# Supplementary material
Source: publisher site journal article supplement (https://www.degruyterbrill.com/publication/isbn/9783110432879/downloadAsset/9783110432879_Elektronischer_Anhang_2.zip)
Supplement: Supplementary file 26 [file Commerzbank GB 2010.pdf › Korpustexte/Korpustexte pdf/Commerzbank/Commerzbank GB 2010.pdf]

Herausforderungen annehmen,  
Ziele erreichen

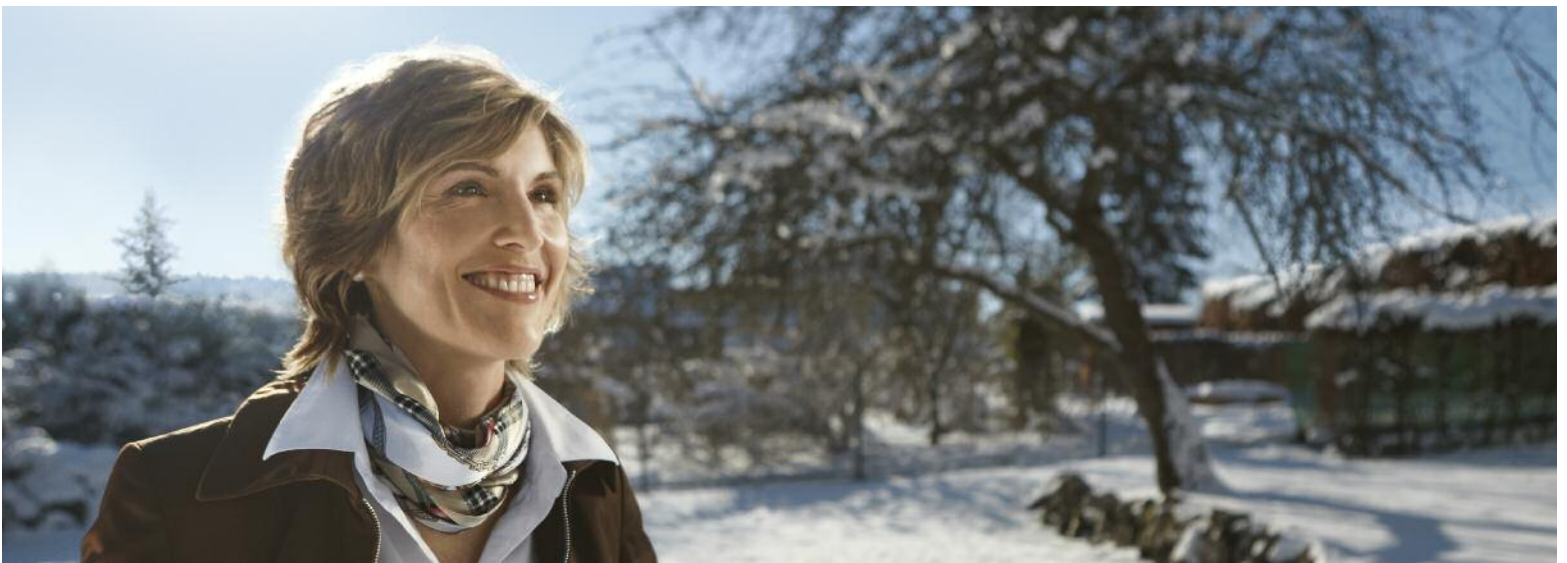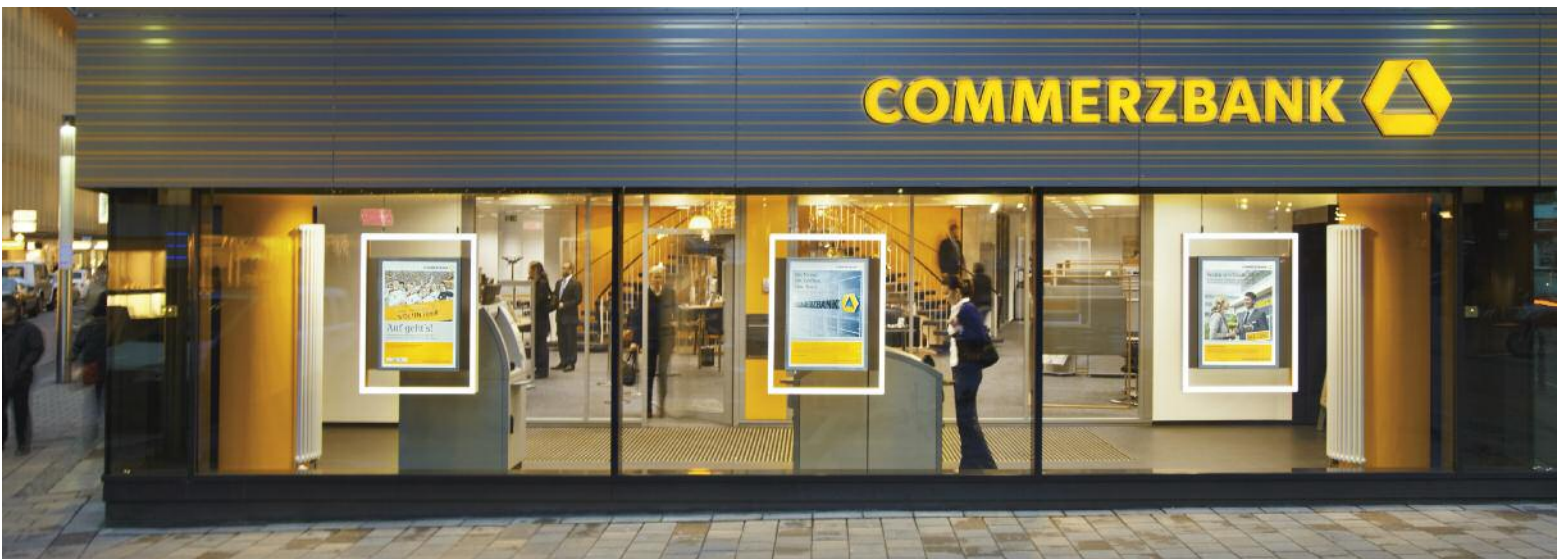

Geschäftsbericht 2010

Gemeinsam mehr erreichen

# Kennzahlen

| Gewinn- und Verlustrechnung                                    | 2010              | 2009              |
|----------------------------------------------------------------|-------------------|-------------------|
| Operatives Ergebnis (Mio €)                                    | 1 386             | -2 270            |
| Operatives Ergebnis je Aktie (€)                               | 1,18              | -2,20             |
| Ergebnis vor Steuern (Mio €)                                   | 1 353             | -4 659            |
| Konzernergebnis <sup>1</sup> (Mio €)                           | 1 430             | -4 537            |
| Ergebnis je Aktie (€)                                          | 1,21              | -4,40             |
| Operative Eigenkapitalrendite (%)                              | 4,5               | -8,0              |
| Aufwandsquote im operativen Geschäft (%)                       | 69,3              | 82,2              |
| Eigenkapitalrendite auf das Konzernergebnis <sup>1,2</sup> (%) | 4,7               | -16,5             |
| <b>Bilanz</b>                                                  | <b>31.12.2010</b> | <b>31.12.2009</b> |
| Bilanzsumme (Mrd €)                                            | 754,3             | 844,1             |
| Risikoaktiva (Mrd €)                                           | 267,5             | 280,1             |
| Bilanzielles Eigenkapital (Mrd €)                              | 28,7              | 26,6              |
| Bilanzielle Eigenmittel (Mrd €)                                | 45,7              | 46,5              |
| <b>Kapitalquoten</b>                                           |                   |                   |
| Kernkapitalquote (%)                                           | 11,9              | 10,5              |
| Eigenmittelquote (%)                                           | 15,3              | 14,8              |
| <b>Lang-/Kurzfrist-Rating</b>                                  |                   |                   |
| Moody's Investors Service, New York <sup>3</sup>               | A2/P-1            | Aa3/P-1           |
| Standard & Poor's, New York                                    | A/A-1             | A/A-1             |
| Fitch Ratings, New York/London                                 | A+/F1+            | A+/F1+            |

Operatives Ergebnis (Mio €)

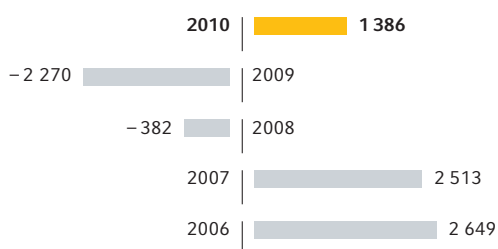Eigenkapitalrendite auf das Konzernergebnis<sup>1,2</sup> (%)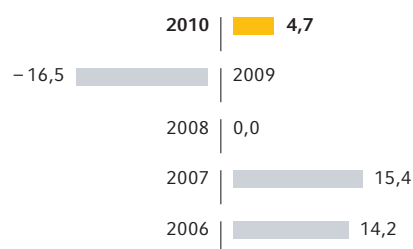

<sup>1</sup> Soweit den Commerzbank-Aktionären zurechenbar.

<sup>2</sup> Die Eigenkapitalbasis bildet das den Commerzbank-Aktionären zurechenbare durchschnittliche Konzernkapital ohne Berücksichtigung der durchschnittlichen Neubewertungsrücklage und der Rücklage aus Cash Flow Hedges.

<sup>3</sup> Ausweis enthält bereits die am 24. Februar 2011 vorgenommene Herabstufung im Langfrist-Rating.

## Das ist die neue Commerzbank

Die Commerzbank ist seit der Übernahme der Dresdner Bank im Mai 2009 eine der führenden Privat- und Firmenkundenbanken in Deutschland. Insgesamt hat die Commerzbank weltweit rund 15 Millionen Privat- und Firmenkunden, die von einem noch breiteren und attraktiveren Produkt- und Beratungsangebot profitieren. Für unsere Kunden sind wir im Heimatmarkt Deutschland mit künftig rund 1 200 Standorten deutlich besser erreichbar.

Gerade für Firmenkunden, insbesondere den exportstarken Mittelstand, ist die Commerzbank ein noch stärkerer Partner, der die Kompetenz der beiden Häuser im deutschen Markt unter einem Dach vereint. So begleitet die Commerzbank ihre Kunden weltweit und baut ihre Position als wichtigster Exportfinanzierer aus.

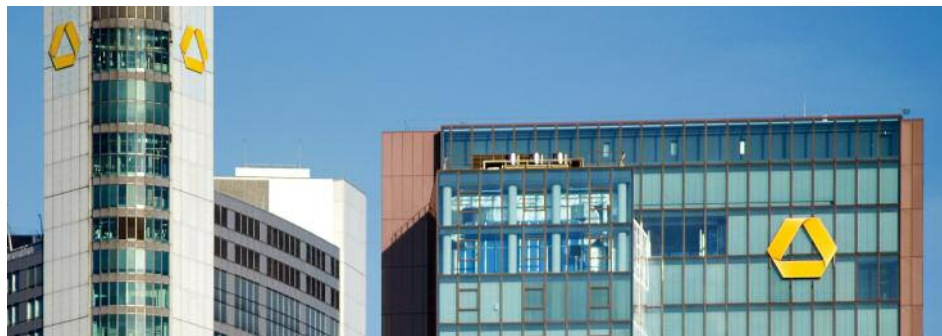

## Das ist unsere Vision

Unsere Vision fasst zusammen, woran wir glauben und was wir erreichen wollen. Sie ist unser gemeinsames Ziel und bildet das Fundament für unser Handeln:

Als Marktführer für Privat- und Firmenkunden mit europäischer Ausrichtung wollen wir die beste Bank in Deutschland werden – und damit erste Wahl für unsere Kunden, Mitarbeiter und Investoren. Wir verstehen uns als *die* Hausbank für Deutschland und stehen für langfristige Partnerschaft sowie herausragende Leistung.

## Das ist unsere Mission

Die Commerzbank hat sich strategisch neu aufgestellt. Bei dieser Neuausrichtung haben wir uns von unserer Vision, die beste Bank in Deutschland zu sein, leiten lassen. Den Weg dorthin soll uns unser strategisches Programm, die „Roadmap 2012“, ebnen, mit dem die Commerzbank nachhaltig profitabel werden wird. Die neue Commerzbank ist auf diesem Weg schon weit vorangeschritten und wird dann schneller, schlagkräftiger und schlanker sein als je zuvor.

# Struktur des Commerzbank-Konzerns

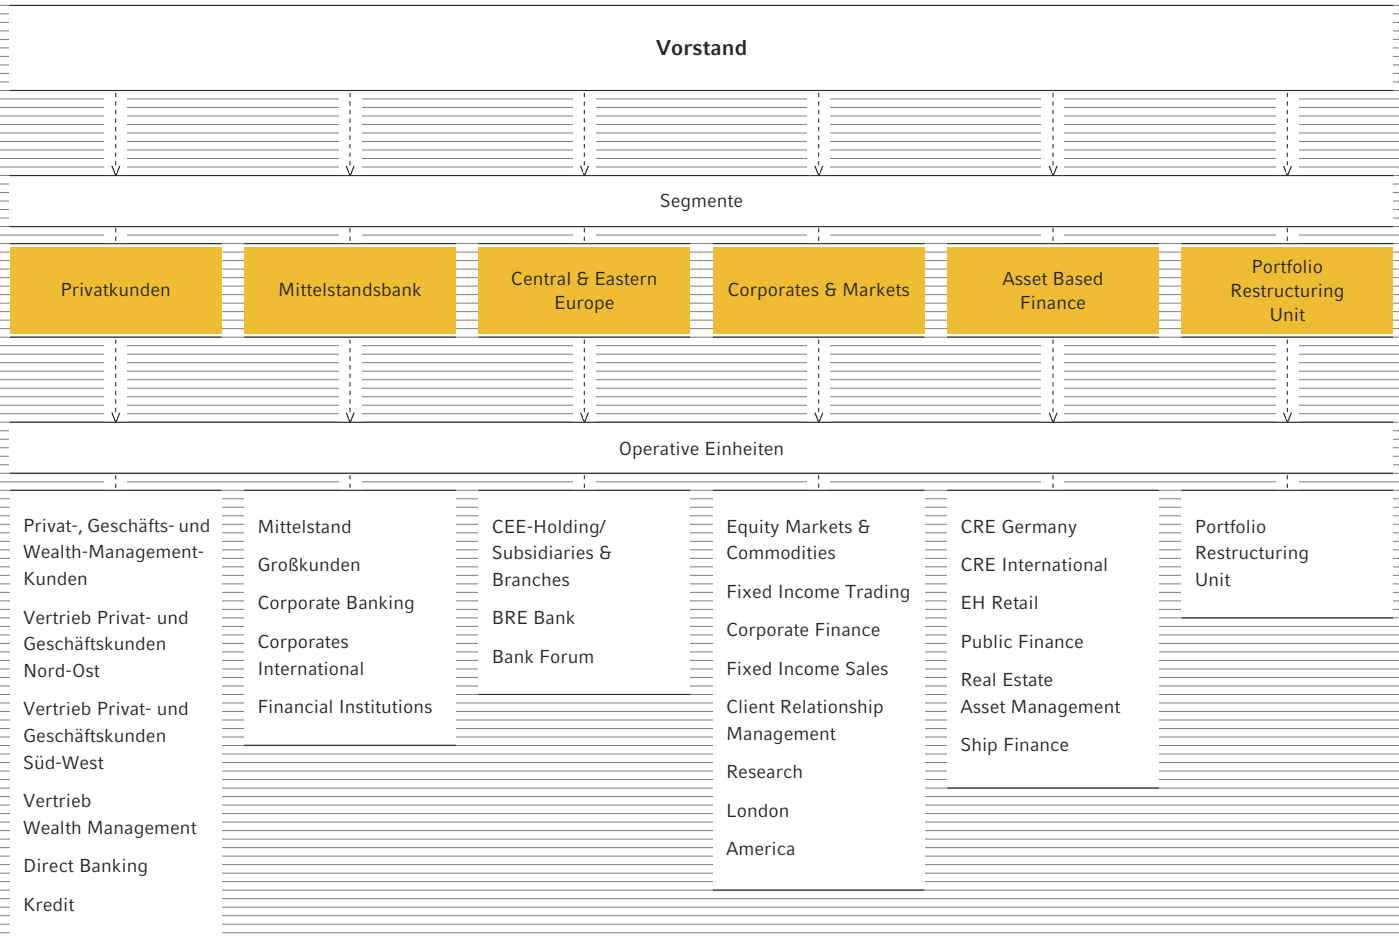

Alle Stabs- und Steuerungsfunktionen sind im Unternehmensbereich Group Management zusammengefasst.  
 Die Unterstützungsfunktionen Group Information Technology, Group Organisation, Group Banking Operations, Group Market Operations,  
 Group Security und Group Support werden vom Unternehmensbereich Group Services bereitgestellt.



## Herausforderungen annehmen, Ziele erreichen

Jedes Unternehmen steht immer wieder vor neuen Herausforderungen. Sie zu erkennen, anzunehmen und nach Lösungswegen zu suchen, ist der erste und wichtigste Schritt, angestrebte Ziele zu erreichen. Das Jahr 2010 stand für die Commerzbank ganz im Zeichen der Herausforderung, die Dresdner Bank zu integrieren – ein einzigartiges Projekt in der deutschen Bankengeschichte. Dabei ist die neue Commerzbank in vielen Bereichen am Ziel angekommen. Welche Schritte erforderlich waren und was wir erreicht haben, zeigen wir Ihnen auf den nächsten Seiten.

Auch für unsere Kunden war das Jahr 2010 von ganz eigenen Projekten, Wünschen oder Notwendigkeiten geprägt. Sechs von ihnen porträtieren wir mit ihren Zielen und Herausforderungen in diesem Bericht. Was sie verbindet: Sie waren erfolgreich – und als Partner haben wir sie dabei unterstützt.

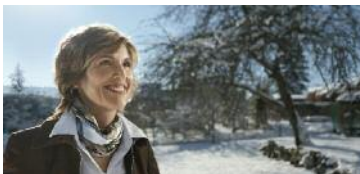

---

**Die Herausforderungen unserer Kunden**  
Seite 70/92/102/112/122/130

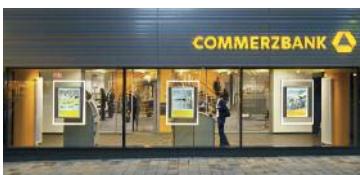

---

**Die Herausforderungen der neuen Commerzbank**  
Seite 2–15

---

# Das größte Integrationsprojekt in der deutschen Bankengeschichte

Der Zusammenschluss von Commerzbank und Dresdner Bank ist ein Meilenstein der deutschen Bankenkonsolidierung. Durch die Integration ist eine neue leistungsstarke Bank für unsere Kunden entstanden. Die neue Commerzbank ist die führende deutsche Mittelstandsbank. Unseren Kunden im Kapitalmarktgeschäft bieten wir das volle Leistungsspektrum einer internationalen Investmentbank. Weltweit betreuen wir rund 15 Millionen Privat- und Firmenkunden und sind im Inland künftig mit 1 200 Standorten für unsere Kunden deutlich besser erreichbar. In den Wachstumsregionen Mittel- und Osteuropas sowie Asiens verfügen wir über starke Standbeine. Die erfolgreiche Integration bildet die Grundlage für zukünftiges profitables Wachstum der neuen Commerzbank.

# Finanzielle Ziele und Projektsteuerung

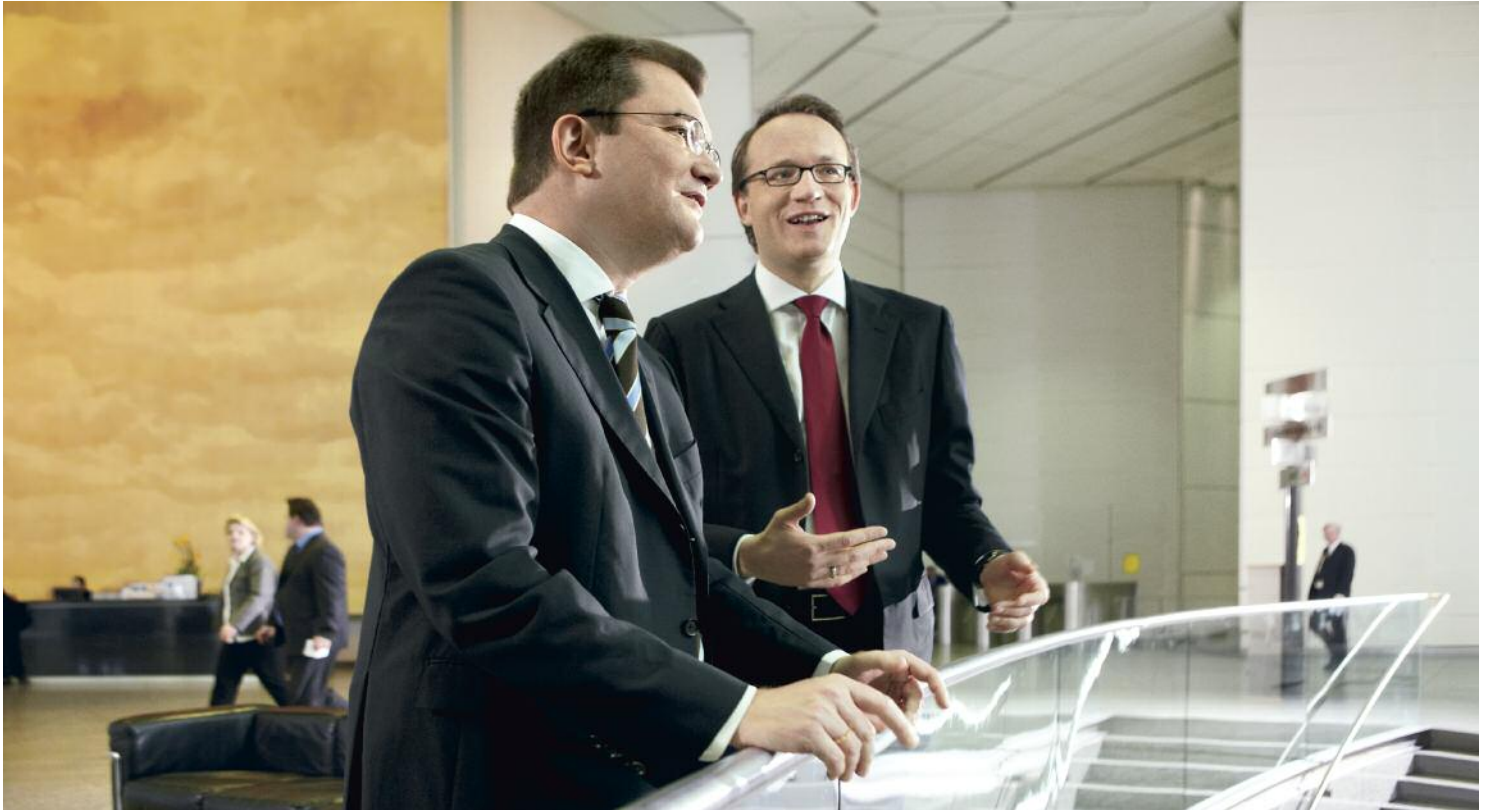

Dr. Peter Leukert (li.), Chief Information Officer, Dr. Markus Krebber (re.), Bereichsvorstand Integration – Herausforderung „neue Commerzbank“ angenommen, Ziele erreicht

Mit der schnellen Auswahl aller Führungskräfte und Übernahme der Zielpositionen durch die Mitarbeiter Mitte 2010 konnten wir die personelle Integration in Rekordtempo umsetzen. Im Zuge der Markenmigration erleben die Kunden seit Juni 2010 die neue Commerzbank weltweit mit einem einheitlichen Marktauftritt. Damit ist die sichtbare Integration zu einem Unternehmen abgeschlossen. Im August 2010 wurden die IT-Systeme mit der größten Softwareanpassung beider Banken auf die Übernahme der Kunden- und Produktdaten der ehemaligen Dresdner Bank vorbereitet. Die Integration der Investmentbank und aller Auslandseinheiten haben wir Ende 2010 abgeschlossen. Nach vollständiger Umsetzung der Integration werden jährlich 2,4 Mrd Euro eingespart. Bis 2010 wurden mit über 1,1 Mrd Euro bereits rund 20 % höhere Einsparungen realisiert als ursprünglich geplant.

- › **2,4** Mrd Euro jährliche Kosteneinsparungen
- › **4500** Mitarbeiterinnen und Mitarbeiter im Projekt

# Aus Commerzbank und Dresdner Bank entsteht ein starkes Team

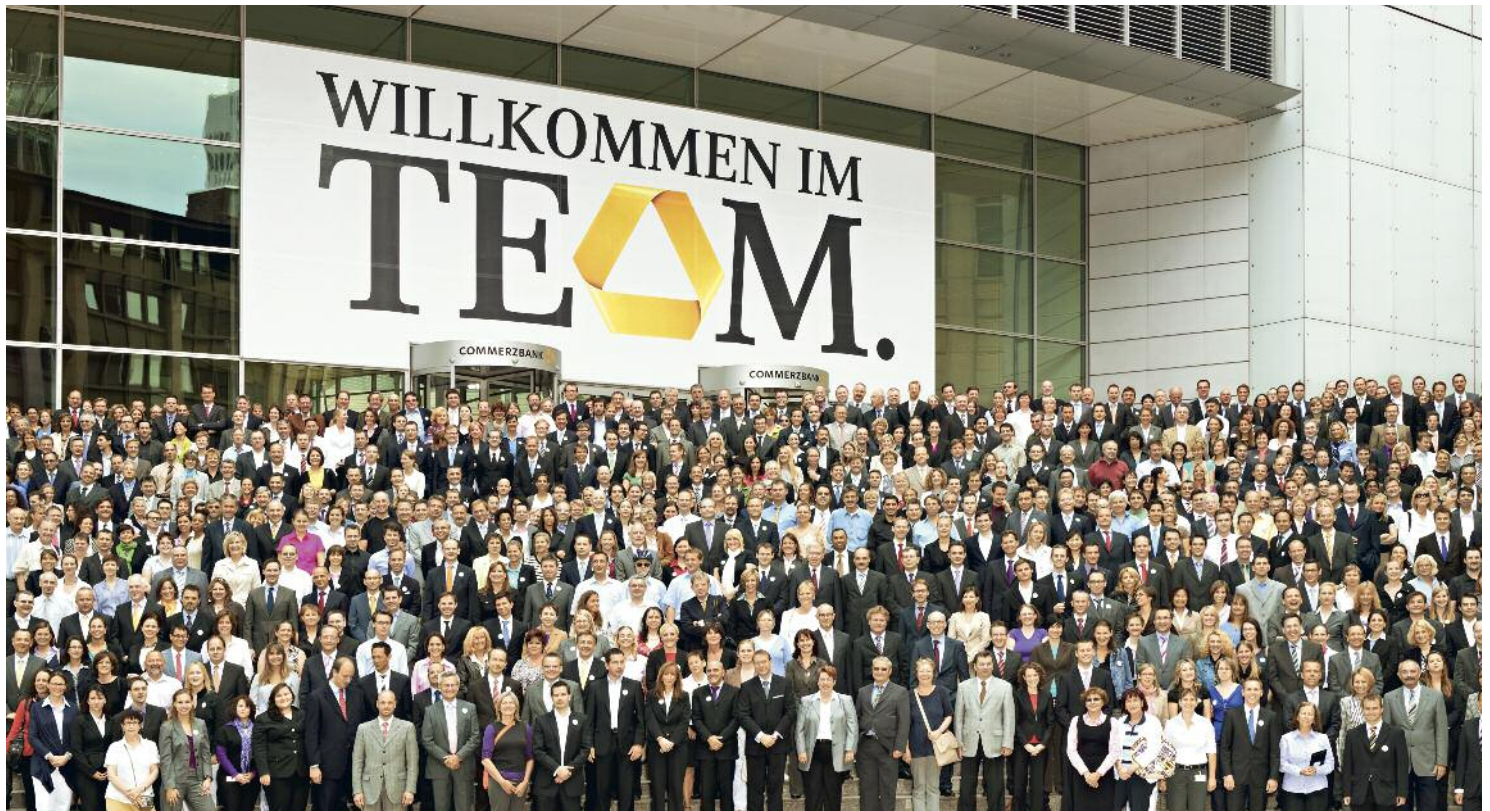

Gemeinsamer Teamauftritt – Zeichen der Einheit von Mitarbeiterinnen und Mitarbeitern der neuen Commerzbank

Im Zuge der Integration der Dresdner Bank in die Commerzbank haben wir die erste und zweite Führungsebene schnell besetzt. Die insgesamt rund 3 800 Führungskräfte der neuen Commerzbank stammen zu annähernd gleichen Teilen aus beiden Häusern. Zudem konnte 45 000 Mitarbeiterinnen und Mitarbeitern durch die rasche Übernahme und Versetzung in die Zielstruktur ein hohes Maß an beruflicher Sicherheit gewährleistet werden. In der Zentrale erfolgte dieser Schritt bereits 2009, bis Juli 2010 dann auch in den Filialen.

- › **3 800** Führungskräfte ausgewählt
- › **45 000** Mitarbeiterinnen und Mitarbeiter in Zielstruktur übernommen



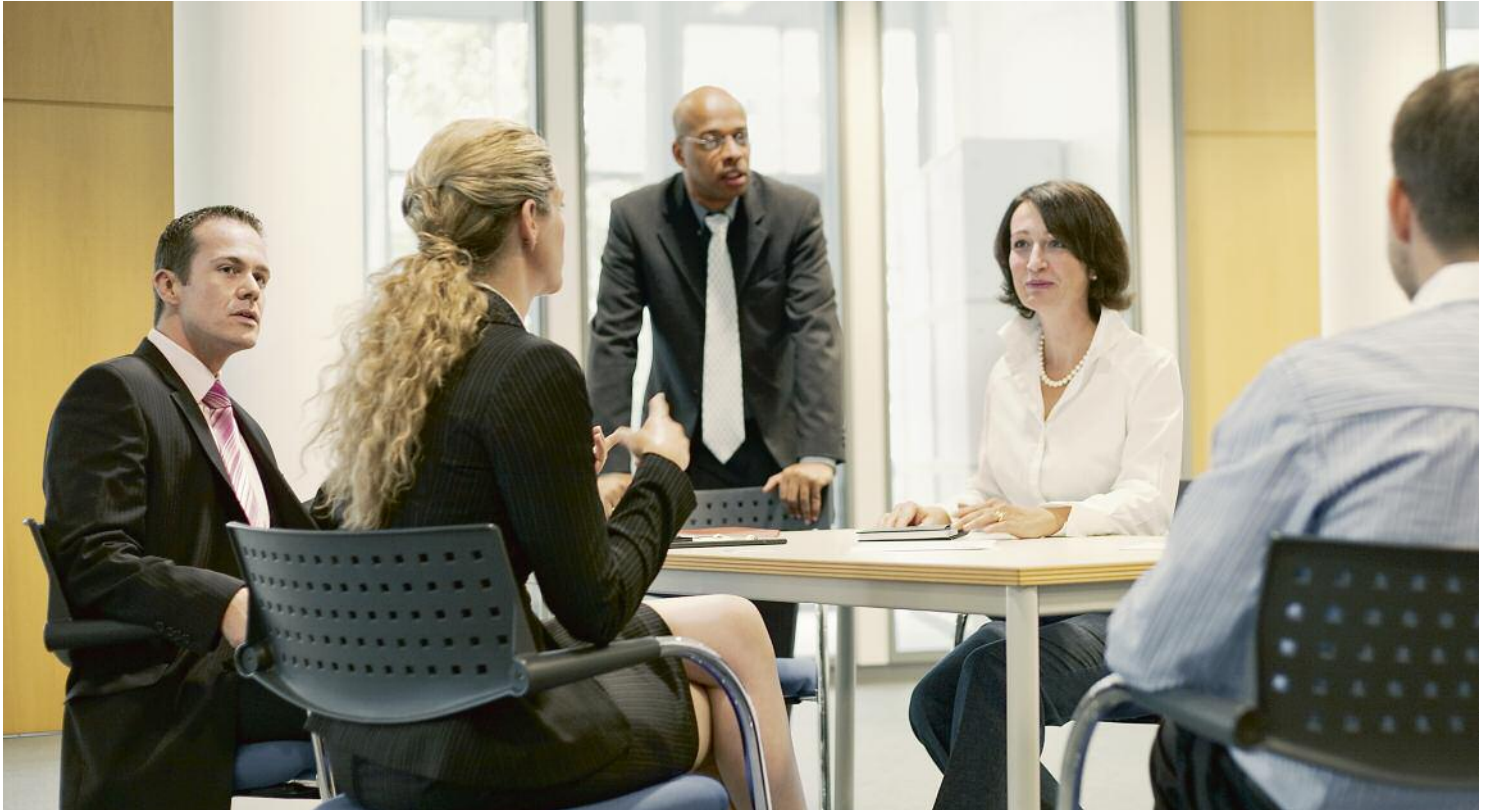

**Kulturelle Integration** – mit mehr als 3 000 „Zusammen Wachsen“-Workshops

Die Einstellung der Bankmitarbeiter zum Integrationsprojekt erheben wir kontinuierlich mit Befragungen. Im September 2010 ließen sich keine Unterschiede im Antwortverhalten mehr zwischen ehemaligen Commerzbank- und Dresdner-Bank-Mitarbeitern feststellen. Rund 80 % der Bankmitarbeiter ist der Erfolg der Integration persönlich wichtig. Auch die Mitarbeiter des Integrationsprojekts sind konstant sehr überzeugt von der Vorteilhaftigkeit und Zukunftsperspektive des Zusammenschlusses. Mehr als 3 000 Workshops zum Change Management leisteten einen wichtigen Beitrag, um die Integration kulturell voranzutreiben.

- 
- › **3 000** Workshops durchgeführt
  - › **80 %** der Mitarbeiterinnen und Mitarbeiter ist der Integrationserfolg wichtig



# Gemeinsamer Marktauftritt

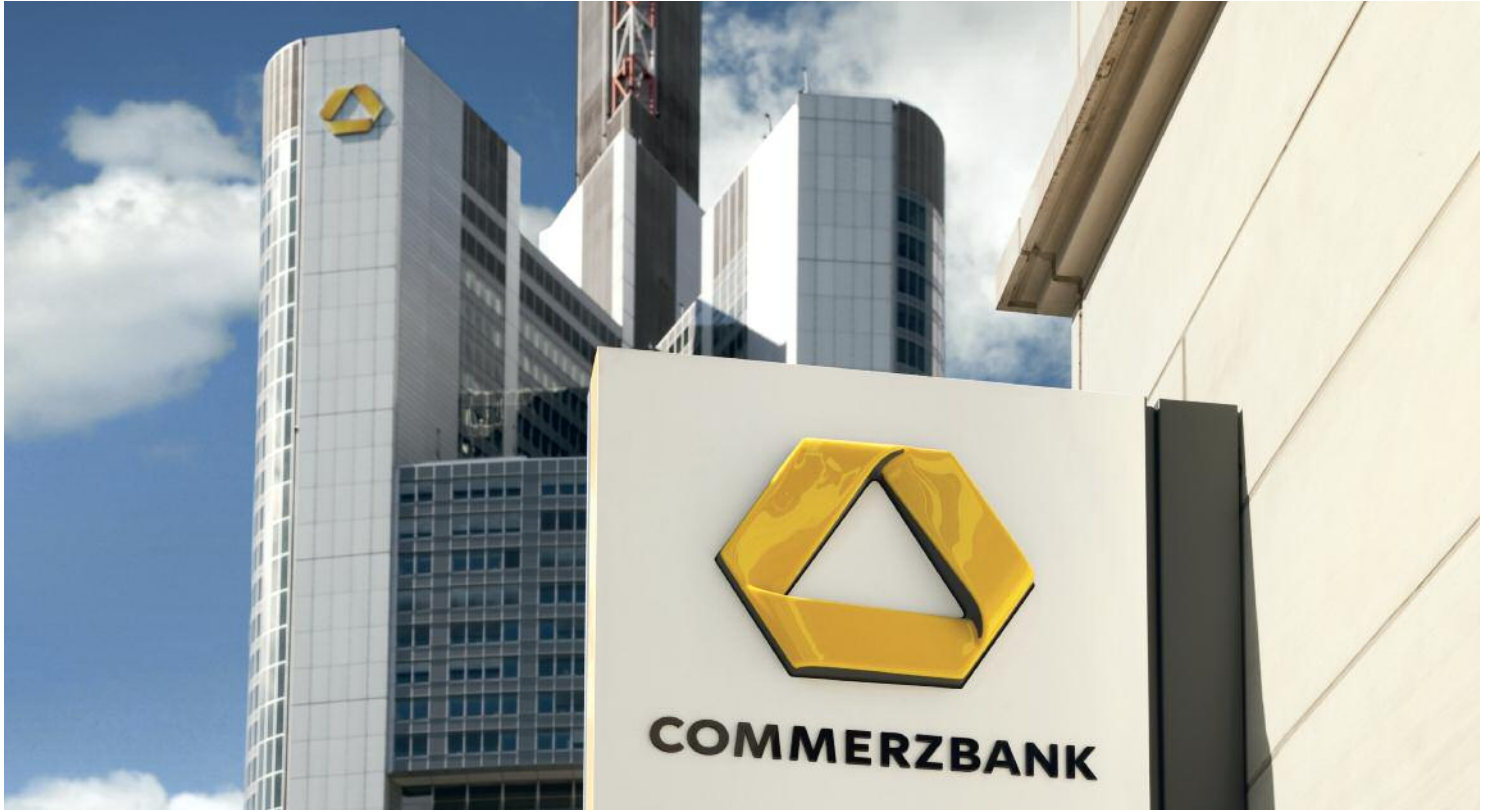

Neues Markenzeichen – positive Elemente beider Marken mit hoher Strahlkraft für die neue Commerzbank

Die Einführung einer neuen Marke und die Umsetzung eines einheitlichen Marktauftritts sind Ausdruck des gemeinsamen Teamverständnisses innerhalb der neuen Commerzbank. Die unmittelbare hohe Strahlkraft der neuen Marke resultiert aus der Nutzung positiv besetzter Elemente aus beiden vorherigen Marken. So haben wir einerseits den bekannten Markennamen der Commerzbank fortgeführt, andererseits setzen wir seither das zu einem dreidimensionalen gelben Band weiterentwickelte Markenzeichen der ehemaligen Dresdner Bank ein.

› 2 Auszeichnungen für das neue Markenzeichen

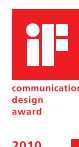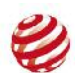

reddot design award  
communication design 2010

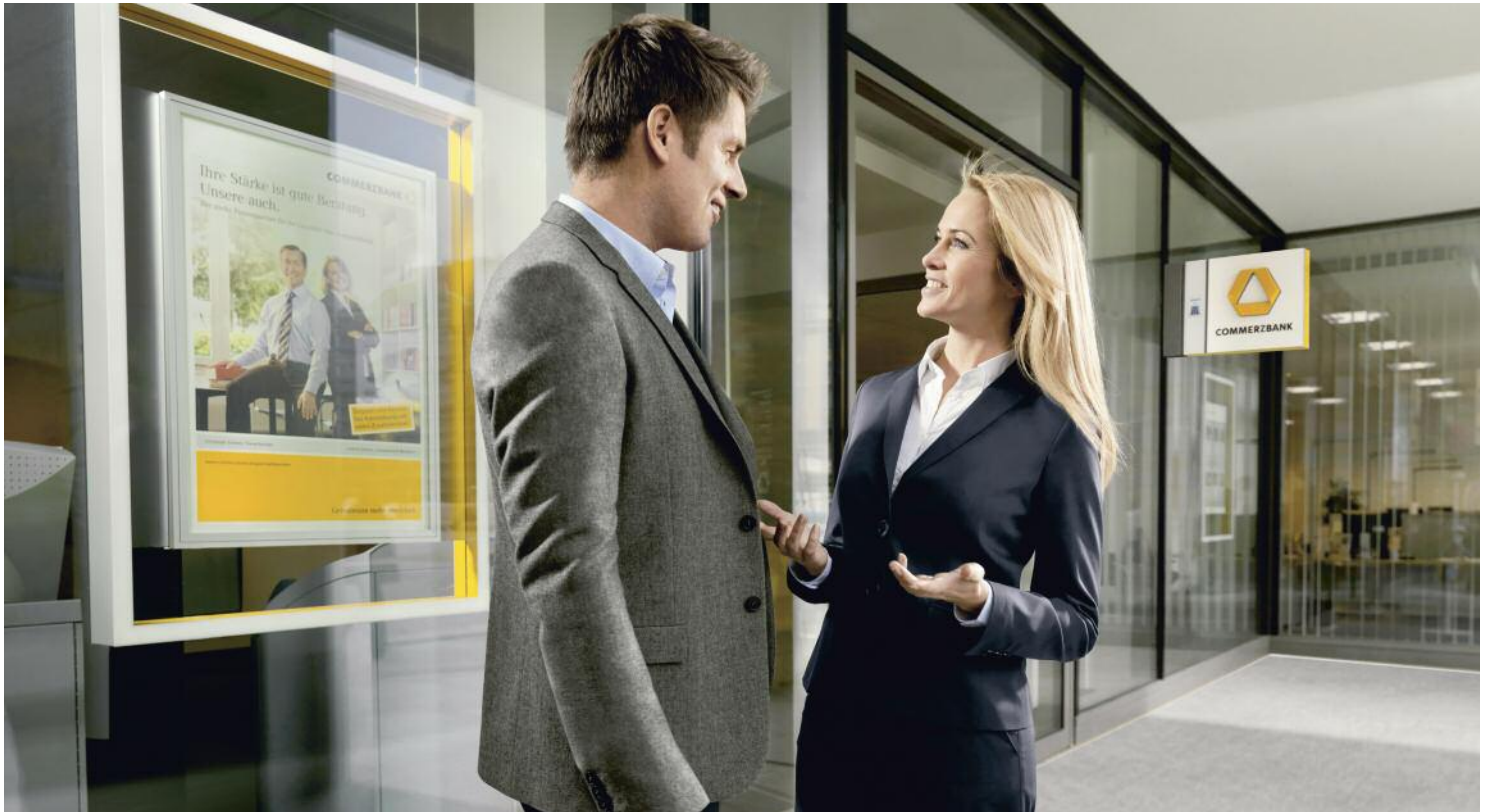

Filialen in neuer Gestalt – die neue Marke für unsere Kunden erlebbar

Seit ihrer Einführung ist die Marke der neuen Commerzbank auf eine überaus positive Kundenresonanz gestoßen. Im Inland ist die neue Marke für den Kunden im Filialbetrieb und in den Onlinekanälen bereits seit Juni 2010 erlebbar. Des Weiteren gelang in einem Zeitraum von lediglich 2,5 Monaten die Umstellung der Außensignalisation von mehr als 1 600 Gebäuden im In- und Ausland auf die Marke der neuen Commerzbank. Gleichzeitig haben wir im zweiten Halbjahr mit der Umstellung der SB-Center in den Filialen auf ein neu entwickeltes kundenfreundliches und hochwertiges Design begonnen. Der Stromverbrauch wird durch den Austausch der Außensignalisation und der Schaufensterkommunikationssysteme (3 700 Leuchtbilder) um ca. 82 % gesenkt.

- › **1 600** Gebäude auf die neue Marke umgestellt
- › **2,5** Monate für die Umstellung der Außensignalisation
- › **82 %** Energieeinsparung durch den Einsatz von LED-Beleuchtung

# Nähe zum Kunden

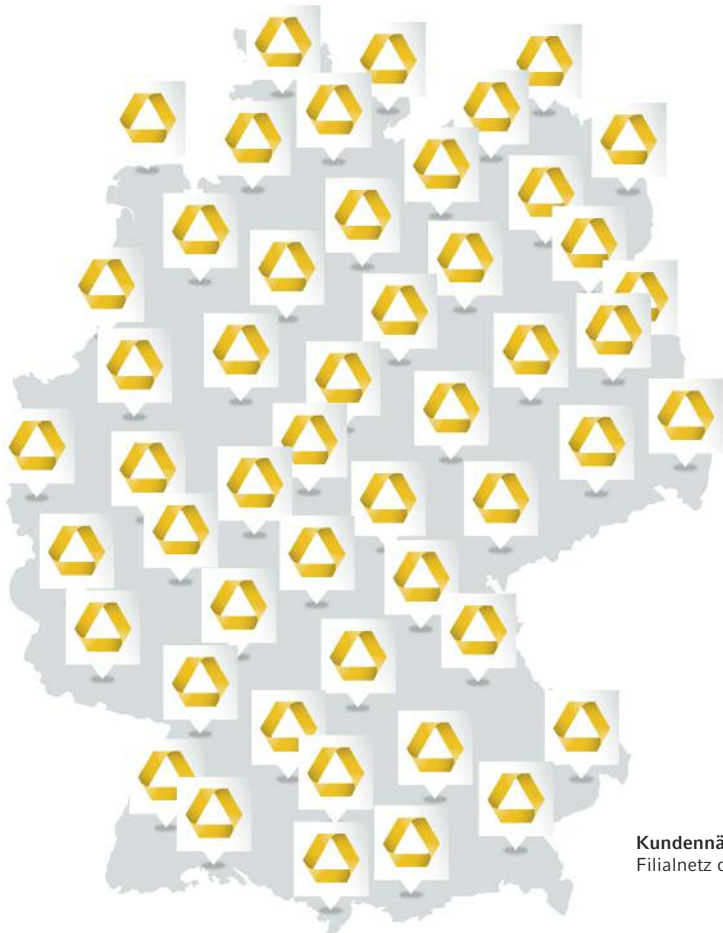

**Kundennähe** – garantiert durch das ausgeweitete Filialnetz der neuen Commerzbank

Die Nähe der neuen Commerzbank zum Kunden wird durch die Ausweitung des Filialnetzes deutlich erhöht. Zudem stehen dem Kunden zusätzliche Produkte und Leistungen zur Verfügung. Um bestmögliche Qualität zu bieten, haben wir 30 000 Mitarbeiter auf die neuen Prozesse und das erweiterte Produktspektrum geschult. Das ausgeweitete Filialnetz im Inland und die Verfügbarkeit von Basisdienstleistungen in allen Filialen stoßen bereits heute auf sehr positive Resonanz unserer Kunden. Ein besonderes Plus ist, dass ehemalige Dresdner-Bank-Kunden auch nach der Integration ihre Kontonummer behalten.

- 
- › **1 200** Filialen in Zielstruktur
  - › **30 000** Mitarbeiterinnen und Mitarbeiter geschult



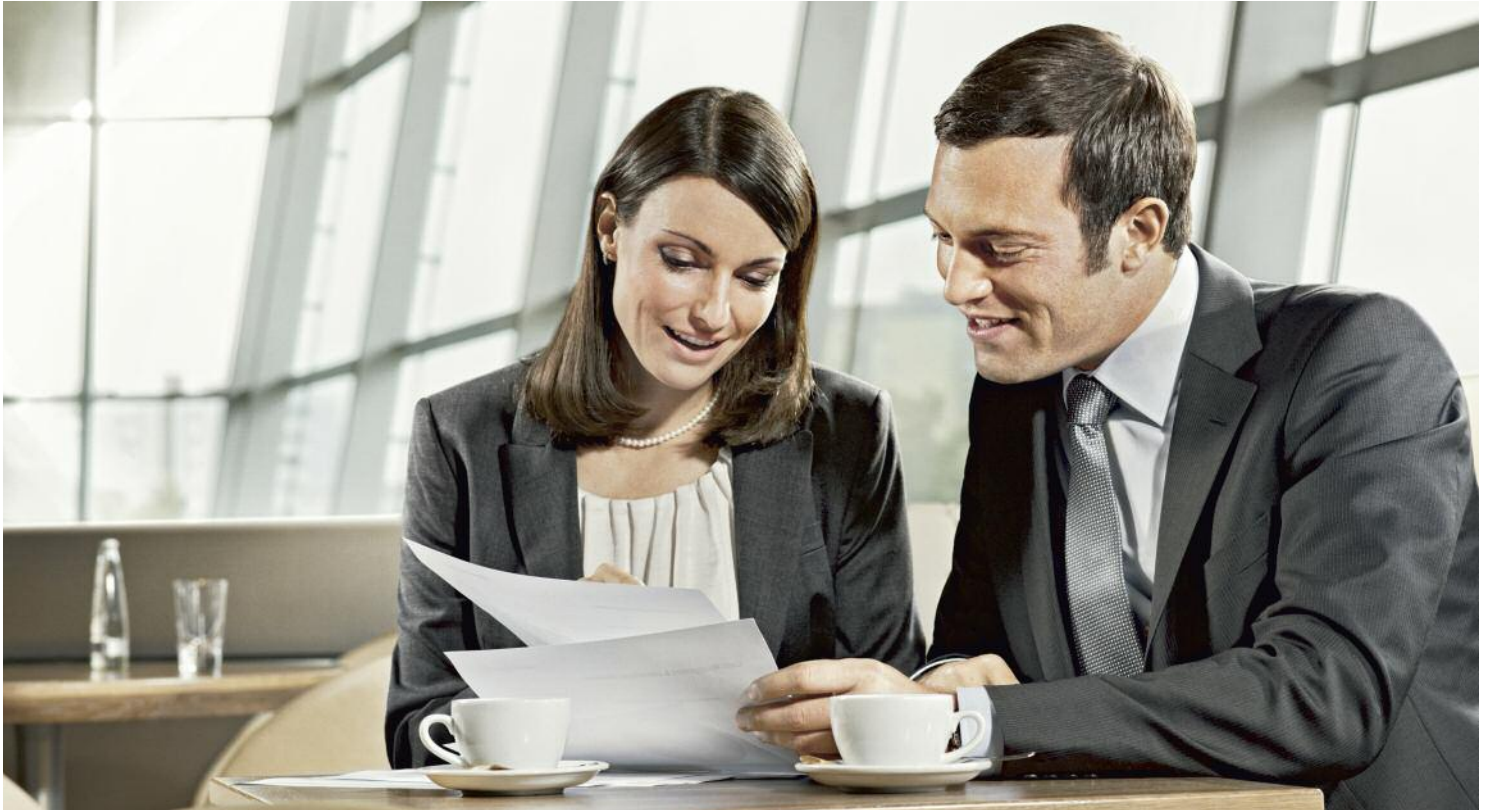

**Beratung aus einer Hand** – optimale Betreuung aller Firmenkunden der neuen Commerzbank an jetzt 150 Standorten

In der Mittelstandsbank wurde die Integration in schnellen Schritten erlebbar. Unter dem Aspekt der Markt- und Branchenexpertise vor Ort sowie kurzer Wege haben wir zeitnah neue Betreuungsteams im Kundeninteresse formiert, die bereits erfolgreich ihre Kunden beraten. Mit 150 Standorten für die Firmenkundenbetreuung bietet die Commerzbank jetzt das dichteste Netz aller privaten Banken in Deutschland. Durch diese regionale Nähe und das harmonisierte Produkt- und Leistungsangebot ist die Mittelstandsbank der strategische Partner ihrer Kunden.

- 
- › **150** Standorte der Mittelstandsbank
  - › **Betreuungsmodell aus einer Hand**

# Auslandsintegration

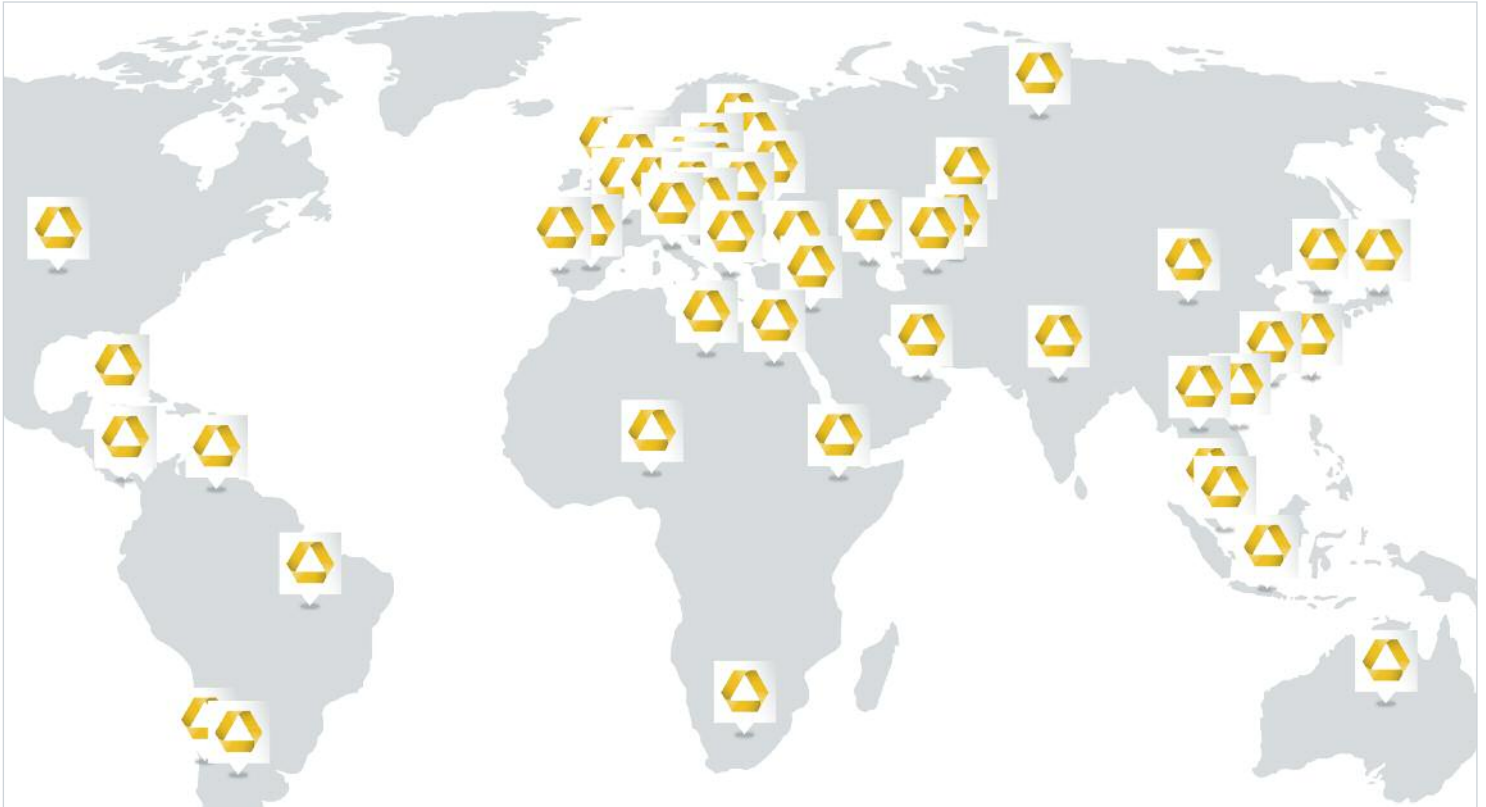

Weltweite Präsenz – das internationale Netzwerk der neuen Commerzbank

Neben ihrer starken Verankerung auf dem deutschen Heimatmarkt ist die neue Commerzbank weltweit in 50 Ländern präsent. Mit einem internationalen Netzwerk aus über 80 Filialen, Repräsentanzen und Tochtergesellschaften ist sie in allen wichtigen Wirtschaftszentren vertreten. Schwerpunkte liegen in London, New York, Asien sowie Mittel- und Osteuropa. Die neue Commerzbank beschäftigt insgesamt 13 800 Mitarbeiter außerhalb Deutschlands.

---

› 80 operative Einheiten in 50 Ländern



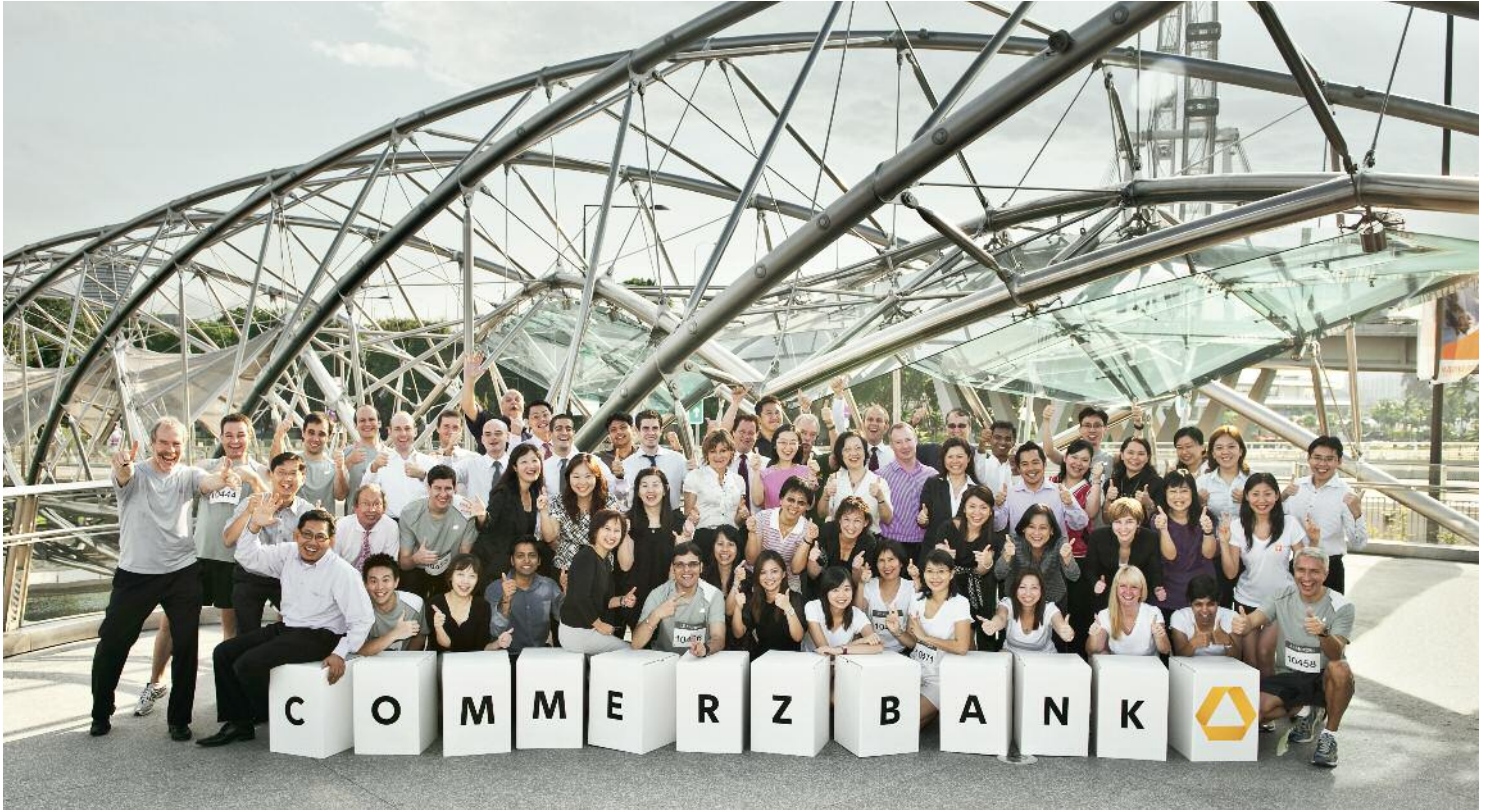

Neue Commerzbank on Tour – Integration in aller Welt abgeschlossen (hier Standort Singapur)

Die Integration außerhalb Deutschlands haben wir schrittweise durchgeführt und Ende 2010 erfolgreich abgeschlossen. Die Vorreiter waren die Kollegen in den USA, gefolgt von den internationalen Repräsentanzen und der Region Asien Mitte des Jahres. Mittel- und Osteuropa folgte im Herbst. Nach den notwendigen Anpassungen der IT-Systeme konnte mit der Migration der Kunden- und Produktdaten auf die Zielplattform der neuen Commerzbank Ende 2010 auch die Integration in Westeuropa abgeschlossen werden.

› **13 800** Mitarbeiterinnen und Mitarbeiter außerhalb Deutschlands

# Investmentbanking – vollständige Integration in Rekordzeit

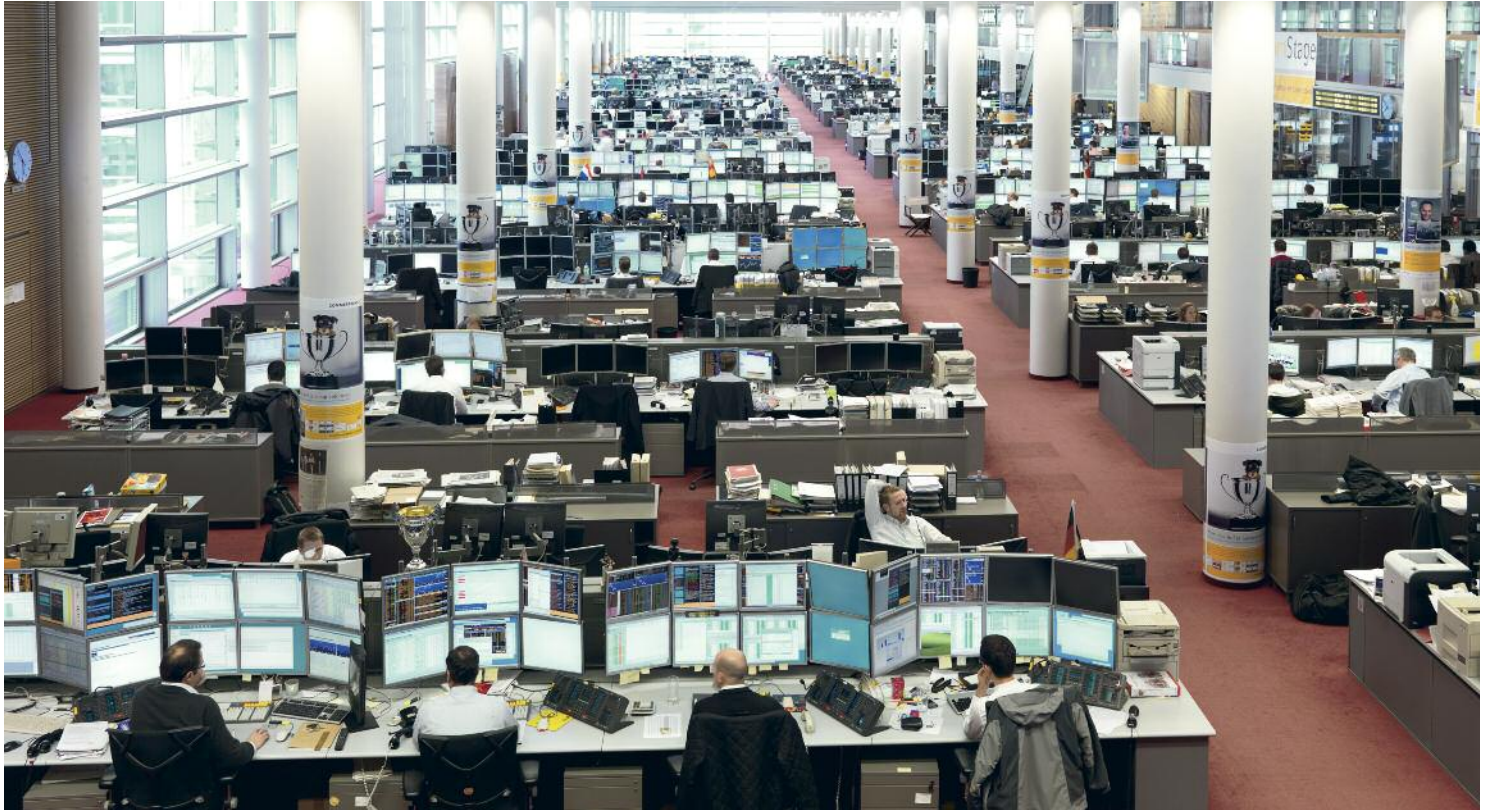

Investmentbanking – mit hohem Tempo zu Integration und Risikominimierung bei der neuen Commerzbank

Schnelligkeit ist im Investmentbanking entscheidend. Daher hat Corporates & Markets die Integration zusammen mit der Risikominimierung aus volatilen Handelspositionen möglichst rasch vorangetrieben – und in einer Rekordzeit von 18 Monaten Ende 2010 abgeschlossen. Zukunftsweisend war die Entscheidung für eine einheitliche Systemplattform, auf die wir mehr als 50 000 Kundenverbindungen und rund 300 000 mittel- und langfristige Handelspositionen von Dresdner Kleinwort mit einem Vielfachen dahinterstehender Absicherungsgeschäfte übergeleitet haben. Darüber hinaus hat Corporates & Markets schnell eine einheitliche Finanz- und Risikosteuerung etabliert.

- › Einheitliche Systemplattform, Finance- und Risikosteuerung für Investmentbanking
- › **300 000** mittel- und langfristige Handelspositionen mit einem Vielfachen an Absicherungen migriert



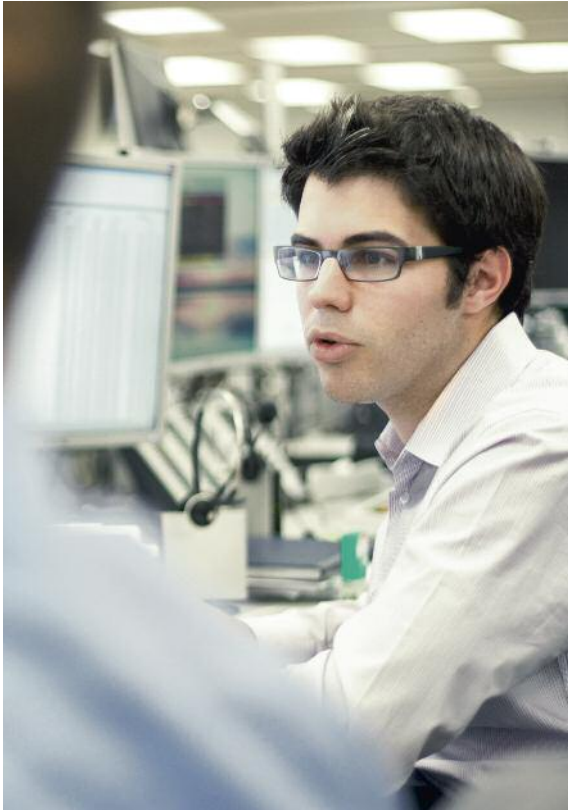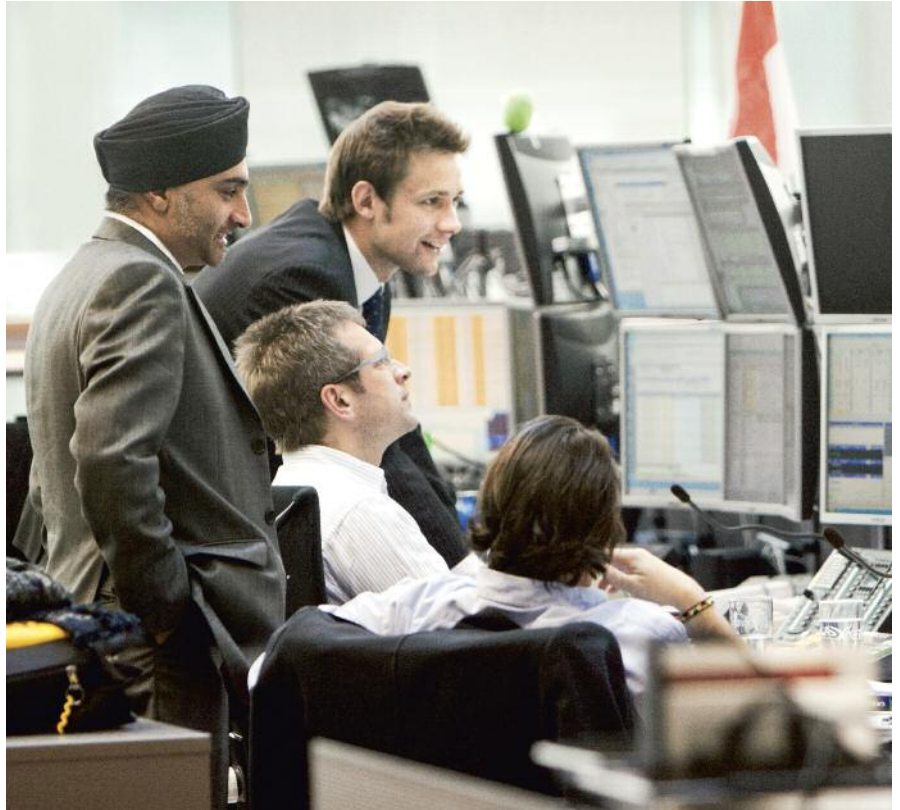

**Raphael Rollin (li.)** – zuvor Dresdner Kleinwort, jetzt EMC Structuring, Exotic Equity Derivatives Structurer  
**Händlersaal (re.)** – vereinte Belegschaft unter dem Markenzeichen der neuen Commerzbank

Mit heute rund 1 650 Mitarbeitern im Frontoffice ist Corporates & Markets durch die Eingliederung von Dresdner Kleinwort um mehr als die Hälfte gewachsen. Das bisherige Commerzbank-Angebotspektrum haben wir gezielt erweitert und bieten damit zusätzlichen Mehrwert für unsere Kunden. Nach 1 500 Umzügen ist die Belegschaft an allen Standorten in Frankfurt, London, New York, Singapur und Hongkong unter dem zu Jahresbeginn eingeführten neuen Markenzeichen vereint. Mit dem Abschluss der Integration hat Corporates & Markets die Grundlage für solides Wachstum im Rahmen des kundenorientierten Geschäftsmodells gelegt.

- 
- › Angebotsspektrum für Kunden wesentlich erweitert
  - › **1 500** Umzüge und Konzentration auf fünf Standorte weltweit

# IT-Systeme bereit für die Kunden- und Produktdaten der Dresdner Bank

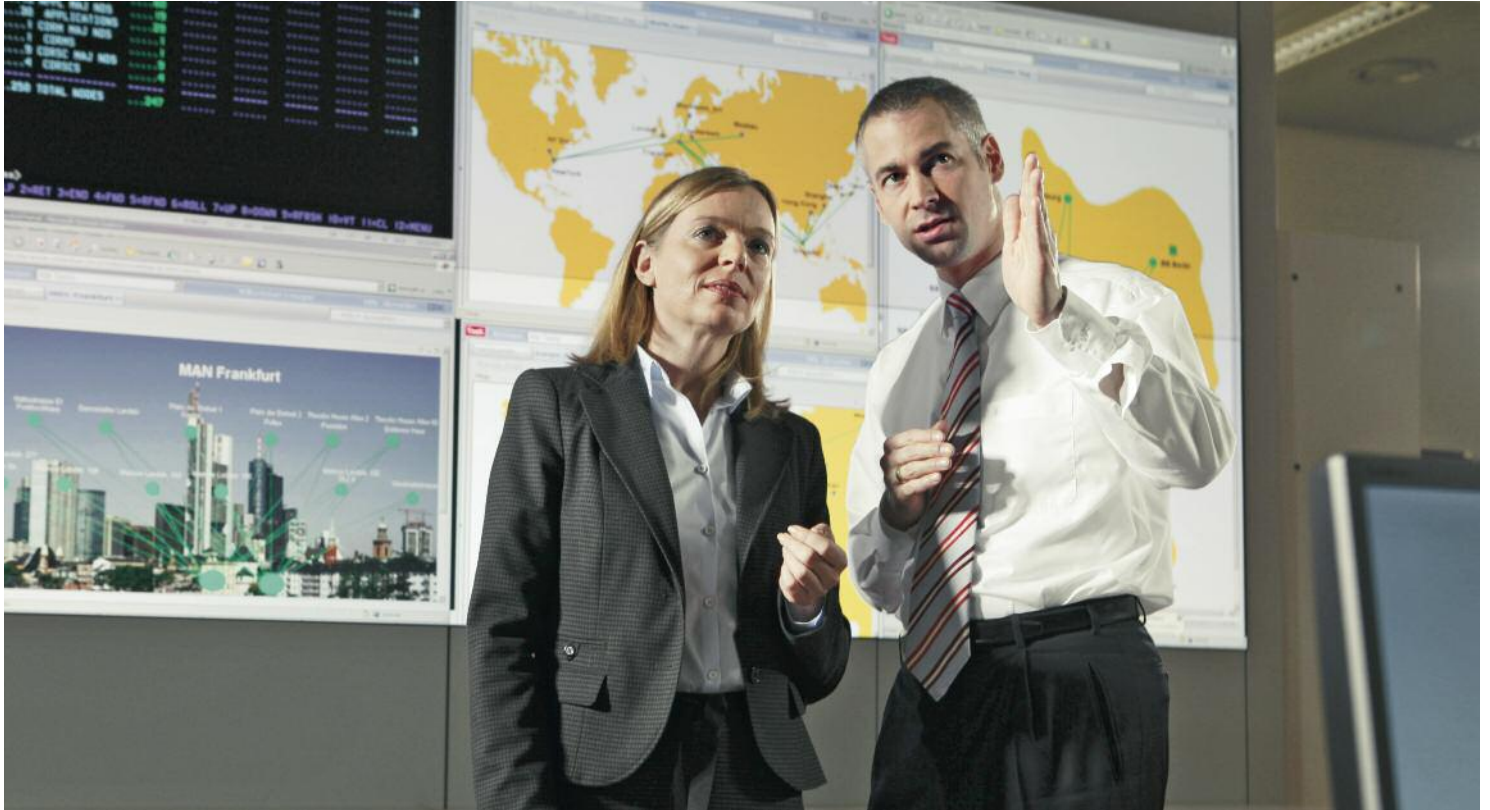

**Sabine Schäfer**, Planung und Steuerung IT Testworkstream Finance, sowie **Felix del Mestre**, Projektleiter, Desktop and Infrastructure Migration Investment Banking and International Locations

Die vollständige IT-Integration beider Banken erreichen wir durch eine einheitliche Plattform. Dadurch können wir im Zahlungsverkehr, der Wertpapierabwicklung und dem IT-Betrieb erhebliche Kostensynergien realisieren. Im Sinne einer zügigen Integration haben wir der Versuchung widerstanden, mit großem Aufwand eine neue Plattform aus dem „Besten beider Welten“ zu bauen. Mit Anpassungen kann die bestehende Commerzbank-Plattform das Geschäftsmodell der neuen Commerzbank tragen.

- › 225 Millionen ZV-Transaktionen der neuen Commerzbank pro Monat
- › 5,5 Millionen WP-Abwicklungen der neuen Commerzbank pro Monat



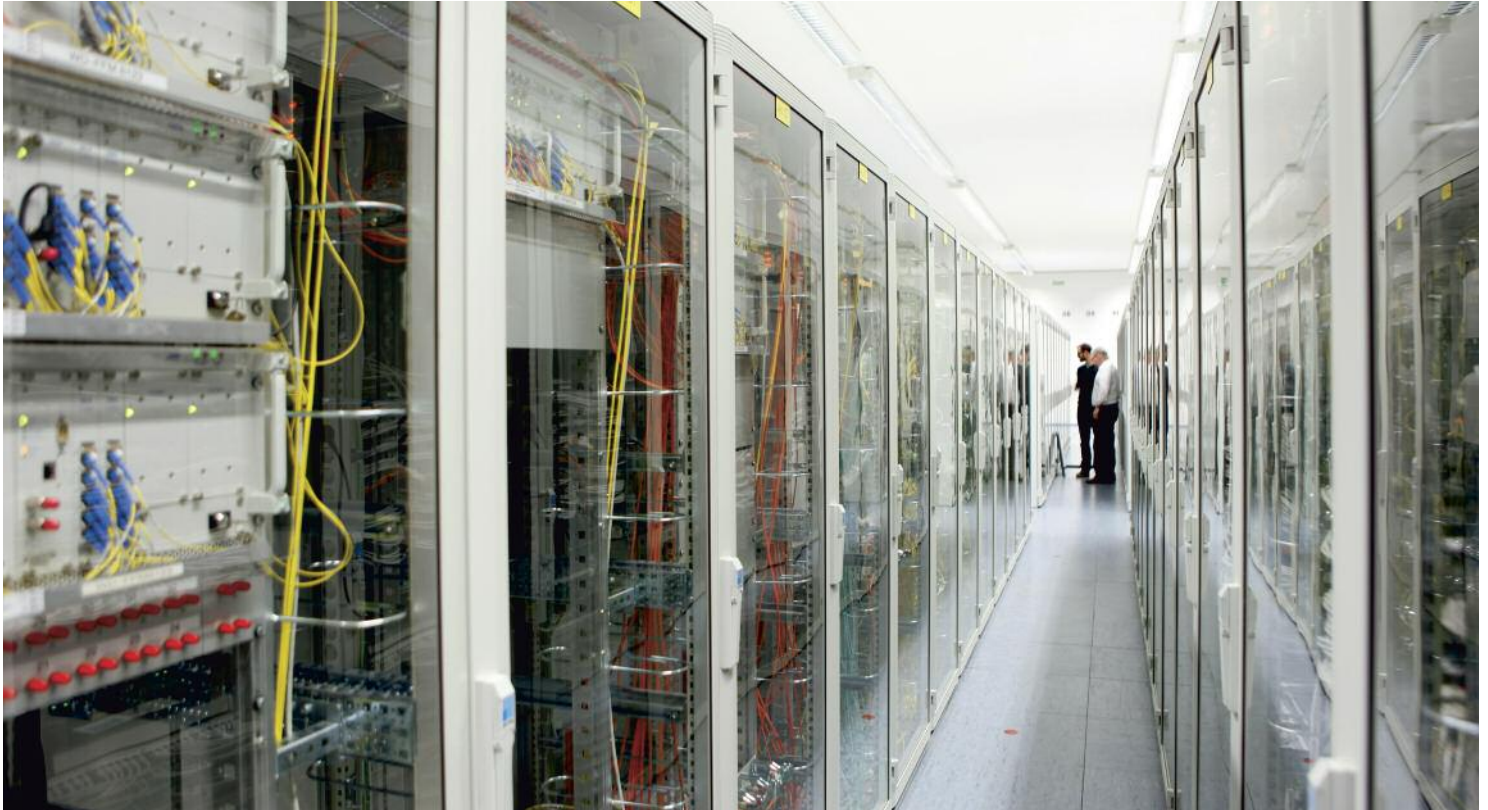

Serverzentrale – Verarbeitung von Kunden- und Produktdaten der neuen Commerzbank

Im August 2010 stemmten rund 2 000 Mitarbeiter mit großer Kompetenz und hohem Engagement den historisch größten Softwareeinsatz beider Häuser: Um die doppelte Datenmenge aufnehmen, neue Produkte und Services einbinden und die bisherigen Kontonummern aller Kunden im Inland erhalten zu können, wurden rund 600 inländische Anwendungen angepasst. Der letzte große Schritt der IT-Integration wird im zweiten Quartal 2011 die Migration der Kunden- und Produktdaten der ehemaligen Dresdner Bank auf die Commerzbank-Plattform sein. Im Anschluss daran werden etwa 1 000 Dresdner-Bank-Anwendungen abgeschaltet und die entsprechenden Synergien realisiert.

- › **600** IT-Anwendungen angepasst
- › **1 000** Dresdner-Bank-IT-Anwendungen werden abgeschaltet



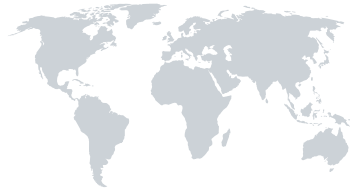

## Commerzbank im Überblick

Umschlag 2 bis Umschlag 8

---

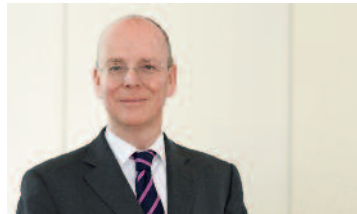

## An unsere Aktionäre

Seite 20 bis Seite 42

---

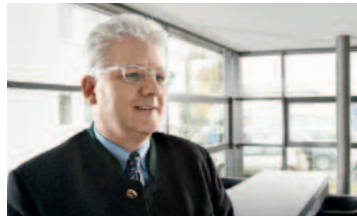

## Unternehmerische Verantwortung

Seite 43 bis Seite 72

---

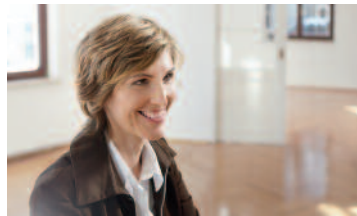

## Konzernlagebericht

Seite 73 bis Seite 160

---

## Konzernrisikobericht

Seite 161 bis Seite 198

---

## Konzernabschluss

Seite 199 bis Seite 370

---

## Weitere Informationen

Seite 371 bis Seite 382

# Inhaltsverzeichnis

---

## U2 – U8

- U2 Das sind unsere Zahlen
- U3 Das ist die Commerzbank
- U4 Konzernstruktur
- U5 Commerzbank weltweit
- U7 Fünfjahresübersicht
- U8 Finanztermine, Kontaktadressen
- 18 Das Jahr 2010 im Überblick

---

## 20 – 42

- 20 Brief des Vorstandsvorsitzenden
- 26 Das Vorstandsteam
- 28 Bericht des Aufsichtsrats
- 34 Aufsichtsrat und Ausschüsse
- 38 Unsere Aktie

---

## 43 – 72

- 45 Corporate-Governance-Bericht
  - 51 Vergütungsbericht
- 62 Angaben gemäß § 315 des Handelsgesetzbuchs (HGB)
- 71 Corporate Responsibility

---

## 73 – 160

- 75 Geschäft und Rahmenbedingungen
- 81 Ertrags-, Finanz- und Vermögenslage
- 93 Entwicklung der Segmente
  - 93 Privatkunden
  - 103 Mittelstandsbank
  - 113 Central & Eastern Europe
  - 123 Corporates & Markets
  - 131 Asset Based Finance
  - 138 Portfolio Restructuring Unit
  - 141 Sonstige und Konsolidierung
- 144 Unsere Mitarbeiterinnen und Mitarbeiter
- 150 Nachtragsbericht
- 151 Prognose- und Chancenbericht

---

## 161 – 198

- 163 Wesentliche Entwicklungen 2010
- 165 Risikoorientierte Gesamtbanksteuerung
- 168 Adressenausfallrisiken
- 184 Intensive Care
- 188 Marktrisiken
- 191 Liquiditätsrisiken
- 193 Operationelle Risiken
- 195 Sonstige Risiken

---

## 199 – 370

- 204 Gesamtergebnisrechnung
- 208 Bilanz
- 210 Eigenkapitalveränderungsrechnung
- 212 Kapitalflussrechnung
- 214 Anhang (Notes)
- 370 Bestätigungsvermerk

---

## 371 – 382

- 372 Zentraler Beirat
- 373 Mandate
- 377 Glossar
- 382 Abbildungs- und Tabellenverzeichnis

# Das Jahr 2010 im Überblick

## 1. Quartal

---

Mit der zunehmenden Integration der Dresdner Bank baut die Commerzbank im ersten Quartal 2010 ihre Position als führende Bank für Privat- und Firmenkunden in Deutschland weiter aus.

Auch international kommt die Bank gut voran: Die polnische Tochter BRE Bank setzt ihre erfolgreiche Geschäftsstrategie fort. In Peking wird die vierte chinesische Filiale eröffnet. Damit ist die Bank nun in allen wichtigen Wirtschaftszentren Chinas vertreten. Außerhalb Deutschlands ist die Commerzbank nun mit 14 000 Mitarbeitern in 50 Ländern tätig.

Die Commerzbank führt zu Jahresbeginn ihre Stiftungen mit denen der ehemaligen Dresdner Bank in einem Stiftungszentrum zusammen. Im Zuge der Neuausrichtung stellt die Bank Museen in Frankfurt, Dresden und Berlin über 100 Werke bedeutender Künstler als Dauerleihgaben zur Verfügung.

## 2. Quartal

---

Anfang Mai legt die Commerzbank die Zahlen für das erste Quartal vor. Mit einem Nettogewinn von über 700 Mio Euro ist sie trotz der anhaltenden Auswirkungen der weltweiten Finanzmarkt- und Wirtschaftskrise profitabel.

Die Integration der Filialen erfolgt schneller als ursprünglich vorgesehen. Ab Mitte Juni erhalten mehr als 1 600 Standorte in ganz Deutschland das dreidimensionale gelbe Band als neues gemeinsames Markenzeichen.

Die Commerzbank zieht Lehren aus der Krise. Sie stärkt konsequent die Rechte der privaten Kunden und schreibt wichtige Kundenrechte in einer Kundencharta fest. Auch ihren Unternehmenskunden steht die Bank weiter fest zur Seite und legt im Juni einen Eigenkapitalfonds für mittelständische Unternehmen auf.

## 3. Quartal

---

Die Commerzbank veröffentlicht die Ergebnisse des Stresstests der europäischen Bankenaufsicht: Die Kernkapitalquote liegt in allen Szenarien weit über den Anforderungen. Die Halbjahreszahlen bestätigen den erfolgreich eingeschlagenen Weg. Die Bruttoerträge steigen gegenüber dem ersten Halbjahr 2009 um 25 %, das Nettoergebnis verbessert sich um 2,6 Mrd Euro.

Im August wird die organisatorische Integration in der Zentrale und in den Filialen abgeschlossen. Gleichzeitig werden die Voraussetzungen für die Zusammenlegung der EDV geschaffen. Trotz der Belastungen der Integration und der anhaltenden Auswirkungen der Krise steht die Ausbildung der Mitarbeiter unverändert im Zentrum – so nehmen im dritten Quartal mehr als 1 000 Nachwuchskräfte ihre Arbeit auf.

## 4. Quartal

---

Das Ergebnis des Geschäftsjahres 2010 bestätigt eindrücklich die Erfolge der Commerzbank bei der Umsetzung der strategischen „Roadmap 2012“: Die Risiken wurden wie angekündigt konsequent reduziert. Die Bank ist in allen Quartalen positiv und kehrt ein Jahr früher als erwartet in die Gewinnzone zurück. Das Nettoergebnis beträgt 1,4 Mrd Euro.

Zum Jahresende schließt die Commerzbank die Integration der Dresdner Bank im Investmentbanking und in den 50 Auslandsmärkten ab. Auch alle anderen Meilensteine werden wie geplant erreicht.

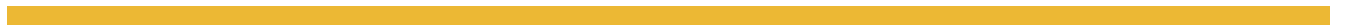

# Preise und Auszeichnungen der Commerzbank

|                                                                                                                                                                                                         |                                                                                                                                                           |                                                                                                                                                                          |                                                                                                                                                                   |
|---------------------------------------------------------------------------------------------------------------------------------------------------------------------------------------------------------|-----------------------------------------------------------------------------------------------------------------------------------------------------------|--------------------------------------------------------------------------------------------------------------------------------------------------------------------------|-------------------------------------------------------------------------------------------------------------------------------------------------------------------|
|  <p><b>Focus Money und n-tv</b><br/>Bester Emittent: Bonuszertifikate</p>                                              |  <p><b>Digita-Preis</b> Lernprogramm zur Informationssicherheit</p>      |  <p><b>IFC-Award</b> Most Active GTFP Confirming Bank in Europe &amp; Central Asia</p> |  <p><b>GTR-Award</b><br/>Participating bank for GTLP</p>                       |
|  <p><b>GTR-Award</b> Participating bank for BiBanco TFFP</p>                                                           |  <p><b>Börse am Sonntag</b><br/>Bester Emittent: Zertifikate</p>         |  <p><b>Der Zertifikate-Berater</b><br/>Bester Emittent: Bonuszertifikate</p>           |  <p><b>EBRD-Award</b><br/>Most active Confirming Bank</p>                      |
| <p>„Beste Mittelstandsbank“<br/>Deutsches Institut für Service-Qualität gemeinsam mit der Buschmann Wirtschafts- und Steuerberatungs GmbH in einer Studie für<br/><b>Focus Money (Heft 05/2010)</b></p> |  <p><b>Wirtschaftswoche comdirect</b><br/>Beste Direktbank</p>           |  <p><b>iF-Award</b><br/>Neues Markenzeichen</p>                                        |  <p><b>BCP-Award</b><br/>Mitarbeitermagazin</p>                                |
|  <p><b>Inkom-Grandprix</b><br/>Mitarbeitermagazin</p>                                                                |  <p><b>Vision-Awards</b><br/>Geschäftsbericht</p>                      | <p>Vermögensverwaltung der Commerzbank<br/>„sehr gut“<br/>(07/2010)</p> <p><b>Test des Magazins Euro</b><br/>Private Banking</p>                                         |  <p><b>Red-Dot-Design-Award</b><br/>Geschäftsbericht</p>                     |
|  <p><b>Red-Dot-Design-Award</b><br/>Neues Markenzeichen</p>                                                          | <p>„Beste Mittelstandsbank Internationales Geschäft“ *</p> <p><b>Impulse (08/2010)</b></p>                                                                |  <p><b>Seer-Award</b> Finance, News and Business Service</p>                         |  <p><b>Deutscher PR-Preis</b> comdirect Nachhaltigkeitskommunikation/CSR</p> |
|  <p><b>Deutscher PR-Preis</b><br/>Beste B2B-Kommunikation</p>                                                        |  <p><b>Pass Online-Banking-Awards</b><br/>comdirect: Bester Broker</p> | <p>„Best Domestic Cash Manager Germany“</p> <p><b>Euromoney</b><br/>Cash Management Poll 2010</p>                                                                        |  <p><b>Focus Money und n-tv</b> Herausragende Vermögensverwaltung</p>        |
|  <p><b>Max-Spohr-Preis</b><br/>Diversity</p>                                                                         |  <p><b>Econ-Special-Award</b><br/>Personalbericht</p>                  |  <p><b>Scope-Award</b><br/>Bester Emittent: Zertifikate</p>                          |  <p><b>Zertifikate-Award</b><br/>Bester Emittent: Zertifikate</p>            |

\* Beliebtestes Institut für das Auslandsgeschäft neben der Hausbank unter den 1 000 befragten Unternehmen.

## Brief des Vorstandsvorsitzenden

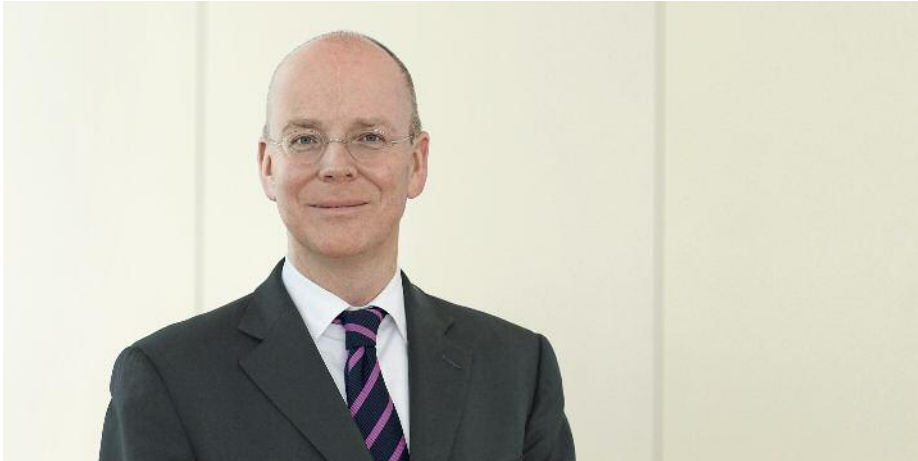

**Martin Blessing** Vorstandsvorsitzender

*Sehr geehrte Aktionärinnen und Aktionäre,*

das Geschäftsjahr 2010 war für die Commerzbank in einem nach wie vor herausfordernden Umfeld ein erfolgreiches Jahr. Die neue Commerzbank nimmt immer deutlichere Konturen an. So ist die Integration in den ausländischen Standorten de facto abgeschlossen und im Inland haben wir wichtige Zwischenziele erreicht. Trotz dieser enormen Integrationsanstrengungen haben wir im Jahr 2010 bei den Geschäftsergebnissen große Fortschritte gemacht. Im Konzern sind wir in die Gewinnzone zurückgekehrt; die Wende gelang uns damit ein Jahr früher als ursprünglich geplant.

---



|    |                                 |
|----|---------------------------------|
| 20 | Brief des Vorstandsvorsitzenden |
| 26 | Vorstandsteam                   |
| 28 | Bericht des Aufsichtsrats       |
| 34 | Aufsichtsrat und Ausschüsse     |
| 38 | Unsere Aktie                    |

Bei unserem Strategieprogramm „Roadmap 2012“ kommen wir weiter gut voran. Nach wenig mehr als zwei Jahren haben wir mit der Integration der Dresdner Bank in die Commerzbank eines der größten Projekte in der deutschen Bankengeschichte in weiten Teilen abgeschlossen.

Im Sommer haben wir die neue Organisations- und Filialstruktur vollständig umgesetzt und der gemeinsame Markenauftritt von Commerzbank- und Dresdner-Bank-Filialen startete – über 1 200 Filialen erhielten ein gemeinsames Markenzeichen. Die Umstellung unserer Filialen auf den gemeinsamen Markenauftritt bietet den Kunden ein größeres Filialnetz, dessen Vorteile sie gerne nutzen. Die Commerzbank spart durch die Integration Geld. Im Geschäftsjahr 2010 konnten wir Kostensynergien in Höhe von 1,1 Mrd Euro erzielen, das ist bereits fast die Hälfte des geplanten Kosteneinsparpotenzials von 2,4 Mrd Euro jährlich.

Sie sehen bereits hier, dass unsere Mitarbeiter wieder ein ausgesprochen arbeitsreiches Jahr hinter sich haben. Aus aktuellen Befragungen wissen wir außerdem, dass unsere Mitarbeiter weiter zu einem Team zusammenwachsen und sich in hohem Maße für die Integration engagieren. Dafür möchte ich mich, auch im Namen meiner Vorstandskollegen, bei unseren Mitarbeiterinnen und Mitarbeitern herzlich bedanken!

Sehr geehrte Aktionärinnen und Aktionäre, im Jahr 2010 hat sich die makroökonomische Lage verbessert. Allerdings wurde deutlich, dass die Krise trotz erkennbarer Erholungstendenzen noch nicht vorbei ist und sich auch die Commerzbank diesem äußerst herausfordernden Umfeld nicht entziehen konnte. Dennoch belief sich das Konzernergebnis im Jahr 2010 auf 1,4 Mrd Euro und wir haben es geschafft, in allen vier Quartalen ein positives Ergebnis zu erzielen. Das zeigt, dass wir uns auf dem richtigen Weg befinden und schon ein beachtliches Stück Wegstrecke hinter uns gelassen haben. Die Bruttoerträge im Konzern konnten wir trotz unserer Integrationsanstrengungen um über 16 % auf 12,7 Mrd Euro steigern. Gleichzeitig verringerte sich die Risikovorsorge – insbesondere in der Kernbank – deutlich um über 40 %.

Die Verwaltungsaufwendungen nahmen im Berichtsjahr lediglich um 2 % ab, da erzielte Synergien zum Teil durch integrationsbedingte Kosten überlagert wurden. Insgesamt erzielten wir ein Operatives Ergebnis von 1,4 Mrd Euro; dies sind 3,7 Mrd Euro mehr als im Vorjahr.

Obwohl das Konzernergebnis nach IFRS deutlich in die Gewinnzone drehte, war für das HGB-Ergebnis der Commerzbank Aktiengesellschaft im Berichtsjahr 2010 ein Verlust auszuweisen. Der Hauptgrund dafür ist, dass wir uns gemäß den Auflagen der Europäischen Union bis Ende 2014 von der Eurohypo trennen müssen. Um die Eurohypo darauf vorzubereiten, haben wir Bestände und Risiken reduziert. Durch die Reduzierung des Neugeschäfts und die anhaltend hohe Risikovorsorge ist der Barwert der künftigen Erträge gesunken, mit der Folge hoher Abschreibungen auf den Buchwert der Eurohypo im Einzelabschluss der Commerzbank Aktiengesellschaft. Aufgrund dieser Verlustsituation können wir für das Berichtsjahr 2010 keine Dividende zahlen und auch die Stillen Einlagen des SoFFin und andere Kapitalinstrumente nicht bedienen.

Unsere Liquiditätsausstattung ist komfortabel und die Kernkapitalquote erreicht per Jahresende 2010 respektable 11,9 %. Auch unsere Core-Tier-1-Quote liegt mit 10 % deutlich über unserem Zielkorridor. Durch unser aktives Management haben wir unsere Risikoaktiva bereits konsequent und nachhaltig verringert. Dies gilt besonders für die Segmente Asset Based Finance und Portfolio Restructuring Unit sowie für den Verkauf von nicht strategischen Beteiligungen.

Mitte Januar 2011 hat die Commerzbank einen wichtigen Schritt zur Optimierung ihrer Kapitalstruktur unternommen: Wir haben im Rahmen unseres Liability Managements eine Kapitalerhöhung gegen Sacheinlage durchgeführt und hybride Eigenmittelinstrumente in Aktien getauscht. Dabei wurden rund 118,1 Millionen Aktien bei institutionellen Investoren platziert. Dies entspricht 10 % minus eine Aktie des bisherigen Grundkapitals. Der SoFFin hat seine Beteiligungsquote an der Commerzbank (25 % plus eine Aktie) nach der

»Nach wenig mehr als zwei Jahren haben wir mit der Integration der Dresdner Bank in die Commerzbank eines der größten Projekte in der deutschen Bankengeschichte in weiten Teilen abgeschlossen.« **Martin Blessing**

Transaktion aufrechterhalten. Die Transaktion hat keine spürbaren Auswirkungen auf die Kernkapitalquote der Bank, führt aber zu einer Erhöhung der Core-Tier-1-Quote. Die starke Nachfrage nach unseren Aktien von institutionellen Investoren hat gezeigt, dass nationale und internationale Anleger bereit sind, in unsere Aktie zu investieren.

Unser Anspruch ist es, die Stillen Einlagen des Bundes so schnell wie möglich abzulösen. Neben Optionen, die uns unsere hohe Eigenkapitalquote, die nachhaltige Reduzierung der risikogewichteten Aktiva und die früher als erwartet erreichte Rückkehr in die Gewinnzone ermöglichen, können wir in aufnahmebereiten Märkten auch Eigenkapital aufnehmen. Mit dem Finanzmarktstabilisierungsbeschleunigungsgesetz hat die Bundesregierung zugleich mehr Flexibilität geschaffen, die wir zur Rückführung von SoFFin-Mitteln nutzen können. Bereits in diesem Jahr wollen wir einen signifikanten Betrag in Milliardenhöhe zurückgeben – unter Beibehaltung einer guten Eigenkapitalquote.

Sehr geehrte Aktionärinnen und Aktionäre, die Commerzbank ist mit Rückenwind ins neue Jahr gestartet, der Januar ist sehr gut gelaufen. Dennoch erwarten wir auch für das Geschäftsjahr 2011 herausfordernde Märkte. Während Deutschland weiterhin von seiner Exportstärke profitieren sollte, dürfte

das Wachstum in anderen Ländern des Euroraums durch weiterhin problematische Immobilienmärkte und die Staatsschuldenkrise eingeschränkt bleiben. Unabhängig davon werden wir die Integration weiter vorantreiben. Wir haben nur noch wenige Schritte zu gehen und sehen bereits die Ziellinie. Im Fokus wird im zweiten Quartal des laufenden Jahres zunächst die Migration der Kunden- und Produktdaten stehen; seit August 2010 sind die hierfür erforderlichen Anpassungen unserer IT-Systeme im Einsatz. Als letzter Schritt der Integration werden ab Mitte 2011 dann knapp 400 Filialpärchen zusammengelegt. Bis zum Jahr 2012 soll dieser Prozess und damit die Integration abgeschlossen sein. Die Integration wird im Jahr 2011 mit Aufwendungen von rund 200 Mio Euro zu Buche schlagen, im Berichtsjahr waren es noch über 400 Mio Euro. Dafür erwarten wir, im laufenden Jahr mit 1,5 Mrd Euro um 300 Mio Euro höhere Kostensynergien zu realisieren.

Auch operativ werden wir uns in allen Bereichen verbessern. In der Mittelstandsbank planen wir weiteres Wachstum auf Basis unserer starken Marktpositionierung, um von der erfreulichen konjunkturellen Situation in Deutschland zu profitieren. Im Segment Corporates & Markets wollen wir das Ergebnis nachhaltig sichern. Im Segment Central & Eastern Europe wird insbesondere die BRE Bank ihre Wachstumsstrategie weiter umsetzen. Unser besonderes Augenmerk legen wir im Jahr 2011 auf das Privatkundengeschäft.

Durch den Abbau der nicht zum Kerngeschäft gehörenden Aktivitäten in den Segmenten Asset Based Finance und Portfolio Restructuring Unit planen wir weiterhin, unsere Risiken zu reduzieren. Im Segment Asset Based Finance werden wir den Volumenabbau über die nächsten Jahre forcieren. Im Bereich Public Finance wird kein Neugeschäft mehr getätigt und das bestehende Volumen über die Zeit abgebaut. Auch im Bereich Commercial Real Estate werden wir unsere Aktivitäten – bei lediglich selektivem Neugeschäft in den Kernmärkten – in den Folgejahren weiter ganz erheblich reduzieren.

Für die Gewinn- und Verlustrechnung des Konzerns erwarten wir für das Jahr 2011 neben dem Rückgang der Verwaltungskosten, dass unsere Risikovorsorge unterhalb des Wertes im Berichtsjahr 2010 bleiben wird. Das Operative Ergebnis im Konzern sollte deutlich über dem Niveau des Jahres 2010 liegen. Erzielt die Bank im Geschäftsjahr 2011 ein positives Ergebnis im Einzelabschluss, werden wir auch die Stillen Einlagen des SoFFin bedienen. Nach unseren derzeitigen Erwartungen ist das der Fall. Ab 2012 planen wir dann für den Konzern ein Operatives Ergebnis vor Regulierungseffekten von mehr als 4 Mrd Euro pro Jahr. Damit gelten die Ziele der „Roadmap 2012“ in einem unveränderten regulatorischen Umfeld und unter stabilen Marktbedingungen weiterhin.

Zu unserer Hauptversammlung im Mai 2011 in der Jahrhunderthalle in Frankfurt lade ich Sie auch in diesem Jahr ein und freue mich auf Ihr Kommen.

Herzlich,  
Ihr  
Martin Blessing

Martin Blessing, Vorstandsvorsitzender

# Das Vorstandsteam

## Frank Annuscheit

48 Jahre  
Chief Operating Officer  
Mitglied des Vorstands seit 1.1.2008

### Mandate

a) comdirect bank Aktiengesellschaft<sup>1</sup>

## Martin Blessing

47 Jahre  
Vorsitzender  
Mitglied des Vorstands seit 1.11.2001

### Mandate

–

## Markus Beumer

46 Jahre  
Mittelstandsbank  
Mitglied des Vorstands seit 1.1.2008

### Mandate

a) Commerz Real AG<sup>1</sup>

## Dr. Achim Kassow

44 Jahre  
Central & Eastern Europe  
Mitglied des Vorstands seit 10.11.2004

### Mandate

a) comdirect bank Aktiengesellschaft<sup>1</sup>, stellv. Vorsitzender; Commerzbank Auslandsbanken Holding AG<sup>1</sup>, Vorsitzender; Generali Deutschland Holding AG<sup>2</sup>  
b) Allianz Global Investors Deutschland GmbH; BRE Bank S.A.<sup>1</sup>

## Jochen Klösges

46 Jahre  
Asset Based Finance  
Mitglied des Vorstands seit 1.6.2009

### Mandate

a) Commerz Real AG<sup>1</sup>, Vorsitzender; Commerz Real Investmentgesellschaft mbH<sup>1</sup>, Vorsitzender; Deutsche Schiffsbank Aktiengesellschaft<sup>1</sup>, Vorsitzender; Eurohypo Aktiengesellschaft<sup>1</sup>, Vorsitzender  
b) Commerzbank Auslandsbanken Holding Nova GmbH<sup>1</sup>; Commerzbank Inlandsbanken Holding GmbH<sup>1</sup>, stellv. Vorsitzender

Stand: 31.12.2010

- a) Mitgliedschaft in gesetzlich zu bildenden Aufsichtsräten
- b) Mitgliedschaft in vergleichbaren Kontrollgremien

<sup>1</sup> Konzernmandat.

<sup>2</sup> Aufsichtsratsmandat in einer konzernexternen börsennotierten Gesellschaft oder in einem Aufsichtsgremium einer Gesellschaft mit vergleichbaren Anforderungen (gemäß Ziff. 5.4.5 des Deutschen Corporate Governance Kodex).

## Michael Reuther

51 Jahre

Corporates & Markets

Mitglied des Vorstands seit 1.10.2006

### Mandate

a) Eurohypo Aktiengesellschaft<sup>1</sup>

---

## Dr. Stefan Schmittmann

54 Jahre

Chief Risk Officer

Mitglied des Vorstands seit 1.11.2008

### Mandate

- a) Commerz Real AG<sup>1</sup>, stellv. Vorsitzender;  
Commerzbank Auslandsbanken Holding AG<sup>1</sup>;  
Eurohypo Aktiengesellschaft<sup>1</sup>; Schaltbau  
Holding AG<sup>2</sup>; Verlagsgruppe Weltbild GmbH
- b) BRE Bank S.A.<sup>1</sup>; KGAL GmbH & Co. KG,  
Vorsitzender
- 

## Ulrich Sieber

45 Jahre

Group Human Resources,

Group Integration

Mitglied des Vorstands seit 1.6.2009

### Mandate

- a) BVV Pensionsfonds des Bankgewerbes AG,  
stellv. Vorsitzender
- b) SWAB Stiftung der Deutschen Wirtschaft  
für Arbeit und Beschäftigung GmbH

## Dr. Eric Strutz

46 Jahre

Chief Financial Officer

Mitglied des Vorstands seit 1.4.2004

### Mandate

- a) ABB AG; Commerzbank Auslandsbanken  
Holding AG<sup>1</sup>, stellv. Vorsitzender; RWE  
Power AG
- b) Commerzbank Auslandsbanken Holding  
Nova GmbH<sup>1</sup>, Vorsitzender; Commerzbank  
Inlandsbanken Holding GmbH<sup>1</sup>, Vorsitzender;  
Mediobanca Banca di Credito Finanziario  
S.p.A.<sup>2</sup>; SdB-Sicherungseinrichtungsgesell-  
schaft deutscher Banken mbH; Verlags-  
beteiligungs- und Verwaltungsgesellschaft  
mit beschränkter Haftung
- 

## Martin Zielke

48 Jahre

Private Customers

Mitglied des Vorstands seit 5.11.2010

### Mandate

- a) comdirect bank Aktiengesellschaft<sup>1</sup>,  
Vorsitzender
- b) BRE Bank S.A.<sup>1</sup>; Commerzbank Auslands-  
banken Holding Nova GmbH<sup>1</sup>, stellv. Vor-  
sitzender; Public Joint Stock Company  
„Bank Forum“<sup>1</sup>



## Bericht des Aufsichtsrats

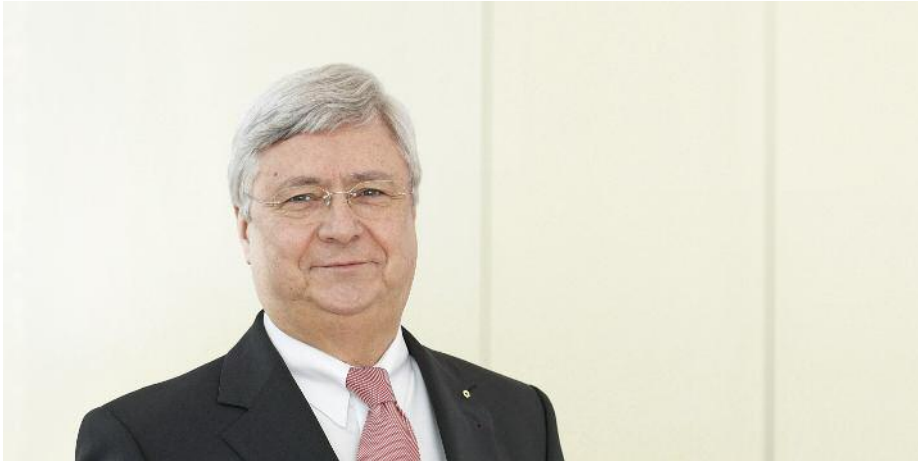

Klaus-Peter Müller Vorsitzender

*Sehr geehrte Aktionärinnen und Aktionäre,*

während des abgelaufenen Geschäftsjahres haben wir den Vorstand bei der Leitung des Unternehmens beraten und die Geschäftsführung der Commerzbank regelmäßig überwacht. Der Vorstand unterrichtete uns regelmäßig, zeitnah und umfassend schriftlich und mündlich über alle wesentlichen Entwicklungen in der Bank, auch zwischen den Sitzungen. Wir haben uns wiederholt über die Geschäftslage des Unternehmens und die wirtschaftliche Situation der einzelnen Geschäftsfelder, die Unternehmensplanung sowie die strategische Ausrichtung der Bank informieren lassen und den Vorstand hierzu beraten. Zwischen den Sitzungen stand ich als Vorsitzender des Aufsichtsrats in ständigem Kontakt mit dem Vorstand und habe mich fortlaufend über die aktuelle Geschäftsentwicklung und wesentliche Geschäfte der Bank und des Konzerns unterrichten lassen. Der Aufsichtsrat war in die Entscheidungen von wesentlicher Bedeutung für die Bank eingebunden und hat, soweit erforderlich, nach umfassender Beratung und Prüfung seine Zustimmung erteilt.

---

## Sitzungen des Aufsichtsrats

Im Geschäftsjahr fanden insgesamt sieben Aufsichtsratssitzungen statt, davon zwei Sitzungen in Form von Telefonkonferenzen. Zudem fand jeweils eine Strategiesitzung für die Vertreter der Arbeitnehmer und der Anteilseigner statt.

Gegenstand sämtlicher ordentlicher Sitzungen war die aktuelle Geschäftslage der Bank, die wir jeweils eingehend mit dem Vorstand erörterten. Schwerpunkte unserer Tätigkeit waren die Vergütung der Vorstände und Mitarbeiter vor dem Hintergrund neuer regulatorischer Anforderungen sowie eventuelle Kapitalmaßnahmen zur Rückführung der Stillen Einlagen. Ein weiterer Schwerpunkt war die intensive Befassung mit dem jeweils aktuellen Stand der Integration der Dresdner Bank in den Commerzbank-Konzern. Die Vorstandsberichte haben wir kritisch hinterfragt und zum Teil ergänzende Informationen angefordert, die stets unverzüglich und zu unserer Zufriedenheit erteilt wurden.

In der Sitzung am 23. Februar 2010 standen die vorläufigen Zahlen für das abgelaufene Geschäftsjahr 2009 sowie die zu erwartenden Ertragsbelastungen der neuen Commerzbank für das Geschäftsjahr 2010 im Mittelpunkt unserer Erörterungen. In der anschließenden Diskussion überzeugten wir uns von der Plausibilität der vorgetragenen Erwartungen und Ziele – insbesondere vor dem Hintergrund der anhaltenden Wirtschaftskrise und dem daraus resultierenden Wertberichtigungsbedarf im Kreditgeschäft – und erörterten die verschiedenen Handlungsalternativen. Gegenstand der Sitzung waren auch der Statusbericht zur Integration der Dresdner Bank und die Bedienung der Stillen Einlagen, der Genüsse und der hybriden Kapitalinstrumente. Des Weiteren befassten wir uns mit dem Bericht des externen Beraters über die Effizienzprüfung des Aufsichtsrats und leiteten hieraus Maßnahmen zur Verbesserung der Zusammenarbeit im Aufsichtsrat und auch der Zusammenarbeit mit dem Vorstand ab. Zudem stimmten wir der Änderung der Geschäftsordnung für den Vorstand zu. Die Änderung war aufgrund eines Rundschreibens der BaFin, das neue Anforderungen an die Informationspflicht der Vorstände gegenüber dem Aufsichtsrat enthält, erforderlich. Des Weiteren haben wir im Hinblick auf neue Anforderungen aus dem BaFin-Rundschreiben, dem Corporate Governance Kodex und dem BilMoG auch Änderungen in der Geschäftsordnung für den Aufsichtsrat beschlossen. Zudem haben wir uns mit dem Erwerb weiterer Anteile an der Bank Forum befasst. Gegenstand der Sitzung war auch die Stellungnahme des Aufsichtsrats gegenüber dem Landgericht Frankfurt zum Antrag eines Aktionärs auf Bestellung eines Sonderprüfers im Hinblick auf den Erwerb der Dresdner Bank AG, der zuvor schon von der Hauptversammlung abgelehnt worden war.

In der Sitzung am 23. März 2010 prüften wir den Jahresabschluss und den Konzernabschluss 2009; hierüber haben wir bereits im letzten Geschäftsbericht ausführlich berichtet. Ferner haben wir uns intensiv mit dem Statusbericht der Integration der Dresdner Bank, insbesondere aus Sicht der verschiedenen Segmente der Commerzbank und dem Wachstumsprogramm der Mittelstandsbank für 2010 befasst. Des Weiteren haben wir uns mit den neuen Vergütungsmodellen für die Mitarbeiter, die an die neuen regulatorischen Anforderungen angepasst wurden, auseinandergesetzt. Auch haben wir beschlossen, die variable Vergütung für die Mitglieder des Vorstands für das Geschäftsjahr 2009 auf 0 Euro festzusetzen. Das im Dezember 2009 beschlossene neue Vergütungsmodell für die Mitglieder des Vorstands haben

wir dahingehend modifiziert, dass falls für 2010 die Festzinskomponente in Höhe von 9 % per annum der Gewinnbeteiligung auf die Stillen Einlagen des SoFFin nicht voll bezahlt wird, für die monetäre Gesamtvergütung der Vorstandsmitglieder, also festes Jahresgrundgehalt, Short Term Incentive und Long Term Incentive, weiter ein Cap in Höhe von insgesamt 500 000 Euro per annum gilt. Zudem haben wir beschlossen, das neue Vorstandsvergütungsmodell der Hauptversammlung zur Billigung vorzulegen; die Hauptversammlung hat dazu ein positives Votum beschlossen.

Die Sitzung am 19. Mai 2010 diente vornehmlich der Vorbereitung auf die anschließende Hauptversammlung. Im Übrigen haben wir für die Erhöhung der Datensicherheit die Geschäftsordnung für den Aufsichtsrat geändert. Die Unterlagen für die Aufsichtsratssitzungen werden nicht mehr postalisch versandt, sondern in einen virtuellen Datenraum eingestellt.

Am 23. Juli 2010 hat uns der Vorstand im Rahmen einer Telefonkonferenz über das Ergebnis des vom Europäischen Ausschuss der Bankaufsichtsbehörden (CEBS) in Zusammenarbeit mit den nationalen Aufsehern und der Europäischen Zentralbank (EZB) durchgeführten EU-weiten Stresstests informiert.

## »Wir haben uns intensiv mit der Integration der Dresdner Bank und dem Wachstumsprogramm der Mittelstandsbank befasst.«

**Klaus-Peter Müller**

In der Sitzung am 4. August 2010 erläuterte uns der Vorstand anhand ausführlicher Unterlagen die Geschäftsentwicklung und das Ergebnis des ersten Halbjahres 2010 sowie den aktuellen Stand der Integration der Dresdner Bank, insbesondere im Hinblick auf Synergien und Personalabbau. Des Weiteren berichtete der Vorstand über den Bereich Human Resources. Wir beschäftigten uns zudem intensiv mit den Berichten externer Kanzleien und Wirtschaftsprüfer im Hinblick auf den Erwerb der Dresdner Bank AG. Gegenstand der Sitzung war auch der Bericht über den Stand des Verfahrens über den Antrag auf Sonderprüfung. Wir haben uns auch mit den Musteranstellungsverträgen für Vorstandsmitglieder, die bei Neuberufungen und Vertragsverlängerungen verwandt werden sollen, befasst.

In der ordentlichen Sitzung am 4. November 2010 lag der Schwerpunkt unserer Beratungen auf dem Bericht über die Geschäftslage einschließlich Budget für das Jahr 2011 und der Mittelfristplanung. Wir haben uns auf Basis der Geschäftszahlen die Ziele für die Bank und den Konzern darstellen lassen und ausführlich mit dem Vorstand besprochen. Außerdem

|    |                                  |
|----|----------------------------------|
| 20 | Brief des Vorstandsvorsitzenden  |
| 26 | Vorstandsteam                    |
| 28 | <b>Bericht des Aufsichtsrats</b> |
| 34 | Aufsichtsrat und Ausschüsse      |
| 38 | Unsere Aktie                     |

haben wir uns über den aktuellen Stand der IT-Integration und der Integration der Dresdner Bank informiert. Weitere Themen dieser Sitzung waren turnusgemäß der Status des Segments Portfolio Restructuring Unit und die Corporate Governance der Bank, insbesondere der Beschluss über die jährliche Entsprechenserklärung nach § 161 AktG. Nähere Einzelheiten zur Corporate Governance in der Commerzbank finden Sie in diesem Geschäftsbericht auf den Seiten 45 bis 50. Gegenstand der Sitzung war auch die Erörterung von Möglichkeiten zur Rückführung der Stillen Einlagen des SoFFin.

Am 15. Dezember 2010 behandelten wir in einer Telefonkonferenz die variable Vorstandsvergütung für 2011 und beschlossen, falls für das Geschäftsjahr 2011 die Festzinskomponente in Höhe von 9 % per annum der Gewinnbeteiligung auf die Stillen Einlagen des SoFFin nicht voll bezahlt wird, gilt für die monetäre Gesamtvergütung der Vorstandsmitglieder, also festes Jahresgrundgehalt, Short Term Incentive und Long Term Incentive, weiter ein Cap in Höhe von insgesamt 500 000 Euro per annum.

In drei Fällen haben wir, wegen besonderer Eilbedürftigkeit, zusätzlich Beschlüsse im Umlaufverfahren gefasst.

In mehreren Sitzungen beschäftigten wir uns nach vorheriger Beratung im Präsidialausschuss mit Vorstandsangelegenheiten, insbesondere mit der Verlängerung der jeweils bis zum 31. Dezember 2010 laufenden Vorstandsbestellungen von Herrn Annuschein und Herrn Beumer für die Dauer von fünf Jahren bis zum 31. Dezember 2015 sowie mit der Neubestellung von Herrn Zielke zum Mitglied des Vorstands mit Wirkung vom 5. November 2010.

## Ausschüsse

Der Aufsichtsrat hat aus seiner Mitte insgesamt sechs Ausschüsse gebildet. Die aktuelle Zusammensetzung der Ausschüsse ist auf Seite 37 dieses Geschäftsberichts abgedruckt.

Der Präsidialausschuss tagte im Berichtsjahr fünfmal, in einem Fall handelte es sich um eine außerordentliche Sitzung. Gegenstand der Beratungen war die Vorbereitung und Vertiefung der Sitzungen des Aufsichtsratsplenums, insbesondere hinsichtlich der Geschäftslage. Anders als in den Vorjahren spielte aufgrund der EU-Auflagen für die Genehmigung der Stabilisierungsmaßnahmen des SoFFin die sonst regelmäßige Diskussion von strategischen Beteiligungen im Finanzbereich keine dominierende Rolle. Darüber hinaus beschäftigte sich der Präsidialausschuss mit Fragen der Vorstandsvergütung, auch vor dem Hintergrund der SoFFin-Auflagen. Ein weiteres Thema war die Kreditvergabe an Mitarbeiter und Organmitglieder der Bank.

Der Prüfungsausschuss trat im Geschäftsjahr 2010 zu insgesamt sieben Sitzungen zusammen. Er erörterte in Gegenwart des Abschlussprüfers den Jahresabschluss und den Konzernabschluss der Commerzbank sowie die Prüfungsberichte. Der Prüfungsausschuss holte die Unabhängigkeitserklärung des Abschlussprüfers gemäß Ziffer 7.2.1 des Deutschen Corporate Governance Kodex ein und erteilte den Prüfungsauftrag an den Abschlussprüfer. Er vereinbarte mit dem Abschlussprüfer die Prüfungsschwerpunkte und das Honorar. Darüber hinaus befasste sich der Prüfungsausschuss mit Aufträgen an den Abschlussprüfer für Nicht-Prüfungsleistungen; er ließ sich außerdem regelmäßig den aktuellen Stand und einzelne Ergebnisse

der Jahresabschlussprüfung erläutern und diskutierte in der zweiten Jahreshälfte jeweils die Zwischenfinanzberichte vor ihrer Veröffentlichung. Die Arbeit der Abteilungen Group Audit und Group Compliance der Bank waren ebenfalls Gegenstand der Erörterungen. Außerdem informierte sich der Prüfungsausschuss über aktuelle und bevorstehende Änderungen des Aufsichtsrechts. An den Sitzungen nahmen jeweils Vertreter des Abschlussprüfers teil, die über ihre Prüfungstätigkeit berichteten.

Der Risikoausschuss tagte im abgelaufenen Geschäftsjahr insgesamt viermal. Er befasste sich in diesen Sitzungen intensiv mit der Risikolage und dem Risikomanagement der Bank, insbesondere mit der Weiterentwicklung der Risikostrategie und den Markt-, Kredit- und operationellen Risiken. Für die Bank bedeutsame Einzelengagements wurden ausführlich mit dem Vorstand diskutiert.

Der Sozialausschuss traf sich im Berichtsjahr zu einer Sitzung, in der er sich in erster Linie mit der Personalentwicklung, den Recruitingmaßnahmen, den konzernweiten variablen Vergütungsmodellen und den Auswirkungen der Instituts-Vergütungsverordnung sowie dem Projekt „Frauen in Führungspositionen“ beschäftigte.

Der Nominierungsausschuss hat im Berichtsjahr nicht getagt.

Der gemäß § 27 Abs. 3 Mitbestimmungsgesetz gebildete Vermittlungsausschuss musste auch im Geschäftsjahr 2010 nicht zusammentreten.

Über die Arbeit der Ausschüsse wurde dem Aufsichtsratsplenum regelmäßig berichtet. Kein Aufsichtsratsmitglied hat einen Interessenkonflikt gemäß § 3 Abs. 6 der Geschäftsordnung des Aufsichtsrats offengelegt.

## Jahres- und Konzernabschluss

Der von der Hauptversammlung gewählte Abschlussprüfer und Konzernabschlussprüfer, die PricewaterhouseCoopers Aktiengesellschaft Wirtschaftsprüfungsgesellschaft, Frankfurt am Main, hat den Jahres- und Konzernabschluss der Commerzbank Aktiengesellschaft sowie die Lageberichte der AG und des Konzerns geprüft und mit dem uneingeschränkten Bestätigungsvermerk versehen. Der Jahresabschluss wurde nach den Vorschriften des Handelsgesetzbuchs (HGB), der Konzernabschluss nach den International Financial Reporting Standards (IFRS) aufgestellt. Die Abschlussunterlagen und die Prüfungsberichte wurden allen Aufsichtsratsmitgliedern rechtzeitig zugesandt. Die Mitglieder des Prüfungsausschusses erhielten darüber hinaus sämtliche Anlagen und Erläuterungen zu den Prüfungsberichten; alle Aufsichtsratsmitglieder hatten die Möglichkeit, diese Unterlagen einzusehen. Der Prüfungsausschuss befasste sich in seiner Sitzung am 23. März 2011 eingehend mit den Abschlussunterlagen. Wir haben im Plenum den Jahres- und Konzernabschluss der Commerzbank Aktiengesellschaft sowie die Lageberichte der AG und des Konzerns in unserer Bilanzsitzung am 24. März 2011 ebenfalls behandelt und gebilligt. Die Abschlussprüfer nahmen an den beiden Sitzungen des Prüfungsausschusses und des Aufsichtsratsplenums teil, erläuterten die wesentlichen Prüfungsergebnisse und standen für Fragen zur Verfügung. In beiden Sitzungen wurden die Abschlussunterlagen eingehend mit dem Vorstand sowie den Vertretern des Abschlussprüfers diskutiert.



|    |                                  |
|----|----------------------------------|
| 20 | Brief des Vorstandsvorsitzenden  |
| 26 | Vorstandsteam                    |
| 28 | <b>Bericht des Aufsichtsrats</b> |
| 34 | Aufsichtsrat und Ausschüsse      |
| 38 | Unsere Aktie                     |

Nach der abschließenden Prüfung durch den Prüfungsausschuss und unserer eigenen Prüfung erhoben wir keine Einwände gegen den Jahres- und Konzernabschluss und stimmten dem Ergebnis der Abschlussprüfung zu. Der Aufsichtsrat hat die vom Vorstand aufgestellten Abschlüsse von AG und Konzern gebilligt, der Jahresabschluss der AG wurde damit festgestellt.

## Veränderungen im Aufsichtsrat und im Vorstand

Im Aufsichtsrat hat es im Geschäftsjahr 2010 keine Veränderungen gegeben. Herr Bludau-Hoffmann hat sein Aufsichtsratsmandat zum 31. Dezember 2010 niedergelegt. Da das gewählte Ersatzmitglied das Aufsichtsratsmandat nicht wahrnehmen wird, hat der Vorstand auf Vorschlag der Vereinten Dienstleistungsgewerkschaft – ver.di – beim Landgericht Frankfurt beantragt, Herrn Mark Roach als Mitglied des Aufsichtsrats zu bestellen. Herr Roach wurde mit Wirkung zum 10. Januar 2011 als Aufsichtsratsmitglied bestellt. Frau Kasischke wird mit Ablauf der ordentlichen Hauptversammlung im Jahr 2011 ihr Aufsichtsratsmandat niederlegen. Das Ersatzmitglied Frau Beate Hoffmann wird mit Ablauf der ordentlichen Hauptversammlung 2011 Mitglied im Aufsichtsrat.

Mit Wirkung vom 5. November 2010 bestellte der Aufsichtsrat Herrn Zielke zum Mitglied des Vorstands.

Wir danken dem Vorstand sowie allen Mitarbeiterinnen und Mitarbeitern für ihren großen persönlichen Einsatz und ihre Leistungen im schwierigen Geschäftsjahr 2010, insbesondere auch im Zusammenhang mit der Integration der Dresdner Bank.

Für den Aufsichtsrat



Klaus-Peter Müller  
Vorsitzender

Frankfurt am Main, 24. März 2011

# Mitglieder des Aufsichtsrats der Commerzbank Aktiengesellschaft

---

## Klaus-Peter Müller

66 Jahre, Mitglied des Aufsichtsrats seit 15.5.2008  
Vorsitzender des Aufsichtsrats der Commerzbank Aktiengesellschaft

### Weitere Mandate

- a) Fraport AG Frankfurt Airport Services Worldwide (bis 31.12.2010); Fresenius SE; Fresenius Management SE (seit 12.5.2010); Linde Aktiengesellschaft; MaschmeyerRürup AG Independent International Consultancy (seit 26.2.2010)
  - b) Landwirtschaftliche Rentenbank; Parker Hannifin Corporation
- 

## Uwe Tschäge

43 Jahre, stellv. Vorsitzender des Aufsichtsrats seit 30.5.2003  
Bankkaufmann

---

## Hans-Hermann Altenschmidt

49 Jahre, Mitglied des Aufsichtsrats seit 30.5.2003  
Bankkaufmann

### Weitere Mandate

- b) BVV Pensionsfonds; BVV Pensionskasse; BVV Unterstützungskasse
- 

## Dott. Sergio Balbinot

52 Jahre, Mitglied des Aufsichtsrats seit 6.11.2002  
Managing Director Assicurazioni Generali S.p.A.

### Weitere Mandate

- a) Deutsche Vermögensberatung AG
- 

## Dr.-Ing. Burckhard Bergmann

67 Jahre, Mitglied des Aufsichtsrats seit 15.5.2008  
Ehemaliger Vorsitzender des Vorstands der E.ON Ruhrgas AG

### Weitere Mandate

- a) Allianz Lebensversicherungs-AG, stellv. Vorsitzender; E.ON Energie AG
- b) OAO Gazprom; Nord Stream AG; OAO Novatek; Telenor ASA; Accumulatorenwerke Hoppecke Carl Zoellner & Sohn GmbH; Jaeger Beteiligungsgesellschaft mbH & Co. KG, Vorsitzender

---

Verkürzte Darstellung der Mandate per 31.12.2010 (ausführliche Darstellung siehe Seite 374 f.).

- a) Mitgliedschaft in gesetzlich zu bildenden Aufsichtsräten
- b) Mitgliedschaft in vergleichbaren Kontrollgremien

20 Brief des Vorstandsvorsitzenden

26 Vorstandsteam

28 Bericht des Aufsichtsrats

34 Aufsichtsrat und Ausschüsse

38 Unsere Aktie

---

## Dr. Nikolaus von Bomhard

54 Jahre, Mitglied des Aufsichtsrats seit 16.5.2009

Vorsitzender des Vorstands Münchener Rückversicherungs-Gesellschaft AG

---

## Karin van Brummelen

57 Jahre, Mitglied des Aufsichtsrats seit 15.5.2008

Bankkauffrau

---

## Astrid Evers

48 Jahre, Mitglied des Aufsichtsrats seit 30.5.2003

Bankkauffrau

---

## Uwe Foullong

53 Jahre, Mitglied des Aufsichtsrats seit 1.11.1994

Mitglied des ver.di-Bundesvorstands, Bank- und Diplomkaufmann

---

## Daniel Hampel

48 Jahre, Mitglied des Aufsichtsrats seit 30.5.2003

Bankkaufmann

---

## Dr.-Ing. Otto Happel

63 Jahre, Mitglied des Aufsichtsrats seit 7.5.1993

Unternehmer

---

## Sonja Kasischke

60 Jahre, Mitglied des Aufsichtsrats seit 30.5.2003

Bankangestellte

---

## Prof. Dr.-Ing. Dr.-Ing. E. h. Hans-Peter Keitel

63 Jahre, Mitglied des Aufsichtsrats seit 15.5.2008

Präsident des Bundesverbandes der Deutschen Industrie

### Weitere Mandate

a) Hochtief AG; National-Bank AG; ThyssenKrupp AG (seit 21.1.2010)

b) EQT Infrastructure Limited; RAG Stiftung

---

## Alexandra Krieger

40 Jahre, Mitglied des Aufsichtsrats seit 15.5.2008

Leiterin Referat Wirtschaft I Mitbestimmungsförderung Hans-Böckler-Stiftung, Bankkauffrau

---

---

## Dr. h.c. Edgar Meister

70 Jahre, Mitglied des Aufsichtsrats seit 16.5.2009  
Rechtsanwalt

### Weitere Mandate

b) DWS Investment GmbH; Standard & Poor's Credit Market Services Europe Limited

---

## Prof. h.c. (CHN) Dr. rer. oec. Ulrich Middelman

66 Jahre, Mitglied des Aufsichtsrats seit 1.4.2006  
Ehemaliger stellv. Vorsitzender des Vorstands der ThyssenKrupp AG

### Weitere Mandate

a) Deutsche Telekom AG; LANXESS AG; LANXESS Deutschland GmbH  
b) Hoberg & Driesch GmbH, Vorsitzender

---

## Dr. Helmut Perlet

63 Jahre, Mitglied des Aufsichtsrats seit 16.5.2009  
Ehemaliges Mitglied des Vorstands der Allianz SE

### Weitere Mandate

a) Allianz Deutschland AG; GEA GROUP AG  
b) Allianz Life Insurance Company of North America; Fireman's Fund Ins. Co.; Allianz of America Inc.; Allianz S.p.A.; Allianz France S.A.

---

## Barbara Priester

52 Jahre, Mitglied des Aufsichtsrats seit 15.5.2008  
Bankkauffrau

---

## Mark Roach

55 Jahre, Mitglied des Aufsichtsrats seit 10.1.2011  
Gewerkschaftssekretär ver.di-Bundesverwaltung

---

## Dr. Marcus Schenck

45 Jahre, Mitglied des Aufsichtsrats seit 15.5.2008  
Finanzvorstand der E.ON AG

---

### Nachrichtlich:

Herbert Bludau-Hoffmann bis 31.12.2010

---

Verkürzte Darstellung der Mandate per 31.12.2010 (ausführliche Darstellung siehe Seite 374 f.).

- a) Mitgliedschaft in gesetzlich zu bildenden Aufsichtsräten
- b) Mitgliedschaft in vergleichbaren Kontrollgremien

20 Brief des Vorstandsvorsitzenden

26 Vorstandsteam

28 Bericht des Aufsichtsrats

34 Aufsichtsrat und Ausschüsse

38 Unsere Aktie

# Ausschüsse des Aufsichtsrats

## Präsidialausschuss

Klaus-Peter Müller, Vorsitzender

Hans-Hermann Altenschmidt

Dr. h. c. Edgar Meister

Uwe Tschäge

## Prüfungsausschuss

Dr. Helmut Perlet, Vorsitzender

Hans-Hermann Altenschmidt

Karin van Brummelen

Prof. Dr.-Ing. Dr.-Ing. E. h. Hans-Peter Keitel

Prof. h. c. Dr. rer. oec. Ulrich Middelmann

## Risikoausschuss

Klaus-Peter Müller, Vorsitzender

Dr. h. c. Edgar Meister

Dr. Helmut Perlet

Dr. Marcus Schenck

## Nominierungsausschuss

Klaus-Peter Müller, Vorsitzender

Dott. Sergio Balbinot

Dr.-Ing. Otto Happel

## Sozialausschuss

Klaus-Peter Müller, Vorsitzender

Dr.-Ing. Burckhard Bergmann

Karin van Brummelen

Astrid Evers

Dr. h. c. Edgar Meister

Uwe Tschäge

## Vermittlungsausschuss

(§ 27 Abs. 3 MitbestG)

Klaus-Peter Müller, Vorsitzender

Hans-Hermann Altenschmidt

Dott. Sergio Balbinot

Uwe Tschäge



# Unsere Aktie

## Entwicklung der Aktienmärkte und Kursindizes

Der DAX hat im Jahr 2010 deutlich um 16,1 % zugelegt. Dazu hat die rasche Erholung der deutschen Wirtschaft nach der Finanzkrise mit einer Zunahme des Bruttoinlandsproduktes (BIP) von 3,6 % maßgeblich beigetragen. Besonders stark stiegen die Kurse der Deutschen Exportwerte. Demgegenüber war die Entwicklung der Bankaktien im Berichtsjahr von der europäischen Schuldenkrise und regulatorischen Veränderungen negativ geprägt. Der EURO STOXX Banken fiel, aufgrund des starken Rückgangs besonders bei den Aktienkursen der südeuropäischen Banken, um 26,9 % und schloss das Jahr als schwächster Sektor – zusammen mit Versorgern – ab.

### Commerzbank-Aktie vs. Kursindizes im Jahr 2010

Tageswerte, 30.12.2009 = 100

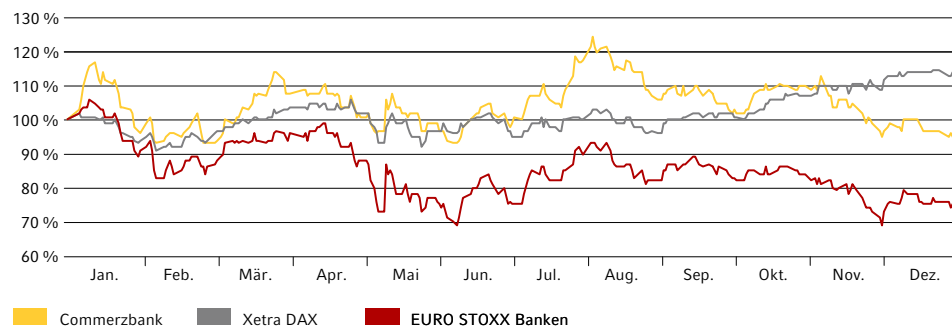

### Commerzbank-Aktie: Entwicklung deutlich besser als die des Sektors

#### Wertpapier-Kürzel

|               |              |
|---------------|--------------|
| Inhaberaktien | 803 200      |
| Reuters       | CBKG.DE      |
| Bloomberg     | CBK GR       |
| ISIN          | DE0008032004 |

Die Kursentwicklung der Commerzbank-Aktie war im gesamten Jahresverlauf durch eine anhaltende Unsicherheit an den Finanzmärkten geprägt. Anfang des Jahres wurden Finanzwerte durch die Krise im Zusammenhang mit der Staatsverschuldung Griechenlands und von den enttäuschenden Konjunkturdaten negativ beeinflusst. Beides sorgte für Nervosität an den Finanzmärkten und beunruhigte Investoren. Die Commerzbank-Aktie fiel in diesem Marktumfeld am 5. Februar 2010 auf ihren Jahrestiefpunkt von 5,33 Euro.

|    |                                 |
|----|---------------------------------|
| 20 | Brief des Vorstandsvorsitzenden |
| 26 | Vorstandsteam                   |
| 28 | Bericht des Aufsichtsrats       |
| 34 | Aufsichtsrat und Ausschüsse     |
| 38 | Unsere Aktie                    |

#### Höchst- und Tiefsturse Commerzbank im Jahr 2010

in €

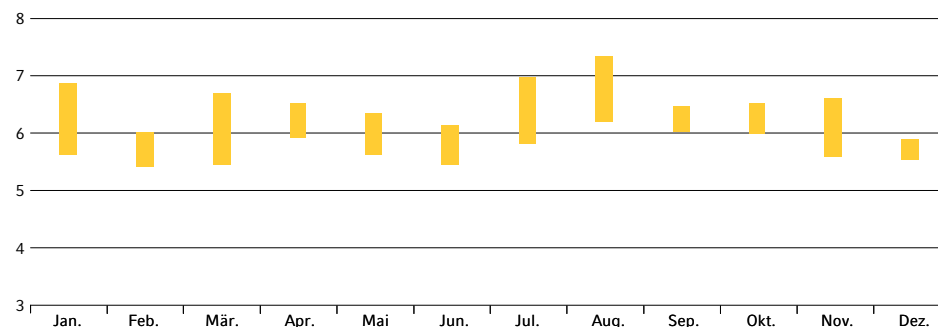

Die Erholung an den Börsen wurde im März durch das verbesserte Geschäftsklima in den USA gestützt. Zudem zeigte der IFO-Geschäftsklimaindex in Deutschland ein gegenüber Februar deutlich aufgehelltes Bild. Mitte März sorgte der Hinweis der US-Notenbank Fed, dass sie ihre Nullzinspolitik noch für eine längere Zeitspanne beibehalten wolle, für eine freundliche Stimmung an den US-Börsen und im Zuge dessen kletterte der DAX wieder über 6000 Punkte. Weiterhin unterstützte die Aussicht auf positivere Ertragszahlen im ersten Quartal die Kurserholung der Commerzbank-Aktie. Erneute Sorgen um die Zahlungskraft der finanzschwachen Euroländer setzten den DAX besonders in der zweiten Aprilhälfte unter Druck. Ein 750 Milliarden Euro Rettungsschirm in Form von Garantien und Krediten, den die Euro-Staaten in Folge dessen zusammen mit dem Internationalen Währungsfonds aufgespannt hatten, beruhigte die Finanzmärkte und stützte den Kurs der Commerzbank-Aktie.

Ende Juli reagierte der Markt mit Erleichterung auf die Ergebnisse der EU-weiten Stress-tests. In den vorgegebenen Szenarien wurden die möglichen Folgen einer Rezession und eines Wertverfalls an den Anleihe- und Aktienmärkten auf die Kapitalausstattung der Banken geprüft. Europas Bankensystem erwies sich dabei in einem besseren Zustand als viele Analysten angenommen hatten. Weitere Impulse erhielten die europäischen Aktienmärkte Anfang August. Gute Quartalszahlen europäischer Unternehmen sowie unerwartet positive Konjunkturdaten aus den USA und China sorgten für kräftige Gewinne. In diesem Marktumfeld erreichte die Commerzbank-Aktie am 3. August mit einem Kurs von 7,37 Euro den höchsten Stand im Jahr 2010.

Mit einer erfreulichen Ergebnisentwicklung im ersten Halbjahr übertraf die Commerzbank am 5. August die Erwartungen der Analysten. Schwache Daten vom US-Arbeitsmarkt und die Aussicht auf eine gedämpfter als erwartet verlaufende US-Konjunkturerholung belasteten ab Mitte August die internationalen Kapitalmärkte. Darüber hinaus wirkte die Diskussion über die Anforderungen der Basel-III-Richtlinien belastend auf die Kurse. Ende November standen die Märkte erneut im Bann der europäischen Schuldenkrise, denn die Schwierigkeiten Irlands drückten auf die Kurse von Finanzwerten.

Die Commerzbank-Aktie gab im Jahresverlauf 2010 insgesamt um 5,8 % nach und schloss mit einem Kurs von 5,55 Euro ab. Die Performance der Commerzbank-Aktie lag im Berichtsjahr aber deutlich über der des EURO STOXX Banken Index (-26,9 %). Die Handelsumsätze pro Tag unserer Aktie fielen im Vergleich zum Vorjahr um 24,8 % auf 9,7 Millionen Stück im Jahr 2010.

**Indizes, die die Commerzbank enthalten**
**Blue-Chip-Indizes**

DAX

EURO STOXX Banken

**Nachhaltigkeitsindizes**

ASPI Eurozone-Index

Ethibel Sustainability Index (ESI)

Ethical Index EURO

## Aktienkennzahlen

Für das Geschäftsjahr 2010 wird es keine Dividendenausschüttungen geben. Dies ist darauf zurückzuführen, dass der Jahresfehlbetrag der Commerzbank-Aktiengesellschaft für das Geschäftsjahr 2010 keine Dividendenausschüttung erlaubt. Darüber hinaus lassen die Vereinbarungen mit dem SoFFin zur Nichtbedienung eigenkapitalähnlicher Instrumente auch keine Dividendenausschüttung aus Rücklagen oder Sonderposten nach § 340g HGB zu.

Die Marktkapitalisierung der Commerzbank lag Ende 2010 bei 6,6 Mrd Euro verglichen mit 7,0 Mrd Euro ein Jahr zuvor. Die Gewichtung im DAX betrug 0,7 %, damit lag die Commerzbank an 29. Stelle. Im europäischen Branchenvergleichsindex EURO STOXX Banken betrug das Gewicht der Commerzbank zum Jahresende 1,2 %, wodurch sie an 12.Stelle notierte. Zudem ist die Bank in den drei Nachhaltigkeitsindizes „ASPI Eurozone-Index“, „Ethibel Excellence Europe-Index“ und dem „ECPI Ethical Index Euro“ vertreten, die neben ökonomischen insbesondere auch ökologische und ethische Kriterien berücksichtigen.

### Kennzahlen zur Commerzbank-Aktie

|                                                       | 2010    | 2009    |
|-------------------------------------------------------|---------|---------|
| <b>Ausgegebene Aktien</b> in Mio Stück (31.12.)       | 1 181,4 | 1 181,4 |
| <b>Xetra-Intraday-Kurse</b> in €                      |         |         |
| Hoch                                                  | 7,37    | 9,64    |
| Tief                                                  | 5,33    | 2,22    |
| Schlusskurs (31.12.)                                  | 5,55    | 5,89    |
| <b>Börsenumsätze pro Tag<sup>1</sup></b> in Mio Stück |         |         |
| Hoch                                                  | 35,7    | 56,0    |
| Tief                                                  | 2,0     | 2,7     |
| Durchschnitt                                          | 9,7     | 12,9    |
| <b>Index-Gewicht</b> in % (31.12.)                    |         |         |
| Xetra DAX                                             | 0,7     | 0,8     |
| EURO STOXX Banken                                     | 1,2     | 1,0     |
| <b>Ergebnis je Aktie</b> in €                         | 1,21    | -4,40   |
| <b>Buchwert je Aktie<sup>2</sup></b> in € (31.12.)    | 11,20   | 8,51    |
| <b>Marktwert/Buchwert</b> (31.12.)                    | 0,50    | 0,69    |

<sup>1</sup> Deutsche Börsen gesamt.

<sup>2</sup> Ohne Stille Einlagen, Anteile in Fremdbesitz und Cash Flow Hedges.

## Aktionärsstruktur

Zum 31. Dezember 2010 befanden sich etwas mehr als die Hälfte aller Commerzbank-Aktien im Besitz von institutionellen Investoren; der Rest entfiel auf unsere überwiegend in Deutschland beheimateten Privataktionäre und unsere Großaktionäre Allianz, Generali sowie den SoFFin. Der Streubesitz, der sogenannte Free Float, lag bei 62,8 %. Der Anteil der Aktien, der von Anlegern aus Deutschland gehalten wurde, belief sich auf 48 %, der Auslandsanteil lag bei 52 %.

|    |                                 |
|----|---------------------------------|
| 20 | Brief des Vorstandsvorsitzenden |
| 26 | Vorstandsteam                   |
| 28 | Bericht des Aufsichtsrats       |
| 34 | Aufsichtsrat und Ausschüsse     |
| 38 | Unsere Aktie                    |

### Aktionärsstruktur nach Typen

31. Dezember 2010

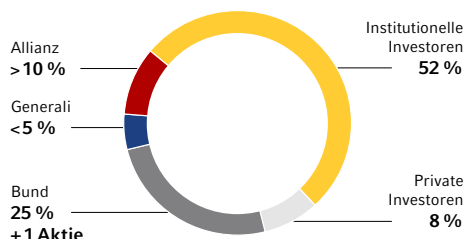

### Aktionärsstruktur nach Regionen

31. Dezember 2010

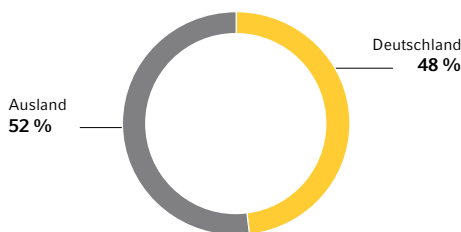

## Emissionstätigkeit der Commerzbank

Trotz des nicht einfachen Marktumfelds im Berichtsjahr konnte die Commerzbank sowohl im unbesicherten als auch im besicherten Kapitalmarkt – über die Konzerntochter Eurohypo AG – erfolgreich Anleihen zu platzieren. Das Gesamtvolumen der Kapitalmarktemissionen im Jahr 2010 lag bei rund 16,1 Mrd Euro. Hierunter fielen sowohl Benchmark- und Jumboemissionen als auch zahlreiche Privatplatzierungen.

Im unbesicherten Bereich sind insbesondere zwei Benchmarkemissionen mit Laufzeiten von sieben und zehn Jahren mit einem Gesamtvolumen in Höhe von 2,0 Mrd Euro zu nennen. Mit diesen öffentlich platzierten Anleihen ließ sich eine internationale Diversifizierung der Investorenbasis erzielen. Über das Privatkundennetz der Commerzbank wurden darüber hinaus Anleihen im Wert von mehr als 6,3 Mrd Euro nachgefragt. Insgesamt betrug das Emissionsvolumen im unbesicherten Bereich rund 8,3 Mrd Euro.

Im besicherten Bereich wurden über die Eurohypo Hypothekendarlehenbriefe in Höhe von knapp 4,0 Mrd Euro und öffentliche Darlehenbriefe über 3,0 Mrd Euro begeben. Neben Privatplatzierungen konnten sechs Jumbo-Darlehenbriefe mit Laufzeiten zwischen drei und sechs Jahren erfolgreich platziert werden. Die Eurohypo profitierte dabei von der Unterstützung des Darlehenbriefmarktes durch das Ankaufprogramm der EZB für Covered Bonds. Die begebenen Emissionen wurden vom Markt gut aufgenommen, was durch die schnelle Platzierung, eine hohe Nachfrage und attraktive Konditionen dokumentiert wurde.

## Investor-Relations-Arbeit weiter optimiert

Im Jahr 2010 gab es etwa 30 Analysten, die regelmäßig über die Commerzbank berichteten. Die ausgesprochenen Empfehlungen bezüglich der Commerzbank-Aktie waren vor dem Hintergrund des anhaltend schwierigen Branchenumfelds sowie der aktuellen Situation der Commerzbank weniger zurückhaltend als noch vor einem Jahr. Zum Jahresende 2010 lag der Anteil der Kaufempfehlungen bei 18 % (buy/overweight/outperform) und 40 % der Analysten empfahlen das Halten unserer Aktie (neutral/hold/equal weight). 42 % der Analysten rieten zum Verkauf (underperform/reduce) unserer Aktie, ein deutlicher Rückgang im Vergleich zum Vorjahr (70 %).



### Analystenempfehlungen

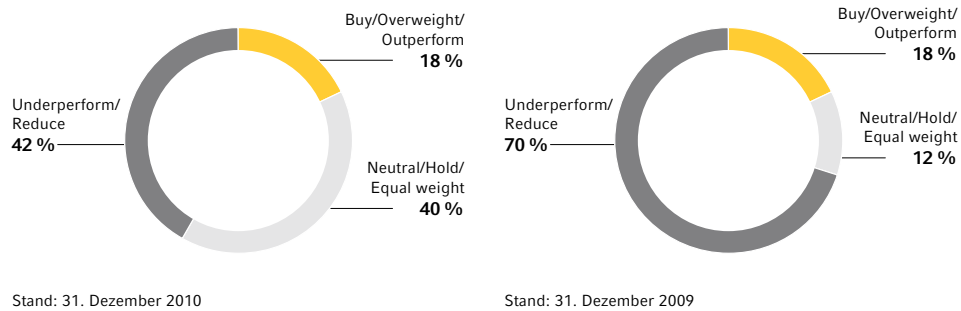

Gerade in dem für die Finanzbranche nicht einfachen Marktumfeld haben wir im Geschäftsjahr 2010 den Kontakt zu unseren Aktionären und Fremdkapitalinvestoren sowie den Analysten auf hohem Niveau gehalten, um ein Höchstmaß an Transparenz zu bieten. Durch die Teilnahme an internationalen Investorenkonferenzen und die Durchführung von Roadshows haben das Management und das Investor-Relations-Team den Markt regelmäßig informiert und standen den Kapitalmarktteilnehmern als Gesprächspartner zur Verfügung. Weiterhin führten wir sowohl Einzelgespräche als auch Gruppenmeetings und Telefonkonferenzen, bei denen die Geschäftsentwicklung und die strategische Zielrichtung der Bank präsentiert und diskutiert wurden. Zudem organisierten wir Gespräche mit Experten der Commerzbank, um bestimmte Themenwünsche vertieft zu besprechen.

Mit unserem Newsletter „IR Monthly“ haben wir auch im Jahr 2010 Analysten und Investoren regelmäßig und proaktiv über die wichtigsten Ereignisse im Commerzbank-Konzern im jeweils gerade zu Ende gegangenen Monat informiert und auf neue Präsentationen sowie bevorstehende Termine hingewiesen. Zu besonders wichtigen Anlässen informieren wir unabhängig hiervon taggleich per Investor-Relations-Mitteilung beziehungsweise Ad-hoc-Meldung. Das Factbook „Commerzbank – Zahlen, Fakten, Ziele“ berichtet zudem viermal im Jahr über Entwicklung, Strategie und Ziele der Bank. Darüber hinaus bieten wir im Internet auf unseren Investor-Relations-Seiten eine Vielzahl von Informationen an.

Im Berichtsjahr haben wir den Dialog mit unseren Fixed-Income-Investoren weiter ausgebaut. Auf Roadshows haben wir unsere Quartalszahlen sowie unser Strategieprogramm „Roadmap 2012“ erläutert. Der Schwerpunkt unserer Non-Deal-Roadshows – Einzelgespräche mit institutionellen Investoren ohne die konkrete Absicht, eine Neuemission zu vermarkten – lag in Europa.

Um die Kapitalmarktcommunication permanent weiterzuentwickeln, unterzieht sich das Investor-Relations-Team regelmäßig einem externen Benchmarking-Prozess. Diese unabhängige Analyse bescheinigt uns, trotz des schwierigen Marktumfelds des letzten Jahres, die Kommunikation mit dem Kapitalmarkt auf hohem Niveau verbessert zu haben. Das Ergebnis ist für uns ein Ansporn, auch im Jahr 2011 alle Anstrengungen zu unternehmen, um unsere Investor-Relations-Arbeit weiter zu optimieren.

#### Börsennotierungen der Commerzbank-Aktie

##### Deutschland

- Berlin-Bremen
- Düsseldorf
- Frankfurt
- Hamburg
- Hannover
- München
- Stuttgart
- Xetra

##### Europa

- London
- Schweiz

##### Nordamerika

- Sponsored ADR (CRZBY)  
CUSIP: 202597308

# Unternehmerische Verantwortung

---

Wir bekennen uns zu den Grundsätzen guter und verantwortungsvoller Unternehmensführung, die im Deutschen Corporate Governance Kodex zusammengefasst sind und erfüllen nahezu alle dort gegebenen Empfehlungen und Anregungen. Über diesen Teil unserer unternehmerischen Verantwortung geben die Seiten 45 bis 50 Auskunft.

Unternehmerische Verantwortung oder Corporate Responsibility beschreibt den Grad, in dem ein Unternehmen sich seiner Verantwortung bewusst ist, wann immer seine geschäftlichen Tätigkeiten Auswirkungen auf Gesellschaft, Mitarbeiter, Umwelt oder das wirtschaftliche Umfeld haben. Wir bekennen uns zu dieser Verantwortung und berichten darüber auf den Seiten 71 und 72.

# Inhalt

## **45 Corporate-Governance-Bericht**

- 45 Empfehlungen des Deutschen Corporate Governance Kodex
- 47 Anregungen des Deutschen Corporate Governance Kodex
- 48 Vorstand
- 49 Aufsichtsrat
- 49 Bilanzierung
- 50 Aktionärsbeziehungen, Transparenz und Kommunikation

### **51 Vergütungsbericht**

- 51 Vorstand
- 59 Aufsichtsrat
- 61 Sonstige Angaben

## **62 Angaben gemäß § 315 des Handelsgesetzbuchs (HGB)**

- 62 Angaben gemäß § 315 Abs. 4 des Handelsgesetzbuchs und erläuternder Bericht
- 65 Angaben gemäß § 315 Abs. 2 Nr. 5 des Handelsgesetzbuchs

## **71 Corporate Responsibility**

- 71 Markt & Kunden
- 72 Ökologie
- 72 Mitarbeiter
- 72 Gesellschaft

# Corporate-Governance-Bericht und Erklärung zur Unternehmensführung

Corporate Governance im Sinne einer verantwortungsvollen und transparenten Unternehmensführung und -kontrolle, die auf nachhaltige Wertschaffung ausgerichtet ist, hat in der Commerzbank seit jeher einen hohen Stellenwert. Daher unterstützen wir – Aufsichtsrat und Vorstand – den Deutschen Corporate Governance Kodex und die damit verfolgten Ziele und Zwecke ausdrücklich. Die Satzung der Commerzbank sowie die Geschäftsordnungen von Vorstand und Aufsichtsrat entsprachen schon bei Erlass des Deutschen Corporate Governance Kodex weitgehend dessen Anforderungen. Soweit das noch nicht der Fall war, haben wir sie den Regelungen des Deutschen Corporate Governance Kodex fortlaufend angepasst. Satzung und Geschäftsordnungen sind im Internet verfügbar.

Corporate-Governance-Beauftragter der Commerzbank ist Günter Hugger, Bereichsvorstand Recht. Er ist der Ansprechpartner für alle Fragen der Corporate Governance und hat die Aufgabe, Vorstand und Aufsichtsrat bei der Umsetzung des Deutschen Corporate Governance Kodex zu beraten und über die Umsetzung durch die Bank zu berichten.

Nachfolgend erläutern wir die Corporate Governance in der Commerzbank gemäß Ziffer 3.10 des Deutschen Corporate Governance Kodex. Dieser Bericht enthält zudem die Erklärung zur Unternehmensführung gemäß § 289 a HGB.

## Empfehlungen des Deutschen Corporate Governance Kodex

Die Bank erklärt jährlich, ob den Verhaltensempfehlungen der Kommission entsprochen wurde und wird und erläutert, weshalb welche Empfehlungen nicht umgesetzt werden. Diese Entsprechenserklärung von Vorstand und Aufsichtsrat wird auf der Internetseite der Commerzbank [www.commerzbank.de](http://www.commerzbank.de) veröffentlicht. Dort findet sich auch ein Archiv mit den Entsprechenserklärungen seit dem Jahr 2002. Die aktuelle Erklärung wurde am 4. November 2010 abgegeben.

Die Commerzbank erfüllt die Empfehlungen des Deutschen Corporate Governance Kodex nahezu vollständig; sie weicht davon lediglich in wenigen Punkten ab:

- Ziffer 4.2.1 des Kodex empfiehlt, dass eine Geschäftsordnung die Arbeit des Vorstands inklusive der Ressortverteilung der Vorstandsmitglieder regeln solle. Der Vorstand hat sich mit Zustimmung des Aufsichtsrats eine Geschäftsordnung gegeben. Die Ressortverteilung legt der Vorstand allerdings selbst außerhalb der Geschäftsordnung fest. Auf diese Weise wird die erforderliche Flexibilität bei notwendigen Änderungen und damit eine effiziente



Arbeitsteilung sichergestellt. Der Aufsichtsrat wird über alle Änderungen informiert und auf diese Weise in die Ressortverteilung eingebunden. Die Geschäftsordnung des Vorstands einschließlich der Ressortzuständigkeit der einzelnen Vorstandsmitglieder ist auf der Internetseite der Commerzbank veröffentlicht.

- Der Kodex empfiehlt, bei Abschluss von Vorstandsverträgen einen Abfindungs-Cap bei vorzeitiger Beendigung der Vorstandstätigkeit ohne wichtigen Grund aufzunehmen, Ziffer 4.2.3 Abs. 4, sowie im Falle der vorzeitigen Beendigung der Vorstandstätigkeit aufgrund eines Kontrollwechsels (Change-of-Control), Ziffer 4.2.3 Abs. 5. Die Anstellungsverträge der Vorstandsmitglieder sehen einen Abfindungs-Cap im Sinne der Ziffer 4.2.3 Abs. 4 vor. Einige Anstellungsverträge von Vorstandsmitgliedern enthalten noch Change-of-Control-Klauseln ohne einen Abfindungs-Cap im Sinne der Ziffer 4.2.3 Abs. 5. Soweit Change-of-Control-Klauseln in Anstellungsverträgen mit Vorstandsmitgliedern enthalten sind, entfallen diese mit Ablauf der aktuellen Bestellungsperiode des jeweiligen Vorstandsmitglieds.
- Nach Ziffer 5.3.2 des Kodex soll sich der Prüfungsausschuss (Audit Committee) neben den Fragen der Rechnungslegung und der Abschlussprüfung auch mit Fragen des Risikomanagements befassen. Da das Risikomanagement bei Banken eine besondere Rolle spielt, hat der Aufsichtsrat bereits vor Jahren – über die Anforderungen des Kodex hinaus – einen eigenständigen Risikoausschuss gebildet, der sich mit der Behandlung von Risiken wie Kredit-, Markt- und operationellen Risiken der Bank befasst. Die umfassende Information des Prüfungsausschusses über die Fragen des Risikomanagements wird dadurch sichergestellt, dass der Vorsitzende des Prüfungsausschusses zugleich Mitglied des Risikoausschusses ist.

Sowohl bei der Zusammensetzung des Vorstands, der Besetzung von Führungsfunktionen in der Bank als auch bei Vorschlägen zur Wahl von Aufsichtsratsmitgliedern (Ziffern 4.1.5, 5.1.2 und 5.4.1 des Kodex) sowie zur Besetzung sonstiger Gremien werden Vorstand und Aufsichtsrat der Commerzbank im Rahmen ihrer jeweiligen Zuständigkeit dafür sorgen, dem Gesichtspunkt der Vielfalt (Diversity) verstärkt Rechnung zu tragen und dabei insbesondere eine angemessene Berücksichtigung von Frauen anstreben.

Der Vorstand initiierte das Projekt „Frauen in Führungspositionen“. Ziel ist es, unter Berücksichtigung aller Talente ein leistungsfähiges Führungsteam für die Commerzbank zu sichern. Umfassende Analysen ergaben ein detailliertes Bild der Ausgangssituation. Auf deren Basis wurden spezifische Maßnahmen zur Steigerung des Anteils an Frauen in Führungspositionen entwickelt und fortlaufend umgesetzt. Der Vorstand wird halbjährlich über den Umsetzungsfortschritt und die Entwicklung des Anteils von Frauen in Führungspositionen informiert. Eine nachhaltige und verbindliche Umsetzung wird durch die Verankerung in den individuellen Zielvereinbarungen des oberen Managements unterstützt. Das Projekt „Frauen in Führungspositionen“ soll letztlich auch dazu beitragen, langfristig den Frauenanteil im Vorstand der Commerzbank zu steigern.

Darüber hinaus unterstützt die Commerzbank die Vereinbarkeit von Familie und Beruf durch betrieblich geförderte Kinderbetreuung und das „Comeback-Plus“-Programm zur Wiedereingliederung nach der Elternzeit. Zur Förderung der Kinderbetreuung bietet die Commerzbank ein umfassendes Angebot, das aus Beratung zu Kinderbetreuung, Vermittlung von Betreuungsplätzen sowie finanziellen Zuschüssen besteht. Seit dem 1. Juni 2005 ist die Kindertagesstätte „Kids & Co.“ in Frankfurt für Kinder geöffnet. „Kids & Co.“ verfügt über eine Krippe (Betreuung für Kinder von neun Wochen bis drei Jahre) sowie einen Kindergarten

(Alter drei Jahre bis Schuleintritt). Ferner können Mitarbeiter seit dem Jahr 2010 Kinderbetreuung im Krippenbereich bundesweit an 20 Standorten nutzen. Die Commerzbank Aktiengesellschaft unterstützt diese Einrichtungen mit einem hohen finanziellen Engagement. Ebenfalls zu den kollektiven Fördermöglichkeiten gehört die spontane Kinderbetreuung, die an verschiedenen Standorten bundesweit genutzt werden kann.

Ziffer 5.4.1 Abs. 2 des Kodex empfiehlt, dass der Aufsichtsrat für seine Zusammensetzung konkrete Ziele benennt, die unter Beachtung der unternehmensspezifischen Situation die internationale Tätigkeit des Unternehmens, potenzielle Interessenkonflikte, eine festzulegende Altersgrenze für Aufsichtsratsmitglieder und Vielfalt (Diversity) berücksichtigen. Diese konkreten Ziele sollen insbesondere eine angemessene Beteiligung von Frauen vorsehen. Der Aufsichtsrat der Commerzbank hat im Einzelnen folgende konkrete Ziele beschlossen:

- Erhöhung des Anteils von Frauen im Aufsichtsrat durch entsprechende Wahlvorschläge an die Hauptversammlung 2013.
- Beibehaltung zumindest eines internationalen Vertreters.
- Berücksichtigung von Sachverstand und Kenntnis in Bezug auf die Bank.
- Berücksichtigung besonderer Kenntnisse und Erfahrungen in der Anwendung von Rechnungslegungsgrundsätzen und internen Kontrollverfahren.
- Unabhängigkeit der Aufsichtsratsmitglieder und Vermeidung von Interessenkonflikten.
- Berücksichtigung der Altersgrenze von 72 Jahren.

Der Aufsichtsrat der Commerzbank besteht aus 20 Mitgliedern, dazu gehören aktuell ein internationaler Vertreter und fünf Frauen. Frau Sonja Kasischke wird mit Ablauf der ordentlichen Hauptversammlung im Jahr 2011 ihr Aufsichtsratsmandat niederlegen. Das Ersatzmitglied Frau Beate Hoffmann wird mit Ablauf der ordentlichen Hauptversammlung im Jahr 2011 Mitglied im Aufsichtsrat, sodass der Frauenanteil im Aufsichtsrat durch diesen Wechsel unverändert bleibt. Mit Ablauf der ordentlichen Hauptversammlung im Jahr 2013 werden die Aufsichtsratsmitglieder neu bestellt. Der Aufsichtsrat wird der Hauptversammlung im Jahr 2013 Wahlvorschläge unterbreiten, die die oben genannten Ziele beachten. Dabei werden sich die Wahlvorschläge des Aufsichtsrats zur Wahl von Aufsichtsratsmitgliedern stets am Wohl der Bank orientieren.

## Anregungen des Deutschen Corporate Governance Kodex

Die Commerzbank erfüllt auch weitgehend die Anregungen des Deutschen Corporate Governance Kodex und weicht nur in wenigen Punkten davon ab:

- Abweichend von Ziffer 2.3.3 ist der Stimmrechtsvertreter grundsätzlich nur bis zum Tag vor der Hauptversammlung erreichbar. Allerdings besteht für Aktionäre, die in der Hauptversammlung anwesend oder vertreten sind, die Möglichkeit, dem Stimmrechtsvertreter am Tag der Hauptversammlung auch dort noch Weisungen zu erteilen.

- In Ziffer 2.3.4 wird angeregt, die Hauptversammlung vollständig über das Internet zu übertragen. Die Commerzbank überträgt die Reden des Aufsichtsratsvorsitzenden und des Vorstandsvorsitzenden, nicht jedoch die Generaldebatte. Zum einen erscheint die vollständige Übertragung angesichts der Dauer von Hauptversammlungen nicht angemessen, zum anderen sind auch die Persönlichkeitsrechte der Redner zu berücksichtigen.
- Ziffer 3.6 des Deutschen Corporate Governance Kodex regt an, regelmäßig getrennte Anteilseigner- und Arbeitnehmvorbesprechungen durchzuführen. Die Commerzbank führt solche Vorbesprechungen bei Bedarf durch.
- Schließlich wird in Ziffer 5.4.6 des Kodex angeregt, die variable Vergütung für die Aufsichtsratsmitglieder auch an den langfristigen Unternehmenserfolg anzuknüpfen. In der Commerzbank ist die variable Vergütung der Aufsichtsratsmitglieder an die Dividende gekoppelt. Dies halten wir für ein transparentes und nachvollziehbares System.

Die Commerzbank unterstützt, wie in Ziffer 5.4.1 des Kodex angeregt, die Aus- und Fortbildungsmaßnahmen der Aufsichtsräte. Zusätzlich zu den intern offerierten Fortbildungsmaßnahmen können die Aufsichtsräte auch an externen Aus- und Fortbildungsmaßnahmen teilnehmen. Soweit hierfür Kosten anfallen, werden diese von der Commerzbank in angemessener Höhe erstattet.

## Vorstand

Der Vorstand der Commerzbank leitet das Unternehmen in eigener Verantwortung im Unternehmensinteresse. Er ist dabei den Belangen von Aktionären, Kunden, Mitarbeitern und sonstigen der Bank verbundenen Gruppen mit dem Ziel nachhaltiger Wertschöpfung verpflichtet. Er entwickelt die strategische Ausrichtung des Unternehmens, stimmt sie mit dem Aufsichtsrat ab und sorgt für ihre Umsetzung. Darüber hinaus gewährleistet er ein effizientes Risikomanagement und Risikocontrolling. Der Vorstand führt die Geschäfte der Commerzbank nach dem Gesetz, der Satzung, seiner Geschäftsordnung, unternehmensinternen Richtlinien und den jeweiligen Anstellungsverträgen. Er arbeitet mit den anderen Organen der Commerzbank und den Arbeitnehmervertretern vertrauensvoll zusammen.

Die Zusammensetzung des Vorstands und die Zuständigkeiten der einzelnen Vorstandsmitglieder sind im Geschäftsbericht auf den Seiten 26 und 27 dargestellt. Die nähere Ausgestaltung der Arbeit im Vorstand wird durch eine Geschäftsordnung des Vorstands bestimmt, die auf der Internetseite der Commerzbank unter [www.commerzbank.de](http://www.commerzbank.de) einzusehen ist.

Gemäß § 9 Abs. 2 der Geschäftsordnung des Vorstands hat jedes Vorstandsmitglied Interessenkonflikte im Sinne von Ziffer 4.3.4 des Deutschen Corporate Governance Kodex offenzulegen. Im Berichtsjahr hat kein Vorstandsmitglied einen Interessenkonflikt offengelegt.

Die Vergütung der Vorstandsmitglieder ist im Vergütungsbericht auf den Seiten 51 bis 59 ausführlich dargestellt.

## Aufsichtsrat

Der Aufsichtsrat berät und überwacht den Vorstand bei der Leitung des Unternehmens. Er bestellt und entlässt die Mitglieder des Vorstands und sorgt gemeinsam mit dem Vorstand für eine langfristige Nachfolgeplanung. Der Aufsichtsrat führt seine Geschäfte nach den Vorschriften des Gesetzes, der Satzung und seiner Geschäftsordnung; er arbeitet vertrauensvoll und eng mit dem Vorstand zusammen.

Die Zusammensetzung des Aufsichtsrats und seiner Ausschüsse ist auf den Seiten 34 bis 37 dieses Geschäftsberichts dargestellt. Über Einzelheiten zur Arbeit des Gremiums, seiner Struktur und seiner Kontrollfunktion informiert der Bericht des Aufsichtsrats auf den Seiten 28 bis 33. Weitere Angaben zu der Arbeitsweise des Aufsichtsrats und dessen Ausschüssen finden sich in der Geschäftsordnung des Aufsichtsrats, die auf der Internetseite der Commerzbank unter [www.commerzbank.de](http://www.commerzbank.de) eingesehen werden kann.

Die Effizienz seiner Tätigkeit hatte der Aufsichtsrat bislang alle zwei Jahre mittels eines detaillierten Fragebogens überprüft. Nachdem Ende 2007 auf dieser Basis eine ausführliche Erhebung durchgeführt worden war und mehrere Aufsichtsratsmitglieder erst im Mai 2008 neu in den Aufsichtsrat gewählt worden sind, folgte im Jahr 2008 eine verkürzte Prüfung. Für das Jahr 2009 wurde erstmals eine externe Beratungsgesellschaft mit der Effizienzprüfung der Tätigkeit des Aufsichtsrats beauftragt. Die Beratungsgesellschaft kam zu dem Ergebnis, dass der Aufsichtsrat in der Commerzbank professionell arbeitet und die Aufgabenverteilung zwischen Plenum und Ausschüssen sinnvoll und effizient ist. Anregungen aus dem Kreis der Aufsichtsratsmitglieder wurden im Plenum diskutiert und werden, soweit mehrheitlich gewünscht, für die zukünftige Arbeit berücksichtigt. Im Jahr 2010 ist keine Effizienzprüfung durchgeführt worden.

Gemäß § 3 Abs. 6 der Geschäftsordnung des Aufsichtsrats hat jedes Aufsichtsratsmitglied Interessenkonflikte im Sinne von Ziffer 5.5 des Deutschen Corporate Governance Kodex offenzulegen. Im Berichtsjahr hat kein Aufsichtsratsmitglied einen Interessenkonflikt offengelegt.

Die Vergütung der Mitglieder des Aufsichtsrats ist im Vergütungsbericht auf den Seiten 59 bis 61 detailliert erläutert.

## Bilanzierung

Die Rechnungslegung des Commerzbank-Konzerns vermittelt ein den tatsächlichen Verhältnissen entsprechendes Bild der Vermögens-, Finanz- und Ertragslage. Sie erfolgt nach den International Financial Reporting Standards (IFRS); der Einzelabschluss der Commerzbank Aktiengesellschaft wird gemäß den Vorschriften des HGB aufgestellt. Konzern- und AG-Abschluss werden vom Vorstand aufgestellt und vom Aufsichtsrat gebilligt. Die Prüfung obliegt dem von der Hauptversammlung gewählten Abschlussprüfer.

Zum Jahresabschluss gehört auch ein ausführlicher Risikobericht, der über den verantwortungsvollen Umgang des Unternehmens mit den unterschiedlichen Risikoarten informiert. Er ist auf den Seiten 161 bis 198 dieses Geschäftsberichts abgedruckt.

Während des Geschäftsjahres werden Anteilseigner und Dritte zusätzlich durch den Halbjahresfinanzbericht und zwei weitere Quartalsberichte über den Geschäftsverlauf unterrichtet. Auch diese Zwischenabschlüsse werden nach den einschlägigen internationalen Rechnungslegungsgrundsätzen aufgestellt.

## Aktionärsbeziehungen, Transparenz und Kommunikation

Ein Mal im Jahr findet die ordentliche Hauptversammlung statt. Sie beschließt insbesondere über – soweit ausgewiesen – die Verwendung des Bilanzgewinns, die Entlastung von Vorstand und Aufsichtsrat, die Bestellung des Abschlussprüfers sowie Satzungsänderungen. Gegebenenfalls erteilt sie die Ermächtigung zu Kapitalmaßnahmen oder die Zustimmung zum Abschluss von Gewinnabführungsverträgen. Dabei gewährt jeweils eine Aktie eine Stimme.

Entsprechend der Anregung in Ziffer 2.2.1 Abs. 2 S. 2 des Kodex hat der Vorstand von der in § 120 Abs. 4 Aktiengesetz vorgesehenen Möglichkeit, die Hauptversammlung über die Billigung des Systems zur Vergütung der Vorstandsmitglieder beschließen zu lassen, im Berichtsjahr Gebrauch gemacht. Die Hauptversammlung hat das System der Vergütung der Vorstandsmitglieder gebilligt.

Die Aktionäre der Bank können Empfehlungen oder sonstige Stellungnahmen per Brief oder E-Mail einbringen beziehungsweise persönlich vortragen. Für die Bearbeitung schriftlicher Hinweise ist das zentrale Qualitätsmanagement der Bank zuständig. Auf der Hauptversammlung erfolgt die Kommentierung oder Beantwortung direkt durch Vorstand oder Aufsichtsrat. Daneben können die Aktionäre durch Gegen- oder Erweiterungsanträge zur Tagesordnung den Ablauf der Hauptversammlung mitbestimmen. Eine außerordentliche Hauptversammlung kann auch auf Antrag der Aktionäre einberufen werden. Die vom Gesetz für die Hauptversammlung verlangten Berichte und Unterlagen einschließlich des Geschäftsberichts sind im Internet abrufbar, ebenso die Tagesordnung der Hauptversammlung und eventuelle Gegen- oder Erweiterungsanträge.

Die Commerzbank informiert die Öffentlichkeit – und damit auch die Aktionäre – vier Mal pro Jahr über die Finanz- und Ertragslage der Bank; weitere kursrelevante Unternehmensnachrichten werden als Ad-hoc-Meldung veröffentlicht. Damit ist die Gleichbehandlung der Aktionäre sichergestellt. Im Rahmen von Pressekonferenzen und Analystenveranstaltungen berichtet der Vorstand über den Jahresabschluss beziehungsweise die Quartalsergebnisse. Zur Berichterstattung nutzt die Commerzbank verstärkt die Möglichkeiten des Internets; unter [www.commerzbank.de](http://www.commerzbank.de) werden weitere umfangreiche Informationen über den Commerzbank-Konzern veröffentlicht. Im Geschäftsbericht und im Internet wird darüber hinaus der Finanzkalender für das laufende und folgende Jahr publiziert. Er enthält alle für die Finanzkommunikation wesentlichen Veröffentlichungstermine und den Termin der Hauptversammlung.

Wir fühlen uns zu offener und transparenter Kommunikation mit unseren Aktionären und allen anderen Stakeholdern verpflichtet. Diesen Anspruch wollen wir auch künftig erfüllen.



## Vergütungsbericht

---

Der nachfolgende Vergütungsbericht ist auch Bestandteil des Konzernlageberichts.

Der Bericht folgt den Empfehlungen des Deutschen Corporate Governance Kodex und trägt den Anforderungen nach IFRS Rechnung.

### Vorstand

#### Grundzüge des Vergütungssystems

Der Aufsichtsrat hat ein neues Vergütungssystem für den Vorstand beschlossen, das nach dem positiven Votum der Hauptversammlung 2010 gemäß § 120 Absatz 4 Aktiengesetz rückwirkend zum 1. Januar 2010 eingeführt wurde.

Kernbestandteile des neuen Vergütungssystems sind ein festes Jahresgrundgehalt sowie ein Short Term Incentive (STI) und ein Long Term Incentive (LTI) als variable Vergütungskomponenten. Den aufsichtsrechtlichen Vorgaben folgend wurde im Vergleich zur bisherigen Vorstandsvergütung der Anteil der kurzfristigen variablen Vergütung (STI) deutlich reduziert. Das feste Grundgehalt und insbesondere die langfristigen Vergütungselemente wurden im Gegenzug angehoben. Die langfristige Komponente kommt erst nach vier Jahren zur Auszahlung. Negative Entwicklungen im Laufe dieser Periode reduzieren zudem die Ansprüche aus dem LTI (Malus).

Die Altersversorgung der Vorstandsmitglieder, die einen weiteren Vergütungsbestandteil darstellt, wurde im Zuge des neuen Vergütungssystems nicht geändert.

Der SoFFin hat die Gewährung von Stabilisierungsmaßnahmen unter anderem mit der Auflage verbunden, dass die monetäre Vergütung der Organmitglieder der Bank für die Geschäftsjahre vom 1. Januar 2008 bis 31. Dezember 2008 sowie vom 1. Januar 2009 bis 31. Dezember 2009 500 Tsd Euro brutto pro Jahr und Organmitglied im Hinblick auf die Tätigkeit für den Konzern nicht übersteigt (SoFFin-Cap). Der Aufsichtsrat hat beschlossen, dass dieser Cap auch für die monetäre Gesamtvergütung der Vorstandsmitglieder 2010 gilt (also das feste Jahresgrundgehalt, Short Term Incentive und Long Term Incentive), falls die Festzinskomponente der Gewinnbeteiligung auf die Stillen Einlagen des SoFFin für das Jahr 2010 nicht voll bezahlt wird. Nicht von diesem Cap erfasst sind Ansprüche auf Altersversorgung sowie Sachbezüge, soweit diese nach Art und Umfang nicht über das vor dem 1. November 2008 bestehende Maß hinausgehen und die Gesamtvergütung hierdurch nicht unangemessen wird.

#### Erfolgsunabhängige Vergütungsbestandteile

Zu den erfolgsunabhängigen Vergütungsbestandteilen zählen das feste Jahresgrundgehalt und die Sachbezüge.

Das feste Jahresgrundgehalt, das in gleichen monatlichen Beträgen ausbezahlt wird, beträgt 750 Tsd Euro. Die Angemessenheit des festen Jahresgrundgehalts wird regelmäßig im Abstand von jeweils zwei Jahren überprüft. Da die Festzinskomponente der Gewinnbeteiligung auf die Stillen Einlagen des SoFFin für 2010 nicht bezahlt wird, ist das Jahresgrundgehalt für das Jahr 2010 auf 500 Tsd Euro per annum begrenzt worden.

Die Sachbezüge bestehen im Wesentlichen aus Dienstwagennutzung mit Fahrer, Sicherheitsmaßnahmen und Versicherungsbeiträgen sowie darauf entfallende Steuern und Sozialabgaben.

### **Erfolgsbezogene Vergütungsbestandteile**

Das neue Vergütungssystem sieht als erfolgsbezogene variable Vergütungskomponenten ein Short Term Incentive und ein Long Term Incentive vor.

Wegen des für das Jahr 2010 geltenden Caps für die monetäre Gesamtvergütung der Vorstandsmitglieder in Höhe von insgesamt 500 Tsd Euro pro Jahr entfallen die erfolgsbezogenen variablen Vergütungskomponenten für das Geschäftsjahr 2010.

### **Short Term Incentive (STI)**

Der STI hat eine Laufzeit von einem Jahr. Er besteht aus zwei gleich gewichteten Komponenten, von denen eine an den Economic Value Added (EVA)<sup>1</sup> (STI-EVA-Komponente), die andere an die individuelle Leistung des Vorstandsmitglieds (STI-Leistungskomponente) anknüpft. Der Gesamtzielwert des STI beträgt 250 Tsd Euro, der Zielwert der einzelnen Komponenten jeweils 125 Tsd Euro. Die Zielwerte werden jeweils bei einer Zielerreichung von 100 % bezahlt; die Zielerreichung kann zwischen 0 % und 200 % liegen. Die Auszahlung erfolgt nach dem Ende der einjährigen Laufzeit und kann für jede der beiden Komponenten zwischen 0 Euro und 250 Tsd Euro betragen.

### **STI-EVA-Komponente**

Für die STI-EVA-Komponente legt der Aufsichtsrat vor Beginn des Geschäftsjahres einen Zielwert für den Konzern-EVA nach Steuern fest, der einer Zielerreichung von 100 % entspricht. Außerdem wird festgelegt, welcher EVA-Wert welchem Zielerreichungsgrad entspricht. Als EVA-Berechnungsgrundlage wird grundsätzlich das Investorenkapital herangezogen. Diese Komponente kommt erst ab dem Jahr 2012 zum Einsatz.

### **STI-Leistungskomponente**

Die individuelle Leistung jedes Vorstandsmitglieds wird auf Basis einer Gesamtbetrachtung von Kriterien beurteilt, die der Aufsichtsrat vor Beginn des jeweiligen Geschäftsjahres festlegt. Bis Ende 2011 kommt ausschließlich diese qualitative STI-Leistungskomponente als Bemessungsgrundlage zum Einsatz; bis dahin beträgt der Zielwert dieser Komponente 250 Tsd Euro per annum.

### **Long Term Incentive (LTI)**

Der LTI hat eine Laufzeit von vier Jahren. Er besteht aus zwei gleich gewichteten Komponenten, von denen eine an den Economic Value Added (EVA) anknüpft (LTI-EVA-Komponente) und die andere aktienbasiert ist (LTI-Aktienkomponente). Der Gesamtzielwert des LTI beträgt 750 Tsd Euro, der Zielwert der einzelnen Komponenten jeweils 375 Tsd Euro. Die Zielwerte werden jeweils bei einer Zielerreichung von 100 % ausgezahlt. Die Zielerreichung kann insgesamt zwischen 0 % und 200 % liegen; die Auszahlung für jede der beiden Komponenten demzufolge zwischen 0 Euro und 750 Tsd Euro. Die LTI-EVA-Komponente beinhaltet eine Malus-Regelung. Der LTI setzt ein dauerhaftes Eigeninvestment des Vorstandsmitglieds in Commerzbank-Aktien in Höhe von jeweils 350 Tsd Euro voraus. Bis zum Erreichen des Eigeninvestments sind jeweils 50 % der Nettoauszahlungen aus dem LTI in Commerzbank-Aktien zu investieren.

<sup>1</sup> EVA ist der Konzernüberschuss nach Steuern abzüglich der Kapitalkosten der Bank (Produkt aus Investorenkapital ohne Fremdanteile und Kapitalkostensatz nach Steuern).

### LTI-Aktienkomponente

Der Auszahlungsbetrag der LTI-Aktienkomponente ergibt sich einerseits aus der relativen Total-Shareholder-Return(TSR-)Performance der Commerzbank im Vergleich zur TSR-Performance der anderen Banken des EURO STOXX Banken und andererseits aus der absoluten Kursperformance der Commerzbank-Aktie. Der Aufsichtsrat legt vor Beginn der LTI-Laufzeit die Zahl der Commerzbank-Aktien fest, deren Kurswert bei einer Zielerreichung von 100 % nach dem Ende der vierjährigen LTI-Laufzeit ausbezahlt wird. Außerdem definiert er, welche TSR-bezogene Platzierung der Commerzbank im Vergleich zu den anderen relevanten Banken welchem Zielerreichungsgrad entspricht. Die relative TSR-Performance bestimmt also die Anzahl der virtuell zugeteilten Aktien; die absolute Kursentwicklung der Commerzbank-Aktie während der LTI-Laufzeit bestimmt deren Gegenwert, der nach vier Jahren in bar zur Auszahlung kommt.

### LTI-EVA-Komponente

Die Zielwerte der EVA-basierten LTI-Komponente werden vom Aufsichtsrat vorab für die gesamte LTI-Laufzeit festgesetzt und können für die einzelnen Jahre der Laufzeit differieren. Der Aufsichtsrat definiert außerdem vorab, welcher EVA-Wert welchem Zielerreichungsgrad entspricht. Die Zielerreichung wird während der vierjährigen LTI-Laufzeit jährlich festgestellt, wobei die Zielerreichung der einzelnen Jahre grundsätzlich zwischen minus 100 % und plus 200 % liegen kann; die Zielerreichung bis Ende 2011 kann zwischen 0 % und 200 % schwanken. Nach dem Ende der vierjährigen LTI-Laufzeit ermittelt der Aufsichtsrat die durchschnittliche Zielerreichung und die sich daraus ergebende Auszahlung. Aufgrund der grundsätzlich möglichen negativen Zielerreichung in den einzelnen Jahren der LTI-Laufzeit enthält das Modell einen Malus-Bezug.

Zielerreichungen werden im STI und im LTI jeweils linear gemessen. Im Falle außerordentlicher Entwicklungen auf Seiten der Bank mit erheblichem Einfluss auf die Erreichbarkeit der Zielwerte von STI oder LTI kann der Aufsichtsrat diesen positiven oder negativen Einfluss durch Anpassung der Ziele neutralisieren.

### Long-Term-Performance-Pläne

Die Mitglieder des Vorstands hatten, ebenso wie andere Führungskräfte und ausgewählte Mitarbeiter des Konzerns, in der Vergangenheit die Möglichkeit, sich an Long-Term-Performance-Plänen (LTP) zu beteiligen. Diese bis 2008 jährlich angebotenen virtuellen Aktienoptionsprogramme enthalten ein Zahlungsverprechen für den Fall, dass die Kursentwicklung der Commerzbank-Aktie nach drei, vier oder fünf Jahren die des EURO-STOXX-Banken-Index übertrifft und/oder die absolute Kursentwicklung der Commerzbank-Aktie mindestens 25% beträgt. Sind diese Schwellen auch nach fünf Jahren nicht erreicht, verfällt das Zahlungsverprechen. Kommt es zu Auszahlungen, werden von den Vorstandsmitgliedern jeweils 50% des Bruttoauszahlungsbetrages in Commerzbank-Aktien investiert. Die Teilnahme an den LTP ist mit einer Eigenbeteiligung der Teilnehmer in Commerzbank-Aktien verbunden. Die Mitglieder des Vorstands konnten mit bis zu 2 500 Aktien, der Vorsitzende des Vorstands mit bis zu 5 000 Aktien teilnehmen.

Die Vorstandsmitglieder nehmen gegenwärtig nur an den noch laufenden LTP 2006 und LTP 2007 teil. Die realisierbaren Vergütungen aus der Teilnahme an den LTP können deutlich von den im Anhang ausgewiesenen Zeitwerten abweichen und auch ganz entfallen, da der endgültige Auszahlungsbetrag erst am Ende der Laufzeit des jeweiligen LTP feststeht. Mögliche Vergütungen aus den LTP 2006 und LTP 2007 werden nicht auf den SoFFin-Cap angerechnet, da die LTPs jeweils für die Leistung im Jahr der Begebung gewährt wurden.

Im Berichtsjahr gab es keine LTP-Auszahlung.

### **Vergütung des Vorstandsvorsitzenden**

Das feste Jahresgrundgehalt und die Zielwerte der variablen Vergütungskomponenten liegen für den Vorstandsvorsitzenden nach dem neuen Vergütungssystem beim 1,75-fachen der für Vorstandsmitglieder genannten Beträge. Auf Wunsch des Vorstandsvorsitzenden kommt diese Regelung bis zum Ende seiner derzeitigen Bestellungsperiode am 31. Oktober 2011 nicht zur Anwendung.

### **Vergütung für die Übernahme von Organfunktionen bei konsolidierten Unternehmen**

Die einem Vorstandsmitglied zufließende Vergütung aus der Wahrnehmung von Organfunktionen bei konsolidierten Unternehmen wird auf die Gesamtbezüge des Vorstandsmitglieds angerechnet. Diese Anrechnung erfolgt jeweils zum Auszahlungszeitpunkt nach der Hauptversammlung, die den Jahresabschluss für das Geschäftsjahr entgegen nimmt, in dem dem Vorstandsmitglied die Konzernbezüge zugeflossen sind.

Die in einem Geschäftsjahr gewährten Vergütungen für Tätigkeiten in Organen von konsolidierten Unternehmen werden in voller Höhe auf den SoFFin-Cap des jeweiligen Vorjahres angerechnet. Daher werden diese Vergütungen in der Tabelle unter der Überschrift „Zusammenfassung“ dem Vorjahr zugeordnet. Soweit diese Vergütungen für Tätigkeiten in Organen von konsolidierten Unternehmen bei einem Vorstandsmitglied zu einer monetären Gesamtvergütung von über 500 Tsd Euro führen, werden diese an die Commerzbank abgeführt.

### **Altersversorgung**

Die Regelungen zur Altersversorgung der Vorstandsmitglieder wurden durch das neue Vergütungssystem nicht geändert; sie knüpfen auch für 2010 an das Grundgehalt für das Geschäftsjahr 2009 an.

Die Bank gewährt danach Vorstandsmitgliedern und ehemaligen Mitgliedern des Vorstands oder deren Hinterbliebenen eine Altersversorgung. Eine Pension wird gezahlt, wenn ein Vorstandsmitglied bei Ausscheiden aus der Bank

- das 62. Lebensjahr vollendet hat oder
- dauerhaft dienstunfähig ist oder
- das Anstellungsverhältnis nach Vollendung des 58. Lebensjahres beendet wird und das Vorstandsmitglied dem Vorstand mindestens 10 Jahre angehört hat oder
- dem Vorstand mindestens 15 Jahre angehört hat.

Die Pension beträgt 30 % von 480 Tsd Euro beziehungsweise 760 Tsd Euro für den Vorstandsvorsitzenden (Grundgehälter vor Einführung des neuen Vergütungssystems) ab der ersten Bestellungsperiode, 40 % ab der zweiten und 60 % ab der dritten Bestellungsperiode. Die Pensionen werden in Anlehnung an die gesetzlichen Bestimmungen zur betrieblichen Altersversorgung gekürzt, wenn ein Vorstandsmitglied vor Vollendung des 62. Lebensjahres aus dem Vorstand ausscheidet. Die Unverfallbarkeit richtet sich ebenfalls grundsätzlich nach den gesetzlichen Bestimmungen zur betrieblichen Altersversorgung.

Den Vorstandsmitgliedern wird für die Dauer von sechs Monaten anstelle der Pension das anteilige Grundgehalt als Übergangsgeld fortbezahlt, wenn sie nach Vollendung des 62. Lebensjahres oder aufgrund dauerhafter Dienstunfähigkeit aus dem Vorstand ausscheiden. Sofern ein Vorstandsmitglied vor Vollendung des 62. Lebensjahres Pension bezieht, ohne dienstunfähig zu sein, wird die Pension im Hinblick auf den früheren Zahlungsbeginn gekürzt. Aus einer anderen Tätigkeit erzielte Einkünfte werden bis zu diesem Alter zur Hälfte auf die Pensionsansprüche angerechnet.

Pensionszahlungen an die Vorstandsmitglieder werden ab Pensionsbeginn jährlich um 1 % erhöht. Unter bestimmten Voraussetzungen wird eine darüber hinausgehende Erhöhung geprüft; ein Anspruch auf eine solche Erhöhung besteht jedoch nicht.

In der nachstehenden Tabelle sind die Pensionsansprüche der im Geschäftsjahr 2010 aktiven Vorstandsmitglieder aufgeführt:

| Tsd €                  | Pensionsansprüche<br>Jahresbezug bei Eintritt<br>des Pensionsfalls<br>Stand 31.12.2010 <sup>1</sup> | Barwert der<br>Pensionsansprüche<br>Stand 31.12.2010 <sup>1</sup> |
|------------------------|-----------------------------------------------------------------------------------------------------|-------------------------------------------------------------------|
| Martin Blessing        | 456                                                                                                 | 2 630                                                             |
| Frank Annuscheit       | 288                                                                                                 | 808                                                               |
| Markus Beumer          | 288                                                                                                 | 681                                                               |
| Dr. Achim Kassow       | 288                                                                                                 | 1 406                                                             |
| Jochen Klösiges        | 288                                                                                                 | 427                                                               |
| Michael Reuther        | 288                                                                                                 | 1 418                                                             |
| Dr. Stefan Schmittmann | 288                                                                                                 | 1 010                                                             |
| Ulrich Sieber          | 288                                                                                                 | 372                                                               |
| Dr. Eric Strutz        | 288                                                                                                 | 1 540                                                             |
| Martin Zielke          | 288                                                                                                 | 57                                                                |
| <b>Summe</b>           |                                                                                                     | <b>10 349</b>                                                     |

<sup>1</sup> Die Beträge berücksichtigen die aktuelle Bestellungsperiode der einzelnen Vorstandsmitglieder und gehen im Übrigen davon aus, dass die Pensionszahlung außer bei Dienstunfähigkeit erst nach Vollendung des 62. Lebensjahres beginnt und die Vorstandstätigkeit bis zum Pensionsbeginn fortgeführt wird.

Die Pensionsansprüche der Mitglieder des Vorstands fallen nicht unter den SoFFin-Cap.

Die Hinterbliebenenpension für den Ehepartner beträgt 66 % der Pensionsansprüche des Vorstandsmitglieds. Falls keine Witwenpension gezahlt wird, haben die minderjährigen oder in der Ausbildung befindlichen Kinder einen Anspruch auf eine Waisenrente in Höhe von jeweils 25 % der Pensionsansprüche des Vorstandsmitglieds, insgesamt jedoch maximal in Höhe der Witwenpension.

Die zur Absicherung dieser Pensionsverpflichtungen dienenden Vermögenswerte wurden mittels eines sogenannten Contractual Trust Arrangements auf den Commerzbank Pension-Trust e. V. übertragen. Im Berichtsjahr wurden keine Vermögenswerte auf den Commerzbank Pension-Trust e. V. übertragen.

Zum 31. Dezember 2010 beliefen sich die Pensionsverpflichtungen (defined benefit obligations) für zum Stichtag aktive Vorstandsmitglieder der Commerzbank Aktiengesellschaft auf insgesamt 10,3 Mio Euro (Vorjahr: 7,0 Mio Euro; siehe auch Tabelle der Einzelansprüche). Nach Abzug der übertragenen Vermögenswerte (Plan Assets) und unter Berücksichtigung versicherungsmathematischer Gewinne und Verluste betragen die Rückstellungen für Pensionsverpflichtungen zum 31. Dezember 2010 für aktive Vorstandsmitglieder 0,5 Mio Euro (Vorjahr: -).

### Change of Control

Das im Jahr 2010 eingeführte neue Vorstandsvergütungssystem sieht keine Change-of-Control-Klauseln vor. Soweit die bisherigen Anstellungsverträge einzelner Vorstandsmitglieder noch Change-of-Control-Regelungen enthielten, entfallen diese jeweils bei Ablauf der aktuellen Bestellungsperiode.



Sofern die Change-of-Control-Regelungen zur Anwendung kommen, geben sie dem Vorstandsmitglied ein Recht zur Kündigung des Anstellungsvertrages. Macht das Vorstandsmitglied von diesem Kündigungsrecht Gebrauch, hat das Vorstandsmitglied Anspruch auf die Abgeltung seiner Bezüge für die Restdauer seiner Bestellungsperiode in Höhe von 75 % seiner durchschnittlichen Jahresgesamtbezüge sowie auf eine Abfindung in Höhe der durchschnittlichen Jahresgesamtbezüge für zwei bis vier Jahre. Abgeltung und Abfindung zusammen dürfen die durchschnittlichen Jahresgesamtbezüge für fünf Jahre sowie die durchschnittlichen Jahresgesamtbezüge für die Zeit bis zur Vollendung des 65. Lebensjahres nicht übersteigen. Im Anschluss an seine Bestellungsperiode hat das Vorstandsmitglied Pensionsansprüche. Die Kündigung des Anstellungsvertrags ist nur wirksam, wenn ihr der Aufsichtsrat zustimmt, es sei denn, sie erfolgt aus wichtigem Grund. Ein Abfindungsanspruch entsteht ferner nicht, soweit das Vorstandsmitglied im Zusammenhang mit einem Change-of-Control-Fall Leistungen vom Mehrheitsaktionär, vom herrschenden Unternehmen oder – im Falle der Eingliederung oder Verschmelzung – vom anderen Rechtsträger erhält.

Die Anstellungsverträge der Herren Klösges, Reuther, Sieber und Zielke enthalten keine Change-of-Control-Regelung; für die Herren Annuscheit und Beumer ist sie mit dem Ende ihrer letzten Bestellungsperiode am 31. Dezember 2010 entfallen. Bei Herrn Dr. Schmittmann dürfen Abgeltung und Abfindung zusammen weder die durchschnittlichen Jahresgesamtbezüge der letzten drei Jahre noch 150 % der Gesamtbezüge für die bei Beendigung des Anstellungsvertrages verbleibende Restdauer der laufenden Bestellungsperiode übersteigen.

### **Sonstige Regelungen**

Falls die Bestellung zum Mitglied des Vorstands vorzeitig endet, endet der Anstellungsvertrag grundsätzlich mit Ablauf von sechs Monaten seit dem Ende der Bestellung (Koppelungsklausel). Dem Vorstandsmitglied werden in diesem Fall das feste Jahresgrundgehalt, STIs und LTIs – vorbehaltlich § 615 Satz 2 BGB – bis zum Ende der ursprünglichen Bestellungsperiode weiter gewährt.

Wird der Anstellungsvertrag zum Ablauf der jeweiligen Bestellungsperiode nicht verlängert, ohne dass ein wichtiger Grund gemäß § 626 BGB vorliegt, oder endet der Anstellungsvertrag nach der beschriebenen Koppelungsklausel, erhält das Vorstandsmitglied zudem für die Dauer von sechs Monaten nach Ablauf der ursprünglichen Bestellungsperiode das feste Grundgehalt (Übergangsgeld). Diese Gehaltsfortzahlung endet auf jeden Fall, sobald das Vorstandsmitglied Pensionszahlungen erhält.

Endet der Anstellungsvertrag aus anderen Gründen als nach der oben beschriebenen Koppelungsklausel wird das feste Jahresgrundgehalt ggf. zeitanteilig, bis zur Beendigung des Anstellungsvertrages bezahlt. Die für Geschäftsjahre vor Beendigung des Anstellungsvertrages zugesagten STI und LTI bleiben unberührt. Der sich am Ende der Laufzeit errechnende Auszahlungsbetrag für STI und LTI des Beendigungsjahres wird anteilig reduziert.

Beendet die Bank die Organstellung vorzeitig oder verlängert sie diese bei Ablauf der Bestellungsperiode nicht aufgrund von Umständen, die die Voraussetzungen des § 626 BGB erfüllen, verfallen Ansprüche aus den für das Geschäftsjahr der Beendigung der Organstellung zugesagten STI und LTI und werden keine STI und LTI mehr gewährt.

Sämtliche Bezüge für die Zeit nach wirksamer Beendigung der Organstellung werden höchstens bis zu einem Betrag in Höhe von zwei Jahresvergütungen gezahlt (Cap). Auszahlungen auf den im Geschäftsjahr der Beendigung der Organstellung zugesagten STI und LTI unterliegen dem Cap anteilig.

Im abgelaufenen Geschäftsjahr hat kein Mitglied des Vorstands Leistungen oder entsprechende Zusagen von einem Dritten in Bezug auf seine Tätigkeit als Vorstandsmitglied erhalten; Gleiches gilt auch für Leistungen und Zusagen von Unternehmen, mit denen der Commerzbank-Konzern bedeutende geschäftliche Beziehungen unterhält.

### Zusammenfassung

Im Folgenden werden die Gesamtbezüge der einzelnen Mitglieder des Vorstands für das Jahr 2010 und zum Vergleich für das Jahr 2009 dargestellt. Gegenüber dem Vorjahr haben wir die Darstellung um den Aufwand für Leistungen der Bank nach Beendigung des Arbeitsverhältnisses ergänzt.

| Tsd €                  |                      | Kurzfristig fällige Leistungen | Leistungen aus Anlass der Beendigung des Arbeitsverhältnisses | Auszahlung aktienbasierte Vergütungspläne <sup>4</sup> | Gesamtvergütung | Aufwand für Leistungen nach Beendigung des Arbeitsverhältnisses <sup>5</sup> |
|------------------------|----------------------|--------------------------------|---------------------------------------------------------------|--------------------------------------------------------|-----------------|------------------------------------------------------------------------------|
| Martin Blessing        | 2010                 | 617                            | –                                                             | –                                                      | 617             | 283                                                                          |
|                        | 2009                 | 572                            | –                                                             | –                                                      | 572             | 216                                                                          |
| Frank Annuscheit       | 2010                 | 603                            | –                                                             | –                                                      | 603             | 259                                                                          |
|                        | 2009                 | 545                            | –                                                             | –                                                      | 545             | 212                                                                          |
| Markus Beumer          | 2010                 | 547                            | –                                                             | –                                                      | 547             | 218                                                                          |
|                        | 2009                 | 602                            | –                                                             | –                                                      | 602             | 176                                                                          |
| Wolfgang Hartmann      | 2010 <sup>2</sup>    | –                              | –                                                             | –                                                      | –               | –                                                                            |
|                        | 2009 <sup>1</sup>    | 232                            | –                                                             | –                                                      | 232             | 130                                                                          |
| Dr. Achim Kassow       | 2010                 | 572                            | –                                                             | –                                                      | 572             | 154                                                                          |
|                        | 2009                 | 564                            | –                                                             | –                                                      | 564             | 119                                                                          |
| Jochen Klösiges        | 2010                 | 566                            | –                                                             | –                                                      | 566             | 262                                                                          |
|                        | 2009 <sup>1</sup>    | 298                            | –                                                             | –                                                      | 298             | –                                                                            |
| Bernd Knobloch         | 2010 <sup>2</sup>    | –                              | –                                                             | –                                                      | –               | –                                                                            |
|                        | 2009 <sup>2, 3</sup> | –                              | 1 113                                                         | –                                                      | 1 113           | –                                                                            |
| Michael Reuther        | 2010                 | 575                            | –                                                             | –                                                      | 575             | 336                                                                          |
|                        | 2009                 | 575                            | –                                                             | –                                                      | 575             | 269                                                                          |
| Dr. Stefan Schmittmann | 2010                 | 555                            | –                                                             | –                                                      | 555             | 454                                                                          |
|                        | 2009                 | 535                            | –                                                             | –                                                      | 535             | 405                                                                          |
| Ulrich Sieber          | 2010                 | 563                            | –                                                             | –                                                      | 563             | 228                                                                          |
|                        | 2009 <sup>1</sup>    | 308                            | –                                                             | –                                                      | 308             | –                                                                            |
| Dr. Eric Strutz        | 2010                 | 595                            | –                                                             | –                                                      | 595             | 168                                                                          |
|                        | 2009                 | 521                            | –                                                             | –                                                      | 521             | 124                                                                          |
| Martin Zielke          | 2010 <sup>1</sup>    | 82                             | –                                                             | –                                                      | 82              | –                                                                            |
|                        | 2009 <sup>2</sup>    | –                              | –                                                             | –                                                      | –               | –                                                                            |
| <b>Gesamt</b>          | <b>2010</b>          | <b>5 275</b>                   | <b>–</b>                                                      | <b>–</b>                                               | <b>5 275</b>    | <b>2 362</b>                                                                 |
|                        | <b>2009</b>          | <b>4 752</b>                   | <b>1 113</b>                                                  | <b>–</b>                                               | <b>5 865</b>    | <b>1 651</b>                                                                 |

<sup>1</sup> Pro rata temporis für den Zeitraum ab Bestellung beziehungsweise bis zum Tag des Ausscheidens.

<sup>2</sup> Diese Herren waren in den angegebenen Jahren keine Vorstandsmitglieder.

<sup>3</sup> Herr Knobloch erhielt im Jahr 2009 einen Betrag von 1 113 Tsd Euro auf Basis einer mit ihm geschlossenen Aufhebungsvereinbarung.

<sup>4</sup> Im Berichtsjahr 2010 wurde kein LTP ausgezahlt.

<sup>5</sup> Dienstzeitaufwand sowie Arbeitgeberanteile zum BVV und zur Rentenversicherung; andere langfristig fällige Leistungen gemäß IAS 24 waren nicht zu verzeichnen.

Einschließlich des Aufwands für Leistungen der Bank nach Beendigung des Arbeitsverhältnisses lagen die Gesamtbezüge der Vorstandsmitglieder bei 7 637 Tsd Euro (Vorjahr: 7 516 Tsd Euro).

In nachfolgender Tabelle sind die Komponenten der kurzfristig fälligen Leistungen aufgeführt. Sie bestehen aus dem Grundgehalt, der variablen Vergütung, der Vergütungen für die Übernahme von Organfunktionen bei im Konzernabschluss der Commerzbank Aktiengesellschaft konsolidierten Unternehmen sowie aus den sonstigen Bezügen der einzelnen Mitglieder des Vorstands. Unter Sonstiges sind unter anderem die im üblichen Rahmen gewährten Sachbezüge (im Wesentlichen Dienstwagen-Nutzungen, Versicherungen, auf die Sachbezüge entfallende Steuern sowie Sozialabgaben) enthalten.

Für die Geschäftsjahre 2010 und 2009 wurde keine variable Vergütung gewährt.

| Tsd €                  |                   | Grundgehalt  | Variable Vergütung <sup>3</sup> | Vergütung für die Übernahme von Organfunktionen <sup>4</sup> | Rückführung gemäß SoFFin-Cap <sup>4</sup> | Monetäre Gesamtvergütung | Sonstiges <sup>5</sup> | Summe kurzfristig fällige Leistungen |
|------------------------|-------------------|--------------|---------------------------------|--------------------------------------------------------------|-------------------------------------------|--------------------------|------------------------|--------------------------------------|
| Martin Blessing        | 2010              | 500          | –                               | –                                                            | –                                         | 500                      | 117                    | 617                                  |
|                        | 2009              | 500          | –                               | –                                                            | –                                         | 500                      | 72                     | 572                                  |
| Frank Annuschein       | 2010              | 500          | –                               | –                                                            | –                                         | 500                      | 103                    | 603                                  |
|                        | 2009              | 480          | –                               | 23                                                           | –3                                        | 500                      | 45                     | 545                                  |
| Markus Beumer          | 2010              | 500          | –                               | –                                                            | –                                         | 500                      | 47                     | 547                                  |
|                        | 2009              | 480          | –                               | 12                                                           | –                                         | 492                      | 110                    | 602                                  |
| Wolfgang Hartmann      | 2010 <sup>2</sup> | –            | –                               | –                                                            | –                                         | –                        | –                      | –                                    |
|                        | 2009 <sup>1</sup> | 200          | –                               | –                                                            | –                                         | 200                      | 32                     | 232                                  |
| Dr. Achim Kassow       | 2010              | 500          | –                               | –                                                            | –                                         | 500                      | 72                     | 572                                  |
|                        | 2009              | 480          | –                               | 124                                                          | –104                                      | 500                      | 64                     | 564                                  |
| Jochen Klösges         | 2010              | 500          | –                               | –                                                            | –                                         | 500                      | 66                     | 566                                  |
|                        | 2009 <sup>1</sup> | 280          | –                               | –                                                            | –                                         | 280                      | 18                     | 298                                  |
| Bernd Knobloch         | 2010 <sup>2</sup> | –            | –                               | –                                                            | –                                         | –                        | –                      | –                                    |
|                        | 2009 <sup>2</sup> | –            | –                               | –                                                            | –                                         | –                        | –                      | –                                    |
| Michael Reuther        | 2010              | 500          | –                               | –                                                            | –                                         | 500                      | 75                     | 575                                  |
|                        | 2009              | 480          | –                               | 21                                                           | –1                                        | 500                      | 75                     | 575                                  |
| Dr. Stefan Schmittmann | 2010              | 500          | –                               | –                                                            | –                                         | 500                      | 55                     | 555                                  |
|                        | 2009              | 480          | –                               | –                                                            | –                                         | 480                      | 55                     | 535                                  |
| Ulrich Sieber          | 2010              | 500          | –                               | –                                                            | –                                         | 500                      | 63                     | 563                                  |
|                        | 2009 <sup>1</sup> | 280          | –                               | –                                                            | –                                         | 280                      | 28                     | 308                                  |
| Dr. Eric Strutz        | 2010              | 500          | –                               | –                                                            | –                                         | 500                      | 95                     | 595                                  |
|                        | 2009              | 480          | –                               | 2                                                            | –                                         | 482                      | 39                     | 521                                  |
| Martin Zielke          | 2010 <sup>1</sup> | 78           | –                               | –                                                            | –                                         | 78                       | 4                      | 82                                   |
|                        | 2009 <sup>2</sup> | –            | –                               | –                                                            | –                                         | –                        | –                      | –                                    |
| <b>Gesamt</b>          | <b>2010</b>       | <b>4 578</b> | <b>–</b>                        | <b>182</b>                                                   | <b>–108</b>                               | <b>4 578</b>             | <b>697</b>             | <b>5 275</b>                         |
|                        | <b>2009</b>       | <b>4 140</b> | <b>–</b>                        | <b>182</b>                                                   | <b>–108</b>                               | <b>4 214</b>             | <b>538</b>             | <b>4 752</b>                         |

<sup>1</sup> Pro rata temporis für den Zeitraum ab Bestellung beziehungsweise bis zum Tag des Ausscheidens.

<sup>2</sup> Diese Herren waren in den angegebenen Jahren keine Vorstandsmitglieder.

<sup>3</sup> Auszahlbar im Folgejahr vorbehaltlich der Feststellung des Jahresabschlusses.

<sup>4</sup> Die in den Geschäftsjahren 2009 und 2010 gewährten Bezüge für die Tätigkeit in Organen von Konzerngesellschaften werden in voller Höhe auf den SoFFin-Cap des jeweiligen Vorjahres angerechnet und deshalb in der Tabelle dem Vorjahr zugeordnet.

<sup>5</sup> Unter Sonstiges sind die im Berichtsjahr gewährten Sachbezüge, Sozialversicherungsbeiträge sowie auf Sachbezüge entfallende Steuern ausgewiesen.

### Kredite an Mitglieder des Vorstands

Bankkredite an Vorstandsmitglieder wurden mit Laufzeiten von bis auf Weiteres bis zur Fälligkeit im Jahr 2038 sowie Zinssätzen zwischen 2,8 % und 5,5 % bei Überziehungen in Einzelfällen bis zu 10,7 % gewährt. Die Kredite sind im marktüblichen Rahmen soweit erforderlich mit Grundschulden und Pfandrechten besichert.

Zum Bilanzstichtag betragen die an Mitglieder des Vorstands gewährten Kredite insgesamt 2 647 Tsd Euro; im Vorjahr waren es 2 304 Tsd Euro. Die Vorstandsmitglieder standen im Berichtsjahr mit Ausnahme von Mietavalen in keinen Haftungsverhältnissen zu den Gesellschaften des Commerzbank-Konzerns.

### Aufsichtsrat

#### Grundzüge des Vergütungssystems und Vergütung für das Geschäftsjahr 2010

Die Vergütung des Aufsichtsrats ist in § 15 der Satzung geregelt; die derzeit gültige Fassung wurde von der Hauptversammlung am 16. Mai 2007 beschlossen. Danach erhalten die Mitglieder des Aufsichtsrats für das jeweilige Geschäftsjahr neben dem Ersatz ihrer Auslagen eine Grundvergütung, die sich zusammensetzt aus:

- einer festen Vergütung von 40 Tsd Euro pro Jahr und
- einer variablen Vergütung von 3 Tsd Euro pro Jahr je 0,05 Euro Dividende, die über einer Dividende von 0,10 Euro je Stückaktie für das abgelaufene Geschäftsjahr an die Aktionäre ausgeschüttet wird.

Der Aufsichtsratsvorsitzende erhält das Dreifache, sein Stellvertreter das Doppelte der dargestellten Grundvergütung. Für die Mitgliedschaft in einem Aufsichtsratsausschuss, der mindestens zwei Mal im Kalenderjahr tagt, erhält der Ausschussvorsitzende eine zusätzliche Vergütung in Höhe der Grundvergütung und jedes Ausschussmitglied in Höhe der halben Grundvergütung; diese zusätzliche Vergütung wird für maximal drei Ausschussmandate gezahlt. Darüber hinaus erhält jedes Aufsichtsratsmitglied je Teilnahme an einer Sitzung des Aufsichtsrats oder eines Ausschusses ein Sitzungsgeld von 1,5 Tsd Euro. Feste Vergütung und Sitzungsgeld sind jeweils zum Ende des Geschäftsjahres, die variable Vergütung ist nach Ablauf der Hauptversammlung, die über die Entlastung des Aufsichtsrats für das betreffende Geschäftsjahr beschließt, zahlbar. Die auf die Vergütung zu zahlende Umsatzsteuer wird von der Bank erstattet.

Da die Commerzbank für das Geschäftsjahr 2010 keine Dividende zahlt, entfällt die variable Vergütung für das Jahr 2010. Die Mitglieder des Aufsichtsrats erhalten für das Geschäftsjahr 2010 eine Vergütung von netto insgesamt 1 563 Tsd Euro (Vorjahr: 1 681 Tsd Euro). Davon entfallen auf die Grund- und Ausschussvergütung 1 240 Tsd Euro (Vorjahr: 1 240 Tsd Euro) und auf das Sitzungsgeld 323 Tsd Euro (Vorjahr: 441 Tsd Euro). Die auf die Vergütungen der Aufsichtsratsmitglieder zu zahlende Umsatzsteuer von 278 Tsd Euro (Vorjahr: 293 Tsd Euro) wird von der Commerzbank Aktiengesellschaft erstattet. Insgesamt beträgt die Vergütung der Aufsichtsratsmitglieder somit 1 841 Tsd Euro (Vorjahr: 1 974 Tsd Euro).

Die Vergütung verteilt sich auf die einzelnen Mitglieder wie folgt:

| Tsd €                                                | Feste Vergütung | Variable Vergütung | Summe          | Sitzungs-geld | Umsatz-steuer <sup>1</sup> | Summe          |
|------------------------------------------------------|-----------------|--------------------|----------------|---------------|----------------------------|----------------|
| Klaus-Peter Müller                                   | 200,0           | –                  | 200,0          | 28,5          | 43,4                       | 271,9          |
| Uwe Tschäge                                          | 100,0           | –                  | 100,0          | 21,0          | 23,0                       | 144,0          |
| Hans-Hermann Altenschmidt                            | 80,0            | –                  | 80,0           | 24,0          | 19,8                       | 123,8          |
| Dott. Sergio Balbinot                                | 40,0            | –                  | 40,0           | 7,5           | –                          | 47,5           |
| Dr.-Ing. Burckhard Bergmann                          | 40,0            | –                  | 40,0           | 10,5          | 9,6                        | 60,1           |
| Herbert Bludau-Hoffmann                              | 40,0            | –                  | 40,0           | 6,0           | 8,7                        | 54,7           |
| Dr. Nikolaus von Bomhard                             | 40,0            | –                  | 40,0           | 9,0           | 9,3                        | 58,3           |
| Karin van Brummelen                                  | 60,0            | –                  | 60,0           | 24,0          | 16,0                       | 100,0          |
| Astrid Evers                                         | 40,0            | –                  | 40,0           | 12,0          | 9,9                        | 61,9           |
| Uwe Foullong                                         | 40,0            | –                  | 40,0           | 10,5          | 9,6                        | 60,1           |
| Daniel Hampel                                        | 40,0            | –                  | 40,0           | 12,0          | 9,9                        | 61,9           |
| Dr.-Ing. Otto Happel                                 | 40,0            | –                  | 40,0           | 10,5          | –                          | 50,5           |
| Sonja Kasischke                                      | 40,0            | –                  | 40,0           | 10,5          | 9,6                        | 60,1           |
| Prof. Dr.-Ing. Dr.-Ing. E. h.<br>Hans-Peter Keitel   | 60,0            | –                  | 60,0           | 21,0          | 15,4                       | 96,4           |
| Alexandra Krieger                                    | 40,0            | –                  | 40,0           | 12,0          | 9,9                        | 61,9           |
| Dr. h. c. Edgar Meister                              | 80,0            | –                  | 80,0           | 27,0          | 20,3                       | 127,3          |
| Prof. h. c. (CHN) Dr. rer. oec.<br>Ulrich Middelmann | 60,0            | –                  | 60,0           | 21,0          | 15,4                       | 96,4           |
| Dr. Helmut Perlet                                    | 100,0           | –                  | 100,0          | 28,5          | 24,4                       | 152,9          |
| Barbara Priester                                     | 40,0            | –                  | 40,0           | 12,0          | 9,9                        | 61,9           |
| Dr. Marcus Schenck                                   | 60,0            | –                  | 60,0           | 15,0          | 14,2                       | 89,2           |
| <b>Gesamt 2010</b>                                   | <b>1 240,0</b>  | <b>–</b>           | <b>1 240,0</b> | <b>322,5</b>  | <b>278,3</b>               | <b>1 840,8</b> |
| <b>Gesamt 2009</b>                                   | <b>1 240,0</b>  | <b>–</b>           | <b>1 240,0</b> | <b>441,0</b>  | <b>292,8</b>               | <b>1 973,8</b> |

<sup>1</sup> Aufgrund ihres Wohnsitzes außerhalb Deutschlands wird für die Herren Dr. Happel und Dott. Balbinot keine Umsatzsteuer fällig, sondern deutsche Einkommensteuer und Solidaritätszuschlag einbehalten.

Beratungs- und Vermittlungsleistungen sowie andere persönliche Leistungen wurden durch Mitglieder des Aufsichtsrats auch im Jahr 2010 nicht erbracht. Entsprechend wurden keine zusätzlichen Vergütungen gewährt.

### Kredite an Mitglieder des Aufsichtsrats

Kredite an Mitglieder des Aufsichtsrats wurden mit Laufzeiten bis auf Weiteres bis zur Fälligkeit im Jahr 2040 sowie zu Zinssätzen zwischen 3,8 % und 7,7 %, bei Überziehungen in Einzelfällen bis zu 10,7 %, herausgelegt. Die Kredite wurden marktüblich teilweise ohne Besicherung gegen Grundschulden oder Pfandrechte gewährt.

Zum Bilanzstichtag betragen die an Mitglieder des Aufsichtsrats gewährten Kredite insgesamt 484 Tsd Euro; im Vorjahr waren es 650 Tsd Euro.

Die Mitglieder des Aufsichtsrats standen im Berichtsjahr nicht in einem Haftungsverhältnis zu der Commerzbank Aktiengesellschaft.



## Sonstige Angaben

### D&O-Versicherung

Für die Mitglieder des Vorstands und des Aufsichtsrats besteht eine Vermögensschaden-Haftpflichtversicherung („D&O“). Für Aufsichtsrats- und Vorstandsmitglieder beträgt der Selbstbehalt jeweils 10 % des Schadens, für alle Versicherungsfälle in einem Jahr höchstens jedoch das Eineinhalbfache der festen jährlichen Vergütung.

### Erwerb oder Veräußerung von Aktien der Gesellschaft

Nach § 15 a des Wertpapierhandelsgesetzes (WpHG) besteht eine Mitteilungs- und Veröffentlichungspflicht für Geschäfte von Führungskräften börsennotierter Unternehmen und von deren Familienangehörigen. Danach sind Käufe und Verkäufe von Aktien sowie von sich auf die Commerzbank beziehenden Finanzinstrumenten ab einer Höhe von 5 Tsd Euro per annum unverzüglich und für die Dauer von einem Monat anzuzeigen. Entsprechend den Empfehlungen des Emittentenleitfadens der BaFin bezieht die Bank diese Meldepflicht auf Vorstand und Aufsichtsrat.

Im Jahr 2010 hat – bis auf die nachfolgende Meldung – kein Mitglied von Vorstand und Aufsichtsrat der Commerzbank Geschäfte mit Commerzbank-Aktien oder darauf bezogenen Derivaten („Directors' Dealings“) gemeldet:<sup>2</sup>

| Geschäfts-<br>tag | Name des<br>Meldepflichtigen                                                                                                            | Ange-<br>höriger | Teilnehmer-<br>kreis | Kauf/<br>Verkauf | Stück-<br>zahl | Preis<br>€ | Geschäfts-<br>volumen<br>€ |
|-------------------|-----------------------------------------------------------------------------------------------------------------------------------------|------------------|----------------------|------------------|----------------|------------|----------------------------|
| 24.2.2010         | Sulmana Vermögens-<br>verwaltung GmbH<br>Person, die die<br>Meldepflicht auslöst:<br>Prof. Dr.-Ing. Dr. Ing. E. h.<br>Hans-Peter Keitel |                  | AR-Mitglied          | K                | 3 000          | 5,439      | 16 317,00                  |

Insgesamt besaßen Vorstand und Aufsichtsrat am 31. Dezember 2010 nicht mehr als 1 % der ausgegebenen Aktien und Optionsrechte der Commerzbank Aktiengesellschaft.

Frankfurt am Main

Commerzbank Aktiengesellschaft

Der Vorstand

Der Aufsichtsrat

<sup>2</sup> Die Directors' Dealings wurden im Berichtsjahr auf der Internetseite der Commerzbank unter der Rubrik „Directors' Dealings“ veröffentlicht.

# Angaben gemäß § 315 des Handelsgesetzbuchs (HGB)

## Angaben gemäß § 315 Abs. 4 des Handelsgesetzbuchs und erläuternder Bericht

---

### **Zusammensetzung des Grundkapitals**

Die Commerzbank hat lediglich Stammaktien ausgegeben, für die sich die Rechte und Pflichten aus den gesetzlichen Regelungen, insbesondere der §§ 12, 53a ff., 118 ff. und 186 AktG, ergeben. Das Grundkapital der Gesellschaft beträgt zum Ende des Geschäftsjahres 3 071 517 607,60 Euro. Es ist eingeteilt in 1 181 352 926 Stückaktien. Die Aktien lauten auf den Inhaber.

### **Ernennung und Abberufung der Mitglieder des Vorstands und Änderungen der Satzung**

Die Mitglieder des Vorstands werden vom Aufsichtsrat nach Maßgabe des § 84 AktG und § 6 Abs. 2 der Satzung bestellt und abberufen. Gemäß § 6 Abs. 1 der Satzung besteht der Vorstand aus mindestens zwei Personen; im Übrigen legt der Aufsichtsrat gemäß § 6 Abs. 2 der Satzung die Anzahl der Vorstandsmitglieder fest. Fehlt ein erforderliches Vorstandsmitglied, ohne dass der Aufsichtsrat eine entsprechende Bestellung vornimmt, so wird dieses in dringenden Fällen nach Maßgabe des § 85 AktG gerichtlich bestellt. Jede Satzungsänderung bedarf gemäß § 179 Abs. 1 Satz 1 AktG eines Beschlusses der Hauptversammlung. Soweit das Gesetz nicht zwingend eine Mehrheit des bei der Beschlussfassung vertretenen Grundkapitals vorschreibt, genügt ergänzend die einfache Mehrheit des vertretenen Kapitals (§ 19 Abs. 3 S. 2 der Satzung). Die Befugnis zu Änderungen der Satzung, die nur die Fassung betreffen, ist gemäß § 10 Abs. 3 der Satzung in Übereinstimmung mit § 179 Abs. 1 Satz 2 AktG auf den Aufsichtsrat übertragen worden.

## Befugnisse des Vorstands

Nach näherer Maßgabe des Hauptversammlungsbeschlusses vom 19. Mai 2010 ist die Commerzbank ermächtigt, eigene Aktien nach § 71 Abs. 1 Nr. 7 AktG in Höhe von bis zu 5 % des Grundkapitals zu erwerben. Diese Ermächtigung ist bis zum 18. Mai 2015 befristet.

Der Vorstand ist mit Zustimmung des Aufsichtsrats zur Erhöhung des Grundkapitals in Höhe von insgesamt 1 535 000 000,00 Euro durch Ausgabe neuer Aktien nach § 4 Abs. 3 (Genehmigtes Kapital 2010) der am 31. Dezember 2010 geltenden Satzung ermächtigt.

Außerdem hat die Hauptversammlung vom 19. Mai 2010 den Vorstand zur Ausgabe von Wandel- und Optionsschuldverschreibungen und/oder von Genussrechten (diese mit oder ohne Wandlungs- oder Optionsrecht) mit der Möglichkeit zum Ausschluss des Bezugsrechts ermächtigt. Hierfür steht nach § 4 Abs. 4 der Satzung ein Bedingtes Kapital von bis zu 702 000 000,00 Euro zur Verfügung (Bedingtes Kapital 2010/I). Weiter ist das Kapital nach § 4 Abs. 5 der Satzung aufgrund des Beschlusses der Hauptversammlung im Mai 2009 um bis zu 390 000 000,00 Euro und nach § 4 Abs. 6 der Satzung aufgrund des Beschlusses der Hauptversammlung vom 19. Mai 2010 um bis zu 355 666 667,20 Euro bedingt erhöht (Bedingtes Kapital 2009 und Bedingtes Kapital 2010/II). Das Bedingte Kapital 2009 und das Bedingte Kapital 2010/II dienen jeweils der Gewährung von Aktien bei Ausübung von Umtauschrechten durch den Finanzmarktstabilisierungsfonds.

Für die Einzelheiten des Genehmigten und des Bedingten Kapitals, insbesondere zu Laufzeiten und Ausübungsbedingungen, verweisen wir auf die ausführlichen Erläuterungen im Anhang Nr. 75 und 76.

Die Befugnisse des Vorstands zur Erhöhung des Grundkapitals aus Genehmigtem und Bedingtem Kapital, zur Ausgabe von Wandel- und Optionsschuldverschreibungen und von Genussrechten ermöglichen es der Bank, auf veränderte Kapitalbedürfnisse angemessen und zeitnah zu reagieren.

## Wesentliche Vereinbarungen bei einem Kontrollwechsel infolge eines Übernahmeangebots

Die Commerzbank hat im Rahmen von ISDA Master Agreements mit einem Teil der Vertragspartner für den Fall eines Kontrollwechsels bei der Commerzbank ein außerordentliches Kündigungsrecht zugunsten dieser Vertragspartner vereinbart. In der Regel setzt das Kündigungsrecht zusätzlich eine wesentliche Verschlechterung der Kreditwürdigkeit der Commerzbank voraus. Die unter diesen Master Agreements abgeschlossenen Einzelverträge wären im Falle einer solchen Kündigung zum Marktwert abzurechnen, der börsentäglich ermittelt werden kann. Es ist aber nicht auszuschließen, dass die Kündigung eines Kunden mit besonders großem Geschäftsvolumen im Einzelfall aufgrund der möglichen Zahlungsverpflichtungen der Bank dennoch wesentliche Auswirkungen auf die Vermögens-, Finanz- und Ertragslage der Commerzbank haben kann.

## Change-of-Control-Klauseln

Das für das Jahr 2010 eingeführte neue Vorstandsvergütungssystem sieht keine Change-of-Control-Klauseln vor. Soweit die bisherigen Anstellungsverträge einzelner Vorstandsmitglieder noch Change-of-Control-Regelungen enthielten, entfallen diese jeweils bei Ablauf der derzeit laufenden Bestellungsperiode.

Sofern die Change-of-Control-Regelungen zur Anwendung kommen, geben sie dem Vorstandsmitglied ein Recht zur Kündigung des Anstellungsvertrages im Falle des Eintritts eines Aktionärs, der mindestens die Mehrheit der in der Hauptversammlung vertretenen Stimmrechte hält, bei Abschluss eines Unternehmensvertrages mit der Commerzbank als abhängigem Unternehmen sowie im Falle einer Eingliederung oder Verschmelzung (Change of Control). Macht das Vorstandsmitglied von diesem Kündigungsrecht Gebrauch und stimmt der Aufsichtsrat der Niederlegung des Vorstandsmandats zu oder endet die Vorstandstätigkeit im Zusammenhang mit dem Change of Control aus anderen i.e. definierten Gründen, hat das Vorstandsmitglied Anspruch auf die Abgeltung seiner Bezüge für die Restdauer seiner Bestellungsperiode in Höhe von 75 % seiner durchschnittlichen Jahresgesamtbezüge (Grundgehalt und variable Tantieme) sowie auf eine Abfindung in Höhe der durchschnittlichen Jahresgesamtbezüge für zwei bis vier Jahre. Abgeltung und Abfindung zusammen dürfen die durchschnittlichen Jahresgesamtbezüge für fünf Jahre sowie die durchschnittlichen Jahresgesamtbezüge für die Zeit bis zur Vollendung des 65. Lebensjahres nicht übersteigen. Hinsichtlich Ruhegeldzahlung und Long-Term-Performance-Plänen wird das Vorstandsmitglied im Wesentlichen so behandelt, als ob es bis zum Ende seiner aktuellen Bestellungsperiode dem Vorstand angehört hätte. Ein Abfindungsanspruch entsteht nicht, soweit das Vorstandsmitglied im Zusammenhang mit dem Change of Control Leistungen vom Mehrheitsaktionär, vom herrschenden Unternehmen oder vom anderen Rechtsträger im Falle der Eingliederung oder Verschmelzung erhält.

Die Anstellungsverträge der Herren Klösges, Reuther, Sieber und Zielke enthalten keine Change-of-Control-Regelung; für die Herren Annuscheit und Beumer ist sie mit dem Ende ihrer letzten Bestellungsperiode am 31. Dezember 2010 entfallen. Bei Herrn Dr. Schmittmann dürfen Abgeltung und Abfindung zusammen weder die durchschnittlichen Jahresgesamtbezüge für drei Jahre noch 150 % der Gesamtbezüge für die bei Beendigung des Anstellungsvertrages verbleibende Restdauer der laufenden Bestellungsperiode übersteigen.

In wenigen Ausnahmefällen wurde vereinzelt auch Führungskräften im In- und Ausland für eine gewisse Übergangszeit ab Beginn ihrer Tätigkeit für die Bank eine Absicherung ihrer Bezüge für bis zu fünf Jahren für den Fall zugesagt, dass sie im Zusammenhang mit einem Kontrollwechsel bei der Commerzbank aus der Bank ausscheiden.

### **Beteiligungen am Kapital von mehr als zehn vom Hundert der Stimmrechte**

An der Commerzbank Aktiengesellschaft sind der Finanzmarktstabilisierungsfonds mit fünf- undzwanzig vom Hundert zuzüglich einer Aktie sowie der Allianz-Konzern laut WpHG-Meldung mit mehr als zehn und weniger als fünfzehn vom Hundert am stimmberechtigten Kapital beteiligt.

Weitere nach § 315 Abs. 4 des Handelsgesetzbuchs angabepflichtige Tatsachen existieren nicht.

## Angaben gemäß § 315 Abs. 2 Nr. 5 des Handelsgesetzbuchs

---

Ziel des internen Kontroll- und des Risikomanagementsystems im Hinblick auf die Finanzberichterstattung ist es, dass gemäß den anzuwendenden Rechnungslegungsvorschriften nach HGB und IFRS der Jahres- und Konzernabschluss ein den tatsächlichen Verhältnissen entsprechendes Bild der Vermögens-, Finanz- und Ertragslage vermittelt. In der Commerzbank sind das interne Kontrollsystem und das Risikomanagementsystem – beide mit Blick auf die Finanzberichterstattung – in Methodik und Durchführung integriert. Im Folgenden wird daher der Begriff „IKS“ (Internes Kontrollsystem) verwendet. Details des Risikomanagementsystems können dem Risikobericht auf den Seiten 161 bis 198 entnommen werden.

Gefährdet wird das Ziel einer ordnungsgemäßen Finanzberichterstattung durch die Existenz von Risiken, die auf die Finanzberichterstattung einwirken. Unter Risiken wird dabei die Möglichkeit verstanden, dass das oben genannte Ziel nicht erreicht wird und wesentliche Informationen in der Finanzberichterstattung fehlerhaft sind. In diesem Zusammenhang betrachtet die Bank eine Information als wesentlich, wenn ihr Fehlen oder ihre falsche Angabe die wirtschaftlichen Entscheidungen der Adressaten beeinflussen könnte. Hierbei spielt es keine Rolle, ob dies durch einen einzelnen Sachverhalt oder erst durch die Kombination mehrerer Sachverhalte gegeben ist.

Risiken für die Finanzberichterstattung können durch Fehler in den Geschäftsabläufen entstehen. Zudem kann betrügerisches Verhalten zu einer fehlerhaften Darstellung von Informationen führen. Daher ist von der Bank sicherzustellen, dass die Risiken bezüglich einer fehlerhaften Darstellung, Bewertung oder eines Ausweises von Informationen der Finanzberichterstattung minimiert werden.

Das IKS der Commerzbank ist darauf ausgerichtet, eine hinreichende Sicherheit bezüglich der Einhaltung geltender rechtlicher Anforderungen, der Ordnungsmäßigkeit und Wirtschaftlichkeit der Geschäftstätigkeit und der Vollständigkeit und Richtigkeit der finanziellen Berichterstattung zu gewährleisten. Zu berücksichtigen ist dabei, dass trotz aller Maßnahmen der Bank die implementierten Methoden und Verfahren des IKS niemals eine absolute, aber dennoch eine hinreichende Sicherheit bieten können.

Nach dem Bilanzstichtag gab es keine wesentlichen Änderungen am IKS der Finanzberichterstattung.

### Gesetzliche Grundlagen und Richtlinien

In § 315 Abs. 2 Nr. 5 HGB ist vom Gesetzgeber vorgegeben, dass Kapitalgesellschaften im Lagebericht die wesentlichen Merkmale ihres IKS beschreiben. In der Commerzbank sind die in den Mindestanforderungen an das Risikomanagement (MaRisk) getroffenen Grundsätze zur institutsspezifischen Ausgestaltung des internen Kontrollsystems umgesetzt.

Grundlage für die Gestaltung des internen Kontrollsystems der Bank ist das vom „Committee of Sponsoring Organizations of the Treadway Commission“ (COSO) entwickelte und international gültige Rahmenwerk. Das COSO-Rahmenwerk wird in der Commerzbank eingesetzt, um folgende Ziele zu erreichen:

- Effektivität und Effizienz der Geschäftsprozesse
- Einhaltung der gültigen Gesetze und Vorschriften
- Verlässlichkeit der Finanzberichterstattung

Im Hinblick auf die vom COSO geforderte Risikobeurteilung des Rechnungslegungsprozesses (wie zum Beispiel Sicherstellung der Vollständigkeit der erfassten Transaktionen oder der korrekten bilanziellen Bewertung) bezüglich der Verlässlichkeit der Finanzberichterstattung richtet sich die Bank nach den Empfehlungen des „International Standards of Auditing and Quality Control, No. 315, 2009 Edition“ (im Folgenden ISA Nummer 315).

## Organisation

Basis für das IKS der Bank ist ein detaillierter Rahmen (Governance Framework) für eine solide Unternehmensführung. Er legt für alle Unternehmenseinheiten einheitliche und verbindliche Mindestanforderungen an die Aufbauorganisation im Hinblick auf Dokumentation und Aktualisierung fest. Primäres Merkmal ist hierbei das Prinzip der eindeutigen Verantwortungszuweisung, ausgehend vom Geschäftsverteilungsplan für den Gesamtvorstand bis hin zur Einzelkompetenz auf Mitarbeiterbasis. Der Umfang und die Ausgestaltung des Governance Frameworks orientieren sich sowohl an rechtlichen und regulatorischen Anforderungen als auch an der durch den Gesamtvorstand verabschiedeten „Unternehmensverfassung der Commerzbank“. Daher übersetzt das Governance Framework wesentliche Leitgedanken der Unternehmensverfassung in praktische Regelungen und beinhaltet folgende Elemente:

- Geschäftsverteilungsplan für den Gesamtvorstand
- Geschäftsordnungen
- Organigramme
- Geschäftsaufträge
- Stellenbeschreibungen
- Kompetenzregelungen

Inhaltlich nicht miteinander zu vereinbarende Aufgaben sind in der Bank nach dem Prinzip der Funktionstrennung in unterschiedlichen Bereichen organisiert. Zusätzlich werden zur Minimierung der Risiken in der Finanzberichterstattung wesentliche Kontrollen nach dem Vieraugenprinzip durchgeführt.

Die Verantwortung für die Implementierung, Umsetzung und Durchführung des bankweiten IKS liegt primär beim Gesamtvorstand, hinsichtlich des Rechnungslegungsprozesses beim Finanzvorstand (CFO) der Bank. Während der Gesamtvorstand die Ausgestaltung und den Nachweis der Angemessenheit des bankweiten IKS verantwortet, trägt der CFO die Verantwortung für die Ausgestaltung der Kontrollen durch angemessene Kontrollschritte und deren Einbettung in die jeweiligen Prozesse sowie die Effektivität des IKS für die Finanzberichterstattung. Dem CFO obliegt die Verantwortung für die ordnungsgemäße Aufstellung des Einzel- und Konzernabschlusses.



Der Aufsichtsrat überwacht die Finanzberichterstattung vornehmlich durch den eigens hierfür geschaffenen Prüfungsausschuss. Zusätzlich ist der Prüfungsausschuss zuständig für die Sicherstellung der Unabhängigkeit des Abschlussprüfers, für die Erteilung des Prüfungsauftrags an den Abschlussprüfer, die Bestimmung von Prüfungsschwerpunkten und die Honorarvereinbarung. Die Interne Revision (Group Audit) berichtet unterjährig an den Aufsichtsrat beziehungsweise an die von ihm eingesetzten Ausschüsse über die Revisionsarbeit und deren wesentliche Ergebnisse.

Für die Erstellung der Abschlüsse im Einklang mit den jeweiligen Gesetzen sowie internen und externen Richtlinien ist der direkt dem CFO unterstellte Bereich Group Management Finance (GM-F) zuständig. Dabei verantwortet GM-F den Einzelabschluss der Commerzbank und konsolidiert die Einzelabschlüsse der Konzerngesellschaften zum Konzernabschluss.

Innerhalb von GM-F ist die Abteilung Accounting Policies & Guidelines mit der Erarbeitung und Kommunikation von konzernweiten Bilanzierungsrichtlinien betraut. Sie unterstützt eine konzernweit konsistente und korrekte Bilanzierung durch das Aufstellen und Abstimmen von Bilanzierungsrichtlinien. Die veröffentlichten Richtlinien werden fortlaufend auf ihren Aktualisierungsbedarf überprüft und gegebenenfalls angepasst. Darüber hinaus werden regelmäßig Schulungen zu relevanten Themen für die Mitarbeiter durchgeführt. Ergänzt wird dieses Angebot durch weiterführende Arbeitsanweisungen im Intranet der Bank.

GM-F wird im Hinblick auf die Rechnungslegung von weiteren Unternehmensbereichen der Bank unterstützt. Insbesondere ist hier der Unternehmensbereich Group Information Technology zu nennen, der die Verantwortung für die Bereitstellung und die technische Weiterentwicklung der in der Rechnungslegung eingesetzten IT-Systeme trägt.

## Kontrollen zur Risikominimierung

Kontrollen sind in der Bank technisch oder manuell (organisatorisch) direkt in die betrieblichen Abläufe integriert. Technische Kontrollen werden in den verwendeten IT-Systemen eingesetzt und bestehen beispielsweise aus Kontrollsummen und Prüfziffern. Ergänzt werden die technischen Kontrollen häufig um manuelle Kontrollbestandteile wie zum Beispiel Bildschirmfreigaben, die vom zuständigen Personal durchgeführt werden. Die Qualität der Daten bei der technischen Erfassung ist durch die organisatorischen Maßnahmen des Vieraugenprinzips, der Kompetenzregelungen, der Funktionstrennung und von technischen Maßnahmen (Vergabe von IT-Berechtigungen) sichergestellt. In der weiteren Verarbeitung stellen zusätzliche Kontrollen die Vollständigkeit und Richtigkeit der übernommenen Daten sicher.

## Prozess der Finanzberichterstattung

Die Prozesse im Rechnungswesen der Commerzbank werden von diversen IT-Systemen unterstützt, die in die jeweiligen Prozessabläufe integriert sind. Im Rahmen der Meldeprozesse für die Finanzberichterstattung werden alle Informationen, die für die Abschlusserstellung des Commerzbank-Konzerns nach IFRS und der Commerzbank Aktiengesellschaft nach HGB relevant sind, durch die Meldestellen (Commerzbank Aktiengesellschaft Inland, Tochtergesellschaften und ausländische Niederlassungen) an die Zentrale übermittelt. Die Übermittlung der Daten erfolgt mittels eines separaten Onlinesystems direkt in die Konsolidierungssoftware SAP EC-CS, die an die Bedürfnisse der Bank angepasst ist. Tochtergesellschaften melden grundsätzlich IFRS-Daten, von den inländischen und ausländischen Niederlassungen werden

zusätzlich HGB-Meldungen erstellt. Die Daten werden automatisch auf Konsistenz geprüft, bevor sie an die Zentrale übermittelt werden. Wenn die hinterlegten Plausibilitätsprüfungen erfolgreich durchlaufen sind, können die einzelnen Zumeldungen finalisiert werden. Auf Basis dieser Daten werden in der Zentrale weitere Plausibilitätskontrollen durchgeführt. Nach erfolgreichem Abschluss dieser Kontrollen werden sämtliche Konsolidierungsschritte für die Konzernabschlusserstellung nach IFRS und die Einzelabschlusserstellung der Commerzbank Aktiengesellschaft nach HGB durchgeführt. Die Maßnahmen zur Erstellung des Konzernabschlusses bestehen dabei aus diversen einzelnen Konsolidierungsschritten (wie Kapital-, Schulden-, Aufwands- und Ertragskonsolidierung), der Währungsumrechnung und der Zwischengewinneliminierung.

Die Berichterstattung nach unternehmensspezifischen Segmenten (Privatkunden, Mittelstandsbank, Central & Eastern Europe, Corporates & Markets, Asset Based Finance und Portfolio Restructuring Unit) ist durch ein separates IT-System gewährleistet. Dabei findet ein Abgleich mit den Daten aus dem Rechnungswesen statt.

## Überwachung durch Group Audit

Group Audit erbringt im Auftrag des Vorstands unabhängig, objektiv und risikoorientiert Prüfungsdienstleistungen, die darauf ausgerichtet sind, die Geschäftsprozesse der Commerzbank hinsichtlich Ordnungsmäßigkeit, Sicherheit und Wirtschaftlichkeit zu unterstützen. Group Audit unterstützt den Vorstand, indem sie die Angemessenheit und Wirksamkeit des internen Kontrollsystems und des Risikomanagements bewertet, wesentliche Projekte revisorisch begleitet und Empfehlungen ausspricht. Hierdurch wird zur Sicherung der geschäftlichen Vorgänge und Vermögenswerte beigetragen. Group Audit ist als Konzernrevision im Rahmen des Risikomanagements der Gruppe ergänzend zu Revisionsabteilungen in Tochtergesellschaften tätig.

Group Audit ist dem Vorstand unmittelbar unterstellt und diesem berichtspflichtig. Sie nimmt ihre Aufgaben selbstständig und unabhängig wahr. Insbesondere bei der Berichterstattung und der Wertung der Prüfungsergebnisse ist sie keinen Weisungen unterworfen. Ausgehend von den MaRisk erstreckt sich die Prüfungstätigkeit auf der Grundlage eines risikoorientierten Prüfungsansatzes grundsätzlich auf alle Aktivitäten und Prozesse des Konzerns, unabhängig davon, ob diese innerhalb des Konzerns erfolgen oder ob sie ausgelagert sind. Die Prüfung der Wirksamkeit und Angemessenheit des IKS umfasst die Risikomanagement- und Risikocontrollingsysteme, das Berichtswesen, die Informationssysteme sowie die Finanzberichterstattung. Zur Wahrnehmung ihrer Aufgaben hat Group Audit ein uneingeschränktes Informationsrecht.

Über jede Prüfung erstellt Group Audit zeitnah einen schriftlichen Bericht, der unter anderem den zuständigen Vorstandsmitgliedern zugeht. Auf der Grundlage der Prüfungsberichte überwacht und dokumentiert Group Audit die fristgerechte Beseitigung der festgestellten Mängel. Bei Nichtbeachtung kommt ein Eskalationsverfahren zur Anwendung. Darüber hinaus erstellt Group Audit einen Jahresbericht über die von ihr im Laufe des Geschäftsjahres durchgeführten Prüfungen, die festgestellten wesentlichen Mängel sowie die ergriffenen Maßnahmen und legt diesen dem Vorstand vor.

## Initiativen zur weiteren Verfeinerung des IKS bezüglich der Finanzberichterstattung

Im Zuge der Integration der Dresdner Bank wird das IKS auf den neuen Gesamtkonzern angepasst und weiterentwickelt. Dazu ist in GM-F die interne Maßnahme „Control Environment Initiative (CEI)“ implementiert worden. Ziel von CEI ist die risikoorientierte Steuerung der Prozesse durch den Einsatz einer einheitlichen Methode zur Risiko- und Kontrolldarstellung und -bewertung. Darüber hinaus soll das IKS mit Blick auf die Finanzberichterstattung durch eine regelmäßige Bewertung von Effektivität und Effizienz der Kontrollen sowie mittels einer regelmäßigen Überprüfung der Kontrolldurchführung gestärkt werden.

Basis für CEI ist die Weiterentwicklung der sogenannten „Prozesslandkarte“ von GM-F. In dieser Prozesslandkarte werden auf Top-down-Basis alle wesentlichen Prozesse aufgeführt, die mittels Ablaufbeschreibungen verfeinert werden. Dazu werden die Risiken hinsichtlich der Zuverlässigkeit der Finanzberichterstattung gemäß dem COSO-Rahmenwerk identifiziert. Hierbei lehnt sich die Bank zusätzlich an die Empfehlungen des ISA Nummer 315 an. Dabei wird geprüft, ob ein Risiko folgenden drei Kategorien und deren Ausprägungen zugeordnet werden kann:

- Aussagen zu Arten von Geschäftsvorfällen: Eintritt, Vollständigkeit, Richtigkeit, Periodenabgrenzung, Kontenzuordnung.
- Aussagen zu Kontensalden am Abschlussstichtag: Vorhandensein, Rechte und Verpflichtungen, Vollständigkeit, Bewertung und Zuordnung.
- Aussagen zur Darstellung im Abschluss und zu den Abschlussangaben: Eintritt sowie Rechte und Verpflichtungen, Vollständigkeit, Ausweis und Verständlichkeit, Richtigkeit und Bewertung.

Zur Minimierung der identifizierten Risiken sind entsprechende Kontrollen implementiert. Für die Wirksamkeit des IKS sind Design – also die Ausgestaltung der Kontrolle durch angemessene Kontrollschritte und deren Einbettung in den jeweiligen Prozess – und operative Durchführung der Kontrollen die entscheidenden Faktoren zur Risikominimierung. Mängel, die Group Audit im Rahmen ihrer Prüfungsaktivitäten feststellt, werden durch einen Maßnahmenplan abgestellt. Die fristgerechte Umsetzung der Maßnahmenpläne wird durch Group Audit überwacht und an den Gesamtvorstand berichtet.

Durch diese einheitliche Vorgehensweise soll gewährleistet werden, dass Risiken erkannt, minimiert und eventuelle operative Fehlentwicklungen vermieden werden können.

## Hassia Mineralquellen GmbH & Co. KG

### Herausforderung: CO<sub>2</sub>-Emissionen und Kosten senken

### Ziel: Stärkung im Wettbewerb

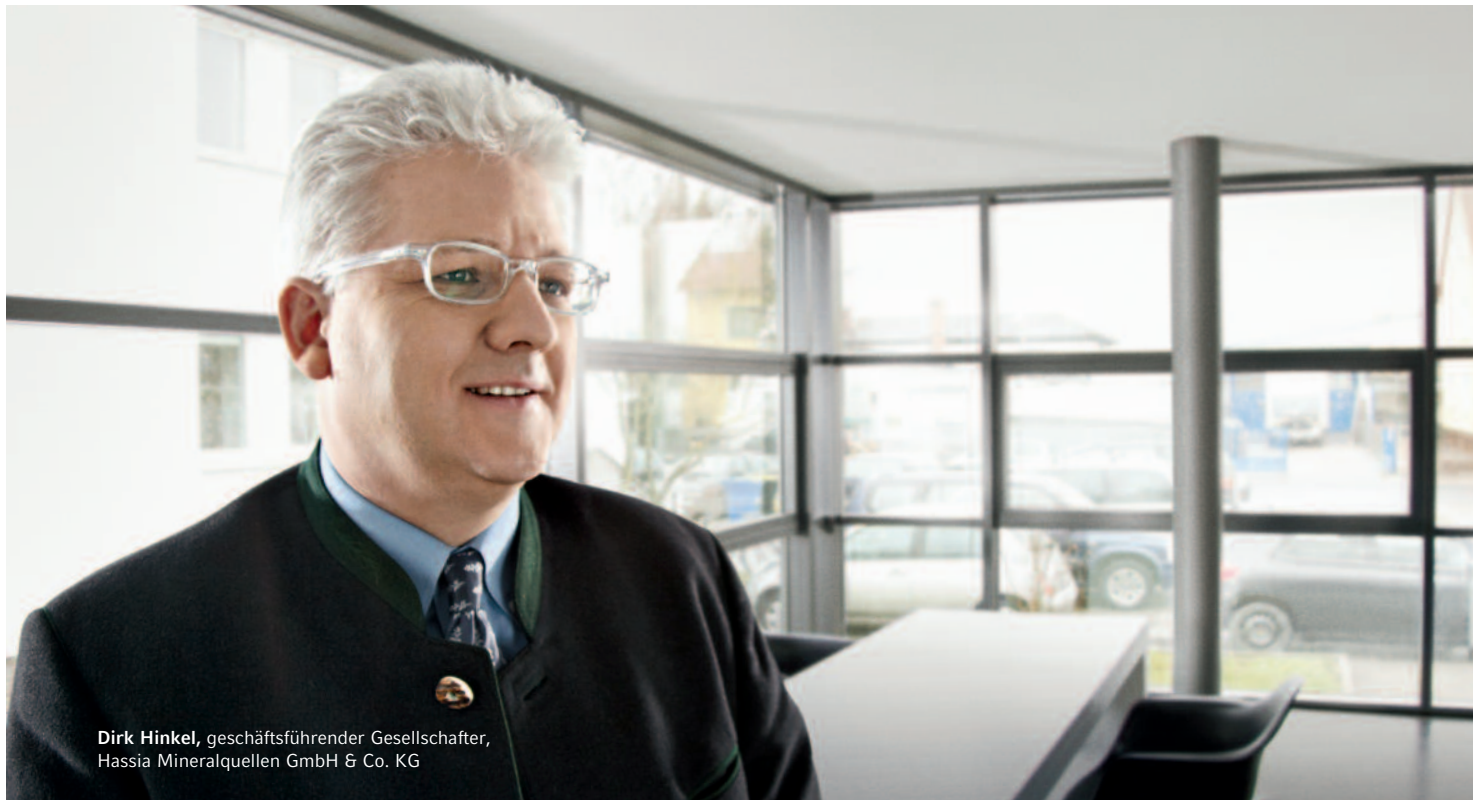

**Dirk Hinkel**, geschäftsführender Gesellschafter,  
Hassia Mineralquellen GmbH & Co. KG

Mit dem richtigen Energiekonzept lässt sich nicht nur ein wesentlicher Beitrag zum Klimaschutz leisten, sondern es lassen sich auch die eigenen Energiekosten senken. Das gilt auch für Betriebe der Nahrungsmittelindustrie wie die hessische Hassia Mineralquellen GmbH.

Deshalb entschlossen sich Dirk Hinkel und die übrigen Geschäftsführer im Jahr 2010, diese Herausforderung anzunehmen und setzten dabei auf Photovoltaik. Mit den Anlagen, in die sie investierten, kann Hassia pro Jahr über 1 Mio kWh umweltfreundlichen Strom produzieren, den Ausstoß von 821 t CO<sub>2</sub> vermeiden und die Stromkosten zusätzlich um rund 20 % senken.

Den entscheidenden Anstoß für dieses Investment gab der klima:coach der Commerzbank, der den Mineralwasser-Hersteller umfassend zu Themen wie Photovoltaik, „CO<sub>2</sub>-Fußabdruck“ oder „Klimaneutralität“ beraten hat. Mit dem klima:coach bietet die Commerzbank eine kombinierte Finanz- und Klimaberatung, die dabei hilft, Energie-Einsparpotenziale zu realisieren sowie die CO<sub>2</sub>-Emissionen von Prozessen und Produkten zu reduzieren.

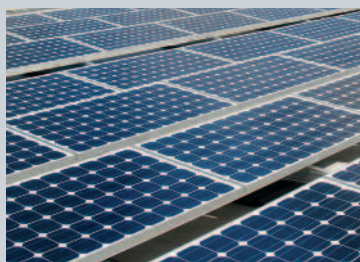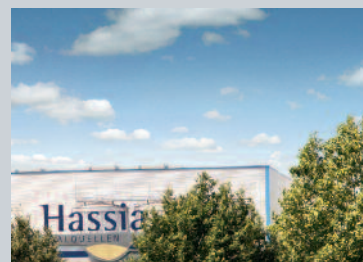

Photovoltaik als Investment für die Zukunft: mehr Klimaschutz bei weniger Stromkosten

Herausforderungen annehmen, Ziele erreichen

# Corporate Responsibility

## Commerzbank baut Nachhaltigkeitsaktivitäten weiter aus

Der neue „Statusbericht zur unternehmerischen Verantwortung 2010“ der Commerzbank stellt die wesentlichen Neuigkeiten und Fortschritte unserer vier Handlungsfelder der Nachhaltigkeit – Markt & Kunden, Ökologie, Mitarbeiter und Gesellschaft – vor. Der Bericht steht im Internet unter [www.nachhaltigkeit.commerzbank.de](http://www.nachhaltigkeit.commerzbank.de) in deutscher und englischer Sprache zur Verfügung. Eine gedruckte Fassung des Statusberichts liegt nicht vor. Nachdem wir bislang alle zwei Jahre umfangreich über unsere unternehmerische Verantwortung berichtet haben, gehen wir nun in einen jährlichen Turnus über. Die Commerzbank reagiert damit auf die zunehmende interne und externe Bedeutung des Themas Nachhaltigkeit und möchte zudem aktueller informieren – zukünftig abwechselnd in Form eines Statusberichts und in der seit dem Jahr 2005 bekannten ausführlichen Langfassung. Der Statusbericht entspricht den Anforderungen eines Fortschrittsberichts (COP – „Communication on Progress“) über den Stand der Umsetzung der zehn Prinzipien des UN Global Compacts, dem die Commerzbank im Jahr 2006 beigetreten ist.

Wir sind uns bewusst, dass die neue Commerzbank eine besondere unternehmerische Verantwortung trägt. Diese werden wir – so wie bisher – sowohl im Kerngeschäft als auch darüber hinaus sehr bestimmt und engagiert wahrnehmen.

### Markt & Kunden

**Reputationsrisikomanagement** Alle Finanzierungen, Produkte und Kundenbeziehungen, bei denen insbesondere ökologische, ethische oder soziale Aspekte eine signifikante Rolle spielen, werden vom Reputationsrisikomanagement der Commerzbank intensiv geprüft, beurteilt und gegebenenfalls abgelehnt oder mit Auflagen versehen. Dazu zählen sensible Bereiche wie beispielsweise Waffen und Rüstungsgüter – für die es eine konzernweit gültige Richtlinie gibt –, sowie Atomkraft und Rohstoffgewinnung. Im Geschäftsjahr 2010 hat unser Reputationsrisikomanagement für rund 1.500 Anfragen unterschiedlichster Art ein schriftliches Votum abgegeben. Rund 10 % dieser Voten enthielten aufgrund sozialer, ökologischer oder ethischer Bedenken eine negative Bewertung.

**Compliance (Geldwäscheprävention)** Zu den Kernaufgaben der Compliance-Abteilung gehört es, die gesetzlichen und aufsichtsrechtlichen Anti-Geldwäscheanforderungen zu erfüllen. Dabei berücksichtigen wir international anerkannte Standards. Um die größtmögliche Transparenz bei Geschäftsbeziehungen und Finanztransaktionen sicherzustellen, verfolgt die Commerzbank das Know-your-Customer-Prinzip: Dies umfasst nicht nur die eindeutige Feststellung und Dokumentation der Identität von Kunden – auch die Herkunft des Vermögens, das im Rahmen der Geschäftsbeziehung oder der Transaktion eingesetzt wird, kann risikobasiert abgeklärt werden.



**Privat- und Firmenkunden** Mit Blick auf die Verantwortung gegenüber ihren Kunden hat die Commerzbank im Jahr 2010 sowohl im Privatkunden- als auch im Firmenkundengeschäft wiederum eine Reihe von Maßnahmen erfolgreich umgesetzt. Dies erfolgt im Bestreben, die Kundenzufriedenheit kontinuierlich zu verbessern. Für unsere Privatkunden haben wir beispielsweise eine Qualitätsoffensive gestartet, die unser Versprechen „Leistung und Partnerschaft“ untermauert. Dazu wurde unter anderem eine Kundencharta eingeführt und die Position eines Kundenanwalts neu geschaffen. Darüber hinaus informieren wir mit der Kampagne „Im Klartext zur neuen Bank“ seit April 2010 unsere Kunden über alle relevanten Neuerungen und Veränderungen, die sich aus dem Zusammenschluss von Dresdner Bank und Commerzbank ergeben. In der Mittelstandsbank ist im Berichtsjahr die Stelle eines Kreditmediators für Mittelstandskredite eingerichtet worden, der die Qualitätssicherung von Kreditentscheidungen noch intensiver wahrnimmt. Des Weiteren hat die Commerzbank gemeinsam mit der KfW-Bankengruppe einen Eigenkapitalfonds für nicht börsennotierte, mittelständische Unternehmen aufgelegt, der final über ein Gesamtvolumen von bis zu 500 Mio Euro verfügen soll.

### Ökologie

Mit der Etablierung eines Konzernumweltausschusses sowie der Re-Zertifizierung unseres Umweltmanagementsystems konnten wir beim Thema Ökologie im Jahr 2010 erneut wichtige Akzente setzen. Im Rahmen unseres langjährigen Engagements für die deutschen Nationalparks präsentierten wir in unserer Frankfurter Zentrale vom 3. Februar bis 11. März 2010 die Ausstellung „Weltnaturerbe Buchenwälder“. Damit unterstützten wir im Jahr der Biodiversität gleichzeitig die Bewerbung des Nationalparks Kellerwald für die Aufnahme in die UNESCO-Weltnaturerbe-Liste. Das Center of Competence „Renewable Energies“ der Commerzbank mit einem Bestandskreditportfolio von rund 4 Mrd Euro verfügt weiterhin über eines der weltweit größten Portfolios auf dem Gebiet der Finanzierung erneuerbarer Energien. Die Commerzbank konnte im Berichtszeitraum ihre Vorreiterrolle durch ein hohes Neugeschäftsvolumen weiter ausbauen.

### Mitarbeiter

Die Integration von Commerzbank und Dresdner Bank ist im Jahr 2010 einen großen Schritt vorangekommen. Wir haben hier bereits mehr als zwei Drittel der Wegstrecke geschafft. Neben der Integration der beiden Zentralen und der Einigung mit den Arbeitnehmervertretern über die Interessenausgleiche zur Integration der Mitarbeiter und der regionalen Standorte ist in erster Linie die schrittweise Umsetzung der neuen Organisationsstruktur hervorzuheben. Seit Juli 2010 arbeiten bereits 90 % der Mitarbeiter in ihrer Zielfunktion. Auch bei Themen wie Weiterbildung, Nachwuchsförderung, Diversity und Gesundheitsmanagement hat die Commerzbank ihre Verantwortung gegenüber ihren Mitarbeitern im Berichtsjahr verlässlich wahrgenommen. Ausführliche Informationen zum Engagement für unsere Mitarbeiterinnen und Mitarbeiter finden sich im Kapitel „Unsere Mitarbeiterinnen und Mitarbeiter“ auf den Seiten 144 bis 149 dieses Geschäftsberichts.

### Gesellschaft

Im Rahmen unseres gesellschaftlichen Engagements ist die Einrichtung des Stiftungszentrums ein wesentlicher Meilenstein gewesen. Unter diesem gemeinsamen Dach haben nun die ehemaligen Stiftungen der beiden Häuser Commerzbank und Dresdner Bank mit einem Dotationskapital von insgesamt rund 100 Mio Euro ihre Arbeit aufgenommen. Darüber hinaus engagierten sich Bank, Kunden und Mitarbeiter im Berichtszeitraum mit Spendenaktionen für Haiti und Pakistan und trugen dazu bei, die Not der von Naturkatastrophen betroffenen Bevölkerung zu lindern.



# Konzernlagebericht

---

Im Konzernlagebericht erläutern wir die wirtschaftlichen Rahmenbedingungen sowie deren Einflüsse auf die Geschäftsaktivitäten der Commerzbank. Des Weiteren informieren wir ausführlich über die Geschäftsentwicklung des Commerzbank-Konzerns im abgelaufenen Geschäftsjahr 2010. Darüber hinaus geben wir einen Ausblick auf die erwartete Entwicklung sowohl der Rahmenbedingungen als auch des Commerzbank-Konzerns selbst.

Das Geschäftsjahr 2010 war insgesamt ein für den Commerzbank-Konzern erfolgreiches Jahr. Ein Jahr früher als geplant, haben wir die Rückkehr in die Gewinnzone geschafft. Bei einem stabilen Marktumfeld gehen wir für das Jahr 2011 davon aus, die Profitabilität weiter zu verbessern und damit einen entscheidenden Schritt in Richtung unserer in der „Roadmap 2012“ definierten Ziele zu machen.

# Inhalt

## 75 Geschäft und Rahmenbedingungen

- 75 Struktur und Organisation
- 76 Unternehmenssteuerung
- 76 Vergütungsbericht
- 76 Angaben gemäß § 315 Abs. 4 des Handelsgesetzbuchs (HGB)  
und erläuternder Bericht
- 76 Angaben gemäß § 315 Abs. 2 Nr. 5 des Handelsgesetzbuchs (HGB)
- 77 Wirtschaftliche Rahmenbedingungen
- 79 Wichtige geschäftspolitische Ereignisse

## 81 Ertrags-, Finanz- und Vermögenslage

- 81 Gewinn- und Verlustrechnung des Commerzbank-Konzerns
- 83 Bilanz des Commerzbank-Konzerns
- 86 Liquidität und Refinanzierung des Commerzbank-Konzerns
- 91 Resümee Geschäftslage 2010

## 93 Entwicklung der Segmente

- 93 Privatkunden
- 103 Mittelstandsbank
- 113 Central & Eastern Europe
- 123 Corporates & Markets
- 131 Asset Based Finance
- 138 Portfolio Restructuring Unit
- 141 Sonstige und Konsolidierung

## 144 Unsere Mitarbeiterinnen und Mitarbeiter

## 150 Nachtragsbericht

## 151 Prognose- und Chancenbericht

- 151 Künftige gesamtwirtschaftliche Situation
- 152 Künftige Situation der Bankbranche
- 153 Erwartete Entwicklung wesentlicher Posten der Gewinn- und Verlustrechnung
- 154 Erwartete Finanzlage des Commerzbank-Konzerns
- 159 Chancenmanagement in der Commerzbank
- 159 Gesamtaussage zur voraussichtlichen Entwicklung des Commerzbank-Konzerns
- 160 Konzernrisikobericht

|     |                                         |
|-----|-----------------------------------------|
| 75  | Geschäft und Rahmenbedingungen          |
| 81  | Ertrags-, Finanz- und Vermögenslage     |
| 93  | Entwicklung der Segmente                |
| 144 | Unsere Mitarbeiterinnen und Mitarbeiter |
| 150 | Nachtragsbericht                        |
| 151 | Prognose- und Chancenbericht            |

# Geschäft und Rahmenbedingungen

## Struktur und Organisation

Die Commerzbank Aktiengesellschaft ist das zweitgrößte Kreditinstitut sowie eine der führenden Privat- und Firmenkundenbanken in Deutschland und eines der bedeutenden in Europa. Mit der bundesweiten Einführung unserer neuen Marke im Juni 2010 setzen wir ein sichtbares Zeichen als neue Commerzbank. Unseren Kunden steht mit künftig rund 1200 Filialen das dichteste Filialnetz aller deutschen Privatbanken zur Verfügung. Insgesamt hat die neue Commerzbank weltweit rund 15 Millionen Privat- und Firmenkunden, davon rund 11 Millionen in Deutschland. Ziel der Commerzbank ist es, ihre Position als Marktführer im Privat- und Firmenkundengeschäft in Deutschland weiter zu stärken.

Der Fokus der Geschäftstätigkeit ist auf die vier Segmente Privatkunden, Mittelstandsbank, Corporates & Markets sowie Central & Eastern Europe gerichtet, die als sogenannte Kernbank das Herzstück der Commerzbank bilden. Dazu kommen das Asset-basierte Kreditgeschäft in den Bereichen Immobilien-, Staats- und Schiffsfinanzierung und Real Estate Asset-Management im Segment Asset Based Finance sowie die nicht zum Kerngeschäft gehörenden Portfolios im Segment Portfolio Restructuring Unit. Die Segmente werden von jeweils einem Mitglied des Vorstands geführt.

Unter Group Management sind alle Stabs- und Steuerungsfunktionen gebündelt: Group Development & Strategy, Group Communications, Group Legal, Group Treasury, Group Human Resources, Group Integration, Group Finance, Group Finance Architecture, Group Compliance, Group Audit sowie die zentralen Risikofunktionen. Die Unterstützungsfunktionen werden von Group Services bereitgestellt. Hierunter fallen Group Information Technology, Group Organisation, Group Banking und Market Operations, Group Security und Group Support. Auch für diese Funktionseinheiten sind die Vorstandszuständigkeiten klar festgelegt. In der externen Berichterstattung sind die Stabs-, Steuerungs- und Unterstützungsfunktionen im Bereich Sonstige & Konsolidierung zusammengefasst.

Im Inland steuert die Commerzbank Aktiengesellschaft aus ihrer Zentrale in Frankfurt am Main heraus ein flächendeckendes Filialnetz, über das alle Kundengruppen betreut werden. Wichtigste inländische Tochtergesellschaften sind die Eurohypo AG, die comdirect bank AG, die Commerz Real AG und die Deutsche Schiffsbank AG. Im Ausland ist die Bank mit 8 wesentlichen Tochtergesellschaften, 25 operativen Auslandsniederlassungen und 32 Repräsentanzen in 50 Ländern und an allen wichtigen Finanzplätzen wie London, New York, Tokio, Hongkong und Singapur vertreten. Der Schwerpunkt der internationalen Aktivitäten liegt aber auf Europa.

Die Commerzbank erstellt einen Konzernabschluss, in den neben der Commerzbank Aktiengesellschaft – als operative Führungsgesellschaft – alle wesentlichen Tochterunternehmen einbezogen werden, an denen die Bank mehr als 50 % der Stimmrechte hält oder anderweitig einen beherrschenden Einfluss ausübt. Geschäftsjahr ist das Kalenderjahr.

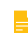

› **Vorstandszuständigkeiten**  
Seiten 26 f.

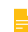

› **Struktur Commerzbank-Konzern**  
Seite U4

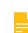

› **Commerzbank weltweit**  
Seite U5

## Unternehmenssteuerung

---

Nachhaltiges Ziel der Commerzbank ist es, für alle Stakeholder einen entsprechenden Mehrwert zu schaffen. Dies beinhaltet unter anderem eine attraktive Rendite auf das eingesetzte Kapital für ihre Aktionäre zu erwirtschaften. Um die Profitabilität und den Unternehmenswert zu steigern, richtet die Bank ihre Geschäftsstruktur aktiv an den sich ändernden Marktverhältnissen aus. Wesentliche Kriterien sind hierbei, dass die eingegangenen Risiken mit externen und internen Risikotragfähigkeitsrichtlinien vereinbar sind und eine angemessene Rendite auf das eingesetzte Kapital erwirtschaftet wird. Wesentliches Instrument der Unternehmenssteuerung ist der Planungsprozess, in dem durch den Vorstand Zielgrößen für die Geschäftseinheiten festgelegt und die vorhandenen Ressourcen wie Kapital und Risikolimits gezielt auf die Segmente zugeordnet werden. Die Einhaltung der Geschäftsplanungen wird regelmäßig durch den Vorstand überwacht. Als Controllingkriterien dienen im Prozess der Unternehmenssteuerung die Ergebnisgrößen Operatives Ergebnis und Ergebnis vor Steuern sowie die Kennzahlen Eigenkapitalrendite, Aufwandsquote und Value Added. Die Eigenkapitalrendite errechnet sich aus dem Verhältnis des operativen beziehungsweise des Vorsteuerergebnisses zum durchschnittlich gebundenen Eigenkapital. Sie zeigt, wie sich das im jeweiligen Segment eingesetzte Kapital verzinst hat. Die Aufwandsquote dient zur Beurteilung der Kosteneffizienz und ist als Verhältnis aus Verwaltungsaufwand zu Erträgen vor Risikoversorge definiert. Der Value Added gibt den durch die Segmente geschaffenen Unternehmenswert an und errechnet sich als Differenz zwischen dem Operativen Ergebnis und den Kapitalkosten vor Steuern. Die Kapitalkosten entsprechen der Mindestrenditeerwartung an die Verzinsung des eingesetzten Kapitals.

## Vergütungsbericht

---

Der Vergütungsbericht ist im Corporate-Governance-Bericht im Kapitel „Unternehmerische Verantwortung“ enthalten. Er ist Bestandteil des Konzernlageberichts.

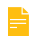

› **Corporate-Governance-Bericht**  
Seiten 45 ff.

## Angaben gemäß § 315 Abs. 4 des Handelsgesetzbuchs (HGB) und erläuternder Bericht

---

Die Angaben gemäß § 315 Abs. 4 HGB und erläuterndem Bericht sind im Kapitel „Unternehmerische Verantwortung“ enthalten. Sie sind Bestandteil des Konzernlageberichts.

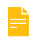

› **Unternehmerische Verantwortung**  
Seiten 62 ff.

## Angaben gemäß § 315 Abs. 2 Nr. 5 des Handelsgesetzbuchs (HGB)

---

Die Angaben gemäß § 315 Abs. 2 Nr. 5 HGB sind im Kapitel „Unternehmerische Verantwortung“ enthalten. Sie sind Bestandteil des Konzernlageberichts.

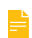

› **Unternehmerische Verantwortung**  
Seiten 65 ff.

|     |                                         |
|-----|-----------------------------------------|
| 75  | Geschäft und Rahmenbedingungen          |
| 81  | Ertrags-, Finanz- und Vermögenslage     |
| 93  | Entwicklung der Segmente                |
| 144 | Unsere Mitarbeiterinnen und Mitarbeiter |
| 150 | Nachtragsbericht                        |
| 151 | Prognose- und Chancenbericht            |

## Wirtschaftliche Rahmenbedingungen

---

### Volkswirtschaftliches Umfeld

Im Jahr 2010 hat sich die Weltwirtschaft weiter von der Finanz- und Wirtschaftskrise erholt. Das weltweite Bruttoinlandsprodukt legte im Jahresdurchschnitt um etwa 4,5 % und damit wieder fast so stark zu wie in den Jahren vor der Krise. Treiber des Wachstums waren erneut die Emerging Markets in Asien, die von der Krise wesentlich weniger betroffen waren als die Industrieländer. Auch in den Industrieländern zeigte der Trend wieder nach oben. In vielen Ländern wurde die Konjunktur allerdings dadurch spürbar gebremst, dass die Übertreibungen der Vergangenheit – insbesondere im Immobiliensektor und bei der Verschuldung von privaten Haushalten und Unternehmen – korrigiert werden müssen. Deshalb hat die Wirtschaft in den USA, trotz massiver Impulse vonseiten der Geld- und Finanzpolitik, nur so stark zugelegt wie im Durchschnitt der vergangenen zehn Jahre. Die Arbeitslosigkeit blieb hoch, weshalb die amerikanische Notenbank ihre Geldpolitik im Herbst weiter gelockert hat.

Im Euroraum kam als weiterer Belastungsfaktor die Staatsschuldenkrise hinzu. Nach den Erfahrungen mit Griechenland, dessen Zahlungsunfähigkeit im Frühjahr nur durch Kredite der anderen Euroländer verhindert werden konnte, zweifelten mehr und mehr Investoren an der langfristigen Tragfähigkeit der Staatsfinanzen auch in anderen Mitgliedsländern der Währungsunion. In der Folge fielen die Kurse der Staatsanleihen dieser Länder teilweise kräftig, und deren Renditeaufschläge gegenüber Bundesanleihen stiegen unter starken Schwankungen deutlich. Die sich daraus ergebenden höheren Finanzierungskosten ließen die langfristigen Perspektiven der Staatsfinanzen dieser Länder in einem noch ungünstigeren Licht erscheinen. Ende des Jahres musste auch Irland um Hilfe nachsuchen, da zur Stützung seines Bankensystems enorme Mittel notwendig waren. Zwar hielt sich der direkte Effekt dieser Turbulenzen auf die Konjunktur im Euroraum in Grenzen; die unter dem Druck der Märkte ergriffenen umfangreichen Maßnahmen zur Konsolidierung der Staatsfinanzen haben das Wachstum in den betroffenen Ländern aber weiter gebremst. Daher hat das Wirtschaftswachstum im Euroraum im vergangenen Jahr mit etwa 1,7 % eher enttäuscht.

Dies gilt umso mehr als ein großer Teil alleine auf den kräftigen Aufschwung in Deutschland zurückzuführen ist, wo mit 3,6 % das stärkste Wirtschaftswachstum seit der Wiedervereinigung zu verzeichnen war. Für diese positive Entwicklung waren verschiedene Faktoren ausschlaggebend: So verzeichnete Deutschland in den vergangenen Jahren weder einen Immobilienboom noch einen Anstieg der Verschuldung der privaten Haushalte und Unternehmen; deshalb gab es hier auch keinen Korrekturbedarf. Gleiches galt für die Staatsfinanzen, bei denen der Konsolidierungsbedarf wesentlich geringer war als in den meisten anderen Euroländern. Folglich konnte die deutsche Wirtschaft von den guten Rahmenbedingungen – insbesondere den sehr niedrigen Zinsen und von der sich erholenden Weltwirtschaft – in vollem Umfang profitieren. Schließlich machte sich die gute Position deutscher Unternehmen in den schnell wachsenden Emerging Markets und die in den vergangenen Jahren merklich verbesserte preisliche Wettbewerbsfähigkeit deutscher Produkte positiv bemerkbar. Dabei stützt sich der Aufschwung nicht nur auf die lebhaftere Auslandsnachfrage, sondern die Unternehmen haben auch ihre Investitionen wieder deutlich gesteigert. Sogar beim privaten Verbrauch gab es positive Tendenzen. Allerdings hat die gesamtwirtschaftliche Produktion das Vorkrisenniveau noch nicht wieder erreicht.

Die Kapitalmärkte wurden in erster Linie von der Staatsschuldenkrise und der zwischenzeitlichen Diskussion über einen Rückfall der US-Wirtschaft in die Rezession geprägt. Beides ließ die Renditen zehnjähriger Bundesanleihen zwischenzeitlich auf neue Rekordtiefs von lediglich etwas mehr als 2 % fallen, bevor sie zum Jahresende aufgrund der sich verflüchtigen-

genden Rezessionsängste in den USA wieder in Richtung 3 % anziehen. Die besseren Aussichten für die Weltwirtschaft ließen gegen Jahresende auch die Aktienkurse kräftig steigen. Dabei erreichte der Dax kurzfristig mit über 7000 Punkten den höchsten Stand seit Mitte 2008. Der Euro erlebte eine Berg-und-Tal-Fahrt, je nachdem ob die Sorgen um die US-Konjunktur oder die Staatsschuldenkrise im Vordergrund standen. Per saldo hat er gegenüber dem US-Dollar aber deutlich an Wert verloren.

## Branchenumfeld

Das Umfeld für Banken war auch im Jahr 2010 durch eine Konsolidierungs- und Stabilisierungsphase nach der Finanzkrise geprägt, wobei sich die Profitabilitätssituation der Branche leicht verbessert hat. Der Median der Eigenkapitalrendite der europäischen Großbanken lag nach Angaben der EZB im ersten Halbjahr 2010 bei rund 8 %. Im Jahr 2009 lag dieser noch bei knapp 3 % und im Jahr 2008 bei rund 2 %. Hauptgründe für den Anstieg der Profitabilität vieler Banken waren rückläufige Risikovorsorgen und höhere Zinsmargen. Daneben spielten auch Effizienzverbesserungen und Kostensenkungen eine Rolle. Auf Basis der gestiegenen Profitabilität haben viele Banken Staatshilfen oder staatliches Partizipationskapital zurückbezahlt. Dazu wurden zum Teil umfangreiche Kapitalerhöhungen am Markt platziert. Die Banken haben in den letzten Quartalen außerdem den Leverage, also das Verhältnis von Bilanzsumme zu Eigenkapital, zurückgefahren und laut Analysen der EZB die Kapitalquoten weltweit verbessert. Eine höhere Eigenkapitalunterlegung des Bankgeschäftes wird vom Markt gefordert. Ebenso drängen die Gesetzgeber weltweit auf eine strengere Eigenkapitalunterlegung und bessere Liquiditätssituation der Bankbranche mittels gesetzlicher Maßnahmen. Gemäß Basel III ist eine Reihe von Verschärfungen der regulatorischen Anforderungen an die Branche zu erwarten. Auch direkte branchenspezifische Abgaben, wie die Bankenabgabe in Deutschland, wurden eingeführt. Die branchenspezifischen Rahmenbedingungen verschärfen sich somit national und international.

Die hohe Intensität der Wettbewerbssituation in der Bankenbranche in Deutschland zeigt sich in den unterschiedlichen Segmenten:

Auch wenn sich die Refinanzierungsbedingungen der Banken im Berichtsjahr gegenüber den beiden Vorjahren verbessert haben, liefern sich die Banken national und international einen harten Wettbewerb um Einlagen als Refinanzierungsmittel. Zusätzlich machte sich bei uns, wie bei den meisten deutschen Kreditinstituten, eine gewisse Zurückhaltung der Privatkunden beim Kauf von Wertpapierprodukten bemerkbar. Im Firmenkundengeschäft profitierte die Bankindustrie von verbesserten Margen im Kreditgeschäft sowie vom hohen Wirtschaftswachstum in Deutschland. Das Investmentbanking leistete zumeist einen positiven Beitrag zu den Ergebnissen der Kreditinstitute im Jahr 2010. Dies gilt sowohl für die Branche als auch für die Commerzbank. Die EZB berichtet jedoch, dass sich die Handlungsergebnisse der Banken im zweiten und dritten Quartal 2010, infolge höherer Marktvolatilität und geringerer Handelsaktivitäten, schon wieder verschlechtert haben. Mit Blick auf das Immobilienfinanzierungsgeschäft sind die Marktentwicklungen der Immobilienmärkte innerhalb Europas uneinheitlich. Es gibt einerseits Länder wie Irland, in denen sich die Krise stark auswirkte, aber auch Länder wie Frankreich, mit einer positiven Entwicklung der Immobilienpreise. Eine Eskalation der internationalen Schuldenkrise europäischer Peripheriestaaten konnte im Jahr 2010 durch konzertierte politische Aktionen verhindert werden. Somit waren die daraus resultierenden Auswirkungen auf die Bankbranche nicht gravierend. Dennoch bleibt die Haushalts- und Verschuldungslage mancher europäischer Staaten ein Risikofaktor für die gesamte Branche.



|     |                                         |
|-----|-----------------------------------------|
| 75  | Geschäft und Rahmenbedingungen          |
| 81  | Ertrags-, Finanz- und Vermögenslage     |
| 93  | Entwicklung der Segmente                |
| 144 | Unsere Mitarbeiterinnen und Mitarbeiter |
| 150 | Nachtragsbericht                        |
| 151 | Prognose- und Chancenbericht            |

## Wichtige geschäftspolitische Ereignisse

---

### Konzentration auf Kerngeschäfte

Die Commerzbank hat auch im Geschäftsjahr 2010 weitere Fortschritte bei der Konzentration auf das Kerngeschäft sowie der Erfüllung der EU-Auflagen erzielt. Wir haben nach Zustimmung der Aufsichtsbehörden nachfolgende Gesellschaften veräußert:

Anfang Februar wurden sowohl der Verkauf der noch bei der Commerzbank verbliebenen Anteile an der österreichischen Privatinvest Bank AG an die Zürcher Kantonalbank als auch der Verkauf des niederländischen Vermögensverwalters Dresdner VPV an das Management vollzogen. Die zuvor über Reuschel & Co. Privatbankiers gehaltene Privatinvest Bank AG mit Hauptsitz in Salzburg und Niederlassung in Wien ist im Private Banking, insbesondere in der Finanzplanung, der Vermögensverwaltung und dem Liquiditätsmanagement tätig. Die Privatinvest Bank AG verwaltete per Ende Juni 2009 mit rund 50 Mitarbeitern ein Vermögen (Assets under Management) in Höhe von etwa 600 Mio Euro. Die Dresdner VPV hatte per Jahresende 2008 in der Gruppe rund 60 Mitarbeiter und verwaltete ein Vermögen (Assets under Management) von 1,2 Mrd Euro.

Ende März hat die Commerzbank den Verkauf der Dresdner Van Moer Courtens sowie der Filiale Belgien ihrer auf gehobene Privatkunden fokussierten Tochtergesellschaft Commerzbank International S.A. Luxembourg (CISAL) an das Management der Dresdner Van Moer Courtens vollzogen. Dresdner Van Moer Courtens konzentriert sich auf die Betreuung vermögender Privatkunden sowie den Wertpapierhandel. Zum Jahresende 2009 verwalteten beide Institute zusammen Assets in Höhe von 630 Mio Euro und beschäftigten 45 Mitarbeiter. Die auf das Firmenkundengeschäft spezialisierte Brüsseler Filiale der Commerzbank Aktiengesellschaft Frankfurt wird von der Commerzbank weitergeführt.

Anfang Juni hat die Commerzbank ihre Tochtergesellschaft Commerzbank International Trust Singapore (CITS) an die Trident-Trust-Gruppe verkauft. CITS ist auf Fondsverwaltung und Treuhanddienstleistungen für Privat- und Firmenkunden spezialisiert. Zum Jahresende 2009 verwaltete die Gesellschaft Vermögenswerte in Höhe von 930 Mio Euro. Die übrigen in Singapur ansässigen Aktivitäten der Commerzbank bleiben von der Transaktion unberührt.

Anfang Juli hat die Commerzbank den Verkauf ihrer Kleinwort-Benson-Aktivitäten an die Beteiligungsgesellschaft RHJ International vollzogen. Veräußert wurden die auf Vermögensverwaltung und Treuhandgeschäfte in Großbritannien und auf den Kanalinseln spezialisierten Gesellschaften Kleinwort Benson Channel Islands Holdings Limited und Kleinwort Benson Private Bank Limited. Per Ende 2009 verfügten sie im Wealth Management über ein verwaltetes Vermögen (Assets under Management) von rund 5,6 Mrd britischen Pfund (6,3 Mrd Euro) und beschäftigten mehr als 600 Mitarbeiter. Die Investmentbanking-Aktivitäten der Commerzbank, die das Investmentbanking der ehemaligen Dresdner Kleinwort und die Commerzbank-Corporates-&-Markets-Aktivitäten umfassen, bleiben von der Transaktion unberührt.

Ebenfalls im Juli hat die Commerzbank ihre auf Bausparen spezialisierte Tochtergesellschaft Allianz Dresdner Bauspar AG (ADB) an die Wüstenrot Bausparkasse AG veräußert. Commerzbank und Wüstenrot haben eine langfristige, exklusive Vertriebskooperation für Bausparprodukte vereinbart, die zum 2. September 2010 in Kraft trat. Die Produkte der Wüstenrot sind für die Kunden der Commerzbank attraktiv und stärken die Position der Bank am Markt. Die Allianz Dresdner Bauspar verfügte per Ende 2009 über eine Bausparsumme in Höhe von 21 Mrd Euro. Die Zahl der Mitarbeiter lag bei rund 350.

Anfang September hat die Commerzbank den Verkauf der Dresdner Bank Monaco S.A.M. an die libanesische Bank Audi-sal-Audi-Saradar-Gruppe vollzogen. Die Dresdner Bank Monaco S.A.M. ist im gehobenen Privatkundengeschäft mit Schwerpunkt Monaco, Südfrankreich und Norditalien tätig. Zum Jahresende 2009 verwaltete sie Vermögenswerte (Assets under Control) in Höhe von 251 Mio Euro und beschäftigte 19 Mitarbeiter.

Die Commerzbank hat Ende des Jahres 2010 ihre auf die Abwicklung von Kartenzahlungen spezialisierte Tochtergesellschaft monrada GmbH an die niederländische Equens SE veräußert. Darüber hinaus haben Commerzbank und Equens eine 5-jährige exklusive Vertriebspartnerschaft für kartengestützte Zahlungsverkehrsprodukte inklusive der Abwicklung von Bargeldauszahlungen an Geldautomaten für Master- und Visakartenninhaber vereinbart.

Der Verkauf nachfolgender Gesellschaft steht noch unter dem Vorbehalt der behördlichen Genehmigung:

Mitte September hat die Commerzbank bekannt gegeben, dass sie ihre brasilianische Tochtergesellschaft Dresdner Bank Brasil S.A. Banco Múltiplo an die in Kanada ansässige Scotiabank verkauft. Hintergrund ist die strategische Neuausrichtung der Commerzbank, in deren Rahmen auch Randaktivitäten veräußert werden. Mit Sitz in São Paulo konzentriert sich Banco Múltiplo auf Aktivitäten im Investmentbanking-Geschäft. Per Ende 2009 verfügte die Bank über eine Bilanzsumme von 284 Mio Euro und zählte etwa 50 Mitarbeiter. Die Commerzbank-Repräsentanz in São Paulo, die durch die Vermittlung von Handelsfinanzierungen und Zahlungsverkehrsprodukten insbesondere die Firmenkunden der Bank unterstützt, bleibt von der Transaktion unberührt. Das brasilianische Investmentbanking der Commerzbank mit Aktivitäten in den Bereichen Aktienderivate, Rohstoff-, Devisen- und Anleihenhandel für Privatbanken und institutionelle Kunden wird ebenfalls weitergeführt.

## Kapitalmaßnahmen bei BRE Bank und Bank Forum

Am 1. März 2010 hat die polnische BRE Bank eine Kapitalerhöhung mit einem Mittelzufluss von 2 Mrd Zloty (rund 500 Mio Euro) angekündigt, der in der am 30. März 2010 in Warschau stattgefundenen Hauptversammlung der BRE Bank zugestimmt wurde. Die Commerzbank hat ihre Bezugsrechte bei der geplanten Kapitalerhöhung der polnischen BRE Bank, an der sie rund 69,8 % der Aktien hält, in vollem Umfang ausgeübt.

Anfang März 2010 hat die Commerzbank an der ukrainischen Bank Forum weitere 26,3 % erworben und somit ihren Anteil auf 89,3 % erhöht. Die Anteile stammen aus dem indirekten Besitz eines bisherigen Minderheitsaktionärs, der mit dem Verkauf seiner Anteile aus dem Aktionärskreis ausscheidet. Über den Kaufpreis sowie weitere Details wurde Stillschweigen vereinbart. Am 4. März haben die Aktionäre der Bank Forum auf einer außerordentlichen Aktionärsversammlung eine Kapitalerhöhung um 2,42 Mrd Hrywnja (rund 240 Mio Euro) beschlossen. Daraus resultierend hat sich der Anteil der Commerzbank an der Bank Forum auf 94,5 % erhöht. In der am 14. Oktober 2010 stattgefundenen Hauptversammlung der ukrainischen Bank Forum haben die Aktionäre eine weitere Kapitalerhöhung um 1,5 Mrd Hrywnja (rund 134 Mio Euro) beschlossen. Die Commerzbank hat sich daran gemäß ihrer Quote beteiligt.

|     |                                            |
|-----|--------------------------------------------|
| 75  | Geschäft und Rahmenbedingungen             |
| 81  | <b>Ertrags-, Finanz- und Vermögenslage</b> |
| 93  | Entwicklung der Segmente                   |
| 144 | Unsere Mitarbeiterinnen und Mitarbeiter    |
| 150 | Nachtragsbericht                           |
| 151 | Prognose- und Chancenbericht               |

# Ertrags-, Finanz- und Vermögenslage

Nachdem die Finanzmarkt- und Wirtschaftskrise in den Vorjahren tiefe Spuren in der Ergebnisentwicklung des Commerzbank-Konzerns hinterlassen hat, ist es uns im Berichtsjahr gelungen, mit einem deutlich positiven Geschäftsergebnis in die Gewinnzone zurückzukehren. Die Erträge vor Risikovorsorge stiegen im Jahresvergleich infolge guten Kundengeschäfts und günstiger Marktbedingungen um rund 16 %. Darüber hinaus konnten wir sowohl Bilanzsumme als auch Risikopositionen planmäßig weiter abbauen. Zum Jahresultimo 2010 verfügten wir mit einer Kernkapitalquote von 11,9 % über eine solide Kapitalbasis.

## Gewinn- und Verlustrechnung des Commerzbank-Konzerns

Im Geschäftsjahr 2010 erzielten wir ein Ergebnis vor Steuern in Höhe von 1 353 Mio Euro nach – 4 659 Mio Euro im Vorjahr. Haupttreiber dieser deutlichen Ergebnisverbesserung um insgesamt 6,0 Mrd Euro waren einerseits das für die interne Steuerung wichtige Operative Ergebnis mit einem Anstieg um rund 3,7 Mrd Euro – besonders im Handelsergebnis und einem deutlich niedrigeren Risikovorsorgebedarf – sowie andererseits der Wegfall von im Vorjahr auszuweisenden Sonderbelastungen in Höhe von rund 2,4 Mrd Euro, größtenteils im Zusammenhang mit der Integration der Dresdner Bank. Im Berichtsjahr erwirtschaftete die Kernbank ein Operatives Ergebnis von 1 981 Mio Euro.

Die einzelnen Posten der Gewinn- und Verlustrechnung haben sich wie folgt entwickelt:

Der Zinsüberschuss lag mit 7 054 Mio Euro leicht unter dem Vorjahreswert von 7 174 Mio Euro. Das niedrige Zinsumfeld machte sich besonders in den Segmenten Privatkunden und Mittelstandsbank bemerkbar. Im Vergleich zum Vorjahr sank der Beitrag des Einlagengeschäfts am Zinsüberschuss, was nur teilweise durch höhere Kreditmargen kompensiert werden konnte.

Bedingt durch die günstigeren wirtschaftlichen Rahmenbedingungen ging die Nettozuführung zur Risikovorsorge im Kreditgeschäft gegenüber dem Vorjahreswert um 40,7 % auf 2 499 Mio Euro zurück. Dies beruhte sowohl auf niedrigeren Bruttozuführungen als auch auf höheren Auflösungen. In allen Segmenten der Kernbank – bis auf das Segment Privatkunden – war die Risikovorsorge deutlich rückläufig, im Segment Central & Eastern Europe – aufgrund der anhaltend schwierigen Situation in der Ukraine – aber weiterhin auf hohem Niveau. Entgegen diesen positiven Trends waren für das Segment Asset Based Finance rund 1,6 Mrd Euro an Risikovorsorge im Kreditgeschäft einzustellen; dieser Betrag entsprach gut 63 % der gesamten Risikovorsorgeaufwendungen des Konzerns. Ursächlich für die hohen Vorsorge-

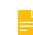

› Anhang (Erläuterungen zur Gewinn- und Verlustrechnung)  
Seiten 237 ff.

notwendigkeiten waren insbesondere Wertberichtigungserfordernisse in der gewerblichen Immobilienfinanzierung in den nach wie vor schwierigen Märkten USA und Spanien.

Der Provisionsüberschuss lag mit 3 647 Mio Euro 3,3 % unter dem Wert des Vorjahres. Bereinigt um die Effekte aus dem Verkauf nicht strategischer Beteiligungen erreichte der Provisionsüberschuss das Vorjahresniveau. Während der Provisionsüberschuss im Segment Privatkunden nach wie vor unter der Kaufzurückhaltung der Kunden sowie integrationsbedingten Belastungen litt, konnten im Segment Mittelstandsbank aufgrund des spürbar zunehmenden Außenhandels steigende Erträge erzielt werden. Im Segment Corporates & Markets ging der Provisionsüberschuss im Wesentlichen bedingt durch einzelne große Transaktionen im Vorjahr zurück.

| Ergebnisrechnung   Mio €                                          | 2010         | 2009          | Veränderung  |
|-------------------------------------------------------------------|--------------|---------------|--------------|
| Zinsüberschuss                                                    | 7 054        | 7 174         | -120         |
| Risikovorsorge im Kreditgeschäft                                  | -2 499       | -4 214        | 1 715        |
| Provisionsüberschuss                                              | 3 647        | 3 773         | -126         |
| Handelsergebnis und Ergebnis aus Sicherungszusammenhängen         | 1 958        | -409          | 2 367        |
| Finanzanlagen-, at-Equity- und Sonstiges Ergebnis                 | 12           | 410           | -398         |
| Verwaltungsaufwendungen                                           | 8 786        | 9 004         | -218         |
| <b>Operatives Ergebnis</b>                                        | <b>1 386</b> | <b>-2 270</b> | <b>3 656</b> |
| Wertminderungen auf Geschäfts- oder Firmenwerte sowie Markennamen | -            | 768           | -768         |
| Restrukturierungsaufwendungen                                     | 33           | 1 621         | -1 588       |
| Ergebnis vor Steuern                                              | 1 353        | -4 659        | 6 012        |
| Steuern vom Einkommen und vom Ertrag                              | -136         | -26           | -110         |
| <b>Konzernergebnis</b>                                            | <b>1 489</b> | <b>-4 633</b> | <b>6 122</b> |
| den Commerzbank-Aktionären zurechenbares Konzernergebnis          | 1 430        | -4 537        | 5 967        |

Tabelle 1

Das Handelsergebnis und Ergebnis aus Sicherungszusammenhängen verbesserte sich im Berichtszeitraum deutlich um 2 367 Mio Euro auf 1 958 Mio Euro. Dieses Ergebnis wurde im Vergleich zum Vorjahr durch insgesamt günstigere Bedingungen an den Finanzmärkten unterstützt. Einen wesentlichen Beitrag lieferten die Segmente Corporates & Markets und Portfolio Restructuring Unit: Im Segment Corporates & Markets konnte der Konzernbereich Equity Markets & Commodities eine stabile Entwicklung über alle Produktlinien verbuchen. Im Segment Portfolio Restructuring Unit wirkten sich Wertaufholungen auf strukturierte Wertpapiere sowie realisierte Gewinne aus dem aktiven Abbau des Portfolios aus.

Das Ergebnis aus Finanzanlagen lag im Berichtsjahr bei 108 Mio Euro, nach 417 Mio Euro im Vorjahr. Erträgen aus dem Verkauf von Generali-Anteilen, nicht strategischer Beteiligungen wie den Kleinwort-Benson-Aktivitäten und monrada sowie aus der Bewertung strukturierter Kredite standen Veräußerungsverluste aus der gezielten Rückführung von Risikoportfolios – insbesondere aus dem Abbau des Staatsfinanzierungsportfolios im Segment Asset Based Finance – gegenüber. Daneben waren auch Wertminderungen auf ABS-Bestände im Segment Portfolio Restructuring Unit zu verzeichnen. Das Laufende Ergebnis aus at-Equity-bewerteten Unternehmen betrug im Berichtsjahr 35 Mio Euro.

Das Sonstige Ergebnis betrug im Berichtsjahr -131 Mio Euro, gegenüber -22 Mio Euro im Vorjahr. Während die Sonstigen Aufwendungen durch die Zuführungen für Rückstellungen sowie durch die Bewertung von als Finanzinvestitionen gehaltenen Immobilien be-

|     |                                         |
|-----|-----------------------------------------|
| 75  | Geschäft und Rahmenbedingungen          |
| 81  | Ertrags-, Finanz- und Vermögenslage     |
| 93  | Entwicklung der Segmente                |
| 144 | Unsere Mitarbeiterinnen und Mitarbeiter |
| 150 | Nachtragsbericht                        |
| 151 | Prognose- und Chancenbericht            |

stimmt waren, konnten bei den Sonstigen Erträgen Auflösungen verschiedener Rückstellungskategorien verbucht werden.

Die Verwaltungsaufwendungen gingen gegenüber dem Vorjahr um 2,4 % auf 8 786 Mio Euro zurück. Dabei sank der Personalaufwand um 6,0 % auf 4 418 Mio Euro, vorwiegend bedingt durch den Rückgang der jahresdurchschnittlichen Mitarbeiterzahl um 8,8 % auf 57 676. Der Sachaufwand einschließlich laufender Abschreibungen lag mit 4 368 Mio Euro auf dem Niveau des Vorjahres. Gestiegenen IT-Aufwendungen und Abschreibungen auf eigen genutzte Immobilien standen rückläufige Beratungskosten gegenüber. Bereinigt insbesondere um die Aufwendungen aus der Integration reduzierte sich der Verwaltungsaufwand gegenüber dem Vorjahr um rund 4 %. Die Aufwandsquote im operativen Geschäft verbesserte sich um 12,9 %-Punkte auf 69,3 %.

Als Resultat der beschriebenen Entwicklungen erzielte der Commerzbank-Konzern im Berichtsjahr 2010 ein Operatives Ergebnis von 1 386 Mio Euro, eine Verbesserung von 3 656 Mio Euro im Vergleich zum Vorjahr. Während im Jahr 2009 signifikante Restrukturierungsaufwendungen sowie Wertminderungen auf Geschäfts- oder Firmenwerte sowie Markennamen von insgesamt gut 2,4 Mrd Euro anfielen, waren im Berichtszeitraum 2010 nur geringe Restrukturierungsaufwendungen im Segment Asset Based Finance in Höhe von 33 Mio Euro zu verzeichnen. Das Ergebnis vor Steuern betrug danach 1 353 Mio Euro nach einem Verlust von 4 659 Mio Euro im Vorjahr.

Für den Berichtszeitraum war ein Steuerertrag in Höhe von 136 Mio Euro nach 26 Mio Euro im Vorjahr auszuweisen. Der Steuerertrag des Berichtsjahres resultierte im Wesentlichen aus der Nachaktivierung latenter Ertragsteueransprüche auf steuerliche Verlustvorträge im Ausland.

Nach Steuern belief sich das Konzernergebnis auf 1 489 Mio Euro. Davon entfallen 59 Mio Euro auf die Minderheitenanteile, den Commerzbank-Aktionären sind 1 430 Mio Euro zuzurechnen.

Die sogenannte Gesamtergebnisrechnung, die neben dem Konzernergebnis auch das Sonstige Periodenergebnis berücksichtigt, belief sich für das Jahr 2010 auf 2 013 Mio Euro. Das Sonstige Periodenergebnis von 524 Mio Euro setzt sich aus den addierten Veränderungen der Neubewertungsrücklage (42 Mio Euro), der Rücklage aus Cash Flow Hedges (230 Mio Euro), der Rücklage aus der Währungsumrechnung (250 Mio Euro) und der aus at-Equity-bewerteten Unternehmen (2 Mio Euro) zusammen. Das Operative Ergebnis je Aktie beträgt 1,18 Euro, das Ergebnis je Aktie 1,21 Euro.

## Bilanz des Commerzbank-Konzerns

Die Bilanzsumme des Commerzbank-Konzerns nahm im Vergleich zum Jahresultimo 2009 um 10,6 % auf 754,3 Mrd Euro ab. Darin spiegelt sich auch der planmäßige Abbau von Volumina und Risiken wider. Auf der Aktivseite fielen die Forderungen an Kunden um 6,9 % auf 327,8 Mrd Euro. Ein noch deutlicherer Rückgang war bei den Handelsaktiva zu verzeichnen; sie fielen um 23,3 % auf 167,8 Mrd Euro. Auch die Finanzanlagen waren mit 11,6 % auf 115,7 Mrd Euro signifikant rückläufig. Auf der Passivseite nahmen insbesondere die verbrieften Verbindlichkeiten um 18,8 % auf 131,4 Mrd. Euro ab. Auch die Handelspassiva gingen um 24,8 % auf 152,4 Mrd. Euro deutlich zurück.

Die Barreserve sank gegenüber dem Vorjahresultimo um 2,3 Mrd Euro auf 8,1 Mrd Euro – insbesondere bei den Guthaben gegenüber Zentralbanken. Die Forderungen an Kreditinstitute haben sich im Vergleich zum Vorjahresende um 3,9 Mrd Euro auf 110,6 Mrd Euro erhöht. Während sich die besicherten Geldmarktgeschäfte in Form von Reverse Repos und

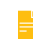

› Anhang (Erläuterungen zur Bilanz)  
Seiten 255 ff.

Cash Collaterals sowie die Übrigen Forderungen um 9,8 Mrd Euro beziehungsweise 6,4 Mrd Euro erhöht haben, gingen die Forderungen aus dem Geldhandel um 9,5 Mrd Euro und die Schuldscheindarlehen um 2,9 Mrd Euro zurück. Der Rückgang der Forderungen an Kunden um 24,4 Mrd Euro auf 327,8 Mrd Euro beruhte auf einem deutlich geringeren Kreditvolumen. Das Kreditvolumen an Kunden und Kreditinstitute insgesamt lag zum Berichtsstichtag bei 330,3 Mrd Euro und wies damit gegenüber dem Jahresultimo einen Rückgang um 38,1 Mrd Euro auf. Die Kredite an Kreditinstitute beliefen sich auf 23,4 Mrd Euro und lagen damit 6,4 % unter dem Vorjahresbestand. Das Kundenkreditgeschäft war mit einem Volumen zum Jahresultimo von 306,9 Mrd Euro um 10,6 % rückläufig. Dies resultierte überwiegend aus der Rückführung des Portfolios im Rahmen der Fokussierung auf das strategische Kerngeschäft der Bank; daneben spielte auch eine geringere Kreditnachfrage im Inland eine Rolle. Die Handelsaktiva beliefen sich zum Berichtsstichtag auf 167,8 Mrd Euro, ein Rückgang gegenüber dem Stand zum Jahresende 2009 um 50,9 Mrd Euro oder 23,3 %. Hierzu hat im Wesentlichen der Rückgang der Positiven Marktwerte aus derivativen Zinsinstrumenten um 49,5 Mrd Euro durch eine Ausweitung des Nettings beigetragen. Die Finanzanlagen lagen mit 115,7 Mrd Euro um 11,6 % unter dem Niveau des Vorjahresresultimos. Die Schuldverschreibungen und anderen zinsbezogenen Wertpapiere nahmen dabei um 14,5 Mrd Euro auf 113,5 Mrd Euro ab, die Bestände an Aktien und anderen eigenkapitalbezogenen Wertpapieren gingen um 0,2 Mrd Euro auf 1,3 Mrd Euro zurück.

| <b>Aktiva   Mio €</b>          | <b>31.12.2010</b> | <b>31.12.2009</b> | <b>Veränderung in %</b> |
|--------------------------------|-------------------|-------------------|-------------------------|
| Forderungen an Kreditinstitute | 110 616           | 106 689           | 3,7                     |
| Forderungen an Kunden          | 327 755           | 352 194           | -6,9                    |
| Handelsaktiva                  | 167 825           | 218 708           | -23,3                   |
| Finanzanlagen                  | 115 708           | 130 914           | -11,6                   |
| Übrige Aktiva                  | 32 395            | 35 598            | -9,0                    |
| <b>Gesamt</b>                  | <b>754 299</b>    | <b>844 103</b>    | <b>-10,6</b>            |

| <b>Passiva   Mio €</b>                       | <b>31.12.2010</b> | <b>31.12.2009</b> | <b>Veränderung in %</b> |
|----------------------------------------------|-------------------|-------------------|-------------------------|
| Verbindlichkeiten gegenüber Kreditinstituten | 137 626           | 140 634           | -2,1                    |
| Verbindlichkeiten gegenüber Kunden           | 262 827           | 264 618           | -0,7                    |
| Verbriefte Verbindlichkeiten                 | 131 356           | 161 779           | -18,8                   |
| Handelspassiva                               | 152 393           | 202 595           | -24,8                   |
| Übrige Passiva                               | 41 439            | 47 901            | -13,5                   |
| Eigenkapital                                 | 28 658            | 26 576            | 7,8                     |
| <b>Gesamt</b>                                | <b>754 299</b>    | <b>844 103</b>    | <b>-10,6</b>            |

Tabelle 2

Auf der Passivseite reduzierten sich die Verbindlichkeiten gegenüber Kreditinstituten leicht um 3,0 Mrd Euro auf 137,6 Mrd Euro; hier war ein starker Rückgang bei den Verbindlichkeiten aus dem Geldhandel zu verzeichnen, der durch gestiegene besicherte Geldmarktgeschäfte wie Repos und Cash Collaterals zum Teil kompensiert wurde. Die Verbindlichkeiten gegenüber Kunden blieben mit 262,8 Mrd Euro gegenüber dem Vorjahr stabil. Die Verbrieften Verbindlichkeiten lagen mit einem Volumen von 131,4 Mrd Euro um 30,4 Mrd Euro unter dem Vorjahresniveau. Die Schuldverschreibungen fielen dabei um 22,8 Mrd Euro auf 116,3 Mrd Euro. Das lag im Wesentlichen am starken Rückgang öffentlicher Pfandbriefe (-15,4 Mrd Euro auf 48,5 Mrd Euro) und dem Rückgang von Hypothekenspfand-



|     |                                         |
|-----|-----------------------------------------|
| 75  | Geschäft und Rahmenbedingungen          |
| 81  | Ertrags-, Finanz- und Vermögenslage     |
| 93  | Entwicklung der Segmente                |
| 144 | Unsere Mitarbeiterinnen und Mitarbeiter |
| 150 | Nachtragsbericht                        |
| 151 | Prognose- und Chancenbericht            |

briefen (–4,8 Mrd Euro auf 28,7 Mrd Euro). Hier wirkte sich ein niedrigerer Refinanzierungsbedarf aufgrund des Abbaus von Beständen bei der Eurohypo AG aus. Die Geldmarktpapiere fielen um 7,6 Mrd Euro auf 15,0 Mrd Euro. Bei den Handelspassiva ergab sich insgesamt ein Rückgang um 50,2 Mrd Euro auf 152,4 Mrd Euro. Dies resultierte – analog der Entwicklung bei den Handelsaktiva – hauptsächlich aus dem Rückgang der Negativen Marktwerte aus derivativen Zinsinstrumenten.

Die Commerzbank hat im Rahmen ihres Strategieprogramms „Roadmap 2012“ die Bilanzsumme nach der Erstkonsolidierung der Dresdner Bank deutlich um insgesamt rund 292 Mrd Euro auf 754,3 Mrd Euro verringert. Damit konnten die Auflagen der EU-Kommission, bis zum Jahr 2012 die Konzernbilanzsumme auf rund 900 Mrd Euro zu reduzieren, bereits deutlich früher erfüllt werden. Der Volumenabbau stand klar im Fokus einer Risikoreduzierung; er betraf besonders das Segment Corporates & Markets aufgrund geringerer Handelsaktivitäten, den im Segment Asset Based Finance ausgewiesenen Konzernbereich Public Finance und den Portfolioabbau im Segment Portfolio Restructuring Unit.

## Eigenkapital

Das in der Bilanz zum 31. Dezember 2010 ausgewiesene Eigenkapital ist gegenüber dem Jahresende 2009 um 7,8 % beziehungsweise 2,1 Mrd Euro auf 28,7 Mrd Euro gestiegen. Haupttreiber war mit 1,4 Mrd Euro das den Commerzbank-Aktionären zurechenbare Konzernergebnis. Des Weiteren stieg das Eigenkapital um 0,4 Mrd Euro aus der Verbesserung sowohl der negativen Rücklage aus der Währungsumrechnung als auch der Verbesserung des negativen Ergebnisses aus Cash Flow Hedges.

Das gezeichnete Kapital, die Kapitalrücklage und die Gewinnrücklage beliefen sich insgesamt auf 13,7 Mrd Euro, nach 12,3 Mrd Euro im Vorjahr. Die Stillen Einlagen betrugen zum 31. Dezember 2010 nach wie vor 17,2 Mrd Euro.

Zum Jahresende belasteten die Neubewertungsrücklage sowie die Rücklagen aus Cash Flow Hedges und der Währungsumrechnung das Eigenkapital mit 3,0 Mrd Euro deutlich geringer als zum Jahresende 2009 mit 3,5 Mrd Euro. Der negative Wert der Neubewertungsrücklage blieb gegenüber dem Jahresende 2009 mit –1,7 Mrd Euro weitgehend unverändert, während sich das Ergebnis aus Cash Flow Hedges um 0,2 Mrd Euro auf –1,0 Mrd Euro und das Ergebnis aus der Währungsumrechnung um 0,2 Mrd Euro auf –0,3 Mrd Euro verbesserten.

Für das Berichtsjahr 2010 wird die Commerzbank keine Bedienung der Stillen Einlagen vornehmen und keine Dividende ausschütten, da kein HGB-Bilanzgewinn im Einzelabschluss der AG vorlag. Wesentlicher Grund des negativen HGB-Ergebnisses war eine Abschreibung auf die Eurohypo. Um die Eurohypo auf den gemäß der EU-Auflagen bis Ende des Jahres 2014 zu erfolgenden Verkauf weiter vorzubereiten, müssen Bestände und Risiken reduziert werden. Durch die weitere Reduzierung des Neugeschäfts und die anhaltend hohe Risikovorsorge ist der Barwert der künftigen Erträge der Eurohypo gesunken, was zu der entsprechenden Abschreibung führte. Der beim Kauf der Eurohypo entstandene Goodwill wurde im Konzernabschluss nach IFRS bereits im Vorjahr vollständig abgeschrieben.

Die Risikoaktiva erreichten zum Jahresende 267,5 Mrd Euro. Dies ist im Vergleich zum Jahresende 2009 ein Rückgang um 12,6 Mrd Euro. Insofern sind wir – im Einklang mit der dargestellten Entwicklung der Bilanzsumme – im Verlauf des Jahres 2010 auch bei unserem Ziel, der Reduzierung von Risikoaktiva, deutlich vorangekommen. Dies beruhte in erster Linie auf einem Volumenabbau bei der Eurohypo sowie bei Auslandsportfolios.

Unser aufsichtsrechtlich anrechenbares Kernkapital nahm im Jahresverlauf um 2,2 Mrd Euro auf 31,7 Mrd Euro zu; einhergehend mit den reduzierten Risikoaktiva stieg die Kernkapitalquote von 10,5 % auf 11,9 %. Die im Zusammenhang mit Basel III wichtige Core-Tier-I-Quote belief sich auf 10,0 %, nach 9,2 % im Vorjahr. Nach der Regulierungsanforderung „Capital Requirements Directive“ (CRD II) werden die Stille Einlage der Allianz und die bislang als hybrides Eigenkapital angerechnete Beteiligung der HT1 Funding GmbH nicht mehr in der Berechnung der Quote anerkannt. Sowohl die Kernkapitalquote als auch die Core-Tier-I-Quote liegen klar über unserem mittelfristigen Zielkorridor, der für die Core-Tier-I-Quote bei 7-8 % liegt. Die Eigenmittelquote betrug zum Berichtsstichtag 15,3 %. Dass die Commerzbank auch unter schwierigen Bedingungen kapitalmäßig solide aufgestellt ist, zeigte sich auch in dem vom Committee of European Banking Supervisors (CEBS), der heutigen „European Banking Authority“ (EBA), angeordneten Belastungstest für 91 europäische Banken, der im Juli 2010 veröffentlicht wurde und den die Commerzbank wie erwartet in allen Szenarien bestanden hat.

## Liquidität und Refinanzierung des Commerzbank-Konzerns

---

### Liquiditätsmanagement im Berichtsjahr

Das Liquiditätsmanagement des Konzerns liegt in der Verantwortung des Bereichs Group Treasury, der an allen wesentlichen Standorten des Konzerns im In- und Ausland vertreten ist und über Berichtslinien in alle Tochtergesellschaften verfügt.

Das Liquiditätsmanagement gliedert sich in operative und strategische Komponenten. Im Rahmen des operativen Liquiditätsmanagements erfolgen die Steuerung der täglichen Zahlungen, die Planung der erwarteten Zahlungsströme und die Steuerung des Zugangs zu Zentralbanken. Darüber hinaus befasst es sich mit dem Zugang zu unbesicherten und besicherten Refinanzierungsquellen im Geld- und Kapitalmarkt sowie dem Management des Liquiditätsportfolios. Das strategische Liquiditätsmanagement beinhaltet die Aufstellung und Auswertung von Fälligkeitsprofilen liquiditätsrelevanter Aktiva und Passiva inklusive der Modellierung von dauerhaft verfügbaren Anteilen der Kundeneinlagen, den sogenannten Bodensätzen. Es beinhaltet auch die abgeleiteten Emissionsstrategien des Konzerns sowie die Ermittlung und Allokation der Liquiditätskosten, die in die Steuerung der Geschäftsaktivitäten der Bank einfließen.

Zur Kompensation unerwarteter kurzfristiger Liquiditätsabflüsse unterhält die Group Treasury ein zentrales Liquiditätsportfolio hoch liquider und zentralbankfähiger Wertpapiere, die mit einer mittel- bis langfristigen Refinanzierung unterlegt sind. Darüber hinaus hält die Commerzbank eine Liquiditätsreserve aus frei verfügbaren Barmitteln und liquiden Wertpapierpositionen. Der Konzern stützt sich bei der kurz- und mittelfristigen Refinanzierung auf eine angemessene Diversifikation hinsichtlich Anlegergruppen, Regionen, Produkten und Währungen.

Auf Basis der Geschäftsstrategie und unter Berücksichtigung der Risikotoleranz werden Richtlinien und Limite für das Refinanzierungsprofil und die Refinanzierungsmittel abgeleitet. Übergeordnete Entscheidungen in Bezug auf das Liquiditätsmanagement werden vom zentralen Asset-Liability-Committee (ALCO) getroffen, das in regelmäßigen Abständen zusammentritt. Die Überwachung der gesetzten Limite sowie des Liquiditätsrisikos erfolgt durch

|     |                                         |
|-----|-----------------------------------------|
| 75  | Geschäft und Rahmenbedingungen          |
| 81  | Ertrags-, Finanz- und Vermögenslage     |
| 93  | Entwicklung der Segmente                |
| 144 | Unsere Mitarbeiterinnen und Mitarbeiter |
| 150 | Nachtragsbericht                        |
| 151 | Prognose- und Chancenbericht            |

die unabhängige Risikofunktion anhand eines internen Modells. Über die Liquiditätsrisikosituation wird dem ALCO und dem Vorstand regelmäßig berichtet.

Zur Überwachung und Steuerung des Liquiditätsrisikos verwendet die Commerzbank ein vierstufiges Limitkonzept. Neben dem Konzernlimit bestehen weitere Limite für Tochtergesellschaften, Konzernbereiche und deren Untereinheiten. Liquiditätsrisiken aus Fremdwährungen werden zusätzlich limitiert. Durch das bestehende Limitkonzept wird gewährleistet, dass ein sich abzeichnender Liquiditätsengpass möglichst frühzeitig erkannt wird und entsprechende Maßnahmen zu dessen Beseitigung rechtzeitig ergriffen werden können.

Einen wichtigen Baustein des internen Liquiditätsrisikomodells stellt das Stresstesting dar. Es simuliert die Auswirkungen unplanmäßiger Entwicklungen auf die Liquiditätssituation aufgrund von institutsspezifischen und marktbedingten Ursachen sowie einer Kombination von beiden. Diesem kombinierten Stressszenario kommt besondere Bedeutung zu, da die Liquiditätssteuerung der Bank hierauf aufsetzt. Darüber hinaus fließen die Ergebnisse des Stresstestings in die Definition des Limitkonzepts und die Erarbeitung eines nachhaltigen Notfallplans ein. Die Stressszenarien werden täglich neu berechnet. Die den Stressszenarien zugrunde liegenden Annahmen werden regelmäßig überprüft und an Veränderungen des Marktumfelds angepasst. Auch nach den strengen Standards des zur Liquiditätssteuerung herangezogenen internen Liquiditätsrisikomodells auf Basis eines kombinierten marktweiten und institutsspezifischen Stressszenarios lag die verfügbare Liquidität jederzeit oberhalb der gesetzten Limite.

Im Berichtsjahr hat die Commerzbank auch eine Anforderung durch das „Committee of European Banking Supervisors“ (CEBS), der heutigen „European Banking Authority“ (EBA), umgesetzt und eine Survival Period in ihre Liquiditätsrisikopolitik integriert.

Wesentliche Bestandteile der Liquiditätssteuerung sind das interne Modell „Available Net Liquidity“ (ANL) mit einem Betrachtungshorizont bis zu einem Jahr und das „Stable-Funding-Konzept“ mit einem Betrachtungshorizont größer als ein Jahr. Als Grundlage der täglichen Liquiditätssteuerung wird das ANL-Konzept verwendet. Dieses ermittelt die verfügbare Nettoliquidität für die nächsten zwölf Monate auf Basis von vertraglichen und ökonomischen Zahlungsströmen bilanzieller und außerbilanzieller Transaktionen sowie den liquidierbaren Vermögenswerten, indem es die erwarteten Mittelzuflüsse den erwarteten Mittelabflüssen gegenüberstellt.

Die Liquidität und Zahlungsfähigkeit der Commerzbank waren im Berichtszeitraum jederzeit gegeben. Die entsprechenden regulatorischen Liquiditätsvorgaben wurden ebenfalls stets eingehalten. Zum Berichtsstichtag 31. Dezember 2010 lag die Liquiditätskennziffer des Standardansatzes der Liquiditätsverordnung der Commerzbank Aktiengesellschaft mit 1,08 über der regulatorischen Mindestanforderung von 1,00.

Das Refinanzierungsprofil wird auf Basis regelmäßiger Strukturanalysen aktiv gesteuert. Im abgelaufenen Geschäftsjahr 2010 hat sich die komfortable Liquiditätssituation der Commerzbank weiter verbessert. Dazu beigetragen haben

- eine Übererfüllung des Fundingplans für unbesicherte Kapitalmarktrefinanzierung,
- der weitere Abbau der Bilanz gemäß des im Jahr 2009 verabschiedeten Strategieprogramms „Roadmap 2012“,
- ein stabiles Einlagengeschäft und die Fokussierung der Commerzbank auf ihre Kernsegmente Mittelstandsbank und Privatkunden,
- der weitere Abbau von nicht strategischen Wertpapierpositionen im Segment Portfolio Restructuring Unit und
- die Rückführung von nicht zu Kerngeschäftsaktivitäten gehörenden Wertpapierpositionen im Konzernbereich Public Finance.

Eine wichtige Beobachtungsgröße stellt die Differenz zwischen dem Dreimonats-Euribor und dem Dreimonats-Eonia-Swapsatz dar, die eine Messgröße für das Kredit- und Liquiditätsrisiko am unbesicherten Geldmarkt repräsentiert. Diese lag im Jahresdurchschnitt bei 31 Basispunkten, zum Jahresultimo 2010 lag sie bei 42 Basispunkten.

Die Ausweitung im Dezember wurde durch das Aussetzen der Exitstrategie der EZB getrieben. Sie hatte, wie angekündigt, zunächst bis März 2011 an dem bestehenden Prozess festzuhalten und den Markt für Laufzeiten bis drei Monate mit unlimitierter Liquidität und bei Laufzeiten bis einen Monat weiterhin zu einem festen Zinssatz zu versorgen. Dieses Vorgehen wirkt unterstützend insbesondere für solche Marktteilnehmer, denen infolge der fortwährenden Finanzmarkt- und Staatsverschuldungskrise der Zugang zu regulären Refinanzierungsmärkten nicht im erforderlichen Maße möglich ist.

Der unbesicherte Interbankmarkt hat sich im Jahr 2010 nach Laufzeiten unterschiedlich entwickelt. Laufzeiten zwischen Overnight und drei Monaten sind weiterhin liquide, während Laufzeiten über sechs Monate volumensmäßig eingeschränkt sind, wobei eine Differenzierung der Marktteilnehmer hinsichtlich ihres Marktzugangs zu beobachten ist. Die Commerzbank konnte im gesamten Jahr jederzeit die für einen ausgewogenen Refinanzierungsmix notwendigen Mittel am Geldmarkt aufnehmen.

Auch der besicherte Repomarkt hat sich bei der Spreadausweitung abhängig vom jeweiligen europäischen Collateral unterschiedlich entwickelt. So handelte gegen Ende des Jahres drei Monate „General Collateral“ Deutschland bei Eonia –10 Basispunkten während Italien bei Eonia +10 Basispunkten und Spanien bei Eonia +30 Basispunkten quotierten. Die Spreadausweitungen am Kapitalmarkt haben sich somit auch am kurzfristigen besicherten Refinanzierungsmarkt etabliert.

Darüber hinaus versuchen Marktteilnehmer, korrelierte Risiken zu vermeiden, das heißt, wenn der Kontrahent und die Sicherheit dem gleichen Länderrisiko unterliegen. Auch forcieren sie die Nutzung sogenannter „Central Counterparts“. Dabei handelt es sich um zentrale Kontrahenten beziehungsweise um Clearingstellen, über die alle Transaktionen abgewickelt werden und somit eine höhere Transparenz und eine Verringerung des Kreditrisikos im Markt gewährleistet werden kann.

## Refinanzierungsstruktur im Berichtsjahr

Die Commerzbank hatte auch im gesamten Geschäftsjahr 2010 uneingeschränkten Zugang zum besicherten und unbesicherten Geld- und Kapitalmarkt. Die Liquiditätsausstattung stellt sich auch weiterhin komfortabel dar. Aufgrund unserer konservativen und vorausschauenden Refinanzierungsstrategie war die Bank im vergangenen Geschäftsjahr nicht auf die Inanspruchnahme von Liquiditätsfazilitäten der Zentralbanken angewiesen. Daher konnte sich die Commerzbank auch im kurzfristigen Bereich für marktübliche Laufzeiten weiterhin ohne Einschränkung am Geldmarkt refinanzieren. Dies spiegelt das gute Standing der Bank im Markt wider.

|     |                                         |
|-----|-----------------------------------------|
| 75  | Geschäft und Rahmenbedingungen          |
| 81  | Ertrags-, Finanz- und Vermögenslage     |
| 93  | Entwicklung der Segmente                |
| 144 | Unsere Mitarbeiterinnen und Mitarbeiter |
| 150 | Nachtragsbericht                        |
| 151 | Prognose- und Chancenbericht            |

Das zurückliegende Geschäftsjahr 2010 wurde trotz Stabilisierungsmaßnahmen vonseiten der Eurostaaten und des Ankaufprogramms der EZB für Euro-Staatsanleihen durch die Krise der Euro-Peripheriestaaten geprägt. Einen neuen Höhepunkt innerhalb der Krise stellt die erstmalige Inanspruchnahme der European Financial Stability Facility (EFSF) durch einen EU-Mitgliedsstaat dar.

#### Refinanzierungsstruktur Kapitalmarkt

zum 31. Dezember 2010

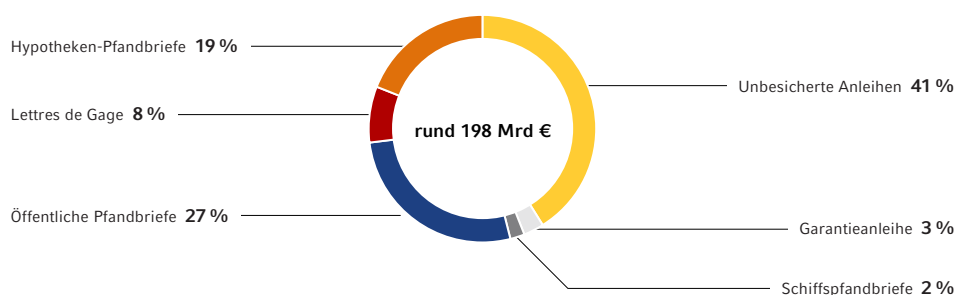

Abbildung 1

Im abgelaufenen Geschäftsjahr begann die EZB mit der Umsetzung ihrer Ausstiegsstrategie, auslaufende langfristige Offenmarkttransaktionen über sechs Monate beziehungsweise ein Jahr nicht zu prolongieren. Als Ersatz der Langfristtender wurden den Banken reguläre Dreimonatstender mit weiterhin unlimitierter Zuteilung angeboten, die nicht im gleichen Volumen wie die auslaufenden Langfristtender in Anspruch genommen wurden. Die daraus resultierende Reduzierung der durch die Geschäftsbanken bei der EZB unterhaltenen Überschussalden führte zu einer erhöhten Volatilität im Geldmarkt und einem moderaten Anstieg der Zinssätze im Geldmarkt. Mit der im Jahr 2010 eingeleiteten Exitstrategie haben sich die Zinssätze im Geldmarkt im Jahresultimovergleich verteuert, so ist der Dreimonats-Euribor von 0,70 % auf 1,01 % gestiegen, der Zwölfmonats-Euribor von 1,25 % auf 1,52 %.

Während der Geld- und Kapitalmarkt für die Mehrheit der Banken liquide ist, sind Banken mit schwacher Bonität sowie Banken aus den Euro-Peripheriestaaten in ihrer Refinanzierung weiterhin auf die Inanspruchnahme der EZB-Fazilitäten angewiesen. Bei den Euro-Peripheriestaaten hat sich auf nationaler Ebene ein relativ liquider Geldmarkt entwickelt. Bei einer länderübergreifenden Refinanzierung im besicherten Geldmarkt ist allerdings festzustellen, dass die Marktteilnehmer korrelierte Risiken meiden, das heißt Repogeschäft, bei dem die Sicherheiten das gleiche Länderrisiko tragen wie die kreditnehmende Bank. Darüber hinaus liegen die Spreads zwischen Repogeschäften mit hochwertigen Anleihen (zum Beispiel Bundesanleihen) und Repogeschäften mit schlechteren Sicherheiten (zum Beispiel Staatsanleihen der Euro-Peripheriestaaten) deutlich auseinander.

Mitte des Jahres konnte die Commerzbank das Volumen des ursprünglichen Fundingplans aufgrund eines verringerten Refinanzierungsbedarfes nach unten auf 12 bis 15 Mrd Euro anpassen. Dieser neue Fundingplan wurde im Laufe des Jahres vollends erfüllt. Des Weiteren profitiert die Bank von einer stabilen Einlagenbasis des Privat- und Firmenkundengeschäftes. Der Fundingspread für langfristige Refinanzierungsmittel am Kapitalmarkt zeigte sich im Laufe des Geschäftsjahres stabil.

### Kapitalmarktfunding des Konzerns im Jahr 2010

Volumen 16,1 Mrd €

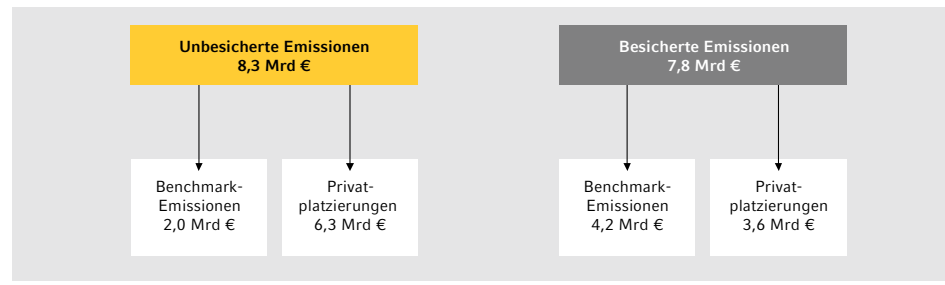

Abbildung 2

Auf dem Kapitalmarkt für besicherte und unbesicherte Refinanzierungen konnte die Commerzbank im Berichtsjahr langfristige Mittel in Höhe von 16,1 Mrd Euro aufnehmen.

Hiervon entfallen 8,3 Mrd Euro auf unbesicherte Emissionen und rund 7,8 Mrd Euro auf Pfandbriefe und Lettres de Gage. Insgesamt wurden im besicherten und unbesicherten Bereich sechs öffentliche Transaktionen mit einem Volumen in Höhe von 5,75 Mrd Euro begeben.

Im unbesicherten Bereich hat die Commerzbank Aktiengesellschaft im März eine siebenjährige Senior-Unsecured-Benchmark-Anleihe über 1 Mrd Euro mit einem Kupon von 3,875 % bei einem Spread von 105 Basispunkten emittiert. Im September folgte eine zehnjährige Senior-Unsecured-Benchmark-Anleihe der Commerzbank mit einem Volumen in Höhe von 1 Mrd Euro bei einem Spread von 150 Basispunkten. Auf der Währungsseite konnten unter anderem Emissionen in Japanischen Yen, Australischen Dollar und Norwegischen Kronen platziert werden.

Im besicherten Bereich wurden von der Eurohypo AG zwei Jumbopfandbriefe emittiert: Ein dreijähriger öffentlicher Pfandbrief mit einem Volumen von 1,5 Mrd Euro und ein fünfjähriger Hypothekenpfandbrief mit einem Volumen in Höhe von 1 Mrd Euro. Außerdem stockte die Eurohypo AG im Laufe des Jahres vier Jumbopfandbriefe um insgesamt 975 Mio Euro auf. Des Weiteren wurde im Rahmen einer Privatplatzierung eine Hypothekenpfandbriefemission mit einem Volumen von 500 Mio Euro mit speziellem Fokus auf den deutschen Markt syndiziert. Zudem hat die Eurohypo S. A. Luxembourg mit einem Volumen in Höhe von 750 Mio Euro die erste Lettres-de-Gage-Emission des Jahres erfolgreich durchgeführt.



|     |                                            |
|-----|--------------------------------------------|
| 75  | Geschäft und Rahmenbedingungen             |
| 81  | <b>Ertrags-, Finanz- und Vermögenslage</b> |
| 93  | Entwicklung der Segmente                   |
| 144 | Unsere Mitarbeiterinnen und Mitarbeiter    |
| 150 | Nachtragsbericht                           |
| 151 | Prognose- und Chancenbericht               |

## Resümee Geschäftslage 2010

---

Mit einem den Commerzbank-Aktionären zurechenbaren Konzernergebnis von rund 1,4 Mrd Euro für das Geschäftsjahr 2010 haben wir die Rückkehr in die Gewinnzone ein Jahr früher erreicht als ursprünglich von uns geplant. Damit wird deutlich, dass wir sowohl mit unserem Strategieprogramm „Roadmap 2012“ als auch mit dem dafür zugrunde liegenden Geschäftsmodell die richtigen Weichen gestellt haben. Wir haben im abgelaufenen Geschäftsjahr weiter Risiken reduziert, die Kapitalbasis gestärkt und die Integration der Dresdner Bank bereits zu mehr als zwei Dritteln abgeschlossen. Dabei hat die Commerzbank im Berichtsjahr als eines der führenden Kreditinstitute in Deutschland auch von der spürbaren Erholung der wirtschaftlichen Entwicklung – insbesondere in Deutschland – profitiert. Die Bruttoerträge konnten wir trotz Integrationsanstrengungen um 15,7 % auf 12,7 Mrd Euro steigern. Gleichzeitig verringerte sich die Risikovorsorge – insbesondere in der Kernbank – deutlich um über 40 %. Die Verwaltungsaufwendungen nahmen im Berichtsjahr um 2,4 % ab; dabei wurden die erzielten Synergien durch Integrationsinvestitionen zum Teil kompensiert. Auf Segmentebene haben alle Segmente der Kernbank ein positives operatives Gesamtjahresergebnis erzielt. Unser mit Abstand profitabelstes Segment war dabei die Mittelstandsbank. Daneben zeigte auch das Segment Corporates & Markets ein sehr erfreuliches Ergebnis. Nach wie vor unbefriedigend verläuft dagegen die Entwicklung im Segment Asset Based Finance. Hier werden wir den eingeschlagenen Kurs, sowohl Risiken als auch Volumina weiter zu reduzieren, fortsetzen. Insgesamt sind wir mit dem Geschäftsverlauf 2010 zufrieden.

Dr. Jana Leidenfrost  
 Herausforderung: Freiräume schaffen  
 Ziel: Individuelles Coaching aus Leidenschaft

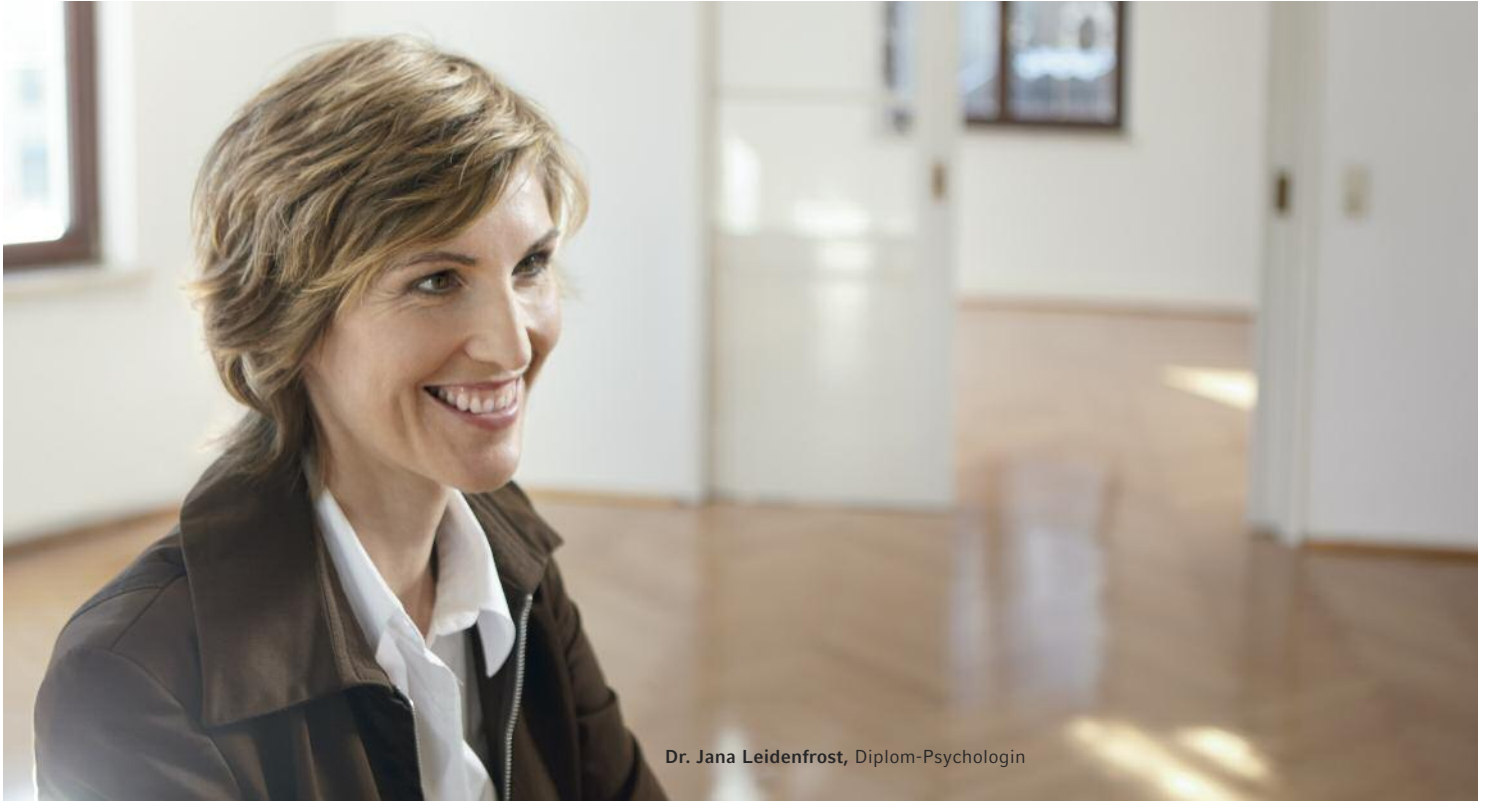

Dr. Jana Leidenfrost, Diplom-Psychologin

Was wäre, wenn mitten in der natürlichen Schönheit Thüringens eine Quelle der Inspiration entstünde? Wenn eine Villa im Grünen zum Freiraum ganz für sich selbst würde? Wenn sich dort neue Perspektiven und berufliche Wege erschließen?

Dieser Herausforderung hat sich Dr. Jana Leidenfrost im Jahr 2010 gestellt: der Gründung eines eigenen Unternehmens auf dem Gebiet der internationalen Führungskräfteentwicklung. Ziel ist es, ihre Mandanten einerseits weltweit zu unterstützen und ihnen andererseits ganz individuelle Möglichkeiten der Beratung in einer einzigartigen Atmosphäre zu bieten. Mit der Renovierung der Familienvilla im Grünen galt es, hierfür Räume zu schaffen. Mit diesem Ruhepol wird die sichere Grundlage zum inspirierenden und effizienten Coaching gelegt.

Die Commerzbank hat sie bei diesem Vorhaben erfolgreich unterstützt. Auf Basis einer langen Kundenbeziehung und eines absoluten Vertrauensverhältnisses wurde Dr. Jana Leidenfrost auf ihrem Weg in die Selbstständigkeit intensiv beraten und gemeinsam mit ihr eine Strategie für das Projekt „Coachen im Grünen“ entwickelt.

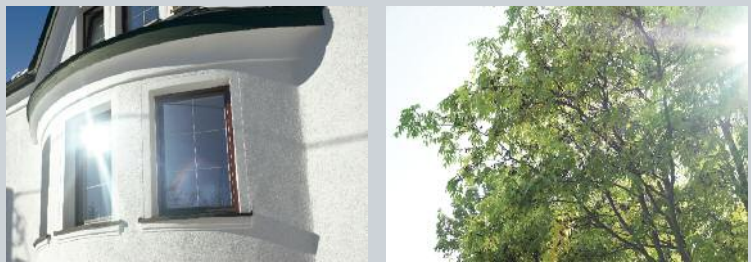

Freiräume für individuelles Coaching: eine Villa als Oase im Grünen

Herausforderungen annehmen, Ziele erreichen

|     |                                         |
|-----|-----------------------------------------|
| 75  | Geschäft und Rahmenbedingungen          |
| 81  | Ertrags-, Finanz- und Vermögenslage     |
| 93  | Entwicklung der Segmente                |
| 93  | Privatkunden                            |
| 144 | Unsere Mitarbeiterinnen und Mitarbeiter |
| 150 | Nachtragsbericht                        |
| 151 | Prognose- und Chancenbericht            |

# Entwicklung der Segmente

## Privatkunden

Das Segment Privatkunden umfasst die Aktivitäten der Konzernbereiche Privat-, Geschäfts- und Wealth-Management-Kunden, Kredit und Direct Banking. Zu Beginn des Jahres 2011 wurden die Konzernbereiche Privat- und Geschäftskunden und Wealth Management zusammengelegt. Nachfolgende Kommentierung orientiert sich noch an der im Geschäftsjahr 2010 gültigen Organisationsstruktur mit den Konzernbereichen Privat- und Geschäftskunden, Wealth Management, Kredit und Direct Banking.

Im Berichtsjahr hat das Segment wichtige Meilensteine bei der Zusammenführung des Privatkundengeschäfts von Commerzbank und Dresdner Bank erreicht. So haben wir unsere neue Marke bundesweit eingeführt und sind dadurch für unsere Kunden inzwischen als eine Bank erlebbar. Im Ergebnis des Jahres 2010 wirkten sich die mit der Integration verbundenen Umstellungsmaßnahmen belastend aus.

## Ergebnisentwicklung

### Privatkunden

|                                          | 2010  | 2009  | Veränderung in %/%-Punkten |
|------------------------------------------|-------|-------|----------------------------|
| Gebundenes Eigenkapital (Mio €)          | 3 397 | 3 256 | 4,3                        |
| Operative Eigenkapitalrendite (%)        | 1,4   | 4,4   | -3,0                       |
| Aufwandsquote im operativen Geschäft (%) | 92,4  | 90,8  | 1,6                        |

Tabelle 3

Das Segment Privatkunden erzielte trotz der nach wie vor ambitionierten Wettbewerbsbedingungen und der Belastungen im Zusammenhang mit der Integration der Dresdner Bank im Gesamtjahr 2010 ein positives Operatives Ergebnis. Das breit aufgestellte Kundengeschäft erwies sich dabei als erfreulich stabil. Insbesondere beim Zinsüberschuss, Provisionsüberschuss und Verwaltungsaufwand wirkte sich der Verkauf nicht strategischer Bankbeteiligungen in den Veränderungsraten maßgeblich aus.

Der Zinsüberschuss verringerte sich um 7,3 % auf 1 983 Mio Euro. Während sich die Einlagen- und Kreditmarge gegenüber dem Vorjahr leicht verbesserte, verminderte sich das Kredit- und Einlagevolumen aufgrund von Entkonsolidierungseffekten. Dabei belastete das anhaltend niedrige Zinsniveau den Zinsüberschuss weiterhin. Die Risikovorsorge blieb mit 246 Mio Euro gegenüber dem Vorjahreszeitraum unverändert. Der Provisionsüberschuss sank um 10,3 % auf 1 941 Mio Euro. Dies resultierte sowohl aus der Kaufzurückhaltung und

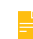

› Anhang (Note 45 – Segmentberichterstattung) Seiten 246 ff.

einer veränderten Produktnachfrage unserer Kunden als auch aus dem Verkauf nicht strategischer Beteiligungen. Darüber hinaus wirkten sich die integrationsbedingten Belastungen der Beratungsteams ebenfalls ertragsmindernd aus. Im Ergebnis aus Finanzanlagen in Höhe von 31 Mio Euro waren positive Effekte aus dem Verkauf einer Tochtergesellschaft enthalten. Das Sonstige Ergebnis belief sich auf –120 Mio Euro nach –99 Mio Euro im Vorjahr. Belastend wirkte insbesondere die Vorsorge für potenzielle Regresse. Der Verwaltungsaufwand verringerte sich um 7,0 % auf 3 552 Mio Euro, wobei sich auch hier die Beteiligungsverkäufe spürbar bemerkbar machten. Deutlich reduzierte sich der Personalaufwand um 13,4 % auf 1 356 Mio Euro, dem standen höhere Sachaufwendungen in Zusammenhang mit der Integration entgegen.

Insgesamt lieferte das Segment mit einem Operativen Ergebnis von 48 Mio Euro einen positiven Beitrag zum Konzernergebnis.

Für die Integration der Dresdner Bank fielen im Berichtsjahr keine weiteren Restrukturierungsaufwendungen an. Im Vorjahreszeitraum waren Aufwendungen in Höhe von 338 Mio Euro zu verzeichnen. Das Ergebnis vor Steuern betrug 48 Mio Euro nach –196 Mio Euro im Vorjahr.

## Wesentliche Entwicklungen im Geschäftsjahr

### Marktpresenz in Deutschland ausgeweitet

Mit einer Kundenzahl von rund 11 Millionen sind wir im Privatkundengeschäft eine der führenden Banken Deutschlands. Als Finanzdienstleister für gehobene Ansprüche legen wir Wert auf hohe Beratungsqualität und passgenaue Finanzlösungen. Unsere Konzernbereiche nehmen in Deutschland Toppositionen ein: So ist die Commerzbank im Bereich Privat- und Geschäftskunden die Nummer-1-Privatbank mit dem dichtesten Filialnetz unter einer Marke. Im Wealth Management gehört sie mit der höchsten Flächenpräsenz zu den wichtigsten Anbietern. Die comdirect Gruppe ist mit rund 1,5 Millionen Depots führende Direktbank im Online-Wertpapiergeschäft. Darüber hinaus gehört die Commerzbank im Kreditgeschäft mit Privatkunden mit einem Volumen von 55 Mrd Euro zu den größten nationalen Instituten.

Im Berichtsjahr ist das Segment Privatkunden bei seiner strategischen Ausrichtung weiter vorangekommen und hat zentrale Herausforderungen erfolgreich gemeistert. Im Vordergrund standen dabei die Integration des Privatkundengeschäfts der Dresdner Bank sowie die Verankerung von Prozessen zur nachhaltigen Steigerung der Qualität unseres Angebots. Zudem haben wir uns vor allem im Ausland von nicht strategischen Beteiligungen getrennt.

### Integrationsmeilensteine erreicht, Qualität nachhaltig verankert, auf das inländische Kerngeschäft fokussiert

Bei der Integration haben wir 2010 wichtige Meilensteine erreicht: So wurden im Juli der Stellenbesetzungsprozess mit der Benennung der dritten und vierten Führungsebene in der Fläche abgeschlossen und die Mitarbeiter in die neuen Strukturen überführt. Die bundesweite Einführung unserer neuen Marke konnten wir im September nach nur wenigen Monaten abschließen. Damit haben wir unsere Präsenz im deutschen Bankenmarkt deutlich ausgeweitet.

|     |                                         |
|-----|-----------------------------------------|
| 75  | Geschäft und Rahmenbedingungen          |
| 81  | Ertrags-, Finanz- und Vermögenslage     |
| 93  | Entwicklung der Segmente                |
| 93  | Privatkunden                            |
| 144 | Unsere Mitarbeiterinnen und Mitarbeiter |
| 150 | Nachtragsbericht                        |
| 151 | Prognose- und Chancenbericht            |

Die Bedürfnisse und Zufriedenheit unserer Kunden sind zentrale Kriterien unseres Qualitätsanspruchs. Um das Kundeninteresse im Privatkundensegment fest zu verankern, haben wir im Jahr 2010 unseren Leistungsanspruch anhand von fünf Kundenrechten formuliert. Parallel wurde eine Kundenanwältin ernannt, die seit Mitte Juni 2010 im Beschwerdeprozess zwischen Kunden und ihren jeweiligen Ansprechpartnern in der Commerzbank vermittelt. Sollte keine Einigkeit erzielt werden, wird der ebenfalls neu eingerichtete Schlichtungsrat, bestehend aus zwei Mitgliedern des Kundenbeirats und dem Privatkundenvorstand der Commerzbank, als höchste Entscheidungsinstanz hinzugezogen.

Darüber hinaus fließen Beratungsqualität und Kundenorientierung seit Juli 2010 als zusätzliche Faktoren in die variable Vergütung der leitenden Angestellten ein. Als Messgröße dient die Weiterempfehlungsbereitschaft unserer Kunden, die im Rahmen des sogenannten Qualitätsbarometers ermittelt wird. Mit diesem seit Februar 2010 eingeführten Instrument werden monatlich rund 15 000 Kunden zu ihrer Loyalität und Zufriedenheit befragt. Die aus dem Qualitätsbarometer gewonnenen Erkenntnisse werden genutzt, um die Beratungsqualität und dadurch die Kundenzufriedenheit und -loyalität nachhaltig zu steigern.

Um höchste Qualität für unsere Kunden zu gewährleisten, haben wir im September zudem unser Produktportfolio um die Premiumanbieter Allianz, Wüstenrot sowie BNP Paribas Personal Finance – Letztere in Form des Joint Ventures Commerz Finanz GmbH – ausgebaut. Damit ist es uns gelungen, die Beratung in den drei Bedarfsfeldern Versicherung, Bausparen und Konsumentenkredit zu stärken.

Als dritten Punkt unserer strategischen Agenda haben wir uns wie im Jahr 2009 auch im Berichtsjahr von nicht strategischen Beteiligungen getrennt. Hierbei standen 2010 vor allem ausländische Beteiligungen wie die Dresdner Bank Monaco S.A.M. im Vordergrund. Dadurch können wir uns noch stärker als bisher auf das inländische Privatkundengeschäft fokussieren.

## Privat- und Geschäftskunden

Der Konzernbereich Privat- und Geschäftskunden umfasst das inländische Filialgeschäft der Commerzbank. Durch die Integration der Dresdner Bank konnten wir unsere Marktpräsenz ausweiten und sind für unsere Kunden mit zukünftig rund 1 200 Filialen immer in der Nähe. Als Finanzdienstleister für gehobene Ansprüche legen wir Wert auf Beratungsqualität und Finanzlösungen, die auf die Bedürfnisse unserer Kunden zugeschnitten sind.

### Maßnahmen für künftigen Erfolg umgesetzt

Im Berichtsjahr haben wir im Filialgeschäft sowohl die nachlaufenden Effekte der Finanz- und Wirtschaftskrise als auch die Ressourcenbindung durch die Integration der Dresdner Bank gespürt. Die Erträge lagen im Vergleich zum Vorjahr auf ähnlichem Niveau.

Dennoch haben wir zahlreiche Maßnahmen für unseren künftigen Erfolg umgesetzt. So sind wir inzwischen unter einer einheitlichen Marke im Markt präsent. Zudem können wir in allen Filialen Basisdienstleistungen anbieten. Für viele unserer Kunden hat sich so der Weg zu uns verkürzt: Rund 800 000-mal pro Monat nutzen Kunden eine näher liegende Filiale der ehemals anderen Bank.

Obwohl wir im Filialgeschäft eine Hauptlast der Integration tragen, ist es uns im Jahr 2010 gelungen, weitere Qualitätsprozesse in unser Geschäftsmodell einzubinden und die Kundenorientierung noch stärker in der Bank zu verankern. Sollte ein Kunde einmal unzufrieden mit unseren Leistungen sein, kann er sich an das Qualitätsmanagement wenden. Im Mai 2010 wurde es bei einem Bankentest der Zeitschrift „Euro“ als bestes Beschwerdemanagement deutscher Banken ausgezeichnet. Die Anliegen der Kunden sind Basis für Ver-

besserungen, die kontinuierlich umgesetzt werden. Maßnahmen zur Steigerung der Kundenzufriedenheit werden zusätzlich aus dem Qualitätsbarometer abgeleitet.

### **Beratungskompetenz gesteigert**

Um der Verunsicherung unserer Kunden infolge der Finanz- und Wirtschaftskrise zu begegnen, stand 2010 die Steigerung der Beratungskompetenz im Mittelpunkt unserer Aktivitäten. Ziel war es, die Beratung zukünftig noch stärker am individuellen Kundenbedarf auszurichten. Dafür haben wir ab März 2010 eine neue systemgestützte Bedarfsanalyse für Privat- und Geschäftskunden eingeführt. So analysieren wir im Rahmen unserer Beratung systematisch die jeweilige Kundensituation – und zwar bezüglich aller für den Kunden relevanten Finanzthemen. Das Ergebnis sind konkrete Handlungsempfehlungen, die die Grundlage für individuelle Finanzlösungen bilden.

Für unsere Geschäftskunden haben wir eine stärkere branchenspezifische Ausrichtung des Leistungs- und Beratungsangebots umgesetzt. Für Ärzte sowie beratende Berufe – Steuerberater, Wirtschaftsprüfer, Rechtsanwälte und Notare – haben wir spezielle Angebote geschaffen und so die Grundlage sowohl für die Intensivierung bestehender Kundenbeziehungen als auch für Kundenwachstum gelegt. Eine breit angelegte Marketing-Kampagne, neue Kooperationen und Kundenveranstaltungen standen im Fokus der begleitenden Marketing-Maßnahmen. So ist es uns in einem insgesamt schwierigen Umfeld gelungen, die Zahl unserer Geschäftskunden stabil zu halten.

Intensive Kundenbetreuung ermöglichen unsere Filialmodelle der Zukunft, die bis zum Jahr 2014 im gesamten Filialnetz eingeführt werden. Modernste Filialtechnik, schlanke Prozesse und ein offenes Raumkonzept zählen zu den Erfolgsfaktoren des Konzepts. Selbstbedienungstechnik sowie die Verlagerung administrativer Tätigkeiten ermöglichen den Fokus auf Beratung. Im Berichtsjahr wurden rund 150 Filialen auf das neue Modell umgestellt. Damit ist mittlerweile bereits die Hälfte unseres Filialnetzes modernisiert und zukunftsfähig aufgestellt.

### **Produkte für anspruchsvolle Privatkunden**

Anlagelösungen auf die weltweit veränderten Rahmenbedingungen – unter anderem die Schuldenproblematik bei einzelnen Industriestaaten oder niedrige Renditen – waren Schwerpunktthemen in der Wertpapierberatung. Hier bildeten flexibel und breit aufgestellte Anlageprodukte mit aktivem Risikomanagement eine gute Möglichkeit für unsere Kunden, ihre Depots der veränderten Situation an den Finanzmärkten anzupassen. Schwerpunktmäßig wurden die konservativen Anlagestrategien unserer Vermögensmanagement-Produkte nachgefragt. Darüber hinaus prägten die Diskussion um neue gesetzliche Regelungen für offene Immobilienfonds sowie Sondereffekte bei einzelnen Produkten das zweite Halbjahr 2010.

Im Vorsorge- und Bauspargeschäft konnten wir unser Leistungsangebot mit dem Wechsel der Produktgeber deutlich ausbauen. Mit der Allianz als Partner im Vorsorge- und Versicherungsgeschäft und der Wüstenrot im Bauspargeschäft setzen wir konsequent auf Qualität. Dabei werden zum einen die Filialen durch exklusiv in der Bank eingesetzte Spezialisten der Partner unterstützt, zum anderen bieten wir unseren Kunden nun im Versicherungsgeschäft die gesamte Palette an Sach- und Krankenversicherungen an. Im wichtigen Bedarfsfeld Altersvorsorge ist insbesondere der Kundenwunsch nach einer lebenslangen Rentenzahlung, finanziert aus angesammeltem Vermögen, zu spüren. Das Geschäft mit Lebensversicherungen mittels Einmalbeitrag ist dadurch deutlich gestiegen, das Geschäft mit Lebensversicherungen gegen laufende Beiträge liegt leicht über Vorjahr.



|     |                                         |
|-----|-----------------------------------------|
| 75  | Geschäft und Rahmenbedingungen          |
| 81  | Ertrags-, Finanz- und Vermögenslage     |
| 93  | Entwicklung der Segmente                |
| 93  | Privatkunden                            |
| 144 | Unsere Mitarbeiterinnen und Mitarbeiter |
| 150 | Nachtragsbericht                        |
| 151 | Prognose- und Chancenbericht            |

Im Einlagengeschäft sind wir in einem Umfeld mit nach wie vor niedrigem Zinsniveau dem Wunsch unserer Kunden nach Angeboten im kurzfristigen Laufzeitenbereich mit unseren Tagesgeldprodukten nachgekommen. Am zeitweilig überhitzten Wettbewerb um zusätzliche Einlagen haben wir uns bewusst nicht beteiligt, da unser Fokus auf der Stabilisierung und dem Ausbau unserer Erträge liegt. Die Erfolgsgeschichte unseres kostenlosen Girokontos haben wir durch unsere Kampagne zum Jahresende 2010 weiter unterstützt.

Durch eine exklusive Kooperation mit unserem Partner MasterCard konnten wir unsere Erträge im Kreditkartengeschäft stabilisieren und für unsere Kunden die Ausstattung der neuen Commerzbank-Master-Card erweitern.

### Ausblick

Im Filialgeschäft werden wir am stärksten von der Integration profitieren. Im laufenden Jahr 2011 starten wir mit der Zusammenlegung räumlich eng beieinander liegender Filialen. Außerdem werden wir weitere Standorte auf das Modell der Filiale der Zukunft umstellen. So können wir signifikante Kostensynergien erzielen. Mit der Migration der Kunden- und Produktdaten werden Übergangsprozesse in den Filialen entfallen, sodass mehr Zeit für Kundenberatung bleibt.

Neben dem erfolgreichen Abschluss der Integration ist es unser Ziel, die Profitabilität des Konzernbereichs nachhaltig zu steigern. Hierfür werden wir unseren Fokus auf die ertragsstarken Zielgruppen legen und sowohl unser Leistungsangebot für anspruchsvolle Privatkunden als auch die Weiterentwicklung im Geschäftskundensegment konsequent vorantreiben. Die Betreuung unserer Geschäftskunden werden wir in bundesweit 65 Geschäftskunden-Beratungszentren bündeln, um die Zielgruppe kompetent und bedarfsgerecht zu beraten. Der weitere Ausbau der Servicequalität bleibt auch im herausfordernden Umfeld der integrationsbedingten Migration der Kunden- und Produktdaten im Jahr 2011 auf unserer Agenda. Neben diesen Maßnahmen gehen wir davon aus, dass sich die Ertragssituation auch durch eine Erhöhung des Zinsniveaus und die weitere Stabilisierung der Kapitalmärkte verbessern wird.

### Wealth Management

Der Konzernbereich Wealth Management konzentriert sich auf die spezifischen Anforderungen besonders vermögender Privatkunden. Deren Ansprüchen begegnen wir mit einem intensiven persönlichen Betreuungskonzept und ganzheitlichen Lösungen für komplexe Vermögensfragen. Mit rund 1 000 Mitarbeitern und bundesweit 41 Standorten gehören wir zu den führenden Anbietern im deutschen Markt. Das internationale Kompetenzzentrum in Luxemburg ergänzt das Angebot für grenzüberschreitende Lösungen: Die neu aufgestellte Commerzbank International S.A. (CISAL) bündelt das 40-jährige Know-how von Commerzbank und Dresdner Bank an diesem wichtigen Finanzplatz. Zum Jahresende 2010 betreuten wir in Deutschland und Luxemburg etwa 37 000 Kundenmandate mit einem Vermögen von 51 Mrd Euro.

### **Integration abgeschlossen, Leistungsumfang ausgebaut**

Wir haben im vergangenen Jahr den Zusammenschluss von Dresdner Bank und Commerzbank im Wealth Management nahezu abgeschlossen und das neue Geschäftsmodell umgesetzt. Ungeachtet des damit verbundenen deutlichen Aufwands konnte der Konzernbereich Wealth Management 2010 erneut einen positiven Beitrag zum Ergebnis im Segment Privatkunden leisten.

Neben der strukturellen Neuausrichtung haben wir im Jahr 2010 unser Betreuungsmodell für vermögende Kunden weiter ausgebaut. Das Angebot unserer Vermögensverwaltung wurde grundlegend weiterentwickelt und spezielle Family-Office-Lösungen werden nun auch für Kunden der Commerzbank angeboten. Die Kooperation mit der Mittelstandsbank haben wir weiter vertieft, um bei Unternehmern die Wechselwirkung von privaten und geschäftlichen Themen bestmöglich zu berücksichtigen.

Verschiedene Medien bestätigten auch im Jahr 2010, dass wir damit erfolgreich sind. So beurteilte das Anlegermagazin „Euro“ den Anlagevorschlag der Vermögensverwaltung als „sehr gut“, das Unternehmermagazin „Impulse“ sieht bei uns den Beweis erbracht „wie ganzheitliche Beratung von Unternehmern funktionieren kann“ und im jährlichen Test von „Focus-Money“ und „n-tv“ wurde dem Wealth Management – zum dritten Mal in Folge – eine „ausgezeichnete Leistung“ attestiert. Aber noch wichtiger für uns: Auch unsere Kunden spiegeln in den kontinuierlich durchgeführten Kundenbefragungen eine hohe Zufriedenheit mit uns wider.

### **Ausblick**

Unser Anspruch ist es, über hohe Qualität nachhaltig zu wachsen. Die neu gewonnene Marktstärke machen die Commerzbank als Qualitätsmarke im Wealth Management erlebbar. Wir verfügen damit heute über eine sehr solide Basis für den weiteren Ausbau des Kundenbestands und der betreuten Assets. Für das Jahr 2011 haben wir uns auf Grundlage dieser Neuaufstellung ehrgeizige Wachstumsziele gesetzt, mit denen wir unseren Beitrag für die Umsetzung des Strategieprogramms „Roadmap 2012“ leisten werden.

### **Kredit**

Der Konzernbereich Kredit verantwortet im Segment Privatkunden marktseitig alle Themenstellungen rund um das Kreditgeschäft. Diese integrierte Aufstellung ermöglicht die Bereitstellung bedarfsgerechter Produkte für die Konzernbereiche, die Umsetzung effizienter Bearbeitungsprozesse und ein wertorientiertes Portfoliomanagement.

#### **Konzernbereich Kredit mit Rückenwind voran**

Die Erträge im Kreditgeschäft mit Privatkunden sind auch im Jahr 2010 stabil. Die erwartungsgemäß große Zahl auslaufender Zinsvereinbarungen im Bestand konnten wir durch die Steigerung der Margen im Neugeschäft ausgleichen. Gleichzeitig konnten durch die zentrale Steuerung des Kreditportfolios – sowohl im Bestand als auch im Neugeschäft – die Risiken gesenkt und die Profitabilität gesteigert werden.

|     |                                         |
|-----|-----------------------------------------|
| 75  | Geschäft und Rahmenbedingungen          |
| 81  | Ertrags-, Finanz- und Vermögenslage     |
| 93  | Entwicklung der Segmente                |
| 93  | Privatkunden                            |
| 144 | Unsere Mitarbeiterinnen und Mitarbeiter |
| 150 | Nachtragsbericht                        |
| 151 | Prognose- und Chancenbericht            |

Im Integrationsprozess haben wir wesentliche Meilensteine erreicht: Erste Standorte wurden zusammengelegt und der Großteil der Mitarbeiter ist an seinem neuen Arbeitsplatz angekommen.

Im Ratenkreditgeschäft wurde die strategische Kooperation mit der BNP Paribas Personal Finance deutlich ausgebaut. So ist die Commerz Finanz GmbH, an der die Commerzbank 49,9 % hält, seit September 2010 neuer Produktgeber für die Commerzbank. Damit heben wir Effizienzen, erzielen Kostenvorteile und bauen neue Vertriebskanäle im Einzelhandel und E-Commerce-Portalen aus.

### **Kredit als Ankerprodukt für Privat- und Geschäftskunden**

Das Kreditgeschäft ist neben dem Girokonto Ankerprodukt der Commerzbank für eine langjährige Kundenbeziehung. Hierzu zählt insbesondere die langlaufende Immobilienfinanzierung. Im Berichtsjahr konnte der rückläufige Neugeschäftstrend durch gezielte Initiativen im Bereich Immobilienfinanzierung gestoppt und profitables Wachstum erzielt werden.

Um bundesweit eine bedarfsgerechte Beratung im Kreditgeschäft von Privat- und Geschäftskunden sicherzustellen, werden den Kundenberatern bei der Immobilienfinanzierung und dem Darlehensgeschäft Kreditspezialisten und im Ratenkreditgeschäft spezialisierte Sales-Manager zur Seite gestellt.

### **Ausblick**

Auf der Produktseite wird die private Immobilienfinanzierung weiterhin im Fokus stehen. Hier wollen wir im Neugeschäft durch die verschiedensten Maßnahmen substantiell wachsen. Darüber hinaus testen wir neue Vertriebskanäle für onlineaffine Kunden.

Mit der Zusammenführung der IT-Systeme im Rahmen der Integration im zweiten Quartal 2011 wird die Kreditbearbeitung auf eine gemeinsame produktorientierte Plattform umgestellt. Dadurch können Synergien realisiert, Bearbeitungszeiten der Kreditanträge deutlich beschleunigt und die Bearbeitungsqualität insgesamt gesteigert werden. Auch durch neue Serviceleistungen in der Kunden- und Filialbetreuung schaffen wir einen weiteren Mehrwert für unsere Kunden.

## **Direct Banking**

Der Konzernbereich Direct Banking umfasste im Berichtsjahr die Aktivitäten der comdirect Gruppe (comdirect bank AG und ebase GmbH) und der Commerz Directservice GmbH. Die comdirect Gruppe ist die zweitgrößte Direktbank in Deutschland und Marktführer im Online-Wertpapiergeschäft.

In der Commerz Directservice GmbH sind die Callcenter-Dienstleistungen der Commerzbank gebündelt. Sie verfügt über rund 470 Vollzeitkräfte und hat im Jahr rund 8,5 Millionen Kundenkontakte.

### **comdirect Gruppe: Marktposition gefestigt**

Mit einer kräftigen Zunahme der Kundenzahl und des betreuten Kundenvermögens sowie einer verbesserten Produktdurchdringung hat die comdirect Gruppe das organische Wachstum des Vorjahres noch einmal übertroffen und ihre Marktposition gefestigt.

Das Produkt- und Leistungsspektrum wurde ausgebaut und optimiert. Im Direktbankgeschäft kam das Wachstumsprogramm „Complus“ weiter voran: Ausschlaggebend für das Wachstum war der hohe Kundenzuspruch zum aktiv vermarkteten Girokonto mit Zufriedenheitsgarantie sowie zum „Tagesgeld PLUS“. Für Wertpapierhändler und -investoren haben

wir unter anderem ein individuell konfigurierbares Markt- und Kursinformationssystem eingeführt und das Sparplanangebot erweitert. Die direktbankfähigen Beratungsmodelle wurden weiter ausgebaut. In diesem Zusammenhang zog sich die comdirect bis zur Jahresmitte aus der Vor-Ort-Beratung über Geschäftsstellen zurück.

Die Ebase hat ihren Weg zur deutschlandweit führenden B2B-Direktbank für institutionelle Partner fortgesetzt. Im Vordergrund standen die Ergänzung der Depotservices durch Bankinglösungen, ein verstärktes Angebot von White-Label-Produkten sowie die Ergänzung des Fondsgeschäfts durch ETFs und ETF-Sparpläne. Hervorzuheben ist der Ausbau der Marktposition im Versicherungssegment durch die technische Anbindung der Depotverwaltung der AmpegaGerling Kapitalanlagegesellschaft.

#### **Commerz-Direktservice: Callcenter-Partner für das Filialgeschäft**

Mit kompetenten Kundenhotlines und hoher Erreichbarkeit festigte der Commerz-Direktservice seine Position als verlässlicher Servicepartner der Commerzbank. Im Berichtsjahr stand der konsequente Kompetenz- und Kapazitätsaufbau am Standort Duisburg im Fokus. So konnten kanalübergreifend und auf einem konstanten Qualitätsniveau sowohl die Kunden der Commerzbank als auch die Kunden der ehemaligen Dresdner Bank über ihre gewohnten Kontaktkanäle betreut werden. Parallel wurde das im Jahr 2009 begonnene Programm zur Kosten- und Effizienzoptimierung im Commerz-Direktservice fortgeführt, insbesondere durch Prozessoptimierung und Reduzierung interner Supportbereiche. Wesentlicher Leistungsschwerpunkt des Jahres 2010 war die Unterstützung der Integration der Dresdner Bank durch die professionelle Hotlinebetreuung von Kunden und Mitarbeitern.

#### **Ausblick**

Der strategische Fokus richtet sich für das laufende Jahr 2011 weiterhin auf profitables Wachstum. Zentraler Treiber dieser Entwicklung bleibt für die comdirect das Girokonto, das über zusätzliche Funktionen nochmals besser ausgestattet werden soll. Im Brokerage können Händler im Laufe des Jahres auf Limitfunktionen im außerbörslichen Handel zurückgreifen und unter anderem bei ETFs von Niedrigpreisaktionen profitieren. Die Ebase hat vor allem mit White-Label-Produkten auf Basis der erweiterten Depot- und Kontoarchitektur gute Chancen, weitere institutionelle Partner zu gewinnen. Insgesamt rechnet die comdirect Gruppe mit einem weiteren Anstieg der Kundenzahl sowie des Depot- und Einlagevolumens.

Im ersten Halbjahr 2011 wird der Commerz-Direktservice seine operativen Kapazitäten unverändert auf die optimale technische und fachliche Kundenbetreuung während der anstehenden Kunden- und Produktdatenmigration der Commerzbank konzentrieren. Im weiteren Jahresverlauf wird der Servicebetrieb im Commerz-Direktservice das mit der Integration angestrebte Zielgeschäftsmodell erreichen. Maßnahmen zur Effizienzsteigerung, Hebung von Kostensynergien und der hohe interne Qualitätsanspruch bleiben Leistungsmotor des Commerz-Direktservice.

|     |                                         |
|-----|-----------------------------------------|
| 75  | Geschäft und Rahmenbedingungen          |
| 81  | Ertrags-, Finanz- und Vermögenslage     |
| 93  | Entwicklung der Segmente                |
| 93  | Privatkunden                            |
| 144 | Unsere Mitarbeiterinnen und Mitarbeiter |
| 150 | Nachtragsbericht                        |
| 151 | Prognose- und Chancenbericht            |

## Ausblick Privatkunden

In den nächsten Jahren konzentrieren wir uns segmentweit auf die anspruchsvollen Ziele des Strategieprogramms „Roadmap 2012“, die wir über zwei Hebel erreichen wollen: Hebung von Kostensynergien und Steigerung der Vertriebsleistungen.

So werden wir in den kommenden Jahren die Synergien der Integration vollumfänglich heben und unsere Kosten deutlich senken. Mit der Kunden- und Produktdatenmigration erreichen wir im zweiten Quartal 2011 einen der wichtigsten Meilensteine der Integration. Dann arbeiten wir bankweit in einer Systemwelt mit einem einheitlichen Produkt- und Leistungsspektrum. Im Anschluss können wir mit dem letzten großen Meilenstein beginnen: Bis zum Jahr 2012 werden räumlich eng beieinander liegende Filialpaare zusammengelegt und auf unsere Filialmodelle der Zukunft umgestellt. Im Jahr 2011 betrifft dies bereits über 100 Filialpaare. Diese Maßnahmen sind ein wesentlicher Bestandteil der Zukunftsfähigkeit und des wirtschaftlichen Erfolgs unseres Privatkundengeschäfts.

Gleichzeitig wollen wir unsere Vertriebsleistungen steigern, indem wir unsere Kunden umfassend in der Breite beraten. Um den Vertrieb noch besser unterstützen zu können, haben wir im ersten Quartal 2011 die beiden Konzernbereiche Privat- und Geschäftskunden und Wealth Management zum neuen Konzernbereich Privat-, Geschäfts- und Wealth-Management-Kunden zusammengelegt. Zudem werden im zweiten Halbjahr 2011 für die Beratung wieder Ressourcen frei, die durch die Integration von technischen Systemen und Produkten gebunden waren.

Rückenwind gibt uns ferner das konjunkturelle Umfeld. Die erwartete Erhöhung des Marktzinzniveaus werden wir positiv im Zinsüberschuss spüren. Auch dürften wir von der Entwicklung der Kapitalmärkte und der abnehmenden Kaufzurückhaltung unserer Kunden profitieren und dadurch unseren Provisionsüberschuss erhöhen.

## Frankenbach Container Terminals GmbH

### Herausforderung: Wasser, Schiene und Straße ideal verbinden

### Ziel: Containerumschlag erhöhen

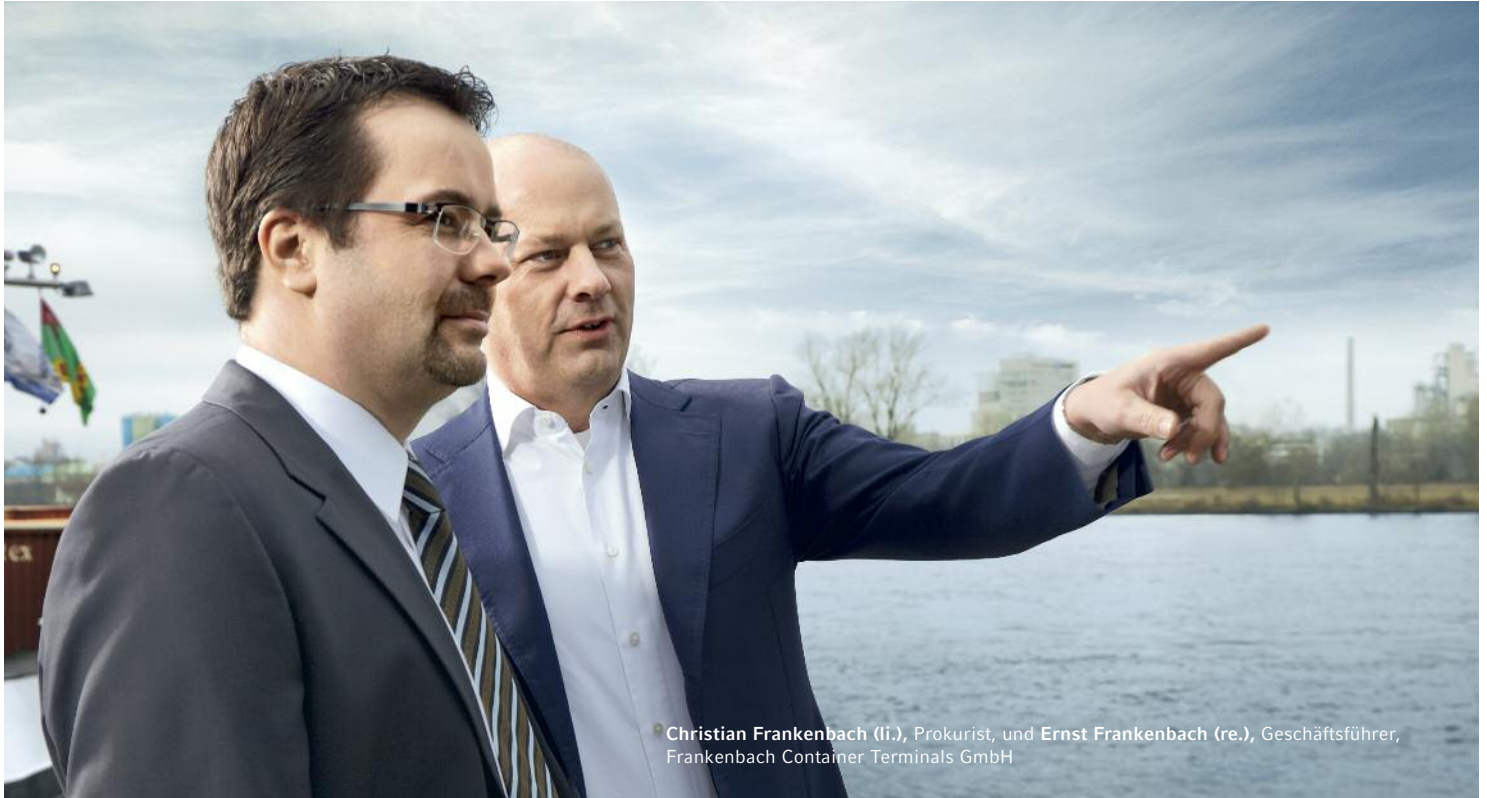

Christian Frankenbach (li.), Prokurist, und Ernst Frankenbach (re.), Geschäftsführer, Frankenbach Container Terminals GmbH

Ein effizienter Warenumsatz im trimodalen Verkehr zwischen Wasser, Straße und Bahn erfordert höchste logistische Präzision und modernste Anlagen. Deshalb hat sich die Ernst Frankenbach GmbH aus Mainz im Jahr 2010 dazu entschlossen, mit erheblichen Investitionen vor Ort ein neues Containerterminal errichten zu lassen – eine echte Investition in die Zukunft, denn schon vor Baubeginn war absehbar, dass die Geschäfte durch die Wirtschaftskrise stark beeinträchtigt sein würden.

Die Herausforderung, vor die sich Ernst Frankenbach gestellt sah, war das Neubauvorhaben zu realisieren, ohne die übrigen Geschäftsfelder zu beeinträchtigen. Mit dem Bau des neuen Terminals konnte im Jahr 2010 dieses Ziel erreicht werden, wobei die Frankenbach GmbH das komplette Bauvorhaben selbst plante und durchführte.

Unterstützt wurde der Logistikspezialist dabei von der Commerzbank, die die Finanzierung sowie das Risikomanagement bezüglich Zinsen, Währung und Rohstoffen übernahm und den Bau durch eine enge Betreuung sowie durch ein Coaching bei der wirtschaftlichen Planung begleitete.

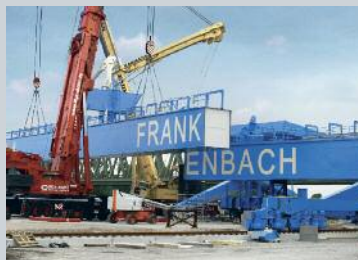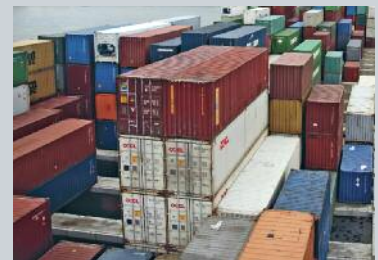

Noch leistungsfähiger: ein neues Containerterminal für den trimodalen Verkehr

Herausforderungen annehmen, Ziele erreichen

|     |                                         |
|-----|-----------------------------------------|
| 75  | Geschäft und Rahmenbedingungen          |
| 81  | Ertrags-, Finanz- und Vermögenslage     |
| 93  | Entwicklung der Segmente                |
| 103 | Mittelstandsbank                        |
| 144 | Unsere Mitarbeiterinnen und Mitarbeiter |
| 150 | Nachtragsbericht                        |
| 151 | Prognose- und Chancenbericht            |

## Mittelstandsbank

Das Segment Mittelstandsbank gliedert sich in die beiden Konzernbereiche Corporate Banking und Financial Institutions. Im Konzernbereich Corporate Banking ist das Geschäft mit mittelständischen Kunden, Großkunden, dem öffentlichen Sektor und institutionellen Kunden gebündelt. Der Konzernbereich Financial Institutions verantwortet die Beziehung zu in- und ausländischen Banken und Finanzinstituten sowie Zentralbanken und stellt dem Corporate Banking eine umfangreiche Plattform für die Abwicklung der Außenhandelsaktivitäten der Firmenkunden zur Verfügung.

Die Mittelstandsbank konnte im Berichtsjahr in einem wirtschaftlich herausfordernden Umfeld ihr nachhaltiges Geschäftsmodell erneut unter Beweis stellen. Wesentliche Erfolgsfaktoren waren unser klar kunden- und bedarfsorientierter Betreuungsansatz – mit seiner Fokussierung auf hohe Marktdurchdringung, Präsenz am Kunden, Internationalität sowie hohen Produkt- und Leistungskompetenz – und das solide Risikomanagement. Auf dieser Basis konnte das Segment seine führende Position als beste Mittelstandsbank weiter festigen und den größten Ergebnisbeitrag zur Gesamtbank liefern.

## Ergebnisentwicklung

### Mittelstandsbank

|                                          | 2010  | 2009  | Veränderung in %/%-Punkten |
|------------------------------------------|-------|-------|----------------------------|
| Gebundenes Eigenkapital (Mio €)          | 5 550 | 5 393 | 2,9                        |
| Operative Eigenkapitalrendite (%)        | 28,8  | 11,2  | 17,6                       |
| Aufwandsquote im operativen Geschäft (%) | 43,5  | 46,1  | -2,6                       |

Tabelle 4

Im Geschäftsjahr 2010 war das Segment Mittelstandsbank innerhalb der Kernbank Hauptergebnistreiber. In einem sich im Vergleich zum Vorjahr deutlich aufhellenden konjunkturellen Umfeld konnte das Segment Mittelstandsbank durch sein stabiles Geschäftsmodell und seine starke Kundenbasis – begünstigt durch deutlich niedrigere Risikovorsorge für das Kreditgeschäft – das Operative Ergebnis im Vergleich zum Vorjahr mehr als verdoppeln.

Der Zinsüberschuss lag mit 2 081 Mio Euro um 3,5 % unter dem Vorjahreswert in Höhe von 2 156 Mio Euro. Während sich der Beitrag des Einlagengeschäfts am Zinsüberschuss aufgrund des weiterhin niedrigen Zinsniveaus verminderte, blieb der Zinsüberschuss im Kreditgeschäft stabil. Rückläufige Volumina, insbesondere aus dem Abbau des nicht strategischen Auslandsportfolios sowie einer nach wie vor stagnierenden Kreditnachfrage, konnten im Vergleich zum Vorjahr durch gestiegene Margen kompensiert werden. Die sich spürbar verbesserten wirtschaftlichen Rahmenbedingungen haben sich im Vergleich zum Vorjahr auch in der deutlich rückläufigen Risikovorsorge für das Kreditgeschäft niedergeschlagen. Für das Jahr 2010 lagen die Risikovorsorgenotwendigkeiten mit 279 Mio Euro um 675 Mio Euro unter dem Wert des Vorjahres in Höhe von 954 Mio Euro. Der Provisionsüberschuss stieg auf 983 Mio Euro, nach 924 Mio Euro im Vorjahr. Der Zuwachs um 59 Mio Euro oder 6,4 % resultierte insbesondere aus dem zunehmenden Außenhandel und steigenden Erträgen in den damit verbundenen Produktkategorien.

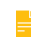

› Anhang (Note 45 – Segmentberichterstattung)  
Seiten 246 ff.



Das Handelsergebnis hat sich – bedingt durch positive Bewertungseffekte aus Kreditsicherungsgeschäften – im Vergleich zum Vorjahreszeitraum um 153 Mio Euro auf 24 Mio Euro verbessert. Das Ergebnis aus Finanzanlagen betrug für den Berichtszeitraum 188 Mio Euro, was im Wesentlichen aus Bewertungseffekten aus umstrukturierten Krediten resultierte. Das Laufende Ergebnis aus at-Equity-bewerteten Unternehmen betrug im Berichtsjahr 30 Mio Euro. Das Sonstige Ergebnis belief sich auf 14 Mio Euro, gegenüber –69 Mio Euro im Vorjahr. Das Ergebnis des Berichtsjahres beruhte insbesondere auf einem Einmalsertrag im Zusammenhang mit einer Vergleichsvereinbarung aus dem Jahr 2006. Der Verwaltungsaufwand lag mit 1 443 Mio Euro um 8,4 % über dem Vorjahreswert in Höhe von 1 331 Mio Euro. Während der Personalaufwand gegenüber dem Vorjahr nur leicht zulegte, stieg der Sachaufwand im Vergleich zum Vorjahr aufgrund von höheren Raumkosten und IT-Aufwendungen stärker an.

Das Segment Mittelstandsbank erzielte im Berichtsjahr 2010 insgesamt ein Operatives Ergebnis von 1 598 Mio Euro und damit den höchsten Beitrag aller Kernsegmente. Das Ergebnis vor Steuern betrug ebenfalls 1 598 Mio Euro nach 528 Mio Euro im Vorjahr.

## Wesentliche Entwicklungen im Geschäftsjahr

### Festigung unserer Position als Marktführer im Mittelstand

Die Commerzbank steht dem Mittelstand regional und international als strategischer Partner zur Verfügung. Mit einem Marktanteil von rund 18 % sind wir in unserem Kernsegment, dem gehobenen Mittelstand, Marktführer. Wir wickeln rund 23 % des deutschen Außenhandels ab. Nach den dramatischen Einbrüchen der Wirtschaftsleistung der Eurozone gilt Deutschland derzeit als „Lokomotive“ der europäischen Volkswirtschaft. Aufgrund unserer starken Marktstellung als Partner des deutschen Mittelstands profitieren wir besonders von dieser Dynamik und Stärke unseres Heimatmarktes. Im Konzernbereich Financial Institutions konnten wir unserer Position als eine der führenden Euro-Transaktionsbanken gerecht werden.

### Integration weit fortgeschritten

Im Konzernbereich Corporate Banking wurde die Zusammenführung der Firmenkundenbetreuung von Commerzbank und Dresdner Bank fast vollständig abgeschlossen. Sowohl die Betreuerzuordnung für unsere Kunden als auch die notwendigen Umzüge und räumlichen Bündelungen der zuständigen Teams sind umgesetzt. Mit 150 Standorten für die Firmenkundenbetreuung und sieben Großkundenzentren können wir den Wünschen unserer Kunden durch die regionale Nähe noch besser gerecht werden. Durch die im zweiten Halbjahr 2010 abgeschlossene Kundenüberleitung ist die neue Commerzbank für ihre Kunden bereits jetzt erlebbar. Unser regionaler Betreuungsansatz gibt uns die Möglichkeit, Standort, Markt und Umfeld unserer Firmenkunden noch besser zu verstehen und auf dieser Basis maßgeschneiderte Lösungen für die Bedürfnisse unserer Kunden anzubieten. Insgesamt wurden im Jahr 2010 über 4 300 Mitarbeiter in den regionalen Einheiten in die neue Struktur versetzt; die räumliche Zusammenführung wird im ersten Halbjahr 2011, deutlich früher als erwartet, abgeschlossen.

|     |                                         |
|-----|-----------------------------------------|
| 75  | Geschäft und Rahmenbedingungen          |
| 81  | Ertrags-, Finanz- und Vermögenslage     |
| 93  | Entwicklung der Segmente                |
| 103 | Mittelstandsbank                        |
| 144 | Unsere Mitarbeiterinnen und Mitarbeiter |
| 150 | Nachtragsbericht                        |
| 151 | Prognose- und Chancenbericht            |

Als weitere wichtige Maßnahme zur Zusammenführung beider Häuser haben wir die Produktpaletten harmonisiert und unsere Kunden profitieren bereits von dem erweiterten Produktangebot. Auch international konnte die Integration nahezu abgeschlossen werden. So bieten wir unseren Kunden an 15 Standorten in Westeuropa und Asien Cross-Border-Geschäft an.

#### **Auszeichnungen für hohes Leistungs- und Serviceniveau**

Auch in Zeiten starker Umbrüche ist es uns gelungen, eine nachhaltige Zufriedenheit unserer Kunden zu erreichen. Wenn Unternehmer nach dem besten Partner für den Mittelstand befragt werden, dann fällt die Wahl immer wieder auf die Commerzbank. So belegten wir im Jahr 2010 bei vielen unabhängigen Umfragen renommierter Medien durchgängig erste Plätze. Zu nennen sind insbesondere die Auszeichnungen „Beste Mittelstandsbank“ bei der Studie des Deutschen Instituts für Service-Qualität (DISO) im Auftrag von „Focus Money“, als „Beliebtestes Institut für das Auslandsgeschäft“ neben der jeweiligen Hausbank durch das Finanzmagazin „Impulse“ und den Platz 1 in der Kategorie „Cash Management in Deutschland“ bei „Euromoney“.

### **Corporate Banking**

Im Konzernbereich Corporate Banking ist das Geschäft mit mittelständischen Kunden ab einem Jahresumsatz von 2,5 Mio Euro, Großkunden – sofern sie nicht als Multinational Clients dem Segment Corporates & Markets zugeordnet sind –, dem öffentlichen Sektor und institutionellen Kunden gebündelt. Den Kern unserer Vertriebsorganisation bilden unsere Firmenkundenbetreuer in 150 deutschen Filialen sowie sieben Großkundencentern, die durch Produktspezialisten unterstützt werden. Als strategischer Partner begleiten wir in unseren Niederlassungen in Westeuropa und Asien sowohl die internationalen Aktivitäten unserer deutschen Firmenkunden als auch internationale Unternehmen mit Geschäftsaktivitäten in unserem deutschen Heimatmarkt.

#### **Nachhaltiges Geschäftsmodell als Erfolgsfaktor**

Der Kern unseres Geschäftsmodells ist der kundenorientierte Betreuungsansatz, mit dem wir bedarfsgerechte Lösungen für alle unsere Kundengruppen entwickeln und uns als strategischer Gesprächspartner positionieren. Durch ein nachhaltiges Bekenntnis zum Mittelstand, eine umfassende Betreuung, kurze Entscheidungswege und das Know-how in Branchen und Märkten können wir Wachstumschancen am Markt erkennen und aktiv nutzen. Neben der Festigung unserer bereits guten Marktstellung im gehobenen Mittelstand haben wir ausdrücklich auch die Erwartungen unserer kleineren Mittelstandskunden im Fokus und dafür unseren Betreuungsansatz an deren Bedürfnisse angepasst. Im Berichtsjahr haben wir in diesem Segment Firmenkundenbetreuer eingesetzt, die sich durch breites Produktwissen auszeichnen, sowie eine Vielzahl von unkomplizierten „Eingangskanälen“ geschaffen, die einen schnellen und einfachen Kontakt zum Betreuer und, sofern erforderlich, zu den Produktspezialisten ermöglichen. Gerade in diesem Kundensegment sehen wir aufgrund unseres bisher vergleichsweise geringen Marktanteils von 6 % weiteres Wachstumspotenzial für die Mittelstandsbank.

### **Verstärkte Zusammenarbeit mit dem Segment Corporates & Markets**

Durch die enge Zusammenarbeit mit dem Segment Corporates & Markets bieten wir unseren Kunden den Zugang und die gesamte Leistungspalette des Investmentbankings an. Mit Corporate-Finance-Advisory haben wir eine Einheit geschaffen, die Kunden mit Blick auf ihre strategischen Ziele zunächst produktneutral berät. Zur Umsetzung einer bedarfsgerechten Lösung stehen wir unseren Kunden mit unseren Client-Service-Teams zur Seite, die neben dem Firmenkundenbetreuer alle relevanten Branchen- und Produktspezialisten einbinden. Dies ermöglicht es uns, Unternehmen eine optimale, maßgeschneiderte Lösung zu bieten – Kapitalmarktzugang und hoch qualifizierte Kundenbetreuung aus einer Hand.

### **Kompetente Begleitung unserer Kunden ins Ausland**

International richten wir unsere Betreuung gezielt auf deutsche Firmenkunden mit internationalem Geschäft aus und unterstützen so den deutschen Mittelstand in all seinen Auslandsaktivitäten. Wir fungieren dabei für unsere Kunden als Partner mit spezifischem Länder-Know-how und einem umfassenden lokalen Netzwerk, der mit den Märkten vertraut ist und die Kunden bei der Strukturierung und Abwicklung des internationalen Geschäfts kompetent begleitet. Zudem begleiten wir ausländische Unternehmen auf den deutschen Markt. Im Ausland ist die Commerzbank in den wichtigsten Wirtschaftszentren in West-, Mittel- und Osteuropa genauso wie in Asien und Nordamerika vertreten. Vor allem auf dem asiatischen Markt wollen wir unser Engagement ausbauen. Unser besonderes Augenmerk gilt dabei China, wo wir mittlerweile an vier Standorten vertreten sind und in der Filiale Peking im November 2010 die Renminbi-Lizenz erhalten haben. Dadurch sind wir jetzt in der Lage, Produkte in der chinesischen Währung anzubieten und unser bereits bestehendes Produktportfolio für Firmenkunden zu komplettieren. Hinzu kommt ein internationales Netzwerk aus Filialen, Repräsentanzen und Tochtergesellschaften der Commerzbank in 50 Ländern weltweit, mit dem wir insbesondere das Exportgeschäft deutscher Unternehmen unterstützen.

### **Verlässlicher und innovativer Finanzierungspartner**

Die Commerzbank sieht sich in besonderer Verantwortung als wichtigster Kreditgeber des deutschen Mittelstands. Vor diesem Hintergrund hat die Bank im Jahr 2010 ein vielschichtiges „Programm für den deutschen Mittelstand“ aufgelegt. Seit Anfang des Berichtsjahres steht unseren Kunden ein zusätzliches Kreditvolumen in Höhe von 5 Mrd Euro zur Finanzierung von Betriebsmitteln und Investitionen im Mittelstand zur Verfügung.

Ergänzt wird dieses Programm durch die Bestellung eines Kreditmediators. Die Commerzbank bietet den Kunden der Mittelstandsbank sowie den Geschäftskunden und Freiberuflern aus dem Segment Privatkunden eine direkte Ansprechmöglichkeit und ein eigenes Mediationsverfahren innerhalb der Commerzbank. Ziel des Kreditmediators der Commerzbank ist es, die Qualität in der Kreditentscheidung bei abgelehnten Finanzierungsvorhaben zu sichern und die Kundenakzeptanz durch Transparenz, Prozessgeschwindigkeit und eine nachvollziehbare Begründung der Entscheidung zu fördern.

|     |                                         |
|-----|-----------------------------------------|
| 75  | Geschäft und Rahmenbedingungen          |
| 81  | Ertrags-, Finanz- und Vermögenslage     |
| 93  | Entwicklung der Segmente                |
| 103 | Mittelstandsbank                        |
| 144 | Unsere Mitarbeiterinnen und Mitarbeiter |
| 150 | Nachtragsbericht                        |
| 151 | Prognose- und Chancenbericht            |

Als dritten Punkt des Maßnahmenpaketes haben wir zusätzliche Entscheidungsparameter bei der Kreditvergabe eingeführt. Mit der Analyse der Zukunftsfähigkeit von Geschäftsmodellen wollen wir unsere bankenübliche ratingorientierte Kreditentscheidung, die sich auf die durch das konjunkturelle Umfeld stark belasteten betriebswirtschaftlichen Kennzahlen der Kunden stützt, ergänzen. Ein zu diesem Zweck eigens entwickeltes Tool bietet dem Firmenkundenbetreuer eine Grundlage, die individuellen Zukunftschancen eines Unternehmens zu überprüfen. Diese zusätzliche Bewertung ermöglicht es uns, frühzeitig nachhaltige Geschäftsmodelle zu identifizieren und unsere Kunden auch in Krisenzeiten zu begleiten. Nach erfolgreichem Test haben wir das Analysetool bereits für 15 Branchen im Inland etabliert. Für das Jahr 2011 ist der erste internationale Roll-out in Westeuropa geplant. Daneben bieten wir unseren Bestandskunden den sogenannten „Hausbankkredit“ an. Wir sichern so den Liquiditätsbedarf unserer langjährigen Kunden, gewähren Planungssicherheit durch feste mittelfristige Laufzeitenzusagen und verzichten dabei für bis zu drei Jahre auf unser ordentliches Kündigungsrecht.

Zusätzlich haben die Commerzbank und die staatliche Förderbank KfW-Bankengruppe als Gründungsinvestoren im Juli 2010 den „AF-Eigenkapitalfonds“ für den deutschen Mittelstand aufgelegt. Zielsetzung des Fonds ist es, die Unternehmen mit neuem, zusätzlichem Eigenkapital auszustatten, um so ihr Wachstum anhaltend zu gewährleisten. Im Fokus stehen deutsche Personen- und Kapitalgesellschaften, insbesondere Familienunternehmen, und deren auf Nachhaltigkeit ausgerichtete Unternehmensentwicklung. Darüber hinaus steht die Sicherung bestehender und Schaffung neuer Arbeitsplätze im Mittelpunkt. Der Bedarf an Eigenkapitallösungen zur Wachstumsfinanzierung wird durch die konjunkturelle Situation weiter ansteigen.

#### **Beratungsleistungen mit Fokus auf bedarfsorientierte Lösungen**

Neben unserer Rolle als zuverlässiger Finanzierungspartner unterstützen wir unsere Kunden verstärkt bei ihren Trade-Finance-Aktivitäten sowie im Anlage-, Währungs- und Commoditygeschäft. Hierfür stehen wir mit unseren Produktspezialisten aus den Bereichen Cash Management & International Business (CMIB), Interest Currency & Liquidity Management (ICLM) und Kredit & Financial Engineering (FE) zur Verfügung.

Der Bereich CMIB bietet Firmenkunden weltweit das gesamte Produktspektrum für Trade-Finance-Aktivitäten: vom Zahlungsverkehr, Cash Management über das Dokumentengeschäft bis hin zu strukturierten Handels- und Exportfinanzierungen. Durch die Zusammenführung der global angebotenen Lösungen der Dresdner Bank und Commerzbank können unsere Kunden jetzt insbesondere im Cash- und Transaktionsmanagement auf ein noch breiteres und leistungsstärkeres Angebot zurückgreifen. Mit rund 30 CMIB-Standorten im Inland sowie weiteren rund 20 Einheiten im Ausland sind wir nicht nur regional gut aufgestellt, sondern können unsere Kunden auch im Ausland aktiv begleiten. Ergänzend bieten wir seit diesem Jahr im internationalen Geschäft eine neue Internetplattform zum elektronischen Nachrichtenaustausch im Dokumenten- und Garantiegeschäft an.

Im Bereich ICLM, in dem das inländische Anlage-, Währungs- und Rohstoffgeschäft sowie die Risikomanagementprodukte zusammengefasst sind, konnten wir durch neue Produkte, Fokussierung auf strategische Beratung sowie eine neue Vertriebsstruktur steigende Geschäftsvolumina verzeichnen. Als besonders erfreulich bewerten wir, dass das Wachstum im Provisionsgeschäft im Wesentlichen über eine Verbreiterung der Kundenbasis erzielt wurde. Hierauf wollen wir in Zukunft aufbauen und setzen bereits verschiedene Vertriebsinitiativen um. Ziel ist es, durch konsequente Potenzialausschöpfung in allen Produktbereichen des ICLM-Geschäfts die Marktführerschaft bei der Breite unserer Kunden auszubauen.

Die Bereiche Kredit und Financial Engineering stehen unseren Kunden sowohl mit klassischen Produkten als auch mit maßgeschneiderten Finanzierungslösungen zur Seite. Aus der Analyse der aktuellen Unternehmenssituationen sowie der Unternehmensstrategien unserer Kunden leiten unsere Spezialisten individuelle Finanzierungslösungen ab und bedienen sich der gesamten Produktpalette an Finanzierungsinstrumenten, die auch Private Equity, Mezzanine, Leasinglösungen und die gesamte Bandbreite öffentlicher Fördermittel umfasst. Das Angebot wird um Beratungsleistungen, zum Beispiel zu den Themen Nachfolge und Rating ergänzt. Im vergangenen Jahr haben wir das Betreuungsangebot aus unseren zehn regionalen Standorten heraus weiter ausgebaut und um Spezialisten für den Bereich Öffentliche Förderprogramme ergänzt. Somit können wir künftig noch stärker regionale wie überregionale Angebote an Fördermitteln in Finanzierungsstrukturen einbinden.

Im Jahr 2010 konnten wir mit der Einführung des Multibank-Kredites, einer Finanzierungslösung, die bilaterale Kreditvereinbarungen unter einheitlichen Rahmenbedingungen zusammenführt, sowie des neuen Beratungstools Finance-Modelling (CB-FIMO) erfolgreich unser Angebot erweitern. CB-FIMO ermöglicht gemeinsam mit dem Kunden die Erstellung von Unternehmensplanungen in verschiedenen Szenarien und darauf aufbauend die Entwicklung von Handlungsoptionen.

### **Ausblick**

Nach dem nahezu vollständigen Abschluss der Integration der ehemaligen Dresdner Bank setzen wir unseren Schwerpunkt für die Folgejahre wieder deutlich auf Ertragswachstum. Im Mittelpunkt steht dabei unser nachhaltiger Betreuungsansatz, den wir noch stärker auf die individuellen Kundenbedürfnisse in unseren Kernsegmenten ausrichten. Zielsetzung ist es, unseren Marktanteil im kleinen Mittelstand von derzeit 6 % durch gezielte Neukundengewinnung und höhere Präsenz am Kunden weiter aufzubauen. Auch bei unseren größeren mittelständischen Kunden sowie den Großkunden wollen wir den Ergebnisbeitrag durch Stärkung unserer Hausbankfunktion erhöhen. Den Schwerpunkt bildet die Sicherstellung eines weiter verbesserten Zusammenspiels von Betreuern und Produkteinheiten. Insbesondere unsere kapitalmarktaffinen Großkunden werden dabei von der engen Verzahnung mit unserem Investmentbanking weiter profitieren. Daneben verstärken wir unser Auslandsengagement weiter und bauen die beiden Standorte Wien und Zürich zu vollwertigen Corporate-Filialen aus.

|     |                                         |
|-----|-----------------------------------------|
| 75  | Geschäft und Rahmenbedingungen          |
| 81  | Ertrags-, Finanz- und Vermögenslage     |
| 93  | Entwicklung der Segmente                |
| 103 | Mittelstandsbank                        |
| 144 | Unsere Mitarbeiterinnen und Mitarbeiter |
| 150 | Nachtragsbericht                        |
| 151 | Prognose- und Chancenbericht            |

Für das Jahr 2011 planen wir eine deutliche Steigerung unseres Kreditgeschäfts. Wir erwarten einerseits durch weiteren Working-Capital-Bedarf unserer Kunden eine stärkere Ausnutzung der Kreditlinien und erreichen damit das Vorkrisenniveau des Jahres 2008. Zum anderen sehen wir eine Verlagerung des Schwerpunkts bei Finanzierungsprodukten von der zunächst geforderten Liquiditätssicherung hin zu ganzheitlichen Finanzierungslösungen für Investitionsmaßnahmen der Unternehmen, die wir als strategischer Partner aktiv begleiten wollen. Auch im Einlagengeschäft fahren wir eine klare Wachstumsstrategie. Neben einem Ausbau unserer Volumina durch konsequente Potenzialausschöpfung gehen wir davon aus, dass dieser Produktbereich durch steigende Geldmarktzinsen deutlich zum Ertragswachstum beitragen wird. Weitere Wachstumsimpulse erwarten wir zudem aufgrund unserer Marktstellung bei der Abwicklung des deutschen Außenhandels.

## Financial Institutions

Um Privat- und Firmenkunden mit Transaktions- und Abwicklungsdienstleistungen sowie Absicherungsinstrumenten bedienen zu können, unterhält die Commerzbank ein weltweites Netzwerk von circa 7 000 Korrespondenzbanken. Im Konzernbereich Financial Institutions verantworten wir die Beziehungen zu diesen in- und ausländischen Banken sowie zu Finanzinstituten und Zentralbanken. Strategischer Schwerpunkt dieser Zusammenarbeit ist die Abwicklung des Auslandszahlungsverkehrs (Produktfeld Cash Services), Absicherung von Außenhandelsrisiken und Finanzierung von Außenhandelsaktivitäten (Produktfeld Trade Finance). Ferner stehen wir Banken mit bilateralen Krediten zur Verfügung, begleiten Kunden bei syndizierten Transaktionen (Produktfeld Banking Products) und bieten gemeinsam mit dem Segment Corporates & Markets Lösungen an, um Bankenrisiken abzusichern (Produktfeld Market Products).

### Starke Marktposition verteidigt

Mit einem Marktanteil von 23 % an der Abwicklung des deutschen Außenhandels ist Financial Institutions nach eigenen Untersuchungen Marktführer in Deutschland in diesem Geschäft und gehört gemäß SWIFT und Bankscope zu den führenden drei Instituten bei der Abwicklung des weltweiten, in Euro denominierten Zahlungsverkehrs.

Im Bereich Cash Services konnten wir unsere Position als eine der führenden Eurotransaktionsbanken und Anbieter umfassender Zahlungsverkehrsdienstleistungen behaupten. Belastend auf dieses Produktfeld wirkte das erneut massiv gesunkene Zinsniveau, was zu einem Rückgang der Rentabilität von Sichteinlagen führte. Infolge der aktuellen Entwicklungen im Eurozahlungsraum setzte eine Wanderung der Euro-Interbanken-Sichteinlagen zu den Bankhäusern im Kern der Eurozone ein, wovon auch die Commerzbank profitiert hat.

Auch im Produktbereich Trade Services konnten wir unsere starke Position halten. Die Commerzbank ist in diesem Bereich in Deutschland Marktführer. Das deutsche Exportvolumen ist im Berichtsjahr wieder gestiegen, das Bedürfnis der deutschen Exportindustrie, dieses Exportvolumen – etwa durch Abgabe einer Akkreditivbestätigung – durch die Commerzbank absichern zu lassen, ist weiterhin konstant hoch. Das gestiegene Risikobewusstsein im Markt erlaubte es Financial Institutions, die Margen in diesem Geschäft stabil zu halten.

Der Bereich Banking Products steht derzeit vor einem grundsätzlichen Wandel. Viele Regulierungen adressieren insbesondere diesen Bereich. Insgesamt waren im Jahr 2010 viele Banken zurückhaltend, sich durch Interbankenkredite zu refinanzieren.

Im Produktfeld Market Products profitierte der Konzernbereich Financial Institutions stark von Produktentwicklungen der ehemaligen Dresdner Bank. So entwickelte sich die im Jahr 2009 bei allen Financial-Institutions-Kunden eingeführte Plattform „Click and Trade“, ein marktführendes Produkt im Bereich FX-Online, sehr erfolgreich. Die intensive und enge Zusammenarbeit zwischen Financial Institutions und den speziell auf das Geld- und Devisengeschäft mit Kundenbanken ausgerichteten Betreuungstischen in unseren Handelsbereichen in Frankfurt, London, New York und Singapur ermöglicht es, das Liquiditätsmanagement für unsere Kundenbanken effizient zu gestalten.

#### **Globale Präsenz durch weit verzweigtes Vertriebsnetz**

Unser zentrales Relationship-Management mit Sitz in Frankfurt verfolgt einen globalen Betreuungsansatz. Es arbeitet dabei mit einem weltweiten Vertriebsnetz von 33 Repräsentanten, 6 Financial Institutions Desks in Auslandsstützpunkten sowie der Niederlassung in Dubai zusammen. Damit ist Financial Institutions in allen wichtigen Wirtschaftsräumen weltweit präsent und ergänzt das operative Stützpunktnetz der Commerzbank im Ausland.

Financial Institutions bietet seinen Kunden eine umfassende Beratung, wobei eine bevorzugte Einschaltung in den internationalen Zahlungsverkehr und die Abwicklung des Außenhandels strategische Schwerpunkte sind. Diese umfassende Betreuung erfolgt durch die Financial-Institutions-Relationship-Manager. Diesen stehen Produkt- und Risikospezialisten – auch aus anderen Einheiten der Commerzbank – zur Verfügung. Der Ansatz einer engen partnerschaftlichen Kundenbeziehung mit einem breiten Produktangebot und umfassendem Know-how wird durch Schulungsmaßnahmen für Mitarbeiter von Partnerbanken aus Emerging Markets und einem einheitlichen Marketingauftritt „Financial Institutions: Partnership meets Expertise“ begleitet.

#### **Ausblick**

Im Jahr 2011 werden für den Konzernbereich Financial Institutions die Veränderungen der Marktstruktur infolge zahlreicher regulatorischer Änderungen im Fokus stehen. Zudem wird der weitere Bedeutungsgewinn der Schwellenländer im internationalen Handel auch höhere Zahlungsverkehrs- und Außenhandelsvolumina in diesen Märkten induzieren. Wir werden daher prüfen, ob das gegenwärtige Repräsentanznetz diesen veränderten Handelsströmen noch gerecht wird. Der nach der Eurokrise wieder zunehmenden „Dollarisierung“ der Weltwirtschaft begegnen wir mit dem Ausbau unseres Angebots an US-Dollar-Produkten. Hierzu planen wir auch die Erschließung von Sovereign Wealth Funds aus Schwellenländern als Kundengruppe.

Die Ertragschancen aus diesen Marktstrukturänderungen überwiegen, da der Konzernbereich Financial Institutions auf Schwellenländer ausgerichtet und flexibel strukturiert ist.



|     |                                         |
|-----|-----------------------------------------|
| 75  | Geschäft und Rahmenbedingungen          |
| 81  | Ertrags-, Finanz- und Vermögenslage     |
| 93  | Entwicklung der Segmente                |
| 103 | Mittelstandsbank                        |
| 144 | Unsere Mitarbeiterinnen und Mitarbeiter |
| 150 | Nachtragsbericht                        |
| 151 | Prognose- und Chancenbericht            |

## Ausblick Mittelstandsbank

Für das Jahr 2011 erwarten wir für Deutschland eine positive Grundstimmung. So zeigt der Ifo-Geschäftsklimaindex – ausgehend von dem bereits hohen Niveau – eine weiter steigende Geschäftserwartung auf und bekräftigt damit, dass Deutschland als Konjunkturlokomotive in Europa anzusehen ist. Allerdings ist ebenfalls davon auszugehen, dass das konjunkturelle Expansionstempo an Dynamik verlieren wird, da das globale Wachstum durch die Sparbemühungen vieler Staaten sowie die hohe Verschuldung der US-Konsumenten weiter belastet ist.

Die Mittelstandsbank setzt für die folgenden Jahre ihren Schwerpunkt klar auf die Steigerung des Ergebnisses aus Vertriebsaktivitäten. Dazu werden wir im laufenden Jahr 2011 mit der Umsetzung unseres Wachstumsprogramms „Kurs: Marktführer“ beginnen, in dem wir verschiedene bereits erarbeitete Wachstumsinitiativen bündeln. Im Fokus dieses Programms stehen die Erschließung bestehender Potenziale sowie neuer Wachstumsfelder und die weitere Steigerung unserer Qualität und Effizienz. Darüber hinaus erwarten wir insbesondere durch eine Normalisierung des Kreditziehungsverhaltens und steigende Investitionen positive Impulse für unser Kreditgeschäft. Mit unseren Wachstumsinitiativen forcieren wir gleichzeitig eine deutliche Ausweitung unserer Einlagen- und Kreditvolumina.

Auf der Risikoseite erwarten wir, ausgehend von den in diesem Jahr sehr hohen Entlastungseffekten, eine Stabilisierung auf niedrigem Niveau. Auch auf der Kostenseite ist mit einer konstanten Entwicklung zu rechnen, bei der die Synergieeffekte aus der Integration die laufenden Kostensteigerungen sowie zusätzliche Faktoren wie die Einlagensicherung auffangen.

Auf dieser Basis streben wir eine Verbesserung unserer Profitabilität an und führen gleichzeitig unsere selektive Wachstumsstrategie fort, die auf Nachhaltigkeit und wertorientiertes Ertragswachstum abzielt.

## EuroChem (Russland)

### Herausforderung: Eintritt in den Kalimarkt

### Ziel: Globaler Kostenführer

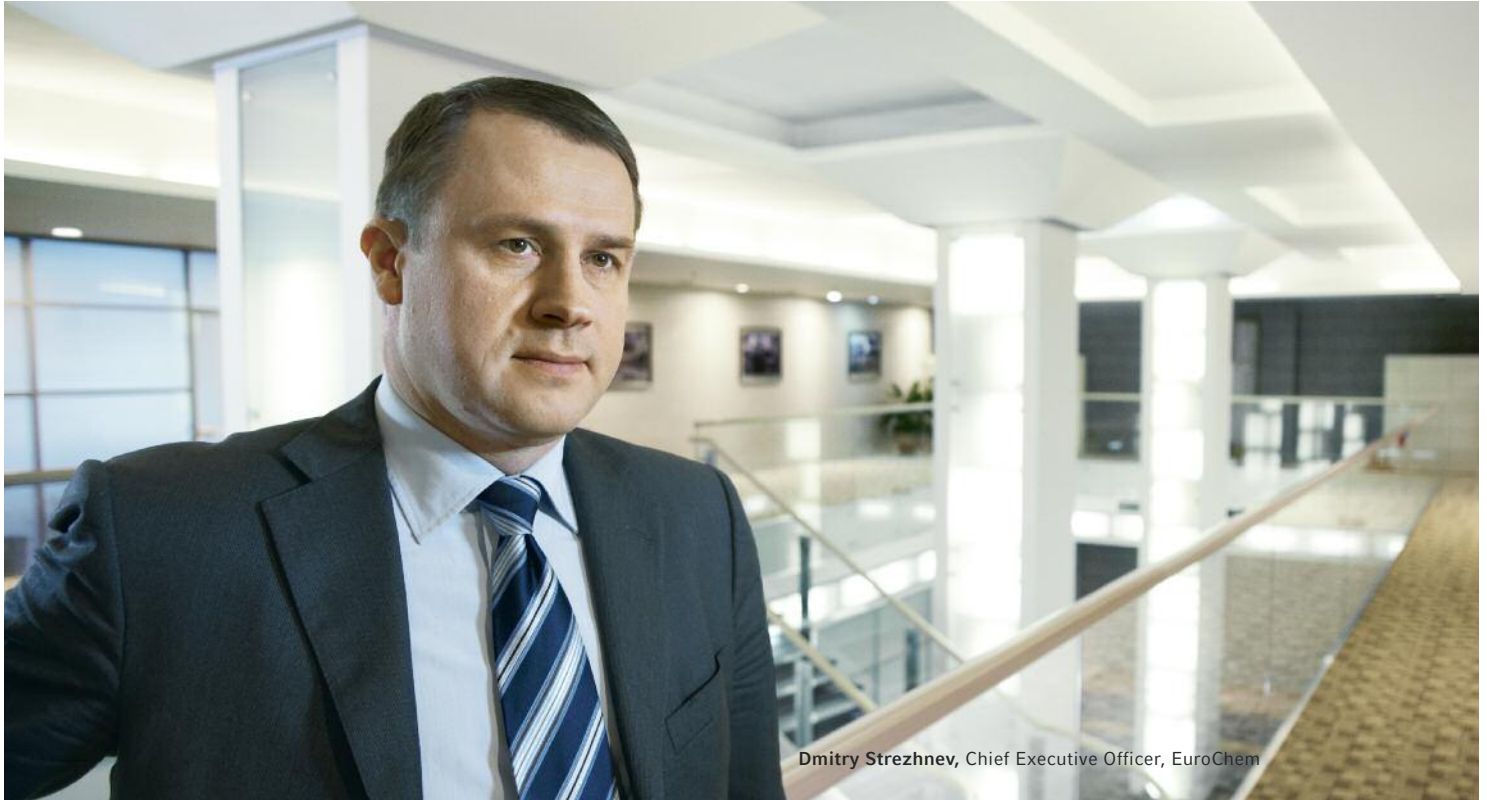

Dmitry Strezhnev, Chief Executive Officer, EuroChem

Düngemittel helfen, ein Grundbedürfnis aller Menschen zu befriedigen: die Versorgung mit Nahrungsmitteln. Deshalb sind sie weltweit sehr begehrt und die Nachfrage nach ihnen steigt stetig – ein Markt mit hervorragenden Zukunftsaussichten angesichts des weltweiten Bevölkerungswachstums und abnehmender Anbauflächen pro Kopf.

Gemessen an der Nährstoffproduktion gehört EuroChem mit Sitz in Moskau weltweit zu den zehn größten Agrochemieunternehmen. Um in den Markt der Kaliförderung einzusteigen und den eigenen Produktmix zu erweitern, hat sich CEO Dmitry Strezhnev im Jahr 2010 folgender Herausforderung gestellt: die Erschließung eines Kalivorkommens bei Gremyachinskø in der Region von Wolgograd. Mit dem Kauf und der Installation von Schachtanlagen hat EuroChem dort einen ersten Meilenstein gesetzt. Mittelfristig will das Unternehmen zu einem der weltweit fünf größten Kaliproduzenten und zum globalen Kostenführer werden.

Als einer der beiden Mandated Lead Arranger hat die Commerzbank das Unternehmen bei der Finanzierung dieses Vorhabens unterstützt.

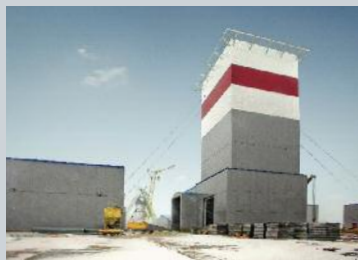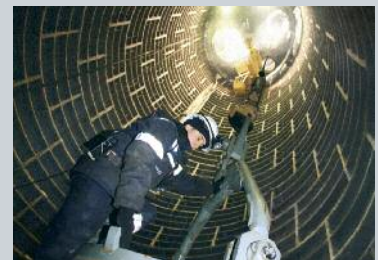

Auf den Weg gebracht: Einstieg in den globalen Wachstumsmarkt Kaliförderung

Herausforderungen annehmen, Ziele erreichen

|     |                                         |
|-----|-----------------------------------------|
| 75  | Geschäft und Rahmenbedingungen          |
| 81  | Ertrags-, Finanz- und Vermögenslage     |
| 93  | Entwicklung der Segmente                |
| 113 | Central & Eastern Europe                |
| 144 | Unsere Mitarbeiterinnen und Mitarbeiter |
| 150 | Nachtragsbericht                        |
| 151 | Prognose- und Chancenbericht            |

## Central & Eastern Europe

Das Segment Central & Eastern Europe umfasst die Aktivitäten der polnischen Tochter BRE Bank, der ukrainischen Bank Forum, der russischen Commerzbank Eurasija, der ungarischen Commerzbank Zrt., unserer Filialen in Tschechien und in der Slowakei sowie Beteiligungen an sieben Mikrofinanzbanken und der russischen Promsvyazbank. Die Aktivitäten sind unter dem Dach einer Management-Holding gebündelt, die als Center of Competence, Steuerungseinheit und Schnittstelle zwischen den lokalen Einheiten und den Zentralabteilungen agiert. Schwerpunkte der Geschäftsaktivität in Mittel- und Osteuropa sind das Privat- und Firmenkundengeschäft sowie das kundenbezogene Investmentbanking.

Die Region Mittel- und Osteuropa hat im Jahr 2010 von einer deutlichen Verbesserung der wirtschaftlichen Rahmenbedingungen profitieren können. In diesem Marktumfeld haben wir im Segment Central & Eastern Europe insgesamt ein positives Operatives Ergebnis und damit den Turnaround erzielt. Gleichwohl verlief die wirtschaftliche Entwicklung unserer Einheiten unterschiedlich: Die polnische BRE Bank trug wesentlich zu den Erträgen des Segments bei und erzielte ein hohes Operatives Ergebnis. In der Ukraine führten die nach wie vor hohe Risikoversorge und der weitere Portfolioabbau zu einem negativen Ergebnis. Unsere Einheiten in Russland und Mitteleuropa entwickelten sich im Berichtsjahr vergleichsweise robust und konnten von der wirtschaftlichen Erholung an den Finanzmärkten profitieren.

### Ergebnisentwicklung

#### Central & Eastern Europe

|                                          | 2010  | 2009  | Veränderung in %/%-Punkten |
|------------------------------------------|-------|-------|----------------------------|
| Gebundenes Eigenkapital (Mio €)          | 1 627 | 1 605 | 1,4                        |
| Operative Eigenkapitalrendite (%)        | 3,3   | -24,5 | 27,8                       |
| Aufwandsquote im operativen Geschäft (%) | 57,7  | 53,7  | 4,0                        |

Tabelle 5

Die Länder Mittel- und Osteuropas profitierten im Berichtsjahr von der anhaltenden, wenn auch sehr unterschiedlichen Erholung der Konjunktur. Während sich diese in Polen als ausgesprochen stabil erwies und in Russland weiter fortsetzte, konnte sich die Lage in der Ukraine zwar verbessern, blieb aber volatil. Der größte Teil der Erträge des Segments entfiel auf die BRE Bank, die ein starkes Operatives Ergebnis erzielt hat.

Trotz niedrigerer Margen lag der Zinsüberschuss mit 674 Mio Euro leicht über dem Niveau des Vorjahreszeitraums. In der Risikoversorge spiegelten sich in allen Einheiten die verbesserten wirtschaftlichen Rahmenbedingungen wider. Die Risikoversorge des gesamten Segments sank im Jahr 2010 um 451 Mio Euro auf 361 Mio Euro. Der Provisionsüberschuss stieg um 22,4 % auf 208 Mio Euro. Insbesondere die BRE Bank konnte von der guten Entwicklung an den Kapitalmärkten profitieren. Im Berichtszeitraum stieg der Verwaltungsaufwand gegenüber dem Vorjahr um 79 Mio Euro auf 565 Mio Euro. Dieser Anstieg resultierte im Wesentlichen aus Währungseffekten und wachstumsbedingt höheren Mitarbeiterzahlen bei der BRE Bank. Aufgrund der guten Entwicklung der BRE Bank und der Entlastung aus der Risikoversorge erzielte das Segment im Jahr 2010 ein Operatives Ergebnis in Höhe von 53 Mio Euro gegenüber -393 Mio Euro im Vorjahreszeitraum. Das Ergebnis vor Steuern betrug ebenfalls 53 Mio Euro nach -398 Mio Euro im Vorjahr.

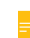

› Anhang (Note 45 – Segmentberichterstattung)  
Seiten 246 ff.

## Wesentliche Entwicklungen im Geschäftsjahr

Der strategische Fokus lag im Berichtsjahr auf der Fortsetzung der Restrukturierung unseres Kreditportfolios, Maßnahmen zur Steigerung der Effizienz sowie der Fortführung selektiver Wachstumsinitiativen. Darüber hinaus haben wir die Integration der Dresdner Bank in Mittel- und Osteuropa im Berichtsjahr erfolgreich abgeschlossen. Nachdem das Geschäft der ehemaligen Dresdner-Bankfiliale in Ungarn bereits im Vorjahr in die Commerzbank Zrt. integriert wurde, folgte im Herbst 2010 die Kundenüberleitung in Russland und Polen. In Russland wurde die Dresdner Bank ZAO im Rahmen eines Mergers in die Commerzbank Eurasija integriert und eine Commerzbank-Eurasija-Filiale am Standort der ehemaligen Dresdner Bank ZAO in St. Petersburg etabliert. In Polen wurde der operative Bankbetrieb der Filiale an die BRE Bank veräußert und das Kundengeschäft entsprechend übertragen.

Im Berichtsjahr konnten wir in einem schwierigen Marktumfeld eine wachsende Kundenzahl von unserem Produkt- und Leistungsangebot überzeugen. Diese erhöhte sich im Jahresverlauf um gut 460 000 auf mehr als 4 Millionen Kunden. Die Commerzbank ist damit die führende deutsche Bank in Mittel- und Osteuropa. Rund 9 500 Mitarbeiter betreuen unsere Kunden in 540 Geschäftsstellen.

Darüber hinaus haben wir im zurückliegenden Jahr die grenzüberschreitende Betreuung mittelständischer Kunden weiter intensiviert. Durch internationale Vertriebsinitiativen in Zusammenarbeit mit der Mittelstandsbank und den Ausbau des Produkt- und Leistungsspektrums, wie zum Beispiel ein grenzüberschreitendes Cash Pooling in Polen, konnten wir die Zahl der Cross-Border-Kunden im Segment Central & Eastern Europe um rund 700 auf fast 4 000 erhöhen.

## BRE-Bank-Gruppe

Im Jahr 2010 hat die BRE Bank ein starkes Operatives Ergebnis in einem zunehmend besseren wirtschaftlichen Umfeld in Polen erzielt. Das Wachstum des Bruttoinlandsproduktes nahm gegenüber dem Vorjahr nochmals deutlich an Fahrt auf. Höhere Außenhandelsumsätze und eine Stabilisierung des Arbeitsmarktes gingen mit einer besseren Bonität der Kunden einher.

Der Beitrag der BRE-Bank-Gruppe zum Operativen Ergebnis des Segments lag für das Jahr 2010 bei 190 Mio Euro und ist damit gegenüber dem Vorjahr um 164 Mio Euro gestiegen. Wesentlich dazu beigetragen haben deutlich gestiegene Erträge vor Risikovorsorge. Ein weiterer Ergebnistreiber war die Entwicklung der Risikovorsorge. Diese lag mit 156 Mio Euro rund 40 % unter dem Wert des Vorjahres. Zugleich wurde die Kostendisziplin erfolgreich gewahrt. Die Cost Income Ratio für das Berichtsjahr lag bei rund 52 %.

Das Kundenwachstum setzte sich mit einem Anstieg um mehr als 390 000 auf 3,7 Millionen Kunden fort. Insbesondere die dynamische Entwicklung der Direktbank mBank in Polen, Tschechien und der Slowakei hat dazu beigetragen.

Durch die Übertragung des polnischen Filialgeschäftes der ehemaligen Dresdner Bank an die BRE-Bank-Gruppe wurde die Integration in Polen erfolgreich abgeschlossen. Darüber hinaus wurden Maßnahmen zur weiteren Optimierung der Zusammenarbeit im Cross-Border-Geschäft mit der Commerzbank und bei der Betreuung internationaler Kunden umgesetzt.

|     |                                         |
|-----|-----------------------------------------|
| 75  | Geschäft und Rahmenbedingungen          |
| 81  | Ertrags-, Finanz- und Vermögenslage     |
| 93  | Entwicklung der Segmente                |
|     | 113 Central & Eastern Europe            |
| 144 | Unsere Mitarbeiterinnen und Mitarbeiter |
| 150 | Nachtragsbericht                        |
| 151 | Prognose- und Chancenbericht            |

### Neue Wachstumsstrategie und erfolgreiche Kapitalerhöhung

Der Schwerpunkt der im März vorgestellten BRE-Bank-Strategie liegt auf profitabilem Wachstum im Privat- und Firmenkundengeschäft. Ziel im Privatkundengeschäft ist es, die Erträge durch weiteres Kundenwachstum sowie Cross-Selling bei Bestandskunden zu erhöhen. Angebotsseitig wird insbesondere das Affluent-Segment adressiert und das Leistungsspektrum bei Girokonten, Konsumentenkrediten und Baufinanzierungen weiter ausgebaut. Darüber hinaus soll die Produktpalette für die Kunden erweitert werden, die bisher noch keine Erstbankverbindung mit der BRE-Bank-Gruppe haben. Durch die weitere Segmentierung der Kundenbasis und den Einsatz von Customer-Relationship-Management-Systemen (CRM) wird das Angebot noch gezielter auf individuelle Bedürfnisse zugeschnitten. Bis zum Jahr 2012 ist geplant, die Zahl der Kunden auf mehr als 4 Millionen zu erhöhen.

Im Firmenkundengeschäft und im Investmentbanking soll sich die starke Position der BRE Bank durch die Konzentration auf attraktive Wachstumsfelder weiter festigen. Wesentliche Maßnahmen liegen in der Weiterentwicklung von Transaction-Banking-Services und einem stärkeren Fokus auf das Cross-Selling von Investmentbanking-Produkten an Firmenkunden. Darüber hinaus wird weiteres Wachstumspotenzial erschlossen, beispielsweise im öffentlichen Sektor (Kommunalfinanzierung), in der Zusammenarbeit mit lokalen Tochtergesellschaften internationaler Konzerne und bei Finanzierungsprojekten, die durch EU-Fördermittel unterstützt werden.

Zur Umsetzung der strategischen Maßnahmen und zur Stärkung ihrer Eigenkapitalbasis hat die BRE Bank im Sommer 2010 eine Kapitalerhöhung durchgeführt. Durch die Ausgabe von 12 371 200 neuen Aktien mit Bezugsrecht hat sich das Kapital um rund 500 Mio Euro erhöht. Die Commerzbank hat an dieser Kapitalerhöhung entlang ihrer bestehenden Beteiligungsquote von 69,8 % teilgenommen.

### Produkt- und Leistungsangebot ausgebaut

Durch die Weiterentwicklung des Produkt- und Leistungsangebots hat die BRE Bank ihre Wettbewerbsposition im Geschäftsjahr 2010 weiter gestärkt.

Im Firmenkundengeschäft wurde mit „iBRE FX“ eine neue Onlineplattform zur Währungskonvertierung geschaffen, die Kunden einen zusätzlichen Zugang zu Kapitalmärkten eröffnet. Zudem startete mit „iBRE 2.0“ eine neue Version der internetbasierten Electronic-Banking-Plattform. Neben einer verbesserten Benutzerführung wurden die Kommunikationsmöglichkeiten zwischen Kunde und Bank erweitert, zum Beispiel über neue Funktionen wie ein interaktiver Kalender oder ein neues Benachrichtigungssystem. Im Produkt- und Leistungsangebot für Firmenkunden erleichtern neue Services den Zahlungsverkehr für Commerzbank-Kunden in Polen. Zudem wurde das Prepaid-Karten-Angebot ausgebaut und einer breiteren Kundenbasis zugänglich gemacht.

Im Investmentbanking konnte die BRE Bank eine führende Rolle im dynamisch wachsenden Markt der polnischen Staatsanleihen und der Zinsderivate einnehmen. Bei mittelfristigen Schuldverschreibungen von Unternehmen und Banken liegt die BRE Bank mit einem Marktanteil von 21 % auf Platz 2.

Das Angebot im Privatkundengeschäft wurde ebenfalls weiterentwickelt. So können Kunden von neuen, individuellen Kreditlimiten profitieren, die auf Basis der Kundenhistorie automatisch eingerichtet werden. Dieses Angebot kann über die Kreditkarte oder als Barkredit in Anspruch genommen werden. Zudem wurde das Leistungsspektrum um Bardarlehen für Kleinunternehmen, Euro-Automobilfinanzierungen und Ratenkredite, die über die Kreditkarte abgerufen werden können, erweitert.

#### **Leistungsstärke ausgezeichnet**

Im vergangenen Jahr wurden die BRE Bank und ihre Tochtergesellschaften mehrfach ausgezeichnet. Beim Wettbewerb „World's Best Internet Banks“ wurde die BRE Bank von dem Magazin „Global Finance“ zur besten Onlinebank für Firmenkunden in Mittel- und Osteuropa im Jahre 2010 gekürt. Im Rahmen eines Wettbewerbs unter der Schirmherrschaft des polnischen Ministeriums für Wirtschaft und der Agentur für Unternehmensentwicklung konnte sich die Leistungsstärke der „iBRE Electronic Banking“-Plattform erneut beweisen: Die Währungskonvertierungsplattform „iBRE FX“ und das „iBRE Cards“-Modul erhielten den Titel „Europrodukt 2010“. Im Privatkundengeschäft wurde die Direktbank mBank von den Lesern der polnischen Tageszeitung „Dziennik Gazeta Prawna“ zur „Bank most accessible to clients“ gewählt, die MultiBank erhielt eine Auszeichnung für ihre Effizienz im Kundengeschäft. Beurteilt wurden die Qualität der MultiBank-Outlets, der Transaktionssysteme, des Internetauftritts ebenso wie die der telefonischen Kundenbetreuung. Zudem erhielt die mBank den Preis „Golden Bank“ für die besten Konten, Kreditkarten und Unternehmenskredite. In der Tschechischen Republik wurde die mBank als beste „Consumer Internet Bank“ ausgezeichnet.

#### **Ausblick**

Für das Jahr 2011 erwarten wir, dass sich die positive Entwicklung der polnischen Wirtschaft weiter fortsetzt. Wesentlich gestützt wird das stabile Wachstum durch den Konsum und private Investitionen. Ziele der BRE-Bank-Gruppe sind Ertragswachstum, einhergehend mit einer weiteren Verbesserung der Profitabilität, der Eigenkapitalrentabilität und der Cost-Income-Ratio.

Die BRE-Bank-Gruppe wird ihr Produkt- und Leistungsspektrum weiterentwickeln. Im Firmenkundengeschäft stehen ein kundenzentrierter Ansatz und der Ausbau des sektorspezifischen Fachwissens in der Kundenbetreuung im Fokus. Auf diese Weise soll die Kundenbindung mit attraktiven Angeboten und durch eine noch stärkere Ausrichtung entlang der Kundenbedürfnisse weiter erhöht werden. Darüber hinaus bilden selektives Kundenwachstum, höhere Marktanteile im öffentlichen Sektor und ein intensivierter Vertrieb im Transaction Banking strategische Eckpunkte im Firmenkundengeschäft.

Im Investmentbanking sind für das Jahr 2011 mehrere Initiativen geplant, die das Volumen bei Fremdwährungstransaktionen erhöhen sollen. Im Vordergrund steht eine Ausweitung des Geschäftsvolumens mit Firmenkunden.

Mit dem Abschluss von Programmen rund um die Fußball Europameisterschaft 2012 und in Verbindung mit EU-finanzierten Projekten wird in Polen sowohl ein steigender Finanzierungsbedarf als auch eine steigende Investitionsneigung bei einer weiteren Stabilisierung des Wirtschaftswachstums erwartet.

|     |                                         |
|-----|-----------------------------------------|
| 75  | Geschäft und Rahmenbedingungen          |
| 81  | Ertrags-, Finanz- und Vermögenslage     |
| 93  | Entwicklung der Segmente                |
| 113 | Central & Eastern Europe                |
| 144 | Unsere Mitarbeiterinnen und Mitarbeiter |
| 150 | Nachtragsbericht                        |
| 151 | Prognose- und Chancenbericht            |

Im Privatkundengeschäft wird die BRE-Bank-Gruppe noch gezielter anspruchsvolle und junge Kunden im Fokus haben. Dabei wird das Cross-Selling weiter forciert, insbesondere bei Konsumentenkrediten und bei Investmentprodukten. Darüber hinaus wird die Bank ihre Zahlungsverkehrsdienstleistungen und innovativen Kartenlösungen weiterentwickeln. Wesentlicher Treiber ist die „Touch-less-Technologie“, mit der Zahlungen durch Auflegen der Karte auf bestimmte Lesegeräte komfortabel ausgeführt werden können.

## Bank Forum

Die wirtschaftliche Entwicklung in der Ukraine hat sich im Jahresverlauf 2010 mit einem Anstieg des ukrainischen Bruttoinlandsproduktes um rund 4 % bis 5 % verbessern können. Im ukrainischen Bankenmarkt zeigte sich diese Entwicklung durch eine verbesserte Liquiditätssituation, steigende Kundeneinlagen und eine geringere Risikovorsorge. Aus der Bank Forum resultierte vor diesem Hintergrund ein geringerer Verlust als im Vorjahr. Der negative Ergebnisbeitrag trotz umfangreicher Restrukturierungsmaßnahmen ergab sich durch eine strukturell hohe Risikovorsorge im Kreditgeschäft und rückläufige Erträge durch wertorientierten Portfolioabbau. Die Zahl der Kunden erhöhte sich im Berichtsjahr um rund 67 000 auf mehr als 500 000. Hierzu konnte unter anderem die im Sommer gestartete Imagekampagne mit dem Slogan „Business the German way“ beitragen, die im November bei den Epica Awards in der Kategorie „Print“ mit Gold ausgezeichnet wurde.

### Restrukturierungsprogramm weiter umgesetzt

Der Schwerpunkt lag im Berichtsjahr in der operativen Umsetzung des im Jahr 2009 aufgesetzten Restrukturierungsprogramms. Im Rahmen der strategischen Neuausrichtung zu einer fokussierten Universalbank wurden die Organisationsstruktur weiter angepasst und Kernprozesse verstärkt in Backoffices gebündelt. Zugleich wurde eine Optimierung der bestehenden Infrastruktur vorgenommen und die Filialpräsenz noch stärker auf profitable Kundensegmente in relevanten Ballungszentren ausgerichtet. Zur Erhöhung der Effizienz und Reduzierung der Kosten wurde die Zahl der Vertriebsseinheiten von 285 auf 194 und die Zahl der Mitarbeiter um 22 % auf 3 080 verringert.

Im Privatkundengeschäft wurden zusätzliche Leistungsangebote eingeführt. So können Kunden beispielsweise mit dem neuen Service „Smarter“ auf ihrem Girokonto einen Mindestbetrag fixieren – die über diesen Betrag hinaus gehende Liquidität wird automatisch auf ein Sparkonto transferiert. Auf diese Weise profitieren Kontoinhaber von einem optimierten Liquiditätsmanagement. Am Ende des Berichtsjahres wurde zudem ein neues Onlinebanking gestartet und damit die Attraktivität der Bank für Kunden erhöht.

Zu Beginn des Jahres 2010 hat die Commerzbank 26,25 % an der Bank Forum von einem Minderheitsaktionär übernommen und damit ihre Kontrollmehrheit auf 89,3 % erhöht. Es wurden zwei Kapitalerhöhungen durchgeführt, wodurch sich der Anteil der Commerzbank an der Bank Forum auf rund 95 % erhöhte.

Durch die sukzessive Implementierung professioneller Prozesse und zukunftsgerichteter Methoden zur Risikobewertung und -erkennung werden das Risikomanagement und damit die Grundlage für selektives Neugeschäft fortlaufend weiter verbessert. Daneben wurde eine interne Restructuring Unit etabliert, um das Non-performing-loan-Portfolio wertorientiert abzubauen.



**Ausblick**

Für das Jahr 2011 erwarten Analysten ein moderates Wirtschaftswachstum. Die Bank Forum wird in diesem Umfeld den Abbau des Portfolios notleidender Kredite weiterführen und selektiv Neugeschäft akquirieren. Ziel ist die weitere Rückführung der Risikokosten sowie der Wiederaufbau eines werthaltigen Kreditbestandes. Zugleich wird der Umbau zu einer fokussierten Universalbank weiter fortgesetzt. Durch die tiefgreifenden strukturellen Veränderungen erwarten wir mittelfristig die Rückkehr in die Gewinnzone.

**Commerzbank CEE Subsidiaries & Branches****Commerzbank Eurasija**

Im Jahr 2010 hat sich die Wirtschaft in Russland positiv entwickelt, unter anderem durch gestiegene Rohstoffpreise und Exporterlöse. Das Bruttoinlandsprodukt erhöhte sich im Jahresverlauf um gut 4 %.

Im Firmenkundengeschäft der russischen Commerzbank Eurasija werden lokale Tochtergesellschaften deutscher und internationaler Unternehmen sowie große russische Gesellschaften betreut. Schwerpunkt im zurückliegenden Geschäftsjahr war die Integration der Dresdner Bank ZAO in die Commerzbank Eurasija verbunden mit einer Erweiterung der Produktpalette für Kunden der ehemaligen Dresdner Bank und einem Ausbau der Kundenbeziehungen. Diese Transaktion wurde im Herbst 2010 erfolgreich abgeschlossen und die Kundenbasis der neuen Commerzbank Eurasija nachhaltig gestärkt. Im Ergebnis hat sich die Zahl der betreuten Kunden verdoppelt. Darüber hinaus wurde die regionale Präsenz der Commerzbank in Russland weiter ausgebaut. Im Mai wurde im Zuge der Integration eine neue Commerzbankfiliale am Standort der ehemaligen Dresdner Bank ZAO in St. Petersburg etabliert.

Einen zusätzlichen Impuls lieferte die Integration mit Blick auf die Weiterentwicklung und die Zusammenarbeit im Cross-Border-Geschäft – zum Beispiel im Cash Management und bei Finanzierungen. Insbesondere Exportfinanzierungen deutscher Unternehmen, die im Zuge der positiven konjunkturellen Entwicklung Investitionsgüter in erhöhten Volumen nach Russland lieferten, haben dazu beigetragen.

**Ausblick** Im Jahr 2011 sollen die Geschäftsaktivitäten der Commerzbank Eurasija im russischen Markt ausgeweitet werden. Der Fokus liegt unter anderem auf einer noch intensiveren Zusammenarbeit der Commerzbank Eurasija mit dem Segment Corporates & Markets für eine noch bessere Betreuung russischer Blue Chips sowie weiterer großer russischer Unternehmen.

**Filialen in Tschechien und der Slowakei**

Im Jahr 2010 hat sich das Bruttoinlandsprodukt der tschechischen sowie der slowakischen Wirtschaft deutlich mit 2,4 % respektive 4,2 % erholt. Schwerpunkte der Aktivitäten waren die Festigung unserer Position im internationalen Geschäft mit tschechischen Unternehmen, insbesondere im Garantiegeschäft, sowie der Ausbau von Geschäftsbeziehungen mit lokalen Tochtergesellschaften deutscher Unternehmen.

|     |                                         |
|-----|-----------------------------------------|
| 75  | Geschäft und Rahmenbedingungen          |
| 81  | Ertrags-, Finanz- und Vermögenslage     |
| 93  | Entwicklung der Segmente                |
| 113 | Central & Eastern Europe                |
| 144 | Unsere Mitarbeiterinnen und Mitarbeiter |
| 150 | Nachtragsbericht                        |
| 151 | Prognose- und Chancenbericht            |

Die Zufriedenheit der Kunden stand auch 2010 im Mittelpunkt. Im Rahmen einer umfangreichen Befragung im Firmen- und Privatkundengeschäft wurde der Commerzbank in Tschechien wie in der Slowakei eine durchweg hohe Zufriedenheit der Kunden bescheinigt.

In Tschechien konnte sich die Commerzbank durch die Projektfinanzierung eines Solarparks in der Region Böhmen im Bereich der erneuerbaren Energien positionieren. Die Finanzierung erfolgte in enger Zusammenarbeit mit den Experten des Commerzbank Center of Competence Renewables (CoC RE) in Hamburg. In der Slowakei konnten wir entlang einer positiven Entwicklung in der Automobil- und Stahlindustrie insbesondere von Neugeschäft in der Betriebs- und Investitionsfinanzierung profitieren.

Im Berichtsjahr erweiterten wir in Tschechien die Zahl der Cash-Management-Lösungen im Cross-Border-Geschäft für eine noch effizientere Liquiditätssteuerung unserer Kunden. Weiterhin konnten diese von der intensiven Unterstützung der Bank im dokumentären Geschäft profitieren, beispielsweise durch unter Akkreditiven abgewickelte ECA-gedekte Bestellerkredite.

**Ausblick** Für das Jahr 2011 erwarten Marktbeobachter zunehmende Wachstumstendenzen und eine stärkere Investitionsnachfrage. In diesem Rahmen werden wir uns weiterhin auf das Geschäft mit dem deutschen sowie dem tschechischen und slowakischen Mittelstand konzentrieren. Zugleich wollen wir weiteres Potenzial im Cross-Border-Geschäft heben. Darüber hinaus soll das Kundenwachstum zur Ertragssteigerung weiter forciert werden. Wesentliche Treiber liegen erstens in einer noch individuelleren Betreuung der Kunden sowie zweitens in einer hohen Servicequalität.

#### **Commerzbank Zrt., Budapest**

Die Commerzbank Zrt. bietet in Ungarn Dienstleistungen im Firmenkundengeschäft sowie für ausgewählte Privatkunden an. Die wirtschaftliche Entwicklung in Ungarn konnte sich im Jahr 2010 gegenüber dem Vorjahr zwar festigen, dennoch verlief diese Erholung im Vergleich zu anderen Ländern Mittel- und Osteuropas langsamer. Zudem belastete die Einführung der Bankensteuer in Ungarn den Finanzdienstleistungssektor und das Operative Ergebnis unserer Einheit.

Im Firmenkundengeschäft konnte das Leistungsspektrum weiter ausgebaut werden. Darüber hinaus konnte die positive Wahrnehmung der Commerzbank Zrt. erneut bestätigt werden: In einer von Dun & Bradstreet im Juni 2010 veröffentlichten Studie wurde die Bonität von Unternehmen untersucht. In diesem Rahmen wurde ermittelt, mit welcher Wahrscheinlichkeit in den nächsten zwölf Monaten ein Konkurs oder Liquidationsverfahren gegen ein Unternehmen eingeleitet wird. Mit ihrem Unternehmensportfolio belegte die Commerzbank Zrt. bei der Kreditwürdigkeit ihrer Kunden Platz 1 unter den ungarischen Geldinstituten mit mehr als 1 000 Firmenkunden.

Im Privatkundengeschäft haben wir unsere Produkte und Services kontinuierlich weiterentwickelt. Das Cross-Selling in Richtung Kunden kleiner und mittelgroßer Unternehmen (SME) wurde ausgebaut. Zudem wurden Maßnahmen zur weiteren Optimierung der Systeme im Zahlungsverkehr initiiert.

**Ausblick** Für das Jahr 2011 erwarten Marktbeobachter eine weitere konjunkturelle Erholung in Ungarn. Die positiven Effekte des Wirtschaftswachstums sollen sich im Unternehmenssektor sowie mit verbesserten Ergebnissen im ungarischen Bankensektor widerspiegeln. Eine zunehmende Ausschöpfung bestehender Cross-Selling-Potenziale soll in der Commerzbank Zrt. zur Erweiterung der Ertragsbasis beitragen.

## Weitere Aktivitäten in Mittel- und Osteuropa

### Mikrofinanzbanken

Die Commerzbank ist mit Minderheitsbeteiligungen zwischen 6 % und 21 % an sechs ProCredit-Banken in Albanien, Bosnien-Herzegowina, Bulgarien, Kosovo, Rumänien und Serbien beteiligt. Diese Banken haben sich auf die Förderung von sehr kleinen sowie kleinen und mittelständischen Unternehmen durch Kredite (inklusive Agrarkredite) und andere Finanzdienstleistungen in ihren jeweiligen Ländern spezialisiert. Zusätzlich bieten sie Spar- und Termineinlagen sowie laufende Konten für Privatkunden an. Mehrheitsgesellschafter ist die ProCredit Holding AG mit Sitz in Frankfurt am Main. Im Falle der ProCredit-Bank Rumänien sind zusätzlich internationale Finanzinstitute wie die Europäische Bank für Wiederaufbau und Entwicklung (EBRD), die KfW-Bankengruppe und die International Finance Corporation (IFC) Gesellschafter. Mit ihrem zugrunde liegenden Geschäftsmodell zeigten die ProCredit-Banken in der Wirtschafts- und Finanzkrise eine relativ stabile Entwicklung im Vergleich zu anderen Banken in den jeweiligen Märkten.

In Weißrussland ist die Commerzbank Aktiengesellschaft mit 9 % an der seit 2008 operativ tätigen Belarusian Bank for Small Business (BBSB) beteiligt. Diese Bank wurde unter der Federführung der EBRD gegründet. Weitere Anteile an der BBSB werden von der Kreditanstalt für Wiederaufbau (KfW), der IFC, der FMO – Nederlandse Financierings-Maatschappij voor Ontwikkelingslanden, der Swedfund, der US Shorebank International und Shore Cap International gehalten. Die BBSB kann auf einen kontinuierlichen Wachstumskurs zurückblicken; die Grundlage bildet ein Filialnetz, das sich über wesentliche weißrussische Ballungszentren erstreckt.

### Promsvyazbank

Mit 15,3 % hält die Commerzbank Auslandsbanken Holding AG eine Minderheitsbeteiligung an der russischen Promsvyazbank. Die 1995 gegründete OJSC Promsvyazbank rangiert nach Assets auf Platz 10 unter den russischen Banken und ist eine der führenden russischen Privatbanken. Die Promsvyazbank bietet Finanzdienstleistungen für Firmen- und Privatkunden. Neben einem attraktiven Onlinebanking-Angebot verfügt die Promsvyazbank über ein russlandweites Filialnetz sowie Auslandsbüros in China, Indien, der Ukraine und auf Zypern. Im Februar des Berichtsjahres hat die EBRD eine Beteiligung in Höhe von 11,8 % an der Promsvyazbank als neuer Anteilseigner übernommen.

|     |                                         |
|-----|-----------------------------------------|
| 75  | Geschäft und Rahmenbedingungen          |
| 81  | Ertrags-, Finanz- und Vermögenslage     |
| 93  | Entwicklung der Segmente                |
| 113 | Central & Eastern Europe                |
| 144 | Unsere Mitarbeiterinnen und Mitarbeiter |
| 150 | Nachtragsbericht                        |
| 151 | Prognose- und Chancenbericht            |

## Ausblick Central & Eastern Europe

Für das Jahr 2011 rechnen wir mit einer weiteren Festigung des wirtschaftlichen Aufschwungs in den Ländern Mittel- und Osteuropas, von der auch das Segment Central & Eastern Europe profitieren sollte. In diesem Marktumfeld wird die Commerzbank nach dem erfolgreichen Turnaround des Segments im Berichtsjahr ihre Position als führende deutsche Bank in Mittel- und Osteuropa weiter ausbauen.

In Polen wird die BRE Bank ihre wertorientierte Wachstumsstrategie weiter umsetzen. Im Fokus steht eine weitere Stärkung der Profitabilität. Wesentliche Treiber sind der Ausbau des Kreditgeschäftes mit Firmen- und Privatkunden sowie die Erweiterung des Produkt- und Leistungsspektrums. Darüber hinaus sollen die Erträge durch zusätzliches Kundenwachstum und Cross-Selling in weiteren Produktsegmenten erhöht werden.

In der Ukraine wird die Bank Forum den Abbau des Portfolios notleidender Kredite weiter forcieren. Zugleich wird die Neuausrichtung zu einer fokussierten Universalbank weiter voran getrieben. Wesentliche Bausteine sind selektives Neugeschäft im Firmenkreditbereich und die zunehmende Ausrichtung auf urbane Kunden im Privatkundengeschäft.

Die Commerzbank Eurasija wird ihre Geschäftsaktivitäten im russischen Markt ausweiten. Dazu liegt ein besonderes Augenmerk auf einer noch intensiveren Zusammenarbeit mit dem Segment Corporates & Markets für eine noch bessere Betreuung unserer Firmenkunden. In Tschechien und der Slowakei liegt der Schwerpunkt weiterhin auf dem Geschäft mit Mittelstandskunden und der Ertragssteigerung durch forciertes Kundenwachstum. In Ungarn soll das Cross-Selling im bestehenden Kundenstamm weiter gesteigert werden.

## Linde AG

### Herausforderung: Absicherung von Währungsrisiken

### Ziel: Finanzierung in Fremdwährung

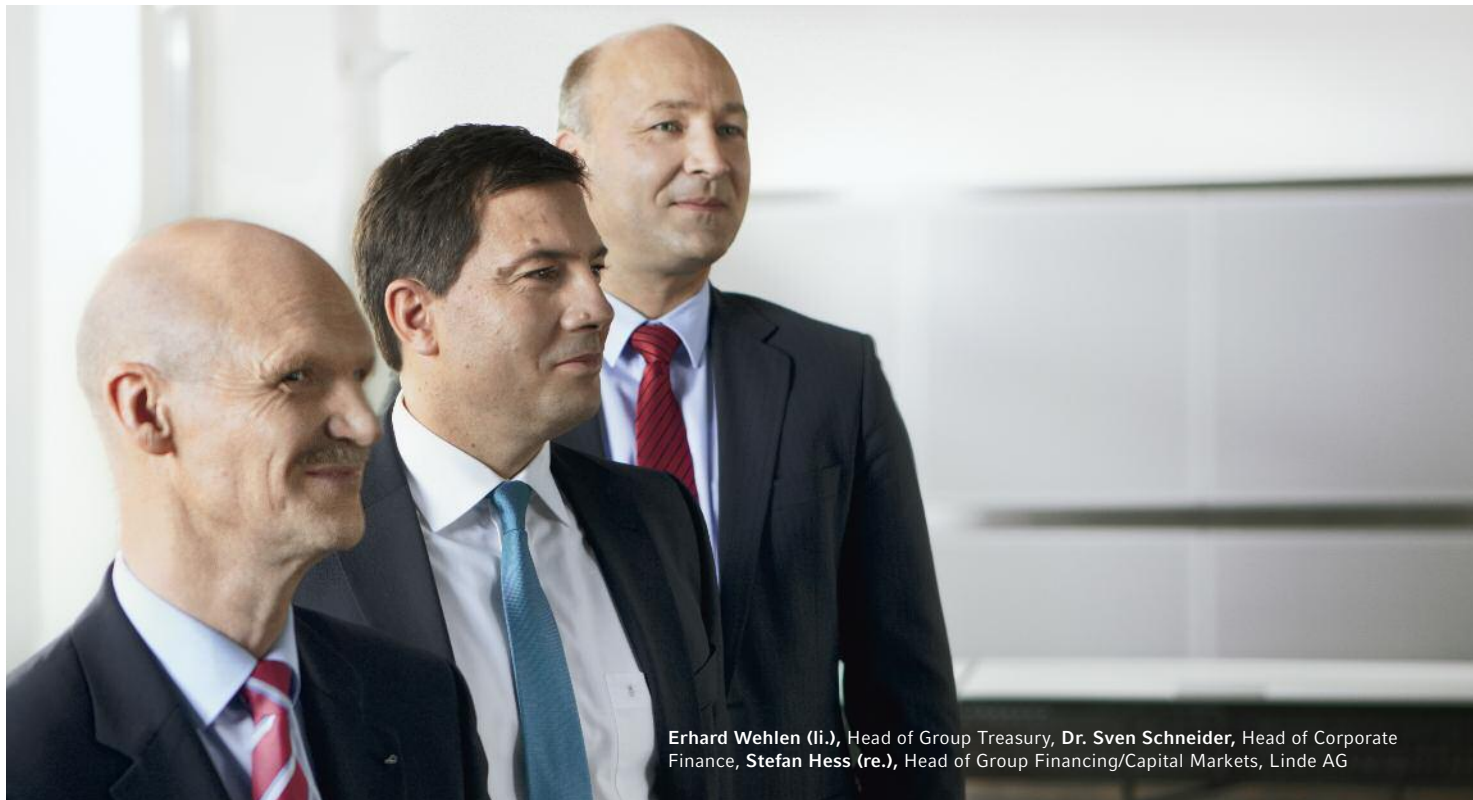

Erhard Wehlen (li.), Head of Group Treasury, Dr. Sven Schneider, Head of Corporate Finance, Stefan Hess (re.), Head of Group Financing/Capital Markets, Linde AG

Linde ist ein weltweit führendes Gase- und Engineering-Unternehmen, das mit rund 48 000 Mitarbeitern in mehr als 100 Ländern vertreten ist. In Australien beispielsweise ist Lindes Tochtergesellschaft BOC seit mehr als 100 Jahren präsent. Linde stand vor der Herausforderung, sich gegen währungsbedingte Schwankungen der australischen Vermögenswerte in der Konzernbilanz abzusichern.

Deshalb hat Linde im Jahr 2010 erstmals eine Anleihe über 150 Mio Australische Dollar (AUD) an den Markt gebracht. Durch die direkte Aufnahme Australischer Dollar konnte Linde bestehende Derivateabsicherungsgeschäfte ersetzen und zugleich Investoren eine Anlagemöglichkeit in einer Währung mit hohem Zinsniveau eröffnen. Darüber hinaus bietet die Anleihe Anlegern die Chance, bei einem weiter steigenden Australischen Dollar Währungsgewinne zu erzielen.

Der Emission war eine dreiwöchige intensive Beratung durch unterschiedlichste Abteilungen der Commerzbank vorausgegangen. Die enge Zusammenarbeit zwischen Corporates & Markets und Wealth Management ermöglichte die erfolgreiche Platzierung dieser Anleihe.

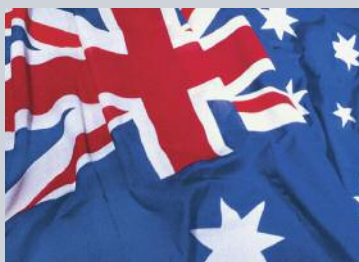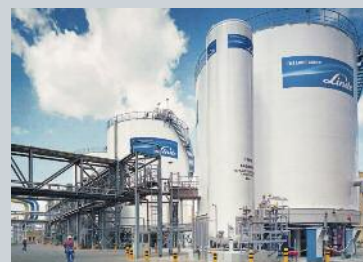

Eine Emission mit großem Erfolg: 150 Mio AUD für die Linde AG

Herausforderungen annehmen, Ziele erreichen

|     |                                         |
|-----|-----------------------------------------|
| 75  | Geschäft und Rahmenbedingungen          |
| 81  | Ertrags-, Finanz- und Vermögenslage     |
| 93  | Entwicklung der Segmente                |
| 123 | Corporates & Markets                    |
| 144 | Unsere Mitarbeiterinnen und Mitarbeiter |
| 150 | Nachtragsbericht                        |
| 151 | Prognose- und Chancenbericht            |

## Corporates & Markets

Das Segment Corporates & Markets umfasst die kundenorientierten Investmentbanking-Aktivitäten der Commerzbank und die Betreuung von kapitalmarktaffinen Kunden. Die angebotene Produkt- und Dienstleistungspalette ermöglicht es der Commerzbank, den gestiegenen Kundenansprüchen an eine Universalbank gerecht zu werden. Als konzernweiter Produktlieferant für Kunden ist das Segment Corporates & Markets ein Kernsegment der Gesamtbank und eng mit den anderen Segmenten verzahnt.

Das Berichtsjahr war durch den erfolgreichen Abschluss der Integration des Investmentbank-Geschäfts der Dresdner Bank geprägt. Trotz dieser großen Herausforderung hat das Segment Corporates & Markets im Berichtsjahr wesentlich zum Konzernergebnis beigetragen. In den nachfolgenden Abschnitten wird auf die vier Konzernbereiche Fixed Income & Currencies, Equity Markets & Commodities, Corporate Finance und Client Relationship Management näher eingegangen.

### Ergebnisentwicklung

#### Corporates & Markets

|                                          | 2010  | 2009  | Veränderung in %/%-Punkten |
|------------------------------------------|-------|-------|----------------------------|
| Gebundenes Eigenkapital (Mio €)          | 3 855 | 4 421 | - 12,8                     |
| Operative Eigenkapitalrendite (%)        | 20,4  | -9,5  | 29,9                       |
| Aufwandsquote im operativen Geschäft (%) | 68,3  | 107,1 | - 38,8                     |

Tabelle 6

Mit der konsequenten Ausrichtung und erfolgreichen Implementierung des kundenorientierten Geschäftsmodells erzielte das Segment Corporates & Markets in allen vier Quartalen 2010 ein positives Operatives Ergebnis.

Beim Vorjahresvergleich der Ergebnisentwicklung ist zu berücksichtigen, dass im ersten Halbjahr 2009 noch Erträge von Bereichen enthalten waren, die im Rahmen des neuen Geschäftsmodells eingestellt beziehungsweise stark reduziert wurden. Darüber hinaus war das Jahr 2009 geprägt durch den Abbau von Risikopositionen und den daraus entstandenen Ergebnisbelastungen.

Das Zinsergebnis lag mit 767 Mio Euro nahezu auf Vorjahresniveau. Positive Beiträge waren insbesondere durch das Geschäft mit strukturierten Finanzierungen zu verzeichnen. In einem sich stabilisierenden wirtschaftlichen Umfeld und bedingt durch Auflösungen kam es bei der Risikovorsorge für das Kreditgeschäft im Geschäftsjahr 2010 zu einem Nettoertrag von 27 Mio Euro, nach einer Nettozuführung im Vorjahr in Höhe von 289 Mio Euro. Der Rückgang im Provisionsergebnis um 98 Mio Euro auf 254 Mio Euro war im Wesentlichen bedingt durch einzelne große Transaktionen im Vorjahr. Mit 1 160 Mio Euro lag das Handelsergebnis deutlich über dem Wert der Vorjahresperiode von 681 Mio Euro.

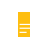

› Anhang (Note 45 – Segmentberichterstattung)  
Seiten 246 ff.

Der Konzernbereich Equity Markets & Commodities verzeichnete im Berichtsjahr eine stabile Entwicklung. Auch im Konzernbereich Fixed Income & Currencies konnten die Operativen Erträge stabilisiert werden, wobei insbesondere das zweite und vierte Quartal durch die schwierigen Rahmenbedingungen im Zusammenhang mit der Schuldenkrise der PIIGS-Staaten geprägt waren. Demgegenüber erzielte der Konzernbereich Corporate Finance im abgelaufenen Berichtsjahr erneut ein Rekordergebnis im Geschäft mit Firmen- und institutionellen Kunden. Das Ergebnis aus Finanzanlagen verbesserte sich aufgrund von Bewertungseffekten bei restrukturierten Krediten von 27 Mio Euro auf 220 Mio Euro. Das Sonstige Ergebnis fiel von 5 Mio Euro auf –20 Mio Euro. Der Verwaltungsaufwand ging deutlich um 343 Mio Euro auf 1 633 Mio Euro zurück. Die Kostenreduzierung – sowohl im Personal- als auch im Sachaufwand – beruhte insbesondere auf Maßnahmen im Rahmen der Integrations- und Restrukturierungsaktivitäten. Die geplante Personal- und Organisationsstruktur wurde sowohl im Inland als auch im Ausland abgeschlossen.

Für das Geschäftsjahr 2010 erreichte das Segment Corporates & Markets ein Operatives Ergebnis von 786 Mio Euro, nach –420 Mio Euro im Vorjahr. Das Ergebnis vor Steuern betrug ebenfalls 786 Mio Euro nach –571 Mio Euro im Vorjahr.

## Wesentliche Entwicklungen im Geschäftsjahr

### Integration erfolgreich abgeschlossen

Zu den besonderen Leistungen des Segments zählt der Abschluss der Integration des Investmentbank-Geschäfts der Dresdner Bank. In nur 18 Monaten haben wir das Geschäftsmodell erfolgreich implementiert, die Organisationsstruktur entsprechend angepasst und die angestrebte Größenordnung erreicht. Dazu wurden an den jeweiligen Standorten die Mitarbeiter zusammengeführt; des Weiteren sind die IT- und Asset-Migration auf die Zielsysteme im Jahr 2010 planmäßig verlaufen. Das Segment verfügt nun über eine deutlich erweiterte sowie internationalisierte Kundenplattform und ein am Markt stark anerkanntes Finanzprodukt-Know-how.

Dies spiegelt sich auch im guten Geschäftsergebnis wider. So ist das Segment Corporates & Markets in diesem Berichtsjahr wieder profitabel und hat wesentlich zum Konzern-erfolg beigetragen. Insbesondere im Konzernbereich Corporate Finance nahm die Anzahl an Transaktionen und Mandatierungen kontinuierlich zu. Die Konzernbereiche Equity Markets & Commodities sowie Fixed Income & Currencies haben vor allem von den ausgebauten Vertriebskanälen, aber auch von der gestärkten Produkttiefe profitiert.

Die nicht strategischen und kapitalintensiven Geschäfte haben wir erfolgreich reduziert mit dem Ziel, die Bilanzstruktur zu verbessern und die Ressourcen effizient einzusetzen.



|     |                                         |
|-----|-----------------------------------------|
| 75  | Geschäft und Rahmenbedingungen          |
| 81  | Ertrags-, Finanz- und Vermögenslage     |
| 93  | Entwicklung der Segmente                |
|     | 123 Corporates & Markets                |
| 144 | Unsere Mitarbeiterinnen und Mitarbeiter |
| 150 | Nachtragsbericht                        |
| 151 | Prognose- und Chancenbericht            |

### **Kundengeschäft im Fokus und Marktchance fest im Blick**

Die Strategie der Commerzbank im Investmentbanking besteht nach wie vor darin, den Handel auf das kundenbezogene Geschäft auszurichten und somit stabile Erträge zu generieren. Dieses Ziel wurde auch während des Integrationsprozesses verfolgt. Die Reduktion des Eigenhandels und die Fokussierung auf die Risikoabsicherung für Kunden spiegeln sich auch in den durchschnittlichen Risikoaktiva der Marktpreisrisiken des kombinierten Segmentes wider; diese betragen zum Jahresende 2010 nur 26 % der Risikoaktiva der Marktpreisrisiken im Konzern.

### **Fixed Income & Currencies**

Der Konzernbereich Fixed Income & Currencies (FIC) verzeichnete im Bereich der kundengetriebenen Handelsaktivitäten mit Zins- und Devisenprodukten und ihren jeweiligen Derivaten ein erfolgreiches Geschäftsjahr.

#### **Leistungsstarke Produktplattform und konzernweite Vertriebskanäle**

Im Berichtsjahr hat sich der Konzernbereich FIC vor allem auf die IT- und Asset-Migration auf die Zielsysteme konzentriert. Nach erfolgter Integration ist der Konzernbereich an den wichtigsten Finanzplätzen der Welt vertreten und kann somit den Kunden Serviceleistungen in unterschiedlichen Zeitzonen anbieten. Mit ausschlaggebend für den Erfolg des Konzernbereichs im abgelaufenen Berichtsjahr sind die konzernweiten Vertriebskanäle; dadurch konnten wir auch den Firmenkunden des Segments Mittelstandsbank sowie den Privatkunden der Commerzbank Produkte und Dienstleistungen anbieten. Des Weiteren stehen seit dem Berichtsjahr mit der Weiterentwicklung der elektronischen Plattformen „eBond“ und „Click&Trade FX“ auf den neuesten technologischen Stand ein noch effizienterer Kundenservice und eine gesteigerte Transaktionskapazität zur Verfügung.

#### **Vertriebsstrategie von Kunden positiv aufgenommen**

Das gute Ergebnis des Konzernbereichs FIC ist auch auf die große Kundenzufriedenheit mit dem neuen Vertriebsansatz der Bank zurückzuführen. Unsere Kunden schätzen den Ausbau und das Know-how der neuen Vertriebseinheit im FIC-Sales-Bereich, der sich darauf spezialisiert hat, die Bedürfnisse jedes einzelnen Kunden ganzheitlich zu erfüllen. Diese Wertschätzung spiegelt sich auch im Ergebnis der Umfrage der „Deutschen Risk-Derivate“ wider. Unsere Kunden haben uns zum zweiten Mal in Folge insgesamt auf Platz 2 und in der Sparte Risk-Management und Währungen auf Platz 1 gewählt. Die Commerzbank wurde außerdem von dem „European CEO Magazine“ für das beste FX- und Treasury-Management-Business in Osteuropa ausgezeichnet.

### **Ausblick**

Der Konzernbereich FIC wird sich im Jahr 2011 darauf konzentrieren, die Kundenbasis im Firmen-, Retail- sowie institutionellen Bereich weiter auszubauen. Durch die Vernetzung mit den konzernweiten Vertriebskanälen wird es möglich sein, die Produkte noch effektiver am Markt platzieren zu können. Ziel ist es, die Position als bevorzugter Partner für Risikomanagement und strukturierte Lösungen weiter zu festigen. Ein besonderes Augenmerk wird dabei aufgrund der Kundennachfragen auch auf den Wachstumsmärkten Osteuropa und Asien liegen.

### **Equity Markets & Commodities**

Der Konzernbereich Equity Markets & Commodities (EMC) hat auch im Berichtsjahr 2010 seine führende Position im Geschäft mit Aktienderivaten in Europa behauptet. Trotz schwieriger Marktverhältnisse war das Berichtsjahr sehr erfolgreich. Insbesondere die Bereiche Flow und Exotics Trading erzielten stabile Ergebnisse. Auch die Plattform für Exchange Traded Funds (ETF) stieß sowohl bei unseren privaten Kunden als auch bei institutionellen Anlegern in diesem Jahr erneut auf große Nachfrage.

Der Konzernbereich konnte des Weiteren seine Rolle als einer der führenden Brokerhäuser für deutsche Aktien weiter ausbauen und im Berichtsjahr Erfolge feiern. Dazu hat auch das erfolgreiche „German Investment Seminar“ in New York mit der Teilnahme von 60 führenden deutschen Firmenkunden und 450 Investoren beigetragen.

### **Erweitertes Produktangebot**

Der Konzernbereich kann nach der erfolgreichen Integration der Dresdner Bank auf vielfältige Vertriebskanäle, einen erweiterten Kundenstamm und eine stark ausgebaute Produktplattform zurückgreifen. Letztere wird kontinuierlich weiterentwickelt und um neue Produkte erweitert. Im Berichtsjahr waren dies insbesondere Contract of Differences (CFDs), Faktorzertifikate, Systematische Fonds, ETFs und Rohstoffindizes.

Die mittlerweile nahezu 100 000 Produkte belegen die traditionell starke Position der Commerzbank bei Aktienderivaten. Dabei wird die Qualität durch mehrere Auszeichnungen bestätigt. So erhielt der Bereich bei den „Scope Investment Awards 2010“ die Auszeichnung als „Beste Bank für strukturierte Produkte in Deutschland“ sowie mehrere Auszeichnungen namhafter Zeitschriften in Deutschland und in Europa. Darüber hinaus wurde der Bereich zum vierten Mal in Folge zum „besten Emittenten im deutschen Markt für Retail-Derivate“ gekürt (Zertifikate-Award 2010). Der Deutsche Derivate-Verband (DDV) verkündete zudem für das dritte Quartal die Marktführerschaft nach Marktvolumen der Commerzbank als Emittent von derivativen Wertpapieren in Deutschland.

|     |                                         |
|-----|-----------------------------------------|
| 75  | Geschäft und Rahmenbedingungen          |
| 81  | Ertrags-, Finanz- und Vermögenslage     |
| 93  | Entwicklung der Segmente                |
| 123 | Corporates & Markets                    |
| 144 | Unsere Mitarbeiterinnen und Mitarbeiter |
| 150 | Nachtragsbericht                        |
| 151 | Prognose- und Chancenbericht            |

## Ausblick

Ziel im Konzernbereich EMC ist es, im Jahr 2011 die führende Rolle als Market Maker mit strukturierten Finanzprodukten sowie Fonds und Comstage-ETF-Produkten weiter auszubauen. Für den Konzernbereich EMC erwarten wir für das laufende Jahr – dank der umfangreichen Produktpalette und den effizienten Vertriebskanälen –, von den Chancen an den verschiedenen Märkten profitieren zu können.

## Corporate Finance

Der Konzernbereich Corporate Finance erzielte im abgelaufenen Berichtsjahr erneut ein Rekordergebnis im Geschäft mit Firmen- und institutionellen Kunden. Unsere umfangreichen Produktkenntnisse und unsere sehr gute Marktposition bei deutschen Firmenkunden und Finanzinvestoren machen uns zu einem sehr attraktiven Partner – auch für die institutionellen Kunden der Mittelstandsbank.

### Weitere Zunahme an Transaktionen und Mandatierungen

Die Einheiten Debt Capital Markets Bonds und Debt Capital Markets Loans erhielten im Jahr 2010 zahlreiche prestigeträchtige Führungsmandate bei Unternehmensanleihen sowie bei mittel- und langfristigen syndizierten Darlehen in Deutschland und Europa. Allein bei den „Benchmark-Deals“ mit einem Volumen von über 500 Mio Euro konnte DCM Bonds im Berichtsjahr 82-mal das Führungsmandat übernehmen.

Der Bereich Leveraged Finance hat mit der Wiederbelebung der europäischen LBO-Märkte Anfang 2010 erfolgreich Arrangierungsmandate gewonnen. Er konnte sich eine führende Position im europäischen Markt bei gleichbleibend konservativer Kreditrisikosteuerung erarbeiten. Underwritings, die im begrenzten Umfang eingegangen wurden, ließen sich ausnahmslos unverzüglich im Markt platzieren.

Der Bereich Equity Capital Markets (ECM) stellte im vergangenen Jahr erneut seine hervorragende Positionierung im deutschen Markt für Eigenkapitaltransaktionen unter Beweis. Darüber hinaus war er auch auf europäischer Ebene zunehmend erfolgreich.

In mehreren Ranglisten erreichten wir sehr gute Platzierungen: Nummer-1-Bookrunner für Deutsche Pfandbriefe, Nummer-1-Bookrunner für German Financial Institutions Bonds und Nummer-4-Bookrunner für German Corporate Bonds. Zusätzlich erhielt die Commerzbank den „Euro Week“- und „The Cover“-Award für das beste Covered Bond Research. Die Bank ist darüber hinaus Nummer-1-Bookrunner für syndizierte Kredite in Deutschland und wurde zum dritten Mal in Folge mit dem angesehenen „EuroWeek“-Award als „Bester Arranger“ für deutsche Konsortialkredite und für Financial Institutions ausgezeichnet. Platz 2 in den Ranglisten für deutsche ECM-Transaktionen nach Transaktionsanzahl hält die Commerzbank dank 15 Bookrunner-Mandaten über die gesamte ECM-Produktpalette und der Begleitung von Benchmark-Transaktionen.

Auf ein erfolgreiches Jahr blickt auch die im Konzernbereich angesiedelte Einheit Credit Portfolio Management (CPM) zurück. Als „Asset Owner“ verantwortet CPM das vom Client Relationship akquirierte Kreditportfolio und optimiert dieses. Zum aktiven Management gehört insbesondere der Risikotransfer von Kreditrisiken über den Kapitalmarkt zur Verbesserung der Portfoliodiversifizierung. CPM hat seine Aktivitäten insbesondere am CDS-Markt fortgeführt und inzwischen erfolgreich nahezu 30 % des Portfolios gehedgt.

**Ausblick**

Auch im Jahr 2011 will Corporate Finance eine dominierende Rolle im deutschen Markt und in europäischen Kernländern spielen sowie die führende Marktposition bei Finanzierungslösungen für Unternehmen, bei Finanzinvestoren und insbesondere bei Finanzinstituten weiter verstärken. Ziel ist es, die Präsenz des Geschäftsbereichs am Markt weiter auszubauen und somit die Anzahl an Transaktionen weiter zu erhöhen.

**Client Relationship Management**

Der Konzernbereich Client Relationship Management betreut namhafte deutsche multinationale Unternehmen, ausgewählte deutsche Familienunternehmen in allen wichtigen Industriezweigen sowie Unternehmen aus dem internationalen Versicherungssektor. Daneben obliegen dem Konzernbereich die Betreuung führender Private-Equity-Investoren sowie die des Bundes und der Länder. Um unseren Kunden maßgeschneiderte Lösungen anbieten zu können, arbeitet der Konzernbereich eng mit den jeweiligen Produktspezialisten aus allen Bereichen der Bank zusammen.

Das Jahr 2010 war von der Weiterentwicklung der Geschäftsbeziehungen zu unseren Kunden geprägt. Dabei haben die überproportionale Teilnahme an der Marktentwicklung sowie die erfolgreiche Etablierung eines neuen Betreuungsmodells für das Corporate Banking in der Investmentbank die Position der Commerzbank als starker Partner im Investmentbanking gefestigt.

**Ausblick**

Im Jahr 2011 wird der Konzernbereich die umfassende Etablierung einer Einheit zur Betreuung der Investmentbank-Kunden im öffentlichen Sektor vorantreiben. Bei den Zielkunden wollen wir die Marktanteile sukzessive ausbauen.

|     |                                         |
|-----|-----------------------------------------|
| 75  | Geschäft und Rahmenbedingungen          |
| 81  | Ertrags-, Finanz- und Vermögenslage     |
| 93  | Entwicklung der Segmente                |
| 123 | Corporates & Markets                    |
| 144 | Unsere Mitarbeiterinnen und Mitarbeiter |
| 150 | Nachtragsbericht                        |
| 151 | Prognose- und Chancenbericht            |

## Ausblick Corporates & Markets

Dank der gestärkten Kundenbasis und des am Markt anerkannten Produkt-Know-hows erwarten wir, unsere Position als starker Investmentbank-Partner zu festigen. Darüber hinaus sollen die Erträge stabilisiert, Kostensynergien weiter gehoben und regulatorisch notwendige Investitionen getätigt werden.

Corporates & Markets wird im Jahr 2011 gezielt das internationale Kundenfranchise ausbauen und Chancen am Markt durch strategische Initiativen ausschöpfen. Unter anderem soll die Produktpalette im US-Dollar-Bereich entsprechend vorhandener Kundennachfrage angereichert werden. Zudem soll unser Know-how europäische Produkte betreffend – besonders des deutschen Marktes – bei ausgewählten Kunden aus Wachstumsländern stärker vermarktet werden. Die Standorte in Asien sollen entlang den Bedürfnissen unseres konzernweiten Kundenfranchise ausgerichtet werden.

Im Hinblick auf die anhaltend schwierigen Marktbedingungen werden wir weiter an einer grundsätzlich konservativen Kreditpolitik festhalten. Entsprechend erwarten wir daher eine moderate Kreditrisikovorsorge. Darüber hinaus streben wir an, das Risiko-Rendite-Profil unserer Portfolios im Rahmen eines aktiven Kapitalmanagements kontinuierlich zu optimieren. Im Rahmen des aktiven Credit-Portfolio-Managements werden wir weiter unsere Diversifizierungsstrategie fortsetzen, um Risikokonzentrationen zu vermeiden. Aufgrund des sehr guten Risikoprofils des Portfolios erwarten wir auch für das Jahr 2011 eine positive Gesamtentwicklung.

Die aus Basel III resultierenden Auswirkungen auf die Liquiditäts- und Kapitalanforderungen im Segment Corporates & Markets halten wir angesichts eines verhältnismäßig niedrigen Risikoprofils unserer Handelsaktivitäten für kontrollierbar. Trotzdem haben wir bereits frühzeitig verschiedene Initiativen zur Abfederung der zu erwartenden regulatorischen Auswirkungen gestartet.

## Vogtland PET GmbH

### Herausforderung: Kapazitäten ausweiten

### Ziel: Marktstellung sichern

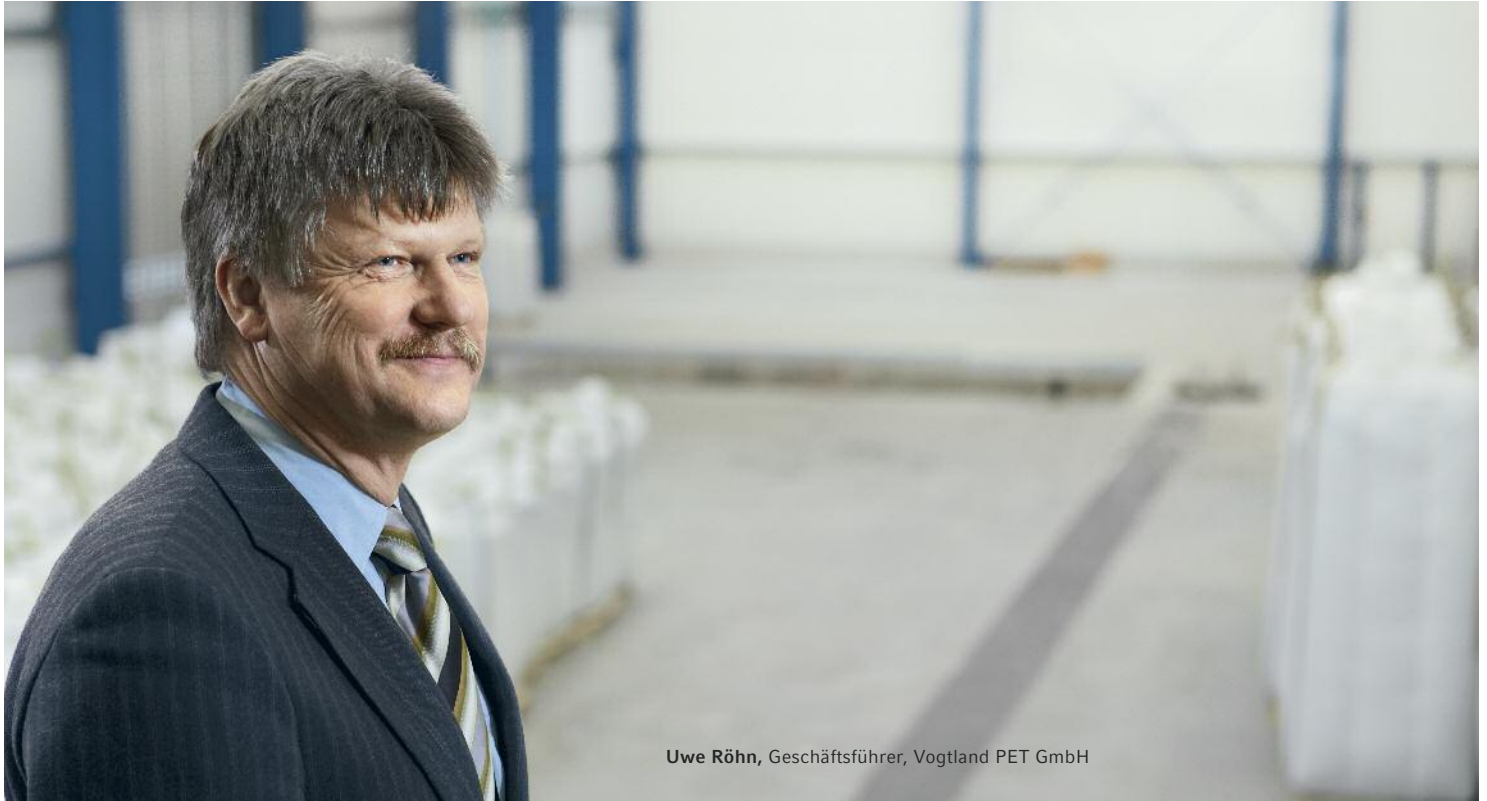

Uwe Röhn, Geschäftsführer, Vogtland PET GmbH

2010 hat sich Uwe Röhn einer besonderen Herausforderung gestellt und sein Ziel erreicht: die erhebliche Erweiterung der Produktionsanlagen. So kann er in dem harten Wettbewerb um PET-Mengen weiterhin mit der größten Versorgungs- und Absatzsicherheit seine Marktstellung in Deutschland behaupten. Sein Unternehmen recycelt seit 2007 PET-Flaschen zu sogenannten PET-Flakes oder schmilzt sie zu lebensmitteltauglichem PET-Regranulat ein, das dem Wirtschaftskreislauf wieder zugeführt wird.

Die Herausforderung bestand darin, innerhalb von kurzer Zeit die Kapazitäten zu erweitern, ohne die laufende Produktion zu beeinträchtigen. Durch den Neubau einer weiteren Produktionshalle ist dies der Gesellschaft gelungen. Jährlich können nun 34 000 t PET-Flaschen zu 20 000 t Granulat von höchster Qualität aufbereitet werden.

Die Commerzbank und ihre 100%ige Tochter Commerz Real haben für die Vogtland PET GmbH frühzeitig einen Finanzierungsplan erarbeitet und die Investition mit einer innovativen Mietkauflösung begleitet. Dabei wurde die Möglichkeit genutzt, öffentliche Fördermittel in das Vorhaben einzubinden.

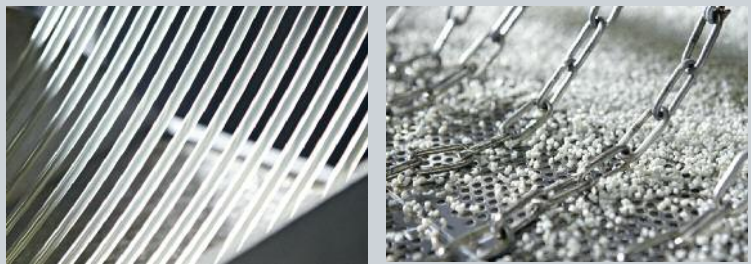

Stranggranulierung und Klassifizierungssieb: Recycling auf höchstem Niveau

Herausforderungen annehmen, Ziele erreichen

|     |                                         |
|-----|-----------------------------------------|
| 75  | Geschäft und Rahmenbedingungen          |
| 81  | Ertrags-, Finanz- und Vermögenslage     |
| 93  | Entwicklung der Segmente                |
| 131 | Asset Based Finance                     |
| 144 | Unsere Mitarbeiterinnen und Mitarbeiter |
| 150 | Nachtragsbericht                        |
| 151 | Prognose- und Chancenbericht            |

## Asset Based Finance

Das Segment Asset Based Finance besteht aus den Konzernbereichen Commercial Real Estate (CRE), Public Finance (PF), Ship Finance (S) sowie Asset Management and Leasing (AML). Die Aktivitäten von ABF-CRE und ABF-PF werden nahezu vollständig von der Commerzbank-Tochter Eurohypo AG durchgeführt. Der Bereich ABF-AML beinhaltet vorrangig die Aktivitäten unserer Tochtergesellschaft Commerz Real AG. Schließlich führt der Bereich ABF-S die Schiffsfinanzierungen der Commerzbank und unserer Tochtergesellschaft Deutsche Schiffsbank AG zusammen.

### Ergebnisentwicklung

#### Asset Based Finance

|                                          | 2010  | 2009  | Veränderung in<br>%/%-Punkten |
|------------------------------------------|-------|-------|-------------------------------|
| Gebundenes Eigenkapital (Mio €)          | 6 166 | 6 821 | -9,6                          |
| Operative Eigenkapitalrendite (%)        | -20,6 | -11,9 | -8,7                          |
| Aufwandsquote im operativen Geschäft (%) | 66,0  | 46,3  | 19,7                          |

Tabelle 7

Obwohl sich die Weltwirtschaft im Berichtsjahr weiter erholte, belasteten die Effekte der Krise in den Immobilien-, Staats- und Schiffsfinanzierungsmärkten das Segment ABF weiterhin und waren maßgeblich für das deutlich negative Ergebnis. Während die Neuzusagen bei gewerblichen Immobilienfinanzierungen im Jahr 2010 im Vergleich zum Vorjahr gestiegen sind, wurde die wertschonende Portfolioabschmelzung in der Immobilien- und Staatsfinanzierung fortgesetzt.

Der Zinsüberschuss nahm im Vergleich zum Vorjahr um 5,4 % auf 1 160 Mio Euro zu. Dieser Anstieg ist insbesondere auf höhere Margen in der Immobilienfinanzierung im Neuzusagen sowie im Prolongationsgeschäft zurückzuführen. Die Risikovorsorge lag mit 1 584 Mio Euro erneut auf dem sehr hohen Niveau des Vorjahres. Ausschlaggebend waren hohe Wertberichtigungen in der gewerblichen Immobilienfinanzierung, in erster Linie in den nach wie vor schwierigen Märkten USA und Spanien. Der Provisionsüberschuss erhöhte sich um 10,1 % auf 327 Mio Euro. Ausschlaggebend hierfür waren gestiegene Erträge im gewerblichen Immobiliengeschäft – hauptsächlich aus Restrukturierungen im Ausland – sowie Erträge aus dem Zins- und Währungsmanagement. Das Handelsergebnis lag mit -78 Mio Euro deutlich unter dem Vorjahresniveau in Höhe von 197 Mio Euro. Im Jahr 2009 fielen positive Bewertungen aus freien Derivaten sowie die gewinnbringende Auflösung einer Total Return Swap Position an. Das Ergebnis aus Finanzanlagen wies einen Verlust von -352 Mio Euro aus, nach -87 Mio Euro im Vorjahr. Es war im Zuge der Reduzierung des Staatsfinanzierungsportfolios sowohl durch Veräußerungsverluste der Anleihen südeuropäischer Staaten als auch durch Wertberichtigungen belastet. Der Verwaltungsaufwand lag mit 609 Mio Euro 9,0 % unter dem entsprechenden Vorjahreswert. Dieser Rückgang war sowohl bei den Personal- als auch bei den Sachkosten durch die Umsetzung von Restrukturierungsmaßnahmen bedingt.

Im Geschäftsjahr 2010 betrug das Operative Ergebnis -1 270 Mio Euro nach -813 Mio Euro im Vorjahr. Im Berichtsjahr fielen Restrukturierungsaufwendungen in Höhe von 33 Mio Euro im Zusammenhang mit dem Strategieprojekt „CORRELATION“ bei der Commerz Real AG an. Das Ergebnis vor Steuern betrug -1 303 Mio Euro nach -1 625 Mio Euro im Vorjahr.

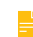

› Anhang (Note 45 –  
Segmentberichterstattung)  
Seiten 246 ff.



## Wesentliche Entwicklungen im Geschäftsjahr

Die Strategie des Asset-basierten Kreditgeschäfts im Segment Asset Based Finance ist darauf ausgerichtet, bestehende Portfolios zu optimieren. Orientierungskriterien sind dabei: Bilanzvolumen zurückführen, Risikopositionen reduzieren, Profitabilität steigern.

Des Weiteren fließt auch die Auflage des SoFFin den Abbau der Bilanzsumme in den Konzernbereichen CRE und PF betreffend ein. Bis zum Jahr 2012 sind folgende Volumina vorgesehen: unter 60 Mrd Euro für CRE und unter 100 Mrd Euro für PF.

Die Auswirkungen der Finanz- und Wirtschaftskrise waren im Jahr 2010 weiterhin spürbar, was sich insbesondere in der hohen Risikovorsorge widerspiegelt und sich auf die Geschäftsentwicklung des Segments belastend auswirkte.

## Commercial Real Estate und Public Finance

### Commercial Real Estate mit neuer Struktur auf dem richtigen Weg

Innerhalb des Commerzbank-Konzerns wird die Finanzierung gewerblicher Immobilien aus der Eurohypo AG betreut. Neben ihrem Heimatmarkt Deutschland hat die Spezialbank ihre Kernaktivitäten auf die Zielmärkte Frankreich, Großbritannien, Italien, Polen, Portugal, Russland, Spanien, Türkei und USA konzentriert. Ihre Kunden sind professionelle Immobilieninvestoren und -entwickler mit einem kontinuierlichen Bedarf an der Finanzierung von Bestandsimmobilien, Projektentwicklungen und Immobilienportfolios. Sie erhalten bei der Eurohypo AG bedarfsgerechte, individuelle Beratung und maßgeschneiderte Finanzierungslösungen.

Bei der im Jahr 2009 begonnenen Umstrukturierung ihres Geschäftsmodells hat die Eurohypo AG im vergangenen Jahr weitere Fortschritte erzielt. Sie hat bereits 15 von 20 Standorten in Restrukturierungsmärkten – teilweise schneller als geplant – geschlossen. Auch den geplanten Abbau ihres Bestandsportfolios trieb die Bank weiter voran: Es reduzierte sich im Berichtsjahr um weitere 3,3 Mrd Euro auf 72 Mrd Euro.

Dennoch gelang es der Bank im Geschäftsjahr 2010, ihr Neugeschäft mit rund 5 Mrd Euro gegenüber dem Vorjahr zu steigern und gleichzeitig gute Margen zu erzielen. Von dem Neugeschäft entfiel jeweils rund die Hälfte auf Deutschland und auf ausländische Märkte. Zusammen mit einem Prolongationsvolumen in Höhe von 6,3 Mrd Euro stand die Eurohypo AG der Immobilienwirtschaft mit insgesamt knapp 12 Mrd Euro als Kreditgeber zur Verfügung.

Die anhaltend hohe Volatilität an den Immobilienmärkten und die unverändert schwierigen Rahmenbedingungen in der Refinanzierung führten dennoch dazu, dass das Ergebnis des Konzernbereichs CRE hinter den Erwartungen zurückblieb. So belastete insbesondere die hohe Risikovorsorge das Ergebnis deutlich.

### Mit Pfandbriefemissionen weiterhin an der Spitze

Die Eurohypo AG ist die Pfandbriefemittentin innerhalb des Commerzbank-Konzerns, die neben der Refinanzierung des eigenen gewerblichen Immobiliengeschäfts auch die Refinanzierung des privaten erstrangigen Baufinanzierungsgeschäfts der Commerzbank ermöglicht. Ihre prominente Marktstellung hat sie auch während der Finanz- und Schuldenkrise beibehalten: Sie ist die größte Pfandbriefemittentin in Deutschland und einer der führenden Jumbo-Covered-Bond-Emittenten weltweit. Im Geschäftsjahr 2010 platzierte die Eurohypo AG erfolgreich Hypotheken- und öffentliche Pfandbriefe (und über deren Tochtergesellschaft Eurohypo S. A. Luxembourg einen Lettres de Gage Publiques) mit einem Volumen von 7,8 Mrd Euro am

|     |                                         |
|-----|-----------------------------------------|
| 75  | Geschäft und Rahmenbedingungen          |
| 81  | Ertrags-, Finanz- und Vermögenslage     |
| 93  | Entwicklung der Segmente                |
| 131 | Asset Based Finance                     |
| 144 | Unsere Mitarbeiterinnen und Mitarbeiter |
| 150 | Nachtragsbericht                        |
| 151 | Prognose- und Chancenbericht            |

Kapitalmarkt – darunter zwei Jumbo-Pfandbriefe mit einem Gesamtvolumen von 2,5 Mrd Euro – und 200 Mio Euro unbesicherte Refinanzierungsmittel.

Damit konnte die Eurohypo AG auch im Berichtsjahr auf ein verlässliches Refinanzierungsinstrument zurückgreifen, das von den schwierigen Marktbedingungen weniger stark betroffen war als andere Covered-Bond-Produkte. Auch im laufenden Jahr wird der Pfandbrief wieder eine große Rolle bei den Funding-Aktivitäten des Commerzbank-Konzerns spielen.

### Ausblick

Gegen Ende des vergangenen Geschäftsjahres war in den meisten Immobilienmärkten eine Bodenbildung zu verzeichnen. Die grundsätzlich erwartete Erholung der Immobilienmärkte wird allerdings durch die Staatsschuldenkrise, die Korrekturen an den Gewerbemärkten und die Konsolidierung des Bankensektors weiter beeinflusst. Der Trend wird zwar überwiegend positiv, die Dynamik allerdings sehr verhalten sein. Das Tempo der Erholung wird maßgeblich vom wirtschaftlichen Umfeld geprägt. Deutschland stellt sich in dieser Hinsicht deutlich besser dar, da dort keine Übertreibungen auf der Staatsfinanzierungsseite oder im privaten Sektor abgearbeitet werden müssen. Risiken, dass sich die Euroschuldenkrise auch hier noch negativ bemerkbar machen könnte, sind damit allerdings nicht vollständig ausgeräumt. In einzelnen Märkten wie Spanien oder den USA dürften sich die Korrekturen in Teilbereichen auch noch im Jahr 2011 fortsetzen.

Mit der strategischen Neuausrichtung seines Kerngeschäfts und seiner risikoadäquaten Geschäftsphilosophie ist der Konzernbereich CRE auf dem richtigen Weg. Ziel ist es, das CRE-Portfolio bis zum Ende des Jahres 2012 auf unter 60 Mrd Euro abzubauen und seinen Risikogehalt weiter entscheidend zu minimieren.

Die Anpassungen an die veränderten Marktbedingungen haben wir vorgenommen und mit der Restrukturierung wesentliche Fortschritte erzielt. Obwohl diese noch nicht im Ergebnis des Geschäftsjahres 2010 sichtbar sind, ist die Bank ihrem Ziel, die gewerbliche Immobilienfinanzierung des Segments Asset Based Finance auf nachhaltige Profitabilität auszurichten, wieder ein Stück nähergekommen.

### Public Finance

Das Geschäft von Public Finance ist auf die Finanzierung von Staaten, Bundesländern, Kommunen und anderer öffentlicher Körperschaften sowie supranationaler Institutionen fokussiert. Es umfasst Aktivitäten der Eurohypo AG einschließlich deren Luxemburger Tochtergesellschaft EUROHYPO Europäische Hypothekenbank S.A. und der Commerzbank-Tochter Erste Europäische Pfandbrief- und Kommunalkreditbank AG (EPPK) in Luxemburg. Die besicherte Refinanzierung der Public-Finance-Aktivitäten erfolgt über die Ausgabe öffentlicher Pfandbriefe und Lettres de Gage Publiques. Zudem spielen Repo-Geschäfte eine bedeutende Rolle. Unbesicherte Refinanzierungen erfolgen über die Treasury der Commerzbank.

### Wertschonender Bestandsabbau in herausforderndem Umfeld

Die Marktentwicklung im Geschäftsjahr 2010 wurde weitestgehend durch die Folgen der Finanzkrise und der Schuldenkrise in einigen europäischen Ländern bestimmt. Auch in Nordamerika und Asien blieben die Spreads für Staatsanleihen auf erhöhtem Niveau oder weiteten sich aus. Die Risikoeinschätzung des Marktes gegenüber Staaten und Emittenten der öffentlichen Hand hat sich im vergangenen Jahr entscheidend geändert. Selbst Emittenten besserer Bonität bezahlen deutlich höhere Risikoaufschläge als noch zu Beginn des Berichtsjahres.

Der Schwerpunkt der Geschäftstätigkeit im Konzernbereich Public Finance lag unverändert auf einem wertschonenden Bestandsabbau des Portfolios. Neugeschäft und Prolongationen wurden nur zur Deckungsstocksteuerung oder aufgrund vertraglicher Verpflichtungen getätigt. Das Portfolio wurde gegenüber dem Vorjahresresultimo um rund 20 Mrd Euro reduziert. Neben hohen Fälligkeiten wurden auch aktive Verkäufe mit einem Volumen von rund 4 Mrd Euro vorgenommen. Das Exposure at Default im Konzernbereich Public Finance belief sich zum Jahresende 2010 auf rund 109 Mrd Euro. Im Rahmen des Abbaus wurde das Exposure in südeuropäischen Staaten ebenfalls reduziert. Zum Berichtsstichtag betrug das Sovereign Exposure in den Staaten Portugal, Spanien, Italien, Irland und Griechenland insgesamt noch 17 Mrd Euro. Dies entspricht einer Reduktion von 3 Mrd Euro gegenüber dem Jahresresultimo 2009.

#### **Strategische Neuausrichtung entschieden**

Der Refinanzierungsplan für das Jahr 2010 konnte schon in der ersten Jahreshälfte weitgehend erfüllt werden. Zu den Refinanzierungsaktivitäten gehörte im Februar 2010 auch die Emission eines dreijährigen öffentlichen Jumbo-Pfandbriefs mit einem Volumen in Höhe von 1,5 Mrd Euro, dessen Orderbuch binnen weniger Stunden geschlossen wurde und der um mehr als 100 % überzeichnet war. Darüber hinaus wurde eine größere Pfandbrief-Privatplatzierung in Höhe von 500 Mio Euro mit Fokus auf den deutschen Markt begeben. Kleinere Privatplatzierungen konnten ganzjährig bis zum Jahresende bei in- und ausländischen Investoren platziert werden.

Mit Blick auf die SoFFin-Auflage zur Reduktion des Public-Finance-Bestandes und die EU-Auflage zur Abtrennung der Eurohypo AG bis spätestens Ende 2014 hat der Vorstand der Commerzbank Aktiengesellschaft im Oktober 2010 eine strategische Neuausrichtung für das Public-Finance-Geschäft verabschiedet. Sie sieht für die Eurohypo AG und die beiden Luxemburger Public-Finance-Einheiten einen risikoorientierten, passiven Auslauf der Public Finance-Bestände vor. Der Repo-Finanzierung kommt dabei phasenweise eine stärkere Bedeutung bei der Refinanzierung der Public-Finance-Bestände zu. Zudem haben wir eine Umstellung des konzerninternen Refinanzierungskonzeptes der Bank im Bereich des Unsecured Fundings auf ein weitgehend fristenkongruentes, eigenständiges Fundingkonzept beschlossen.

#### **Ausblick**

Für die Jahre 2011 und 2012 ist von weiterhin hohen Defiziten und somit einem hohen Refinanzierungsbedarf der öffentlichen Hand auszugehen. Daneben bestehen weiterhin Unsicherheiten am Markt, zum Beispiel bezüglich einer Rettung schwacher Eurostaaten. Vor diesem Hintergrund ist mit einer weiteren Verschlechterung der Bonitätseinschätzungen zu rechnen. Wir erwarten daher, dass die Volatilität im Markt anhalten wird. Die beabsichtigten Neuerungen in der Bankenregulierung werden trotz langer Übergangsfristen erhebliche Auswirkungen auf die Geschäftsmöglichkeiten im Staatsfinanzierungsgeschäft haben. Der eingeschlagene Weg der Bestandsreduktion wird konsequent fortgesetzt, insbesondere durch den Abbau von kreditmateriell schwächeren Assets, sofern sich Marktopportunitäten ergeben. Dies wird weiterhin zu negativen Ergebniseffekten führen.

|     |                                         |
|-----|-----------------------------------------|
| 75  | Geschäft und Rahmenbedingungen          |
| 81  | Ertrags-, Finanz- und Vermögenslage     |
| 93  | Entwicklung der Segmente                |
| 131 | Asset Based Finance                     |
| 144 | Unsere Mitarbeiterinnen und Mitarbeiter |
| 150 | Nachtragsbericht                        |
| 151 | Prognose- und Chancenbericht            |

## Ship Finance

Im Zuge der Integration der Dresdner Bank in die Commerzbank wurden alle Schiffsfinanzierungsaktivitäten des Commerzbank-Konzerns in den Konzernbereich Ship Finance zusammengefasst. Neben den Schiffsfinanzierungen der Commerzbank betrifft dies die Tochtergesellschaft Deutsche Schiffsbank AG mit Sitz in Bremen und Hamburg.

Im Geschäftsjahr 2010 konnten wir im Konzernbereich Ship Finance unsere starke Marktposition halten. Mit einem Exposure at Default (EaD) für Schiffs-, Werft- und Reederei-finanzierungen in Höhe von 20 Mrd Euro ist der Commerzbank-Konzern einer der führenden Schiffsfinanzierer weltweit, mit einem langjährigen Know-how in maritimen Finanzierungsfragen. Das Kreditportfolio ist nach Kundengruppen, Schiffstypen und Ländern gut diversifiziert.

### Marktentwicklung und Portfolio

Die Erholung der Weltwirtschaft im Jahr 2010 wirkte positiv auf einzelne Segmente der Schifffahrt. Im Containerbereich haben sich die Märkte – mit Ausnahme bei kleineren Containerschiffen – etwas erholt, wobei der Containerumschlag durchschnittlich sogar leicht über dem Niveau vor der Krise lag. Die Containerschifffahrt profitierte im Jahr 2010 stark von der anziehenden Nachfrage vor allem in den Größenklassen >2 500 Twenty-foot Equivalent Unit (Maß für die Lade- beziehungsweise Transportkapazität von Containerschiffen).

Die Nachfrage nach Massengutschiffen und Tankern ging dagegen im Sommer 2010 spürbar zurück. Der Tankermarkt zeigte sich im Jahresverlauf schwankend und wird grundsätzlich von zahlreichen kaum prognostizierbaren Faktoren beeinflusst. Der Rückgang der zwischenzeitlichen Lagernutzung von Öl auf Schiffen hat zu einem deutlichen Angebotsüberhang an großen Tankern geführt. Der Einmaleffekt durch die Verschrottung von Einhülentankern bis Ende des Jahres 2010 hat das Flottenwachstum dagegen temporär verringert.

Das weitgehend in US-Dollar denominierte Exposure der Schiffsfinanzierungen hat sich gegenüber dem Jahresende 2009 von 22 Mrd Euro auf 20 Mrd Euro verringert. Außerplanmäßige Tilgungen wirkten dabei reduzierend, die Veränderungen des US-Dollar-Wechselkurses erhöhend.

Das Gesamtportfolio verteilt sich in weitgehend unveränderten Anteilen auf die drei Standardschiffstypen Containerschiffe (6 Mrd Euro), Tanker (5 Mrd Euro) und Massengutfrachter (4 Mrd Euro). Die weiteren 5 Mrd Euro beinhalten unterschiedliche Spezialtonnagen mit hoher Diversifikation über die verschiedenen Schiffssegmente.

Die Strategie, das Risiko im Bestandsgeschäft konsequent zu reduzieren, hat im Berichtszeitraum zu Stabilisierungserfolgen geführt, auch bedingt durch einvernehmlich mit Kunden vorgenommene Restrukturierungen.

### Ausblick

Die im zweiten Halbjahr 2010 im Markt verhandelten Zeitcharterraten deuten auf eine auch künftig wieder stabilere Marktentwicklung in den großen Schiffsklassen hin.

Das prognostizierte Wachstum der Weltwirtschaft für das Jahr 2011, getrieben insbesondere durch die positive Entwicklung der asiatischen Schwellenländer, dürfte vor allem auch auf dem Anstieg des Handelsvolumens und – damit einhergehend – einer steigenden Seetransportnachfrage basieren. In der Folge sollten steigende Transportmengen die Fracht- und Charterraten gegenüber der Krise weiter stabilisieren und die Ergebnissituation in der Schifffahrtbranche verbessern. Aufgrund der bis zum Jahr 2008 hohen Bestellvolumina für Neubautonnage besteht jedoch weiter ein Druck auf der Angebotsseite, der sich bis 2013/2014 mit der sukzessiven Indienstnahme der Schiffe nur langsam abbauen wird.

Bei vergleichsweise geringem Verschrottungsvolumen im gleichen Zeitraum bleibt das Erholungspotenzial für die Schifffahrtsbranche deshalb insgesamt begrenzt.

Für das laufende Jahr 2011 sehen wir gegenüber dem Jahr 2010 insgesamt positivere Vorzeichen. Wir erwarten deshalb stabilere Erträge und eine rückläufige Risikovorsorge. Die Integration der Schiffsfinanzierungsaktivitäten wird weiter vorangetrieben.

## **Asset Management und Leasing**

Das Jahr 2010 war entscheidend für die geschäftliche und strukturelle Neuausrichtung der Commerz Real AG. Nach einer negativen Ergebnisentwicklung im Verlauf der Finanzmarktkrise sowie personeller Wechsel im Management leitete die Gesellschaft Ende 2009 den strategischen Review des Geschäftsmodells ein. Auf Basis der Ergebnisse wurde zu Beginn des zweiten Quartals 2010 entschieden, sich fortan noch stärker als Anbieter von Anlage- und Finanzierungsprodukten für die Privat- und Mittelstandskunden der Commerzbank zu positionieren. In der Folge wird sowohl die Aufbau- und Ablauforganisation als auch das Risiko-profil der Gesellschaft entsprechend angepasst.

### **hausInvest-Fusion erfolgreich abgeschlossen**

Die Regulierungspläne des Bundesfinanzministeriums und die Ankündigung erster Fondsa-bwicklungen sorgten für erhebliche Verunsicherung bei den Anlegern offener Immobilien-fonds. Beträchtliche Mittelabflüsse waren die Folge. Zum Ende des dritten Quartals 2010 wurde jedoch mit der Fusion von „hausInvest europa“ und „hausInvest global“ eine solide Basis für die erfolgreiche Zukunft der Marke „hausInvest“ geschaffen. Durch die Zusammen-führung der beiden Produkte wurde eine in mehrfacher Hinsicht deutlich breitere Aufstel-lung erreicht, die Entwicklungen einzelner Märkte oder Branchen noch wirksamer abfedern kann. Der neue hausInvest deckt eine größere Zahl von Wirtschaftsregionen ab, optimiert die Struktur nach Immobiliennutzungsarten und erschließt ein umfassendes Mieterspektrum.

### **Immobilien-Spezialfonds behaupten sich in schwierigem Umfeld**

Auch bei institutionellen Investoren war angesichts des volatilen Umfelds an den Finanz- und Kapitalmärkten noch eine große Verunsicherung spürbar. Es ist der Commerz Real AG dennoch gelungen, den Investorenkreis ihrer Immobilien-Spezialfonds zu stabilisieren. Wei-tere Entwicklungsmöglichkeiten werden maßgeblich von den Auswirkungen neuer regulato-rischer Bestimmungen wie etwa Solvency II und den damit verbundenen Eigenkapitalvor-schriften für Immobilieninvestitionen durch institutionelle Anleger abhängig sein.

### **Scope-Award für CFB-Fonds in der Assetklasse „Energie“**

Die geschlossenen Fonds der Commerz Real Fonds Beteiligungsgesellschaft mbH (CFB) konnten im Jahr 2010 positive Akzente setzen. Im Sommer des Berichtsjahres war der exklusiv durch die Commerzbank vertriebene Solarfonds „CFB 177“ binnen weniger Wochen voll-ständig platziert. Bereits die vorangegangenen Solarfonds hatten sich als überaus erfolgreich erwiesen. So ging der jährlich von der unabhängigen Ratingagentur Scope verliehene „Scope-Award“ in der Assetklasse „Energie“ in diesem Jahr an die CFB. Ausgezeichnet wurden vor allem die hohe Konzeptions- und Prospektqualität sowie die Einbindung von kompetenten und zuverlässigen Partnern. Einen weiteren Platzierungsschwerpunkt bildeten im Jahr 2010 zwei Flugzeugfonds mit Maschinen des Typs A 319, für die langfristige Leasingverträge mit der Fluggesellschaft Air Berlin bestehen.

|     |                                         |
|-----|-----------------------------------------|
| 75  | Geschäft und Rahmenbedingungen          |
| 81  | Ertrags-, Finanz- und Vermögenslage     |
| 93  | Entwicklung der Segmente                |
| 131 | Asset Based Finance                     |
| 144 | Unsere Mitarbeiterinnen und Mitarbeiter |
| 150 | Nachtragsbericht                        |
| 151 | Prognose- und Chancenbericht            |

### **Konsequente Neupositionierung bei Structured Investments**

Die noch niedrige Investitionsneigung der deutschen Wirtschaft im Jahr 2010, ein entsprechend geringer Auftragseingang und die teils schwierige Fremdkapitalbeschaffung haben das Neugeschäftspotenzial für die Finanzierungsprodukte deutlich eingeschränkt. Im Leistungsbereich Structured Investments ist dies vor allem für das Baumanagement spürbar. In der Folge zeichnete sich kaum attraktives Anschlussgeschäft ab. Die Commerz Real nutzte jedoch die Zeit für eine konsequente Neupositionierung: „Planen, Bauen, Finanzieren aus einer Hand“ – mit diesem Konzept optimiert sie die Leistungspalette rund um die Immobilie. Diese Neuausrichtung zeigte bereits im letzten Quartal 2010 erste Wirkung durch eine spürbare Zunahme von Geschäftsanfragen.

### **Portfoliobereinigung im Mobilienleasing**

Im Mobilienleasing konnte im Berichtsjahr ein umfangliches Neugeschäft akquiriert werden. Dies ist ein besonderer Erfolg in Anbetracht der Tatsache, dass der Leasingmarkt im Jahr 2009 eingebrochen war und für den Berichtszeitraum in einer Seitwärtsbewegung verharnte. Zum Jahresende 2010 startete die Commerz Real auch mit der Bereinigung der Randaktivitäten dieses Leistungsbereichs. So konnte im Dezember die auf gewerbliche Leasingdienstleistungen spezialisierte Commerz Real Autoleasing GmbH an die Arval Deutschland GmbH, ein Tochterunternehmen der französischen Bank BNP Paribas S.A., verkauft werden.

### **Ausblick**

Die tragende Säule bei den Anlageprodukten der Commerz Real bleibt weiter der offene Immobilienfonds. Die Marke hausInvest ist bestens etabliert und wird auch weiterhin eine wichtige Rolle im Fondsangebot für Privatkunden spielen. Sowohl über Spezialfonds als auch über KG-Lösungen wird die Commerz Real verstärkt die Zielgruppe der institutionellen Investoren erschließen. Bei den geschlossenen CFB-Fonds wird sie ihr Augenmerk fortan vor allem auf die Assetklassen Immobilien, Flugzeuge und regenerative Energien richten. Eine sinnvolle Ergänzung des Commerzbank-Angebots für den Mittelstand stellen die vielfältigen Investmentlösungen im Mobilienleasing und bei Structured Investments dar. Vor dem Hintergrund der konjunkturellen Aufhellung und wachsenden Investitionsneigung ist hier von attraktiven Neugeschäftsmöglichkeiten auszugehen.

### **Ausblick Asset Based Finance**

In einem weiterhin herausfordernden Marktumfeld werden wir die strategische Neuausrichtung der Segmentgeschäftsfelder weiter vorantreiben. Übergreifend wird ein besonderer Schwerpunkt in der Optimierung der Refinanzierungsstruktur bestehen. Ein weiterer Fokus liegt auf dem konsequenten Management des gebundenen Kapitals und der Risikopositionen. Auf dieser Basis wollen wir die im Rahmen des Strategieprogramms „Roadmap 2012“ definierten Ziele erreichen.

## Portfolio Restructuring Unit

---

Die Einrichtung der Portfolio Restructuring Unit (PRU) erfolgte im Jahr 2009 als Antwort auf die Verschärfung der Finanzmarktkrise. Sie umfasst mehrere Assetklassen, insbesondere aus dem Investmentbanking-Bereich, die im Zusammenhang mit eingestellten Eigenhandels- und Investmentaktivitäten stehen und nicht mehr als strategisch klassifiziert werden. Die Portfolio Restructuring Unit bildet ein eigenständiges Segment. Im Berichtsjahr 2010 war die PRU in die Bereiche Structured Credit sowie Credit Trading unterteilt, wobei das letztgenannte zum Jahresende 2010 geschlossen wurde. Die Aktivitäten der operativen Einheiten der PRU erfolgen von London und New York aus.

### Ergebnisentwicklung

Im Geschäftsjahr 2010 war bei der PRU ein deutlich wiederkehrendes Investoreninteresse und zunehmende Liquidität in den Bereichen Structured Credit und Credit Trading zu beobachten.

In einem wechselhaften Marktumfeld im Zusammenhang mit der Schuldenkrise europäischer Staaten wurde der Portfolioabbau im Jahresverlauf unter Nutzung von Marktopportunitäten weiter vorangetrieben. Zusätzlich wirkten Restrukturierungen und Fälligkeiten von Positionen ebenfalls volumenmindernd.

Das Bilanzvolumen konnte im Berichtszeitraum – trotz gegenläufiger Währungseffekte – um 5,6 Mrd Euro reduziert werden. Insgesamt konnten beträchtliche Fortschritte bei der Reduzierung der Anzahl von Positionen erzielt und somit die Komplexität deutlich verringert werden. Durch eine der größten Einzeltransaktionen der PRU wurde das Credit-Trading-Portfolio im vierten Quartal vollständig abgebaut. Der Zinsüberschuss sank im Vergleich zum Vorjahreszeitraum um 170 Mio Euro auf 82 Mio Euro, was in erster Linie auf den Abbau von Beständen zurückzuführen war. Die Risikovorsorge ging bedingt durch geringere Belastungen aus einzelnen Kreditstrukturen deutlich von 327 Mio Euro auf 62 Mio Euro zurück. Das Handelsergebnis nahm im Vergleich zum Geschäftsjahr 2009 signifikant um 1 599 Mio Euro auf 787 Mio Euro zu. Dies resultierte sowohl aus realisierten Gewinnen aus dem aktiven Abbau des Portfolios als auch aus Wertaufholungen auf strukturierte Wertpapiere. Der Verlust beim Ergebnis aus Finanzanlagen konnte auf –29 Mio Euro gesenkt werden, nachdem im Vorjahr noch –432 Mio Euro anfielen. Die Verwaltungsaufwendungen beliefen sich im Geschäftsjahr 2010 auf 106 Mio Euro und lagen somit 42 Mio Euro unter dem Vorjahreszeitraum.

Im Geschäftsjahr 2010 erzielte das Segment PRU ein Operatives Ergebnis von 675 Mio Euro gegenüber –1 452 Mio Euro im Vorjahreszeitraum.

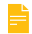

› Anhang (Note 45 –  
Segmentberichterstattung)  
Seiten 246 ff.



|     |                                         |
|-----|-----------------------------------------|
| 75  | Geschäft und Rahmenbedingungen          |
| 81  | Ertrags-, Finanz- und Vermögenslage     |
| 93  | Entwicklung der Segmente                |
|     | 138 Portfolio Restructuring Unit        |
| 144 | Unsere Mitarbeiterinnen und Mitarbeiter |
| 150 | Nachtragsbericht                        |
| 151 | Prognose- und Chancenbericht            |

## Wesentliche Entwicklungen im Geschäftsjahr

Das strategische Managementziel der PRU besteht unverändert im wertoptimierten Portfolioabbau innerhalb eines Zeitraums, der dieser Zielsetzung angemessen erscheint. Dieses Ziel wird sowohl durch Abbaumaßnahmen als auch durch aktives Management aller Exposures, die intern als Structured Credit und Credit Trading klassifiziert worden sind, verfolgt. Der Bereich Structured Credit beinhaltet alle nicht staatlich gesicherten Asset-backed Securities (ABS), jedoch keine eigenen Verbriefungen. Der Bereich Credit Trading umfasst Eigenhandelspositionen in Firmen- und Finanzanleihen sowie Kreditderivate wie zum Beispiel synthetische Collateralised Debt Obligations (CDOs), First to Default (FTD), Single Name CDS, Index CDS, Index Tranches und Credit Linked Notes.

Die Steuerungsphilosophie ist auf ein umfassendes und nachvollziehbares Portfoliomanagement sowie auf Reduktionsstrategien mit klaren Bilanz- und RWA-Zielen ausgerichtet. Kapitalerhalt und Risikoreduktion haben hierbei oberste Priorität. Ein Verkauf „um jeden Preis“ ist daher nicht Bestandteil dieser Steuerungsphilosophie und würde auch dem Ziel der Wertmaximierung entgegenlaufen. Vielmehr versucht das Management der PRU Portfolios abzubauen, indem bestimmte Marktgegebenheiten proaktiv ausgenutzt beziehungsweise Restrukturierungen vorgenommen werden. Mit Ausnahme von Hedge-/Risiko-Managementzwecken werden in der PRU keine neuen Positionen eingegangen.

Im Jahr 2010 haben wir beim Abbau der auf die PRU übertragenen Portfolios große Erfolge erzielt. Bilanzvolumen und Anzahl der Positionen konnten abgebaut und somit die Komplexität verringert werden. Diese Reduktionen haben auch zur Folge, dass die Risikoposition (speziell im Hinblick sowohl auf Kontrahenten- als auch auf Emittentenrisiko) zurückgeführt wurde und die PRU in einem weitaus geringeren Maß von den bevorstehenden regulatorischen Änderungen im Hinblick auf Kapitalanforderungen betroffen sein wird.

Dies war besonders in der Geschäftseinheit Credit Trading ausgeprägt. So haben wir zu Beginn des Berichtsjahres Unternehmens- und Finanzanleihen in einem positiven Marktumfeld veräußert, zudem haben wir das Volumen illiquider US-Kredite über Auktionen und vorzeitige Rückzahlungen abgebaut. Darüber hinaus konnten große maßgeschneiderte Kreditderivate-Portfolios in bilateralen Transaktionen reduziert werden. Im Jahresverlauf 2010 haben wir den Verkauf von Positionen aus dem Bereich Credit Trading erfolgreich mittels regelmäßiger Auktionen beschleunigt.

Im Rahmen der größten jemals in diesem Zusammenhang durchgeführten Auktion wurde im vierten Quartal 2010 ein Kreditderivate-Portfolio im Bereich Credit Trading, das zu diesem Zeitpunkt primär aus 54 000 CDS und Index-CDS bestand, veräußert. Die Anzahl der verwalteten Positionen innerhalb der PRU haben wir damit seit Etablierung von rund 144 000 auf etwa 6 000 per Jahresende reduziert.

Auch bei strukturierten Kreditprodukten haben wir große Erfolge erzielt. Wir veräußerten beispielsweise ABS und CMBS Assets vor der Eurokrise, zudem verzeichneten wir Restrukturierungserfolge und vorzeitige Terminierungen. Um die operationale Komplexität der Front-to-End-Prozesskette zu reduzieren, hat die PRU die Mehrzahl der Positionen und Prozesse von New York nach London transferiert. In deren Folge basieren die Abläufe nunmehr auf einheitlichen internen Prozessen.

## Ausblick Portfolio Restructuring Unit

Für die Entwicklung der Märkte wird weiterhin eine hohe Abhängigkeit von allgemeinen makroökonomischen Faktoren erwartet. Dazu gehören die internationale Geldpolitik, die Lösung der europäischen Schuldenkrise sowie das regulatorische und rechtliche Umfeld, die großen Einfluss auf die Marktliquidität haben. Infolgedessen ist der ökonomische Ausblick für das Jahr 2011 vorsichtig optimistisch, wenngleich eine weitere verstärkte Marktvolatilität zu erwarten ist. Das Wirtschaftswachstum hat sich im Jahr 2010, insbesondere im Vergleich zum Vorjahr 2009, in den USA sowie in Europa weiter erholt. In vielen Teilbereichen haben sich die Kreditmärkte positiv entwickelt, nicht zuletzt dank der US-Geldpolitik.

Die PRU wird auch im laufenden Jahr 2011 in einem schwierigen Umfeld die verbleibenden Exposures aktiv managen und weiter reduzieren. Daher wird im laufenden Jahr 2011 und im Jahr 2012 das Bilanzvolumen weiter zurückgehen. Als Konsequenz werden im laufenden Jahr sowohl der Zinsüberschuss als auch die operative Kostenbasis im Vergleich zum Berichtsjahr 2010 abnehmen. Integrationsbedingte Themen wie zum Beispiel Positions- und IT-System-Migrationen haben wir im Berichtsjahr weitestgehend abgeschlossen, sodass sich der Managementfokus nunmehr auf Effizienzverbesserungen verlagert.

|     |                                         |
|-----|-----------------------------------------|
| 75  | Geschäft und Rahmenbedingungen          |
| 81  | Ertrags-, Finanz- und Vermögenslage     |
| 93  | Entwicklung der Segmente                |
| 141 | Sonstige und Konsolidierung             |
| 144 | Unsere Mitarbeiterinnen und Mitarbeiter |
| 150 | Nachtragsbericht                        |
| 151 | Prognose- und Chancenbericht            |

## Sonstige und Konsolidierung

Im Bereich Sonstige und Konsolidierung werden Erträge und Aufwendungen eingestellt, die nicht in die Verantwortungsbereiche der Geschäftssegmente fallen. Unter Sonstige wird über Beteiligungen, die nicht den Geschäftssegmenten zugeordnet sind, und das Group Treasury berichtet. Ferner sind hier die Kosten der Serviceeinheiten abgebildet, die – mit Ausnahme der Integrations- und Restrukturierungskosten – vollständig auf die Segmente verrechnet werden. Unter Konsolidierung fallen Aufwendungen und Erträge, die von den in der Segmentberichterstattung dargestellten Ergebnisgrößen der internen Managementberichterstattung auf den Konzernabschluss nach IFRS überleiten. Ferner sind hier die Kosten der Konzernsteuerungseinheiten abgebildet, die – mit Ausnahme der Integrations- und Restrukturierungskosten – ebenfalls vollständig auf die Segmente verrechnet werden.

Für den Ergebnisausweis im Vorjahr ist für den Bereich Sonstige und Konsolidierung eine Besonderheit zu beachten: Da die Ergebnisse der Marktsegmente aus Gründen der besseren Vergleichbarkeit den Zeitraum 1. Januar bis 31. Dezember beinhalten, wird die Differenz zum Konzernergebnis, das für die Dresdner Bank nur den Zeitraum 13. Januar bis 31. Dezember 2009 umfasst, hier ausgewiesen.

### Ergebnisentwicklung

Das Operative Ergebnis des Jahres 2010 belief sich auf –504 Mio Euro gegenüber 64 Mio Euro im Vorjahreszeitraum. Die Operativen Erträge vor Risikovorsorge in Höhe von 368 Mio Euro stammten im Wesentlichen aus der Treasury. Konzernübergreifende Effekte, die mit der Übernahme der Dresdner Bank im Zusammenhang standen und nicht einzelnen Segmenten zugeordnet werden konnten, sowie negative Bewertungseffekte, die aus der Anwendung des Hedge-Accounting gemäß IAS 39 auf bankübergreifende Transaktionen resultierten, wirkten sich negativ auf die Erträge aus. Hohe Einmalerträge aus Beteiligungsverkäufen im Vorjahr führten dabei zu einem deutlichen Rückgang des Ergebnisses aus Finanzanlagen. Die Verwaltungsaufwendungen des Bereichs Sonstige und Konsolidierung in Höhe von 878 Mio Euro resultierten im Wesentlichen aus Integrationsaufwendungen der Service- und Steuerungsfunktionen im Rahmen des Projekts „Zusammen Wachsen“, aus nicht auf die Geschäftssegmente verrechneten Kosten der Treasury, aus gesellschaftsrechtlichen Aufwendungen sowie aus Sachaufwendungen im Zusammenhang mit der Erfüllung der SoFFin-Auflagen. Das Ergebnis vor Steuern des Jahres 2010 betrug –504 Mio Euro nach –943 Mio Euro im Jahr 2009. Im Vorjahr waren Restrukturierungsaufwendungen in Höhe von 1 007 Mio Euro angefallen.

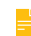

› Anhang (Note 45 –  
Segmentberichterstattung)  
Seiten 246 ff.

Tanja Birkholz  
Frauen in Führungspositionen  
bei der Commerzbank

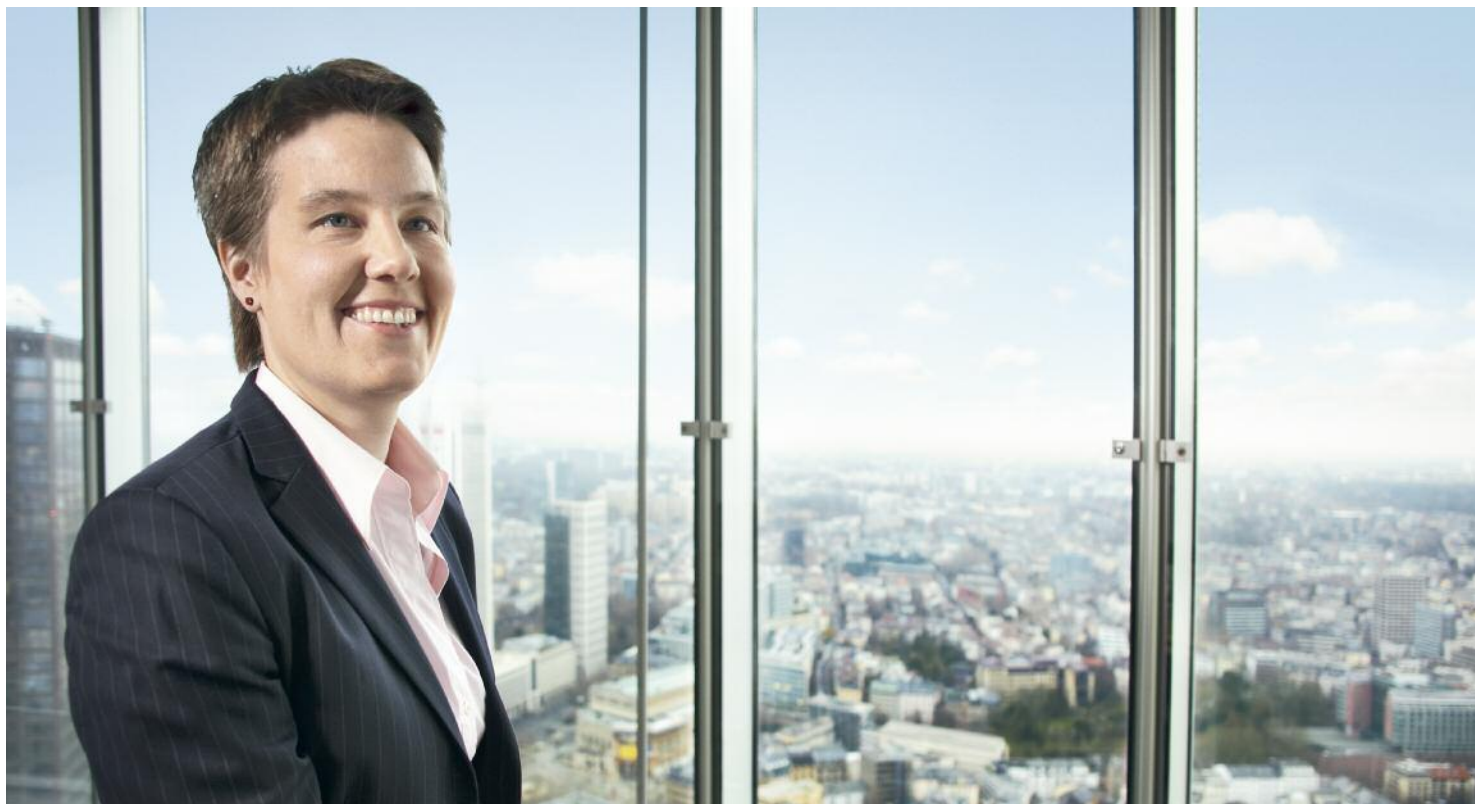

Tanja Birkholz, Bereichsvorstand Group Finance Architecture

Tanja Birkholz ist seit dem Jahr 2009 Executive Group Finance Architecture und damit eine der beiden Frauen im Topmanagement der Commerzbank. Eingestiegen ist sie im Jahr 1999 als Trainee und hat seitdem schon viele Stationen in der Bank durchlaufen. Beispielsweise war sie im Kredit- und Marktrisikomanagement und der Konzernstrategie in unterschiedlichen Funktionen tätig. Als junges Nachwuchstalent ist sie so kontinuierlich die Karriereleiter hochgeklettert – ganz ohne eine gesetzliche Quote. Heute verantwortet sie das neben der Integration der Dresdner Bank wichtigste Projekt der Bank: die Finanzsysteme der Bank zukunftsfähig aufzustellen. Sie ist zudem ein gutes Beispiel dafür, dass sich Kind und Karriere auch in der obersten Führungsebene nicht ausschließen.

## Frauen in Führungspositionen

---

Der Vorstand der Commerzbank spricht sich klar für mehr Frauen in Führungspositionen aus. Um das leistungsfähigste Führungsteam zu stellen, müssen alle Talente berücksichtigt werden. Deshalb initiierte der Vorstand im Jahr 2010 ein Projekt mit dem Ziel, mehr Führungspositionen mit Frauen zu besetzen.

Am Anfang des Projekts standen umfassende Analysen und Befragungen. Unter anderem wurde erkannt, dass die Ausgangslage in den einzelnen Segmenten der Bank sehr unterschiedlich ist. Im Personalbereich sind zum Beispiel deutlich mehr Frauen tätig als in der IT. Deshalb hat sich der Vorstand gegen eine einheitliche Besetzungsquote entschieden. Bankweite und segmentspezifische Maßnahmen sollen eine deutliche Erhöhung des Frauenanteils in Führungspositionen bewirken.

Jeder Vorstand benannte einen Projektpaten aus dem Topmanagement seines Bereichs. Mit ihren Teams entwickeln die Projektpaten Maßnahmen, die auf das jeweilige Segment zugeschnitten sind. Zusätzliche bankweite Maßnahmen sind unter anderem Mentoringprogramme für weiblichen Führungsnachwuchs oder der Ausbau der (Schul-)Kinderbetreuung. Neben etablierten Lösungen stehen Programme wie der Pilot „keep in touch (k.i.t.)“. Um während der Elternzeit den Kontakt zum Unternehmen nicht zu verlieren, wird ein Teilzeitarbeitsvertrag von 10 % der tariflichen wöchentlichen Arbeitszeit mit Jahresstundenkontingent (p.r.t.) für die Dauer der k.i.t.-Maßnahme vereinbart. Es kann für Qualifizierungsmaßnahmen oder Teamevents genutzt werden. Bereits umgesetzt wurde ein segmentinterner Karrieretag, bei dem Potenzialträgerinnen die Möglichkeit hatten, mit dem Topmanagement und Vorständen ins Gespräch zu kommen. Beim Rekrutierungs-event „Women Up 2010“ konnten Hochschulabsolventinnen die Commerzbank kennenlernen.

Transparenz und das Messen von Fortschritten sind zentral für das Projekt „Frauen in Führungspositionen“. Bis zum Jahr 2015 wird der Vorstand regelmäßig über den Umsetzungsfortschritt und den Zielerreichungsgrad informiert. Ihm werden sechs Steuerungskriterien vorgestellt, um weibliche Talente nachhaltig zu identifizieren, zu fördern und schließlich die Anzahl qualifizierter Kandidatinnen für Führungspositionen zu erhöhen. Ab dem laufenden Jahr 2011 sind die Fortschritte vergütungsrelevant in den Zielvereinbarungen des Topmanagements verankert.

## Unsere Mitarbeiterinnen und Mitarbeiter

Um unserem Anspruch gerecht zu werden, die beste Bank für unsere Kunden zu sein, benötigen wir die besten Mitarbeiterinnen und Mitarbeiter. Ziel unserer Personalarbeit ist es daher in erster Linie, die Attraktivität der Commerzbank als Arbeitgeber intern und extern kontinuierlich zu steigern. Deshalb schafft der Funktionsbereich Group Human Resources die Rahmenbedingungen, um geeignete Mitarbeiterinnen und Mitarbeiter für die Bank zu gewinnen, zu qualifizieren und weiterzuentwickeln. Um diesem Anspruch noch besser gerecht zu werden, haben wir uns im Frühjahr 2010 ein neues Leitbild für unsere Personalarbeit gegeben. Die Kernbotschaft lautet: „Menschen machen den Erfolg.“

Zum Jahresende 2010 waren im Commerzbank-Konzern 59 101 Mitarbeiterinnen und Mitarbeiter beschäftigt. Gegenüber dem Jahresende 2009 entspricht dies einem Rückgang um 3 570 Mitarbeiterinnen und Mitarbeiter.

### Mitarbeiterzahlen der Commerzbank

| Kopfzahlen                      | 31.12.2010 | 31.12.2009 |
|---------------------------------|------------|------------|
| Gesamtzahl Beschäftigte Konzern | 59 101     | 62 671     |
| Gesamtzahl Beschäftigte AG      | 43 550     | 44 227     |

Tabelle 8

Umgerechnet auf Vollzeitbeschäftigte lagen die Mitarbeiterkapazitäten bei 50 489 gegenüber 53 231 im Vorjahr. In der folgenden Tabelle sind die Vollzeitbeschäftigten nach Segment jeweils zum Jahresende aufgeschlüsselt.

| Vollzeitkräfte               | 31.12.2010    | 31.12.2009    |
|------------------------------|---------------|---------------|
| Privatkunden                 | 17 202        | 18 580        |
| Mittelstandsbank             | 4 831         | 4 791         |
| Central & Eastern Europe     | 8 163         | 8 748         |
| Corporates & Markets         | 1 747         | 2 256         |
| Asset Based Finance          | 1 743         | 1 745         |
| Portfolio Restructuring Unit | 45            | 60            |
| Sonstige und Konsolidierung  | 16 758        | 17 051        |
| <b>Konzern gesamt</b>        | <b>50 489</b> | <b>53 231</b> |

Tabelle 9

|     |                                                |
|-----|------------------------------------------------|
| 75  | Geschäft und Rahmenbedingungen                 |
| 81  | Ertrags-, Finanz- und Vermögenslage            |
| 93  | Entwicklung der Segmente                       |
| 144 | <b>Unsere Mitarbeiterinnen und Mitarbeiter</b> |
| 150 | Nachtragsbericht                               |
| 151 | Prognose- und Chancenbericht                   |

Mit 77 % ist der größte Teil unserer Mitarbeiterinnen und Mitarbeiter in Deutschland beschäftigt. Die durchschnittliche Betriebszugehörigkeit unserer Mitarbeiterinnen und Mitarbeiter liegt bei rund 17 Jahren; knapp ein Viertel sind bis zu 9 Jahre im Unternehmen, 39 % zwischen 10 und 19 Jahren und 38 % 20 Jahre und länger. Die Fluktuationsquote lag im Jahr 2010 bei 4,8 %. Sie ist seit dem Jahr 2000 mit 9,4 % in der damaligen Commerzbank nahezu kontinuierlich gesunken. Die vergleichsweise lange Unternehmenszugehörigkeit und eine niedrige Fluktuation unterstreichen die Attraktivität der Commerzbank als Arbeitgeber.

## **Personalwirtschaftliche Integration auf der Zielgeraden, kulturelle Integration kommt deutlich voran**

Group Human Resources hat das Zusammenwachsen von Commerzbank und Dresdner Bank seit der Vorbereitung der Integration intensiv und erfolgreich mitgestaltet. Hierzu zählen auch die Verhandlungen mit den Arbeitnehmergremien, die sehr konstruktiv geführt wurden. Inzwischen befindet sich die personalwirtschaftliche Integration auf der Zielgeraden.

Im letzten Schritt des integrationsbedingten Stellenbesetzungsprozesses wurden im vergangenen Jahr die Führungskräfte der vierten Ebene in der Fläche, also die Filial- und Gruppenleiter außerhalb der Frankfurter Zentrale, benannt. Die Kandidaten hatten bis Mitte Dezember 2009 Gelegenheit, sich auf diese Positionen zu bewerben, um im Anschluss daran mit der jeweils verantwortlichen Führungskraft der zweiten oder dritten Führungsebene ein strukturiertes Interview zu führen. Wie schon bei den zurückliegenden Stellenbesetzungsprozessen im Zuge der Integration haben wir alles daran gesetzt, das Verfahren so offen, fair und transparent wie möglich zu gestalten. Zum 1. Juli 2010 haben Regionalfilialleiter und Filialdirektoren sowie Abteilungs- und Gruppenleiter ihre Verantwortung übernommen. Von diesem Zeitpunkt an standen Führungskraft, Teamkollegen und Zielstandort für jede Mitarbeiterin und jeden Mitarbeiter – mit wenigen Ausnahmen – fest. Der Prozess der organisatorischen Integration im Bereich Personal war damit rund 22 Monate nach Ankündigung der Übernahme der Dresdner Bank abgeschlossen. Insgesamt waren zum Jahresende 2010 rund 4 200 Führungskräfte in der Commerzbank Aktiengesellschaft (Inland) tätig.

Der mit der Integration verbundene Stellenabbau geht schneller voran als geplant. Der Abbau von rund 9 000 Vollzeitstellen, der sozialverträglich, also ohne betriebsbedingte Beendigungskündigungen, erfolgen soll, ist unter Berücksichtigung aller abgeschlossenen Verträge bereits zu mehr als 80 % umgesetzt. Der verbleibende Abbau entfällt überwiegend auf die Frankfurter Zentrale. Group Human Resources unterstützt Führungskräfte und Mitarbeiterinnen und Mitarbeiter weiterhin aktiv mit verschiedenen Personalinstrumenten, unter anderem mit Newplacement-Angeboten.

Die Integration der Dresdner Bank in die Commerzbank bedeutet einen tief greifenden kulturellen Wandel und eine enorme Herausforderung für alle Beteiligten. Aufgaben und Arbeitsumfeld haben sich in vielen Fällen verändert und der Prozess des emotionalen Zusammenwachsens dauert weiter an. Ob die Integration von Commerzbank und Dresdner Bank eine Erfolgsgeschichte wird, hängt stark von der Überzeugung der Mitarbeiterinnen und Mitarbeiter ab. Der Glaube an den Integrationserfolg und das individuelle Engagement für den Zusammenschluss unterliegen immer wieder Stimmungsschwankungen. Um diese zeitnah aufgreifen zu können, hat die Commerzbank schon kurz nach Ankündigung der Übernahme mit systematischen Mitarbeiterbefragungen begonnen. Sie sind ein wichtiges Instrument zur Organisationsentwicklung und liefern wertvolle Daten zur Steuerung des Integrationsprozesses.



Das umfassendste Befragungsinstrument ist der im September 2010 zum zweiten Mal durchgeführte repräsentative „Change Monitor“, an dem rund 15 000 Mitarbeiterinnen und Mitarbeiter und Führungskräfte der Commerzbank Aktiengesellschaft Inland sowie der Standorte New York, Luxemburg, London und Asien teilnahmen. Die Auswertung zeigt für die gesamte Bank ein positives Bild und belegt den Fortschritt der Integration.

### **Die besten Kandidaten erkennen, Leistungsträger umfassend fördern**

Wir wollen die Fähigkeiten unserer Mitarbeiterinnen und Mitarbeiter frühzeitig erkennen und entwickeln. Deshalb verfolgen wir in der Personalarbeit einen ganzheitlichen Ansatz von der Nachwuchskraft bis zum Topmanagement. Vielversprechende Mitarbeiterinnen und Mitarbeiter fördern wir entlang attraktiver Karrierewege und bieten ihnen ein umfassendes Programm beruflicher Weiterbildungsmaßnahmen. Von den 39 812 Mitarbeiterinnen und Mitarbeitern, die zum 31. Dezember 2010 in der Commerzbank Aktiengesellschaft (Inland) beschäftigt waren, befanden sich 2 299 in einer Berufsausbildung. 172 Mitarbeiter haben wir als Trainees beschäftigt, durchschnittlich 274 gehörten als Studenten dem Commerzbank-Studienkreis an. Darüber hinaus beschäftigten wir im Jahr 2010 rund 700 akademische Praktikanten.

Mit dem Commerzbank-Projektmanagement-Programm (CPP) planen wir die Einführung eines neuen Karriereweges. Zukünftig sollen sich Mitarbeiterinnen und Mitarbeiter neben der Führungslaufbahn für die Projektlaufbahn als gleichwertigen Karriereweg entscheiden können. Diese Entwicklung im Rahmen des CPPs erfolgt analog zur Führungskarriere in drei Schritten: Die CPP-Audits prüfen zunächst das Potenzial zur Übernahme einer Leitungsaufgabe auf der jeweiligen Projektmanagementebene. Ein erfolgreich absolviertes Audit wird Voraussetzung für die Teilnahme am CPP-Development sein, das gezielt auf die Anforderungen der angestrebten Projektmanagementfunktion vorbereiten soll. Für Projektmanager, die bereits in einer Funktion tätig sind, wird im Rahmen des CPP-Professional ein maßgeschneidertes Qualifizierungsprogramm mit vertiefenden Seminaren angeboten. Das Professional-Programm ermöglicht auch die international anerkannte Zertifizierung und Ausbildung nach dem Standard der International Project Management Association (IPMA).

Um die Qualifizierung unserer Mitarbeiterinnen und Mitarbeiter bankweit einheitlich aufzubauen, haben wir im Jahr 2010 das Projekt „Commerzbank-Akademie“ initiiert. Ziel ist es, das gesamte Qualifizierungs- und Entwicklungsangebot aller Karrierewege bankweit unter einem Dach zu vereinen. Zudem werden wir die Fachkarriere als gleichwertige Alternative zur Führungs- und Projektkarriere stärken. Eine Fachkarriere kommt für alle Vertriebsmitarbeiter und Spezialisten im tariflichen und außertariflichen Bereich, die keine Führungs- oder Projektleitungsfunktion wahrnehmen, infrage. Jeder Mitarbeiter in der Fachlaufbahn wird dann auf einen Blick erkennen können, welche Entwicklungsperspektiven ihm offenstehen und welche Qualifizierungsmaßnahmen hierfür im Angebot sind.

Bei der Internationalisierung unserer Nachwuchsentwicklung haben wir im vergangenen Jahr einen wichtigen Meilenstein erreicht. Im August 2010 startete das Graduate Programme im Segment Corporates & Markets. Dieses zwölfmonatige internationale Traineeprogramm für Hochschulabsolventen bereitet durch gezielte Qualifizierung und Praxiseinsätze auf spätere Positionen in den Bereichen Investmentbanking, Market Risk und Treasury vor. Das Programm, an dem 84 Absolventen aus Frankfurt, London, Singapur, Hongkong und New York teilnahmen, erlaubt neben einer praxisorientierten Qualifizierung den frühzeitigen Aufbau eines internationalen Netzwerks.

|     |                                                |
|-----|------------------------------------------------|
| 75  | Geschäft und Rahmenbedingungen                 |
| 81  | Ertrags-, Finanz- und Vermögenslage            |
| 93  | Entwicklung der Segmente                       |
| 144 | <b>Unsere Mitarbeiterinnen und Mitarbeiter</b> |
| 150 | Nachtragsbericht                               |
| 151 | Prognose- und Chancenbericht                   |

Im Anschluss an ein gemeinsames fünfwöchiges praxisorientiertes Training in London sind die Absolventen an ihre Standorte zurückgekehrt, um dort das Gelernte anzuwenden. Das Graduate Programme Corporates & Markets stellt sicher, dass die Nachwuchskräfte einen gemeinsamen Wissensstand erreichen und optimal auf einen weltweiten Einsatz vorbereitet sind.

An der Schnittstelle zwischen Nachwuchsförderung und gesellschaftlichem Engagement war unsere Veranstaltung „Move it!“ angesiedelt. Die Renovierung der Fridtjof-Nansen-Schule in Frankfurt, einer öffentlichen Grundschule mit hohem Modernisierungsbedarf, hatten sich 250 akademische Nachwuchskräfte vorgenommen. Gemeinsam mit 30 Führungskräften wurden Klassenzimmer gestrichen, Spielgeräte aufgebaut und der Garten neu angelegt – eine Teamleistung, die nach zwei intensiven Arbeitstagen Kinder und Schulleitung nachhaltig begeistert hat.

## Produkte und Prozesse verbessern, Kreativität fördern

Um interne und externe Unternehmensabläufe zu verbessern, betreibt die Commerzbank seit vielen Jahren ein systematisches Ideenmanagement unter der Bezeichnung „ComIdee“. Ziel ist es, Material oder Energie zu sparen, die Kunden- oder Arbeitszufriedenheit zu steigern, innovative Produkte zu entwickeln oder den Umweltschutz zu optimieren. Alle Mitarbeiterinnen und Mitarbeiter sind permanent aufgerufen, Verbesserungsideen online einzureichen, deren Realisierbarkeit von internen Gutachtern ebenfalls online geprüft wird. Positiv begutachtet wird ein Vorschlag, wenn er der Bank einen konkreten quantifizierbaren Nutzen bringt. Als Gutachter für ComIdee engagieren sich Mitarbeiter und Führungskräfte – dies hängt ausschließlich von der fachlichen Zuständigkeit, nicht von der Hierarchieebene ab. Um Anreize zur Ideeneinreichung zu setzen, werden realisierte Ideen mit Geld- oder Sachleistungen prämiert, und zwar mit bis zu 25 % jenes Betrags, der durch eine Idee im ersten Jahr erzielt werden kann. Eine Begrenzung nach oben gibt es nicht, die bisherige Höchstprämie liegt bei 48 000 Euro. Im Jahr 2010 wurden 3 638 Ideen eingereicht, 5,4 % aller Mitarbeiterinnen und Mitarbeiter haben sich beteiligt. Der von ComIdee im Jahr 2010 nach Abzug aller Kosten erzielte Nutzen lag auf Basis einer durchschnittlichen fünfjährigen Anwendungsdauer bei rund 3,3 Mio Euro. Dass ComIdee über die Commerzbank hinaus Maßstäbe setzt, beweist die Auszeichnung mit dem „Seer Award“ für internationales Ideenmanagement, den die Employee Involvement Association (EIA) 2010 bereits zum zweiten Mal an die Commerzbank verliehen hat. Die Bank hat sich damit in besonderem Maße mit der Zahl der eingereichten Ideen, dem erzielten Nutzen und einer überdurchschnittlich hohen Realisierungs- und Beteiligungsquote hervorgetan.

## Gesund leben und arbeiten, Erkrankungen vermeiden

Die Motivation und Leistungsstärke unserer Mitarbeiterinnen und Mitarbeiter hängt in hohem Maße von deren Gesundheit ab. Deshalb bieten wir seit vielen Jahren interne Maßnahmen an, die die Gesundheit am Arbeitsplatz erhalten und fördern. Das Spektrum reicht von Schulungen zu gesundheitsrelevanten Themen über Aktionen zur gesunden Lebensweise bis hin zum Betriebssport. Ein systematisches und ganzheitliches betriebliches Gesundheitsmanagement passt die Angebote regelmäßig an die gestiegenen Anforderungen im beruflichen Alltag und an die verlängerte Lebensarbeitszeit an. Hierzu zählen unter anderem Stressmanagementseminare, Gripeschutzimpfungen und die Aktion „Mit dem Rad zur Arbeit“.

Unser Ziel ist es nicht nur, die Krankheitsquote, die 2010 bei 4 % lag, günstig zu beeinflussen, sondern das Wohlbefinden unserer Mitarbeiterinnen und Mitarbeiter am Arbeitsplatz insgesamt zu steigern.

Um unsere Mitarbeiterinnen und Mitarbeiter aktiv in unser Gesundheitsmanagement einzubeziehen, haben wir im Jahr 2010 einen Beschäftigtenbeirat Gesundheit gegründet. In diesem Gremium diskutieren 45 Mitarbeiterinnen und Mitarbeiter aus nahezu allen Bereichen der Bank regelmäßig über arbeitsbezogene Gesundheitsthemen. Die Ergebnisse fließen in die Maßnahmenentwicklung ein, um eine gesundheitsorientierte Führungskultur zu entwickeln und hohe Arbeitsbelastungen besser zu bewältigen.

Neben der physischen Gesundheit haben für einige unserer Mitarbeiterinnen und Mitarbeiter in den letzten Jahren die psychosozialen Belastungen in der Lebens- und Berufswelt zugenommen. Daher bieten wir jetzt eine schnelle und umfassende Unterstützung mit unserem „Employee Assistance Program“. Experten unseres Partners dbgs GesundheitsService GmbH beraten unsere Mitarbeiterinnen und Mitarbeiter telefonisch zu gesundheitlichen Themen im Beruf, helfen aber auch bei Fragestellungen in Familie und Partnerschaft. Bei Bedarf vermitteln sie an Spezialisten, etwa Fachkliniken oder Ärzte. Darüber hinaus sind die Berater für im Haushalt lebende Angehörige unserer Mitarbeiterinnen und Mitarbeiter da. Selbstverständlich können sich auch Führungskräfte mit speziellen Anliegen an die telefonische Beratung wenden.

Gesundheitsmanagement ist aber noch mehr als Stressmanagement, Vorsorge und gesunde Ernährung. Da Bankmitarbeiter überwiegend im Sitzen arbeiten, halten wir eine regelmäßige sportliche Betätigung für wichtig. Deshalb unterstützen wir alle Mitarbeiterinnen und Mitarbeiter, die nach der Arbeit Sport treiben möchten, mit unseren Betriebssportangeboten. Um die regionalen Sportgemeinschaften untereinander zu vernetzen und den Betriebssport weiter voranzubringen, werden im laufenden Jahr 2011 in Berlin mit mehr als 1 200 Teilnehmern die Com-Games stattfinden.

## **Vielfalt produktiv nutzen, Mitarbeiterinnen und Mitarbeiter unterstützen**

Wir agieren in einem Umfeld mit weitreichendem Wettbewerb und heterogenen Geschäftsbeziehungen. Unter diesen Bedingungen wäre kaum etwas innovationsfeindlicher als eine Belegschaft mit ausschließlich ähnlich denkenden und handelnden Mitarbeiterinnen und Mitarbeitern. Erst wenn vielfältige Talente, Erfahrungen und Lebenssituationen in einem Team zusammenkommen, lassen sich die Wünsche verschiedenartiger Kunden umfassend erkennen und erfolgreich umsetzen. Um die Vielfalt unserer Mitarbeiter – Männer und Frauen, Eltern und Kinderlose, Jüngere und Ältere, Homo- und Heterosexuelle – gezielt zu nutzen und zu fördern, betreiben wir seit vielen Jahren aktives Diversity-Management, mit dem wir unsere Mitarbeiterinnen und Mitarbeiter in unterschiedlichen Lebensphasen unterstützen. Denn unsere Erfahrungen zeigen: Wer seine persönlichen Vorstellungen von Beruf und Privatleben umsetzen kann, ist motiviert und leistungsstark.

Zu den bewährten Eckpfeilern unseres Diversity-Managements zählen Maßnahmen, die die Vereinbarkeit von Beruf und Familie verbessern. Mutterschutz und Elternzeit unterstützen wir mit zahlreichen Angeboten, damit Eltern informiert bleiben und ihr Wiedereinstieg reibungslos funktioniert. An diese Zielgruppe richtet sich insbesondere unser im Juni 2010 im Internet eröffnetes Diversity-Portal. Auch unsere Kinderbetreuung haben wir im Jahr 2010 weiter ausgebaut. Bundesweit haben wir an 20 Standorten bei hochkarätigen Betreuungseinrichtungen weitere Plätze für Kinder im Alter von bis zu drei Jahren gebucht.

|     |                                                |
|-----|------------------------------------------------|
| 75  | Geschäft und Rahmenbedingungen                 |
| 81  | Ertrags-, Finanz- und Vermögenslage            |
| 93  | Entwicklung der Segmente                       |
| 144 | <b>Unsere Mitarbeiterinnen und Mitarbeiter</b> |
| 150 | Nachtragsbericht                               |
| 151 | Prognose- und Chancenbericht                   |

In Frankfurt am Main feierte die Kindertagesstätte Kids & Co. 2010 ihr fünfjähriges Jubiläum. In allen Betreuungseinrichtungen wird eine reguläre Tagesbetreuung mit flexiblen Zeiten angeboten. Insgesamt stellt die Bank 220 Vollzeitplätze für Krippen- und Kindergartenkinder zur Verfügung und dank einer intelligenten Platzverteilung lassen sich rund 340 Mädchen und Jungen betreuen. Wissenschaftliche Studien zeigen, dass unsere Mitarbeiterinnen und Mitarbeiter nach der Elternzeit früher an ihre Arbeitsplätze zurückkehren, weniger Wiedereinarbeitungszeit benötigen, höhere Stundenkontingente wählen und insgesamt motivierter sind.

Im Frühjahr 2010 haben wir im Auftrag des Vorstands das Projekt „Frauen in Führungspositionen“ gestartet. Frauen stellen 50 % unserer Belegschaft, besetzen bei den Führungspositionen aber nur zwischen 4,7 % der ersten und 29 % der vierten Ebene. Diese Anteile wollen wir signifikant erhöhen, um langfristig das leistungsfähigste Führungsteam für die Commerzbank zu sichern – unter Berücksichtigung aller Talente. Zu den Maßnahmen des Projekts zählen unter anderem ein bankweites internes Mentoringprogramm, die Erhöhung des Anteils weiblicher Beobachter bei unseren Auswahlaudits für Führungskräfte, bankinterne Karrieretage, Diversity-Trainings für alle Führungskräfte und ein halbjährlicher Managementreport über die Umsetzungserfolge des Projekts.

Diversity wird jedoch nicht allein von der Personalabteilung geplant und umgesetzt. Vielmehr beziehen wir unsere Mitarbeiterinnen und Mitarbeiter über Netzwerke aktiv in den Diversity-Prozess ein. So befasst sich „Fokus Väter“ mit Chancengleichheit aus Sicht der Männer. Im Frauennetzwerk „Courage“, das bundesweit an mehreren Standorten vertreten ist, haben sich Mitarbeiterinnen organisiert, um Erfahrungen auszutauschen und ihre berufliche Entwicklung zu fördern. Das Netzwerk „Arco“ für Schwule und Lesben ist mit mehr als 350 Mitgliedern das größte betriebliche Netzwerk seiner Art in Deutschland. Unsere Diversity-Arbeit für homosexuelle Mitarbeiterinnen und Mitarbeiter hat der Völklinger Kreis, der Bundesverband schwuler Führungskräfte, 2010 mit dem Max-Spohr-Preis ausgezeichnet. Und auf unserer Intranetseite „Forum Diversity“ haben wir 2010 die Workshop- und Informationsangebote mit mehr als 40 Veranstaltungen nahezu verdoppelt. Darunter befinden sich auch neue Angebote wie Aufstiegskompetenz und Verhandlungstrainings für Mitarbeiterinnen, ein Netzwerktreffen für pflegende Angehörige und ein Workshop für homosexuelle Mitarbeiterinnen und Mitarbeiter.

## Vergütung

Die Offenlegung der Vergütung für Mitarbeiterinnen und Mitarbeiter erfolgt aufgrund der erhöhten Bedeutung, die sich aus erweiterten regulatorischen Anforderungen ergibt, erstmals für das Geschäftsjahr 2010 in Form eines eigenständigen Berichts. Dieser wird auf der Internetseite der Commerzbank unter [www.commerzbank.de](http://www.commerzbank.de) veröffentlicht und künftig jährlich aktualisiert.

## Dank an die Mitarbeiterinnen und Mitarbeiter

Unser Dank gilt allen, die mit einer vertrauensvollen und konstruktiven Zusammenarbeit an der erfolgreichen Personalarbeit des Jahres 2010 beteiligt waren. Vor allem jedoch danken wir unseren Mitarbeiterinnen und Mitarbeitern für ihr außerordentliches Engagement. Ob im Tagesgeschäft oder bei der Integration der Dresdner Bank in die Commerzbank – sie haben einen ganz entscheidenden Beitrag dazu geleistet, dass wir das vergangene Jahr so gut gemeistert haben.

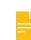

› **Corporate-Governance-Bericht**  
Seiten 46 f.

# Nachtragsbericht

Mitte Januar 2011 hat die Commerzbank einen wichtigen Schritt zur Optimierung ihrer Kapitalstruktur unternommen: Credit Suisse Securities (Europe) Limited (Credit Suisse) hat von Gesellschaften des Commerzbank-Konzerns begebene hybride Eigenmittelinstrumente (Trust Preferred Securities), die sie – im eigenen Namen und auf eigene Rechnung – zu einem unter ihrem Nennwert liegenden Preis von Investoren erworben hat, als Sacheinlage gegen aus genehmigtem Kapital der Commerzbank zu begebende Aktien in die Commerzbank eingebracht. Ein Bankenconsortium aus Credit Suisse, Citigroup, Goldman Sachs und UBS hat am 13. Januar 2011 rund 118,1 Millionen Aktien bei institutionellen Investoren platziert. Dies entspricht 10 % minus eine Aktie des bisherigen Grundkapitals der Commerzbank. Die für die Sacheinlage erforderlichen Beschlüsse von Vorstand und Aufsichtsrat der Commerzbank wurden am 21. Januar 2011 gefasst. Der Sonderfonds Finanzmarktstabilisierung (SoFFin) hat seine Beteiligungsquote an der Commerzbank (25 % plus eine Aktie) nach der Transaktion aufrechterhalten. Dazu wurden rund 221 Mio Euro der Stillen Einlagen des SoFFin aus dem in der Hauptversammlung 2009 geschaffenen Bedingten Kapital in rund 39,4 Millionen Aktien gewandelt. Mit Durchführung der beiden Kapitalmaßnahmen stieg die Anzahl der Commerzbank-Aktien auf insgesamt 1 339 Millionen Stück.

Am 18. Januar 2011 hat uns die Allianz SE, München, Deutschland, gemäß § 21 Abs. 1 WpHG mitgeteilt, dass ihr Stimmrechtsanteil an der Commerzbank Aktiengesellschaft, Frankfurt am Main, Deutschland, am 17. Januar 2011 die Schwelle von 10 % unterschritten hat und zu diesem Zeitpunkt 9,48 % betrug.

Am 24. Februar 2011 hat die Ratingagentur Moody's das Langfrist-Rating der Commerzbank von Aa3 um zwei Stufen auf A2 mit stabilem Ausblick gesenkt. Das Bank Financial Strength Rating (BFSR) wurde mit C- bestätigt. Haupttreiber für die Herabstufung sind die nach Meinung von Moody's verschlechterte Finanzkraft der Eurohypo AG sowie eine Änderung in der Moody's internen Methodik, nach der die zukünftige systemische Unterstützung für Banken weltweit als zunehmend geringer eingeschätzt wird.

|     |                                         |
|-----|-----------------------------------------|
| 75  | Geschäft und Rahmenbedingungen          |
| 81  | Ertrags-, Finanz- und Vermögenslage     |
| 93  | Entwicklung der Segmente                |
| 144 | Unsere Mitarbeiterinnen und Mitarbeiter |
| 150 | Nachtragsbericht                        |
| 151 | Prognose- und Chancenbericht            |

# Prognose- und Chancenbericht

## Künftige gesamtwirtschaftliche Situation

Der Aufschwung der Weltwirtschaft dürfte sich im Jahr 2011 in etwa gleichem Tempo wie im Jahr 2010 fortsetzen. Es ist zwar davon auszugehen, dass die Dynamik in den Emerging Markets etwas nachlassen wird, dafür dürfte aber insbesondere die US-Wirtschaft stärker wachsen als im vergangenen Jahr. Dort scheinen die Korrekturen im Immobiliensektor und bei den Finanzen der privaten Haushalte größtenteils abgeschlossen zu sein. Daher sollten sich die noch einmal verstärkten Impulse vonseiten der Geldpolitik nun auch in einem überdurchschnittlichen Wachstum niederschlagen.

### Reales Bruttoinlandsprodukt

Veränderung gegenüber Vorjahr

|                       | 2010  | 2011 <sup>1</sup> | 2012 <sup>1</sup> |
|-----------------------|-------|-------------------|-------------------|
| USA                   | 2,8 % | 4,0 %             | 3,5 %             |
| Euroraum              | 1,7 % | 1,7 %             | 1,8 %             |
| Deutschland           | 3,6 % | 3,0 %             | 2,5 %             |
| Mittel- und Osteuropa | 4,0 % | 4,4 %             | 4,0 %             |
| Polen                 | 3,7 % | 4,5 %             | 4,2 %             |

<sup>1</sup> Werte für 2011 und 2012 jeweils Prognosen der Commerzbank.  
Tabelle 10

Im Euroraum werden voraussichtlich die Staatsschuldenkrise und die sich auch hieraus ergebenden konjunkturellen Unterschiede zwischen den Mitgliedsstaaten die beherrschenden Themen bleiben. Es besteht die Gefahr, dass weitere Länder die Hilfe des Europäischen Stabilisierungsfonds in Anspruch nehmen müssen; zumindest dürften die Unsicherheit an den Märkten und damit die Renditeaufschläge der Staatsanleihen der betroffenen Länder hoch bleiben. Wir rechnen jedoch aus heutiger Sicht nicht mit einem Ausfall eines Eurolandes. Die unumgängliche Konsolidierung der Staatsfinanzen und die in vielen Ländern noch nicht abgeschlossene Korrektur früherer Übertreibungen werden die Konjunktur weiter bremsen. Da diese bremsenden Faktoren in Deutschland weiterhin keine größere Rolle spielen, dürfte seine Wirtschaft im Jahr 2011 mit 3 % erneut klar überdurchschnittlich zulegen. Damit wäre der Einbruch nach der Lehman-Pleite mehr als aufgeholt. Neben weiterhin kräftig zulegenden Exporten und Ausrüstungsinvestitionen dürfte der private Verbrauch allmählich eine weitere Stütze für den Aufschwung werden.

Neben der noch nicht ausgestandenen Staatsschuldenkrise dürfte die Finanzmärkte die Diskussion beschäftigen, wann und in welchem Umfang die wichtigsten Notenbanken die Leitzinsen anheben. Die EZB hat in Aussicht gestellt, wegen der gestiegenen Inflationsrisiken die Zinsen bereits im April zu erhöhen. Wir gehen davon aus, dass sich weitere moderate Zinsschritte anschließen werden. Die Fed wird wohl im Jahr 2012 folgen, wenn die Arbeitslosigkeit in den USA weiter gesunken ist. Angesichts des sich fortsetzenden Aufschwungs der Weltwirtschaft und allmählich erfolgender Zinserhöhungen der Notenbanken rechnen wir damit, dass die Renditen langlaufender Staatsanleihen weiter zulegen. Der Euro dürfte unter der anhaltenden Unsicherheit über die langfristigen Aussichten der Währungsunion leiden. Zudem sollte die Aussicht, dass die Fed trotz späteren Beginns die Zinsen deutlich stärker als die EZB anheben dürfte, den Dollar unterstützen. Daher ist mittelfristig mit einer Abwertung der Gemeinschaftswährung gegenüber der US-Währung zu rechnen.

#### Wechselkurse

|             | 31.12.2010 | 31.12.2011 <sup>1</sup> | 31.12.2012 <sup>1</sup> |
|-------------|------------|-------------------------|-------------------------|
| Euro/Dollar | 1,32       | 1,32                    | 1,27                    |
| Euro/Pfund  | 0,83       | 0,83                    | 0,81                    |
| Euro/Zloty  | 3,95       | 3,70                    | 3,62                    |

<sup>1</sup> Werte für 2011 und 2012 jeweils Prognosen der Commerzbank.  
Tabelle 11

## Künftige Situation der Bankbranche

Die gesamtwirtschaftliche Einschätzung der Commerzbank ist durchaus positiv. So erwarten wir Wachstumsraten des Bruttoinlandsprodukts im Euroraum von 1,7 % beziehungsweise 1,8 % für das Jahr 2011 und das Jahr 2012. Die Commerzbank mit ihrer starken Stellung im deutschen Mittelstands- und Privatkundengeschäft sollte insbesondere vom Wirtschaftswachstum in Deutschland profitieren.

Trotz der gesamtwirtschaftlich verbesserten Erwartungen ist die Bank die mikroökonomische Branchenentwicklung betreffend, etwas vorsichtiger. In einigen Bereichen des Bankgeschäfts sind die Aussichten für die Branche eher begrenzt. Darüber hinaus bestehen auch Risiken und Belastungsfaktoren für die Banken.

Insbesondere im Kreditneugeschäft sollten in der näheren Zukunft die Wachstumsaussichten für die Branche eher verhalten ausfallen, weil in Europa viele öffentliche und private Haushalte ihre Verschuldung reduzieren müssen. Länderspezifisch wird es hierbei jedoch Unterschiede geben. In Deutschland gibt es bislang keine vom Markt wahrgenommenen Anzeichen einer Überschuldung. Die Risikovorsorgen der Banken haben sich im Jahr 2010 zum Teil deutlich verringert. Wir erwarten bis zum Jahr 2012 für die Bankbranche insgesamt einen weiteren rückläufigen Trend. Für das Handelsergebnis der Banken sind die Ertragszuwächse kurzfristig eher limitiert. Ein insgesamt profitables Investmentbanking-Geschäft ist jedoch derzeit wieder möglich.

Wir gehen ferner davon aus, dass der Wettbewerb um Einlagen von Privatkunden auch in den nächsten Jahren intensiv sein wird. Damit bleiben auch die Margen in diesem Geschäft unter Druck. Viele Banken werden ihre Refinanzierung durch den Interbankenmarkt verringern. Darüber hinaus treten auch neue Teilnehmer im Einlagegeschäft in den Markt ein. Besonders einige Auslandsbanken agieren relativ aggressiv in Bezug auf Einlagenkonditionen. Entsprechend hart gestaltet sich der Wettbewerb. Daran werden wir uns nicht beteiligen.



|     |                                         |
|-----|-----------------------------------------|
| 75  | Geschäft und Rahmenbedingungen          |
| 81  | Ertrags-, Finanz- und Vermögenslage     |
| 93  | Entwicklung der Segmente                |
| 144 | Unsere Mitarbeiterinnen und Mitarbeiter |
| 150 | Nachtragsbericht                        |
| 151 | Prognose- und Chancenbericht            |

Und dies nicht nur aufgrund der Auflagen der EU-Kommission, die uns im Zusammenhang mit der SoFFin-Einlage untersagen, die Preisführerschaft bei Konditionen im Kundengeschäft einzunehmen.

Der sogenannte Leverage, also das Verhältnis von Bilanzsumme zu Eigenkapital, wurde in den letzten Jahren branchenweit zurückgefahren. Dieses niedrigere Niveau wird wohl beibehalten und dürfte das Ertragswachstum in den nächsten Jahren begrenzen.

Von regulatorischer Seite ist infolge Basel III eine klare Verschärfung der Richtlinien in Bezug auf die Eigenkapitalunterlegung und Liquiditätsvorhaltung der Banken zu erwarten. Dies wird die Profitabilität der Institute negativ beeinflussen.

Trotz der skizzierten Belastungsfaktoren und zusätzlichen Anforderungen an die Bankbranche erwarten wir, dass sich die grundlegenden Branchenstrukturen in den europäischen Ländern nur langsam ändern und auch nach der Finanzkrise relativ stabil bleiben werden. Die Commerzbank wird weiterhin die Rolle einer führenden Bank in Deutschland innehaben. Durch die Übernahme und Integration der Dresdner Bank hat sich diese Position der Commerzbank klar gestärkt. Aufgrund der hohen Anzahl rechtlich selbstständiger Sparkassen und Genossenschaftsbanken ist Deutschland ein eher polypolistischer Bankenmarkt mit einer im europäischen Vergleich relativ geringen Marktkonzentration. Obwohl es in den Sparkassen- und Genossenschaftsverbänden kontinuierliche Konzentrationsprozesse gibt, wird diese Branchenstruktur in Deutschland auch in den nächsten Jahren grundsätzlich erhalten bleiben.

## Erwartete Entwicklung wesentlicher Posten der Gewinn- und Verlustrechnung

---

Für das Geschäftsjahr 2011 erwarten wir für die einzelnen Posten der Gewinn- und Verlustrechnung folgende Entwicklung:

Für den Zinsüberschuss gehen wir davon aus, dass keine signifikanten Verbesserungen gegenüber dem Jahr 2010 erzielt werden. Obwohl sich im Segment Privatkunden eine Erhöhung des Zinsniveaus positiv auswirken wird und die von uns erwartete Normalisierung des Kreditziehungsverhaltens und steigende Investitionen von Firmenkunden im Segment Mittelstandsbank positive Impulse geben werden, ist damit zu rechnen, dass sich diese Effekte durch den zunehmenden Margendruck nur zum Teil durchschlagen werden. Die Risikoversorge im Kreditgeschäft sollte sich weiter verringern. Insbesondere im Segment Asset Based Finance erwarten wir einen deutlich niedrigeren Risikoversorbedarf. Der Provisionsüberschuss sollte im laufenden Jahr 2011 – insbesondere im zweiten Halbjahr – vor allem vor dem Hintergrund der abnehmenden Kaufzurückhaltung unserer Kunden sowie dem Wegfall der integrationsbedingten Belastungen unserer Beratungsteams profitieren. Eine Prognose des Handelsergebnisses ist insbesondere aufgrund der hohen Volatilität an den Finanzmärkten und deren Auswirkungen auf die Bewertung der entsprechenden Finanzinstrumente nur bedingt möglich. Wir erwarten für das Jahr 2011 jedoch ein Handelsergebnis über dem Niveau des Berichtsjahres. Die Verwaltungsaufwendungen werden im Jahr 2011 durch das anhaltend strikte Kostenmanagement und realisierte Synergieeffekte bestimmt. Als Folge gehen wir davon aus, dass die Verwaltungsaufwendungen sinken werden. Das Operative Ergebnis des Commerzbank-Konzerns dürfte sich im Jahr 2011 signifikant gegenüber dem Wert des Berichtsjahres verbessern.

## Erwartete Finanzlage des Commerzbank-Konzerns

---

### Geplante Finanzierungsmaßnahmen

Das Group Treasury der Commerzbank ist konzernweit für das Kapital- und Liquiditätsmanagement verantwortlich. Hierbei greift das Group Treasury als Grundlage zur Ermittlung der Emissionsplanung im Kapitalmarkt auf die Ergebnisse des „Stable-Funding-Konzepts“ zurück. Dabei werden der strukturelle Liquiditätsbedarf für das Kern-Aktivgeschäft der Bank sowie die nicht innerhalb eines Jahres liquidierbaren Aktiva ermittelt und den langfristig für die Bank verfügbaren Passivmitteln – inklusive stabiler Bodensätze aus Kundeneinlagen – gegenübergestellt.

Durch fest definierte Prozesse soll sichergestellt werden, dass auf Basis dieses Konzepts die Fundingaktivitäten regelmäßig an geänderte Voraussetzungen angepasst werden. Auch führt das Liquiditätsmanagement regelmäßig Strukturanalysen der diversen Refinanzierungsquellen durch, um auf dieser Basis das Refinanzierungsprofil aktiv zu steuern. Ziel ist es, die nicht liquiden Aktiva sowie das Kerngeschäft der Bank weitestgehend durch langfristig verfügbare Passivmittel zu finanzieren.

Die Refinanzierungsstruktur des Commerzbank-Konzerns kann sich hierbei weiterhin auf eine breite Diversifikation hinsichtlich Anlegergruppen, Regionen, Produkten und Währungen stützen. Auch im laufenden Geschäftsjahr 2011 und dem kommenden Geschäftsjahr 2012 wird die Bank ihr erklärtes Ziel im Rahmen des Strategieprogramms „Roadmap 2012“, den Auf- und Ausbau stabiler und langfristiger Kundenbeziehungen, konsequent verfolgen.

Die langfristige Refinanzierung wird im Wesentlichen durch Kapitalmarktprodukte sowohl auf besicherter als auch unbesicherter Basis sowie durch stabil anzusehende und der Bank langfristig zur Verfügung stehende Kundeneinlagen sichergestellt. Um den bereits ausgewogenen Refinanzierungsmix der Commerzbank zu optimieren, ist ein US-Dollar-Emissionsprogramm in den Vereinigten Staaten in Vorbereitung.

Wir erwarten ein weiterhin schwieriges Kapitalmarktumfeld. Für das Jahr 2011 sieht der Commerzbank-Konzern eine Mittelaufnahme am Kapitalmarkt in Höhe von insgesamt circa 10 bis 12 Mrd Euro vor, damit liegen wir deutlich unter den für dieses Jahr fällig werdenden Emissionen. Diese Mittelaufnahmen sollen in etwa zu gleichen Teilen über besicherte und unbesicherte Emissionen erfolgen. Die derzeitige Mittelfristplanung für das Jahr 2012 sieht ein ähnliches Volumen und eine ähnliche Aufteilung von besicherten und unbesicherten Emissionen vor. Die Planung des Fundingbedarfs orientiert sich an den Aktivitäten des Neugeschäftes und der Ausrichtung der einzelnen Geschäftsbereiche.

|     |                                         |
|-----|-----------------------------------------|
| 75  | Geschäft und Rahmenbedingungen          |
| 81  | Ertrags-, Finanz- und Vermögenslage     |
| 93  | Entwicklung der Segmente                |
| 144 | Unsere Mitarbeiterinnen und Mitarbeiter |
| 150 | Nachtragsbericht                        |
| 151 | Prognose- und Chancenbericht            |

### Fälligkeitsprofil des Konzerns zum 31. Dezember 2010

in Mrd €

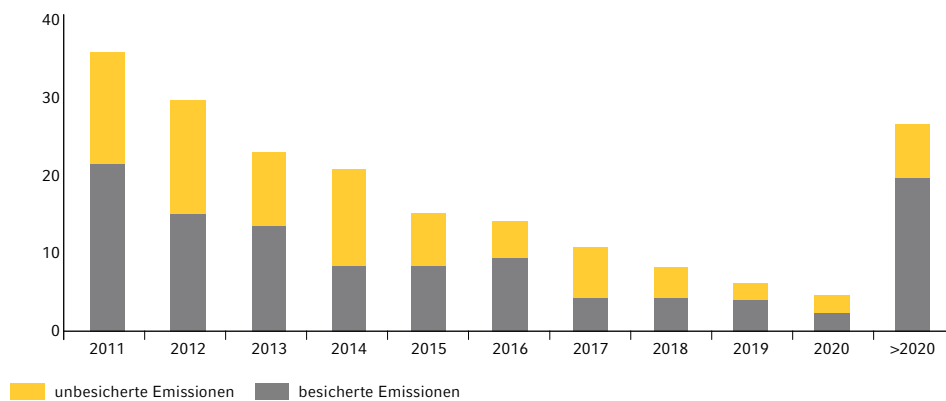

Abbildung 3

Bei der Platzierung unbesicherter Anleihen liegt der Schwerpunkt weiterhin auf Privatplatzierungen. Öffentliche Transaktionen werden wir selektiv zur Verbreiterung unserer Investorenbasis in Erwägung ziehen oder für die Abdeckung von in Fremdwährungen bestehenden Refinanzierungserfordernissen nutzen. Die besicherte Refinanzierung der Eurohypo AG erfolgt über Pfandbriefe und Privatplatzierungen. Durch regelmäßige Überprüfung und Adjustierung der getroffenen Annahmen für das Liquiditätsmanagement wird Group Treasury den Veränderungen des Marktumfelds weiterhin voll Rechnung tragen und eine solide Liquiditätsausstattung sowie eine angemessene Refinanzierungsstruktur gewährleisten.

### Geplante Investitionen

Die Investitionstätigkeiten in den kommenden Jahren sind schwerpunktmäßig weiterhin durch die Integration der Dresdner Bank geprägt. Für die Integration sind insgesamt 2,5 Mrd Euro vorgesehen, denen nach vollständiger Umsetzung künftig Einsparungen verglichen mit dem Jahr 2008 von jährlich 2,4 Mrd Euro gegenüberstehen. Von den Investitionen für die Integration entfielen bereits rund 1,9 Mrd Euro auf das Jahr 2009 und 0,4 Mrd Euro auf das Jahr 2010. Bis zum Jahr 2012 sind weitere 0,2 Mrd Euro als laufender Aufwand für die Integration geplant.

Die Integration der Dresdner Bank bestimmt wesentliche Anteile der nachfolgenden Investitionstätigkeiten der einzelnen Bereiche im laufenden Jahr 2011:

Im Segment Privatkunden stehen für das Jahr 2011 die Zusammenführung der IT-Infrastruktur sowie der Kundensysteme und die Optimierung des Filialnetzes im Fokus. Die Kunden- und Produktdatenmigration ist für das zweite Quartal 2011 geplant. Nach erfolgreicher Umsetzung wird das Privatkundensegment mit einer einheitlichen Systemwelt arbeiten und allen Kunden das gleiche Produkt- und Leistungsspektrum bieten können. Im Anschluss beginnen wir mit der Zusammenlegung von räumlich eng beieinander liegenden Filialpaaren – dem letzten großen Meilenstein der Integration. Im Jahr 2011 werden bereits über 100 Filialpaare konsolidiert, damit kommt das Privatkundengeschäft dem Ziel von 1 200 Filialen ein großes Stück näher. Im Rahmen dieser Umsetzung wird auch die Umstellung auf die neuen Filialmodelle „Filiale der Zukunft“ und „Filiale der Zukunft Plus“ mit verbessertem Beratungsangebot für unsere Kunden und der Ausweitung unserer Services in der SB-Zone fort-

geführt. Hiermit verbessern wir zugleich unsere Servicequalität und steigern die Kosteneffizienz. Darüber hinaus konzentrieren sich weitere Investitionen auf die kontinuierliche Verbesserung der Qualität im Beratungsprozess.

Im Segment Mittelstandsbank konzentriert sich die Investitionsplanung für das Jahr 2011 nach der Integration beider IT-Systemlandschaften auf die Stärkung der Kernkompetenzen Kundenberatung, Kundenbindung und Akquisition. Hierzu zählt die Modernisierung der Customer-Relationship-Anwendungen und der Kundenbedarfsanalyse-Systeme mit dem Ziel, die Beratungsqualität weiter zu erhöhen. Im Hinblick auf die ganzheitliche Bewertung der Bankverbindung durch den Kunden wird die kundenfokussierte Prozesseffizienz gestärkt und die Qualität der Pre- und After-Sales-Services weiter verbessert. Einen weiteren Schwerpunkt stellen die Investitionen zur Gewährleistung der operativen Stabilität der IT-Systeme für das Segment Mittelstandsbank dar. Marktgegebenheiten und regulatorische Anforderungen machen weitere Anpassungen, unter anderem in der Pricing- und Vertriebssteuerungssystematik, notwendig. Der internationale Zahlungsverkehr wird eine weitere Konzentration erfahren. Um als Prime Provider auftreten zu können und von dieser Marktkonzentration zu profitieren, wird der Konzernbereich Financial Institutions die Flexibilität der diesbezüglichen IT-Systeme ausbauen und damit zusätzliche Zahlungsverkehrsvolumina generieren. Mit dem Ausbau der beiden Standorte in Wien und in Zürich zu vollwertigen Corporate-Filialen im Jahr 2011 wird die Cross-Border-Strategie des Segments weiter operationalisiert.

Das Segment Corporates & Markets wird weiterhin in eine belastbare und flexible IT- und Backoffice-Infrastruktur investieren. Nur dadurch können Flexibilität, Kosteneffizienz und die Kontrolle operationaler Risiken gewährleistet werden. Darüber hinaus wollen wir im Konzernbereich Fixed Income & Currencies die eFX- und eBond-Plattformen – die Kunden eine direkte Anbindung an den Online-Handel ermöglichen – auf- und ausbauen. Die höhere Flexibilität, Präsenz und Leistungsfähigkeit in diesem Markt wird unseren Kunden zugutekommen. Im Bereich Aktienderivate werden wir eine Handelsplattform für CFDs „Contracts for Difference“ in der strategischen IT-Landschaft von Corporates & Markets implementieren. In einem weiteren Schritt soll dieses Produkt auch privaten Investoren in Form einer Onlineplattform zur Verfügung gestellt werden. Ein Schwerpunkt wird in dem Jahr 2011 auf der Finalisierung der Integration der ehemaligen Dresdner-Bank-Handelsaktivitäten in die C&M-Plattform liegen.

Darüber hinaus gibt es weitere – von der Integration der Dresdner Bank unabhängige – Investitionsschwerpunkte in den folgenden Bereichen der Commerzbank:

Im Segment Central & Eastern Europe wurde bei der BRE Bank bislang wesentlich in Projekte zur Prozessautomatisierung im Backoffice und im Kreditbereich investiert. Weitere Schwerpunkte lagen in der Implementierung neuer Bankprodukte sowie in der kontinuierlichen Optimierung elektronischer Vertriebskanäle. Diese Initiativen werden in den Jahren 2011 und 2012 fortgesetzt. Darüber hinaus ist im Zuge der Strategieumsetzung der BRE Bank eine Weiterentwicklung des Filialnetzes im Corporate Banking geplant. Bei der Bank Forum lag der Schwerpunkt im Jahr 2010 in der weiteren Umsetzung des Restrukturierungsprogramms. Besonderes Augenmerk galt der Weiterentwicklung des Risikomanagements sowie der Zentralisierung von Backoffice-Einheiten und -Prozessen. Im laufenden Jahr 2011 liegt neben der Fortführung dieser Maßnahmen ein zusätzlicher Schwerpunkt auf aktivem Neugeschäft und der gezielten Adressierung profitabler Kundensegmente.

|     |                                         |
|-----|-----------------------------------------|
| 75  | Geschäft und Rahmenbedingungen          |
| 81  | Ertrags-, Finanz- und Vermögenslage     |
| 93  | Entwicklung der Segmente                |
| 144 | Unsere Mitarbeiterinnen und Mitarbeiter |
| 150 | Nachtragsbericht                        |
| 151 | Prognose- und Chancenbericht            |

Im Segment Asset Based Finance wird die strategische Neuausrichtung des Geschäftsmodells der Eurohypo AG fortgesetzt. Durch die Optimierung der Portfoliostruktur und die Fokussierung auf Kernmärkte wird die Komplexität des Geschäfts weiter reduziert. Ziel ist die konsequente Beschränkung auf das wertsteigernde Kerngeschäft. In diesem Rahmen werden in der Eurohypo AG im Bereich Commercial Real Estate für das in diesem Jahr geplante Ende des Projekts „Fokus“ 25 Mio Euro anfallen. Darüber hinaus wird das im Jahr 2009 bei der Commerz Real AG aufgrund der Auswirkungen der Finanzmarktkrise aufgesetzte Strategiprojekt „CORRELATION“ fortgeführt. Hierbei werden die Trennung von nicht strategischen Randaktivitäten geprüft sowie Maßnahmen zur Optimierung der Aufbau- und Ablauforganisation geplant. In diesem Zusammenhang sind 33 Mio Euro Restrukturierungsaufwendungen und 5 Mio Euro Umsetzungsaufwand im Jahr 2010 angefallen. Für das laufende Jahr 2011 rechnen wir mit knapp 8 Mio Euro Umsetzungsaufwand.

Auch im laufenden Jahr wird das im Jahr 2009 initiierte Programm „Group Finance Architecture“ (GFA) zur Neugestaltung der Prozess- und Systemarchitektur der Finanzfunktion im Commerzbank-Konzern fortgeführt. Ziele des Programms sind der Aufbau einer Multi-Gaap-fähigen Lösung, die Integration von Financial und Management Accounting und damit insbesondere auch eine deutliche Beschleunigung des Abschlussprozesses sowie eine Verbesserung der Analysemöglichkeiten. Damit soll die Grundlage für eine noch stärker proaktive Unternehmenssteuerung durch den Bereich Finanzen zur Unterstützung des Managements geschaffen werden. Dies beinhaltet bis Ende des Jahres 2014 den Aufbau der entsprechenden Architektur für den Funktionsbereich Accounting der Commerzbank Aktiengesellschaft Inland. Bis zum Ende des Projektes im Jahr 2014 ist ein Investitionsvolumen zum Aufbau der neuen Plattform von 0,3 Mrd Euro geplant. Von den Investitionen sind bis zum Jahr 2010 bereits 53 Mio Euro angefallen. Für das Jahr 2011 rechnen wir mit weiteren 59 Mio Euro. Die Finanzierung der für das Jahr 2011 geplanten Investitionen erfolgt aus dem frei verfügbaren Mittelzufluss der Commerzbank.

## Voraussichtliche Entwicklung der Liquidität

Wir rechnen damit, dass die EZB in den kommenden beiden Jahren 2011 und 2012 an der Umsetzung ihrer Exitstrategie festhält. Allerdings hat sich die EZB im Dezember 2010 aufgrund der anhaltenden Marktskepsis bezüglich Staatsanleihen der EWU-Peripherieländer veranlasst gesehen, ihre Exitstrategie aus der sehr expansiven Geldpolitik zumindest zu verschieben. So hat sie angekündigt, die Handhabung ihres geldpolitischen Instrumentariums über das gesamte erste Quartal 2011 hinweg nicht zu verändern. Insbesondere würden die Hauptrefinanzierungsgeschäfte und die Einmonatstender weiterhin zum Festzinssatz voll zugeteilt. Überdies werde sie im ersten Quartal erneut drei Dreimonatstender ausschreiben. Auch diese würden voll zugeteilt. Der Zinssatz richte sich hier weiterhin nach dem durchschnittlichen Hauptrefinanzierungssatz, der während der Laufzeit der Tender gelte. Des Weiteren wird die EZB im Bedarfsfall den Kauf von Staatsanleihen der EWU-Mitgliedsländer fortsetzen. Begründet wird dies durch die anhaltenden Probleme der Euro-Peripheriestaaten, die durch die erstmalige Inanspruchnahme des „europäischen Rettungsschirms“ durch einen dieser Staaten einen neuen Höhepunkt im abgelaufenen Quartal erreicht hat.

In der Folge sehen wir den Eonia-Satz im ersten Quartal 2011 bei einem durchschnittlichen Niveau von etwa 0,7 % weiterhin in einem erheblichen Abstand zum Hauptrefinanzierungssatz von 1,0 %. Würde die EZB ab dem zweiten Quartal ihre Exitstrategie wieder aufnehmen, gehen wir davon aus, dass sich der Eonia-Satz dem Refinanzierungssatz annähern wird, verbunden mit einem moderaten Anstieg des generellen Zinsniveaus am Geldmarkt.

Abhängig von der konjunkturellen Entwicklung und einer damit verbundenen stärkeren Inanspruchnahme der Kapitalmärkte in den Jahren 2011 und 2012, könnte die EZB ab dem Jahr 2012 leichte Zinserhöhungen umsetzen, um Inflationsrisiken entgegenzuwirken. Entsprechend der Zinserhöhungen werden die Zinsen am Geldmarkt weiter leicht zulegen. Für die Commerzbank rechnen wir weiterhin mit einem uneingeschränkten Zugang zum besicherten und unbesicherten Geld- und Kapitalmarkt. Hierfür ursächlich ist zum einen das gute Standing der Bank im Markt sowie der Umstand, dass die Bank in einem starken Euroland ansässig ist, was sich begünstigend auf die Refinanzierungsmöglichkeiten und somit die Refinanzierungsstruktur auswirkt. Darüber hinaus profitiert die Bank von ihrem gut ausgebauten Liquiditätsmanagement, sodass wir davon ausgehen, auch die für die nächsten beiden Geschäftsjahre gesetzten Refinanzierungsziele wie geplant umsetzen zu können.

Für das Liquiditätsrisikomanagement der Banken stehen künftig von regulatorischer Seite neue Herausforderungen an, insbesondere durch die Implementierung der Novelle der Mindestanforderungen für das Risikomanagement (MaRisk) sowie zusätzliche Kapital- und Liquiditätsanforderungen nach Basel III. Die entsprechenden Dokumente wurden Mitte Dezember 2010 in ihrer endgültigen Form verabschiedet und veröffentlicht. Gleichzeitig wurde auch ein Zeitplan für die einzelnen Umsetzungsstufen festgelegt, wie zum Beispiel die Einhaltung der beiden neuen Liquiditätskennzahlen „Liquidity Coverage Ratio“ (LCR) und „Net Stable Funding Ratio“ (NSFR) zum Jahr 2015 beziehungsweise 2018.

Ungeachtet der regulatorischen Fristsetzung, die von einer sogenannten „Observation Period“ begleitet wird, gehen wir davon aus, dass sich die Auswirkungen der neuen Anforderungen schon in den nächsten Jahren an den Finanzmärkten durch die von den Banken vorangetriebenen Umstellungs- und Anpassungsmaßnahmen beobachten lassen. Exemplarisch seien an dieser Stelle mögliche Folgen für den Anleihenmarkt genannt, die sich durch die Vorgaben an die Zusammensetzung des sogenannten „Liquidity Buffers“ ergeben. So wird zum Beispiel davon ausgegangen, dass sich die Credit-Spreads von Staatsanleihen und Unternehmensanleihen mit einem erstklassigen Rating einengen werden, wohingegen bei Anleihen mit einem Rating unterhalb von „A“ mit einer Ausweitung des Credit-Spreads gerechnet wird.

Die Commerzbank ist auf die sich veränderten Marktbedingungen gut vorbereitet. Änderungen der regulatorischen Vorgaben werden im Rahmen der Refinanzierungsstrategie der Bank zeitnah berücksichtigt und mit unternehmerischer Weitsicht entsprechend umgesetzt.

|     |                                         |
|-----|-----------------------------------------|
| 75  | Geschäft und Rahmenbedingungen          |
| 81  | Ertrags-, Finanz- und Vermögenslage     |
| 93  | Entwicklung der Segmente                |
| 144 | Unsere Mitarbeiterinnen und Mitarbeiter |
| 150 | Nachtragsbericht                        |
| 151 | Prognose- und Chancenbericht            |

## Chancenmanagement in der Commerzbank

---

Die systematische Identifikation und Nutzung von Chancen ist für die Commerzbank eine zentrale Managementaufgabe. Dies gilt sowohl operativ im täglichen Wettbewerb als auch strategisch für die Identifikation von Wachstums- oder Effizienzpotenzialen. In diesem Verständnis setzt die Commerzbank auf ein dreistufiges Chancenmanagement:

- Zentrales strategisches Chancenmanagement: Identifikation strategischer Handlungsoptionen für den Gesamtkonzern durch den Vorstand und im Bereich Group Development & Strategy (zum Beispiel Entwicklung des Markt- und Geschäftsfeldportfolios)
- Zentrales operatives und strategisches Chancenmanagement für die Segmente: Definition operativer und strategischer Wachstums- und Effizienzsteigerungspotenziale für die einzelnen Konzernbereiche innerhalb der Segmente durch die jeweiligen Verantwortlichen (zum Beispiel Entwicklung der Produkt- und Kundenportfolien)
- Dezentrales operatives Chancenmanagement: Kunden- und geschäftsvorfallbasierte Identifikation operativer Chancen durch alle Mitarbeiterinnen und Mitarbeiter (zum Beispiel regionale Nutzung von Marktchancen und Kundenpotenzialen, Kundenberatungskonzepte)

Die Realisierung der identifizierten Chancen und daraus abgeleiteter operativer wie strategischer Maßnahmen obliegt dann den jeweiligen Konzernbereichsverantwortlichen. Die Erfolgskontrolle erfolgt einerseits anhand der internen Controlling- und Risikocontrolling-Instrumente sowie der individuellen Zielvereinbarungen und andererseits gestützt auf externe Beurteilungen (zum Beispiel Rating, Marktforschungsergebnisse, Benchmarking, Kundenbefragungen).

Die Identifikation und Implementierung innovativer Lösungen für Kunden wird darüber hinaus durch das interne Wertesystem der Commerzbank immer stärker in der Unternehmenskultur verankert.

Zudem hat die Commerzbank im Bereich Group Communications ein Früherkennungssystem etabliert. Hier werden potenziell interessante Themen, die für die Commerzbank Risiken aber auch Chancen mit sich bringen könnten, frühzeitig identifiziert, systematisch verfolgt und an die Verantwortlichen im Konzern weitergeleitet.

Welche Chancen die Commerzbank im Einzelnen identifiziert hat, haben wir in dem Abschnitt „Entwicklung der Segmente“ bei den jeweiligen Segmenten dargelegt.

## Gesamtaussage zur voraussichtlichen Entwicklung des Commerzbank-Konzerns

---

Auch für das laufende Geschäftsjahr 2011 erwarten wir ein herausforderndes Marktumfeld. Während die Wirtschaft in Deutschland erneut überdurchschnittlich zulegen wird, dürfte das Wachstum in anderen Ländern des Euroraums durch die Staatsschuldenkrise und den sich hieraus ergebenden konjunkturellen Unsicherheiten eingeschränkt bleiben. Belastungen für Finanzinstitute sind aus der Verschärfung der regulatorischen Erfordernisse in Bezug auf Kapital- und Liquiditätsmanagement zu erwarten.



Trotzdem wollen wir im Jahr 2011 auf Basis unseres Geschäftsmodells, das ein nachhaltiges Ertragspotenzial besitzt, in allen Bereichen operativ sichtbare Ergebnisfortschritte erzielen. Die Commerzbank wird weiterhin die Rolle einer führenden Bank in Deutschland innehaben. Durch die Übernahme und Integration der Dresdner Bank hat sich diese Position der Commerzbank klar verstärkt. So werden wir uns weiter darauf konzentrieren, unser Kundengeschäft in Deutschland auszubauen. Hauptaugenmerk liegt dabei auf dem Privatkundengeschäft, in dem wir in den kommenden Jahren die Synergien der Integration vollumfänglich heben und unsere Kosten deutlich senken werden. Gleichzeitig wollen wir nach der Kunden- und Produktdatenmigration im zweiten Quartal 2011 unsere Vertriebsleistungen steigern und die hier liegenden Potenziale umfassend ausschöpfen. Aber auch die Mittelstandsbank setzt für die folgenden Jahre ihren Schwerpunkt klar auf die Steigerung des Ergebnisses aus Vertriebsaktivitäten. Im Fokus stehen dabei die Erschließung bestehender Potenziale sowie neuer Wachstumsfelder und die weitere Steigerung von Qualität und Effizienz. In den Ländern Mittel- und Osteuropas rechnen wir für das Jahr 2011 mit einer weiteren Festigung des wirtschaftlichen Aufschwungs, von der das Segment Central & Eastern Europe profitieren sollte. In Polen wird die BRE Bank auf Wachstumskurs bleiben, in der Ukraine werden wir dagegen unseren Konsolidierungskurs fortsetzen. Das Segment Corporates & Markets sollte seine Profitabilität weiter stabilisieren. Dank der gestärkten Kundenbasis und der am Markt anerkannten Produktexpertise erwarten wir, unsere Position als starker Investmentbank-Partner zu festigen. Außerhalb der Kernbank werden wir im Segment Asset Based Finance den Volumenabbau über die nächsten Jahre forcieren. Während wir im Bereich Public Finance kein Neugeschäft mehr tätigen und das bestehende Volumen sukzessive abbauen, werden wir im Bereich Commercial Real Estate unsere Aktivitäten erheblich reduzieren. Auf die Risikoaktiva wird die schrittweise Einführung von Basel III einen erhöhenden Effekt haben; aufgrund bereits umgesetzter als auch geplanter Maßnahmen betreffend den Abbau von Risikoportfolios, sollten die Risikoaktiva jedoch nur leicht ansteigen. Die Regelungen zur Bankenabgabe sowie zur Harmonisierung der gesetzlichen Einlagensicherung in der EU werden künftig ergebnisbelastend wirken. Die konkrete Größenordnung ist derzeit noch nicht zu beziffern.

Vor dem Hintergrund der beschriebenen Erwartungen gehen wir davon aus, dass wir für das Geschäftsjahr 2011 – bei einem stabilen Marktumfeld – ein Operatives Ergebnis erzielen werden, das signifikant über dem Niveau des Berichtsjahres 2010 liegt.

Mit Blick auf das Geschäftsjahr 2012 rechnen wir gemäß unseren im Strategieprogramm „Roadmap 2012“ kommunizierten Zielen mit einem weiteren Anstieg der Erträge, die bei prognostizierten Kosten- und Risikovorsorgerückgängen zu einem Operativen Ergebnis vor Regulierungseffekten von rund 4 Mrd Euro führen werden.

## Konzernrisikobericht

---

Der Konzernrisikobericht ist ein eigenständiger Berichtsteil im Geschäftsbericht. Er ist Bestandteil des Konzernlageberichts.

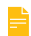

# Konzernrisikobericht

---

Im Konzernrisikobericht stellen wir umfassend die Risiken dar, denen wir ausgesetzt sind und geben einen detaillierten Einblick in die Organisation und maßgeblichen Prozesse unseres Risikomanagements. Unser vorrangiges Ziel ist es, jederzeit sicherzustellen, dass alle Risiken in der Commerzbank vollständig und auf Basis adäquater Verfahren identifiziert, überwacht und gesteuert werden.

# Inhalt

## 163 Wesentliche Entwicklungen 2010

## 165 Risikoorientierte Gesamtbanksteuerung

- 165 Organisation des Risikomanagements
- 165 Risikostrategie und Risikosteuerung
- 166 Risikotragfähigkeit und Stresstesting

## 168 Adressenausfallrisiken

- 168 Adressrisikosteuerung
- 170 Commerzbank-Konzern nach Segmenten
  - 171 Segment Privatkunden
  - 171 Segment Mittelstandsbank
  - 172 Segment Central & Eastern Europe
  - 173 Segment Corporates & Markets
  - 173 Segment Asset Based Finance
  - 176 Segment Portfolio Restructuring Unit (PRU)
- 176 Segmentübergreifende Portfolioanalyse
  - 176 Structured-Credit-Portfolio
  - 180 Leveraged-Acquisition-Finance-(LAF)-Portfolio
  - 181 Financial-Institutions- und Non-Bank-Financial-Institutions-Portfolio
  - 182 Länderklassifizierung
  - 182 Ratingklassifizierung
  - 183 Branchenklassifizierung Corporates

## 184 Intensive Care

- 184 Risikovorsorge
- 186 Default-Portfolio

## 188 Marktrisiken

- 188 Marktrisikosteuerung
- 189 Marktrisiken im Handelsbuch
- 190 Marktrisiken im Bankbuch

## 191 Liquiditätsrisiken

- 191 Liquiditätsrisikosteuerung
- 192 Available Net Liquidity

## 193 Operationelle Risiken

- 193 OpRisk-Steuerung
- 193 OpRisk-Entwicklung

## 195 Sonstige Risiken

- 195 Geschäftsrisiko
- 195 Nicht quantifizierbare Risiken

Der nachfolgende Konzernrisikobericht ist auch Bestandteil des Konzernlageberichts. Aufgrund von Rundungen können sich bei Summenbildungen und bei der Berechnung von Prozentangaben geringfügige Abweichungen ergeben.

|     |                                       |
|-----|---------------------------------------|
| 163 | Wesentliche Entwicklungen 2010        |
| 165 | Risikoorientierte Gesamtbanksteuerung |
| 168 | Adressenausfallrisiken                |
| 184 | Intensive Care                        |
| 188 | Marktrisiken                          |
| 191 | Liquiditätsrisiken                    |
| 193 | Operationelle Risiken                 |
| 195 | Sonstige Risiken                      |

# Wesentliche Entwicklungen 2010

Im Jahr 2010 war die Risikolage von gegenläufigen Entwicklungen beeinflusst. Einerseits führte die Herabstufung von Bonitätsnoten einiger europäischer Staaten durch die Rating-agenturen zu steigender Unsicherheit und hohen Kursausschlägen an den Kapitalmärkten, andererseits konnten vor dem Hintergrund einer positiven Entwicklung des konjunkturellen Umfelds – insbesondere in Deutschland – die Risikovorsorge im Konzern im Vergleich zu 2009 signifikant von 4,2 Mrd Euro auf 2,5 Mrd Euro reduziert und Risiken in wesentlichen Teilportfolios weiter abgebaut werden.

- Der gesamtwirtschaftlichen Erholung folgend sind die meisten Immobilienmärkte 2010 in eine Phase der Bodenbildung übergegangen, wobei jedoch insbesondere die USA und Spanien noch keine nachhaltig positive Trendwende zeigten. Vor dem Hintergrund der strategischen Neuausrichtung der Eurohypo konzentrieren sich unsere Aktivitäten im Bereich **Commercial Real Estate** auf den Abbau von Teilportfolios, die zukünftig nicht mehr in unserem strategischen Fokus stehen. Das Exposure at Default in diesem Bereich konnte zwar im Geschäftsjahr 2010 um weitere 7 Mrd Euro auf 70 Mrd Euro abgebaut werden, allerdings blieb die Risikovorsorge mit 1,3 Mrd Euro weiterhin auf einem hohen Niveau.
- Die Strategie der konsequenten Risikoreduzierung im Bestandsgeschäft der **Schiffsfinanzierungen** hat im Berichtszeitraum zu Stabilisierungserfolgen auch infolge einvernehmlich mit Kunden vorgenommener Restrukturierungen geführt. Der Bestand an Schiffsfinanzierungen, der überwiegend in US-Dollar denominiert ist, wurde im Berichtsjahr um mehr als 15 % reduziert. Aufgrund des US-Dollar-Anstiegs gegenüber dem Euro ergibt sich auf Euro-Basis nur eine geringe Exposure-Reduktion um 1 Mrd Euro auf 21 Mrd Euro.
- Hinsichtlich des **Public-Finance**-Portfolios verfolgen wir eine klare Abbaustrategie. Im Berichtsjahr konnte das Exposure um weitere 20 Mrd Euro auf 109 Mrd Euro reduziert werden. Insgesamt wird für den Bereich Public Finance ein Abbau auf unter 100 Mrd Euro bis Ende 2012 sowie unter 80 Mrd Euro bis Ende 2014 angestrebt. Vor dem Hintergrund der Verschuldungskrise in verschiedenen europäischen Staaten haben wir unser Sovereign-Exposure insbesondere in den Ländern Griechenland, Irland, Italien, Portugal und Spanien im Jahresverlauf insgesamt um 3,1 Mrd Euro auf 16,8 Mrd Euro weiter zurückgefahren.

- Im Segment **PRU** haben wir die Risikowerte des Structured-Credit-Portfolios im Jahresverlauf deutlich um 6,6 Mrd Euro auf nunmehr 17,1 Mrd Euro abgebaut. Die Positionen des Bereichs Credit Trading (Credit Flow und Correlation Book) wurden nahezu vollständig zurückgeführt.
- Vor dem Hintergrund eines verbesserten ökonomischen Umfelds entwickelten sich auch die Risikokennzahlen unseres **Corporates** Portfolios in der Mittelstandsbank und in Corporates & Markets sehr positiv. Insbesondere die Risikovorsorge der Mittelstandsbank konnte gegenüber dem Vorjahr von 1,0 Mrd Euro auf 0,3 Mrd Euro reduziert werden; in Corporates & Markets war im Jahr 2010 sogar eine Nettoauflösung zu verzeichnen.
- Die Risikoreduzierung im Hinblick auf Klumpenrisiken wurde auch im Jahr 2010 konsequent vorangetrieben. Hierbei konnten wir insbesondere das Exposure gegenüber **Financial Institutions** im Jahresverlauf um weitere 18 Mrd Euro auf 95 Mrd Euro reduzieren.
- Die wirtschaftliche Situation in **Mittel- und Osteuropa** hat sich im Vergleich zum Jahresende 2009, insbesondere in Polen und Russland, deutlich verbessert, die Risikovorsorge im Segment konnte mehr als halbiert werden. In der Ukraine bleibt die Risikosituation weiter angespannt, allerdings konnten wir hier im Jahr 2010 eine deutliche Reduktion unserer Risikoposition erreichen.
- Die Risikovorsorge im **Privatkundengeschäft** liegt nach einer guten Entwicklung in der zweiten Jahreshälfte insgesamt mit 246 Mio Euro auf dem Niveau des Vorjahres.

Der Prozess der Dresdner-Bank-Integration im Risikomanagement ist weit fortgeschritten. Im Jahr 2010 konnten wir weitere wichtige Meilensteine umsetzen:

- Zur Jahresmitte wurde die **Branchenaufstellung** der Marktfolge im inländischen Firmenkundengeschäft erfolgreich etabliert und somit das vorhandene Branchenwissen entlang der Wertschöpfungsketten gebündelt.
- Bereits im ersten Quartal 2010 wurde die Integration der **Ratingverfahren im Non-Retail-Bereich** erfolgreich abgeschlossen und somit die Vereinheitlichung von Bonitätsprüfung und Bilanzanalyse erreicht.
- Die neue **Basel-II-Rechenkernarchitektur** wurde im vierten Quartal 2010 erfolgreich in Betrieb genommen und damit eine methodische Harmonisierung der RWA-Ermittlung auf vereinheitlichter Zielinfrastruktur umgesetzt.
- Für die interne **Marktrisikosteuerung** wurden die bestehenden Berechnungsmodelle von Commerzbank und Dresdner Bank im Oktober 2010 in ein neues, integriertes Marktpreisrisikomodell basierend auf einem historischen Simulationsansatz überführt. Dieses Modell gewährleistet eine konsistente Risikomessung im Gesamtkonzern und wird den zukünftigen Anforderungen nach Basel III gerecht.
- Die bisher von Commerzbank und Dresdner Bank verwendeten IT-Systeme zur Berechnung der **Kontrahenten- und Emittentenrisiken** wurden im Jahr 2010 auf eine gemeinsame Plattform migriert. Das neue System gewährleistet die integrierte Berechnung und Überwachung aller Kreditrisiken für Handelsgeschäfte.

|     |                                              |
|-----|----------------------------------------------|
| 163 | Wesentliche Entwicklungen 2010               |
| 165 | <b>Risikoorientierte Gesamtbanksteuerung</b> |
| 168 | Adressenausfallrisiken                       |
| 184 | Intensive Care                               |
| 188 | Marktrisiken                                 |
| 191 | Liquiditätsrisiken                           |
| 193 | Operationelle Risiken                        |
| 195 | Sonstige Risiken                             |

# Risikoorientierte Gesamtbanksteuerung

## 1 Organisation des Risikomanagements

---

Als Risiko bezeichnet die Commerzbank die Gefahr möglicher Verluste oder entgangener Gewinne aufgrund interner oder externer Faktoren. Die Risikosteuerung unterscheidet grundsätzlich zwischen quantifizierbaren – also üblicherweise im Jahresabschluss oder in der Kapitalbindung bewertbaren – und nicht quantifizierbaren Risikoarten, wie zum Beispiel Reputations- und Compliancerisiken.

Der Chief Risk Officer (CRO) der Bank ist für die Umsetzung der vom Gesamtvorstand für die quantifizierbaren Risiken festgelegten risikopolitischen Leitlinien im Konzern verantwortlich. Der CRO berichtet dem Gesamtvorstand und dem Risikoausschuss des Aufsichtsrats regelmäßig über die Gesamtrisikolage des Konzerns.

Die Risikomanagementaktivitäten sind auf die Bereiche Kreditrisikomanagement, Marktrisikomanagement, Intensive Care sowie Risikocontrolling und Kapitalmanagement verteilt – alle vier mit konzernweiter Ausrichtung und direkter Berichtslinie an den CRO. Gemeinsam mit den vier Bereichsvorständen bildet der CRO innerhalb der Konzernsteuerung das Risk Management Board.

Das operative Risikomanagement hat der Vorstand an Komitees delegiert. Im Rahmen der jeweiligen Geschäftsordnungen sind dies das Group Credit Committee, das Group Market Risk Committee und das Group OpRisk Committee. Zusätzlich wurde im Jahr 2010 das Group Strategic Risk Committee als risikoartenübergreifendes Entscheidungsgremium etabliert. In allen Komitees hat der CRO den Vorsitz und ein Vetorecht.

Das Asset Liability Committee der Commerzbank ist aufgrund der Zuständigkeiten für die konzernübergreifende Steuerung der Portfoliozusammensetzung sowie der Kapitalallokation und der RWA-Entwicklung wichtiger Ausgangspunkt unseres Internal Capital Adequacy Assessment Process (ICAAP), im Rahmen dessen bankintern sichergestellt wird, dass stets genügend Risikodeckungspotenzial zur Abdeckung aller wesentlichen Risiken vorhanden ist.

## 2 Risikostrategie und Risikosteuerung

---

In der Risikostrategie werden, basierend auf der Geschäftsstrategie, die risikostrategischen Leitplanken für die Entwicklung der Investitionsportfolios der Commerzbank definiert. Durch die konkrete Limitierung der dem Konzern zur Verfügung stehenden Risikoressourcen Kapital und Liquiditätsreserve werden die Risikotragfähigkeit und die Liquidität sichergestellt.

Der Gültigkeitsbereich der Risikostrategie wird durch die sogenannte „Risikotoleranz“ beschrieben. Extremszenarios wie beispielsweise der Ausfall einer Core Economy (zum Beispiel Deutschland, Frankreich oder USA) oder der Wegfall der Grundfunktionalität der EZB (Repo) liegen außerhalb der im Rahmen der Risikostrategie festgelegten Steuerung.

Die Gesamtrisikostrategie deckt sowohl alle wesentlichen quantifizierbaren als auch nicht quantifizierbaren Risiken ab. Sie wird in Form von Teilrisikostrategien für die einzelnen Risikoarten weiter detailliert und über Policies, Regularien und Arbeitsanweisungen/Richtlinien konkretisiert und operationalisiert. Im jährlich durchzuführenden Prozess der Risikoinventur wird sichergestellt, dass alle für den Konzern wesentlichen Risiken (sowohl quantifizierbare als auch nicht quantifizierbare) identifiziert werden. Die Einschätzung der Wesentlichkeit richtet sich hierbei nach der Frage, ob das Eintreten des Risikos mittel- oder unmittelbar einen maßgeblichen negativen Einfluss auf die Risikotragfähigkeit des Konzerns haben könnte.

Im Rahmen des Planungsprozesses entscheidet der Vorstand unter Berücksichtigung von Stressszenarios, in welchem Umfang das Risikodeckungspotenzial des Konzerns ausgeschöpft werden soll. Über einen bewusst zur Verfügung gestellten Kapitalrahmen als Teil des verfügbaren Risikodeckungspotenzials legt er den Risikoappetit auf Konzernebene fest. Der Kapitalrahmen wird in einem zweiten Schritt für die einzelnen Risikoarten limitiert und als Ergebnis der Planung auf die steuerungrelevanten Einheiten/Geschäftsfelder allokiert. Im Rahmen des unterjährigen Monitorings wird die Einhaltung der Limite und Leitplanken überprüft und bei Bedarf werden Steuerungsimpulse gesetzt.

### 3 Risikotragfähigkeit und Stresstesting

---

Die Risikotragfähigkeitsanalyse ist ein wesentlicher Bestandteil der Gesamtbanksteuerung und des Internal Capital Adequacy Assessment Process (ICAAP) der Commerzbank. Zielsetzung ist die fortlaufende Sicherstellung einer für das Risikoprofil des Commerzbank-Konzerns ausreichenden Kapitalausstattung. Das Risikotragfähigkeitskonzept folgt dabei einer stringent ökonomischen Betrachtung der Aktiv- und Passivseite des Konzerns.

Die Risikotragfähigkeit überwacht die Commerzbank auf Basis eines sogenannten Gone-Concern-Ansatzes, dessen grundlegendes Sicherungsziel der Schutz der erstrangigen Fremdkapitalgeber ist. Das Erreichen dieses Ziels soll auch im Fall außerordentlich hoher Verluste aus einem unwahrscheinlichen Extremereignis gewährleistet bleiben. Das Konzept unterstellt dabei einen Gone-Concern-Verlauf, der auch die diesbezüglichen aktuellen gesetzlichen und regulatorischen Entwicklungen reflektiert. Das Risikotragfähigkeitskonzept wurde im Jahr 2010 konzeptionell weiterentwickelt. Daraus resultierende methodische Anpassungen sind in den Zahlen per 31. Dezember 2009 rückwirkend berücksichtigt.

Bei der Ermittlung des ökonomischen Kapitalbedarfs werden mögliche unerwartete Wertschwankungen betrachtet. Derartige – über den Erwartungen liegende – Wertschwankungen stellen das eigentliche Risiko dar, das durch das verfügbare ökonomische Kapital (Risikodeckungspotenzial) abgedeckt werden muss. Die Bemessung des Risikodeckungspotenzials beinhaltet eine differenzierte Betrachtung der buchhalterischen Wertansätze der Aktiva und Passiva unter ökonomischer Wertanpassung bestimmter bilanzieller Posten.

Die Quantifizierung des aus den eingegangenen Risiken resultierenden Kapitalbedarfs erfolgt auf Basis des internen ökonomischen Kapitalmodells. Im Rahmen der Festlegung des ökonomischen Kapitalbedarfs werden alle im Rahmen der jährlichen Risikoinventur als wesentlich eingestuftes Risikoarten des Commerzbank-Konzerns berücksichtigt. Die ökonomische Risikobetrachtung beinhaltet daher auch Risikoarten, die in den regulatorischen



|     |                                       |
|-----|---------------------------------------|
| 163 | Wesentliche Entwicklungen 2010        |
| 165 | Risikoorientierte Gesamtbanksteuerung |
| 168 | Adressenausfallrisiken                |
| 184 | Intensive Care                        |
| 188 | Marktrisiken                          |
| 191 | Liquiditätsrisiken                    |
| 193 | Operationelle Risiken                 |
| 195 | Sonstige Risiken                      |

Anforderungen an die Eigenmittelausstattung von Banken nicht enthalten sind und reflektiert überdies portfoliospezifische Wechselwirkungen. Der hohe Konfidenzanspruch des ökonomischen Kapitalmodells von derzeit 99,95 % korrespondiert mit den zugrunde liegenden Gone-Concern-Annahmen und gewährleistet ein in sich konsistentes, ökonomisches Risikotragfähigkeitskonzept.

Die Überwachung und Steuerung der Risikotragfähigkeit erfolgt monatlich auf Ebene des Commerzbank-Konzerns. Die Risikotragfähigkeit wird seit Dezember 2010 anhand des Ausnutzungsgrades des Risikodeckungspotenzials beurteilt (bislang anhand sogenannter ökonomischer Kapitalquoten). Die Risikotragfähigkeit gilt demnach als gegeben, solange der Ausnutzungsgrad unter 100 % liegt. Per 31. Dezember 2010 betrug der Ausnutzungsgrad 56,8 %. Im Berichtszeitraum lag der Ausnutzungsgrad stets deutlich unter 100 %.

Zur Überprüfung der Risikotragfähigkeit bei unterstellten adversen Veränderungen des volkswirtschaftlichen Umfelds werden makroökonomische Stressszenarios genutzt. Die zugrunde liegenden makroökonomischen Szenarios, die mindestens quartalsweise aktualisiert werden, beschreiben eine außergewöhnliche, aber plausible negative Entwicklung der Volkswirtschaft und werden risikoartenübergreifend angewendet. In den Szenariorechnungen werden die Inputparameter der ökonomischen Kapitalbedarfsberechnung in Abhängigkeit von der erwarteten makroökonomischen Entwicklung simuliert. Zusätzlich zum Kapitalbedarf wird auf Basis der makroökonomischen Szenarios auch die Gewinn- und Verlustrechnung gestresst und darauf aufbauend die Entwicklung des Risikodeckungspotenzials simuliert. Die Beurteilung der Risikotragfähigkeit im Stressfall erfolgt ebenfalls anhand des Ausnutzungsgrades des Risikodeckungspotenzials. Der Ausnutzungsgrad im Stressfall lag im gesamten Berichtszeitraum ebenfalls deutlich unter 100 %. Wir werden auch zukünftig stetig an der Weiterentwicklung unseres Risikotragfähigkeits- und Stresstesting-Konzepts arbeiten.

| Risikotragfähigkeit Commerzbank-Konzern   Mrd € | 31.12.2010    | 31.12.2009 <sup>2</sup> |
|-------------------------------------------------|---------------|-------------------------|
| <b>Ökonomisches Risikodeckungspotenzial</b>     | <b>36</b>     | <b>39</b>               |
| <b>Ökonomischer Kapitalbedarf</b>               | <b>20</b>     | <b>19</b>               |
| davon für Kreditrisiko                          | 14            | 14                      |
| davon für Marktrisiko                           | 6             | 5                       |
| davon für OpRisk                                | 3             | 2                       |
| davon für Geschäftsrisiko                       | 2             | 1                       |
| davon Diversifikationseffekte                   | -4            | -3                      |
| <b>Ausnutzungsgrad<sup>1</sup></b>              | <b>56,8 %</b> | <b>49,6 %</b>           |

<sup>1</sup> Ausnutzungsgrad = ökonomischer Kapitalbedarf/Risikodeckungspotenzial.

<sup>2</sup> Zahlen per 2009 angepasst auf Basis aktueller Methodik.

Tabelle 12

Die regulatorischen RWA wurden im Jahresverlauf von 280 Mrd Euro auf 268 Mrd Euro reduziert. Die Commerzbank hat sich gut auf die erhöhten regulatorischen Anforderungen aus Basel 2,5 und Basel 3 vorbereitet. Der auf Basis der durchgeführten quantitativen Wirkungsanalyse erwartete Anstieg von etwa 75 Mrd Euro an RWA wird durch proaktives – teilweise bereits eingeleitetes – Management sowie die Reduzierung der betroffenen Portfolios überkompensiert. Durch Management der Counterparty-Risiken sowie durch die Optimierung und den Abbau der Assets außerhalb der Kernbank erwarten wir einen Entlastungseffekt in Summe von etwa 85 Mrd Euro RWA. Zusammen mit dem Wachstumsprogramm der Kernbank in Höhe von etwa 30 Mrd Euro RWA gehen wir davon aus, dass die RWA Ende 2014 unter 290 Mrd Euro liegen werden.

# Adressenausfallrisiken

Adressenausfallrisiken umfassen das Risiko von Verlusten aufgrund von Ausfällen von Geschäftspartnern sowie die Veränderung dieses Risikos. Unter den Adressenausfallrisiken subsumiert die Commerzbank neben den Kreditausfall- und Drittschuldnerisiken auch das Kontrahenten- und Emittentenrisiko sowie das Länder- beziehungsweise Transferrisiko.

## 1 Adressrisikosteuerung

---

Zur Steuerung der Adressenausfallrisiken bedient sich die Commerzbank eines umfassenden Risikomanagementsystems bestehend aus Aufbauorganisation, Methoden und Modellen, Risikostrategie mit quantitativen und qualitativen Steuerungsinstrumenten sowie Regularien und Prozessen. Das Risikomanagementsystem gewährleistet top-down eine konsistente und durchgängige Steuerung des Gesamtkreditportfolios und der Teilportfolios bis hinunter auf das Einzelengagement.

Die für die operative Risikosteuerung notwendigen Kennzahlen und Impulse leiten sich aus den übergeordneten Konzernzielen ab und werden auf nachgelagerten Ebenen um Teilportfolio- beziehungsweise Produktspezifika ergänzt. Eine risikoorientierte Kreditkompetenzordnung lenkt den Managementfokus der höchsten Entscheidungsgremien auf beispielsweise Konzentrationsrisiken beziehungsweise Abweichungen von der Risikostrategie.

Für das operative Management des Kreditportfolios stand im Jahr 2010 unverändert das De-Risking bei Klumpenrisiken im Fokus. Gleichzeitig wurde die Kreditportfolioüberwachung und -steuerung mit Stärkung der Asset-Quality-Review-Funktion in der Marktfolge ausgebaut.

Im Jahresverlauf wurde die Umsetzung der Branchenaufstellung der Marktfolge im inländischen Firmenkundengeschäft abgeschlossen. Durch die Aufstellung entlang der Wertschöpfungsketten wird vorhandenes Branchenwissen gebündelt und gleichzeitig der Grundstein für den zukünftigen Ausbau gelegt.

Darüber hinaus wurden die bisher von Commerzbank und Dresdner Bank verwendeten IT-Systeme zur Berechnung der Kontrahenten- und Emittentenrisiken im Jahr 2010 auf eine gemeinsame Plattform migriert. Durch das neue System wird die integrierte Berechnung und Überwachung aller Kreditrisiken für Handelsgeschäfte gewährleistet.

Die Länderrisikosteuerung wurde ebenfalls überarbeitet. Im Rahmen der Länderrisikoeermittlung werden sowohl die Transferrisiken als auch die Adressenausfallrisiken berücksichtigt. Die Länderrisikosteuerung basiert auf der Festlegung von Risikolimiten sowie auf der Definition von länderspezifischen Strategien zum Erreichen eines gewünschten Zielfortfolios.

- 163 Wesentliche Entwicklungen 2010
- 165 Risikoorientierte Gesamtbanksteuerung
- 168 Adressenausfallrisiken
- 184 Intensive Care
- 188 Marktrisiken
- 191 Liquiditätsrisiken
- 193 Operationelle Risiken
- 195 Sonstige Risiken

Steuerungsinstrumente und -ebenen im Überblick

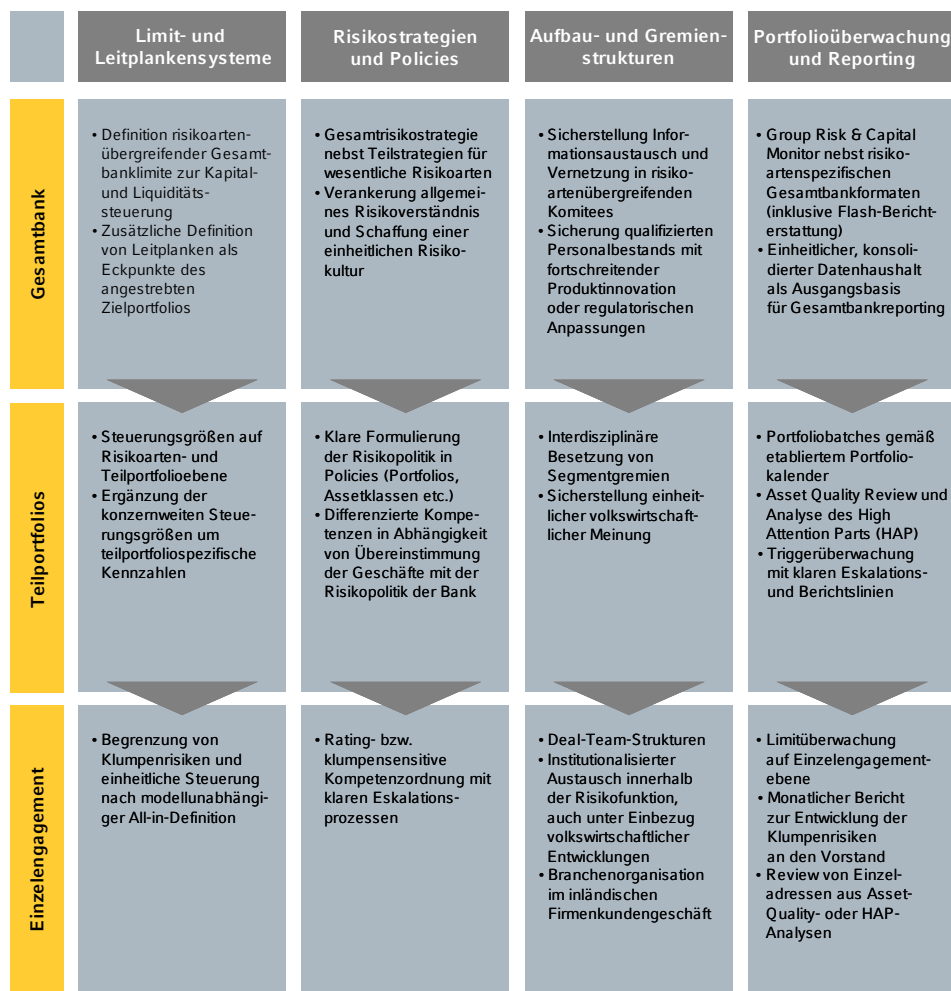

Abbildung 4

Insbesondere durch die Branchenaufstellung der Marktfolge im inländischen Firmenkundengeschäft und Fokussierung auf schwächere Ratings ist es möglich geworden, Auffälligkeiten auf Gesamt- und Teilportfolioebenen unmittelbar nachzugehen und diese direkt auf Ebene der Einzelkredite zu übertragen, zu identifizieren und Maßnahmen einzuleiten. Hierin liegt ein erheblicher Fortschritt bei sowohl Geschwindigkeit als auch Effizienz von Präventionsmaßnahmen ebenso wie bei der Prognosequalität zur Risikoentwicklung.

## 2 Commerzbank-Konzern nach Segmenten

Zur Steuerung und Limitierung der Adressenausfallrisiken werden die Risikokennzahlen Exposure at Default (EaD), Expected Loss (EL), Risikodichte (EL/EaD) sowie Unexpected Loss (UL = Ökonomischer Kapitalbedarf für Kreditrisiken mit einem Konfidenzniveau von 99,95 % und einer Haltedauer von einem Jahr) genutzt. Diese verteilen sich wie folgt auf die Segmente:

| Kreditrisikokennzahlen nach Segmenten per 31.12.2010 | Exposure at Default<br>Mrd € | Expected Loss<br>Mio € | Risikodichte<br>Bp | Unexpected Loss<br>Mio € |
|------------------------------------------------------|------------------------------|------------------------|--------------------|--------------------------|
| <b>Kernbank</b>                                      | <b>324</b>                   | <b>1 164</b>           | <b>36</b>          | <b>8 152</b>             |
| Privatkunden                                         | 69                           | 255                    | 37                 | 1 032                    |
| Private Baufinanzierung                              | 36                           | 127                    | 36                 |                          |
| Renditeobjekte                                       | 5                            | 18                     | 36                 |                          |
| Individualkredite                                    | 13                           | 57                     | 44                 |                          |
| Verfügungskredite/Ratenkredite/<br>Kreditkarten      | 12                           | 49                     | 42                 |                          |
| Inländische Tochtergesellschaften                    | 2                            | 2                      | 10                 |                          |
| Ausländische Tochtergesellschaften<br>und Sonstige   | 2                            | 1                      | 9                  |                          |
| Mittelstandsbank                                     | 111                          | 469                    | 42                 | 3 682                    |
| Financial Institutions                               | 18                           | 51                     | 29                 |                          |
| Corporates Inland                                    | 65                           | 303                    | 47                 |                          |
| Corporates Ausland                                   | 28                           | 115                    | 41                 |                          |
| Central & Eastern Europe                             | 25                           | 210                    | 84                 | 583                      |
| BRE Group                                            | 21                           | 142                    | 68                 |                          |
| CB Eurasija                                          | 2                            | 18                     | 98                 |                          |
| Bank Forum                                           | <1                           | 38                     | 956                |                          |
| Sonstige                                             | 2                            | 13                     | 64                 |                          |
| Corporates & Markets                                 | 78                           | 215                    | 28                 | 2 397                    |
| Deutschland                                          | 28                           | 65                     | 23                 |                          |
| Westeuropa                                           | 28                           | 73                     | 26                 |                          |
| Mittel- und Osteuropa                                | 3                            | 10                     | 33                 |                          |
| Nordamerika                                          | 11                           | 30                     | 27                 |                          |
| Sonstige                                             | 9                            | 37                     | 43                 |                          |
| Sonstige und Konsolidierung                          | 41                           | 15                     | 4                  | 458                      |
| <b>Optimierung – Asset Based Finance</b>             | <b>220</b>                   | <b>674</b>             | <b>31</b>          | <b>4 639</b>             |
| Commercial Real Estate                               | 70                           | 377                    | 54                 |                          |
| Eurohypo Retail                                      | 17                           | 29                     | 17                 |                          |
| Shipping                                             | 25                           | 187                    | 75                 |                          |
| <i>davon Schiffsfinanzierungen</i>                   | 21                           | 185                    | 90                 |                          |
| Public Finance                                       | 109                          | 81                     | 7                  |                          |
| <b>Reduzierung – PRU</b>                             | <b>18</b>                    | <b>87</b>              | <b>48</b>          | <b>910</b>               |
| <b>Gesamt</b>                                        | <b>562</b>                   | <b>1 925</b>           | <b>34</b>          | <b>13 701</b>            |

Tabelle 13

|     |                                       |
|-----|---------------------------------------|
| 163 | Wesentliche Entwicklungen 2010        |
| 165 | Risikoorientierte Gesamtbanksteuerung |
| 168 | Adressenausfallrisiken                |
| 184 | Intensive Care                        |
| 188 | Marktrisiken                          |
| 191 | Liquiditätsrisiken                    |
| 193 | Operationelle Risiken                 |
| 195 | Sonstige Risiken                      |

## 2.1 Segment Privatkunden

Im Segment Privatkunden werden die natürlichen Personen in den Bereichen Private Kunden, Geschäftskunden (auch bilanzierende Adressen bis zu einem Geschäftsumsatz von 2,5 Mio Euro) und Wealth Management betreut und risikoseitig gemanagt. Das Exposure im Segment entfällt vor allem auf die Bereiche Immobilienfinanzierung (41 Mrd Euro), Individualkredite (13 Mrd Euro) sowie Verfügungskredite, Ratenkredite und Kreditkarten (12 Mrd Euro). Der Portfoliorückgang um etwa 9 Mrd Euro im Jahresverlauf wurde primär durch den Verkauf von Exit-Einheiten verursacht; die Risikodichte des verbleibenden Buchs liegt bei 37 Basispunkten. Wir gehen von einem stabilen makroökonomischen Umfeld aus.

Im Jahr 2010 haben wir die Retailportfolios von Commerzbank und Dresdner Bank erfolgreich zusammengeführt, die Marktfolge neu aufgestellt, Richtlinien vereinheitlicht und im Fraud Management standardisierte Prozesse implementiert. Kompetenzstruktur und Entscheidungsparameter sind vereinheitlicht worden, und die Integration verlief planmäßig.

Für 2011 stehen die Steigerung der Effizienz, der weitere Ausbau der Risikofrüherkennung und die risikobewusste Begleitung der Marktseite bei der Erschließung von Vertriebspotenzialen im Vordergrund. Der Fokus im Neugeschäft liegt weiter auf Wachstum in der Immobilienfinanzierung und im Ausbau der Geschäftskunden-Kreditbasis. Unverändert werden wir am Effizienzgewinn (End-to-end-Betrachtung) und Management des granularen Portfolios in den schwächeren Ratingklassen weiterarbeiten.

## 2.2 Segment Mittelstandsbank

In diesem Segment bündelt der Konzern das Geschäft mit mittelständischen Kunden (sofern sie nicht den Segmenten Central & Eastern Europe oder Corporates & Markets zugeordnet sind), dem öffentlichen Sektor und institutionellen Kunden. Darüber hinaus verantwortet das Segment die Beziehungen des Konzerns zu in- und ausländischen Banken und Finanzinstituten sowie Zentralbanken.

Das wirtschaftliche Umfeld war im Jahr 2010 von überwiegend guten Nachrichten geprägt. Die Erholung der Weltwirtschaft hat sich weiter fortgesetzt, was sich positiv auf den deutschen Kernmarkt der Mittelstandsbank ausgewirkt hat. Deutschland hat sich 2010 – bei weiterhin starker Abhängigkeit von der Entwicklung des Exportgeschäfts – zur Konjunkturlokomotive Europas entwickelt. In Teilbereichen konnten die Wachstumsraten bereits wieder das Vorkrisenniveau erreichen. Im Teilportfolio Corporates Inland sind deutliche Bonitätsverbesserungen gegenüber der schwierigen Situation im Jahr 2009 zu verzeichnen. Diese Entwicklung hat sich auch in einer positiven Ratingmigration der Einzelkunden niedergeschlagen. Der EL und die Risikodichte in diesem Bereich konnten – bei leicht gestiegenem EaD – deutlich auf 303 Mio Euro beziehungsweise 47 Basispunkte reduziert werden.

Im Bereich Corporates Ausland waren im Jahresverlauf leichte Anstiege von EaD und EL zu beobachten. Auch die Risikodichte erhöhte sich per 31. Dezember 2010 geringfügig auf 41 Basispunkte. Die weitere Entwicklung steht unter dem Einfluss des wirtschaftlichen Umfelds in den Märkten außerhalb Europas, insbesondere in den USA und Asien. Die Entwicklung des Exposures wird wesentlich von der Veränderung des Investitionsverhaltens der Kunden abhängen.

Insgesamt ist das Exposure zum Jahresende auf 111 Mrd Euro angestiegen. Die momentan immer noch unterdurchschnittliche Ausnutzung von vorhandenen Kreditlinien ist unter anderem auf verstärktes Working Capital Management der Unternehmen in der Krise zurückzuführen. Daher ist eine gewisse zeitverzögerte Ausweitung der Kreditinanspruchnahmen in einem sich weiter aufhellenden konjunkturellen Umfeld im Jahr 2011 zu erwarten. Für Details zur Entwicklung des Financial-Institutions-Portfolios siehe Abschnitt 3.3.

## 2.3 Segment Central & Eastern Europe

Das Segment umfasst die Aktivitäten der operativen Einheiten und Beteiligungen des Konzerns in Mittel- und Osteuropa.

Die wirtschaftliche Situation in mittel- und osteuropäischen Ländern hat sich im Vergleich zum Jahresende 2009 deutlich verbessert, wenn auch mit unterschiedlicher Intensität in den einzelnen Ländern. Die positive Entwicklung in allen relevanten Volkswirtschaften spiegelt sich auch in der Verbesserung der Risikodaten wider.

Den größten Teil des Portfolios im Segment CEE mit einem Exposure von knapp 21 Mrd Euro hat die polnische BRE Group. Die positive Entwicklung der Wirtschaftsleistung in Polen wird vor allem durch die deutlich wachsende Industrieproduktion getrieben. Allerdings ist die Arbeitslosenquote immer noch hoch, was naturgemäß höhere Ausfallraten im Retailgeschäft zur Folge hat. Dennoch konnten wir die Risikoversorge der BRE Bank dank erfolgreicher Präventionsmaßnahmen im Vergleich zum Jahr 2009 deutlich verringern.

In Russland hat sich der Aufschwung gefestigt. Bei unserer Einheit Commerzbank Eurasija konnten wir im Berichtsjahr die Risikodichte mehr als halbieren. Aufgrund der erhaltenen Rohstoffpreise erwarten wir im Jahr 2011 keine Verschlechterung der Kreditportfolios der Commerzbank Eurasija.

Die Ukraine litt in diesem Jahr weiterhin stark unter der Krise, obwohl im Vergleich zu 2009 ein leichter konjunktureller Aufschwung zu verzeichnen war. Auch wenn die Risikosituation angespannt bleibt, sind wieder leicht positive Signale erkennbar. Wir legen hier aber weiterhin den Fokus auf die Risikobegrenzung.

Die gesamtwirtschaftliche Situation in Mittel- und Osteuropa hat sich aufgrund der globalen konjunkturellen Erholung und der anziehenden Rohstoffnotierungen deutlich verbessert, wir sehen auch für 2011 eine anhaltend positive Wirtschaftsentwicklung. Für Polen erwarten wir angesichts der insgesamt relativ soliden ökonomischen Basis auch 2011 ein weiteres Kreditwachstum mit guten Risiko-Ertrags-Relationen. Unser russisches Portfolio bei Commerzbank Eurasija sehen wir im Jahr 2011 ebenfalls wachsend, hier ist jedoch die Abhängigkeit von der Entwicklung der Rohstoffpreise und des US-Dollar-Kurses zu berücksichtigen. In der Ukraine erwarten wir hingegen auch weiterhin einen herausfordernden Markt. Wir haben 2010 bei der Portfoliobereinigung wesentliche Meilensteine erreicht und werden diese fokussiert auch im weiterhin wirtschaftlich wie politisch schwierigen Umfeld vorantreiben.

|     |                                       |
|-----|---------------------------------------|
| 163 | Wesentliche Entwicklungen 2010        |
| 165 | Risikoorientierte Gesamtbanksteuerung |
| 168 | Adressenausfallrisiken                |
| 184 | Intensive Care                        |
| 188 | Marktrisiken                          |
| 191 | Liquiditätsrisiken                    |
| 193 | Operationelle Risiken                 |
| 195 | Sonstige Risiken                      |

## 2.4 Segment Corporates & Markets

Dieses Segment bildet die kundenorientierten Kapitalmarktaktivitäten sowie das kommerzielle Geschäft mit multinationalen Unternehmen und ausgewählten Großkunden des Konzerns ab. Der regionale Schwerpunkt des Segments liegt in Deutschland und Westeuropa, wo sich unverändert mehr als zwei Drittel des Exposures befinden; der Anteil von Nordamerika liegt per 31. Dezember 2010 bei rund 11 Mrd Euro. Ein hoher Prozentsatz des EaD entfällt auf Financial Institutions, wo wir im Jahresverlauf kontinuierlich Konzentrationsrisiken abbauen konnten. Im Handels- und Kreditneugeschäft legen wir unverändert strenge Qualitätsmaßstäbe an, bei den Beständen gehen wir für 2011 von weiterer Risikoreduktion aus.

Im Leveraged-Finance-Bereich ist eine Wiederbelebung der Marktaktivitäten zu beobachten; im Rahmen einer konservativen Risikostrategie haben wir ab dem zweiten Quartal 2010 auf selektiver Basis neue Transaktionen begleitet.

## 2.5 Segment Asset Based Finance

Das Segment Asset Based Finance (ABF) setzt sich aus den Teilportfolios Commercial Real Estate (CRE) inklusive Asset Management, Eurohypo Retail, Schiffsfinanzierung und Public Finance zusammen, die im Folgenden detailliert dargestellt sind.

### Commercial Real Estate

Im Rahmen der strategiekonformen Bestandsreduktion (Weißbuch), im Wesentlichen bei der Eurohypo, haben wir das Gesamtexposure (EaD) auf nunmehr 70 Mrd Euro (31. Dezember 2009: 77 Mrd Euro) weiter abgebaut. Die größten Anteile des Exposures entfallen weiterhin auf die Teilportfolios Büro (27 Mrd Euro), Handel (20 Mrd Euro) und Wohnimmobilien (9 Mrd Euro). Das CRE-Exposure beinhaltet auch die Portfolios des Bereichs Asset Management (Commerz Real), die sich aus Warehouse-Beständen für Fonds sowie typischen Leasingforderungen aus dem Mobiliensektor zusammensetzen.

Die spürbare Exposure-Reduktion im Jahresverlauf in Höhe von rund 7 Mrd Euro resultiert aus Rückführungen beziehungsweise Nichtverlängerungen von Darlehen, Wechselkurschwankungen und marktbedingten Überleitungen in das Default-Portfolio. Mit Blick auf die nachhaltige Stärkung des Finanzierungsmodells – auch vor dem Hintergrund der strategischen Neuausrichtung der Eurohypo bis 2014 – stehen gegenwärtig die Aktivitäten zum Bestandsabbau im unmittelbaren Fokus unserer Anstrengungen. Die Commerzbank hat hierzu ein Strategieprojekt aufgesetzt, in dessen Zuge wir unter anderem einen signifikanten Asset-Abbau beschlossen und eingeleitet haben.

Der gesamtwirtschaftlichen Erholung folgend sind die meisten Immobilienmärkte 2010 in eine Phase der Bodenbildung übergegangen. Die Aktivitäten auf den Investmentmärkten bewegen sich jedoch weiterhin auf niedrigem Niveau, wenn auch mit zunehmender Tendenz.

Die Marktentwicklung in Deutschland und den europäischen Kernmärkten wie Großbritannien, Italien und Frankreich ist – insbesondere bei hochwertigen Immobilien – stabil bis positiv. Die Entwicklung in den USA und Spanien bleibt angespannt.

Die durch Grundschulden besicherten Finanzierungen zeigen vertretbare Ausläufe (Loan to Value).



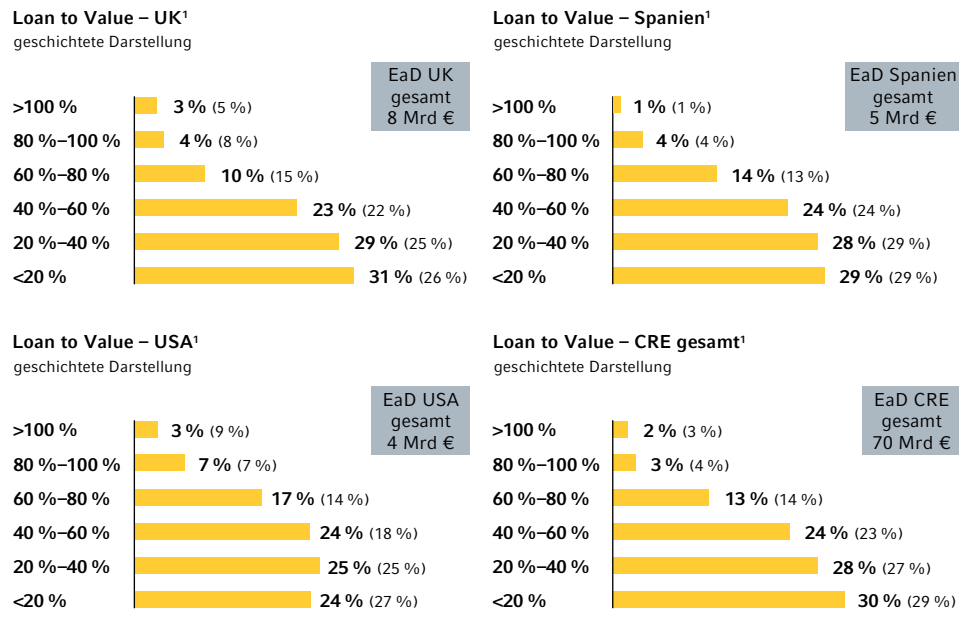

<sup>1</sup> Auslaufsichtung auf Basis Marktwerte; exklusive Margelinien und Corporate Loans; ohne Berücksichtigung von Zusatzsicherheiten. Alle Darstellungen beziehen sich auf grundpfandrechtlich besichertes Geschäft. Werte in Klammern: Dezember 2009.

Abbildung 5

### Eurohypo Retail

Seit dem Übergang der Neugeschäftsaktivitäten im Bereich Retail Banking auf die Commerzbank im Jahre 2007 betreut die Eurohypo nur noch das bestehende Kreditbuch. Neugeschäftsaktivitäten in diesem Bereich sind strategisch nicht geplant. Der ertragsschonende Bestandsabbau wird weiter kontinuierlich vorangetrieben. Das Exposure des Eurohypo-Retailportfolios wurde im Jahresverlauf weiter um mehr als 2 Mrd Euro reduziert und betrug zum 31. Dezember 2010 noch 17 Mrd Euro, wobei die Schwerpunkte unverändert in den Bereichen Eigenheime (10 Mrd Euro) und Eigentumswohnungen (3 Mrd Euro) liegen. Aufgrund restlaufzeitbedingter geringer Ausläufe bei weitestgehend erstrangiger Besicherung schätzen wir derzeit das Risiko in diesem Portfolio – auch vor dem Hintergrund einer makroökonomischen Aufhellung in Deutschland – als vergleichsweise gering ein.

### Schiffsfinanzierung

Das weitgehend in US-Dollar denominierte Exposure der Schiffsfinanzierungen (unter Einbeziehung der Deutschen Schiffsbank) haben wir im Berichtsjahr um mehr als 15 % reduziert. Aufgrund des US-Dollar-Anstiegs ergab sich auf Euro-Basis nur eine geringe Exposure-Reduktion um 1 Mrd Euro auf 21 Mrd Euro. Der Schwerpunkt des Portfolios liegt unverändert auf den drei Standardschiffstypen Containerschiffe (6 Mrd Euro), Tanker (5 Mrd Euro) und Massengutfrachter (4 Mrd Euro). Die restlichen 5 Mrd Euro beinhalten unterschiedliche Spezialtonnagen mit hoher Diversifikation über die verschiedenen Schiffssegmente.

Die Strategie der konsequenten Risikoreduzierung im Bestandsgeschäft hat im Berichtszeitraum zu Stabilisierungserfolgen auch infolge einvernehmlich mit Kunden vorgenommener Restrukturierungen geführt. Der Expected Loss wurde im Vergleich zum Ultimo 2009 um 47 Mio Euro auf 185 Mio Euro und die Risikodichte um 16 Basispunkte auf 90 Basispunkte reduziert.

|     |                                       |
|-----|---------------------------------------|
| 163 | Wesentliche Entwicklungen 2010        |
| 165 | Risikoorientierte Gesamtbanksteuerung |
| 168 | Adressenausfallrisiken                |
| 184 | Intensive Care                        |
| 188 | Marktrisiken                          |
| 191 | Liquiditätsrisiken                    |
| 193 | Operationelle Risiken                 |
| 195 | Sonstige Risiken                      |

Die Erholung der Weltwirtschaft wirkt positiv auf einzelne Segmente der Schifffahrt. Starkes Wirtschaftswachstum, vor allem in den asiatischen Schwellenländern, dürfte die Seetransportnachfrage weiter steigen lassen. Im Bulker- und Containerbereich haben sich die Märkte etwas erholt (mit Ausnahme der kleineren Containerschiffe). Die jüngst verhandelten Zeitcharterraten deuten auf eine zunehmend stabile Marktentwicklung hin.

Dem prognostizierten Wachstum der Weltwirtschaft von gut 4 % und dem daraus resultierenden Handelsvolumen mit entsprechender Auswirkung auf die Transportnachfrage stehen nach wie vor zusätzliche, auf den Markt drängende Neubauten gegenüber. Bei vergleichsweise geringem Verschrottungsvolumen bleibt daher das Erholungspotenzial begrenzt.

### Public Finance

Die Commerzbank bündelt im Segment Asset Based Finance einen Großteil der Positionen im Staatsfinanzierungsgeschäft.

Das Public-Finance-Portfolio setzt sich aus Forderungen und Wertpapieren zusammen, die in den Tochterunternehmen Eurohypo und EEPK gehalten werden.

Schuldner im Staatsfinanzierungsgeschäft (70 Mrd Euro EaD) sind Staaten, Bundesländer, Regionen, Städte und Gemeinden sowie supranationale Institutionen. Das Hauptexposure liegt in Deutschland und Westeuropa.

Das restliche Public-Finance-Portfolio im Segment ABF entfällt auf Banken (39 Mrd Euro EaD), wobei der Fokus ebenfalls in Deutschland und Westeuropa (circa 92 %) liegt. Der überwiegende Teil des Bankenportfolios besteht aus Wertpapieren/Darlehen, die zu einem hohen Anteil mit Grandfathering, Gewährträgerhaftungen/Anstaltslasten oder anderen Haftungserklärungen der öffentlichen Hand ausgestattet sind oder in Form von Covered Bonds emittiert wurden.

Die Strategie des Segments ABF ist der Abbau des Public-Finance-Portfolios (Staatsfinanzierung sowie Banken) durch Tilgungen, Fälligkeiten, aber auch aktive Verkäufe, soweit diese kaufmännisch sinnvoll sind.

Der EaD des Public-Finance-Portfolios wurde im Jahr 2010 im Rahmen der De-Risking-Strategie entsprechend überwiegend durch Nutzung von Fälligkeiten, aber auch durch aktive Portfolioreduzierung unter teilweiser Inkaufnahme von Verlusten um 20 Mrd Euro auf 109 Mrd Euro reduziert. Insgesamt wird ein Abbau auf unter 100 Mrd Euro bis Ende 2012 sowie unter 80 Mrd Euro bis Ende 2014 angestrebt.

Das segmentübergreifende, jedoch ganz überwiegend aus dem Geschäftsfeld Public Finance resultierende Sovereign-Exposure in den Ländern Portugal, Irland, Italien, Griechenland und Spanien belief sich auf insgesamt rund 16,8 Mrd Euro (31. Dezember 2009: 19,9 Mrd Euro).

| Sovereign-Exposures in ausgewählten Staaten   Mrd € | 31.12.2010 |
|-----------------------------------------------------|------------|
| Portugal                                            | 0,9        |
| Irland                                              | <0,1       |
| Italien                                             | 9,7        |
| Griechenland                                        | 3,0        |
| Spanien                                             | 3,1        |

Tabelle 14

Wir erwarten auch 2011 unverändert keine nennenswerten Belastungen durch Risikovorsorge und gehen nicht davon aus, dass es zu Ausfällen von öffentlich-rechtlichen Körperschaften oder Banken in Ländern der OECD kommen wird.

## 2.6 Segment Portfolio Restructuring Unit (PRU)

In der PRU sind ausschließlich Assets zusammengeführt, die von der Commerzbank als nicht strategisch eingestuft wurden und deshalb abgebaut werden sollen. Die Bündelung erlaubt ein einheitliches und effizientes Management dieser Positionen. Es handelt sich dabei überwiegend um Structured-Credit-Positionen (im Wesentlichen Asset-backed Securities – ABS) mit einem Nominalwert per 31. Dezember 2010 in Höhe von 29,0 Mrd Euro, die im Detail in Kapitel 3.1.1 dargestellt werden.

Im letzten Quartal des Jahres 2010 konnten wir die verbliebenen sonstigen Positionen in der PRU (Credit Default Swaps und Tranchen auf Pools von Credit Default Swaps, die außerhalb des strategischen Fokus der Commerzbank liegen) durch Auktionen und Novationen bestehender Geschäfte fast vollständig abbauen. Die geringfügigen Restbestände werden weiter aktiv gegen Marktbewegungen immunisiert, wobei Credit Default Swaps sowie die standardisierten Credit-Indizes und Indextranchen verwendet werden. Das Management der Positionen erfolgt innerhalb enger Limite für Value-at-Risk und Credit-Spread-Sensitivitäten.

## 3 Segmentübergreifende Portfolioanalyse

---

Bei den im Folgenden dargestellten Positionen ist zu beachten, dass diese bereits vollständig in den Konzern- und Segmentdarstellungen enthalten sind.

### 3.1 Structured-Credit-Portfolio

#### 3.1.1 Structured-Credit-Exposure PRU

Während die meisten Assetklassen rückläufige Tendenzen bei Spreads und Spreadvolatilitäten im Jahresverlauf 2010 zeigten und damit auf oder unter die Niveaus von Ende 2009 fielen, zeigten RMBS-Transaktionen aus Irland, Spanien und Portugal infolge der „Sovereign Crisis“ eine gegenläufige Entwicklung. Der positiven allgemeinen Entwicklung vor allem im ersten Drittel des Jahres stand eine noch stärkere Zurückhaltung potenzieller Käufer ab Mitte des Jahres gegenüber, sodass sich unter Beachtung des Wertmaximierungsgebots der Abbau gegen Ende des Jahres verlangsamte. Bei geringfügigen Aufwertungseffekten des US-Dollars und des Britischen Pfunds reduzierte sich das Nominalvolumen im vierten Quartal trotzdem von 31,4 Mrd Euro auf 29,0 Mrd Euro – bei gleichzeitiger Reduzierung der Risikowerte<sup>1</sup> von 19,9 Mrd Euro auf 17,1 Mrd Euro. Im Gesamtjahr 2010 reduzierte sich das Nominalvolumen um 8,3 Mrd Euro und die Risikowerte um 6,6 Mrd Euro. Die Commerzbank setzt auch weiterhin den wertmaximierenden Abbau des Structured-Credit-Portfolios fort.

<sup>1</sup> Der Risikowert stellt den Balance Sheet Value von Cashinstrumenten dar, bei Long-CDS-Positionen setzt er sich aus dem Nominalwert des Referenzinstruments abzüglich des Barwerts des Kreditderivats zusammen.

|     |                                       |
|-----|---------------------------------------|
| 163 | Wesentliche Entwicklungen 2010        |
| 165 | Risikoorientierte Gesamtbanksteuerung |
| 168 | Adressenausfallrisiken                |
| 184 | Intensive Care                        |
| 188 | Marktrisiken                          |
| 191 | Liquiditätsrisiken                    |
| 193 | Operationelle Risiken                 |
| 195 | Sonstige Risiken                      |

| Structured-Credit-Portfolio PRU     | 31.12.2010   |             | 31.12.2009   |             |
|-------------------------------------|--------------|-------------|--------------|-------------|
|                                     | Nominalwerte | Risikowerte | Nominalwerte | Risikowerte |
| Mrd €                               |              |             |              |             |
| RMBS                                | 5,1          | 3,0         | 8,7          | 5,9         |
| CMBS                                | 0,7          | 0,5         | 2,2          | 1,6         |
| CDO                                 | 11,1         | 6,7         | 12,5         | 7,3         |
| Sonstige ABS                        | 3,3          | 2,8         | 5,7          | 5,2         |
| PFI/Infrastructure                  | 4,3          | 3,8         | 4,1          | 3,7         |
| CIRC                                | 0,7          | 0,0         | 0,9          | 0,0         |
| Andere Structured-Credit-Positionen | 3,6          | 0,2         | 3,2          | 0,0         |
| <b>Gesamt</b>                       | <b>29,0</b>  | <b>17,1</b> | <b>37,3</b>  | <b>23,7</b> |

Tabelle 15

Insgesamt werden über die Restlaufzeit der Assets Wertaufholungen erwartet, wobei mögliche zukünftige Wertverluste zum Beispiel bei den bereits stark abgeschriebenen US RMBS und US CDO of ABS durch positive Wertentwicklungen anderer Assets voraussichtlich weit überkompensiert werden. Dabei spielt sowohl der zwischenzeitlich lange Zeitraum seit Emission der Strukturen, der eine zuverlässige Einwertung der künftigen Portfolio-Performance ermöglicht, als auch die sich weiterhin stabilisierende beziehungsweise positiv verlaufende gesamtwirtschaftliche Entwicklung in den für uns maßgeblichen Volkswirtschaften eine entscheidende Rolle. Die nebenstehende Grafik zeigt die Verteilung des Bestands des Structured-Credit-Exposures nach Ratings auf Basis der Risikowerte.

**Asset-backed Securities (ABS)** Hierbei handelt es sich um Investments in ABS-Papiere, die die Commerzbank im Rahmen des Kreditersatzgeschäfts beziehungsweise in ihrer Funktion als Arranger und Marktteilnehmer im Handel mit diesen Produkten vorgenommen hat. Seit Anfang 2010 werden die Positionen in die Produktsegmente RMBS, CMBS, CDO und Sonstige ABS gegliedert. Dies erlaubt eine übersichtliche und assetklassenspezifische Darstellungsweise und trägt der abnehmenden Bedeutung der bis Ende 2009 dargestellten PRU-Subportfolios ABS Hedge Book und Conduits Rechnung.

**Residential Mortgage-backed Securities (RMBS)** In diesem Subsegment befinden sich alle Positionen, deren Zins- und Kapitalanspruch durch private Immobilienkredite besichert oder an deren realen Verlauf vertraglich gekoppelt ist. Die Immobilienkredite selbst sind ebenfalls durch die jeweils finanzierten Wohnimmobilien teilweise oder voll besichert. Insgesamt betrug hier der Risikowert zum Stichtag 3,0 Mrd Euro (31. Dezember 2009: 5,9 Mrd Euro).

Die Bestände an direkten und indirekten Verbriefungen von US-amerikanischen Wohnungsbaukrediten sind bereits zu einem hohen Prozentsatz abgeschrieben. Trotz der derzeit aufgrund der Seniorität der Investments teilweise eingehenden Tilgungen können wir wegen der anhaltend unsicheren zukünftigen Performance dieses Sektors in Einzelfällen weitere Wertkorrekturen nicht ausschließen. Das US-RMBS-Portfolio wies zum Ende der Berichtsperiode einen Risikowert von 0,7 Mrd Euro (31. Dezember 2009: 0,9 Mrd Euro) aus. Die Mark-down-Ratio für US RMBS lag zum 31. Dezember 2010 bei 69 %.

Europäische RMBS-Positionen (Risikowert 2,3 Mrd Euro) zeigten im Berichtsjahr ein sehr differenziertes Bild. Infolge der „Sovereign Crisis“, die sich ausgehend von Griechenland im Jahresverlauf auf Irland, Spanien und Portugal ausweitete, litten insbesondere RMBS-Transaktionen aus diesen Ländern unter deutlicher Spreadausweitung beziehungsweise

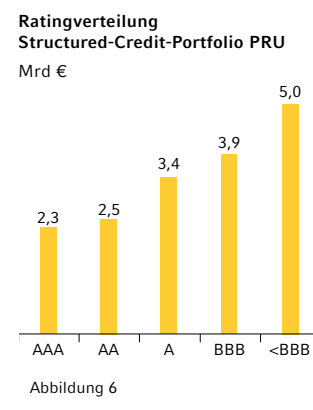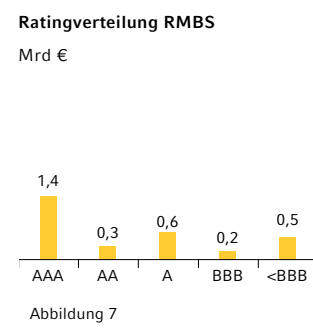

deutlich gestiegener Spreadvolatilität im Vergleich zu anderen Assetklassen und Jahresanfangswerten. Dieser marktinduzierten Wertvolatilität steht die unveränderte, aus den Fundamentaldaten abgeleitete Erwartung einer weitgehend vollständigen Rückzahlung dieser Verbriefungen gegenüber.

**Commercial Mortgage-backed Securities (CMBS)** In diesem Subsegment befinden sich alle Positionen, deren Zins- und Kapitalanspruch durch gewerbliche Immobilienkredite besichert oder an deren realen Verlauf vertraglich gekoppelt ist. Die Immobilienkredite selbst sind ebenfalls durch die jeweils finanzierten Gewerbeimmobilien teilweise oder voll besichert.

Die CMBS wiesen aufgrund des erfolgreichen Portfolioabbaus im Jahresverlauf per Ende Dezember 2010 einen Risikowert von nur noch 0,5 Mrd Euro auf (31. Dezember 2009: 1,6 Mrd Euro). Die verbrieften Gewerbeimmobilienkredite stammen überwiegend aus Großbritannien/Irland (22 %), Kontinentaleuropa (23 %) und paneuropäischen Transaktionen (49 %). Der Anteil an US CMBS lag bei 6 %. Die Mark-down-Ratio per 31. Dezember 2010 betrug 35 %.

**Collateralised Debt Obligations (CDO)** In diesem Subsegment befinden sich alle Positionen, deren Zins- und Kapitalanspruch durch Unternehmenskredite und -anleihen sowie andere ABS besichert oder an deren realen Verlauf vertraglich gekoppelt ist. Der Grad der Besicherung dieser Aktiva selbst variiert zwischen sehr gering und sehr hoch und ist transaktionsabhängig.

Insgesamt hat sich das Risikoexposure zum Stichtag in dieser Assetklasse auf 6,7 Mrd Euro (31. Dezember 2009: 7,3 Mrd Euro) trotz geringfügiger US-Dollar-Aufwertungseffekte leicht verringert. Der größte Anteil in diesem Subsegment entfiel mit 53 % des Risikowertes auf CDOs, denen überwiegend Unternehmenskredite für Corporates in den USA und in Europa zugrunde lagen (CLOs). CLOs profitierten weiterhin direkt von der sich stabilisierenden beziehungsweise positiven Entwicklung der wichtigsten Volkswirtschaften und damit weiter sinkenden Ausfallzahlen und -prognosen als auch gestiegenen Recovery-Erwartungen im Unternehmenssektor. Verbesserungen in der Portfolioqualität und wieder wachsende Investorennachfrage, insbesondere für Senior-Tranchen von CLOs, haben in diesem Sektor zu leicht gestiegenen Marktwerten in diesem Portfolio geführt. Die Mark-down-Ratio zum Berichtsstichtag lag bei 14 %.

Weitere 40 % des Risikowertes entfielen auf US CDOs of ABS, die größtenteils durch US-Subprime RMBS besichert sind. Die Mark-down-Ratio beträgt aufgrund der unverändert geringen Bonitätseinschätzung für private Immobilienfinanzierungen im US-Subprime-Markt und der konservativen Berücksichtigung daraus resultierender Verluste 57 %, obgleich die von der Commerzbank gehaltenen Verbriefungen zum überwiegenden Teil aus den höchstrangigen Tranchen solcher CDOs bestehen.

**Sonstige ABS** In diesem Subsegment befinden sich alle Positionen, deren Zins- und Kapitalanspruch durch Konsumentenkredite (inklusive Auto- und Studentenkredite), Leasingforderungen und sonstige Forderungsarten besichert oder an deren realen Verlauf vertraglich gekoppelt ist. Der Grad der Besicherung dieser Aktiva selbst variiert zwischen sehr gering und sehr hoch (zum Beispiel Autokredite) und ist transaktionsabhängig.

Insgesamt betrug der Risikowert per 31. Dezember 2010 in dieser Assetklasse 2,8 Mrd Euro (31. Dezember 2009: 5,2 Mrd Euro). Der größte Anteil des Risikoexposures entfiel auf Consumer ABS und ABS, die durch sonstige US-Aktiva besichert sind, wie beispielsweise verbriefte Forderungen aus der Vermarktung von Filmrechten und Lebensversicherungspolicen. Im Berichtsjahr wurde das Exposure gegenüber Forderungen aus der

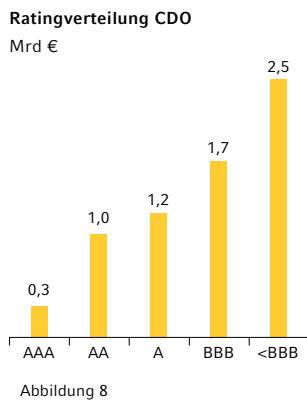

|     |                                       |
|-----|---------------------------------------|
| 163 | Wesentliche Entwicklungen 2010        |
| 165 | Risikoorientierte Gesamtbanksteuerung |
| 168 | Adressenausfallrisiken                |
| 184 | Intensive Care                        |
| 188 | Marktrisiken                          |
| 191 | Liquiditätsrisiken                    |
| 193 | Operationelle Risiken                 |
| 195 | Sonstige Risiken                      |

Vermarktung von Filmrechten aktiv reduziert. Aufgrund transaktionsspezifischer Strukturcharakteristika sind moderate Ertragsbelastungen trotz aktuell neutraler Erwartung nicht vollständig auszuschließen. Die Mark-down-Ratio der im Segment Sonstige ABS verbliebenen Positionen betrug zum Berichtsstichtag 14 %.

**PFI/Infrastruktur-Finanzierungen** Ebenfalls innerhalb der Kategorie Structured Credit der PRU ist das Exposure in sogenannten Private Finance Initiatives (PFI) mit einem Risikowert von 3,8 Mrd Euro zum 31. Dezember 2010 enthalten. Das Portfolio umfasst die private Finanzierung und den Betrieb von öffentlichen Einrichtungen und Dienstleistungen, beispielsweise von Krankenhäusern oder Wasserversorgungsbetrieben. Sämtliche Finanzierungen entfallen auf Großbritannien und sind durch extrem lange Laufzeiten von mehr als 10 bis über 40 Jahren gekennzeichnet. Das Kreditrisiko des Bestandes ist zu über 80 % zumeist durch Monoline-Versicherer, bei denen die Commerzbank derzeit nicht von einem Ausfall ausgeht, abgesichert.

**Credit Investment-related Conduits (CIRC)/Andere Structured-Credit-Positionen** Aus den nominellen Engagements resultiert zum 31. Dezember 2010 nur ein geringes Risikoexposure von 0,2 Mrd Euro, da die Strukturen ausreichend kapitalisiert waren.

### 3.1.2 Structured-Credit-Exposure Non-PRU

Im Folgenden wird auf Structured-Credit-Positionen aus dem strategischen Kundengeschäft eingegangen, die auch zukünftig der Kernbank zugeordnet bleiben und deshalb nicht in die PRU transferiert wurden.

| Structured-Credit-Portfolio Non-PRU | 31.12.2010   |                          | 31.12.2009   |                          |
|-------------------------------------|--------------|--------------------------|--------------|--------------------------|
|                                     | Nominalwerte | Risikowerte <sup>1</sup> | Nominalwerte | Risikowerte <sup>1</sup> |
| Mrd €                               |              |                          |              |                          |
| Conduits                            | 4,3          | 4,3                      | 5,9          | 5,9                      |
| Sonstige                            | 6,5          | 6,3                      | 7,2          | 6,7                      |
| <b>Gesamt</b>                       | <b>10,8</b>  | <b>10,6</b>              | <b>13,1</b>  | <b>12,6</b>              |

<sup>1</sup> Der Risikowert stellt den Balance Sheet Value von Cashinstrumenten dar, bei Long-CDS-Positionen setzt er sich aus dem Nominalwert des Referenzinstruments abzüglich des Barwerts des Kreditderivats zusammen.  
Tabelle 16

**Conduit-Exposure** Das vollständig in der Bilanz der Commerzbank abgebildete, nicht durch die PRU verwaltete Geschäft aus Asset-backed Commercial Paper (ABCP) Conduits des Segments Corporates & Markets belief sich Ende Dezember 2010 auf 4,3 Mrd Euro (Dezember 2009: 5,9 Mrd Euro). Im Jahresverlauf konnte, aufgrund der Wiederbelebung der Märkte, der Conduit-Bereich wieder vollständig über Commercial Papers refinanziert werden. Der Volumenrückgang ist auf weiter amortisierende ABS-Programme in den Conduits zurückzuführen, wobei im zweiten Halbjahr drei neue Transaktionen (Gesamtvolumen 0,2 Mrd Euro) eingegangen wurden. Die Positionen bestehen überwiegend aus Liquiditätsfazilitäten/Backup-Linien zugunsten der von der Commerzbank administrierten Conduits „Kaiserplatz“ und „Silver Tower“. Gegenüber Drittbank-Conduits besteht bereits seit dem zweiten Quartal 2010 kein Exposure mehr.

Die den ABCP-Programmen der Bank zugrunde liegenden Forderungen sind stark diversifiziert und spiegeln die unterschiedliche Geschäftsausrichtung der jeweiligen Forderungsverkäufer beziehungsweise Kunden wider. Diese Forderungsportfolios enthalten keine Non-Prime-Anteile. Unverändert sind bislang bei keiner dieser Transaktionen Verluste eingetreten.

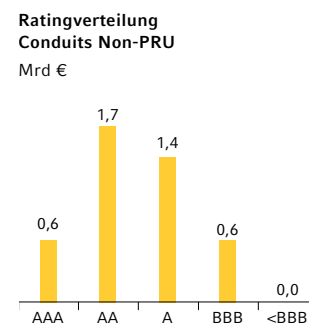

Abbildung 9

Ein Bedarf an Risikovorsorge für die unter der IFRS-Kategorie Loans and Receivables geführten Liquiditätsfazilitäten/Backup-Linien ist derzeit nicht erkennbar.

Das Volumen der von Silver Tower finanzierten ABS-Strukturen belief sich zum 31. Dezember 2010 auf 3,5 Mrd Euro (per 31. Dezember 2009: 5,0 Mrd Euro). Den ABS-Strukturen liegen Forderungsportfolios von Kunden, aber auch bankeigene Kreditforderungen, die im Rahmen eines aktiven Kreditrisikomanagements verbrieft wurden, zugrunde.

Das Volumen der unter Kaiserplatz finanzierten ABS-Strukturen belief sich zum 31. Dezember 2010 auf 0,8 Mrd Euro (per 31. Dezember 2009: 0,9 Mrd Euro). Sämtliche Assets entfielen hier auf die Verbriefung von Forderungsportfolios von und für Kunden.

**Sonstige Asset-backed-Exposures** Weitere ABS-Positionen mit einem Gesamtrisikoe Exposure von 6,3 Mrd Euro werden überwiegend von der Eurohypo im Bereich Public Finance (5,2 Mrd Euro) und der Commerzbank Europe (Ireland) (1,1 Mrd Euro) gehalten. Es handelt sich dabei vor allem um staatsgarantierte Papiere (5,3 Mrd Euro), wovon rund 4,0 Mrd Euro auf US-Government Guaranteed Student Loans entfallen. Weitere 1,0 Mrd Euro verteilen sich auf Non-US RMBS, CMBS sowie sonstige überwiegend europäische ABS-Papiere.

### 3.1.3 Originatorenpositionen

Zusätzlich zu den auf den vorherigen Seiten dargestellten Sekundärmarktpositionen haben Commerzbank und Eurohypo im Laufe der letzten Jahre – überwiegend aus Gründen des Kapitalmanagements – Forderungsverbriefungen von Kreditforderungen gegenüber Kunden der Bank mit einem aktuellen Volumen von 13,4 Mrd Euro vorgenommen, wovon zum Stichtag 31. Dezember 2010 Risikopositionen in Höhe von 8,7 Mrd Euro zurückbehalten wurden. Der weitaus größte Teil dieser Positionen entfiel mit 8,3 Mrd Euro auf Senior-Tranchen, die nahezu vollständig AAA oder AA geratet sind.

Die aus der Originatorenrolle resultierenden Positionen spiegeln die Sicht des aufsichtsrechtlichen Meldewesens unter Berücksichtigung eines regulatorisch anerkannten Risikotransfers wider. Aufgeführt sind neben den verbrieften Kreditportfolios der Commerzbank auch die am Sekundärmarkt zurückerworbenen Wertpapiere beziehungsweise zurückbehaltenen Tranchen. Dies gilt unabhängig davon, ob die Tranchen im Sinne eines handelbaren Wertpapiers strukturiert worden sind.

| Verbriefungspool<br>per 31.12.2010<br>Mrd € | Fälligkeit | Gesamt-<br>volumen <sup>1</sup> | Volumen Commerzbank <sup>1</sup> |            |                     |
|---------------------------------------------|------------|---------------------------------|----------------------------------|------------|---------------------|
|                                             |            |                                 | Senior                           | Mezzanine  | First Loss<br>Piece |
| Corporates                                  | 2013–2027  | 8,0                             | 7,3                              | 0,1        | 0,2                 |
| MezzCap                                     | 2036       | 0,2                             | <0,1                             | <0,1       | <0,1                |
| RMBS                                        | 2048       | 0,2                             | <0,1                             | <0,1       | <0,1                |
| CMBS                                        | 2010–2084  | 5,0                             | 0,9                              | <0,1       | <0,1                |
| <b>Gesamt</b>                               |            | <b>13,4</b>                     | <b>8,3</b>                       | <b>0,2</b> | <b>0,2</b>          |

<sup>1</sup> Tranchen/Rückbehalte (nominal): Bank- und Handelsbuch.  
Tabelle 17

## 3.2 Leveraged-Acquisition-Finance-(LAF)-Portfolio

Das LAF-Portfolio hat sich im Verlauf des Jahres 2010 von 4,1 Mrd Euro auf 3,4 Mrd Euro reduziert. Ursächlich hierfür waren primär vorzeitige Rückführungen von Bestandsfinanzierungen – insbesondere Refinanzierungen über den Kapitalmarkt und Unternehmensverkäufe.



|            |                                       |
|------------|---------------------------------------|
| 163        | Wesentliche Entwicklungen 2010        |
| 165        | Risikoorientierte Gesamtbanksteuerung |
| <b>168</b> | <b>Adressenausfallrisiken</b>         |
| 184        | Intensive Care                        |
| 188        | Marktrisiken                          |
| 191        | Liquiditätsrisiken                    |
| 193        | Operationelle Risiken                 |
| 195        | Sonstige Risiken                      |

Die positive Konjunktorentwicklung in den operativen Kernmärkten sowie weiterhin ausreichende Liquidität an den Kapitalmärkten haben insgesamt zu einer weiteren Verbesserung der Portfolioqualität geführt. Der geografische Schwerpunkt des Portfolios liegt unverändert in Europa (94 %) mit besonderem Fokus auf Deutschland (50 %).

Für das Jahr 2011 erwarten wir bei weiter stabilen Kapitalmärkten eine Belebung des LAF-Geschäfts. Wir werden die günstigen Umfeldbedingungen zu attraktiven risikoverträglichen Neuengagements nutzen.

| Direktes LAF-Portfolio nach Branchen   EaD Mrd € | 31.12.2010 |
|--------------------------------------------------|------------|
| Technologie/Elektronik                           | 0,6        |
| Chemie/Verpackung/Healthcare                     | 0,5        |
| Financial Institutions                           | 0,5        |
| Automobil/Maschinen                              | 0,5        |
| Konsum                                           | 0,4        |
| Dienstleistungen/Medien                          | 0,4        |
| Transport/Tourismus                              | 0,2        |
| Grundstoffe/Energie/Metall                       | 0,2        |
| Sonstige                                         | 0,1        |
| <b>Gesamt</b>                                    | <b>3,4</b> |

Tabelle 18

### 3.3 Financial-Institutions- und Non-Bank-Financial-Institutions-Portfolio

Der Geschäftsverlauf 2010 im Teilportfolio Financial Institutions war maßgeblich durch die Verschuldungsdiskussion einiger europäischer Peripherie-Länder sowie mögliche Auswirkungen auf Gesamteuropa bestimmt. Unser wesentliches Augenmerk lag daher auf der Würdigung von Länderrisiken und einer damit eng in Zusammenhang stehenden adäquaten Ausrichtung der Geschäfts- und Risikostrategie. Ebenso haben wir die Risikoreduzierung im Gesamtportfolio „Financial Institutions“ mit Blick auf Klumpenrisiken kontinuierlich proaktiv vorangetrieben, aber auch attraktives kommerzielles Geschäft unterstützt. Das Exposure konnte im Jahresverlauf 2010 um 18 Mrd Euro auf 95 Mrd Euro reduziert werden. Gleichzeitig stieg der Expected Loss, insbesondere aufgrund einer Parameteraktualisierung, um 21 Mio Euro auf 96 Mio Euro an. Für das Geschäftsjahr 2011 erwarten wir aus Ländersicht weiterhin angespannte Fundamentaldaten. Diesen werden wir mit einer konsequenten Ausrichtung und Anwendung unserer Geschäfts- und Risikostrategie angemessen Rechnung tragen.

Das NBFI-Portfolio war im Geschäftsjahr 2010 durch den weiteren Abbau von Klumpenrisiken geprägt. Hierdurch konnte der EaD des Teilportfolios (inklusive ABS- und LAF-Geschäfte mit NBFI-Bezug sowie PRU-NBFI-Assets) im Jahresverlauf um 14 Mrd Euro auf 38 Mrd Euro reduziert und die Risikodichte auf 24 Basispunkte verbessert werden. Durch das weiterhin günstige Kapitalmarktumfeld ist unsere Markteinschätzung für den NBFI-Sektor positiv, wenngleich die Probleme in verschiedenen europäischen Peripherie-Staaten und die Änderungen in den regulatorischen Rahmenbedingungen auch den Bereich NBFI 2011 vor Herausforderungen stellen werden.

| FI-/NBFI-Portfolio<br>nach Regionen<br>per 31.12.2010 | Financial Institutions          |                           |                         | Non-Bank Financial Institutions |                           |                         |
|-------------------------------------------------------|---------------------------------|---------------------------|-------------------------|---------------------------------|---------------------------|-------------------------|
|                                                       | Exposure<br>at Default<br>Mrd € | Expected<br>Loss<br>Mio € | Risiko-<br>dichte<br>Bp | Exposure<br>at Default<br>Mrd € | Expected<br>Loss<br>Mio € | Risiko-<br>dichte<br>Bp |
| Deutschland                                           | 29                              | 4                         | 2                       | 8                               | 18                        | 23                      |
| Westeuropa                                            | 36                              | 25                        | 7                       | 18                              | 39                        | 21                      |
| Mittel- und Osteuropa                                 | 7                               | 31                        | 42                      | 1                               | 2                         | 28                      |
| Nordamerika                                           | 8                               | 1                         | 1                       | 5                               | 24                        | 52                      |
| Sonstige                                              | 15                              | 34                        | 23                      | 7                               | 10                        | 15                      |
| <b>Gesamt</b>                                         | <b>95</b>                       | <b>96</b>                 | <b>10</b>               | <b>38</b>                       | <b>93</b>                 | <b>24</b>               |

Tabelle 19

### 3.4 Länderklassifizierung

Die regionale Verteilung des Exposures entspricht der strategischen Ausrichtung der Bank und spiegelt die Schwerpunkte der globalen Geschäftstätigkeit der Bank wider. Rund die Hälfte des Engagements entfällt auf Deutschland, ein weiteres Drittel auf andere Länder in Europa und 7 % auf Nordamerika. Der Rest ist breit diversifiziert und verteilt sich auf eine große Anzahl Länder, in denen insbesondere deutsche Exporteure begleitet werden beziehungsweise die Commerzbank mit lokalen Einheiten vor Ort präsent ist.

| Gesamtportfolio nach<br>Regionen per 31.12.2010 | Exposure at Default<br>Mrd € | Expected Loss<br>Mio € | Risikodichte<br>Bp |
|-------------------------------------------------|------------------------------|------------------------|--------------------|
| Deutschland                                     | 282                          | 855                    | 30                 |
| Westeuropa                                      | 138                          | 393                    | 28                 |
| Mittel- und Osteuropa                           | 43                           | 286                    | 66                 |
| Nordamerika                                     | 42                           | 104                    | 25                 |
| Sonstige                                        | 57                           | 287                    | 51                 |
| <b>Gesamt</b>                                   | <b>562</b>                   | <b>1 925</b>           | <b>34</b>          |

Tabelle 20

### 3.5 Ratingklassifizierung

Das Gesamtportfolio des Konzerns verteilt sich auf Basis von PD-Ratings anteilig wie folgt auf die internen Ratingklassifizierungen:

| Ratingverteilung per 31.12.2010   % | 1,0–1,8   | 2,0–2,8   | 3,0–3,8   | 4,0–4,8  | 5,0–5,8  |
|-------------------------------------|-----------|-----------|-----------|----------|----------|
| Privatkunden                        | 21        | 45        | 23        | 9        | 3        |
| Mittelstandsbank                    | 14        | 51        | 27        | 5        | 3        |
| Central & Eastern Europe            | 23        | 34        | 29        | 11       | 2        |
| Corporates & Markets                | 39        | 42        | 15        | 2        | 2        |
| Asset Based Finance                 | 38        | 42        | 15        | 4        | 2        |
| <b>Konzern<sup>1</sup></b>          | <b>34</b> | <b>42</b> | <b>18</b> | <b>4</b> | <b>2</b> |

<sup>1</sup> Inklusive PRU sowie Sonstige und Konsolidierung.

Tabelle 21

|            |                                       |
|------------|---------------------------------------|
| 163        | Wesentliche Entwicklungen 2010        |
| 165        | Risikoorientierte Gesamtbanksteuerung |
| <b>168</b> | <b>Adressenausfallrisiken</b>         |
| 184        | Intensive Care                        |
| 188        | Marktrisiken                          |
| 191        | Liquiditätsrisiken                    |
| 193        | Operationelle Risiken                 |
| 195        | Sonstige Risiken                      |

### 3.6 Branchenklassifizierung Corporates

Die nachfolgende Tabelle zeigt die Verteilung des Corporates-Exposures nach Branchen unabhängig von der bestehenden Segmentzugehörigkeit:

| Teilportfolio Corporates<br>nach Branchen<br>per 31.12.2010 | Exposure at Default | Expected Loss | Risikodichte |
|-------------------------------------------------------------|---------------------|---------------|--------------|
|                                                             | Mrd €               | Mio €         | Bp           |
| Grundstoffe/Energie/Metall                                  | 25                  | 106           | 42           |
| Konsum                                                      | 21                  | 110           | 53           |
| Automobil                                                   | 11                  | 55            | 48           |
| Transport/Tourismus                                         | 11                  | 58            | 53           |
| Technologie/Elektronik                                      | 11                  | 44            | 41           |
| Chemie/Verpackung                                           | 11                  | 60            | 56           |
| Dienstleistungen/Medien                                     | 10                  | 58            | 56           |
| Maschinen                                                   | 9                   | 66            | 75           |
| Bau                                                         | 5                   | 49            | 103          |
| Sonstige                                                    | 21                  | 84            | 41           |
| <b>Gesamt</b>                                               | <b>134</b>          | <b>690</b>    | <b>51</b>    |

Tabelle 22

# Intensive Care

## 1 Risikovorsorge

Die Risikovorsorge im Kreditgeschäft liegt rund 40 % unter dem Vorjahreswert und beläuft sich auf knapp 2,5 Mrd Euro. Der sich bereits im Laufe des Jahres abzeichnende positive Trend hielt im vierten Quartal weiter an, sodass hier die Ergebnisbelastung mit 595 Mio Euro erneut unter der des Vorquartals lag. Im Vergleich zum vierten Quartal des Jahres 2009 ging die Risikovorsorge um mehr als die Hälfte zurück. Die Tabelle zeigt die Entwicklung auf Segmentebene:

| Risikovorsorge<br>Mio €            | 2010<br>gesamt <sup>1</sup> | Q4<br>2010 | Q3<br>2010 | Q2<br>2010 | Q1<br>2010 | 2009<br>gesamt <sup>1</sup> | Q4<br>2009   | Q3<br>2009   | Q2<br>2009 | Q1<br>2009 |
|------------------------------------|-----------------------------|------------|------------|------------|------------|-----------------------------|--------------|--------------|------------|------------|
| Privat-<br>kunden                  | 246<br>(35)                 | 46         | 64         | 70         | 66         | 246<br>(31)                 | 72           | 70           | 55         | 49         |
| Mittel-<br>standsbank              | 279<br>(24)                 | 93         | -69        | 94         | 161        | 954<br>(84)                 | 298          | 330          | 236        | 90         |
| Central &<br>Eastern Europe        | 361<br>(133)                | 48         | 127        | 92         | 94         | 812<br>(309)                | 296          | 142          | 201        | 173        |
| Corporates &<br>Markets            | -27<br>(-3)                 | -14        | 6          | 0          | -19        | 289<br>(32)                 | 25           | 44           | -34        | 254        |
| Asset Based<br>Finance             | 1 584<br>(69)               | 412        | 493        | 354        | 325        | 1 588<br>(60)               | 651          | 372          | 358        | 207        |
| Portfolio<br>Restructuring<br>Unit | 62<br>(33)                  | 10         | 2          | 28         | 22         | 327<br>(100)                | -11          | 99           | 169        | 70         |
| Sonstige und<br>Konsolidierung     | -6<br>(-1)                  | 0          | -2         | 1          | -5         | -2<br>(-1)                  | -7           | -4           | 8          | 1          |
| <b>Gesamt</b>                      | <b>2 499<br/>(43)</b>       | <b>595</b> | <b>621</b> | <b>639</b> | <b>644</b> | <b>4 214<br/>(65)</b>       | <b>1 324</b> | <b>1 053</b> | <b>993</b> | <b>844</b> |

<sup>1</sup> Angaben in ( ) entsprechen der Risikovorsorgequote: Risikovorsorge im Verhältnis zum Exposure at Default Weißbuch zuzüglich Default Volumen Schwarzbuch in Basispunkten.

Tabelle 23

Die deutliche Reduzierung der Risikovorsorge gegenüber dem Vorjahr wird von nahezu allen Segmenten getragen. Der größte Rückgang entfällt dabei auf die Mittelstandsbank, die von der guten Konjunktorentwicklung profitiert und ihr Risikoergebnis im Vergleich zum Jahr 2009 um fast 700 Mio Euro verbessert hat. In dem Betrag ist ein einmaliger positiver Sondereffekt von 100 Mio Euro aus dem dritten Quartal enthalten.

|            |                                       |
|------------|---------------------------------------|
| 163        | Wesentliche Entwicklungen 2010        |
| 165        | Risikoorientierte Gesamtbanksteuerung |
| 168        | Adressenausfallrisiken                |
| <b>184</b> | <b>Intensive Care</b>                 |
| 188        | Marktrisiken                          |
| 191        | Liquiditätsrisiken                    |
| 193        | Operationelle Risiken                 |
| 195        | Sonstige Risiken                      |

Auch dem Segment Central & Eastern Europe gelang im Jahresverlauf bei der Kreditrisikoversorge die Trendwende, hier liegt die Belastung um rund 450 Mio Euro unter dem Vorjahr, wobei vor allem die Bank Forum die Risikoversorge deutlich verringern konnte.

Das Segment Corporates & Markets liefert mit einer Nettoauflösung von 27 Mio Euro in der Jahresbetrachtung ein positives Risikoergebnis, das vor allem auf die gute Entwicklung der Portfoliorisikoversorge zurückzuführen ist. Gegenüber dem Vorjahr, in dem teilweise noch Nachlaufeffekte der Finanz- und Wirtschaftskrise zu verzeichnen waren, ist die Risikoversorge um über 300 Mio Euro rückläufig.

Im Segment Portfolio Restructuring Unit wurde die wesentliche Portfoliobereinigung im Rahmen der Abbaustrategie bereits in den Vorjahren umgesetzt. Unter verbesserten Marktbedingungen für Structured-Credit-Produkte ging die Risikoversorge 2010 nochmals um mehr als 250 Mio Euro zurück.

Das Risikoergebnis im Privatkundengeschäft liegt nach einer guten Entwicklung in der zweiten Jahreshälfte auf dem Niveau des Vorjahres.

Im Segment Asset Based Finance waren im Jahresverlauf erneut erhebliche Belastungen zu verzeichnen. Allerdings fiel die Risikoversorge im vierten Quartal gegenüber dem Vorquartal um rund 80 Mio Euro geringer aus. Wir gehen davon aus, dass die Höchstbelastung überschritten ist und die Risikoversorge im Jahr 2011 rückläufig sein wird.

Die ökonomischen Rahmenbedingungen haben sich insgesamt sehr gut entwickelt. Die sich seit Jahresbeginn abzeichnende konjunkturelle Erholung hat sich vor allem im Inland als nachhaltig erwiesen, der Aufschwung zeigte sich in der zweiten Jahreshälfte robust. Die Risikoversorge nähert sich dem eingeschwungenen Niveau beziehungsweise hat dieses in einigen Segmenten bereits erreicht.

Nach wie vor bestehen jedoch erhebliche Unsicherheiten. Marktturbulenzen mit negativen Auswirkungen auf die Konjunktur und damit auch auf die Risikoversorge sind aus heutiger Sicht nicht auszuschließen. Unter der Voraussetzung, dass solche Negativszenarios, insbesondere Defaults von öffentlich-rechtlichen Kreditnehmern und Banken, erwartungsgemäß ausbleiben, wird der Vorsorgebedarf 2011 unter der diesjährigen Belastung liegen und voraussichtlich 2,3 Mrd. Euro nicht überschreiten.

Die folgende Übersicht zeigt die Einzelfälle mit ertragswirksamen Einzelrisikoversorgeveränderungen nach Größenklassen:

| Jahr | Sonstige Fälle    |                   | ≥10 Mio €                  |                   | ≥20 Mio €                  |                   | ≥50 Mio €                  |                   | Einzelfälle                |       | Netto-RV<br>gesamt<br>Mio € |
|------|-------------------|-------------------|----------------------------|-------------------|----------------------------|-------------------|----------------------------|-------------------|----------------------------|-------|-----------------------------|
|      | <10 Mio €         | <20 Mio €         | <20 Mio €                  | ≥20 Mio €         | <50 Mio €                  | ≥50 Mio €         | <10 Mio €                  | ≥10 Mio €         | gesamt                     |       |                             |
|      | Netto-RV<br>Mio € | Netto-RV<br>Mio € | Anzahl<br>Engage-<br>ments |       |                             |
| 2010 | 1 064             | 381               | 40                         | 564               | 27                         | 490               | 11                         | 1 435             | 78                         | 2 499 |                             |
| 2009 | 2 107             | 652               | 48                         | 495               | 22                         | 960               | 10                         | 2 107             | 80                         | 4 214 |                             |

Tabelle 24

Die Fälle mit individuellem Vorsorgebedarf  $\geq 50$  Mio Euro entfielen überwiegend auf das Segment Asset Based Finance, während in den Segmenten Mittelstandsbank und PRU auch Auflösungen in dieser Größenklasse vorgenommen wurden. Die Nettobelastung aus großen Einzelengagements ist analog zur Gesamtrisikoversorge im Vergleich zum Vorjahr deutlich gesunken.

## 2 Default-Portfolio

Das Default-Portfolio des Konzerns ist gegenüber dem Vorjahr leicht rückläufig und belief sich zum Jahresende auf 21,7 Mrd Euro. Die Struktur kann im Detail der folgenden Darstellung entnommen werden:

### Default-Portfolio und Coverage Ratios nach Segmenten

Mio € – exklusive/inklusive GLLP

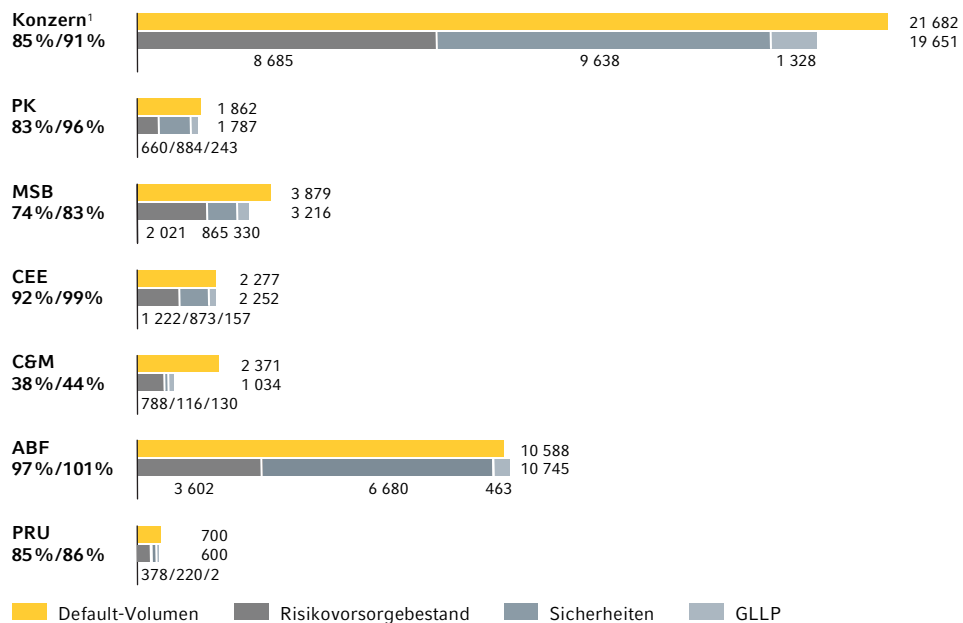

<sup>1</sup> Inklusive Sonstige und Konsolidierung.  
Abbildung 10

In der Kernbank mit den Segmenten Privatkunden, Mittelstandsbank, Central & Eastern Europe und Corporates & Markets reduzierte sich das Default-Volumen insgesamt gegenüber dem Vorjahr analog zur stark rückläufigen Risikovorsorge deutlich. Der Nettoabbau betrug hier trotz währungsbedingt gegenläufiger Effekte in den Auslandsportfolios rund 1 Mrd Euro. Die gute Entwicklung wurde allerdings auf Konzernebene durch den Anstieg des Default-Portfolios um 0,8 Mrd Euro im Segment Asset Based Finance (größtenteils im Bereich CRE Banking) und die leichte Erhöhung im Segment PRU überwiegend kompensiert. Teilweise ist die Volumenerhöhung in diesen beiden Segmenten auf Währungseffekte zurückzuführen.

Im Jahr 2011 sind auch im Segment Asset Based Finance deutlich rückläufige Inflows in das Default-Portfolio zu erwarten. In den anderen Segmenten ist weiterhin von stabilen beziehungsweise rückläufigen Inflows auszugehen. Unter unverändert guten ökonomischen Rahmenbedingungen erwarten wir darüber hinaus weitere Restrukturierungs- und Verwertungserfolge, die zu einer Reduzierung im Default-Portfolio beitragen werden, sodass insgesamt ein spürbarer Nettoabbau des Volumens antizipiert wird.

In unserem Portfolio haften Sicherheiten sowohl für Positionen des Default-Portfolios als auch für Positionen des Weiß- und Graubuchs, wobei auf das Default-Portfolio derzeit rund 9,6 Mrd Euro entfallen. Im Segment Privatkunden handelt es sich dabei überwiegend um Grundschulden auf eigen- und fremdgenutztes Wohneigentum. In der Mittelstandsbank ist die Besicherung auf diverse Sicherheitenarten verteilt. Garantien und Grundpfandrechte auf

|            |                                       |
|------------|---------------------------------------|
| 163        | Wesentliche Entwicklungen 2010        |
| 165        | Risikoorientierte Gesamtbanksteuerung |
| 168        | Adressenausfallrisiken                |
| <b>184</b> | <b>Intensive Care</b>                 |
| 188        | Marktrisiken                          |
| 191        | Liquiditätsrisiken                    |
| 193        | Operationelle Risiken                 |
| 195        | Sonstige Risiken                      |

gewerblichen Objekten decken dabei die weitaus größten Beträge ab. Darüber hinaus sind nennenswerte Portfolioanteile auch durch Ausfallbürgschaften sowie durch Sicherungsvereinbarungen besichert. Für das Mittel- und Osteuropaportfolio im Segment Central & Eastern Europe dienen sowohl im gewerblichen als auch im Retailbereich vorwiegend Grundpfandrechte als Sicherheit. Außerdem entfällt im Firmenkundengeschäft ein signifikanter Anteil der Sicherheiten auf Garantien und Verpfändungen. Die Besicherung des Corporates & Markets-Portfolios setzt sich überwiegend aus Sicherungsvereinbarungen sowie aus Verpfändungen von liquiden Assets und Abtretungen zusammen. Im Segment Asset Based Finance entfallen die Sicherheitenwerte überwiegend auf gewerbliche Grundschulden (auch Schiffshypotheken) und außerdem auf Grundschulden bei eigen- und fremdgenutztem Wohneigentum. Bei den Sicherheiten für das PRU-Portfolio handelt es sich nahezu ausschließlich um Abtretungen.

Zur Vermeidung eines Anstiegs des Default-Portfolios werden Überziehungen in der Commerzbank eng überwacht. Neben dem 90 days-past-due trigger event gibt es schon im Vorfeld ab dem ersten Überziehungstag ein DV-technisch unterstütztes Überziehungsmanagement. Die nachfolgende Tabelle zeigt die Überziehungen im Weißbuch basierend auf dem Exposure at Default (Mio Euro) per Ende Dezember 2010:

| Segment                      | >0 ≤ 30 Tage | >30 ≤ 60 Tage | >60 ≤ 90 Tage | >90 Tage   | Gesamt       |
|------------------------------|--------------|---------------|---------------|------------|--------------|
| PK                           | 541          | 54            | 78            | 0          | 674          |
| MSB                          | 1 573        | 180           | 69            | 51         | 1 874        |
| CEE <sup>1</sup>             | 86           | 0             | 2             | 0          | 764          |
| C & M                        | 252          | 4             | 76            | 3          | 335          |
| ABF                          | 566          | 104           | 57            | 76         | 803          |
| <b>Konzern<sup>1,2</sup></b> | <b>3 029</b> | <b>373</b>    | <b>306</b>    | <b>162</b> | <b>4 545</b> |

<sup>1</sup> BRE und Bank Forum nur in Gesamtzahl enthalten.

<sup>2</sup> Inklusive Sonstige und Konsolidierung sowie PRU.

Tabelle 25

Im Jahr 2010 wurde der Bestand an Rettungserwerben im Vergleich zum Vorjahr um 117 Mio Euro auf 268 Mio Euro (Zugänge 1 Mio Euro, Abgänge 44 Mio Euro, Bewertungsverluste 74 Mio Euro) reduziert. Vom Jahresendbestand entfielen Immobilien im Wert von rund 176 Mio Euro auf unsere Hypothekentochter Eurohypo. Die Objekte werden in Gesellschaften, an denen die Eurohypo über Tochtergesellschaften mehrheitlich beteiligt ist, betreut und verwaltet. In der Regel ist dies die EH Estate Management GmbH. Ziel ist es, durch das Immobilien-Know-how der EH Estate eine Wertsteigerung und Weiterentwicklung des gewerblich geprägten Immobilienportfolios zu erreichen, um die Objekte kurz- bis mittelfristig wieder am Markt zu platzieren. Weitere Immobilien im Wert von 92 Mio Euro werden durch die TIGNATO Beteiligungsgesellschaft betreut und verwaltet.



# Marktrisiken

Marktpreisrisiken drücken die Gefahr möglicher ökonomischer Wertverluste aus, die durch die Veränderung von Marktpreisen (Zinsen, Rohwaren, Credit Spreads, Devisen- und Aktienkursen) oder sonstiger preisbeeinflussender Parameter (Volatilitäten, Korrelationen) entstehen. Die Wertverluste können unmittelbar erfolgswirksam werden, zum Beispiel bei Handelsbuchpositionen, oder im Fall von Bankbuchpositionen in der Neubewertungsrücklage beziehungsweise in den Stillen Lasten/Reserven Berücksichtigung finden. Zusätzlich betrachten wir das Marktliquiditätsrisiko, das Fälle abdeckt, in denen es aufgrund unzureichender Marktliquidität nicht möglich ist, risikobehaftete Positionen zeitgerecht im gewünschten Umfang und zu vertretbaren Konditionen zu liquidieren oder abzusichern.

## 1 Marktrisikosteuerung

---

Zur Steuerung und Überwachung der Marktpreisrisiken nutzt die Commerzbank ein vielfältiges qualitatives und quantitatives Instrumentarium. Die wesentlichen Leitlinien legt die vom Vorstand verabschiedete Marktrisikostategie fest. Vorgaben zur Laufzeitbegrenzung sowie Mindest-Ratings zielen auf die Sicherstellung der Qualität der Marktrisikopositionen ab. Quantitative Vorgaben für Sensitivitäten, Value-at-Risk-Kennzahlen, Stresstests und Szenarioanalysen sowie Kennziffern zum ökonomischen Kapital limitieren das Marktrisiko.

Die das Marktpreisrisiko begrenzenden qualitativen und quantitativen Faktoren werden vom Group Market Risk Committee festgelegt. Die Auslastung der Limite wird zusammen mit den relevanten Ergebniszahlen täglich an den Vorstand und die zuständigen Leiter der Konzernbereiche berichtet. Aufbauend auf qualitativen Analysen und quantitativen Kennzahlen identifiziert die Marktrisikofunktion potenzielle zukünftige Risiken, antizipiert mögliche ökonomische Wertverluste und erarbeitet Maßnahmenvorschläge. Eine eventuell notwendige Adjustierung der Portfoliosteuerung wird in Gremien wie dem Group Market Risk Committee beschlossen.

Das Jahr 2010 war von der europäischen Verschuldungskrise geprägt. Der hohe Verschuldungsgrad sowie die Herabstufung von Bonitätsnoten einiger europäischer Staaten durch Ratingagenturen führten zu steigender Unsicherheit und hohen Kursauschlägen an den Märkten. Auch der Aufbau des europäischen Rettungsschirms konnte nicht zu einer Normalisierung der Märkte beitragen. Insbesondere das Staatsfinanzierungsportfolio im Bankbuch wurde hierdurch beeinflusst. Die Wechselkursentwicklung im Geschäftsjahr 2010 war von starken Schwankungen des Euro-US-Dollar-Kurses vor dem Hintergrund der europäischen Verschuldungskrise geprägt. Das Fremdwährungsrisiko der Commerzbank befindet sich aufgrund geeigneter Steuerungsmaßnahmen trotz des schwierigen Marktumfeldes auf sehr niedrigem Niveau. Gleiches gilt für das Rohwarenrisiko, das im Geschäftsjahr 2010

|            |                                       |
|------------|---------------------------------------|
| 163        | Wesentliche Entwicklungen 2010        |
| 165        | Risikoorientierte Gesamtbanksteuerung |
| 168        | Adressenausfallrisiken                |
| 184        | Intensive Care                        |
| <b>188</b> | <b>Marktrisiken</b>                   |
| 191        | Liquiditätsrisiken                    |
| 193        | Operationelle Risiken                 |
| 195        | Sonstige Risiken                      |

insbesondere durch einen schwankenden Ölpreis sowie einen sehr festen Goldpreis gekennzeichnet war. Auf den Aktienmärkten dominierten im Jahr 2010 steigende Kurse bei sinkenden Volatilitäten.

Für das kommende Jahr erwarten wir eine positive ökonomische Entwicklung in den USA sowie den europäischen Kernländern. Dadurch dürften die Aktienmärkte weiter steigen – auch mit positiven Effekten etwa im Zertifikategeschäft. Für die europäischen Peripherieländer ist keine schnelle Lösung der Schuldenkrise zu erwarten. Dies könnte im Jahr 2011 zu weiteren Turbulenzen auf den Zins- und Währungsmärkten führen. Gefahren resultieren darüber hinaus aus steigenden Inflationsraten, insbesondere aufgrund steigender Preise für Rohwaren.

Die Commerzbank wird den Abbau und die Optimierung kritischer Portfolios konsequent vorantreiben. Wir erwarten für die Commerzbank unter den genannten Marktbedingungen ein konstantes oder moderat sinkendes Marktrisiko.

## 2 Marktrisiken im Handelsbuch

Für die interne Steuerung setzen wir seit Ende Oktober 2010 ein neues, übergreifendes Marktpreisrisikomodell basierend auf einer historischen Simulation (HistSim-Modell) ein. Dies gewährleistet eine konsistente Risikomessung im Gesamtkonzern und wird darüber hinaus den zukünftigen Anforderungen nach Basel III gerecht. Neben einer verbesserten Qualität der Messergebnisse führt die Vereinheitlichung der Methoden zu einer Reduktion der Komplexität.

Der Value-at-Risk im Handelsbuch stieg per Jahresende 2010 im Vergleich zum Vorjahr deutlich an. Hintergrund sind neben der Umstellung des internen Marktrisikomodells die Volatilitäten der Märkte im Rahmen der Verschuldungskrise.

Das Marktrisikoprofil im Handelsbuch ist über alle Anlageklassen diversifiziert. Dabei sind Zins- und Credit-Spread-Risiken die dominierenden Anlageklassen.

Die Maßnahmen zum Abbau von Risikopositionen, insbesondere im Bereich Portfolio Restructuring Unit, wurden im Jahresverlauf konsequent fortgeführt. So konnte das komplexe Kreditderivatesgeschäft nahezu vollständig abgebaut werden. Dennoch führt die deutlich verbesserte Abbildung des Credit-Spread-Risikos nach der Umstellung auf das HistSim-Modell zu einem Anstieg des Value-at-Risk-Beitrags aus Credit Spreads und Zinsen.

| VaR-Beitrag nach Risikoarten im Handelsbuch <sup>1</sup>   Mio € | 31.12.2010  | 31.12.2009  |
|------------------------------------------------------------------|-------------|-------------|
| Credit Spreads                                                   | 43,9        | 32,6        |
| Zinsen                                                           | 36,9        | 13,9        |
| Aktien                                                           | 6,1         | 9,0         |
| FX                                                               | 4,7         | 3,5         |
| Rohwaren                                                         | 4,2         | 1,5         |
| <b>Gesamt</b>                                                    | <b>95,9</b> | <b>60,5</b> |

<sup>1</sup> 99 % Konfidenzniveau, 1 Tag Haltedauer, gleichgewichtete Marktdaten, 250 Tage Historie.  
Tabelle 26

Die Berechnung der regulatorischen Eigenkapitalunterlegung erfolgt in Abstimmung mit der BaFin bisher unverändert über die jeweils durch die Aufsicht zertifizierten Marktrisikomodelle der Commerzbank (alt) und der Dresdner Bank. Mit der Abnahme des neuen Marktpreisrisiko-Modells durch die Bundesbank zur Nutzung auch für regulatorische Zwecke rechnet die Commerzbank im laufenden Geschäftsjahr.

Die Zuverlässigkeit der Marktrisikomodelle wird durch die Anwendung von Backtesting-Verfahren ständig überwacht. Ziel ist neben der Erfüllung aufsichtsrechtlicher Anforderungen insbesondere die Beurteilung der Prognosegüte. Die Analyse von Backtesting-Ergebnissen liefert wichtige Anhaltspunkte zur Überprüfung von Parametern und zur weiteren Verbesserung der Modelle. Alle negativen Ausreißer auf Konzernebene werden im Rahmen eines von der Aufsicht vorgegebenen Ampelansatzes klassifiziert und sofort unter Angabe von Ausmaß und Ursache an die Aufsichtsbehörden gemeldet. Im Verlauf des Jahres 2010 wurden weder mit dem Modell der Dresdner Bank noch mit dem Modell der Commerzbank (alt) negative Ausreißer für die jeweiligen Portfolios gemessen.

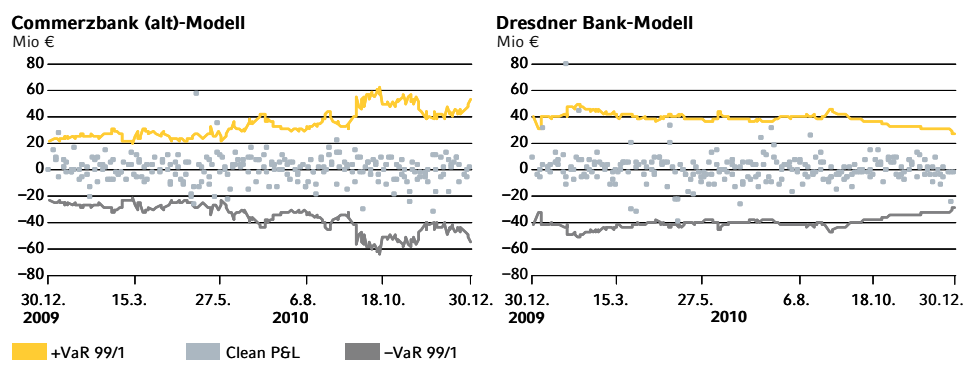

Abbildung 11

### 3 Marktrisiken im Bankbuch

Die wesentlichen Treiber des Marktrisikos im Bankbuch sind die Credit-Spread-Risiken des Bereichs Staatsfinanzierung (Public Finance) mit den Positionen der Tochtergesellschaften Eurohypo und Erste Europäische Pfandbrief- und Kommunalkreditbank (EPPK), die Portfolios der Treasury sowie das Aktienkursrisiko des Beteiligungsbestands. Die beschlossene Reduzierung des Public-Finance-Portfolios im Rahmen unserer De-Risking-Strategie wird weiter fortgesetzt.

Das nebenstehende Diagramm dokumentiert die Entwicklung der Credit-Spread-Sensitivitäten aller Wertpapier- und Derivatepositionen (ohne Kredite) des Commerzbank-Konzerns. Die oben erwähnten Abbaumaßnahmen insbesondere im Public-Finance-Portfolio sowie geringere Marktwerte aus einem leicht gestiegenen Euro-Zinsniveau haben zu einer rückläufigen Entwicklung in den Credit-Spread-Sensitivitäten mit einer Gesamtposition am Jahresende von 82 Mio Euro geführt. Etwa 75 % der Credit-Spread-Sensitivitäten entfallen weiterhin auf Wertpapierpositionen, die als Loans and Receivables (LaR) klassifiziert sind. Credit-Spread-Änderungen haben für diese Portfolios keinen Einfluss auf Neubewertungsrücklage und Gewinn- und Verlustrechnung.

Aus dem Beteiligungsportfolio wurden im Jahresvergleich planmäßig erhebliche Bestände abgebaut. Dies führt zu einer deutlichen Reduktion der Aktienrisiken im Bankbuch.

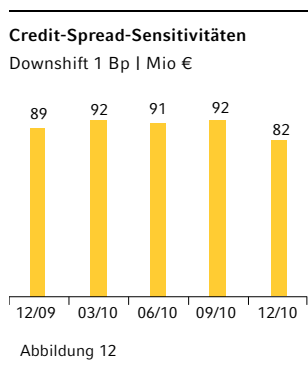

|            |                                       |
|------------|---------------------------------------|
| 163        | Wesentliche Entwicklungen 2010        |
| 165        | Risikoorientierte Gesamtbanksteuerung |
| 168        | Adressenausfallrisiken                |
| 184        | Intensive Care                        |
| 188        | Marktrisiken                          |
| <b>191</b> | <b>Liquiditätsrisiken</b>             |
| 193        | Operationelle Risiken                 |
| 195        | Sonstige Risiken                      |

# Liquiditätsrisiken

Unter Liquiditätsrisiko verstehen wir im engeren Sinne das Risiko, dass die Commerzbank ihren tagesaktuellen Zahlungsverpflichtungen nicht nachkommen kann. In weiterem Sinne beschreibt das Liquiditätsrisiko, dass zukünftige Zahlungen nicht termingerecht, nicht in vollem Umfang, nicht in der richtigen Währung und nicht zu marktüblichen Konditionen finanziert werden können.

## 1 Liquiditätsrisikosteuerung

Grundlage der Liquiditätssteuerung und der Berichterstattung an den Vorstand bildet das interne Liquiditätsrisikomodell der Commerzbank. Bezogen auf einen Stichtag ermittelt dieses Risikomessverfahren die verfügbare Nettoliquidität (ANL - Available Net Liquidity) für die nächsten zwölf Monate in verschiedenen Szenarios. Die Berechnung erfolgt auf Grundlage von deterministischen, das heißt vertraglich vereinbarten, wie auch von statistisch erwarteten ökonomischen Cashflows (Forward Cash Exposure – FCE beziehungsweise Dynamic Trade Strategy – DTS) und unter Berücksichtigung liquidierbarer Vermögenswerte (Balance Sheet Liquidity – BSL). Zum 31. Dezember 2010 betrug das Volumen der frei verfügbaren zentralbankfähigen Aktiva, die als Teil der Balance Sheet Liquidity in die ANL-Modellierung einfließen, 93 Mrd Euro.

Das der Modellierung zugrunde liegende steuerungsrelevante Stressszenario berücksichtigt bei der Berechnung der Liquidität und in der Limitierung sowohl die Auswirkungen eines institutsspezifischen Stressfalls als auch einer marktweiten Krise. Auf Grundlage des Stressszenarios ist eine detaillierte Notfallplanung etabliert. Die Stressszenarios werden täglich berechnet und an das Management berichtet. Die ihnen zugrunde liegenden Annahmen werden regelmäßig überprüft und gegebenenfalls den veränderten Marktgegebenheiten angepasst. Mit der Integration der Schiffsbank in das interne Liquiditätsrisikomodell im Jahr 2010 konnte die Abdeckung aller aus Liquiditätsrisikosicht wesentlichen Konzerneinheiten vervollständigt werden.

## 2 Available Net Liquidity

Die nachfolgende Darstellung der verfügbaren ANL und ihrer Teilkomponenten FCE, DTS und BSL zeigt, dass im berechneten konservativen Stressszenario per Stichtag 31. Dezember 2010 über den gesamten Betrachtungszeitraum ausreichende Liquiditätsüberhänge bestanden.

### Available Net Liquidity im kombinierten Stressszenario des internen Liquiditätsrisikomodells

Mrd €

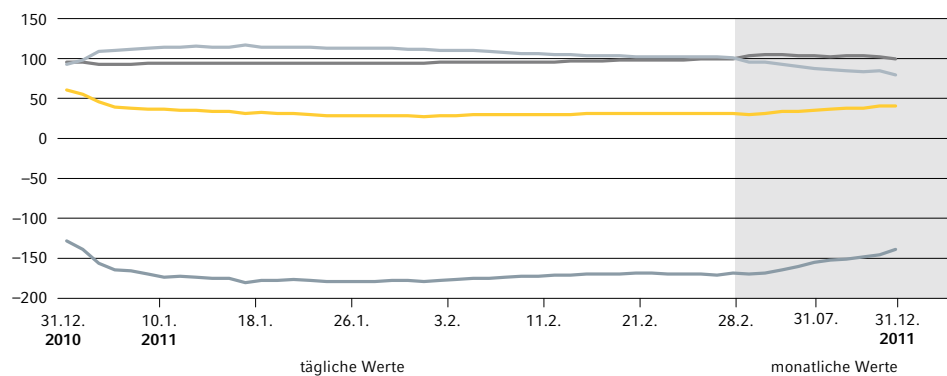

■ Available Net Liquidity (ANL)

### Teilkomponenten des ANL-Profiles

■ Dynamic Trade Strategy    ■ Forward Cash Exposure<sup>1</sup>    ■ Balance Sheet Liquidity

<sup>1</sup> Derivate der ehemaligen Dresdner Bank wurden nahezu vollständig integriert.

Abbildung 13

Die ermittelten Liquiditätsüberhänge bewegten sich für das gesamte Geschäftsjahr 2010 stets deutlich innerhalb des vom Vorstand festgelegten Limits. Die Zahlungsfähigkeit der Commerzbank war somit nicht nur gemäß der externen regulatorischen Liquiditätsverordnung, sondern auch im Sinne der internen Limitvorgaben jederzeit gewährleistet. Unsere Liquiditätssituation stufen wir daher unverändert als stabil und komfortabel ein.

Wir profitierten hierbei von unseren Kerngeschäftsaktivitäten im Privat- und Firmenkundenbereich sowie aus den hinsichtlich Produkten, Regionen und Investoren breit diversifizierten Refinanzierungsquellen am Geld- und Kapitalmarkt.

Im Rahmen der Weiterentwicklung der Liquiditätsrisikoüberwachung und des laufenden Berichtswesens begleiten wir aktiv verschiedene aufsichtsrechtliche Initiativen zur Vereinheitlichung internationaler Liquiditätsrisikostandards und bereiten uns im Rahmen eines Projektes sorgfältig auf die Einführung der in Basel III definierten Liquiditätsrisikokennzahlen vor. Im Berichtsjahr 2010 hat die Commerzbank sich an der Quantitative Impact Study zu Basel III beteiligt und ein entsprechendes Projekt gestartet, um regelmäßig die Basel-III-Beobachtungskennzahlen zu ermitteln.

Weitere Informationen zum Liquiditätsmanagement sind im Abschnitt „Liquidität und Refinanzierung des Commerzbank-Konzerns“ im Konzernlagebericht zu finden.

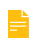

|            |                                       |
|------------|---------------------------------------|
| 163        | Wesentliche Entwicklungen 2010        |
| 165        | Risikoorientierte Gesamtbanksteuerung |
| 168        | Adressenausfallrisiken                |
| 184        | Intensive Care                        |
| 188        | Marktrisiken                          |
| 191        | Liquiditätsrisiken                    |
| <b>193</b> | <b>Operationelle Risiken</b>          |
| 195        | Sonstige Risiken                      |

# Operationelle Risiken

Das operationelle Risiko (OpRisk) ist in der Commerzbank in Anlehnung an die Solvabilitätsverordnung definiert als die Gefahr von Verlusten, die infolge der Unangemessenheit oder des Versagens von internen Verfahren und Systemen, Menschen oder infolge externer Ereignisse eintreten. Diese Definition beinhaltet Rechtsrisiken; Reputations- und strategische Risiken sind nicht berücksichtigt.

## 1 OpRisk-Steuerung

Die Steuerung und Limitierung der operationellen Risiken unterscheidet sich systematisch von der Begrenzung der Kredit- und Marktrisiken, da weder einzelne Kunden noch Positionen, sondern interne Prozesse die relevanten Steuerungseinheiten bilden. Unser Fokus liegt in dieser Risikoart auf einer antizipativen Steuerung durch die Segmente und Querschnittseinheiten auf Basis einer übergreifenden Risikostrategie für operationelle Risiken und die hierfür relevanten Prozesse.

Hierbei werden risikostrategische Handlungsfelder und quantitative Leitplanken auf Konzern- und Segmentebene definiert. Die steuerungsrelevanten Themen werden regelmäßig in den Sitzungen der Konzern- und Segment-OpRisk-Komitees behandelt.

Die weltweite Steuerung der Rechtsrisiken im Commerzbank-Konzern wird durch Group Legal wahrgenommen. Die zentrale Aufgabe des Bereiches besteht darin, mögliche Verluste aus rechtlichen Risiken in einem frühen Stadium zu erkennen und Lösungsmöglichkeiten zu deren Minimierung, Begrenzung oder Vermeidung aufzuzeigen sowie die erforderlichen Rückstellungen zu bilden.

## 2 OpRisk-Entwicklung

Auch im abgelaufenen Geschäftsjahr haben wir unser Ziel der Verbesserung des OpRisk-Profiles im Konzern weiter vorangetrieben. Die Implementierung unserer vereinheitlichten Methoden und Prozesse konnte abgeschlossen und insbesondere unser Frühwarnsystem weiterentwickelt werden.

Aus OpRisk-Ereignissen (Verluste sowie die Veränderung der kapitalwirksamen Rückstellungen für operationelle Risiken und laufende Rechtsstreitigkeiten) ergab sich im Jahr 2010 eine Gesamtbelastung für die Commerzbank in Höhe von 274 Mio Euro (Vorjahr: 272 Mio Euro).

Hierfür waren in erster Linie Rückstellungsbildungen im Privatkundenbereich mit Bezug zu Beratungshaftung und prozessualen Themen verantwortlich.

| OpRisk-Ereignisse nach Segmenten   Mio € | 2010       | 2009       |
|------------------------------------------|------------|------------|
| Privatkunden                             | 132        | 127        |
| Mittelstandsbank                         | -8         | 46         |
| Central & Eastern Europe                 | 7          | 1          |
| Corporates & Markets                     | 14         | 41         |
| Asset Based Finance                      | 34         | 24         |
| Portfolio Restructuring Unit             | 11         | 7          |
| Sonstige und Konsolidierung              | 84         | 26         |
| <b>Konzern</b>                           | <b>274</b> | <b>272</b> |

Tabelle 27

Die regulatorische Eigenkapitalbindung aus operationellen Risiken betrug zum Jahresende 2010 auf Basis des Advanced Measurement Approachs (AMA) 21,8 Mrd Euro (Vorjahreswert RWA: 19,5 Mrd Euro). Davon entfielen rund 63 % auf die Segmente Privatkunden und Corporates & Markets.

Bis zur geplanten Zertifizierung unseres neu entwickelten, integrierten Modells im Jahr 2011 durch die Aufsichtsbehörde wird der Kapitalbedarf für die regulatorische Meldung und das interne Reporting weiterhin getrennt in Einzelrechnungen für Commerzbank (alt) und Dresdner Bank ermittelt und als Summe gemeldet.



|     |                                       |
|-----|---------------------------------------|
| 163 | Wesentliche Entwicklungen 2010        |
| 165 | Risikoorientierte Gesamtbanksteuerung |
| 168 | Adressenausfallrisiken                |
| 184 | Intensive Care                        |
| 188 | Marktrisiken                          |
| 191 | Liquiditätsrisiken                    |
| 193 | Operationelle Risiken                 |
| 195 | Sonstige Risiken                      |

# Sonstige Risiken

## 1 Geschäftsrisiko

---

Unter Geschäftsrisiko wird ein potenzieller Verlust verstanden, der aus Abweichungen der tatsächlichen Erträge (negative Abweichung) und Kosten (positive Abweichung) von den Planzahlen resultiert. Dieses Risiko wird wesentlich durch die Geschäftsstrategie und die bankinterne Budgetplanung sowie durch sich verändernde Rahmenbedingungen bei Geschäftsvolumina, technischen Prozessen und der Wettbewerbssituation der Bank und ihrer Mitbewerber um den Kunden determiniert. Das Management des Geschäftsrisikos erfolgt durch klare segmentspezifische Vorgaben zu Renditeanspruch sowie Aufwands-Ertrags-Relation in Verbindung mit unverändert flexiblem Kostenmanagement bei Nichterfüllung.

## 2 Nicht quantifizierbare Risiken

---

Zur Erfüllung der Säule 2 des Baseler Rahmenwerkes fordern die MaRisk eine ganzheitliche Risikobetrachtung und damit auch die Berücksichtigung von nicht quantifizierbaren Risikokategorien. Diese unterliegen in der Commerzbank einem qualitativen Steuerungs- und Controllingprozess.

### Personalrisiken

Personalrisiken fallen unter die Definition der operationellen Risiken gemäß § 269 Abs. 1 SolvV. Im Sinne einer internen, steuerungsorientierten Ausgestaltung dieser Definition subsumieren wir unter Personalrisiken folgende Elemente:

- Anpassungsrisiko: Durch ausgewählte interne sowie externe Aus- und Weiterbildungsmaßnahmen gewährleisten wir, dass das Qualifikationsniveau unserer Mitarbeiter dem aktuellen Stand der Entwicklungen entspricht und die Mitarbeiter ihren Aufgaben und Verantwortlichkeiten gerecht werden.
- Motivationsrisiko: Über Mitarbeiterbefragungen – gerade auch im Rahmen der Integration – können mögliche Veränderungen in der Unternehmensverbundenheit der Mitarbeiter frühzeitig erkannt und adäquate Steuerungsmaßnahmen initiiert werden.

- Austrittsrisiko: Mit großer Sorgfalt versucht die Commerzbank sicherzustellen, dass die Abwesenheit oder das Ausscheiden von Mitarbeitern nicht zu nachhaltigen Störungen der Betriebsabläufe führt. Zudem wird regelmäßig die Fluktuation sowohl quantitativ als auch qualitativ beobachtet.
- Engpassrisiko: Die quantitative und qualitative Personalausstattung orientiert sich – insbesondere aufgrund der hohen Beanspruchung der Mitarbeiter im Rahmen der Zusammenführung beider Banken – an den betriebsinternen Erfordernissen, den Geschäftsaktivitäten, der Strategie sowie der Risikosituation der Commerzbank.

Personal stellt für die Commerzbank eine zentrale Ressource dar. Unser Erfolg gründet auf dem fachlichen Wissen, den Kompetenzen und Fähigkeiten sowie der Motivation unserer Mitarbeiter. Durch ein systematisches Personalrisikomanagement verfolgen wir das Ziel, Risiken so früh wie möglich zu identifizieren, zu beurteilen und zu steuern, beispielsweise durch den Einsatz ausgewählter personalwirtschaftlicher Instrumente. Der Gesamtvorstand wird regelmäßig über das Thema Personalrisiken informiert.

## Geschäftsstrategische Risiken

Das geschäftsstrategische Risiko ist definiert als Gefahr negativer Abweichungen von gegebenen Geschäftszielen aus bisherigen oder zukünftigen geschäftsstrategischen Entscheidungen und aus Veränderungen der Umfeldbedingungen.

Die Weiterentwicklung der Konzernstrategie erfolgt im Rahmen eines strukturierten Strategieprozesses, der dem jährlichen Planungsprozess der Bank zugrunde liegt. Dabei werden die konzernstrategischen Stoßrichtungen und strategischen Leitplanken festgelegt sowie quantitative Zielvorgaben als Aspirationsniveau für Konzern und Segmente bestimmt.

Um die sachgerechte Umsetzung der Konzernstrategie zur Erreichung der avisierten Geschäftsziele sicherzustellen, erfolgt das strategische Controlling durch quartalsweises Monitoring von quantitativen und qualitativen Zielen im Konzern und in den Segmenten. Daneben werden laufend auch externe Einflussfaktoren wie beispielsweise die Markt- und Wettbewerbsbedingungen, die Kapitalmarktanforderungen und veränderte Regulierungsbedingungen beobachtet, was bei relevanten Veränderungen zur Adjustierung der Konzernstrategie führen kann. Im Rahmen der regulatorischen Anforderungen der MaRisk wird eine nachhaltige Geschäftsstrategie festgelegt, in der die wesentlichen Geschäftsaktivitäten und die Maßnahmen zur Zielerreichung dargestellt werden. Ebenso wird eine dazu konsistente Risikostrategie festgelegt. Im Rahmen eines Strategieprozesses wird die Planung, Umsetzung, Beurteilung und Anpassung der Strategien koordiniert und schließlich wird die Strategie im Unternehmen kommuniziert.

Die Verantwortung für die strategische Unternehmenssteuerung liegt beim Gesamtvorstand, der bei strategischen Fragestellungen von Group Development & Strategy unterstützt wird. Der Aufsichtsrat wird in einer Strategiesitzung über die Strategie des Hauses detailliert informiert. Bestimmte geschäftspolitische Entscheidungen (Beteiligungserwerb und Verkauf >1 % des Eigenkapitals) bedürfen zudem der Zustimmung des Risikoausschusses des Aufsichtsrats. Alle größeren Investitionen unterliegen einer sorgfältigen Prüfung durch das Investment and Resources Allocation Committee.

|     |                                       |
|-----|---------------------------------------|
| 163 | Wesentliche Entwicklungen 2010        |
| 165 | Risikoorientierte Gesamtbanksteuerung |
| 168 | Adressenausfallrisiken                |
| 184 | Intensive Care                        |
| 188 | Marktrisiken                          |
| 191 | Liquiditätsrisiken                    |
| 193 | Operationelle Risiken                 |
| 195 | Sonstige Risiken                      |

## Reputationsrisiken

Als Reputationsrisiko bezeichnen wir die Gefahr von Verlusten, sinkenden Erträgen oder vermindertem Unternehmenswert aufgrund von Geschäftsvorfällen, die das Vertrauen in die Commerzbank in der Öffentlichkeit oder in den Medien, bei Mitarbeitern oder Kunden, bei Ratingagenturen, Investoren oder Geschäftspartnern mindern.

Die operativen Unternehmensbereiche, Filialen und Tochtergesellschaften tragen im Rahmen ihrer Geschäftsaktivitäten unmittelbare Verantwortung für Reputationsrisiken, die aus ihrer jeweiligen Geschäftstätigkeit entstehen. Reputationsrisiken können auch aus anderen Risikoarten resultieren und diese verstärken. Die Zuständigkeit von Group Communications für das Controlling sichert eine frühzeitige Marktwahrnehmung. Vor diesem Hintergrund unterliegen relevante geschäftspolitische Maßnahmen und Aktivitäten einer sorgfältigen Prüfung. Insbesondere vermeidet die Commerzbank geschäftspolitische Maßnahmen und Geschäfte, die beträchtliche steuerliche oder rechtliche Risiken sowie ethische, ökologische oder soziale Risiken bergen. Alle entsprechenden Kreditentscheidungen werden einzeln bezüglich einhergehender Reputationsrisiken votiert. Diese Voten können zur Ablehnung von Geschäften führen.

## Compliancerisiken

Die Basis unserer Geschäftstätigkeit ist das Vertrauen unserer Kunden, Aktionäre und Geschäftspartner in das ordnungsgemäße und gesetzestreue Handeln der Commerzbank. Dieses Vertrauen basiert insbesondere auf der Einhaltung der jeweiligen Vorschriften sowie der Beachtung marktüblicher Standards und Verhaltensregeln (Compliance). Um das Vertrauen in die Integrität des Konzerns weiterhin zu stärken, werden sämtliche hieraus entstehenden Risiken effektiv gesteuert. Der stetig wachsenden Komplexität der nationalen wie internationalen Gesetze, Regelungen und Marktstandards tragen wir durch eine ständige Weiterentwicklung der Steuerung der Compliancerisiken und durch Anpassung an aktuelle Entwicklungen und Herausforderungen Rechnung.

**Disclaimer**

Die in der Commerzbank eingesetzten Methoden und Modelle zur Risikomessung entsprechen dem aktuellen Erkenntnisstand und orientieren sich an der Praxis der Bankenbranche. Die mit den Risikomodellen ermittelten Ergebnisse sind zur Steuerung der Bank geeignet. Die Messkonzepte unterliegen einer regelmäßigen Überprüfung durch das Risikocontrolling sowie durch die Interne Revision, durch externe Wirtschaftsprüfer und die deutschen Aufsichtsbehörden. Trotz sorgfältiger Modellentwicklung und regelmäßiger Kontrolle können Modelle nicht alle in der Realität wirksamen Einflussfaktoren vollständig erfassen und deren komplexes Verhalten einschließlich Wechselwirkungen abbilden. Diese Grenzen der Risikomodellierung gelten insbesondere für Extremsituationen. Ergänzende Stresstests und Szenarioanalysen können nur beispielhaft zeigen, welchen Risiken ein Portfolio unter extremen Marktsituationen unterliegen kann; eine Untersuchung aller denkbaren Szenarios ist jedoch auch bei Stresstests nicht möglich. Sie können keine endgültige Einschätzung des maximalen Verlusts im Falle eines Extremereignisses geben.

# Konzernabschluss

---

Wir stellen unseren Konzernabschluss nach den International Financial Reporting Standards (IFRS) und deren Auslegung durch das International Financial Reporting Interpretations Committee auf. Dabei berücksichtigen wir alle Standards und Interpretationen, die für das Geschäftsjahr 2010 in der Europäischen Union verpflichtend anzuwenden sind.

# Abschluss des Commerzbank-Konzerns zum 31. Dezember 2010

## Inhalt

|            |                                                                                          |
|------------|------------------------------------------------------------------------------------------|
| <b>204</b> | <b>Gesamtergebnisrechnung</b>                                                            |
| <b>208</b> | <b>Bilanz</b>                                                                            |
| <b>210</b> | <b>Eigenkapitalveränderungsrechnung</b>                                                  |
| <b>212</b> | <b>Kapitalflussrechnung</b>                                                              |
| <b>214</b> | <b>Anhang (Notes)</b>                                                                    |
| 214        | Grundlagen der Konzernrechnungslegung                                                    |
| 214        | <b>Bilanzierungs- und Bewertungsmethoden</b>                                             |
| 214        | (1) Grundsätze                                                                           |
| 215        | (2) Anpassung der Bilanzierungs- und Bewertungsmethoden                                  |
| 217        | (3) Konsolidierungskreis                                                                 |
| 220        | (4) Konsolidierungsgrundsätze                                                            |
| 221        | (5) Finanzinstrumente: Ansatz und Bewertung (IAS 39)                                     |
| 225        | (6) Währungsumrechnung                                                                   |
| 226        | (7) Barreserve                                                                           |
| 226        | (8) Forderungen                                                                          |
| 226        | (9) Risikovorsorge im Kreditgeschäft                                                     |
| 226        | (10) Echte Pensionsgeschäfte und Wertpapierleihgeschäfte                                 |
| 227        | (11) Wertanpassung aus Portfolio Fair Value Hedges                                       |
| 227        | (12) Positive Marktwerte aus derivativen Sicherungsinstrumenten                          |
| 227        | (13) Handelsaktiva                                                                       |
| 227        | (14) Finanzanlagen                                                                       |
| 228        | (15) Immaterielle Anlagewerte                                                            |
| 229        | (16) Sachanlagen                                                                         |
| 230        | (17) Leasinggeschäft                                                                     |
| 230        | (18) Als Finanzinvestitionen gehaltene Immobilien                                        |
| 231        | (19) Zur Veräußerung gehaltene Vermögenswerte und Vermögenswerte aus Veräußerungsgruppen |
| 231        | (20) Verbindlichkeiten                                                                   |
| 231        | (21) Negative Marktwerte aus derivativen Sicherungsinstrumenten                          |
| 231        | (22) Handelspassiva                                                                      |
| 231        | (23) Rückstellungen                                                                      |
| 232        | (24) Rückstellungen für Pensionen und ähnliche Verpflichtungen                           |
| 233        | (25) Mitarbeitervergütungspläne                                                          |
| 235        | (26) Ertragsteuern                                                                       |
| 235        | (27) Nachrang- und Hybridkapital                                                         |
| 236        | (28) Treuhandgeschäfte                                                                   |
| 236        | (29) Eventualverbindlichkeiten und unwiderrufliche Kreditzusagen                         |
| 236        | (30) Eigene Aktien                                                                       |

|     |                                  |
|-----|----------------------------------|
| 204 | Gesamtergebnisrechnung           |
| 208 | Bilanz                           |
| 210 | Eigenkapitalveränderungsrechnung |
| 212 | Kapitalflussrechnung             |
| 214 | Anhang (Notes)                   |
| 370 | Bestätigungsvermerk              |

## Anhang (Notes)

### 237 Erläuterungen zur Gewinn- und Verlustrechnung

|     |      |                                                         |
|-----|------|---------------------------------------------------------|
| 237 | (31) | Zinsüberschuss                                          |
| 238 | (32) | Risikovorsorge im Kreditgeschäft                        |
| 239 | (33) | Provisionsüberschuss                                    |
| 240 | (34) | Handelsergebnis                                         |
| 240 | (35) | Ergebnis aus Sicherungszusammenhängen                   |
| 241 | (36) | Ergebnis aus Finanzanlagen                              |
| 241 | (37) | Laufendes Ergebnis aus at-Equity-bewerteten Unternehmen |
| 242 | (38) | Sonstiges Ergebnis                                      |
| 242 | (39) | Verwaltungsaufwendungen                                 |
| 243 | (40) | Restrukturierungsaufwendungen                           |
| 244 | (41) | Steuern vom Einkommen und vom Ertrag                    |
| 245 | (42) | Nettoergebnis                                           |
| 246 | (43) | Ergebnis je Aktie                                       |
| 246 | (44) | Aufwandsquote                                           |
| 246 | (45) | Segmentberichterstattung                                |

### 255 Erläuterungen zur Bilanz

#### Aktiva

|     |      |                                                                                     |
|-----|------|-------------------------------------------------------------------------------------|
| 255 | (46) | Barreserve                                                                          |
| 255 | (47) | Forderungen an Kreditinstitute                                                      |
| 256 | (48) | Forderungen an Kunden                                                               |
| 256 | (49) | Kreditvolumen                                                                       |
| 257 | (50) | Risikovorsorge im Kreditgeschäft                                                    |
| 258 | (51) | Aktivische Wertanpassung aus Portfolio Fair Value Hedges                            |
| 259 | (52) | Positive Marktwerte aus derivativen Sicherungsinstrumenten                          |
| 259 | (53) | Handelsaktiva                                                                       |
| 260 | (54) | Finanzanlagen                                                                       |
| 262 | (55) | Anteile an at-Equity-bewerteten Unternehmen                                         |
| 262 | (56) | Immaterielle Anlagewerte                                                            |
| 264 | (57) | Sachanlagen                                                                         |
| 265 | (58) | Ertragsteueransprüche                                                               |
| 266 | (59) | Als Finanzinvestition gehaltene langfristige Immobilien                             |
| 266 | (60) | Zur Veräußerung gehaltene Vermögenswerte und Vermögenswerte von Veräußerungsgruppen |
| 267 | (61) | Sonstige Aktiva                                                                     |

#### Passiva

|     |      |                                                            |
|-----|------|------------------------------------------------------------|
| 268 | (62) | Verbindlichkeiten gegenüber Kreditinstituten               |
| 268 | (63) | Verbindlichkeiten gegenüber Kunden                         |
| 269 | (64) | Verbrieftete Verbindlichkeiten                             |
| 270 | (65) | Passivische Wertanpassung aus Portfolio Fair Value Hedges  |
| 271 | (66) | Negative Marktwerte aus derivativen Sicherungsinstrumenten |

## Anhang (Notes)

- 271 (67) Handelspassiva
- 271 (68) Rückstellungen
- 276 (69) Ertragsteuerschulden
- 276 (70) Verbindlichkeiten von zur Veräußerung gehaltenen Veräußerungsgruppen
- 277 (71) Sonstige Passiva
- 277 (72) Nachrangkapital
- 278 (73) Hybridkapital
- 279 (74) Zusammensetzung des Eigenkapitals
- 282 (75) Bedingtes Kapital
- 283 (76) Genehmigtes Kapital
- 284 (77) Fremdwährungsvolumina
  
- 285 Erläuterungen zu Finanzinstrumenten**
- 285 (78) Derivative Geschäfte
- 289 (79) Als Sicherheit übertragene Vermögenswerte
- 290 (80) Restlaufzeitengliederung
- 291 (81) Marktwert (Fair Value) von Finanzinstrumenten
- 297 (82) Angaben zu finanziellen Vermögenswerten und finanziellen Verbindlichkeiten, für die die Fair Value Option angewendet wurde
  
- 299 Risikomanagement**
- 299 (83) Risikosteuerung
- 299 (84) Adressenausfallrisiken
- 301 (85) Marktpreisrisiken
- 302 (86) Zinsänderungsrisiken
- 302 (87) Operationelle Risiken
- 303 (88) Kreditrisikokonzentration
- 305 (89) Maximales Kreditrisiko
- 305 (90) Liquiditätskennzahl der Commerzbank Aktiengesellschaft
  
- 306 Sonstige Erläuterungen**
- 306 (91) Nachrangige Vermögenswerte
- 306 (92) Eventualverbindlichkeiten und unwiderrufliche Kreditzusagen
- 307 (93) Echte Pensionsgeschäfte (Repo- und Reverse-Repo-Geschäfte), Wertpapierleihgeschäfte und Cash Collaterals
- 309 (94) Erhaltene Sicherheiten
- 309 (95) Treuhandgeschäfte
- 309 (96) Eigenmittelanforderungen und Kapitalquoten
- 311 (97) Absicherung von Krediten
- 312 (98) Durchschnittliche Zahl der während des Geschäftsjahres beschäftigten Mitarbeiter
- 313 (99) Beziehungen zu nahestehenden Unternehmen und Personen
- 321 (100) Aktienbasierte Vergütungspläne
- 322 (101) Sonstige Verpflichtungen



|     |                                  |
|-----|----------------------------------|
| 204 | Gesamtergebnisrechnung           |
| 208 | Bilanz                           |
| 210 | Eigenkapitalveränderungsrechnung |
| 212 | Kapitalflussrechnung             |
| 214 | Anhang (Notes)                   |
| 370 | Bestätigungsvermerk              |

## **Anhang (Notes)**

- 323 (102) Angaben als Leasinggeber und Leasingnehmer
- 324 (103) Zeitpunkt der Freigabe zur Veröffentlichung
- 325 (104) Corporate Governance Kodex
- 325 (105) Patronatserklärung
- 326 (106) Anteilsbesitz

368 **Organe der Commerzbank Aktiengesellschaft**

**369 Versicherung der gesetzlichen Vertreter**

**370 Bestätigungsvermerk des Konzernabschlussprüfers**

# Gesamtergebnisrechnung

## Gewinn- und Verlustrechnung

| Mio €                                                             | Notes    | 1.1.–31.12.2010 | 1.1.–31.12.2009 | Veränderung in % |
|-------------------------------------------------------------------|----------|-----------------|-----------------|------------------|
| Zinserträge                                                       | (31)     | 18 306          | 20 338          | -10,0            |
| Zinsaufwendungen                                                  | (31)     | 11 252          | 13 164          | -14,5            |
| Zinsüberschuss                                                    | (31)     | 7 054           | 7 174           | -1,7             |
| Risikovorsorge im Kreditgeschäft                                  | (32)     | -2 499          | -4 214          | -40,7            |
| Zinsüberschuss nach Risikovorsorge                                |          | 4 555           | 2 960           | 53,9             |
| Provisionserträge <sup>1</sup>                                    | (33)     | 4 237           | 4 562           | -7,1             |
| Provisionsaufwendungen                                            | (33)     | 590             | 789             | -25,2            |
| Provisionsüberschuss <sup>1</sup>                                 | (33)     | 3 647           | 3 773           | -3,3             |
| Handelsergebnis <sup>1</sup>                                      | (34)     | 2 052           | -510            | .                |
| Ergebnis aus Sicherungszusammenhängen                             | (35)     | -94             | 101             | .                |
| Handelsergebnis und Ergebnis aus Sicherungszusammenhängen         | (34, 35) | 1 958           | -409            | .                |
| Ergebnis aus Finanzanlagen                                        | (36)     | 108             | 417             | -74,1            |
| Laufendes Ergebnis aus at-Equity-bewerteten Unternehmen           | (37)     | 35              | 15              | .                |
| Sonstiges Ergebnis                                                | (38)     | -131            | -22             | .                |
| Verwaltungsaufwendungen                                           | (39)     | 8 786           | 9 004           | -2,4             |
| Wertminderungen auf Geschäfts- oder Firmenwerte sowie Markennamen |          | -               | 768             | .                |
| Restrukturierungsaufwendungen                                     | (40)     | 33              | 1 621           | -98,0            |
| <b>Ergebnis vor Steuern</b>                                       |          | <b>1 353</b>    | <b>-4 659</b>   | .                |
| Steuern vom Einkommen und vom Ertrag                              | (41)     | -136            | -26             | .                |
| <b>Konzernergebnis</b>                                            |          | <b>1 489</b>    | <b>-4 633</b>   | .                |
| den Minderheitenanteilen zurechenbares Konzernergebnis            |          | 59              | -96             | .                |
| den Commerzbank-Aktionären zurechenbares Konzernergebnis          |          | 1 430           | -4 537          | .                |

<sup>1</sup> Anpassung Vorjahr aufgrund Vereinheitlichung der Ausweisstruktur (siehe Note 2).

| Ergebnis je Aktie   € |      | 2010 | 2009  | Veränderung in % |
|-----------------------|------|------|-------|------------------|
| Ergebnis je Aktie     | (43) | 1,21 | -4,40 | .                |

Das nach IAS 33 errechnete Ergebnis je Aktie basiert auf dem den Commerzbank-Aktionären zurechenbaren Konzernergebnis. Im laufenden Geschäftsjahr sowie im Vorjahr waren keine Wan-

del- oder Optionsrechte im Umlauf. Das verwässerte Ergebnis war daher mit dem unverwässerten identisch.

|     |                                  |
|-----|----------------------------------|
| 204 | Gesamtergebnisrechnung           |
| 208 | Bilanz                           |
| 210 | Eigenkapitalveränderungsrechnung |
| 212 | Kapitalflussrechnung             |
| 214 | Anhang (Notes)                   |
| 370 | Bestätigungsvermerk              |

## Zusammengefasste Gesamtergebnisrechnung

| Mio €                                                     | Notes | 1.1.–31.12.2010 | 1.1.–31.12.2009 | Veränderung in % |
|-----------------------------------------------------------|-------|-----------------|-----------------|------------------|
| Konzernergebnis                                           |       | 1 489           | -4 633          | .                |
| Veränderung der Neubewertungsrücklage                     | (74)  |                 |                 |                  |
| Umbuchung in die Gewinn- und Verlustrechnung              |       | -352            | 59              | .                |
| Erfolgsneutrale Wertänderung                              |       | 394             | 537             | -26,6            |
| Veränderung der Rücklage aus Cash Flow Hedges             | (74)  |                 |                 |                  |
| Umbuchung in die Gewinn- und Verlustrechnung              |       | 283             | 9               | .                |
| Erfolgsneutrale Wertänderung                              |       | -53             | -361            | -85,3            |
| Veränderung der Rücklage aus der Währungsumrechnung       | (74)  |                 |                 |                  |
| Umbuchung in die Gewinn- und Verlustrechnung              |       | 41              | -7              | .                |
| Erfolgsneutrale Wertänderung                              |       | 209             | -210            | .                |
| Veränderung bei at-Equity-bewerteten Unternehmen          |       | 2               | 42              | -95,2            |
| Sonstiges Periodenergebnis                                |       | 524             | 69              | .                |
| <b>Gesamtergebnis</b>                                     |       | <b>2 013</b>    | <b>-4 564</b>   | .                |
| den Minderheitenanteilen zurechenbares Periodenergebnis   |       | 127             | 75              | 69,3             |
| den Commerzbank-Aktionären zurechenbares Periodenergebnis |       | 1 886           | -4 639          | .                |

| 4. Quartal   Mio €                                        |  | 1.10.–31.12.2010 | 1.10.–31.12.2009 | Veränderung in % |
|-----------------------------------------------------------|--|------------------|------------------|------------------|
| Konzernergebnis                                           |  | 277              | -1 911           | .                |
| Veränderung der Neubewertungsrücklage                     |  |                  |                  |                  |
| Umbuchung in die Gewinn- und Verlustrechnung              |  | -286             | 129              | .                |
| Erfolgsneutrale Wertänderung                              |  | 498              | -73              | .                |
| Veränderung der Rücklage aus Cash Flow Hedges             |  |                  |                  |                  |
| Umbuchung in die Gewinn- und Verlustrechnung              |  | 71               | 9                | .                |
| Erfolgsneutrale Wertänderung                              |  | 8                | 42               | -81,0            |
| Veränderung der Rücklage aus der Währungsumrechnung       |  |                  |                  |                  |
| Umbuchung in die Gewinn- und Verlustrechnung              |  | 20               | -7               | .                |
| Erfolgsneutrale Wertänderung                              |  | 44               | 67               | -34,3            |
| Veränderung bei at-Equity-bewerteten Unternehmen          |  | 1                | -                | .                |
| Sonstiges Periodenergebnis                                |  | 356              | 167              | .                |
| <b>Gesamtergebnis</b>                                     |  | <b>633</b>       | <b>-1 744</b>    | .                |
| den Minderheitenanteilen zurechenbares Periodenergebnis   |  | 15               | 43               | -65,1            |
| den Commerzbank-Aktionären zurechenbares Periodenergebnis |  | 618              | -1 787           | .                |

| Sonstiges Periodenergebnis   Mio €                  | 1.1.–31.12.2010 |             |              | 1.1.–31.12.2009 |             |              |
|-----------------------------------------------------|-----------------|-------------|--------------|-----------------|-------------|--------------|
|                                                     | Vor Steuern     | Steuern     | Nach Steuern | Vor Steuern     | Steuern     | Nach Steuern |
| Veränderung der Neubewertungsrücklage               | 89              | -47         | 42           | 987             | -391        | 596          |
| Veränderung der Rücklage aus Cash Flow Hedges       | 346             | -116        | 230          | -490            | 138         | -352         |
| Veränderung der Rücklage aus der Währungsumrechnung | 250             | -           | 250          | -217            | -           | -217         |
| Veränderung bei at-Equity-bewerteten Unternehmen    | 2               | -           | 2            | 42              | -           | 42           |
| <b>Sonstiges Periodenergebnis</b>                   | <b>687</b>      | <b>-163</b> | <b>524</b>   | <b>322</b>      | <b>-253</b> | <b>69</b>    |

Für das vierte Quartal 2010 stellte sich das Sonstige Periodenergebnis wie folgt dar:

| Sonstiges Periodenergebnis   Mio €                  | 1.10.–31.12.2010 |             |              | 1.10.–31.12.2009 |             |              |
|-----------------------------------------------------|------------------|-------------|--------------|------------------|-------------|--------------|
|                                                     | Vor Steuern      | Steuern     | Nach Steuern | Vor Steuern      | Steuern     | Nach Steuern |
| Veränderung der Neubewertungsrücklage               | 329              | -117        | 212          | 135              | -79         | 56           |
| Veränderung der Rücklage aus Cash Flow Hedges       | 127              | -48         | 79           | 72               | -21         | 51           |
| Veränderung der Rücklage aus der Währungsumrechnung | 64               | -           | 64           | 60               | -           | 60           |
| Veränderung bei at-Equity-bewerteten Unternehmen    | 1                | -           | 1            | -                | -           | -            |
| <b>Sonstiges Periodenergebnis</b>                   | <b>521</b>       | <b>-165</b> | <b>356</b>   | <b>267</b>       | <b>-100</b> | <b>167</b>   |

|     |                                  |
|-----|----------------------------------|
| 204 | Gesamtergebnisrechnung           |
| 208 | Bilanz                           |
| 210 | Eigenkapitalveränderungsrechnung |
| 212 | Kapitalflussrechnung             |
| 214 | Anhang (Notes)                   |
| 370 | Bestätigungsvermerk              |

## Gewinn- und Verlustrechnung (Quartalsaufteilung)

| 2010   Mio €                                                      | 4. Quartal | 3. Quartal | 2. Quartal | 1. Quartal |
|-------------------------------------------------------------------|------------|------------|------------|------------|
| Zinsüberschuss                                                    | 1 682      | 1 633      | 1 853      | 1 886      |
| Risikovorsorge im Kreditgeschäft                                  | -595       | -621       | -639       | -644       |
| Zinsüberschuss nach Risikovorsorge                                | 1 087      | 1 012      | 1 214      | 1 242      |
| Provisionsüberschuss <sup>1</sup>                                 | 875        | 870        | 905        | 997        |
| Handelsergebnis <sup>1</sup>                                      | 384        | 445        | 358        | 865        |
| Ergebnis aus Sicherungszusammenhängen                             | -          | -23        | -42        | -29        |
| Handelsergebnis und Ergebnis aus Sicherungszusammenhängen         | 384        | 422        | 316        | 836        |
| Ergebnis aus Finanzanlagen                                        | 191        | -24        | 60         | -119       |
| Laufendes Ergebnis aus at-Equity-bewerteten Unternehmen           | 32         | -5         | 6          | 2          |
| Sonstiges Ergebnis                                                | -149       | 26         | -30        | 22         |
| Verwaltungsaufwendungen                                           | 2 164      | 2 185      | 2 228      | 2 209      |
| Wertminderungen auf Geschäfts- oder Firmenwerte sowie Markennamen | -          | -          | -          | -          |
| Restrukturierungsaufwendungen                                     | -          | -          | 33         | -          |
| <b>Ergebnis vor Steuern</b>                                       | <b>256</b> | <b>116</b> | <b>210</b> | <b>771</b> |
| Steuern vom Einkommen und vom Ertrag                              | -21        | -19        | -151       | 55         |
| <b>Konzernergebnis</b>                                            | <b>277</b> | <b>135</b> | <b>361</b> | <b>716</b> |
| den Minderheitenanteilen zurechenbares Konzernergebnis            | 20         | 22         | 9          | 8          |
| den Commerzbank-Aktionären zurechenbares Konzernergebnis          | 257        | 113        | 352        | 708        |

<sup>1</sup> Anpassung erstes und zweites Quartal aufgrund Vereinheitlichung der Ausweisstruktur (siehe Note 2).

| 2009   Mio €                                                      | 4. Quartal    | 3. Quartal    | 2. Quartal <sup>1</sup> | 1. Quartal <sup>1</sup> |
|-------------------------------------------------------------------|---------------|---------------|-------------------------|-------------------------|
| Zinsüberschuss                                                    | 1 882         | 1 765         | 1 838                   | 1 689                   |
| Risikovorsorge im Kreditgeschäft                                  | -1 324        | -1 053        | -993                    | -844                    |
| Zinsüberschuss nach Risikovorsorge                                | 558           | 712           | 845                     | 845                     |
| Provisionsüberschuss <sup>2</sup>                                 | 985           | 965           | 960                     | 863                     |
| Handelsergebnis <sup>2</sup>                                      | -638          | 607           | 101                     | -580                    |
| Ergebnis aus Sicherungszusammenhängen                             | 64            | 40            | -43                     | 40                      |
| Handelsergebnis und Ergebnis aus Sicherungszusammenhängen         | -574          | 647           | 58                      | -540                    |
| Ergebnis aus Finanzanlagen                                        | -87           | -54           | 172                     | 386                     |
| Laufendes Ergebnis aus at-Equity-bewerteten Unternehmen           | 8             | 4             | -                       | 3                       |
| Sonstiges Ergebnis                                                | -68           | 112           | 5                       | -71                     |
| Verwaltungsaufwendungen                                           | 2 396         | 2 264         | 2 263                   | 2 081                   |
| Wertminderungen auf Geschäfts- oder Firmenwerte sowie Markennamen | 52            | 646           | 70                      | -                       |
| Restrukturierungsaufwendungen                                     | 212           | 904           | 216                     | 289                     |
| <b>Ergebnis vor Steuern</b>                                       | <b>-1 838</b> | <b>-1 428</b> | <b>-509</b>             | <b>-884</b>             |
| Steuern vom Einkommen und vom Ertrag                              | 73            | -375          | 269                     | 7                       |
| <b>Konzernergebnis</b>                                            | <b>-1 911</b> | <b>-1 053</b> | <b>-778</b>             | <b>-891</b>             |
| den Minderheitenanteilen zurechenbares Konzernergebnis            | -54           | 2             | -17                     | -27                     |
| den Commerzbank-Aktionären zurechenbares Konzernergebnis          | -1 857        | -1 055        | -761                    | -864                    |

<sup>1</sup> Nach Anpassung Counterparty Default Adjustments.

<sup>2</sup> Anpassung aufgrund Vereinheitlichung der Ausweisstruktur (siehe Note 2).

# Bilanz

| Aktiva   Mio €                                                                                         | Notes                         | 31.12.2010     | 31.12.2009     | Veränderung<br>in % | 1.1.2009 <sup>1</sup> |
|--------------------------------------------------------------------------------------------------------|-------------------------------|----------------|----------------|---------------------|-----------------------|
| Barreserve                                                                                             | (7, 46)                       | 8 053          | 10 329         | -22,0               | 6 566                 |
| Forderungen an Kreditinstitute                                                                         | (8, 9, 10, 47,<br>49, 50, 80) | 110 616        | 106 689        | 3,7                 | 62 969                |
| darunter: als Sicherheit übertragen                                                                    | (79)                          | 94             | -              | .                   | 83                    |
| Forderungen an Kunden                                                                                  | (8, 9, 10, 48,<br>49, 50, 80) | 327 755        | 352 194        | -6,9                | 284 815               |
| darunter: als Sicherheit übertragen                                                                    | (79)                          | -              | -              | .                   | -                     |
| Wertanpassung aus Portfolio Fair Value Hedges                                                          | (11, 51)                      | 113            | -16            | .                   | -                     |
| Positive Marktwerte aus derivativen<br>Sicherungsinstrumenten                                          | (12, 52)                      | 4 961          | 6 352          | -21,9               | 10 528                |
| Handelsaktiva                                                                                          | (13, 53, 80)                  | 167 825        | 218 708        | -23,3               | 118 569               |
| darunter: als Sicherheit übertragen                                                                    | (79)                          | 19 397         | 41 838         | -53,6               | 17 272                |
| Finanzanlagen                                                                                          | (14, 54, 80)                  | 115 708        | 130 914        | -11,6               | 127 154               |
| darunter: als Sicherheit übertragen                                                                    | (79)                          | 22 374         | 13 293         | 68,3                | 17 724                |
| Anteile an at-Equity-bewerteten Unternehmen                                                            | (4, 55)                       | 737            | 378            | 95,0                | 296                   |
| Immaterielle Anlagewerte                                                                               | (15, 56)                      | 3 101          | 3 209          | -3,4                | 1 336                 |
| Sachanlagen                                                                                            | (16, 57)                      | 1 590          | 1 779          | -10,6               | 1 240                 |
| Als Finanzinvestition gehaltene Immobilien                                                             | (18, 59)                      | 1 192          | 1 279          | -6,8                | 909                   |
| Zur Veräußerung gehaltene langfristige<br>Vermögenswerte und Vermögenswerte aus<br>Veräußerungsgruppen | (19, 60)                      | 1 082          | 2 868          | -62,3               | 684                   |
| Tatsächliche Ertragsteueransprüche                                                                     | (26, 58)                      | 650            | 1 267          | -48,7               | 684                   |
| Latente Ertragsteueransprüche                                                                          | (26, 58)                      | 3 567          | 4 370          | -18,4               | 6 042                 |
| Sonstige Aktiva                                                                                        | (17, 61)                      | 7 349          | 3 783          | 94,3                | 3 432                 |
| <b>Gesamt</b>                                                                                          |                               | <b>754 299</b> | <b>844 103</b> | <b>-10,6</b>        | <b>625 224</b>        |

<sup>1</sup> Der 1. Januar 2009 entspricht dem 31. Dezember 2008 nach Anpassung der Bilanzstruktur (siehe Note 2).

204 Gesamtergebnisrechnung

208 Bilanz

210 Eigenkapitalveränderungsrechnung

212 Kapitalflussrechnung

214 Anhang (Notes)

370 Bestätigungsvermerk

| Passiva   Mio €                                                      | Notes            | 31.12.2010     | 31.12.2009     | Veränderung<br>in % | 1.1.2009 <sup>1</sup> |
|----------------------------------------------------------------------|------------------|----------------|----------------|---------------------|-----------------------|
| Verbindlichkeiten gegenüber Kreditinstituten                         | (10, 20, 62, 80) | 137 626        | 140 634        | -2,1                | 128 492               |
| Verbindlichkeiten gegenüber Kunden                                   | (10, 20, 63, 80) | 262 827        | 264 618        | -0,7                | 170 203               |
| Verbriefte Verbindlichkeiten                                         | (20, 64, 80)     | 131 356        | 161 779        | -18,8               | 157 957               |
| Wertanpassung aus Portfolio Fair Value Hedges                        | (11, 65)         | 121            | -16            | .                   | -                     |
| Negative Marktwerte aus derivativen Sicherungsinstrumenten           | (21, 66)         | 9 369          | 11 345         | -17,4               | 21 463                |
| Handelsspassiva                                                      | (22, 67, 80)     | 152 393        | 202 595        | -24,8               | 104 168               |
| Rückstellungen                                                       | (23, 24, 68)     | 4 778          | 5 115          | -6,6                | 2 030                 |
| Tatsächliche Ertragsteuerschulden                                    | (26, 69)         | 1 072          | 1 346          | -20,4               | 627                   |
| Latente Ertragsteuerschulden                                         | (26, 69)         | 222            | 1 240          | -82,1               | 2 534                 |
| Verbindlichkeiten von zur Veräußerung gehaltenen Veräußerungsgruppen | (19, 70)         | 650            | 2 839          | -77,1               | 329                   |
| Sonstige Passiva                                                     | (71)             | 8 136          | 6 103          | 33,3                | 2 585                 |
| Nachrangkapital                                                      | (27, 72, 80)     | 12 910         | 15 850         | -18,5               | 11 836                |
| Hybridkapital                                                        | (27, 73, 80)     | 4 181          | 4 079          | 2,5                 | 3 158                 |
| Eigenkapital                                                         | (30, 74, 75, 76) | 28 658         | 26 576         | 7,8                 | 19 842                |
| Gezeichnetes Kapital                                                 | (74)             | 3 047          | 3 071          | -0,8                | 1 877                 |
| Kapitalrücklage                                                      | (74)             | 1 302          | 1 334          | -2,4                | 6 619                 |
| Gewinnrücklagen                                                      | (74)             | 9 345          | 7 878          | 18,6                | 5 842                 |
| Stille Einlagen                                                      | (74)             | 17 178         | 17 178         | 0,0                 | 8 200                 |
| Andere Rücklagen                                                     | (5, 6, 14, 74)   | -2 999         | -3 455         | -13,2               | -3 353                |
| Gesamt vor Minderheitenanteilen                                      |                  | 27 873         | 26 006         | 7,2                 | 19 185                |
| Minderheitenanteile                                                  | (74)             | 785            | 570            | 37,7                | 657                   |
| <b>Gesamt</b>                                                        |                  | <b>754 299</b> | <b>844 103</b> | <b>-10,6</b>        | <b>625 224</b>        |

<sup>1</sup> Der 1. Januar 2009 entspricht dem 31. Dezember 2008 nach Anpassung der Bilanzstruktur (siehe Note 2).

# Eigenkapitalveränderungsrechnung

| Mio €                                               | Gezeichnetes Kapital | Kapitalrücklage | Gewinnrücklagen | Stille Einlagen | Andere Rücklagen      |                               |                                     | Gesamt vor Minderheitenanteilen | Minderheitenanteile | Eigenkapital  |
|-----------------------------------------------------|----------------------|-----------------|-----------------|-----------------|-----------------------|-------------------------------|-------------------------------------|---------------------------------|---------------------|---------------|
|                                                     |                      |                 |                 |                 | Neubewertungsrücklage | Rücklage aus Cash Flow Hedges | Rücklage aus der Währungsumrechnung |                                 |                     |               |
| <b>Eigenkapital zum 31.12.2008</b>                  | <b>1 877</b>         | <b>6 619</b>    | <b>5 904</b>    | <b>8 200</b>    | <b>-2 221</b>         | <b>-872</b>                   | <b>-260</b>                         | <b>19 247</b>                   | <b>657</b>          | <b>19 904</b> |
| Veränderung aufgrund retrospektiver Anpassungen     |                      |                 | -62             |                 |                       |                               |                                     | -62                             |                     | -62           |
| <b>Eigenkapital zum 1.1.2009</b>                    | <b>1 877</b>         | <b>6 619</b>    | <b>5 842</b>    | <b>8 200</b>    | <b>-2 221</b>         | <b>-872</b>                   | <b>-260</b>                         | <b>19 185</b>                   | <b>657</b>          | <b>19 842</b> |
| Gesamtergebnis                                      | -                    | -6 619          | 2 082           | -               | 466                   | -351                          | -217                                | -4 639                          | 75                  | -4 564        |
| Konzernergebnis                                     |                      | -6 619          | 2 082           |                 |                       |                               |                                     | -4 537                          | -96                 | -4 633        |
| Veränderung der Neubewertungsrücklage               |                      |                 |                 |                 | 424                   |                               |                                     | 424                             | 172                 | 596           |
| Veränderung der Rücklage aus Cash Flow Hedges       |                      |                 |                 |                 |                       | -351                          |                                     | -351                            | -1                  | -352          |
| Veränderung der Rücklage aus der Währungsumrechnung |                      |                 |                 |                 |                       |                               | -217                                | -217                            |                     | -217          |
| Veränderung bei at-Equity-bewerteten Unternehmen    |                      |                 |                 |                 | 42                    |                               |                                     | 42                              |                     | 42            |
| Ausschüttung Stille Einlagen                        |                      |                 |                 |                 |                       |                               |                                     | -                               |                     | -             |
| Dividendenausschüttung                              |                      |                 |                 |                 |                       |                               |                                     | -                               | -12                 | -12           |
| Kapitalerhöhungen                                   | 1 193                | 1 320           |                 |                 |                       |                               |                                     | 2 513                           |                     | 2 513         |
| Veränderungen im Anteilsbesitz                      |                      |                 | -50             |                 |                       |                               |                                     | -50                             |                     | -50           |
| Sonstige Veränderungen <sup>1</sup>                 | 1                    | 14              | 4               | 8 978           |                       |                               |                                     | 8 997                           | -150                | 8 847         |
| <b>Eigenkapital zum 31.12.2009</b>                  | <b>3 071</b>         | <b>1 334</b>    | <b>7 878</b>    | <b>17 178</b>   | <b>-1 755</b>         | <b>-1 223</b>                 | <b>-477</b>                         | <b>26 006</b>                   | <b>570</b>          | <b>26 576</b> |
| Gesamtergebnis                                      | -                    | -               | 1 430           | -               | 24                    | 218                           | 214                                 | 1 886                           | 127                 | 2 013         |
| Konzernergebnis                                     |                      |                 | 1 430           |                 |                       |                               |                                     | 1 430                           | 59                  | 1 489         |
| Veränderung der Neubewertungsrücklage               |                      |                 |                 |                 | 24                    |                               |                                     | 24                              | 18                  | 42            |
| Veränderung der Rücklage aus Cash Flow Hedges       |                      |                 |                 |                 |                       | 218                           |                                     | 218                             | 12                  | 230           |
| Veränderung der Rücklage aus der Währungsumrechnung |                      |                 |                 |                 |                       |                               | 212                                 | 212                             | 38                  | 250           |
| Veränderung bei at-Equity-bewerteten Unternehmen    |                      |                 |                 |                 |                       |                               | 2                                   | 2                               |                     | 2             |
| Ausschüttung Stille Einlagen                        |                      |                 |                 |                 |                       |                               |                                     | -                               |                     | -             |
| Dividendenausschüttung                              |                      |                 |                 |                 |                       |                               |                                     | -                               | -12                 | -12           |
| Kapitalerhöhungen                                   |                      |                 |                 |                 |                       |                               |                                     | -                               | 173                 | 173           |
| Veränderungen im Anteilsbesitz                      |                      |                 | 5               |                 |                       |                               |                                     | 5                               |                     | 5             |
| Sonstige Veränderungen <sup>1</sup>                 | -24                  | -32             | 32              |                 |                       |                               |                                     | -24                             | -73                 | -97           |
| <b>Eigenkapital zum 31.12.2010</b>                  | <b>3 047</b>         | <b>1 302</b>    | <b>9 345</b>    | <b>17 178</b>   | <b>-1 731</b>         | <b>-1 005</b>                 | <b>-263</b>                         | <b>27 873</b>                   | <b>785</b>          | <b>28 658</b> |

<sup>1</sup> Einschließlich Veränderung des Bestands eigener Aktien, Veränderung Derivate auf eigene Eigenkapitalinstrumente und Einzahlung Stille Einlagen.



|            |                                         |
|------------|-----------------------------------------|
| 204        | Gesamtergebnisrechnung                  |
| 208        | Bilanz                                  |
| <b>210</b> | <b>Eigenkapitalveränderungsrechnung</b> |
| 212        | Kapitalflussrechnung                    |
| 214        | Anhang (Notes)                          |
| 370        | Bestätigungsvermerk                     |

Zum 31. Dezember 2010 entfielen auf zur Veräußerung gehaltene Vermögenswerte und Vermögenswerte aus Veräußerungsgruppen –94 Mio Euro der Rücklage aus Cash Flow Hedges und 45 Mio Euro der Rücklage aus der Währungsumrechnung.

Das Gezeichnete Kapital der Commerzbank Aktiengesellschaft betrug zum 31. Dezember 2010 gemäß Satzung 3 072 Mio Euro und war in 1 181 352 926 Stückaktien eingeteilt (rechnerischer Wert pro Aktie 2,60 Euro).

Nach Abzug der zum 31. Dezember 2010 im Bestand befindlichen 9 315 335 Aktien betrug das Gezeichnete Kapital 3 047 Mio Euro.

Von der Ermächtigung der Hauptversammlung am 19. Mai 2010 zum Erwerb eigener Aktien für Zwecke des Wert-

papierhandels nach § 71 Absatz 1 Nr. 7 AktG wurde Gebrauch gemacht. Gewinne und Verluste aus dem Handel mit eigenen Aktien wurden erfolgsneutral behandelt.

Für das Geschäftsjahr 2010 erfolgt keine Dividendenzahlung, da die Commerzbank Aktiengesellschaft in ihrem Einzelabschluss nach den Vorschriften des HGB keinen Bilanzgewinn erzielt hat. Eine Ausschüttung auf die im Eigenkapital ausgewiesenen Stillen Einlagen wird ebenfalls nicht erfolgen, da die Zahlung gemäß vertraglicher Vereinbarung nicht zu einem Bilanzverlust der Commerzbank Aktiengesellschaft führen oder diesen erhöhen darf.

Weitere Details zum Eigenkapital sind in den Notes 74, 75 und 76 enthalten.

# Kapitalflussrechnung

| Mio €                                                                                                                                                                      | Notes            | 2010           | 2009          |
|----------------------------------------------------------------------------------------------------------------------------------------------------------------------------|------------------|----------------|---------------|
| <b>Konzernergebnis</b>                                                                                                                                                     |                  | <b>1 489</b>   | <b>-4 633</b> |
| Im Konzernergebnis enthaltene zahlungsunwirksame Posten und Überleitung auf den Cashflow aus operativer Geschäftstätigkeit:                                                |                  |                |               |
| Abschreibungen, Wertberichtigungen, Zuschreibungen auf Sachanlagen und Vermögenswerte, Veränderungen der Rückstellungen sowie Bewertungsveränderungen aus Hedge Accounting |                  | 4 101          | 1 511         |
| Veränderung anderer zahlungsunwirksamer Posten                                                                                                                             |                  | 2 952          | 6 470         |
| Gewinn/Verlust aus der Veräußerung von Vermögenswerten                                                                                                                     | (36)             | -108           | -417          |
| Ergebnis aus der Veräußerung von Sachanlagen                                                                                                                               | (38)             | -              | 16            |
| Sonstige Anpassungen (Zinsüberschuss)                                                                                                                                      | (31)             | -7 054         | -7 174        |
| <b>Zwischensumme</b>                                                                                                                                                       |                  | <b>1 380</b>   | <b>-4 227</b> |
| Veränderung des Vermögens und der Verbindlichkeiten aus operativer Geschäftstätigkeit nach Korrektur um zahlungsunwirksame Bestandteile:                                   |                  |                |               |
| Forderungen an Kreditinstitute                                                                                                                                             | (47)             | -3 747         | -43 974       |
| Forderungen an Kunden                                                                                                                                                      | (48)             | 24 611         | -71 335       |
| Wertpapiere des Handelsbestands                                                                                                                                            | (53)             | -4 323         | -15 664       |
| Andere Aktiva aus operativer Geschäftstätigkeit                                                                                                                            | (54-57, 59-61)   | -3 231         | -6 305        |
| Verbindlichkeiten gegenüber Kreditinstituten                                                                                                                               | (62)             | -3 008         | 12 142        |
| Verbindlichkeiten gegenüber Kunden                                                                                                                                         | (63)             | -1 791         | 94 415        |
| Verbriefte Verbindlichkeiten                                                                                                                                               | (64)             | -30 423        | 5 543         |
| Andere Passiva aus operativer Geschäftstätigkeit                                                                                                                           | (65-71)          | -470           | 15 464        |
| Erhaltene Zinsen                                                                                                                                                           | (31)             | 18 253         | 20 280        |
| Erhaltene Dividenden                                                                                                                                                       | (31)             | 53             | 58            |
| Gezahlte Zinsen                                                                                                                                                            | (31)             | -11 252        | -13 164       |
| Ertragsteuerzahlungen                                                                                                                                                      | (41)             | -218           | -199          |
| <b>Cashflow aus operativer Geschäftstätigkeit</b>                                                                                                                          |                  | <b>-14 166</b> | <b>-6 966</b> |
| Einzahlungen aus der Veräußerung von:                                                                                                                                      |                  |                |               |
| Finanzanlagen und Anteile an at-Equity-bewerteten Unternehmen                                                                                                              | (36, 37, 54, 55) | 15 274         | 858           |
| Sachanlagevermögen                                                                                                                                                         | (38, 57)         | 187            | 663           |
| Auszahlungen für den Erwerb von:                                                                                                                                           |                  |                |               |
| Finanzanlagen und Anteile an at-Equity-bewerteten Unternehmen                                                                                                              | (36, 37, 54, 55) | -504           | -5 240        |
| Sachanlagevermögen                                                                                                                                                         | (38, 57)         | -492           | -4 426        |
| Effekte aus Veränderungen des Konsolidierungskreises                                                                                                                       |                  |                |               |
| Cashflow aus dem Erwerb abzüglich erworbene Zahlungsmittel                                                                                                                 | (46)             | -              | 2 083         |
| Cashflow aus der Veräußerung abzüglich veräußerte Zahlungsmittel                                                                                                           | (46)             | 298            | 370           |
| <b>Cashflow aus Investitionstätigkeit</b>                                                                                                                                  |                  | <b>14 763</b>  | <b>-5 692</b> |
| Einzahlungen aus Kapitalerhöhungen                                                                                                                                         | (74)             | -56            | 2 528         |
| Dividendenzahlungen                                                                                                                                                        | (74)             | -              | -             |
| Mittelveränderung aus Veränderung im Anteilsbesitz an vollkonsolidierten Unternehmen                                                                                       |                  | -36            | -111          |
| Mittelveränderung aus sonstiger Finanzierungstätigkeit (Nachrangkapital)                                                                                                   | (72, 73)         | -2 838         | 13 913        |
| <b>Cashflow aus Finanzierungstätigkeit</b>                                                                                                                                 |                  | <b>-2 930</b>  | <b>16 330</b> |
| <b>Zahlungsmittelbestand zum Ende der Vorperiode</b>                                                                                                                       |                  | <b>10 329</b>  | <b>6 566</b>  |
| Cashflow aus operativer Geschäftstätigkeit                                                                                                                                 |                  | -14 166        | -6 966        |
| Cashflow aus Investitionstätigkeit                                                                                                                                         |                  | 14 763         | -5 692        |
| Cashflow aus Finanzierungstätigkeit                                                                                                                                        |                  | -2 930         | 16 330        |
| Effekte aus Wechselkursänderungen                                                                                                                                          |                  | 116            | -5            |
| Effekte aus Minderheitenanteilen                                                                                                                                           |                  | -59            | 96            |
| <b>Zahlungsmittelbestand zum Ende der Periode</b>                                                                                                                          | <b>(46)</b>      | <b>8 053</b>   | <b>10 329</b> |

|     |                                  |
|-----|----------------------------------|
| 204 | Gesamtergebnisrechnung           |
| 208 | Bilanz                           |
| 210 | Eigenkapitalveränderungsrechnung |
| 212 | Kapitalflussrechnung             |
| 214 | Anhang (Notes)                   |
| 370 | Bestätigungsvermerk              |

Der Zahlungsmittelbestand setzt sich wie folgt zusammen:

| Mio €                                                                                                          | 31.12.2010 | 31.12.2009 | Veränderung in % |
|----------------------------------------------------------------------------------------------------------------|------------|------------|------------------|
| Kassenbestand                                                                                                  | 1 388      | 1 338      | 3,7              |
| Guthaben bei Zentralnotenbanken                                                                                | 6 386      | 7 842      | -18,6            |
| Schuldtitel öffentlicher Stellen und Wechsel,<br>die zur Refinanzierung bei Zentralnotenbanken zugelassen sind | 279        | 1 149      | -75,7            |

Im Zahlungsmittelbestand zum 31. Dezember 2010 waren keine Zugänge aus erstkonsolidierten Gesellschaften enthalten (Vorjahr: 615 Mio Euro).

Die Kapitalflussrechnung zeigt die Zusammensetzung und die Veränderungen des Zahlungsmittelbestands des Geschäftsjahres. Sie ist in die Positionen operative Geschäftstätigkeit, Investitionstätigkeit und Finanzierungstätigkeit aufgeteilt.

Als Cashflow aus operativer Geschäftstätigkeit werden Zahlungsvorgänge (Zu- und Abflüsse) aus Forderungen an Kreditinstitute und Kunden sowie Wertpapieren des Handelsbestands und anderen Aktiva ausgewiesen. Zu- und Abgänge aus Verbindlichkeiten gegenüber Kreditinstituten und Kunden, aus verbrieften Verbindlichkeiten und anderen Passiva gehören ebenfalls zur operativen Geschäftstätigkeit. Auch die aus dem operativen Geschäft resultierenden Zins- und Dividendenzahlungen finden sich im Cashflow aus operativer Geschäftstätigkeit wieder.

Die Veränderungen des Cashflows aus operativer Geschäftstätigkeit resultieren unter anderem aus der Veräußerung von konsolidierten Gesellschaften. Die anderen Aktiva und Passiva aus operativer Geschäftstätigkeit enthalten dabei auch Abgängen von Gesellschaften, die zum 31. Dezember 2009 als zur Veräußerung gehalten klassifiziert waren und im Berichtsjahr veräußert wurden. Die nachstehenden Tabellen geben einen Überblick über die Vermögenswerte und Schulden zu den Abgangszeitpunkten.

| Aktiva   Mio €                 | 31.12.2010 |
|--------------------------------|------------|
| Forderungen an Kreditinstitute | 2 218      |
| Forderungen an Kunden          | 2 271      |
| Handelsaktiva                  | 3          |
| Finanzanlagen                  | 3 172      |
| Sachanlagen                    | 16         |
| Sonstige Aktivposten           | 1 330      |

| Passiva   Mio €                              | 31.12.2010 |
|----------------------------------------------|------------|
| Verbindlichkeiten gegenüber Kreditinstituten | 238        |
| Verbindlichkeiten gegenüber Kunden           | 5 286      |
| Verbrieftete Verbindlichkeiten               | -          |
| Handelspassiva                               | 2          |
| Sonstige Passivposten                        | 309        |

Der Cashflow aus Investitionstätigkeit zeigt Zahlungsvorgänge für die Finanzanlagen, die immateriellen Vermögenswerte sowie für die Sachanlagen. Darüber hinaus werden hier die Cashflows im Zusammenhang mit dem Erwerb oder der Veräußerung von Tochterunternehmen gezeigt. Der Cashflow aus Finanzierungstätigkeit umfasst Einzahlungen aus Kapitalerhöhungen sowie Ein- und Auszahlungen für Nachrang- und Hybridkapital. Auch ausgeschüttete Dividenden weisen wir hier aus.

Der Zahlungsmittelbestand umfasst die Zahlungsmittel und Zahlungsmitteläquivalente, die unmittelbar in liquide Mittel umgewandelt werden können und nur einem unwesentlichen Wertänderungsrisiko unterliegen. Wir fassen darunter den Posten Barreserve, der sich aus Kassenbestand, Guthaben bei Zentralnotenbanken sowie Schuldtiteln öffentlicher Stellen und Wechseln, die zur Refinanzierung bei Zentralnotenbanken zugelassen sind, zusammensetzt (vergleiche Note 46). Nicht einbezogen werden täglich fällige Forderungen an Kreditinstitute.

Für den Commerzbank-Konzern ist die Aussagefähigkeit der Kapitalflussrechnung als gering anzusehen. Die Kapitalflussrechnung ersetzt für uns weder die Liquiditäts- beziehungsweise Finanzplanung noch wird sie als Steuerungsinstrument eingesetzt.

# Anhang (Notes)

## Grundlagen der Konzernrechnungslegung

Unser Konzernabschluss zum 31. Dezember 2010 wurde in Einklang mit § 315a Abs. 1 HGB und der Verordnung (EG) Nr. 1606/2002 (IAS-Verordnung) des Europäischen Parlaments und des Rates vom 19. Juli 2002 aufgestellt. Ebenso kamen weitere Verordnungen zur Übernahme bestimmter internationaler Rechnungslegungsstandards auf der Grundlage der vom International Accounting Standards Board (IASB) verabschiedeten und veröffentlichten International Financial Reporting Standards (IFRS) und deren Auslegungen durch das International Financial Reporting Interpretations Committee (IFRIC) zur Anwendung. Alle für das Geschäftsjahr 2010 in der EU verpflichtend anzuwendenden Standards und Interpretationen wurden berücksichtigt.

Von der vorzeitigen Anwendung von Standards und Interpretationen, die erst ab dem Geschäftsjahr 2011 oder später umzusetzen sind (IFRS 9, überarbeiteter IAS 24 sowie überarbeiteter IFRIC 14 und 19; Änderungen aus dem jährlichen Verbesserungsprozess des IASB) haben wir zulässigerweise abgesehen. Durch IFRS 9, der erst teilweise durch das IASB veröffentlicht und noch nicht durch die EU verabschiedet wurde, könnten sich signifikante Effekte auf die Bilanzierung und Bewertung ergeben. Aufgrund der noch ausstehenden Anerkennung durch die EU sowie wesentlicher noch nicht verabschiedeter Teilbereiche ist

keine verlässliche Quantifizierung der Effekte möglich. Aus den anderen derzeit noch nicht anzuwendenden Standards und Interpretationen erwarten wir jedoch keine wesentlichen Auswirkungen auf den Konzernabschluss.

Die im Geschäftsjahr 2010 erstmals anzuwendenden überarbeiteten Standards und Interpretationen (IFRS 1, 2, 3 und IAS 27, 32, 39 sowie IFRIC 12, 15, 16, 17 und 18; Änderungen aus dem jährlichen Verbesserungsprozess des IASB) hatten keine wesentlichen Auswirkungen auf den Konzernabschluss.

Neben der Gesamtergebnisrechnung und der Bilanz beinhaltet der Konzernabschluss als weitere Komponenten die Eigenkapitalveränderungsrechnung, eine Kapitalflussrechnung und den Anhang (Notes). Die Segmentberichterstattung und die Berichterstattung über das Risikomanagement erfolgen innerhalb des Anhangs (Note 45 beziehungsweise Notes 83 bis 90).

Der Konzernlagebericht einschließlich des separaten Berichts über die Chancen und Risiken der künftigen Entwicklung (Risikobericht) gemäß § 315 HGB ist auf den Seiten 73 bis 198 unseres Geschäftsberichts abgedruckt.

Berichtswährung des Konzernabschlusses ist Euro. Alle Beträge sind, sofern nicht gesondert darauf hingewiesen wird, in Mio Euro dargestellt.

## Bilanzierungs- und Bewertungsmethoden

### 1) Grundsätze

Der Konzernabschluss basiert auf dem Grundsatz der Unternehmensfortführung (Going Concern). Die Bewertung von Vermögenswerten erfolgt grundsätzlich zu fortgeführten Anschaffungskosten. Davon ausgenommen sind bestimmte Finanzinstrumente, als Finanzinvestitionen gehaltene Immobilien und zur Veräußerung gehaltene Vermögenswerte.

Erträge und Aufwendungen werden zeitanteilig abgegrenzt und in der Periode erfolgswirksam erfasst, der sie wirtschaftlich zuzurechnen sind. Zinsen weisen wir unter Berücksichtigung aller vertraglichen Vereinbarungen im Zusammenhang mit den finanziellen Vermögenswerten oder Verbindlichkeiten periodengerecht im Zinsüberschuss oder, sofern sie aus Handelsgeschäften einschließlich deren Refinanzierung resultieren, im Handelsergebnis aus. Dividendenerträge werden erst vereinnahmt, wenn ein entsprechender Rechtsanspruch vorliegt.

Provisionserträge und -aufwendungen im Provisionsüberschuss erfassen wir zum einen nach der Bilanzierungsmethode für zugehörige Finanzinstrumente, zum anderen nach der Zweckbestimmung. Provisionen für Leistungen, die über einen bestimmten Zeitraum erbracht werden, werden über die Periode der Leistungserbringung erfasst. Gebühren, die mit der vollständigen Erbringung einer bestimmten Dienstleistung verbunden sind, werden zum Zeitpunkt der vollständig erbrachten Dienstleistung vereinnahmt. Die Berücksichtigung von leistungsabhängigen Provisionen erfolgt, wenn die Leistungskriterien erfüllt werden. Provisionen aus Handelsgeschäften weisen wir im Handelsergebnis aus.

Finanzielle Vermögenswerte und Verbindlichkeiten gegenüber dem gleichen Geschäftspartner werden gegeneinander aufgerechnet und entsprechend saldiert in der Bilanz ausgewie-

|     |                                  |
|-----|----------------------------------|
| 204 | Gesamtergebnisrechnung           |
| 208 | Bilanz                           |
| 210 | Eigenkapitalveränderungsrechnung |
| 212 | Kapitalflussrechnung             |
| 214 | <b>Anhang (Notes)</b>            |
| 370 | Bestätigungsvermerk              |

sen, sofern ein einklagbares Recht zur Aufrechnung der Beträge besteht und die Erfüllung der Geschäfte auf Nettobasis oder die Realisierung des Vermögenswertes gleichzeitig mit Begleichung der Verbindlichkeit erfolgt. Neben der Aufrechnung positiver und negativer Marktwerte aus Derivaten betrifft dies auch die Aufrechnung von Forderungen und Verbindlichkeiten aus Reverse Repos und Repos (Wertpapierpensionsgeschäfte).

Die Rechnungslegung im Commerzbank-Konzern erfolgt nach konzerneinheitlichen Bilanzierungs- und Bewertungsmethoden, die in den folgenden Notes erläutert werden.

Für die Vollkonsolidierung sowie für die at-Equity-Bewertung im Konzernabschluss verwenden wir im Wesentlichen zum 31. Dezember 2010 erstellte Abschlüsse.

Die Angabe von Restlaufzeiten erfolgt im Commerzbank-Konzern grundsätzlich für alle Finanzinstrumente, für die vertragliche Fälligkeiten vorliegen (siehe Notes 78 und 80). Als kurzfristig definieren wir die Restlaufzeit, wenn diese zwischen dem Abschlussstichtag und dem Fälligkeitstermin weniger als ein Jahr beträgt. Für die wesentlichen Arten von Rückstellungen nehmen wir eine entsprechende Unterscheidung in Note 68 vor. Finanzinstrumente in den Handelaktiva und -passiva ohne vertragliche Fälligkeiten, der Posten Barreserve sowie die Vermögenswerte und Schulden, die zur Veräußerung gehalten werden, sind grundsätzlich als kurzfristig einzustufen. Die Bilanzposten Immaterielle Anlagewerte, Sachanlagen und Als Finanzinvestition gehaltene Vermögenswerte dagegen sind grundsätzlich als langfristig einzuordnen.

Der Konzernabschluss enthält Werte, die wir zulässigerweise unter Verwendung von Schätzungen und Annahmen ermittelt haben. Die verwendeten Schätzungen und Annahmen basieren auf historischen Erfahrungen und anderen Faktoren wie Planungen und – nach heutigem Ermessen – wahrscheinlichen Erwartungen und Prognosen zukünftiger Ereignisse. Die Schätzungen und Beurteilungen selbst sowie die zugrunde liegenden Beurteilungsfaktoren und Schätzverfahren werden regelmäßig überprüft und mit den tatsächlich eingetretenen Ereignissen abgeglichen. Nach unserer Ansicht sind die verwendeten Parameter sachgerecht und vertretbar. Schätzungsunsicherheiten ergeben sich bei der Ermittlung der Pensionsverpflichtungen und des Geschäfts- oder Firmenwertes. Die Bewertung der Pensionsverpflichtungen beruht auf dem Anwartschaftsbarwertverfahren für leistungsorientierte Altersversorgungspläne. Bei der Bewertung dieser Verpflichtungen sind insbesondere Annahmen über den langfristigen Gehalts- und Rentenentwicklungstrend sowie die durchschnittliche Lebenserwartung zu treffen. Veränderungen der Schätzannahmen von Jahr zu Jahr sowie Abweichungen zu den tatsächlichen Jahreseffekten sind in den versicherungsmathematischen Gewinnen/Verlusten abgebildet (bezüglich der Auswirkungen von Parameteränderungen siehe Note 68 Rück-

stellungen). Der Werthaltigkeitstest für Geschäfts- oder Firmenwerte, der jährlich vorzunehmen ist, basiert auf der anerkannten Ertragswertmethode. Dabei werden die zukünftig zu erwartenden Überschüsse aus der jüngsten Managementplanung zugrunde gelegt. Eine Analyse der Schätzungsunsicherheiten bei der Bestimmung des Geschäfts- oder Firmenwertes beziehungsweise des beizulegenden Zeitwertes (Fair Values) von Finanzinstrumenten befinden sich in der Note 15 beziehungsweise Note 81. Für Schätzungsunsicherheiten hinsichtlich der Marktwerte von Immobilien, die als Finanzinvestition gehalten werden, nehmen wir Analysen auf Basis der Parameter Liegenschaftszins beziehungsweise Bodenwert vor (vergleiche Note 59). Weiterhin bestehen Schätzungsunsicherheiten im Wesentlichen bei aktiven latenten Steuern, der Risikoversorge im Kreditgeschäft und der auf Bewertungsmodellen beruhenden Fair-Value-Ermittlung sowie bei der Bewertung insbesondere von Finanzinstrumenten. Für den Bereich Risikoversorge weisen wir auf den Risikobericht im Konzernlagebericht.

## **(2) Anpassung der Bilanzierungs- und Bewertungsmethoden**

Wir haben die Bilanzierungs- und Bewertungsmethoden im Vergleich zum Konzernabschluss 31. Dezember 2009 grundsätzlich beibehalten.

Zum 31. Dezember 2010 haben wir eine Anpassung der Struktur der Gewinn- und Verlustrechnung und der Bilanz gemäß IAS 1.82 beziehungsweise IAS 1.54 vorgenommen. Die Posten

- Ergebnis aus Sicherungszusammenhängen,
- Laufendes Ergebnis aus at-Equity-bewerteten Unternehmen,
- Anteile an at-Equity-bewerteten Unternehmen,
- Als Finanzinvestition gehaltene Immobilien,
- Zur Veräußerung gehaltene langfristige Vermögenswerte und Vermögenswerte aus Veräußerungsgruppen beziehungsweise Verbindlichkeiten von zur Veräußerung gehaltenen Veräußerungsgruppen,
- Tatsächliche Ertragsteueransprüche beziehungsweise -schulden sowie
- Latente Ertragsteueransprüche beziehungsweise -schulden

weisen wir nun in der Gewinn- und Verlustrechnung beziehungsweise in der Bilanz gesondert aus. Weiterhin wurden die Eigenkapitalbestandteile Neubewertungsrücklage, Rücklage aus Cash Flow Hedges und Rücklage aus der Währungsumrechnung in der Bilanz zusammengefasst und als Andere Rücklagen dargestellt. Das Konzernergebnis ist nunmehr Teil der Gewinnrücklagen. In der Eigenkapitalveränderungsrechnung wurde zudem die Darstellung des Sonstigen Periodenergebnisses weiter auf-

gegliedert. Außerdem weisen wir in der Gesamtergebnisrechnung die Veränderungen des Sonstigen Periodenergebnisses getrennt nach erfolgswirksamen und erfolgsneutralen Veränderungen sowie auf at-Equity-bewertete Unternehmen aus. Die Vorjahreswerte haben wir entsprechend angepasst.

Zudem haben wir die Darstellung der Restlaufzeiten vereinheitlicht und weisen nun auch für die Nominalwerte der derivativen Geschäfte des laufenden Geschäftsjahres in der Note 78 die Restlaufzeiten wie folgt aus:

- täglich fällig
- bis drei Monate
- drei Monate bis ein Jahr
- ein bis fünf Jahre
- über fünf Jahre

Zur weiteren Erhöhung der Transparenz und Vereinheitlichung des Ausweises, haben wir die nachstehenden Anpassungen vorgenommen.

In den Notes 47, 48, 54, 62 bis 64 sowie 72 und 73 haben wir eine Änderung der Angaben zu den Kategorien gemäß IAS 39.9 vorgenommen. Die bisherige Angabe der Finanzinstrumente, für die die Fair Value Option angewendet wird, haben wir ersetzt durch die Angabe aller Finanzinstrumente, die erfolgswirksam zum beizulegenden Zeitwert bewertet werden. In diesen Angaben zeigen wir im Wesentlichen auch die echten Pensionsgeschäfte (Reverse Repos und Repos), die unverändert zum Vorjahr zum beizulegenden Zeitwert in den Forderungen an Kreditinstituten beziehungsweise Kunden und Verbindlichkeiten gegenüber Kreditinstituten beziehungsweise Kunden ausgewiesen werden. Die beizulegenden Zeitwerte sind der Bewertungshierarchie Level II (Note 81) zuzuordnen. Die Angaben zu den Finanzinstrumenten, für die die Fair Value Option angewendet wird, sind in Note 82 enthalten.

Darüber hinaus wurde der Detaillierungsgrad des Sachaufwands in der Note 39 Verwaltungsaufwendungen erhöht.

Außerdem weisen wir eigene Emissionen des Handelsbereichs gesondert in den Handelspassiva statt wie bisher in den Verbrieften Verbindlichkeiten aus und haben in Note 99 die Darstellung der Vorstandsbezüge präzisiert.

Die Vorjahreswerte haben wir in der Bilanz, der Eigenkapitalveränderungsrechnung und in den betroffenen Notes entsprechend angepasst. Durch die Anpassungen ergeben sich für die Geschäftsjahre 2009 und 2010 jedoch keine Auswirkung auf das Konzernergebnis und auf das Ergebnis je Aktie.

Weiterhin wurden im Zusammenhang mit der Integration der ehemaligen Dresdner Bank unterschiedliche Ausweisstrukturen innerhalb des Zinsüberschusses vereinheitlicht. Die Anpassungen in den Vorperioden betreffen sowohl die Zinserträge als auch die Zinsaufwendungen. Die Umgliederungen wurden für das Geschäftsjahr 2009 und für das erste Quartal 2010 innerhalb der Zinserträge von der Kategorie zur Veräußerung verfügbarer finanzieller Vermögenswerte in die Kategorie Kredite und Forderungen und innerhalb der Zinsaufwendungen von der Kategorie aus der Anwendung der Fair Value Option in die Zinsaufwendungen für Nachrangkapital (zu Anschaffungskosten bewertet) vorgenommen.

Eine weitere Anpassung für das Geschäftsjahr 2009 betrifft die Zinsen aus derivativen Finanzinstrumenten, die nicht dem Handelsbuch zuzuordnen sind. Die Umgliederung erfolgte von den Zinserträgen der Kategorie zur Veräußerung verfügbarer finanzieller Vermögenswerte in die Sonstigen Zinserträge.

Darüber hinaus sind Devisenkommissionsgewinne der ehemaligen Dresdner Bank nun Teil des Provisionsüberschusses und nicht mehr des Handelsergebnisses. Die Umgliederung für das Geschäftsjahr 2009 beträgt 51 Mio Euro und betrifft die Provisionen aus dem Zahlungsverkehr und dem Auslandsgeschäft. Die Vorjahreswerte haben wir entsprechend angepasst.

Für das Geschäftsjahr 2009 sowie für die ersten beiden Quartale 2010 haben wir eine Anpassung vorgenommen. Durch die Anpassungen ergeben sich für die Geschäftsjahre 2009 und 2010 jedoch keine Auswirkung auf das Konzernergebnis, die Bilanz, die Eigenkapitalveränderungsrechnung sowie auf das Ergebnis je Aktie.

Die Anpassungen in der Note Zinsüberschuss sowie in der Gewinn- und Verlustrechnung werden in den nachfolgenden Tabellen dargestellt.

|     |                                  |
|-----|----------------------------------|
| 204 | Gesamtergebnisrechnung           |
| 208 | Bilanz                           |
| 210 | Eigenkapitalveränderungsrechnung |
| 212 | Kapitalflussrechnung             |
| 214 | Anhang (Notes)                   |
| 370 | Bestätigungsvermerk              |

## Anpassungen im Zinsüberschuss:

| Mio €                                                                                                                                   | veröffentlichter Konzernabschluss | Anpassung | angepasster Konzernabschluss |
|-----------------------------------------------------------------------------------------------------------------------------------------|-----------------------------------|-----------|------------------------------|
| Zinsüberschuss 1.1.–31.12.2009                                                                                                          |                                   |           |                              |
| Zinserträge aus Kredit- und Geldmarktgeschäften sowie aus dem Wertpapierbestand (zur Veräußerung verfügbare finanzielle Vermögenswerte) | 2 905                             | –817      | 2 088                        |
| Zinserträge aus Kredit- und Geldmarktgeschäften sowie aus dem Wertpapierbestand (Kredite und Forderungen)                               | 16 439                            | 444       | 16 883                       |
| Sonstige Zinserträge                                                                                                                    | 289                               | 373       | 662                          |
| Zinserträge gesamt <sup>1</sup>                                                                                                         | 20 353                            | –15       | 20 338                       |
| Zinsaufwendungen für Nachrang- und Hybridkapital                                                                                        | 981                               | 115       | 1 096                        |
| Zinsaufwendungen aus der Anwendung der Fair Value Option                                                                                | 332                               | –115      | 217                          |
| Zinsaufwendungen gesamt                                                                                                                 | 13 164                            | –         | 13 164                       |

<sup>1</sup> Nach Umgliederung des Laufenden Ergebnisses aus at-Equity-bewerteten Unternehmen von 15 Mio Euro.

## Effekte aus der Umgliederung der Devisenkommissionsgewinne:

| Mio €                                                    | veröffentlichter Konzernabschluss | Anpassung | angepasster Konzernabschluss |
|----------------------------------------------------------|-----------------------------------|-----------|------------------------------|
| Gewinn- und Verlustrechnung 1.1.–31.12.2009 <sup>1</sup> |                                   |           |                              |
| Provisionsüberschuss                                     | 3 722                             | 51        | 3 773                        |
| Handelsergebnis <sup>2</sup>                             | –358                              | –51       | –409                         |

<sup>1</sup> Von dem Anpassungsbetrag 2009 entfielen 13 Mio Euro auf das erste, 13 Mio Euro auf das zweite, 12 Mio Euro auf das dritte und 13 Mio Euro auf das vierte Quartal.

<sup>2</sup> Einschließlich Ergebnis aus Sicherungszusammenhängen.

Im Rahmen der Bewertung von Derivaten werden für die Commerzbank Aktiengesellschaft seit dem 30. September 2009 auch die Ausfallrisiken von Kontrahenten durch sogenannte Counterparty Default Adjustments (CDA) berücksichtigt. Für die Vorquartale des Geschäftsjahres 2009 hatten wir bereits im drit-

ten Quartal 2009 eine Anpassung gemäß IAS 8.41 vorgenommen. Dadurch wurde der Konzernüberschuss im ersten Quartal 2009 um 3 Mio Euro und im zweiten Quartal 2009 um 15 Mio Euro reduziert. Die Vorjahreswerte der betroffenen Posten in der Quartalsentwicklung wurden entsprechend angepasst.

**(3) Konsolidierungskreis**

In unseren Konzernabschluss werden alle wesentlichen Tochterunternehmen einbezogen, an denen die Commerzbank Aktiengesellschaft direkt oder indirekt mehr als 50 % der Stimmrechte hält oder anderweitig einen beherrschenden Einfluss ausübt. Hierzu zählen auch wesentliche Zweckgesellschaften und Fonds, die im Sinne von SIC 12 beherrscht werden. Wesentliche assoziierte Unternehmen und wesentliche Gemeinschaftsunternehmen werden nach der Equity-Methode bewertet.

Tochterunternehmen, assoziierte Unternehmen und Gemeinschaftsunternehmen mit untergeordneter Bedeutung für den

Einblick in die Vermögens-, Finanz- und Ertragslage des Konzerns wurden nicht vollkonsolidiert beziehungsweise nicht at-Equity-bewertet, sondern als Anteile an nicht konsolidierten Tochterunternehmen oder Beteiligungen unter den Finanzanlagen bilanziert. Bezogen auf die Summenbilanz des Konzerns machen die nicht wesentlichen Tochterunternehmen weniger als 0,3 % (Vorjahr: 0,2 %) aus.

Eine vollständige Aufzählung des Anteilsbesitzes des Commerzbank-Konzerns ist der Note 106 zu entnehmen.



Die folgenden wesentlichen Tochtergesellschaften, Zweckgesellschaften und Fonds wurden im Geschäftsjahr 2010 erstkonsolidiert:

| Gesellschaften   Mio €                                                      | Kapital- und Stimmrechte<br>in % | Anschaffungs-<br>kosten | Vermögenswerte | Schulden |
|-----------------------------------------------------------------------------|----------------------------------|-------------------------|----------------|----------|
| BRE.Iocum S.A., Lodz                                                        | 80,0                             | 5,4                     | 73,8           | 47,7     |
| BRE Ubezpieczenia Towarzystwo Ubezpieczen i Reasekuracji S.A., Warschau     | 100,0                            | 6,4                     | 37,6           | 27,5     |
| BRE Ubezpieczenia Sp.z o.o., Warschau                                       | 100,0                            | 1,5                     | 8,2            | 5,3      |
| BRE Holding Sp. z o.o., Warschau                                            | 100,0                            | 41,3                    | 44,9           | 0,0      |
| Commerzbank Finance 3 S.à.r.l., Luxemburg                                   | 100,0                            | 132,1                   | 132,2          | 0,1      |
| Commerzbank Leasing December (17) Limited, London                           | 100,0                            | 13,8                    | 138,9          | 138,9    |
| Commerzbank Leasing December (19) Limited, London                           | 100,0                            | 28,0                    | 311,3          | 311,2    |
| Commerzbank Leasing December (20) Limited, London                           | 100,0                            | –                       | 163,5          | 163,5    |
| Commerzbank Leasing December (21) Limited, London                           | 100,0                            | –                       | 41,4           | 41,4     |
| Commerzbank Leasing December (22) Limited, London                           | 100,0                            | –                       | 49,5           | 49,1     |
| Commerzbank Leasing December (23) Limited, London                           | 100,0                            | –                       | 188,0          | 188,0    |
| Commerzbank Leasing December (24) Limited, London                           | 100,0                            | 0,1                     | 62,5           | 62,5     |
| Commerzbank Leasing December (25) Limited, London                           | 70,0                             | 18,6                    | 187,1          | 172,1    |
| Commerzbank Leasing December (26) Limited, London                           | 100,0                            | 1,2                     | 160,0          | 160,0    |
| ComStage ETF Nikkei 225®, Luxemburg                                         | 26,5                             | 125,8                   | 125,9          | 0,1      |
| ComStage ETF MSCI USA TRN, Luxemburg                                        | 65,4                             | 154,2                   | 155,5          | 1,3      |
| ComStage ETF iBoxx € Liquid Sovereigns Diversified 3m-1 TR, Luxemburg       | 13,9                             | 99,8                    | 99,8           | –        |
| COMSTAGE ETF-IBOXX EUR. L.SOV.DIV. 5-7 TR, Luxemburg                        | 75,0                             | 101,4                   | 103,5          | 2,1      |
| ComStage ETF iBoxx € Sovereigns Germany Capped 3m-2 TR, Luxemburg           | 94,8                             | 10,0                    | 10,0           | –        |
| GS SICAV - UK Premia, Luxemburg                                             | 86,6                             | 198,7                   | 198,9          | 0,2      |
| EH MoLu IV, LLC, Dover/Delaware                                             | 100,0                            | 4,1                     | 19,6           | 15,5     |
| Film Library Holding LLC, Wilmington/Delaware                               | 100,0                            | 29,4                    | 57,6           | 28,3     |
| Galbraith Investments Ltd, London                                           | 100,0                            | –                       | 170,5          | 170,5    |
| Kommanditgesellschaft MS "CPO Toulon" Offen Reederei GmbH & Co. KG, Hamburg | 90,0                             | 45,3                    | 37,9           | 11,0     |
| Pisces Nominees Limited, London                                             | 100,0                            | 65,8                    | 2 110,1        | 2 018,0  |
| Property Invest Italy Srl, Mailand                                          | 100,0                            | 60,3                    | 109,2          | 48,9     |
| Truckman Inc., Cayman Island                                                | –                                | –                       | 68,1           | 68,1     |

Wesentliche Änderungen im Kreis der at-Equity-bewerteten Unternehmen ergaben sich durch die Wandlung von Schuldtiteln im Zusammenhang mit der Restrukturierung des Kreditengagements Inmobiliaria Colonial S.A., Barcelona. In diesem Zusammenhang hat die Bank Aktien der Kreditnehmerin erhalten. Die Wandlung erfolgte in zwei Stufen. Im Rahmen der ersten Stufe wurde die Wandelanleihe in Eigenkapital und im Rahmen der zweiten Stufe der Kredit in Eigenkapital gewandelt.

Aus den Erstkonsolidierungen sowie aus der erstmaligen at-Equity-Bewertung resultierten keine als Geschäfts- oder Firmenwerte zu aktivierenden Unterschiedsbeträge. Es handelt sich um Unternehmen, die unsere Wesentlichkeitsgrenzen für

die Konsolidierung beziehungsweise at-Equity-Bewertung überschritten haben oder um Neugründungen im Rahmen von strukturierten Finanzierungen.

Aus der Folgebewertung der im Jahr 2009 im Rahmen des Dresdner-Bank-Erwerbs aufgedeckten Reserven und Lasten ergaben sich in der Gewinn- und Verlustrechnung des laufenden Geschäftsjahres Aufwendungen von 278 Mio Euro vor Steuern beziehungsweise 167 Mio Euro nach Steuern. Die wesentlichen Effekte resultierten aus der Aufzinsung des Nachrang- und Hybridkapitals sowie aus den Abschreibungen von Kundenstamm und Markennamen.



|     |                                  |
|-----|----------------------------------|
| 204 | Gesamtergebnisrechnung           |
| 208 | Bilanz                           |
| 210 | Eigenkapitalveränderungsrechnung |
| 212 | Kapitalflussrechnung             |
| 214 | Anhang (Notes)                   |
| 370 | Bestätigungsvermerk              |

Die nachstehenden Tochtergesellschaften, Zweckgesellschaften und Fonds wurden veräußert beziehungsweise teilveräußert oder liquidiert und wurden daher nicht mehr konsolidiert beziehungsweise auch nicht nach der Equity-Methode bewertet:

- Veräußerung

- ADENARA Flugzeug-Leasinggesellschaft mbH & Co. Erste A319 KG, Karlsruhe
- Allianz Dresdner Bauspar AG, Bad Vilbel
- ASSERTA Flugzeug-Leasinggesellschaft mbH & Co. Zweite A319 KG, Karlsruhe
- BONITAS Vermietungsgesellschaft mbH & Co. Objekt Bötzingen KG, Grünwald (München)
- Commerz Real Beteiligungsgesellschaft mbH, Düsseldorf
- dbi-BSK Rentenfonds, Frankfurt am Main
- dbi-BSK Rentenfonds Plus, Frankfurt am Main
- Dresdner Bank Monaco S.A.M., Monaco
- Dresdner Van Moers Courtens S.A., Brüssel
- Dresdner VPV N.V., Gouda
- Kleinwort Benson Channel Island Holdings Limited, St. Peter Port (Teilkonzern einschließlich vollkonsolidierter Teilkonzerntöchter)
- Kleinwort Benson Private Bank Limited Group, London (Teilkonzern einschließlich vollkonsolidierter Teilkonzerntöchter)
- Commerzbank Leasing December (2) Limited, London
- Dresdner Kleinwort Leasing December (16) Limited, London
- Privatinvest Bank AG, Salzburg
- TASKABANA erste Mobilien-Vermietungsgesellschaft mbH & Co. Objekt Marl KG, Grünwald (München)

Die Veräußerungserlöse für die veräußerten Gesellschaften betragen rund 0,5 Mrd Euro.

- Liquidation (einschließlich Gesellschaften, die die operative Geschäftstätigkeit eingestellt haben oder unsere Wesentlichkeitsgrenzen für die Konsolidierung dauerhaft unterschritten haben)

- AGI Global Selection Balance, Luxemburg
- ALLIANZ BULGARIA PENSION FUND, Paris
- Alexandria Capital plc, Dublin<sup>1</sup>
- Alternative Holding Partenaire, London<sup>1</sup>
- CB Mezzanine Capital Limited Partnership, St. Helier/Jersey
- Classic I (Cayman) Limited, George Town/Cayman Island<sup>1</sup>
- Commerzbank December Leasing (18) Limited, London
- DIT-Garantie Plus 2012, Luxemburg<sup>1</sup>

- DIT-Protect Global Winner 2014, Luxemburg<sup>1</sup>
- DKNA Phoenix LLC, Wilmington/Delaware
- Dresdner Bank (DIFC) Limited, Dubai
- Dresdner Finanziaria S.p.A., Mailand
- Dresdner Kleinwort (Drc) Limited, London
- Dresdner Kleinwort (China) Ltd., East Hong Kong
- Dresdner Kleinwort (Hong Kong) Ltd., East Hong Kong
- Dresdner Kleinwort (Lbdp) Holdings Limited, London
- Dresdner Kleinwort (Services) Inc, Panama City
- Dresdner Kleinwort Derivative Investments Limited, London<sup>1</sup>
- Dresdner Kleinwort Equipment LLC, Wilmington/Delaware
- Dresdner Kleinwort Finance EURL, Paris
- Dresdner Kleinwort France SAS, Paris
- Dresdner Kleinwort Metals Limited, London
- Dresdner Kleinwort Overseas Employees Limited, London
- Dresdner Kleinwort Securities (Asia) Holdings Ltd., East Hong Kong
- Dresdner Kleinwort Securities France S. A., Paris
- Dresdner Leasing 7 S.à.r.l., Luxemburg
- Dresdner Leasing 8 S.à.r.l., Luxemburg
- Eurohypo Representacoes Ltd., Sao Paulo<sup>1</sup>
- H 47 GmbH & Co. KG, Düsseldorf
- HQ Trust Kensington Ltd., George Town/Cayman Island<sup>1</sup>
- Kaiserplatz Holdings Incorporated, Wilmington/Delaware
- Kaiserplatz Purchaser No. 8 Limited, St. Helier/Jersey
- Idilias SPC (Silo VI), George Town/Cayman Island
- KBEMF (GP) Limited, London
- KP Avalon Limited, Dublin
- Kreativ 1 Limited, St. Helier/Jersey
- Priamos Limited, Tortola<sup>1</sup>
- Ryder Square Limited, St. Helier/Jersey<sup>1</sup>
- Sigma-1 CLO 2007, Dublin
- Symphony No. 1 Llc, Wilmington/Delaware
- Symphony No. 3 Llc, Dover/Delaware
- The Riverbank Trust, London
- Thebes Capital Plc, Dublin
- Thebes Plc, Dublin

<sup>1</sup> Unterschreitung der Wesentlichkeitsgrenzen.

Folgende Gesellschaften wurden im laufenden Geschäftsjahr auf die Commerzbank Aktiengesellschaft oder konsolidierte Gesellschaften verschmolzen:

- CBG Commerz Beteiligungsgesellschaft mbH, Frankfurt am Main
- CG New Venture 2 GmbH & Co. KG, Wiesbaden
- CG New Venture 3 GmbH & Co. KG, Wiesbaden

- comdirect private finance AG, Quickborn
- Commerz Asset Management Holding GmbH & Co. KG, Frankfurt am Main
- Commerzbank Capital Markets Corporation, New York
- DreCo Erste Beteiligungs GmbH, Frankfurt am Main
- Dreiundzwanzigste DRESIB Beteiligungs-Gesellschaft mbH, Frankfurt am Main
- Dresdner Bank Luxembourg S.A., Luxemburg
- Dresdner Bank ZAO, St. Petersburg
- Dresdner Mezzanine GmbH & Co. KG, Frankfurt am Main
- GENUJO LOK BeteiligungsGmbH & Co. KG, Frankfurt am Main
- Genujo Vierte BeteiligungsGmbH, Frankfurt am Main
- Zenon Beteiligungs-GmbH, Frankfurt am Main

Folgende Tochtergesellschaften und at-Equity-bewertete Unternehmen wurden gemäß IFRS 5 als zur Veräußerung gehalten ausgewiesen, da eine Verkaufsabsicht besteht und sie mit hoher Wahrscheinlichkeit innerhalb eines Jahres veräußert werden:

- Gesellschaften, die dem Segment Asset Based Finance zugeordnet sind:
  - Commerz Real Autoleasing GmbH, Hamburg
  - MS „CPO Alicante“ Offen Reederei GmbH & Co.KG, Hamburg
  - MS „CPO Ancona“ Offen Reederei GmbH & Co.KG, Hamburg
  - MS „CPO Barcelona“ Offen Reederei GmbH & Co.KG, Hamburg
  - MS „CPO Bilbao“ Offen Reederei GmbH & Co.KG, Hamburg
  - MS „CPO Cadiz“ Offen Reederei GmbH & Co.KG, Hamburg
  - MS „CPO Marseille“ Offen Reederei GmbH & Co.KG, Hamburg
  - MS „CPO Palermo“ Offen Reederei GmbH & Co.KG, Hamburg
  - MS „CPO Toulon“ Offen Reederei GmbH & Co.KG, Hamburg
  - MS „CPO Valencia“ Offen Reederei GmbH & Co.KG, Hamburg
  - MS „CPO Vigo“ Offen Reederei GmbH & Co.KG, Hamburg

Die Ergebnisse der Dresdner Bank Brasil S.A. Banco Multiplo, São Paulo, werden hauptsächlich in dem Segment Corporates & Markets ausgewiesen. Die at-Equity-bewertete KGAL GmbH & Co. KG, Grünwald (München) ist in dem Segment Sonstige und Konsolidierung enthalten. Bis zur endgültigen Übertragung der Anteile bewerten wir die Veräußerungsgruppen in

Übereinstimmung mit IFRS 5 und weisen deren Vermögenswerte und Schulden in den entsprechenden Bilanzposten und Notes sowie in der Eigenkapitalveränderungsrechnung separat aus.

#### (4) Konsolidierungsgrundsätze

Tochterunternehmen sind Gesellschaften, an denen die Commerzbank Aktiengesellschaft direkt oder indirekt die Stimmrechtsmehrheit hält oder anderweitig die Finanz- und Geschäftspolitik bestimmen und somit einen beherrschenden Einfluss ausüben kann, um aus deren Tätigkeiten Nutzen zu ziehen. Die Konsolidierung erfolgt ab dem Zeitpunkt, an dem der Konzern die Stimmrechtsmehrheit oder einen beherrschenden Einfluss erlangt.

Im Rahmen der Kapitalkonsolidierung bewerten wir Vermögenswerte und Verpflichtungen von Tochterunternehmen unabhängig von der Anteilsquote zum Zeitpunkt des Erwerbs vollständig neu. Die neu bewerteten Vermögenswerte und Schulden werden unter Berücksichtigung latenter Steuern in die Konzernbilanz übernommen, die aufgedeckten stillen Reserven und Lasten in den Folgeperioden entsprechend den anzuwendenden Standards behandelt. Verbleibt nach der Neubewertung ein aktiver Unterschiedsbetrag, wird dieser als Geschäfts- oder Firmenwert aktiviert.

Assoziierte Unternehmen sind Gesellschaften, bei denen die Commerzbank Aktiengesellschaft direkt oder indirekt über einen maßgeblichen Einfluss verfügt. Ein maßgeblicher Einfluss wird bei Stimmrechtsanteilen zwischen 20 % und 50 % vermutet. Weitere Kriterien für einen maßgeblichen Einfluss sind beispielsweise wesentliche Geschäftsvorfälle mit dem Beteiligungsunternehmen, die Mitgliedschaft in einem Leitungs- oder Aufsichtsgremium oder die Mitwirkung bei der Geschäftspolitik des Beteiligungsunternehmens.

Gemeinschaftsunternehmen sind Gesellschaften, bei denen wir über die gemeinsame Kontrolle mit anderen Unternehmen verfügen. Die gemeinsame Kontrolle kann sich aus Stimmrechtsgleichheit oder vertraglichen Vereinbarungen ergeben.

Assoziierte Unternehmen und Gemeinschaftsunternehmen bewerten wir grundsätzlich nach der Equity-Methode und weisen sie als Anteile an at-Equity-bewerteten Unternehmen aus.

Die Anschaffungskosten dieser Beteiligungen einschließlich darin enthaltener Geschäfts- oder Firmenwerte werden zum Zeitpunkt der erstmaligen Einbeziehung in den Konzernabschluss bestimmt. Dabei wenden wir sinngemäß die gleichen Regeln wie bei Tochtergesellschaften an. Für die wesentlichen assoziierten Unternehmen und Gemeinschaftsunternehmen nehmen wir eine Fortschreibung des Equity-Buchwertes vor.

Anteile an Tochterunternehmen, die wegen untergeordneter Bedeutung nicht konsolidiert werden, und Beteiligungen an assoziierten Unternehmen und Gemeinschaftsunternehmen,

|     |                                  |
|-----|----------------------------------|
| 204 | Gesamtergebnisrechnung           |
| 208 | Bilanz                           |
| 210 | Eigenkapitalveränderungsrechnung |
| 212 | Kapitalflussrechnung             |
| 214 | Anhang (Notes)                   |
| 370 | Bestätigungsvermerk              |

die wegen untergeordneter Bedeutung nicht nach der Equity-Methode bewertet werden, sind zum beizulegenden Zeitwert (Fair Value) oder, sofern dieser nicht zuverlässig ermittelbar ist, zu Anschaffungskosten in den Finanzanlagen ausgewiesen.

Die Konsolidierung von Tochterunternehmen endet zu dem Zeitpunkt, an dem die Bank den beherrschenden Einfluss verliert. Die Bewertung nach der Equity-Methode von Anteilen an assoziierten Unternehmen endet zu dem Zeitpunkt, an dem die Stimmrechtsanteile kleiner als 20 % sind oder die sonstigen maßgeblichen Einflussmöglichkeiten auf das assoziierte Unternehmen wegfallen. Die Equity-Bewertung von Gemeinschaftsunternehmen endet mit der Aufgabe der gemeinschaftlichen Führung.

Die Verpflichtung, unter bestimmten Voraussetzungen Zweckgesellschaften (Special Purpose Entities) zu konsolidieren, ergibt sich aus SIC 12. Eine Konsolidierung ist erforderlich, wenn bei wirtschaftlicher Betrachtung

- die Geschäftstätigkeit der Zweckgesellschaft zugunsten des Unternehmens entsprechend seiner besonderen Geschäftsbedürfnisse beziehungsweise auf seine Veranlassung hin geführt wird, sodass das Unternehmen Nutzen aus der Geschäftstätigkeit der Zweckgesellschaft ziehen kann;
- das Unternehmen über die Entscheidungsmacht verfügt, die Mehrheit des Nutzens aus der Geschäftstätigkeit der Zweckgesellschaft zu ziehen oder durch die Einrichtung eines sogenannten Autopiloten diese Entscheidungsmacht delegiert;
- das Unternehmen das Recht hat, die Mehrheit des Nutzens aus der Geschäftstätigkeit der Zweckgesellschaft zu ziehen und sich deshalb Risiken aussetzt, die mit der Geschäftstätigkeit der Zweckgesellschaft verbunden sind;
- das Unternehmen die Mehrheit der mit der Zweckgesellschaft verbundenen Residual- oder Eigentumsrisiken behält, um Nutzen aus der Geschäftstätigkeit der Zweckgesellschaft zu ziehen.

Im Commerzbank-Konzern wird die Verpflichtung zur Konsolidierung von Zweckgesellschaften im Rahmen eines Prozesses geprüft, der zum einen Transaktionen umfasst, bei denen eine Zweckgesellschaft durch uns mit oder ohne Beteiligung dritter Parteien gegründet wird, sowie Transaktionen, bei denen wir mit oder ohne Beteiligung dritter Parteien in vertragliche Beziehungen zu einer bereits bestehenden Zweckgesellschaft treten. Die Konsolidierungsentscheidungen unterziehen wir einer regelmäßigen Überprüfung. Die Auflistung aller konsolidierten Zweckgesellschaften ist Bestandteil der Note 106.

Beschränkungen in der Fähigkeit von Zweckgesellschaften zum Transfer von finanziellen Mitteln wie zum Beispiel Bardividenden aus Eigenkapitalinstrumenten oder Zins- und Tilgungszahlungen aus Fremdkapitalinstrumenten an die Commerzbank

bestehen grundsätzlich nicht. Dies gilt zum einen für Zweckgesellschaften, bei denen die Commerzbank über gesellschaftsrechtlich begründete Anteile mit Stimmrechten verfügt, die eine Kontrolle aller operativen Entscheidungen einschließlich des Finanzmitteltransfers ermöglichen. Zum anderen gibt es auch keine Beschränkungen hinsichtlich der Zweckgesellschaften, bei denen die Commerzbank ohne gesellschaftsrechtlich begründete Anteile ihre Ansprüche auf Finanzmitteltransfers aus entsprechenden schuldrechtlichen Verträgen mit der Zweckgesellschaft begründet.

Auf Geschäftsbeziehungen von Unternehmen innerhalb des Konzerns basierende Forderungen und Verbindlichkeiten sowie Aufwendungen und Erträge eliminieren wir im Rahmen der Schulden- sowie der Aufwands- und Ertragskonsolidierung. Im Konzern angefallene Zwischenergebnisse werden herausgerechnet, soweit sie nicht von untergeordneter Bedeutung sind.

#### (5) Finanzinstrumente: Ansatz und Bewertung (IAS 39)

Gemäß IAS 39 sind alle finanziellen Vermögenswerte und Verbindlichkeiten, zu denen auch derivative Finanzinstrumente zählen, grundsätzlich in der Bilanz anzusetzen. Ein Finanzinstrument ist ein Vertrag, der gleichzeitig bei dem einen Unternehmen zu einem finanziellen Vermögenswert und bei dem anderen Unternehmen zu einer finanziellen Verbindlichkeit oder einem Eigenkapitalinstrument führt. Beim erstmaligen Ansatz sind Finanzinstrumente mit dem beizulegenden Zeitwert zu bewerten; das entspricht in der Regel den Anschaffungskosten zum Zugangszeitpunkt.

In der Folgebewertung werden Finanzinstrumente in Abhängigkeit der jeweiligen Kategorie entweder zu (fortgeführten) Anschaffungskosten oder zum beizulegenden Zeitwert (Fair Value) in der Bilanz angesetzt. Der beizulegende Zeitwert ist der Betrag, zu dem am Bilanzstichtag zwischen sachverständigen, vertragswilligen und voneinander unabhängigen Geschäftspartnern ein Vermögenswert getauscht oder eine Schuld beglichen werden könnte. Der beizulegende Zeitwert wird durch den an einem aktiven Markt festgestellten Preis des Finanzinstruments bestimmt (mark-to-market). Sofern keine Marktpreise verfügbar sind, setzen wir zur Ermittlung des beizulegenden Zeitwertes Bewertungsmodelle ein (mark-to-model), die im größtmöglichen Umfang Marktdaten als Parameter verwenden.

Die nachstehenden Erläuterungen geben eine Übersicht, wie die Regelungen des IAS 39 in der derzeit gültigen Fassung in unserem Konzern umgesetzt wurden:

##### a) Zugang und Abgang von Finanzinstrumenten

Der Bilanzansatz eines finanziellen Vermögenswertes oder einer finanziellen Verpflichtung erfolgt grundsätzlich, wenn der Konzern Vertragspartei zu den vertraglichen Regelungen des

Finanzinstruments wird. Bei regulären Kassakäufen oder -verkäufen von finanziellen Vermögenswerten fallen Handels- und Erfüllungstag im Allgemeinen auseinander. Für diese regulären Kassakäufe oder -verkäufe besteht ein Wahlrecht der Bilanzierung zum Handelstag (Trade Date Accounting) oder zum Erfüllungstag (Settlement Date Accounting). Im Konzern erfolgt für alle Regular-Way-Käufe und -Verkäufe finanzieller Vermögenswerte bei Ansatz und Abgang die Bilanzierung zum Handelstag.

Die Abgangsvorschriften des IAS 39 richten sich sowohl nach dem Konzept der Chancen und Risiken als auch nach der Verfügungsmacht bei der Prüfung von Ausbuchungsvorgängen. Die Bewertung der Chancen und Risiken aus dem Eigentum hat dabei Vorrang vor der Bewertung der Übertragung der Verfügungsmacht.

Bei einer nur teilweisen Übertragung der Chancen und Risiken und der Zurückbehaltung von Verfügungsmacht kommt der Ansatz für fortdauernde Engagements zur Anwendung. Der finanzielle Vermögenswert wird dabei unter Berücksichtigung bestimmter Bilanzierungs- und Bewertungsmethoden in dem Umfang erfasst, der seinem fortdauernden Engagement (Continuing Involvement) entspricht. Die Höhe des fortdauernden Engagements bestimmt sich aus dem Umfang, in dem der Konzern weiterhin das Risiko von Wertänderungen des übertragenen Vermögenswertes trägt. Eine finanzielle Verpflichtung (oder ein Teil einer finanziellen Verpflichtung) wird ausgebucht, wenn sie erloschen ist, das heißt wenn die im Vertrag genannten Verpflichtungen beglichen, aufgehoben oder ausgelaufen sind. Auch der Rückerwerb eigener Schuldtitel fällt unter die Ausbuchung finanzieller Verpflichtungen. Unterschiedsbeträge beim Rückkauf zwischen dem Buchwert der Verpflichtung (einschließlich Agien und Disagien) und dem Kaufpreis werden erfolgswirksam erfasst; bei Wiederveräußerung zu einem späteren Zeitpunkt entsteht eine neue finanzielle Verpflichtung, deren Anschaffungskosten dem Veräußerungserlös entsprechen. Unterschiedsbeträge zwischen diesen neuen Anschaffungskosten und dem Rückzahlungsbetrag werden nach der Effektivzinsmethode über die Restlaufzeit des Schuldtitels verteilt.

#### **b) Kategorisierung finanzieller Vermögenswerte und Verbindlichkeiten und ihre Bewertung**

- Kredite und Forderungen (Loans and Receivables):

Dieser Kategorie ordnen wir nicht derivative Finanzinstrumente mit festen oder bestimmaren Zahlungsansprüchen zu, für die kein aktiver Markt besteht. Dies gilt unabhängig davon, ob die Finanzinstrumente originär begründet oder im Sekundärmarkt erworben wurden. Ein aktiver Markt ist dann gegeben, wenn notierte Preise regelmäßig zum Beispiel von einer Börse oder einem Broker zur Verfügung gestellt wer-

den und diese Preise repräsentativ für aktuelle Transaktionen zwischen fremden Dritten sind. Die Bewertung erfolgt zu fortgeführten Anschaffungskosten. Bei Vorliegen einer Wertminderung wird diese bei der Ermittlung der fortgeführten Anschaffungskosten erfolgswirksam berücksichtigt. Agien beziehungsweise Disagien werden über die Laufzeit verteilt und erfolgswirksam im Zinsergebnis vereinnahmt.

- Bis zur Endfälligkeit zu haltende finanzielle Vermögenswerte (Held-to-Maturity):

Dieser Kategorie dürfen nicht derivative finanzielle Vermögenswerte mit festen oder bestimmaren Zahlungen sowie festgelegter Laufzeit dann zugeordnet werden, wenn die Absicht sowie die Fähigkeit besteht, sie bis zur Endfälligkeit zu halten. Die Bewertung erfolgt zu fortgeführten Anschaffungskosten. Bei Vorliegen einer Wertminderung wird dieses bei der Ermittlung der fortgeführten Anschaffungskosten erfolgswirksam berücksichtigt. Agien beziehungsweise Disagien werden über die Laufzeit verteilt und erfolgswirksam im Zinsergebnis vereinnahmt. Der Commerzbank-Konzern verwendet die Kategorie bis zur Endfälligkeit zu haltende finanzielle Vermögenswerte auch im Geschäftsjahr 2010 nicht.

- Erfolgswirksam zum beizulegenden Zeitwert bewertete finanzielle Vermögenswerte oder Verbindlichkeiten (Financial Assets or Financial Liabilities at Fair Value through Profit or Loss); diese Kategorie umfasst zwei Unterkategorien:

- Zu Handelszwecken gehaltene finanzielle Vermögenswerte oder Verbindlichkeiten (Held for Trading):

Diese Kategorie umfasst die finanziellen Vermögenswerte und finanziellen Verbindlichkeiten, die zu Handelszwecken gehalten werden (Handelsaktiva und -passiva). Zu den Handelsaktiva zählen originäre Finanzinstrumente (insbesondere verzinsliche Wertpapiere, Aktien und Schuldscheindarlehen), Edelmetalle sowie derivative Finanzinstrumente mit positivem beizulegendem Zeitwert. Die Handelspassiva umfassen insbesondere derivative Finanzinstrumente mit einem negativen beizulegenden Zeitwert, eigene Emissionen des Handelsbuchs sowie Lieferverpflichtungen aus Wertpapierleerverkäufen.

Derivative Finanzinstrumente, die als Sicherungsinstrumente eingesetzt werden, sind nur dann in den Handelsaktiva beziehungsweise Handelspassiva enthalten, wenn diese die Bedingungen für die Anwendung des Hedge Accountings (vergleiche unten in dieser Note) nicht erfüllen. Ansonsten werden sie als Marktwerte aus derivativen Sicherungsinstrumenten ausgewiesen.

|     |                                  |
|-----|----------------------------------|
| 204 | Gesamtergebnisrechnung           |
| 208 | Bilanz                           |
| 210 | Eigenkapitalveränderungsrechnung |
| 212 | Kapitalflussrechnung             |
| 214 | Anhang (Notes)                   |
| 370 | Bestätigungsvermerk              |

Handelsaktiva und Handelspassiva werden zu jedem Bilanzstichtag zum Fair Value bilanziert. Die Bewertungs- sowie Veräußerungsergebnisse werden in der Gewinn- und Verlustrechnung im Handelsergebnis erfasst.

Der Commerzbank-Konzern hat Transaktionen getätigt, bei denen der Fair Value anhand eines Bewertungsmodells ermittelt wurde, bei der nicht alle wesentlichen Inputparameter auf beobachtbaren Marktparametern basieren. Der Bilanzansatz solcher Transaktionen erfolgt zum Transaktionspreis. Die Differenz zwischen dem Transaktionspreis und dem Fair Value des Bewertungsmodells wird als Day-One Profit or Loss bezeichnet. Der Day-One Profit or Loss wird nicht sofort, sondern über die Laufzeit der Transaktion in der Gewinn- und Verlustrechnung erfasst. Sofern sich für die Transaktion ein Referenzkurs auf einem aktiven Markt ermitteln lässt oder die wesentlichen Inputparameter auf beobachtbaren Marktdaten basieren, wird der abgegrenzte Day-One Profit or Loss unmittelbar erfolgswirksam im Handelsergebnis erfasst.

- Zum beizulegenden Zeitwert designierte Finanzinstrumente (Designated at Fair Value through Profit or Loss): Gemäß der sogenannten Fair Value Option ist es zulässig, jedes Finanzinstrument freiwillig einer Bewertung zum Fair Value mit Erfassung der Bewertungsergebnisse in der Gewinn- und Verlustrechnung zu unterwerfen. Die Entscheidung zur Nutzung der Fair Value Option ist für ein Finanzinstrument zum Zeitpunkt des Zugangs unwiderruflich zu treffen.

Voraussetzung für die Anwendung der Fair Value Option für ein Finanzinstrument ist, dass

- eine Ansatz- oder Bewertungsinkongruenz (Accounting Mismatch) vermieden oder erheblich reduziert wird oder
- das Management und die Performancemessung eines Portfolios aus Finanzinstrumenten auf Fair-Value-Basis erfolgt oder
- das Finanzinstrument ein oder mehrere trennungspflichtige eingebettete Derivate enthält.

Finanzinstrumente, für die die Fair Value Option angewendet wird, verbleiben in ihrem jeweiligen Bilanzposten. Die Bewertungsergebnisse erfassen wir in der Gewinn- und Verlustrechnung im Posten Handelsergebnis, Zinserträge und -aufwendungen weisen wir im Zinsüberschuss aus. Weitere Ausführungen zu Art und Umfang der Anwendung der Fair Value Option im Commerzbank-Konzern finden sich in Note 82.

- Zur Veräußerung verfügbare finanzielle Vermögenswerte (Available-for-Sale):

Diese Kategorie umfasst alle nicht derivativen finanziellen Vermögenswerte, die keiner der vorgenannten Kategorien zugeordnet wurden oder für die eine Designation als zur Veräußerung verfügbare finanzielle Vermögenswerte erfolgte. Dabei handelt es sich insbesondere um verzinsliche Wertpapiere, Aktien und Beteiligungen. Die Bewertung erfolgt zum beizulegenden Zeitwert. Ist der beizulegende Zeitwert bei Eigenkapitalinstrumenten ausnahmsweise nicht verlässlich ermittelbar, erfolgt die Bewertung zu fortgeführten Anschaffungskosten. Das Ergebnis aus der Bewertung weisen wir – nach Berücksichtigung latenter Steuern – erfolgsneutral in einem gesonderten Posten der Anderen Rücklagen (Neubewertungsrücklage) innerhalb des Eigenkapitals aus. Agien oder Disagien bei Fremdkapitalinstrumenten werden erfolgswirksam über die Laufzeit im Zinsergebnis vereinnahmt. Bei einer Veräußerung des finanziellen Vermögenswerts lösen wir das in der Neubewertungsrücklage bilanzierte kumulierte Bewertungsergebnis auf und erfassen es in der Gewinn- und Verlustrechnung. Im Falle einer Wertminderung ist die Neubewertungsrücklage um den Wertminderungsbetrag anzupassen und der Betrag in der Gewinn- und Verlustrechnung zu berücksichtigen. Bei einer Wertaufholung unterscheiden wir zwischen Eigen- und Fremdkapitalinstrumenten. Während Wertaufholungen für Eigenkapitalinstrumente erfolgsneutral durchgeführt werden, sind Wertaufholungen für Fremdkapitalinstrumente bei Wegfall des Wertminderungsgrundes erfolgswirksam maximal in Höhe der Wertminderung zu erfassen.

- Sonstige finanzielle Verbindlichkeiten:

Alle finanziellen Verbindlichkeiten, die nicht als zu Handelszwecken gehalten kategorisiert wurden und für die nicht die Fair Value Option angewendet wurde, fallen unter die Kategorie sonstige finanzielle Verbindlichkeiten. Zu dieser Kategorie zählen Verbindlichkeiten gegenüber Kreditinstituten und Kunden sowie Verbriefte Verbindlichkeiten. Die Bewertung erfolgt zu fortgeführten Anschaffungskosten. Agien beziehungsweise Disagien werden über die Laufzeit verteilt erfolgswirksam im Zinsergebnis vereinnahmt.

Die Nettoerfolge umfassen erfolgswirksame Fair-Value-Bewertungen, Wertminderungen, Zuschreibungen, realisierte Abgangserfolge und nachträgliche Eingänge aus abgeschriebenen Finanzinstrumenten der jeweiligen Kategorie gemäß IAS 39. Die Bestandteile werden in den Notes Zinsüberschuss, Risikovorsorge im Kreditgeschäft, Handelsergebnis und Ergebnis aus Finanzanlagen nach den Kategorien gemäß IAS 39 dargestellt.



#### c) Finanzgarantien (Financial Guarantee Contracts)

Eine Finanzgarantie ist gemäß IAS 39 ein Vertrag, bei dem der Garantiegeber zur Leistung bestimmter Zahlungen verpflichtet ist, die den Garantiennehmer für einen Verlust entschädigen, der ihm entsteht, weil ein bestimmter Schuldner seinen Zahlungsverpflichtungen gemäß den ursprünglichen oder geänderten Bedingungen eines Schuldinstruments nicht fristgemäß nachkommt. Ist der Commerzbank-Konzern Garantiennehmer, wird die Finanzgarantie bilanziell nicht erfasst und nur bei der Ermittlung der Wertminderung eines besicherten Vermögenswertes berücksichtigt. Als Garantiegeber erfasst der Commerzbank-Konzern die Verpflichtung aus einer Finanzgarantie bei Vertragsabschluss. Die Erstbewertung erfolgt mit dem beizulegenden Zeitwert zum Erfassungszeitpunkt. Insgesamt betrachtet ist der beizulegende Zeitwert einer Finanzgarantie bei Vertragsabschluss null, denn der Wert der vereinbarten Prämie wird bei marktgerechten Verträgen regelmäßig dem Wert der Garantieverpflichtung entsprechen. Im Rahmen der Folgebewertung wird geprüft, ob eine Risikovorsorge erforderlich ist.

Sofern eine Finanzgarantie Bestandteil einer Finanzierungszusage ist, für die eine Handelsabsicht besteht, ist auch die Finanzgarantie als zu Handelszwecken gehalten zu kategorisieren. Die Behandlung solcher Finanzgarantien erfolgt dann abweichend zu der vorhergehenden Beschreibung gemäß den Vorgaben der Kategorie zu Handelszwecken gehalten (vergleiche Note 5 b).

#### d) Eingebettete Derivate (Embedded Derivatives)

IAS 39 regelt auch die bilanzielle Behandlung von Derivaten, die in originäre Finanzinstrumente eingebettet sind (Embedded Derivatives). Dabei handelt es sich zum Beispiel um Aktienanleihen (Anleihen mit Rückzahlungsrecht in Aktien) oder Anleihen mit indexbezogener Verzinsung. Gemäß IAS 39 ist das eingebettete Derivat unter bestimmten Bedingungen getrennt vom originären Trägerinstrument wie ein freistehendes Derivat zu bilanzieren.

Eine solche bilanzielle Trennungspflicht ist dann gegeben, wenn die drei folgenden Bedingungen erfüllt sind:

- Die Charakteristika und Risiken des eingebetteten Derivats sind nicht eng mit denen des originären Trägerinstrumentes verbunden,
- ein eigenständiges Derivat mit den gleichen Bedingungen wie das eingebettete Derivat erfüllt die Definition eines Derivats nach IAS 39, und
- das originäre Finanzinstrument wird nicht erfolgswirksam zum beizulegenden Zeitwert bewertet.

In diesem Fall ist das zu trennende eingebettete Derivat als Teil des Handelsbestands anzusehen und zum beizulegenden Zeitwert (Fair Value) zu bilanzieren. Bewertungsänderungen sind

erfolgswirksam im Ergebnis aus der Bewertung von derivativen Finanzinstrumenten innerhalb des Handelsergebnisses zu erfassen. Die Bilanzierung und Bewertung des Basisvertrages folgt hingegen den Vorschriften der zugewiesenen Kategorie des Finanzinstruments.

Wenn die oben genannten drei Bedingungen nicht erfüllt sind, wird das eingebettete Derivat nicht getrennt bilanziert und das hybride Finanzinstrument (strukturiertes Produkt) insgesamt nach den allgemeinen Vorschriften der Kategorie bewertet, der das Finanzinstrument zugeordnet wurde.

#### e) Bilanzierung von Sicherungszusammenhängen (Hedge Accounting)

IAS 39 beinhaltet umfassende Regelungen für die bilanzielle Abbildung von Sicherungszusammenhängen, das heißt der Bilanzierung von Sicherungsinstrumenten (insbesondere Derivate) und den durch sie abgesicherten Grundgeschäften.

Nach den allgemeinen Regelungen werden Derivate als Handelsaktiva oder Handelspassiva klassifiziert und zum beizulegenden Zeitwert (Fair Value) bewertet. Das Bewertungsergebnis wird im Handelsergebnis ausgewiesen.

Werden Derivate nachweislich zur Absicherung von Risiken aus Nichthandelsgeschäften eingesetzt, lässt IAS 39 unter bestimmten Bedingungen die Anwendung des Hedge Accountings (Bilanzierung von Sicherungszusammenhängen) zu. Dabei werden vorwiegend zwei Formen des Hedge Accountings angewendet:

- Fair Value Hedge Accounting:

IAS 39 sieht die Anwendung des Hedge Accountings für Derivate vor, die der Absicherung des beizulegenden Zeitwertes bilanzierter Vermögenswerte oder Verbindlichkeiten dienen. Einem solchen Marktwertisiko unterliegen insbesondere die Emissions- und Kreditgeschäfte des Konzerns und die Wertpapierbestände der Liquiditätssteuerung, sofern es sich um festverzinsliche Papiere handelt. Zur Absicherung dieser Risiken werden vor allem Zinsswaps verwendet.

Gemäß den Regelungen des Fair Value Hedge Accountings werden die zur Absicherung eingesetzten derivativen Finanzinstrumente zum Fair Value als Marktwerte aus derivativen Sicherungsinstrumenten bilanziert. Die Bewertungsänderungen werden erfolgswirksam in der Gewinn- und Verlustrechnung als Ergebnis aus Sicherungszusammenhängen erfasst. Für den gesicherten Vermögenswert beziehungsweise die gesicherte Verbindlichkeit sind die aus dem gesicherten Risiko resultierenden gegenläufigen Fair-Value-Änderungen bilanziell zu erfassen und ebenfalls erfolgswirksam in der Gewinn- und Verlustrechnung als Ergebnis aus Sicherungszusammenhängen zu vereinnahmen.

|     |                                  |
|-----|----------------------------------|
| 204 | Gesamtergebnisrechnung           |
| 208 | Bilanz                           |
| 210 | Eigenkapitalveränderungsrechnung |
| 212 | Kapitalflussrechnung             |
| 214 | Anhang (Notes)                   |
| 370 | Bestätigungsvermerk              |

Fair Value Hedge Accounting kann entweder als Mikro Fair Value Hedge oder als Portfolio Fair Value Hedge für Zinsrisiken ausgestaltet werden:

- Beim Micro Fair Value Hedge Accounting wird ein Grundgeschäft mit einem oder mehreren Sicherungsgeschäften in einer Sicherungsbeziehung verknüpft. Die Buchwerte der Grundgeschäfte werden im Falle von Fair-Value-Änderungen, die dem abgesicherten Risiko zuzuordnen sind, erfolgswirksam angepasst.
- Beim Portfolio Fair Value Hedge wird die Absicherung von Zinsrisiken auf Portfolioebene abgebildet. Abgesichert werden nicht einzelne Geschäfte oder Gruppen von Geschäften mit ähnlicher Risikostruktur, sondern ein Betrag von Grundgeschäften gliedert nach Laufzeitbändern entsprechend den erwarteten Rückzahlungs- und Zinsanpassungsterminen in einem Portfolio. Portfolios können nur Aktiva, nur Passiva oder beides enthalten. Bei dieser bilanziellen Abbildung von Sicherungszusammenhängen werden die Wertänderungen der Grundgeschäfte als separater Aktiv- beziehungsweise Passivposten in der Bilanz erfasst. Der abgesicherte Betrag der Grundgeschäfte wird im Konzernabschluss ohne Sicht- oder Spareinlagen bestimmt (die Regelungen des EU-Carve-out werden damit nicht in Anspruch genommen).
- Cash Flow Hedge Accounting:  
IAS 39 sieht die Anwendung des Cash Flow Hedge Accountings für Derivate vor, die der Absicherung gegen das Risiko einer Veränderung künftiger Zahlungsströme dienen. Im Rahmen des Cash Flow Hedge Accountings eingesetzte Derivate werden zum Fair Value bilanziert. Das Bewertungsergebnis wird, sofern effektiv, erfolgsneutral nach Berücksichtigung latenter Steuern in der Rücklage aus Cash Flow Hedges im Eigenkapital erfasst. Der ineffektive Teil wird hingegen ergebniswirksam als Ergebnis aus Sicherungszusammenhängen ausgewiesen. Für die den gesicherten Zahlungsströmen zugrunde liegenden Geschäfte ändern sich die oben beschriebenen allgemeinen Bilanzierungsregeln nicht.

Die Anwendung der Regeln des Hedge Accountings ist an eine Reihe von Bedingungen gebunden. Diese beziehen sich insbesondere auf die Dokumentation des Sicherungszusammenhangs sowie auf die Wirksamkeit der Absicherungsmaßnahme.

Die Sicherungsbeziehung muss ab dem Zeitpunkt ihrer Begründung dokumentiert werden. Die Dokumentation umfasst insbesondere die Identifikation des Sicherungsinstruments und des gesicherten Grundgeschäfts sowie die Kennzeichnung des gesicherten Risikos und der Methodik zur Bestimmung der Effektivität des Sicherungszusammenhangs. Neben der

Dokumentation verlangt IAS 39 für die Anwendung der Regelungen des Hedge Accountings den Nachweis eines effektiven Sicherungszusammenhangs. Unter Effektivität wird in diesem Zusammenhang das Verhältnis der aus dem gesicherten Grundgeschäft resultierenden Änderung des beizulegenden Zeitwertes (Fair Value) beziehungsweise des Zahlungsstroms zur Änderung des beizulegenden Zeitwertes beziehungsweise des Zahlungsstroms aus dem Sicherungsgeschäft verstanden. Wenn sich diese Änderungen fast vollständig ausgleichen, liegt eine hohe Effektivität vor. Der Effektivitätsnachweis verlangt einerseits, dass für eine Sicherungsbeziehung künftig eine hohe Effektivität erwartet werden kann (prospektive Effektivität). Andererseits ist während des Bestehens der Sicherungsbeziehung regelmäßig nachzuweisen, dass diese während der Berichtsperiode hoch effektiv war (retrospektive Effektivität). Eine hohe retrospektive Effektivität ist gegeben, wenn das Verhältnis der Änderungen der beizulegenden Zeitwerte beziehungsweise der Zahlungsströme zwischen 0,8 und 1,25 liegt.

Die Commerzbank wendet für die Effektivitätsmessung für Mikro Fair Value Hedge Accounting das statistische Verfahren der Regressionsanalyse an, wobei die Wertänderungen von Grund- und Sicherungsgeschäft für den prospektiven Effektivitätstest durch historische Simulationen ermittelt werden. Retrospektiv werden die tatsächlichen Wertveränderungen genutzt. Auch für Portfolio Fair Value Hedge Accounting kommt für den prospektiven Effektivitätstest die Regressionsanalyse zur Anwendung, während für den retrospektiven Effektivitätstest die Dollar-Offset-Methode zur Anwendung kommt.

## (6) Währungsumrechnung

Monetäre Vermögenswerte und Schulden, die auf Fremdwährung lauten, und schwebende Fremdwährungskassageschäfte werden zum Kassamittelkurs des Bilanzstichtages, Devisentermingeschäfte zum Terminkurs des Bilanzstichtages umgerechnet. Realisierte Aufwendungen und Erträge rechnen wir grundsätzlich mit dem zum Zeitpunkt der Realisierung gültigen Kassakurs um. Zur Umrechnung von Aufwendungen und Erträgen können auch Durchschnittskurse verwendet werden, sofern diese keine bedeutenden Schwankungen aufweisen. Kursgesicherte Aufwendungen und Erträge rechnen wir zum Sicherungskurs um. Die aus der Umrechnung von Bilanzposten resultierenden Aufwendungen und Erträge werden grundsätzlich erfolgswirksam im Handelsergebnis erfasst.

Nicht monetäre Posten, zum Beispiel Beteiligungen, werden grundsätzlich mit historischen Kursen umgerechnet, wenn sie zu fortgeführten Anschaffungskosten bewertet werden. Wir nutzen für die Umrechnung den Stichtagskurs, wenn sie zum beizulegenden Zeitwert bewertet werden. Ergebnisse aus der Umrechnung von Gewinnen oder Verlusten aus nicht-monetären Posten

weisen wir entsprechend der Erfassung der Gewinne oder Verluste entweder ergebnisneutral im Eigenkapital oder ergebniswirksam in der Gewinn- und Verlustrechnung aus.

Die Umrechnung von in Fremdwährung aufgestellten Abschlüsse von konsolidierten Tochterunternehmen und at-Equity-bewerteten Unternehmen erfolgt für Erträge und Aufwendungen grundsätzlich zum Wechselkurs am Tag des Geschäftsvorfalles. Vereinfachend kann bei der Umrechnung auch ein Kurs verwendet werden, der einen Näherungswert für den Umrechnungskurs am Tag des Geschäftsvorfalles darstellt, beispielsweise der Durchschnittskurs einer Periode. Alle sich aus der Umrechnung ergebenden Differenzen sind als separater Bestandteil des Eigenkapitals in der Rücklage aus der Währungsumrechnung erfolgsneutral anzusetzen. Umrechnungsgewinne und -verluste aus der Kapitalkonsolidierung weisen wir ebenfalls erfolgsneutral in der Rücklage aus der Währungsumrechnung im Eigenkapital aus. Zum Zeitpunkt der Veräußerung dieser Vermögenswerte werden die Umrechnungsdifferenzen erfolgswirksam im Ergebnis aus Finanzanlagen erfasst.

#### **(7) Barreserve**

Die Barreserve umfasst den Kassenbestand, Guthaben bei Zentralnotenbanken, Schuldtitel öffentlicher Stellen und Wechsel, die zur Refinanzierung bei Zentralnotenbanken zugelassen sind. Mit Ausnahme der Schuldtitel öffentlicher Stellen, die wir zum beizulegenden Zeitwert (Fair Value) bilanzieren, sind alle Bestände zum Nennwert ausgewiesen.

#### **(8) Forderungen**

Forderungen an Kreditinstitute und Kunden im Commerzbank-Konzern, die nicht zu Handelszwecken gehalten werden und nicht an einem aktiven Markt notiert sind, werden zu fortgeführten Anschaffungskosten bilanziert. Agien oder Disagien werden erfolgswirksam über die Laufzeit verteilt im Zinsergebnis vereinnahmt. Die Buchwerte von Forderungen, für die Micro Fair Value Hedge Accounting angewendet wird, werden um die dem abgesicherten Risiko zuzurechnenden Fair-Value-Änderungen angepasst. Forderungen, die im Rahmen der Fair Value Option angesetzt werden, sind mit ihrem beizulegenden Zeitwert (Fair Value) bilanziert worden. Bei Anwendung von Portfolio Fair Value Hedge Accounting werden die Fair-Value-Änderungen in dem aktivischen Bilanzposten Wertanpassung Portfolio Fair Value Hedges erfasst.

#### **(9) Risikovorsorge im Kreditgeschäft**

Den besonderen Adressenausfallrisiken im Kreditbereich tragen wir durch die Bildung von Einzel- und Portfoliowertberichtigungen Rechnung.

Für die bei Kunden- und Bankenforderungen vorhandenen Bonitätsrisiken haben wir nach konzerneinheitlichen Maßstäben Einzelwertberichtigungen gebildet. Die Wertberichtigung eines Kredites ist notwendig, wenn es aufgrund beobachtbarer Kriterien wahrscheinlich ist, dass nicht alle Zins- und Tilgungsverpflichtungen vertragsmäßig geleistet werden können. Die Höhe der Wertberichtigung entspricht der Differenz zwischen dem Buchwert des Kredites abzüglich des Barwertes erwarteter Rückflüsse.

Weiterhin tragen wir Kreditrisiken in Form von Portfoliowertberichtigungen Rechnung. Die Höhe der zu bildenden Portfoliowertberichtigungen wird unter Verwendung von aus der Basel-II-Systematik abgeleiteten Parametern ermittelt.

Der Gesamtbetrag der Risikovorsorge wird, sofern er sich auf bilanzielle Forderungen bezieht, in der Bilanz von den entsprechenden Aktivposten gekürzt. Die Risikovorsorge für außerbilanzielle Geschäfte (Avale, Indossamentsverbindlichkeiten, Kreditzusagen) wird hingegen als Rückstellung für Risiken aus dem Kreditgeschäft gezeigt.

Uneinbringliche Forderungen, für die keine Einzelwertberichtigungen bestanden, werden direkt abgeschrieben. Eingänge auf abgeschriebene Forderungen werden erfolgswirksam in der Risikovorsorge erfasst. Wertgeminderte Forderungen werden unter Verbrauch von etwaigen bestehenden Einzelwertberichtigungen (teil-)abgeschrieben, wenn sich die teilweise oder vollständige Uneinbringlichkeit der Forderung herausstellt. Forderungsteile wertgeminderter Forderungen, die die bestehende Risikovorsorge übersteigen, werden im Falle der Uneinbringlichkeit ebenfalls direkt abgeschrieben.

#### **(10) Echte Pensionsgeschäfte und Wertpapierleihgeschäfte**

Repo-Geschäfte sind Kombinationen aus Kassakäufen oder -verkäufen von Wertpapieren mit gleichzeitigem Verkauf oder Rückkauf auf Termin mit demselben Kontrahenten. Die bei Repo-Geschäften in Pension gegebenen Wertpapiere (Kassaverkauf) werden in der Konzernbilanz weiterhin als Wertpapierbestand bilanziert und bewertet. Der Liquiditätszufluss aus dem Repo-Geschäft wird je nach Gegenpartei als Verbindlichkeit gegenüber Kreditinstituten oder Kunden in der Bilanz ausgewiesen. Vereinbarte Zinszahlungen werden laufzeitgerecht als Zinsaufwendungen im Handelsergebnis und, sofern sie nicht aus Handelsgeschäften resultieren, im Zinsüberschuss erfasst.



|     |                                  |
|-----|----------------------------------|
| 204 | Gesamtergebnisrechnung           |
| 208 | Bilanz                           |
| 210 | Eigenkapitalveränderungsrechnung |
| 212 | Kapitalflussrechnung             |
| 214 | Anhang (Notes)                   |
| 370 | Bestätigungsvermerk              |

Die bei Reverse Repos entstehenden Liquiditätsabflüsse werden als Forderungen an Kreditinstitute oder Kunden bilanziert und, sofern diese dem Bankbuch zuzuordnen sind, zu den fortgeführten Anschaffungskosten bewertet. Reverse Repos aus Handelsgeschäften bewerten wir zum beizulegenden Zeitwert. Die dem Geldgeschäft zugrunde liegenden in Pension genommenen Wertpapiere (Kassakauf) werden nicht in der Bilanz ausgewiesen und folglich auch nicht bewertet. Vereinbarte Zinsen aus Reverse Repos werden laufzeitgerecht als Zinserträge im Handelsergebnis und, sofern sie nicht aus Handelsgeschäften resultieren, im Zinsüberschuss erfasst.

Wertpapierleihgeschäfte bilanzieren wir analog dem Ausweis von Wertpapieren aus echten Pensionsgeschäften. Dabei verbleiben verliehene Wertpapiere weiterhin in unserem Wertpapierbestand und werden nach den Regeln des IAS 39 bewertet. Entliehene Wertpapiere werden nicht bilanziert und auch nicht bewertet. Durch uns gestellte Barsicherheiten für Wertpapierleihgeschäfte weisen wir als Forderungen, erhaltene Sicherheiten als Verbindlichkeiten aus.

Insofern bestehen für die übertragenen, aber nicht ausgebuchten finanziellen Vermögenswerte die gleichen Risiken und Chancen wie für die nicht übertragenen finanziellen Vermögenswerte, die in Note 5 beschrieben sind.

### (11) Wertanpassung aus Portfolio Fair Value Hedges

In diesen Posten erfassen wir die aktivischen beziehungsweise passivischen Wertänderungen der Grundgeschäfte, für die Portfolio Fair Value Hedge Accounting angewendet wird.

### (12) Positive Marktwerte aus derivativen Sicherungsinstrumenten

Derivative Finanzinstrumente, die zur Absicherung eingesetzt sind und sich für das Hedge Accounting qualifizieren sowie einen positiven Marktwert aufweisen, werden in diesem Bilanzposten ausgewiesen. Die Bewertung der Sicherungsinstrumente erfolgt zum beizulegenden Zeitwert (Fair Value).

Börsennotierte Sicherungsinstrumente werden mit Börsenkursen bewertet; bei den nicht börsennotierten erfolgt die Bewertung anhand von Vergleichspreisen und interner Bewertungsverfahren (Barwert- oder Optionspreismodelle). Die im Rahmen des Hedge Accountings für Fair Value Hedges ermittelten Bewertungsergebnisse werden im Ergebnis aus Sicherungszusammenhängen in der Gewinn- und Verlustrechnung erfasst. Im Ergebnis aus Sicherungszusammenhängen sind ebenfalls ineffektive Teile der Wertänderungen aus Cash Flow Hedges enthalten; effektive Teile der Wertänderungen hingegen werden ergebnisneutral in den Anderen Rücklagen (Rücklage aus Cash Flow Hedges) im Eigenkapital gezeigt.

### (13) Handelsaktiva

Handelszwecken dienende Finanzinstrumente bewerten wir in der Bilanz zum beizulegenden Zeitwert (Fair Value) am Bilanzstichtag. Ebenfalls zum beizulegenden Zeitwert sind hier alle derivativen Finanzinstrumente ausgewiesen, die nicht als Sicherungsinstrumente im Rahmen des Hedge Accountings eingesetzt werden und einen positiven beizulegenden Zeitwert besitzen. Darüber hinaus werden Kreditzusagen mit positivem Marktwert und Edelmetalltransaktionen in diesem Posten bilanziert.

Bei börsennotierten Produkten verwenden wir Börsenkurse; für nicht börsennotierte Produkte nutzen wir Vergleichspreise, indikative Preise von Preisagenturen beziehungsweise anderen Kreditinstituten (Lead Manager) oder interne Bewertungsverfahren (Barwert- oder Optionspreismodelle).

Alle realisierten Gewinne und Verluste sowie nicht realisierte Bewertungsergebnisse sind Teil des Handelsergebnisses in der Gewinn- und Verlustrechnung. Ebenfalls im Handelsergebnis werden Zins- und Dividendenerträge aus Handelsbeständen sowie zugehörige Refinanzierungsaufwendungen ausgewiesen.

### (14) Finanzanlagen

Die Finanzanlagen umfassen Finanzinstrumente, die keinem anderen Bilanzposten zugeordnet werden. Als Finanzanlagen weisen wir alle nicht Handelszwecken dienenden Schuldverschreibungen und andere zinsbezogene Wertpapiere, Aktien und andere eigenkapitalbezogene Wertpapiere, Beteiligungen und Anteile an nicht konsolidierten Tochterunternehmen aus, es sei denn, sie sind als zur Veräußerung gehalten im Sinne von IFRS 5 zu behandeln. Die nicht at-Equity-bewerteten Anteile an assoziierten Unternehmen beziehungsweise Gemeinschaftsunternehmen weisen wir in den Finanzanlagen unter Beteiligungen aus.

In den Finanzanlagen enthaltene Finanzinstrumente der Kategorie Kredite und Forderungen sind zu fortgeführten Anschaffungskosten bewertet. Bei umkategorisierten Beständen setzen wir den beizulegenden Zeitwert zum Umkategorisierungszeitpunkt als neuen Buchwert der Wertpapierbestände an. Die zu diesem Zeitpunkt bestehende Neubewertungsrücklage nach latenten Steuern verbleibt in den Anderen Rücklagen im Eigenkapital und wird über die Restlaufzeit der umkategorisierten Wertpapiere aufgelöst.

Die Bilanzierung und Bewertung der Bestände, die der Kategorie zur Veräußerung verfügbarer finanzieller Vermögenswerte zugeordnet sind, erfolgt zum beizulegenden Zeitwert (Fair Value). Kann der beizulegende Zeitwert nicht einem aktiven Markt entnommen werden, bewerten wir die Bestände grundsätzlich anhand von Vergleichspreisen, indikativen Preisen von Preisagenturen beziehungsweise anderen Kreditinstituten (Lead Managern) oder interner Bewertungsverfahren (Barwert- oder Optionspreismodelle). Sofern der beizulegende Zeitwert für

Eigenkapitalinstrumente ausnahmsweise nicht zuverlässig bestimmt werden kann, erfolgt der Ansatz zu Anschaffungskosten abzüglich erforderlicher Wertminderungen.

Bewertungsergebnisse werden bei Beständen der Kategorie zur Veräußerung verfügbarer finanzieller Vermögenswerte – nach Berücksichtigung latenter Steuern – innerhalb des Eigenkapitals in die Anderen Rücklagen (Neubewertungsrücklage) eingestellt. Eine erfolgswirksame Realisierung von Gewinnen oder Verlusten findet erst bei Verkauf oder im Falle einer Wertminderung im Ergebnis aus Finanzanlagen statt.

Agien oder Disagien werden erfolgswirksam über die Laufzeit verteilt und im Zinsergebnis vereinnahmt. Ebenfalls im Zinsergebnis werden Zinserträge aus Schuldverschreibungen, Dividendenzahlungen aus Aktien und aus Anteilen an nicht konsolidierten verbundenen Unternehmen sowie laufende Beteiligungsergebnisse gezeigt.

Sofern für hier bilanzierte Finanzinstrumente eine effektive Sicherungsbeziehung im Rahmen eines Fair Value Hedges zu einem derivativen Finanzinstrument besteht, wird der Teil der Änderung des beizulegenden Zeitwertes, der auf das gesicherte Risiko entfällt, erfolgswirksam im Ergebnis aus Sicherungszusammenhängen ausgewiesen. Wertänderungen der beizulegenden Zeitwerte von Finanzanlagen, auf die die Fair Value Option angewendet wird, weisen wir im Ergebnis aus der Anwendung der Fair Value Option aus, das Bestandteil des Handelsergebnisses ist.

Für die unter den Finanzanlagen ausgewiesenen Finanzinstrumente ist zu prüfen, ob objektive Hinweise gemäß IAS 39.59 (zum Beispiel Vertragsbruch, Schadensfall, erhöhte Wahrscheinlichkeit für Sanierungsverfahren oder Insolvenz) auf einen nach dem Zugangszeitpunkt eingetretenen Verlust vorliegen, die zu einer Minderung der hieraus erwarteten Zahlungsströme führen. Eine Wertminderung besteht, wenn der Barwert der erwarteten Zahlungsströme geringer als der Buchwert des betreffenden Finanzinstrumentes ist. Im Falle einer Wertminderung ist das Bewertungsergebnis nicht mehr erfolgsneutral in den Anderen Rücklagen (Neubewertungsrücklage) im Eigenkapital, sondern als Wertminderungsaufwand in der Gewinn- und Verlustrechnung im Ergebnis aus Finanzanlagen zu erfassen.

Bei Eigenkapitalinstrumenten liegt eine Wertminderung unter anderem vor, wenn der beizulegende Zeitwert entweder signifikant oder länger anhaltend unter den Anschaffungskosten liegt.

Im Commerzbank-Konzern werden Eigenkapitalinstrumente des Available-for-Sale-Bestandes abgeschrieben, wenn der beizulegende Zeitwert entweder signifikant ( $\geq 20\%$ ) oder dauerhaft (mindestens neun Monate) unter den Anschaffungskosten liegt. Neben diesen quantitativen Hinweisen (Trigger Events) werden zur Prüfung auch die qualitativen Trigger Events des IAS 39.59 herangezogen.

Wertaufholungen dürfen bei Eigenkapitalinstrumenten der Kategorie zur Veräußerung verfügbarer finanzieller Vermögenswerte nicht erfolgswirksam erfasst werden; vielmehr sind sie ergebnisneutral über die Neubewertungsrücklage zu buchen. Insofern ergeben sich ergebniswirksame Effekte hier nur bei Wertminderung oder Veräußerung. Bei nicht notierten Eigenkapitalinstrumenten, für die ein verlässlicher beizulegender Zeitwert nicht regelmäßig ermittelt werden kann und die deshalb zu Anschaffungskosten abzüglich erforderlicher Wertminderungen bewertet sind, darf überhaupt keine Wertaufholung vorgenommen werden.

Liegen qualitative Trigger Events (IAS 39.59) vor, werden Fremdkapitalinstrumente der Kategorie zur Veräußerung verfügbarer finanzieller Vermögenswerte einzeln auf einen Wertminderungsbedarf untersucht und sofern erforderlich wertberichtet. Zur Operationalisierung der qualitativen Trigger Events wurden im Commerzbank-Konzern zusätzliche Indikatoren für eine Abschreibung entwickelt. So sind zum Beispiel Fremdkapitalinstrumente des Available-for-Sale-Bestandes grundsätzlich abzuschreiben, wenn das Rating des Schuldners CCC oder schlechter aufweist (siehe Note 84; S&P Rating) und der Fair Value unter den fortgeführten Anschaffungskosten liegt.

Fallen die Gründe für eine Wertminderung von Fremdkapitalinstrumenten der Kategorie zur Veräußerung verfügbarer finanzieller Vermögenswerte weg, ist eine Wertaufholung erfolgswirksam bis maximal zur Höhe der fortgeführten Anschaffungskosten vorzunehmen. Der über die Anschaffungskosten hinausgehende Betrag ist in der Neubewertungsrücklage zu erfassen.

Für Finanzinstrumente der Kategorie Kredite und Forderungen wird eine Wertminderung nach analogen Maßstäben wie für das Kreditgeschäft (vergleiche Note 5) gebildet. Die Wertminderungen werden im Ergebnis aus Finanzanlagen erfasst. Sollten die Indikatoren für eine Wertminderung von einzelnen Wertpapieren nicht mehr gegeben sein beziehungsweise nicht mehr auf eine Wertminderung hindeuten, so müssen diese bis maximal zur Höhe der fortgeführten Anschaffungskosten erfolgswirksam zugeschrieben werden. Ebenso kann ein verbessertes Risikoumfeld zur Auflösung einer zuvor gebildeten Wertminderung auf Portfolioebene führen.

### **(15) Immaterielle Anlagewerte**

Unter den Immateriellen Anlagewerten bilanzieren wir insbesondere Software, erworbene Markennamen, Kundenbeziehungen und Geschäfts- oder Firmenwerte. Die Bilanzierung erfolgt zu fortgeführten Anschaffungskosten. Software und Kundenbeziehungen schreiben wir aufgrund ihrer begrenzten Nutzungsdauer linear ab. Für die übrigen Marken sowie die Geschäfts- oder Firmenwerte werden mindestens jährliche Werthaltigkeitstests (Impairmenttests) durchgeführt.

|     |                                  |
|-----|----------------------------------|
| 204 | Gesamtergebnisrechnung           |
| 208 | Bilanz                           |
| 210 | Eigenkapitalveränderungsrechnung |
| 212 | Kapitalflussrechnung             |
| 214 | Anhang (Notes)                   |
| 370 | Bestätigungsvermerk              |

### Methode des Werthaltigkeitstests

Alle Geschäfts- oder Firmenwerte sowie Markennamen werden zum Erwerbszeitpunkt auf die zahlungsmittelgenerierenden Einheiten (Cash Generating Units) allokiert. Die Commerzbank hat die Segmente nach IFRS 8 als zahlungsmittelgenerierende Einheiten definiert. Eine Beschreibung der Segmente erfolgt in Note 45. In der Folge werden diese Vermögenswerte mindestens jährlich zu jedem Bilanzstichtag auf ihren künftigen wirtschaftlichen Nutzen auf Basis der Cash Generating Units überprüft. Dabei wird der Buchwert des gebundenen Eigenkapitals eines Segments als Cash Generating Unit (einschließlich eines zugeordneten Geschäfts- oder Firmenwerts) mit deren erzielbarem Betrag verglichen. Der erzielbare Betrag wird als der höhere Betrag aus Nutzungswert (Value in Use) und Nettoveräußerungswert (Fair Value less Cost to Sell) ermittelt. Der Nutzungswert basiert auf den erwarteten Ergebnissen der Einheit sowie den Kapitaleffekten gemäß der vom Vorstand genehmigten Mehrjahresplanungen der einzelnen Segmente. Sofern der Nutzungswert den Buchwert unterschreitet, wird zusätzlich der Nettoveräußerungswert (Fair Value less Cost to Sell) ermittelt. Der höhere Wert wird angesetzt.

### Annahmen im Werthaltigkeitstest

Die Ertragswertberechnungen beruhen auf der Mehrjahresplanung der Segmente. Diese besteht neben der Ergebnisplanung aus einer Planung der Risikoaktiva sowie des gebundenen Eigenkapitals. Wesentliche Werttreiber sind Forderungsvolumina, Zinsüberschuss nach Risikovorsorge sowie Provisionsüberschuss. Weitere sensibel reagierende Planungsparameter sind die Risikoaktiva. Die Planungen basieren auf Prognosen des Economic Research hinsichtlich der gesamtwirtschaftlichen Entwicklung und anderer wesentlicher Parameter wie zum Beispiel der Entwicklung der Zinsen, Wechselkurse, Aktien- und Rentenmärkte. Dabei finden ebenso Erfahrungen des Managements aus der Vergangenheit sowie eine Abwägung von Chancen und Risiken aus den Prognosen Eingang in die Planungen.

Die Mehrjahresplanung beinhaltet grundsätzlich vier (bisher drei) Planjahre. Für den Werthaltigkeitstest wurde die Ergebnisplanung des letzten Planjahres bis 2019 fortgeschrieben, um die Auswirkungen von Basel III einschließlich der Übergangsberechnungen auf das gebundene Kapital zu berücksichtigen.

Bei der Ertragswertberechnung haben wir durchschnittliche risikoadäquate Zinssätze zwischen 11,1 % (Vorjahr: 12,1 %) und 12,2 % (Vorjahr: 13,4 %) angewendet. Als nachhaltige Wachstumsrate für die Berechnung der ewigen Rente wird in allen Segmenten 2 % (Vorjahr: 2 %) angesetzt.

Sofern objektive Hinweise dafür vorliegen, dass der ursprünglich erkennbare Nutzen nicht mehr erzielt werden kann, ist zunächst eine Wertminderung auf den Geschäfts- oder Firmenwert der

zahlungsmittelgenerierenden Einheit vorzunehmen; der Ausweis erfolgt in einem separaten Posten der Gewinn- und Verlustrechnung. Ein etwaiger darüber hinausgehender Wertminderungsbedarf wird anteilig auf die übrigen Vermögenswerte der Einheit verteilt.

Die erworbenen Rechte an der Marke Dresdner Bank wurden im Jahr 2010 voll abgeschrieben. Die Nutzung dieser Marke erfolgt dann nur noch in einer Filiale in Dresden.

Erworbene Kundenbeziehungen werden über einen Zeitraum von sieben bis fünfzehn Jahren abgeschrieben.

Für den Posten Software nehmen wir eine lineare Abschreibung über die voraussichtliche wirtschaftliche Nutzungsdauer von zwei bis zehn Jahren zulasten der Verwaltungsaufwendungen vor. Unter Software wird sowohl selbst erstellte als auch erworbene Software bilanziert. Mit dem Kauf der Dresdner Bank erworbene Software wird linear bis zum Zeitpunkt der Migration abgeschrieben, sofern sie hiernach nicht weiterverwendet wird.

Sofern der Grund für eine in früheren Geschäftsjahren vorgenommene Wertminderung entfallen ist, werden die immateriellen Vermögenswerte bis maximal zu den fortgeführten Anschaffungs- und Herstellungskosten zugeschrieben. Für Geschäfts- oder Firmenwerte sind Zuschreibungen unzulässig.

### (16) Sachanlagen

Die hierunter ausgewiesenen Grundstücke und Gebäude sowie die Betriebs- und Geschäftsausstattung werden zu Anschaffungskosten, vermindert um planmäßige Abschreibungen, angesetzt. Wertminderungen nehmen wir in der Höhe vor, in der der Buchwert den höheren Wert aus beizulegendem Zeitwert abzüglich Veräußerungskosten und aus dem Nutzungswert des Vermögenswertes übersteigt.

Sofern der Grund für eine in früheren Geschäftsjahren vorgenommene Wertminderung entfallen ist, werden die Vermögenswerte bis maximal zu den fortgeführten Anschaffungs- und Herstellungskosten zugeschrieben.

Die Bestimmung der Nutzungsdauer nehmen wir unter Beachtung der voraussichtlichen physischen Abnutzung, der technischen Veralterung sowie rechtlicher und vertraglicher Beschränkungen vor. Alle Sachanlagen werden linear über die folgenden Zeiträume abgeschrieben:

| in Jahren                          | Voraussichtliche Nutzungsdauer |
|------------------------------------|--------------------------------|
| Gebäude                            | 30-50                          |
| Betriebs- und Geschäftsausstattung | 2-23                           |

Mit dem Kauf der Dresdner Bank erworbene Betriebs- und Geschäftsausstattung wie zum Beispiel IT-Hardware, Inneneinrichtungen und Filialausstattungen wird linear bis zum Zeitpunkt der Migration abgeschrieben, sofern sie hiernach nicht

weiter verwendet wird, ansonsten erfolgt die Abschreibung über die zu erwartende Nutzungsdauer.

Anschaffungen geringwertiger Sachanlagen wurden aus Wesentlichkeitsgründen direkt als Verwaltungsaufwand erfasst. Gewinne aus der Veräußerung von Sachanlagen vereinnahmen wir in den Sonstigen Erträgen, Verluste weisen wir in den Sonstigen Aufwendungen aus.

### **(17) Leasinggeschäft**

Nach IAS 17 wird ein Leasinggeschäft als Operating-Leasing-Verhältnis klassifiziert, wenn es nicht im Wesentlichen alle Chancen und Risiken, die mit dem Eigentum verbunden sind, auf den Leasingnehmer überträgt. Demgegenüber gelten als Finanzierungsleasing solche Vertragsverhältnisse, in denen der Leasingnehmer alle wesentlichen Chancen und Risiken trägt. Maßgeblich für die Zuordnung der Chancen und Risiken ist grundsätzlich der Barwert der mit den Leasingverträgen verbundenen Zahlungsströme. Sofern der Barwert zumindest der Investitionssumme des Leasingobjekts entspricht, erfolgt eine Klassifizierung als Finanzierungsleasing. Zu den Leasingobjekten gehören insbesondere Immobilien und Kraftfahrzeuge.

#### **Konzern als Leasinggeber**

- **Operating Leasing**  
Soweit die wesentlichen Chancen und Risiken aus dem Leasinggegenstand beim Leasinggeber verbleiben (Operating Leasing), wird dieser weiterhin bilanziert. Die Leasinggegenstände werden in der Konzernbilanz unter den Sonstigen Aktiva ausgewiesen. Die Bilanzierung der Leasingobjekte erfolgt zu Anschaffungs- oder Herstellungskosten, vermindert um die über die wirtschaftliche Nutzungsdauer planmäßig erfolgten Abschreibungen oder Wertminderungen. Die Leasingerlöse vereinnahmen wir, sofern in Einzelfällen nicht eine andere Verteilung geboten ist, linear über die Vertragslaufzeit und weisen sie im Sonstigen Ergebnis aus.
- **Finanzierungsleasing**  
Wenn nahezu alle Chancen und Risiken an dem Leasinggegenstand auf den Leasingnehmer übergehen (Finanzierungsleasing), weisen wir im Commerzbank-Konzern eine Forderung gegenüber dem Leasingnehmer aus. Der Ausweis der Forderung erfolgt in Höhe des Nettoinvestitionswertes zum Zeitpunkt des Vertragsabschlusses. Vereinnahmte Leasingraten werden in einen ertragswirksamen Zinsanteil und einen Tilgungsanteil aufgespalten. Die Erträge werden als Zinserträge auf der Basis einer periodengerechten Abgrenzung verteilt vereinnahmt.

Die Leasingverträge für Immobilien besitzen eine unkündbare Grundmietzeit und sind in der Regel mit Ankaufsrechten der

Leasingnehmer ausgestattet. Berechnungsgrundlage für die Zahlungen des Leasingnehmers sind die Gesamtinvestitionskosten abzüglich der zu Beginn des Leasingvertrages festgelegten Restwerte der Leasingobjekte. Während der unkündbaren Grundmietzeit trägt der Leasingnehmer alle objektbezogenen Kosten sowie die Fremdkosten der Leasinggesellschaft. Die Gefahr des zufälligen oder teilweisen Untergangs des Leasinggegenstandes trägt der Leasinggeber.

Die Leasingverträge für Mobilien (Fahrzeuge, EDV-Ausstattung) sind dagegen als Teilamortisationsverträge mit Andienungsrechten und als kündbare Verträge ausgestaltet. Im Fall der Teilamortisationsverträge wird aufgrund der im Verhältnis zur betriebsgewöhnlichen Nutzungsdauer kürzeren Grundmietzeit nur ein Teil der Gesamtinvestitionskosten amortisiert.

Kündbare Leasingverträge besitzen keine feste Grundmietzeit. Im Fall einer Kündigung wird eine im Voraus vereinbarte Abschlusszahlung fällig, die die noch nicht amortisierten Gesamtinvestitionskosten deckt. Erfolgt keine Kündigung, verlängert sich das Mietverhältnis. Die Gefahr des zufälligen oder teilweisen Untergangs des Leasingobjektes trägt wieder der Leasinggeber.

#### **Konzern als Leasingnehmer**

Aufwendungen für Operating-Leasing-Verhältnisse werden grundsätzlich linear über die Laufzeit des Leasingvertrages erfasst und im Verwaltungsaufwand ausgewiesen.

Finanzierungsleasingverträge, bei denen der Commerzbank-Konzern als Leasingnehmer auftritt, sind von untergeordneter Bedeutung.

### **(18) Als Finanzinvestitionen gehaltene Immobilien**

Als Finanzinvestitionen gehaltene Immobilien (Investment Properties) sind solche Grundstücke und Gebäude zu verstehen, die zur Erzielung von Mieteinnahmen oder aus Gründen eines erwarteten Wertzuwachses gehalten werden. Der Commerzbank-Konzern weist unter anderem die im Rahmen der Sicherheitenverwertung als Finanzinvestition erworbenen Immobilien (Rettungserwerbe) aus.

Die Bewertung erfolgt zum Zugangszeitpunkt gemäß IAS 40 mit den Anschaffungs- beziehungsweise Herstellungskosten unter Einbeziehung der direkt zurechenbaren Transaktionskosten. Für die Folgebewertung der als Finanzinvestitionen gehaltenen Immobilien wird das Modell des beizulegenden Zeitwertes (Fair Value) angewendet. Die Ermittlung des beizulegenden Zeitwertes basiert im Wesentlichen auf jährlich aktualisierten Bewertungen von internen Sachverständigen sowie auf den bei der aktuellen Marktlage erzielbaren Marktpreisen. Die Bewertung gewerblich genutzter Objekte erfolgt in der Regel ertragswertorientiert; individuelle Wohnungsbauten werden

|     |                                  |
|-----|----------------------------------|
| 204 | Gesamtergebnisrechnung           |
| 208 | Bilanz                           |
| 210 | Eigenkapitalveränderungsrechnung |
| 212 | Kapitalflussrechnung             |
| 214 | Anhang (Notes)                   |
| 370 | Bestätigungsvermerk              |

üblicherweise sach- oder vergleichswertorientiert bewertet. Ein Gewinn beziehungsweise Verlust, der durch die Änderung des beizulegenden Zeitwertes entsteht, wird im Sonstigen Ergebnis der Periode erfolgswirksam berücksichtigt.

Laufende Erträge und Aufwendungen werden entsprechend im Zinsüberschuss ausgewiesen.

### (19) Zur Veräußerung gehaltene Vermögenswerte und Vermögenswerte aus Veräußerungsgruppen

Langfristige Vermögenswerte und Veräußerungsgruppen, die in ihrem gegenwärtigen Zustand veräußert werden können und deren Veräußerung höchstwahrscheinlich ist, sind als zur Veräußerung bestimmt zu klassifizieren. Die entsprechenden Vermögenswerte sind mit ihrem beizulegenden Zeitwert abzüglich Veräußerungskosten anzusetzen, sofern dieser niedriger als der Buchwert ist. Im Falle daraus resultierender Wertminderungen sind diese für Veräußerungsgruppen erfolgswirksam im Ergebnis aus Finanzanlagen, für langfristige Vermögenswerte im Sonstigen Ergebnis zu erfassen. Eine spätere Wertaufholung ist auf die Summe der vorher erfassten Wertminderungen begrenzt.

### (20) Verbindlichkeiten

Finanzielle Verbindlichkeiten bilanzieren wir, sofern sie dem Bankbuch zuzuordnen sind, mit fortgeführten Anschaffungskosten. Die in den Verbindlichkeiten eingebetteten Derivate (Embedded Derivatives) werden, sofern trennungspflichtig, abgespalten und mit dem beizulegenden Zeitwert (Fair Value) bewertet unter den Handelsaktiva oder -passiva ausgewiesen. Im Rahmen des Micro Fair Value Hedge Accountings werden gesicherte Verbindlichkeiten um die dem abgesicherten Risiko zuzurechnenden Fair-Value-Änderungen angepasst. Bei Anwendung von Portfolio Fair Value Hedge Accounting werden die Fair-Value-Änderungen in dem passivischen Bilanzposten Wertanpassung aus Portfolio Fair Value Hedges erfasst. Verbindlichkeiten, für die die Fair Value Option angewendet wird, sind mit ihrem beizulegenden Zeitwert (Fair Value) bilanziert.

### (21) Negative Marktwerte aus derivativen Sicherungsinstrumenten

In diesem Posten werden derivative Finanzinstrumente ausgewiesen, die zur Absicherung eingesetzt werden und sich für das Hedge Accounting qualifizieren, sofern sie einen negativen Marktwert haben. Die Bewertung der Sicherungsinstrumente erfolgt zum beizulegenden Zeitwert (Fair Value).

Börsennotierte Sicherungsinstrumente werden mit Börsenkursen bewertet; bei den nicht börsennotierten erfolgt die Bewertung anhand von Vergleichspreisen und interner Bewertungsverfahren (Barwert- oder Optionspreismodelle). Im Rahmen von Fair Value Hedges werden Änderungen des beizule-

genden Zeitwertes der Sicherungsinstrumente im Ergebnis aus Sicherungszusammenhängen in der Gewinn- und Verlustrechnung ausgewiesen. Effektive Teile der Wertänderungen aus Cash Flow Hedges werden hingegen in der Rücklage aus Cash Flow Hedges im Eigenkapital gezeigt.

### (22) Handelspassiva

Derivative Finanzinstrumente, die nicht als Sicherungsinstrumente im Rahmen des Hedge Accountings eingesetzt werden sowie Kreditzusagen des Handelsbuchs, die einen negativen Marktwert besitzen, werden unter den Handelspassiva ausgewiesen. Darüber hinaus bilanzieren wir auch eigene Emissionen des Handelsbuchs und Lieferverpflichtungen aus Wertpapierleerverkäufen in diesem Posten. Die Bewertung der Handelspassiva erfolgt ergebniswirksam zum beizulegenden Zeitwert (Fair Value). Bei börsennotierten Finanzinstrumenten werden Börsenkurse verwendet; für nicht börsennotierte Produkte werden Vergleichspreise oder interne Bewertungsverfahren (Barwert- oder Optionspreismodelle) genutzt. Alle realisierten Gewinne und Verluste sowie nicht realisierte Bewertungsergebnisse sind Teil des es Handelsergebnisses in der Gewinn- und Verlustrechnung.

### (23) Rückstellungen

Eine Rückstellung ist anzusetzen, wenn zum Bilanzstichtag aus einem Ereignis der Vergangenheit eine gegenwärtige rechtliche oder faktische Verpflichtung entstanden, der Abfluss von Ressourcen zur Erfüllung dieser Verpflichtung wahrscheinlich und eine verlässliche Schätzung der Höhe der Verpflichtung möglich ist. Rückstellungen bilden wir daher für ungewisse Verbindlichkeiten gegenüber Dritten und drohende Verluste aus schwebenden Geschäften in Höhe der zu erwartenden Inanspruchnahmen.

Die Zuführung zu den unterschiedlichen Rückstellungsarten erfolgt über verschiedene Posten der Gewinn- und Verlustrechnung. Rückstellungen im Kreditgeschäft werden dem Risikovor-sorgeaufwand, Restrukturierungsrückstellungen den Restrukturierungsaufwendungen und Rückstellungen für Rechtsrisiken dem Sonstigen Ergebnis belastet. Die übrigen Rückstellungen werden grundsätzlich zulasten der Verwaltungsaufwendungen gebildet.

Rückstellungen für Restrukturierungsmaßnahmen werden dann angesetzt, wenn der Commerzbank-Konzern einen detaillierten formellen Plan für die Restrukturierungsmaßnahmen besitzt und bereits begonnen hat, diesen zu verwirklichen, oder die wesentlichen Details der Restrukturierung bekannt gemacht hat. Der detaillierte Plan umfasst die betroffenen Geschäftsbereiche, die ungefähre Anzahl der Mitarbeiter, deren Stellen im Rahmen der Restrukturierungsmaßnahmen betroffen sind, die damit verbundenen Kosten und den Zeitraum, in dem die Restrukturierungsmaßnahme durchgeführt werden soll. Der detaillierte Plan



muss in einer Art und Weise kommuniziert werden, dass die Betroffenen mit seiner Verwirklichung rechnen können. Der Posten Restrukturierungsaufwendungen in der Gewinn- und Verlustrechnung enthält weitere im Zusammenhang mit Restrukturierungsmaßnahmen stehende Aufwendungen, die unmittelbar angefallen und nicht in der Restrukturierungsrückstellung enthalten sind.

#### Abzinsung

Der für eine Rückstellung angesetzte Betrag stellt die bestmögliche Schätzung der Ausgabe dar, die zur Erfüllung der gegenwärtigen Verpflichtung zum Abschlussstichtag erforderlich ist. Risiken und Unsicherheiten sind bei der Schätzung berücksichtigt. Langfristige Rückstellungen sind mit ihrem Barwert angesetzt.

#### (24) Rückstellungen für Pensionen und ähnliche Verpflichtungen

Die betriebliche Altersversorgung für die aktiven und ehemaligen Mitarbeiter und Hinterbliebenen der Commerzbank Aktiengesellschaft sowie einiger inländischer Tochterunternehmen richtet sich nach verschiedenen Versorgungssystemen (beitrags- und leistungsorientierte Pläne).

Zum einen erwerben die Mitarbeiter eine Anwartschaft auf Versorgungsansprüche aufgrund einer beitragsorientierten Zusage über ein externes Versorgungswerk (Defined Contribution Plan). Zur Finanzierung leistet der Konzern unter Beteiligung der aktiven Mitarbeiter einen festgelegten Beitrag an externe Versorgungsträger (unter anderem Versicherungsverein des Bankgewerbes a. G. (BVV), Berlin, Versorgungskasse des Bankgewerbes e. V., Berlin).

Die Höhe der gegenwärtigen und künftigen Pensionsleistungen wird hier durch die gezahlten Beiträge und die damit verbundenen Vermögenserträge bestimmt. Für diese mittelbaren Systeme werden die Rechnungslegungsvorschriften gemäß IAS 19 für einen beitragsorientierten Plan (Defined Contribution Plan) angewendet, das heißt die Beiträge an die externen Versorgungsträger im Personalaufwand erfasst. Rückstellungen werden nicht gebildet.

Zum anderen bestehen Verpflichtungen aus Versorgungsanwartschaften und laufenden Leistungen aufgrund einer unmittelbaren Versorgungszusage der Commerzbank, bei der die Höhe der Versorgungsleistung festgelegt und von Faktoren wie Alter, Vergütung und Betriebszugehörigkeit abhängig ist (Defined Benefit Plan). Für diese Versorgungssysteme werden die Rechnungslegungsvorschriften gemäß IAS 19 für einen leistungsorientierten Plan angewendet, das heißt, es werden Rückstellungen gebildet.

Für versorgungsberechtigte Mitarbeiter, die bis zum 31. Dezember 2004 in die Dienste der Commerzbank Aktiengesellschaft oder einigen anderen konsolidierten Gesellschaften eingetreten sind, richten sich die unmittelbaren Versorgungsansprüche überwiegend nach den Regelungen des Commerzbank-Bausteinplans zur Altersvorsorge (CBA). Die Leistungen nach dem CBA setzen sich der Höhe nach aus einem Initialbaustein für die Zeit bis zum 31. Dezember 2004 und aus einem Versorgungsbaustein – gegebenenfalls zuzüglich eines Dynamikbausteins – für jedes beitragsfähige Kalenderjahr ab dem Jahr 2005 zusammen. Seit dem 1. Januar 2005 eingetretene Mitarbeiter erhalten eine Zusage nach dem Commerzbank-Kapitalplan zur betrieblichen Altersvorsorge (CKA). Die Leistungen nach dem CKA setzen sich der Höhe nach aus einer beitragsorientierten Garantieleistung für jedes beitragsfähige Kalenderjahr ab dem Jahr 2005 zuzüglich einer performanceabhängigen Zulage zusammen. Die Performancemessung erstreckt sich über den Zeitraum der Beitragszahlung bis zum Eintritt des Versorgungsfalles.

Die unmittelbare betriebliche Altersversorgung für die Mitarbeiter der ehemaligen Dresdner Bank Aktiengesellschaft wird seit dem 1. Januar 2010 ebenfalls nach den Regelungen des Commerzbank-Bausteinplans zur Altersvorsorge (CBA) durchgeführt. Die Überleitung der Mitarbeiter in den CBA zum 1. Januar 2010 war dabei an das Vorgehen angelehnt, das die Commerzbank im Jahre 2004 bei der Neuordnung der betrieblichen Altersversorgung für ihre damaligen Mitarbeiter angewendet hat.

Zur Erfüllung der unmittelbaren Versorgungsverpflichtungen wurden Deckungsmittel an einen rechtlich unabhängigen Treuhänder, den Commerzbank Pension-Trust e. V. (CPT), übertragen. Das vom CPT gehaltene Treuhandvermögen ist als Planvermögen im Sinne von IAS 19.7 qualifiziert. Gemäß IAS 19.54 sind die übertragenen Vermögenswerte mit dem Barwert der Verpflichtungen (DBO) zu saldieren, woraus eine entsprechende Reduzierung der Pensionsrückstellungen im Konzern resultiert.

Über die oben beschriebene Altersversorgung hinaus gibt es in Großbritannien einen intern finanzierten Gesundheitsfürsorgeplan, nach dem den Berechtigten in der Rentenphase medizinische Aufwendungen erstattet werden beziehungsweise ein Zuschuss zur privaten Krankenversicherung gewährt wird. Die daraus resultierenden Verpflichtungen sind gemäß IAS 19 nach den Regeln für leistungsorientierte Pensionspläne zu bilanzieren.

Der im Personalaufwand zu erfassende Pensionsaufwand für die unmittelbaren Versorgungszusagen setzt sich aus mehreren Komponenten zusammen: zum einen aus dem Dienstzeitaufwand (Service Cost), der die von den Anwärtern im Geschäftsjahr verdienten Ansprüche repräsentiert, zum anderen aus den

|     |                                  |
|-----|----------------------------------|
| 204 | Gesamtergebnisrechnung           |
| 208 | Bilanz                           |
| 210 | Eigenkapitalveränderungsrechnung |
| 212 | Kapitalflussrechnung             |
| 214 | Anhang (Notes)                   |
| 370 | Bestätigungsvermerk              |

Zinsaufwendungen (Interest Cost) auf den Barwert der Pensionsverpflichtungen, da der Zeitpunkt der Erfüllung der Pensionsverpflichtungen eine Periode vorangeschritten ist. Dagegen mindern die erwarteten Nettoerträge aus dem Planvermögen den Pensionsaufwand. Weiterhin wird der Pensionsaufwand durch die Tilgung bisher nicht erfolgswirksam erfasster versicherungsmathematischer Gewinne beziehungsweise Verluste in seiner Höhe beeinflusst. Wurden die unmittelbaren Versorgungszusagen geändert und ergibt sich hieraus eine Änderung der Leistungsverpflichtung, ist ein nachzuerrechnender Dienstzeitaufwand beziehungsweise -ertrag zu erfassen.

Die Höhe der Rückstellung berechnet sich gemäß IAS 19.54 folgendermaßen:

|                                                                                                                       |
|-----------------------------------------------------------------------------------------------------------------------|
| Barwert der leistungsorientierten Verpflichtung für Direktzusagen (DBO)                                               |
| abzüglich beizulegendem Zeitwert des Planvermögens                                                                    |
| ab-/zuzüglich nicht erfasster versicherungsmathematischer Verluste oder Gewinne                                       |
| ab-/zuzüglich eines gegebenenfalls bisher noch nicht erfassten, nachzuerrechnenden Dienstzeitaufwandes oder -ertrages |
| <hr/>                                                                                                                 |
| =Höhe der Pensionsrückstellung                                                                                        |

Bei leistungsorientierten Plänen ermittelt ein unabhängiger Versicherungsmathematiker die Pensionsverpflichtungen und ähnliche Verpflichtungen (Altersteilzeit, Vorruhestand, Jubiläen) jährlich nach dem Anwartschaftsbarwertverfahren (Projected Unit Credit Method). Dabei zieht dieser neben biometrischen Annahmen (zum Beispiel Heubeck-Richttafeln 2005G) insbesondere einen aktuellen Marktzins für langfristige, festverzinsliche Industrieanleihen höchster Bonität, Fluktuation und Karrieretrends sowie künftig zu erwartende Gehalts- oder Rentensteigerungsraten in die Berechnung ein.

Etwaige, noch nicht getilgte versicherungsmathematische Gewinne und Verluste brauchen nach IAS 19.92 ff. erst in der Berichtsperiode erfasst zu werden, an deren Anfang sie den Korridor von 10 % des Maximums aus DBO und dem beizulegenden Zeitwert des Planvermögens übersteigen.

Die Commerzbank hat sich dafür entschieden, noch nicht erfasste versicherungsmathematische Gewinne oder Verluste schneller als die Regelmortisation in IAS 19 zu erfassen. Dazu werden ab einer Signifikanzgrenze von 75 % des 10 % Korridors 20 % der innerhalb des Korridors liegenden Gewinne oder Verluste amortisiert.

## (25) Mitarbeitervergütungspläne

### 1. Beschreibung der wesentlichen Vergütungspläne

#### a) Commerzbank Aktiengesellschaft

##### Long-Term-Performance-Pläne (LTP)

Für Führungskräfte und ausgewählte weitere Mitarbeiter hatte die Commerzbank jährlich Long-Term-Performance-Pläne (LTP) aufgelegt. Seit dem Geschäftsjahr 2009 und bis auf Weiteres wird kein neuer LTP mehr angeboten.

Teilnahmeberechtigt waren Führungskräfte und Mitarbeiter in der Commerzbank Aktiengesellschaft, verschiedenen inländischen Tochtergesellschaften sowie ausgewählten operativen Auslandseinheiten. Die Teilnahme an den LTP war mit einer Eigenbeteiligung der Berechtigten an Commerzbank-Aktien verbunden.

Die Auszahlung der LTP ist an die Bedingung geknüpft, dass die Commerzbank Aktiengesellschaft eine Dividende im Geschäftsjahr der Auszahlung ausschüttet. Der Berechtigte erhält maximal 100 Euro pro Aktie, die bar ausgezahlt werden. Für die Auszahlung nach drei Jahren werden die Basiswerte, die im Ausgabejahr bestimmt wurden, mit den Daten des ersten Quartals des Berichtsjahres verglichen. Bei einer Outperformance von mindestens 1 Prozentpunkt gegenüber dem Dow-Jones-Euro-Stoxx (für 50 % der als Eigenbeteiligung eingebrachten Aktien) und/oder einer Kurssteigerung der Commerzbank-Aktie von mindestens 25 % im Vergleich zum Basiswert (für 50 % der als Eigenbeteiligung eingebrachten Aktien), erfolgt die Auszahlung. Sollte nach drei Jahren keines der Ausübungskriterien erfüllt worden sein, wird der Abgleich jeweils im Jahresabstand wiederholt. Vergleichsbasis bleiben die Daten des Ausgabejahres. Wird nach einer Laufzeit von fünf Jahren keine der Erfolgshürden übersprungen, wird der Plan beendet.

In den Geschäftsjahren 2010 und 2009 wurden keine LTP vergütet. Die noch laufenden Pläne LTP 2006 bis 2008 ermöglichen unverändert eine an der Aktien-/Indexkursentwicklung orientierte Vergütung. Die LTP sind als aktienbasierte Vergütungstransaktionen mit Barausgleich bilanziert.

##### Share Awards

Im Januar 2010 wurden Share Awards im Rahmen neuer Vergütungsmodelle für außertariflich bezahlte Mitarbeiter der Commerzbank Aktiengesellschaft eingeführt. Im Grundsatz sind Share Awards eine Komponente der variablen Vergütung bei der es sich um eine aufgeschobene Vergütung durch die Zuteilung virtueller Commerzbank-Aktien handelt. Sie gelten als Teil der variablen Entlohnung für das abgelaufene Jahr und berechtigen nach Ablauf der Wartezeit ausschließlich zum Bezug des Brutto-Cash-Gegenwertes der zum Zeitpunkt der Zusage festgelegten Anzahl an Aktien. Der in Share Awards umzuwandelnde Teil des individuell festzulegenden variablen Vergütungsbetrags wird in

Abhängigkeit vom Erfolg der Bank erst im Frühjahr des auf das Geschäftsjahr folgenden Jahres festgelegt. Die Anzahl der Aktien wird zum Zuteilungszeitpunkt bestimmt, indem der umzuwandelnde variable Vergütungsbetrag durch den durchschnittlichen Xetra-Schlusskurs der Monate Januar und Februar des Zuteilungsjahres sowie dem des Dezembers des Vorjahres geteilt wird. Die Auszahlung erfolgt grundsätzlich drei Jahre nach dem Zuteilungszeitpunkt, die Auszahlung ist an bestimmte Bedingungen geknüpft.

Auch für die Ermittlung des Auszahlungsbetrags wird der durchschnittliche Xetra-Schlusskurs der Commerzbank-Aktien der Monate Januar und Februar des Auszahlungsjahres sowie der des Monats Dezember des Vorjahres herangezogen. Der auszuzahlende Betrag errechnet sich dann durch die Multiplikation dieses Durchschnittskurses mit der zum Zuteilungszeitpunkt festgelegten Anzahl von Aktien.

Hat die Commerzbank während der Laufzeit der Share Awards Dividenden gezahlt, wird zusätzlich zu dem Brutto-Cash-Gegenwert ein Barbetrag in Höhe der Dividende ausgeschüttet.

Für das Geschäftsjahr 2010 werden keine Rückstellungen für für aktienbasierte Vergütungen hinsichtlich der neuen Share Awards ausgewiesen, da die Zuteilung und damit Festlegung der Höhe der Rückstellung erstmals im Frühjahr 2011 erfolgt. Der auf Share Awards entfallende Teil der variablen Vergütung, der im Jahr 2010 aufwandswirksam erfasst wurde, ist bis zum Zuteilungszeitpunkt in den Rückstellungen für den Personalbereich enthalten.

#### b) BRE Bank S.A.

Im März 2008 hat die BRE Bank S.A. für deren Vorstandsmitglieder zwei neue aktienbasierte Vergütungspläne aufgelegt. Während das erste Programm den Bezug von BRE-Bank-Aktien vorsieht, ermöglicht das zweite Programm den Bezug von Commerzbank-Aktien. Die Vorstandsmitglieder können in den Jahren 2009 bis 2018 an diesen Programmen teilnehmen. Die Teilnahme ist jedoch an verschiedene Bedingungen geknüpft, wie zum Beispiel die Eigenkapitalrendite oder den Jahresüberschuss der BRE Bank.

Während das Programm zum Bezug der BRE-Bank-Aktien jedes Jahr die gleichen Bedingungen aufweist, ist der Bezug von Commerzbank-Aktien jedes Jahr von deren Preis innerhalb der letzten 30 Tage vor dem jeweiligen Bezugstag maßgebend. Beide Programme sind als aktienbasierte Vergütungstransaktionen mit Ausgleich durch Eigenkapitalinstrumente einzustufen.

#### c) Sonstige konsolidierte Gesellschaften

Darüber hinaus besteht bei weiteren konsolidierten Unternehmen (zum Beispiel comdirect bank Aktiengesellschaft) für ausgewählte Mitarbeiter die Möglichkeit, im Rahmen von Beteiligungsmodellen an der typisierten Wertentwicklung der jeweiligen Gesellschaft zu partizipieren. Eine Vergütung ist dabei vom

Erreichungsgrad vereinbarter Ziele abhängig. Zu diesen Modellen zählt auch die direkte Beteiligung an Aktien der entsprechenden Gesellschaft. Häufig werden diese zu vergünstigten Preisen und/oder in Kombination mit Call- beziehungsweise Put-Optionen angeboten. Darüber hinaus werden Optionsscheine und Bezugsrechte zum Aktienerwerb begeben. Auch Prämien werden gewährt, die entweder zur Aktienzeichnung verwendet oder in bar vergütet werden können. Die Einhaltung von Sperrfristen sowie spätere Rückkaufsvereinbarungen bedingen den Erhalt zusätzlicher Erträge.

## 2. Bilanzierung und Bewertung

Die Bilanzierung der hier beschriebenen Mitarbeitervergütungspläne erfolgt nach den Vorschriften des IFRS 2 Aktienbasierte Vergütung (Share-based Payment). IFRS 2 unterscheidet aktienbasierte Vergütungstransaktionen mit Ausgleich durch Eigenkapitalinstrumente und mit Barausgleich. Für beide Formen gilt jedoch, dass die Gewährung von aktienbasierten Vergütungen zum beizulegenden Zeitwert im Jahresabschluss zu erfassen ist. Die Mehrzahl der beschriebenen Mitarbeitervergütungspläne wird als Vergütungstransaktionen mit Barausgleich eingestuft und bilanziert.

- Aktienbasierte Vergütungstransaktionen mit Ausgleich durch Eigenkapitalinstrumente

Der beizulegende Zeitwert von aktienbasierten Vergütungstransaktionen mit Ausgleich durch Eigenkapitalinstrumente ist als Personalaufwand mit einer entsprechenden Berücksichtigung im Eigenkapital (Kapitalrücklage) zu erfassen. Der beizulegende Zeitwert (ausgenommen der Effekt nicht marktbasierter Ausübungsbedingungen) ist zum Zeitpunkt der Gewährung der Rechte zu ermitteln und aufwandswirksam linear über die Laufzeit zu verteilen, in der der Mitarbeiter unwiderruflich Ansprüche auf die Rechte erwirbt. Der als Aufwand erfasste Betrag wird nur insoweit angepasst, als sich die von dem Bilanzierenden gemachten Schätzungen über die Anzahl der endgültig zu gewährenden Eigenkapitalinstrumente ändern.

Sofern Rechte infolge des Ausbleibens von Ausübungsbedingungen (zum Beispiel Nichterreichen einer Leistungsvorgabe) nicht endgültig ausgeübt werden können, erfolgt keine Änderung der bisher im Eigenkapital erfassten Beträge.

- Aktienbasierte Vergütungstransaktionen mit Barausgleich

Der Anteil des beizulegenden Zeitwertes von aktienbasierten Vergütungen mit Barausgleich, der auf bis zum Bewertungsstichtag geleistete Dienste entfällt, wird als Personalaufwand mit einem gleichzeitigen Ausweis als Rückstellung erfasst. Der beizulegende Zeitwert wird an jedem Bilanzstichtag und



|     |                                  |
|-----|----------------------------------|
| 204 | Gesamtergebnisrechnung           |
| 208 | Bilanz                           |
| 210 | Eigenkapitalveränderungsrechnung |
| 212 | Kapitalflussrechnung             |
| 214 | Anhang (Notes)                   |
| 370 | Bestätigungsvermerk              |

bis einschließlich des Auszahlungstages neu ermittelt. Jede Änderung des beizulegenden Zeitwertes der Verpflichtung ist aufwandswirksam zu berücksichtigen. Somit muss die Rückstellung am Auszahlungstag möglichst dem Betrag entsprechen, der als Zahlung an die begünstigten Mitarbeiter geleistet wird. Für Share Awards wird zum Zeitpunkt der Zuteilung der auf Share Awards entfallende Teil der Rückstellungen für den Personalbereich in die Rückstellung für Share Awards umgebucht. Der Betrag errechnet sich als Produkt aus der Zahl zugeteilter Rechte und dem durchschnittlichen Xetra-Schlusskurs der Monate Januar und Februar des Zuteilungsjahres sowie dem des Dezembers des Vorjahres. Zu den folgenden Bilanzstichtagen schwanken die Rückstellungen parallel zur Entwicklung des Aktienkurses der Commerzbank Aktiengesellschaft. Fluktuationsabschläge werden nicht vorgenommen, da die Share Awards auch bei Kündigung oder Tod nicht verfallen. Sofern die Commerzbank Aktiengesellschaft während der Wartefrist Dividendenzahlungen leistet, wird zum Auszahlungszeitpunkt je Share Award zusätzlich zum Auszahlungswert der Share Awards eine Barzahlung in Höhe der Dividende geleistet, für die gegebenenfalls Rückstellungen zu bilden sind.

- **Bewertungsmodelle**

Zur Ermittlung der beizulegenden Zeitwerte für die in der Commerzbank-Gruppe bestehenden Mitarbeitervergütungspläne mit Ausnahme der Share Awards haben wir externe Aktuare beauftragt. Zur Bewertung werden entweder ein Monte-Carlo-Modell oder ein Binominal-Modell verwendet.

Für die Bewertung der nach den LTP eingeräumten Rechte wird ein Monte-Carlo-Modell genutzt, das kurssteigernde Änderungen der zukünftigen Aktienkurse simuliert. Das Modell basiert auf der Annahme, dass die Aktienrenditen um einen Mittelwert, der einer risikofreien Zinsanlage entspricht, statistisch normalverteilt sind.

Für die Bestimmung des beizulegenden Zeitwertes der in den übrigen konsolidierten Gesellschaften bestehenden Optionen aus den Mitarbeitervergütungsplänen wird in der Regel ein versicherungsmathematisches Binominal-Modell verwendet. Dieses berücksichtigt die Bedingungen und Konditionen, mit denen diese Rechte eingeräumt wurden. Der Aktienpreis zu jedem Bewertungsstichtag und der Ausübungspreis werden auf der Basis der in den Plänen enthaltenen spezifizierten Bedingungen und Formeln, die an den Nachsteuergewinn der jeweiligen Gesellschaft geknüpft sind, berechnet.

## (26) Ertragsteuern

Tatsächliche Ertragsteueransprüche und -schulden werden anhand der steuerlichen Bestimmungen der jeweiligen Länder

mit den aktuell gültigen Steuersätzen in der Höhe ermittelt, in der die Erstattung von der beziehungsweise die Zahlung an die jeweilige Steuerbehörde erwartet wird.

Aktive und passive latente Steuern werden für Differenzen zwischen den IFRS-Buchwerten der Vermögenswerte oder Schulden und deren steuerlichen Wertansätzen gebildet, soweit hieraus voraussichtlich zukünftige Ertragsteuerentlastungs- oder -belastungseffekte resultieren (temporäre Unterschiede) und kein Ansatzverbot besteht. Darüber hinaus werden aktive latente Steuern auch für steuerliche Verlustvorträge sowie für noch nicht genutzte Steuergutschriften gebildet. Für die Bewertung der latenten Steuern sind die zum 31. Dezember 2010 bereits beschlossenen, bei Realisierung der Unterschiede anwendbaren Ertragsteuersätze maßgebend.

Aktive latente Steuern auf steuerentlastende temporäre Differenzen, auf noch nicht genutzte steuerliche Verluste sowie auf noch nicht genutzte Steuergutschriften werden nur in dem Umfang bilanziert, in dem es wahrscheinlich ist, dass in absehbarer Zukunft steuerliche Ergebnisse des gleichen Steuersubjekts und in Bezug auf die gleiche Steuerbehörde anfallen.

Die Bildung und Fortführung aktiver und passiver latenter Steuern erfolgt – in Abhängigkeit von der Behandlung des zugrunde liegenden Sachverhaltes – entweder erfolgswirksam in den Steuern vom Einkommen und vom Ertrag oder erfolgsneutral in der entsprechenden Eigenkapitalposition.

Den Ertragsteueraufwand beziehungsweise -ertrag weisen wir in der Gewinn- und Verlustrechnung des Konzerns als Steuern vom Einkommen und vom Ertrag aus.

Latente Ertragsteueransprüche und -schulden wurden saldiert, soweit ein Recht zur Aufrechnung tatsächlicher Ertragsteuern besteht und sich die aktiven und passiven latenten Steuern auf Ertragsteuern beziehen, die von der gleichen Steuerbehörde für das gleiche Steuersubjekt erhoben werden.

Die zu versteuernden temporären Differenzen im Zusammenhang mit Anteilen an Commerzbank-Konzerngesellschaften, für die keine latenten Ertragsteuerschulden passiviert wurden, betragen 95 Mio Euro (Vorjahr: 93 Mio Euro).

Eine Unterscheidung zwischen tatsächlichen und latenten Ertragsteueransprüchen sowie zwischen tatsächlichen und latenten Ertragsteuerschulden erfolgt in der Bilanz sowie in den Notes 58 und 69.

## (27) Nachrang- und Hybridkapital

Als Nachrang- und Hybridkapital bilanzieren wir Genussrechte-emissionen, verbrieft und unverbrieft nachrangige Verbindlichkeiten sowie hybride Kapitalinstrumente. Die Bilanzierung erfolgt zu fortgeführten Anschaffungskosten. Agien oder Disagien werden über die Laufzeit verteilt erfolgswirksam im Zinsergebnis vereinnahmt.

**(28) Treuhandgeschäfte**

Treuhandgeschäfte, die eine Verwaltung oder Platzierung von Vermögenswerten für fremde Rechnung zur Basis haben, werden in der Bilanz nicht ausgewiesen. Provisionszahlungen aus diesen Geschäften sind in der Gewinn- und Verlustrechnung im Provisionsüberschuss enthalten.

**(29) Eventualverbindlichkeiten und unwiderrufliche Kreditzusagen**

Hier weisen wir im Wesentlichen Eventualverbindlichkeiten aus Bürgschaften und Gewährleistungsverträgen sowie Unwiderrufliche Kreditzusagen zum Nominalwert aus.

Als Bürgschaften sind Sachverhalte auszuweisen, bei denen die meldende Gesellschaft als Bürge gegenüber dem Gläubiger eines Dritten für die Erfüllung der Verbindlichkeit des Dritten einsteht. Unter Gewährleistungen fallen vertragliche Verpflichtungen, die das Entstehen für einen bestimmten Erfolg oder eine Leistung beinhalten.

Als Unwiderrufliche Kreditzusagen sind Verpflichtungen auszuweisen, aus denen ein Kreditrisiko entstehen kann, sofern sie nicht zu Handelszwecken gehalten werden. Dazu gehören Verpflichtungen, Darlehen zu gewähren (zum Beispiel extern dem Kunden bekannt gegebene Linien), Wertpapiere zu kaufen oder Garantien und Akzente bereitzustellen.

Die Risikovorsorge für Eventualverbindlichkeiten und unwiderrufliche Kreditzusagen wird als Rückstellung für Risiken aus dem Kreditgeschäft gezeigt.

Die Erträge aus Bürgschaften werden im Provisionsüberschuss erfasst; deren Höhe wird durch Anwendung vereinbarter Sätze auf den Nominalbetrag der Bürgschaften bestimmt.

**(30) Eigene Aktien**

Die von der Commerzbank Aktiengesellschaft zum Bilanzstichtag im Bestand befindlichen eigenen Aktien werden direkt vom Eigenkapital abgesetzt. Aus eigenen Aktien resultierende Gewinne oder Verluste haben wir ergebnisneutral verrechnet.

|     |                                  |
|-----|----------------------------------|
| 204 | Gesamtergebnisrechnung           |
| 208 | Bilanz                           |
| 210 | Eigenkapitalveränderungsrechnung |
| 212 | Kapitalflussrechnung             |
| 214 | Anhang (Notes)                   |
| 370 | Bestätigungsvermerk              |

## Erläuterungen zur Gewinn- und Verlustrechnung

### (31) Zinsüberschuss

| Mio €                                                                                                                                                | 2010         | 2009         | Veränderung in % |
|------------------------------------------------------------------------------------------------------------------------------------------------------|--------------|--------------|------------------|
| Zinserträge                                                                                                                                          | 18 306       | 20 338       | - 10,0           |
| Zinserträge aus Kredit- und Geldmarktgeschäften sowie aus dem Wertpapierbestand (zur Veräußerung verfügbare finanzielle Vermögenswerte) <sup>1</sup> | 1 225        | 2 088        | - 41,3           |
| Zinserträge aus Kredit- und Geldmarktgeschäften sowie aus dem Wertpapierbestand (Kredite und Forderungen) <sup>1</sup>                               | 15 949       | 16 883       | - 5,5            |
| Zinserträge aus Kredit- und Geldmarktgeschäften sowie aus dem Wertpapierbestand (aus der Anwendung der Fair Value Option)                            | 130          | 305          | - 57,4           |
| Vorfälligkeitsentschädigungen                                                                                                                        | 132          | 74           | 78,4             |
| Gewinne aus der Veräußerung von Forderungen und Krediten sowie aus dem Rückkauf von Verbindlichkeiten <sup>2</sup>                                   | 26           | 78           | - 66,7           |
| Dividenden aus Wertpapieren                                                                                                                          | 53           | 58           | - 8,6            |
| Laufendes Ergebnis aus Beteiligungen und nicht konsolidierten Tochterunternehmen                                                                     | 77           | 92           | - 16,3           |
| Laufende Erträge aus zur Veräußerung und als Finanzinvestition gehaltenen Immobilien                                                                 | 106          | 98           | 8,2              |
| Sonstige Zinserträge <sup>1</sup>                                                                                                                    | 608          | 662          | - 8,2            |
| Zinsaufwendungen                                                                                                                                     | 11 252       | 13 164       | - 14,5           |
| Zinsaufwendungen für Nachrang- und Hybridkapital <sup>1</sup>                                                                                        | 1 030        | 1 096        | - 6,0            |
| Zinsaufwendungen für Verbriefte Verbindlichkeiten                                                                                                    | 4 494        | 5 757        | - 21,9           |
| Zinsaufwendungen für sonstige Verbindlichkeiten                                                                                                      | 5 055        | 5 950        | - 15,0           |
| Zinsaufwendungen aus der Anwendung der Fair Value Option <sup>1,3</sup>                                                                              | 94           | 217          | - 56,7           |
| Verluste aus der Veräußerung von Forderungen und Krediten sowie aus dem Rückkauf von Verbindlichkeiten <sup>2</sup>                                  | 102          | 72           | 41,7             |
| Laufende Aufwendungen aus zur Veräußerung und als Finanzinvestition gehaltenen Immobilien                                                            | 85           | 53           | 60,4             |
| Sonstige Zinsaufwendungen <sup>1</sup>                                                                                                               | 392          | 19           | .                |
| <b>Gesamt</b>                                                                                                                                        | <b>7 054</b> | <b>7 174</b> | <b>- 1,7</b>     |

<sup>1</sup> Anpassung Vorjahr aufgrund Änderung der Ausweisstruktur einschließlich Umgliederung zwischen Zinserträgen und Zinsaufwendungen (siehe Note 2).

<sup>2</sup> Darunter: 23 Mio Euro Gewinne und 33 Mio Euro Verluste aus dem Rückkauf von Verbindlichkeiten im laufenden Geschäftsjahr (Vorjahr: 31 Mio Euro Gewinne und 6 Mio Euro Verluste).

<sup>3</sup> Darunter: 1 Mio Euro für Nachrang- und Hybridkapital (Vorjahr: 17 Mio Euro).

Für gekündigte Engagements und für wertberichtigte gewerbliche Immobilienfinanzierungen ergab sich ein Unwinding in Höhe von 223 Mio Euro (Vorjahr 192 Mio Euro).

Aus derivativen Finanzinstrumenten, die nicht dem Handelsbuch zugehören, waren 608 Mio Euro (Vorjahr: 662 Mio Euro) im Zinsüberschuss enthalten.

Die laufenden Erträge und Aufwendungen aus als Finanzinvestition gehaltenen Immobilien setzten sich wie folgt zusammen:

| Mio €                                          | 2010      | 2009      | Veränderung in % |
|------------------------------------------------|-----------|-----------|------------------|
| Mieteinnahmen                                  | 94        | 73        | 28,8             |
| Sonstige Erträge                               | -         | -         | .                |
| <b>Summe Erträge</b>                           | <b>94</b> | <b>73</b> | <b>28,8</b>      |
| Gebäude- und Raumkosten für vermietete Objekte | 27        | 32        | -15,6            |
| Sonstige Aufwendungen                          | 55        | 7         | .                |
| <b>Summe Aufwendungen</b>                      | <b>82</b> | <b>39</b> | <b>.</b>         |

### (32) Risikovorsorge im Kreditgeschäft

Die Risikovorsorge stellt sich in der Gewinn- und Verlustrechnung des Konzerns wie folgt dar:

| Mio €                                                   | 2010          | 2009          | Veränderung in % |
|---------------------------------------------------------|---------------|---------------|------------------|
| Zuführung zur Risikovorsorge                            | -4 440        | -5 305        | -16,3            |
| Auflösung von Risikovorsorge                            | 2 207         | 1 315         | 67,8             |
| Direktabschreibungen                                    | -459          | -402          | 14,2             |
| Zuschreibungen, Eingänge auf abgeschriebene Forderungen | 193           | 178           | 8,4              |
| <b>Gesamt</b>                                           | <b>-2 499</b> | <b>-4 214</b> | <b>-40,7</b>     |

Der Nettoaufwand aus Zuführung und Auflösung gliedert sich wie folgt:

| Mio €                                                                         | 2010          | 2009          | Veränderung in % |
|-------------------------------------------------------------------------------|---------------|---------------|------------------|
| Einzelrisiken                                                                 | -2 685        | -3 711        | -27,6            |
| Forderungen an Kreditinstitute                                                | 19            | -185          | .                |
| Forderungen an Kunden                                                         | -2 656        | -3 496        | -24,0            |
| Außerbilanzielle Geschäfte                                                    | -48           | -30           | 60,0             |
| Portfoliorisiken                                                              | 452           | -279          | .                |
| Forderungen an Kreditinstitute                                                | 7             | 19            | -63,2            |
| Forderungen an Kunden                                                         | 399           | -334          | .                |
| Außerbilanzielle Geschäfte                                                    | 46            | 36            | 27,8             |
| Direktabschreibungen, Zuschreibungen, Eingänge auf abgeschriebene Forderungen | -266          | -224          | 18,8             |
| <b>Gesamt</b>                                                                 | <b>-2 499</b> | <b>-4 214</b> | <b>-40,7</b>     |

|     |                                  |
|-----|----------------------------------|
| 204 | Gesamtergebnisrechnung           |
| 208 | Bilanz                           |
| 210 | Eigenkapitalveränderungsrechnung |
| 212 | Kapitalflussrechnung             |
| 214 | Anhang (Notes)                   |
| 370 | Bestätigungsvermerk              |

**(33) Provisionsüberschuss**

| Mio €                                             | 2010         | 2009         | Veränderung in % |
|---------------------------------------------------|--------------|--------------|------------------|
| <b>Provisionserträge</b>                          | <b>4 237</b> | <b>4 562</b> | <b>-7,1</b>      |
| Wertpapiergeschäft <sup>1</sup>                   | 1 403        | 1 521        | -7,8             |
| Vermögensverwaltung <sup>1</sup>                  | 175          | 218          | -19,7            |
| Zahlungsverkehr und Auslandsgeschäft <sup>1</sup> | 1 290        | 1 164        | 10,8             |
| Immobilienkreditgeschäft                          | 226          | 247          | -8,5             |
| Bürgschaften <sup>1</sup>                         | 238          | 385          | -38,2            |
| Ergebnis aus Syndizierungen <sup>1</sup>          | 241          | 254          | -5,1             |
| Treuhandgeschäfte                                 | 8            | 4            | .                |
| Übrige Erträge <sup>1</sup>                       | 656          | 769          | -14,7            |
| <b>Provisionsaufwendungen</b>                     | <b>590</b>   | <b>789</b>   | <b>-25,2</b>     |
| Wertpapiergeschäft <sup>1</sup>                   | 182          | 194          | -6,2             |
| Vermögensverwaltung <sup>1</sup>                  | 17           | 20           | -15,0            |
| Zahlungsverkehr und Auslandsgeschäft <sup>1</sup> | 158          | 88           | 79,5             |
| Immobilienkreditgeschäft                          | 40           | 43           | -7,0             |
| Bürgschaften <sup>1</sup>                         | 80           | 211          | -62,1            |
| Ergebnis aus Syndizierungen                       | 2            | 5            | -60,0            |
| Treuhandgeschäfte                                 | 4            | -            | .                |
| Übrige Aufwendungen                               | 107          | 228          | -53,1            |
| <b>Provisionsüberschuss</b>                       |              |              |                  |
| Wertpapiergeschäft <sup>1</sup>                   | 1 221        | 1 327        | -8,0             |
| Vermögensverwaltung <sup>1</sup>                  | 158          | 198          | -20,2            |
| Zahlungsverkehr und Auslandsgeschäft <sup>1</sup> | 1 132        | 1 076        | 5,2              |
| Immobilienkreditgeschäft                          | 186          | 204          | -8,8             |
| Bürgschaften <sup>1</sup>                         | 158          | 174          | -9,2             |
| Ergebnis aus Syndizierungen <sup>1</sup>          | 239          | 249          | -4,0             |
| Treuhandgeschäfte                                 | 4            | 4            | 0,0              |
| Übrige <sup>1</sup>                               | 549          | 541          | 1,5              |
| <b>Gesamt</b>                                     | <b>3 647</b> | <b>3 773</b> | <b>-3,3</b>      |

<sup>1</sup> Umgliederung der Devisenkommissionsgewinne aus dem Ergebnis aus dem Handel in den Posten Zahlungsverkehr und Auslandsgeschäft (siehe Note 2) sowie weitere Anpassungen aufgrund Vereinheitlichung der Ausweisstruktur.

In den Provisionserträgen waren 792 Mio Euro (Vorjahr: 911 Mio Euro) und in den Provisionsaufwendungen sind 100 Mio Euro (Vorjahr: 121 Mio Euro) enthalten, die aus

Geschäften mit Finanzinstrumenten resultieren, die nicht erfolgswirksam zum beizulegenden Zeitwert bewertet werden.

### (34) Handelsergebnis

Das Handelsergebnis haben wir in drei Komponenten aufgeteilt:

- Ergebnis aus dem Handel mit Wertpapieren, Schuldscheindarlehen, Edelmetallen und derivativen Instrumenten
- Ergebnis aus der Bewertung derivativer Finanzinstrumente, die sich nicht für das Hedge Accounting qualifizieren
- Ergebnis aus der Anwendung der Fair Value Option

Alle Finanzinstrumente des Handelsbestands werden mit dem beizulegenden Zeitwert (Fair Value) bewertet (vergleiche Note 13). Im Handelsergebnis sind, neben den realisierten und unrealisierten Ergebnissen, auch die auf Handelszwecken dienenden Geschäfte entfallenden Zins- und Dividenderträge sowie Refinanzierungsaufwendungen enthalten.

| Mio €                                                         | 2010         | 2009        | Veränderung in % |
|---------------------------------------------------------------|--------------|-------------|------------------|
| Ergebnis aus dem Handel <sup>1</sup>                          | 1 718        | -1 296      | .                |
| Realisierungen <sup>1</sup>                                   | 115          | -75         | .                |
| Bewertungsergebnis                                            | 1 186        | -1 861      | .                |
| Zinsergebnis                                                  | 417          | 640         | -34,8            |
| Ergebnis aus der Bewertung von derivativen Finanzinstrumenten | 203          | -53         | .                |
| Ergebnis aus der Anwendung der Fair Value Option              | 131          | 839         | -84,4            |
| Realisierungen                                                | -119         | 1 032       | .                |
| Bewertungsergebnis                                            | 250          | -193        | .                |
| <b>Gesamt</b>                                                 | <b>2 052</b> | <b>-510</b> | .                |

<sup>1</sup> Anpassung Vorjahr aufgrund Umgliederung der Devisenkommissionsgewinne in die Provisionserträge (siehe Note 2).

Das Zinsergebnis aus dem Handel setzte sich aus 3 437 Mio Euro Zinserträgen (Vorjahr: 4 882 Mio Euro) und 3 020 Mio Euro Zinsaufwendungen (Vorjahr: 4 242 Mio Euro) für die Refinanzierung von Handelsgeschäften zusammen. Das Zinsergebnis aus derivativen Finanzinstrumenten ist in den Zinsaufwendungen

berücksichtigt und betrug im Geschäftsjahr -281 Mio Euro (Vorjahr: -416 Mio Euro).

Im Ergebnis aus der Anwendung der Fair Value Option werden auch die Wertänderungen der dazugehörigen Derivate ausgewiesen.

### (35) Ergebnis aus Sicherungszusammenhängen

Das Ergebnis aus Sicherungszusammenhängen beinhaltet zum einen die Bewertungsergebnisse aus effektiven Sicherungszusammenhängen im Rahmen des Hedge Accountings (Fair

Value Hedge). Zum anderen enthält das Ergebnis aus Sicherungszusammenhängen den ineffektiven Teil aus Cash Flow Hedges. Es setzte sich wie folgt zusammen:

| Mio €                                                                      | 2010       | 2009       | Veränderung in % |
|----------------------------------------------------------------------------|------------|------------|------------------|
| <b>Fair Value Hedges</b>                                                   |            |            |                  |
| Fair-Value-Änderungen aus Sicherungsgeschäften                             | -1 363     | 2 719      | .                |
| Micro Fair Value Hedges                                                    | -1 278     | 2 717      | .                |
| Portfolio Fair Value Hedges                                                | -85        | 2          | .                |
| Fair-Value-Änderungen aus Grundgeschäften                                  | 1 269      | -2 613     | .                |
| Micro Fair Value Hedges                                                    | 1 317      | -2 612     | .                |
| Portfolio Fair Value Hedges                                                | -48        | -1         | .                |
| <b>Cash Flow Hedges</b>                                                    |            |            |                  |
| Ergebnis aus effektiv gesicherten Cash-Flow-Hedges (nur ineffektiver Teil) | -          | -5         | .                |
| <b>Gesamt</b>                                                              | <b>-94</b> | <b>101</b> | .                |

|     |                                  |
|-----|----------------------------------|
| 204 | Gesamtergebnisrechnung           |
| 208 | Bilanz                           |
| 210 | Eigenkapitalveränderungsrechnung |
| 212 | Kapitalflussrechnung             |
| 214 | Anhang (Notes)                   |
| 370 | Bestätigungsvermerk              |

### (36) Ergebnis aus Finanzanlagen

Im Ergebnis aus Finanzanlagen weisen wir Veräußerungs- und Bewertungsergebnisse (Wertminderungen) aus Wertpapieren der Kategorien Kredite und Forderungen sowie zur Veräußerung

verfügbarer finanzieller Vermögenswerte, aus Beteiligungen sowie aus Anteilen an at-Equity-bewerteten Unternehmen und an Tochterunternehmen aus.

| Mio €                                                                                                            | 2010       | 2009         | Veränderung in % |
|------------------------------------------------------------------------------------------------------------------|------------|--------------|------------------|
| <b>Ergebnis aus zinstragendem Geschäft</b>                                                                       | <b>67</b>  | <b>-610</b>  | <b>.</b>         |
| der Kategorie zur Veräußerung verfügbarer finanzieller Vermögenswerte                                            | 191        | -588         | .                |
| Veräußerungsgewinne (einschließlich Umbuchung aus der Neubewertungsrücklage) <sup>1</sup>                        | 245        | 271          | -9,6             |
| Veräußerungsverluste (einschließlich Umbuchung aus der Neubewertungsrücklage) <sup>1</sup>                       | -377       | -355         | 6,2              |
| Bewertungsergebnis <sup>1</sup>                                                                                  | 323        | -504         | .                |
| der Kategorie Kredite und Forderungen                                                                            | -124       | -22          | .                |
| Veräußerungsgewinne                                                                                              | 6          | 5            | 20,0             |
| Veräußerungsverluste                                                                                             | -126       | -            | .                |
| Bewertungsergebnis <sup>2</sup>                                                                                  | -4         | -27          | -85,2            |
| <b>Ergebnis aus Eigenkapitalinstrumenten</b>                                                                     | <b>41</b>  | <b>1 027</b> | <b>-96,0</b>     |
| der Kategorie zur Veräußerung verfügbarer finanzieller Vermögenswerte                                            | 180        | 738          | -75,6            |
| Veräußerungsgewinne (einschließlich Umbuchung aus der Neubewertungsrücklage) <sup>1</sup>                        | 184        | 886          | -79,2            |
| Veräußerungsverluste (einschließlich Umbuchung aus der Neubewertungsrücklage) <sup>1</sup>                       | -4         | -148         | -97,3            |
| der Kategorie zur Veräußerung verfügbarer finanzieller Vermögenswerte, die zu Anschaffungskosten bewertet wurden | 11         | 542          | -98,0            |
| Bewertungsergebnis <sup>1</sup>                                                                                  | -39        | -209         | -81,3            |
| Veräußerungs- und Bewertungsergebnis aus at-Equity-bewerteten Unternehmen                                        | -111       | -44          | .                |
| <b>Gesamt</b>                                                                                                    | <b>108</b> | <b>417</b>   | <b>-74,1</b>     |

<sup>1</sup> Hierin waren Umbuchungen aus im Geschäftsjahr 2010 entstandener Neubewertungsrücklage in Höhe von 361 Mio Euro (Vorjahr: 399 Mio Euro) enthalten.

<sup>2</sup> Hierin waren Portfoliowertberichtigungen von 1 Mio Euro (Vorjahr: 25 Mio Euro) für umgewidmete Wertpapiere enthalten.

### (37) Laufendes Ergebnis aus at-Equity-bewerteten Unternehmen

Das Laufende Ergebnis aus at-Equity-bewerteten Unternehmen betrug 35 Mio Euro (Vorjahr: 15 Mio Euro). Einschließlich des im Ergebnis aus Finanzanlagen enthaltenen Veräußerungs- und Bewertungsergebnisses aus at-Equity-bewerteten Unternehmen

von -111 Mio Euro (Vorjahr: -44 Mio Euro) belief sich das Gesamtergebnis aus at-Equity-bewerteten Unternehmen auf -76 Mio Euro (Vorjahr: -29 Mio Euro).

**(38) Sonstiges Ergebnis**

Im Sonstigen Ergebnis sind vor allem Zuführungen und Auflösungen von Rückstellungen, Aufwendungen und Erträge aus Operating-Leasing-Verträgen sowie Zwischenmietforderungen und -erträge aus Mietkaufvereinbarungen enthalten. Auf-

wendungen und Erträge aus Bau- und Architektengebühren fallen im Rahmen des Baumanagements unseres Teilkonzerns Commerz Real an. Auch die Sonstigen Steuern sind in diesem Posten enthalten.

| Mio €                                                        | 2010        | 2009       | Veränderung in % |
|--------------------------------------------------------------|-------------|------------|------------------|
| <b>Wesentliche sonstige Aufwendungen</b>                     | <b>549</b>  | <b>507</b> | <b>8,3</b>       |
| Zuführungen zu Rückstellungen                                | 275         | 257        | 7,0              |
| Aufwendungen aus Operating-Leasing-Verträgen                 | 181         | 151        | 19,9             |
| Aufwendungen aus Bau- und Architektenleistungen              | 15          | 58         | -74,1            |
| Mietkaufaufwand und Zwischenmietforderung                    | 78          | 41         | 90,2             |
| <b>Wesentliche sonstige Erträge</b>                          | <b>546</b>  | <b>461</b> | <b>18,4</b>      |
| Auflösungen von Rückstellungen                               | 272         | 190        | 43,2             |
| Erträge aus Operating-Leasing-Verträgen                      | 187         | 163        | 14,7             |
| Erträge aus Bau- und Architektenleistungen                   | 24          | 63         | -61,9            |
| Mietkaufenerlös und Zwischenmietertrag                       | 35          | 38         | -7,9             |
| Erträge aus der Veräußerung von Sachanlagen                  | 28          | 7          | .                |
| Übrige sonstige Aufwendungen/Erträge (saldiert) <sup>1</sup> | -128        | 24         | .                |
| <b>Sonstiges Ergebnis</b>                                    | <b>-131</b> | <b>-22</b> | <b>.</b>         |

<sup>1</sup> Darunter: -72 Mio Euro (Vorjahr: -10 Mio Euro) aus Wechselkursveränderungen.

**(39) Verwaltungsaufwendungen**

Die Verwaltungsaufwendungen von 8 786 Mio Euro im Konzern setzen sich zusammen aus Personalaufwand (4 418 Mio Euro), Sachaufwand (3 768 Mio Euro) und Abschreibungen auf

Betriebs- und Geschäftsausstattung, Immobilien und Sonstige immaterielle Anlagewerte (600 Mio Euro). Die Aufwendungen gliedern sich wie folgt:

| Personalaufwand   Mio €                             | 2010         | 2009         | Veränderung in % |
|-----------------------------------------------------|--------------|--------------|------------------|
| Löhne und Gehälter                                  | 4 101        | 4 341        | -5,5             |
| Aufwendungen für Altersversorgung und Unterstützung | 317          | 357          | -11,2            |
| <b>Gesamt</b>                                       | <b>4 418</b> | <b>4 698</b> | <b>-6,0</b>      |

Im Personalaufwand waren 507 Mio Euro Aufwendungen für soziale Abgaben enthalten (Vorjahr: 501 Mio Euro).

| Sachaufwand   Mio €                                            | 2010         | 2009         | Veränderung in % |
|----------------------------------------------------------------|--------------|--------------|------------------|
| Raumaufwendungen                                               | 831          | 867          | -4,2             |
| EDV-Aufwendungen                                               | 1 217        | 1 190        | 2,3              |
| Arbeitsplatz- und Informationsaufwendungen                     | 357          | 380          | -6,1             |
| Pflichtbeiträge                                                | 148          | 169          | -12,4            |
| Beratungs-, Prüfungs- und gesellschaftsrechtliche Aufwendungen | 437          | 445          | -1,8             |
| Reise-, Repräsentations- und Werbungskosten                    | 341          | 327          | 4,3              |
| Personalinduzierter Sachaufwand                                | 158          | 149          | 6,0              |
| Übriger Sachaufwand                                            | 279          | 241          | 15,8             |
| <b>Gesamt</b>                                                  | <b>3 768</b> | <b>3 768</b> | <b>0,0</b>       |



|     |                                  |
|-----|----------------------------------|
| 204 | Gesamtergebnisrechnung           |
| 208 | Bilanz                           |
| 210 | Eigenkapitalveränderungsrechnung |
| 212 | Kapitalflussrechnung             |
| 214 | Anhang (Notes)                   |
| 370 | Bestätigungsvermerk              |

Die im Geschäftsjahr in Deutschland als Aufwand erfassten Honorare (exklusive Umsatzsteuer) für den Abschlussprüfer betragen 36,3 Mio Euro für das Geschäftsjahr 2010. Davon

entfielen 954 Tsd Euro auf Leistungen, die bereits im Geschäftsjahr 2009 erbracht wurden.

| Honorare des Abschlussprüfers   Tsd € | 2010          | 2009          | Veränderung in % |
|---------------------------------------|---------------|---------------|------------------|
| Abschlussprüfung                      | 19 344        | 17 358        | 11,4             |
| Andere Bestätigungsleistungen         | 5 358         | 5 394         | -0,7             |
| Steuerberatungsleistungen             | 905           | 913           | -0,9             |
| Sonstige Leistungen                   | 10 649        | 12 608        | -15,5            |
| <b>Gesamt</b>                         | <b>36 256</b> | <b>36 273</b> | <b>0,0</b>       |

Die Abschreibungen auf Betriebs- und Geschäftsausstattung, Immobilien und Sonstige immaterielle Anlagewerte stellten sich wie folgt dar:

| Mio €                              | 2010       | 2009       | Veränderung in % |
|------------------------------------|------------|------------|------------------|
| Betriebs- und Geschäftsausstattung | 203        | 206        | -1,5             |
| Immobilien                         | 81         | 38         | .                |
| Sonstige immaterielle Anlagewerte  | 316        | 294        | 7,5              |
| <b>Gesamt</b>                      | <b>600</b> | <b>538</b> | <b>11,5</b>      |

In den Abschreibungen auf Sonstige immaterielle Anlagewerte waren Wertminderungen von 42 Mio Euro (Vorjahr: 25 Mio Euro) enthalten, für Immobilien wurden Wertminderungen von 41 Mio Euro (Vorjahr: 1 Mio Euro) erfasst.

#### (40) Restrukturierungsaufwendungen

| Mio €                                                    | 2010      | 2009         | Veränderung in % |
|----------------------------------------------------------|-----------|--------------|------------------|
| Aufwendungen für eingeleitete Restrukturierungsmaßnahmen | 33        | 1 621        | -98,0            |
| <b>Gesamt</b>                                            | <b>33</b> | <b>1 621</b> | <b>-98,0</b>     |

Im Zusammenhang mit der Neuausrichtung der Commerz Real Aktiengesellschaft sind im Personalbereich Restrukturierungsaufwendungen von 33 Mio Euro angefallen. Im Vorjahr resultier-

ten die Restrukturierungsaufwendungen von 1 621 Mio Euro im Wesentlichen aus der Integration des Dresdner-Bank-Konzerns.

**(41) Steuern vom Einkommen und vom Ertrag**

Die Ertragsteueraufwendungen setzten sich wie folgt zusammen:

| Mio €                                                                                              | 2010        | 2009       | Veränderung in % |
|----------------------------------------------------------------------------------------------------|-------------|------------|------------------|
| Tatsächliche Ertragsteuern                                                                         | 220         | 199        | 10,6             |
| Steueraufwand/-ertrag für das laufende Jahr                                                        | 224         | 314        | -28,7            |
| Steueraufwand/-ertrag Vorjahre                                                                     | -4          | -115       | -96,5            |
| Latente Ertragsteuern                                                                              | -356        | -225       | 58,2             |
| Steueraufwand/-ertrag aufgrund der Veränderung von temporären Differenzen und Verlustvorträgen     | -23         | -628       | -96,3            |
| Steuersatzdifferenzen                                                                              | -89         | 54         | .                |
| Steueraufwand aufgrund von Abschreibungen auf bisher gebildete latente Steuern auf Verlustvorträge | -           | 349        | .                |
| Steuerertrag aus bisher nicht berücksichtigten steuerlichen Verlustvorträgen                       | -244        | -          | .                |
| <b>Gesamt</b>                                                                                      | <b>-136</b> | <b>-26</b> | .                |

Der für die Commerzbank Aktiengesellschaft und den inländischen Organkreis geltende tarifliche kombinierte Ertragsteuersatz beträgt 30,9 %.

Die nachfolgende Überleitungsrechnung zeigt den Zusammenhang zwischen dem Jahresergebnis vor Ertragsteuern nach IFRS sowie den Steuern vom Einkommen und vom Ertrag im Geschäftsjahr.

Der als Basis für die Überleitungsrechnung gewählte, anzuwendende Konzernertragsteuersatz setzt sich zusammen aus dem in Deutschland geltenden Körperschaftsteuersatz von 15,0 % zuzüglich Solidaritätszuschlag von 5,5 % und einem durchschnittlichen Steuersatz für die Gewerbesteuer von 15,0 %. Es ergibt sich somit ein inländischer Ertragsteuersatz von 30,9 %.

Ertragsteuereffekte ergeben sich aufgrund unterschiedlicher Steuersätze bei ausländischen Einheiten. Die Steuersätze im Ausland betragen zwischen 0 % (Dubai) und 46 % (New York).

Zum 31. Dezember 2010 betrug die Konzernsteuerquote -10,1 % (Vorjahr: 0,6 %). Der Steuerertrag des Gesamtjahres resultierte im Wesentlichen aus der Nachaktivierung latenter Steueransprüche auf steuerliche Verlustvorträge der Filiale London und britischer Tochtergesellschaften (-244 Mio Euro). Zusätzlich hat sich der Verbrauch von Verlustvorträgen, für die in Vorjahren keine latenten Steueransprüche gebildet wurden (-211 Mio Euro) positiv auf die Konzernsteuerquote ausgewirkt. Hingegen konnten wir bei einigen Gesellschaften keine latenten Ertragsteueransprüche auf neu entstandene steuerliche Verluste bilanzieren (123 Mio Euro).

| Mio €                                                                                                        | 2010         | 2009          |
|--------------------------------------------------------------------------------------------------------------|--------------|---------------|
| <b>Jahresergebnis vor Ertragsteuern nach IFRS</b>                                                            | <b>1 353</b> | <b>-4 659</b> |
| Konzernertragsteuersatz (%)                                                                                  | 30,9         | 30,9          |
| <b>Rechnerischer Ertragsteueraufwand im Geschäftsjahr</b>                                                    | <b>417</b>   | <b>-1 437</b> |
| Auswirkungen wegen abweichender Steuersätze und Steuersatzänderungen bei erfolgswirksamen Steuerabgrenzungen | -89          | 54            |
| Auswirkungen aus dem Ansatz von latenten Steuern auf Verlustvorträge                                         | -244         | -             |
| Auswirkungen von nicht abziehbaren Betriebsausgaben und steuerfreien Erträgen                                | -104         | -62           |
| Nicht angesetzte latente Steuern                                                                             | 123          | 1 506         |
| Verbrauch von steuerlichen Verlustvorträgen, auf die bislang keine latenten Steueransprüche gebildet wurden  | -211         | -             |
| Auswirkungen von Hinzurechnungen und Kürzungen für Gewerbesteuer                                             | 13           | 9             |
| Sonstige Auswirkungen                                                                                        | -41          | -96           |
| <b>Steuern vom Einkommen und vom Ertrag</b>                                                                  | <b>-136</b>  | <b>-26</b>    |

|     |                                  |
|-----|----------------------------------|
| 204 | Gesamtergebnisrechnung           |
| 208 | Bilanz                           |
| 210 | Eigenkapitalveränderungsrechnung |
| 212 | Kapitalflussrechnung             |
| 214 | Anhang (Notes)                   |
| 370 | Bestätigungsvermerk              |

Nachfolgende Tabelle zeigt den Bestand der tatsächlichen und latenten Steuern, die aus Posten resultieren, die direkt im Eigenkapital gutgeschrieben beziehungsweise belastet wurden:

| Erfolgsneutral bilanzierte Ertragsteuern   Mio € | 31.12.2010   | 31.12.2009   | Veränderung in % |
|--------------------------------------------------|--------------|--------------|------------------|
| Tatsächliche Ertragsteuern                       | –            | –            | .                |
| Latente Ertragsteuern                            | 1 238        | 1 347        | – 8,1            |
| Bewertungsunterschiede aus Cash Flow Hedges      | 389          | 526          | – 26,0           |
| Neubewertungsrücklage                            | 827          | 756          | 9,4              |
| Verlustvorräte                                   | 22           | 100          | – 78,0           |
| Sonstiges                                        | –            | – 35         | .                |
| <b>Gesamt</b>                                    | <b>1 238</b> | <b>1 347</b> | <b>– 8,1</b>     |

#### (42) Nettoergebnis

Die Nettoerfolge setzen sich zusammen aus Fair-Value-Bewertungen, Wertminderungen/Zuschreibungen, realisierten Abgangserfolgen und nachträglichen Eingängen aus abgeschriebenen Finanzinstrumenten (siehe Note 5). Im Zinsergeb-

nis werden die Zinsbestandteile aus den Notes Zinsüberschuss und Handelsergebnis nach den Kategorien gemäß IAS 39 dargestellt.

| Mio €                                                                                                       | 2010    | 2009    | Veränderung in % |
|-------------------------------------------------------------------------------------------------------------|---------|---------|------------------|
| <b>Nettoerfolge aus</b>                                                                                     |         |         |                  |
| Handelsaktiva und -passiva <sup>1</sup>                                                                     | 1 410   | – 1 888 | .                |
| Anwendung der Fair Value Option                                                                             | 131     | 839     | – 84,4           |
| Zur Veräußerung verfügbaren finanziellen Vermögenswerten sowie Anteilen an at-Equity-bewerteten Unternehmen | 232     | 439     | – 47,2           |
| Kredite und Forderungen                                                                                     | – 2 623 | – 4 236 | – 38,1           |
| Anderen finanziellen Verbindlichkeiten                                                                      | –       | –       | .                |

<sup>1</sup> Umgliederung der Devisenkommissionsgewinne im Vorjahr.

| Mio €                                                                 | 2010     | 2009     | Veränderung in % |
|-----------------------------------------------------------------------|----------|----------|------------------|
| <b>Zinsergebnis aus</b>                                               |          |          |                  |
| Handelsaktiva und -passiva                                            | 698      | 1 056    | – 33,9           |
| Anwendung der Fair Value Option <sup>1</sup>                          | 36       | 88       | – 59,1           |
| Zur Veräußerung verfügbaren finanziellen Vermögenswerten <sup>1</sup> | 1 225    | 2 088    | – 41,3           |
| Kredite und Forderungen <sup>1</sup>                                  | 15 949   | 16 883   | – 5,5            |
| Anderen finanziellen Verbindlichkeiten <sup>1</sup>                   | – 10 579 | – 12 803 | – 17,4           |

<sup>1</sup> Anpassungen aufgrund Vereinheitlichung der Ausweisstruktur im Vorjahr.

**(43) Ergebnis je Aktie**

|                                                                    | 2010          | 2009          | Veränderung in % |
|--------------------------------------------------------------------|---------------|---------------|------------------|
| Operatives Ergebnis (Mio €)                                        | 1 386         | - 2 270       | .                |
| Den Commerzbank-Aktionären zurechenbarer Konzernüberschuss (Mio €) | 1 430         | - 4 537       | .                |
| Durchschnittliche Anzahl ausgegebener Stammaktien (Stück)          | 1 178 599 388 | 1 031 871 714 | 14,2             |
| Operatives Ergebnis je Aktie (€)                                   | 1,18          | - 2,20        | .                |
| Ergebnis je Aktie (€)                                              | 1,21          | - 4,40        | .                |

Der gemäß IAS 33 errechnete Gewinn je Aktie basiert auf dem den Commerzbank-Aktionären zurechenbaren Konzernüberschuss. Im laufenden Geschäftsjahr sowie im Vorjahr waren keine Wandel- und Optionsrechte im Umlauf. Das verwässerte Er-

gebnis je Aktie war daher mit dem unverwässerten identisch. Die Zusammensetzung des Operativen Ergebnisses ist in der Segmentberichterstattung (Note 45) definiert.

**(44) Aufwandsquote**

| in %                                            | 2010 | 2009 | Veränderung in Prozentpunkten |
|-------------------------------------------------|------|------|-------------------------------|
| Aufwandsquote vor Restrukturierungsaufwendungen | 69,3 | 82,2 | - 12,9                        |

Die Aufwandsquote gibt das Verhältnis der Verwaltungsaufwendungen zu den Erträgen vor Risikovorsorge wieder.

**(45) Segmentberichterstattung**

In der Segmentberichterstattung spiegeln sich die Resultate der im Commerzbank-Konzern eingebundenen operativen Geschäftssegmente wider. Als Grundlage für die nachfolgenden Segmentinformationen dient IFRS 8 Operating Segments, der dem sogenannten Managementansatz folgt: Die Segmentinformationen werden auf Basis des internen Berichtswesens bestimmt, das dem Chief Operating Decision Maker dazu dient, die Leistung der Segmente zu beurteilen und Entscheidungen über die Allokation von Ressourcen auf die Segmente zu treffen. Im Commerzbank-Konzern übt die Funktion des Chief Operating Decision Maker der Vorstand aus.

In unserer Segmentberichterstattung berichten wir über sechs operative Segmente sowie über den Bereich Sonstige und Konsolidierung. Dieses Vorgehen folgt der Organisationsstruktur des Commerzbank-Konzerns und ist Grundlage der internen Managementberichterstattung. Die Aufteilung der Geschäftssegmente orientiert sich an der Unterschiedlichkeit der Produkte und Dienstleistungen beziehungsweise an den Kundenzielgruppen. Im Zuge der weiteren Verfeinerung der Geschäftsmodelle der Segmente wurden die Geschäftsverantwortlichkeiten geringfügig angepasst.

Im Jahr 2010 erfolgte eine weitere Harmonisierung der Ergebnispositionen im Zusammenhang mit der Integration der Dresdner Bank. Diese betrifft zum einen die einheitliche

Abbildung der Beteiligungsrefinanzierung und der Eigenkapitalanlageerträge für konsolidierte Töchter. Darüber hinaus wird das Laufende Ergebnis aus at-Equity-bewerteten Unternehmen gesondert sowie das Devisenkommissionsgeschäft der ehemaligen Dresdner Bank im Provisionsüberschuss ausgewiesen. Die Vergleichswerte des Vorjahres wurden jeweils entsprechend angepasst.

- Das Segment Privatkunden besteht aus den vier Konzernbereichen Privat- und Geschäftskunden, Wealth Management, Direct Banking und Kredit. Das klassische Filialgeschäft ist im Konzernbereich Privat- und Geschäftskunden gebündelt. Im Wealth Management betreuen wir vermögende Kunden im In- und Ausland, ebenso ist hier die Vermögensverwaltung angesiedelt. Das Direct Banking umfasst die Aktivitäten der comdirect-bank-Gruppe und alle Callcenter-Leistungen für unsere Kunden. Im Konzernbereich Kredit ist das Kreditgeschäft mit den vorgenannten Kundengruppen zentral zusammengefasst.
- Das Segment Mittelstandsbank umfasst die Konzernbereiche Corporate Banking und Financial Institutions. Im Konzernbereich Corporate Banking liegen die beiden Schwerpunkte auf der Betreuung von Mittelstandskunden sowie von Großkunden und internationalen Kunden. Des Weiteren ist hier das Kompetenzzentrum für Kunden aus dem Bereich

|     |                                  |
|-----|----------------------------------|
| 204 | Gesamtergebnisrechnung           |
| 208 | Bilanz                           |
| 210 | Eigenkapitalveränderungsrechnung |
| 212 | Kapitalflussrechnung             |
| 214 | Anhang (Notes)                   |
| 370 | Bestätigungsvermerk              |

- Renewable Energies angesiedelt. Zudem betreut der Konzernbereich den öffentlichen Sektor sowie institutionelle Kunden. Unser umfassendes Leistungsangebot beinhaltet den Zahlungsverkehr, flexible Finanzierungslösungen, Produkte zum Zins- und Währungsmanagement, professionelle Anlageberatung sowie innovative Investmentbanking-Lösungen. Durch unsere ausländischen Niederlassungen sind wir der strategische Partner sowohl für internationale Aktivitäten unserer deutschen Firmenkunden als auch für internationale Unternehmen mit Geschäftsaktivitäten in unserem Heimatmarkt. Der Konzernbereich Financial Institutions verantwortet die Beziehung zu in- und ausländischen Banken und Finanzinstituten sowie Zentralbanken. Er bietet unseren Kunden eine umfassende Betreuung und Beratung an, der strategische Schwerpunkt ist die bevorzugte Einschaltung in die finanzielle Abwicklung des Außenhandels. Durch ein Netz von über 7 000 Korrespondenzbanken sowie Geschäftsverbindungen mit Schwellenländern fördert Financial Institutions die Finanzierung und Abwicklung der weltweiten Außenhandelsaktivitäten aller Kunden des Commerzbank-Konzerns und unterstützt damit auch andere Konzernbereiche in deren internationalen Strategien.
- Das Segment Central & Eastern Europe umfasst die Aktivitäten von Tochtergesellschaften, Filialen und Beteiligungen in Mittel- und Osteuropa (zum Beispiel die der polnischen BRE Bank, der Bank Forum in der Ukraine oder der Commerzbank Eurasija in Russland). Diese sind unter dem Dach einer Holding zusammengefasst. Diese Managementholding agiert als Center of Competence, operative Steuerungseinheit und Schnittstelle zwischen den lokalen Einheiten und den inländischen Zentralabteilungen sowie als strategischer Entscheider. Geschäftsschwerpunkte im Segment Central & Eastern Europe liegen im Privat- und Firmenkundengeschäft sowie im kundenbezogenen Investmentbanking. In unseren Auslandseinheiten und Tochtergesellschaften werden nationale und internationale Kunden betreut, die sowohl lokales Geschäft in der Region haben als auch grenzüberschreitende Cross-Border-Geschäfte tätigen.
  - Corporates & Markets umfasst drei wesentliche Säulen. In Equity Markets & Commodities sind der Handel mit Aktien, Aktienderivaten und Rohstoffprodukten sowie die entsprechenden Vertriebskapazitäten zusammengefasst. Fixed Income & Currencies umfasst Handel und Vertrieb von Zins- und Währungsinstrumenten sowie entsprechender Derivate. Corporate Finance umfasst Finanzierungs- und Beratungsleistungen für Eigen- und Fremdkapitalinstrumente und das zentrale Kreditportfoliomanagement des Segments Corporates & Markets. Zusätzlich ist in Corporates & Markets das Client Relationship Management mit Fokus auf die 100 größten deutschen Firmenkunden sowie ausländische und ausgewählte inländische Versicherungen angesiedelt.
  - Im Segment Asset Based Finance werden die Ergebnisse aus den Konzernbereichen Commercial Real Estate (CRE) Germany, CRE International, Public Finance, Asset Management and Leasing sowie Ship Finance zusammengefasst. Dabei liegen CRE Germany, CRE International sowie Public Finance nahezu vollständig bei der Commerzbank-Tochter Eurohypo Aktiengesellschaft, ebenso wie der Retail-Bestand der Eurohypo. Der Bereich Asset Management and Leasing beinhaltet vorrangig die Aktivitäten unserer Tochtergesellschaft Commerz Real Aktiengesellschaft. Schließlich führt der Bereich Ship Finance die Schiffsfinanzierungen der Commerzbank-Gruppe in unserer Tochtergesellschaft Deutsche Schiffsbank Aktiengesellschaft zusammen.
  - Das Segment Portfolio Restructuring Unit (PRU) ist verantwortlich für die Zurückführung von Aktiva, die im Zusammenhang mit eingestellten Eigenhandels- und Investmentaktivitäten stehen, die nicht mehr in die kundenorientierte Strategie der Commerzbank Aktiengesellschaft passen. Die Zielsetzung des Segmentes besteht in der wertmaximierenden Zurückführung des Portfolios. Die Positionen, die durch dieses Segment verwaltet werden, beinhalten nicht staatlich gesicherte Asset-backed Securities (ABS), weitere strukturierte Kreditprodukte, Eigenhandelspositionen in Firmen- und Finanzanleihen sowie exotische Kreditderivate. Diese Positionen wurden primär aus den Segmenten Corporates & Markets sowie ehemals Commercial Real Estate auf die Portfolio Restructuring Unit übertragen.
  - Im Bereich Sonstige und Konsolidierung werden Erträge und Aufwendungen eingestellt, die nicht in die Verantwortungsbereiche der operativen Geschäftssegmente fallen. Unter Sonstige werden unter anderem Beteiligungen, die nicht den operativen Segmenten zugeordnet sind und das Group Treasury ausgewiesen. Ferner sind hier die Kosten der Serviceeinheiten abgebildet, die – mit Ausnahme der Integrations- und Restrukturierungskosten – vollständig auf die Segmente verrechnet werden. Unter Konsolidierung fallen Aufwendungen und Erträge, die von den in der Segmentberichterstattung dargestellten Ergebnisgrößen der internen Managementberichterstattung auf den Konzernabschluss nach IFRS überleiten. Ferner sind hier die Kosten der Konzernsteuerungseinheiten abgebildet, die – mit Ausnahme der Integrations- und Restrukturierungskosten – ebenfalls vollständig auf die Segmente verrechnet werden.
- Der Erfolg jedes einzelnen Segments wird anhand des Operativen Ergebnisses und des Ergebnisses vor Steuern sowie der Kennziffern Eigenkapitalrendite und Aufwandsquote gemessen.

Das Operative Ergebnis ist definiert als die Summe aus Zinsüberschuss nach Risikovorsorge, Provisionsüberschuss, Handelsergebnis einschließlich Ergebnis aus Sicherungszusammenhängen, Ergebnis aus Finanzanlagen, Laufendem Ergebnis aus at-Equity-bewerteten Unternehmen und Sonstigem Ergebnis abzüglich der Verwaltungsaufwendungen. Durch den Ausweis von Vorsteuerergebnissen sind sowohl im Ergebnis als auch im durchschnittlich gebundenen Eigenkapital die Anteile Dritter enthalten. Alle Erträge, für die ein Segment verantwortlich ist, sind somit im Ergebnis vor Steuern berücksichtigt.

Die Eigenkapitalrendite errechnet sich aus dem Verhältnis des Ergebnisses (operativ und vor Steuern) zum durchschnittlich gebundenen Eigenkapital. Sie gibt an, wie sich das im Segment eingesetzte Kapital verzinst. Die Aufwandsquote im operativen Geschäft spiegelt die Kosteneffizienz der Segmente wider; sie errechnet sich aus dem Verhältnis von Verwaltungsaufwand zu Erträgen vor Risikovorsorge.

Erträge und Aufwendungen weisen wir verursachungsgerecht zu Marktpreisen und im Zinsbereich nach der Marktzinsmethode bei den Segmenten aus. Im Zinsüberschuss werden die tatsächlichen Refinanzierungsaufwendungen für die den jeweiligen Segmenten zugeordneten geschäftsspezifischen Beteiligungen gezeigt. Der im Konzern erwirtschaftete Anlagenutzen aus dem Eigenkapital wird im Verhältnis des durchschnittlich gebundenen Eigenkapitals dem Zinsüberschuss der jeweiligen Segmente zugeordnet. Der Zinssatz entspricht dem Zinssatz einer risikofreien Anlage auf dem langfristigen Kapitalmarkt. Die Ermittlung des durchschnittlich gebundenen Eigenkapitals erfolgte im Jahr 2010 nach Basel-II-Systematik auf Basis der ermittelten durchschnittlichen Risikoaktiva und der Anrechnungsbeträge für Marktrisikopositionen (Risikoaktiva-Äquivalente). Auf Konzernebene wird das Investorenkapital gezeigt, das der Berechnung der Eigenkapitalrendite dient. Die für die Segmentberichterstattung unterstellte Kapitalunterlegung der Risikoaktiva beträgt 7 %.

Die Segmentberichterstattung des Commerzbank-Konzerns zeigt die Vorsteuerergebnisse der Segmente. Um den betriebswirtschaftlichen Ergebniseffekt aus spezifischen steuerlich induzierten Transaktionen des Segments Corporates & Markets in dieser Berichterstattung abzubilden, enthält der Zinsüberschuss des Segments Corporates & Markets deshalb ein dem Nachsteuerergebnis dieser Transaktionen entsprechendes Vorsteueräquivalent. Bei der Überleitung der Segmentberichterstattung auf die Zahlen der externen Rechnungslegung wird dieses Vorsteueräquivalent im Bereich Sonstige und Konsolidierung eliminiert.

Die Buchwerte der at-Equity-bewerteten Unternehmen in Höhe von 737 Mio Euro (Vorjahr: 378 Mio Euro) verteilen sich auf die Segmente Privatkunden mit 236 Mio Euro (Vorjahr: 174 Mio Euro), Mittelstandsbank mit 95 Mio Euro (Vorjahr: 40 Mio Euro), Corporates & Markets mit 20 Mio Euro (Vorjahr: 19 Mio Euro), Asset Based Finance mit 320 Mio Euro (Vorjahr: 71 Mio Euro) sowie Sonstige und Konsolidierung mit 66 Mio Euro (Vorjahr: 74 Mio Euro).

Der im Operativen Ergebnis ausgewiesene Verwaltungsaufwand beinhaltet den Personalaufwand, den Sachaufwand sowie die Abschreibungen auf Sachanlagen und Sonstige immaterielle Anlagewerte. Restrukturierungsaufwendungen und Wertminderungen auf Geschäfts- oder Firmenwerte sowie Markennamen werden unterhalb des Operativen Ergebnisses im Ergebnis vor Steuern ausgewiesen. Die Zuordnung des Verwaltungsaufwands zu den einzelnen Segmenten erfolgt nach dem Verursachungsprinzip. Die sich aus den internen Leistungen ergebenden indirekten Aufwendungen werden dem Leistungsempfänger in Rechnung gestellt beziehungsweise führen beim Leistungserbringer zu einer entsprechenden Entlastung. Die Bewertung dieser internen Leistungsbeziehungen erfolgt zu Marktpreisen oder Vollkosten.

Die nachstehenden Tabellen enthalten Informationen zu den Segmenten für die Geschäftsjahre 2010 und 2009.

|     |                                  |
|-----|----------------------------------|
| 204 | Gesamtergebnisrechnung           |
| 208 | Bilanz                           |
| 210 | Eigenkapitalveränderungsrechnung |
| 212 | Kapitalflussrechnung             |
| 214 | Anhang (Notes)                   |
| 370 | Bestätigungsvermerk              |

Aufteilung nach Segmenten:

| Geschäftsjahr 2010                                                   | Privat-<br>kunden | Mittel-<br>stands-<br>bank | Central<br>& Eastern<br>Europe | Corpo-<br>rates &<br>Markets | Asset<br>Based<br>Finance | Portfolio<br>Restruc-<br>turing Unit | Sonstige<br>und Konso-<br>lidierung | Konzern        |
|----------------------------------------------------------------------|-------------------|----------------------------|--------------------------------|------------------------------|---------------------------|--------------------------------------|-------------------------------------|----------------|
| Mio €                                                                |                   |                            |                                |                              |                           |                                      |                                     |                |
| Zinsüberschuss                                                       | 1 983             | 2 081                      | 674                            | 767                          | 1 160                     | 82                                   | 307                                 | 7 054          |
| Risikovorsorge im Kreditgeschäft                                     | -246              | -279                       | -361                           | 27                           | -1 584                    | -62                                  | 6                                   | -2 499         |
| Zinsüberschuss nach Risikovorsorge                                   | 1 737             | 1 802                      | 313                            | 794                          | -424                      | 20                                   | 313                                 | 4 555          |
| Provisionsüberschuss                                                 | 1 941             | 983                        | 208                            | 254                          | 327                       | -                                    | -66                                 | 3 647          |
| Handelsergebnis und Ergebnis aus<br>Sicherungszusammenhängen         | 1                 | 24                         | 73                             | 1 160                        | -78                       | 787                                  | -9                                  | 1 958          |
| Ergebnis aus Finanzanlagen                                           | 31                | 188                        | -4                             | 220                          | -352                      | -29                                  | 54                                  | 108            |
| Laufendes Ergebnis aus at-Equity-<br>bewerteten Unternehmen          | 10                | 30                         | -                              | 11                           | -20                       | -                                    | 4                                   | 35             |
| Sonstiges Ergebnis                                                   | -120              | 14                         | 28                             | -20                          | -114                      | 3                                    | 78                                  | -131           |
| <i>Erträge vor Risikovorsorge</i>                                    | <i>3 846</i>      | <i>3 320</i>               | <i>979</i>                     | <i>2 392</i>                 | <i>923</i>                | <i>843</i>                           | <i>368</i>                          | <i>12 671</i>  |
| <i>Erträge nach Risikovorsorge</i>                                   | <i>3 600</i>      | <i>3 041</i>               | <i>618</i>                     | <i>2 419</i>                 | <i>-661</i>               | <i>781</i>                           | <i>374</i>                          | <i>10 172</i>  |
| Verwaltungsaufwendungen                                              | 3 552             | 1 443                      | 565                            | 1 633                        | 609                       | 106                                  | 878                                 | 8 786          |
| <b>Operatives Ergebnis</b>                                           | <b>48</b>         | <b>1 598</b>               | <b>53</b>                      | <b>786</b>                   | <b>-1 270</b>             | <b>675</b>                           | <b>-504</b>                         | <b>1 386</b>   |
| Wertminderungen auf Geschäfts- oder<br>Firmenwerte sowie Markennamen | -                 | -                          | -                              | -                            | -                         | -                                    | -                                   | -              |
| Restrukturierungsaufwendungen                                        | -                 | -                          | -                              | -                            | 33                        | -                                    | -                                   | 33             |
| <b>Ergebnis vor Steuern</b>                                          | <b>48</b>         | <b>1 598</b>               | <b>53</b>                      | <b>786</b>                   | <b>-1 303</b>             | <b>675</b>                           | <b>-504</b>                         | <b>1 353</b>   |
| <b>Aktiva</b>                                                        | <b>60 330</b>     | <b>80 026</b>              | <b>29 424</b>                  | <b>255 925</b>               | <b>238 013</b>            | <b>16 980</b>                        | <b>73 601</b>                       | <b>754 299</b> |
| <b>Durchschnittlich gebundenes<br/>Eigenkapital</b>                  | <b>3 397</b>      | <b>5 550</b>               | <b>1 627</b>                   | <b>3 855</b>                 | <b>6 166</b>              | <b>1 211</b>                         | <b>9 175</b>                        | <b>30 981</b>  |
| <b>Operative Eigenkapitalrendite (%)</b>                             | <b>1,4</b>        | <b>28,8</b>                | <b>3,3</b>                     | <b>20,4</b>                  | <b>-20,6</b>              |                                      |                                     | <b>4,5</b>     |
| <b>Aufwandsquote im operativen<br/>Geschäft (%)</b>                  | <b>92,4</b>       | <b>43,5</b>                | <b>57,7</b>                    | <b>68,3</b>                  | <b>66,0</b>               |                                      |                                     | <b>69,3</b>    |
| <b>Eigenkapitalrendite des Ergebnisses<br/>vor Steuern (%)</b>       | <b>1,4</b>        | <b>28,8</b>                | <b>3,3</b>                     | <b>20,4</b>                  | <b>-21,1</b>              |                                      |                                     | <b>4,4</b>     |
| Mitarbeiterdurchschnitt                                              | 20 007            | 5 367                      | 9 733                          | 1 991                        | 1 875                     | 52                                   | 18 651                              | 57 676         |

| Geschäftsjahr 2009                                                        | Privat-<br>kunden | Mittel-<br>stands-<br>bank | Central<br>& Eastern<br>Europe | Corpo-<br>rates &<br>Markets | Asset<br>Based<br>Finance | Portfolio<br>Restruc-<br>turing Unit | Sonstige<br>und Konso-<br>lidierung | Konzern        |
|---------------------------------------------------------------------------|-------------------|----------------------------|--------------------------------|------------------------------|---------------------------|--------------------------------------|-------------------------------------|----------------|
| Mio €                                                                     |                   |                            |                                |                              |                           |                                      |                                     |                |
| Zinsüberschuss                                                            | 2 139             | 2 156                      | 665                            | 780                          | 1 101                     | 252                                  | 81                                  | 7 174          |
| Risikovorsorge im Kreditgeschäft                                          | -246              | -954                       | -812                           | -289                         | -1 588                    | -327                                 | 2                                   | -4 214         |
| Zinsüberschuss nach Risikovorsorge                                        | 1 893             | 1 202                      | -147                           | 491                          | -487                      | -75                                  | 83                                  | 2 960          |
| Provisionsüberschuss <sup>1</sup>                                         | 2 163             | 924                        | 170                            | 352                          | 297                       | 11                                   | -144                                | 3 773          |
| Handelsergebnis <sup>1</sup> und Ergebnis aus<br>Sicherungszusammenhängen | -1                | -129                       | 79                             | 681                          | 197                       | -812                                 | -424                                | -409           |
| Ergebnis aus Finanzanlagen                                                | -4                | 1                          | -14                            | 27                           | -87                       | -432                                 | 926                                 | 417            |
| Laufendes Ergebnis aus at-Equity-<br>bewerteten Unternehmen               | 11                | 4                          | -                              | -                            | -                         | -                                    | -                                   | 15             |
| Sonstiges Ergebnis                                                        | -99               | -69                        | 5                              | 5                            | -64                       | 4                                    | 196                                 | -22            |
| <i>Erträge vor Risikovorsorge</i>                                         | <i>4 209</i>      | <i>2 887</i>               | <i>905</i>                     | <i>1 845</i>                 | <i>1 444</i>              | <i>-977</i>                          | <i>635</i>                          | <i>10 948</i>  |
| <i>Erträge nach Risikovorsorge</i>                                        | <i>3 963</i>      | <i>1 933</i>               | <i>93</i>                      | <i>1 556</i>                 | <i>-144</i>               | <i>-1 304</i>                        | <i>637</i>                          | <i>6 734</i>   |
| Verwaltungsaufwendungen                                                   | 3 821             | 1 331                      | 486                            | 1 976                        | 669                       | 148                                  | 573                                 | 9 004          |
| <b>Operatives Ergebnis</b>                                                | <b>142</b>        | <b>602</b>                 | <b>-393</b>                    | <b>-420</b>                  | <b>-813</b>               | <b>-1 452</b>                        | <b>64</b>                           | <b>-2 270</b>  |
| Wertminderungen auf Geschäfts- oder<br>Firmenwerte sowie Markennamen      | -                 | -                          | -                              | 23                           | 745                       | -                                    | -                                   | 768            |
| Restrukturierungsaufwendungen                                             | 338               | 74                         | 5                              | 128                          | 67                        | 2                                    | 1 007                               | 1 621          |
| <b>Ergebnis vor Steuern</b>                                               | <b>-196</b>       | <b>528</b>                 | <b>-398</b>                    | <b>-571</b>                  | <b>-1 625</b>             | <b>-1 454</b>                        | <b>-943</b>                         | <b>-4 659</b>  |
| <b>Aktiva</b>                                                             | <b>69 220</b>     | <b>85 235</b>              | <b>25 761</b>                  | <b>300 211</b>               | <b>261 455</b>            | <b>26 002</b>                        | <b>76 219</b>                       | <b>844 103</b> |
| <b>Durchschnittlich gebundenes<br/>Eigenkapital</b>                       | <b>3 256</b>      | <b>5 393</b>               | <b>1 605</b>                   | <b>4 421</b>                 | <b>6 821</b>              | <b>1 740</b>                         | <b>5 116</b>                        | <b>28 352</b>  |
| <b>Operative Eigenkapitalrendite (%)</b>                                  | <b>4,4</b>        | <b>11,2</b>                | <b>-24,5</b>                   | <b>-9,5</b>                  | <b>-11,9</b>              |                                      |                                     | <b>-8,0</b>    |
| <b>Aufwandsquote im operativen<br/>Geschäft (%)</b>                       | <b>90,8</b>       | <b>46,1</b>                | <b>53,7</b>                    | <b>107,1</b>                 | <b>46,3</b>               |                                      |                                     | <b>82,2</b>    |
| <b>Eigenkapitalrendite des Ergebnisses<br/>vor Steuern (%)</b>            | <b>-6,0</b>       | <b>9,8</b>                 | <b>-24,8</b>                   | <b>-12,9</b>                 | <b>-23,8</b>              |                                      |                                     | <b>-16,4</b>   |
| Mitarbeiterdurchschnitt                                                   | 22 789            | 5 638                      | 10 511                         | 2 755                        | 2 089                     | 53                                   | 19 432                              | 63 267         |

<sup>1</sup> Anpassung aufgrund Vereinheitlichung der Ausweisstruktur (siehe Note 2).



|     |                                  |
|-----|----------------------------------|
| 204 | Gesamtergebnisrechnung           |
| 208 | Bilanz                           |
| 210 | Eigenkapitalveränderungsrechnung |
| 212 | Kapitalflussrechnung             |
| 214 | Anhang (Notes)                   |
| 370 | Bestätigungsvermerk              |

## Detailangaben Sonstige und Konsolidierung:

| Mio €                                                                  | 2010          |                |                             | 2009          |                |                             |
|------------------------------------------------------------------------|---------------|----------------|-----------------------------|---------------|----------------|-----------------------------|
|                                                                        | Sonstige      | Konsolidierung | Sonstige und Konsolidierung | Sonstige      | Konsolidierung | Sonstige und Konsolidierung |
| Zinsüberschuss                                                         | 332           | -25            | 307                         | 72            | 9              | 81                          |
| Risikovorsorge im Kreditgeschäft                                       | 6             | -              | 6                           | 2             | -              | 2                           |
| Zinsüberschuss nach Risikovorsorge                                     | 338           | -25            | 313                         | 74            | 9              | 83                          |
| Provisionsüberschuss <sup>1</sup>                                      | -65           | -1             | -66                         | -12           | -132           | -144                        |
| Handelsergebnis <sup>1</sup> und Ergebnis aus Sicherungszusammenhängen | 10            | -19            | -9                          | -200          | -224           | -424                        |
| Ergebnis aus Finanzanlagen                                             | 55            | -1             | 54                          | 930           | -4             | 926                         |
| Laufendes Ergebnis aus at-Equity-bewerteten Unternehmen                | 4             | -              | 4                           | -             | -              | -                           |
| Sonstiges Ergebnis                                                     | 100           | -22            | 78                          | 124           | 72             | 196                         |
| <i>Erträge vor Risikovorsorge</i>                                      | <i>436</i>    | <i>-68</i>     | <i>368</i>                  | <i>914</i>    | <i>-279</i>    | <i>635</i>                  |
| <i>Erträge nach Risikovorsorge</i>                                     | <i>442</i>    | <i>-68</i>     | <i>374</i>                  | <i>916</i>    | <i>-279</i>    | <i>637</i>                  |
| Verwaltungsaufwendungen                                                | 891           | -13            | 878                         | 558           | 15             | 573                         |
| <b>Operatives Ergebnis</b>                                             | <b>-449</b>   | <b>-55</b>     | <b>-504</b>                 | <b>358</b>    | <b>-294</b>    | <b>64</b>                   |
| Wertminderungen auf Geschäfts- oder Firmenwerte sowie Markennamen      | -             | -              | -                           | -             | -              | -                           |
| Restrukturierungsaufwendungen                                          | -             | -              | -                           | 676           | 331            | 1 007                       |
| <b>Ergebnis vor Steuern</b>                                            | <b>-449</b>   | <b>-55</b>     | <b>-504</b>                 | <b>-318</b>   | <b>-625</b>    | <b>-943</b>                 |
| <b>Aktiva</b>                                                          | <b>73 601</b> | <b>-</b>       | <b>73 601</b>               | <b>76 219</b> | <b>-</b>       | <b>76 219</b>               |

<sup>1</sup> Anpassung im Vorjahr aufgrund Vereinheitlichung der Ausweisstruktur (siehe Note 2).

In den Vorjahreswerten ist für den Bereich Sonstige und Konsolidierung zu beachten, dass die Ergebnisse der Marktsegmente aus Gründen der besseren Vergleichbarkeit den Zeitraum 1. Januar bis 31. Dezember 2009 beinhalten. Die Differenz zum Konzernergebnis – das für die Dresdner Bank nur den Zeitraum 13. Januar bis 31. Dezember 2009 beinhaltet – wird im Bereich Sonstige ausgewiesen.

Unter Konsolidierung berichten wir Konsolidierungs- und Überleitungssachverhalte vom Ergebnis der Segmente und des Bereichs Sonstige auf den Konzernabschluss. Unter anderem werden dort folgende Sachverhalte abgebildet:

- Bewertungseffekte aus der Anwendung des Hedge Accountings gemäß IAS 39 auf bankübergreifende Transaktionen werden in Konsolidierung gezeigt.

- Das dem Segment Corporates & Markets aus steuerlich induzierten Transaktionen im Zinsüberschuss zugeordnete Vorsteueräquivalent wird unter Konsolidierung wieder eliminiert.
- In den Segmenten angefallene Bewertungsergebnisse für eigene Schuldverschreibungen werden unter Konsolidierung eliminiert.
- Sonstige Konsolidierungseffekte für konzerninterne Sachverhalte werden ebenfalls hier berichtet.
- Integrations- und Restrukturierungsaufwendungen der Konzernsteuerungseinheiten werden unter Konsolidierung ausgewiesen.

## Quartalsergebnisse nach Segmenten:

| 1. Quartal 2010                                                           | Privat-<br>kunden | Mittel-<br>stands-<br>bank | Central<br>& Eastern<br>Europe | Corpo-<br>rates &<br>Markets | Asset<br>Based<br>Finance | Portfolio<br>Restruc-<br>turing Unit | Sonstige<br>und Konso-<br>lidierung | Konzern      |
|---------------------------------------------------------------------------|-------------------|----------------------------|--------------------------------|------------------------------|---------------------------|--------------------------------------|-------------------------------------|--------------|
| Mio €                                                                     |                   |                            |                                |                              |                           |                                      |                                     |              |
| Zinsüberschuss                                                            | 489               | 523                        | 159                            | 208                          | 298                       | 23                                   | 186                                 | 1 886        |
| Risikovorsorge im Kreditgeschäft                                          | -66               | -161                       | -94                            | 19                           | -325                      | -22                                  | 5                                   | -644         |
| Zinsüberschuss nach Risikovorsorge                                        | 423               | 362                        | 65                             | 227                          | -27                       | 1                                    | 191                                 | 1 242        |
| Provisionsüberschuss <sup>1</sup>                                         | 547               | 271                        | 47                             | 75                           | 88                        | -3                                   | -28                                 | 997          |
| Handelsergebnis <sup>1</sup> und Ergebnis aus<br>Sicherungszusammenhängen | 1                 | -4                         | 18                             | 448                          | -4                        | 282                                  | 95                                  | 836          |
| Ergebnis aus Finanzanlagen                                                | 9                 | -3                         | -1                             | -14                          | -2                        | -94                                  | -14                                 | -119         |
| Laufendes Ergebnis aus at-Equity-<br>bewerteten Unternehmen               | 4                 | -                          | -                              | -                            | -2                        | -                                    | -                                   | 2            |
| Sonstiges Ergebnis                                                        | -49               | 45                         | 3                              | 8                            | 14                        | -                                    | 1                                   | 22           |
| <i>Erträge vor Risikovorsorge</i>                                         | <i>1 001</i>      | <i>832</i>                 | <i>226</i>                     | <i>725</i>                   | <i>392</i>                | <i>208</i>                           | <i>240</i>                          | <i>3 624</i> |
| <i>Erträge nach Risikovorsorge</i>                                        | <i>935</i>        | <i>671</i>                 | <i>132</i>                     | <i>744</i>                   | <i>67</i>                 | <i>186</i>                           | <i>245</i>                          | <i>2 980</i> |
| Verwaltungsaufwendungen                                                   | 912               | 358                        | 126                            | 410                          | 152                       | 25                                   | 226                                 | 2 209        |
| <b>Operatives Ergebnis</b>                                                | <b>23</b>         | <b>313</b>                 | <b>6</b>                       | <b>334</b>                   | <b>-85</b>                | <b>161</b>                           | <b>19</b>                           | <b>771</b>   |
| Wertminderungen auf Geschäfts- oder<br>Firmenwerte sowie Markennamen      | -                 | -                          | -                              | -                            | -                         | -                                    | -                                   | -            |
| Restrukturierungsaufwendungen                                             | -                 | -                          | -                              | -                            | -                         | -                                    | -                                   | -            |
| <b>Ergebnis vor Steuern</b>                                               | <b>23</b>         | <b>313</b>                 | <b>6</b>                       | <b>334</b>                   | <b>-85</b>                | <b>161</b>                           | <b>19</b>                           | <b>771</b>   |

<sup>1</sup> Anpassung aufgrund Vereinheitlichung der Ausweisstruktur (siehe Note 2).

| 2. Quartal 2010                                                           | Privat-<br>kunden | Mittel-<br>stands-<br>bank | Central<br>& Eastern<br>Europe | Corpo-<br>rates &<br>Markets | Asset<br>Based<br>Finance | Portfolio<br>Restruc-<br>turing Unit | Sonstige<br>und Konso-<br>lidierung | Konzern      |
|---------------------------------------------------------------------------|-------------------|----------------------------|--------------------------------|------------------------------|---------------------------|--------------------------------------|-------------------------------------|--------------|
| Mio €                                                                     |                   |                            |                                |                              |                           |                                      |                                     |              |
| Zinsüberschuss                                                            | 486               | 554                        | 161                            | 198                          | 319                       | 10                                   | 125                                 | 1 853        |
| Risikovorsorge im Kreditgeschäft                                          | -70               | -94                        | -92                            | -                            | -354                      | -28                                  | -1                                  | -639         |
| Zinsüberschuss nach Risikovorsorge                                        | 416               | 460                        | 69                             | 198                          | -35                       | -18                                  | 124                                 | 1 214        |
| Provisionsüberschuss <sup>1</sup>                                         | 497               | 222                        | 53                             | 64                           | 80                        | 7                                    | -18                                 | 905          |
| Handelsergebnis <sup>1</sup> und Ergebnis aus<br>Sicherungszusammenhängen | 1                 | 50                         | 20                             | 187                          | 30                        | 56                                   | -28                                 | 316          |
| Ergebnis aus Finanzanlagen                                                | 5                 | 15                         | 4                              | 43                           | -158                      | 70                                   | 81                                  | 60           |
| Laufendes Ergebnis aus at-Equity-<br>bewerteten Unternehmen               | 3                 | -                          | -                              | -                            | 2                         | -                                    | 1                                   | 6            |
| Sonstiges Ergebnis                                                        | 6                 | -11                        | 9                              | 11                           | -21                       | 7                                    | -31                                 | -30          |
| <i>Erträge vor Risikovorsorge</i>                                         | <i>998</i>        | <i>830</i>                 | <i>247</i>                     | <i>503</i>                   | <i>252</i>                | <i>150</i>                           | <i>130</i>                          | <i>3 110</i> |
| <i>Erträge nach Risikovorsorge</i>                                        | <i>928</i>        | <i>736</i>                 | <i>155</i>                     | <i>503</i>                   | <i>-102</i>               | <i>122</i>                           | <i>129</i>                          | <i>2 471</i> |
| Verwaltungsaufwendungen                                                   | 914               | 349                        | 148                            | 394                          | 147                       | 27                                   | 249                                 | 2 228        |
| <b>Operatives Ergebnis</b>                                                | <b>14</b>         | <b>387</b>                 | <b>7</b>                       | <b>109</b>                   | <b>-249</b>               | <b>95</b>                            | <b>-120</b>                         | <b>243</b>   |
| Wertminderungen auf Geschäfts- oder<br>Firmenwerte sowie Markennamen      | -                 | -                          | -                              | -                            | -                         | -                                    | -                                   | -            |
| Restrukturierungsaufwendungen                                             | -                 | -                          | -                              | -                            | 33                        | -                                    | -                                   | 33           |
| <b>Ergebnis vor Steuern</b>                                               | <b>14</b>         | <b>387</b>                 | <b>7</b>                       | <b>109</b>                   | <b>-282</b>               | <b>95</b>                            | <b>-120</b>                         | <b>210</b>   |

<sup>1</sup> Anpassung aufgrund Vereinheitlichung der Ausweisstruktur (siehe Note 2).

|     |                                  |
|-----|----------------------------------|
| 204 | Gesamtergebnisrechnung           |
| 208 | Bilanz                           |
| 210 | Eigenkapitalveränderungsrechnung |
| 212 | Kapitalflussrechnung             |
| 214 | Anhang (Notes)                   |
| 370 | Bestätigungsvermerk              |

| 3. Quartal 2010                                                         | Privat-<br>kunden | Mittel-<br>stands-<br>bank | Central<br>& Eastern<br>Europe | Corpo-<br>rates &<br>Markets | Asset<br>Based<br>Finance | Portfolio<br>Restruc-<br>turing Unit | Sonstige<br>und Konso-<br>lidierung | Konzern      |
|-------------------------------------------------------------------------|-------------------|----------------------------|--------------------------------|------------------------------|---------------------------|--------------------------------------|-------------------------------------|--------------|
| Mio €                                                                   |                   |                            |                                |                              |                           |                                      |                                     |              |
| Zinsüberschuss                                                          | 501               | 482                        | 164                            | 141                          | 283                       | 29                                   | 33                                  | 1 633        |
| Risikovorsorge im Kreditgeschäft                                        | -64               | 69                         | -127                           | -6                           | -493                      | -2                                   | 2                                   | -621         |
| Zinsüberschuss nach<br>Risikovorsorge                                   | 437               | 551                        | 37                             | 135                          | -210                      | 27                                   | 35                                  | 1 012        |
| Provisionsüberschuss                                                    | 458               | 239                        | 53                             | 55                           | 83                        | 2                                    | -20                                 | 870          |
| Handelsergebnis und Ergebnis<br>aus Sicherungszusammenhängen            | 2                 | -14                        | 19                             | 313                          | -49                       | 328                                  | -177                                | 422          |
| Ergebnis aus Finanzanlagen                                              | 4                 | 29                         | 4                              | 31                           | -51                       | -9                                   | -32                                 | -24          |
| Laufendes Ergebnis aus at-<br>Equity-bewerteten Unternehmen             | 4                 | -                          | -                              | 1                            | -9                        | -                                    | -1                                  | -5           |
| Sonstiges Ergebnis                                                      | -6                | -9                         | 9                              | 25                           | -24                       | -3                                   | 34                                  | 26           |
| <i>Erträge vor Risikovorsorge</i>                                       | <i>963</i>        | <i>727</i>                 | <i>249</i>                     | <i>566</i>                   | <i>233</i>                | <i>347</i>                           | <i>-163</i>                         | <i>2 922</i> |
| <i>Erträge nach Risikovorsorge</i>                                      | <i>899</i>        | <i>796</i>                 | <i>122</i>                     | <i>560</i>                   | <i>-260</i>               | <i>345</i>                           | <i>-161</i>                         | <i>2 301</i> |
| Verwaltungsaufwendungen                                                 | 875               | 367                        | 153                            | 438                          | 144                       | 31                                   | 177                                 | 2 185        |
| <b>Operatives Ergebnis</b>                                              | <b>24</b>         | <b>429</b>                 | <b>-31</b>                     | <b>122</b>                   | <b>-404</b>               | <b>314</b>                           | <b>-338</b>                         | <b>116</b>   |
| Wertminderungen auf Geschäfts-<br>oder Firmenwerte sowie<br>Markennamen | -                 | -                          | -                              | -                            | -                         | -                                    | -                                   | -            |
| Restrukturierungsaufwendungen                                           | -                 | -                          | -                              | -                            | -                         | -                                    | -                                   | -            |
| <b>Ergebnis vor Steuern</b>                                             | <b>24</b>         | <b>429</b>                 | <b>-31</b>                     | <b>122</b>                   | <b>-404</b>               | <b>314</b>                           | <b>-338</b>                         | <b>116</b>   |

| 4. Quartal 2010                                                         | Privat-<br>kunden | Mittel-<br>stands-<br>bank | Central<br>& Eastern<br>Europe | Corpo-<br>rates &<br>Markets | Asset<br>Based<br>Finance | Portfolio<br>Restruc-<br>turing Unit | Sonstige<br>und Konso-<br>lidierung | Konzern      |
|-------------------------------------------------------------------------|-------------------|----------------------------|--------------------------------|------------------------------|---------------------------|--------------------------------------|-------------------------------------|--------------|
| Mio €                                                                   |                   |                            |                                |                              |                           |                                      |                                     |              |
| Zinsüberschuss                                                          | 507               | 522                        | 190                            | 220                          | 260                       | 20                                   | -37                                 | 1 682        |
| Risikovorsorge im Kreditgeschäft                                        | -46               | -93                        | -48                            | 14                           | -412                      | -10                                  | -                                   | -595         |
| Zinsüberschuss nach<br>Risikovorsorge                                   | 461               | 429                        | 142                            | 234                          | -152                      | 10                                   | -37                                 | 1 087        |
| Provisionsüberschuss                                                    | 439               | 251                        | 55                             | 60                           | 76                        | -6                                   | -                                   | 875          |
| Handelsergebnis und Ergebnis<br>aus Sicherungszusammenhängen            | -3                | -8                         | 16                             | 212                          | -55                       | 121                                  | 101                                 | 384          |
| Ergebnis aus Finanzanlagen                                              | 13                | 147                        | -11                            | 160                          | -141                      | 4                                    | 19                                  | 191          |
| Laufendes Ergebnis aus at-<br>Equity-bewerteten Unternehmen             | -1                | 30                         | -                              | 10                           | -11                       | -                                    | 4                                   | 32           |
| Sonstiges Ergebnis                                                      | -71               | -11                        | 7                              | -64                          | -83                       | -1                                   | 74                                  | -149         |
| <i>Erträge vor Risikovorsorge</i>                                       | <i>884</i>        | <i>931</i>                 | <i>257</i>                     | <i>598</i>                   | <i>46</i>                 | <i>138</i>                           | <i>161</i>                          | <i>3 015</i> |
| <i>Erträge nach Risikovorsorge</i>                                      | <i>838</i>        | <i>838</i>                 | <i>209</i>                     | <i>612</i>                   | <i>-366</i>               | <i>128</i>                           | <i>161</i>                          | <i>2 420</i> |
| Verwaltungsaufwendungen                                                 | 851               | 369                        | 138                            | 391                          | 166                       | 23                                   | 226                                 | 2 164        |
| <b>Operatives Ergebnis</b>                                              | <b>-13</b>        | <b>469</b>                 | <b>71</b>                      | <b>221</b>                   | <b>-532</b>               | <b>105</b>                           | <b>-65</b>                          | <b>256</b>   |
| Wertminderungen auf Geschäfts-<br>oder Firmenwerte sowie<br>Markennamen | -                 | -                          | -                              | -                            | -                         | -                                    | -                                   | -            |
| Restrukturierungsaufwendungen                                           | -                 | -                          | -                              | -                            | -                         | -                                    | -                                   | -            |
| <b>Ergebnis vor Steuern</b>                                             | <b>-13</b>        | <b>469</b>                 | <b>71</b>                      | <b>221</b>                   | <b>-532</b>               | <b>105</b>                           | <b>-65</b>                          | <b>256</b>   |

Die Zuordnung in die Segmente nach dem jeweiligen Sitz der Filiale oder des Konzernunternehmens ergab nachfolgende Verteilung:

| Geschäftsjahr 2010                                           | Deutschland    | Europa<br>ohne<br>Deutschland | Amerika       | Asien        | Sonstige  | Gesamt         |
|--------------------------------------------------------------|----------------|-------------------------------|---------------|--------------|-----------|----------------|
| Mio €                                                        |                |                               |               |              |           |                |
| Zinsüberschuss                                               | 4 497          | 2 170                         | 263           | 123          | 1         | 7 054          |
| Risikovorsorge im Kreditgeschäft                             | - 873          | - 1 302                       | - 302         | - 22         | -         | - 2 499        |
| Zinsüberschuss nach Risikovorsorge                           | 3 624          | 868                           | - 39          | 101          | 1         | 4 555          |
| Provisionsüberschuss                                         | 3 189          | 360                           | 70            | 28           | -         | 3 647          |
| Handelsergebnis und Ergebnis aus<br>Sicherungszusammenhängen | 381            | 1 496                         | 72            | 9            | -         | 1 958          |
| Ergebnis aus Finanzanlagen                                   | 57             | 1                             | 44            | 6            | -         | 108            |
| Laufendes Ergebnis aus at-<br>Equity-bewerteten Unternehmen  | 40             | - 5                           | -             | -            | -         | 35             |
| Sonstiges Ergebnis                                           | - 130          | - 11                          | 8             | 2            | -         | - 131          |
| <i>Erträge vor Risikovorsorge</i>                            | <i>8 034</i>   | <i>4 011</i>                  | <i>457</i>    | <i>168</i>   | <i>1</i>  | <i>12 671</i>  |
| <i>Erträge nach Risikovorsorge</i>                           | <i>7 161</i>   | <i>2 709</i>                  | <i>155</i>    | <i>146</i>   | <i>1</i>  | <i>10 172</i>  |
| Verwaltungsaufwendungen                                      | 7 011          | 1 465                         | 201           | 109          | -         | 8 786          |
| <b>Operatives Ergebnis</b>                                   | <b>150</b>     | <b>1 244</b>                  | <b>- 46</b>   | <b>37</b>    | <b>1</b>  | <b>1 386</b>   |
| <b>Risikoaktiva für Kreditrisiken</b>                        | <b>150 837</b> | <b>66 138</b>                 | <b>10 742</b> | <b>4 672</b> | <b>49</b> | <b>232 438</b> |

Im Vorjahr erzielten wir in den geografischen Märkten folgende Ergebnisse:

| Geschäftsjahr 2009                                                        | Deutschland    | Europa<br>ohne<br>Deutschland | Amerika       | Asien        | Sonstige  | Gesamt         |
|---------------------------------------------------------------------------|----------------|-------------------------------|---------------|--------------|-----------|----------------|
| Mio €                                                                     |                |                               |               |              |           |                |
| Zinsüberschuss                                                            | 4 631          | 2 107                         | 334           | 101          | 1         | 7 174          |
| Risikovorsorge im Kreditgeschäft                                          | - 1 915        | - 1 767                       | - 512         | - 21         | 1         | - 4 214        |
| Zinsüberschuss nach Risikovorsorge                                        | 2 716          | 340                           | - 178         | 80           | 2         | 2 960          |
| Provisionsüberschuss <sup>1</sup>                                         | 3 182          | 495                           | 64            | 32           | -         | 3 773          |
| Handelsergebnis <sup>1</sup> und Ergebnis aus<br>Sicherungszusammenhängen | 739            | - 910                         | - 155         | - 83         | -         | - 409          |
| Ergebnis aus Finanzanlagen                                                | 691            | - 118                         | - 170         | 14           | -         | 417            |
| Laufendes Ergebnis aus at-<br>Equity-bewerteten Unternehmen               | 13             | 2                             | -             | -            | -         | 15             |
| Sonstiges Ergebnis                                                        | - 72           | - 6                           | 78            | - 24         | 2         | - 22           |
| <i>Erträge vor Risikovorsorge</i>                                         | <i>9 184</i>   | <i>1 570</i>                  | <i>151</i>    | <i>40</i>    | <i>3</i>  | <i>10 948</i>  |
| <i>Erträge nach Risikovorsorge</i>                                        | <i>7 269</i>   | <i>- 197</i>                  | <i>- 361</i>  | <i>19</i>    | <i>4</i>  | <i>6 734</i>   |
| Verwaltungsaufwendungen                                                   | 6 908          | 1 698                         | 271           | 124          | 3         | 9 004          |
| <b>Operatives Ergebnis</b>                                                | <b>361</b>     | <b>- 1 895</b>                | <b>- 632</b>  | <b>- 105</b> | <b>1</b>  | <b>- 2 270</b> |
| <b>Risikoaktiva für Kreditrisiken</b>                                     | <b>147 472</b> | <b>77 899</b>                 | <b>16 558</b> | <b>4 294</b> | <b>90</b> | <b>246 313</b> |

<sup>1</sup> Anpassung aufgrund Vereinheitlichung der Ausweisstruktur (siehe Note 2).

Von den Erträgen vor Risikovorsorge in Europa entfielen rund 55 % auf unsere Einheiten in Großbritannien (Vorjahr: - 34 %), 18 % auf unsere Einheiten in Polen (Vorjahr: 40 %) und 12 % auf unseren Einheiten in Luxemburg (Vorjahr: 28 %). Statt der langfristigen Vermögenswerte weisen wir die Risikoaktiva für Kreditrisiken aus. Eine Aufgliederung des Gesamtbetrags der

Erträge des Commerzbank-Konzerns nach Produkten und Dienstleistungen wird bedingt durch die Übernahme der Dresdner Bank erst erfolgen, wenn die Produkt- und Dienstleistungsdefinitionen und die Informationssysteme im neuen Commerzbank-Konzern vereinheitlicht sind.

|     |                                  |
|-----|----------------------------------|
| 204 | Gesamtergebnisrechnung           |
| 208 | Bilanz                           |
| 210 | Eigenkapitalveränderungsrechnung |
| 212 | Kapitalflussrechnung             |
| 214 | Anhang (Notes)                   |
| 370 | Bestätigungsvermerk              |

## Erläuterungen zur Bilanz

### (46) Barreserve

Als Barreserve fassen wir folgende Posten zusammen:

| Mio €                                                                                                       | 31.12.2010   | 31.12.2009    | Veränderung in % |
|-------------------------------------------------------------------------------------------------------------|--------------|---------------|------------------|
| Kassenbestand                                                                                               | 1 388        | 1 338         | 3,7              |
| Guthaben bei Zentralnotenbanken                                                                             | 6 386        | 7 842         | -18,6            |
| Schuldtitle öffentlicher Stellen und Wechsel, die zur Refinanzierung bei Zentralnotenbanken zugelassen sind | 279          | 1 149         | -75,7            |
| <b>Gesamt</b>                                                                                               | <b>8 053</b> | <b>10 329</b> | <b>-22,0</b>     |

Im Guthaben bei Zentralnotenbanken waren Forderungen in Höhe von 1 111 Mio Euro (Vorjahr: 3 633 Mio Euro) an die Deutsche Bundesbank enthalten. Das im Durchschnitt vorzuhaltende Mindestreserve-Soll betrug 4 593 Mio Euro (Vorjahr: 4 349 Mio

Euro) für die Erfüllungsperiode Dezember 2010 bis Januar 2011. Da sich die Erfüllung der Mindestreservepflicht nach den durchschnittlichen Guthaben bemisst, gibt es keine Verfügungsbeschränkungen für Guthaben bei der Deutschen Bundesbank.

### (47) Forderungen an Kreditinstitute

| Mio €                                                 | Gesamt         |                |              | Täglich fällig |               | Andere Forderungen |               |
|-------------------------------------------------------|----------------|----------------|--------------|----------------|---------------|--------------------|---------------|
|                                                       | 31.12.2010     | 31.12.2009     | Veränd. in % | 31.12.2010     | 31.12.2009    | 31.12.2010         | 31.12.2009    |
| Kreditinstitute in Deutschland                        | 33 403         | 32 331         | 3,3          | 16 628         | 13 568        | 16 775             | 18 763        |
| Kreditinstitute außerhalb Deutschlands                | 77 553         | 74 878         | 3,6          | 28 723         | 22 996        | 48 830             | 51 882        |
| <b>Gesamt</b>                                         | <b>110 956</b> | <b>107 209</b> | <b>3,5</b>   | <b>45 351</b>  | <b>36 564</b> | <b>65 605</b>      | <b>70 645</b> |
| darunter entfallen auf die Kategorie:                 |                |                |              |                |               |                    |               |
| Kredite und Forderungen                               | 62 883         | 52 347         | 20,1         |                |               |                    |               |
| Zur Veräußerung verfügbare finanzielle Vermögenswerte | -              | -              | .            |                |               |                    |               |
| Erfolgswirksam zum beizulegenden Zeitwert bewertet    | 48 073         | 54 862         | -12,4        |                |               |                    |               |

Die Forderungen an Kreditinstitute beliefen sich nach Abzug der Risikovorsorge auf 110 616 Mio Euro (Vorjahr: 106 689 Mio Euro). Die nachfolgende Tabelle stellt die Forderungen an Kreditinstitute nach wesentlichen Geschäftsarten dar:

| Mio €                              | 31.12.2010     | 31.12.2009     | Veränderung in % |
|------------------------------------|----------------|----------------|------------------|
| Reverse Repos und Cash Collaterals | 68 687         | 58 863         | 16,7             |
| Forderungen aus dem Geldhandel     | 6 765          | 16 312         | -58,5            |
| Schuldscheindarlehen               | 9 893          | 12 831         | -22,9            |
| Übrige Forderungen                 | 25 611         | 19 203         | 33,4             |
| <b>Gesamt</b>                      | <b>110 956</b> | <b>107 209</b> | <b>3,5</b>       |

In den Schuldscheindarlehen und den Übrigen Forderungen an Kreditinstitute waren 9 572 Mio Euro (Vorjahr: 10 080 Mio Euro) Kommunalkredite enthalten.

**(48) Forderungen an Kunden**

| Mio €                                                 | 31.12.2010     | 31.12.2009     | Veränderung in % |
|-------------------------------------------------------|----------------|----------------|------------------|
| Forderungen an Kunden in Deutschland                  | 207 690        | 217 987        | -4,7             |
| Forderungen an Kunden außerhalb Deutschlands          | 129 182        | 143 496        | -10,0            |
| <b>Gesamt</b>                                         | <b>336 872</b> | <b>361 483</b> | <b>-6,8</b>      |
| darunter entfallen auf die Kategorie:                 |                |                |                  |
| Kredite und Forderungen                               | 308 456        | 336 995        | -8,5             |
| Zur Veräußerung verfügbare finanzielle Vermögenswerte | -              | -              | .                |
| Erfolgswirksam zum beizulegenden Zeitwert bewertet    | 28 416         | 24 488         | 16,0             |

Die Forderungen an Kunden beliefen sich nach Abzug der Risikovorsorge auf 327 755 Mio Euro (Vorjahr: 352 194 Mio Euro). Die nachfolgende Tabelle stellt die Forderungen an Kunden nach wesentlichen Geschäftsarten dar:

| Mio €                                           | 31.12.2010     | 31.12.2009     | Veränderung in % |
|-------------------------------------------------|----------------|----------------|------------------|
| Reverse Repos und Cash Collaterals              | 29 963         | 22 362         | 34,0             |
| Forderungen aus dem Geldhandel                  | 8 996          | 17 025         | -47,2            |
| Schuldscheindarlehen                            | 26 599         | 36 836         | -27,8            |
| Hypotheken- und dinglich besicherte Forderungen | 134 321        | 139 904        | -4,0             |
| Übrige Forderungen                              | 136 993        | 145 356        | -5,8             |
| <b>Gesamt</b>                                   | <b>336 872</b> | <b>361 483</b> | <b>-6,8</b>      |

In den Schuldscheindarlehen und den Übrigen Forderungen an Kunden waren Kommunalkredite in Höhe von 34 041 Mio Euro (Vorjahr: 38 456 Mio Euro) enthalten.

**(49) Kreditvolumen**

| Mio €                      | 31.12.2010     | 31.12.2009     | Veränderung in % |
|----------------------------|----------------|----------------|------------------|
| Kredite an Kreditinstitute | 23 404         | 25 011         | -6,4             |
| Kredite an Kunden          | 306 912        | 343 390        | -10,6            |
| <b>Gesamt</b>              | <b>330 316</b> | <b>368 401</b> | <b>-10,3</b>     |

Kredite grenzen wir gegenüber den Forderungen an Kreditinstitute und Kunden dahingehend ab, dass als Kredite nur solche Forderungen gezeigt werden, für die besondere Kreditvereinbarungen mit den Kreditnehmern geschlossen wurden. Damit

werden zum Beispiel Geldhandelsgeschäfte mit Banken und Reverse-Repo-Geschäfte nicht als Kredite ausgewiesen. In den Krediten an Kunden sind auch Wechselkredite enthalten.

|     |                                  |
|-----|----------------------------------|
| 204 | Gesamtergebnisrechnung           |
| 208 | Bilanz                           |
| 210 | Eigenkapitalveränderungsrechnung |
| 212 | Kapitalflussrechnung             |
| 214 | Anhang (Notes)                   |
| 370 | Bestätigungsvermerk              |

## (50) Risikovorsorge im Kreditgeschäft

Die Risikovorsorge im Kreditgeschäft wird nach konzerneinheitlichen Regeln gebildet und deckt alle erkennbaren Bonitätsrisiken ab. Für eingetretene, aber noch nicht bekannt gewordene Ausfälle haben wir Portfoliowertberichtigungen anhand der aus

der Basel-II-Systematik abgeleiteten Verfahren ermittelt. Insgesamt entwickelte sich die Risikovorsorge im Kreditgeschäft nach Kategorien wie folgt:

| Mio €                                                         | Stand<br>1.1.2010 | Zuführung    | Auflösungen  | Verbrauch    | Veränderungen im<br>Konsolidierungskreis | Wechselkurs-<br>änderungen/<br>Umbuchung | Stand<br>31.12.2010 |
|---------------------------------------------------------------|-------------------|--------------|--------------|--------------|------------------------------------------|------------------------------------------|---------------------|
| Risikovorsorge für bilanzwirksame Risiken im Kreditgeschäft   | 9 809             | 4 137        | 1 906        | 2 631        | –                                        | 48                                       | 9 457               |
| Forderungen an Kreditinstitute                                | 520               | 41           | 67           | 310          | –                                        | 156                                      | 340                 |
| Forderungen an Kunden                                         | 9 289             | 4 096        | 1 839        | 2 321        | –                                        | –108                                     | 9 117               |
| Rückstellungen für außerbilanzielle Risiken im Kreditgeschäft | 642               | 303          | 301          | 7            | –                                        | –22                                      | 615                 |
| <b>Gesamt</b>                                                 | <b>10 451</b>     | <b>4 440</b> | <b>2 207</b> | <b>2 638</b> | <b>–</b>                                 | <b>26</b>                                | <b>10 072</b>       |

Die erfolgswirksamen Zuführungen und Auflösungen führten unter Berücksichtigung von Direktabschreibungen, Zuschreibungen und Eingängen auf abgeschriebene Forderungen zu einem Risikovorsorgeaufwand von 2 499 Mio Euro (Vorjahr: 4 214 Mio Euro).

| Mio €                                 | Wertberichtigungen für Einzelrisiken |              | Wertberichtigungen für Portfoliorisiken |              | Wertberichtigungen gesamt |              | Veränd. in % |
|---------------------------------------|--------------------------------------|--------------|-----------------------------------------|--------------|---------------------------|--------------|--------------|
|                                       | 2010                                 | 2009         | 2010                                    | 2009         | 2010                      | 2009         |              |
| <b>Stand 1.1.</b>                     | <b>8 345</b>                         | <b>4 779</b> | <b>1 464</b>                            | <b>820</b>   | <b>9 809</b>              | <b>5 599</b> | <b>75,2</b>  |
| Zuführungen                           | 3 894                                | 4 542        | 243                                     | 497          | 4 137                     | 5 039        | –17,9        |
| Abgänge                               | 3 888                                | 3 004        | 649                                     | 182          | 4 537                     | 3 186        | 42,4         |
| darunter: Inanspruchnahmen            | 2 631                                | 2 143        | –                                       | –            | 2 631                     | 2 143        | 22,8         |
| darunter: Auflösungen                 | 1 257                                | 861          | 649                                     | 182          | 1 906                     | 1 043        | 82,7         |
| Veränderungen im Konsolidierungskreis | –                                    | 2 126        | –                                       | 376          | –                         | 2 502        | .            |
| Wechselkursänderungen/<br>Umbuchungen | 10                                   | –98          | 38                                      | –47          | 48                        | –145         | .            |
| <b>Stand 31.12.</b>                   | <b>8 361</b>                         | <b>8 345</b> | <b>1 096</b>                            | <b>1 464</b> | <b>9 457</b>              | <b>9 809</b> | <b>–3,6</b>  |

| Mio €                                 | Rückstellungen für Einzelrisiken |            | Rückstellungen für Portfoliorisiken |            | Rückstellungen im Kreditgeschäft |            | Veränd. in % |
|---------------------------------------|----------------------------------|------------|-------------------------------------|------------|----------------------------------|------------|--------------|
|                                       | 2010                             | 2009       | 2010                                | 2009       | 2010                             | 2009       |              |
| <b>Stand 1.1.</b>                     | <b>364</b>                       | <b>232</b> | <b>278</b>                          | <b>214</b> | <b>642</b>                       | <b>446</b> | <b>43,9</b>  |
| Zuführungen                           | 207                              | 209        | 96                                  | 57         | 303                              | 266        | 13,9         |
| Abgänge                               | 166                              | 180        | 142                                 | 93         | 308                              | 273        | 12,8         |
| darunter: Inanspruchnahmen            | 7                                | 1          | –                                   | –          | 7                                | 1          | .            |
| darunter: Auflösungen                 | 159                              | 179        | 142                                 | 93         | 301                              | 272        | 10,7         |
| Veränderungen im Konsolidierungskreis | –                                | 107        | –                                   | 94         | –                                | 201        | .            |
| Wechselkursänderungen/<br>Umbuchungen | –21                              | –4         | –1                                  | 6          | –22                              | 2          | .            |
| <b>Stand 31.12.</b>                   | <b>384</b>                       | <b>364</b> | <b>231</b>                          | <b>278</b> | <b>615</b>                       | <b>642</b> | <b>–4,2</b>  |

Die Aufgliederung der Risikovorsorge für Adressenausfallrisiken nach Kundengruppen stellte sich wie folgt dar:

| Mio €                                  | Einzelwertberichtigungen<br>und Rückstellungen für<br>das Kreditgeschäft | Kreditausfälle <sup>1</sup><br>im Jahr 2010 | Nettozuführung <sup>2</sup> zu den<br>Wertberichtigungen und<br>Rückstellungen im<br>Kreditgeschäft |
|----------------------------------------|--------------------------------------------------------------------------|---------------------------------------------|-----------------------------------------------------------------------------------------------------|
| <b>Kunden in Deutschland</b>           | <b>4 194</b>                                                             | <b>1 479</b>                                | <b>1 090</b>                                                                                        |
| Firmenkunden                           | 2 889                                                                    | 752                                         | 686                                                                                                 |
| Verarbeitendes Gewerbe                 | 901                                                                      | 221                                         | 69                                                                                                  |
| Baugewerbe                             | 113                                                                      | 76                                          | -6                                                                                                  |
| Handel                                 | 249                                                                      | 104                                         | 82                                                                                                  |
| Dienstleistungen und Übrige            | 1 626                                                                    | 351                                         | 541                                                                                                 |
| Privatkunden                           | 1 305                                                                    | 727                                         | 404                                                                                                 |
| <b>Kunden außerhalb Deutschlands</b>   | <b>4 243</b>                                                             | <b>1 295</b>                                | <b>1 614</b>                                                                                        |
| Firmenkunden und Privatkunden          | 4 235                                                                    | 1 295                                       | 1 607                                                                                               |
| Öffentliche Haushalte                  | 8                                                                        | -                                           | 7                                                                                                   |
| <b>Risikovorsorge Kunden</b>           | <b>8 437</b>                                                             | <b>2 774</b>                                | <b>2 704</b>                                                                                        |
| Kreditinstitute in Deutschland         | 82                                                                       | 76                                          | -1                                                                                                  |
| Kreditinstitute außerhalb Deutschlands | 226                                                                      | 247                                         | -18                                                                                                 |
| <b>Risikovorsorge Kreditinstitute</b>  | <b>308</b>                                                               | <b>323</b>                                  | <b>-19</b>                                                                                          |
| <b>Gesamt</b>                          | <b>8 745</b>                                                             | <b>3 097</b>                                | <b>2 685</b>                                                                                        |

<sup>1</sup> Direktabschreibungen, Verbrauch von Wertberichtigungen und Verbrauch von Rückstellungen im Kreditgeschäft.

<sup>2</sup> Zuführung abzüglich Auflösung.

Den Kreditausfällen und der Nettozuführung zur Risikovorsorge standen Erträge aus Zuschreibungen von 9 Mio Euro (Vorjahr: 7 Mio Euro) und Eingänge aus abgeschriebenen Forderungen von 184 Mio Euro (Vorjahr: 171 Mio Euro) gegenüber.

Kennziffern zur Kreditrisikovorsorge:

| in %                         | 2010 | 2009 |
|------------------------------|------|------|
| Zuführungsquote <sup>1</sup> | 0,71 | 1,13 |
| Ausfallquote <sup>2</sup>    | 0,82 | 0,63 |
| Bestandsquote <sup>3</sup>   | 2,85 | 2,80 |

<sup>1</sup> Nettorisikovorsorge (Neubildung abzüglich Auflösung von Wertberichtigungen und Rückstellungen im Kreditgeschäft zuzüglich des Saldos aus Direktabschreibungen, Zuschreibungen und Eingängen auf bereits abgeschriebene Forderungen) in Relation zum Kreditvolumen.

<sup>2</sup> Kreditausfälle (Verbrauch von Wertberichtigungen und Rückstellungen im Kreditgeschäft zuzüglich des Saldos aus Direktabschreibungen, Zuschreibungen und Eingängen auf bereits abgeschriebene Forderungen) in Relation zum Kreditvolumen.

<sup>3</sup> Risikovorsorgebestand (Bestand an Wertberichtigungen und Rückstellungen im Kreditgeschäft) in Relation zum Kreditvolumen; Kreditvolumen = Forderungen aus besonderen Kreditvereinbarungen mit Kreditnehmern (Note 49).

## (51) Aktive Wertanpassung aus Portfolio Fair Value Hedges

Der Wertanpassungsbetrag von gegen Zinsänderungsrisiken gesicherten Grundgeschäften betrug 113 Mio Euro (Vorjahr: -16 Mio Euro). Ein ökonomisch gegenläufiger Betrag der Sicher-

ungsgeschäfte wird auf der Passivseite unter dem Posten Negative Marktwerte aus derivativen Sicherungsinstrumenten ausgewiesen.



|     |                                  |
|-----|----------------------------------|
| 204 | Gesamtergebnisrechnung           |
| 208 | Bilanz                           |
| 210 | Eigenkapitalveränderungsrechnung |
| 212 | Kapitalflussrechnung             |
| 214 | Anhang (Notes)                   |
| 370 | Bestätigungsvermerk              |

## (52) Positive Marktwerte aus derivativen Sicherungsinstrumenten

In diesem Posten werden die positiven Marktwerte von Derivaten ausgewiesen, die zur Absicherung von Grundgeschäften gegen das Zinsänderungsrisiko eingesetzt wurden.

| Mio €                                                     | 31.12.2010   | 31.12.2009   | Veränderung in % |
|-----------------------------------------------------------|--------------|--------------|------------------|
| Positive Marktwerte Micro Fair Value Hedge Accounting     | 4 455        | 5 566        | -20,0            |
| Positive Marktwerte Portfolio Fair Value Hedge Accounting | 506          | 786          | -35,6            |
| <b>Gesamt</b>                                             | <b>4 961</b> | <b>6 352</b> | <b>-21,9</b>     |

## (53) Handelsaktiva

Die Handelsaktivitäten des Konzerns umfassen den Handel mit

- Schuldverschreibungen und anderen zinsbezogenen Wertpapieren,
- Aktien, anderen eigenkapitalbezogenen Wertpapieren und Anteilen an Investmentfonds,
- Schuldscheindarlehen und sonstigen Forderungen,
- Devisen und Edelmetallen,
- derivativen Finanzinstrumenten und
- Sonstigen Handelsaktiva.

Der Posten Sonstige Handelsaktiva setzt sich aus positiven Marktwerten von zu syndizierenden Krediten, Kreditzusagen, Emissionsrechten sowie Krediten und Geldhandelsgeschäften zusammen.

Alle Handelsbestände werden zum beizulegenden Zeitwert (Fair Value) bilanziert.

In den Positiven Marktwerten sind auch derivative Finanzinstrumente enthalten, die nicht als Sicherungsinstrumente im Rahmen des Hedge Accountings eingesetzt werden können.

| Mio €                                                                          | 31.12.2010     | 31.12.2009     | Veränderung in % |
|--------------------------------------------------------------------------------|----------------|----------------|------------------|
| Schuldverschreibungen und andere zinsbezogene Wertpapiere                      | 30 305         | 28 898         | 4,9              |
| Geldmarktpapiere                                                               | 2 927          | 1 331          | .                |
| von öffentlichen Emittenten                                                    | 1 938          | 55             | .                |
| von anderen Emittenten                                                         | 989            | 1 276          | -22,5            |
| Anleihen und Schuldverschreibungen                                             | 27 378         | 27 567         | -0,7             |
| von öffentlichen Emittenten                                                    | 12 198         | 9 152          | 33,3             |
| von anderen Emittenten                                                         | 15 180         | 18 415         | -17,6            |
| Schuldscheindarlehen                                                           | 1 810          | 850            | .                |
| Aktien, andere eigenkapitalbezogene Wertpapiere und Anteile an Investmentfonds | 11 704         | 8 982          | 30,3             |
| Positive Marktwerte aus derivativen Finanzinstrumenten                         | 123 743        | 177 307        | -30,2            |
| Währungsbezogene derivative Geschäfte                                          | 18 345         | 17 653         | 3,9              |
| Zinsbezogene derivative Geschäfte                                              | 97 012         | 146 487        | -33,8            |
| Übrige derivate Geschäfte                                                      | 8 386          | 13 167         | -36,3            |
| Sonstige Handelsaktiva <sup>1</sup>                                            | 263            | 2 671          | -90,2            |
| <b>Gesamt</b>                                                                  | <b>167 825</b> | <b>218 708</b> | <b>-23,3</b>     |

<sup>1</sup> Einschließlich sonstiger Forderungen aus Handelsaktivitäten.

Von den Schuldverschreibungen und anderen zinsbezogenen Wertpapieren sowie Aktien, anderen eigenkapitalbezogenen Wertpapieren und Anteilen an Investmentfonds waren 30 690 Mio Euro (Vorjahr: 31 745 Mio Euro) börsennotiert. Die

übrigen Marktwerte aus derivativen Finanzinstrumenten setzten sich hauptsächlich aus 4 125 Mio Euro Aktienderivaten (Vorjahr: 6 963 Mio Euro) und 3 565 Mio Euro Kreditderivaten (Vorjahr: 5 331 Mio Euro) zusammen.

**(54) Finanzanlagen**

Die Finanzanlagen umfassen Finanzinstrumente, die keinem anderen Bilanzposten zugeordnet werden. Sie setzen sich zusammen aus den nicht Handelszwecken dienenden Schuldverschreibungen und anderen zinsbezogenen Wertpapieren, Aktien und anderen eigenkapitalbezogenen Wertpapieren sowie Anteilen an

Investmentfonds, den Beteiligungen (einschließlich nicht at-Equity-bewerteten Unternehmen und Gemeinschaftsunternehmen) sowie den Anteilen an nicht konsolidierten Tochterunternehmen.

| Mio €                                                                          | 31.12.2010     | 31.12.2009     | Veränderung in % |
|--------------------------------------------------------------------------------|----------------|----------------|------------------|
| Schuldverschreibungen und andere zinsbezogene Wertpapiere <sup>1</sup>         | 113 493        | 128 032        | -11,4            |
| Geldmarktpapiere                                                               | 5 036          | 6 452          | -21,9            |
| von öffentlichen Emittenten                                                    | 2 874          | 510            | .                |
| von anderen Emittenten                                                         | 2 162          | 5 942          | -63,6            |
| Anleihen und Schuldverschreibungen                                             | 108 457        | 121 580        | -10,8            |
| von öffentlichen Emittenten                                                    | 53 148         | 53 410         | -0,5             |
| von anderen Emittenten                                                         | 55 309         | 68 170         | -18,9            |
| Aktien, andere eigenkapitalbezogene Wertpapiere und Anteile an Investmentfonds | 1 284          | 1 530          | -16,1            |
| Beteiligungen                                                                  | 807            | 1 194          | -32,4            |
| darunter: an Kreditinstituten                                                  | 410            | 358            | 14,5             |
| Anteile an Tochterunternehmen                                                  | 124            | 158            | -21,5            |
| darunter: an Kreditinstituten                                                  | -              | 3              | .                |
| <b>Gesamt</b>                                                                  | <b>115 708</b> | <b>130 914</b> | <b>-11,6</b>     |
| darunter entfallen auf die Kategorie:                                          |                |                |                  |
| Kredite und Forderungen                                                        | 70 435         | 79 194         | -11,1            |
| zur Veräußerung verfügbare finanzielle Vermögenswerte                          | 41 764         | 44 998         | -7,2             |
| darunter: mit Anschaffungskosten bewertet                                      | 372            | 492            | -24,4            |
| Erfolgswirksam zum beizulegenden Zeitwert bewertet                             | 3 509          | 6 722          | -47,8            |

<sup>1</sup> Gekürzt um Portfoliowertberichtigungen für umgewidmete Wertpapiere von 51 Mio Euro (Vorjahr: 50 Mio Euro).

Nach der Anpassung der Bilanzstruktur (siehe Note 2) beliefen sich die Finanzanlagen ohne Berücksichtigung der Anteile an at-Equity-bewerteten Unternehmen (296 Mio Euro) zum 31. Dezember 2008 beziehungsweise zum 1. Januar 2009 auf 127 154 Mio Euro.

In den Finanzanlagen zum 31. Dezember 2010 waren 372 Mio Euro (Vorjahr: 492 Mio Euro) eigenkapitalbezogene Wertpapiere enthalten, die im Wesentlichen nicht börsennotiert sind (unter anderem GmbH-Anteile) und zu Anschaffungskosten

bilanziert wurden, da uns keine verlässlichen Angaben zur Berechnung von Marktwerten vorlagen.

In der folgenden Tabelle sind die in den Finanzanlagen enthaltenen börsennotierten Bestände dargestellt. Die zur Veräußerung verfügbaren Finanzanlagen und Finanzanlagen, auf die die Fair Value Option angewendet wird, sind dabei mit ihren Marktwerten aufgeführt. Die Finanzanlagen der Kategorie Kredite und Forderungen sind zu fortgeführten Anschaffungskosten gezeigt:

| Mio €                                                                          | 31.12.2010    | 31.12.2009     | Veränderung in % |
|--------------------------------------------------------------------------------|---------------|----------------|------------------|
| Schuldverschreibungen und andere zinsbezogene Wertpapiere                      | 95 793        | 109 012        | -12,1            |
| Aktien, andere eigenkapitalbezogene Wertpapiere und Anteile an Investmentfonds | 581           | 772            | -24,7            |
| Beteiligungen                                                                  | 300           | 752            | -60,1            |
| <b>Gesamt</b>                                                                  | <b>96 674</b> | <b>110 536</b> | <b>-12,5</b>     |

|     |                                  |
|-----|----------------------------------|
| 204 | Gesamtergebnisrechnung           |
| 208 | Bilanz                           |
| 210 | Eigenkapitalveränderungsrechnung |
| 212 | Kapitalflussrechnung             |
| 214 | Anhang (Notes)                   |
| 370 | Bestätigungsvermerk              |

In seiner Mitteilung vom 13. Oktober 2008 hat das IASB Änderungen des IAS 39 hinsichtlich der Umkategorisierung von Finanzinstrumenten verabschiedet. Danach wurden in den Geschäftsjahren 2008 und 2009 Wertpapiere des Public-Finance-Bestandes, die keinen aktiven Markt aufwiesen, aus der Kategorie zur Veräußerung verfügbarer finanzieller Vermögenswerte in die Kategorie Kredite und Forderungen umkategorisiert. Für die umkategorisierten Bestände bestand zum jeweiligen Umkategorisierungszeitpunkt die Absicht und die Fähigkeit, die Wertpapiere für die vorhersehbare Zukunft beziehungsweise bis zur Fälligkeit zu halten. Der jeweilige beizulegende Zeitwert zum Umkategorisierungszeitpunkt wurde als neuer Buchwert der Wertpapierbestände angesetzt. Im Wesentlichen handelte es sich dabei um Wertpapiere öffentlicher Schuldner (unter anderem europäische und nordamerikanische Gebietskörperschaften, öffentlich garantierte Asset-backed Securities) sowie von Finanzunternehmen.

Die Neubewertungsrücklage nach latenten Steuern belief sich für alle umkategorisierten Wertpapiere der Geschäftsjahre 2008 und 2009 zum 31. Dezember 2010 auf –1,0 Mrd Euro (Vorjahr: –1,2 Mrd Euro). Dieser negative Bestand wird über die Restlaufzeit der umkategorisierten Wertpapiere aufgelöst. Ohne

die durchgeführten Umkategorisierungen in den Geschäftsjahren 2008 und 2009 hätte sich eine Neubewertungsrücklage nach latenten Steuern für den gesamten Bestand von –2,8 Mrd Euro zum 31. Dezember 2010 ergeben (Vorjahr: –1,4 Mrd Euro); die Veränderung zum Vorjahr betrug somit –1,4 Mrd Euro (Veränderung 31.12.2009 zum 31.12.2008: –0,1 Mrd Euro).

Neben den auf Portfoliobasis ermittelten Wertberichtigungen von 1 Mio Euro (Vorjahr: 25 Mio Euro), wurden für die umkategorisierten Bestände im laufenden Geschäftsjahr saldiert 1,8 Mrd Euro (Vorjahr: 2,5 Mrd Euro) in der Gewinn- und Verlustrechnung erfasst.

Zum 31. Dezember 2010 betrug der Buchwert der umkategorisierten Bestände 67,1 Mrd Euro (Vorjahr: 74,9 Mrd Euro), der beizulegende Zeitwert belief sich auf 64,6 Mrd Euro (Vorjahr: 74,6 Mrd Euro) und der Bestand der Portfoliowertberichtigungen betrug kumuliert 51 Mio Euro (Vorjahr: 50 Mio Euro). Die Geschäfte wiesen durchschnittliche Effektivzinssätze zwischen 0,8 % und 16,2 % (Vorjahr: zwischen 1,2 % und 16,2 %) auf und wir erwarten daraus ein Zahlungsmittelzufluss von 84,3 Mrd Euro (Vorjahr: 94,6 Mrd Euro).

Entwicklung der Beteiligungen und Anteile an nicht konsolidierten Tochterunternehmen:

| Mio €                                                                 | Beteiligungen |              | Anteile an Tochterunternehmen |            |
|-----------------------------------------------------------------------|---------------|--------------|-------------------------------|------------|
|                                                                       | 2010          | 2009         | 2010                          | 2009       |
| <b>Beizulegender Zeitwert zum 1.1.</b>                                | <b>1 194</b>  | <b>1 093</b> | <b>158</b>                    | <b>124</b> |
| Anschaffungskosten zum 1.1.                                           | 1 569         | 1 479        | 320                           | 248        |
| Wechselkursveränderungen                                              | 8             | –1           | 6                             | 4          |
| Zugänge                                                               | 39            | 297          | 16                            | 19         |
| Abgänge                                                               | 691           | 254          | 53                            | 61         |
| Umbuchungen/Veränderungen Konsolidierungskreis                        | –47           | 48           | 54                            | 110        |
| Anschaffungskosten zum 31.12.                                         | 878           | 1 569        | 343                           | 320        |
| Zuschreibungen                                                        | –             | –            | –                             | –          |
| Kumulierte Abschreibungen zum 1.1.                                    | 613           | 519          | 162                           | 125        |
| Wechselkursveränderungen                                              | 6             | –            | –                             | –          |
| Zugänge                                                               | 14            | 128          | 11                            | –          |
| Abgänge                                                               | 297           | 27           | 19                            | 27         |
| Umbuchungen/Veränderungen Konsolidierungskreis                        | –10           | –7           | 65                            | 64         |
| Kumulierte Abschreibungen zum 31.12.                                  | 326           | 613          | 219                           | 162        |
| Kumulierte Veränderungen aus der Bewertung zum beizulegenden Zeitwert | 255           | 238          | –                             | –          |
| <b>Beizulegender Zeitwert zum 31.12.</b>                              | <b>807</b>    | <b>1 194</b> | <b>124</b>                    | <b>158</b> |

**(55) Anteile an at-Equity-bewerteten Unternehmen**

| Mio €                                                | 2010       | 2009       |
|------------------------------------------------------|------------|------------|
| <b>Beizulegender Zeitwert zum 1.1.</b>               | <b>378</b> | <b>296</b> |
| Anschaffungskosten zum 1.1.                          | 410        | 160        |
| Wechselkursveränderungen                             | –          | –          |
| Zugänge                                              | 425        | 560        |
| Abgänge                                              | –          | 3          |
| Umbuchungen/Veränderungen Konsolidierungskreis       | –14        | –307       |
| Anschaffungskosten zum 31.12.                        | 821        | 410        |
| Zuschreibungen                                       | –          | –          |
| Kumulierte Abschreibungen zum 1.1.                   | 45         | –          |
| Wechselkursveränderungen                             | –          | –          |
| Zugänge                                              | 111        | 45         |
| Abgänge                                              | –          | –          |
| Umbuchungen/Veränderungen Konsolidierungskreis       | –          | –          |
| Kumulierte Abschreibungen zum 31.12.                 | 156        | 45         |
| Kumulierte Veränderungen aus der at-Equity-Bewertung | 72         | 13         |
| <b>Beizulegender Zeitwert zum 31.12.</b>             | <b>737</b> | <b>378</b> |
| darunter: Anteile an Kreditinstituten                | 224        | 174        |

Nach der Anpassung der Bilanzstruktur (siehe Note 2) beliefen sich die Anteile an at-Equity-bewerteten Unternehmen zum 31. Dezember 2008 beziehungsweise zum 1. Januar 2009 auf 296 Mio Euro.

Unsere Anteile an der Gesamtsumme aller Vermögenswerte und Verbindlichkeiten sowie Erträge und Aufwendungen unserer at-Equity-bewerteten Unternehmen sind nachstehend aufgelistet:

| Mio €             | 31.12.2010 | 31.12.2009 | Veränderung in % |
|-------------------|------------|------------|------------------|
| Vermögenswerte    | 6 161      | 4 370      | 41,0             |
| Verbindlichkeiten | 5 502      | 3 732      | 47,4             |
| Erträge           | 472        | 444        | 6,3              |
| Aufwendungen      | 566        | 340        | 66,5             |

Der Commerzbank-Konzern war keinen signifikanten Verpflichtungen aus Eventualverbindlichkeiten gegenüber at-Equity-bewerteten Unternehmen ausgesetzt.

**(56) Immaterielle Anlagewerte**

| Mio €                             | 31.12.2010   | 31.12.2009   | Veränderung in % |
|-----------------------------------|--------------|--------------|------------------|
| Geschäfts- oder Firmenwerte       | 2 081        | 2 061        | 1,0              |
| Sonstige immaterielle Anlagewerte | 1 020        | 1 148        | –11,1            |
| Kundenbeziehungen                 | 546          | 613          | –10,9            |
| Markennamen                       | 9            | 51           | –82,4            |
| Selbst erstellte Software         | 219          | 235          | –6,8             |
| Übrige                            | 246          | 249          | –1,2             |
| <b>Gesamt</b>                     | <b>3 101</b> | <b>3 209</b> | <b>–3,4</b>      |

Von den Übrigen entfielen 240 Mio Euro (Vorjahr: 243 Mio Euro) auf Software.

|     |                                  |
|-----|----------------------------------|
| 204 | Gesamtergebnisrechnung           |
| 208 | Bilanz                           |
| 210 | Eigenkapitalveränderungsrechnung |
| 212 | Kapitalflussrechnung             |
| 214 | Anhang (Notes)                   |
| 370 | Bestätigungsvermerk              |

| Mio €                        | Geschäfts- oder Firmenwerte |              | Markennamen |            |
|------------------------------|-----------------------------|--------------|-------------|------------|
|                              | 31.12.2010                  | 31.12.2009   | 31.12.2010  | 31.12.2009 |
| Privatkunden                 | 1 079                       | 1 079        | –           | 31         |
| Mittelstandsbank             | 569                         | 569          | –           | 12         |
| Central & Eastern Europe     | 292                         | 272          | 9           | 8          |
| Corporates & Markets         | 138                         | 138          | –           | –          |
| Asset Based Finance          | –                           | –            | –           | –          |
| Portfolio Restructuring Unit | –                           | –            | –           | –          |
| Sonstige und Konsolidierung  | 3                           | 3            | –           | –          |
| <b>Gesamt</b>                | <b>2 081</b>                | <b>2 061</b> | <b>9</b>    | <b>51</b>  |

Im Rahmen des Werthaltigkeitstests für Geschäfts- oder Firmenwerte ergab sich für das Geschäftsjahr 2010 kein Wertminderungsbedarf. Bei der Bewertung wurden Beta-Faktoren für die Detailplanungsphase, wie in nachstehender Tabelle aufgeführt, angesetzt.

|                          | Privatkunden | Mittelstandsbank | Corporates & Markets | Central & Eastern Europe |
|--------------------------|--------------|------------------|----------------------|--------------------------|
| Angesetzte Beta-Faktoren | 1,20         | 1,47             | 1,64                 | 1,19                     |

Bei der Variation der Beta-Faktoren auf 1,0 beziehungsweise 2,0 ergaben sich die nachfolgenden Verhältnisse zwischen Überdeckung und Buchwert:

|                    |                         | Privatkunden | Mittelstandsbank | Corporates & Markets | Central & Eastern Europe |
|--------------------|-------------------------|--------------|------------------|----------------------|--------------------------|
| Realistischer Wert | angesetzter Beta-Faktor | 200,8%       | 132,4%           | 60,0%                | 73,0%                    |
| Sensitivierung     | Beta 1,00               | 206,7%       | 143,4%           | 63,1%                | 76,3%                    |
|                    | Beta 2,00               | 178,3%       | 120,6%           | 48,5%                | 60,4%                    |

Innerhalb der Sensitivitäten ergaben sich keine Auswirkungen auf die Geschäfts- oder Firmenwerte.

## Entwicklung der immateriellen Anlagewerte:

| Mio €                                                    | Geschäfts- oder Firmenwerte |              | Selbst erstellte Software |            | Markennamen und Kundenbeziehungen |            | Sonstige immaterielle Anlagewerte |            |
|----------------------------------------------------------|-----------------------------|--------------|---------------------------|------------|-----------------------------------|------------|-----------------------------------|------------|
|                                                          | 2010                        | 2009         | 2010                      | 2009       | 2010                              | 2009       | 2010                              | 2009       |
| <b>Buchwert zum 1.1.</b>                                 | <b>2 061</b>                | <b>1 006</b> | <b>235</b>                | <b>55</b>  | <b>664</b>                        | <b>120</b> | <b>249</b>                        | <b>155</b> |
| Anschaffungs-/Herstellungskosten zum 1.1.                | 2 830                       | 1 086        | 895                       | 259        | 983                               | 207        | 1 683                             | 1 240      |
| Wechselkursveränderungen                                 | 20                          | -20          | 14                        | 45         | 4                                 | -2         | 13                                | 6          |
| Zugänge                                                  | -                           | 1 765        | 162                       | 128        | -                                 | -          | 114                               | 155        |
| Abgänge                                                  | -                           | 1            | 238                       | 56         | -                                 | -          | 29                                | 92         |
| Umbuchungen/Veränderungen Konsolidierungskreis           | -                           | -            | -8                        | 519        | -                                 | 778        | 16                                | 374        |
| Anschaffungs-/Herstellungskosten zum 31.12.              | 2 850                       | 2 830        | 825                       | 895        | 987                               | 983        | 1 797                             | 1 683      |
| Zuschreibungen                                           | -                           | -            | -                         | -          | -                                 | -          | -                                 | -          |
| Kumulierte Abschreibungen zum 1.1.                       | 769                         | 79           | 660                       | 204        | 319                               | 87         | 1 434                             | 1 085      |
| Wechselkursveränderungen                                 | -                           | -            | 14                        | 21         | -                                 | -          | 9                                 | 3          |
| Zugänge                                                  | -                           | 690          | 118                       | 95         | 93                                | 232        | 105                               | 54         |
| darunter: außerplanmäßig                                 | -                           | 690          | 41                        | 25         | 1                                 | 78         | -                                 | -          |
| Abgänge                                                  | -                           | -            | 177                       | 39         | -                                 | -          | 13                                | 52         |
| Umbuchungen/Veränderungen Konsolidierungskreis           | -                           | -            | -9                        | 379        | 20                                | -          | 16                                | 344        |
| Kumulierte Abschreibungen zum 31.12.                     | 769                         | 769          | 606                       | 660        | 432                               | 319        | 1 551                             | 1 434      |
| <b>Buchwert zum 31.12.</b>                               | <b>2 081</b>                | <b>2 061</b> | <b>219</b>                | <b>235</b> | <b>555</b>                        | <b>664</b> | <b>246</b>                        | <b>249</b> |
| Im laufenden Geschäftsjahr aktivierte Fremdkapitalzinsen | -                           | -            | -                         | -          | -                                 | -          | -                                 | -          |
| Bandbreite angewendete Zinssätze (in %)                  | -                           | -            | -                         | -          | -                                 | -          | -                                 | -          |

## (57) Sachanlagen

| Mio €                                                    | Grundstücke und Gebäude |              | Betriebs- und Geschäftsausstattung |            |
|----------------------------------------------------------|-------------------------|--------------|------------------------------------|------------|
|                                                          | 2010                    | 2009         | 2010                               | 2009       |
| <b>Buchwert zum 1.1.</b>                                 | <b>1 018</b>            | <b>786</b>   | <b>761</b>                         | <b>454</b> |
| Anschaffungs-/Herstellungskosten zum 1.1.                | 1 506                   | 1 211        | 3 403                              | 2 181      |
| Wechselkursveränderungen                                 | 11                      | 17           | 59                                 | 19         |
| Zugänge                                                  | 25                      | 15           | 170                                | 184        |
| Abgänge                                                  | 185                     | 152          | 218                                | 378        |
| Umbuchungen/Veränderungen Konsolidierungskreis           | -28                     | 415          | 74                                 | 1 397      |
| Anschaffungs-/Herstellungskosten zum 31.12.              | 1 329                   | 1 506        | 3 488                              | 3 403      |
| Zuschreibungen                                           | -                       | -            | -                                  | -          |
| Kumulierte Abschreibungen zum 1.1.                       | 488                     | 425          | 2 642                              | 1 727      |
| Wechselkursveränderungen                                 | 4                       | 14           | 52                                 | 7          |
| Zugänge                                                  | 81                      | 37           | 203                                | 227        |
| darunter: außerplanmäßig                                 | 41                      | 1            | -                                  | 7          |
| Abgänge                                                  | 102                     | 110          | 192                                | 352        |
| Umbuchungen/Veränderungen Konsolidierungskreis           | -16                     | 122          | 67                                 | 1 033      |
| Kumulierte Abschreibungen zum 31.12.                     | 455                     | 488          | 2 772                              | 2 642      |
| <b>Buchwert zum 31.12.</b>                               | <b>874</b>              | <b>1 018</b> | <b>716</b>                         | <b>761</b> |
| Im laufenden Geschäftsjahr aktivierte Fremdkapitalzinsen | -                       | -            | -                                  | -          |
| Bandbreite angewendete Zinssätze (in %)                  | -                       | -            | -                                  | -          |

|     |                                  |
|-----|----------------------------------|
| 204 | Gesamtergebnisrechnung           |
| 208 | Bilanz                           |
| 210 | Eigenkapitalveränderungsrechnung |
| 212 | Kapitalflussrechnung             |
| 214 | Anhang (Notes)                   |
| 370 | Bestätigungsvermerk              |

Die Sachanlagen im Commerzbank-Konzern betragen insgesamt 1 590 Mio Euro (Vorjahr: 1 779 Mio Euro). Im laufenden Geschäftsjahr gab es keine Umgliederungen in den

Bilanzposten Zur Veräußerung gehaltene langfristige Vermögenswerte und Vermögenswerte aus Veräußerungsgruppen.

### (58) Ertragsteueransprüche

| Mio €                                     | 31.12.2010   | 31.12.2009   | Veränderung in % |
|-------------------------------------------|--------------|--------------|------------------|
| <b>Tatsächliche Ertragsteueransprüche</b> | <b>650</b>   | <b>1 267</b> | <b>-48,7</b>     |
| in Deutschland                            | 532          | 1 035        | -48,6            |
| außerhalb Deutschlands                    | 118          | 232          | -49,1            |
| <b>Latente Ertragsteueransprüche</b>      | <b>3 567</b> | <b>4 370</b> | <b>-18,4</b>     |
| erfolgswirksame Ertragsteueransprüche     | 2 329        | 2 950        | -21,1            |
| erfolgsneutrale Ertragsteueransprüche     | 1 238        | 1 420        | -12,8            |
| <b>Gesamt</b>                             | <b>4 217</b> | <b>5 637</b> | <b>-25,2</b>     |

Aktive latente Steuern bilden die potenziellen Ertragsteuerentlastungen aus temporären Unterschieden zwischen den Wertansätzen der Vermögenswerte und Schulden in der Konzernbilanz nach IFRS und den Steuerwerten nach lokalen steuerrechtlichen Vorschriften der Konzernunternehmen sowie zukünftige Ertragsteuerentlastungen aus steuerlichen Verlustvorträgen und noch nicht genutzten Steuergutschriften ab.

Für folgende steuerliche Verlustvorträge wurden zum 31. Dezember 2010 aufgrund des zeitlich beschränkten Planungshorizonts und der dadurch bedingten nicht ausreichenden Wahrscheinlichkeit der Nutzung keine latenten Ertragsteueransprüche aktiviert beziehungsweise bestehende latente Ertragsteueransprüche wertberichtigt.

| Steuerliche Verlustvorträge   Mio €                   | 31.12.2010    | 31.12.2009    | Veränderung in % |
|-------------------------------------------------------|---------------|---------------|------------------|
| <b>Körperschaftsteuer/Corporation Tax/Federal Tax</b> | <b>10 620</b> | <b>12 560</b> | <b>-15,4</b>     |
| Unbegrenzt vortragsfähig                              | 10 302        | 11 550        | -10,8            |
| Begrenzt vortragsfähig                                | 318           | 1 010         | .                |
| darunter: Verfall in der Folgeperiode                 | -             | 117           | .                |
| <b>Gewerbesteuer/Lokale Steuer</b>                    | <b>4 029</b>  | <b>2 935</b>  | <b>37,3</b>      |
| Unbegrenzt vortragsfähig                              | 3 793         | 1 948         | 94,7             |
| Begrenzt vortragsfähig                                | 236           | 987           | .                |
| darunter: Verfall in der Folgeperiode                 | -             | -             | .                |

Latente Ertragsteueransprüche auf steuerliche Verlustvorträge werden im Wesentlichen für den inländischen Organkreis, die Filliale London und britische Tochtergesellschaften gebildet. Sie wurden in Zusammenhang mit folgenden Posten gebildet:

| Mio €                                                   | 31.12.2010   | 31.12.2009   | Veränderung in % |
|---------------------------------------------------------|--------------|--------------|------------------|
| Marktwerte aus derivativen Sicherungsinstrumenten       | 275          | 774          | -64,5            |
| Handelsaktiva und -passiva                              | 941          | 698          | 34,8             |
| Forderungen an Kreditinstitute und Kunden               | 13           | 144          | -91,0            |
| Finanzanlagen                                           | 80           | 48           | 66,7             |
| Rückstellungen                                          | 60           | 343          | -82,5            |
| Verbindlichkeiten gegenüber Kreditinstituten und Kunden | 59           | 90           | -34,4            |
| Übrige Bilanzposten                                     | 463          | 1 071        | -56,8            |
| Steuerliche Verlustvorträge                             | 1 676        | 1 202        | 39,4             |
| <b>Gesamt</b>                                           | <b>3 567</b> | <b>4 370</b> | <b>-18,4</b>     |

### (59) Als Finanzinvestition gehaltene Immobilien

Die als Finanzinvestition gehaltenen Immobilien von 1 192 Mio Euro (Vorjahr: 1 279 Mio Euro) entwickelten sich wie folgt:

| Mio €                                                                 | 2010         | 2009         |
|-----------------------------------------------------------------------|--------------|--------------|
| <b>Buchwert zum 1.1.</b>                                              | <b>1 279</b> | <b>909</b>   |
| Anschaffungskosten/Herstellungskosten zum 1.1.                        | 1 455        | 997          |
| Wechselkursveränderungen                                              | –            | –            |
| Zugänge                                                               | 83           | 278          |
| Abgänge                                                               | 70           | 7            |
| Veränderungen Konsolidierungskreis                                    | –            | 40           |
| Umbuchungen                                                           | 2            | 147          |
| Anschaffungskosten/Herstellungskosten zum 31.12.                      | 1 470        | 1 455        |
| Kumulierte Veränderungen aus der Bewertung zum beizulegenden Zeitwert | –278         | –176         |
| <b>Buchwert zum 31.12.</b>                                            | <b>1 192</b> | <b>1 279</b> |
| Im laufenden Geschäftsjahr aktivierte Fremdkapitalzinsen              | –            | –            |
| Bandbreite angewendete Zinssätze (in %)                               | –            | –            |

Von den als Finanzinvestition gehaltenen Immobilien wurden 268 Mio Euro (Vorjahr: 385 Mio Euro) rettungshalber erworben. In den Zugängen des Berichtszeitraums waren 49 Mio Euro (Vorjahr: 14 Mio Euro) nachträgliche Anschaffungskosten für wesentliche Objekte enthalten.

Im Rahmen von Sensitivitätsanalysen unterstellen wir für Renditeobjekte eine Änderung des Liegenschaftszinses von

+50 Basispunkten beziehungsweise –50 Basispunkten und für Baugrundstücke eine Änderung des Bodenwertes von +20 % beziehungsweise –20 %. Für die wesentlichen Renditeobjekte würde sich daraus eine Marktwertänderung von rund –74 Mio Euro beziehungsweise +86 Mio Euro ergeben. Für Baugrundstücke würde sich der Marktwert um 12 Mio Euro erhöhen beziehungsweise um 12 Mio Euro vermindern.

### (60) Zur Veräußerung gehaltene langfristige Vermögenswerte und Vermögenswerte aus Veräußerungsgruppen

Die zur Veräußerung gehaltenen langfristigen Vermögenswerte und Vermögenswerte von Veräußerungsgruppen setzten sich wie folgt zusammen:

| Mio €                                                      | 31.12.2010   | 31.12.2009   | Veränderung in % |
|------------------------------------------------------------|--------------|--------------|------------------|
| Forderungen an Kreditinstitute                             | 10           | 764          | –98,7            |
| Forderungen an Kunden                                      | 128          | 782          | –83,6            |
| Positive Marktwerte aus derivativen Sicherungsinstrumenten | 108          | 96           | 12,5             |
| Handelsaktiva                                              | 82           | 834          | –90,2            |
| Finanzanlagen                                              | 71           | 51           | 39,2             |
| Sachanlagen                                                | 196          | 271          | –27,7            |
| Sonstige Aktivposten                                       | 487          | 70           | .                |
| <b>Gesamt</b>                                              | <b>1 082</b> | <b>2 868</b> | <b>–62,3</b>     |

Der Gesamtwert verteilt sich auf die in Note 3 genannten vollkonsolidierten Tochtergesellschaften, die jeweils als Veräußerungsgruppe eingestuft wurden. In allen Fällen sind die

Verkaufsverträge entweder bereits abgeschlossen oder ein Abschluss steht bevor. Die Erfüllung der Verträge soll voraussichtlich während des Geschäftsjahres 2011 erfolgen.



|     |                                  |
|-----|----------------------------------|
| 204 | Gesamtergebnisrechnung           |
| 208 | Bilanz                           |
| 210 | Eigenkapitalveränderungsrechnung |
| 212 | Kapitalflussrechnung             |
| 214 | Anhang (Notes)                   |
| 370 | Bestätigungsvermerk              |

## (61) Sonstige Aktiva

Die Sonstigen Aktiva setzten sich im Wesentlichen aus folgenden Posten zusammen:

| Mio €                      | 31.12.2010   | 31.12.2009   | Veränderung in % |
|----------------------------|--------------|--------------|------------------|
| Einzugspapiere             | 612          | 632          | -3,2             |
| Edelmetalle                | 671          | 811          | -17,3            |
| Leasinggegenstände         | 221          | 554          | -60,1            |
| Rechnungsabgrenzungsposten | 340          | 380          | -10,5            |
| Übrige Aktiva              | 5 505        | 1 406        | .                |
| <b>Gesamt</b>              | <b>7 349</b> | <b>3 783</b> | <b>94,3</b>      |

Nach Anpassung der Bilanzstruktur (siehe Note 2) betragen die Sonstigen Aktiva 3 432 Mio Euro zum 31. Dezember 2008 beziehungsweise zum 1. Januar 2009 ohne Berücksichtigung der als Finanzinvestition gehaltenen Immobilien (909 Mio Euro) sowie

der zur Veräußerung gehaltenen Vermögenwerte und der Vermögenwerte von Veräußerungsgruppen (684 Mio Euro). Die Leasinggegenstände innerhalb der Sonstigen Aktiva haben sich wie folgt entwickelt:

| Mio €                                                                 | 2010       | 2009       |
|-----------------------------------------------------------------------|------------|------------|
| <b>Buchwert zum 1.1.</b>                                              | <b>554</b> | <b>358</b> |
| Anschaffungskosten/Herstellungskosten zum 1.1.                        | 788        | 504        |
| Wechselkursveränderungen                                              | 1          | -2         |
| Zugänge                                                               | 206        | 97         |
| Abgänge                                                               | 97         | 46         |
| Veränderungen Konsolidierungskreis                                    | -          | 235        |
| Umbuchungen                                                           | -534       | -          |
| Anschaffungskosten/Herstellungskosten zum 31.12.                      | 364        | 788        |
| Kumulierte Abschreibungen zum 1.1.                                    | 234        | 146        |
| Wechselkursveränderungen                                              | -          | -          |
| Zugänge                                                               | 68         | 120        |
| darunter: außerplanmäßig                                              | -          | 44         |
| Abgänge                                                               | 18         | 31         |
| Veränderungen Konsolidierungskreis                                    | -          | -          |
| Umbuchungen                                                           | -141       | -1         |
| Kumulierte Abschreibungen zum 31.12.                                  | 143        | 234        |
| Kumulierte Veränderungen aus der Bewertung zum beizulegenden Zeitwert | -          | -          |
| <b>Buchwert zum 31.12.</b>                                            | <b>221</b> | <b>554</b> |

**(62) Verbindlichkeiten gegenüber Kreditinstituten**

| Mio €                                                           | Gesamt         |                | Veränderung in % |
|-----------------------------------------------------------------|----------------|----------------|------------------|
|                                                                 | 31.12.2010     | 31.12.2009     |                  |
| Kreditinstitute in Deutschland                                  | 45 475         | 54 188         | -16,1            |
| Kreditinstitute außerhalb Deutschlands                          | 92 151         | 86 446         | 6,6              |
| <b>Gesamt</b>                                                   | <b>137 626</b> | <b>140 634</b> | <b>-2,1</b>      |
| darunter entfallen auf die Kategorie:                           |                |                |                  |
| Zu fortgeführten Anschaffungskosten bewertete Verbindlichkeiten | 95 154         | 91 897         | 3,5              |
| Erfolgswirksam zum beizulegenden Zeitwert bewertet              | 42 472         | 48 737         | -12,9            |

| davon:                                 | Täglich fällig |               | Andere Verbindlichkeiten |               |
|----------------------------------------|----------------|---------------|--------------------------|---------------|
| Mio €                                  | 31.12.2010     | 31.12.2009    | 31.12.2010               | 31.12.2009    |
| Kreditinstitute in Deutschland         | 17 097         | 11 989        | 28 378                   | 42 199        |
| Kreditinstitute außerhalb Deutschlands | 33 082         | 35 521        | 59 069                   | 50 925        |
| <b>Gesamt</b>                          | <b>50 179</b>  | <b>47 510</b> | <b>87 447</b>            | <b>93 124</b> |

Die nachfolgende Tabelle stellt die Verbindlichkeiten gegenüber Kreditinstituten nach wesentlichen Geschäftsarten dar:

| Mio €                                | 31.12.2010     | 31.12.2009     | Veränderung in % |
|--------------------------------------|----------------|----------------|------------------|
| Repos und Cash Collaterals           | 44 016         | 31 556         | 39,5             |
| Verbindlichkeiten aus dem Geldhandel | 35 166         | 51 785         | -32,1            |
| Übrige Verbindlichkeiten             | 58 444         | 57 293         | 2,0              |
| <b>Gesamt</b>                        | <b>137 626</b> | <b>140 634</b> | <b>-2,1</b>      |

**(63) Verbindlichkeiten gegenüber Kunden**

Die Verbindlichkeiten gegenüber Kunden setzen sich aus Spareinlagen, täglich fälligen Geldern und Termineinlagen einschließlich Sparbriefen zusammen.

| Mio €                                                           | Gesamt         |                | Veränderung in % |
|-----------------------------------------------------------------|----------------|----------------|------------------|
|                                                                 | 31.12.2010     | 31.12.2009     |                  |
| <b>Kunden in Deutschland</b>                                    | <b>195 561</b> | <b>206 123</b> | <b>-5,1</b>      |
| Firmenkunden                                                    | 122 544        | 139 908        | -12,4            |
| Privatkunden und Übrige                                         | 66 144         | 57 809         | 14,4             |
| Öffentliche Haushalte                                           | 6 873          | 8 406          | -18,2            |
| <b>Kunden außerhalb Deutschlands</b>                            | <b>67 266</b>  | <b>58 495</b>  | <b>15,0</b>      |
| Firmen- und Privatkunden                                        | 61 293         | 54 808         | 11,8             |
| Öffentliche Haushalte                                           | 5 973          | 3 687          | 62,0             |
| <b>Gesamt</b>                                                   | <b>262 827</b> | <b>264 618</b> | <b>-0,7</b>      |
| darunter entfallen auf die Kategorie:                           |                |                |                  |
| Zu fortgeführten Anschaffungskosten bewertete Verbindlichkeiten | 243 177        | 246 020        | -1,2             |
| Erfolgswirksam zum beizulegenden Zeitwert bewertet              | 19 650         | 18 598         | 5,7              |

|     |                                  |
|-----|----------------------------------|
| 204 | Gesamtergebnisrechnung           |
| 208 | Bilanz                           |
| 210 | Eigenkapitalveränderungsrechnung |
| 212 | Kapitalflussrechnung             |
| 214 | Anhang (Notes)                   |
| 370 | Bestätigungsvermerk              |

| Mio €                                | Spareinlagen |              | Andere Verbindlichkeiten |                |                                                   |                |
|--------------------------------------|--------------|--------------|--------------------------|----------------|---------------------------------------------------|----------------|
|                                      | 31.12.2010   | 31.12.2009   | täglich fällig           |                | mit vereinbarter Laufzeit<br>oder Kündigungsfrist |                |
|                                      | 31.12.2010   | 31.12.2009   | 31.12.2010               | 31.12.2009     | 31.12.2010                                        | 31.12.2009     |
| <b>Kunden in Deutschland</b>         | <b>3 970</b> | <b>5 242</b> | <b>106 097</b>           | <b>105 155</b> | <b>85 494</b>                                     | <b>95 726</b>  |
| Firmenkunden                         | 43           | 40           | 49 365                   | 77 424         | 73 136                                            | 62 444         |
| Privatkunden und Übrige              | 3 926        | 5 202        | 54 658                   | 26 768         | 7 560                                             | 25 839         |
| Öffentliche Haushalte                | 1            | –            | 2 074                    | 963            | 4 798                                             | 7 443          |
| <b>Kunden außerhalb Deutschlands</b> | <b>2 586</b> | <b>2 187</b> | <b>37 710</b>            | <b>26 618</b>  | <b>26 970</b>                                     | <b>29 690</b>  |
| Firmen- und Privatkunden             | 2 585        | 2 186        | 32 864                   | 25 241         | 25 844                                            | 27 381         |
| Öffentliche Haushalte                | 1            | 1            | 4 846                    | 1 377          | 1 126                                             | 2 309          |
| <b>Gesamt</b>                        | <b>6 556</b> | <b>7 429</b> | <b>143 807</b>           | <b>131 773</b> | <b>112 464</b>                                    | <b>125 416</b> |

Die Spareinlagen waren wie folgt unterteilt:

| Mio €                                                                   | 31.12.2010   | 31.12.2009   | Veränderung in % |
|-------------------------------------------------------------------------|--------------|--------------|------------------|
| Spareinlagen mit vereinbarter Kündigungsfrist von drei Monaten          | 5 700        | 6 095        | –6,5             |
| Spareinlagen mit vereinbarter Kündigungsfrist von mehr als drei Monaten | 856          | 1 334        | –35,8            |
| <b>Gesamt</b>                                                           | <b>6 556</b> | <b>7 429</b> | <b>–11,8</b>     |

Die nachfolgende Tabelle stellt die Verbindlichkeiten gegenüber Kunden nach wesentlichen Geschäftsarten dar:

| Mio €                                | 31.12.2010     | 31.12.2009     | Veränderung in % |
|--------------------------------------|----------------|----------------|------------------|
| Repos und Cash Collaterals           | 18 106         | 17 619         | 2,8              |
| Verbindlichkeiten aus dem Geldhandel | 46 339         | 48 791         | –5,0             |
| Übrige Verbindlichkeiten             | 198 382        | 198 208        | 0,1              |
| <b>Gesamt</b>                        | <b>262 827</b> | <b>264 618</b> | <b>–0,7</b>      |

#### (64) Verbriefte Verbindlichkeiten

Als Verbriefte Verbindlichkeiten werden Schuldverschreibungen, einschließlich Hypothekenpfandbriefe und öffentliche Pfandbriefe, Geldmarktpapiere (zum Beispiel Certificates of Deposit, Euro Notes, Commercial Papers), Indezertifikate, Eigene Akzepte und Solawechsel im Umlauf ausgewiesen.

Die Geldmarktpapiere wurden nominell zu Zinssätzen zwischen 0,02 % und 5,45 % (Vorjahr: 0,19 % bis 6,91 %) verzinst;

Schuldverschreibungen zu 0,03 % bis 12,00 % (Vorjahr: 0,03 % bis 16,73 %). In den Verbrieften Verbindlichkeiten waren Hypothekenpfandbriefe in Höhe von 28 744 Mio Euro (Vorjahr: 33 506 Mio Euro) sowie öffentliche Pfandbriefe in Höhe von 48 495 Mio Euro (Vorjahr: 63 885 Mio Euro) enthalten.

| Mio €                                                           | Gesamt         |                         | Darunter: begeben von Hypothekenbanken |                |
|-----------------------------------------------------------------|----------------|-------------------------|----------------------------------------|----------------|
|                                                                 | 31.12.2010     | 31.12.2009 <sup>1</sup> | 31.12.2010                             | 31.12.2009     |
| Begebene Schuldverschreibungen                                  | 116 270        | 139 079                 | 80 284                                 | 103 333        |
| Begebene Geldmarktpapiere                                       | 15 024         | 22 612                  | –                                      | –              |
| Eigene Akzepte und Solawechsel im Umlauf                        | 62             | 88                      | 55                                     | 75             |
| <b>Gesamt</b>                                                   | <b>131 356</b> | <b>161 779</b>          | <b>80 339</b>                          | <b>103 408</b> |
| darunter entfallen auf die Kategorie:                           |                |                         |                                        |                |
| Zu fortgeführten Anschaffungskosten bewertete Verbindlichkeiten | 128 150        | 158 276                 | 80 339                                 | 103 408        |
| Erfolgswirksam zum beizulegenden Zeitwert bewertet              | 3 206          | 3 503                   | –                                      | –              |

<sup>1</sup> Nach Umgliederung in die Handelspassiva (siehe Note 2).

Im Geschäftsjahr 2010 wurden neue Emissionen mit einem Volumen von 44,4 Mrd Euro begeben. Im gleichen Zeitraum belief sich das Volumen der fälligen Emissionen auf 76,9 Mrd

Euro. Die folgende Aufstellung enthält die wesentlichen im Geschäftsjahr 2010 begebenen Schuldverschreibungen:

| Gegenwert<br>Mio € | Währung | Emittent                                 | Zinssatz<br>in %   | Fälligkeit |
|--------------------|---------|------------------------------------------|--------------------|------------|
| 1 500              | EUR     | Eurohypo Aktiengesellschaft              | 2,000              | 2013       |
| 1 250              | EUR     | Eurohypo Aktiengesellschaft              | 2,250              | 2015       |
| 1 000              | EUR     | Commerzbank Aktiengesellschaft           | 3,880              | 2017       |
| 1 000              | EUR     | Commerzbank Aktiengesellschaft           | 4,000              | 2020       |
| 750                | EUR     | EUROHYPO Europäische Hypothekenbank S.A. | 2,250              | 2013       |
| 500                | EUR     | Eurohypo Aktiengesellschaft              | 2,000              | 2014       |
| 500                | EUR     | Eurohypo Aktiengesellschaft              | 1,136 <sup>1</sup> | 2014       |

<sup>1</sup> Variabel verzinslich.

#### (65) Passive Wertanpassung aus Portfolio Fair Value Hedges

Der Wertanpassungsbetrag von gegen Zinsänderungsrisiken gesicherten Grundgeschäften betrug 121 Mio Euro (Vorjahr: –16 Mio Euro). Einen ökonomisch gegenläufigen Betrag der

Sicherungsgeschäfte weisen wir auf der Aktivseite unter dem Posten Positive Marktwerte aus derivativen Sicherungsinstrumenten aus.

|     |                                  |
|-----|----------------------------------|
| 204 | Gesamtergebnisrechnung           |
| 208 | Bilanz                           |
| 210 | Eigenkapitalveränderungsrechnung |
| 212 | Kapitalflussrechnung             |
| 214 | Anhang (Notes)                   |
| 370 | Bestätigungsvermerk              |

## (66) Negative Marktwerte aus derivativen Sicherungsinstrumenten

In diesem Posten werden die Negativen Marktwerte von Derivaten ausgewiesen, die zur Absicherung von Grundgeschäften gegen das Zinsänderungsrisiko eingesetzt werden.

| Mio €                                                     | 31.12.2010   | 31.12.2009    | Veränderung in % |
|-----------------------------------------------------------|--------------|---------------|------------------|
| Negative Marktwerte Micro Fair Value Hedge Accounting     | 9 312        | 10 844        | - 14,1           |
| Negative Marktwerte Portfolio Fair Value Hedge Accounting | 40           | 449           | - 91,1           |
| Negative Marktwerte Cash Flow Hedge Accounting            | 17           | 52            | - 67,3           |
| <b>Gesamt</b>                                             | <b>9 369</b> | <b>11 345</b> | <b>- 17,4</b>    |

## (67) Handelspassiva

In den Handelspassiva werden die Negativen Marktwerte aus derivativen Finanzinstrumenten, die nicht als Sicherungsinstrumente im Rahmen des Hedge Accountings eingesetzt sind, sowie Kreditzusagen mit negativen Marktwerten, ausgewiesen.

Außerdem sind eigene Emissionen des Handelsbereichs und Lieferverbindlichkeiten aus Wertpapierleerverkäufen in den Handelspassiva enthalten.

| Mio €                                                                                                                  | 31.12.2010     | 31.12.2009     | Veränderung in % |
|------------------------------------------------------------------------------------------------------------------------|----------------|----------------|------------------|
| Währungsbezogene derivative Geschäfte                                                                                  | 19 368         | 16 999         | 13,9             |
| Zinsbezogene derivative Geschäfte                                                                                      | 100 479        | 145 764        | - 31,1           |
| Übrige derivate Geschäfte                                                                                              | 10 248         | 15 609         | - 34,3           |
| Zertifikate und andere eigene Emissionen <sup>1</sup>                                                                  | 9 070          | 9 591          | - 5,4            |
| Lieferverbindlichkeiten aus Wertpapierleerverkäufen, negative Marktwerte von Kreditzusagen und sonstige Handelspassiva | 13 228         | 14 632         | - 9,6            |
| <b>Gesamt</b>                                                                                                          | <b>152 393</b> | <b>202 595</b> | <b>- 24,8</b>    |

<sup>1</sup> Nach Umgliederung aus den Verbrieften Verbindlichkeiten (siehe Note 2).

Die Übrigen derivativen Geschäfte setzten sich im Wesentlichen aus 5 803 Mio Euro Aktienderivaten (Vorjahr: 7 738 Mio Euro) und 3 782 Mio Euro Kreditderivaten (Vorjahr: 6 668 Mio Euro) zusammen.

## (68) Rückstellungen

Die Rückstellungen gliederten sich wie folgt:

| Mio €                                                     | 31.12.2010   | 31.12.2009   | Veränderung in % |
|-----------------------------------------------------------|--------------|--------------|------------------|
| Rückstellungen für Pensionen und ähnliche Verpflichtungen | 539          | 759          | - 29,0           |
| Sonstige Rückstellungen                                   | 4 239        | 4 356        | - 2,7            |
| <b>Gesamt</b>                                             | <b>4 778</b> | <b>5 115</b> | <b>- 6,6</b>     |

### a) Rückstellungen für Pensionen und ähnliche Verpflichtungen

Im Jahr 2010 haben sich die Rückstellungen für Pensionen und ähnliche Verpflichtungen folgendermaßen entwickelt:

| Mio €                                                                                                      | Stand<br>1.1.2010 | Pensions-<br>leistungen | Zuführung  | Dotierung<br>des Plan-<br>vermögens <sup>1</sup> | Umbuchungen/<br>Wechselkurs-<br>änderungen | Änderung<br>Konsolidier-<br>ungskreis | Stand<br>31.12.2010 |
|------------------------------------------------------------------------------------------------------------|-------------------|-------------------------|------------|--------------------------------------------------|--------------------------------------------|---------------------------------------|---------------------|
| Anwartschaften der aktiven und<br>ausgeschiedenen Mitarbeiter<br>sowie Pensionsansprüche der<br>Pensionäre | 552               | 244                     | 95         | 52                                               | 26                                         | -21                                   | 356                 |
| Vorruhestand                                                                                               | 104               | 31                      | 9          | -                                                | -                                          | -                                     | 82                  |
| Altersteilzeit                                                                                             | 103               | 38                      | 95         | 60                                               | 2                                          | -1                                    | 101                 |
| <b>Gesamt</b>                                                                                              | <b>759</b>        | <b>313</b>              | <b>199</b> | <b>112</b>                                       | <b>28</b>                                  | <b>-22</b>                            | <b>539</b>          |

<sup>1</sup> Soweit im Rahmen der Rückstellungsermittlung berücksichtigt.

### b) Pensionsverpflichtungen

Die Pensionsverpflichtungen sowie der Pensionsaufwand werden jährlich von unabhängigen Aktuaren nach dem Anwartschaftsbarwertverfahren (Projected Unit Credit Method) ermittelt. Die

zugrundeliegenden Prämissen richten sich dabei nach den Verhältnissen des Landes, in dem der Pensionsplan begründet wurde.

| in %                                                       | 31.12.2010 | 31.12.2009 |
|------------------------------------------------------------|------------|------------|
| <b>Parameter der Pensionspläne in Deutschland</b>          |            |            |
| für die Ermittlung der Pensionsverpflichtung am Jahresende |            |            |
| Diskontierungszinssatz                                     | 4,90       | 5,30       |
| Gehaltsentwicklung                                         | 2,50       | 2,50       |
| Rentenanpassung                                            | 1,80       | 1,80       |
| für die Ermittlung des Pensionsaufwands im Geschäftsjahr   |            |            |
| Diskontierungszinssatz                                     | 5,30       | 6,00       |
| Gehaltsentwicklung                                         | 2,50       | 2,50       |
| Rentenanpassung                                            | 1,80       | 1,60       |
| Erwartete Rendite des Planvermögens                        | 5,70       | 6,00       |
| <b>Parameter der Pensionspläne außerhalb Deutschlands</b>  |            |            |
| für die Ermittlung der Pensionsverpflichtung am Jahresende |            |            |
| Diskontierungszinssatz                                     | 4,20–5,40  | 1,60–6,10  |
| Gehaltsentwicklung                                         | 2,00–4,50  | 2,00–8,50  |
| Rentenanpassung                                            | 1,50–3,70  | 0,40–3,75  |
| für die Ermittlung des Pensionsaufwands im Geschäftsjahr   |            |            |
| Diskontierungszinssatz                                     | 1,60–6,10  | 6,00       |
| Gehaltsentwicklung                                         | 2,00–8,50  | 2,50       |
| Rentenanpassung                                            | 0,40–3,75  | 1,60       |
| Erwartete Rendite des Planvermögens                        | 4,40–8,50  | 5,00–8,50  |
| <b>Parameter des Gesundheitsfürsorgeplans</b>              |            |            |
| für die Ermittlung der Verpflichtung am Jahresende         |            |            |
| Diskontierungszinssatz                                     | 5,40       | 5,50       |
| Gesundheitskostensteigerungsrate                           | 6,00       | 5,90       |
| für die Ermittlung des Aufwands im Geschäftsjahr           |            |            |
| Diskontierungszinssatz                                     | 5,50       | 6,40       |
| Gesundheitskostensteigerungsrate                           | 5,90       | 5,50       |

|     |                                  |
|-----|----------------------------------|
| 204 | Gesamtergebnisrechnung           |
| 208 | Bilanz                           |
| 210 | Eigenkapitalveränderungsrechnung |
| 212 | Kapitalflussrechnung             |
| 214 | Anhang (Notes)                   |
| 370 | Bestätigungsvermerk              |

Die Pensionsverpflichtungen haben sich folgendermaßen entwickelt:

| Mio €                                                             | 2010         | 2009         |
|-------------------------------------------------------------------|--------------|--------------|
| <b>Pensionsverpflichtungen zum 1. Januar</b>                      | <b>5 699</b> | <b>2 118</b> |
| Dienstzeitaufwand                                                 | 61           | 75           |
| Zinsaufwand                                                       | 295          | 289          |
| Pensionsleistungen                                                | -277         | -277         |
| Versicherungsmathematische Gewinne (-)/Verluste (+)               | 314          | 541          |
| Erfahrungsbedingte Anpassungen                                    | -5           | 3            |
| Sonstige Anpassungen                                              | 319          | 538          |
| Veränderungen Konsolidierungskreis                                | -54          | 2 983        |
| Nachzuverrechnender Dienstzeitaufwand                             | -1           | 1            |
| Plankürzungen                                                     | -6           | -12          |
| Wechselkursänderungen                                             | 33           | 4            |
| Sonstige Veränderungen                                            | 9            | -23          |
| <b>Pensionsverpflichtungen zum 31. Dezember</b>                   | <b>6 073</b> | <b>5 699</b> |
| darunter vollständig oder teilweise durch Planvermögen finanziert | 5 884        | 5 505        |
| darunter nicht durch Planvermögen finanziert                      | 189          | 194          |

Die Pensionsverpflichtungen waren folgenden Regionen zuzuordnen:

| Mio €                     | 31.12.2010   | 31.12.2009   |
|---------------------------|--------------|--------------|
| Deutschland               | 5 032        | 4 721        |
| Europa (ohne Deutschland) | 952          | 894          |
| Amerika                   | 87           | 78           |
| Asien und Sonstige        | 2            | 6            |
| <b>Gesamt</b>             | <b>6 073</b> | <b>5 699</b> |

Eine Änderung des Diskontierungzinssatzes beziehungsweise der Gesundheitskostensteigerungsrate würde sich wie folgt auswirken:

| Mio €                                                          | Verpflichtung zum 31.12.2010 | Aufwendungen im Jahr 2010 |
|----------------------------------------------------------------|------------------------------|---------------------------|
| Zinssensitivität                                               |                              |                           |
| Diskontierungzinssatz +50 Basispunkte                          | -435                         | -                         |
| Diskontierungzinssatz -50 Basispunkte                          | 489                          | -                         |
| Sensitivität in Bezug auf die Gesundheitskostensteigerungsrate |                              |                           |
| Gesundheitskostensteigerungsrate +100 Basispunkte              | 2                            | -                         |
| Gesundheitskostensteigerungsrate -100 Basispunkte              | -2                           | -                         |

Die Aufwendungen für Altersversorgung und Unterstützung setzten sich aus folgenden Komponenten zusammen:

| Mio €                                                             | 2010       | 2009       |
|-------------------------------------------------------------------|------------|------------|
| Dienstzeitaufwand                                                 | 61         | 75         |
| Zinsaufwand                                                       | 295        | 289        |
| Erwartete Erträge aus dem Planvermögen                            | -267       | -250       |
| Nachzuverrechnender Dienstzeitaufwand                             | -1         | 1          |
| Plankürzungen                                                     | -5         | -12        |
| Amortisation versicherungsmathematischer Gewinne (-)/Verluste (+) | 9          | -          |
| Sonstiges                                                         | 3          | -16        |
| <b>Aufwendungen für leistungsorientierte Pläne</b>                | <b>95</b>  | <b>87</b>  |
| Aufwendungen für beitragsorientierte Pläne                        | 98         | 102        |
| Andere Altersversorgung (Altersteilzeit und Vorruhestand)         | 104        | 66         |
| Sonstiger pensionsnaher Aufwand                                   | 20         | 102        |
| Wechselkursveränderungen                                          | -          | -          |
| <b>Aufwendungen für Altersversorgung und Unterstützung</b>        | <b>317</b> | <b>357</b> |

Daneben haben wir im Personalaufwand 228 Mio Euro als Arbeitgeberanteile zur gesetzlichen Rentenversicherung erfasst.

Der erwartete Ertrag aus dem Planvermögen orientiert sich im Fall von festverzinslichen Wertpapieren an den langfristigen Renditen des Kapitalmarktes am Abschlussstichtag und im Fall

anderer Kapitalanlagen an den in der Vergangenheit beobachteten Kapitalmarktentwicklungen. Das Planvermögen hat sich folgendermaßen entwickelt:

| Mio €                                               | 2010         | 2009         |
|-----------------------------------------------------|--------------|--------------|
| <b>Beizulegender Zeitwert zum 1. Januar</b>         | <b>4 764</b> | <b>2 039</b> |
| Veränderung Konsolidierungskreis                    | -28          | 2 354        |
| Einstellung Planvermögen (Arbeitgeberbeiträge)      | 52           | 21           |
| Erwartete Erträge aus dem Planvermögen              | 267          | 250          |
| Pensionsleistungen                                  | -34          | -            |
| Umbuchungen                                         | -3           | -4           |
| Wechselkursänderungen                               | 27           | 6            |
| Versicherungsmathematische Gewinne (+)/Verluste (-) | 149          | 98           |
| <b>Beizulegender Zeitwert zum 31. Dezember</b>      | <b>5 194</b> | <b>4 764</b> |
| Tatsächliche Erträge aus dem Planvermögen           | 416          | 348          |

Für das Geschäftsjahr 2011 erwarten wir im Konzern für leistungsorientierte Pensionspläne Arbeitgeberbeiträge zum Planvermögen von 62 Mio Euro sowie Pensionsleistungen von 250 Mio Euro.



|     |                                  |
|-----|----------------------------------|
| 204 | Gesamtergebnisrechnung           |
| 208 | Bilanz                           |
| 210 | Eigenkapitalveränderungsrechnung |
| 212 | Kapitalflussrechnung             |
| 214 | Anhang (Notes)                   |
| 370 | Bestätigungsvermerk              |

Die Zusammensetzung des Planvermögens stellte sich wie folgt dar:

| %                            | 31.12.2010 | 31.12.2009 |
|------------------------------|------------|------------|
| Festverzinsliche Wertpapiere | 69,3       | 73,7       |
| Aktien                       | 15,6       | 12,9       |
| Fondsanteile                 | 9,2        | 4,3        |
| Liquide Mittel               | 2,4        | 4,1        |
| Sonstige                     | 3,5        | 5,0        |

Zusammenfassende Übersicht wesentlicher Komponenten leistungsorientierter Pensionspläne:

| Mio €                                                              | 2010         | 2009         | 2008         | 2007         | 2006         |
|--------------------------------------------------------------------|--------------|--------------|--------------|--------------|--------------|
| <b>Pensionsverpflichtung (Anwartschaftsbarwert)</b>                | <b>6 073</b> | <b>5 699</b> | <b>2 118</b> | <b>2 202</b> | <b>2 410</b> |
| Fair Value des Planvermögens                                       | 5 194        | 4 764        | 2 039        | 1 831        | 1 617        |
| <b>Finanzierungsstatus</b>                                         | <b>879</b>   | <b>935</b>   | <b>79</b>    | <b>371</b>   | <b>793</b>   |
| Nicht erfasste versicherungsmathematische Gewinne (+)/Verluste (-) | -576         | -416         | 33           | 71           | -251         |
| Nachzuverrechnender Dienstzeitertrag (+)/-aufwand (-)              | -            | -            | -            | -            | -            |
| Aktiviertes Planvermögen                                           | 53           | 33           | -            | -            | -            |
| <b>Pensionsrückstellung</b>                                        | <b>356</b>   | <b>552</b>   | <b>112</b>   | <b>442</b>   | <b>542</b>   |

### c) Sonstige Rückstellungen

Entwicklung der Sonstigen Rückstellungen:

| Mio €                                   | Stand 1.1.2010 | Zuführung    | Verbrauch    | Auflösung  | Umbuchung/Änderung Konsolidierungskreis | Stand 31.12.2010 |
|-----------------------------------------|----------------|--------------|--------------|------------|-----------------------------------------|------------------|
| Personalbereich                         | 723            | 640          | 361          | 132        | -51                                     | 819              |
| Restrukturierungsmaßnahmen              | 1 362          | 56           | 402          | 111        | 18                                      | 923              |
| Einzelrisiken aus dem Kreditgeschäft    | 364            | 207          | 7            | 159        | -21                                     | 384              |
| Portfoliorisiken aus dem Kreditgeschäft | 278            | 96           | -            | 142        | -1                                      | 231              |
| Bonifikation für Sondersparformen       | 59             | 6            | 40           | -          | 5                                       | 30               |
| Prozesse und Regresse                   | 625            | 205          | 108          | 83         | 169                                     | 808              |
| Übrige                                  | 945            | 673          | 510          | 272        | 208                                     | 1 044            |
| <b>Gesamt</b>                           | <b>4 356</b>   | <b>1 883</b> | <b>1 428</b> | <b>899</b> | <b>327</b>                              | <b>4 239</b>     |

Die Rückstellungen für den Personalbereich sind überwiegend kurzfristiger Natur, beinhalten unter anderem aber auch Jubiläumsrückstellungen, die aufgrund ihres Charakters langfristig sind und in nachfolgenden Perioden sukzessive verbraucht werden.

Die durchschnittliche Restlaufzeit der Rückstellungen im Kreditgeschäft orientiert sich an den in Note 92 angegebenen Restlaufzeiten der Eventualverbindlichkeiten und unwiderprüflichen Kreditzusagen. Bei Rechtsstreitigkeiten kann weder die Dauer des Verfahrens noch die Höhe des Betrags zum Zeitpunkt

der Rückstellungsbildung abschließend vorhergesagt werden. Die unter Übrige ausgewiesenen Rückstellungen weisen im Wesentlichen eine Restlaufzeit von bis zu einem Jahr auf.

Die gebildeten Restrukturierungsrückstellungen resultieren überwiegend aus Maßnahmen im Zusammenhang mit der Integration des Dresdner-Bank-Konzerns und entfallen vorwiegend auf den Personalbereich sowie auf die Bereiche Organisation und IT. Die Rückstellungen verteilen sich im Wesentlichen über eine Laufzeit von bis zu vier Jahren, wobei der größte Teil voraussichtlich bis Ende 2012 in Anspruch genommen werden wird.

**(69) Ertragsteuerschulden**

| Mio €                                                        | 31.12.2010   | 31.12.2009   | Veränderung in % |
|--------------------------------------------------------------|--------------|--------------|------------------|
| <b>Tatsächliche Ertragsteuerschulden</b>                     | <b>1 072</b> | <b>1 346</b> | <b>-20,4</b>     |
| Verbindlichkeiten gegenüber Steuerbehörden aus Ertragsteuern | 4            | 111          | -96,4            |
| Rückstellungen für Ertragsteuern                             | 1 068        | 1 235        | -13,5            |
| <b>Latente Ertragsteuerschulden</b>                          | <b>222</b>   | <b>1 240</b> | <b>-82,1</b>     |
| Erfolgswirksame Ertragsteuerschulden                         | 222          | 1 167        | -81,0            |
| Erfolgsneutrale Ertragsteuerschulden                         | -            | 73           | .                |
| <b>Gesamt</b>                                                | <b>1 294</b> | <b>2 586</b> | <b>-50,0</b>     |

Rückstellungen für Ertragsteuern sind potenzielle Steuerverpflichtungen, für die noch keine rechtskräftigen Steuerbescheide ergangen sind beziehungsweise für Risiken im Rahmen von Betriebsprüfungen. Die Verbindlichkeiten gegenüber Finanzämtern beinhalten Zahlungsverpflichtungen aus laufenden Ertragsteuern gegenüber inländischen und ausländischen Steuerbehörden.

Passive latente Steuern stellen die potenziellen Ertragsteuerbelastungen aus temporären Unterschieden zwischen Wertansätzen der Vermögenswerte und Schulden in der Konzernbilanz nach IFRS und den Steuerwerten nach lokalen steuerrechtlichen Vorschriften der Konzernunternehmen dar. Sie wurden im Zusammenhang mit folgenden Posten gebildet:

| Mio €                                                   | 31.12.2010 | 31.12.2009   | Veränderung in % |
|---------------------------------------------------------|------------|--------------|------------------|
| Handelsaktiva und -passiva                              | 53         | 261          | -79,7            |
| Marktwerte aus derivativen Sicherungsinstrumenten       | 52         | 28           | 85,7             |
| Finanzanlagen                                           | 29         | 326          | -91,1            |
| Forderungen an Kreditinstitute und Kunden               | 38         | 123          | -69,1            |
| Verbindlichkeiten gegenüber Kreditinstituten und Kunden | 2          | 236          | -99,2            |
| Übrige Bilanzposten                                     | 48         | 266          | -82,0            |
| <b>Gesamt</b>                                           | <b>222</b> | <b>1 240</b> | <b>-82,1</b>     |

**(70) Verbindlichkeiten von zur Veräußerung gehaltenen Veräußerungsgruppen**

Die Verbindlichkeiten von zur Veräußerung gehaltenen Veräußerungsgruppen setzten sich wie folgt zusammen:

| Mio €                                                      | 31.12.2010 | 31.12.2009   | Veränderung in % |
|------------------------------------------------------------|------------|--------------|------------------|
| Verbindlichkeiten gegenüber Kreditinstituten               | 199        | 74           | .                |
| Verbindlichkeiten gegenüber Kunden                         | 214        | 2 365        | -91,0            |
| Negative Marktwerte aus derivativen Sicherungsinstrumenten | 181        | 318          | -43,1            |
| Rückstellungen                                             | 56         | 82           | -31,7            |
| <b>Gesamt</b>                                              | <b>650</b> | <b>2 839</b> | <b>-77,1</b>     |

Nach Anpassung der Bilanzstruktur (siehe Note 2) beliefen sich Verbindlichkeiten von zur Veräußerung gehaltenen Veräußerungsgruppen zum 31. Dezember 2008 beziehungsweise zum 1. Januar 2009 auf 329 Mio Euro.

|     |                                  |
|-----|----------------------------------|
| 204 | Gesamtergebnisrechnung           |
| 208 | Bilanz                           |
| 210 | Eigenkapitalveränderungsrechnung |
| 212 | Kapitalflussrechnung             |
| 214 | Anhang (Notes)                   |
| 370 | Bestätigungsvermerk              |

## (71) Sonstige Passiva

| Mio €                           | 31.12.2010   | 31.12.2009   | Veränderung in % |
|---------------------------------|--------------|--------------|------------------|
| Verbindlichkeiten für Filmfonds | 2 197        | 2 219        | -1,0             |
| Fremdkapital aus Minderheiten   | 2 290        | 1 985        | 15,4             |
| Rechnungsabgrenzungsposten      | 559          | 506          | 10,5             |
| Übrige Passiva                  | 3 090        | 1 393        | .                |
| <b>Gesamt</b>                   | <b>8 136</b> | <b>6 103</b> | <b>33,3</b>      |

Aufgrund der Anpassung der Bilanzstruktur (siehe Note 2) beliefen sich die Sonstigen Passiva zum 31. Dezember 2008 beziehungsweise zum 1. Januar 2009 auf 2 585 Mio Euro ohne

Berücksichtigung der Verbindlichkeiten von zur Veräußerung gehaltenen Veräußerungsgruppen (329 Mio Euro).

## (72) Nachrangkapital

Die Nachrangigen Verbindlichkeiten und die Genußrechte sind Eigenmittel im Sinne der §§ 10 Abs. 5 und 5a KWG in der neuen Fassung und teilten sich wie folgt auf:

| Mio €                                                           | 31.12.2010    | 31.12.2009    | Veränderung in % |
|-----------------------------------------------------------------|---------------|---------------|------------------|
| <b>Nachrangige Verbindlichkeiten</b>                            | <b>11 256</b> | <b>12 215</b> | <b>-7,9</b>      |
| darunter: Drittrangmittel i.S. des § 10 Abs. 7 KWG              | -             | 24            | .                |
| darunter: vor Ablauf von zwei Jahren fällig                     | 2 175         | 2 458         | -11,5            |
| <b>Genussrechtskapital</b>                                      | <b>1 259</b>  | <b>3 372</b>  | <b>-62,7</b>     |
| darunter: vor Ablauf von zwei Jahren fällig                     | 765           | 645           | 18,6             |
| Zinsabgrenzungen einschließlich Disagien <sup>1</sup>           | -187          | -277          | -32,5            |
| Bewertungseffekte                                               | 582           | 540           | 7,8              |
| <b>Gesamt</b>                                                   | <b>12 910</b> | <b>15 850</b> | <b>-18,5</b>     |
| darunter entfallen auf die Kategorie:                           |               |               |                  |
| Zu fortgeführten Anschaffungskosten bewertete Verbindlichkeiten | 12 886        | 15 821        | -18,6            |
| Erfolgswirksam zum beizulegenden Zeitwert bewertet              | 24            | 29            | -17,2            |

<sup>1</sup> Einschließlich Effekte aus der Anpassung der Zeitwerte des Nachrangkapitals zum Erwerbszeitpunkt der Dresdner Bank.

Ansprüche von Gläubigern auf Rückzahlung dieser Verbindlichkeiten sind gegenüber anderen Gläubigern nachrangig. Eine vorzeitige Rückzahlungsverpflichtung kann nicht entstehen. Im Falle einer Insolvenz oder Liquidation dürfen sie erst nach Befriedigung aller nicht nachrangigen Gläubiger zurückgezahlt werden.

Im Geschäftsjahr 2010 belief sich das Volumen der fälligen Nachrangigen Verbindlichkeiten auf 1,0 Mrd Euro. Bei den Genussrechten wurden Rückzahlungen in Höhe von 2,4 Mrd Euro getätigt. Darüber hinaus gab es keine nennenswerten Veränderungen im Geschäftsjahr.

Ende 2010 waren folgende wesentliche Nachrangige Verbindlichkeiten im Umlauf:

| Laufzeitbeginn | Mio € | Mio Währung | Emittent                       | Zinssatz           | Fälligkeit |
|----------------|-------|-------------|--------------------------------|--------------------|------------|
| 2006           | 1 250 | 1 250 EUR   | Commerzbank Aktiengesellschaft | 4,125              | 2016       |
| 2007           | 750   | 750 EUR     | Commerzbank Aktiengesellschaft | 5,625              | 2017       |
| 2007           | 600   | 600 EUR     | Commerzbank Aktiengesellschaft | 1,815 <sup>1</sup> | 2017       |
| 2001           | 500   | 500 EUR     | Commerzbank Aktiengesellschaft | 6,125              | 2011       |
| 2008           | 500   | 500 EUR     | Commerzbank Aktiengesellschaft | 6,250              | 2014       |
| 2009           | 374   | 500 USD     | Commerzbank Aktiengesellschaft | 7,250              | 2015       |
| 2001           | 250   | 250 EUR     | Commerzbank Aktiengesellschaft | 6,100              | 2011       |
| 2003           | 250   | 250 EUR     | Eurohypo Aktiengesellschaft    | 5,000              | 2016       |
| 2009           | 250   | 250 EUR     | Commerzbank Aktiengesellschaft | 5,000              | 2017       |
| 2003           | 220   | 220 EUR     | Eurohypo Aktiengesellschaft    | 5,000              | 2014       |
| 2006           | 225   | 300 CAD     | Commerzbank Aktiengesellschaft | 4,500              | 2016       |
| 1999           | 174   | 150 GBP     | Commerzbank Aktiengesellschaft | 6,625              | 2019       |
| 2002           | 150   | 150 EUR     | Eurohypo Aktiengesellschaft    | 5,750              | 2012       |

<sup>1</sup> Variabel verzinslich.

Im Berichtsjahr fiel im Konzern ein Zinsaufwand für Nachrangige Verbindlichkeiten in Höhe von 713 Mio Euro (Vorjahr: 760 Mio Euro) an. Zinsabgrenzungen für noch nicht gezahlte Zinsen wurden in Höhe von 275 Mio Euro (Vorjahr: 325 Mio Euro) ausgewiesen. Das Genussrechtskapital nimmt bis zur vollen Höhe am Verlust teil. Zinszahlungen erfolgen nur im Rah-

men eines vorhandenen Bilanzgewinns der emittierenden Gesellschaft. Die Ansprüche der Genussrechtsinhaber auf Rückzahlung des Kapitals sind gegenüber den Ansprüchen der anderen Gläubiger nachrangig. Ende 2010 waren folgende wesentliche Genussrechte im Umlauf:

| Laufzeitbeginn | Mio € | Mio Währung | Emittent                       | Zinssatz | Fälligkeit        |
|----------------|-------|-------------|--------------------------------|----------|-------------------|
| 2006           | 750   | 750 EUR     | Commerzbank Aktiengesellschaft | 5,386    | 2015              |
| 2000           | 320   | 320 EUR     | Commerzbank Aktiengesellschaft | 6,375    | 2010 <sup>1</sup> |

<sup>1</sup> Rückzahlung erfolgt 2011.

Zu zahlende Zinsen auf das Genussrechtskapital für das Geschäftsjahr 2010 fielen in Höhe von 162 Mio Euro (Vorjahr: 150 Mio Euro) an beziehungsweise wurden abgegrenzt. Zins-

abgrenzungen für noch nicht gezahlte Zinsen wurden in Höhe von 130 Mio Euro (Vorjahr: 79 Mio Euro) ausgewiesen.

### (73) Hybridkapital

| Mio €                                                           | 31.12.2010   | 31.12.2009   | Veränderung in % |
|-----------------------------------------------------------------|--------------|--------------|------------------|
| Hybridkapital                                                   | 5 005        | 5 191        | -3,6             |
| Zinsabgrenzungen einschließlich Disagien <sup>1</sup>           | -1 084       | -1 342       | -19,2            |
| Bewertungseffekte                                               | 260          | 230          | 13,0             |
| <b>Gesamt</b>                                                   | <b>4 181</b> | <b>4 079</b> | <b>2,5</b>       |
| darunter entfallen auf die Kategorie:                           |              |              |                  |
| Zu fortgeführten Anschaffungskosten bewertete Verbindlichkeiten | 4 181        | 4 079        | 2,5              |
| Erfolgswirksam zum beizulegenden Zeitwert bewertet              | -            | -            | .                |

<sup>1</sup> Einschließlich Effekte aus der Anpassung der Zeitwerte des Hybridkapitals zum Erwerbszeitpunkt der Dresdner Bank.

|     |                                  |
|-----|----------------------------------|
| 204 | Gesamtergebnisrechnung           |
| 208 | Bilanz                           |
| 210 | Eigenkapitalveränderungsrechnung |
| 212 | Kapitalflussrechnung             |
| 214 | Anhang (Notes)                   |
| 370 | Bestätigungsvermerk              |

Im Geschäftsjahr 2010 wurden keine Neuemissionen oder Rückkäufe getätigt, auch waren keine Emissionen fällig. Folgende wesentliche hybride Kapitalinstrumente waren Ende 2010 im Umlauf:

| Laufzeitbeginn | Mio € | Mio Währung | Emittent                              | Zinssatz | Fälligkeit  |
|----------------|-------|-------------|---------------------------------------|----------|-------------|
| 2006           | 1 000 | 1 000 EUR   | Commerzbank Capital Funding Trust I   | 5,012    | unbefristet |
| 2006           | 1 000 | 1 000 EUR   | Commerzbank Aktiengesellschaft        | 6,932    | unbefristet |
| 2006           | 929   | 800 GBP     | Commerzbank Capital Funding Trust II  | 5,905    | unbefristet |
| 1999           | 748   | 1 000 USD   | Dresdner Capital LLC I                | 8,151    | 2031        |
| 2003           | 600   | 600 EUR     | Eurohypo Capital Funding Trust I      | 6,445    | unbefristet |
| 2006           | 300   | 300 EUR     | Commerzbank Capital Funding Trust III | 2,524    | unbefristet |
| 2005           | 300   | 300 EUR     | Eurohypo Capital Funding Trust II     | 3,486    | unbefristet |

Für das Geschäftsjahr 2010 fielen auf das Hybridkapital zu zahlende Zinsen in Höhe von 155 Mio Euro (Vorjahr: 203 Mio Euro) an. Das Hybridkapital ist Bestandteil des haftenden Eigenkapitals. Zinszahlungen erfolgen nach Maßgabe der maßgeblichen Emissionsbedingungen. Die Ansprüche der Inhaber hybrider

Instrumente auf Rückzahlung des Kapitals sind nachrangig gegenüber den Ansprüchen der Gläubiger der unter Nachrangigen Verbindlichkeiten und Genussrechtskapital ausgewiesenen Verbindlichkeiten.

#### (74) Zusammensetzung des Eigenkapitals

| Mio €                                  | 31.12.2010    | 31.12.2009    | Veränderung in % |
|----------------------------------------|---------------|---------------|------------------|
| a) Gezeichnetes Kapital                | 3 047         | 3 071         | -0,8             |
| b) Kapitalrücklage                     | 1 302         | 1 334         | -2,4             |
| c) Gewinnrücklagen                     | 9 345         | 7 878         | 18,6             |
| d) Stille Einlagen                     | 17 178        | 17 178        | 0,0              |
| Andere Rücklagen                       | -2 999        | -3 455        | -13,2            |
| e) Neubewertungsrücklage               | -1 731        | -1 755        | -1,4             |
| f) Rücklage aus Cash Flow Hedges       | -1 005        | -1 223        | -17,8            |
| g) Rücklage aus der Währungsumrechnung | -263          | -477          | -44,9            |
| <b>Gesamt vor Minderheitenanteilen</b> | <b>27 873</b> | <b>26 006</b> | <b>7,2</b>       |
| Minderheitenanteile                    | 785           | 570           | 37,7             |
| <b>Eigenkapital</b>                    | <b>28 658</b> | <b>26 576</b> | <b>7,8</b>       |

#### a) Gezeichnetes Kapital

Das Gezeichnete Kapital (Grundkapital) der Commerzbank Aktiengesellschaft besteht aus nennwertlosen Stückaktien mit einem rechnerischen Wert von 2,60 Euro. Die Aktien lauten auf den Inhaber.

|                                                               | Stückzahl            |
|---------------------------------------------------------------|----------------------|
| <b>Anzahl der im Umlauf befindlichen Aktien am 1.1.2010</b>   | <b>1 180 489 021</b> |
| zuzüglich: Eigene Aktien im Bestand am 31.12. des Vorjahres   | 863 905              |
| Kapitalerhöhung                                               | -                    |
| Ausgabe neuer Aktien                                          | -                    |
| <b>Anzahl der ausgegebenen Aktien am 31.12.2010</b>           | <b>1 181 352 926</b> |
| abzüglich: Eigene Aktien im Bestand am Bilanzstichtag         | 9 315 335            |
| <b>Anzahl der im Umlauf befindlichen Aktien am 31.12.2010</b> | <b>1 172 037 591</b> |

Vor Verrechnung der im Eigenbestand befindlichen eigenen Aktien belief sich das Gezeichnete Kapital auf 3 072 Mio Euro. Vorzugsrechte oder Beschränkungen in Bezug auf die Ausschüttung von Dividenden liegen bei der Commerzbank Aktiengesell-

schaft nicht vor. Alle ausgegebenen Aktien sind voll eingezahlt. Der Wert der ausgegebenen, im Umlauf befindlichen und genehmigten Aktien ergab sich wie folgt:

|                                                       | 31.12.2010     |                  | 31.12.2009     |                  |
|-------------------------------------------------------|----------------|------------------|----------------|------------------|
|                                                       | Mio €          | Stückzahl Tsd    | Mio €          | Stückzahl Tsd    |
| Ausgegebene Aktien                                    | 3 071,5        | 1 181 353        | 3 071,5        | 1 181 353        |
| ./. Eigene Aktien im Bestand                          | 24,2           | 9 315            | 2,2            | 864              |
| = im Umlauf befindliche Aktien                        | 3 047,3        | 1 172 038        | 3 069,3        | 1 180 489        |
| noch nicht ausgegebene Aktien aus Genehmigtem Kapital | 1 535,0        | 590 385          | 1 142,0        | 439 231          |
| <b>Gesamt</b>                                         | <b>4 582,3</b> | <b>1 762 423</b> | <b>4 211,3</b> | <b>1 619 720</b> |

Die Anzahl der autorisierten Aktien betrug 1 771 738 Tsd Stück (Vorjahr: 1 620 584 Tsd Stück). Der rechnerische Wert der autorisierten Aktien belief sich auf 4 606,5 Mio Euro (Vorjahr: 4 213,5 Mio Euro).

Wir hatten zum 31. Dezember 2010 im Konzern 10 774 Tsd Stück Aktien (Vorjahr: 10 821 Tsd Stück Aktien) als Pfand

genommen. Dies entspricht 0,9 % (Vorjahr: 0,9 %) der am Bilanzstichtag im Umlauf befindlichen Aktien.

Die Wertpapierhandelsgeschäfte in eigenen Aktien gemäß § 71 Abs. 1 Nr. 1 und Nr. 7 AktG stellten sich wie folgt dar:

|                                                       | Anzahl Aktien<br>Stück | Rechnerischer <sup>1</sup><br>Wert in Tsd € | Anteil am Grund-<br>kapital in % |
|-------------------------------------------------------|------------------------|---------------------------------------------|----------------------------------|
| Bestand am 31.12.2010                                 | 9 315 335              | 24 220                                      | 0,79                             |
| Höchster erworbener Bestand im Geschäftsjahr          | 9 782 622              | 25 435                                      | 0,83                             |
| Von der Kundschaft verpfändeter Bestand am 31.12.2010 | 10 773 955             | 28 012                                      | 0,92                             |
| Im Geschäftsjahr erworbene Aktien                     | 216 017 380            | 561 645                                     | –                                |
| Im Geschäftsjahr veräußerte Aktien                    | 207 565 950            | 539 671                                     | –                                |

<sup>1</sup> Rechnerischer Wert je Aktie 2,60 Euro.

Die Bank hat sich gegenüber dem Finanzmarktstabilisierungsfonds (SoFFin), vertreten durch die Finanzmarktstabilisierungsanstalt, verpflichtet, keine Aktien oder sonstigen Bestandteile der haftenden Eigenmittel der Bank (außer im Rahmen des § 71 Abs. 1 Nrn. 2, 4 (Einkaufskommission), 7 oder 8 AktG) selbst oder durch verbundene Unternehmen zurückzukaufen.

Im Rahmen unseres Kapitalmanagements haben wir im Januar 2011 unser Grundkapital um 10 % minus eine Aktie (118 135 291 Aktien) aus Genehmigtem Kapital unter Ausschluss des gesetzlichen Bezugsrechts der Aktionäre gegen Sacheinlage erhöht. Die neuen Aktien wurden vollständig gegen Einbringung von hybriden Eigenkapitalinstrumenten (Trust Preferred Securities) gezeichnet, die von Gesellschaften des Commerzbank-Konzerns begeben wurden. Der Nominalbetrag des zurückgegebenen Hybridkapitals beläuft sich auf 0,9 Mrd Euro und wirkt sich einmalig mit einem Ertrag von 0,3 Mrd Euro auf das Ergebnis vor Steuern im Konzern aus. Das Gezeichnete Kapital und die Kapitalrücklage erhöhen sich jeweils um 0,3 Mrd Euro. Es

ergeben sich keine spürbaren Auswirkungen auf die Kernkapitalquote.

Der SoFFin hat in der Folge einen Teil seiner Stillen Einlagen in Aktien gewandelt, um seine Beteiligungsquote an der Commerzbank (25 % plus eine Aktie) aufrecht zu erhalten. Damit werden Stille Einlagen im Nominalbetrag von 0,2 Mrd Euro in 39 378 430 Aktien aus dem in der Hauptversammlung 2009 geschaffenen Bedingten Kapital gewandelt.

Mit Durchführung der beiden Kapitalmaßnahmen im Jahr 2011 erhöht sich die Aktienanzahl der Commerzbank Aktiengesellschaft auf insgesamt 1 338 866 647 Aktien.

#### b) Kapitalrücklage

In der Kapitalrücklage werden neben Agiobeträgen aus der Ausgabe von Aktien auch beizulegende Zeitwerte von aktienbasierten Vergütungs-transaktionen ausgewiesen, für die ein Ausgleich in Eigenkapitalinstrumenten erfolgt, die aber noch nicht ausgeübt wurden. Außerdem sind die Beträge, die bei der Ausgabe von Schuldverschreibungen für Wandlungs- und Optionsrechte

|     |                                  |
|-----|----------------------------------|
| 204 | Gesamtergebnisrechnung           |
| 208 | Bilanz                           |
| 210 | Eigenkapitalveränderungsrechnung |
| 212 | Kapitalflussrechnung             |
| 214 | Anhang (Notes)                   |
| 370 | Bestätigungsvermerk              |

zum Erwerb von Anteilen erzielt wurden, in der Kapitalrücklage enthalten.

### c) Gewinnrücklagen

Die Gewinnrücklagen untergliedern sich in die gesetzliche Rücklage und andere Rücklagen. In der gesetzlichen Rücklage sind nach nationalem Recht zwingend zu bildende Rücklagen erfasst; die hier eingestellten Beträge unterliegen im Einzelabschluss einem Ausschüttungsverbot. Der Gesamtbetrag der in der Bilanz ausgewiesenen Gewinnrücklagen resultierte aus anderen Gewinnrücklagen von 9 345 Mio Euro (Vorjahr: 7 878 Mio Euro). Gesetzliche Rücklagen waren weder zum 31. Dezember 2010 noch zum 31. Dezember 2009 vorhanden.

### d) Stille Einlagen

Die Einlagen der Stillen Gesellschaft Finanzmarktstabilisierungsfonds (SoFFin), vertreten durch die Finanzmarktstabilisierungsanstalt, in Höhe von je 8,2 Mrd Euro wurden zum 31. Dezember 2008 und 4. Juni 2009 erbracht. Grundlage dieser Stillen Einlagen bildet der Vertrag vom 19. Dezember 2008 sowie die Ergänzungsvereinbarung vom 3. Juni 2009 über die Errichtung einer Stillen Gesellschaft zwischen dem Finanzmarktstabilisierungsfonds, vertreten durch die Finanzmarktstabilisierungsanstalt, und der Commerzbank Aktiengesellschaft. Die Commerzbank Aktiengesellschaft hat sich gegenüber dem SoFFin verpflichtet, im Geschäftsjahr vom 1. Januar 2009 bis zum 31. Dezember 2009 sowie im Geschäftsjahr vom 1. Januar 2010 bis zum 31. Dezember 2010 für das jeweilige vorangegangene Geschäftsjahr keine Dividende zu zahlen. Die Stillen Einlagen werden mit 9 % jährlich verzinst und zu 100 % als Kernkapital (Tier 1) angerechnet. Eine Rückzahlung der Stillen Einlagen wird zum Nominalwert erfolgen. In Jahren mit Dividendenzahlungen steigt der Zinssatz der Stillen Einlagen. Der dann zu zahlende Zinsaufschlag ergibt sich aus der Gesamthöhe der ausgeschütteten Bardividende. Für je rund 5,9 Mio Euro Bardividende erhöht sich der Zinssatz so um 0,01 Prozentpunkte.

An einem Bilanzverlust nimmt der SoFFin im Verhältnis des Buchwerts der Stillen Einlage zum Gesamtbuchwert aller am Bilanzverlust teilnehmenden Haftkapitalanteile (§ 10 Abs. 2a, 4 und 5 KWG) der Gesellschaft teil. Nach einer Herabsetzung wird die Stille Einlage in den der Herabsetzung folgenden Geschäftsjahren bis zur vollständigen Höhe des Einlagennennbetrags wieder zugeschrieben, soweit hierdurch kein Bilanzverlust entstehen oder erhöht würde.

Darüber hinaus schlossen die Commerzbank Aktiengesellschaft und die Allianz SE am 3. Juni 2009 einen Vertrag über die Errichtung einer Stillen Gesellschaft, auf dessen Basis die

Allianz mittels einer Tochtergesellschaft eine Stille Einlage in Höhe von 750 Mio Euro in die Commerzbank Aktiengesellschaft einbrachte. Die Stille Einlage ist mit einer Gewinnbeteiligung ausgestattet, die zum einen aus einer auf den Einlagennennbetrag bezogenen Festverzinsung in Höhe von 9 % pro anno und zum anderen aus einer dividendenabhängigen Zusatzvergütung in Höhe von 0,01 % pro anno für je rund 5,9 Mio Euro Dividendensumme besteht.

Die Stillen Einlagen sind nach IFRS innerhalb des Eigenkapitals gesondert zu bilanzieren, die Vergütung der Stillen Einlagen wird ohne Berührung der Gewinn- und Verlustrechnung direkt mit dem Eigenkapital verrechnet. Die Vergütung erfolgt nur, wenn ein Bilanzgewinn im Einzelabschluss der Commerzbank Aktiengesellschaft (nach HGB) vorliegt. Für 2010 wurden die Voraussetzungen für eine Vergütung nicht erfüllt und somit war keine Vergütung zu zahlen (Vorjahr: -).

### e) Neubewertungsrücklage

In die Neubewertungsrücklage werden die Ergebnisse aus der Bewertung der Finanzanlagen zum beizulegenden Zeitwert (Fair Value) nach Berücksichtigung latenter Steuern eingestellt. Eine erfolgswirksame Erfassung der Gewinne oder Verluste erfolgt erst, wenn der Vermögenswert veräußert beziehungsweise wertgemindert worden ist.

### f) Rücklage aus Cash Flow Hedges

Die aus Sicherungsinstrumenten im Rahmen von Cash Flow Hedges ermittelten Bewertungsergebnisse aus dem effektiven Teil der Absicherungen sind nach Berücksichtigung latenter Steuern in diesem Eigenkapitalposten ausgewiesen. Im Geschäftsjahr 2009 haben wir bis auf geringfügige Ausnahmen das Cash Flow Hedge Accounting beendet und nutzen für das Zinsrisikomanagement seitdem Micro und Portfolio Fair Value Hedge Accounting. Ab dem Umstellungszeitpunkt werden die im Eigenkapital ausgewiesene Rücklage aus Cash Flow Hedges sowie die zugehörigen Sicherungsgeschäfte über die Restlaufzeit der Sicherungsgeschäfte im Zinsüberschuss amortisiert. Ein Ergebniseffekt entsteht dabei nicht.

### g) Rücklage aus der Währungsumrechnung

Die Rücklage aus der Währungsumrechnung beinhaltet Umrechnungsgewinne und -verluste, die im Rahmen der Kapitalkonsolidierung entstanden sind. Einbezogen wurden dabei Wechselkursdifferenzen aus der Konsolidierung von Tochterunternehmen und at-Equity-bewerteten Unternehmen.

## (75) Bedingtes Kapital

Das Bedingte Kapital ist für die Ausgabe von Wandel- oder Optionsschuldverschreibungen sowie Genussrechten mit Wandlungs- oder Optionsrechten vorgesehen. Die Entwicklung des Bedingten Kapitals stellt sich wie folgt dar:

| Mio €                                    | Bedingtes Kapital<br>1.1.2010 | Zugänge      | Verfall/<br>Verbrauch | Bedingtes Kapital <sup>1</sup><br>31.12.2010 | darunter:                        |                 |
|------------------------------------------|-------------------------------|--------------|-----------------------|----------------------------------------------|----------------------------------|-----------------|
|                                          |                               |              |                       |                                              | belegtes<br>Bedingtes<br>Kapital | freie<br>Linien |
| Wandel-/Optionsanleihen/<br>Genussrechte | 1 222                         | 1 058        | 832                   | 1 448                                        | –                                | 1 448           |
| <b>Gesamt</b>                            | <b>1 222</b>                  | <b>1 058</b> | <b>832</b>            | <b>1 448</b>                                 | <b>–</b>                         | <b>1 448</b>    |

<sup>1</sup> Das Bedingte Kapital dient in Höhe von 746 MioEuro der Gewährung von Aktien bei Ausübung von Umtauschrechten, die dem nach dem Finanzmarktstabilisierungsfondsgesetz errichteten Finanzmarktstabilisierungsfonds, vertreten durch die Finanzmarktstabilisierungsanstalt, als stillem Gesellschafter der Gesellschaft gewährt wurden. Die bedingte Kapitalerhöhung wird nur insoweit durchgeführt, als der Finanzmarktstabilisierungsfonds von dem Umtauschrecht Gebrauch macht.

Das Grundkapital der Gesellschaft ist aufgrund des Beschlusses der Hauptversammlung vom 19. Mai 2010 um bis zu 702 000 000,00 Euro eingeteilt in 270 000 000 auf den Inhaber lautende Stückaktien, bedingt erhöht (Bedingtes Kapital 2010/I). Die bedingte Kapitalerhöhung wird nur insoweit durchgeführt, wie die Inhaber beziehungsweise Gläubiger von Wandelschuldverschreibungen oder Wandelgenussrechten oder von Optionscheinen aus Optionsschuldverschreibungen oder Optionsgenussrechten, die von der Commerzbank Aktiengesellschaft oder unmittelbaren oder mittelbaren Mehrheitsbeteiligungsgesellschaften der Commerzbank Aktiengesellschaft (Konzernunternehmen im Sinne von § 18 Absatz 1 AktG) auf der Grundlage des Ermächtigungsbeschlusses der Hauptversammlung vom 19. Mai 2010 (Ermächtigung 2010) bis zum 18. Mai 2015 ausgegeben oder garantiert werden, von ihren Wandlungs- oder Optionsrechten Gebrauch machen oder ihre entsprechenden Wandlungs- oder Optionspflichten erfüllen und nicht andere Erfüllungsformen gewählt werden.

Das Grundkapital der Gesellschaft ist aufgrund des Beschlusses der ordentlichen Hauptversammlung im Mai 2009 um bis zu 390 000 000,00 Euro, eingeteilt in bis zu 150 000 000 auf den

Inhaber lautende Stückaktien, bedingt erhöht (Bedingtes Kapital 2009). Die bedingte Kapitalerhöhung dient der Gewährung von Aktien bei Ausübung von Umtauschrechten, die dem nach dem Finanzmarktstabilisierungsfondsgesetz errichteten Finanzmarktstabilisierungsfonds, vertreten durch die Finanzmarktstabilisierungsanstalt, als stillem Gesellschafter der Gesellschaft gewährt wurden. Die bedingte Kapitalerhöhung wird nur insoweit durchgeführt, wie der Finanzmarktstabilisierungsfonds von dem Umtauschrecht Gebrauch macht.

Das Grundkapital der Gesellschaft ist aufgrund der Beschlüsse der ordentlichen Hauptversammlung im Mai 2010 um bis zu 355 666 667,20 Euro eingeteilt in bis zu 136 794 872 auf den Inhaber lautende Stückaktien, bedingt erhöht (Bedingtes Kapital 2010/II). Die bedingte Kapitalerhöhung dient der Gewährung von Aktien bei Ausübung von Umtauschrechten, die dem nach dem Finanzmarktstabilisierungsfondsgesetz errichteten Finanzmarktstabilisierungsfonds, vertreten durch die Finanzmarktstabilisierungsanstalt, als stillem Gesellschafter der Gesellschaft gewährt wurden. Die bedingte Kapitalerhöhung wird nur insoweit durchgeführt, wie der Finanzmarktstabilisierungsfonds von dem Umtauschrecht Gebrauch macht.



|     |                                  |
|-----|----------------------------------|
| 204 | Gesamtergebnisrechnung           |
| 208 | Bilanz                           |
| 210 | Eigenkapitalveränderungsrechnung |
| 212 | Kapitalflussrechnung             |
| 214 | Anhang (Notes)                   |
| 370 | Bestätigungsvermerk              |

## (76) Genehmigtes Kapital

| Datum der Beschlussfassung | Ursprünglicher Betrag<br>Mio € | In Vorjahren für Kapitalerhöhungen verbraucht<br>Mio € | 2010 für Kapitalerhöhungen verbraucht<br>Mio € | Aufhebung gemäß Satzung<br>Mio € | verbleibender Betrag<br>Mio € | Befristung |
|----------------------------|--------------------------------|--------------------------------------------------------|------------------------------------------------|----------------------------------|-------------------------------|------------|
| 17.5.2006                  | 12                             | –                                                      | –                                              | 12                               | –                             | 30.4.2011  |
| 15./16.5.2009              | 670                            | –                                                      | –                                              | 670                              | –                             | 14.5.2014  |
| 15./16.5.2009              | 460                            | –                                                      | –                                              | 460                              | –                             | 14.5.2014  |
| 18.5.2010                  | 1 535                          | –                                                      | –                                              | –                                | 1 535                         | 18.5.2015  |
| <b>Gesamt</b>              | <b>2 677</b>                   | <b>–</b>                                               | <b>–</b>                                       | <b>1 142</b>                     | <b>1 535</b>                  |            |

Der Vorstand ist ermächtigt, das Grundkapital der Gesellschaft bis zum 18. Mai 2015 mit Zustimmung des Aufsichtsrats durch Ausgabe neuer Stückaktien gegen Bar- oder Sacheinlagen einmalig oder mehrfach, jedoch insgesamt höchstens um 1 535 000 000,00 Euro zu erhöhen (Genehmigtes Kapital 2010). Dabei ist den Aktionären grundsätzlich ein Bezugsrecht einzuräumen; das gesetzliche Bezugsrecht kann auch in der Weise eingeräumt werden, dass die neuen Aktien von einem Kreditinstitut oder einem Konsortium von Kreditinstituten mit der Verpflichtung übernommen werden, sie den Aktionären der Commerzbank Aktiengesellschaft zum Bezug anzubieten. Der Vorstand ist jedoch ermächtigt, mit Zustimmung des Aufsichtsrats das Bezugsrecht in folgenden Fällen auszuschließen:

- um Spitzenbeträge vom Bezugsrecht auszunehmen;
- um in dem Umfang, in dem es erforderlich ist, Inhabern von durch die Commerzbank Aktiengesellschaft oder durch unmittelbare oder mittelbare Mehrheitsbeteiligungsgesellschaften der Commerzbank Aktiengesellschaft (Konzernunternehmen im Sinne von § 18 Absatz 1 AktG) ausgegebenen oder noch auszugebenden Wandlungs- oder Optionsrechten ein Bezugsrecht einzuräumen, wie es ihnen nach Ausübung des Wandlungs- oder Optionsrechts oder nach Erfüllung einer entsprechenden Wandlungs- oder Optionspflicht zustehen würde;
- um in Höhe von bis zu 12 000 000,00 Euro Belegschaftsaktien an Mitarbeiter der Commerzbank Aktiengesellschaft und unmittelbarer oder mittelbarer Mehrheitsbeteiligungsgesellschaften der Commerzbank Aktiengesellschaft (Konzernunternehmen im Sinne von § 18 Absatz 1 AktG) auszugeben;
- um das Grundkapital gegen Sacheinlagen zu erhöhen;
- bei Kapitalerhöhungen gegen Bareinlagen, wenn der Ausgabebetrag der neuen Aktien den Börsenpreis für Aktien der Gesellschaft gleicher Ausstattung im Zeitpunkt der Festlegung des Ausgabetrags nicht wesentlich unterschreitet. Die unter Ausschluss des Bezugsrechts gemäß §§ 203 Absatz 1, 186 Absatz 3 Satz 4 AktG aufgrund dieser Ermächtigung ausgegebenen Aktien dürfen insgesamt 10 % des Grundkapitals der Gesellschaft im Zeitpunkt des Wirksamwerdens oder – falls dieser Wert geringer ist – im Zeitpunkt der Ausübung der vorliegenden Ermächtigung nicht überschreiten. Die Höchstgrenze von 10 % des Grundkapitals vermindert sich um den anteiligen Betrag des Grundkapitals, der auf diejenigen eigenen Aktien der Gesellschaft entfällt, die während der Laufzeit des Genehmigten Kapitals 2010 unter Ausschluss des Bezugsrechts der Aktionäre gemäß §§ 71 Absatz 1 Nr. 8 Satz 5, 186 Absatz 3 Satz 4 AktG veräußert werden. Die Höchstgrenze vermindert sich ferner um den anteiligen Betrag des Grundkapitals, der auf diejenigen Aktien entfällt, die zur Bedienung von Options- oder Wandelschuldverschreibungen mit Options- oder Wandlungsrecht oder mit Options- oder Wandlungspflicht auszugeben sind, sofern die Schuldverschreibungen während der Laufzeit des Genehmigten Kapitals 2010 unter Ausschluss des Bezugsrechts in entsprechender Anwendung von § 186 Absatz 3 Satz 4 AktG ausgegeben werden.

Der Vorstand ist ermächtigt, die weiteren Einzelheiten der Kapitalerhöhung und ihrer Durchführung festzulegen. Der letztjährige § 4 Absätze 3, 6 und 7 der Satzung wurde auf Beschluss der Hauptversammlung vom 19. Mai 2010 zum Zwecke der Schaffung einer einheitlichen neuen Ermächtigung gestrichen.

**(77) Fremdwährungsvolumina**

Zum 31. Dezember 2010 wurden im Konzern folgende Vermögenswerte und Verbindlichkeiten (ohne Marktwerte aus Derivaten) in fremder Währung bilanziert:

| Mio €                                        | 31.12.2010    |               |               |               | Gesamt         | 31.12.2009 <sup>1</sup> | Veränderung<br>in % |
|----------------------------------------------|---------------|---------------|---------------|---------------|----------------|-------------------------|---------------------|
|                                              | USD           | PLN           | GBP           | Andere        |                | Gesamt                  |                     |
| Barreserve                                   | 3 914         | 571           | 48            | 1 234         | 5 767          | 5 379                   | 7,2                 |
| Forderungen an Kreditinstitute               | 15 336        | 333           | 1 894         | 15 088        | 32 651         | 21 663                  | 50,7                |
| Forderungen an Kunden                        | 45 624        | 6 524         | 16 029        | 21 721        | 89 898         | 91 921                  | -2,2                |
| Handelsaktiva                                | 5 316         | 651           | 3 975         | 179           | 10 121         | 19 041                  | -46,8               |
| Finanzanlagen                                | 19 008        | 4 934         | 3 341         | 3 896         | 31 179         | 35 432                  | -12,0               |
| Andere Bilanzposten                          | 644           | 632           | 615           | 404           | 2 295          | 15 742                  | -85,4               |
| <b>Fremdwährungsvermögen</b>                 | <b>89 842</b> | <b>13 645</b> | <b>25 902</b> | <b>42 522</b> | <b>171 911</b> | <b>189 178</b>          | <b>-9,1</b>         |
| Verbindlichkeiten gegenüber Kreditinstituten | 37 846        | 992           | 7 860         | 6 356         | 53 054         | 42 799                  | 24,0                |
| Verbindlichkeiten gegenüber Kunden           | 29 096        | 9 891         | 3 864         | 5 428         | 48 279         | 30 009                  | 60,9                |
| Verbriefte Verbindlichkeiten                 | 20 030        | 423           | 2 024         | 8 033         | 30 510         | 42 170                  | -27,6               |
| Handelsspassiva                              | 52            | -             | 7 132         | 52            | 7 236          | 21 723                  | -66,7               |
| Andere Bilanzposten                          | 1 255         | 251           | 1 748         | 1 092         | 4 346          | 25 715                  | -83,1               |
| <b>Fremdwährungsverbindlichkeiten</b>        | <b>88 279</b> | <b>11 557</b> | <b>22 628</b> | <b>20 961</b> | <b>143 425</b> | <b>162 416</b>          | <b>-11,7</b>        |

<sup>1</sup> Nach Umgliederung aus den Verbrieften Verbindlichkeiten in die Handelsspassiva (siehe Note 2).

Den offenen Bilanzposten außerhalb des Handelsbereichs standen entsprechende laufzeitkongruente Devisentermingeschäfte oder Währungsswaps gegenüber.

|     |                                  |
|-----|----------------------------------|
| 204 | Gesamtergebnisrechnung           |
| 208 | Bilanz                           |
| 210 | Eigenkapitalveränderungsrechnung |
| 212 | Kapitalflussrechnung             |
| 214 | Anhang (Notes)                   |
| 370 | Bestätigungsvermerk              |

## Erläuterungen zu Finanzinstrumenten

### (78) Derivative Geschäfte

Die nachstehenden Tabellen stellen das Geschäft des Commerzbank-Konzerns mit derivativen Finanzinstrumenten zum Bilanzstichtag dar.

Bei einem Derivat handelt es sich um ein Finanzinstrument, dessen Wert von einem sogenannten Basiswert abhängt. Dieser Basiswert kann beispielsweise ein Zinssatz, ein Warenpreis, ein Aktien-, Währungs- oder Anleihenkurs sein. Dabei erfordert das Finanzinstrument keine oder, im Vergleich zu anderen Vertragsformen mit ähnlicher Reaktion auf Marktbedingungsänderungen, nur geringe Anschaffungskosten. Der Ausgleich erfolgt zu einem späteren Zeitpunkt.

Bei dem größten Teil der Derivatetransaktionen handelt es sich um OTC-Derivate, bei denen Nominalbetrag, Laufzeit und Preis jeweils individuell zwischen der Bank und ihren Gegenparteien ausgehandelt werden. Die Bank schließt Derivate jedoch auch an regulierten Börsen ab. Es handelt sich hier um standardisierte Kontrakte mit standardisierten Nominalbeträgen und Erfüllungsterminen.

Dabei gibt der Nominalbetrag das von der Bank gehandelte Geschäftsvolumen an. Die in den Tabellen aufgeführten positiven beziehungsweise negativen Marktwerte sind dagegen die Aufwendungen, die der Bank beziehungsweise der Gegenpartei für den Ersatz der ursprünglich geschlossenen Kontrakte durch wirtschaftlich gleichwertige Geschäfte entstehen würden. Ein positiver Marktwert gibt damit aus Sicht der Bank das maximale, potenzielle kontrahentenbezogene Adressenausfallrisiko an, das am Bilanzstichtag aus derivativen Geschäften bestanden hat.

Zur Minimierung (Reduzierung) sowohl des ökonomischen als auch des regulatorischen Kreditrisikos aus diesen Instrumenten schließt unsere Rechtsabteilung Rahmenverträge (zweiseitige Aufrechnungsvereinbarungen) mit unseren Geschäftspartnern ab (wie beispielsweise 1992 ISDA Master Agreement Multicurrency Cross Border; deutscher Rahmenvertrag für Finanztermingeschäfte). Durch den Abschluss derartiger zweiseitiger Aufrechnungsvereinbarungen können die positiven und negativen Marktwerte der unter einem Rahmenvertrag einbezogenen derivativen Kontrakte miteinander verrechnet, sowie die regulatorischen Zuschläge für zukünftige Risiken (Add-ons) dieser Produk-

te verringert werden. Im Rahmen dieses Nettingprozesses reduziert sich das Kreditrisiko auf eine einzige Nettoforderung gegenüber dem Vertragspartner (Close-out-Netting).

Sowohl für die regulatorischen Meldungen als auch für die interne Messung und Überwachung unserer Kreditengagements setzen wir derartige risikoreduzierenden Techniken nur dann ein, wenn wir sie bei Insolvenz des Geschäftspartners in der jeweiligen Jurisdiktion auch für durchsetzbar halten. Zur Prüfung der Durchsetzbarkeit nutzen wir die von verschiedenen internationalen Kanzleien hierfür erstellten Rechtsgutachten.

Analog zu den Rahmenverträgen gehen wir mit unseren Geschäftspartnern auch Sicherheitenvereinbarungen ein (zum Beispiel Besicherungsanhang für Finanztermingeschäfte, Credit Support Annex), um die sich nach Netting ergebende Nettoforderung/-verbindlichkeit abzusichern (Erhalt oder Stellung von Sicherheiten). Dieses Sicherheitenmanagement führt in der Regel zur Kreditrisikominderung durch zeitnahe (meist tägliche oder wöchentliche) Bewertung und Anpassung der Kundenengagements.

Die folgende Übersicht zeigt neben den Nominalbeträgen und Marktwerten des Derivategeschäftes, die nach zinsabhängigen, währungsabhängigen und von sonstigen Preisrisiken abhängigen Kontrakten aufgegliedert sind, auch die Laufzeitstruktur dieser Geschäfte. Als Marktwerte sind die Summen der positiven und negativen Beträge pro Kontrakt zunächst ohne Kürzung von Sicherheiten und ohne Berücksichtigung etwaiger Nettingvereinbarungen angegeben, da diese produktübergreifend wirken. Bei verkauften Optionen ergeben sich definitionsgemäß keine positiven Marktwerte. Der Nominalbetrag stellt das Bruttovolumen aller Käufe und Verkäufe dar. Die aufgeführte Fristengliederung der Geschäfte beruht dabei auf den Restlaufzeiten, wobei auf die Kontraktlaufzeit und nicht auf die Laufzeit des Underlyings abgestellt wird. Darüber hinaus zeigt die folgende Übersicht aber auch die sich aus dem in Note 1 beschriebenen saldierten Ausweis in der Bilanz ergebenden Marktwerte der Derivate. Das Nettingvolumen zum 31. Dezember 2010 betrug 207 088 Mio Euro (Vorjahr: 136 763 Mio Euro).

| 31.12.2010                                     |                   | Nominalbetrag<br>Restlaufzeiten |                             |                            |                        |                   | Marktwert      |                |
|------------------------------------------------|-------------------|---------------------------------|-----------------------------|----------------------------|------------------------|-------------------|----------------|----------------|
| Mio €                                          | täglich<br>fällig | bis drei<br>Monate              | drei Monate<br>bis ein Jahr | ein Jahr bis<br>fünf Jahre | mehr als<br>fünf Jahre | Summe             | positiv        | negativ        |
| <b>Fremdwährungsabhängige Termingeschäfte</b>  |                   |                                 |                             |                            |                        |                   |                |                |
| OTC-Produkte                                   | 4                 | 556 439                         | 269 677                     | 229 003                    | 128 309                | 1 183 432         | 18 960         | 19 716         |
| Devisenkassa und -<br>termingeschäfte          | -                 | 459 796                         | 124 259                     | 35 974                     | 1 011                  | 621 040           | 7 760          | 7 471          |
| Zins-/ Währungsswaps                           | -                 | 20 690                          | 56 431                      | 153 471                    | 114 166                | 344 758           | 8 391          | 9 481          |
| Devisenoptionen – Käufe                        | -                 | 34 420                          | 41 393                      | 18 545                     | 6 735                  | 101 093           | 2 560          | -              |
| Devisenoptionen – Verkäufe                     | -                 | 40 779                          | 46 507                      | 19 363                     | 5 328                  | 111 977           | -              | 2 586          |
| Sonstige Devisenkontrakte                      | 4                 | 754                             | 1 087                       | 1 650                      | 1 069                  | 4 564             | 249            | 178            |
| Börsengehandelte Produkte                      | -                 | 2 943                           | 189                         | -                          | -                      | 3 132             | -              | -              |
| Devisenfutures                                 | -                 | 2 943                           | 189                         | -                          | -                      | 3 132             | -              | -              |
| Devisenoptionen                                | -                 | -                               | -                           | -                          | -                      | -                 | -              | -              |
| <b>Gesamt</b>                                  | <b>4</b>          | <b>559 382</b>                  | <b>269 866</b>              | <b>229 003</b>             | <b>128 309</b>         | <b>1 186 564</b>  | <b>18 960</b>  | <b>19 716</b>  |
| <b>Zinsabhängige Termingeschäfte</b>           |                   |                                 |                             |                            |                        |                   |                |                |
| OTC-Produkte                                   | 23                | 935 289                         | 1 659 611                   | 3 783 989                  | 3 560 026              | 9 938 938         | 308 399        | 316 541        |
| Forward Rate Agreements                        | -                 | 115 631                         | 492 410                     | 3 108                      | -                      | 611 149           | 261            | 295            |
| Zinsswaps                                      | -                 | 809 751                         | 1 119 744                   | 3 657 641                  | 3 383 598              | 8 970 734         | 298 659        | 306 996        |
| Zinsoptionen – Käufe                           | -                 | 2 357                           | 26 445                      | 58 615                     | 74 552                 | 161 969           | 6 820          | -              |
| Zinsoptionen – Verkäufe                        | -                 | 3 335                           | 18 794                      | 56 266                     | 93 894                 | 172 289           | -              | 7 052          |
| Sonstige Zinskontrakte                         | 23                | 4 215                           | 2 218                       | 8 359                      | 7 982                  | 22 797            | 2 659          | 2 198          |
| Börsengehandelte Produkte                      | -                 | 1 415                           | 125 290                     | 6 650                      | 4 128                  | 137 483           | -              | -              |
| Zinsfutures                                    | -                 | 582                             | 73 385                      | 6 489                      | 4 128                  | 84 584            | -              | -              |
| Zinsoptionen                                   | -                 | 833                             | 51 905                      | 161                        | -                      | 52 899            | -              | -              |
| <b>Gesamt</b>                                  | <b>23</b>         | <b>936 704</b>                  | <b>1 784 901</b>            | <b>3 790 639</b>           | <b>3 564 154</b>       | <b>10 076 421</b> | <b>308 399</b> | <b>316 541</b> |
| <b>Sonstige Termingeschäfte</b>                |                   |                                 |                             |                            |                        |                   |                |                |
| OTC-Produkte                                   | 1 436             | 22 923                          | 51 038                      | 167 423                    | 24 788                 | 267 608           | 8 433          | 10 295         |
| Strukturierte Aktien-/<br>Index-Produkte       | 1 433             | 9 930                           | 12 237                      | 14 146                     | 1 837                  | 39 583            | 1 977          | 2 645          |
| Aktienoptionen – Käufe                         | -                 | 2 064                           | 9 756                       | 8 823                      | 349                    | 20 992            | 2 148          | -              |
| Aktienoptionen – Verkäufe                      | -                 | 2 820                           | 12 754                      | 11 947                     | 993                    | 28 514            | -              | 3 158          |
| Kreditderivate                                 | -                 | 3 534                           | 13 800                      | 129 526                    | 21 503                 | 168 363           | 3 612          | 3 830          |
| Edelmetallgeschäfte                            | 3                 | 4 087                           | 1 412                       | 1 121                      | -                      | 6 623             | 308            | 125            |
| Sonstige Geschäfte                             | -                 | 488                             | 1 079                       | 1 860                      | 106                    | 3 533             | 388            | 537            |
| Börsengehandelte Produkte                      | -                 | 27 731                          | 50 086                      | 38 616                     | 1 467                  | 117 900           | -              | -              |
| Aktienfutures                                  | -                 | 7 043                           | 451                         | 15                         | 12                     | 7 521             | -              | -              |
| Aktienoptionen                                 | -                 | 16 314                          | 43 640                      | 36 483                     | 1 455                  | 97 892            | -              | -              |
| Sonstige Futures                               | -                 | 2 350                           | 1 970                       | 840                        | -                      | 5 160             | -              | -              |
| Sonstige Optionen                              | -                 | 2 024                           | 4 025                       | 1 278                      | -                      | 7 327             | -              | -              |
| <b>Gesamt</b>                                  | <b>1 436</b>      | <b>50 654</b>                   | <b>101 124</b>              | <b>206 039</b>             | <b>26 255</b>          | <b>385 508</b>    | <b>8 433</b>   | <b>10 295</b>  |
| <b>Summe aller schwebenden Termingeschäfte</b> |                   |                                 |                             |                            |                        |                   |                |                |
| OTC-Produkte                                   | 1 463             | 1 514 651                       | 1 980 326                   | 4 180 415                  | 3 713 123              | 11 389 978        | 335 792        | 346 552        |
| Börsengehandelte Produkte                      | -                 | 32 089                          | 175 565                     | 45 266                     | 5 595                  | 258 515           | -              | -              |
| <b>Gesamt</b>                                  | <b>1 463</b>      | <b>1 546 740</b>                | <b>2 155 891</b>            | <b>4 225 681</b>           | <b>3 718 718</b>       | <b>11 648 493</b> | <b>335 792</b> | <b>346 552</b> |
| <b>Nettoausweis in der Bilanz</b>              |                   |                                 |                             |                            |                        |                   | <b>128 704</b> | <b>139 464</b> |

|     |                                  |
|-----|----------------------------------|
| 204 | Gesamtergebnisrechnung           |
| 208 | Bilanz                           |
| 210 | Eigenkapitalveränderungsrechnung |
| 212 | Kapitalflussrechnung             |
| 214 | Anhang (Notes)                   |
| 370 | Bestätigungsvermerk              |

| 31.12.2009                                     | Nominalbetrag<br>Restlaufzeiten |                                                                               |                       |                    | Marktwert      |                |
|------------------------------------------------|---------------------------------|-------------------------------------------------------------------------------|-----------------------|--------------------|----------------|----------------|
|                                                | Mio €                           | täglich<br>fällig, bis<br>drei Monate<br>sowie drei<br>Monate bis<br>ein Jahr | ein bis fünf<br>Jahre | über fünf<br>Jahre | Summe          | positiv        |
| <b>Fremdwährungsabhängige Termingeschäfte</b>  |                                 |                                                                               |                       |                    |                |                |
| OTC-Produkte                                   | 569 568                         | 210 591                                                                       | 94 331                | 874 490            | 18 121         | 17 357         |
| Devisenkassa und -termingeschäfte              | 363 697                         | 28 683                                                                        | 669                   | 393 049            | 5 677          | 6 692          |
| Zins-/ Währungsswaps                           | 84 856                          | 144 436                                                                       | 83 462                | 312 754            | 8 815          | 7 795          |
| Devisenoptionen – Käufe                        | 58 077                          | 17 807                                                                        | 5 458                 | 81 342             | 3 417          | –              |
| Devisenoptionen – Verkäufe                     | 61 304                          | 19 417                                                                        | 3 657                 | 84 378             | –              | 2 687          |
| Sonstige Devisenkontrakte                      | 1 634                           | 248                                                                           | 1 085                 | 2 967              | 212            | 183            |
| Börsengehandelte Produkte                      | 1 855                           | –                                                                             | –                     | 1 855              | –              | –              |
| Devisenfutures                                 | 1 855                           | –                                                                             | –                     | 1 855              | –              | –              |
| Devisenoptionen                                | –                               | –                                                                             | –                     | –                  | –              | –              |
| <b>Gesamt</b>                                  | <b>571 423</b>                  | <b>210 591</b>                                                                | <b>94 331</b>         | <b>876 345</b>     | <b>18 121</b>  | <b>17 357</b>  |
| <b>Zinsabhängige Termingeschäfte</b>           |                                 |                                                                               |                       |                    |                |                |
| OTC-Produkte                                   | 2 953 987                       | 4 062 581                                                                     | 3 777 029             | 10 793 597         | 284 970        | 289 293        |
| Forward Rate Agreements                        | 770 675                         | 1 894                                                                         | –                     | 772 569            | 398            | 399            |
| Zinsswaps                                      | 2 105 395                       | 3 921 755                                                                     | 3 638 619             | 9 665 769          | 279 452        | 281 937        |
| Zinsoptionen – Käufe                           | 34 156                          | 62 963                                                                        | 55 171                | 152 290            | 4 844          | –              |
| Zinsoptionen – Verkäufe                        | 42 526                          | 69 708                                                                        | 80 447                | 192 681            | –              | 6 334          |
| Sonstige Zinskontrakte                         | 1 235                           | 6 261                                                                         | 2 792                 | 10 288             | 276            | 623            |
| Börsengehandelte Produkte                      | 249 123                         | 8 414                                                                         | 1 455                 | 258 992            | –              | –              |
| Zinsfutures                                    | 184 415                         | 8 123                                                                         | 1 068                 | 193 606            | –              | –              |
| Zinsoptionen                                   | 64 708                          | 291                                                                           | 387                   | 65 386             | –              | –              |
| <b>Gesamt</b>                                  | <b>3 203 110</b>                | <b>4 070 995</b>                                                              | <b>3 778 484</b>      | <b>11 052 589</b>  | <b>284 970</b> | <b>289 293</b> |
| <b>Sonstige Termingeschäfte</b>                |                                 |                                                                               |                       |                    |                |                |
| OTC-Produkte                                   | 170 164                         | 447 984                                                                       | 71 942                | 690 090            | 17 331         | 19 830         |
| Strukturierte Aktien-/Index-Produkte           | 15 003                          | 14 074                                                                        | 2 610                 | 31 687             | 929            | 2 093          |
| Aktienoptionen – Käufe                         | 28 049                          | 11 795                                                                        | 1 637                 | 41 481             | 6 035          | –              |
| Aktienoptionen – Verkäufe                      | 32 024                          | 18 081                                                                        | 2 485                 | 52 590             | –              | 5 650          |
| Kreditderivate                                 | 88 225                          | 400 473                                                                       | 65 150                | 553 848            | 9 494          | 10 883         |
| Edelmetallgeschäfte                            | 5 797                           | 2 189                                                                         | –                     | 7 986              | 150            | 362            |
| Sonstige Geschäfte                             | 1 066                           | 1 372                                                                         | 60                    | 2 498              | 723            | 842            |
| Börsengehandelte Produkte                      | 104 748                         | 59 050                                                                        | 2 141                 | 165 939            | –              | –              |
| Aktienfutures                                  | 6 300                           | –                                                                             | –                     | 6 300              | –              | –              |
| Aktienoptionen                                 | 88 322                          | 53 495                                                                        | 2 141                 | 143 958            | –              | –              |
| Sonstige Futures                               | 3 795                           | 1 306                                                                         | –                     | 5 101              | –              | –              |
| Sonstige Optionen                              | 6 331                           | 4 249                                                                         | –                     | 10 580             | –              | –              |
| <b>Gesamt</b>                                  | <b>274 912</b>                  | <b>507 034</b>                                                                | <b>74 083</b>         | <b>856 029</b>     | <b>17 331</b>  | <b>19 830</b>  |
| <b>Summe aller schwebenden Termingeschäfte</b> |                                 |                                                                               |                       |                    |                |                |
| OTC-Produkte                                   | 3 693 719                       | 4 721 156                                                                     | 3 943 302             | 12 358 177         | 320 422        | 326 480        |
| Börsengehandelte Produkte                      | 355 726                         | 67 464                                                                        | 3 596                 | 426 786            | –              | –              |
| <b>Gesamt</b>                                  | <b>4 049 445</b>                | <b>4 788 620</b>                                                              | <b>3 946 898</b>      | <b>12 784 963</b>  | <b>320 422</b> | <b>326 480</b> |
| <b>Nettoausweis in der Bilanz</b>              |                                 |                                                                               |                       |                    |                |                |
|                                                |                                 |                                                                               |                       |                    | <b>183 659</b> | <b>189 717</b> |

**Kreditgruppengliederung im derivativen Geschäft:**

Die folgende Tabelle weist die positiven und negativen Marktwerte der derivativen Geschäfte des Commerzbank-Konzerns nach den jeweiligen Kontrahenten auf. Der Commerzbank-Konzern betreibt derivative Geschäfte überwie-

gend mit Kontrahenten einwandfreier Bonität. Der überwiegende Teil der Marktwerte konzentriert sich auf Kredit- und Finanzinstitute mit Sitz in einem OECD-Land.

| Mio €                                | Marktwert         |                | Marktwert         |                |
|--------------------------------------|-------------------|----------------|-------------------|----------------|
|                                      | positiv           | negativ        | positiv           | negativ        |
|                                      | <b>31.12.2010</b> |                | <b>31.12.2009</b> |                |
| OECD-Zentralregierungen              | 1 442             | 1 515          | 1 094             | 877            |
| OECD-Banken                          | 113 015           | 125 386        | 167 040           | 178 872        |
| OECD-Finanzinstitute                 | 210 674           | 213 304        | 140 706           | 140 637        |
| Sonstige Unternehmen, Privatpersonen | 9 437             | 4 642          | 8 880             | 3 942          |
| Nicht-OECD-Banken                    | 1 224             | 1 705          | 2 702             | 2 152          |
| <b>Gesamt</b>                        | <b>335 792</b>    | <b>346 552</b> | <b>320 422</b>    | <b>326 480</b> |

Das Volumen bei dem der Commerzbank-Konzern als Sicherungsnehmer (Käufer) beziehungsweise als Sicherungsgeber (Verkäufer) auftritt, belief sich zum Bilanzstichtag auf 89 106 Mio Euro (Vorjahr: 281 956 Mio Euro) beziehungsweise 79 257 Mio Euro (Vorjahr: 271 892 Mio Euro). Diese dem Trans-

fer von Kreditrisiken dienenden Produkte werden von uns sowohl im Handelsbereich zum Arbitrieren als auch im Anlagebereich zum Diversifizieren unserer Kreditportfolios eingesetzt. Die nachfolgende Tabelle veranschaulicht dabei unsere Risikostruktur bezogen auf die jeweils abgesicherten Risikoaktiva.

Gliederung nach Referenzaktiva:

| Mio €                                | Nominale          |                 | Nominale          |                 |
|--------------------------------------|-------------------|-----------------|-------------------|-----------------|
|                                      | Sicherungsnehmer  | Sicherungsgeber | Sicherungsnehmer  | Sicherungsgeber |
|                                      | <b>31.12.2010</b> |                 | <b>31.12.2009</b> |                 |
| OECD-Zentralregierungen              | 8 126             | 7 122           | 8 292             | 7 936           |
| OECD-Banken                          | 6 851             | 7 224           | 16 295            | 17 089          |
| OECD-Finanzinstitute                 | 7 301             | 6 002           | 94 893            | 93 603          |
| Sonstige Unternehmen, Privatpersonen | 65 756            | 58 051          | 160 480           | 152 111         |
| Nicht-OECD-Banken                    | 1 072             | 858             | 1 996             | 1 153           |
| <b>Gesamt</b>                        | <b>89 106</b>     | <b>79 257</b>   | <b>281 956</b>    | <b>271 892</b>  |

**Angaben zu Derivaten des Cash Flow Hedge Accountings:**

Die Nominalwerte der Derivate, die bis zur Beendigung des Cash Flow Hedge Accountings in 2009 (vergleiche Note 74) eingesetzt wurden, beliefen sich zum 31. Dezember 2010 auf

335 Mrd Euro. Nachstehende Tabelle zeigt die Berichtszeiträume, in welchen diese voraussichtlich fällig werden.

| Mio €                             | 31.12.2010 |
|-----------------------------------|------------|
| Bis drei Monate                   | 17         |
| Mehr als drei Monate bis ein Jahr | 85         |
| Mehr als ein Jahr bis fünf Jahre  | 176        |
| Mehr als fünf Jahre               | 57         |

Je Laufzeitband lagen Grundgeschäfte mit Nominalwerten in mindestens dieser Höhe vor.

### (79) Als Sicherheit übertragene Vermögenswerte

Für folgende Verbindlichkeiten wurden Vermögenswerte als Sicherheit übertragen:

| Mio €                                        | 31.12.2010    | 31.12.2009    | Veränderung in % |
|----------------------------------------------|---------------|---------------|------------------|
| Verbindlichkeiten gegenüber Kreditinstituten | 60 504        | 58 627        | 3,2              |
| Verbindlichkeiten gegenüber Kunden           | 19 330        | 35 948        | -46,2            |
| Verbriefte Verbindlichkeiten                 | -             | 144           | .                |
| Sonstige Passiva                             | -             | 3 096         | .                |
| <b>Gesamt</b>                                | <b>79 834</b> | <b>97 815</b> | <b>-18,4</b>     |

Nachstehende Vermögenswerte waren insgesamt als Sicherheiten für die vorgenannten Verbindlichkeiten übertragen:

| Mio €                                     | 31.12.2010    | 31.12.2009     | Veränderung in % |
|-------------------------------------------|---------------|----------------|------------------|
| Forderungen an Kreditinstitute und Kunden | 23 911        | 21 095         | 13,3             |
| Handelsaktiva sowie Finanzanlagen         | 66 602        | 79 395         | -16,1            |
| Sonstige Aktiva                           | -             | -              | .                |
| <b>Gesamt</b>                             | <b>90 513</b> | <b>100 490</b> | <b>-9,9</b>      |

Von den Vermögenswerten des Commerzbank-Konzerns konnten vom Empfänger aufgrund vertrags- oder gewohnheitsmäßiger Rechte weiterveräußert oder verpfändet werden:

| Mio €                                     | 31.12.2010    | 31.12.2009    | Veränderung in % |
|-------------------------------------------|---------------|---------------|------------------|
| Forderungen an Kreditinstitute und Kunden | 94            | -             | .                |
| Handelsaktiva sowie Finanzanlagen         | 41 771        | 55 131        | -24,2            |
| Sonstige Aktiva                           | -             | -             | .                |
| <b>Gesamt</b>                             | <b>41 865</b> | <b>55 131</b> | <b>-24,1</b>     |

Die Sicherheitenstellung erfolgte für Geldaufnahmen im Rahmen echter Pensionsgeschäfte (Repos). Darüber hinaus wurden Sicherheiten für zweckgebundene Refinanzierungsmittel und

Wertpapierleihgeschäfte gestellt. Die Transaktionen wurden unter den handelsüblichen und gebräuchlichen Bedingungen für Wertpapierleih- und -Pensionsgeschäfte ausgeführt.

**(80) Restlaufzeitengliederung**

| Mio €                                                                                                  | Restlaufzeiten zum 31.12.2010  |                 |                          |                         |                 |
|--------------------------------------------------------------------------------------------------------|--------------------------------|-----------------|--------------------------|-------------------------|-----------------|
|                                                                                                        | täglich fällig und unbefristet | bis drei Monate | drei Monate bis ein Jahr | ein Jahr bis fünf Jahre | über fünf Jahre |
| Forderungen an Kreditinstitute                                                                         | 45 351                         | 45 557          | 7 044                    | 10 928                  | 2 076           |
| Forderungen an Kunden                                                                                  | 21 098                         | 59 879          | 40 818                   | 110 558                 | 104 519         |
| Schuldverschreibungen und andere zinsbezogene Wertpapiere sowie Schuldscheindarlehen der Handelsaktiva | 222                            | 5 685           | 3 894                    | 12 114                  | 10 200          |
| Schuldverschreibungen und andere zinsbezogene Wertpapiere der Finanzanlagen                            | 16                             | 5 366           | 10 324                   | 37 682                  | 60 105          |
| <b>Gesamt</b>                                                                                          | <b>66 687</b>                  | <b>116 487</b>  | <b>62 080</b>            | <b>171 282</b>          | <b>176 900</b>  |
| Verbindlichkeiten gegenüber Kreditinstituten                                                           | 50 179                         | 56 284          | 4 634                    | 13 315                  | 13 214          |
| Verbindlichkeiten gegenüber Kunden                                                                     | 143 807                        | 54 520          | 15 898                   | 13 158                  | 35 444          |
| Verbriefte Verbindlichkeiten                                                                           | 62                             | 23 679          | 18 011                   | 66 248                  | 23 356          |
| Handelsspassiva                                                                                        | –                              | 304             | 3 886                    | 3 061                   | 1 819           |
| Nachrang- und Hybridkapital <sup>1</sup>                                                               | –                              | 55              | 1 741                    | 3 341                   | 12 383          |
| <b>Gesamt</b>                                                                                          | <b>194 048</b>                 | <b>134 842</b>  | <b>44 170</b>            | <b>99 123</b>           | <b>86 216</b>   |

<sup>1</sup> Ohne Zinsabgrenzungen und Disagien (– 1 271 Mio Euro) sowie Bewertungseffekte (842 Mio Euro).

| Mio €                                                                                                  | Restlaufzeiten zum 31.12.2009  |                 |                          |                         |                 |
|--------------------------------------------------------------------------------------------------------|--------------------------------|-----------------|--------------------------|-------------------------|-----------------|
|                                                                                                        | täglich fällig und unbefristet | bis drei Monate | drei Monate bis ein Jahr | ein Jahr bis fünf Jahre | über fünf Jahre |
| Forderungen an Kreditinstitute                                                                         | 36 564                         | 37 968          | 14 525                   | 13 059                  | 5 093           |
| Forderungen an Kunden                                                                                  | 23 047                         | 68 766          | 34 830                   | 122 114                 | 112 726         |
| Schuldverschreibungen und andere zinsbezogene Wertpapiere sowie Schuldscheindarlehen der Handelsaktiva | –                              | 2 822           | 2 986                    | 11 575                  | 12 365          |
| Schuldverschreibungen und andere zinsbezogene Wertpapiere der Finanzanlagen                            | –                              | 6 606           | 14 341                   | 44 440                  | 62 645          |
| <b>Gesamt</b>                                                                                          | <b>59 611</b>                  | <b>116 162</b>  | <b>66 682</b>            | <b>191 188</b>          | <b>192 829</b>  |
| Verbindlichkeiten gegenüber Kreditinstituten                                                           | 47 510                         | 44 485          | 19 580                   | 14 216                  | 14 843          |
| Verbindlichkeiten gegenüber Kunden                                                                     | 131 773                        | 64 249          | 15 736                   | 17 045                  | 35 815          |
| Verbriefte Verbindlichkeiten <sup>1</sup>                                                              | 92                             | 25 854          | 32 414                   | 74 327                  | 29 092          |
| Handelsspassiva <sup>1</sup>                                                                           | –                              | 1 464           | 2 801                    | 3 174                   | 2 152           |
| Nachrang- und Hybridkapital <sup>2</sup>                                                               | –                              | 615             | 3 129                    | 4 183                   | 12 851          |
| <b>Gesamt</b>                                                                                          | <b>179 375</b>                 | <b>136 667</b>  | <b>73 660</b>            | <b>112 945</b>          | <b>94 753</b>   |

<sup>1</sup> Nach Umgliederung aus den Verbrieften Verbindlichkeiten in die Handelsspassiva (siehe Note 2).

<sup>2</sup> Ohne Zinsabgrenzungen und Disagien (– 1 619 Mio Euro) sowie Bewertungseffekte (770 Mio Euro).

Als Restlaufzeit wird der Zeitraum zwischen Bilanzstichtag und der vertraglichen Fälligkeit der Finanzinstrumente angesehen. Bei Finanzinstrumenten, die in Teilbeträgen gezahlt werden, ist die Restlaufzeit für jeden einzelnen Teilbetrag angesetzt worden.



|     |                                  |
|-----|----------------------------------|
| 204 | Gesamtergebnisrechnung           |
| 208 | Bilanz                           |
| 210 | Eigenkapitalveränderungsrechnung |
| 212 | Kapitalflussrechnung             |
| 214 | Anhang (Notes)                   |
| 370 | Bestätigungsvermerk              |

## (81) Marktwert (Fair Value) von Finanzinstrumenten

### Ermittlung des Fair Values

Im Folgenden gehen wir insbesondere auf die Ermittlung von beizulegenden Zeitwerten (Fair Values) von Finanzinstrumenten ein, die in der Bilanz nicht zum Fair Value anzusetzen sind, für die aber gemäß IFRS 7 zusätzlich ein Fair Value anzugeben ist. Für die in der Bilanz zum Fair Value ausgewiesenen Finanzinstrumente sind die Bestimmungsmethoden in den Bilanzierungs- und Bewertungsmethoden (Notes 2 bis 30) sowie nachfolgend in den Abschnitten zur Bewertung von Finanzinstrumenten und zur Fair-Value-Hierarchie dargelegt.

Der Nominalwert von täglich fälligen Finanzinstrumenten wird als deren Fair Value angesehen. Zu diesen Instrumenten zählen die Barreserve, sowie Kontokorrentkredite beziehungsweise Sichteinlagen der Klassen Forderungen an Kreditinstitute und Kunden beziehungsweise Verbindlichkeiten gegenüber Kreditinstituten und Kunden.

Für Kredite und Einlagen stehen keine unmittelbaren Marktpreise zur Verfügung, da es für diese Finanzinstrumente keine organisierten Märkte gibt, an denen sie gehandelt werden. Die Ermittlung des Fair Values für diese Instrumente erfolgt unter Anwendung finanzmathematisch anerkannter Bewertungsverfahren mit aktuellen Marktparametern. Bei Krediten kommt ein Discounted-Cash-Flow-Modell zur Anwendung, dessen Parameter auf einer risikolosen Zinstrukturkurve, Risikoaufschlägen

sowie einem pauschalen Aufschlag zur Abdeckung von Liquiditätsspreads, Verwaltungs- und Eigenkapitalkosten beruhen. Bei Verbindlichkeiten wird für die Fair-Value-Ermittlung ebenfalls eine risikolose Zinstrukturkurve herangezogen, wobei das eigene Kreditrisiko (Own Credit Spread) der Commerzbank Aktiengesellschaft sowie ein Zuschlag für Verwaltungsaufwendungen gesondert berücksichtigt werden. Daneben werden die marktconformen Risikoaufschläge für Hypothekendarlehen, für Öffentliche Pfandbriefe und für aufgenommene Darlehen herangezogen.

Den Fair Value für Verbriefte Verbindlichkeiten, Nachrang- und Hybridkapital ermitteln wir auf der Basis verfügbarer Marktpreise. Bei der Bewertung werden verschiedene Faktoren, unter anderem die aktuellen Marktzinsen und das Kreditrating, berücksichtigt. Sind keine Preise erhältlich, werden die Fair Values durch finanzmathematische Bewertungsmodelle (Discounted-Cash-Flow-Modell, Optionspreismodelle) ermittelt, die wiederum auf Zinskurven, Volatilitäten, Kreditrating der Commerzbank etc. aufsetzen. Insbesondere in Fällen, bei denen die Bank strukturierte Schuldverschreibungen, die zum Fair Value bewertet werden, emittiert hat, wird im Fair Value das eigene Kreditrisiko (Own Credit Spread) berücksichtigt.

In den nachfolgenden Tabellen stellen wir die beizulegenden Zeitwerte (Fair Values) der Bilanzposten ihren Buchwerten gegenüber:

| Aktiva   Mrd €                                                | Marktwert (Fair Value) |                         | Buchwert   |            | Differenz  |                         |
|---------------------------------------------------------------|------------------------|-------------------------|------------|------------|------------|-------------------------|
|                                                               | 31.12.2010             | 31.12.2009 <sup>1</sup> | 31.12.2010 | 31.12.2009 | 31.12.2010 | 31.12.2009 <sup>1</sup> |
| Barreserve                                                    | 8,1                    | 10,3                    | 8,1        | 10,3       | –          | –                       |
| Forderungen an Kreditinstitute                                | 110,5                  | 106,6                   | 110,6      | 106,7      | –0,1       | –0,1                    |
| Reverse Repos und Cash Collaterals                            | 68,7                   | 58,9                    | 68,7       | 58,9       |            |                         |
| Forderungen aus dem Geldhandel                                | 6,8                    | 16,3                    | 6,8        | 16,3       |            |                         |
| Schuldscheindarlehen                                          | 9,7                    | 12,3                    | 9,9        | 12,8       | –0,2       | –0,5                    |
| Übrige Forderungen                                            | 25,6                   | 19,6                    | 25,5       | 19,2       | 0,1        | 0,4                     |
| Risikovorsorge                                                | –0,3                   | –0,5                    | –0,3       | –0,5       |            |                         |
| Forderungen an Kunden                                         | 327,3                  | 352,8                   | 327,8      | 352,2      | –0,5       | 0,6                     |
| Reverse Repos und Cash Collaterals                            | 30,0                   | 22,4                    | 30,0       | 22,4       |            |                         |
| Forderungen aus dem Geldhandel                                | 9,0                    | 17,0                    | 9,0        | 17,0       |            |                         |
| Schuldscheindarlehen                                          | 26,2                   | 36,8                    | 26,6       | 36,8       | –0,4       | 0,0                     |
| Hypotheken- und dinglich<br>besicherte Forderungen            | 133,5                  | 139,6                   | 134,3      | 139,9      | –0,8       | –0,3                    |
| Übrige Forderungen                                            | 137,7                  | 146,3                   | 137,0      | 145,4      | 0,7        | 0,9                     |
| Risikovorsorge                                                | –9,1                   | –9,3                    | –9,1       | –9,3       |            |                         |
| Wertanpassung aus Portfolio Fair Value Hedges                 | 0,0                    | 0,0                     | 0,1        | 0,0        | –0,1       | 0,0                     |
| Positive Marktwerte aus derivativen<br>Sicherungsinstrumenten | 5,0                    | 6,4                     | 5,0        | 6,4        | –          | –                       |
| Handelsaktiva                                                 | 167,8                  | 218,7                   | 167,8      | 218,7      | –          | –                       |
| Finanzanlagen                                                 | 113,1                  | 130,6                   | 115,7      | 130,9      | –2,6       | –0,3                    |
| Forderungen und Kredite                                       | 67,8                   | 78,9                    | 70,4       | 79,2       | –2,6       | –0,3                    |
| Zur Veräußerung verfügbar                                     | 41,4                   | 44,5                    | 41,4       | 44,5       |            |                         |
| nicht börsennotierte Anteile an Unternehmen                   | 0,4                    | 0,5                     | 0,4        | 0,5        |            |                         |
| Erfolgswirksam zum beizulegenden Zeitwert<br>bewertet         | 3,5                    | 6,7                     | 3,5        | 6,7        |            |                         |
| Anteile an at-Equity-bewerteten Unternehmen                   | 0,7                    | 0,4                     | 0,7        | 0,4        | –          | –                       |

<sup>1</sup> Die Angaben zum 31.12.2009 wurden teilweise angepasst. Der saldierte Unterschied zwischen Buchwert und Marktwert reduzierte sich zum 31.12.2009 dadurch von insgesamt 4,0 Mrd Euro auf 3,3 Mrd Euro.

|     |                                  |
|-----|----------------------------------|
| 204 | Gesamtergebnisrechnung           |
| 208 | Bilanz                           |
| 210 | Eigenkapitalveränderungsrechnung |
| 212 | Kapitalflussrechnung             |
| 214 | Anhang (Notes)                   |
| 370 | Bestätigungsvermerk              |

| Passiva   Mrd €                               | Marktwert (Fair Value) |                         | Buchwert   |            | Differenz  |                         |
|-----------------------------------------------|------------------------|-------------------------|------------|------------|------------|-------------------------|
|                                               | 31.12.2010             | 31.12.2009 <sup>1</sup> | 31.12.2010 | 31.12.2009 | 31.12.2010 | 31.12.2009 <sup>1</sup> |
| Verbindlichkeiten gegenüber Kreditinstituten  | 137,7                  | 140,5                   | 137,6      | 140,6      | 0,1        | -0,1                    |
| Repos und Cash Collaterals                    | 44,0                   | 31,6                    | 44,0       | 31,6       |            |                         |
| Verbindlichkeiten aus dem Geldhandel          | 35,2                   | 51,8                    | 35,2       | 51,8       |            |                         |
| Übrige Verbindlichkeiten                      | 58,5                   | 57,1                    | 58,4       | 57,2       | 0,1        | -0,1                    |
| Verbindlichkeiten gegenüber Kunden            | 262,6                  | 263,8                   | 262,8      | 264,6      | -0,2       | -0,8                    |
| Repos und Cash Collaterals                    | 18,1                   | 17,6                    | 18,1       | 17,6       |            |                         |
| Verbindlichkeiten aus dem Geldhandel          | 46,3                   | 48,8                    | 46,3       | 48,8       |            |                         |
| Übrige Verbindlichkeiten                      | 198,2                  | 197,4                   | 198,4      | 198,2      | -0,2       | -0,8                    |
| Verbriefte Verbindlichkeiten                  | 130,3                  | 161,4                   | 131,4      | 161,8      | -1,1       | -0,4                    |
| Zu fortgeführten Anschaffungs-                |                        |                         |            |            |            |                         |
| kosten bewertet                               | 127,1                  | 157,9                   | 128,2      | 158,3      | -1,1       | -0,4                    |
| Erfolgswirksam zum beizulegenden Zeitwert     |                        |                         |            |            |            |                         |
| bewertet                                      | 3,2                    | 3,5                     | 3,2        | 3,5        |            |                         |
| Wertanpassung aus Portfolio Fair Value Hedges | 0,0                    | 0,0                     | 0,1        | 0,0        | -0,1       | 0,0                     |
| Negative Marktwerte aus derivativen           |                        |                         |            |            |            |                         |
| Sicherungsinstrumenten                        | 9,4                    | 11,3                    | 9,4        | 11,3       | -          | -                       |
| Handelsspassiva                               | 152,4                  | 202,6                   | 152,4      | 202,6      | -          | -                       |
| Nachrang- und Hybridkapital                   | 14,5                   | 18,1                    | 17,1       | 19,9       | -2,6       | -1,8                    |

<sup>1</sup> Die Angaben zum 31.12.2009 wurden teilweise angepasst. Der saldierte Unterschied zwischen Buchwert und Marktwert reduzierte sich zum 31.12.2009 dadurch von insgesamt 4,0 Mrd Euro auf 3,3 Mrd Euro.

Saldiert belief sich der Unterschied zwischen Buchwert und Marktwert (Fair Value) über alle Posten zum 31. Dezember 2010 auf 0,6 Mrd Euro (Vorjahr: 3,3 Mrd Euro).

### Bewertung von Finanzinstrumenten

Nach IAS 39 sind alle Finanzinstrumente beim erstmaligen Ansatz zu ihrem beizulegenden Zeitwert (Fair Value) zu bewerten, im Falle eines Finanzinstruments, das nicht als erfolgswirksam zum Fair Value zu bewerten klassifiziert ist, unter Einschluss bestimmter Transaktionskosten. Die Folgebewertung der Finanzinstrumente, die als erfolgswirksam zum beizulegenden Zeitwert zu bewerten klassifiziert sind, oder von jederzeit veräußerbaren finanziellen Vermögenswerten erfolgt laufend zum beizulegenden Zeitwert. In diesem Sinne beinhalten erfolgswirksam zum Fair Value zu bewertende Finanzinstrumente Derivate, zu Handelszwecken gehaltene Instrumente sowie Instrumente, die als zum Fair Value zu bewerten designiert wurden.

Der beizulegende Zeitwert eines Finanzinstruments ist der Betrag, zu dem dieses zwischen sachverständigen, vertragswilligen und voneinander unabhängigen Geschäftspartnern getauscht werden könnte. Der am besten geeignete Maßstab für den Fair Value ist der notierte Marktpreis für ein identisches Instrument an einem aktiven Markt (Bewertungshierarchie Level I). Wenn keine notierten Preise verfügbar sind, erfolgt die Bewertung anhand von notierten Preisen ähnlicher Instrumente an aktiven Märkten. Um den Preis wiederzugeben, zu dem ein Vermögenswert getauscht oder eine Verbindlichkeit beglichen werden könnte, werden Vermögenswerte zum Geldkurs und Verbindlichkeiten zum Briefkurs bewertet (Bewertungshierarchie Level II).

Sind keine notierten Preise für identische oder ähnliche Finanzinstrumente verfügbar, wird der Fair Value unter Anwendung eines geeigneten Bewertungsmodells ermittelt, bei dem die einfließenden Daten soweit möglich aus überprüfbar Marktquellen stammen. Während sich die meisten Bewertungsmethoden auf Daten aus überprüfbar Marktquellen stützen, werden bestimmte Finanzinstrumente unter Einsatz von Bewertungsmodellen bewertet, die andere Eingangswerte heranziehen, für die nicht ausreichend aktuelle überprüfbar Marktquellen vorhanden sind. Diese Bewertungen unterliegen naturgemäß in höherem Maße den Einschätzungen des Managements. Diese nicht beobachtbaren Eingangswerte können Daten enthalten, die extrapoliert oder interpoliert oder in Form von Näherungswerten aus korrelierten oder historischen Daten ermittelt werden. Allerdings werden hierbei in größtmöglichem Umfang Marktquellen oder Daten Dritter und so wenig wie möglich unternehmensspezifische Eingangswerte herangezogen (Bewertungshierarchie Level III).

Bewertungsmodelle müssen anerkannten betriebswirtschaftlichen Methoden zur Bewertung von Finanzinstrumenten entsprechen und alle Faktoren berücksichtigen, die Marktteilnehmer bei der Festlegung eines Preises als angemessen betrachten würden. Alle beizulegenden Zeitwerte unterliegen den internen Kontrollen und Verfahren des Commerzbank-Konzerns, in denen die Standards für deren unabhängige Prüfung oder Validierung festgelegt sind. Diese Kontrollen und

Verfahren werden von der Independent Price Verification Group (IPV) innerhalb der Finanzfunktion verwaltet. Die Modelle, die einfließenden Daten und die daraus resultierenden Fair Values werden regelmäßig vom Senior Management und der Risikofunktion überprüft.

#### Hierarchie der Fair Values

Nach IFRS 7 werden zum Fair Value ausgewiesene Finanzinstrumente wie folgt in die dreistufige Bewertungshierarchie zum Fair Value eingestuft (vergleiche Bewertung von Finanzinstrumenten):

Level I: Finanzinstrumente, deren Fair Value auf Basis von notierten Preisen für identische Finanzinstrumente an aktiven Märkten ermittelt wird.

Level II: Finanzinstrumente, für die keine notierten Preise für identische Instrumente an einem aktiven Markt verfügbar sind

und deren Fair Value unter Einsatz von Bewertungsmethoden ermittelt wird.

Level III: Finanzinstrumente, die unter Anwendung von Bewertungsmethoden bewertet werden, für deren Eingangswerte nicht ausreichend beobachtbare Marktdaten vorhanden sind und bei denen diese Eingangswerte den Fair Value nicht nur unwesentlich beeinflussen.

Die in der Bilanz zum Fair Value ausgewiesenen Finanzinstrumente werden in nachfolgenden Übersichten nach Kategorien gruppiert sowie nach Bewertungsgrundlagen gegliedert dargestellt. Dabei wird unterschieden, ob der Bewertung notierte Marktpreise zugrunde liegen (Level I), ob die Bewertungsmodelle auf beobachtbaren Marktdaten (Level II) oder auf nicht am Markt beobachtbaren Parametern (Level III) basieren.

| Finanzielle Vermögenswerte                                 |                                                       | Level I     | Level II     | Level III  | Gesamt       | Level I     | Level II <sup>1</sup> | Level III  | Gesamt       |
|------------------------------------------------------------|-------------------------------------------------------|-------------|--------------|------------|--------------|-------------|-----------------------|------------|--------------|
| Mrd €                                                      |                                                       | 31.12.2010  |              |            |              | 31.12.2009  |                       |            |              |
| Forderungen an Kreditinstitute                             | Erfolgswirksam zum beizulegenden Zeitwert bewertet    | –           | 48,1         | –          | 48,1         | 0,7         | 54,2                  | –          | 54,9         |
| Forderungen an Kunden                                      | Erfolgswirksam zum beizulegenden Zeitwert bewertet    | 0,2         | 27,6         | 0,6        | 28,4         | 0,7         | 23,6                  | 0,2        | 24,5         |
| Positive Marktwerte aus derivativen Sicherungsinstrumenten | Hedge Accounting                                      | –           | 5,0          | –          | 5,0          | –           | 6,4                   | –          | 6,4          |
| Handelsaktiva                                              | Zu Handelszwecken gehalten                            | 40,0        | 123,8        | 4,0        | 167,8        | 28,6        | 185,0                 | 5,1        | 218,7        |
|                                                            | darunter: Positive Marktwerte aus Derivaten           | –           | 123,0        | 0,7        | 123,7        | –           | 173,5                 | 3,8        | 177,3        |
| Finanzanlagen                                              | Erfolgswirksam zum beizulegenden Zeitwert bewertet    | 3,5         | –            | –          | 3,5          | 5,1         | 0,9                   | 0,7        | 6,7          |
|                                                            | Zur Veräußerung verfügbare finanzielle Vermögenswerte | 10,5        | 30,0         | 1,3        | 41,8         | 5,3         | 38,4                  | 1,3        | 45,0         |
| <b>Gesamt</b>                                              |                                                       | <b>54,2</b> | <b>234,5</b> | <b>5,9</b> | <b>294,6</b> | <b>40,4</b> | <b>308,5</b>          | <b>7,3</b> | <b>356,2</b> |

<sup>1</sup> Einschließlich echte Pensionsgeschäfte, Cash Collaterals und kurzfristige Geldmarktgeschäfte (siehe Note 2).

|     |                                  |
|-----|----------------------------------|
| 204 | Gesamtergebnisrechnung           |
| 208 | Bilanz                           |
| 210 | Eigenkapitalveränderungsrechnung |
| 212 | Kapitalflussrechnung             |
| 214 | Anhang (Notes)                   |
| 370 | Bestätigungsvermerk              |

| Finanzielle Verbindlichkeiten                              |                                                    | Level I     | Level II     | Level III  | Gesamt       | Level I <sup>1</sup> | Level II <sup>1</sup> | Level III  | Gesamt       |
|------------------------------------------------------------|----------------------------------------------------|-------------|--------------|------------|--------------|----------------------|-----------------------|------------|--------------|
| Mrd €                                                      |                                                    | 31.12.2010  |              |            |              | 31.12.2009           |                       |            |              |
| Verbindlichkeiten gegenüber Kreditinstituten               | Erfolgswirksam zum beizulegenden Zeitwert bewertet | 0,6         | 41,9         | –          | 42,5         | 1,6                  | 47,1                  | –          | 48,7         |
| Verbindlichkeiten gegenüber Kunden                         | Erfolgswirksam zum beizulegenden Zeitwert bewertet | 1,3         | 18,4         | –          | 19,7         | 1,7                  | 16,9                  | –          | 18,6         |
| Verbriefte Verbindlichkeiten                               | Erfolgswirksam zum beizulegenden Zeitwert bewertet | 3,2         | –            | –          | 3,2          | 3,5                  | –                     | –          | 3,5          |
| Negative Marktwerte aus derivativen Sicherungsinstrumenten | Hedge Accounting                                   | –           | 9,4          | –          | 9,4          | –                    | 11,3                  | –          | 11,3         |
| Handelsspassiva                                            | Zu Handelszwecken gehalten                         | 16,1        | 135,0        | 1,3        | 152,4        | 12,3                 | 187,8                 | 2,4        | 202,5        |
| darunter: Negative Marktwerte aus Derivaten                |                                                    | –           | 130,1        | –          | 130,1        | –                    | 176,0                 | 2,4        | 178,4        |
| Nachrangkapital                                            | Erfolgswirksam zum beizulegenden Zeitwert bewertet | –           | –            | –          | –            | –                    | –                     | –          | –            |
| <b>Gesamt</b>                                              |                                                    | <b>21,2</b> | <b>204,7</b> | <b>1,3</b> | <b>227,2</b> | <b>19,1</b>          | <b>263,1</b>          | <b>2,4</b> | <b>284,6</b> |

<sup>1</sup> Einschließlich eigene Emissionen, echte Pensionsgeschäfte, Cash Collaterals und kurzfristige Geldmarktgeschäfte (siehe Note 2).

Im laufenden Geschäftsjahr wie auch im Vorjahr wurden keine signifikanten Umwidmungen zwischen Level I und Level II vorgenommen. Die dem Level III zugeordneten Finanzinstrumente entwickelten sich im Geschäftsjahr wie folgt:

| Finanzielle Vermögenswerte                           | Handelsaktiva | Positive Marktwerte aus Derivaten <sup>1</sup> | Erfolgswirksam zum beizulegenden Zeitwert bewertet <sup>2</sup> | Available-for-Sale-Finanzanlagen | Gesamt       |
|------------------------------------------------------|---------------|------------------------------------------------|-----------------------------------------------------------------|----------------------------------|--------------|
| Mio €                                                |               |                                                |                                                                 |                                  |              |
| <b>Fair Value zum 1.1.2009</b>                       | <b>578</b>    | <b>233</b>                                     | <b>–</b>                                                        | <b>2 511</b>                     | <b>3 322</b> |
| Veränderungen im Konsolidierungskreis                | 4 024         | 5 805                                          | 1 748                                                           | 147                              | 11 724       |
| Erfolgswirksam erfasste Gewinne/Verluste der Periode | –528          | –284                                           | –133                                                            | –                                | –945         |
| Im Eigenkapital erfasste Gewinne/Verluste            | –             | –                                              | –                                                               | –10                              | –10          |
| Käufe                                                | 448           | –                                              | 2                                                               | 184                              | 634          |
| Verkäufe                                             | –414          | –                                              | –5                                                              | –25                              | –444         |
| Emissionen                                           | –             | –                                              | –                                                               | –                                | –            |
| Rückzahlungen                                        | –             | –                                              | –                                                               | –                                | –            |
| Transfers                                            | –2 818        | –1 955                                         | –640                                                            | –1 578                           | –6 991       |
| <b>Fair Value zum 31.12.2009</b>                     | <b>1 290</b>  | <b>3 799</b>                                   | <b>972</b>                                                      | <b>1 229</b>                     | <b>7 290</b> |
| Veränderungen im Konsolidierungskreis                | –             | –                                              | –                                                               | –                                | –            |
| Erfolgswirksam erfasste Gewinne/Verluste der Periode | 537           | –                                              | –419                                                            | –                                | 118          |
| Im Eigenkapital erfasste Gewinne/Verluste            | –             | –                                              | –                                                               | 453                              | 453          |
| Käufe                                                | 37            | –                                              | –                                                               | 205                              | 242          |
| Verkäufe                                             | –             | –                                              | –                                                               | –67                              | –67          |
| Emissionen                                           | –             | –                                              | –                                                               | –                                | –            |
| Rückzahlungen                                        | –             | –                                              | –                                                               | –170                             | –170         |
| Transfers                                            | 1 447         | –3 106                                         | 93                                                              | –356                             | –1 922       |
| <b>Fair Value zum 31.12.2010</b>                     | <b>3 311</b>  | <b>693</b>                                     | <b>646</b>                                                      | <b>1 294</b>                     | <b>5 944</b> |

<sup>1</sup> Einschließlich Sicherungsinstrumente.

<sup>2</sup> Ohne Handelsaktiva und Positive Marktwerte aus Derivaten.

| Finanzielle Verbindlichkeiten                        | Handelsspassiva | Negative Marktwerte aus Derivaten <sup>1</sup> | Erfolgswirksam zum beizulegenden Zeitwert bewertet <sup>2</sup> | Gesamt       |
|------------------------------------------------------|-----------------|------------------------------------------------|-----------------------------------------------------------------|--------------|
| Mio €                                                |                 |                                                |                                                                 |              |
| <b>Fair Value zum 1.1.2009</b>                       | <b>2</b>        | <b>16</b>                                      | <b>-</b>                                                        | <b>18</b>    |
| Veränderungen im Konsolidierungskreis                | 271             | 3 520                                          | -                                                               | 3 791        |
| Erfolgswirksam erfasste Gewinne/Verluste der Periode | 4               | 582                                            | -                                                               | 586          |
| Im Eigenkapital erfasste Gewinne/Verluste            | -               | -                                              | -                                                               | -            |
| Käufe                                                | -               | -                                              | 29                                                              | 29           |
| Verkäufe                                             | -               | -                                              | -                                                               | -            |
| Emissionen                                           | 25              | 13                                             | -                                                               | 38           |
| Rückzahlungen                                        | -               | -                                              | -                                                               | -            |
| Transfers                                            | -275            | -1 740                                         | -                                                               | -2 015       |
| <b>Fair Value zum 31.12.2009</b>                     | <b>27</b>       | <b>2 391</b>                                   | <b>29</b>                                                       | <b>2 447</b> |
| Veränderungen im Konsolidierungskreis                | -               | -                                              | -                                                               | -            |
| Erfolgswirksam erfasste Gewinne/Verluste der Periode | 4               | -                                              | -                                                               | 4            |
| Im Eigenkapital erfasste Gewinne/Verluste            | -               | -                                              | -                                                               | -            |
| Käufe                                                | -               | -                                              | -                                                               | -            |
| Verkäufe                                             | -               | -                                              | -                                                               | -            |
| Emissionen                                           | -               | -                                              | -                                                               | -            |
| Rückzahlungen                                        | -               | -                                              | -                                                               | -            |
| Transfers                                            | 1 240           | -2 371                                         | -29                                                             | -1 160       |
| <b>Fair Value zum 31.12.2010</b>                     | <b>1 271</b>    | <b>20</b>                                      | <b>-</b>                                                        | <b>1 291</b> |

<sup>1</sup> Einschließlich Sicherungsinstrumente.

<sup>2</sup> Ohne Handelsspassiva und Negative Marktwerte aus Derivaten.

### Sensitivitätsanalyse

Basiert der Wert von Finanzinstrumenten auf nicht beobachtbaren Eingangsparametern, kann der genaue Wert dieser Parameter zum Bilanzstichtag aus einer Bandbreite von angemessenen möglichen Alternativen abgeleitet werden. Im Rahmen der Erstellung des Konzernabschlusses werden für diese nicht beobachtbaren Eingangsparameter angemessene Werte ausgewählt, die den herrschenden Marktgegebenheiten und dem Bewertungskontrollansatz des Konzerns entsprechen.

Die vorliegenden Angaben sollen die möglichen Auswirkungen darstellen, die aus der relativen Unsicherheit in den Fair Values von Finanzinstrumenten resultieren, deren Bewertung

auf nicht beobachtbaren Eingangsparametern basiert. Dabei liegen diese Parameter an den äußeren Enden der Bandbreiten von angemessenen möglichen Alternativen. In der Praxis ist es unwahrscheinlich, dass alle nicht beobachtbaren Parameter gleichzeitig am jeweils äußeren Ende ihrer Bandbreite von angemessenen möglichen Alternativen liegen. Aus diesem Grund dürften die angegebenen Schätzwerte die tatsächliche Unsicherheit in den Fair Values dieser Instrumente übertreffen. Die vorliegenden Angaben dienen nicht der Schätzung oder Vorhersage der künftigen Veränderungen des Fair Values.

|     |                                  |
|-----|----------------------------------|
| 204 | Gesamtergebnisrechnung           |
| 208 | Bilanz                           |
| 210 | Eigenkapitalveränderungsrechnung |
| 212 | Kapitalflussrechnung             |
| 214 | Anhang (Notes)                   |
| 370 | Bestätigungsvermerk              |

Die nachfolgende Tabelle enthält eine Aufgliederung der Sensitivitätsanalyse nach Arten von Instrumenten:

| Mio €                        | Positive erfolgswirksame Effekte | Negative erfolgswirksame Effekte |
|------------------------------|----------------------------------|----------------------------------|
| <b>Wertpapiere</b>           | <b>262</b>                       | <b>263</b>                       |
| ABS und MBS                  | 224                              | 225                              |
| Andere Schuldverschreibungen | 38                               | 38                               |
| <b>Derivate</b>              | <b>114</b>                       | <b>38</b>                        |
| Kreditderivate               | –                                | –                                |
| Zinsbezogene Geschäfte       | –                                | –                                |
| Übrige Geschäfte             | 114                              | 38                               |

#### Day-One-P-&-L

Die aggregierte Differenz zwischen Transaktionspreis und Modellwert, der nicht ausschließlich auf beobachtbaren Marktdaten basiert (die sogenannte Day-One-P-&-L) betrifft alle Level-III-Posten; die Beträge entwickelten sich wie folgt:

| Day-One-P-&-L               | Handelsaktiva | Handelsspassiva | Gesamt   | Handelsaktiva | Handelsspassiva | Gesamt    |
|-----------------------------|---------------|-----------------|----------|---------------|-----------------|-----------|
| Mio €                       | 2010          |                 |          | 2009          |                 |           |
| Bestand zum 1.1.            | 11            | 5               | 16       | –             | 4               | 4         |
| Erfolgsneutrale Zuführungen | 2             | –               | 2        | 24            | 2               | 26        |
| Erfolgswirksame Auflösungen | 12            | 4               | 16       | 13            | 1               | 14        |
| <b>Bestand zum 31.12.</b>   | <b>1</b>      | <b>1</b>        | <b>2</b> | <b>11</b>     | <b>5</b>        | <b>16</b> |

#### (82) Angaben zu finanziellen Vermögenswerten und finanziellen Verbindlichkeiten, für die die Fair Value Option angewendet wurde

Im Commerzbank-Konzern wenden wir die Fair Value Option im Wesentlichen zur Vermeidung oder signifikanten Verringerung von Ansatz- und Bewertungsinkongruenzen (Accounting Mismatch) aus Wertpapieren und Krediten, die mit Zins- beziehungsweise Kreditderivaten gesichert sind, an. Das gilt gleichermaßen bei begebenen strukturierten Schuldverschrei-

bungen, die mit Zins- und Fremdwährungsderivaten gesichert sind. Darüber hinaus wird die Fair Value Option für Finanzinstrumente genutzt, deren Management und Performance-messung auf Fair-Value-Basis erfolgt beziehungsweise für Finanzinstrumente mit eingebetteten Derivaten genutzt.

Aus der Anwendung der Fair Value Option ergaben sich in den einzelnen Bilanzposten folgende Wertansätze:

| Mio €                                        | 31.12.2010   | 31.12.2009    | Veränderung in % |
|----------------------------------------------|--------------|---------------|------------------|
| Forderungen an Kreditinstitute               | –            | 699           | .                |
| Forderungen an Kunden                        | 805          | 3 136         | –74,3            |
| Finanzanlagen                                | 3 509        | 6 722         | –47,8            |
| <b>Aktiva Gesamt</b>                         | <b>4 314</b> | <b>10 557</b> | <b>–59,1</b>     |
| Verbindlichkeiten gegenüber Kreditinstituten | 591          | 1 551         | –61,9            |
| Verbindlichkeiten gegenüber Kunden           | 1 292        | 1 658         | –22,1            |
| Verbriefte Verbindlichkeiten                 | 3 206        | 3 503         | –8,5             |
| Nachrang- und Hybridkapital                  | 24           | 29            | –17,2            |
| <b>Passiva Gesamt</b>                        | <b>5 113</b> | <b>6 741</b>  | <b>–24,2</b>     |

Das Ergebnis aus der Anwendung der Fair Value Option belief sich insgesamt auf 131 Mio Euro (Vorjahr: 839 Mio Euro) (vergleiche Note 34).

Für die zum beizulegenden Zeitwert bewerteten Forderungen von 805 Mio Euro wurden 159 Mio Euro (Vorjahr: 2 735 Mio Euro) durch Kreditderivate gesichert. Die Höhe der Änderungen des beizulegenden Zeitwertes der Forderungen, die auf Änderungen des Ausfallrisikos zurückzuführen ist, betrug im Geschäftsjahr –130 Mio Euro (Vorjahr: 510 Mio Euro) und kumuliert –166 Mio Euro (Vorjahr: –36 Mio Euro).

Die Änderung der beizulegenden Zeitwerte der zugehörigen, risikobegrenzenden Kreditderivate belief sich im Geschäftsjahr auf 28 Mio Euro (Vorjahr: –460 Mio Euro) und kumuliert auf –22 Mio Euro (Vorjahr: –50 Mio Euro).

Für Verbindlichkeiten, auf die die Fair Value Option angewendet wird, betrug die im Geschäftsjahr 2010 eingetretene kreditrisikobedingte Änderung der beizulegenden Zeitwerte –89 Mio Euro (Vorjahr: 142 Mio Euro). Kumuliert belief sich die Veränderung auf –138 Mio Euro (Vorjahr: –49 Mio Euro). Der Rückzahlungsbetrag für die zum beizulegenden Zeitwert bewerteten finanziellen Verbindlichkeiten betrug 8 625 Mio Euro (Vorjahr: 7 161 Mio Euro).

Die kreditrisikobedingten Änderungen der beizulegenden Zeitwerte der Forderungen und Verbindlichkeiten wurden im Wesentlichen als Änderungen der beizulegenden Zeitwerte abzüglich der aus Marktkonditionen resultierenden Wertänderungen ermittelt.



|     |                                  |
|-----|----------------------------------|
| 204 | Gesamtergebnisrechnung           |
| 208 | Bilanz                           |
| 210 | Eigenkapitalveränderungsrechnung |
| 212 | Kapitalflussrechnung             |
| 214 | Anhang (Notes)                   |
| 370 | Bestätigungsvermerk              |

## Risikomanagement

---

### (83) Risikosteuerung

Die Risikosteuerung ist ein elementarer Bestandteil aller Geschäftsprozesse der Commerzbank und darauf ausgerichtet, die Unternehmenssteuerung zu unterstützen. Risiken werden identifiziert, gemessen und entsprechend der Risikoneigung der Bank gesteuert und überwacht.

Als Risiko bezeichnet die Commerzbank die Gefahr möglicher Verluste oder entgangener Gewinne aufgrund interner oder externer Faktoren. Die Risikosteuerung unterscheidet grundsätzlich zwischen quantifizierbaren – also üblicherweise im Jahresabschluss oder in der Kapitalbindung bewertbaren – und nicht quantifizierbaren Risikoarten, wie zum Beispiel Reputations- und Compliancerisiken.

Der Chief Risk Officer (CRO) der Bank ist für die Umsetzung der vom Gesamtvorstand für die quantifizierbaren Risiken festgelegten risikopolitischen Leitlinien im Konzern verantwortlich. Der CRO berichtet dem Gesamtvorstand und dem Risikoausschuss des Aufsichtsrats regelmäßig über die Gesamtrisikolage des Konzerns.

### (84) Adressenausfallrisiken

Grundlage der Messung der Adressenausfallrisiken sind die Rating- und Scoring-Verfahren der Commerzbank, die für alle wesentlichen Kreditportfolien im Einsatz sind. Sowohl die Kalibrierung der Ausfallwahrscheinlichkeiten, die den einzelnen Adressen oder Finan-

#### Ratingverteilung

Das Ratingverfahren der Commerzbank umfasst 25 Ratingstufen für nicht ausgefallene Kredite (1,0 bis 5,8) und fünf Default-Klassen (6,1 bis 6,5). Die Commerzbank-Masterskala weist jeder Ratingklasse genau eine zeitstabile, überlappungsfreie Spannweite von Ausfallwahrscheinlichkeiten zu. Die Ratingverfahren

Die Risikomanagement-Aktivitäten sind auf die Bereiche Kreditrisikomanagement, Markttrisikomanagement, Intensive Care sowie Risikocontrolling und Kapitalmanagement verteilt – alle vier mit konzernweiter Ausrichtung und direkter Berichtslinie an den CRO. Gemeinsam mit den vier Bereichsvorständen bildet der CRO innerhalb der Konzernsteuerung das Risk Management Board.

Das Controlling der Risiken der geschäftsstrategischen Ausrichtung und der Reputationsrisiken liegt im Verantwortungsbereich des Vorstandsvorsitzenden (CEO). Für das Controlling der Compliance-Risiken, insbesondere im Hinblick auf Anlegerschutz, Insiderrichtlinien und Geldwäsche, zeichnet der Finanzvorstand (CFO) verantwortlich. Art und Ausmaß von Risiken, die sich aus Finanzinstrumenten ergeben, werden im Risikobericht beschrieben.

zierungen zugewiesen werden, wie auch die Bewertung der Sicherheiten beruhen dabei auf der Analyse historischer Daten aus dem Commerzbank-Portfolio. Die Erfahrungen des laufenden Jahres sind die Basis für die jährliche Rekalibrierung der Verfahren.

unterliegen einer jährlich durchzuführenden Validierung und Rekalibrierung, so dass sie vor dem Hintergrund aller tatsächlich beobachteten Ausfälle die jeweils aktuellste Einschätzung widerspiegeln.

**Masterskala**

| Rating Commerzbank AG | PD- und EL-Midpoint in % | PD- und EL-Bereich in %                            | S & P        |                      |                  |
|-----------------------|--------------------------|----------------------------------------------------|--------------|----------------------|------------------|
| 1.0                   | 0                        | 0                                                  | ] AAA        | ] AAA                | Investment Grade |
| 1.2                   | 0,01                     | 0–0,02                                             |              |                      |                  |
| 1.4                   | 0,02                     | 0,02–0,03                                          | AA+          | ] AA                 |                  |
| 1.6                   | 0,04                     | 0,03–0,05                                          | AA, AA–      |                      |                  |
| 1.8                   | 0,07                     | 0,05–0,08                                          | A+, A        | ] A                  |                  |
| 2.0                   | 0,11                     | 0,08–0,13                                          | A–           |                      |                  |
| 2.2                   | 0,17                     | 0,13–0,21                                          | BBB+         | ] BBB                |                  |
| 2.4                   | 0,26                     | 0,21–0,31                                          | ] BBB        |                      |                  |
| 2.6                   | 0,39                     | 0,31–0,47                                          |              |                      |                  |
| 2.8                   | 0,57                     | 0,47–0,68                                          | BBB–         | Non-Investment Grade |                  |
| 3.0                   | 0,81                     | 0,68–0,96                                          | BB+          |                      |                  |
| 3.2                   | 1,14                     | 0,96–1,34                                          | ] BB         |                      |                  |
| 3.4                   | 1,56                     | 1,34–1,81                                          |              |                      |                  |
| 3.6                   | 2,10                     | 1,81–2,40                                          | BB–          |                      |                  |
| 3.8                   | 2,74                     | 2,40–3,10                                          | ] B+         |                      |                  |
| 4.0                   | 3,50                     | 3,10–3,90                                          |              |                      |                  |
| 4.2                   | 4,35                     | 3,90–4,86                                          | ] B          |                      |                  |
| 4.4                   | 5,42                     | 4,86–6,04                                          |              |                      |                  |
| 4.6                   | 6,74                     | 6,04–7,52                                          |              |                      |                  |
| 4.8                   | 8,39                     | 7,52–9,35                                          | ] B–         |                      |                  |
| 5.0                   | 10,43                    | 9,35–11,64                                         |              |                      |                  |
| 5.2                   | 12,98                    | 11,64–14,48                                        | ] CCC+       |                      |                  |
| 5.4                   | 16,15                    | 14,48–18,01                                        |              |                      |                  |
| 5.6                   | 20,09                    | 18,01–22,41                                        | ] CCC        |                      |                  |
| 5.8                   | 47,34                    | 22,41–99,99                                        |              |                      |                  |
| 6.1                   |                          | Drohende Zahlungsunfähigkeit (>90 Tage überfällig) | C, D-I, D-II | Default              |                  |
| 6.2                   |                          | Sanierung/Restrukturierung                         |              |                      |                  |
| 6.3                   | 100                      | Sanierung mit Sanierungsbeiträgen                  |              |                      |                  |
| 6.4                   |                          | Kündigung ohne Insolvenz                           |              |                      |                  |
| 6.5                   |                          | Insolvenz                                          |              |                      |                  |

Entsprechend dem Ansatz der Masterskala bleiben zum Zwecke der Vergleichbarkeit bei der Commerzbank-Masterskala die den Ratings zugeordneten Ausfallbänder unverändert (zeit- und portfoliostabil). Zur Orientierung sind externe Ratings gegenübergestellt. Da bei externen Ratings die beobachteten Ausfallraten von Jahr zu Jahr und teilweise auch zwischen unterschiedlichen Portfolien schwanken, ist eine direkte Überleitung aber nicht möglich.

Die Kreditkompetenzen einzelner Mitarbeiter wie auch die Kompetenzen der Komitees (Gesamtvorstand, Kreditkomitee,

Sub-Kreditkomitees) sind nach Ratingklassen gestaffelt. Wichtigste Steuerungsgröße für das Kreditausfallrisiko sind die aus den Ratings abgeleiteten erwarteten Verluste (EL). Die Kreditrisikostategie gibt Zielwerte für einzelne Portfolioteile vor. Dadurch wird gewährleistet, dass die zu erwartende Risikovorsorge im Einklang mit der strategischen Ausrichtung der Bank, wie zum Beispiel dem Zielrating der Ratingagenturen oder der angestrebten Portfolioqualität und -zusammensetzung, gehalten wird.

|     |                                  |
|-----|----------------------------------|
| 204 | Gesamtergebnisrechnung           |
| 208 | Bilanz                           |
| 210 | Eigenkapitalveränderungsrechnung |
| 212 | Kapitalflussrechnung             |
| 214 | Anhang (Notes)                   |
| 370 | Bestätigungsvermerk              |

## (85) Marktpreisrisiken

Marktpreisrisiken (Marktrisiken) umfassen die Gefahr von Verlusten durch die Veränderung von Marktpreisen (Zinsen, Spreads, Devisen-, Aktienkurse und Commodities) oder preisbeeinflussenden Parametern (Volatilitäten, Korrelationen). Auch Risiken aus Beteiligungen im Bankbuch und Aktieneventrisiken (Modellierung von Aktienrisiken, die über den VaR hinausgehen wie zum Beispiel Insolvenz des Emittenten) stellen nach Definition der Commerzbank Marktpreisrisiken dar. Des Weiteren berücksichtigen wir das Marktliquiditätsrisiko, das Fälle abdeckt, in denen es der Bank aufgrund unzureichender Marktliquidität nicht möglich ist, risikobehaftete Positionen zeitgerecht im gewünschten Umfang zu liquidieren oder abzusichern.

Die Marktrisikosteuerung beruht auf einem ausgereiften Limitsystem in Verbindung mit bewährten und optimierten Risikomess- und Überwachungsmethoden. Die Commerzbank legt ihre Marktrisikolimiten unter Berücksichtigung des ökonomischen Kapitalverbrauches (Risikotragfähigkeit) und der Geschäftserwartungen fest, wodurch eine risiko- und ertragsorientierte Steuerung des Marktpreisrisikos vorgenommen wird. Die Auslastung der Limite wird zusammen mit den relevanten Ergebniseffekten täglich an den Vorstand und die zuständigen Bereichsvorstände berichtet.

Zur täglichen Quantifizierung und Überwachung der Marktpreisrisiken werden mathematisch-statistische Ansätze zur Berechnung der VaR-Werte herangezogen. Die zugrunde liegenden statistischen Parameter basieren auf einer Beobachtungsperiode der letzten 255 Handelstage, einer zehntägigen Haltedauer und einem Konfidenzniveau von 99 %. Die VaR-Modelle werden kontinuierlich dem sich wandelnden Umfeld angepasst.

Bedingt durch die Übernahme der Dresdner Bank verwendet die Commerzbank in Abstimmung mit der Bundesanstalt für Finanzdienstleistungsaufsicht (BaFin) interimistisch zwei paral-

lele, jeweils durch die Aufsicht zertifizierte Marktrisikomodelle zur Ermittlung der aufsichtsrechtlichen Eigenmittelanforderungen. Für die Positionen der alten Commerzbank erfolgt die Berechnung des allgemeinen Marktrisikos auf Basis einer historischen Simulation, während das spezifische Zinsrisiko (spezifisches Marktrisiko) mittels Varianz-Kovarianz-Ansatz berechnet wird. Für die Positionen der ehemaligen Dresdner Bank wird im VaR-Modell aufgrund historischer Beobachtungen ein stochastisches Verhalten entsprechend der Gauß'schen Normalverteilung angenommen. Per Ende Oktober 2010 wurde die interne Steuerung auf ein neues Marktpreisrisikomodell basierend auf einer historischen Simulation (HistSim-Modell) umgestellt, um eine konsistente Risikomessung im Gesamtkonzern zu gewährleisten und die zukünftigen Anforderungen nach Basel III erfüllen zu können. Mit der Abnahme des HistSim-Modells durch die Bundesbank zur Nutzung auch für regulatorische Zwecke rechnet die Commerzbank im Geschäftsjahr 2011.

Durch die Anwendung von Backtestingverfahren wird die Zuverlässigkeit beider interner Modelle regelmäßig einer Überprüfung unterzogen. Ziel ist neben der Erfüllung aufsichtsrechtlicher Anforderungen die Beurteilung und kontinuierliche Verbesserung der Prognosegüte. Die Anzahl der signifikanten Abweichungen bildet auch die Grundlage für die von den Aufsichtsbehörden durchgeführte Bewertung der internen Risikomodelle.

In der folgenden Tabelle ist das konzernweite regulatorische Marktrisiko des Handelsbestands inklusive der Währungsrisiken des Bankbuches dargestellt, so wie es auch im Rahmen der Berechnungen zur Eigenkapitalunterlegung Verwendung findet. Als VaR werden Verlustpotenziale ausgewiesen, die mit einem Wahrscheinlichkeitsgrad von 99 % bei einer Haltedauer von zehn Tagen nicht überschritten werden:

| Konzern                |              |              |
|------------------------|--------------|--------------|
| Mio €                  | 31.12.2010   | 31.12.2009   |
| Minimum                | 165,2        | 174,6        |
| Median                 | 236,1        | 270,6        |
| Maximum                | 320,8        | 358,1        |
| <b>Jahresendziffer</b> | <b>250,4</b> | <b>199,8</b> |

Da das VaR-Konzept eine Prognose für die möglichen Verluste unter normalen Marktbedingungen liefert, wird es in der Commerzbank zur Berücksichtigung möglicher extremer Szenarien durch die Berechnung von Stresstests ergänzt. Die Zielsetzung von Stresstests besteht darin, die Wirkung von

Krisen, extremen Marktsituationen und großen Veränderungen von Korrelationen und Volatilitäten zu simulieren.

Im Rahmen der täglichen Berichterstattung werden Stresstests angewendet, die je Geschäftsbereich individuell auf die Risikofaktoren der einzelnen Portfolios abgestimmt sind.

Portfolioübergreifende Stresstests simulieren die Auswirkungen historischer und zukünftig denkbarer Krisenszenarien auf den Gesamtkonzern. Das Gesamtbild wird durch monatliche spezifi-

sche Szenario-Analysen je Anlageklasse (zum Beispiel hypothetische Zins-, Aktien-, Währungs- und Credit-Spread-Szenarien) abgerundet.

### (86) Zinsänderungsrisiken

Die Zinsänderungsrisiken des Commerzbank-Konzerns resultieren sowohl aus den Positionen des Handelsbuchs als auch des Bankbuchs. Im Bankbuch ergeben sich Zinsänderungsrisiken hauptsächlich aus Laufzeitinkongruenzen zwischen den zinstragenden Aktiva und Passiva der Bank, zum Beispiel aus der kurzfristigen Refinanzierung langlaufender Kredite. In die Messung der Zinsänderungsrisiken werden dabei die bilanziellen Zinspositionen sowie die zu ihrer Steuerung eingesetzten derivativen Finanzinstrumente einbezogen.

Die Zinsänderungsrisiken auf Konzernebene werden derzeit auf der Grundlage eines Barwertkonzepts gemessen.

Die im Vorjahr verwendete Darstellung der Zinsrisiken anhand der VaR-Kennzahl ersetzen wir in diesem Jahr durch die Darstellung der Zinssensitivitäten. Hierdurch wird eine bessere Vergleichbarkeit der Zahlen gewährleistet, da das der Berichterstattung zugrunde liegende VaR-Modell im abgelaufenen Geschäftsjahr durch das HistSim-Modell abgelöst wurde.

| Zinssensitivität +1 Bp<br>Mio € | 31.12.2010  | 31.12.2009  |
|---------------------------------|-------------|-------------|
| Bankbuch                        | -0,1        | -0,2        |
| Handelsbuch                     | -1,4        | 0,1         |
| <b>Konzern</b>                  | <b>-1,5</b> | <b>-0,1</b> |

Für die Bankbücher des Konzerns werden zudem nach aufsichtsrechtlichen Vorgaben monatlich die Auswirkungen von Zinsänderungsschocks auf den ökonomischen Wert simuliert. Entsprechend der Bankenrichtlinie hat die Bundesanstalt für Finanzdienstleistungsaufsicht (BaFin) eine für alle Institute einheitliche plötzliche und unerwartete Zinsänderung vorgegeben.

Die anzuwendende Zinsänderung beträgt derzeit +130 Basispunkte und -190 Basispunkte. Zum Jahresende gab es in beiden Szenarien einen leichten Gewinn, so dass der definierte Grenzwert für einen potentiellen Rückgang des haftenden Eigenkapitals (20 % für so genannte Ausreißerbanken) klar unterschritten wurde.

### (87) Operationelle Risiken

Das operationelle Risiko ist gemäß Solvabilitätsverordnung (SolvV) definiert als die Gefahr von Verlusten, die infolge der Unangemessenheit oder des Versagens von internen Verfahren und Systemen, Menschen oder infolge externer Ereignisse eintreten. Diese Definition beinhaltet auch rechtliche Risiken.

Über die Risikosituation wird das Operational Risk Committee regelmäßig informiert. Es befasst sich insbesondere mit der Steuerung der operationellen Risiken im Konzern. Ziel ist es, den Erwarteten Verlust aus OpRisk unter Kosten-Nutzen-Überlegungen zu optimieren sowie das Schadenspotenzial aus dem Unerwarteten Verlust zu minimieren. Hierbei verfolgt das Operational Risk Committee eine End-to-end-Sicht auf die Prozesse in der Bank, mit dem Ziel der Risikofrüherkennung. Das Operational Risk Committee befasst sich ferner mit allen

Themen, die in Zusammenhang mit der AMA-Umsetzung im Konzern stehen beziehungsweise sich aus den MaRisk zu OpRisk ergeben. Das Operational Risk Committee ist insbesondere für die Umsetzung der Grundsätze gemäß § 280 SolvV verantwortlich, die operativ in den Aufgabenbereich des Group Risk Control & Capital Management (GRM-CC) fallen.

Das Operational-Risk-Profil des Konzerns, ausgedrückt über die eingetretenen Ereignisse (Verluste und Rückstellungen) pro Ereigniskategorie gemäß § 287 SolvV, zeigt, dass rund 91 % der Schäden (Vorjahr: 83 %) in den beiden Ereigniskategorien Produktbezogene Schäden sowie Prozessuale Fehler eingetreten sind. GRM-CC führt regelmäßige Benchmarks der Werte im Vergleich zu Daten der Operational Riskdata eXchange, ORX, sowie zu öffentlichen Daten durch; diese zeigen vergleichbare Verteilungen.

|     |                                  |
|-----|----------------------------------|
| 204 | Gesamtergebnisrechnung           |
| 208 | Bilanz                           |
| 210 | Eigenkapitalveränderungsrechnung |
| 212 | Kapitalflussrechnung             |
| 214 | Anhang (Notes)                   |
| 370 | Bestätigungsvermerk              |

| OpRisk-Ereignisse                        | 31.12.2010   |              | 31.12.2009   |              |
|------------------------------------------|--------------|--------------|--------------|--------------|
|                                          | Mio €        | in %         | Mio €        | in %         |
| Interner Betrug                          | 9,9          | 3,6          | 16,3         | 6,0          |
| Externer Betrug                          | 8,6          | 3,1          | 29,3         | 10,7         |
| Sachschäden und Systemausfälle           | 1,6          | 0,6          | 1,3          | 0,5          |
| Produktbezogene Schäden                  | 195,8        | 71,4         | 148,8        | 54,7         |
| Prozessuale Fehler                       | 56,2         | 20,5         | 76,3         | 28,0         |
| Das Arbeitsverhältnis betreffende Fehler | 2,3          | 0,8          | 0,2          | 0,1          |
| <b>Konzern</b>                           | <b>274,4</b> | <b>100,0</b> | <b>272,2</b> | <b>100,0</b> |

### (88) Kreditrisikokonzentration

Konzentrationen von Ausfallrisiken (Kreditrisikokonzentrationen) können durch Geschäftsbeziehungen mit einzelnen Schuldern oder Schuldnergruppen entstehen, die eine Reihe gemeinsamer Merkmale aufweisen und deren Fähigkeit zur Schuldentilgung gleichermaßen von der Veränderung bestimmter wirtschaftlicher Rahmenbedingungen abhängt. Neben der Einholung von Sicherheiten und der Anwendung einer einheitlichen Kredit-

vergabepolitik ist die Bank zur Minimierung von Kreditrisiken eine Reihe von Master Netting Agreements eingegangen, die das Recht zur Verrechnung von Ansprüchen und Verpflichtungen mit einem Kunden im Falle des Ausfalls oder der Insolvenz des Kunden sicherstellen. Die Kreditrisiken im Bereich der Forderungen an Kunden stellten sich nach Buchwerten zum 31. Dezember 2010 wie folgt dar:

| Mio €                                | Forderungen    |                |
|--------------------------------------|----------------|----------------|
|                                      | 31.12.2010     | 31.12.2009     |
| <b>Kunden in Deutschland</b>         | <b>207 690</b> | <b>217 987</b> |
| Firmenkunden                         | 97 316         | 98 150         |
| Verarbeitendes Gewerbe               | 22 291         | 26 674         |
| Baugewerbe                           | 2 489          | 4 146          |
| Handel                               | 8 845          | 8 738          |
| Dienstleistungen und Übrige          | 63 691         | 58 592         |
| Öffentliche Haushalte                | 35 574         | 37 256         |
| Privatkunden                         | 74 800         | 82 581         |
| <b>Kunden außerhalb Deutschlands</b> | <b>129 182</b> | <b>143 496</b> |
| Firmen- und Privatkunden             | 120 285        | 134 817        |
| Öffentliche Haushalte                | 8 897          | 8 679          |
| <b>Zwischensumme</b>                 | <b>336 872</b> | <b>361 483</b> |
| abzüglich Wertberichtigungen         | -9 117         | -9 289         |
| <b>Gesamt</b>                        | <b>327 755</b> | <b>352 194</b> |

Die Kreditrisiken im Bereich der Eventualverbindlichkeiten und unwiderruflichen Kreditzusagen stellten sich nach Buchwerten zum 31. Dezember 2010 wie folgt dar:

| Mio €                                                    | Eventualverbindlichkeiten,<br>unwiderrufliche Kreditzusagen |                |
|----------------------------------------------------------|-------------------------------------------------------------|----------------|
|                                                          | 31.12.2010                                                  | 31.12.2009     |
| <b>Kunden und Kreditinstitute in Deutschland</b>         | <b>46 424</b>                                               | <b>58 337</b>  |
| Kreditinstitute                                          | 1 374                                                       | 1 166          |
| Firmenkunden                                             | 42 811                                                      | 55 319         |
| Verarbeitendes Gewerbe                                   | 15 082                                                      | 25 312         |
| Baugewerbe                                               | 1 769                                                       | 2 085          |
| Handel                                                   | 3 239                                                       | 3 186          |
| Dienstleistungen und Übrige                              | 22 721                                                      | 24 736         |
| Öffentliche Haushalte                                    | 379                                                         | 106            |
| Privatkunden                                             | 1 860                                                       | 1 746          |
| <b>Kunden und Kreditinstitute außerhalb Deutschlands</b> | <b>52 794</b>                                               | <b>52 238</b>  |
| Kreditinstitute                                          | 9 102                                                       | 7 827          |
| Firmen- und Privatkunden                                 | 43 051                                                      | 43 429         |
| Öffentliche Haushalte                                    | 641                                                         | 982            |
| <b>Zwischensumme</b>                                     | <b>99 218</b>                                               | <b>110 575</b> |
| abzüglich Rückstellungen                                 | -556                                                        | -539           |
| <b>Gesamt</b>                                            | <b>98 662</b>                                               | <b>110 036</b> |

Die in den obigen Tabellen aufgeführten Buchwerte zur Kreditrisikokonzentration im Bereich der Forderungen sowie im Bereich der Eventualverbindlichkeiten und unwiderruflichen Kreditzusagen sind nicht Gegenstand der internen Risikosteuerung, da das Management von Kreditrisiken auch Sicherheiten,

Ausfallwahrscheinlichkeiten sowie andere ökonomische Faktoren berücksichtigt. Insofern sind die Beträge nicht repräsentativ für die tatsächliche Einschätzung der Kreditrisikokonzentration in der Bank.

|     |                                  |
|-----|----------------------------------|
| 204 | Gesamtergebnisrechnung           |
| 208 | Bilanz                           |
| 210 | Eigenkapitalveränderungsrechnung |
| 212 | Kapitalflussrechnung             |
| 214 | Anhang (Notes)                   |
| 370 | Bestätigungsvermerk              |

### (89) Maximales Kreditrisiko

Die maximale Kreditrisikoexposition gemäß IFRS 7 – ohne Berücksichtigung von Sicherheiten oder sonstigen Kreditverbesserungen – entspricht den Buchwerten der betreffenden bilanziellen Vermögenswerte je Klasse; bei unwiderruflichen Kredit-

zusagen und Eventualverbindlichkeiten den Nominalwerten. In nachfolgender Tabelle sind die Buch- beziehungsweise Nominalwerte der mit einem potenziellen Ausfallrisiko behafteten Finanzinstrumente zusammengefasst:

| Maximales Kreditrisiko   Mio €                                  | 31.12.2010 | 31.12.2009 | Veränderung in % |
|-----------------------------------------------------------------|------------|------------|------------------|
| Schuldverschreibungen und andere zinsbezogene Wertpapiere unter |            |            |                  |
| Handelsaktiva                                                   | 145 608    | 157 780    | -7,7             |
| Finanzanlagen                                                   | 32 115     | 29 748     | 8,0              |
| Forderungen an Kreditinstitute                                  | 113 493    | 128 032    | -11,4            |
| Forderungen an Kunden                                           | 110 956    | 107 209    | 3,5              |
| Forderungen an Kunden                                           | 336 872    | 361 483    | -6,8             |
| Positive Marktwerte aus derivativen Finanzinstrumenten          | 128 704    | 183 659    | -29,9            |
| Handelsaktiva                                                   | 123 743    | 177 307    | -30,2            |
| Sicherungsinstrumente gemäß IAS 39                              | 4 961      | 6 352      | -21,9            |
| Sonstige Handelsaktiva                                          | 263        | 2 671      | -90,2            |
| Unwiderrufliche Kreditzusagen                                   | 60 566     | 69 281     | -12,6            |
| Eventualverbindlichkeiten                                       | 38 096     | 40 755     | -6,5             |

Die in obiger Tabelle aufgeführten Beträge zum maximalen Kreditrisikolumen sind nicht Gegenstand der internen Risikosteuerung, da das Management von Kreditrisiken auch Sicher-

heiten, Ausfallwahrscheinlichkeiten sowie andere ökonomische Faktoren berücksichtigt. Insofern sind die Beträge nicht repräsentativ für die tatsächliche Risikoeinschätzung durch die Bank.

### (90) Liquiditätskennzahl der Commerzbank Aktiengesellschaft

Die Liquidität eines Instituts gilt als ausreichend, wenn die zu ermittelnde Liquiditätskennzahl den Wert 1 nicht unterschreitet. Die Liquiditätskennzahl gibt das Verhältnis zwischen den ab Meldestichtag bis zum Ende des folgenden Monats (Laufzeitband 1) zur Verfügung stehenden Zahlungsmitteln und den während dieses Zeitraums zu erwartenden Zahlungsabflüssen an. In der Commerzbank Aktiengesellschaft wurde 2010 das als

Standardansatz umgesetzte Konzept der Liquiditätsverordnung angewendet.

Zum 31. Dezember 2010 betrug die von der Commerzbank Aktiengesellschaft ermittelte Liquiditätskennzahl 1,08 (Vorjahr: 1,20). Der Liquiditätsüberhang aus dem Laufzeitband 1 erreichte 20,4 Mrd Euro (Vorjahr: 52,0 Mrd Euro). Die Liquiditätskennzahlen der Commerzbank Aktiengesellschaft im Jahr 2010 stellten sich wie folgt dar:

| Stand am Monatsende |      | Stand am Monatsende |      |
|---------------------|------|---------------------|------|
| Januar              | 1,18 | Juli                | 1,12 |
| Februar             | 1,19 | August              | 1,12 |
| März                | 1,19 | September           | 1,11 |
| April               | 1,15 | Oktober             | 1,11 |
| Mai                 | 1,14 | November            | 1,09 |
| Juni                | 1,16 | Dezember            | 1,08 |

## Sonstige Erläuterungen

### (91) Nachrangige Vermögenswerte

In den Bilanzaktiva waren folgende Nachrangige Vermögenswerte enthalten:

| Mio €                                                                      | 31.12.2010 | 31.12.2009 | Veränderung in % |
|----------------------------------------------------------------------------|------------|------------|------------------|
| Forderungen an Kreditinstitute                                             | 66         | 62         | 6,5              |
| Forderungen an Kunden                                                      | 529        | 214        | .                |
| Handelsaktiva                                                              | 222        | 37         | .                |
| Finanzanlagen                                                              | 41         | 101        | -59,4            |
| <b>Gesamt</b>                                                              | <b>858</b> | <b>414</b> | .                |
| darunter: an Kreditinstitute, mit denen ein Beteiligungsverhältnis besteht | 1          | -          | .                |

Als nachrangig sind Vermögenswerte anzusehen, wenn sie als Forderungen im Fall der Liquidation oder der Insolvenz des Emittenten erst nach den Forderungen der anderen Gläubiger erfüllt werden dürfen.

### (92) Eventualverbindlichkeiten und unwiderrufliche Kreditzusagen

Der Commerzbank-Konzern ermöglicht seinen Kunden durch Kreditfazilitäten schnellen Zugriff auf Gelder, die von den Kunden zur Erfüllung ihrer kurzfristigen Verpflichtungen sowie der langfristigen Finanzierungsbedürfnisse benötigt werden. Die Kreditfazilitäten können in unterschiedlicher Form bereitgestellt werden, die wir nachstehend beispielhaft aufführen:

- Bürgschaften, mit denen der Konzern die Rückzahlung eines von einem Kunden bei einem Dritten aufgenommenen Kredits garantiert,
- Stand-by-Letters-of-Credit, die die Kreditwürdigkeit des Kunden erhöhen und seine Außenhandelsfinanzierung zu niedrigeren Kosten erleichtern,
- Dokumentenakkreditive für Zahlungen im Außenhandel, die im Namen eines Kunden erfolgen und dem Konzern später erstattet werden,
- Stand-by-Fazilitäten für kurzfristige Schuldtitel und auf revolving-Basis begebene Schuldtitel, mit denen Kunden bei Bedarf Geldmarktpapiere oder mittelfristige Schuldtitel

begeben können, ohne jedes Mal das übliche Emissionsprozedere zu durchlaufen.

Gegebenenfalls dienen Sicherheiten für das Gesamtbligo von Kunden aus Krediten und Avalen. Daneben gibt es Unterbeteiligungen Dritter zu unwiderruflichen Kreditzusagen und Avalen.

Die in der folgenden Tabelle genannten Zahlen wären nur im Falle der vollständigen Ausnutzung der Fazilitäten durch sämtliche Kunden und den darauf folgenden Zahlungsverzug aller – unter der Voraussetzung, dass keine Sicherheiten vorhanden sind – abzuschreiben. Tatsächlich verfällt jedoch der weitaus größte Teil dieser Verpflichtungen, ohne in Anspruch genommen zu werden. Insofern sind diese Beträge nicht repräsentativ für die Risikoeinschätzung, das tatsächliche künftige Kreditengagement oder daraus erwachsende Liquiditätserfordernisse. Weitere Informationen zum Kreditrisiko aus Finanzgarantien beziehungsweise unwiderruflichen Kreditzusagen sowie zu Liquiditätsrisiken und deren Steuerung und Überwachung enthält der Risikobericht.



|     |                                  |
|-----|----------------------------------|
| 204 | Gesamtergebnisrechnung           |
| 208 | Bilanz                           |
| 210 | Eigenkapitalveränderungsrechnung |
| 212 | Kapitalflussrechnung             |
| 214 | Anhang (Notes)                   |
| 370 | Bestätigungsvermerk              |

| Mio €                                         | 31.12.2010    | 31.12.2009     | Veränderung in % |
|-----------------------------------------------|---------------|----------------|------------------|
| <b>Eventualverbindlichkeiten</b>              | <b>38 096</b> | <b>40 755</b>  | <b>-6,5</b>      |
| aus weitergegebenen abgerechneten Wechseln    | 3             | 3              | 0,0              |
| aus Bürgschaften und Gewährleistungsverträgen | 38 087        | 40 603         | -6,2             |
| Kreditbürgschaften                            | 3 632         | 6 031          | -39,8            |
| Sonstige Bürgschaften                         | 27 256        | 27 228         | 0,1              |
| Akkreditive                                   | 6 939         | 7 036          | -1,4             |
| Garantien für ABS Verbriefungen               | -             | 13             | .                |
| Sonstige Gewährleistungen                     | 260           | 295            | -11,9            |
| Sonstige Verpflichtungen                      | 6             | 149            | -96,0            |
| <b>Unwiderrufliche Kreditzusagen</b>          | <b>60 566</b> | <b>69 281</b>  | <b>-12,6</b>     |
| Buchkredite an Kreditinstitute                | 1 442         | 899            | 60,4             |
| Buchkredite an Kunden                         | 56 058        | 65 101         | -13,9            |
| Avalkredite                                   | 3 016         | 3 247          | -7,1             |
| Akkreditive                                   | 50            | 34             | 47,1             |
| <b>Gesamt</b>                                 | <b>98 662</b> | <b>110 036</b> | <b>-10,3</b>     |

Die Restlaufzeiten der Eventualverbindlichkeiten und unwiderruflichen Kreditzusagen insgesamt stellten sich wie folgt dar:

| Mio €                             | 31.12.2010    | 31.12.2009     | Veränderung in % |
|-----------------------------------|---------------|----------------|------------------|
| Täglich fällig                    | 2 307         | 1 773          | 30,1             |
| Bis drei Monate                   | 29 641        | 34 409         | -13,9            |
| Mehr als drei Monate bis ein Jahr | 20 729        | 24 162         | -14,2            |
| Mehr als ein Jahr bis fünf Jahre  | 41 322        | 45 529         | -9,2             |
| Mehr als fünf Jahre               | 4 663         | 4 163          | 12,0             |
| <b>Gesamt</b>                     | <b>98 662</b> | <b>110 036</b> | <b>-10,3</b>     |

Die Risikovorsorge für außerbilanzielle Verpflichtungen wurde in diesen Aufstellungen von den entsprechenden Posten gekürzt.

### (93) Echte Pensionsgeschäfte (Repo- und Reverse-Repo-Geschäfte), Wertpapierleihgeschäfte und Cash Collaterals

Im Rahmen echter Pensionsgeschäfte verkauft beziehungsweise kauft der Commerzbank-Konzern Wertpapiere mit einer Rücknahmeverpflichtung beziehungsweise Rückgabeverpflichtung. Die erhaltenen Gegenwerte aus Pensionsgeschäften, bei denen der Commerzbank-Konzern Pensionsgeber ist (Rücknahmeverpflichtung der Wertpapiere), werden als Verbindlichkeit gegenüber Kreditinstituten oder Kunden bilanziert.

Wertpapierleihgeschäfte werden mit Kreditinstituten und Kunden getätigt, um dem Bedarf zur Erfüllung von Lieferverpflichtungen nachzukommen oder am Geldmarkt Wertpapierpensionsgeschäfte tätigen zu können. Die verliehenen Wertpapiere weisen wir in unserer Bilanz im Handelsbestand oder in den Finanzanlagen aus, während entliehene Wertpapiere nicht

bilanziert werden. Die aus Wertpapierleihgeschäften resultierenden Aufwendungen und Erträge wurden, soweit sie das abgelaufene Geschäftsjahr betreffen, in der Gewinn- und Verlustrechnung laufzeitgerecht im Zinsergebnis berücksichtigt.

Im Rahmen von Wertpapierleihgeschäften kann das Bonitätsrisiko des Kontrahenten durch die Stellung von Sicherheiten unter anderem in Form von Liquidität vermieden werden. Die Stellung von Sicherheiten für ein Leihgeschäft wird als Cash Collateral Out (gezahlte Sicherheitsleistung) und der Erhalt von Sicherheiten als Cash Collateral In (erhaltene Sicherheitsleistungen) bezeichnet. Darüber hinaus werden Cash Collateral Outs im Zusammenhang mit Derivaten als Sicherheiten hinterlegt.

Die zum Bilanzstichtag abgeschlossenen echten Pensionsgeschäfte und Wertpapierleihegeschäfte sowie die Cash Collaterals stellten sich wie folgt dar:

| <b>Pensions- und Leihgeschäfte   Mio €</b>                                     | <b>31.12.2010</b> | <b>31.12.2009</b> | <b>Veränderung in %</b> |
|--------------------------------------------------------------------------------|-------------------|-------------------|-------------------------|
| <b>Echte Pensionsgeschäfte als Pensionsgeber</b><br>(Repo-Agreements)          |                   |                   |                         |
| Buchwerte der übertragenen Wertpapiere                                         | 57 166            | 56 711            | 0,8                     |
| Erhaltene Sicherheitsleistungen                                                |                   |                   |                         |
| Verbindlichkeiten gegenüber Kreditinstituten                                   | 28 481            | 25 643            | 11,1                    |
| Verbindlichkeiten gegenüber Kunden                                             | 13 923            | 15 423            | -9,7                    |
| <b>Verliehene Wertpapiere aus Leihgeschäften</b>                               |                   |                   |                         |
| Buchwerte der übertragenen Wertpapiere                                         | 14 005            | 8 315             | 68,4                    |
| Erhaltene Sicherheitsleistungen                                                |                   |                   |                         |
| Verbindlichkeiten gegenüber Kreditinstituten                                   | 15 535            | 5 913             | .                       |
| Verbindlichkeiten gegenüber Kunden                                             | 4 183             | 2 196             | 90,5                    |
| <b>Summe der Buchwerte der übertragenen Wertpapiere</b>                        | <b>71 171</b>     | <b>65 026</b>     | <b>9,5</b>              |
| <b>Summe der erhaltenen Sicherheiten</b>                                       | <b>62 122</b>     | <b>49 175</b>     | <b>26,3</b>             |
| <b>Echte Pensionsgeschäfte als Pensionsnehmer</b><br>(Reverse-Repo-Agreements) |                   |                   |                         |
| Marktwerte der erhaltenen Wertpapiere                                          | 81 478            | 73 198            | 11,3                    |
| Gezahlte Sicherheitsleistungen                                                 |                   |                   |                         |
| Forderungen an Kreditinstitute                                                 | 40 528            | 42 336            | -4,3                    |
| Forderungen an Kunden                                                          | 25 148            | 18 099            | 38,9                    |
| <b>Entliehene Wertpapiere aus Leihgeschäften</b>                               |                   |                   |                         |
| Marktwerte der erhaltenen Wertpapiere                                          | 28 914            | 21 182            | 36,5                    |
| Gezahlte Sicherheitsleistungen                                                 |                   |                   |                         |
| Forderungen an Kreditinstitute                                                 | 28 159            | 16 527            | 70,4                    |
| Forderungen an Kunden                                                          | 4 815             | 4 263             | 12,9                    |
| <b>Summe der Marktwerte der erhaltenen Wertpapiere</b>                         | <b>110 392</b>    | <b>94 380</b>     | <b>17,0</b>             |
| <b>Summe der geleisteten Sicherheiten</b>                                      | <b>98 650</b>     | <b>81 225</b>     | <b>21,5</b>             |

Den Buchwerten der verliehenen Wertpapiere in Höhe von 14 005 Mio Euro (Vorjahr 8 315 Mio Euro) standen neben den zugehörigen Verbindlichkeiten von 19 718 Mio Euro (Vorjahr: 8 109 Mio Euro) auch 1 721 Mio Euro Wertpapiere (Vorjahr:

2 919 Mio Euro) als Sicherheiten gegenüber. Die Forderungen und Verbindlichkeiten aus Pensionsgeschäften werden nach Netting dargestellt.

|     |                                  |
|-----|----------------------------------|
| 204 | Gesamtergebnisrechnung           |
| 208 | Bilanz                           |
| 210 | Eigenkapitalveränderungsrechnung |
| 212 | Kapitalflussrechnung             |
| 214 | Anhang (Notes)                   |
| 370 | Bestätigungsvermerk              |

## (94) Erhaltene Sicherheiten

Die beizulegenden Zeitwerte der erhaltenen Sicherheiten, für die das Recht besteht, diese ohne Ausfall des Sicherungsgebers weiterzuveräußern oder -zuverpfänden, stellten sich wie folgt dar:

| Mio €                                    | 31.12.2010 | 31.12.2009 | Veränderung in % |
|------------------------------------------|------------|------------|------------------|
| Gesamtbetrag der erhaltenen Sicherheiten | 135 068    | 86 977     | 55,3             |
| darunter:                                |            |            |                  |
| weiterveräußert oder weiterverpfändet    | 24 676     | 17 735     | 39,1             |
| darunter:                                |            |            |                  |
| mit Rückgabeverpflichtung                | –          | –          | .                |

Die Transaktionen wurden unter den handelsüblichen und gebräuchlichen Bedingungen für Wertpapierleih- und -pensionsgeschäfte sowie Darlehensgeschäfte ausgeführt.

## (95) Treuhandgeschäfte

Die in der Bilanz nicht auszuweisenden Treuhandgeschäfte hatten am Bilanzstichtag folgenden Umfang:

| Mio €                                        | 31.12.2010   | 31.12.2009   | Veränderung in % |
|----------------------------------------------|--------------|--------------|------------------|
| Forderungen an Kreditinstitute               | 303          | 14           | .                |
| Forderungen an Kunden                        | 838          | 530          | 58,1             |
| Sonstige Vermögenswerte                      | 495          | 777          | –36,3            |
| <b>Treuhandvermögen</b>                      | <b>1 636</b> | <b>1 321</b> | <b>23,8</b>      |
| Verbindlichkeiten gegenüber Kreditinstituten | 67           | 32           | .                |
| Verbindlichkeiten gegenüber Kunden           | 1 569        | 1 289        | 21,7             |
| <b>Treuhandverbindlichkeiten</b>             | <b>1 636</b> | <b>1 321</b> | <b>23,8</b>      |

## (96) Eigenmittelanforderungen und Kapitalquoten

Das novellierte Kreditwesengesetz und die Solvabilitätsverordnung als nationale Umsetzung von Basel II verpflichten die deutschen Institute zur Einhaltung von Mindestkapitalquoten. Danach müssen Kreditinstitute ihre gewichteten Risikoaktiva mit mindestens 8 % Eigenmitteln unterlegen (Eigenmittelquote). Für die Unterlegung der Risikoaktiva mit Kernkapital wird durchgängig eine Quote von mindestens 4 % verlangt (Kernkapitalquote).

Die Eigenmittel setzen sich aus Kern- und Ergänzungskapital zuzüglich Drittrangmitteln zusammen. Das Kernkapital besteht im Wesentlichen aus Gezeichnetem Kapital zuzüglich Rücklagen, den Stillen Einlagen, dem Hybridkapital sowie den Anteilen in Fremdbesitz, vermindert um Abzugsposten wie Geschäfts- oder Firmenwerte, Beteiligungen und immaterielle Vermögenswerte. Zum Ergänzungskapital gehören Genussrechtskapital und langfristige nachrangige Verbindlichkeiten. Unter den Drittrangmit-

teln werden kurzfristige nachrangige Verbindlichkeiten ausgewiesen.

Das Kapitalmanagement der Commerzbank dient den folgenden Zielen:

- Einhaltung der gesetzlichen Mindestkapitalanforderungen auf Konzernbasis sowie in allen Konzerngesellschaften der aufsichtsrechtlichen Gruppe
- Bereitstellung von ausreichend Puffer zur Sicherstellung der jederzeitigen Handlungsfähigkeit der Bank
- strategische Zuordnung von Kernkapital auf Segmente und Geschäftsfelder zur Nutzung von Wachstumschancen

Im Zuge der Finanzmarktkrise ist die Bedeutung eines angemessenen Kernkapitals für Banken immer stärker in den Fokus der Öffentlichkeit gerückt. Für die Commerzbank hat das Kern-

kapital schon immer eine wesentliche Steuerungsgröße dargestellt. Dabei gehen die Ansprüche der Bank an die Kapitalquoten weit über die gesetzlichen Mindestanforderungen hinaus. Bei der Festlegung der angestrebten internen Kapitalquoten spielen neben der Risikotragfähigkeit der Bank auch Markterwartungen eine wichtige Rolle. Aus diesem Grund hat die Commerzbank einen Zielkorridor für das regulatorische Kapital definiert; dieser liegt für das Kernkapital aktuell bei rund 9 % bis 10 %, der für die Eigenmittel zwischen 10,5 % und 12,5 %.

Die Allokation des Kernkapitals erfolgt in einem regelmäßig wiederkehrenden Prozess, in dem die strategische Ausrichtung der Bank, profitable Neugeschäftsmöglichkeiten im Kern-

geschäft der einzelnen Geschäftsfelder sowie Risikotragfähigkeitsaspekte Eingang finden.

Alle Kapitalmaßnahmen – sowohl die Emission von Eigenkapital als auch ein potenzieller Aktienrückkauf – werden im Rahmen der von der Hauptversammlung erteilten Ermächtigungen vom zentralen Asset-Liability-Committee der Bank vorgeschlagen und vom Gesamtvorstand beschlossen.

Im vergangenen Jahr hat die Commerzbank die an sie gestellten gesetzlichen Mindestkapitalanforderungen, ebenso wie die deutlich strengeren Anforderungen der SoFFin jederzeit eingehalten. Die Zusammensetzung der Eigenmittel im Commerzbank-Konzern zeigt folgendes Bild:

| Mio €                                  | 31.12.2010    | 31.12.2009    | Veränderung in % |
|----------------------------------------|---------------|---------------|------------------|
| <b>Kernkapital (TIER I)</b>            |               |               |                  |
| Gezeichnetes Kapital                   | 3 047         | 3 071         | -0,8             |
| Rücklagen, Fremdanteile, eigene Aktien | 8 276         | 6 025         | 37,4             |
| Stille Einlagen                        | 16 428        | 17 604        | -6,7             |
| Hybrides Kapital                       | 4 999         | 3 820         | 30,9             |
| Sonstiges                              | -1 023        | -1 000        | 2,3              |
| <b>Gesamt</b>                          | <b>31 727</b> | <b>29 520</b> | <b>7,5</b>       |
| <b>Ergänzungskapital (TIER II)</b>     |               |               |                  |
| Hybrides Kapital                       | -             | -             | .                |
| Genussrechte                           | 674           | 2 405         | -72,0            |
| Reserven in Wertpapieren (Ansatz 45%)  | 148           | 148           | 0,0              |
| Nachrangige Verbindlichkeiten          | 9 328         | 10 338        | -9,8             |
| Sonstiges                              | -1 020        | -998          | 2,2              |
| <b>Gesamt</b>                          | <b>9 130</b>  | <b>11 893</b> | <b>-23,2</b>     |
| <b>Drittangemittel</b>                 | <b>-</b>      | <b>24</b>     | <b>.</b>         |
| <b>Anrechenbare Eigenmittel</b>        | <b>40 857</b> | <b>41 437</b> | <b>-1,4</b>      |

Aufgrund der Änderungen des KWG durch die CRD II werden seit dem 31. Dezember 2010 nur noch die Stillen Einlagen des SoFFin als Stille Einlagen ausgewiesen. Die Stille Einlage der Allianz sowie die von der HT1 Funding GmbH gehaltene Stille

Einlage werden regulatorisch seitdem als Hybridkapital im Kernkapital erfasst. Für den bilanziellen Ausweis ergaben sich hierdurch keine Änderungen. Die aufsichtsrechtlichen Eigenmittelanforderungen und Kapitalquoten stellten sich wie folgt dar:

| Mio €                                        | 31.12.2010    | 31.12.2009    | Veränderung in % |
|----------------------------------------------|---------------|---------------|------------------|
| Eigenmittelanforderung Kreditrisiko          | 18 595        | 19 705        | -5,6             |
| Eigenmittelanforderung Marktrisiko           | 1 059         | 1 144         | -7,4             |
| Eigenmittelanforderung Operationelles Risiko | 1 746         | 1 562         | 11,8             |
| <b>Eigenmittelanforderung gesamt</b>         | <b>21 400</b> | <b>22 411</b> | <b>-4,5</b>      |
| Anrechenbare Eigenmittel                     | 40 857        | 41 437        | -1,4             |
| Kernkapitalquote                             | 11,9          | 10,5          |                  |
| Eigenmittelquote                             | 15,3          | 14,8          |                  |

|     |                                  |
|-----|----------------------------------|
| 204 | Gesamtergebnisrechnung           |
| 208 | Bilanz                           |
| 210 | Eigenkapitalveränderungsrechnung |
| 212 | Kapitalflussrechnung             |
| 214 | Anhang (Notes)                   |
| 370 | Bestätigungsvermerk              |

#### Überleitungsrechnung vom ausgewiesenen Konzernkapital zu den anrechenbaren Eigenmitteln:

| 31.12.2010<br>Mio €                                                                                                                                                                           | Kernkapital/<br>Eigenkapital | Ergänzungs-/<br>Nachrangkapital | Gesamt        |
|-----------------------------------------------------------------------------------------------------------------------------------------------------------------------------------------------|------------------------------|---------------------------------|---------------|
| Bilanziell ausgewiesen                                                                                                                                                                        | 28 658                       | 12 910                          | 41 568        |
| Neubewertungsrücklage                                                                                                                                                                         | 1 731                        |                                 | 1 731         |
| Rücklage aus Cash Flow Hedges                                                                                                                                                                 | 1 005                        |                                 | 1 005         |
| Nicht im Kernkapital auszuweisende Anteile<br>im Fremdbesitz (unter anderem Neubewertungsrücklage,<br>Rücklage aus Cash Flow Hedges),<br>Unterschiede im Konsolidierungskreis und Firmenwerte | - 1 775                      |                                 | - 1 775       |
| Sonstiges Kapital mit 15% Anrechnungsgrenze                                                                                                                                                   | 3 158                        |                                 | 3 158         |
| Sonstiges Kapital mit 35% Anrechnungsgrenze                                                                                                                                                   | 1 841                        |                                 | 1 841         |
| Umgliederung von den stillen Einlagen zum sonstigen Kapital                                                                                                                                   | - 750                        |                                 | - 750         |
| Nicht anrechenbare Teile des Nachrangkapitals<br>wegen Restlaufzeitbeschränkung                                                                                                               |                              | - 1 918                         | - 1 918       |
| Latente Neubewertungsrücklagen für Wertpapiere                                                                                                                                                |                              | 148                             | 148           |
| Sonstiges                                                                                                                                                                                     | - 2 141                      | - 2 010                         | - 4 151       |
| <b>Anrechenbare Eigenmittel</b>                                                                                                                                                               | <b>31 727</b>                | <b>9 130</b>                    | <b>40 857</b> |

#### (97) Absicherung von Krediten

Durch den Einsatz von Kreditderivaten (zum Beispiel Credit Default Swaps, Total Return Swaps, Credit Linked Notes) kann die Risikoanrechnung eines Kreditportfolios verringert werden. Dabei kann sich die Sicherungswirkung eines Kreditderivates sowohl auf einzelne Kredite oder Wertpapiere als auch auf Kredit- oder Wertpapierportfolios beziehen. Die Sicherheitenstellung erfolgt in der Regel im Rahmen einer synthetischen Verbriefung durch Credit Default Swap (CDS) und/oder durch Credit Linked Notes (CLN). Hiermit können drei wesentliche Ziele erreicht werden:

- Risikodiversifikation (Reduzierung von Kreditrisiken im Portfolio, insbesondere Klumpenrisiken),
- Eigenkapitalentlastung (durch Übertragung der Kreditrisiken auf Investoren wird eine Reduzierung der regulatori-

schen Eigenkapitalanforderungen nach Solvabilitätsverordnung erreicht) und

- Refinanzierung (Nutzung von Verbriefungen als alternatives Kapitalbeschaffungsinstrument zu ungedeckten Inhaberschuldverschreibungen).

Zum Ende des Geschäftsjahres 2010 hatte der Commerzbank-Konzern (Commerzbank Aktiengesellschaft und drei Tochtergesellschaften) sechs Verbriefungs-Transaktionen als Sicherungnehmer aufgelegt.

Die vertragliche Laufzeit (Legal Maturity Date) liegt zwischen 10 und 76 Jahren. Insgesamt waren Ende Dezember 2010 Kundenkredite in Höhe von 9,2 Mrd Euro abgesichert. Die Entlastung der gewichteten Risikoaktiva betrug 2,1 Mrd Euro.

| Name der Transaktion    | Sicherungsnehmer                                                                           | Jahr des Abschlusses | Laufzeit der Transaktion<br>in Jahren | Forderungsart                           | Kredit-          | Entlastung                                  |
|-------------------------|--------------------------------------------------------------------------------------------|----------------------|---------------------------------------|-----------------------------------------|------------------|---------------------------------------------|
|                         |                                                                                            |                      |                                       |                                         | volumen<br>Mio € | der<br>gewichteten<br>Risikoaktiva<br>Mio € |
| CoCo Finance 2006-1     | Commerzbank Aktiengesellschaft, Commerzbank International S.A., Commerzbank (Eurasija) SAO | 2006                 | 10                                    | nationale und internationale Großkunden | 4 377            | 329                                         |
| Cosmo Finance 2007-1    | Commerzbank Aktiengesellschaft                                                             | 2007                 | 20                                    | Mittelstandskunden                      | 1 972            | 820                                         |
| Cosmo Finance 2008-1    | Commerzbank Aktiengesellschaft                                                             | 2008                 | 14                                    | Mittelstandskunden                      | 1 381            | 551                                         |
| Provide GEMS 2002-1 PLC | Eurohypo Aktiengesellschaft                                                                | 2002                 | 45                                    | wohnungswirtschaftliches Portfolio      | 238              | 59                                          |
| Semper Finance 2006-1   | Eurohypo Aktiengesellschaft                                                                | 2006                 | 76                                    | Project Castle – gewerbliches Portfolio | 707              | 206                                         |
| Semper Finance 2007-1   | Eurohypo Aktiengesellschaft                                                                | 2007                 | 36                                    | gewerbliches Portfolio                  | 525              | 167                                         |
|                         |                                                                                            |                      |                                       |                                         | <b>9 200</b>     | <b>2 132</b>                                |

#### (98) Durchschnittliche Zahl der während des Geschäftsjahres beschäftigten Mitarbeiter

|                        | 2010   |          |          | 2009   |          |          |
|------------------------|--------|----------|----------|--------|----------|----------|
|                        | Gesamt | männlich | weiblich | Gesamt | männlich | weiblich |
| Im Konzern             | 57 676 | 31 141   | 26 535   | 63 267 | 34 680   | 28 587   |
| In Deutschland         | 43 378 | 21 776   | 21 602   | 45 299 | 22 912   | 22 387   |
| Außerhalb Deutschlands | 14 298 | 9 365    | 4 933    | 17 968 | 11 768   | 6 200    |

Die obigen Zahlen enthalten sowohl Vollzeit- als auch Teilzeitkräfte. In der Zahl der Arbeitnehmer sind die im Konzern durchschnittlich in Ausbildung befindlich gewesenen Arbeitnehmer

nicht enthalten. Die durchschnittliche Arbeitszeit der Teilzeitkräfte betrug 59 % (Vorjahr: 60 %) der Normalarbeitszeit.

|               | 2010   |          |          | 2009   |          |          |
|---------------|--------|----------|----------|--------|----------|----------|
|               | Gesamt | männlich | weiblich | Gesamt | männlich | weiblich |
| Auszubildende | 2 616  | 1 313    | 1 303    | 2 282  | 1 021    | 1 261    |

|     |                                  |
|-----|----------------------------------|
| 204 | Gesamtergebnisrechnung           |
| 208 | Bilanz                           |
| 210 | Eigenkapitalveränderungsrechnung |
| 212 | Kapitalflussrechnung             |
| 214 | Anhang (Notes)                   |
| 370 | Bestätigungsvermerk              |

## (99) Beziehungen zu nahestehenden Unternehmen und Personen

### a) Geschäftsbeziehungen

Im Rahmen der gewöhnlichen Geschäftstätigkeit kommt es zwischen der Commerzbank Aktiengesellschaft und/oder deren konsolidierten Gesellschaften zu Geschäftsbeziehungen mit nahestehenden Unternehmen und Personen. Hierzu gehören beherrschte, aber aus Gründen der Wesentlichkeit nicht konsolidierte Gesellschaften, at-Equity-bewertete Unternehmen, Beteiligungen, unternehmensexterne Versorgungsträger zur betrieblichen Altersversorgung der Mitarbeiter der Commerzbank Aktiengesellschaft, Personen in Schlüsselpositionen und deren Angehörige sowie von diesem Personenkreis beherrschte Unternehmen. Zu den Personen in Schlüsselpositionen zählen ausschließlich die Vorstands- und Aufsichtsratsmitglieder der Commerzbank Aktiengesellschaft.

Der Anteilsbesitz von 25 % plus einer Aktie gewährt dem Bund als Träger der Finanzmarktstabilisierungsanstalt, die den Sonderfonds Finanzmarktstabilisierung (SoFFin) verwaltet, die Möglichkeit einen maßgeblichen Einfluss auf die Commerzbank Aktiengesellschaft auszuüben. Demnach zählen der Bund sowie der Kontrolle der Bundesrepublik Deutschland unterstehende Unternehmen (Bundesunternehmen) zum Kreis der nahestehenden Unternehmen und Personen nach IAS 24. Die Beziehungen zu Bundesunternehmen zeigen wir im Folgenden getrennt von den Beziehungen zu den übrigen nahestehenden Unternehmen und Personen.

Aktiva, Passiva und außerbilanzielle Posten in Verbindung mit nahestehenden Unternehmen (ohne Bundesunternehmen) und Personen stellten sich im Berichtsjahr folgendermaßen dar:

| Aktiva   Mio €                                                                                            | 31.12.2010   | 31.12.2009   | Veränderung in % |
|-----------------------------------------------------------------------------------------------------------|--------------|--------------|------------------|
| <b>Forderungen an Kreditinstitute</b>                                                                     | <b>617</b>   | <b>923</b>   | <b>-33,2</b>     |
| Tochterunternehmen                                                                                        | -            | -            | .                |
| Anteile an at-Equity-bewerteten Unternehmen und Unternehmen, mit denen ein Beteiligungsverhältnis besteht | 617          | 923          | -33,2            |
| <b>Forderungen an Kunden</b>                                                                              | <b>1 359</b> | <b>1 042</b> | <b>30,4</b>      |
| Tochterunternehmen                                                                                        | 321          | 289          | 11,1             |
| Anteile an at-Equity-bewerteten Unternehmen und Unternehmen, mit denen ein Beteiligungsverhältnis besteht | 1 032        | 750          | 37,6             |
| Personen in Schlüsselpositionen                                                                           | 3            | 3            | 0,0              |
| Sonstige nahestehende Unternehmen/Personen                                                                | 3            | -            | .                |
| <b>Handelsaktiva</b>                                                                                      | <b>1 285</b> | <b>1 692</b> | <b>-24,1</b>     |
| Tochterunternehmen                                                                                        | 1 285        | 1 692        | -24,1            |
| Anteile an at-Equity-bewerteten Unternehmen und Unternehmen, mit denen ein Beteiligungsverhältnis besteht | -            | -            | .                |
| Sonstige nahestehende Unternehmen/Personen                                                                | -            | -            | .                |
| <b>Finanzanlagen</b>                                                                                      | <b>82</b>    | <b>39</b>    | <b>.</b>         |
| Tochterunternehmen                                                                                        | 69           | 38           | 81,6             |
| Anteile an at-Equity-bewerteten Unternehmen und Unternehmen, mit denen ein Beteiligungsverhältnis besteht | 9            | -            | .                |
| Sonstige nahestehende Unternehmen/Personen                                                                | 4            | 1            | .                |
| <b>Sonstige Aktiva</b>                                                                                    | <b>298</b>   | <b>-</b>     | <b>.</b>         |
| Tochterunternehmen                                                                                        | -            | -            | .                |
| Anteile an at-Equity-bewerteten Unternehmen und Unternehmen, mit denen ein Beteiligungsverhältnis besteht | 298          | -            | .                |
| <b>Gesamt</b>                                                                                             | <b>3 641</b> | <b>3 696</b> | <b>-1,5</b>      |

| <b>Passiva   Mio €</b>                                                                                    | <b>31.12.2010</b> | <b>31.12.2009</b> | <b>Veränderung in %</b> |
|-----------------------------------------------------------------------------------------------------------|-------------------|-------------------|-------------------------|
| <b>Verbindlichkeiten gegenüber Kreditinstituten</b>                                                       | <b>5</b>          | <b>6</b>          | <b>-16,7</b>            |
| Tochterunternehmen                                                                                        | -                 | -                 | .                       |
| Anteile an at-Equity-bewerteten Unternehmen und Unternehmen, mit denen ein Beteiligungsverhältnis besteht | 5                 | 6                 | -16,7                   |
| <b>Verbindlichkeiten gegenüber Kunden</b>                                                                 | <b>1 607</b>      | <b>1 512</b>      | <b>6,3</b>              |
| Tochterunternehmen                                                                                        | 208               | 102               | .                       |
| Anteile an at-Equity-bewerteten Unternehmen und Unternehmen, mit denen ein Beteiligungsverhältnis besteht | 117               | 197               | -40,6                   |
| Personen in Schlüsselpositionen                                                                           | 10                | 11                | -9,1                    |
| Sonstige nahestehende Unternehmen/Personen                                                                | 1 272             | 1 202             | 5,8                     |
| <b>Handelspassiva</b>                                                                                     | <b>2 021</b>      | <b>1 495</b>      | <b>35,2</b>             |
| Tochterunternehmen                                                                                        | 2 021             | 1 495             | 35,2                    |
| Anteile an at-Equity-bewerteten Unternehmen und Unternehmen, mit denen ein Beteiligungsverhältnis besteht | -                 | -                 | .                       |
| Sonstige nahestehende Unternehmen/Personen                                                                | -                 | -                 | .                       |
| <b>Sonstige Passiva</b>                                                                                   | <b>16</b>         | <b>-</b>          | <b>.</b>                |
| Tochterunternehmen                                                                                        | 9                 | -                 | .                       |
| Anteile an at-Equity-bewerteten Unternehmen und Unternehmen, mit denen ein Beteiligungsverhältnis besteht | 7                 | -                 | .                       |
| <b>Gesamt</b>                                                                                             | <b>3 649</b>      | <b>3 013</b>      | <b>21,1</b>             |
| <b>Außerbilanzielle Posten   Mio €</b>                                                                    | <b>31.12.2010</b> | <b>31.12.2009</b> | <b>Veränderung in %</b> |
| <b>Garantien und Sicherheiten gewährt an</b>                                                              | <b>590</b>        | <b>131</b>        | <b>.</b>                |
| Tochterunternehmen                                                                                        | 36                | 16                | .                       |
| Anteile an at-Equity-bewerteten Unternehmen und Unternehmen, mit denen ein Beteiligungsverhältnis besteht | 554               | 115               | .                       |
| Personen in Schlüsselpositionen                                                                           | -                 | -                 | .                       |
| Sonstige nahestehende Unternehmen/Personen                                                                | -                 | -                 | .                       |
| <b>Garantien und Sicherheiten erhalten von</b>                                                            | <b>7</b>          | <b>35</b>         | <b>-80,0</b>            |
| Tochterunternehmen                                                                                        | 7                 | 20                | -65,0                   |
| Anteile an at-Equity-bewerteten Unternehmen und Unternehmen, mit denen ein Beteiligungsverhältnis besteht | -                 | 15                | .                       |
| Personen in Schlüsselpositionen                                                                           | -                 | -                 | .                       |
| Sonstige nahestehende Unternehmen/Personen                                                                | -                 | -                 | .                       |

In den Verbindlichkeiten gegenüber Kunden waren unter den Sonstigen nahestehenden Unternehmen 1,3 Mrd Euro (Vorjahr: 1,2 Mrd Euro) für unternehmensexterne Versorgungsträger enthalten.



|     |                                  |
|-----|----------------------------------|
| 204 | Gesamtergebnisrechnung           |
| 208 | Bilanz                           |
| 210 | Eigenkapitalveränderungsrechnung |
| 212 | Kapitalflussrechnung             |
| 214 | Anhang (Notes)                   |
| 370 | Bestätigungsvermerk              |

Aus Kreditverträgen und Einlagen sowie erbrachten Dienstleistungen in Verbindung mit nahestehenden Unternehmen und Personen (ohne Bundesunternehmen) ergaben sich folgende Aufwendungen und Erträge:

| Erträge   Mio €                                                                                                  | 1.1.–31.12.2010 | 1.1.–31.12.2009 | Veränderung in % |
|------------------------------------------------------------------------------------------------------------------|-----------------|-----------------|------------------|
| <b>Nicht konsolidierte Tochterunternehmen</b>                                                                    |                 |                 |                  |
| Zinsen                                                                                                           | 60              | 12              | .                |
| Provisionen                                                                                                      | 2               | 16              | -87,5            |
| Lieferungen und Leistungen                                                                                       | -               | 4               | .                |
| <b>Anteile an at-Equity-bewerteten Unternehmen und Unternehmen, mit denen ein Beteiligungsverhältnis besteht</b> |                 |                 |                  |
| Zinsen                                                                                                           | 114             | 59              | 93,2             |
| Provisionen                                                                                                      | 12              | 21              | -42,9            |
| Lieferungen und Leistungen                                                                                       | -               | 5               | .                |
| <b>Personen in Schlüsselpositionen</b>                                                                           |                 |                 |                  |
| Zinsen                                                                                                           | -               | -               | .                |
| Provisionen                                                                                                      | -               | -               | .                |
| Lieferungen und Leistungen                                                                                       | -               | -               | .                |
| <b>Sonstige nahestehende Unternehmen/Personen</b>                                                                |                 |                 |                  |
| Zinsen                                                                                                           | -               | -               | .                |
| Provisionen                                                                                                      | -               | -               | .                |
| Lieferungen und Leistungen                                                                                       | -               | -               | .                |
| <b>Summen</b>                                                                                                    |                 |                 |                  |
| Zinsen                                                                                                           | 174             | 71              | .                |
| Provisionen                                                                                                      | 14              | 37              | -62,2            |
| Lieferungen und Leistungen                                                                                       | -               | 9               | .                |

| Aufwendungen   Mio €                                                                                             | 1.1.–31.12.2010 | 1.1.–31.12.2009 | Veränderung in % |
|------------------------------------------------------------------------------------------------------------------|-----------------|-----------------|------------------|
| <b>Nicht konsolidierte Tochterunternehmen</b>                                                                    |                 |                 |                  |
| Zinsen                                                                                                           | –               | 7               | .                |
| Provisionen                                                                                                      | 33              | 15              | .                |
| Lieferungen und Leistungen                                                                                       | 48              | 14              | .                |
| Abschreibungen/Wertminderungen                                                                                   | –               | –               | .                |
| <b>Anteile an at-Equity-bewerteten Unternehmen und Unternehmen, mit denen ein Beteiligungsverhältnis besteht</b> |                 |                 |                  |
| Zinsen                                                                                                           | –               | 10              | .                |
| Provisionen                                                                                                      | –               | –               | .                |
| Lieferungen und Leistungen                                                                                       | 9               | 11              | – 18,2           |
| Abschreibungen/Wertminderungen                                                                                   | –               | –               | .                |
| <b>Personen in Schlüsselpositionen</b>                                                                           |                 |                 |                  |
| Zinsen                                                                                                           | –               | –               | .                |
| Provisionen                                                                                                      | –               | –               | .                |
| Lieferungen und Leistungen                                                                                       | –               | –               | .                |
| Abschreibungen/Wertminderungen                                                                                   | –               | –               | .                |
| <b>Sonstige nahestehende Unternehmen/Personen</b>                                                                |                 |                 |                  |
| Zinsen                                                                                                           | 56              | 59              | – 5,1            |
| Provisionen                                                                                                      | –               | –               | .                |
| Lieferungen und Leistungen                                                                                       | –               | –               | .                |
| Abschreibungen/Wertminderungen                                                                                   | –               | –               | .                |
| <b>Summen</b>                                                                                                    |                 |                 |                  |
| Zinsen                                                                                                           | 56              | 76              | – 26,3           |
| Provisionen                                                                                                      | 33              | 15              | .                |
| Lieferungen und Leistungen                                                                                       | 57              | 25              | .                |
| Abschreibungen/Wertminderungen                                                                                   | –               | –               | .                |

Die Forderungen an Personen in Schlüsselpositionen stellten sich wie folgt dar:

| Tsd €        | 31.12.2010   | 31.12.2009   | Veränderung in % |
|--------------|--------------|--------------|------------------|
| Vorstand     | 2 647        | 2 304        | 14,9             |
| Aufsichtsrat | 484          | 650          | – 25,5           |
| <b>Summe</b> | <b>3 131</b> | <b>2 954</b> | <b>6,0</b>       |

Barkredite an Vorstände wurden mit Laufzeiten von bis auf Weiteres und letzter Fälligkeit im Jahr 2038 sowie zu Zinssätzen zwischen 2,8 % und 5,5 %, bei Überziehungen in Einzelfällen bis zu 10,7 % gewährt. Die Besicherung erfolgte zu marktüblichen Bedingungen, soweit erforderlich mit Grundschulden oder Pfandrechten.

Die Kredite an Mitglieder des Aufsichtsrates wurden mit Laufzeiten von bis auf Weiteres und letzter Fälligkeit im Jahr 2040 sowie zu Zinssätzen zwischen 3,8 % und 7,7 %, bei Überziehungen in Einzelfällen bis zu 10,7 % herausgelegt. Die

Besicherung erfolgte zu marktüblichen Bedingungen soweit erforderlich mit Grundschulden oder Pfandrechten.

Die Mitglieder von Vorstand und Aufsichtsrat standen im Berichtsjahr, mit Ausnahme von Mietavalen, nicht in einem Haftungsverhältnis mit den Gesellschaften des Commerzbank-Konzerns.

Die mit nahestehenden Unternehmen und Personen getätigten Bankgeschäfte wurden zu marktüblichen Bedingungen und Konditionen abgeschlossen.

|     |                                  |
|-----|----------------------------------|
| 204 | Gesamtergebnisrechnung           |
| 208 | Bilanz                           |
| 210 | Eigenkapitalveränderungsrechnung |
| 212 | Kapitalflussrechnung             |
| 214 | Anhang (Notes)                   |
| 370 | Bestätigungsvermerk              |

### Geschäfte mit Bundesunternehmen

Der Commerzbank-Konzern wickelt Geschäfte mit Bundesunternehmen im Rahmen der gewöhnlichen Geschäftstätigkeit grundsätzlich zu marktgerechten Bedingungen und Konditionen ab. Einzelheiten der Beziehungen zum SoFFin sind in der Note 74

angegeben. Nachstehende Tabelle enthält die am 31. Dezember 2010 bestehenden Vermögenswerte und Verpflichtungen aus Geschäften mit Bundesunternehmen:

| Mio €                                        | 31.12.2010    | 31.12.2009    | Veränderung in % |
|----------------------------------------------|---------------|---------------|------------------|
| Barreserve                                   | 1 111         | 3 633         | -69,4            |
| Forderungen an Kreditinstitute               | 726           | 213           | .                |
| Forderungen an Kunden                        | 2 991         | 2 378         | 25,8             |
| Handelsaktiva                                | 5 040         | 2 628         | 91,8             |
| Finanzanlagen                                | 7 079         | 6 209         | 14,0             |
| <b>Gesamt</b>                                | <b>16 947</b> | <b>15 061</b> | <b>12,5</b>      |
| Verbindlichkeiten gegenüber Kreditinstituten | 15 262        | 24 260        | -37,1            |
| Verbindlichkeiten gegenüber Kunden           | 88            | 90            | -2,2             |
| Nachrangkapital                              | 16 428        | 16 428        | 0,0              |
| <b>Gesamt</b>                                | <b>31 778</b> | <b>40 778</b> | <b>-22,1</b>     |
| Garantien und Sicherheiten                   |               |               |                  |
| gewährt                                      | 298           | 3             | .                |
| erhalten                                     | 5 000         | 5 000         | 0,0              |

Bei den unter Handelsaktiva beziehungsweise Finanzanlagen ausgewiesenen Finanzinstrumenten handelt es sich um Fremdkapitalinstrumente. Die auf Geschäfte mit Bundesunternehmen entfallenden Aufwendungen und Erträge stellen sich wie folgt dar:

| 31.12.2010   Mio €             | Aufwendungen | Erträge |
|--------------------------------|--------------|---------|
| Zinsen                         | 27           | 163     |
| Provisionen                    | 48           | -       |
| Lieferungen und Leistungen     | -            | 8       |
| Abschreibungen/Wertminderungen | -            | -       |

### b) Vergütungen für Personen in Schlüsselpositionen

Eine detaillierte Beschreibung der Grundzüge des Vergütungssystems für die Mitglieder des Vorstands und des Aufsichtsrates wird im Vergütungsbericht (Seiten 51 ff.) wiedergegeben. Ohne Berücksichtigung des in der Berechnung der Pensionsverpflich-

tungen berücksichtigten Dienstzeitaufwands sowie der Arbeitgeberanteile zum BVV und zur Rentenversicherung für die Mitglieder des Vorstands belief sich die gesamte Vergütung für die Organmitglieder auf:

| in Tsd €      | 31.12.2010   | 31.12.2009   |
|---------------|--------------|--------------|
| Vorstand      | 5 275        | 5 865        |
| Aufsichtsrat  | 1 841        | 1 974        |
| <b>Gesamt</b> | <b>7 116</b> | <b>7 839</b> |

**Vorstand.** In der folgenden Tabelle wird die Vergütung der Vorstandsmitglieder nach den in IAS 24 bestimmten Kategorien dargestellt:

| Tsd €                  |                     | Kurzfristig fällige Leistungen | Leistungen aus Anlass der Beendigung des Arbeitsverhältnisses | Auszahlung aktienbasierte Vergütungspläne <sup>4</sup> | Gesamtvergütung | Aufwand für Leistungen nach Beendigung des Arbeitsverhältnisses <sup>5</sup> |
|------------------------|---------------------|--------------------------------|---------------------------------------------------------------|--------------------------------------------------------|-----------------|------------------------------------------------------------------------------|
| Martin Blessing        | 2010                | 617                            |                                                               | –                                                      | 617             | 283                                                                          |
|                        | 2009                | 572                            |                                                               | –                                                      | 572             | 216                                                                          |
| Frank Annuschein       | 2010                | 603                            |                                                               | –                                                      | 603             | 259                                                                          |
|                        | 2009                | 545                            |                                                               | –                                                      | 545             | 212                                                                          |
| Markus Beumer          | 2010                | 547                            |                                                               | –                                                      | 547             | 218                                                                          |
|                        | 2009                | 602                            |                                                               | –                                                      | 602             | 176                                                                          |
| Wolfgang Hartmann      | 2010 <sup>2</sup>   | –                              |                                                               | –                                                      | –               | –                                                                            |
|                        | 2009 <sup>1</sup>   | 232                            |                                                               | –                                                      | 232             | 130                                                                          |
| Dr. Achim Kassow       | 2010                | 572                            |                                                               | –                                                      | 572             | 154                                                                          |
|                        | 2009                | 564                            |                                                               | –                                                      | 564             | 119                                                                          |
| Jochen Klösches        | 2010                | 566                            |                                                               | –                                                      | 566             | 262                                                                          |
|                        | 2009 <sup>1</sup>   | 298                            |                                                               | –                                                      | 298             | –                                                                            |
| Bernd Knobloch         | 2010 <sup>2</sup>   | –                              | –                                                             | –                                                      | –               | –                                                                            |
|                        | 2009 <sup>2,3</sup> | –                              | 1 113                                                         | –                                                      | 1 113           | –                                                                            |
| Michael Reuther        | 2010                | 575                            |                                                               | –                                                      | 575             | 336                                                                          |
|                        | 2009                | 575                            |                                                               | –                                                      | 575             | 269                                                                          |
| Dr. Stefan Schmittmann | 2010                | 555                            |                                                               | –                                                      | 555             | 454                                                                          |
|                        | 2009                | 535                            |                                                               | –                                                      | 535             | 405                                                                          |
| Ulrich Sieber          | 2010                | 563                            |                                                               | –                                                      | 563             | 228                                                                          |
|                        | 2009 <sup>1</sup>   | 308                            |                                                               | –                                                      | 308             | –                                                                            |
| Dr. Eric Strutz        | 2010                | 595                            |                                                               | –                                                      | 595             | 168                                                                          |
|                        | 2009                | 521                            |                                                               | –                                                      | 521             | 124                                                                          |
| Martin Zielke          | 2010 <sup>1</sup>   | 82                             |                                                               | –                                                      | 82              | –                                                                            |
|                        | 2009 <sup>2</sup>   | –                              |                                                               | –                                                      | –               | –                                                                            |
| <b>Gesamt</b>          | <b>2010</b>         | <b>5 275</b>                   | <b>–</b>                                                      | <b>–</b>                                               | <b>5 275</b>    | <b>2 362</b>                                                                 |
|                        | <b>2009</b>         | <b>4 752</b>                   | <b>1 113</b>                                                  | <b>–</b>                                               | <b>5 865</b>    | <b>1 651</b>                                                                 |

<sup>1</sup> Pro rata temporis für den Zeitraum ab Bestellung beziehungsweise bis zum Tag des Ausscheidens.

<sup>2</sup> Diese Herren waren in den angegebenen Jahren keine Vorstandsmitglieder.

<sup>3</sup> Herr Knobloch erhielt 2009 einen Betrag von 1 113 Tsd Euro auf Basis einer mit ihm geschlossenen Aufhebungsvereinbarung.

<sup>4</sup> Im Berichtsjahr 2010 wurde kein LTP ausgezahlt.

<sup>5</sup> Dienstzeitaufwand sowie Arbeitgeberanteile zum BVV und zur Rentenversicherung; andere langfristig fällige Leistungen gemäß IAS 24 waren nicht zu verzeichnen.

Einschließlich des Aufwandes für Leistungen der Bank nach Beendigung des Arbeitsverhältnisses lagen die Gesamtbezüge der Vorstandsmitglieder bei 7 637 Tsd Euro (Vorjahr: 7 516 Tsd Euro).

In nachfolgender Tabelle sind die Komponenten der kurzfristig fälligen Leistungen aufgeführt. Sie bestehen aus dem Grundgehalt, der variablen Vergütung, der Vergütungen für die Übernahme von Organfunktionen bei im Konzernabschluss der

Commerzbank Aktiengesellschaft konsolidierten Unternehmen sowie aus den sonstigen Bezügen der einzelnen Mitglieder des Vorstands. Unter Sonstiges sind unter anderem die im üblichen Rahmen gewährten Sachbezüge (im Wesentlichen Dienstwagennutzungen, Versicherungen, auf die Sachbezüge entfallende Steuern sowie Sozialabgaben) enthalten.

Für die Geschäftsjahre 2010 und 2009 wurde keine variable Vergütung gewährt.

|     |                                  |
|-----|----------------------------------|
| 204 | Gesamtergebnisrechnung           |
| 208 | Bilanz                           |
| 210 | Eigenkapitalveränderungsrechnung |
| 212 | Kapitalflussrechnung             |
| 214 | Anhang (Notes)                   |
| 370 | Bestätigungsvermerk              |

|                           |                   | Grund-<br>gehalt | variable<br>Vergütung <sup>3</sup> | Vergütung<br>für die<br>Übernahme<br>von Organ-<br>funktionen <sup>4</sup> | Rückführung<br>gemäß SoFFin-<br>Cap <sup>4</sup> | Monetäre<br>Gesamt-<br>vergütung | Sonstiges <sup>5</sup> | Summe<br>kurzfristig<br>fällige<br>Leistungen |
|---------------------------|-------------------|------------------|------------------------------------|----------------------------------------------------------------------------|--------------------------------------------------|----------------------------------|------------------------|-----------------------------------------------|
| Tsd €                     |                   |                  |                                    |                                                                            |                                                  |                                  |                        |                                               |
| Martin Blessing           | 2010              | 500              | –                                  | –                                                                          | –                                                | 500                              | 117                    | 617                                           |
|                           | 2009              | 500              | –                                  | –                                                                          | –                                                | 500                              | 72                     | 572                                           |
| Frank Annuscheit          | 2010              | 500              | –                                  | –                                                                          | –                                                | 500                              | 103                    | 603                                           |
|                           | 2009              | 480              | –                                  | 23                                                                         | –3                                               | 500                              | 45                     | 545                                           |
| Markus Beumer             | 2010              | 500              | –                                  | –                                                                          | –                                                | 500                              | 47                     | 547                                           |
|                           | 2009              | 480              | –                                  | 12                                                                         | –                                                | 492                              | 110                    | 602                                           |
| Wolfgang Hartmann         | 2010 <sup>2</sup> | –                | –                                  | –                                                                          | –                                                | –                                | –                      | –                                             |
|                           | 2009 <sup>1</sup> | 200              | –                                  | –                                                                          | –                                                | 200                              | 32                     | 232                                           |
| Dr. Achim Kassow          | 2010              | 500              | –                                  | –                                                                          | –                                                | 500                              | 72                     | 572                                           |
|                           | 2009              | 480              | –                                  | 124                                                                        | –104                                             | 500                              | 64                     | 564                                           |
| Jochen Klösger            | 2010              | 500              | –                                  | –                                                                          | –                                                | 500                              | 66                     | 566                                           |
|                           | 2009 <sup>1</sup> | 280              | –                                  | –                                                                          | –                                                | 280                              | 18                     | 298                                           |
| Bernd Knobloch            | 2010 <sup>2</sup> | –                | –                                  | –                                                                          | –                                                | –                                | –                      | –                                             |
|                           | 2009 <sup>2</sup> | –                | –                                  | –                                                                          | –                                                | –                                | –                      | –                                             |
| Michael Reuther           | 2010              | 500              | –                                  | –                                                                          | –                                                | 500                              | 75                     | 575                                           |
|                           | 2009              | 480              | –                                  | 21                                                                         | –1                                               | 500                              | 75                     | 575                                           |
| Dr. Stefan<br>Schmittmann | 2010              | 500              | –                                  | –                                                                          | –                                                | 500                              | 55                     | 555                                           |
|                           | 2009              | 480              | –                                  | –                                                                          | –                                                | 480                              | 55                     | 535                                           |
| Ulrich Sieber             | 2010              | 500              | –                                  | –                                                                          | –                                                | 500                              | 63                     | 563                                           |
|                           | 2009 <sup>1</sup> | 280              | –                                  | –                                                                          | –                                                | 280                              | 28                     | 308                                           |
| Dr. Eric Strutz           | 2010              | 500              | –                                  | –                                                                          | –                                                | 500                              | 95                     | 595                                           |
|                           | 2009              | 480              | –                                  | 2                                                                          | –                                                | 482                              | 39                     | 521                                           |
| Martin Zielke             | 2010 <sup>1</sup> | 78               | –                                  | –                                                                          | –                                                | 78                               | 4                      | 82                                            |
|                           | 2009 <sup>2</sup> | –                | –                                  | –                                                                          | –                                                | –                                | –                      | –                                             |
| <b>Gesamt</b>             | <b>2010</b>       | <b>4 578</b>     | <b>–</b>                           | <b>–</b>                                                                   | <b>–</b>                                         | <b>4 578</b>                     | <b>697</b>             | <b>5 275</b>                                  |
|                           | <b>2009</b>       | <b>4 140</b>     | <b>–</b>                           | <b>182</b>                                                                 | <b>–108</b>                                      | <b>4 214</b>                     | <b>538</b>             | <b>4 752</b>                                  |

<sup>1</sup> Pro rata temporis für den Zeitraum ab Bestellung beziehungsweise bis zum Tag des Ausscheidens.

<sup>2</sup> Diese Herren waren in den angegebenen Jahren keine Vorstandsmitglieder.

<sup>3</sup> Auszahlbar im Folgejahr vorbehaltlich der Feststellung des Jahresabschlusses.

<sup>4</sup> Die in den Geschäftsjahren 2009 und 2010 gewährten Bezüge für die Tätigkeiten in Organen von Konzerngesellschaften werden in voller Höhe auf den SoFFin-Cap des jeweiligen Vorjahres angerechnet und deshalb in der Tabelle dem Vorjahr zugeordnet (vergleiche Vergütungsbericht).

<sup>5</sup> Unter Sonstiges sind die im Berichtsjahr gewährten Sachbezüge, Sozialversicherungsbeiträge sowie auf Sachbezüge entfallende Steuern ausgewiesen.

Zu den Regelungen bezüglich der Leistungen aus Anlass der Beendigung des Dienstverhältnisses für die aktiven Vorstandsmitglieder verweisen wir auf die Darstellung im Vergütungsbericht unter Sonstige Regelungen.

Für Vorstandsmitglieder und ehemalige Mitglieder des Vorstands oder deren Hinterbliebene sieht die Bank eine Altersversorgung vor, deren zur Absicherung dienende Vermögenswerte insgesamt im Wege eines Contractual Trust Arrangements auf den Commerzbank Pensions-Trust e. V. übertragen wurden.

Zum 31. Dezember 2010 beliefen sich die Pensionsverpflichtungen für aktive Vorstandsmitglieder auf 10,3 Mio Euro (Vor-

jahr: 7,0 Mio Euro) und für ehemalige Mitglieder des Vorstands der Commerzbank Aktiengesellschaft oder deren Hinterbliebene auf 70,9 Mio Euro (Vorjahr: 75,7 Mio Euro).

Nach Abzug der übertragenen Vermögenswerte (Plan Assets) und unter Berücksichtigung versicherungsmathematischer Gewinne und Verluste betragen die Rückstellungen für Pensionsverpflichtungen zum 31. Dezember 2010 für aktive Vorstandsmitglieder 0,5 Mio Euro (Vorjahr: –).

Die Bezüge der ehemaligen Mitglieder des Vorstands der Commerzbank Aktiengesellschaft und ihrer Hinterbliebenen betragen im Geschäftsjahr 6 519 Tsd Euro (Vorjahr: 7 677 Tsd Euro).

Die aktiven Vorstandsmitglieder hatten und haben sich an den in Note 25 erläuterten Long-Term-Performance-Plänen (LTP), die eine aktienbasierte Vergütungsform darstellen, beteiligt. Um an den einzelnen Plänen teilzunehmen, haben die Vorstandsmitglieder nach individueller Entscheidung eine Eigenbeteiligung von bis zu 2 500 Aktien, der Vorstandsvorsitzender bis zu 5 000 Aktien der Commerzbank Aktiengesellschaft je Plan zu den jeweils geltenden Tageskursen erbracht.

In der folgenden Tabelle sind die Daten zu den am 31. Dezember 2010 bestehenden Long-Term-Performance-

Plänen der aktiven Vorstandsmitglieder, die sie in ihrer Eigenschaft als aktive Vorstandsmitglieder erworben haben, dargestellt. Im Februar 2009 hatten die Vorstandsmitglieder sämtliche Aktien aus dem LTP 2008 abgemeldet, weshalb sie aus diesem Plan keine Zahlungen erhalten. Der beizulegende Zeitwert für die Pläne 2006 und 2007 war zum 31. Dezember 2010 jeweils null. Dies führte zur vollständigen Auflösung der bis dahin gebildeten Rückstellung von rund 10 Tsd Euro.

Laufende Long-Term-Performance-Pläne der aktiven Vorstandsmitglieder, die in der Eigenschaft als aktiver Vorstand erworben wurden:

|                    | LTP         | Anzahl der eingebrachten Aktien<br>in Stück | beizulegender Zeitwert    |                           | ratierlich gebildete Rückstellung<br>am 31.12.2010<br>in Tsd € |
|--------------------|-------------|---------------------------------------------|---------------------------|---------------------------|----------------------------------------------------------------|
|                    |             |                                             | bei Gewährung<br>in Tsd € | am 31.12.2010<br>in Tsd € |                                                                |
| Martin Blessing    | 2008        | -                                           | -                         | -                         | -                                                              |
|                    | 2007        | 2 500                                       | 79                        | -                         | -                                                              |
|                    | 2006        | 2 500                                       | 87                        | -                         | -                                                              |
| Frank Annuscheit   | 2008        | -                                           | -                         | -                         | -                                                              |
|                    | 2007        | 1 200                                       | 38                        | -                         | -                                                              |
|                    | 2006        | 1 200                                       | 42                        | -                         | -                                                              |
| Dr. Achim Kassow   | 2008        | -                                           | -                         | -                         | -                                                              |
|                    | 2007        | 2 500                                       | 79                        | -                         | -                                                              |
|                    | 2006        | 2 500                                       | 87                        | -                         | -                                                              |
| Michael Reuther    | 2008        | -                                           | -                         | -                         | -                                                              |
|                    | 2007        | 2 500                                       | 79                        | -                         | -                                                              |
|                    | 2006        | -                                           | -                         | -                         | -                                                              |
| Dr. Eric Strutz    | 2008        | -                                           | -                         | -                         | -                                                              |
|                    | 2007        | 2 500                                       | 79                        | -                         | -                                                              |
|                    | 2006        | 2 500                                       | 87                        | -                         | -                                                              |
| <b>Summen</b>      | <b>2008</b> | -                                           | -                         | -                         | -                                                              |
|                    | <b>2007</b> | <b>11 200</b>                               | <b>354</b>                | -                         | -                                                              |
|                    | <b>2006</b> | <b>8 700</b>                                | <b>303</b>                | -                         | -                                                              |
| <b>Gesamt 2010</b> |             | <b>19 900</b>                               | <b>657</b>                | -                         | -                                                              |
| <b>Gesamt 2009</b> |             | <b>19 900</b>                               | <b>657</b>                | <b>18</b>                 | <b>9,9</b>                                                     |

Sofern in obiger Tabelle Mitglieder des Vorstands namentlich nicht aufgeführt sind, hielten sie am 31. Dezember 2010 keine LTP, die sie als aktiver Vorstand erworben haben.

|     |                                  |
|-----|----------------------------------|
| 204 | Gesamtergebnisrechnung           |
| 208 | Bilanz                           |
| 210 | Eigenkapitalveränderungsrechnung |
| 212 | Kapitalflussrechnung             |
| 214 | Anhang (Notes)                   |
| 370 | Bestätigungsvermerk              |

**Aufsichtsrat.** Die Vergütung der Mitglieder des Aufsichtsrates wird in § 15 der Satzung der Commerzbank Aktiengesellschaft geregelt. Aufsichtsratsmitglieder erhielten für das Geschäftsjahr 2010 eine gesamte Vergütung von netto 1 563 Tsd Euro (Vorjahr: 1 681 Tsd Euro). Davon entfielen auf die Grund- und Ausschussvergütung 1 240 Tsd Euro (Vorjahr: 1 240 Tsd Euro) und auf das Sitzungsgeld 323 Tsd Euro (Vorjahr: 441 Tsd Euro). Das Sitzungsgeld wird für die Teilnahme an den Sitzungen des Aufsichtsrats und seiner sechs im Berichtsjahr tagenden Ausschüsse (Präsidial-, Prüfungs-, Risiko-, Nominierungs-, Vermittlungs-

und Sozialausschuss) gewährt. Die auf die Vergütungen der Aufsichtsratsmitglieder zu zahlende Umsatzsteuer von 278 Tsd Euro (Vorjahr: 293 Tsd Euro) wird von der Commerzbank Aktiengesellschaft erstattet. Insgesamt betrug die Vergütung der Aufsichtsratsmitglieder somit 1 841 Tsd Euro (Vorjahr: 1 974 Tsd Euro).

Vorstand und Aufsichtsrat besaßen am 31. Dezember 2010 insgesamt nicht mehr als 1 % (Vorjahr: unter 1 %) der ausgegebenen Aktien und Optionsrechte der Commerzbank Aktiengesellschaft.

### (100) Aktienbasierte Vergütungspläne

Aufgrund bereits erbrachter Leistungen der Mitarbeiter fielen auch im Geschäftsjahr 2010 Aufwendungen im Zusammenhang mit aktienbasierten Vergütungen an. Der aktienbasierte Vergütungsaufwand setzte sich wie folgt zusammen:

| Mio €                                           | 2010     | 2009     |
|-------------------------------------------------|----------|----------|
| Pläne mit Barausgleich                          | 3        | 1        |
| darunter: LTP                                   | 1        | 1        |
| Pläne mit Ausgleich in Eigenkapitalinstrumenten | 2        | –        |
| <b>Gesamt</b>                                   | <b>5</b> | <b>1</b> |

Die Rückstellungen für die Pläne mit Barausgleich sowie die Rücklagen im Eigenkapital für Pläne mit Ausgleich in Eigenkapitalinstrumenten stellten sich wie folgt dar:

| Mio €                     | 31.12.2010 | 31.12.2009 |
|---------------------------|------------|------------|
| Rückstellungen            | 8          | 2          |
| darunter: LTP             | 2          | 1          |
| Rücklagen im Eigenkapital | 3          | 2          |

Weitere Details und Bedingungen zu den aktienbasierten Vergütungsplänen sind der Note 25 zu entnehmen. Für das im Geschäftsjahr 2010 neu aufgelegte Programm der Share Awards erfolgt der Ausweis in den Rückstellungen für den Personalbereich. Die Höhe der Rückstellungen, die davon auf aktienbasierte Vergütungen entfallen, kann erst im April 2011 nach endgültiger

Festlegung der individuellen variablen Auszahlungsbeträge ermittelt werden. Auf Basis vorläufiger Informationen zum Abschlussstichtag schätzen wir die Höhe der möglichen Rückstellungen für die aktienbasierten Vergütungen aus diesem Programm auf 41,6 Mio Euro.

Die für die Berechnung der LTP verwendeten Parameter stellen wir in den nachfolgenden Tabellen dar:

| Typ     | Tag der Gewährung | Zeitwert pro Optionsrecht am |            |
|---------|-------------------|------------------------------|------------|
|         |                   | 31.12.2010                   | 31.12.2009 |
| in Euro |                   |                              |            |
| 2006    | 1. April 2006     | –                            | –          |
| 2007    | 1. April 2007     | –                            | 1,76       |
| 2008    | 1. Mai 2008       | 4,84                         | 4,60       |

| in Stück                   | Anzahl der Rechte |                  |
|----------------------------|-------------------|------------------|
|                            | 2010              | 2009             |
| <b>Bestand zum 1.1.</b>    | <b>988 400</b>    | <b>1 033 500</b> |
| im Jahresverlauf gewährt   | –                 | –                |
| im Jahresverlauf verwirkt  | 40 550            | 45 100           |
| im Jahresverlauf ausgeübt  | –                 | –                |
| im Jahresverlauf verfallen | –                 | –                |
| <b>Bestand zum 31.12.</b>  | <b>947 850</b>    | <b>988 400</b>   |

Die erwartete Restlaufzeit der zum Jahresende bestehenden Rechte bewegt sich zwischen 3 und 28 Monaten (Vorjahr: zwischen 15 und 28 Monaten). Die beizulegenden Zeitwerte für die

Rechte aus den LTP wurden mithilfe eines Monte-Carlo-Modells berechnet. Folgende Daten wurden herangezogen:

|                                                    | 31.12.2010 | 31.12.2009 |
|----------------------------------------------------|------------|------------|
| Volatilität des Commerzbank-Aktienkurses           | 80%        | 82%-86%    |
| Volatilität des DJ-Euro-Stoxx-Banken-Index         | 47%        | 46%-48%    |
| Korrelation des Commerzbank-Aktienkurses zum Index | 80%        | 82%        |
| Dividendenrendite der Commerzbank-Aktie            | 1,3%       | 1,3%       |
| Dividendenrendite des DJ-Euro-Stoxx-Banken-Index   | 2,8%       | 2,0%       |
| Risikofreier Zinssatz                              | 0,9%       | 1,5%-1,7%  |
| Mitarbeiterfluktuation                             | 4,5%       | 4,5%       |

Die Volatilität basiert auf der historischen Volatilität des Commerzbank-Aktienkurses und des Dow-Jones-(DJ)-Euro-Stoxx-Banken-Index. Die Korrelation bezieht sich auf den Zeit-

ablauf bis zum Bewertungsstichtag; die erwartete Restlaufzeit der Pläne wurde dabei berücksichtigt.

### (101) Sonstige Verpflichtungen

Einzahlungsverpflichtungen gegenüber konzernfremden und nicht konsolidierten Gesellschaften auf nicht voll eingezahlte Gesellschaftsanteile bestanden in Höhe von 67,8 Mio Euro (Vorjahr: 4,9 Mio Euro).

Für die Liquiditäts-Konsortialbank (Liko) GmbH, Frankfurt/Main, bestand eine Nachschusspflicht von bis zu 96 Mio Euro (Vorjahr: 96 Mio Euro). Auch die einzelnen Bankenverbände haben Nachschussverpflichtungen gegenüber der Liko erklärt. Für die Erfüllung dieser Verbindlichkeiten haben sich Konzern-

unternehmen zugunsten ihres jeweiligen Verbandes selbstschuldnerisch gegenüber der Liko verbürgt.

Nach § 5 Abs. 10 der Statuten des Einlagensicherungsfonds haben wir uns verpflichtet, den Bundesverband deutscher Banken e. V., Berlin, von Verlusten freizustellen, die diesem durch eine Hilfeleistung zugunsten von im Mehrheitsbesitz der Commerzbank stehenden Kreditinstituten entstehen.

Für Verpflichtungen an Terminbörsen und bei Clearingstellen wurden Wertpapiere mit einem Buchwert von 7 501 Mio € (Vorjahr: 6 979 Mio Euro) als Sicherheit hinterlegt.



|     |                                  |
|-----|----------------------------------|
| 204 | Gesamtergebnisrechnung           |
| 208 | Bilanz                           |
| 210 | Eigenkapitalveränderungsrechnung |
| 212 | Kapitalflussrechnung             |
| 214 | Anhang (Notes)                   |
| 370 | Bestätigungsvermerk              |

## (102) Angaben als Leasinggeber und Leasingnehmer

### Angaben als Leasinggeber – Operating Leasing

Die Commerzbank ist Leasinggeber in Zusammenhang mit Operating-Leasing-Verhältnissen. Diese Leasingverträge umfassen zum Stichtag insbesondere vermietete Immobilien und Fahrzeuge.

Aus den gewährten Operating-Leasing-Verhältnissen werden dem Commerzbank-Konzern in den folgenden Jahren folgende Mindestleasingzahlungen aus unkündbaren Verträgen zufließen:

| Fälligkeit   Mio €       | 31.12.2010 | 31.12.2009   |
|--------------------------|------------|--------------|
| in bis zu einem Jahr     | 184        | 251          |
| in einem bis fünf Jahren | 572        | 707          |
| in mehr als fünf Jahren  | 160        | 292          |
| <b>Gesamt</b>            | <b>916</b> | <b>1 250</b> |

In den Leasingverträgen sind keine bedingten Leasingraten vereinbart.

### Angaben als Leasinggeber – Finanzierungsleasing

Die Commerzbank ist Leasinggeber in Zusammenhang mit Finanzierungsleasingverhältnissen. Diese Leasingverträge umfassen zum Stichtag insbesondere vermietete Immobilien und Geschäfts-

ausstattung (zum Beispiel Kraftfahrzeuge und Kopierer). Das Verhältnis zwischen Bruttoinvestitionen und Barwert der Mindestleasingzahlungen stellte sich wie folgt dar:

| Mio €                                      | 31.12.2010 | 31.12.2009 |
|--------------------------------------------|------------|------------|
| Ausstehende Leasingzahlungen               | 3 392      | 2 142      |
| + Garantierte Restwerte                    | 129        | 28         |
| = Mindestleasingzahlungen                  | 3 521      | 2 170      |
| + Nicht garantierte Restwerte              | 9          | 19         |
| = Bruttoinvestitionen                      | 3 530      | 2 189      |
| – Nicht realisierter Finanzertrag          | 464        | 263        |
| = Nettoinvestitionen                       | 3 066      | 1 926      |
| – Barwert der nicht garantierten Restwerte | 6          | 14         |
| = Barwert der Mindestleasingzahlungen      | 3 060      | 1 912      |

Die Mindestleasingzahlungen umfassen die vom Leasingnehmer insgesamt aus dem Leasingvertrag zu zahlenden Leasingraten zuzüglich garantiertem Restwert. Der nicht garantierte Restwert wird zu Beginn des Leasingverhältnisses geschätzt und regelmäßig zum Stichtag überprüft. Der unrealisierte Finanzertrag

entspricht der impliziten Verzinsung des Leasingverhältnisses zwischen Stichtag und Vertragsende.

Die Fristigkeit der Bruttoinvestitionen und der Barwerte der Mindestleasingzahlungen aus unkündbaren Finanzierungsleasingverhältnissen gliederten sich folgendermaßen:

| Restlaufzeiten zum 31.12.<br>Mio € | Bruttoinvestitionen |              | Barwert der Mindestleasingzahlungen |              |
|------------------------------------|---------------------|--------------|-------------------------------------|--------------|
|                                    | 2010                | 2009         | 2010                                | 2009         |
| bis zu einem Jahr                  | 1 012               | 736          | 881                                 | 648          |
| ein bis fünf Jahre                 | 1 645               | 1 153        | 1 384                               | 1 013        |
| mehr als fünf Jahre                | 873                 | 300          | 795                                 | 251          |
| <b>Gesamt</b>                      | <b>3 530</b>        | <b>2 189</b> | <b>3 060</b>                        | <b>1 912</b> |

### Angaben als Leasingnehmer – Operating Leasing

Die im Konzern bestehenden Verpflichtungen aus Operating Leasing betreffen Miet- und Leasingverträge für Gebäude und Geschäftsausstattung und führten im Geschäftsjahr 2010 zu Aufwendungen in Höhe von 562 Mio Euro (Vorjahr: 700 Mio

Euro). Davon entfiel auf kündbare Miet- und Leasingverträge ein Aufwand von 21 Mio Euro (Vorjahr: 8 Mio Euro). Für unkündbare Miet- und Leasingverträge ist in künftigen Geschäftsjahren mit folgenden Aufwendungen zu rechnen:

| Fälligkeit   Mio €       | 31.12.2010   | 31.12.2009   |
|--------------------------|--------------|--------------|
| in bis zu einem Jahr     | 549          | 651          |
| in einem bis fünf Jahren | 1 625        | 1 863        |
| in mehr als fünf Jahren  | 1 355        | 1 531        |
| <b>Gesamt</b>            | <b>3 529</b> | <b>4 045</b> |

Die Mietverträge für Immobilienobjekte sind in der Regel mit Laufzeiten zwischen 1 und 30 Jahren sowie mit bis zu drei Verlängerungsoptionen um jeweils 3 bis 5 Jahre ausgestattet. Preisanpassungsklauseln existieren in verschiedenen Varianten wie zum Beispiel Staffelmieten oder Indexklauseln. Im

Commerzbank-Konzern wurden für nicht mehr genutzte Gebäude Untermietverträge abgeschlossen. Diese Verträge besitzen eine unkündbare Vertragslaufzeit. Hieraus fließen dem Commerzbank-Konzern in den folgenden Jahren folgende Erträge zu:

| Fälligkeit   Mio €       | 31.12.2010 | 31.12.2009 |
|--------------------------|------------|------------|
| in bis zu einem Jahr     | 54         | 50         |
| in einem bis fünf Jahren | 136        | 178        |
| in mehr als fünf Jahren  | 103        | 405        |
| <b>Gesamt</b>            | <b>293</b> | <b>633</b> |

Die Leasingverträge enthalten wie im Vorjahr keine Vereinbarungen über bedingte Mietzahlungen.

### (103) Zeitpunkt der Freigabe zur Veröffentlichung

Der vorliegende Konzernabschluss wurde vom Vorstand am 7. März 2011 zur Weitergabe an den Aufsichtsrat freigegeben. Der Aufsichtsrat hat die Aufgabe, den Konzernabschluss zu

prüfen und zu erklären, ob er den Konzernabschluss billigt. Vorläufige Eckzahlen des Jahresabschlusses 2010 wurden vom Vorstand am 18. Februar 2011 zur Veröffentlichung freigegeben.

|     |                                  |
|-----|----------------------------------|
| 204 | Gesamtergebnisrechnung           |
| 208 | Bilanz                           |
| 210 | Eigenkapitalveränderungsrechnung |
| 212 | Kapitalflussrechnung             |
| 214 | Anhang (Notes)                   |
| 370 | Bestätigungsvermerk              |

#### (104) Corporate-Governance-Kodex

Unsere jährliche Entsprechenserklärung zum Deutschen Corporate-Governance-Kodex gemäß § 161 AktG haben wir abgegeben und unseren Aktionären im Internet ([www.commerzbank.de](http://www.commerzbank.de)) dauerhaft zugänglich gemacht. Für die

comdirect bank Aktiengesellschaft wurde ebenfalls die jährliche Entsprechenserklärung zum Deutschen Corporate-Governance-Kodex gemäß § 161 AktG abgegeben und im Internet ([www.comdirect.de](http://www.comdirect.de)) dauerhaft zugänglich gemacht.

#### (105) Patronatserklärung

Für die nachfolgend aufgeführten, in den Konzernabschluss unserer Bank einbezogenen Tochterunternehmen tragen wir, abgesehen von politischen Risiken, dafür Sorge, dass diese ihre vertraglichen Verbindlichkeiten erfüllen.

| Name                                                                                 | Sitz              |
|--------------------------------------------------------------------------------------|-------------------|
| AFÖG GmbH & Co. KG                                                                   | Frankfurt am Main |
| comdirect bank Aktiengesellschaft                                                    | Quickborn         |
| Commerz (East Asia) Ltd.                                                             | Hongkong          |
| Commerzbank (Eurasija) SAO                                                           | Moskau            |
| Commerzbank Europe (Ireland)                                                         | Dublin            |
| Commerzbank Europe Finance (Ireland) plc.                                            | Dublin            |
| Commerzbank Inlandsbanken Holding GmbH                                               | Frankfurt am Main |
| Commerzbank International S.A.                                                       | Luxemburg         |
| CommerzTrust GmbH                                                                    | Frankfurt am Main |
| Commerz Markets LLC                                                                  | New York          |
| Erste Europäische Pfandbrief- und Kommunalkreditbank Aktiengesellschaft in Luxemburg | Luxemburg         |
| Eurohypo Aktiengesellschaft                                                          | Eschborn          |

**(106) Anteilsbesitz**

Die nachstehenden Angaben nehmen wir gemäß § 313 Abs. 2 HGB zum Konzernabschluss einschließlich der Angaben nach § 285 Nr. 11a HGB vor.

**1. Verbundene Unternehmen****a) In den Konzernabschluss einbezogene verbundene Unternehmen**

| Name                                                                                               | Sitz                     | Kapital-<br>anteil<br>in % insg. | Stimmanteil<br>in % insg. | Währung | Eigen-<br>kapital<br>Tsd | Jahres-<br>ergebnis<br>Tsd |
|----------------------------------------------------------------------------------------------------|--------------------------|----------------------------------|---------------------------|---------|--------------------------|----------------------------|
| ABORONUM Grundstücks-Vermietungs-<br>gesellschaft mbH & Co. Objekt Berlin KG                       | Düsseldorf               | 60,0                             | 85,0                      | EUR     | 27                       | 4                          |
| ADMERA Grundstücks-Vermietungs-<br>gesellschaft mbH                                                | Düsseldorf               | 100,0                            | 100,0                     | EUR     | 26                       | 2                          |
| AFÖG GmbH & Co. KG                                                                                 | Frankfurt am Main        | 100,0                            | 100,0                     | EUR     | 151 071                  | -95 965                    |
| AGV Allgemeine Grundstücksverwaltungs-<br>und -verwertungsgesellschaft mit<br>beschränkter Haftung | Eschborn                 | 100,0                            | 100,0                     | EUR     | 40                       | - <sup>b)</sup>            |
| AJUNTA Grundstücks-Vermietungs-<br>gesellschaft mbH                                                | Düsseldorf               | 100,0                            | 100,0                     | EUR     | -4 908                   | -1 582                     |
| ALDUNA Grundstücks-Vermietungs-<br>gesellschaft mbH                                                | Düsseldorf               | 100,0                            | 100,0                     | EUR     | -10 397                  | -3 378                     |
| ALMURUS Grundstücks-Vermietungs-<br>gesellschaft mbH                                               | Düsseldorf               | 100,0                            | 100,0                     | EUR     | 8 294                    | -951                       |
| ALTEREGO Beteiligungsgesellschaft mbH                                                              | Düsseldorf               | 100,0                            | 100,0                     | EUR     | 959                      | -6 721                     |
| ASCARA Grundstücks-Vermietungs-<br>gesellschaft mbH                                                | Düsseldorf               | 100,0                            | 100,0                     | EUR     | -689                     | -488                       |
| ASTUTIA Beteiligungsgesellschaft mbH                                                               | Düsseldorf               | 100,0                            | 100,0                     | EUR     | 3 788                    | - <sup>b)</sup>            |
| Atlas-Vermögensverwaltungs-Gesellschaft<br>mit beschränkter Haftung                                | Bad Homburg<br>v.d. Höhe | 100,0                            | 100,0                     | EUR     | 455 113                  | - <sup>b)</sup>            |
| BACUL Beteiligungsgesellschaft mbH                                                                 | Eschborn                 | 100,0                            | 100,0                     | EUR     | 3                        | -7                         |
| BERGA Grundstücks-Verwaltungsgesellschaft<br>mbH & Co. KG                                          | Grünwald<br>(München)    | 100,0                            | 100,0                     | EUR     | -1 253                   | 400                        |
| Bishop Finance Inc.                                                                                | Wilmington,<br>Delaware  | 100,0                            | 100,0                     | GBP     | 569 985                  | -979                       |
| BRE Bank Hipoteczny S.A.                                                                           | Warschau                 | 100,0                            | 100,0                     | PLN     | 368 373                  | 30 861                     |
| BRE Bank SA                                                                                        | Warschau                 | 69,8                             | 69,8                      | PLN     | 6 923 121                | 655 907                    |
| BRE Finance France S.A.                                                                            | Levallois Perret         | 100,0                            | 100,0                     | EUR     | 163                      | -18                        |
| BRE Holding Sp. z o.o.                                                                             | Warschau                 | 100,0                            | 100,0                     | PLN     | 370 742                  | 523 <sup>a)</sup>          |
| BRE Leasing Sp. z o.o.                                                                             | Warschau                 | 100,0                            | 100,0                     | PLN     | 121 358                  | 27 437                     |
| BRE Ubezpieczenia Sp. z o.o.                                                                       | Warschau                 | 100,0                            | 100,0                     | PLN     | 13 051                   | 7 051 <sup>a)</sup>        |
| BRE Ubezpieczenia Towarzystwo<br>Ubezpieczen i Reasekuracji S.A.                                   | Warschau                 | 100,0                            | 100,0                     | PLN     | 59 255                   | 9 460 <sup>a)</sup>        |
| BRE.Iocum S.A.                                                                                     | Lódz                     | 80,0                             | 80,0                      | PLN     | 109 185                  | 6 207 <sup>a)</sup>        |
| Bridge Re Limited                                                                                  | Hamilton, Bermuda        | 100,0                            | 100,0                     | USD     | 411                      | 0                          |
| CB Building Kirchberg GmbH                                                                         | Düsseldorf               | 100,0                            | 100,0                     | EUR     | 2 216                    | 785                        |
| CBG Commerz Beteiligungsgesellschaft<br>Holding mbH                                                | Bad Homburg<br>v.d. Höhe | 100,0                            | 100,0                     | EUR     | 6 137                    | - <sup>b)</sup>            |
| CBG Commerz Beteiligungskapital GmbH &<br>Co. KG                                                   | Frankfurt am Main        | 100,0                            | 100,0                     | EUR     | 33 745                   | 6 783                      |
| CFB-Fonds Transfair GmbH                                                                           | Düsseldorf               | 100,0                            | 100,0                     | EUR     | 26                       | - <sup>b)</sup>            |

|     |                                  |
|-----|----------------------------------|
| 204 | Gesamtergebnisrechnung           |
| 208 | Bilanz                           |
| 210 | Eigenkapitalveränderungsrechnung |
| 212 | Kapitalflussrechnung             |
| 214 | Anhang (Notes)                   |
| 370 | Bestätigungsvermerk              |

| Name                                                      | Sitz                    | Kapital-<br>anteil<br>in % insg. | Stimmanteil<br>in % insg. | Währung | Eigen-<br>kapital<br>Tsd | Jahres-<br>ergebnis<br>Tsd |
|-----------------------------------------------------------|-------------------------|----------------------------------|---------------------------|---------|--------------------------|----------------------------|
| CG New Venture 2 Verwaltungsgesellschaft mbH              | Wiesbaden               | 100,0                            | 100,0                     | EUR     | 83                       | 0                          |
| CG New Venture 4 GmbH & Co. KG                            | Wiesbaden               | 99,9                             | 99,0                      | EUR     | 20 315                   | 0                          |
| CG Real Estate Master FCP-SIF                             | Luxemburg               | 58,0                             | 58,0                      | EUR     | 203 243                  | 8 464                      |
| Chess Finance LLC                                         | New York                | 100,0                            | 100,0                     | USD     | 17 161                   | -1 502                     |
| Coba Holdings I, LLC <sup>1)</sup>                        | Wilmington,<br>Delaware | 100,0                            | 100,0                     | USD     | 409 779                  | 15 611                     |
| Coba Vermögensverwaltungsgesellschaft mbH                 | Düsseldorf              | 100,0                            | 100,0                     | EUR     | 26                       | - <sup>b)</sup>            |
| comdirect bank Aktiengesellschaft                         | Quickborn               | 80,5                             | 80,5                      | EUR     | 418 644                  | 52 983                     |
| Commerz (East Asia) Limited                               | Hong Kong               | 100,0                            | 100,0                     | EUR     | 5 543                    | 47                         |
| Commerz Asset Management Asia Pacific Pte Ltd.            | Singapur                | 100,0                            | 100,0                     | SGD     | 51 099                   | -7 609                     |
| Commerz Business Consulting GmbH                          | Frankfurt am Main       | 100,0                            | 100,0                     | EUR     | 73                       | - <sup>b)</sup>            |
| Commerz Direktservice GmbH                                | Duisburg                | 100,0                            | 100,0                     | EUR     | 1 178                    | - <sup>b)</sup>            |
| Commerz Grundbesitz Beteiligungsgesellschaft mbH & Co. KG | Frankfurt am Main       | 90,0                             | 90,0                      | EUR     | 13 433                   | 1 179                      |
| Commerz Markets LLC <sup>2)</sup>                         | Wilmington,<br>Delaware | 100,0                            | 100,0                     | USD     | 412 331                  | 5 111                      |
| Commerz Real AG                                           | Düsseldorf              | 100,0                            | 100,0                     | EUR     | 408 394                  | - <sup>b)</sup>            |
| Commerz Real Asset Verwaltungsgesellschaft mbH            | Grünwald<br>(München)   | 100,0                            | 100,0                     | EUR     | 25                       | - <sup>b)</sup>            |
| Commerz Real Autoleasing GmbH                             | Hamburg                 | 100,0                            | 100,0                     | EUR     | 7 553                    | - <sup>b)</sup>            |
| Commerz Real Baucontract GmbH                             | Düsseldorf              | 100,0                            | 100,0                     | EUR     | 4 238                    | - <sup>b)</sup>            |
| Commerz Real Baumanagement GmbH                           | Düsseldorf              | 100,0                            | 100,0                     | EUR     | 52                       | - <sup>b)</sup>            |
| Commerz Real Fonds Beteiligungsgesellschaft mbH           | Düsseldorf              | 100,0                            | 100,0                     | EUR     | 25                       | - <sup>b)</sup>            |
| Commerz Real Immobilien GmbH                              | Düsseldorf              | 100,0                            | 100,0                     | EUR     | 12 936                   | - <sup>b)</sup>            |
| Commerz Real Investmentgesellschaft mbH                   | Wiesbaden               | 100,0                            | 100,0                     | EUR     | 21 968                   | - <sup>b)</sup>            |
| Commerz Real IT-Leasing GmbH                              | Düsseldorf              | 100,0                            | 100,0                     | EUR     | 1 954                    | - <sup>b)</sup>            |
| Commerz Real Leasingervice GmbH & Co. KG                  | Hamburg                 | 100,0                            | 100,0                     | EUR     | -20                      | -103                       |
| Commerz Real Mietkauf GmbH                                | Düsseldorf              | 100,0                            | 100,0                     | EUR     | 26                       | - <sup>b)</sup>            |
| Commerz Real Mobilienleasing GmbH                         | Düsseldorf              | 100,0                            | 100,0                     | EUR     | -3 463                   | - <sup>b)</sup>            |
| Commerz Real Partner Hannover GmbH                        | Düsseldorf              | 100,0                            | 100,0                     | EUR     | -386                     | -205                       |
| Commerz Real Partner Nord GmbH                            | Düsseldorf              | 100,0                            | 100,0                     | EUR     | 1 163                    | -688                       |
| Commerz Real Partner Süd GmbH                             | Düsseldorf              | 65,0                             | 65,0                      | EUR     | 1 098                    | 793                        |
| Commerz Real Spezialfondsgesellschaft mbH                 | Wiesbaden               | 100,0                            | 100,0                     | EUR     | 5 948                    | - <sup>b)</sup>            |
| Commerz Real Verwaltung und Treuhand GmbH                 | Düsseldorf              | 100,0                            | 100,0                     | EUR     | 26                       | - <sup>b)</sup>            |
| Commerz Services Holding GmbH                             | Frankfurt am Main       | 100,0                            | 100,0                     | EUR     | 12 564                   | - <sup>b)</sup>            |
| Commerz Systems GmbH                                      | Frankfurt am Main       | 100,0                            | 100,0                     | EUR     | 6 108                    | 4 351                      |
| Commerz Transaction Services Mitte GmbH                   | Erfurt                  | 100,0                            | 100,0                     | EUR     | 2 715                    | - <sup>b)</sup>            |
| Commerz Transaction Services Nord GmbH                    | Magdeburg               | 100,0                            | 100,0                     | EUR     | 1 493                    | - <sup>b)</sup>            |
| Commerz Transaction Services West GmbH                    | Hamm                    | 100,0                            | 100,0                     | EUR     | 1 256                    | - <sup>b)</sup>            |
| Commerzbank (Eurasija) SAO                                | Moskau                  | 100,0                            | 100,0                     | RUB     | 10 922 008               | 1 333 058                  |
| Commerzbank (South East Asia) Ltd.                        | Singapur                | 100,0                            | 100,0                     | EUR     | 69 460                   | 2 203                      |
| Commerzbank Asset Management Asia Ltd.                    | Singapur                | 100,0                            | 100,0                     | SGD     | 2 839                    | -4 399                     |
| Commerzbank Auslandsbanken Holding AG                     | Frankfurt am Main       | 100,0                            | 100,0                     | EUR     | 1 792 196                | - <sup>b)</sup>            |

| Name                                                             | Sitz                        | Kapital-<br>anteil<br>in % insg. | Stimmanteil<br>in % insg. | Währung | Eigen-<br>kapital<br>Tsd | Jahres-<br>ergebnis<br>Tsd |
|------------------------------------------------------------------|-----------------------------|----------------------------------|---------------------------|---------|--------------------------|----------------------------|
| Commerzbank Auslandsbanken Holding Nova GmbH                     | Frankfurt am Main           | 100,0                            | 100,0                     | EUR     | 921 212                  | – <sup>b)</sup>            |
| Commerzbank Capital Funding LLC I                                | Wilmington,<br>Delaware     | 100,0                            | 100,0                     | EUR     | 2                        | 0                          |
| Commerzbank Capital Funding LLC II                               | Wilmington,<br>Delaware     | 100,0                            | 100,0                     | GBP     | 2                        | 0                          |
| Commerzbank Capital Funding LLC III                              | Wilmington,<br>Delaware     | 100,0                            | 100,0                     | EUR     | 2                        | 0                          |
| Commerzbank Capital Funding Trust I                              | Wilmington,<br>Delaware     | 100,0                            | 100,0                     | EUR     | 1                        | 0                          |
| Commerzbank Capital Funding Trust II                             | Wilmington,<br>Delaware     | 100,0                            | 100,0                     | GBP     | 1                        | 0                          |
| Commerzbank Capital Funding Trust III                            | Wilmington,<br>Delaware     | 100,0                            | 100,0                     | EUR     | 1                        | 0                          |
| Commerzbank Capital Investment Company Limited <sup>3)</sup>     | London                      | 100,0                            | 100,0                     | GBP     | 0                        | 0                          |
| Commerzbank Capital Ventures Management Limited <sup>4)</sup>    | London                      | 100,0                            | 100,0                     | GBP     | 0                        | 0                          |
| Commerzbank Europe (Ireland)                                     | Dublin, Irland              | 81,7                             | 81,7                      | EUR     | 373 395                  | 436                        |
| Commerzbank Europe Finance (Ireland) plc                         | Dublin, Irland              | 100,0                            | 100,0                     | EUR     | 54                       | 1                          |
| Commerzbank Finance 2 S.à.r.l. <sup>5)</sup>                     | Luxemburg                   | 100,0                            | 100,0                     | EUR     | 1 005                    | –19                        |
| Commerzbank Finance 3 S.à.r.l.                                   | Luxemburg                   | 100,0                            | 100,0                     | EUR     | 132 050                  | 134 <sup>a)</sup>          |
| Commerzbank Finance BV <sup>6)</sup>                             | Amsterdam,<br>Niederlande   | 100,0                            | 100,0                     | EUR     | 6 640                    | 7 292                      |
| Commerzbank Holdings (UK) Limited <sup>7)</sup>                  | London                      | 100,0                            | 100,0                     | GBP     | 495 330                  | 80 100                     |
| Commerzbank Holdings France                                      | Paris                       | 100,0                            | 100,0                     | EUR     | 80 638                   | 2 447                      |
| Commerzbank Immobilien- und Vermögensverwaltungsgesellschaft mbH | Frankfurt am Main           | 100,0                            | 100,0                     | EUR     | 462 597                  | – <sup>b)</sup>            |
| Commerzbank Inlandsbanken Holding GmbH                           | Frankfurt am Main           | 100,0                            | 100,0                     | EUR     | 6 359 838                | – <sup>b)</sup>            |
| Commerzbank International S.A.                                   | Luxemburg                   | 100,0                            | 100,0                     | EUR     | 558 321                  | 88 045                     |
| Commerzbank Investments (UK) Ltd. <sup>8)</sup>                  | London                      | 100,0                            | 100,0                     | GBP     | 226 381                  | 219 178                    |
| Commerzbank Leasing (Guernsey) Limited <sup>9)</sup>             | St. Peter Port,<br>Guernsey | 100,0                            | 100,0                     | EUR     | 8                        | 0                          |
| Commerzbank Leasing 1 S.à.r.l. <sup>10)</sup>                    | Luxemburg                   | 100,0                            | 100,0                     | GBP     | 258                      | 6                          |
| Commerzbank Leasing 2 S.à.r.l. <sup>11)</sup>                    | Luxemburg                   | 100,0                            | 100,0                     | GBP     | 63 200                   | –367                       |
| Commerzbank Leasing 4 S.à.r.l. <sup>12)</sup>                    | Luxemburg                   | 100,0                            | 100,0                     | GBP     | 32                       | 18                         |
| Commerzbank Leasing 5 S.à.r.l. <sup>13)</sup>                    | Luxemburg                   | 100,0                            | 100,0                     | GBP     | –91                      | –44                        |
| Commerzbank Leasing 6 S.à.r.l. <sup>14)</sup>                    | Luxemburg                   | 100,0                            | 100,0                     | GBP     | 111                      | –20                        |
| Commerzbank Leasing December (1) Limited <sup>15)</sup>          | London                      | 100,0                            | 100,0                     | GBP     | 1 486                    | 365                        |
| Commerzbank Leasing December (10) <sup>16)</sup>                 | London                      | 100,0                            | 100,0                     | GBP     | 32                       | 0                          |
| Commerzbank Leasing December (11) <sup>17)</sup>                 | London                      | 100,0                            | 100,0                     | GBP     | 0                        | 0                          |
| Commerzbank Leasing December (12) Limited <sup>18)</sup>         | London                      | 100,0                            | 100,0                     | GBP     | 254                      | –163                       |
| Commerzbank Leasing December (13) Limited <sup>19)</sup>         | London                      | 100,0                            | 100,0                     | GBP     | 0                        | 0                          |
| Commerzbank Leasing December (15) <sup>20)</sup>                 | London                      | 100,0                            | 100,0                     | USD     | –283                     | 12                         |
| Commerzbank Leasing December (17) Limited                        | London                      | 100,0                            | 100,0                     | GBP     | 207                      | 617 <sup>a)</sup>          |
| Commerzbank Leasing December (19) Limited                        | London                      | 100,0                            | 100,0                     | GBP     | 55 028                   | 55 829 <sup>a)</sup>       |

|     |                                  |
|-----|----------------------------------|
| 204 | Gesamtergebnisrechnung           |
| 208 | Bilanz                           |
| 210 | Eigenkapitalveränderungsrechnung |
| 212 | Kapitalflussrechnung             |
| 214 | Anhang (Notes)                   |
| 370 | Bestätigungsvermerk              |

| Name                                                              | Sitz                         | Kapital-<br>anteil<br>in % insg. | Stimmanteil<br>in % insg. | Währung | Eigen-<br>kapital<br>Tsd | Jahres-<br>ergebnis<br>Tsd |    |
|-------------------------------------------------------------------|------------------------------|----------------------------------|---------------------------|---------|--------------------------|----------------------------|----|
| Commerzbank Leasing December (20) Limited                         | London                       | 100,0                            | 100,0                     | GBP     | 0                        | 0                          | a) |
| Commerzbank Leasing December (21) Limited                         | London                       | 100,0                            | 100,0                     | GBP     | 0                        | 0                          | a) |
| Commerzbank Leasing December (22) Limited                         | London                       | 100,0                            | 100,0                     | GBP     | 22                       | -421                       | a) |
| Commerzbank Leasing December (23) Limited                         | London                       | 100,0                            | 100,0                     | GBP     | 25                       | -45                        | a) |
| Commerzbank Leasing December (24) Limited                         | London                       | 100,0                            | 100,0                     | GBP     | 737                      | 712                        | a) |
| Commerzbank Leasing December (25) Limited                         | London                       | 70,0                             | 70,0                      | GBP     | -14 991                  | 0                          | a) |
| Commerzbank Leasing December (26) Limited                         | London                       | 100,0                            | 100,0                     | GBP     | 1 345                    | 1 298                      | a) |
| Commerzbank Leasing December (3) Limited <sup>21)</sup>           | London                       | 100,0                            | 100,0                     | GBP     | 427                      | -25                        |    |
| Commerzbank Leasing December (4) Limited <sup>22)</sup>           | London                       | 74,0                             | 74,0                      | GBP     | 20                       | 0                          |    |
| Commerzbank Leasing December (7) Limited <sup>23)</sup>           | Edinburgh                    | 100,0                            | 100,0                     | GBP     | 0                        | 0                          |    |
| Commerzbank Leasing December (8) Limited <sup>24)</sup>           | London                       | 100,0                            | 100,0                     | GBP     | 0                        | 0                          |    |
| Commerzbank Leasing December (9) Limited <sup>25)</sup>           | London                       | 100,0                            | 100,0                     | GBP     | 0                        | 0                          |    |
| Commerzbank Leasing Holdings Limited <sup>26)</sup>               | London                       | 100,0                            | 100,0                     | GBP     | 2 883                    | 6 464                      |    |
| Commerzbank Leasing Limited <sup>27)</sup>                        | London                       | 100,0                            | 100,0                     | GBP     | 2 109                    | 655                        |    |
| Commerzbank Leasing March (3) Limited <sup>28)</sup>              | London                       | 100,0                            | 100,0                     | GBP     | 5                        | 5                          |    |
| Commerzbank Leasing September (5) Limited <sup>29)</sup>          | London                       | 100,0                            | 100,0                     | GBP     | -5                       | -12                        |    |
| Commerzbank Leasing September (6) Limited <sup>30)</sup>          | London                       | 100,0                            | 100,0                     | GBP     | 0                        | 0                          |    |
| Commerzbank Online Ventures Limited <sup>31)</sup>                | London                       | 100,0                            | 100,0                     | EUR     | 0                        | 0                          |    |
| Commerzbank Overseas Holdings Limited <sup>32)</sup>              | London                       | 100,0                            | 100,0                     | GBP     | 10 039                   | 1 254                      |    |
| Commerzbank Property Management & Services Limited <sup>33)</sup> | London                       | 100,0                            | 100,0                     | GBP     | 0                        | -945                       |    |
| Commerzbank Securities Ltd <sup>34)</sup>                         | London                       | 100,0                            | 100,0                     | GBP     | 475                      | 10                         |    |
| Commerzbank Securities Nominees Limited <sup>35)</sup>            | London                       | 100,0                            | 100,0                     | GBP     | 10                       | 0                          |    |
| Commerzbank U.S. Finance, Inc.                                    | Wilmington,<br>Delaware      | 100,0                            | 100,0                     | USD     | 657                      | 13                         |    |
| Commerzbank Zrt.                                                  | Budapest                     | 100,0                            | 100,0                     | HUF     | 22 231 390               | -153 461                   |    |
| CommerzFactoring GmbH                                             | Mainz                        | 50,1                             | 50,1                      | EUR     | 1 099                    | -                          | b) |
| CSA COMMERZ SOUTH AFRICA (PROPRIETARY) LIMITED                    | Johannesburg,<br>Südafrika   | 100,0                            | 100,0                     | ZRA     | 5 833                    | 7 330                      |    |
| Deutsche Schiffsbank AG                                           | Bremen/Hamburg               | 92,1                             | 92,1                      | EUR     | 950 370                  | 0                          |    |
| Dom Inwestycyjny BRE Banku S.A.                                   | Warschau                     | 100,0                            | 100,0                     | PLN     | 72 474                   | 29 849                     |    |
| Dresdner Bank Brasil S.A. Banco Múltiplo                          | São Paulo - SP,<br>Brasilien | 100,0                            | 100,0                     | BRL     | 269 247                  | 6 419                      |    |
| Dresdner Capital LLC I                                            | Wilmington,<br>Delaware      | 100,0                            | 100,0                     | USD     | 1 582                    | 42                         |    |
| Dresdner Capital LLC III                                          | Wilmington,<br>Delaware      | 100,0                            | 100,0                     | EUR     | 303                      | 10                         |    |

| Name                                                                 | Sitz                         | Kapital-<br>anteil<br>in % insg. | Stimmanteil<br>in % insg. | Währung | Eigen-<br>kapital<br>Tsd | Jahres-<br>ergebnis<br>Tsd |
|----------------------------------------------------------------------|------------------------------|----------------------------------|---------------------------|---------|--------------------------|----------------------------|
| Dresdner Capital LLC IV                                              | Wilmington,<br>Delaware      | 100,0                            | 100,0                     | JPY     | 18 333                   | 452                        |
| Dresdner Kleinwort - Grantchester, Inc.                              | Wilmington,<br>Delaware      | 100,0                            | 100,0                     | USD     | 27 846                   | 16                         |
| Dresdner Kleinwort & Co. Holdings, Inc.                              | Wilmington,<br>Delaware      | 100,0                            | 100,0                     | USD     | 224 695                  | 18                         |
| Dresdner Kleinwort (Japan) Limited                                   | Hong Kong                    | 100,0                            | 100,0                     | JPY     | 2 250 133                | 66 717                     |
| Dresdner Kleinwort Capital Inc                                       | New York                     | 100,0                            | 100,0                     | USD     | 3 608                    | -1 331                     |
| Dresdner Kleinwort Capital Investment Trust<br>Limited               | London                       | 100,0                            | 100,0                     | GBP     | 0                        | 0                          |
| Dresdner Kleinwort do Brasil Limitada                                | Rio de Janeiro,<br>Brasilien | 100,0                            | 100,0                     | BRL     | -13 339                  | -15                        |
| Dresdner Kleinwort EIV Manager, Inc.                                 | Wilmington,<br>Delaware      | 100,0                            | 100,0                     | USD     | -18                      | 0                          |
| Dresdner Kleinwort Finance Inc.                                      | New York                     | 100,0                            | 100,0                     | USD     | 2 105                    | 228                        |
| Dresdner Kleinwort Flags Inc.                                        | Wilmington,<br>Delaware      | 13,9                             | 100,0                     | USD     | 140 479                  | 0                          |
| Dresdner Kleinwort Group Holdings, LLC                               | Wilmington,<br>Delaware      | 100,0                            | 100,0                     | USD     | 170 917                  | 4                          |
| Dresdner Kleinwort Holdings LLC                                      | New York                     | 100,0                            | 100,0                     | USD     | 65 386                   | -20 133                    |
| Dresdner Kleinwort Leasing Inc.                                      | New York                     | 100,0                            | 100,0                     | USD     | 15 765                   | 40                         |
| Dresdner Kleinwort Limited                                           | London                       | 100,0                            | 100,0                     | GBP     | 317 053                  | 71 594                     |
| Dresdner Kleinwort LLC                                               | Wilmington,<br>Delaware      | 14,8                             | 100,0                     | USD     | 34 022                   | 27                         |
| Dresdner Kleinwort Luminary Inc.                                     | Wilmington,<br>Delaware      | 13,9                             | 76,1                      | USD     | 813 341                  | 6 418                      |
| Dresdner Kleinwort Moon LLC                                          | Wilmington,<br>Delaware      | 100,0                            | 100,0                     | USD     | 83 755                   | 6 039                      |
| Dresdner Kleinwort Pfandbriefe Investments<br>II, Inc.               | Wilmington,<br>Delaware      | 100,0                            | 100,0                     | USD     | 12 959                   | 1 490                      |
| Dresdner Kleinwort Services (Guernsey)<br>Limited                    | St. Peter Port,<br>Guernsey  | 100,0                            | 100,0                     | GBP     | 2                        | 0                          |
| Dresdner Kleinwort Services LLC                                      | New York                     | 100,0                            | 100,0                     | USD     | 866                      | 0                          |
| Dresdner Kleinwort Servicios y Asesorias<br>Ltda.                    | Santiago de Chile,<br>Chile  | 100,0                            | 100,0                     | CLP     | -40 713                  | 1 024                      |
| Dresdner Kleinwort Stripes LLC                                       | Wilmington,<br>Delaware      | 100,0                            | 100,0                     | USD     | 193 213                  | 158                        |
| Dresdner Kleinwort Wasserstein<br>(Argentina) S.A.                   | Buenos Aires,<br>Argentinien | 100,0                            | 100,0                     | USD     | 136                      | -45                        |
| Dresdner Kleinwort Wasserstein Securities<br>(India) Private Limited | Mumbai, Indien               | 75,0                             | 75,0                      | INR     | 474 867                  | 75 318                     |
| Dresdner Lateinamerika Aktiengesellschaft                            | Hamburg                      | 100,0                            | 100,0                     | EUR     | 50 109                   | - <sup>b)</sup>            |
| Dresdner UK Investments 2 B.V.                                       | Amsterdam,<br>Niederlande    | 100,0                            | 100,0                     | EUR     | 957                      | 5                          |
| Dresdner UK Investments N.V.                                         | Amsterdam,<br>Niederlande    | 100,0                            | 100,0                     | EUR     | 1 723                    | 4                          |
| EH Estate Management GmbH                                            | Eschborn                     | 100,0                            | 100,0                     | EUR     | 11 026                   | - <sup>b)</sup>            |
| EH MoLu IV, LLC                                                      | Dover, USA                   | 100,0                            | 100,0                     | USD     | 14 389                   | -161 <sup>a)</sup>         |
| EH NY IV, LLC                                                        | Dover, USA                   | 100,0                            | 100,0                     | USD     | -827                     | 9 710                      |
| EHNY Ashland, LLC                                                    | Dover, USA                   | 100,0                            | 100,0                     | USD     | -827                     | 9 710                      |
| EHY Real Estate Fund I, LLC                                          | New York                     | 100,0                            | 100,0                     | USD     | -3 511                   | -353                       |



|     |                                  |
|-----|----------------------------------|
| 204 | Gesamtergebnisrechnung           |
| 208 | Bilanz                           |
| 210 | Eigenkapitalveränderungsrechnung |
| 212 | Kapitalflussrechnung             |
| 214 | Anhang (Notes)                   |
| 370 | Bestätigungsvermerk              |

| Name                                                                               | Sitz                          | Kapital-<br>anteil<br>in % insg. | Stimmanteil<br>in % insg. | Währung | Eigen-<br>kapital<br>Tsd | Jahres-<br>ergebnis<br>Tsd |
|------------------------------------------------------------------------------------|-------------------------------|----------------------------------|---------------------------|---------|--------------------------|----------------------------|
| EHY Sub Asset LLC                                                                  | Wilmington,<br>Delaware       | 100,0                            | 100,0                     | USD     | -7 901                   | 84                         |
| Elco Leasing Limited                                                               | London                        | 100,0                            | 100,0                     | GBP     | 504                      | 3                          |
| Erste Europäische Pfandbrief- und<br>Kommunalkreditbank Aktiengesellschaft         | Luxemburg                     | 100,0                            | 100,0                     | EUR     | 281 548                  | 197                        |
| Eurohypo (Japan) Corporation                                                       | Tokyo, Japan                  | 100,0                            | 100,0                     | JPY     | 2 876 293                | -398 662                   |
| Eurohypo Aktiengesellschaft                                                        | Eschborn                      | 100,0                            | 100,0                     | EUR     | 5 661 992                | - <sup>b)</sup>            |
| Eurohypo Capital Funding LLC I                                                     | Wilmington,<br>Delaware       | 100,0                            | 100,0                     | EUR     | 1                        | 0                          |
| Eurohypo Capital Funding LLC II                                                    | Wilmington,<br>Delaware       | 100,0                            | 100,0                     | EUR     | 3                        | 0                          |
| Eurohypo Capital Funding Trust I                                                   | Wilmington,<br>Delaware       | 100,0                            | 100,0                     | EUR     | 1                        | 0                          |
| Eurohypo Capital Funding Trust II                                                  | Wilmington,<br>Delaware       | 100,0                            | 100,0                     | EUR     | 1                        | 0                          |
| EUROHYPO Europäische Hypothekenbank<br>S.A.                                        | Senningerberg,<br>Luxemburg   | 100,0                            | 100,0                     | EUR     | 35 250                   | 69 374                     |
| European Bank for Fund Services Gesell-<br>schaft mit beschränkter Haftung (ebase) | Haar bei München              | 80,5                             | 100,0                     | EUR     | 29 575                   | 6 036                      |
| European Venture Partners (Holdings) Ltd                                           | St. Helier, Jersey            | 85,0                             | 85,0                      | GBP     | 0                        | 280                        |
| European Venture Partners Ltd                                                      | London                        | 85,0                             | 100,0                     | GBP     | 0                        | 9 381                      |
| FABA Vermietungsgesellschaft mbH                                                   | Düsseldorf                    | 95,0                             | 75,0                      | EUR     | 26                       | - <sup>b)</sup>            |
| Felix (CI) Limited                                                                 | George Town,<br>Cayman Island | 100,0                            | 100,0                     | GBP     | 25                       | 0                          |
| FHB - Immobilienprojekte GmbH                                                      | Eschborn                      | 100,0                            | 100,0                     | EUR     | 52                       | - <sup>b)</sup>            |
| FI Pro-City Immobilien GmbH                                                        | Eschborn                      | 100,0                            | 100,0                     | EUR     | 26                       | - <sup>b)</sup>            |
| Film Library Holdings LLC                                                          | Wilmington,<br>Delaware       | 51,0                             | 51,0                      | USD     | 32 321                   | -2 806 <sup>a)</sup>       |
| FM LeasingPartner GmbH                                                             | Bissendorf, Kr<br>Osnabrück   | 50,4                             | 50,4                      | EUR     | 832                      | 290                        |
| Forum Immobiliengesellschaft mbH                                                   | Eschborn                      | 100,0                            | 100,0                     | EUR     | 809                      | - <sup>b)</sup>            |
| Frankfurter Gesellschaft für Vermögen-<br>anlagen mit beschränkter Haftung         | Eschborn                      | 100,0                            | 100,0                     | EUR     | 5 952                    | - <sup>b)</sup>            |
| Futura Hochhausprojektgesellschaft mbH                                             | Eschborn                      | 100,0                            | 100,0                     | EUR     | 2 421                    | - <sup>b)</sup>            |
| Galbraith Investments Limited                                                      | London                        | 100,0                            | 100,0                     | GBP     | 71                       | 20 <sup>a)</sup>           |
| GBG Verwaltungs- und Verwertungs-<br>gesellschaft für Grundbesitz mbH              | Eschborn                      | 100,0                            | 100,0                     | EUR     | 312                      | - <sup>b)</sup>            |
| General Leasing (No.16) Limited                                                    | London                        | 43,8                             | 43,8                      | GBP     | -343                     | -56                        |
| G-G-B Gebäude- und Grundbesitz GmbH                                                | Eschborn                      | 100,0                            | 100,0                     | EUR     | 256                      | - <sup>b)</sup>            |
| GIE Dresdner Kleinwort France                                                      | Paris                         | 100,0                            | 100,0                     | EUR     | 0                        | 0                          |
| GO German Office GmbH                                                              | Wiesbaden                     | 100,0                            | 100,0                     | EUR     | -31 818                  | - <sup>b)</sup>            |
| gr Grundstücks GmbH Objekt Corvus                                                  | Frankfurt am Main             | 100,0                            | 100,0                     | EUR     | 53                       | -3                         |
| gr Grundstücks GmbH Objekt Corvus & Co.<br>Sossenheim KG                           | Frankfurt am Main             | 100,0                            | 100,0                     | EUR     | 442                      | -213                       |
| Gresham Leasing March (1) Limited                                                  | London                        | 25,0                             | 100,0                     | GBP     | 1 065                    | 0                          |
| Gresham Leasing March (2) Limited                                                  | London                        | 25,0                             | 100,0                     | GBP     | 2 411                    | 288                        |
| Grundbesitzgesellschaft Berlin<br>Rungestr. 22 - 24 mbH                            | Eschborn                      | 94,0                             | 94,0                      | EUR     | 1 159                    | -894                       |
| GVG Gesellschaft zur Verwertung von<br>Grundbesitz mit beschränkter Haftung        | Eschborn                      | 100,0                            | 100,0                     | EUR     | 26                       | - <sup>b)</sup>            |

| Name                                                                                                | Sitz                        | Kapital-<br>anteil<br>in % insg. | Stimmanteil<br>in % insg. | Währung | Eigen-<br>kapital<br>Tsd | Jahres-<br>ergebnis<br>Tsd |
|-----------------------------------------------------------------------------------------------------|-----------------------------|----------------------------------|---------------------------|---------|--------------------------|----------------------------|
| Herradura Ltd                                                                                       | London                      | 100,0                            | 100,0                     | GBP     | 5                        | 0                          |
| Hibernia Beta Beteiligungsgesellschaft mbH                                                          | Frankfurt am Main           | 100,0                            | 100,0                     | EUR     | 70 644                   | -10 691                    |
| Hibernia Eta Beteiligungsgesellschaft mbH                                                           | Frankfurt am Main           | 85,0                             | 85,0                      | EUR     | 50 168                   | -7 344                     |
| Hibernia Gamma Beteiligungsgesellschaft mbH                                                         | Frankfurt am Main           | 60,6                             | 60,6                      | EUR     | 139 087                  | -22 823                    |
| Hibernia Sigma Beteiligungsgesellschaft mbH                                                         | Frankfurt am Main           | 100,0                            | 100,0                     | EUR     | 50 194                   | -7 376                     |
| Intermarket Bank AG                                                                                 | Wien                        | 56,2                             | 56,2                      | EUR     | 37 042                   | 1 425                      |
| Inversiones Dresdner Kleinwort Chile Ltda.                                                          | Santiago de Chile,<br>Chile | 100,0                            | 100,0                     | CLP     | -1 229 990               | 141 158                    |
| IVV - Immobilien - Verwaltungs- und<br>Verwertungsgesellschaft mbH                                  | Eschborn                    | 100,0                            | 100,0                     | EUR     | 26                       | -                          |
| KENSTONE GmbH                                                                                       | Eschborn                    | 100,0                            | 100,0                     | EUR     | 26                       | -                          |
| Kleinwort Benson (Canada) Limited                                                                   | Toronto, Kanada             | 100,0                            | 100,0                     | CAD     | 0                        | 0                          |
| Kommanditgesellschaft MS "CPO<br>ALICANTE" Offen Reederei GmbH & Co.                                | Hamburg                     | 90,0                             | 90,0                      | EUR     | 20 504                   | -1 219                     |
| Kommanditgesellschaft MS "CPO ANCONA"<br>Offen Reederei GmbH & Co.                                  | Hamburg                     | 77,2                             | 77,2                      | EUR     | 39 585                   | -235                       |
| Kommanditgesellschaft MS "CPO<br>BARCELONA" Offen Reederei GmbH & Co.                               | Hamburg                     | 90,0                             | 90,0                      | EUR     | 20 543                   | -926                       |
| Kommanditgesellschaft MS "CPO BILBAO"<br>Offen Reederei GmbH & Co.                                  | Hamburg                     | 90,0                             | 90,0                      | EUR     | 20 791                   | -765                       |
| Kommanditgesellschaft MS "CPO CADIZ"<br>Offen Reederei GmbH & Co.                                   | Hamburg                     | 90,0                             | 90,0                      | EUR     | 20 819                   | -617                       |
| Kommanditgesellschaft MS "CPO<br>MARSEILLE" Offen Reederei GmbH & Co.                               | Hamburg                     | 77,2                             | 77,2                      | EUR     | 39 906                   | -970                       |
| Kommanditgesellschaft MS "CPO PALERMO"<br>Offen Reederei GmbH & Co.                                 | Hamburg                     | 73,9                             | 73,9                      | EUR     | 39 504                   | -477                       |
| Kommanditgesellschaft MS "CPO TOULON"<br>Offen Reederei GmbH & Co.                                  | Hamburg                     | 90,0                             | 90,0                      | EUR     | 38 633                   | -4 995                     |
| Kommanditgesellschaft MS "CPO<br>VALENCIA" Offen Reederei GmbH & Co.                                | Hamburg                     | 90,0                             | 90,0                      | EUR     | 21 635                   | -455                       |
| Kommanditgesellschaft MS "CPO VIGO"<br>Offen Reederei GmbH & Co.                                    | Hamburg                     | 90,0                             | 90,0                      | EUR     | 21 428                   | -369                       |
| Langham Nominees Ltd                                                                                | St. Peter Port,<br>Guernsey | 100,0                            | 100,0                     | GBP     | 0                        | 0                          |
| LAUREA MOLARIS Grundstücks-<br>Vermietungsgesellschaft mbH & Co.<br>Objekt Berlin Anthropolis KG    | Düsseldorf                  | 94,5                             | 94,4                      | EUR     | -7 355                   | 3 949                      |
| LAUREA MOLARIS Grundstücks-<br>Vermietungsgesellschaft mbH & Co.<br>Objekt Berlin Grindelwaldweg KG | Düsseldorf                  | 94,5                             | 94,6                      | EUR     | -4 883                   | 1 836                      |
| LUGO Photovoltaik Beteiligungsgesellschaft<br>mbH                                                   | Düsseldorf                  | 100,0                            | 100,0                     | EUR     | -12 012                  | -12 420                    |
| Magyar Factor Zrt.                                                                                  | Budapest                    | 100,0                            | 100,0                     | HUF     | 1 912 721                | 143 383                    |
| Marlyna Ltd                                                                                         | London                      | 100,0                            | 100,0                     | GBP     | 25                       | 0                          |
| Marylebone Commercial Finance (2)                                                                   | London                      | 25,0                             | 25,0                      | GBP     | 7 014                    | -47                        |
| Marylebone Commercial Finance Limited                                                               | London                      | 25,0                             | 87,0                      | GBP     | 571                      | 0                          |
| Max Lease S.à.r.l. & Cie. Secs                                                                      | Luxemburg                   | 100,0                            | 100,0                     | EUR     | 3 030                    | 771                        |
| MERKUR Grundstücks GmbH                                                                             | Frankfurt am Main           | 100,0                            | 100,0                     | EUR     | 73 576                   | -530                       |
| Messestadt Riem "Office am See" I GmbH                                                              | Eschborn                    | 94,0                             | 94,0                      | EUR     | -134                     | -                          |
| Messestadt Riem "Office am See" II GmbH                                                             | Eschborn                    | 94,0                             | 94,0                      | EUR     | 459                      | -                          |

b)

a)

b)

b)

|     |                                  |
|-----|----------------------------------|
| 204 | Gesamtergebnisrechnung           |
| 208 | Bilanz                           |
| 210 | Eigenkapitalveränderungsrechnung |
| 212 | Kapitalflussrechnung             |
| 214 | Anhang (Notes)                   |
| 370 | Bestätigungsvermerk              |

| Name                                                                          | Sitz                 | Kapital-<br>anteil<br>in % insg. | Stimmanteil<br>in % insg. | Währung | Eigen-<br>kapital<br>Tsd | Jahres-<br>ergebnis<br>Tsd |
|-------------------------------------------------------------------------------|----------------------|----------------------------------|---------------------------|---------|--------------------------|----------------------------|
| Messestadt Riem "Office am See" III GmbH                                      | Eschborn             | 94,0                             | 94,0                      | EUR     | 19                       | – <sup>b)</sup>            |
| Morris (S.P.) Holdings Limited                                                | London               | 100,0                            | 100,0                     | GBP     | 11                       | 0                          |
| NAVALIS Schiffsbetriebsgesellschaft mbH & Co. MS "NEDLLOYD JULIANA" KG        | Hamburg              | 93,6                             | 92,8                      | EUR     | 17 771                   | 1 477                      |
| NAVIPOS Schiffsbeteiligungsgesellschaft mbH                                   | Hamburg              | 100,0                            | 100,0                     | EUR     | 902                      | 443                        |
| New Asian Land Fund Holdings Limited                                          | Hamilton, Bermuda    | 100,0                            | 100,0                     | BMD     | 34 733                   | – 18 438                   |
| NORA Grundstücks-Vermietungsgesellschaft mbH & Co. Objekt Lampertheim KG      | Düsseldorf           | 95,0                             | 95,0                      | EUR     | 32                       | 166                        |
| NORA Grundstücks-Vermietungsgesellschaft mbH & Co. Objekte Plön und Preetz KG | Düsseldorf           | 90,0                             | 65,0                      | EUR     | –517                     | 82                         |
| Nordboden Immobilien- und Handelsgesellschaft mbH                             | Eschborn             | 100,0                            | 100,0                     | EUR     | 315                      | – <sup>b)</sup>            |
| NOVELLA Grundstücks-Vermietungsgesellschaft mbH                               | Düsseldorf           | 100,0                            | 100,0                     | EUR     | 10 804                   | – <sup>b)</sup>            |
| OLEANDRA Grundstücks-Vermietungsgesellschaft mbH & Co. Objekt Jupiter KG      | Düsseldorf           | 100,0                            | 51,0                      | EUR     | 21 259                   | 2 110                      |
| OLEANDRA Grundstücks-Vermietungsgesellschaft mbH & Co. Objekt Luna KG         | Düsseldorf           | 100,0                            | 51,0                      | EUR     | 666                      | 335                        |
| OLEANDRA Grundstücks-Vermietungsgesellschaft mbH & Co. Objekt Neptun KG       | Düsseldorf           | 100,0                            | 51,0                      | EUR     | 15 024                   | 1 660                      |
| OLEANDRA Grundstücks-Vermietungsgesellschaft mbH & Co. Objekt Pluto KG        | Düsseldorf           | 100,0                            | 51,0                      | EUR     | 23 056                   | 2 376                      |
| OLEANDRA Grundstücks-Vermietungsgesellschaft mbH & Co. Objekt Uranus KG       | Düsseldorf           | 100,0                            | 51,0                      | EUR     | 36 087                   | 6 091                      |
| OLEANDRA Grundstücks-Vermietungsgesellschaft mbH & Co. Objekt Venus KG        | Düsseldorf           | 100,0                            | 51,0                      | EUR     | 19 797                   | 1 719                      |
| Parc Continental Ltd.                                                         | London               | 100,0                            | 100,0                     | GBP     | 0                        | 0                          |
| Pisces Nominees Limited                                                       | London               | 100,0                            | 100,0                     | GBP     | 76 844                   | – 30 196 <sup>a)</sup>     |
| Polfactor S.A.                                                                | Warschau             | 100,0                            | 100,0                     | PLN     | 46 426                   | 9 560                      |
| Property Invest GmbH                                                          | Eschborn             | 100,0                            | 100,0                     | EUR     | 61 059                   | – 30 332                   |
| Property Invest Italy S.r.l.                                                  | Mailand, Italien     | 100,0                            | 100,0                     | EUR     | 60 280                   | – 4 116 <sup>a)</sup>      |
| PUBLIC JOINT STOCK COMPANY "BANK FORUM"                                       | Kyiv, Ukraine        | 94,5                             | 94,5                      | UAH     | 764 801                  | – 3 282 345                |
| Real Estate Holdings Limited                                                  | Hamilton, Bermuda    | 100,0                            | 100,0                     | BMD     | 29 385                   | 10 897                     |
| Real Estate TOP TEGEL Drei GmbH                                               | Eschborn             | 94,0                             | 94,0                      | EUR     | 60                       | – <sup>b)</sup>            |
| Real Estate TOP TEGEL Eins GmbH                                               | Eschborn             | 94,0                             | 94,0                      | EUR     | 421                      | – <sup>b)</sup>            |
| Real Estate TOP TEGEL Sechs GmbH                                              | Eschborn             | 94,0                             | 94,0                      | EUR     | 129                      | – <sup>b)</sup>            |
| Real Estate TOP TEGEL Vier GmbH                                               | Eschborn             | 94,0                             | 94,0                      | EUR     | 60                       | – <sup>b)</sup>            |
| Real Estate TOP TEGEL Zwei GmbH                                               | Eschborn             | 94,0                             | 94,0                      | EUR     | 60                       | – <sup>b)</sup>            |
| REFUGIUM Beteiligungsgesellschaft mbH                                         | Grünwald (München)   | 100,0                            | 100,0                     | EUR     | 10 714                   | 5 701                      |
| Rood Nominees Limited                                                         | London               | 100,0                            | 100,0                     | GBP     | 0                        | 0                          |
| Rook Finance LLC                                                              | Wilmington, Delaware | 100,0                            | 100,0                     | USD     | 31 752                   | – 314                      |
| SB-Bauträger Gesellschaft mit beschränkter Haftung                            | Eschborn             | 100,0                            | 100,0                     | EUR     | 55                       | – <sup>b)</sup>            |
| SB-Bauträger GmbH & Co. Urbis Hochhaus-KG                                     | Frankfurt am Main    | 100,0                            | 100,0                     | EUR     | 232                      | 0                          |
| SB-Bauträger GmbH & Co. Urbis Verwaltungs-KG                                  | Frankfurt am Main    | 100,0                            | 100,0                     | EUR     | 258                      | 0                          |

| Name                                                                       | Sitz                          | Kapital-<br>anteil<br>in % insg. | Stimmanteil<br>in % insg. | Währung | Eigen-<br>kapital<br>Tsd | Jahres-<br>ergebnis<br>Tsd |    |
|----------------------------------------------------------------------------|-------------------------------|----------------------------------|---------------------------|---------|--------------------------|----------------------------|----|
| SECUNDO Grundstücks-Vermietungs-<br>gesellschaft mbH                       | Düsseldorf                    | 100,0                            | 100,0                     | EUR     | 5 811                    | –                          | b) |
| Service-Center Inkasso GmbH Düsseldorf                                     | Düsseldorf                    | 100,0                            | 100,0                     | EUR     | 128                      | –                          | b) |
| South East Asia Properties Limited                                         | London                        | 100,0                            | 100,0                     | GBP     | 13 702                   | 0                          |    |
| Southwark Bridge Investments Ltd.                                          | London                        | 100,0                            | 100,0                     | GBP     | 0                        | 0                          |    |
| Space Park GmbH & Co. KG                                                   | Frankfurt am Main             | 90,0                             | 90,0                      | EUR     | –95 038                  | –39                        |    |
| Süddeutsche Industrie-Beteiligungs-GmbH                                    | Frankfurt am Main             | 100,0                            | 100,0                     | EUR     | 6 676                    | –                          | b) |
| TARA Immobiliengesellschaft mbH                                            | Eschborn                      | 100,0                            | 100,0                     | EUR     | 25                       | –                          | b) |
| TARA Immobilienprojekte GmbH                                               | Eschborn                      | 100,0                            | 100,0                     | EUR     | 25                       | –                          | b) |
| The New Asian Property Fund Ltd.                                           | Bermuda                       | 100,0                            | 100,0                     | BMD     | 9 007                    | 5 726                      |    |
| Thurlaston Finance Limited                                                 | George Town,<br>Cayman Island | 100,0                            | 100,0                     | GBP     | 25                       | 0                          |    |
| TIGNATO Beteiligungsgesellschaft mbH &<br>Co. KölnTurm Media Park KG       | Eschborn                      | 100,0                            | 100,0                     | EUR     | –1 329                   | –9 380                     |    |
| TOMO Vermögensverwaltungsgesellschaft<br>mbH                               | Frankfurt am Main             | 100,0                            | 100,0                     | EUR     | 22 779                   | –                          | b) |
| Transfinance a.s.                                                          | Prag                          | 100,0                            | 100,0                     | CZK     | 252 529                  | –41 508                    |    |
| U.S. Residential Investment I, L.P.                                        | Wilmington,<br>Delaware       | 90,0                             | 90,0                      | USD     | 29 058                   | –5 267                     |    |
| Unica Immobiliengesellschaft mbH                                           | Eschborn                      | 100,0                            | 100,0                     | EUR     | 43                       | –                          | b) |
| Valorem LLC                                                                | New York                      | 100,0                            | 100,0                     | USD     | 1 048                    | –748                       |    |
| Vendome Lease S.A.                                                         | Paris                         | 100,0                            | 100,0                     | EUR     | 1                        | –484                       |    |
| Watling Leasing March (1)                                                  | London                        | 25,0                             | 25,0                      | GBP     | 11 174                   | –97                        |    |
| WebTek Software Private Limited i.L.                                       | Bangalore, Indien             | 100,0                            | 100,0                     | INR     | 230 933                  | 14 286                     |    |
| WESTBODEN - Bau- und Verwaltungs-<br>gesellschaft mit beschränkter Haftung | Eschborn                      | 100,0                            | 100,0                     | EUR     | 55                       | –                          | b) |
| Westend Grundstücksgesellschaft mbH                                        | Eschborn                      | 99,4                             | 100,0                     | EUR     | 260                      | –                          | b) |
| Wohnbau-Beteiligungsgesellschaft mbH                                       | Eschborn                      | 90,0                             | 90,0                      | EUR     | 307                      | –8                         |    |
| Yarra Finance Limited                                                      | George Town,<br>Cayman Island | 100,0                            | 100,0                     | GBP     | 55                       | 0                          |    |

|     |                                  |
|-----|----------------------------------|
| 204 | Gesamtergebnisrechnung           |
| 208 | Bilanz                           |
| 210 | Eigenkapitalveränderungsrechnung |
| 212 | Kapitalflussrechnung             |
| 214 | Anhang (Notes)                   |
| 370 | Bestätigungsvermerk              |

**b) Wegen untergeordneter Bedeutung nicht in den Konzernabschluss einbezogene verbundene Unternehmen<sup>9</sup>**

| Name                                                                            | Sitz              | Kapitalanteil<br>in % insg. | Stimmanteil<br>in % insg. |
|---------------------------------------------------------------------------------|-------------------|-----------------------------|---------------------------|
| 1. CR Fonds-Verwaltungsgesellschaft mbH                                         | Düsseldorf        | 100,0                       | 100,0                     |
| 10. CR Fonds-Verwaltungsgesellschaft mbH                                        | Düsseldorf        | 100,0                       | 100,0                     |
| 11. CR Fonds-Verwaltungsgesellschaft mbH                                        | Düsseldorf        | 100,0                       | 100,0                     |
| 12. CR Fonds-Verwaltungsgesellschaft mbH                                        | Düsseldorf        | 100,0                       | 100,0                     |
| 13. CR Fonds-Verwaltungsgesellschaft mbH                                        | Düsseldorf        | 100,0                       | 100,0                     |
| 14. CR Fonds-Verwaltungsgesellschaft mbH                                        | Düsseldorf        | 100,0                       | 100,0                     |
| 2. CR Fonds-Verwaltungsgesellschaft mbH                                         | Düsseldorf        | 100,0                       | 100,0                     |
| 3. CR Fonds-Verwaltungsgesellschaft mbH                                         | Düsseldorf        | 100,0                       | 100,0                     |
| 4. CR Fonds-Verwaltungsgesellschaft mbH                                         | Düsseldorf        | 100,0                       | 100,0                     |
| 4274563 CANADA INC.                                                             | Toronto           | 100,0                       | 100,0                     |
| 5. CR Fonds-Verwaltungsgesellschaft mbH                                         | Düsseldorf        | 100,0                       | 100,0                     |
| 6. CR Fonds-Verwaltungsgesellschaft mbH                                         | Düsseldorf        | 100,0                       | 100,0                     |
| 7. CR Fonds-Verwaltungsgesellschaft mbH                                         | Düsseldorf        | 100,0                       | 100,0                     |
| 8. CR Fonds-Verwaltungsgesellschaft mbH                                         | Düsseldorf        | 100,0                       | 100,0                     |
| 9. CR Fonds-Verwaltungsgesellschaft mbH                                         | Düsseldorf        | 100,0                       | 100,0                     |
| ABANTITIM Grundstücks-Vermietungsgesellschaft mbH                               | Düsseldorf        | 100,0                       | 100,0                     |
| ABANTUM Beteiligungsgesellschaft mbH                                            | Düsseldorf        | 100,0                       | 100,0                     |
| ABELASSA Grundstücks-Vermietungsgesellschaft mbH                                | Düsseldorf        | 100,0                       | 100,0                     |
| ABENITA Photovoltaik Beteiligungsgesellschaft mbH                               | Düsseldorf        | 100,0                       | 100,0                     |
| ABESTA Grundstücks-Vermietungsgesellschaft mbH                                  | Düsseldorf        | 100,0                       | 100,0                     |
| ABORONUM Grundstücks-Vermietungsgesellschaft mbH                                | Düsseldorf        | 100,0                       | 100,0                     |
| ABOTORIUM Finanz- und Verwaltungsgesellschaft mbH                               | Düsseldorf        | 100,0                       | 100,0                     |
| ACARINA Beteiligungsgesellschaft mbH                                            | Düsseldorf        | 100,0                       | 100,0                     |
| ACCESSA Grundstücks-Vermietungsgesellschaft mbH                                 | Düsseldorf        | 100,0                       | 100,0                     |
| ACINA Grundstücks-Vermietungsgesellschaft mbH                                   | Düsseldorf        | 100,0                       | 100,0                     |
| ACOLA Grundstücks-Vermietungsgesellschaft mbH                                   | Düsseldorf        | 100,0                       | 100,0                     |
| ACREDA Grundstücks-Vermietungsgesellschaft mbH                                  | Düsseldorf        | 100,0                       | 100,0                     |
| ACRONA Photovoltaik-Beteiligungsgesellschaft mbH                                | Düsseldorf        | 100,0                       | 100,0                     |
| ACTOSA Grundstücks-Vermietungsgesellschaft mbH                                  | Düsseldorf        | 100,0                       | 100,0                     |
| ADAMANTA Grundstücks-Vermietungsgesellschaft mbH                                | Düsseldorf        | 100,0                       | 100,0                     |
| ADELIA Grundstücks-Vermietungsgesellschaft mbH                                  | Düsseldorf        | 100,0                       | 100,0                     |
| ADELIA Grundstücks-Vermietungsgesellschaft mbH & Co.<br>Objekt Berlin Teltow KG | Düsseldorf        | 91,9                        | 91,6                      |
| ADELKA Grundstücks-Vermietungsgesellschaft mbH                                  | Düsseldorf        | 100,0                       | 100,0                     |
| ADENARA Flugzeug-Leasinggesellschaft mbH                                        | Düsseldorf        | 100,0                       | 100,0                     |
| ADUKKA Grundstücks-Vermietungsgesellschaft mbH                                  | Düsseldorf        | 100,0                       | 100,0                     |
| ADURAMA Verwaltung und Treuhand GmbH                                            | Düsseldorf        | 100,0                       | 100,0                     |
| AFINA, Bufete de Socios Financieros S.A.                                        | Madrid            | 98,7                        | 99,3                      |
| AFÖG Vermögensverwaltungsgesellschaft mbH                                       | Frankfurt am Main | 94,2                        | 94,2                      |
| AGALINA Grundstücks-Vermietungsgesellschaft mbH                                 | Düsseldorf        | 100,0                       | 100,0                     |
| AGARBA Grundstücks-Vermietungsgesellschaft mbH                                  | Düsseldorf        | 100,0                       | 100,0                     |
| AGASILA Grundstücks-Vermietungsgesellschaft mbH                                 | Düsseldorf        | 100,0                       | 100,0                     |
| AGREGATA Grundstücks-Vermietungsgesellschaft mbH                                | Haan              | 100,0                       | 100,0                     |
| AJOLA Grundstücks-Vermietungsgesellschaft mbH                                   | Düsseldorf        | 100,0                       | 100,0                     |
| AKERA Verwaltung und Treuhand GmbH                                              | Düsseldorf        | 100,0                       | 100,0                     |

| Name                                                                     | Sitz              | Kapitalanteil<br>in % insg. | Stimmanteil<br>in % insg. |
|--------------------------------------------------------------------------|-------------------|-----------------------------|---------------------------|
| AKUSTIA Verwaltung und Treuhand GmbH i.L.                                | Düsseldorf        | 100,0                       | 100,0                     |
| ALACRITAS Verwaltungs- und Treuhand GmbH                                 | Düsseldorf        | 100,0                       | 100,0                     |
| ALBELLA Verwaltung und Treuhand GmbH                                     | Düsseldorf        | 100,0                       | 100,0                     |
| ALBOLA Verwaltung und Treuhand GmbH                                      | Düsseldorf        | 100,0                       | 100,0                     |
| ALCARDA Grundstücks-Vermietungsgesellschaft mbH                          | Düsseldorf        | 100,0                       | 100,0                     |
| ALDANZA Grundstücks-Vermietungsgesellschaft mbH                          | Düsseldorf        | 100,0                       | 100,0                     |
| ALDINGA Verwaltung und Treuhand GmbH                                     | Düsseldorf        | 100,0                       | 100,0                     |
| ALDULA Verwaltung und Treuhand GmbH                                      | Düsseldorf        | 100,0                       | 100,0                     |
| ALEMANTA Photovoltaik Beteiligungsgesellschaft mbH                       | Düsseldorf        | 100,0                       | 100,0                     |
| ALEMONA Verwaltung und Treuhand GmbH                                     | Düsseldorf        | 100,0                       | 100,0                     |
| Alexanderplatz D4 Erste Verwaltungsgesellschaft mbH                      | Berlin            | 90,0                        | 90,0                      |
| ALFRIDA Grundstücks-Vermietungsgesellschaft mbH                          | Düsseldorf        | 100,0                       | 100,0                     |
| ALFUTURA Grundstücks-Vermietungsgesellschaft mbH                         | Frankfurt am Main | 100,0                       | 100,0                     |
| ALIBORA Verwaltung- und Treuhand GmbH i.L.                               | Düsseldorf        | 100,0                       | 100,0                     |
| ALIDA Photovoltaik-Beteiligungsgesellschaft mbH                          | Düsseldorf        | 100,0                       | 100,0                     |
| ALIVERA Grundstücks-Vermietungsgesellschaft mbH                          | Düsseldorf        | 100,0                       | 100,0                     |
| ALKANTA Beteiligungsgesellschaft mbH                                     | Düsseldorf        | 100,0                       | 100,0                     |
| ALMARENA Grundstücks-Vermietungsgesellschaft mbH                         | Düsseldorf        | 100,0                       | 100,0                     |
| ALMONDA Grundstücks-Vermietungsgesellschaft mbH                          | Düsseldorf        | 100,0                       | 100,0                     |
| ALONGA Grundstücks-Vermietungsgesellschaft mbH                           | Düsseldorf        | 100,0                       | 100,0                     |
| ALSANTA Grundstücks-Vermietungsgesellschaft mbH                          | Düsseldorf        | 100,0                       | 100,0                     |
| ALSANTA Grundstücks-Vermietungsgesellschaft mbH & Co.<br>Objekte RiCö KG | Düsseldorf        | 0,0                         | 85,0                      |
| ALSENNA Grundstücks-Vermietungsgesellschaft mbH                          | Düsseldorf        | 100,0                       | 100,0                     |
| ALSTRUCTA Grundstücks-Vermietungsgesellschaft mbH                        | Düsseldorf        | 100,0                       | 100,0                     |
| Alternative Asset Management S.A.                                        | Luxemburg         | 100,0                       | 100,0                     |
| ALUBRA Verwaltung und Treuhand GmbH                                      | Düsseldorf        | 100,0                       | 100,0                     |
| ALUDANTA Grundstücks-Vermietungsgesellschaft mbH                         | Düsseldorf        | 100,0                       | 100,0                     |
| ALVENTA Grundstücks-Vermietungsgesellschaft mbH                          | Düsseldorf        | 100,0                       | 100,0                     |
| ALVINA Grundstücks-Vermietungsgesellschaft mbH                           | Düsseldorf        | 100,0                       | 100,0                     |
| AMALIA Verwaltung und Treuhand GmbH                                      | Düsseldorf        | 100,0                       | 100,0                     |
| AMBRESA Sp. z o.o.                                                       | Warschau          | 100,0                       | 100,0                     |
| AMENA Grundstücks-Vermietungsgesellschaft mbH                            | Düsseldorf        | 100,0                       | 100,0                     |
| AMERA Verwaltung und Treuhand GmbH                                       | Düsseldorf        | 100,0                       | 100,0                     |
| AMITEA Beteiligungsgesellschaft mbH                                      | Düsseldorf        | 100,0                       | 100,0                     |
| AMITICULA Photovoltaik Beteiligungsgesellschaft mbH                      | Düsseldorf        | 100,0                       | 100,0                     |
| AMONEUS Grundstücks-Vermietungsgesellschaft mbH                          | Düsseldorf        | 100,0                       | 100,0                     |
| AMTERA Grundstücks-Vermietungsgesellschaft mbH                           | Düsseldorf        | 100,0                       | 100,0                     |
| AMUNDA Verwaltung und Treuhand GmbH i.L.                                 | Düsseldorf        | 100,0                       | 100,0                     |
| ANBANA Grundstücks-Vermietungsgesellschaft mbH                           | Düsseldorf        | 100,0                       | 100,0                     |
| ANCAVA Grundstücks-Vermietungsgesellschaft mbH                           | Düsseldorf        | 100,0                       | 100,0                     |
| ANCAVA Vermietungsgesellschaft mbH & Co.<br>Objekt Stuttgart KG          | Düsseldorf        | 47,2                        | 52,6                      |
| ANCAVA Vermietungsgesellschaft mbH & Co.<br>Objekt Weilimdorf KG         | Düsseldorf        | 47,2                        | 52,6                      |
| ANEA Grundstücks-Vermietungsgesellschaft mbH                             | Düsseldorf        | 100,0                       | 100,0                     |
| ANSELMA Grundstücks-Vermietungsgesellschaft mbH i.L.                     | Düsseldorf        | 100,0                       | 100,0                     |
| ARAFINA Grundstücks-Vermietungsgesellschaft mbH                          | Düsseldorf        | 100,0                       | 100,0                     |

|     |                                  |
|-----|----------------------------------|
| 204 | Gesamtergebnisrechnung           |
| 208 | Bilanz                           |
| 210 | Eigenkapitalveränderungsrechnung |
| 212 | Kapitalflussrechnung             |
| 214 | Anhang (Notes)                   |
| 370 | Bestätigungsvermerk              |

| Name                                                                           | Sitz              | Kapitalanteil<br>in % insg. | Stimmanteil<br>in % insg. |
|--------------------------------------------------------------------------------|-------------------|-----------------------------|---------------------------|
| AREBA Verwaltung und Treuhand GmbH                                             | Düsseldorf        | 100,0                       | 100,0                     |
| Ariondaz SAS                                                                   | Paris             | 100,0                       | 100,0                     |
| ARISA Vermietungsgesellschaft mbH i.L.                                         | Düsseldorf        | 100,0                       | 100,0                     |
| ARMANDA Flugzeug-Leasinggesellschaft mbH                                       | Düsseldorf        | 100,0                       | 100,0                     |
| AROSA Flugzeug-Leasinggesellschaft mbH                                         | Düsseldorf        | 100,0                       | 100,0                     |
| ARQUATUS Grundstücks-Vermietungsgesellschaft mbH i. L.                         | Düsseldorf        | 100,0                       | 100,0                     |
| ARVINA Verwaltung und Treuhand GmbH                                            | Düsseldorf        | 100,0                       | 100,0                     |
| ASCETO Grundstücks-Vermietungsgesellschaft mbH                                 | Düsseldorf        | 100,0                       | 100,0                     |
| ASERTUNA Grundstücks-Vermietungsgesellschaft mbH                               | Düsseldorf        | 100,0                       | 100,0                     |
| ASILUS Grundstücks-Vermietungsgesellschaft mbH i.L.                            | Düsseldorf        | 100,0                       | 100,0                     |
| ASISTA Grundstücks-Vermietungsgesellschaft mbH                                 | Düsseldorf        | 100,0                       | 100,0                     |
| ASKANZA Grundstücks-Vermietungsgesellschaft mbH                                | Düsseldorf        | 100,0                       | 100,0                     |
| ASKANZA Grundstücks-Vermietungsgesellschaft mbH & Co.<br>Objekt Lüdenscheid KG | Düsseldorf        | 94,4                        | 86,0                      |
| ASKIBA Grundstücks-Vermietungsgesellschaft mbH                                 | Düsseldorf        | 100,0                       | 100,0                     |
| ASPERGA Grundstücks-Vermietungsgesellschaft mbH                                | Düsseldorf        | 100,0                       | 100,0                     |
| Aspiro S.A. <sup>36)</sup>                                                     | Lódz              | 100,0                       | 100,0                     |
| ASSANDRA Grundstücks-Vermietungsgesellschaft mbH                               | Düsseldorf        | 100,0                       | 100,0                     |
| ASSENTO Photovoltaik-Beteiligungsgesellschaft mbH                              | Düsseldorf        | 100,0                       | 100,0                     |
| ASSERTA Flugzeug-Leasinggesellschaft mbH                                       | Düsseldorf        | 100,0                       | 100,0                     |
| ASTRELLA Grundstücks-Vermietungsgesellschaft mbH i.L.                          | Berlin            | 100,0                       | 100,0                     |
| ASTRIFA Mobilien-Vermietungsgesellschaft mbH                                   | Düsseldorf        | 100,0                       | 100,0                     |
| ATERNA Mobilien-Vermietungsgesellschaft mbH                                    | Berlin            | 100,0                       | 100,0                     |
| ATLAS-ALPHA GmbH                                                               | Frankfurt am Main | 100,0                       | 100,0                     |
| ATUNO Verwaltung und Treuhand GmbH                                             | Düsseldorf        | 100,0                       | 100,0                     |
| AURESTA Grundstücks-Vermietungsgesellschaft mbH                                | Düsseldorf        | 100,0                       | 100,0                     |
| AVANCIA Vermietungsgesellschaft mbH                                            | Düsseldorf        | 100,0                       | 100,0                     |
| AVARICA Grundstücks-Vermietungsgesellschaft mbH                                | Düsseldorf        | 100,0                       | 100,0                     |
| AVARICA Grundstücks-Vermietungsgesellschaft mbH & Co.<br>Objekt Münchberg KG   | Düsseldorf        | 93,2                        | 93,6                      |
| AVENDO Beteiligungsgesellschaft mbH                                            | Stuttgart         | 100,0                       | 100,0                     |
| AVERTUM Flugzeug-Leasinggesellschaft mbH                                       | Düsseldorf        | 100,0                       | 100,0                     |
| AVERTUM Flugzeug-Leasinggesellschaft mbH & Co. Zweite<br>Legacy 600 KG         | Düsseldorf        | 100,0                       | 100,0                     |
| Bankowy Dom Hipoteczny Sp. z o.o                                               | Warschau          | 100,0                       | 100,0                     |
| Belus Immobilien- und Beteiligungsgesellschaft mbH                             | Eschborn          | 100,0                       | 100,0                     |
| Beteiligungsgesellschaft für Industrie und Handel mbH                          | Frankfurt am Main | 100,0                       | 100,0                     |
| BFC Berliner Film Companie Beteiligungsgesellschaft mbH                        | Berlin            | 100,0                       | 100,0                     |
| BFC Berliner Film Companie Productions GmbH i.L.                               | Berlin            | 100,0                       | 100,0                     |
| Brafero-Sociedade Imobiliária, S.A.                                            | Lissabon          | 100,0                       | 100,0                     |
| BRE Corporate Finance S.A.                                                     | Warschau          | 100,0                       | 100,0                     |
| BRE Property Partner Sp. z o.o.                                                | Warschau          | 100,0                       | 100,0                     |
| BRE Systems Sp. z o.o.                                                         | Warschau          | 100,0                       | 100,0                     |
| BRE Wealth Management SA                                                       | Warschau          | 100,0                       | 100,0                     |
| BREL-Property Management Sp. z o.o.                                            | Warschau          | 100,0                       | 100,0                     |
| BREL-AG Sp. z o.o.                                                             | Warschau          | 100,0                       | 100,0                     |
| BREL-AN Sp. z o.o.                                                             | Warschau          | 100,0                       | 100,0                     |
| BREL-APEX Sp. z o.o.                                                           | Warschau          | 100,0                       | 100,0                     |

b)

| Name                                                                         | Sitz                 | Kapitalanteil<br>in % insg. | Stimmanteil<br>in % insg. |
|------------------------------------------------------------------------------|----------------------|-----------------------------|---------------------------|
| BREL-BAT Sp. z o.o.                                                          | Warschau             | 100,0                       | 100,0                     |
| BREL-COM Sp. z o.o.                                                          | Warschau             | 100,0                       | 100,0                     |
| BREL-ESTATE Sp. z o.o.                                                       | Warschau             | 100,0                       | 100,0                     |
| BREL-FIN Sp. z o.o.                                                          | Warschau             | 100,0                       | 100,0                     |
| BREL-FORCA Sp. z o.o.                                                        | Warschau             | 100,0                       | 100,0                     |
| BREL-HAN Sp. z o.o.                                                          | Warschau             | 100,0                       | 100,0                     |
| BREL-IMMO Sp. z o.o.                                                         | Warschau             | 100,0                       | 100,0                     |
| BRELINVEST Sp. z o.o. Fly 2 Sp. Komandytowa                                  | Warschau             | 100,0                       | 100,0                     |
| BRELINVEST Sp.z o.o.                                                         | Warschau             | 100,0                       | 100,0                     |
| BREL-MAR Sp. z o.o.                                                          | Warschau             | 100,0                       | 100,0                     |
| BREL-MIG Sp. z.o.o. w likwidacji                                             | Warschau             | 100,0                       | 100,0                     |
| BREL-POL Sp. z o.o.                                                          | Warschau             | 100,0                       | 100,0                     |
| BREL-PRO Sp. z o.o.                                                          | Warschau             | 100,0                       | 100,0                     |
| BREL-STAR Sp. z o.o.                                                         | Warschau             | 100,0                       | 100,0                     |
| CAP Kiel Betriebs-GmbH                                                       | Kiel                 | 51,0                        | 51,0                      |
| CB Euregio GmbH                                                              | Frankfurt am Main    | 100,0                       | 100,0                     |
| CB Lux Kirchberg GmbH                                                        | Frankfurt am Main    | 100,0                       | 100,0                     |
| CBG Commerz Beteiligungskapital Verwaltungs GmbH                             | Frankfurt am Main    | 100,0                       | 100,0                     |
| CCR Courtage i.L.                                                            | Paris                | 100,0                       | 100,0                     |
| Centrum Rozliczeń i Informacji CERI Sp. z.o.o.                               | Lódz                 | 100,0                       | 100,0                     |
| CG Japan GmbH                                                                | Wiesbaden            | 100,0                       | 100,0                     |
| CG NL Holding B.V.                                                           | Amsterdam            | 100,0                       | 100,0                     |
| CG Real Estate Luxemburg S.à.r.l. i.L.                                       | Luxemburg            | 100,0                       | 100,0                     |
| CGG Canada Grundbesitz GmbH                                                  | Wiesbaden            | 100,0                       | 100,0                     |
| CGI Stadtgalerie Schweinfurt Verwaltungs- GmbH                               | Wiesbaden            | 100,0                       | 100,0                     |
| CGI Victoria Square Limited                                                  | London               | 100,0                       | 100,0                     |
| CGI Victoria Square Nominees Limited                                         | London               | 100,0                       | 100,0                     |
| CGM Lux 1 S.à.r.l. i.L.                                                      | Luxemburg            | 100,0                       | 100,0                     |
| CGM Lux 2 S.à.r.l. i.L.                                                      | Luxemburg            | 100,0                       | 100,0                     |
| CGM Lux 3 S.à.r.l. i.L.                                                      | Luxemburg            | 100,0                       | 100,0                     |
| CIV GmbH Alpha                                                               | Frankfurt am Main    | 100,0                       | 100,0                     |
| CIV GmbH Beta                                                                | Frankfurt am Main    | 100,0                       | 100,0                     |
| COLLEGIUM GLASHÜTTEN Zentrum für Kommunikation GmbH                          | Glashütten           | 100,0                       | 100,0                     |
| Commerz (Nederland) N.V.                                                     | Amsterdam            | 100,0                       | 100,0                     |
| Commerz Building and Management GmbH                                         | Essen                | 100,0                       | 100,0                     |
| Commerz Derivatives Funds Solutions S.A.                                     | Luxemburg            | 100,0                       | 100,0                     |
| Commerz Europe (Ireland), Inc.                                               | Wilmington, Delaware | 100,0                       | 100,0                     |
| Commerz Grundbesitz Gestao de Centras Comerciais, Sociedade Unipessoal, Lda. | Lissabon             | 100,0                       | 100,0                     |
| Commerz Keyes Avenue Properties (Pty) Ltd.                                   | Johannesburg         | 100,0                       | 100,0                     |
| Commerz Nominees Ltd.                                                        | London               | 100,0                       | 100,0                     |
| Commerz Overseas Services Ltd.                                               | London               | 100,0                       | 100,0                     |
| Commerz Real Autoservice GmbH <sup>37)</sup>                                 | Düsseldorf           | 100,0                       | 100,0                     |
| Commerz Real Benelux GmbH                                                    | Wiesbaden            | 100,0                       | 100,0                     |
| Commerz Real CZ s.r.o.                                                       | Prag                 | 100,0                       | 100,0                     |
| Commerz Real Direkt GmbH                                                     | Düsseldorf           | 100,0                       | 100,0                     |
| Commerz Real Finanzierungsleasing GmbH                                       | Düsseldorf           | 100,0                       | 100,0                     |

b)

b)

b)



|     |                                  |
|-----|----------------------------------|
| 204 | Gesamtergebnisrechnung           |
| 208 | Bilanz                           |
| 210 | Eigenkapitalveränderungsrechnung |
| 212 | Kapitalflussrechnung             |
| 214 | Anhang (Notes)                   |
| 370 | Bestätigungsvermerk              |

| Name                                                                              | Sitz                 | Kapitalanteil<br>in % insg. | Stimmanteil<br>in % insg. |
|-----------------------------------------------------------------------------------|----------------------|-----------------------------|---------------------------|
| Commerz Real France GmbH                                                          | Wiesbaden            | 100,0                       | 100,0                     |
| Commerz Real Nederland B. V.                                                      | Breda                | 100,0                       | 100,0                     |
| Commerz Real Projektconsult GmbH                                                  | Düsseldorf           | 100,0                       | 100,0                     |
| Commerz Real Vertrieb GmbH                                                        | Düsseldorf           | 100,0                       | 100,0                     |
| Commerz U.S. Financial Corporation                                                | Wilmington, Delaware | 100,0                       | 100,0                     |
| Commerz U.S. Holding, Inc.                                                        | Wilmington, Delaware | 100,0                       | 100,0                     |
| Commerzbank Capital Management<br>Unternehmensbeteiligungs GmbH <sup>38)</sup>    | Frankfurt am Main    | 100,0                       | 100,0                     |
| Commerzbank International Trust (Jersey) Ltd.                                     | St. Helier, Jersey   | 100,0                       | 100,0                     |
| Commerzbank Leasing December (6) Limited                                          | London               | 100,0                       | 100,0                     |
| Commerzbank Representative Office Nigeria Limited                                 | Lagos                | 100,0                       | 100,0                     |
| Commerzbank Representative Office Panama, S.A.                                    | City of Panama       | 100,0                       | 100,0                     |
| Commerzbank Sao Paulo Servicos Ltda.                                              | São Paulo            | 100,0                       | 100,0                     |
| Commerzbank Sponsoring GmbH <sup>39)</sup>                                        | Frankfurt am Main    | 100,0                       | 100,0                     |
| CommerzKommunalbau GmbH                                                           | Düsseldorf           | 100,0                       | 100,0                     |
| CommerzLeasing GmbH                                                               | Düsseldorf           | 100,0                       | 100,0                     |
| CommerzStiftungsTreuhand GmbH                                                     | Frankfurt am Main    | 100,0                       | 100,0                     |
| CommerzTrust GmbH                                                                 | Frankfurt am Main    | 100,0                       | 100,0                     |
| CR KaiserKarree Holding S.a.r.l.                                                  | Luxemburg            | 100,0                       | 100,0                     |
| CR Station General Partner Inc.                                                   | Toronto              | 100,0                       | 100,0                     |
| CR Station Limited Partnership                                                    | Toronto              | 100,0                       | 100,0                     |
| Crédito Germánico S.A                                                             | Montevideo           | 100,0                       | 100,0                     |
| CRI 1 Sp.zo.o                                                                     | Warschau             | 100,0                       | 100,0                     |
| CRI Erste Beteiligungsgesellschaft mbH                                            | Wiesbaden            | 100,0                       | 100,0                     |
| CRI Zweite Beteiligungsgesellschaft mbH                                           | Wiesbaden            | 100,0                       | 100,0                     |
| CSK Sp. z o.o.                                                                    | Lódz                 | 100,0                       | 100,0                     |
| CTF Consulting OOO                                                                | Moskau               | 100,0                       | 100,0                     |
| Czwarty Polski Fundusz Rozwoju Sp. z o.o.                                         | Lódz                 | 100,0                       | 100,0                     |
| Delphi I Eurohypo LLC                                                             | Wilmington           | 100,0                       | 100,0                     |
| DFI S.p.A. in liquidazione <sup>40)</sup>                                         | Mailand              | 100,0                       | 100,0                     |
| DOMINO Projektentwicklungsgesellschaft mbH & Co.<br>Objekt Neue Mainzer Straße KG | Frankfurt am Main    | 100,0                       | 100,0                     |
| dozent.it Vermögensverwaltungsgesellschaft mbH                                    | Frankfurt am Main    | 100,0                       | 100,0                     |
| Dresdner Kleinwort Derivative Investments Limited                                 | London               | 100,0                       | 100,0                     |
| Dresdner Kleinwort Group LLC                                                      | Wilmington, Delaware | 100,0                       | 100,0                     |
| Dresdner Kleinwort Holdings II, Inc.                                              | Wilmington, Delaware | 100,0                       | 100,0                     |
| Dresdner Kleinwort Securities (Asia) Limited                                      | Hong Kong            | 100,0                       | 100,0                     |
| Dresdner Private Placement GmbH                                                   | Bad Vilbel           | 100,0                       | 100,0                     |
| Dresdner Structured Products S.A.                                                 | Luxemburg            | 100,0                       | 100,0                     |
| Dresdner Versicherung GmbH                                                        | Dresden              | 100,0                       | 100,0                     |
| Dritte SIB Aktiengesellschaft                                                     | Frankfurt am Main    | 100,0                       | 100,0                     |
| EHNY Holdings, LLC                                                                | Dover, Delaware      | 100,0                       | 100,0                     |
| EHNY Montelucia Manager, LLC                                                      | Dover, Delaware      | 100,0                       | 100,0                     |
| Einunddreißigste DRESIB Beteiligungs-Gesellschaft mbH                             | Frankfurt am Main    | 100,0                       | 100,0                     |
| Elfte Umbra Vermögensverwaltungsgesellschaft mbH                                  | Frankfurt am Main    | 100,0                       | 100,0                     |
| EP Euro-Projektentwicklungs GmbH & Co. Objekt 1 KG                                | Frankfurt am Main    | 100,0                       | 100,0                     |
| EP Euro-Projektentwicklungs-Verwaltungs GmbH                                      | Frankfurt am Main    | 100,0                       | 100,0                     |
| Erste Alexanderplatz 3 Betriebsvorrichtung GmbH                                   | Berlin               | 90,0                        | 90,0                      |

b)

b)

| Name                                                                                       | Sitz               | Kapitalanteil<br>in % insg. | Stimmanteil<br>in % insg. |
|--------------------------------------------------------------------------------------------|--------------------|-----------------------------|---------------------------|
| Erste DRESIB Beteiligungs-Gesellschaft mbH                                                 | Frankfurt am Main  | 100,0                       | 100,0                     |
| EuREAM GmbH                                                                                | Wiesbaden          | 100,0                       | 100,0                     |
| Eurohypo Investment Banking Limited                                                        | London             | 100,0                       | 100,0                     |
| Eurohypo Nominees 1 Limited                                                                | London             | 100,0                       | 100,0                     |
| Eurohypo Representacoes Ltda.                                                              | São Paulo          | 100,0                       | 100,0                     |
| Eurologistik 1 Freehold BVBA                                                               | Brüssel            | 94,9                        | 94,9                      |
| Eurologistik 1 Leasehold General Partner                                                   | Brüssel            | 94,9                        | 94,9                      |
| Eurologistik 1 Leasehold Société en commandite simple                                      | Brüssel            | 94,9                        | 94,9                      |
| Fernwärmenetz Leipzig GmbH                                                                 | Leipzig            | 100,0                       | 100,0                     |
| Finanztrust AG                                                                             | Glarus             | 100,0                       | 100,0                     |
| Forum Algarve - Gestao de Centro comercial, Sociedade Unipessoal, Lda. i.L.                | Lissabon           | 100,0                       | 100,0                     |
| Forum Almada - Gestao de Centro Comercial, Sociedade Unipessoal Lda. II & Comandita i.L.   | Lissabon           | 100,0                       | 100,0                     |
| Forum Almada - Gestao de Centro Commercial, Sociedade Unipessoal, Lda. i.L.                | Lissabon           | 100,0                       | 100,0                     |
| Forum Montijo, Gestao de Centro Comercial Sociedade Unipessoal, Lda i.L.                   | Lissabon           | 100,0                       | 100,0                     |
| Frega Vermögensverwaltungsgesellschaft mbH                                                 | Frankfurt am Main  | 100,0                       | 100,0                     |
| FV EURL                                                                                    | Paris              | 100,0                       | 100,0                     |
| Garbary Sp. z. o.o.                                                                        | Poznań             | 100,0                       | 100,0                     |
| Gesellschaft für Kreditsicherung mbH                                                       | Berlin             | 63,3                        | 63,3                      |
| GIE Victoria Aéronautique                                                                  | Paris              | 100,0                       | 100,0                     |
| GRAMOLINDA VermietungsGmbH & Co. Objekt Frankfurt KG                                       | Grünwald (München) | 97,0                        | 70,0                      |
| GRANADA Investment GmbH                                                                    | Düsseldorf         | 100,0                       | 100,0                     |
| Grundstücks- und Vermögensverwaltungsgesellschaft Geretsried mbH                           | Düsseldorf         | 51,1                        | 51,0                      |
| H 47 GmbH & Co. KG                                                                         | Düsseldorf         | 99,7                        | 94,9                      |
| H 47 Verwaltungsgesellschaft mbH                                                           | Düsseldorf         | 94,4                        | 94,0                      |
| Hamudi S.A.                                                                                | Madrid             | 100,0                       | 100,0                     |
| Hardy Beteiligungs-Gesellschaft mbH                                                        | Frankfurt am Main  | 100,0                       | 100,0                     |
| Haus am Kai 2 O.O.O.                                                                       | Moskau             | 100,0                       | 100,0                     |
| HDW Grundstücks-Vermietungsgesellschaft mbH                                                | Frankfurt am Main  | 100,0                       | 100,0                     |
| Histel Beteiligungs GmbH                                                                   | Frankfurt am Main  | 100,0                       | 100,0                     |
| HVI Handels- und Verwertungsgesellschaft für Immobilien mbH                                | Düsseldorf         | 94,0                        | 94,0                      |
| Immobilien-gesellschaft Ost Hägle spol. s. r.o.                                            | Prag               | 100,0                       | 100,0                     |
| Immobilien-Vermietungsgesellschaft Reeder & Co. Objekt Airport Bürocenter Dresden KG i. L. | Dresden            | 88,2                        | 87,5                      |
| Immobilien-Vermietungsgesellschaft Reeder & Co. Objekt Aschersleben KG                     | Düsseldorf         | 94,0                        | 93,8                      |
| Immobilienverwaltungs- und Vertriebsgesellschaft Villen am Glienicker Horn mbH             | Berlin             | 100,0                       | 100,0                     |
| Immobilienverwaltungsgesellschaft Grammophon Büropark mbH                                  | Berlin             | 100,0                       | 100,0                     |
| Immobilienverwaltungsgesellschaft Kampfmeyer Villa mbH                                     | Berlin             | 100,0                       | 100,0                     |
| Immobilienverwaltungsgesellschaft Schlachthof Offenbach mbH                                | Eschborn           | 100,0                       | 100,0                     |
| IMMOFIDUCIA Sp. z. o.o.                                                                    | Warschau           | 100,0                       | 100,0                     |

|     |                                  |
|-----|----------------------------------|
| 204 | Gesamtergebnisrechnung           |
| 208 | Bilanz                           |
| 210 | Eigenkapitalveränderungsrechnung |
| 212 | Kapitalflussrechnung             |
| 214 | Anhang (Notes)                   |
| 370 | Bestätigungsvermerk              |

| Name                                                                                  | Sitz               | Kapitalanteil<br>in % insg. | Stimmanteil<br>in % insg. |
|---------------------------------------------------------------------------------------|--------------------|-----------------------------|---------------------------|
| IWP International West Pictures GmbH & Co.<br>Erste Produktions KG                    | Köln               | 94,9                        | 94,9                      |
| IWP International West Pictures Verwaltungs GmbH                                      | Köln               | 100,0                       | 100,0                     |
| KTC Kommunikations- und Trainings-Center Königstein<br>GmbH                           | Königstein/Taunus  | 100,0                       | 100,0                     |
| L.I.A. Leasinggesellschaft für Immobilien und Anlagegüter<br>mbH                      | Düsseldorf         | 100,0                       | 100,0                     |
| LAUREA MOLARIS Grundstücks-Vermietungsgesellschaft<br>mbH                             | Düsseldorf         | 94,0                        | 94,0                      |
| LOFRA GmbH & Co. KG                                                                   | Frankfurt am Main  | 99,9                        | 100,0                     |
| LOFRA Verwaltungs-Gesellschaft mbH                                                    | Frankfurt am Main  | 100,0                       | 100,0                     |
| Lufthansa Leasing GmbH & Co. Echo-Oscar KG i. L.                                      | Grünwald (München) | 100,0                       | 99,6                      |
| Lufthansa Leasing GmbH & Co. Echo-Papa KG i. L.                                       | Grünwald (München) | 71,2                        | 71,0                      |
| LUGO Photovoltaik-Beteiligungsgesellschaft mbH & Co.<br>Objekt El Baldio 1 KG         | Düsseldorf         | 100,0                       | 100,0                     |
| Max Lease S.à.r.l.                                                                    | Luxemburg          | 100,0                       | 100,0                     |
| MOLBINA Vermietungsgesellschaft mbH & Co.<br>Objekt Düsseldorf Ludwig-Erhard-Allee KG | Düsseldorf         | 97,0                        | 93,8                      |
| MOLBRIELA Vermietungsgesellschaft mbH                                                 | Düsseldorf         | 100,0                       | 100,0                     |
| MOLITA Vermietungsgesellschaft mbH & Co.<br>Objekt Messe Hamburg KG                   | Hamburg            | 0,0                         | 51,0                      |
| MOLMELFI Vermietungsgesellschaft mbH & Co.<br>Objekt Burghausen KG                    | Düsseldorf         | 100,0                       | 51,0                      |
| MOLRATUS Vermietungsgesellschaft mbH                                                  | Düsseldorf         | 100,0                       | 100,0                     |
| MOLRATUS Vermietungsgesellschaft mbH & Co.<br>Objekt Loxstedt KG                      | Düsseldorf         | 0,0                         | 85,0                      |
| MONEA Vermietungsgesellschaft mbH                                                     | Düsseldorf         | 100,0                       | 100,0                     |
| Montitail - Gestao de Retail Park, Sociedade<br>Unipessoal Lda.                       | Lissabon           | 94,9                        | 94,9                      |
| NACOLO Schiffsbetriebsgesellschaft mbH                                                | Hamburg            | 100,0                       | 100,0                     |
| NACONA Schiffsbetriebsgesellschaft mbH                                                | Hamburg            | 100,0                       | 100,0                     |
| NACONEO Schiffsbetriebsgesellschaft mbH                                               | Hamburg            | 100,0                       | 100,0                     |
| NACONGA Schiffsbetriebsgesellschaft mbH                                               | Hamburg            | 100,0                       | 100,0                     |
| NACORINO Schiffsbetriebsgesellschaft mbH                                              | Hamburg            | 100,0                       | 100,0                     |
| NACORONA Schiffsbetriebsgesellschaft mbH                                              | Hamburg            | 100,0                       | 100,0                     |
| NACOTA Schiffsbetriebsgesellschaft mbH                                                | Hamburg            | 100,0                       | 100,0                     |
| NAFARI Schiffsbetriebsgesellschaft mbH                                                | Hamburg            | 100,0                       | 100,0                     |
| NAFIRINA Schiffsbetriebsgesellschaft mbH                                              | Hamburg            | 100,0                       | 100,0                     |
| NAMINO Schiffsbetriebsgesellschaft mbH                                                | Hamburg            | 100,0                       | 100,0                     |
| NAROLA Schiffsbetriebsgesellschaft mbH                                                | Hamburg            | 100,0                       | 100,0                     |
| NASIRO Schiffsbetriebsgesellschaft mbH                                                | Hamburg            | 100,0                       | 100,0                     |
| NASTO Schiffsbetriebsgesellschaft mbH                                                 | Hamburg            | 100,0                       | 100,0                     |
| NAUCULA Schiffsbetriebsgesellschaft mbH                                               | Hamburg            | 100,0                       | 100,0                     |
| NAULUMO Schiffsbetriebsgesellschaft mbH                                               | Hamburg            | 100,0                       | 100,0                     |
| NAUMARE Schiffsbetriebsgesellschaft mbH                                               | Hamburg            | 100,0                       | 100,0                     |
| NAUMOSA Schiffsbetriebsgesellschaft mbH                                               | Hamburg            | 100,0                       | 100,0                     |
| NAUPEUS Schiffsbetriebsgesellschaft mbH                                               | Hamburg            | 100,0                       | 100,0                     |
| NAURANTO Schiffsbetriebsgesellschaft mbH                                              | Hamburg            | 100,0                       | 100,0                     |
| NAURATA Schiffsbetriebsgesellschaft mbH                                               | Hamburg            | 100,0                       | 100,0                     |
| NAUSOLA Schiffsbetriebsgesellschaft mbH                                               | Hamburg            | 100,0                       | 100,0                     |

| Name                                                                           | Sitz              | Kapitalanteil<br>in % insg. | Stimmanteil<br>in % insg. |
|--------------------------------------------------------------------------------|-------------------|-----------------------------|---------------------------|
| NAUTARO Schiffsbetriebsgesellschaft mbH                                        | Hamburg           | 100,0                       | 100,0                     |
| NAUTESSA Schiffsbetriebsgesellschaft mbH                                       | Hamburg           | 100,0                       | 100,0                     |
| NAUTINO Schiffsbetriebsgesellschaft mbH                                        | Hamburg           | 100,0                       | 100,0                     |
| NAUTIRA Schiffsbetriebsgesellschaft mbH                                        | Hamburg           | 100,0                       | 100,0                     |
| NAUTIS Schiffsbetriebsgesellschaft mbH                                         | Hamburg           | 100,0                       | 100,0                     |
| NAUTLUS Schiffsbetriebsgesellschaft mbH                                        | Hamburg           | 100,0                       | 100,0                     |
| NAUTO Schiffsbetriebsgesellschaft mbH                                          | Hamburg           | 100,0                       | 100,0                     |
| NAUTORIA Schiffsbetriebsgesellschaft mbH                                       | Hamburg           | 100,0                       | 100,0                     |
| NAUTUGO Schiffsbetriebsgesellschaft mbH                                        | Hamburg           | 100,0                       | 100,0                     |
| NAVALIS Schiffsbetriebsgesellschaft mbH                                        | Hamburg           | 100,0                       | 100,0                     |
| NAVIBOLA Schiffsbetriebsgesellschaft mbH                                       | Hamburg           | 100,0                       | 100,0                     |
| NAVIBOTO Schiffsbetriebsgesellschaft mbH                                       | Hamburg           | 100,0                       | 100,0                     |
| NAVIFIORI Schiffsbetriebsgesellschaft mbH                                      | Hamburg           | 100,0                       | 100,0                     |
| NAVIGA Schiffsbeteiligung GmbH                                                 | Hamburg           | 100,0                       | 100,0                     |
| NAVIGATO Schiffsbetriebsgesellschaft mbH                                       | Hamburg           | 100,0                       | 100,0                     |
| NAVIGOLO Schiffsbetriebsgesellschaft mbH                                       | Hamburg           | 100,0                       | 100,0                     |
| NAVILO Vermietungsgesellschaft mbH                                             | Hamburg           | 100,0                       | 100,0                     |
| NAVINA Schiffsbetriebsgesellschaft mbH                                         | Hamburg           | 100,0                       | 100,0                     |
| NAVIRENA Schiffsbetriebsgesellschaft mbH                                       | Hamburg           | 100,0                       | 100,0                     |
| NAVIROSSA Schiffsbetriebsgesellschaft mbH                                      | Hamburg           | 100,0                       | 100,0                     |
| NAVISTA Verwaltung und Treuhand GmbH i.L.                                      | Düsseldorf        | 100,0                       | 100,0                     |
| NAVITA Schiffsbetriebsgesellschaft mbH                                         | Hamburg           | 100,0                       | 100,0                     |
| NAVITARIA Schiffsbetriebsgesellschaft mbH                                      | Hamburg           | 100,0                       | 100,0                     |
| NAVITONI Schiffsbetriebsgesellschaft mbH                                       | Hamburg           | 100,0                       | 100,0                     |
| NAVITOSA Schiffsbetriebsgesellschaft mbH                                       | Hamburg           | 100,0                       | 100,0                     |
| NAVITURA Schiffsbetriebsgesellschaft mbH                                       | Hamburg           | 100,0                       | 100,0                     |
| NEB-Shipping Co.                                                               | Monrovia/Liberia  | 92,1                        | 92,1                      |
| NEPTANA Schiffsbetriebsgesellschaft mbH                                        | Hamburg           | 100,0                       | 100,0                     |
| NEPTILA Schiffsbetriebsgesellschaft mbH                                        | Hamburg           | 100,0                       | 100,0                     |
| NEPTORA Schiffsbetriebsgesellschaft mbH                                        | Hamburg           | 100,0                       | 100,0                     |
| NEPTUGA Schiffsbetriebsgesellschaft mbH                                        | Hamburg           | 100,0                       | 100,0                     |
| NEPTUNO Schiffsbetriebsgesellschaft mbH                                        | Hamburg           | 100,0                       | 100,0                     |
| NESTOR Grundstücks-Vermietungsgesellschaft mbH                                 | Düsseldorf        | 100,0                       | 100,0                     |
| NESTOR Grundstücks-Vermietungsgesellschaft mbH & Co.<br>Objekt Hamme KG        | Düsseldorf        | 100,0                       | 100,0                     |
| NESTOR Grundstücks-Vermietungsgesellschaft mbH & Co.<br>Objekt Wiemelhausen KG | Düsseldorf        | 100,0                       | 100,0                     |
| Neuma Vermögensverwaltungsgesellschaft mbH                                     | Hamburg           | 100,0                       | 100,0                     |
| Neunzehnte FraMü Beteiligungs GmbH                                             | Frankfurt am Main | 100,0                       | 100,0                     |
| NORA Grundstücks-Vermietungsgesellschaft mbH                                   | Düsseldorf        | 100,0                       | 100,0                     |
| NOSCO Grundstücks-Vermietungsgesellschaft mbH                                  | Mainz             | 100,0                       | 100,0                     |
| NOTITIA Grundstücks-Vermietungsgesellschaft mbH                                | Berlin            | 100,0                       | 100,0                     |
| NOVITAS Grundstücks-Vermietungsgesellschaft mbH                                | Düsseldorf        | 100,0                       | 100,0                     |
| Number X Real Estate GmbH                                                      | Eschborn          | 100,0                       | 100,0                     |
| NUMERIA Grundstücks-Vermietungsgesellschaft mbH                                | Düsseldorf        | 100,0                       | 100,0                     |
| NURUS Beteiligungsgesellschaft mbH                                             | Düsseldorf        | 100,0                       | 100,0                     |
| OSKAR Medienbeteiligungsgesellschaft mbH                                       | Düsseldorf        | 100,0                       | 100,0                     |
| PAREO Kraftwerk-Beteiligungsgesellschaft mbH                                   | Leipzig           | 100,0                       | 100,0                     |

|     |                                  |
|-----|----------------------------------|
| 204 | Gesamtergebnisrechnung           |
| 208 | Bilanz                           |
| 210 | Eigenkapitalveränderungsrechnung |
| 212 | Kapitalflussrechnung             |
| 214 | Anhang (Notes)                   |
| 370 | Bestätigungsvermerk              |

| Name                                                                             | Sitz               | Kapitalanteil<br>in % insg. | Stimmanteil<br>in % insg. |
|----------------------------------------------------------------------------------|--------------------|-----------------------------|---------------------------|
| Property Invest Spain, S.L.                                                      | Barcelona          | 100,0                       | 100,0                     |
| PRUNA Betreiber GmbH                                                             | Grünwald (München) | 51,0                        | 51,0                      |
| RAMONIA Grundstücks-Vermietungsgesellschaft mbH                                  | Düsseldorf         | 100,0                       | 100,0                     |
| RAPIDA Grundstücks-Vermietungsgesellschaft mbH                                   | Düsseldorf         | 100,0                       | 100,0                     |
| RAVENNA Katowice Sp. z.o.o. w likwidacji                                         | Warschau           | 100,0                       | 100,0                     |
| RAVENNA Kraków Sp. z o.o.                                                        | Warschau           | 100,0                       | 100,0                     |
| Receivable Partners Inc.                                                         | North Brook        | 66,0                        | 66,0                      |
| RECURSA Grundstücks-Vermietungsgesellschaft mbH                                  | Frankfurt am Main  | 100,0                       | 100,0                     |
| RESIDO Flugzeug-Leasinggesellschaft mbH                                          | Düsseldorf         | 100,0                       | 100,0                     |
| RIMA Medien-Beteiligungsgesellschaft mbH                                         | Düsseldorf         | 100,0                       | 100,0                     |
| RIPA Medien-Beteiligungsgesellschaft mbH                                         | Düsseldorf         | 100,0                       | 100,0                     |
| ROSARIA Grundstücks-Vermietungsgesellschaft mbH                                  | Düsseldorf         | 100,0                       | 100,0                     |
| ROSARIA Grundstücks-Vermietungsgesellschaft mbH & Co.<br>Objekt Baden-Airpark KG | Düsseldorf         | 50,0                        | 65,0                      |
| ROSATA Grundstücks-Vermietungsgesellschaft mbH                                   | Düsseldorf         | 100,0                       | 100,0                     |
| ROSEA Grundstücks-Vermietungsgesellschaft mbH                                    | Düsseldorf         | 100,0                       | 100,0                     |
| ROSINTA Grundstücks-Vermietungsgesellschaft mbH                                  | Düsseldorf         | 100,0                       | 100,0                     |
| ROSOLA Grundstücks-Vermietungsgesellschaft mbH                                   | Düsseldorf         | 100,0                       | 100,0                     |
| ROTUNDA Grundstücks-Vermietungsgesellschaft mbH                                  | Düsseldorf         | 100,0                       | 100,0                     |
| Schunk GmbH                                                                      | Willich            | 51,0                        | 51,0                      |
| Solar Cuever del Negro 1, S.L.U.                                                 | Madrid             | 100,0                       | 100,0                     |
| Solar Cuever del Negro 10, S.L.U.                                                | Madrid             | 100,0                       | 100,0                     |
| Solar Cuever del Negro 11, S.L.U.                                                | Madrid             | 100,0                       | 100,0                     |
| Solar Cuever del Negro 12, S.L.U.                                                | Madrid             | 100,0                       | 100,0                     |
| Solar Cuever del Negro 13, S.L.U.                                                | Madrid             | 100,0                       | 100,0                     |
| Solar Cuever del Negro 14, S.L.U.                                                | Madrid             | 100,0                       | 100,0                     |
| Solar Cuever del Negro 15, S.L.U.                                                | Madrid             | 100,0                       | 100,0                     |
| Solar Cuever del Negro 16, S.L.U.                                                | Madrid             | 100,0                       | 100,0                     |
| Solar Cuever del Negro 17, S.L.U.                                                | Madrid             | 100,0                       | 100,0                     |
| Solar Cuever del Negro 18, S.L.U.                                                | Madrid             | 100,0                       | 100,0                     |
| Solar Cuever del Negro 2, S.L.U.                                                 | Madrid             | 100,0                       | 100,0                     |
| Solar Cuever del Negro 3, S.L.U.                                                 | Madrid             | 100,0                       | 100,0                     |
| Solar Cuever del Negro 4, S.L.U.                                                 | Madrid             | 100,0                       | 100,0                     |
| Solar Cuever del Negro 5, S.L.U.                                                 | Madrid             | 100,0                       | 100,0                     |
| Solar Cuever del Negro 6, S.L.U.                                                 | Madrid             | 100,0                       | 100,0                     |
| Solar Cuever del Negro 7, S.L.U.                                                 | Madrid             | 100,0                       | 100,0                     |
| Solar Cuever del Negro 8, S.L.U.                                                 | Madrid             | 100,0                       | 100,0                     |
| Solar Cuever del Negro 9, S.L.U.                                                 | Madrid             | 100,0                       | 100,0                     |
| Solar Los Arroyos de Escuzar 1, S.L.U.                                           | Madrid             | 100,0                       | 100,0                     |
| Solar Los Arroyos de Escuzar 10, S.L.U.                                          | Madrid             | 100,0                       | 100,0                     |
| Solar Los Arroyos de Escuzar 11, S.L.U.                                          | Madrid             | 100,0                       | 100,0                     |
| Solar Los Arroyos de Escuzar 12, S.L.U.                                          | Madrid             | 100,0                       | 100,0                     |
| Solar Los Arroyos de Escuzar 13, S.L.U.                                          | Madrid             | 100,0                       | 100,0                     |
| Solar Los Arroyos de Escuzar 14, S.L.U.                                          | Madrid             | 100,0                       | 100,0                     |
| Solar Los Arroyos de Escuzar 15, S.L.U.                                          | Madrid             | 100,0                       | 100,0                     |
| Solar Los Arroyos de Escuzar 16, S.L.U.                                          | Madrid             | 100,0                       | 100,0                     |
| Solar Los Arroyos de Escuzar 17, S.L.U.                                          | Madrid             | 100,0                       | 100,0                     |

| Name                                                             | Sitz              | Kapitalanteil<br>in % insg. | Stimmanteil<br>in % insg. |
|------------------------------------------------------------------|-------------------|-----------------------------|---------------------------|
| Solar Los Arroyos de Escuzar 18, S.L.U.                          | Madrid            | 100,0                       | 100,0                     |
| Solar Los Arroyos de Escuzar 2, S.L.U.                           | Madrid            | 100,0                       | 100,0                     |
| Solar Los Arroyos de Escuzar 3, S.L.U.                           | Madrid            | 100,0                       | 100,0                     |
| Solar Los Arroyos de Escuzar 4, S.L.U.                           | Madrid            | 100,0                       | 100,0                     |
| Solar Los Arroyos de Escuzar 5, S.L.U.                           | Madrid            | 100,0                       | 100,0                     |
| Solar Los Arroyos de Escuzar 6, S.L.U.                           | Madrid            | 100,0                       | 100,0                     |
| Solar Los Arroyos de Escuzar 7, S.L.U.                           | Madrid            | 100,0                       | 100,0                     |
| Solar Los Arroyos de Escuzar 8, S.L.U.                           | Madrid            | 100,0                       | 100,0                     |
| Solar Los Arroyos de Escuzar 9, S.L.U.                           | Madrid            | 100,0                       | 100,0                     |
| SOLTRX Transaction Services GmbH                                 | Düsseldorf        | 100,0                       | 100,0                     |
| Space Park Erste Verwaltungs GmbH                                | Frankfurt am Main | 100,0                       | 100,0                     |
| TARA Immobilien-Besitz GmbH                                      | Eschborn          | 100,0                       | 100,0                     |
| TARA Immobilien-Verwaltungs-GmbH                                 | Eschborn          | 100,0                       | 100,0                     |
| TARA Property-Management GmbH                                    | Eschborn          | 100,0                       | 100,0                     |
| Tele-Tech Investment Sp. z o.o.                                  | Warschau          | 100,0                       | 100,0                     |
| Theresiencenter Dienstleistungsgesellschaft mbH                  | Wiesbaden         | 94,9                        | 94,9                      |
| TIGNARIS Beteiligungsgesellschaft mbH & Co. Objekt Ostfildern KG | Düsseldorf        | 94,9                        | 97,0                      |
| TIGNARIS Beteiligungsgesellschaft mbH & Co. Streubesitz KG       | Düsseldorf        | 94,8                        | 94,8                      |
| TIGNATO Beteiligungsgesellschaft mbH                             | Eschborn          | 100,0                       | 100,0                     |
| Transfactor Slovakia a.s.                                        | Bratislava        | 100,0                       | 100,0                     |
| TRANSFERIA Managementgesellschaft mbH i.L.                       | Dortmund          | 100,0                       | 100,0                     |
| Veer Palthe Voûte (Antilles) N.V.                                | Curacao           | 100,0                       | 100,0                     |
| Wall Street Technology Managers LP                               | New York          | 90,0                        | 90,0                      |
| Wijkertunnel Beheer III B.V.                                     | Amsterdam         | 100,0                       | 100,0                     |
| WST-Broker-GmbH                                                  | Frankfurt am Main | 90,0                        | 90,0                      |

b)

b)

|     |                                  |
|-----|----------------------------------|
| 204 | Gesamtergebnisrechnung           |
| 208 | Bilanz                           |
| 210 | Eigenkapitalveränderungsrechnung |
| 212 | Kapitalflussrechnung             |
| 214 | Anhang (Notes)                   |
| 370 | Bestätigungsvermerk              |

## 2. Assoziierte Unternehmen

### a) In der Konzernbilanz at-Equity-bewertete assoziierte Unternehmen

| Name                                                                       | Sitz                    | Kapital-<br>anteil<br>in %<br>insg. | Stimm-<br>anteil<br>in %<br>insg. | Währung | Eigen-<br>kapital<br>Tsd | Jahres-<br>ergebnis<br>Tsd |
|----------------------------------------------------------------------------|-------------------------|-------------------------------------|-----------------------------------|---------|--------------------------|----------------------------|
| 36th Street CO-INVESTMENT, L.P.                                            | Wilmington,<br>Delaware | 48,0                                | 49,0                              | USD     | 14 271                   | -1 368                     |
| AKA Ausfuhrkredit-Gesellschaft<br>mbH                                      | Frankfurt am Main       | 31,6                                | 31,6                              | EUR     | 20 500                   | 8 360                      |
| Argor-Heraeus S.A.                                                         | Mendrisio               | 26,5                                | 26,5                              | CHF     | 6 369                    | 20 686                     |
| Capital Investment Trust<br>Corporation                                    | Taipei                  | 24,0                                | 24,0                              | TWD     | 495 022                  | 609 583                    |
| Captain Holdings S.à.r.l.                                                  | Luxemburg               | 46,0                                | 46,0                              | GBP     | 3 929                    | -42                        |
| Commerz Unternehmensbeteili-<br>gungs-Aktiengesellschaft                   | Frankfurt am Main       | 40,0                                | 40,0                              | EUR     | 30 000                   | 15                         |
| COMUNITHY Immobilien GmbH                                                  | Düsseldorf              | 49,9                                | 49,9                              | EUR     | -8 143                   | 747                        |
| Exploitiemaatschappij<br>Wijkertunnel C.V.                                 | Amsterdam               | 33,3                                | 33,3                              | EUR     | 10 607                   | 5 991                      |
| GIE Céline Bail                                                            | Paris                   | 40,0                                | 40,0                              | EUR     | 0                        | 4 213                      |
| GIE Morgane Bail                                                           | Paris                   | 40,0                                | 40,0                              | EUR     | 0                        | 3 581                      |
| GIE Northbail                                                              | Puteaux                 | 25,0                                | 25,0                              | EUR     | 0                        | 7                          |
| GIE Vulcain Energie                                                        | Paris                   | 21,0                                | 21,0                              | EUR     | 0                        | 23 082                     |
| HJOBANTA GmbH & Co. Asia<br>Opportunity I KG                               | Düsseldorf              | 20,7                                | 20,7                              | EUR     | 150 168                  | -31 856                    |
| IGS Aerosols GmbH                                                          | Wehr/Baden              | 100,0                               | 0,0                               | EUR     | 3 208                    | 23                         |
| ILV Immobilien-Leasing Verwal-<br>tungsgesellschaft Düsseldorf mbH         | Düsseldorf              | 47,0                                | 47,0                              | EUR     | 45 047                   | 1 269                      |
| Inmobiliaria Colonial S.A.                                                 | Barcelona               | 20,1                                | 20,1                              | EUR     | 1 699 600                | -474 000                   |
| Irving Place Co-Investment, L.P.                                           | New York                | 33,9                                | 45,0                              | USD     | 12 633                   | 0                          |
| KGAL GmbH & Co. KG                                                         | Grünwald<br>(München)   | 45,0                                | 45,0                              | EUR     | 12 500                   | 0                          |
| KGAL Verwaltungs-GmbH                                                      | Grünwald<br>(München)   | 45,0                                | 45,0                              | EUR     | 1 400                    | 0                          |
| Linde Leasing GmbH                                                         | Wiesbaden               | 25,0                                | 25,0                              | EUR     | 600                      | 5 502                      |
| MFG Flughafen-Grundstücksver-<br>waltungsgesellschaft mbH & Co.<br>BETA KG | Grünwald<br>(München)   | 29,4                                | 29,4                              | EUR     | 62 072                   | 489                        |
| MM Cogène 2                                                                | Paris                   | 49,8                                | 49,8                              | EUR     | 0                        | 2 476                      |
| RECAP/COMMERZ Alta Phoenix<br>Lofts Investment, L.P.                       | New York                | 45,0                                | 45,0                              | USD     | 16 158                   | 0                          |
| RECAP/COMMERZ AMW Apart-<br>ments Investment, L.P.                         | New York                | 45,0                                | 45,0                              | USD     | 15 480                   | 0                          |
| RECAP/COMMERZ Greenwich<br>Park Investment, L.P.                           | New York                | 45,0                                | 45,0                              | USD     | 10 870                   | 0                          |
| Reederei MS "E.R. INDIA" Beteili-<br>gungsgesellschaft mbH & Co. KG        | Hamburg                 | 26,1                                | 26,1                              | EUR     | 1 585                    | 0                          |
| Southwestern Co-Investment, L.P.                                           | New York                | 45,0                                | 45,0                              | USD     | 13 196                   | 0                          |

## b) Wegen untergeordneter Bedeutung in der Konzernbilanz nicht at-Equity-bewertete assoziierte Unternehmen

| Name                                                                                        | Sitz                 | Kapitalanteil<br>in % insg. | Stimmanteil<br>in % insg. |
|---------------------------------------------------------------------------------------------|----------------------|-----------------------------|---------------------------|
| 229 W. 36 th Street Partnership, L.P.                                                       | Wilmington, Delaware | 47,6                        | 49,0                      |
| 4239431 Canada Inc.                                                                         | Toronto              | 47,5                        | 47,5                      |
| 4239440 Canada Inc.                                                                         | Toronto              | 47,5                        | 47,5                      |
| 4239440 Canada Inc. General Partner                                                         | Toronto              | 47,5                        | 47,5                      |
| 4239458 Canada Inc.                                                                         | Toronto              | 47,5                        | 47,5                      |
| 4239466 Canada Inc.                                                                         | Toronto              | 47,5                        | 47,5                      |
| 4239474 Canada Inc.                                                                         | Toronto              | 47,5                        | 47,5                      |
| 4239482 Canada Inc.                                                                         | Toronto              | 47,5                        | 47,5                      |
| ABELASSA Grundstücks-Vermietungsgesellschaft mbH & Co.<br>Objekt Witt Weiden KG             | Düsseldorf           | 0,0                         | 50,0                      |
| ACOLA Grundstücks-Vermietungsgesellschaft mbH & Co.<br>Objekt Düsseldorf Kasernenstraße KG  | Düsseldorf           | 1,0                         | 50,0                      |
| ACREDA Grundstücks-Vermietungsgesellschaft mbH & Co.<br>Objekt Conow KG                     | Düsseldorf           | 0,0                         | 50,0                      |
| ACREDA Grundstücks-Vermietungsgesellschaft mbH & Co.<br>Objekt NESTLÉ KG                    | Düsseldorf           | 0,0                         | 50,0                      |
| ACTIUM Leasobjekt GmbH & Co. Objekte Amberg und Landshut KG                                 | Düsseldorf           | 23,5                        | 23,5                      |
| ACTOR Vermietungsgesellschaft mbH                                                           | Düsseldorf           | 47,0                        | 47,0                      |
| ADAMANTA Grundstücks-Vermietungsgesellschaft mbH & Co.<br>Objekt Elbphilharmonie KG         | Düsseldorf           | 50,0                        | 50,0                      |
| ADMIRA Vermietungsgesellschaft mbH                                                          | Düsseldorf           | 47,0                        | 47,0                      |
| AERA Grundstücks-GmbH                                                                       | Düsseldorf           | 44,2                        | 44,2                      |
| AF Eigenkapitalfonds für deutschen Mittelstand GmbH & Co. KG                                | München              | 49,7                        | 49,7                      |
| AGASILA Grundstücks-Vermietungsgesellschaft mbH & Co.<br>Objekt Düsseldorf KG               | Düsseldorf           | 23,4                        | 25,0                      |
| ALFUTURA Grundstücks-Vermietungsgesellschaft mbH & Co.<br>Objekte Hessen KG                 | Frankfurt am Main    | 0,0                         | 50,0                      |
| ALIVERA Grundstücks-Vermietungsgesellschaft mbH & Co.<br>Objekt Düsseldorf-Lichtenbroich KG | Düsseldorf           | 5,2                         | 23,3                      |
| ALMARENA Grundstücks-Vermietungsgesellschaft mbH & Co.<br>Objekt Berlin KG                  | Düsseldorf           | 0,0                         | 50,0                      |
| ALONGA Grundstücks-Vermietungsgesellschaft mbH & Co.<br>Objekt Bayerstraße 33 KG            | Düsseldorf           | 0,0                         | 50,0                      |
| Ampton B.V.                                                                                 | Amsterdam            | 50,0                        | 50,0                      |
| Arbeitsgemeinschaft Projekt Justizvollzugsanstalt Neustrelitz                               | Schwerin             | 100,0                       | 50,0                      |
| ASERTUNA Grundstücks-Vermietungsgesellschaft mbH & Co.<br>Objekt Schülke-Mayr KG            | Düsseldorf           | 0,0                         | 50,0                      |
| ASTIRA Grundstücks-Vermietungsgesellschaft mbH                                              | Düsseldorf           | 50,0                        | 50,0                      |
| ASTIRA Grundstücks-Vermietungsgesellschaft mbH & Co.<br>Objekt Furth/Bogen KG               | Düsseldorf           | 0,0                         | 40,0                      |
| AV America Grundbesitzverwaltungsgesellschaft mbH i.L.                                      | Eschborn             | 25,0                        | 25,0                      |
| AVENDO Beteiligungsgesellschaft mbH & Co.<br>Objekt Fernwärmenetz Cottbus KG                | Stuttgart            | 0,0                         | 50,0                      |
| Babcock Borsig Grundstücks-Vermietungsgesellschaft mbH & Co.<br>Objekt Friedrichsfeld KG    | Düsseldorf           | 2,9                         | 37,3                      |
| Babcock Borsig Grundstücks-Vermietungsgesellschaft mbH & Co.<br>Objekt Oberhausen KG        | Düsseldorf           | 2,9                         | 37,3                      |
| BAF Berlin Animation Film GmbH                                                              | Berlin               | 49,0                        | 49,0                      |
| Banco Comercial S. A. i.L.                                                                  | Montevideo           | 33,3                        | 33,3                      |



|     |                                  |
|-----|----------------------------------|
| 204 | Gesamtergebnisrechnung           |
| 208 | Bilanz                           |
| 210 | Eigenkapitalveränderungsrechnung |
| 212 | Kapitalflussrechnung             |
| 214 | Anhang (Notes)                   |
| 370 | Bestätigungsvermerk              |

| Name                                                                             | Sitz               | Kapitalanteil<br>in % insg. | Stimmanteil<br>in % insg. |
|----------------------------------------------------------------------------------|--------------------|-----------------------------|---------------------------|
| BONITAS Mobilien-Vermietungsgesellschaft mbH & Co.<br>Objekt Alzenau KG          | Düsseldorf         | 0,0                         | 37,6                      |
| BONITAS Mobilien-Vermietungsgesellschaft mbH & Co.<br>Objekt Neustadt-Schwaig KG | Grünwald (München) | 16,9                        | 45,1                      |
| BONITAS Mobilien-Vermietungsgesellschaft mbH & Co.<br>Objekt Peguform Weiden KG  | Grünwald (München) | 16,9                        | 45,1                      |
| BONITAS Mobilien-Vermietungsgesellschaft mbH & Co.<br>Objekt Rastatt KG          | Grünwald (München) | 16,9                        | 45,1                      |
| BONITAS Mobilien-Vermietungsgesellschaft mbH & Co.<br>Objekt Singen KG           | Düsseldorf         | 0,0                         | 37,6                      |
| Bonitos GmbH & Co. KG                                                            | Frankfurt am Main  | 50,0                        | 50,0                      |
| Bonitos Verwaltungs GmbH                                                         | Frankfurt am Main  | 50,0                        | 50,0                      |
| BONUS Vermietungsgesellschaft mbH                                                | Düsseldorf         | 33,0                        | 33,0                      |
| C & W Projektentwicklungsgesellschaft mbH                                        | Düsseldorf         | 49,9                        | 49,9                      |
| C O M U N I T H Y Projektentwicklungsgesellschaft mbH                            | Düsseldorf         | 49,9                        | 49,9                      |
| CALMATO Grundstücks-Vermietungsgesellschaft mbH                                  | Düsseldorf         | 0,5                         | 24,0                      |
| CANDOR Vermietungsgesellschaft mbH                                               | Düsseldorf         | 47,0                        | 47,0                      |
| CANTICA Beteiligungsgesellschaft mbH                                             | Schönefeld         | 0,5                         | 24,0                      |
| CANUS Grundstücks-Vermietungsgesellschaft mbH i. L.                              | Düsseldorf         | 47,0                        | 47,0                      |
| CAPRA Grundstücks-Vermietungsgesellschaft mbH                                    | Düsseldorf         | 47,0                        | 47,0                      |
| CAPRA Grundstücks-Vermietungsgesellschaft mbH & Co.<br>Objekt Walbeck KG i. L.   | Düsseldorf         | 47,0                        | 47,0                      |
| Captain North Sea Finance Limited                                                | Luxemburg          | 46,0                        | 46,0                      |
| CARBO Beteiligungsgesellschaft mbH                                               | Düsseldorf         | 47,0                        | 47,0                      |
| CARUS Grundstücks-Vermietungsgesellschaft mbH                                    | Düsseldorf         | 47,0                        | 47,0                      |
| CATINA Grundstücks-Vermietungsgesellschaft mbH                                   | Düsseldorf         | 47,0                        | 47,0                      |
| CATINA Grundstücks-Vermietungsgesellschaft mbH & Co.<br>Objekt Hamburg KG        | Düsseldorf         | 2,8                         | 23,5                      |
| CELEBRA Grundstücks-Vermietungsgesellschaft mbH i. L.                            | Düsseldorf         | 47,0                        | 47,0                      |
| CENULA Grundstücks-Vermietungsgesellschaft mbH                                   | Grünwald (München) | 47,0                        | 47,0                      |
| CEPA Beteiligungsgesellschaft mbH                                                | Düsseldorf         | 47,0                        | 47,0                      |
| CERVA Grundstücks-Vermietungsgesellschaft mbH                                    | Düsseldorf         | 47,0                        | 47,0                      |
| CERVA Grundstücks-Vermietungsgesellschaft mbH & Co.<br>Objekt Frankfurt KG       | Düsseldorf         | 50,0                        | 50,0                      |
| CERVISIA Grundstücks-Vermietungsgesellschaft mbH                                 | Düsseldorf         | 47,0                        | 47,0                      |
| CERVISIA Grundstücks-Vermietungsgesellschaft mbH & Co.<br>Kommanditgesellschaft  | Düsseldorf         | 47,0                        | 47,0                      |
| CESSIO Grundstücks-Vermietungsgesellschaft mbH                                   | Düsseldorf         | 47,0                        | 47,0                      |
| CETERA Grundstücks-Vermietungsgesellschaft mbH                                   | Düsseldorf         | 47,0                        | 47,0                      |
| CETERA Grundstücks-Vermietungsgesellschaft mbH & Co.<br>Objekt Oberhausen KG     | Düsseldorf         | 47,0                        | 47,0                      |
| CHRISTA Grundstücks-Vermietungsgesellschaft mbH                                  | Düsseldorf         | 47,0                        | 47,0                      |
| CHRISTA Grundstücks-Vermietungsgesellschaft mbH & Co.<br>Objekt Döllken KG       | Düsseldorf         | 47,0                        | 47,0                      |
| CHRISTA Grundstücks-Vermietungsgesellschaft mbH & Co.<br>Objekt Rottweil KG      | Düsseldorf         | 46,1                        | 34,8                      |
| CICADA Grundstücks-Vermietungsgesellschaft mbH                                   | Düsseldorf         | 47,0                        | 47,0                      |
| CICONIA Grundstücks-Vermietungsgesellschaft mbH i.L.                             | Düsseldorf         | 47,0                        | 47,0                      |
| CLANGO Grundstücks-Vermietungsgesellschaft mbH & Co.<br>Objekt Haan KG           | Düsseldorf         | 0,0                         | 40,0                      |
| Commerz GOA Realty Associates LLC                                                | New York           | 49,0                        | 49,0                      |

| Name                                                                                   | Sitz                 | Kapitalanteil<br>in % insg. | Stimmanteil<br>in % insg. |
|----------------------------------------------------------------------------------------|----------------------|-----------------------------|---------------------------|
| COMMERZ GOA REALTY Management, LLC                                                     | Atlanta              | 49,0                        | 49,0                      |
| Commerz Realty Associates GP V, LLC                                                    | Wilmington, Delaware | 49,0                        | 49,0                      |
| COMPAT Immobilien GmbH                                                                 | Düsseldorf           | 49,9                        | 49,9                      |
| COMPOSITA Grundstücks-Vermietungsgesellschaft mbH                                      | Düsseldorf           | 47,0                        | 47,0                      |
| COMPRA Grundstücks-Vermietungsgesellschaft mbH                                         | Düsseldorf           | 47,0                        | 47,0                      |
| COMUNITHY Wohnimmobilien GmbH                                                          | Düsseldorf           | 49,9                        | 49,9                      |
| CORVA Grundstücks-Vermietungsgesellschaft mbH                                          | Düsseldorf           | 47,0                        | 47,0                      |
| DATIS Vermietungsgesellschaft mbH                                                      | Düsseldorf           | 47,0                        | 47,0                      |
| DAUNUS Vermietungsgesellschaft mbH                                                     | Düsseldorf           | 47,0                        | 47,0                      |
| DECIMA Grundstücks-Vermietungsgesellschaft mbH                                         | Düsseldorf           | 47,0                        | 47,0                      |
| DECIMA Grundstücks-Vermietungsgesellschaft mbH & Co. KG                                | Düsseldorf           | 47,0                        | 47,0                      |
| Deutsche Babcock Grundstücks-Vermietungsgesellschaft mbH                               | Düsseldorf           | 45,9                        | 46,1                      |
| DIGITUS Grundstücks-Vermietungsgesellschaft mbH & Co.<br>Objekt Gladbach KG            | Schönefeld           | 2,6                         | 42,3                      |
| DIGITUS Vermietungsgesellschaft mbH                                                    | Düsseldorf           | 47,0                        | 47,0                      |
| DILAP Vermietungsgesellschaft mbH                                                      | Düsseldorf           | 47,0                        | 47,0                      |
| DIO Vermietungsgesellschaft mbH                                                        | Düsseldorf           | 47,0                        | 47,0                      |
| DONUM Vermietungsgesellschaft mbH                                                      | Düsseldorf           | 47,0                        | 47,0                      |
| Dr. Gubelt Immobilien Vermietungs-Gesellschaft mbH & Co.<br>Objekt Bochum KG           | Düsseldorf           | 0,0                         | 50,0                      |
| DRABELA Grundstücks-Vermietungsgesellschaft mbH                                        | Düsseldorf           | 50,0                        | 50,0                      |
| DRABELA Grundstücks-Vermietungsgesellschaft mbH & Co.<br>Objekt Stade KG               | Düsseldorf           | 0,0                         | 42,5                      |
| DREBACUSA Grundstücks-Vermietungsgesellschaft mbH                                      | Düsseldorf           | 50,0                        | 50,0                      |
| DREBACUSA Grundstücks-Vermietungsgesellschaft mbH & Co.<br>Objekt Produktion Wolfen KG | Düsseldorf           | 0,0                         | 42,5                      |
| DREBANTA Grundstücks-Vermietungsgesellschaft mbH                                       | Düsseldorf           | 50,0                        | 50,0                      |
| DREBECUM Grundstücks-Vermietungsgesellschaft mbH                                       | Düsseldorf           | 50,0                        | 50,0                      |
| DREBENDA Grundstücks-Vermietungsgesellschaft mbH                                       | Köln                 | 50,0                        | 50,0                      |
| DREBENDA Grundstücks-Vermietungsgesellschaft mbH & Co.<br>Objekt FTTB NetCologne KG    | Köln                 | 0,0                         | 42,5                      |
| DREBOSTA Grundstücks-Vermietungsgesellschaft mbH                                       | Düsseldorf           | 50,0                        | 50,0                      |
| DREBOSTA Grundstücks-Vermietungsgesellschaft mbH & Co.<br>Objekt Schwerin KG           | Düsseldorf           | 0,0                         | 42,5                      |
| DRECORA Grundstücks-Vermietungsgesellschaft mbH                                        | Düsseldorf           | 50,0                        | 50,0                      |
| DRECREDO Grundstücks-Vermietungsgesellschaft mbH                                       | Düsseldorf           | 50,0                        | 50,0                      |
| DREDARA Grundstücks-Vermietungsgesellschaft mbH                                        | Düsseldorf           | 50,0                        | 50,0                      |
| DREDOLA Grundstücks-Vermietungsgesellschaft mbH                                        | Düsseldorf           | 50,0                        | 50,0                      |
| DREDOLA Grundstücks-Vermietungsgesellschaft mbH & Co.<br>Objekt Berlin KG              | Düsseldorf           | 0,0                         | 42,5                      |
| DREFLORA Grundstücks-Vermietungsgesellschaft mbH & Co.<br>Objekt Schwenningen KG       | Düsseldorf           | 0,0                         | 42,5                      |
| DREFLORA Grundstücks-Vermietungsgesellschaft mbH                                       | Düsseldorf           | 50,0                        | 50,0                      |
| DREFUMA Grundstücks-Vermietungsgesellschaft mbH                                        | Düsseldorf           | 50,0                        | 50,0                      |
| DREHERA Grundstücks-Vermietungsgesellschaft mbH                                        | Düsseldorf           | 50,0                        | 50,0                      |
| DREKANDIS Grundstücks-Vermietungsgesellschaft mbH                                      | Düsseldorf           | 50,0                        | 50,0                      |
| DREKONTA Grundstücks-Vermietungsgesellschaft mbH                                       | Düsseldorf           | 50,0                        | 50,0                      |
| DRELARA Grundstücks-Vermietungsgesellschaft mbH                                        | Düsseldorf           | 50,0                        | 50,0                      |
| DRELARA Grundstücks-Vermietungsgesellschaft mbH & Co.<br>Objekt Freiburg KG            | Düsseldorf           | 0,0                         | 42,5                      |

|     |                                  |
|-----|----------------------------------|
| 204 | Gesamtergebnisrechnung           |
| 208 | Bilanz                           |
| 210 | Eigenkapitalveränderungsrechnung |
| 212 | Kapitalflussrechnung             |
| 214 | Anhang (Notes)                   |
| 370 | Bestätigungsvermerk              |

| Name                                                                                               | Sitz                 | Kapitalanteil<br>in % insg. | Stimmanteil<br>in % insg. |
|----------------------------------------------------------------------------------------------------|----------------------|-----------------------------|---------------------------|
| DRELOBA Grundstücks-Vermietungsgesellschaft mbH                                                    | Düsseldorf           | 50,0                        | 50,0                      |
| DRELOBA Grundstücks-Vermietungsgesellschaft mbH & Co.<br>Objekt Gevelsberg KG                      | Düsseldorf           | 0,0                         | 42,5                      |
| DRELOSINA Grundstücks-Vermietungsgesellschaft mbH                                                  | Düsseldorf           | 50,0                        | 50,0                      |
| DRELOSINA Grundstücks-Vermietungsgesellschaft mbH & Co.<br>Objekt Ivenack KG                       | Düsseldorf           | 0,0                         | 42,5                      |
| DRELUNA Grundstücks-Vermietungsgesellschaft mbH                                                    | Düsseldorf           | 50,0                        | 50,0                      |
| DRELUTA Grundstücks-Vermietungsgesellschaft mbH                                                    | Düsseldorf           | 50,0                        | 50,0                      |
| DREMARA Grundstücks-Vermietungsgesellschaft mbH                                                    | Düsseldorf           | 50,0                        | 50,0                      |
| DRENITA Grundstücks-Vermietungsgesellschaft mbH                                                    | Düsseldorf           | 50,0                        | 50,0                      |
| DRENITA Grundstücks-Vermietungsgesellschaft mbH & Co.<br>Objekt Fertigung Dräger Medizintechnik KG | Düsseldorf           | 0,0                         | 42,5                      |
| DRESANTA Grundstücks-Vermietungsgesellschaft mbH                                                   | Düsseldorf           | 50,0                        | 50,0                      |
| DRESEMPA Grundstücks-Vermietungsgesellschaft mbH                                                   | Düsseldorf           | 50,0                        | 50,0                      |
| DRESIWA Grundstücks-Vermietungsgesellschaft mbH                                                    | Düsseldorf           | 50,0                        | 50,0                      |
| DRETERUM Grundstücks-Vermietungsgesellschaft mbH                                                   | Düsseldorf           | 50,0                        | 50,0                      |
| DRETERUM Grundstücks-Vermietungsgesellschaft mbH & Co.<br>Objekt BBS Kiel Ravensberg KG            | Düsseldorf           | 0,0                         | 42,5                      |
| DRETUNA Grundstücks-Vermietungsgesellschaft mbH                                                    | Düsseldorf           | 50,0                        | 50,0                      |
| DREVERA Grundstücks-Vermietungsgesellschaft mbH                                                    | Düsseldorf           | 50,0                        | 50,0                      |
| DREVERA Grundstücks-Vermietungsgesellschaft mbH & Co.<br>Objekt Greven KG                          | Düsseldorf           | 0,0                         | 42,5                      |
| DURUS Vermietungsgesellschaft mbH                                                                  | Düsseldorf           | 47,0                        | 47,0                      |
| Düsseldorfer Börsenhaus GmbH                                                                       | Düsseldorf           | 20,0                        | 20,0                      |
| ECLIPS Vermietungsgesellschaft mbH                                                                 | Düsseldorf           | 47,0                        | 47,0                      |
| ECLIPS Vermietungsgesellschaft mbH & Co.<br>Objekt Göppingen Kommanditgesellschaft                 | Düsseldorf           | 2,8                         | 40,0                      |
| edding AG & Co. Grundstücksverwaltung OHG                                                          | Düsseldorf           | 0,0                         | 50,0                      |
| EDITUS Vermietungsgesellschaft mbH                                                                 | Düsseldorf           | 47,0                        | 47,0                      |
| EHNY Montelucia Holdings Trust                                                                     | Wilmington, Delaware | 30,8                        | 26,7                      |
| EHNY Montelucia Resort, LLC                                                                        | Dover, Delaware      | 30,8                        | 26,7                      |
| EHNY Montelucia Villas, LLC                                                                        | Dover, Delaware      | 30,8                        | 26,7                      |
| ELEGANTIA Vermietungsgesellschaft mbH                                                              | Düsseldorf           | 47,0                        | 47,0                      |
| ELOTUS Vermietungsgesellschaft mbH                                                                 | Düsseldorf           | 47,0                        | 47,0                      |
| EP Euro-Projektentwicklungs GmbH & Co.<br>Objekt Köln-Porz KG i.L.                                 | Frankfurt am Main    | 50,0                        | 50,0                      |
| FABIUS Vermietungsgesellschaft mbH                                                                 | Düsseldorf           | 47,0                        | 47,0                      |
| FACO Vermietungsgesellschaft mbH                                                                   | Düsseldorf           | 47,0                        | 47,0                      |
| FAGUS Vermietungsgesellschaft mbH                                                                  | Düsseldorf           | 47,0                        | 47,0                      |
| FAR Vermietungsgesellschaft mbH                                                                    | Düsseldorf           | 47,0                        | 47,0                      |
| FERO Vermietungsgesellschaft mbH                                                                   | Düsseldorf           | 34,8                        | 34,8                      |
| FESTAR Vermietungsgesellschaft mbH                                                                 | Düsseldorf           | 47,0                        | 47,0                      |
| FLOR Vermietungsgesellschaft mbH                                                                   | Düsseldorf           | 47,0                        | 47,0                      |
| Flumen Vermietungsgesellschaft mbH i.L.                                                            | Düsseldorf           | 47,0                        | 47,0                      |
| FOLLIS Vermietungsgesellschaft mbH                                                                 | Düsseldorf           | 47,0                        | 47,0                      |
| FORNAX Kraftwerk-Beteiligungsgesellschaft mbH                                                      | Grünwald (München)   | 50,0                        | 50,0                      |
| FORNAX Kraftwerk-Beteiligungsgesellschaft mbH & Co.<br>Objekt Knapsack KG                          | Grünwald (München)   | 0,0                         | 42,5                      |
| FOSSUM Beteiligungsgesellschaft mbH                                                                | Düsseldorf           | 24,8                        | 25,0                      |

| Name                                                                              | Sitz              | Kapitalanteil<br>in % insg. | Stimmanteil<br>in % insg. |
|-----------------------------------------------------------------------------------|-------------------|-----------------------------|---------------------------|
| FOSSUM Vermietungsgesellschaft Brno s.r.o.                                        | Prag              | 24,8                        | 25,0                      |
| FOSSUM Vermietungsgesellschaft Liberec s.r.o.                                     | Prag              | 24,8                        | 25,0                      |
| FOSSUM Vermietungsgesellschaft Mladá Boleslav s.r.o.                              | Prag              | 24,8                        | 25,0                      |
| FOSSUM Vermietungsgesellschaft Ostrava s.r.o.                                     | Prag              | 24,8                        | 25,0                      |
| FOSSUM Vermietungsgesellschaft PRAHA s.r.o.                                       | Prag              | 24,8                        | 25,0                      |
| FOSSUM Vermietungsgesellschaft Tabor s.r.o.                                       | Prag              | 24,8                        | 25,0                      |
| FRAGUM Grundstücks-Vermietungsgesellschaft mbH                                    | Düsseldorf        | 47,0                        | 47,0                      |
| FREMITUS Vermietungsgesellschaft mbH                                              | Düsseldorf        | 47,0                        | 47,0                      |
| FRENO Vermietungsgesellschaft mbH i.L.                                            | Düsseldorf        | 47,0                        | 47,0                      |
| FRETUM Vermietungsgesellschaft mbH                                                | Düsseldorf        | 47,0                        | 47,0                      |
| FRIGO Vermietungsgesellschaft mbH                                                 | Düsseldorf        | 47,0                        | 47,0                      |
| FUCATUS Vermietungsgesellschaft mbH                                               | Düsseldorf        | 47,0                        | 47,0                      |
| FUCATUS Vermietungsgesellschaft mbH & Co, Objekt Mainz OHG                        | Düsseldorf        | 2,8                         | 23,5                      |
| FUCATUS Vermietungsgesellschaft mbH & Co.<br>Objekt Bad Rappenau KG               | Düsseldorf        | 47,0                        | 47,0                      |
| FUCATUS Vermietungsgesellschaft mbH & Co.<br>Objekt Recklinghausen KG             | Düsseldorf        | 47,0                        | 47,0                      |
| FUCATUS Vermietungsgesellschaft mbH & Co.<br>Objekt Schwalbach KG                 | Düsseldorf        | 47,0                        | 47,0                      |
| FUGA Vermietungsgesellschaft mbH                                                  | Düsseldorf        | 47,0                        | 47,0                      |
| FULGENS Vermietungsgesellschaft mbH                                               | Düsseldorf        | 47,0                        | 47,0                      |
| FULGENS Vermietungsgesellschaft mbH & Co.<br>Objekt Ravensburg KG                 | Düsseldorf        | 47,0                        | 47,0                      |
| FUNCTIO Vermietungsgesellschaft mbH                                               | Düsseldorf        | 47,0                        | 47,0                      |
| FUNGOR Vermietungsgesellschaft mbH                                                | Düsseldorf        | 46,1                        | 46,1                      |
| FUTAR Grundstücks-Vermietungsgesellschaft mbH                                     | Schönefeld        | 47,0                        | 47,0                      |
| GAIUS Grundstücks-Vermietungsgesellschaft mbH                                     | Düsseldorf        | 47,0                        | 47,0                      |
| GALBA Grundstücks-Vermietungsgesellschaft mbH                                     | Düsseldorf        | 47,0                        | 47,0                      |
| Galleries Rive Nord Limited Partnership                                           | Toronto           | 0,0                         | 47,5                      |
| GALLO Grundstücks-Vermietungsgesellschaft mbH                                     | Düsseldorf        | 47,0                        | 47,0                      |
| GAMMA Grundstücks-Vermietungsgesellschaft mbH                                     | Düsseldorf        | 47,0                        | 47,0                      |
| GAURO Grundstücks-Vermietungsgesellschaft mbH i. L.                               | Düsseldorf        | 47,0                        | 47,0                      |
| GELAS Grundstücks-Vermietungsgesellschaft mbH                                     | Düsseldorf        | 47,0                        | 47,0                      |
| GENUS Grundstücks-Vermietungsgesellschaft mbH                                     | Düsseldorf        | 47,0                        | 47,0                      |
| GERAM Grundstücks-Vermietungsgesellschaft mbH                                     | Düsseldorf        | 47,0                        | 47,0                      |
| GERO Grundstücks-Vermietungsgesellschaft mbH i.L.                                 | Düsseldorf        | 47,0                        | 47,0                      |
| GESTUM Grundstücks-Vermietungsgesellschaft mbH                                    | Düsseldorf        | 47,0                        | 47,0                      |
| GIE Cinquieme Lease                                                               | Puteaux           | 33,3                        | 33,3                      |
| GIE Go Lease                                                                      | Puteaux           | 50,0                        | 50,0                      |
| GIE Hu Lease                                                                      | Puteaux           | 50,0                        | 50,0                      |
| GIE Quatrieme Lease                                                               | Puteaux           | 33,3                        | 33,3                      |
| GILLOS Grundstücks-Vermietungsgesellschaft mbH                                    | Düsseldorf        | 47,0                        | 47,0                      |
| GMF German Mittelstand Fund GmbH                                                  | Frankfurt am Main | 23,5                        | 23,5                      |
| GOPA Gesellschaft für Organisation, Planung und Ausbildung mbH                    | Bad Homburg       | 24,8                        | 24,8                      |
| GRADUS Investitionsgüter-Vermietungsgesellschaft mbH                              | Karlsruhe         | 47,0                        | 47,0                      |
| GRADUS Investitionsgüter-Vermietungsgesellschaft mbH & Co.<br>Objekt Badenwerk KG | Karlsruhe         | 0,0                         | 40,0                      |

|     |                                  |
|-----|----------------------------------|
| 204 | Gesamtergebnisrechnung           |
| 208 | Bilanz                           |
| 210 | Eigenkapitalveränderungsrechnung |
| 212 | Kapitalflussrechnung             |
| 214 | Anhang (Notes)                   |
| 370 | Bestätigungsvermerk              |

| Name                                                                         | Sitz               | Kapitalanteil<br>in % insg. | Stimmanteil<br>in % insg. |
|------------------------------------------------------------------------------|--------------------|-----------------------------|---------------------------|
| GRALANA Vermietungsgesellschaft mbH                                          | Grünwald (München) | 50,0                        | 50,0                      |
| GRAMEDA Vermietungsgesellschaft mbH                                          | Grünwald (München) | 50,0                        | 50,0                      |
| GRAMEN Grundstücks-Vermietungsgesellschaft mbH                               | Düsseldorf         | 47,0                        | 47,0                      |
| GRAMINA Vermietungsgesellschaft mbH                                          | Grünwald (München) | 50,0                        | 50,0                      |
| GRAMINA Vermietungsgesellschaft mbH & Co.<br>Objekt München Triebstraße KG   | Grünwald (München) | 0,0                         | 42,5                      |
| GRAMOLINDA Vermietungsgesellschaft mbH                                       | Grünwald (München) | 50,0                        | 50,0                      |
| GRANA Grundstücks-Vermietungsgesellschaft mbH                                | Düsseldorf         | 47,0                        | 47,0                      |
| GRANOS Vermietungsgesellschaft mbH                                           | Grünwald (München) | 50,0                        | 50,0                      |
| GRASSANO Vermietungsgesellschaft mbH                                         | Grünwald (München) | 50,0                        | 50,0                      |
| GRATIA Grundstücks-Vermietungsgesellschaft mbH                               | Düsseldorf         | 47,0                        | 47,0                      |
| GRATNOMA Grundstücks-Vermietungsgesellschaft mbH                             | Grünwald (München) | 50,0                        | 50,0                      |
| GRATNOMA Grundstücks-Vermietungsgesellschaft mbH & Co.<br>Objekt Itzehoe KG  | Grünwald (München) | 0,0                         | 42,5                      |
| GRAVIS Grundstücks-Vermietungsgesellschaft mbH                               | Düsseldorf         | 47,0                        | 47,0                      |
| GRENADO Vermietungsgesellschaft mbH                                          | Grünwald (München) | 50,0                        | 50,0                      |
| GRETANA Grundstücks-Vermietungsgesellschaft mbH & Co.<br>Objekt D 19 KG      | Grünwald (München) | 0,0                         | 42,5                      |
| GRETANA Vermietungsgesellschaft mbH                                          | Grünwald (München) | 50,0                        | 50,0                      |
| GRETANA Vermietungsgesellschaft mbH & Co.<br>Objekt Lagerimmobilie KG        | Grünwald (München) | 0,0                         | 42,5                      |
| GRETANA Vermietungsgesellschaft mbH & Co.<br>Objekt Lagerlogistik KG         | Grünwald (München) | 0,0                         | 42,5                      |
| GREX Grundstücks-Vermietungsgesellschaft mbH                                 | Düsseldorf         | 47,0                        | 47,0                      |
| GREZANA Vermietungsgesellschaft mbH                                          | Grünwald (München) | 50,0                        | 50,0                      |
| GRISLEVA Vermietungsgesellschaft mbH                                         | Grünwald (München) | 50,0                        | 50,0                      |
| GRONDALIS Vermietungsgesellschaft mbH                                        | Grünwald (München) | 47,0                        | 47,0                      |
| GRONDOLA Vermietungsgesellschaft mbH                                         | Grünwald (München) | 50,0                        | 50,0                      |
| GROSINA Vermietungsgesellschaft mbH                                          | Grünwald (München) | 50,0                        | 50,0                      |
| GROSINA Vermietungsgesellschaft mbH & Co.<br>Objekt Berlin Marzahn KG        | Grünwald (München) | 0,0                         | 38,0                      |
| GROSINA Vermietungsgesellschaft mbH & Co.<br>Objekt Berlin Weißensee KG      | Grünwald (München) | 0,0                         | 38,0                      |
| GROSINA Vermietungsgesellschaft mbH & Co. Objekt Chemnitz KG                 | Grünwald (München) | 0,0                         | 38,0                      |
| GROSINA Vermietungsgesellschaft mbH & Co.<br>Objekt Darmstadt KG             | Grünwald (München) | 0,0                         | 38,0                      |
| GROSINA Vermietungsgesellschaft mbH & Co. Objekt Dreieich KG                 | Grünwald (München) | 0,0                         | 38,0                      |
| GROSINA Vermietungsgesellschaft mbH & Co. Objekt Dresden KG                  | Grünwald (München) | 0,0                         | 38,0                      |
| GROSINA Vermietungsgesellschaft mbH & Co. Objekt Essen KG                    | Grünwald (München) | 0,0                         | 38,0                      |
| GROSINA Vermietungsgesellschaft mbH & Co.<br>Objekt Hannover Hauptbetrieb KG | Grünwald (München) | 0,0                         | 38,0                      |
| GROSINA Vermietungsgesellschaft mbH & Co.<br>Objekt Saarbrücken KG           | Grünwald (München) | 0,0                         | 38,0                      |
| GROSINA Vermietungsgesellschaft mbH & Co. Objekt Saarlouis KG                | Grünwald (München) | 0,0                         | 38,0                      |
| GROSINA Vermietungsgesellschaft mbH & Co. Objekt Stuttgart KG                | Grünwald (München) | 0,0                         | 38,0                      |
| GROTEGA Vermietungsgesellschaft mbH                                          | Grünwald (München) | 50,0                        | 50,0                      |
| GRUMENTO Vermietungsgesellschaft mbH                                         | Grünwald (München) | 50,0                        | 50,0                      |
| GRUMONA Vermietungsgesellschaft mbH                                          | Grünwald (München) | 50,0                        | 50,0                      |

| Name                                                                                 | Sitz               | Kapitalanteil<br>in % insg. | Stimmanteil<br>in % insg. |
|--------------------------------------------------------------------------------------|--------------------|-----------------------------|---------------------------|
| GRUMOSA Vermietungsgesellschaft mbH                                                  | Grünwald (München) | 50,0                        | 50,0                      |
| GRUNATA Vermietungsgesellschaft mbH                                                  | Grünwald (München) | 50,0                        | 50,0                      |
| GRUNATA Vermietungsgesellschaft mbH & Co.<br>Objekt Knautnaundorf KG                 | Grünwald (München) | 0,0                         | 42,5                      |
| GUSTO Grundstücks-Vermietungsgesellschaft mbH                                        | Düsseldorf         | 47,0                        | 47,0                      |
| GZ Verwaltungsgesellschaft für Transportmittel mbH                                   | München            | 50,0                        | 50,0                      |
| HABILIS Grundstücks-Vermietungsgesellschaft mbH                                      | Düsseldorf         | 47,0                        | 47,0                      |
| HABILIS Grundstücks-Vermietungsgesellschaft mbH & Co.<br>Kommanditgesellschaft       | Düsseldorf         | 47,0                        | 47,0                      |
| HABILIS Grundstücks-Vermietungsgesellschaft mbH & Co.<br>Objekt Solingen KG          | Düsseldorf         | 47,0                        | 47,0                      |
| HAGIA Grundstücks-Vermietungsgesellschaft mbH                                        | Grünwald (München) | 47,0                        | 47,0                      |
| HALOS Grundstücks-Vermietungsgesellschaft mbH                                        | Düsseldorf         | 47,0                        | 47,0                      |
| HALOS Grundstücks-Vermietungsgesellschaft mbH & Co.<br>Objekt Göttingen KG           | Düsseldorf         | 47,0                        | 47,0                      |
| HALOS Grundstücks-Vermietungsgesellschaft mbH & Co.<br>Objekt Pforzheim KG           | Düsseldorf         | 2,4                         | 31,3                      |
| HALOS Grundstücks-Vermietungsgesellschaft mbH & Co.<br>Objekt Varn Products KG       | Düsseldorf         | 47,0                        | 47,0                      |
| HAMA Grundstücks-Vermietungsgesellschaft mbH i.L.                                    | Düsseldorf         | 47,0                        | 47,0                      |
| HAMSUN Grundstücks-Vermietungsgesellschaft mbH                                       | Düsseldorf         | 47,0                        | 47,0                      |
| HAMSUN Grundstücks-Vermietungsgesellschaft mbH & Co. KG                              | Düsseldorf         | 47,0                        | 47,0                      |
| HANNO Grundstücks-Vermietungsgesellschaft mbH                                        | Düsseldorf         | 47,0                        | 47,0                      |
| HARPEX Grundstücks-Vermietungsgesellschaft mbH                                       | Düsseldorf         | 47,0                        | 47,0                      |
| HARPEX Grundstücks-Vermietungsgesellschaft mbH & Co.<br>Objekt Bremen OHG            | Grünwald (München) | 0,0                         | 40,0                      |
| HARPEX Grundstücks-Vermietungsgesellschaft mbH & Co.<br>Objekt Gummersbach KG        | Düsseldorf         | 38,5                        | 38,5                      |
| HECATE Grundstücks-Vermietungsgesellschaft mbH                                       | Düsseldorf         | 47,0                        | 47,0                      |
| HELIUM Grundstücks-Vermietungsgesellschaft mbH                                       | Düsseldorf         | 47,0                        | 47,0                      |
| HENDRA Grundstücks-Vermietungsgesellschaft mbH                                       | Düsseldorf         | 47,0                        | 47,0                      |
| HEPHAISTOS Grundstücks-Vermietungsgesellschaft mbH                                   | Düsseldorf         | 47,0                        | 47,0                      |
| HEPHAISTOS Grundstücks-Vermietungsgesellschaft mbH & Co. KG                          | Düsseldorf         | 47,0                        | 47,0                      |
| HERMUS Grundstücks-Vermietungsgesellschaft mbH                                       | Düsseldorf         | 47,0                        | 47,0                      |
| HERMUS Grundstücks-Vermietungsgesellschaft mbH & Co.<br>Objekt Willich KG            | Düsseldorf         | 47,0                        | 47,0                      |
| HESTA Grundstücks-Vermietungsgesellschaft mbH                                        | Düsseldorf         | 47,0                        | 47,0                      |
| HESTA Grundstücks-Vermietungsgesellschaft mbH & Co.<br>Objekt Frankfurt KG           | Düsseldorf         | 47,0                        | 47,0                      |
| HESTA Grundstücks-Vermietungsgesellschaft mbH & Co.<br>Objekt Pirmasens KG i.L.      | Düsseldorf         | 47,0                        | 47,0                      |
| HIMUS Grundstücks-Vermietungsgesellschaft mbH                                        | Düsseldorf         | 47,0                        | 47,0                      |
| HONOR Grundstücks-Vermietungsgesellschaft mbH                                        | Düsseldorf         | 47,0                        | 47,0                      |
| HONOR Grundstücks-Vermietungsgesellschaft mbH & Co.<br>Objekt Rostock KG             | Düsseldorf         | 47,0                        | 47,0                      |
| HORA Grundstücks-Vermietungsgesellschaft mbH                                         | Düsseldorf         | 47,0                        | 47,0                      |
| HORA Grundstücks-Vermietungsgesellschaft mbH & Co.<br>Objekt Hamburg Liebigstraße KG | Düsseldorf         | 47,0                        | 47,0                      |
| HULDA Grundstücks-Vermietungsgesellschaft mbH                                        | Düsseldorf         | 47,0                        | 47,0                      |

|     |                                  |
|-----|----------------------------------|
| 204 | Gesamtergebnisrechnung           |
| 208 | Bilanz                           |
| 210 | Eigenkapitalveränderungsrechnung |
| 212 | Kapitalflussrechnung             |
| 214 | Anhang (Notes)                   |
| 370 | Bestätigungsvermerk              |

| Name                                                                                   | Sitz               | Kapitalanteil<br>in % insg. | Stimmanteil<br>in % insg. |
|----------------------------------------------------------------------------------------|--------------------|-----------------------------|---------------------------|
| ILV Anlagen-Vermietungsgesellschaft mbH                                                | Düsseldorf         | 47,0                        | 47,0                      |
| ILV Asset Verwaltungsgesellschaft Grünwald mbH                                         | Grünwald (München) | 47,0                        | 47,0                      |
| ILV Baubetreuungsgesellschaft mbH                                                      | Düsseldorf         | 47,0                        | 47,0                      |
| ILV DRITTE Fonds-Beteiligungsgesellschaft mbH                                          | Düsseldorf         | 47,0                        | 47,0                      |
| ILV Finanzierungsleasing GmbH                                                          | Düsseldorf         | 47,0                        | 47,0                      |
| ILV FÜNFTE Fonds-Beteiligungsgesellschaft mbH                                          | Düsseldorf         | 47,0                        | 47,0                      |
| ILV Gesellschaft für Grundbesitzvermietung mbH                                         | Düsseldorf         | 47,0                        | 47,0                      |
| ILV Gesellschaft für Immobilien-Mietkauf mbH                                           | Düsseldorf         | 47,0                        | 47,0                      |
| ILV Grundstücks-Leasing GmbH                                                           | Düsseldorf         | 47,0                        | 47,0                      |
| ILV Grundstücks-Vermietungsgesellschaft mbH                                            | Düsseldorf         | 47,0                        | 47,0                      |
| ILV Immobilien Vermietungsgesellschaft mbH                                             | Düsseldorf         | 47,0                        | 47,0                      |
| ILV Immobilien Vermietungsgesellschaft mbH 1987                                        | Düsseldorf         | 47,0                        | 47,0                      |
| ILV Immobilien Vermietungsgesellschaft mbH 1988                                        | Düsseldorf         | 47,0                        | 47,0                      |
| ILV Immobilien Vermietungsgesellschaft mbH Objekte 1990                                | Düsseldorf         | 47,0                        | 47,0                      |
| ILV Immobilien-Vermietungsgesellschaft mbH<br>Objekte 1990 & Co. Kommanditgesellschaft | Düsseldorf         | 47,0                        | 47,0                      |
| ILV Leasinggesellschaft für Grundstücke mbH                                            | Düsseldorf         | 47,0                        | 47,0                      |
| ILV Leasinggesellschaft für Immobilien mbH                                             | Düsseldorf         | 47,0                        | 47,0                      |
| ILV Projektbaugesellschaft mbH                                                         | Düsseldorf         | 47,0                        | 47,0                      |
| ILV VIERTE Fonds-Beteiligungsgesellschaft mbH                                          | Düsseldorf         | 47,0                        | 47,0                      |
| ILV ZWEITE Fonds-Beteiligungsgesellschaft mbH                                          | Düsseldorf         | 47,0                        | 47,0                      |
| ILV-Achte Fonds Beteiligungsgesellschaft mbH                                           | Düsseldorf         | 47,0                        | 47,0                      |
| ILV-Fonds-Beteiligungsgesellschaft mbH                                                 | Düsseldorf         | 47,0                        | 47,0                      |
| ILV-Neunte Fonds Beteiligungsgesellschaft mbH                                          | Düsseldorf         | 47,0                        | 47,0                      |
| ILV-Sechste Fonds Beteiligungsgesellschaft mbH                                         | Düsseldorf         | 47,0                        | 47,0                      |
| ILV-Siebte Fonds Beteiligungsgesellschaft mbH                                          | Düsseldorf         | 47,0                        | 47,0                      |
| ILV-Siebte Immobilien-Vermietungsgesellschaft mbH & Co.<br>Objekt Hamburg KG           | Düsseldorf         | 35,4                        | 35,4                      |
| Immobilien Vermietungsgesellschaft Etzenhausen<br>Dr. Rühl & Co. KG                    | Düsseldorf         | 47,2                        | 46,6                      |
| Immobilien-Leasing Verwaltungsgesellschaft Waltersdorf mbH                             | Schönefeld         | 47,0                        | 47,0                      |
| Immobilien-Vermietungsgesellschaft Objekt Eindhoven B.V.                               | Breda              | 30,0                        | 30,0                      |
| Industriedruck Krefeld Kurt Janßen GmbH & Co KG i.K.                                   | Krefeld            | 25,7                        | 25,7                      |
| Kapelaansdijk I BV                                                                     | Amsterdam          | 25,0                        | 25,0                      |
| Koppelenweg I BV                                                                       | Hoewelaken         | 33,3                        | 33,3                      |
| Küppersbusch Aktiengesellschaft & Co. Grundstücksgesellschaft<br>OHG                   | Düsseldorf         | 2,4                         | 24,0                      |
| LARIX Grundstücks-Vermietungsgesellschaft mbH                                          | Düsseldorf         | 47,0                        | 47,0                      |
| LARS Grundstücks-Vermietungsgesellschaft mbH                                           | Augsburg           | 47,0                        | 47,0                      |
| LARS Grundstücks-Vermietungsgesellschaft mbH & Co.<br>Objekt Augsburg OHG              | Augsburg           | 0,0                         | 40,0                      |
| LARS Grundstücks-Vermietungsgesellschaft mbH & Co.<br>Objekt Hagen KG                  | Düsseldorf         | 44,7                        | 40,0                      |
| LARS Grundstücks-Vermietungsgesellschaft mbH & Co.<br>Objekt Weishaupt OHG             | Düsseldorf         | 0,0                         | 40,0                      |
| LAUTUS Grundstücks-Vermietungsgesellschaft mbH                                         | Düsseldorf         | 47,0                        | 47,0                      |
| LAUTUS Grundstücks-Vermietungsgesellschaft mbH & Co.<br>Objekt Arnsberg KG             | Düsseldorf         | 47,0                        | 47,0                      |

| Name                                                                         | Sitz               | Kapitalanteil<br>in % insg. | Stimmanteil<br>in % insg. |
|------------------------------------------------------------------------------|--------------------|-----------------------------|---------------------------|
| LECTIO Grundstücks-Vermietungsgesellschaft mbH                               | Düsseldorf         | 47,0                        | 47,0                      |
| LECTIO Grundstücks-Vermietungsgesellschaft mbH & Co.<br>Objekt Passau KG     | Düsseldorf         | 47,0                        | 47,0                      |
| LECTIO Grundstücks-Vermietungsgesellschaft mbH & Co.<br>Objekt Weimar KG     | Düsseldorf         | 47,0                        | 47,0                      |
| LEGALIS Grundstücks-Vermietungsgesellschaft mbH                              | Düsseldorf         | 47,0                        | 47,0                      |
| LENIS Grundstücks-Vermietungsgesellschaft mbH                                | Düsseldorf         | 47,0                        | 47,0                      |
| LENIS Grundstücks-Vermietungsgesellschaft mbH & Co.<br>Objekt Attendorn KG   | Düsseldorf         | 0,0                         | 40,0                      |
| LENIS Grundstücks-Vermietungsgesellschaft mbH & Co.<br>Objekt Essenbach KG   | Düsseldorf         | 47,0                        | 47,0                      |
| Lerchesberg Grundstücks-Gesellschaft mbH i.L.                                | Frankfurt am Main  | 49,0                        | 49,0                      |
| LIBRA Grundstücks-Vermietungsgesellschaft mbH                                | Düsseldorf         | 47,0                        | 47,0                      |
| Liegenschaft Hainstraße GbR                                                  | Frankfurt am Main  | 50,0                        | 50,0                      |
| LIGO Grundstücks-Vermietungsgesellschaft mbH                                 | Düsseldorf         | 47,0                        | 47,0                      |
| LINDA Grundstücks-Vermietungsgesellschaft mbH                                | Düsseldorf         | 47,0                        | 47,0                      |
| LIRIS Grundstücks-Vermietungsgesellschaft mbH                                | Düsseldorf         | 47,0                        | 47,0                      |
| LIRIS Grundstücks-Vermietungsgesellschaft mbH & Co. KG                       | Düsseldorf         | 47,0                        | 47,0                      |
| LOCO Grundstücks-Vermietungsgesellschaft mbH                                 | Düsseldorf         | 47,0                        | 47,0                      |
| LOCO Grundstücks-Vermietungsgesellschaft mbH & Co.<br>Objekt Air Treads KG   | Düsseldorf         | 47,0                        | 47,0                      |
| LOCO Grundstücks-Vermietungsgesellschaft mbH & Co.<br>Objekt Rosental KG     | Düsseldorf         | 47,0                        | 47,0                      |
| LOCO Grundstücks-Vermietungsgesellschaft mbH & Co.<br>Objekt Selsten KG      | Düsseldorf         | 47,0                        | 47,0                      |
| LONGUM Grundstücks-Vermietungsgesellschaft mbH                               | Düsseldorf         | 47,0                        | 47,0                      |
| LONGUM Grundstücks-Vermietungsgesellschaft mbH & Co.<br>Objekt Krefeld KG    | Düsseldorf         | 47,0                        | 47,0                      |
| LONGUM Grundstücks-Vermietungsgesellschaft mbH & Co.<br>Objekt Wettenberg KG | Düsseldorf         | 47,0                        | 47,0                      |
| LORATA Grundstücks-Vermietungsgesellschaft mbH                               | Düsseldorf         | 47,0                        | 47,0                      |
| LORATA Grundstücks-Vermietungsgesellschaft mbH & Co.<br>Objekt Bonn KG       | Düsseldorf         | 47,0                        | 47,0                      |
| LORATA Grundstücks-Vermietungsgesellschaft mbH & Co.<br>Objekt Kosmedico KG  | Düsseldorf         | 47,0                        | 47,0                      |
| LORATA Grundstücks-Vermietungsgesellschaft mbH & Co.<br>Objekt Rheine KG     | Düsseldorf         | 47,0                        | 47,0                      |
| LORICA Grundstücks-Vermietungsgesellschaft mbH                               | Düsseldorf         | 47,0                        | 47,0                      |
| LORICA Grundstücks-Vermietungsgesellschaft mbH & Co. KG                      | Düsseldorf         | 47,0                        | 47,0                      |
| LOUISENA Vermietungsgesellschaft mbH                                         | Grünwald (München) | 50,0                        | 50,0                      |
| LOUISENA Vermietungsgesellschaft mbH & Co.<br>Objekt Königstein KG           | Grünwald (München) | 0,0                         | 42,5                      |
| Lufthansa Leasing GmbH & Co. Echo-November KG i. L.                          | Grünwald (München) | 30,6                        | 30,5                      |
| MADENA Grundstücks-Vermietungsgesellschaft mbH                               | Düsseldorf         | 47,0                        | 47,0                      |
| MADENA Grundstücks-Vermietungsgesellschaft mbH & Co. KG                      | Düsseldorf         | 47,0                        | 47,0                      |
| MAECENA Grundstücks-Vermietungsgesellschaft mbH                              | Düsseldorf         | 47,0                        | 47,0                      |
| MAECENA Grundstücks-Vermietungsgesellschaft mbH & Co.<br>Objekt Bremen KG    | Düsseldorf         | 42,3                        | 42,3                      |
| MAECENA Grundstücks-Vermietungsgesellschaft mbH & Co.<br>Objekt Dortmund KG  | Düsseldorf         | 44,7                        | 31,3                      |



|     |                                  |
|-----|----------------------------------|
| 204 | Gesamtergebnisrechnung           |
| 208 | Bilanz                           |
| 210 | Eigenkapitalveränderungsrechnung |
| 212 | Kapitalflussrechnung             |
| 214 | Anhang (Notes)                   |
| 370 | Bestätigungsvermerk              |

| Name                                                                                         | Sitz               | Kapitalanteil<br>in % insg. | Stimmanteil<br>in % insg. |
|----------------------------------------------------------------------------------------------|--------------------|-----------------------------|---------------------------|
| MAGISTRA Grundstücks-Vermietungsgesellschaft mbH                                             | Düsseldorf         | 47,0                        | 47,0                      |
| MAGNA Grundstücks-Vermietungsgesellschaft mbH & Co.<br>Objekt Nürnberg OHG                   | Grünwald (München) | 0,0                         | 40,0                      |
| MAGNIFICA Grundstücks-Vermietungsgesellschaft mbH                                            | Düsseldorf         | 47,0                        | 47,0                      |
| MAHO Grundstücks-Vermietungsgesellschaft mbH                                                 | Düsseldorf         | 47,0                        | 47,0                      |
| MAIESTA Grundstücks-Vermietungsgesellschaft mbH                                              | Vreden             | 23,0                        | 23,0                      |
| MAIORA Grundstücks-Vermietungsgesellschaft mbH                                               | Düsseldorf         | 47,0                        | 47,0                      |
| MALAXA Grundstücks-Vermietungsgesellschaft mbH                                               | Düsseldorf         | 47,0                        | 47,0                      |
| MALEA Grundstücks-Vermietungsgesellschaft mbH                                                | Düsseldorf         | 47,0                        | 47,0                      |
| MALEA Grundstücks-Vermietungsgesellschaft mbH & Co.<br>Objekt Gerwisch KG                    | Düsseldorf         | 47,0                        | 47,0                      |
| MANDATA Grundstücks-Vermietungsgesellschaft mbH & Co.<br>Objekt Dortmund KG                  | Düsseldorf         | 47,0                        | 47,0                      |
| MANDATA Grundstücks-Vermietungsgesellschaft mbH & Co.<br>Objekt elho Sportbekleidung KG      | Grünwald (München) | 47,0                        | 47,0                      |
| MANDATA Grundstücks-Vermietungsgesellschaft mbH & Co.<br>Objekt Hanau KG                     | Düsseldorf         | 47,0                        | 47,0                      |
| MANDATA Grundstücks-Vermietungsgesellschaft mbH & Co.<br>Objekt Ulm KG                       | Düsseldorf         | 47,0                        | 47,0                      |
| MANICA Grundstücks-Vermietungsgesellschaft mbH                                               | Düsseldorf         | 47,0                        | 47,0                      |
| MANICA Grundstücks-Vermietungsgesellschaft mbH & Co.<br>Objekt Neutraubling KG               | Düsseldorf         | 44,7                        | 23,5                      |
| MARBANA Vermietungsgesellschaft mbH & Co.<br>Objekt Hallenbad Flensburg KG                   | Flensburg          | 40,0                        | 40,0                      |
| MARBREVA Vermietungsgesellschaft mbH & Co.<br>Objekt AOK Bayern KG                           | Düsseldorf         | 100,0                       | 50,0                      |
| MARBREVA Vermietungsgesellschaft mbH & Co.<br>Objekt AOK Rheinland-Pfalz KG                  | Düsseldorf         | 100,0                       | 50,0                      |
| Marie Lease S.à r.l.                                                                         | Luxemburg          | 49,0                        | 49,0                      |
| MARIUS Grundstücks-Vermietungsgesellschaft mbH                                               | Düsseldorf         | 47,0                        | 47,0                      |
| MARIUS Grundstücks-Vermietungsgesellschaft mbH & Co.<br>Objekt Assamstadt KG                 | Düsseldorf         | 0,0                         | 40,0                      |
| MARIUS Grundstücks-Vermietungsgesellschaft mbH & Co.<br>Objekt Hannover KG                   | Düsseldorf         | 21,0                        | 40,0                      |
| MAROLA Vermietungsgesellschaft mbH & Co. Objekt Essen KG                                     | Düsseldorf         | 0,1                         | 50,0                      |
| MARTINA Grundstücks-Vermietungsgesellschaft mbH                                              | Düsseldorf         | 47,0                        | 47,0                      |
| MATERNA Grundstücks-Vermietungsgesellschaft mbH                                              | Düsseldorf         | 47,0                        | 47,0                      |
| MATERNA Grundstücks-Vermietungsgesellschaft mbH & Co.<br>Objekt Reisholz KG                  | Düsseldorf         | 0,5                         | 24,0                      |
| MATIS Grundstücks-Vermietungsgesellschaft mbH                                                | Haan               | 47,0                        | 47,0                      |
| MATIS Grundstücks-Vermietungsgesellschaft mbH & Co. Gehe<br>Objekte OHG                      | Haan               | 0,0                         | 40,0                      |
| MAXIMA Grundstücks-Vermietungsgesellschaft mbH                                               | Düsseldorf         | 47,0                        | 47,0                      |
| Mayfair Shopping Centre Limited Partnership                                                  | Toronto            | 0,0                         | 47,5                      |
| Mercedes Benz AG & Co. Grundstücksvermietung<br>Objekt Franken KG                            | Schönefeld         | 0,5                         | 40,0                      |
| MERCEDES BENZ AG & Co. Grundstücksvermietung<br>Objekt Germersheim Betriebsvorrichtungen OHG | Düsseldorf         | 0,5                         | 40,0                      |
| MERCEDES BENZ AG & Co. Grundstücksvermietung<br>Objekt Germersheim KG                        | Düsseldorf         | 0,5                         | 40,0                      |

| Name                                                                             | Sitz               | Kapitalanteil<br>in % insg. | Stimmanteil<br>in % insg. |
|----------------------------------------------------------------------------------|--------------------|-----------------------------|---------------------------|
| Mercedes-Benz AG & Co. Grundstücksvermietung<br>Objekt Rhein-Main OHG            | Schönefeld         | 0,5                         | 40,0                      |
| MERCEDES-BENZ AG & Co. Grundstücksvermietung<br>Objekt Südwest KG                | Düsseldorf         | 0,5                         | 40,0                      |
| Mercedes-Benz AG & Co. Grundstücksvermietung<br>Objekte Leipzig und Magdeburg KG | Schönefeld         | 0,0                         | 42,0                      |
| MERLAN Mobilien-Verwaltungsgesellschaft mbH & Co. Projekt Nr.<br>15 KG i. L.     | Grünwald (München) | 32,0                        | 31,1                      |
| Mic Mac Mall Limited Partnership                                                 | Toronto            | 0,0                         | 47,5                      |
| MIDAS Grundstücks-Vermietungsgesellschaft mbH                                    | Düsseldorf         | 47,0                        | 47,0                      |
| MIDAS Grundstücks-Vermietungsgesellschaft mbH & Co.<br>Objekt Bumke OHG          | Düsseldorf         | 0,0                         | 40,0                      |
| MIDAS Grundstücks-Vermietungsgesellschaft mbH & Co.<br>Objekt Langenhagen KG     | Düsseldorf         | 44,7                        | 44,7                      |
| MILES Grundstücks-Vermietungsgesellschaft mbH                                    | Düsseldorf         | 47,0                        | 47,0                      |
| MILES Grundstücks-Vermietungsgesellschaft mbH & Co. KG                           | Düsseldorf         | 47,0                        | 47,0                      |
| MILVUS Grundstücks-Vermietungsgesellschaft mbH                                   | Düsseldorf         | 47,0                        | 47,0                      |
| MILVUS Grundstücks-Vermietungsgesellschaft mbH & Co.<br>Objekt Günzburg KG       | Düsseldorf         | 0,0                         | 40,0                      |
| MINERVA Grundstücks-Vermietungsgesellschaft mbH                                  | Düsseldorf         | 47,0                        | 47,0                      |
| MINERVA Grundstücks-Vermietungsgesellschaft mbH & Co.<br>Objekt Herrmann KG      | Grünwald (München) | 0,0                         | 40,0                      |
| MINERVA Grundstücks-Vermietungsgesellschaft mbH & Co.<br>Objekt Pfullendorf OHG  | Grünwald (München) | 0,0                         | 40,0                      |
| MINERVA Grundstücks-Vermietungsgesellschaft mbH & Co.<br>Objekt Radolfzell KG    | Düsseldorf         | 37,1                        | 37,1                      |
| MINERVA Grundstücks-Vermietungsgesellschaft mbH & Co.<br>Objekt Sigmaringen KG   | Düsseldorf         | 0,0                         | 40,0                      |
| MIRABILIS Grundstücks-Vermietungsgesellschaft mbH                                | Düsseldorf         | 47,0                        | 47,0                      |
| MIRABILIS Grundstücks-Vermietungsgesellschaft mbH & Co.<br>Objekt Berching KG    | Düsseldorf         | 47,0                        | 47,0                      |
| MIRATIO Grundstücks-Vermietungsgesellschaft mbH                                  | Düsseldorf         | 47,0                        | 47,0                      |
| MITEC engine.tec gmbh & Co. Objekt Krauthausen KG                                | Eisenach           | 0,5                         | 45,0                      |
| MITIGO Grundstücks-Vermietungsgesellschaft mbH                                   | Düsseldorf         | 47,0                        | 47,0                      |
| MODESTA Grundstücks-Vermietungsgesellschaft mbH                                  | Düsseldorf         | 47,0                        | 47,0                      |
| MODICA Grundstücks-Vermietungsgesellschaft mbH                                   | Düsseldorf         | 23,0                        | 23,0                      |
| MOLA Vermögensverwaltungsgesellschaft mbH                                        | Düsseldorf         | 47,0                        | 47,0                      |
| MOLARIS Beteiligungsgesellschaft mbH & Co. Objekt Kurhaus KG                     | Düsseldorf         | 100,0                       | 49,0                      |
| MOLBARVA Vermietungsgesellschaft mbH                                             | Düsseldorf         | 50,0                        | 50,0                      |
| MOLBARVA Vermietungsgesellschaft mbH & Co.<br>Objekt Augsburg KG                 | Düsseldorf         | 0,0                         | 42,5                      |
| MOLBERNO Vermietungsgesellschaft mbH                                             | Grünwald (München) | 50,0                        | 50,0                      |
| MOLBERNO Vermietungsgesellschaft mbH & Co.<br>Objekt Pirmasens KG                | Grünwald (München) | 0,0                         | 25,0                      |
| MOLCASA Vermietungsgesellschaft Objekt Smart mbH                                 | Grünwald (München) | 50,0                        | 50,0                      |
| MOLDOMA Vermietungsgesellschaft mbH & Co.<br>Objekt Augsburg KG                  | Düsseldorf         | 100,0                       | 50,0                      |
| MOLERSA Vermietungsgesellschaft mbH & Co.<br>Objekt Altenkunstadt KG             | Grünwald (München) | 0,0                         | 42,5                      |

|     |                                  |
|-----|----------------------------------|
| 204 | Gesamtergebnisrechnung           |
| 208 | Bilanz                           |
| 210 | Eigenkapitalveränderungsrechnung |
| 212 | Kapitalflussrechnung             |
| 214 | Anhang (Notes)                   |
| 370 | Bestätigungsvermerk              |

| Name                                                                                     | Sitz                | Kapitalanteil<br>in % insg. | Stimmanteil<br>in % insg. |
|------------------------------------------------------------------------------------------|---------------------|-----------------------------|---------------------------|
| MOLGRADO Vermietungsgesellschaft<br>Objekt Göttingen und Oldenburg mbH                   | Grünwald (München)  | 50,0                        | 50,0                      |
| MOLPIREAS Vermietungsgesellschaft mbH                                                    | Düsseldorf          | 50,0                        | 50,0                      |
| MOLPIREAS Vermietungsgesellschaft mbH & Co.<br>Objekt Heilbronn KG                       | Düsseldorf          | 0,0                         | 42,5                      |
| MOLSOLA Vermietungsgesellschaft mbH & Co. Objekt Aquarius KG                             | Düsseldorf          | 98,5                        | 49,0                      |
| MOLSOLA Vermietungsgesellschaft mbH & Co. Objekt Aries KG                                | Düsseldorf          | 98,5                        | 49,0                      |
| MOLSOLA Vermietungsgesellschaft mbH & Co.<br>Objekt Düsseldorf Hohe Straße KG            | Düsseldorf          | 98,5                        | 49,0                      |
| MOLSOLA Vermietungsgesellschaft mbH & Co. Objekt Geminus KG                              | Düsseldorf          | 98,5                        | 49,0                      |
| MOLSOLA Vermietungsgesellschaft mbH & Co.<br>Objekt Halle Markt 11 KG                    | Düsseldorf          | 98,5                        | 49,0                      |
| MOLSOLA Vermietungsgesellschaft mbH & Co.<br>Objekt Halle Riegel KG                      | Düsseldorf          | 98,5                        | 49,0                      |
| MOLSOLA Vermietungsgesellschaft mbH & Co.<br>Objekt Pforzheim KG                         | Düsseldorf          | 98,5                        | 49,0                      |
| MOLSOLA Vermietungsgesellschaft mbH & Co. Objekt Taurus KG                               | Düsseldorf          | 98,5                        | 49,0                      |
| MOLSTINA Vermietungsgesellschaft mbH & Co.<br>Objekt Stuttgart KG                        | Düsseldorf          | 0,1                         | 50,0                      |
| MOLSURA Vermietungsgesellschaft mbH                                                      | Düsseldorf          | 50,0                        | 50,0                      |
| MOLWANKUM Vermietungsgesellschaft mbH & Co.<br>Objekt Landkreis Hildburghausen KG        | Düsseldorf          | 6,0                         | 29,0                      |
| MOLWARGA Vermietungsgesellschaft mbH & Co. Objekt Aue KG                                 | Düsseldorf          | 4,6                         | 25,0                      |
| MOTIO Grundstücks-Vermietungsgesellschaft mbH                                            | Singen (Hohentwiel) | 47,0                        | 47,0                      |
| MS "Meta" Stefan Patjens GmbH & Co. KG                                                   | Drochtersen         | 30,5                        | 30,5                      |
| MUTUSCA Grundstücks-Vermietungsgesellschaft mbH                                          | Düsseldorf          | 47,0                        | 47,0                      |
| NESTOR Grundstücks-Vermietungsgesellschaft mbH & Co.<br>Objekt Bergkamen KG              | Düsseldorf          | 0,0                         | 50,0                      |
| NESTOR Grundstücks-Vermietungsgesellschaft mbH & Co.<br>Objekt Erlangen KG               | Düsseldorf          | 10,0                        | 50,0                      |
| NESTOR Grundstücks-Vermietungsgesellschaft mbH & Co.<br>Objekt Landau KG                 | Düsseldorf          | 0,0                         | 50,0                      |
| NESTOR Grundstücks-Vermietungsgesellschaft mbH & Co.<br>Objekt Villingen-Schwenningen KG | Düsseldorf          | 0,0                         | 50,0                      |
| Neue Krausenhöfe Berlin Erste Grundstücksgesellschaft mbH                                | Teltow              | 47,4                        | 47,4                      |
| Neue Krausenhöfe Berlin Zweite Grundstücksgesellschaft mbH                               | Teltow              | 47,4                        | 47,4                      |
| NORA Grundstücks-Vermietungsgesellschaft mbH & Co.<br>Objekt Castrop-Rauxel KG           | Düsseldorf          | 0,0                         | 50,0                      |
| NORA Grundstücks-Vermietungsgesellschaft mbH & Co.<br>Objekt Ettlingen KG                | Düsseldorf          | 0,0                         | 50,0                      |
| NORA Grundstücks-Vermietungsgesellschaft mbH & Co.<br>Objekt Gelsenkirchen KG            | Düsseldorf          | 0,0                         | 50,0                      |
| NORA Grundstücks-Vermietungsgesellschaft mbH & Co.<br>Objekt Görlitz KG                  | Düsseldorf          | 0,0                         | 50,0                      |
| NORA Grundstücks-Vermietungsgesellschaft mbH & Co.<br>Objekt Groß-Kienitz OHG            | Düsseldorf          | 0,0                         | 50,0                      |
| NORA Grundstücks-Vermietungsgesellschaft mbH & Co.<br>Objekt Koblenz-Kesselheim KG       | Düsseldorf          | 0,0                         | 50,0                      |
| NORA Grundstücks-Vermietungsgesellschaft mbH & Co.<br>Objekt Langenau KG                 | Düsseldorf          | 0,0                         | 50,0                      |

| Name                                                                                                      | Sitz               | Kapitalanteil<br>in % insg. | Stimmanteil<br>in % insg. |
|-----------------------------------------------------------------------------------------------------------|--------------------|-----------------------------|---------------------------|
| NORA Grundstücks-Vermietungsgesellschaft mbH & Co.<br>Objekt Lüdinghausen KG                              | Düsseldorf         | 0,0                         | 50,0                      |
| NORA Grundstücks-Vermietungsgesellschaft mbH & Co.<br>Objekt Singen KG                                    | Düsseldorf         | 0,0                         | 50,0                      |
| NORA Grundstücks-Vermietungsgesellschaft mbH & Co.<br>Objekt Weingarten KG                                | Grünwald (München) | 0,0                         | 42,5                      |
| NORA Grundstücks-Vermietungsgesellschaft mbH & Co.<br>Objekt Weishaupt OHG                                | Düsseldorf         | 0,0                         | 50,0                      |
| NOSCO Grundstücks-Vermietungsgesellschaft mbH & Co.<br>Objekt Alzey KG                                    | Mainz              | 0,0                         | 50,0                      |
| NOSSIA Grundstücks-Verwaltungsgesellschaft mbH & Co. KG                                                   | Grünwald (München) | 2,5                         | 25,0                      |
| NOTITIA Grundstücks-Vermietungsgesellschaft mbH & Co.<br>Objekt Technologiepark Adlershof KG              | Berlin             | 0,0                         | 50,0                      |
| NULUX NUKEM LUXEMBURG GmbH                                                                                | Luxemburg          | 49,5                        | 49,5                      |
| OB Lagerhaus Betriebsgesellschaft mbH & Co.<br>Objekt Glasstrasse KG                                      | Düsseldorf         | 47,0                        | 23,5                      |
| ORBITA Kraftwerk-Beteiligungsgesellschaft mbH                                                             | Düsseldorf         | 50,0                        | 50,0                      |
| ORBITA Kraftwerk-Beteiligungsgesellschaft mbH & Co.<br>Objekt Kraftwerk Hessen KG                         | Grünwald (München) | 0,0                         | 42,5                      |
| ORNATUS Grundstücks-Vermietungsgesellschaft mbH                                                           | Schönefeld         | 50,0                        | 50,0                      |
| OSCA Grundstücks-Verwaltungsgesellschaft mbH & Co. KG                                                     | Grünwald (München) | 26,0                        | 26,0                      |
| PACTOR Grundstücks-Vermietungsgesellschaft mbH                                                            | Düsseldorf         | 47,0                        | 47,0                      |
| PACTOR Grundstücks-Vermietungsgesellschaft mbH & Co.<br>Objekt Berlin Mühlenstraße KG i.L.                | Düsseldorf         | 47,0                        | 47,0                      |
| Patella Grundstücks-Vermietungsgesellschaft mbH & Co.<br>Objekt Fernwärmetrasse Lutherstadt Wittenberg KG | Berlin             | 94,0                        | 37,6                      |
| Pinova GmbH & Co. Erste Beteiligungs KG                                                                   | München            | 41,8                        | 41,8                      |
| Place Ste-Foy Limited Partnership                                                                         | Toronto            | 0,0                         | 47,5                      |
| ProCredit Bank S.A., Romania                                                                              | Bukarest           | 21,0                        | 21,0                      |
| ProCredit Bank Sh.A.                                                                                      | Tirana             | 20,0                        | 20,0                      |
| RAMONIA Grundstücks-Vermietungsgesellschaft mbH & Co.<br>Objekte Kleinmachnow/Mölln KG                    | Düsseldorf         | 0,0                         | 42,0                      |
| RAMONIA Grundstücks-Vermietungsgesellschaft mbH & Co.<br>Objekt Friedrichshafen KG                        | Düsseldorf         | 0,0                         | 50,0                      |
| RAMONIA Grundstücks-Vermietungsgesellschaft mbH & Co.<br>Objekt Kraichtal KG                              | Düsseldorf         | 0,0                         | 50,0                      |
| RAMONIA Grundstücks-Vermietungsgesellschaft mbH & Co.<br>Objekt Lichtenau KG                              | Düsseldorf         | 0,0                         | 50,0                      |
| RAMONIA Grundstücks-Vermietungsgesellschaft mbH & Co.<br>Objekt München KG                                | Düsseldorf         | 0,0                         | 50,0                      |
| RAMONIA Grundstücks-Vermietungsgesellschaft mbH & Co.<br>Objekt München-Haar KG                           | Düsseldorf         | 0,0                         | 50,0                      |
| RAMONIA Grundstücks-Vermietungsgesellschaft mbH & Co.<br>Objekt Oberhausen KG                             | Düsseldorf         | 0,0                         | 50,0                      |
| RAMONIA Grundstücks-Vermietungsgesellschaft mbH & Co.<br>Objekt Stuttgart-Feuerbach KG                    | Düsseldorf         | 0,0                         | 50,0                      |
| RAMONIA Grundstücks-Vermietungsgesellschaft mbH & Co.<br>Objekt Vaihingen KG                              | Düsseldorf         | 0,0                         | 50,0                      |
| RAVENNA KRAKOW Spolka z Ograniczona Odpowiedzialnoscia                                                    | Warschau           | 50,0                        | 50,0                      |
| RAVENNA Szczecin Spolka Z Ograniczona Odpowiedzialnoscia                                                  | Warschau           | 50,0                        | 50,0                      |
| Registra Securita Trust GmbH                                                                              | Frankfurt am Main  | 33,3                        | 33,3                      |
| Rendite Partner Gesellschaft für Vermögensverwaltung mbH i. L.                                            | Frankfurt am Main  | 33,3                        | 33,3                      |

|     |                                  |
|-----|----------------------------------|
| 204 | Gesamtergebnisrechnung           |
| 208 | Bilanz                           |
| 210 | Eigenkapitalveränderungsrechnung |
| 212 | Kapitalflussrechnung             |
| 214 | Anhang (Notes)                   |
| 370 | Bestätigungsvermerk              |

| Name                                                                                      | Sitz               | Kapitalanteil<br>in % insg. | Stimmanteil<br>in % insg. |
|-------------------------------------------------------------------------------------------|--------------------|-----------------------------|---------------------------|
| Riverbank Trustees Limited                                                                | London             | 94,0                        | 40,0                      |
| ROSARIA Grundstücks-Vermietungsgesellschaft mbH & Co.<br>Heilbronn KG                     | Düsseldorf         | 0,0                         | 50,0                      |
| ROSARIA Grundstücks-Vermietungsgesellschaft mbH & Co.<br>Logistikobjekt Schweinfurt KG    | Düsseldorf         | 2,5                         | 35,0                      |
| ROSARIA Grundstücks-Vermietungsgesellschaft mbH & Co.<br>Objekt Garmisch-Partenkirchen KG | Düsseldorf         | 0,0                         | 50,0                      |
| ROSARIA Grundstücks-Vermietungsgesellschaft mbH & Co.<br>Objekt Bankakademie KG           | Düsseldorf         | 0,0                         | 50,0                      |
| ROSARIA Grundstücks-Vermietungsgesellschaft mbH & Co.<br>Objekt CAP Kiel KG               | Düsseldorf         | 0,0                         | 50,0                      |
| ROSARIA Grundstücks-Vermietungsgesellschaft mbH & Co.<br>Objekt Ettlingen KG              | Grünwald (München) | 0,0                         | 42,5                      |
| ROSARIA Grundstücks-Vermietungsgesellschaft mbH & Co.<br>Objekt Fischerwerke KG           | Düsseldorf         | 0,0                         | 50,0                      |
| ROSARIA Grundstücks-Vermietungsgesellschaft mbH & Co.<br>Objekt Gerlingen KG              | Düsseldorf         | 0,0                         | 50,0                      |
| ROSARIA Grundstücks-Vermietungsgesellschaft mbH & Co.<br>Objekt Gutenbergstraße KG        | Düsseldorf         | 0,0                         | 50,0                      |
| ROSARIA Grundstücks-Vermietungsgesellschaft mbH & Co.<br>Objekt Hamm KG                   | Düsseldorf         | 0,0                         | 50,0                      |
| ROSARIA Grundstücks-Vermietungsgesellschaft mbH & Co.<br>Objekt Haßfurt KG                | Düsseldorf         | 0,0                         | 50,0                      |
| ROSARIA Grundstücks-Vermietungsgesellschaft mbH & Co.<br>Objekt Heimstetten KG            | Grünwald (München) | 0,0                         | 42,5                      |
| ROSARIA Grundstücks-Vermietungsgesellschaft mbH & Co.<br>Objekt Holzstraße KG             | Düsseldorf         | 0,0                         | 50,0                      |
| ROSARIA Grundstücks-Vermietungsgesellschaft mbH & Co.<br>Objekt Kahl KG                   | Düsseldorf         | 0,0                         | 50,0                      |
| ROSARIA Grundstücks-Vermietungsgesellschaft mbH & Co.<br>Objekt Lechfeld KG               | Düsseldorf         | 0,0                         | 50,0                      |
| ROSARIA Grundstücks-Vermietungsgesellschaft mbH & Co.<br>Objekt Lüdenscheid KG            | Düsseldorf         | 0,0                         | 50,0                      |
| ROSARIA Grundstücks-Vermietungsgesellschaft mbH & Co.<br>Objekt Mainz KG                  | Düsseldorf         | 0,0                         | 50,0                      |
| ROSARIA Grundstücks-Vermietungsgesellschaft mbH & Co.<br>Objekt Maritim Stuttgart KG      | Grünwald (München) | 0,0                         | 42,5                      |
| ROSARIA Grundstücks-Vermietungsgesellschaft mbH & Co.<br>Objekt Moers KG                  | Düsseldorf         | 0,0                         | 50,0                      |
| ROSARIA Grundstücks-Vermietungsgesellschaft mbH & Co.<br>Objekt Neckarkanal KG            | Düsseldorf         | 0,0                         | 50,0                      |
| ROSARIA Grundstücks-Vermietungsgesellschaft mbH & Co.<br>Objekt Oberhaching KG            | Grünwald (München) | 0,0                         | 42,5                      |
| ROSARIA Grundstücks-Vermietungsgesellschaft mbH & Co.<br>Objekt Pforzheim KG              | Düsseldorf         | 0,5                         | 50,0                      |
| ROSARIA Grundstücks-Vermietungsgesellschaft mbH & Co.<br>Objekt Recklinghausen KG         | Grünwald (München) | 0,0                         | 42,5                      |
| ROSARIA Grundstücks-Vermietungsgesellschaft mbH & Co.<br>Objekt Singen KG                 | Düsseldorf         | 0,0                         | 50,0                      |
| ROSARIA Grundstücks-Vermietungsgesellschaft mbH & Co.<br>Objekte topwert KG               | Düsseldorf         | 0,0                         | 50,0                      |
| ROSATA Grundstücks-Vermietungsgesellschaft mbH & Co.<br>Objekt Am Hammergarten KG         | Düsseldorf         | 0,0                         | 50,0                      |

| Name                                                                                        | Sitz               | Kapitalanteil<br>in % insg. | Stimmanteil<br>in % insg. |
|---------------------------------------------------------------------------------------------|--------------------|-----------------------------|---------------------------|
| ROSATA Grundstücks-Vermietungsgesellschaft mbH & Co.<br>Objekt Bad Schönborn KG             | Düsseldorf         | 0,0                         | 50,0                      |
| ROSATA Grundstücks-Vermietungsgesellschaft mbH & Co.<br>Objekt Dieselstraße KG              | Grünwald (München) | 0,0                         | 35,0                      |
| ROSATA Grundstücks-Vermietungsgesellschaft mbH & Co.<br>Objekt FINOVA KG                    | Düsseldorf         | 0,0                         | 50,0                      |
| ROSATA Grundstücks-Vermietungsgesellschaft mbH & Co.<br>Objekt Fulda-West KG                | Grünwald (München) | 0,0                         | 42,5                      |
| ROSATA Grundstücks-Vermietungsgesellschaft mbH & Co.<br>Objekt Garching KG                  | Düsseldorf         | 0,0                         | 50,0                      |
| ROSATA Grundstücks-Vermietungsgesellschaft mbH & Co.<br>Objekt Kässbohrer KG                | Düsseldorf         | 0,0                         | 50,0                      |
| ROSATA Grundstücks-Vermietungsgesellschaft mbH & Co.<br>Objekt Kelsterbach KG               | Düsseldorf         | 0,0                         | 50,0                      |
| ROSATA Grundstücks-Vermietungsgesellschaft mbH & Co.<br>Objekt Logistik-Center Heilbronn KG | Düsseldorf         | 0,0                         | 50,0                      |
| ROSATA Grundstücks-Vermietungsgesellschaft mbH & Co.<br>Objekt Metzingen KG                 | Grünwald (München) | 0,0                         | 35,0                      |
| ROSATA Grundstücks-Vermietungsgesellschaft mbH & Co.<br>Objekt Neustadt-Schwaig KG          | Grünwald (München) | 0,0                         | 42,5                      |
| ROSATA Grundstücks-Vermietungsgesellschaft mbH & Co.<br>Objekt Offenbach KG                 | Düsseldorf         | 0,0                         | 50,0                      |
| ROSATA Grundstücks-Vermietungsgesellschaft mbH & Co.<br>Objekt Östringen KG                 | Düsseldorf         | 0,0                         | 50,0                      |
| ROSATA Grundstücks-Vermietungsgesellschaft mbH & Co.<br>Objekt Saarbrücken KG               | Grünwald (München) | 0,0                         | 42,5                      |
| ROSEA Grundstücks-Vermietungsgesellschaft mbH & Co.<br>Objekt Bamberg KG                    | Düsseldorf         | 0,0                         | 50,0                      |
| ROSEA Grundstücks-Vermietungsgesellschaft mbH & Co.<br>Objekt Braunschweig KG               | Düsseldorf         | 0,0                         | 50,0                      |
| ROSEA Grundstücks-Vermietungsgesellschaft mbH & Co.<br>Objekt BURDA Medien Park KG          | Düsseldorf         | 0,0                         | 50,0                      |
| ROSEA Grundstücks-Vermietungsgesellschaft mbH & Co.<br>Objekt BURDA Offenburg KG            | Düsseldorf         | 0,0                         | 50,0                      |
| ROSEA Grundstücks-Vermietungsgesellschaft mbH & Co.<br>Objekt Eckental KG                   | Düsseldorf         | 0,0                         | 50,0                      |
| ROSEA Grundstücks-Vermietungsgesellschaft mbH & Co.<br>Objekt Essen KG                      | Düsseldorf         | 0,0                         | 50,0                      |
| ROSEA Grundstücks-Vermietungsgesellschaft mbH & Co.<br>Objekt Ettlingen KG                  | Düsseldorf         | 0,0                         | 50,0                      |
| ROSEA Grundstücks-Vermietungsgesellschaft mbH & Co.<br>Objekt Fenepark Kempten KG           | Düsseldorf         | 0,0                         | 50,0                      |
| ROSEA Grundstücks-Vermietungsgesellschaft mbH & Co.<br>Objekt Genshagen KG                  | Grünwald (München) | 0,0                         | 42,5                      |
| ROSEA Grundstücks-Vermietungsgesellschaft mbH & Co.<br>Objekt Gründau-Lieblos KG            | Düsseldorf         | 0,0                         | 50,0                      |
| ROSEA Grundstücks-Vermietungsgesellschaft mbH & Co.<br>Objekt Hannover-Stöcken KG           | Grünwald (München) | 0,0                         | 42,5                      |
| ROSEA Grundstücks-Vermietungsgesellschaft mbH & Co.<br>Objekt Hüttenheim KG                 | Düsseldorf         | 0,0                         | 50,0                      |
| ROSEA Grundstücks-Vermietungsgesellschaft mbH & Co.<br>Objekt ISF Sindlingen KG             | Düsseldorf         | 0,0                         | 50,0                      |
| ROSEA Grundstücks-Vermietungsgesellschaft mbH & Co.<br>Objekt Köngen KG                     | Düsseldorf         | 0,0                         | 50,0                      |

|     |                                  |
|-----|----------------------------------|
| 204 | Gesamtergebnisrechnung           |
| 208 | Bilanz                           |
| 210 | Eigenkapitalveränderungsrechnung |
| 212 | Kapitalflussrechnung             |
| 214 | Anhang (Notes)                   |
| 370 | Bestätigungsvermerk              |

| Name                                                                                    | Sitz               | Kapitalanteil<br>in % insg. | Stimmanteil<br>in % insg. |
|-----------------------------------------------------------------------------------------|--------------------|-----------------------------|---------------------------|
| ROSEA Grundstücks-Vermietungsgesellschaft mbH & Co.<br>Objekt Langenselbold KG          | Düsseldorf         | 0,0                         | 50,0                      |
| ROSEA Grundstücks-Vermietungsgesellschaft mbH & Co.<br>Objekt Liesborn KG               | Düsseldorf         | 0,0                         | 50,0                      |
| ROSEA Grundstücks-Vermietungsgesellschaft mbH & Co.<br>Objekt Maichingen KG             | Düsseldorf         | 0,0                         | 50,0                      |
| ROSEA Grundstücks-Vermietungsgesellschaft mbH & Co.<br>Objekt Oelkinghausen KG          | Düsseldorf         | 0,0                         | 50,0                      |
| ROSEA Grundstücks-Vermietungsgesellschaft mbH & Co.<br>Objekt Offenburg KG              | Düsseldorf         | 0,0                         | 50,0                      |
| ROSEA Grundstücks-Vermietungsgesellschaft mbH & Co.<br>Objekt Ratingen KG               | Düsseldorf         | 0,0                         | 50,0                      |
| ROSEA Grundstücks-Vermietungsgesellschaft mbH & Co.<br>Objekt Römerberg KG              | Düsseldorf         | 0,0                         | 50,0                      |
| ROSEA Grundstücks-Vermietungsgesellschaft mbH & Co.<br>Objekt Schwalbach KG             | Düsseldorf         | 6,6                         | 50,0                      |
| ROSEA Grundstücks-Vermietungsgesellschaft mbH & Co.<br>Objekt Schweinfurt KG            | Düsseldorf         | 0,0                         | 50,0                      |
| ROSEA Grundstücks-Vermietungsgesellschaft mbH & Co.<br>Objekt Veldhoven KG              | Düsseldorf         | 19,0                        | 37,9                      |
| ROSEA Grundstücks-Vermietungsgesellschaft mbH & Co.<br>Objekt Wustermark KG             | Düsseldorf         | 0,0                         | 50,0                      |
| ROSEA Grundstücks-Vermietungsgesellschaft mbH & Co.<br>Objekte TANK & RAST KG           | Düsseldorf         | 0,0                         | 50,0                      |
| ROSINTA Grundstücks-Vermietungsgesellschaft mbH & Co.<br>Objekt Berlin KG               | Düsseldorf         | 0,5                         | 50,0                      |
| ROSINTA Grundstücks-Vermietungsgesellschaft mbH & Co.<br>Objekt Haus der Schifffahrt KG | Düsseldorf         | 0,0                         | 50,0                      |
| ROSINTA Grundstücks-Vermietungsgesellschaft mbH & Co.<br>Objekt Kürnach KG              | Düsseldorf         | 0,0                         | 50,0                      |
| ROSINTA Grundstücks-Vermietungsgesellschaft mbH & Co.<br>Objekt Möbel Wallach Celle KG  | Düsseldorf         | 0,0                         | 50,0                      |
| ROSINTA Grundstücks-Vermietungsgesellschaft mbH & Co.<br>Objekt Nürnberg KG             | Düsseldorf         | 0,0                         | 50,0                      |
| ROSOLA Grundstücks-Vermietungsgesellschaft mbH & Co.<br>Objekt Alzenau KG               | Düsseldorf         | 0,0                         | 50,0                      |
| ROSOLA Grundstücks-Vermietungsgesellschaft mbH & Co.<br>Objekt Düsseldorf KG            | Düsseldorf         | 0,0                         | 50,0                      |
| ROSOLA Grundstücks-Vermietungsgesellschaft mbH & Co.<br>Objekt Hafenhause Lübeck KG     | Düsseldorf         | 0,0                         | 50,0                      |
| ROSOLA Grundstücks-Vermietungsgesellschaft mbH & Co.<br>Objekt Heddernheim KG           | Düsseldorf         | 0,0                         | 50,0                      |
| ROSOLA Grundstücks-Vermietungsgesellschaft mbH & Co.<br>Objekt Lünen/Soest KG           | Düsseldorf         | 0,0                         | 50,0                      |
| ROSOLA Grundstücks-Vermietungsgesellschaft mbH & Co.<br>Objekt Peguform KG              | Grünwald (München) | 0,0                         | 42,5                      |
| Rudolph Beteiligungs GmbH                                                               | Halver             | 100,0                       | 0,0                       |
| SCI l'Argentière                                                                        | Grenoble           | 30,0                        | 30,0                      |
| S.E.A. Hotels Investment AB                                                             | Danderyd           | 50,0                        | 50,0                      |
| S-Factoring druzba d.d.                                                                 | Ljubljana          | 22,5                        | 22,5                      |
| SITA Immobiliaria GmbH & Co. KG                                                         | Köln               | 5,1                         | 50,0                      |
| Somentec Software GmbH                                                                  | Langen             | 35,7                        | 35,7                      |
| Southcentre Mall Limited Partnership                                                    | Toronto            | 0,0                         | 47,5                      |

| Name                                                                                | Sitz                | Kapitalanteil<br>in % insg. | Stimmanteil<br>in % insg. |
|-------------------------------------------------------------------------------------|---------------------|-----------------------------|---------------------------|
| Südkurier GmbH & Co. Objekt Konstanz OHG                                            | Singen (Hohentwiel) | 0,0                         | 39,5                      |
| TAMOLDINA Vermietungsgesellschaft mbH                                               | Grünwald (München)  | 50,0                        | 50,0                      |
| TAMOLTEMPA Vermietungsgesellschaft mbH                                              | Grünwald (München)  | 50,0                        | 50,0                      |
| TAMOLTESSA Vermietungsgesellschaft mbH                                              | Grünwald (München)  | 50,0                        | 50,0                      |
| TASKABANA dritte Immobilien-Vermietungsgesellschaft mbH & Co.<br>Objekt Marl KG     | Grünwald (München)  | 0,0                         | 42,5                      |
| TASKABANA dritte Mobilien-Vermietungsgesellschaft mbH & Co.<br>Objekt Tankanlage KG | Grünwald (München)  | 0,0                         | 23,5                      |
| TASKABANA erste Immobilien-Vermietungsgesellschaft mbH & Co.<br>Objekt Marl KG      | Grünwald (München)  | 0,0                         | 42,5                      |
| TASKABANA erste Mobilien-Vermietungsgesellschaft mbH & Co.<br>Objekt Marl KG        | Grünwald (München)  | 16,9                        | 45,1                      |
| TASKABANA Vermietungsgesellschaft mbH                                               | Grünwald (München)  | 47,0                        | 47,0                      |
| TASKABANA zweite Immobilien-Vermietungsgesellschaft mbH &<br>Co.Objekt Marl KG      | Grünwald (München)  | 0,0                         | 42,5                      |
| TASKABANA zweite Mobilien-Vermietungsgesellschaft mbH & Co.<br>Objekt Tankanlage KG | Grünwald (München)  | 0,0                         | 40,0                      |
| The World Markets Company GmbH i. L.                                                | Frankfurt am Main   | 25,2                        | 25,2                      |
| TIGNARIS Beteiligungsgesellschaft mbH & Co.<br>Objekt Giershagen KG                 | Grünwald (München)  | 0,0                         | 42,5                      |
| TIGNARIS Beteiligungsgesellschaft mbH & Co.<br>Objekt Pfullendorf KG                | Grünwald (München)  | 0,0                         | 42,5                      |
| Vermietungsgesellschaft Objekt 12 m.b.H.                                            | Düsseldorf          | 46,5                        | 46,5                      |
| WEKO Grundstücks-Vermietungsgesellschaft mbH & Co.<br>Objekt Rosenheim KG           | Grünwald (München)  | 0,0                         | 42,5                      |

### 3. In der Konzernbilanz at-Equity-bewertete Gemeinschaftsunternehmen

| Name                                  | Sitz/<br>Sitz der<br>Verwaltungs-<br>gesellschaft | Kapital-<br>anteil<br>in % insg. | Stimm-<br>anteil<br>in % insg. | Währung | Eigen-<br>kapital<br>Tsd | Jahres-<br>ergebnis<br>Tsd |
|---------------------------------------|---------------------------------------------------|----------------------------------|--------------------------------|---------|--------------------------|----------------------------|
| Carbon Trade & Finance SICAR S.A.     | Luxemburg                                         | 50,0                             | 50,0                           | EUR     | 1 000                    | 2 860                      |
| Delphi I LLC                          | Wilmington,<br>Delaware                           | 33,3                             | 32,3                           | EUR     | -299 141                 | -26 615                    |
| Commerz Finanz GmbH <sup>41)</sup>    | München                                           | 49,9                             | 49,9                           | EUR     | 9 780                    | 20 258                     |
| FV Holding S.A.                       | Brüssel                                           | 60,0                             | 50,0                           | EUR     | 33 659                   | -5 051                     |
| CR Kaiserkarree S.a.r.l.              | Luxemburg                                         | 50,0                             | 50,0                           | EUR     | -26 211                  | -14 509                    |
| Servicing Advisors Deutschland GmbH   | Frankfurt am Main                                 | 50,0                             | 50,0                           | EUR     | 2 665                    | 1 731                      |
| Urbanitas Grundbesitzgesellschaft mbH | Berlin                                            | 50,0                             | 50,0                           | EUR     | -7 728                   | 1 396                      |



|     |                                  |
|-----|----------------------------------|
| 204 | Gesamtergebnisrechnung           |
| 208 | Bilanz                           |
| 210 | Eigenkapitalveränderungsrechnung |
| 212 | Kapitalflussrechnung             |
| 214 | Anhang (Notes)                   |
| 370 | Bestätigungsvermerk              |

#### 4. Zweckgesellschaften und Spezialfonds

##### a) In den Konzernabschluss gemäß IAS 27/SIC 12 einbezogene Zweckgesellschaften

| Name                                                                        | Sitz/<br>Sitz der Verwaltungs-<br>gesellschaft | Kapital-<br>anteil<br>in % | Währung | Gezeichnetes<br>Kapital<br>Tsd |
|-----------------------------------------------------------------------------|------------------------------------------------|----------------------------|---------|--------------------------------|
| ALEPPA Funding I LLC                                                        | Dover, Delaware                                | 0,0                        | USD     | 0                              |
| ALEPPA Funding II LLC                                                       | Dover, Delaware                                | 0,0                        | USD     | 0                              |
| Asset Securitisation Programme for Insured<br>Receivables Ltd. (ASPIRE)     | Dublin                                         | 0,0                        | EUR     | 0                              |
| Barrington II CDO Ltd.                                                      | George Town, Cayman Island                     | 0,0                        | EUR     | 0                              |
| Barrington II LLC                                                           | Dover, Delaware                                | 0,0                        | USD     | 0                              |
| Beethoven Funding Corporation                                               | Dover, Delaware                                | 0,0                        | USD     | 3                              |
| Borromeo Finance S.r.l.                                                     | Mailand                                        | 0,0                        | EUR     | 0                              |
| Bosphorus Capital Ltd.                                                      | Dublin                                         | 0,0                        | EUR     | 0                              |
| CB MezzCAP Limited Partnership                                              | St. Helier, Jersey                             | 0,0                        | EUR     | 0                              |
| Classic Finance BV                                                          | Amsterdam                                      | 0,0                        | EUR     | 0                              |
| Classic I Netherlands Limited                                               | Amsterdam                                      | 0,0                        | EUR     | 0                              |
| CoCo Finance 2006-1 plc                                                     | Dublin                                         | 0,0                        | EUR     | - 3 039                        |
| CoSMO Finance 2007-1 Ltd.                                                   | Dublin                                         | 0,0                        | EUR     | 3                              |
| CoSMO Finance 2008-1 Ltd.                                                   | Dublin                                         | 0,0                        | EUR     | 2                              |
| Danube Delta PLC                                                            | Dover, Delaware                                | 0,0                        | USD     | 0                              |
| FAF Inc.                                                                    | George Town, Cayman Island                     | 0,0                        | EUR     | 164                            |
| Greenway Infrastructure Capital Plc                                         | St. Helier, Jersey                             | 0,0                        | EUR     | 0                              |
| Greenway Infrastructure Fund                                                | St. Helier, Jersey                             | 0,0                        | EUR     | 0                              |
| Honeywell Grundbesitzverwaltungs-GmbH & Co<br>Vermietungs-KG                | Grünwald (München)                             | 100,0                      | EUR     | - 11 577 <sup>d)</sup>         |
| Idilias SPC Inc.                                                            | George Town, Cayman Island                     | 0,0                        | EUR     | 1 906                          |
| Idilias SPC (Silo II)                                                       | George Town, Cayman Island                     | 0,0                        | EUR     | 0                              |
| Idilias SPC (Silo IV)                                                       | George Town, Cayman Island                     | 0,0                        | EUR     | 0                              |
| Justine Capital SRL                                                         | Mailand                                        | 0,0                        | EUR     | 0                              |
| Kaiserplatz-Gesellschaften:                                                 |                                                |                            |         |                                |
| Kaiserplatz Funding LLC                                                     | Wilmington, Delaware                           | 0,0                        | EUR     | 0                              |
| Kaiserplatz Holdings Ltd.                                                   | St. Helier, Jersey                             | 0,0                        | EUR     | 0                              |
| Kaiserplatz Funding Ltd.                                                    | St. Helier, Jersey                             | 0,0                        | EUR     | 0                              |
| Kaiserplatz Sub-Holding Ltd.                                                | St. Helier, Jersey                             | 0,0                        | EUR     | 0                              |
| Kaiserplatz Purchaser No. 05 Ltd.                                           | St. Helier, Jersey                             | 0,0                        | EUR     | 0                              |
| Kaiserplatz Purchaser No. 06 Ltd.                                           | St. Helier, Jersey                             | 0,0                        | EUR     | 0                              |
| Kaiserplatz Purchaser No. 15 Ltd.                                           | St. Helier, Jersey                             | 0,0                        | EUR     | 0                              |
| Kaiserplatz Purchaser No. 16 Ltd.                                           | St. Helier, Jersey                             | 0,0                        | EUR     | 0                              |
| Kaiserplatz Purchaser No. 17 Ltd.                                           | St. Helier, Jersey                             | 0,0                        | EUR     | 0                              |
| MidCABS Ltd.                                                                | St. Helier, Jersey                             | 0,0                        | EUR     | 0                              |
| Kalmus Grundstücks Gesellschaft Objekt KG                                   | Grünwald (München)                             | 0,0                        | EUR     | 0                              |
| Lamina Grundstücks- Verwaltungsgesellschaft<br>mbH & Co Objekt Leipzig KG   | Grünwald (München)                             | 0,0                        | EUR     | 0                              |
| Liffey (Emerald) Limited                                                    | Dublin                                         | 0,0                        | EUR     | 0                              |
| Livingstone Mortgages Limited                                               | London                                         | 0,0                        | GBP     | 0                              |
| Mandas Receivables No.2 Limited                                             | St. Helier, Jersey                             | 0,0                        | EUR     | 0                              |
| Merkur Grundstücks-Gesellschaft<br>Objekt Berlin Lange Strasse mbH & Co. KG | Grünwald (München)                             | 0,0                        | EUR     | 0                              |

| Name                                                 | Sitz/<br>Sitz der Verwaltungs-<br>gesellschaft | Kapital-<br>anteil<br>in % | Währung | Gezeichnetes<br>Kapital<br>Tsd |
|------------------------------------------------------|------------------------------------------------|----------------------------|---------|--------------------------------|
| Millstone II LLC                                     | Dover, Delaware                                | 0,0                        | USD     | 0                              |
| Millstone II Ltd.                                    | Dover, Delaware                                | 0,0                        | USD     | 0                              |
| Mole Finance Inc.                                    | George Town, Cayman Island                     | 0,0                        | EUR     | 176                            |
| More Global Inc.                                     | George Town, Cayman Island                     | 0,0                        | EUR     | 112                            |
| Pantheon Master Fund                                 | Dover, Delaware                                | 0,0                        | USD     | 0                              |
| Plymouth Capital Ltd.                                | St. Helier, Jersey                             | 0,0                        | EUR     | 19 614                         |
| Portland Capital Ltd.                                | St. Helier, Jersey                             | 0,0                        | EUR     | 7                              |
| RCL Securitisation GmbH                              | Frankfurt am Main                              | 0,0                        | EUR     | 64                             |
| Rügen I GmbH                                         | Frankfurt am Main                              | 0,0                        | EUR     | 0                              |
| Semper Finance 2006-1 Ltd.                           | St. Helier, Jersey                             | 0,0                        | GBP     | 0                              |
| Semper Finance 2007-1 GmbH                           | Frankfurt am Main                              | 0,0                        | EUR     | 0                              |
| Shannon Capital plc.                                 | Dublin                                         | 0,0                        | EUR     | 1 394                          |
| Silver Tower 125 Inc.                                | George Town, Cayman Island                     | 0,0                        | EUR     | 5 761                          |
| Symphony No.2 Llc                                    | Wilmington, Delaware                           | 0,0                        | USD     | -39                            |
| Symphony No.4 Llc                                    | Dover, Delaware                                | 0,0                        | USD     | 8                              |
| Thames SPC                                           | George Town, Cayman Island                     | 0,0                        | EUR     | 0                              |
| Truckman Inc                                         | Cayman Island                                  | 0,0                        | EUR     | 13 <sup>a)</sup>               |
| TS Co. mit One GmbH                                  | Frankfurt am Main                              | 0,0                        | EUR     | 25                             |
| TS Lago One GmbH                                     | Frankfurt am Main                              | 0,0                        | EUR     | 26                             |
| Twins Financing LLC                                  | New York                                       | 0,0                        | USD     | 0                              |
| Victoria Capital (Ireland) Public Limited<br>Company | Luxemburg                                      | 0,0                        | EUR     | 0                              |
| Victoria Capital Holdings S.A.                       | Luxemburg                                      | 0,0                        | EUR     | 0                              |
| Victoria Capital S.A.                                | Luxemburg                                      | 0,0                        | EUR     | 0                              |
| Wisley Inc.                                          | George Town, Cayman Island                     | 0,0                        | EUR     | 291                            |

|     |                                  |
|-----|----------------------------------|
| 204 | Gesamtergebnisrechnung           |
| 208 | Bilanz                           |
| 210 | Eigenkapitalveränderungsrechnung |
| 212 | Kapitalflussrechnung             |
| 214 | Anhang (Notes)                   |
| 370 | Bestätigungsvermerk              |

**b) In den Konzernabschluss gemäß IAS 27/SIC 12 einbezogene Spezialfonds**

| Name                                                          | Sitz/<br>Sitz der<br>Verwaltungs-<br>gesellschaft | Anteil des<br>Investors<br>am Fonds<br>in % | Währung | Fonds-<br>volumen<br>Tsd |
|---------------------------------------------------------------|---------------------------------------------------|---------------------------------------------|---------|--------------------------|
| BRE Gold Fund                                                 | Luxemburg                                         | 100,0                                       | PLN     | 242 569                  |
| CDBS Cofonds                                                  | Frankfurt am Main                                 | 100,0                                       | EUR     | 101 121                  |
| CDBS Cofonds II                                               | Frankfurt am Main                                 | 100,0                                       | EUR     | 91 430                   |
| CDBS Cofonds III                                              | Frankfurt am Main                                 | 100,0                                       | EUR     | 96 183                   |
| CDBS Cofonds IV                                               | Frankfurt am Main                                 | 100,0                                       | EUR     | 98 086                   |
| ComStage ETF CB Commodity EW Index TR                         | Luxemburg                                         | 75,2                                        | USD     | 616 631                  |
| ComStage ETF Commerzbank EONIA INDEX TR                       | Luxemburg                                         | 8,2                                         | EUR     | 409 223                  |
| ComStage ETF DAX® TR                                          | Luxemburg                                         | 22,6                                        | EUR     | 599 251                  |
| ComStage ETF Dow Jones EURO STOXX 50® TR                      | Luxemburg                                         | 36,2                                        | EUR     | 275 830                  |
| ComStage ETF Dow Jones EURO STOXX®<br>Select Dividend 30 TR   | Luxemburg                                         | 68,1                                        | EUR     | 131 100                  |
| ComStage ETF Dow Jones INDUSTRIAL<br>AVERAGE™                 | Luxemburg                                         | 66,9                                        | USD     | 206 504                  |
| ComStage ETF Dow Jones STOXX® 600 TR                          | Luxemburg                                         | 77,7                                        | EUR     | 344 948                  |
| ComStage ETF iBoxx € Liquid Sovereigns<br>Diversified 1-3 TR  | Luxemburg                                         | 34,7                                        | EUR     | 284 500                  |
| ComStage ETF iBoxx € Liquid Sovereigns<br>Diversified 3-5 TR  | Luxemburg                                         | 44,2                                        | EUR     | 330 901                  |
| ComStage ETF iBoxx € Liquid Sovereigns<br>Diversified 3m-1 TR | Luxemburg                                         | 13,9                                        | EUR     | 100 427 a)               |
| ComStage ETF iBoxx € Liquid Sovereigns<br>Diversified 5-7 TR  | Luxemburg                                         | 95,5                                        | EUR     | 103 951 a)               |
| ComStage ETF iBoxx € Sovereigns Germany<br>Capped 1-5 TR      | Luxemburg                                         | 98,8                                        | EUR     | 105 354                  |
| ComStage ETF iBoxx € Sovereigns Germany<br>Capped 3m-2 TR     | Luxemburg                                         | 94,8                                        | EUR     | 10 173 a)                |
| ComStage ETF MSCI EMU TRN                                     | Luxemburg                                         | 79,9                                        | USD     | 500 018                  |
| ComStage ETF MSCI USA TRN                                     | Luxemburg                                         | 78,2                                        | USD     | 226 742 a)               |
| ComStage ETF MSCI World TRN                                   | Luxemburg                                         | 64,3                                        | USD     | 311 344                  |
| ComStage ETF NIKKEI 225                                       | Luxemburg                                         | 47,8                                        | JPY     | 14 668 438 a)            |
| Gresham Bond Fund                                             | Wilmington/Delaware                               | 99,7                                        | GBP     | 137 795                  |
| GS SICAV - UK Premia                                          | Luxemburg                                         | 86,6                                        | GBP     | 171 180 a)               |
| ILSP Mutual Fund AG & Co. KG                                  | Vaduz                                             | 85,4                                        | USD     | 511 159                  |
| OP-Fonds CDBS V                                               | Frankfurt am Main                                 | 100,0                                       | EUR     | 89 029                   |

## 5. Beteiligungen an großen Kapitalgesellschaften, bei denen die Beteiligung 5 % der Stimmrechte überschreitet

| Name                                                             | Sitz              | Kapitalanteil<br>in % insg. | Stimmanteil<br>in % insg. |
|------------------------------------------------------------------|-------------------|-----------------------------|---------------------------|
| ARES Energie Aktiengesellschaft                                  | Berlin            | 13,7                        | 13,7                      |
| CarMeile AG                                                      | Wuppertal         | 10,0                        | 10,0                      |
| ConCardis Gesellschaft mit beschränkter Haftung                  | Frankfurt am Main | 13,9                        | 13,9                      |
| EURO Kartensysteme Gesellschaft mit beschränkter Haftung         | Frankfurt am Main | 13,9                        | 13,9                      |
| GEWOBA Aktiengesellschaft Wohnen und Bauen                       | Bremen            | 7,1                         | 7,1                       |
| Liquiditäts-Konsortialbank Gesellschaft mit beschränkter Haftung | Frankfurt am Main | 9,6                         | 9,6                       |
| Open Joint-Stock Company Promsvyazbank                           | Moskau            | 15,3                        | 15,3                      |

### Fußnoten

|                            |                                                                                                                        |
|----------------------------|------------------------------------------------------------------------------------------------------------------------|
| <sup>1)</sup> Umfirmiert:  | aus Dresdner Kleinwort Holdings I, Inc. wurde Cobra Holdings I, LLC                                                    |
| <sup>2)</sup> Umfirmiert:  | aus Dresdner Kleinwort Securities LLC wurde Commerz Markets LLC                                                        |
| <sup>3)</sup> Umfirmiert:  | aus Dresdner Kleinwort Capital Investment Company Limited wurde Commerzbank Capital Investment Company Limited         |
| <sup>4)</sup> Umfirmiert:  | aus Dresdner Kleinwort Capital Ventures Management Limited wurde Commerzbank Capital Ventures Management Limited       |
| <sup>5)</sup> Umfirmiert:  | aus Dresdner Finance 2 S.à.r.l. wurde Commerzbank Finance 2 S.à.r.l.                                                   |
| <sup>6)</sup> Umfirmiert:  | aus Kleinwort Benson Finance BV wurde Commerzbank Finance BV                                                           |
| <sup>7)</sup> Umfirmiert:  | aus Dresdner Kleinwort Group Limited wurde Commerzbank Holdings (UK) Limited                                           |
| <sup>8)</sup> Umfirmiert:  | aus Dresdner Investments (UK) Limited wurde Commerzbank Investments (UK) Ltd.                                          |
| <sup>9)</sup> Umfirmiert:  | aus Dresdner Kleinwort Leasing (Guernsey) Ltd wurde Commerzbank Leasing (Guernsey) Limited                             |
| <sup>10)</sup> Umfirmiert: | aus Dresdner Leasing 1 S.a.r.l. wurde Commerzbank Leasing 1 S.à.r.l.                                                   |
| <sup>11)</sup> Umfirmiert: | aus Dresdner Leasing 2 S.a.r.l. wurde Commerzbank Leasing 2 S.à.r.l.                                                   |
| <sup>12)</sup> Umfirmiert: | aus Dresdner Leasing 4 S.à.r.l. wurde Commerzbank Leasing 4 S.à.r.l.                                                   |
| <sup>13)</sup> Umfirmiert: | aus Dresdner Leasing 5 S.à.r.l. wurde Commerzbank Leasing 5 S.à.r.l.                                                   |
| <sup>14)</sup> Umfirmiert: | aus Dresdner Leasing 6 S.a.r.l. wurde Commerzbank Leasing 6 S.à.r.l.                                                   |
| <sup>15)</sup> Umfirmiert: | aus Dresdner Kleinwort Leasing December (1) Limited wurde Commerzbank Leasing December (1) Limited                     |
| <sup>16)</sup> Umfirmiert: | aus Dresdner Kleinwort Leasing December (10) wurde Commerzbank Leasing December (10)                                   |
| <sup>17)</sup> Umfirmiert: | aus Dresdner Kleinwort Leasing December (11) wurde Commerzbank Leasing December (11)                                   |
| <sup>18)</sup> Umfirmiert: | aus Dresdner Kleinwort Leasing December (12) Limited wurde Commerzbank Leasing December (12) Limited                   |
| <sup>19)</sup> Umfirmiert: | aus Dresdner Kleinwort Leasing December (13) Limited wurde Commerzbank Leasing December (13) Limited                   |
| <sup>20)</sup> Umfirmiert: | aus Dresdner Kleinwort Leasing December (15) Limited wurde Commerzbank Leasing December (15)                           |
| <sup>21)</sup> Umfirmiert: | aus Dresdner Kleinwort Leasing December (3) Limited wurde Commerzbank Leasing December (3) Limited                     |
| <sup>22)</sup> Umfirmiert: | aus Dresdner Kleinwort Leasing December (4) Limited wurde Commerzbank Leasing December (4) Limited                     |
| <sup>23)</sup> Umfirmiert: | aus Dresdner Kleinwort Leasing December (7) Limited wurde Commerzbank Leasing December (7) Limited                     |
| <sup>24)</sup> Umfirmiert: | aus Dresdner Kleinwort Leasing December (8) Limited wurde Commerzbank Leasing December (8) Limited                     |
| <sup>25)</sup> Umfirmiert: | aus Dresdner Kleinwort Leasing December (9) Limited wurde Commerzbank Leasing December (9) Limited                     |
| <sup>26)</sup> Umfirmiert: | aus Dresdner Kleinwort Leasing Holdings Limited wurde Commerzbank Leasing Holdings Limited                             |
| <sup>27)</sup> Umfirmiert: | aus Dresdner Kleinwort Leasing Limited wurde Commerzbank Leasing Limited                                               |
| <sup>28)</sup> Umfirmiert: | aus Dresdner Kleinwort Leasing March (3) Limited wurde Commerzbank Leasing March (3) Limited                           |
| <sup>29)</sup> Umfirmiert: | aus Dresdner Kleinwort Leasing September (5) Limited wurde Commerzbank Leasing September (5) Limited                   |
| <sup>30)</sup> Umfirmiert: | aus Dresdner Kleinwort Leasing September (6) Limited wurde Commerzbank Leasing September (6) Limited                   |
| <sup>31)</sup> Umfirmiert: | aus Dresdner Kleinwort Online Ventures Limited wurde Commerzbank Online Ventures Limited                               |
| <sup>32)</sup> Umfirmiert: | aus Dresdner Kleinwort Overseas Holdings Limited wurde Commerzbank Overseas Holdings Limited                           |
| <sup>33)</sup> Umfirmiert: | aus Dresdner Kleinwort Property Management & Services Limited wurde Commerzbank Property Management & Services Limited |

|     |                                  |
|-----|----------------------------------|
| 204 | Gesamtergebnisrechnung           |
| 208 | Bilanz                           |
| 210 | Eigenkapitalveränderungsrechnung |
| 212 | Kapitalflussrechnung             |
| 214 | Anhang (Notes)                   |
| 370 | Bestätigungsvermerk              |

## Fußnoten

|     |             |                                                                                                            |
|-----|-------------|------------------------------------------------------------------------------------------------------------|
| 34) | Umfirmiert: | aus Dresdner Kleinwort Securities Ltd wurde Commerzbank Securities Ltd                                     |
| 35) | Umfirmiert: | aus Dresdner Kleinwort Securities Nominees Limited wurde Commerzbank Securities Nominees Limited           |
| 36) | Umfirmiert: | aus Aspiro Sp.z.o.o. wurde Aspiro S.A.                                                                     |
| 37) | Umfirmiert: | aus Commerz Real Autoleasing GmbH wurde Commerz Real Autoservice GmbH                                      |
| 38) | Umfirmiert: | aus Commerzbank Capital Management GmbH wurde Commerzbank Capital Management Unternehmensbeteiligungs GmbH |
| 39) | Umfirmiert: | aus Dresdner Kleinwort Sponsoring GmbH wurde Commerzbank Sponsoring GmbH                                   |
| 40) | Umfirmiert: | aus Dresdner Finanziaria S.p.A. wurde DFI S.p.A. in liquidazione                                           |
| 41) | Umfirmiert: | aus Dresdner-Cetelem Kreditbank GmbH wurde Commerz Finanz GmbH                                             |

## Anmerkungen und Erläuterungen

<sup>a)</sup> Im Geschäftsjahr erstmals in den Konzernabschluss einbezogen.

<sup>b)</sup> Ergebnisabführungsvertrag.

<sup>c)</sup> Die Angaben gemäß § 285 Nr.11a HGB sind wegen untergeordneter Bedeutung nach § 286 Abs. 3 Nr.1 HGB unterblieben.

<sup>d)</sup> Nach SIC 12 konsolidiert, da Stimmrechtsanteil 19%.

## Devisenkurse für 1 Euro zum 31.12.2010:

|                       |     |           |
|-----------------------|-----|-----------|
| Bermuda               | BMD | 1,33620   |
| Brasilien             | BRL | 2,21770   |
| Chile                 | CLP | 626,28090 |
| Großbritannien        | GBP | 0,86075   |
| Indien                | INR | 59,75800  |
| Japan                 | JPY | 108,65000 |
| Kanada                | CAD | 1,33220   |
| Polen                 | PLN | 3,97500   |
| Russland              | RUB | 40,82000  |
| Singapur              | SGD | 1,71360   |
| Südafrika             | ZAR | 8,86250   |
| Taiwan                | TWD | 38,99750  |
| Tschechische Republik | CZK | 25,06100  |
| Ukraine               | UAH | 10,66330  |
| Ungarn                | HUF | 277,95000 |
| USA                   | USD | 1,33620   |

## Organe der Commerzbank Aktiengesellschaft

---

### Aufsichtsrat

**Klaus-Peter Müller**

Vorsitzender

**Uwe Tschäge**<sup>1</sup>

stellv. Vorsitzender

Bankangestellter

Commerzbank Aktiengesellschaft

**Hans-Hermann Altenschmidt**<sup>1</sup>

Bankangestellter

Commerzbank Aktiengesellschaft

**Dott. Sergio Balbinot**

Managing Director

Assicurazioni Generali S. p. A.

**Dr.-Ing. Burckhard Bergmann**

Ehemaliger Vorsitzender

des Vorstands

E.ON Ruhrgas AG

**Herbert Bludau-Hoffmann**<sup>1</sup>

(bis 31.12.2010)

Dipl.-Volkswirt

Gewerkschaft ver.di

Fachbereich Finanzdienstleistungen,

Unternehmensbetreuer

Commerzbank

**Dr. Nikolaus von Bomhard**

Vorsitzender des Vorstands

Münchener Rückversicherungs-

Gesellschaft AG

**Karin van Brummelen**<sup>1</sup>

Bankangestellte

Commerzbank Aktiengesellschaft

**Astrid Evers**<sup>1</sup>

Bankangestellte

Commerzbank Aktiengesellschaft

**Uwe Foullong**<sup>1</sup>

Mitglied des ver.di-Bundesvorstands

**Daniel Hampel**<sup>1</sup>

Bankangestellter

Commerzbank Aktiengesellschaft

**Dr.-Ing. Otto Happel**

Unternehmer

Luverse AG

**Sonja Kasischke**<sup>1</sup>

Bankangestellte

Commerzbank Aktiengesellschaft

**Prof. Dr.-Ing. Dr.-Ing. E.h.**

**Hans-Peter Keitel**

Präsident des Bundesverbandes

der Deutschen Industrie

**Alexandra Krieger**<sup>1</sup>

Dipl.-Kauffrau

Leiterin Referat Wirtschaft I

Mitbestimmungsförderung

Hans-Böckler-Stiftung

**Dr. h.c. Edgar Meister**

Rechtsanwalt

Mitglied des Vorstands

der Deutschen Bundesbank a.D.

**Prof. h.c. (CHN) Dr. rer. oec.**

**Ulrich Middelmann**

Ehemaliger stellv. Vorsitzender

des Vorstands

ThyssenKrupp AG

**Dr. Helmut Perlet**

Ehemaliges Mitglied des Vorstands

Allianz SE

**Barbara Priester**<sup>1</sup>

Bankangestellte

Commerzbank Aktiengesellschaft

**Mark Roach**<sup>1</sup>

(seit 10.1.2011)

Gewerkschaftssekretär

ver.di Bundesverwaltung

**Dr. Marcus Schenck**

Mitglied des Vorstands

E.ON AG

**Dr. Walter Seipp**

Ehrenvorsitzender

<sup>1</sup> Von den Arbeitnehmern gewählt.

### Vorstand

**Martin Blessing**

Vorsitzender

**Frank Annuscheit**

**Markus Beumer**

**Dr. Achim Kassow**

**Jochen Klösge**

**Michael Reuther**

**Dr. Stefan Schmittmann**

**Ulrich Sieber**

**Dr. Eric Strutz**

**Martin Zielke**

(seit 5.11.2010)

|     |                                  |
|-----|----------------------------------|
| 191 | Gesamtergebnisrechnung           |
| 195 | Bilanz                           |
| 196 | Eigenkapitalveränderungsrechnung |
| 198 | Kapitalflussrechnung             |
| 200 | Anhang (Notes)                   |
| 316 | Bestätigungsvermerk              |

# Versicherung der gesetzlichen Vertreter

Wir versichern nach bestem Wissen, dass gemäß den anzuwendenden Rechnungslegungsgrundsätzen der Konzernabschluss ein den tatsächlichen Verhältnissen entsprechendes Bild der Vermögens-, Finanz- und Ertragslage des Konzerns vermittelt und im Konzernlagebericht der Geschäftsverlauf einschließlich

des Geschäftsergebnisses und die Lage des Konzerns so dargestellt wird, dass ein den tatsächlichen Verhältnissen entsprechendes Bild vermittelt wird, sowie die wesentlichen Chancen und Risiken der voraussichtlichen Entwicklung des Konzerns beschrieben sind.

Frankfurt am Main, 7. März 2011

Der Vorstand



Martin Blessing



Frank Annuscheit



Markus Beumer



Achim Kassow



Jochen Klösges



Michael Reuther



Stefan Schmittmann



Ulrich Sieber



Eric Strutz



Martin Zielke

# Bestätigungsvermerk des Konzernabschlussprüfers

Wir haben den von der COMMERZBANK Aktiengesellschaft, Frankfurt am Main, aufgestellten Konzernabschluss – bestehend aus Bilanz, Gesamtergebnisrechnung, Eigenkapitalveränderungsrechnung, Kapitalflussrechnung und Anhang – sowie den Konzernlagebericht für das Geschäftsjahr vom 1. Januar bis 31. Dezember 2010 geprüft. Die Aufstellung von Konzernabschluss und Konzernlagebericht nach den IFRS, wie sie in der EU anzuwenden sind, und den ergänzend nach § 315a Abs. 1 HGB anzuwendenden handelsrechtlichen Vorschriften liegt in der Verantwortung des Vorstands der Gesellschaft. Unsere Aufgabe ist es, auf der Grundlage der von uns durchgeführten Prüfung eine Beurteilung über den Konzernabschluss und den Konzernlagebericht abzugeben.

Wir haben unsere Konzernabschlussprüfung nach § 317 HGB unter Beachtung der vom Institut der Wirtschaftsprüfer (IDW) festgestellten deutschen Grundsätze ordnungsmäßiger Abschlussprüfung unter ergänzender Beachtung der International Standards on Auditing (ISA) vorgenommen. Danach ist die Prüfung so zu planen und durchzuführen, dass Unrichtigkeiten und Verstöße, die sich auf die Darstellung des durch den Konzernabschluss unter Beachtung der anzuwendenden Rechnungslegungsvorschriften und durch den Konzernlagebericht vermittelten Bildes der Vermögens-, Finanz- und Ertragslage wesentlich auswirken, mit hinreichender Sicherheit erkannt werden. Bei der Festlegung der Prüfungshandlungen werden die Kenntnisse über die Geschäftstätigkeit und über das wirtschaftliche und rechtliche Umfeld des Konzerns sowie die Erwartungen über mögliche Fehler berücksichtigt. Im Rahmen der Prüfung werden die Wirksamkeit des rechnungslegungsbezogenen internen Kontrollsystems sowie Nachweise für die Angaben im Konzernabschluss und Konzernlagebericht überwiegend auf der Basis von Stichproben beurteilt. Die Prüfung umfasst die Beurteilung der

Jahresabschlüsse der in den Konzernabschluss einbezogenen Unternehmen, der Abgrenzung des Konsolidierungskreises, der angewandten Bilanzierungs- und Konsolidierungsgrundsätze und der wesentlichen Einschätzungen des Vorstands sowie die Würdigung der Gesamtdarstellung des Konzernabschlusses und des Konzernlageberichts. Wir sind der Auffassung, dass unsere Prüfung eine hinreichend sichere Grundlage für unsere Beurteilung bildet.

Unsere Prüfung hat zu keinen Einwendungen geführt. Nach unserer Beurteilung aufgrund der bei der Prüfung gewonnenen Erkenntnisse entspricht der Konzernabschluss den IFRS, wie sie in der EU anzuwenden sind, und den ergänzend nach § 315a Abs. 1 HGB anzuwendenden handelsrechtlichen Vorschriften und vermittelt unter Beachtung dieser Vorschriften ein den tatsächlichen Verhältnissen entsprechendes Bild der Vermögens-, Finanz- und Ertragslage des Konzerns. Der Konzernlagebericht steht in Einklang mit dem Konzernabschluss, vermittelt insgesamt ein zutreffendes Bild von der Lage des Konzerns und stellt die Chancen und Risiken der zukünftigen Entwicklung zutreffend dar.

Frankfurt am Main, den 8. März 2011

PricewaterhouseCoopers  
Aktiengesellschaft  
Wirtschaftsprüfungsgesellschaft

Lothar Schreiber  
(Wirtschaftsprüfer)

Peter Goldschmidt  
(Wirtschaftsprüfer)



# Weitere Informationen

---

Wir informieren über die Zusammensetzung unseres Zentralen Beirats und über die Mandate in gesetzlich zu bildenden Aufsichtsräten und die Mitgliedschaften in vergleichbaren Kontrollgremien für die Mitglieder des Vorstands, des Aufsichtsrats und für Mitarbeiter der Commerzbank sowie in einem Glossar über die wichtigsten Begriffe aus der Finanzwelt.

# Zentraler Beirat

## **Dr. Simone Bagel-Trah**

Vorsitzende des Aufsichtsrats  
und des Gesellschafterausschusses  
Henkel AG & Co. KGaA  
Düsseldorf

## **Dr. Olaf Berlien**

Mitglied des Vorstands  
ThyssenKrupp AG  
Düsseldorf  
CEO  
Division Technologies  
Essen  
Vorsitzender des Vorstands  
ThyssenKrupp Elevator AG  
Düsseldorf

## **Cathrina Claas-Mühlhäuser**

Vorsitzende des Aufsichtsrats und  
Stellv. Vorsitzende  
des Gesellschafterausschusses  
CLAAS KGaA mbH  
Harsewinkel

## **Prof. Dr. Hans Heinrich Driftmann**

Persönlich haftender und  
geschäftsführender Gesellschafter  
Peter Kölln KGaA  
Elmshorn  
Präsident des Deutschen Industrie-  
und Handelskammertages  
Berlin

## **Dr. Hubertus Erlen**

Stellv. Vorsitzender des Aufsichtsrats  
Bayer Schering Pharma AG  
Berlin

## **Prof. Dr. Johanna Hey**

Direktorin  
Institut für Steuerrecht  
Universität zu Köln  
Köln

## **Prof. Dr. Edward G. Krubasik**

Mitglied des Aufsichtsrats  
Vallourec SA  
Paris

## **Uwe Lüders**

Vorsitzender des Vorstands  
L. Possehl & Co. mbH  
Lübeck

## **Dipl.-Kfm. Friedrich Lürßen**

Geschäftsführender Gesellschafter  
Fr. Lürssen Werft GmbH & Co. KG  
Bremen

## **Dr.-Ing. E. h. Hartmut Mehdorn**

Frankfurt am Main

## **Dr. Christoph M. Müller**

Rechtsanwalt  
Mitglied des Gesellschafter-  
ausschusses und des Aufsichtsrats  
Vaillant GmbH  
Remscheid

## **Prof. Hans Georg Näder**

Geschäftsführender Gesellschafter  
Otto Bock HealthCare GmbH  
Duderstadt

## **Klaus M. Patig**

Königstein

## **Hans Dieter Pötsch**

Mitglied des Vorstands  
Volkswagen AG  
Wolfsburg

## **Dr. Helmut Reitze**

Intendant  
Hessischer Rundfunk  
Frankfurt am Main

## **Dr. Axel Frhr. v. Ruedorffer**

Bad Homburg

## **Georg F.W. Schaeffler**

Vorsitzender des Aufsichtsrats  
Schaeffler GmbH  
Herzogenaurach

## **Dr. Ernst F. Schröder**

Persönlich haftender Gesellschafter  
Dr. August Oetker KG  
Bielefeld

## **Jürgen Schulte-Laggenbeck**

CFO  
OTTO (GmbH & Co. KG)  
Hamburg

## **Prof. Dennis J. Snower, Ph.D.**

Präsident  
Institut für Weltwirtschaft  
an der Universität Kiel  
Kiel

## **Dr. Dr. h. c. Edmund Stoiber**

Bayerischer Ministerpräsident a. D.  
Wolfratshausen

## **Nicholas Teller**

CEO  
E.R. Capital Holding GmbH & Cie. KG  
Hamburg

## **Prof. Dr. Klaus Trützscher**

Mitglied des Vorstands  
Franz Haniel & Cie. GmbH  
Duisburg

## **Dr. Bernd W. Voss**

Frankfurt am Main/Kronberg

## **Dr. Michael Werhahn**

Mitglied des Vorstands  
Wilh. Werhahn KG  
Neuss

## **Dr. Wendelin Wiedeking**

Bietigheim-Bissingen

Die Verzeichnisse der Mitglieder unserer Regionalbeiräte Nord, Nordwest, West, Ost, Mitte, Süd und Südwest finden Sie im Internet unter [www.commerzbank.de](http://www.commerzbank.de) > Über uns > Konzerninformationen > Beiräte.

# Mandate in Aufsichtsräten und anderen Kontrollgremien

## Mitglieder des Vorstands der Commerzbank Aktiengesellschaft

Angaben gemäß § 285 Ziffer 10 HGB  
 Stand: 31.12.2010

- a) Mitgliedschaft in gesetzlich zu bildenden Aufsichtsräten
- b) Mitgliedschaft in vergleichbaren Kontrollgremien

### Martin Blessing

./.

### Frank Annuscheit

- a) comdirect bank Aktiengesellschaft<sup>1</sup>

### Markus Beumer

- a) Commerz Real AG<sup>1</sup>

### Dr. Achim Kassow

- a) comdirect bank Aktiengesellschaft<sup>1</sup>  
 stellv. Vorsitzender  
 Commerzbank Auslandsbanken Holding AG<sup>1</sup>  
 Vorsitzender  
 Generali Deutschland Holding AG<sup>2</sup>
- b) Allianz Global Investors Deutschland GmbH  
 BRE Bank S.A.<sup>1</sup>

### Jochen Klösger

- a) Commerz Real AG<sup>1</sup>  
 Vorsitzender  
 Commerz Real Investmentgesellschaft mbH<sup>1</sup>  
 Vorsitzender  
 Deutsche Schiffsbank Aktiengesellschaft<sup>1</sup>  
 Vorsitzender  
 Eurohypo Aktiengesellschaft<sup>1</sup>  
 Vorsitzender
- b) Commerzbank Auslandsbanken Holding Nova GmbH<sup>1</sup>  
 Commerzbank Inlandsbanken Holding GmbH<sup>1</sup>  
 stellv. Vorsitzender

### Michael Reuther

- a) Eurohypo Aktiengesellschaft<sup>1</sup>

### Dr. Stefan Schmittmann

- a) Commerz Real AG<sup>1</sup>  
 stellv. Vorsitzender  
 Commerzbank Auslandsbanken Holding AG<sup>1</sup>  
 Eurohypo Aktiengesellschaft<sup>1</sup>  
 Schaltbau Holding AG<sup>2</sup>  
 Verlagsgruppe Weltbild GmbH
- b) BRE Bank S.A.<sup>1</sup>  
 KGAL GmbH & Co. KG  
 Vorsitzender

### Ulrich Sieber

- a) BVV Pensionsfonds des Bankgewerbes AG  
 stellv. Vorsitzender
- b) SWAB Stiftung der Deutschen Wirtschaft für Arbeit und Beschäftigung GmbH

### Dr. Eric Strutz

- a) ABB AG  
 Commerzbank Auslandsbanken Holding AG<sup>1</sup>  
 stellv. Vorsitzender  
 RWE Power AG
  - b) Commerzbank Auslandsbanken Holding Nova GmbH<sup>1</sup>  
 Vorsitzender  
 Commerzbank Inlandsbanken Holding GmbH<sup>1</sup>  
 Vorsitzender  
 Mediobanca Banca di Credito Finanziario S.p.A.<sup>2</sup>  
 SdB-Sicherungseinrichtungsgesellschaft deutscher Banken mbH  
 Verlagsbeteiligungs- und Verwaltungsgesellschaft mit beschränkter Haftung
- ### Martin Zielke
- a) comdirect bank Aktiengesellschaft<sup>1</sup>  
 Vorsitzender
  - b) BRE Bank S.A.<sup>1</sup>  
 Commerzbank Auslandsbanken Holding Nova GmbH<sup>1</sup>  
 stellv. Vorsitzender  
 Public Joint Stock Company „Bank Forum“<sup>1</sup>

<sup>1</sup> Konzernmandat.

<sup>2</sup> Aufsichtsratsmandat in einer konzernexternen börsennotierten Gesellschaft oder in einem Aufsichtsgremium einer Gesellschaft mit vergleichbaren Anforderungen (gemäß Ziff. 5.4.5 des Deutschen Corporate Governance Kodex).

### Mitglieder des Aufsichtsrats der Commerzbank Aktiengesellschaft

Angaben gemäß § 285 Ziffer 10 HGB  
Stand: 31.12.2010

- a) Mitgliedschaft in anderen gesetzlich zu bildenden Aufsichtsräten
- b) Mitgliedschaft in vergleichbaren Kontrollgremien

#### Klaus-Peter Müller

- a) Fraport AG Frankfurt Airport Services Worldwide (bis 31.12.2010)  
Fresenius SE & Co. KGaA (vormals Fresenius SE)  
Fresenius Management SE (seit 12.5.2010)  
Linde Aktiengesellschaft  
MaschmeyerRürup AG Independent International Consultancy (seit 26.2.2010)
- b) Landwirtschaftliche Rentenbank  
Parker Hannifin Corporation  
Assicurazioni Generali S.p.A. (bis 24.4.2010)

#### Uwe Tschäge

./.

#### Hans-Hermann Altenschmidt

- b) BVV Pensionsfonds  
BVV Pensionskasse  
BVV Unterstützungskasse

#### Dott. Sergio Balbinot

- a) Deutsche Vermögensberatung AG  
AachenMünchener Lebensversicherung AG<sup>1</sup>  
AachenMünchener Versicherung AG<sup>1</sup>  
Generali Deutschland Holding AG<sup>1</sup>
- b) Banco Vitalicio de España, C.A. de Seguros y Réaseguros<sup>1</sup> (bis 30.6.2010)  
Generali España S.A. de Seguros y Reaseguros<sup>1</sup> (seit 30.6.2010; die Gesellschaft ist aus der Verschmelzung der Banco Vitalico C.A. de Seguros y Reaseguros und La Estrella S.A. entstanden)  
Europ Assistance Holding<sup>1</sup>  
Future Generali India Insurance Co. Ltd.<sup>1</sup>  
Future Generali India Life Insurance Co. Ltd.<sup>1</sup>  
Generali Asia N.V.<sup>1</sup>  
Generali China Insurance Company Ltd.<sup>1</sup> stellv. Vorsitzender  
Generali China Life Insurance Co. Ltd.<sup>1</sup> stellv. Vorsitzender  
Generali España, Holding de Entidades de Seguros, S.A.<sup>1</sup> stellv. Vorsitzender  
Generali Finance B.V.<sup>1</sup>  
Generali France S.A.<sup>1</sup> stellv. Vorsitzender

Generali Holding Vienna AG<sup>1</sup> stellv. Vorsitzender

Generali Investments SpA<sup>1</sup>

Generali (Schweiz) Holding<sup>1</sup> stellv. Vorsitzender

Generali PPF Holding BV<sup>1</sup> Vorsitzender

La Centrale Finanziaria Generale S.p.A.<sup>1</sup>

La Estrella S.A.<sup>1</sup> (bis 30.6.2010)

Migdal Insurance & Financial Holdings Ltd.<sup>1</sup>

Participatie Maatschappij Graafschap Holland N.V.<sup>1</sup>

Transocean Holding Corporation<sup>1</sup>

#### Dr.-Ing. Burckhard Bergmann

- a) Allianz Lebensversicherungs-AG stellv. Vorsitzender  
E.ON Energie AG
- b) OAO Gazprom  
Nord Stream AG  
OAO Novatek  
Telenor  
Accumulatorenwerke Hoppecke Carl Zoellner & Sohn GmbH  
Jaeger Beteiligungsgesellschaft mbH & Co. KG  
Vorsitzender

#### Herbert Bludau-Hoffmann

(bis 31.12.2010)

./.

<sup>1</sup> Konzernmandat.

<sup>2</sup> Aufsichtsratsmandat in einer konzernexternen börsennotierten Gesellschaft oder in einem Aufsichtsgremium einer Gesellschaft mit vergleichbaren Anforderungen (gemäß Ziff. 5.4.5 des Deutschen Corporate Governance Kodex).

**Dr. Nikolaus von Bomhard**

- a) ERGO Versicherungsgruppe AG<sup>1</sup>  
 Vorsitzender  
 Munich Health Holding AG<sup>1</sup>  
 Vorsitzender

**Karin van Brummelen**

./.

**Astrid Evers**

./.

**Uwe Foullong**

./.

**Daniel Hampel**

./.

**Dr.-Ing. Otto Happel**

./.

**Sonja Kasischke**

./.

**Prof. Dr.-Ing. Dr.-Ing. E. h.****Hans-Peter Keitel**

- a) Hochtief AG  
 National-Bank AG  
 ThyssenKrupp AG  
 (seit 21.1.2010)
- b) EQT Infrastructure Limited  
 RAG Stiftung

**Alexandra Krieger**

./.

**Dr. h. c. Edgar Meister**

- b) DWS Investment GmbH  
 Standard & Poors Credit Market  
 Services Europe Limited

**Prof. h. c. (CHN) Dr. rer. oec.  
Ulrich Middelman**

- a) Deutsche Telekom AG<sup>2</sup>  
 E.ON Ruhrgas AG  
 (bis 30.6.2010)  
 LANXESS AG<sup>2</sup>  
 LANXESS Deutschland GmbH  
 ThyssenKrupp Marine Systems AG<sup>1</sup>  
 (bis Februar 2010)  
 ThyssenKrupp Materials  
 International GmbH<sup>1</sup>  
 ThyssenKrupp Nirosta GmbH<sup>1</sup>  
 (vormals ThyssenKrupp Stainless AG)  
 (bis April 2010)  
 ThyssenKrupp Steel Europe AG<sup>1</sup>
- b) Hoberg & Driesch GmbH  
 Vorsitzender  
 ThyssenKrupp Acciai  
 Speciali Terni S.p.A.<sup>1</sup>  
 (bis April 2010)  
 ThyssenKrupp (China) Ltd.<sup>1</sup>  
 (bis April 2010)

**Dr. Helmut Perlet**

- a) Allianz Deutschland AG  
 Allianz Global Corporate &  
 Specialty AG  
 Allianz Global Investors AG  
 Allianz Investment Management SE  
 GEA GROUP AG
- b) Allianz Life Insurance Company  
 of North America  
 Fireman's Fund Ins. Co.  
 Allianz of America Inc.  
 Allianz S.p.A.  
 Allianz France S.A.

**Barbara Priester**

./.

**Dr. Marcus Schenck**

- a) E.ON Ruhrgas AG<sup>1</sup>
- b) E.ON IT GmbH<sup>1</sup>  
 (Umfirmierung 1.4.2010)  
 E.ON Energy Trading SE<sup>1</sup>

<sup>1</sup> Konzernmandat.

<sup>2</sup> Aufsichtsratsmandat in einer konzernexternen börsennotierten Gesellschaft oder in einem Aufsichtsgremium einer Gesellschaft mit vergleichbaren Anforderungen (gemäß Ziff. 5.4.5 des Deutschen Corporate Governance Kodex).

**Mitarbeiter der  
Commerzbank Aktiengesellschaft**

Angaben gemäß § 340a Abs. 4 Ziff. 1 HGB  
Stand: 31.12.2010

**Manfred Breuer**

Deutsche Edelstahlwerke GmbH

**Dr. Detlev Dietz**

Commerz Real AG

Commerz Real Investment-  
gesellschaft mbH

**Gerold Fahr**

Stadtwerke Ratingen GmbH

**Martin Fishedick**

Borgers AG

Commerz Real AG

Commerz Real Investment-  
gesellschaft mbH

**Bernd Förster**

SE Spezial Electronic  
Aktiengesellschaft  
stellv. Vorsitzender

**Sven Gohlke**

Bombardier Transportation GmbH

**Bernd Grossmann**

Textilgruppe Hof AG

**Detlef Hermann**

Kaiser's Tengelman GmbH

Ritzenhoff AG

**Jochen H. Ihler**

Hüttenwerke Krupp Mannesmann  
GmbH

**Dr. Thorsten Reitmeyer**

Commerz Real AG

Commerz Real Investment-  
gesellschaft mbH

**Andreas Schmidt**

Goodyear Dunlop Tires Germany  
GmbH

**Dirk Wilhelm Schuh**

GEWOBA Wohnen und Bauen AG

**Berthold Stahl**

Maincor AG  
stellv. Vorsitzender

**Rupert Winter**

Klinikum Burgenlandkreis GmbH

# Glossar

## **Ad-hoc-Publizität**

Ein vorrangiges Ziel der Ad-hoc-Publizität besteht in der Prävention von Insidergeschäften. Das Wertpapierhandelsgesetz (WpHG) schreibt in § 15 vor, dass Emittenten, deren Wertpapiere an einer deutschen Börse zum amtlichen Handel oder im geregelten Markt zugelassen sind, Ad-hoc-Veröffentlichungspflichten unterliegen. Eine neue Tatsache ist dann meldepflichtig, wenn sie im Tätigkeitsbereich des Unternehmens eingetreten und nicht öffentlich bekannt ist. Des Weiteren muss sich die neue Tatsache auf die Vermögens- oder Finanzlage oder auf den allgemeinen Geschäftsverlauf des Emittenten auswirken sowie geeignet sein, den Börsenpreis der zugelassenen Wertpapiere erheblich zu beeinflussen.

## **American Depository Receipts (ADR)**

Zur Erleichterung der Handelbarkeit nicht US-amerikanischer Aktien werden von dortigen Banken Hinterlegungsscheine über in der Regel im Ursprungsland verwahrte Originalstücke ausgestellt. Sie sind an den amerikanischen Börsen wie Aktien handelbar.

## **Asset-backed Securities (ABS)**

Wertpapiere, deren Zins- und Tilgungszahlung durch den zugrunde liegenden Forderungspool gedeckt („backed“) sind. Sie werden in der Regel durch eine Zweckgesellschaft im Rahmen einer Verbriefung begeben.

## **Assoziiertes Unternehmen**

Unternehmen, das weder durch Voll- noch Quotenkonsolidierung, sondern nach der Equity-Methode in den Konzernabschluss einbezogen ist, auf dessen Geschäfts- oder Finanzpolitik aber ein in den Konzernabschluss einbezogenes Unternehmen maßgeblichen Einfluss hat.

## **Aufwandsquote**

Sie stellt den Quotienten aus Verwaltungsaufwand und Erträgen vor Risikovorsorge dar und spiegelt die Kosteneffizienz des Unternehmens oder eines Geschäftsfelds wider.

## **Backtesting**

Verfahren zur Überwachung der Güte von Value-at-Risk-Modellen. Hierzu wird über einen längeren Zeitraum geprüft, ob die über den VaR-Ansatz geschätzten potenziellen Verluste rückwirkend nicht wesentlich häufiger überschritten werden, als gemäß dem angewandten Konfidenzniveau zu erwarten ist.

## **Benchmarks**

Bezugsgrößen wie Indizes, die zum Beispiel im Portfoliomanagement eingesetzt werden. Sie können zum einen die Ausrichtung der Anlagestrategie bestimmen, indem sie dem Portfoliomanager als Orientierung für die Zusammensetzung von Portfolios dienen. Zum anderen dienen sie als Maßstab für den Anlageerfolg.

## **Cash Flow Hedge**

Hierunter wird die Absicherung gegen das Risiko einer Veränderung zukünftiger Zahlungsströme (Cashflows) insbesondere bei Zinszahlungen aus einem variabel verzinslichen Bilanzgeschäft mit einem Swap verstanden. Die Bewertung erfolgt zum Marktwert (Fair Value).

## **Collateralised Debt Obligations (CDOs)**

Mit einem Pool von unterschiedlichen Wertpapieren, insbesondere Krediten und sonstigen verbrieften Schuldtiteln, besicherte ABS.

## **Commercial Mortgage-backed Securities (CMBS)**

Mit gewerblichen Immobilienkrediten besicherte ABS.

## **Corporate Governance**

Corporate Governance legt Richtlinien für eine transparente Leitung und Überwachung von Unternehmen fest. Die Empfehlungen des Corporate Governance Kodex schaffen Transparenz und stärken das Vertrauen in eine verantwortungsvolle Unternehmensführung; sie dienen im Besonderen dem Schutz der Aktionäre.

## **Credit Default Swap (CDS)**

Finanzinstrument zur Übertragung des Kreditrisikos aus einem Referenzaktivism (zum Beispiel Wertpapier oder Kredit). Dafür zahlt der Sicherungsnehmer an den Sicherungsgeber eine Prämie und erhält bei Eintritt eines vorab vereinbarten Kreditereignisses eine Ausgleichszahlung.

### Credit-VaR

Der Begriff resultiert aus der Anwendung des Value-at-Risk-Konzepts auf die Kreditrisikomessung. Inhaltlich stellt der Credit-VaR eine Abschätzung dar, um welchen Betrag die Verluste aus Kreditrisiken den erwarteten Verlust (Expected Loss) innerhalb eines Jahres potenziell übersteigen könnten; daher auch: Unerwarteter Verlust (Unexpected Loss). Diesem Ansatz liegt die Idee zugrunde, dass der erwartete Verlust lediglich den langfristigen Mittelwert der Kreditverluste darstellt, diese jedoch von den tatsächlichen Kreditausfällen des laufenden Geschäftsjahres (positiv oder negativ) abweichen können.

### Derivate

Finanzinstrumente, deren Bewertung sich vom Preis eines Basiswerts ableitet (zum Beispiel Wertpapier, Zinssatz, Währung, Kredit). Diese Instrumente bieten erweiterte Möglichkeiten für Risikomanagement und -steuerung.

### Eigenkapitalrendite

Sie errechnet sich aus dem Verhältnis einer Ergebnisgröße zum durchschnittlich gebundenen Eigenkapital und gibt an, wie sich das im Unternehmen eingesetzte Kapital verzinst.

### Embedded Derivatives

Eingebettete Derivate sind Bestandteil eines originären Finanzinstruments und mit diesem untrennbar verbunden, sogenannte Hybrid Financial Instruments wie zum Beispiel Aktienanleihen (Anleihen mit Rückzahlungsrecht in Aktien). Sie sind rechtlich und wirtschaftlich miteinander verbunden.

### EONIA (Euro Overnight Index Average)

Auf der Basis effektiver Umsätze berechneter Durchschnittszinssatz für Tagesgeld im Euro-Interbankengeschäft. Er wird als gewichteter

Durchschnitt der Sätze für unbesicherte Euro-Übernachtkontrakte, die von einer Gruppe bestimmter Institute im Euro-Währungsgebiet gemeldet wird, berechnet.

### Equity-Methode

Verfahren zur Bewertung von Beteiligungen, die als assoziierte Unternehmen im Konzernabschluss ausgewiesen werden. Der anteilige Jahresüberschuss/-fehlbetrag des Unternehmens wird in der Konzern-Gewinn- und -Verlustrechnung als laufendes Ergebnis aus at-Equity-bewerteten Unternehmen ausgewiesen. Der Bilanzansatz erfolgt in Höhe des anteiligen Eigenkapitals des assoziierten Unternehmens.

### Erwarteter Verlust

Messgröße für den potenziellen Verlust eines Kreditportfolios, der innerhalb eines Jahres aufgrund von historischen Verlustdaten zu erwarten ist.

### EURIBOR (Euro Interbank Offered Rate)

Durchschnittszinssatz, zu dem ein als erstklassig eingestuftes Kreditinstitut bereit ist, einem anderen Kreditinstitut mit höchster Bonität Euro-Gelder zur Verfügung zu stellen. Der EURIBOR wird täglich anhand der Zinssätze ausgewählter Banken für Laufzeiten von bis zu zwölf Monaten berechnet.

### European Financial Stability Facility

Die Länder des Euro-Währungsgebiets errichteten auf zwischenstaatlicher Ebene die europäische Finanzstabilitätsfazilität (EFSF). Als Aktiengesellschaft luxemburgischen Rechts darf die ESFS zur Finanzierung von Darlehen an Euro-Länder mit Finanzschwierigkeiten Schuldverschreibungen begeben, die mit anteiligen Garantien der Euro-Länder von bis zu 440 Mrd Euro besichert sind. Diese Schuldverschrei-

bungen dürften die höchste Bonitätseinstufung (AAA) der drei führenden Ratingagenturen erlangen. Die EFSF ist vorübergehend bis zum Juni 2013 eingerichtet worden.

### Fair Value

Betrag, zu dem Vermögenswerte zwischen sachverständigen, vertragswilligen und unabhängigen Partnern getauscht werden. Zur Bewertung werden entweder Marktpreise (zum Beispiel Börsenkurse) oder – wenn diese fehlen – interne Bewertungsmodelle herangezogen.

### Fair Value Hedge

Wird angewandt zur Absicherung des beizulegenden Zeitwerts (Fair Value) bilanzierter Vermögenswerte oder Verbindlichkeiten. Hierbei handelt es sich in der Regel um einen festverzinslichen Bilanzposten (zum Beispiel eine Forderung oder ein Wertpapier), der durch einen Swap gegen das Marktrisiko gesichert ist. Die Bewertung erfolgt zum Marktwert (Fair Value).

### Finanzinstrumente

Hierunter werden zum einen finanzielle Vermögenswerte, insbesondere Kredite beziehungsweise Forderungen, verzinsliche Wertpapiere, Aktien und Beteiligungen, zum anderen finanzielle Verpflichtungen wie zum Beispiel Einlagen von Kreditinstituten und Kunden sowie emittierte Anleihen, aber auch Derivate subsumiert.

### Future

Der Future-Kontrakt ist ein verbindlicher Vertrag, der beide Vertragsparteien dazu verpflichtet, eine bestimmte Anzahl oder Menge eines Basiswerts zu einem festgelegten Preis zu einem vereinbarten Datum zu liefern beziehungsweise zu übernehmen. Im Gegensatz zur Option ist der Future sehr stark standardisiert.



### Genussschein

Verbriefung von Genussrechten, die von Unternehmen jeder Rechtsform ausgegeben und in den amtlichen (Börsen-)Handel eingeführt werden. Genussscheine können unter bestimmten Voraussetzungen dem haftenden Eigenkapital der Kreditinstitute zugerechnet werden.

### Goodwill

Der bei einer Beteiligungs- oder Unternehmensübernahme nach Aufdeckung stiller Reserven und Lasten verbleibende Unterschiedsbetrag zwischen Kaufpreis und Wert des hierfür erworbenen Reinvermögens (deutscher Fachbegriff: Geschäfts- oder Firmenwert).

### Grandfathering

Die sogenannte Gewährträgerhaftung der Sparkassen und Landesbanken, nach der der Träger des Instituts (Land, Stadt oder Landkreis) für Einlagen und emittierte Anleihen bürgt, wurde 2001 aus Wettbewerbsgründen abgeschafft. Für eine Übergangszeit bis 2005 kam die Regelung für bestimmte Emissionen der Sparkassen und Landesbanken noch zum Tragen, was als „Grandfathering“ bezeichnet wird.

### Handelsaktiva

In diesem Bilanzposten werden Handelszwecken dienende Wertpapiere, Schuldscheindarlehen, Devisen, Edelmetalle, Kredite und Kreditzusagen sowie derivative Finanzinstrumente ausgewiesen. Sie werden zum Fair Value bewertet.

### Handelsspassiva

In diesem Bilanzposten werden derivative Finanzinstrumente und Kreditzusagen des Handelsbestands, die einen negativen Marktwert besitzen, Emis-

sionen des Handelsbuchs sowie Lieferverpflichtungen aus Wertpapierleerverkäufen ausgewiesen. Die Bewertung erfolgt zum Fair Value.

### Hedge Accounting

bezeichnet die Bilanzierung zweier oder mehrerer Finanzinstrumente, die in einem Sicherungszusammenhang stehen, wobei gegensätzliche Wertentwicklungen der Sicherungsgeschäfte (zum Beispiel Zinsswaps) und der Grundgeschäfte (zum Beispiel Kredite) dargestellt werden. Ziel des Hedge Accounting ist es, den Einfluss der erfolgswirksamen Bewertung und Erfassung der Bewertungsergebnisse aus derivativen Geschäften auf die Gewinn- und Verlustrechnung zu minimieren.

### Hedging

Eine Strategie, bei der Sicherungsgeschäfte mit dem Ziel abgeschlossen werden, sich gegen das Risiko von ungünstigen Preisentwicklungen (Zinsen, Kurse, Rohstoffe) abzusichern.

### Hybride Finanzmittel

sind Finanzierungsmöglichkeiten, die flexibel an die Bedürfnisse des Unternehmens angepasst werden können. Vom Charakter her sind sie eine Mischform zwischen Fremd- und Eigenkapital, sodass im Interessenausgleich zwischen dem Wunsch nach Risikoübernahme und der Beschränkung der unternehmerischen Führung stets ein Optimum gefunden werden kann. Typische Vertreter der hybriden Finanzmittel sind: Nachrangdarlehen, stille Einlagen oder Genussscheine.

### Internal Capital Adequacy Assessment Process (ICAAP)

Prozess, der gewährleistet, dass Kreditinstitute über genügend internes Kapital zur Abdeckung aller wesentlichen Risiken verfügen.

### International Financial Reporting Standards (IFRS)/International Accounting Standards (IAS)

Vom International Accounting Standards Board verabschiedete Rechnungslegungsvorschriften. Zielsetzung von Jahresabschlüssen nach IFRS/IAS ist es, entscheidungsrelevante Informationen für Investoren über die Vermögens-, Finanz- und Ertragslage des Unternehmens sowie deren Veränderungen im Zeitablauf zu vermitteln. Im Gegensatz dazu orientiert sich ein Jahresabschluss nach HGB vorrangig am Gläubigerschutzgedanken.

### Kapitalflussrechnung

Sie zeigt Zusammensetzung und Veränderungen des Zahlungsmittelbestands eines Geschäftsjahres und ist aufgeteilt in die Quellen der Veränderungen aus operativer Geschäftstätigkeit, Investitions- und Finanzierungstätigkeit.

### Klumpenrisiko

Als Klumpenrisiken bezeichnet man Ausfallrisiken, die einen hohen ökonomischen Kapitalverbrauch haben und somit die Risikotragfähigkeit der Bank stärker belasten. Geht die Bank diese Risiken ein, beispielsweise durch Vergabe von Großkrediten an einzelne Kreditnehmer, besteht die Gefahr, dass die Bank schon bei Ausfall dieses Schuldners einen erheblichen Verlust erleidet. Gleiches gilt für hohe Risikokonzentrationen in einzelnen Ländern oder Branchen aufgrund von Korrelationen.

### Konfidenzniveau

Wahrscheinlichkeit, mit der ein potenzieller Verlust eine durch den Value-at-Risk definierte Verlustobergrenze nicht überschreitet.

**Kreditderivat**

Finanzinstrument, dessen Wert von einer zugrunde liegenden Forderung abhängt, zum Beispiel einem Kredit oder Wertpapier. In der Regel werden diese Kontrakte OTC abgeschlossen. Sie werden unter anderem zur Risiko-steuerung eingesetzt. Das am häufigsten eingesetzte Kreditderivat ist der Credit Default Swap.

**Latente Steuern**

Latente Steuern sind zukünftige Steuer-be- beziehungsweise Steuerentlastungen, die aus temporären Differenzen und aus noch nicht genutzten steuerlichen Verlusten beziehungsweise Steuergutschriften resultieren. Dabei sind temporäre Differenzen unterschiedliche Wertansätze von Vermögenswerten und Schulden zwischen der veröffentlichten Handels- oder IFRS-Bilanz und der Steuerbilanz (Liability-Methode), die sich in späteren Wirtschaftsjahren ausgleichen und aus denen tatsächliche Steuerwirkungen resultieren. Abzugsfähige temporäre Differenzen sowie noch nicht genutzte steuerliche Verluste beziehungsweise Steuergutschriften führen zu latenten Steueransprüchen; hingegen führen zu versteuernde temporäre Differenzen zu latenten Steuerschulden. Latente Steueransprüche/Steuerschulden sind getrennt von den tatsächlichen Steueransprüchen/Steuerschulden auszuweisen.

**Mark-to-Market**

Bewertung von Positionen zu aktuellen Marktpreisen einschließlich unrealisierter Gewinne – ohne Berücksichtigung der Anschaffungskosten.

**Mezzanine**

Mezzaninkapital oder Mezzaninfinanzierung beschreibt Finanzierungsarten, die in ihren rechtlichen

und wirtschaftlichen Ausgestaltungen eine Mischform zwischen Eigen- und Fremdkapital darstellen. Mezzaninkapital kann eigenkapitalähnlich (sogenannte Equity-Mezzanine) in Form von Genussrechten, wertpapierverbrieften Genussscheinen oder stillen Beteiligungen begeben werden. Es eignet sich besonders für mittelständische Unternehmen, die ihre Eigenmittelbasis stärken, aber nicht die Eigentümerstruktur verändern wollen.

**Nachhaltigkeit**

Nachhaltigkeit bezeichnet langfristiges, auf eine lebenswerte Gegenwart und Zukunft gerichtetes Wirtschaften. Verantwortung für die Umwelt und ausgewogene soziale Beziehungen verstehen sich dabei als leitende Ziele.

**Netting**

Aufrechnung betrags- oder risikomäßig gegenläufiger Positionen.

**Neubewertungsrücklage**

In der Neubewertungsrücklage werden Marktwertänderungen von Wertpapieren und Beteiligungen im zur Veräußerung verfügbaren Finanzanlagebestand erfolgsneutral erfasst. Der Ausweis in der Bilanz erfolgt nach Berücksichtigung latenter Steuern.

**Ökonomisches Kapital**

Betrag, der zur Abdeckung unerwarteter Verluste aus risikobehafteten Positionen mit einem hohen Maß an Sicherheit (in der Commerzbank zurzeit 99,95 %) ausreicht. Nicht identisch mit dem bilanziellen oder regulatorischen Kapital.

**Option**

Die Option ist eine Vereinbarung, die dem einen Vertragspartner das einseitige Recht einräumt, eine im Voraus bestimmte Menge einer Ware oder

eines Werts zu einem vorab festgelegten Preis innerhalb eines definierten Zeitraums zu kaufen oder zu verkaufen.

**OTC**

Abkürzung für „Over the Counter“: Damit wird der außerbörsliche Handel von Finanzinstrumenten bezeichnet.

**Patronatserklärung**

Üblicherweise Verpflichtung einer Konzernmuttergesellschaft gegenüber Dritten (zum Beispiel Banken), für die ordnungsgemäße Geschäftsführung und die Erfüllung von Verbindlichkeiten ihrer Tochtergesellschaft Sorge zu tragen.

**Rating**

Standardisierte Bonitätsbeurteilung/ Risikoeinschätzung von Unternehmen, Staaten oder von diesen emittierten Schuldtiteln auf Basis standardisierter qualitativer und quantitativer Kriterien. Das Ergebnis des Ratingprozesses ist Grundlage für die Feststellung der Ausfallwahrscheinlichkeit, die wiederum in die Berechnung des Eigenmittelerfordernisses für das Kreditrisiko einfließt. Ratings können durch die Bank selbst (interne Ratings) oder durch spezialisierte Ratingagenturen wie Standard & Poor's, Fitch oder Moody's ermittelt werden (externe Ratings).

**Repo-Geschäfte**

Abkürzung für Repurchase Agreement; sie sind Kombinationen aus Kassakäufen oder -verkäufen von Wertpapieren mit gleichzeitigem Verkauf oder Rückkauf der Wertpapiere auf Termin mit demselben Kontrahenten. Während diese Art von Geschäften aus Käufersicht als Repo-Geschäfte bezeichnet werden, stellen sie auf der Verkäuferseite sogenannte Reverse-Repo-Geschäfte dar.

**Residential Mortgage-backed Securities (RMBS)**

Mit privaten Immobilienkrediten besicherte ABS.

**Spread**

Differenz zwischen zwei Preisen oder Zinssätzen, zum Beispiel Spanne zwischen An- und Verkaufskurs von Wertpapieren oder bonitätsbedingter Aufschlag auf einen Marktzinssatz.

**STOXX**

Bei der „Indexfamilie“ STOXX handelt es sich um ein System europäischer Benchmark-, Blue Chip- sowie Branchenindizes.

**Stresstest**

Mit Stresstests werden die Auswirkungen krisenhafter Kapitalmarktveränderungen auf die Risikoposition untersucht. In der Commerzbank werden risikoartenspezifische und integrierte risikoartenübergreifende Stresstests unterschieden. Im Rahmen der Risikotragfähigkeitsrechnung werden sowohl Parameter-Stresstests (im Sinne multivariater Sensitivitätsanalysen) sowie makroökonomische Stresstests (Szenarioanalysen auf Basis makroökonomischer Prognosen) unterschieden. Bei Szenarioanalysen wird der Einfluss makroökonomischer Rahmenbedingungen sowohl auf die Risikoposition als auch die Kapitalbestandteile betrachtet.

**Swaps**

Finanzinstrumente, bei denen der Austausch von Zahlungsströmen (Zinsen und/oder Währungsbeträge) über einen festgelegten Zeitraum vereinbart wird. Mittels Zinsswaps werden Zinszahlungsströme getauscht (zum Beispiel fest gegen variabel). Währungsswaps bieten darüber hinaus die Mög-

lichkeit, das Wechselkursrisiko über einen Austausch von Kapitalbeträgen auszuschalten.

**Tochterunternehmen**

Von einer Muttergesellschaft beherrschtes Unternehmen, das vollkonsolidiert wird. Liegt eine geringfügige Bedeutung vor, erfolgt keine Konsolidierung. In diesem Fall wird das Unternehmen zum beizulegenden Zeitwert (Fair Value) oder, sofern dieser nicht zuverlässig ermittelbar ist, zu fortgeführten Anschaffungskosten bilanziert.

**Value-at-Risk (VaR)**

VaR bezeichnet eine Methodik zur Quantifizierung von Risiken. Um aussagekräftig zu sein, muss zusätzlich immer die Haltedauer (zum Beispiel 1 Tag) und das Konfidenzniveau (zum Beispiel 97,5 %) angegeben werden. Der VaR-Wert bezeichnet dann diejenige Verlustobergrenze, die innerhalb der Haltedauer mit einer Wahrscheinlichkeit entsprechend dem Konfidenzniveau nicht überschritten wird.

**Verbriefung**

Im Rahmen von Verbriefungen werden Forderungen (zum Beispiel Kredite, Handelswechsel oder Leasingforderungen) in einem Pool gebündelt und in der Regel auf eine Zweckgesellschaft (SPV) übertragen. Das SPV refinanziert sich durch die Emission von Wertpapieren (zum Beispiel ABS oder CLNs). Die Rückzahlung und Zinszahlung der Wertpapiere ist direkt an die Performance der zugrunde liegenden Forderungen geknüpft und nicht an die des Emittenten.

**Volatilität**

Mit dem Begriff Volatilität wird die Kursschwankung eines Wertpapiers beziehungsweise einer Währung bezeichnet. Oftmals wird diese in Form der Standardabweichung aus der Kurshistorie berechnet beziehungsweise implizit aus einer Preissetzungsformel. Je höher die Volatilität, desto risikoreicher ist das Halten der Anlage.

**90 days-past-due (90 dpd)**

Ein Ausfallkriterium nach Basel II. Engagements, die länger als 90 Tage (unter Berücksichtigung von Bagatellgrenzen) rückständig sind, müssen nach Basel II als Ausfall geschlüsselt werden. Bei der Commerzbank Berücksichtigung in der Ratingklasse 6,1.

Eine Vielzahl weiterer Begriffserklärungen bietet unser Glossar im Internet unter [www.commerzbank.de](http://www.commerzbank.de).

# Abbildungs- und Tabellenverzeichnis

## Abbildungen

|              |                                                  |            |               |                                                                                              |            |
|--------------|--------------------------------------------------|------------|---------------|----------------------------------------------------------------------------------------------|------------|
| Abbildung 1, | Refinanzierungsstruktur Kapitalmarkt             | <b>89</b>  | Abbildung 8,  | Ratingverteilung CDO                                                                         | <b>178</b> |
| Abbildung 2, | Kapitalmarktfunding des Konzerns im Jahr 2010    | <b>90</b>  | Abbildung 9,  | Ratingverteilung Conduits Non-PRU                                                            | <b>179</b> |
| Abbildung 3, | Fälligkeitsprofil des Konzerns                   | <b>155</b> | Abbildung 10, | Default-Portfolio und Coverage Ratios nach Segmenten                                         | <b>186</b> |
| Abbildung 4, | Steuerungsinstrumente und -ebenen im Überblick   | <b>169</b> | Abbildung 11, | Backtesting-Ergebnisse                                                                       | <b>190</b> |
| Abbildung 5, | Loan to Value Bereich CRE                        | <b>174</b> | Abbildung 12, | Credit-Spread-Sensitivitäten                                                                 | <b>190</b> |
| Abbildung 6, | Ratingverteilung Structured-Credit-Portfolio PRU | <b>177</b> | Abbildung 13, | Available Net Liquidity im kombinierten Stressszenario des internen Liquiditätsrisikomodells | <b>192</b> |
| Abbildung 7, | Ratingverteilung RMBS                            | <b>177</b> |               |                                                                                              |            |

## Tabellen

|             |                                                   |            |             |                                             |            |
|-------------|---------------------------------------------------|------------|-------------|---------------------------------------------|------------|
| Tabelle 1,  | Ergebnisrechnung Commerzbank-Konzern              | <b>82</b>  | Tabelle 14, | Sovereign-Exposures in ausgewählten Staaten | <b>175</b> |
| Tabelle 2,  | Kurzfassung Bilanz Commerzbank-Konzern            | <b>84</b>  | Tabelle 15, | Structured-Credit-Portfolio PRU             | <b>177</b> |
| Tabelle 3,  | Kennzahlen Privatkunden                           | <b>93</b>  | Tabelle 16, | Structured-Credit-Portfolio Non-PRU         | <b>179</b> |
| Tabelle 4,  | Kennzahlen Mittelstandsbank                       | <b>103</b> | Tabelle 17, | Originatorenpositionen: Verbriefungspool    | <b>180</b> |
| Tabelle 5,  | Kennzahlen Central & Eastern Europe               | <b>113</b> | Tabelle 18, | Direktes LAF-Portfolio nach Branchen        | <b>181</b> |
| Tabelle 6,  | Kennzahlen Corporates & Markets                   | <b>123</b> | Tabelle 19, | FI-/NBFI-Portfolio nach Regionen            | <b>182</b> |
| Tabelle 7,  | Kennzahlen Asset Based Finance                    | <b>131</b> | Tabelle 20, | Gesamtportfolio nach Regionen               | <b>182</b> |
| Tabelle 8,  | Mitarbeiterzahlen der Commerzbank – Kopffzahlen   | <b>144</b> | Tabelle 21, | Ratingverteilung Gesamtportfolio            | <b>182</b> |
| Tabelle 9,  | Mitarbeiterzahlen nach Segmenten – Vollzeitkräfte | <b>144</b> | Tabelle 22, | Teilportfolio Corporates nach Branchen      | <b>183</b> |
| Tabelle 10, | Reales Bruttoinlandsprodukt 2010–2012             | <b>151</b> | Tabelle 23, | Risikovorsorgeentwicklung auf Segmentebene  | <b>184</b> |
| Tabelle 11, | Wechselkurse 2010–2012                            | <b>152</b> | Tabelle 24, | Einzelrisikovorsorge nach Größenklassen     | <b>185</b> |
| Tabelle 12, | Risikotragfähigkeit Commerzbank-Konzern           | <b>167</b> | Tabelle 25, | Überziehungen im Weißbuch                   | <b>187</b> |
| Tabelle 13, | Kreditrisikokennzahlen nach Segmenten             | <b>170</b> | Tabelle 26, | VaR-Beitrag nach Risikoarten im Handelsbuch | <b>189</b> |
|             |                                                   |            | Tabelle 27, | OpRisk-Ereignisse nach Segmenten            | <b>194</b> |

## Herausgeber

Commerzbank AG  
Zentrale  
Kaiserplatz  
Frankfurt am Main  
www.commerzbank.de

Dieser Geschäftsbericht liegt auch  
in englischer Sprache vor.  
Beide Sprachfassungen sind im  
Internet abrufbar.

<http://geschaeftsbericht2010.commerzbank.de>  
<http://annualreport2010.commerzbank.com>

ISSN 0414-0443 | VKI 02040

## Konzept und Gestaltung

wirDesign Berlin Braunschweig

## Fotografie

Steve Allen/gettyimages (S. 122)  
Charlie Birchmore (S. 13)  
EuroChem (S. 112)  
Frankenbach Container Terminals  
GmbH (S. 102)  
Hassia Mineralquellen GmbH &  
Co. KG (S. 70)  
Claudia Kempf (S. 20; S. 28)  
Linde AG (S. 122)  
Christof Mattes (S. 5)  
Erich Mehr/ARCHIV MEHRL (U2)  
PixSync Pte Ltd., Singapore (S. 11)  
Niko Schmid-Burgk (S. 9)  
Julia Schwager (S. 6)  
Mark Trautmann (S. 4)  
Piet Truhlar (Titel, S. 3; S. 7; S. 12;  
S. 14; S. 15; S. 70; S. 92; S. 102;  
S. 112; S. 122; S. 130; S. 142)

## Titel

Dr. Jana Leidenfrost  
Diplom-Psychologin (oben)  
Commerzbank Filiale  
Frohsinnstraße 16  
63739 Aschaffenburg (unten)

## Druck und Verarbeitung

Kunst- und Werbedruck,  
Bad Oeynhausen

## Disclaimer

### Vorbehalt bei Zukunftsaussagen

Dieser Geschäftsbericht enthält zukunftsgerichte-  
tete Aussagen zur Geschäfts- und Ertragsent-  
wicklung der Commerzbank, die auf unseren  
derzeitigen Plänen, Einschätzungen, Prognosen  
und Erwartungen beruhen. Die Aussagen bein-  
halten Risiken und Unsicherheiten. Denn es  
gibt eine Vielzahl von Faktoren, die auf unser  
Geschäft einwirken und zu großen Teilen außer-  
halb unseres Einflussbereichs liegen. Dazu  
gehören vor allem die konjunkturelle Entwick-  
lung, die Verfassung der Finanzmärkte weltweit  
und mögliche Kreditausfälle. Die tatsächlichen  
Ergebnisse und Entwicklungen können also  
erheblich von unseren heute getroffenen  
Annahmen abweichen. Sie haben daher nur  
zum Zeitpunkt der Veröffentlichung Gültigkeit.  
Wir übernehmen keine Verpflichtung, die  
zukunftsgerichteten Aussagen angesichts neuer  
Informationen oder unerwarteter Ereignisse zu  
aktualisieren.

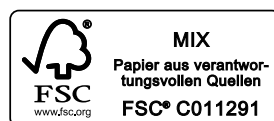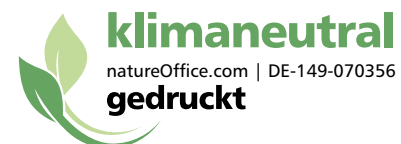

Dieser Geschäftsbericht wurde klimaneutral gestellt. Die durch die Produktion und Distribution verursachte Menge von 68 Tonnen CO<sub>2</sub>-Emissionen wurde durch Investitionen in Klimaschutzprojekte aus dem „myclimate International Portfolio“ kompensiert. Diese hochwertigen Gold-Standard-Klimaschutzmaßnahmen tragen zur weltweiten Reduktion von Treibhausgasemissionen bei und unterliegen der Kontrolle einer durch die Vereinten Nationen anerkannten Prüfungsstelle.

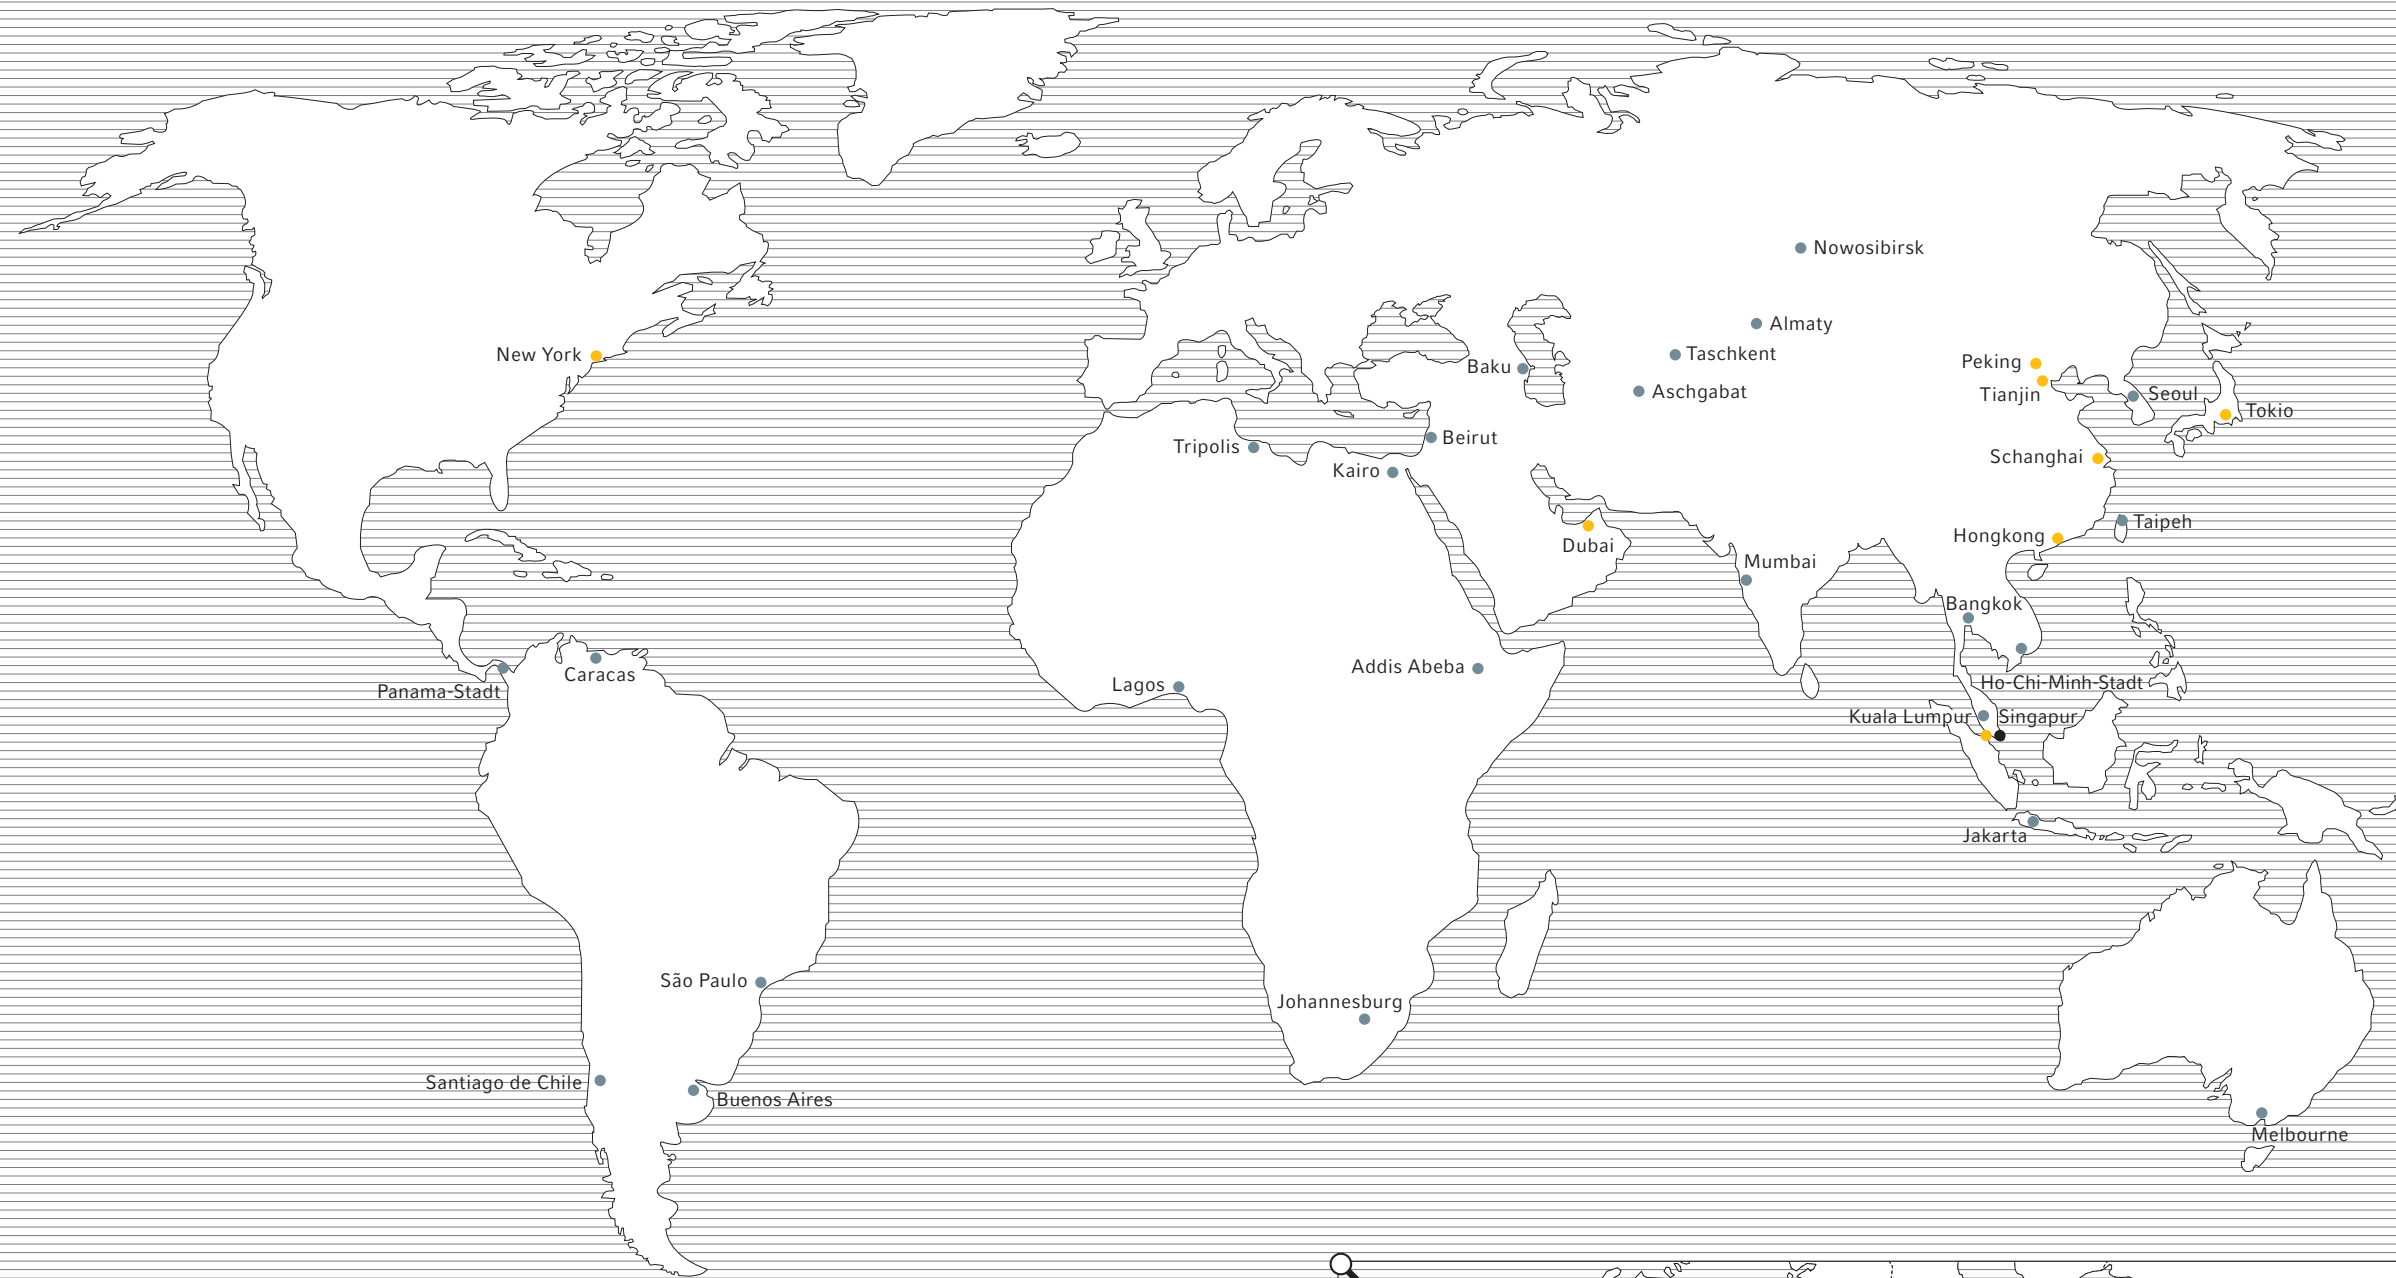

## Commerzbank weltweit

|                                                                  |        |
|------------------------------------------------------------------|--------|
| ● Operative Auslandsniederlassungen                              | 25     |
| ● Repräsentanzen                                                 | 32     |
| ● Konzerngesellschaften und wesentliche Beteiligungen im Ausland | 8      |
| Inlandsfilialen im Privatkundengeschäft                          | 1 535  |
| Mitarbeiter weltweit                                             | 59 101 |
| Mitarbeiter Ausland                                              | 13 800 |
| Mitarbeiter Inland                                               | 45 301 |

Stand 31.12.2010

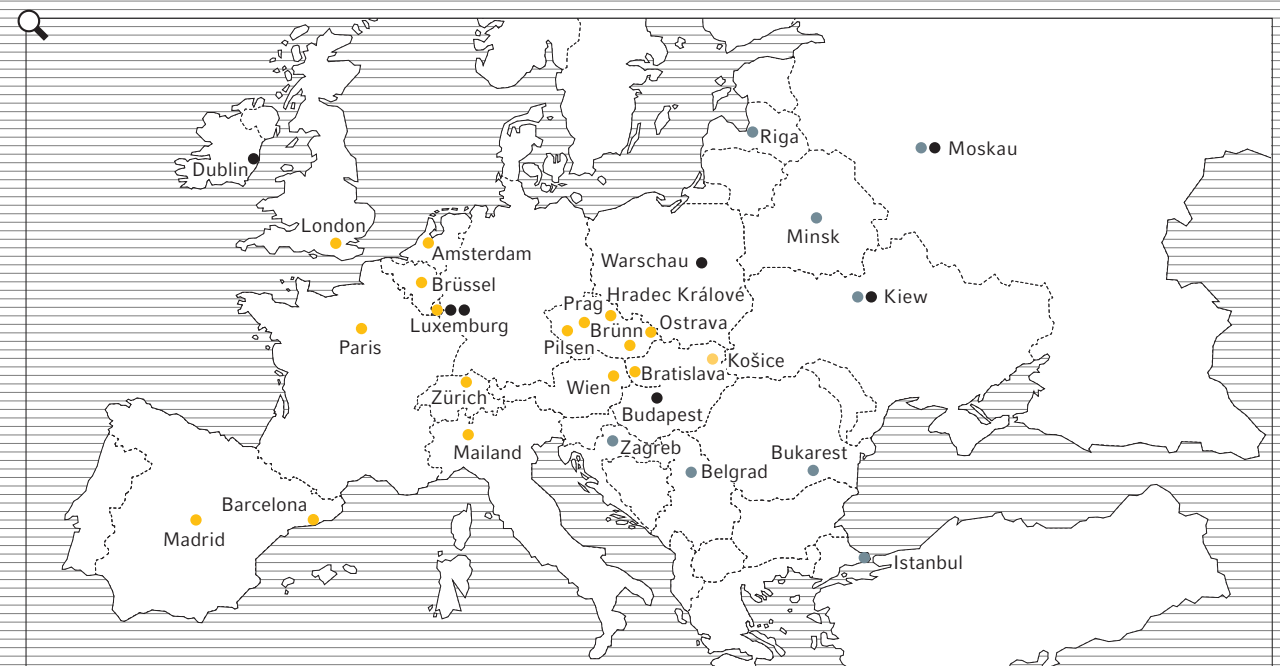

## Fünfjahresübersicht

| Gewinn- und Verlustrechnung   Mio €                               | 2010              | 2009 <sup>1</sup>             | 2008 <sup>1,2</sup>           | 2007 <sup>1</sup> | 2006 <sup>1</sup> |
|-------------------------------------------------------------------|-------------------|-------------------------------|-------------------------------|-------------------|-------------------|
| Zinsüberschuss                                                    | 7 054             | 7 174                         | 4 689                         | 3 971             | 3 847             |
| Risikovorsorge im Kreditgeschäft                                  | -2 499            | -4 214                        | -1 855                        | -479              | -878              |
| Provisionsüberschuss                                              | 3 647             | 3 773                         | 2 846                         | 3 150             | 2 927             |
| Handelsergebnis und Ergebnis aus Sicherungszusammenhängen         | 1 958             | -409                          | -454                          | 879               | 1 111             |
| Ergebnis aus Finanzanlagen                                        | 108               | 417                           | -665                          | 126               | 770               |
| Laufendes Ergebnis aus at-Equity-bewerteten Unternehmen           | 35                | 15                            | 40                            | 36                | 90                |
| Sonstiges Ergebnis                                                | -131              | -22                           | -27                           | 196               | -14               |
| Verwaltungsaufwendungen                                           | 8 786             | 9 004                         | 4 956                         | 5 366             | 5 204             |
| Operatives Ergebnis                                               | 1 386             | -2 270                        | -382                          | 2 513             | 2 649             |
| Wertminderungen auf Geschäfts- oder Firmenwerte sowie Markennamen | -                 | 768                           | -                             | -                 | -                 |
| Restrukturierungsaufwendungen                                     | 33                | 1 621                         | 25                            | 8                 | 253               |
| Ergebnis vor Steuern                                              | 1 353             | -4 659                        | -407                          | 2 505             | 2 396             |
| Steuern vom Einkommen und vom Ertrag                              | -136              | -26                           | -466                          | 580               | 595               |
| Konzernfremden Gesellschaftern zustehende Gewinne/Verluste        | 59                | -96                           | 59                            | 8                 | 197               |
| <b>Konzernergebnis<sup>3</sup></b>                                | <b>1 430</b>      | <b>-4 537</b>                 | <b>-</b>                      | <b>1 917</b>      | <b>1 604</b>      |
| <b>Kennzahlen</b>                                                 |                   |                               |                               |                   |                   |
| Ergebnis je Aktie (€)                                             | 1,21              | -4,40                         | 0,00                          | 2,92              | 2,44              |
| Dividendensumme (Mio €)                                           | -                 | -                             | -                             | 657               | 493               |
| Dividende je Aktie (€)                                            | -                 | -                             | -                             | 1,00              | 0,75              |
| Operative Eigenkapitalrendite (%)                                 | 4,5               | -8,0                          | -2,6                          | 18,7              | 21,8              |
| Eigenkapitalrendite auf das Konzernergebnis <sup>3,4</sup> (%)    | 4,7               | -16,5                         | 0,0                           | 15,4              | 14,2              |
| Aufwandsquote im operativen Geschäft (%)                          | 69,3              | 82,2                          | 77,1                          | 64,2              | 59,6              |
| <b>Bilanz   Mrd €</b>                                             |                   |                               |                               |                   |                   |
|                                                                   | <b>31.12.2010</b> | <b>31.12.2009<sup>1</sup></b> | <b>31.12.2008<sup>2</sup></b> | <b>31.12.2007</b> | <b>31.12.2006</b> |
| Bilanzsumme                                                       | 754,3             | 844,1                         | 625,2                         | 616,5             | 608,3             |
| Kreditvolumen                                                     | 330,3             | 368,4                         | 313,7                         | 316,6             | 316,4             |
| Verbindlichkeiten                                                 | 531,8             | 567,0                         | 464,5                         | 490,0             | 495,8             |
| Eigenkapital                                                      | 28,7              | 26,6                          | 19,8                          | 16,1              | 15,3              |
| <b>Kapitalquoten   %</b>                                          |                   |                               |                               |                   |                   |
| Kernkapitalquote                                                  | 11,9              | 10,5                          | 10,1                          | 6,9               | 6,7               |
| Eigenmittelquote                                                  | 15,3              | 14,8                          | 13,9                          | 10,8              | 11,1              |
| <b>Lang- / Kurzfrist-Ratings</b>                                  |                   |                               |                               |                   |                   |
| Moody's Investors Service, New York <sup>5</sup>                  | A2/P-1            | Aa3/P-1                       | Aa3/P-1                       | Aa3/P-1           | A2/P-1            |
| Standard & Poor's, New York                                       | A/A-1             | A/A-1                         | A/A-1                         | A/A-1             | A-/A-2            |
| Fitch Ratings, New York/London                                    | A+/F1+            | A+/F1+                        | A/F1                          | A/F1              | A/F1              |

<sup>1</sup> Anpassung aufgrund Vereinheitlichung der Ausweisstruktur, vergleiche Note 2.

<sup>2</sup> Nach Anpassung Counterparty Default Adjustments, vergleiche Note 2.

<sup>3</sup> Soweit den Commerzbank-Aktionären zurechenbar.

<sup>4</sup> Die Eigenkapitalbasis bildet das den Commerzbank-Aktionären zurechenbare durchschnittliche Konzernkapital ohne Berücksichtigung der durchschnittlichen Neubewertungsrücklage und der Rücklage aus Cash Flow Hedges.

<sup>5</sup> Ausweis enthält bereits die am 24. Februar 2011 vorgenommene Herabstufung im Langfrist-Rating.

#### Finanzkalender 2011/2012

|                  |                         |
|------------------|-------------------------|
| 4. Mai 2011      | Zwischenbericht Q1 2011 |
| 18. Mai 2011     | Hauptversammlung        |
| 10. August 2011  | Zwischenbericht Q2 2011 |
| 4. November 2011 | Zwischenbericht Q3 2011 |
| Ende März 2012   | Geschäftsbericht 2011   |

#### Commerzbank AG

Zentrale  
Kaiserplatz  
Frankfurt am Main  
[www.commerzbank.de](http://www.commerzbank.de)

Postanschrift  
60261 Frankfurt am Main  
Tel. +49 (0) 69 / 136-20  
[info@commerzbank.com](mailto:info@commerzbank.com)

Investor Relations  
Tel. +49 (0) 69 / 136-2 22 55  
Fax +49 (0) 69 / 136-2 94 92  
[ir@commerzbank.com](mailto:ir@commerzbank.com)
