# Supplementary material
Source: publisher site journal article supplement (https://www.degruyterbrill.com/publication/isbn/9783110432879/downloadAsset/9783110432879_Elektronischer_Anhang_2.zip)
Supplement: Supplementary file 27 [file Commerzbank Unternehmenswerte geben Halt.pdf › Korpustexte/Korpustexte pdf/Commerzbank/Commerzbank Unternehmenswerte geben Halt.pdf]

## MITARBEITERKOMMUNIKATION

# Unternehmenswerte geben Halt

Investitionen in weiche Faktoren stehen in schwierigen Zeiten oftmals als erstes zur Diskussion. Warum aber gerade jetzt Unternehmenswerte ein wichtiges „Asset“ sein können und welchen Mehrwert Mitarbeiterkommunikation dabei schaffen kann, zeigt das Beispiel ComWerte der Commerzbank. **Matthias Goldbeck | Melanie Loriz**

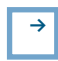

**Keywords:** Interne Kommunikation, Corporate Identity, Unternehmensführung

Es gibt kaum ein großes Unternehmen, das heutzutage kein Unternehmensleitbild, keine Unternehmenswerte vorweisen kann. Aber was muss geschehen, damit diese Werte nicht nur auf dem Papier bestehen, sondern tatsächlich gelebt werden? Für ComWerte, den

**„Für alle Mitarbeiter ist es wichtig, dass ComWerte kein kurzfristiges Thema oder gar eine Schönwetterbeschäftigung ist. Um eine werteorientierte Kultur auszubauen, muss sie nachhaltig im Alltag erlebt und gelebt werden.“**

2007 gestarteten Werteprozess der Commerzbank, wurden fünf zentrale Erfolgsfaktoren identifiziert.

### **Werteprozesse brauchen eine breite Partizipation der Mitarbeiter**

Wichtig war zunächst die Prämisse eines offenen und stark partizipativ ausgerichteten Prozesses, bei dem die Werte von allen Mitarbeitern gemeinsam ausgestaltet und umgesetzt werden. Zuvor waren Integrität, Respekt/Partnerschaftlichkeit, Marktorientierung, Leistung und Teamgeist vom Vorstand auf Basis der Unternehmenshistorie und der Stakeholder-Anforderungen als die fünf Werte der Commerzbank festgelegt worden.

Mit der Festlegung der Werte war es für den Vorstand im Rahmen des Werteprozesses allerdings nicht

getan. Seine Teilnahme und Visibilität am Prozess war und ist Voraussetzung für die Glaubwürdigkeit und damit ein weiterer Erfolgsfaktor für den Werteprozess.

Der dritte wesentliche Aspekt: Neben dem Vorstand tragen alle Führungskräfte des Unternehmens eine besondere Verantwortung für den Prozess. Sie sind natürliche Vorreiter und Vorbilder. Welcher Mitarbeiter kann in der Praxis langfristig und erfolgreich werteorientiert handeln, wenn ihn seine Führungskraft dabei nicht unterstützt?

Für alle Mitarbeiter ist es wichtig, dass ComWerte kein kurzfristiges Thema oder gar eine Schönwetterbeschäftigung ist. Um eine werteorientierte Kultur auszubauen, muss sie nachhaltig im Alltag erlebt und gelebt werden.

Als fünfter Erfolgsfaktor schließlich wurde eine breite Beteiligung der Mitarbeiter angestrebt – und erreicht. Das wäre allein mit dem Drucken und Verteilen von Hochglanzbroschüren nicht gelungen. Deshalb hat die Commerzbank den Schwerpunkt des Werteprozesses auf die persönliche Mitwirkung jedes einzelnen Mitarbeiters gelegt. In über 2.000 Workshops hatten alle Mitarbeiterinnen und Mitarbeiter der Commerzbank AG Inland die Gelegenheit, an einem ComWerte-Workshop teilzunehmen. Auch im Ausland und in Tochterunternehmen fanden bereits und finden noch immer Werte-Workshops statt. Diese Workshops sind das Herz der ersten Phase von ComWerte.

### **Partizipative Werteprozesse erfordern viel Organisationstalent**

An den ungefähr fünfstündigen ComWerte-Workshop nehmen jeweils eine Führungskraft und alle ihr direkt

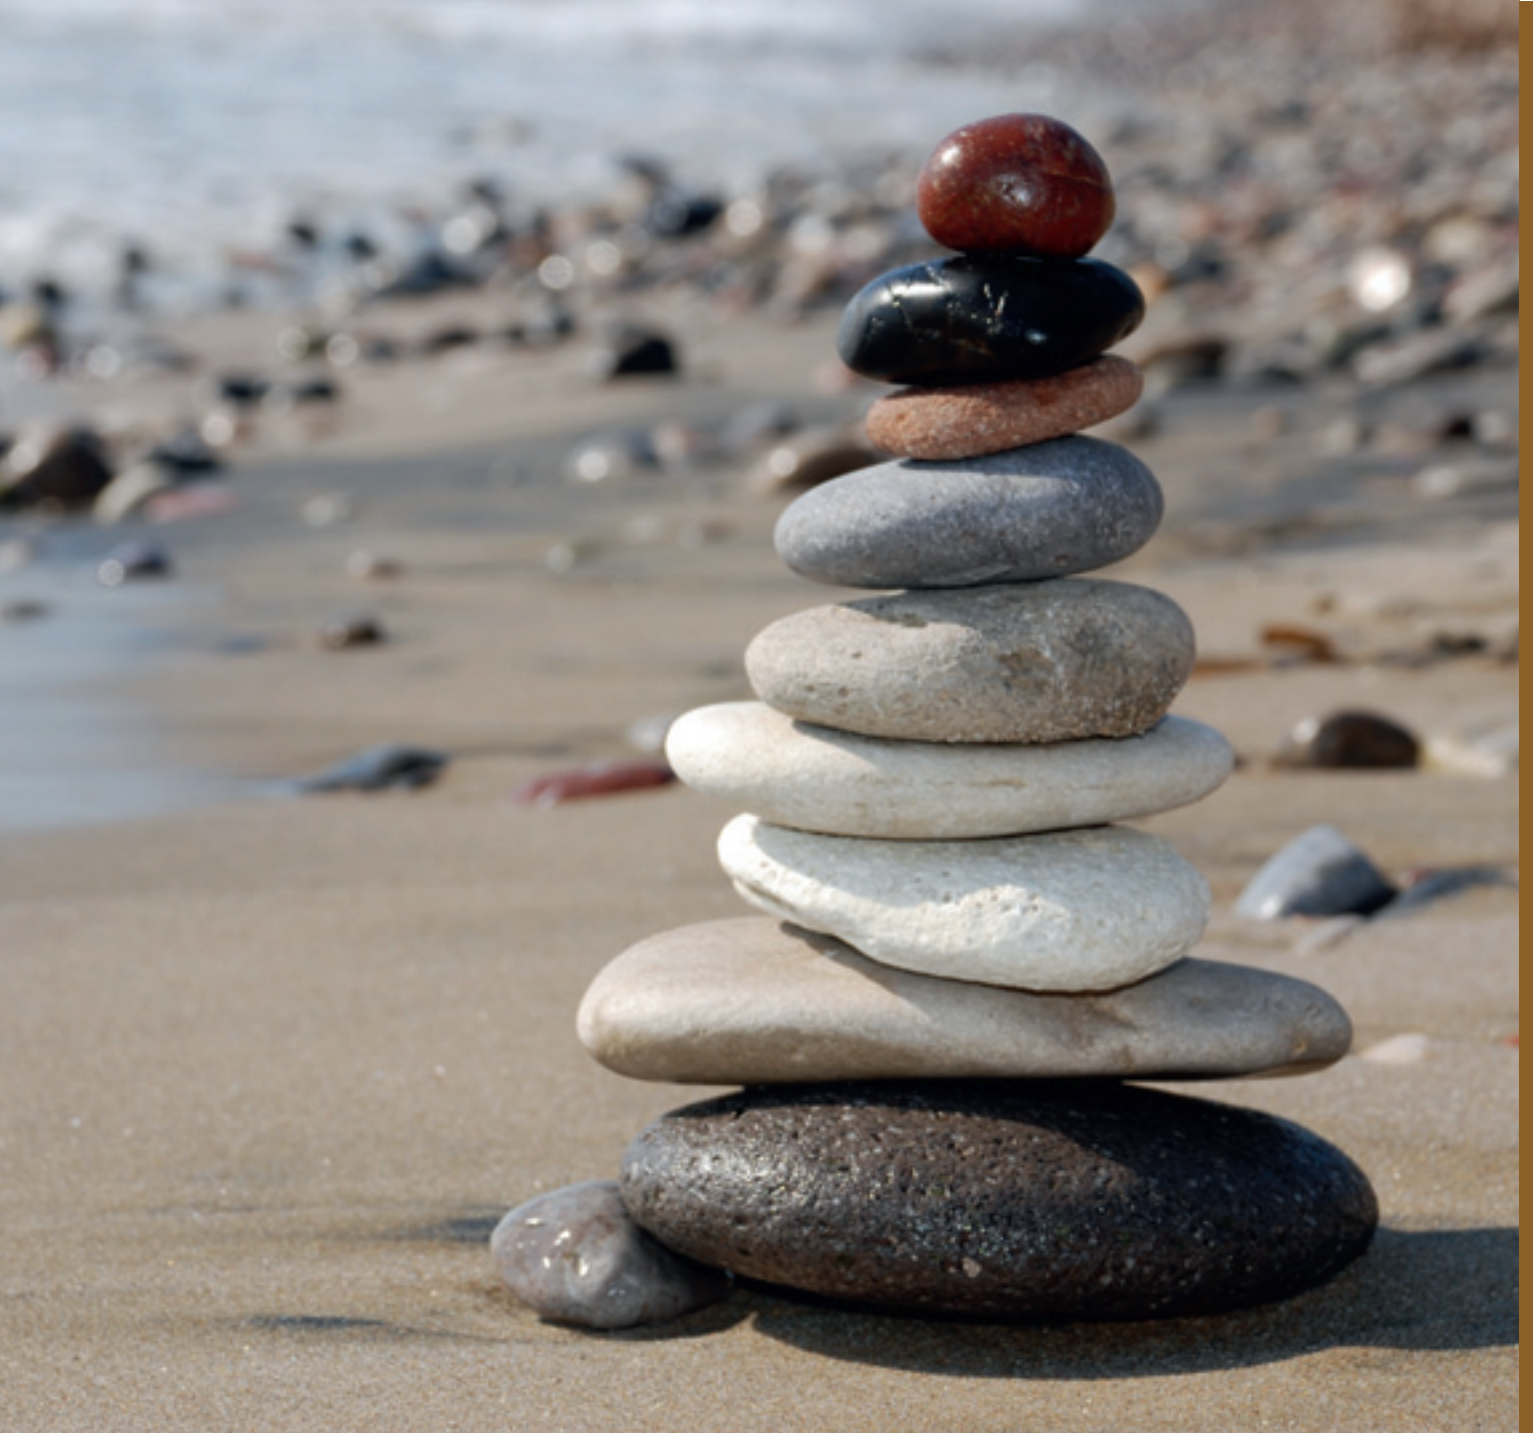

## WORKSHOP-KASKADE ▶ 1

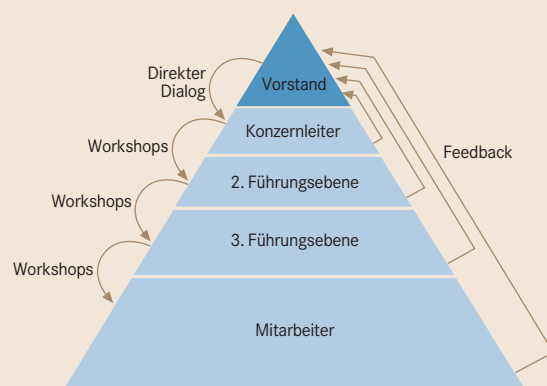

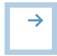

zugeordneten Mitarbeiter teil. Die Workshop-Kaskade verläuft von der Spitze des Unternehmens über alle Führungsebenen bis zu jedem Mitarbeiter ► **1.** Das bedeutet, dass jede Führungskraft an zwei Workshops teilnimmt. Zunächst am Workshop mit dem eigenen Vorgesetzten und den Kollegen im Führungsteam und dann mit seinen direkten Mitarbeitern.

Jedes Team definiert in den ComWerte-Workshops, was die Werte für das Team bedeuten, wie stark die einzelnen Werte bereits gelebt werden und welche Maßnahmen das Team selbst oder aber die gesamte

**„Der ComWerte-Film ist eine mutige und sehr authentische Produktion, die zur Diskussion anregen wollte. Von 1.200 befragten Kinogästen hat der Film 94 % gut oder sogar sehr gut gefallen.“**

Bank anstrengen muss, um einzelne Werte besser zu leben. Teilnehmer berichten, dass dieses Workshop-Format auch häufig genutzt wird, um Themen anzusprechen, die das Team beschäftigen, die aber im Arbeitsalltag nicht besprochen werden. Die Workshops waren oft Ventil und/ oder Katalysator für Gruppenprozesse. Denn fast jedes Problem lässt sich anhand eines der fünf Werte diskutieren. Die interne Kommunikation hat diesen Wandel vorbereitet, mit regelmäßigen Impulsen eng begleitet und schließlich filmisch dokumentiert und sichtbar gemacht.

Um eine einheitlich hohe Qualität der Workshops zu gewährleisten, und die Führungskräfte nicht in die Doppelrolle Moderator und Workshopteilnehmer zu bringen, wurde jeder Workshop von einem geschulten Moderator begleitet. Dazu wurden rund 80 Moderatoren ausgewählt, davon waren circa ein Viertel Commerzbank-interne Trainer. Über eine interne Anlaufstelle wurden die Moderatorenanfragen und das Moderationsangebot koordiniert.

Wenn über 2.000 Workshops innerhalb kurzer Zeit kaskadenförmig in einer Organisation ablaufen, stellt das die prozessbegleitende Kommunikation vor die Herausforderung, diese mangelnde Gleichzeitigkeit des Prozesses zu bewältigen. Bei jeder Kommunikationsmaßnahme muss berücksichtigt werden, dass ein Teil der Adressaten bereits an einem Workshop teilnehmen konnte und damit andere Kommunikations- und Informationsbedürfnisse hat als die Kollegen, deren Workshop noch bevorsteht.

## **Die Mitarbeiterkommunikation zu ComWerte baut schrittweise Verständnis und Empathie auf**

Der ComWerte-Kommunikationsprozess verlief zunächst in drei Schritten. Bevor das Gros der Mitarbeiter einen ComWerte-Workshop durchlief, wurde die Relevanz des Prozesses hervorgehoben. Während der Zeit, in der die meisten Mitarbeiter an Workshops teilnahmen stand der individuelle Bezug jedes Einzelnen zu ComWerte im Vordergrund. Bereits hier sollte das Thema emotionalisiert werden, was dann im dritten Schritt noch verstärkt wurde durch das gemeinsame Erleben von ComWerte.

Für den Einstieg in die Kommunikation wurde ein leiser, an die Ratio appellierender Ton gewählt. Die Zielgruppe war zunächst recht homogen, da der Großteil der Mitarbeiter noch keinen Werte-Workshop besucht hatte. Es ging zunächst darum zu vermitteln, weshalb Werte für ein Unternehmen wichtig sind, und dass der Vorstand hinter dem Werteprozess steht. Dazu wurde unter anderem eine persönliche Videobotschaft des damaligen Sprechers des Vorstands, Klaus-Peter Müller, eingesetzt.

In einem nächsten Schritt war es wichtig, für jeden Mitarbeiter einen individuellen Bezug zu ComWerte herzustellen. Recherchiert man die Werte verschiedener Unternehmen fällt schnell auf, dass diese oft ähnlich sind. Allgemeinplätze wie „Teamgeist“ führen dazu, dass diese beliebig und austauschbar wirken. Dabei werden Werteprojekte meist auch ins Leben gerufen, um zu zeigen, wie positiv sich die eigene Kultur vom Wettbewerb unterscheidet.

Während die ersten Workshops stattfanden, haben mehrere tausend Plakate in Filialen und Zentralen die Commerzbanker angeregt, sich mit dem Thema „Werte“ auseinanderzusetzen. Ein Plakat fragt zum Beispiel vor einer Konferenzraumszene „Wann wird aus Reden Handeln?“ Diese Plakatkampagne bestand aus insgesamt drei Motiven und hatte zunächst schlicht ein Ziel: jeden Mitarbeiter zum Nachdenken zu bringen und zur Auseinandersetzung mit Frage, Bild und Werteprozess einzuladen ► **2.**

Besonders in weichen und schwer fassbaren Prozessen – wie es Werteprozesse sind – ist es wichtig, auf Erreichtes hinzuweisen und darauf aufzubauen. Eine Sonderausgabe der Mitarbeiterzeitschrift zeigte Ende 2007 erste Erfolge von ComWerte. Neben Best-Practice-Beispielen und Initiativen in Tochterunternehmen diskutierten drei Mitarbeiter mit dem Sprecher des Vorstands über bereits Erreichtes und stell-

ten auch heikle Fragen: „Wie verträgt sich Wertschätzung mit Outsourcing?“ Und sie haben eine Antwort bekommen.

Die Akzeptanz von Werten steht und fällt mit der Fähigkeit, auch auf schwierige Fragen Antworten zu geben. Werte schließen nicht aus, wirtschaftlich notwendige Entscheidungen zu treffen. Auch wenn sie für den Einzelnen unangenehme Folgen haben können – Beispiel Outsourcing. Gemeinsame Werte können allerdings eine große Hilfe sein, wenn es darum geht, wie mit solchen schwierigen Situationen umgegangen wird. Ein offener und ehrlicher, respektvoller und partnerschaftlicher Umgang macht solch eine Situation für alle Beteiligten einfacher.

### Gemeinsamkeit erlebbar machen

Mitte 2008 wurden für eine zweite Plakatkampagne fünf Mitarbeiter der Bank fotografiert, die jeweils ein – teilweise provokatives – Statement zu einem der fünf Werte geben ► 3. „Ich finde für meine Kunden die richtige Antwort. Durch zuhören.“ Oder: „Von meiner Leistung profitiert das Team. Aber ich auch.“ Besonders die zweite Plakatkampagne hat viele Mit-

arbeiter angesprochen. Vor allem die Filialmitarbeiter spürten, dass es nicht nur den ComWerte-Workshop in der eigenen Filiale gibt, sondern dass sich Kollegen von Konstanz bis Hamburg mit den Unternehmenswerten beschäftigen.

Ein Filialleiter sagte zum Beispiel: „Es hilft uns zu wissen, dass wir mit den ComWerten jetzt etwas haben, auf das wir uns im Konzern beziehen können.“ Die Bedeutung von ComWerte als Referenzsystem ist vor allem zum Ende der Workshopkaskade an vielen Stellen in der Bank spürbar geworden. Wenn man in Diskussionen einmal nicht einer Meinung war, wurden die Werte als Argument verwendet. An Stelle von „Damit fühle ich mich nicht wohl“, trat zum Beispiel „Wie passt das mit unserem Wert Integrität zusammen?“

Bis Mitte September 2008 hatte der Werteprozess die meisten Mitarbeiter erreicht – und auch kommunikativ abgeholt. 84 % der Mitarbeiter, die bis dahin an einem ComWerte-Workshop teilgenommen hatten, fühlten sich laut einer Mitarbeiterbefragung von TNS Infratest „gut“ oder „sehr gut“ informiert über den ComWerte-Prozess.

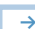

### Plakatkampagne zum Thema „Werte“

► 2

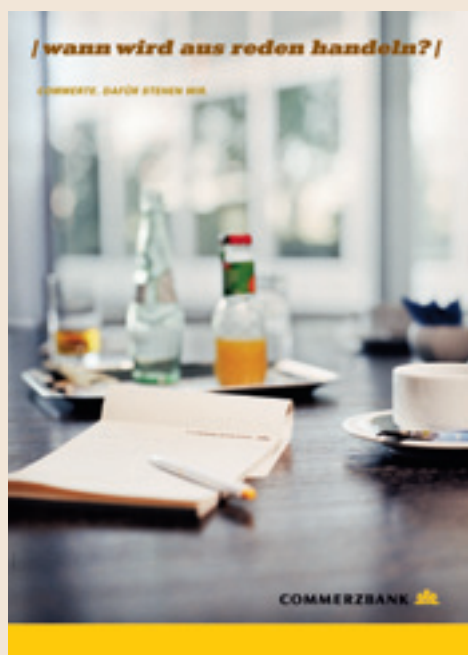

### Plakatkampagne: Mitarbeiterstatements zu ComWerte

► 3

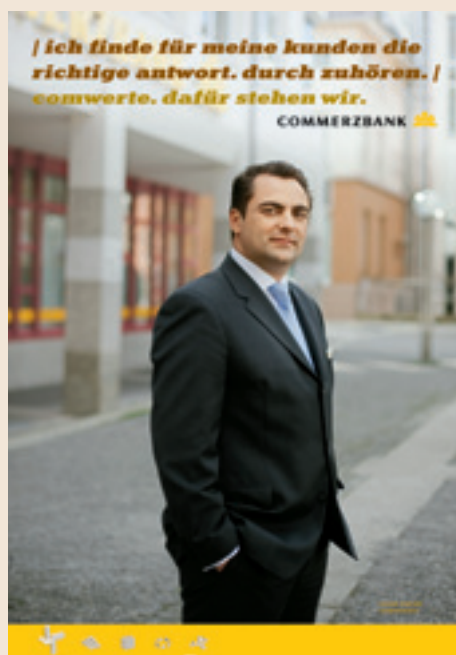



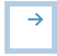

Nach der persönlichen Auseinandersetzung mit den Werten sollte in einem nächsten Schritt erlebbar werden, wie emotional ComWerte ist und gezeigt werden, dass der Prozess viele Menschen in der Bank bewegt. Mit „Wofür wir stehen. ComWerte – der Film“ wurde genau dies erreicht und zusätzlich ein Rückblick gewagt.

#### ComWerte-Film – Dokumentation und Meilenstein

Von Sommer 2007 bis Herbst 2008 wurden mehrere Teams bei ihrem ComWerte-Workshop durch ein Filmteam begleitet. In heißen Diskussionen biss man sich oft an speziell einem Wert fest. Die Teams nahmen sich im Anschluss einen Tag Zeit, um genau zu „ihrem“ Wert einen kleinen Film zu drehen. Die Idee und das

**„84 % der Workshop-Teilnehmer fühlten sich gut oder sehr gut informiert über den ComWerte-Prozess.“**

Drehbuch wurden spontan am Morgen zusammen mit einem professionellen Filmemacher entwickelt – die Commerzbanker spielten, filmten, schnitten und vertonten ihren persönlichen Spot noch am selben Tag.

Das Resultat waren circa vier Minuten lange Clips, die sich sehen lassen können. Besonders lebendig waren die Diskussionen während die Idee in ein Drehbuch umgesetzt wurde – und auch dieser Teil wurde von Kameras festgehalten.

Um Werte zu leben, braucht es sicherlich keinen Film. Das war auch nicht das Ziel von „Wofür wir stehen. ComWerte – der Film.“ Er sollte vielmehr zeigen, mit wie viel Engagement und Kreativität die Kollegen – von Flensburg bis Garmisch-Partenkirchen – dieses komplexe Thema angenommen und weiterentwickelt haben. Der Film dokumentiert, was in der Commerzbank bereits alles erreicht wurde. Er soll aber auch neue Impulse für den eigenen Bereich geben und motivieren, ComWerte auch in der Zukunft weiter umzusetzen.

Der Film zeigt die Realität. In manchen Teams ist ComWerte sehr harmonisch diskutiert worden, in anderen gab es Konflikte; mal ist das bisherige Handeln in den Teams durch die Workshops bestätigt worden, mal sind neue Aspekte hervorgetreten und Verbesserungsbedarf sichtbar geworden. Der Film markiert keinen Endpunkt im ComWerte-Prozess, sondern einen Meilenstein. Mit dem Rückblick auf die Startphase des ComWerte-Prozesses bildet er den Auftakt für die kommende Phase – das gemeinsame

Leben der Werte in der gesamten Bank, über Team- und Standortgrenzen hinweg.

Als Ergebnis aus mehreren tausend Minuten Film entstand ein 90-minütiger Kinostreifen, der den Mitarbeitern am 4. Februar 2009 in einer Premierenvorstellung in Kinos an 26 Standorten deutschlandweit gezeigt wurde. „Wofür wir stehen. ComWerte – der Film“ ist eine mutige und sehr authentische Produktion, die zur Diskussion anregen wollte. Von 1.200 befragten Kinogästen hat der Film 94 % gut oder sogar sehr gut gefallen.

Der Film war entstanden in einer Zeit, als die Übernahme der Dresdner Bank noch Zukunftsmusik war. Dass der Film vielen Dresdner Bankern einen wertvollen Einblick in die Kultur der Commerzbank gegeben hat, zeigen Kommentare wie: „Dem Miteinander der Kollegen so viel Raum einzuräumen macht mir als Dresdner Banker Mut und weckt Neugier.“

In der nächsten Phase von ComWerte wird es für die Bank wichtig sein, ComWerte noch stärker in die Organisation und besonders an die Führungskräfte zu übergeben. Dies schafft die beste Voraussetzung für Nachhaltigkeit im Werteprozess.

#### In herausfordernden Zeiten braucht es Stabilität und Verlässlichkeit

Mit der vollständigen Übernahme der Dresdner Bank im Januar 2009 ist die Commerzbank die führende Privat- und Firmenkundenbank in Deutschland. Zurzeit meistert sie neben den schwierigen Marktbedingungen die größte deutsche Bankenintegration. Ein Umfeld, in dem keine Zeit mehr bleibt, einen Werteprozess voran zu treiben? Nein.

In Wachstumsphasen und auch in schwierigen Zeiten profitiert eine Organisation von einem Wertegerüst. Es sorgt für Stabilität und Verlässlichkeit, worauf die Commerzbank bei der Integration der Dresdner Bank bauen kann. Werte sind gerade in Integrationsprozessen von zentraler Bedeutung. Wenn sich etwas verändert, hilft es, ein solides Fundament, ein Referenzsystem, zu haben, das Bestand hat und auf das aufgesetzt werden kann. Deshalb wird auch der Integrationsprozess sehr eng mit den Werten der Commerzbank verbunden sein. ▣

**Autoren:** Matthias Goldbeck ist Leiter der Internen Konzernkommunikation der Commerzbank und leitet das ComWerte-Teilprojekt Kommunikation. Melanie Loriz hat als Spezialistin für Projekt- und Führungskräftekommunikation maßgeblich an der Kommunikation von ComWerte gearbeitet, bevor sie in die Pressestelle der Commerzbank wechselte.
