# Supplementary material
Source: publisher site journal article supplement (https://www.degruyterbrill.com/publication/isbn/9783110432879/downloadAsset/9783110432879_Elektronischer_Anhang_2.zip)
Supplement: Supplementary file 28 [file Daimler Daimler hat das Automobil erfunden.pdf › Korpustexte/Korpustexte pdf/Daimler/Daimler Daimler hat das Automobil erfunden.pdf]

## **Daimler hat das Automobil erfunden -**

Und gestaltet mit Leidenschaft seine Zukunft. Der Kern der Unternehmensidentität ist und bleibt die Tradition als Pionier des Automobils. Auf dieses Erbe, das Daimler von allen Wettbewerbern unterscheidet, gründen sich die Innovationskraft des Unternehmens und sein Qualitätsanspruch.

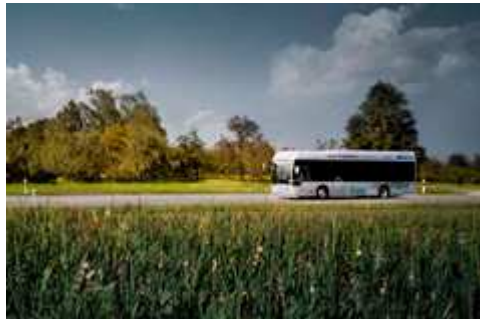

Heute ist die Daimler AG ein führender Anbieter von Premium-Pkw und der weltweit größte Hersteller von Nutzfahrzeugen. Die Angebotspalette des Unternehmens reicht vom CO<sub>2</sub>-Champion smart bis zu wirtschaftlichen Schwer-Lkw und Bussen. Maßgeschneiderte Finanz- und Serviceleistungen kommen hinzu. Die Produkte von Daimler sind weltweit gefragt; in nahezu allen Ländern ist das Unternehmen aktiv, in 19 hat Daimler eigene Fertigungsstätten.

Daimler hat das Automobil erfunden - jetzt schreibt das Unternehmen das nächste Kapitel seiner Erfolgsgeschichte:

- mit alternativen Antrieben,
- mit starken Marken, die bei Menschen in aller Welt begehrt sind,
- mit Produkten, deren Qualität Maßstäbe setzt,
- mit Technologien, die Leidenschaft, Sicherheit und Umweltfreundlichkeit unter einen Hut bringen,
- und mit Servicelösungen, die unseren Kunden größtmöglichen Nutzen bieten.

Daimler will der Motor für nachhaltige Mobilität sein - mit zukunftsweisenden Lösungen für emissions- und unfallfreies Fahren.

Was immer die weltweit mehr als 260.000 Mitarbeiterinnen und Mitarbeiter des Unternehmens tun, sie verbindet ein gemeinsames Ziel: Spitzenleistung. Dieser Anspruch steckt Daimler gewissermaßen „in den Genen“. Und er bezieht sich nicht allein auf die Herstellung von herausragenden Pkw und Nutzfahrzeugen: Wo immer Mitarbeiterinnen und Mitarbeiter von Daimler leben und arbeiten, stellen sie sich ihrer gesellschaftlichen Verantwortung.

Unsere Philosophie ist klar: Wir geben unser Bestes für Kunden, die das Beste erwarten, und wir leben eine Kultur der Spitzenleistung, die auf gemeinsamen Werten basiert. Unsere Unternehmensgeschichte ist geprägt von Innovationen - sie sind Grundlage und Ansporn für unseren Führungsanspruch im Automobilbau.

<http://designnavigator.daimler.com/index.php?id=1416&lang=de>
