# Supplementary material
Source: publisher site journal article supplement (https://www.degruyterbrill.com/publication/isbn/9783110432879/downloadAsset/9783110432879_Elektronischer_Anhang_2.zip)
Supplement: Supplementary file 30 [file Daimler Das Unternehmen Daimler AG.pdf › Korpustexte/Korpustexte pdf/Daimler/Daimler Das Unternehmen Daimler AG.pdf]

## Das Unternehmen Daimler AG

Innovation aus Tradition. Als Pioniere des Automobilbaus betrachten wir es als Ansporn und Verpflichtung, unsere Tradition mit wegweisenden Technologien und hochwertigen Produkten fortzusetzen.

Die Daimler AG ist eines der erfolgreichsten Automobilunternehmen der Welt. Mit den Geschäftsfeldern Mercedes-Benz Cars, Daimler Trucks, Mercedes-Benz Vans, Daimler Buses und Daimler Financial Services gehört der Fahrzeughersteller zu den größten Anbietern von Premium-Pkw und ist der größte weltweit aufgestellte Nutzfahrzeug-Hersteller. Daimler Financial Services bietet ein umfassendes Finanzdienstleistungsangebot mit Finanzierung, Leasing, Versicherungen und Flottenmanagement.

Die Firmengründer Gottlieb Daimler und Carl Benz haben mit der Erfindung des Automobils im Jahr 1886 Geschichte geschrieben. Als Pionier des Automobilbaus gestaltet Daimler auch heute, 125 Jahre später, die Zukunft der Mobilität: Das Unternehmen setzt dabei auf innovative und grüne Technologien sowie auf sichere und hochwertige Fahrzeuge, die ihre Kunden faszinieren und begeistern.

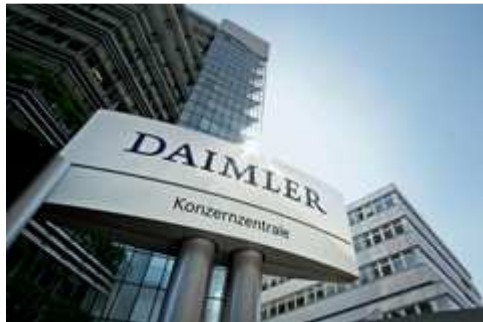

Daimler investiert bei der Entwicklung alternativer Antriebe als einziger Automobilhersteller sowohl in den Hybrid-, als auch in den Elektromotor und in die Brennstoffzelle mit dem Ziel, langfristig das emissionsfreie Fahren zu ermöglichen. Denn Daimler betrachtet es als Anspruch und Verpflichtung, seiner Verantwortung für Gesellschaft und Umwelt gerecht zu werden.

Daimler vertreibt seine Fahrzeuge und Dienstleistungen in nahezu allen Ländern der Welt und hat Produktionsstätten auf fünf Kontinenten. Zum heutigen Markenportfolio zählen neben Mercedes-Benz, der wertvollsten Automobilmarke der Welt, die Marken smart, Maybach, Freightliner, Western Star, BharatBenz, Fuso, Setra, Orion und Thomas Built Buses.

Das Unternehmen ist an den Börsen Frankfurt und Stuttgart notiert (Börsenkürzel DAI). Im Jahr 2010 setzte der Konzern mit mehr als 260.000 Mitarbeitern 1,9 Mio. Fahrzeuge ab. Der Umsatz lag bei 97,8 Mrd. €, das EBIT betrug 7,3 Mrd. €.

<http://designnavigator.daimler.com/index.php?id=1031&lang=de>
