# Supplementary material
Source: publisher site journal article supplement (https://www.degruyterbrill.com/publication/isbn/9783110432879/downloadAsset/9783110432879_Elektronischer_Anhang_2.zip)
Supplement: Supplementary file 31 [file Daimler GB 2010.pdf › Korpustexte/Korpustexte pdf/Daimler/Daimler GB 2010.pdf]

# DAIMLER

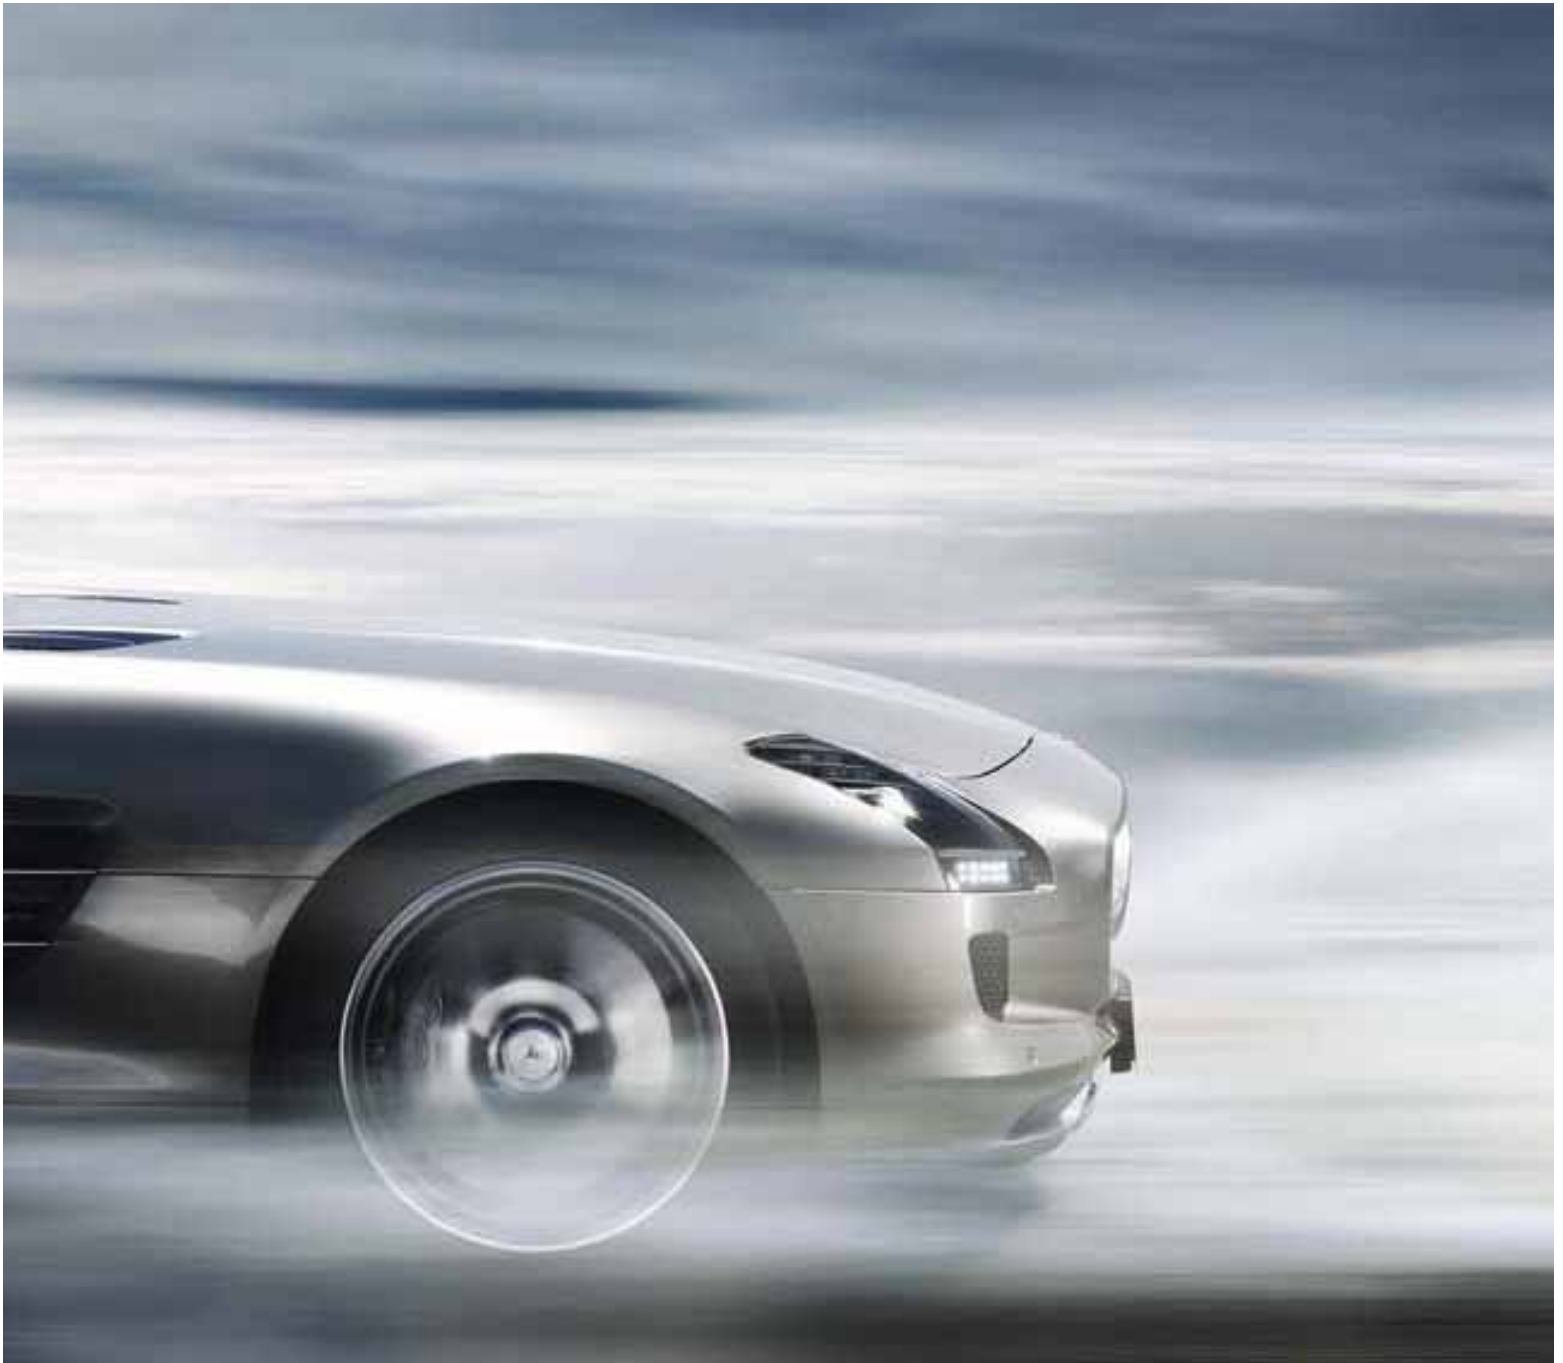

Innovation aus Tradition. [Geschäftsbericht 2010.](#)

# Wichtige Kennzahlen

| Daimler-Konzern                                    |         |         |         |                  |
|----------------------------------------------------|---------|---------|---------|------------------|
|                                                    | 2010    | 2009    | 2008    | 10/09            |
| €-Werte in Millionen                               |         |         |         | Veränd. in %     |
| Umsatz                                             | 97.761  | 78.924  | 98.469  | +24 <sup>1</sup> |
| Westeuropa                                         | 38.478  | 36.458  | 46.276  | +6               |
| davon Deutschland                                  | 19.281  | 18.788  | 21.832  | +3               |
| NAFTA                                              | 23.582  | 19.380  | 23.243  | +22              |
| davon USA                                          | 20.216  | 16.569  | 19.956  | +22              |
| Asien                                              | 19.659  | 12.435  | 13.840  | +58              |
| davon China                                        | 9.094   | 4.349   | 3.226   | +109             |
| Übrige Märkte                                      | 16.042  | 10.651  | 15.110  | +51              |
| Beschäftigte (31.12.)                              | 260.100 | 256.407 | 273.216 | +1               |
| Sachinvestitionen                                  | 3.653   | 2.423   | 3.559   | +51              |
| Forschungs- und Entwicklungsleistungen             | 4.849   | 4.181   | 4.442   | +16              |
| davon aktiviert                                    | 1.373   | 1.285   | 1.387   | +7               |
| Cash Flow aus der Geschäftstätigkeit               | 8.544   | 10.961  | -786    | -22              |
| EBIT                                               | 7.274   | -1.513  | 2.730   | .                |
| Wertbeitrag (Value Added)                          |         |         |         |                  |
| (einschließlich aufgegebene Aktivitäten)           | 2.773   | -4.644  | -1.147  | .                |
| Konzernergebnis                                    | 4.674   | -2.644  | 1.414   | .                |
| Konzernergebnis aus fortgeführten Aktivitäten      | 4.674   | -2.644  | 1.704   | .                |
| Ergebnis je Aktie (in €)                           | 4,28    | -2,63   | 1,41    | .                |
| Ergebnis je Aktie, fortgeführte Aktivitäten (in €) | 4,28    | -2,63   | 1,71    | .                |
| Dividendensumme                                    | 1.971   | 0       | 556     | .                |
| Dividende je Aktie (in €)                          | 1,85    | 0,00    | 0,60    | .                |

1 Bereinigt um Wechselkurseffekte und Konsolidierungskreisveränderungen Umsatzanstieg um 19%.

|                                        | 2010      | 2009      | 2008      | 10/09        |
|----------------------------------------|-----------|-----------|-----------|--------------|
| €-Werte in Millionen                   |           |           |           | Veränd. in % |
| <b>Mercedes-Benz Cars</b>              |           |           |           |              |
| EBIT                                   | 4.656     | -500      | 2.117     | .            |
| Umsatz                                 | 53.426    | 41.318    | 47.772    | +29          |
| Umsatzrendite                          | 8,7%      | -1,2%     | 4,4%      | .            |
| Sachinvestitionen                      | 2.457     | 1.618     | 2.246     | +52          |
| Forschungs- und Entwicklungsleistungen | 3.130     | 2.696     | 2.994     | +16          |
| davon aktiviert                        | 940       | 913       | 1.060     | +3           |
| Absatz (Einheiten)                     | 1.276.827 | 1.093.905 | 1.273.013 | +17          |
| Beschäftigte (31.12.)                  | 96.281    | 93.572    | 97.303    | +3           |
| <b>Daimler Trucks</b>                  |           |           |           |              |
| EBIT                                   | 1.323     | -1.001    | 1.607     | .            |
| Umsatz                                 | 24.024    | 18.360    | 28.572    | +31          |
| Umsatzrendite                          | 5,5%      | -5,5%     | 5,6%      | .            |
| Sachinvestitionen                      | 1.003     | 597       | 991       | +68          |
| Forschungs- und Entwicklungsleistungen | 1.282     | 1.116     | 1.056     | +15          |
| davon aktiviert                        | 373       | 368       | 326       | +1           |
| Absatz (Einheiten)                     | 355.263   | 259.328   | 472.074   | +37          |
| Beschäftigte (31.12.)                  | 71.706    | 70.699    | 79.415    | +1           |
| <b>Mercedes-Benz Vans</b>              |           |           |           |              |
| EBIT                                   | 451       | 26        | 818       | .            |
| Umsatz                                 | 7.812     | 6.215     | 9.479     | +26          |
| Umsatzrendite                          | 5,8%      | 0,4%      | 8,6%      | .            |
| Sachinvestitionen                      | 91        | 113       | 150       | -19          |
| Forschungs- und Entwicklungsleistungen | 267       | 193       | 228       | +38          |
| davon aktiviert                        | 29        | 0         | 0         | .            |
| Absatz (Einheiten)                     | 224.224   | 165.576   | 287.198   | +35          |
| Beschäftigte (31.12.)                  | 14.557    | 15.226    | 16.775    | -4           |
| <b>Daimler Buses</b>                   |           |           |           |              |
| EBIT                                   | 215       | 183       | 406       | +17          |
| Umsatz                                 | 4.558     | 4.238     | 4.808     | +8           |
| Umsatzrendite                          | 4,7%      | 4,3%      | 8,4%      | .            |
| Sachinvestitionen                      | 95        | 78        | 117       | +22          |
| Forschungs- und Entwicklungsleistungen | 223       | 212       | 178       | +5           |
| davon aktiviert                        | 31        | 5         | 1         | +520         |
| Absatz (Einheiten)                     | 39.118    | 32.482    | 40.591    | +20          |
| Beschäftigte (31.12.)                  | 17.134    | 17.188    | 18.110    | -0           |
| <b>Daimler Financial Services</b>      |           |           |           |              |
| EBIT                                   | 831       | 9         | 677       | .            |
| Umsatz                                 | 12.788    | 11.996    | 11.964    | +7           |
| Neugeschäft                            | 29.267    | 25.066    | 29.514    | +17          |
| Vertragsvolumen                        | 63.725    | 58.350    | 63.353    | +9           |
| Sachinvestitionen                      | 12        | 14        | 41        | -14          |
| Beschäftigte (31.12.)                  | 6.742     | 6.800     | 7.116     | -1           |

# Daimler Marken

Mercedes-Benz Cars

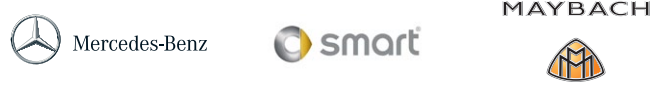

Daimler Trucks

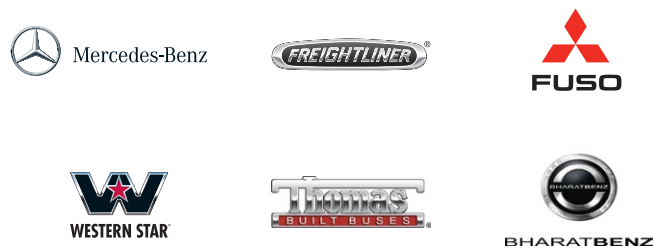

Mercedes-Benz Vans

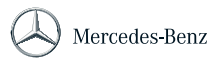

Daimler Buses

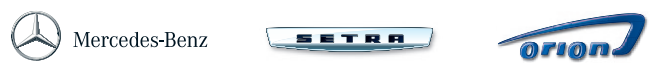

Daimler Financial Services

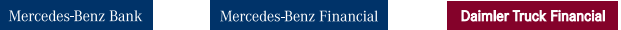

# 125! Jahre Erfinder des Automobils

**Innovation aus Tradition.** Vor 125 Jahren haben Gottlieb Daimler und Carl Benz das Automobil erfunden – jetzt gestalten wir mit Leidenschaft seine Zukunft:

Als Pioniere des Automobilbaus betrachten wir es als Ansporn und Verpflichtung, unsere Tradition mit wegweisenden Technologien und hochwertigen Produkten fortzusetzen.

Wir geben unser Bestes für Kunden, die das Beste erwarten, und wir leben eine Kultur der Spitzenleistung, die auf gemeinsamen Werten basiert. Unsere Unternehmensgeschichte ist geprägt von Innovationen und Pionierleistungen; sie sind Grundlage und Ansporn für unseren Führungsanspruch im Automobilbau.

Der Grundsatz nachhaltiger Mobilität leitet unser Denken und Handeln: Es ist unser Ziel, die Mobilität der Zukunft erfolgreich zu gestalten. Damit wollen wir dauerhaft Werte schaffen – für unsere Aktionäre, Kunden, Mitarbeiter und die Gesellschaft insgesamt.



Dieter Zetsche



Wolfgang Bernhard



Christine Hohmann-Dennhardt



Wilfried Porth



Andreas Renschler



Bodo Uebber



Thomas Weber

Innovationen ganz nah. Schon seit jeher beginnen Pionierleistungen bei Daimler mit der Liebe zum Detail. Das hat bei Daimler Tradition – und das nun schon seit 125 Jahren. Auf den Seiten 26 bis 59 stellen wir das Thema Innovation deshalb aus einer neuen Perspektive dar. Aktuelle Pionierleistungen können Sie dort ganz nah erleben.

# Inhaltsverzeichnis

## 2 - 25 An unsere Aktionäre

- 4 Wichtige Ereignisse 2010
- 8 Brief des Vorstandsvorsitzenden
- 12 Der Vorstand
- 14 Bericht des Aufsichtsrats
- 20 Der Aufsichtsrat
- 22 Die Daimler-Aktie

## 26 - 59 Innovationen ganz nah

## 60 - 119 Lagebericht

- 62 Geschäft und Rahmenbedingungen
- 74 Ertragslage
- 89 Finanzlage
- 96 Vermögenslage
- 98 Daimler AG (Kurzfassung nach HGB)
- 102 Gesamtaussage zur wirtschaftlichen Lage
- 103 Ereignisse nach Ablauf des Geschäftsjahres 2010
- 104 Risikobericht
- 114 Ausblick

## 120 - 135 Geschäftsfelder

- 122 Mercedes-Benz Cars
- 126 Daimler Trucks
- 130 Mercedes-Benz Vans
- 132 Daimler Buses
- 134 Daimler Financial Services

## 136 - 147 Nachhaltigkeit

- 138 Nachhaltigkeit bei Daimler
- 140 Innovation, Sicherheit und Umwelt
- 144 Mitarbeiterinnen und Mitarbeiter
- 146 Gesellschaftliche Verantwortung

## 148 - 167 Corporate Governance

- 150 Bericht des Prüfungsausschusses
- 152 Vergütungsbericht
- 158 Compliance
- 160 Corporate Governance Bericht
- 166 Entsprechenserklärung zum Deutschen Corporate Governance Kodex

## 168 - 247 Konzernabschluss

- 170 Versicherung der gesetzlichen Vertreter
- 171 Bestätigungsvermerk des Abschlussprüfers
- 172 Konzern-Gewinn- und Verlustrechnung
- 173 Konzern-Gesamtergebnisrechnung
- 174 Konzernbilanz
- 175 Entwicklung des Konzern-Eigenkapitals
- 176 Konzern-Kapitalflussrechnung
- 177 Konzernanhang

## 248 - 252 Weitere Informationen

- 248 Zehnjahresübersicht
- 250 Glossar
- 251 Stichwortverzeichnis
- 252 Internationale Konzernrepräsentanzen  
Internet | Informationen | Adressen  
Daimler weltweit  
Finanzkalender 2011

## Erstes Quartal

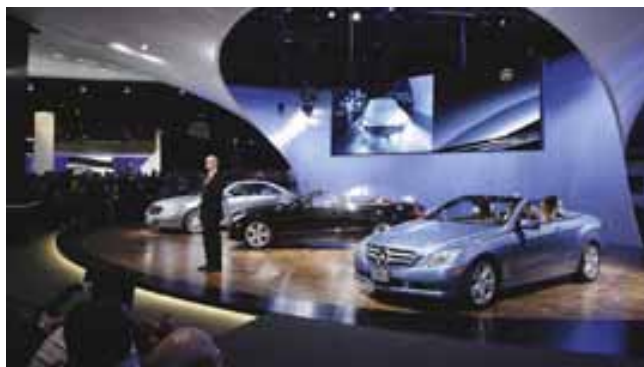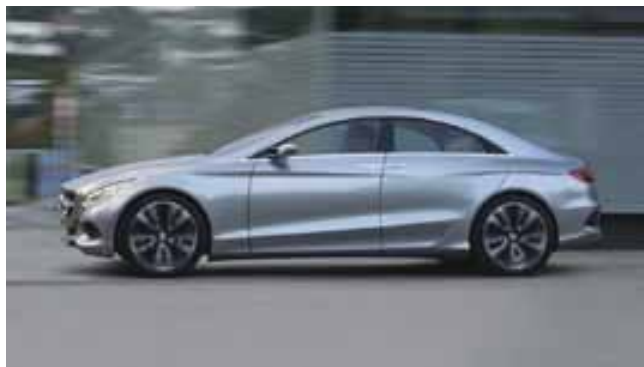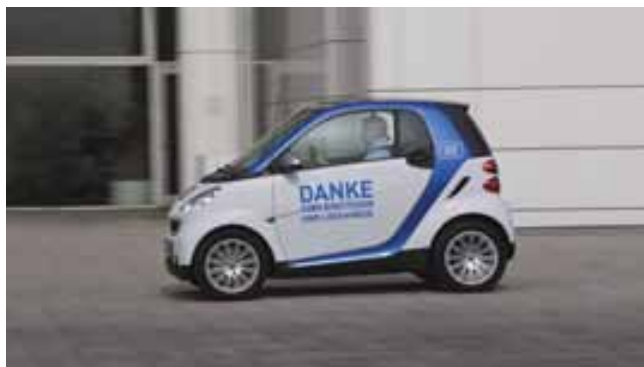

### **Weltpremiere des neuen E-Klasse Cabriolets in Detroit.**

Das viersitzige Ganzjahres-Cabrio komplettiert die erfolgreiche E-Klasse Familie und bietet mit dem Windschott AIRCAP eine Weltneuheit, die Luftwirbel im Innenraum bei offenem Verdeck deutlich verringert.

**Britischer Sicherheitspreis für Mercedes-Benz.** Die größte britische Konsumentenorganisation für Autokäufer zeichnet Mercedes-Benz mit dem Car of the Year Award 2010 für die beste Sicherheitsinnovation aus. Der Preis wird für den ATTENTION ASSIST verliehen, der den Fahrer vor Übermüdung warnt.

**Neues Vorstandsressort bei Daimler.** Der Aufsichtsrat beruft zum 18. Februar 2010 Dr. Wolfgang Bernhard auf die neu geschaffene Vorstandsposition für Produktion und Einkauf Mercedes-Benz Cars sowie für das Geschäftsfeld Mercedes-Benz Vans.

**Wegweisende Oberklasselimousine.** Mit dem Forschungsfahrzeug F 800 Style zeigt Mercedes-Benz auf dem Genfer Automobilsalon 2010 die Zukunft des Premiumautomobils aus einer neuen Perspektive.

**Daimler verkauft Beteiligung an Tata Motors.** Die Daimler AG veräußert sämtliche Anteile in Höhe von 5,34% am indischen Automobilkonzern Tata Motors an verschiedene Investorengruppen. Daimler wird am künftigen Wachstum des indischen Marktes durch die Stärkung seiner eigenen Aktivitäten partizipieren.

**car2go startet regulären Betrieb.** Nach Abschluss des einjährigen öffentlichen Pilotprojekts in Ulm fällt die Bilanz des innovativen Mobilitätskonzepts eindeutig positiv aus. Die neu gegründete car2go GmbH soll die internationale Kommerzialisierung vorantreiben.

**Konzern-EBIT von 1,2 Mrd. € im ersten Quartal.** Die sehr gute Ergebnisentwicklung spiegelt den sich fortsetzenden Aufwärtstrend in nahezu allen Geschäftsfeldern wider.



## Zweites Quartal

**Einigung mit US-Behörden.** Die Daimler AG einigt sich mit der US-Börsenaufsicht und dem US-Justizministerium auf den Abschluss der Untersuchungen wegen Verletzungen des US-amerikanischen Foreign Corrupt Practices Act.

**Kooperation mit Renault-Nissan.** Daimler und Renault-Nissan vereinbaren eine weitreichende strategische Kooperation. Die wesentlichen Projekte der Zusammenarbeit sind eine neue Architektur für smart, neue Drei- und Vierzylindermotoren und kleine Transporter.

**Transporterfertigung in China angelaufen.** Der erste von Fujian Daimler Automotive produzierte Mercedes-Benz Viano ist im neuen Werk in Fuzhou vom Band gelaufen. Fujian Daimler Automotive ist ein 2007 gegründetes Joint Venture der Fujian Motors Group, der China Motor Corp. und von Daimler.

**Beendigung der Börsennotierung in New York.** Aufsichtsrat und Vorstand der Daimler AG beschließen, die Notierung an der New York Stock Exchange zu beenden. Daimler legt weiterhin sehr viel Wert auf eine internationale Aktionärsbasis. Auch von internationalen Investoren wird die Aktie aber hauptsächlich in Frankfurt gehandelt.

**Daimler Financial Services kündigt Bündelung der Aktivitäten in Deutschland an.** Dabei wird die weltweite Zentrale von Daimler Financial Services von Berlin nach Stuttgart umziehen und dort mit der Zentrale der Mercedes-Benz Bank unter einem Dach zusammengeführt. Ziel ist es, Prozesse und Strukturen zu verschlanken und damit die Wettbewerbsposition zu sichern.

**Joint Venture zur Entwicklung von Elektrofahrzeugen in China.** BYD und die Daimler AG vereinbaren die Gründung des 50:50-Joint-Ventures »Shenzhen BYD Daimler New Technology Co. Ltd.« zur Entwicklung von Elektrofahrzeugen für den chinesischen Markt.

**Daimler Day in China.** Aufgrund der zunehmenden Bedeutung des chinesischen Marktes für das Unternehmen lädt Daimler Investoren und Analysten erstmalig in Peking zu einem Unternehmenstag ein.

**Daimler erhöht Kamaz-Beteiligung.** Daimler erhöht seine Beteiligung an Kamaz und stärkt damit die strategische Partnerschaft mit dem russischen Lkw-Hersteller. Aus wirtschaftlicher Sicht hält Daimler nun einen Anteil von 15%.

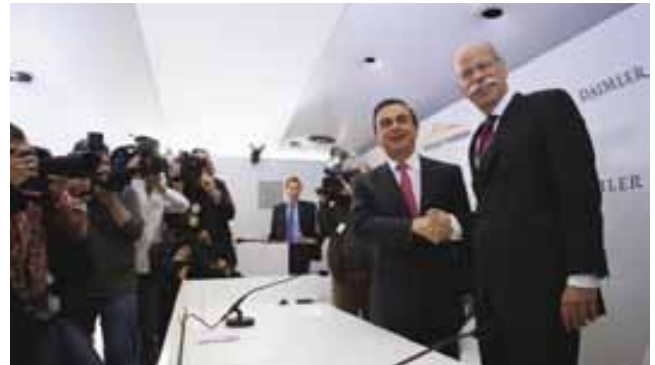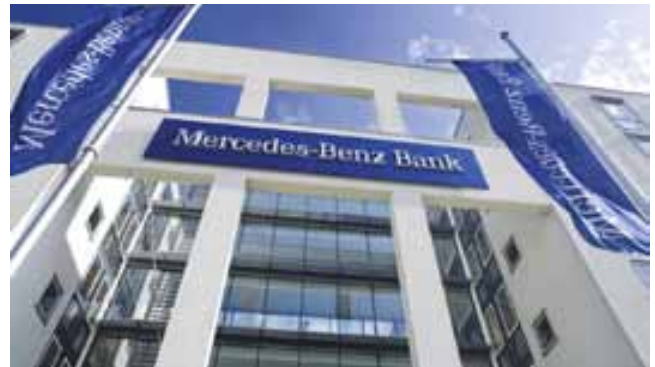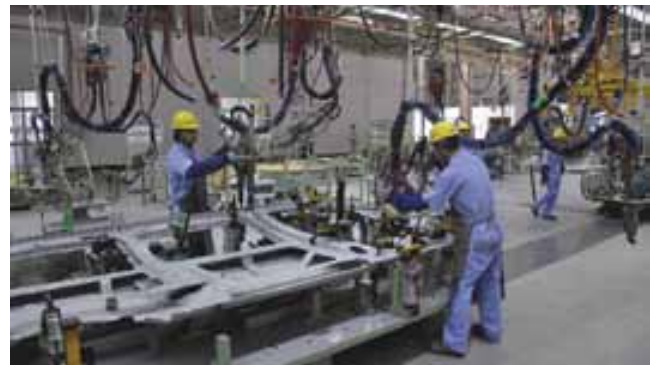

## Drittes Quartal

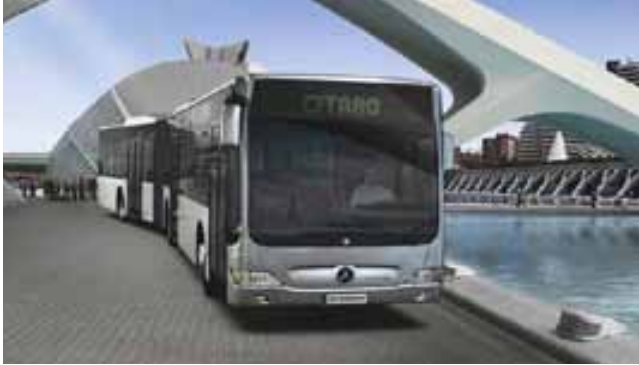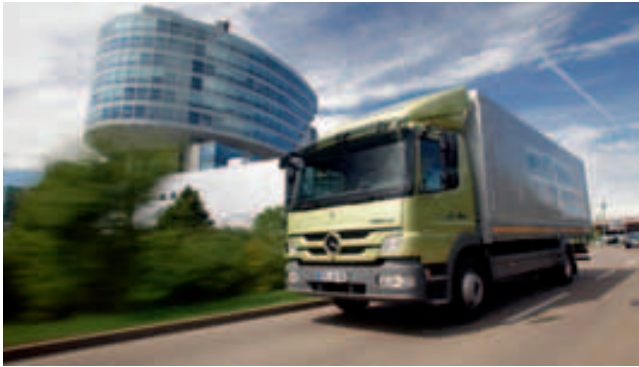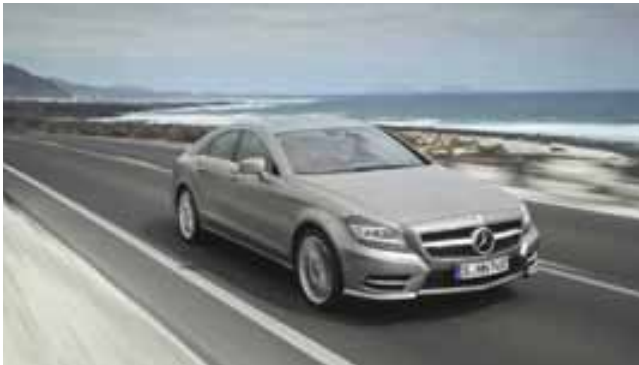

### **Daimler ist das beliebteste deutsche Unternehmen 2010.**

Dies ist das Ergebnis einer repräsentativen Umfrage von TNS Emnid für die Wirtschaftsprüfungs- und Beratungsgesellschaft PricewaterhouseCoopers (PwC).

**Erste Fuso Canter Lkw in Russland ausgeliefert.** Für die Produktion und den Verkauf von Fuso Lkw in Russland ist das Ende 2009 gegründete Joint Venture Fuso Kamaz Trucks Russia zuständig, eine strategische Partnerschaft zwischen Daimler und Kamaz.

### **Mercedes-Benz Citaro erfolgreichster Stadtbus aller Zeiten.**

Nach nur zwölf Produktionsjahren ist der 30.000ste Mercedes-Benz Citaro ausgeliefert worden – eine Stückzahl, die bei Stadtbussen einmalig ist und für den Erfolg eines flexiblen Baukastens steht.

**Verkaufsstart Mercedes-Benz Actros in Brasilien.** Um die steigende Nachfrage nach schweren Premium-Lkw in diesem Wachstumsmarkt zu bedienen, wird der Mercedes-Benz Actros nun auch in Brasilien verkauft. Ab dem Jahr 2012 soll der Schwer-Lkw ebenfalls im Werk Juiz de Fora in Brasilien produziert werden.

**Vorstandsressort für Integrität und Recht.** Der Aufsichtsrat der Daimler AG beschließt die Erweiterung des Konzernvorstands um ein neues Ressort für Integrität und Recht. Die neue Vorstandsfunktion ist ein konsequenter Schritt in der Weiterentwicklung der Unternehmensstruktur und -kultur.

**Mercedes-Benz Atego wird »Truck of the Year«.** Auf der IAA Nutzfahrzeuge würdigen Fachjournalisten aus 23 europäischen Ländern die innovative Technik des Mercedes-Benz Atego. Der in Serie gebaute Atego 1222 L EEV BlueTec Hybrid wird von der Jury als Wegbereiter für alternative Antriebe gesehen.

**Mercedes-Benz CLS auf dem Automobilsalon in Paris vorgestellt.** Das neue viertürige Coupé CLS knüpft an die Pionierrolle seines Vorgängers an und ist dennoch ein absoluter Neuauftritt. Der neue CLS vereint ein kraftvolles und selbstbewusstes Design mit höchster Effizienz.

**Daimler weiter auf Erfolgskurs.** Daimler erzielt im dritten Quartal ein EBIT von 2,4 Mrd. €. Damit setzt sich der Aufwärtstrend in der Ergebnisentwicklung fort.

## Viertes Quartal

**Daimler und Europcar bringen car2go nach Hamburg.** Das innovative Mobilitätskonzept, das in Ulm und Austin sehr erfolgreich erprobt wurde, soll in der Hansestadt mit zunächst 300 smart fortwo den Betrieb aufnehmen. Im Zuge einer Kooperation gründen Daimler und Europcar eine eigene Betreibergesellschaft.

**Neuer Fahrsimulator im Werk Sindelfingen eingeweiht.** Der neue Simulator ist der leistungsfähigste in der Automobilindustrie und das Herzstück einer Investition in Höhe von 160 Mio. € in Spitzentechnologie am Standort Sindelfingen.

**Richtfest für das Werk Kecskemét.** Das neue Werk wird mit dem deutschen Werk in Rastatt einen Produktionsverbund bilden. In Ungarn werden ab 2012 zwei der insgesamt vier neuen Modelle produziert, die Mercedes-Benz als Nachfolgegeneration der heutigen A- und B-Klasse anbieten wird.

**Neue Generation des Fuso Canter vorgestellt.** Dank niedriger Verbrauchswerte erfüllt die gesamte Baureihe die ab 2015 in Japan geltenden Lkw-Verbrauchsnormen schon heute. Nach der Einführung auf dem japanischen Markt wird der neue Lkw ab 2011 auch in den weltweiten Exportmärkten von Fuso erhältlich sein.

**Start der Serienproduktion des Actros im Werk Aksaray.** Mit der vollständigen Produktpalette in der Türkei und der Montage vor Ort bekennt sich Daimler Trucks langfristig zum Standort Türkei und stärkt den Produktionsverbund der Werke Wörth und Aksaray. Die in Aksaray produzierten Fahrzeuge sind für den türkischen Markt sowie den Export bestimmt.

**Transporterfertigung in Russland.** Daimler und der russische Nutzfahrzeughersteller GAZ unterzeichnen ein Memorandum of Understanding. Ziel ist es, den Mercedes-Benz Sprinter in Russland zu produzieren. Zudem sollen Motoren, Getriebe, Achsen und weitere Komponenten lokal gefertigt werden.

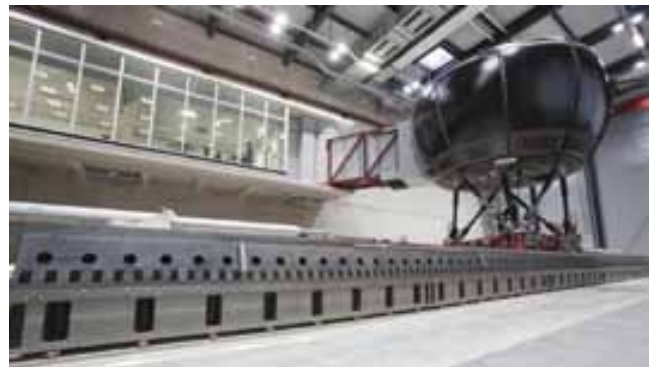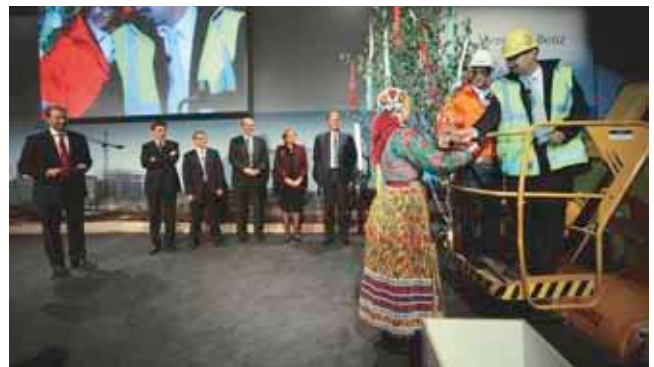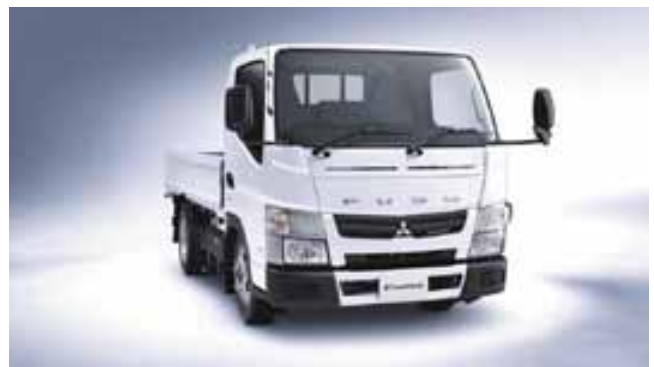



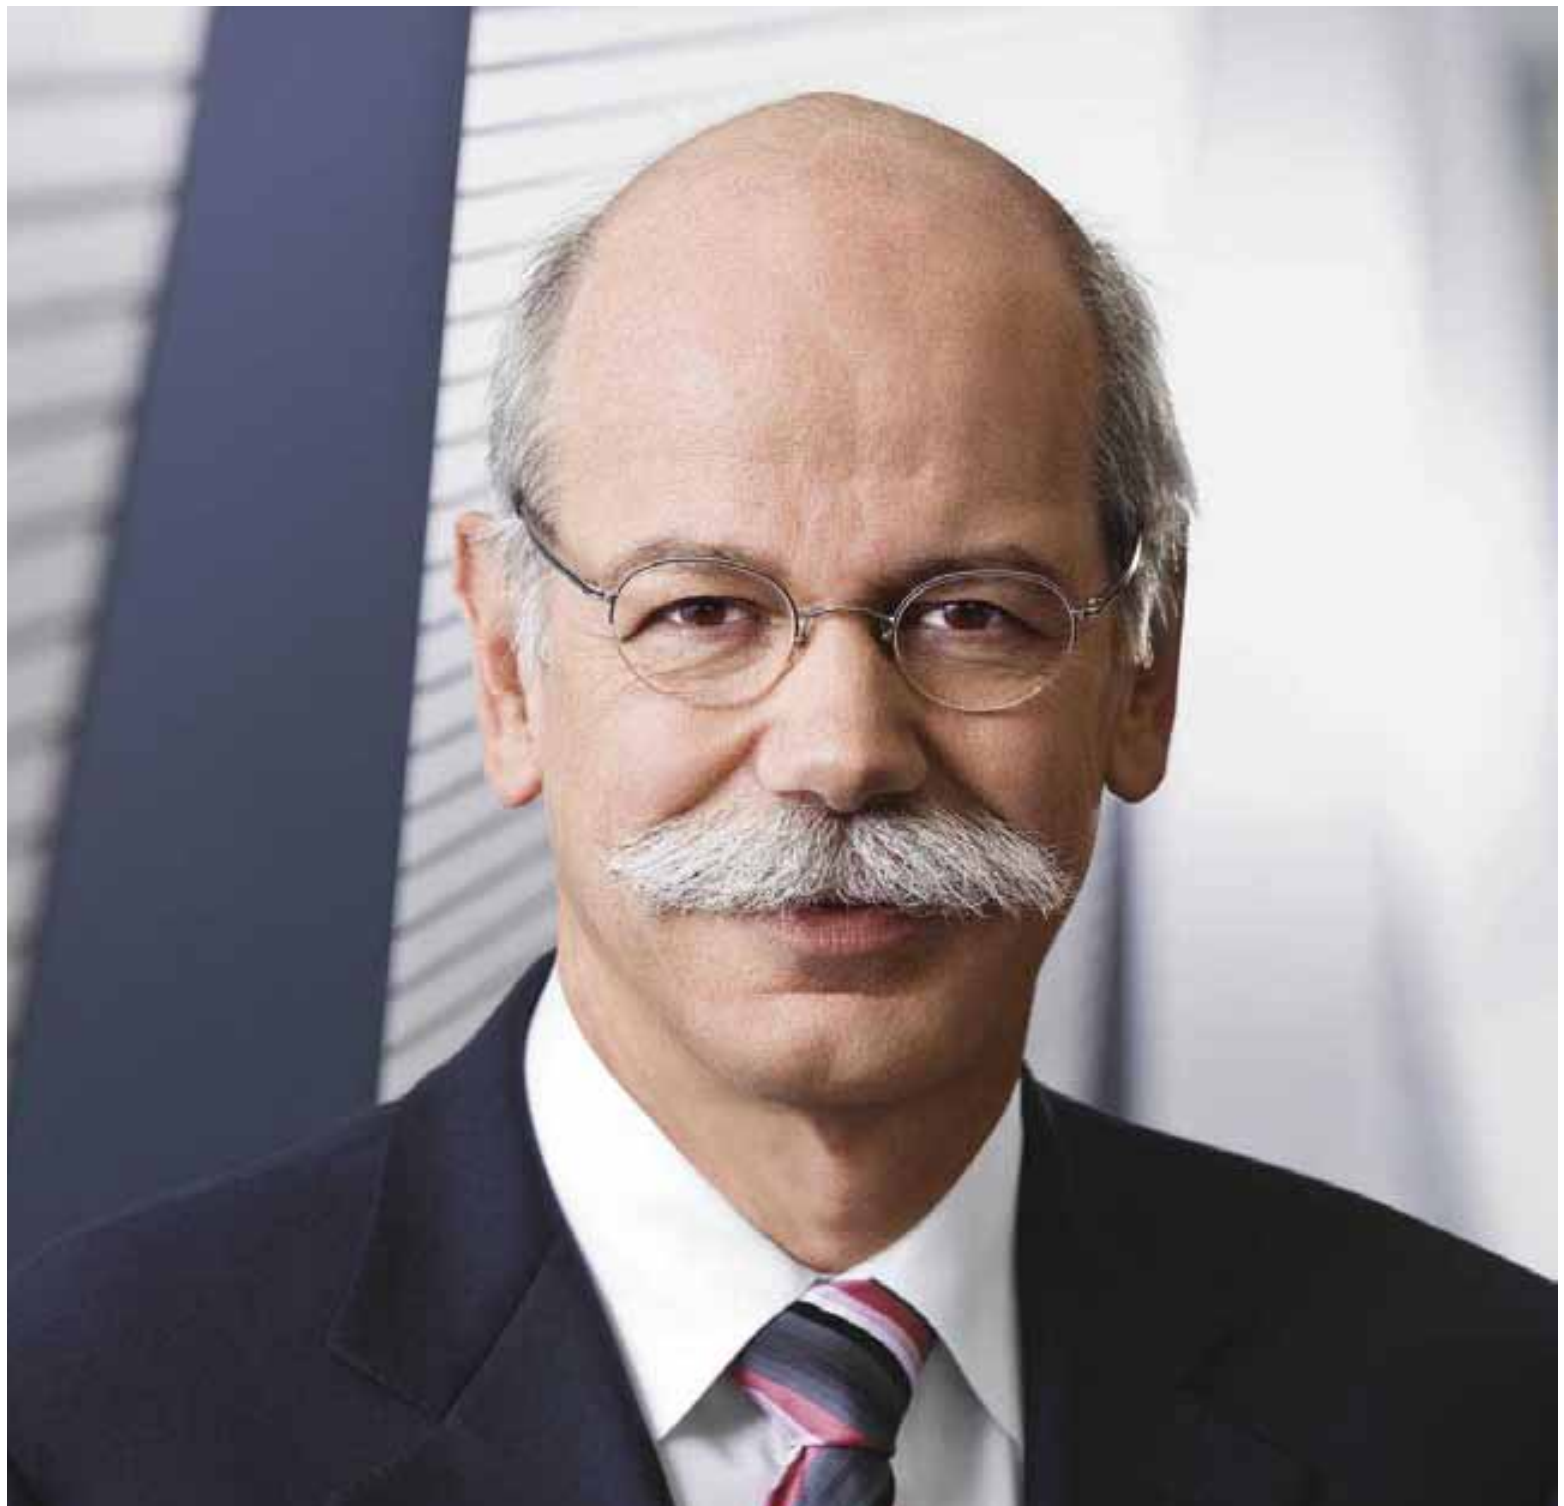

»Wir blicken auf ein exzellentes Jahr zurück – und entsprechend ehrgeizig sind unsere Ziele für das laufende. Auch 125 Jahre nach der Erfindung von Daimler und Benz sind wir es, die die Zukunft des Automobils von der Spitze weg gestalten«.

*Sehr geehrte Aktionärinnen und Aktionäre,*

das abgelaufene Geschäftsjahr war für Ihr Unternehmen ein sehr erfolgreiches. Hatte die Finanz- und Wirtschaftskrise der Jahre 2008/2009 noch zu massiven Markteinbrüchen geführt, so ist uns 2010 ein glänzendes Comeback gelungen – mit zweistelligen Wachstumsraten in allen Geschäftsfeldern. Unsere Produkte sind stark gefragt, unsere Auftragsbücher gut gefüllt. Viele unserer Werke arbeiten an der Kapazitätsgrenze.

Konzernweit haben wir im letzten Jahr ein EBIT von 7,3 Milliarden Euro erwirtschaftet. Das Konzernergebnis betrug 4,7 Milliarden Euro. Ihnen, liebe Aktionärinnen und Aktionäre, zahlt Daimler für 2010 eine Dividende von 1,85 Euro je Aktie.

Lassen Sie mich kurz erläutern, was die wichtigsten Entwicklungen in den einzelnen Geschäftsfeldern waren:

Bei Mercedes-Benz Cars haben wir den zweithöchsten Absatz in unserer Unternehmensgeschichte erzielt. In China konnten wir im Vergleich zum Vorjahr um volle 137 Prozent zulegen. Global haben wir dem Wettbewerb in vielen Segmenten die Rücklichter gezeigt: Unsere Limousinen der S-, E- und C-Klasse waren Weltmarktführer. Neue Modelle wie der SLS oder der neue CLS begeistern Kunden und Fachpresse. Und nicht nur die nackten Zahlen, auch Umfragen und Auszeichnungen belegen: Der Stern leuchtet. Wir machen ernst mit »Das Beste oder nichts«.

Auch bei Daimler Trucks ging es bereits 2010 kräftig aufwärts. Weltweit haben wir 37 Prozent mehr Lkw verkauft als im Vorjahr. Der neue Mercedes-Benz Atego und der Atego BlueTec Hybrid wurden gemeinsam als »Truck of the Year 2011« ausgezeichnet. Bei Fuso haben wir unsere Baureihen nahezu komplett aktualisiert, bei Freightliner begann der Verkauf des Schwerlast-Lkw Coronado.

Mercedes-Benz Vans ist mit einem Absatzplus von 35 Prozent ähnlich schnell gewachsen wie unsere Lkw-Sparte. In Europa war der Marktanteil des Sprinter so hoch wie noch nie. Und mit dem neuen Vito haben wir einen mittelschweren Transporter für den gewerblichen Einsatz vorgestellt, mit dem neuen Viano einen hochwertigen Großraum-Pkw.

Daimler Buses hat die globale Marktführerschaft im Segment für Busse über acht Tonnen erneut behauptet. Unsere Bussparte konnte den Absatz um gut 20 Prozent steigern – vor allem dank der starken Nachfrage in Lateinamerika.

Vervollständigt wird das erfreuliche Gesamtbild durch die positive Entwicklung bei Daimler Financial Services: Neugeschäft und Vertragsvolumen sind deutlich gestiegen. Vor allem das Geschäft mit Nutzfahrzeug-Flottenkunden und gewerblichen Kunden zog spürbar an.

Keine Frage: Wir blicken auf ein insgesamt exzellentes Jahr zurück – und entsprechend ehrgeizig sind unsere Ziele für das laufende. Das gilt umso mehr, als das Auto im Jahr 2011 einen besonderen Geburtstag feiert und wir gerade im Jubiläumsjahr zeigen wollen: Auch 125 Jahre nach der Erfindung von Daimler und Benz sind wir es, die die Zukunft des Automobils von der Spitze weg gestalten. Das untermauern wir mit zahlreichen Fakten:

Bei Mercedes-Benz Cars setzen wir unsere Modelloffensive fort – etwa mit dem neuen SLK, der neuen Generation der C-Klasse, dem neuen C-Klasse Coupé und der neuen M-Klasse. Gleichzeitig greifen wir im Kompaktsegment an. Den Anfang macht im Herbst die neue B-Klasse; weitere Modelle unserer neuen Kompaktfamilie folgen.

Bei den Trucks und Bussen ist die Erneuerung unserer Modellpalette ebenfalls in vollem Gange: 2011 kommt die neue Generation des Stadtbusses Mercedes-Benz Citaro auf den Markt. Auch der neue Fuso Canter wird von diesem Jahr an auf den weltweiten Exportmärkten von Fuso erhältlich sein.

Generell sind wir mit unserem Produktportfolio in einer guten Position, um vom globalen Wachstum der Automobilindustrie überproportional zu profitieren. Das gilt für unsere angestammten Kernmärkte genauso wie für die neuen Wachstumsmärkte, in denen wir unsere Vor-Ort-Präsenz gezielt ausbauen. In China etwa ist die Marke Mercedes-Benz derart gefragt, dass wir dort nicht nur unsere erste Pkw-Motorenfabrik außerhalb Deutschlands errichten, sondern auch weitere Baureihen vor Ort produzieren wollen – darunter den GLK. In Russland laufen die Vorbereitungen für die lokale Fertigung des Sprinter auf Hochtouren; in Indien gehen wir in Kürze mit der neuen Lkw-Marke »BharatBenz« an den Start. In Brasilien haben wir seit Jahrzehnten eine sehr starke Marktstellung; auch hier erweitern wir unsere Kapazitäten nochmals.

Weitere wichtige Fortschritte erwarten wir 2011 bei der Entwicklung grüner Zukunftstechnologien. So werden wir die CO<sub>2</sub>-Emissionen unserer Fahrzeugflotte weiter verringern, die erste E-Klasse mit Dieselhybrid präsentieren und weitere Schritte auf dem Weg zum lokal emissionsfreien Fahren gehen. Der Countdown für die Großserienproduktion des Elektro-smart läuft; die A-Klasse E-Cell liefern wir ab dem Frühjahr an Kunden aus. Auch für den Brennstoffzellenantrieb ist 2011 ein wichtiges Jahr. Mit einer Weltumrundung von drei F-Cell-getriebenen B-Klassen unterstreichen wir: Elektro-Autos mit Brennstoffzellenantrieb funktionieren. Was noch fehlt, ist die Infrastruktur. Die gilt es aufzubauen.

Bei all dem ist uns sehr bewusst: Nachhaltiger Erfolg beruht letztlich auf einer Unternehmenskultur der Spitzenleistung und der Integrität. Entsprechend systematisch fördern wir die konzernweite Verankerung einer beispielhaften globalen Geschäftsethik – nicht zuletzt durch die Schaffung eines eigenen Vorstandsressorts für »Integrität und Recht«, vertreten durch die Spitzenjuristin und ehemalige Bundesverfassungsrichterin Frau Dr. Christine Hohmann-Dennhardt. Wir setzen damit zugleich ein klares Zeichen: Spitzenleistung ist keine Frage des Geschlechts. Wir wollen mehr Frauen in Führungspositionen – und wir handeln auch so.

Sehr geehrte Aktionärinnen und Aktionäre, als Bundeskanzlerin Angela Merkel Ihrem Unternehmen kürzlich zum 125. Jahrestag der Erfindung des Automobils gratuliert hat, definierte sie in ihrer Rede »das A und O dessen, was Daimler und Benz uns lehren: niemals stillstehen, immer weitermachen, immer wieder träumen und immer wieder zu neuen Ufern aufbrechen«. In der Tat ist diese Fähigkeit zu ständiger Erneuerung der Kern unseres Erfolgs – und wahrscheinlich für viele von Ihnen ein wichtiger Grund, in Daimler zu investieren. Für dieses Vertrauen möchte ich Ihnen auch im Namen des gesamten Vorstandsteams herzlich danken.

»Innovation aus Tradition« – das ist nicht nur der Titel dieses Geschäftsberichts. Es ist der Anspruch, den mehr als eine Viertelmillion Daimler-Mitarbeiterinnen und -Mitarbeiter weltweit auch 2011 wieder einlösen wollen. Gemeinsam werden wir alles daran setzen, Ihr Vertrauen auch in Zukunft zu rechtfertigen.

Ihr

A handwritten signature in black ink, appearing to read 'Dieter Zetsche', with a stylized 'A' at the end.

Dieter Zetsche



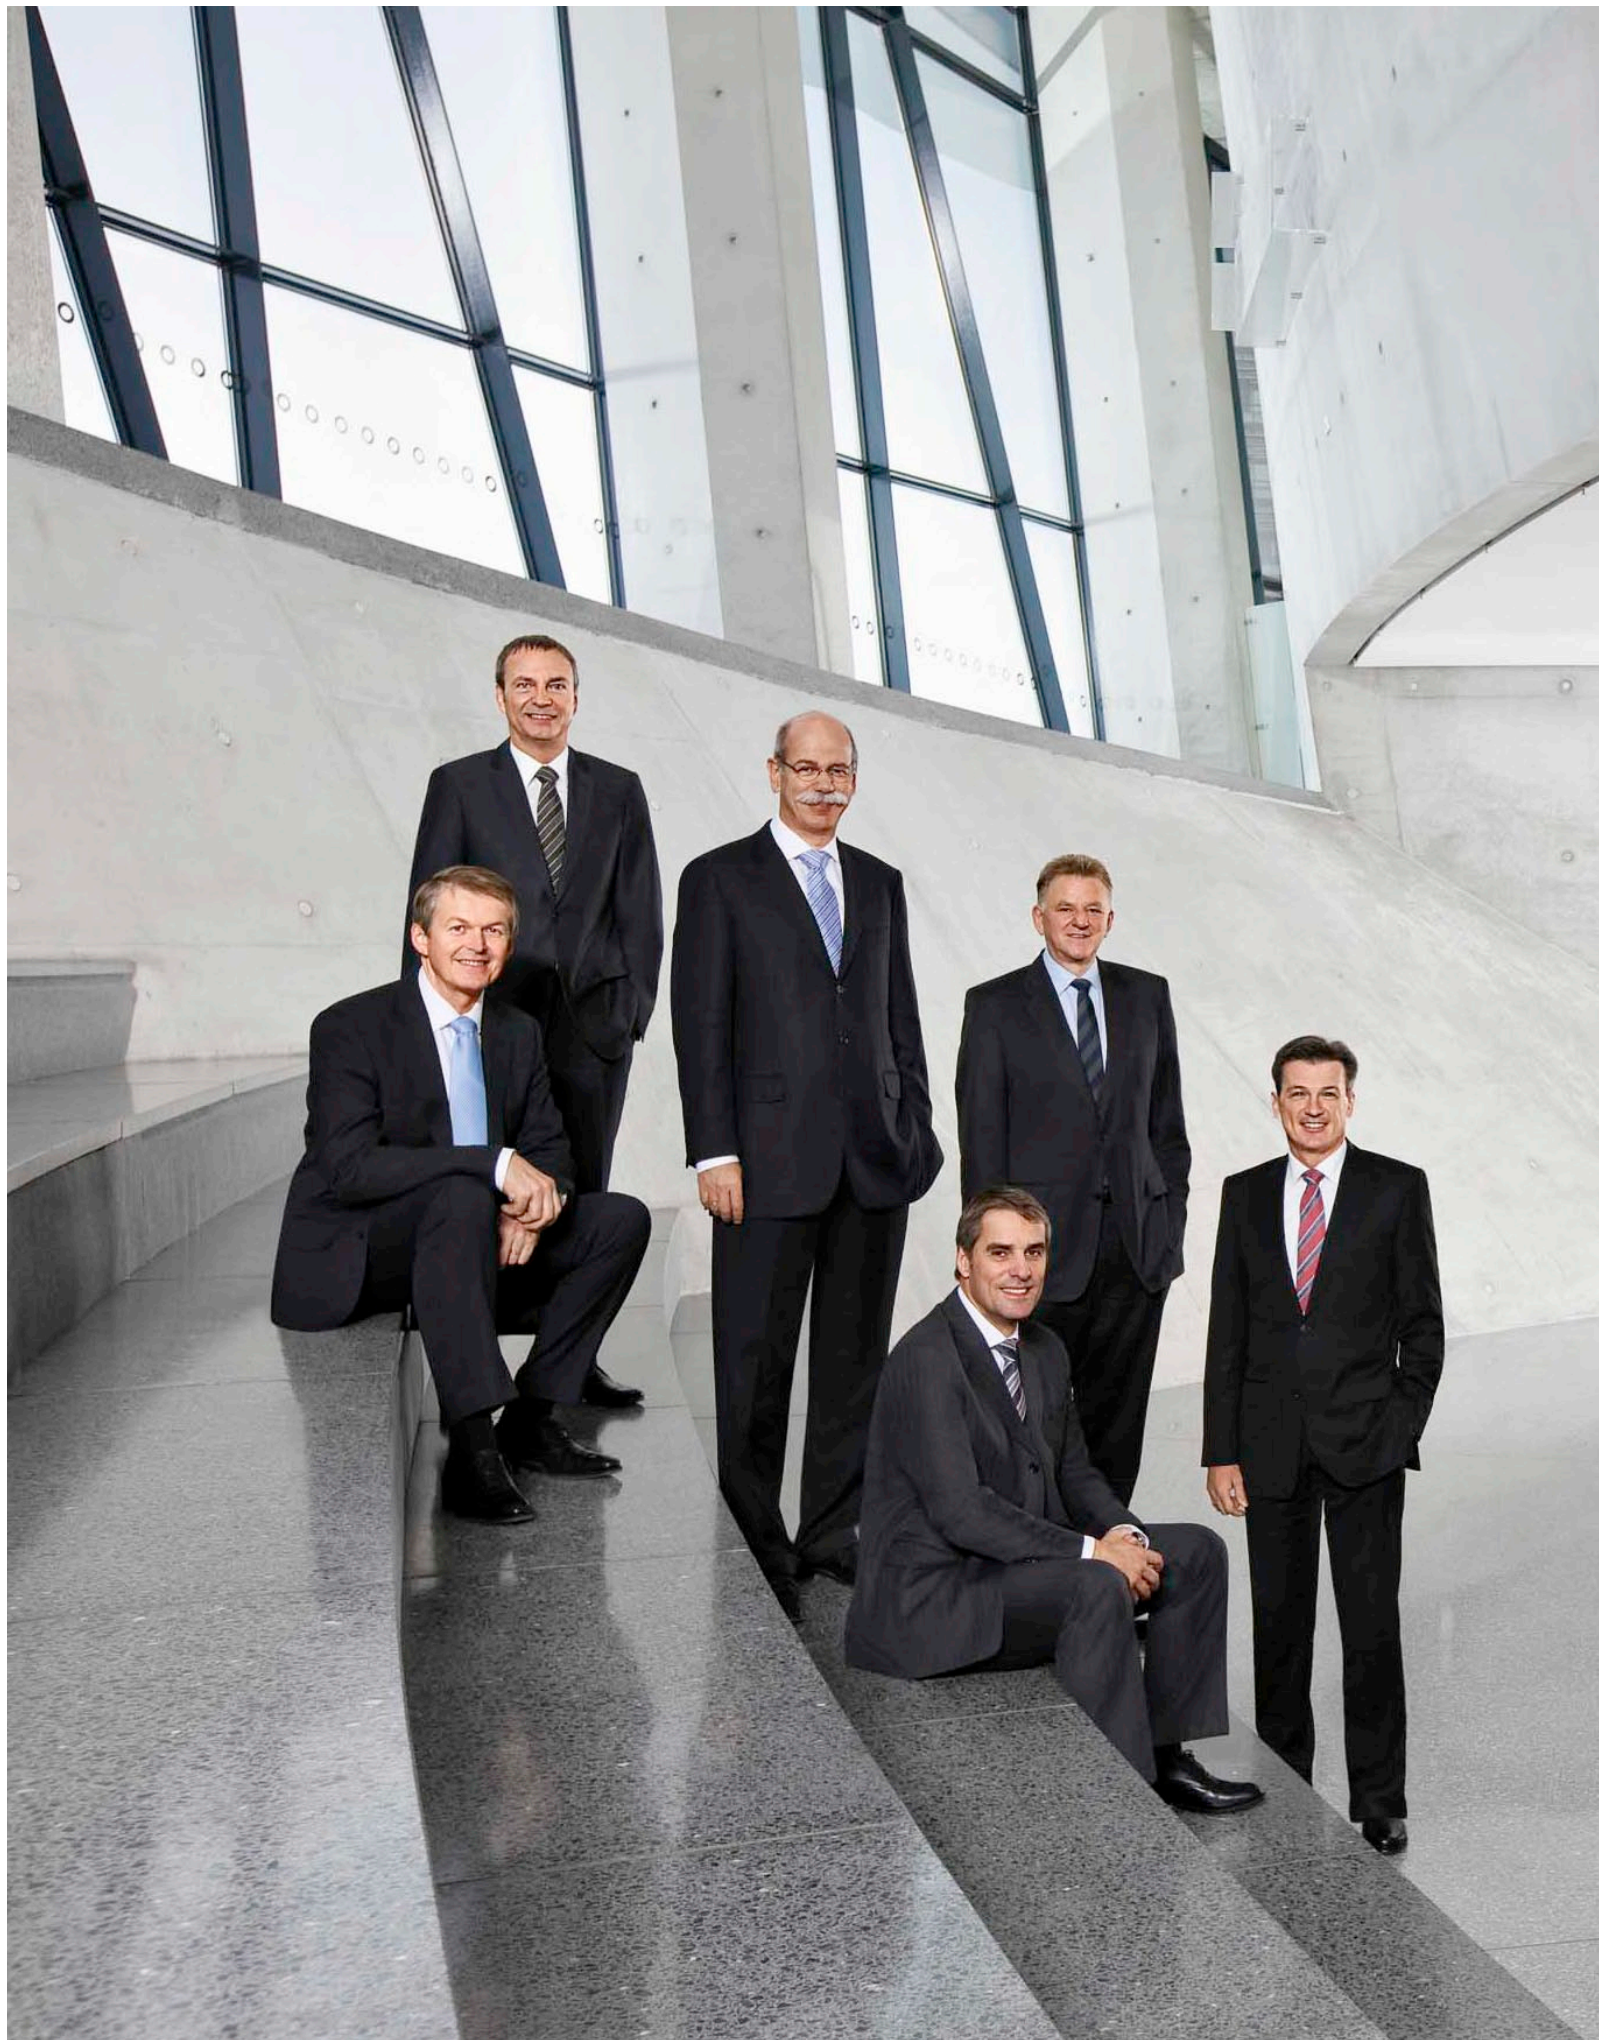



## Der Vorstand

### Von links nach rechts

**Thomas Weber** | 56  
Konzernforschung & Mercedes-Benz Cars Entwicklung  
Bestellung bis Dezember 2013

**Bodo Uebber** | 51  
Finanzen & Controlling, Daimler Financial Services  
Bestellung bis Dezember 2014

**Dieter Zetsche** | 57  
Vorsitzender des Vorstands, Leiter Mercedes-Benz Cars  
Bestellung bis Dezember 2013

**Wilfried Porth** | 52  
Personal & Arbeitsdirektor  
Bestellung bis April 2012

**Andreas Renschler** | 52  
Daimler Trucks  
Bestellung bis September 2013

**Wolfgang Bernhard** | 50  
Produktion und Einkauf Mercedes-Benz Cars &  
Mercedes-Benz Vans  
Bestellung bis Februar 2013

**Im Vorstand seit 16. Februar 2011:**  
**Christine Hohmann-Dennhardt** | 60  
Integrität und Recht  
Bestellung bis Februar 2014

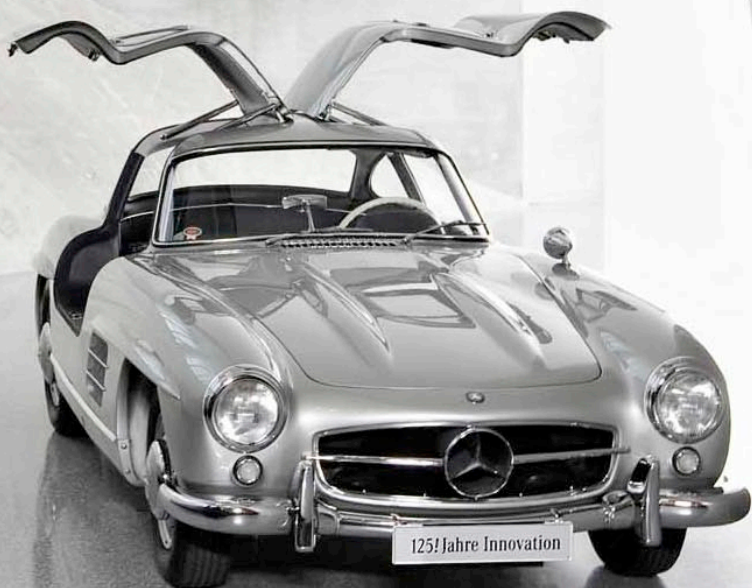

Sehr geehrte Aktionärinnen und Aktionäre, im Geschäftsjahr 2010 trat der Aufsichtsrat zu acht Sitzungen zusammen und befasste sich eingehend mit der operativen und strategischen Entwicklung des Unternehmens.

Der Aufsichtsrat hatte 2010 zahlreiche Sachthemen zu entscheiden, z.B. Kooperationsvorhaben, Kapitalmaßnahmen, Investitionen, Vertragsabschlüsse, Vorstandsangelegenheiten, Satzungsfragen etc. Darüber hinaus hat der Vorstand den Aufsichtsrat über eine Vielzahl nicht zustimmungspflichtiger Geschäfte informiert und mit ihm diskutiert, wie zum Beispiel über die Entwicklung der Vertriebsstrukturen, Ernennungen auf der obersten Führungsebene, Aus- bzw. Umbau der Bereiche Interne Revision und Compliance etc. Der Aufsichtsrat hat die Informationen und Bewertungen, die für seine Entscheidungen bzw. für seine Vorschläge maßgeblich waren, gemeinsam mit dem Vorstand erörtert. Die Aufsichtsratssitzungen wurden regelmäßig in getrennten Gesprächen mit den Arbeitnehmervertretern und mit den Anteilseignervertretern vorbereitet.

War der Jahresbeginn 2010 noch von der tiefen Rezession des Vorjahres geprägt, zeigte sich im weiteren Verlauf ein beachtlicher und kontinuierlicher Aufwärtstrend bei allen Absatz-, Umsatz- und Ergebniskennzahlen. Die Ursachen für diese erfreuliche Entwicklung waren nicht nur die Markterholung einiger wichtiger Absatzmärkte, sondern vor allem auch der Markterfolg der Produkte und Dienstleistungen von Daimler. Darüber hinaus haben sich die Maßnahmen zur Effizienzsteigerung und Kostensenkung, die vom Vorstand ergriffen und vom Aufsichtsrat seit Beginn der Finanz- und Wirtschaftskrise begleitet worden waren, nachhaltig positiv auf das Ergebnis ausgewirkt. Die Kennzahlen zum Free Cash Flow und zum Eigenkapital des Industriegeschäfts belegen die solide Finanzposition des Unternehmens.

Der Aufsichtsrat beurteilte diese positive Entwicklung durchweg als außerordentlich erfreulich, berücksichtigte dabei jedoch gleichermaßen, dass die Entwicklung noch nicht als verlässlich stabil anzusehen war. Risiko- bzw. Unsicherheitsfaktoren ergaben sich unter anderem im Hinblick auf die wirtschaftliche Situation in den USA, wo im Jahresverlauf nach Experteneinschätzung ein erneuter Einbruch der Konjunktur nicht ausgeschlossen werden konnte. In China, einem weiteren Schlüsselmarkt des Unternehmens, musste mit der Möglichkeit einer Marktabkühlung gerechnet werden. In der Eurozone wiederum kam zu Jahresbeginn, insbesondere ausgelöst durch die Situation in Griechenland, die hohe Verschuldung öffentlicher Haushalte als wesentlicher Belastungsfaktor auf. Vor diesem Hintergrund unterstützte der Aufsichtsrat das risikobewusste Vorgehen des Vorstands auch im weiteren Jahresverlauf.

Weitere Themen, über die der Vorstand den Aufsichtsrat über die üblichen wirtschaftlichen Kennzahlen hinaus fortlaufend informierte, waren u. a.

- die Rentabilität und Liquiditätssituation des Unternehmens,
- das interne Kontroll- und Risikomanagementsystem,
- die Risikokosten im Finanzdienstleistungsgeschäft,
- die Fahrzeugrestwerte,
- die Rohstoffpreisentwicklung und
- die Situation der Lieferanten.

Ausführlich diskutiert wurden im Jahr 2010 auch die langfristige Sicherung der Wettbewerbsfähigkeit des Unternehmens, grundsätzliche Fragen der Unternehmensplanung einschließlich der Finanz-, Investitions- und Personalplanung, Entwicklungen bei Konzerngesellschaften und die Umsetzung der bereits eingeleiteten Maßnahmen zur Sicherstellung einer zukunftsweisenden nachhaltigen Mobilität. Diesen Themen widmete sich der Aufsichtsrat in engem Austausch mit dem Vorstand und besonders intensiv in einem zweitägigen Strategieworkshop.

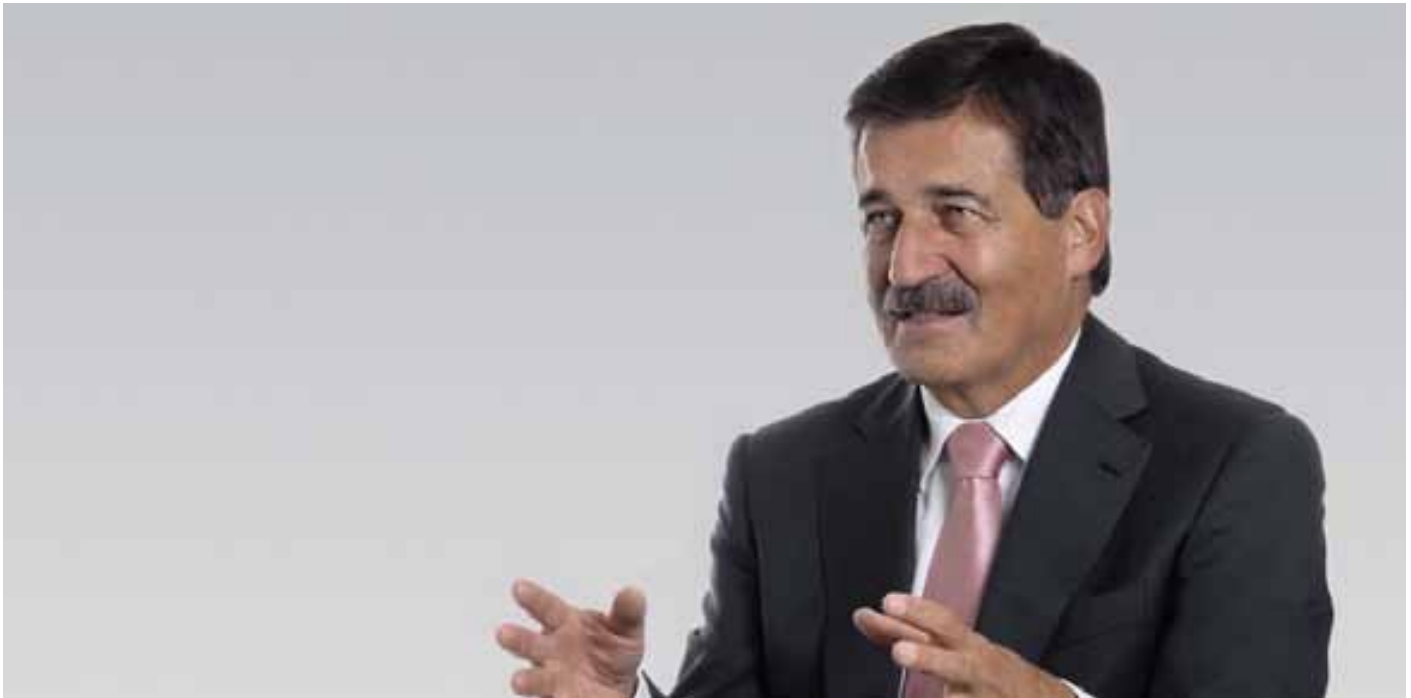

**Dr. Manfred Bischoff, Vorsitzender des Aufsichtsrats.**

#### **Zusammenarbeit zwischen dem Aufsichtsrat und dem**

**Vorstand.** Die Aufsichtsratssitzungen waren von einem intensiven und offenen Austausch zur Lage des Unternehmens, zur Entwicklung der Geschäfts- und Finanzlage, zu grundsätzlichen Fragen der Unternehmenspolitik und -strategie, zu bestehenden Entwicklungschancen in wichtigen Wachstumsmärkten sowie zu Compliance-Themen gekennzeichnet. Die Aufsichtsratsmitglieder bereiteten sich auf Beschlüsse über zustimmungspflichtige Geschäftsvorhaben regelmäßig anhand von Unterlagen vor, die der Vorstand vorab zur Verfügung stellte. Sie wurden dabei von den jeweils zuständigen Ausschüssen unterstützt und diskutierten die zur Entscheidung anstehenden Vorhaben mit dem Vorstand. Sämtliche Mitglieder des Vorstands nahmen an allen Sitzungen des Aufsichtsrats teil. Darüber hinaus unterrichtete der Vorstand den Aufsichtsrat anhand schriftlicher Monatsberichte und quartalsweiser Risikoberichte über die wichtigsten wirtschaftlichen Kennzahlen und legte dem Aufsichtsrat die Zwischenfinanzberichte sowie den Halbjahresbericht vor. Über besondere Vorgänge wurde der Aufsichtsrat auch zwischen den Sitzungen in Kenntnis gesetzt und in sachlich gerechtfertigten Einzelfällen in Abstimmung mit dem Aufsichtsratsvorsitzenden um schriftliche Beschlussfassung gebeten. Zusätzlich informierte der Vorstandsvorsitzende den Aufsichtsratsvorsitzenden in regelmäßigen Gesprächen über wichtige Entwicklungen und anstehende Entscheidungen.

**Themen der Aufsichtsrats Tätigkeit im Jahr 2010.** In einer Sitzung im Februar 2010 behandelte der Aufsichtsrat Personalangelegenheiten des Vorstands. Im Beisein von Vertretern des Abschlussprüfers wurden im Februar auch die vorläufigen Kennzahlen des Jahres- und des Konzernabschlusses sowie die möglichen Alternativen für den Dividendenvorschlag an die Hauptversammlung besprochen. Angesichts der außergewöhnlichen Krisenbedingungen im Geschäftsjahr 2009 und des negativen Konzernergebnisses beschloss der Aufsichtsrat, der Empfehlung des Vorstands zu folgen und auf einen Dividendenvorschlag an die Hauptversammlung zu verzichten. Die vorläufigen Kennzahlen wurden in der Jahrespressekonferenz am 18. Februar 2010 veröffentlicht.

Nachdem sich der Aufsichtsrat eingehend mit den Konditionen befasst hatte, erteilte er im Februar 2010 seine Zustimmung zur einvernehmlichen Beendigung des Verfahrens der US-Börsenaufsicht (Securities & Exchange Commission, SEC) und des US-Justizministeriums (U.S. Department of Justice, DOJ) wegen Verletzungen des US-amerikanischen Foreign Corrupt Practices Act. Die abschließende Einigung mit den US-Behörden erfolgte dann am 1. April 2010.

Anfang März 2010 behandelte der Aufsichtsrat den vom Abschlussprüfer mit einem uneingeschränkten Bestätigungsvermerk versehenen Jahresabschluss 2009 der Gesellschaft, den Konzernabschluss 2009 und den für die Daimler AG und den Konzern zusammengefassten Lagebericht. Zur Vorbereitung standen den Aufsichtsratsmitgliedern umfangreiche Unterlagen, teilweise im Entwurf, zur Verfügung, unter anderem der Geschäftsbericht, die Prüfungsberichte der KPMG für den Jahresabschluss der Daimler AG und den Konzernabschluss nach IFRS, der zusammengefasste Lagebericht für die Daimler AG und den Konzern sowie Entwürfe der Berichte des Aufsichtsrats und des Prüfungsausschusses und des Berichts nach Form 20-F.

Der Prüfungsausschuss und der Aufsichtsrat haben diese Unterlagen eingehend behandelt und im Beisein des Abschlussprüfers, der über die Ergebnisse seiner Prüfung berichtete, erörtert. Der Aufsichtsrat schloss sich dem Ergebnis der Prüfung durch den Abschlussprüfer an, stellte im Rahmen seiner eigenen Prüfung fest, dass Einwendungen nicht zu erheben waren, und billigte die vom Vorstand aufgestellten Abschlüsse. Damit war der Jahresabschluss der Daimler AG festgestellt. Schließlich hat der Aufsichtsrat dem Vorschlag des Vorstands zugestimmt, den Jahresfehlbetrag der Daimler AG durch eine Entnahme aus der Kapitalrücklage auszugleichen und auf einen Dividendenvorschlag an die Hauptversammlung zu verzichten. Der Aufsichtsrat stimmte ferner dem Bericht des Aufsichtsrats in der vorliegenden Fassung zu. Weitere Themen waren die Tagesordnung der Hauptversammlung einschließlich des Vorschlags zur Wahl eines Anteilseignervertreeters des Aufsichtsrats und die Aktualisierung der Entsprechenserklärung. Abschließend genehmigte der Aufsichtsrat die in der Sitzung vorgestellten sonstigen Mandate und Nebentätigkeiten der Vorstandsmitglieder.

Im März 2010 befasste sich der Aufsichtsrat in einer außerordentlichen Sitzung mit dem Stand der Kooperationsgespräche mit Renault-Nissan zu möglichen Kooperationsfeldern im Klein- und Kleinstwagensegment, bei der Elektromobilität, bei Transportern und leichten Nutzfahrzeugen sowie kleinen Motoren. Ein weiterer Gegenstand der Erörterung war die Einordnung von Kooperationsmöglichkeiten in die Unternehmens- und Geschäftsfeldstrategie einschließlich wirtschaftlicher und rechtlicher Aspekte. Darüber hinaus wurde eine Überkreuzbeteiligung mit Renault-Nissan zur Unterstützung dieser Kooperationsmöglichkeiten diskutiert. In diesem Zusammenhang stimmte der Aufsichtsrat zu, aus dem Bestand an eigenen Aktien rund 3% der Daimler-Aktien auf Renault und/oder Nissan zu übertragen im Austausch gegen eine Beteiligung von jeweils rund 3% an Renault und Nissan. Außerdem wurden weitere Rahmenbedingungen für die Überkreuzbeteiligung festgelegt.

Im April fanden zwei Sitzungen des Aufsichtsrats statt. In einer ersten Sitzung beschloss der Aufsichtsrat auf Vorschlag des Präsidialausschusses zwei Änderungen innerhalb des Systems zur Vergütung der Vorstandsmitglieder mit Wirkung zum 1. Januar 2011. Die Summe aus Grundgehalt und Jahresbonus bleibt dabei in der Höhe grundsätzlich unverändert, wird jedoch nunmehr wertgleich auf beide Komponenten verteilt. Diese Umstellung wird, unter Berücksichtigung der Überprüfung der Vergütung im Dezember, eine neutrale Verschiebung der Zielvergütung vom Jahresbonus zum Fixum bewirken. Im Ergebnis wird so der Zielbonus vom 1,5-Fachen auf das 1-Fache der Grundvergütung abgesenkt. Zusätzlich wird der Jahresbonus künftig nicht mehr vollständig nach Ablauf des Geschäftsjahres ausbezahlt, sondern nur zu 50%. Die zweite Hälfte wird ein Jahr später zur Auszahlung kommen, und zwar in Abhängigkeit von der Entwicklung der Daimler-Aktie im Vergleich zum Aktienindex Dow Jones STOXX Automobiles & Parts, den die Daimler AG als Maßstab für die relative Entwicklung der Aktie heranzieht. Über diese Änderungen wurde bereits in der Hauptversammlung 2010 berichtet.



In einer weiteren Sitzung im April 2010 befasste sich der Aufsichtsrat mit dem Geschäftsverlauf und den Ergebnissen des ersten Quartals sowie mit der zwischenzeitlich erfolgten gerichtlichen Einigung mit den US-Behörden. In dieser Sitzung begrüßte der Aufsichtsrat Judge Louis Freeh, ehemaliger US-Bundesrichter, in seiner Funktion als den im Rahmen der gerichtlichen Einigung bestellten sogenannten Monitor der Daimler AG und ließ sich von ihm wichtige Grundprinzipien für die weitere Zusammenarbeit aus seiner Sicht erläutern.

Im Mai stimmte der Aufsichtsrat u. a. dem Vorschlag des Vorstands zu, die Notierung der Aktien der Daimler AG an der New York Stock Exchange zu beenden und bei der U.S. Securities and Exchange Commission einen Antrag auf Deregistrierung aller Wertpapiere zu stellen.

Nach der Erörterung des Geschäftsverlaufs und der Ergebnisse im zweiten Quartal ermächtigte der Aufsichtsrat den Vorstand in seiner Sitzung im Juli zur Vornahme einer Kapitalerhöhung bei der Konzerngesellschaft Mitsubishi Fuso Truck and Bus Corporation. In derselben Sitzung informierte der Monitor über die Ergebnisse einer Erstprüfung.

Während des zweitägigen Strategiewerkshops im September informierte sich der Aufsichtsrat erneut über den Status der Compliance im Unternehmen. Außerdem wurde der Stand der Umsetzung der vom Vorstand in den Vorjahren aufgezeigten strategischen Ziele der Daimler AG und der einzelnen Geschäftsfelder umfassend behandelt. Vor dem Hintergrund der aktuellen gesamtwirtschaftlichen Rahmenbedingungen diskutierte der Aufsichtsrat dabei den Umsetzungsstand der initiierten Vorhaben der Geschäftsfelder, die Positionierung des Unternehmens und seiner Geschäftsfelder im Wettbewerb sowie die Marken- und Produktstrategie.

Weitere Schwerpunkte waren

- Wachstumschancen in den unterschiedlichen Märkten,
- Wettbewerbsanalysen,
- die neuesten Trends im Kundenverhalten auch im Hinblick auf künftige Entwicklungen urbaner Mobilität,
- die gesamte Technologie- und Marktstrategie zur Sicherstellung nachhaltiger Mobilität,
- die technologische Entwicklung bei Verbrennungsmotoren,
- elektrische Antriebe, Hybride und wasserstoffbetriebene Antriebe,
- Managementkapazitäten und weitere personalspezifische Themen sowie
- sonstige strategische Themen.

Im Dezember behandelte der Aufsichtsrat auf Basis einer umfassenden Dokumentation eingehend die Operative Planung für die Jahre 2011/2012, diskutierte dabei bestehende Chancen und Risiken und das Risikomanagement des Unternehmens. Darüber hinaus beschloss der Aufsichtsrat den Finanzierungsrahmen für das Geschäftsjahr 2011. Weitere Gegenstände der Dezember-sitzung waren Corporate Governance Angelegenheiten und Vorstandsvergütungsthemen. In dieser Sitzung beschloss der Aufsichtsrat über bereits bestehende qualitative Zielsetzungen hinaus auch zahlenmäßig konkretisierte Ziele für seine Zusammensetzung, die insbesondere eine angemessene Beteiligung von Frauen vorsehen.

**Corporate Governance.** Der Aufsichtsrat befasste sich im Verlauf des Geschäftsjahres 2010 kontinuierlich mit der Weiterentwicklung der Corporate Governance und berücksichtigte dabei rechtliche Änderungen und Fortentwicklungen.

Seit der Erneuerung des Directors & Officers-Versicherungsschutzes (D&O-Versicherung) am 1. April 2010 ist für fahrlässig begangene Pflichtverletzungen ein Selbstbehalt der Aufsichtsratsmitglieder in Höhe von 50% der jeweiligen jährlichen Vergütung vorgesehen.

In seiner Dezembersitzung hat der Aufsichtsrat die Geschäftsordnung des Aufsichtsrats und seiner Ausschüsse aktualisiert und gemäß § 161 AktG die Entsprechenserklärung 2010 zum Deutschen Corporate Governance Kodex in der Fassung vom 26. Mai 2010 verabschiedet.

Wichtiger Garant für eine effektive Zusammenarbeit im Aufsichtsrat ist nicht nur die im Vordergrund stehende sachliche Expertise, sondern auch eine der Größe und der Internationalität des Unternehmens angemessene Vielfalt der Mitglieder in Bezug auf Geschlecht, ethnische Herkunft oder andere persönliche Merkmale. Der Aufsichtsrat der Daimler AG wird daher bei künftigen Wahlvorschlägen zum Aufsichtsrat auf Ausgewogenheit, insbesondere in Bezug auf das Geschlecht, achten und betrachtet dies als Beitrag zur Stärkung des Führungsanspruchs von Daimler in der Automobilindustrie. Eine Richtschnur für die Ausgewogenheit in Bezug auf das Geschlecht bildet dabei die Zielsetzung des Unternehmens, bis zum Jahr 2020 einen Frauenanteil von 20% an den leitenden Führungskräften zu erreichen.

In jeder Aufsichtsratssitzung gab es eine sogenannte Executive Session, in der die Mitglieder des Aufsichtsrats die Möglichkeit hatten, Themen in Abwesenheit der Vorstandsmitglieder zu besprechen.

Der Aufsichtsrat hat im Geschäftsjahr 2010 eine extern moderierte Effizienzüberprüfung durchführen lassen und erfüllt damit die Anforderung zur Durchführung einer regelmäßigen Effizienzprüfung im Sinne seiner Geschäftsordnung und des Deutschen Corporate Governance Kodex.

Aufsichtsratsmitglieder der Daimler AG sind verpflichtet, potenzielle Interessenkonflikte dem Gesamtgremium gegenüber offenzulegen und sich nicht an der Behandlung von Themen zu beteiligen, die zu einem Interessenkonflikt führen können. Im Geschäftsjahr 2010 hat es in diesem Zusammenhang keine Hinweise auf potenzielle Interessenkonflikte gegeben.

Das mit Beendigung der Hauptversammlung am 14. April 2010 ausgeschiedene Mitglied des Aufsichtsrats Arnaud Lagardère konnte aufgrund dringender anderweitiger Verpflichtungen nur an weniger als der Hälfte der Sitzungen zwischen dem Beginn des Geschäftsjahres und seinem Ausscheiden teilnehmen.

## Bericht über die Arbeit der Ausschüsse

Der **Präsidialausschuss** ist im vergangenen Geschäftsjahr zu drei Sitzungen zusammengekommen. Dabei behandelte er insbesondere Corporate Governance Themen und Vergütungsfragen sowie Personalangelegenheiten des Vorstands. Wie in den Vorjahren waren Compliance-Ziele Teil der individuellen Zielvereinbarungen der Vorstandsmitglieder.

Der **Prüfungsausschuss** trat im Jahr 2010 zu sieben Sitzungen zusammen. Einzelheiten sind dem gesonderten Bericht dieses Ausschusses zu entnehmen (vgl. S. 150 f.).

Der **Nominierungsausschuss** hat im Geschäftsjahr 2010 in einer Sitzung eine Empfehlung für den Wahlvorschlag des Aufsichtsrats zur Wahl eines Anteilseignervertreeters in den Aufsichtsrat der Daimler AG erarbeitet. Der Wahlvorschlag wurde auf der Basis der Festlegungen zur Struktur, zur Ausrichtung und zum Qualifikationsprofil der Anteilseignervertreter im Aufsichtsrat sowie unter Berücksichtigung von Corporate Governance Anforderungen erarbeitet.

Der nach dem deutschen Mitbestimmungsgesetz obligatorische **Vermittlungsausschuss** hatte wie in den Vorjahren auch im Geschäftsjahr 2010 keinen Anlass, tätig zu werden.

Die Ausschussvorsitzenden unterrichteten die Mitglieder des Aufsichtsrats über die Aktivitäten der Ausschüsse und etwaige Entscheidungen kontinuierlich in der jeweils nächsten Aufsichtsratssitzung.

**Personalien des Aufsichtsrats.** Mit Ablauf der Hauptversammlung am 14. April 2010 schied der Anteilseignervertreter Arnaud Lagardère aus dem Aufsichtsrat der Daimler AG aus. Auf Vorschlag des Aufsichtsrats wurde Dr. Paul Achleitner mit Wirkung ab Beendigung der Hauptversammlung als Anteilseignervertreter in den Aufsichtsrat gewählt. Der Wahlvorschlag des Aufsichtsrats beruhte auf einer Empfehlung des Nominierungsausschusses des Aufsichtsrats und einem entsprechenden Beschluss der Anteilseignervertreter.

**Personalia des Vorstands.** In einer Aufsichtsratssitzung im Februar 2010 beschloss der Aufsichtsrat die Wiederbestellungen von Dr. Dieter Zetsche und Dr. Thomas Weber, jeweils mit Wirkung zum 1. Januar 2011 für drei Jahre, gemäß den im Jahr 2006 getroffenen Festlegungen des Aufsichtsrats. Darüber hinaus beschloss der Aufsichtsrat, den Vorstand um ein Ressort zu erweitern und Dr. Wolfgang Bernhard ab dem 18. Februar 2010 für drei Jahre zum Mitglied des Vorstands der Daimler AG zu bestellen mit Verantwortung für Produktion und Einkauf Mercedes-Benz Cars sowie für das Geschäftsfeld Mercedes-Benz Vans.

In einer Aufsichtsratssitzung im September 2010 beschloss der Aufsichtsrat die künftige Erweiterung des Vorstands und die Schaffung eines neuen Vorstandsressorts für »Integrität und Recht«.

Mitte Februar 2011 beschloss der Aufsichtsrat in einer Sitzung im Zusammenhang mit der Erweiterung des Vorstands um das Ressort Integrität und Recht, Dr. Christine Hohmann-Dennhardt, ehemalige Richterin am Bundesverfassungsgericht, mit Wirkung ab dem 16. Februar 2011 für drei Jahre zum Mitglied des Vorstands zu bestellen, ihr dieses Ressort zu übertragen sowie den Geschäftsverteilungsplan des Vorstands entsprechend anzupassen. Des Weiteren beschloss der Aufsichtsrat die Wiederbestellung von Bodo Uebber zum Mitglied des Vorstands, verantwortlich für Finanzen & Controlling und Daimler Financial Services, mit Wirkung zum 16. Dezember 2011 für drei Jahre, gemäß den im Jahr 2006 getroffenen Festlegungen des Aufsichtsrats. Darüber hinaus behandelte der Aufsichtsrat im Beisein von Vertretern des Abschlussprüfers in dieser Sitzung die vorläufigen Kennzahlen des Jahres- und des Konzernabschlusses sowie den Dividendenvorschlag an die Hauptversammlung. Die vorläufigen Kennzahlen wurden in der Jahrespressekonferenz am 16. Februar 2011 veröffentlicht.

**Prüfung des Jahresabschlusses 2010.** Der Jahresabschluss der Daimler AG und der für die Daimler AG und den Konzern zusammengefasste Lagebericht 2010 sind ordnungsgemäß von der KPMG AG, Wirtschaftsprüfungsgesellschaft, Berlin, geprüft und mit einem uneingeschränkten Bestätigungsvermerk versehen worden. Dies gilt auch für den nach IFRS aufgestellten und um den zusammengefassten Lagebericht und weitere Erläuterungen ergänzten Konzernabschluss 2010. Die Abschlussunterlagen und der Gewinnverwendungsvorschlag des Vorstands sowie die Prüfungsberichte des Abschlussprüfers haben dem Aufsichtsrat zur Prüfung vorgelegen.

Zur Vorbereitung standen den Aufsichtsratsmitgliedern umfangreiche Unterlagen – teilweise im Entwurf – zur Verfügung, unter anderem der Geschäftsbericht, die Prüfungsberichte der KPMG für den Jahresabschluss der Daimler AG und den Konzernabschluss nach IFRS und der zusammengefasste Lagebericht für die Daimler AG und den Konzern sowie Entwürfe der Berichte des Aufsichtsrats und des Prüfungsausschusses. Ein Bericht nach Form 20-F war infolge Delisting und Deregistrierung in den USA nicht mehr zu erstellen. Die vorgelegten Unterlagen wurden in einer Sitzung Ende Februar zunächst vom Prüfungsausschuss und sodann vom Aufsichtsrat eingehend behandelt und im Beisein des Abschlussprüfers, der über die Ergebnisse seiner Prüfung berichtete, erörtert. Der Aufsichtsrat hat sich dem Ergebnis der Prüfung durch den Abschlussprüfer angeschlossen und im Rahmen seiner eigenen Prüfung festgestellt, dass Einwendungen nicht zu erheben sind. Der Aufsichtsrat billigte die vom Vorstand aufgestellten Abschlüsse. Damit ist der Jahresabschluss der Daimler AG festgestellt. Der Aufsichtsrat befasste sich darüber hinaus mit dem Stand der kartellrechtlichen Nachprüfung der EU-Kommission bei europäischen Nutzfahrzeugherstellern, behandelte den Gewinnverwendungsvorschlag des Vorstands und schloss sich diesem im Ergebnis an. Er stimmte ferner dem Bericht des Aufsichtsrats in der vorliegenden Fassung zu und billigte die Tagesordnung für die ordentliche Hauptversammlung 2011.

**Dank.** Der Aufsichtsrat dankt allen Mitarbeiterinnen und Mitarbeitern der Gesellschaften des Daimler-Konzerns und der Unternehmensleitung sowie dem ausgeschiedenen Mitglied des Aufsichtsrats für den persönlichen Beitrag und den besonderen Einsatz, mit dem das Unternehmen schon im ersten Jahr nach erfolgreicher Bewältigung der Herausforderungen des Krisenjahres 2009 eine sehr positive Entwicklung verzeichnen konnte.

Stuttgart, im Februar 2011

Der Aufsichtsrat



Dr. Manfred Bischoff  
Vorsitzender

# Der Aufsichtsrat

## Dr. Manfred Bischoff

München

Vorsitzender des Aufsichtsrats der Daimler AG

### **Mitgliedschaften in Aufsichtsräten/anderen Kontrollgremien:**

Fraport AG

Royal KPN N.V.

SMS GmbH – Vorsitzender

UniCredit S.p.A.

Voith GmbH – Vorsitzender

## Erich Klemm\*

Sindelfingen

Vorsitzender des Konzernbetriebsrats im Daimler-Konzern;

Vorsitzender des Gesamtbetriebsrats der Daimler AG;

Stellvertretender Vorsitzender des Aufsichtsrats der

Daimler AG

## Dr. Paul Achleitner

München

Mitglied des Vorstands der Allianz SE

(seit 14. April 2010)

### **Mitgliedschaften in Aufsichtsräten/anderen Kontrollgremien:**

Bayer AG

RWE AG

Allianz Investment Management SE – Vorsitzender

Allianz Global Investors AG

## Sari Baldauf

Helsinki

Former Executive Vice President and General Manager

of the Networks Business Group of Nokia Corporation

### **Mitgliedschaften in Aufsichtsräten/anderen Kontrollgremien:**

Hewlett-Packard Company

F-Secure Corporation

CapMan OYj

Fortum OYj

## Dr. Clemens Börsig

Frankfurt am Main

Vorsitzender des Aufsichtsrats der Deutsche Bank AG

### **Mitgliedschaften in Aufsichtsräten/anderen Kontrollgremien:**

Linde AG

Bayer AG

Emerson Electric Co.

## Prof. Dr. Heinrich Flegel\*

Stuttgart

Leiter Forschung Material, Leichtbau und Produktions-  
technologien, Daimler AG; Vorsitzender des Konzernsprecher-  
ausschusses im Daimler-Konzern

## Dr. Jürgen Hambrecht

Ludwigshafen

Vorsitzender des Vorstands der BASF SE

### **Mitgliedschaften in Aufsichtsräten/anderen Kontrollgremien:**

Deutsche Lufthansa AG

## Jörg Hofmann\*

Stuttgart

IG Metall, Bezirksleiter Baden-Württemberg

### **Mitgliedschaften in Aufsichtsräten/anderen Kontrollgremien:**

Robert Bosch GmbH

Heidelberger Druckmaschinen AG

## Dr. Thomas Klebe\*

Frankfurt am Main

Leiter des Justiziariats der IG Metall

### **Mitgliedschaften in Aufsichtsräten/anderen Kontrollgremien:**

Daimler Luft- und Raumfahrt Holding AG

ThyssenKrupp Materials International GmbH

## Gerard Kleisterlee

Amsterdam

President and CEO of Royal Philips Electronics N.V.

### **Mitgliedschaften in Aufsichtsräten/anderen Kontrollgremien:**

De Nederlandsche Bank N.V.

Royal Dutch Shell Plc.

## Jürgen Langer\*

Frankfurt am Main

Betriebsratsvorsitzender der Niederlassung Frankfurt/

Offenbach, Daimler AG

## Ansgar Osseforth\*

Sindelfingen

Teamleiter Mercedes-Benz Forschung und Entwicklung;

Mitglied des Betriebsrats des Werks Sindelfingen, Daimler AG

## Valter Sanches\*

São Paulo

Secretary of International Relations of Confederação

Nacional dos Metalúrgicos/CUT



#### **Dr. Manfred Schneider**

Leverkusen

Vorsitzender des Aufsichtsrats der Bayer AG

#### **Mitgliedschaften in Aufsichtsräten/anderen Kontrollgremien:**

Linde AG – Vorsitzender

RWE AG – Vorsitzender

TUI AG

#### **Stefan Schwaab\***

Gaggenau

Stellvertretender Vorsitzender des Konzernbetriebsrats im Daimler-Konzern und des Gesamtbetriebsrats der Daimler AG; Stellvertretender Vorsitzender des Betriebsrats des Werks Gaggenau der Daimler AG

#### **Jörg Spies\***

Stuttgart

Vorsitzender des Betriebsrats der Zentrale, Daimler AG (seit 5. Januar 2010)

#### **Lloyd G. Trotter**

Plainville

Former Vice Chairman General Electric;

President & CEO of the General Electric Group's Industrial Division;

Managing Partner, Founder, GenNx360 Capital Partners

#### **Mitgliedschaften in Aufsichtsräten/anderen Kontrollgremien:**

PepsiCo Inc.

Textron Inc.

#### **Dr. h.c. Bernhard Walter**

Frankfurt am Main

Ehemaliger Vorstandssprecher der Dresdner Bank AG

#### **Mitgliedschaften in Aufsichtsräten/anderen Kontrollgremien:**

Bilfinger Berger SE – Vorsitzender

Deutsche Telekom AG

Henkel AG & Co. KGaA

#### **Uwe Werner\***

Bremen

Vorsitzender des Betriebsrats des Werks Bremen der Daimler AG

#### **Lynton R. Wilson**

Toronto

Chairman of the Board of CAE Inc.;

Chancellor, McMaster University

#### **Aus dem Aufsichtsrat ausgeschieden:**

#### **Arnaud Lagardère**

Paris

General Partner and CEO of Lagardère SCA (ausgeschieden am 14. April 2010)

#### **Helmut Lense\***

Stuttgart

Vorsitzender des Betriebsrats des

Werks Untertürkheim

(ausgeschieden am 31. Dezember 2009)

#### **Ausschüsse des Aufsichtsrats:**

#### **Ausschuss nach § 27 Abs. 3 MitbestG**

Dr. Manfred Bischoff – Vorsitzender

Erich Klemm\*

Dr. Manfred Schneider

Dr. Thomas Klebe\*

#### **Präsidialausschuss**

Dr. Manfred Bischoff – Vorsitzender

Erich Klemm\*

Dr. Manfred Schneider

Dr. Thomas Klebe\*

#### **Prüfungsausschuss**

Dr. h.c. Bernhard Walter – Vorsitzender

Dr. Clemens Börsig

Erich Klemm\*

Stefan Schwaab\*

#### **Nominierungsausschuss**

Dr. Manfred Bischoff – Vorsitzender

Dr. Manfred Schneider

Lynton R. Wilson

\* Vertreter der Arbeitnehmer

Die Daimler-Aktie profitierte im Jahr 2010 von der sehr positiven Entwicklung im operativen Geschäft und entwickelte sich deutlich besser als der DAX. Wir informieren die Analysten und Investoren im Rahmen umfassender Investor Relations-Aktivitäten. Vorstand und Aufsichtsrat schlagen die Auszahlung einer Dividende von 1,85 € pro Aktie vor.

## Entwicklung der Daimler-Aktie und wichtiger Börsenindizes

|                              | Ende 2010 | Ende 2009 | 10/09<br>Veränd. in % |
|------------------------------|-----------|-----------|-----------------------|
| Daimler-Aktie (in €)         | 50,73     | 37,23     | +36                   |
| DAX 30                       | 6.914     | 5.957     | +16                   |
| Dow Jones Euro STOXX 50      | 2.793     | 2.966     | -6                    |
| Dow Jones Industrial Average | 11.578    | 10.428    | +11                   |
| Nikkei                       | 10.229    | 10.546    | -3                    |
| Dow Jones STOXX Auto Index   | 341       | 236       | +44                   |

## Kennzahlen je Aktie

|                                     | 2010  | 2009  | 10/09<br>Veränd. in % |
|-------------------------------------|-------|-------|-----------------------|
| Werte in €                          |       |       |                       |
| Konzern-Ergebnis                    | 4,28  | -2,63 | .                     |
| Konzern-Ergebnis (verwässert)       | 4,28  | -2,63 | .                     |
| Dividende                           | 1,85  | 0,00  | .                     |
| Eigenkapital (31.12.)               | 35,62 | 29,99 | +19                   |
| Börsenkurs: Jahresende <sup>1</sup> | 50,73 | 37,23 | +36                   |
| Höchst <sup>1</sup>                 | 54,87 | 37,65 | +46                   |
| Tiefst <sup>1</sup>                 | 30,35 | 17,44 | +74                   |

<sup>1</sup> Schlusskurse

**Wechselhafte Entwicklung an den Weltbörsen.** Die weltweiten Aktienmärkte entwickelten sich im Jahr 2010 weiterhin volatil und uneinheitlich. Vor dem Hintergrund der Debatte über die öffentliche Verschuldung und die hohen Haushaltsdefizite einiger Staaten der Eurozone verhielten sich die Anleger zunächst abwartend, und die internationalen Aktienmärkte tendierten seitwärts. Angesichts zunehmender Befürchtungen vor einem möglichen Rückfall – insbesondere der US-Wirtschaft – in die Rezession (double-dip) sanken die Aktienkurse über die Sommermonate auf ihre Jahrestiefstwerte. Mit den Halbjahreszahlen der Unternehmen und nach guten Wirtschaftsdaten begann die Stimmung an den internationalen Aktienmärkten zu drehen, sodass sich die wichtigsten Indizes in der zweiten Jahreshälfte wieder deutlich aufwärts bewegten. Die Ankündigung eines neuerlichen Programms zur Ausweitung der Geldmenge in den USA sowie das graduell eher abnehmende Risiko eines neuerlichen Konjunkturerinbruchs kamen den Aktienmärkten zusätzlich zugute.

Die sehr unterschiedliche konjunkturelle Entwicklung in den einzelnen Regionen spiegelte sich auch in den unterjährigen Kursverläufen wider. Der Index der wichtigsten Titel im Euroraum, der Dow Jones Euro STOXX 50, gab im Jahr 2010 insgesamt um 6% nach. Der deutsche Leitindex DAX entwickelte sich hingegen mit einem Plus von 16% sehr positiv.

Hier wirkte sich, abgesehen von der robusten Konjunktur in Deutschland, auch die Tatsache günstig aus, dass Unternehmen, die in erheblichem Maße außerhalb Europas tätig sind, von der Schwäche des Euros profitieren. Nachdem Sorgen um einen möglichen double-dip in den USA den Aktienmarkt zunächst belastet hatten, stellte sich in der zweiten Jahreshälfte wieder ein spürbarer Aufwärtstrend ein, sodass der Dow Jones auf Jahressicht ebenfalls um 11% zulegen konnte. In Japan konnten auch die Kursgewinne in den letzten beiden Monaten des Jahres dem Nikkei-Index nicht mehr zu einer insgesamt positiven Jahresbilanz verhelfen (-3%).

**Daimler-Aktie mit starker Wertentwicklung im Jahresverlauf (+36%).** Die Daimler-Aktie startete mit einem Kurs von rund 37 € ins Jahr 2010. Die Bedenken bei den Investoren im Zusammenhang mit der Ankündigung einer restriktiveren Geldpolitik durch die chinesische Notenbank und der Schuldenkrise in Griechenland wirkten in den ersten beiden Monaten des Jahres auch belastend auf den Kursverlauf zyklischer Aktien wie Daimler. Infolge starker Abgaben nach der Ankündigung, auf eine Dividendenzahlung für das Geschäftsjahr 2009 zu verzichten, fiel die Daimler-Aktie am 25. Februar auf 30,35 €, den tiefsten Stand des Jahres.

### Höchst- und Tiefstkurse Daimler, 2010

in €

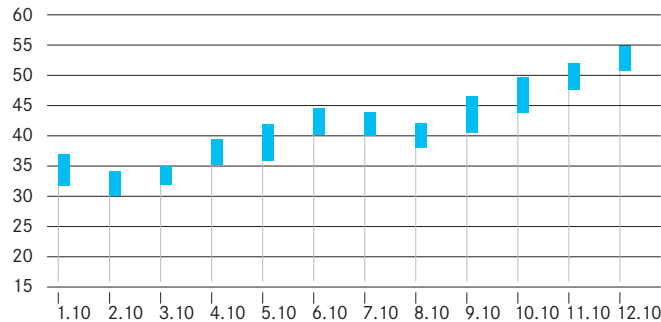

Danach setzte eine länger anhaltende Phase der Erholung ein. Wachsendes Vertrauen vieler Anleger in Bezug auf eine schnelle Belebung der Weltwirtschaft und deutlich steigende Pkw-Absätze steigerten die Nachfrage nach der Daimler-Aktie. Auf einem Analysten- und Investorentag Ende Mai in Peking erläuterten wir die Strategie der nächsten Jahre für Mercedes-Benz Cars und stellten ein nachhaltiges Profitabilitätsziel von 10% über den Zyklus ab dem Jahr 2013 in Aussicht. Dies gab unserer Aktie weiteren Auftrieb. Nach einem sehr volatilen Kursverlauf innerhalb des zweiten Quartals erreichte unsere Aktie am 21. Juni mit 44,50 € den höchsten Stand im ersten Halbjahr.

Während die Halbjahresergebnisse und die Anhebung des Ergebnisausblicks die positive Erwartung des Kapitalmarkts gegenüber unserer Aktie bestätigten, belasteten Gewinnmitnahmen im weiteren Verlauf den Börsenkurs der Daimler-Aktie. Angesichts der guten Geschäftsentwicklung im September setzte jedoch ein neuer Kursaufschwung ein. Die Ergebniszahlen für das dritte Quartal sowie die erneute Anhebung der Gewinnerwartung für das Gesamtjahr 2010 untermauerten die Nachhaltigkeit der Erholung.

Nach einem Analysten- und Investorentag Ende November und der Präsentation der mittelfristigen Perspektiven des Daimler-Nutzfahrzeuggeschäfts in unserem Lkw-Werk in Wörth sowie einer allgemein positiven Kursentwicklung von Automobil-Aktien konnte sich die Daimler-Aktie über der 50-€-Marke etablieren. Am 10. Dezember erreichte unsere Aktie bei 54,87 € ihr Jahreshoch. In den letzten Handelstagen kam die Daimler-Aktie aufgrund kurzfristiger Bedenken über die Perspektiven des chinesischen Pkw-Marktes für das Jahr 2011 unter Druck und beendete das Börsenjahr mit einem Xetra-Kurs von 50,73 €. Die Marktkapitalisierung lag zum Jahresende bei 54,0 Mrd. €.

Im Jahresverlauf verzeichnete die Daimler-Aktie einen Wertzuwachs von 13,50 € oder rd. 36%. Mit dieser starken Performance entwickelte sich die Daimler-Aktie deutlich besser als der DAX (+16%), blieb jedoch leicht unter dem Anstieg des Dow Jones STOXX Auto Index (+44%).

### Börsenkursentwicklung (indiziert)

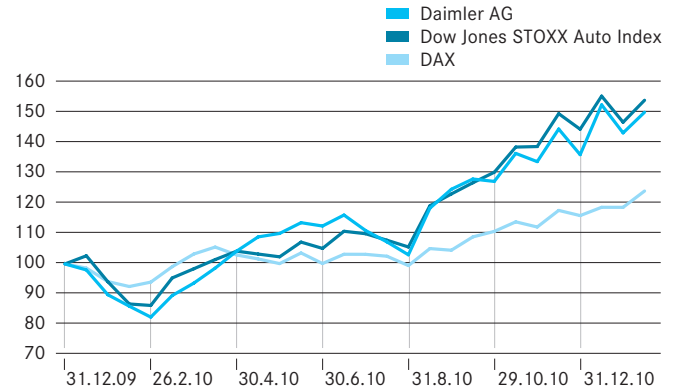

**Dividende von 1,85 €.** Vorstand und Aufsichtsrat werden der Hauptversammlung für das Geschäftsjahr 2010 eine Dividende von 1,85 € pro Aktie vorschlagen. Die Ausschüttungssumme beträgt 1.971 Mio. €.

### Börsennotierung an der New York Stock Exchange (NYSE)

**beendet.** Daimler informierte am 14. Mai 2010 die New York Stock Exchange (NYSE) und die Öffentlichkeit über die Absicht, die Notierung der Daimler-Aktie sowie der von der Daimler Finance North America LLC begebenen 8,5%-USD-Anleihe, fällig per 18. Januar 2031, und die dazugehörige Daimler-Garantie zu beenden und einen Antrag auf Deregistrierung bei der amerikanischen Börsenaufsicht Securities and Exchange Commission (SEC) zu stellen. Nach Inkrafttreten des Delistings zum 7. Juni 2010 und der Deregistrierung aller Wertpapiere zum 7. September 2010 sind unsere Berichtspflichten nach dem U.S. Securities Exchange Act 1934 beendet. Der wesentliche Grund für die Beendigung der Notierung an der NYSE und die Deregistrierung bei der SEC ist ein stark verändertes Verhalten der Investoren, die den Handel mit Daimler-Aktien mittlerweile in erster Linie in Deutschland und über elektronische Handelsplattformen abwickeln. Ziel ist es zudem, die Komplexität in der Finanzberichterstattung sowie Verwaltungskosten und Gebühren zu reduzieren. Unabhängig vom Delisting und von der Deregistrierung wird Daimler in seiner Finanzberichterstattung ein hohes Maß an Transparenz beibehalten und weiterhin den Anforderungen internationaler Anleger entsprechen.

### American-Depositary-Receipt (ADR)-Programm in den USA

**aufgelegt.** Im September 2010 haben wir ein Sponsored-Level-1-ADR-Programm in den USA aufgelegt. Die ADRs werden im außerbörslichen Handel (over-the-counter) in den USA unter dem Symbol DDAIY gehandelt. Das Verhältnis der ADRs gegenüber der zugrunde liegenden Stammaktie beträgt 1:1, d. h. ein Daimler-ADR entspricht einer Daimler-Aktie. Die Deutsche Bank Trust Company agiert als Depotbank für das ADR-Programm.

## Kennzahlen

|                                  | Ende 2010 | Ende 2009 | 10/09        |
|----------------------------------|-----------|-----------|--------------|
|                                  |           |           | Veränd. in % |
| Gezeichnetes Kapital (in Mio. €) | 3.058     | 3.045     | +0           |
| Anzahl der Aktien (in Mio.)      | 1.065,6   | 1.061,2   | +0           |
| davon im eigenen Bestand         | 0,2       | 37,1      | -99          |
| Börsenkurswert (in Mrd. €)       | 54,0      | 38,1      | +42          |
| Anzahl der Aktionäre (in Mio.)   | 1,0       | 1,2       | -20          |
| Indexgewichtung                  |           |           |              |
| DAX 30                           | 7,51%     | 5,98%     |              |
| Dow Jones Euro STOXX 50          | 2,88%     | 2,05%     |              |
| Langfristiges Credit Rating      |           |           |              |
| Standard & Poor's                | BBB+      | BBB+      |              |
| Moody's                          | A3        | A3        |              |
| Fitch                            | BBB+      | BBB+      |              |
| DBRS                             | A (low)   | A (low)   |              |

## Internationale Aktionärsstruktur mit stabilen Großaktionären.

Mit rund 1,0 Mio. Aktionären verfügt Daimler weiterhin über eine breite Aktionärsbasis. Die Aktionärszahlen sind jedoch weiter rückläufig, da insbesondere Privatanleger weniger Anteile halten. Der Anteil der institutionellen Investoren ist im Berichtsjahr 2010 weiter gestiegen. Aabar Investments PJSC, Abu Dhabi, hält 9,0% der Daimler-Aktien und ist damit nach wie vor unser größter Investor. Zweitgrößter Aktionär ist weiterhin die Kuwait Investment Authority mit einem Anteil von 6,9%. Im April 2010 haben die Daimler AG und die Renault-Nissan-Allianz zusätzlich zu einer weitreichenden strategischen Kooperation eine gegenseitige Kapitalbeteiligung vereinbart. Die Renault-Nissan-Allianz hat dabei aus unserem Bestand eigener Aktien einen Anteil von 3,1% erhalten. Der Bestand eigener Aktien hat sich dadurch unter die Meldeschwelle von 3% reduziert. Zum Jahresende hielten wir noch 221.418 Aktien (0,02%) im eigenen Bestand.

Die Capital Research and Management Company, Los Angeles, hat uns mitgeteilt, dass sie zum 26. Mai 2010 3,1% der Daimler-Aktien hielt. Weiterhin oberhalb der Meldeschwelle von 3% gemäß WpHG liegt die BlackRock Inc., New York, die uns im Dezember 2009 einen Anteil von 3,9% als meldepflichtiger Großaktionär mitgeteilt hatte.

Insgesamt hielten institutionelle Anleger zum Ende des Berichtsjahres 62% des Aktienkapitals, 19% befanden sich im Eigentum von Privatanlegern. Europäische Investoren besaßen rund 65% des Kapitals, rund 15% lagen bei US-Investoren.

## Börsendaten der Daimler-Aktie

|                        |              |
|------------------------|--------------|
| ISIN                   | DE0007100000 |
| Wertpapierkennnummer   | 710000       |
| Börsenkürzel           | DAI          |
| Tickersymbol Reuters   | DAIGn.DE     |
| Tickersymbol Bloomberg | DAI:GR       |

Die Gewichtung der Daimler-Aktie in wichtigen Indizes hat sich im Jahresverlauf durch die positive Kursentwicklung erhöht. Mit einer Gewichtung von 7,51 (i. V. 5,98)% stand Daimler am Jahresende 2010 an dritter Stelle im deutschen Aktienindex DAX 30. Im Dow Jones Euro STOXX 50 war die Aktie mit einem Gewicht von 2,88 (i. V. 2,05)% vertreten. Die Daimler-Aktie ist in Frankfurt und Stuttgart notiert. Im Jahr 2010 lag der Börsenumsatz in Deutschland bei 1.492 (i. V. 1.830) Mio. Aktien. Darüber hinaus wird Daimler zunehmend auf den neu entstandenen multilateralen Handelsplattformen und im Over-The-Counter-Markt gehandelt.

**Belegschaftsaktienprogramm wieder aufgenommen.** Im Mai 2010 konnten bezugsberechtigte Mitarbeiter wieder Belegschaftsaktien erwerben und dabei den neuen erhöhten Steuerfreibetrag nutzen. Dabei haben 19.400 Mitarbeiterinnen und Mitarbeiter insgesamt 350.700 Belegschaftsaktien erworben.

**Hauptversammlung bestätigt mit großer Mehrheit Vorschläge der Verwaltung.** Unsere Hauptversammlung am 14. April 2010 im Internationalen Congress Centrum (ICC) Berlin besuchten rund 4.700 (i. V. 7.000) Aktionärinnen und Aktionäre. Mit 40,3 (i. V. 41,6)% des vertretenen Grundkapitals lag die Hauptversammlungspräsenz aber fast auf dem Niveau des Vorjahres. Bei der Abstimmung über die Tagesordnungspunkte folgten die Aktionäre jeweils mit großer Mehrheit den Vorschlägen der Verwaltung.

Ihr Stimmrecht können die Anteilseigner in der Hauptversammlung entweder selbst ausüben oder durch einen Bevollmächtigten ihrer Wahl oder einen weisungsgebundenen Stimmrechtsvertreter der Gesellschaft ausüben lassen. Für die Hauptversammlung 2011 beabsichtigen wir erstmals auch die Briefwahl anzubieten. Alle Dokumente und Informationen zur Hauptversammlung sind unter [www.daimler.com/ir/hv](http://www.daimler.com/ir/hv) verfügbar.

Daimler nutzte die Ausstellungsflächen des ICC erneut, um den Anteilseignern das breite Produktspektrum und die Technologiekompetenz des Unternehmens, insbesondere im Bereich nachhaltiger Mobilität, zu demonstrieren.

### Aktionärsstruktur am 31. 12. 2010

nach Aktionärsgruppen

|                             |       |
|-----------------------------|-------|
| Aabar Investments PJSC      | 9,0%  |
| Kuwait Investment Authority | 6,9%  |
| Renault-Nissan              | 3,1%  |
| Institutionelle Investoren  | 61,9% |
| Private Anleger             | 19,1% |

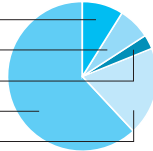

**Umfassende Investor Relations-Aktivitäten.** Auch im Jahr 2010 hat der Bereich Investor Relations institutionelle Investoren, Analysten, Ratingagenturen sowie die privaten Anleger zeitnah über die wirtschaftliche Entwicklung des Unternehmens informiert. Für institutionelle Anleger und Analysten veranstalteten wir Roadshows in den Finanzzentren Europas, Nordamerikas, Asiens und Australiens. Darüber hinaus führten wir zahlreiche Einzelgespräche, sogenannte »one-on-one-Meetings«, durch. Unternehmenspräsentationen haben wir im Rahmen von Investorenkonferenzen, insbesondere während der internationalen Automobilausstellungen in Genf, Paris und Hannover, durchgeführt. Über unsere Quartalsergebnisse wurde mittels Telefonkonferenzen und Internetübertragungen regelmäßig berichtet. Die Präsentationen lassen sich auf unserer Internetseite unter <http://www.daimler.com/ir/event/d> einsehen. Schwerpunkte der Gespräche mit den Analysten und Investoren waren die aktuelle Ergebniserwartung für das Jahr 2010 sowie die Geschäftsentwicklungen und die Ertragskraft in den einzelnen Geschäftsfeldern und Regionen.

Besonders hervorzuheben sind drei Veranstaltungen: Am 7. April 2010 hat Daimler auf einer gemeinsamen Pressekonferenz mit Renault-Nissan die strategische Allianz bekannt gegeben. Die Akteure am Kapitalmarkt wurden mit einer Live-Videoübertragung im Internet sowie durch eine separate Telefonkonferenz mit den beiden Vorstandsvorsitzenden über die Kooperation informiert. Am 28. Mai 2010 veranstalteten wir einen Analysten- und Investorentag in Peking mit Vorträgen und Diskussionen zu den Perspektiven und Zielen von Mercedes-Benz Cars in China. Am 30. November 2010 luden wir rund 160 Analysten, Investoren und Bankenvertreter in unser Lkw-Werk nach Wörth ein und informierten dort über die Perspektiven und Ziele von Daimler Trucks und Daimler Buses in den verschiedenen Regionen der Welt.

### Aktionärsstruktur am 31. 12. 2010

nach Regionen

|                              |       |
|------------------------------|-------|
| Deutschland                  | 28,2% |
| Europa, ohne Deutschland     | 36,9% |
| USA                          | 15,4% |
| Vereinigte Arabische Emirate | 9,0%  |
| Kuwait                       | 6,9%  |
| Asien                        | 3,0%  |
| Sonstige                     | 0,6%  |

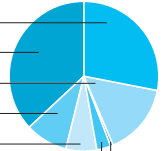

**Internetauftritt nutzt neue Möglichkeiten.** Nach der grundlegenden Modernisierung der Daimler-Konzernwebsite wurde im Jahr 2010 ein breites Spektrum von Konzernthemen vorgestellt. Informative Texte, schematische Animationen und viel Filmmaterial laden durch ihre innovative, multimediale Präsentationsform die Nutzer zum eigenständigen Vertiefen ein. Zudem überarbeiteten wir die mobile Konzernwebsite, sodass sie jetzt über mobile Endgeräte – wie z. B. Smartphones – optimal erreichbar ist. Neben den bislang angebotenen Inhalten von Investor Relations können damit alle aktuellen Informationen von Daimler zu unseren Marken und Produkten sowie zu Technologie- und Innovationsthemen schnell und bequem auch von unterwegs unter [www.daimler.mobi](http://www.daimler.mobi) abgerufen werden. Darüber hinaus steht jetzt für iPhone™- bzw. für iPad™-Nutzer eine neue Daimler-App zur Verfügung. Nutzer können dabei multimediale Specials mobil optimiert abrufen – beispielsweise zu den Marken und Produkten, Technologien oder Veranstaltungen des Unternehmens.

Unser interaktiver Geschäftsbericht 2009 wurde von der League of American Communications Professionals LLC (LACP) mit einem LACP-Award in Silber ausgezeichnet. Von der Jury besonders hervorgehoben wurden das Design und die perfekt auf die Zielgruppe abgestimmten Informationen.

**Zahl der Online-Aktionäre weiterhin auf hohem Niveau.** Die Angebote zur persönlichen elektronischen Information und Kommunikation finden bei unseren Aktionärinnen und Aktionären weiterhin großen Zuspruch. Die Zahl der Aktionäre, die ihre Einladung zur Hauptversammlung nicht mehr per Post, sondern per E-Mail erhalten haben, ist von 85.000 auf 90.000 Aktionäre gestiegen. Wir bedanken uns bei diesen Aktionären, da sie dazu beigetragen haben, die Umwelt zu schonen und Kosten zu sparen. Auch im Jahr 2010 haben wir unter diesen Aktionären 50 attraktive Preise verlost. Den Zugang und weitere Informationen zum e-service für Aktionäre finden Sie im Internet unter <https://register.daimler.com>.

Nach der Optimierung unseres elektronischen HV-Services war es für unsere Online-Aktionäre erstmals möglich, die Eintrittskarte zur Hauptversammlung bei Bedarf selbst auszudrucken. Von diesem neuen Service haben rund 1.400 Aktionärinnen und Aktionäre Gebrauch gemacht.

Vor 125 Jahren begann mit der Erfindung des Automobils durch unsere Pioniere Gottlieb Daimler und Carl Benz die Erfolgsgeschichte der motorisierten und individuellen Mobilität. Dieses Jubiläum hat für Daimler eine besondere Bedeutung. In der Tradition unserer Firmengründer haben wir seitdem zahlreiche technische Errungenschaften auf den Weg gebracht. Daimler hat Pionierarbeit geleistet und wird weiterhin im Automobil- und Nutzfahrzeugbau mit wegweisenden Innovationen die Zukunft der Mobilität gestalten.

Innovationen ganz nah.  
Jede Pionierleistung beginnt  
mit der Liebe zum Detail.



# Die schönste Form von Effizienz.

Mit einem innovativen Technologiepaket erreichen die neuen Mercedes-Benz V6- und V8-Ottomotoren herausragende Leistungsdaten mit geringem Kraftstoffverbrauch. Saubere und effiziente Verbrennungsmotoren werden noch lange Zeit die Basis der Mobilität bilden – auch für Hybridantriebe. Mercedes-Benz Modelle, wie etwa der neue CLS, bringen die neue Effizienz in Vollendung auf die Straße.



A close-up photograph of a metallic cylinder liner, likely from a V6 or V8 engine. The image is heavily stylized with a deep blue color cast. The metallic surface shows fine, parallel machining marks. The lighting creates strong highlights and shadows, emphasizing the curved, cylindrical shape of the component. The background is a dark, textured blue.

Zylinderlaufbuchse des neuen  
V6- und V8-Motors.

Weltweit fasziniert der neu aufgelegte Mercedes-Benz CLS in besonderem Design: mit kultivierter Sportlichkeit und Effizienz auf höchstem Niveau.

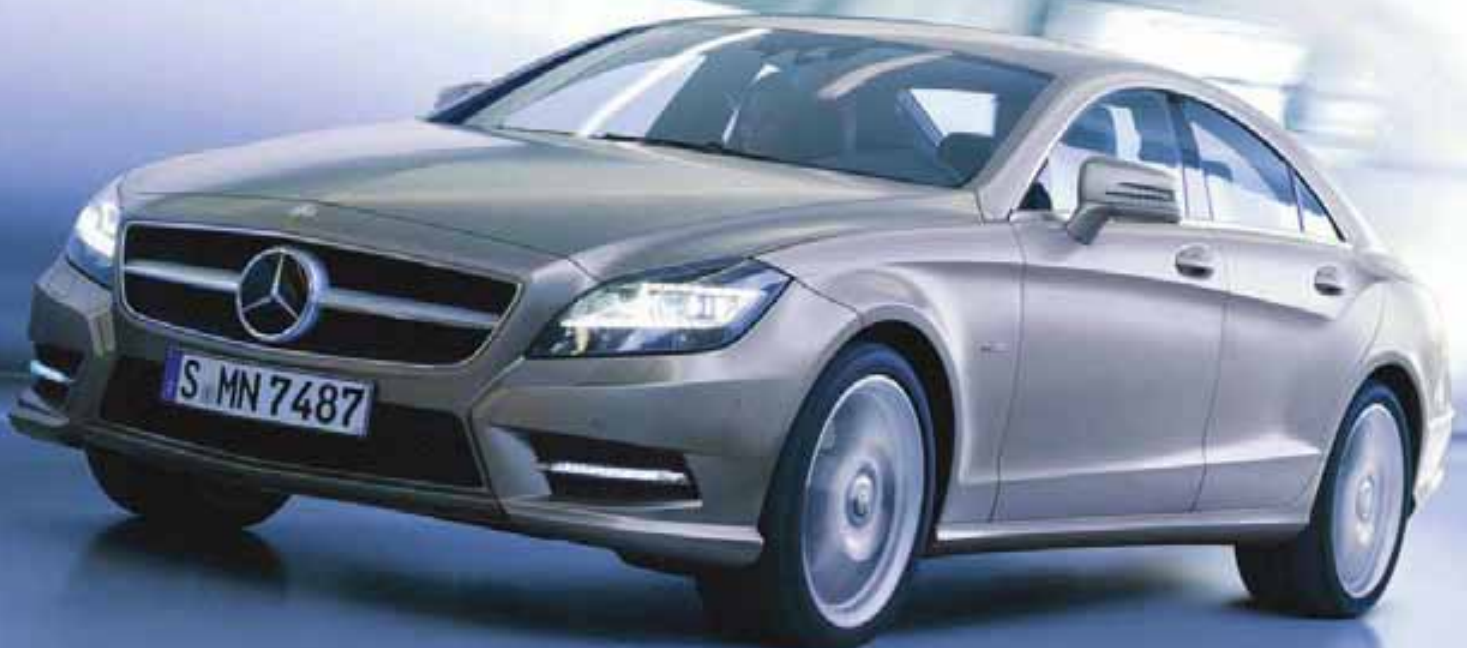

**E**in aufregender Newcomer war er schon immer: Der Mercedes-Benz CLS begründete bereits im Jahr 2003 als weltweit erstes viertüriges Coupé ein völlig neues Fahrzeugsegment. 2010 feierte der neu aufgelegte CLS Premiere. Auch die zweite Generation macht Sinnlichkeit und Sinn, Design und Technologie auf besondere Weise erlebbar. Die CLS-Silhouette wird durch ein neuartiges Linien- und Flächenspiel noch bewegender. Zeitloses Design und innovative Details zeichnen auch das Interieur aus. Dynamik beweist der CLS durch seine Leichtbauweise und die effiziente V6- und V8-Motorisierung: bis zu 25 Prozent weniger Verbrauch und noch mehr Leistung als der Vorgänger. So wurde die Stilikone von einer Fachjury sowie von den Lesern der »Auto Bild«, »Bild am Sonntag« und anderen europäischen Automobilzeitschriften mit dem »Goldenen Lenkrad 2010« ausgezeichnet.

»Eine herausragende Designsprache und ein höchst effizienter Antrieb verleihen dem neuen CLS seinen einzigartigen Charakter.«

Hubert Lee, Creative Director, Mercedes-Benz Research & Development,  
Advanced Design, Carlsbad, Kalifornien

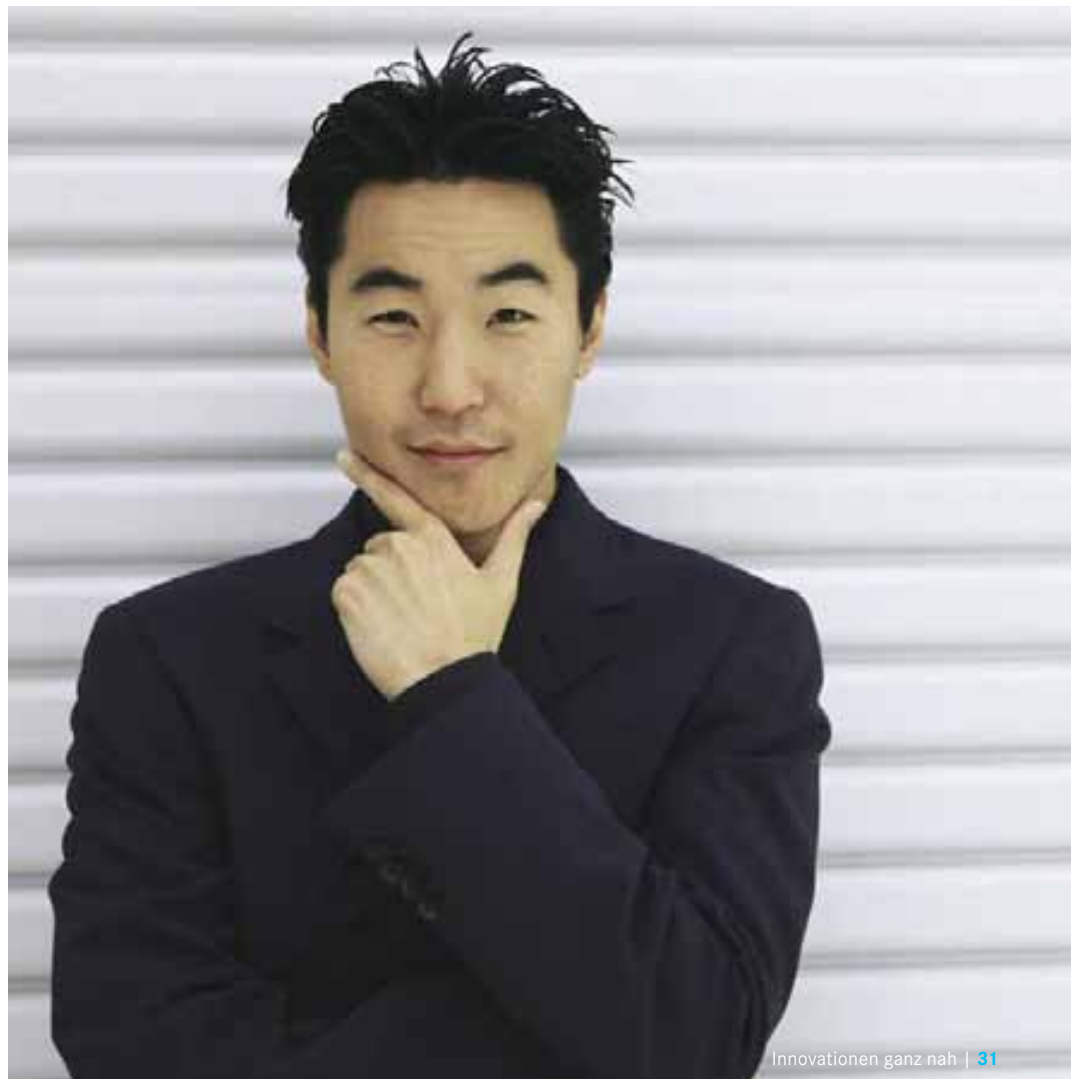

Design-Trendsetter und Vorreiter in puncto Effizienz. Noch mehr Leistung und weniger Verbrauch charakterisieren alle vier V6- und V8-Motoren, die im Mercedes-Benz CLS eingesetzt werden.



# Das effiziente E-Klasse Cabrio folgt keiner Strömung, sondern gibt sie vor.

**D**as Mercedes-Benz E-Klasse Cabriolet lässt alle Herzen höher schlagen. Unter den Neuerscheinungen des Jahres 2010 ist es von den Lesern der »auto motor und sport« zum »schönsten Cabrio 2010« gewählt worden. Den Designpreis »Autonis« erhielt der offene Viersitzer mit klassischem Stoffverdeck für sein stilreines Cabrio-Gefühl und seine Optik. Das E-Klasse Cabrio fasziniert mit klaren Proportionen und einer eleganten Silhouette. Einzigartig sind auch das Sicherheitsniveau sowie der herausragende Ganzjahreskomfort mit dem innovativen Windschott AIRCAP, Nackenheizung und Akustikverdeck. Das Cabriolet weckt Emotionen – nicht nur mit seinem zukunftsweisenden Design und Komfort. Es begeistert auch durch seine Motoren: Die V6- und V8-Technologie der zweiten Generation macht den offenen Viersitzer noch leistungsstärker, sauberer und sparsamer. So avanciert das Mercedes-Benz E-Klasse Cabrio zum Open Air Star aller vier Jahreszeiten.

»Die Schönheit und Eleganz meines E-Klasse Cabrios begeistern mich immer wieder. Genauso die enorme Effizienz.«

Stefan von Wallfeld, Unternehmer, Stuttgart

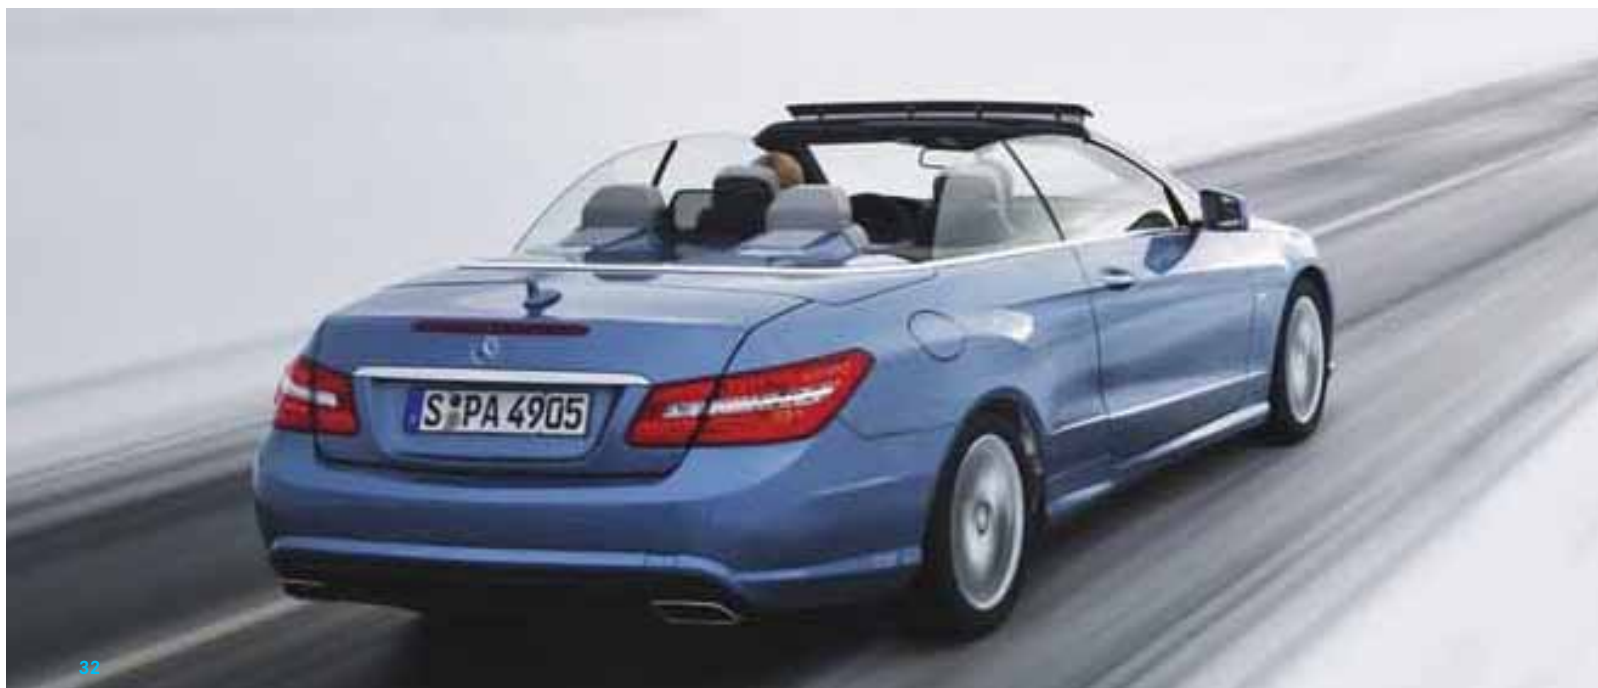

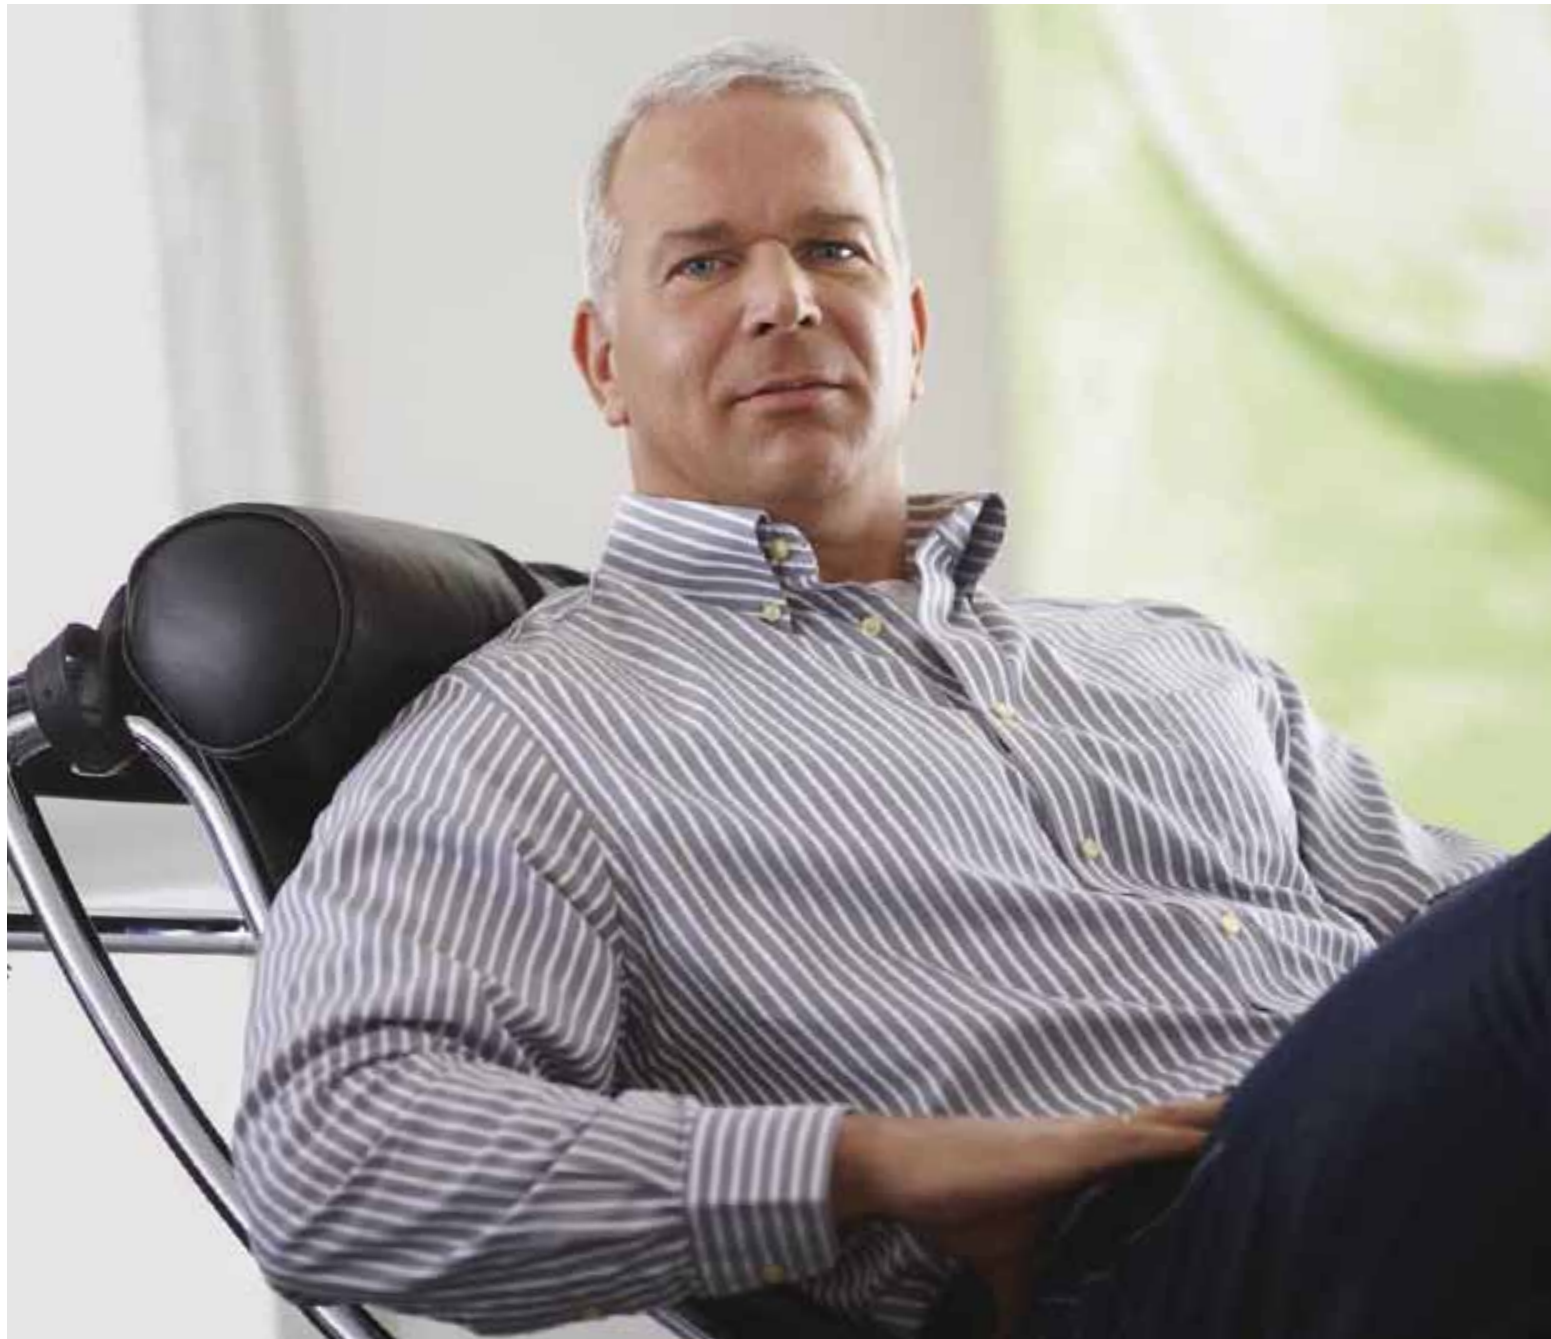

Frischer Wind für noch mehr Effizienz.  
Innovative Benzin-Direkteinspritzer sorgen  
im Mercedes-Benz E-Klasse Cabrio für  
Spitzenwerte in der Leistung – und für nied-  
rigen Verbrauch und geringe Emissionen.



Wabenstruktur eines SCR-Katalysators  
als ein Modul zur Stickoxidreduzierung.

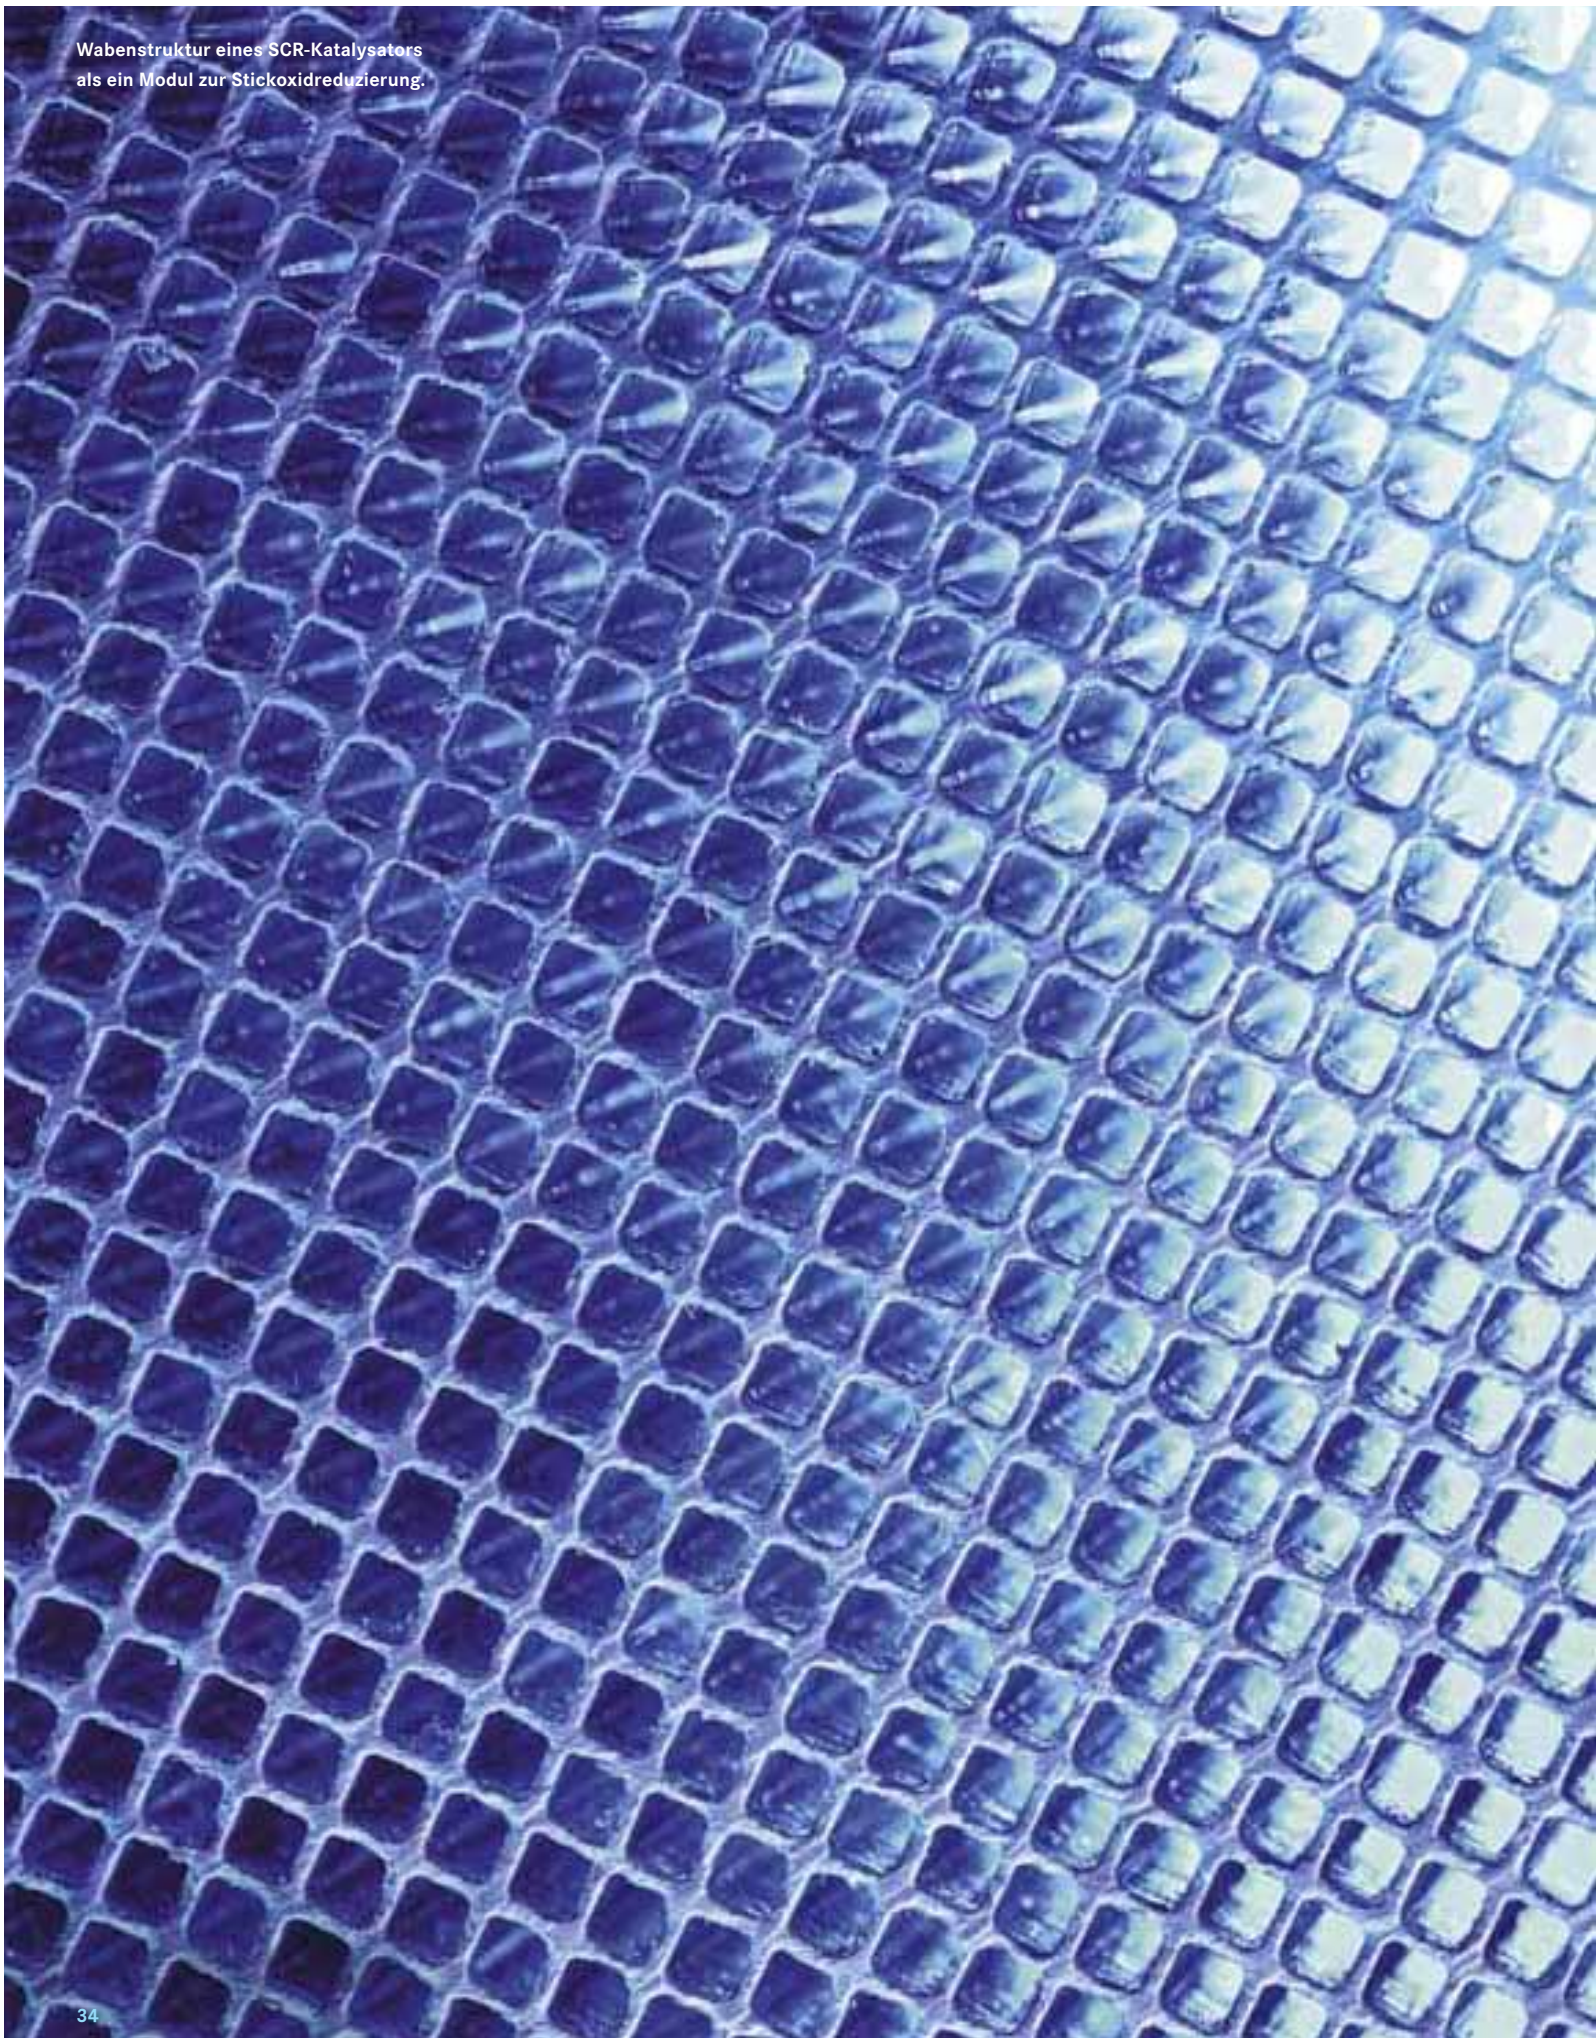



# Zukunftsstark bis ins kleinste Detail.

Die SCR-Technologie macht die sparsamen Dieselmotoren so sauber, dass sie weltweit strengste Emissionsanforderungen erfüllen. Daimler hat 2005 als Pionier diese revolutionäre Abgastechnologie unter der Bezeichnung »BLUETEC« erstmals bei Nutzfahrzeugen und 2006 auch bei Pkw eingeführt. Jetzt rollen die neuen Freightliner Cascadia Trucks ebenfalls mit SCR-Katalysator über die US-Highways.



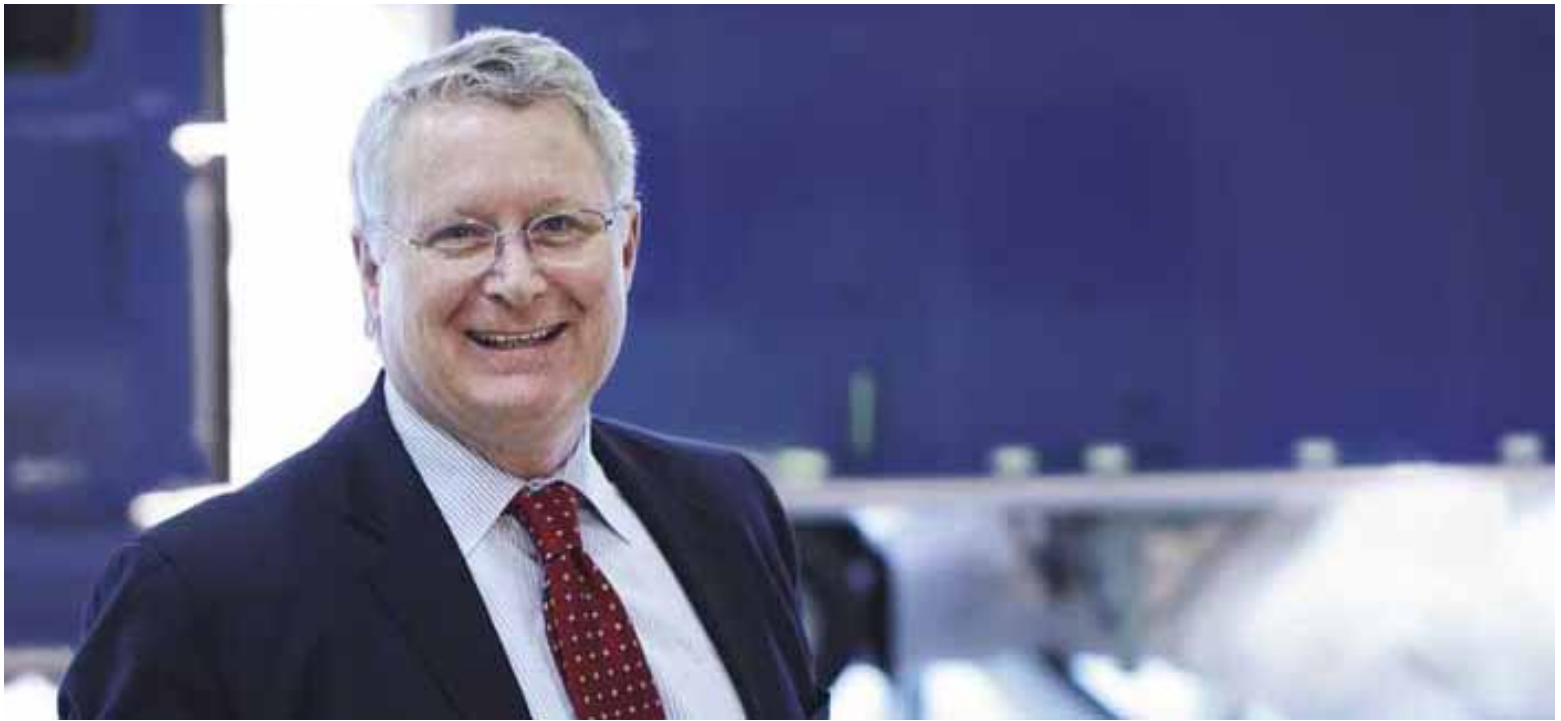

»Der Freightliner Cascadia mit SCR-Technologie ist für mich die erste Wahl zur Einhaltung der strengen US-Abgasrichtlinie EPA 2010.«

Chris Lofgren, CEO Schneider National, Inc., Green Bay, Wisconsin

Perfekt gerüstet für eine saubere Zukunft. Mit neuen Großaufträgen hat Daimler Trucks North America (DTNA) bereits im Jahr 2010 rund 20.000 BlueTec-Lkw der Marken Freightliner und Western Star verkauft. Einer der Aufträge kommt von Schneider National, Inc., einem der größten Transportunternehmen der USA. Seit 1991 bezieht Schneider seine Motoren von der Daimler-Tochter Detroit Diesel Corporation, die bereits seit 2005 auf die SCR-Technologie setzt. Die innovativen Detroit Diesel Motoren sind heute die gefragtesten Motoren in allen Lkw der DTNA-Marke Freightliner. Unter dem Namen BlueTec hat DTNA die SCR-Abgasreinigungstechnologie zur Einhaltung der strengen US-Abgasrichtlinie EPA 2010 eingeführt, da sie den Schadstoffausstoß nachweislich am effektivsten senkt. Mit den SCR-Katalysatoren wird die Erfahrung der Mercedes-Benz BlueTec-Lkw genutzt, die in Europa bereits viele Millionen Kilometer sicher, zuverlässig und kraftstoffsparend zurückgelegt haben. 2009 beteiligte sich Schneider mit zwei Cascadia, dem Flaggschiff der schweren Freightliner Lkw-Klasse, an der Alltagserprobung der SCR-Technologie. Jetzt hat das Transportunternehmen weitere Cascadia mit SCR-Abgasreinigung geordert und lässt auf dem amerikanischen Kontinent die Räder der Wirtschaft umweltfreundlich rollen.

# Freightliner Trucks mit sauberer BLUETEC-Technologie sind im Kommen.

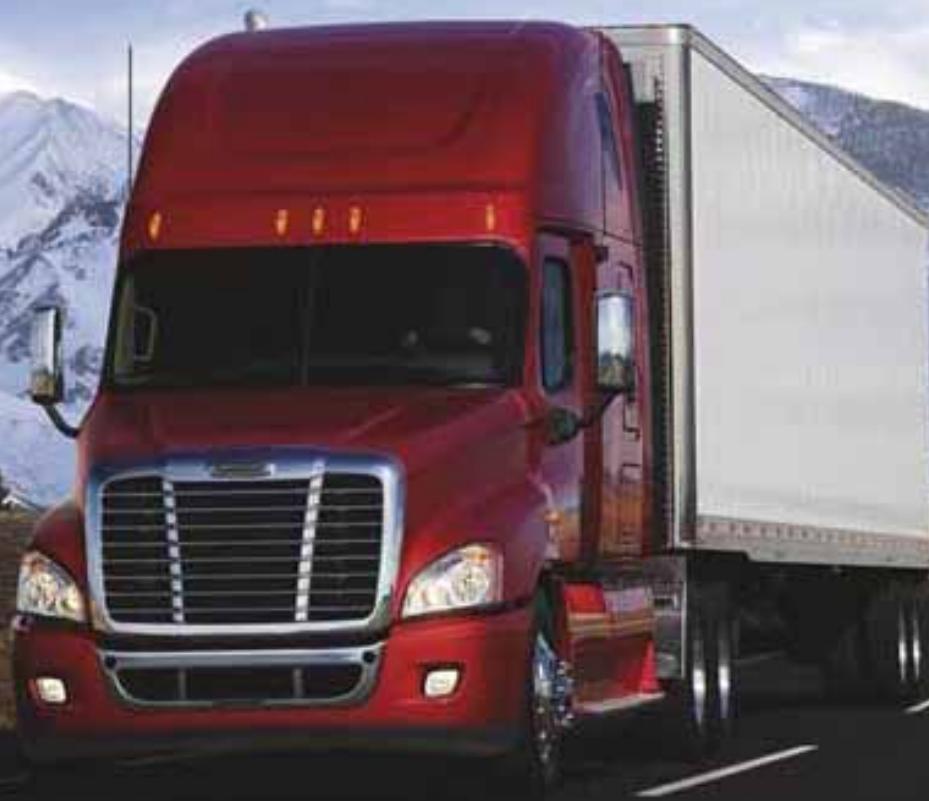

**Starke Leistung:** Alle neuen Freightliner Cascadia sind mit SCR-Abgasreinigung erhältlich. In Europa legten BlueTec-Lkw von Mercedes-Benz bereits über 20 Millionen Kilometer mit der innovativen SCR-Technologie erfolgreich zurück.



# Eine wegweisende Verbindung.

Hybridantriebe kombinieren Verbrennungs- und Elektromotoren und sind ein Meilenstein zur weiteren Effizienzsteigerung des Antriebs. Daimler hat einen modularen Hybrid-Baukasten entwickelt, auf dessen Basis je nach Leistung und Einsatzspektrum viele Varianten realisiert werden können. Im Praxiseinsatz beweisen der Mercedes-Benz Atego BlueTec Hybrid und der Mercedes-Benz Citaro FuelCELL-Hybrid ihre innovativen Stärken.



A close-up, macro photograph of a copper wire winding in a motor stator. The wire is tightly coiled, creating a series of overlapping loops that catch the light, giving it a glossy, metallic appearance. The background is a soft, out-of-focus blue, which makes the copper wire stand out as the primary subject. The lighting highlights the texture and curvature of the wire, emphasizing the precision of the manufacturing process.

Die lackierte Kupferdrahtwicklung  
eines Elektromotors im Hybridantrieb.

Der Atego BlueTec Hybrid  
liefert Bestleistungen.  
Auch im Umweltschutz.

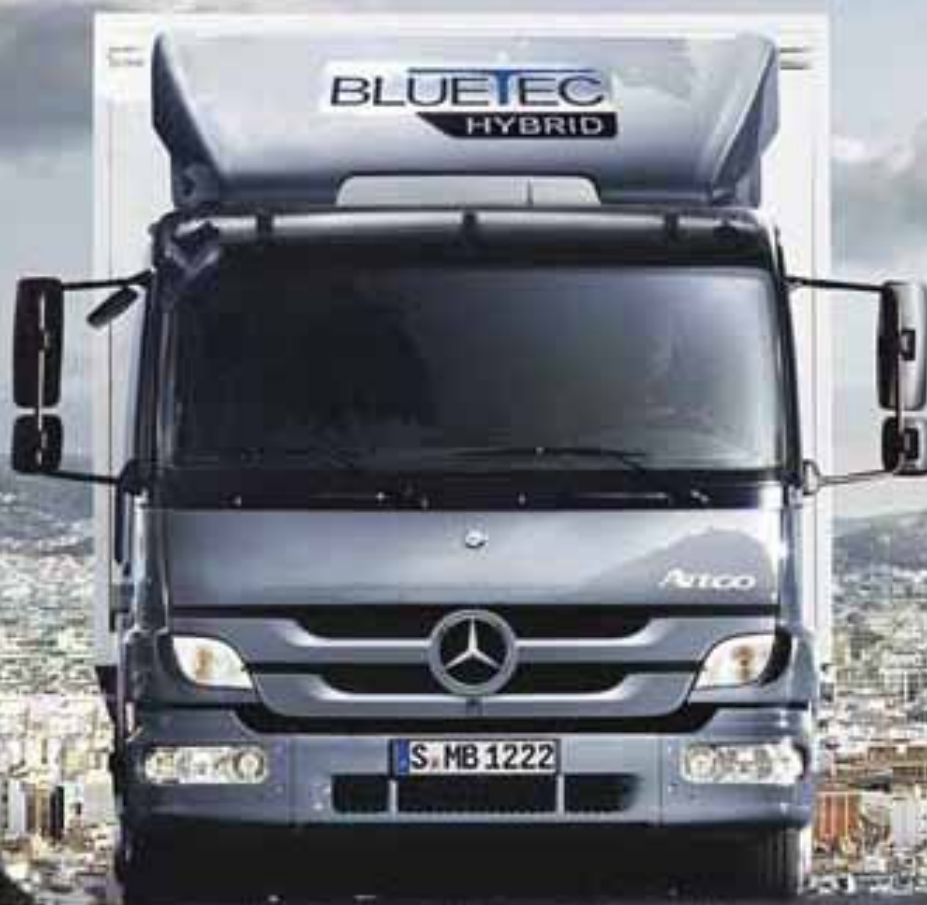

Obenauf. Als »Truck of the Year 2011« überzeugt der Mercedes-Benz BlueTec Hybrid durch seinen umweltschonenden Antrieb – und auch durch seinen Beitrag zum nachhaltigen Verteilerverkehr.



»Mit dem Atego BlueTec Hybrid bringen wir unsere ganze Leidenschaft für Lkw auf die Straße. Und unser Know-how für Wirtschaftlichkeit und Nachhaltigkeit.«

Georg Klohr, Leiter Prototypenbau/Produktion Mercedes-Benz Atego BlueTec Hybrid, Mercedes-Benz Werk Mannheim

Sauberkeit, Sicherheit, Alltagstauglichkeit und Komfort – das sind die Produkteckpfeiler des Mercedes-Benz Atego BlueTec Hybrid. Deshalb wählte eine internationale Expertengruppe das innovative Multitalent zum »Truck of the Year 2011«. Nicht nur in der Hybridversion, sondern auch in allen Modellen des mittelschweren Verteiler-Lkw genießt der Fahrer heute eine Ausstattung, die bislang nur den Kollegen im Fernverkehr vorbehalten war. Zudem sorgt der fortschrittliche Parallel-Hybridantrieb für 10 bis 15 % weniger Kraftstoffverbrauch und CO<sub>2</sub>-Emissionen. Mit dem parallelen Hybrid hat Daimler als führender Nutzfahrzeughersteller außerdem den internationalen Standard für die Hybridarchitektur geschaffen. Nach erfolgreichen Flotteneinsätzen konnten bereits Ende 2009 die ersten 50 Mercedes-Benz Atego BlueTec Hybrid der nächsten Evolutionsstufe an Kunden verkauft werden. Mit dem umweltschonenden Lkw gestaltet Mercedes-Benz den weltweiten Fortschritt bei Nutzfahrzeugen mit Hybridantrieb. Damit gilt der in Serie gebaute Atego BlueTec Hybrid als Wegbereiter für alternative Antriebe im Verteilerverkehr und erhielt dafür im Herbst 2010 den »Deutschen Nachhaltigkeitspreis« in der Kategorie Produkt.

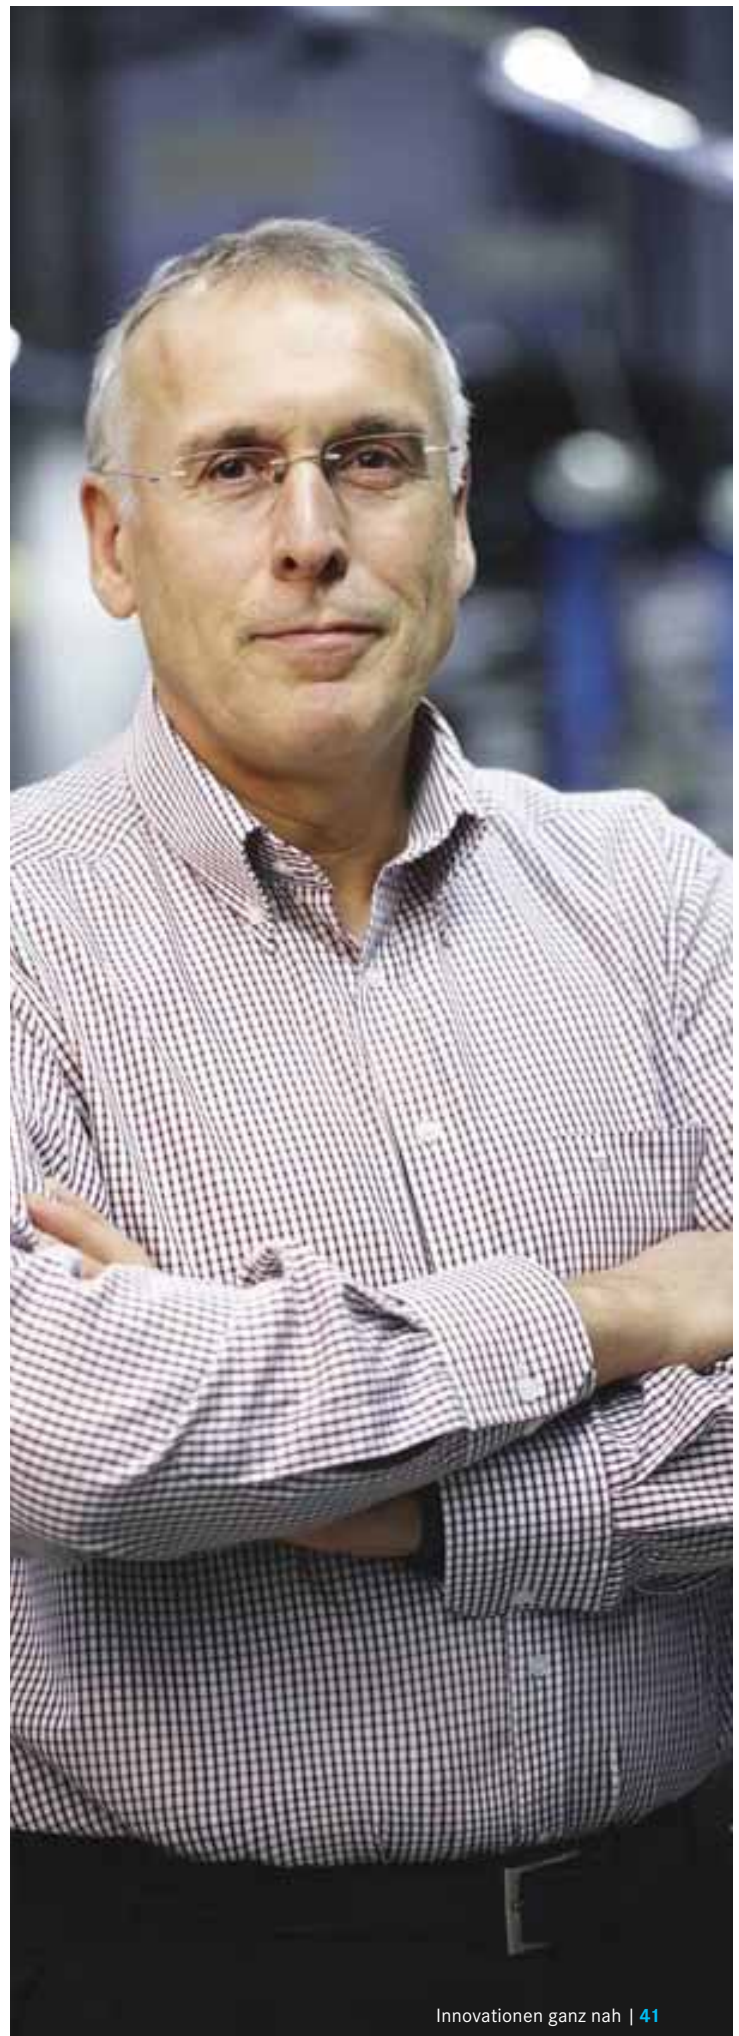

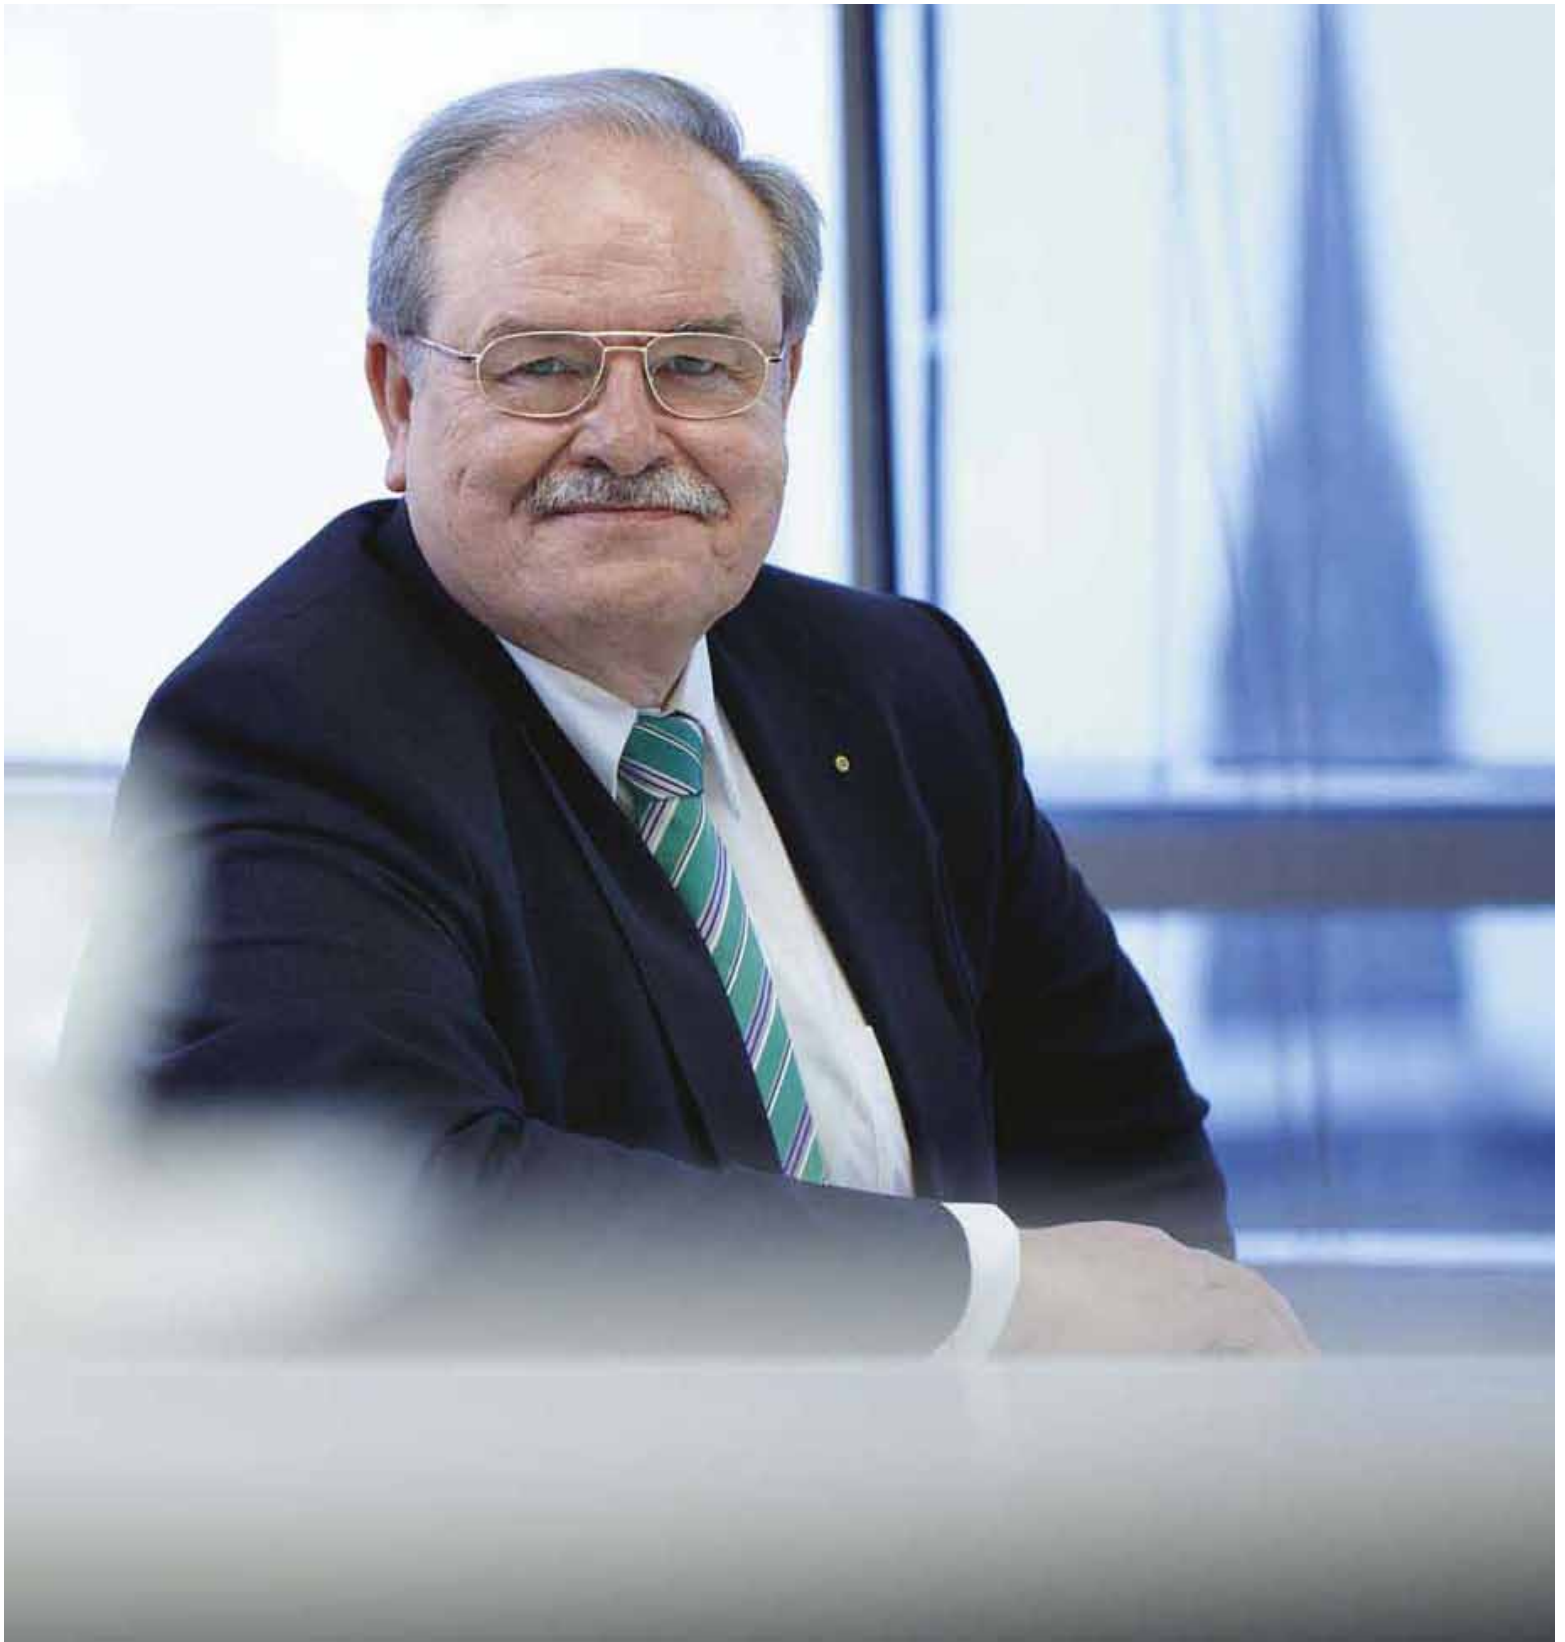

»Sparsam, sicher, sauber. Das ist die Zukunft des Öffentlichen Personennahverkehrs – in Hamburg mit dem Citaro FuelCELL-Hybrid.«

Günter Elste, Vorstandsvorsitzender Hamburger Hochbahn, Hamburg

# Umweltfreundlich nach Plan. Der Citaro FuelCELL-Hybrid macht Metropolen lokal emissionsfrei mobil.

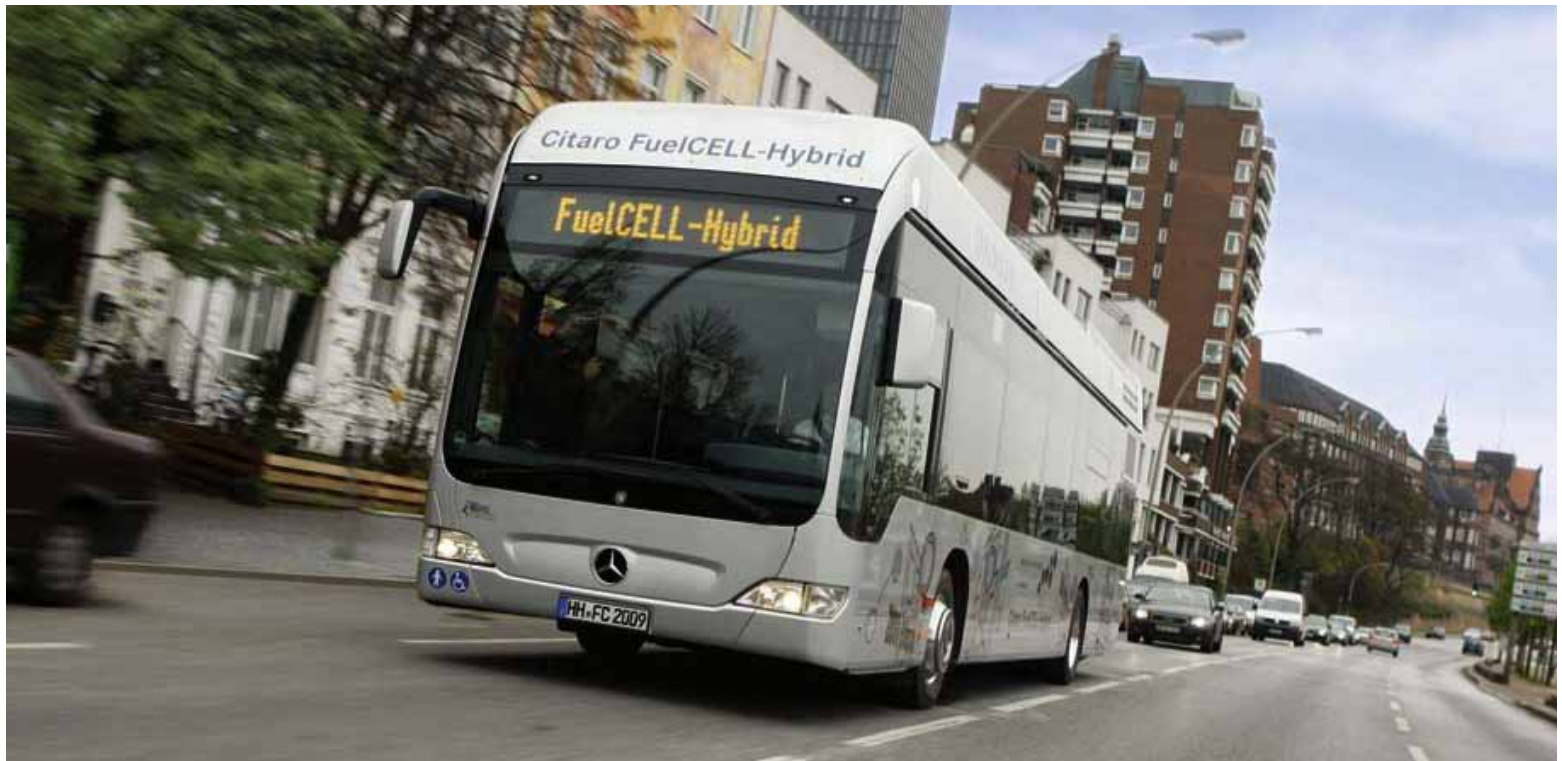

**Vorteile auf der ganzen Linie. Der Mercedes-Benz Citaro FuelCELL-Hybrid erfüllt die Anforderungen urbaner Mobilität höchst umweltverträglich und äußerst wirtschaftlich.**

**S**tädte und Ballungsräume atmen auf. Lokal ohne Emissionen und höchst wirtschaftlich setzt sich der Mercedes-Benz Citaro FuelCELL-Hybrid an die Spitze der nachhaltigen Mobilität. Die umweltschonenden, energieeffizienten Brennstoffzellen-Hybridbusse der jüngsten Generation geben ab Frühjahr 2011 unter anderem im Rahmen des NaBuZ-Projekts (Nachhaltige Bussysteme der Zukunft) in Hamburg den Takt im Öffentlichen Nahverkehr an. Dank weiter verbesserter Brennstoffzellen und der Hybridisierung mit Lithium-Ionen-Batterien hat der zukunftsweisende Citaro FuelCELL-Hybrid eine Reichweite von rund 250 Kilometern und spart im Vergleich zum Vorgänger fast 50 Prozent Wasserstoff. Damit ist der exzellente Hybridstadtbuss

im Hier und Heute angekommen. Pünktlich zur Stelle ist der Citaro FuelCELL-Hybrid auch im EU-Förderprojekt CHIC (Clean Hydrogen in European Cities / Sauberer Wasserstoff für europäische Städte). Start des Projekts war 2010 in Köln. Ziel wird die Integration von 26 Brennstoffzellenbussen im täglichen Linienverkehr der fünf Städte Aarau, Bozen, Mailand, London und Oslo sein. Erfahrungen aus den erfolgreichen Vorgängerprojekten in Berlin, Hamburg, Köln und dem kanadischen Whistler werden ebenfalls einfließen. Mit dem Mercedes-Benz Citaro FuelCELL-Hybrid der neuesten Generation beteiligt sich Daimler an den großflächigen CHIC-Flottentests und gestaltet die Zukunft des lokal emissionsfreien Öffentlichen Personennahverkehrs.





# Ein Anschluss für bewegende Momente.

Grenzenlos mobil werden lokal emissionsfreie Elektrofahrzeuge erst durch eine standardisierte Strom-Infrastruktur. Daimler hat gemeinsam mit mittelständischen Unternehmen die Entwicklung eines einheitlichen Ladesteckers für alle deutschen Hersteller vorangetrieben. Er macht das Laden und Bezahlen von Strom für die Kunden so sicher und einfach wie telefonieren. Der Mercedes-Benz Vito E-CELL und der smart fortwo electric drive fahren schon mal voraus.



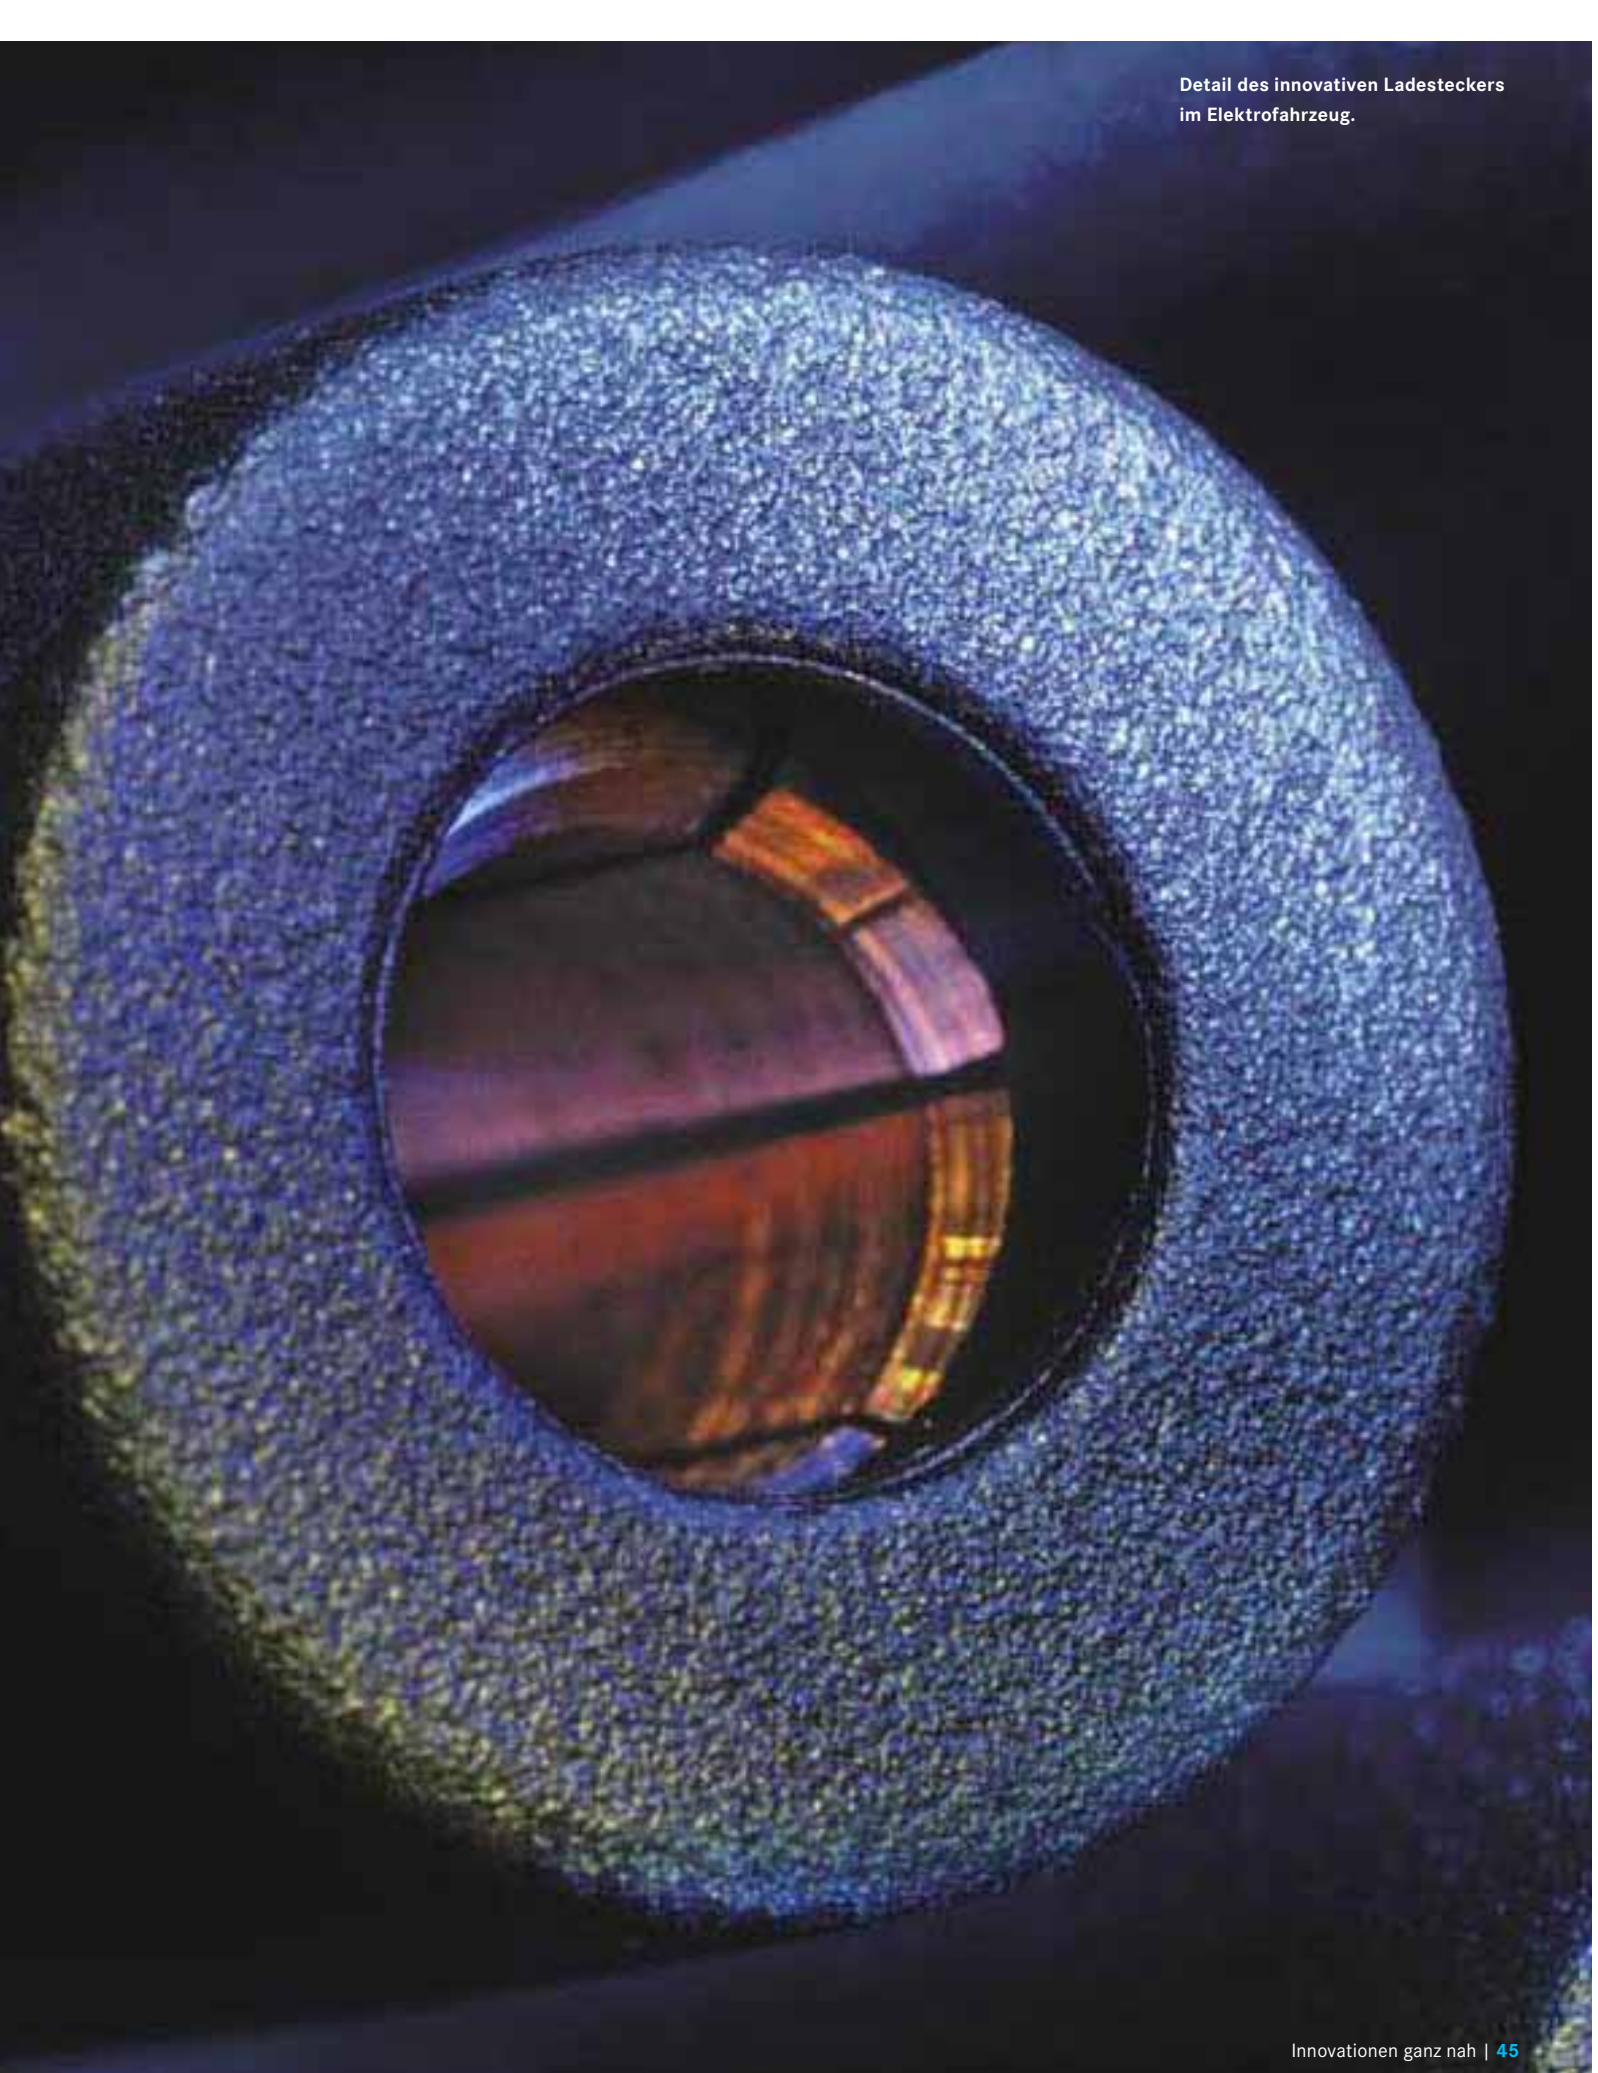



Intelligente Ladetechnik:  
Der Vito E-CELL tankt grünen Strom  
und bringt mehr Lebensqualität.

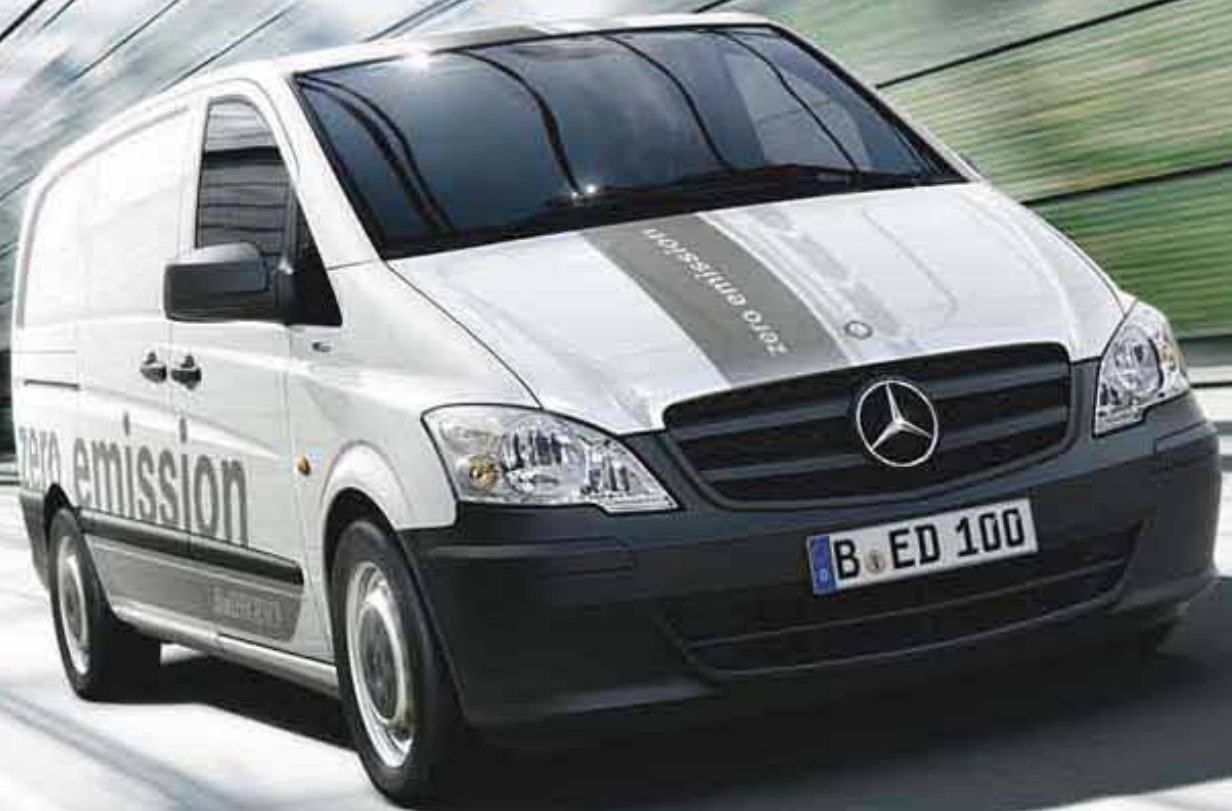

Emissionsfreies Fahren ab Werk.  
Als erster Elektrotransporter der  
Welt aus Serienproduktion ist der  
Mercedes-Benz Vito E-CELL im  
Alltagseinsatz bei Kunden unterwegs.

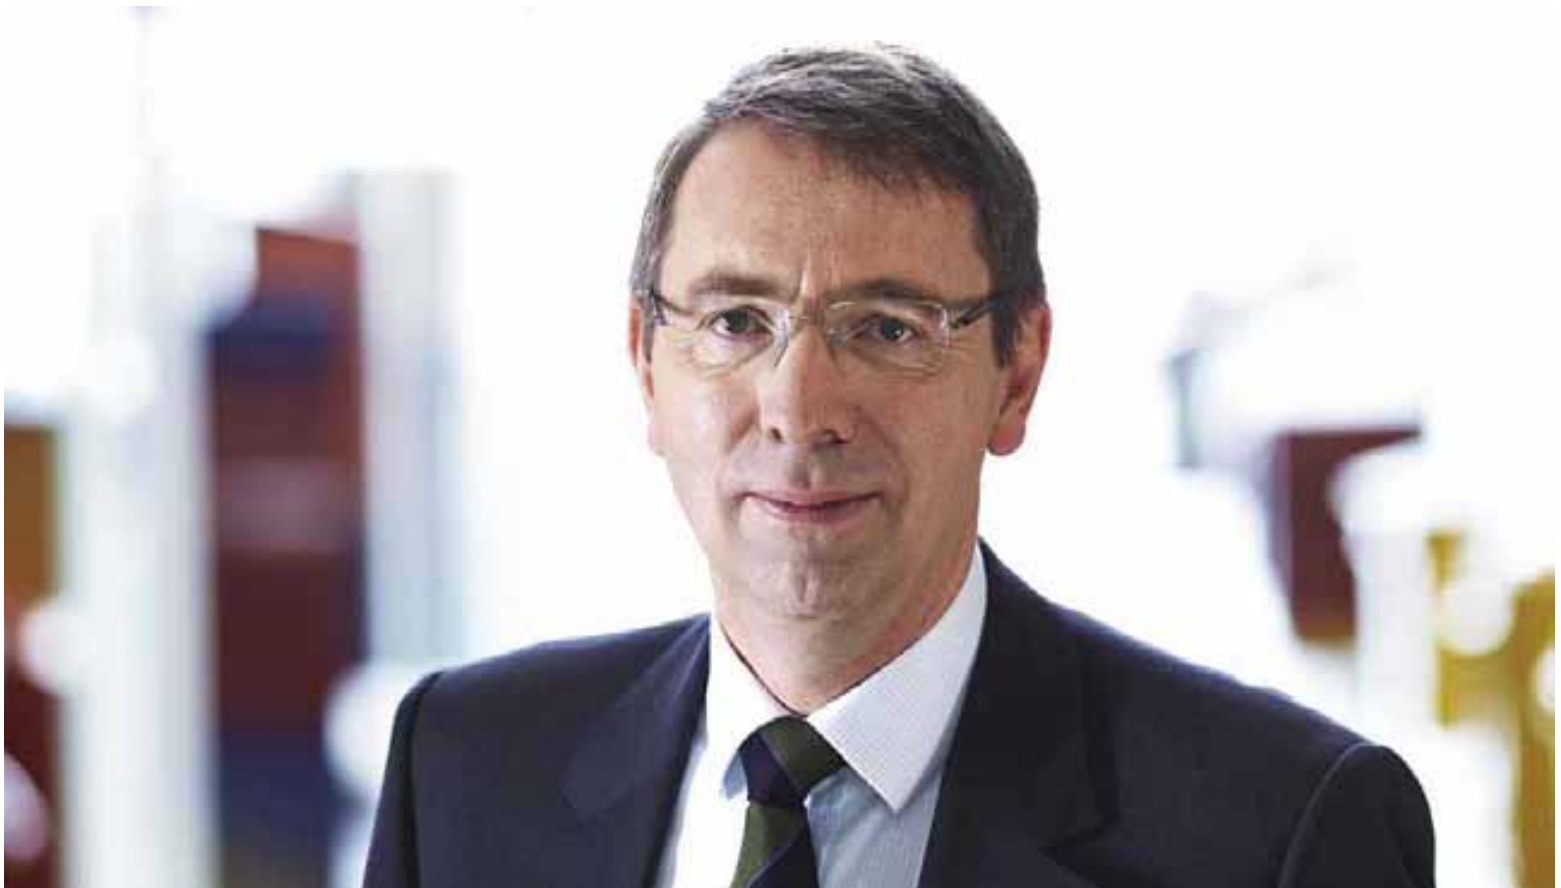

»Mit jedem Einsatz transportiert der Vito E-CELL auch ein Stück Innovationsgeist und Verantwortung. Qualitäten, von denen Unternehmen und die Umwelt profitieren.«

Dr. Joachim Wessels, Bereichsvorstand Brief Deutsche Post AG, Bonn

**E**volution in der City. Der Mercedes-Benz Vito E-CELL läutet die neue Ära des sauberen urbanen Transports ein. 2010 lieferte Mercedes-Benz die ersten Vito E-CELL in Berlin an Kunden aus. Sie gehören zu der weltweit ersten Serie elektromotorisch angetriebener Transporter, die vom Band läuft. Gemeinsam mit Unternehmen, Energieversorgern und der Politik treibt Daimler die Elektromobilität weiter voran. Mit dem Vito E-CELL gehören lokal emissionsfrei fahrende Elektrotransporter ab sofort zur Realität im Straßenverkehr. Zu den Pionieren der Elektromobilität im Wirtschaftsverkehr zählt auch die Deutsche Post DHL, die den Vito E-CELL im Alltagsbetrieb einsetzt. Voraussetzung für den wirtschaftlichen und umweltfreundlichen Betrieb ist eine intelligente Ladetechnik, bei der die Kunden den Ladezeitpunkt selbst definieren können. Diesen Anspruch beantwortet der Vito E-CELL mit einer Smart Charge Communication Unit (SCCU), durch welche die Lithium-Ionen-Batterie exakt dann geladen wird, wenn »grüner« und kostengünstiger Strom verfügbar ist. Das reduziert die Emissionen und die Kosten. Ein echter Gewinn für die Umwelt – und den Vito E-CELL. Für seine wegweisende Technologie wurde er mehrfach ausgezeichnet: mit dem »Postal Technology Award 2010« sowie vom irischen Fleet Transport Magazin als »Green Commercial of the Year«.



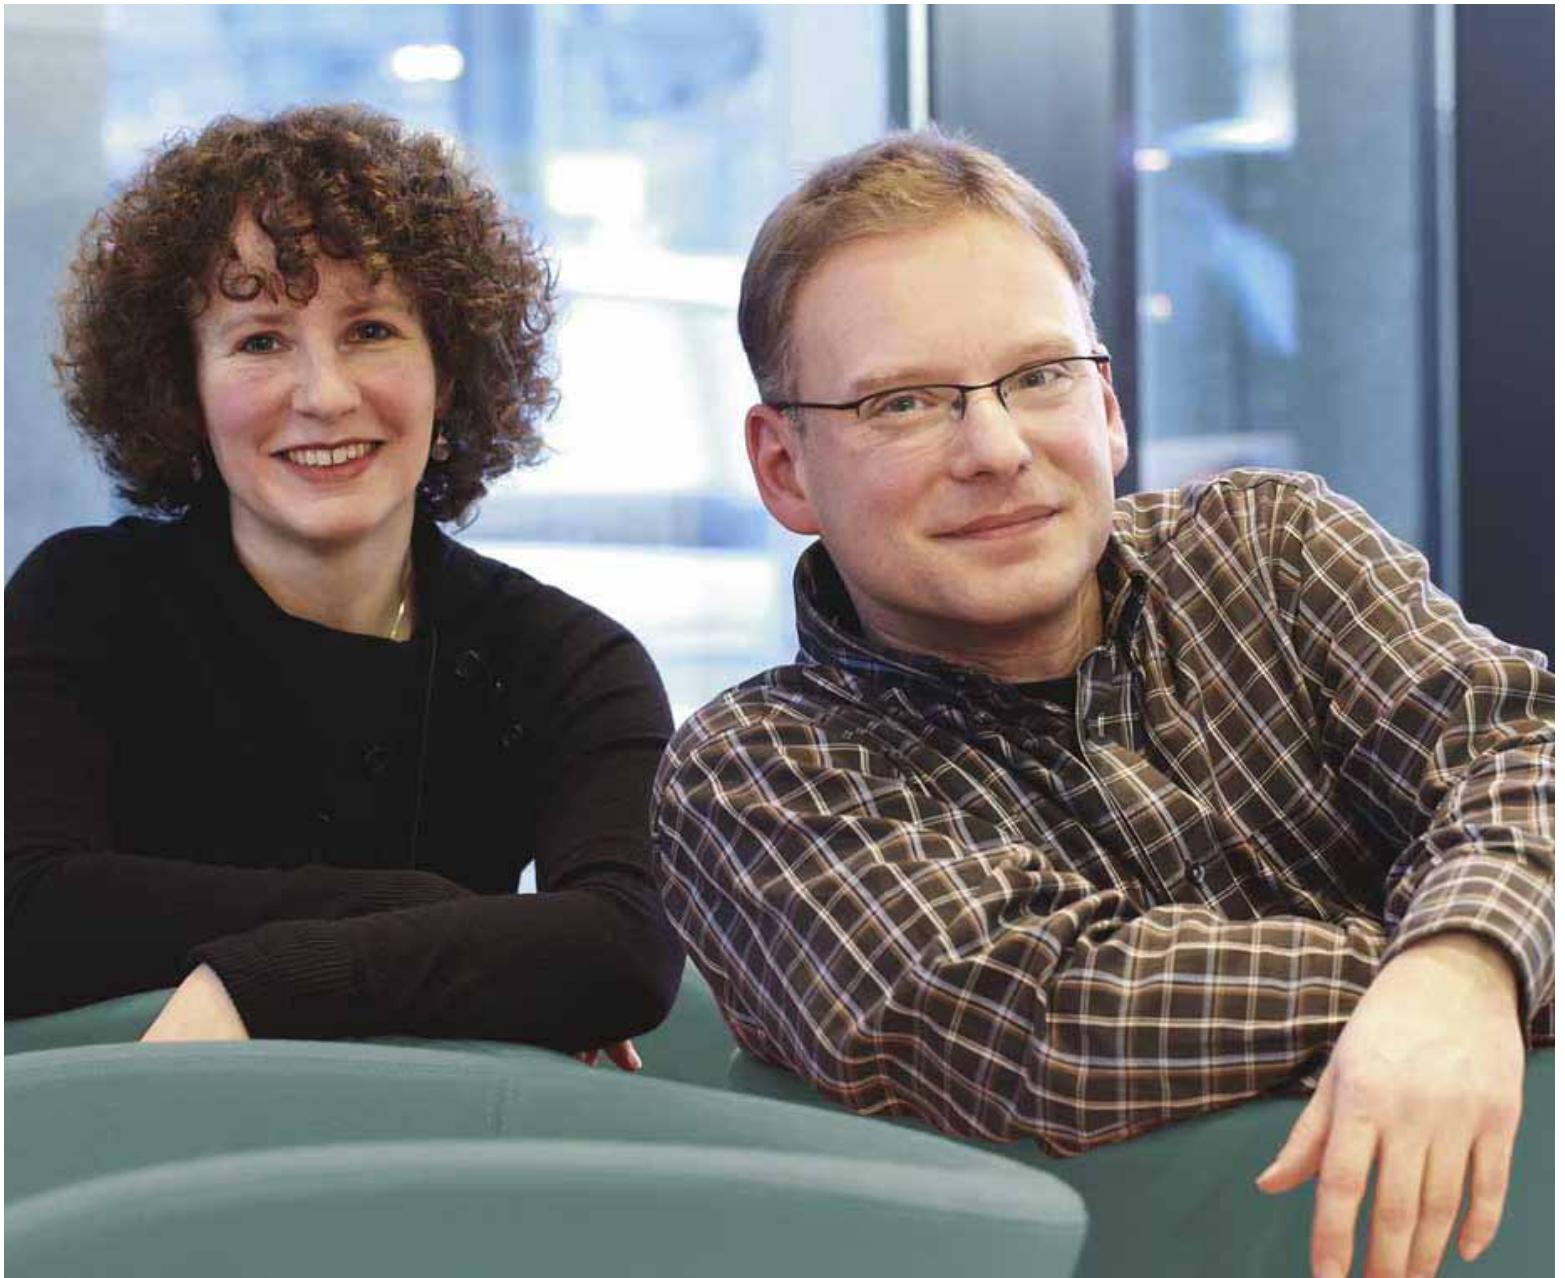

»Vor über zehn Jahren veränderte der smart das Bild der Cities rund um den Globus. Heute sind wir die Pioniere urbaner Mobilität – mit unserem smart fortwo electric drive.«

Maja Affeldt, Dipl.-Ing. Biotechnologie, und Julian Affeldt, Grundschullehrer, Kleinmachnow/Berlin

# Hundert Prozent Spaß und lokale Null-Emission mit dem smart fortwo electric drive.

**D**er neue smart fortwo electric drive elektrisiert die Metropolen Europas. Bereits 2007 hatte eine erste Flotte in London für Aufsehen gesorgt. Seit ihrer Einführung Ende 2009 begeistert nun die zweite Generation die Menschen. Nachdem die ersten Exemplare des elektrisch angetriebenen Cityflitzers in Berlin an Kunden übergeben wurden, gehört er inzwischen auch in Rom, Madrid, Zürich, Paris und London zum urbanen Lebensstil. Aber auch in weiteren Großstädten Europas, Nordamerikas und Asiens wird der umweltfreundliche Kosmopolit seine Alltagstauglichkeit beweisen. Ab 2012 ist der lokal emissionsfreie smart fortwo electric drive mit Produktionszahlen in fünfstelliger Höhe dann für jeden Interessenten in rund 40 smart-Märkten erhältlich.

Das Fahrvergnügen beginnt ganz einfach an der Haushaltssteckdose. Hier kann die Lithium-Ionen-Batterie des smart fortwo electric drive in nur drei Stunden aufgeladen werden – genug für eine stadtverkehrsgerechte Reichweite von rund 135 Kilometern. Im Heck des smart fortwo electric drive arbeitet ein agiler 30-kW-Elektromotor, dessen Drehmoment sofort beim Start zur Verfügung steht. Dynamik bringt der kultige Elektro-smart auch in die Produktion im französischen Hambach. Dort sollen bis Ende 2011 zunächst einmal mehr als 1.500 des gefragten Null-Emission-Trendsetters vom Band laufen.

**Mit dem smart fortwo electric drive definiert die Kultmarke die Vorreiterrolle auch in Sachen emissionsfreies Fahren in Metropolen.**

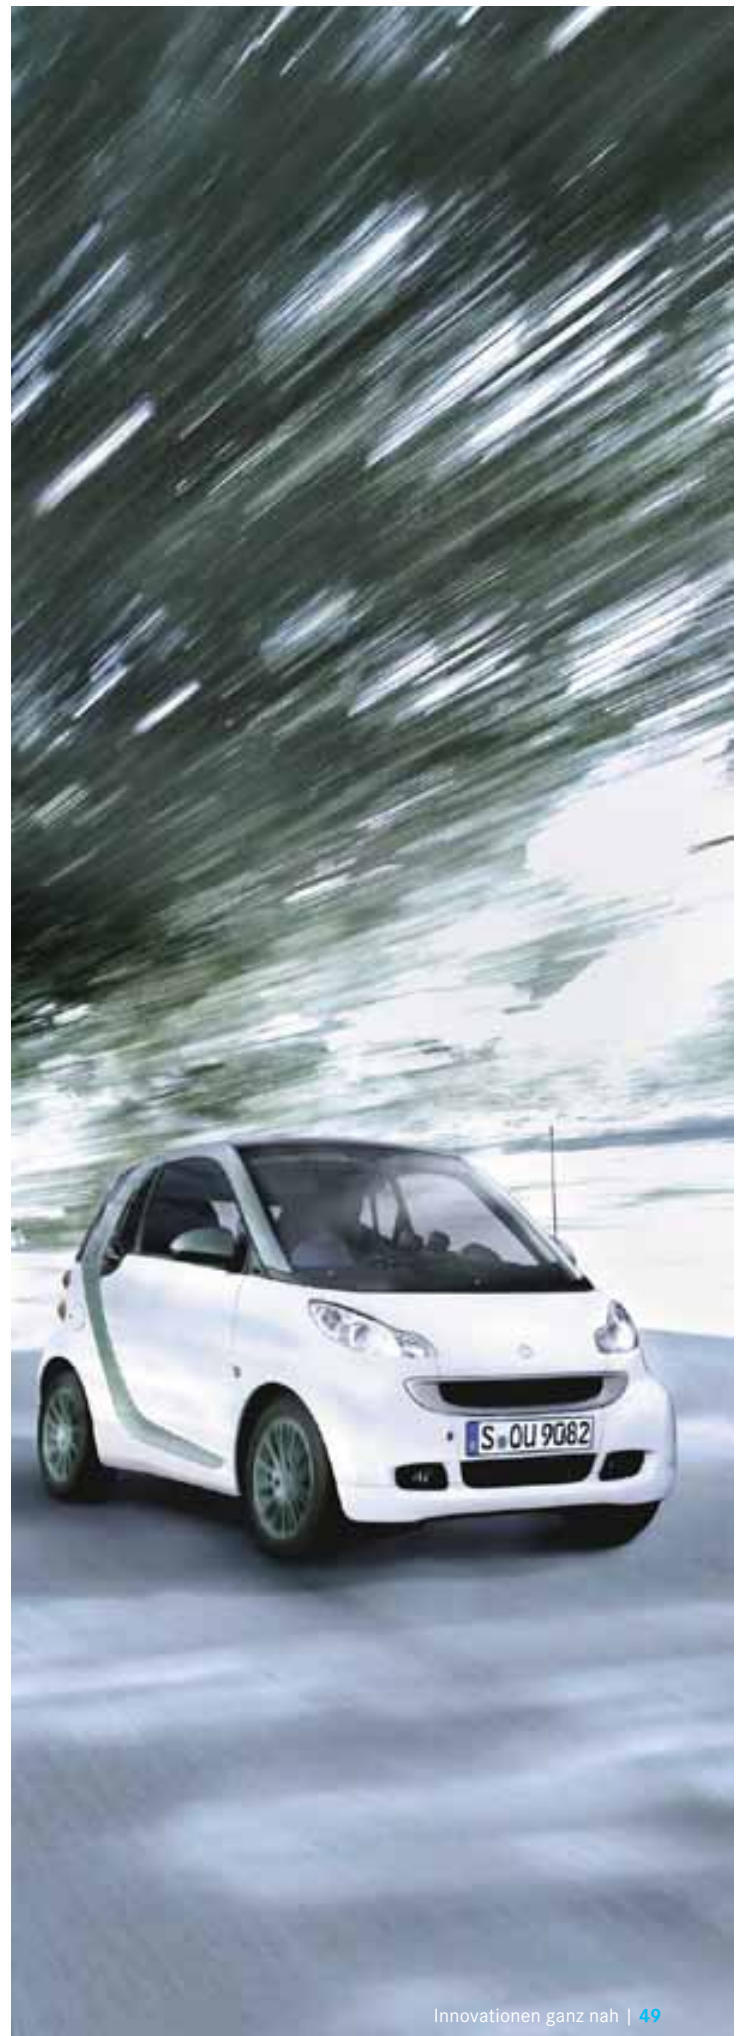

Kameralinse des Nachtsicht-Assistenten PLUS  
in der Fahrzeugwindschutzscheibe.

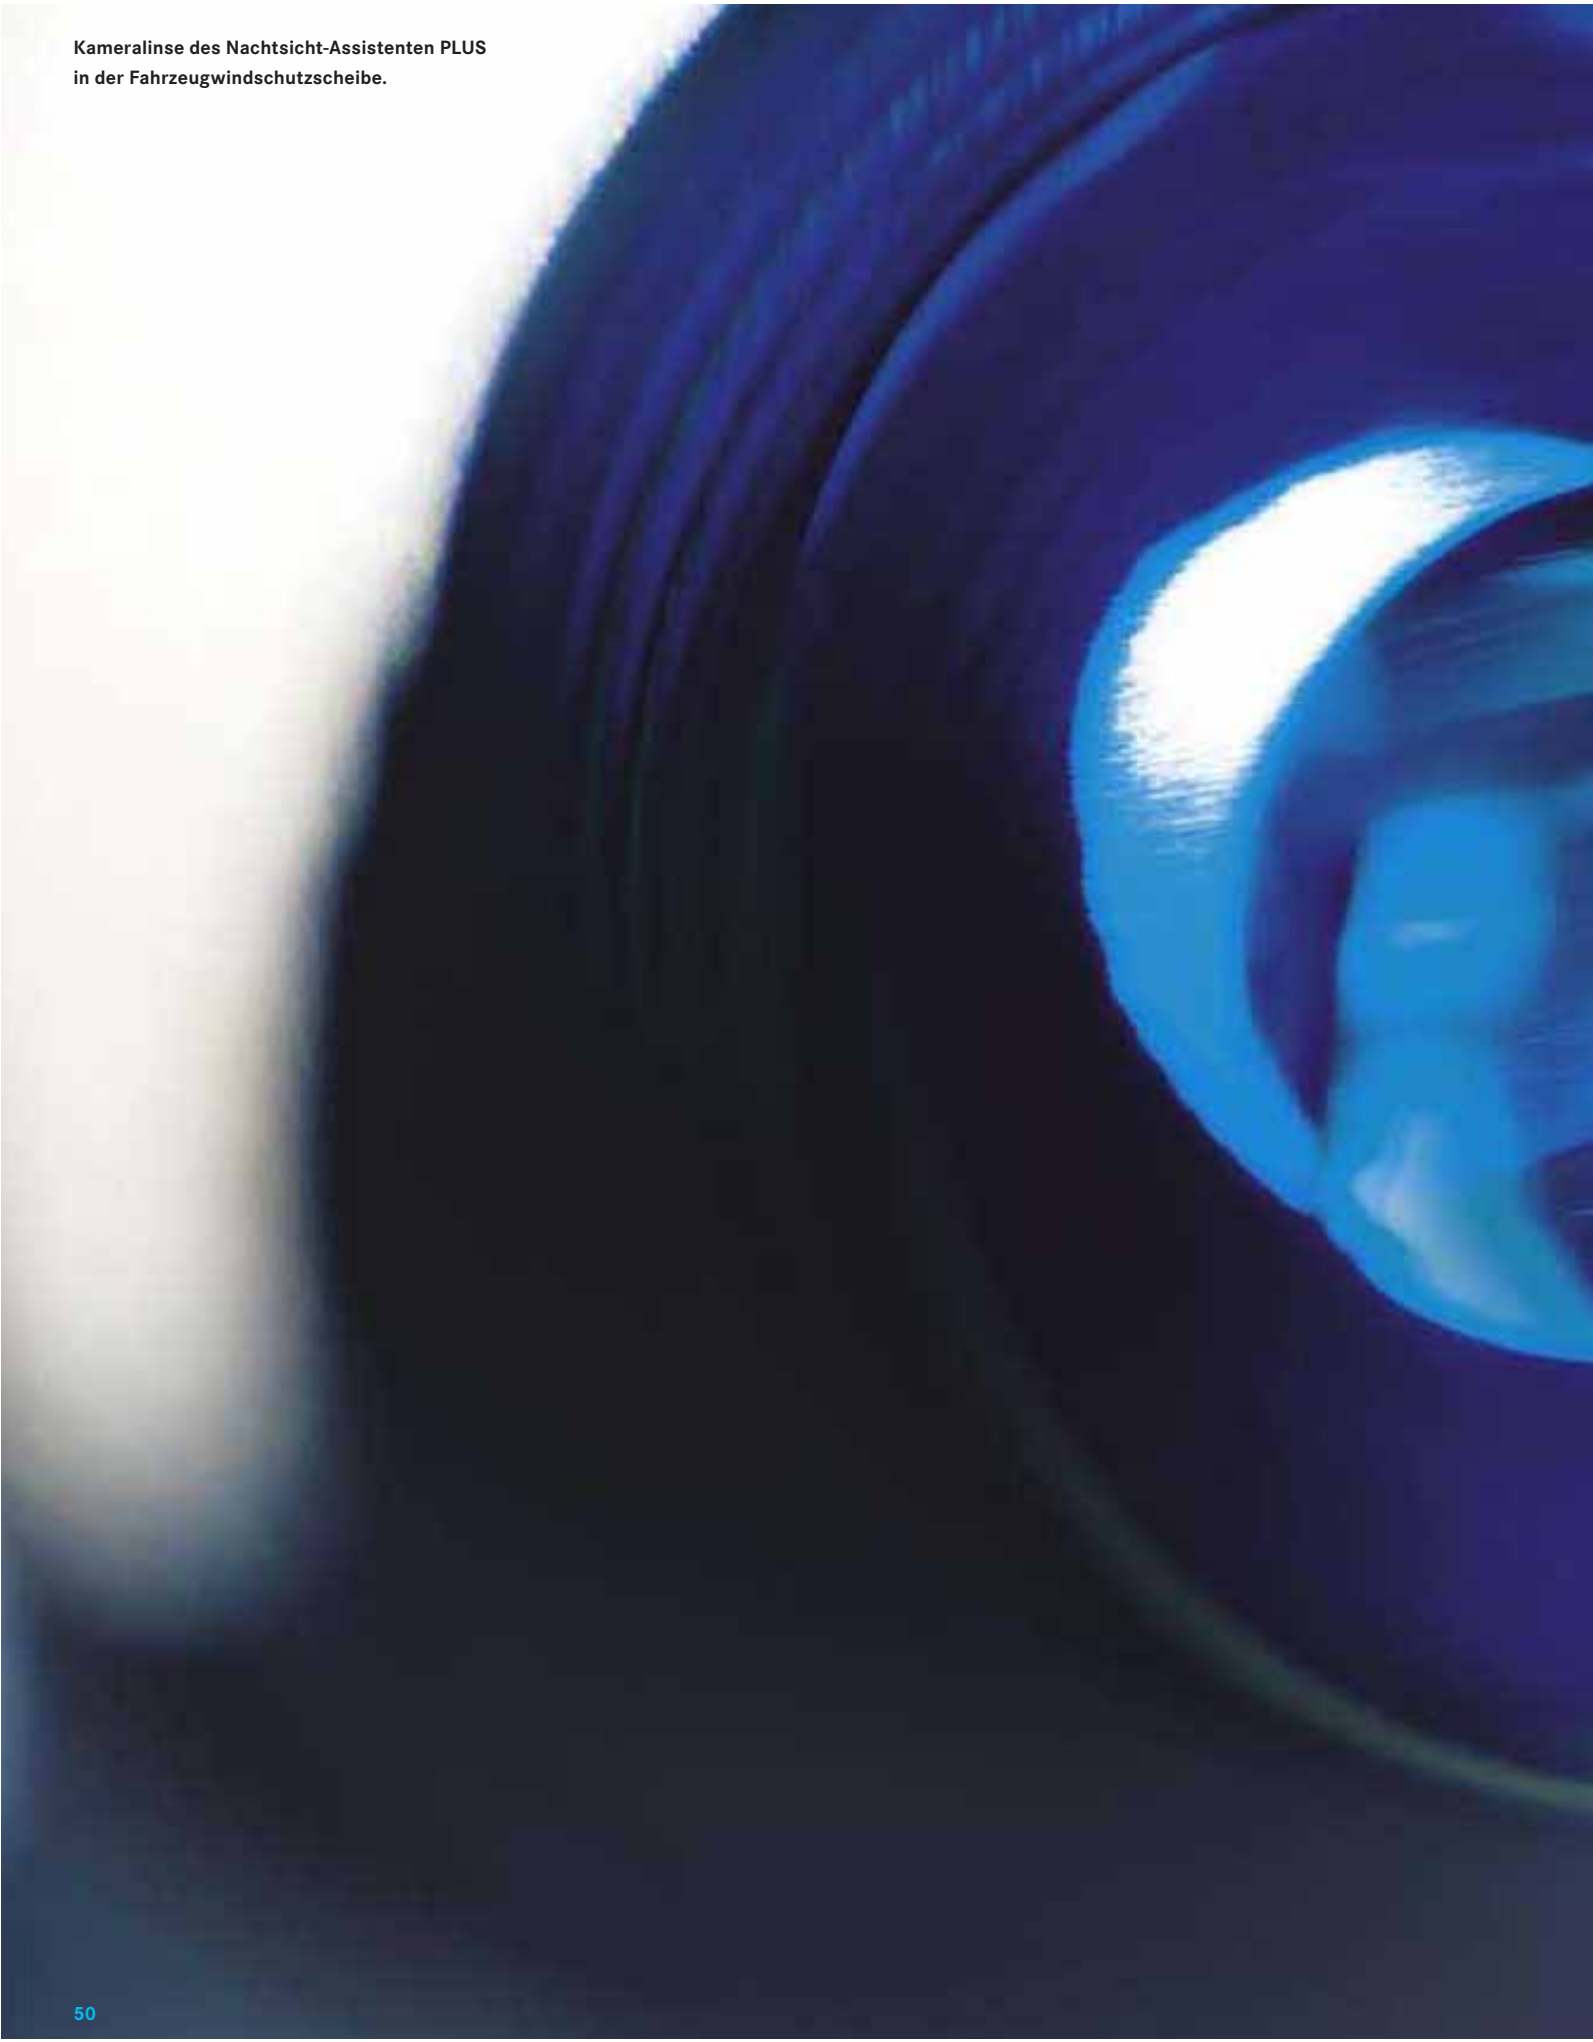



An abstract background featuring a deep blue gradient. A bright, glowing yellow and orange arc curves from the upper left towards the lower right, creating a sense of motion and energy. The overall composition is modern and high-tech.

# Erstklassige Perspektiven für die Sicherheit.

Die Infrarotkamera des Mercedes-Benz Nachtsicht-Assistenten PLUS überträgt das Geschehen vor dem Auto auf ein Display in der Instrumententafel. Intelligente Assistenzsysteme machen das Auto zum Partner, der sehen, vorausdenken und reagieren kann. So können Unfälle vermieden werden. Sicherheit auf höchstem Niveau, die auch in der Mercedes-Benz S-Klasse erlebbar wird.

»Erfolg ist für mich, wenn ich  
mein Ziel souverän erreiche.  
Und andere ebenfalls gewinnen.  
Auch das Sicherheitskonzept  
meiner S-Klasse bringt alle  
Interessen perfekt in Einklang.«

Shen Li, Unternehmerin, Shanghai

**F**ahrten durch die Nacht werden künftig sicherer: mit dem neuen Aktiven Nachtsicht-Assistenten PLUS, einem weiteren Meilenstein der Aktiven Sicherheit von Mercedes-Benz. Das weiterentwickelte Fahrerassistenzsystem in der S-Klasse macht die Nacht zum Tage. Fußgänger bei Dunkelheit auf der Fahrbahn erkennen und sie in einem Kombi-Instrument zur Warnung des Fahrers markieren, das leistet der Aktive Nachtsicht-Assistent PLUS seit 2009. Jetzt geht Mercedes-Benz einen wesentlichen Schritt weiter und stellt als Weltpremiere die jüngste Entwicklungsstufe mit Spotlight-Funktion vor. Im unmittelbaren Sichtfeld des Fahrers wird auf die potenzielle Gefahr hingewiesen, indem Personen auf der Straße angeblinkt werden können. Als positiver Nebeneffekt werden auch die Fußgänger gewarnt. So schützt eine mit Spotlight-Funktion ausgerüstete Mercedes-Benz S-Klasse nicht nur die eigenen Insassen, sondern trägt auch maßgeblich zu einer höheren Sicherheit anderer Verkehrspartner bei – für ein völlig neues Sicherheitslevel bei Nacht.

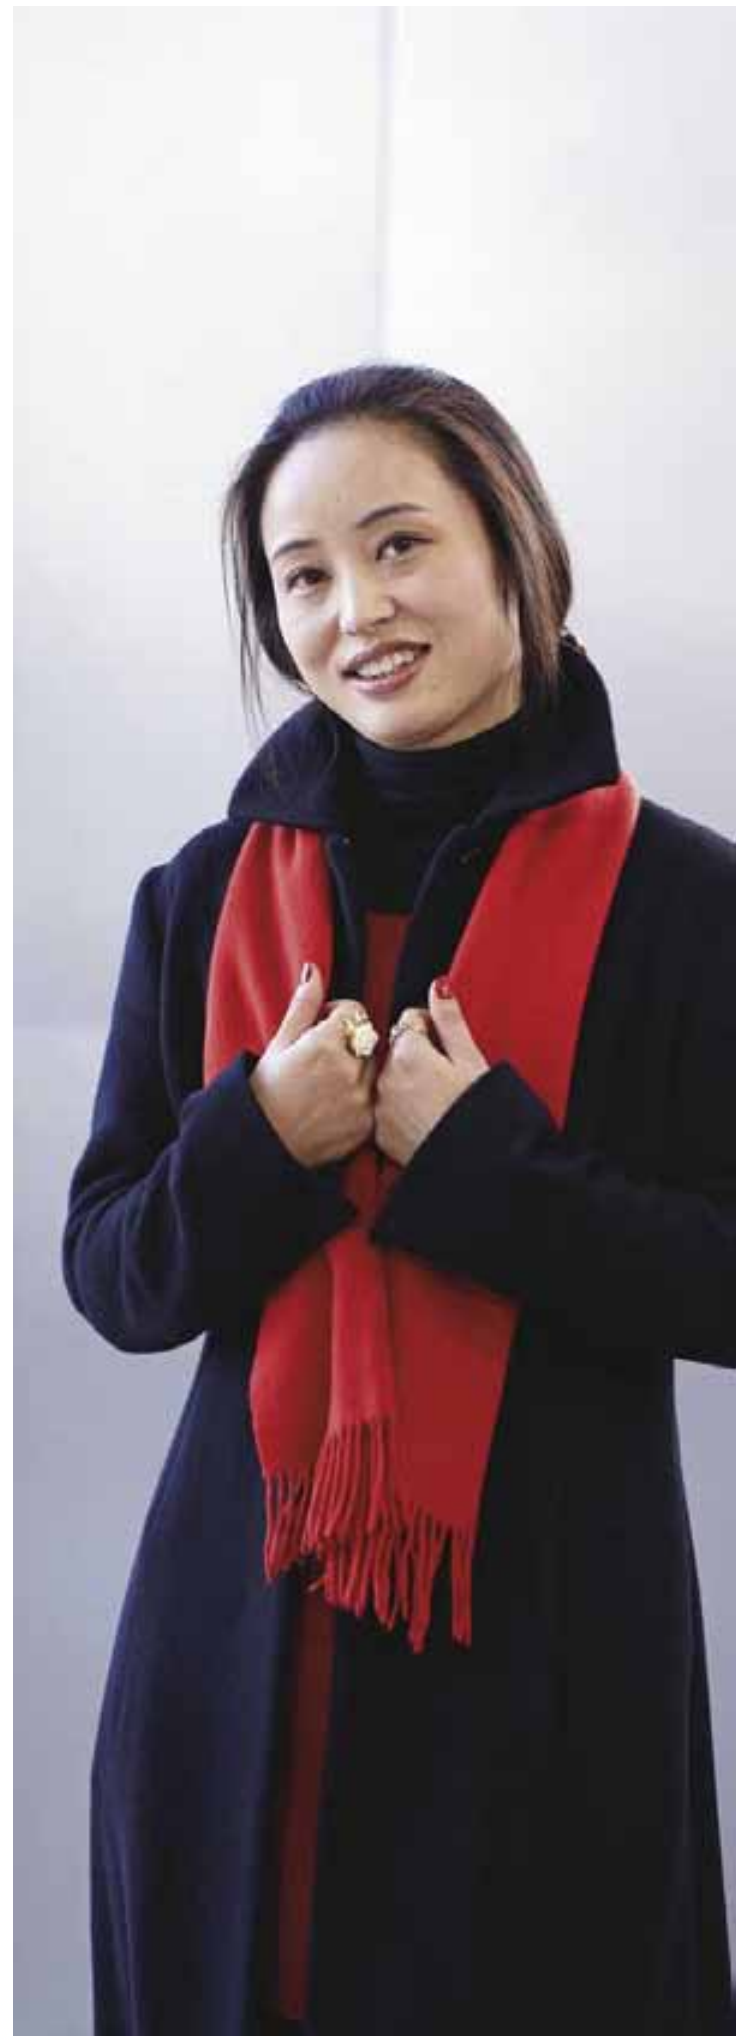

Sicher durch die Nacht mit der Ikone der Fortbewegung. Die Mercedes-Benz S-Klasse bietet noch mehr Sicherheit für alle Verkehrsteilnehmer mit dem neuen Aktiven Nachtsicht-Assistenten PLUS.

Im Blickpunkt: Sicherheit mit Premiumanspruch in der Mercedes-Benz S-Klasse.

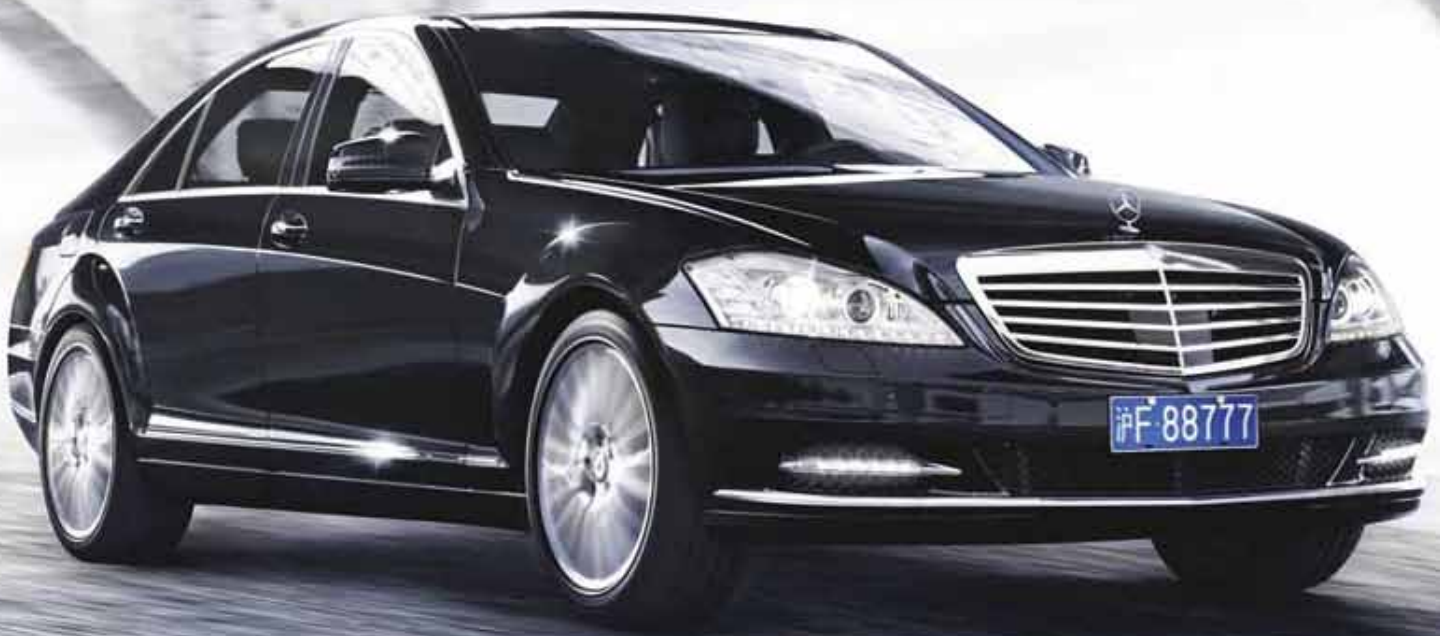





# Ein Zeichen exzellenter Kundenbeziehung.

Mit einer zukunftsweisenden Download-Applikation für mobile Anwendungen stellte Mercedes-Benz weltweit als erster Autofinanzierer wichtige Servicefunktionen für Kunden zur Verfügung. Jetzt geht die mobile Strategie mit dem Apple iPad™ in den Showrooms US-amerikanischer Mercedes-Benz Händler noch einen Schritt weiter.







A man and a woman are sitting in the front of a car, looking at an iPad together. The man is on the right, wearing a dark suit and a patterned tie, and is holding the iPad. The woman is on the left, wearing a dark blue top, and is looking at the screen. They are both smiling. The background shows the interior of the car and a window looking out onto a bright outdoor area.

Neue Modelle machen den  
Kundenservice mobil.

Die Vorteile liegen auf der Hand:  
Das iPad™ ermöglicht den schnellen  
und direkten Zugriff auf das  
Händlersystem MB Advantage –  
bei den Kunden im Showroom.



**A**m Puls der Märkte ist Mercedes-Benz Financial seit 1982. Als Partner der Mercedes-Benz Händler und Kunden setzt Mercedes-Benz Financial in den Vereinigten Staaten auch jetzt die Trends. Mit Services, die via iPhone™ sowie andere Smartphones genutzt werden können – und aktuell mit dem Apple iPad™. So wird das umfassende Angebot zur Finanzierung von Mercedes-Benz Fahrzeugen intelligent beschleunigt. Weltweit als Erste nutzen die 355 nordamerikanischen Mercedes-Benz Händler die neue mobile Anwendung im Business-Umfeld für eine innovative Kundenbetreuung.

Am Point-of-Sale bei den Fahrzeugen und im Dialog mit den Kunden können die Finanzteams mit dem Tablet-Rechner schnell und sicher auf das Händlersystem MB Advantage zugreifen. Bereits während des Pilotprojekts Mitte 2010 zeigte sich rasch, wie alle Beteiligten profitieren. Von Neufinanzierungen über Leasingverträge bis zur Rückgabe von Leasingfahrzeugen können die Aufträge noch kundenorientierter und effizienter abgewickelt werden. Wegweisend ist auch die elektronische Signaturfunktion, die es den Kunden erlaubt, Dokumente direkt auf dem Bildschirm zu unterschreiben.

»Mit MB Advantage auf dem iPad™ bieten wir Information direkt im Verkaufsraum. Für einen noch besseren und flexibleren Service – ein absoluter Wettbewerbsvorteil.«

Bernie Moreno, President of Mercedes-Benz of North Olmsted, Cleveland, Ohio

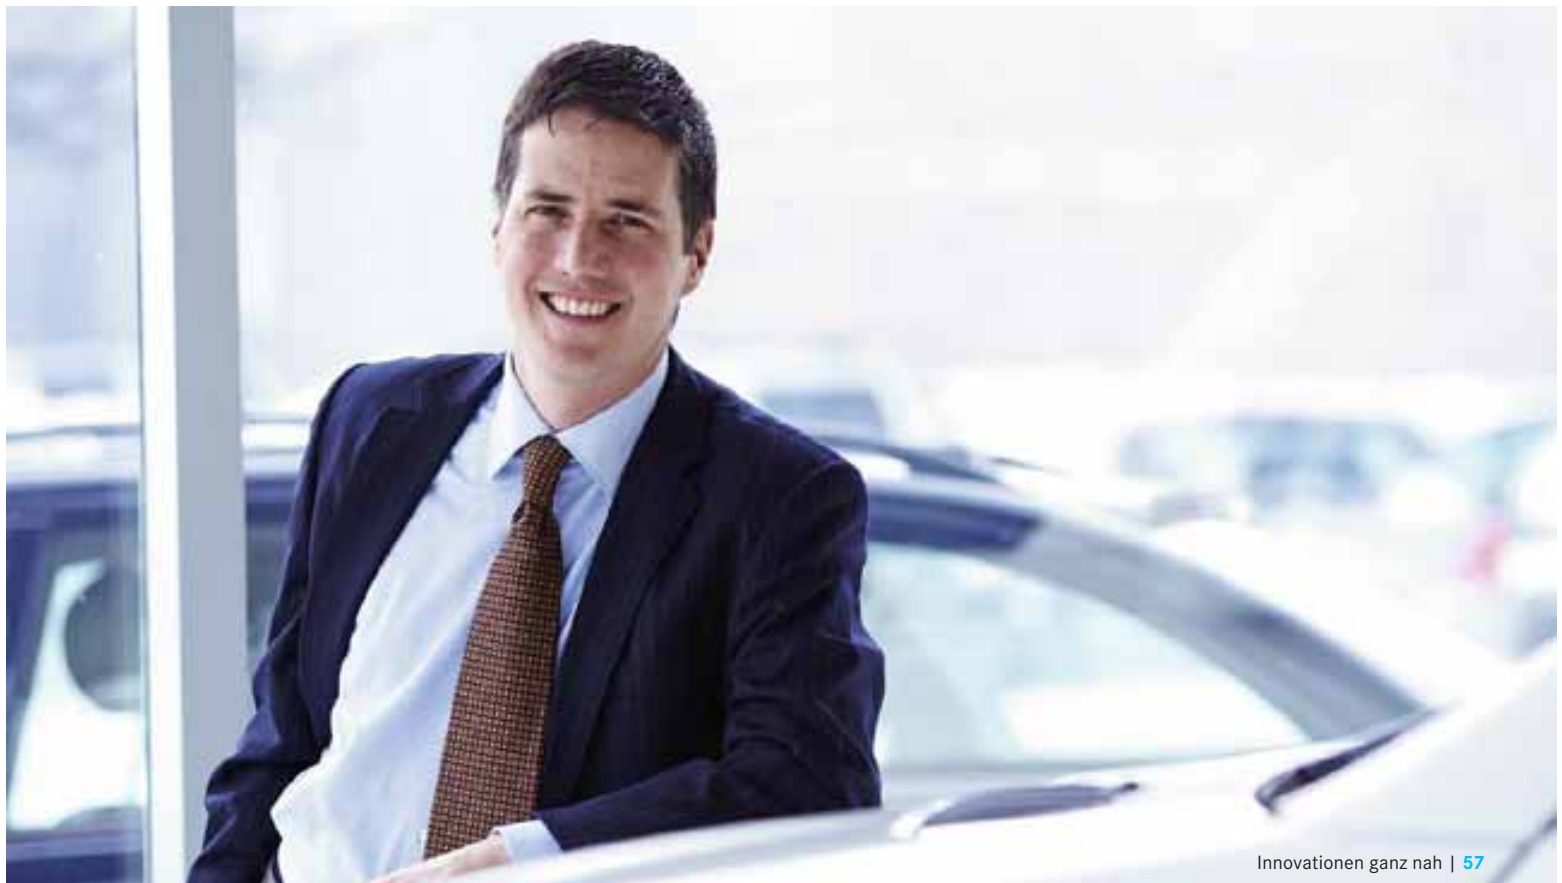

Wir haben das Automobil erfunden.  
Und erfinden es immer wieder neu.  
Mit Begeisterung und Leidenschaft.

Durch innovative und nachhaltige Fahrzeugkonzepte wird Daimler die Mobilität auch für künftige Generationen sichern: mit einem einmaligen Produktmix, umweltfreundlichen Antriebskonzepten und bahnbrechenden Sicherheitstechnologien.



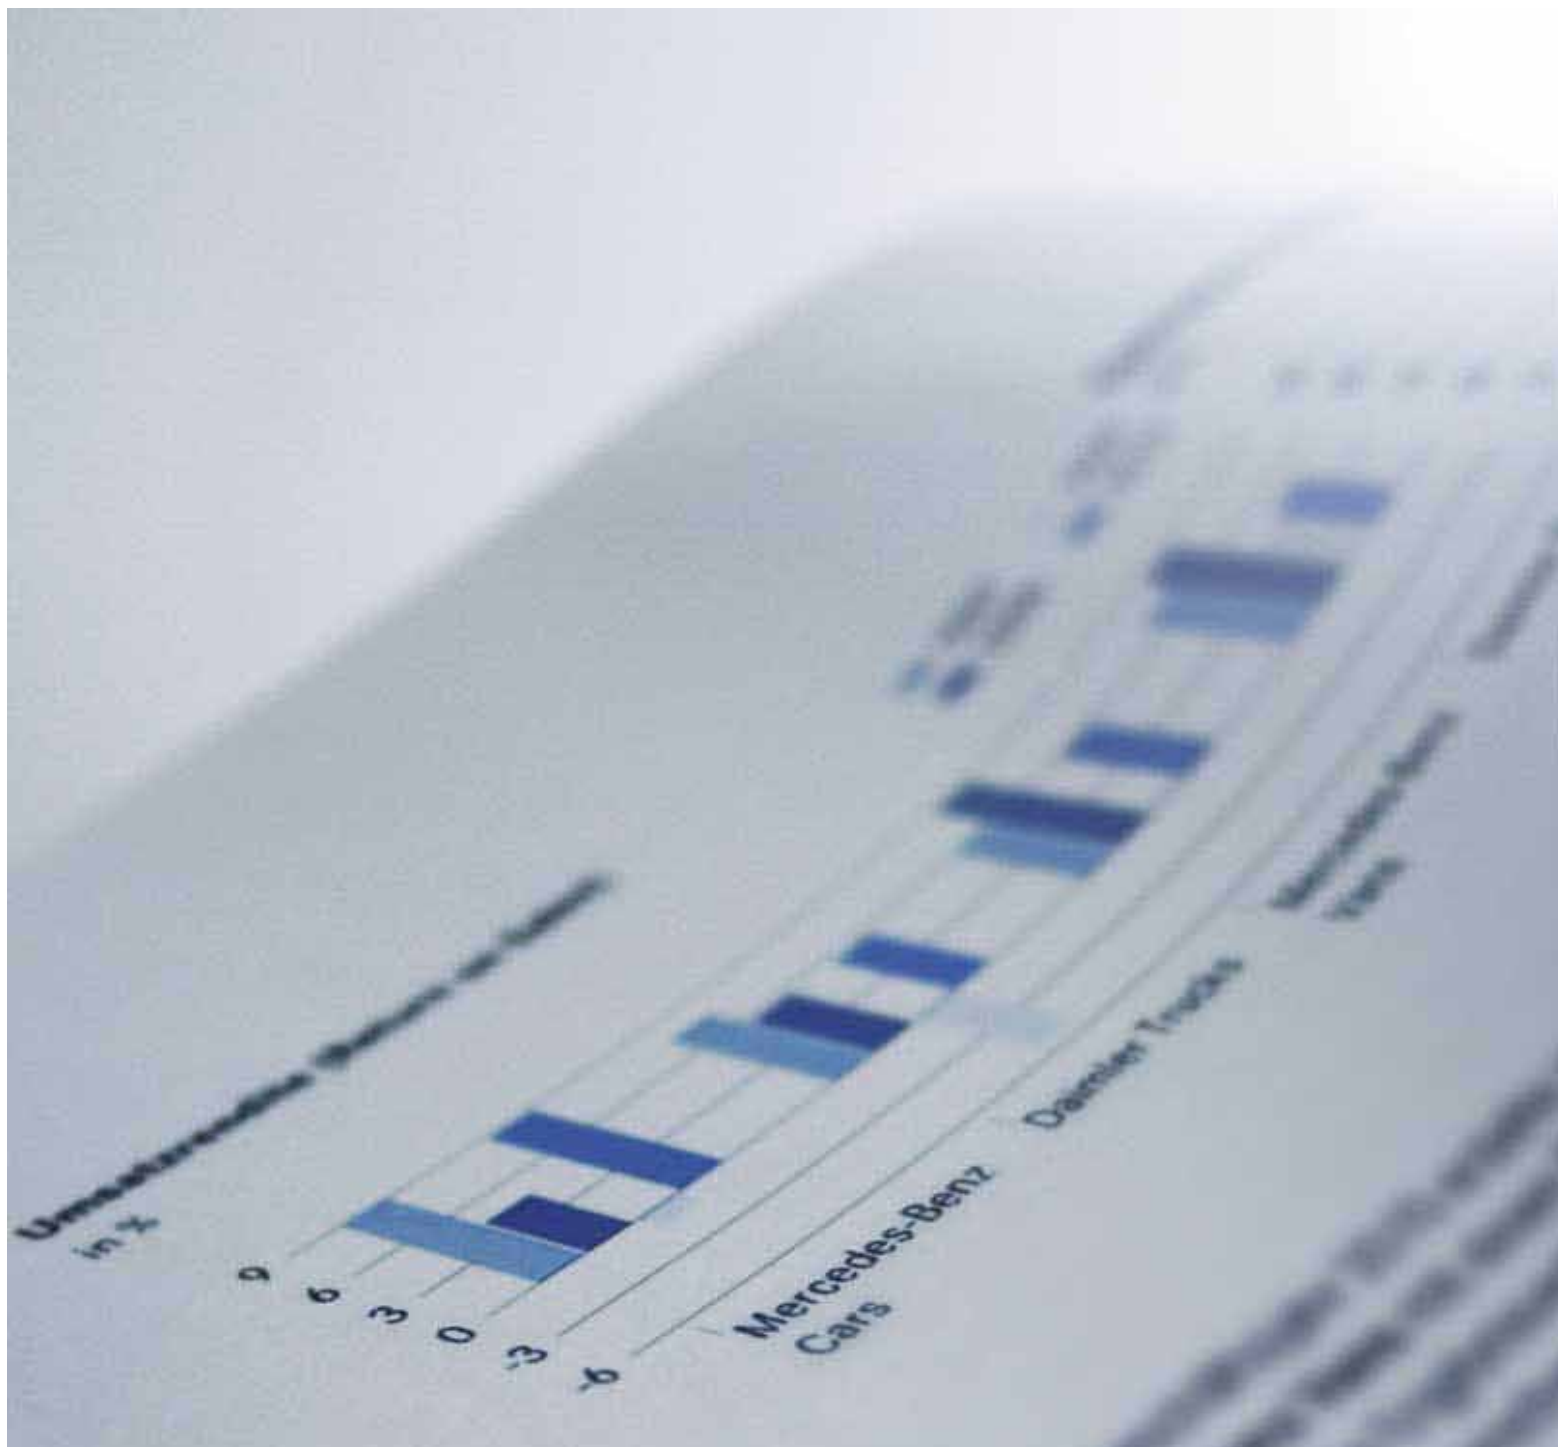

Das Geschäftsjahr 2010 hat sich für Daimler günstiger als erwartet entwickelt. Der Absatz stieg in allen Geschäftsfeldern mit deutlich zweistelligen Zuwachsraten. Der Umsatz erhöhte sich um 24% auf 97,8 Mrd. €, und das operative Ergebnis (EBIT) erreichte 7,3 (i. V. -1,5) Mrd. €. Für das Jahr 2011 erwarten wir einen insgesamt positiven Geschäftsverlauf.

## 62 - 73 Geschäft und Rahmenbedingungen

- 62 Das Unternehmen
- 63 Corporate Governance
- 63 Übernahmerelevante Angaben und Erläuterungen
- 65 Strategie
- 68 Einigung mit US-Behörden
- 68 Neues Vorstandsressort »Integrität und Recht«
- 69 Wirtschaftliche Rahmenbedingungen
- 71 Geschäftsentwicklung

## 74 - 88 Ertragslage

- 74 EBIT
- 77 Finanzielle Steuerungsgrößen
- 78 Value Added
- 80 Gewinn- und Verlustrechnung
- 82 Dividende
- 83 Forschung und Entwicklung, Umweltschutz
- 86 Beschäftigung
- 87 Einkauf
- 88 Informationstechnologie

## 89 - 95 Finanzlage

- 89 Grundsätze und Ziele des Finanzmanagements
- 90 Cash Flow
- 92 Investitionen
- 93 Refinanzierung
- 94 Sonstige finanzielle Verpflichtungen und außerbilanzielle Transaktionen
- 95 Rating

## 96 - 97 Vermögenslage

## 98 - 101 Daimler AG (Kurzfassung nach HGB)

- 99 Ertragslage
- 100 Vermögens- und Finanzlage
- 101 Risiken und Chancen
- 101 Ausblick

## 102 Gesamtaussage zur wirtschaftlichen Lage

## 103 Ereignisse nach Ablauf des Geschäftsjahres 2010

## 104 - 113 Risikobericht

- 104 Risiken und Chancen
- 104 Risikomanagementsysteme
- 106 Volkswirtschaftliche Risiken
- 108 Branchen- und unternehmensspezifische Risiken
- 112 Finanzwirtschaftliche Risiken
- 113 Rechtliche Risiken
- 113 Gesamtrisiko

## 114 - 119 Ausblick

- 114 Weltwirtschaft
- 114 Automobilmärkte
- 115 Absatz
- 117 Umsatz und Ergebnis
- 117 Chancen und Risiken
- 118 Investitionen
- 119 Forschung und Entwicklung
- 119 Mitarbeiterinnen und Mitarbeiter

## 152 - 157 Vergütungsbericht

Der Vergütungsbericht im Abschnitt Corporate Governance auf den Seiten 152 ff. ist zugleich Bestandteil des Lageberichts.

## Das Unternehmen

Die Daimler AG ist das Mutterunternehmen des Daimler-Konzerns und hat ihren Sitz in Stuttgart. Die Geschäftstätigkeit umfasst im Wesentlichen die Entwicklung, die Produktion und den Vertrieb von Pkw, Lkw und Transportern in Deutschland sowie die Steuerung des Daimler-Konzerns. Zusätzlich zur Daimler AG beinhaltet der Daimler-Konzern weltweit alle Tochtergesellschaften, auf welche die Daimler AG direkt oder indirekt beherrschenden Einfluss ausüben kann. In diesen Konzerngesellschaften betreiben wir zum Beispiel auch das Omnibus- und das Finanzdienstleistungsgeschäft. Die Lageberichte für die Daimler AG und für den Konzern haben wir in diesem Bericht zusammengefasst.

Daimler blickt auf eine nunmehr 125-jährige Tradition zurück, die bis zu Gottlieb Daimler und Carl Benz, den Erfindern des Automobils, reicht und von Pionierleistungen im Automobilbau geprägt ist. Heute ist das Unternehmen ein weltweit führender Automobilhersteller mit einem in der Branche einzigartigen Produktangebot an hochwertigen Pkw, Lkw, Transportern und Omnibussen. Maßgeschneiderte Serviceleistungen rund um diese Produkte ergänzen das Angebot.

Mit seinen starken Marken ist Daimler in nahezu allen Ländern der Erde vertreten. Das Unternehmen verfügt über Fertigungskapazitäten in insgesamt 18 Ländern und weltweit rund 8.000 Vertriebsstandorte. Die globale Vernetzung der Forschungs- und Entwicklungsaktivitäten sowie der Produktions- und Vertriebsstandorte eröffnet Daimler beachtliche Potenziale zur Effizienzsteigerung und damit Vorteile im internationalen Wettbewerb. Zum Beispiel können wir unsere »grünen« Antriebstechnologien in einem umfangreichen Fahrzeugportfolio einsetzen und gleichzeitig die Erfahrungen sowie das Know-how aus allen Teilen des Konzerns nutzen. Im Jahr 2010 erzielte Daimler einen Umsatz von 97,8 Mrd. €. Die einzelnen Geschäftsfelder haben hierzu wie folgt beigetragen: Mercedes-Benz Cars 53%, Daimler Trucks 22%, Mercedes-Benz Vans 8%, Daimler Buses 5% und Daimler Financial Services 12%. Mehr als 260.000 Mitarbeiterinnen und Mitarbeiter waren zum Jahresende 2010 weltweit für Daimler tätig.

Das Produktangebot des Geschäftsfelds **Mercedes-Benz Cars** reicht von den hochwertigen Kleinwagen der Marke smart über die Premiumfahrzeuge der Marke Mercedes-Benz bis hin zur Luxuslimousine Maybach. Der Schwerpunkt der Produktion liegt in Deutschland, das Geschäftsfeld fertigt aber auch in den USA, in China, Frankreich, Südafrika, Indien, Vietnam und Indonesien. Weltweit verfügt Mercedes-Benz Cars derzeit über 17 Produktionsstätten. Zur Erweiterung der Modellpalette im Kompaktwagen-segment bauen wir derzeit ein neues Werk in Ungarn, das im Jahr 2012 in Betrieb gehen soll. Die wichtigsten Märkte für Mercedes-Benz Cars waren im Jahr 2010 Deutschland mit 23% des Absatzes, die übrigen Märkte Westeuropas (27%), die USA (17%) und China (13%).

Als der größte weltweit aufgestellte Hersteller von Lkw über 6t entwickelt und fertigt das Geschäftsfeld **Daimler Trucks** in einem globalen Verbund Lkw der Marken Mercedes-Benz, Freightliner, Western Star und Fuso. Die insgesamt 28 Produktionsstandorte befinden sich in der NAFTA (14, davon 11 in den USA und 3 in Mexiko), in Asien (5), in Europa (7), in Südamerika (1) und in Afrika (1). In Brasilien wird Daimler Trucks seinen Produktionsverbund ab 2012 um das Werk Juiz de Fora erweitern und dort den schweren Lkw Mercedes-Benz Actros sowie den mittelschweren Accelo für den lateinamerikanischen Markt produzieren. Die Produktpalette von Daimler Trucks umfasst leichte, mittelschwere und schwere Lkw für den Fern-, Verteiler- und Baustellenverkehr sowie Spezialfahrzeuge für den Einsatz im kommunalen Bereich. Aufgrund der engen produktionstechnischen Verknüpfung zählen auch die Omnibusse der Marken Thomas Built Buses und Fuso zum Produktangebot von Daimler Trucks. Die wichtigsten Absatzmärkte für das Geschäftsfeld waren im Jahr 2010 Asien (34%), die NAFTA mit 22%, Lateinamerika ohne Mexiko (16%) und Westeuropa (16%).

Das Geschäftsfeld **Mercedes-Benz Vans** produziert an insgesamt sieben Standorten: in Deutschland, Spanien, USA, Argentinien, Vietnam und seit April 2010 im Rahmen des 50:50-Gemeinschaftsunternehmens Fujian Daimler Automotive auch in China. Das Produktangebot besteht aus den Baureihen Sprinter, Vito/Viano und Vario in den Gewichtsklassen von 1,9t bis 7,5t. Die wichtigsten Märkte liegen mit insgesamt 77% des Absatzes in Europa. In den USA wird der Sprinter unter der Marke Freightliner und seit Beginn des Jahres 2010 auch unter der Marke Mercedes-Benz vertrieben.



## Konzernumsatz nach Geschäftsfeldern

|                            |     |
|----------------------------|-----|
| Mercedes-Benz Cars         | 53% |
| Daimler Trucks             | 22% |
| Mercedes-Benz Vans         | 8%  |
| Daimler Buses              | 5%  |
| Daimler Financial Services | 12% |

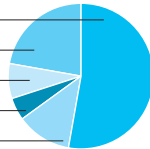

Das Geschäftsfeld **Daimler Buses** ist mit den Marken Mercedes-Benz, Setra und Orion der weltweit führende Hersteller von Omnibussen über 8t. Das Angebot von Daimler Buses umfasst Stadt-, Überland- und Reisebusse sowie Fahrgestelle. Die wichtigsten der insgesamt 15 Produktionsstandorte liegen in Deutschland, der Türkei, Lateinamerika, Frankreich, Spanien und der NAFTA. 45% des Umsatzes erzielte Daimler Buses in Westeuropa, 12% in den NAFTA-Märkten und 27% in Lateinamerika (ohne Mexiko). Während wir in Europa und der NAFTA-Region hauptsächlich Komplettbusse verkaufen, konzentriert sich das Geschäft in Lateinamerika, Afrika und Asien auf die Produktion und den Vertrieb von Fahrgestellen.

Das Geschäftsfeld **Daimler Financial Services** unterstützt weltweit den Absatz der Automobilmarken des Daimler-Konzerns in nahezu 40 Ländern. Das Angebot beinhaltet im Wesentlichen maßgeschneiderte Finanzierungs- und Leasingangebote für Endkunden und Händler. Zum Leistungsspektrum gehören auch Versicherungen, Flottenmanagement, Anlageprodukte und Kreditkarten. Die Schwerpunkte der Aktivitäten liegen in Westeuropa und Nordamerika. Im Berichtsjahr wurden mehr als 40% der von Daimler verkauften Fahrzeuge von Daimler Financial Services finanziert. Das Vertragsvolumen von 63,7 Mrd. € entspricht einem Bestand von 2,5 Mio. Fahrzeugen. Am Konsortium Toll Collect, das in Deutschland ein System zur elektronischen Mauterhebung bei Lkw über 12t betreibt, ist Daimler Financial Services mit 45% beteiligt.

An der European Aeronautic Defence and Space Company (EADS), einem führenden Unternehmen der Luftfahrt-, Raumfahrt- und Verteidigungsindustrie, hält die Daimler AG über eine Tochtergesellschaft eine Beteiligung in Höhe von 22,5%. Wirtschaftlich betrachtet liegt der Anteil von Daimler an der EADS bei 15%, da ein Konsortium von nationalen und internationalen Investoren mit einem Drittel an dieser Tochtergesellschaft beteiligt ist, die den EADS-Anteil hält. Außerdem ist Daimler mit 28,4% an der Tognum AG, einem weltweit führenden Hersteller von Off-Highway-Motoren, beteiligt. Über ein breitgefächertes Netz von Beteiligungen, Gemeinschaftsunternehmen und Kooperationen ist Daimler in die globale Automobilindustrie und angrenzende Wirtschaftsbereiche eingebunden. Die Aufstellung des Anteilsbesitzes gemäß § 313 HGB finden Sie im Internet unter <http://www.daimler.com/ir/ergebnis2010>.

## Corporate Governance

Umfassende Informationen zum Thema Corporate Governance bei Daimler finden Sie im Abschnitt Corporate Governance auf den Seiten 148 ff. dieses Geschäftsberichts.

**Erklärung zur Unternehmensführung.** Die nach § 289a HGB abzugebende Erklärung zur Unternehmensführung ist Bestandteil dieses zusammengefassten Lageberichts und steht im Internet unter [www.daimler.com/corpgov/de](http://www.daimler.com/corpgov/de) zur Verfügung. Gemäß § 317 Abs. 2 Satz 3 HGB sind die Angaben nach § 289a HGB nicht in die Prüfung durch den Abschlussprüfer einbezogen.

**Vergütungsbericht.** Die Beschreibung des Vergütungssystems sowie der individualisierte Ausweis der Vergütung von Vorstand und Aufsichtsrat sind im Vergütungsbericht auf den Seiten 152 ff. enthalten. Dieser ist zugleich Bestandteil des Lageberichts.

## Übernahmerelevante Angaben und Erläuterungen

(Bericht nach § 315 Absatz 4 HGB und § 289 Absatz 4 HGB)

**Unternehmensleitung; Bestimmungen über die Ernennung und Abberufung von Vorstandsmitgliedern.** Die Daimler AG ist eine Aktiengesellschaft mit Sitz in Deutschland. Das Unternehmen wird vom Vorstand geleitet und gegenüber Dritten vertreten. Der Vorstand besteht aus mindestens zwei Personen, die gemäß § 84 Aktiengesetz vom Aufsichtsrat für eine Amtszeit von höchstens fünf Jahren bestellt werden. Eine wiederholte Bestellung oder Verlängerung der Amtszeit, jeweils für höchstens fünf Jahre, ist zulässig. Bestellung und Wiederbestellung bedürfen eines Aufsichtsratsbeschlusses, der grundsätzlich frühestens ein Jahr vor Ablauf der Amtszeit gefasst werden darf. Der Aufsichtsrat ernennt eines der Vorstandsmitglieder zum Vorsitzenden des Vorstands. In Ausnahmefällen kann ein Vorstandsmitglied gemäß § 85 Aktiengesetz gerichtlich bestellt werden. Der Aufsichtsrat kann die Bestellung zum Vorstand und die Ernennung zum Vorsitzenden des Vorstands widerrufen, wenn ein wichtiger Grund vorliegt.

**Unternehmensgegenstand; Bestimmungen über die Änderung der Satzung.** Der Umfang der Tätigkeit, die das Unternehmen ausführen kann, ist in § 2 der Satzung definiert. Die Satzung kann gemäß § 179 Aktiengesetz nur durch einen Beschluss der Hauptversammlung geändert werden. Soweit nicht zwingende Vorschriften des Gesetzes etwas Abweichendes bestimmen, werden Beschlüsse der Hauptversammlung nach § 133 Aktiengesetz, § 16 Abs. 1 der Satzung mit einfacher Mehrheit der abgegebenen Stimmen und gegebenenfalls mit einfacher Mehrheit des vertretenen Kapitals gefasst, im Fall von Wahlen nach § 16 Abs. 2 der Satzung mit der relativen Mehrheit der Ja-Stimmen. Für eine Änderung des Unternehmensgegenstandes ist gemäß § 179 Abs. 2 Aktiengesetz eine Mehrheit von 75% des vertretenen Grundkapitals erforderlich. Änderungen der Satzung, die lediglich die Fassung betreffen, kann der Aufsichtsrat gemäß § 7 Abs. 2 der Satzung beschließen. Satzungsänderungen werden nach § 181 Abs. 3 Aktiengesetz mit Eintragung in das Handelsregister wirksam.

**Gezeichnetes Kapital.** Das Gezeichnete Kapital der Daimler AG zum 31. Dezember 2010 beträgt rund 3.058 Mio. €. Es ist eingeteilt in 1.065.641.907 auf den Namen lautende Stückaktien. Alle Aktien gewähren die gleichen Rechte. Jede Aktie vermittelt eine Stimme und, gegebenenfalls mit Ausnahme eventueller nicht dividendenberechtigter junger Aktien, den gleichen Anteil am Gewinn. Die Rechte und Pflichten aus den Aktien ergeben sich aus den gesetzlichen Vorschriften. Zum 31. Dezember 2010 befanden sich 221.418 Aktien im eigenen Bestand.

**Beschränkungen, die Stimmrechte oder die Übertragung von Aktien betreffen.** Aus eigenen Aktien stehen der Gesellschaft keine Rechte zu. In den Fällen des § 136 Aktiengesetz ist das Stimmrecht aus den betroffenen Aktien kraft Gesetzes ausgeschlossen. Im Rahmen des Belegschaftsaktienprogramms von Mitarbeitern erworbene Aktien unterliegen bis zum Ende des auf das Erwerbsjahr folgenden Jahres einer Veräußerungssperre.

Die Daimler AG und die Renault-Nissan-Allianz haben am 7. April 2010 ein Master Cooperation Agreement über eine weitreichende strategische Kooperation und eine gegenseitige Kapitalbeteiligung abgeschlossen. Renault S.A. und Nissan Motors Co. Ltd erhielten jeweils eine Beteiligung von 1,55 % an der Daimler AG, und die Daimler AG erhielt jeweils 3,1% an der Renault S.A. und an der Nissan Motors Co. Ltd. Für die Dauer der Laufzeit des Master Cooperation Agreement, mindestens für die Dauer von fünf Jahren, können grundsätzlich weder i) die Daimler AG ihre Beteiligung an Renault S.A. und Nissan Motors Co. Ltd noch ii) Renault S.A. und Nissan Motors Co. Ltd ihre Beteiligung an der Daimler AG ohne vorherige Zustimmung der anderen Parteien an einen Dritten übertragen. Übertragungen an Dritte, die in keinem Wettbewerbsverhältnis zu einem der Emittenten der betreffenden Aktien stehen, sind unter bestimmten Voraussetzungen von diesem Verbot ausgenommen, unter anderem im Falle konzerninterner Übertragungen, Übertragungen im Zusammenhang mit dem Übernahmeangebot eines Dritten für die Anteile einer der anderen Parteien oder im Falle eines Kontrollwechsels beim Emittenten der entsprechenden Aktien.

**Ermächtigung zum Aktienrückkauf, Genehmigtes und Bedingtes Kapital.** Am 14. April 2010 hat die Hauptversammlung der Gesellschaft die im Vorjahr erteilte Ermächtigung zum Erwerb eigener Aktien aufgehoben, soweit von ihr noch kein Gebrauch gemacht worden war. Gleichzeitig wurde die Gesellschaft erneut ermächtigt, bis zum 13. April 2015 für bestimmte definierte Zwecke eigene Aktien im Umfang von bis zu 10% des zum Zeitpunkt der Beschlussfassung der Hauptversammlung bestehenden Grundkapitals zu erwerben. Unter anderem ist der Kauf eigener Aktien für folgende Zwecke zulässig: zum Zwecke der Einziehung, des Angebots an Dritte im Rahmen eines Unternehmenszusammenschlusses oder -erwerbs, zur Veräußerung in anderer Weise als durch ein Angebot an alle Aktionäre und zum Zwecke der Bedienung des Stock-Option-Programms. Eigene Aktien im Umfang von bis zu 5% des im Zeitpunkt der Beschlussfassung der Hauptversammlung bestehenden Grundkapitals können auch über Derivate erworben werden, wobei die Laufzeit der einzelnen Option 18 Monate nicht überschreiten darf.

Mit Beschluss der Hauptversammlung vom 8. April 2009 wurde der Vorstand ermächtigt, das Grundkapital der Daimler AG bis zum 7. April 2014 mit Zustimmung des Aufsichtsrats durch Ausgabe neuer, auf den Namen lautender Stückaktien gegen Bar- und/oder gegen Sacheinlage ganz oder in Teilbeträgen einmal oder mehrmals um bis zu insgesamt 1.000 Mio. € zu erhöhen (Genehmigtes Kapital 2009). Der Vorstand wurde unter anderem auch ermächtigt, unter bestimmten Voraussetzungen mit Zustimmung des Aufsichtsrats das Bezugsrecht der Aktionäre auszuschließen.

Darüber hinaus wurde der Vorstand mit Beschluss der Hauptversammlung vom 14. April 2010 ermächtigt, mit Zustimmung des Aufsichtsrats bis zum 13. April 2015 einmal oder mehrmals Wandel- und/oder Optionsschuldverschreibungen oder eine Kombination dieser Instrumente im Gesamtnennbetrag von bis zu 10 Mrd. € mit einer Laufzeit von längstens zehn Jahren zu begeben und den Inhabern bzw. Gläubigern dieser Schuldverschreibungen Wandlungs- bzw. Optionsrechte auf neue, auf den Namen lautende Stückaktien der Daimler AG mit einem anteiligen Betrag des Grundkapitals von insgesamt bis zu 500 Mio. € nach näherer Maßgabe der Wandel- bzw. Optionsanleihebedingungen zu gewähren. Die Schuldverschreibungen können auch durch unmittelbare oder mittelbare Mehrheitsbeteiligungen der Daimler AG begeben werden. Dementsprechend wurde das Grundkapital um bis zu 500 Mio. € bedingt erhöht (Bedingtes Kapital 2010). Von der Ermächtigung zur Ausgabe von Wandel- und/oder Optionsschuldverschreibungen wurde bislang kein Gebrauch gemacht.

**Change-of-Control-Klauseln.** Die Daimler AG hat die im Folgenden aufgeführten wesentlichen Vereinbarungen abgeschlossen, die Regelungen für den Fall eines Kontrollwechsels beinhalten, wie er unter anderem aufgrund eines Übernahmeangebots eintreten kann:

- eine unbeanspruchte syndizierte Kreditlinie über einen Betrag von insgesamt 7 Mrd. €, die ein Kündigungsrecht des Darlehensgebers für den Fall vorsieht, dass die Daimler AG Tochterunternehmen einer anderen Gesellschaft oder einer oder mehrerer gemeinsam handelnder Personen wird;
- Kreditverträge mit Darlehensgebern über einen Betrag von insgesamt 800 Mio. €, die ein Kündigungsrecht der Darlehensgeber für den Fall vorsehen, dass die Daimler AG Tochterunternehmen einer anderen Gesellschaft oder einer oder mehrerer gemeinsam handelnder Personen wird;
- Garantien und Bürgschaften für Kreditverträge von konsolidierten Beteiligungsgesellschaften über einen Betrag von insgesamt 505 Mio. €, die ein Kündigungsrecht der Darlehensgeber für den Fall vorsehen, dass die Daimler AG Tochterunternehmen einer anderen Gesellschaft oder einer oder mehrerer gemeinsam handelnder Personen wird;
- eine Vereinbarung über den Erwerb der Mehrheit (50,1%) an der »AFCC Automotive Fuel Cell Cooperation Corp.«; diese hat das Ziel, die Brennstoffzelle für automobiler Anwendungen weiterzuentwickeln und vermarktungsfähig zu machen. Die Vereinbarung sieht für den Fall eines Kontrollwechsels bei der Daimler AG ein Kündigungsrecht des anderen Hauptgesellschafters Ford Motor Company sowie eine Put-Option des Minderheitsgesellschafters Ballard Power Systems vor. Kontrolle im Sinne dieser Vereinbarung sind die wirtschaftliche Inhaberschaft (beneficial ownership) der Mehrheit der Stimmrechte und die daraus folgende Berechtigung, die Mehrheit der Mitglieder des Vorstands zu bestellen;
- ein Master Cooperation Agreement über eine weitreichende strategische Kooperation mit Renault S.A., Renault-Nissan B.V. und Nissan Motors Co. Ltd. in Verbindung mit einer wechselseitigen Kapitalbeteiligung: Die Renault-Nissan-Allianz erhielt eine Beteiligung von 3,1% an der Daimler AG, und die Daimler AG erhielt jeweils 3,1% an der Renault S.A. und an der Nissan Motors Co. Ltd. Im Falle eines Kontrollwechsels bei einer Vertragspartei ist jede der anderen Parteien berechtigt, die Vereinbarung zu kündigen. Ein Kontrollwechsel im Sinne des Master Cooperation Agreements liegt vor, wenn ein Dritter oder mehrere gemeinsam agierende Dritte rechtlich oder wirtschaftlich direkt oder indirekt mindestens 50% der Stimmrechte der entsprechenden Partei erwerben oder berechtigt sind, die Mehrheit der Mitglieder des geschäftsführenden Organs zu bestellen. Unter dem Master Cooperation Agreement wurden mehrere Kooperationsverträge zwischen der Daimler AG einerseits und Renault und/oder Nissan andererseits über eine neue Architektur für Kleinwagen, die gemeinsame Nutzung von verbrauchs-

armen Diesel- und Benzinmotoren sowie Getrieben und die Entwicklung und Belieferung mit einem kleinen Stadtlieferwagen abgeschlossen, die für den Fall des Kontrollwechsels bei einer Vertragspartei ein Kündigungsrecht für die andere Vertragspartei vorsehen. Der Kontrollwechsel knüpft dabei an einen Schwellenwert von 50% der Stimmrechte an oder an die Berechtigung, die Mehrheit der Mitglieder des geschäftsführenden Organs zu bestellen. Bei einer Kündigung der Kooperation im Bereich der Entwicklung von Kleinwagen infolge eines Kontrollwechsels in der Frühphase der Zusammenarbeit wäre die von dem Kontrollwechsel betroffene Partei verpflichtet, ihren Anteil an den Kosten für die Entwicklung von gemeinsamen Komponenten zu tragen, auch wenn die Entwicklung für diese Partei eingestellt würde;

- ein Vertragswerk, das die Ausübung der Stimmrechte an der EADS N.V. regelt. Dieses sieht für den Fall eines Kontrollwechsels vor, dass die Daimler AG nach Aufforderung durch die französischen Vertragspartner verpflichtet ist, sich nach besten Kräften zu bemühen, ihren Anteil an der EADS an einen Dritten, der kein Wettbewerber der EADS bzw. der französischen Vertragspartner der Daimler AG ist, zu angemessenen Konditionen zu veräußern. In diesem Fall steht der französischen Seite ein Vorkaufsrecht zu den von Dritten angebotenen Bedingungen zu. Auch kann es im Falle eines Beherrschungswechsels zu einer Auflösung des Stimmrechtskonsortiums mit der französischen Seite kommen. Ein Beherrschungswechsel liegt nach dem EADS-Vertragswerk dann vor, wenn ein Wettbewerber der EADS N.V. oder der französischen Vertragspartner entweder so viele Aufsichtsratsmitglieder bei der Daimler AG benennt, dass er damit die Mehrheit der Mitglieder des Vorstands bestellen kann, oder über eine Beteiligung verfügt, aufgrund derer er das Tagesgeschäft der Daimler AG bestimmen kann.

## Strategie

Vor 125 Jahren haben wir mit der Erfindung des Automobils die Mobilität grundlegend verändert. Auch für die Zukunft bleibt es unser Anspruch, richtungweisend bei der Weiterentwicklung der Mobilität zu sein. Als Pioniere des Automobilbaus wollen wir die Mobilität der Zukunft sicher und nachhaltig gestalten. Im Fokus unseres Handelns stehen die Bedürfnisse unserer Kunden. Wir wollen sie begeistern mit

- faszinierenden Premiumautomobilen, die bei Design, Sicherheit, Komfort, Wertanmutung, Zuverlässigkeit und Umweltfreundlichkeit Maßstäbe setzen,
- Nutzfahrzeugen, die die Besten in ihrem jeweiligen Wettbewerbsumfeld sind,
- herausragenden Serviceleistungen rund um diese Produkte sowie
- neuen Mobilitätslösungen, orientiert an den Bedürfnissen unserer Kunden.

Das ist unser Anspruch, und dafür stehen wir als Daimler. Diesen Anspruch haben wir im Daimler-Zielsystem formuliert, das die Ziele für Daimler insgesamt und für jedes unserer Geschäfte beinhaltet.



**Zielsystem.** Unser oberstes Unternehmensziel ist es, nachhaltig profitabel zu wachsen und damit den Wert des Unternehmens zu steigern. Wir wollen zu den führenden Automobilunternehmen der Welt gehören. Das Daimler-Zielsystem beinhaltet, wie in der Grafik auf Seite 67 dargestellt, sechs strategische Dimensionen. Es gibt den strategischen Rahmen vor und definiert, in welchen Dimensionen wir führend sein möchten. Mit unseren Marken, Produkten und Dienstleistungen wollen wir unsere Kunden begeistern. Und in den jeweiligen Marktsegmenten streben wir die Spitzenposition an. Mit wegweisenden Technologien wollen wir Vorreiter bei umweltverträglichen Antriebstechnologien und bei der Sicherheit sein. Globale Präsenz bedeutet für uns, dass wir unsere Position in traditionellen Märkten sichern und gleichzeitig in den neuen Märkten ausbauen wollen. Herausragende Umsetzung und Effizienz sowie motivierte und leistungsstarke Mitarbeiter sind der Schlüssel für den künftigen Unternehmenserfolg. Dabei bestimmt Nachhaltigkeit unser unternehmerisches Handeln: in den Bereichen Ökonomie und Corporate Governance, Umweltschutz und Sicherheit sowie in unseren Beziehungen zu Mitarbeitern, Kunden und der Gesellschaft insgesamt. Da wir die Nachhaltigkeit nicht nur in der Umsetzung, sondern auch formal stärker verankern wollen, haben wir Nachhaltigkeit als zusätzliches Ziel ins Daimler-Zielsystem aufgenommen. Unsere Mitarbeiterinnen und Mitarbeiter orientieren sich in ihrer Handlungsweise an den Unternehmenswerten Begeisterung, Wertschätzung, Integrität und Disziplin und wollen in ethischem und gesetzeskonformem Verhalten vorbildlich sein.

**Exzellente Produkte mit hervorragendem Kundenerlebnis bilden die Grundlage unseres Erfolgs.** Vor dem Hintergrund der stetigen Suche nach der besten Lösung und um dem Lebenszyklus der Produkte Rechnung zu tragen, führten und führen wir in den Jahren 2010 und 2011 allein bei Mercedes-Benz Cars 16 neue Modelle ein. In allen Geschäftsfeldern erweitern wir unser Produktportfolio, um die stärkere Differenzierung innerhalb der Kundensegmente und regional unterschiedliche Bedürfnisse zu adressieren. Beispiele hierfür sind der CLS Shooting Brake oder die Langversion der E-Klasse für China. Bei Daimler Trucks haben wir unser Produktprogramm mit fünf neuen Modellen im Jahr 2010 umfangreich erneuert. Nummer 1 in der Kundenzufriedenheit bleibt eines unserer Hauptziele. Die Aktivitäten zur Verbesserung der Produkt- und Servicequalität stehen dabei genauso im Vordergrund wie das kundengerechte Angebot an Serviceleistungen.

**Führende Marken** tragen langfristig zum Erfolg des Unternehmens bei. Führende Marken geben auch dem Kunden Orientierung, schaffen Vertrauen und wecken Emotionen. Die Marke Mercedes-Benz ist eine der erfolgreichsten und bekanntesten Marken der Welt. Diese Position wollen wir auch in Zukunft erhalten und ausbauen. Die Markenstrategien unserer Geschäftsfelder, zum Beispiel »Das Beste oder nichts« bei Mercedes-Benz Cars, tragen dazu bei, die Markenprofile gegenüber den Wettbewerbern weiter zu schärfen und unsere Unternehmensaktivitäten daran auszurichten.

**Innovations- und Technologieführerschaft.** Innovationsführer wollen wir bei »grünen« Technologien und bei der Sicherheit sein: Mit »Green Technology Leadership« bei Mercedes-Benz Cars und »Shaping Future Transportation« bei Daimler Trucks, Mercedes-Benz Vans und Daimler Buses werden wir unseren Anspruch heute und in Zukunft verwirklichen. Unterschiedliche Mobilitätsanforderungen erfordern verschiedene Antriebslösungen. Unser Lösungsportfolio reicht dabei von der Optimierung von Verbrennungsmotoren über die Hybridisierung bis hin zum lokal emissionsfreien Fahren. Auch bei der aktiven und passiven Sicherheit wollen wir bei Pkw und Nutzfahrzeugen unsere Vorreiterrolle weiter ausbauen.

Mit neuen Geschäftsideen wie car2go und Bus Rapid Transit (BRT) verfolgen wir innovative Mobilitätskonzepte und Geschäftsmodelle, die neuen Kundenbedürfnissen Rechnung tragen und zusätzliche Wachstumspotenziale erschließen sollen (vgl. S. 142 f.).

**Globale Präsenz und Vernetzung.** Es ist unser Ziel, als Unternehmen weiter profitabel zu wachsen und dabei zu den Besten in der Branche zu gehören: im Kerngeschäft, in traditionellen und in neuen Märkten. Insbesondere in den stark wachsenden Märkten China, Indien, Russland und Brasilien verstärken wir unsere Aktivitäten vor Ort durch den Auf- und Ausbau lokaler Produktions- und Vertriebsstandorte, teilweise mit lokalen Partnern.

**Herausragende Umsetzung und Nachhaltigkeit.** Herausragende Umsetzung erreichen wir durch Effizienzziele und entsprechende Programme in den Bereichen Produktion, Entwicklung, Vertrieb und Verwaltung. Die Basis dafür ist eine Kultur der Spitzenleistung. Durch Standardisierung und Modularisierung in den Geschäften können wir die Effizienz bei neuen Produkten, neuen Technologien und neuen Prozessen deutlich steigern. Unterstützt durch Kooperationen, zum Beispiel mit Renault-Nissan, verbessern wir unsere Kostenposition. Darüber hinaus erweitern wir dadurch unser Produktportfolio im Kleinwagensegment und bei kleinen Transportern. Durch die Flexibilisierung, zum Beispiel in der Produktion bei Daimler Trucks, sind wir in der Lage, die Zyklen des Marktes besser abzufedern. Programme wie das Truck Operating System (TOS) bei Daimler Trucks schaffen eine Kultur des Lernens und der kontinuierlichen Verbesserung. Durch diesen ganzheitlichen Managementansatz steigern alle direkten und indirekten Bereiche der weltweiten Standorte von Daimler Trucks sukzessive ihre Effizienz.

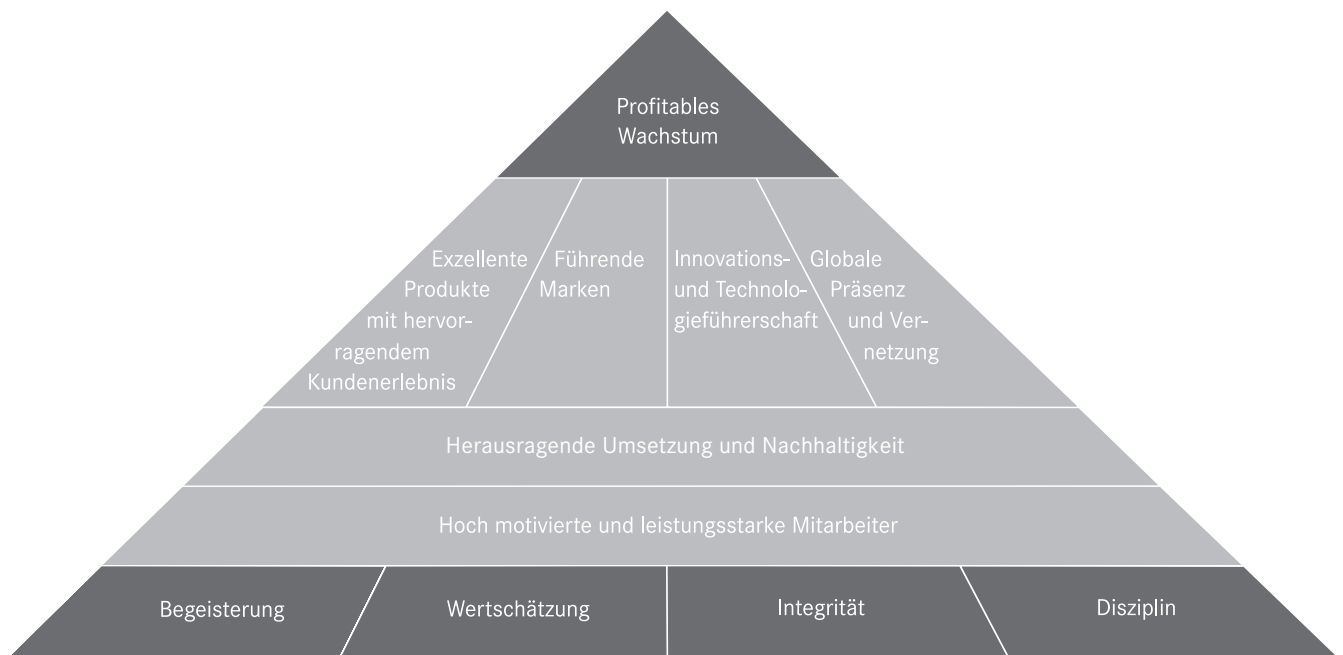

Auch beim Thema Nachhaltigkeit haben wir einen klaren Führungsanspruch. Dabei legen wir besonderes Augenmerk auf den Umweltschutz bei Produktion und Produkten, die langfristige Sicherung von Arbeitsplätzen, verantwortlich handelnde Zulieferer, auf ein intaktes Verhältnis zur Gesellschaft sowie eine transparente Kommunikation. Ein wichtiges Ziel ist in diesem Zusammenhang auch die weitere Reduzierung des CO<sub>2</sub>-Ausstoßes unserer Pkw und Nutzfahrzeuge. So wollen wir die durchschnittlichen CO<sub>2</sub>-Emissionen unserer Pkw-Neuwagenflotte in der Europäischen Union von 158 g/km im Jahr 2010 bis zum Jahr 2012 auf unter 140 g/km reduzieren. Einen wichtigen Beitrag hierzu werden die BlueDirect V6- und V8-Motoren mit Benzin-Direkteinspritzung der dritten Generation leisten, die wir zum Jahresende 2010 eingeführt haben. Bei den Lkw verfolgen wir im Rahmen einer von verschiedenen Truck-Herstellern unterzeichneten Selbstverpflichtung das Ziel, die CO<sub>2</sub>-Emissionen der von uns in Europa verkauften schweren Lkw (über 12t) gegenüber dem Basisjahr 2005 bis zum Jahr 2020 um durchschnittlich 20% pro Tonnenkilometer zu senken (vgl. S. 140 ff.).

**Hoch motivierte und leistungsstarke Mitarbeiter**, die ihr Handeln an den Unternehmenswerten ausrichten und sich an höchsten ethischen Standards orientieren, sind unser Ziel. Das neue Vorstandsressort »Integrität und Recht« hat die Aufgabe, für die Einhaltung von Regeln und Vorschriften und höchste ethische Standards zu sorgen. Da wir die Vielfalt innerhalb der Mitarbeiter-schaft als Vorteil ansehen, arbeiten wir gezielt daran, zum Beispiel den Frauenanteil bei Führungskräften bis zum Jahr 2020 auf 20% zu erhöhen und die Internationalität anzuheben.

In Summe werden wir weiter profitabel wachsen, indem wir die aus dem Zielsystem abgeleiteten Strategien konsequent umsetzen. Dabei steht für alle Geschäfte im Vordergrund,

- das Kerngeschäft zu stärken,
- in neuen Märkten weiter zu wachsen,
- in »grünen« Technologien führend zu sein und
- die Entwicklung neuer Mobilitätskonzepte und Dienstleistungen maßgebend voranzutreiben.

**Anspruchsvolle Renditeziele.** Wir haben uns klare Renditeziele gesetzt. Ab 2013 streben wir für unser Automobilgeschäft über die Markt- und Produktzyklen hinweg eine durchschnittliche Umsatzrendite von 9% an. Basis hierfür sind die Zielrenditen der einzelnen Geschäftsfelder: 10% für Mercedes-Benz Cars, 8% für Daimler Trucks, 9% für Mercedes-Benz Vans und 6% für Daimler Buses. Für das Geschäftsfeld Daimler Financial Services haben wir uns eine Eigenkapitalrendite von 17% vorgenommen.

**Portfolioveränderungen.** Mit dem Ziel, unser Kerngeschäft zu stärken und neue Wachstumspotenziale zu erschließen, haben wir im Jahr 2010 das Geschäftsportfolio von Daimler weiterentwickelt:

Im März 2010 hat die Daimler AG sämtliche Anteile in Höhe von 5,34% am indischen Automobilkonzern **Tata Motors** an verschiedene Investorengruppen verkauft. Durch den Verkauf der Anteile haben wir einen Kapitalzufluss von 303 Mio. € erzielt. Daimler ist für die Erschließung der Wachstumspotenziale bei Pkw und Nutzfahrzeugen in Indien in einer hervorragenden Ausgangsposition und stärkt dort seine eigenen Aktivitäten. Die Fortführung der Kapitalbeteiligung von Daimler an Tata war deshalb nicht mehr erforderlich.

Am 7. April 2010 haben die Daimler AG und die **Renault-Nissan**-Allianz eine weitreichende strategische Kooperation vereinbart, die beiden Unternehmen Vorteile aus einer Reihe von konkreten Projekten und der gemeinsamen Nutzung von »Best Practices«-Ansätzen erschließt. Hierbei handelt es sich im Einzelnen um eine neue, gemeinsame Architektur für Kleinwagen, die gemeinsame Nutzung von verbrauchsarmen Drei- und Vierzylindermotoren sowie die Zusammenarbeit im Bereich der leichten Nutzfahrzeuge. Darüber hinaus wurde eine gegenseitige Kapitalbeteiligung vereinbart: Die Renault-Nissan-Allianz erhielt aus dem Bestand eigener Aktien einen Anteil von 3,1% an Daimler, und im Gegenzug erhielt Daimler einen Anteil von jeweils 3,1% an Renault und Nissan.

Die **BYD Company Limited** und die Daimler AG haben am 27. Mai 2010 einen Vertrag über die Gründung des 50:50-Joint-Ventures »Shenzhen BYD Daimler New Technology Co. Ltd.« zur Entwicklung eines Elektrofahrzeugs für den chinesischen Markt unterzeichnet. BYD und Daimler werden in das Joint Venture ein Investitionsvolumen von 600 Millionen RMB (ca. 71 Mio. €) einbringen. Das Gemeinschaftsunternehmen soll eine neue Generation eines Elektrofahrzeugs entwickeln, die das Know-how von Daimler bei Fahrzeugarchitekturen und Sicherheit mit BYDs Kompetenzen bei Batterietechnologien und elektrischen Fahrzeugsystemen verbindet. Das Fahrzeug wird unter einer neuen Marke angeboten, die von Daimler und BYD gemeinsam geschaffen wird. Die Markenrechte werden bei dem Joint Venture liegen.

Am 17. Juni 2010 haben die Daimler AG und die Europäische Bank für Wiederaufbau und Entwicklung (EBRD) die Erhöhung ihrer strategischen Beteiligungen am russischen Lkw-Hersteller **Kamaz** erfolgreich abgeschlossen. Bereits am 11. Februar 2010 hatte die Daimler AG ein Memorandum of Understanding zur Übernahme von 5% der von Troika Dialog Limited gehaltenen Anteile an Kamaz unterzeichnet. Damit hat Daimler seinen Anteil an Kamaz um einen Prozentpunkt auf 11% erhöht, während die restlichen 4% der Anteile rechtlich von der EBRD gehalten werden. Aufgrund der vertraglichen Gegebenheiten werden die EBRD-Anteile nach IFRS Daimler wirtschaftlich zugerechnet.

Daimler und **Foton** sind bei den Verhandlungen zur Gründung eines 50:50-Joint-Ventures einen großen Schritt vorangekommen. Nachdem die chinesische National Development and Reform Commission dem geplanten Joint Venture zugestimmt hat, wurde am 16. Juli der Joint-Venture-Vertrag unterzeichnet. Daimler wird seine Technologiekompetenz, insbesondere bei Dieselmotoren und Abgastechnologie, einbringen. Beide Partner werden die Lkw-Marke Auman von Foton als Plattform in China und Ausgangsbasis für gemeinsame Exporte einsetzen. Das Joint Venture ist ein weiterer Meilenstein bei der Umsetzung der China-Strategie von Daimler.

Im Dezember wurde bei der Daimler-Tochter **Mitsubishi Fuso Truck and Bus Corporation (MFTBC)** eine Kapitalerhöhung in Höhe von 30 Mrd. japanischen Yen (274 Mio. €) durchgeführt. Im Rahmen dieser Kapitalmaßnahme hat Daimler seine Beteiligung an MFTBC von 85% auf 89% erhöht; der Anteil der Mitsubishi-Group-Gesellschaften verringerte sich auf 11%.

## Einigung mit US-Behörden

Am 1. April 2010 hat die Daimler AG eine Einigung mit der US-Börsenaufsicht (Securities and Exchange Commission, SEC) und dem US-Justizministerium (U.S. Department of Justice, DOJ) zum Abschluss der Untersuchungen wegen Verletzungen des US-amerikanischen Foreign Corrupt Practices Act (FCPA) erzielt. Im Rahmen dieser Einigung zahlte Daimler eine Geldbuße in Höhe von 93,6 Mio. US-\$ (ca. 70 Mio. €) und stimmte einer Gewinnabschöpfung in Höhe von 91,4 Mio. US-\$ (ca. 68 Mio. €) zu. Das Unternehmen hatte dafür in den Vorjahren ausreichende Rückstellungen gebildet.

Bei der Untersuchung der Vorwürfe, die im Herbst 2004 begann, hat Daimler mit der SEC und dem DOJ kooperiert. Parallel dazu hat Daimler eine umfassende Compliance-Organisation aufgebaut, um für die Zukunft sicherzustellen, dass das Geschäftsgebahren den Verhaltensrichtlinien des Unternehmens und den gesetzlichen Vorgaben entspricht (vgl. S. 158 f.).

Die Verfahren des DOJ gegen die Daimler AG und die Daimler North East Asia Ltd. wurden gegen die Auflagen ausgesetzt, die Vorschriften des FCPA während der zweijährigen Laufzeit der Vereinbarungen nicht zu verletzen und ein umfassendes Compliance-Programm aufrechtzuerhalten. Dieses Programm ist unter anderem darauf ausgerichtet, die Einhaltung von Anti-Bestechungsvorschriften, wie zum Beispiel den FCPA, sicherzustellen. Nach Erfüllung der Auflagen werden die ausgesetzten Verfahren eingestellt. Darüber hinaus wurde der ehemalige US-Bundesrichter Louis Freeh für drei Jahre unabhängiger Compliance-Monitor, der unter anderem die Compliance-Maßnahmen des Unternehmens bewertet und dokumentiert. Weitere Informationen hierzu finden Sie in Anmerkung 28 des Konzernanhangs.

## Neues Vorstandsressort »Integrität und Recht«

Daimler verfolgt das Ziel, eine Unternehmenskultur zu schaffen, die nicht nur die gesetzlichen Anforderungen erfüllt, sondern auch höchsten ethischen Ansprüchen genügt und branchenweit als beispielhaft gilt.

Um dieses Ziel zu erreichen, hat der Aufsichtsrat am 28. September 2010 beschlossen, ein zusätzliches Vorstandsressort für den Bereich »Integrität und Recht« einzurichten. Zu den Aufgaben des neuen Ressorts zählen unter anderem das Management der globalen Rechts- und Compliance-Organisation und der entsprechenden Prozesse, die Geschäftsethik sowie eine nachhaltige Verankerung von Compliance und Integrität im gesamten Unternehmen.

## Wirtschaftswachstum

Bruttoinlandsprodukt real in % zum Vorjahr

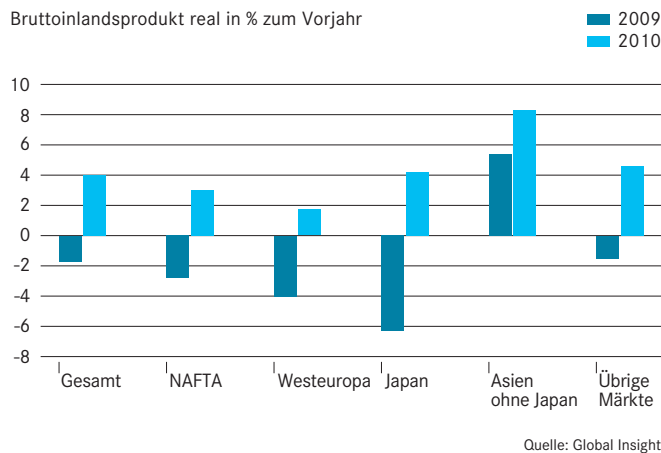

Die neue Vorstandsfunktion ist ein konsequenter Schritt in der Weiterentwicklung der Unternehmensstruktur und -kultur. Der Daimler-Vorstand hat in diesem Zusammenhang beschlossen, seine Compliance-Aktivitäten noch weiter voranzutreiben – einschließlich der Beziehungen mit Geschäftspartnern. Das Unternehmen ist heute in beinahe 200 Ländern entweder mit eigenen Gesellschaften oder über seine Geschäftspartner tätig. Die regelkonforme und einwandfreie Abwicklung aller Geschäfte fordert eine entsprechend ausgebildete und weltweit aufgestellte Compliance-Organisation sowie wirksame Prozesse und Kontrollen. Gleichzeitig ist und bleibt es die Aufgabe des gesamten Vorstandes und aller Führungskräfte, das Bewusstsein für die Einhaltung von Gesetzen und Richtlinien, aber auch für Geschäftsethik permanent im Unternehmen zu verankern (vgl. S. 158 f.).

## Wirtschaftliche Rahmenbedingungen

**Weltwirtschaft.** Mit einem Wachstum von 4,0% hat die Weltwirtschaft im Berichtsjahr mit erstaunlicher Dynamik die vorausgegangene Rezession überwunden und schon im Sommer 2010 wieder das Vorkrisenniveau übertroffen. Maßgeblichen Anteil an dieser erfreulichen Entwicklung hatten die kräftig expandierenden Schwellenländer, deren Bruttoinlandsprodukt um fast 7% zulegte. Die Industrieländer zeigten mit einem Anstieg der Wirtschaftsleistung von rund 2,5% zwar ein solides Wachstum, lagen damit aber mit wenigen Ausnahmen noch deutlich unter dem Niveau der Jahre 2007 und 2008. Innerhalb der Industrieländer konnten die stärker export- und investitionsgüterabhängigen Volkswirtschaften wie Deutschland (3,6%) und Japan (4,2%) am meisten von der globalen Erholung und der damit verbundenen deutlichen Belebung des Welthandels profitieren. Insgesamt wurde das Wachstum gerade in den reiferen Volkswirtschaften durch die weiterhin sehr expansive Geldpolitik und die Auswirkungen der massiven Konjunkturprogramme des Vorjahres gestützt.

Hinzu kamen Sonder- und Einmaleffekte wie das Auffüllen der in der Rezession geräumten Lager. Insgesamt hat die Wachstumsdynamik der Weltwirtschaft im Jahresverlauf jedoch wieder an Fahrt verloren. Ein belastender Faktor war zunächst im Frühjahr das hohe Haushaltsdefizit in Griechenland und die Verschuldungsproblematik weiterer europäischer Länder. Die Finanzmärkte reagierten darauf mit starken Schwankungen, und die Verunsicherung von Investoren und Konsumenten nahm wieder deutlich zu. Letztendlich sahen sich die Regierungen der Europäischen Union gezwungen, zusammen mit dem Internationalen Währungsfonds einen umfassenden Rettungsschirm aufzuspannen, den schließlich Irland als erstes Land im November in Anspruch nehmen musste. Bereits in den Sommermonaten hatten die Sorgen um die Nachhaltigkeit des Aufschwungs und die Befürchtungen um einen neuerlichen Rückfall in eine Rezession spürbar zugenommen. Hier stand insbesondere die US-Wirtschaft aufgrund relativ geringer gesamtwirtschaftlicher Zuwächse und anhaltend hoher Arbeitslosigkeit im Fokus. Die amerikanische Notenbank verkündete deshalb im Herbst eine neuerliche Ausweitung ihrer ohnehin schon expansiven Geldpolitik, und im Dezember einigten sich Regierung und Opposition auf neue finanzpolitische Unterstützungsmaßnahmen. Insgesamt konnte die US-Konjunktur aufgrund einer Belebung im Schlussquartal für das Gesamtjahr 2010 noch ein Wachstum von 2,9% erreichen. Die Schwellenländer, allen voran China und Indien, waren in diesem eher unsicheren Umfeld wie schon im Vorjahr bedeutsame Wachstumsstützen. Wichtig war für die Weltwirtschaft auch, dass die chinesische Wirtschaft aus der Überhitzungszone heraus in ein nachhaltigeres und nur unwesentlich schwächeres Wachstum einschwenkte. Ausgesprochen kritisch war dagegen die im Jahresverlauf zunehmende Debatte um nicht marktgerechte Wechselkurse. Hier standen vor allem der chinesische Yuan, aber auch der US-Dollar im Zentrum der Diskussion. Der G20-Gipfel in Seoul Mitte November verhinderte zwar zunächst eine weitere Eskalation, eine nachhaltige Lösung zur Behebung der globalen Ungleichgewichte wurde aber nicht erzielt.

In diesem Umfeld waren die Wechselkurse erneut sehr volatil. So pendelte der US-Dollar zum Euro von jahresanfänglichen 1,44 bis zur Jahresmitte auf 1,20 US-\$/€, um danach bis zum Herbst zunächst wieder auf 1,40 zu steigen. Zum Jahresende war dann der Wert des Euros im Vergleich zum US-Dollar mit 1,34 US-\$/€ um 7% niedriger als ein Jahr zuvor. Unter Schwankungen verlor der Euro im Jahresverlauf gegenüber dem japanischen Yen um 18% an Wert. Gegenüber dem britischen Pfund hatte der Euro bei ebenfalls stark volatilem Verlauf einen Wertverlust von 3% zu verzeichnen.



## Automobilmärkte weltweit

Absatz im Jahr 2010 in % zum Vorjahr

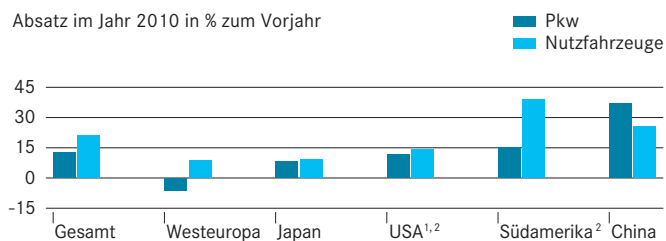

1 Segment Personenwagen einschließlich leichte Nutzfahrzeuge

2 Mittelschwere und schwere Nutzfahrzeuge

Quelle: VDA, div. Institute

**Automobilmärkte.** Nach den teilweise dramatischen Nachfragerückgängen im Jahr 2009 sind die weltweiten Automobilmärkte im Berichtsjahr wieder deutlich gewachsen.

Zu Jahresbeginn wirkten noch in vielen Ländern die staatlichen Anreizprogramme, sodass der globale Pkw-Markt im ersten Halbjahr zweistellige Zuwachsraten erreichte. Im zweiten Halbjahr schwächte sich die Wachstumsdynamik vorübergehend etwas ab, die Nachfrage zog aber zum Jahresende hin wieder an und übertraf im Gesamtjahr 2010 das Vorjahresvolumen um rund 12%. Damit wurde weltweit bereits wieder das Rekordniveau des Jahres 2007 übertroffen. Regional entwickelte sich die Nachfrage dabei aber sehr unterschiedlich. Vor allem die starke Nachfrage in den asiatischen Schwellenländern, allen voran China und Indien, mit Zuwächsen von 30% und mehr war für das Wachstum des Weltmarkts verantwortlich. Der US-amerikanische Markt legte zwar insgesamt um 11% zu, die Erholung fiel damit allerdings etwas weniger dynamisch aus als zu Jahresbeginn erwartet. In Westeuropa liefen die staatlichen Abwrackprämien im Jahresverlauf nach und nach aus, sodass die Nachfrage ab dem zweiten Quartal deutlich unter dem Vorjahresniveau blieb und im Gesamtjahr um 5% zurückging. Von den Volumenmärkten übertrafen nur Großbritannien und Spanien leicht das Vorjahresniveau; in Deutschland (-23%), Frankreich (-2%) und Italien (-9%) fiel die Nachfrage hingegen merklich geringer aus. In Japan profitierte der Markt bis September von staatlichen Anreizen und legte im Gesamtjahr um gut 7% zu. Nach Auslaufen des Programms brach die Pkw-Nachfrage allerdings ein und lag im vierten Quartal deutlich zweistellig unter dem Vorjahresniveau. Insgesamt positiv haben sich die Märkte in Osteuropa und Südamerika entwickelt. Der russische Markt hat sich dank staatlicher Verschrottungsprämien mit einem Zuwachs von 30% nach dem fast 50%-igen Einbruch im Vorjahr wieder leicht erholt. Die Nachfrage in Brasilien zeigte sich robust und übertraf das Vorjahresniveau um rund 10%, obwohl das staatliche Förderprogramm bereits im März endete. Damit übertraf Brasilien mit einem Marktvolumen von deutlich über drei Mio. Fahrzeugen auch Deutschland und war damit viertgrößter Pkw-Markt weltweit.

Auch die globale Nutzfahrzeugnachfrage ist im Jahr 2010 wieder deutlich gestiegen. Das Wachstum wurde aber auch hier überwiegend von den Regionen außerhalb der Triademärkte Westeuropa, USA und Japan getragen. Im Segment der mittelschweren und schweren Lkw legten die weltweiten Verkäufe um rund 35% zu, in der Triade fiel das Wachstum mit rund 10% allerdings deutlich weniger dynamisch aus. Der US-Markt erholte sich dabei mit einem Zuwachs von knapp 15% bislang eher zögerlich, nachdem das Marktvolumen in den Jahren 2006 bis 2009 um nahezu zwei Drittel geschrumpft war. In Westeuropa erreichte der Lkw-Markt zu Jahresbeginn seinen Tiefpunkt und zeigte dann eine erkennbare Aufwärtstendenz. Im Gesamtjahr lag das Volumen allerdings nur leicht über dem Vorjahresniveau. Der für Daimler besonders wichtige deutsche Markt konnte allerdings im Vergleich zum Vorjahr um mehr als 20% zulegen. In Japan stieg die Nachfrage im Segment der mittelschweren und schweren Lkw im Gesamtjahr zwar um fast 25% an, nach dem Auslaufen des staatlichen Anreizprogramms im September war jedoch eine vorübergehende Abschwächung der Nachfrage erkennbar. Zum Jahresende schwenkte der japanische Markt jedoch wieder auf einen moderaten Erholungskurs ein. In den großen Schwellenländern stieg die Nutzfahrzeugnachfrage stark an. Der für Daimler bedeutende brasilianische Lkw-Markt expandierte kräftig und übertraf das Vorjahresniveau um nahezu 50%. Die Erholung des russischen Marktes gewann im Jahresverlauf zunehmend an Dynamik, sodass die Lkw-Nachfrage im Gesamtjahr deutlich zweistellig zulegte. Der indische Markt übertraf das Vorjahr um knapp 50%, und in China wurden mehr als 1,2 Millionen (i. V. 834.000) mittelschwere und schwere Lkw verkauft, was in etwa der Hälfte des gesamten Weltmarktvolumens für 2010 entspricht.

Im Hinblick auf die für Daimler wichtigen Transportermärkte erholte sich die Nachfrage in Westeuropa im Berichtsjahr moderat und übertraf das Vorjahresniveau um 10%. Der US-amerikanische Markt verzeichnete einen deutlichen Zuwachs (+19%), wenn auch die Erholungsdynamik im Jahresverlauf merklich nachließ.

Die Omnibusbmärkte entwickelten sich im Jahr 2010 sehr unterschiedlich: Einem deutlichen Marktwachstum von 27% in Lateinamerika (ohne Mexiko) stand ein rückläufiges Marktvolumen in der NAFTA (-7%) gegenüber. Auch die meisten westeuropäischen Märkte blieben unter dem Vorjahresniveau; insgesamt verringerte sich das Marktvolumen in Westeuropa um 9%.

## Absatzstruktur Mercedes-Benz Cars

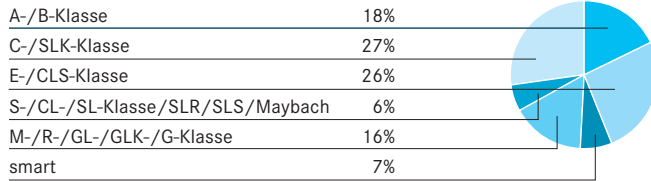

## Geschäftsentwicklung

**Absatz.** Daimler hat im Jahr 2010 insgesamt 1,9 Mio. Fahrzeuge abgesetzt. Das aufgrund der globalen Wirtschafts- und Finanzkrise sehr niedrige Vorjahresniveau wurde damit um 22% übertroffen. Insbesondere bei den Pkw war die Marktbelegung deutlich dynamischer als zu Beginn des Jahres erwartet.

Das Geschäftsfeld **Mercedes-Benz Cars** hat den Absatz im Berichtsjahr um 17% auf 1.276.800 Fahrzeuge gesteigert. Die Marke Mercedes-Benz hatte einen Zuwachs von 21% auf 1.178.300 Fahrzeuge zu verzeichnen. Damit haben wir unsere Position im Markt für hochwertige Fahrzeuge weiter ausgebaut. Unsere S-, E- und C-Klasse Limousinen sowie das T-Modell der E-Klasse sind in ihren jeweiligen Marktsegmenten weltweit führend. Besonders begehrt waren die neuen E-Klasse Modelle, deren Modellangebot im März 2010 mit dem neuen Cabriolet komplettiert wurde. Insgesamt stiegen die Auslieferungen im E-Klasse Segment im Jahr 2010 von 212.100 auf 330.800 Fahrzeuge. Aufgrund des Markterfolgs der S-Klasse konnten wir den Absatz auch im Luxussegment (S-, CL-, SL-Klasse, SLR, SLS und Maybach) um 41% auf 80.400 Fahrzeuge steigern. Dabei war die S-Klasse einmal mehr weltweit die meistverkaufte Luxuslimousine. Im C-Klasse Segment (C- und SLK-Klasse) erhöhte sich der Absatz um 6% auf 341.900 Fahrzeuge, und im Geländewagensegment (M-, R-, GL-, GLK- und G-Klasse) konnte Mercedes-Benz den Absatz sogar um 21% auf 202.800 Fahrzeuge steigern. Die Modelle der A- und B-Klasse verzeichneten gegen Ende des Lebenszyklus immer noch einen leichten Zuwachs auf 222.400 (i. V. 215.500) Fahrzeuge.

Mercedes-Benz konnte den Absatz in allen Regionen steigern. In den USA stiegen die Verkäufe um 15% auf 216.400 Fahrzeuge. In Deutschland haben wir mit 265.000 (i. V. 265.500) abgesetzten Fahrzeugen unsere führende Marktposition im Premiumsegment behauptet; in den anderen Ländern Westeuropas wurden insgesamt 290.500 (i. V. 267.200) Fahrzeuge ausgeliefert. Sehr positiv entwickelte sich das Geschäft in den Schwellenländern. So ist Mercedes-Benz in China weiterhin die am schnellsten wachsende Premiummarke:

## Absatzstruktur Daimler Trucks

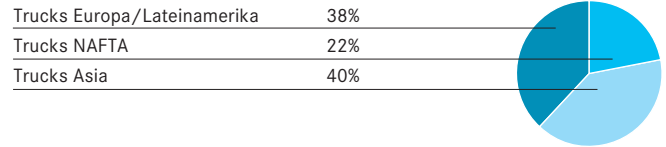

Dort hat sich der Absatz im Jahr 2010 mit 156.400 (+140%) mehr als verdoppelt. Für unsere S-Klasse ist China nun bereits im zweiten Jahr der wichtigste Markt. Durchgängig zweistellige Wachstumsraten gab es auch in den übrigen BRIC-Staaten Brasilien (+40%), Russland (+68%) und Indien (+79%). Der Absatz des smart fortwo ging im Berichtsjahr auf 94.300 (i. V. 113.900) Fahrzeuge zurück. Seit Oktober 2010 ist die neue Generation des innovativen Zweisitzers im Handel (vgl. S. 122 ff.).

Nach dem starken Rückgang im Vorjahr konnte das Geschäftsfeld **Daimler Trucks** den Absatz im Jahr 2010 um 37% steigern. Insgesamt haben wir im Berichtsjahr 355.300 schwere, mittelschwere und leichte Lkw sowie Omnibusse der Marken Thomas Built Buses und Fuso ausgeliefert; damit sind wir weiterhin der größte weltweit aufgestellte Hersteller von Lkw über 6t. Zum signifikanten Absatzanstieg haben alle unsere Kernmärkte beigetragen – sowohl Europa und die USA als auch Lateinamerika und Japan. Der Bereich Trucks Europa/Lateinamerika profitierte von der weltwirtschaftlichen Erholung und steigerte den Absatz um 41% auf 135.200 Fahrzeuge. Besonders deutlich stieg der Absatz in Brasilien (+45%), in Osteuropa (+139%) und in der Türkei (+122%). In Westeuropa haben wir den Absatz um 23% auf 50.200 Fahrzeuge gesteigert und mit einem Marktanteil von 24,3% die führende Position im Segment der schweren und mittelschweren Lkw ausgebaut. Mit 79.400 Einheiten hat Trucks NAFTA 25% mehr Fahrzeuge abgesetzt als im Vorjahr. Maßgeblich hierfür waren sowohl die erfolgreichen neuen Motoren als auch, speziell im Klasse-8 Segment, ein verstärktes Engagement im Bereich Baustellenanwendungen und Entsorgungsdienstleistungen. Unseren Marktanteil in der NAFTA haben wir im mittleren und schweren Segment (Klassen 6 bis 8) auf 31,6 (i. V. 29,6)% gesteigert und damit die Marktführerschaft erobert. Mit 140.700 Fahrzeugen lag der Absatz von Trucks Asia im Berichtsjahr deutlich über dem Vorjahr (+41%). Besonders dynamisch stieg der Absatz in Indonesien (+82%), und auch im japanischen Heimatmarkt war eine leichte Erholung (+7%) zu verzeichnen. Fuso ist bereits in einigen asiatischen Schwellenländern Marktführer. So liegen wir im Segment der leichten Lkw in Taiwan und Indonesien an erster Stelle (vgl. S. 126 ff.).

Der Absatz des Geschäftsfelds **Mercedes-Benz Vans** stieg im Jahr 2010 um 35% auf 224.200 Fahrzeuge der Modelle Sprinter, Vito/Viano und Vario. In Westeuropa haben wir den Vorjahreswert mit 156.800 Einheiten um 22% übertroffen. Alle westeuropäischen Schlüsselmärkte haben hierzu beigetragen. Damit konnte Mercedes-Benz Vans seine Marktführerschaft in der Europäischen Union im Segment mittelgroßer und großer Transporter behaupten. Sehr gut hat sich unser Geschäft auch in der NAFTA-Region entwickelt: Der Absatz stieg dort auf 13.300 (i. V. 2.600) Einheiten. Im vielversprechenden chinesischen Markt für hochwertige Transporter und Premium-Mehrzweckfahrzeuge hat Mercedes-Benz Vans im Jahr 2010 12.200 Fahrzeuge abgesetzt. Davon stammten 10.700 Einheiten aus der lokalen Produktion, die wir im April 2010 aufgenommen haben. Auch in Lateinamerika und in Osteuropa war Mercedes-Benz Vans im Berichtsjahr sehr erfolgreich. Insgesamt hat der Absatz des Sprinter im Jahr 2010 um 37% auf 143.700 Fahrzeuge zugelegt. Von den Modellen Vito und Viano haben wir 77.600 Einheiten (+34%) verkauft, obwohl die neue Generation dieser Transporter erst im vierten Quartal eingeführt wurde (vgl. S. 130 f.).

Mit einem Absatz von 39.100 (i. V. 32.500) Komplettbussen und Fahrgestellen war **Daimler Buses** auch im Jahr 2010 der weltweit größte Hersteller im Segment für Busse über 8t zulässigem Gesamtgewicht. Der Absatzanstieg um 20% resultierte insbesondere aus der positiven Geschäftsentwicklung bei den Fahrgestellen in Lateinamerika. In Westeuropa ging der Absatz um 1% auf 7.200 Omnibusse zurück. Insbesondere im Stadtbusgeschäft spürten wir die Zurückhaltung der öffentlichen Hand. Dennoch gelang es Daimler Buses, die führende Position in Westeuropa mit einem Marktanteil von rund 30 (i. V. 30)% zu behaupten. In Lateinamerika steigerte Daimler Buses den Fahrgestellabsatz der Marke Mercedes-Benz nach einer signifikanten Markterholung um 43% auf 23.200 Einheiten. Damit konnte Daimler Buses seinen Marktanteil in Lateinamerika auf 47,1 (i. V. 44,7)% erhöhen. Während sich der mexikanische Markt leicht erholte, waren die Absätze in der Region USA/Kanada rückläufig (vgl. S. 132 f.).

| Marktanteile                                 |      |      |                          |
|----------------------------------------------|------|------|--------------------------|
|                                              | 2010 | 2009 | 10/09                    |
| in %                                         |      |      | Veränd.<br>Prozentpunkte |
| <b>Mercedes-Benz Cars</b>                    |      |      |                          |
| Westeuropa                                   | 4,8  | 4,7  | +0,1                     |
| davon Deutschland                            | 10,6 | 8,3  | +2,3                     |
| USA                                          | 1,9  | 2,0  | -0,1                     |
| Japan                                        | 0,8  | 0,8  | 0,0                      |
| <b>Daimler Trucks</b>                        |      |      |                          |
| Mittelschwere und schwere Lkw Westeuropa     | 24,3 | 23,0 | + 1,3                    |
| davon Deutschland                            | 40,5 | 41,6 | - 1,1                    |
| Schwere Lkw NAFTA (Klasse 8)                 | 32,4 | 30,9 | + 1,5                    |
| Mittelschwere Lkw NAFTA (Klasse 6 und 7)     | 29,9 | 27,2 | + 2,7                    |
| Mittelschwere und schwere Lkw Brasilien      | 27,4 | 28,5 | - 1,1                    |
| Lkw Japan                                    | 19,8 | 20,2 | - 0,4                    |
| <b>Mercedes-Benz Vans</b>                    |      |      |                          |
| Mittelgroße und große Transporter Westeuropa | 17,8 | 18,1 | - 0,3                    |
| davon Deutschland                            | 26,1 | 27,6 | - 1,5                    |
| <b>Daimler Buses</b>                         |      |      |                          |
| Busse über 8t Westeuropa                     | 29,6 | 29,6 | 0,0                      |
| davon Deutschland                            | 55,5 | 59,6 | - 4,1                    |
| Busse über 8t Lateinamerika                  | 47,1 | 44,7 | + 2,4                    |

Das Geschäft von **Daimler Financial Services** hat sich im Berichtsjahr sehr positiv entwickelt. Das weltweite Vertragsvolumen lag mit 63,7 Mrd. € um 9% über dem Vorjahreswert. Bereinigt um Wechselkurseffekte gab es einen Anstieg um 3%. Das Neugeschäft stieg im Vergleich zum Vorjahr um 17% auf 29,3 Mrd. €, wechselkursbereinigt lag der Zuwachs bei 11%. Die Wachstumsimpulse kamen vor allem aus den Regionen Nord- und Südamerika sowie aus Asien, während sich das Vertragsvolumen in Europa auf dem Vorjahresniveau stabilisierte. Der Bereich Insurance Services konnte im Jahr 2010 weltweit mehr als 839.000 Versicherungspolicen vermitteln. Das ist ein Zuwachs von 22% im Vergleich zum Vorjahr. Bei den Versicherungen waren wir insbesondere auch deshalb so erfolgreich, weil wir Versicherungsleistungen, Leasing- und Finanzierungsprodukte, Serviceverträge und zusätzliche Sicherheitsausstattungen in den Fahrzeugen aufeinander abstimmen. Auch das Geschäft mit gewerblichen Kunden und Flottenkunden konnten wir im Berichtsjahr nochmals ausweiten. In enger Zusammenarbeit mit dem Vertrieb der Fahrzeugsparten hat Daimler Financial Services damit einen wesentlichen Beitrag zur Absatzunterstützung der automobilen Geschäftsfelder geleistet (vgl. S. 134 f.).



## Konzernumsatz nach Regionen

in Milliarden €

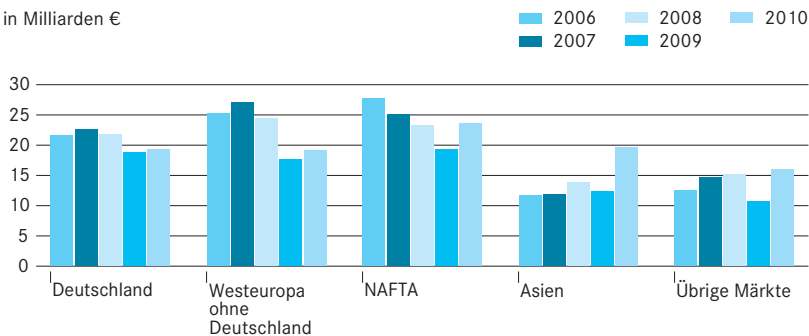

**Auftragslage.** Die Geschäftsfelder Mercedes-Benz Cars, Daimler Trucks, Mercedes-Benz Vans und Daimler Buses fertigen auf Bestellung nach den Wünschen von Kunden ausgestattete Fahrzeuge. Dabei versuchen wir, die Kapazitäten bei einzelnen Modellen flexibel der sich verändernden Nachfrage anzupassen. Als Folge der weltweiten Konjunkturbelastung und insbesondere auch aufgrund der verstärkten Nachfrage in den Schwellenländern hat sich der Auftragseingang im Berichtsjahr nach dem deutlichen Einbruch im Jahr 2009 in allen Geschäftsfeldern signifikant belebt. Bei Mercedes-Benz Cars erreichten die Bestellungen wieder das hohe Niveau der Jahre vor der Wirtschafts- und Finanzkrise. Hierzu haben vor allem der Markterfolg der neuen E-Klasse Modelle und die große Nachfrage in China und anderen Schwellenländern beigetragen. Bei Daimler Trucks war aufgrund der Erholung wichtiger Märkte und der großen Akzeptanz unserer Produkte ein besonders deutlicher Anstieg des Auftragseingangs zu verzeichnen. Aufgrund der wieder erheblich verbesserten Nachfragesituation haben wir die Produktion bei Pkw, Lkw, Transportern und Omnibussen wieder kräftig erhöht. Über weite Strecken des Jahres waren die Pkw-Werke voll ausgelastet, um die erhöhte Nachfrage des Marktes erfüllen zu können. Die Auftragsbestände lagen zum Jahresende 2010 insgesamt wieder deutlich über dem schwachen Vorjahresniveau.

**Umsatz.** Der Konzernumsatz stieg im Jahr 2010 um 24% auf 97,8 Mrd. €; bereinigt um Wechselkurseffekte war ein Zuwachs um 19% zu verzeichnen. Damit hat sich unser Geschäft nach der weltweiten Absatzkrise zwar wesentlich schneller erholt als noch zu Jahresbeginn erwartet, insgesamt lag der Konzernumsatz aber erst in der Größenordnung des Jahres 2008 und noch unterhalb des Rekordniveaus aus dem Jahr 2007. Von der Erholung wichtiger Märkte haben alle Geschäftsfelder profitiert: Bei Mercedes-Benz Cars stieg das Geschäftsvolumen um 29% auf 53,4 Mrd. €, bei Daimler Trucks um 31% auf 24,0 Mrd. €, bei Mercedes-Benz Vans um 26% auf 7,8 Mrd. € und bei Daimler Buses um 8% auf 4,6 Mrd. €. Auch das Geschäftsfeld Daimler Financial Services hat einen Zuwachs von 7% auf 12,8 Mrd. € erzielt.

In der regionalen Betrachtung erhöhte sich der Umsatz von Daimler insbesondere in der Region Asien (+58% auf 19,7 Mrd. €). Positiv wirkte hier vor allem die günstige Geschäftsentwicklung in China (+109% auf 9,1 Mrd. €). In der NAFTA stieg das Geschäftsvolumen um 22% auf 23,6 Mrd. €. Besonders dynamisch war der Geschäftsverlauf auch in Lateinamerika und hier vor allem in Brasilien (+54% auf 4,2 Mrd. €). In Westeuropa war hingegen nur ein leichter Anstieg um 6% auf 38,5 Mrd. € zu verzeichnen; einem nur leichten Wachstum um 3% in Deutschland stand dabei ein stärkerer Zuwachs von 9% in den anderen westeuropäischen Märkten gegenüber. Grundsätzlich hat sich die regionale Aufteilung des Geschäftsvolumens von Daimler in den beiden zurückliegenden Jahren deutlich zugunsten neuer Märkte verändert. So erzielten wir mittlerweile 35% unseres Geschäftsvolumens in den Märkten außerhalb der Triade USA, Westeuropa und Japan. Im Jahr 2008 lag dieser Anteil noch bei 28%.

## Umsatz

|                            | 2010   | 2009   | 10/09        |
|----------------------------|--------|--------|--------------|
| in Millionen €             |        |        | Veränd. in % |
| Daimler-Konzern            | 97.761 | 78.924 | +24          |
| Mercedes-Benz Cars         | 53.426 | 41.318 | +29          |
| Daimler Trucks             | 24.024 | 18.360 | +31          |
| Mercedes-Benz Vans         | 7.812  | 6.215  | +26          |
| Daimler Buses              | 4.558  | 4.238  | +8           |
| Daimler Financial Services | 12.788 | 11.996 | +7           |

## EBIT

**Daimler** erzielte im abgelaufenen Geschäftsjahr ein EBIT von 7,3 (i. V. -1,5) Mrd. € und konnte damit das Geschäftsjahr 2010 sehr erfolgreich abschließen.

### EBIT nach Segmenten

|                            | 2010  | 2009   | 10/09        |
|----------------------------|-------|--------|--------------|
| in Millionen €             |       |        | Veränd. in % |
| Mercedes-Benz Cars         | 4.656 | -500   | .            |
| Daimler Trucks             | 1.323 | -1.001 | .            |
| Mercedes-Benz Vans         | 451   | 26     | .            |
| Daimler Buses              | 215   | 183    | +17          |
| Daimler Financial Services | 831   | 9      | .            |
| Überleitung                | -202  | -230   | -12          |
| Daimler-Konzern            | 7.274 | -1.513 | .            |

Nachdem das Vorjahr noch stark von der Finanz- und Wirtschaftskrise beeinflusst war, entwickelte sich das operative Ergebnis in allen Geschäftsfeldern deutlich erfreulicher als noch zu Beginn des Jahres erwartet. Hierzu trugen zusätzlich zur allgemeinen Markterholung insbesondere unsere attraktive Produktpalette sowie die realisierten Effizienzsteigerungen bei. Gegenläufig wirkten unter anderem gestiegene Forschungs- und Entwicklungsaufwendungen im operativen Ergebnis.

Positiv auf das EBIT wirkten des Weiteren geringere Aufwendungen im Rahmen der Aufzinsung der langfristigen Rückstellungen (2010: 240 Mio. €; 2009: 1.003 Mio. €) sowie ein deutlich geringerer Jahresbeitrag an den deutschen Pensions-Sicherungs-Verein (2010: Aufwand von 23 Mio. €; 2009: Aufwand von 164 Mio. €).

Im Zusammenhang mit der Anpassung von Gesundheitsfürsorge- und Pensionsleistungen bei unserer US-amerikanischen Tochtergesellschaft Daimler Trucks North America entstand im Geschäftsjahr 2010 ein Sonderertrag von 160 Mio. €. Aus dem Verkauf der 5,3%igen Beteiligung an Tata Motors sowie infolge der positiven Entscheidung eines Rechtsverfahrens gegen die Daimler AG im Oktober 2010 ergaben sich weitere Sondererträge von insgesamt 483 Mio. €.

Dagegen führten die Programme zur Neuausrichtung von Daimler Trucks North America und Mitsubishi Fuso Truck and Bus Corporation im Geschäftsjahr 2010 zu Aufwendungen von 40 (i. V. 340) Mio. €. Der Beschluss, die Geschäftstätigkeiten der Daimler Financial Services AG und der Mercedes-Benz Bank AG bis zum Jahresende 2012 in Deutschland neu auszurichten, führte im Jahr 2010 zu Aufwendungen in Höhe von 82 Mio. €; diese stehen insbesondere im Zusammenhang mit Personalmaßnahmen. Durch den zwischenzeitlich abgeschlossenen Verkauf nicht fahrzeugbezogener Vermögenswerte entstanden bei Daimler Financial Services im Jahr 2010 zudem noch Aufwendungen von 9 (i. V. 100) Mio. €.

Darüber hinaus belastete der Ergebnisbeitrag unserer at-equity bewerteten EADS-Beteiligung das Konzern-EBIT mit 261 Mio. €; das anteilige EADS-Ergebnis war maßgeblich durch Aufwendungen (237 Mio. €) im Zusammenhang mit dem Militärtransporter A400M beeinflusst.

Aufgrund der sehr guten Ergebnisentwicklung des Jahres 2010 sowie im Hinblick auf das 125-jährige Jubiläum der Erfindung des Automobils im Jahr 2011 hat sich der Vorstand im Dezember verpflichtet, den Mitarbeitern in Abhängigkeit von ihrer Betriebszugehörigkeit einen einmaligen Sonderbonus in einem Volumen von rd. 125 Mio. € auszus zahlen und das Stiftungskapital der Daimler und Benz Stiftung von 37 auf 125 Mio. € zu erhöhen. Diese Aufwendungen sowie weitere im Jahr 2010 entstandene Aufwendungen im Zusammenhang mit rechtlichen Verfahren sind nicht dem EBIT der Geschäftsfelder zugeordnet, sondern unter den zentral verantworteten Sachverhalten in der Überleitung vom EBIT der Geschäftsfelder auf das Konzern-EBIT ausgewiesen.

Im Vorjahr enthielt das Konzern-EBIT noch Chrysler-bezogene Aufwendungen von 294 Mio. €.

## Ergebnisentwicklung

in Milliarden €

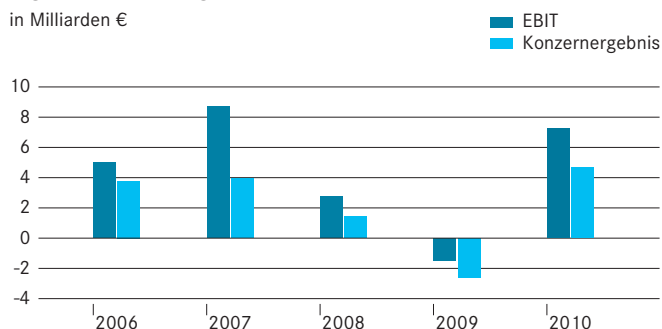

Die Sonderfaktoren, die die Ergebnisentwicklung in den Jahren 2010 und 2009 beeinflussten, sind in der nachfolgenden Tabelle im Einzelnen dargestellt.

### Sonderfaktoren im EBIT

|                                                           | 2010 | 2009 |
|-----------------------------------------------------------|------|------|
| in Millionen €                                            |      |      |
| <b>Daimler Trucks</b>                                     |      |      |
| Anpassung von Gesundheitsfürsorge- und Pensionsleistungen | 160  | -    |
| Neuausrichtung Mitsubishi Fuso Truck and Bus Corporation  | -3   | -245 |
| Neuausrichtung Daimler Trucks North America               | -37  | -95  |
| <b>Daimler Financial Services</b>                         |      |      |
| Neuausrichtung der Geschäftsaktivitäten in Deutschland    | -82  | -    |
| Veräußerung nicht fahrzeugbezogener Vermögenswerte        | -9   | -100 |
| <b>Überleitung</b>                                        |      |      |
| Ertrag aus dem Verkauf der Beteiligung an Tata Motors     | 265  | -    |
| Ertrag im Zusammenhang mit einem Rechtsverfahren          | 218  | -    |
| Jubiläumsbonus und Zuwendung an Stiftung                  | -213 | -    |
| Aufwendungen im Zusammenhang mit Chrysler                 | -    | -294 |

Das Geschäftsfeld **Mercedes-Benz Cars** beendete das Geschäftsjahr mit einem EBIT von 4.656 Mio. € und konnte damit das operative Ergebnis gegenüber dem Vorjahr um 5,2 Mrd. € verbessern. Die Umsatzrendite betrug 8,7% (i. V. -1,2%).

Das hervorragende Ergebnis ist vor allem auf das hohe Absatzniveau (+17%) zurückzuführen, insbesondere im Oberklasse- und Luxussegment, während im Vorjahr noch ein Rückgang der Pkw-Nachfrage zu verzeichnen war. Vor allem in den USA und China konnte das Geschäftsfeld Mercedes-Benz Cars aufgrund der attraktiven Produktpalette seine Fahrzeugabsätze deutlich steigern. Weitere Faktoren, die das Ergebnis positiv beeinflussten, waren ein vorteilhafterer Produkt-Mix, eine verbesserte Preisdurchsetzung sowie Effizienzsteigerungen. Darüber hinaus wirkten geringere Aufwendungen im Rahmen der Aufzinsung der langfristigen Rückstellungen (2010: 140 Mio. €; 2009: 657 Mio. €). Für Forschungs- und Entwicklungsaufwendungen wurden höhere Beträge aufgewendet als im Vorjahr.

Das EBIT des Geschäftsfelds **Daimler Trucks** lag mit 1.323 Mio. € ebenfalls deutlich über dem Vorjahresergebnis von -1.001 Mio. €. Die Umsatzrendite belief sich auf 5,5% (i. V. -5,5%).

Diese Ergebnisverbesserung ist vor allem auf die gute Absatzentwicklung zurückzuführen, nachdem der Nutzfahrzeugabsatz im Vorjahr außergewöhnlich stark durch den Nachfragerückgang nach Transportleistungen geprägt war. Mit einer attraktiven Produktpalette konnte im Jahr 2010 ein Absatzanstieg um 37% erzielt werden, zu dem alle Kernmärkte beitrugen. Weitere positive Ergebniseffekte ergaben sich im abgelaufenen Jahr aus den Maßnahmen zur Kostensenkung, insbesondere aus der Neuausrichtung von Daimler Trucks North America und Mitsubishi Fuso Truck and Bus Corporation, wobei die Umsetzung dieser Programme das Ergebnis 2010 noch mit 40 (i. V. 340) Mio. € belastete. Darüber hinaus enthält das Ergebnis im Jahr 2010 Aufwendungen im Rahmen der Bewertung von langfristigen Garantie- und Serviceverpflichtungen sowie höhere Aufwendungen für Forschungs- und Entwicklungsleistungen. Gegenläufig entstanden bei Daimler Trucks North America Erträge von 160 Mio. € aus der Anpassung von Gesundheitsfürsorge- und Pensionsleistungen. Zusätzlich wirkten geringere Aufwendungen im Rahmen der Aufzinsung der langfristigen Rückstellungen (2010: 58 Mio. €; 2009: 241 Mio. €).



### Umsatzrendite (Return on Sales)

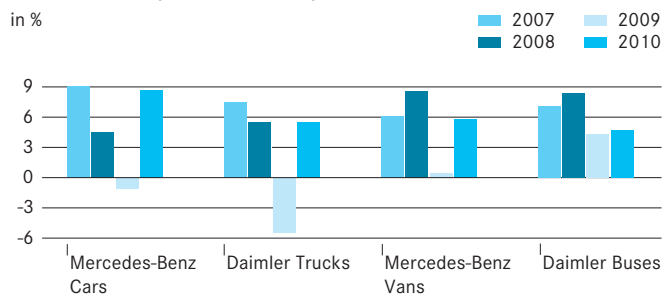

Im Geschäftsjahr 2010 erzielte auch das Geschäftsfeld **Mercedes-Benz Vans** mit einem EBIT von 451 (i. V. 26) Mio. € eine deutliche Ergebnisverbesserung. Die Umsatzrendite entwickelte sich entsprechend und lag mit 5,8% deutlich über dem Vorjahreswert von 0,4%.

Die positive Ergebnisentwicklung resultierte im Wesentlichen aus dem im Vergleich zum Vorjahr höheren Fahrzeugabsatz (+35%), insbesondere in Westeuropa, den USA und in China, sowie aus einer besseren Preisdurchsetzung. Ergebnisbelastungen aus Wechselkurseffekten konnten durch nachhaltige Effizienzsteigerungen mehr als ausgeglichen werden.

Das Geschäftsfeld **Daimler Buses** konnte sein EBIT im abgelaufenen Geschäftsjahr auf 215 (i. V. 183) Mio. € steigern und erzielte eine Umsatzrendite von 4,7% (i. V. 4,3%).

Diese Ergebnisverbesserung ist im Wesentlichen auf die im Vergleich zum Vorjahr deutlich höheren Auslieferungen von Fahrzeugen in Lateinamerika zurückzuführen. Gegenläufig wirkte sich ein geringerer Absatz von Komplettbussen in Westeuropa und Nordamerika aus.

**Daimler Financial Services** konnte das Ergebnis im Berichtsjahr ebenfalls deutlich auf 831 (i. V. 9) Mio. € steigern. Die erwirtschaftete Eigenkapitalrendite lag bei 16,1% (i. V. 0,2%).

Maßgeblich für den Ergebnisanstieg waren nach dem Krisenjahr 2009 geringere Aufwendungen für die Risikoversicherung sowie höhere Zinsmargen. Gegenläufig waren im Rahmen der Neuausrichtung der Geschäftsaktivitäten in Deutschland im Jahr 2010 Belastungen von 82 Mio. € zu verzeichnen. Ferner veräußerte das Geschäftsfeld im Jahr 2010 nicht fahrzeugbezogene Vermögenswerte, die Gegenstand von Leasingvereinbarungen waren, woraus sich ein Aufwand von 9 (i. V. 100) Mio. € ergab.

Die **Überleitung** der operativen Ergebnisse der Geschäftsfelder auf das EBIT des Konzerns berücksichtigt das anteilige Ergebnis der at-equity bewerteten Beteiligung an EADS, weitere zentral verantwortete Sachverhalte sowie Ergebniseffekte aus der Eliminierung konzerninterner Transaktionen zwischen den Geschäftsfeldern.

### Eigenkapitalrendite (Return on Equity)

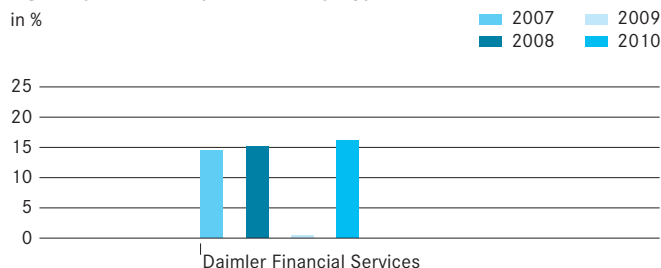

Der Anteil von Daimler am Ergebnis der **EADS** betrug -261 (i. V. 88) Mio. €. Der starke Rückgang des Ergebnisbeitrags ist überwiegend auf die bei der EADS im Konzernabschluss 2009 zusätzlich gebildeten Rückstellungen im Zusammenhang mit dem Militärtransporter A400M zurückzuführen (-237 Mio. €). Zusätzlich wirkten negative Wechselkurseffekte.

Die zentral verantworteten Sachverhalte des abgelaufenen Geschäftsjahres führten zu einem Ertrag von 30 (i. V. Aufwand von 486) Mio. € und umfassen insbesondere einen Ertrag von 265 Mio. € aus dem Verkauf der 5,3%igen Beteiligung an Tata Motors sowie einen Ertrag vor Steuern von 218 Mio. € infolge eines im Oktober 2010 positiv beschiedenen Rechtsverfahrens gegen die Daimler AG. Ebenso enthalten sind Aufwendungen von insgesamt 213 Mio. € für einen Jubiläumsbonus und die Erhöhung des Stiftungskapitals der Daimler und Benz Stiftung sowie weitere im Jahr 2010 entstandene Aufwendungen im Zusammenhang mit rechtlichen Verfahren. Im Vorjahr beinhalteten die zentral verantworteten Sachverhalte noch Chrysler-bezogene Aufwendungen von insgesamt 294 Mio. €, die unter anderem im Zusammenhang mit der vollständigen Abgabe des 19,9%igen Restanteils an Chrysler standen.

Aus der Eliminierung konzerninterner Transaktionen ergab sich im Jahr 2010 ein Ertrag von 29 (i. V. 168) Mio. €.

## Finanzielle Steuerungsgrößen

Die im Konzern eingesetzten finanziellen Steuerungsgrößen orientieren sich an den Interessen und Ansprüchen der Kapitalgeber und stellen die Basis für eine wertorientierte Unternehmensführung dar.

**Value Added.** Zu Steuerungszwecken unterscheidet Daimler zwischen der Konzern- und der Geschäftsfeldebene. Der Value Added (Wertbeitrag) ist dabei ein Element des Steuerungssystems auf beiden Ebenen. Er ermittelt sich als Differenz aus der operativen Ergebnisgröße und den auf das durchschnittlich gebundene Kapital (Net Assets) anfallenden Kapitalkosten.

$$\text{Value Added} = \text{Ergebnisgröße} - \underbrace{\text{Net Assets} \times \text{Kapitalkostensatz}}_{\text{Kapitalkosten}}$$

Alternativ kann der Value Added der industriellen Geschäftsfelder auch über die zentralen Werttreiber Return on Sales (ROS; Verhältnis von EBIT zu Umsatz) und Net-Assets-Produktivität (Verhältnis von Umsatz zu Net Assets) bestimmt werden.

$$\text{Value Added} = \left[ \text{Return on Sales} \times \text{Net-Assets-Produktivität} - \text{Kapitalkostensatz} \right] \times \text{Net Assets}$$

Die Kombination aus ROS und Net-Assets-Produktivität zielt in Verbindung mit einer auf Umsatzwachstum ausgerichteten Strategie auf eine positive Entwicklung des Value Added ab. Der Value Added zeigt, in welchem Umfang der Konzern und seine Geschäftsfelder insgesamt den Verzinsungsanspruch der Kapitalgeber erwirtschaften bzw. übertreffen und damit Wert schaffen.

**Ergebnisgröße.** Als operative Ergebnisgröße der Geschäftsfelder wird das EBIT (Earnings before Interest and Taxes) herangezogen. Als Ergebnis vor Zinsergebnis, Ertragsteuern und Ergebnis aus aufgegebenen Aktivitäten reflektiert das EBIT die Ergebnisverantwortung der Geschäftsfelder. Die operative Ergebnisgröße auf Konzernebene ist der Net Operating Profit. Dieser beinhaltet zusätzlich zum EBIT der Geschäftsfelder auch Ergebniseffekte, die nicht durch die Geschäftsfelder zu verantworten sind. Hierzu zählen das Ergebnis aus aufgegebenen Aktivitäten, Ertragsteuern sowie sonstige Überleitungsposten.

**Net Assets.** Die Net Assets stellen die Bemessungsgrundlage für die Verzinsungsansprüche der Kapitalgeber dar. Die industriellen Geschäftsfelder sind für die operativen Net Assets verantwortlich; ihnen werden daher sämtliche Vermögenswerte sowie Verbindlichkeiten bzw. Rückstellungen zugerechnet, für die sie im operativen Geschäft die Verantwortung tragen. Die Steuerung von Daimler Financial Services erfolgt, der branchenüblichen Vorgehensweise im Bankengeschäft entsprechend, auf Basis des Eigenkapitals. Die Net Assets des Konzerns beinhalten zusätzlich zu den operativen Net Assets der industriellen Geschäftsfelder und dem Eigenkapital von Daimler Financial Services noch Net Assets aus aufgegebenen Aktivitäten und Ertragsteuern sowie sonstige Überleitungsposten, die nicht durch die Geschäftsfelder zu verantworten sind. Die durchschnittlichen Net Assets des Jahres werden aus den durchschnittlichen Net Assets der Quartale berechnet. Diese ermitteln sich als Durchschnitt der Net Assets zu Beginn und zum Ende eines Quartals.

**Kapitalkostensatz.** Der Verzinsungsanspruch auf die Net Assets, und damit der Kapitalkostensatz, wird aus den Mindestrenditen abgeleitet, die Anleger für ihr investiertes Kapital erwarten. Bei der Ermittlung der Kapitalkosten des Konzerns und der industriellen Geschäftsfelder werden die Kapitalkostensätze des Eigenkapitals sowie der Finanzierungsverbindlichkeiten und Pensionsverpflichtungen des Industriegeschäfts berücksichtigt; mit umgekehrten Vorzeichen werden die erwarteten Renditen der Liquidität und des Planvermögens der Pensionsfonds des Industriegeschäfts berücksichtigt.

Der Eigenkapitalkostensatz wird entsprechend dem Capital-Asset-Pricing-Modell (CAPM) bestimmt, also durch den Zinssatz für langfristige, risikofreie Wertpapiere (z. B. Staatsanleihen) zuzüglich einer Risikoprämie für das spezifische Risiko der Anlage in Aktien der Daimler AG. Der Fremdkapitalkostensatz ergibt sich aus dem Verzinsungsanspruch der Gläubiger unserer Finanzierungsverbindlichkeiten. Der Kostensatz für Pensionsverpflichtungen wird auf Basis der nach IFRS verwendeten Diskontierungssätze bestimmt. Die erwartete Rendite der Liquidität orientiert sich am Geldmarktzinssatz. Die erwartete Rendite des Planvermögens der Pensionsfonds ergibt sich aus der erwarteten Rendite des zur Erfüllung der Pensionsverpflichtungen angelegten Planvermögens. Der Kapitalkostensatz des Konzerns ist der gewichtete Mittelwert der einzelnen Verzinsungsansprüche bzw. -erwartungen; im Berichtsjahr lag der Kapitalkostensatz bei 8% nach Steuern. Auf der Ebene der industriellen Geschäftsfelder belief sich der Kapitalkostensatz vor Steuern auf 12%, für Daimler Financial Services wurde ein Eigenkapitalkostensatz vor Steuern von 13% verwendet.

#### Kapitalkostensatz

|                                           | 2010 | 2009 |
|-------------------------------------------|------|------|
| in Prozent                                |      |      |
| Konzern, nach Steuern                     | 8    | 8    |
| Industrielle Geschäftsfelder, vor Steuern | 12   | 12   |
| Daimler Financial Services, vor Steuern   | 13   | 13   |

**Return on Sales.** Als zentraler Werttreiber des Value Added hat die Umsatzrendite (Return on Sales, ROS) eine besondere Bedeutung für die Beurteilung der Rentabilität der industriellen Geschäftsfelder. Für Daimler Financial Services wird zur Beurteilung der Rentabilität nicht auf die Umsatzrendite, sondern, wie im Bankengeschäft üblich, auf die Eigenkapitalrendite (Return on Equity, ROE) abgestellt.

#### Value Added

Der **Value Added des Konzerns** stieg um 7,4 Mrd. € auf 2,8 Mrd. €; dies entspricht einer Verzinsung des eingesetzten Kapitals von 17,5% (i. V. -6,6%). Der Mindestverzinsungsanspruch von 8% wurde somit erheblich übertroffen. Neben dem Rückgang der durchschnittlichen Net Assets war der Anstieg des Value Added vor allem auf den deutlichen Anstieg des operativen Ergebnisses der Geschäftsfelder zurückzuführen. Gegenläufig wirkten insbesondere höhere Aufwendungen für Ertragsteuern.

**Mercedes-Benz Cars** erzielte einen positiven Value Added von 3,4 (i. V. -1,9) Mrd. €. Das hervorragende Ergebnis, das insbesondere aus dem hohen Absatzniveau und dem vorteilhafteren Produkt-Mix resultierte, und der Rückgang der durchschnittlichen Net Assets aufgrund steigender Verbindlichkeiten trugen zum Anstieg des Value Added bei.

Der Value Added von **Daimler Trucks** erhöhte sich um 2,3 Mrd. € auf 0,5 Mrd. €. Maßgeblich für den Anstieg war vor allem die deutliche Ergebnisverbesserung infolge der guten Absatzentwicklung und positiver Effekte aus den Maßnahmen zur Kostensenkung. Das durchschnittlich gebundene Kapital war nahezu unverändert.

Das Geschäftsfeld **Mercedes-Benz Vans** verzeichnete mit 0,3 Mrd. € einen Anstieg des Value Added um 0,5 Mrd. €, der insbesondere aus der deutlichen Ergebnisverbesserung infolge des höheren Fahrzeugabsatzes resultierte. Darüber hinaus führte der Rückgang der durchschnittlichen Net Assets aufgrund des niedrigeren Working Capital zu einem weiteren Anstieg des Value Added.

Bei **Daimler Buses** stieg der Value Added von 36 Mio. € auf 71 Mio. €. Neben dem leichten Rückgang der durchschnittlichen Net Assets trug vor allem die positive Ergebnisentwicklung zum Anstieg bei.

Im Geschäftsfeld **Daimler Financial Services** konnte der Value Added ebenfalls deutlich erhöht werden (um 0,8 Mrd. € auf 0,2 Mrd. €). Die Eigenkapitalrendite lag bei 16,1% (i. V. 0,2%). Die Entwicklung war hauptsächlich auf den Ergebnisanstieg infolge geringerer Aufwendungen für Risikovorsorge sowie höherer Zinsmargen zurückzuführen. Gegenläufig wirkte der Anstieg des Eigenkapitals.

| Value Added                |              |        |              |
|----------------------------|--------------|--------|--------------|
|                            | 2010         | 2009   | 10/09        |
| in Millionen €             |              |        | Veränd. in % |
| <b>Daimler-Konzern</b>     | <b>2.773</b> | -4.644 | .            |
| Mercedes-Benz Cars         | 3.438        | -1.865 | .            |
| Daimler Trucks             | 499          | -1.808 | .            |
| Mercedes-Benz Vans         | 303          | -181   | .            |
| Daimler Buses              | 71           | 36     | +97          |
| Daimler Financial Services | 160          | -599   | .            |

#### Net Assets (Durchschnitt)

|                                                               | 2010          | 2009   | 10/09        |
|---------------------------------------------------------------|---------------|--------|--------------|
| in Millionen €                                                |               |        | Veränd. in % |
| Mercedes-Benz Cars                                            | 10.146        | 11.373 | -11          |
| Daimler Trucks                                                | 6.863         | 6.720  | +2           |
| Mercedes-Benz Vans                                            | 1.228         | 1.728  | -29          |
| Daimler Buses                                                 | 1.200         | 1.221  | -2           |
| Daimler Financial Services <sup>1</sup>                       | 5.156         | 4.671  | +10          |
| <b>Net Assets der Geschäftsfelder</b>                         | <b>24.593</b> | 25.713 | -4           |
| At-equity bewertete<br>Finanzinvestitionen <sup>2</sup>       | 3.119         | 3.591  | -13          |
| Vermögenswerte und Schulden<br>aus Ertragsteuern <sup>3</sup> | 1.278         | 2.944  | -57          |
| Sonstige Überleitung <sup>3</sup>                             | 348           | -470   | .            |
| <b>Daimler-Konzern</b>                                        | <b>29.338</b> | 31.778 | -8           |

1 Eigenkapital.

2 Soweit nicht den Segmenten zugeordnet.

3 Industriegeschäft.

| Überleitung zum Net Operating Profit (Loss) |              |        |              |
|---------------------------------------------|--------------|--------|--------------|
|                                             | 2010         | 2009   | 10/09        |
| in Millionen €                              |              |        | Veränd. in % |
| Mercedes-Benz Cars                          | 4.656        | -500   | .            |
| Daimler Trucks                              | 1.323        | -1.001 | .            |
| Mercedes-Benz Vans                          | 451          | 26     | .            |
| Daimler Buses                               | 215          | 183    | +17          |
| Daimler Financial Services                  | 831          | 9      | .            |
| <b>EBIT der Geschäftsfelder</b>             | <b>7.476</b> | -1.283 | .            |
| Ertragsteuern <sup>1</sup>                  | -2.154       | -589   | .            |
| Sonstige Überleitung                        | -202         | -230   | .            |
| <b>Net Operating Profit (Loss)</b>          | <b>5.120</b> | -2.102 | .            |

1 Angepasst um Ertragsteuern auf das Zinsergebnis.



Aus der Konzernbilanz lassen sich die Net Assets zum Jahresende wie folgt ableiten:

#### Net Assets (Nettovermögen) des Daimler-Konzerns zum Jahresende

|                                                         | 2010          | 2009          | 10/09        |
|---------------------------------------------------------|---------------|---------------|--------------|
| in Millionen €                                          |               |               | Veränd. in % |
| Net Assets des Industriegeschäfts                       |               |               |              |
| Immaterielle Vermögenswerte                             | 7.444         | 6.690         | +11          |
| Sachanlagen                                             | 17.544        | 15.911        | +10          |
| Vermietete Gegenstände                                  | 9.611         | 8.651         | +11          |
| Vorräte                                                 | 14.056        | 12.337        | +14          |
| Forderungen aus Lieferungen und Leistungen              | 6.964         | 5.073         | +37          |
| Abzgl. Rückstellungen für sonstige Risiken              | -12.078       | -10.655       | +13          |
| Abzgl. Verbindlichkeiten aus Lieferungen und Leistungen | -7.429        | -5.422        | +37          |
| Abzgl. übrige Vermögenswerte und Schulden               | -12.031       | -9.651        | +25          |
| Vermögenswerte und Schulden aus Ertragsteuern           | 718           | 1.586         | -55          |
| Eigenkapital                                            |               |               |              |
| Daimler Financial Services                              | 4.865         | 4.670         | +4           |
| <b>Net Assets (Nettovermögen)</b>                       | <b>29.664</b> | <b>29.191</b> | <b>+2</b>    |

#### Gewinn- und Verlustrechnung

#### Konzern-Gewinn- und Verlustrechnung

|                                                                        | 2010          | 2009          | 10/09        |
|------------------------------------------------------------------------|---------------|---------------|--------------|
| in Millionen €                                                         |               |               | Veränd. in % |
| Umsatzerlöse                                                           | 97.761        | 78.924        | +24          |
| Umsatzkosten                                                           | -74.988       | -65.567       | +14          |
| <b>Bruttoergebnis vom Umsatz</b>                                       | <b>22.773</b> | <b>13.357</b> | <b>+71</b>   |
| Vertriebskosten                                                        | -8.861        | -7.608        | +17          |
| Allgemeine Verwaltungskosten                                           | -3.474        | -3.287        | +6           |
| Forschungs- und nicht aktivierte Entwicklungskosten                    | -3.476        | -2.896        | +20          |
| Sonstige betriebliche Erträge                                          | 971           | 693           | +40          |
| Sonstige betriebliche Aufwendungen                                     | -660          | -503          | +31          |
| Ergebnis aus at-equity bewerteten Finanzinvestitionen                  | -148          | 72            | .            |
| Übriges Finanzergebnis                                                 | 149           | -1.341        | .            |
| <b>Ergebnis vor Zinsergebnis und Ertragsteuern (EBIT) <sup>1</sup></b> | <b>7.274</b>  | <b>-1.513</b> | <b>.</b>     |
| Zinserträge                                                            | 825           | 1.136         | -27          |
| Zinsaufwendungen                                                       | -1.471        | -1.921        | -23          |
| <b>Ergebnis vor Ertragsteuern</b>                                      | <b>6.628</b>  | <b>-2.298</b> | <b>.</b>     |
| Ertragsteuern                                                          | -1.954        | -346          | .            |
| <b>Konzernergebnis</b>                                                 | <b>4.674</b>  | <b>-2.644</b> | <b>.</b>     |
| Auf Minderheitsanteile entfallendes Ergebnis                           | -176          | 4             | .            |
| <b>Anteil der Aktionäre der Daimler AG am Konzernergebnis</b>          | <b>4.498</b>  | <b>-2.640</b> | <b>.</b>     |

<sup>1</sup> EBIT enthält Aufwendungen aus der Aufzinsung von Rückstellungen sowie Effekte aus der Änderung der Abzinsungsfaktoren (2010: -240 Mio. €; 2009: -1.003 Mio. €).

Der **Konzernumsatz** von Daimler verbesserte sich im Jahr 2010 um 23,9% auf 97,8 (i. V. 78,9) Mrd. €; bereinigt um positive Wechselkurseffekte war eine Zunahme um 19,1% zu verzeichnen. Der Umsatzanstieg war vor allem auf die höheren Fahrzeugauslieferungen gegenüber dem krisenbedingt schwächeren Vorjahr zurückzuführen. Weitere Informationen zur Umsatzentwicklung können dem Abschnitt »Geschäftsentwicklung« des Lageberichts entnommen werden.

Die **Umsatzkosten** betrugen im Berichtsjahr 75,0 Mrd. € und nahmen damit um 14,4% gegenüber dem Vorjahr (65,6 Mrd. €) zu. Der Anstieg der Umsatzkosten war durch das erhöhte Geschäftsvolumen und infolgedessen im Wesentlichen durch höhere Material- und Personalaufwendungen bedingt. Gegenläufig wirkten weitere Kostensenkungen, unter anderem infolge der Effizienzsteigerungsprogramme, sowie geringere Aufwendungen für die Risikoversicherung und Refinanzierung bei Daimler Financial Services. Insgesamt entwickelten sich die Umsatzkosten unterproportional zu den Umsatzerlösen, sodass der Anteil des Bruttoergebnisses am Umsatz mit 23,3% deutlich über dem des Vorjahres (16,9%) lag. Weitere Informationen zu den Umsatzkosten enthält Anmerkung 5 des Konzernanhangs.

Absatzbedingt erhöhten sich die **Vertriebskosten** um 1,3 Mrd. € auf 8,9 (i. V. 7,6) Mrd. €. In dem Anstieg spiegeln sich unter anderem höhere Aufwendungen für Personal, IT und Marketing wider. Der Anteil der Vertriebskosten an den Umsatzerlösen nahm unter anderem infolge der Kostensenkungsmaßnahmen in den Vertriebsorganisationen von 9,6% auf 9,1% ab.

Im abgelaufenen Geschäftsjahr stiegen die **allgemeinen Verwaltungskosten** um 5,7% auf 3,5 (i. V. 3,3) Mrd. €. Die Zunahme ist überwiegend auf Aufwendungen im Zusammenhang mit der Neuausrichtung von Daimler Financial Services in Deutschland sowie den Restrukturierungsaktivitäten bei Daimler Trucks North America und bei Mitsubishi Fuso Truck and Bus Corporation zurückzuführen. Darüber hinaus waren höhere sonstige Personalaufwendungen zu verzeichnen. Der Anteil der allgemeinen Verwaltungskosten an den Umsatzerlösen betrug 3,6% (i. V. 4,2%).

Die **Forschungs- und nicht aktivierten Entwicklungskosten** beliefen sich im Berichtsjahr auf 3,5 (i. V. 2,9) Mrd. €. Der Anstieg wurde im Wesentlichen durch höhere Personalaufwendungen sowie gestiegene Aufwendungen für bezogene Leistungen verursacht. Die Schwerpunkte der Forschungs- und Entwicklungsarbeit lagen im Berichtsjahr auf der Entwicklung von Nachfolgemodellen sowie neuer Motorgenerationen und alternativer Antriebssysteme. Aufgrund der im Vergleich zum Umsatz unterproportionalen Entwicklung der Aufwendungen verringerte sich der Anteil der Forschungs- und Entwicklungskosten an den Umsatzerlösen leicht von 3,7% auf 3,6%. Weitere Informationen zu den Forschungs- und Entwicklungsleistungen des Konzerns können dem Abschnitt »Forschung und Entwicklung, Umweltschutz« des Lageberichts entnommen werden.

Die **sonstigen betrieblichen Erträge** erhöhten sich auf 1,0 (i. V. 0,7) Mrd. €, was im Wesentlichen auf einen Ertrag infolge eines positiv beschiedenen Rechtsverfahrens gegen die Daimler AG (218 Mio. €) sowie auf den Verkauf von Immobilien zurückzuführen war.

Die **sonstigen betrieblichen Aufwendungen** beliefen sich auf 0,7 (i. V. 0,5) Mrd. €.

Weitere Informationen zur Zusammensetzung der sonstigen betrieblichen Erträge und Aufwendungen sind in Anmerkung 6 des Konzernanhangs enthalten.

Im Jahr 2010 belief sich das **Ergebnis aus at-equity bewerteten Finanzinvestitionen** auf -0,1 (i. V. 0,1) Mrd. € und lag damit unter dem Vorjahresergebnis. Belastend wirkte sich vor allem der anteilig negative Ergebnisbeitrag der EADS aus (2010: -0,3 Mrd. €; 2009: +0,1 Mrd. €), der maßgeblich durch Aufwendungen im Zusammenhang mit dem A400M-Programm beeinflusst war.

Das **übrige Finanzergebnis** entwickelte sich von -1,3 Mrd. € im Vorjahr auf 0,1 Mrd. € im Berichtsjahr. Die Verbesserung resultiert daraus, dass aufgrund des gesunkenen Zinsniveaus geringere Aufwendungen im Zusammenhang mit der Aufzinsung langfristiger sonstiger Rückstellungen entstanden (Aufwand 2010: 0,2 Mrd. €; Aufwand 2009: 1,0 Mrd. €). Darüber hinaus erzielte der Konzern einen Ertrag von 0,3 Mrd. € aus der Veräußerung der Anteile an Tata Motors. Im Vorjahr waren im übrigen Finanzergebnis noch Aufwendungen infolge der mit Chrysler geschlossenen Vereinbarungen enthalten (-0,3 Mrd. €).

Das **Zinsergebnis** des Geschäftsjahres 2010 lag bei -0,6 (i. V. -0,8) Mrd. € und verbesserte sich insbesondere durch geringere Zinsaufwendungen als Folge einer niedrigeren Verschuldung im Industriegeschäft. Hierdurch wurden höhere Aufwendungen im Zusammenhang mit den Pensions- und Gesundheitsfürsorgeverpflichtungen mehr als ausgeglichen. Weitere Informationen zum Zinsergebnis finden sich in Anmerkung 8 des Konzernanhangs.

Der im Geschäftsjahr 2010 unter **Ertragsteuern** ausgewiesene Steueraufwand in Höhe von -2,0 (i. V. -0,3) Mrd. € ist im Wesentlichen auf den Vorsteuergewinn des Konzerns zurückzuführen, wobei gegenläufig Auflösungen von Wertberichtigungen auf aktive Steuerlatenzen wirkten. Die Steuerquote lag im Geschäftsjahr 2010 bei 29,5% (i. V. -15,1%). Die Steuerquote des Vorjahres war dadurch beeinflusst, dass bei ausländischen Tochtergesellschaften aktive latente Steuern wertberichtigt werden mussten und Steueraufwendungen im Zusammenhang mit der steuerlichen Veranlagung von Vorjahren anfielen. Weitere Informationen zu den Steuern vom Einkommen und vom Ertrag können der Anmerkung 9 des Konzernanhangs entnommen werden.

Die positive EBIT-Entwicklung führte zu einer signifikanten Verbesserung des **Konzernergebnisses** im Berichtsjahr auf 4,7 (i. V. -2,6) Mrd. €. Das Ergebnis je Aktie verbesserte sich entsprechend auf 4,28 € (i. V. -2,63 €).

#### Dividende je Aktie

in €

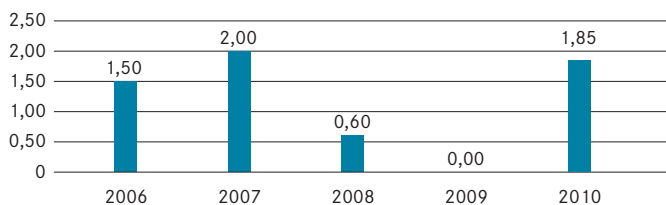

#### Dividende

Nachdem wir im vergangenen Jahr angesichts des negativen Konzernergebnisses auf die Ausschüttung einer Dividende verzichtet haben, wollen wir unsere Aktionäre nun wieder in angemessener Form am Unternehmenserfolg beteiligen. Dabei orientieren wir uns an einer Ausschüttungsquote in der Größenordnung von rund 40% des auf die Daimler-Aktionäre entfallenden Konzernergebnisses. Auf dieser Basis haben Vorstand und Aufsichtsrat entschieden, der Hauptversammlung am 13. April 2011 die Ausschüttung einer Dividende von 1,85 € pro Aktie vorzuschlagen. Dies entspricht einer Ausschüttungssumme von 1.971 Mio. €.

## Der Weg zur emissionsfreien Mobilität

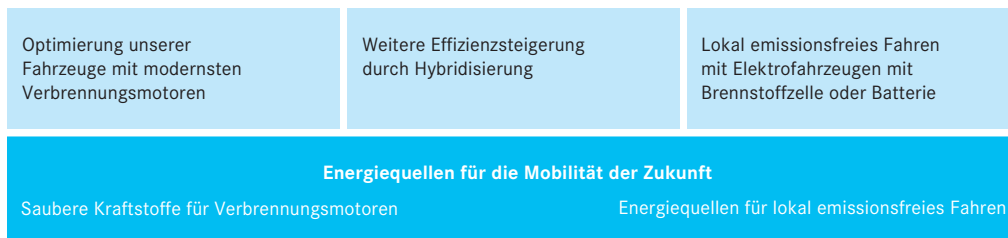

## Forschung und Entwicklung, Umweltschutz

### Forschung und Entwicklung als wesentlicher Erfolgsfaktor.

Forschung und Entwicklung spielen bei Daimler seit jeher eine Schlüsselrolle. Der Tradition von Gottlieb Daimler und Carl Benz folgend, die vor 125 Jahren das Automobil erfunden haben, verstehen wir uns als Pioniere und Innovationstreiber in der Automobilindustrie. Angesichts des durchgreifenden technologischen Wandels, dem die gesamte Automobilbranche gegenübersteht, ist eine erfolgreiche Forschungs- und Entwicklungsarbeit ein wesentlicher Faktor für den künftigen Unternehmenserfolg. Unsere Forschung antizipiert Trends, Kundenwünsche und Anforderungen an die Mobilität der Zukunft, die von der Entwicklung konsequent in serienreife Produkte umgesetzt werden. Es ist unser Ziel, unseren Kunden faszinierende Produkte und maßgeschneiderte Lösungen für eine bedarfsgerechte, sichere und nachhaltige Mobilität anzubieten. Darauf richten wir unser Technologieportfolio und unsere Kernkompetenzen aus (vgl. S. 140 ff.).

**22.100 Mitarbeiterinnen und Mitarbeiter in Forschungs- und Entwicklungsbereichen.** Wesentliche Faktoren für den Markterfolg unserer Fahrzeuge sind das Know-how, die Kreativität und die Motivation unserer Mitarbeiterinnen und Mitarbeiter in der Forschung und Entwicklung. Zum Jahresende 2010 arbeiteten bei Daimler weltweit 22.100 Personen in Forschungs- und in Entwicklungsbereichen. Davon waren 14.700 Mitarbeiterinnen und Mitarbeiter im Ressort Konzernforschung & Mercedes-Benz Cars Entwicklung tätig, 5.400 Beschäftigte sind dem Geschäftsfeld Daimler Trucks zuzurechnen, 900 dem Geschäftsfeld Mercedes-Benz Vans und 1.100 Daimler Buses. Mehr als 4.000 Forscher und Entwickler waren außerhalb Deutschlands beschäftigt.

Die wichtigsten Standorte unseres Forschungs- und Entwicklungsnetworks sind Sindelfingen und Stuttgart-Untertürkheim in Deutschland. Zu unseren Forschungs- und Entwicklungseinrichtungen in Nordamerika und Asien zählen Palo Alto, Kalifornien und Portland, Oregon, sowie das Forschungszentrum für Informations- und Kommunikationstechnologie in Bangalore, Indien, und das Global Hybrid Center in Kawasaki, Japan. Darüber hinaus arbeiten wir mit verschiedenen renommierten Forschungsinstituten weltweit zusammen und beteiligen uns an internationalen Austauschprogrammen für Nachwuchswissenschaftler.

**Zielgerichtete Einbindung der Zulieferindustrie.** Um unsere anspruchsvollen Forschungs- und Entwicklungsziele zu erreichen, nehmen wir auch Leistungen aus der Zulieferindustrie in Anspruch. Gerade im Hinblick auf die in der Automobilindustrie anstehenden technologischen Herausforderungen und die Notwendigkeit, neue Technologien möglichst schnell zur Marktreife zu bringen, ist eine enge Verzahnung mit Zulieferfirmen unabdingbar. Im Rahmen der gemeinsamen Forschungs- und Entwicklungsarbeit stellen wir sicher, dass die Kernkompetenzen für Technologien, die für die Zukunft des Automobils insgesamt und die Einzigartigkeit unserer Marken wichtig sind, im Unternehmen bleiben.

**Mehr als 2.100 Patente angemeldet.** Daimler hat im Jahr 2010 insgesamt 2.105 (i. V. 2.072) Patente neu angemeldet. Die Schwerpunkte lagen in den Bereichen Antriebe und Sicherheit. Mehr als 1.000 Patentanmeldungen waren dabei dem Themenbereich emissionsfreie Mobilität, insbesondere dem Elektroantrieb mit Batterie oder der Brennstoffzelle, zuzurechnen. Wir werden in den nächsten Jahren unsere Technologie- und Innovationsführerschaft über alle Produkte und Marken hinweg mithilfe von gewerblichen Schutzrechten weiter ausbauen.

### Forschungs- und Entwicklungsleistungen auf hohem Niveau.

Die für die Wettbewerbsfähigkeit unserer Fahrzeuge wichtigen Forschungs- und Entwicklungsprojekte haben wir im Jahr 2010 zielgerichtet fortgeführt, gleichzeitig haben wir die Effizienz und die Qualität unserer Forschungs- und Entwicklungsarbeit weiter verbessert. Wir wollen den in der Automobilbranche anstehenden technologischen Wandel auch künftig mit richtungsweisenden Innovationen aktiv mitgestalten. Deshalb haben wir die Forschungs- und Entwicklungsleistungen im Jahr 2010 auf 4,8 (i. V. 4,2) Mrd. € erhöht. In Übereinstimmung mit den Bilanzierungsregeln nach IFRS wurden Entwicklungskosten in Höhe von 1,4 (i. V. 1,3) Mrd. € aktiviert. Schwerpunkte unserer Arbeit waren, basierend auf unserer Initiative »Der Weg zur emissionsfreien Mobilität«, neue, besonders kraftstoffeffiziente und umweltschonende Antriebs-technologien. Dabei beschäftigten wir uns sowohl mit der Optimierung konventioneller Antriebstechnologien als auch mit der weiteren Effizienzsteigerung durch Hybridisierung sowie mit Elektroautos mit Brennstoffzelle und Batterie. Ein weiterer Schwerpunkt sind neue Sicherheitstechnologien: Im Rahmen unseres »Wegs zum unfallfreien Fahren« verfolgen wir damit das Ziel, Unfälle weitestgehend zu vermeiden oder deren Folgen zumindest so gering wie möglich zu halten.



## Forschungs- und Entwicklungsleistungen

in Milliarden €

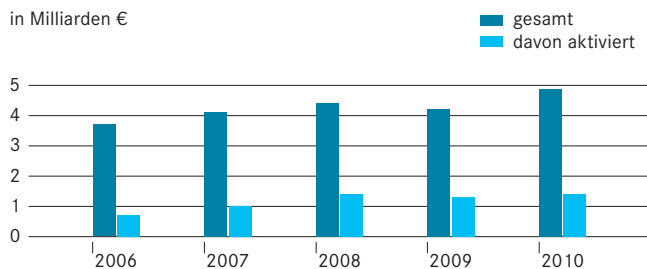

Die wichtigsten Projekte bei Mercedes-Benz Cars waren die Nachfolgemodelle für die A-/B-Klasse und die M-Klasse, die Modellpflege für die C-Klasse sowie neue Motorengenerationen und alternative Antriebssysteme. Insgesamt lagen die Forschungs- und Entwicklungsleistungen bei Mercedes-Benz Cars bei 3,1 (i. V. 2,7) Mrd. €. Daimler Trucks hat 1,3 (i. V. 1,1) Mrd. € für Forschung und Entwicklung aufgebracht. Schwerpunkte waren hier alternative Antriebe, neue Motoren im mittelschweren und schweren Bereich sowie Nachfolgenerationen bestehender Produkte. Bei Mercedes-Benz Vans standen Aufwendungen für die Weiterentwicklung der Motoren im Hinblick auf künftige Abgasnormen im Vordergrund. Das Geschäftsfeld Daimler Buses hat seine Entwicklungsaktivitäten vor allem auf neue Produkte, die Erfüllung neuer Abgasnormen und auf alternative Antriebssysteme, wie zum Beispiel den Diesel Hybrid und die Brennstoffzelle, konzentriert.

**CO<sub>2</sub>-Ausstoß bei Pkw weiter gesenkt.** Mithilfe unserer neuen und sparsamen Motoren und zusätzlicher BlueEFFICIENCY-Modelle konnten wir den durchschnittlichen CO<sub>2</sub>-Ausstoß der von uns in der Europäischen Union verkauften Pkw im Berichtsjahr trotz eines höheren Anteils besonders hochwertiger und leistungsstarker Fahrzeuge auf 158 g/km verringern. Die Ersten dieser verbrauchsoptimierten Fahrzeuge, mit denen wir im Vergleich zu den Standardmodellen zusätzliche Verbrauchseinsparungen von mehr als 20% erzielen, haben wir im Jahr 2008 eingeführt. Zum Ende des Jahres 2010 waren 85 »BlueEFFICIENCY«-Modelle am Markt verfügbar. Mittlerweile haben nahezu ein Drittel der von uns in Europa verkauften Pkw einen CO<sub>2</sub>-Ausstoß von weniger als 140 g/km. Mit innovativen Technologien zur lokal emissionsfreien Mobilität werden wir die Verbrauchs- und CO<sub>2</sub>-Werte künftig noch stärker reduzieren. Unser Ziel ist es, die CO<sub>2</sub>-Emissionen unserer Neuwagenflotte in der Europäischen Union bis zum Jahr 2012 auf unter 140 g/km zu senken. Auch die Schadstoffemissionen unserer Pkw haben wir in den zurückliegenden Jahren kontinuierlich verringert: um mehr als 75% seit 1995 und immerhin um über 30% in den vergangenen fünf Jahren. Besonders deutlich haben wir die Emissionen mit unseren BlueTEC-Diesel-Pkw reduziert: um über 90% im Vergleich zu 1995 und um mehr als 75% im Vergleich zu 2005. Mit der BLUETEC-Technologie sind wir bei Dieselfahrzeugen weltweit führend. Die damit ausgestatteten Pkw erfüllen die strengsten Abgasnormen und sind die saubersten Diesel-Pkw der Welt.

**Verbrauchs- und schadstoffarme Nutzfahrzeuge.** Auch bei den Nutzfahrzeugen haben wir den CO<sub>2</sub>-Ausstoß und die Schadstoffemissionen in den zurückliegenden Jahren kontinuierlich verringert. Die BLUETEC-Technologie erhöht die Effizienz und reduziert den Schadstoffausstoß unserer Lkw deutlich: Der Verbrauch sinkt um 2 bis 5%, das sind bis zu 2.000 Liter weniger Dieselmotorkraftstoff pro Lkw und Jahr. Der Mercedes-Benz Actros 1844 LS hält mit einem Verbrauch von 19,44 l Diesel/100 km den Rekord als weltweit verbrauchsgünstigster Serien-Lkw. Im Nutzfahrzeugbereich übernimmt die Hybridtechnik eine wichtige Funktion. Sie kann den Dieserverbrauch im Verteilerverkehr um bis zu 15% reduzieren. Daimler ist der weltweit führende Hersteller von Nutzfahrzeugen mit Hybridantrieb: Bis Dezember 2010 haben wir über 3.000 Orion-Hybridbusse, rund 1.000 Freightliner Lkw und Vans mit Hybridantrieb sowie mehr als 1.100 Lkw und Busse von Fuso mit Hybridtechnik an Kunden ausgeliefert. Insgesamt sind mehr als 5.200 Nutzfahrzeuge von Daimler mit Hybridantrieb weltweit unterwegs.

## Forschungs- und Entwicklungsleistungen

|                    | 2010  | 2009  | 10/09        |
|--------------------|-------|-------|--------------|
| in Millionen €     |       |       | Veränd. in % |
| Daimler-Konzern    | 4.849 | 4.181 | +16          |
| davon aktiviert    | 1.373 | 1.285 | +7           |
| Mercedes-Benz Cars | 3.130 | 2.696 | +16          |
| davon aktiviert    | 940   | 913   | +3           |
| Daimler Trucks     | 1.282 | 1.116 | +15          |
| davon aktiviert    | 373   | 368   | +1           |
| Mercedes-Benz Vans | 267   | 193   | +38          |
| davon aktiviert    | 29    | 0     | .            |
| Daimler Buses      | 223   | 212   | +5           |
| davon aktiviert    | 31    | 5     | +520         |

**2,3 Mrd. € für den Umweltschutz.** Auch im Jahr 2010 haben wir mit Nachdruck das Ziel verfolgt, die Ressourcen zu schonen und alle relevanten Emissionen zu reduzieren. Von der Fahrzeugentwicklung über die Produktion bis hin zu Recycling und umweltschonender Entsorgung haben wir dabei die Auswirkungen aller Prozesse im Blick. Im Jahr 2010 haben wir unsere Aufwendungen für den Umweltschutz um 8% auf 2,3 Mrd. € gesteigert.

**Umfangreiche Maßnahmen zum Umweltschutz in der Produktion.** Mithilfe umweltschonender Produktionsverfahren ist es uns gelungen den Energieverbrauch und die CO<sub>2</sub>-Emissionen der Werke, die produktionsbedingten Lösemittlemissionen, Lärmbelastung und Geräuschemissionen in den zurückliegenden Jahren bei einem vergleichbaren Produktionsvolumen kontinuierlich zu verringern. So sank der Energieverbrauch im Zeitraum von 2005 bis 2010 um 5,7% auf 10,3 Mio. Megawattstunden. Die CO<sub>2</sub>-Emissionen gingen im gleichen Zeitraum um 3,0% auf insgesamt 3,7 Mio. Tonnen zurück. Im Vergleich zum Jahr 2009 sind sowohl der Energieverbrauch als auch die CO<sub>2</sub>-Emissionen im Berichtsjahr um 16% bzw. 18% angestiegen. Dies ist jedoch ausschließlich auf das im Vorjahr außergewöhnlich niedrige Produktionsvolumen aufgrund der weltweiten Absatzkrise zurückzuführen. Aussagekräftiger ist der Vergleich zum Jahr 2008: Beim Energieverbrauch war hier, trotz der neuen zusätzlichen Erfassung des produktionsbedingten Kraftstoffverbrauchs, ein Rückgang um 5,9% und bei den CO<sub>2</sub>-Emissionen um 4,6% zu verzeichnen. Ohne diese Neuerfassung betrug der Rückgang des Energieverbrauchs sogar 6,6% und der CO<sub>2</sub>-Emissionen 4,7%. Durch ressourcenschonende Techniken, wie zum Beispiel Kreislaufsysteme, konnte der Wasserverbrauch zwischen den Jahren 2005 und 2010 um 10,5% gesenkt werden. Auch der Wasserbrauch war zwar im Berichtsjahr um 18% höher als im Ausnahmejahr 2009, im Vergleich zum Jahr 2008 war er jedoch um 10,1% niedriger.

In der Abfallwirtschaft lautet unser Leitsatz: Vermeiden und verwerten sind besser als beseitigen. Innovative technische Verfahren und eine umweltgerechte Produktionsplanung ermöglichen es uns, die Abfallmenge stetig zu reduzieren. Insgesamt verringerte sich die gesamte produktionsbedingte Abfallmenge zwischen 2005 und 2010 um 13% auf 1,0 Mio. Tonnen. Auch hier war im Jahr 2010 – einhergehend mit den deutlich gestiegenen Produktionsumfängen – gegenüber dem Vorjahr ein Anstieg um 27% zu verzeichnen. Im aussagekräftigeren Vergleich mit dem Jahr 2008 ergibt sich hingegen ein Rückgang um 10%. Die genannten Angaben für das Jahr 2010 beziehen sich auf eine Hochrechnung der Umweltdaten für das Jahr 2010; die genauen Größen werden wir mit dem neuen Nachhaltigkeitsbericht im April 2011 veröffentlichen.

Um unsere Aktivitäten im Umweltschutz zielgerichtet voranzutreiben, setzen wir auf umfassende Umweltmanagementsysteme: Mehr als 98% unserer Beschäftigten weltweit arbeiten heute in Werken, deren Umweltmanagementsysteme nach den Umweltnormen ISO 14001 beziehungsweise EMAS zertifiziert sind.

## Mitarbeiter nach Geschäftsfeldern

Daimler-Konzern 260.100

|                            |        |
|----------------------------|--------|
| Mercedes-Benz Cars         | 96.281 |
| Daimler Trucks             | 71.706 |
| Mercedes-Benz Vans         | 14.557 |
| Daimler Buses              | 17.134 |
| Vertrieb Fahrzeuge         | 48.299 |
| Daimler Financial Services | 6.742  |
| Sonstige                   | 5.381  |

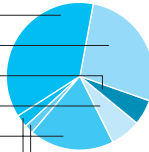

## Beschäftigung

**Weltweit 260.100 Mitarbeiterinnen und Mitarbeiter.** Durch die sich wieder belebende Nachfrage hat sich im Jahr 2010 die Zahl der Beschäftigten leicht erhöht. Am 31. Dezember beschäftigten wir weltweit 260.100 Mitarbeiterinnen und Mitarbeiter, gegenüber 256.407 zum Jahresende 2009. In Deutschland stieg die Belegschaft auf 164.026 (i. V. 162.565) Mitarbeiterinnen und Mitarbeiter; 18.295 (i. V. 17.697) waren in den USA, 13.484 (i. V. 13.088) in Brasilien und 12.836 (i. V. 14.152) in Japan tätig. Bei unseren konsolidierten Tochtergesellschaften in China waren zum Jahresende 2010 1.552 (i. V. 1.166) Beschäftigte tätig; darüber hinaus beschäftigten unsere chinesischen Gemeinschaftsunternehmen rund 7.500 Mitarbeiterinnen und Mitarbeiter. Die Zahl der Auszubildenden belief sich auf 8.841 (i. V. 9.151). In der Daimler AG waren zum 31.12.2010 145.796 (i. V. 147.052) Mitarbeiterinnen und Mitarbeiter beschäftigt.

Einen Beschäftigungsanstieg verzeichneten die Geschäftsfelder Mercedes-Benz Cars (+3%) und Daimler Trucks (+1%). Während sich auch in der Vertriebsorganisation die Zahl der Mitarbeiterinnen und Mitarbeiter erhöhte (+1%), verringerte sie sich in den Geschäftsfeldern Mercedes-Benz Vans (-4%) und Daimler Financial Services (-1%). Bei Daimler Buses blieb der Personalstand annähernd konstant.

**Kosteneinsparungen durch Maßnahmenpaket.** Die Maßnahmen, die 2009 von Unternehmensleitung und Gesamtbetriebsrat in Deutschland vereinbart wurden, um die Arbeitskosten zu senken und die Beschäftigung zu sichern, konnten im Jahr 2010 wieder aufgehoben werden. Aufgrund der sich verbessernden wirtschaftlichen Situation haben wir die Kurzarbeit ab Januar zunächst in den Pkw-Werken und danach schrittweise bei Lkw und Transportern zurückgeführt und zum Ende des dritten Quartals vollständig beendet. Für die Gesamtbelegschaft wurde für Ende Mai 2010 – ein Monat früher als vorgesehen – der kollektive Ausstieg aus der Arbeitszeitverkürzung vereinbart. Insgesamt leistete das Maßnahmenpaket, das auch Einsparungen bei betrieblichen Leistungen beinhaltete, einen wesentlichen Beitrag, die Personalkosten zu reduzieren. Durch die getroffenen Maßnahmen zur Personalflexibilität konnte die schlechte Wirtschaftslage ohne aktiven Personalabbau in Deutschland überwunden werden.

Durch das Auslaufen der Arbeitszeitverkürzung und der Kurzarbeit erhöhten sich die Personal- und Sozialaufwendungen im Jahr 2010 auf 16,5 Mrd. €, gegenüber 13,9 Mrd. € im Jahr davor.

**Ergebnisbeteiligung.** Aufgrund des unbefriedigenden Geschäftsverlaufs im Jahr 2009 konnte für dieses Jahr keine Ergebnisbeteiligung gewährt werden. Dennoch erhielten die Tarifbeschäftigten der Daimler AG im April 2010 eine einmalige Sonderzahlung in Höhe von 500 €. Damit sollte die Anerkennung des Vorstands gegenüber der Belegschaft für ihren Einsatz in schwierigem Umfeld zum Ausdruck kommen. Darüber hinaus wurden im Mai 2010 wieder Belegschaftsaktien zum Erwerb angeboten, nachdem im Vorjahr das Belegschaftsaktien-Programm ausgesetzt werden musste.

In Anbetracht der positiven wirtschaftlichen Entwicklung des Unternehmens im Berichtsjahr haben Vorstand und Gesamtbetriebsrat vereinbart, die besonderen Leistungen des Jahres 2010 mit einer hohen Ergebnisbeteiligung zu honorieren: In Deutschland erhalten die anspruchsberechtigten Mitarbeiter der Daimler AG Ende April 2011 3.150 €.

**Altersdurchschnitt.** Der Altersdurchschnitt unserer Beschäftigten lag im Jahr 2010 weltweit bei 41,9 (i. V. 41,4) Jahren. In Deutschland waren die Mitarbeiter bei der Daimler AG durchschnittlich 43 Jahre alt. Mit der demografischen Entwicklung wird sich dieser Altersdurchschnitt in den nächsten Jahren weiter erhöhen.

Dieser demografische Wandel führt zu unterschiedlichen Herausforderungen und Chancen. Ziel der initiierten Maßnahmen ist es, die Leistungsfähigkeit unserer Mitarbeiter zu fördern und ihren zunehmenden Erfahrungsschatz zu nutzen. Im Rahmen des Ressourcenmanagements untersuchen wir beispielsweise, wie sich die demografische Entwicklung auf den künftigen Bedarf an qualifizierten Mitarbeitern auswirkt. Dabei wollen wir mit präventiven Maßnahmen die Wettbewerbsfähigkeit unserer Belegschaft dauerhaft erhalten.

**Durchschnittliche Betriebszugehörigkeit und Anteil von Frauen in Führungsfunktionen gestiegen.** Die durchschnittliche Betriebszugehörigkeit der Mitarbeiterinnen und Mitarbeiter bei Daimler hat sich im Berichtsjahr von 15,4 auf 16,0 Jahre erhöht. In Deutschland waren die Mitarbeiterinnen und Mitarbeiter am Jahresende 2010 im Durchschnitt seit 18,7 (i. V. 18,1) Jahren bei Daimler beschäftigt, in der Daimler AG seit 18,9 (i. V. 18,4) Jahren. Außerhalb Deutschlands lag die durchschnittliche Betriebszugehörigkeit bei 11,3 (i. V. 11,0) Jahren. Der Anteil der Frauen an der Gesamtbelegschaft betrug in der Daimler AG zum Ende des Berichtsjahres 13,5% (i. V. 13,1%). In den Führungsfunktionen der Ebenen 1 bis 4 stieg der Anteil der Frauen gegenüber dem Vorjahr von 10,9% auf 11,6%.

## Einkauf

**Ziel: das weltweit effektivste Lieferantennetzwerk.** Der Einkauf der Daimler AG setzt sich aus den drei Einkaufsbereichen Procurement Mercedes-Benz Cars and Vans, Procurement Daimler Trucks and Buses sowie Einkauf Nichtproduktionsmaterial – International Procurement Services zusammen und ist an über 50 Standorten weltweit vertreten. Ziel des Einkaufs ist es, das weltweit effektivste Lieferantennetzwerk zu schaffen und damit zum Unternehmenserfolg von Daimler beizutragen.

**Leistungsorientierte Zusammenarbeit mit unseren Lieferanten.** Unter dem Motto »Commitment to Excellence« definiert das Daimler Supplier Network (DSN) die Geschäftsphilosophie des Daimler-Einkaufs. Seine Prinzipien sind Leistung und Partnerschaft: Lieferantenleistungen werden mithilfe der External Balanced Scorecard in den Kategorien Qualität, Technologie, Kosten und Liefertreue gemessen. Partnerschaft bedeutet für uns Fairness, Verlässlichkeit und Glaubwürdigkeit. Die besten Lieferanten werden jährlich mit dem Daimler Supplier Award für herausragende Leistungen ausgezeichnet.

**Erhöhung der Rohstoffpreise.** Nach den historischen Tiefständen im Vorjahr sind die Preise vieler Rohstoffe im Jahr 2010 wieder signifikant gestiegen. Dieser Preisanstieg wird insbesondere durch die weltweit expansive Geldpolitik, die steigende Industrienachfrage in den Schwellenländern sowie die Interessen der Finanzinvestoren getrieben. Daimler sichert sich gegen Schwankungen durch eine Reihe von Maßnahmen ab, zu denen Langzeitverträge und Sicherungsgeschäfte gehören.

**Risikomanagement hat sich weiter bewährt.** Auch im Jahr 2010 haben wir die finanzwirtschaftliche Entwicklung unserer Lieferanten im Rahmen unseres Risikomanagements laufend beobachtet. Dabei stehen insbesondere die folgenden Themen im Fokus: Sicherung der Belieferung durch die Lieferanten, Working-Capital-Aufbau sowie die Weiterführung von Projekten zur Produktivitätssteigerung aus dem Krisenjahr 2009. Obwohl im Jahr 2010 einige unserer Lieferanten Insolvenz anmelden mussten, konnten nennenswerte Produktionsausfälle verhindert werden. Aufgrund der großen Bedeutung der Zulieferer für unsere Produktionsprozesse hat Daimler ein regelmäßig tagendes Supplier Risk Board eingerichtet. Das bereichsübergreifend zusammengesetzte Gremium entwickelt im Bedarfsfall Maßnahmen, die uns in die Lage versetzen, kurzfristig auf drohende Lieferanteninsolvenzen zu reagieren. So unterstützen wir notleidende Zulieferunternehmen beispielsweise durch Vorauszahlungen, die mit anschließenden Warenlieferungen verrechnet werden.

**Nachhaltigkeit im Einkauf.** Es ist unser Ziel, nachhaltiges Wirtschaften über die gesamte Wertschöpfungskette hinweg sicherzustellen. Unsere Erwartungen hinsichtlich ökologischer und gesellschaftlicher Aspekte sind in der Richtlinie zur Nachhaltigkeit für Lieferanten formuliert. Seit Ende 2010 ist sie zunächst verbindlicher Bestandteil der Einkaufsbedingungen in Deutschland, die für einen Großteil unserer Lieferanten gelten. Weitere Vertragswerke werden weltweit sukzessive angepasst. Außerdem setzen wir verschiedene Instrumente ein, mit denen wir die Umsetzung unserer Anforderungen prüfen und auch unterstützen. Dazu zählen Lieferantenschulungen sowie Dialog- und Kommunikationsmaßnahmen.



## Informationstechnologie

**Effizienz- und Innovationsfaktor IT.** Angesichts des technologischen Fortschritts und der zunehmenden Verschmelzung von Informationstechnologie (IT) und Geschäftsprozessen wird eine sichere und leistungsfähige IT für das Unternehmen immer wichtiger. Nahezu alle Geschäftsprozesse – von der Produktentwicklung über die Fahrzeugproduktion bis hin zu Abläufen im Vertrieb und Finanzwesen – werden immer stärker digitalisiert. Effiziente und innovative IT-Systeme leisten deshalb einen wesentlichen Beitrag zum Unternehmenserfolg. Rund 4.800 Mitarbeiter an über 500 Standorten arbeiten daran, die Geschäfte von Daimler durch IT-Anwendungen wirkungsvoll zu unterstützen. Dazu zählt, dass die Systemlandschaften jederzeit funktionsfähig sind und permanent optimiert werden. Um gleichzeitig die Effizienz zu steigern, konsolidieren wir die IT-Systemlandschaft kontinuierlich und wollen die Anzahl der bestehenden Systeme bis zum Jahr 2015 um bis zu 40 Prozent bereinigen. Bereits im Berichtsjahr haben wir die Anzahl der Applikationen um rund 8% reduziert.

Weltweit versorgt die IT-Organisation von Daimler über 260.000 Mitarbeiterinnen und Mitarbeiter sowie auch externe Geschäftspartner mit einer durchgängigen Netzwerkinfrastruktur. Deshalb ist es eine zentrale Aufgabe der IT, den Informationsaustausch zwischen den Partnern vor unbefugtem Zugriff zu schützen. Angesichts zunehmender Risiken und Bedrohungen für die Sicherheit von Informationen haben wir hierfür einen ganzheitlich und zentral operierenden Bereich im Einsatz. Diese Organisation definiert und überwacht technische Schutzmaßnahmen und trifft auch organisatorische Vorkehrungen wie zum Beispiel die weltweite Schulung von Mitarbeitern oder die Steuerung der dezentralen Informationssicherheitsbeauftragten.

**IT-Lösungen unterstützen die Weiterentwicklung individueller Mobilität.** Sowohl für unsere operativ tätigen Geschäftseinheiten als auch für den Vertrieb haben wir maßgeschneiderte IT-Lösungen entwickelt, die die Mobilitätsstrategie von Daimler unterstützen. Nach der systemseitigen Unterstützung von car2go übernahm die Daimler-IT auch bei der webbasierten Mitfahrzentrale car2gether die Beratung für die Systemkonzeption und wirkte bei Design und Implementierung des Webportals mit. Darüber hinaus hat die IT die Inbetriebnahme des Pilotprojekts von car2gether in Ulm begleitet.

Auch im Vertrieb entwickelt die IT Mobilitätsservices weiter. Nach der Einführung der »Apple iPhone App« für die personalisierte Vertragsverwaltung von Finanzdienstleistungen bei Mercedes-Benz Financial wurde im Jahr 2010 das gesamte Händlernetz von Mercedes-Benz in den USA für das mobile Arbeiten mit dem Apple iPad™ 3G ausgestattet. Alle 355 Händler können damit am Point-of-Sale jederzeit ortsunabhängig auf das Mercedes-Benz Händlersystem Advantage® zugreifen. Darüber hinaus haben wir eine Funktion entwickelt, die es Kunden erlaubt, Dokumente direkt auf dem iPad-Display elektronisch zu unterzeichnen. Seit Anfang 2010 gehört zu den IT-Services von Mercedes-Benz Financial auch eine Website, die ausschließlich für Smartphone-Nutzer erstellt wurde.

**Integrierte Systemlösung im Nutzfahrzeugvertrieb.** Nach dem erfolgreichen Start in den Daimler-TruckStores haben wir die internetbasierte Softwarelösung für das Nutzfahrzeug-Gebrauchtwagengeschäft im Berichtsjahr für den Busbereich weiterentwickelt und eingeführt. Alle buchungsrelevanten Transaktionen werden weltweit automatisch verarbeitet. Im Bestand befindliche Fahrzeuge inklusive Bilder werden täglich vom System an das Truck-Store-Internetportal für den Verkauf übermittelt.

**GreenIT leistet sichtbaren Beitrag zur Nachhaltigkeit.** Ein Schwerpunkt der IT-Arbeit liegt bei Daimler auch bei Nachhaltigkeitsthemen wie GreenIT. Im Rahmen dieser Initiative ist es uns gelungen, erhebliche Einsparungen von Ressourcen zu erzielen: So wurden im IT-Bereich innerhalb eines Jahres 55 Mio. Kilowattstunden Strom und 33.000 Tonnen CO<sub>2</sub>-Emissionen eingespart. Damit haben wir nicht nur unsere Umweltbilanz verbessert, sondern auch die Wirtschaftlichkeit gesteigert.

Die konsequente Ausrichtung der IT an den Aspekten der Nachhaltigkeit wird durch die Aufnahme von GreenIT-Kennzahlen in die Balanced Scorecard der IT untermauert. Dadurch wird es möglich, den umwelt- und ressourcenschonenden IT-Einsatz kontinuierlich zu messen. Innovative Umweltpotenziale können wir so schneller erkennen und in die operativen Geschäftsprozesse integrieren. Über Daimler hinaus engagiert sich die IT im EU Code of Conduct for Data Centers, einer Umweltinitiative der Europäischen Union für die Selbstverpflichtung zum Einsatz von effizienten Rechenzentren.

Im November 2010 wurde die Daimler AG für das Konzept und die messbaren Erfolge der unternehmensweiten GreenIT-Initiative »Ökonomisch denken, ökologisch handeln« mit dem Gartner Data Center Excellence Award ausgezeichnet. Dieser Preis wird für besonders zukunftsweisende und strategisch angelegte Konzepte rund um die Gestaltung und den ökologischen Betrieb von Rechenzentren verliehen. Er ist die renommierteste Auszeichnung in der IT-Branche im internationalen Raum.

## Grundsätze und Ziele des Finanzmanagements

Das Finanzmanagement bei Daimler umfasst das Kapitalstrukturmanagement, das Cash- und Liquiditätsmanagement, das Management des Pensionsvermögens sowie das Management von Marktpreisrisiken (Währungen, Zinsen, Commodities) und von Kreditausfall- und Länderrisiken. Das weltweite Finanzmanagement wird von der Treasury-Organisation im Rahmen der gesetzlichen Bestimmungen für alle Konzerngesellschaften einheitlich ausgeführt. Grundsätzlich operiert es in einem vorgegebenen Rahmen von Richtlinien, Limits und Benchmarks; organisatorisch ist es getrennt von den Funktionen Abwicklung, Finanzcontrolling, Berichterstattung und Rechnungslegung.

Das **Kapitalstrukturmanagement** gestaltet die Kapitalstruktur des Konzerns und seiner Tochtergesellschaften. Die Kapitalausstattung von Financial-Services-, Produktions-, Vertriebs- oder Finanzierungsgesellschaften wird nach den Grundsätzen kosten- und risikooptimaler Finanz- und Kapitalausstattung vorgenommen. Zudem berücksichtigen wir, dass die vielfältigen Kapitalverkehrsbeschränkungen und sonstigen Kapital- sowie Devisentransferbeschränkungen eingehalten werden.

Das **Liquiditätsmanagement** stellt sicher, dass der Konzern jederzeit seine Zahlungsverpflichtungen erfüllen kann. Hierzu erfassen wir die Zahlungsströme aus dem operativen Geschäft und aus Finanzgeschäften in einer rollierenden Planung. Die entstehenden Finanzierungsbedarfe werden mittels geeigneter Instrumente zur Liquiditätssteuerung (z. B. Bankkredite, Commercial Paper, Anleihen) gedeckt; Liquiditätsüberschüsse legen wir risiko- und renditeoptimal im Geld- oder Kapitalmarkt an. Zielsetzung ist, eine für notwendig erachtete Liquidität kostenoptimal zu realisieren. Zusätzlich zur operativen Liquidität verfügt Daimler über weitere Liquiditätsreserven, die kurzfristig verfügbar sind. Bestandteile dieser zusätzlichen Absicherung sind am Kapitalmarkt verbriefbare Forderungen aus dem Finanzdienstleistungsgeschäft sowie eine vertraglich zugesagte syndizierte Kreditlinie im Volumen von 7 Mrd. €.

Im **Cash Management** werden Zahlungsmittelbedarfe und -überschüsse zentral ermittelt. Das konzerninterne Saldieren (Netting) dieser Bedarfe und Überschüsse reduziert die Anzahl externer Bankgeschäfte auf ein Mindestmaß. Das Netting erfolgt durch Cash-Concentration- oder Cash-Pooling-Verfahren. Daimler hat zur Steuerung seiner Bankkonten und der internen Verrechnungskonten sowie zur Durchführung automatisierter Zahlungsvorgänge standardisierte Prozesse und Systeme etabliert.

Das **Management von Marktpreisrisiken** hat die Aufgabe, die Auswirkungen von Schwankungen bei Währungen, Zinssätzen und Rohstoffen (Commodities) auf das Ergebnis der Geschäftsfelder und des Konzerns zu begrenzen. Hierzu wird zunächst das konzernweite Risikovolumen (Exposure) für diese Marktpreisrisiken ermittelt; auf dieser Basis treffen wir dann Sicherungsentscheidungen. Diese beinhalten das zu sichernde Volumen, den abzusichernden Zeitraum sowie die Wahl der Sicherungsinstrumente. Entscheidungsgremien sind regelmäßig tagende Komitees für Währungen, Commodities und das Asset-/Liability-Management (Zinsen).

Das **Management von Pensionsvermögen** beinhaltet die Anlage des Vermögens, das zur Deckung der Pensionsverpflichtungen vorgehalten wird. Das Vermögen ist in Pensionsfonds ausgelagert und steht damit für allgemeine Unternehmenszwecke nicht zur Verfügung. Die Fondsvermögen werden ausgehend von der erwarteten Entwicklung der Pensionsverbindlichkeiten mithilfe eines Prozesses zur Risiko-Rendite-Optimierung auf verschiedene Anlageklassen verteilt, beispielsweise Aktien, festverzinsliche Wertpapiere, alternative Investments und Immobilien. Den Erfolg der Vermögensanlage messen wir mit festgelegten Referenz-Indizes. Das Risikomanagement der einzelnen Pensionsfonds obliegt den lokalen Treuhändern. Über eine konzernweit verbindliche Richtlinie limitiert das »Global Pension Committee« diese Risiken unter Beachtung der jeweils maßgeblichen Gesetze. Zusätzliche Informationen zu den Pensionsplänen und ähnlichen Verpflichtungen enthält Anmerkung 22 des Konzernanhangs.

Das beim **Management von Kreditausfallrisiken** betrachtete Risikovolumen umfasst weltweit alle Gläubigerpositionen von Daimler gegenüber Finanzinstituten, Emittenten von Wertpapieren und Kunden aus dem Finanzdienstleistungs- sowie dem Liefer- und Leistungsgeschäft. Das Kreditrisiko gegenüber Finanzinstituten und Emittenten von Wertpapieren ergibt sich vor allem aus der Anlage liquider Mittel im Rahmen des Liquiditätsmanagements sowie durch den Einsatz derivativer Finanzinstrumente. Das Management dieser Kreditrisiken basiert im Wesentlichen auf einem internen Limitsystem, das sich an der Bonität des Finanzinstituts bzw. des Emittenten orientiert. Das Kreditrisiko gegenüber Kunden aus dem Liefer- und Leistungsgeschäft resultiert aus eingeräumten Zahlungszielen und beinhaltet das Ausfallrisiko von Vertragshändlern und Generalvertretern, sonstigen Firmenkunden sowie Privatkunden. Im Rahmen des Exportgeschäfts werden bei Generalvertretungen, die – als Ergebnis unserer Bonitätsanalysen – über keine ausreichende Bonität verfügen, im Regelfall Kreditsicherheiten, wie beispielsweise erstklassige Bankgarantien, angefordert. Das Kreditrisiko gegenüber Endkunden aus dem Finanzdienstleistungsgeschäft steuert Daimler Financial Services auf Basis eines einheitlichen Risikomanagementprozesses. In diesem Prozess werden Mindestanforderungen an das Kredit- und Leasinggeschäft definiert und Standards für die Kreditprozesse sowie für das Identifizieren, Messen und Steuern von Risiken gesetzt. Wesentliche Elemente für die Steuerung der Kreditrisiken sind eine sachgerechte Kreditbeurteilung, die durch statistische Analysemethoden und Bewertungsverfahren unterstützt wird, sowie eine strukturierte Portfolioanalyse und -überwachung.

Das **Management von Länderrisiken** beinhaltet mehrere Risikoaspekte: das Risiko aus Kapitalanlagen in Tochtergesellschaften und Joint Ventures, das Risiko aus grenzüberschreitenden Finanzierungen von Konzerngesellschaften in Risikoländern sowie das Risiko aus dem direkten Verkauf an Kunden in diesen Ländern. Daimler verfügt über ein internes Ratingsystem, bei dem alle Länder, in denen Daimler operativ tätig ist, in Risikoklassen eingeteilt werden. Eigenkapitalmaßnahmen in Risikoländern werden durch Investitionsschutzversicherungen, wie beispielsweise Investitionsgarantien der Bundesrepublik Deutschland, gegen politische Risiken abgesichert; grenzüberschreitende Forderungen gegenüber Kunden sichern wir teilweise durch Exportkreditversicherungen, erstklassige Bankgarantien und Akkreditive. Ferner wird im Rahmen eines Komitees die Höhe von Hartwährungsportfolios bei Financial-Services-Gesellschaften in Risikoländern festgelegt und begrenzt.

Weitergehende Informationen zum Management der Marktpreis-, Kreditausfall- und Liquiditätsrisiken enthält Anmerkung 31 des Konzernanhangs.

## Cash Flow

### Verkürzte Konzern-Kapitalflussrechnung

|                                                                                         | 2010          | 2009   | 10/09       |
|-----------------------------------------------------------------------------------------|---------------|--------|-------------|
| in Millionen €                                                                          |               |        | Veränderung |
| <b>Zahlungsmittel und Zahlungsmitteläquivalente zum Jahresanfang</b>                    | <b>9.800</b>  | 6.912  | 2.888       |
| Cash Flow aus der Geschäftstätigkeit                                                    | <b>8.544</b>  | 10.961 | -2.417      |
| Cash Flow aus der Investitionstätigkeit                                                 | <b>-313</b>   | -8.950 | 8.637       |
| Cash Flow aus der Finanzierungstätigkeit                                                | <b>-7.551</b> | 1.057  | -8.608      |
| Einfluss von Wechselkursänderungen auf die Zahlungsmittel und Zahlungsmitteläquivalente | <b>423</b>    | -180   | 603         |
| <b>Zahlungsmittel und Zahlungsmitteläquivalente zum Jahresende</b>                      | <b>10.903</b> | 9.800  | 1.103       |

Der **Cash Flow aus der Geschäftstätigkeit** belief sich im Jahr 2010 auf 8,5 (i. V. 11,0) Mrd. €. Die positiven Einflüsse aus dem deutlich verbesserten Konzernergebnis wurden durch die Entwicklung der Vorratsbestände teilweise kompensiert; während die Vorräte im Berichtszeitraum aufgrund des höheren Produktionsvolumens anstiegen, waren sie in der Vergleichsperiode erheblich zurückgegangen. Gegenüber dem Vorjahr ergaben sich weitere den Cash Flow aus der Geschäftstätigkeit belastende Einflüsse infolge des höheren Neugeschäfts bei der Leasing- und Absatzfinanzierung sowie im Vergleich zum Vorjahr geringeren Erlösen aus dem Verkauf von Teilen des nicht fahrzeugbezogenen Portfolios im Finanzdienstleistungsgeschäft.

Darüber hinaus wurden die gegenüber dem Vorjahr negativen Effekte aus den absatzbedingt höheren Forderungen aus Lieferungen und Leistungen durch den Anstieg der Verbindlichkeiten aus Lieferungen und Leistungen nur teilweise ausgeglichen. Zudem waren die Zahlungen für Ertragsteuern mit 1,2 Mrd. € höher als im Vorjahr (0,4 Mrd. €); infolge der Nutzung von Verlustvorträgen stiegen sie jedoch im Verhältnis zum operativen Ergebnis in deutlich geringerem Umfang.

Aus dem **Cash Flow aus der Investitionstätigkeit** ergab sich ein Mittelabfluss in Höhe von 0,3 (i. V. 9,0) Mrd. €. Der gegenüber dem Vorjahr geringere Mittelabfluss resultierte insbesondere aus den im Rahmen des Liquiditätsmanagements vorgenommenen Käufen und Verkäufen von Wertpapieren; diese führten im Geschäftsjahr 2010 zu einem Zufluss an Zahlungsmitteln in Höhe von 4,3 Mrd. €, während im Vorjahreszeitraum hieraus ein Mittelabfluss von 5,4 Mrd. € zu verzeichnen war. Weiterhin war die Berichtsperiode durch Erlöse aus dem Verkauf der Anteile an Tata Motors beeinflusst (0,3 Mrd. €). Höhere Mittelabflüsse ergaben sich aus den erheblich gestiegenen Investitionen in Sachanlagen und immaterielle Vermögenswerte sowie aufgrund der im Rahmen der gegenseitigen Kapitalbeteiligung mit der Renault-Nissan-Allianz geleisteten Barzahlung (0,1 Mrd. €).

Aus dem **Cash Flow der Finanzierungstätigkeit** resultierte im Berichtszeitraum ein Mittelabfluss von 7,6 Mrd. €, der nahezu ausschließlich auf der Tilgung von Finanzierungsverbindlichkeiten beruhte. In geringerem Umfang wirkten gegenläufig Mittelzuflüsse aus der Ausgabe neuer Aktien, die im Zusammenhang mit der Ausübung von Stock Options standen (0,2 Mrd. €). Der Mittelzufluss des Vorjahres in Höhe von 1,1 Mrd. € war insbesondere durch die Kapitalerhöhung aus der Ausgabe neuer Aktien (1,95 Mrd. €) bedingt, der in geringerem Umfang die Zahlung der Dividende für das Geschäftsjahr 2008 entgegenwirkte (0,6 Mrd. €).

Die Zahlungsmittel und Zahlungsmitteläquivalente erhöhten sich gegenüber dem 31. Dezember 2009 einschließlich der Berücksichtigung von Wechselkurseffekten um 1,1 Mrd. €. Die Liquidität, zu der auch die verzinslichen Wertpapiere und andere Geldanlagen gehören, wurden um 3,1 Mrd. € auf 13,0 Mrd. € gesenkt.

Der **Free Cash Flow des Industriegeschäfts** als die von Daimler verwendete Messgröße für die Finanzkraft erhöhte sich deutlich um 2,7 Mrd. € auf 5,4 Mrd. €.

Der Anstieg des Free Cash Flow war vor allem durch die erheblich verbesserten Ergebnisbeiträge der Geschäftsfelder bedingt, die belastende Effekte aufgrund der Entwicklung der Vorratsbestände sowie höhere Investitionen in Sachanlagen und immaterielle Vermögenswerte mehr als kompensierten. Darüber hinaus wirkte sich der Verkauf der Anteile an Tata Motors positiv im Free Cash Flow aus.

#### Free Cash Flow des Industriegeschäfts

|                                                                                       | 2010         | 2009   | 10/09       |
|---------------------------------------------------------------------------------------|--------------|--------|-------------|
| in Millionen €                                                                        |              |        | Veränderung |
| Cash Flow aus der Geschäftstätigkeit                                                  | 10.066       | 6.544  | 3.522       |
| Cash Flow aus der Investitionstätigkeit                                               | -741         | -7.716 | 6.975       |
| Veränderung Zahlungsmittel (> 3 Monate) und in die Liquidität einbezogene Wertpapiere | -3.893       | 3.878  | -7.771      |
| <b>Free Cash Flow des Industriegeschäfts</b>                                          | <b>5.432</b> | 2.706  | 2.726       |

#### Netto-Liquidität des Industriegeschäfts

|                                                                           | 31.12.2010    | 31.12.2009 | 10/09       |
|---------------------------------------------------------------------------|---------------|------------|-------------|
| in Millionen €                                                            |               |            | Veränderung |
| Zahlungsmittel                                                            | 9.535         | 6.735      | 2.800       |
| Wertpapiere und längerfristige Geldanlagen                                | 1.258         | 5.073      | -3.815      |
| <b>Liquidität</b>                                                         | <b>10.793</b> | 11.808     | -1.015      |
| Finanzierungsverbindlichkeiten                                            | 1.358         | -5.516     | 6.874       |
| Marktbewertung und Währungsabsicherung für Finanzierungsverbindlichkeiten | -213          | 993        | -1.206      |
| <b>Finanzierungsverbindlichkeiten (nominal)</b>                           | <b>1.145</b>  | -4.523     | 5.668       |
| <b>Netto-Liquidität</b>                                                   | <b>11.938</b> | 7.285      | 4.653       |

Die Netto-Liquidität des Industriegeschäfts errechnet sich als Bestand der bilanziell ausgewiesenen Zahlungsmittel, Zahlungsmitteläquivalente, verzinslichen Wertpapiere und anderen in das Liquiditätsmanagement einbezogenen Geldanlagen abzüglich des währungsgesicherten Rückzahlungsbetrags der Finanzierungsverbindlichkeiten.

Soweit die konzerninterne Refinanzierung des Finanzdienstleistungsgeschäfts durch Gesellschaften des Industriegeschäfts erfolgt, wird diese bei der Ermittlung der Verschuldung des Industriegeschäfts in Abzug gebracht. Zum 31. Dezember 2010 hatte die konzerninterne Refinanzierung aufgrund der Verwendung von Eigenmitteln des Industriegeschäfts einen höheren Umfang als die originär im Industriegeschäft aufgenommenen Finanzierungsverbindlichkeiten. Hieraus ergab sich ein positiver, die Netto-Liquidität erhöhender Wert für die Finanzierungsverbindlichkeiten des Industriegeschäfts.

Gegenüber dem Vorjahr stieg die **Netto-Liquidität des Industriegeschäfts** um 4,7 Mrd. € auf 11,9 Mrd. €.

Der Anstieg war im Wesentlichen auf den positiven Free Cash Flow zurückzuführen.



Die auf Konzernebene vor allem aus der Refinanzierung des Leasing- und Absatzfinanzierungsgeschäfts resultierende Netto-Verschuldung hat sich gegenüber dem 31. Dezember 2009 um 0,3 Mrd. € vermindert.

#### Netto-Verschuldung des Daimler-Konzerns

|                                                                           | 31.12.2010     | 31.12.2009     | 10/09         |
|---------------------------------------------------------------------------|----------------|----------------|---------------|
| in Millionen €                                                            |                |                | Veränderung   |
| Zahlungsmittel                                                            | 10.903         | 9.800          | 1.103         |
| Wertpapiere und längerfristige Geldanlagen                                | 2.096          | 6.342          | -4.246        |
| <b>Liquidität</b>                                                         | <b>12.999</b>  | <b>16.142</b>  | <b>-3.143</b> |
| Finanzierungsverbindlichkeiten                                            | -53.682        | -58.294        | 4.612         |
| Marktbewertung und Währungsabsicherung für Finanzierungsverbindlichkeiten | -213           | 993            | -1.206        |
| <b>Finanzierungsverbindlichkeiten (nominal)</b>                           | <b>-53.895</b> | <b>-57.301</b> | <b>3.406</b>  |
| <b>Netto-Verschuldung</b>                                                 | <b>-40.896</b> | <b>-41.159</b> | <b>263</b>    |

#### Investitionen

Nach den deutlichen Einschnitten im Jahr 2009 infolge des strikten Liquiditätsmanagements haben wir – einhergehend mit der günstigeren Geschäftsentwicklung – die Investitionen in Sachanlagen im Berichtsjahr auf 3,7 (i. V. 2,4) Mrd. € erhöht. Im Mittelpunkt standen dabei Investitionen in neue Fahrzeugmodelle und neue Antriebssysteme. Vom gesamten Investitionsvolumen entfielen 2,1 Mrd. € auf Deutschland.

Bei Mercedes-Benz Cars stiegen die Sachinvestitionen im Jahr 2010 um 52% auf 2,5 Mrd. €. Ein Schwerpunkt war der Aufbau der Produktionskapazitäten für die Nachfolgemodelle der A/B-Klasse im neuen Montagewerk in Kecskemét, Ungarn, und im Werk Rastatt. Darüber hinaus haben wir in Tuscaloosa, USA, in den Anlauf der neuen M-Klasse Modelle investiert und den Start der C-Klasse Produktion ab 2014 vorbereitet. Im Werk Bremen standen Aufwendungen für die neue Generation des Roadsters SLK im Vordergrund. Weitere Mittel entfielen auf Motorenprojekte, wie zum Beispiel die Produktion der neuen V6- und V8-Benzinmotoren im Werk Stuttgart-Bad Cannstatt, sowie auf die Erweiterung unserer Pkw-Produktionskapazitäten in den Wachstumsmärkten China und Indien. Daimler Trucks investierte im Berichtsjahr vor allem in Projekte zur globalen Harmonisierung und Standardisierung von Motoren und Aggregaten und zur Erfüllung strengerer Emissionsvorschriften. Darüber hinaus haben wir Mittel für Folgegenerationen bestehender Lkw-Modelle eingesetzt. Ein weiterer Schwerpunkt waren zusätzliche Produktionskapazitäten für den Schwer-Lkw Actros, der seit Ende 2010 auch im türkischen Aksaray und ab 2012 zusätzlich in Juiz de Fora in Brasilien montiert wird, und die Erweiterung der Kapazitäten am Standort São Bernardo do Campo in Brasilien.

#### Sachinvestitionen

in Milliarden €

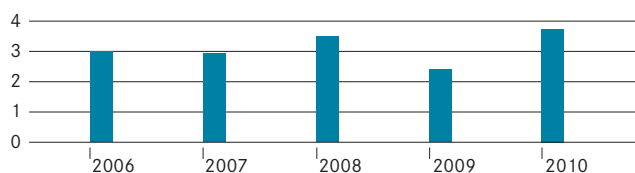

Insgesamt betrugen die Investitionen in Sachanlagen bei Daimler Trucks 1,0 (i. V. 0,6) Mrd. €. Im Geschäftsfeld Mercedes-Benz Vans lag der Schwerpunkt der Investitionen auf der Modellpflege des Vito/Viano, der Entwicklung von neuen Produkten sowie Investitionen in unsere Werke und Vertriebsorganisation. Bei Daimler Buses haben wir im Jahr 2010 vor allem in neue Produkte sowie in unsere Produktionsstandorte investiert.

#### Sachinvestitionen

|                            | 2010  | 2009  | 10/09        |
|----------------------------|-------|-------|--------------|
| in Millionen €             |       |       | Veränd. in % |
| Daimler-Konzern            | 3.653 | 2.423 | +51          |
| Mercedes-Benz Cars         | 2.457 | 1.618 | +52          |
| Daimler Trucks             | 1.003 | 597   | +68          |
| Mercedes-Benz Vans         | 91    | 113   | -19          |
| Daimler Buses              | 95    | 78    | +22          |
| Daimler Financial Services | 12    | 14    | -14          |

## Refinanzierung

Zur Deckung seines **Refinanzierungsbedarfs** nutzt Daimler ein breites Spektrum von unterschiedlichen Finanzierungsinstrumenten in den internationalen Geld- und Kapitalmärkten. Kapital benötigt Daimler vor allem für die Finanzierung von Fahrzeugen im Leasing- und Absatzfinanzierungsgeschäft. Neben der Begebung von kurzfristigen Schuldverschreibungen im Geldmarktbereich (Commercial Paper) emittiert das Unternehmen im Kapitalmarkt Anleihen in verschiedenen Währungen mit mittleren und langen Laufzeiten. Diese beinhalten neben sogenannten Benchmarkemissionen (Anleihen mit großem Volumen und hohem Handelsvolumen) auch Emissionen mit geringerem Volumen. Zusätzlich werden Kreditlinien bei Banken und durch Forderungen besicherte Finanzmarktinstrumente zur Finanzierung des Mittelbedarfs eingesetzt.

Im Jahr 2010 hat der Konzern seinen Liquiditätsbedarf insbesondere durch die Emission von Anleihen sowie über Bankkredite gedeckt. Aufgrund der positiven Entwicklung des operativen Cash Flow war der Kapitalbedarf deutlich geringer als im Jahr 2009. In einem nur sehr geringen Umfang wurden auch Mittel über Commercial-Paper-Emissionen aufgenommen. Ferner wurden die unverändert hohen Kundeneinlagen bei der Mercedes-Benz Bank als weitere Refinanzierungsquelle genutzt.

Für längerfristige Kapitalaufnahmen im Kapitalmarkt existieren verschiedene Programme wie das 35 Mrd. € umfassende Multi-Currency Multi-Issuer Euro-Medium Term Note Programm, unter dem im Jahr 2010 unter anderem folgende Euro-Benchmark-Anleihen erfolgreich im Markt platziert wurden:

| Beträge<br>in Mrd. € | Laufzeiten<br>in Jahren | Fälligkeiten |
|----------------------|-------------------------|--------------|
| 1,0                  | 3,5                     | 07/2013      |
| 1,0                  | 7,0                     | 01/2017      |

Mit dem Ziel, unsere Refinanzierung weiter zu diversifizieren, haben wir darüber hinaus kleinere Privatplatzierungen im Euromarkt vorgenommen sowie Anleihen in den lokalen Kapitalmärkten in Südafrika, Mexiko, Argentinien und Thailand emittiert. Ferner wurde im April 2010 in den USA eine ABS-Transaktion in Höhe von 1,0 Mrd. US-\$ erfolgreich bei Investoren platziert; hierfür nutzte Daimler seine US-Plattform Mercedes-Benz Auto Receivables Trust.

Zum Jahresende 2010 bestanden für Daimler kurz- und langfristige Kreditlinien von insgesamt 24,0 (i. V. 21,1) Mrd. €, von denen 9,4 (i. V. 8,0) Mrd. € nicht in Anspruch genommen waren. Diese beinhalten eine neue, mit einem Konsortium internationaler Banken vereinbarte syndizierte Kreditlinie in Höhe von 7 Mrd. € mit einer Laufzeit von fünf Jahren. Die Kreditlinie war deutlich überzeichnet. Nach der Unterzeichnung der neuen Kreditlinie hat Daimler die beiden bisherigen syndizierten Kreditlinien über 5 Mrd. US-\$ und 3 Mrd. € vorzeitig gekündigt.

Die Buchwerte der wesentlichen Refinanzierungsinstrumente sowie die gewogenen Durchschnittszinssätze sind in der nachfolgenden Tabelle dargestellt.

|                                              | Durchschnittszinssätze |            | Buchwerte      |            |
|----------------------------------------------|------------------------|------------|----------------|------------|
|                                              | 31.12.2010             | 31.12.2009 | 31.12.2010     | 31.12.2009 |
|                                              | in %                   |            | in Millionen € |            |
| Anleihen                                     | 4,58                   | 4,66       | 26.123         | 30.095     |
| Schuldverschreibungen                        | 4,82                   | 6,48       | 91             | 176        |
| Verbindlichkeiten gegenüber Kreditinstituten | 4,42                   | 5,04       | 14.328         | 13.000     |

Die in obiger Tabelle dargestellten Finanzinstrumente zum 31. Dezember 2010 entfallen überwiegend auf die folgenden Währungen: 30% auf US-Dollar, 29% auf Euro, 7% auf japanischer Yen, 7% auf brasilianischer Real und 5% auf britischer Pfund.

Zum 31. Dezember 2010 betrugen die in der Konzernbilanz ausgewiesenen Finanzierungsverbindlichkeiten, die unter anderem Einlagen aus dem Direktbankgeschäft beinhalten, 53.682 (i. V. 58.294) Mio. €.

Detaillierte Informationen zu den Beträgen und Laufzeiten der Finanzierungsverbindlichkeiten können den Anmerkungen 24 und 31 des Konzernanhangs entnommen werden. Anmerkung 31 des Konzernanhangs gibt zudem Auskunft über die Fälligkeiten der übrigen finanziellen Verbindlichkeiten.

## Sonstige finanzielle Verpflichtungen und außerbilanzielle Transaktionen

Im Rahmen seiner gewöhnlichen Geschäftstätigkeit ist der Konzern sonstige finanzielle Verpflichtungen eingegangen, die über die in der Konzernbilanz zum 31. Dezember 2010 ausgewiesenen Verbindlichkeiten hinausgehen. Diese betreffen überwiegend Einkaufsverpflichtungen und Verpflichtungen für Ersatz- und Erweiterungsinvestitionen. Darüber hinaus sind wir Zahlungsverpflichtungen im Rahmen von Miet-, Pacht- und Leasingverträgen zur Nutzung von Produktionsstätten und sonstigen Sachanlagen eingegangen. Zudem gewährte insbesondere Daimler Financial Services im Rahmen seiner Geschäftstätigkeit unwiderrufliche Kreditzusagen.

Die folgende Tabelle gibt einen Überblick über diese Verpflichtungen und deren Fälligkeiten:

|                                                                       | Insgesamt | von<br>einem Jahr | Zahlungen, die fällig werden innerhalb:<br>nach |            |          |
|-----------------------------------------------------------------------|-----------|-------------------|-------------------------------------------------|------------|----------|
|                                                                       |           |                   | 1-3 Jahren                                      | 4-5 Jahren | 5 Jahren |
| in Millionen €                                                        |           |                   |                                                 |            |          |
| Einkaufsverpflichtungen, Ersatz- und Erweiterungsinvestitionen        | 7.420     | 6.017             | 1.086                                           | 168        | 149      |
| Zukünftige Mietzahlungen im Rahmen von Miet- und Leasingverhältnissen | 2.150     | 297               | 504                                             | 396        | 953      |
| Unwiderrufliche Kreditzusagen                                         | 1.910     | 1.624             | 262                                             | 24         | -        |

Außerbilanzielle Transaktionen des Konzerns betreffen Sachverhalte, bei denen Daimler Garantien gewährt hat und damit weiterhin einem Risiko ausgesetzt ist. Hierunter fallen jedoch nicht die Gewährleistungs- und Kulanzzusagen (Produktgarantien), die der Konzern im Rahmen seiner Fahrzeugverkäufe bereitstellt.

Die von uns ausgewiesenen Garantien (ohne Produktgarantien) entfallen überwiegend auf Finanzgarantien, bei denen wir zur Leistung von bestimmten Zahlungen verpflichtet sind, sofern ein Garantiennehmer seine finanziellen Verpflichtungen nicht erfüllt. Die maximal möglichen Zahlungsverpflichtungen aus solchen Finanzgarantien belaufen sich zum 31. Dezember 2010 auf 1,1 (2009: 1,5) Mrd. €; hierfür gebildete Rückstellungen betragen 0,2 (2009: 0,2) Mrd. €.

Die Finanzgarantien entfallen überwiegend auf folgende Sachverhalte: Im Zusammenhang mit der Abgabe der Mehrheit an Chrysler garantiert der Konzern Zahlungen bis insgesamt 200 Mio. US-\$ an die Chrysler Pensionsfonds. Die Laufzeit dieser Garantie ist auf den Zeitraum bis August 2012 begrenzt. Zudem garantiert der Konzern für weitere Verpflichtungen von Chrysler; zum 31. Dezember 2010 beliefen sich diese Garantien auf 0,3 Mrd. €, wobei als Sicherheit für die zugrunde liegenden Verpflichtungen eine Einlage von Chrysler von 0,2 Mrd. € auf einem Treuhandkonto zur Verfügung steht. Eine weitere Finanzgarantie entfällt mit 0,1 Mrd. € auf Bankverbindlichkeiten der Toll Collect GmbH, der Betreibergesellschaft für das elektronische Lkw-Mauterhebungssystem in Deutschland.

Weitere Risiken ergeben sich aus einer Garantie, die der Konzern für Verpflichtungen der Toll Collect GmbH gegenüber der Bundesrepublik Deutschland übernommen hat. Diese Garantie steht im Zusammenhang mit der Fertigstellung und dem Betrieb des Mautsystems; eine Inanspruchnahme dieser Garantie entsteht im Wesentlichen, falls technisch bedingt Mautgebühren ausfallen oder bestimmte vertraglich definierte Leistungsparameter nicht erfüllt werden, falls die Bundesrepublik Deutschland zusätzliche Aufrechnungen aufstellt oder die endgültige Betriebserlaubnis verweigert wird. Gegen den Konzern ist auch ein Schiedsverfahren anhängig. Das maximale Verlustrisiko für den Konzern aus dieser Garantie ist beträchtlich, kann jedoch nicht mit ausreichender Sicherheit bestimmt werden.

Darüber hinaus hat der Konzern eine Mehrzahl von jeweils kleinen Garantien abgegeben, bei denen Daimler unter anderem finanzielle Verpflichtungen von Gesellschaften garantiert, die uns mit Zulieferteilen, Fahrzeugkomponenten oder Dienstleistungen beliefern oder Produktionseinrichtungen an uns vermieten.

**Rückkaufverpflichtungen** ergeben sich für den Konzern aus Vereinbarungen, bei denen wir bestimmte Rückkaufwerte oder Marktwerte von verkauften Fahrzeugen garantieren. Der überwiegende Teil dieser Garantien begründet für den Begünstigten das Recht, erworbene Fahrzeuge an den Konzern zurückzugeben, soweit der Kunde erneut ein Fahrzeug von Daimler erwirbt. Zum 31. Dezember 2010 betrug das maximale Verlustrisiko aus diesen Garantien 0,7 (2009: 0,7) Mrd. €; dafür gebildete Rückstellungen beliefen sich zum Jahresende 2010 auf 0,1 (2009: 0,1) Mrd. €.

Weitergehende Informationen zu den sonstigen finanziellen Verpflichtungen und den bedingten Verpflichtungen aus gewährten Garantien bzw. zum elektronischen Mauterhebungssystem und den damit verbundenen Risiken können den Anmerkungen 29 (Garantien und sonstige finanzielle Verpflichtungen) bzw. 28 (Rechtliche Verfahren) des Konzernanhangs entnommen werden.

## Rating

Bei den Ratingeinstufungen der Daimler AG und ihrer verbundenen Unternehmen ergaben sich im Berichtsjahr keine wesentlichen Veränderungen. Lediglich Standard & Poor's Ratings Services (Standard & Poor's) und Fitch Ratings (Fitch) haben jeweils den Ausblick für unser langfristiges Unternehmensrating angehoben, wobei die Anhebung bei Fitch mit einer Verbesserung von negativ auf positiv deutlicher ausfiel als die Veränderung von negativ auf stabil bei Standard & Poor's.

Die Ratingagenturen verwiesen in ihren Veröffentlichungen im Laufe des Berichtsjahres überwiegend auf die deutlich verbesserte Ertragskraft von Daimler, insbesondere von Mercedes-Benz Cars. Auch die Erholung der weltweiten Autonachfrage ist im Berichtsjahr stärker ausgefallen als von den meisten Ratingagenturen erwartet. Dennoch blieben angesichts bestehender Unsicherheiten über die weitere wirtschaftliche Entwicklung der Autoindustrie sowie zusätzlicher Kostenbelastungen aus den gesetzlichen Vorschriften zur Emissionsreduzierung weitergehende Anpassungen unserer Ratings bisher aus.

Am 26. August 2010 bestätigte **Standard & Poor's** das langfristige Unternehmensrating der Daimler AG mit BBB+ und änderte gleichzeitig den Ausblick von negativ auf stabil. Begründet wurde dieser Schritt mit der erheblichen Verbesserung unseres finanziellen Risikoprofils im Laufe des ersten Halbjahres 2010. In diesem Zusammenhang verwies Standard & Poor's auf die deutlich gesteigerte Ertragskraft des Konzerns.

Die Ratingagentur **Moody's Investors Service** (Moody's) hat die Ratingeinstufung von Daimler im Laufe des Jahres 2010 nicht verändert. Am 7. Dezember 2010 bestätigte Moody's das Langfristrating mit A3 und würdigte die erheblichen Verbesserungen im operativen Geschäft von Daimler. Gleichzeitig machte Moody's deutlich, dass die in den ersten neun Monaten erreichten Verbesserungen bei der Profitabilität und der Cash-Flow-Generierung über das Jahr 2010 hinaus aufrechterhalten werden müssten, um das bestehende Ratingniveau abzusichern.

Am 19. Juli 2010 wurde unser Ratingausblick bei **Fitch** im Rahmen einer Überarbeitung der Ratings für die europäischen Automobilhersteller von negativ auf positiv heraufgesetzt. Unser Langfristrating wurde mit BBB+ bestätigt. Zur Begründung verwies Fitch auf die kontinuierliche Verbesserung in den Finanzprofilen der europäischen Automobilhersteller seit dem Jahr 2009, die Erholung der weltweiten Absatzsituation, die schneller eintraf als erwartet, sowie die aktualisierten Erwartungen von Fitch für die Bonitätskennziffern der Automobilhersteller in den nächsten Jahren.

Die kanadische Agentur **DBRS** bestätigte am 29. November 2010 das Langfristrating für die Daimler AG und ihre verbundenen Unternehmen von A (low) mit stabilem Ausblick. Zwar habe sich das Finanzprofil im Vorjahr im Zuge des weltweiten wirtschaftlichen Abschwungs verschlechtert, jedoch sei die Ertragskraft von Daimler in den ersten drei Quartalen des Jahres 2010 wieder kräftig gewachsen.

Die Kurzfristratings blieben im Jahresverlauf 2010 bei allen vier Ratingagenturen unverändert.

|                             | Ende 2010 | Ende 2009 |
|-----------------------------|-----------|-----------|
| Langfristiges Credit Rating |           |           |
| Standard & Poor's           | BBB+      | BBB+      |
| Moody's                     | A3        | A3        |
| Fitch                       | BBB+      | BBB+      |
| DBRS                        | A (low)   | A (low)   |
| Kurzfristiges Credit Rating |           |           |
| Standard & Poor's           | A-2       | A-2       |
| Moody's                     | P-2       | P-2       |
| Fitch                       | F2        | F2        |
| DBRS                        | R-1 (low) | R-1 (low) |



## Verkürzte Konzernbilanz

|                                                                         | 31.12.2010 | 31.12.2009 | 10/09               |
|-------------------------------------------------------------------------|------------|------------|---------------------|
| in Millionen €                                                          |            |            | Veränderung<br>in % |
| <b>Aktiva</b>                                                           |            |            |                     |
| Immaterielle Vermögenswerte                                             | 7.504      | 6.753      | 11                  |
| Sachanlagen                                                             | 17.593     | 15.965     | 10                  |
| Vermietete Gegenstände<br>und Forderungen aus<br>Finanzdienstleistungen | 60.955     | 57.010     | 7                   |
| At-equity bewertete<br>Finanzinvestitionen                              | 3.960      | 4.295      | -8                  |
| Vorräte                                                                 | 14.544     | 12.845     | 13                  |
| Forderungen aus Lieferungen<br>und Leistungen                           | 7.192      | 5.285      | 36                  |
| Zahlungsmittel und<br>Zahlungsmitteläquivalente                         | 10.903     | 9.800      | 11                  |
| Verzinsliche Wertpapiere                                                | 2.096      | 6.342      | -67                 |
| Übrige finanzielle Vermögenswerte                                       | 5.441      | 5.135      | 6                   |
| Sonstige Vermögenswerte                                                 | 5.642      | 5.391      | 5                   |
| Summe Aktiva                                                            | 135.830    | 128.821    | 5                   |
| <b>Passiva</b>                                                          |            |            |                     |
| Eigenkapital                                                            | 37.953     | 31.827     | 19                  |
| Rückstellungen                                                          | 20.637     | 18.372     | 12                  |
| Finanzierungsverbindlichkeiten                                          | 53.682     | 58.294     | -8                  |
| Verbindlichkeiten aus<br>Lieferungen und Leistungen                     | 7.657      | 5.622      | 36                  |
| Übrige finanzielle Verbindlichkeiten                                    | 10.509     | 9.737      | 8                   |
| Sonstige Schulden                                                       | 5.392      | 4.969      | 9                   |
| Summe Passiva                                                           | 135.830    | 128.821    | 5                   |

Die **Bilanzsumme** stieg im Vergleich zum 31. Dezember 2009 um 7,0 Mrd. € auf 135,8 Mrd. €. Währungsbereinigt hätte der Anstieg 0,7 Mrd. € betragen. Von der Bilanzsumme entfallen 67,9 (31. Dezember 2009: 65,1) Mrd. € auf das Finanzdienstleistungsgeschäft; dies entspricht 50% (31. Dezember 2009: 51%) aller Vermögenswerte im Daimler-Konzern.

Der Anteil der kurzfristigen Vermögenswerte an der Bilanzsumme beträgt wie im Vorjahr 42%. Der Anstieg bei den Forderungen, den Vorräten sowie den Zahlungsmitteln und Zahlungsmitteläquivalenten wurde durch die Reduzierung der verzinslichen Wertpapiere ausgeglichen. Der Anteil der kurzfristigen Schulden liegt bei 39% der Bilanzsumme (31. Dezember 2009: 37%). Der Anstieg beruht insbesondere auf höheren Verbindlichkeiten aus Lieferungen und Leistungen sowie höheren Rückstellungen.

Die **Immateriellen Vermögenswerte** stiegen auf 7,5 Mrd. € (31. Dezember 2009: 6,8 Mrd. €). Der Wechselkursbereinigte Anstieg von 0,6 Mrd. € entfällt insbesondere auf die aktivierten Entwicklungskosten. Der Anteil der aktivierten Entwicklungskosten an den gesamten Entwicklungsleistungen betrug 28,3% (2009: 30,7%).

Investitionen, die deutlich über den Abschreibungen lagen, sowie Wechselkurseffekte führten bei den **Sachanlagen** zu einem Anstieg auf 17,6 Mrd. € (31. Dezember 2009: 16,0 Mrd. €). Die Investitionen betrafen unter anderem die Pkw-Standorte Kecskemét, Rastatt, Tuscaloosa und Köllda sowie die Lkw-Standorte in Deutschland, Brasilien und Indien.

Die **Vermieteten Gegenstände** und **Forderungen aus Finanzdienstleistungen** stiegen insbesondere aufgrund von Wechselkurseffekten um 3,9 Mrd. € auf insgesamt 61,0 Mrd. €. Der Wechselkursbereinigte Anstieg war durch das gestiegene Neugeschäft aufgrund des höheren Absatzvolumens der automobilen Geschäftsfelder bedingt und resultierte insbesondere aus dem Geschäft mit Endkunden. Der Anteil an der Bilanzsumme belief sich auf 45% (31. Dezember 2009: 44%).

Die **At-equity bewerteten Finanzinvestitionen** in Höhe von 4,0 Mrd. € umfassen vor allem die Buchwerte unserer Beteiligungen an EADS, Tognum und Kamaz. Der Rückgang um 0,3 Mrd. € betraf vorrangig unsere Beteiligung an der EADS und war insbesondere durch die ergebnisneutrale Bewertung derivativer Finanzinstrumente sowie das anteilige negative Ergebnis bedingt.

Die **Vorräte** stiegen um 1,7 Mrd. € auf 14,5 Mrd. €; der Anteil an der Bilanzsumme beträgt 11%. Der Anstieg war auf das höhere Produktionsvolumen und Wechselkurseffekte zurückzuführen und entfiel insbesondere auf Fertige Erzeugnisse.

Die **Forderungen aus Lieferungen und Leistungen** haben sich absatz- und Wechselkursbedingt um 1,9 Mrd. € auf 7,2 Mrd. € erhöht.

Die **Zahlungsmittel und Zahlungsmitteläquivalente** stiegen gegenüber dem 31. Dezember 2009 um 1,1 Mrd. € auf 10,9 Mrd. €.

Der Bestand an **Verzinslichen Wertpapieren** wurde gegenüber dem 31. Dezember 2009 von 6,3 Mrd. auf 2,1 Mrd. € reduziert.

### Bilanzstruktur Daimler-Konzern

in Milliarden €

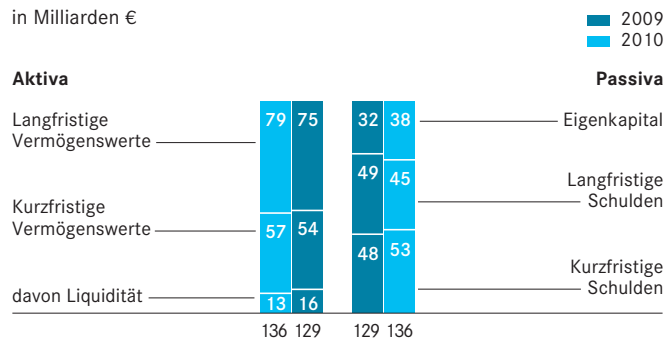

Er beinhaltet im Wesentlichen der Liquidität zugeordnete Schuldtitel, die auf einem aktiven Markt gehandelt werden.

Die **Übrigen finanziellen Vermögenswerte** erhöhten sich von 5,1 Mrd. € auf 5,4 Mrd. €. Sie beinhalten vor allem Beteiligungen, derivative Finanzinstrumente sowie Kredite und sonstige Forderungen an Dritte. Bei den Beteiligungen ergab sich infolge der gegenseitigen Kapitalbeteiligung aus der strategischen Kooperation mit der Renault-Nissan-Allianz ein Anstieg, dem der Verkauf der Anteile an Tata Motors teilweise entgegenwirkte. Die Marktwerte der derivativen Finanzinstrumente reduzierten sich unter anderem infolge des schwächeren Euros.

Die **Sonstigen Vermögenswerte** in Höhe von 5,6 (31. Dezember 2009: 5,4) Mrd. € beinhalten insbesondere latente Steuern sowie Steuererstattungsansprüche.

Das **Eigenkapital** des Konzerns erhöhte sich gegenüber dem 31. Dezember 2009 um 6,1 Mrd. € auf 38,0 Mrd. €. Der Anstieg resultiert im Wesentlichen aus dem positiven Konzernergebnis in Höhe von 4,7 Mrd. €, verstärkt durch Wechselkurseffekte und die Ausgabe eigener Anteile im Zusammenhang mit dem Erwerb der Anteile an Renault und Nissan. Der Erwerb der Anteile an Renault bzw. Nissan wurde überwiegend durch einen Aktientausch gegen Daimler-Anteile aus dem eigenen Bestand vollzogen. Die **Eigenkapitalquote** lag bei 26,5% (31. Dezember 2009: 24,7%); für das Industriegeschäft belief sich die Eigenkapitalquote auf 45,8% (31. Dezember 2009: 42,6%). Die Eigenkapitalquoten 2010 sind um die vorgeschlagene Dividendenzahlung für das Geschäftsjahr 2010 bereinigt.

Der Anteil der **Rückstellungen** an der Bilanzsumme beträgt 15%. Sie umfassen vor allem Garantie-, Personal- und Pensionsverpflichtungen und lagen mit 20,6 Mrd. € über dem Niveau zum 31. Dezember 2009 (18,4 Mrd. €). Der Anstieg resultiert hauptsächlich aus höheren Rückstellungen für Personalverpflichtungen.

### Bilanzstruktur Industriegeschäft

in Milliarden €

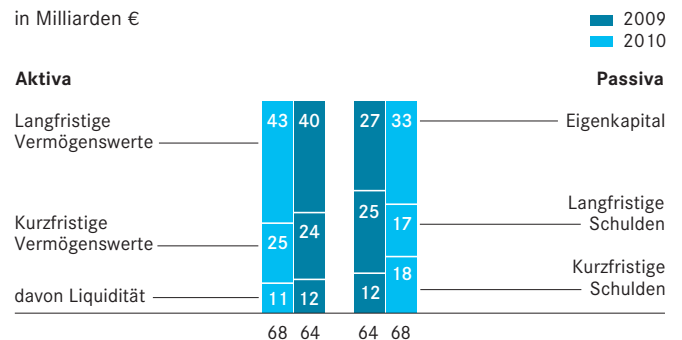

Die **Finanzierungsverbindlichkeiten** gingen um 4,6 Mrd. € auf 53,7 Mrd. € zurück. Der wechselkursbereinigte Rückgang in Höhe von 6,9 Mrd. € entfiel im Wesentlichen auf die Anleihen und die Verbindlichkeiten aus Kundeneinlagen im Rahmen des Direktbankgeschäfts der Mercedes-Benz Bank.

Die **Verbindlichkeiten aus Lieferungen und Leistungen** haben sich unter anderem aufgrund der gestiegenen Produktion um 2,0 Mrd. € auf 7,7 Mrd. € erhöht.

Die **Übrigen finanziellen Verbindlichkeiten** stiegen auf 10,5 Mrd. € (31. Dezember 2009: 9,7) Mrd. € an. Sie umfassen vor allem die Verbindlichkeiten aus Restwertgarantien und aus der Lohn- und Gehaltsabrechnung, die derivativen Finanzinstrumente sowie die Zinsabgrenzungen auf Finanzierungsverbindlichkeiten. Der Anstieg resultierte vor allem aus der Bewertung von Sicherungsgeschäften infolge des schwächeren Euros.

Die **Sonstigen Schulden** in Höhe von 5,4 (31. Dezember 2009: 5,0) Mrd. € beinhalten insbesondere latente Steuern, Steuerverbindlichkeiten und Rechnungsabgrenzungsposten.

Der **Finanzierungsstatus der Pensionsverpflichtungen** als Differenz zwischen dem Barwert der Pensionsverpflichtungen und dem Marktwert der Planvermögen für Pensionen verringerte sich im Vergleich zum Vorjahr um 0,6 Mrd. € auf -6,5 Mrd. €.

Am Bilanzstichtag betrugen die Pensionsverpflichtungen des Konzerns 17,7 Mrd. € gegenüber 16,5 Mrd. € im Vorjahr. Der Anstieg resultierte überwiegend aus der Reduzierung des Diskontierungszinssatzes bei den inländischen Pensionsplänen um 0,3%-Punkte auf 5,0%. Die Fondsvermögen zur Finanzierung der Pensionsverpflichtungen erhöhten sich durch die positive Entwicklung an den Kapitalmärkten und die Zuführungen zu den Planvermögen von 10,6 Mrd. € auf 11,2 Mrd. €.

Weitere Informationen zu Pensionen und ähnlichen Verpflichtungen können der Anmerkung 22 des Konzernanhangs entnommen werden.

Ergänzend zur Berichterstattung über den Daimler-Konzern erläutern wir im Folgenden die Entwicklung der Daimler AG.

Die Daimler AG ist das Mutterunternehmen des Daimler-Konzerns und hat ihren Sitz in Stuttgart. Die Geschäftstätigkeit umfasst im Wesentlichen die Entwicklung, Produktion und den Vertrieb von Pkw, Transportern und Lkw in Deutschland sowie die Steuerung des Daimler-Konzerns.

Die Fahrzeuge werden in den inländischen Werken der Daimler AG, im Rahmen von Contract-Manufacturing-Verträgen bei in- und ausländischen Tochtergesellschaften und bei Spezialfahrzeugherstellern produziert. Der Vertrieb der Daimler AG erfolgt über das eigene Vertriebsnetz mit 34 deutschen Niederlassungen, über die ausländischen Vertriebstochtergesellschaften und über Vertragspartner.

Der Jahresabschluss der Daimler AG wird im Gegensatz zum Konzernabschluss, der im Einklang mit den International Financial Reporting Standards (IFRS) steht, nach deutschem Handelsrecht (HGB) aufgestellt. Daraus resultieren Unterschiede bei den Bilanzierungs- und Bewertungsmethoden. Diese betreffen hauptsächlich die immateriellen Vermögensgegenstände, die Rückstellungen, die Finanzinstrumente und die latenten Steuern.

Der Jahresabschluss 2010 wurde unter erstmaliger Anwendung der Bilanzierungsvorschriften des Bilanzrechtsmodernisierungsgesetzes (BilMoG) aufgestellt.

Die Umstellung auf die neuen Bilanzierungsvorschriften führte im Wesentlichen zur Verrechnung des Planvermögens mit den Pensionsrückstellungen, zu Änderungen im Bereich der Rückstellungsbewertung, der Vorräte und der Fremdwährungsbewertung sowie zu einem geänderten Ausweis der eigenen Anteile.

Das Ergebnis der Daimler AG erhöhte sich durch die Umstellung auf die neuen Bilanzierungsvorschriften nach BilMoG um 254 Mio. €. Die Bilanzsumme reduzierte sich um 7.936 Mio. €.

Die folgende Übersicht leitet die im Jahresabschluss 2009 ausgewiesenen Bilanzansätze auf die »Übergangsbilanz-Werte« nach dem HGB in der Fassung des Bilanzrechtsmodernisierungsgesetzes (HGB n.F.) im Zeitpunkt der Erstanwendung (1. Januar 2010) über.

### Überleitung des Jahresabschlusses 2009 auf die Übergangsbilanzwerte nach BilMoG zum 01.01.2010

|                                                            | 01.01.2010    | Überleitung | 31.12.2009 |
|------------------------------------------------------------|---------------|-------------|------------|
| in Millionen €                                             |               |             |            |
| <b>Aktiva</b>                                              |               |             |            |
| <b>Anlagevermögen</b>                                      | <b>37.637</b> | -7.811      | 45.448     |
| Vorräte                                                    | 5.006         | 134         | 4.872      |
| Forderungen, Wertpapiere und sonstige Vermögensgegenstände | 20.582        | -259        | 20.841     |
| Zahlungsmittel                                             | 2.251         |             | 2.251      |
| <b>Umlaufvermögen</b>                                      | <b>27.839</b> | -125        | 27.964     |
| <b>Rechnungsabgrenzungsposten</b>                          | <b>53</b>     |             | 53         |
|                                                            | <b>65.529</b> | -7.936      | 73.465     |
| <b>Passiva</b>                                             |               |             |            |
| Gezeichnetes Kapital                                       | 2.938         | -107        | 3.045      |
| (Bedingtes Kapital 415 Mio. €)                             |               |             |            |
| Kapitalrücklage                                            | 11.123        |             | 11.123     |
| Gewinnrücklagen                                            | 7.279         | 1.558       | 5.721      |
| Jahresüberschuss                                           | 254           | 254         | 0          |
| <b>Eigenkapital</b>                                        | <b>21.594</b> | 1.705       | 19.889     |
| Rückstellungen für Pensionen und ähnliche Verpflichtungen  | 3.961         | -9.020      | 12.981     |
| Übrige Rückstellungen                                      | 10.624        | -580        | 11.204     |
| <b>Rückstellungen</b>                                      | <b>14.585</b> | -9.600      | 24.185     |
| Verbindlichkeiten aus Lieferungen und Leistungen           | 3.111         | -7          | 3.118      |
| Übrige Verbindlichkeiten                                   | 24.427        | -34         | 24.461     |
| <b>Verbindlichkeiten</b>                                   | <b>27.538</b> | -41         | 27.579     |
| <b>Rechnungsabgrenzungsposten</b>                          | <b>1.812</b>  |             | 1.812      |
|                                                            | <b>65.529</b> | -7.936      | 73.465     |

### Auswirkung der Umstellung auf BilMoG zum 1. Januar 2010 auf die Gewinn- und Verlustrechnung 2010

|                                                          |            |
|----------------------------------------------------------|------------|
| in Millionen €                                           |            |
| Vorratsbewertung                                         | 134        |
| Zeitwertbewertung Planvermögen                           | 38         |
| Zuführung übrige Rückstellungen                          | -12        |
| Fremdwährungsbewertung Vermögensgegenstände und Schulden | 94         |
| <b>Außerordentliches Ergebnis</b>                        | <b>254</b> |

Die Eigenkapitalquote erhöht sich zum 1. Januar 2010 durch die Umstellung auf das HGB n.F. auf 33,0 (zum 31.12.2009: 27,1)%.

## Ertragslage

Die Geschäftsentwicklung im Jahr 2010 war maßgeblich durch die konjunkturelle Erholung der Weltwirtschaft geprägt. Wesentliche Automobilmärkte entwickelten sich positiv und bewegten sich auf insgesamt hohem Niveau. Beim Absatz konnte in allen Bereichen das Vorjahresniveau deutlich übertroffen werden. Nachdem das Vorjahr stark von der Finanz- und Wirtschaftskrise beeinflusst war, stieg das **Ergebnis der gewöhnlichen Geschäftstätigkeit** der Daimler AG im Jahr 2010 auf 5,6 (i. V. -4,4) Mrd. €.

Die Ergebnisverbesserung ist hauptsächlich auf den gestiegenen Fahrzeugabsatz, eine günstigere Absatzstruktur sowie auf das höhere Finanzergebnis zurückzuführen.

Der Umsatz stieg um 15,8 Mrd. € auf 63,0 Mrd. €. Im Bereich Pkw nahm das Geschäftsvolumen absatz- und strukturbedingt um 11,7 Mrd. € auf 46,1 Mrd. € zu. Infolge der weltweiten Erholung der Märkte verzeichnete die Daimler AG auch bei Lkw und Transportern einen deutlichen Umsatzanstieg um 4,1 Mrd. € auf 16,9 Mrd. €.

Der Bereich Pkw erzielte im Berichtsjahr ein deutlich positives Ergebnis. Dies war vor allem auf das hohe Absatzniveau sowie auf einen vorteilhafteren Produkt-Mix zurückzuführen. Eine bessere Preisdurchsetzung wirkte sich zudem positiv auf das Ergebnis aus. Gegenläufig belasteten gestiegene Forschungs- und Entwicklungsaufwendungen das Ergebnis. Der Absatz des Bereichs Pkw erhöhte sich im Berichtsjahr um 21% auf 1.256.000 (i. V. 1.038.000) Einheiten\*. Insbesondere in den USA und China sowie im Oberklasse- und Luxussegment konnten die Fahrzeugabsätze deutlich gesteigert werden. Der Absatz der S-Klasse stieg um 78% auf 84.000 Einheiten der Absatz der E-Klasse um 47% auf 320.000 Einheiten.

Auch das Ergebnis bei Lkw und Transportern lag aufgrund des gestiegenen Absatzes deutlich über dem Niveau des Vorjahres. Der Transporterabsatz erhöhte sich infolge der positiven Marktentwicklung um 39% auf 208.000 Einheiten. Der Absatz bei Lkw erreichte 77.000 (i. V. 53.000) Einheiten\*. Der Anstieg bei Lkw und Transportern betrifft überwiegend die Baureihen Actros (62%), Axor (33%) und Sprinter (50%).

\*Im Absatz der Daimler AG sind auch an Konzerngesellschaften fakturierte Fahrzeuge enthalten, die von den Gesellschaften noch nicht an Konzernritte verkauft wurden. Fahrzeugverkäufe von Produktionsgesellschaften des Daimler-Konzerns sind im Absatz der Daimler AG nicht berücksichtigt.

## Verkürzte Gewinn- und Verlustrechnung der Daimler AG

|                                                     | 31.12.2010   | 31.12.2009 |
|-----------------------------------------------------|--------------|------------|
| in Millionen €                                      |              |            |
| Umsatzerlöse                                        | 63.002       | 47.177     |
| Umsatzkosten (inkl. F&E-Aufwendungen)               | -54.241      | -44.503    |
| Vertriebskosten                                     | -4.907       | -4.389     |
| Allgemeine Verwaltungskosten                        | -2.194       | -2.178     |
| Sonstiges betriebliches Ergebnis                    | 923          | -68        |
| Finanzergebnis                                      | 3.024        | -403       |
| <b>Ergebnis der gewöhnlichen Geschäftstätigkeit</b> | <b>5.607</b> | -4.364     |
| Außerordentliches Ergebnis                          | 254          | -          |
| Steuern vom Einkommen und vom Ertrag                | -462         | -401       |
| <b>Jahresüberschuss/-fehlbetrag</b>                 | <b>5.399</b> | -4.765     |
| Entnahmen aus der Kapitalrücklage                   | -            | 4.765      |
| Einstellung in die Gewinnrücklagen                  | -2.699       | -          |
| <b>Bilanzgewinn</b>                                 | <b>2.700</b> | -          |

Das **Finanzergebnis** verbesserte sich insbesondere aufgrund des höheren Beteiligungsergebnisses um 3,4 Mrd. € auf 3,0 Mrd. €. Der Anstieg des Beteiligungsergebnisses ist hauptsächlich auf höhere Ergebnisbeiträge der in- und ausländischen Tochtergesellschaften der Daimler AG zurückzuführen.

Die **Umsatzkosten** (ohne F&E-Aufwendungen) stiegen im Verhältnis zu den Umsatzerlösen unterproportional um 22,8% auf 50,0 (i. V. 40,7) Mrd. €. Der Anstieg der Umsatzkosten ist im Wesentlichen auf die absatzbedingte Steigerung des Materialaufwands zurückzuführen. Dies zeigt sich insbesondere im Fertigungsmaterial und in den Aufwendungen für bezogene Leistungen.

Die **Forschungs- und Entwicklungskosten**, die in den Umsatzkosten ausgewiesen werden, stiegen von 3,8 Mrd. € auf 4,2 Mrd. €; der Anteil an den Umsatzerlösen verringerte sich von 8,0% auf 6,7%. Der Anstieg der Forschungs- und Entwicklungskosten resultierte überwiegend aus höheren Aufwendungen für bezogene Waren und Leistungen. Ein Schwerpunkt der Forschungs- und Entwicklungsleistungen betraf Maßnahmen zur Verminderung des Kraftstoffverbrauchs und der CO<sub>2</sub>-Emissionen sowie die Entwicklung alternativer Antriebssysteme. Weitere wichtige Projekte bezogen sich auf die Überarbeitung und Erweiterung des Produktportfolios, insbesondere bei der S-/SL-Klasse, der C-Klasse, der A-/B-Klasse und bei smart. Auf Pkw entfallen 3,0 (i. V. 2,8) Mrd. €, auf Lkw und Transporter 1,2 (i. V. 1,0) Mrd. €. Zum Jahresende arbeiteten rd. 16.000 Personen im Forschungs- und Entwicklungsbereich.



Im abgelaufenen Geschäftsjahr erhöhten sich die **Vertriebskosten** auf 4,9 (i. V. 4,4) Mrd. €. Der Anstieg war bedingt durch das gestiegene Geschäftsvolumen und die damit im Zusammenhang stehenden höheren Aufwendungen aus der Forderungsbewertung und Aufwendungen für Ausgangsfrachten. Des Weiteren waren gestiegene Aufwendungen für Informationstechnologie zu verzeichnen.

Die **Verwaltungskosten** lagen mit 2,2 Mrd. € auf dem Niveau des Vorjahres (i. V. 2,2 Mrd. €).

Das **sonstige betriebliche Ergebnis** verbesserte sich um 1,0 Mrd. € auf 0,9 Mrd. €. Hier waren im Vorjahr Aufwendungen im Zusammenhang mit Chrysler und Nachbesserungsansprüche ehemaliger AEG-Aktionäre enthalten.

Im **außerordentlichen Ergebnis** wurden die Erträge und Aufwendungen aus der zum 1. Januar 2010 erfolgten Umstellung auf die neuen Bilanzierungsvorschriften nach BilMoG ausgewiesen.

Der Aufwand aus **Steuern vom Einkommen und vom Ertrag** beträgt 0,5 Mrd. € und ist im Wesentlichen auf die Steuerbelastung für das laufende Jahr zurückzuführen.

## Vermögens- und Finanzlage

Die Ausführungen zu Veränderungen einzelner Positionen beziehen sich auf die übergeleiteten Bilanzwerte zum 1. Januar 2010.

Die **Bilanzsumme** stieg im Vergleich zum 1. Januar 2010 um 17,0% auf 76,7 Mrd. €.

Das **Anlagevermögen** erhöhte sich im Jahresverlauf um 1,5 Mrd. € auf 39,2 Mrd. €. Der Anstieg resultiert hauptsächlich aus dem Anstieg der Anteile an verbundenen Unternehmen und steht maßgeblich im Zusammenhang mit der strategischen Kooperation mit Renault-Nissan. Infolge der gegenseitigen Kapitalbeteiligung erhielt die Daimler AG einen Anteil von 3,1% an Renault und von 3,1% an Nissan. Die Beteiligungen wurden durch die Daimler AG in eine spanische Tochtergesellschaft eingebracht. Die Investitionen in das Sachanlagevermögen (ohne Vermietvermögen, rd. 2,1 Mrd. €) betreffen insbesondere Investitionen in die Produktion des neuen SLK, CLS und des C-Klasse Coupes sowie Investitionen in Aggregate- und Getriebeprojekte im Pkw- und Nutzfahrzeugbereich.

## Bilanzstruktur der Daimler AG

|                                                            | 31.12.2010    | 01.01.2010    | 31.12.2009    |
|------------------------------------------------------------|---------------|---------------|---------------|
| in Millionen €                                             |               |               |               |
| <b>Aktiva</b>                                              |               |               |               |
| Anlagevermögen                                             | 39.151        | 37.637        | 45.448        |
| Vorräte                                                    | 5.574         | 5.006         | 4.872         |
| Forderungen, Wertpapiere und sonstige Vermögensgegenstände | 26.123        | 20.582        | 20.841        |
| Zahlungsmittel                                             | 5.753         | 2.251         | 2.251         |
| <b>Umlaufvermögen</b>                                      | <b>37.450</b> | <b>27.839</b> | <b>27.964</b> |
| <b>Rechnungsabgrenzungsposten</b>                          | <b>99</b>     | <b>53</b>     | <b>53</b>     |
|                                                            | <b>76.700</b> | <b>65.529</b> | <b>73.465</b> |
| <b>Passiva</b>                                             |               |               |               |
| Gezeichnetes Kapital                                       | 3.057         | 2.938         | 3.045         |
| (Bedingtes Kapital 602 Mio. €)                             |               |               |               |
| Kapitalrücklage                                            | 11.321        | 11.123        | 11.123        |
| Gewinnrücklagen                                            | 11.193        | 7.279         | 5.721         |
| Bilanzgewinn                                               | 2.700         | 254           | 0             |
| <b>Eigenkapital</b>                                        | <b>28.271</b> | <b>21.594</b> | <b>19.889</b> |
| Rückstellungen für Pensionen und ähnliche Verpflichtungen  | 4.027         | 3.961         | 12.981        |
| Übrige Rückstellungen                                      | 11.463        | 10.624        | 11.204        |
| <b>Rückstellungen</b>                                      | <b>15.490</b> | <b>14.585</b> | <b>24.185</b> |
| Verbindlichkeiten aus Lieferungen und Leistungen           | 4.334         | 3.111         | 3.118         |
| Übrige Verbindlichkeiten                                   | 27.598        | 24.427        | 24.461        |
| <b>Verbindlichkeiten</b>                                   | <b>31.932</b> | <b>27.538</b> | <b>27.579</b> |
| <b>Rechnungsabgrenzungsposten</b>                          | <b>1.007</b>  | <b>1.812</b>  | <b>1.812</b>  |
|                                                            | <b>76.700</b> | <b>65.529</b> | <b>73.465</b> |

Die **Vorräte** stiegen gegenüber dem 1. Januar 2010 um 0,6 Mrd. € auf 5,6 Mrd. €. Der Anstieg betrifft hauptsächlich fertige Erzeugnisse und steht im Zusammenhang mit dem höheren Produktionsvolumen.

Die **Forderungen, Wertpapiere und sonstige Vermögensgegenstände** stiegen im Vergleich zum 1. Januar 2010 um 5,5 Mrd. € auf 26,1 Mrd. €. Der Zuwachs beruht im Wesentlichen auf einem durch die Finanzierungsfunktion des Mutterunternehmens bedingten Anstieg der Forderungen gegen verbundene Unternehmen (7,8 Mrd. €). Gegenläufig wirkt der Rückgang der Wertpapiere des Umlaufvermögens um 3,2 Mrd. €.

Die **Zahlungsmittel** nahmen um 3,5 Mrd. € auf 5,8 Mrd. € zu.

Die **Bruttoliquidität** – definiert als Zahlungsmittel zuzüglich sonstige Wertpapiere – lag am Bilanzstichtag mit 7,0 Mrd. € um 0,3 Mrd. € über dem Niveau des Vorjahres. Der **Cash Flow aus der Geschäftstätigkeit** belief sich im Geschäftsjahr 2010 auf 6,7 (i. V. 3,3) Mrd. €. Die positiven Einflüsse aus dem deutlich verbesserten operativen Ergebnis und dem Beteiligungsergebnis wurden durch höhere Forderungen aus dem konzerninternen Lieferungs- und Leistungsverkehr teilweise kompensiert. Darüber hinaus erhöht sich der Cash Flow der Geschäftstätigkeit durch den absatz- und produktionsbedingten Anstieg der Verbindlichkeiten aus Lieferungen und Leistungen. Aus dem **Cash Flow aus der Investitionstätigkeit** ergab sich im Geschäftsjahr 2010 ein Mittelzufluss in Höhe von 0,4 (i. V. Mittelabfluss 5,1) Mrd. €. Dieser resultiert überwiegend aus dem Verkauf von Wertpapieren des Umlaufvermögens. Gegenläufig wirken die Investitionen in das Sachanlagevermögen. Aus dem **Cash Flow aus der Finanzierungstätigkeit** ergab sich im Berichtszeitraum ein Mittelabfluss in Höhe von 3,6 (i. V. Mittelzufluss 3,3) Mrd. €.

Dieser ist insbesondere auf den Anstieg der konzerninternen Finanzforderungen zurückzuführen. Die Aufnahme von Finanzmitteln erhöhte dagegen den Cash Flow aus der Finanzierungstätigkeit.

Das **Eigenkapital** erhöhte sich gegenüber dem 1. Januar 2010 um 6,7 Mrd. €. Die Veränderung steht hauptsächlich im Zusammenhang mit dem Jahresüberschuss, von dem gemäß § 58 Abs. 2 AktG 2,7 Mrd. € den Gewinnrücklagen zugeführt wurden, sowie mit der strategischen Kooperation mit Renault-Nissan. Die Gewinnrücklagen erhöhten sich durch die Ausgabe eigener Anteile an die Renault S.A. und die Nissan Motor Co. Ltd. um 1,1 Mrd. €. Die Eigenkapitalquote liegt bei 36,9% (zum 1. Januar 2010: 33,0%).

Die **Rückstellungen** stiegen im Vergleich zum 1. Januar 2010 um 0,9 Mrd. € auf 15,5 Mrd. €. Dies war hauptsächlich auf Verpflichtungen im Personal- und Sozialbereich sowie auf Rückstellungen für derivative Finanzinstrumente zurückzuführen.

Die **Verbindlichkeiten** sind um 4,4 Mrd. € auf 31,9 Mrd. € (1. Januar 2010: 27,5 Mrd. €) gestiegen. Die Veränderung ist vor allem bedingt durch die Zunahme der Anleihen und Schuldverschreibungen (+2,1 Mrd. €), der Verbindlichkeiten aus Lieferungen und Leistungen (+1,2 Mrd. €) sowie der Finanzverbindlichkeiten gegenüber verbundenen Unternehmen (+0,9 Mrd. €).

## Risiken und Chancen

Die Geschäftsentwicklung der Daimler AG unterliegt im Wesentlichen den gleichen Risiken und Chancen wie die des Daimler-Konzerns. An den Risiken der Beteiligungen und Tochterunternehmen partizipiert die Daimler AG grundsätzlich entsprechend ihrer jeweiligen Beteiligungsquote. Aus den Beziehungen zu unseren Beteiligungen können zusätzlich aus gesetzlichen oder vertraglichen Haftungsverhältnissen (insbesondere Finanzierungen) Belastungen resultieren. Die Risiken werden im Risikobericht dargestellt.

## Ausblick

Aufgrund der Verflechtungen der Daimler AG mit den Konzerngesellschaften und ihres Gewichts im Konzern verweisen wir auf unsere Aussagen im Kapitel »Ausblick«, die im Wesentlichen auch die Erwartungen für die Muttergesellschaft widerspiegeln. Die Daimler AG erwartet für das Jahr 2011 ein geringeres, jedoch weiterhin deutlich positives Jahresergebnis. Mittelfristig wird von weiter steigenden Jahresergebnissen ausgegangen.

Die Geschäfte von Daimler haben sich im Berichtsjahr insgesamt deutlich besser entwickelt als zu Beginn des Jahres erwartet. Daimler ist gestärkt und mit großer Dynamik aus der weltweiten Finanz- und Wirtschaftskrise hervorgegangen. Wir haben die Jahre 2009 und 2010 genutzt, um die Effizienz deutlich zu steigern und unsere Kostenbasis nachhaltig zu verbessern. Gleichzeitig profitieren wir nun von der Tatsache, dass wir unsere Projekte für die Zukunftssicherung auch über die Finanz- und Wirtschaftskrise hinweg zielgerichtet weiterverfolgt haben. Daher können wir nun mit einer Vielzahl neuer und attraktiver Produkte und richtungweisenden Technologien in den Märkten überzeugen. Darüber hinaus hat sich unser langfristiges und umfangreiches Engagement in Märkten wie China, Indien, Brasilien und Russland gerade im Berichtsjahr bezahlt gemacht – dies nicht zuletzt deshalb, weil die Erholung der weltweiten Automobilnachfrage nicht von unseren etablierten Märkten, sondern von den Wachstumsmärkten in Asien und Lateinamerika getragen wurde.

Vor diesem Hintergrund haben alle Automobilgeschäftsfelder von Daimler den Absatz im Jahr 2010 deutlich gesteigert. Dabei erreichten Mercedes-Benz Cars und Daimler Buses bereits wieder die Größenordnung des Jahres 2008. Daimler Trucks und Mercedes-Benz Vans erzielten trotz der nur zögerlichen Aufwärtsentwicklung der Nutzfahrzeugmärkte zweistellige Wachstumsraten, blieben aber noch hinter den Rekordwerten aus den Jahren vor der Krise zurück. Der Umsatz von Daimler erhöhte sich noch stärker als der Absatz – um 24% auf 97,8 Mrd. €. Dies ist unter anderem auch darauf zurückzuführen, dass sich die Absatzstruktur bei Mercedes-Benz Cars aufgrund des Markterfolgs der neuen E-Klasse Modelle und der S-Klasse zugunsten höherwertiger Fahrzeuge verändert hat.

Besonders deutlich war die Trendwende beim Ergebnis: Nach dem Verlust im Vorjahr haben wir im Jahr 2010 ein EBIT von 7,3 Mrd. € und ein Konzernergebnis von 4,7 Mrd. € erwirtschaftet. Den größten Beitrag hierzu leistete Mercedes-Benz Cars. Die Geschäftsfelder Daimler Trucks und Mercedes-Benz Vans haben das EBIT jeweils deutlich gesteigert. Auch bei Daimler Buses lag das Ergebnis über dem Vorjahresniveau, und das EBIT von Financial Services erreichte mit 831 (i. V. 9) Mio. € ein sehr hohes Niveau.

Aufgrund der günstigen Ergebnisentwicklung haben sich unsere finanzwirtschaftlichen Kennziffern im Jahr 2010 deutlich verbessert. So stieg die Eigenkapitalquote im Konzern von 24,7% auf 26,5% und im Industriegeschäft von 42,6% auf 45,8%. Der Free Cash Flow aus dem Industriegeschäft – die von uns verwendete Messgröße für die Finanzkraft – erhöhte sich um 2,7 Mrd. € auf 5,4 Mrd. € im Jahr 2010. Dies hat dazu geführt, dass sich auch die Nettoliquidität unseres Industriegeschäfts im Jahresverlauf von 7,3 auf 11,9 Mrd. € verbessert hat.

Nachdem wir im vergangenen Jahr angesichts des negativen Konzernergebnisses auf die Ausschüttung einer Dividende verzichtet haben, wollen wir unsere Aktionäre nun wieder in angemessener Form am Unternehmenserfolg beteiligen. Dabei orientieren wir uns an einer Ausschüttungsquote in der Größenordnung von rund 40% des auf die Daimler-Aktionäre entfallenden Konzernergebnisses. Auf dieser Basis haben Vorstand und Aufsichtsrat entschieden, der Hauptversammlung am 13. April 2011 die Ausschüttung einer Dividende von 1,85 € pro Aktie vorzuschlagen. Dies entspricht einer Ausschüttungssumme von 1.971 Mio. €.

Auf die Herausforderungen der kommenden Jahre sind wir gut vorbereitet.

Ausgehend von einer soliden finanziellen Basis treiben wir unsere Forschungs- und Entwicklungsarbeit verstärkt voran. So werden wir im Planungszeitraum 2011 bis 2012 insgesamt 10,3 Mrd. € für Forschungs- und Entwicklungsaktivitäten einsetzen. Dabei verfolgen wir das Ziel, die Wettbewerbsposition von Daimler vor dem Hintergrund der anstehenden technologischen Herausforderungen auszubauen. Insbesondere mit innovativen Lösungen für eine emissionsarme und sichere Mobilität wollen wir im Markt überzeugen.

Auch unsere Sachinvestitionen werden wir in den Jahren 2011 und 2012 mit einem Volumen von insgesamt mehr als 10 Mrd. € deutlich erhöhen. Im Vordergrund stehen dabei die Vorbereitungen für unsere zahlreichen Produktanläufe sowie der Ausbau und die Modernisierung der Produktionsstätten. Zur Erschließung der Märkte in den Schwellenländern investieren wir verstärkt in lokale Produktionskapazitäten, insbesondere in China, Indien und Russland. Nur über eine ausreichende Präsenz vor Ort können wir sicherstellen, dass wir vom künftigen Wachstum dieser Märkte profitieren.

Daimler ist ein finanziell gesundes, ein starkes und vor allem ein innovatives Unternehmen. In das Jahr 2011 gehen wir deshalb mit großer Zuversicht.

## Ereignisse nach Ablauf des Geschäftsjahres 2010

Über die im Abschluss berücksichtigten beziehungsweise berichteten Ereignisse hinausgehend sind nach Ablauf des Geschäftsjahres 2010 keine Ereignisse eingetreten, die für Daimler von wesentlicher Bedeutung sind. Der Geschäftsverlauf in den ersten beiden Monaten des Jahres 2011 bestätigt die im Kapitel »Ausblick« getroffenen Aussagen.



## Risiken und Chancen

Die Geschäftsfelder von Daimler sind einer Vielzahl von Risiken ausgesetzt, die untrennbar mit dem unternehmerischen Handeln verbunden sind. Um Risiken frühzeitig zu erkennen, zu bewerten und konsequent zu handhaben, setzen wir wirksame Steuerungs- und Kontrollsysteme ein; diese haben wir zu einem einheitlichen Risikomanagementsystem zusammengefasst, das nachfolgend dargestellt ist.

Unternehmerisches Handeln besteht auch darin, Chancen zu erschließen und zu nutzen und so die Wettbewerbsfähigkeit des Unternehmens zu sichern und auszubauen. Unternehmerische Chancen werden nicht innerhalb unseres Risikomanagementsystems berichtet; sie werden in der jährlich zu erstellenden Operativen Planung erfasst und unterjährig im Rahmen der periodischen Berichterstattung verfolgt. Die direkte Verantwortung, Chancen frühzeitig zu identifizieren und zu realisieren, liegt bei den Geschäftsfeldern. Im Rahmen des Strategieprozesses werden längerfristig die Chancen für weiteres profitables Wachstum ermittelt und in den Entscheidungsprozess eingebracht. Weitere Aussagen hierzu enthalten die Ausführungen auf Seite 117 des Lageberichts.

## Risikomanagementsysteme

(Bericht und Erläuterungen gemäß § 315 Absatz 2 Nr. 5 und § 289 Abs. 5 HGB)

Das **Risikomanagementsystem im Hinblick auf wesentliche und bestandsgefährdende Risiken** ist in das wertorientierte Führungs- und Planungssystem der Daimler AG und des Konzerns eingebettet. Es ist integraler Bestandteil des gesamten Planungs-, Steuerungs- und Berichterstattungsprozesses in allen relevanten rechtlichen Einheiten, Geschäftsfeldern und Zentralfunktionen. Es zielt darauf ab, wesentliche und bestandsgefährdende Risiken systematisch zu identifizieren, zu beurteilen, zu kontrollieren und zu dokumentieren. Die Risikoeinschätzung erfolgt prinzipiell für einen zweijährigen Planungszeitraum, wenngleich Daimler in den Diskussionen zur Ableitung der mittelfristigen und strategischen Ziele auch längerfristige Risiken identifiziert und überwacht. Im Rahmen der zweijährigen Operativen Planung werden, unter Berücksichtigung definierter Risikokategorien, Risiken der Geschäftsfelder und der operativen Einheiten, der bedeutenden Gemeinschaftsunternehmen und assoziierten Unternehmen sowie der zentralen Bereiche identifiziert und bezüglich ihrer Eintrittswahrscheinlichkeit und Schadenshöhe bewertet.

Die Bewertung der Schadenshöhe erfolgt in der Regel mit Blick auf die Auswirkungen der Risiken auf das EBIT. Darüber hinaus werden beispielsweise Risiken mit Auswirkungen auf die Reputation des Konzerns nach qualitativen Kriterien bewertet. Die Berichterstattung über relevante Risiken orientiert sich an festgelegten Wertgrenzen. Aufgabe der Verantwortlichen ist es auch, Maßnahmen zu entwickeln und gegebenenfalls zu initiieren, die dazu dienen, Risiken zu vermeiden, zu reduzieren oder sich gegen diese abzusichern. Im Rahmen unterjähriger Prozesse werden die wesentlichen Risiken sowie eingeleitete Gegenmaßnahmen überwacht. Zusätzlich zur Regelberichterstattung gibt es für unerwartet auftretende Risiken eine konzerninterne Berichterstattungspflicht. Das zentrale Risikomanagement berichtet regelmäßig über die identifizierten Risiken an Vorstand und Aufsichtsrat.

## Das interne Kontroll- und Risikomanagementsystem im Hinblick auf den Rechnungslegungsprozess

Das **interne Kontroll- und Risikomanagementsystem im Hinblick auf den Rechnungslegungsprozess** hat zum Ziel, die Ordnungsmäßigkeit und Wirksamkeit der Rechnungslegung und Finanzberichterstattung sicherzustellen. Es wird kontinuierlich weiterentwickelt und ist integraler Bestandteil der Rechnungslegungs- und Finanzberichterstattungsprozesse in allen relevanten rechtlichen Einheiten und Zentralfunktionen. Das System beinhaltet Grundsätze, Verfahren sowie präventive und aufdeckende Kontrollen. Unter anderem prüfen wir regelmäßig, dass

- konzerneinheitliche Bilanzierungs-, Bewertungs- und Kontierungsvorgaben fortlaufend aktualisiert und regelmäßig geschult sowie eingehalten werden;
- konzerninterne Transaktionen vollständig erfasst und sachgerecht eliminiert werden;
- bilanzierungsrelevante und angabepflichtige Sachverhalte aus getroffenen Vereinbarungen erkannt und entsprechend abgebildet werden;
- Prozesse existieren, die die Vollständigkeit der Finanzberichterstattung gewährleisten;
- Prozesse zur Funktionstrennung und zum Vier-Augen-Prinzip im Rahmen der Abschlusserstellung sowie Autorisierungs- und Zugriffsregelungen bei relevanten IT-Rechnungslegungssystemen bestehen.

Die Wirksamkeit des internen Kontroll- und Risikomanagementsystems im Hinblick auf den Rechnungslegungsprozess wird systematisch bewertet. Zunächst erfolgen eine Risikoanalyse und eine Kontrolldefinition. Dabei identifizieren wir bedeutende Risiken im Hinblick auf die Rechnungslegungs- und Finanzberichterstattungsprozesse in den wesentlichen rechtlichen Einheiten und Zentralfunktionen. Die für die Identifizierung der Risiken notwendigen Kontrollen werden daraufhin definiert und gemäß den konzernweiten Vorgaben dokumentiert. Um die Wirksamkeit der Kontrollen zu beurteilen, führen wir regelmäßig Tests auf Basis von Stichproben durch. Diese bilden die Grundlage für eine Selbsteinschätzung, ob die Kontrollen angemessen ausgestaltet und wirksam sind. Die Ergebnisse dieser Selbsteinschätzung werden in einem globalen IT-System dokumentiert und berichtet; erkannte Kontrollschwächen werden unter Beachtung ihrer potenziellen Auswirkungen behoben. Die ausgewählten rechtlichen Einheiten und Zentralfunktionen bestätigen am Ende des jährlichen Zyklus die Effektivität des internen Kontroll- und Risikomanagementsystems im Hinblick auf den Rechnungslegungsprozess. Der Vorstand und der Prüfungsausschuss des Aufsichtsrats werden regelmäßig über wesentliche Kontrollschwächen sowie die Wirksamkeit der eingerichteten Kontrollen informiert. Das interne Kontroll- und Risikomanagementsystem im Hinblick auf den Rechnungslegungsprozess kann jedoch keine absolute Sicherheit bieten, dass wesentliche Falschaussagen in der Rechnungslegung vermieden werden.

Zur Sicherstellung einer **gesamtheitlichen Risikodarstellung und -würdigung** sowohl der wesentlichen und bestandsgefährdenden Risiken als auch der Kontroll- und Risikoprozesse im Hinblick auf den Rechnungslegungsprozess hat Daimler das Group Risk Management Committee (GRMC) eingerichtet. Es setzt sich aus Vertretern der Bereiche Finanzen & Controlling, Rechnungswesen, Recht und Compliance zusammen und wird vom Finanzvorstand geleitet. Die Interne Revision bringt wesentliche Feststellungen über das interne Kontroll- und Risikomanagementsystem mit ein. Das Gremium befasst sich mit Grundsatzfragen sowie mit den nachfolgenden Aufgaben:

- Das GRMC schafft und gestaltet die Rahmenbedingungen hinsichtlich der Organisation, Methoden, Prozesse und Systeme, die wir benötigen, um ein funktionsfähiges konzernweites und gesamtheitliches Kontroll- und Risikomanagementsystem sicherzustellen.

- Das GRMC überprüft regelmäßig die Wirksamkeit und Funktionsfähigkeit der installierten Kontroll- und Risikomanagementprozesse. Dabei können Mindestanforderungen hinsichtlich der Ausgestaltung der Kontrollprozesse und des Risikomanagements vorgegeben sowie erforderliche und angemessene Korrekturmaßnahmen zur Beseitigung eventuell festgestellter Systemmängel oder -schwächen beauftragt werden. Die Verantwortung für das operative Risikomanagement der bestandsgefährdenden Risiken sowie der Kontroll- und Risikomanagementprozesse im Hinblick auf den Rechnungslegungsprozess verbleibt jedoch direkt in den Konzernbereichen, Gesellschaften und Zentralfunktionen. Die Maßnahmen des GRMC stellen sicher, dass relevante Risiken und gegebenenfalls bestehende Prozessschwächen im Rechnungslegungsprozess frühestmöglich identifiziert und beseitigt werden.

Im Vorstand und im Prüfungsausschuss des Aufsichtsrats der Daimler AG wird regelmäßig über die aktuelle Risikosituation sowie über die Wirksamkeit, Funktionsweise und Angemessenheit des internen Kontroll- und Risikomanagementsystems berichtet. Ferner werden Risiken aus dem operativen Geschäft durch die Verantwortlichen regelmäßig im Vorstand diskutiert.

Die **Überwachung des internen Kontroll- und Risikomanagementsystems** obliegt dem Prüfungsausschuss des Aufsichtsrats. Die Interne Revision prüft, ob die gesetzlichen Rahmenbedingungen und konzerninternen Richtlinien für das gesamte Kontroll- und Risikomanagementsystem des Konzerns eingehalten werden, und entwickelt bei Bedarf entsprechende Maßnahmen, die vom Management initiiert werden. Der Abschlussprüfer prüft das in das Risikomanagementsystem integrierte Risikofrüherkennungssystem auf seine grundsätzliche Eignung, bestandsgefährdende Risiken frühzeitig zu erkennen; zudem berichtet er dem Aufsichtsrat über wesentliche festgestellte Schwächen des internen Kontroll- und Risikomanagementsystems.

## Volkswirtschaftliche Risiken

Die **Weltwirtschaft** konnte im ersten Jahr nach der tiefsten Rezession der Nachkriegszeit eine relativ kräftige Erholung aufweisen. Allerdings schwächte sich die globale Dynamik zur Jahresmitte 2010 ab. Gleichzeitig nahmen die Sorgen um einen neuerlichen konjunkturellen Einbruch (»double dip«) zu. Die Weltwirtschaft ist daher weiterhin sehr fragil und anfällig für externe Störungen. Wir sehen die größten Einzelrisiken für das laufende Jahr 2011 in erneuten Finanzmarkturbulenzen (einschließlich Währungsrisiken), in der sich weiter verschärfenden Verschuldungsproblematik der öffentlichen Haushalte, einem Wachstumseinbruch in China, in hohen Preisvolatilitäten auf den Rohstoffmärkten, in aufkeimendem Protektionismus sowie möglichen destabilisierenden Effekten einer zu expansiven Geldpolitik. Die für das Jahr 2011 von der Mehrzahl der Wirtschaftsforschungsinstitute und auch von Daimler unterstellte Entwicklung der Weltwirtschaft ist maßgeblich von Änderungen dieser Risikofaktoren abhängig. Aber erst bei einem Eintritt einiger dieser Faktoren wäre es möglich, dass die Weltwirtschaft nochmals eine rezessive Phase erfährt. Damit bestehen weiterhin beträchtliche ökonomisch bedingte Risiken für die Vermögens-, Finanz- und Ertragslage von Daimler.

Ein zentrales Thema im Jahr 2010 war die **Verschuldung der öffentlichen Haushalte in der Triade**, die im Zuge der Rezession und der eingeleiteten, teilweise beträchtlichen Konjunkturprogramme stark angestiegen ist. Dieses Problem wird im Jahr 2011 nicht nur die konjunkturellen Perspektiven dämpfen, sondern könnte zudem die Finanzmärkte erheblich beeinträchtigen. Dies gilt insbesondere für das Risiko eines Staatsbankrotts; aus der Perspektive der Finanzmärkte ist dieses Risiko für einige europäische Länder auch nach dem durch die Europäische Union und den International Monetary Fund (IMF) installierten Rettungsschirm nicht beseitigt. Das große Risiko besteht darin, dass nach Griechenland und Irland weitere Länder in Refinanzierungsnöte kommen bzw. gebracht werden könnten. Die Folgen davon wären noch höhere Volatilitäten auf den Finanzmärkten, ein spürbarer Abwertungsdruck auf den Euro sowie einschneidende Konsolidierungsmaßnahmen zur Verringerung der öffentlichen Defizite. Diese Austeritätsbemühungen könnten so strikt ausfallen, dass die Nachfrage in den betroffenen Ländern merklich einbricht und eine rezessive Phase folgt. Ein weiteres Risiko könnte darin bestehen, dass nach den Ländern der Eurozone auch andere hoch verschuldete Länder in den Fokus der Finanzmärkte geraten.

Die Notenbanken hatten im Zuge der Krisenbewältigung auf eine teilweise stark **expansive Geldpolitik** gesetzt. Dies gilt insbesondere für die USA sowie für Großbritannien. Angesichts der eher zögerlichen konjunkturellen Erholung wurde im Herbst 2010 in den USA eine neuerliche Ausweitung der Geldmenge angekündigt. Je weiter allerdings der konjunkturelle Erholungsprozess fortschreitet, umso größer wird das Risikopotenzial einer dann vorhandenen Überschussliquidität, insbesondere was mögliche neue Blasenbildungen oder eine höhere Inflation betrifft. Auch die Rückkoppelungen einer expansiven Geldpolitik auf die globalen Wechselkurskonstellationen sind mit entsprechenden Risiken behaftet.

Die **US-amerikanische Wirtschaft** befand sich zum Jahresende 2010 auf einem vergleichsweise verhaltenen Erholungskurs. Der Aufschwung blieb über weite Strecken zu schwach, um für eine Entlastung auf dem Arbeitsmarkt zu sorgen, weshalb die Arbeitslosigkeit bis zuletzt für US-amerikanische Verhältnisse ungewöhnlich hoch blieb. Sollte sich die Arbeitslosigkeit nicht zumindest ansatzweise verbessern bzw. sogar eventuell weiter verschlechtern, würde das den privaten Konsum massiv beeinträchtigen. Hinzu kommen die Risiken aus dem Immobiliensektor; falls sich dieser weiterhin schwach entwickelt, könnte dies die Vermögenspositionen von Privathaushalten und Banken zusätzlich unter Druck bringen. Ein weiteres Risiko für die US-Konjunktur besteht trotz üppiger Ausweitung der Geldmenge in einer unzureichenden Kreditversorgung. Dies wäre vor allem dann der Fall, wenn die Geschäftsbanken das Kreditvolumen massiv einschränken würden, um selbst ihre Risikopositionen zu vermindern bzw. ihre Bilanzrelationen zu verbessern. In einem solchen Szenario würde die Investitionstätigkeit belastet werden, ohne deren Erholung aber keine nachhaltige Entlastung auf dem Arbeitsmarkt einsetzen kann. Die Folgen davon wären ein noch schwächeres Wachstum des Bruttoinlandsprodukts und möglicherweise eine noch stärkere geldpolitische Expansion. Eine solch ungünstige gesamtwirtschaftliche Entwicklung würde angesichts der hohen Bedeutung der US-Wirtschaft auch für die Weltkonjunktur entsprechend negative Konsequenzen haben. Die USA haben außerdem weiterhin ein relativ hohes Leistungsbilanzdefizit und bleiben damit auf den Kapitalzufluss von außen angewiesen. Eine mögliche – und mittelfristig auch unvermeidliche – Korrektur des außenwirtschaftlichen Defizits könnte die Inlandsnachfrage belasten und eine Abwertung des US-Dollars nach sich ziehen. Diese Abwertung könnte zusätzlich durch massive Umschichtungen bei den globalen Währungsreserven verstärkt werden. In Summe würden sich all diese Ereignisse sowohl auf die Pkw- als auch auf die Nutzfahrzeugnachfrage negativ auswirken.

Von wenigen Ausnahmen wie beispielsweise Deutschland oder Schweden abgesehen, war die konjunkturelle Erholung in **Westeuropa** bislang eher verhalten. Die größten Risiken für die weitere Entwicklung gehen auch hier vom Finanzmarkt sowie von der Konsolidierung der öffentlichen Haushalte aus. Insbesondere die Länder der Eurozone könnten aufgrund der anhaltenden Diskussion um Refinanzierungssorgen, Staatsbankrott und Bankenprobleme unter Druck geraten. Da schon im Basisszenario ein erhebliches Wachstumsgefälle innerhalb Westeuropas besteht, könnte sich dieses noch ausweiten und somit die Spannungen vergrößern. Im bisherigen Konjunkturverlauf waren Kreditnachfrage und -versorgung eher enttäuschend. Sollte sich hier eine spürbare Verknappung der Kreditvolumina einstellen, dann wäre dies vor allem für die klein- und mittelständischen Unternehmen eine große Belastung. Die Fortsetzung des konjunkturellen Erholungsprozesses könnte gefährdet werden und sich in der Folge ein neuer Schub von Insolvenzen ergeben. Davon könnten unter anderem auch die Kraftfahrzeughändler und Automobilzulieferer betroffen sein. Ferner besteht das Risiko, dass sowohl privater Konsum als auch Unternehmensinvestitionen wesentlich schwächer ausfallen als unterstellt. Dies hätte entsprechend negative Konsequenzen für die Automobilnachfrage. Aufgrund der Bedeutung Deutschlands und der übrigen Länder Westeuropas als wichtige Absatzmärkte für den Daimler-Konzern liegt darin ein beträchtliches Risikopotenzial.

Für **Japan** gilt ein ähnliches konjunkturelles Grundmuster. Die gesamtwirtschaftliche Zuwachsrate fiel für das Gesamtjahr 2010 zwar relativ kräftig aus, allerdings schwächte sich die Dynamik schon in der zweiten Jahreshälfte merklich ab. Ein besonderer Belastungsfaktor war dabei die Aufwertung des Yens. Sollte dieser dauerhaft stark bleiben bzw. an Wert gewinnen, würde die japanische Konjunktur noch mehr unter Druck geraten. Die immens gestiegene Staatsverschuldung und die für japanische Verhältnisse hohe Arbeitslosigkeit bergen ein weiteres, nicht zu unterschätzendes Risikopotenzial. Ungünstigere konjunkturelle Perspektiven in Japan würden nicht nur den Export von Produkten des Konzerns dorthin erheblich belasten, sondern auch die Ergebnisentwicklung unserer operativen Einheiten in Japan beeinträchtigen.

Von wirtschaftlicher und strategischer Bedeutung für Daimler wäre zudem ein länger anhaltender Wachstumseinbruch in China. In **China** kamen im Verlauf des vergangenen Jahres immer wieder Sorgen um eine Investitions- und Immobilienblase auf. Ferner geriet in der zweiten Jahreshälfte 2010 durch gestiegene Nahrungsmittelpreise die Inflationsrate unter Druck, was bei längerer Dauer die soziale Stabilität gefährden könnte. Ein merklich geringeres Wachstum in China würde auch spürbare Einbußen für die Weltwirtschaft nach sich ziehen und damit die Aktivitäten von Daimler beeinträchtigen. Risiken für die Nachfrageentwicklung können zudem von Maßnahmen ausgehen, die zur Vermeidung von Überhitzungstendenzen eingesetzt werden (z.B. regionale Zulassungsbeschränkungen), insbesondere wenn diese sehr umfassend oder stringent ausfallen. Des Weiteren könnten mögliche Wirtschaftskrisen in den Schwellenländern, in denen der Konzern wichtige Produktionsstätten unterhält, von besonderer Bedeutung sein. Ein eher begrenztes Risikopotenzial würde sich dagegen aus Krisen in Schwellenländern ergeben, in denen Daimler ausschließlich über den Vertrieb seiner Produkte aktiv ist.

Risiken sehen wir auch in der Entwicklung der **Rohstoffpreise**. Sollten die Preise erneut stark ansteigen und sich noch mehr von den fundamental gerechtfertigten Niveaus entfernen, wäre der angenommene konjunkturelle Ausblick der Weltwirtschaft gefährdet. Die Rohstoffmärkte haben bisher schon einen Teil der überschüssigen Liquidität aufgenommen, und bei Fortsetzung der expansiven Geldpolitik drohen hier spekulative Blasen. Insgesamt würde hieraus eine Belastung des Wachstums insbesondere in den rohstoffimportierenden Ländern resultieren. Dagegen bergen rückläufige Rohstoffpreise für die rohstoffexportierenden Schwellenländer erhebliche Risiken für deren Wachstumsausichten.



Risiken für den Marktzugang und die globale Vernetzung von Standorten könnten sich aus einer **Schwächung des internationalen Freihandels** zugunsten regionaler Handelsblöcke oder verstärkter protektionistischer Tendenzen ergeben. Letztere könnten insbesondere aus einem Abwertungswettlauf resultieren, der Ergebnis der unzureichenden Anpassung der Wechselkurse und des Anstiegs spekulativer Kapitalbewegungen ist. Auch die Zunahme von bilateralen Freihandelsabkommen außerhalb der Europäischen Union könnte die Position von Daimler in wichtigen ausländischen Märkten beeinträchtigen.

Die Weltwirtschaft könnte schließlich durch eine dauerhafte Belastung der **Konsumenten- und Investorenstimmung** sowie durch anhaltende deflationäre, aber auch inflationäre Tendenzen negativ beeinflusst werden. Auslöser hierfür könnten zusätzlich zu den Finanzmarktp Problemen geopolitische und militärische Instabilitäten sein. Dazu gehören auch die jüngsten Ereignisse im nördlichen Afrika, die durchaus das Potenzial für weit über die Region hinausgehende Implikationen in sich bergen. Neben den möglichen Auswirkungen auf die Rohstoffpreise würde vor allem ein Übergreifen der politischen Instabilität auf andere Länder bzw. Regionen nicht nur die regionalen, sondern auch die globalen Konjunkturperspektiven eintrüben.

#### Branchen- und unternehmensspezifische Risiken

**Allgemeine Marktrisiken.** Wenngleich sich die Weltwirtschaft im Jahr 2010 kräftig erholte, bestehen weiterhin beträchtliche ökonomisch bedingte Risiken für die wirtschaftliche Entwicklung auf den Automobilmärkten. Zudem hält der **Wettbewerbsdruck auf den Automobilmärkten** unverändert an. Die Kunden haben sich zwischenzeitlich an ein bestimmtes Niveau von **absatzunterstützenden Maßnahmen** gewöhnt. Sollte sich der Wettbewerbsdruck auf den Automobilmärkten weiter erhöhen, gegebenenfalls auch ausgelöst durch eine erneute Eintrübung der weltwirtschaftlichen Entwicklung, könnte dies dazu führen, dass absatzfördernde Finanzierungsangebote und Kaufanreize erneut verstärkt eingesetzt werden. Dies würde nicht nur die Erträge des Neufahrzeuggeschäfts belasten, sondern auch zu niedrigeren Preisniveaus auf den Gebrauchtwagenmärkten und damit zu abnehmenden Fahrzeugrestwerten führen. In vielen Märkten ist weiterhin eine Tendenz im Nachfrageverhalten hin zu kleineren, verbrauchsgünstigeren Fahrzeugen zu verzeichnen; dies ist die Folge einer stark gestiegenen Sensibilität der Kunden hinsichtlich der Umweltfreundlichkeit der Fahrzeuge und der Kraftstoffpreisentwicklung. Um die Attraktivität von weniger verbrauchs-günstigen Fahrzeugen zu steigern, könnten ebenfalls zusätzliche ergebnisbelastende Maßnahmen notwendig werden. Dies sowie die Verschiebung im Modell-Mix hin zu kleineren, renditeschwächeren Fahrzeugen würde die Vermögens-, Finanz- und Ertragslage des Konzerns belasten.

Infolge des Wettbewerbsdrucks auf den Automobilmärkten ist es unerlässlich, dass wir unsere **Produktions- und Kostenstrukturen** laufend und erfolgreich an sich verändernde Rahmenbedingungen anpassen. Sollte uns das nicht gelingen, würde sich dies auf die Wettbewerbsfähigkeit des Konzerns auswirken und könnte erneut kostenintensive Restrukturierungsmaßnahmen auslösen.

Die vergangenen Krisenjahre haben nicht zuletzt auch dazu geführt, dass sich die **wirtschaftliche Lage einiger Zulieferer, Händler- und Fahrzeugimporteure** verschlechterte. Insofern können einzelne oder gemeinschaftliche Stützungsmaßnahmen seitens der Fahrzeughersteller weiterhin nicht ausgeschlossen werden, die die Vermögens-, Finanz- und Ertragslage von Daimler belasten würden.

**Risiken im Zusammenhang mit dem Leasing- und Absatzfinanzierungsgeschäft.** Das Finanzdienstleistungsgeschäft von Daimler umfasst im Wesentlichen die Finanzierung und das Leasing von Konzernprodukten. Damit verbunden ist insbesondere das Risiko, dass die bei Ablauf der Leasingverträge erzielbaren Gebrauchtfahrzeugpreise unterhalb der Buchwerte des Leasingvermögens liegen (Restwertrisiko). Ferner ist dem Financial-Services-Geschäft das Risiko inhärent, dass die Forderungen aus dem Finanzdienstleistungsgeschäft aufgrund von Zahlungsausfällen der Kunden teilweise uneinbringlich werden (Kreditrisiko). Weitere Risiken im Zusammenhang mit dem Leasing- und Absatzfinanzierungsgeschäft betreffen mögliche höhere Refinanzierungskosten sowie potenzielle Zinsänderungen. Bei einer Anpassung der Kreditkonditionen für Kunden im Leasing- und Absatzfinanzierungsgeschäft infolge höherer Refinanzierungskosten könnten sich das Neugeschäft und das Vertragsvolumen von Daimler Financial Services und damit auch der Absatz der Fahrzeugsegmente verringern. Daimler begegnet den Restwert- und Kreditrisiken mit entsprechenden Marktanalysen und Bonitätsprüfungen. Zur Absicherung der Zinsänderungsrisiken werden derivative Finanzinstrumente eingesetzt. Weitere Informationen zum Kreditrisiko und zu den risikobegrenzenden Maßnahmen des Konzerns können der Anmerkung 31 des Konzernanhangs entnommen werden.

**Produktions- und Technologierisiken.** Bei der Durchsetzung eines angestrebten Preisniveaus spielen Faktoren wie **Markenimage, Design und Produktqualität** sowie zusätzliche technische Merkmale auf der Basis innovativer Forschung und Entwicklung eine herausragende Rolle. Überzeugende Lösungen, die zum Beispiel ein unfallfreies Fahren unterstützen oder das Verbrauchs- und Emissionsverhalten unserer Fahrzeuge weiter verbessern, wie die Elektrifizierung des Antriebsstrangs, sind für eine sichere und nachhaltige Mobilität von zentraler Bedeutung. Da diese Lösungen in der Regel einen höheren Mitteleinsatz und eine größere technische Komplexität erfordern, nimmt die Herausforderung zu, weitere Effizienzsteigerungen bei gleichzeitiger Einhaltung der Daimler-Qualitätsstandards zu realisieren. Sollte uns eine optimale Lösung dieses Spannungsfelds nicht gelingen oder sollten wir nicht in der Lage sein, gesetzliche Vorgaben rechtzeitig umzusetzen, könnte sich dies nachteilig auf die künftige Profitabilität des Konzerns auswirken. Ein möglicher Akzeptanzverlust unserer Produkte könnte sich negativ auf die Durchsetzung von Preisen und die Auslastung der Produktionskapazitäten auswirken.

Die **Produktqualität** hat einen wesentlichen Einfluss auf die Entscheidung des Kunden beim Kauf von Pkw und Nutzfahrzeugen. Gleichzeitig nimmt die technische Komplexität infolge zusätzlicher Merkmale, unter anderem auch für die Erfüllung der vielfältigen Emissions-, Verbrauchs- und Sicherheitsvorschriften, weiter zu und erhöht die Gefahr der Fehleranfälligkeit der Fahrzeuge. Technische Probleme könnten zu Rückrufaktionen und Reparaturmaßnahmen führen oder sogar Neuentwicklungen notwendig machen. Darüber hinaus kann eine sich verschlechternde Produktqualität zu vermehrten Garantie- und Kulanzansprüchen führen.

**Risiken infolge gesetzlicher und politischer Rahmenbedingungen.** Rechtliche und politische Rahmenbedingungen haben einen großen Einfluss auf den künftigen Geschäftserfolg von Daimler. Dabei spielen insbesondere die **Emissions-, Verbrauchswert- und Sicherheitsbestimmungen** für Fahrzeuge eine wichtige Rolle. Um die vielfältigen und weltweit oftmals divergierenden Regelungen einzuhalten, sind erhebliche Anstrengungen seitens der Automobilindustrie erforderlich. Wir erwarten, dass wir auch in Zukunft unseren Mitteleinsatz in der Forschung und Entwicklung weiter erhöhen müssen, um diese Anforderungen zu erfüllen. Viele Länder haben bereits strengere Regelungen zur Reduzierung von Emissions- und Verbrauchswerten von Fahrzeugen erlassen bzw. sind im Begriff, entsprechende Gesetzesvorgaben auf den Weg zu bringen. Dies trifft unter anderem auf die europäischen Emissions- und Verbrauchswertbestimmungen zu. So sehen zum Beispiel die wesentlichen Elemente der Ende 2008 im Europäischen Parlament verabschiedeten CO<sub>2</sub>-Verordnung der Europäischen Union ab dem Jahr 2012 eine deutliche Reduzierung des Kohlendioxidausstoßes für neue Pkw vor, wobei stufenweise bis zum Jahr 2015 die gesamte europäische Neuwagenflotte eines Herstellers im Durchschnitt die verbindlichen Grenzwerte einhalten muss. Werden diese Grenzwerte überschritten, müssen die Hersteller Strafzahlungen leisten. Ähnliche Gesetzesvorgaben bzw. -vorschläge gibt es im Pkw-Bereich auch in den USA, China, Südkorea, Japan und der Schweiz. Im Jahr 2010 wurde auch die CO<sub>2</sub>-Gesetzgebung für leichte Nutzfahrzeuge in der europäischen Union weitgehend verabschiedet. Die sich daraus ergebenden Ziele sind vor allem langfristig eine Herausforderung für das Geschäftsfeld Mercedes-Benz Vans. Für die schweren Nutzfahrzeuge sind ebenfalls weltweit Bestrebungen im Gange, den CO<sub>2</sub>-Ausstoß zu reglementieren. Wir gehen davon aus, dass wir diese Vorgaben erreichen werden. Aufgrund möglicher Kundenkaufentscheidungen können in den USA monetäre Sanktionen nicht vollkommen ausgeschlossen werden. Zusätzlich zu Emissions-, Verbrauchswert- und Sicherheitsbestimmungen nehmen in Städten und Ballungszentren der Europäischen Union und anderer Regionen der Welt **verkehrs- politische Restriktionen** zur Bekämpfung von Stau und Emissionen an Bedeutung zu. Drastische Maßnahmen wie generelle Zulassungsbeschränkungen, beispielsweise in Peking oder Shanghai, können sich dämpfend auf die Absatzentwicklung, insbesondere in den Wachstumsmärkten, auswirken. Daimler verfolgt die Entwicklung dieser Rahmenbedingungen und versucht, absehbare Anforderungen und langfristige Zielsetzungen bereits im Produktentstehungsprozess zu antizipieren.

**Beschaffungsmarktrisiken.** Risiken auf der Beschaffungsseite ergeben sich für den Konzern aus den **Preisschwankungen bei Rohstoffen**. Nach den Preisrückgängen an den Rohstoffmärkten Ende 2008 und der anschließenden Erholung der Preise im Jahr 2009 haben die Preise wieder ein hohes bis sehr hohes Niveau erreicht. Die Erholung der Preise ist dabei stark abhängig von der konjunkturellen Erholung in den einzelnen Weltwirtschaftsregionen. Der Ausblick, wie sich die Preise auf den Rohstoffmärkten entwickeln, bleibt jedoch nicht zuletzt auch vor dem Hintergrund des zunehmenden Einflusses durch institutionelle Kapitalanleger ungewiss. Dieser Einfluss drückt sich in verstärkter Nachfrage nach Rohmaterialinvestments aus und begründet dadurch eine hohe Preisvolatilität an den Rohstoffmärkten. Generell sind der Weitergabe der Rohstoff- bzw. Materialverteuerungen über höhere Preise für die hergestellten Fahrzeuge aufgrund des ausgeprägten Konkurrenzdrucks auf den internationalen Automobilmärkten enge Grenzen gesetzt. Den Risiken auf der Beschaffungsseite begegnet Daimler mit einem gezielten Material- und Lieferantenrisikomanagement. Im Rahmen des Materialmanagements versuchen wir, unter anderem durch technologische Fortschritte, die Abhängigkeiten von einzelnen Materialien zu reduzieren. Gegen die Volatilität bei Rohstoffpreisen sichern wir uns durch den Abschluss von Langzeitverträgen ab, die kurzfristige Risiken für die Materialversorgung sowie Effekte aus den Preisschwankungen kalkulierbarer machen. Darüber hinaus nutzen wir bei verschiedenen Metallen das Instrumentarium der derivativen finanziellen Sicherungsgeschäfte. Das Lieferantenrisikomanagement zielt darauf ab, mögliche finanzielle Engpässe bei Lieferanten frühzeitig zu erkennen und geeignete Abwehrmaßnahmen einzuleiten. Infolge der Finanzmarktkrise haben sich die Refinanzierungsmöglichkeiten einiger Zulieferer spürbar verschlechtert. Dies hat dazu geführt, dass einzelne oder gemeinschaftliche **Stützungsmaßnahmen** seitens der Fahrzeughersteller notwendig wurden, um deren Produktion und Absatz sicherzustellen. Im Rahmen des Lieferantenrisikomanagements werden in Abhängigkeit von der internen Einstufung regelmäßige Berichtstermine für Lieferanten vereinbart, an denen wichtige Leistungskennziffern an Daimler berichtet und etwaige Stützungsmaßnahmen bestimmt werden.

**Informationstechnische Risiken und unvorhersehbare Ereignisse.** Die Produktions- und Geschäftsprozesse könnten zudem durch **unvorhersehbare Ereignisse**, wie beispielsweise Naturkatastrophen oder terroristische Anschläge, gestört werden. Das Verbrauchervertrauen würde dadurch spürbar beeinträchtigt werden, und es könnte zu Produktionsunterbrechungen infolge von Zulieferproblemen und verstärkten Sicherheitsmaßnahmen an den Landesgrenzen kommen. Bei der Abwicklung unserer Geschäftsprozesse spielt die **Informationstechnologie** eine zentrale Rolle. Informationen zeitaktuell, vollständig und korrekt vorzuhalten und auszutauschen sowie voll funktionsfähige IT-Applikationen einsetzen zu können sind für ein globales Unternehmen wie Daimler von großer Bedeutung. Mögliche Risiken, die im Schadensfall eine Unterbrechung unserer Geschäftsprozesse aufgrund von IT-Systemausfällen oder den Verlust oder die Verfälschung von Daten zur Folge haben könnten, werden deshalb über den gesamten Lebenszyklus der Applikationen und IT-Systeme hinweg identifiziert und bewertet. Daimler hat geeignete Maßnahmen definiert, damit Risiken vermieden und mögliche Schäden begrenzt werden können. Wir passen diese Maßnahmen laufend an sich verändernde Umstände an. Diese Aktivitäten sind in einen mehrstufigen IT-Risikomanagementprozess eingebettet. Zum Beispiel minimiert der Konzern potenzielle Störungen der betrieblichen Abläufe in den Rechenzentren durch Maßnahmen wie gespiegelte Datenbestände, dezentrale Datenhaltung, ausgelagerte Archivierung, Hochverfügbarkeitsrechner sowie entsprechende Notfallpläne. Um wachsenden Bedrohungen für den Betrieb zentraler IT-Systeme sowie der Sicherheit von vertraulichen Daten ausreichend Rechnung zu tragen, betreiben wir zudem ein eigenes Risikomanagement für die Sicherheit von Informationen. Vor dem Hintergrund der umfangreichen Sicherungsmaßnahmen haben IT-Risiken meist eine niedrige Eintrittswahrscheinlichkeit, können sich aber im Fall des Eintritts durchaus spürbar auf die betrieblichen Abläufe auswirken.

**Reputation.** Das Verhalten von Unternehmen in Fragen der Ethik und Nachhaltigkeit wird von der Öffentlichkeit in immer stärkerem Maße wahrgenommen. Die Übereinstimmung des unternehmerischen Handelns mit gesetzlichen und ethischen Regeln ist für den Konzern unerlässlich. Darüber hinaus verfolgen Kunden und Kapitalmärkte kritisch, wie das Unternehmen auf die technologischen Herausforderungen der Zukunft reagiert und wie es ihm gelingt, zeitgemäße und technologisch führende Produkte auf den Märkten anzubieten. Der sichere Umgang mit sensiblen Daten ist auch Voraussetzung dafür, die Geschäftsbeziehungen zu Kunden und Lieferanten in einem vertrauensvollen, partnerschaftlichen Umfeld zu betreiben. Der Konzern setzt umfassende Maßnahmenpakete ein, damit Risiken mit Wirkung auf die Reputation des Unternehmens geregelten internen Kontrollen unterliegen.

**Spezifische Risiken im Personalbereich.** Der Erfolg von Daimler ist ganz wesentlich vom Know-how und von der Einsatzbereitschaft der Mitarbeiterinnen und Mitarbeiter abhängig. Der Wettbewerb um hoch qualifizierte Mitarbeiter und Führungskräfte ist in der Branche und in den Regionen, in denen wir tätig sind, nach wie vor sehr stark. Unser künftiger Erfolg hängt auch davon ab, inwiefern es uns dauerhaft gelingt, Führungskräfte, Ingenieure und anderes Fachpersonal einzustellen, zu integrieren und dauerhaft an das Unternehmen zu binden. Der Einsatz unserer Personalinstrumente berücksichtigt solche bestehenden Personalrisiken, trägt zu einer gezielten Nachwuchs- und Know-how-Sicherung bei und stellt gleichzeitig die Transparenz bezüglich unserer Ressourcen sicher. Ein Schwerpunkt unseres Personalmanagements liegt in der zielgerichteten Personalentwicklung und Weiterbildung unserer Belegschaft. Unsere Mitarbeiterinnen und Mitarbeiter profitieren dabei unter anderem von den Angeboten der Daimler Corporate Academy und der Transparenz, die durch das weltweit einheitliche Performance- und Potenzialmanagementsystem LEAD geschaffen wird.

Die demografische Entwicklung zwingt das Unternehmen zudem, mit den Veränderungen durch eine älter werdende Belegschaft umzugehen und einen qualifizierten Fach- und Führungskräftenachwuchs zu sichern.

**Risiken im Zusammenhang mit Beteiligungen und Kooperationen sowie sonstige unternehmensspezifische Risiken.**

An den Risiken seiner Beteiligungen, zum Beispiel an denen von EADS und der Gemeinschaftsunternehmen in Wachstumsmärkten, partizipiert Daimler grundsätzlich entsprechend seiner jeweiligen Anteilsquote. Um zusätzliche Wachstumschancen zu nutzen, insbesondere in den Schwellenländern, gewinnen die Zusammenarbeit mit Partnern in Gemeinschaftsunternehmen (Joint Ventures) sowie die daraus resultierenden Risiken an Bedeutung. Der Konzern berücksichtigt assoziierte Unternehmen und Gemeinschaftsunternehmen nach der Equity-Methode im Konzernabschluss; Faktoren, die die Profitabilität dieser Unternehmen negativ beeinflussen, belasten anteilig das Konzernergebnis. Zudem können diese Faktoren dazu führen, dass die Beteiligungsbuchwerte bzw. die Wertansätze auf Basis der At-equity-Bewertung erfolgswirksam abzuwerten sind. Ferner könnten das Scheitern oder Verzögerungen im Aufbau von Joint Ventures in den für uns wichtigen Märkten unsere Wachstumsziele beeinträchtigen. Auch die erfolgreiche Umsetzung von Kooperationen mit anderen Unternehmen ist für uns von zentraler Bedeutung, um Kostenvorteile zu realisieren und damit dem Wettbewerbsdruck in der Automobilindustrie zu begegnen.

Der Konzern ist auch Risiken ausgesetzt, da er **Garantien** begeben hat und zudem am Mauterhebungssystem beteiligt ist, das Autobahngebühren bei Nutzfahrzeugen mit mehr als 12t zulässigem Gesamtgewicht erfasst. Der Betrieb des elektronischen Mauterhebungssystems erfolgt durch die Betreibergesellschaft Toll Collect GmbH, an der Daimler 45% der Anteile hält und die nach der Equity-Methode in den Konzernabschluss einbezogen wird. Zusätzlich zur Konsortialmitgliedschaft und zur Kapitalbeteiligung an der Toll Collect GmbH resultieren Risiken aus Garantien, die der Konzern für Verpflichtungen der Toll Collect GmbH gegenüber der Bundesrepublik Deutschland im Zusammenhang mit der Fertigstellung und dem Betrieb des Mautsystems übernommen hat. Eine Inanspruchnahme dieser Garantien könnte entstehen, falls technisch bedingt Mautgebühren ausfallen oder bestimmte vertraglich definierte Leistungsparameter nicht erfüllt werden, falls die Bundesrepublik Deutschland zusätzliche Aufrechnungen aufstellt oder falls die endgültige Betriebserlaubnis verweigert wird. Weitergehende Informationen zu den bedingten Verpflichtungen aus gewährten Garantien sowie zum elektronischen Mautsystem und zu den damit verbundenen Risiken können den Anmerkungen 28 (Rechtliche Verfahren) und 29 (Garantien und sonstige finanzielle Verpflichtungen) des Konzernanhangs entnommen werden.



## Finanzwirtschaftliche Risiken

Daimler ist Marktpreisrisiken in Form von Veränderungen von Wechselkursen, Zinssätzen, Commodity-Preisen und Aktienkursen ausgesetzt. Marktpreisrisiken können einen negativen Einfluss auf die Vermögens-, Finanz- und Ertragslage des Konzerns haben. Daimler steuert und überwacht Marktpreisrisiken vorwiegend im Rahmen seiner operativen Geschäfts- und Finanzierungsaktivitäten und bei Bedarf durch den Einsatz derivativer Finanzinstrumente. Im Rahmen des Risikomanagementprozesses beurteilt Daimler diese Risiken regelmäßig, indem Änderungen ökonomischer Schlüsselindikatoren sowie Marktinformationen berücksichtigt werden. Die von den Pensionsfonds gehaltenen marktsensitiven Anlagen, einschließlich Eigenkapitaltitel und zinstragende Wertpapiere, sind nicht Bestandteil der folgenden Betrachtung.

**Wechselkursrisiken.** Aus der globalen Ausrichtung der Geschäftsaktivitäten des Konzerns folgt, dass mit dem operativen Geschäft sowie den Finanztransaktionen Risiken aus Wechselkurschwankungen verbunden sind. Diese resultieren insbesondere aus Schwankungen des US-Dollars und anderer wichtiger Währungen gegenüber dem Euro. Ein Wechselkursrisiko entsteht im operativen Geschäft vor allem dann, wenn Umsatzerlöse in einer anderen Währung anfallen als die zugehörigen Kosten (Transaktionsrisiko). Dies betrifft in besonderem Maße das Geschäftsfeld Mercedes-Benz Cars, bei dem ein größerer Anteil der Umsatzerlöse in Fremdwährungen erzielt wird, während die Produktionskosten vorwiegend in Euro anfallen. Das Geschäftsfeld Daimler Trucks ist ebenfalls einem solchen Transaktionsrisiko ausgesetzt, jedoch aufgrund des weltweiten Produktionsnetzwerkes nur in einem geringeren Ausmaß. Daimler sichert das Währungsexposure anhand fortlaufend überprüfter Devisenkursbewertungen mit geeigneten Finanzinstrumenten, vorwiegend Devisentermin- und Devisenoptionsgeschäften, schrittweise ab. Des Weiteren bestehen Wechselkursrisiken in Bezug auf die Umrechnung des bei ausländischen Konzerngesellschaften außerhalb der Eurozone gebundenen Netto-Vermögens und deren Erträge und Aufwendungen (Translationsrisiko), gegen die sich der Konzern nicht absichert.

**Zinsänderungsrisiken.** Daimler nutzt eine Vielzahl von zins-sensitiven Finanzinstrumenten dazu, die Liquiditätsanforderungen des täglichen Geschäfts zu erfüllen. Der überwiegende Teil dieser Finanzinstrumente steht im Zusammenhang mit dem Finanzdienstleistungsgeschäft von Daimler Financial Services, das grundsätzlich eine fristenkongruente Refinanzierung vornimmt. In geringem Umfang wird jedoch auf eine solche verzichtet, wodurch ein Zinsänderungsrisiko besteht. Die Kapitalbeschaffungsmaßnahmen für das Industrie- und das Finanzdienstleistungsgeschäft werden im Konzern zentral koordiniert. Derivative Zinsinstrumente wie Zinsswaps und Forward Rate Agreements werden mit dem Ziel eingesetzt, die gewünschten Zinsbindungen und Aktiv-/Passiv-Strukturen (Asset-/Liability-Management) zu erreichen.

**Aktienkursrisiken.** Daimler besitzt Anlagen in Aktien; entsprechend dem internationalen Bankenstandard werden diese Anlagen in Aktien, die als langfristige Investitionen klassifiziert sind, wie zum Beispiel in EADS, Tognum, Kamaz, Renault und Nissan, nicht in die Bewertung des Aktienkursrisikos einbezogen.

**Commodity-Preis-Risiken.** Im Rahmen seiner Geschäftstätigkeit ist Daimler einem Marktpreisrisiko aus dem Bezug von Teilleistungen und Rohstoffen ausgesetzt. Wir begegnen diesen beschaffungsseitigen Risiken mit einem gezielten Commodity- und Supplier-Risk-Management. In geringem Umfang werden auch derivative Finanzinstrumente eingesetzt mit dem Ziel, die Marktpreisrisiken vornehmlich aus dem Bezug bestimmter Metalle zu reduzieren.

**Liquiditätsrisiken.** Im normalen Geschäftsverlauf setzen wir Anleihen, Commercial Paper und verbriefte Transaktionen sowie Bankdarlehen in verschiedenen Währungen ein, im Wesentlichen mit dem Ziel, das Leasing- und Absatzfinanzierungsgeschäft zu finanzieren. Eine negative Entwicklung an den Kapitalmärkten könnte die Finanzierungskosten des Konzerns erhöhen. Eine Verteuerung der Refinanzierung würde sich negativ auf die Wettbewerbsfähigkeit und Profitabilität unseres Finanzdienstleistungsgeschäfts auswirken; eine Begrenzung des Finanzdienstleistungsgeschäfts hätte zudem negative Folgen für das Fahrzeuggeschäft.

**Risiken aus Ratingveränderungen.** Die Ratingagenturen Standard & Poor's Ratings Services, Moody's Investors Service, Fitch Ratings und DBRS bewerten die Kreditwürdigkeit von Daimler. Heraufstufungen der von den Ratingagenturen vergebenen Ratings könnten zu geringeren Fremdkapitalkosten des Konzerns führen. Mögliche Risiken liegen in Herabstufungen, die sich negativ auf die Konzernfinanzierung auswirken könnten.

**Risiken im Zusammenhang mit den Pensionsplänen.** Daimler hat Pensionsverpflichtungen und in einem geringen Umfang Zuschussverpflichtungen für Gesundheitsfürsorgeleistungen, die nicht vollständig durch Planvermögen gedeckt sind. Der Saldo aus Verpflichtungen abzüglich Planvermögen ergibt den Finanzierungsstatus für diese Versorgungspläne. Selbst geringe Änderungen der für die Bewertung der Versorgungspläne verwendeten Annahmen, wie beispielsweise die Absenkung der Diskontierungszinssätze, könnten zu einem Anstieg der Verpflichtungen führen. Demgegenüber wird der Marktwert der Planvermögen maßgeblich von der Lage auf den Kapitalmärkten bestimmt. Ungünstige Entwicklungen, insbesondere bei Aktien und festverzinslichen Wertpapieren, könnten den Marktwert vermindern. Sowohl höhere Verpflichtungen als auch verminderte Planvermögen oder eine Kombination aus beidem würden den Finanzierungsstatus unserer Versorgungspläne negativ beeinflussen. Höhere Verpflichtungen und geringere Erträge aus den Planvermögen könnten zudem die Netto-Aufwendungen im Zusammenhang mit diesen Versorgungsplänen in den Folgeperioden erhöhen.

Weitergehende Informationen zu finanzwirtschaftlichen Risiken, risikobegrenzenden Maßnahmen und dem Management dieser Risiken enthält Anmerkung 31 des Konzernanhangs. Informationen zu Finanzinstrumenten sowie zu den Pensionsfonds des Konzerns finden sich in den Anmerkungen 30 und 22.

## Rechtliche Risiken

Gegen Daimler sind verschiedene Rechtsstreitigkeiten und behördliche Verfahren anhängig bzw. könnten anhängig werden. Bei diesen handelt es sich nach unserer Ansicht im Wesentlichen um normale, routinemäßige und im Zusammenhang mit dem Geschäft des Konzerns stehende Rechtsstreitigkeiten, die teilweise auch Auswirkungen auf die Reputation des Konzerns haben können. Der Konzern bildet Rückstellungen für Rechtsstreitigkeiten, wenn die daraus resultierenden Verpflichtungen wahrscheinlich sind und die Höhe der Verpflichtungen hinreichend genau bestimmbar ist. Es ist jedoch möglich, dass aufgrund abschließender Entscheidungen in einigen dieser anhängigen Fälle hierfür gebildete Rückstellungen sich teilweise als unzureichend erweisen und infolgedessen erhebliche zusätzliche Aufwendungen entstehen könnten. Dies trifft auch auf Rechtsstreitigkeiten zu, für die aus Sicht des Konzerns keine Rückstellungen zu bilden waren. Obwohl der endgültige Ausgang einzelner Verfahren gegebenenfalls einen wesentlichen Einfluss auf das Ergebnis von Daimler in einer bestimmten Berichtsperiode haben kann, werden die daraus eventuell resultierenden Verpflichtungen nach Einschätzung des Konzerns keinen nachhaltigen Einfluss auf die Finanz-, Vermögens- und Ertragslage von Daimler haben. Weitere Informationen über rechtliche Verfahren können der Anmerkung 28 des Konzernanhangs entnommen werden.

## Gesamtrisiko

Die Gesamtrisikosituation des Konzerns setzt sich aus den Einzelrisiken aller Risikokategorien der Geschäftsfelder und Zentralfunktionen zusammen. Dort sind Risiken, die allein oder in Kombination mit anderen Risiken den Fortbestand des Konzerns gefährden könnten, nicht erkennbar. Insgesamt haben die Risiken gegenüber dem Krisenjahr 2009 spürbar abgenommen. Vor dem Hintergrund, dass weiterhin beträchtliche gesamtwirtschaftliche und branchenbedingte Risiken bestehen, können Rückschläge auf dem Weg zur nachhaltigen Realisierung unserer angestrebten Wachstums- und Renditeziele jedoch nicht völlig ausgeschlossen werden.

Die im Kapitel »Ausblick« getroffenen Aussagen basieren auf der im Dezember 2010 von Vorstand und Aufsichtsrat verabschiedeten operativen Planung der Daimler AG für die Jahre 2011 und 2012. Grundlage dieser Planung sind zum einen Prämissen zu den gesamtwirtschaftlichen Rahmenbedingungen, die sich aus den Einschätzungen renommierter Wirtschaftsforschungsinstitute ergeben, und zum anderen die Zielsetzungen unserer Geschäftsfelder. Die dargestellten Einschätzungen für den künftigen Geschäftsverlauf orientieren sich an den Chancen und Risiken, welche die erwarteten Marktbedingungen und die Wettbewerbssituation im Planungszeitraum bieten. Vor dem Hintergrund der aktuellen Prognosen zur Entwicklung der Weltwirtschaft und der Automobilmärkte sowie der jüngsten Geschäftsentwicklung passen wir unsere Erwartungen laufend an. Die im Folgenden getroffenen Aussagen basieren auf unserem Kenntnisstand im Februar 2011.

## Weltwirtschaft

Zu Beginn des Jahres 2011 spricht die überwiegende Anzahl von Frühindikatoren dafür, dass sich der konjunkturelle Aufschwung der Weltwirtschaft fortsetzen wird. Allerdings zeichnet sich auch ab, dass das Wachstumstempo im Vergleich zum Vorjahr vermutlich eher etwas schwächer ausfallen dürfte. Die anhaltende Unsicherheit an den Finanzmärkten ist ein Indiz für die weiterhin vorhandenen Sorgen um die Nachhaltigkeit des Aufschwungs. Gerade in den Industrieländern sind die ökonomischen Perspektiven eher verhalten. Die angesichts hoher öffentlicher Haushaltsdefizite eingeleiteten Sparmaßnahmen stellen verschiedene Länder vor große Herausforderungen. Und da auch im privaten Sektor die Konsolidierung ein wichtiges Thema ist, dämpft dies in Summe die gesamtwirtschaftliche Nachfrage spürbar. Die vielfach weiterhin hohe Arbeitslosigkeit, angespannte Immobilienmärkte sowie unterausgelastete Produktionskapazitäten schränken die Wachstumsmöglichkeiten sowohl des privaten Konsums als auch der Investitionen ein. Da gleichzeitig auch der Welthandel schon an Schwung verloren hat und nicht mehr so kräftig zulegt wie im Vorjahr, kann der Außenhandel die Schwäche anderer Konjunkturkomponenten nicht gänzlich kompensieren. Dies ist von besonderer Bedeutung für exportorientierte Volkswirtschaften wie Deutschland oder Japan, bei denen im Jahr 2010 ein erheblicher Wachstumsbeitrag gerade aus der Außenwirtschaft gekommen war. In den USA sollte zwar der Beschäftigungsaufbau in der Privatwirtschaft weiter vorangehen, aber vermutlich werden die Zuwächse zu gering sein, um die Arbeitslosigkeit nennenswert abzubauen. Durch die neu verabschiedeten steuerlichen Maßnahmen sollte aber der private Konsum, eine wesentliche Stütze der Konjunktur, einen

spürbaren Impuls erhalten, wodurch sich die Wachstumsperspektiven für 2011 zuletzt merklich erhöht haben. Welche Auswirkungen die beträchtliche Expansion der Geldmenge sowie der weitere Anstieg der öffentlichen Verschuldung auf die US-Wirtschaft haben, muss sich allerdings erst noch zeigen. In Westeuropa belasten die Verschuldungskrise und die damit einhergehenden Konsolidierungsmaßnahmen den gesamtwirtschaftlichen Wachstumsspielraum. Einige Volkswirtschaften wie Griechenland werden deshalb sogar noch weiter eine rezessive Phase durchlaufen müssen. Dagegen haben sich angesichts günstiger Konjunkturindikatoren zum Jahreswechsel die Aussichten für die deutsche Wirtschaft merklich aufgehellt, sodass hier ein deutlich über dem europäischen Durchschnitt liegendes Wachstum zu erwarten ist. Vor diesem Hintergrund dürften die Industrieländer bei relativ unterschiedlichen Wachstumsraten im Jahr 2011 insgesamt leicht an Wachstumsdynamik einbüßen und um 2 bis 2,5% zulegen. Deutlich größere Wachstumsimpulse für die Weltwirtschaft sollten erneut von den Schwellenländern ausgehen, die insgesamt eine rund zweieinhalbfache so hohe Zuwachsrate erzielen dürften. Allerdings hat sich auch hier schon in den vergangenen Monaten eine leichte konjunkturelle Verlangsamung angedeutet; dies gilt insbesondere für den asiatischen Wirtschaftsraum und für Südamerika. Im Falle der chinesischen Wirtschaft ist ein etwas geringeres Wachstum angesichts des deutlich angewachsenen Kreditvolumens und regionaler Immobilienblasen aber sogar wünschenswert. In Summe könnte sich damit für die Weltwirtschaft im Jahr 2011 ein Zuwachs von immerhin rund 3,5% ergeben. Angesichts der vielerorts anhaltenden Verunsicherung bei Konsumenten und Investoren bleibt die globale Konjunktur allerdings weiterhin eher fragil und damit auch anfällig für externe Störungen.

## Automobilmärkte

Nach heutiger Einschätzung wird die weltweite Automobilnachfrage im laufenden Jahr weiter wachsen, allerdings nicht mehr so dynamisch wie im Vorjahr. Der globale Pkw-Markt könnte in der Größenordnung von 5 bis 7% zulegen und damit auf ein neues Rekordniveau ansteigen. Die asiatischen Schwellenländer und insbesondere der chinesische Markt werden dabei weiterhin eine tragende Rolle spielen. Auch die Bedeutung Chinas für die deutschen Premiumhersteller wird in diesem Jahr weiter zunehmen. Mit Blick auf die Triademärkte ist dagegen weiterhin ein gemischtes Bild zu erwarten. Der US-Markt sollte seinen Erholungskurs fortsetzen, während für Westeuropa in Summe mit einer Stagnation der Pkw-Verkäufe zu rechnen ist.

Die Nachwirkungen der staatlichen Anreizprogramme belasten weiterhin die Nachfrage in einigen Volumenmärkten, vor allem in den unteren Marktsegmenten. In Deutschland hingegen ist nach dem zweistelligen Marktrückgang im Jahr 2010 nun mit einem spürbaren Zuwachs zu rechnen. Der japanische Pkw-Markt dürfte dagegen das durch staatliche Kaufanreize künstlich überhöhte Niveau des Jahres 2010 nicht erreichen. Abgesehen von den asiatischen Schwellenländern wird auch die Nachfrage in Lateinamerika und Osteuropa weiter wachsen. In Brasilien ist mit einem etwas geringeren Marktzuwachs als im Vorjahr zu rechnen, und auch in Russland dürfte die Nachfragedynamik leicht nachlassen.

Die weltweite Nutzfahrzeugnachfrage wird dieses Jahr voraussichtlich durch eine deutlich unterschiedliche Marktentwicklung innerhalb und außerhalb der Triade gekennzeichnet sein. In der Triade ist vor allem im Segment der mittelschweren und schweren Lkw davon auszugehen, dass die Erholung weiter an Fahrt gewinnt. Für die Region NAFTA ist mit einem Marktzuwachs von 20 bis 25% zu rechnen. Die Lkw-Nachfrage in Europa dürfte um 15 bis 20% zulegen. Nach dem Auslaufen der staatlichen Kaufanreize im Herbst des vergangenen Jahres ist für mittlere und schwere Lkw in Japan ein moderater Volumenzuwachs zu erwarten. Die Lkw-Nachfrage außerhalb der Triade wird maßgeblich vom chinesischen Markt beeinflusst. Nachdem das staatliche Anreizprogramm zum Jahresende 2010 beendet wurde, ist für dieses Jahr mit einem Nachfragerückgang in China zu rechnen. Der indische Markt dagegen dürfte weiter wachsen, wenn auch eher moderat. Der für Daimler wichtige brasilianische Markt wird sich voraussichtlich in etwa auf dem hohen Vorjahresniveau bewegen. Das Ende staatlicher Kaufanreize nach dem ersten Quartal dürfte durch die anhaltend hohe Nachfrage aus Infrastrukturprojekten kompensiert werden. Mögliche vorgezogene Käufe vor einer Verschärfung der Emissionsrichtlinien im Jahr 2012 könnten den Markt in diesem Jahr zusätzlich positiv beeinflussen. Im russischen Markt ist, unterstützt durch eine staatliche Verschrottungsprämie, mit einer fortgesetzten Erholung zu rechnen. Weltweit betrachtet ist allerdings aufgrund des erwarteten Nachfragerückgangs in China von einer leichten Marktabschwächung auszugehen.

Mit Blick auf den für Daimler aktuell wichtigsten Transportermarkt Europa ist mit einem moderaten Marktzuwachs von 4 bis 6% zu rechnen. Die Transporternachfrage in den USA dürfte zweistellig zulegen.

Bei den Omnibussen gehen wir für Lateinamerika von einer anhaltend hohen Nachfrage auf dem Niveau des Jahres 2010 aus. Für Westeuropa erwarten wir keine wesentliche Veränderung der Marktsituation.

Unabhängig von der konjunkturellen Entwicklung der Märkte haben sich die Schwerpunkte der weltweiten Automobilnachfrage in den vergangenen Jahren deutlich verschoben. Nicht nur für die gesamte Industrie, sondern insbesondere für die Hersteller von Premiumfahrzeugen hat die Bedeutung der Schwellenländer massiv zugenommen, und dieser Trend wird voraussichtlich auch in den kommenden Jahren anhalten. Das stellt die Industrie vor große Herausforderungen hinsichtlich der Produktionsstandorte und deren Flexibilität sowie der Bedürfnisse der unterschiedlichen Kunden in einem globalen Markt. Dazu kommt die anhaltende und zunehmende Notwendigkeit, in verbrauchsgünstige und zukunftsorientierte Technologien zu investieren sowie innovative und nachhaltige Mobilitäts- und Transportlösungen zu entwickeln und anzubieten. Wer diese Herausforderungen annimmt und diese grundlegenden Veränderungen aktiv für sich nutzt, hat auch zukünftig hervorragende Wachstumsperspektiven. Insgesamt wird die Fähigkeit, sich durch Innovationen, faszinierende Produkte und starke Marken von den Wettbewerbern zu differenzieren, mehr denn je zum Erfolgsfaktor.

## Absatz

**Mercedes-Benz Cars** geht für das Jahr 2011 angesichts der insgesamt weiterhin günstigen Marktperspektiven sowie zahlreicher Modellwechsel und Produktneuheiten von einer weiteren Steigerung des Absatzes der Marke Mercedes-Benz aus. Dank unseres aktuellen und wettbewerbsfähigen Modellangebots werden wir auch im Jahr 2011 von der hohen Nachfrage nach unseren Modellen der E-Klasse und vom Markterfolg der S-Klasse profitieren. Darüber hinaus wird ab Ende Januar 2011 die Neuauflage des viertürigen Coupés CLS an unsere Kunden ausgeliefert. Für zusätzliche Absatzimpulse werden dann ab März 2011 die neue Generation der Limousine und des T-Modells der C-Klasse sowie der neue Roadster SLK sorgen. Im Juni folgt das Coupé der C-Klasse, ab September die Neuauflage der M-Klasse und im vierten Quartal die Roadster-Variante des Mercedes-Benz SLS AMG. Im November geht dann die neue B-Klasse an den Start – das erste Modell von insgesamt vier neuen Fahrzeugen im Kompaktwagensegment. Auf der Motorenseite führen wir unsere besonders effizienten Vier-, Sechs- und Achtzylindermotoren sowie die Eco-Start-Stopp-Technologie in weiteren Modellen ein. Damit verfügen wir über ein breites Angebot an Fahrzeugen, die mit hoher Leistung und herausragenden Fahreigenschaften bei niedrigem Verbrauch insbesondere unsere Flottenkunden überzeugen. Auf dieser Basis werden wir besonders sparsame und umweltschonende Modellvarianten auf die Straße bringen und damit den CO<sub>2</sub>-Ausstoß unserer Flotte weiter senken. So kommt mit der neuen Generation der C-Klasse beispielsweise der C 220 CDI mit einem Verbrauch von nur 4,4 l/100 km bzw. 117g CO<sub>2</sub>/km in den Handel.



In regionaler Hinsicht sehen wir in den kommenden Jahren vor allem in Nordamerika, in den BRIC-Staaten China, Indien, Russland und Brasilien sowie in Südkorea gute Wachstumschancen. Demgegenüber sind die Wachstumsperspektiven in Westeuropa und Japan eher begrenzt. Auf der Basis unseres attraktiven Fahrzeugangebots gehen wir aber davon aus, dass wir unsere Position auch in diesen weiterhin sehr wettbewerbsintensiven Märkten behaupten können. Insgesamt ist es unser Ziel, den Absatz von Mercedes-Benz sowohl im Jahr 2011 als auch im Jahr 2012 jeweils zu steigern. Für die Marke smart erwarten wir aufgrund der vollen Verfügbarkeit der neuen Generation des smart fortwo ein Absatzniveau in der Größenordnung des Jahres 2010.

**Daimler Trucks** geht für die Jahre 2011 und 2012 von einer nochmals erheblichen Absatzsteigerung aus. Unterstützt von der allgemeinen wirtschaftlichen Erholung und dem dadurch zu erwartenden Nachfrageanstieg nach Transportdienstleistungen und Fahrzeugen werden unsere Märkte überwiegend deutliche Wachstumsraten verzeichnen. In Westeuropa erwarten wir nach einer verhaltenen Erholung im abgelaufenen Jahr eine deutliche Absatzsteigerung, wenngleich unsere Markterwartung noch unter dem Vorkrisenniveau bleibt. In Osteuropa dürfte unser Absatz im Jahr 2011 in etwa auf dem Vorjahresniveau liegen. Mit einem anhaltend hohen Niveau rechnen wir in Lateinamerika, bedingt durch eine starke Infrastrukturnachfrage sowie aufgrund von vorgezogenen Käufen im Rahmen der Euro-5-Einführung. Auch wenn sich die Wirtschaftslage in der NAFTA-Region nur langsam verbessert, ist dort ein deutlich positiver Trend zu verzeichnen. Auch in Asien sehen wir für unser Geschäft klar positive Impulse. In Japan rechnen wir trotz des Wegfalls von Subventionen mit einer positiven Geschäftsentwicklung.

Unsere Absatzerwartungen stützen sich auf zahlreiche Produktneuheiten. Dazu zählen der neue Atego sowie der Atego BlueTec Hybrid, beide Truck of the Year 2011. Die Neuauflage des Axor bietet als erstes Fahrzeug seiner Klasse im oberen Leistungsbereich in Deutschland serienmäßig die Schaltautomatik Mercedes PowerShift. Sie optimiert den Verbrauch und erhöht den Fahrkomfort. Die bereits seit mehreren Jahren in Europa bewährte BLUETEC-Technologie wurde im Jahr 2010 auch in den neuen Motoren in den USA und in Kanada sehr erfolgreich eingeführt. Wir gehen davon aus, dass wir mit den neuen Motoren von der in Nordamerika erwarteten Bestandserneuerung besonders profitieren können. In Japan haben wir im Frühjahr den neuen Fernverkehr-Lkw Super Great vorgestellt. Im November 2010 wurde der komplett neu entwickelte, leichte Lkw Fuso Canter eingeführt, der bei Wirtschaftlichkeit, Umweltfreundlichkeit, Sicherheit und Design Maßstäbe setzt. Der Fuso Canter Eco Hybrid, die Nummer 1 in der Verbraucheffizienz bei den Lkw bis 5t in Japan, ist nun auch in Australien, Irland und Hongkong erhältlich. Unser umfangreiches Angebot an Sicherheitstechnologien wurde bei Mercedes-Benz Lkw mit der zweiten Generation des Active Brake Assist erweitert, der im Ernstfall auch vor stehenden Hindernissen eine Notbremsung einleiten kann.

Darüber hinaus wollen wir mit unserem Engagement in den Schwellenländern – insbesondere in Russland, Indien und China – zusätzliche Wachstumspotenziale erschließen. Außerdem erweitern wir unsere Kapazitäten in Brasilien und in der Türkei. Dies wird dazu beitragen, dass unsere Lkw dort noch besser verfügbar sind und wir dadurch unsere Position in diesen Märkten behaupten oder sogar ausbauen können.

Bei **Mercedes-Benz Vans** dürfte sich der positive Absatztrend des Jahres 2010 in den Jahren 2011 und 2012 fortsetzen. Auf der Produktseite werden die neue Generation des Vito und Viano sowie weitere BlueEFFICIENCY-Modelle für Impulse sorgen. Die Produktion in Argentinien werden wir zum Jahresende 2011 auf die aktuelle Modellgeneration des Sprinter umstellen und damit unser Angebot in den lateinamerikanischen Märkten deutlich aufwerten. Darüber hinaus wird im Jahr 2011 der Sprinter in China eingeführt. Über die Fertigung vor Ort wollen wir den Absatz in diesem vielversprechenden Zukunftsmarkt deutlich steigern. Hierzu werden wir in dem 50:50-Gemeinschaftsunternehmen Fujian Daimler Automotive ab dem Jahr 2011 zusätzlich zu den Modellen Vito und Viano den Sprinter als Bus produzieren.

**Daimler Buses** geht davon aus, die weltweit führende Position bei den Omnibussen über 8t mit innovativen und qualitativ hochwertigen neuen Produkten behaupten zu können. Dabei erwarten wir, in den Jahren 2011 und 2012 an den hohen Absatz des Jahres 2010 anknüpfen zu können. Aufgrund der voraussichtlichen Entwicklung unserer Kernmärkte Westeuropa und Lateinamerika sind die Wachstumsspielräume aber eher begrenzt.

**Daimler Financial Services** rechnet für die Geschäftsjahre 2011 und 2012 mit weiterem Wachstum sowohl im Finanzierungs- und Leasinggeschäft als auch bei Versicherungen und im Flottenmanagement. Dazu weiten wir das Produktangebot kontinuierlich aus und verknüpfen die einzelnen Finanzdienstleistungsbausteine und Servicekomponenten zu attraktiven Mobilitätslösungen.

Auf Basis unserer Annahmen zur Entwicklung wichtiger Absatzmärkte und der Planungen der Geschäftsfelder erwarten wir für den **Daimler-Konzern**, dass der Absatz in den Jahren 2011 und 2012 insgesamt weiter gesteigert werden kann.

## Umsatz und Ergebnis

Nach dem deutlichen Anstieg im Jahr 2010 gehen wir davon aus, dass der **Umsatz** von Daimler in den Jahren 2011 und 2012 mit geringerer Dynamik weiter zunehmen wird. Das Wachstum wird voraussichtlich von allen automobilen Geschäftsfeldern getragen.

Für die **Ertragssituation des Daimler-Konzerns** in den Jahren 2011 und 2012 sind insbesondere die folgenden Faktoren von Bedeutung:

- Wir haben das Krisenjahr 2009 und auch das Jahr 2010 genutzt, um unsere Kostenbasis nachhaltig zu verbessern. Hierzu haben wir die in allen Geschäftsfeldern laufenden Programme zur Effizienzsteigerung intensiviert und teilweise um strukturelle Komponenten erweitert. Unsere Anstrengungen zur Effizienzsteigerung werden wir auf Basis der bestehenden Programme konsequent weiterführen.
- Gleichzeitig profitieren wir nun von der Tatsache, dass wir unsere Projekte für die Zukunftssicherung auch über die Finanz- und Wirtschaftskrise hinweg zielgerichtet weiterverfolgt haben. Nur deshalb können wir nun mit einer Vielzahl sehr attraktiver Produkte und mit neuen Technologien in den Märkten überzeugen. Im Rahmen unserer Initiative »Der Weg zur emissionsfreien Mobilität« wollen wir die Umweltfreundlichkeit und Verbrauchseffizienz unserer Fahrzeuge über den Einsatz neuer Technologien weiter verbessern und gleichzeitig mit unseren typischen Produkteigenschaften am Markt überzeugen.
- In den BRIC-Staaten haben wir Produktionsstätten und Vertriebsstrukturen aufgebaut und können deshalb am überdurchschnittlichen Wachstum dieser Märkte partizipieren.
- Um unsere Wettbewerbsposition zu sichern und auszubauen, werden wir die Aufwendungen für die Zukunftssicherung in den Jahren 2011 und 2012 deutlich erhöhen.
- Die teilweise deutlich gestiegenen Rohstoffpreise, mit denen wir auch im Jahr 2011 rechnen müssen, werden sich voraussichtlich negativ auf das Ertragsniveau auswirken.

Auf der Basis der aktuellen Einschätzungen erwarten wir für Daimler im Jahr 2011 ein EBIT aus dem laufenden Geschäft, das deutlich über dem Niveau des Jahres 2010 liegt.

In den kommenden Jahren wollen wir das Ergebnisniveau der einzelnen Geschäftsfelder und damit des Unternehmens insgesamt erhöhen und nachhaltig die Zielrenditen erreichen. Vom erwarteten Wachstum der Automobilmärkte wollen wir dabei überproportional profitieren.

Für unser Automobilgeschäft streben wir über die Markt- und Produktzyklen hinweg eine jahresdurchschnittliche Umsatzrendite von 9% an, die wir ab dem Jahr 2013 nachhaltig erreichen wollen. Basis hierfür sind die Zielrenditen der einzelnen Geschäftsfelder: 10% für Mercedes-Benz Cars, 8% für Daimler Trucks, 9% für Mercedes-Benz Vans und 6% für Daimler Buses. Für das Geschäftsfeld Daimler Financial Services haben wir uns eine Eigenkapitalrendite von 17% vorgenommen.

Die Jahre 2011 und 2012 werden allerdings durch hohe Aufwendungen für neue Produkte und Technologien sowie die Erschließung neuer Märkte gekennzeichnet sein. Darüber hinaus werden sich die zahlreichen Modellwechsel, die bei Mercedes-Benz Cars im Planungszeitraum anstehen, erst mit zeitlicher Verzögerung positiv im Ergebnis niederschlagen. Außerdem muss berücksichtigt werden, dass die großen Nutzfahrzeugmärkte trotz hoher Wachstumsraten erst mittelfristig wieder in die Größenordnung der Rekordjahre vor der Finanz- und Wirtschaftskrise hineinwachsen.

Nachdem wir im vergangenen Jahr angesichts des negativen Konzernergebnisses auf die Ausschüttung einer Dividende verzichtet haben, wollen wir unsere Aktionäre in den kommenden Jahren wieder in angemessener Form am Unternehmenserfolg beteiligen. Dabei orientieren wir uns an einer Ausschüttungsquote in der Größenordnung von rund 40% des auf die Daimler-Aktionäre entfallenden Konzernergebnisses. Auf dieser Basis haben Vorstand und Aufsichtsrat entschieden, der Hauptversammlung am 13. April 2011 die Ausschüttung einer Dividende von 1,85 € pro Aktie vorzuschlagen.

## Chancen und Risiken

Die Basis unserer Einschätzungen für die Jahre 2011 und 2012 sind insgesamt stabile politische Rahmenbedingungen sowie die Annahme, dass es keinen gravierenden Rückschlag in der Entwicklung der Weltwirtschaft gibt und sich der Aufwärtstrend der weltweiten Automobilnachfrage in den Jahren 2011 und 2012 fortsetzt. Zusätzliche Chancen und Risiken können sich aus der Entwicklung der Wechselkurse und der Rohstoffpreise ergeben sowie aus den von uns unterstellten Einschätzungen zum Markterfolg unserer Produkte.

Die größten Einzelrisiken für die Weltwirtschaft sind aus unserer Sicht: erneute Finanzmarkturbulenzen einschließlich Währungsrisiken, eine Verschärfung der Verschuldungsproblematik der öffentlichen Haushalte, ein Wachstumseinbruch in China, hohe Volatilitäten auf den Rohstoffmärkten, Unterbrechungen der Produktion aufgrund von Engpässen bei den Zulieferfirmen, aufkeimender Protektionismus sowie mögliche destabilisierende Effekte einer zu expansiven Geldpolitik. Erst wenn einige dieser Faktoren gemeinsam eintreten, wäre zu befürchten, dass die Weltwirtschaft nochmals eine rezessive Phase erfährt.

Die Risiken, die sich aus großen Wechselkursschwankungen für unser Geschäft ergeben, haben wir für das Jahr 2011 bereits weitgehend abgesichert. Beim US-Dollar und beim britischen Pfund liegt die Sicherungsquote bei rund 75%.

Grundsätzlich gibt es aber durchaus auch Chancen für eine insgesamt positivere Entwicklung der Weltwirtschaft: Sollten Investoren und Konsumenten sehr zügig wieder mehr Zuversicht in die Nachhaltigkeit des Aufschwungs gewinnen und sich dies dann auch in Form von vermehrter Nachfrage und Investitionen niederschlagen, so könnte das Wachstum gerade in den Industrieländern spürbar stärker ausfallen. Dies gilt vor allem dann, wenn die Geschäftsbanken diesen Aufschwung zugleich über entsprechende Kreditexpansion unterstützen und außerdem die Bremswirkungen der staatlichen Konsolidierungsmaßnahmen weniger deutlich als angenommen ausfallen würden. Ein rasches Wiedererlangen der Stabilität an den Finanzmärkten gehört ebenfalls zu den Faktoren, die dem globalen Aufschwung mehr Nachhaltigkeit verleihen könnten.

Aus einem solchen Szenario würden sich dann auch Perspektiven für eine deutlich günstigere Geschäftsentwicklung bei Daimler in den Jahren 2011 und 2012 ergeben. Zusätzliche Absatz- und Ertragschancen sehen wir insbesondere dann, wenn die reifen Automobilmärkte der Triade Nordamerika, Westeuropa und Japan schneller als allgemein erwartet wieder in die Größenordnung der Rekordjahre 2007 und 2008 hineinwachsen.

Mittelfristig eröffnen sich aber vor allem durch den Ausbau unserer Präsenz in Asien und Osteuropa zusätzliche Wachstumspotenziale. Über unsere Aktivitäten vor Ort schaffen wir die Voraussetzungen dafür, diese Chancen nutzen zu können. Gemeinsam mit unseren lokalen Partnern erweitern wir in China die Produktion von Pkw und Transportern und sind dabei, die Gründung eines Lkw-Joint-Ventures einschließlich des Aufbaus einer Fertigung von schweren Lkw-Motoren vorzubereiten. Auch in Indien erhöhen wir die Fertigungskapazitäten für Pkw und errichten ein neues Lkw-Werk. In Russland intensivieren wir die Partnerschaft mit dem Lkw-Hersteller Kamaz, und mit GAZ haben wir ein Memorandum of Understanding zur Fertigung des Sprinter unterzeichnet. Darüber hinaus haben wir in Ungarn mit dem Bau eines Pkw-Werks begonnen. Gute Möglichkeiten für zusätzliches Wachstum sehen wir auch in Lateinamerika und in Schwellenländern wie Indonesien, Vietnam und Thailand.

Darüber hinaus ergeben sich mittelfristig beträchtliche Chancen aus den grundlegenden Veränderungen in der Fahrzeugtechnologie, die sich gegenwärtig abzeichnen. Wenn es – wie von uns angestrebt – gelingt, mit innovativen Technologien eine Vorreiterrolle bei Fahrzeugen und Lösungskonzepten für nachhaltige Mobilität einzunehmen, dann können sich sowohl beim Absatz als auch beim Ergebnis zusätzliche Wachstumspotenziale ergeben.

## Sachinvestitionen 2011–2012

in %

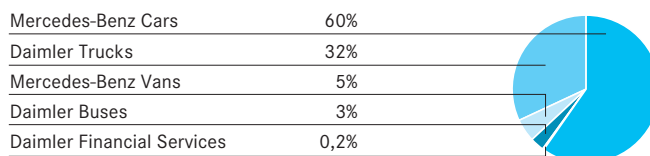

## Investitionen

Auch in den kommenden Jahren werden wir unsere Investitionsbudgets auf Projekte konzentrieren, die für den Markterfolg unserer Produkte besonders wichtig sind. Dennoch werden wir unsere Sachinvestitionen in den Jahren 2011 und 2012 deutlich erhöhen. Maßgeblich dafür sind einerseits der tief greifende technologische Wandel in der Automobilbranche, den wir federführend mitgestalten wollen, andererseits aber auch die Notwendigkeit, die künftigen Wachstumsmärkte mit den passenden Produkten und Produktionskapazitäten vor Ort zu erschließen. Sowohl bei Mercedes-Benz Cars als auch bei Daimler Trucks sind die geplanten Sachinvestitionen deutlich höher als in den Jahren zuvor. Im Geschäftsfeld Mercedes-Benz Cars liegt der Schwerpunkt auf Vorleistungen für neue Fahrzeuge, zum Beispiel die Nachfolgemodelle der A- und B-Klasse und die neue M-Klasse. Das derzeit größte Projekt ist die Erweiterung unseres Modellangebots im A/B-Klasse Segment: Allein dafür investieren wir an den Standorten Rastatt und Kecskemét, Ungarn, insgesamt rund 1,4 Mrd. €. Umfangreiche Mittel sind aber auch für den Ausbau unserer Produktionskapazitäten in den USA, in China und in Indien vorgesehen. Daimler Trucks wird in den kommenden Jahren vor allem in Folgegenerationen bestehender Produkte investieren. Ein weiterer Schwerpunkt ist der Auf- und Ausbau von Fertigungskapazitäten, beispielsweise für den Eintritt in den indischen Markt. Bei Mercedes-Benz Vans stehen Investitionen in die Kooperationsprojekte mit Renault, in die Lokalisierung des Sprinter in Russland und in die Produktionsstandorte im Vordergrund. Wichtige Projekte bei Daimler Buses sind Vorleistungen für neue Modelle, zukünftige Abgast Technologien und alternative Antriebe.

## Sachinvestitionen

|                            | Ist 2009 | Ist 2010 | 2011-2012 |
|----------------------------|----------|----------|-----------|
| in Milliarden €            |          |          |           |
| Daimler-Konzern            | 2,4      | 3,7      | 10,1      |
| Mercedes-Benz Cars         | 1,6      | 2,5      | 6,1       |
| Daimler Trucks             | 0,6      | 1,0      | 3,2       |
| Mercedes-Benz Vans         | 0,1      | 0,1      | 0,5       |
| Daimler Buses              | 0,1      | 0,1      | 0,3       |
| Daimler Financial Services | 0,01     | 0,01     | 0,02      |

## Forschungs- und Entwicklungsleistungen 2011–2012

in %

|                    |     |
|--------------------|-----|
| Mercedes-Benz Cars | 62% |
| Daimler Trucks     | 26% |
| Mercedes-Benz Vans | 8%  |
| Daimler Buses      | 4%  |

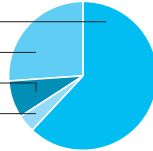

## Forschung und Entwicklung

Mit unseren Forschungs- und Entwicklungsaktivitäten verfolgen wir das Ziel, die Wettbewerbsposition von Daimler vor dem Hintergrund der anstehenden technologischen Herausforderungen auszubauen. Durch innovative Lösungen für eine emissionsarme und sichere Mobilität wollen wir uns Vorteile im Wettbewerb verschaffen. Im Zeitraum von 2011 bis 2012 wird Daimler insgesamt 10,3 Mrd. € für Forschungs- und Entwicklungsaktivitäten einsetzen. Das sind rund 1,3 Mrd. € mehr als in den Jahren 2009 und 2010. Nochmals steigern wollen wir die Forschungs- und Entwicklungsleistungen bei Mercedes-Benz Cars. Die wesentlichen Projekte sind hier die Nachfolgemodelle für die A/B-Klasse, die M-Klasse und die S-Klasse sowie neue Motoren und alternative Antriebssysteme. Bei Daimler Trucks werden sich die Forschungs- und Entwicklungskosten weiterhin auf einem hohen Niveau bewegen. Die Schwerpunkte liegen dabei auf der Entwicklung und Anpassung neuer Motorengenerationen, mit denen wir die sich weiter verschärfenden Abgasvorschriften erfüllen, sowie auf Folgegenerationen für bestehende Produkte. Die Weiterentwicklung der Motoren im Hinblick auf die Erfüllung künftiger Abgasnormen ist auch bei Mercedes-Benz Vans und bei Daimler Buses ein wichtiger Forschungs- und Entwicklungsschwerpunkt. Insbesondere bei Daimler Buses spielen auch alternative Antriebssysteme eine wichtige Rolle.

Über die oben genannten Projekte hinausgehend hat Daimler im Forschungsbudget umfangreiche Mittel für neue Technologien eingeplant, mit denen wir die Sicherheit, Umweltverträglichkeit und Wirtschaftlichkeit des Straßenverkehrs verbessern wollen.

## Mitarbeiterinnen und Mitarbeiter

Daimler geht davon aus, dass sich die Zahl der Beschäftigten vor dem Hintergrund steigender Produktionsumfänge und der angestrebten Produktivitätsfortschritte in den Jahren 2011 und 2012 leicht erhöhen wird.

## Vorausschauende Aussagen in diesem Geschäftsbericht

Dieses Dokument enthält vorausschauende Aussagen zu unserer aktuellen Einschätzung zukünftiger Vorgänge. Wörter wie »antizipieren«, »annehmen«, »glauben«, »einschätzen«, »erwarten«, »beabsichtigen«, »können/könnten«, »planen«, »projizieren«, »sollten« und ähnliche Begriffe kennzeichnen solche vorausschauenden Aussagen. Diese Aussagen sind einer Reihe von Risiken und Unsicherheiten unterworfen. Einige Beispiele hierfür sind eine ungünstige Entwicklung der weltwirtschaftlichen Situation, insbesondere ein Rückgang der Nachfrage in unseren wichtigsten Absatzmärkten, eine Verschlechterung unserer Refinanzierungsmöglichkeiten an den Kredit- und Finanzmärkten, Veränderungen der Wechselkurse, eine Veränderung des Konsumverhaltens in Richtung kleinerer und weniger gewinnbringender Fahrzeuge oder ein möglicher Akzeptanzverlust unserer Produkte und Dienstleistungen mit der Folge einer verschlechterten Durchsetzung von Preisen und Auslastung von Produktionskapazitäten, Preiserhöhungen bei Kraftstoffen und Rohstoffen, Unterbrechungen der Produktion aufgrund von Materialengpässen, Belegschaftsstreiks oder Lieferanteninsolvenzen, ein Rückgang der Wiederverkaufspreise von Gebrauchtfahrzeugen, die erfolgreiche Umsetzung von Kostenreduzierungs- und Effizienzsteigerungsmaßnahmen, die Geschäftsaussichten der Gesellschaften, an denen wir bedeutende Beteiligungen halten, insbesondere EADS, die erfolgreiche Umsetzung strategischer Kooperationen und Joint Ventures, die Änderungen von Gesetzen, Bestimmungen und behördlichen Richtlinien, insbesondere soweit sie Fahrzeugemission, Kraftstoffverbrauch und Sicherheit betreffen, sowie der Abschluss laufender behördlicher Untersuchungen und der Ausgang anhängiger oder drohender künftiger rechtlicher Verfahren und weitere Risiken und Unwägbarkeiten, von denen einige in diesem Geschäftsbericht von Daimler unter der Überschrift »Risikobericht« beschrieben sind. Sollte einer dieser Unsicherheitsfaktoren oder Unwägbarkeiten eintreten oder sollten sich die den vorausschauenden Aussagen zugrunde liegenden Annahmen als unrichtig erweisen, könnten die tatsächlichen Ergebnisse wesentlich von den in diesen Aussagen genannten oder implizit zum Ausdruck gebrachten Ergebnissen abweichen. Wir haben weder die Absicht noch übernehmen wir eine Verpflichtung, vorausschauende Aussagen laufend zu aktualisieren, da diese ausschließlich auf den Umständen am Tag der Veröffentlichung basieren.

## Forschungs- und Entwicklungsleistungen

|                    | Ist 2009 | Ist 2010 | 2011-2012 |
|--------------------|----------|----------|-----------|
| in Milliarden €    |          |          |           |
| Daimler-Konzern    | 4,2      | 4,8      | 10,3      |
| Mercedes-Benz Cars | 2,7      | 3,1      | 6,4       |
| Daimler Trucks     | 1,1      | 1,3      | 2,7       |
| Mercedes-Benz Vans | 0,2      | 0,3      | 0,8       |
| Daimler Buses      | 0,2      | 0,2      | 0,4       |



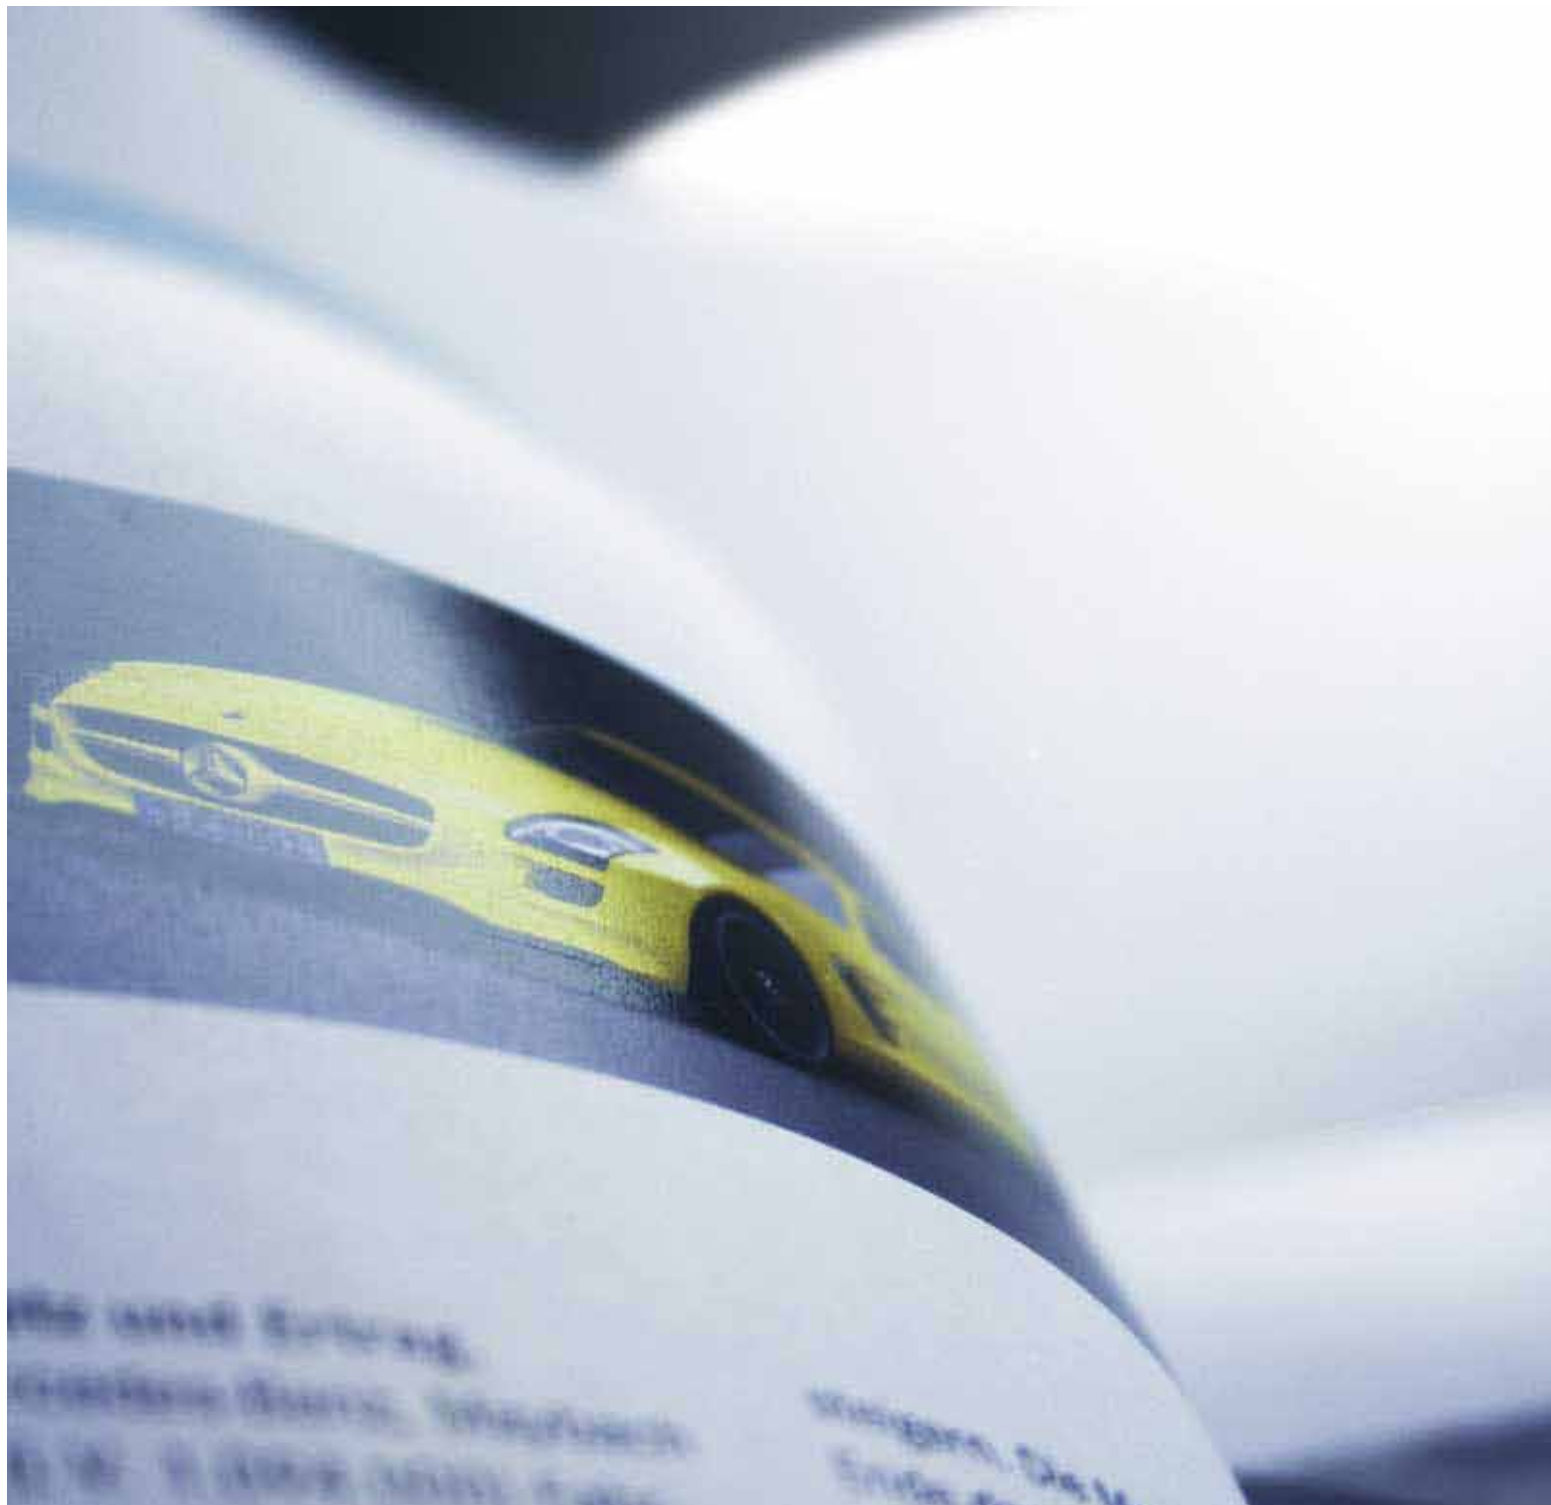

Alle Geschäftsfelder von Daimler haben vom Aufschwung der Weltwirtschaft und der attraktiven Produktpalette profitiert. Bei Absatz und Umsatz wurden überwiegend zweistellige Wachstumsraten erzielt. Unsere Marktposition konnten wir in vielen Bereichen ausbauen.

## 122 - 125 Mercedes-Benz Cars

- Absatz um 17% gestiegen
- Marktposition und Modellmix verbessert
- Neue Modelle der E-Klasse überzeugen im Markt
- Verbrauchsreduzierung durch neue Motoren
- Ertragskraft deutlich gesteigert:  
EBIT von 4,7 Mrd. € und Umsatzrendite von 8,7%

## 126 - 129 Daimler Trucks

- Kräftige Absatzsteigerung in allen Kernmärkten
- Weltweite Produktoffensive bei Motoren und Modellen
- Erschließung neuer Märkte und Wachstumsfelder
- EBIT auf 1,3 Mrd. € deutlich gesteigert

## 130 - 131 Mercedes-Benz Vans

- Deutliches Plus beim Absatz mit 224.200 Einheiten
- Führende Marktposition in der Europäischen Union behauptet
- Produktion in China aufgenommen
- EBIT von 451 Mio. €

## 132 - 133 Daimler Buses

- Lateinamerika trägt insgesamt positive Absatzentwicklung
- Erfreuliche Marktanteilsentwicklung in den Kernmärkten
- Attraktives Produktportfolio mit zukunftsweisenden Antriebstechnologien
- EBIT von 215 Mio. €

## 134 - 135 Daimler Financial Services

- Hohe Wachstumsraten in Asien
- Neuausrichtung des Geschäfts in Deutschland
- Spitzenplätze bei der Kunden- und Händlerzufriedenheit
- EBIT mit 831 Mio. € auf sehr hohem Niveau

Im Jahr 2010 hat Mercedes-Benz Cars die Marktposition verbessert und die Ertragskraft nachhaltig gestärkt. Vor allem die neuen Modelle der E-Klasse und der Markterfolg der S-Klasse haben dazu beigetragen. Faszinierende Produktneuheiten waren das E-Klasse Cabrio, das neue viertürige Coupé CLS und der Supersportwagen Mercedes-Benz SLS AMG. Dass Effizienz und Leistung keine Gegensätze mehr sind, zeigen unsere neuen Motoren.

## Mercedes-Benz Cars

|                                        | 2010      | 2009      | 10/09        |
|----------------------------------------|-----------|-----------|--------------|
| €-Werte in Millionen                   |           |           | Veränd. in % |
| EBIT                                   | 4.656     | -500      | .            |
| Umsatz                                 | 53.426    | 41.318    | +29          |
| Umsatzrendite                          | 8,7%      | -1,2%     | .            |
| Sachinvestitionen                      | 2.457     | 1.618     | +52          |
| Forschungs- und Entwicklungsleistungen | 3.130     | 2.696     | +16          |
| davon aktiviert                        | 940       | 913       | +3           |
| Produktion                             | 1.312.456 | 1.031.562 | +27          |
| Absatz <sup>1</sup>                    | 1.276.827 | 1.093.905 | +17          |
| Beschäftigte (31.12.)                  | 96.281    | 93.572    | +3           |

## Deutliche Steigerung bei Absatz, Umsatz und Ertrag.

Mercedes-Benz Cars mit den Marken Mercedes-Benz, Maybach und smart hat im Berichtsjahr 1.276.800 (i. V. 1.093.900) Fahrzeuge abgesetzt. Mit diesem Zuwachs von 17% konnte das Geschäftsfeld nach dem marktbedingt schwachen Jahr 2009 wieder an die Größenordnung des Jahres 2008 anknüpfen. Da sich die Absatzstruktur zugunsten besonders hochwertiger Fahrzeuge verändert hat, konnte der Umsatz deutlich stärker um 29% auf 53,4 Mrd. € gesteigert werden. Das EBIT stieg auf 4,7 (i. V. -0,5) Mrd. €, und die Umsatzrendite erreichte 8,7%. Hierzu haben einerseits die allgemeine Markterholung, die hohe Dynamik in den Märkten Asiens und der Absatzerfolg unserer Fahrzeuge beigetragen, andererseits aber auch die umfangreichen Maßnahmen zur Senkung der Kosten und zur Steigerung der Effizienz.

**Mercedes-Benz gewinnt Marktanteile in vielen Ländern.** Die Marke Mercedes-Benz hat im Jahr 2010 1.178.300 (i. V. 974.700) Fahrzeuge ausgeliefert. Damit haben wir unsere Position in zahlreichen Märkten verbessert. Unsere Limousinen der S-, E- und C-Klasse sowie das T-Modell der E-Klasse sind in ihren jeweiligen Marktsegmenten weltweit führend.

Dank des Erfolgs unserer neuen Modelle konnten wir den Absatz im E-Klasse Segment im Jahr 2010 um 56% auf 330.800 Fahrzeuge steigern. Nachdem wir die Limousine, das Coupé und das T-Modell der E-Klasse bereits im Verlauf des Jahres 2009 eingeführt hatten, folgte im Frühjahr 2010 das E-Klasse Cabriolet. Der Absatz von Mercedes-Benz im Luxussegment (S-, CL-, SL-Klasse, SLR, SLS und Maybach) stieg von 57.100 auf 80.400 Fahrzeuge. Dabei hat die S-Klasse trotz neuer Wettbewerber im Segment ihre Position als weltweit meistverkaufte Luxuslimousine behauptet – insbesondere aufgrund der lebhaften Nachfrage aus China. Im C-Klasse Segment (C- und SLK-Klasse) erhöhte sich der Absatz um 6% auf 341.900 Fahrzeuge, und im Geländewagensegment (M-, R-, GL-, GLK- und G-Klasse) konnte Mercedes-Benz den Absatz sogar um 21% auf 202.800 Fahrzeuge steigern. Die Modelle der A- und B-Klasse verzeichneten gegen Ende des Lebenszyklus einen Zuwachs von 3% auf 222.400 (i. V. 215.500) Fahrzeuge.

## Pkw-Absatz

|                                      | 2010         | 2009  | 10/09        |
|--------------------------------------|--------------|-------|--------------|
| in 1.000 Einheiten                   |              |       | Veränd. in % |
| <b>Mercedes-Benz</b>                 | <b>1.178</b> | 975   | +21          |
| davon: A-/B-Klasse                   | 222          | 215   | +3           |
| C-/CLK-/SLK-Klasse                   | 342          | 323   | +6           |
| E-/CLS-Klasse                        | 331          | 212   | +56          |
| S-/CL-/SL-Klasse/<br>SLR/SLS/Maybach | 80           | 57    | +41          |
| M-/R-/GL-/GLK-/<br>G-Klasse          | 203          | 167   | +21          |
| smart                                | 94           | 114   | -17          |
| Mercedes-Benz Cars <sup>1</sup>      | 1.277        | 1.094 | +17          |
| davon: Westeuropa                    | 636          | 623   | +2           |
| davon: Deutschland                   | 293          | 298   | -2           |
| NAFTA                                | 256          | 236   | +9           |
| davon: USA                           | 220          | 203   | +9           |
| China                                | 160          | 67    | +137         |
| Japan                                | 31           | 27    | +17          |

<sup>1</sup> Einschließlich in Südafrika gefertigter und/oder verkaufter Mitsubishi Fahrzeuge.

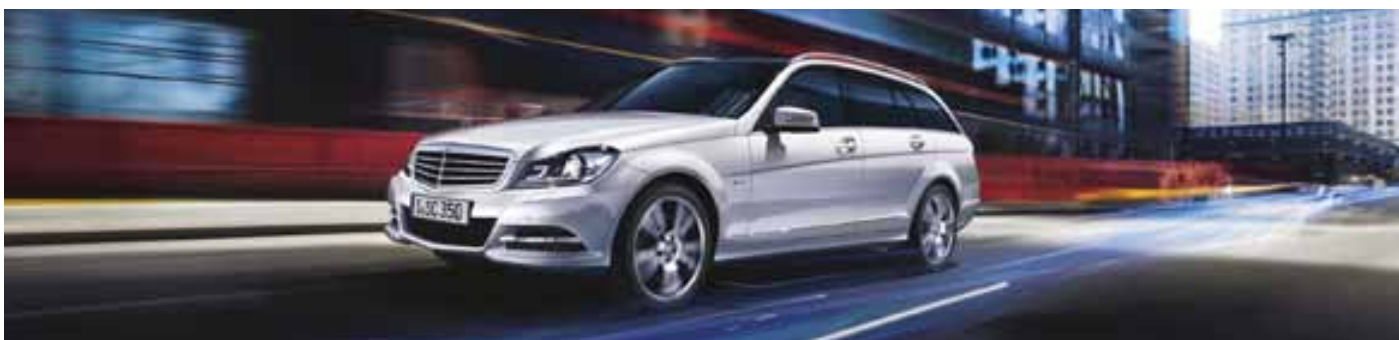

**Zum Frühjahr 2011 präsentiert sich die neue Generation der Mercedes-Benz C-Klasse umfassend modernisiert.**

Mercedes-Benz konnte den Absatz in allen Regionen steigern. In Deutschland haben wir mit 265.000 (i. V. 265.500) Fahrzeugen trotz einer schwachen Marktentwicklung das Absatzniveau des Vorjahres erreicht, Marktanteile hinzugewonnen und unsere führende Marktposition im Premiumsegment behauptet. In den anderen Ländern Westeuropas stieg der Absatz von Mercedes-Benz um 9% auf insgesamt 290.500 (i. V. 267.200) Einheiten. In den USA konnten wir unsere Verkäufe um 15% auf 216.400 Fahrzeuge steigern. Sehr positiv entwickelte sich das Geschäft in den Schwellenländern: So ist Mercedes-Benz zum Beispiel in China weiterhin die am schnellsten wachsende Premiummarke; unser Absatz hat sich dort im Jahr 2010 mit 156.400 Fahrzeugen mehr als verdoppelt (+140%). Für unsere S-Klasse ist China nun bereits im zweiten Jahr der wichtigste Markt. Für zusätzliche Nachfrage sorgte auch eine verlängerte Version der E-Klasse, die wir seit Mai 2010 ausschließlich für den chinesischen Markt vor Ort produzieren. Durchgängig zweistellige Wachstumsraten gab es zudem in den übrigen BRIC-Staaten Brasilien (+40%), Russland (+68%) und Indien (+79%) sowie in weiteren Wachstumsmärkten wie Taiwan (+109%), Südkorea (+80%) und dem Mittleren Osten (+63%).

**Das neue E-Klasse Cabriolet – open air für vier.** Im Januar 2010 feierte das Cabriolet der E-Klasse auf der North American International Auto Show in Detroit seine Weltpremiere. Das viersitzige Ganzjahres-Cabrio komplettiert die erfolgreiche E-Klasse Familie und bietet mit dem Windschott AIRCAP eine Weltneuheit, die Luftwirbel im Innenraum bei offenem Verdeck deutlich verringert. Wie alle E-Klasse Modelle bietet auch das Cabriolet ein herausragendes Sicherheitsniveau. Zur Ausstattung gehören unter anderem die Müdigkeitserkennung »ATTENTION ASSIST«, der präventive Insassenschutz PRE-SAFE®, das »Intelligent Light System« sowie der Abstandsregel-Tempomat »DISTRONIC PLUS«. Die Leser der Zeitschrift »auto motor und sport« haben das neue Cabriolet zum »schönsten Cabrio 2010« gekürt. An die ersten Kunden wurde das E-Klasse Cabriolet im März 2010 ausgeliefert; bis zum Jahresende wurden bereits 24.500 Fahrzeuge verkauft.

**Faszination und Effizienz – der neue CLS.** Das neue viertürige Coupé CLS, das erstmals Ende September auf dem Pariser Automobilsalon präsentiert wurde, knüpft an die Pionierrolle seines Vorgängers an und ist dennoch ein absoluter Neuauftritt. Der neue CLS vereinigt ein kraftvolles und selbstbewusstes Design mit höchster Effizienz. Alle Motoren für den CLS sind neu, sie sorgen für einen Verbrauchsvorteil von bis zu 25% gegenüber den Vorgängermodellen. Seit Januar 2011 wird der CLS an unsere Kunden ausgeliefert. Bereits kurz nach der Messepremiere erhielt der CLS das begehrte »Goldene Lenkrad 2010«.

**Weitere Modellneuheiten 2010.** Wichtigstes äußeres Merkmal der neuen R-Klasse Generation ist die komplett neu gestaltete Frontpartie. Zu den inneren Werten gehören unter anderem die Raumökonomie moderner Großraumlimousinen sowie der Komfort, die Wertanmutung und das Prestige klassischer Mercedes-Benz Limousinen. Mit der neuen Generation der CL-Klasse rückt Mercedes-Benz den Kraftstoffverbrauch und die Abgasemissionen auch im exklusiven Top-Segment in den Blickpunkt. Neben der neu entwickelten BlueDIRECT-Technologie mit strahlgeführter Direkteinspritzung trägt das maßgeschneiderte BlueEFFICIENCY-Paket des CL 500 BlueEFFICIENCY zu der beachtlichen Verbrauchsminderung um 22 Prozent bei.

**Sparsame und leistungsstarke Motoren.** Dass Effizienz und Leistung keine Gegensätze mehr sind, zeigen unsere neuen Motoren. Bereits im Jahr 2009 haben wir unser Angebot an Vierzylindermotoren erneuert. Im Jahr 2010 folgten die neuen Sechs- und Achtzylindermotoren. Damit verfügen wir über ein breites Angebot an Motoren, die mit hoher Leistung bei niedrigem Verbrauch überzeugen und in einer Vielzahl von Modellen flexibel eingesetzt werden können. Mit insgesamt vier neuen Diesel- und Benzinmotoren ist die Mercedes-Benz S-Klasse in ihrem Segment richtungweisend. So sichert sich zum Beispiel der neue S 250 CDI BlueEFFICIENCY das Prädikat »Sparsamste Luxuslimousine der Welt«. Bei einer Leistung von 150 kW (204 PS) verbraucht diese S-Klasse nur 5,7 l Dieselkraftstoff pro 100 km (kombinierter NEFZ-Verbrauch); das entspricht einem CO<sub>2</sub>-Ausstoß von 149 g/km). Der neue V6-Diesel im S 350 BlueTEC leistet 190 kW (258 PS) bei einem kombinierten Verbrauch von 6,8 l pro 100 km (177 g CO<sub>2</sub>/km) und ist dank AdBlue®-Abgasreinigung einer der saubersten Dieselmotoren der Welt.



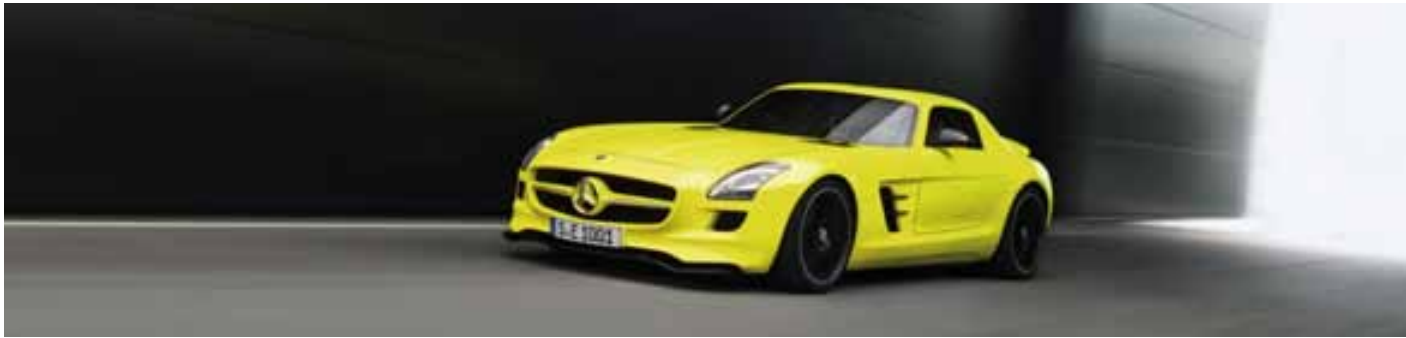

**Der Supersportwagen Mercedes-Benz SLS AMG E-CELL fährt rein elektrisch.**

Der neu entwickelte Sechszylinder-Benzinmotor wird zum Beispiel auch im neuen CLS 350 BlueEFFICIENCY eingesetzt. Serienmäßig mit ECO Start-Stopp-Funktion ausgestattet, kommt dieses Modell auf einen kombinierten Verbrauch von 6,8 l pro 100 km (159 g CO<sub>2</sub>/km).

**CO<sub>2</sub>-Ausstoß weiter gesenkt.** Mithilfe unserer neuen und sparsamen Motoren und zusätzlicher BlueEFFICIENCY-Modelle konnten wir den durchschnittlichen CO<sub>2</sub>-Ausstoß der von uns in der Europäischen Union verkauften Pkw im Berichtsjahr trotz eines höheren Anteils besonders hochwertiger und leistungsstarker Fahrzeuge auf 158 g/km verringern. Bis zum Jahr 2012 wollen wir die CO<sub>2</sub>-Emissionen unserer Neuwagenflotte in der EU auf unter 140 g/km senken (vgl. S. 83 f. und 140 ff.).

**Lokal emissionsfreie Elektrofahrzeuge in Serie.** Seit Jahresende 2009 werden mit der Mercedes-Benz B-Klasse F-CELL und dem smart fortwo electric drive die ersten lokal emissionsfreien Elektrofahrzeuge von Daimler unter Serienbedingungen gefertigt. Insgesamt 1.500 smart fortwo electric drive werden bis Ende 2011 in Berlin und anderen Metropolen Europas sowie in den USA an ausgewählte Kunden vermietet. Bis zum Jahresende 2010 wurde bereits die Hälfte dieser Fahrzeuge ausgeliefert. Von unserem Brennstoffzellenfahrzeug Mercedes-Benz B-Klasse F-CELL werden insgesamt 200 Fahrzeuge in Kleinserie gefertigt und bis zum Jahr 2012 für den Alltagsbetrieb an ausgewählte Kunden in Deutschland und den USA übergeben. Seit September 2010 wird der dritte Elektro-Pkw von Mercedes-Benz, die A-Klasse E-CELL, im Werk Rastatt produziert: Der voll alltags- und familientaugliche Fünfsitzer mit batterieelektrischem Antrieb basiert auf der aktuellen A-Klasse und bietet einen großzügigen und flexibel nutzbaren Innen- und Kofferraum. Die beiden hocheffizienten Lithium-Ionen-Batterien sind platzsparend im Fahrzeugboden untergebracht und ermöglichen eine Reichweite von 255 km (NEFZ). Die rund 500 Fahrzeuge werden im Rahmen eines Full-Service-Mietmodells an ausgewählte Kunden in mehreren europäischen Ländern ausgeliefert, unter anderem in Deutschland, Frankreich und den Niederlanden (vgl. S. 141).

**Die neue Generation des smart fortwo.** Seit Oktober 2010 ist die neue Generation des innovativen Zweisitzers im Handel. Der neue Auftritt im Innenraum, ein aufgewertetes Exterieur und umweltschonendere Motoren machen den smart fortwo noch attraktiver. Mit modernster Technik ausgestattet sind die Kommunikations- und Entertainment-Systeme. Für zeitgemäßen Antrieb sorgen weiter verfeinerte Benzinmotoren, die in der 45-kW- und 52-kW-Variante weniger als 100 g CO<sub>2</sub>/km ausstoßen und damit Bestwerte setzen. Insgesamt haben wir im Berichtsjahr 94.300 (i. V. 113.900) smart fortwo abgesetzt.

**car2go weiter auf Erfolgskurs.** Das innovative Mobilitätskonzept car2go, das wir seit März 2009 in Ulm und seit November 2009 in Austin/Texas anbieten, entwickelt sich sehr vielversprechend. In Ulm ist die Zahl der Kunden im Jahresverlauf auf über 20.500 gestiegen, und in Austin sind rund 15.000 Nutzer registriert. Aufgrund des großen Erfolgs in Ulm und in Austin soll car2go nun in weiteren Städten angeboten werden (vgl. S. 142).

**Maybach-Limousinen in neuem Glanz.** Auf der Auto China in Peking präsentierte Maybach im April 2010 seine High-End-Luxuslimousinen mit deutlich erweiterten, hochklassigen Ausstattungs- und Individualisierungsmöglichkeiten. Ein neuer großer Chrom-Kühlergrill betont selbstbewusst den Ausnahmestatus der legendären Limousinen. Die Leistung des Zwölfzylindertriebwerks im Maybach 57 S und 62 S wurde auf 463 kW (630 PS) gesteigert, der Schadstoffausstoß aller Modelle hat sich dennoch reduziert. Der Absatz lag mit 200 Maybach-Modellen auf dem Vorjahresniveau.

**Automobile Faszination: der Mercedes-Benz SLS AMG.** Die wichtigste Produktneuheit unserer Performance-Marke AMG war der Mercedes-Benz SLS AMG. Der Supersportwagen steht für automobile Faszination und Hightech auf höchstem Niveau. Er begeistert mit seinem puristischen Design, konsequentem Leichtbau und überlegener Fahrdynamik. Der Mercedes-Benz SLS AMG hat bereits zahlreiche Auszeichnungen wie den Designpreis der Bundesrepublik Deutschland in Gold, das »Goldene Lenkrad« der »Auto Bild« oder den Titel »Schönster Sportwagen« bei einer Leserumfrage der Zeitschrift »auto motor und sport« erhalten. Darüber hinaus stellte AMG im Jahr 2010 auch einen neuen, hocheffizienten Antriebsstrang mit Benzindirekteinspritzer-Biturbo-V8-Motor in der S- und CL-Klasse vor.

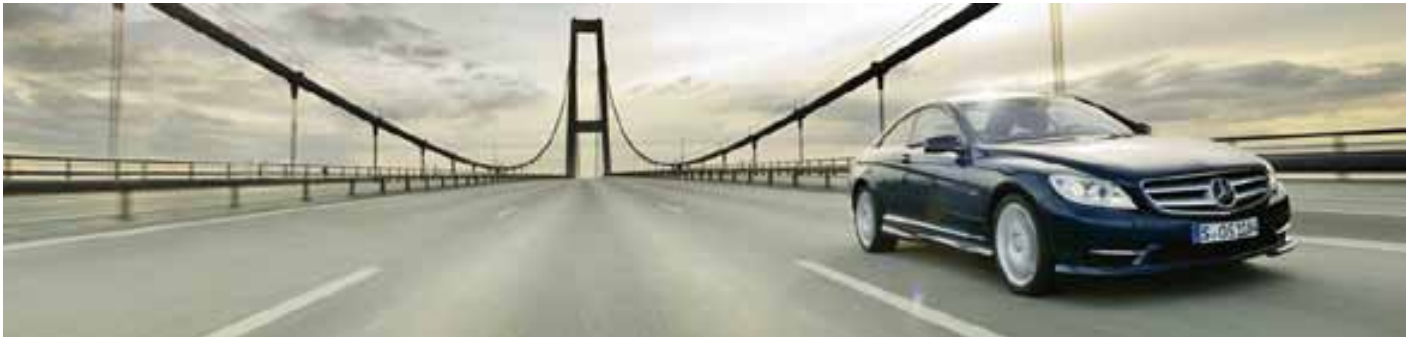

**Luxus-Coupé in Vollendung: Die neue Generation der Mercedes-Benz CL-Klasse.**

**Investitionen in den weltweiten Produktionsverbund.** Mit dem gezielten Ausbau des internationalen Produktionsverbunds steigern wir unsere Wettbewerbsfähigkeit, verringern die Abhängigkeit von Wechselkursschwankungen und können optimal von Wachstumschancen profitieren. Gleichzeitig unterstreichen wir mit substanziellen Investitionen in die deutschen Werke, dass der Standort Deutschland unverändert das Herzstück unseres Produktionsverbunds bleibt.

Nach nur einem Jahr Bauzeit konnten wir im Oktober das Richtfest für das neue Pkw-Werk in Kecskemét, Ungarn, feiern. Dort werden wir ab 2012 im Verbund mit dem Werk Rastatt zwei Modelle der Nachfolgenerationen der aktuellen A- und B-Klasse produzieren. Daimler investiert in diesem Zusammenhang 800 Mio. € in den Werksaufbau in Ungarn sowie 600 Mio. € in das deutsche Stammwerk in Rastatt. Die Kapazitäten bei Beijing Benz Automotive Co., Ltd. (BBAC) in Peking haben wir in einem ersten Schritt auf 100.000 Einheiten jährlich ausgebaut, um der steigenden Nachfrage nach unseren Produkten in China zu begegnen. Parallel zur C-Klasse Limousine wird bei BBAC seit Mai 2010 auch eine Langversion der E-Klasse exklusiv für den chinesischen Markt hergestellt. Wichtige Projekte in Deutschland waren die Vorbereitungen für die Produktion des neuen SLK im Werk Bremen, die Fertigungsanlagen für die neuen Sechs- und Achtzylinder-Benzinmotoren in Bad Cannstatt und die Erweiterung der Motorenmontage bei der MDC Power GmbH im thüringischen Kölleda.

**Zahlreiche Auszeichnungen für Mercedes-Benz Pkw.** Mit unseren Maßnahmen zur weiteren Steigerung der Qualität waren wir im Berichtsjahr sehr erfolgreich – und haben dies auch in externen Studien bestätigt bekommen. Im Rahmen der aktuellen Qualitätsstudie des Marktforschungsinstituts J. D. Power and Associates wurden 82.000 Kunden zur Auslieferungsqualität nach 90 Tagen für Fahrzeuge des Modelljahres 2010 befragt. Bei dieser Befragung auf dem amerikanischen Markt haben wir das beste Ergebnis seit 1990 erzielt: Die C-Klasse belegte den ersten Platz in ihrem Segment; die E-Klasse Limousine, das Coupé der E-Klasse und die S-Klasse wurden jeweils Zweiter.

Auch in den Kategorien Sicherheit, Design, Wertbeständigkeit und Service wurde Mercedes-Benz im Jahr 2010 von verschiedenen Institutionen ausgezeichnet. So konnten zum Beispiel auch die Werkstätten von Mercedes-Benz überzeugen: In einem Test des deutschen Automobilclubs ADAC und der Stiftung Warentest sowie in weiteren Tests haben sie absolute Bestnoten erhalten.

**Das Beste oder nichts.** Die Marke Mercedes-Benz ist eines der wertvollsten Güter des Konzerns. So war Mercedes-Benz im international renommierten Interbrand-Ranking im Jahr 2010 weiterhin die wertvollste automobiler Premiummarke und gleichzeitig die wertvollste deutsche Marke. Wir setzen alles daran, diese Position weiter auszubauen. Dazu gehören nicht nur faszinierende Produkte, sondern auch ein selbstbewusster Markenauftritt, den wir im Jahr 2010 auf Basis unserer einzigartigen Historie behutsam präzisiert haben. Wir haben das Automobil erfunden und prägen mit bahnbrechenden Innovationen unsere Industrie seit 125 Jahren. Viele in Automobilen heute selbstverständliche Technologien kommen aus unserem Haus – von der Sicherheitszelle über ABS, den Airbag oder ESP® bis hin zu aktuellen technologischen Highlights wie »PRE-SAFE« und modernen Fahrerassistenzsystemen wie die Müdigkeitserkennung »ATTENTION ASSIST«. Schon aus dieser Historie heraus erwarten unsere Kunden immer ein Stückchen mehr. Für uns heißt das: Wir wollen unseren Kunden in allen Bereichen das Beste liefern – heute und in Zukunft.

**Eigenes Werksteam in der Formel 1; Titel in der DTM.** Im ersten Jahr als Formel-1-Werksteam erzielte MERCEDES GP PETRONAS mit Nico Rosberg und Michael Schumacher die Plätze sieben und neun in der Fahrer- und Rang vier in der Konstrukteurs-Weltmeisterschaft. Vier Grand Prix wurden von McLaren-Fahrzeugen mit Mercedes-Benz Motoren gewonnen. Unser Formel-1-Team arbeitet intensiv daran, im Jahr 2011 mit einem konkurrenzfähigen Fahrzeug aussichtsreich um beide WM-Titel zu kämpfen. Die DTM-Saison 2010 war für Mercedes-Benz eine der erfolgreichsten in der Geschichte dieser Serie. Die C-Klasse siegte in neun von elf Rennen. Schon nach dem neunten Lauf stand fest, dass nur noch einer von drei Mercedes-Fahrern den Titel gewinnen konnte. Die Meisterschaft errang schließlich Paul Di Resta mit drei Siegen.

Daimler Trucks verzeichnete im Jahr 2010 eine deutlich positive Geschäftsentwicklung. Durch das aktive Management von Marktzyklen, einem der vier Pfeiler der »Global Excellence«-Strategie, waren wir nach dem Krisenjahr 2009 gut vorbereitet, die weltweite Erholung der Nutzfahrzeug-Konjunktur für uns zu nutzen. Mit der Fortführung des Strategieprogramms sichern wir unsere langfristige Wettbewerbsfähigkeit.

## Daimler Trucks

|                                        | 2010    | 2009    | 10/09        |
|----------------------------------------|---------|---------|--------------|
| €-Werte in Millionen                   |         |         | Veränd. in % |
| EBIT                                   | 1.323   | -1.001  | .            |
| Umsatz                                 | 24.024  | 18.360  | +31          |
| Umsatzrendite                          | 5,5%    | -5,5%   | .            |
| Sachinvestitionen                      | 1.003   | 597     | +68          |
| Forschungs- und Entwicklungsleistungen | 1.282   | 1.116   | +15          |
| davon aktiviert                        | 373     | 368     | +1           |
| Produktion                             | 360.896 | 235.474 | +53          |
| Absatz                                 | 355.263 | 259.328 | +37          |
| Beschäftigte (31.12.)                  | 71.706  | 70.699  | +1           |

## Absatz

|                             | 2010 | 2009 | 10/09        |
|-----------------------------|------|------|--------------|
| in 1.000 Einheiten          |      |      | Veränd. in % |
| Gesamt                      | 355  | 259  | +37          |
| Westeuropa                  | 55   | 44   | +25          |
| davon: Deutschland          | 30   | 25   | +21          |
| Großbritannien              | 6    | 4    | +53          |
| Frankreich                  | 6    | 5    | +26          |
| NAFTA                       | 77   | 62   | +24          |
| davon: USA                  | 63   | 52   | +20          |
| Lateinamerika (ohne Mexiko) | 58   | 37   | +57          |
| davon: Brasilien            | 44   | 30   | +45          |
| Asien                       | 120  | 87   | +39          |
| davon: Japan                | 25   | 23   | +7           |

**Deutliche Steigerung von Absatz, Umsatz und EBIT.** Im Jahr 2010 hat sich die weltweite Konjunktur, wenn auch regional in sehr unterschiedlichem Tempo, gegenüber 2009 erholt. Dieser Aufschwung führte zu einem deutlichen Anstieg der Nachfrage nach Nutzfahrzeugen und Transportdienstleistungen. Daimler Trucks verbuchte in diesem Umfeld eine kräftige Absatz- und Ergebnissteigerung. Der Absatz erhöhte sich um 37% auf 355.300 Fahrzeuge; hierzu trugen alle unsere Kernmärkte (Europa, USA, Lateinamerika und Japan) bei. Der Umsatz nahm um 31% auf 24,0 Mrd. € zu, das EBIT erreichte 1,3 (i. V. -1,0) Mrd. €.

### Positive Absatzentwicklung bei Trucks Europa/Lateinamerika.

Die Marke Mercedes-Benz Trucks steht für »Trucks you can trust«: Dies bedeutet, für die Kunden stets alles zu geben und dabei immer ein zuverlässiger Partner zu sein. Mercedes-Benz bietet mit den Modellen Actros, Axor und Atego individuelle Lösungen im Segment der mittleren und schweren Lkw für den Fern-, Baustellen- und Verteilerverkehr. Die Angebotspalette wird durch Mercedes-Benz Special Trucks mit den Produkten Econic, Zetros und Unimog vervollständigt.

Ein Jahr nach dem starken Absatzrückgang profitierte Trucks Europa/Lateinamerika im Berichtsjahr von der weltwirtschaftlichen Erholung und steigerte den Absatz um 41% auf 135.200 Fahrzeuge. In Westeuropa haben wir unsere Marktführerschaft im Bereich der mittelschweren und schweren Lkw mit einem Marktanteil von 24,3 (i. V. 23)% ausgebaut. Dies gilt vor allem für Deutschland; hier ist Mercedes-Benz Trucks mit einem Marktanteil von 40,5 (i. V. 41,6)% weiterhin die Nummer 1.

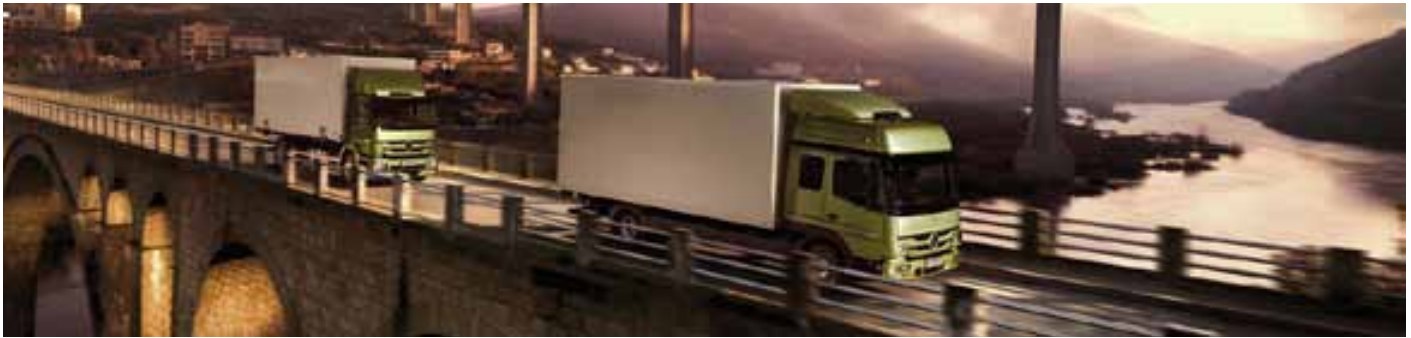

Trucks Europa/Lateinamerika – im Blickpunkt stand die Markteinführung des neuen Mercedes-Benz Atego und des neuen Mercedes-Benz Axor.

Nach einem überproportionalen Rückgang im Vorjahr hat sich der Absatz in Osteuropa im Jahr 2010 mehr als verdoppelt (+11.000 Einheiten auf 19.000 Fahrzeuge). In der Türkei konnten wir unsere Verkäufe um 122% auf 11.500 Fahrzeuge steigern und sind mit einem Marktanteil von 38 (i. V. 33,5)% Marktführer. In Brasilien trug die sehr positive wirtschaftliche Entwicklung zu einem Absatzanstieg um 45% auf 44.300 Einheiten bei. Dort wirkten sich unter anderem staatliche Förderungen positiv auf die Nachfrage aus. Der Marktanteil im Segment der mittleren und schweren Lkw war aufgrund des starken Wettbewerbsumfelds mit 27,4 (i. V. 28,5)% leicht rückläufig.

Zur langfristigen Sicherung unserer Wettbewerbsfähigkeit tragen kontinuierliche Investitionen in die Weiterentwicklung der Produktpalette sowie in den Ausbau der Werke bei. Das Resultat konnte auf der IAA 2010 präsentiert werden, wo wir eine Vielzahl von Produktneuerungen vorgestellt haben. Angesichts der massiv gestiegenen Nachfrage nach schweren Fernverkehrs-Lkw in unseren Kernmärkten wird der Actros seit Ende 2010 auch im türkischen Aksaray und ab 2012 zusätzlich in Juiz de Fora in Brasilien montiert. Darüber hinaus investierte Mercedes-Benz do Brasil in die Erweiterung der Kapazitäten am Standort São Bernardo do Campo um 15% auf 75.000 Nutzfahrzeuge jährlich.

Die Anforderungen an Nutzfahrzeuge nehmen stetig zu, und individuelle Lösungen und Umbauten gewinnen im Lkw-Bereich an Bedeutung. Daher hat der Bereich Mercedes-Benz Special Trucks in den vergangenen zwei Jahren den Bereich Mercedes-Benz Custom Tailored Trucks (CTT) ausgebaut und am elsässischen Standort Molsheim ein Entwicklungszentrum für Special Trucks errichtet. CTT ist auf Kundensonderwünsche, die Umbauten und besondere Ausstattungen von Mercedes-Benz Lkw betreffen, spezialisiert und feierte im Jahr 2010 bereits sein zehnjähriges Bestehen.

**Absatzwachstum in der NAFTA-Region.** Trucks NAFTA ist der führende Lkw-Hersteller in den Klassen 6-8 in Nordamerika. Unter der Marke Freightliner bieten wir schwere Lkw für den Fernverkehr sowie mittelschwere Lkw vor allem für den Verteilerverkehr an. Ergänzend dazu bedienen die schweren Lkw der Premiummarke Western Star den Spezial- und Bautransport ebenso wie den Langstreckentransport. Bereits seit dem Jahr 1916 steht Thomas Built Buses für innovatives Design, Sicherheit und höchste Qualität. Die gelben Schulbusse des führenden Herstellers Thomas Built Buses sind in den USA überall präsent.

Mit 79.400 Einheiten hat Trucks NAFTA 25% mehr Fahrzeuge verkauft als im Vorjahr. In der Region ist eine verhaltene wirtschaftliche Erholung zu verzeichnen. Zusätzlich zu den erfolgreichen neuen EPA10-fähigen Motoren führt auch, speziell im Klasse-8-Segment, ein verstärktes Engagement im Bereich Baustellenanwendungen und Entsorgungsdienstleistungen zu einer positiven Absatzentwicklung. Somit konnten wir unseren Marktanteil in den Klassen 6-8 auf 31,6 (i. V. 29,6)% steigern und sind damit in der gesamten NAFTA-Region Marktführer. Auch auf dem US-Markt ist Trucks NAFTA mit einem Marktanteil von 32,6 (i. V. 30,0)% erfolgreichster Anbieter in diesem Segment. In der Klasse 8 gelang es uns sogar, unsere Marktführerschaft sowohl in der NAFTA-Region mit einem Marktanteil von 32,4 (i. V. 30,9%) als auch im US-Markt mit 33,9 (i. V. 31,2)% weiter auszubauen. Dies ist ein deutliches Zeichen für die hohe Kundenakzeptanz unserer Produkte.

Daimler Trucks North America hat im Jahr 2008 ein Programm zur Neuausrichtung aufgesetzt, das seitdem erfolgreich umgesetzt wurde. Um die langfristige Wettbewerbsfähigkeit weiter zu festigen, werden wir auch künftig Prozesse optimieren und Effizienzverbesserungen realisieren. Zur erfolgreichen Umsetzung des Programms hat die Einigung mit der US-Gewerkschaft UAW (United Auto Workers) für die vier Standorte Mt. Holly, Cleveland und Gastonia sowie Portland wesentlich beigetragen. Aufgrund der insgesamt positiven Marktentwicklung in der NAFTA-Region haben wir im Jahr 2010 frühzeitig die Produktionskapazitäten erhöht und im Jahresverlauf nahezu 1.100 Arbeitsplätze wieder besetzt. Zusätzlich wurden am neuen Standort in Saltillo rund 700 neue Mitarbeiter eingestellt. Auch das Motorenwerk Detroit Diesel in Redford, Michigan, profitiert von der guten Auftragslage sowie von den in den USA neu eingeführten BLUETEC-Motoren. Dort investieren wir rund 200 Mio. US-\$ in die Kapazitätserweiterung. Unser Engagement zur Entwicklung von umweltschonenden und effizienten Antriebstechnologien wurde Anfang 2010 auch vom US-Energieministerium gewürdigt: Daimler Trucks North America erhält im Rahmen des US-Förderprogramms »21st Century Truck Technology Partnership« in den kommenden fünf Jahren rund 40 Mio. US-\$ an Fördermitteln, die wir für die Nutzfahrzeug- und Motorenentwicklung verwenden. Die hohe Akzeptanz unserer Motoren bestätigt der Erfolg der »Captive Engine«-Strategie von Trucks NAFTA: Im schweren Segment fahren mehr als 95% unserer Fahrzeuge mit einem Motor aus unserem Haus.



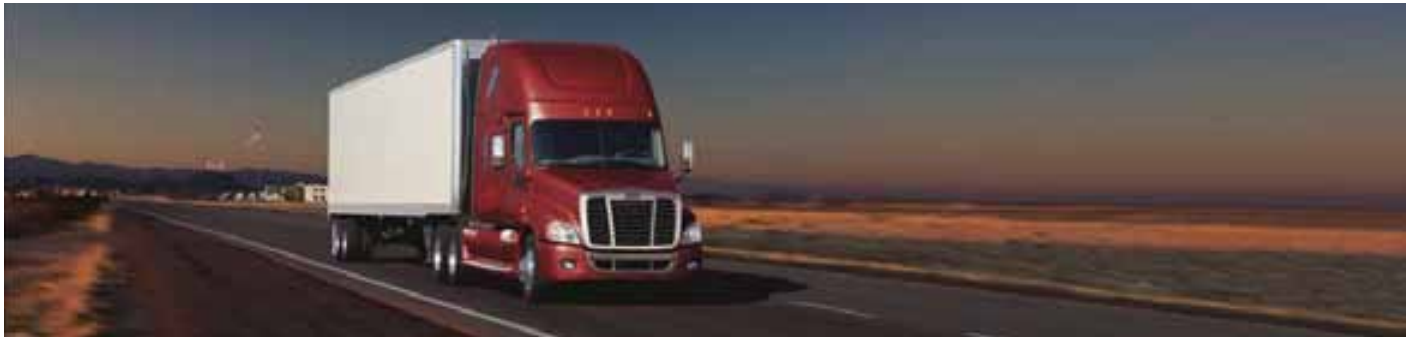

**Trucks North America – Marktführer für schwere Lkw in den USA und der NAFTA-Region.**

**Deutlich gestiegene Verkäufe bei Trucks Asia.** Mit den Lkw-Modellen Canter, Fighter und Super Great sowie den Bussen Rosa und Aero hat sich die Marke Fuso weltweit einen Namen als qualitätsbewusster Hersteller gemacht. Mitsubishi Fuso Truck and Bus Corporation (MFTBC) kann nicht nur mit einer erfolgreichen Modellpalette im leichten bis schweren Segment aufwarten, sondern ist auch das Kompetenzzentrum für leichte Lkw und modernste Hybridtechnologie von Daimler Trucks.

Mit 140.700 Fahrzeugen lag der Absatz von Trucks Asia im Berichtsjahr um 41% deutlich über dem Vorjahr. Neben einem starken Absatzanstieg in Indonesien um 82% auf 55.700 Fahrzeuge konnte Trucks Asia auch in Taiwan den Absatz um 30% auf 8.200 Fahrzeuge deutlich steigern und somit in vollem Umfang am dortigen Aufschwung partizipieren. Der japanische Heimatmarkt verzeichnete eine leichte Erholung; hier konnten wir unseren Absatz um 7% auf 24.800 Einheiten steigern.

Fuso ist bereits in einigen asiatischen Schwellenländern Marktführer. So liegen wir im Segment der leichten Lkw in Taiwan und Indonesien an erster Stelle.

Die angesichts der Strukturveränderungen im japanischen Nutzfahrzeugmarkt im Jahr 2009 begonnene Neuausrichtung von MFTBC haben wir 2010 konsequent und sehr erfolgreich fortgesetzt. Um auch künftig gut aufgestellt und wettbewerbsfähig zu sein, gilt unser besonderes Augenmerk der Nachhaltigkeit der jetzt erreichten Effizienz. Im Dezember 2010 hat die Daimler AG ihre Beteiligung an MFTBC im Zuge einer Kapitalerhöhung in Höhe von 30 Mrd. JPY, umgerechnet 271 Mio. €, von 85% auf 89% erhöht.

Fuso verfügt über ausgeprägte Kompetenzen bei der Entwicklung von alternativen Antrieben für Nutzfahrzeuge sowie bei der Konstruktion und Entwicklung von leichten Lkw. Aufbauend auf dem Erfolg des Fuso Canter Eco Hybrid erweiterte MFTBC seine Hybridentwicklung. Im Dezember 2010 wurde das Prüfzentrum Kitsuregawa in Japan um einen Prüfstand ergänzt. Künftig sollen dort Hybridantriebe unter verschiedenen praxisnahen Bedingungen getestet werden.

**Präsentation unserer Produktneuheiten stößt auf große Akzeptanz.** Innovation und Kundennutzen zukünftiger Produktgenerationen sind ein wichtiger Bestandteil der »Global Excellence«-Strategie von Daimler Trucks. Auf der 63. IAA Nutzfahrzeuge in Hannover haben wir zahlreiche neue Produkte vorgestellt, die an die bisherigen Erfolgsgeschichten anknüpfen. Die neuen Atego und Atego BlueTec Hybrid wurden als Truck of the Year 2011 ausgezeichnet. Zusätzlich erhielt die Hybridvariante den Umwelttechnikpreis und den Deutschen Nachhaltigkeitspreis. Der neue Axor überzeugt mit der serienmäßigen Schaltautomatik Mercedes-Benz PowerShift sowie einem neuen Design. Mit der zweiten Generation des Active Brake Assist, der im Ernstfall auch vor stehenden Hindernissen eine Notbremsung einleiten kann, unterstreichen wir einmal mehr unsere führende Rolle beim Thema Sicherheit. Bei Daimler Trucks North America haben wir uns im abgelaufenen Geschäftsjahr auf die Entwicklung und Markteinführung neuer umweltschonender Technologien konzentriert: Auf der Mid-American Trucking Show (MATS) im März 2010 standen die drei neuen Motoren DD13, DD15 und DD16 von Detroit Diesel (DDC) im Mittelpunkt unserer Präsentation. Die Motoren mit der Technologie der selektiven katalytischen Reduktion (SCR) zur Abgasnachbehandlung erfüllen die seit Anfang 2010 in den USA gültige Emissionsrichtlinie EPA10. Insgesamt sind seit Markteinführung der neuen Motorengeneration nahezu 20.000 Lkw und Busse von Trucks NAFTA mit dieser fortschrittlichen Technologie auf den Straßen Nordamerikas unterwegs. Mit der Einführung des neuen Fernverkehr-Lkw Super Great auf dem japanischen Markt im Frühjahr 2010 hat Fuso seine Produktoffensive gestartet. Das Flaggschiff erfüllt mit dem Motor 6R10 mit BLUETEC-Technologie aus der neuen schweren Motorengeneration von Daimler Trucks die strenge Emissionsrichtlinie JP09 und verfügt über verschiedene innovative Sicherheitstechnologien. Darüber hinaus sind seit Juni neue Versionen des mittelschweren Lkw Fuso Fighter auf dem japanischen Markt. Im November 2010 hat Trucks Asia den neuen Canter in Japan vorgestellt. Mit seinen niedrigen Verbrauchswerten setzt er im leichten Lkw-Segment erneut Maßstäbe bei Wirtschaftlichkeit, Umweltfreundlichkeit, Sicherheit und Design und wird ab 2011 auch in den weltweiten Exportmärkten von Fuso erhältlich sein. Mit dem Duonic-Getriebe kommt erstmals in einem Lkw ein Doppelkupplungsgetriebe serienmäßig zum Einsatz.

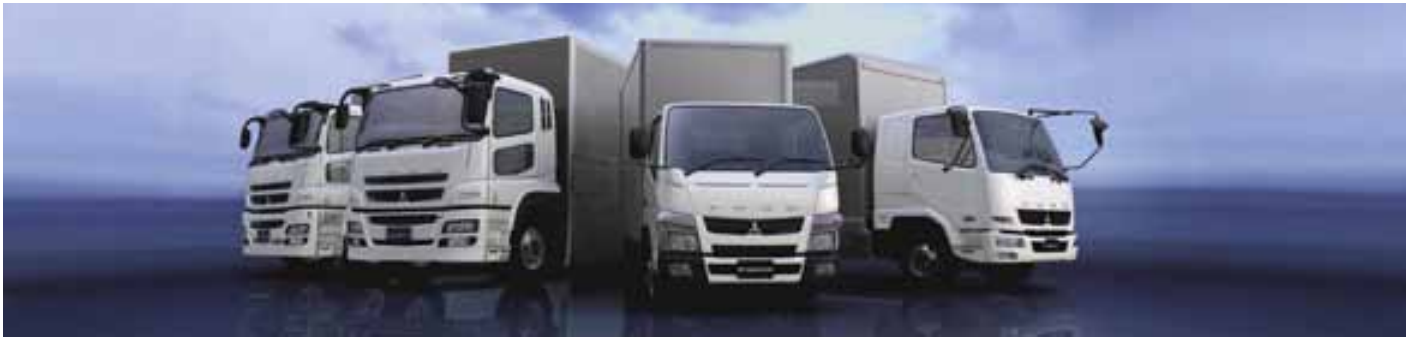

**Trucks Asia – der neue Fernverkehr-Lkw Super Great und der neue Verteiler-Lkw Canter sind das Herzstück der Fuso Produktoffensive.**

Der Fuso Canter ist der weltweit meistverkaufte Lkw von Daimler Trucks und erfüllt in der Dieselvariante seit Februar 2010 serienmäßig den Enhanced-Environmentally-Friendly-Vehicle-Standard. Die Hybridversion Fuso Canter Eco Hybrid ist die Nummer 1 in der Verbrauchseffizienz bei den Lkw bis 5t in Japan. Mittlerweile wurden weltweit über 1.000 Fahrzeuge dieses Typs verkauft. Er ist nach Japan nun ebenso in Australien, Irland und Hongkong erhältlich. Auch die Weltpremiere der Studie Fuso Canter E-CELL bekam sehr positive Resonanz. Durch ein batterie-elektrisches Antriebskonzept kann hier komplett auf einen Verbrennungsmotor verzichtet werden.

**Shaping Future Transportation.** Unsere neuen Produkte und Technologien sind Leistungsbelege zu den Themenbereichen CleanDrive, SafeDrive und ValueDrive, die hinter der im Jahr 2007 eingeleiteten Initiative Shaping Future Transportation stecken. Dabei steht »CleanDrive« für umweltschonende und wirtschaftliche Nutzfahrzeuge von Daimler für alle Einsatzbereiche. Im Rahmen von »SafeDrive« verfolgen wir die Vision vom unfallfreien Fahren und entwickeln kontinuierlich neue Sicherheitstechnologien. Der Kundennutzen steht bei uns stets im Fokus, da die Unterhaltskosten eines Nutzfahrzeugs rund 90% der sogenannten Total Costs of Ownership (TCO) ausmachen. Hier setzen die vielfältigen und maßgeschneiderten Dienstleistungen von Daimler Trucks wie Charterway oder der Telematikdienst FleetBoard an, die wir unter »ValueDrive« zusammengefasst haben.

Daimler FleetBoard entwickelt und vertreibt bereits seit zehn Jahren Telematiklösungen für eine höhere Wirtschaftlichkeit von Nutzfahrzeugflotten. Wesentliche Vorteile sind durchschnittlich sieben Prozent Kraftstoffersparnis innerhalb der ersten drei Monate nach Einführung des Systems und einem Training für Neukunden, deutliche Einsparungen bei Wartungs- und Reparaturkosten für langjährige Kunden, optimales Auftragsmanagement durch FleetBoard-Transportmanagement, eine zeitnahe Übertragung von Fahrzeugposition und Streckenverlauf über Satellitenbilder mit FleetBoard-Mapping sowie die Unterstützung bei der Überwachung von Lenk- und Ruhezeiten mithilfe der Zeitwirtschaft und damit einer optimierten Disposition der Aufträge.

**Weltweit erfolgreich aufgestellt mit dem »Global Excellence«-Programm.** Auch die Erschließung und intensive Bearbeitung neuer Märkte und Wachstumsfelder, einen weiteren Pfeiler der »Global Excellence«-Strategie, haben wir im abgelaufenen Geschäftsjahr erfolgreich vorangetrieben. In Russland wurden die ersten Lkw der Marken Fuso und Mercedes-Benz durch unsere Joint Ventures Fuso Kamaz Trucks Russia und Mercedes-Benz Trucks Vostok gefertigt und in den Markt eingeführt. Darüber hinaus haben wir Ende 2010 gemeinsam mit Kamaz ein Memorandum of Understanding bezüglich einer Zusammenarbeit bei der Fertigung von Achsen in Russland unterschrieben. Dazu führt Kamaz derzeit das bei Daimler Trucks weltweit angewandte Managementsystem Truck Operating System (TOS) ein. Das System ist im Rahmen der »Global Excellence«-Strategie die Grundlage der »Operational Excellence«-Initiative. Bei dieser Initiative geht es darum, die Material- und Fixkosten zu senken, die weltweiten Prozesse zu optimieren und zu vereinheitlichen und die Produktion in den Werken weiter zu flexibilisieren. In Indien haben wir sämtliche Lkw-Vertriebsaktivitäten bei Daimler India Commercial Vehicles (DICV) in Chennai konzentriert, womit DICV nun auch den Bereich Marketing und Vertrieb von Mercedes-Benz Lkw in Indien verantwortet. Im Frühjahr 2010 nahmen wir unsere Teststrecke in Betrieb. In China haben wir von der chinesischen National Development and Reform Commission (NDRC) als ersten großen behördlichen Genehmigungsschritt die Genehmigung zur Gründung eines 50:50-Joint-Ventures mit dem chinesischen Lkw-Hersteller Foton Motor erhalten und den Joint-Venture-Vertrag unterzeichnet.

Im Dezember 2010 unterzeichneten wir einen Vertrag zur Lieferung von Mercedes-Benz Lkw-Komponenten an den finnischen Lkw-Hersteller Oy Sisu Auto Ab. Damit erschließt Mercedes-Benz Lkw ein neues Geschäftsfeld und generiert zusätzliches Absatzpotenzial für unsere Fahrzeugkomponenten. Der Vertrag umfasst die Lieferung von Kabinen, Motoren und Getrieben des Mercedes-Benz Actros für 200 bis 400 Fahrzeuge jährlich. Die schweren Lkw des Modells Polar Truck werden bei Sisu montiert und in Finnland unter der Marke Sisu vertrieben. Die Auslieferung der ersten Fahrzeuge an Kunden ist für März 2011 geplant.

Mercedes-Benz Vans zeigte im Geschäftsjahr 2010 eine starke Entwicklung und konnte seine Marktführerschaft in der Europäischen Union behaupten. Durch die Aufnahme der Produktion im neuen Werk in Fuzhou können wir nun den chinesischen Markt mit Transportern aus lokaler Produktion bedienen. Mit den neuen Fahrzeuggenerationen des Vito und des Viano setzen wir unsere Produktoffensive fort.

| Mercedes-Benz Vans                     |         |         |              |
|----------------------------------------|---------|---------|--------------|
|                                        | 2010    | 2009    | 10/09        |
| €-Werte in Millionen                   |         |         | Veränd. in % |
| EBIT                                   | 451     | 26      | .            |
| Umsatz                                 | 7.812   | 6.215   | +26          |
| Umsatzrendite                          | 5,8%    | 0,4%    | .            |
| Sachinvestitionen                      | 91      | 113     | -19          |
| Forschungs- und Entwicklungsleistungen | 267     | 193     | +38          |
| davon aktiviert                        | 29      | 0       | .            |
| Produktion                             | 227.975 | 156.667 | +46          |
| Absatz                                 | 224.224 | 165.576 | +35          |
| Beschäftigte (31.12.)                  | 14.557  | 15.226  | -4           |

| Absatz                      |         |         |              |
|-----------------------------|---------|---------|--------------|
|                             | 2010    | 2009    | 10/09        |
|                             |         |         | Veränd. in % |
| Gesamt                      | 224.224 | 165.576 | +35          |
| Westeuropa                  | 156.775 | 128.134 | +22          |
| davon: Deutschland          | 62.193  | 58.185  | +7           |
| Osteuropa                   | 16.404  | 10.980  | +49          |
| USA                         | 10.482  | 1.604   | +553         |
| Lateinamerika (ohne Mexiko) | 12.528  | 9.453   | +33          |
| China                       | 12.151  | 1.302   | +833         |
| Übrige Märkte               | 15.884  | 14.103  | +13          |

**Absatz, Umsatz und EBIT nach Markterholung deutlich gesteigert.** Mercedes-Benz Vans setzte im Berichtsjahr 224.200 Einheiten ab. Die Verkäufe der Modelle Sprinter, Vario, Vito und Viano lagen dank sich erholender Märkte und steigender Nachfrage um 35% über dem Vorjahr. Der Umsatz übertraf mit 7,8 (i. V. 6,2) Mrd. € ebenfalls deutlich das Vorjahresniveau. Das EBIT konnte im Vergleich zum Vorjahr deutlich auf 451 (i. V. 26) Mio. € gesteigert werden.

**Mercedes-Benz Vans erzielt kräftiges Absatzplus.** In Westeuropa, dem für uns wichtigsten Absatzmarkt, hat Mercedes-Benz Vans deutliche Zuwächse erzielt. Der Absatz übertraf mit 156.800 Einheiten den Vorjahreswert um 22%. Die Absatzsituation war insbesondere in den westeuropäischen Schlüsselmärkten wie Großbritannien und Frankreich, die von einer frühen und anhaltenden Markterholung profitierten, mit Zuwächsen von 43% bzw. 45% gegenüber dem Vorjahr sehr erfreulich. Der Absatz in Deutschland erhöhte sich um 7% auf 62.200 Transporter. In Osteuropa erzielte Mercedes-Benz Vans im Jahr 2010 ein deutlich zweistelliges Absatzplus (+49%).

Sehr erfolgreich war Mercedes-Benz Vans mit der neuen Vertriebsorganisation in den USA und Kanada. Seit Jahresbeginn verkaufen wir den Sprinter in Nordamerika unter den Marken Mercedes-Benz und Freightliner über unser Vertriebsnetz von derzeit rund 180 Händlern. Wir profitierten dabei vom Markterfolg des Sprinter, der mit seiner Technologie, Sicherheit und Wirtschaftlichkeit sowie mit seinen Fahrleistungen in seinem Fahrzeugsegment immer wieder neue Maßstäbe setzt. Im Berichtsjahr stieg der Absatz in der NAFTA-Region auf 13.300 (i. V. 2.600) Einheiten.

In einem schnell wachsenden chinesischen Markt für hochwertige Transporter und Premium-Mehrzweckfahrzeuge hat Mercedes-Benz Vans im Jahr 2010 12.200 Einheiten abgesetzt. Davon stammten 10.700 Einheiten aus der im Frühjahr 2010 aufgenommenen lokalen Produktion. Mit der Fertigung vor Ort haben wir die Voraussetzungen dafür geschaffen, an einem der größten und am dynamischsten wachsenden Fahrzeugmärkte der Welt schnell und erfolgreich zu partizipieren.

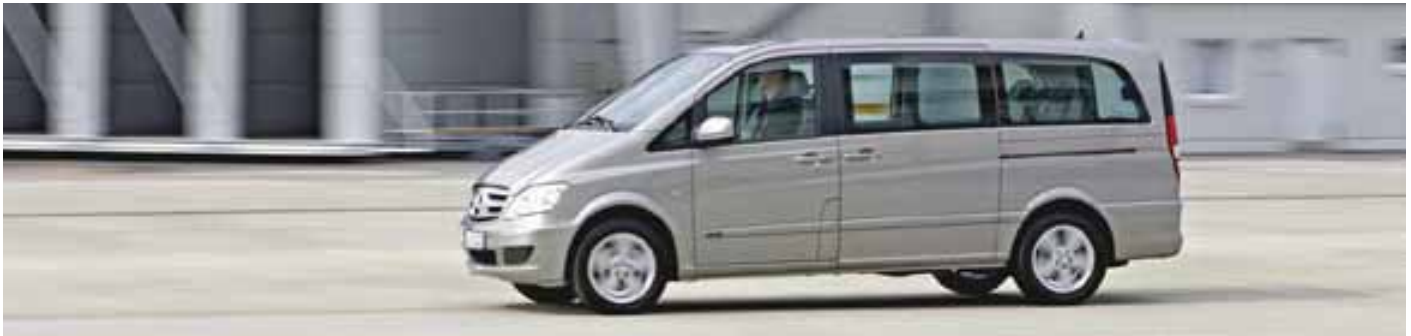

**Der neue Mercedes-Benz Viano: Spitzenklasse in Komfort und Umweltfreundlichkeit.**

Mit einem Zuwachs um 33% auf 12.500 Einheiten war Mercedes-Benz Vans im Berichtsjahr auch in Lateinamerika sehr erfolgreich. Der weltweite Absatz des Sprinter erhöhte sich gegenüber dem Vorjahr um 37% auf 143.700 Einheiten. Die Modelle Vito und Viano verzeichneten in der Anlaufphase der neuen Fahrzeuggenerationen eine Absatzsteigerung um 34% auf 77.600 Einheiten.

Zudem konnte Mercedes-Benz Vans seine Marktführerschaft in der Europäischen Union im Segment mittelgroßer und großer Transporter behaupten. Insbesondere der Sprinter erreichte mit einem Marktanteil von über 18% im Segment der großen Transporter seinen höchsten Marktanteil seit Bestehen der Europäischen Union in der derzeitigen Zusammensetzung.

#### **Erstes Kundenfahrzeug in China vom Band gelaufen.**

Mercedes-Benz Vans hat im Jahr 2010 seine Strategie konsequent weiterverfolgt, zusätzlich zum Wachstum in traditionellen Märkten und zur Technologieführerschaft auch Wachstum in neuen Märkten anzustreben. Im Jahr 2007 hatten wir zusammen mit der Fujian Motors Group das erste Van-Joint-Venture in China überhaupt gegründet, um vom Wachstumspotenzial dieses wichtigen Marktes zu profitieren. Durch die Aufnahme der Produktion im neuen Werk in Fuzhou im April 2010 kann das 50:50-Gemeinschaftsunternehmen Fujian Daimler Automotive (FDJA) den chinesischen Markt nun mit Transportern der Modelle Vito und Viano aus lokaler Produktion bedienen. Ab 2011 werden wir auch den Sprinter als Bus direkt vor Ort produzieren.

#### **Vertragsfertigung von Transportern in Russland vereinbart.**

Im Dezember 2010 haben wir zur Produktion der Mercedes-Benz Sprinter in Russland ein Memorandum of Understanding mit dem russischen Nutzfahrzeughersteller GAZ unterzeichnet. Zudem sollen Motoren, Getriebe, Achsen und weitere Komponenten lokal gefertigt werden, die dann im Sprinter und im GAZ Produktportfolio zum Einsatz kommen.

**Erweiterung des Produktportfolios.** Die im April 2010 mit Renault-Nissan vereinbarte weitreichende strategische Kooperation umfasst auch eine Zusammenarbeit im Bereich der leichten Nutzfahrzeuge. Diese Kooperation ist für Mercedes-Benz Vans ein wichtiger Schritt für künftige Projekte und die Erweiterung des Produktportfolios. Wir werden in diesem Zusammenhang ab dem Jahr 2012 einen komplett neuen Stadtlieferwagen für gewerbliche Kunden in unser Produktprogramm aufnehmen.

**Produktoffensive auf der IAA Nutzfahrzeuge.** Um in den traditionellen Märkten weiteres Wachstum zu generieren, hat Mercedes-Benz Vans auch im Berichtsjahr in die Erneuerung und Erweiterung der aktuellen Produktpalette investiert. Mit gleich vier Weltpremieren waren wir auf der IAA Nutzfahrzeuge in Hannover vertreten. Der neue Vito für den gewerblichen Einsatz überzeugt durch höhere Nutzlast und Robustheit, während der neue Viano bei Großfahrzeugen Maßstäbe bei Komfort, Sicherheit und Fahrspaß setzt. Beide Fahrzeuge verfügen zudem über die effizienten, umweltschonenden und verbrauchsarmen Motoren mit BlueEFFICIENCY-Technologie. Dadurch sinken CO<sub>2</sub>-Emissionen und Kraftstoffverbrauch im Vergleich zu den Vorgängermodellen um bis zu 15%.

Zur strategischen Ausrichtung von Mercedes-Benz Vans gehört die Erschließung neuer Wachstumsfelder. Dazu zählt vor allem die Entwicklung umweltschonender Technologien und Sicherheitstechnologien. Auf der IAA Nutzfahrzeuge haben wir den Mercedes-Benz Vito E-CELL präsentiert, den weltweit ersten elektromotorisch angetriebenen Transporter aus Serienproduktion. Dank seines lokal emissionsfreien Antriebs eignet sich der Vito E-CELL ideal für den innerstädtischen Einsatz sowie für besonders umweltsensible Gebiete. Für den Alltagstest haben wir im Berichtsjahr rund 70 Vito E-CELL in Kleinserie produziert und an Kunden in Berlin und Stuttgart übergeben. Bis zum Jahr 2012 sollen 2.000 Fahrzeuge auf die Straße kommen. Premiere feierte auf der IAA auch der Mercedes-Benz Sprinter LGT, der wahlweise mit Flüssiggas oder Benzin betrieben werden kann.

#### **Ausgezeichnete Produkte überzeugen Fachwelt und Kunden.**

Die Transporter von Mercedes-Benz haben auch im Jahr 2010 ihre Beliebtheit bei Kunden und Fachexperten in Gestalt mehrerer Auszeichnungen bewiesen. Beim jährlich durchgeführten Image-Ranking des Fachmagazins VerkehrsRundschau belegten unsere Fahrzeuge in der Gesamtkategorie Transporter den ersten Platz. Bei der Leserwahl »Die besten Nutzfahrzeuge 2010« von ETM-Verlag und DEKRA sicherte sich der Sprinter bis 3,5t den ersten Platz.



Daimler Buses konnte im Geschäftsjahr 2010 den Rekordabsatz aus dem Jahr 2008 nahezu wieder erreichen. Damit unterstreichen wir als weltgrößter Bushersteller im Segment für Busse über 8t unsere seit Jahren unangefochtene globale Marktführerschaft. Wir setzen unseren Weg mit alternativen Antriebstechnologien konsequent fort.

## Daimler Buses

|                                        | 2010   | 2009   | 10/09        |
|----------------------------------------|--------|--------|--------------|
| €-Werte in Millionen                   |        |        | Veränd. in % |
| EBIT                                   | 215    | 183    | +17          |
| Umsatz                                 | 4.558  | 4.238  | +8           |
| Umsatzrendite                          | 4,7%   | 4,3%   | .            |
| Sachinvestitionen                      | 95     | 78     | +22          |
| Forschungs- und Entwicklungsleistungen | 223    | 212    | +5           |
| davon aktiviert                        | 31     | 5      | +520         |
| Produktion                             | 39.405 | 32.666 | +21          |
| Absatz                                 | 39.118 | 32.482 | +20          |
| Beschäftigte (31.12.)                  | 17.134 | 17.188 | -0           |

## Absatz

|                             | 2010   | 2009   | 10/09        |
|-----------------------------|--------|--------|--------------|
|                             |        |        | Veränd. in % |
| Gesamt                      | 39.118 | 32.482 | +20          |
| Westeuropa                  | 7.168  | 7.219  | -1           |
| davon: Deutschland          | 2.635  | 2.831  | -7           |
| NAFTA                       | 3.878  | 3.899  | -1           |
| Lateinamerika (ohne Mexiko) | 23.215 | 16.286 | +43          |
| Asien                       | 1.462  | 1.976  | -26          |
| Übrige Märkte               | 3.395  | 3.102  | +9           |

## Absatz-, Umsatz- und Ergebnisanstieg durch höhere Nachfrage in Lateinamerika.

Mit einem Absatz von 39.100 (i. V. 32.500) Komplettbussen und Fahrgestellen erzielte Daimler Buses einen Umsatz von 4,6 (i. V. 4,2) Mrd. €. Damit war Daimler Buses auch im Jahr 2010 der weltweit größte Hersteller im Segment für Busse und Fahrgestelle über 8t. Der Anstieg des Absatzes bei Daimler Buses um 20% resultierte insbesondere aus der positiven Geschäftsentwicklung bei Fahrgestellen in Lateinamerika. In Westeuropa blieb der Absatz marktbedingt leicht unter dem Niveau des Vorjahres. Das EBIT lag vor allem aufgrund der positiven Absatzentwicklung in Lateinamerika mit 215 (i. V. 183) Mio. € über dem Niveau des Vorjahres.

## Positive Marktanteilsentwicklung in den Kernmärkten.

In Westeuropa bietet Daimler Buses mit den Marken Mercedes-Benz und Setra die gesamte Produktpalette von Stadt-, Überland- und Reisebussen sowie Fahrgestelle der Marke Mercedes-Benz an. Der Absatz ging um 1% auf 7.200 Einheiten zurück. Bei den Reisebussen verzeichneten wir nur einen moderaten Absatzrückgang gegenüber dem Vorjahr; dies war vor allem auf unser attraktives Produktportfolio zurückzuführen. Im Stadtbusgeschäft spürten wir im Jahr 2010 die Zurückhaltung der öffentlichen Auftraggeber; hier ging der Absatz deutlich zurück. Dagegen konnten wir eine erfreuliche Entwicklung des europäischen Fahrgestellabsatzes verzeichnen. Daimler Buses gelang es, in Westeuropa die führende Marktposition mit einem Marktanteil von rund 30 (i. V. 30)% zu behaupten.

Der Absatz von Daimler Buses ging auf dem stark rückläufigen nordamerikanischen Markt im Jahr 2010 um 29% auf 800 Einheiten zurück. Der Anteil der Orion-Hybridbusse am Gesamtabsatz in Nordamerika lag bei 32%.

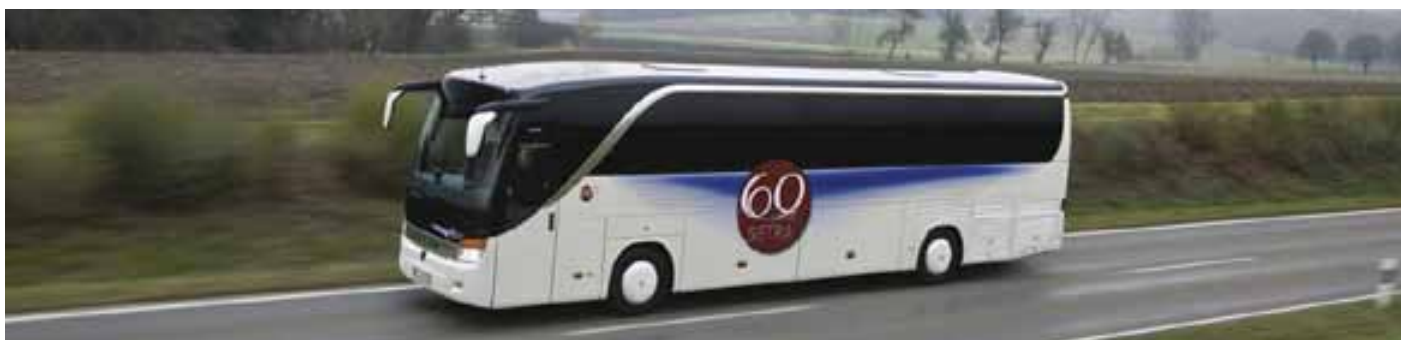

**60 Jahre Setra – die Erfolgsgeschichte des selbsttragenden Omnibusses geht weiter.**

In Mexiko produziert und vertreibt Daimler Buses Fahrgestelle und Komplettbusse der Marke Mercedes-Benz. In dieser Region, die 2009 am stärksten von der Wirtschaftskrise betroffen war, zeigte sich im Berichtsjahr eine leichte Erholung. Unser Absatz in Mexiko lag mit 3.100 Einheiten um 12% über dem Vorjahr. Der Marktanteil von Daimler Buses hat sich auf 53,6 (i. V. 51,8)% erhöht. Damit wurde die Marktführerschaft weiter ausgebaut.

In den lateinamerikanischen Märkten steigerte Daimler Buses den Fahrgestellabsatz der Marke Mercedes-Benz nach einer signifikanten Markterholung um 43% auf 23.200 Einheiten. Damit haben wir das Vorkrisenniveau wieder erreicht. Gleichzeitig konnte Daimler Buses seinen Marktanteil in Lateinamerika auf 47,1 (i. V. 44,7)% erhöhen.

**Daimler Buses setzt den Weg mit alternativen Antrieben konsequent fort.** Seit der Vorstellung im Jahr 2009 wurden mittlerweile 16 Mercedes-Benz Citaro G BlueTec Hybridbusse an Kunden ausgeliefert: Sie bewähren sich in sechs europäischen Städten. Mit seiner zukunftsweisenden Antriebstechnologie ist der Mercedes-Benz Hybridbus bislang der einzige Omnibus, der Streckenanteile von bis zu fünf Kilometern rein elektrisch fahren kann.

Darüber hinaus ist im Jahr 2010 der Startschuss für das CHIC-Projekt (Clean Hydrogen in European Cities/Sauberer Wasserstoff für europäische Städte) in Köln gefallen. Das von der EU geförderte Projekt ermöglicht in fünf europäischen Städten die Integration von 26 Brennstoffzellenbussen in den täglichen Linienverkehr. Unter den mindestens drei Herstellern liefert Daimler Buses Brennstoffzellen-Hybridfahrzeuge im Rahmen dieses Projektes. Damit wurde ein entscheidender Schritt zur umfassenden Einführung und Vermarktung von Brennstoffzellenbussen mit Wasserstoffbetrieb getan. Das Projekt zielt auf den schrittweisen Aufbau von Busflotten mit Brennstoffzellenfahrzeugen und der erforderlichen Infrastruktur ab. Die hierbei gesammelten Erfahrungen sollen dann in einem nächsten Schritt in 14 Regionen in Europa in den Aufbau von Brennstoffzellenflotten und der entsprechenden Infrastruktur eingebracht werden.

Daimler Buses forciert mit diesen Initiativen die Verbreiterung der lokal emissionsfreien Antriebstechnologie und reagiert damit auf die globalen Herausforderungen unserer Zeit: Aufgrund des Klimawandels, der wachsenden Weltbevölkerung und der Urbanisierung sollten sich alle Verkehrsträger in einem funktionierenden, vernetzten System ergänzen. Dem Omnibus kommt hierbei eine besondere Schlüsselrolle zu.

**Bus Rapid Transit.** Mit hocheffizienten Verkehrslösungen wie Bus Rapid Transit (BRT) hilft Daimler Buses dabei, der steigenden Nachfrage nach Mobilität auf nachhaltige Weise gerecht zu werden. BRT ist ein effizientes und günstiges Verkehrssystem, das aus einer oder mehreren eigenen Busspuren besteht, auf dem Großraumbusse in hoher Taktfrequenz fahren. Ein intelligentes rechnergesteuertes Verkehrsmanagement, zum Beispiel durch Vorrangschaltung an Ampeln, ermöglicht eine Verkehrssteuerung in Echtzeit und eine hohe Beförderungsgeschwindigkeit. Außerdem zeichnet sich das System durch schnell realisierbare Busstrecken aus. Gebaut wurden solche Systeme im Jahr 2010 beispielsweise auch im Zuge der Fußball-Weltmeisterschaft in Südafrika, zu der Daimler Buses sein Know-how im Zusammenhang mit diesen intelligenten Transportsystemen einbrachte und darüber hinaus 460 Mercedes-Benz Omnibusse ausgeliefert hat.

**Ausbau der Aktivitäten im Zukunftsmarkt Indien.** Daimler Buses baut sein Engagement in Indien konsequent weiter aus. Auf der Auto Expo in Neu-Delhi haben wir Anfang 2010 unseren neuen dreiachsigen Reisebus im Luxussegment präsentiert. Dieser Reisebus ist mit einem Fahrgestell von Mercedes-Benz ausgestattet; der Aufbau erfolgt durch das indische Partnerunternehmen Sulej Motors Ltd. Insgesamt wurden im Jahr 2010 rund 100 Omnibusse an indische Busunternehmen ausgeliefert.

Im Berichtsjahr hat sich das Finanzdienstleistungsgeschäft spürbar erholt. Wesentliche Impulse kamen aus Asien, aber auch in Nord- und Südamerika war unser Geschäft sehr ertragsstark. Daimler Financial Services belegte erneut Spitzenplätze bei der Kunden- und Händlerzufriedenheit.

## Daimler Financial Services

|                       | 2010   | 2009   | 10/09        |
|-----------------------|--------|--------|--------------|
| €-Werte in Millionen  |        |        | Veränd. in % |
| EBIT                  | 831    | 9      | .            |
| Umsatz                | 12.788 | 11.996 | +7           |
| Neugeschäft           | 29.267 | 25.066 | +17          |
| Vertragsvolumen       | 63.725 | 58.350 | +9           |
| Sachinvestitionen     | 12     | 14     | -14          |
| Beschäftigte (31.12.) | 6.742  | 6.800  | -1           |

**Starkes Ergebnis für die Finanzdienstleistungssparte.** Das Geschäft von Daimler Financial Services hat sich im Berichtsjahr sehr positiv entwickelt. Das weltweite Vertragsvolumen lag mit 63,7 Mrd. € um 9% über dem Vorjahreswert. Bereinigt um Wechselkurseffekte gab es einen Anstieg um 3%. Das Neugeschäft stieg im Vergleich zum Vorjahr um 17% auf 29,3 Mrd. €, bereinigt lag der Zuwachs bei 11%. Das EBIT lag mit 831 (i. V. 9) Mio. € auf einem sehr hohen Niveau.

**Erfolgreiche Fortführung von »Captive #1«.** Daimler Financial Services hat im Berichtsjahr die Umsetzung seines strategischen Programms »Captive #1« fortgesetzt. Die Ziele sind eine weitere Verbesserung der Kunden- und Händlerzufriedenheit, eine Steigerung der Effizienz und Profitabilität sowie nachhaltiges Wachstum. Nachdem im Jahr 2009 aufgrund der globalen Wirtschaftskrise und Finanzkrise der Fokus auf Kostensenkungen und einer gesicherten Refinanzierung lag, spielt nun nachhaltig profitables Wachstum wieder eine stärkere Rolle für Daimler Financial Services. Das gilt besonders für die Märkte China und Brasilien. Der für 2011 geplante Markteintritt in Indien verspricht zusätzliches Wachstum.

**Stabile Entwicklung in Europa.** In Europa wies unser Finanzdienstleistungsgeschäft im Jahr 2010 eine stabile Entwicklung auf. Das Vertragsvolumen lag bei 29,2 Mrd. € und damit um 2% über dem Vorjahreswert. Wechselkursbereinigt ergab sich ein leichter Anstieg um 1%. Das Neugeschäft lag mit 14,8 Mrd. € um 8% über dem Vorjahresniveau. Das Vertragsvolumen der Mercedes-Benz Bank in Deutschland lag mit 16,1 Mrd. € auf Vorjahresniveau.

Im Direktbankgeschäft sank das Einlagevolumen von 12,6 Mrd. € auf 10,9 Mrd. €, weil wir den Fokus unserer Geschäftspolitik von der Liquiditätsvorhaltung zugunsten der Ertragskraft verändert haben.

Die europäischen Märkte entwickelten sich im Berichtszeitraum sehr unterschiedlich. Einige mittel- und osteuropäische Länder litten noch unter den Folgen der weltweiten Finanz- und Wirtschaftskrise. Hier lag der Schwerpunkt darauf, das Forderungsmanagement zu stärken und die Verwertungsprozesse zu verbessern. In anderen europäischen Märkten wie Portugal (+23%), Schweden (+17%) und Großbritannien (+16%) stieg das Vertragsvolumen wieder deutlich an. Auch in Russland gab es Zuwächse (+25%).

**Neuausrichtung des Geschäfts in Deutschland.** Daimler Financial Services und die Mercedes-Benz Bank haben beschlossen, ihre Geschäftsaktivitäten in Deutschland neu auszurichten. Im Oktober haben wir mit dem Betriebsrat eine Einigung über die Eckpunkte der Neuausrichtung erreicht, die vorsieht, die Geschäftsaktivitäten bis zum Jahresende 2012 von bislang neun auf drei deutsche Standorte zu konzentrieren. Mittelfristig ergeben sich daraus Kostenvorteile von rund 40 Mio. € pro Jahr.

Dazu wird die Zentrale von Daimler Financial Services im Jahr 2012 von Berlin nach Stuttgart verlagert und dort mit der Zentrale der Mercedes-Benz Bank unter einem Dach zusammengeführt. Die Mercedes-Benz Bank wird bis 2012 ein neues Service-Center in Berlin einrichten und dort die Funktionen für das gewerbliche Finanzdienstleistungsgeschäft für Daimler-Fahrzeuge bündeln, die derzeit noch in acht Geschäftsstellen und in der Stuttgarter Zentrale der Mercedes-Benz Bank angesiedelt sind.

**Wachstum in Nord- und Südamerika.** In Nord- und Südamerika lag das Vertragsvolumen im Berichtsjahr mit 25,9 Mrd. € um 13% über dem Vorjahreswert. Wechselkursbereinigt ergab sich ein Anstieg um 4%. Das Neugeschäft stieg um 22% auf 10,9 Mrd. €. Deutliches Wachstum gab es in Mexiko, Brasilien und Argentinien: Hier stieg das Vertragsvolumen um insgesamt 30% auf 4,1 Mrd. €. Mercedes-Benz Financial Services hat in den USA das Angebot für Smartphones und andere internetfähige Endgeräte erweitert und eine bequeme und flexible Zahlung ihrer Leasing- und Finanzierungsraten ermöglicht. Ab dem zweiten Quartal 2010 wurden alle

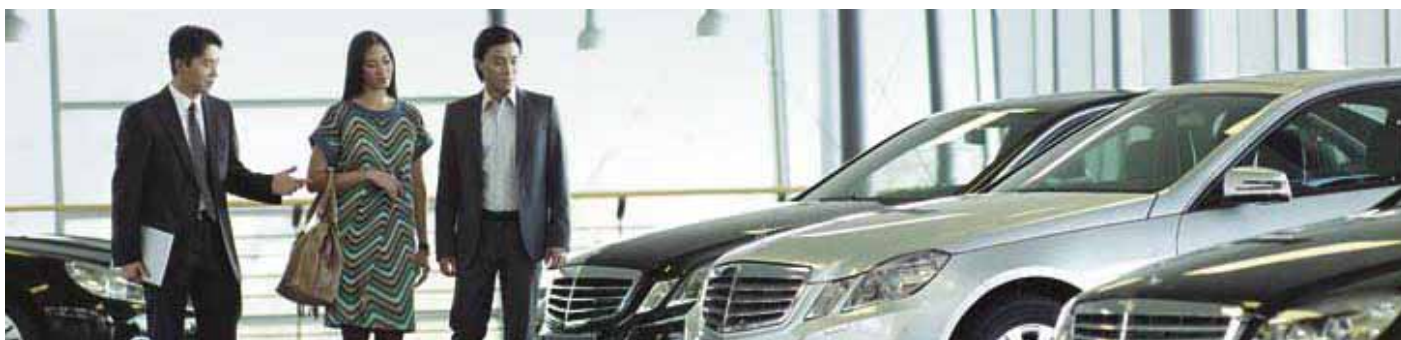

**Daimler Financial Services hat im vergangenen Jahr zahlreiche neue Kunden gewonnen. Das Neugeschäft stieg deutlich um 17 Prozent.**

Mercedes-Benz Fahrzeughändler in den USA mit Apple iPads® ausgestattet. Die Geräte ermöglichen einen direkten Zugriff auf das Händlersystem am Point-of-Sale. Dies macht eine flexible und effektive Kundenberatung im Verkaufsprozess möglich und erleichtert die Rückgabe von Leasingfahrzeugen.

**Starkes Wachstum in Asien.** In der Region Afrika & Asien/Pazifik stieg das Vertragsvolumen um 28% auf 8,7 Mrd. €. Bereinigt um Wechselkurseffekte ergab sich ein Zuwachs um 7%. Das Neugeschäft lag mit 3,6 Mrd. € um 45% über dem Vorjahresniveau.

Zu diesem Wachstum haben alle Märkte der Region beigetragen. Ein besonders starkes Wachstum gab es in China. Hier stieg das Vertragsvolumen um 101% auf 958 Mio. €. Auch in anderen Märkten der Region gab es zweistellige Zuwächse beim Vertragsvolumen, wie etwa in Südkorea (+51%), Thailand (+28%), Australien (+25%), Südafrika (+24%) und Japan (+14%). Angesichts des erheblichen Wachstums in der Region haben wir dem Risikomanagement zur Sicherung unserer Portfolioqualität besondere Bedeutung beigemessen.

**Zunehmendes Geschäft mit Versicherungen.** Der Bereich Insurance Services konnte im Jahr 2010 weltweit mehr als 839.000 Versicherungspolicen vermitteln. Das ist ein Zuwachs von 22% im Vergleich zum Vorjahr. Der Anstieg wurde erreicht, weil wir Versicherungsleistungen gezielt mit Leasing- und Finanzierungsprodukten, Serviceverträgen und zusätzlichen Sicherheitsausstattungen in den Fahrzeugen aufeinander abgestimmt haben. Auch die konsequente Nutzung von Geschäftspotenzialen in Wachstumsmärkten wie China und die verstärkte Vermittlung von Versicherungsprodukten an Barzahler haben zum Wachstum beigetragen.

Daimler Financial Services hat im Jahr 2010 weitere Kooperationsvereinbarungen mit internationalen Versicherern abgeschlossen. So wurde unter anderem ein Rahmenvertrag mit der Allianz SE zur Zusammenarbeit im globalen Kfz-Versicherungsgeschäft geschlossen. Die in den Verträgen vorgesehene Weiterleitung von Schadenfällen an Mercedes-Benz Vertragswerkstätten sichert die Servicequalität für unsere Kunden und generiert zusätzliche Umsätze für das Ersatzteil- und Reparaturgeschäft.

**Flottengeschäft mit gewerblichen Kunden wächst.** Daimler Financial Services konnte im Berichtsjahr sein Geschäft mit gewerblichen Kunden und Flottenkunden erneut ausweiten. So wurden ein wesentlicher Beitrag zur Absatzunterstützung geleistet und der Anteil von finanzierten Mercedes-Benz Fahrzeugen in gewerblichen Fuhrparks ausgebaut. Das Neugeschäft in diesem Segment lag mit 112.000 Einheiten um 35% über dem Vorjahresniveau. Der Vertragsbestand stieg um 5% auf 303.000 Einheiten. Dabei zahlen sich die hohe Verlässlichkeit von Daimler Financial Services in der Finanz- und Wirtschaftskrise und das dadurch gewonnene Kundenvertrauen aus. Das Angebotsspektrum reicht von Finanzierung und Leasing über Full-Service-Leasing bis hin zum Flottenmanagement für gewerbliche Einzelkunden ebenso wie für internationale Großkunden.

**Spitzenplätze bei der Kunden- und Händlerzufriedenheit.** Daimler Financial Services wurde im Berichtszeitraum bei einer Reihe weltweiter Studien zur Kunden- und Händlerzufriedenheit ausgezeichnet. Mercedes-Benz Financial Services in den USA belegte den ersten Platz in der Kategorie Gesamt-Händlerzufriedenheit in der J.-D.-Power-Umfrage. Die Mercedes-Benz Bank in Deutschland wurde beim »Autohaus« BankenMonitor 2010 erneut als bester Finanzdienstleister im Premiumsegment ausgezeichnet. Auch in Großbritannien lag Mercedes-Benz Financial Services wieder auf dem ersten Platz der Sewells-Studie zur Zufriedenheit der Fahrzeughändler. In einer Umfrage von AC Nielsen in Australien sowie bei markenübergreifenden Studien in Russland, Tschechien und Portugal erreichte Mercedes-Benz Financial Services jeweils die Spitzenposition in der Händlerzufriedenheit.

**Toll-Collect-Mautsystem läuft weiter reibungslos.** Das System zur Erhebung der Lkw-Maut auf deutschen Autobahnen arbeitete auch im Jahr 2010 stabil und störungsfrei. Zum Jahresende waren insgesamt 665.600 Fahrzeuggeräte zur automatischen Mauterfassung im Einsatz. Insgesamt wurden im Berichtsjahr 25,8 Mrd. Streckenkilometer erfasst. Daimler Financial Services ist am Toll-Collect-Konsortium mit einem Anteil von 45% beteiligt.



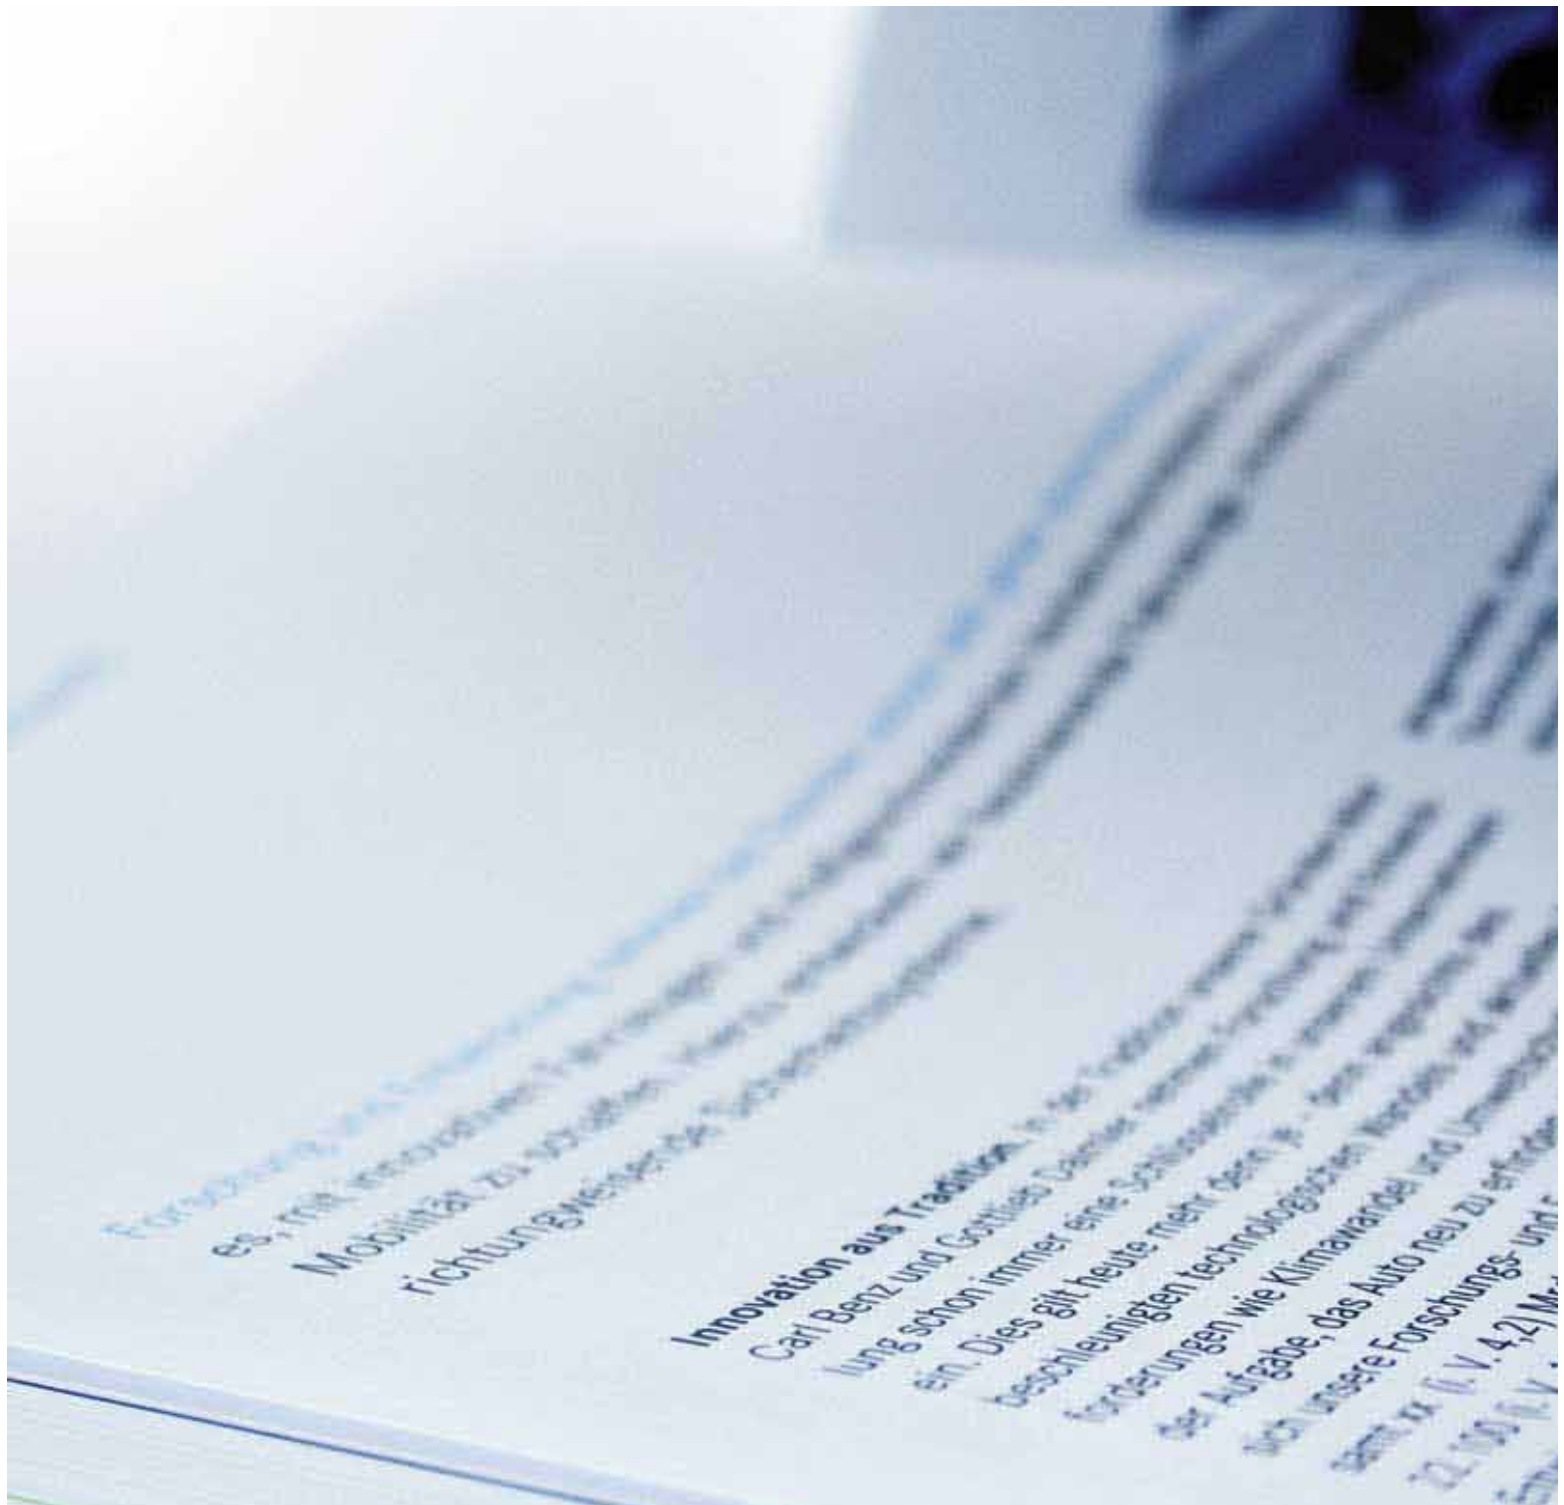

Daimler hat sich dem Leitbild der Nachhaltigkeit verpflichtet und versteht dieses ganzheitlich. Deshalb gehören wirtschaftlich, sozial und ökologisch verantwortliches Handeln für uns untrennbar zusammen.

## 138 - 139 Nachhaltigkeit bei Daimler

- 125 Jahre Nachhaltigkeit
- Leitbild der Nachhaltigkeit ist fester Bestandteil der Unternehmensstrategie
- Nachhaltige Steigerung des Unternehmenswerts als Ziel
- Daimler Sustainability Board ergänzt etablierte Managementstrukturen
- Intensiver Dialog mit Stakeholdern

## 140 - 143 Innovation, Sicherheit und Umwelt

- Forschungs- und Entwicklungsleistungen in Höhe von 4,8 Mrd. €
- Verbrauch und CO<sub>2</sub>-Emissionen weiter reduziert
- Sparsame und umweltfreundliche Motoren für Pkw und Nutzfahrzeuge
- Vier Zero-Emission-Fahrzeuge in Serie
- Innovative Konzepte für urbane Mobilität
- Neue Technologien für mehr Sicherheit

## 144 - 145 Mitarbeiterinnen und Mitarbeiter

- Personalstand leicht gestiegen
- Nachwuchssicherung durch vielfältige Maßnahmen
- Mitarbeiter in neuen Technologien qualifiziert
- Vielfalt im Unternehmen gefördert
- Gesundheitsvorsorge und -betreuung auf hohem Niveau

## 146 - 147 Gesellschaftliche Verantwortung

- Gesellschaftliches Engagement als Bestandteil unserer Unternehmenstätigkeit
- Klare Regelungen für die Vergabe von Projektmitteln
- Katastrophenhilfe in Haiti und Pakistan geleistet
- Unterstützung diverser Nachbarschaftsprojekte an unseren Standorten

## Umfassende Berichterstattung zum Thema Nachhaltigkeit.

Detaillierte Informationen finden Sie in unserem Nachhaltigkeitsbericht. Er beschreibt transparent und faktenorientiert die Nachhaltigkeitsbilanz des vergangenen Geschäftsjahres.

Der online-basierte »Interaktive Nachhaltigkeitsbericht« (<http://nachhaltigkeit2010.daimler.com>) ergänzt unsere Nachhaltigkeitsberichterstattung mit vertiefenden und weiterführenden Informationen.

Im Jahr 2011 wird der neue Nachhaltigkeitsbericht zur Hauptversammlung ab Mitte April verfügbar sein.

Weitere Informationen zum Thema Nachhaltigkeit finden Sie im Internet unter <http://www.daimler.com/nachhaltigkeit>

**Nachhaltigkeit ist ein wesentlicher Bestandteil der Unternehmensstrategie.** Effiziente Managementstrukturen unterstützen die Umsetzung von Nachhaltigkeitsthemen in allen Geschäftsfeldern. Den intensiven Dialog mit den Stakeholdern haben wir im Berichtsjahr fortgeführt.

**125 Jahre Automobil.** Am 29. Januar 1886 veränderte Carl Benz die Welt. Beim Reichspatentamt in Berlin meldete er sein »Fahrzeug mit Gasmotorenbetrieb« unter der Nummer 37435 zum Patent an. Das war die Geburtsstunde des Automobils, und bis dahin reichen die Wurzeln der heutigen Daimler AG zurück. Nachhaltigkeit ist eine wesentliche Voraussetzung für eine derart lange und erfolgreiche Unternehmensgeschichte. Nur nachhaltiges Wirtschaften kann den Fortbestand, das Wachstum und den ökonomischen Erfolg eines Unternehmens dauerhaft sichern. Nicht zuletzt deshalb fühlen wir uns in der Tradition unserer Gründer Carl Benz und Gottlieb Daimler dem Postulat der Nachhaltigkeit verpflichtet.

**Unsere Nachhaltigkeitsstrategie.** Wir wollen den Wert unseres Unternehmens nachhaltig steigern. Das können wir nur, wenn wir Wertschöpfung in einem umfassenden Sinne verstehen und den Erfolg unserer Geschäftstätigkeit nicht nur an finanziellen Kennzahlen, sondern auch an deren gesellschaftlicher Akzeptanz messen. Das Leitbild der Nachhaltigkeit ist deswegen ein fester Bestandteil unserer Unternehmensstrategie. Von grundsätzlicher Bedeutung sind für uns zudem die zehn Prinzipien des Global Compact, die Arbeitsnormen der International Labour Organization (ILO) und die OECD-Leitlinien für multinationale Unternehmen.

Effektive und aufeinander abgestimmte Strategien und Initiativen sorgen dafür, dass Nachhaltigkeit in unserer Geschäftstätigkeit ihren festen Platz hat. In unserem konzernweiten Nachhaltigkeitsmanagementsystem sind diese Strategien mit Maßnahmen hinterlegt und mit messbaren Zielindikatoren verbunden:

– **Ökonomische Nachhaltigkeit:** Profitables Wachstum und langfristiger ökonomischer Erfolg sichern unser Engagement für eine nachhaltige Entwicklung. Als technologischer Schrittmacher der Automobilbranche wollen wir mit Spitzenleistungen überzeugen und die Zukunft einer sicheren und umweltverträglichen Mobilität gestalten. Grundlage unserer Geschäftstätigkeit ist eine verantwortungsbewusste Unternehmensführung, die auf eine gute Corporate Governance und unmissverständliche Compliance-Grundsätze setzt und ein ethisch einwandfreies Verhalten jedes einzelnen Mitarbeiters und jeder Führungskraft fördert.

– **Ökologische Nachhaltigkeit:** Umweltschutz, Innovation und Sicherheit sind die größten Herausforderungen auf unserem Weg zur Nachhaltigkeit. Unsere Pkw und Nutzfahrzeuge zählen in ihren jeweiligen Marktsegmenten in puncto Umweltschutz und Sicherheit zur Spitze. Mit neuen Mobilitätskonzepten denken wir über das einzelne Fahrzeug hinaus und erproben umweltverträgliche Ansätze für urbane Mobilität. Auch bei der Produktion unserer Fahrzeuge achten wir darauf, jeden Herstellungsschritt so umweltverträglich wie möglich zu gestalten.

– **Soziale und gesellschaftliche Nachhaltigkeit:** Wir verstehen uns als »mitgestaltender Akteur in der Gesellschaft«. Deswegen setzen wir uns für unsere Mitarbeiter, unsere Kunden und für die Menschen im Umfeld unserer Standorte ein. Denn wir profitieren von einer hoch motivierten und qualifizierten Belegschaft, von zufriedenen Kunden und von vertrauensvollen Beziehungen zu unseren Stakeholdern. Wir wollen Wert für die Gesellschaft schaffen und engagieren uns mit unserer Spenden-, Sponsoring- und Stiftungstätigkeit unter anderem für in Not geratene Menschen, für die Verständigung zwischen den Kulturen sowie die Förderung von Kunst, Kultur, Bildung, Wissenschaft und Sport.

**Managementstrukturen der Nachhaltigkeit.** Seit dem Jahr 2008 ergänzt und vernetzt das Daimler Sustainability Board unsere etablierten Nachhaltigkeitsmanagementstrukturen und unterstützt die Geschäftsfelder bei der Umsetzung von Nachhaltigkeitsmaßnahmen. Im Mai 2009 wurde Dr. Thomas Weber, im Vorstand der Daimler AG verantwortlich für Konzernforschung und Mercedes-Benz Cars Entwicklung, neuer Vorsitzender dieses Gremiums.

Aufgabe des Sustainability Board ist es auch, Nachhaltigkeitsleistungen unseres Unternehmens zu analysieren und zu bewerten. Wird dabei Handlungsbedarf sichtbar, entwickeln die Mitglieder des Gremiums Entscheidungsvorlagen. Gemeinsam mit dem auf Arbeitsebene angesiedelten Sustainability Office unterstützt das Sustainability Board den Vorstand bei der Meinungsbildung zu nachhaltigkeitsrelevanten Themen.

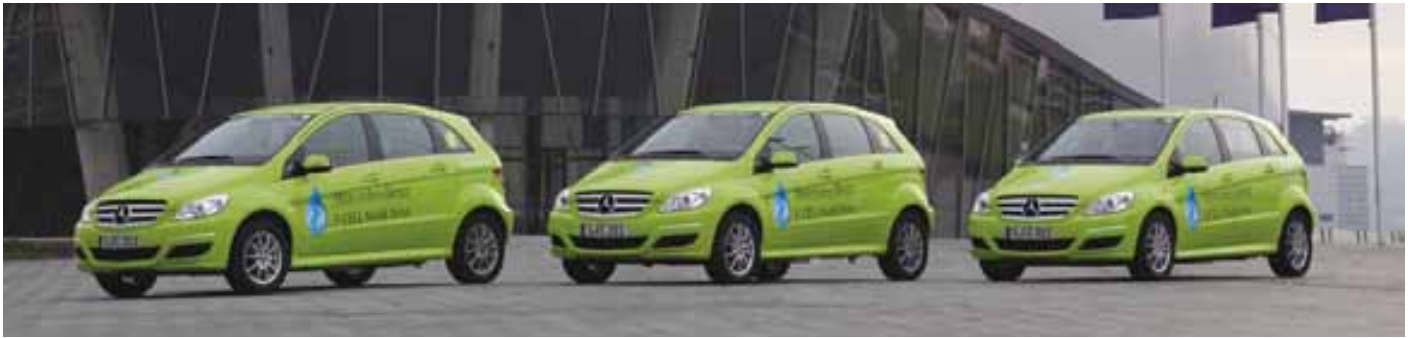

**Lokal emissionsfrei rund um den Globus: Drei Mercedes-Benz B-Klasse F-CELL unterstreichen den Führungsanspruch von Daimler auf dem Gebiet der nachhaltigen Mobilität.**

**Unsere Stakeholder: Korrektiv auf dem Weg zur Nachhaltigkeit.** Bereits im Jahr 2008 haben wir den Dialog mit unseren Anspruchsgruppen intensiviert und den »Daimler Sustainability Dialogue« ins Leben gerufen. Dieses jährlich stattfindende Forum bringt Vertreter aus Gesellschaft, Politik und Wissenschaft mit Vertretern des Daimler-Top-Managements zusammen. Anspruch der Dialogveranstaltung ist es, den Austausch auch zu kritischen Themen zu vertiefen und gemeinsam praktische Lösungen zu suchen.

Zum dritten Daimler Sustainability Dialogue kamen im November 2010 in Stuttgart 130 Teilnehmer zusammen. Nach einer Einführung durch Dr. Dieter Zetsche lag der Schwerpunkt der Veranstaltung auf Workshops zu den folgenden Themen: Elektromobilität, nachhaltige Mobilitätssysteme, Jobsicherheit in der Krise, demografische Entwicklung, Menschenrechte, Lieferantenmanagement und Community Relations. Die Ergebnisse der Workshops werden in den folgenden zwölf Monaten weiterbearbeitet und schaffen Anknüpfungspunkte für den nächsten Sustainability Dialogue.

Im Juli 2010 haben wir – als eines der ersten deutschen Unternehmen überhaupt – in China einen Stakeholder-Dialog zum Thema Nachhaltigkeit initiiert. Die Konferenz unter dem Titel »Daimler Sustainability Forum – Ethic Standards and Corporate Social Responsibility« fand im Pavillon der Vereinten Nationen im Expo-Park in Shanghai statt.

**Selbstverpflichtung zu verantwortlichem Handeln.** Am 25. November 2010 haben Top-Manager und Unternehmer von 21 deutschen Unternehmen in Berlin ein »Leitbild für verantwortliches Handeln in der Wirtschaft« unterzeichnet. Auch Daimler bekennt sich darin zur sozialen Marktwirtschaft und zu fairen Regeln im globalen Wettbewerb. Basierend auf sechs Prinzipien verpflichten sich die Unterzeichner zu einer erfolgs- und werteorientierten Führung im Sinne der sozialen Marktwirtschaft. So ist dem Leitbild entsprechend Wettbewerb unverzichtbar, Gewinne dürfen allerdings nicht durch unrechtmäßige Schädigungen Dritter erzielt werden. Die Unternehmen sehen sich zudem in der Verantwortung, zum Wohl der Menschen fortlaufend nach besseren Wegen der Ressourcennutzung zu suchen und damit nachhaltiger zu wirtschaften. Die im oben genannten Leitbild enthaltenen Prinzipien sollen gemeinsam mit Beschäftigten und Sozialpartnern auf allen Unternehmensebenen gelebt und zum Bestandteil der Führungsprozesse werden.

**Transparente Nachhaltigkeitsberichterstattung.** Im Jahr 1993 haben wir erstmals einen Umweltbericht veröffentlicht und damit den Grundstein für unsere Nachhaltigkeitsberichterstattung gelegt. Im Jahr 2010 erschien zum sechsten Mal unser konzernweiter Nachhaltigkeitsbericht 360 GRAD, der an den Richtlinien der Global Reporting Initiative (GRI) ausgerichtet ist. Er liefert eine detaillierte und umfassende Nachhaltigkeitsbilanz des zurückliegenden Geschäftsjahres und wird ergänzt durch einen online-basierten interaktiven Nachhaltigkeitsbericht mit vertiefenden und weiterführenden Informationen (<http://nachhaltigkeit.daimler.com>). Zur Hauptversammlung 2011 Mitte April präsentieren wir den neuen Nachhaltigkeitsbericht.

In regelmäßigen Abständen informieren wir mit dem elektronischen »Daimler Sustainability Newsletter« über unser Engagement im Bereich Nachhaltigkeit. Sie können den Newsletter unter [sustainability@daimler.com](mailto:sustainability@daimler.com) abonnieren. Weitere Informationen finden Sie im Internet unter <http://nachhaltigkeit.daimler.com>.



**Forschung und Entwicklung nehmen bei Daimler schon seit jeher eine Schlüsselrolle ein.** Unser Ziel ist es, mit innovativen Fahrzeugen und maßgeschneiderten Verkehrskonzepten eine sichere und nachhaltige Mobilität zu schaffen. Hierzu entwickeln wir faszinierende Fahrzeuge, modernste Antriebskonzepte und richtungsweisende Sicherheitssysteme.

**Innovation aus Tradition.** In der Tradition unserer Gründerväter Carl Benz und Gottlieb Daimler nehmen Forschung und Entwicklung schon immer eine Schlüsselrolle in unserem Unternehmen ein. Dies gilt heute mehr denn je – denn angesichts des beschleunigten technologischen Wandels und aktueller Herausforderungen wie Klimawandel und Umweltschutz stehen wir vor der Aufgabe, das Auto neu zu erfinden. Im Jahr 2010 beliefen sich unsere Forschungs- und Entwicklungsleistungen auf insgesamt 4,8 (i. V. 4,2) Mrd. €. Zum Jahresende 2010 waren rund 22.100 Beschäftigte in der Forschung und in den Entwicklungsbereichen von Mercedes-Benz Cars, Daimler Trucks, Mercedes-Benz Vans und Daimler Buses tätig.

**Patente belegen Innovationskraft.** Der Erfindung des Automobils folgten bei Daimler und den Vorgängerunternehmen in den zurückliegenden 125 Jahren weltweit mehr als 80.000 angemeldete Patente. Dabei geht Qualität schon seit jeher vor Quantität. Dies zeigt sich auch im Patent Asset Index der WHU – Otto Beisheim School of Management: Hier liegt Daimler im »Competitive Impact per Patent«, einem wichtigen Indikator für die Innovationskraft von Unternehmen, an der Spitze des Wettbewerbs. Heute verfügt Daimler über ein umfangreiches Patentportfolio von über 19.600 Schutzrechten sowie ein breites Spektrum an Markenrechten und geschützten Designs.

**Unser Ziel: emissionsfreie Mobilität.** Das Automobil erlebt aktuell eine Zeitenwende. Die Erdölvorkommen sind endlich, und ihre Nutzung trägt zum Klimawandel bei. Gleichzeitig wächst weltweit der Mobilitätsbedarf, und der Individualverkehr nimmt weiter zu – mit entsprechenden Auswirkungen auf Umwelt und Klima. Unser Ziel ist es daher, den Verbrauch und die Emissionen unserer Fahrzeuge schon heute deutlich zu reduzieren und langfristig ganz zu vermeiden. Um die Mobilität für künftige Generationen zu sichern, entwickeln wir maßgeschneiderte innovative Fahrzeugkonzepte. Die Elektrifizierung des Antriebsstrangs ist hierbei eine Schlüsseltechnologie. Die Daimler-Ingenieure haben in den vergangenen 30 Jahren mehr als 750 Erfindungen zu Elektrofahrzeugen mit Batterieantrieb und mehr als 1.000 Erfindungen zu Brennstoffzellenantrieben zum Patent angemeldet, davon über 380 auf dem Gebiet der Lithium-Ionen-Technologie.

Der Weg zur Elektromobilität wird sich aber nicht in einem großen Sprung, sondern in vielen kleinen Schritten vollziehen. Deshalb ist eine differenzierte Herangehensweise erforderlich, die sich bei Daimler in einem kundenorientierten, dreispurigen Antriebsmix widerspiegelt:

- Wir optimieren den Verbrauch herkömmlicher Fahrzeuge.
- Wir entwickeln Hybridantriebe – vor allem für große Pkw, Omnibusse und leichte Lkw für den Verteilerverkehr.
- Und wir arbeiten am emissionsfreien, rein elektrischen Fahren mit Batterie- und Brennstoffzellenantrieb.

Gestützt auf die Forschungsergebnisse und die Erfahrungen aus unseren erfolgreichen Großprojekten zur Erprobung von alternativen Fahrzeug- und Antriebskonzepten haben wir die Voraussetzungen für das lokal emissionsfreie Fahren geschaffen. Darüber hinaus haben wir die Unternehmenstätigkeit auf zukunftsweisende Geschäftsfelder, wie die Entwicklung und Fertigung von Lithium-Ionen-Batterien und Brennstoffzellen-Antrieben, ausgedehnt. Mit unseren strategischen Kooperationen sichern wir uns den direkten Zugriff auf die Schlüsseltechnologien von morgen.

**Verbrauch und CO<sub>2</sub>-Emissionen weiter reduziert.** Durch unsere vielseitig optimierten Verbrennungsmotoren, Downsizing-Konzepte mit Aufladung und neue Getriebe haben wir den Kraftstoffverbrauch und die CO<sub>2</sub>-Emissionen in den zurückliegenden Jahren bereits signifikant gesenkt, und das sowohl bei Pkw als auch bei Nutzfahrzeugen. Bei den Pkw haben wir unser Angebot an Motoren in den Jahren 2009 und 2010 nahezu vollständig erneuert. Damit verfügen wir nun über ein breites Angebot an Fahrzeugen, die mit herausragenden Fahreigenschaften bei niedrigem Verbrauch überzeugen. Im Jahr 2010 konnten wir die CO<sub>2</sub>-Emissionen unserer Neuwagenflotte deshalb nochmals verringern, obwohl der Anteil besonders hochwertiger und leistungsstarker Fahrzeuge gestiegen ist. Hierzu hat auch unser breites Angebot an besonders sparsamen BlueEFFICIENCY-Modellen beigetragen. Insgesamt sanken die CO<sub>2</sub>-Emissionen unserer Pkw-Flotte in der Europäischen Union im Jahr 2010 trotz verschiedener gegenläufiger Effekte, wie zum Beispiel einer Verschiebung der Absatzstruktur hin zu größeren Fahrzeugen, auf 158 g/km.

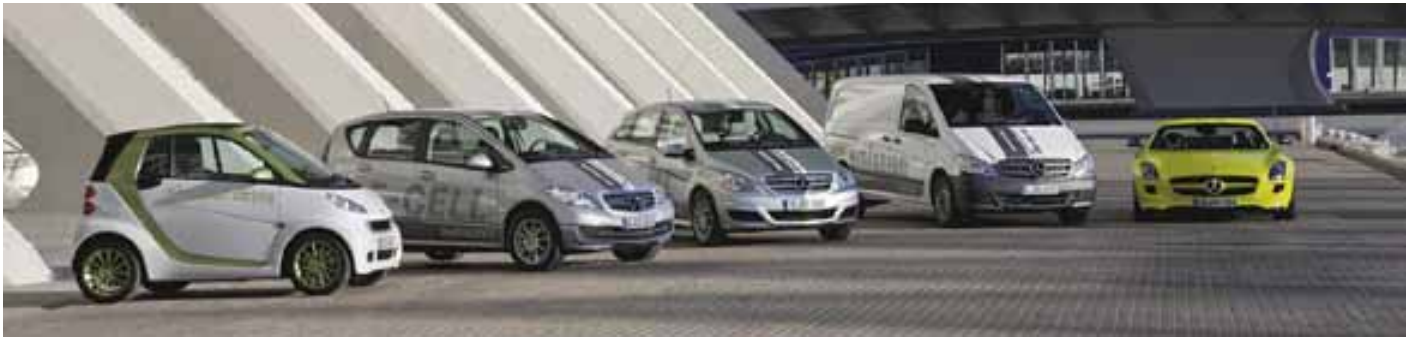

**E-Drive on the move: Seriennahe Elektrofahrzeuge von Daimler.**

#### **BlueDirect Motoren setzen neue Maßstäbe beim Verbrauch.**

Mit innovativen Technologien werden wir die Verbrauchs- und CO<sub>2</sub>-Werte künftig weiter reduzieren. Einen wichtigen Beitrag hierzu leisten die BlueDirect V6- und V8-Motoren mit Benzin-Direkteinspritzung der dritten Generation, die wir zum Jahresende 2010 eingeführt haben. Sie setzen neue Verbrauchsmaßstäbe in diesem Segment. In Kombination mit dem weiterentwickelten Sieben-Gang-Automatikgetriebe 7G-TRONIC PLUS mit serienmäßiger ECO Start-Stopp-Funktion und reibungsoptimierter neuer Wandler-Technologie kann der Verbrauch mit diesen neuen Aggregaten um mehr als 20% verringert werden. Unser selbstgestecktes Ziel ist es, die durchschnittlichen CO<sub>2</sub>-Emissionen unserer Neuwagenflotte in der EU bis zum Jahr 2012 auf unter 140 g/km zu reduzieren. Fahrzeuge wie der S 250 CDI BlueEFFICIENCY, das weltweit erste Fünf-Liter-Auto im Luxussegment – und damit auch das erste Fahrzeug seiner Klasse mit weniger als 150 g CO<sub>2</sub>/km –, unterstreichen, dass wir unsere Spritsparttechnologien konsequent in allen Fahrzeugsegmenten einsetzen.

**Umwelttechnologien für Lkw und Omnibusse.** BLUETEC ist eine Schlüsseltechnologie von Daimler und mittlerweile ein Synonym für schadstoffarme und verbrauchoptimierte Dieselaggregate für Pkw und Nutzfahrzeuge. Bereits im Jahr 2005 haben wir den ersten Mercedes-Benz Actros Schwer-Lkw mit BLUETEC-Technologie eingeführt. Als BLUETEC-Pionier hat Daimler Trucks diese Technologie konsequent weiterentwickelt. Mittlerweile bieten wir BLUETEC nicht nur in Westeuropa, sondern auch in Nordamerika und in Japan an. Bis zum Jahresende 2010 haben wir mehr als 380.000 BLUETEC-Nutzfahrzeuge verkauft – ein Beleg für die große Akzeptanz bei unseren Kunden und gleichzeitig ein wichtiger Beitrag zur Verbrauchs- und Schadstoffreduzierung.

EEV (Enhanced Environmentally Friendly Vehicle) ist ein Standard für Motoren, der die Partikelemission gegenüber den Euro-5-Grenzwerten nochmals um rund ein Drittel reduziert. Um dies zu erfüllen, haben wir unsere Motoren weiterentwickelt und die BLUETEC-Technologie nochmals optimiert. Hiermit können die strengen Abgasgrenzwerte ohne zusätzliche Abgasnachbehandlung eingehalten werden. Mit einem erweiterten Angebot führt Daimler Trucks EEV-Ausführungen nun sukzessive in bestimmte Leistungsklassen bei Lkw und Bussen ein. Beim Mercedes-Benz Econic gehört BlueTec EEV seit Januar 2010

zum erweiterten Lieferumfang. Als erstes Fahrzeug von Daimler wird der Fuso Canter seit Februar 2010 serienmäßig in allen Leistungsklassen als EEV-Fahrzeug ausgeliefert.

Im Rahmen einer von verschiedenen Lkw-Herstellern unterzeichneten Selbstverpflichtung verfolgen wir das Ziel, die CO<sub>2</sub>-Emissionen der von uns in Europa verkauften schweren Lkw (über 12t) gegenüber dem Basisjahr 2005 bis zum Jahr 2020 um durchschnittlich 20% pro Tonnenkilometer zu senken.

**Vier Zero-Emission-Fahrzeuge in Serie.** Bereits seit Jahresende 2009 werden bei Daimler mit der Mercedes-Benz B-Klasse F-CELL und dem smart fortwo electric drive die ersten lokal emissionsfreien Elektrofahrzeuge unter Serienbedingungen gefertigt (vgl. S. 124). Im Berichtsjahr folgten nun der Transporter Vito E-CELL und die Mercedes-Benz A-Klasse E-CELL. Der Vito E-CELL, der seit September an unsere Kunden ausgeliefert wird, ist ein vollwertiger Transporter für den Alltagseinsatz. Er läuft als der weltweit erste Elektrotransporter innerhalb der Serienfertigung vom Band. Mit rund 900 Kilogramm Zuladung und einem uneingeschränkt nutzbaren Laderaum übernimmt der Vito E-CELL im Kundeneinsatz alle gewohnten Transportaufgaben eines Fahrzeugs seiner Klasse. Die abgasfrei und leise fahrenden Transporter gehören zu einer ersten Kleinserie von 100 Fahrzeugen, von denen jeweils 50 in Berlin und im Großraum Stuttgart eingesetzt werden. Weitere 2.000 Einheiten des innovativen Transporters werden ab dem Jahr 2011 gefertigt. Bei der voll alltags- und familientauglichen A-Klasse E-CELL mit batterieelektrischem Antrieb ermöglichen zwei hocheffiziente Lithium-Ionen-Batterien eine Reichweite von mehr als 250 km (NEFZ). Die rund 500 Fahrzeuge werden im Rahmen eines Full-Service-Mietmodells an ausgewählte Kunden in mehreren europäischen Ländern ausgeliefert.

**Brennstoffzelle im Praxiseinsatz.** Aufgrund ihrer Alltagstauglichkeit und der großen Reichweite sind Elektrofahrzeuge mit Brennstoffzelle für uns eine vielversprechende Alternative auf dem Weg zur nachhaltigen Mobilität. Mit zahlreichen Patenten und der weltweit am besten erprobten Fahrzeugflotte ist Daimler Technologieführer bei Brennstoffzellen im automobilen Bereich. Zur neuesten Generation unserer Brennstoffzellenfahrzeuge gehören die B-Klasse F-CELL und der Omnibus Citaro FuelCELL-Hybrid. Die B-Klasse F-CELL überzeugt mit souveränen Fahrleistungen und beweist ihre Alltagstauglichkeit unter anderem mit einer

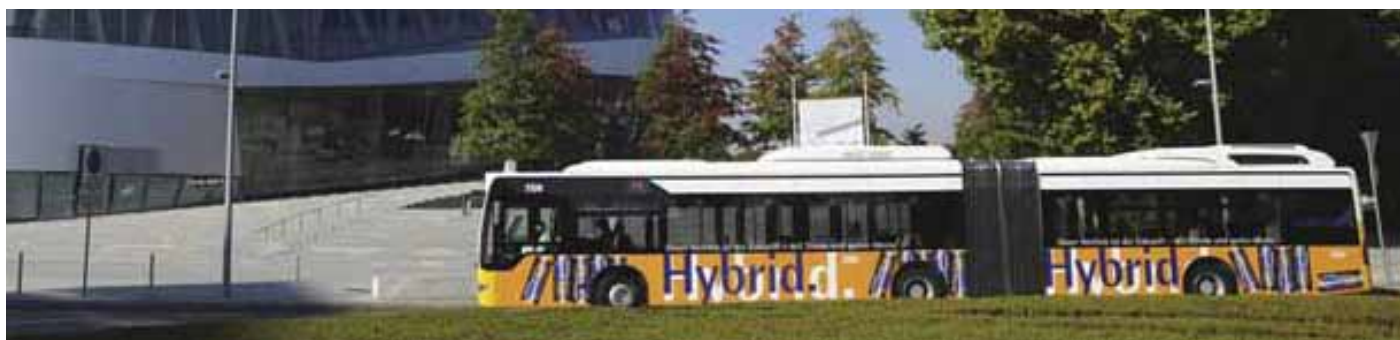

**Citaro G BlueTec Hybrid: Meilensteine bei Verbrauchseffizienz und niedrigen Emissionen.**

Reichweite von rund 400 km. Insgesamt sollen rund 200 Fahrzeuge der B-Klasse F-CELL produziert und in Deutschland und in den USA bei Kunden im Alltagsbetrieb getestet werden.

Der Mercedes-Benz Citaro FuelCELL-Hybrid zeichnet sich durch sein ökologisches Konzept aus: Er fährt ohne Schadstoffemissionen und nahezu geräuschlos. Damit eignet er sich bestens für Einsätze in hoch belasteten Innenstädten. Insgesamt haben sich bereits 36 Mercedes-Benz Citaro mit Brennstoffzellenantrieb in zwölf Verkehrsbetrieben auf drei Kontinenten bestens bewährt. Mit mehr als 140.000 Betriebsstunden und über 2,2 Mio. km Laufleistung haben Mercedes-Benz Busse die Praxistauglichkeit des Brennstoffzellenantriebs nachgewiesen.

**Deutscher Nachhaltigkeitspreis für den Mercedes-Benz Atego BlueTec Hybrid.** Die im November 2010 von der Stiftung Deutscher Nachhaltigkeitspreis e. V. verliehene Auszeichnung wird an Unternehmen vergeben, die wirtschaftlichen Erfolg mit sozialer Verantwortung und Schonung der Umwelt verbinden. Nach Auffassung der Jury ist der Mercedes-Benz Atego BlueTec Hybrid ein umweltfreundliches Fahrzeug, mit dem die Daimler AG weltweit Maßstäbe setzt. Mit dem innovativen Hybridantrieb im Mercedes-Benz Atego bietet die Daimler AG erstmalig in Europa diese besonders emissionsarme Technologie ab Werk an. Der Parallel-Hybridantrieb verringert den Kraftstoffverbrauch und die Abgasemissionen um bis zu 15% und ermöglicht darüber hinaus eine geringere Geräuschemission. Die ersten 50 Atego BlueTec Hybrid wurden Anfang 2011 an deutsche Kunden aus dem Bereich Verteilerverkehr ausgeliefert. Mit dem Mercedes-Benz Atego BlueTec Hybrid unterstreichen wir unsere Position als Weltmarktführer bei Nutzfahrzeugen mit Hybridantrieb.

**Mercedes-Benz Citaro G BlueTec Hybrid im Praxiseinsatz.** 20 bis 30% weniger Dieselverbrauch und CO<sub>2</sub>-Emissionen, auf Teilstrecken absolut abgasfrei und fast geräuschlos – das sind die herausragenden Fahrzeugmerkmale der neuen Citaro G BlueTec Hybridomnibusse, die seit Anfang 2010 in mehreren europäischen Städten in Dienst gestellt wurden. Der Citaro G BlueTec Hybrid ist der bislang einzige Hybridbus, der Teilstrecken rein elektrisch ohne Dieselmotor fahren kann und nahezu geräuschlos an die Haltestelle kommt. Den Antrieb übernehmen vier elektrische Radnabenmotoren, die ihren Strom aus einer der weltweit größten

Lithium-Ionen-Batterien im mobilen Einsatz beziehen. Bei Bedarf kann der Strom auch über einen Generator erzeugt werden, der durch einen für diese Fahrzeugklasse vergleichsweise kleinen Dieselmotor angetrieben wird. Außerdem wird Strom auch über Bremsvorgänge wie beispielsweise bei Gefällefahrten gewonnen.

**Innovative Konzepte für urbane Mobilität.** Vor allem in Ballungsgebieten bringt der Wunsch nach schnellen und komfortablen Transportmöglichkeiten die vorhandenen Infrastruktur- und Transportsysteme mehr und mehr an ihre Grenzen. Zugleich liegen gerade hierin Chancen für neue und nachhaltige Mobilitätskonzepte wie car2go, car2gether oder Bus Rapid Transit.

Das innovative Mobilitätskonzept **car2go**, das wir seit März 2009 in Ulm und seit November 2009 in Austin, Texas, anbieten, überzeugt durch seine Flexibilität: Die Fahrzeuge sind im gesamten Geschäftsgebiet verteilt; sie lassen sich spontan anmieten, beliebig lange nutzen und können danach an jedem Ort innerhalb des Geschäftsgebiets abgestellt werden. In Ulm ist die Zahl der Kunden im Jahresverlauf auf über 20.500 gestiegen, und mehr als 230.000 Mietverträge wurden im Jahr 2010 vollautomatisch abgewickelt. In Austin haben rund 15.000 Nutzer die Fahrzeuge mehr als 120.000-mal gemietet. Nach diesem Erfolg soll car2go nun weltweit in weiteren Städten eingeführt werden. Bereits ab dem Frühjahr 2011 werden wir car2go in Kooperation mit der Europcar Autovermietung GmbH in Hamburg anbieten. Dabei kommt mit der smart car2go edition das weltweit erste, ab Werk serienmäßig produzierte Carsharing-Auto zum Einsatz – unter anderem mit verbrauchoptimiertem Benzinmotor, Start-Stopp-Automatik, einer neu entwickelten Telematikgeneration und einem Solardach.

Nach car2go hat die Daimler AG ein weiteres innovatives Konzept für urbane Mobilität entwickelt: **car2gether** startete im Herbst mit zwei Pilotprojekten in Ulm und Aachen. Die webbasierte Mitfahr-Community greift auf die vielfältigen Kommunikationsmöglichkeiten des mobilen Internets zurück. Mitfahrgelegenheiten können über Smartphones von unterwegs oder vom heimischen Rechner aus vermittelt werden – und das nahezu in Echtzeit. Daimler ist das erste Automobilunternehmen, das diese Form der Mobilität in einem Pilotversuch testet und damit eine intelligente und zeitgemäße Nutzung einer Mitfahrvermittlung speziell in Ballungsgebieten erprobt.

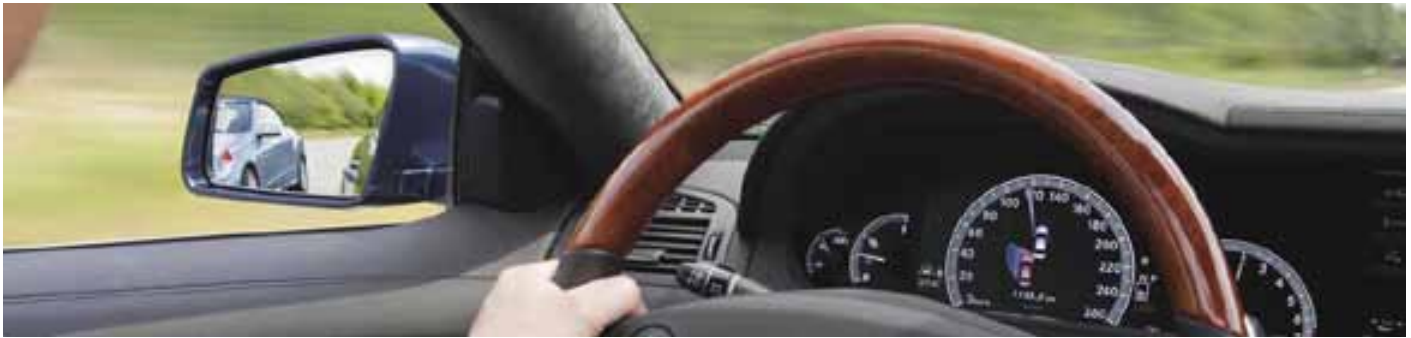

**Aktiver Totwinkelassistent: Eine Innovation für aktive Sicherheit.**

Für den steigenden Transportbedarf in Metropolen und Regionen mit großem Bevölkerungswachstum setzt Daimler auf **Bus-Rapid-Transit-Lösungen** (BRT). Ein BRT-System besteht aus einer oder mehreren Hauptachsen, auf der Linienbusse in hoher Taktfrequenz verkehren und die durch Zubringerlinien aus allen Gebieten der Stadt gespeist werden. Eigens abgetrennte Spuren mit separaten Ampelschaltungen ermöglichen auch in Hauptverkehrszeiten ein schnelles Vorankommen. Das System lässt sich leicht an die individuellen Bedingungen einer Stadt anpassen. Daimler Buses bietet mit seinem BRT-Expertenteam Unterstützung bei der Planung, Einführung und Weiterentwicklung maßgeschneiderter BRT-Systeme. Städte wie Nantes, Istanbul, Bogotá und Mexiko City setzen BRT bereits erfolgreich ein.

**Auf dem »Weg zum unfallfreien Fahren«.** Fahrzeugsicherheit gehört zu unseren Kernkompetenzen und ist zentraler Bestandteil unserer Produktstrategie. Weltweit investiert kein anderer Hersteller mehr in die Entwicklung lebensrettender Sicherheitssysteme als Daimler. Seit über 60 Jahren sind unsere Entwicklungen für die Sicherheit von Pkw, Lkw, Transportern und Omnibussen weltweit wegweisend. Der Einsatz für mehr Sicherheit im Straßenverkehr liegt im Interesse aller Verkehrsteilnehmer und ist für uns eine Aufgabe von gesellschaftlicher Bedeutung. Deshalb setzen wir unseren »Weg zum unfallfreien Fahren« Schritt für Schritt in die Realität um, und das wird auch von externer Seite honoriert. So zeichnete Euro NCAP, eine unabhängige europäische Sicherheitsvereinigung, die Marke Mercedes-Benz für das Insassenschutzsystem PRE-SAFE® und das Assistenzsystem PRE-SAFE® Bremse im Jahr 2010 mit zwei »Euro NCAP Advanced Rewards« aus.

**Innovationen erhöhen aktive Sicherheit.** Zur weiteren Verbesserung der aktiven Sicherheit haben wir im Jahr 2010 über die bewährten Technologien Antiblockiersystem (ABS), Elektronisches Stabilitätsprogramm® (ESP®), Bremsassistent Plus und PRE-SAFE®-Bremse hinaus zwei weitere Sicherheitsinnovationen eingeführt: den Aktiven Totwinkel-Assistenten und den Aktiven Spurhalte-Assistenten. Im Nutzfahrzeugsbereich markiert die zweite Generation des Active Brake Assist einen weiteren Meilenstein bei Sicherheitsinnovationen.

**Der Aktive Totwinkel-Assistent** warnt den Fahrer, wenn das System erkennt, dass bei einem Spurwechsel Kollisionsgefahr droht. Nahbereichs-Radarsensoren beobachten hierzu den Bereich unmittelbar neben und hinter dem Auto. Über die reine Warnfunktion hinaus greift der Aktive Totwinkel-Assistent an den Rädern der gegenüberliegenden Fahrzeugseite über das ESP® korrigierend ein, um dem Kollisionskurs entgegenzuwirken. Zeitgleich informiert eine Anzeige im Kombi-Instrument den Autofahrer. Lässt sich ein Unfall trotz Richtungskorrektur nicht mehr vermeiden, so kann der Aktive Totwinkel-Assistent die Folgen eines Zusammenstoßes verringern.

Der ebenfalls mit dem ESP® vernetzte **Aktive Spurhalte-Assistent** tritt in Aktion, wenn das Fahrzeug ohne Betätigung des Blinkers eine durchgezogene Linie rechts oder links der Fahrspur überfährt. In diesem Fall bremst der Aktive Spurhalte-Assistent durch das ESP® die gegenüberliegenden Räder ab, um das Fahrzeug am Überfahren der Linie zu hindern. Zugleich warnt eine Anzeige im Kombi-Instrument den Fahrer. Beim Überfahren von unterbrochenen Fahrbahnmarkierungen steuert das System einen Elektromotor im Lenkrad an. Dieser sorgt für kurzzeitige Vibrationen – ein dezenter, aber durchaus wirkungsvoller Hinweis, unverzüglich gegenzulenken.

Für zusätzliche Sicherheit im Nutzfahrzeug sorgt der **Active Brake Assist 2**. Mittels Radartechnik ermittelt er wie sein Vorgänger fortlaufend die Differenzgeschwindigkeit zum vorausfahrenden Fahrzeug und in der neuen Version nun auch die Distanz zu einem stehenden Hindernis. Ist ein Unfall bei unveränderter Fahrweise unvermeidlich, wird der Fahrer zunächst optisch durch ein rot aufleuchtendes Dreieck und dann akustisch gewarnt. Bei einer Verschärfung der Situation reagiert das System mit einer Abbremsung. Das Warnkonzept ist so ausgelegt, dass der Fahrer eine kritische Situation selbst und ohne automatischen Bremsengriff entschärfen kann. Deshalb, und um gefährliche Situationen für nachfolgende Fahrzeuge in jedem Fall zu vermeiden, reagiert der Active Brake Assist auf stehende Hindernisse mit einer Teilbremsung von 50% der maximalen Bremskraft. Im Vergleich zu anderen Systemen, die sich in der Entwicklung befinden, verfügt der Active Brake Assist 2 von Mercedes-Benz über entscheidende Vorteile. So arbeitet die bewährte Radartechnik unbeeinflusst von Witterungs- und Lichteinflüssen und ist darüber hinaus im gesamten Geschwindigkeitsspektrum eines Lkw aktiv.



Unsere Beschäftigten sollen auf qualitativ hohem Niveau entwickelt und gefördert werden. Unser Ziel ist es, auch für die Zukunft eine wettbewerbsfähige Belegschaft sicherzustellen. Vor dem Hintergrund der demografischen Entwicklung haben wir diverse Initiativen gestartet, mit denen wir die Leistungsfähigkeit der Belegschaft erhalten und stärken sowie geeignete Nachwuchskräfte gewinnen wollen.

## Mitarbeiterinnen und Mitarbeiter

|                            | 2010    | 2009    | 10/09        |
|----------------------------|---------|---------|--------------|
| Beschäftigte (31.12.)      |         |         | Veränd. in % |
| Daimler-Konzern            | 260.100 | 256.407 | +1           |
| Mercedes-Benz Cars         | 96.281  | 93.572  | +3           |
| Daimler Trucks             | 71.706  | 70.699  | +1           |
| Mercedes-Benz Vans         | 14.557  | 15.226  | -4           |
| Daimler Buses              | 17.134  | 17.188  | -0           |
| Vertrieb Fahrzeuge         | 48.299  | 47.625  | +1           |
| Daimler Financial Services | 6.742   | 6.800   | -1           |
| Sonstige                   | 5.381   | 5.297   | +2           |

**Beschäftigungsentwicklung.** Am 31. Dezember 2010 beschäftigte der Daimler-Konzern weltweit 260.100 Mitarbeiterinnen und Mitarbeiter. Das waren 3.693 mehr als ein Jahr zuvor. Der Anstieg resultierte zum einen aus Zugängen im Konsolidierungskreis, insbesondere von Gesellschaften bei Mercedes-Benz Cars und in der Vertriebsorganisation. Zum anderen erhöhte sich der Personalstand dadurch, dass die Personalkapazitäten an die wieder anziehende Nachfrage angepasst wurden. Weitere Informationen zur Beschäftigungsentwicklung, vor allem in einzelnen Regionen und den Geschäftsfeldern, finden Sie im Lagebericht auf Seite 86 dieses Geschäftsberichts.

**Umfangreiches Ausbildungsangebot.** Die Entwicklung und Förderung unserer Mitarbeiter auf qualitativ hohem Niveau ist uns ein zentrales Anliegen. Wir sehen Mitarbeiterentwicklung als durchgängigen Prozess und starten unsere Aktivitäten bereits in Kindergarten und Schule. So vermittelt unsere Initiative Genius Kindern und Jugendlichen wertvolle Einblicke in Zukunftstechnologien und Berufsbilder in der Automobilindustrie, um sie schon frühzeitig für Ingenieurberufe und Daimler zu begeistern.

Nach wie vor hat die Ausbildung bei Daimler einen großen Stellenwert und eine anerkannt hohe Qualität. Technische und kaufmännische Berufsausbildung sowie das Studium an der Dualen Hochschule sind wesentliche Bausteine unserer Nachwuchssicherung, durch die wir unseren Unternehmenserfolg auch langfristig gewährleisten.

Ende 2010 beschäftigten wir weltweit 8.841 Auszubildende (i. V. 9.151), in Deutschland haben im Berichtsjahr 2.034 (i. V. 2.341) junge Menschen eine Ausbildung bei uns aufgenommen. Bei entsprechenden Leistungen erhalten die Auszubildenden attraktive Übernahmeangebote. Für die Daimler AG lag die Übernahmequote im Jahr 2010 bei 84% (i. V. 89%). Dabei richten wir die Ausbildungs- und Übernahmehzahlen konsequent am Bedarf und an der künftigen Entwicklung des Unternehmens aus. Die künftigen Ausbildungskontingente haben wir für den Mittelfristzeitraum mit dem Betriebsrat vereinbart. Diese liegen für die Daimler AG im Jahr 2010 bei 1.250, 2011 bei 1.150 und 2012 bei 1.050 Auszubildenden.

**Sicherung und Förderung von Nachwuchskräften.** Auch im Jahr 2010 haben wir weltweit wieder mehr als 500 Absolventen und Berufseinsteigern mit erster Praxiserfahrung einen erstklassigen Einstieg ins Berufsleben ermöglicht. Dabei lag der Schwerpunkt unserer Einstellungen über das Konzernnachwuchsprogramm CAREer auf den strategischen Feldern wie Green Technology. Der Frauenanteil in CAREer liegt aktuell bei 35%, und unsere Trainees kommen aus rund 20 verschiedenen Nationen. Zur strategischen Nachwuchssicherung und -förderung leistet auch das Daimler-Student-Partnership (dsp)-Programm mit aktuell etwa 100 aktiven Teilnehmern einen wichtigen Beitrag. Unser Ziel ist es, die potenziellen Nachwuchskräfte bereits während des Studiums anzusprechen und an unser Haus zu binden.

Mit unseren neuen Daimler-Academic-Programmen investieren wir in eigene Mitarbeiterressourcen. Herausragende Mitarbeiterinnen und Mitarbeiter erhalten die Möglichkeit, berufsbegleitend oder im Rahmen eines Vollzeitstudiums einen Bachelor-, Master- oder MBA-Abschluss zu erwerben. Die ersten geförderten Mitarbeiterinnen und Mitarbeiter haben ihr Studium zum Wintersemester 2010 aufgenommen.

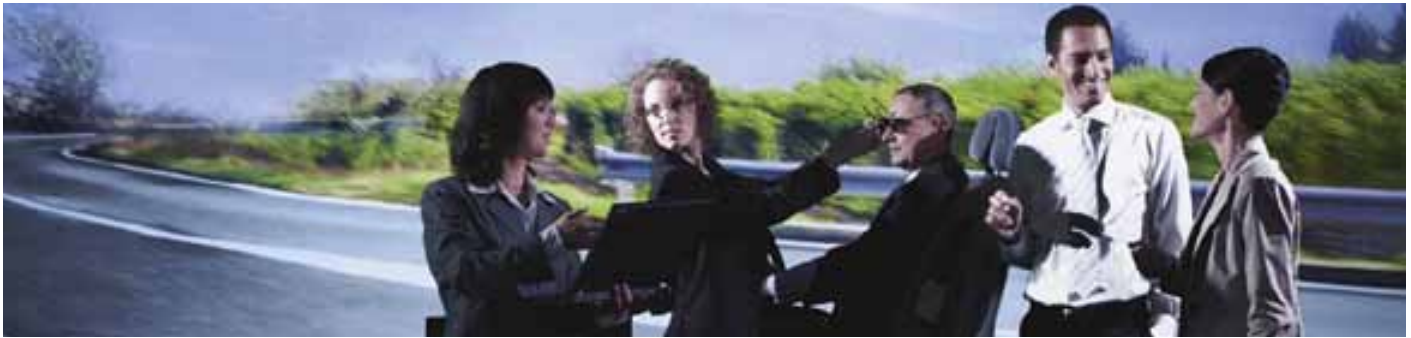

**Mitarbeiterinnen und Mitarbeiter mit den unterschiedlichsten Kompetenzen und Erfahrungen arbeiten bei Daimler gemeinsam daran, die Zukunft des Automobils zu gestalten.**

In einem weiteren Schritt ist vorgesehen, das Förderprogramm auch außerhalb Deutschlands auf- und auszubauen.

**Mitarbeiterqualifizierung.** »Man lernt nie aus« ist ein Satz, der schon Generationen geprägt hat und heute noch an Bedeutung gewinnt. Durch ein zielgerichtetes Angebot an Qualifizierungsprogrammen und -maßnahmen, verbunden mit dem Eigenengagement unserer Mitarbeiterinnen und Mitarbeiter, sichern wir ihre Einsatzfähigkeit gerade auch in den neuen Technologien. Allein in Deutschland haben wir im Berichtsjahr 202 (i. V. 207) Mio. € in die Ausbildung und Qualifizierung unserer Beschäftigten investiert; jeder Mitarbeiter wurde im Schnitt 2,3 (i. V. 2,4) Tage im Jahr qualifiziert.

Unsere Technologieführerschaft sichern wir durch unterschiedliche Qualifizierungsmaßnahmen. Im Bereich der Aus- und Weiterbildung von Elektrofachkräften sind wir im deutschen Wirtschaftsraum führend. Seit dem Jahr 2006 wurden bei der Daimler AG in Deutschland bereits über 1.000 Mitarbeiter im Bereich Hochvolt-technologie qualifiziert. Das Green-Qualification-Programm, das Qualifizierungsmaßnahmen in umweltschonende Technologien umfasst, soll konzernweit in den nächsten drei Jahren mehr als 30.000 Mitarbeiter und Führungskräfte erreichen. Geschult werden insbesondere Fachkräfte entlang der gesamten Wertschöpfungskette von der Entwicklung bis zum Vertrieb und Service weltweit.

**Diversity-Management.** Unterschiedlichkeit fordern, Verbindungen schaffen, Zukunftsfähigkeit gestalten – mit diesen Anforderungen formuliert Daimler klar sein Bekenntnis zu Vielfalt und Diversity-Management. Denn Diversity-Management ist nicht nur unter sozialen, sondern auch unter wirtschaftlichen Gesichtspunkten ein Erfolgsfaktor.

Bereits seit 2005 ist Diversity-Management bei Daimler etabliert. Einen Schwerpunkt stellt die Förderung von Frauen in Führungspositionen (Gender Diversity) dar. Ende 2010 betrug der Anteil von Frauen in leitenden Führungspositionen konzernweit rund 9%. Bis zum Jahr 2020 wollen wir den Anteil auf 20% steigern. Diese Zielvorgabe berücksichtigt branchenbedingte Spezifika und bildet eine realistische Zielgröße auf der Basis des aktuellen

Frauenanteils in der Belegschaft der Daimler AG von 13,5% bzw. von 15% im Daimler-Konzern. Ein weiterer wichtiger Aspekt, den wir bei der Bestimmung einer sachgerechten Zielvorgabe berücksichtigen, ist der Anteil weiblicher Studierender der Fachrichtung Ingenieurwissenschaften. Dieser liegt in Westeuropa derzeit zwischen 5 und 20%.

Außer der Frauenförderung haben wir auch viele andere Facetten der Vielfalt im Blickfeld. Hierzu gehören Themen wie Generationenmanagement und Internationalität.

#### **Gesunde Mitarbeiter in einem gesunden Unternehmen.**

Durch eine arbeitsplatzbezogene Versorgung fördert Daimler präventiv und nachhaltig die Gesundheit seiner Mitarbeiter. Die Erstversorgung bei Unfällen an unseren Standorten wird durch eine hoch qualifizierte Akut- und Notfallversorgung garantiert. Bei gesundheitlichen Problemen oder arbeitsmedizinischen Untersuchungen steht den Mitarbeitern der Werksärztliche Dienst zur Verfügung. Erhöhten körperlichen Belastungen und damit verbundenen Gesundheitsrisiken beugen wir vor, indem wir Ergonomiemaßnahmen und geeignete, arbeitswissenschaftlich fundierte Bewertungsmethoden in den gesamten Produktentstehungsprozess einfließen lassen.

Einen weiteren wesentlichen Beitrag zur Gesunderhaltung der Mitarbeiter leistet das Integrationsmanagement. Ein Schwerpunkt hierbei ist es, einsatzeingeschränkte Mitarbeiter wieder einzugliedern. Im Jahr 2010 haben wir deutschlandweit verbindliche Regeln und Leitlinien zum Umgang mit Gesundheitsdaten geschaffen, die verantwortungsbewusstes und erfolgreiches Führungsverhalten unterstützen.

**Dank an die Belegschaft.** Der Vorstand dankt allen Mitarbeiterinnen und Mitarbeitern für ihre Unterstützung in der Krise und ihren Einsatz in der anschließenden Phase des Aufschwungs. Ohne die Flexibilität der Belegschaft hätte dieser Kraftakt nicht in dem erreichten Maße bewältigt werden können. Wir danken auch den Arbeitnehmervetretern für ihr entschlossenes Engagement und die konstruktive Zusammenarbeit.

Unser gesellschaftliches Engagement betrachten wir als grundlegenden Bestandteil unserer Unternehmenstätigkeit. Deshalb unterstützen wir gesamtgesellschaftliche Belange und engagieren uns an unseren Standorten. Weltweit waren wir auch im Jahr 2010 mit Corporate Volunteering, Stiftungen und Community Relations aktiv und haben Initiativen durch Spenden und Sponsoring gefördert.

**Warum wir uns gesellschaftlich engagieren.** An all unseren Standorten steht unser Unternehmen in vielfältigen Wechselwirkungen zu seinem gesellschaftlichen Umfeld. Diese Beziehungen sind für uns Chance und Verpflichtung zugleich. Sie betreffen unsere Rolle als Arbeit- und Auftraggeber, Dienstleister und Automobilproduzent sowie in einem umfassenden Sinne unser Selbstverständnis als Corporate Citizen: Wir wollen Werte für alle Stakeholder schaffen. Darum engagieren wir uns in der Gesellschaft und an unseren Standorten und leisten Beiträge zur Entwicklung des gesellschaftlichen Ordnungsrahmens.

Dies betrachten wir als grundlegenden Bestandteil unserer Unternehmenstätigkeit. Unterstützung leisten wir durch Spenden, Sponsoring, Corporate Volunteering sowie Stiftungen und Community Relations – mit klarem thematischen Fokus: Wir fördern Kultur, Bildung, Wissenschaft, Sport und Gesundheit sowie karitative Projekte und leisten auch kurzfristig in Katastrophenfällen schnelle Hilfe. Dabei berücksichtigen wir die spezifischen Bedingungen an unseren Standorten sowie gesamtgesellschaftliche Belange und setzen auf einen engen Dialog mit den Kommunen und gesellschaftlichen Institutionen vor Ort.

**Transparentes Management.** Wir legen hohe Qualitätsmaßstäbe an unser Engagement an und haben für die Vergabe von Mitteln transparente Strukturen und klare Verantwortlichkeiten geschaffen. Ein Spenden- und Sponsoringausschuss entscheidet anhand von definierten Förderkriterien. In einer Datenbank erfassen wir alle konzernweiten Aktivitäten in den Bereichen Spenden und Sponsoring. Im Jahr 2009 haben wir zudem eine Sponsoring-Richtlinie verabschiedet, die Grundlage für einen transparenten Vergabeprozess ist und mit deren Hilfe gewährleistet wird, dass unsere Zuwendungen bestehende rechtliche Bestimmungen und ethische Standards erfüllen.

Spezifische regionale Handlungsfelder legen wir in enger Abstimmung mit den Landesgesellschaften und Produktionsstandorten fest. Im Jahr 2010 hat Daimler gesellschaftliche Projekte und gemeinnützige Institutionen mit Projektmitteln in einem Umfang von mehr als 51 Mio. € unterstützt. Zudem erfolgte eine Zustiftung in Höhe von 88 Mio. € in das Vermögen der Daimler und Benz Stiftung.

Auch bei Parteispenden orientieren wir uns an einer klaren Leitlinie. Zuwendungen an politische Akteure bedürfen danach generell der Zustimmung des Vorstands und werden derzeit nur an Parteien in Deutschland geleistet.

**Spendenaktivitäten.** Im Mittelpunkt unserer Spendentätigkeit stehen die Förderung von Wissenschaft und Bildung, die Unterstützung karitativer Projekte sowie die Katastrophenhilfe. Weil Hilfsleistungen in einem Notfall schnell und effektiv erfolgen müssen, haben wir 2009 für die Katastrophenhilfe einen gesonderten Prozess installiert. Er ermöglichte uns, beim Erdbeben in Haiti im Januar und bei der Flutkatastrophe in Pakistan im Juli und August 2010 umgehend zu reagieren und geeignete Hilfsprojekte zu unterstützen.

Seit dem Jahr 2009 unterstützt Daimler unter anderem auch die Deutsche Cleft-Kinder-Hilfe e. V. Der karitative Verein setzt sich weltweit für die umfassende Behandlung von Kindern mit Lippen-Kiefer-Gaumenspalten ein. In Indien haben wir den Bau eines neuen Hilfszentrums in Mumbai gefördert und unterstützen, mit dem Anspruch der Hilfe zur Selbsthilfe, den laufenden Betrieb.

**Sponsoring in Bildung, Sport und Kultur.** Mit unseren Sponsoring-Aktivitäten wollen wir eine nachhaltige Entwicklung in Kernbereichen gesellschaftlicher Verantwortung vorantreiben. Dies betrifft insbesondere Bildung, Umwelt, Kunst und Kultur an unseren Standorten. So unterstützen wir als Sponsor zum Beispiel seit vielen Jahren die Staatsgalerie Stuttgart und schaffen damit kulturelle Bildungsangebote nicht nur für Daimler-Mitarbeiter und ihre Familien.

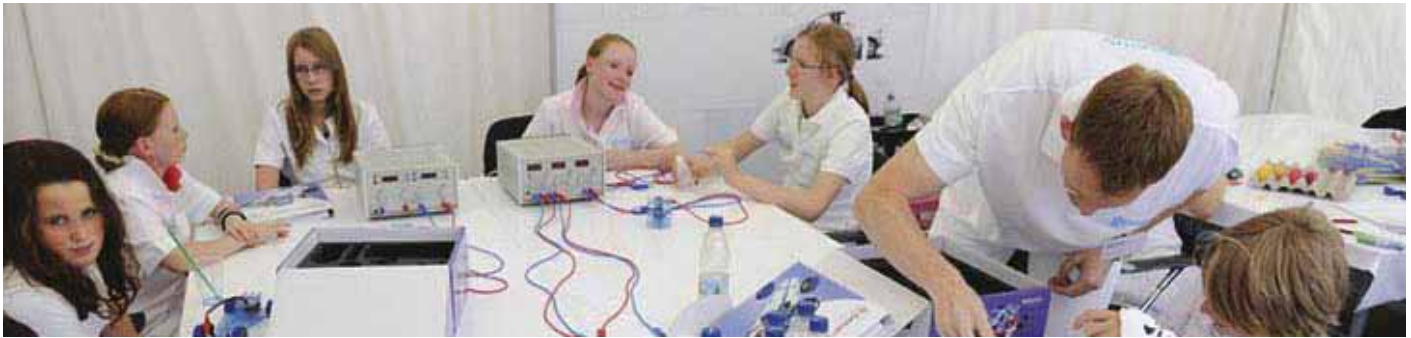

Mit Genius möchte Daimler vor allem Mädchen für Naturwissenschaft und Technik begeistern.

Seit dem Jahr 2007 schreibt Mercedes-Benz gemeinsam mit dem Deutschen Fußballbund jedes Jahr einen Integrationspreis aus, der unter dem Motto »Fußball: Viele Kulturen – eine Leidenschaft« steht. Er zeichnet integrationsfördernde Fußballprojekte für Kinder und Jugendliche aus. Der Integrationspreis ist mit Sach- und Geldpreisen im Wert von insgesamt 150.000 € einer der höchstdotierten Sozialpreise der Bundesrepublik Deutschland.

**Corporate Volunteering und andere gemeinwohlorientierte Tätigkeiten.** Wir legen Wert auf eine gute Nachbarschaft an unseren Standorten und beteiligen uns daher am lokalen gesellschaftlichen Leben. Schwerpunkte hierbei sind Bildung und Ausbildung. Im Jahr 2010 haben wir »Genius – Die junge Wissens-Community von Daimler« ins Leben gerufen, um mehr Kinder und Jugendliche für Technik und Naturwissenschaft zu begeistern.

Darüber hinaus engagieren sich viele unserer Mitarbeiterinnen und Mitarbeiter ehrenamtlich in Nachbarschaftsprojekten. Beschäftigte von Daimler Financial Services arbeiten beispielsweise seit dem Jahr 2005 in dem Programm »Beyond Basics« der Thirkell Elementary School in Detroit, Michigan, mit. Es dient der Bildungsförderung von Schülern aus sozial schwachen Familien. Im Jahr 2010 nahmen 650 Kinder an dem Programm teil. Beim »Day of Caring«, den Daimler Financial Services auch 2010 wieder an 15 Standorten weltweit veranstaltete, haben rund 2.000 Mitarbeiter ihre Zeit und Fähigkeiten dafür eingebracht, sozial benachteiligten Menschen zu helfen.

**Förderung durch Stiftungen.** In einigen Ländern haben wir Stiftungen gegründet, über die wir unsere gesellschaftlichen Aktivitäten bündeln. Dazu zählen die 1986 in Deutschland gegründete Daimler und Benz Stiftung, der Daimler-Fonds im Stifterverband für die Deutsche Wissenschaft sowie die Daimler Foundation in Japan, die sich Wohltätigkeitsprojekten und der Kulturförderung verschrieben hat. Ende des Jahres 2010 hat der Vorstand beschlossen, anlässlich des 125. Automobiljubiläums das Kapital der Daimler und Benz Stiftung auf insgesamt 125 Mio. € aufzustocken.

Die von Daimler mitbegründete Laureus Sport for Good Foundation nutzt die Kraft des Sports, um die sozialen Herausforderungen unserer Zeit zu bekämpfen. Sie ist heute eine der größten sozialen Initiativen weltweit. Die Stiftung ist mit Unterstützung von 46 Sportlegenden in 80 sozialen Sportprojekten auf jedem Kontinent aktiv und hat inzwischen über eine Million Kinder und Jugendliche gefördert.

**Community Relations.** Als Arbeitgeber und Auftraggeber wollen wir daran mitwirken, die Wettbewerbsfähigkeit der Regionen, in denen wir tätig sind, weiterzuentwickeln und einen Beitrag zur Lösung sozialer, ökologischer und bildungspolitischer Herausforderungen zu leisten. Deswegen bringen wir uns in die Lösung ordnungspolitischer Fragen und die Gestaltung politischer Rahmenbedingungen ein. Themen, die wir mit politischen Entscheidungsträgern diskutieren, betreffen etwa die Verkehrsinfrastruktur, neue Mobilitätskonzepte oder die Elektromobilität.

Weiterführende Details zu den Förderprojekten und gesellschaftlichen Aktivitäten des Konzerns finden Sie im Daimler Nachhaltigkeitsbericht und auf unseren Internetseiten unter dem Stichwort Nachhaltigkeit ([www.daimler.com/nachhaltigkeit](http://www.daimler.com/nachhaltigkeit)).





Vorstand und Aufsichtsrat von Daimler bekennen sich zu den Grundsätzen guter Corporate Governance. Unser gesamtes Handeln ist auf eine verantwortungsvolle, transparente und nachhaltige Unternehmensführung und -kontrolle ausgerichtet.

## 150 - 151 Bericht des Prüfungsausschusses

## 152 - 157 Vergütungsbericht

- Grundsätze der Vergütung des Vorstands
- Vergütung des Vorstands im Geschäftsjahr 2010
- Zusagen bei Beendigung der Tätigkeit
- Vergütung des Aufsichtsrats

## 158 - 159 Compliance

- Unser Verständnis und unsere Grundsätze
- Compliance-Organisation weiterentwickelt
- Systematisches Compliance-Risikomanagement
- Höchste Erwartungen auch an Geschäftspartner
- Umfassende Compliance-Leistungen und weltweites Trainingsangebot

## 160 - 165 Corporate Governance Bericht

- Selbstverständnis und Rahmenbedingungen
- Die Organe der Daimler AG
- Aktienbesitz von Vorstand und Aufsichtsrat
- Directors' Dealings
- Risikomanagement, Rechnungslegung und Transparenz
- Integrität

## 166 - 167 Entsprechenserklärung zum Deutschen Corporate Governance Kodex

- Abweichungen von den Empfehlungen des Kodex
- Abweichungen von den Anregungen des Kodex

## Sehr geehrte Aktionärinnen und Aktionäre,

im Geschäftsjahr 2010 fanden sieben Sitzungen des Prüfungsausschusses statt. An den Sitzungen nahmen neben den Ausschussmitgliedern regelmäßig auch der Aufsichtsratsvorsitzende, der Vorstandsvorsitzende, das für Finanzen und Controlling zuständige Vorstandsmitglied und die Vertreter des Abschlussprüfers teil. Darüber hinaus waren zu einzelnen Tagesordnungspunkten die Leiter von Fachabteilungen vertreten. Zusätzlich führte der Prüfungsausschussvorsitzende regelmäßig Einzelgespräche, unter anderem mit dem Abschlussprüfer, mit dem für Finanzen und Controlling zuständigen Vorstandsmitglied, mit dem Leiter des Bilanzbereichs, mit den Leitern der Bereiche Interne Revision, Corporate Compliance und Recht sowie mit dem unabhängigen Compliance Monitor. Über die Ergebnisse dieser bilateralen Gespräche informierte der Prüfungsausschussvorsitzende zunächst den Prüfungsausschuss. Der Prüfungsausschussvorsitzende berichtete dann dem Aufsichtsrat in der jeweils folgenden Sitzung über die Tätigkeit des Ausschusses und den Verlauf von Sitzungen und Gesprächen.

In einer Sitzung Mitte Februar 2010 behandelte der Prüfungsausschuss im Beisein von Vertretern des Abschlussprüfers die vorläufigen Kennzahlen des Jahres- und des Konzernabschlusses, die möglichen Alternativen für einen Dividendenvorschlag und die Empfehlung des Vorstands, auf eine Dividendenauszahlung zu verzichten. Angesichts der außergewöhnlichen Krisenbedingungen im Geschäftsjahr 2009 und des negativen Konzernergebnisses empfahl der Prüfungsausschuss dem Aufsichtsrat, dem Vorschlag des Vorstands zu folgen und auf einen Dividendenvorschlag an die Hauptversammlung zu verzichten. Die vorläufigen Kennzahlen wurden in der Jahrespressekonferenz am 18. Februar 2010 veröffentlicht.

Anfang März 2010 behandelte der Prüfungsausschuss in Anwesenheit von Vertretern des Abschlussprüfers den vom Abschlussprüfer jeweils mit einem uneingeschränkten Bestätigungsvermerk versehenen Jahresabschluss, Konzernabschluss sowie den zusammengefassten Lagebericht für die Daimler AG und den Konzern für das Jahr 2009. Zur Vorbereitung standen den Prüfungsausschussmitgliedern, wie allen Aufsichtsratsmitgliedern, umfangreiche Unterlagen zur Verfügung, u. a. der Geschäftsbericht, die Prüfungsberichte der KPMG für den Jahresabschluss der Daimler AG und den Konzernabschluss nach IFRS, der zusammengefasste Lagebericht für die Daimler AG und den Konzern sowie Entwürfe der Berichte des Aufsichtsrats und des Prüfungsausschusses und des Berichts nach Form 20-F. Anhaltspunkte für eine mangelnde Wirksamkeit des internen Kontroll- und Risikomanagementsystems waren auf Basis von Berichten der Internen Revision und des Abschlussprüfers nicht gegeben.

Der Prüfungsausschuss empfahl dem Aufsichtsrat im Ergebnis, die aufgestellten Abschlüsse zu billigen, und bestätigte nochmals seine Empfehlung an den Aufsichtsrat, sich dem Vorschlag des Vorstands zum Verzicht auf einen Dividendenvorschlag an die Hauptversammlung anzuschließen. Darüber hinaus befasste sich der Prüfungsausschuss in dieser Sitzung mit dem Entwurf der Tagesordnung zur Hauptversammlung 2010, mit dem Jahresprüfplan der Internen Revision im Geschäftsjahr 2010 und nahm einen Tätigkeitsbericht des Bereichs Corporate Compliance entgegen. Des Weiteren behandelte er den Bericht über die an den Abschlussprüfer im Geschäftsjahr 2009 geleisteten Honorare, diskutierte die Honorarvereinbarung für das Geschäftsjahr 2010 und genehmigte einen Katalog zulässiger Nicht-Prüfungsleistungen des Abschlussprüfers für das Geschäftsjahr 2010.

Der Prüfungsausschuss überprüfte die Qualifikation und Unabhängigkeit des Abschlussprüfers und die Umsetzung der beschlossenen Grundsätze zur Genehmigung zulässiger Nicht-Prüfungsleistungen des Abschlussprüfers auf fortlaufender Basis. Nach entsprechendem Beschluss durch die Hauptversammlung beauftragte der Prüfungsausschuss die KPMG AG, Wirtschaftsprüfungsgesellschaft, Berlin, mit der Abschlussprüfung 2010, vereinbarte das Honorar des Abschlussprüfers, legte die Prüfungsschwerpunkte für das Geschäftsjahr 2010 fest und informierte den Aufsichtsrat entsprechend.

Im Jahresverlauf 2010 behandelte der Prüfungsausschuss in den quartalsbezogenen Sitzungen die Zwischenfinanzberichte bzw. den Halbjahresbericht einschließlich der jeweiligen Risikoberichte. Des Weiteren nahm er in diesen Sitzungen Berichte über die Inanspruchnahme von Nichtprüfungsleistungen des Abschlussprüfers sowie Tätigkeitsberichte des Bereichs Corporate Compliance, der Internen Revision und des unabhängigen Compliance Monitors entgegen. In diesem Zusammenhang ist der Prüfungsausschussvorsitzende auch in die Vereinbarung und Bewertung der jährlichen Compliance-Ziele für den Vorstand eingebunden.

Daneben befasste sich der Prüfungsausschuss mit Mitteilungen, die vertraulich und auf Wunsch anonym über ein unternehmens-eigenes sogenanntes Whistleblowing-System entgegengenommen und intern vom Business Practices Office bearbeitet wurden.

Ein weiterer Schwerpunkt im Geschäftsjahr 2010 waren die durch das Bilanzrechtsmodernisierungsgesetz weiter konkretisierten Kontrollaufgaben des Prüfungsausschusses. Der Ausschuss behandelte in diesem Zusammenhang in einer zusätzlichen Sitzung, gestützt auf von ihm gewürdigte Stellungnahmen des Abschlussprüfers und der Internen Revision, die Wirksamkeit der bestehenden Systeme der internen Kontrolle und des Risikomanagements,

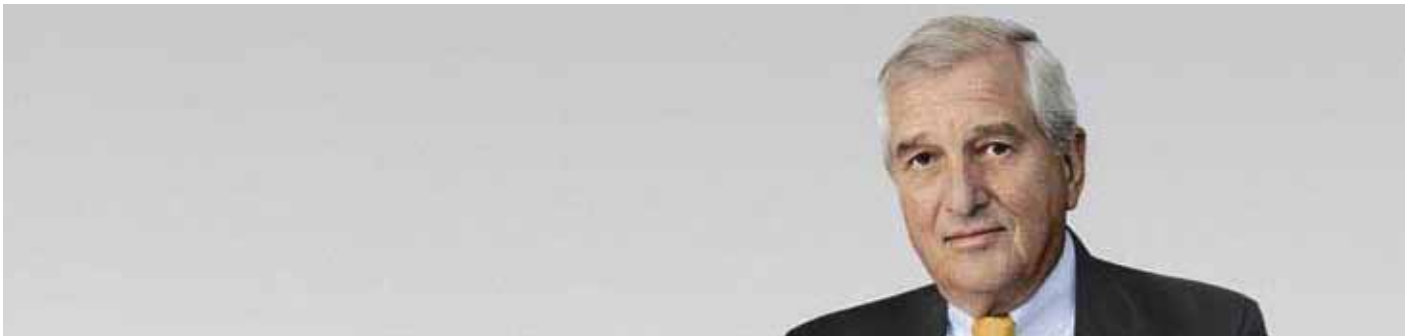

**Bernhard Walter, Vorsitzender des Prüfungsausschusses.**

der Internen Revision und des Compliance-Managements auch über den rechnungslegungsbezogenen Bereich hinaus. Zu diesem Zweck befasste sich der Prüfungsausschuss mit den Tätigkeitsprogrammen der Internen Revision und des Bereichs Corporate Compliance sowie in systematischer Hinsicht mit dem Risikomanagement und der Risikoberichterstattung sowie mit der Funktionsfähigkeit der eingesetzten Systeme. Integraler Bestandteil des internen Kontrollsystems ist seit Jahren das rechnungslegungsbezogene interne Kontrollsystem (Internal Control over Financial Reporting gemäß Abschnitt 404 des Sarbanes-Oxley Acts). In diesem Zusammenhang diskutierte der Prüfungsausschuss mit dem Vorstand den Stand der Überlegungen für die Fortführung der aufgrund der Deregistrierung bei der amerikanischen Börsenaufsichtsbehörde SEC und dem Delisting von der New York Stock Exchange entfallenden externen Prüfung nach Abschnitt 404 des Sarbanes-Oxley Act unter anderen Rahmenbedingungen. Diesbezüglich stellte das Unternehmen einen mit dem Abschlussprüfer bereits diskutierten risikoorientierten Ansatz für die Prüfung des rechnungslegungsbezogenen internen Kontrollsystems vor, der vorsieht, dass der Abschlussprüfer das Ergebnis seiner diesbezüglichen, zukünftig durchzuführenden Prüfung in eine Bescheinigung fasst. Darüber hinaus nahm der Ausschuss den Jahrestätigkeitsbericht des Konzerndatenschutzbeauftragten entgegen, informierte sich über das Treasury-Risk-Management und die Anlagestrategie, über den Umfang des Versicherungsschutzes innerhalb des Konzerns sowie über den Status und das Management der Pensionsfonds. Weitere Gegenstände der zusätzlichen Sitzung bildeten die Methodik der Berechnung von Finanzkennziffern bei Daimler, die durch das Bilanzrechtsmodernisierungsgesetz weiterentwickelten Bilanzierungsregeln, die Neuerungen der International Financial Reporting Standards und grundsätzliche rechtliche Fragestellungen in Bezug auf die Tätigkeit von Aufsichtsrats- und Prüfungsausschussmitgliedern.

In einer Sitzung im September 2010 behandelte der Prüfungsausschuss die Ergebnisse und Empfehlungen des ersten Berichts des Compliance Monitors. Dabei wurden auch der Stand der Umsetzung sowie die Anforderungen an die Weiterentwicklung interner Richtlinien zur Sicherstellung der Compliance intensiv diskutiert.

Ende Februar 2011 prüfte der Ausschuss im Beisein des Abschlussprüfers im Rahmen von zwei Sitzungen den Jahresabschluss 2010, den Konzernabschluss 2010 und den für die Daimler AG und den Konzern zusammengefassten Lagebericht

sowie den Gewinnverwendungsvorschlag des Vorstands. Zur Vorbereitung standen den Prüfungsausschussmitgliedern wie allen Aufsichtsratsmitgliedern umfangreiche Unterlagen teilweise im Entwurf zur Verfügung, u. a. der Geschäftsbericht, die Prüfungsberichte der KPMG für den Jahresabschluss der Daimler AG und den Konzernabschluss nach IFRS, der zusammengefasste Lagebericht für die Daimler AG und den Konzern sowie Entwürfe der Berichte des Aufsichtsrats und des Prüfungsausschusses. Ein Bericht nach Form 20-F war infolge Delisting und Deregistrierung in den USA nicht mehr zu erstellen. Die Prüfungsberichte und wesentliche Vorgänge hinsichtlich der Rechnungslegung wurden gemeinsam mit dem Abschlussprüfer diskutiert. Ferner hat sich der Prüfungsausschuss der Daimler AG mit der Überwachung des Rechnungslegungsprozesses, der Wirksamkeit des internen Kontrollsystems, des Risikomanagementsystems und des internen Revisionssystems sowie mit Fragen der Compliance einschließlich kartellrechtlicher Themen befasst. Dies umfasst auch die vom Vorstand beschlossenen Weiterentwicklungen und erforderlichen Anpassungen innerhalb der konzernweiten Compliance-Strukturen und -Aktivitäten. Der Prüfungsausschuss empfahl dem Aufsichtsrat nach intensiver Prüfung und Erörterung der Unterlagen, die aufgestellten Abschlüsse zu billigen und sich dem Gewinnverwendungsvorschlag des Vorstands anzuschließen. Der Prüfungsausschuss stimmte ferner dem Bericht des Prüfungsausschusses in der vorliegenden Fassung zu. Darüber hinaus befasste sich der Prüfungsausschuss in dieser Sitzung mit dem Entwurf der Tagesordnung zur Hauptversammlung 2011 und dem Jahresprüfplan der Internen Revision.

Auch im Jahr 2010 führte der Ausschuss wie in den Vorjahren eine Selbstevaluierung der Prüfungsausschusstätigkeit durch. Handlungsbedarf im Hinblick auf die Aufgaben des Ausschusses oder auf den Inhalt oder den Ablauf der Sitzungen ergab sich dabei nicht.

Stuttgart, im Februar 2011

Der Prüfungsausschuss

Dr. h. c. Bernhard Walter  
Vorsitzender



Der Vergütungsbericht fasst die Grundsätze zusammen, die für die Festlegung der Vergütung des Vorstands der Daimler AG angewendet werden, und erläutert sowohl die Höhe als auch die Struktur der Vorstandseinkommen. Darüber hinaus werden die Grundsätze und die Höhe der Vergütung des Aufsichtsrats beschrieben. Der Vergütungsbericht ist Bestandteil des Lageberichts für die Daimler AG und den Konzern.

## Grundsätze der Vergütung des Vorstands

**Zielsetzung.** Zielsetzung des Vergütungssystems für den Vorstand ist, die Vorstandsmitglieder gemäß ihres Tätigkeits- und Verantwortungsbereichs sowie im Einklang mit den gesetzlichen Vorgaben angemessen zu vergüten, um auch für Spitzenkräfte ein attraktiver Arbeitgeber zu sein. Durch eine adäquate Variabilität sollen die gemeinsame und persönliche Leistung des Vorstands sowie der nachhaltige Unternehmenserfolg deutlich und unmittelbar berücksichtigt werden.

**Umsetzung in der Praxis.** Für jedes anstehende Geschäftsjahr bereitet der Präsidialausschuss zunächst auf Basis eines Wettbewerbsvergleichs die Überprüfung der Vergütungssystematik und -höhe durch den Aufsichtsrat vor. Im Mittelpunkt steht dabei die Prüfung der Angemessenheit, die auf einem horizontalen und vertikalen Vergleich basiert. Dazu werden mit Bezug auf eine Gruppe vergleichbarer Unternehmen aus Deutschland insbesondere die folgenden Aspekte geprüft:

- die Wirkungsweise der einzelnen fixen und variablen Komponenten, also deren Methodik und Bezugsparameter,
- die Gewichtung der Komponenten zueinander, d. h. das Verhältnis der fixen Grundvergütung zu den kurzfristigen und langfristigen variablen Bestandteilen,
- die Relation des durchschnittlichen Gehalts eines Mitarbeiters zu dem eines Vorstands sowie die sich daraus ergebende Zielgesamtvergütung, bestehend aus einem Grundgehalt, einem Jahresbonus und einer langfristig orientierten Vergütung unter Berücksichtigung auch von Altersversorgungsansprüchen und Nebenleistungen.

Dazu nehmen Präsidialausschuss und Aufsichtsrat unabhängige externe Beratung in Anspruch, um insbesondere den Vergleich mit den marktüblichen Vergütungssystemen zu erleichtern. Soweit sich als Ergebnis hieraus Änderungsbedarf für das Vergütungssystem für den Vorstand ergibt, legt der Präsidialausschuss entsprechende Änderungsvorschläge dem gesamten Aufsichtsrat zur Beschlussfassung vor.

Auf Basis des verabschiedeten Vergütungssystems entscheidet der Aufsichtsrat zu Beginn des Jahres über die Grund- und Zielvergütung der einzelnen Vorstandsmitglieder und legt für das anstehende Geschäftsjahr die für die variablen Vergütungskomponenten relevanten Erfolgsparameter fest. Jährlich werden zudem zwischen dem Aufsichtsratsvorsitzenden, dem Vorstandsvorsitzenden und jedem Vorstandsmitglied individuelle Ziele für seinen spezifischen Verantwortungsbereich für das anstehende Geschäftsjahr vereinbart, die nach Abschluss des Geschäftsjahres zusätzlich in die Festlegung des Jahresbonus durch den Aufsichtsrat eingehen.

Somit stehen zu Beginn des Geschäftsjahres die individuellen Grund- und Zielvergütungen sowie die dafür relevanten Erfolgsparameter fest. Diese Festlegungen werden durch den Aufsichtsrat verabschiedet.

Nach Ablauf des Geschäftsjahres wird auf dieser Basis die Zielerreichung gemessen, die tatsächliche Vergütung durch den Präsidialausschuss ermittelt und dem Aufsichtsrat zur Beschlussfassung vorgelegt.

**Systematik der Vorstandsvergütung im Jahr 2010.** Unverändert setzte sich das Vergütungssystem aus einer fixen Grundvergütung (etwa 20% der Zielvergütung), einem Jahresbonus (etwa 30% der Zielvergütung) sowie einer variablen Vergütung mit mittel- und langfristiger Anreizwirkung (etwa 50% der Zielvergütung) zusammen. Letztere trägt dabei durch die Anbindung an den Aktienkurs einerseits und an zusätzliche anspruchsvolle Vergleichsparameter andererseits den Empfehlungen des Deutschen Corporate Governance Kodex Rechnung und berücksichtigt sowohl positive als auch negative Entwicklungen. Im Einzelnen stellt sich das System wie folgt dar:

Die **Grundvergütung** ist eine fixe, auf das Gesamtjahr bezogene Barvergütung, die sich am Verantwortungsbereich des jeweiligen Vorstandsmitglieds orientiert und in zwölf Monatsraten ausbezahlt wird. In den ersten sechs Monaten des Jahres 2010 kam dabei im Rahmen der Krisenbewältigung ein seit dem 1. Mai 2009 geltender, freiwilliger Entgeltverzicht des Vorstands in Höhe von 15% der Grundvergütung zur Anwendung.

Der **Jahresbonus** ist eine variable Barvergütung, deren Höhe sich primär am operativen Ergebnis des Daimler-Konzerns (EBIT) sowohl gegenüber einer vom Aufsichtsrat festgelegten Zielsetzung wie auch gegenüber dem Istwert des Vorjahres sowie optional an weiteren Kennzahlen und Zielen (für 2010: Total Shareholder Return und Compliance) sowie der individuellen Leistung der Vorstandsmitglieder im abgelaufenen Geschäftsjahr orientiert.

**Bezugsparameter:**

- Zu 50% Vergleich EBIT Istwert 2010 zu Zielwert 2010.
- Zu 50% Vergleich EBIT Istwert 2010 zu Istwert 2009.

**Wert bei 100%-Zielerreichung:**

Im Jahr 2010 das 1,5-Fache des Grundgehalts; die Festlegung erfolgt unter Berücksichtigung des Marktvergleichs.

**Bandbreite der Zielerreichung:**

0 bis 200%, d. h. der Jahresbonus ist nach oben begrenzt auf das Dreifache des Grundgehalts, und ein Totalausfall ist möglich.

Auf den sich daraus ergebenden Zielerreichungsgrad kann abhängig von weiteren, vorab festgelegten Kennzahlen ein bis zu 10%iger Zu- oder Abschlag vorgenommen werden. Zusätzlich hat der Aufsichtsrat die Möglichkeit, unter anderem auf Basis der oben genannten Zielvereinbarungen die persönliche Leistung des einzelnen Vorstandsmitglieds mit einem Zu- oder Abschlag von bis zu 25% zu berücksichtigen.

Auch im Jahr 2010 wurden mit dem Vorstand zusätzlich Ziele mit Blick auf den Aufbau und die nachhaltige Funktion eines Compliance-Systems vereinbart. Die ganz oder teilweise Nicht-Erfüllung der individuellen Compliance-Ziele kann mit einem Abschlag von bis zu 25% auf die Zielerreichung wirken. Aus den Compliance-Zielen kann jedoch selbst bei vollständiger Erfüllung keine Erhöhung der individuellen Zielerreichung resultieren.

Der **Performance Phantom Share Plan** ist eine langfristig orientierte Vergütung, deren Chancen- und Risikopotenzial aufgrund der Gewährung von virtuellen Aktien maßgeblich durch die Entwicklung des Aktienkurses gekennzeichnet ist. Zu Planbeginn werden für die Dauer von drei Jahren mittelfristige Erfolgsziele gesetzt, deren Erreichung auf die Anzahl der verdienten virtuellen Aktien wirkt. Der im Jahr 2010 begebene Plan kommt nach vier Jahren mit dem dann geltenden Kurs der Daimler-Aktie in bar zur Auszahlung. Für die Zuteilung legt der Aufsichtsrat einen absoluten Eurobetrag im Rahmen der jährlichen Zielvergütung fest. Die Zahl der zugeteilten Phantomaktien ergibt sich rechnerisch durch Division dieses Betrags durch den relevanten, über einen längeren Zeitraum ermittelten Durchschnittskurs. Zudem ist dieser Durchschnittskurs nicht nur maßgeblich für die Zuteilung des neuen, sondern auch für die Auszahlung des vier Jahre zuvor gewährten Plans. Von der Hälfte des Netto-Auszahlungsbetrags müssen echte Aktien der Gesellschaft gekauft und dauerhaft gehalten werden, bis dazu bestehende Richtlinien für den Aktienbesitz (siehe unten) erfüllt sind.

**Bezugsparameter für den Plan 2010:**

- Zu 50% die erzielte Umsatzrendite im Vergleich zu einer Wettbewerbsgruppe (BMW, Fiat, Ford, Honda, Paccar, Renault, Toyota, Volvo, Volkswagen). Für die Messung dieses Erfolgskriteriums wird über drei Jahre hinweg die durchschnittliche Umsatzrendite der Wettbewerber ermittelt, wobei der jeweils schlechteste und beste Wert nicht berücksichtigt wird. In dem Maß, in dem die Umsatzrendite von Daimler um +/- 2%-Punkte vom ermittelten Durchschnitt abweicht, ergibt sich die Bandbreite

der Zielerreichung. Eine Zielerreichung von 200% ergibt sich also, wenn die Daimler-Umsatzrendite um 2%-Punkte oder mehr vom Durchschnittswert der Wettbewerber nach oben abweicht. Eine Zielerreichung von 0% ergibt sich entsprechend bei einer Abweichung von 2%-Punkte oder mehr nach unten.

- Zu 50% die erzielte Kapitalrendite unter Berücksichtigung der Kapitalkosten. Maßstab ist die Wertschaffung durch das Unternehmen. In dem Maß, in dem die Kapitalrendite von Daimler über drei Jahre hinweg um +/- 2%-Punkte von einem Zielwert von 8% abweicht, ergibt sich die Bandbreite der Zielerreichung. Eine Zielerreichung von 200% ergibt sich also, wenn Daimler eine Kapitalrendite von 10% oder mehr erwirtschaftet. Eine Zielerreichung von 0% ergibt sich entsprechend bei einer Kapitalrendite von 6% oder weniger.

**Wert bei Zuteilung:**

Festlegung jährlich abhängig vom Marktvergleich; im Jahr 2010 rund das 2- bis 2,5-Fache des Grundgehalts.

**Bandbreite der Zielerreichung:**

0 bis 200%, d. h. der Plan ist nach oben begrenzt, und ein Totalausfall ist möglich.

**Wert der virtuellen Aktien bei der Auszahlung:**

Entsprechend dem ermittelten Aktienkurs und der nach den oben genannten Kriterien erreichten Zahl von Aktien. Die Auszahlung ist in jedem Fall auf das 2,5-Fache des Aktienkurses bei Planbeginn begrenzt.

Während des Vier-Jahres-Zeitraums entfällt auf die virtuellen Aktien ein Dividendenäquivalent, dessen Höhe sich nach der Dividende bestimmt, die im betreffenden Jahr auf eine echte Daimler-Aktie bezahlt wird. Hinsichtlich der aktienorientierten Vergütung ist eine nachträgliche Änderung der festgelegten Erfolgsziele oder Vergleichsparameter ausgeschlossen.

**Richtlinien für den Aktienbesitz.** In Ergänzung zu diesen drei Komponenten der Vorstandsvergütung wurden Richtlinien für den Aktienbesitz des Vorstands (»Stock Ownership Guidelines«) verabschiedet. Danach sind die Vorstandsmitglieder gehalten, über mehrere Jahre hinweg einen Teil ihres Privatvermögens zum Erwerb von Daimler-Aktien einzusetzen und diese Aktien während der Zugehörigkeit zum Vorstand zu halten. Die Festlegung der Zahl der zu haltenden Aktien orientierte sich für den Vorstandsvorsitzenden am Dreifachen und für die anderen Vorstandsmitglieder am Zweifachen der Grundvergütung. Zur Erfüllung der Richtlinien ist grundsätzlich die Hälfte der Netto-Auszahlungsbeträge aus den Performance Phantom Share Plänen zum Erwerb echter Aktien der Gesellschaft zu verwenden; der Aktien-erwerb kann aber auch anderweitig erfolgen.

**Umsetzung des Gesetzes zur Angemessenheit der Vorstandsvergütung / Anpassung des Vergütungssystems im Jahr 2011.** Der Aufsichtsrat der Daimler AG hat vor dem Hintergrund des Gesetzes zur Angemessenheit der Vorstandsvergütung (VorstAG) Ende 2009 eine Begutachtung des Vorstandsvergütungssystems durch einen unabhängigen Prüfer veranlasst. Im Ergebnis wurde das oben dargestellte Vergütungssystem als konform mit den gesetzlichen Vorgaben bestätigt. Auf dieser Basis und vor dem Hintergrund der schwierigen wirtschaftlichen Situation zu Beginn des Jahres hat sich der Aufsichtsrat für ein unverändertes Vergütungssystem im Jahr 2010 entschieden. Dieses Vergütungssystem ist im April 2010 von der Hauptversammlung mit einer Mehrheit von 95,97% der abgegebenen Stimmen gebilligt worden.

Die Hauptversammlung 2010 wurde bereits über die Anpassung der Vergütung ab dem Jahr 2011 informiert. Die Summe aus Grundgehalt und Jahresbonus wird wertgleich auf beide Komponenten verteilt. Diese Umstellung bewirkt zunächst eine neutrale Verschiebung innerhalb der Zielvergütung vom Jahresbonus zum Fixum. Infolgedessen wird der Zielbonus vom 1,5-Fachen auf das 1-Fache der Grundvergütung abgesenkt und so der maximal zur Auszahlung kommende Jahresbonus auf 200% des Grundgehalts reduziert. Die Bandbreite der Zielerreichung und die Bezugsparameter bleiben unverändert. Zusätzlich wird der Jahresbonus nicht mehr vollständig nach dem Geschäftsjahr ausbezahlt, sondern nur zu 50%. Die zweite Hälfte wird ein Jahr später im Rahmen einer Bonus-/Malusregelung zur Auszahlung kommen, und zwar in Abhängigkeit von der Entwicklung der Daimler-Aktie im Vergleich zu einem automobilbezogenen Index (Auto-STOXX vgl. S. 22 ff.), den die Daimler AG als Maßstab für die relative Entwicklung der Aktie heranzieht.

## Vergütung des Vorstands im Geschäftsjahr 2010

**Höhe der Vorstandsvergütung im Jahr 2010.** Die von Konzernunternehmen gewährten Gesamtbezüge für den Vorstand der Daimler AG berechnen sich aus der Summe der zufließenden Barvergütungen (Grundgehalt und Jahresbonus), dem Wert der aktienorientierten Vergütung zum Gewährungszeitpunkt im Februar 2010 (Performance Phantom Share Plan – PPSP) und der Summe steuerpflichtiger geldwerter Vorteile. Der für den Auszahlungsbetrag des PPSP relevante Kurs in vier Jahren kann deutlich von dem jetzt bei der Gewährung relevanten Kurs abweichen.

Es entfallen 4,8 (i. V. 4,8) Mio. € auf fixe, d. h. erfolgsunabhängige, 13,5 (i. V. 1,8) Mio. € auf variable, d. h. kurzfristig erfolgsbezogene, und 7,5 (i. V. 5,2) Mio. € auf im Geschäftsjahr gewährte variable erfolgsbezogene Vergütungskomponenten mit langfristiger Anreizwirkung. Das entspricht für das Jahr 2010 einer Summe von 25,8 (i. V. 11,8) Mio. €.

### Vorstandsvergütung 2010

|                                |      | Grundvergütung | Verzicht | Kurzfristig orientierte Vergütung (Jahresbonus) | Langfristig orientierte Vergütung (PPSP) in Stück | Wert der Zuteilung (2010: bei Kurs 30,61 €) (2009: bei Kurs 18,82 €) | Summe  |
|--------------------------------|------|----------------|----------|-------------------------------------------------|---------------------------------------------------|----------------------------------------------------------------------|--------|
| €-Werte in Tausend             |      |                |          |                                                 |                                                   |                                                                      |        |
| Dr. Dieter Zetsche             | 2010 | 1.530          | - 115    | 4.819                                           | 80.269                                            | 2.457                                                                | 8.691  |
|                                | 2009 | 1.530          | - 153    | 689                                             | 114.967                                           | 2.164                                                                | 4.230  |
| Dr. Wolfgang Bernhard          | 2010 | 472            | - 30     | 1.487                                           | 29.554                                            | 905                                                                  | 2.834  |
|                                | 2009 | 382            | - 53     | 172                                             |                                                   |                                                                      | 501    |
| Wilfried Porth                 | 2010 | 535            | -39      | 1.679                                           | 32.108                                            | 983                                                                  | 3.158  |
|                                | 2009 | 382            | - 53     | 172                                             |                                                   |                                                                      | 501    |
| Andreas Renschler <sup>1</sup> | 2010 | 575            | - 43     | 1.771                                           | 35.829                                            | 1.079                                                                | 3.382  |
|                                | 2009 | 575            | - 58     | 305                                             | 51.317                                            | 966                                                                  | 1.788  |
| Bodo Uebber <sup>2</sup>       | 2010 | 660            | - 50     | 2.079                                           | 38.383                                            | 997                                                                  | 3.686  |
|                                | 2009 | 660            | -66      | 297                                             | 54.975                                            | 930                                                                  | 1.821  |
| Dr. Thomas Weber               | 2010 | 545            | - 41     | 1.679                                           | 34.078                                            | 1.043                                                                | 3.226  |
|                                | 2009 | 545            | - 55     | 245                                             | 48.809                                            | 919                                                                  | 1.654  |
| Summe                          | 2010 | 4.317          | - 318    | 13.514                                          | 250.221                                           | 7.464                                                                | 24.977 |
|                                | 2009 | 3.692          | - 385    | 1.708                                           | 270.068                                           | 4.979                                                                | 9.994  |

<sup>1</sup> PPSP-Wert nach Abzug von Mandatsvergütung eines Beteiligungsunternehmens in Höhe von 17.732 €.

<sup>2</sup> PPSP-Wert nach Abzug von Mandatsvergütung eines Beteiligungsunternehmens in Höhe von 177.321 €.

In der Grundvergütung kam abermals der seit dem 1. Mai 2009 wirksame und bis 30. Juni 2010 geltende, freiwillige Gehaltsverzicht des Vorstands in Höhe von 15% der Grundvergütung zur Anwendung. Der Anstieg der Grundvergütungssumme im Vergleich zum Vorjahr ist auf die veränderte Anzahl der Vorstandsmitglieder im Vergleich zum Vorjahr zurückzuführen.

Die Tabelle auf Seite 154 zeigt das Grundgehalt und die variable Vergütung der aktiven Vorstandsmitglieder für das Jahr 2010 im Vergleich zum Jahr 2009. Dabei ist zu berücksichtigen, dass Herr Dr. Bernhard mit Wirkung zum 18. Februar 2010 neu in den Vorstand berufen wurde.

Im Wesentlichen durch die Gestellung von Dienstwagen und Aufwendungen für Sicherheitsleistungen entstanden für die Vorstandsmitglieder zu versteuernde geldwerte Vorteile in folgender Höhe:

#### Steuerpflichtige geldwerte Vorteile und Sonstige Leistungen

|                          | 2010 | 2009  |
|--------------------------|------|-------|
| €-Werte in Tausend       |      |       |
| Dr. Dieter Zetsche       | 133  | 112   |
| Dr. Wolfgang Bernhard    | 52   |       |
| Wilfried Porth           | 101  | 346   |
| Andreas Renschler        | 148  | 251   |
| Bodo Uebber <sup>1</sup> | 217  | 114   |
| Dr. Thomas Weber         | 162  | 252   |
| Summe                    | 813  | 1.075 |

<sup>1</sup> 2010: Unter Berücksichtigung von Jubiläumsgeld in Höhe von 55.000 €.

#### Zusagen bei Beendigung der Tätigkeit

**Altersversorgung.** Die Pensionsverträge der Vorstandsmitglieder enthalten teilweise Zusagen auf ein jährliches Ruhegehalt, das sich in Abhängigkeit von der Dauer der Vorstandstätigkeit als Prozentsatz der früheren Grundvergütung errechnet. Diese Pensionsansprüche wurden bis 2005 gewährt und blieben bestehen, wurden jedoch auf dem damaligen Niveau eingefroren.

Diese Ruhegehaltszahlungen beginnen auf Antrag als Altersleistung, wenn das Dienstverhältnis mit oder nach Vollendung des 60. Lebensjahres endet, bzw. als Invalidenleistung, wenn das Dienstverhältnis vor dem 60. Lebensjahr aufgrund von Dienstunfähigkeit endet. Es erfolgt eine jährliche Erhöhung um 3,5% (abweichend davon erfolgt für Wilfried Porth eine Anpassung gemäß den gesetzlichen Regelungen). Die Verträge enthalten eine Regelung, nach der bei einem Ableben des Vorstands dem Ehepartner 60% des jeweiligen Ruhegehalts zustehen. Der Betrag kann sich je nach Anzahl unterhaltspflichtiger Kinder um bis zu 30%-Punkte erhöhen.

Mit Wirkung zum Beginn des Jahres 2006 wurden die Pensionsverträge der Vorstandsmitglieder auf ein neues Altersversorgungssystem, das sogenannte Pension Capital, umgestellt. Hierbei wird dem Vorstandsmitglied jährlich ein Kapitalbaustein gutgeschrieben. Dieser Kapitalbaustein setzt sich aus einem Beitrag in Höhe von 15% der Summe seiner Grundvergütung und des tatsächlich erreichten Jahresbonus zusammen, multipliziert mit einem Altersfaktor, der einer Verzinsung von derzeit 6% (Wolfgang Bernhard und Wilfried Porth: 5%) entspricht. Dieser Pensionsplan kommt frühestens mit Erreichen des 60. Lebensjahrs zur Auszahlung.



Der Dienstzeitaufwand für die Pensionsverpflichtungen nach IFRS lag im Geschäftsjahr 2010 bei 1,945 Mio. € (2009: 1,660 Mio. €). Der Barwert der Gesamtverpflichtung (Defined Benefit Obligation) nach IFRS betrug zum 31. Dezember 2010 49,327 Mio. € (2009: 41,588 Mio. €). Unter Berücksichtigung von Lebensalter und Dienstjahren ergeben sich folgende individuelle Ansprüche, Dienstzeitaufwendungen und Barwerte:

**Individuelle Versorgungsansprüche, Dienstzeitaufwendungen und Barwerte für die in den Geschäftsjahren 2009/2010 verdienten Versorgungsansprüche des Vorstands**

|                       |      | Jährliches Ruhegehalt<br>(aus Regelung bis 2005)<br>bei Erreichen des<br>60. Lebensjahres | Dienstzeitaufwand<br>(für Ruhegehalt und<br>Pension Capital) | Barwert der<br>Verpflichtungen<br>(für Ruhegehalt und<br>Pension Capital) |
|-----------------------|------|-------------------------------------------------------------------------------------------|--------------------------------------------------------------|---------------------------------------------------------------------------|
| €-Werte in Tausend    |      |                                                                                           |                                                              |                                                                           |
| Dr. Dieter Zetsche    | 2010 | 1.050                                                                                     | 712                                                          | 26.149                                                                    |
|                       | 2009 | 1.050                                                                                     | 629                                                          | 22.706                                                                    |
| Dr. Wolfgang Bernhard | 2010 |                                                                                           | 205                                                          | 410                                                                       |
|                       |      |                                                                                           |                                                              |                                                                           |
| Wilfried Porth        | 2010 | 156                                                                                       | 118                                                          | 3.715                                                                     |
|                       | 2009 | 156                                                                                       | 88                                                           | 3.002                                                                     |
| Andreas Renschler     | 2010 | 250                                                                                       | 243                                                          | 6.102                                                                     |
|                       | 2009 | 250                                                                                       | 215                                                          | 5.078                                                                     |
| Bodo Uebber           | 2010 | 275                                                                                       | 397                                                          | 5.357                                                                     |
|                       | 2009 | 275                                                                                       | 362                                                          | 4.301                                                                     |
| Dr. Thomas Weber      | 2010 | 300                                                                                       | 270                                                          | 7.594                                                                     |
|                       | 2009 | 300                                                                                       | 240                                                          | 6.501                                                                     |
| Summe                 | 2010 | 2.031                                                                                     | 1.945                                                        | 49.327                                                                    |
|                       | 2009 | 2.031                                                                                     | 1.534                                                        | 41.588                                                                    |

**Zusagen bei vorzeitiger Beendigung der Tätigkeit.** Die Zahlung einer Abfindung an ein Vorstandsmitglied ist im Fall der vorzeitigen Beendigung des Dienstverhältnisses nicht vorgesehen. Allein für den Fall der vorzeitigen Beendigung des Dienstverhältnisses im gegenseitigen Einvernehmen enthalten die Vorstandsverträge eine Zusage auf Auszahlung der Grundvergütung und auf Gestellung eines Fahrzeugs bis zum Ende der ursprünglichen Vertragslaufzeit. Ein Anspruch auf die Auszahlung erfolgsbezogener Vergütungskomponenten besteht dagegen nur zeitanteilig bis zum Tag des Ausscheidens aus der Gesellschaft. Der Anspruch auf die Auszahlung der erfolgsbezogenen Vergütungskomponenten mit langfristiger Anreizwirkung orientiert sich an den festgelegten Ausübungsbedingungen der jeweiligen Pläne. Ausscheidende Vorstandsmitglieder können für den Zeitraum beginnend nach dem Ende der ursprünglichen Vertragslaufzeit Zahlungen in Höhe der im vorherigen Abschnitt beschriebenen Ruhegehaltszusagen und eine Fahrzeuggestellung erhalten. Bei diesen bis zum Erreichen des 60. Lebensjahres gewährten, gegebenenfalls einer Anrechnung anderer Einkünfte unterliegenden Zahlungen kommen die zuvor beschriebenen Erhöhungsbeträge ebenfalls zur Anwendung.

**Nebentätigkeiten der Vorstandsmitglieder.** Die Vorstandsmitglieder sollen Vorstands- oder Aufsichtsratsmandate und/oder sonstige administrative oder ehrenamtliche Funktionen außerhalb des Unternehmens nur in begrenztem Umfang übernehmen. Zudem benötigen die Vorstände zur Aufnahme von Nebentätigkeiten die Zustimmung des Aufsichtsrats. So ist sichergestellt, dass weder der zeitliche Aufwand noch die dafür gewährte Vergütung zu einem Konflikt mit den Aufgaben für das Unternehmen führt. Soweit es sich bei den Nebentätigkeiten um Aufsichtsratsmandate oder Mandate in vergleichbaren Kontrollgremien handelt, sind diese im Jahresabschluss der Daimler AG aufgeführt und im Internet veröffentlicht. Für die Übernahme von Mandaten in Konzerngesellschaften erfolgt keine Vergütung.

**Darlehen an Vorstandsmitglieder.** Im Jahr 2010 wurden keine Vorschüsse oder Kredite an Vorstandsmitglieder der Daimler AG gewährt.

**Vergütungen an ehemalige Vorstandsmitglieder der Daimler AG und ihre Hinterbliebenen.** Die im Jahr 2010 gewährten Bezüge ehemaliger Vorstandsmitglieder der Daimler AG und ihrer Hinterbliebenen belaufen sich auf 17,5 (i. V. 16,1) Mio. €. Die Pensionsrückstellungen für frühere Mitglieder des Vorstands sowie deren Hinterbliebene belaufen sich zum 31. Dezember 2010 auf insgesamt 197,1 (i. V. 192,8) Mio. €.

## Vergütung des Aufsichtsrats

**Vergütung des Aufsichtsrats im Jahr 2010.** Die Vergütung des Aufsichtsrats wird von der Hauptversammlung der Daimler AG festgelegt; sie ist in der Satzung des Unternehmens geregelt. Die von der Hauptversammlung im April 2008 neu festgelegte Vergütung sieht vor, dass die Mitglieder des Aufsichtsrats zusätzlich zu einem Auslagenersatz und der ihnen für die Aufsichtsrats Tätigkeit zur Last fallenden Umsatzsteuer nach Abschluss des Geschäftsjahres eine feste Vergütung in Höhe von 100.000 € erhalten. Der Vorsitzende des Aufsichtsrats erhält das Dreifache, der Stellvertreter des Vorsitzenden des Aufsichtsrats und der Vorsitzende des Prüfungsausschusses erhalten das Zweifache, Vorsitzende in sonstigen Ausschüssen des Aufsichtsrats und Mitglieder des Prüfungsausschusses das 1,5-Fache und Mitglieder in den übrigen Ausschüssen des Aufsichtsrats das 1,3-Fache der festen Vergütung eines ordentlichen Mitglieds. Die Vergütung der Ausschusstätigkeiten für ein Geschäftsjahr setzt voraus, dass der betreffende Ausschuss in diesem Zeitraum zur Erfüllung seiner Aufgaben getagt hat. Soweit ein Mitglied des Aufsichtsrats mehrere der genannten Funktionen ausübt, bemisst sich seine Vergütung ausschließlich nach der am höchsten vergüteten Funktion.

Im April 2009 beschloss der Aufsichtsrat, einen Solidarbeitrag zu den Maßnahmen zur Senkung der Arbeitskosten zu leisten und im Zeitraum 1. Mai 2009 bis 30. Juni 2010 auf 10% der jeweiligen individuellen Vergütungskomponenten zu verzichten.

Die individuelle Vergütung der Mitglieder des Aufsichtsrats ist in der nachstehenden Tabelle ausgewiesen.

Die Mitglieder des Aufsichtsrats und seiner Ausschüsse erhalten für jede Aufsichtsrats- und Ausschusssitzung, an der sie teilnehmen, ein Sitzungsentgelt in Höhe von 1.100 €.

Für persönlich erbrachte Leistungen außerhalb der oben beschriebenen Gremientätigkeiten, insbesondere Beratungs- und Vermittlungsleistungen, wurden keine Vergütungen gewährt. Ausgenommen davon ist die Vergütung der betrieblichen Arbeitnehmervertreter aus ihrem Arbeitsvertrag.

Damit lag die Vergütung für die gesamte Tätigkeit der Mitglieder des Aufsichtsrats der Daimler AG im Jahr 2010 bei 2,7 (i. V. 2,6) Mio. €.

**Darlehen an Aufsichtsratsmitglieder.** Im Jahr 2010 wurden keine Vorschüsse oder Kredite an Aufsichtsratsmitglieder der Daimler AG gewährt.

### Vergütung für die Mitglieder des Aufsichtsrats

| Name<br>in €                    | Vergütete Funktion(en)                                                                       | Gesamt 2010 |
|---------------------------------|----------------------------------------------------------------------------------------------|-------------|
| Dr. Manfred Bischoff            | Vorsitzender des Aufsichtsrats, des Präsidiums und des Nominierungsausschusses               | 298.543     |
| Erich Klemm <sup>1</sup>        | Stellvertretender Vorsitzender des Aufsichtsrats, des Präsidiums und des Prüfungsausschusses | 208.672     |
| Dr. Paul Achleitner             | Mitglied des Aufsichtsrats (ab 14. April 2010)                                               | 73.934      |
| Sari Baldauf                    | Mitglied des Aufsichtsrats                                                                   | 102.301     |
| Dr. Clemens Börsig              | Mitglied des Aufsichtsrats und des Prüfungsausschusses                                       | 155.982     |
| Prof. Dr. Heinrich Flegel       | Mitglied des Aufsichtsrats                                                                   | 102.301     |
| Dr. Jürgen Hambrecht            | Mitglied des Aufsichtsrats                                                                   | 102.301     |
| Jörg Hofmann <sup>1</sup>       | Mitglied des Aufsichtsrats                                                                   | 102.301     |
| Dr. Thomas Klebe <sup>1,3</sup> | Mitglied des Aufsichtsrats und des Präsidiums                                                | 148.583     |
| Gerard Kleisterlee              | Mitglied des Aufsichtsrats                                                                   | 101.201     |
| Arnaud Lagardère                | Mitglied des Aufsichtsrats (bis 14. April 2010)                                              | 25.644      |
| Jürgen Langer <sup>1</sup>      | Mitglied des Aufsichtsrats                                                                   | 103.291     |
| Ansgar Osseforth <sup>4</sup>   | Mitglied des Aufsichtsrats                                                                   | 103.291     |
| Valter Sanches <sup>2</sup>     | Mitglied des Aufsichtsrats                                                                   | 103.291     |
| Dr. Manfred Schneider           | Mitglied des Aufsichtsrats, des Präsidiums und des Nominierungsausschusses                   | 136.973     |
| Stefan Schwaab <sup>1</sup>     | Mitglied des Aufsichtsrats und des Prüfungsausschusses                                       | 158.072     |
| Jörg Spies <sup>1</sup>         | Mitglied des Aufsichtsrats (ab 5. Januar 2010)                                               | 102.305     |
| Lloyd G. Trotter                | Mitglied des Aufsichtsrats                                                                   | 102.301     |
| Dr. h.c. Bernhard Walter        | Mitglied des Aufsichtsrats und Vorsitzender des Prüfungsausschusses                          | 205.592     |
| Uwe Werner <sup>1</sup>         | Mitglied des Aufsichtsrats                                                                   | 102.301     |
| Lynton R. Wilson                | Mitglied des Aufsichtsrats und des Nominierungsausschusses                                   | 133.893     |

<sup>1</sup> Die Arbeitnehmervertreter haben erklärt, ihre Vergütung nach den Richtlinien des Deutschen Gewerkschaftsbundes an die Hans-Böckler-Stiftung abzuführen.

<sup>2</sup> Herr Sanches hat auf die Auszahlung seiner Vergütung verzichtet. Seinem Wunsch entsprechend werden die Beträge an die Hans-Böckler-Stiftung überwiesen.

<sup>3</sup> Herr Dr. Klebe erhielt zudem 13.700 € Vergütung und Sitzungsgelder für seine Aufsichtsrats Tätigkeit bei der Daimler Luft- und Raumfahrt Holding AG.

Auch hierfür gilt Fußnote 1.

<sup>4</sup> Herr Osseforth hat erklärt, dass ein Teil seiner Vergütung an die Treuhandstiftung Erwachsenenbildung abgeführt wird.

**Unser Verständnis und unsere Grundsätze.** Integrität ist einer unserer vier Unternehmenswerte. Sie ist das Fundament unseres Handelns und unseres Erfolgs als weltweit tätiges Unternehmen. Nach unserer Überzeugung kann wirtschaftlicher Erfolg nur dann nachhaltig sein, wenn er legal und korrekt zustande gekommen ist. Was bedeutet Compliance in diesem Zusammenhang? Wir verstehen darunter die Einhaltung aller maßgeblichen Gesetze, Vorschriften und Regelungen sowie der zugehörigen internen Richtlinien. Eine nachhaltige Kultur der Compliance können wir nur etablieren, wenn jeder Einzelne die Regeln verinnerlicht und Verantwortung übernimmt. Eine integre Geschäftspraxis und nachhaltiges Wachstum sind eng verbunden, denn Wertegemeinschaften sind auf Dauer auch Wertschöpfungsgemeinschaften. Zu unserer Verhaltensrichtlinie und unseren Antikorruptionsrichtlinien haben wir im Jahr 2010 erstmals eine Umfrage durchgeführt, um einen Überblick über die Einstellungen und die Kenntnisse unserer Mitarbeiter zu gewinnen. Die Ergebnisse der Umfrage tragen dazu bei, die Qualität der Richtlinien und Prozesse zu verbessern.

**Einigung mit den US-Behörden.** Die Verfahren in den USA gegen die Daimler AG und drei weitere Konzerngesellschaften wegen Verstößen gegen den Foreign Corrupt Practices Act wurden am 1. April 2010 beendet. Den US-Behörden wird Judge Louis Freeh, ehemaliger US-Bundesrichter und Direktor des FBI, als »Compliance Monitor« in den nächsten Jahren regelmäßig über die Effektivität unseres Compliance-Programms berichten. Das Unternehmen unterstützt den Monitor vollumfänglich bei der Erfüllung seiner Aufgaben. Umgekehrt hilft uns die Tätigkeit des Monitors bei der Verbesserung der Effektivität und Effizienz unseres Compliance-Programms.

**Compliance-Organisation weiterentwickelt.** Im dritten Quartal 2010 hat der Aufsichtsrat die Schaffung eines neuen Vorstandsressorts »Integrität und Recht« beschlossen und damit unsere Compliance-Organisation weiterentwickelt. Zu den Aufgaben des neuen Vorstandsmitglieds zählen das Management der globalen Rechts- und Compliance-Organisation, die Geschäftsethik sowie die nachhaltige Verankerung von Integrität und Compliance im gesamten Unternehmen. Die Leitung des Bereichs Group Compliance obliegt dem Chief Compliance Officer. Er wird künftig direkt an das für »Integrität und Recht« verantwortliche Mitglied des Vorstands berichten und unterrichtet regelmäßig den Prüfungsausschuss des Aufsichtsrats.

**Systematisches Compliance-Risikomanagement.** Der Bereich Corporate Compliance Operations (CCO) definiert das jährliche Antikorruptionsprogramm und unterstützt dessen weltweite Umsetzung. In einer systematischen Risikoanalyse werden alle Gesellschaften und Einheiten des Daimler-Konzerns hinsichtlich ihres Korruptionsrisikos bewertet und klassifiziert. Ausschlaggebend sind insbesondere die Geschäftsaktivitäten, das geschäftliche Umfeld sowie die länderspezifische Bewertung in dem von der Antikorruptionsorganisation »Transparency International« ermittelten Korruptions-Wahrnehmungs-Index. Im Anschluss setzen wir auf Basis der Risikobewertung in den Gesellschaften und Einheiten ein individuell abgestimmtes Programm zur Korruptionsprävention um.

Dabei sind die weltweit eingesetzten lokalen Compliance-Manager als direkte Ansprechpartner und Schnittstelle zu Corporate Compliance Operations von besonderer Bedeutung. Rund 90 gezielt qualifizierte lokale Compliance-Manager betreuen mehr als 180 Gesellschaften und Geschäftsbereiche vor Ort. Sie unterstützen das jeweilige Management dabei, Antikorruptionsvorschriften einzuhalten, und berichten regelmäßig sowohl in ihrer Geschäftseinheit als auch an die Konzernzentrale.

In 72 Vertriebsgesellschaften bzw. Geschäftseinheiten haben wir zusätzlich standardisierte Kontrollsysteme eingerichtet, die dazu beitragen, integriertes und regelkonformes Verhalten sicherzustellen. Die Wirksamkeit der Kontrollen wird jährlich durch die Gesellschaften mit standardisierten Bewertungsverfahren beurteilt und ist auch Gegenstand der Prüfung durch die Interne Revision. Um Korruptionsrisiken weiter zu minimieren, wird der bestehende Standardprozess zur Prüfung von Geschäften mit öffentlichen Stellen und regierungsnahen Kunden in Ländern mit erhöhtem Korruptionsrisiko ausgebaut.

**Höchste Erwartungen auch an Geschäftspartner.** Integres Verhalten ist Voraussetzung für vertrauensvolle Partnerschaft und Zusammenarbeit. Von Geschäftspartnern erwarten wir daher uneingeschränkt regelkonformes Verhalten. Wer im Auftrag von Daimler handelt, muss höchsten ethischen Ansprüchen genügen. Um Korruptionsrisiken zu minimieren, führen wir daher bei Geschäftspartnern, die Daimler bei Verkaufsgeschäften unterstützen, eine risikobasierte Integritätsprüfung durch und treffen mit diesen Partnern vertragliche Vereinbarungen, die unsere Erwartungen im Hinblick auf rechtmäßiges Verhalten deutlich machen.

**Standardprozesse unterstützen regelkonformes Verhalten.** Compliance ist nicht delegierbar. Führungskräfte tragen als Vorbilder und erste Ansprechpartner für die Mitarbeiter eine besondere Verantwortung für korrektes Verhalten. Daher ist die grundlegende Bedeutung von Compliance in den Qualifizierungsprogrammen für Führungs- und Nachwuchskräfte sowie in der Talentförderung fest verankert. Nur Mitarbeiter, die Entscheidungen und Prozesse konsequent an den Regeln ausrichten, können mehr Verantwortung übernehmen. Zudem geben wir konkrete Compliance-Ziele für Geschäftsführer, Finanzleiter, Vertriebsleiter und After-Sales-Leiter in Einheiten mit erhöhtem Korruptionsrisiko vor. Zukünftig verknüpfen wir die variable Managementvergütung noch stärker mit Compliance-Verhalten.

**Umfassende Compliance-Leistungen.** Zusätzlich zu den Vorgesetzten und den Ansprechpartnern vor Ort gibt es im Daimler-Konzern zentrale Anlaufstellen. Alle Mitarbeiter des Unternehmens können sich mit Fragen zur Korruptionsprävention an die Berater des »Compliance Consultation Desk« wenden. In einer Online-Datenbank stellen wir zudem die häufigsten Fragen und Antworten der Compliance-Beratung zur Verfügung. Gemäß der Konzernrahmenrichtlinie »Null-Toleranz-Prinzip« und der »Konzernrichtlinie zu Disziplinarmaßnahmen« gibt es keinerlei Spielraum bei rechts- und vorschriftswidrigem Verhalten.

Anlaufstelle für die weltweite Entgegennahme, Dokumentation und Bearbeitung von vermutetem Fehlverhalten ist das Hinweisgebersystem Business Practices Office (BPO). Hier können sowohl Mitarbeiter als auch externe Personen über verschiedene Zugangswege und jederzeit vertraulich – auf Wunsch auch anonym – Anhaltspunkte für vermutetes Fehlverhalten mitteilen. Mitarbeiter sind aufgefordert und Führungskräfte verpflichtet, dem BPO konkrete Verdachtsmomente auf Verstöße gegen strafrechtliche Bestimmungen oder gegen die Daimler-Verhaltensrichtlinie zu melden. Der Schutz von Hinweisgebern ist verbindlich geregelt. Die Bearbeitung der eingegangenen Hinweise auf vermutetes Fehlverhalten wurde 2010 durch Prozessverbesserungen maßgeblich beschleunigt. Zur Erhöhung der Transparenz leiten wir alle wesentlichen gemeldeten Hinweise zu vermutetem Fehlverhalten in anonymisierter Form vierteljährlich an die Top-Führungskräfte. Durch die Fallanalyse können bei Bedarf Prozesse geändert werden, um künftig Schäden zu vermeiden.

**Weltweites Trainingsangebot ausgebaut.** Am webbasierten Training zur Daimler-Verhaltensrichtlinie nahmen im Jahr 2010 erneut über 111.000 Mitarbeiter teil. Zusätzlich zum Thema Korruptionsprävention berücksichtigen wir die Aspekte Umweltschutz, Einhaltung der Menschenrechte, Umgang mit Interessenkonflikten sowie Auftreten in der Öffentlichkeit. Zudem absolvierten mehr als 21.000 Beschäftigte aus Gesellschaften und Bereichen, die Vertriebsaktivitäten durchführen, das webbasierte Training zur Korruptionsprävention. Die Schulungen umfassen außerdem weltweit über 140 Präsenztrainings mit mehr als 3.500 Teilnehmern aus besonders risikobehafteten Funktionen. Darüber hinaus durchliefen die obersten Führungskräfte des Unternehmens ein gezieltes Antikorruptionstraining.



## Selbstverständnis

Good Corporate Governance geht für die Daimler AG über die bloße Erfüllung gesetzlicher Vorgaben hinaus. Vorstand und Aufsichtsrat haben den Anspruch, die Unternehmensführung und -überwachung an nationalen und internationalen Maßstäben auszurichten, um durch nachhaltige Wertschöpfung den dauerhaften Fortbestand unseres traditionsreichen Unternehmens zu sichern und einen Beitrag zur Sicherstellung der Mobilität als einem Teilbereich der individuellen Freiheit zu leisten.

## Rahmenbedingungen

Der Gestaltungsrahmen für die Corporate Governance der Daimler AG als deutscher Aktiengesellschaft beruht auf dem deutschen Recht, insbesondere dem Aktien-, dem Mitbestimmungs- und dem Kapitalmarktrecht, sowie auf der Satzung der Daimler AG.

Durch das deutsche Aktienrecht ist der Daimler AG ein duales Führungssystem gesetzlich vorgegeben, das durch eine strikte personelle Trennung zwischen dem Vorstand als Leitungsorgan und dem Aufsichtsrat als Überwachungsorgan (Two-tier-Board) gekennzeichnet ist. Danach leitet der Vorstand das Unternehmen, während der Aufsichtsrat den Vorstand berät und überwacht. Eine gleichzeitige Mitgliedschaft in beiden Organen ist nicht zulässig.

## Die Organe der Daimler AG

**Hauptversammlung.** Die Aktionäre üben ihre Rechte in den Angelegenheiten der Gesellschaft, insbesondere ihr Stimmrecht, in der Hauptversammlung aus. Jede Aktie der Daimler AG gewährt eine Stimme. Aktien mit Mehrfachstimmrechten, Vorzugsstimmrechten oder Höchststimmrechten gibt es bei der Daimler AG nicht. Dokumente und Informationen zur Hauptversammlung sind unter [www.daimler.com/ir/hv](http://www.daimler.com/ir/hv) verfügbar (vgl. hierzu auch S. 24).

Die jährliche ordentliche Hauptversammlung findet in der Regel innerhalb von vier Monaten nach Ende eines Geschäftsjahres statt. Die Gesellschaft erleichtert ihren Aktionären die Ausübung des Stimmrechts durch die Bestellung von weisungsgebundenen Stimmrechtsvertretern. Die Satzung ermächtigt den Vorstand, auch die Stimmabgabe durch Briefwahl zuzulassen.

Die Hauptversammlung beschließt unter anderem über die Verwendung des Bilanzgewinns, die Entlastung der Mitglieder des Vorstands und des Aufsichtsrats, die Wahl des Abschlussprüfers sowie die Wahl der Anteilseignervertreter im Aufsichtsrat. Darüber hinaus entscheidet die Hauptversammlung insbesondere über Satzungsänderungen, Kapitalmaßnahmen und die Zustimmung zu bestimmten Unternehmensverträgen. Aktionäre können Gegenanträge zu Beschlussvorschlägen von Vorstand und Aufsichtsrat stellen und Beschlüsse der Hauptversammlung gerichtlich anfechten.

Der Einfluss der Hauptversammlung auf die Leitung des Unternehmens ist jedoch rechtlich begrenzt. Über Fragen der Geschäftsführung kann die Hauptversammlung grundsätzlich nur entscheiden, wenn der Vorstand dies verlangt.

**Aufsichtsrat.** Nach dem deutschen Mitbestimmungsgesetz besteht der Aufsichtsrat der Daimler AG aus 20 Mitgliedern. Sie werden zur Hälfte von den Aktionären in der Hauptversammlung gewählt. Zur anderen Hälfte besteht der Aufsichtsrat aus Vertretern, die von den Arbeitnehmern der deutschen Betriebe des Konzerns gewählt werden. Anteilseignervertreter und Arbeitnehmervertreter sind gesetzlich gleichermaßen dem Unternehmensinteresse verpflichtet.

## Governance-Struktur

|                                                                                                                                                               |
|---------------------------------------------------------------------------------------------------------------------------------------------------------------|
| <b>Hauptversammlung</b>                                                                                                                                       |
| Wahl der Anteilseignervertreter                                                                                                                               |
| <b>Aufsichtsrat (10 Anteilseigner- und 10 Arbeitnehmervertreter),<br/>Nominierungsausschuss, Prüfungsausschuss, Präsidialausschuss, Vermittlungsausschuss</b> |
| Bestellung, Überwachung, Beratung                                                                                                                             |
| <b>Vorstand (7 Mitglieder)</b>                                                                                                                                |

Der Aufsichtsrat hat sich eine Geschäftsordnung gegeben, die neben seinen Aufgaben und Zuständigkeiten sowie den persönlichen Anforderungen an seine Mitglieder insbesondere die Einberufung, Vorbereitung und Leitung seiner Sitzungen sowie das Prozedere der Beschlussfassung regelt. Die Geschäftsordnung des Aufsichtsrats ist im Internet unter [www.daimler.com/dai/go](http://www.daimler.com/dai/go) öffentlich zugänglich.

Im Hinblick auf seine eigene Zusammensetzung hat der Aufsichtsrat in seiner Geschäftsordnung bestimmt, dass mehr als die Hälfte der Anteilseignervertreter im Aufsichtsrat unabhängig sein sollen, um eine unabhängige Beratung und Überwachung des Vorstands zu ermöglichen. Ferner sieht die Geschäftsordnung vor, dass dem Aufsichtsrat keine Mitglieder angehören dürfen, die Organfunktionen oder Beratungsaufgaben bei wesentlichen Wettbewerbern der Daimler AG oder ihrer Konzernunternehmen ausüben oder sonstigen Interessenkonflikten ausgesetzt sind. In seiner derzeitigen Zusammensetzung erfüllt der Aufsichtsrat der Daimler AG diese Kriterien.

Ein Anteilseignervertreter, der Vorsitzende des Aufsichtsrats, ist ein ehemaliges Mitglied des Vorstands. Nach Ausscheiden aus dem Vorstand der Daimler AG im Dezember 2003 wurde er nach einer mehr als zwei Jahre dauernden Cool-Off-Period im April 2006 in den Aufsichtsrat und nach einer mehr als drei Jahre dauernden Cool-Off-Period im April 2007 zum Vorsitzenden des Aufsichtsrats gewählt. Drei Mitglieder des Aufsichtsrats gehören dem Vorstand einer börsennotierten Gesellschaft an, bekleiden jedoch einschließlich ihres Mandats bei der Daimler AG außerhalb des jeweiligen Konzerns nicht mehr als drei Aufsichtsratsmandate in börsennotierten Gesellschaften oder in Aufsichtsgremien von Gesellschaften mit vergleichbaren Anforderungen.

In der Geschäftsordnung des Aufsichtsrats ist niedergelegt, dass Kandidaten/Kandidatinnen für die Wahl von Anteilseignervertretern, die für eine volle Amtszeit vorgesehen sind, zum Zeitpunkt der Wahl grundsätzlich nicht älter als 68 Jahre sein sollen.

Wahlvorschläge für die Wahl von Anteilseignervertretern der Daimler AG berücksichtigen neben den Anforderungen von Gesetz, Satzung und Deutschem Corporate Governance Kodex einen Kriterienkatalog von Qualifikationen und Erfahrungen. Hierzu gehören z. B. Marktkennntnisse in den für Daimler besonders wichtigen Regionen, Expertise im Management von Technologien und Erfahrungen in bestimmten Managementfunktionen. Zusätzlicher Garant für eine produktive Zusammenarbeit im Aufsichtsrat, die neben der sachlichen Kompetenz auch geprägt sein soll von Internationalität und Offenheit für gesellschaftliche Themen, ist die persönliche individuelle Vielfalt der Mitglieder hinsichtlich des Geschlechts, der ethnischen Herkunft oder anderer persönlicher Eigenschaften. Der Aufsichtsrat achtet bei Vorschlägen für die Wahl von Anteilseignervertretern daher auf Ausgewogenheit, insbesondere in Bezug auf das Geschlecht, aber auch in Bezug auf weitere Merkmale, und betrachtet dies als Mehrwert für den Aufsichtsrat insgesamt. Eine Richtschnur für die Ausgewogenheit in Bezug auf das Geschlecht bildet die unternehmensspezifische Zielsetzung der schrittweisen Erreichung eines Frauenanteils von 20% an den leitenden Führungskräften bis zum Jahr 2020 (der Frauenanteil der Anteilseignervertreter im Aufsichtsrat beträgt zum 31.12.2010 10%). In Bezug auf die Sicherstellung angemessener Internationalität erscheint nach derzeitiger Sicht ein Anteil von mehr als einem Drittel nicht deutscher Anteilseignervertreter als angemessene, derzeit erfüllte Zielvorgabe.

Zu den Aufgaben des Aufsichtsrats gehört es, die Mitglieder des Vorstands zu bestellen und abzurufen, das System der Vorstandsvergütung festzulegen und regelmäßig zu überprüfen und die individuelle Gesamtvergütung der einzelnen Vorstandsmitglieder zu bestimmen.

Bei der Zusammensetzung des Vorstands achtet der Aufsichtsrat unter Berücksichtigung der internationalen Tätigkeit des Unternehmens insbesondere auch auf Vielfalt (Diversity), z. B. im Hinblick auf das Geschlecht, die ethnische Herkunft und andere persönliche Eigenschaften.

Der Aufsichtsrat überwacht und berät den Vorstand bei der Führung der Geschäfte. In regelmäßigen Abständen lässt sich der Aufsichtsrat vom Vorstand über die Strategie des Unternehmens, die Unternehmensplanung, die Rentabilität und die Geschäftsentwicklung berichten. Für Geschäfte von grundlegender Bedeutung hat sich der Aufsichtsrat Zustimmungsrechte vorbehalten.

Nach Erörterung mit dem Abschlussprüfer und eigener Prüfung billigt der Aufsichtsrat den Jahres- und Konzernabschluss unter Berücksichtigung der Prüfungsberichte des Abschlussprüfers sowie der Ergebnisse der durch den Prüfungsausschuss vorgenommenen Prüfung. Der Aufsichtsrat berichtet der Hauptversammlung über die Ergebnisse seiner eigenen Prüfung.

Die Mitglieder des Aufsichtsrats nehmen die für die Wahrnehmung ihrer Aufgaben erforderlichen Aus- und Fortbildungsmaßnahmen eigenverantwortlich wahr und werden dabei von der Gesellschaft unterstützt. Zusätzlich zu bereits angebotenen Maßnahmen wird die Daimler AG ihren Aufsichtsratsmitgliedern künftig bei Bedarf entsprechende Angebote unterbreiten. Inhalte könnten unter anderem die Themen technologische und wirtschaftliche Entwicklungen, Bilanzierung und Rechnungslegung, Internes Kontroll- und Risikomanagementsystem, Compliance, rechtliche Neuerungen und Vorstandsvergütung darstellen.

Der Aufsichtsrat hat vier Ausschüsse gebildet, die im Namen und in Vertretung des Gesamtaufwichtsrats die ihnen übertragenen Aufgaben erfüllen, soweit dies gesetzlich zulässig ist: den Präsidialausschuss, den Nominierungsausschuss, den Prüfungsausschuss und den Vermittlungsausschuss. Die jeweiligen Ausschussvorsitzenden berichten dem Aufsichtsratsplenum spätestens in der nächsten auf die Ausschusssitzung folgenden Aufsichtsratsitzung über die Arbeit der Ausschüsse. Für alle seine Ausschüsse hat der Aufsichtsrat eigene Geschäftsordnungen erlassen. Auch diese Geschäftsordnungen stehen im Internet unter [www.daimler.com/dai/go](http://www.daimler.com/dai/go) zur Verfügung, ebenso wie Informationen über die aktuelle Besetzung des Aufsichtsrats ([www.daimler.com/aufsichtsrat](http://www.daimler.com/aufsichtsrat)) und seiner Ausschüsse ([www.daimler.com/dai/ara](http://www.daimler.com/dai/ara)). Die Namen der Mitglieder des Aufsichtsrats und seiner Ausschüsse sind auch auf den Seiten 20 und 21 dieses Geschäftsberichts abgedruckt.

Dem **Präsidialausschuss** gehören der Vorsitzende des Aufsichtsrats, sein Stellvertreter und zwei weitere Mitglieder an, die mit der Mehrheit der in der entsprechenden Beschlussfassung des Aufsichtsrats abgegebenen Stimmen gewählt werden.

Der Präsidialausschuss gibt dem Aufsichtsrat Empfehlungen für die Bestellung von Vorstandsmitgliedern und ist für deren vertragliche Angelegenheiten verantwortlich. Er unterbreitet dem Aufsichtsrat Vorschläge zur Gestaltung des Vergütungssystems für den Vorstand sowie für die angemessene individuelle Gesamtvergütung der einzelnen Vorstandsmitglieder und entscheidet über die Erteilung der Zustimmung zu Nebentätigkeiten von Vorstandsmitgliedern.

Ferner berät und entscheidet der Präsidialausschuss über Fragen der Corporate Governance, zu der er auch Empfehlungen an den Aufsichtsrat gibt. Er unterstützt und berät den Vorsitzenden des Aufsichtsrats sowie dessen Stellvertreter und bereitet die Sitzungen des Aufsichtsrats vor.

Der **Nominierungsausschuss** besteht aus mindestens drei Mitgliedern, die von den Anteilseignervertretern im Aufsichtsrat mit der Mehrheit der abgegebenen Stimmen gewählt werden, und ist als einziger Aufsichtsratsausschuss ausschließlich mit Vertretern der Anteilseigner besetzt. Er unterbreitet dem Aufsichtsrat Empfehlungen für die Vorschläge zur Wahl von Aufsichtsratsmitgliedern der Anteilseignerseite an die Hauptversammlung. Er berücksichtigt dabei die konkreten Ziele, die der Aufsichtsrat für seine eigene Zusammensetzung festgelegt hat. Des Weiteren definiert er die Anforderungen für das konkret zu besetzende Mandat.

Der **Prüfungsausschuss** setzt sich aus vier Mitgliedern zusammen, die mit der Mehrheit der bei der entsprechenden Beschlussfassung des Aufsichtsrats abgegebenen Stimmen gewählt werden. Der Ausschussvorsitzende muss über besondere Kenntnisse auf dem Gebiet der Rechnungslegung verfügen und soll darüber hinaus besondere Kenntnisse und Erfahrungen auf dem Gebiet der internen Kontrollverfahren aufweisen. Auch alle anderen Mitglieder des Prüfungsausschusses sollen über besondere Kenntnisse auf dem Gebiet der Rechnungslegung, der Betriebs- oder Finanzwirtschaft verfügen.

Der Aufsichtsrat hat sich von der Unabhängigkeit des Ausschussvorsitzenden Dr. h.c. Bernhard Walter und des weiteren Anteilseignervertreeters im Prüfungsausschuss, Dr. Clemens Börsig, überzeugt. Beide verfügen über besondere Kenntnisse und Erfahrungen in der Anwendung von Rechnungslegungsgrundsätzen und internen Kontrollverfahren, die sie als »Financial Expert« qualifizieren.

Der Prüfungsausschuss befasst sich mit Fragen der Rechnungslegung und des Risikomanagements, der internen Kontrollsysteme, der Internen Revision, der Compliance und mit der Abschlussprüfung. Er diskutiert mindestens einmal jährlich mit dem Vorstand und dem Abschlussprüfer die Wirksamkeit, Funktionsweise und Angemessenheit des internen Kontrollsystems und des Risikomanagementsystems und mit dem Vorstand die Effektivität und Angemessenheit des internen Revisionssystems und des Compliance-Managements. Über die Arbeit der Internen Revision und der Compliance-Organisation lässt er sich darüber hinaus regelmäßig berichten. Mindestens vierteljährlich nimmt der Prüfungsausschuss den Bericht des für Beschwerden und Informationen über etwaige Richtlinienverstöße, Straftaten oder fragwürdige Buchhaltungs-, Rechnungslegungs- und Buchprüfungsbelange eingerichteten Business Practices Office entgegen und lässt sich regelmäßig über deren Behandlung informieren.

Der Prüfungsausschuss erörtert vor deren Veröffentlichung mit dem Vorstand die Halbjahres- und Quartalsberichte. Auf der Grundlage des Berichts des Abschlussprüfers prüft der Prüfungsausschuss den Jahres- und Konzernabschluss und erörtert diesen gemeinsam mit dem Abschlussprüfer. Er unterbreitet dem Aufsichtsrat seine Empfehlungen für einen Gewinnverwendungsvorschlag sowie für die Feststellung des Jahresabschlusses der Daimler AG und für die Billigung des Konzernabschlusses. Der Ausschuss gibt ferner Empfehlungen für den Vorschlag zur Wahl des Abschlussprüfers, beurteilt dessen Eignung und Unabhängigkeit und erteilt ihm nach Bestellung durch die Hauptversammlung den Auftrag für die Konzern- und Jahresabschlussprüfung sowie für die prüferische Durchsicht von Zwischenberichten. Dabei vereinbart er das Honorar und legt die Prüfungsschwerpunkte fest.

Der Prüfungsausschuss lässt sich vom Abschlussprüfer über alle als kritisch angesehenen Vorgänge bei der Rechnungslegung und über eventuelle wesentliche Schwächen des internen Kontroll- und Risikomanagementsystems bezogen auf den Rechnungslegungsprozess berichten. Schließlich genehmigt der Prüfungsausschuss Leistungen, die der Abschlussprüfer oder mit ihm verbundene Unternehmen für die Daimler AG oder deren Konzernunternehmen erbringen und die nicht in direktem Zusammenhang mit der Prüfung des Abschlusses stehen.

Der **Vermittlungsausschuss** besteht aus dem Aufsichtsratsvorsitzenden, seinem Stellvertreter sowie je einem von den Arbeitnehmer- und Anteilseignervertretern im Aufsichtsrat mit der Mehrheit der abgegebenen Stimmen gewählten Mitglied. Er ist ausschließlich zu dem Zweck gebildet, die in § 31 Absatz 3 Mitbestimmungsgesetz genannte Aufgabe wahrzunehmen. Danach hat der Vermittlungsausschuss Vorschläge für die Bestellung von Vorstandsmitgliedern zu machen, wenn im ersten Wahlgang die für die Bestellung eines Vorstandsmitglieds erforderliche Mehrheit von zwei Dritteln der Aufsichtsratsmitglieder nicht erreicht wurde.

**Vorstand.** Der Vorstand der Daimler AG bestand zum 31. Dezember 2010 aus sechs Mitgliedern. Informationen über Aufgabenbereiche und Lebensläufe sind im Internet unter [www.daimler.com/dai/vorstand](http://www.daimler.com/dai/vorstand) verfügbar. Über die Mitglieder des Vorstands und ihre Verantwortungsbereiche informieren auch die Seiten 12 und 13 dieses Geschäftsberichts.

Kein Mitglied des Vorstands nimmt mehr als drei Aufsichtsratsmandate in anderen börsennotierten Gesellschaften oder in Aufsichtsgremien von Gesellschaften mit vergleichbaren Anforderungen wahr.

Der Vorstand bestimmt mit Zustimmung des Aufsichtsrats die strategische Ausrichtung des Unternehmens. Seine Mitglieder nehmen die Geschäftsführung für das Unternehmen in gemeinsamer Verantwortung wahr.

Der Vorstand stellt die Quartals- und Halbjahresberichte des Unternehmens, den Jahresabschluss der Daimler AG und den Konzernabschluss auf. Er hat ein Risikomanagementsystem eingerichtet und überwacht dieses. Ferner sorgt der Vorstand für die Einhaltung von Rechtsvorschriften, behördlichen Regelungen und unternehmensinternen Richtlinien und wirkt auf deren Beachtung durch die Konzernunternehmen hin (Compliance). Weitere Informationen zu Compliance sind im Kapitel Compliance auf den Seiten 158 und 159 dieses Geschäftsberichts zusammengefasst.

Für bestimmte Arten von Geschäften mit grundlegender Bedeutung bedarf der Vorstand der Zustimmung des Aufsichtsrats. In regelmäßigen Abständen berichtet der Vorstand dem Aufsichtsrat über die Strategie des Unternehmens, die Unternehmensplanung, die Rentabilität und die Geschäftsentwicklung sowie über das interne Kontrollsystem, das Risikomanagementsystem und Compliance-Fragen. Über wesentliche Abweichungen wird umgehend berichtet.

Bei der Besetzung von Führungsfunktionen im Unternehmen achtet der Vorstand auf Vielfalt (**Diversity**), unter anderem im Hinblick auf die Kriterien Alter, Geschlecht und Internationalität. Die Diversity-Management-Aktivitäten umfassen Diversity-Workshops, den Aufbau von internen Netzwerken sowie externe Kooperationen mit Bildungseinrichtungen und Mitgliedschaften in ausgewählten Initiativen. Ein zentraler Handlungsschwerpunkt liegt auf der gezielten Förderung von Frauen. So soll der Anteil von Frauen in leitenden Führungspositionen von derzeit 9% bis zum Jahr 2020 auf 20% erhöht werden. Unter anderem mit flexiblen Arbeitszeitmodellen, der Einrichtung von betriebsnahen Krippenplätzen und einem speziellen Mentoring-Programm für Frauen ist es bereits gelungen, den Anteil von Frauen in leitenden Führungspositionen seit 2005 zu steigern.



Auch der Vorstand hat sich eine im Internet unter [www.daimler.com/dai/go](http://www.daimler.com/dai/go) verfügbare Geschäftsordnung gegeben, die zusätzlich zu den Verantwortlichkeiten seiner Mitglieder insbesondere das bei Beschlussfassungen zu beachtende Verfahren regelt und Bestimmungen zur Vermeidung von Interessenkollisionen enthält.

Zur **Vergütung** des Vorstands einschließlich des Performance Phantom Share Plans und zur Vergütung des Aufsichtsrats wird auf den Vergütungsbericht auf den Seiten 152 ff. dieses Geschäftsberichts verwiesen.

Von Mitgliedern des Vorstands und Aufsichtsrats (sowie ihnen nach Maßgabe des § 15a Wertpapierhandelsgesetz nahestehenden Personen) wurden im Geschäftsjahr 2010 die in der nachfolgenden Tabelle aufgelisteten Geschäfte mit Aktien der Daimler AG oder sich darauf beziehenden Finanzinstrumenten getätigt. Die Daimler AG veröffentlicht diese Transaktionen unverzüglich, nachdem sie dem Unternehmen mitgeteilt wurden. Aktuelle Informationen sind in diesem Zusammenhang im Internet unter [www.daimler.com/dai/dd](http://www.daimler.com/dai/dd) abrufbar.

## Aktienbesitz von Vorstand und Aufsichtsrat, Directors' Dealings

Am 31. Dezember 2010 waren 1,2 Mio. Aktien oder Optionen der Daimler AG (0,110% der ausgegebenen Aktien) im Besitz von Mitgliedern des Vorstands. Zu diesem Stichtag besaßen Mitglieder des Aufsichtsrats 0,1 Mio. Aktien oder Optionen der Daimler AG (0,006% der ausgegebenen Aktien).

### Directors' Dealings (Geschäfte von Führungspersonen nach § 15a WpHG) im Jahr 2010

| Datum      | Name               | Funktion                             | Art und Ort der Transaktion                                 | Stückzahl | Kurs/Preis | Gesamtvolumen |
|------------|--------------------|--------------------------------------|-------------------------------------------------------------|-----------|------------|---------------|
| 25.11.2010 | Andreas Renschler  | Mitglied des Vorstands               | Erwerb von Aktien durch Ausübung von Optionen außerbörslich | 40.000    | 51,52 €    | 2.060.800 €   |
| 25.11.2010 | Andreas Renschler  | Mitglied des Vorstands               | Veräußerung neuer Aktien Frankfurt                          | 40.000    | 51,81 €    | 2.072.400 €   |
| 26.11.2010 | Andreas Renschler  | Mitglied des Vorstands               | Erwerb von Aktien durch Ausübung von Optionen außerbörslich | 8.000     | 34,40 €    | 275.200 €     |
| 25.11.2010 | Bodo Uebber        | Mitglied des Vorstands               | Erwerb von Aktien durch Ausübung von Optionen außerbörslich | 47.000    | 43,57 €    | 2.047.790 €   |
| 25.11.2010 | Bodo Uebber        | Mitglied des Vorstands               | Veräußerung neuer Aktien Frankfurt                          | 47.000    | 51,81 €    | 2.435.070 €   |
| 25.11.2010 | Bodo Uebber        | Mitglied des Vorstands               | Erwerb von Aktien durch Ausübung von Optionen außerbörslich | 18.000    | 34,40 €    | 619.200 €     |
| 25.11.2010 | Bodo Uebber        | Mitglied des Vorstands               | Veräußerung neuer Aktien Frankfurt                          | 18.000    | 51,81 €    | 932.580 €     |
| 25.11.2010 | Bodo Uebber        | Mitglied des Vorstands               | Erwerb von Aktien durch Ausübung von Optionen außerbörslich | 18.000    | 51,52 €    | 927.360 €     |
| 25.11.2010 | Bodo Uebber        | Mitglied des Vorstands               | Veräußerung neuer Aktien Frankfurt                          | 18.000    | 51,81 €    | 932.580 €     |
| 25.11.2010 | Bodo Uebber        | Mitglied des Vorstands               | Erwerb von Aktien durch Ausübung von Optionen außerbörslich | 13.000    | 43,57 €    | 566.410 €     |
| 25.11.2010 | Dr. Thomas Weber   | Mitglied des Vorstands               | Erwerb von Aktien durch Ausübung von Optionen außerbörslich | 19.000    | 51,52 €    | 978.880 €     |
| 25.11.2010 | Dr. Thomas Weber   | Mitglied des Vorstands               | Veräußerung neuer Aktien Frankfurt                          | 19.000    | 51,81 €    | 984.390 €     |
| 25.11.2010 | Dr. Thomas Weber   | Mitglied des Vorstands               | Erwerb von Aktien durch Ausübung von Optionen außerbörslich | 1.000     | 51,52 €    | 51.520 €      |
| 25.11.2010 | Dr. Dieter Zetsche | Vorsitzender des Vorstands           | Erwerb von Aktien durch Ausübung von Optionen außerbörslich | 231.000   | 51,52 €    | 11.901.120 €  |
| 25.11.2010 | Dr. Dieter Zetsche | Vorsitzender des Vorstands           | Veräußerung neuer Aktien Frankfurt                          | 231.000   | 51,81 €    | 11.968.110 €  |
| 25.11.2010 | Dr. Dieter Zetsche | Vorsitzender des Vorstands           | Erwerb von Aktien durch Ausübung von Optionen außerbörslich | 19.000    | 51,52 €    | 978.880 €     |
| 04.11.2010 | Gregor Zetsche     | Natürliche Person in enger Beziehung | Verkauf von Aktien Frankfurt                                | 1.425     | 50,00 €    | 71.250 €      |

## Risikomanagement, Rechnungslegung und Transparenz

**Das Risikomanagement im Konzern.** Daimler verfügt über ein Risikomanagementsystem, das der globalen Ausrichtung des Unternehmens gerecht wird (vgl. S. 104 ff.). Das Risikomanagementsystem ist Bestandteil des gesamten Planungs-, Steuerungs- und Berichterstattungsprozesses. Damit soll sichergestellt werden, dass die Unternehmensleitung wesentliche Risiken frühzeitig erkennt und Maßnahmen zur Gegensteuerung rechtzeitig einleiten kann. Der Aufsichtsrat behandelt das Risikomanagementsystem insbesondere anlässlich der Genehmigung der Operativen Planung. Darüber hinaus diskutiert der Prüfungsausschuss mindestens einmal jährlich mit dem Vorstand und dem Abschlussprüfer die Wirksamkeit, Funktionsweise und Angemessenheit des Risikomanagementsystems. Zudem befasst sich der Prüfungsausschuss quartalsweise mit dem Risikobericht. Der Aufsichtsratsvorsitzende hält regelmäßig Kontakt zum Vorstand, um mit ihm zusätzlich zur Strategie und Geschäftsentwicklung des Konzerns auch Fragen des Risikomanagements zu erörtern. Die Interne Revision kontrolliert die Einhaltung gesetzlicher Rahmenbedingungen und Unternehmensstandards mit zielgerichteten Prüfungen und initiiert bei Bedarf entsprechende Maßnahmen.

**Rechnungslegungsgrundsätze.** Die Rechnungslegung des Daimler-Konzerns erfolgt nach den Grundsätzen der International Financial Reporting Standards (IFRS), wie sie in der Europäischen Union anzuwenden sind, und den nach § 315a Abs. 1 HGB ergänzend anzuwendenden handelsrechtlichen Vorschriften. Nähere Erläuterungen zu den IFRS sind im Finanzteil dieses Geschäftsberichts dargestellt (vgl. Anmerkung 1 des Konzernanhangs). Der Jahresabschluss der Daimler AG, also der Konzernmuttergesellschaft, wird nach den Rechnungslegungsvorschriften des deutschen Handelsgesetzbuchs (HGB) erstellt. Beide Abschlüsse werden von einer unabhängigen Wirtschaftsprüfungsgesellschaft geprüft.

**Transparenz.** Im Rahmen unserer umfassenden Investor Relations-Tätigkeit stehen wir in enger Verbindung mit unseren Anteilseignern. Wir unterrichten Aktionäre, Finanzanalysten, Aktionärsvereinigungen, Medien und die interessierte Öffentlichkeit regelmäßig über die Lage sowie über wesentliche geschäftliche Veränderungen des Unternehmens (vgl. S. 24 f.).

Wir haben eine Übersicht aller wesentlichen im Geschäftsjahr 2010 veröffentlichten Informationen auf unsere Internetseite unter [www.daimler.com/ir/jahrdok10](http://www.daimler.com/ir/jahrdok10) eingestellt.

Ungeachtet der Beendigung der Registrierung der Daimler-Aktien bei der US-Wertpapieraufsichtsbehörde SEC (Securities and Exchange Commission) und der Beendigung der Notierung an der New York Stock Exchange im Berichtsjahr wird die Gesellschaft in ihrer Finanzberichterstattung ein hohes Maß an Transparenz beibehalten.

**Fair Disclosure.** Wir stellen sämtliche neuen Tatsachen, die Finanzanalysten und institutionellen Investoren mitgeteilt werden, allen Aktionären und auch der interessierten Öffentlichkeit zeitgleich zur Verfügung. Werden Informationen im Ausland aufgrund der jeweiligen kapitalmarktrechtlichen Vorschriften veröffentlicht, stellen wir diese auch im Inland in der Originalfassung oder in englischer Sprache unverzüglich zur Verfügung. Um eine zeitnahe Information sicherzustellen, nutzt Daimler das Internet und zusätzlich andere Kommunikationswege.

**Finanzkalender.** In einem Finanzkalender werden die Termine wesentlicher Veröffentlichungen (z. B. Geschäftsbericht, Zwischenberichte) und der Termin der Hauptversammlung frühzeitig bekannt gegeben. Der Finanzkalender ist auf der hinteren Umschlagseite dieses Geschäftsberichts abgedruckt und im Internet unter [www.daimler.com/ir/termine](http://www.daimler.com/ir/termine) abrufbar.

## Integrität

**Verhaltensrichtlinie.** Die 1999 in Kraft gesetzte und 2003 überarbeitete Verhaltensrichtlinie setzt für sämtliche Mitarbeiter weltweit verbindliche Verhaltensregeln fest. Die Richtlinie definiert unter anderem das Verhalten im internationalen Geschäftsverkehr und im Fall auftretender Interessenkonflikte, Fragen der Gleichbehandlung, die Ächtung von Korruption, die Rolle der internen Kontrollsysteme sowie den Anspruch auf Einhaltung gesetzlicher Normen und sonstiger interner und externer Regelungen. Bestandteil der Verhaltensrichtlinie sind auch die »Grundsätze zur sozialen Verantwortung«. Wir bekennen uns darin zu den international anerkannten Menschen- und Arbeitnehmerrechten. Wir erwarten von allen Mitarbeiterinnen und Mitarbeitern die strikte Beachtung der Verhaltensrichtlinie, deren Wortlaut im Internet unter [www.daimler.com/dai/richtlinien](http://www.daimler.com/dai/richtlinien) zur Verfügung steht.

**Code of Ethics.** Im Juli 2003 haben wir einen »Code of Ethics« verabschiedet. Dieser Kodex richtet sich an die Mitglieder des Vorstands sowie an Personen mit besonderer Verantwortung für die Inhalte der Finanzberichterstattung. Die darin enthaltenen Vorschriften sind darauf ausgerichtet, Fehlverhalten der angesprochenen Personen zu vermeiden und ethisches Verhalten sowie eine vollständige, angemessene, genaue, zeitgerechte und verständliche Veröffentlichung von Unternehmensinformationen zu fördern. Auch der Wortlaut des Code of Ethics steht im Internet unter [www.daimler.com/dai/richtlinien](http://www.daimler.com/dai/richtlinien) zur Verfügung.

# Entsprechenserklärung zum Deutschen Corporate Governance Kodex

Nach § 161 AktG haben Vorstand und Aufsichtsrat einer börsennotierten Aktiengesellschaft jährlich zu erklären, dass den vom Bundesministerium der Justiz im amtlichen Teil des elektronischen Bundesanzeigers bekannt gemachten Empfehlungen der »Regierungskommission Deutscher Corporate Governance Kodex« entsprochen wurde und wird oder welche Empfehlungen begründet nicht angewendet wurden oder werden. Die Erklärung ist auf der Internetseite der Gesellschaft dauerhaft öffentlich zugänglich zu machen.

Der Deutsche Corporate Governance Kodex (»Kodex«) enthält Regelungen unterschiedlicher Bindungswirkung. Neben Darstellungen des geltenden Aktienrechts enthält er Empfehlungen, von denen die Gesellschaften abweichen können; sie sind dann aber verpflichtet, dies jährlich offen zu legen. Nach § 161 AktG müssen Abweichungen von den Empfehlungen des Kodex auch begründet werden. Darüber hinaus enthält der Kodex Anregungen, von denen ohne Offenlegung abgewichen werden kann.

Vorstand und Aufsichtsrat der Daimler AG haben sich entschlossen, nicht nur Abweichungen von den im Kodex enthaltenen Empfehlungen (siehe dazu I.), sondern auch Abweichungen von im Kodex enthaltenen Anregungen (siehe dazu II.) offen zu legen und zu begründen, ohne dass insoweit eine Rechtspflicht bestünde.

Für den Zeitraum seit der letzten Entsprechenserklärung vom April 2010 bis zum 1. Juli 2010 bezieht sich die nachfolgende Erklärung auf die Kodex-Fassung vom 18. Juni 2009. Für die Corporate Governance Praxis der Daimler AG seit dem 2. Juli 2010 bezieht sich die Erklärung auf die Anforderungen des Kodex in seiner Fassung vom 26. Mai 2010, die am 2. Juli 2010 im elektronischen Bundesanzeiger veröffentlicht wurde.

Vorstand und Aufsichtsrat der Daimler AG erklären, dass den Empfehlungen und Anregungen der »Regierungskommission Deutscher Corporate Governance Kodex« grundsätzlich entsprochen wird und in der Vergangenheit entsprochen wurde. Vorstand und Aufsichtsrat der Daimler AG beabsichtigen, diese auch in Zukunft zu beachten. Lediglich die folgenden Empfehlungen und Anregungen des Deutschen Corporate Governance Kodex wurden und werden nicht angewendet:

## I. Abweichungen von den Empfehlungen des Deutschen Corporate Governance Kodex

**1. Selbstbehalt bei der D&O-Versicherung für den Aufsichtsrat (Ziffer 3.8 Abs. 3).** Die Directors & Officers-Versicherung (D&O-Versicherung) der Daimler AG erstreckt sich auch auf die Mitglieder des Aufsichtsrats. Da kein Versicherungsschutz für vorsätzliche Handlungen und Unterlassungen sowie wissentliche Pflichtverletzungen gegeben ist, stellt sich nur im Rahmen fahrlässig begangener Pflichtverletzungen die Frage nach der Vereinbarung eines Selbstbehalts.

Mit Erneuerung des D&O-Versicherungsschutzes zum 1. April 2010 ist für fahrlässig begangene Pflichtverletzungen ein Selbstbehalt für die Aufsichtsratsmitglieder in Höhe von 50% der jeweiligen Vergütung vorgesehen.

Da die Vergütungsstruktur des Aufsichtsrats auf eine fixe Vergütung ohne erfolgsabhängige Bestandteile beschränkt ist, würde die Festlegung eines Selbstbehalts für Aufsichtsratsmitglieder in Höhe des Eineinhalbfachen der fixen jährlichen Vergütung im Vergleich zu den Mitgliedern des Vorstands, deren Vergütung aus fixen und erfolgsabhängigen Bestandteilen besteht, wirtschaftlich betrachtet zu einem unverhältnismäßigen Ergebnis führen. Vor diesem Hintergrund hat der Aufsichtsrat für seine Mitglieder einen Selbstbehalt in Höhe von 50% der jeweiligen Vergütung beschlossen, der den gesetzlichen Pflichtselbstbehalt für die Vorstandsmitglieder im Verhältnis zur Gesamtvergütung übersteigt.

**2. Konkrete Ziele für die Zusammensetzung des Aufsichtsrats (Ziffer 5.4.1 Abs. 2).** Der Aufsichtsrat hat am 9. Dezember 2010 über bereits bestehende qualitative Zielsetzungen hinaus zahlenmäßig konkretisierte Ziele für seine Zusammensetzung beschlossen, die insbesondere eine angemessene Beteiligung von Frauen vorsehen.

**3. Ausgestaltung der Vergütung des Aufsichtsrats (Ziffer 5.4.6 Abs. 2, Satz 1).** Der Aufsichtsrat der Daimler AG erhält eine angemessene Vergütung, die fixe und funktionsbezogene Bestandteile sowie ein Sitzungsentgelt enthält. Für jedes Mitglied ist durch die Satzung ein Grundbetrag festgelegt. Dieser erhöht sich mit Übernahme weiterer Funktionen innerhalb des Aufsichtsrats, wie bei Mitgliedschaft oder Vorsitz in einem Ausschuss oder bei Übernahme des Vorsitzes bzw. des stellvertretenden Vorsitzes im Aufsichtsrat entsprechend dem jeweiligen Verantwortungsbereich.

Soweit ein Mitglied des Aufsichtsrats mehrere der vorstehend genannten Funktionen ausübt, bemisst sich seine Vergütung ausschließlich nach der Funktion, die unter diesen am höchsten vergütet wird. Dieses System der funktionsbezogenen Vergütung wird der überwachenden Aufgabe der Aufsichtsratsmitglieder nach unserer Auffassung auch deshalb besser gerecht als eine erfolgsabhängige Vergütung, weil so potenzielle Interessenkonflikte bei Entscheidungen des Aufsichtsrats, die Einfluss auf Erfolgskriterien haben könnten, ausgeschlossen sind. Eine erfolgsabhängige Vergütung erfolgt daher nicht.

## II. Abweichungen von den Anregungen des Deutschen Corporate Governance Kodex

**1. Übertragung der Hauptversammlung über moderne Kommunikationsmedien (Ziffer 2.3.4).** Die Hauptversammlung der Daimler AG wird bis zum Ende des Berichts des Vorstandes im Internet übertragen. Eine weitergehende Übertragung, insbesondere eine solche der Wortbeiträge einzelner Aktionäre, könnte als weitgehender Eingriff in die Persönlichkeitssphäre auch von Aktionären empfunden werden. Der Umstand, dass im Vorfeld einer vollständigen Übertragung erst eine rechtliche Legitimation per Satzung oder Geschäftsordnung der Hauptversammlung geschaffen werden müsste, belegt, dass das Persönlichkeitsrecht des Aktionärs in der gebotenen Abwägung nicht automatisch hinter einem Übertragungsinteresse zurücktritt.

Deshalb wird auch weiterhin von einer derartigen Übertragung abgesehen.

**2. Auf den langfristigen Unternehmenserfolg bezogene variable Vergütung des Aufsichtsrates (Ziffer 5.4.6 Abs. 2, Satz 2).** Wegen der Einführung einer erfolgsabhängigen Vergütung für die Mitglieder des Aufsichtsrats verweisen wir auf die Erläuterungen unter I. Ziffer 3.

Stuttgart, im Dezember 2010

Der Aufsichtsrat

Der Vorstand





|        |        |    |
|--------|--------|----|
| 1.7M   | 47.313 | 40 |
| 1.008  | 52.182 | 47 |
| 13.866 | 3.106  | 7  |
| 12.912 | 31.466 | 31 |
| 30.187 |        |    |

Der nachfolgend dargestellte Konzernabschluss wurde nach den International Financial Reporting Standards (IFRS) aufgestellt. Der Konzernabschluss berücksichtigt auch zusätzliche Anforderungen gemäß § 315a (1) des deutschen Handelsgesetzbuches (HGB).

|     |                                          |
|-----|------------------------------------------|
| 170 | Versicherung der gesetzlichen Vertreter  |
| 171 | Bestätigungsvermerk des Abschlussprüfers |
| 172 | Konzern-Gewinn- und Verlustrechnung      |
| 173 | Konzern-Gesamtergebnisrechnung           |
| 174 | Konzernbilanz                            |
| 175 | Entwicklung des Konzern-Eigenkapitals    |
| 176 | Konzern-Kapitalflussrechnung             |
| 177 | Konzernanhang                            |

|     |                                                                                                         |     |                                                              |
|-----|---------------------------------------------------------------------------------------------------------|-----|--------------------------------------------------------------|
| 177 | 1. Wesentliche Rechnungslegungsgrundsätze                                                               | 204 | 20. Eigenkapital                                             |
| 186 | 2. Schätzungen und Beurteilungen<br>im Rahmen der Rechnungslegung                                       | 207 | 21. Aktienorientierte Vergütung                              |
| 188 | 3. Wesentliche Zu- und Abgänge von<br>Unternehmensanteilen und sonstiger<br>Vermögenswerte und Schulden | 211 | 22. Pensionen und ähnliche Verpflichtungen                   |
| 189 | 4. Umsatzerlöse                                                                                         | 217 | 23. Rückstellungen für sonstige Risiken                      |
| 189 | 5. Funktionskosten                                                                                      | 218 | 24. Finanzierungsverbindlichkeiten                           |
| 191 | 6. Sonstige betriebliche Erträge und Aufwendungen                                                       | 219 | 25. Übrige finanzielle Verbindlichkeiten                     |
| 191 | 7. Übriges Finanzergebnis                                                                               | 219 | 26. Übrige Verbindlichkeiten                                 |
| 192 | 8. Zinserträge und Zinsaufwendungen                                                                     | 220 | 27. Konzern-Kapitalflussrechnung                             |
| 192 | 9. Ertragsteuern                                                                                        | 220 | 28. Rechtliche Verfahren                                     |
| 195 | 10. Immaterielle Vermögenswerte                                                                         | 222 | 29. Garantien und sonstige finanzielle<br>Verpflichtungen    |
| 196 | 11. Sachanlagen                                                                                         | 225 | 30. Finanzinstrumente                                        |
| 197 | 12. Vermietete Gegenstände                                                                              | 231 | 31. Risikomanagement                                         |
| 198 | 13. At-equity bewertete Finanzinvestitionen                                                             | 239 | 32. Segmentberichterstattung                                 |
| 199 | 14. Forderungen aus Finanzdienstleistungen                                                              | 243 | 33. Kapitalmanagement                                        |
| 201 | 15. Verzinsliche Wertpapiere                                                                            | 243 | 34. Ergebnis je Aktie                                        |
| 201 | 16. Übrige finanzielle Vermögenswerte                                                                   | 244 | 35. Beziehungen zu nahestehenden Personen<br>und Unternehmen |
| 202 | 17. Übrige Vermögenswerte                                                                               | 246 | 36. Vergütung des Vorstands und des<br>Aufsichtsrats         |
| 202 | 18. Vorräte                                                                                             | 246 | 37. Honorare des Abschlussprüfers                            |
| 203 | 19. Forderungen aus Lieferungen und Leistungen                                                          | 247 | 38. Zusätzliche Angaben                                      |

## Versicherung der gesetzlichen Vertreter

gemäß § 37y Nr. 1 WpHG i. V. m. §§ 297 Abs. 2 Satz 4 und 315 Abs. 1 Satz 6 HGB

Wir versichern nach bestem Wissen, dass gemäß den anzuwendenden Rechnungslegungsgrundsätzen der Konzernabschluss ein den tatsächlichen Verhältnissen entsprechendes Bild der Vermögens-, Finanz- und Ertragslage des Konzerns vermittelt und im Konzernlagebericht, der mit dem Lagebericht der Daimler AG zusammengefasst ist, der Geschäftsverlauf einschließlich des Geschäftsergebnisses und die Lage des Konzerns so dargestellt sind, dass ein den tatsächlichen Verhältnissen entsprechendes Bild vermittelt wird sowie die wesentlichen Chancen und Risiken der voraussichtlichen Entwicklung des Konzerns beschrieben sind.

Stuttgart, den 28. Februar 2011



Dieter Zetsche

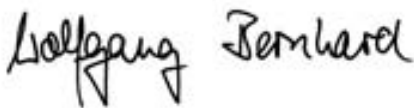

Wolfgang Bernhard



Christine Hohmann-Dennhardt



Wilfried Porth



Andreas Renschler



Bodo Uebber



Thomas Weber

# Bestätigungsvermerk des Abschlussprüfers

Wir haben den von der Daimler AG, Stuttgart, aufgestellten Konzernabschluss – bestehend aus Gewinn- und Verlustrechnung, Gesamtergebnisrechnung, Bilanz, Entwicklung des Eigenkapitals, Kapitalflussrechnung und Anhang – sowie ihren Bericht über die Lage der Gesellschaft und des Konzerns für das Geschäftsjahr vom 1. Januar bis 31. Dezember 2010 geprüft. Die Aufstellung von Konzernabschluss und Konzernlagebericht nach den IFRS, wie sie in der EU anzuwenden sind, und den ergänzend nach § 315a Abs. 1 HGB anzuwendenden handelsrechtlichen Vorschriften liegt in der Verantwortung des Vorstands der Gesellschaft. Unsere Aufgabe ist es, auf der Grundlage der von uns durchgeführten Prüfung eine Beurteilung über den Konzernabschluss und den Konzernlagebericht abzugeben. Ergänzend wurden wir beauftragt zu beurteilen, ob der Konzernabschluss auch den vom International Accounting Standards Board (IASB) veröffentlichten IFRS (IASB-IFRS) entspricht.

Wir haben unsere Konzernabschlussprüfung nach § 317 HGB unter Beachtung der vom Institut der Wirtschaftsprüfer (IDW) festgestellten deutschen Grundsätze ordnungsmäßiger Abschlussprüfung vorgenommen. Danach ist die Prüfung so zu planen und durchzuführen, dass Unrichtigkeiten und Verstöße, die sich auf die Darstellung des durch den Konzernabschluss unter Beachtung der anzuwendenden Rechnungslegungsvorschriften und durch den Konzernlagebericht vermittelten Bildes der Vermögens-, Finanz- und Ertragslage wesentlich auswirken, mit hinreichender Sicherheit erkannt werden. Bei der Festlegung der Prüfungshandlungen werden die Kenntnisse über die Geschäftstätigkeit und über das wirtschaftliche und rechtliche Umfeld des Konzerns sowie die Erwartungen über mögliche Fehler berücksichtigt. Im Rahmen der Prüfung werden die Wirksamkeit des rechnungslegungsbezogenen internen Kontrollsystems sowie Nachweise für die Angaben im Konzernabschluss und Konzernlagebericht überwiegend auf der Basis von Stichproben beurteilt. Die Prüfung umfasst die Beurteilung der Jahresabschlüsse der in den Konzernabschluss einbezogenen Unternehmen, der Abgrenzung des Konsolidierungskreises, der angewandten Bilanzierungs- und Konsolidierungsgrundsätze und der wesentlichen Einschätzungen des Vorstands sowie die Würdigung der Gesamtdarstellung des Konzernabschlusses und des Konzernlageberichts. Wir sind der Auffassung, dass unsere Prüfung eine hinreichend sichere Grundlage für unsere Beurteilung bildet.

Unsere Prüfung hat zu keinen Einwendungen geführt.

Nach unserer Beurteilung aufgrund der bei der Prüfung gewonnenen Erkenntnisse entspricht der Konzernabschluss den IFRS, wie sie in der EU anzuwenden sind, und den ergänzend nach § 315a Abs. 1 HGB anzuwendenden handelsrechtlichen Vorschriften sowie den IASB-IFRS und vermittelt unter Beachtung dieser Vorschriften ein den tatsächlichen Verhältnissen entsprechendes Bild der Vermögens-, Finanz- und Ertragslage des Konzerns. Der Konzernlagebericht steht in Einklang mit dem Konzernabschluss, vermittelt insgesamt ein zutreffendes Bild von der Lage des Konzerns und stellt die Chancen und Risiken der zukünftigen Entwicklung zutreffend dar.

Stuttgart, den 28. Februar 2011

KPMG AG  
Wirtschaftsprüfungsgesellschaft



Prof. Dr. Nonnenmacher  
Wirtschaftsprüfer



Meyer  
Wirtschaftsprüfer



# Konzern-Gewinn- und Verlustrechnung

| Daimler-Konzern                                                                           |      |         |         | Industriegeschäft<br>(ungeprüfte<br>Zusatzinformationen) |         | Daimler Financial Services<br>(ungeprüfte<br>Zusatzinformationen) |         |
|-------------------------------------------------------------------------------------------|------|---------|---------|----------------------------------------------------------|---------|-------------------------------------------------------------------|---------|
| Anmerkung                                                                                 | 2010 | 2009    | 2010    | 2009                                                     | 2010    | 2009                                                              |         |
| in Millionen €                                                                            |      |         |         |                                                          |         |                                                                   |         |
| Umsatzerlöse                                                                              | 4    | 97.761  | 78.924  | 84.973                                                   | 66.928  | 12.788                                                            | 11.996  |
| Umsatzkosten                                                                              | 5    | -74.988 | -65.567 | -63.912                                                  | -54.268 | -11.076                                                           | -11.299 |
| Bruttoergebnis vom Umsatz                                                                 |      | 22.773  | 13.357  | 21.061                                                   | 12.660  | 1.712                                                             | 697     |
| Vertriebskosten                                                                           | 5    | -8.861  | -7.608  | -8.517                                                   | -7.303  | -344                                                              | -305    |
| Allgemeine Verwaltungskosten                                                              | 5    | -3.474  | -3.287  | -2.951                                                   | -2.838  | -523                                                              | -449    |
| Forschungs- und nicht aktivierte Entwicklungskosten                                       | 5    | -3.476  | -2.896  | -3.476                                                   | -2.896  | -                                                                 | -       |
| Sonstige betriebliche Erträge                                                             | 6    | 971     | 693     | 879                                                      | 589     | 92                                                                | 104     |
| Sonstige betriebliche Aufwendungen                                                        | 6    | -660    | -503    | -569                                                     | -460    | -91                                                               | -43     |
| Ergebnis aus at-equity bewerteten Finanzinvestitionen                                     | 13   | -148    | 72      | -141                                                     | 65      | -7                                                                | 7       |
| Übriges Finanzergebnis                                                                    | 7    | 149     | -1.341  | 157                                                      | -1.339  | -8                                                                | -2      |
| Ergebnis vor Zinsergebnis<br>und Ertragsteuern (EBIT) <sup>1</sup>                        |      | 7.274   | -1.513  | 6.443                                                    | -1.522  | 831                                                               | 9       |
| Zinserträge                                                                               | 8    | 825     | 1.136   | 821                                                      | 1.132   | 4                                                                 | 4       |
| Zinsaufwendungen                                                                          | 8    | -1.471  | -1.921  | -1.457                                                   | -1.907  | -14                                                               | -14     |
| Ergebnis vor Ertragsteuern                                                                |      | 6.628   | -2.298  | 5.807                                                    | -2.297  | 821                                                               | -1      |
| Ertragsteuern                                                                             | 9    | -1.954  | -346    | -1.681                                                   | -350    | -273                                                              | 4       |
| Konzernergebnis                                                                           |      | 4.674   | -2.644  | 4.126                                                    | -2.647  | 548                                                               | 3       |
| Auf Minderheitsanteile entfallendes Ergebnis                                              |      | -176    | 4       |                                                          |         |                                                                   |         |
| Anteil der Aktionäre der<br>Daimler AG am Konzernergebnis                                 |      | 4.498   | -2.640  |                                                          |         |                                                                   |         |
|                                                                                           |      |         |         |                                                          |         |                                                                   |         |
| Ergebnis je Aktie (in €)<br>auf Basis des Ergebnisanteils der<br>Aktionäre der Daimler AG | 34   |         |         |                                                          |         |                                                                   |         |
| Unverwässert                                                                              |      | 4,28    | -2,63   |                                                          |         |                                                                   |         |
| Verwässert                                                                                |      | 4,28    | -2,63   |                                                          |         |                                                                   |         |

<sup>1</sup> EBIT enthält Aufwendungen aus der Aufzinsung von Rückstellungen sowie Effekte aus der Änderung der Abzinsungsfaktoren (2010: -240 Mio. €; 2009: -1.003 Mio. €).

Der nachfolgende Konzernanhang ist integraler Bestandteil des Konzernabschlusses.

# Konzern-Gesamtergebnisrechnung<sup>1</sup>

|                                                                                             | Daimler-Konzern |        |
|---------------------------------------------------------------------------------------------|-----------------|--------|
|                                                                                             | 2010            | 2009   |
| in Millionen €                                                                              |                 |        |
| <b>Konzernergebnis</b>                                                                      | <b>4.674</b>    | -2.644 |
| Unrealisierte Gewinne aus der Währungsumrechnung                                            | 1.200           | 267    |
| Unrealisierte Gewinne/Verluste aus zur Veräußerung verfügbaren finanziellen Vermögenswerten | -121            | 247    |
| Unrealisierte Verluste aus derivativen Finanzinstrumenten                                   | -484            | -308   |
| Unrealisierte Gewinne/Verluste aus at-equity bewerteten Finanzinvestitionen                 | -449            | 195    |
| <b>Sonstiges Ergebnis, nach Steuern</b>                                                     | <b>146</b>      | 401    |
| Davon auf Minderheitsanteile entfallendes sonstiges Ergebnis, nach Steuern                  | -86             | 103    |
| Davon Anteil der Aktionäre der Daimler AG am sonstigen Ergebnis, nach Steuern               | 232             | 298    |
| <b>Gesamtergebnis</b>                                                                       | <b>4.820</b>    | -2.243 |
| Davon auf Minderheitsanteile entfallendes Gesamtergebnis                                    | 90              | 99     |
| Davon Anteil der Aktionäre der Daimler AG am Gesamtergebnis                                 | 4.730           | -2.342 |

1 Sonstige Angaben zur Konzern-Gesamtergebnisrechnung können auch Anmerkung 20 entnommen werden.

Der nachfolgende Konzernanhang ist integraler Bestandteil des Konzernabschlusses.

# Konzernbilanz

| Daimler-Konzern                                                                           |                      |                      |         | Industriegeschäft<br>(ungeprüfte<br>Zusatzinformationen) |                      | Daimler Financial Services<br>(ungeprüfte<br>Zusatzinformationen) |                      |
|-------------------------------------------------------------------------------------------|----------------------|----------------------|---------|----------------------------------------------------------|----------------------|-------------------------------------------------------------------|----------------------|
| Anmerkung                                                                                 | 31. Dezember<br>2010 | 31. Dezember<br>2009 |         | 31. Dezember<br>2010                                     | 31. Dezember<br>2009 | 31. Dezember<br>2010                                              | 31. Dezember<br>2009 |
| in Millionen €                                                                            |                      |                      |         |                                                          |                      |                                                                   |                      |
| <b>Aktiva</b>                                                                             |                      |                      |         |                                                          |                      |                                                                   |                      |
| Immaterielle Vermögenswerte                                                               | 10                   | 7.504                | 6.753   | 7.450                                                    | 6.690                | 54                                                                | 63                   |
| Sachanlagen                                                                               | 11                   | 17.593               | 15.965  | 17.544                                                   | 15.911               | 49                                                                | 54                   |
| Vermietete Gegenstände                                                                    | 12                   | 19.925               | 18.532  | 9.611                                                    | 8.651                | 10.314                                                            | 9.881                |
| At-equity bewertete Finanzinvestitionen                                                   | 13                   | 3.960                | 4.295   | 3.917                                                    | 4.241                | 43                                                                | 54                   |
| Forderungen aus Finanzdienstleistungen                                                    | 14                   | 22.864               | 22.250  | -45                                                      | -24                  | 22.909                                                            | 22.274               |
| Verzinsliche Wertpapiere                                                                  | 15                   | 766                  | 1.224   | 15                                                       | 85                   | 751                                                               | 1.139                |
| Übrige finanzielle Vermögenswerte                                                         | 16                   | 3.194                | 2.793   | 2.015                                                    | 2.634                | 1.179                                                             | 159                  |
| Aktive latente Steuern                                                                    | 9                    | 2.613                | 2.233   | 2.108                                                    | 1.830                | 505                                                               | 403                  |
| Übrige Vermögenswerte                                                                     | 17                   | 408                  | 496     | 214                                                      | 305                  | 194                                                               | 191                  |
| <b>Langfristige Vermögenswerte</b>                                                        |                      | 78.827               | 74.541  | 42.829                                                   | 40.323               | 35.998                                                            | 34.218               |
| Vorräte                                                                                   | 18                   | 14.544               | 12.845  | 14.056                                                   | 12.337               | 488                                                               | 508                  |
| Forderungen aus Lieferungen und Leistungen                                                | 19                   | 7.192                | 5.285   | 6.964                                                    | 5.073                | 228                                                               | 212                  |
| Forderungen aus Finanzdienstleistungen                                                    | 14                   | 18.166               | 16.228  | -51                                                      | -37                  | 18.217                                                            | 16.265               |
| Zahlungsmittel und Zahlungsmitteläquivalente                                              |                      | 10.903               | 9.800   | 9.535                                                    | 6.735                | 1.368                                                             | 3.065                |
| Verzinsliche Wertpapiere                                                                  | 15                   | 1.330                | 5.118   | 1.243                                                    | 4.988                | 87                                                                | 130                  |
| Übrige finanzielle Vermögenswerte                                                         | 16                   | 2.247                | 2.342   | -5.282                                                   | -4.312               | 7.529                                                             | 6.654                |
| Übrige Vermögenswerte                                                                     | 17                   | 2.621                | 2.352   | -1.335                                                   | -1.346               | 3.956                                                             | 3.698                |
| <b>Zwischensumme kurzfristige Vermögenswerte</b>                                          |                      | 57.003               | 53.970  | 25.130                                                   | 23.438               | 31.873                                                            | 30.532               |
| Zur Veräußerung bestimmte Vermögenswerte<br>aus nicht fahrzeugbezogenen Leasingportfolios | 3                    | -                    | 310     | -                                                        | -                    | -                                                                 | 310                  |
| <b>Kurzfristige Vermögenswerte</b>                                                        |                      | 57.003               | 54.280  | 25.130                                                   | 23.438               | 31.873                                                            | 30.842               |
| <b>Summe Aktiva</b>                                                                       |                      | 135.830              | 128.821 | 67.959                                                   | 63.761               | 67.871                                                            | 65.060               |
| <b>Passiva</b>                                                                            |                      |                      |         |                                                          |                      |                                                                   |                      |
| Gezeichnetes Kapital                                                                      |                      | 3.058                | 3.045   |                                                          |                      |                                                                   |                      |
| Kapitalrücklagen                                                                          |                      | 11.905               | 11.864  |                                                          |                      |                                                                   |                      |
| Gewinnrücklagen                                                                           |                      | 20.553               | 16.163  |                                                          |                      |                                                                   |                      |
| Übrige Rücklagen                                                                          |                      | 864                  | 632     |                                                          |                      |                                                                   |                      |
| Eigene Anteile                                                                            |                      | -7                   | -1.443  |                                                          |                      |                                                                   |                      |
| <b>Den Aktionären der Daimler AG zustehendes Eigenkapital</b>                             |                      | 36.373               | 30.261  |                                                          |                      |                                                                   |                      |
| Minderheitsanteile                                                                        |                      | 1.580                | 1.566   |                                                          |                      |                                                                   |                      |
| <b>Eigenkapital</b>                                                                       | 20                   | 37.953               | 31.827  | 33.088                                                   | 27.157               | 4.865                                                             | 4.670                |
| Rückstellungen für Pensionen und ähnliche Verpflichtungen                                 | 22                   | 4.329                | 4.082   | 4.141                                                    | 3.901                | 188                                                               | 181                  |
| Rückstellungen für Ertragsteuern                                                          |                      | 2.539                | 2.774   | 2.537                                                    | 2.772                | 2                                                                 | 2                    |
| Rückstellungen für sonstige Risiken                                                       | 23                   | 5.548                | 4.696   | 5.367                                                    | 4.585                | 181                                                               | 111                  |
| Finanzierungsverbindlichkeiten                                                            | 24                   | 27.861               | 33.258  | 3.480                                                    | 13.390               | 24.381                                                            | 19.868               |
| Übrige finanzielle Verbindlichkeiten                                                      | 25                   | 1.883                | 2.148   | 1.824                                                    | 1.985                | 59                                                                | 163                  |
| Passive latente Steuern                                                                   | 9                    | 675                  | 509     | -1.813                                                   | -2.987               | 2.488                                                             | 3.496                |
| Rechnungsabgrenzungsposten                                                                |                      | 1.824                | 1.914   | 1.481                                                    | 1.305                | 343                                                               | 609                  |
| Übrige Verbindlichkeiten                                                                  | 26                   | 79                   | 75      | 74                                                       | 66                   | 5                                                                 | 9                    |
| <b>Langfristige Schulden</b>                                                              |                      | 44.738               | 49.456  | 17.091                                                   | 25.017               | 27.647                                                            | 24.439               |
| Verbindlichkeiten aus Lieferungen und Leistungen                                          |                      | 7.657                | 5.622   | 7.429                                                    | 5.422                | 228                                                               | 200                  |
| Rückstellungen für Ertragsteuern                                                          |                      | 1.229                | 509     | 382                                                      | 75                   | 847                                                               | 434                  |
| Rückstellungen für sonstige Risiken                                                       | 23                   | 6.992                | 6.311   | 6.711                                                    | 6.070                | 281                                                               | 241                  |
| Finanzierungsverbindlichkeiten                                                            | 24                   | 25.821               | 25.036  | -4.838                                                   | -7.874               | 30.659                                                            | 32.910               |
| Übrige finanzielle Verbindlichkeiten                                                      | 25                   | 8.626                | 7.589   | 6.058                                                    | 6.280                | 2.568                                                             | 1.309                |
| Rechnungsabgrenzungsposten                                                                |                      | 1.269                | 1.397   | 766                                                      | 755                  | 503                                                               | 642                  |
| Übrige Verbindlichkeiten                                                                  | 26                   | 1.545                | 1.074   | 1.272                                                    | 859                  | 273                                                               | 215                  |
| <b>Kurzfristige Schulden</b>                                                              |                      | 53.139               | 47.538  | 17.780                                                   | 11.587               | 35.359                                                            | 35.951               |
| <b>Summe Passiva</b>                                                                      |                      | 135.830              | 128.821 | 67.959                                                   | 63.761               | 67.871                                                            | 65.060               |

Der nachfolgende Konzernanhang ist integraler Bestandteil des Konzernabschlusses.

# Entwicklung des Konzern-Eigenkapitals <sup>1</sup>

|                                                          | Gezeichnetes<br>Kapital | Kapital-<br>rücklage | Gewinn-<br>rücklage | Unter-<br>schieds-<br>betrag aus<br>Währungs-<br>umrechnung | Zur Ver-<br>äußerung<br>verfügbare<br>finanzielle<br>Vermögens-<br>werte | Übrige Rücklagen<br><br>Derivative<br>Finanz-<br>instrumente | Anteil<br>at-equity<br>bewerteter<br>Finanzin-<br>vestitionen | Den<br>Aktionären<br>der<br>Daimler AG<br>zustehendes<br>Eigenkapital | Minder-<br>heitsanteile | Summe<br>Eigenkapital |        |
|----------------------------------------------------------|-------------------------|----------------------|---------------------|-------------------------------------------------------------|--------------------------------------------------------------------------|--------------------------------------------------------------|---------------------------------------------------------------|-----------------------------------------------------------------------|-------------------------|-----------------------|--------|
| in Millionen €                                           |                         |                      |                     |                                                             |                                                                          |                                                              |                                                               |                                                                       |                         |                       |        |
|                                                          |                         |                      |                     |                                                             |                                                                          |                                                              |                                                               |                                                                       |                         |                       |        |
| Stand zum<br>1. Januar 2009                              | 2.768                   | 10.204               | 19.359              | -487                                                        | 23                                                                       | 576                                                          | 222                                                           | -1.443                                                                | 31.222                  | 1.508                 | 32.730 |
| Konzernergebnis                                          | -                       | -                    | -2.640              | -                                                           | -                                                                        | -                                                            | -                                                             | -                                                                     | -2.640                  | -4                    | -2.644 |
| Unrealisierte<br>Gewinne/Verluste                        | -                       | -                    | -                   | 274                                                         | 255                                                                      | -431                                                         | 102                                                           | -                                                                     | 200                     | 141                   | 341    |
| Latente Steuern<br>auf unrealisierte<br>Gewinne/Verluste | -                       | -                    | -                   | -                                                           | -8                                                                       | 123                                                          | -17                                                           | -                                                                     | 98                      | -38                   | 60     |
| Gesamtergebnis                                           | -                       | -                    | -2.640              | 274                                                         | 247                                                                      | -308                                                         | 85                                                            | -                                                                     | -2.342                  | 99                    | -2.243 |
| Dividenden                                               | -                       | -                    | -556                | -                                                           | -                                                                        | -                                                            | -                                                             | -                                                                     | -556                    | -101                  | -657   |
| Veränderung durch<br>Stock Options                       | -                       | 1                    | -                   | -                                                           | -                                                                        | -                                                            | -                                                             | -                                                                     | 1                       | -                     | 1      |
| Kapitalerhöhung durch<br>Ausgabe neuer Aktien            | 277                     | 1.676                | -                   | -                                                           | -                                                                        | -                                                            | -                                                             | -                                                                     | 1.953                   | -                     | 1.953  |
| Sonstiges                                                | -                       | -17                  | -                   | -                                                           | -                                                                        | -                                                            | -                                                             | -                                                                     | -17                     | 60                    | 43     |
| Stand zum<br>31. Dezember 2009                           | 3.045                   | 11.864               | 16.163              | -213                                                        | 270                                                                      | 268                                                          | 307                                                           | -1.443                                                                | 30.261                  | 1.566                 | 31.827 |
| Konzernergebnis                                          | -                       | -                    | 4.498               | -                                                           | -                                                                        | -                                                            | -                                                             | -                                                                     | 4.498                   | 176                   | 4.674  |
| Unrealisierte<br>Gewinne/Verluste                        | -                       | -                    | -                   | 1.152                                                       | -128                                                                     | -696                                                         | -461                                                          | -                                                                     | -133                    | -148                  | -281   |
| Latente Steuern<br>auf unrealisierte<br>Gewinne/Verluste | -                       | -                    | -                   | -                                                           | 7                                                                        | 212                                                          | 146                                                           | -                                                                     | 365                     | 62                    | 427    |
| Gesamtergebnis                                           | -                       | -                    | 4.498               | 1.152                                                       | -121                                                                     | -484                                                         | -315                                                          | -                                                                     | 4.730                   | 90                    | 4.820  |
| Dividenden                                               | -                       | -                    | -                   | -                                                           | -                                                                        | -                                                            | -                                                             | -                                                                     | -                       | -93                   | -93    |
| Veränderung durch<br>Stock Options                       | -                       | 4                    | -                   | -                                                           | -                                                                        | -                                                            | -                                                             | -                                                                     | 4                       | -                     | 4      |
| Kapitalerhöhung/<br>Ausgabe neuer Aktien                 | 13                      | 156                  | -                   | -                                                           | -                                                                        | -                                                            | -                                                             | -                                                                     | 169                     | 5                     | 174    |
| Erwerb eigener Aktien                                    | -                       | -                    | -                   | -                                                           | -                                                                        | -                                                            | -                                                             | -54                                                                   | -54                     | -                     | -54    |
| Ausgabe und<br>Verwendung eigener<br>Anteile             | -                       | -110                 | -108                | -                                                           | -                                                                        | -                                                            | -                                                             | 1.490                                                                 | 1.272                   | -                     | 1.272  |
| Sonstiges                                                | -                       | -9                   | -                   | -                                                           | -                                                                        | -                                                            | -                                                             | -                                                                     | -9                      | 12                    | 3      |
| Stand zum<br>31. Dezember 2010                           | 3.058                   | 11.905               | 20.553              | 939                                                         | 149                                                                      | -216                                                         | -8                                                            | -7                                                                    | 36.373                  | 1.580                 | 37.953 |

<sup>1</sup> Sonstige Angaben zur Eigenkapitalentwicklung können Anmerkung 20 entnommen werden.

Der nachfolgende Konzernanhang ist integraler Bestandteil des Konzernabschlusses.



# Konzern-Kapitalflussrechnung <sup>1</sup>

| Daimler-Konzern                                                                         |         | Industriegeschäft<br>(ungeprüfte<br>Zusatzinformationen) |         | Daimler Financial Services<br>(ungeprüfte<br>Zusatzinformationen) |         |         |
|-----------------------------------------------------------------------------------------|---------|----------------------------------------------------------|---------|-------------------------------------------------------------------|---------|---------|
| 2010                                                                                    | 2009    | 2010                                                     | 2009    | 2010                                                              | 2009    |         |
| in Millionen €                                                                          |         |                                                          |         |                                                                   |         |         |
|                                                                                         |         |                                                          |         |                                                                   |         |         |
| Konzernergebnis, korrigiert um                                                          | 4.674   | -2.644                                                   | 4.126   | -2.647                                                            | 548     | 3       |
| Abschreibungen                                                                          | 3.364   | 3.264                                                    | 3.335   | 3.231                                                             | 29      | 33      |
| Sonstige zahlungsunwirksame Aufwendungen und Erträge                                    | 434     | -563                                                     | 1.839   | 738                                                               | -1.405  | -1.301  |
| Ergebnis aus dem Verkauf von Aktiva                                                     | -366    | -34                                                      | -367    | -35                                                               | 1       | 1       |
| Veränderung betrieblicher Aktiva und Passiva                                            |         |                                                          |         |                                                                   |         |         |
| Vorräte                                                                                 | -955    | 4.232                                                    | -1.018  | 4.267                                                             | 63      | -35     |
| Forderungen aus Lieferungen und Leistungen                                              | -1.493  | 1.795                                                    | -1.499  | 1.787                                                             | 6       | 8       |
| Verbindlichkeiten aus Lieferungen und Leistungen                                        | 1.778   | -902                                                     | 1.763   | -876                                                              | 15      | -26     |
| Forderungen aus Finanzdienstleistungen                                                  | -823    | 3.148                                                    | 103     | -615                                                              | -926    | 3.763   |
| Vermietete Fahrzeuge                                                                    | -571    | 1.766                                                    | 39      | 167                                                               | -610    | 1.599   |
| Sonstige betriebliche Aktiva und Passiva                                                | 2.502   | 899                                                      | 1.745   | 527                                                               | 757     | 372     |
| Cash Flow aus der Geschäftstätigkeit                                                    | 8.544   | 10.961                                                   | 10.066  | 6.544                                                             | -1.522  | 4.417   |
| Zugänge zu Sachanlagen                                                                  | -3.653  | -2.423                                                   | -3.641  | -2.409                                                            | -12     | -14     |
| Zugänge zu immateriellen Vermögenswerten                                                | -1.555  | -1.422                                                   | -1.548  | -1.415                                                            | -7      | -7      |
| Erlöse aus dem Abgang von Sachanlagen und immateriellen Vermögenswerten                 | 329     | 280                                                      | 320     | 268                                                               | 9       | 12      |
| Erwerb von Unternehmen                                                                  | -163    | -141                                                     | -163    | -139                                                              | -       | -2      |
| Erlöse aus dem Verkauf von Unternehmen                                                  | 365     | 67                                                       | 362     | 61                                                                | 3       | 6       |
| Erwerb von Wertpapieren (ohne Handelspapiere)                                           | -11.710 | -17.782                                                  | -11.710 | -16.560                                                           | -       | -1.222  |
| Erlöse aus dem Verkauf von Wertpapieren (ohne Handelspapiere)                           | 16.035  | 12.407                                                   | 15.603  | 12.407                                                            | 432     | -       |
| Veränderung sonstiger Geldanlagen                                                       | 39      | 64                                                       | 36      | 71                                                                | 3       | -7      |
| Cash Flow aus der Investitionstätigkeit                                                 | -313    | -8.950                                                   | -741    | -7.716                                                            | 428     | -1.234  |
| Veränderung der kurzfristigen Finanzierungsverbindlichkeiten                            | -28     | -2.332                                                   | 203     | -1.347                                                            | -231    | -985    |
| Aufnahme langfristiger Finanzierungsverbindlichkeiten                                   | 13.828  | 24.900                                                   | -4.484  | 6.887                                                             | 18.312  | 18.013  |
| Tilgung langfristiger Finanzierungsverbindlichkeiten                                    | -21.482 | -22.807                                                  | -2.474  | -3.377                                                            | -19.008 | -19.430 |
| Gezahlte Dividenden                                                                     | -93     | -657                                                     | -86     | -654                                                              | -7      | -3      |
| Erlöse aus der Ausgabe von Aktien (einschließlich Minderheitsanteile)                   | 278     | 1.953                                                    | 278     | 1.952                                                             | -       | 1       |
| Erwerb eigener Anteile                                                                  | -54     | -                                                        | -54     | -                                                                 | -       | -       |
| Interne Eigenkapitaltransaktionen                                                       | -       | -                                                        | -286    | 7                                                                 | 286     | -7      |
| Cash Flow aus der Finanzierungstätigkeit                                                | -7.551  | 1.057                                                    | -6.903  | 3.468                                                             | -648    | -2.411  |
| Einfluss von Wechselkursänderungen auf die Zahlungsmittel und Zahlungsmitteläquivalente | 423     | -180                                                     | 378     | -225                                                              | 45      | 45      |
| Veränderung der Zahlungsmittel und Zahlungsmitteläquivalente                            | 1.103   | 2.888                                                    | 2.800   | 2.071                                                             | -1.697  | 817     |
| Zahlungsmittel und Zahlungsmitteläquivalente zum Jahresanfang                           | 9.800   | 6.912                                                    | 6.735   | 4.664                                                             | 3.065   | 2.248   |
| Zahlungsmittel und Zahlungsmitteläquivalente zum Jahresende                             | 10.903  | 9.800                                                    | 9.535   | 6.735                                                             | 1.368   | 3.065   |

<sup>1</sup> Sonstige Angaben zur Konzern-Kapitalflussrechnung können Anmerkung 27 entnommen werden.

Der nachfolgende Konzernanhang ist integraler Bestandteil des Konzernabschlusses.

## 1. Wesentliche Rechnungslegungsgrundsätze

### Allgemeine Angaben

Der Konzernabschluss der Daimler AG und ihrer Tochtergesellschaften (»Daimler« oder »der Konzern«) wurde aufgestellt unter Anwendung von § 315a HGB (Konzernabschluss nach internationalen Rechnungslegungsstandards) im Einklang mit den International Financial Reporting Standards (IFRS) und deren Interpretationen, wie sie vom International Accounting Standards Board (IASB) veröffentlicht wurden und wie sie in der Europäischen Union anzuwenden sind.

Die Daimler AG ist eine Aktiengesellschaft nach dem Recht der Bundesrepublik Deutschland. Die Gesellschaft ist im Handelsregister des Amtsgerichts Stuttgart unter HRB 19360 eingetragen und hat ihren Firmensitz in der Mercedesstraße 137, 70327 Stuttgart, Deutschland.

Der Konzernabschluss der Daimler AG wird in Euro (€) aufgestellt.

Der Vorstand hat den Konzernabschluss am 28. Februar 2011 zur Veröffentlichung freigegeben.

### Grundlagen der Bilanzierung

**Angewendete IFRS.** Die im Konzernabschluss angewendeten Bilanzierungs- und Bewertungsmethoden entsprechen den zum 31. Dezember 2010 verpflichtend anzuwendenden IFRS. Im Januar 2008 hat das IASB die Überarbeitung von IFRS 3 »Business Combinations« und IAS 27 »Consolidated and Separate Financial Statements« veröffentlicht. Wesentliche Änderungen sind: (a) Anforderung, dass die erworbenen Vermögenswerte, die übernommenen Verbindlichkeiten sowie das Eigenkapital einheitlich zum beizulegenden Zeitwert zum Übernahmzeitpunkt bewertet werden, (b) erfolgswirksame Erfassung von Aufwendungen, die in der Berichtsperiode im Zusammenhang mit der Übernahme entstanden sind, (c) Wahlrecht zur Berücksichtigung des anteiligen Geschäftswertes bei Minderheitenanteilen und (d) erfolgsneutrale Abbildung von Beteiligungsänderungen nach Erlangung von Kontrolle. Daimler wendet die Standards prospektiv ab dem 1. Januar 2010 an.

**Veröffentlichte, von der EU noch nicht übernommene und noch nicht angewendete IFRS.** Das IASB hat im November 2009 im Rahmen eines Projektes zur Überarbeitung der Rechnungslegung für Finanzinstrumente IFRS 9 »Financial Instruments« veröffentlicht, der sich auf finanzielle Vermögenswerte bezog. Im Oktober 2010 wurden Regelungen für finanzielle Verbindlichkeiten in den IFRS 9 »Financial Instruments« eingefügt. Die Vorschriften für finanzielle Verbindlichkeiten wurden bis auf neue Regelungen zur Berücksichtigung des eigenen Kreditrisikos bei Ausübung der Fair Value Option unverändert aus IAS 39 übernommen. Der neue Standard regelt die Bilanzierung von finanziellen Vermögenswerten und finanziellen Verbindlichkeiten im Hinblick auf Klassifizierung und Bewertung. Die Bestimmungen treten grundsätzlich retrospektiv für Geschäftsjahre in Kraft, die am oder nach dem 1. Januar 2013 beginnen. Eine vorzeitige Anwendung ist zulässig. Der Konzern wird IFRS 9 »Financial Instruments« für das Jahr 2011 nicht vorzeitig anwenden. Daimler wird die Auswirkungen auf den Konzernabschluss untersuchen.

Die übrigen verabschiedeten Standards werden voraussichtlich keine wesentlichen Auswirkungen auf die Vermögens-, Finanz- und Ertragslage des Konzerns haben.

**Darstellung.** Die Darstellung in der Bilanz unterscheidet zwischen kurz- und langfristigen Vermögenswerten und Schulden. Vermögenswerte und Schulden werden als kurzfristig klassifiziert, wenn sie innerhalb eines Jahres oder innerhalb eines längeren Geschäftszyklus fällig werden. Aktive und passive latente Steuern sowie Vermögenswerte und Rückstellungen für Pensionen und ähnliche Verpflichtungen werden als langfristige Posten dargestellt. Die Konzern-Gewinn- und Verlustrechnung wird nach dem Umsatzkostenverfahren aufgestellt.

Um den Vertrieb bestimmter, im Konzern hergestellter Produkte zu unterstützen, werden den Kunden Finanzierungen (einschließlich Leasingverträge) angeboten. Aufgrund dessen ist der Konzernabschluss wesentlich durch die Aktivitäten der konzerneigenen Finanzdienstleistungsgesellschaften geprägt.

Um einen besseren Einblick in die Vermögens-, Finanz- und Ertragslage des Konzerns zu ermöglichen, haben wir den geprüften Konzernabschluss um ungeprüfte Informationen zum Industriegeschäft bzw. zu den Financial Services ergänzt. Diese stellen jedoch keine Pflichtangaben nach IFRS dar und erfüllen nicht den Zweck, einzeln und für sich allein die Vermögens-, Finanz- und Ertragslage von Industriegeschäft bzw. Financial Services im Einklang mit IFRS darzustellen. Die Eliminierungen der konzerninternen Beziehungen zwischen dem Industriegeschäft und Financial Services sind grundsätzlich dem Industriegeschäft zugeordnet.

Zur Verbesserung des Einblicks in die Vermögens- und Finanzlage des Konzerns wurde entschieden, die bisher als Bestandteil der übrigen finanziellen Vermögenswerte ausgewiesenen verzinslichen Wertpapiere als gesonderten Posten in der Bilanz und im Anhang gesondert darzustellen und damit die Ableitung der Liquidität direkt aus der Bilanz zu ermöglichen. Diese als zur Veräußerung verfügbar klassifizierten Fremdkapitalanteile werden in die Liquiditätssteuerung des Konzerns einbezogen. Die Vorjahresbeträge wurden entsprechend angepasst (siehe auch Anmerkung 15).

**Bewertung.** Der Konzernabschluss ist mit Ausnahme bestimmter Posten, wie zum Beispiel zur Veräußerung verfügbarer finanzieller Vermögenswerte, derivativer Finanzinstrumente oder abgesicherter Grundgeschäfte sowie Pensionen und ähnlicher Verpflichtungen, nach dem historischen Anschaffungs- oder Herstellungskostenprinzip aufgestellt. Die für die Ausnahmen angewandten Bewertungsmethoden werden nachfolgend beschrieben.

**Risiken und Unsicherheiten.** Die Vermögens-, Finanz- und Ertragslage von Daimler ist Risiken und Unsicherheiten ausgesetzt. Ein erneuter konjunktureller Einbruch der Weltwirtschaft, erneute Finanzmarkturbulenzen oder auch ein Wachstumseinbruch in China sind beispielhaft einige Unsicherheitsfaktoren, durch die Abweichungen von den Erwartungen verursacht werden können. Weitere Einflussgrößen, durch die Abweichungen von den Erwartungen verursacht werden können, betreffen unter anderem eine weitere Zunahme der Überkapazitäten und Wettbewerbsintensität in der Automobilindustrie, Abhängigkeiten von Zulieferern, insbesondere bei Exklusivlieferanten, dauerhafter Nachfragewandel hin zu kleineren Fahrzeugen, Einführung neuer Technologien, Entwicklungen der Währungskurse, der Zinssätze und der Rohstoffpreise sowie der Ausgang wesentlicher Gerichtsverfahren und behördlicher Untersuchungen sowie umweltrechtliche bzw. sonstige gesetzliche Bestimmungen.

**Grundsätze der Konsolidierung.** Der Konzernabschluss umfasst zusätzlich zum Abschluss der Daimler AG grundsätzlich die Abschlüsse aller Tochtergesellschaften einschließlich Zweckgesellschaften (Special Purpose Entities), auf welche die Daimler AG direkt oder indirekt beherrschenden Einfluss ausüben kann. Beherrschung bedeutet die unmittelbare oder mittelbare Möglichkeit, die Finanz- und Geschäftspolitik einer anderen Gesellschaft zu bestimmen, so dass der Konzern einen Nutzen aus den Tätigkeiten dieser Gesellschaft zieht.

Die Abschlüsse der in den Konzernabschluss einbezogenen Tochtergesellschaften werden grundsätzlich zum Bilanzstichtag des Konzernabschlusses aufgestellt. Eine Abweichung besteht bei Mitsubishi Fuso Truck and Bus Corporation (MFTBC), einem wesentlichen Teilkonzern; MFTBC wird mit einem zeitlichen Versatz von einem Monat konsolidiert. Bedeutende Geschäftsvorfälle werden jedoch ohne Zeitversatz im Konzernabschluss berücksichtigt.

Die Abschlüsse der Daimler AG und ihrer in den Konzernabschluss einbezogenen Tochtergesellschaften wurden unter Beachtung einheitlich geltender Ansatz- und Bewertungsprinzipien aufgestellt. Alle wesentlichen konzerninternen Salden und Transaktionen zwischen den in den Konzernabschluss einbezogenen Tochtergesellschaften einschließlich Zweckgesellschaften wurden eliminiert.

Unternehmenszusammenschlüsse werden nach der Erwerbsmethode bilanziert.

Anteilsveränderungen bei Tochterunternehmen, durch die sich die Beteiligungsquote des Konzerns ohne Verlust der Kontrolle vermindert bzw. erhöht, werden als erfolgsneutrale Transaktion zwischen Eigenkapitalgebern abgebildet.

Zur Refinanzierung des Konzerns veräußert Daimler auch Finanzforderungen, insbesondere Forderungen aus dem Leasing- und Fahrzeuggeschäft, an Zweckgesellschaften. Dabei werden die wesentlichen Risiken der übertragenen Forderungen regelmäßig zurückbehalten. Gemäß IAS 27 »Consolidated and Separate Financial Statements« und der Standing Interpretations Committee (SIC) Interpretation 12 »Consolidation – Special Purpose Entities« müssen diese Zweckgesellschaften konsolidiert werden. Dementsprechend verbleiben die übertragenen finanziellen Vermögenswerte in der Konzernbilanz.

### Anteile an assoziierten Unternehmen und Joint Ventures.

Assoziierte Unternehmen sind Beteiligungen, bei denen Daimler einen maßgeblichen Einfluss auf die Finanz- und Geschäftspolitik ausüben kann. Joint Ventures sind Gesellschaften, die Daimler gemeinschaftlich mit Partnern führt. Die gemeinschaftliche Führung beruht auf einer vertraglichen Vereinbarung, die einstimmige Entscheidungen über die Finanz- und Geschäftspolitik des Joint Ventures erforderlich macht. Assoziierte Unternehmen und Joint Ventures werden nach der Equity-Methode bilanziert.

Im Erwerbszeitpunkt wird die Differenz zwischen den Anschaffungskosten und dem anteiligen neu bewerteten Eigenkapital als Geschäftswert (»Investor Level Goodwill«) angesetzt und in den Buchwert der nach der Equity-Methode bilanzierten Finanzinvestition einbezogen.

Übersteigt der Buchwert den erzielbaren Betrag einer Beteiligung an einem assoziierten Unternehmen oder eines Joint Ventures, wird der Buchwert der Beteiligung auf den erzielbaren Betrag abgeschrieben. Der erzielbare Betrag ist der höhere der beiden Beträge aus beizulegendem Zeitwert abzüglich der Veräußerungskosten und Nutzungswert. Die Wertminderung wird in der Gewinn- und Verlustrechnung in der Zeile Ergebnis aus at-equity bewerteten Anteilen erfasst; darin werden auch Ergebnisse aus dem Verkauf von at-equity bewerteten Anteilen ausgewiesen.

Zu eliminierende Zwischengewinne aus Transaktionen mit assoziierten Unternehmen und Gemeinschaftsunternehmen werden erfolgswirksam gegen den Beteiligungsbuchwert verrechnet.

Daimlers Anteil an Verwässerungsgewinnen und -verlusten von Beteiligungen, die nach der Equity-Methode bilanziert werden, werden im Ergebnis aus at-equity bewerteten Finanzinvestitionen berücksichtigt.

Bei den Beteiligungen an der European Aeronautic Defence and Space Company EADS N.V. (EADS), der Tognum AG (Tognum) und der Kamaz OAO (Kamaz) werden die anteiligen Gewinne oder Verluste mit einem zeitlichen Versatz von drei Monaten in den Konzernabschluss einbezogen, da die Konzernabschlüsse dieser assoziierten Unternehmen nicht rechtzeitig vorliegen. Bedeutende Geschäftsvorfälle werden jedoch ohne Zeitversatz bilanziert (siehe auch Anmerkung 13).

**Fremdwährungsumrechnung.** Geschäftsvorfälle in fremder Währung werden mit den relevanten Fremdwährungskursen zum Transaktionszeitpunkt umgerechnet. In Folgeperioden werden die Gewinne und Verluste aus der Folgebewertung von in Fremdwährung lautenden finanziellen Vermögenswerten und Schulden erfolgswirksam erfasst. Davon ausgenommen sind zur Veräußerung verfügbare Eigenkapitalanteile und finanzielle Schulden, die zur Absicherung der Nettoinvestition in einen ausländischen Geschäftsbetrieb designed sind.

Die Vermögenswerte und Schulden ausländischer Gesellschaften, deren funktionale Währung nicht der Euro ist, werden mit den Kursen vom Periodenende in Euro umgerechnet. Die daraus nach der Umstellung auf IFRS zum 1. Januar 2005 resultierenden Umrechnungsdifferenzen werden direkt im Eigenkapital ausgewiesen. Die Konzern-Gewinn- und Verlustrechnungen und die Konzern-Kapitalflussrechnungen werden mit den entsprechenden Periodendurchschnittskursen in Euro umgerechnet.

Die der Währungsumrechnung zugrunde liegenden Wechselkurse des US-Dollars, der für Daimler wesentlichsten ausländischen Währung, haben sich wie folgt entwickelt:

|                            | 2010   | 2009   |
|----------------------------|--------|--------|
|                            | 1 € =  | 1 € =  |
| Mittelkurs am 31. Dezember | 1,3362 | 1,4406 |
| Periodendurchschnittskurse |        |        |
| 1. Quartal                 | 1,3829 | 1,3029 |
| 2. Quartal                 | 1,2709 | 1,3632 |
| 3. Quartal                 | 1,2910 | 1,4303 |
| 4. Quartal                 | 1,3590 | 1,4785 |

### Bilanzierungs- und Bewertungsmethoden

**Umsatzrealisierung.** Umsatzerlöse aus dem Verkauf von Fahrzeugen, Ersatzteilen und anderen damit in Zusammenhang stehenden Produkten werden erfasst, wenn der Eigentums- und Gefahrenübergang an den Kunden erfolgt ist, der Betrag der Umsatzerlöse verlässlich bestimmt und von dessen Bezahlung ausgegangen werden kann. Die Umsatzerlöse werden abzüglich von Erlösschmälerungen, wie z. B. Skonti und Preisnachlässe, ausgewiesen.

Aufgrund unterschiedlicher markt- und produktabhängiger Faktoren, wie z. B. Höhe der Preisnachlässe durch Wettbewerber, Überkapazitäten, Wettbewerbsintensität und Nachfrageverhalten der Kunden, setzt Daimler Verkaufsanreize ein. Der Konzern behält sich vor, zu einem Zeitpunkt seiner Wahl unterschiedliche Programme zur Verkaufsförderung anzubieten, einschließlich finanzieller Anreize für Händler und Kunden sowie subventionierte Leasinggebühren oder Darlehen zu reduzierten Zinssätzen.



Umsätze aus Forderungen aus Finanzdienstleistungen werden nach der Effektivzinsmethode realisiert. Sofern Darlehen unterhalb marktüblicher Zinssätze begeben werden, erfolgt der Ansatz der Forderungen in Höhe des Barwerts, und die Umsatzerlöse werden um die gewährten Zinsvorteile gekürzt.

Der Konzern bietet für bestimmte Produkte eine verlängerte, separat berechnete Gewährleistung an. Die Umsatzerlöse aus diesen Verträgen werden abgegrenzt und über die Vertragslaufzeit erfolgswirksam aufgelöst. Die Auflösung erfolgt proportional zum erwarteten Kostenanfall auf Basis von Erfahrungswerten. Sofern Erfahrungswerte nur unzureichend vorliegen, werden die Erträge linear realisiert. Ein Verlust aus diesen Verträgen wird im jeweils aktuellen Geschäftsjahr berücksichtigt, wenn die Summe der erwarteten Kosten für vertragliche Leistungen die abgegrenzten Umsatzerlöse übersteigt.

Für Umsatzgeschäfte mit mehreren Teilleistungen, wie z. B. bei Fahrzeugverkäufen mit kostenfreien bzw. verbilligten Wartungsverträgen, erfolgt eine Aufteilung der Umsatzerlöse auf die verschiedenen Leistungen auf der Grundlage ihrer geschätzten beizulegenden Zeitwerte.

Fahrzeugverkäufe, bei denen der Konzern eine Restwertgarantie gewährt (z. B. bei Verkäufen an einige Autovermieter), werden als »Operating Lease« bilanziert. Restwertgarantien verpflichten Daimler entweder zu Ausgleichszahlungen an den Kunden, wenn bei Wiederverkauf des Fahrzeugs im Rahmen einer Auktion der vom Kunden erzielte Erlös unter dem garantierten Restwert liegt, oder zum Rückkauf des Fahrzeugs nach einer festgelegten Laufzeit zu einem garantierten Betrag. Gewinne und Verluste aus dem Wiederverkauf der Fahrzeuge sind im Bruttoergebnis vom Umsatz enthalten.

Erlöse aus »Operating Leases« werden linear über die Laufzeit der Verträge realisiert. Gegenstand von »Operating Leases« sind auch Konzernprodukte, die Daimler Financial Services von konzern-unabhängigen Händlern erwirbt und an Endkunden vermietet. Nach der Umsatzrealisierung durch den Verkauf an unabhängige Händler generieren diese Fahrzeuge aufgrund der abgeschlossenen Leasingverträge Umsatzerlöse aus Leasingzahlungen und Verwertungserlöse. Der mit diesen Fahrzeugen beim Verkauf an die Händler erzielte Umsatz liegt nach Einschätzung des Konzerns in der Größenordnung des Zugangs zum Vermietvermögen bei Daimler Financial Services. Im Jahr 2010 betrugen die Zugänge zu den Vermieteten Gegenständen bei Daimler Financial Services rund 5 (2009: rund 4) Mrd. €.

#### **Forschungs- und nicht aktivierte Entwicklungskosten.**

Aufwendungen für Forschung und Entwicklung, soweit sie nach IAS 38 »Intangible Assets« nicht aktivierungspflichtig sind, werden zum Zeitpunkt ihres Anfalls ergebniswirksam erfasst.

**Fremdkapitalkosten.** Fremdkapitalkosten werden im Zeitpunkt ihres Anfalls aufwandswirksam erfasst, sofern sie nicht direkt dem Erwerb, dem Bau oder der Herstellung eines qualifizierten Vermögenswerts zugeordnet werden können und deshalb zu den Anschaffungs- oder Herstellungskosten dieses Vermögenswerts gehören.

**Zuwendungen der öffentlichen Hand.** Zuwendungen der öffentlichen Hand für Vermögenswerte werden bei der Feststellung des Buchwerts des Vermögenswerts abgesetzt und mittels eines reduzierten Abschreibungsbetrags über die Lebensdauer des abschreibungsfähigen Vermögenswerts im Gewinn oder Verlust erfasst. Zuwendungen der öffentlichen Hand, die den Konzern für entstandene Aufwendungen kompensieren, werden in der Periode erfolgswirksam als sonstige betriebliche Erträge erfasst, in der auch die zu kompensierenden Aufwendungen anfallen.

**Zinserträge und Zinsaufwendungen.** In den Zinserträgen und Zinsaufwendungen sind Zinsaufwendungen aus Schulden, Zinserträge aus der Anlage von Wertpapieren sowie Zahlungsmitteln und Zahlungsmitteläquivalenten und Zinsen sowie Änderungen der Marktwerte im Zusammenhang mit Zinssicherungsgeschäften enthalten. Darunter fallen auch Erträge und Aufwendungen aus der Verteilung von Agien bzw. Disagien. Ferner werden die Zinskomponenten aus leistungsorientierten Pensionsplänen und ähnlichen Verpflichtungen unter diesen Posten ausgewiesen.

Eine Ausnahme von diesen Grundsätzen wird für Daimler Financial Services gemacht. Hier werden die Zinserträge und Zinsaufwendungen sowie das Ergebnis aus derivativen Finanzinstrumenten in den Umsatzerlösen bzw. Umsatzkosten ausgewiesen.

**Übriges Finanzergebnis.** Im übrigen Finanzergebnis werden alle Aufwendungen und Erträge aus Finanzvorgängen gezeigt, die nicht in den Zinserträgen bzw. Zinsaufwendungen bzw. bei Daimler Financial Services nicht in den Umsatzerlösen bzw. Umsatzkosten enthalten sind. Zum Beispiel sind Aufwendungen aus der Aufzinsung von Rückstellungen für sonstige Risiken in diesem Posten enthalten.

**Ertragsteuern.** Die laufenden Ertragsteuern werden basierend auf den jeweiligen nationalen steuerlichen Ergebnissen des Jahres sowie den nationalen Steuervorschriften berechnet. Darüber hinaus beinhalten die laufenden Steuern des Jahres auch Anpassungsbeträge für eventuell anfallende Steuerzahlungen bzw. -erstattungen für noch nicht veranlagte Jahre sowie Zinszahlungen und Strafen auf Steuernachzahlungen. Die latenten Steuern spiegeln innerhalb der Ertragsteuern – mit Ausnahme erfolgsneutral im Eigenkapital vorzunehmender Veränderungen – die Entwicklungen der aktiven und passiven latenten Steuern wider.

Aktive und passive latente Steuern werden auf Basis von temporären Unterschieden zwischen den bilanziellen und steuerlichen Wertansätzen einschließlich Unterschieden aus Konsolidierung, Verlustvorträgen und Steuergutschriften ermittelt. Die Bewertung erfolgt anhand der Steuersätze, deren Gültigkeit für die Periode, in der ein Vermögenswert realisiert oder eine Schuld erfüllt wird, zu erwarten ist. Dabei werden die Steuersätze und -vorschriften zugrunde gelegt, die zum Bilanzstichtag gültig oder angekündigt sind. Aktive latente Steuern werden in dem Umfang erfasst, in dem zu versteuerndes Einkommen auf Ebene der relevanten Finanzbehörde für die Nutzung der abzugsfähigen temporären Differenzen zur Verfügung stehen wird. Daimler nimmt eine Wertberichtigung auf aktive latente Steuern vor, wenn es nicht wahrscheinlich ist, dass zukünftiges zu versteuerndes Ergebnis in ausreichendem Umfang zur Verfügung stehen wird oder wenn Daimler keine Verfügungsgewalt mehr über den Steuervorteil hat.

Steuervorteile aus unsicheren Ertragsteuerpositionen werden mit der besten Schätzung der erwarteten Steuerzahlung angesetzt.

**Ergebnis je Aktie.** Das unverwässerte Ergebnis je Aktie wird ermittelt, indem der Ergebnisanteil der Aktionäre der Daimler AG durch den gewogenen Durchschnitt der Zahl der im Umlauf befindlichen Aktien dividiert wird. Das verwässerte Ergebnis je Aktie berücksichtigt zusätzlich alle aufgrund von Stock-Option-Plänen möglicherweise auszugebenden Aktien.

**Geschäftswerte.** Der Betrag, um den die Summe der übertragenen Gegenleistung im Rahmen einer Unternehmensakquisition die Summe der Zeitwerte der einzeln identifizierbaren erworbenen Vermögenswerte und Schulden übersteigt, wird als Geschäftswert angesetzt.

**Sonstige immaterielle Vermögenswerte.** Erworben immaterielle Vermögenswerte werden zu Anschaffungs- oder Herstellungskosten abzüglich kumulierter Abschreibungen bewertet. Sofern erforderlich, werden kumulierte Wertminderungen berücksichtigt.

Immaterielle Vermögenswerte mit unbegrenzter Nutzungsdauer werden jährlich dahingehend überprüft, ob die Einschätzung einer unbegrenzten Nutzungsdauer aufrechterhalten werden kann. Eine Änderung von einer unbegrenzten auf eine begrenzte Nutzungsdauer wird prospektiv vorgenommen.

Immaterielle Vermögenswerte (mit Ausnahme von Entwicklungskosten) mit begrenzter Nutzungsdauer werden grundsätzlich linear über ihre Nutzungsdauer abgeschrieben (drei bis zehn Jahre) und immer dann auf Wertminderung geprüft, wenn Anzeichen vorliegen, dass der immaterielle Vermögenswert wertgemindert sein könnte. Die Abschreibungsdauer für immaterielle Vermögenswerte mit begrenzter Nutzungsdauer wird mindestens zum Ende eines jeden Geschäftsjahres überprüft. Änderungen bezüglich der erwarteten Nutzungsdauer werden als Schätzungsänderung behandelt. Abschreibungen auf immaterielle Vermögenswerte mit begrenzter Nutzungsdauer werden in den Funktionskosten berücksichtigt.

Entwicklungskosten werden aktiviert, wenn die Ansatzkriterien von IAS 38 erfüllt sind. Nach der erstmaligen Aktivierung wird der Vermögenswert zu Anschaffungs- oder Herstellungskosten abzüglich kumulierter Abschreibungen und kumulierter Wertminderungen geführt. Aktivierter Entwicklungskosten beinhalten alle direkt zurechenbaren Einzelkosten sowie anteilige Gemeinkosten und werden linear über die geplante Produktlebensdauer (zwei bis zehn Jahre) abgeschrieben. Die Abschreibungen auf aktivierte Entwicklungskosten sind Bestandteil der Herstellungskosten und werden denjenigen Fahrzeugen und Komponenten zugeordnet, durch die sie verursacht worden sind. Beim Verkauf der Vorräte bzw. Fahrzeuge werden sie in den Umsatzkosten berücksichtigt.

**Sachanlagen.** Sachanlagen werden zu Anschaffungs- oder Herstellungskosten abzüglich kumulierter Abschreibungen angesetzt. Sofern erforderlich, werden kumulierte Wertminderungen berücksichtigt. Die Kosten für selbst erstellte Anlagen beinhalten alle direkt zurechenbaren Einzelkosten sowie anteilig zurechenbare Gemeinkosten. Soweit relevant, beinhalten die Anschaffungs- oder Herstellungskosten die geschätzten Kosten für Abbruch und Beseitigung des Vermögenswerts und die Wiederherstellung des Standorts. Sachanlagen, die im Rahmen eines »Finance Lease« bilanziert werden, sind mit dem niedrigeren Wert aus dem Barwert der Mindestleasingzahlungen und dem Zeitwert des Leasinggegenstands, abzüglich kumulierter Abschreibungen und sonstiger kumulierter Wertminderungen, berücksichtigt. Die Abschreibung erfolgt linear; Restwerte der Vermögenswerte werden entsprechend berücksichtigt. Sachanlagen werden über die folgenden Nutzungsdauern abgeschrieben:

|                                      |                 |
|--------------------------------------|-----------------|
| Gebäude und Grundstückseinrichtungen | 10 bis 50 Jahre |
| Technische Anlagen und Maschinen     | 6 bis 25 Jahre  |
| Betriebs- und Geschäftsausstattung   | 2 bis 30 Jahre  |

**Leasing.** Als Leasingverträge gelten alle Vereinbarungen, die das Recht zur Nutzung eines bestimmten Vermögenswerts für einen festgelegten Zeitraum gegen Zahlung übertragen. Dies gilt auch für Vereinbarungen, bei denen die Übertragung eines solchen Rechts nicht ausdrücklich beschrieben ist. Der Konzern nutzt als Leasingnehmer Sachanlagen und vermietet als Leasinggeber seine Produkte. Anhand der Chancen und Risiken an einem Leasinggegenstand wird beurteilt, ob dem Leasingnehmer (sogenannte »Finance Leases«) oder dem Leasinggeber (sogenannte »Operating Leases«) das wirtschaftliche Eigentum am Leasinggegenstand zuzurechnen ist. Mietaufwendungen aus »Operating Leases«, bei denen der Konzern als Leasingnehmer auftritt, werden über die entsprechenden Leasingzeiträume linear berücksichtigt. Vermietete Gegenstände, die Daimler als Leasinggeber bei »Operating Leases« bilanziert, werden zu Anschaffungs- bzw. Herstellungskosten aktiviert und über die Leasingdauer linear auf die erwarteten Restwerte abgeschrieben. Leasingverträge über veräußerte und zurückgemietete Vermögenswerte (Sale and Lease back) werden nach denselben Grundsätzen im Konzernabschluss dargestellt.

**Wertminderung nicht-finanzieller Vermögenswerte.** Daimler überprüft zu jedem Bilanzstichtag, ob Anhaltspunkte für Wertminderungen von Vermögenswerten vorliegen. Liegen solche Anzeichen vor oder ist eine jährliche Überprüfung auf Wertminderung erforderlich (für Geschäftswerte, sonstige immaterielle Vermögenswerte mit unbegrenzter Nutzungsdauer sowie noch nicht nutzungsbereite immaterielle Vermögenswerte), nimmt Daimler eine Schätzung des erzielbaren Betrags des Vermögenswerts vor. Der erzielbare Betrag wird für jeden einzelnen Vermögenswert bestimmt, es sei denn, ein Vermögenswert erzeugt Zahlungsmittelzuflüsse, die nicht weitestgehend unabhängig von denen anderer Vermögenswerte oder anderer Gruppen von Vermögenswerten (zahlungsmittelgenerierende Einheiten) sind. Der erzielbare Betrag ist der höhere der beiden Werte aus beizulegendem Zeitwert abzüglich Veräußerungskosten und dem Nutzungswert. Daimler bestimmt den erzielbaren Betrag als beizulegenden Zeitwert abzüglich Veräußerungskosten und vergleicht diesen mit den Buchwerten (einschließlich Geschäftswerte). Der beizulegende Zeitwert wird durch Diskontierung zukünftiger Zahlungsströme mit einem risikoangepassten Zinssatz ermittelt. Die Zahlungsströme, die der Ermittlung der Restwerte zugrunde liegen, werden auf Basis einer mehrjährigen Planung ermittelt. Nicht in den Planungsrechnungen enthaltene Perioden werden durch Ansatz eines Restwerts abgebildet, der grundsätzlich keine Zuwächse berücksichtigt. Kann der beizulegende Zeitwert abzüglich Veräußerungskosten nicht bestimmt werden oder ist er niedriger als der Buchwert, wird der Nutzungswert ermittelt. Übersteigt der Buchwert den erzielbaren Betrag, wird eine Wertminderung in Höhe des Unterschiedsbetrags vorgenommen.

Zu jedem Berichtsstichtag wird geprüft, ob eine in früheren Perioden erfasste Wertminderung, soweit diese sich nicht auf Geschäftswerte bezieht, nicht länger besteht oder sich vermindert haben könnte. In diesem Fall führt Daimler eine teilweise oder vollständige Wertaufholung durch; dabei wird der Buchwert auf den erzielbaren Betrag erhöht. Der erhöhte Buchwert darf jedoch den Buchwert nicht übersteigen, der ermittelt worden wäre (abzüglich planmäßiger Abschreibungen), wenn in früheren Jahren kein Wertminderungsaufwand erfasst worden wäre.

**Zur Veräußerung bestimmte Vermögenswerte und Veräußerungsgruppen.** Zur Veräußerung bestimmte langfristige Vermögenswerte oder Veräußerungsgruppen werden als zur Veräußerung bestimmt klassifiziert und gesondert in der Bilanz ausgewiesen. Die Vermögenswerte oder Veräußerungsgruppen werden dann nicht mehr planmäßig abgeschrieben, sondern mit dem niedrigeren Betrag aus Buchwert und beizulegendem Zeitwert abzüglich Veräußerungskosten bewertet. Im Falle einer späteren Erhöhung des beizulegenden Zeitwerts abzüglich Veräußerungskosten erfolgt eine entsprechende Wertaufholung; diese ist auf die zuvor für den Vermögenswert erfasste Wertminderung begrenzt.

**Vorräte.** Vorräte werden zum niedrigeren Wert aus historischen Anschaffungs- oder Herstellungskosten und Nettoveräußerungswert angesetzt. Der Nettoveräußerungswert ergibt sich aus dem erwarteten Verkaufserlös abzüglich noch anfallender Kosten. Die Anschaffungs- oder Herstellungskosten von Vorräten werden nach der Durchschnittsmethode ermittelt und beinhalten die Kosten des Erwerbs sowie diejenigen Kosten, die dafür angefallen sind, die Vorräte an ihren derzeitigen Ort und in ihren derzeitigen Zustand zu versetzen. Bei selbst erstellten unfertigen und fertigen Erzeugnissen beinhalten die Herstellungskosten auch produktionsbezogene Gemeinkosten basierend auf einer Normalauslastung.

**Finanzinstrumente.** Ein Finanzinstrument ist ein Vertrag, der gleichzeitig bei einem Unternehmen zu einem finanziellen Vermögenswert und bei einem anderen Unternehmen zu einer finanziellen Verbindlichkeit oder einem Eigenkapitalinstrument führt. Als finanzielle Vermögenswerte oder finanzielle Verbindlichkeiten erfasste Finanzinstrumente werden grundsätzlich getrennt ausgewiesen. Finanzinstrumente werden erfasst, sobald Daimler Vertragspartei des Finanzinstruments wird.

Der erstmalige Ansatz von Finanzinstrumenten erfolgt zum beizulegenden Zeitwert. Für die Folgebewertung werden die Finanzinstrumente einer der in IAS 39 »Financial Instruments: Recognition and Measurement« aufgeführten Bewertungskategorien zugeordnet. Dem Erwerb oder der Emission direkt zurechenbare Transaktionskosten werden bei der Ermittlung des Buchwerts berücksichtigt, wenn die Finanzinstrumente nicht erfolgswirksam zum beizulegenden Zeitwert bewertet werden. Wenn Handelstag und Erfüllungstag (d. h. Tag der Lieferung) auseinanderfallen, wählt Daimler den Handelstag für die erstmalige bilanzielle Erfassung bzw. den bilanziellen Abgang.

**Finanzielle Vermögenswerte.** Finanzielle Vermögenswerte beinhalten insbesondere Forderungen aus Finanzdienstleistungen, Forderungen aus Lieferungen und Leistungen, Forderungen gegenüber Kreditinstituten, Kassenbestände, derivative finanzielle Vermögenswerte sowie marktgängige Wertpapiere und Finanzinvestitionen.

*Finanzielle Vermögenswerte, die erfolgswirksam zum beizulegenden Zeitwert bewertet werden.* Erfolgswirksam zum beizulegenden Zeitwert bewertete finanzielle Vermögenswerte umfassen die zu Handelszwecken gehaltenen finanziellen Vermögenswerte.

Finanzielle Vermögenswerte, wie z. B. Aktien oder verzinsliche Wertpapiere, werden als zu Handelszwecken gehalten eingestuft, wenn sie mit der Absicht der kurzfristigen Veräußerung erworben werden. Derivate, einschließlich eingebetteter Derivate, die vom Basisvertrag getrennt wurden, werden ebenfalls als zu Handelszwecken gehalten eingestuft, es sei denn, sie wurden als Sicherungsinstrumente in ein Hedge Accounting einbezogen und sind als solche effektiv. Gewinne oder Verluste aus finanziellen Vermögenswerten, die zu Handelszwecken gehalten werden, werden erfolgswirksam erfasst.

*Kredite und Forderungen.* Kredite und Forderungen sind nicht-derivative finanzielle Vermögenswerte mit festen oder bestimmbaren Zahlungen, die nicht auf einem aktiven Markt notiert sind, wie z. B. Forderungen aus Finanzdienstleistungen oder Forderungen aus Lieferungen und Leistungen. Nach dem erstmaligen Ansatz werden die Kredite und Forderungen zu fortgeführten Anschaffungskosten unter Anwendung der Effektivzinsmethode abzüglich Wertminderungen bewertet. Gewinne und Verluste werden im Konzernergebnis erfasst, wenn die Kredite und Forderungen ausgebucht oder wertgemindert werden. Die Zinseffekte aus der Anwendung der Effektivzinsmethode werden ebenfalls erfolgswirksam erfasst.

*Zur Veräußerung verfügbare finanzielle Vermögenswerte.* Zur Veräußerung verfügbare finanzielle Vermögenswerte sind nicht-derivative finanzielle Vermögenswerte, die als zur Veräußerung verfügbar und nicht in eine der vorstehend genannten Kategorien eingeordnet sind. Diese Kategorie enthält unter anderem Eigenkapitalinstrumente und Schuldtitel wie beispielsweise Staatsanleihen, Industriefinanzierungen und Geldmarktpapiere.

Nach der erstmaligen Bewertung werden zur Veräußerung verfügbare finanzielle Vermögenswerte zum beizulegenden Zeitwert bewertet, wobei die nicht realisierten Gewinne oder Verluste erfolgsneutral im Eigenkapital in der Rücklage für zur Veräußerung verfügbare finanzielle Vermögenswerte erfasst werden. Sofern es objektive Hinweise auf eine Wertminderung gibt oder wenn Änderungen des Zeitwerts eines Fremdkapitalinstruments aus Wechselkursschwankungen resultieren, werden diese erfolgswirksam berücksichtigt. Mit dem Abgang finanzieller Vermögenswerte werden die im Eigenkapital erfassten kumulierten Gewinne und Verluste aus der Bewertung zum beizulegenden Zeitwert erfolgswirksam erfasst. Lässt sich für nicht börsennotierte Eigenkapitalinstrumente wie z. B. GmbH-Anteile nach deutschem Recht der Zeitwert nicht hinreichend verlässlich bestimmen, werden die Anteile zu fortgeführten Anschaffungskosten (gegebenenfalls abzüglich Wertminderungen) bewertet. Erhaltene Zinsen aus diesen finanziellen Vermögenswerten werden grundsätzlich als Zinserträge unter Anwendung der Effektivzinsmethode erfolgswirksam berücksichtigt. Dividenden werden mit Entstehung des Rechtsanspruchs auf Zahlung erfolgswirksam erfasst.

*Zahlungsmittel und Zahlungsmitteläquivalente.* Zahlungsmittel und Zahlungsmitteläquivalente umfassen insbesondere Kassenbestände, Schecks, Einlagen bei Banken sowie Schuldverschreibungen und Einlagenzertifikate mit einer Ursprungslaufzeit von bis zu drei Monaten. Zahlungsmittel und Zahlungsmitteläquivalente stimmen mit dem Zahlungsmittelfonds in der Konzern-Kapitalflussrechnung überein.

**Wertminderung finanzieller Vermögenswerte.** Zu jedem Bilanzstichtag werden die Buchwerte der finanziellen Vermögenswerte, die nicht erfolgswirksam zum beizulegenden Zeitwert bewertet werden, daraufhin untersucht, ob objektive Hinweise (wie etwa erhebliche finanzielle Schwierigkeiten des Schuldners, bedeutende Veränderungen des technologischen, ökonomischen und rechtlichen Umfelds sowie des Marktumfelds des Schuldners) auf eine Wertminderung hindeuten. Für börsennotierte Eigenkapitalinstrumente ist zusätzlich ein nachhaltiges oder signifikantes Absinken des beizulegenden Zeitwerts ein objektiver Hinweis auf eine möglicherweise vorzunehmende Wertminderung. Daimler hat Kriterien für die Signifikanz und Dauerhaftigkeit der Wertminderung festgelegt. Ein Absinken des beizulegenden Zeitwerts um mehr als 20% ist als signifikant anzusehen; ein Absinken ist nachhaltig, soweit der beizulegende Zeitwert länger als neun Monate unter dem Buchwert liegt.

*Kredite und Forderungen.* Die Höhe der Wertminderung bei Krediten und Forderungen ist die Differenz zwischen dem Buchwert des Vermögenswerts und dem Barwert der erwarteten künftigen Cash Flows (mit Ausnahme erwarteter künftiger, noch nicht eingetretener Kreditausfälle), die mit dem ursprünglichen Effektivzinssatz des finanziellen Vermögenswerts abgezinst werden. Die Wertminderung wird ergebniswirksam erfasst.

Verringert sich die Höhe der Wertberichtigung in einer der folgenden Berichtsperioden und kann diese Verringerung objektiv auf einen nach der Erfassung der Wertminderung eingetretenen Sachverhalt zurückgeführt werden, wird die in früheren Perioden erfasste Wertberichtigung ergebniswirksam rückgängig gemacht.

Die Wertminderungen von Krediten und Forderungen (z. B. Forderungen aus Finanzdienstleistungen einschließlich Forderungen aus Finance Leases, Forderungen aus Lieferungen und Leistungen) werden größtenteils auf Wertberichtigungskonten erfasst. Die Entscheidung, ob ein Ausfallrisiko mittels eines Wertberichtigungskontos oder über eine direkte Minderung der Forderung berücksichtigt wird, hängt davon ab, wie hoch die Wahrscheinlichkeit eines Forderungsausfalls geschätzt wird. Wenn Forderungen als uneinbringlich eingestuft werden, wird der entsprechende wertgeminderte Vermögenswert ausgebucht.

*Zur Veräußerung verfügbare finanzielle Vermögenswerte.* Ist ein zur Veräußerung verfügbarer finanzieller Vermögenswert in seinem Wert gemindert, wird ein bislang nur erfolgsneutral im Eigenkapital erfasster Betrag in Höhe der Differenz zwischen den Anschaffungskosten (abzüglich etwaiger Tilgungen und Amortisationen) und dem aktuellen beizulegenden Zeitwert, abzüglich etwaiger, bereits früher ergebniswirksam erfasster Wertberichtigungen dieses finanziellen Vermögenswerts, in der Gewinn- und Verlustrechnung erfasst. Wertaufholungen bei Eigenkapitalinstrumenten, die als zur Veräußerung verfügbar eingestuft sind, werden erfolgsneutral erfasst. Wertaufholungen bei Fremdkapitalinstrumenten werden ergebniswirksam erfasst, wenn sich der Anstieg des beizulegenden Zeitwerts des Instruments objektiv auf ein Ereignis zurückführen lässt, das nach der ergebniswirksamen Erfassung der Wertminderung eingetreten ist.

**Finanzielle Verbindlichkeiten.** Finanzielle Verbindlichkeiten enthalten insbesondere Verbindlichkeiten aus Lieferungen und Leistungen, Verbindlichkeiten gegenüber Kreditinstituten, Anleihen, derivative finanzielle Verbindlichkeiten und andere Verbindlichkeiten.

*Finanzielle Verbindlichkeiten, die zu fortgeführten Anschaffungskosten bewertet werden.* Nach der erstmaligen Erfassung werden die finanziellen Verbindlichkeiten unter Anwendung der Effektivzinsmethode zu fortgeführten Anschaffungskosten bewertet.

*Finanzielle Verbindlichkeiten, die erfolgswirksam zum beizulegenden Zeitwert bewertet werden.* Erfolgswirksam zum beizulegenden Zeitwert bewertete finanzielle Verbindlichkeiten umfassen zu Handelszwecken gehaltene finanzielle Verbindlichkeiten. Als zu Handelszwecken gehalten werden Derivate, einschließlich eingebetteter Derivate, die vom Basisvertrag getrennt wurden, eingestuft, es sei denn, sie wurden als Sicherungsinstrumente in ein Hedge Accounting einbezogen und sind als solche effektiv. Gewinne oder Verluste aus finanziellen Verbindlichkeiten, die zu Handelszwecken gehalten werden, werden erfolgswirksam erfasst.

**Derivative Finanzinstrumente und Bilanzierung von Sicherungsbeziehungen.** Derivative Finanzinstrumente wie zum Beispiel Termingeschäfte, Swaps, Optionen, Futures, Optionen auf Zinsswaps, Zinstermingeschäfte, Caps und Floors werden bei Daimler insbesondere zur Absicherung von Zins- und Währungsrisiken eingesetzt, die aus dem operativen Geschäft, Finanztransaktionen und Investitionen resultieren.

Eingebettete Derivate werden vom Basisvertrag, der nicht erfolgswirksam zum beizulegenden Zeitwert bewertet wird, getrennt, wenn die Beurteilung ergibt, dass die wirtschaftlichen Merkmale und Risiken des eingebetteten Derivats nicht eng mit den wirtschaftlichen Merkmalen und Risiken des Basisvertrags verbunden sind.

Derivative Finanzinstrumente werden bei ihrer erstmaligen Erfassung und an jedem folgenden Bilanzstichtag mit ihrem beizulegenden Zeitwert angesetzt. Der beizulegende Zeitwert börsennotierter Derivate entspricht dem positiven oder negativen Marktwert. Liegen keine Marktwerte vor, werden diese mittels anerkannter finanzmathematischer Modelle berechnet, wie z. B. Discounted-Cash-Flow-Modelle oder Optionspreismodelle. Derivate werden als Vermögenswert ausgewiesen, wenn deren beizulegender Zeitwert positiv ist, und als Verbindlichkeit, wenn deren beizulegender Zeitwert negativ ist.

Wenn die Vorgaben des IAS 39 zur Bilanzierung von Sicherungsbeziehungen (Hedge Accounting) erfüllt sind, designiert und dokumentiert Daimler die Sicherungsbeziehung ab diesem Zeitpunkt entweder als Fair Value Hedge oder als Cash Flow Hedge. Bei einem Fair Value Hedge wird der beizulegende Zeitwert eines bilanzierten Vermögenswerts oder einer bilanzierten Verbindlichkeit oder einer nicht bilanzierten festen Verpflichtung gesichert. Bei einem Cash Flow Hedge werden hochwahrscheinliche zukünftige Zahlungsströme oder zu zahlende bzw. zu erhaltende schwankende Zahlungsströme im Zusammenhang mit einem bilanzierten Vermögenswert oder einer bilanzierten Verbindlichkeit abgesichert. Die Dokumentation der Sicherungsbeziehungen beinhaltet die Ziele und Strategie des Risikomanagements, die Art der Sicherungsbeziehung, das gesicherte Risiko, die Bezeichnung des Sicherungsinstruments und des Grundgeschäfts sowie eine Beschreibung der Methode zur Effektivitätsmessung. Die Sicherungsbeziehungen werden hinsichtlich der Erreichung einer



Kompensation der Risiken aus Änderungen des beizulegenden Zeitwerts oder der Zahlungsströme in Bezug auf das abgesicherte Risiko als in hohem Maße wirksam eingeschätzt und regelmäßig dahingehend untersucht, ob sie während der gesamten Berichtsperiode, für die sie designed waren, hocheffektiv waren.

Zeitwertänderungen der Derivate werden regelmäßig im Ergebnis oder im Eigenkapital als Bestandteil der übrigen Rücklagen berücksichtigt, je nachdem, ob es sich bei den Sicherungsbeziehungen um Fair Value Hedges oder Cash Flow Hedges handelt. Bei Fair Value Hedges werden die Veränderungen der Marktbewertung derivativer Finanzinstrumente und der dazugehörigen Grundgeschäfte ergebniswirksam erfasst. Die Zeitwertveränderungen von derivativen Finanzinstrumenten, die einem Cash Flow Hedge zugeordnet sind, werden in Höhe des hedge-effektiven Teils nach Steuern zunächst erfolgsneutral in den übrigen Rücklagen berücksichtigt. Die Umbuchung in die Gewinn- und Verlustrechnung erfolgt zeitgleich mit der Ergebniswirkung der abgesicherten Grundgeschäfte. Die hedge-ineffektiven Anteile der Zeitwertveränderungen werden unmittelbar im Ergebnis berücksichtigt.

Werden derivative Finanzinstrumente nicht oder nicht mehr in ein Hedge Accounting einbezogen, weil die Voraussetzungen für ein Hedge Accounting nicht oder nicht mehr erfüllt sind, werden diese als zu Handelszwecken gehalten eingestuft.

**Pensionen und ähnliche Verpflichtungen.** Die Bewertung von leistungsorientierten Pensionszusagen und anderen ähnlichen Versorgungsleistungen nach Beendigung des Arbeitsverhältnisses (Gesundheitsfürsorgeleistungen) erfolgt gemäß IAS 19 »Employee Benefits« nach der »Projected Unit Credit Method«. Abweichungen zwischen den getroffenen Annahmen und den tatsächlich eingetretenen Entwicklungen sowie Änderungen der Annahmen für die Bewertung leistungsorientierter Pensionspläne und ähnlicher Verpflichtungen führen zu versicherungsmathematischen Gewinnen und Verlusten, die grundsätzlich in zukünftigen Perioden zu tilgen sind. Die Tilgung versicherungsmathematischer Gewinne und Verluste, die ab dem 1. Januar 2005 angefallen sind, erfolgt gemäß der »Korridormethode«. Hiernach erfolgt eine anteilige erfolgswirksame Tilgung der versicherungsmathematischen Gewinne und Verluste für das folgende Jahr, wenn die unberücksichtigten Gewinne und Verluste 10% des höheren Betrags von (1) der Verpflichtung aus dem leistungsorientierten Plan oder (2) dem beizulegenden Zeitwert des entsprechenden Planvermögens überschreiten. In diesem Fall ermittelt sich der ergebniswirksam zu berücksichtigende Tilgungsbetrag aus dem übersteigenden Betrag dividiert durch die durchschnittliche Restdienstzeit der aktiven Mitarbeiter.

Die Aufwendungen aus der Aufzinsung von Pensions- und ähnlichen Verpflichtungen bzw. die erwarteten Vermögenserträge der Planvermögen werden in den Zinsaufwendungen bzw. den Zinserträgen ausgewiesen. Die Tilgung der versicherungsmathematischen Gewinne und Verluste ist ebenfalls in diesen Posten enthalten. Die übrigen Aufwendungen infolge der Gewährung von Pensionszusagen und anderen ähnlichen Versorgungsleistungen werden in den Funktionskosten in der Konzern-Gewinn- und Verlustrechnung berücksichtigt.

Gewinne oder Verluste aus der Kürzung oder Abgeltung eines leistungsorientierten Plans werden zum Zeitpunkt der Kürzung oder Abgeltung erfolgswirksam erfasst.

**Rückstellungen für sonstige Risiken und Eventualverbindlichkeiten.** Rückstellungen werden gebildet, wenn eine Verpflichtung gegenüber Dritten besteht und wenn der Ressourcenabfluss wahrscheinlich und die voraussichtliche Verpflichtung zuverlässig schätzbar sind. Rückstellungen mit einer ursprünglichen Laufzeit von mehr als einem Jahr werden mit ihrem auf den Bilanzstichtag abgezinsten Erfüllungsbetrag angesetzt. Für Restrukturierungsmaßnahmen werden Rückstellungen gebildet, wenn mit der Umsetzung eines detaillierten und formellen Plans begonnen wurde oder dieser bereits kommuniziert wurde. Rückstellungen werden regelmäßig überprüft und bei neuen Erkenntnissen oder geänderten Umständen angepasst.

Die Rückstellung für Gewährleistungen wird im Zeitpunkt des Verkaufs der Produkte, bei Beginn eines Leasingvertrags oder bei Initiierung neuer Garantiemaßnahmen gebildet. Die Bewertung von passivierten Garantieraufwendungen basiert vorrangig auf historischen Erfahrungswerten.

Daimler berücksichtigt Verpflichtungen aus dem Abgang von Sachanlagen mit ihrem beizulegenden Zeitwert ab der Periode, in der die Verpflichtung begründet wird.

Restrukturierungsrückstellungen werden gebildet, wenn die Maßnahmen den Umfang oder die Art der Ausführung der Geschäftstätigkeit eines Segments oder einer Geschäftseinheit wesentlich verändern. In den überwiegenden Fällen entstehen Restrukturierungsaufwendungen im Zusammenhang mit Leistungen anlässlich der Beendigung von Arbeitsverhältnissen und für Ausgleichsleistungen an Händler und Lieferanten.

**Aktienorientierte Vergütung.** Die aktienorientierte Vergütung umfasst verbindlichkeitsbasierte Vergütungspläne, deren Ausgleich durch Geldzahlungen erfolgt, sowie eigenkapitalbasierte Vergütungspläne, deren Ausgleich durch Eigenkapitalinstrumente erfolgt.

Die Ermittlung des beizulegenden Zeitwerts von eigenkapitalbasierten Vergütungsplänen erfolgt grundsätzlich mittels eines modifizierten Black-Scholes-Optionspreismodells zum Gewährungszeitpunkt und bestimmt den gesamten Personalaufwand, der über den Erdienungszeitraum erfolgswirksam erfasst und gegen die Kapitalrücklage verrechnet wird.

Die verbindlichkeitsbasierten Vergütungspläne werden bis zu ihrem Ausgleich an jedem Bilanzstichtag zum beizulegenden Zeitwert bewertet und als Rückstellung ausgewiesen. Der anteilige Aufwand der Periode entspricht der Zuführung bzw. Auflösung der Rückstellung zwischen den Bilanzstichtagen zuzüglich des in der Berichtsperiode ausbezahlten Dividendenäquivalents.

**Ausweis in der Konzern-Kapitalflussrechnung.** Gezahlte Zinsen und Steuern sowie erhaltene Zinsen und Dividenden werden dem Cash Flow aus der Geschäftstätigkeit zugeordnet. Gezahlte Dividenden werden im Cash Flow aus der Finanzierungstätigkeit ausgewiesen.

## 2. Schätzungen und Beurteilungen im Rahmen der Rechnungslegung

Im Konzernabschluss müssen zu einem gewissen Grad Schätzungen, Beurteilungen und Annahmen vorgenommen werden, die Auswirkungen auf Höhe und Ausweis der bilanzierten Vermögenswerte und Schulden, die Angaben zu Eventualforderungen und -verbindlichkeiten am Stichtag sowie die ausgewiesenen Erträge und Aufwendungen für die Berichtsperiode haben können. Wesentliche Sachverhalte, die von solchen Schätzungen, Beurteilungen und Annahmen betroffen sind, werden im Folgenden beschrieben. Die sich tatsächlich einstellenden Beträge können von den Schätzungen abweichen. Veränderungen der Schätzungen, Beurteilungen und Annahmen können einen wesentlichen Einfluss auf den Konzernabschluss haben.

**Werthaltigkeit von zahlungsmittelgenerierenden Einheiten und at-equity bewerteten Finanzinvestitionen.** Im Rahmen der Werthaltigkeitstests für nicht-finanzielle Vermögenswerte sind zur Bestimmung des erzielbaren Betrags einer zahlungsmittelgenerierenden Einheit Einschätzungen vorzunehmen. Hierbei sind insbesondere Annahmen bezüglich der zukünftigen Zahlungsmittelzu- und -abflüsse sowohl im Planungszeitraum als auch für die Zeiträume danach zu treffen. Die Einschätzungen umfassen insbesondere Annahmen hinsichtlich der zukünftigen Marktanteile und des Wachstums auf den jeweiligen Märkten sowie Annahmen bezüglich der Profitabilität der Produkte. Auf Basis der durchgeführten Werthaltigkeitstests übersteigen die erzielbaren Beträge die Netto-Vermögenswerte der zahlungsmittelgenerierenden Einheiten des Konzerns erheblich.

Bei Vorliegen eines objektiven Hinweises auf eine Wertminderung müssen auch bei der Ermittlung des erzielbaren Betrags einer at-equity bewerteten Finanzinvestition des Konzerns Schätzungen und Beurteilungen getroffen werden. Der Ermittlung des erzielbaren Betrags liegen Annahmen über die künftige Geschäftsentwicklung zur Ermittlung der erwarteten zukünftigen Cash Flows dieser Finanzinvestition zugrunde. Für die Darstellung der Buch- und Marktwerte der börsennotierten at-equity bewerteten Finanzinvestitionen siehe Anmerkung 13.

**Werthaltigkeit von vermieteten Gegenständen.** Der Konzern überprüft regelmäßig die wertbestimmenden Faktoren seiner vermieteten Fahrzeuge. Dabei sind insbesondere die Restwerte der Fahrzeuge nach Ablauf der Leasinglaufzeit einzuschätzen, die einen wesentlichen Teil der zukünftig erwarteten Zahlungsmittelzuflüsse aus vermieteten Gegenständen darstellen. Im Rahmen dessen sind vor allem Annahmen bezüglich des zukünftigen Fahrzeugangebots und der Fahrzeugnachfrage sowie der Entwicklung der Fahrzeugpreise zu treffen. Diese Annahmen werden entweder durch qualifizierte Schätzungen oder durch Gutachten sachverständiger Dritter bestimmt; qualifizierte Schätzungen beruhen auf extern verfügbaren Daten unter Berücksichtigung intern vorliegender Zusatzinformationen, wie z. B. historischen Erfahrungswerten und zeitnahen Verkaufsdaten. Die ermittelten Restwerte dienen als Grundlage der planmäßigen Abschreibung; die Veränderung der Restwerterwartung führt entweder zur prospektiven Anpassung der planmäßigen Abschreibung oder, bei einem signifikanten Abfallen der Restwerterwartung zu einer außerplanmäßigen Wertminderung. Wird die planmäßige Abschreibung prospektiv angepasst, wirken sich Änderungen der Restwerteinschätzung nicht unmittelbar sondern gleichmäßig verteilt über die Restlaufzeit des Leasingvertrags aus.

**Einbringbarkeit von Forderungen aus Finanzdienstleistungen.** Der Konzern schätzt regelmäßig das Ausfallrisiko bei den Forderungen aus Finanzdienstleistungen ein. In diesem Zusammenhang werden viele Faktoren berücksichtigt; diese umfassen Erfahrungswerte hinsichtlich eingetretener Kreditausfälle, die Größe und Zusammensetzung einzelner Portfolios, aktuelle wirtschaftliche Ereignisse und Rahmenbedingungen sowie die aktuellen Marktwerte bzw. die Angemessenheit der Kredit-sicherheiten. Veränderungen der wirtschaftlichen Rahmenbedingungen können zusätzlich zu einer Veränderung der Bonität unserer Kunden auch veränderte Gebrauchtfahrzeugpreise zur Folge haben, die sich unmittelbar auf die Marktwerte der sicherungsübereigneten Fahrzeuge auswirken würden. Änderungen in der Einschätzung und Beurteilung dieser Faktoren beeinflussen die Höhe der zu bildenden Wertberichtigungen bzw. wirken sich auf das Konzernergebnis aus. Für weitere Informationen siehe auch Anmerkungen 14 und 31.

**Produktgarantien.** Die Bilanzierung von Rückstellungen für Produktgarantien ist grundsätzlich mit Einschätzungen verbunden.

Der Konzern gewährt verschiedene Arten von Produktgarantien in Abhängigkeit der jeweiligen Produkte und Marktgegebenheiten. Rückstellungen für Produktgarantien werden grundsätzlich zum Zeitpunkt des Fahrzeugverkaufs, bei Beginn eines Fahrzeugleasings oder bei Einführung neuer Arten von Produktgarantien gebildet. Basierend auf Erfahrungswerten hinsichtlich in der Vergangenheit erfolgter Schadensanfälligkeiten bzw. -verläufe sind Annahmen über Art und Umfang künftiger Garantie- und Kulanzfälle sowie möglicher Rückruf- und Rückkaufaktionen pro Baureihe zu treffen. Ferner umfassen die Einschätzungen unter anderem Annahmen über die Höhe der potentiellen Reparaturkosten pro Fahrzeug und die Auswirkungen möglicher Zeit- oder Kilometerbeschränkungen. Die Rückstellungen werden regelmäßig an neue Erkenntnisse angepasst.

Weitere Informationen zu Rückstellungen für sonstige Risiken können der Anmerkung 23 entnommen werden.

**Haftungs- und Prozessrisiken.** Die Daimler AG und ihre Tochtergesellschaften sind mit verschiedenen Gerichtsverfahren, Ansprüchen und behördlichen Untersuchungen konfrontiert, die eine große Bandbreite von Themen betreffen. Sofern einzelnen oder mehreren dieser Klagen stattgegeben würde, könnten sich hierdurch erhebliche Schaden- sowie Strafschadensersatzzahlungen, Nachbesserungsarbeiten, Rückrufaktionen oder sonstige kostenintensive Maßnahmen ergeben. Rechtsstreitigkeiten oder behördlichen Untersuchungen liegen häufig komplexe rechtliche Fragestellungen zugrunde und sind mit erheblichen Unsicherheiten verbunden. Entsprechend ist die Beurteilung, ob zum Stichtag eine gegenwärtige Verpflichtung als Ergebnis eines Ereignisses in der Vergangenheit besteht, ob ein zukünftiger Mittelabfluss wahrscheinlich und die Verpflichtung verlässlich schätzbar ist, in einem erheblichen Maß mit Einschätzungen durch das Management verbunden. Daimler beurteilt den jeweiligen Stand eines Verfahrens regelmäßig, auch unter Einbeziehung externer Anwälte. Es ist daher möglich, dass die Höhe der Rückstellungen für anhängige und drohende Verfahren aufgrund neuer zukünftiger Entwicklungen angepasst werden müssen. Veränderungen von Schätzungen und Prämissen können eine wesentliche Auswirkung auf die künftige Ertragslage des Konzerns haben. Die Beendigung eines Verfahrens kann Daimler zu Zahlungen zwingen, die über die zurückgestellten Beträge hinausgehen. Es ist auch möglich, dass der Ausgang einzelner Verfahren, für die keine Rückstellungen gebildet werden konnten, den Konzern zu Zahlungen zwingt, die am 31. Dezember 2010 weder betragsmäßig noch in Bandbreiten hinreichend genau bestimmbar waren. Obwohl der endgültige Ausgang solcher Fälle einen wesentlichen Einfluss auf das Ergebnis oder den Cash Flow von Daimler in einer bestimmten Berichtsperiode haben kann, werden die sich daraus ergebenden möglichen Verpflichtungen nach unserer Einschätzung keinen nachhaltigen Einfluss auf die Vermögenslage des Konzerns haben. Erläuterungen zu rechtlichen Verfahren können Anmerkung 28 entnommen werden.

**Pensionsverpflichtungen.** Für die Ermittlung der Barwerte der leistungsorientierten Pensionsverpflichtungen sind unter anderem die Abzinsungsfaktoren festzulegen. Die Abzinsungsfaktoren sind auf der Grundlage der Renditen zu bestimmen, die am Abschlussstichtag für erstrangige, festverzinsliche Unternehmensanleihen am jeweiligen Markt erzielt werden. Ferner hat der Konzern eine Einschätzung über die erwarteten Erträge der Planvermögen basierend auf den zu Beginn des Geschäftsjahres herrschenden Markterwartungen für die in den Planvermögen enthaltenen Anlageformen vorzunehmen. Die Höhe der Abzinsungsfaktoren hat einen wesentlichen Einfluss auf den Finanzierungsstatus der Pensionspläne und die erwartete Verzinsung der Planvermögen wirkt sich maßgeblich auf den Pensionsaufwand aus. Aufgrund der Anwendung der Korridormethode wirken sich Änderungen bei den Annahmen nicht unmittelbar in der Konzernbilanz und der Konzern-Gewinn- und Verlustrechnung aus. Weitere Informationen in diesem Zusammenhang können Anmerkung 22 entnommen werden.

**Ertragsteuern.** Bei der Ermittlung von aktiven latenten Steuern sind Annahmen hinsichtlich des künftigen zu versteuernden Einkommens sowie der Zeitpunkte der Realisierung der aktiven latenten Steuern erforderlich. Diesbezüglich werden unter anderem die geplanten Ergebnisse aus der operativen Geschäftstätigkeit, die Ergebniswirkungen aus der Umkehrung von zu versteuernden temporären Differenzen sowie realisierbare Steuerstrategien mit berücksichtigt. Da künftige Geschäftsentwicklungen unsicher sind und sich teilweise der Steuerung durch den Konzern entziehen, sind die zu treffenden Annahmen im Zusammenhang mit der Bilanzierung von aktiven latenten Steuern in erheblichem Maß mit Unsicherheiten verbunden. Daimler beurteilt zu jedem Bilanzstichtag die Werthaltigkeit der aktiven latenten Steuern auf Basis der geplanten steuerpflichtigen Einkommen in künftigen Geschäftsjahren; sofern der Konzern davon ausgeht, dass künftige Steuervorteile mit einer Wahrscheinlichkeit von mehr als 50% teilweise oder vollständig nicht realisiert werden können, wird eine Wertberichtigung auf die aktiven latenten Steuern vorgenommen. Weitere Informationen können Anmerkung 9 entnommen werden.

### 3. Wesentliche Zu- und Abgänge von Unternehmensanteilen und sonstiger Vermögenswerte und Schulden

#### Zugänge

**Renault-Nissan.** Im April 2010 hat Daimler im Rahmen einer weitreichenden strategischen Kooperation mit der Renault-Nissan Allianz eine gegenseitige Kapitalbeteiligung vereinbart. Dabei erhielt Daimler einen Anteil von 3,1% an der Renault SA (Renault) sowie von Renault 3,1% der Aktien der Nissan Motor Company Ltd. (Nissan) im Gegenwert von insgesamt 1,3 Mrd. €. Die Daimler AG hat für die Erwerbe Aktien aus dem eigenen Bestand verwendet und zusätzlich eine Zahlung von 90 Mio. € geleistet. Für Informationen zur Anzahl der verwendeten eigenen Aktien siehe Anmerkung 20.

#### Abgänge

**Daimler Financial Services.** Im Jahr 2010 wurden nicht fahrzeugbezogene Vermögenswerte, die Gegenstand von Finance Leases waren und die in der Konzernbilanz zum 31. Dezember 2009 separat als zur Veräußerung gehalten ausgewiesen wurden (310 Mio. €), zum überwiegenden Teil veräußert; hieraus resultierte im Jahr 2010 ein Mittelzufluss von 274 Mio. € und ein Aufwand vor Steuern von 1 Mio. €. Der verbliebene Teil der als zur Veräußerung eingestuft Vermögenswerte wurde im dritten Quartal 2010 in die Forderungen aus Finanzdienstleistungen umgegliedert, da die Kriterien für diese Einstufung nicht mehr gegeben waren; der Ertrag vor Steuern aus der Bewertung dieser Vermögenswerte betrug 1 Mio. €. Im Vorjahr führte die Bewertung der zum 31. Dezember 2009 als zur Veräußerung ausgewiesenen Vermögenswerte mit dem beizulegenden Zeitwert zu einem Aufwand vor Steuern von 69 Mio. €.

Zusätzlich wurden im Jahr 2010 nicht fahrzeugbezogene Vermögenswerte, die ebenfalls Gegenstand von Finance Leases und bisher in den Forderungen aus Finanzdienstleistungen ausgewiesen waren, veräußert. Die Mittelzuflüsse hieraus beliefen sich auf 187 Mio. €. In diesem Zusammenhang entstand im Jahr 2010 ein Aufwand vor Steuern von insgesamt 9 Mio. € (darin enthalten ist ein Aufwand von 35 Mio. € aus der Bewertung).

Auch im Jahr 2009 veräußerte Daimler Financial Services nicht fahrzeugbezogene Finance Leases, wodurch sich ein Mittelzufluss von 825 Mio. € und ein Aufwand vor Steuern von 31 Mio. € ergaben.

Die Ergebnisse aus diesen Transaktionen sind in der Konzern-Gewinn- und Verlustrechnung in den Umsatzkosten enthalten und wurden dem Segment Daimler Financial Services zugeordnet.

**Tata Motors.** Im März 2010 hat der Konzern seine Beteiligung von rund 5% an Tata Motors Limited über den Kapitalmarkt an verschiedene Investorengruppen veräußert. Aus dieser Transaktion resultierte im Jahr 2010 ein Mittelzufluss von 303 Mio. € und ein Ertrag vor Steuern von 265 Mio. €. Der Ertrag ist in der Konzern-Gewinn- und Verlustrechnung im übrigen Finanzergebnis ausgewiesen und in der Segmentberichterstattung in der Überleitung zum Konzern-EBIT enthalten.

**Chrysler.** Auf Grundlage einer im April 2009 geschlossenen, bindenden Rahmenvereinbarung haben Daimler und Cerberus im Juni 2009 einen Vertrag unterzeichnet, der die sofortige Aufgabe sämtlicher Gesellschaftsrechte von Daimler an der Chrysler Holding LLC (Chrysler Holding) zur Folge hatte. In diesem Zusammenhang hat Daimler die Beteiligung von 19,9% an der Chrysler Holding abgegeben. Der Konzern besitzt demzufolge seit dem 3. Juni 2009 keine Beteiligung mehr an der Chrysler Holding oder einer ihrer Tochtergesellschaften und hat sämtliche Mitwirkungsrechte in Gremien der Chrysler Holding und ihrer Tochtergesellschaften aufgegeben.

Die Rahmenvereinbarung sah darüber hinaus vor, dass ein Vertrag über verbliebene offene Sachverhalte im Zusammenhang mit Chrysler geschlossen wird. Dieser wurde ebenfalls im Juni 2009 von Daimler, der Pension Benefit Guaranty Corporation (PBGC), Chrysler LLC (Chrysler) und Cerberus unterzeichnet. Im Rahmen dieses Vertrags verzichten Chrysler und Cerberus auf die mögliche Geltendmachung etwaiger Forderungen aus üblichen Garantien und Gewährleistungen im Zusammenhang mit der Abgabe der Mehrheit an den Chrysler-Aktivitäten am 3. August 2007, einschließlich auf von Cerberus angekündigte Ansprüche gegenüber Daimler aufgrund der angeblich nicht ordnungsgemäßen Geschäftsführung seitens Daimler im Zeitraum zwischen Vertragsunterzeichnung und Abschluss dieser Transaktion, sowie bestimmter anderer Ansprüche gegen den Konzern.

Im Zusammenhang mit dieser Rahmenvereinbarung hat der Konzern im Juni 2009 und im Juni 2010 Zahlungen von jeweils 200 Mio. US-\$ zugunsten der Chrysler Pensionspläne geleistet. Der vereinbarte Restbetrag von weiteren 200 Mio. US-\$ wird im zweiten Quartal 2011 zur Zahlung fällig. Darüber hinaus wurde die im Jahr 2007 mit der PBGC vereinbarte Garantie (1,0 Mrd. US-\$) durch eine Garantie in Höhe von 200 Mio. US-\$ ersetzt. Die Laufzeit der Garantie ist auf den Zeitraum bis August 2012 begrenzt.

Die Vereinbarung sieht ferner vor, dass der Konzern auf die Rückzahlung von Forderungen aus einem nachrangigen Darlehen und einer im Jahr 2008 in Anspruch genommenen Kreditlinie, die der Konzern im Rahmen der Transaktion vom 3. August 2007 dem Industriegeschäft von Chrysler zur Verfügung gestellt hatte, verzichtet. Die Nominalwerte dieser bereits zum 31. Dezember 2008 vollständig wertberechtigten Forderungen betragen 0,4 und 1,5 Mrd. US-\$.

Der Verzicht bezüglich der Forderung aus der Kreditlinie durch Daimler stand unter dem Vorbehalt, dass bestimmte unbesicherte Gläubiger von Chrysler, die durch ein Gremium nach US-amerikanischem Insolvenzrecht vertreten werden, keine Ansprüche gegen Daimler im Rahmen des laufenden Chrysler-Insolvenzverfahrens geltend machen. Infolge der vom Gremium der unbesicherten Gläubiger im dritten Quartal 2009 beim Konkursgericht geltend gemachten Ansprüche wurde der Forderungsverzicht hinfällig (siehe auch Anmerkung 28).

Das EBIT des Jahres 2009 war infolge der beschriebenen Vereinbarungen insgesamt mit 379 Mio. € belastet; in der Segmentberichterstattung sind diese Belastungen in der Überleitung zum Konzern-EBIT ausgewiesen.

Im Zusammenhang mit der rechtlichen Übertragung der internationalen Chrysler-Vertriebsaktivitäten an Chrysler im ersten Quartal 2009 sowie aus der Bewertung von Chrysler-bezogenen Vermögenswerten ergaben sich im Jahr 2009 Erträge von insgesamt 85 Mio. € vor Steuern, die in der Segmentberichterstattung in der Überleitung zum Konzern-EBIT enthalten sind.

#### 4. Umsatzerlöse

Die Umsatzerlöse des Konzerns setzen sich wie folgt zusammen:

|                                                                             | 2010   | 2009   |
|-----------------------------------------------------------------------------|--------|--------|
| in Millionen €                                                              |        |        |
| Erlöse aus dem Verkauf von Produkten                                        | 84.573 | 66.772 |
| Erlöse aus Vermiet- und Leasinggeschäften                                   | 9.971  | 8.886  |
| Zinsen aus dem Finanzdienstleistungsgeschäft bei Daimler Financial Services | 2.862  | 2.885  |
| Erlöse aus der Erbringung von sonstigen Dienstleistungen                    | 355    | 381    |
|                                                                             | 97.761 | 78.924 |

Die Zusammensetzung der Umsatzerlöse nach Geschäftsfeldern und Regionen ist in Anmerkung 32 dargestellt.

#### 5. Funktionskosten

**Umsatzkosten.** Die Umsatzkosten beinhalten folgende Aufwendungen:

|                                                            | 2010    | 2009    |
|------------------------------------------------------------|---------|---------|
| in Millionen €                                             |         |         |
| Herstellungskosten der abgesetzten Erzeugnisse             | -64.604 | -54.276 |
| Abschreibungen auf vermietete Gegenstände                  | -3.404  | -3.450  |
| Refinanzierungskosten bei Daimler Financial Services       | -2.021  | -2.211  |
| Wertminderungen für Forderungen aus Finanzdienstleistungen | -536    | -853    |
| Übrige Umsatzkosten                                        | -4.423  | -4.777  |
|                                                            | -74.988 | -65.567 |

**Vertriebskosten.** Die Vertriebskosten beliefen sich im Jahr 2010 auf 8.861 (2009: 7.608) Mio. €. Sie umfassen die angefallenen Vertriebs- und -gemeinkosten und setzen sich aus Personal-, Material- und übrigen Vertriebskosten zusammen.

**Allgemeine Verwaltungskosten.** Im Jahr 2010 betrugen die Kosten der allgemeinen Verwaltung 3.474 (2009: 3.287) Mio. €. Sie enthalten die Aufwendungen, die nicht der Produktion, dem Vertrieb und der Forschung und Entwicklung zuzuordnen sind, und beinhalten Personalaufwendungen, Abschreibungen auf immaterielle Vermögenswerte und Sachanlagen sowie übrige Verwaltungskosten.

**Forschungs- und nicht aktivierte Entwicklungskosten.** Die Forschungs- und nicht aktivierten Entwicklungskosten lagen im Jahr 2010 bei 3.476 (2009: 2.896) Mio. € und enthalten überwiegend Personal- und Materialkosten.

Im Jahr 2010 betrugen die Abschreibungen auf aktivierte Entwicklungskosten 719 (2009: 647) Mio. €; diese sind in den Umsatzkosten enthalten.



**Optimierungsprogramme.** Die Maßnahmen und Programme, deren Implementierungskosten sich wesentlich auf das EBIT ausgewirkt haben, sind im Folgenden kurz dargestellt:

*Daimler Financial Services.* Im Mai 2010 hat der Vorstand beschlossen, die Geschäftstätigkeiten der Daimler Financial Services AG und der Mercedes-Benz Bank AG bis zum Jahresende 2012 in Deutschland neu auszurichten. Hierdurch sollen unter anderem Strukturen verschlankt und Prozesse vereinfacht werden. Der im Jahr 2010 erfasste Aufwand steht insbesondere im Zusammenhang mit Personalmaßnahmen.

*Mitsubishi Fuso Truck and Bus Corporation (MFTBC).* Im Mai 2009 hat der Vorstand der Daimler AG einen Plan zur umfassenden Neuausrichtung des operativen Geschäfts von MFTBC beschlossen. Der Plan sah unter anderem vor, dass das Produktportfolio reduziert wird, die Produktionsstandorte neu ausgerichtet werden, das japanische Händlernetz angepasst wird und weitere Maßnahmen zur Effizienzsteigerung realisiert werden. Der Konzern plante unter anderem die Verlagerung und Schließung einzelner Produktionsstandorte, einen Personalabbau von bis zu 2.300 Mitarbeitern bis zum Ende des Jahres 2010 und eine Reduzierung des Händlernetzes.

*Daimler Trucks North America (DTNA).* Im Oktober 2008 hat der Konzern einen umfassenden Plan zur Optimierung und Neuausrichtung des operativen Geschäfts der Tochtergesellschaft Daimler Trucks North America beschlossen, mit dem der Konzern auf die anhaltende Nachfrageschwäche in der gesamten Branche und die strukturellen Veränderungen in wichtigen Kernmärkten reagierte. Die Maßnahmen umfassten unter anderem die Einstellung des Sterling Trucks Produktprogramms im Jahr 2009, eine weitere Konsolidierung des Produktionsverbundes in der NAFTA-Region und Kapazitätsanpassungen, die unter anderem die Schließung von zwei Nutzfahrzeugwerken in den Jahren 2009 und 2010 beinhaltetete. Des Weiteren beinhaltetete der Plan einen Personalabbau von bis zu 3.500 Mitarbeitern, der größtenteils im Jahr 2009 erfolgte. Aufgrund neuer Erkenntnisse hat Daimler entschieden, ein Nutzfahrzeugwerk, das im Jahr 2010 zur Schließung vorgesehen war, fortzuführen.

Die nachfolgende Tabelle zeigt die Implementierungskosten der Maßnahmen und Programme bzw. die Erträge und Aufwendungen infolge der Anpassung von Schätzungen, die sich wesentlich auf das EBIT einzelner Segmente ausgewirkt haben. Zudem sind die mit der Umsetzung dieser Maßnahmen und Programme verbundenen Zahlungsmittelabflüsse und die jeweiligen Rückstellungsstände dargestellt.

|                                                          | 2010 | 2009 |
|----------------------------------------------------------|------|------|
| in Millionen €                                           |      |      |
| <b>Daimler Financial Services</b>                        |      |      |
| EBIT                                                     | -82  | -    |
| Zahlungsmittelabfluss                                    | 6    | -    |
| Stand Rückstellung zum 31. Dezember                      | 76   | -    |
| <b>Daimler Trucks</b>                                    |      |      |
| <b>Mitsubishi Fuso Truck and Bus Corporation (MFTBC)</b> |      |      |
| EBIT                                                     | -3   | -245 |
| Zahlungsmittelabfluss                                    | 103  | 31   |
| Stand Rückstellung zum 31. Dezember                      | 32   | 156  |
| <b>Daimler Trucks North America LLC (DTNA)</b>           |      |      |
| EBIT                                                     | -37  | -95  |
| Zahlungsmittelabfluss                                    | 68   | 151  |
| Stand Rückstellung zum 31. Dezember                      | 6    | 34   |

Die Aufwendungen und Erträge aus diesen Programmen sind in den folgenden Posten der Konzern-Gewinn- und Verlustrechnung enthalten:

|                                                     | 2010 | 2009 |
|-----------------------------------------------------|------|------|
| in Millionen €                                      |      |      |
| Umsatzkosten                                        | 4    | -72  |
| Vertriebskosten                                     | -12  | -159 |
| Allgemeine Verwaltungskosten                        | -117 | -91  |
| Forschungs- und nicht aktivierte Entwicklungskosten | 3    | -14  |
| Sonstige betriebliche Aufwendungen                  | -    | -4   |
|                                                     | -122 | -340 |

**Personalaufwand und Anzahl Beschäftigte.** Die in der Konzern-Gewinn- und Verlustrechnung enthaltenen Personalaufwendungen sowie die Zahl der im Geschäftsjahr durchschnittlich beschäftigten Mitarbeiter stellen sich wie folgt dar:

|                                            | 2010    | 2009    |
|--------------------------------------------|---------|---------|
| in Millionen € bzw. Anzahl der Mitarbeiter |         |         |
| Personalaufwendungen                       | -16.454 | -13.928 |
| Mitarbeiter                                | 258.120 | 258.628 |
| davon Auszubildende und Praktikanten       | 13.272  | 12.911  |

Informationen über die Gesamtbezüge von aktiven und früheren Mitgliedern des Vorstands sowie aktiven Mitgliedern des Aufsichtsrats sind in Anmerkung 36 enthalten.

## 6. Sonstige betriebliche Erträge und Aufwendungen

Die sonstigen betrieblichen Erträge setzen sich wie folgt zusammen:

|                                                                     | 2010 | 2009 |
|---------------------------------------------------------------------|------|------|
| in Millionen €                                                      |      |      |
| Erträge aus dem Abgang von Sachanlagen                              | 148  | 44   |
| Fördergelder und Subventionen                                       | 110  | 137  |
| Nicht mit der Absatzfinanzierung in Verbindung stehende Mieterträge | 45   | 51   |
| Versicherungsentschädigungen                                        | 22   | 20   |
| Übrige sonstige Erträge                                             | 646  | 441  |
|                                                                     | 971  | 693  |

Die Fördergelder und Subventionen enthalten überwiegend Erstattungsbeiträge der Bundesagentur für Arbeit für Sozialversicherungsbeiträge die im Rahmen der Kurzarbeit in den deutschen Produktionswerken gewährt wurden sowie Erstattungen im Zusammenhang mit laufenden Altersteilzeitverträgen.

Die übrigen sonstigen Erträge umfassen Rückerstattungen von nicht einkommensbezogenen Steuern, Erträge aus Mitarbeiterkantinen und übrige sonstige Bestandteile. Im Jahr 2010 beinhalten die übrigen sonstigen Erträge einen Ertrag vor Steuern von 218 Mio. € infolge eines im Oktober 2010 positiv beschiedenen Rechtsverfahrens gegen die Daimler AG.

Die sonstigen betrieblichen Aufwendungen setzen sich wie folgt zusammen:

|                                         | 2010 | 2009 |
|-----------------------------------------|------|------|
| in Millionen €                          |      |      |
| Verluste aus dem Abgang von Sachanlagen | -73  | -56  |
| Übrige sonstige Aufwendungen            | -587 | -447 |
|                                         | -660 | -503 |

Die übrigen sonstigen Aufwendungen enthalten Verluste aus dem Abgang von kurzfristigen Vermögenswerten, Veränderungen von übrigen Rückstellungen und übrige sonstige Bestandteile.

Im Hinblick auf das 125-jährige Jubiläum der Erfindung des Automobils im Jahr 2011 hat sich der Vorstand im Dezember 2010 verpflichtet, das Stiftungskapital der gemeinnützigen Daimler und Benz Stiftung von 37 auf 125 Mio. € zu erhöhen. Die Aufwendungen in Höhe von 88 Mio. € sowie weitere im Jahr 2010 entstandene Aufwendungen im Zusammenhang mit rechtlichen Verfahren sind in den übrigen sonstigen Aufwendungen im Jahr 2010 enthalten.

## 7. Übriges Finanzergebnis

|                                                                                                                     | 2010 | 2009   |
|---------------------------------------------------------------------------------------------------------------------|------|--------|
| in Millionen €                                                                                                      |      |        |
| Aufwendungen aus der Aufzinsung und Effekte aus der Änderung der Abzinsungsfaktoren von Rückstellungen <sup>1</sup> | -240 | -1.003 |
| Sonstiges übriges Finanzergebnis                                                                                    | 389  | -338   |
|                                                                                                                     | 149  | -1.341 |

<sup>1</sup> Ohne die Aufwendungen aus der Aufzinsung der Rückstellungen für Pensionen und ähnliche Verpflichtungen.

Das sonstige übrige Finanzergebnis des Jahres 2010 beinhaltet einen Ertrag aus dem Verkauf der Beteiligung an der Tata Motors von 0,3 Mrd. €. Im sonstigen übrigen Finanzergebnis des Jahres 2009 sind Aufwendungen aufgrund von Zahlungen sowie Zahlungsverpflichtungen zugunsten der Chrysler-Pensionspläne in Höhe von insgesamt 0,4 Mrd. € enthalten. Darüber hinaus ergaben sich im Jahr 2009 Erträge von 0,1 Mrd. € aus der Neubewertung von Chrysler-bezogenen Darlehen, Forderungen und anderen Vermögenswerten.

## 8. Zinserträge und Zinsaufwendungen

|                                                                                                                | 2010   | 2009   |
|----------------------------------------------------------------------------------------------------------------|--------|--------|
| in Millionen €                                                                                                 |        |        |
| Zinserträge                                                                                                    |        |        |
| Erwartete Erträge aus den Pensions- und sonstigen altersversorgungsbezogenen Fondsvermögen                     | 622    | 671    |
| Zinsen und ähnliche Erträge                                                                                    | 203    | 465    |
|                                                                                                                | 825    | 1.136  |
| Zinsaufwendungen                                                                                               |        |        |
| Aufwendungen aus der Aufzinsung der erwarteten Verpflichtungen für Pensions- und Gesundheitsfürsorgeleistungen | -1.011 | -950   |
| Zinsen und ähnliche Aufwendungen                                                                               | -460   | -971   |
|                                                                                                                | -1.471 | -1.921 |

## 9. Ertragsteuern

Das Ergebnis vor Ertragsteuern setzt sich wie folgt zusammen:

|                | 2010  | 2009   |
|----------------|-------|--------|
| in Millionen € |       |        |
| Inland         | 2.318 | -2.543 |
| Ausland        | 4.310 | 245    |
|                | 6.628 | -2.298 |

Das inländische Ergebnis beinhaltet auch das Ergebnis aus nach der Equity-Methode bewerteten Finanzinvestitionen, wenn die Anteile an diesen Unternehmen von inländischen Unternehmen gehalten werden.

Der ausgewiesene Steueraufwand teilt sich auf das In- und Ausland wie folgt auf:

|                  | 2010   | 2009 |
|------------------|--------|------|
| in Millionen €   |        |      |
| Laufende Steuern |        |      |
| Inland           | -464   | -423 |
| Ausland          | -1.237 | -472 |
| Latente Steuern  |        |      |
| Inland           | -376   | 883  |
| Ausland          | 123    | -334 |
|                  | -1.954 | -346 |

Im tatsächlichen Steueraufwand sind periodenfremde Steuererträge von in- und ausländischen Unternehmen in Höhe von 101 (2009: Steueraufwand von 237) Mio. € enthalten.

Der latente Steueraufwand (2009: Steuerertrag) setzt sich wie folgt zusammen:

|                                                   | 2010   | 2009 |
|---------------------------------------------------|--------|------|
| in Millionen €                                    |        |      |
| Latente Steuern                                   | -253   | 549  |
| Davon aus temporären Differenzen                  | 1.205  | 218  |
| Davon aus Verlustvorträgen und Steuergutschriften | -1.458 | 331  |

Bei den inländischen Gesellschaften wurde für die Berechnung der latenten Steuern ein Körperschaftsteuersatz von 15% verwendet. Weiterhin wurden ein Solidaritätszuschlag von jeweils 5,5% auf die Körperschaftsteuer sowie ein Gewerbesteuer-satz von 14% berücksichtigt; für die Berechnung der latenten Steuern ergab sich bei den inländischen Gesellschaften insge-samt ein Steuersatz von 29,825%. Bei den ausländischen Gesellschaften wurden für die Berechnung der latenten Steuern die jeweils länderspezifischen Steuersätze verwendet.

Die folgende Tabelle zeigt eine Überleitungsrechnung vom im Geschäftsjahr erwarteten Steueraufwand (2009: Steuerertrag) zum jeweils ausgewiesenen Steueraufwand. Zur Ermittlung des erwarteten Steueraufwands/-ertrags wird der im Geschäftsjahr jeweils gültige inländische Gesamtsteuersatz von 29,825% mit dem Ergebnis vor Steuern multipliziert.

|                                                       | 2010   | 2009 |
|-------------------------------------------------------|--------|------|
| in Millionen €                                        |        |      |
| Erwarteter Steueraufwand (2009: Steuerertrag)         | -1.977 | 685  |
| Abweichende ausländische Steuersätze                  | -65    | 74   |
| Abweichende Gewerbesteuer                             | 38     | 40   |
| Effekt aus Steuergesetzänderungen                     | -22    | -2   |
| Wertberichtigungen auf aktive latente Steuern         | 259    | -695 |
| Steuerfreie Erträge und nicht abziehbare Aufwendungen | -143   | -509 |
| Sonstiges                                             | -44    | 61   |
| Ausgewiesener Steueraufwand                           | -1.954 | -346 |

Im Jahr 2010 konnten Wertberichtigungen auf aktive latente Steuern bei ausländischen Tochtergesellschaften aufgelöst werden, während im Jahr 2009 aktive latente Steuern bei ausländischen Tochtergesellschaften wertberichtigt werden mussten. Die Steueraufwendungen und -erträge sind jeweils in der Zeile Wertberichtigungen auf aktive latente Steuern enthalten.

Die Zeile steuerfreie Erträge und nicht abziehbare Aufwendungen enthält alle Effekte von in- und ausländischen Gesellschaften im Zusammenhang mit steuerfreien Erträgen und nicht abziehbaren Aufwendungen wie beispielsweise die steuerfreien Erträge im Zusammenhang mit den Netto-Pensionsaufwendungen im Inland sowie Effekte aus steuerfreien Ergebnisbeiträgen der at-equity bewerteten Beteiligungen. Weiterhin sind in dieser Zeile auch die folgenden nicht abziehbaren Aufwendungen und steuerfreien Erträge enthalten:

Im Jahr 2010 entstanden steuerfreie Erträge aufgrund des Verkaufs der Beteiligung an Tata Motors.

Im Jahr 2009 führte eine Anpassung betreffend Verrechnungspreisleistungen bei unserer ehemaligen Beteiligung Chrysler in Kanada zu einem zusätzlichen Steueraufwand, der vom Daimler-Konzern zu tragen ist. Darüber hinaus resultierten zusätzliche Steueraufwendungen aus der steuerlichen Veranlagung und Einschätzung von Vorjahren.

Bezüglich der Art der temporären Unterschiede und der Art noch nicht genutzter steuerlicher Verlustvträge und noch nicht genutzter Steuergutschriften ergaben sich vor Saldierung die folgenden aktiven und passiven latenten Steuern:

|                                                                         | 31. Dezember<br>2010 | 2009           |
|-------------------------------------------------------------------------|----------------------|----------------|
| in Millionen €                                                          |                      |                |
| Immaterielle Vermögenswerte                                             | 81                   | 84             |
| Sachanlagen                                                             | 673                  | 646            |
| Vermietete Gegenstände                                                  | 917                  | 659            |
| Vorräte                                                                 | 695                  | 562            |
| Nach der Equity-Methode bilanzierte Finanzinvestitionen                 | 16                   | 15             |
| Forderungen aus Finanzdienstleistungen                                  | 168                  | 117            |
| Sonstige finanzielle Vermögenswerte                                     | 3.336                | 3.324          |
| Steuerliche Verlustvträge und Steuergutschriften                        | 4.970                | 5.770          |
| Rückstellungen für Pensionen und ähnliche Verpflichtungen               | 607                  | 620            |
| Sonstige Rückstellungen                                                 | 2.048                | 1.874          |
| Verbindlichkeiten                                                       | 1.427                | 882            |
| Passiver Rechnungsabgrenzungsposten                                     | 863                  | 751            |
| Sonstige                                                                | 78                   | 74             |
|                                                                         | 15.879               | 15.378         |
| Wertberichtigungen                                                      | -3.578               | -3.096         |
| <b>Aktive latente Steuern, unsaldiert</b>                               | <b>12.301</b>        | <b>12.282</b>  |
| Entwicklungskosten                                                      | -1.795               | -1.598         |
| Sonstige immaterielle Vermögenswerte                                    | -88                  | -67            |
| Sachanlagen                                                             | -1.066               | -999           |
| Vermietete Gegenstände                                                  | -2.582               | -3.159         |
| Vorräte                                                                 | -142                 | -132           |
| Forderungen aus Finanzdienstleistungen                                  | -727                 | -805           |
| Sonstige finanzielle Vermögenswerte                                     | -181                 | -110           |
| Sonstige Vermögenswerte                                                 | -296                 | -257           |
| Rückstellungen für Pensionen und ähnliche Verpflichtungen               | -2.882               | -2.851         |
| Sonstige Rückstellungen                                                 | -235                 | -264           |
| Steuer auf thesaurierte Gewinne bei ausländischen Tochtergesellschaften | -50                  | -46            |
| Sonstige                                                                | -319                 | -270           |
| <b>Passive latente Steuern, unsaldiert</b>                              | <b>-10.363</b>       | <b>-10.558</b> |
| <b>Netto-Betrag der aktiven latenten Steuern</b>                        | <b>1.938</b>         | <b>1.724</b>   |

Aktive latente Steuern wurden mit passiven latenten Steuern saldiert, wenn sie sich auf Ertragsteuern beziehen, die von der gleichen Steuerbehörde erhoben werden, und ein Anspruch auf Verrechnung eines tatsächlichen Steuererstattungsanspruches mit einer tatsächlichen Steuerschuld besteht. Beim Ausweis der aktiven und passiven latenten Steuern in der Konzernbilanz wird nicht zwischen kurz- und langfristig unterschieden.

Der Anstieg des Netto-Betrages der aktiven latenten Steuern in Höhe von 214 (2009: 621) Mio. € setzt sich wie folgt zusammen:

|                                                                                                                      | 2010 | 2009 |
|----------------------------------------------------------------------------------------------------------------------|------|------|
| in Millionen €                                                                                                       |      |      |
| Latenter Steueraufwand (2009: Steuerertrag) in der Gewinn- und Verlustrechnung                                       | -253 | 549  |
| Neutrale Erhöhung (2009: Reduzierung) der latenten Steuern auf zur Veräußerung verfügbare finanzielle Vermögenswerte | 7    | -8   |
| Neutrale Erhöhung der latenten Steuern auf derivative Finanzinstrumente                                              | 212  | 123  |
| Steueraufwand (2009: Steuerertrag) auf steuerlich höhere Aufwendungen aus Stock Options                              | -1   | .    |
| Sonstige neutrale Veränderung <sup>1</sup>                                                                           | 249  | -43  |

1 Betrifft im Wesentlichen Veränderungen aufgrund von Währungsumrechnungen.

Unter Berücksichtigung der erfolgsneutral im Eigenkapital erfassten Buchungen (einschließlich der erfolgsneutralen Eigenkapitalbuchungen der nach der Equity-Methode bilanzierten Finanzinvestitionen) ergab sich folgender Steueraufwand im Eigenkapital:

|                                                                                         | 2010   | 2009 |
|-----------------------------------------------------------------------------------------|--------|------|
| in Millionen €                                                                          |        |      |
| Steueraufwand in der Gewinn- und Verlustrechnung                                        | -1.954 | -346 |
| Steuerertrag auf Bestandteile der übrigen Rücklagen im Eigenkapital                     | 427    | 60   |
| Steueraufwand (2009: Steuerertrag) auf steuerlich höhere Aufwendungen aus Stock Options | -1     | .    |
|                                                                                         | -1.528 | -286 |

Die Wertberichtigungen auf aktive latente Steuern betreffen ausländische Gesellschaften und erhöhten sich trotz der ergebniswirksamen Auflösung von 259 Mio. € vom 31. Dezember 2009 zum 31. Dezember 2010 in der Bilanz um 482 Mio. €. Zurückzuführen ist dies zum einen auf die ergebnisneutrale Erhöhung aufgrund von Währungsumrechnungen. Weiterhin entstand aus unserer ehemaligen Beteiligung an Chrysler ein zusätzlicher Verlustvortrag im Zusammenhang mit Kapitalveräußerungen (»capital loss«); aufgrund der Bildung von Wertberichtigungen auf diesen zusätzlichen Verlustvortrag wurde die Konzern-Gewinn- und Verlustrechnung hierdurch nicht tangiert. Die aktiven latenten Steuern auf die Verlustvträge im Zusammenhang mit Kapitalveräußerungen wurden komplett wertberichtigt, da die Verlustvträge zeitlich begrenzt vortragsfähig sind und nur mit Gewinnen aus Kapitalveräußerungen verrechnet werden können.

Die Wertberichtigungen auf aktive latente Steuern in der Konzernbilanz zum 31. Dezember 2010 betreffen u. a. mit 1.335 Mio. € Verlustvträge im Zusammenhang mit Kapitalveräußerungen, mit 1.107 Mio. € die körperschaftsteuerlichen Verlustvträge und mit 427 Mio. € die Steuergutschriften. Von den wertberechtigten aktiven latenten Steuern auf die Verlustvträge im Zusammenhang mit Kapitalveräußerungen verfallen 1.233 Mio. € im Jahr 2014 und 102 Mio. € im Jahr 2015. Von den wertberechtigten aktiven latenten Steuern auf die körperschaftsteuerlichen Verlustvträge verfallen 157 Mio. € im Jahr 2011, 227 Mio. € im Jahr 2012, 205 Mio. € im Jahr 2013, 15 Mio. € im Jahr 2014, 267 Mio. € im Jahr 2015 und 129 Mio. € im Zeitraum von 2016 bis 2030; 107 Mio. € sind unbegrenzt vortragsfähig. Von den wertberechtigten aktiven latenten Steuern auf die Steuergutschriften verfallen 154 Mio. € im Zeitraum von 2012 bis 2015 und 5 Mio. € im Zeitraum von 2016 bis 2030; 268 Mio. € sind unbegrenzt vortragsfähig. Darüber hinaus betreffen die Wertberichtigungen zu einem großen Teil auch temporäre Differenzen und Verlustvträge für »State and local taxes« bei den US-amerikanischen Gesellschaften. Daimler ist der Ansicht, die wertberechtigten aktiven latenten Steuern mit einer Wahrscheinlichkeit von über 50% nicht nutzen zu können. Der Konzern hat in mehreren Tochterunternehmen einiger Länder im Jahr 2010 bzw. in Vorjahren steuerliche Verluste erwirtschaftet. Bei den nach Verrechnung mit passiven latenten Steuern nicht wertberechtigten aktiven latenten Steuern dieser ausländischen Gesellschaften von 1.089 Mio. € geht Daimler davon aus, dass das zukünftige steuerpflichtige Einkommen ausreichen wird, um die aktiven latenten Steuern wahrscheinlich realisieren zu können. Die heutige Einschätzung bezüglich der Werthaltigkeit der aktiven latenten Steuern kann sich ändern und höhere oder niedrigere Wertberichtigungen erforderlich machen.

Bei ausländischen Tochtergesellschaften einbehaltene Gewinne von 3.323 (2009: 3.082) Mio. € sollen in den nächsten Jahren nach Deutschland ausgeschüttet werden. Der bei Ausschüttung anfallende deutsche Steueraufwand in Höhe von 50 (2009: 46) Mio. € wurde im Rahmen der latenten Steuern passiviert.

Passive latente Steuern auf einbehaltene Gewinne bei ausländischen Tochterunternehmen in Höhe von 9.578 (2009: 6.413) Mio. € sind nicht berechnet worden, weil diese Gewinne aus heutiger Sicht permanent investiert bleiben sollen. Bei Ausschüttung würden die Gewinne zu 5% der deutschen Besteuerung zu unterwerfen sein; gegebenenfalls würden ausländische Quellensteuern anfallen. Darüber hinaus wären bei Ausschüttung der Gewinne einer ausländischen Tochtergesellschaft an eine ausländische Zwischenholding gegebenenfalls weitere ertragsteuerliche Konsequenzen zu beachten. Ausschüttungen würden deshalb in der Regel zu einem zusätzlichen Steueraufwand führen. Die Ermittlung der zu versteuernden temporären Differenzen wäre mit einem unverhältnismäßig hohen Aufwand verbunden.

Im Konzern sind mehrere Jahre noch nicht endgültig steuerlich veranlagt. Daimler ist der Ansicht, ausreichend Vorsorge für diese offenen Veranlagungsjahre getroffen zu haben.



## 10. Immaterielle Vermögenswerte

Die immateriellen Vermögenswerte haben sich wie folgt entwickelt:

|                                         | Geschäfts-<br>werte<br>(erworben) | Entwicklungs-<br>kosten<br>(selbst<br>geschaffen) | Übrige<br>immaterielle<br>Vermögens-<br>werte<br>(erworben) | Gesamt |
|-----------------------------------------|-----------------------------------|---------------------------------------------------|-------------------------------------------------------------|--------|
| in Millionen €                          |                                   |                                                   |                                                             |        |
| <b>Anschaffungs-/Herstellungskosten</b> |                                   |                                                   |                                                             |        |
| <b>Stand 1. Januar 2009</b>             | 893                               | 7.664                                             | 2.127                                                       | 10.684 |
| Zugänge durch Unternehmenserwerbe       | -                                 | -                                                 | 58                                                          | 58     |
| Übrige Zugänge                          | -                                 | 1.286                                             | 140                                                         | 1.426  |
| Umbuchungen                             | -                                 | -                                                 | -                                                           | -      |
| Abgänge                                 | -                                 | -1.015                                            | -321                                                        | -1.336 |
| Sonstige Veränderungen <sup>1</sup>     | 32                                | -1                                                | -21                                                         | 10     |
| <b>Stand 31. Dezember 2009</b>          | 925                               | 7.934                                             | 1.983                                                       | 10.842 |
| Zugänge durch Unternehmenserwerbe       | -                                 | -                                                 | -                                                           | -      |
| Übrige Zugänge                          | -                                 | 1.378                                             | 190                                                         | 1.568  |
| Umbuchungen                             | -                                 | -                                                 | -                                                           | -      |
| Abgänge                                 | -                                 | -165                                              | -166                                                        | -331   |
| Sonstige Veränderungen <sup>1</sup>     | 9                                 | 37                                                | 149                                                         | 195    |
| <b>Stand 31. Dezember 2010</b>          | 934                               | 9.184                                             | 2.156                                                       | 12.274 |
| <b>Abschreibungen</b>                   |                                   |                                                   |                                                             |        |
| <b>Stand 1. Januar 2009</b>             | 233                               | 2.948                                             | 1.390                                                       | 4.571  |
| Zugänge                                 | -                                 | 647                                               | 181                                                         | 828    |
| Umbuchungen                             | -                                 | -                                                 | -                                                           | -      |
| Abgänge                                 | -                                 | -1.014                                            | -285                                                        | -1.299 |
| Sonstige Veränderungen <sup>1</sup>     | -2                                | -                                                 | -9                                                          | -11    |
| <b>Stand 31. Dezember 2009</b>          | 231                               | 2.581                                             | 1.277                                                       | 4.089  |
| Zugänge                                 | -                                 | 719                                               | 168                                                         | 887    |
| Umbuchungen                             | -                                 | -                                                 | -                                                           | -      |
| Abgänge                                 | -                                 | -156                                              | -155                                                        | -311   |
| Sonstige Veränderungen <sup>1</sup>     | -26                               | 31                                                | 100                                                         | 105    |
| <b>Stand 31. Dezember 2010</b>          | 205                               | 3.175                                             | 1.390                                                       | 4.770  |
| <b>Buchwert zum 31. Dezember 2009</b>   | 694                               | 5.353                                             | 706                                                         | 6.753  |
| <b>Buchwert zum 31. Dezember 2010</b>   | 729                               | 6.009                                             | 766                                                         | 7.504  |

<sup>1</sup> Betrifft im Wesentlichen Veränderungen aufgrund von Währungsumrechnungen.

Zum 31. Dezember 2010 entfallen von den Geschäftswerten 426 (2009: 388) Mio. € auf das Segment Daimler Trucks und 199 (2009: 189) Mio. € auf das Segment Mercedes-Benz Cars.

Immaterielle Vermögenswerte, die keiner planmäßigen Abschreibung unterliegen, entfallen überwiegend auf Geschäftswerte sowie Entwicklungskosten, bei denen die zugrunde liegenden Projekte noch nicht abgeschlossen sind (Buchwert zum 31. Dezember 2010: 2.906 Mio. €; 31. Dezember 2009: 2.753 Mio. €). Ferner unterliegen übrige immaterielle Vermögenswerte mit einem Buchwert von 161 (2009: 137) Mio. € keiner planmäßigen Abschreibung; diese Vermögenswerte betreffen insbesondere Markenzeichen, deren zeitliche Nutzung unbegrenzt ist und die dem Segment Daimler Trucks zugeordnet sind.

Die gesamten Abschreibungen auf immaterielle Vermögenswerte sind in der Konzern-Gewinn- und Verlustrechnung in den folgenden Posten enthalten:

|                                                     | 2010 | 2009 |
|-----------------------------------------------------|------|------|
| in Millionen €                                      |      |      |
| Umsatzkosten                                        | 810  | 735  |
| Vertriebskosten                                     | 37   | 39   |
| Allgemeine Verwaltungskosten                        | 35   | 50   |
| Forschungs- und nicht aktivierte Entwicklungskosten | 5    | 4    |
|                                                     | 887  | 828  |

## 11. Sachanlagen

Die Sachanlagen haben sich wie folgt entwickelt:

|                                         | Grundstücke,<br>grundstücksgleiche<br>Rechte und Bauten<br>einschließlich der<br>Bauten auf fremden<br>Grundstücken | Technische<br>Anlagen<br>und<br>Maschinen | Andere<br>Anlagen,<br>Betriebs- und<br>Geschäfts-<br>ausstattung | Geleistete<br>Anzahlungen<br>und<br>Anlagen im Bau | Gesamt |
|-----------------------------------------|---------------------------------------------------------------------------------------------------------------------|-------------------------------------------|------------------------------------------------------------------|----------------------------------------------------|--------|
| in Millionen €                          |                                                                                                                     |                                           |                                                                  |                                                    |        |
| <b>Anschaffungs-/Herstellungskosten</b> |                                                                                                                     |                                           |                                                                  |                                                    |        |
| <b>Stand 1. Januar 2009</b>             | 13.162                                                                                                              | 18.540                                    | 15.413                                                           | 1.133                                              | 48.248 |
| Zugänge durch Unternehmenserwerbe       | 15                                                                                                                  | 15                                        | 2                                                                | –                                                  | 32     |
| Übrige Zugänge                          | 146                                                                                                                 | 551                                       | 845                                                              | 913                                                | 2.455  |
| Umbuchungen                             | 241                                                                                                                 | 208                                       | 484                                                              | -933                                               | –      |
| Abgänge                                 | -130                                                                                                                | -482                                      | -765                                                             | -92                                                | -1.469 |
| Sonstige Veränderungen <sup>1</sup>     | 62                                                                                                                  | 130                                       | 139                                                              | 11                                                 | 342    |
| <b>Stand 31. Dezember 2009</b>          | 13.496                                                                                                              | 18.962                                    | 16.118                                                           | 1.032                                              | 49.608 |
| Zugänge durch Unternehmenserwerbe       | –                                                                                                                   | –                                         | –                                                                | –                                                  | –      |
| Übrige Zugänge                          | 246                                                                                                                 | 471                                       | 1.053                                                            | 2.023                                              | 3.793  |
| Umbuchungen                             | 201                                                                                                                 | 352                                       | 587                                                              | -1.140                                             | –      |
| Abgänge                                 | -236                                                                                                                | -857                                      | -690                                                             | -33                                                | -1.816 |
| Sonstige Veränderungen <sup>1</sup>     | 358                                                                                                                 | 191                                       | 424                                                              | 78                                                 | 1.051  |
| <b>Stand 31. Dezember 2010</b>          | 14.065                                                                                                              | 19.119                                    | 17.492                                                           | 1.960                                              | 52.636 |
| <b>Abschreibungen</b>                   |                                                                                                                     |                                           |                                                                  |                                                    |        |
| <b>Stand 1. Januar 2009</b>             | 7.139                                                                                                               | 13.495                                    | 11.509                                                           | 18                                                 | 32.161 |
| Zugänge                                 | 289                                                                                                                 | 725                                       | 1.422                                                            | –                                                  | 2.436  |
| Umbuchungen                             | 3                                                                                                                   | -95                                       | 92                                                               | –                                                  | –      |
| Abgänge                                 | -87                                                                                                                 | -445                                      | -677                                                             | –                                                  | -1.209 |
| Sonstige Veränderungen <sup>1</sup>     | 60                                                                                                                  | 100                                       | 90                                                               | 5                                                  | 255    |
| <b>Stand 31. Dezember 2009</b>          | 7.404                                                                                                               | 13.780                                    | 12.436                                                           | 23                                                 | 33.643 |
| Zugänge                                 | 300                                                                                                                 | 781                                       | 1.396                                                            | –                                                  | 2.477  |
| Umbuchungen                             | -3                                                                                                                  | 28                                        | -25                                                              | –                                                  | –      |
| Abgänge                                 | -116                                                                                                                | -816                                      | -618                                                             | -17                                                | -1.567 |
| Sonstige Veränderungen <sup>1</sup>     | 81                                                                                                                  | 85                                        | 324                                                              | –                                                  | 490    |
| <b>Stand 31. Dezember 2010</b>          | 7.666                                                                                                               | 13.858                                    | 13.513                                                           | 6                                                  | 35.043 |
| <b>Buchwert zum 31. Dezember 2009</b>   | 6.092                                                                                                               | 5.182                                     | 3.682                                                            | 1.009                                              | 15.965 |
| <b>Buchwert zum 31. Dezember 2010</b>   | 6.399                                                                                                               | 5.261                                     | 3.979                                                            | 1.954                                              | 17.593 |

<sup>1</sup> Betrifft im Wesentlichen Veränderungen aufgrund von Währungsumrechnungen.

Die Sachanlagen enthalten auch gemietete Gebäude, technische Anlagen und andere Anlagen mit einem Buchwert von insgesamt 453 (2009: 350) Mio. €, die infolge der Gestaltung der ihnen zugrunde liegenden Leasingverträge (sog. »Finance Leases«) dem Konzern als wirtschaftlichem Eigentümer zugerechnet werden. Die auf gemietete Anlagen entfallenden Abschreibungen des Geschäftsjahres betrugen 69 (2009: 72) Mio. €.

## 12. Vermietete Gegenstände

Die vermieteten Gegenstände haben sich wie folgt entwickelt:

| in Millionen €                          |         |
|-----------------------------------------|---------|
| <b>Anschaftungs-/Herstellungskosten</b> |         |
| <b>Stand 1. Januar 2009</b>             | 24.928  |
| Zugänge durch Unternehmenserwerbe       | –       |
| Übrige Zugänge                          | 10.759  |
| Umbuchungen                             | –       |
| Abgänge                                 | -11.162 |
| Sonstige Veränderungen <sup>1</sup>     | -23     |
| <b>Stand 31. Dezember 2009</b>          | 24.502  |
| Zugänge durch Unternehmenserwerbe       | –       |
| Übrige Zugänge                          | 11.643  |
| Umbuchungen                             | –       |
| Abgänge                                 | -11.498 |
| Sonstige Veränderungen <sup>1</sup>     | 1.036   |
| <b>Stand 31. Dezember 2010</b>          | 25.683  |
| <b>Abschreibungen</b>                   |         |
| <b>Stand 1. Januar 2009</b>             | 6.256   |
| Zugänge                                 | 3.450   |
| Umbuchungen                             | –       |
| Abgänge                                 | -3.723  |
| Sonstige Veränderungen <sup>1</sup>     | -13     |
| <b>Stand 31. Dezember 2009</b>          | 5.970   |
| Zugänge                                 | 3.404   |
| Umbuchungen                             | –       |
| Abgänge                                 | -3.930  |
| Sonstige Veränderungen <sup>1</sup>     | 314     |
| <b>Stand 31. Dezember 2010</b>          | 5.758   |
| <b>Buchwert zum 31. Dezember 2009</b>   | 18.532  |
| <b>Buchwert zum 31. Dezember 2010</b>   | 19.925  |

<sup>1</sup> Betrifft im Wesentlichen Veränderungen aufgrund von Währungsumrechnungen.

Zum 31. Dezember 2009 waren vermietete Gegenstände mit einem Buchwert von 643 Mio. € als Sicherheiten für Verbindlichkeiten aus ABS-Transaktionen gestellt. Die Verbindlichkeiten stammen aus Transaktionen mit verbrieften zukünftigen Ansprüchen im Zusammenhang mit vermieteten Fahrzeugen (siehe auch Anmerkung 24).

**Mindestleasingzahlungen.** Die zukünftigen an Daimler zu leistenden Leasingzahlungen aus nicht kündbaren Operating-Lease-Verträgen sind wie folgt fällig:

|                                | 31. Dezember<br>2010 | 2009  |
|--------------------------------|----------------------|-------|
| in Millionen €                 |                      |       |
| Fälligkeit                     |                      |       |
| innerhalb eines Jahres         | 3.794                | 3.550 |
| zwischen einem und fünf Jahren | 4.255                | 3.842 |
| nach mehr als fünf Jahren      | 213                  | 155   |
|                                | 8.262                | 7.547 |

### 13. At-equity bewertete Finanzinvestitionen

Die folgende Übersicht zeigt Eckdaten zu den at-equity bewerteten Finanzinvestitionen:

|                                        | EADS  | Tognum | BBAC | Kamaz | Übrige <sup>1</sup> | Gesamt |
|----------------------------------------|-------|--------|------|-------|---------------------|--------|
| €-Werte in Millionen                   |       |        |      |       |                     |        |
| <b>31. Dezember 2010</b>               |       |        |      |       |                     |        |
| Höhe des Anteils (in %)                | 22,5  | 28,4   | 50,0 | 15,0  | -                   | -      |
| Börsenwert                             | 3.197 | 737    | -    | 188   | -                   | -      |
| At-equity-Buchwert <sup>2</sup>        | 2.415 | 672    | 175  | 177   | 521                 | 3.960  |
| At-equity-Ergebnis (2010) <sup>2</sup> | -261  | 9      | 86   | -4    | 22                  | -148   |
| <b>31. Dezember 2009</b>               |       |        |      |       |                     |        |
| Höhe des Anteils (in %)                | 22,5  | 28,4   | 50,0 | 10,0  | -                   | -      |
| Börsenwert                             | 2.583 | 433    | -    | 105   | -                   | -      |
| At-equity-Buchwert <sup>2</sup>        | 3.112 | 671    | 79   | 87    | 346                 | 4.295  |
| At-equity-Ergebnis (2009) <sup>2</sup> | 88    | -9     | 10   | -7    | -10                 | 72     |

<sup>1</sup> Hierin sind auch Gemeinschaftsunternehmen berücksichtigt, die at-equity in den Konzernabschluss einbezogen werden.

<sup>2</sup> Einschließlich der Anpassungen des Konzerns aus Sicht als Investor.

Die folgende Übersicht stellt die zusammengefassten IFRS-Abschlüsse der at-equity bewerteten Finanzinvestitionen dar, die Basis für die Equity-Bewertung im Konzern waren:

|                                                             | EADS   | Tognum | BBAC  | Kamaz | Übrige <sup>1</sup> | Gesamt |
|-------------------------------------------------------------|--------|--------|-------|-------|---------------------|--------|
| in Millionen €                                              |        |        |       |       |                     |        |
| <b>Angaben zur Gewinn- und Verlustrechnung <sup>2</sup></b> |        |        |       |       |                     |        |
| <b>2010</b>                                                 |        |        |       |       |                     |        |
| Umsatzerlöse                                                | 44.567 | 2.462  | 1.804 | 1.731 | 3.502               | 54.066 |
| Konzernergebnis                                             | -1.021 | 97     | 123   | -27   | 44                  | -784   |
| <b>2009</b>                                                 |        |        |       |       |                     |        |
| Umsatzerlöse                                                | 43.478 | 2.594  | 685   | 960   | 1.759               | 49.476 |
| Konzernergebnis                                             | 711    | 101    | 7     | -51   | 4                   | 772    |
| <b>Angaben zur Bilanz <sup>3</sup></b>                      |        |        |       |       |                     |        |
| <b>2010</b>                                                 |        |        |       |       |                     |        |
| Vermögenswerte                                              | 78.441 | 2.611  | 1.416 | 1.651 | 3.586               | 87.705 |
| Eigenkapital                                                | 10.552 | 720    | 288   | 736   | 1.558               | 13.854 |
| Schulden                                                    | 67.889 | 1.891  | 1.128 | 915   | 2.028               | 73.851 |
| <b>2009</b>                                                 |        |        |       |       |                     |        |
| Vermögenswerte                                              | 73.889 | 2.407  | 647   | 1.738 | 2.538               | 81.219 |
| Eigenkapital                                                | 13.706 | 632    | 146   | 723   | 1.132               | 16.339 |
| Schulden                                                    | 60.183 | 1.775  | 501   | 1.015 | 1.406               | 64.880 |

<sup>1</sup> Hierin sind auch Gemeinschaftsunternehmen berücksichtigt, die at-equity in den Konzernabschluss einbezogen werden.

<sup>2</sup> Die Angaben betreffen für EADS, Tognum und Kamaz grundsätzlich den Zeitraum 1. Oktober bis 30. September.

Für Kamaz betreffen die Angaben für das Jahr 2009 den Zeitraum 1. Januar bis 30. September.

Für BBAC betreffen die Angaben den Zeitraum 1. Januar bis 31. Dezember.

<sup>3</sup> Die Angaben betreffen für EADS, Tognum und Kamaz grundsätzlich den Bilanzstichtag 30. September.

Für BBAC betreffen die Angaben den Bilanzstichtag 31. Dezember.

**EADS.** Der Beteiligungsbuchwert an bzw. der Ergebnisanteil von der European Aeronautic Defence and Space Company EADS N.V. (EADS) wird in der Segmentberichterstattung in der Überleitung zu den Konzern-Vermögenswerten bzw. zum Konzern-EBIT ausgewiesen.

Drohverlustrückstellungen, die die EADS im Rahmen der Erstellung ihres Konzernabschlusses zum 31. Dezember 2009 für ihr Militärtransporterprogramm A400 M gebildet hat, hat Daimler infolge der Einbeziehung der EADS mit einem Zeitversatz von drei Monaten im Jahr 2010 anteilig berücksichtigt; hieraus resultierte ein Aufwand von 237 Mio. €, der das Equity-Ergebnis des Jahres 2010 belastete.

Am 13. März 2007 hat eine Tochtergesellschaft von Daimler, die den 22,5%-Anteil an der EADS hält, Eigenkapitalanteile an Investoren für 1.554 Mio. € in bar ausgegeben. Infolge dieser Transaktion weist der Konzern in der Bilanz Minderheitsanteile aus, die den Anteil der Investoren an der konsolidierten Tochtergesellschaft darstellen, die die Eigenkapitalanteile ausgegeben hat. Dieser Minderheitsanteil spiegelt den 33%-Anteil der Investoren an den Netto-Vermögenswerten dieser Tochtergesellschaft wider. Im Zusammenhang mit dieser Transaktion hatte Daimler im Zeitraum vom 1. Juli bis zum 30. September 2010 das Wahlrecht, die neu ausgegebenen Eigenkapitalanteile in 7,5% der Anteile an EADS oder in einen Barausgleich zu tauschen, der dem Marktwert dieser EADS-Anteile zu diesem Zeitpunkt entspricht. Im März 2010 hat Daimler entschieden, von dieser Option keinen Gebrauch zu machen. Daimler wird daher die EADS weiterhin mit einem Anteil von 22,5% in den Konzernabschluss einbeziehen.

**Tognum.** Der Beteiligungsbuchwert an bzw. der Ergebnisanteil der Tognum AG sind in der Segmentberichterstattung in der Überleitung zu den Konzern-Vermögenswerten bzw. zum Konzern-EBIT berücksichtigt.

**BBAC.** Der Beteiligungsbuchwert an bzw. die anteiligen Ergebnisse der Beijing Benz Automotive Co., Ltd. (BBAC) sind dem Segment Mercedes-Benz Cars zugeordnet.

**Kamaz.** Aufgrund vereinbarter Mitwirkungsrechte im Aufsichtsrat sowie umfangreicher vertraglicher Rechte als Minderheitsaktionär kann der Konzern einen maßgeblichen Einfluss bei Kamaz OAO (Kamaz) ausüben. Infolgedessen bezieht der Konzern die Beteiligung an Kamaz nach der Equity-Methode in den Konzernabschluss ein. Der Beteiligungsbuchwert und der Ergebnisanteil sind dem Segment Daimler Trucks zugeordnet. Im Jahr 2010 haben die Daimler AG und die Europäische Bank für Wiederaufbau und Entwicklung (EBRD) die Erhöhung ihrer strategischen Beteiligungen an Kamaz abgeschlossen. Daimler hat seinen Anteil an Kamaz um einen Prozentpunkt auf 11% erhöht; die restlichen 4% der Anteile werden rechtlich von der EBRD gehalten. Aufgrund der vertraglichen Gegebenheiten werden die von der EBRD gehaltenen Anteile nach IFRS Daimler wirtschaftlich zugerechnet.

**Übrige.** Bei den übrigen Gesellschaften ist die Beteiligung an der Tesla Motors, Inc. (Tesla) enthalten. Der Anteil des Konzerns lag zum 31. Dezember 2010 bei 7,9% (2009: 9,09%); der Börsenwert bzw. der Buchwert der Beteiligung betrug 149 bzw. 36 Mio. € zum 31. Dezember 2010. Aufgrund vereinbarter Mitwirkungsrechte im Aufsichtsrat sowie umfangreicher vertraglicher Rechte als Minderheitsaktionär kann der Konzern einen maßgeblichen Einfluss bei Tesla ausüben. Infolgedessen bezieht der Konzern die Beteiligung an Tesla nach der Equity-Methode in den Konzernabschluss ein. Der Beteiligungsbuchwert und der Ergebnisanteil sind dem Segment Mercedes-Benz Cars zugeordnet.

## 14. Forderungen aus Finanzdienstleistungen

Die Forderungen aus Finanzdienstleistungen setzen sich wie folgt zusammen:

|                                              | 31. Dezember 2010 |             |        | 31. Dezember 2009 |             |        |
|----------------------------------------------|-------------------|-------------|--------|-------------------|-------------|--------|
|                                              | Kurzfristig       | Langfristig | Gesamt | Kurzfristig       | Langfristig | Gesamt |
| in Millionen €                               |                   |             |        |                   |             |        |
| Forderungen aus Finanzdienstleistungen gegen |                   |             |        |                   |             |        |
| Endkunden                                    | 12.436            | 21.363      | 33.799 | 11.835            | 20.772      | 32.607 |
| Händler                                      | 6.131             | 1.091       | 7.222  | 4.808             | 1.001       | 5.809  |
| Übrige                                       | 76                | 1.017       | 1.093  | 125               | 1.105       | 1.230  |
| Buchwert (brutto)                            | 18.643            | 23.471      | 42.114 | 16.768            | 22.878      | 39.646 |
| Wertberichtigungen                           | -477              | -607        | -1.084 | -540              | -628        | -1.168 |
| Buchwert (netto)                             | 18.166            | 22.864      | 41.030 | 16.228            | 22.250      | 38.478 |



**Forderungstypen.** Forderungen gegen Endkunden enthalten Forderungen aus Finanzierungs- und Leasingverträgen gegen konzernfremde Dritte, die ihr Fahrzeug entweder über einen Händler oder direkt von Daimler bezogen haben.

Forderungen gegen Händler stellen Darlehensforderungen dar, die aus der Bestandsfinanzierung der von Daimler bezogenen Fahrzeuge resultieren. Darüber hinaus betreffen diese Forderungen auch die Finanzierung von anderen Vermögenswerten, welche die Händler von Dritten gekauft haben, insbesondere Gebrauchtfahrzeuge oder Immobilien (z. B. Verkaufsräume).

In den übrigen Forderungen werden Vermögenswerte aus Verträgen des Finanzdienstleistungsgeschäfts mit Dritten ausgewiesen, die nicht das Automobilgeschäft betreffen.

Sämtliche Zahlungsströme der Forderungen aus Finanzdienstleistungen werden in der Konzern-Kapitalflussrechnung im Cash Flow aus der Geschäftstätigkeit ausgewiesen.

**Wertberichtigungen.** Die Wertberichtigungen auf Forderungen aus Finanzdienstleistungen entwickelten sich wie folgt:

|                                             | 2010         | 2009  |
|---------------------------------------------|--------------|-------|
| in Millionen €                              |              |       |
| <b>Stand zum 1. Januar</b>                  | <b>1.168</b> | 934   |
| Zuführungen                                 | 534          | 850   |
| Inanspruchnahmen                            | -439         | -446  |
| Auflösungen                                 | -241         | -165  |
| Wechselkurseffekte und andere Veränderungen | 62           | -5    |
| <b>Stand zum 31. Dezember</b>               | <b>1.084</b> | 1.168 |

Im Jahr 2010 betrug der Gesamtaufwand aus Wertminderungen für Forderungen aus Finanzdienstleistungen 536 (2009: 853) Mio. €.

**Kreditrisiken.** Die folgende Tabelle gibt Informationen über die in den Forderungen aus Finanzdienstleistungen enthaltenen Kreditrisiken:

|                                                              | 2010          | 31. Dezember<br>2009 |
|--------------------------------------------------------------|---------------|----------------------|
| in Millionen €                                               |               |                      |
| Weder überfällige noch einzelwertberichtigte Forderungen     | 37.827        | 35.270               |
| Überfällige Forderungen, die nicht einzelwertberichtigt sind |               |                      |
| weniger als 30 Tage                                          | 1.195         | 1.219                |
| 30 bis 59 Tage                                               | 367           | 442                  |
| 60 bis 89 Tage                                               | 99            | 121                  |
| 90 bis 119 Tage                                              | 52            | 78                   |
| 120 Tage oder mehr                                           | 255           | 184                  |
| <b>Gesamt</b>                                                | <b>1.968</b>  | 2.044                |
| Einzelwertberichtigte Forderungen                            | 1.235         | 1.164                |
| <b>Buchwert (netto)</b>                                      | <b>41.030</b> | 38.478               |

Um die Kreditrisiken der nicht einzelwertberichtigten Forderungen abzudecken, werden Wertminderungsaufwendungen auf Gruppenbasis berücksichtigt.

Zum 31. Dezember 2010 betrugen die Buchwerte der Forderungen aus Finanzdienstleistungen, bei denen die Vertragsbedingungen neu verhandelt wurden und die ansonsten wertberichtigt oder überfällig wären, 399 (2009: 260) Mio. €.

Weitere Informationen über Finanzrisiken und die Risikoarten sind in Anmerkung 31 enthalten.

**Finanzierungsleasing.** Die Forderungen aus Finanzierungsleasing umfassen Leasingverträge, bei denen die wesentlichen Chancen und Risiken aus dem Leasinggeschäft auf den Leasingnehmer übertragen wurden.

Die Forderungen aus Finanzierungsleasing-Verträgen setzen sich wie folgt zusammen:

|                                          | 31. Dezember 2010 |                       |           |        | 31. Dezember 2009 |                       |           |        |
|------------------------------------------|-------------------|-----------------------|-----------|--------|-------------------|-----------------------|-----------|--------|
|                                          | < 1 Jahr          | 1 Jahr bis<br>5 Jahre | > 5 Jahre | Gesamt | < 1 Jahr          | 1 Jahr bis<br>5 Jahre | > 5 Jahre | Gesamt |
| in Millionen €                           |                   |                       |           |        |                   |                       |           |        |
| Vertragliche zukünftige Leasingzahlungen | 4.036             | 6.526                 | 1.076     | 11.638 | 4.103             | 6.461                 | 1.807     | 12.371 |
| Nicht garantierte Restbuchwerte          | 740               | 915                   | 165       | 1.820  | 740               | 975                   | 209       | 1.924  |
| Bruttoinvestition                        | 4.776             | 7.441                 | 1.241     | 13.458 | 4.843             | 7.436                 | 2.016     | 14.295 |
| Nicht realisierter Finanzertrag          | -530              | -846                  | -271      | -1.647 | -621              | -1.168                | -334      | -2.123 |
| Buchwert (brutto)                        | 4.246             | 6.595                 | 970       | 11.811 | 4.222             | 6.268                 | 1.682     | 12.172 |
| Wertberichtigungen                       | -189              | -275                  | -19       | -483   | -191              | -284                  | -6        | -481   |
| Buchwert (netto)                         | 4.057             | 6.320                 | 951       | 11.328 | 4.031             | 5.984                 | 1.676     | 11.691 |

**Forderungsverkäufe.** In Abhängigkeit von Marktgegebenheiten und vom Liquiditätsbedarf veräußert Daimler bestimmte Umsätze von Forderungen aus Finanzdienstleistungen gegen Endkunden und Händler an Dritte (z. B. Zweckgesellschaften). Daimler prüft vor einer Ausbuchung dieser Forderungen, ob die im Rahmen von Forderungsverkäufen rechtlich übertragenen Forderungen die Kriterien zur Ausbuchung nach den anzuwendenden Vorschriften erfüllen; werden die Kriterien nicht erfüllt, verbleiben die Forderungen in der Bilanz.

Forderungsverkäufe, welche die Kriterien für eine Ausbuchung nicht erfüllen, führten zum 31. Dezember 2010 zu einem Buchwert an Forderungen aus Finanzdienstleistungen in Höhe von 1.254 (2009: 1.006) Mio. €; die damit verbundenen Chancen und Risiken entsprechen im Wesentlichen denen der nicht veräußerten Forderungen. Die Verbindlichkeiten, die insgesamt mit den übertragenen und nicht ausgebuchten Forderungen im Zusammenhang stehen, ergeben sich aus Anmerkung 24.

## 15. Verzinsliche Wertpapiere

In der Konzernbilanz zum 31. Dezember 2010 sind verzinsliche Wertpapiere mit einem Buchwert von 2.096 Mio. € separat ausgewiesen. In den Jahren 2009 und 2008 waren diese innerhalb der übrigen finanziellen Vermögenswerte mit Buchwerten von 6.342 bzw. 814 Mio. € enthalten. Auf langfristige Wertpapiere entfielen davon 766 (2009: 1.224; 2008: 103) Mio. €. Die Jahreswerte wurden entsprechend angepasst.

Bei den verzinslichen Wertpapieren, die in die Liquiditätssteuerung des Konzerns einbezogen sind, handelt es sich um Fremdkapitalanteile, die auf einem aktiven Markt gehandelt werden und als zur Veräußerung verfügbar klassifiziert sind.

Weitere Angaben zu den verzinslichen Wertpapieren erfolgen in Anmerkung 30.

## 16. Übrige finanzielle Vermögenswerte

Der in der Konzernbilanz ausgewiesene Posten übrige finanzielle Vermögenswerte setzt sich aus den folgenden Klassen zusammen:

|                                                                                | 31. Dezember 2010 |             |        | 31. Dezember 2009 |             |        |
|--------------------------------------------------------------------------------|-------------------|-------------|--------|-------------------|-------------|--------|
|                                                                                | Kurzfristig       | Langfristig | Gesamt | Kurzfristig       | Langfristig | Gesamt |
| in Millionen €                                                                 |                   |             |        |                   |             |        |
| Zur Veräußerung verfügbare finanzielle Vermögenswerte                          | –                 | 2.199       | 2.199  | –                 | 1.084       | 1.084  |
| Davon Eigenkapitalanteile zum beizulegenden Zeitwert bewertet                  | –                 | 1.485       | 1.485  | –                 | 385         | 385    |
| Davon Eigenkapitalanteile zu Anschaffungskosten bewertet                       | –                 | 714         | 714    | –                 | 699         | 699    |
| Derivative Finanzinstrumente, die in ein Hedge Accounting einbezogen sind      | 345               | 471         | 816    | 474               | 600         | 1.074  |
| Erfolgswirksam zum beizulegenden Zeitwert bewertete finanzielle Vermögenswerte | 565               | 166         | 731    | 504               | 714         | 1.218  |
| Sonstige Forderungen und Vermögenswerte                                        | 1.337             | 358         | 1.695  | 1.364             | 395         | 1.759  |
|                                                                                | 2.247             | 3.194       | 5.441  | 2.342             | 2.793       | 5.135  |

Im Berichtsjahr wurden zu Anschaffungskosten bewertete Eigenkapitalanteile mit einem Buchwert in Höhe von 23 (2009: 8) Mio. € veräußert. Der dabei realisierte Gewinn belief sich auf 23 (2009: Verlust von 7) Mio. €. Für die zum 31. Dezember 2010 ausgewiesenen Anteile bestand grundsätzlich keine Veräußerungsabsicht.

Die erfolgswirksam zum beizulegenden Zeitwert bewerteten finanziellen Vermögenswerte beinhalten ausschließlich derivative Finanzinstrumente, die nicht in ein Hedge Accounting einbezogen sind.

Weitere Angaben zu den übrigen finanziellen Vermögenswerten erfolgen in Anmerkung 30.

## 17. Übrige Vermögenswerte

Die übrigen nicht finanziellen Vermögenswerte setzen sich wie folgt zusammen:

|                                                  | 31. Dezember 2010 |             |        | 31. Dezember 2009 |             |        |
|--------------------------------------------------|-------------------|-------------|--------|-------------------|-------------|--------|
|                                                  | Kurzfristig       | Langfristig | Gesamt | Kurzfristig       | Langfristig | Gesamt |
| in Millionen €                                   |                   |             |        |                   |             |        |
| Erstattungsansprüche aus Ertragsteuern           | 525               | 31          | 556    | 584               | 176         | 760    |
| Erstattungsansprüche aus sonstigen Steuern       | 1.181             | 17          | 1.198  | 989               | 20          | 1.009  |
| Erstattungsansprüche aufgrund Medicare Act (USA) | .                 | 112         | 112    | –                 | 122         | 122    |
| Erwartete sonstige Erstattungsansprüche          | 339               | 26          | 365    | 385               | 14          | 399    |
| Aktive Rechnungsabgrenzungsposten                | 298               | 81          | 379    | 225               | 52          | 277    |
| Übrige                                           | 278               | 141         | 419    | 169               | 112         | 281    |
|                                                  | 2.621             | 408         | 3.029  | 2.352             | 496         | 2.848  |

Die erwarteten sonstigen Erstattungsansprüche ergeben sich zum überwiegenden Teil aus Gewährleistungsansprüchen gegenüber Lieferanten für gewährte Produktgarantien.

## 18. Vorräte

|                                            | 31. Dezember<br>2010 | 31. Dezember<br>2009 |
|--------------------------------------------|----------------------|----------------------|
| in Millionen €                             |                      |                      |
| Roh-, Hilfs- und Betriebsstoffe            | 1.509                | 1.517                |
| Unfertige Erzeugnisse und Leistungen       | 2.002                | 1.626                |
| Fertige Erzeugnisse, Ersatzteile und Waren | 10.974               | 9.666                |
| Geleistete Anzahlungen                     | 59                   | 36                   |
|                                            | 14.544               | 12.845               |

Der in den Umsatzkosten ausgewiesene Aufwand aus der Abwertung auf Vorräte belief sich im Jahr 2010 auf 269 (2009: 299) Mio. €. Von den am 31. Dezember 2010 ausgewiesenen Vorräten wurden 1.403 (2009: 1.482) Mio. € zu ihrem Nettoveräußerungswert bilanziert. Die Buchwerte der Vorräte, die voraussichtlich nach mehr als zwölf Monaten realisiert werden, betrugen 718 (2009: 634) Mio. €; hierbei handelt es sich überwiegend um Ersatzteile.

Aufgrund der Vorschriften zur Sicherung von Verpflichtungen aus Altersteilzeit und Langzeitkonten wurde dem Daimler Pension Trust e.V. der in den Vorräten enthaltene Bestand an Geschäftsfahrzeugen der Daimler AG in Höhe von 482 (2009: 457) Mio. € sicherungsübereignet.

In den Vorräten sind aufgrund der Inanspruchnahme von Sicherheiten Vermögenswerte mit einem Buchwert in Höhe von 124 (2009: 136) Mio. € enthalten. Diese Vermögenswerte werden im Rahmen des normalen Geschäftszyklus verwertet.

## 19. Forderungen aus Lieferungen und Leistungen

|                    | 31. Dezember<br>2010 | 2009  |
|--------------------|----------------------|-------|
| in Millionen €     |                      |       |
| Buchwert (brutto)  | 7.598                | 5.675 |
| Wertberichtigungen | -406                 | -390  |
| Buchwert (netto)   | 7.192                | 5.285 |

Von den Forderungen aus Lieferungen und Leistungen weisen 25 (2009: 8) Mio. € eine Restlaufzeit von mehr als einem Jahr auf.

**Wertberichtigungen.** Die Wertberichtigungen auf Forderungen aus Lieferungen und Leistungen entwickelten sich wie folgt:

|                                             | 2010       | 2009 |
|---------------------------------------------|------------|------|
| in Millionen €                              |            |      |
| <b>Stand zum 1. Januar</b>                  | <b>390</b> | 620  |
| Netto-Zuführungen                           | 86         | 50   |
| Inanspruchnahmen                            | -73        | -281 |
| Wechselkurseffekte und andere Veränderungen | 3          | 1    |
| <b>Stand zum 31. Dezember</b>               | <b>406</b> | 390  |

Im Jahr 2010 betrug der Gesamtaufwand aus Wertminderungen für Forderungen aus Lieferungen und Leistungen 176 (2009: 186) Mio. €.

**Kreditrisiken.** Die folgende Tabelle gibt Informationen über die in den Forderungen aus Lieferungen und Leistungen enthaltenen Kreditrisiken:

|                                                              | 31. Dezember<br>2010 | 2009  |
|--------------------------------------------------------------|----------------------|-------|
| in Millionen €                                               |                      |       |
| Weder überfällige noch einzelwertberichtigte Forderungen     | 4.327                | 3.026 |
| Überfällige Forderungen, die nicht einzelwertberichtigt sind |                      |       |
| weniger als 30 Tage                                          | 665                  | 512   |
| 30 bis 59 Tage                                               | 153                  | 110   |
| 60 bis 89 Tage                                               | 51                   | 62    |
| 90 bis 119 Tage                                              | 48                   | 34    |
| 120 Tage und mehr                                            | 308                  | 394   |
| Gesamt                                                       | 1.225                | 1.112 |
| Einzelwertberichtigte Forderungen                            | 1.640                | 1.147 |
| Buchwert (netto)                                             | 7.192                | 5.285 |

Um die Kreditrisiken der nicht einzelwertberichtigten Forderungen abzudecken, werden Wertminderungsaufwendungen auf Gruppenbasis berücksichtigt.

Weitere Informationen über Finanzrisiken und die Risikoarten sind in Anmerkung 30 enthalten.

**Forderungsverkäufe.** In Abhängigkeit von Marktgegebenheiten und vom Liquiditätsbedarf veräußert Daimler bestimmte Umsätze von Forderungen aus Lieferungen und Leistungen an Dritte. Daimler prüft vor einer Ausbuchung dieser Forderungen, ob die im Rahmen von Forderungsverkäufen rechtlich übertragenen Forderungen die Kriterien zur Ausbuchung nach den anzuwendenden Vorschriften erfüllen; werden die Kriterien nicht erfüllt, verbleiben die Forderungen in der Bilanz.

Verkaufte Forderungen, die die Kriterien für eine Ausbuchung nicht erfüllen, führten zum 31. Dezember 2010 zu einem Buchwert an Forderungen aus Lieferungen und Leistungen in Höhe von 83 (2009: 38) Mio. €. Die Verbindlichkeiten, die insgesamt mit nicht ausgebuchten Forderungsverkäufen im Zusammenhang stehen, ergeben sich aus Anmerkung 24.

## 20. Eigenkapital

Siehe hierzu auch die Entwicklung des Konzern-Eigenkapitals. Das gezeichnete Kapital ist in nennwertlose Stückaktien unterteilt. Sämtliche Aktien sind voll einbezahlt. Jede Stückaktie gewährt eine Stimme in der Hauptversammlung der Daimler AG und, gegebenenfalls mit Ausnahme eventueller nicht dividendenberechtigter junger Aktien, den gleichen Anteil am Gewinn nach Maßgabe der von der Hauptversammlung beschlossenen Dividendenausschüttung.

|                                                                                                                                | 2010  | 2009  |
|--------------------------------------------------------------------------------------------------------------------------------|-------|-------|
| in Millionen Aktien                                                                                                            |       |       |
| Ausgegebene Aktien am 1. Januar                                                                                                | 1.061 | 964   |
| Im Rahmen des Aktienrückkaufprogramms zurückgekauft und nicht eingezogene Aktien (Vorjahre)                                    | -37   | -37   |
| In Umlauf befindliche Aktien am 1. Januar                                                                                      | 1.024 | 927   |
| Schaffung neuer Aktien durch Ausübung von Optionsrechten aus Stock-Option-Plänen                                               | 5     | 1     |
| Schaffung neuer Aktien durch Kapitalerhöhung                                                                                   | –     | 96    |
| Verwendung eigener Aktien zum Erwerb einer gegenseitigen Kapitalbeteiligung der Daimler AG an Renault/Nissan                   | 35    | –     |
| Rückkauf eigener Aktien durch Ausübung eines Termingeschäfts zum Zweck der Erfüllung der Ansprüche ehemaliger AEG Altaktionäre | -1    | –     |
| Verwendung eigener Aktien im Zusammenhang mit der Erfüllung von Ansprüchen ehemaliger AEG Altaktionäre                         | 3     | –     |
| In Umlauf befindliche Aktien am 31. Dezember                                                                                   | 1.066 | 1.024 |
| Im Rahmen des Aktienrückkaufprogramms zurückgekauft und noch nicht eingezogene Aktien (Vorjahre)                               | –     | 37    |
| Ausgegebene Aktien am 31. Dezember                                                                                             | 1.066 | 1.061 |

**Aktienrückkaufprogramm.** Am 9. April 2008 hatte die Hauptversammlung die Daimler AG ermächtigt, bis zum 9. Oktober 2009 für bestimmte vordefinierte Zwecke eigene Aktien im Umfang von bis zu 10% des zum Zeitpunkt der Beschlussfassung bestehenden Grundkapitals, z. B. zum Zwecke der Verwendung im Rahmen von Unternehmenszusammenschlüssen und -erwerben oder zur Bedienung von Stock Options zu erwerben. Zwischen dem 18. Juni 2008 und dem 23. Oktober 2008 hat die Daimler AG durch Rückerwerb von insgesamt 37,3 Mio. Aktien, entsprechend rund 3,87% des zum Zeitpunkt des Hauptversammlungsbeschlusses bestehenden Grundkapitals, von dieser Ermächtigung teilweise Gebrauch gemacht. Im Geschäftsjahr 2008 wurden 0,2 Mio. eigene Aktien zur Bedienung von Ausübungen unter dem Stock-Option-Programm verwendet.

Soweit von der Ermächtigung der Hauptversammlung vom 9. April 2008 noch kein Gebrauch gemacht war, wurde Sie mit Beschluss der Hauptversammlung vom 8. April 2009 aufgehoben. Gleichzeitig wurde Daimler erneut ermächtigt, bis zum 8. Oktober 2010 für bestimmte vordefinierte Zwecke, unter anderem zum Zweck der Einziehung oder der Verwendung im Rahmen von Unternehmenszusammenschlüssen und -erwerben, bis zu 10% des zum Zeitpunkt der Beschlussfassung der Hauptversammlung bestehenden Grundkapitals zu erwerben. Zum 31. Dezember 2009 befanden sich noch 37,1 Mio. der im Jahr 2008 erworbenen eigenen Aktien im Bestand der Daimler AG.

Die nicht genutzte Ermächtigung der Hauptversammlung vom 8. April 2009 zum Erwerb eigener Aktien bis 8. Oktober 2010 wurde durch Beschluss der Hauptversammlung vom 14. April 2010 aufgehoben. Gleichzeitig wurde die Daimler AG bis zum 13. April 2015 wiederum ermächtigt, unter anderem zum Zwecke der Einziehung oder der Verwendung im Rahmen von Unternehmenszusammenschlüssen und -erwerben, eigene Aktien im Umfang von bis zu 10% des zum Zeitpunkt der Beschlussfassung der Hauptversammlung bestehenden Grundkapitals zu erwerben. Von dieser neuen Ermächtigung wurde im Berichtszeitraum kein Gebrauch gemacht.

Im Geschäftsjahr 2010 wurden 32,9 Mio. eigene Aktien, entsprechend einem anteiligen Betrag am Grundkapital von 94 Mio. € bzw. 3,1% im Gegenwert von insgesamt 1.278 Mio. € im Rahmen einer gegenseitigen Kapitalbeteiligung zum Erwerb von jeweils 3,1% an der Renault S.A. und der Nissan Motors Co. Ltd. verwendet (siehe auch Anmerkung 3). 2,4 Mio. Aktien, entsprechend einem anteiligen Betrag am Grundkapital von 7 Mio. € bzw. 0,23% wurden zum Gesamtpreis von 90 Mio. € über die Börse veräußert, um damit im Rahmen der Transaktion eine bare Zuzahlung zu begleichen.



Mit rechtskräftiger Entscheidung vom November 2009 hat das Oberlandesgericht Frankfurt am Main das im Beherrschungs- und Gewinnabführungsvertrag zwischen der ehemaligen Daimler-Benz AG und der ehemaligen AEG AG aus 1988 vorgesehene Abfindungsverhältnis sowie die ebenfalls dort geregelte Ausgleichszahlung für entgangene AEG-Dividenden zu Gunsten der ehemaligen AEG-Aktionäre nachgebessert. In diesem Zusammenhang wurden 1,5 Mio. eigene Aktien, entsprechend einem anteiligen Betrag am Grundkapital von 4 Mio. € bzw. 0,15% im Berichtszeitraum zum Preis von insgesamt 40 Mio. € durch Ausübung eines Termingeschäftes erworben. Dieses Termingeschäft war ohne eine Verpflichtung zum Erwerb von Aktien mit Blick auf das oben genannte Spruchverfahren abgeschlossen worden. Insgesamt wurden im Jahr 2010 Ansprüche ehemaliger AEG-Aktionäre durch Verwendung von 3,1 Mio. eigene Aktien im Gegenwert von 108 Mio. € beglichen. Davon wurden 1,2 Mio. Aktien, entsprechend einem anteiligen Betrag von 3 Mio. € bzw. 0,11% des Grundkapitals im Geschäftsjahr 2010 über die Börse veräußert, um den Erlös von insgesamt 44 Mio. € zur Erfüllung von Barausgleichsansprüchen der ehemaligen AEG Aktionäre aus dem Spruchverfahren zu verwenden. Die weiteren 1,9 Mio. Aktien, entsprechend einem anteiligen Betrag am Grundkapital von 6 Mio. € bzw. 0,19%, wurden in Erfüllung der Ansprüche auf Lieferung zusätzlicher Daimler-Aktien an ehemalige AEG-Aktionäre übertragen.

Zum 31. Dezember 2010 befinden sich noch 0,2 Mio. Aktien, entsprechend einem anteiligen Betrag von 1 Mio. € bzw. 0,02% des Grundkapitals, die bereits auf Basis der Ermächtigung der Hauptversammlung vom 9. April 2008 erworben worden waren, im Bestand der Daimler AG.

**Belegschaftsaktienprogramme.** Im Jahr 2010 hat Daimler im Zusammenhang mit Belegschaftsaktienprogrammen 0,4 Mio. Daimler Aktien erworben und an Mitarbeiter ausgegeben. Im Jahr 2009 wurden weder Daimler-Aktien erworben noch an Mitarbeiter ausgegeben.

**Genehmigtes Kapital.** Durch Beschluss der Hauptversammlung vom 9. April 2008 wurde der Vorstand ermächtigt, das Grundkapital der Daimler AG in der Zeit bis zum 8. April 2013 mit Zustimmung des Aufsichtsrats gegen Bareinlage um bis zu 500 Mio. € sowie darüber hinaus gegen Sacheinlage um bis zu 500 Mio. € zu erhöhen (Genehmigte Kapitalia I und II) und unter bestimmten Voraussetzungen mit Zustimmung des Aufsichtsrats das Bezugsrecht der Aktionäre auszuschließen. Unter teilweiser Ausnutzung des genehmigten Kapitals wurde das Grundkapital der Daimler AG im März 2009 von rund 2.768 Mio. € um einen Betrag von rund 276 Mio. € auf rund 3.044 Mio. € gegen Bareinlage unter Ausschluss des Bezugsrechts der Aktionäre durch Ausgabe von rund 96,4 Mio. neuen auf den Namen lautenden Stückaktien an eine mittelbare Tochtergesellschaft der Aabar Investments PJSC, Abu Dhabi (Aabar) erhöht. Angefallene Transaktionskosten von 7 Mio. € (nach Steuern) wurden mit der Kapitalrücklage verrechnet.

Mit Beschluss der Hauptversammlung vom 8. April 2009 wurde der Vorstand erneut ermächtigt, das Grundkapital der Daimler AG bis zum 7. April 2014 mit Zustimmung des Aufsichtsrats durch Ausgabe neuer, auf den Namen lautender Stückaktien gegen Bar- und/oder gegen Sacheinlage ganz oder in Teilbeträgen, einmal oder mehrmals um bis zu insgesamt 1.000 Mio. € zu erhöhen (Genehmigtes Kapital 2009). Der Vorstand wurde unter anderem auch ermächtigt, unter bestimmten Voraussetzungen mit Zustimmung des Aufsichtsrats das Bezugsrecht der Aktionäre auszuschließen. In diesem Zusammenhang hat die Hauptversammlung ferner beschlossen, die im Jahr 2008 genehmigten Kapitalia I und II für die Zeit ab Wirksamwerden des neu geschaffenen Genehmigten Kapitals 2009 aufzuheben, soweit zum Zeitpunkt des Wirksamwerdens der Aufhebung noch nicht von ihnen Gebrauch gemacht worden war.

**Bedingtes Kapital.** Mit Beschluss der Hauptversammlung vom 14. April 2010 wurde der Vorstand ermächtigt, mit Zustimmung des Aufsichtsrats bis zum 13. April 2015 ein- oder mehrmals Wandel- und/oder Optionsschuldverschreibungen oder eine Kombination dieser Instrumente im Gesamtnennbetrag von bis zu 10 Mrd. € mit einer Laufzeit von längstens 10 Jahren zu begeben und den Inhabern bzw. Gläubigern dieser Schuldverschreibungen Wandlungs- oder Optionsrechte auf neue, auf den Namen lautende Stückaktien der Daimler AG mit einem anteiligen Betrag des Grundkapitals von insgesamt bis zu 500 Mio. €, nach näherer Maßgabe der Wandel- bzw. Optionsanleihebedingungen, zu gewähren. Die Schuldverschreibungen können auch durch unmittelbare oder mittelbare Mehrheitsbeteiligungen der Daimler AG begeben werden. Dementsprechend wurde das Grundkapital um bis zu 500 Mio. € bedingt erhöht (Bedingtes Kapital 2010). Von der Ermächtigung zur Ausgabe von Wandel- und/oder Optionsschuldverschreibungen wurde bislang kein Gebrauch gemacht.

**Stock-Option-Pläne.** Zum 31. Dezember 2010 waren 11 Mio. Optionen mit Bezugsrechten auf Aktien mit einem anteiligen Betrag am Grundkapital von insgesamt 32 Mio. € aus den Stock-Option-Plänen noch nicht ausgeübt.

**Dividende.** Nach dem deutschen Aktiengesetz bemessen sich die an die Aktionäre ausschüttbaren Dividenden nach dem im handelsrechtlichen Jahresabschluss der Daimler AG (Einzelabschluss) ausgewiesenen Bilanzgewinn. Der Hauptversammlung wird vorgeschlagen, aus dem Bilanzgewinn des Jahres 2010 der Daimler AG 1.971 Mio. € (1,85 € je dividendenberechtigter Stückaktie) an die Aktionäre auszuschütten.

Die nachfolgende Tabelle zeigt die Veränderungen der übrigen Rücklagen:

|                                                                                             | Vor<br>Steuern | Steuern | 2010<br>Nach<br>Steuern | Vor<br>Steuern | Steuern | 2009<br>Nach<br>Steuern |
|---------------------------------------------------------------------------------------------|----------------|---------|-------------------------|----------------|---------|-------------------------|
| in Millionen €                                                                              |                |         |                         |                |         |                         |
| Unrealisierte Gewinne aus der Währungsumrechnung                                            | 1.200          | –       | 1.200                   | 267            | –       | 267                     |
| Zur Veräußerung verfügbare finanzielle Vermögenswerte                                       |                |         |                         |                |         |                         |
| Unrealisierte Gewinne/Verluste                                                              | 137            | 3       | 140                     | 255            | -8      | 247                     |
| Umgliederungen von realisierten Gewinnen (-)/Verlusten                                      | -265           | 4       | -261                    | –              | –       | –                       |
| Unrealisierte Gewinne/Verluste aus zur Veräußerung verfügbaren finanziellen Vermögenswerten | -128           | 7       | -121                    | 255            | -8      | 247                     |
| Derivative Finanzinstrumente                                                                |                |         |                         |                |         |                         |
| Unrealisierte Gewinne/Verluste                                                              | -987           | 301     | -686                    | -17            | 54      | 37                      |
| Umgliederungen von realisierten Gewinnen (-)/Verlusten                                      | 291            | -89     | 202                     | -414           | 69      | -345                    |
| Unrealisierte Gewinne/Verluste aus derivativen Finanzinstrumenten                           | -696           | 212     | -484                    | -431           | 123     | -308                    |
| At-equity bewertete Finanzinvestitionen                                                     |                |         |                         |                |         |                         |
| Unrealisierte Gewinne/Verluste                                                              | -523           | 165     | -358                    | 441            | -116    | 325                     |
| Umgliederungen von realisierten Gewinnen (-)/Verlusten                                      | -134           | 43      | -91                     | -191           | 61      | -130                    |
| Unrealisierte Gewinne/Verluste aus at-equity bewerteten Finanzinvestitionen                 | -657           | 208     | -449                    | 250            | -55     | 195                     |
| Sonstiges Ergebnis                                                                          | -281           | 427     | 146                     | 341            | 60      | 401                     |

Im Jahr 2010 sind in der Zeile »Unrealisierte Gewinne/Verluste aus at-equity bewerteten Finanzinvestitionen« die folgenden Komponenten enthalten (nur Anteil der auf Aktionäre der Daimler AG entfallenden Werte): unrealisierte Gewinne aus der Währungsumrechnung vor Steuern und nach Steuern von 40 (2009: unrealisierte Gewinne vor Steuern und nach Steuern von 31) Mio. €, unrealisierte Verluste aus zur Veräußerung verfügbaren finanziellen Vermögenswerten vor Steuern von 15 und nach Steuern von 19 (2009: unrealisierte Gewinne vor Steuern von 28 und nach Steuern von 26) Mio. € und unrealisierte Verluste aus derivativen Finanzinstrumenten vor Steuern von 486 und nach Steuern von 336 (2009: unrealisierte Gewinne vor Steuern von 42 und nach Steuern von 27) Mio. €.

Von den Veränderungen der übrigen Rücklagen entfallen auf die Minderheitsanteile:

|                                                                             | Vor<br>Steuern | Steuern | 2010<br>Nach<br>Steuern | Vor<br>Steuern | Steuern | 2009<br>Nach<br>Steuern |
|-----------------------------------------------------------------------------|----------------|---------|-------------------------|----------------|---------|-------------------------|
| in Millionen €                                                              |                |         |                         |                |         |                         |
| Unrealisierte Gewinne/Verluste aus der Währungsumrechnung                   | 48             | –       | 48                      | -7             | –       | -7                      |
| Unrealisierte Gewinne/Verluste aus at-equity bewerteten Finanzinvestitionen | -196           | 62      | -134                    | 148            | -38     | 110                     |
| Sonstiges Ergebnis                                                          | -148           | 62      | -86                     | 141            | -38     | 103                     |

## 21. Aktienorientierte Vergütung

Der Konzern verfügt zum 31. Dezember 2010 über die Performance-Phantom-Share-Pläne (PPSP) 2007 bis 2010 und die Stock-Option-Pläne (SOP) 2001 bis 2004. Die nicht ausgeübten Rechte des Stock-Option-Plan 2000 sind zum 21. April 2010 verfallen. Die in den Jahren 2003 und 2004 gewährten Stock Options werden als aktienorientierte Vergütungsformen mit Ausgleich durch Eigenkapitalinstrumente mit dem beizulegenden Zeitwert zum Zeitpunkt der Planaufgabe angesetzt. Die PPSP werden als aktienorientierte Vergütungsinstrumente mit Barausgleich mit dem jeweiligen beizulegenden Zeitwert zum Bilanzstichtag bewertet.

Die PPSP werden am Ende ihrer vertraglich festgelegten Laufzeiten ausbezahlt; eine vorzeitige, anteilige Auszahlung ist nur unter bestimmten Bedingungen beim Ausscheiden aus dem Konzern möglich. Der PPSP 2006 wurde planmäßig im ersten Quartal 2010 ausbezahlt.

Im Zusammenhang mit der aktienorientierten Vergütung ergaben sich in der Gewinn- und Verlustrechnung sowie in der Bilanz folgende Effekte (ohne Berücksichtigung von Ertragsteuern):

|                | Gewinn- und Verlustrechnung |      | Rückstellung |      |
|----------------|-----------------------------|------|--------------|------|
|                | Aufwand                     |      | 31. Dezember |      |
|                | 2010                        | 2009 | 2010         | 2009 |
| in Millionen € |                             |      |              |      |
| PPSP           | -69                         | -31  | 124          | 72   |
| SOP            | -4                          | -1   | -            | -    |
|                | -73                         | -32  | 124          | 72   |

Aufwendungen in der Gewinn- und Verlustrechnung aus Rechten von aktiven Mitgliedern des Vorstands:

|                | Dr. Dieter Zetsche |      | Dr. Wolfgang Bernhard |      | Wilfried Porth |      |
|----------------|--------------------|------|-----------------------|------|----------------|------|
|                | 2010               | 2009 | 2010                  | 2009 | 2010           | 2009 |
| in Millionen € |                    |      |                       |      |                |      |
| PPSP           | -3,5               | -1,7 | -0,6                  | -    | -0,9           | -0,3 |
| SOP            | -2,0               | -0,1 | -                     | -    | -              | -    |

|                | Andreas Renschler |      | Bodo Uebber |      | Dr. Thomas Weber |      |
|----------------|-------------------|------|-------------|------|------------------|------|
|                | 2010              | 2009 | 2010        | 2009 | 2010             | 2009 |
| in Millionen € |                   |      |             |      |                  |      |
| PPSP           | -1,6              | -0,7 | -1,7        | -0,8 | -1,5             | -0,7 |
| SOP            | -                 | -    | -0.9        | -0.1 | -0.8             | -0.1 |

Die Angaben in der Tabelle stellen keine zugeflossene und auch keine zugesicherte Vergütung dar, sondern einen nach IFRS ermittelten Aufwand. Angaben über die Vorstandsvergütung im Geschäftsjahr 2010 sind im Vergütungsbericht auf den Seiten 152 f. dargestellt.

**Performance-Phantom-Share-Pläne.** Im Jahr 2010 hat der Konzern, ebenso wie in den Jahren 2005 bis 2009, einen Performance-Phantom-Share-Plan (PPSP) ausgegeben. Im Rahmen des PPSP gewährt Daimler bezugsberechtigten Mitarbeitern virtuelle Aktien (Phantom Shares), die nach vier Jahren dazu berechtigen, eine Auszahlung in bar zu erhalten. Der Auszahlungsbetrag ergibt sich aus der Multiplikation der (endgültig) erdienten Anzahl der Phantom Shares (wird nach drei Jahren in Abhängigkeit vom Grad der Erreichung bestimmter Konzernkennzahlen festgelegt) mit dem Kurs der Daimler-Aktie (ermittelt als durchschnittlicher Kurs innerhalb eines festgelegten Zeitraums am Ende der vierjährigen Planlaufzeit). Bei den in den Jahren 2009 und 2010 gewährten Plänen ist der Kurs der Daimler-Aktie bei Auszahlung begrenzt auf das 2,5-fache des Kurses bei Gewährung.

Die Ermittlung der Zielerreichung basiert auf dem Return on Net Assets und dem Return on Sales im Vergleich zu Benchmarks, die von Wettbewerbern sowie internen Zielgrößen abgeleitet sind.

Der Konzern bilanziert die Verpflichtung aus den PPSP in den Rückstellungen für sonstige Risiken. Da die Auszahlung pro erdientem Phantom Share vom Kurs der Daimler-Aktie abhängig ist, stellt der Aktienkurs der Daimler-Aktie nahezu vollständig den beizulegenden Zeitwert pro Phantom Share zum Bilanzstichtag dar. Der in den einzelnen Jahren anteilig berücksichtigte Aufwand aus den PPSP richtete sich nach dem Kurs der Daimler-Aktie und einer Schätzung des Zielerreichungsgrades.

**Stock-Option-Pläne.** Im April 2000 hatte die Hauptversammlung den Daimler Stock-Option-Plänen (SOP) zugestimmt. Diese Pläne sahen vor, bezugsberechtigten Mitarbeitern Stock Options zum Bezug von Daimler-Aktien zu gewähren. Die im Rahmen dieser Pläne gewährten Optionen können zu einem vorher festgelegten Referenzpreis je Daimler-Aktie zuzüglich eines Aufschlags von 20% ausgeübt werden. Die Optionen sind je zur Hälfte frühestens zwei bzw. drei Jahre nach Gewährung ausübbar. Nicht ausgeübte Optionen verfallen zehn Jahre nach Gewährung. Liegt der Börsenkurs der Daimler-Aktie bei Ausübung mindestens 20% über dem Referenzpreis, erhält der Berechtigte einen Geldbetrag in Höhe des 20%igen Aufschlags. Aus diesen Plänen wurden letztmalig 2004 neue Stock Options gewährt.

Im Falle von Ausübungen hat Daimler bisher im Wesentlichen neue Aktien ausgegeben.

Die Basisdaten des SOP (in Mio. Stück) stellen sich wie folgt dar:

|                        | Referenz-<br>preis | Ausübungs-<br>preis | Gewährte<br>Optionen | Bestehende<br>Optionen<br>31. Dezember 2010 | Ausübbar<br>Optionen |
|------------------------|--------------------|---------------------|----------------------|---------------------------------------------|----------------------|
| Option gewährt im Jahr |                    |                     |                      |                                             |                      |
| 2001                   | 55,80 €            | 66,96 €             | 18,7                 | 4,6                                         | 4,6                  |
| 2002                   | 42,93 €            | 51,52 €             | 20,0                 | 1,8                                         | 1,8                  |
| 2003                   | 28,67 €            | 34,40 €             | 20,5                 | 1,9                                         | 1,9                  |
| 2004                   | 36,31 €            | 43,57 €             | 18,0                 | 2,8                                         | 2,8                  |

Die Optionen, die im Jahr 2004 an den Vorstand gewährt wurden und für die der Präsidialausschuss – entsprechend den Empfehlungen des Deutschen Corporate Governance Kodex – bei außerordentlichen, nicht vorhergesehenen Entwicklungen eine Begrenzungsmöglichkeit vereinbaren oder sich eine solche Begrenzungsmöglichkeit vorbehalten kann, werden mit dem inneren Wert zum Bilanzstichtag bewertet.

Entwicklung der ausgegebenen Stock Options:

|                              | Anzahl der<br>Optionsrechte<br>Mio. Stück | 2010<br>Durchschnitt-<br>licher Aus-<br>übungspreis<br>€ je Stück | Anzahl der<br>Optionsrechte<br>Mio. Stück | 2009<br>Durchschnitt-<br>licher Aus-<br>übungspreis<br>€ je Stück |
|------------------------------|-------------------------------------------|-------------------------------------------------------------------|-------------------------------------------|-------------------------------------------------------------------|
| Bestand am Jahresanfang      | 22,4                                      | 56,57                                                             | 24,3                                      | 56,61                                                             |
| Gewährte Optionen            | –                                         | –                                                                 | –                                         | –                                                                 |
| Ausgeübt                     | -4,5                                      | 45,04                                                             | -0,2                                      | 34,40                                                             |
| Abgänge/Verfallen            | -6,8                                      | 70,07                                                             | -1,7                                      | 60,15                                                             |
| Noch bestehend am Jahresende | 11,1                                      | 52,90                                                             | 22,4                                      | 56,57                                                             |
| Ausübbar am Jahresende       | 11,1                                      | 52,90                                                             | 22,4                                      | 56,57                                                             |

Der gewichtete durchschnittliche Kurs der Daimler-Aktie bei Ausübung lag bei 50,42 (2009: 35,07) €. Die gewichtete durchschnittliche Restlaufzeit der noch nicht ausgeübten Optionen beträgt zum 31. Dezember 2010 1,5 Jahre (2009: 2,1 Jahre).

Entwicklung der ausgegebenen Stock Options von aktiven Mitgliedern des Vorstands:

#### Dr. Dieter Zetsche

|                              | Anzahl der<br>Optionsrechte<br>Mio. Stück | 2010<br>Durchschnittlicher Aus-<br>übungspreis<br>€ je Stück | Anzahl der<br>Optionsrechte<br>Mio. Stück | 2009<br>Durchschnittlicher Aus-<br>übungspreis<br>€ je Stück |
|------------------------------|-------------------------------------------|--------------------------------------------------------------|-------------------------------------------|--------------------------------------------------------------|
| Bestand am Jahresanfang      | 1,0                                       | 52,99                                                        | 1,0                                       | 52,99                                                        |
| Gewährte Optionen            | -                                         | -                                                            | -                                         | -                                                            |
| Ausgeübt                     | -0,3                                      | 51,52                                                        | -                                         | -                                                            |
| Abgänge/Verfallen            | -0,1                                      | 74,76                                                        | -                                         | -                                                            |
| Noch bestehend am Jahresende | 0,6                                       | 49,04                                                        | 1,0                                       | 52,99                                                        |
| Ausübbar am Jahresende       | 0,6                                       | 49,04                                                        | 1,0                                       | 52,99                                                        |
| Gewichtete Restlaufzeit      |                                           | 1,5 Jahre                                                    |                                           | 2,0 Jahre                                                    |

#### Dr. Wolfgang Bernhard

|                              | Anzahl der<br>Optionsrechte<br>Mio. Stück | 2010<br>Durchschnittlicher Aus-<br>übungspreis<br>€ je Stück | Anzahl der<br>Optionsrechte<br>Mio. Stück | 2009<br>Durchschnittlicher Aus-<br>übungspreis<br>€ je Stück |
|------------------------------|-------------------------------------------|--------------------------------------------------------------|-------------------------------------------|--------------------------------------------------------------|
| Bestand am Jahresanfang      | -                                         | -                                                            | -                                         | -                                                            |
| Gewährte Optionen            | -                                         | -                                                            | -                                         | -                                                            |
| Ausgeübt                     | -                                         | -                                                            | -                                         | -                                                            |
| Abgänge/Verfallen            | -                                         | -                                                            | -                                         | -                                                            |
| Noch bestehend am Jahresende | -                                         | -                                                            | -                                         | -                                                            |
| Ausübbar am Jahresende       | -                                         | -                                                            | -                                         | -                                                            |
| Gewichtete Restlaufzeit      |                                           | -                                                            |                                           | -                                                            |

#### Wilfried Porth

|                              | Anzahl der<br>Optionsrechte <sup>1</sup><br>Mio. Stück | 2010<br>Durchschnittlicher Aus-<br>übungspreis<br>€ je Stück | Anzahl der<br>Optionsrechte<br>Mio. Stück | 2009<br>Durchschnittlicher Aus-<br>übungspreis<br>€ je Stück |
|------------------------------|--------------------------------------------------------|--------------------------------------------------------------|-------------------------------------------|--------------------------------------------------------------|
| Bestand am Jahresanfang      | .                                                      | 65,40                                                        | .                                         | 65,40                                                        |
| Gewährte Optionen            | -                                                      | -                                                            | -                                         | -                                                            |
| Ausgeübt                     | .                                                      | 51,52                                                        | -                                         | -                                                            |
| Abgänge/Verfallen            | .                                                      | 74,76                                                        | -                                         | -                                                            |
| Noch bestehend am Jahresende | .                                                      | 66,96                                                        | .                                         | 65,40                                                        |
| Ausübbar am Jahresende       | .                                                      | 66,96                                                        | .                                         | 65,40                                                        |
| Gewichtete Restlaufzeit      |                                                        | 0,3 Jahre                                                    |                                           | 1,0 Jahre                                                    |

1 Für die Anzahl der Optionsrechte erfolgt rundungsbedingt teilweise kein Ausweis.



## Andreas Renschler

|                              | Anzahl der<br>Optionsrechte <sup>1</sup><br>Mio. Stück | 2010<br>Durchschnitt-<br>licher Aus-<br>übungspreis<br>€ je Stück | Anzahl der<br>Optionsrechte<br>Mio. Stück | 2009<br>Durchschnitt-<br>licher Aus-<br>übungspreis<br>€ je Stück |
|------------------------------|--------------------------------------------------------|-------------------------------------------------------------------|-------------------------------------------|-------------------------------------------------------------------|
| Bestand am Jahresanfang      | 0,2                                                    | 51,88                                                             | 0,2                                       | 51,88                                                             |
| Gewährte Optionen            | -                                                      | -                                                                 | -                                         | -                                                                 |
| Ausgeübt                     | .                                                      | 48,67                                                             | -                                         | -                                                                 |
| Abgänge/Verfallen            | .                                                      | 74,76                                                             | -                                         | -                                                                 |
| Noch bestehend am Jahresende | 0,1                                                    | 48,46                                                             | 0,2                                       | 51,88                                                             |
| Ausübbar am Jahresende       | 0,1                                                    | 48,46                                                             | 0,2                                       | 51,88                                                             |
| Gewichtete Restlaufzeit      |                                                        | 1,7 Jahre                                                         |                                           | 2,2 Jahre                                                         |

1 Für die Anzahl der Optionsrechte erfolgt rundungsbedingt teilweise kein Ausweis.

## Bodo Uebber

|                              | Anzahl der<br>Optionsrechte <sup>1</sup><br>Mio. Stück | 2010<br>Durchschnitt-<br>licher Aus-<br>übungspreis<br>€ je Stück | Anzahl der<br>Optionsrechte<br>Mio. Stück | 2009<br>Durchschnitt-<br>licher Aus-<br>übungspreis<br>€ je Stück |
|------------------------------|--------------------------------------------------------|-------------------------------------------------------------------|-------------------------------------------|-------------------------------------------------------------------|
| Bestand am Jahresanfang      | 0,1                                                    | 49,51                                                             | 0,1                                       | 49,51                                                             |
| Gewährte Optionen            | -                                                      | -                                                                 | -                                         | -                                                                 |
| Ausgeübt                     | -0,1                                                   | 43,34                                                             | -                                         | -                                                                 |
| Abgänge/Verfallen            | .                                                      | 74,76                                                             | -                                         | -                                                                 |
| Noch bestehend am Jahresende | .                                                      | 66,96                                                             | 0,1                                       | 49,51                                                             |
| Ausübbar am Jahresende       | .                                                      | 66,96                                                             | 0,1                                       | 49,51                                                             |
| Gewichtete Restlaufzeit      |                                                        | 0,3 Jahre                                                         |                                           | 2,8 Jahre                                                         |

1 Für die Anzahl der Optionsrechte erfolgt rundungsbedingt teilweise kein Ausweis.

## Dr. Thomas Weber

|                              | Anzahl der<br>Optionsrechte <sup>1</sup><br>Mio. Stück | 2010<br>Durchschnitt-<br>licher Aus-<br>übungspreis<br>€ je Stück | Anzahl der<br>Optionsrechte<br>Mio. Stück | 2009<br>Durchschnitt-<br>licher Aus-<br>übungspreis<br>€ je Stück |
|------------------------------|--------------------------------------------------------|-------------------------------------------------------------------|-------------------------------------------|-------------------------------------------------------------------|
| Bestand am Jahresanfang      | 0,2                                                    | 43,61                                                             | 0,2                                       | 43,61                                                             |
| Gewährte Optionen            | -                                                      | -                                                                 | -                                         | -                                                                 |
| Ausgeübt                     | .                                                      | 51,52                                                             | -                                         | -                                                                 |
| Abgänge/Verfallen            | .                                                      | 74,76                                                             | -                                         | -                                                                 |
| Noch bestehend am Jahresende | 0,2                                                    | 40,56                                                             | 0,2                                       | 43,61                                                             |
| Ausübbar am Jahresende       | 0,2                                                    | 40,56                                                             | 0,2                                       | 43,61                                                             |
| Gewichtete Restlaufzeit      |                                                        | 2,1 Jahre                                                         |                                           | 2,8 Jahre                                                         |

1 Für die Anzahl der Optionsrechte erfolgt rundungsbedingt teilweise kein Ausweis.

Bei den Angaben in der Tabelle ist zu berücksichtigen, dass Vorteile aus den Optionsplänen nur entstehen, wenn der Kurs der Daimler-Aktie die für jeden Plan individuell festgelegte Hürde übersteigt und der Optionsinhaber eine Ausübung veranlasst. Dabei kommt als variable Vergütung ausschließlich die Differenz zwischen Referenz- und Ausübungspreis des jeweiligen Optionsplanes zur Auszahlung.

Der hier aufgeführte durchschnittliche Ausübungspreis ist dagegen eine rein statistische Größe, die sich aus dem gewichteten Durchschnitt der in der Tabelle zu den Basisdaten des SOP dargestellten Ausübungspreise ergibt. Die angegebene Summe der Rechte ergibt sich aus der Addition der in der Anzahl unterschiedlichen Optionsgewährungen der Jahre 2000 bis 2004.

## 22. Pensionen und ähnliche Verpflichtungen

Die Rückstellungen für Pensionen und ähnliche Verpflichtungen betreffen:

|                                                           | 31. Dezember |       |
|-----------------------------------------------------------|--------------|-------|
|                                                           | 2010         | 2009  |
| in Millionen €                                            |              |       |
| Pensionsverpflichtungen                                   | 3.449        | 3.158 |
| Zuschussverpflichtungen für Gesundheitsfürsorgeleistungen | 880          | 924   |
|                                                           | 4.329        | 4.082 |

**Leistungsorientierte Pensionszusagen.** Rückstellungen für Pensionsverpflichtungen werden ausschließlich im Zusammenhang mit leistungsorientierten Pensionszusagen an aktive und ehemalige Mitarbeiter gebildet. Im Rahmen von leistungsorientierten Pensionszusagen wird den Berechtigten eine Zusage auf eine definierte Leistung im Versorgungsfall gewährt. Im Daimler-Konzern haben fast alle Mitarbeiter Pensionszusagen mit festen Leistungszusagen; der überwiegende Teil der Pensionszusagen für die aktive Belegschaft basiert auf Kapitalbausteinen, die sich die Mitarbeiter für jedes Beschäftigungsjahr erwerben. Die Höhe der in einem Jahr erworbenen Kapitalbausteine ist abhängig vom Einkommen der Mitarbeiter und von ihrem jeweiligen Alter. Grundsätzlich variieren die leistungsorientierten Pensionspläne im Konzern entsprechend den wirtschaftlichen, steuerlichen und rechtlichen Gegebenheiten in den jeweiligen Ländern. Leistungsorientierte Pensionszusagen umfassen in der Regel auch Leistungen bei Invalidität und Todesfall. Die Verpflichtungen aus leistungsorientierten Pensionszusagen sind zum Großteil durch Vermögen in langfristig ausgelagerten Fonds gedeckt.

**Beitragsorientierte Pensionszusagen.** In geringerem Umfang gewährt der Konzern darüber hinaus beitragsorientierte Pensionszusagen. Im Rahmen derer werden festgelegte Beiträge an externe Versicherungen oder Fonds entrichtet. Über die Bezahlung der festgelegten Beiträge hinaus bestehen für Daimler grundsätzlich keine weiteren Leistungsverpflichtungen oder Risiken aus diesen Pensionsplänen. Zudem entrichtet der Konzern Beiträge an gesetzliche Rentenversicherungsträger. Im Jahr 2010 betrugen die Aufwendungen im Zusammenhang mit beitragsorientierten Pensionsplänen 1,2 (2009: 1,0) Mrd. € und entfielen überwiegend auf die Beiträge an gesetzliche Rentenversicherungsträger.

### Zuschussverpflichtungen für Gesundheitsfürsorgeleistungen.

Bestimmte ausländische Tochtergesellschaften, insbesondere in den USA, gewähren ihren Mitarbeitern nach Beendigung des Arbeitsverhältnisses Zusagen für Gesundheitsfürsorgeleistungen mit festen Leistungsansprüchen, die als leistungsorientierte Pläne zu bilanzieren sind. Diese Zusagen sind zu einem geringen Teil durch Erstattungsansprüche und Planvermögen gedeckt. Die folgende Tabelle enthält Informationen zu den wesentlichen Eckdaten:

|                                                                      | 2010  | 2009  |
|----------------------------------------------------------------------|-------|-------|
| in Millionen €                                                       |       |       |
| Barwert der leistungsorientierten Verpflichtung                      | 1.056 | 1.040 |
| Beizulegender Zeitwert der Planvermögen und der Erstattungsansprüche | 130   | 149   |
| Finanzierungsstatus                                                  | -926  | -891  |
| Netto-Aufwand/Ertrag für Gesundheitsfürsorgeleistungen               | 76    | -102  |

Infolge der Anpassung von Gesundheitsfürsorge- und Pensionsleistungen bei der US-amerikanischen Tochtergesellschaft Daimler Trucks North America entstand im Jahr 2010 ein Ertrag vor Steuern von 160 Mio. €. Der Ertrag ist in der Konzern-Gewinn- und Verlustrechnung im Wesentlichen in den Umsatzkosten enthalten und dem Segment Daimler Trucks zugeordnet. Der Ertrag ist entsprechend in den Netto-Aufwendungen/Erträgen für die Gesundheitsfürsorge- bzw. Pensionsleistungen berücksichtigt, die für das Geschäftsjahr 2010 in dieser Anmerkung dargestellt sind.

### Angaben zu leistungsorientierten Pensionsplänen

**Finanzierungsstatus.** Die nachfolgend dargestellten Informationen zum Finanzierungsstatus der Pensionspläne des Konzerns sind unterteilt in inländische und ausländische Pensionspläne. Die ausländischen Pensionspläne betreffen im Jahr 2006 hauptsächlich Pensionspläne in den USA, da in diesen Jahren noch die Pläne von Chrysler enthalten sind. Infolge der Entkonsolidierung der Chrysler-Aktivitäten ergab sich im Jahr 2007 eine deutliche Reduzierung der Barwerte der leistungsorientierten Pensionsverpflichtungen bzw. der Zeitwerte der Planvermögen.

Der Finanzierungsstatus entwickelte sich seit dem Jahr 2006 wie folgt:

|                                                      | 31. Dezember 2010 |                                   |                                    | 31. Dezember 2009 |                                   |                                    | 31. Dezember 2008 |                                   |                                    |
|------------------------------------------------------|-------------------|-----------------------------------|------------------------------------|-------------------|-----------------------------------|------------------------------------|-------------------|-----------------------------------|------------------------------------|
|                                                      | Gesamt            | Inländische<br>Pensions-<br>pläne | Ausländische<br>Pensions-<br>pläne | Gesamt            | Inländische<br>Pensions-<br>pläne | Ausländische<br>Pensions-<br>pläne | Gesamt            | Inländische<br>Pensions-<br>pläne | Ausländische<br>Pensions-<br>pläne |
| in Millionen €                                       |                   |                                   |                                    |                   |                                   |                                    |                   |                                   |                                    |
| Barwert der leistungs-orientierten Verpflichtungen   | 17.684            | 15.040                            | 2.644                              | 16.529            | 14.183                            | 2.346                              | 15.044            | 12.780                            | 2.264                              |
| Abzüglich beizulegender<br>Zeitwert der Planvermögen | 11.177            | 9.542                             | 1.635                              | 10.624            | 9.197                             | 1.427                              | 10.110            | 8.796                             | 1.314                              |
| Finanzierungsstatus                                  | -6.507            | -5.498                            | -1.009                             | -5.905            | -4.986                            | -919                               | -4.934            | -3.984                            | -950                               |

|                                                   | 31. Dezember 2007 |                                   |                                    | 31. Dezember 2006 |                                   |                                    |
|---------------------------------------------------|-------------------|-----------------------------------|------------------------------------|-------------------|-----------------------------------|------------------------------------|
|                                                   | Gesamt            | Inländische<br>Pensions-<br>pläne | Ausländische<br>Pensions-<br>pläne | Gesamt            | Inländische<br>Pensions-<br>pläne | Ausländische<br>Pensions-<br>pläne |
| in Millionen €                                    |                   |                                   |                                    |                   |                                   |                                    |
| Barwert der leistungsorientierten Verpflichtungen | 15.686            | 13.539                            | 2.147                              | 37.466            | 14.728                            | 22.738                             |
| Abzüglich beizulegender Zeitwert der Planvermögen | 13.774            | 12.073                            | 1.701                              | 35.176            | 11.542                            | 23.634                             |
| Finanzierungsstatus                               | -1.912            | -1.466                            | -446                               | -2.290            | -3.186                            | 896                                |

In der folgenden Tabelle wird der Finanzierungsstatus der leistungsorientierten Pensionspläne zu den in der Konzernbilanz erfassten Beträgen übergeleitet:

|                                                                                              | 31. Dezember 2010 |                                   |                                    | 31. Dezember 2009 |                                   |                                    |
|----------------------------------------------------------------------------------------------|-------------------|-----------------------------------|------------------------------------|-------------------|-----------------------------------|------------------------------------|
|                                                                                              | Gesamt            | Inländische<br>Pensions-<br>pläne | Ausländische<br>Pensions-<br>pläne | Gesamt            | Inländische<br>Pensions-<br>pläne | Ausländische<br>Pensions-<br>pläne |
| in Millionen €                                                                               |                   |                                   |                                    |                   |                                   |                                    |
| Finanzierungsstatus                                                                          | -6.507            | -5.498                            | -1.009                             | -5.905            | -4.986                            | -919                               |
| Saldo der noch nicht in der Bilanz angesetzten<br>versicherungsmathematischen Verluste       | 3.120             | 2.741                             | 379                                | 2.785             | 2.458                             | 327                                |
| Saldo der noch nicht in der Bilanz angesetzten<br>nachzuverrechnenden Dienstzeitaufwendungen | -                 | -                                 | -                                  | 1                 | -                                 | 1                                  |
| Bilanzbetrag (Saldo)                                                                         | -3.387            | -2.757                            | -630                               | -3.119            | -2.528                            | -591                               |
| Davon in: Übrige Vermögenswerte                                                              | 62                | -                                 | 62                                 | 39                | -                                 | 39                                 |
| Davon in: Rückstellungen für Pensionen und ähnliche Verpflichtungen                          | -3.449            | -2.757                            | -692                               | -3.158            | -2.528                            | -630                               |

**Barwert der leistungsorientierten Verpflichtungen und beizulegender Zeitwert der Planvermögen.** Die Größen haben sich in den Berichtsperioden wie folgt entwickelt:

|                                                                    | 2010   |                           |                            | 2009   |                           |                            |
|--------------------------------------------------------------------|--------|---------------------------|----------------------------|--------|---------------------------|----------------------------|
|                                                                    | Gesamt | Inländische Pensionspläne | Ausländische Pensionspläne | Gesamt | Inländische Pensionspläne | Ausländische Pensionspläne |
| in Millionen €                                                     |        |                           |                            |        |                           |                            |
| Barwert der leistungsorientierten Verpflichtungen zum 1. Januar    | 16.529 | 14.183                    | 2.346                      | 15.044 | 12.780                    | 2.264                      |
| Laufender Dienstaufwand                                            | 337    | 264                       | 73                         | 295    | 226                       | 69                         |
| Zinsaufwand                                                        | 859    | 734                       | 125                        | 847    | 734                       | 113                        |
| Beiträge der Teilnehmer des Plans                                  | 7      | 4                         | 3                          | 57     | 54                        | 3                          |
| Versicherungsmathematische Verluste                                | 620    | 518                       | 102                        | 1.134  | 1.015                     | 119                        |
| Nachzuverrechnende Dienstaufwendungen/-erträge (-)                 | -8     | -18                       | 10                         | 4      | -                         | 4                          |
| Plankürzungen                                                      | -24    | -                         | -24                        | -      | -                         | -                          |
| Planabgeltungen                                                    | -93    | -                         | -93                        | -101   | -                         | -101                       |
| Geleistete Pensionszahlungen                                       | -744   | -647                      | -97                        | -733   | -626                      | -107                       |
| Wechselkursänderungen und sonstige Veränderungen                   | 201    | 2                         | 199                        | -18    | -                         | -18                        |
| Barwert der leistungsorientierten Verpflichtungen zum 31. Dezember | 17.684 | 15.040                    | 2.644                      | 16.529 | 14.183                    | 2.346                      |
| Davon Pensionspläne mit Finanzierung durch Planvermögen            | 16.404 | 13.873                    | 2.531                      | 15.300 | 13.058                    | 2.242                      |
| Davon Pensionspläne ohne Finanzierung durch Planvermögen           | 1.280  | 1.167                     | 113                        | 1.229  | 1.125                     | 104                        |
| Beizulegender Zeitwert der Planvermögen zum 1. Januar              | 10.624 | 9.197                     | 1.427                      | 10.110 | 8.796                     | 1.314                      |
| Erwartete Erträge aus Planvermögen                                 | 609    | 503                       | 106                        | 660    | 568                       | 92                         |
| Versicherungsmathematische Gewinne/Verluste                        | 226    | 168                       | 58                         | -32    | -116                      | 84                         |
| Tatsächliche Erträge/Verluste der Planvermögen                     | 835    | 671                       | 164                        | 628    | 452                       | 176                        |
| Beiträge des Arbeitgebers                                          | 345    | 246                       | 99                         | 602    | 500                       | 102                        |
| Beiträge der Teilnehmer des Plans                                  | 2      | -                         | 2                          | 3      | -                         | 3                          |
| Planabgeltungen                                                    | -85    | -                         | -85                        | -89    | -                         | -89                        |
| Geleistete Pensionszahlungen der Planvermögen                      | -660   | -572                      | -88                        | -645   | -551                      | -94                        |
| Wechselkursveränderungen und sonstige Veränderungen                | 116    | -                         | 116                        | 15     | -                         | 15                         |
| Beizulegender Zeitwert der Planvermögen zum 31. Dezember           | 11.177 | 9.542                     | 1.635                      | 10.624 | 9.197                     | 1.427                      |

**Erfahrungsbedingte Anpassungen.** Die erfahrungsbedingten Anpassungen, d. h. der Unterschied zwischen den früheren versicherungsmathematischen Annahmen und den tatsächlichen Entwicklungen, bezogen auf die Verpflichtungen und Planvermögen zum 31. Dezember, können folgender Tabelle entnommen werden:

|                                                   | 2010 | 2009 | 2008   | 2007 | 31. Dezember 2006 |
|---------------------------------------------------|------|------|--------|------|-------------------|
| in Millionen €                                    |      |      |        |      |                   |
| Barwert der leistungsorientierten Verpflichtungen | 550  | -43  | -194   | 154  | 45                |
| Beizulegender Zeitwert der Planvermögen           | 226  | -32  | -3.970 | -238 | 1.685             |

**Zusammensetzung des Planvermögens.** Zum 31. Dezember 2010 waren die Planvermögen in breit gestreuten Portfolios angelegt, die hauptsächlich aus festverzinslichen Wertpapieren und Aktien bestanden. Das Planvermögen und die Erträge aus Planvermögen sind ausschließlich für die Pensionszahlungen vorgesehen sowie dafür, die Aufwendungen für die Verwaltung der Pensionspläne zu decken. Die Zusammensetzung der Planvermögen des Konzerns stellt sich wie folgt dar:

|                                     | Inländische Planvermögen<br>31. Dezember |      | Ausländische Planvermögen<br>31. Dezember |      |
|-------------------------------------|------------------------------------------|------|-------------------------------------------|------|
|                                     | 2010                                     | 2009 | 2010                                      | 2009 |
| in % der Planvermögen               |                                          |      |                                           |      |
| Aktien                              | 34                                       | 26   | 41                                        | 45   |
| Schuldinstrumente                   | 46                                       | 49   | 43                                        | 40   |
| Alternative Investments             | 11                                       | 8    | 4                                         | 4    |
| Immobilien                          | 4                                        | 4    | 3                                         | 3    |
| Liquidität und übriges Planvermögen | 5                                        | 13   | 9                                         | 8    |

Alternative Investments umfassen Private Equity & Debt sowie Investments in Rohstoffe und Hedgefonds.

**Bewertungsprämissen.** Der Stichtag für die Bewertung der leistungsorientierten Pensionsverpflichtungen und der Planvermögen ist grundsätzlich der 31. Dezember. Der Bewertungsstichtag für die laufenden Pensionsaufwendungen ist grundsätzlich der 1. Januar. Die zur Berechnung der Pensionsverpflichtungen unterstellten Prämissen sowie die Annahmen für die langfristige Verzinsung der Planvermögen variieren entsprechend der wirtschaftlichen Situation des Landes, in dem der Pensionsplan aufgestellt wurde.

Zur Berechnung der Pensionsverpflichtungen wurden die folgenden gewichteten durchschnittlichen Bewertungsfaktoren verwendet:

|                                                                       | Inländische Pensionspläne<br>31. Dezember |      | Ausländische Pensionspläne<br>31. Dezember |      |
|-----------------------------------------------------------------------|-------------------------------------------|------|--------------------------------------------|------|
|                                                                       | 2010                                      | 2009 | 2010                                       | 2009 |
| in %                                                                  |                                           |      |                                            |      |
| Abzinsungsfaktoren                                                    | 5,0                                       | 5,3  | 4,7                                        | 5,1  |
| Erwartete langfristige Lohn- und Gehaltssteigerungsraten <sup>1</sup> | –                                         | –    | 3,7                                        | 3,9  |
| Erwartete Lebenshaltungskostensteigerungen <sup>2</sup>               | 1,7                                       | 1,8  | –                                          | –    |

<sup>1</sup> Beim überwiegenden Anteil der inländischen Pläne sind erwartete langfristige Lohn- und Gehaltssteigerungsraten kein Bestandteil der Leistungsformel.

<sup>2</sup> Beim überwiegenden Anteil der ausländischen Pläne sind erwartete Lebenshaltungskostensteigerungen kein Bestandteil der Leistungsformel.



Zur Berechnung der Pensionsaufwendungen wurden die folgenden gewichteten durchschnittlichen Faktoren verwendet:

|                                                                       | Inländische Pensionspläne |      | Ausländische Pensionspläne |      |
|-----------------------------------------------------------------------|---------------------------|------|----------------------------|------|
|                                                                       | 2010                      | 2009 | 2010                       | 2009 |
| in %                                                                  |                           |      |                            |      |
| Abzinsungsfaktoren                                                    | 5,3                       | 5,9  | 5,1                        | 5,0  |
| Erwartete langfristige Renditen auf die Planvermögen                  | 5,5                       | 6,5  | 7,0                        | 7,2  |
| Erwartete langfristige Lohn- und Gehaltssteigerungsraten <sup>1</sup> | –                         | –    | 3,9                        | 3,7  |
| Erwartete Lebenshaltungskostensteigerungen <sup>2</sup>               | 1,8                       | 1,8  | –                          | –    |

<sup>1</sup> Beim überwiegenden Anteil der inländischen Pläne sind erwartete langfristige Lohn- und Gehaltssteigerungsraten kein Bestandteil der Leistungsformel.

<sup>2</sup> Beim überwiegenden Anteil der ausländischen Pläne sind erwartete Lebenshaltungskostensteigerungen kein Bestandteil der Leistungsformel.

**Abzinsungsfaktoren.** Die Abzinsungsfaktoren für die inländischen und ausländischen Pensionspläne werden jährlich zum 31. Dezember auf Basis von erstrangigen, festverzinslichen Industrieanleihen fristen- und wertkongruent zu den Pensionszahlungen bestimmt.

**Erwartete Erträge der Planvermögen.** Die langfristig erwarteten Renditen der deutschen und der ausländischen Planvermögen werden aus den Asset-Allokationen der Planvermögen und den erwarteten Renditen der in den Portfolios enthaltenen Asset-Klassen abgeleitet. Vorübergehende Schwankungen in den Asset-Allokationen der Planvermögen führen nicht dazu, dass die langfristig erwarteten Renditen der Planvermögen angepasst werden. Zur Bestimmung der langfristig erwarteten Renditen werden von unseren Anlageausschüssen Renditeprognosen für die relevanten Kapitalmarktindizes von Banken und Vermögensverwaltern herangezogen. Der allokatationsgewichtete Durchschnitt der Renditeprognosen dient als Ausgangspunkt für die Festlegung der erwarteten Renditen der Vermögenswerte der einzelnen Planvermögen.

Darüber hinaus betrachtet Daimler die langfristigen, tatsächlichen Erträge der Planvermögen sowie historische Gesamtmarkrenditen bei der Ermittlung der erwarteten Verzinsung, um auch den langfristigen Charakter der Planvermögen angemessen zu berücksichtigen.

**Gemeinschaftliche Pläne mehrerer Arbeitgeber.** Daimler ist an einigen gemeinschaftlich gegründeten leistungsorientierten Pensionsplänen beteiligt, die von mehr als einem Arbeitgeber unterhalten werden. Diese Pläne werden im Konzernabschluss als beitragsorientierte Pensionspläne dargestellt, da die für eine Bilanzierung als leistungsorientierte Pensionspläne erforderlichen Informationen weder zeitgerecht noch in ausreichender Detailierung zur Verfügung stehen. Der Konzern hat keine Möglichkeiten einen beherrschenden Einfluss auf diese Pensionspläne auszuüben und die Treuhänder der Pläne haben keine gesetzlichen Informationspflichten gegenüber den beteiligten Arbeitgebern. Höhere Beitragszahlungen des Konzerns an einen dieser Pensionspläne können insbesondere dann notwendig werden, wenn ein negativer Finanzierungsstatus eine bestimmte Grenze überschreitet.

**Pensionsaufwendungen.** Die in der Konzern-Gewinn- und Verlustrechnung enthaltenen Pensionsaufwendungen setzen sich wie folgt zusammen:

|                                                            | 2010   |                           |                            | 2009   |                           |                            |
|------------------------------------------------------------|--------|---------------------------|----------------------------|--------|---------------------------|----------------------------|
|                                                            | Gesamt | Inländische Pensionspläne | Ausländische Pensionspläne | Gesamt | Inländische Pensionspläne | Ausländische Pensionspläne |
| in Millionen €                                             |        |                           |                            |        |                           |                            |
| Laufender Dienstzeitaufwand                                | -337   | -264                      | -73                        | -295   | -226                      | -69                        |
| Zinsaufwand                                                | -859   | -734                      | -125                       | -847   | -734                      | -113                       |
| Erwartete Erträge aus Planvermögen                         | 609    | 503                       | 106                        | 660    | 568                       | 92                         |
| Tilgung versicherungsmathematischer Verluste               | -79    | -66                       | -13                        | -27    | -14                       | -13                        |
| Nachzuverrechnende Dienstzeitaufwendungen/-erträge         | 17     | 18                        | -1                         | -5     | -                         | -5                         |
| Aufwendungen/Erträge aus Plankürzungen und Planabgeltungen | 7      | -                         | 7                          | -17    | -                         | -17                        |
| Pensionsaufwendungen                                       | -642   | -543                      | -99                        | -531   | -406                      | -125                       |

Die Pensionsaufwendungen sind in der Konzern-Gewinn- und Verlustrechnung in den folgenden Posten enthalten:

|                                                     | 2010 | 2009 |
|-----------------------------------------------------|------|------|
| in Millionen €                                      |      |      |
| Umsatzkosten                                        | -197 | -172 |
| Vertriebskosten                                     | -51  | -70  |
| Allgemeine Verwaltungskosten                        | -32  | -37  |
| Forschungs- und nicht aktivierte Entwicklungskosten | -33  | -38  |
| Zinserträge                                         | 609  | 660  |
| Zinsaufwendungen                                    | -938 | -874 |
|                                                     | -642 | -531 |

**Erwartete Zahlungen.** Für das Jahr 2011 plant der Konzern, Zuwendungen an die Pensionsplanvermögen in Höhe von 0,6 Mrd. € vorzunehmen. Die Pensionszahlungen der Pensionspläne ohne Planvermögen werden im Jahr 2011 voraussichtlich 0,1 Mrd. € betragen.

## 23. Rückstellungen für sonstige Risiken

Die Rückstellungen für sonstige Risiken entwickelten sich wie folgt:

|                                                                 | Produkt-<br>garantien | Verkaufs-<br>geschäfte | Personal- und<br>Sozialbereich | Übrige | Gesamt |
|-----------------------------------------------------------------|-----------------------|------------------------|--------------------------------|--------|--------|
| in Millionen €                                                  |                       |                        |                                |        |        |
| <b>Stand zum 31. Dezember 2009</b>                              | 5.489                 | 914                    | 2.054                          | 2.550  | 11.007 |
| Davon kurzfristig                                               | 2.874                 | 914                    | 803                            | 1.720  | 6.311  |
| Davon langfristig                                               | 2.615                 | -                      | 1.251                          | 830    | 4.696  |
| Zuführungen                                                     | 2.682                 | 1.079                  | 1.816                          | 1.280  | 6.857  |
| Inanspruchnahmen                                                | -2.628                | -705                   | -793                           | -782   | -4.908 |
| Auflösungen                                                     | -131                  | -76                    | -75                            | -674   | -956   |
| Aufzinsungen und Effekte aus der Änderung des Abzinsungsfaktors | 119                   | 1                      | 75                             | 45     | 240    |
| Wechselkurseffekte und andere Veränderungen                     | 109                   | 54                     | 40                             | 97     | 300    |
| <b>Stand zum 31. Dezember 2010</b>                              | 5.640                 | 1.267                  | 3.117                          | 2.516  | 12.540 |
| Davon kurzfristig                                               | 2.783                 | 1.265                  | 1.693                          | 1.251  | 6.992  |
| Davon langfristig                                               | 2.857                 | 2                      | 1.424                          | 1.265  | 5.548  |

**Produktgarantien.** Daimler gewährt verschiedene Arten von Produktgarantien, die üblicherweise die Funktion eines Produktes oder eine zu erbringende Dienstleistung für eine bestimmte Periode garantieren. Die Rückstellung für diese Produktgarantien enthält sowohl erwartete Aufwendungen aus gesetzlichen und vertraglichen Gewährleistungsansprüchen als auch erwartete Aufwendungen für Kulanzleistungen, Rückrufaktionen und Rückkaufverpflichtungen. Rückkaufverpflichtungen umfassen erwartete Kosten, die sich aus der Verpflichtung ergeben, Fahrzeuge unter bestimmten Bedingungen von Kunden zurückzukaufen. Diese Verpflichtungen können verschiedene Ursachen haben, beispielsweise Rechtsstreitigkeiten, die Einhaltung gesetzlicher Bestimmungen in bestimmten Ländern sowie Maßnahmen zur Sicherstellung der Kundenzufriedenheit. Der Zeitpunkt der Inanspruchnahme der Produktgarantien ist abhängig vom Eintreten des Gewährleistungsanspruches und kann sich über den gesamten Garantie- und Kulanzzeitraum erstrecken.

**Verkaufsgeschäfte.** Die Rückstellungen für Verpflichtungen aus Verkaufsgeschäften decken erwartete Belastungen für nachträgliche Minderungen bereits erzielter Umsatzerlöse ab. Hierzu zählen noch zu gewährende Boni, Rabatte und sonstige Preisnachlässe, die im Berichtsjahr oder früher Vertragspartnern eingeräumt wurden, jedoch erst in den Folgejahren zur Auszahlung gelangen.

**Personal- und Sozialbereich.** Rückstellungen für Verpflichtungen im Personal- und Sozialbereich enthalten im Wesentlichen erwartete Aufwendungen des Konzerns für Jubiläumsgelder, die Ergebnisbeteiligung tariflicher Mitarbeiter, die variable Vergütung für Führungskräfte sowie Frühpensionierungs- und Alters- teilzeitmodelle. Die im Berichtsjahr gebildeten Rückstellungen für Ergebnisbeteiligung und variable Vergütung führen in der Regel im Folgejahr zu Auszahlungen.

**Übrige.** In den Rückstellungen für übrige Risiken werden unter anderem erwartete Aufwendungen für Haftungs- und Prozessrisiken, Verpflichtungen aus der EU-Altautoverordnung und Umweltschutzrisiken ausgewiesen. Diese Position enthält darüber hinaus Rückstellungen für sonstige Steuern und diverse Einzel-sachverhalte, die sich keiner anderen Position zuordnen lassen.

## 24. Finanzierungsverbindlichkeiten

|                                                 | 31. Dezember 2010 |             |        | 31. Dezember 2009 |             |        |
|-------------------------------------------------|-------------------|-------------|--------|-------------------|-------------|--------|
|                                                 | Kurzfristig       | Langfristig | Gesamt | Kurzfristig       | Langfristig | Gesamt |
| in Millionen €                                  |                   |             |        |                   |             |        |
| Anleihen                                        | 10.322            | 15.801      | 26.123 | 7.972             | 22.123      | 30.095 |
| Geldmarktpapiere                                | 91                | –           | 91     | 176               | –           | 176    |
| Verbindlichkeiten gegenüber Kreditinstituten    | 6.295             | 8.033       | 14.328 | 6.066             | 6.934       | 13.000 |
| Einlagen aus Direktbank-Geschäft                | 7.856             | 3.020       | 10.876 | 9.403             | 3.195       | 12.598 |
| Verbindlichkeiten aus ABS-Transaktionen         | 595               | 519         | 1.114  | 753               | 539         | 1.292  |
| Verbindlichkeiten aus Finance Lease             | 80                | 419         | 499    | 49                | 348         | 397    |
| Darlehen, übrige Finanzierungsverbindlichkeiten | 582               | 69          | 651    | 617               | 119         | 736    |
|                                                 | 25.821            | 27.861      | 53.682 | 25.036            | 33.258      | 58.294 |

Daimler veräußert in Abhängigkeit von Marktgegebenheiten und dem Liquiditätsbedarf bestimmte Umfänge von Forderungen sowie zukünftige Ansprüche aus Leasingverhältnissen im Zusammenhang mit vermieteten Gegenständen an Dritte. Zum 31. Dezember 2010 betrugen die Verbindlichkeiten aus diesen Transaktionen, bei denen die Kriterien für eine Ausbuchung nicht erfüllt werden, 1.197 (2009: 1.330) Mio. €. Diese sind in Höhe von 1.114 (2009: 1.292) Mio. € in den Verbindlichkeiten aus ABS-Transaktionen und in Höhe von 83 (2009: 38) Mio. € in den Verbindlichkeiten gegenüber Kreditinstituten enthalten.

Die Verbindlichkeiten aus Finance Lease beruhen überwiegend auf Sachanlagen, die infolge der Gestaltung der ihnen zugrunde liegenden Leasingverträge dem Konzern als wirtschaftlichem Eigentümer zugerechnet werden. Zum 31. Dezember 2010 betrugen die zukünftigen Mindestleasingzahlungen aus Finance-Lease-Verträgen 780 (2009: 588) Mio. €. Die Überleitung der Mindestleasingzahlungen aus Finance-Lease-Verträgen zu den entsprechenden Verbindlichkeiten stellt sich wie folgt dar:

|                                | Mindestleasingzahlungen |                      | In den Mindestleasingzahlungen<br>enthaltene Zinsen |                      | Verbindlichkeiten aus<br>Finance-Lease-Verträgen |                      |
|--------------------------------|-------------------------|----------------------|-----------------------------------------------------|----------------------|--------------------------------------------------|----------------------|
|                                | 31. Dezember<br>2010    | 31. Dezember<br>2009 | 31. Dezember<br>2010                                | 31. Dezember<br>2009 | 31. Dezember<br>2010                             | 31. Dezember<br>2009 |
| in Millionen €                 |                         |                      |                                                     |                      |                                                  |                      |
| Fälligkeit                     |                         |                      |                                                     |                      |                                                  |                      |
| innerhalb eines Jahres         | 105                     | 61                   | 25                                                  | 12                   | 80                                               | 49                   |
| zwischen einem und fünf Jahren | 233                     | 160                  | 84                                                  | 62                   | 149                                              | 98                   |
| nach mehr als fünf Jahren      | 442                     | 367                  | 172                                                 | 117                  | 270                                              | 250                  |
|                                | 780                     | 588                  | 281                                                 | 191                  | 499                                              | 397                  |

## 25. Übrige finanzielle Verbindlichkeiten

Die übrigen finanziellen Verbindlichkeiten setzen sich wie folgt zusammen:

|                                                                                   | 31. Dezember 2010 |             |        | 31. Dezember 2009 |             |        |
|-----------------------------------------------------------------------------------|-------------------|-------------|--------|-------------------|-------------|--------|
|                                                                                   | Kurzfristig       | Langfristig | Gesamt | Kurzfristig       | Langfristig | Gesamt |
| in Millionen €                                                                    |                   |             |        |                   |             |        |
| Derivative Finanzinstrumente, die in ein Hedge Accounting einbezogen sind         | 468               | 390         | 858    | 141               | 67          | 208    |
| Erfolgswirksam zum beizulegenden Zeitwert bewertete finanzielle Verbindlichkeiten | 662               | 488         | 1.150  | 273               | 402         | 675    |
| Verbindlichkeiten aus Restwertgarantien                                           | 1.016             | 659         | 1.675  | 1.338             | 1.115       | 2.453  |
| Verbindlichkeiten aus Personalabrechnung                                          | 1.005             | –           | 1.005  | 896               | –           | 896    |
| Übrige                                                                            | 5.475             | 346         | 5.821  | 4.941             | 564         | 5.505  |
| Sonstige übrige finanzielle Verbindlichkeiten                                     | 7.496             | 1.005       | 8.501  | 7.175             | 1.679       | 8.854  |
|                                                                                   | 8.626             | 1.883       | 10.509 | 7.589             | 2.148       | 9.737  |

Die erfolgswirksam zum beizulegenden Zeitwert bewerteten finanziellen Verbindlichkeiten beinhalten ausschließlich derivative Finanzinstrumente, die nicht in ein Hedge Accounting einbezogen sind.

Weitere Angaben zu den übrigen finanziellen Verbindlichkeiten erfolgen in Anmerkung 30.

## 26. Übrige Verbindlichkeiten

Die übrigen Verbindlichkeiten setzen sich wie folgt zusammen:

|                                           | 31. Dezember 2010 |             |        | 31. Dezember 2009 |             |        |
|-------------------------------------------|-------------------|-------------|--------|-------------------|-------------|--------|
|                                           | Kurzfristig       | Langfristig | Gesamt | Kurzfristig       | Langfristig | Gesamt |
| in Millionen €                            |                   |             |        |                   |             |        |
| Steuerverbindlichkeiten für Ertragsteuern | 169               | 73          | 242    | 56                | 74          | 130    |
| Sonstige übrige Verbindlichkeiten         | 1.376             | 6           | 1.382  | 1.018             | 1           | 1.019  |
|                                           | 1.545             | 79          | 1.624  | 1.074             | 75          | 1.149  |



## 27. Konzern-Kapitalflussrechnung

**Cash Flow aus der Geschäftstätigkeit.** Die Veränderung der sonstigen betrieblichen Aktiva und Passiva setzt sich wie folgt zusammen:

|                                    | 2010  | 2009 |
|------------------------------------|-------|------|
| in Millionen €                     |       |      |
| Rückstellungen                     | 1.648 | 203  |
| Finanzinstrumente                  | -60   | -44  |
| Sonstige übrige Aktiva und Passiva | 914   | 740  |
|                                    | 2.502 | 899  |

Im Cash Flow aus der Geschäftstätigkeit sind folgende Zahlungsströme enthalten:

|                                | 2010   | 2009 |
|--------------------------------|--------|------|
| in Millionen €                 |        |      |
| Gezahlte Zinsen                | -523   | -894 |
| Erhaltene Zinsen               | 92     | 471  |
| Gezahlte Ertragsteuern (netto) | -1.189 | -358 |
| Erhaltene Dividenden           | 38     | 109  |

Die in der Überleitung vom Konzernergebnis zum Cash Flow aus der Geschäftstätigkeit ausgewiesenen sonstigen zahlungsunwirksamen Aufwendungen und Erträge umfassen im Wesentlichen Aufwendungen bzw. Erträge aus latenten Steuern und den Ergebnisanteil des Konzerns aus at-equity bewerteten Finanzinvestitionen.

**Cash Flow aus der Finanzierungstätigkeit.** Zahlungsströme aus der Sicherung von Fremdwährungsrisiken der Finanzierungsverbindlichkeiten sind im Cash Flow aus der Finanzierungstätigkeit berücksichtigt. Der Cash Flow aus der Finanzierungstätigkeit enthielt Auszahlungen durch Tilgung von Verbindlichkeiten aus Finance Lease in Höhe von 75 (2009: 71) Mio. €.

## 28. Rechtliche Verfahren

Die Daimler AG und ihre Tochtergesellschaften sind mit verschiedenen Gerichtsverfahren, Ansprüchen und behördlichen Untersuchungen konfrontiert, die eine große Bandbreite von Themen betreffen. Diese umfassen z. B. Fahrzeugsicherheit, Emissionen, Kraftstoffverbrauch, Finanzdienstleistungen, Händler-, Lieferanten- und weitere Vertragsbeziehungen, gewerblichen Rechtsschutz, Gewährleistungsansprüche, Umweltverfahren und Aktionärsklagen. In einigen dieser Verfahren werden angebliche Mängel bei verschiedenen Bauteilen mehrerer Fahrzeugmodelle oder Konstruktionsmängel in Bezug auf die Fahrzeugstabilität, falsche Pedalbedienung, Bremsen oder Aufprallsicherheit vorgebracht. Die teilweise im Wege der Sammelklage geltend gemachten Ansprüche reichen von der Reparatur bzw. dem Austausch der Fahrzeuge oder Schadenersatz für ihren angeblichen Wertverlust bis zu Schadenersatz wegen Sachbeschädigung, Körperverletzung oder Todesfolge. Sofern einzelnen oder mehreren dieser Klagen stattgegeben würde, könnten sich hierdurch erhebliche Schaden- sowie Strafschadenersatzzahlungen, Nachbesserungsarbeiten, Rückrufaktionen oder sonstige kostenintensive Maßnahmen ergeben.

Mitte Januar 2011 führte die Europäische Kommission kartellrechtliche Nachprüfungen bei europäischen Nutzfahrzeugherstellern durch, unter anderem auch bei der Daimler AG. Daimler nimmt den Ausgangsverdacht der Kommission sehr ernst und klärt parallel zu den Ermittlungen der Kommission den zugrunde liegenden Sachverhalt auch intern umfassend auf. Bei Kartellverstößen kann die Europäische Kommission abhängig von der Schwere des Verstoßes erhebliche Bußgelder verhängen. Weitergehende Angaben zu diesem kartellrechtlichen Verfahren und des damit für das Unternehmen verbundenen Risikos, insbesondere der in diesem Zusammenhang getroffenen Maßnahmen, werden gem. IAS 37.92 nicht gemacht, um das Ergebnis des Verfahrens nicht zu beeinträchtigen.

Am 1. April 2010 gab Daimler eine Einigung zur Beendigung der bereits mitgeteilten Untersuchungen der US-Börsenaufsicht (US Securities and Exchange Commission, SEC) und des US-Justizministeriums (US Department of Justice, DOJ) wegen möglicher Verletzungen des Bestechungsverbots, der Rechnungslegungs- und Buchführungs- sowie der internen Kontrollvorschriften des US Foreign Corrupt Practices Act (FCPA) durch Daimler bekannt.

Entsprechend der Einigung mit der SEC hat die SEC eine zivilrechtliche Klage gegen die Daimler AG vor dem US-Bezirksgericht des District of Columbia eingereicht. Ohne die in der Klage erhobenen Vorwürfe anzuerkennen oder zu bestreiten, stimmte die Daimler AG dem Erlass eines abschließenden Urteils zu. Nach dem Urteil des Gerichts (i) führte die Daimler AG einen Gewinn in Höhe von 91,4 Mio. US-\$ ab, (ii) ist es der Daimler AG untersagt, das Bestechungsverbot, die Rechnungslegungs- und Buchführungs- sowie die internen Kontrollvorschriften des FCPA zu verletzen und (iii) wird der frühere US-Bundesrichter Louis J. Freeh zum Post-Settlement Monitor der Daimler AG für die Dauer von drei Jahren bestellt.

Entsprechend der Einigung mit dem DOJ schloss die Daimler AG ein Deferred Prosecution Agreement (Vereinbarung über die Aussetzung der Strafverfahrens gegen Auflagen) mit einer Laufzeit von zwei Jahren ab, aufgrund dessen das DOJ eine Strafanzeige mit den folgenden Punkten bei Gericht eingereicht hat: (i) Verschwörung zur Verletzung der Rechnungslegungs- und Buchführungsvorschriften des FCPA und (ii) Verletzung der Rechnungslegungs- und Buchführungsvorschriften des FCPA. Dabei stimmte die Daimler AG der Zahlung einer maximalen Geldbuße in Höhe von 93,6 Mio. US-\$, der Beauftragung des früheren US-Bundesrichters Louis J. Freeh als Post-Settlement Monitor für die Dauer von drei Jahren sowie der Fortführung der Einrichtung eines Compliance- und Ethik-Programms zu, das darauf ausgerichtet ist, Verletzungen des FCPA und anderer anwendbarer Anti-Korruptionsgesetze zu vermeiden und aufzudecken. Des Weiteren schloss eine chinesische Tochtergesellschaft, die Daimler North East Asia Ltd. (DNEA), ein Deferred Prosecution Agreement mit gleicher Laufzeit mit dem DOJ ab, aufgrund dessen das DOJ eine Strafanzeige mit zwei Punkten bei Gericht eingereicht hat.

Außerdem schlossen sowohl eine russische als auch eine deutsche Tochtergesellschaft, die Mercedes-Benz Russia S.A.O. (MB Russia) und die Daimler Export and Trade Finance GmbH (ETF), je ein Plea Agreement (Verfahrensabsprache) mit einer Bewährungsfrist von drei Jahren ab, aufgrund dessen sich die jeweilige Gesellschaft der (i) Verschwörung zur Verletzung des Bestechungsverbots des FCPA und (ii) Verletzung des Bestechungsverbots des FCPA für schuldig bekannte. Entsprechend verurteilte das Gericht die MB Russia zur Zahlung einer Geldbuße in Höhe von 27,36 Mio. US-\$ und die ETF zur Zahlung einer Geldbuße in Höhe von 29,12 Mio. US-\$. Beide Beträge wurden von der maximal vereinbarten Geldbuße der Daimler AG in Höhe von 93,6 Mio. US-\$ abgezogen.

Insgesamt zahlte Daimler 185 Mio. US-\$ als Geldbuße und zivilrechtliche Gewinnabschöpfung im Rahmen der Einigung mit der SEC und dem DOJ. Daimler hatte hierfür bereits ausreichend Rückstellungen gebildet. Darüber hinaus hat Daimler personelle und organisatorische Maßnahmen ergriffen, um sicherzustellen, dass ihr Geschäftsverhalten künftig mit dem FCPA und ähnlichen Anti-Korruptionsgesetzen im Einklang steht. Zu diesen Maßnahmen gehören z. B. die Einrichtung einer unternehmensweiten Compliance-Organisation sowie die Bewertung und Anpassung der Richtlinien zur Unternehmensführung und der internen Kontrollverfahren.

Eine Verletzung der Bedingungen der Einigung mit der SEC und dem DOJ einschließlich der Bedingungen der Deferred Prosecution Agreements kann die Wiederaufnahme der Anklagen und andere aufsichtsrechtliche Sanktionen zur Folge haben.

In Hinblick auf diese Sachverhalte, die vom DOJ und der SEC untersucht wurden, hat es auch Kontakte mit deutschen Staatsanwaltschaften gegeben und es wurden Unterlagen übergeben.

Am 17. August 2009 hat das Official Committee of Unsecured Creditors von OldCarCo LLC (vormals Chrysler LLC) eine Klage beim United States Konkursgericht des südlichen Distrikts von New York, gegen die Daimler AG, Daimler North America Corporation und andere eingereicht. Dieses Gremium wurde mittlerweile vom Liquidation Trust abgelöst, der weiterhin unbefristete Schadenersatzansprüche auf der Grundlage von Ausschüttungs- sowie anderen juristischen Theorien erhebt. Dabei wird behauptet, dass die empfangene Gegenleistung bei bestimmten Transaktionen im Zusammenhang mit dem Investment von Cerberus in Chrysler nicht angemessen war. Daimler hat bislang verschiedene juristische Verteidigungsargumente vorgebracht und hält die Ansprüche und Vorwürfe des Liquidation Trust für unbegründet und wird sich entschieden dagegen verteidigen.

Die Bundesrepublik Deutschland leitete gegen die Daimler Financial Services AG, Deutsche Telekom AG und die Toll Collect GbR ein Schiedsverfahren ein; die Schiedsklage wurde im August 2005 eingereicht. Diese verlangt Schadenersatz, Vertragsstrafen sowie die Übertragung von gewerblichen Schutzrechten auf die Toll Collect GmbH. Die Bundesrepublik Deutschland macht insbesondere Ansprüche geltend auf

- Ersatz von Mautausfallschäden für den Zeitraum vom 1. September 2003 bis 31. Dezember 2004 in Höhe von 3,33 Mrd. € zuzüglich Zinsen von 5% pro Jahr über dem jeweiligen Basiszinssatz seit Einreichung der Schiedsklage (per 21. November 2010 beziffert auf 1,4 Mrd. €),
- Vertragsstrafen nach dem Stand vom 31. Juli 2005 in Höhe von ungefähr 1,65 Mrd. € zuzüglich Zinsen von 5% pro Jahr über dem jeweiligen Basiszinssatz seit Einreichung der Schiedsklage (per 21. November 2010 beziffert auf 282 Mio. €) und
- Refinanzierungskosten in Höhe von 115 Mio. €.

Der Betrag für Vertragsstrafen kann sich erhöhen, da unter anderem zeitabhängige Vertragsstrafen verlangt und weitere vertragsstrafenrelevante Sachverhalte durch die Bundesrepublik Deutschland geltend gemacht werden. Die Klageerwiderung wurde dem Schiedsgericht am 30. Juni 2006 zugestellt. Die Replik der Bundesrepublik Deutschland wurde dem Schiedsgericht am 15. Februar 2007 zugestellt. Die Duplik der Beklagten wurde dem Schiedsgericht am 1. Oktober 2007 übergeben (siehe auch Anmerkung 29). Das Schiedsgericht hielt am 16. und 17. Juni 2008 eine erste mündliche Verhandlung ab. Die Klägerin und die Beklagten haben seither weitere Schriftsätze eingereicht. Eine Anhörung von Zeugen und Sachverständigen fand zwischen dem 6. und 14. Dezember 2010 statt. Es wurde eine weitere Schriftsatzfrist für die Parteien bis zum 20. Mai 2011 festgelegt. Daimler hält die Ansprüche der Bundesrepublik Deutschland für unbegründet und setzt sich gegen sie weiterhin entschlossen zur Wehr.

Rechtsstreitigkeiten sind vielen Unsicherheiten unterworfen, und der Ausgang einzelner Verfahren kann nicht mit Sicherheit vorausgesagt werden. Der Konzern bildet Rückstellungen für anhängige und drohende Verfahren, wenn eine Verpflichtung wahrscheinlich und deren Höhe hinreichend genau bestimmbar ist. Da diese Rückstellungen, die im Konzernabschluss berücksichtigt sind, auf Schätzungen beruhen, ist es durchaus möglich, dass die Beendigung einiger dieser Verfahren uns zu Zahlungen zwingt, die über die zurückgestellten Beträge hinausgehen und deren Umfang oder Bandbreite zum 31. Dezember 2010 nicht hinreichend genau bestimmbar waren. Es ist auch möglich, dass der Ausgang einzelner Verfahren, für die keine Rückstellungen gebildet werden konnten, den Konzern zu Zahlungen zwingt, die am 31. Dezember 2010 weder betragsmäßig noch in Bandbreiten hinreichend genau bestimmbar waren. Obwohl der endgültige Ausgang solcher Fälle einen wesentlichen Einfluss auf das Ergebnis oder den Cash Flow von Daimler in einer bestimmten Berichtsperiode haben kann, werden die sich daraus ergebenden möglichen Verpflichtungen nach unserer Einschätzung keinen nachhaltigen Einfluss auf die Vermögenslage des Konzerns haben.

## 29. Garantien und sonstige finanzielle Verpflichtungen

**Garantien.** Die folgende Tabelle zeigt die zu den Bilanzstichtagen im Zusammenhang mit der Begebung von Garantien (ohne Produktgarantien) berücksichtigten Rückstellungen und Verbindlichkeiten:

|                         | Berücksichtigte<br>Verbindlichkeiten<br>bzw. Rückstellungen<br>31. Dezember |      |
|-------------------------|-----------------------------------------------------------------------------|------|
|                         | 2010                                                                        | 2009 |
| in Millionen €          |                                                                             |      |
| Finanzgarantien         | 227                                                                         | 183  |
| Rückkaufverpflichtungen | 66                                                                          | 66   |
| Sonstige Garantien      | 106                                                                         | 105  |
|                         | 399                                                                         | 354  |

**Finanzgarantien.** Finanzgarantien stellen vertragliche Vereinbarungen dar, bei denen der Konzern als Garantiebergeber zur Leistung von bestimmten Zahlungen verpflichtet ist, sofern die Garantiennehmer ihre finanziellen Verpflichtungen nicht erfüllen. Die maximal möglichen Zahlungsverpflichtungen aus Finanzgarantien belaufen sich zum 31. Dezember 2010 auf 1.140 (2009: 1.493) Mio. €. In diesen Werten sind bestimmte Finanzgarantien enthalten, die der Konzern im Zusammenhang mit den Chrysler-Transaktionen der Jahre 2007 und 2009 zugunsten von Chrysler gewährt hat. Diese Garantien stehen im Zusammenhang mit den Pensionsverpflichtungen von Chrysler sowie mit sonstigen Zahlungsverpflichtungen der Chrysler-Gruppe. Als Sicherheit für einen Teil dieser Finanzgarantien hat Chrysler eine Einlage auf einem Treuhandkonto geleistet. Für weitere Informationen siehe Anmerkung 3.

**Rückkaufverpflichtungen.** Rückkaufverpflichtungen stellen Vereinbarungen dar, bei denen der Konzern Rückkaufswerte oder Marktwerte von verkauften Fahrzeugen garantiert. Diese Garantien begründen für den Begünstigten das Recht, erworbene Fahrzeuge an den Konzern zurückzugeben; dieses Recht steht in der Regel im Zusammenhang mit zukünftigen Fahrzeugkäufen oder Dienstleistungen. Restwertgarantien, die im Rahmen von Fahrzeugverkäufen gewährt wurden und aufgrund derer die sofortige Umsatzrealisierung aus dem Verkauf nicht bilanziert werden konnte, sind in diesen Werten nicht berücksichtigt.

**Sonstige Garantien.** Die sonstigen Garantien beinhalten im Wesentlichen Entschädigungsverpflichtungen hinsichtlich der termin- und qualitätsgerechten Leistungserstellung durch Dritte oder Gewährleistungen aus der Beteiligung an Konsortien. Zum 31. Dezember 2010 betrug der bestmögliche Schätzwert für eine mögliche Belastung aus sonstigen Garantien, für die noch keine Rückstellungen gebildet wurden, 50 (2009: 37) Mio. €.

Im Jahr 2002 haben unsere Tochtergesellschaft Daimler Financial Services AG, die Deutsche Telekom AG und die Compagnie Financière et Industrielle des Autoroutes S.A. (Cofiroute) einen Konsortialvertrag zum Zweck geschlossen, ein elektronisches System zur Erhebung von Maut auf deutschen Autobahnen für Nutzfahrzeuge mit mehr als 12 Tonnen zulässigem Gesamtgewicht zu entwickeln sowie eine gemeinsame Projektgesellschaft aufzubauen und das Mautsystem auf der Grundlage des mit der Bundesrepublik Deutschland abgeschlossenen Vertrags (Betreibervertrag) zu betreiben. Daimler Financial Services AG und die Deutsche Telekom AG halten jeweils 45% sowohl an dem Konsortium (Toll Collect GbR) als auch an der Projektgesellschaft (Toll Collect GmbH) (zusammen Toll Collect), die restlichen 10% der Anteile hält jeweils Cofiroute.

Laut Betreibervertrag hätte das Mauterhebungssystem spätestens zum 31. August 2003 betriebsbereit sein müssen. Nach einer Verzögerung beim Start des Systems, die bei Toll Collect zu Umsatzeinbußen und Zahlungen von Verspätungsvertragsstrafen führte, wurde das Mauterhebungssystem am 1. Januar 2005 mit On-Board Units eingeführt, die im Vergleich zu den ursprünglichen Vorgaben über eine geringfügig eingeschränkte Funktionalität verfügten (Phase 1). Am 1. Januar 2006 wurde das Mauterhebungssystem mit voller Funktionalität gemäß Betreibervertrag installiert und in Betrieb genommen (Phase 2). Die Toll Collect GmbH erhielt am 20. Dezember 2005 die Vorläufige Betriebserlaubnis gemäß Betreibervertrag. Die Toll Collect GmbH erwartet, dass sie die Endgültige Betriebserlaubnis erhalten wird, und betreibt das Mauterhebungssystem in der Zwischenzeit auf Basis der Vorläufigen Betriebserlaubnis.

Das Versäumnis, verschiedenen Verpflichtungen aus dem Betreibervertrag nachzukommen, kann zu Vertragsstrafen, weiteren Vergütungsminderungen und Rückgriffsforderungen führen, die im weiteren Verlauf ein erhebliches Ausmaß erreichen können.

Die Vertragsstrafen und Vergütungsminderungen sind jedoch in ihrer Höhe wie folgt begrenzt: bis zur Erteilung der Endgültigen Betriebserlaubnis auf 150 Mio. € pro Jahr und nach Erteilung der Endgültigen Betriebserlaubnis auf 100 Mio. € pro Jahr. Diese Beträge erhöhen sich pro Betriebsjahr um 3%.

Im Juni 2006 begann die Bundesrepublik Deutschland damit, die monatlichen Vorauszahlungen der Betreibervergütung an die Toll Collect GmbH partiell in Höhe von 8 Mio. € mit Forderungen aus Vertragsstrafen aufzurechnen, die bereits Gegenstand des nachfolgend beschriebenen Schiedsverfahrens sind. Als Folge der Aufrechnung könnte es für die Konsortialmitglieder im weiteren Verlauf erforderlich sein, der Toll Collect GmbH weitere Liquidität zuzuführen.

Der Betreibervertrag sieht für sämtliche Streitigkeiten, die mit dem Mauterhebungssystem zusammenhängen, die Zuständigkeit eines Schiedsgerichts vor. Die Bundesrepublik Deutschland hat ein Schiedsverfahren gegen die Daimler Financial Services AG, die Deutsche Telekom AG und das Konsortium eingeleitet. Nach der im August 2005 erhaltenen Schiedsklage verlangt die Bundesrepublik Deutschland Schadenersatz einschließlich Vertragsstrafen und die Begleichung von Mautausfall, der angeblich durch die Verspätung der Inbetriebnahme des Mautsystems entstanden ist. Vergleiche hierzu auch die Ausführungen in Anmerkung 28.

Jedes Konsortialmitglied (einschließlich der Daimler Financial Services AG) hat Garantien für Verpflichtungen der Toll Collect GmbH gegenüber der Bundesrepublik Deutschland im Zusammenhang mit der Fertigstellung und dem Betrieb des Mautsystems abgegeben. Darüber hinaus garantiert die Daimler AG Bankkredite zugunsten der Toll Collect GmbH. Diese Garantien, die von bestimmten Eintrittsbedingungen abhängig sind, sind nachfolgend beschrieben:

– *Garantie von Bankkrediten.* Die Daimler AG garantiert gegenüber Dritten bis zu einem Höchstbetrag von 105 Mio. € Bankkredite, die der Toll Collect GmbH gewährt werden; dieser Betrag entspricht dem 50%-igen Anteil des Konzerns an der durch die Gesellschafter garantierten Fremdfinanzierung von Toll Collect GmbH.

– **Kapitalintakthalteerklärung.** Die Konsortialmitglieder haben die Verpflichtung, gesamt- und einzelschuldnerisch weiteres Eigenkapital bei der Toll Collect GmbH bereitzustellen, um eine Eigenkapitalquote in Höhe von mindestens 15% (nach deutschem Handelsrecht) zu gewährleisten (sogenannte Kapitalintakthalteerklärung). Diese Verpflichtung endet mit Ablauf des Betreibervertrages am 31. August 2015 oder früher, falls der Betreibervertrag vorzeitig gekündigt werden sollte. Eine solche Nachschussverpflichtung könnte eintreten, falls die Toll Collect GmbH wegen Minderleistung Vergütungsminderungen hinnehmen muss, falls die Bundesrepublik Deutschland gegen die Toll Collect GmbH erfolgreich entgangene Mauteinnahmen für Zeiträume, in denen das Mautsystem nicht vertragsgemäß funktionierte, durchsetzt oder falls die Toll Collect GmbH Vertragsstrafen, die aus den oben genannten Vereinbarungen hervorgehen, entrichten muss. Falls solche Vertragsstrafen, Vergütungsminderungen oder andere Ereignisse dazu führen, dass die Eigenkapitalquote der Toll Collect GmbH unter das vertraglich vereinbarte Minimum fällt, sind die Konsortialmitglieder verpflichtet, die Toll Collect GmbH finanziell so auszustatten, dass die erforderliche Mindesteigenkapitalquote erreicht wird.

Die Risiken und Verpflichtungen von Cofiroute sind auf den Betrag von 70 Mio. € beschränkt. Die Daimler Financial Services AG und die Deutsche Telekom AG sind gesamtschuldnerisch verpflichtet, Cofiroute von weiteren Ansprüchen freizustellen.

Während die maximale zukünftige Verpflichtung von Daimler aus der Bankgarantie bestimmt werden kann (2010: 105 Mio. €), kann das maximale Verlustrisiko aus der Kapitalintakthalteerklärung, das wesentlich sein könnte, aufgrund der oben beschriebenen Unsicherheiten nicht mit ausreichender Sicherheit eingeschätzt werden. Lediglich die Bankgarantie ist in den obigen Ausführungen und Beträgen zu den Finanzgarantien enthalten.

Verpflichtungen aus Produktgarantien und erweiterten Produktgarantien sind in den obigen Ausführungen nicht enthalten. Informationen zu Produktgarantien können der Anmerkung 23 entnommen werden.

**Sonstige finanzielle Verpflichtungen.** Daimler hat im Rahmen seiner Produktionsprogramme mit Lieferanten mehrjährige Lieferverträge über den Bezug von Zulieferteilen oder Fahrzeugkomponenten abgeschlossen. Darüber hinaus ging der Konzern sonstige finanzielle Verpflichtungen im Rahmen von Dienstleistungsvereinbarungen sowie im Zusammenhang mit Ersatz- und Erweiterungsinvestitionen für Produktionseinrichtungen ein. Zum 31. Dezember 2010 betrugen die finanziellen Verpflichtungen hieraus 7,4 (2009: 4,5) Mrd. €.

Der Konzern hat weitere sonstige Zahlungsverpflichtungen im Rahmen von Miet-, Pacht- und Leasingverträgen zur Nutzung von Produktionsstätten und Sachanlagen. Im Geschäftsjahr 2010 wurden Mietzahlungen in Höhe von 491 (2009: 513) Mio. € aufwandswirksam erfasst. Die zukünftigen Verpflichtungen aus längerfristigen Verträgen (Nominalwerte) stellen sich wie folgt dar:

|                                | 31. Dezember |       |
|--------------------------------|--------------|-------|
|                                | 2010         | 2009  |
| in Millionen €                 |              |       |
| <b>Fälligkeit</b>              |              |       |
| innerhalb eines Jahres         | 297          | 304   |
| zwischen einem und drei Jahren | 504          | 524   |
| zwischen vier und fünf Jahren  | 396          | 427   |
| nach mehr als fünf Jahren      | 953          | 1.117 |
|                                | 2.150        | 2.372 |

Zudem hat Daimler zum 31. Dezember unwiderrufliche Kreditzusagen von 1,9 (2009: 1,6) Mrd. € gewährt, die zu diesem Zeitpunkt nicht in Anspruch genommen wurden.



### 30. Finanzinstrumente

#### Buch- und beizulegende Zeitwerte von Finanzinstrumenten

Die folgende Tabelle stellt die Buch- und beizulegenden Zeitwerte der Finanzinstrumente des Konzerns dar. Der beizulegende Zeitwert eines Finanzinstruments ist der Preis, zu dem eine Partei die Rechte und/oder Pflichten aus diesem Finanzinstrument von einer unabhängigen anderen Partei übernehmen würde. Angesichts variierender Einflussfaktoren können die dargestellten beizulegenden Zeitwerte nur als Indikatoren für tatsächlich am Markt realisierbare Werte angesehen werden.

|                                                                                   | 31. Dezember 2010 |                           | 31. Dezember 2009 |                           |
|-----------------------------------------------------------------------------------|-------------------|---------------------------|-------------------|---------------------------|
|                                                                                   | Buchwert          | beizulegender<br>Zeitwert | Buchwert          | beizulegender<br>Zeitwert |
| in Millionen €                                                                    |                   |                           |                   |                           |
| Finanzielle Vermögenswerte                                                        |                   |                           |                   |                           |
| Forderungen aus Finanzdienstleistungen                                            | 41.030            | 41.107                    | 38.478            | 38.510                    |
| Forderungen aus Lieferungen und Leistungen                                        | 7.192             | 7.192                     | 5.285             | 5.285                     |
| Zahlungsmittel und Zahlungsmitteläquivalente                                      | 10.903            | 10.903                    | 9.800             | 9.800                     |
| Verzinsliche Wertpapiere                                                          |                   |                           |                   |                           |
| Zur Veräußerung verfügbare finanzielle Vermögenswerte                             | 2.096             | 2.096                     | 6.342             | 6.342                     |
| Übrige finanzielle Vermögenswerte                                                 |                   |                           |                   |                           |
| Zur Veräußerung verfügbare finanzielle Vermögenswerte <sup>1</sup>                | 2.199             | 2.199                     | 1.084             | 1.084                     |
| Erfolgswirksam zum beizulegenden Zeitwert bewertete finanzielle Vermögenswerte    | 731               | 731                       | 1.218             | 1.218                     |
| Derivative Finanzinstrumente, die in ein Hedge Accounting einbezogen sind         | 816               | 816                       | 1.074             | 1.074                     |
| Sonstige Forderungen und Vermögenswerte                                           | 1.695             | 1.695                     | 1.759             | 1.759                     |
|                                                                                   | 66.662            | 66.739                    | 65.040            | 65.072                    |
| Finanzielle Verbindlichkeiten                                                     |                   |                           |                   |                           |
| Finanzierungsverbindlichkeiten                                                    | 53.682            | 55.419                    | 58.294            | 59.677                    |
| Verbindlichkeiten aus Lieferungen und Leistungen                                  | 7.657             | 7.657                     | 5.622             | 5.622                     |
| Übrige finanzielle Verbindlichkeiten                                              |                   |                           |                   |                           |
| Erfolgswirksam zum beizulegenden Zeitwert bewertete finanzielle Verbindlichkeiten | 1.150             | 1.150                     | 675               | 675                       |
| Derivative Finanzinstrumente, die in ein Hedge Accounting einbezogen sind         | 858               | 858                       | 208               | 208                       |
| Sonstige übrige finanzielle Verbindlichkeiten                                     | 8.501             | 8.501                     | 8.854             | 8.854                     |
|                                                                                   | 71.848            | 73.585                    | 73.653            | 75.036                    |

<sup>1</sup> Darin enthalten sind zu Anschaffungskosten bewertete Eigenkapitalanteile, für die beizulegende Zeitwerte nicht verlässlich bestimmbar sind (2010: 714 Mio. €; 2009: 669 Mio. €).

Die beizulegenden Zeitwerte der Finanzinstrumente wurden auf Basis der am Bilanzstichtag zur Verfügung stehenden Marktinformationen ermittelt; folgende Methoden und Prämissen wurden dabei angewendet:

**Forderungen aus Finanzdienstleistungen.** Bei den Forderungen aus Finanzdienstleistungen mit variablen Zinssätzen wird vereinfachend angenommen, dass die beizulegenden Zeitwerte den Buchwerten entsprechen, da die vereinbarten und die am Markt erzielbaren Zinssätze annähernd gleich hoch sind. Die beizulegenden Zeitwerte der Forderungen aus Finanzdienstleistungen mit festen Zinssätzen werden auf Basis abgezinster, zukünftig erwarteter Cash Flows berechnet. Zur Abzinsung werden aktuelle Zinssätze herangezogen, zu denen vergleichbare Darlehen mit identischen Fristigkeiten zum 31. Dezember 2010 bzw. 31. Dezember 2009 hätten aufgenommen werden können.

**Forderungen aus Lieferungen und Leistungen sowie Zahlungsmittel und Zahlungsmitteläquivalente.** Aufgrund der kurzen Laufzeiten dieser Finanzinstrumente wird angenommen, dass die beizulegenden Zeitwerte den Buchwerten entsprechen.

**Verzinsliche Wertpapiere und übrige finanzielle Vermögenswerte.** Die zur Veräußerung verfügbaren finanziellen Vermögenswerte beinhalten:

- zum beizulegenden Zeitwert bewertete Fremd- und Eigenkapitalanteile; diese Finanzinstrumente wurden mit Börsenkursen zum 31. Dezember bewertet. Sofern öffentliche Notierungen für einzelne Fremd- und Eigenkapitalanteile nicht vorlagen, basiert die Marktwertermittlung auf Parametern, für die entweder direkt oder indirekt abgeleitete notierte Preise auf einem aktiven Markt zur Verfügung standen.
- zu Anschaffungskosten bewertete Eigenkapitalanteile; für diese Finanzinstrumente konnten keine beizulegenden Zeitwerte ermittelt werden, da Börsen- oder Marktwerte nicht vorhanden waren. Hierbei handelt es sich um Anteile an nicht börsennotierten Unternehmen, bei denen keine Indikatoren einer dauerhaften Wertminderung zum Bilanzstichtag vorlagen und für die beizulegende Zeitwerte nicht verlässlich bestimmbar sind. Für diese Finanzinstrumente wird angenommen, dass die beizulegenden Zeitwerte den Buchwerten entsprechen.

Die erfolgswirksam zum beizulegenden Zeitwert bewerteten finanziellen Vermögenswerte betreffen derivative Finanzinstrumente, die nicht in ein Hedge Accounting einbezogen sind. Diese Finanzinstrumente, sowie die *derivativen Finanzinstrumente, die in ein Hedge Accounting einbezogen sind*, umfassen:

- derivative Währungssicherungskontrakte; die beizulegenden Zeitwerte von Devisentermingeschäften und von Zinswährungsswaps wurden auf Basis abgezinster, zukünftiger erwarteter Cash Flows ermittelt. Dabei wurden die für die Restlaufzeiten der Finanzinstrumente geltenden Marktzinssätze verwendet. Devisenoptionen wurden mittels Kursnotierungen oder Optionspreismodellen unter Verwendung von Marktdaten bewertet.
- derivative Zinssicherungskontrakte; die beizulegenden Zeitwerte der Zinssicherungsinstrumente (z. B. Zinsswaps, Forward Rate Agreements) wurden auf Basis abgezinster, zukünftig erwarteter Cash Flows ermittelt. Dabei wurden die für die Restlaufzeiten der Finanzinstrumente geltenden Marktzinssätze verwendet. Zinsoptionen wurden mittels Kursnotierungen oder Optionspreismodellen unter Verwendung von Marktdaten bewertet.
- derivative Commodity-Sicherungskontrakte; die beizulegenden Zeitwerte der Commodity-Sicherungskontrakte (z. B. Commodity Forwards) wurden auf Basis aktueller Referenzkurse unter Berücksichtigung der Terminauf- bzw. -abschläge bestimmt.

Die *sonstigen Forderungen und Vermögenswerte* werden zu fortgeführten Anschaffungskosten bewertet. Aufgrund der überwiegend kurzen Laufzeiten dieser Finanzinstrumente wird angenommen, dass die beizulegenden Zeitwerte den Buchwerten entsprechen.

**Finanzierungsverbindlichkeiten.** Die beizulegenden Zeitwerte der Anleihen, Darlehen und der Einlagen aus dem Direktbankgeschäft werden als Barwerte der zukünftig erwarteten Cash Flows ermittelt. Zur Diskontierung werden marktübliche Zinssätze, bezogen auf die entsprechenden Fristigkeiten, verwendet. Aufgrund der überwiegend kurzen Laufzeiten wird für Geldmarktpapiere unterstellt, dass die Buchwerte dieser Finanzinstrumente näherungsweise den beizulegenden Zeitwerten entsprechen.

**Verbindlichkeiten aus Lieferungen und Leistungen.** Es wird angenommen, dass die beizulegenden Zeitwerte aufgrund der kurzen Laufzeiten den Buchwerten dieser Finanzinstrumente entsprechen.

**Übrige finanzielle Verbindlichkeiten.** Die *erfolgswirksam zum beizulegenden Zeitwert bewerteten finanziellen Verbindlichkeiten* betreffen derivative Finanzinstrumente, die nicht in ein Hedge Accounting einbezogen sind. Für Erläuterungen zu diesen Finanzinstrumenten, sowie zu derivativen Finanzinstrumenten, die in ein Hedge Accounting einbezogen sind, vergleiche die Ausführungen unter »Verzinsliche Wertpapiere und übrige finanzielle Vermögenswerte«.

Die *sonstigen übrigen finanziellen Verbindlichkeiten* werden zu fortgeführten Anschaffungskosten bewertet. Aufgrund der überwiegend kurzen Laufzeiten dieser Finanzinstrumente wird angenommen, dass die beizulegenden Zeitwerte den Buchwerten entsprechen.

Finanzielle Vermögenswerte und Verbindlichkeiten, die zu beizulegenden Zeitwerten bewertet werden, lassen sich in die folgende Bewertungshierarchie einstufen:

|                                                                                   | 31. Dezember 2010 |                      |                      |                      | 31. Dezember 2009 |                      |                      |                      |
|-----------------------------------------------------------------------------------|-------------------|----------------------|----------------------|----------------------|-------------------|----------------------|----------------------|----------------------|
|                                                                                   | Gesamt            | Stufe 1 <sup>1</sup> | Stufe 2 <sup>2</sup> | Stufe 3 <sup>3</sup> | Gesamt            | Stufe 1 <sup>1</sup> | Stufe 2 <sup>2</sup> | Stufe 3 <sup>3</sup> |
| in Millionen €                                                                    |                   |                      |                      |                      |                   |                      |                      |                      |
| Zum beizulegenden Zeitwert zu bewertende finanzielle Vermögenswerte               |                   |                      |                      |                      |                   |                      |                      |                      |
| Zur Veräußerung verfügbare finanzielle Vermögenswerte                             | 3.581             | 2.150                | 1.431                | –                    | 6.727             | 940                  | 5.787                | –                    |
| Erfolgswirksam zum beizulegenden Zeitwert bewertete finanzielle Vermögenswerte    | 731               | –                    | 731                  | –                    | 1.218             | –                    | 1.218                | –                    |
| Derivative Finanzinstrumente, die in ein Hedge Accounting einbezogen sind         | 816               | –                    | 816                  | –                    | 1.074             | –                    | 1.074                | –                    |
|                                                                                   | 5.128             | 2.150                | 2.978                | –                    | 9.019             | 940                  | 8.079                | –                    |
| Zum beizulegenden Zeitwert zu bewertende finanzielle Verbindlichkeiten            |                   |                      |                      |                      |                   |                      |                      |                      |
| Erfolgswirksam zum beizulegenden Zeitwert bewertete finanzielle Verbindlichkeiten | 1.150             | –                    | 1.150                | –                    | 675               | –                    | 675                  | –                    |
| Derivative Finanzinstrumente, die in ein Hedge Accounting einbezogen sind         | 858               | –                    | 858                  | –                    | 208               | –                    | 208                  | –                    |
|                                                                                   | 2.008             | –                    | 2.008                | –                    | 883               | –                    | 883                  | –                    |

1 Die Marktwertermittlung erfolgte auf Basis notierter, unangepasster Preise auf aktiven Märkten für diese Vermögenswerte und Schulden.

2 Die Marktwertermittlung erfolgte für diese Vermögenswerte und Schulden auf Basis von Parametern, für die entweder direkt oder indirekt abgeleitete notierte Preise auf einem aktiven Markt zur Verfügung stehen.

3 Die Marktwertermittlung erfolgte für diese Vermögenswerte und Schulden auf Basis von Parametern, für die keine beobachtbaren Marktdaten zur Verfügung stehen.

Die Buchwerte der Finanzinstrumente, gegliedert nach den Bewertungskategorien von IAS 39, stellen sich wie folgt dar:

|                                                                                                                                                                                                                                                                                | 31. Dezember<br>2010 | 2009   |
|--------------------------------------------------------------------------------------------------------------------------------------------------------------------------------------------------------------------------------------------------------------------------------|----------------------|--------|
| in Millionen €                                                                                                                                                                                                                                                                 |                      |        |
| <b>Aktiva</b>                                                                                                                                                                                                                                                                  |                      |        |
| Forderungen aus Finanzdienstleistungen <sup>1</sup>                                                                                                                                                                                                                            | 29.702               | 26.787 |
| Forderungen aus Lieferungen und Leistungen                                                                                                                                                                                                                                     | 7.192                | 5.285  |
| Sonstige Forderungen und Vermögenswerte                                                                                                                                                                                                                                        | 1.695                | 1.759  |
| Kredite und Forderungen                                                                                                                                                                                                                                                        | 38.589               | 33.831 |
| Verzinsliche Wertpapiere                                                                                                                                                                                                                                                       | 2.096                | 6.342  |
| Übrige finanzielle Vermögenswerte                                                                                                                                                                                                                                              | 2.199                | 1.084  |
| Zur Veräußerung verfügbare finanzielle Vermögenswerte                                                                                                                                                                                                                          | 4.295                | 7.426  |
| Erfolgswirksam zum beizulegenden Zeitwert bewertete finanzielle Vermögenswerte <sup>2</sup>                                                                                                                                                                                    | 731                  | 1.218  |
| <b>Passiva</b>                                                                                                                                                                                                                                                                 |                      |        |
| Verbindlichkeiten aus Lieferungen und Leistungen                                                                                                                                                                                                                               | 7.657                | 5.622  |
| Finanzierungsverbindlichkeiten <sup>3</sup>                                                                                                                                                                                                                                    | 51.986               | 56.567 |
| Sonstige übrige finanzielle Verbindlichkeiten <sup>4</sup>                                                                                                                                                                                                                     | 8.274                | 8.671  |
| Zu Anschaffungskosten bewertete finanzielle Verbindlichkeiten                                                                                                                                                                                                                  | 67.917               | 70.860 |
| Erfolgswirksam zum beizulegenden Zeitwert bewertete finanzielle Verbindlichkeiten <sup>2</sup>                                                                                                                                                                                 | 1.150                | 675    |
| Zahlungsmittel und Zahlungsmitteläquivalente sowie die Buchwerte der derivativen Finanzinstrumente, die in ein Hedge Accounting einbezogen sind, sind in der obigen Tabelle nicht enthalten, da diese Finanzinstrumente keiner Bewertungskategorie von IAS 39 zugeordnet sind. |                      |        |

1 Hierin nicht enthalten sind Leasingforderungen in Höhe von 11.328 (2009: 11.691) Mio. €, da diese keiner Bewertungskategorie von IAS 39 zugeordnet sind.

2 Finanzinstrumente, die als zu Handelszwecken gehalten klassifiziert sind. Diese Beträge entfallen auf derivative Finanzinstrumente, die nicht in ein Hedge Accounting einbezogen sind.

3 Hierin nicht enthalten sind Verbindlichkeiten aus Finance Lease in Höhe von 499 (2009: 397) Mio. € sowie Verbindlichkeiten aus der Nicht-Übertragung von Vermögenswerten in Höhe von 1.197 (2009: 1.330) Mio. €, da diese keiner Bewertungskategorie von IAS 39 zugeordnet sind.

4 Hierin nicht enthalten sind Verbindlichkeiten aus Finanzgarantien in Höhe von 227 (2009: 183) Mio. €, da diese keiner Bewertungskategorie von IAS 39 zugeordnet sind.

## Nettogewinne oder -verluste

Die folgende Tabelle stellt die in der Konzern-Gewinn- und Verlustrechnung berücksichtigten Nettogewinne oder -verluste von Finanzinstrumenten dar (ohne derivative Finanzinstrumente, die in ein Hedge Accounting einbezogen sind):

|                                                                                                                               | 2010 | 2009 |
|-------------------------------------------------------------------------------------------------------------------------------|------|------|
| in Millionen €                                                                                                                |      |      |
| Erfolgswirksam zum beizulegenden Zeitwert bewertete finanzielle Vermögenswerte und finanzielle Verbindlichkeiten <sup>1</sup> | -613 | -407 |
| Zur Veräußerung verfügbare finanzielle Vermögenswerte                                                                         | 353  | 38   |
| Kredite und Forderungen                                                                                                       | -237 | -546 |
| Zu Anschaffungskosten bewertete finanzielle Verbindlichkeiten                                                                 | 255  | -130 |

1 Finanzinstrumente, die als zu Handelszwecken gehalten klassifiziert sind; diese Beträge entfallen auf derivative Finanzinstrumente, die nicht in ein Hedge Accounting einbezogen sind.

Die Nettogewinne bzw. -verluste der erfolgswirksam zum beizulegenden Zeitwert bewerteten finanziellen Vermögenswerte und Verbindlichkeiten beinhalten insbesondere die Ergebnisse aus Marktwertänderungen.

Die Nettogewinne bzw. -verluste der zur Veräußerung verfügbaren finanziellen Vermögenswerte beinhalten unter anderem Erträge von Beteiligungen sowie realisierte Erfolge aus dem Abgang dieser Anteile.

Die Nettogewinne bzw. -verluste aus Krediten und Forderungen beinhalten im Wesentlichen Ergebnisse aus Wertminderungen und Zuschreibungen, die in den Umsatzkosten, in den Vertriebskosten und im übrigen Finanzergebnis ausgewiesen sind.

Die Nettogewinne bzw. -verluste aus zu Anschaffungskosten bewerteten finanziellen Verbindlichkeiten umfassen im Wesentlichen Gewinne und Verluste infolge der Bewertung von Verbindlichkeiten in fremden Währungen.

## Gesamtzinserträge und -aufwendungen

Die Gesamtzinserträge und -aufwendungen für finanzielle Vermögenswerte und finanzielle Verbindlichkeiten, die nicht erfolgswirksam mit den beizulegenden Zeitwerten bewertet wurden, stellen sich wie folgt dar:

|                        | 2010   | 2009   |
|------------------------|--------|--------|
| in Millionen €         |        |        |
| Gesamtzinserträge      | 2.881  | 2.983  |
| Gesamtzinsaufwendungen | -2.322 | -2.943 |

Qualitative Beschreibungen zur Bilanzierung und zum Ausweis von Finanzinstrumenten (einschließlich derivativer Finanzinstrumente) sind in Anmerkung 1 enthalten.

## Angaben zu derivativen Finanzinstrumenten

**Einsatz von Derivaten.** Der Konzern nutzt derivative Finanzinstrumente zur Absicherung von Zinsrisiken, Währungsrisiken und Rohstoffpreisrisiken. Hierfür werden überwiegend Devisentermingeschäfte, Zinswährungsswaps, Zinsswaps, Optionen und Warentermingeschäfte eingesetzt.

### Beizulegende Zeitwerte von Sicherungsinstrumenten.

Die nachfolgende Tabelle beinhaltet die beizulegenden Zeitwerte der Sicherungsinstrumente:

|                   | 31. Dezember<br>2010 | 2009 |
|-------------------|----------------------|------|
| in Millionen €    |                      |      |
| Fair Value Hedges | 240                  | 425  |
| Cash Flow Hedges  | -282                 | 441  |

**Fair Value Hedges.** Der Konzern designiert Fair Value Hedges überwiegend im Zusammenhang mit der Absicherung von Zinsrisiken.

Die Nettoverluste aus diesen Sicherungsinstrumenten und die Nettogewinne der dazugehörigen Grundgeschäfte stellen sich wie folgt dar:

|                                          | 31. Dezember<br>2010 | 2009 |
|------------------------------------------|----------------------|------|
| in Millionen €                           |                      |      |
| Nettoverluste aus Sicherungsinstrumenten | -66                  | -31  |
| Nettogewinne aus Grundgeschäften         | 67                   | 53   |

Diese Werte beinhalten auch die von der Ermittlung der Hedge-Effektivität ausgeschlossenen Bestandteile der derivativen Finanzinstrumente und die Hedge-Ineffektivitäten.

**Cash Flow Hedges.** Der Konzern designiert Cash Flow Hedges im Zusammenhang mit der Absicherung von Währungs-, Zins- und Rohstoffpreisrisiken.

Die unrealisierten Gewinne und Verluste (vor Steuern) aus der Bewertung von Derivaten, die erfolgsneutral im Eigenkapital erfasst wurden, stellen sich wie folgt dar:

|                                | 2010 | 2009 |
|--------------------------------|------|------|
| in Milliarden €                |      |      |
| Unrealisierte Gewinne/Verluste | 1,0  | .    |

Die aus dem Eigenkapital in die Gewinn- und Verlustrechnung umgebuchten Gewinne/Verluste vor Steuern sind wie folgt:

|                  | 2010 | 2009 |
|------------------|------|------|
| in Millionen €   |      |      |
| Umsatzerlöse     | -265 | 707  |
| Umsatzkosten     | 11   | -63  |
| Zinserträge      | -    | -    |
| Zinsaufwendungen | -37  | -230 |
|                  | -291 | 414  |



Die unrealisierten Gewinne und Verluste sowie die erfolgswirksamen Umbuchungen in die Gewinn- und Verlustrechnung beinhalten nicht die Gewinne und Verluste aus Derivaten von at-equity bewerteten Finanzinvestitionen (für weitere Informationen siehe auch Anmerkung 20).

Im Konzernergebnis des Jahres 2010 sind netto Gewinne (vor Steuern) in Höhe von 2 (2009: Verluste von 1) Mio. € aus der Bewertung von derivativen Finanzinstrumenten enthalten, die hedge-ineffektiv waren.

Als Folge der vorzeitigen Beendigung von Cash Flow Hedges ergaben sich im Jahr 2010 Erträge von 3 (2009: 18) Mio. €.

Die Laufzeiten der Zinssicherungen bzw. Zinswährungssicherungen entsprechen grundsätzlich denen der abgesicherten Grundgeschäfte. Zum 31. Dezember 2010 hatte Daimler derivative Instrumente mit einer maximalen Laufzeit von 44 Monaten im Bestand, um Währungsrisiken aus zukünftigen Transaktionen abzusichern.

**Nominalwerte derivativer Finanzinstrumente.** Die nachfolgende Tabelle zeigt die Nominalvolumina der derivativen Finanzinstrumente:

|                                                              | 31. Dezember 2010 |                                        | 31. Dezember 2009 |                                        |
|--------------------------------------------------------------|-------------------|----------------------------------------|-------------------|----------------------------------------|
|                                                              | Nominalwerte      | davon Fair Value bzw. Cash Flow Hedges | Nominalwerte      | davon Fair Value bzw. Cash Flow Hedges |
| in Millionen €                                               |                   |                                        |                   |                                        |
| Währungssicherung bilanzierter Forderungen/Verbindlichkeiten |                   |                                        |                   |                                        |
| Devisentermingeschäfte                                       | 7.192             | –                                      | 2.115             | –                                      |
| Zinswährungsswaps                                            | 9.475             | 1.950                                  | 14.154            | 923                                    |
| Währungssicherung zukünftiger Transaktionen                  |                   |                                        |                   |                                        |
| Devisentermin- und -optionsgeschäfte                         | 24.032            | 23.199                                 | 13.525            | 13.029                                 |
| Zinssicherung bilanzierter Forderungen/Verbindlichkeiten     |                   |                                        |                   |                                        |
| Zinsswaps                                                    | 21.312            | 17.430                                 | 20.500            | 18.424                                 |
| Rohstoffpreissicherung zukünftiger Transaktionen             |                   |                                        |                   |                                        |
| Warentermingeschäfte                                         | 831               | 736                                    | 411               | 327                                    |
|                                                              | 62.842            | 43.315                                 | 50.705            | 32.703                                 |

Absicherungen, bei denen sich die Bewertungseffekte aus Grund- und Sicherungsgeschäft in der Konzern-Gewinn- und Verlustrechnung weitestgehend ausgleichen, wurden größtenteils nicht in ein Hedge-Accounting einbezogen.

Erläuterungen zur Absicherung der Währungs-, Zinsänderungs- und Rohstoffpreissicherungen sind im Unterpunkt Finanzmarktrisiken in Anmerkung 31 enthalten.

## 31. Risikomanagement

### Allgemeine Informationen über Finanzrisiken

Aufgrund der Geschäftstätigkeit und der globalen Ausrichtung ist Daimler Marktpreisrisiken durch Veränderungen von Wechselkursen, Zinssätzen und Aktienkursen ausgesetzt. Auf der Beschaffungsseite bestehen Commodity-Preis-Risiken. Der Konzern unterliegt darüber hinaus Kreditrisiken, die vor allem aus dem Finanzdienstleistungsgeschäft und den Forderungen aus Lieferungen und Leistungen resultieren. Die Kreditrisiken aus dem Finanzdienstleistungsgeschäft betreffen mögliche Zahlungsausfälle im Rahmen der Operating-Lease-, Finance-Lease- und Finanzierungsverträge. Ferner bestehen Liquiditätsrisiken, die im Zusammenhang mit den Kredit- und Marktpreisrisiken stehen oder mit einer Verschlechterung des operativen Geschäfts beziehungsweise mit Störungen an den Finanzmärkten einhergehen. Sofern diese Finanzrisiken eintreten, wird die Vermögens-, Finanz- und Ertragslage des Konzerns negativ beeinflusst.

Daimler hat interne Richtlinien, die die Prozesse des Risikocontrollings zum Gegenstand haben, den Einsatz von Finanzinstrumenten regeln und dabei eine eindeutige Funktionstrennung der operativen Finanzaktivitäten, deren Abwicklung und Buchführung sowie des zugehörigen Controllings beinhalten. Die Leitlinien, die den Risikomanagementprozessen des Konzerns zugrunde liegen, sind darauf ausgerichtet, dass die Risiken konzernweit identifiziert und analysiert werden. Ferner zielen sie auf eine geeignete Begrenzung und Kontrolle der Risiken ab sowie auf deren Überwachung mithilfe verlässlicher und moderner Verwaltungs- und Informationssysteme. Die Leitlinien sowie die Systeme werden regelmäßig überprüft und an aktuelle Markt- und Produktentwicklungen angepasst.

Der Konzern steuert und überwacht diese Risiken vorrangig über seine operativen Geschäfts- und Finanzierungsaktivitäten und setzt bei Bedarf derivative Finanzinstrumente ein. Daimler verwendet derivative Finanzinstrumente ausschließlich für Zwecke des Risikomanagements. Ohne deren Verwendung wäre der Konzern höheren finanziellen Risiken ausgesetzt (zusätzliche Informationen über Finanzinstrumente und insbesondere über die Höhe der eingesetzten derivativen Finanzinstrumente sind in Anmerkung 30 enthalten). Daimler beurteilt seine Finanzrisiken regelmäßig und berücksichtigt dabei auch Änderungen ökonomischer Schlüsselindikatoren sowie aktuelle Marktinformationen.

Die von den Fonds zur Abdeckung der Pensionen und ähnlicher Verpflichtungen gehaltenen marktsensitiven Anlagen einschließlich Eigenkapitaltitel und zinstragender Wertpapiere sind nicht Bestandteil dieser quantitativen und qualitativen Betrachtung. Weitere Informationen zu den Pensionsplänen des Konzerns enthält Anmerkung 22.

### Kreditrisiko

Das Kreditrisiko beschreibt die Gefahr eines ökonomischen Verlustes, der dadurch entsteht, dass ein Kontrahent seinen vertraglichen Zahlungsverpflichtungen nicht nachkommt. Das Kreditrisiko umfasst dabei sowohl das unmittelbare Ausfallrisiko als auch das Risiko einer Bonitätsverschlechterung sowie Konzentrationsrisiken.

Die maximalen Risikopositionen aus finanziellen Vermögenswerten, die grundsätzlich einem Kreditrisiko unterliegen, entsprechen deren Buchwerten und stellen sich wie folgt dar:

|                                                                                                      | Siehe auch<br>Anmerkung | Maximale<br>Risikoposition<br>2010 | Maximale<br>Risikoposition<br>2009 |
|------------------------------------------------------------------------------------------------------|-------------------------|------------------------------------|------------------------------------|
| in Millionen €                                                                                       |                         |                                    |                                    |
| Liquide Mittel                                                                                       |                         | 12.999                             | 16.142                             |
| Forderungen aus Finanzdienstleistungen                                                               | 14                      | 41.030                             | 38.478                             |
| Forderungen aus Lieferungen und Leistungen                                                           | 19                      | 7.192                              | 5.285                              |
| Derivative Finanzinstrumente, die in ein Hedge Accounting einbezogen sind (nur Vermögenswerte)       | 16                      | 816                                | 1.074                              |
| Derivative Finanzinstrumente, die nicht in ein Hedge Accounting einbezogen sind (nur Vermögenswerte) | 16                      | 731                                | 1.218                              |
| Kreditzusagen                                                                                        | 29                      | 1.910                              | 1.587                              |
| Sonstige Forderungen und Vermögenswerte                                                              | 16                      | 1.695                              | 1.759                              |

**Liquide Mittel.** Die liquiden Mittel umfassen Zahlungsmittel und Zahlungsmitteläquivalente sowie als zur Veräußerung verfügbar ausgewiesene verzinsliche Wertpapiere. Bei der Anlage von liquiden Mitteln werden die Finanzinstitute und Emittenten von Wertpapieren sorgfältig ausgewählt und über eine Limitsystematik diversifiziert. Im Zusammenhang mit der Finanzmarktkrise wurde die Limitsystematik dahingehend angepasst, dass überwiegend die Limits reduziert wurden. Die Limits und ihre Ausnutzungen werden laufend überprüft; diese Überprüfung erfolgt auch unter Berücksichtigung der Einschätzung der Kreditrisiken unserer Kontrahenten durch die Kapitalmärkte. Es entspricht der Risikopolitik des Konzerns, dass der Großteil der liquiden Mittel in Anlagen mit einem externen Rating von A oder besser gehalten wird.

**Forderungen aus Finanzdienstleistungen.** Die Finanzierungs- und Leasingaktivitäten von Daimler sind vor allem auf die Absatzunterstützung der Automobilprodukte des Konzerns ausgerichtet. Hieraus resultieren Kreditrisiken, die anhand von definierten Standards, Leitlinien und Prozessen überwacht und gesteuert werden. Das Kreditrisiko wird sowohl für Operating-Lease- als auch für Finance-Lease-Verträge betrachtet. Aus diesem Grund beziehen sich die Angaben zum Kreditrisiko von Daimler Financial Services auf das gesamte Leasinggeschäft, sofern dies nicht anders kenntlich gemacht ist.

Das Kreditrisiko aus den Finanzierungs- und Leasingaktivitäten wird auf Basis des kreditrisikobehafteten Portfolios überwacht. Das kreditrisikobehaftete Portfolio ist eine interne Steuerungsgröße, die sich aus den Forderungen aus Finanzdienstleistungen, dem kreditrisikobehafteten Teil des Operating-Lease-Portfolios und den Umsätzen aus der Händlerbestandsfinanzierung zusammensetzt. Die Forderungen aus Finanzdienstleistungen selbst umfassen Ansprüche aus Finance-Lease-Verträgen sowie Rückzahlungsansprüche aus Finanzierungsdarlehen. Das Operating-Lease-Portfolio wird unter der Position Vermietete Gegenstände in der Konzernbilanz berichtet.

Des Weiteren ist das Segment Daimler Financial Services Kreditrisiken aus unwiderruflichen Kreditzusagen gegenüber Endkunden und Händlern ausgesetzt. Zum 31. Dezember 2010 beliefen sich die unwiderruflichen Kreditzusagen von Daimler Financial Services auf 1.722 (2009: 1.503) Mio. €; hiervon haben 1.436 (2009: 651) Mio. € eine Laufzeit von unter einem Jahr; 262 (2009: 852) Mio. € weisen eine Laufzeit zwischen zwei und drei Jahren auf; 24 Mio. € weisen eine Laufzeit zwischen drei und vier Jahren auf.

Das Segment Daimler Financial Services verfügt sowohl auf globaler als auch auf lokaler Ebene über Richtlinien, die den Rahmen für ein effektives Risikomanagement setzen. Gegenstand der Richtlinien sind insbesondere Mindestanforderungen für alle risikorelevanten Prozesse im Kreditgeschäft, die Einschätzung der Kreditwürdigkeit der Kunden, die Einforderung von Sicherheiten sowie das Vorgehen bei unbesicherten Krediten und bei notleidenden Ansprüchen. Die Begrenzung von Konzentrationsrisiken erfolgt primär über globale Limits, die sich auf Einzelkundenengagements beziehen. Zum 31. Dezember 2010 betrugen die Kreditpositionen der 15 größten Kunden nicht mehr als 4,2% des Portfolios (2009: 4,5%).

Im Rahmen seiner Finanzdienstleistungsaktivitäten hält der Konzern für Einzelgeschäfte Kreditsicherheiten. Der Wert einer Kreditsicherheit hängt in der Regel vom Betrag des finanzierten Vermögenswertes ab. Üblicherweise dienen die finanzierten Fahrzeuge durch Sicherungsübereignung des Kraftfahrzeugbriefs als Kreditsicherheit. Darüber hinaus limitiert Daimler Financial Services das Kreditrisiko aus Finanzierungs- und Leasingaktivitäten, zum Beispiel durch Anzahlungen von Kunden.

Im Hinblick auf die Beurteilung des Ausfallrisikos werden zur Bewertung von Privatkunden und Kleinunternehmen Scoringssysteme eingesetzt. Großkunden werden durch interne Ratinginstrumente und, falls verfügbar, mithilfe von Informationen externer Kreditagenturen bewertet. Die Ergebnisse des Scorings und Ratings, ebenso wie die Verfügbarkeit von Sicherheiten und von anderen risikomindernden Instrumenten, wie zum Beispiel Anzahlungen, Garantien und in geringerem Umfang Restschuldversicherungen, sind wesentliche Bestandteile der Kreditentscheidung.

Wesentliche Finanzierungsdarlehen und Leasingverträge gegenüber Großkunden werden individuell auf Wertminderungsbedarf untersucht. Ein Darlehen oder ein Leasingvertrag wird wertberichtigt, wenn objektive Hinweise vorliegen, dass der Konzern nicht in der Lage sein wird, alle fälligen Beträge entsprechend den vertraglichen Bedingungen zu vereinnahmen. Objektive Hinweise auf eine Uneinbringlichkeit sind zum Beispiel finanzielle Schwierigkeiten und drohende Zahlungsunfähigkeit des Schuldners, Überfälligkeit der Forderungen und nachträgliche Veränderung der Vertragskonditionen zur Vermeidung des Forderungsausfalls.

Die überwiegende Mehrheit der Kredite und Leasingforderungen gegenüber Privatkunden und Kleinunternehmen wird zu Gruppen gleichartiger Verträge zusammengefasst und als Gruppe auf Wertminderungsbedarf beurteilt. Hinweise für einen möglichen Wertberichtigungsbedarf sind zum Beispiel Verschlechterungen im Zahlungsverhalten innerhalb der Gruppe sowie nachteilige Veränderungen der wirtschaftlichen Rahmenbedingungen.

Sofern bei Einzelverträgen ein Wertminderungsbedarf erkannt wird, werden entweder Maßnahmen mit dem Ziel eingeleitet, den finanzierten oder verleasten Gegenstand wieder in Besitz zu nehmen oder den wertgeminderten Vertrag neu zu verhandeln. Interne Richtlinien zur Durchführung einer Neustrukturierung des Kredit- bzw. Leasingvertrags knüpfen dabei an das Vorliegen von Indikatoren bzw. Kriterien an, die nach der Einschätzung des lokalen Managements weitere Zahlungen in einem Umfang erwarten lassen, so dass die erwarteten Erlöse aus dem neu verhandelten Vertrag insgesamt die erwarteten Erlöse aus sofortiger Inbesitznahme und Wiederverkauf übersteigen. Die Buchwerte der Forderungen aus neu verhandelten Verträgen, die ansonsten überfällig oder im Wert zu berichtigen wären, können Anmerkung 14 entnommen werden.

Weitere Informationen über die Forderungen aus Finanzdienstleistungen und den Stand der vorgenommenen Wertberichtigungen können ebenfalls der Anmerkung 14 entnommen werden.

**Forderungen aus Lieferungen und Leistungen.** Forderungen aus Lieferungen und Leistungen resultieren hauptsächlich aus den weltweiten Verkaufsaktivitäten von Personenkraftwagen und Nutzfahrzeugen sowie von Ersatzteilen. Das Kreditrisiko beinhaltet das Ausfallrisiko der Kunden, zu denen unter anderem Vertragshändler bzw. Generalvertreter, sonstige Firmenkunden sowie Privatkunden gehören. Daimler steuert Kreditrisiken aus Forderungen aus Lieferungen und Leistungen auf Basis von internen Richtlinien.

Im jeweiligen Inlandsgeschäft wird ein Großteil der Forderungen aus Lieferungen und Leistungen durch verschiedene, gegebenenfalls länderspezifische Sicherungsformen abgesichert. Die Sicherungen umfassen zum Beispiel den Eigentumsvorbehalt, Garantien und Bürgschaften sowie Hypotheken und Kundeneinlagen. Um dem Kreditrisiko vorzubeugen, prüft Daimler die Bonität von Kontrahenten.

Im jeweiligen Exportgeschäft beurteilt Daimler ebenfalls die Bonität der Generalvertretungen über einen internen Ratingprozess sowie unter Einbeziehung des spezifischen Länderrisikos. In diesem Zusammenhang werden Jahresabschlüsse und andere relevante Informationen, wie z. B. das Zahlungsverhalten der Generalvertretungen, herangezogen und ausgewertet.

Abhängig von der Bonität der Generalvertretungen etabliert Daimler Kreditlimits und begrenzt das Kreditrisiko durch folgende Sicherheiten:

- Kreditversicherungen,
- erstklassige Bankgarantien und
- Akkreditive.

Diese Vorgehensweisen sind in einer konzernweit gültigen Exportkreditrichtlinie definiert.

Für das den Forderungen aus Lieferungen und Leistungen inhärente Risiko wird eine angemessene Risikovorsorge gebildet. Hierzu werden regelmäßig sämtliche Forderungen überprüft und bei objektiven Hinweisen auf Ausfälle oder sonstige Vertragsstörungen Wertberichtigungen gebildet. Grundsätzlich werden hierbei wesentliche Einzelforderungen sowie Forderungen, deren Einbringlichkeit gefährdet ist, individuell bewertet. Unter Berücksichtigung länderspezifischer Risiken und gegebenenfalls vorhandener Sicherheiten werden die übrigen Forderungen zu Gruppen gleichartiger Verträge zusammengefasst und auf Wertberichtigungsbedarf untersucht.

Weitere Informationen über die Forderungen aus Lieferungen und Leistungen sowie den Stand der vorgenommenen Wertberichtigungen können der Anmerkung 19 entnommen werden.

**Derivative Finanzinstrumente.** Der Konzern verwendet derivative Finanzinstrumente ausschließlich für Zwecke des Risikomanagements. Das Kreditrisiko im Zusammenhang mit Derivaten wird mittels eines Limitsystems gesteuert, das auf der Überprüfung der kontrahentenspezifischen Finanzkraft basiert. Diese Limitierung begrenzt und diversifiziert das Kreditrisiko. Daher ist Daimler aus den derivativen Finanzinstrumenten einem Kreditrisiko in nur geringem Ausmaß ausgesetzt. Entsprechend der Risikopolitik des Konzerns wurde der Großteil der Derivate mit Kontrahenten abgeschlossen, die ein externes Rating von A oder besser aufweisen.

**Sonstige Forderungen und Vermögenswerte.** Bezogen auf die sonstigen Forderungen und Vermögenswerte der Jahre 2010 und 2009 ist Daimler in nur geringem Ausmaß einem Kreditrisiko ausgesetzt.

### Liquiditätsrisiko

Das Liquiditätsrisiko beschreibt die Gefahr, dass ein Unternehmen seine finanziellen Verpflichtungen nicht in ausreichendem Maß erfüllen kann.

Daimler steuert seine Liquidität, indem der Konzern ergänzend zum Zahlungsmittelzufluss aus dem operativen Geschäft in ausreichendem Umfang liquide Mittel vorhält und Kreditlinien bei Banken unterhält. Bei den liquiden Mitteln handelt es sich um Zahlungsmittel und Zahlungsmitteläquivalente sowie um zur Veräußerung verfügbare Fremdkapitalinstrumente, über die der Konzern kurzfristig verfügen kann.

Zur Deckung des Finanzmittelbedarfs nutzt Daimler grundsätzlich ein breites Spektrum an Finanzinstrumenten. In Abhängigkeit von Finanzmittelbedarf und Marktkonditionen emittiert Daimler Geldmarktpapiere, Anleihen oder durch Forderungen besicherte Finanzmarktinstrumente in verschiedenen Währungen. Zusätzlich werden Kreditlinien zur Finanzierung des Mittelbedarfs eingesetzt. Auch die Kundeneinlagen bei der Mercedes-Benz Bank werden als weitere Refinanzierungsquelle genutzt. Die liquiden Mittel dienen vorrangig dazu, den Finanzbedarf des Leasing- und Absatzfinanzierungsgeschäfts abzudecken sowie das Working Capital und die Investitionen zu finanzieren. Entsprechend interner Richtlinien wird das Leasing- und Absatzfinanzierungsgeschäft grundsätzlich mit kongruenten Fälligkeiten der Cash Flows refinanziert.

Zum Jahresende 2010 betrug die Liquidität 13,0 (2009: 16,1) Mrd. €. Vor dem Hintergrund der Finanz- und Wirtschaftskrise und der daraus resultierenden Risiken hatte der Konzern im Jahr 2009 seine Liquidität bewusst erhöht.

Zum Jahresende 2010 bestanden für den Konzern kurz- und langfristige Kreditlinien über insgesamt 24,0 Mrd. €, von denen 9,4 Mrd. € nicht in Anspruch genommen waren. Diese Kreditlinien beinhalten eine im Oktober 2010 abgeschlossene syndizierte 7,0-Mrd.-Euro-Kreditfazilität der Daimler AG mit fünfjähriger Laufzeit. Die syndizierte Kreditfazilität dient als Absicherung für Commercial-Paper-Ziehungen und kann für die Finanzierung allgemeiner Unternehmenszwecke verwendet werden; sie war zum Jahresende 2010 nicht in Anspruch genommen.

Das operative Liquiditätsmanagement umfasst einen Cash-Concentration-Prozess, durch den täglich die liquiden Mittel zusammengeführt werden. Dadurch können Liquiditätsüberschüsse und -anforderungen entsprechend den Bedürfnissen des Gesamtkonzerns sowie einzelner Konzerngesellschaften gesteuert werden. In das kurz- und mittelfristige Liquiditätsmanagement werden die Fälligkeiten finanzieller Vermögenswerte und finanzieller Verbindlichkeiten sowie Schätzungen des operativen Cash Flows einbezogen.

Angaben zu den Finanzierungsverbindlichkeiten des Konzerns enthält auch Anmerkung 24.

Die folgende Fälligkeitsübersicht zeigt, wie die Cash Flows der Verbindlichkeiten und Finanzgarantien per 31. Dezember 2010 die Liquiditätssituation des Konzerns beeinflussen.

#### Fälligkeitsübersicht <sup>1</sup>

|                                                                                                       | Gesamt | 2011   | 2012   | 2013  | 2014  | 2015  | ≥ 2016 |
|-------------------------------------------------------------------------------------------------------|--------|--------|--------|-------|-------|-------|--------|
| in Millionen €                                                                                        |        |        |        |       |       |       |        |
| Finanzierungsverbindlichkeiten <sup>2</sup>                                                           | 60.413 | 27.885 | 12.238 | 7.827 | 5.498 | 1.648 | 5.317  |
| Derivative Finanzinstrumente <sup>3</sup>                                                             | 2.631  | 1.627  | 693    | 195   | 109   | 4     | 3      |
| Verbindlichkeiten aus Lieferungen und Leistungen <sup>4</sup>                                         | 7.657  | 7.655  | 2      | –     | –     | –     | –      |
| Übrige finanzielle Verbindlichkeiten ohne Derivate                                                    | 8.501  | 7.496  | 340    | 332   | 113   | 60    | 160    |
| Unwiderrufliche Kreditzusagen des Segments Daimler Financial Services und der Daimler AG <sup>5</sup> | 1.910  | 1.624  | 102    | 160   | 24    | –     | –      |
| Finanzgarantien <sup>6</sup>                                                                          | 1.140  | 1.140  | –      | –     | –     | –     | –      |
| Summe                                                                                                 | 82.252 | 47.427 | 13.375 | 8.514 | 5.744 | 1.712 | 5.480  |

<sup>1</sup> Bei der Ermittlung der Beträge wurde grundsätzlich wie folgt vorgegangen:

(a) Falls der Vertragspartner eine Zahlung zu verschiedenen Zeitpunkten abrufen kann, wird die Verbindlichkeit auf den frühesten Fälligkeitstermin bezogen.

Die Kundeneinlagen der Mercedes-Benz Bank werden deshalb überwiegend als im ersten Jahr fällig angenommen.

(b) Die Zinsauszahlungen von Finanzinstrumenten mit variabler Verzinsung werden auf Basis von Terminzinssätzen ermittelt.

<sup>2</sup> Die angegebenen Cash Flows der Finanzierungsverbindlichkeiten setzen sich aus deren undiskontierten Tilgungs- und Zinsauszahlungen zusammen.

<sup>3</sup> Es werden die undiskontierten, für das jeweilige Jahr summierten Netto-Auszahlungen der derivativen Finanzinstrumente dargestellt. Dies beinhaltet für einzelne Zeitbänder gegebenenfalls auch negative Cash Flows aus Derivaten mit einem insgesamt positiven beizulegenden Zeitwert.

<sup>4</sup> Die Auszahlungen aus Verbindlichkeiten aus Lieferungen und Leistungen werden undiskontiert angegeben.

<sup>5</sup> Es werden die maximal abrufbaren Beträge dargestellt.

<sup>6</sup> Es werden die maximal möglichen Zahlungsverpflichtungen aus gewährten Finanzgarantien dargestellt. Die Beträge werden als im ersten Jahr fällig angenommen.



## Finanzmarktrisiken

Daimler ist aufgrund seiner weltweiten Geschäftsaktivitäten wesentlichen Marktpreisrisiken aus Änderungen von Wechselkursen und Zinssätzen ausgesetzt. Im Rahmen der operativen Geschäftstätigkeit entstehen darüber hinaus Rohstoffpreisrisiken, die der Konzern durch derivative Finanzinstrumente teilweise absichert. Ferner unterliegt der Konzern Aktienkursrisiken. Sofern Marktpreisrisiken eintreten, wird die Vermögens-, Finanz- und Ertragslage des Konzerns negativ beeinflusst.

Das Management von Marktpreisrisiken hat die Aufgabe, die Auswirkungen von Schwankungen bei Währungen, Zinssätzen und Rohstoffen (Commodities) auf das Ergebnis der Segmente und des Konzerns zu begrenzen. Hierzu wird zunächst das konzernweite Risikovolumen (Exposure) für diese Marktpreisrisiken ermittelt, auf dessen Basis dann Sicherungsentscheidungen getroffen werden. Diese beinhalten die Wahl der Sicherungsinstrumente, das zu sichernde Volumen sowie den abzusichernden Zeitraum. Entscheidungsgremien sind regelmäßig tagende Komitees für Währungen und Rohstoffe sowie für das Asset-Liability-Management (Zinsen).

Als Teil des Risikomanagementsystems setzt Daimler entsprechend den Empfehlungen der Bank für Internationalen Zahlungsausgleich (BIZ) Value-at-Risk-Analysen ein. Bei diesen Analysen wird regelmäßig die Risikoposition gegenüber Änderungen von Marktrisikofaktoren wie Wechselkursen und Zinssätzen gemessen, indem bei Vorgabe eines Konfidenzniveaus und einer Halteperiode ein maximaler Verlust berechnet wird.

Der Ermittlung des Value-at-Risk liegen die folgenden Annahmen zugrunde:

- Potenzielle Verluste beziehen sich auf Marktwertänderungen und
- das Konfidenzniveau beträgt 99% bei einer Halteperiode von fünf Tagen.

Daimler ermittelt den Value-at-Risk aus Wechselkurs- und aus Zinsänderungsrisiken über den Varianz-Kovarianz-Ansatz. Der Value-at-Risk-Bestimmung bei Rohstoffsicherungskontrakten liegt methodisch die Monte-Carlo-Simulation zugrunde.

Beim Varianz-Kovarianz-Ansatz wird zu Beginn der Value-at-Risk-Berechnung der aktuelle Marktwert des Portfolios aus Finanzinstrumenten des Konzerns ermittelt. Im nächsten Schritt wird die Sensitivität des Portfolios gegenüber Änderungen der relevanten Marktrisikofaktoren, wie einzelnen Wechselkursen oder laufzeitspezifischen Zinssätzen, bestimmt. Auf Basis der Volatilitäten und Korrelationen dieser Marktrisikofaktoren, die dem RiskMetrics™-Datensatz entnommen sind, wird eine statistische Verteilung der möglichen Änderungen des Portfoliowertes am Ende der Halteperiode berechnet. Der daraus abgeleitete Verlust, der nur in 1% der Fälle erreicht oder überschritten wird, gibt den Value-at-Risk an.

Bei der Monte-Carlo-Simulation werden mithilfe von Zufallszahlen mögliche Änderungen der Marktrisikofaktoren über die Halteperiode hinweg generiert. Die Veränderungen der Marktrisikofaktoren zielen auf eine mögliche Wertänderung des Portfolios. Eine vielfache Wiederholung des Simulationslaufes führt zu einem Verteilungsbild für die Portfoliowertänderungen.

An diesem ist wiederum derjenige Portfoliowertverlust als Value-at-Risk abzulesen, der nur in 1% der Fälle erreicht oder überschritten wird.

In Übereinstimmung mit den für internationale Banken geltenden Standards zum Risikomanagement betreibt Daimler ein von der Treasury unabhängiges Finanzcontrolling mit getrennten Berichtslinien.

**Wechselkursrisiko.** *Transaktionsrisiko und Management von Währungsrisiken.* Aus der globalen Ausrichtung des Konzerns folgt, dass die Cash Flows und die Ergebnisse Risiken aus Wechselkursschwankungen ausgesetzt sind. Diese bestehen vor allem zwischen dem US-Dollar und dem Euro.

Im operativen Fahrzeuggeschäft entsteht das Wechselkursrisiko primär dann, wenn die Umsatzerlöse in einer anderen Währung als die zugehörigen Kosten anfallen (Transaktionsrisiko). Beim Tausch der Umsatzerlöse in die Währung, in der die Kosten anfallen, kann der Fall eintreten, dass nach einer zwischenzeitlichen Währungsabwertung die getauschten Beträge die Kosten nicht mehr decken. Dieses Risiko betrifft vor allem das Segment Mercedes-Benz Cars, bei dem ein größerer Anteil der Umsatzerlöse in Fremdwährungen erzielt wird, während die Produktionskosten vorwiegend in Euro anfallen. Das Segment Daimler Trucks ist ebenfalls einem Transaktionsrisiko ausgesetzt, jedoch aufgrund des weltweiten Produktionsnetzwerkes nur in einem geringeren Ausmaß. Auch die Segmente Mercedes-Benz Vans und Daimler Buses sind einem Transaktionsrisiko ausgesetzt, das jedoch verglichen mit Mercedes-Benz Cars und Daimler Trucks von geringem Ausmaß ist. Darüber hinaus ist der Konzern einem indirekten Transaktionsrisiko über die at-equity bewertete Beteiligung an der EADS ausgesetzt.

Sofern Zahlungseingänge und Zahlungsausgänge innerhalb eines Segments in derselben Währung erfolgen, gleichen sich diese aus; dadurch kann das Wechselkursrisiko infolge von Umsatzerlösen in einer bestimmten Währung durch Kosten in derselben Währung kompensiert werden, auch wenn die zugrunde liegenden Transaktionen unabhängig voneinander abgeschlossen wurden. Somit unterliegt lediglich das Nettoexposure einem Transaktionsrisiko. Das gesamte Währungsexposure des Konzerns wird zusätzlich durch natürliche Hedges reduziert, die darin bestehen, dass sich die Fremdwährungsexposures aus dem operativen Geschäft einzelner Segmente über den Konzern hinweg partiell ausgleichen. In Höhe der ausgeglichenen Position sind damit keine Absicherungsmaßnahmen nötig. Um eine weitere, natürliche Absicherung gegen das verbleibende Transaktionsrisiko zu erzielen, ist Daimler grundsätzlich bestrebt, die Auszahlungen vorzugsweise in den Währungen zu erhöhen, in denen Netto-Einzahlungsüberschüsse bestehen.

Um die Auswirkung von Wechselkursschwankungen im operativen Geschäft (zukünftige Transaktionen) zu reduzieren, bewertet Daimler fortlaufend das Wechselkursrisiko und sichert einen Anteil dieses Risikos durch den Einsatz derivativer Finanzinstrumente ab. Bei diesen Sicherungen handelt es sich überwiegend um Makro-Hedges. Die Wechselkursrisiken sowie deren Absicherung mithilfe von Derivaten werden durch das Foreign Exchange Committee (FXCo) gesteuert. Dem FXCo gehören der Vorstand für Finanzen & Controlling, der Leiter von Investor Relations & Treasury, die Leiter des Controllings der relevanten Segmente sowie des Corporate Controllings an. Die Treasury erfasst Wechselkurspositionen und setzt die im FXCo getroffenen Entscheidungen zur Absicherung von Währungsrisiken mittels Transaktionen mit internationalen Finanzinstituten um. Das Risk Controlling informiert den Konzernvorstand regelmäßig über die von der Treasury auf Basis der Entscheidungen des FXCo eingeleiteten Maßnahmen.

Daimler verwendet ein Referenzmodell, mit dem angestrebte Absicherungsquoten für die erwarteten operativen Zahlungen festgelegt werden. Der Absicherungshorizont ist hierbei in natürlicher Weise durch die Planungsunsicherheit weit in der Zukunft liegender Cash Flows sowie gegebenenfalls aufgrund der eingeschränkten Verfügbarkeit geeigneter Währungskontrakte begrenzt. Die Anwendung des Modells soll den Konzern vor ungünstigen Wechselkursänderungen schützen, zugleich aber hinreichende Freiräume belassen, um von günstigen Entwicklungen profitieren zu können. Auf Basis des Modells und je nach Markteinschätzung bestimmt das FXCo den Absicherungszeitraum – in der Regel zwischen einem und drei Jahren – sowie die

durchschnittlichen Absicherungsquoten. Entsprechend dem Charakter der zugrunde liegenden Risiken werden die Absicherungsquoten geringer, je weiter die erwarteten Cash Flows in der Zukunft liegen. So wies das zentrale Währungsmanagement im Automobilgeschäft am Jahresende 2010 für das Kalenderjahr 2011 eine offene Position in Höhe von 28% der zugrunde liegenden geplanten Cash Flows in US-Dollar aus. Am Jahresende 2009 lag der entsprechende Wert für das Jahr 2010 bei 30%. Die im Vergleich zum Vorjahr geringere offene Position trägt zu einer niedrigeren Risikoposition bezüglich der US-Dollar-Cash-Flows bei.

Die abgesicherte Währungsposition im operativen Fahrzeuggeschäft wird durch die Höhe des Bestands der derivativen Währungskontrakte bestimmt; dieser setzt sich im Wesentlichen aus Fremdwährungstermingeschäften und Fremdwährungsoptionen zusammen. Die Leitlinien von Daimler sehen eine Mischung der Finanzinstrumente je nach Markteinschätzung vor. Das Wechselkursrisiko aus diesen derivativen Finanzinstrumenten wird mit dem Value-at-Risk gemessen.

Die folgende Tabelle zeigt die End-, Höchst-, Tiefst- und Durchschnittsstände des Value-at-Risk für die Jahre 2010 und 2009 für das Portfolio der derivativen Finanzinstrumente, die im Wesentlichen in Bezug auf das operative Fahrzeuggeschäft abgeschlossen wurden. Die Durchschnittswerte wurden auf Basis der Quartalsendstände berechnet. Die den Derivaten zugrunde liegenden Grundgeschäfte sind in der folgenden Darstellung des Value-at-Risk nicht enthalten.

|                                                           | 2010       |      |      |              | 2009       |      |      |              |
|-----------------------------------------------------------|------------|------|------|--------------|------------|------|------|--------------|
|                                                           | Jahresende | Hoch | Tief | Durchschnitt | Jahresende | Hoch | Tief | Durchschnitt |
| in Millionen €                                            |            |      |      |              |            |      |      |              |
| Wechselkursrisiko<br>(aus derivativen Finanzinstrumenten) | 558        | 590  | 346  | 507          | 177        | 692  | 165  | 337          |

Der Anstieg der Absatz-Prognosen im Verlauf des Jahres 2010 hat zu einer Erhöhung des Währungssicherungsvolumens im operativen Fahrzeuggeschäft geführt. Da sich der ausgewiesene Währungs-Value-at-Risk auf das Portfolio der Währungssicherungskontrakte bezieht, lässt sich der starke Anstieg des Value-at-Risks im Jahr 2010 im Wesentlichen auf die Erhöhung des Sicherungsvolumens zurückführen.

Aus den Liquiditätsanlagen des Konzerns entstehen aufgrund interner Vorgaben grundsätzlich keine Währungsrisiken. Sollten Transaktionsrisiken im Zusammenhang mit den Verbindlichkeiten in fremden Währungen aus der Refinanzierung des Konzerns an Geld- und Kapitalmärkten entstehen, werden diese in der Regel gemäß einer internen Richtlinie zum Zeitpunkt der Refinanzierung durch geeignete derivative Finanzinstrumente (z. B. Zinswährungsswaps) gegen Währungsrisiken gesichert.

Dadurch, dass sich Währungsrisiken aus Verbindlichkeiten in fremden Währungen aufgrund der Refinanzierung des Konzerns sowie diesbezüglich eingesetzter derivativer Finanzinstrumente grundsätzlich vollständig ausgleichen, wurden diese Finanzinstrumente nicht in die oben dargestellte Value-at-Risk-Berechnung einbezogen.

*Effekte aus der Währungsumrechnung (Translationsrisiko).* Im Rahmen der Erstellung des Konzernabschlusses werden die Erträge und Aufwendungen sowie die Vermögenswerte und Schulden von Tochtergesellschaften, die außerhalb der Euro-Zone ansässig sind, in Euro umgerechnet. Dadurch können Änderungen der Wechselkurse von einer Berichtsperiode zur anderen signifikante Umrechnungseffekte verursachen, zum Beispiel in Bezug auf die Umsatzerlöse, das Segmentergebnis (EBIT) und das Konzernergebnis. Im Unterschied zum Transaktionsrisiko wirkt sich das Translationsrisiko jedoch nicht zwangsläufig auf zukünftige Cash Flows aus. Das Eigenkapital des Konzerns spiegelt die wechselkursbedingten Buchwertänderungen wider. Daimler sichert sich gegen das Translationsrisiko nicht ab.

**Zinsänderungsrisiko.** Daimler nutzt ein breites Spektrum von zinssensitiven Finanzinstrumenten, um die Liquiditätsanforderungen des täglichen Geschäfts zu erfüllen. Der überwiegende Teil der zinssensitiven Vermögenswerte und Verbindlichkeiten resultiert jedoch aus den Finanzdienstleistungsaktivitäten, die von Daimler Financial Services betrieben werden. Die von den Daimler Financial Services Gesellschaften mit Kunden abgeschlossenen Verträge begründen vorwiegend festverzinsliche Forderungen. Gemäß den Konzernrichtlinien werden die zinstragenden Vermögenswerte grundsätzlich kongruent hinsichtlich Zins- und Liquiditätsbindung refinanziert, soweit dies mit vertretbarem Aufwand möglich ist. In ausgewählten, entwickelten Märkten verzichtet Daimler im Rahmen der Refinanzierung in eng begrenztem Umfang auf eine Fristenkongruenz in der Zinsbindung, um sich Marktchancen zu erhalten. Hierdurch entsteht für den Konzern ein Zinsänderungsrisiko; Liquiditätsrisiken werden dabei nicht eingegangen.

Im Hinblick auf die Leasing- und Finanzierungsaktivitäten wird das Zinsänderungsrisiko durch ein Asset/Liability Committee aus Vertretern des Daimler Financial Services Segments, der Treasury und des Corporate Controlling über Zielvorgaben für die Zinsrisikoposition gesteuert. Die Treasury ist gemeinsam mit den lokalen Daimler Financial Services Gesellschaften für die Umsetzung der festgelegten Zielvorgaben verantwortlich. Getrennt davon überprüft das Risiko Management von Daimler Financial Services monatlich, ob die Zielvorgaben eingehalten werden. Um die festgelegten Zielvorgaben in Bezug auf Fälligkeiten und Zinsbindung zu erreichen, setzt der Konzern in der Regel derivative Finanzinstrumente ein, wie Zinsswaps, Forward Rate Agreements, Swaptions sowie Caps und Floors. Die Beurteilung der Zinsrisikoposition basiert entsprechend auf einer fristengerechten Gegenüberstellung der Aktiva und Passiva unter Einbeziehung der relevanten Zinsderivate. Bei den Sicherungen im Zinsbereich handelt es sich überwiegend um Micro-Hedges.

Derivative Zinsinstrumente werden ebenso im Rahmen der Refinanzierung des Industriegeschäfts eingesetzt. Daimler koordiniert die Kapitalbeschaffungsmaßnahmen für das Industrie- und das Finanzdienstleistungsgeschäft auf Konzernebene.

Die folgende Tabelle zeigt die End-, Höchst-, Tiefst- und Durchschnittsstände des Value-at-Risk für die Jahre 2010 und 2009 für die zinssensitiven originären und derivativen Finanzinstrumente des Konzerns, einschließlich der Finanzinstrumente des Finanzdienstleistungsgeschäfts. Insofern zeigt die nachfolgend dargestellte Tabelle das Zinsänderungsrisiko bezogen auf die insgesamt offenen Positionen der zinssensitiven Finanzinstrumente. Die Durchschnittswerte wurden auf Basis der Quartalsendstände berechnet.

|                     | 2010       |      |      |              | 2009       |      |      |              |
|---------------------|------------|------|------|--------------|------------|------|------|--------------|
|                     | Jahresende | Hoch | Tief | Durchschnitt | Jahresende | Hoch | Tief | Durchschnitt |
| in Millionen €      |            |      |      |              |            |      |      |              |
| Zinsänderungsrisiko | 49         | 52   | 33   | 45           | 49         | 49   | 33   | 41           |

Der Value-at-Risk der zinssensitiven Finanzinstrumente in 2010 ist im Vergleich zu 2009 nahezu unverändert.

**Commodity-Preis-Risiko.** Daimler ist Risiken aus der Änderung von Rohstoffpreisen ausgesetzt, die im Zusammenhang mit dem Bezug von Produktionsmitteln entstehen. Ein geringer Teil der Rohstoffpreisrisiken, vornehmlich aus dem geplanten Bezug bestimmter Metalle, wird durch den Einsatz derivativer Finanzinstrumente reduziert. Bei diesen Sicherungen handelt es sich um Makro-Hedges.

Für Edelmetalle wies das zentrale Commoditymanagement am Jahresende 2010 für das Kalenderjahr 2011 eine offene Position von 26% der zugrunde liegenden geplanten Rohstoffkäufe aus. Am Jahresende 2009 lag der entsprechende Wert für das Jahr 2010 bei 27%.

Die folgende Tabelle zeigt die End-, Höchst-, Tiefst- und Durchschnittsstände des Value-at-Risk für die Jahre 2010 und 2009 für das Portfolio der derivativen Finanzinstrumente zur Absicherung von Rohstoffpreisrisiken. Die Durchschnittswerte wurden auf Basis der Quartalsendstände berechnet. Die den Derivaten zugrunde liegenden Grundgeschäfte sind in der folgenden Darstellung des Value-at-Risk nicht enthalten.

|                                                             | 2010       |      |      |              | 2009       |      |      |              |
|-------------------------------------------------------------|------------|------|------|--------------|------------|------|------|--------------|
|                                                             | Jahresende | Hoch | Tief | Durchschnitt | Jahresende | Hoch | Tief | Durchschnitt |
| in Millionen €                                              |            |      |      |              |            |      |      |              |
| Rohstoffpreisrisiko<br>(aus derivativen Finanzinstrumenten) | 52         | 52   | 27   | 38           | 24         | 35   | 21   | 27           |

Der Anstieg der Absatz-Prognosen im Verlauf des Jahres 2010 hat zu einer Erhöhung des Commoditysicherungsvolumens geführt. Da sich der ausgewiesene Commodity-Value-at-Risk auf das Portfolio der Rohstoffpreissicherungskontrakte bezieht, lässt sich der Anstieg des Value-at-Risks im Jahr 2010 im Wesentlichen auf die Erhöhung des Sicherungsvolumens zurückführen. Zudem haben die im Jahr 2010 gestiegenen Rohstoffpreise und Rohstoffpreis-Volatilitäten zum Anstieg des Commodity-Value-at-Risk beigetragen.

**Aktienkursrisiko.** Daimler besitzt Anlagen in Aktien. Entsprechend internationalen Bankenstandards bezieht der Konzern diese Anlagen in Aktien, die als langfristige Investitionen klassifiziert werden, nicht in die Bewertung des Aktienkursrisikos ein.

### 32. Segmentberichterstattung

**Berichtspflichtige Segmente.** Die berichtspflichtigen Segmente des Konzerns umfassen Mercedes-Benz Cars, Daimler Trucks, Mercedes-Benz Vans, Daimler Buses und Daimler Financial Services. Die Segmente werden entsprechend der Art der angebotenen Produkte und Dienstleistungen sowie der Marken, Vertriebswege und Kundenprofile weitgehend eigenständig organisiert und geführt.

Die Fahrzeugsegmente entwickeln und produzieren Personenkraftwagen, Geländewagen, Lastkraftwagen, Transporter und Busse. Mercedes-Benz Cars vertreibt Personen- und Geländewagen der Marken Mercedes-Benz, smart und Maybach. Die Lastkraftwagen des Segments Daimler Trucks werden unter den Marken Mercedes-Benz, Freightliner, Western Star und Fuso vertrieben. Bei Mercedes-Benz Vans erfolgt der Vertrieb der Transporter überwiegend unter der Marke Mercedes-Benz. Daimler Buses vertreibt Komplettbusse der Marken Mercedes-Benz, Setra und Orion. Zudem fertigt und vertreibt Daimler Buses Fahrgestelle. Die Fahrzeugsegmente bieten darüber hinaus entsprechende Ersatzteile und Zubehör an.

Das Segment Daimler Financial Services unterstützt weltweit den Absatz der Fahrzeugsegmente. Das Angebot beinhaltet im Wesentlichen Finanzierungs- und Leasingprodukte für Endkunden und Händler; zum Leistungsspektrum gehören auch Versicherungen, Flottenmanagement sowie Anlageprodukte und Kreditkarten.

**Interne Steuerung und Berichterstattung.** Die interne Steuerung und Berichterstattung im Daimler-Konzern basiert grundsätzlich auf den in Anmerkung 1 beschriebenen Grundsätzen der Rechnungslegung nach IFRS.

Der Konzern misst den Erfolg seiner Segmente anhand einer Segmentergebnisgröße, die in der internen Steuerung und Berichterstattung als »EBIT« bezeichnet wird.

Die Segmentergebnisgröße EBIT setzt sich zusammen aus dem Bruttoergebnis vom Umsatz, den Vertriebs-, den allgemeinen Verwaltungs-, den Forschungs- und nicht aktivierten Entwicklungskosten sowie den sonstigen betrieblichen Erträgen und Aufwendungen, dem Ergebnis aus at-equity bewerteten Finanzinvestitionen und dem übrigen Finanzergebnis.

Erlöse zwischen den Segmenten werden weitgehend zu marktgerechten Preisen berechnet.

Die Vermögenswerte der Segmente umfassen grundsätzlich alle Vermögenswerte. Die Vermögenswerte der Segmente des Industriegeschäfts schließen Vermögenswerte aus Ertragsteuern, Vermögenswerte im Zusammenhang mit Pensions- und ähnlichen Verpflichtungen sowie bestimmte Finanzinstrumente (einschließlich Liquidität) aus.

Die Segmentschulden beinhalten grundsätzlich alle Schulden. Die Schulden der Segmente des Industriegeschäfts beinhalten nicht die Schulden aus Ertragsteuern, die Schulden aus Pensions- und ähnlichen Verpflichtungen sowie bestimmte Finanzinstrumente (einschließlich Finanzierungsverbindlichkeiten).

Die mit den Operate-Lease-Verträgen und den Forderungen aus Finanzdienstleistungen im Zusammenhang stehenden Restwertrisiken des Konzerns werden überwiegend von den Fahrzeugsegmenten getragen, die die Leasingfahrzeuge hergestellt haben. Die Risikoaufteilung basiert auf Vereinbarungen zwischen den Fahrzeugsegmenten und Daimler Financial Services; die Bedingungen variieren je nach Segment und Region.

Die langfristigen Vermögenswerte umfassen immaterielle Vermögenswerte, Sachanlagen und vermietete Gegenstände.

Investitionen in immaterielle Vermögenswerte und Sachinvestitionen stellen die zahlungswirksamen Zugänge zu den immateriellen Vermögenswerten und Sachanlagen dar, soweit sie nicht aktivierte Fremdkapitalkosten oder Geschäftswerte und Finance Leases betreffen.

Die Auswirkungen bestimmter Rechts- und Compliance-Themen sind nicht Bestandteil der operativen Ergebnisse und Schulden der Segmente, wenn diese aufgrund ihres Betrags und ihrer Unregelmäßigkeit zu einer Verzerrung des Geschäftsergebnisses führen würden und dieses damit nicht mehr aussagekräftig wäre für die Entwicklung der Segmente. Dies gilt ebenso für Themen, die mehr als einem berichtspflichtigen Segment zuzuordnen sind.

Im Hinblick auf die Informationen über geografische Regionen werden die Umsätze den Ländern nach dem Bestimmungslandprinzip zugerechnet; die langfristigen Vermögenswerte werden entsprechend dem Standort des jeweiligen Vermögenswertes angegeben.



Die Segmentinformationen stellen sich für die Geschäftsjahre 2010 und 2009 wie folgt dar:

|                                                                          | Mercedes-Benz Cars | Daimler Trucks | Mercedes-Benz Vans | Daimler Buses | Daimler Financial Services | Summe Segmente | Überleitung | Daimler-Konzern |
|--------------------------------------------------------------------------|--------------------|----------------|--------------------|---------------|----------------------------|----------------|-------------|-----------------|
| in Millionen €                                                           |                    |                |                    |               |                            |                |             |                 |
| <b>2010</b>                                                              |                    |                |                    |               |                            |                |             |                 |
| Außenumsatzerlöse                                                        | 51.721             | 21.961         | 7.517              | 4.487         | 12.075                     | 97.761         | –           | 97.761          |
| Konzerninterne Umsatzerlöse                                              | 1.705              | 2.063          | 295                | 71            | 713                        | 4.847          | -4.847      | –               |
| Umsatzerlöse gesamt                                                      | 53.426             | 24.024         | 7.812              | 4.558         | 12.788                     | 102.608        | -4.847      | 97.761          |
| Segmentergebnis (EBIT)                                                   | 4.656              | 1.323          | 451                | 215           | 831                        | 7.476          | -202        | 7.274           |
| davon Ergebnis aus at-equity bewerteten Finanzinvestitionen              | 80                 | 32             | -5                 | –             | -7                         | 100            | -248        | -148            |
| Segmentvermögenswerte                                                    | 36.206             | 17.342         | 4.555              | 3.118         | 67.871                     | 129.092        | 6.738       | 135.830         |
| davon Beteiligungsbuchwerte der at-equity bewerteten Finanzinvestitionen | 311                | 374            | 63                 | 7             | 43                         | 798            | 3.162       | 3.960           |
| Segmentschulden                                                          | 25.833             | 9.799          | 3.432              | 2.055         | 63.006                     | 104.125        | -6.248      | 97.877          |
| Zugänge zu langfristigen Vermögenswerten                                 | 8.246              | 2.294          | 685                | 351           | 5.618                      | 17.194         | -190        | 17.004          |
| davon Investitionen in immaterielle Vermögenswerte                       | 1.021              | 445            | 54                 | 36            | 7                          | 1.563          | -8          | 1.555           |
| davon Sachinvestitionen                                                  | 2.457              | 1.003          | 91                 | 95            | 12                         | 3.658          | -5          | 3.653           |
| Abschreibungen auf langfristige Vermögenswerte                           | 3.014              | 1.018          | 449                | 145           | 2.039                      | 6.665          | 103         | 6.768           |
| davon Abschreibungen auf immaterielle Vermögenswerte                     | 658                | 129            | 74                 | 10            | 16                         | 887            | –           | 887             |
| davon Abschreibungen auf Sachanlagen                                     | 1.586              | 602            | 207                | 68            | 13                         | 2.476          | 1           | 2.477           |

|                                                                           | Mercedes-Benz Cars | Daimler Trucks | Mercedes-Benz Vans | Daimler Buses | Daimler Financial Services | Summe Segmente | Überleitung | Daimler-Konzern |
|---------------------------------------------------------------------------|--------------------|----------------|--------------------|---------------|----------------------------|----------------|-------------|-----------------|
| in Millionen €                                                            |                    |                |                    |               |                            |                |             |                 |
| <b>2009</b>                                                               |                    |                |                    |               |                            |                |             |                 |
| Außenumsatzerlöse                                                         | 40.205             | 16.633         | 6.002              | 4.173         | 11.366                     | 78.379         | 545         | 78.924          |
| Konzerninterne Umsatzerlöse                                               | 1.113              | 1.727          | 213                | 65            | 630                        | 3.748          | -3.748      | -               |
| Umsatzerlöse gesamt                                                       | 41.318             | 18.360         | 6.215              | 4.238         | 11.996                     | 82.127         | -3.203      | 78.924          |
| Segmentergebnis (EBIT)                                                    | -500               | -1.001         | 26                 | 183           | 9                          | -1.283         | -230        | -1.513          |
| davon Ergebnis aus at-equity bewerteten Finanzinvestitionen               | -3                 | -4             | -13                | -             | 7                          | -13            | 85          | 72              |
| Segmentvermögenswerte                                                     | 32.452             | 14.317         | 4.585              | 2.806         | 65.059                     | 119.219        | 9.602       | 128.821         |
| davon Beteiligungs-buchwerte der at-equity bewerteten Finanzinvestitionen | 101                | 220            | 60                 | 2             | 54                         | 437            | 3.858       | 4.295           |
| Segmentsschulden                                                          | 21.978             | 8.020          | 3.109              | 1.728         | 60.389                     | 95.224         | 1.770       | 96.994          |
| Zugänge zu langfristigen Vermögenswerten                                  | 8.263              | 1.518          | 574                | 318           | 4.527                      | 15.200         | -560        | 14.640          |
| davon Investitionen in immaterielle Vermögenswerte                        | 967                | 427            | 9                  | 10            | 7                          | 1.420          | 2           | 1.422           |
| davon Sachinvestitionen                                                   | 1.618              | 597            | 113                | 78            | 14                         | 2.420          | 3           | 2.423           |
| Abschreibungen auf langfristige Vermögenswerte                            | 2.732              | 1.045          | 476                | 132           | 2.571                      | 6.956          | -242        | 6.714           |
| davon Abschreibungen auf immaterielle Vermögenswerte                      | 597                | 129            | 74                 | 11            | 19                         | 830            | -2          | 828             |
| davon Abschreibungen auf Sachanlagen                                      | 1.511              | 619            | 229                | 59            | 14                         | 2.432          | 4           | 2.436           |

**Mercedes-Benz Cars.** Im Jahr 2009 hat der Konzern die Zusammenarbeit mit der McLaren Group Ltd. geändert; in diesem Zusammenhang ergab sich ein Aufwand vor Steuern von 87 Mio. € (siehe auch Anmerkung 35). Ferner entstand im Jahr 2009 ein nicht zahlungswirksamer Aufwand vor Steuern von 79 Mio. € aus einer im Jahr 2009 geänderten Vereinbarung zur Übernahme von Restwerttrisiken zwischen Daimler und unabhängigen Händlern.

**Daimler Trucks.** Im Jahr 2010 führte die Anpassung von Gesundheitsfürsorge- und Pensionsleistungen bei Daimler Trucks North America (DTNA) zu nicht zahlungswirksamen Erträgen vor Steuern von 160 Mio. €.

Ferner fielen in den Jahren 2010 und 2009 bei DTNA infolge der Optimierung und Neuausrichtung des operativen Geschäfts Aufwendungen vor Steuern von 37 und 95 Mio. € an; im Jahr 2009 waren davon 68 Mio. € nicht zahlungswirksam. Der Plan zur umfassenden Neuausrichtung des operativen Geschäfts der Mitsubishi Fuso Truck and Bus Corporation (MFTBC) führte in den Jahren 2010 und 2009 zu Aufwendungen vor Steuern

von 3 und 245 Mio. €; darin enthalten sind 13 und 50 Mio. € nicht zahlungswirksame Aufwendungen. Weitere Informationen zu diesen Optimierungsprogrammen können der Anmerkung 5 entnommen werden.

**Daimler Financial Services.** Im Jahr 2010 hat der Vorstand beschlossen, die Geschäftsaktivitäten von Daimler Financial Services und der Mercedes-Benz Bank in Deutschland bis zum Jahresende 2012 neu auszurichten. In diesem Zusammenhang entstanden im Jahr 2010 Aufwendungen vor Steuern von 82 Mio. €, von denen 76 Mio. € nicht zahlungswirksam waren (siehe auch Anmerkung 5).

Aus dem Verkauf bzw. der Bewertung von zur Veräußerung gehaltener nicht fahrzeugbezogener Vermögenswerte resultierten in den Jahren 2010 und 2009 Aufwendungen vor Steuern von 9 bzw. 100 Mio. € (vergleiche auch Anmerkung 3).

**Überleitungen.** Die Überleitungen der Segmentgrößen auf die jeweiligen in den Abschlüssen enthaltenen Größen ergeben sich wie folgt:

|                                                                                                                                             | 2010    | 2009    |
|---------------------------------------------------------------------------------------------------------------------------------------------|---------|---------|
| in Millionen €                                                                                                                              |         |         |
| Summe Segmentergebnisse (EBIT)                                                                                                              | 7.476   | -1.283  |
| Ergebnis aus at-equity bewerteten Finanzinvestitionen <sup>1</sup>                                                                          | -248    | 85      |
| Sonstige zentrale Posten                                                                                                                    | 17      | -483    |
| Eliminierungen                                                                                                                              | 29      | 168     |
| Konzern-EBIT                                                                                                                                | 7.274   | -1.513  |
| Zinserträge                                                                                                                                 | 825     | 1.136   |
| Zinsaufwendungen                                                                                                                            | -1.471  | -1.921  |
| Ergebnis vor Ertragsteuern                                                                                                                  | 6.628   | -2.298  |
| Summe Segmentvermögenswerte                                                                                                                 | 129.092 | 119.219 |
| Beteiligungsbuchwerte von at-equity bewerteten Finanzinvestitionen <sup>1</sup>                                                             | 3.162   | 3.858   |
| Vermögenswerte aus Ertragsteuern <sup>2</sup>                                                                                               | 2.605   | 2.536   |
| Nicht zugeordnete Finanzinstrumente (einschließlich Liquidität) und Vermögenswerte aus Pensionen und ähnlichen Verpflichtungen <sup>2</sup> | 11.777  | 13.346  |
| Sonstige zentrale Posten und Eliminierungen                                                                                                 | -10.806 | -10.138 |
| Konzern-Vermögenswerte                                                                                                                      | 135.830 | 128.821 |
| Summe Segmentschulden                                                                                                                       | 104.125 | 95.224  |
| Schulden aus Ertragsteuern <sup>2</sup>                                                                                                     | 1.887   | 950     |
| Nicht zugeordnete Finanzinstrumente und Schulden aus Pensionen und ähnlichen Verpflichtungen <sup>2</sup>                                   | 3.488   | 10.709  |
| Sonstige zentrale Posten und Eliminierungen                                                                                                 | -11.623 | -9.889  |
| Konzern-Schulden                                                                                                                            | 97.877  | 96.994  |

<sup>1</sup> Beinhaltet im Wesentlichen die anteiligen Ergebnisse und Beteiligungsbuchwerte von EADS und Tognum. Für weitere Informationen siehe Anmerkung 13.

<sup>2</sup> Industriegeschäft

In der »Überleitung« werden zentral verantwortete Sachverhalte der Konzernzentrale ausgewiesen. Geschäftsbeziehungen zwischen den Segmenten werden in der Überleitung eliminiert.

Innerhalb der Überleitung auf das Konzern-EBIT sind in der Zeile »Sonstige zentrale Posten« im Jahr 2010 ein Ertrag vor Steuern von 218 Mio. € infolge einer positiven Entscheidung eines Rechtsverfahrens gegen die Daimler AG sowie ein Ertrag vor Steuern von 265 Mio. € aufgrund des Verkaufs der Beteiligung an Tata Motors berücksichtigt. Aufgrund der sehr guten Ergebnisentwicklung des Jahres 2010 sowie im Hinblick auf das 125-jährige Jubiläum der Erfindung des Automobils im Jahr 2011 hat sich der Vorstand im Dezember verpflichtet, den im Konzern beschäftigten Mitarbeitern in Abhängigkeit von ihrer Betriebszugehörigkeit einen einmaligen Sonderbonus in einem Volumen von rund 125 Mio. € auszus zahlen und das Stiftungskapital der Daimler und Benz Stiftung von 37 auf 125 Mio. € zu erhöhen. Diese Aufwendungen sowie weitere Aufwendungen im Zusammenhang mit rechtlichen Verfahren sind ebenfalls in diesem Posten enthalten. Im Jahr 2009 sind in den sonstigen zentralen Posten Chrysler-bezogene Aufwendungen von 294 Mio. € berücksichtigt.

## Umsatzerlöse und langfristige Vermögenswerte nach Regionen.

Die Außenumsätze stellen sich wie folgt dar:

|                | Deutschland | Westeuropa <sup>1</sup> | USA    | Sonstige amerikanische Länder | Asien  | Sonstige Länder | Daimler-Konzern |
|----------------|-------------|-------------------------|--------|-------------------------------|--------|-----------------|-----------------|
| in Millionen € |             |                         |        |                               |        |                 |                 |
| 2010           | 19.281      | 19.197                  | 20.216 | 9.112                         | 19.659 | 10.296          | 97.761          |
| 2009           | 18.788      | 17.670                  | 16.569 | 6.159                         | 12.435 | 7.303           | 78.924          |

<sup>1</sup> ohne Deutschland

Die langfristigen Vermögenswerte sind regional wie folgt aufgeteilt:

|                | 2010   | 2009   |
|----------------|--------|--------|
| in Millionen € |        |        |
| Deutschland    | 24.985 | 23.452 |
| USA            | 10.154 | 8.937  |
| Übrige Länder  | 9.883  | 8.861  |
|                | 45.022 | 41.250 |

### 33. Kapitalmanagement

Die Grundlage für das Kapitalmanagement im Daimler-Konzern stellen die »Net Assets« und der »Value Added« dar. Die Ermittlung der Konzern-Net-Assets erfolgt über die Vermögenswerte und die Schulden der Segmente nach IFRS. Die industriellen Segmente sind für die operativen Net Assets verantwortlich; ihnen werden sämtliche Vermögenswerte und Verbindlichkeiten bzw. Rückstellungen zugerechnet, für die sie im operativen Geschäft die Verantwortung tragen. Die Steuerung des Segments Daimler Financial Services erfolgt, der branchenüblichen Vorgehensweise im Bankengeschäft entsprechend, auf Basis des Eigenkapitals. Die Kapitalbindung des Konzerns beinhaltet zusätzlich die Vermögenswerte und Schulden aus Ertragsteuern sowie sonstige zentrale Posten und Eliminierungen. Die durchschnittlichen Net Assets des Jahres werden aus den durchschnittlichen Net Assets der Quartale berechnet.

Diese ermitteln sich als Durchschnitt der Net Assets zu Beginn und zum Ende eines Quartals und stellen sich wie folgt dar:

|                                                                                 | 2010   | 2009   |
|---------------------------------------------------------------------------------|--------|--------|
| in Millionen €                                                                  |        |        |
| Mercedes-Benz Cars                                                              | 10.146 | 11.373 |
| Daimler Trucks                                                                  | 6.863  | 6.720  |
| Mercedes-Benz Vans                                                              | 1.228  | 1.728  |
| Daimler Buses                                                                   | 1.200  | 1.221  |
| Daimler Financial Services <sup>1</sup>                                         | 5.156  | 4.671  |
| Net Assets der Segmente                                                         | 24.593 | 25.713 |
| Beteiligungsbuchwerte von at-equity bewerteten Finanzinvestitionen <sup>2</sup> | 3.119  | 3.591  |
| Vermögenswerte und Schulden aus Ertragsteuern <sup>3</sup>                      | 1.278  | 2.944  |
| Sonstige zentrale Posten und Eliminierungen <sup>3</sup>                        | 348    | -470   |
| Net Assets Daimler-Konzern                                                      | 29.338 | 31.778 |

<sup>1</sup> Eigenkapital

<sup>2</sup> Soweit nicht den Segmenten zugeordnet

<sup>3</sup> Industriegeschäft

Die auf die durchschnittlichen Net Assets des Konzerns anfallenden Kapitalkosten fließen in den Value Added ein. Der Value Added zeigt, in welchem Umfang der Konzern den Verzinsungsanspruch seiner Kapitalgeber erwirtschaftet bzw. übertrifft und damit Wert schafft. Der Verzinsungsanspruch auf die Net Assets, und damit der Kapitalkostensatz, wird aus den Mindestrenditen abgeleitet, die Anleger für ihr investiertes Kapital erwarten. Bei der Ermittlung der Kapitalkosten des Konzerns werden die Kapitalkostensätze des Eigenkapitals sowie der Finanzierungsverbindlichkeiten und Pensionsverpflichtungen des Industriegeschäfts berücksichtigt; darüber hinaus werden die erwarteten Renditen der Liquidität und des Planvermögens der Pensionsfonds des Industriegeschäfts mit umgekehrten Vorzeichen einbezogen. Im Berichtsjahr lag der Kapitalkostensatz, der für die interne Kapitalsteuerung verwendet wird, bei 8% nach Steuern.

Das Ziel des Kapitalmanagements ist die Optimierung der Kapitalkosten, die zum einen durch die in der operativen Verantwortung der Segmente liegende Optimierung der Net Assets gewährleistet wird. Darüber hinaus wird die Kapitalstruktur, und damit einhergehend der Kapitalkostensatz, unter Berücksichtigung gesetzlicher Regelungen kosten- und risikooptimal ausgestaltet.

### 34. Ergebnis je Aktie

Das Ergebnis je Aktie (unverwässert) und das Ergebnis je Aktie (verwässert) berechnen sich auf Basis des Ergebnisanteils der Aktionäre der Daimler AG wie folgt:

|                                                                         | 2010    | 2009    |
|-------------------------------------------------------------------------|---------|---------|
| in Millionen €                                                          |         |         |
| Ergebnisanteil der Aktionäre der Daimler AG – unverwässert              | 4.498   | -2.640  |
| Verwässerungseffekte im Konzernergebnis                                 | -       | -       |
| Ergebnisanteil der Aktionäre der Daimler AG – verwässert                | 4.498   | -2.640  |
| In Millionen Aktien                                                     |         |         |
| Gewogener Durchschnitt der in Umlauf befindlichen Aktien – unverwässert | 1.050,8 | 1.003,8 |
| Verwässerungseffekt durch Stock Options                                 | 0,7     | -       |
| Gewogener Durchschnitt der in Umlauf befindlichen Aktien – verwässert   | 1.051,5 | 1.003,8 |

Für die Jahre 2010 bzw. 2009 wurden Stock Options, die zum Bezug von 9,3 Mio. bzw. 22,4 Mio. Daimler-Aktien berechnen und im Zusammenhang mit dem Stock-Option-Plan gewährt wurden, nicht in die Berechnung der Ergebnisse je Aktie (verwässert) einbezogen, da die Ausübungspreise der Optionen über den durchschnittlichen Börsenkursen der Daimler-Aktie in diesen Perioden lagen.

## 35. Beziehungen zu nahe stehenden Personen und Unternehmen

### Assoziierte Unternehmen und Gemeinschaftsunternehmen.

Der überwiegende Teil des Lieferungs- und Leistungsvolumens aus dem gewöhnlichen Geschäftsverkehr zwischen dem Konzern und nahe stehenden Unternehmen entfällt auf assoziierte Unternehmen und Gemeinschaftsunternehmen und ist in der folgenden Tabelle dargestellt:

|                          | Erbrachte Lieferungen und Leistungen und sonstige Erträge |       | Empfangene Lieferungen und Leistungen und sonstige Aufwendungen |       | Forderungen 31. Dezember |      | Verbindlichkeiten 31. Dezember |      |
|--------------------------|-----------------------------------------------------------|-------|-----------------------------------------------------------------|-------|--------------------------|------|--------------------------------|------|
|                          | 2010                                                      | 2009  | 2010                                                            | 2009  | 2010                     | 2009 | 2010                           | 2009 |
| in Millionen €           |                                                           |       |                                                                 |       |                          |      |                                |      |
| Assoziierte Unternehmen  | 797                                                       | 990   | 163                                                             | 1.132 | 218                      | 155  | 55                             | 28   |
| Gemeinschaftsunternehmen | 2.251                                                     | 1.242 | 342                                                             | 140   | 457                      | 236  | 154                            | 188  |

Bei den Geschäftsbeziehungen mit assoziierten Unternehmen entfallen wesentliche erbrachte und empfangene Lieferungen und Leistungen des Konzerns auf die Tognum AG.

Im Zusammenhang mit seiner 45%igen Eigenkapitalbeteiligung an Toll Collect hat Daimler Garantien für Verpflichtungen von Toll Collect ausgegeben, die in der Tabelle nicht enthalten sind (für weitere Informationen siehe Anmerkung 29).

Im Jahr 2009 ergaben sich bis zur Abgabe des 19,9%-Anteils an der Chrysler Holding am 3. Juni 2009 Aufwendungen und Erträge aus den Geschäftsbeziehungen mit Chrysler, die in der Zeile »Assoziierte Unternehmen« in obiger Tabelle berücksichtigt sind. Darin enthalten ist ein Ertrag von insgesamt 0,1 Mrd. €, der aus der rechtlichen Übertragung der internationalen Chrysler-Vertriebsaktivitäten an Chrysler im ersten Quartal 2009 entstand. Des Weiteren hat sich der Konzern im Zusammenhang mit der Abgabe des 19,9%-Anteils an der Chrysler Holding verpflichtet, Zahlungen in Höhe von insgesamt 0,6 Mrd. US-\$ zugunsten von Chrysler-Pensionsplänen zu leisten (siehe auch Anmerkung 3); die sich daraus ergebenden Aufwendungen sind ebenfalls in obiger Tabelle enthalten. Aufgrund des Abgangs der Beteiligung an Chrysler waren zum 31. Dezember 2009 keine Forderungen und Verbindlichkeiten gegenüber Chrysler-Gesellschaften mehr zu berichten.

Darüber hinaus hat Daimler im November 2009 im Zusammenhang mit der Neuordnung der Formel-1-Aktivitäten des Konzerns mit der McLaren Group Ltd. (McLaren), einem damals assoziierten Unternehmen des Konzerns, vereinbart, die Zusammenarbeit zu ändern. McLaren wird in zwei Schritten den vom Daimler-Konzern gehaltenen 40%-Anteil zurückkaufen; bereits im November 2009 hat McLaren einen 28,6%-Anteil von Daimler übernommen. Den verbliebenen Anteil wird McLaren bis zum Ende des Jahres 2011 von Daimler zu einem festgelegten Preis zurücknehmen; zum 31. Dezember 2009 belief sich das noch vorhandene Gesamtinvestment in McLaren auf 26 Mio. €. Der Konzern hat sich im Rahmen dieser Transaktion bereit erklärt, bestehende Verpflichtungen, beispielsweise die Unterstützung der Forschungs- und Entwicklungsaktivitäten von McLaren bis Ende 2011, durch eine Einmalzahlung abzugelten. Zudem hat sich Daimler verpflichtet, McLaren bis zum Ende des Jahres 2012 weiter mit Formel-1-Motoren zu beliefern. Die zwischen dem Konzern und der McLaren Automotive Ltd., einer 100%igen Tochtergesellschaft der McLaren Group Ltd., bisher bestehende Vereinbarung über die Produktion des Mercedes McLaren Sportwagens SLR wurde zum Jahresende 2009 beendet. Durch den Anteilsverkauf hat der Konzern seinen maßgeblichen Einfluss bei McLaren aufgegeben. Dementsprechend beendete Daimler im November 2009 die Einbeziehung von McLaren nach der Equity-Methode; die bis zu diesem Zeitpunkt noch angefallenen Transaktionen mit McLaren sind in der Tabelle oben enthalten. Aus der im November 2009 mit McLaren geschlossenen Vereinbarung resultierte im Jahr 2009 ein Aufwand von insgesamt 87 Mio. €, der dem Segment Mercedes-Benz Cars zugeordnet wurde; dieser ist in obiger Tabelle nicht enthalten.



Zum Jahresende 2009 hat der Konzern mit Kamaz OAO, einem weiteren assoziierten Unternehmen, auf Basis bestehender vertraglicher Vereinbarungen beschlossen, zwei Gemeinschaftsunternehmen zu gründen. Zielsetzung dieser Gemeinschaftsunternehmen ist es, in Russland Lkw der Marken Mercedes-Benz und Fuso zu vertreiben sowie bestimmte Baureihen dieser Marken zu produzieren. Zudem sollen Busse der Marken Mercedes-Benz und Setra vertrieben werden. Diese Gemeinschaftsunternehmen haben im Jahr 2010 ihre Geschäftstätigkeit größtenteils aufgenommen. Daimler hat Ende des Jahres 2010 gemeinsam mit Kamaz eine Absichtserklärung bezüglich einer Zusammenarbeit bei der Fertigung von Achsen in einem Gemeinschaftsunternehmen in Russland unterzeichnet.

Die Beziehungen des Konzerns zu den Gemeinschaftsunternehmen betreffen überwiegend die Geschäftsbeziehungen mit Beijing Benz Automotive Co., Ltd. (BBAC). BBAC produziert und vertreibt für den Konzern Mercedes-Benz Fahrzeuge in China.

Weitere wesentliche erbrachte Lieferungen und Leistungen entfallen auf Gemeinschaftsunternehmen in Österreich und Taiwan; diese Unternehmen vertreiben Fahrzeuge und Ersatzteile des Konzerns. Zudem bestehen seit Mitte des Jahres 2010 größere Geschäftsbeziehungen mit dem chinesischen Gemeinschaftsunternehmen Fujian Daimler Automotive Co. Ltd. (FJDA). FJDA produziert und vertreibt Vans der Marke Mercedes-Benz in China.

**Organmitglieder.** Der Konzern unterhält im Rahmen der gewöhnlichen Geschäftstätigkeit weltweit mit einer Vielzahl von Unternehmen, die auch Kunden und/oder Lieferanten des Konzerns sind, Geschäftsbeziehungen. Unter diesen Kunden und/oder Lieferanten befinden sich auch Unternehmen, die eine Verbindung zu Mitgliedern des Aufsichtsrats oder des Vorstands der Daimler AG oder deren Tochterunternehmen haben.

Mitglieder des Vorstands und des Aufsichtsrats können zugleich Kunden der Daimler AG und ihrer Tochtergesellschaften sein und Produkte und Dienstleistungen erwerben. Sofern solche Geschäftsbeziehungen bestehen, werden sie zu marktüblichen Konditionen abgewickelt.

Gesellschaften des Daimler-Konzerns unterhalten von Zeit zu Zeit im Rahmen der normalen Geschäftstätigkeit Beziehungen mit Gesellschaften der Lagardère-Gruppe. Darunter fallen der Erwerb von Gütern und Dienstleistungen (hauptsächlich Werbung) durch Gesellschaften des Daimler-Konzerns sowie der Verkauf oder die Vermietung von Fahrzeugen oder die Bereitstellung von Finanzdienstleistungen durch Daimler an Gesellschaften der Lagardère-Gruppe. Arnaud Lagardère, der im April 2005 Mitglied des Aufsichtsrats der Daimler AG wurde und am 14. April 2010 aus diesem ausschied, ist persönlich haftender Gesellschafter und Geschäftsführer der Muttergesellschaft der Lagardère-Gruppe, Lagardère SCA, einer börsennotierten Gesellschaft.

Angaben zur Vergütung von Organmitgliedern sind in Anmerkung 36 enthalten.

**Anteilseigner.** Der Konzern verkauft Fahrzeuge über einen Händler in der Türkei, der auch Mitgesellschafter einer Tochtergesellschaft des Konzerns ist. Darüber hinaus bestehen Geschäftsbeziehungen zu Fahrzeugimporteuren in einigen anderen Ländern, die auch Anteile an Tochtergesellschaften des Konzerns halten. Aus diesen Geschäftsbeziehungen resultierten im Jahr 2010 Umsatzerlöse von 0,3 (2009: 0,2) Mrd. €. Zudem ergaben sich im Jahr 2010 Aufwendungen von 22 (2009: 27) Mio. € im Zusammenhang mit diesen Transaktionen; die Aufwendungen entstanden im Wesentlichen durch Abschreibungen auf bezogene Fahrzeuge.

**Zuwendungen zu Planvermögen.** In den Jahren 2010 und 2009 leistete der Konzern Zuwendungen an die ausgelagerten Fonds zur Deckung der Pensions- und Gesundheitsfürsorgeverpflichtungen von 345 (2009: 602) Mio. €. Für weitere Informationen siehe Anmerkung 22.

### 36. Vergütung des Vorstands und des Aufsichtsrats

Der im Geschäftsjahr erfolgswirksam erfasste Aufwand für die Vergütung der aktiven Mitglieder des Vorstands und des Aufsichtsrats stellt sich wie folgt dar:

|                                                                                                   | 2010 | 2009 |
|---------------------------------------------------------------------------------------------------|------|------|
| in Millionen €                                                                                    |      |      |
| Bezüge des Vorstands                                                                              |      |      |
| Fixe Vergütungskomponente                                                                         | 4,8  | 4,8  |
| Kurzfristig variable Vergütungskomponente                                                         | 13,5 | 1,8  |
| Variable Vergütungskomponente mit langfristiger Anreizwirkung                                     | 13,5 | 4,5  |
| Leistungen nach Beendigung des Arbeitsverhältnisses (Dienstzeitaufwand aus Versorgungsansprüchen) | 1,9  | 1,7  |
| Leistungen aus Anlass der Beendigung des Arbeitsverhältnisses                                     | -    | -    |
|                                                                                                   | 33,7 | 12,8 |
| Bezüge des Aufsichtsrats                                                                          | 2,7  | 2,6  |
|                                                                                                   | 36,4 | 15,4 |

Die in der Tabelle dargestellten Aufwendungen im Zusammenhang mit der variablen Vergütungskomponente mit langfristiger Anreizwirkung resultierten aus der fortlaufenden Bewertung aller ausgegebenen und noch nicht fällig gewordenen Performance-Phantom-Share-Pläne (PPSP) mit dem jeweils beizulegenden Zeitwert zum Bilanzstichtag sowie aus der Bewertung der im Jahr 2004 gewährten Stock Options. Den aktiven Mitgliedern des Vorstands wurden im Jahr 2010 insgesamt 250.221 (2009: 270.068) Mio. Stück virtuelle Aktien im Rahmen des PPSP gewährt; der beizulegende Zeitwert dieser virtuellen Aktien zum Zeitpunkt der Gewährung betrug 7,5 (2009: 5,2) Mio. €. Nach Maßgabe des §314 Abs. 1 Nr. 6a HGB wurden dem Vorstand somit Gesamtbezüge, ohne Dienstzeitaufwendungen aus Versorgungsansprüchen, von 25,8 (2009: 11,8) Mio. € gewährt. Zusätzliche Informationen zur aktienorientierten Vergütung der Vorstandsmitglieder können Anmerkung 21 entnommen werden.

Die Mitglieder des Aufsichtsrats erhalten ausschließlich kurzfristig fällige Leistungen. Ausgenommen davon sind die Vergütungen und sonstigen Leistungen der betrieblichen Arbeitnehmervertreter aus ihren Arbeitsverträgen. Für persönlich erbrachte Leistungen außerhalb der Gremientätigkeiten der Mitglieder des Aufsichtsrats, insbesondere für Beratungs- und Vermittlungsleistungen, wurden in den Jahren 2009 und 2010 keine Vergütungen gewährt.

Es wurden keine Vorschüsse oder Kredite an Vorstandsmitglieder bzw. Aufsichtsratsmitglieder der Daimler AG gewährt.

Die im Jahr 2010 gewährten Gesamtbezüge ehemaliger Vorstandsmitglieder der Daimler AG und ihrer Hinterbliebenen belaufen sich auf 17,5 (2009: 16,1) Mio. €. Die Pensionsrückstellungen für frühere Mitglieder des Vorstands sowie ihren Hinterbliebenen betrugen am 31. Dezember 2010 insgesamt 197,1 (2009: 192,8) Mio. €.

Individualisierte Angaben zur Vergütung des Vorstands und des Aufsichtsrats der Daimler AG sind im Vergütungsbericht, der Bestandteil des geprüften Konzernlageberichts ist (siehe Seite 152 f.), dargestellt.

### 37. Honorare des Abschlussprüfers

Die Honorare des Abschlussprüfers KPMG für Dienstleistungen setzen sich wie folgt zusammen:

|                                 | 2010 | 2009 |
|---------------------------------|------|------|
| in Millionen €                  |      |      |
| Abschlussprüfung                | 30   | 26   |
| davon Inland                    | 14   | 12   |
| Sonstige Bestätigungsleistungen | 13   | 20   |
| davon Inland                    | 9    | 13   |
| Steuerberatung                  | -    | -    |
| davon Inland                    | -    | -    |
| Sonstige Leistungen             | 1    | 1    |
| davon Inland                    | 1    | -    |
|                                 | 44   | 47   |

Im Jahr 2010 entfallen auf die KPMG AG Wirtschaftsprüfungsgesellschaft und verbundene Unternehmen (zusammengeschlossen in der KPMG Europe LLP) 17 (2009: 14) Mio. € für Honorare für Abschlussprüfungen sowie 9 (2009: 14) Mio. € für Honorare für sonstige Bestätigungsleistungen. Die Honorare für Abschlussprüfungen betreffen die Prüfung des Konzernabschlusses und der Jahresabschlüsse der Daimler AG und ihrer in den Konzernabschluss einbezogenen verbundenen Unternehmen. Die Honorare für sonstige Bestätigungsleistungen betreffen insbesondere die prüferische Durchsicht der Zwischenabschlüsse nach IFRS. Darüber hinaus sind hier die Honorare im Zusammenhang mit der Prüfung des internen Kontrollsystems sowie für projektbegleitende Prüfungen im Rahmen der Einführung von IT-Systemen und sonstige freiwillige Prüfungen enthalten.

### 38. Zusätzliche Angaben

**Aufstellung des Anteilsbesitzes.** Die Aufstellung des Anteilsbesitzes der Daimler AG gemäß § 313 Abs. 2 HGB wird auf der Internetseite von Daimler unter <http://www.daimler.com/ir/ergebnis2010> veröffentlicht. In dieser Aufstellung ist die Inanspruchnahme der Befreiungsmöglichkeiten des § 264 Abs. 3 bzw. des § 264b HGB hinsichtlich der Offenlegung der Abschlüsse bzw. der Erstellung eines Lageberichts oder Anhangs von Gesellschaften, die verbundene konsolidierte Unternehmen der Daimler AG sind und für die der Konzernabschluss der Daimler AG der befreiende Konzernabschluss ist, kenntlich gemacht.

**Deutscher Corporate Governance Kodex.** Der Vorstand und der Aufsichtsrat der Daimler AG haben eine Erklärung gemäß § 161 AktG abgegeben und den Aktionären auf der Internetseite von Daimler unter <http://www.daimler.com/unternehmen/organisation-und-fuehrung/corporate-governance/erklaerung-161-aktg> dauerhaft zugänglich gemacht.

**Drittunternehmen.** Zum 31. Dezember 2010 hielt der Konzern folgende Beteiligungen an wesentlichen Drittunternehmen im Sinne des Deutschen Corporate Governance Kodex:

| Name der Gesellschaft                | Renault SA <sup>2</sup>             | Nissan Motor Company Ltd. <sup>3</sup> |
|--------------------------------------|-------------------------------------|----------------------------------------|
| Sitz der Gesellschaft                | Boulogne-Billancourt,<br>Frankreich | Tokio,<br>Japan                        |
| Höhe des Anteils (in %) <sup>1</sup> | 3,1                                 | 3,1                                    |
| Eigenkapital (in Millionen €)        | 22.757                              | 28.579                                 |
| Ergebnis (in Millionen €)            | 3.490                               | 323                                    |

<sup>1</sup> Zum 31. Dezember 2010

<sup>2</sup> Angaben auf Basis des IFRS-Konzernabschlusses für das Geschäftsjahr 1. Januar 2010 bis 31. Dezember 2010

<sup>3</sup> Angaben auf Basis des landesrechtlichen Konzernabschlusses für das Geschäftsjahr 1. April 2009 bis 31. März 2010

# Zehnjahresübersicht <sup>1</sup>

|                                                           | 2001    | 2002    | 2003    | 2004    | 2005    | 2006    | 2007    | 2008    | 2009    | 2010    |
|-----------------------------------------------------------|---------|---------|---------|---------|---------|---------|---------|---------|---------|---------|
| €-Werte in Millionen                                      |         |         |         |         |         |         |         |         |         |         |
| <b>Aus der Gewinn- und Verlustrechnung</b>                |         |         |         |         |         |         |         |         |         |         |
| Umsatz                                                    | 150.422 | 147.408 | 136.437 | 142.059 | 95.209  | 99.222  | 101.569 | 98.469  | 78.924  | 97.761  |
| Personalaufwand <sup>2</sup>                              | 25.095  | 24.163  | 24.287  | 24.216  | 24.650  | 23.574  | 20.256  | 15.066  | 13.928  | 16.454  |
| Forschungs- und Entwicklungsleistungen                    | 5.848   | 5.942   | 5.571   | 5.658   | 3.928   | 3.733   | 4.148   | 4.442   | 4.181   | 4.849   |
| davon aktiviert                                           | -       | -       | -       | -       | 591     | 715     | 990     | 1.387   | 1.285   | 1.373   |
| Operating Profit/EBIT                                     | -1.346  | 6.827   | 5.686   | 5.754   | 2.873   | 4.992   | 8.710   | 2.730   | -1.513  | 7.274   |
| Operating Profit/EBIT in % des Umsatzes                   | -0,9%   | 4,6%    | 4,2%    | 4,1%    | 3,0%    | 5,0%    | 8,6%    | 2,8%    | -1,9%   | 7,4%    |
| Ergebnis vor Ertragsteuern und außerordentliches Ergebnis | -1.703  | 6.439   | 596     | 3.535   | 2.426   | 4.902   | 9.181   | 2.795   | -2.298  | 6.628   |
| Net Operating Income/Net Operating Profit                 | 332     | 6.116   | 1.467   | 3.165   | 4.834   | 4.032   | 4.123   | 1.370   | -2.102  | 5.120   |
| in % der Net Assets (RONA)                                | 0,5%    | 9,4%    | 2,5%    | 5,7%    | 10,0%   | 8,3%    | 10,5%   | 4,4%    | -6,6%   | 17,5%   |
| Konzernergebnis                                           | -593    | 5.098   | 448     | 2.466   | 4.215   | 3.783   | 3.985   | 1.414   | -2.644  | 4.674   |
| Konzernergebnis je Aktie (€)                              | -0,59   | 5,06    | 0,44    | 2,43    | 4,09    | 3,66    | 3,83    | 1,41    | -2,63   | 4,28    |
| Konzernergebnis je Aktie, verwässert (€)                  | -0,59   | 5,03    | 0,44    | 2,43    | 4,08    | 3,64    | 3,80    | 1,40    | -2,63   | 4,28    |
| Dividendensumme                                           | 1.003   | 1.519   | 1.519   | 1.519   | 1.527   | 1.542   | 1.928   | 556     | 0       | 1.971   |
| Dividende je Aktie (€)                                    | 1,00    | 1,50    | 1,50    | 1,50    | 1,50    | 1,50    | 2,00    | 0,60    | 0,00    | 1,85    |
| <b>Aus der Bilanz</b>                                     |         |         |         |         |         |         |         |         |         |         |
| Sachanlagen                                               | 41.180  | 36.285  | 32.933  | 34.017  | 35.295  | 32.747  | 14.650  | 16.087  | 15.965  | 17.593  |
| Vermietete Gegenstände                                    | 36.002  | 28.243  | 24.385  | 26.711  | 34.236  | 36.949  | 19.638  | 18.672  | 18.532  | 19.925  |
| Sonstige langfristige Vermögenswerte                      | -       | -       | -       | -       | 76.200  | 67.507  | 39.686  | 42.077  | 40.044  | 41.309  |
| Vorräte                                                   | 16.754  | 15.642  | 14.948  | 16.805  | 19.699  | 18.396  | 14.086  | 16.805  | 12.845  | 14.544  |
| Liquide Mittel                                            | 14.536  | 12.439  | 14.296  | 11.666  | 8.063   | 8.409   | 15.631  | 6.912   | 9.800   | 10.903  |
| Sonstige kurzfristige Vermögenswerte                      | -       | -       | -       | -       | 54.519  | 53.626  | 31.403  | 31.672  | 31.635  | 31.556  |
| Bilanzsumme                                               | 207.616 | 187.527 | 178.450 | 182.872 | 228.012 | 217.634 | 135.094 | 132.225 | 128.821 | 135.830 |
| Eigenkapital                                              | 38.928  | 35.076  | 34.486  | 33.522  | 35.957  | 37.346  | 38.230  | 32.730  | 31.827  | 37.953  |
| davon: Gezeichnetes Kapital                               | 2.609   | 2.633   | 2.633   | 2.633   | 2.647   | 2.673   | 2.766   | 2.768   | 3.045   | 3.058   |
| Eigenkapitalquote Konzern                                 | 18,3%   | 17,9%   | 18,5%   | 17,5%   | 15,1%   | 16,5%   | 26,9%   | 24,3%   | 24,7%   | 26,5%   |
| Eigenkapitalquote im Industriegeschäft                    | 25,7%   | 24,9%   | 26,1%   | 25,2%   | 23,7%   | 27,1%   | 43,7%   | 42,7%   | 42,6%   | 45,8%   |
| Langfristige Schulden                                     | -       | -       | -       | -       | 96.823  | 90.452  | 47.998  | 47.313  | 49.456  | 44.738  |
| Kurzfristige Schulden                                     | -       | -       | -       | -       | 95.232  | 89.836  | 48.866  | 52.182  | 47.538  | 53.139  |
| Nettoliquidität im Industriegeschäft                      | -4.768  | 380     | 1.774   | 2.193   | 8.016   | 9.861   | 12.912  | 3.106   | 7.285   | 11.938  |
| Net Assets im Durchschnitt                                | 66.094  | 65.128  | 59.572  | 55.885  | 48.313  | 48.584  | 39.187  | 31.466  | 31.778  | 29.338  |

|                                                           | 2001    | 2002    | 2003    | 2004    | 2005    | 2006    | 2007    | 2008    | 2009    | 2010    |
|-----------------------------------------------------------|---------|---------|---------|---------|---------|---------|---------|---------|---------|---------|
| €-Werte in Millionen                                      |         |         |         |         |         |         |         |         |         |         |
| <b>Aus der Kapitalflussrechnung<sup>2</sup></b>           |         |         |         |         |         |         |         |         |         |         |
| Investitionen in Sachanlagen                              | 8.896   | 7.145   | 6.614   | 6.386   | 6.480   | 5.874   | 4.247   | 3.559   | 2.423   | 3.653   |
| Abschreibungen                                            | -       | -       | -       | -       | 7.363   | 7.169   | 4.146   | 3.023   | 3.264   | 3.364   |
| Cash Flow aus der Geschäftstätigkeit                      | 15.944  | 15.909  | 13.826  | 11.060  | 11.032  | 14.337  | 7.146   | -786    | 10.961  | 8.544   |
| Cash Flow aus der Investitionstätigkeit                   | -13.287 | -10.839 | -13.608 | -16.682 | -10.237 | -15.857 | 26.479  | -4.812  | -8.950  | -313    |
| Cash Flow aus der Finanzierungstätigkeit                  | 1.859   | -5.490  | 2.518   | 2.549   | -1.284  | 2.396   | -25.204 | -2.915  | 1.057   | -7.551  |
| Free Cash Flow des Industriegeschäfts                     | -1.392  | 7.271   | 3.877   | 1.757   | 2.423   | 2.679   | 7.637   | -3.915  | 2.706   | 5.432   |
| <b>Börsenkennzahlen</b>                                   |         |         |         |         |         |         |         |         |         |         |
| Jahresendkurs Frankfurt (€)                               | 48,35   | 29,35   | 37,00   | 35,26   | 43,14   | 46,80   | 66,50   | 26,70   | 37,23   | 50,73   |
| New York (US-\$)                                          | 41,67   | 30,65   | 46,22   | 48,05   | 51,03   | 61,41   | 95,63   | 38,28   | 53,30   | -       |
| Durchschnittl. Anzahl der Aktien (Mio. Stück)             | 1.003,2 | 1.008,3 | 1.012,7 | 1.012,8 | 1.014,7 | 1.022,1 | 1.037,8 | 957,7   | 1.003,8 | 1.050,8 |
| Durchschnittl. Anzahl der Aktien, verwässert (Mio. Stück) | 1.003,2 | 1.013,9 | 1.012,7 | 1.014,5 | 1.017,7 | 1.027,3 | 1.047,3 | 959,9   | 1.003,8 | 1.051,5 |
| <b>Rating</b>                                             |         |         |         |         |         |         |         |         |         |         |
| Langfristiges Credit Rating                               |         |         |         |         |         |         |         |         |         |         |
| Standard & Poor's                                         | BBB+    | BBB+    | BBB     | BBB     | BBB     | BBB     | BBB+    | A-      | BBB+    | BBB+    |
| Moody's                                                   | A3      | A3      | A3      | A3      | A3      | Baa1    | A3      | A3      | A3      | A3      |
| Fitch                                                     | -       | -       | BBB+    | BBB+    | BBB+    | BBB+    | A-      | A-      | BBB+    | BBB+    |
| DBRS                                                      | -       | -       | A (low) |
| <b>Beschäftigte im Jahresdurchschnitt (Personen)</b>      |         |         |         |         |         |         |         |         |         |         |
|                                                           | 379.544 | 370.677 | 370.684 | 379.019 | 296.109 | 277.771 | 271.704 | 274.330 | 258.628 | 258.120 |

1 Werte für die Jahre 2001 bis 2004 nach US-GAAP, ab 2005 nach IFRS.

2 Bis 3. August 2007 einschließlich Chrysler.



**BlueEFFICIENCY.** Effizienzpakete zur Kraftstoffeinsparung. Dazu gehören innermotorische Maßnahmen, Karosserie-Gewichtseinsparungen, Leichtlaufreifen, Aerodynamik-Optimierungen, die ECO Start-Stopp-Funktion und Weiteres. So kann der Kraftstoffverbrauch um mehr als 20% gesenkt werden.

**BLUETEC.** Kombination innermotorischer Maßnahmen zur Verringerung von Emissionen mit einer Abgasnachbehandlung. Durch eine optimierte Verbrennung wird die Effizienz von Dieselmotoren bei Pkw und Nutzfahrzeugen erhöht, und ein SCR-Katalysator reduziert den Schadstoffausstoß.

**BRIC.** Die Abkürzung BRIC steht für die Anfangsbuchstaben der vier Staaten Brasilien, Russland, Indien und China.

**Code of Ethics.** Der Ethik-Kodex gilt für die Mitglieder des Vorstands und Personen mit besonderer Verantwortung für die Inhalte der Finanzberichterstattung. Die in dem Kodex enthaltenen Vorschriften sind darauf ausgerichtet, Fehlverhalten zu vermeiden und ethisches Verhalten sowie eine korrekte Veröffentlichung von Unternehmensinformationen sicherzustellen.

**Compliance.** Unter Compliance verstehen wir die Einhaltung von allen für das Geschäftsmodell relevanten Gesetzen, Regelungen und freiwilligen Selbstverpflichtungen sowie den zugehörigen internen Richtlinien und Verfahren bei allen Aktivitäten von Daimler.

**Corporate Governance.** Unter dem Stichwort Corporate Governance werden Fragen der Unternehmensführung und -kontrolle diskutiert. Die Gestaltung der Corporate Governance der Daimler AG wird vom deutschen Aktien-, Mitbestimmungs- und Kapitalmarktrecht bestimmt.

**CSR – Corporate Social Responsibility.** Sammelbegriff für die von Unternehmen wahrgenommene gesellschaftliche Verantwortung, die ökonomische, ökologische und soziale Aspekte einbezieht.

**EBIT.** Das EBIT (Earnings before Interest and Taxes) stellt die operative Ergebnisgröße vor Steuern dar (vgl. S. 74 ff.).

**Equity-Methode.** Methode zur Bilanzierung und Bewertung von Beteiligungen an assoziierten Unternehmen sowie gegebenenfalls an Gemeinschaftsunternehmen und an Konzernunternehmen, die nicht vollständig konsolidiert werden.

**Fair Value.** Betrag, zu dem zwischen sachverständigen, vertragswilligen und voneinander unabhängigen Parteien ein Vermögenswert getauscht oder eine Schuld beglichen werden könnte.

**Goodwill.** Der Betrag, um den die Anschaffungskosten einer Unternehmensakquisition die Summe der Zeitwerte der einzelnen identifizierbaren erworbenen Vermögenswerte und Schulden übersteigen, wird als Geschäftswert (Goodwill) angesetzt.

**Hybridantriebe.** Sie kombinieren Verbrennungs- und Elektromotoren, die abhängig von Fahrzeugtyp und Fahrsituation einzeln oder gemeinsam betrieben werden.

**IFRS – International Financial Reporting Standards.** Die IFRS sind ein Regelwerk von Standards und Interpretationen zur externen Rechnungslegung und Berichterstattung von Unternehmen, die von einem unabhängigen privaten Gremium, dem International Accounting Standards Board (IASB), entwickelt werden.

**Integrity Code.** Die Verhaltensrichtlinie (Integrity Code) gilt seit 1999 und wurde im Jahr 2003 überarbeitet und erweitert. Sie legt für alle Beschäftigten weltweit verbindliche Verhaltensregeln fest.

**Kapitalkosten.** Die Kapitalkosten ergeben sich als Produkt aus durchschnittlich gebundenem Kapital und Kapitalkostensatz. Der Kapitalkostensatz leitet sich aus den Verzinsungsansprüchen der Kapitalgeber ab (vgl. S. 77 f.).

**Konsolidierungskreis.** Der Konsolidierungskreis bezeichnet die Summe aller in den Konzernabschluss einbezogenen Gesellschaften.

**Lithium-Ionen-Batterie.** Sie bildet die Basis für künftige Elektroantriebe. Im Vergleich zu herkömmlichen Batterien ist sie deutlich platzsparender, hat eine höhere Leistungsfähigkeit, kurze Ladezeiten und eine lange Lebensdauer.

**Nachhaltigkeit.** Nachhaltigkeit bedeutet, natürliche Ressourcen so zu nutzen, dass auch künftige Generationen ihre Bedürfnisse erfüllen können. Aus Unternehmenssicht sind für nachhaltiges Wirtschaften ökonomische, ökologische und soziale Aspekte zu berücksichtigen.

**NEFZ – Neuer Europäischer Fahrzyklus.** In Europa angewandtes Messverfahren zur objektiven Bewertung des Kraftstoffverbrauchs von Fahrzeugen.

**Net Assets.** Die Net Assets stellen das gebundene Kapital des Konzerns sowie der industriellen Geschäftsfelder dar. Die für Daimler Financial Services relevante Kapitalbasis ist das Eigenkapital (vgl. S. 77 ff.).

**Net Operating Profit.** Der Net Operating Profit stellt die für die Erfolgsmessung des Konzerns relevante operative Ergebnisgröße nach Steuern dar.

**Rating.** Einschätzung der Bonität eines Unternehmens, die durch Ratingagenturen vergeben wird.

**ROE – Return on Equity.** Zur Beurteilung der Rentabilität von Daimler Financial Services wird auf die Eigenkapitalrendite (ROE) abgestellt. Der ROE ist definiert als Quotient aus EBIT und Eigenkapital.

**ROS – Return on Sales.** Zur Beurteilung der Rentabilität der industriellen Geschäftsfelder wird auf die Umsatzrendite (ROS) abgestellt. Die Umsatzrendite ist definiert als Quotient aus EBIT und Umsatz.

**Value-at-Risk.** Misst für ein gegebenes Portfolio den potenziellen künftigen Verlust (bezogen auf den Marktwert), der in einer bestimmten Periode und mit einer bestimmten Wahrscheinlichkeit nicht überschritten wird.

**Value Added (Wertbeitrag).** Der Value Added gibt an, um wie viel die operative Ergebnisgröße die Kapitalkosten übersteigt. Bei einem positiven Value Added liegt die Kapitalrendite über dem Kapitalkostensatz (vgl. S. 77).

|                                 |                                   |
|---------------------------------|-----------------------------------|
| <b>Absatz</b>                   | <b>71 f.</b> , 122, 126, 130, 132 |
| Aktie                           | <b>22 ff.</b> , 64                |
| <b>Bestätigungsvermerk</b>      | <b>171</b>                        |
| Brennstoffzelle                 | 42, <b>141 f.</b>                 |
| <b>Cash Flow</b>                | <b>90 f.</b> , 176, 220           |
| Change-of-Control               | <b>64</b>                         |
| CO <sub>2</sub> -Reduzierung    | <b>84 f.</b> , 140 ff.            |
| Code of Ethics                  | 165                               |
| Compliance                      | <b>158 f.</b>                     |
| Corporate Governance            | 63, <b>148 ff.</b>                |
| <b>Dividende</b>                | 23, <b>82</b> , 117               |
| <b>EADS</b>                     | 63, 65, 76, <b>199</b>            |
| EBIT                            | <b>74 ff.</b> , 102               |
| Eigenkapital                    | 97, 101, <b>204 ff.</b>           |
| Ergebnis je Aktie (EPS)         | 22, <b>244</b>                    |
| Ertragslage                     | <b>74 ff.</b>                     |
| Ertragsteuern                   | 82, <b>192 ff.</b>                |
| <b>Finanzergebnis</b>           | 81 f., <b>191</b>                 |
| <b>Global Excellence</b>        | 129                               |
| Geschäftswerte                  | <b>195</b>                        |
| <b>Hauptversammlung</b>         | <b>24</b> , 160                   |
| Hybrid                          | 38 ff., <b>140 ff.</b>            |
| <b>Integrity Code</b>           | <b>165</b>                        |
| Investitionen                   | <b>92</b> , 118,                  |
| Investor Relations              | <b>25</b>                         |
| <b>Konsolidierungskreis</b>     | <b>178 f.</b>                     |
| Konzernergebnis                 | <b>82</b> , 172, 173              |
| <b>Nachhaltigkeit</b>           | <b>136 ff.</b>                    |
| Net Assets                      | <b>77 ff.</b>                     |
| <b>Pensionsverpflichtungen</b>  | 89, 97, <b>211 ff.</b>            |
| Portfolioveränderungen          | <b>67 f.</b>                      |
| <b>Rating</b>                   | <b>95</b>                         |
| ROE – Return on Equity          | <b>77 f.</b>                      |
| ROS – Return on Sales           | <b>77 f.</b>                      |
| <b>Segmentberichterstattung</b> | <b>239 ff.</b>                    |
| Strategie                       | <b>65 ff.</b>                     |
| <b>Umsatz</b>                   | <b>73</b> , 189                   |
| <b>Verbindlichkeiten</b>        | 97, <b>218 ff.</b>                |
| Vergütungssystem                | <b>152 ff.</b> , 246              |
| Value Added                     | <b>77 ff.</b>                     |

# Internationale Konzernrepräsentanzen

**Ägypten, Kairo**

Tel. +20 2 529 91 00

Fax +20 2 529 9105

**Argentinien, Buenos Aires**

Tel. +54 11 4808 8719

Fax +54 11 4808 8702

**Australien, Melbourne**

Tel. +61 39 566 9104

Fax +61 39 566 9110

**Belgien, Brüssel**

Tel. +32 2 23311 33

Fax +32 2 23311 50

**Brasilien, São Paulo**

Tel. +55 11 4173 7171

Fax +55 11 4173 7118

**Bulgarien, Sofia**

Tel. +359 2 919 8813

Fax +359 2 945 4818

**China, Peking**

Tel. +86 10 8417 8177

Fax +86 10 8417 8077

**Dänemark, Kopenhagen**

Tel. +45 3378 5520

Fax +45 3378 5525

**Deutschland, Berlin**

Tel. +49 30 2594 1100

Fax +49 30 2594 1109

**Frankreich, Paris**

Tel. +33 1 39 23 5400

Fax +33 1 39 23 5442

**Griechenland, Kifissia**

Tel. +30 210 629 6700

Fax +30 210 629 6710

**Großbritannien,**

Milton Keynes

Tel. +44 190 8245 800

Fax +44 190 8245 802

**Indien, Pune**

Tel. +91 2135 673 800

Fax +91 2135 673 951

**Indonesien, Jakarta**

Tel. +62 21 3000 3600

Fax +62 21 8689 9103

**Italien, Rom**

Tel. +39 06 4144 2405

Fax +39 06 4121 9097

**Japan, Tokio**

Tel. +81 44330 7071

Fax +81 44330 5831

**Kanada, Toronto**

Tel. +1 416 847 7500

Fax +1 416 425 0598

**Korea, Seoul**

Tel. +82 2 6456 2555

Fax +82 2 6459 2599

**Kroatien, Zagreb**

Tel. +385 1 344 1251

Fax +385 1 344 1258

**Malaysia, Kuala Lumpur**

Tel. +603 2246 8811

Fax +603 2246 8812

**Mazedonien, Skopje**

Tel. +389 2 2580 000

Fax +389 2 2580 401

**Mexiko, Mexico City**

Tel. +52 55 4155 2540

Fax +52 55 4155 2495

**Niederlande, Utrecht**

Tel. +31 3024 7 1259

Fax +31 3029 8 7258

**Österreich, Salzburg**

Tel. +43 662 447 8212

Fax +43 662 447 8334

**Polen, Warschau**

Tel. +48 22 312 7200

Fax +48 22 312 7201

**Rumänien, Bukarest**

Tel. +40 21 2004 501

Fax +40 21 2004 670

**Russland, Moskau**

Tel. +7 495 745 2616

Fax +7 495 745 2614

**Singapur, Singapur**

Tel. +65 6849 8321

Fax +65 6849 8621

**Slowakei, Bratislava**

Tel. +42 1 2492 94900

Fax +42 1 2492 94904

**Spanien, Madrid**

Tel. +34 91 484 6161

Fax +34 91 484 6019

**Südafrika, Pretoria**

Tel. +27 12 677 1502

Fax +27 12 666 8191

**Taiwan, Taipeh**

Tel. +886 2 2715 9696

Fax +886 2 2719 2776

**Thailand, Bangkok**

Tel. +66 2344 6101

Fax +66 2676 6234

**Tschechien, Prag**

Tel. +42 0 2710 77700

Fax +42 0 2710 77702

**Türkei, Istanbul**

Tel. +90 212 867 3330

Fax +90 212 867 4518

**Ungarn, Budapest**

Tel. +36 1 887 7002

Fax +36 1 887 7001

**USA, Washington**

Tel. +1 202 414 6746

Fax +1 202 414 6790

**Vereinigte Arabische**

**Emirate, Dubai**

Tel. +97 14 8075 202

Fax +97 14 8833 201

**Vietnam, Ho-Chi-Minh-Stadt**

Tel. +848 3588 9100

Fax +848 3895 8714

**Informationen im Internet.** Spezielle Informationen rund um die Aktie und die Ergebnisentwicklung finden Sie in der Rubrik Investor Relations. Dort sind Geschäfts- und Zwischenberichte sowie Einzelabschlüsse der Daimler AG abrufbar. Darüber hinaus erhalten Sie dort aktuelle Meldungen, Präsentationen, diverse Kennzahlenübersichten, Informationen zum Börsenkurs und zusätzliche Serviceangebote.

**[www.daimler.com/investor](http://www.daimler.com/investor)**

**Publikationen für unsere Aktionäre:**

- Geschäftsbericht (deutsch, englisch)
- Zwischenberichte zum ersten, zweiten und dritten Quartal (deutsch und englisch)
- Nachhaltigkeitsbericht (deutsch und englisch)
- Broschüre: Der Weg zur emissionfreien Mobilität (deutsch und englisch)
- Broschüre: Meilensteine der Fahrzeugsicherheit. Die Vision vom unfallfreien Fahren (deutsch und englisch)

[www.daimler.com/ir/berichte](http://www.daimler.com/ir/berichte)

[www.daimler.com/downloads/de](http://www.daimler.com/downloads/de)

Der nach den deutschen Bilanzierungsvorschriften aufgestellte Jahresabschluss der Daimler AG und der nach den International Financial Reporting Standards (IFRS) aufgestellte Konzernabschluss wurden von der KPMG AG Wirtschaftsprüfungsgesellschaft mit dem uneingeschränkten Bestätigungsvermerk versehen; sie werden beim Betreiber des elektronischen Bundesanzeigers eingereicht und im elektronischen Bundesanzeiger veröffentlicht.

Die genannten Publikationen können angefordert werden bei: Daimler AG, Investor Relations, HPC 0324, 70546 Stuttgart, telefonisch oder per Fax unter: +49 711 17 92287.

**Daimler AG**

70546 Stuttgart

Tel. +49 711 17 0

Fax +49 711 17 22244

[www.daimler.com](http://www.daimler.com)

[www.daimler.mobi](http://www.daimler.mobi)

**Investor Relations**

Tel. +49 711 17 95277

+49 711 17 92261

+49 711 17 95256

Fax +49 711 17 94075

[ir.dai@daimler.com](mailto:ir.dai@daimler.com)

|                                    | Mercedes-Benz<br>Cars | Daimler Trucks | Mercedes-Benz<br>Vans | Daimler Buses | Vertrieb<br>Fahrzeuge | Daimler<br>Financial<br>Services |
|------------------------------------|-----------------------|----------------|-----------------------|---------------|-----------------------|----------------------------------|
| <b>Europa</b>                      |                       |                |                       |               |                       |                                  |
| Produktionsstandorte               | 10                    | 7              | 4                     | 7             | -                     | -                                |
| Vertriebsstandorte                 | -                     | -              | -                     | -             | 3.900                 | 38                               |
| Umsatz (Mio. €)                    | 25.486                | 7.953          | 6.292                 | 2.421         | -                     | 5.318                            |
| Belegschaft                        | 87.136                | 30.617         | 13.149                | 14.566        | 40.339                | 4.199                            |
| <b>NAFTA</b>                       |                       |                |                       |               |                       |                                  |
| Produktionsstandorte               | 1                     | 14             | 1                     | 3             | -                     | -                                |
| Vertriebsstandorte                 | -                     | -              | -                     | -             | 1.424                 | 5                                |
| Umsatz (Mio. €)                    | 10.645                | 6.166          | 457                   | 540           | -                     | 6.026                            |
| Belegschaft                        | 3.028                 | 15.749         | 85                    | 1.346         | 3.193                 | 1.236                            |
| <b>Lateinamerika (ohne Mexiko)</b> |                       |                |                       |               |                       |                                  |
| Produktionsstandorte               | 1                     | 1              | 1                     | 2             | -                     | -                                |
| Vertriebsstandorte                 | -                     | -              | -                     | -             | 601                   | 5                                |
| Umsatz (Mio. €)                    | 614                   | 3.740          | 364                   | 1.208         | -                     | 320                              |
| Belegschaft                        | 874                   | 11.434         | 1.323                 | 1.222         | 81                    | 292                              |
| <b>Afrika</b>                      |                       |                |                       |               |                       |                                  |
| Produktionsstandorte               | 1                     | 1              | -                     | 1             | -                     | -                                |
| Vertriebsstandorte                 | -                     | -              | -                     | -             | 314                   | 1                                |
| Umsatz (Mio. €)                    | 1.727                 | 894            | 171                   | 175           | -                     | 467                              |
| Belegschaft                        | 4.710                 | 1.050          | -                     | -             | -                     | 300                              |
| <b>Asien</b>                       |                       |                |                       |               |                       |                                  |
| Produktionsstandorte               | 4                     | 5              | 1                     | 2             | -                     | -                                |
| Vertriebsstandorte                 | -                     | -              | -                     | -             | 1.480                 | 9                                |
| Umsatz (Mio. €)                    | 13.964                | 4.757          | 386                   | 130           | -                     | 444                              |
| Belegschaft                        | 533                   | 12.856         | -                     | -             | 3.602                 | 559                              |
| <b>Australien/Ozeanien</b>         |                       |                |                       |               |                       |                                  |
| Produktionsstandorte               | -                     | -              | -                     | -             | -                     | -                                |
| Vertriebsstandorte                 | -                     | -              | -                     | -             | 285                   | 2                                |
| Umsatz (Mio. €)                    | 994                   | 507            | 143                   | 83            | -                     | 213                              |
| Belegschaft                        | -                     | -              | -                     | -             | 1.084                 | 156                              |

Erläuterung: Umsätze aus Sicht des jeweiligen Geschäftsfelds.



**Jahrespressekonferenz**

16. Februar 2011

**Telefonkonferenz für Analysten und Investoren**

16. Februar 2011

**Vorlage des Geschäftsberichts 2010**

2. März 2011

**Hauptversammlung**

13. April 2011

10.00 Uhr MESZ | 4.00 Uhr EST

Messe Berlin

**Zwischenbericht Q1 2011**

28. April 2011

**Zwischenbericht Q2 2011**

26. Juli 2011

**Zwischenbericht Q3 2011**

26. Oktober 2011

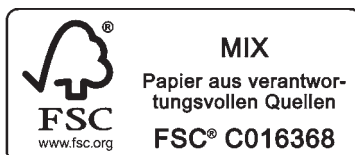

Das für diesen Geschäftsbericht verwendete Papier wurde aus Zellstoffen hergestellt, die aus verantwortungsvoll bewirtschafteten und gemäß den Bestimmungen des Forest Stewardship Council zertifizierten Forstbetrieben stammen.
