# Supplementary material
Source: publisher site journal article supplement (https://www.degruyterbrill.com/publication/isbn/9783110432879/downloadAsset/9783110432879_Elektronischer_Anhang_2.zip)
Supplement: Supplementary file 32 [file Daimler Unternehmensinformationen 2010.pdf › Korpustexte/Korpustexte pdf/Daimler/Daimler Unternehmensinformationen 2010.pdf]

# DAIMLER

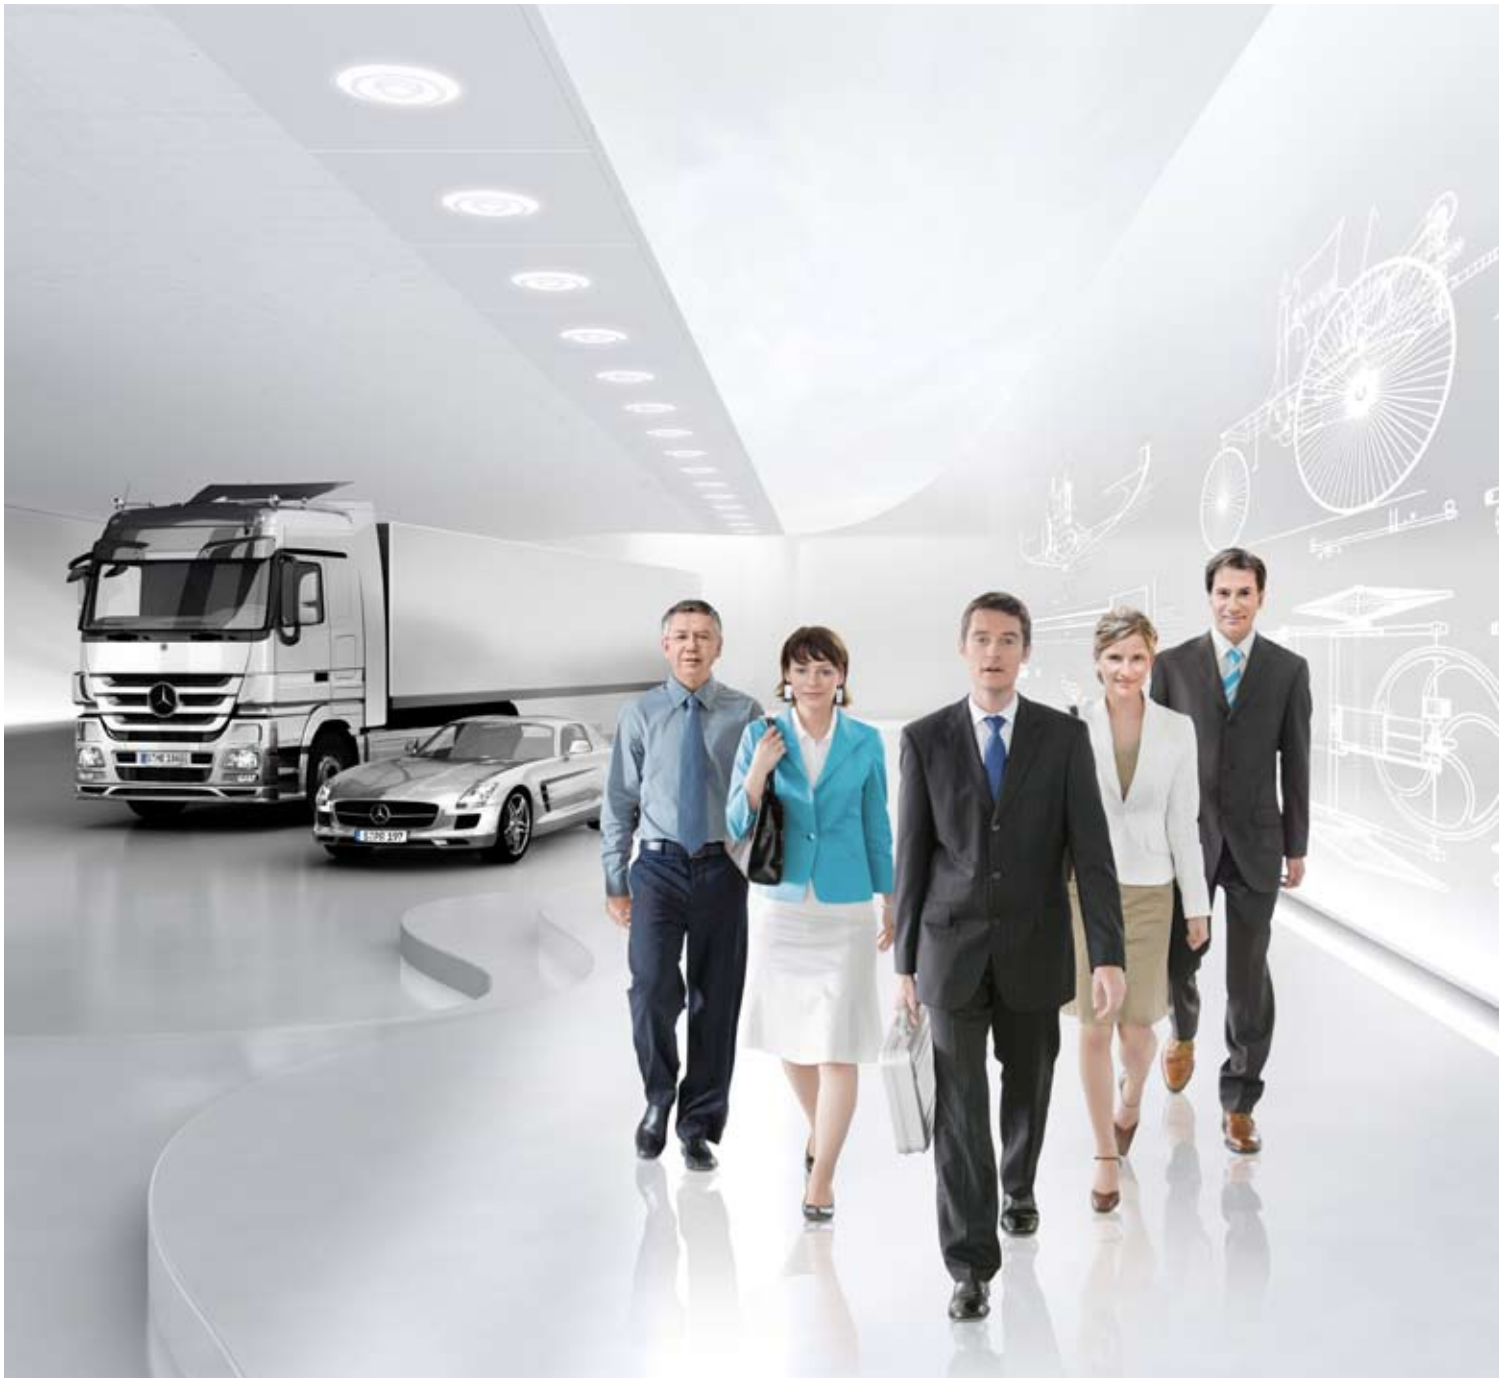

Unternehmensinformationen 2010.

Pioniergeist und Innovationskraft für eine nachhaltige Mobilität. Seit fast 125 Jahren entwickeln wir Antworten auf die automobilen Fragen der jeweiligen Zeit. Als Erfinder des Automobils fühlen wir uns dem Klima- und Umweltschutz ebenso verpflichtet wie der Sicherheit unserer Fahrzeuge. Darauf können unsere Kunden – und alle anderen Verkehrsteilnehmer – weltweit vertrauen.

Wir haben das Automobil erfunden. Jetzt gestalten wir mit Leidenschaft seine Zukunft.

Als Pioniere des Automobilbaus betrachten wir es als Ansporn und Verpflichtung, unsere Tradition mit wegweisenden Technologien und hochwertigen Produkten fortzusetzen. Dafür steht zum einen unsere breit angelegte Strategie für nachhaltige Mobilität. Ziel ist es, Verbrauch und Emissionen unserer Fahrzeuge bereits heute deutlich zu reduzieren und langfristig ganz zu vermeiden. Ein weiteres Kernanliegen: Sicherheit im Straßenverkehr. Schon immer waren wir bei der Entwicklung neuer Technologien und der Verbesserung der Aktiven und Passiven Sicherheit unserer Zeit voraus. Daimler wird auch weiterhin mit richtungsweisenden Innovationen die Mobilität der Zukunft immer sicherer gestalten.

Unsere Philosophie ist klar: Wir geben unser Bestes für Kunden, die das Beste erwarten, und wir leben eine Kultur der Spitzenleistung, die auf gemeinsamen Werten basiert. Unsere Unternehmensgeschichte ist geprägt von Innovationen – sie sind Grundlage und Ansporn für unseren Führungsanspruch im Automobilbau.

Es ist unser Ziel, uns den Mobilitätsanforderungen der Zukunft erfolgreich zu stellen. Damit wollen wir dauerhaft Werte schaffen für unsere Aktionäre, Kunden, Mitarbeiter und die Gesellschaft insgesamt.

| Innovationskraft & Perspektiven          |                                          | Daten & Fakten                  |                               |
|------------------------------------------|------------------------------------------|---------------------------------|-------------------------------|
| 04 Pioniere nachhaltiger Mobilität       | 24 Vielfalt ist unser Wettbewerbsvorteil | 38 Geschäftsfelder im Überblick | 50 Mercedes-Benz Vans         |
| 08 Der Weg zur emissionsfreien Mobilität | 32 Pionierleistungen                     | 40 Daimler AG                   | 54 Daimler Buses              |
| 16 Die Vision vom unfallfreien Fahren    |                                          | 42 Mercedes-Benz Cars           | 58 Daimler Financial Services |
|                                          |                                          | 46 Daimler Trucks               | 62 Konzern im Überblick       |

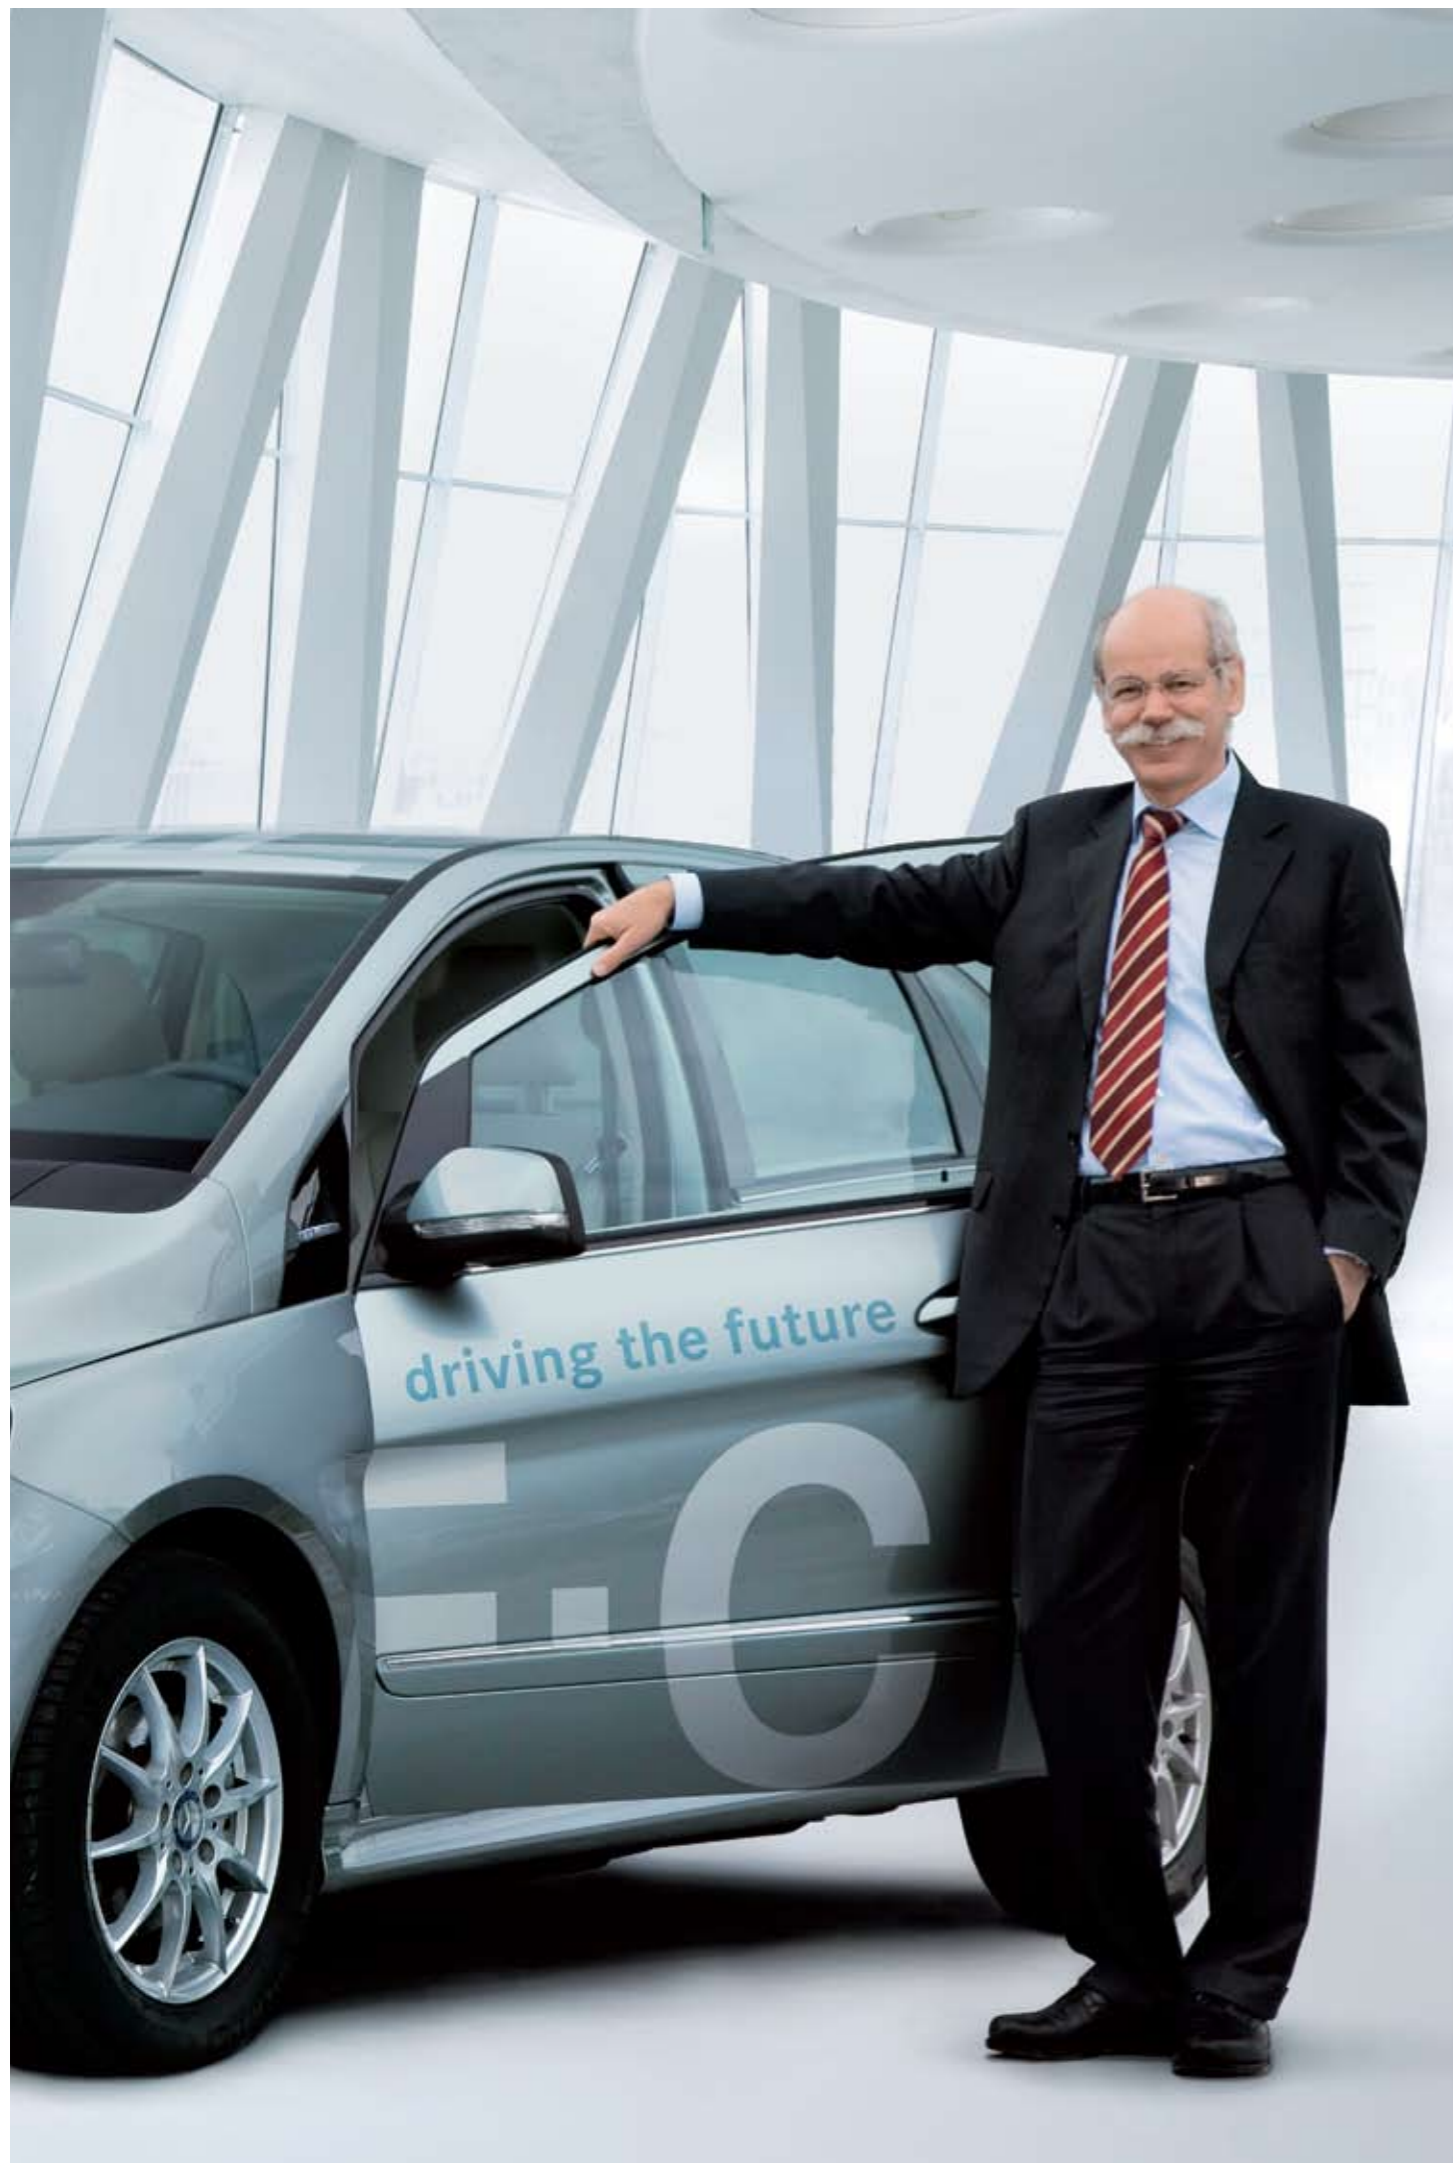

**Dieter Zetsche:** „Grün denken – innovativ handeln – sicher fahren.“

**Fast 125 Jahre nach der Erfindung des Automobils durch Gottlieb Daimler und Carl Benz erfinden wir das Auto neu. Wir erschließen neue Wachstumsmöglichkeiten – zum Beispiel bei der Vermarktung von Batterien an Dritte. Und wir schaffen neue Bündnisse – zum Beispiel mit Stromanbietern –, damit zu den alternativen Antrieben auch die alternative Infrastruktur kommt. Ein Interview mit Dr. Dieter Zetsche.**

**Lassen Sie uns einige Jahre vorausschauen. Wie sieht das Auto der Zukunft aus?** Das Automobil steht vor einer Zeitenwende. Die Erdölvorkommen sind begrenzt – und ihre Nutzung trägt zum Klimawandel bei. Gleichzeitig wächst aber der weltweite Mobilitätsbedarf. Deshalb arbeiten wir mit Hochdruck daran, unsere Fahrzeuge immer sauberer zu machen. Langfristig werden Wasserstoff und Strom Diesel und Benzin als „Leitwährungen“ der Mobilität ablösen. Darauf arbeiten wir konsequent hin: Seit November letzten Jahres produzieren wir Fahrzeuge mit Batterie- und Brennstoffzellenantrieb in Kleinserie. Dieses Jahr folgt nun der groß angelegte Praxiseinsatz in mehreren deutschen und europäischen Städten.

**Dr. Dieter Zetsche. Vorsitzender des Vorstands der Daimler AG und Leiter Mercedes-Benz Cars.**

**Sind wir also bald alle in Elektroautos unterwegs?** Ganz so schnell wird die flächendeckende Umstellung auf Elektroautos nicht kommen. Bis jetzt ist die Technologie noch sehr teuer. Außerdem braucht E-Mobilität auch eine andere Infrastruktur aus Ladestationen und Wasserstofftankstellen – die muss erst noch aufgebaut werden. Aber wir sind auf dem richtigen Weg: Auf beiden Gebieten gibt es gemeinsame Projekte von Automobilherstellern, Energieversorgern, Wasserstoffproduzenten und der öffentlichen Hand.

**Welches Potenzial hat der Verbrennungsmotor noch?** Ein beträchtliches. Auf mittlere Sicht werden effiziente Diesel- und Benzinmotoren der wichtigste Hebel zur Emissionssenkung bleiben. Aber in mehr und mehr Modellen werden wir sie mit elektrischen Komponenten kombinieren. Bei Daimler ist der Weg zu emissionsärmeren und letztlich emissionsfreien Fahrzeugen dreispurig ausgebaut: Spur eins: der hoch effiziente Verbrennungsmotor. Spur zwei: der Hybridantrieb. Und Spur drei: das Elektroauto mit Batterie oder Brennstoffzelle.

**„Grüne Autos“ scheinen eher „Vernunftautos“ zu sein und mit Fahrspaß nicht so recht zusammenzupassen. Bedeutet das die Abkehr vom Premiumautomobil?** Ganz im Gegenteil: Es ist kein Zufall, dass der erste Hybrid eines europäischen Herstellers eine Mercedes-Benz S-Klasse ist. Sogar unseren neuen Supersportler – den SLS AMG – haben wir von Anfang an auch mit rein elektrischem Antrieb konzipiert. Und es gibt kein Auto, das mehr Fahrspaß bietet als gerade der SLS. Generell kann man sagen: Wir machen faszinierende Autos grüner; wir machen aber auch grüne Autos faszinierender. Deshalb wird es in Zukunft auch in den kleineren und mittleren Segmenten „mehr Premium“ geben. Und zumindest Mercedes-Benz Kunden werden nicht wählen müssen zwischen „grün“ und „emotional“: Wir bieten ihnen beides.

**Und wie ist Daimler für die Verschiebung der Nachfrage in Ländern wie China, Indien oder Russland im Wettbewerbsvergleich gerüstet?** Wir sind gut darauf vorbereitet. Mit einem Plus von 65 Prozent war Mercedes-Benz in China 2009 zum dritten Mal in Folge die am schnellsten wachsende Premiummarke. Wir erhöhen deshalb auch unsere Produktionskapazitäten im Reich der Mitte und bauen unser Vertriebsnetz aus. Gemeinsam mit BYD, einem der führenden Entwickler von Lithium-Ionen-Technologien im Auto, wollen wir ein speziell auf China zugeschnittenes Elektrofahrzeug entwickeln. Wir wollen eine neue Marke kreieren, unter

der wir dieses innovative elektrische Stadtauto auf den Markt bringen. Bei den Trucks haben wir die Zusammenarbeit mit dem russischen Lkw-Hersteller Kamaz vertieft und unsere Beteiligung aufgestockt: Das verschafft uns einen besseren Zugang zum größten europäischen Markt für Schwer-Lkw. Wir sind also nicht nur bei Zukunftstechnologien gut aufgestellt, sondern auch in den Zukunftsmärkten.

**Das bedeutet, Sie gehen mit Zuversicht nach vorn?** Ja, weil alle Fakten dafür sprechen. Denn Daimler hat in der Krise die Voraussetzungen für künftige Erfolge geschaffen – strategisch, technologisch und natürlich produktseitig. So ist seit Anfang 2010 die neue E-Klasse-Familie mit allen vier Modellvarianten verfügbar; das gibt uns einen Vorsprung gegenüber dem Wettbewerb. Im weiteren Jahresverlauf werden wir nachlegen – unter anderem mit dem neuen CLS. Auch die bisher sparsamste und umweltfreundlichste S-Klasse aller Zeiten kommt auf den Markt. Bei Trucks, Transportern und Bussen stehen ebenfalls neue attraktive Produkte an. Und in Sachen Elektromobilität macht uns niemand etwas vor.

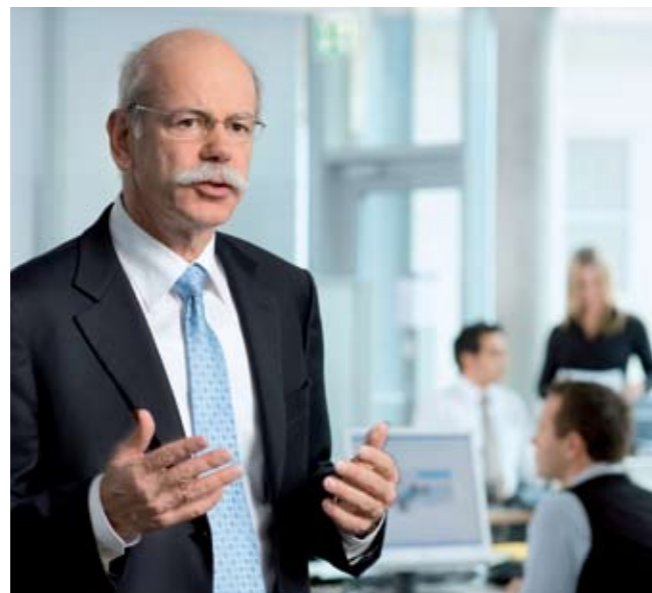

Der Mercedes-Benz F 800 Style zeigt, dass sich grüne Technologie und faszinierende Premiumfahrzeuge nicht ausschließen (rechte Seite).

Technologisch sind wir längst im Aufbruch – genauer gesagt: auf dem Weg ins Nach-Ölzeitalter. Wir sind bereit. Letztlich werden wir emissionsfrei fahren.

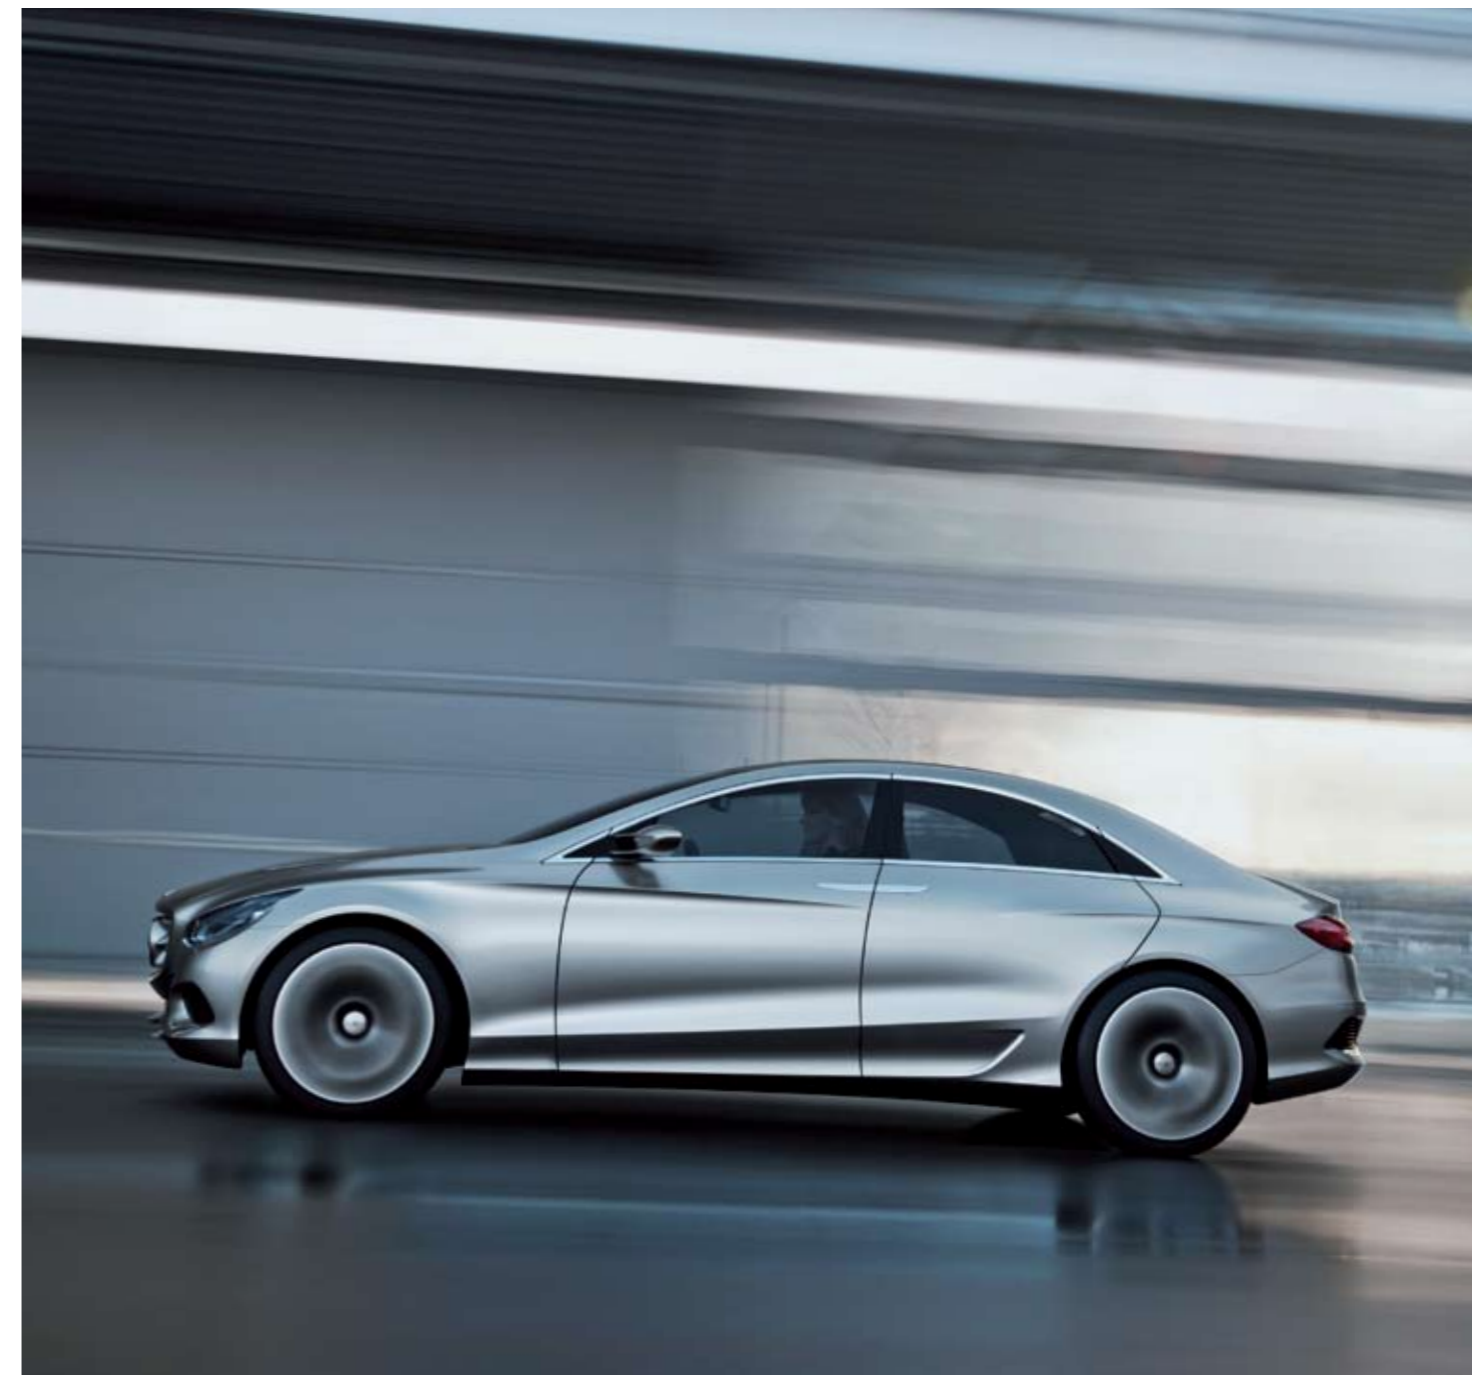

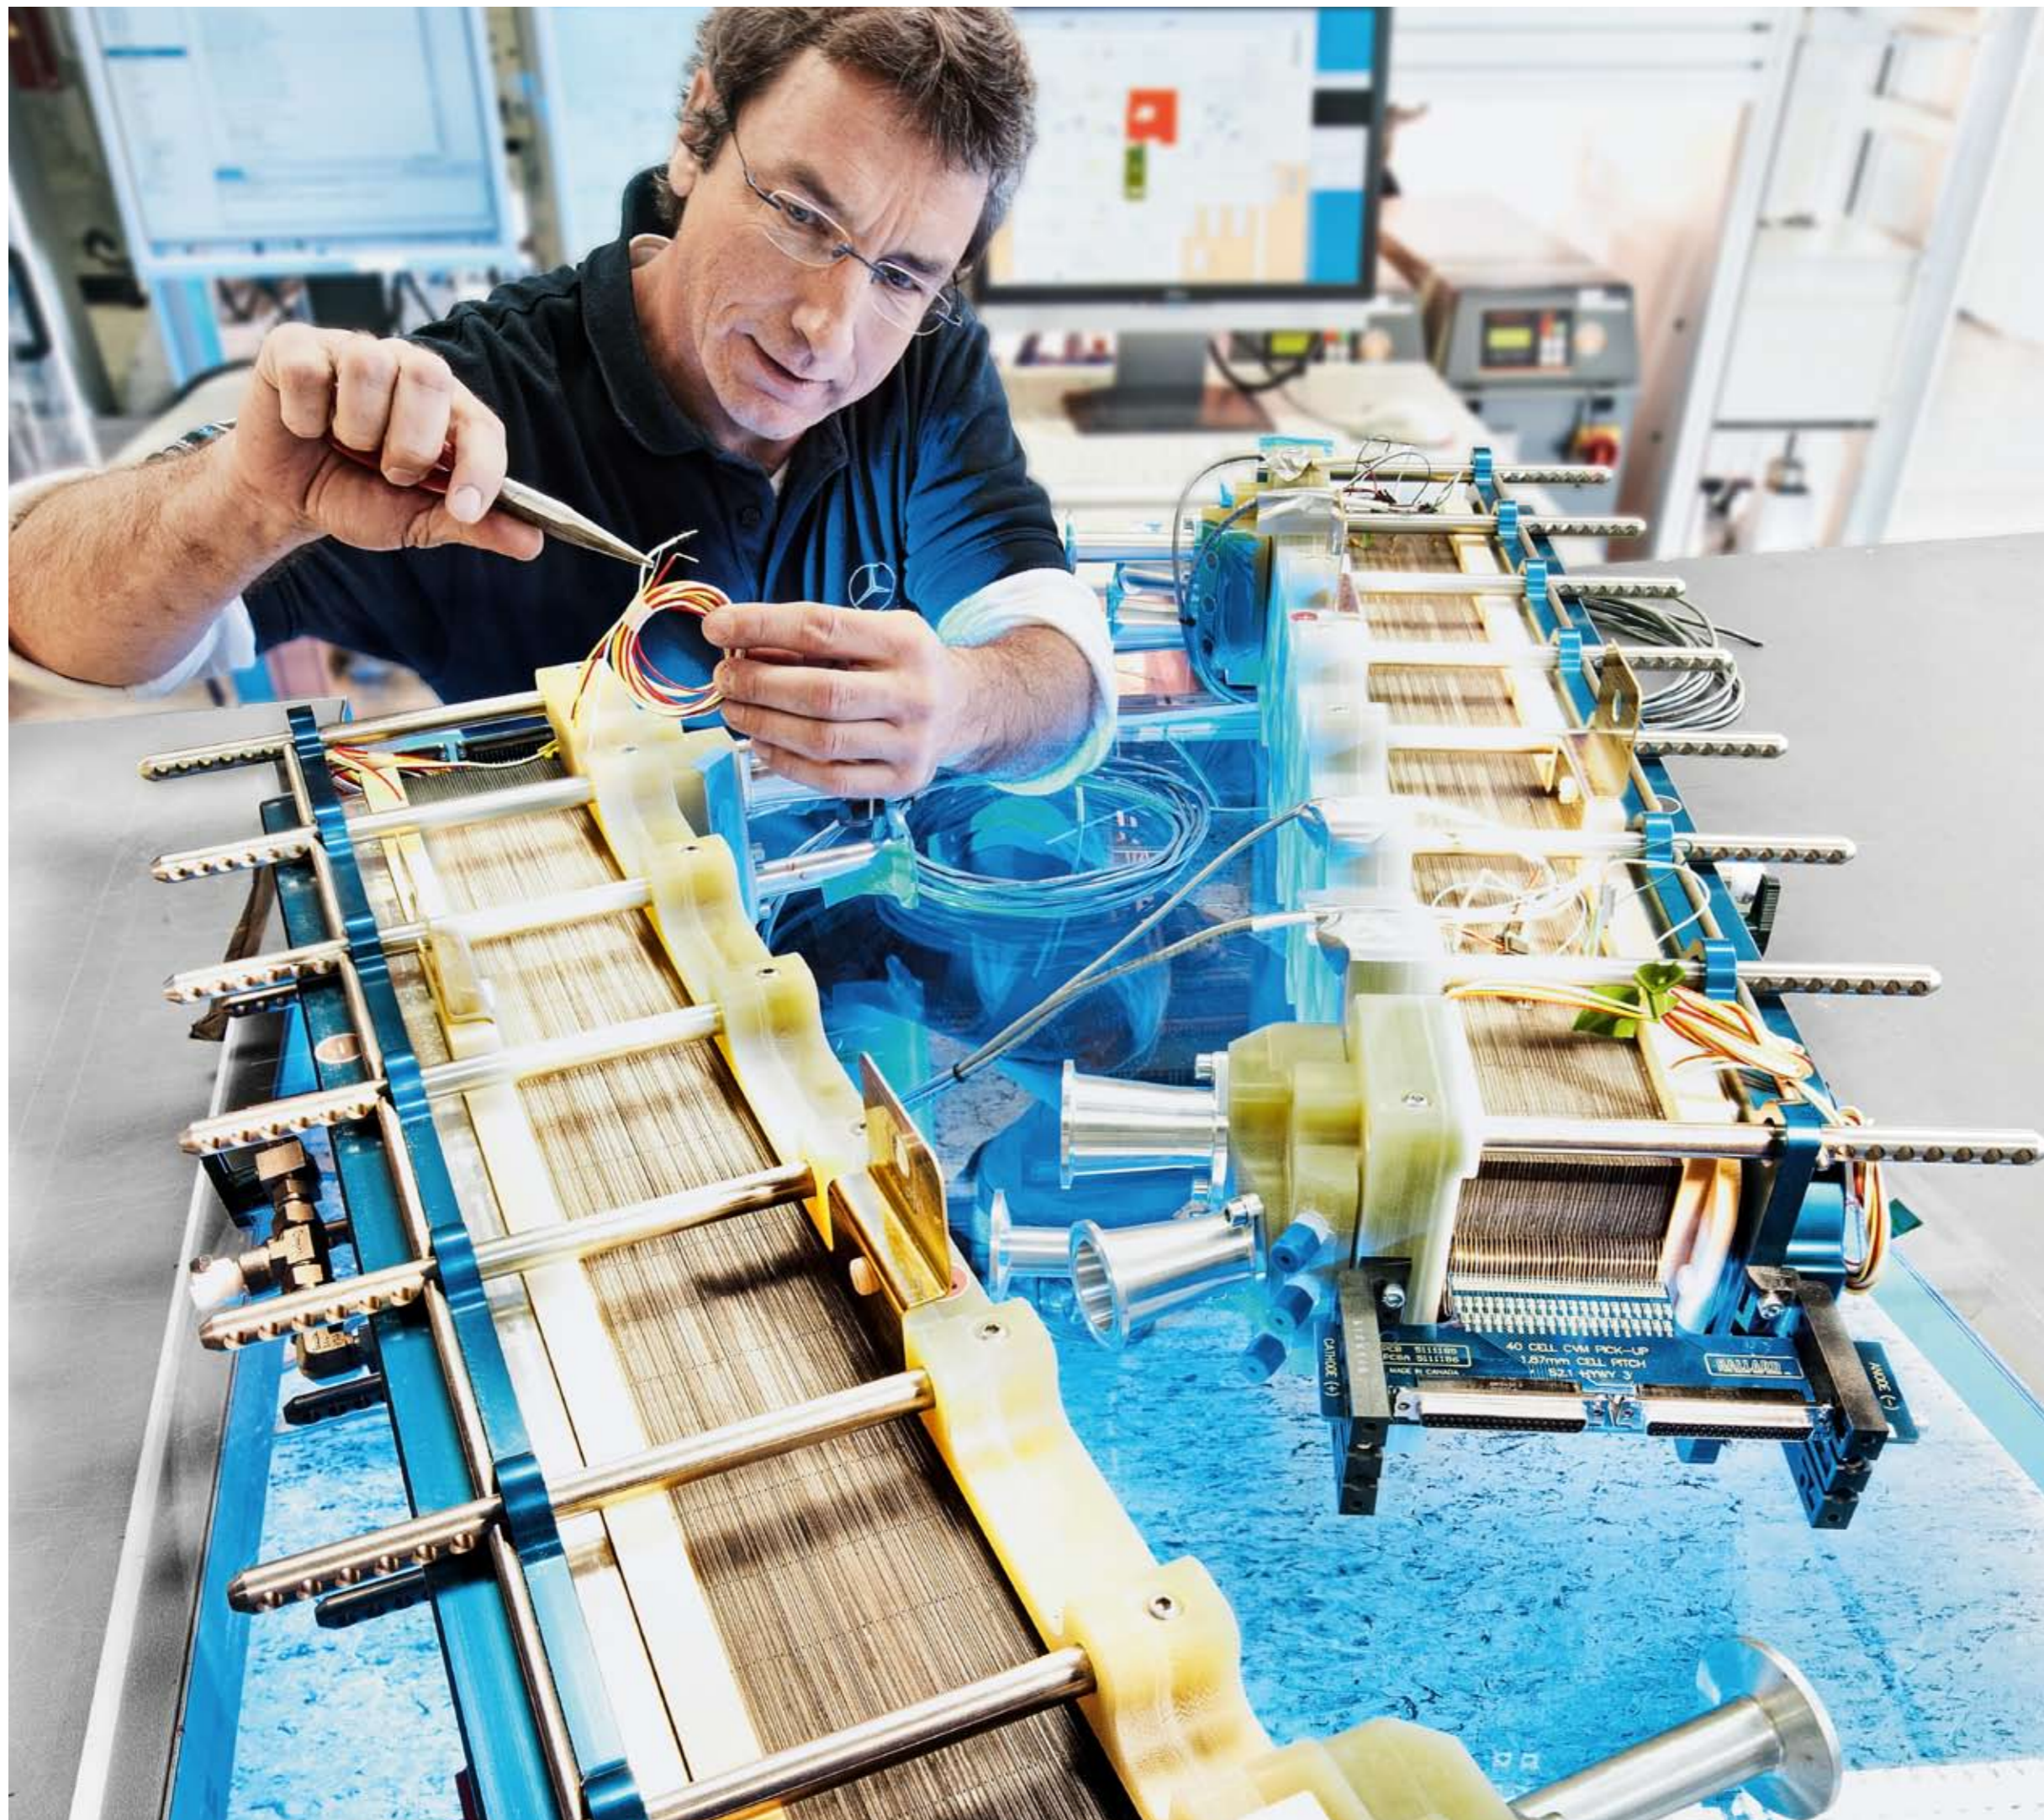

## Der Weg zur emissionsfreien Mobilität.

**Emissionsfrei, leise, sicher und komfortabel – die Brennstoffzellensysteme von Daimler.** Elektrofahrzeuge mit Brennstoffzelle (FuelCELL) erzeugen ihren Strom direkt an Bord und eignen sich mit ihren großen Reichweiten und kurzen Betankungszeiten hervorragend für den Langstreckenverkehr. Getankt wird Wasserstoff, der in der Brennstoffzelle den Strom für den Elektromotor erzeugt.

Die Technologie erweist sich dabei als äußerst effizient, denn der Wirkungsgrad der Brennstoffzelle ist etwa doppelt so hoch wie der von modernen Verbrennungsmotoren. Ein weiterer Vorteil: Es entstehen lokal keine Emissionen, als einziges Abgas verbleibt Wasser. Wird der Wasserstoff aus regenerativen Energien gewonnen, ist die ökologische Gesamtbilanz rundum positiv.

# Das Daimler Engagement: Unser Weg ins Zeitalter der emissionsfreien Mobilität.

**Wir gestalten die Zukunft. Mobilität ist der Motor für Wachstum und Wohlstand jeder modernen Gesellschaft. Ob Pkw, Busse, Transporter oder schwere Lkw: Daimler bietet Premiumlösungen für jeden Mobilitätsbedarf.**

Als Erfinder des Automobils übernimmt Daimler Verantwortung für dessen Zukunft. Die Daimler Initiative „The Road to Emission-free Mobility“ steht für unser Engagement. Unser Ziel ist es, Verbrauch und Emissionen unserer Fahrzeuge bereits heute deutlich zu reduzieren und langfristig ganz zu vermeiden. Dafür entwickeln wir ein breites Spektrum modernster Antriebstechnologien, das die spezifischen Anforderungen an die Mobilität von heute und morgen in allen Sparten des Straßenverkehrs erfüllt.

Unser Kurs ist konsequent: Alle relevanten Technologien – von den CDI- und BlueTec-Dieseln über die Benzindirekteinspritzung (CGI) und die Hybridisierung bis hin zum Elektroantrieb mit Batterie und Brennstoffzelle – wurden weiterentwickelt und sind zum Teil bereits vor Jahren in die Serienfertigung eingeflossen. Schon heute bieten wir wirkungsvolle Technologien für noch mehr Effizienz, Umweltverträglichkeit und Sicherheit. Und: Gestützt auf konkrete

Forschungsergebnisse und die Erfahrung aus erfolgreichen Großprojekten haben wir Voraussetzungen für das lokal emissionsfreie Fahren geschaffen.

**Unsere Lösung heißt intelligenter Antriebsmix. Kein anderer Premiumautomobilhersteller verfügt in Summe über so gute Voraussetzungen wie wir, um die gesamte Bandbreite an nachhaltiger Mobilität zu erfüllen.**

**Für eine mobile Zukunft: Daimler initiiert Infrastruktur- und Mobilitätsinitiativen.** Auch die Erprobung von alternativen Kraftstoffen und die Entwicklung einer geeigneten Infrastruktur gewinnen an Bedeutung. Ob Stromladestationen oder Wasserstofftankstellen, intelligente Verkehrsführung und Telematik – Daimler initiiert und begleitet aktiv Modellversuche und Pilotprojekte für eine mobile nachhaltige Zukunft. Beispielhaft dafür steht das Projekt „e-mobility Berlin“, das die Rahmenbedingungen für emissionsfreies Fahren mit batterieelektrischen Antrieben schafft. Ähnliche „e-mobility“-Projekte wird Daimler 2010 in Rom, Mailand und Pisa durchführen. Auch haben wir mit car2go im Jahr 2008 ein innovatives Mobilitätskonzept gestartet,

**Daimler orientiert sich an der Vielfalt der mobilen Anforderungen. Unsere Antwort: eine bislang einmalige Produktvielfalt, mit der wir konsequent mehrspurig in die Zukunft fahren.**

das eine neue, flexible und umweltverträgliche Art des Autofahrens in der Stadt ermöglicht: immer und überall einfach einsteigen und losfahren. Eine Fahrzeugflotte steht in Ulm zur Verfügung – jeden Tag, rund um die Uhr und in minutengenaue Abrechnung –, Tanken, Parken und Reinigung inklusive. Das innovative Mobilitätskonzept car2go startete Ende 2009 auch international in Austin, Texas.

**Mit der Initiative „H2-Mobility“ zur Wasserstoffinfrastruktur.** Im September 2009 haben sich führende Industrieunternehmen über den Aufbau einer flächendeckenden Infrastruktur zur Versorgung mit Wasserstoff in Deutschland verständigt. Gemeinsame Absicht von Daimler, EnBW, Linde, OMV, Shell, Total, Vattenfall und der Nationalen Organisation für Wasserstoff- und Brennstoffzellentechnologie NOW ist es, die Serienfertigung von Elektrofahrzeugen mit Brennstoffzelle voranzutreiben. Das Memorandum geht auf eine Initiative von Daimler und Linde zurück, die sich den Aufbau eines flächendeckenden Wasserstofftankstellennetzes zum Ziel gesetzt hat.

**Daimler ist weltweit der erste Automobilhersteller, der Batterien für die automobile Anwendung selbst entwickelt und ab 2012 auch produziert.**

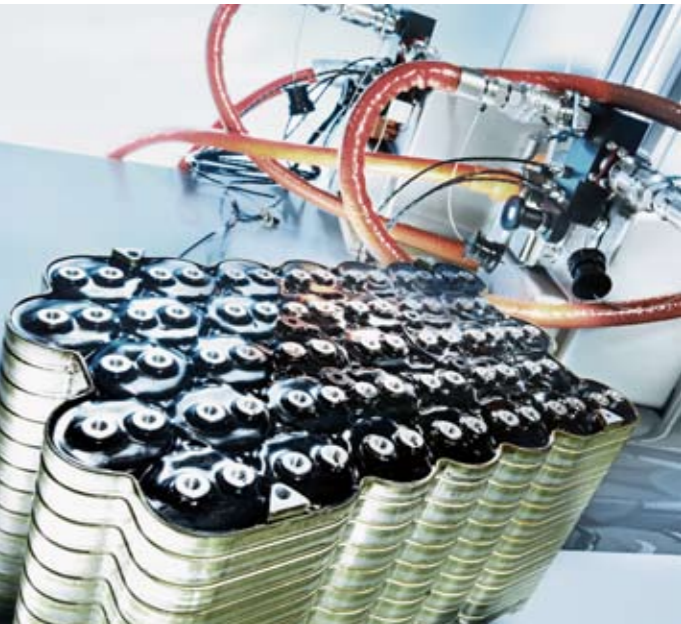

## Der Weg zur emissionsfreien Mobilität

|                                                                                             |                                                                                                                                                                                                                                                                                                                                                                                                                                                                                                                     |
|---------------------------------------------------------------------------------------------|---------------------------------------------------------------------------------------------------------------------------------------------------------------------------------------------------------------------------------------------------------------------------------------------------------------------------------------------------------------------------------------------------------------------------------------------------------------------------------------------------------------------|
| <b>Effiziente Fahrzeuge mit optimierten Verbrennungsmotoren.</b>                            | Im Fernverkehr werden Otto- und Dieselmotoren noch lange Zeit das Rückgrat der Mobilität bilden. Unser erster Baustein für nachhaltige Mobilität sind optimierte, besonders energieeffiziente Fahrzeuge mit Verbrennungsmotoren – für deutlich weniger Verbrauch und Emissionen. Zudem engagieren wir uns bei der Entwicklung von sauberen und alternativen Kraftstoffen.                                                                                                                                           |
| <b>Weitere Effizienzsteigerung durch Hybridisierung.</b>                                    | Zusätzliches Potenzial bietet die „Elektrifizierung“ des Automobils. Deshalb setzen wir bei unserem zweiten Baustein auf die bedarfsgerechte Hybridisierung des Antriebs. Dafür haben wir einen modularen Hybrid-Systembaukasten entwickelt, der in puncto Leistung und Einsatzspektrum vielfältige Ausbaumöglichkeiten bietet – und damit technisch und wirtschaftlich neue Maßstäbe setzt.                                                                                                                        |
| <b>Lokal emissionsfreies Fahren mit Elektrofahrzeugen mit Batterie und Brennstoffzelle.</b> | Emissionsfreies Fahren mit Brennstoffzellen- und Batteriefahrzeugen ist das dritte Element unserer Antriebsstrategie. Den Weg dorthin haben wir mit unserer Pionierarbeit vor allem im Bereich der Brennstoffzellentechnologie geebnet. Voraussetzung für die konsequente Elektrifizierung des Antriebs ist eine leistungsfähige, sichere und bezahlbare Batterietechnologie. Deshalb entwickeln, produzieren und vertreiben wir zukünftig als erster Automobilhersteller modernste Lithium-Ionen-Batterien selbst. |

**Die Daimler Mobilitätsinitiativen gehen mit der Entwicklung einer geeigneten Infrastruktur Hand in Hand. Mit der Initiative „H2-Mobility“ treibt Daimler den flächendeckenden Aufbau von Wasserstofftankstellen voran.**

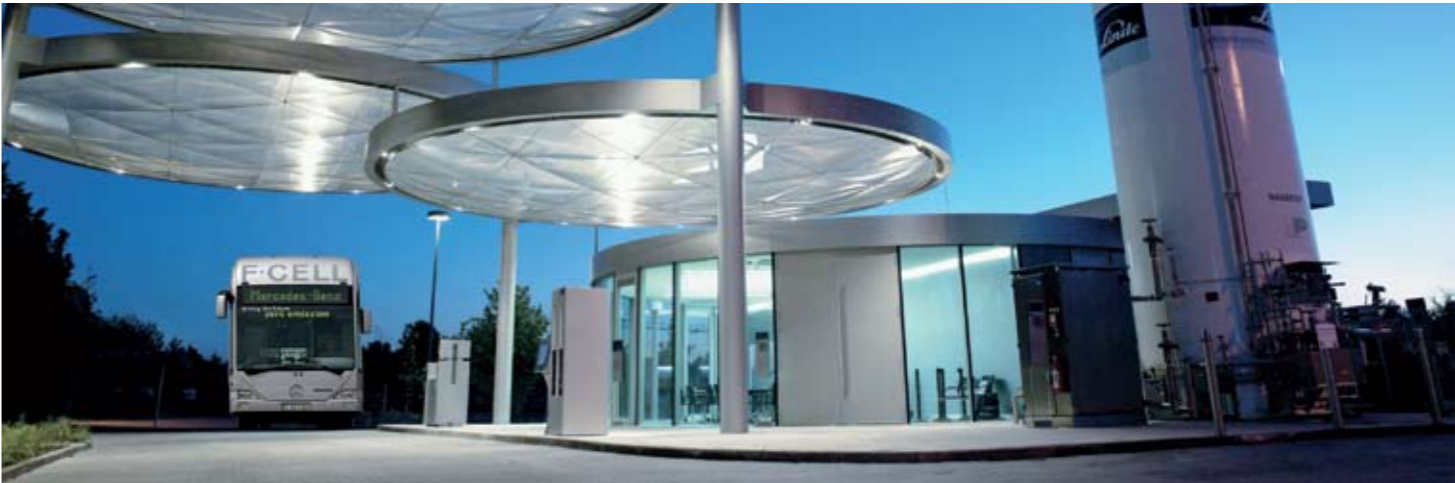

**Energieeffiziente Verbrennungsmotoren.** 100 moderne Fahrzeuge verursachen im Schnitt weniger Emissionen als ein einziges Auto aus den 1970er-Jahren. Seitdem wurde auch der Dieselsonsum von schweren Nutzfahrzeugen um ein Drittel reduziert. Zwei Beispiele, die belegen, wie erfolgreich Effizienzmaßnahmen im klassischen Antriebssegment ausfallen. Damit nicht genug. Der Schlüssel zu mehr Effizienz und Umweltverträglichkeit liegt in der Elektrifizierung des Antriebs. Das Potenzial ist groß: Es reicht von den Nebenaggregaten über die Start-Stopp-Funktion bis hin zur Hybridisierung. Dafür hat Daimler einen modularen Hybrid-Systembaukasten entwickelt, auf dessen Basis alle Varianten des Hybridantriebs realisiert werden können: vom Start-Stopp-System über Rekuperation- und Boosterfunktion bis hin zum rein elektrischen Fahren. Eine weitere Option ist der Plug-in HYBRID, bei dem die Batterie zur Steigerung der „elektrischen“ Reichweite an der Steckdose aufgeladen werden kann. Der Mercedes-Benz S 400 HYBRID beispielsweise ist das erste europäische Hybridmodell mit Lithium-Ionen-Batterie der

Luxusklasse. Mit der Kombination von einem weiterentwickelten V6-Motor und einem kompakten Hybridmodul erreicht es den unter mit Benzin angetriebenen Fahrzeugen dieser Klasse niedrigsten CO<sub>2</sub>-Ausstoß von nur 186 Gramm pro Kilometer.

**Effizienzpaket BlueEFFICIENCY in allen Pkw-Baureihen.** Maßnahmen zur Kraftstoffeinsparung bei Benzin- und Diesel-Pkw fasst Daimler in den BlueEFFICIENCY-Paketen zusammen, die bis Ende 2010 in 85 Fahrzeugen von Mercedes-Benz erhältlich sind.

**Daimler Trucks-Initiative „Shaping Future Transportation“.** Mit den „CleanDrive-Technologies“ gestaltet der Nutzfahrzeugbereich von Daimler die Zukunft der Mobilität. Ob Abgasreinigung mit BlueTec und SCR-Katalysator, Fahren mit Erdgasantrieb oder Flottentests mit Hybrid-Bussen und -Lkw: Daimler agiert an der Spitze der Bewegung hin zum emissionsfreien Fahren im Güter- und Personentransport.

Die Mercedes-Benz BlueEFFICIENCY-Flotte wird bis Ende 2010 auf 85 Modelle wachsen.

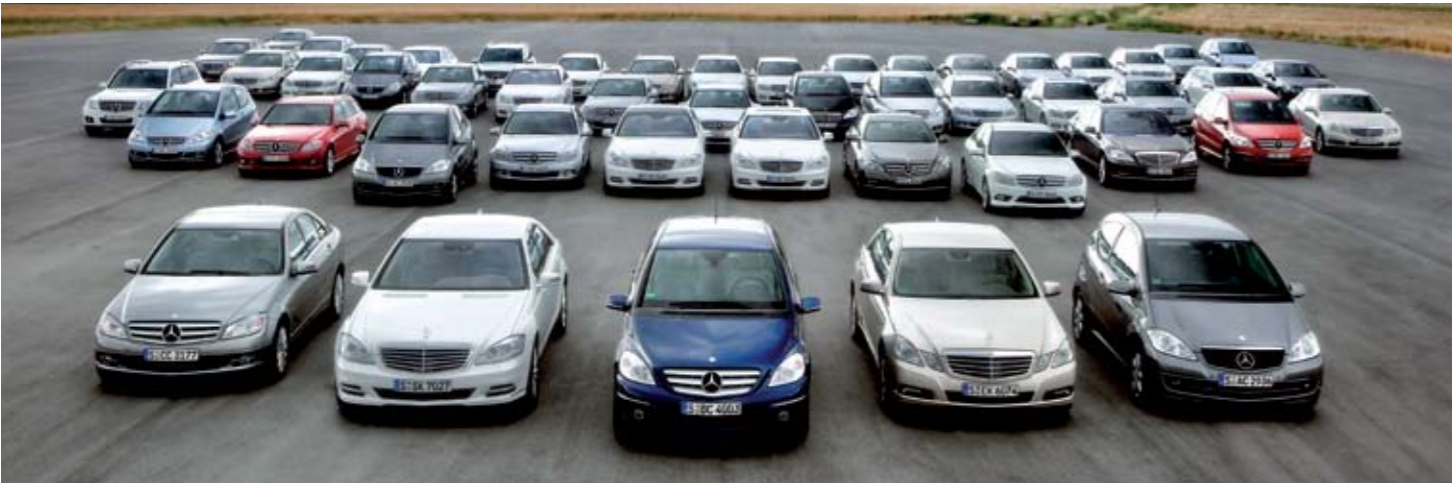

Verbrennungsmotoren bleiben noch lange das Rückgrat der Mobilität. Deren Effizienz ist entscheidend für die bedarfsgerechte Hybridisierung.

**Bedarfsgerechte Hybridisierung.** Mit dem Mercedes-Benz S 400 HYBRID bieten wir als erster europäischer Hersteller einen Hybrid-Pkw der Luxusklasse in Großserie. Der Technologieträger Mercedes-Benz Vision S 500 Plug-in HYBRID weist den Weg in die Zukunft: Mit einem zertifizierten Verbrauch von nur 3,2 Liter Benzin pro 100 Kilometer und einer rein elektrischen Reichweite von 30 Kilometern bietet er grüne Technologie in einem faszinierenden Fahrzeug.

Der modulare Hybrid-Systembaukasten erschließt auch viele Einsatzmöglichkeiten in Nutzfahrzeugen. Kein Hersteller bietet mehr Fahrzeuge mit Hybridantrieb. Mit rund 2.700 Orion-Hybridbussen auf den Straßen Nordamerikas, mehr als 550 Freightliner-Fahrzeugen sowie circa 800 leichten Lkw und Bussen von Fuso ist Daimler hier Weltmarktführer. Rund 30 Mercedes-Benz Diesel-Hybridbusse werden ab 2010 im Alltagsbetrieb in Europa eingesetzt.

**Zukunftsweisend: Der Technologieträger Mercedes-Benz Vision S 500 Plug-in HYBRID zeigt die Zukunft des modularen Hybrid-Systembaukastens und ist das erste Oberklassemodell in der Kategorie „Dreiliterauto“.**

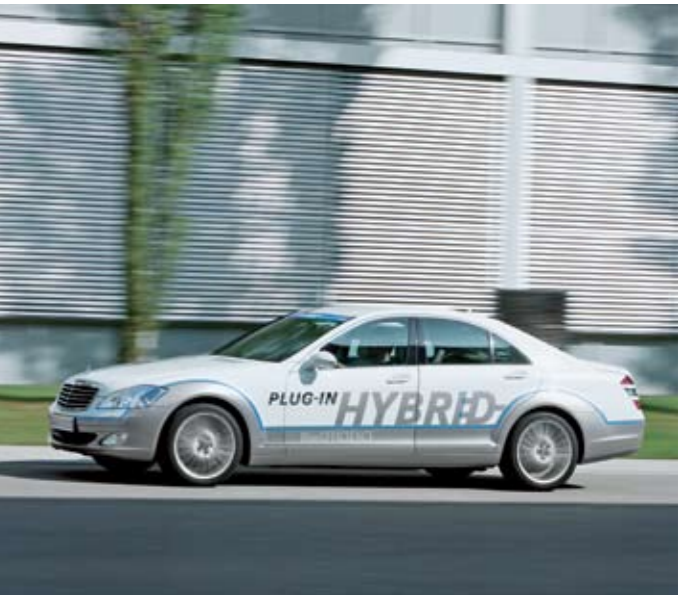

Auf dem Weg zum emissionsfreien Fahren steht Daimler mit der Initiative „Shaping Future Transportation“ auch im Nutzfahrzeugbereich an der Spitze.

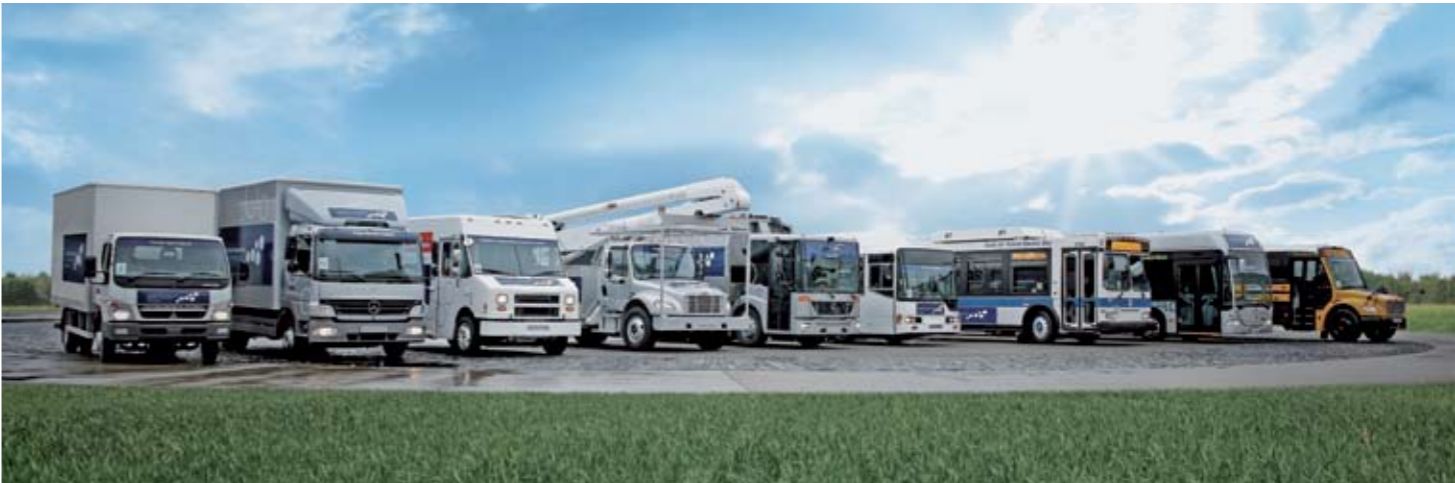

# Elektrofahrzeuge mit Batterie- und Brennstoffzellenantrieb leisten einen wichtigen Beitrag zur nachhaltigen Mobilität. Im urbanen Umfeld sind sie in Kleinserie bereits Realität.

**Lokal emissionsfreies Fahren.** Die Zukunft hat begonnen: Zahlreiche Elektro- und Brennstoffzellen-Versuchsfahrzeuge haben sich in Feldtests bewährt. Der Nachweis für die technische Machbarkeit ist erbracht – etwa mit 100 Elektro-smarts in London. Jetzt geht es in die Serie. Als erster Automobilhersteller fahren wir schon 2010 mit drei serienreifen Modellen ins emissionsfreie Zeitalter. Neu ist die Mercedes-Benz A-Klasse E-CELL. Sie ergänzt ab Oktober 2010 das Angebot von Mercedes-Benz Cars an rein elektrisch angetriebenen Fahrzeugen. Dazu zählt bereits der smart fortwo electric drive, Pionier bei batterieelektrischen Fahrzeugen, der schon seit November 2009 vom Band läuft. Ebenfalls begonnen hat die Serienproduktion der mit Brennstoffzelle ausgerüsteten Mercedes-Benz B-Klasse F-CELL.

**Im Zeichen der Elektromobilität.** Die neue Mercedes-Benz A-Klasse E-CELL ist wie auch der smart electric drive und die Mercedes-Benz B-Klasse F-CELL mit einer hoch effizienten Lithium-Ionen-Batterie ausgerüstet. Während der smart eine überzeugende Reichweite von 135 Kilometern erzielt, erreicht die Mercedes-Benz A-Klasse mit 200 Kilometern eine Bestmarke in ihrem Segment. Die Mercedes-Benz B-Klasse F-CELL führt ihren Treibstoff mit an Bord und eignet sich mit einer Reichweite von rund 400 Kilometern sowohl für das emissionsfreie Fahren im Stadtverkehr als auch für größere Distanzen im Überlandverkehr. Ihre Tanks können innerhalb von nur rund drei Minuten mit gasförmigem Wasserstoff über die bereits weltweit standardisierte Zapfvorrichtung voll gefüllt werden. Im Bereich Nutzfahrzeuge startet 2010 die Kundenerprobung des

Drei Elektrofahrzeuge mit Batterie oder Brennstoffzelle weisen den Weg in die Zukunft: der smart fortwo electric drive, die Mercedes-Benz A-Klasse E-CELL und die Mercedes-Benz B-Klasse F-CELL.

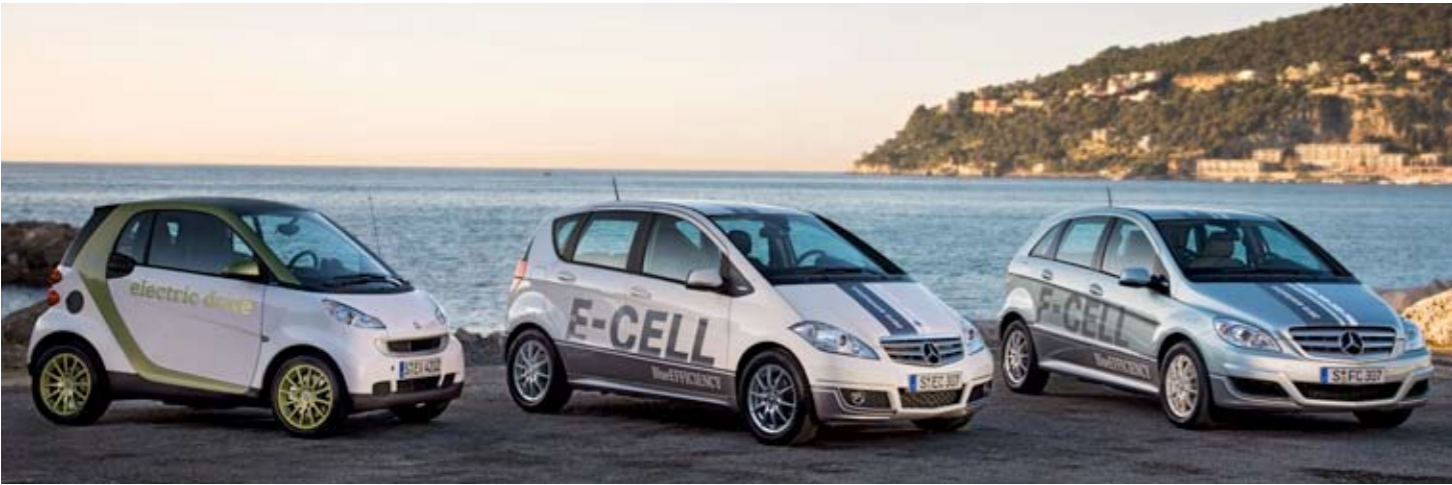

Unser Ziel: Fahrzeugemissionen bereits heute spürbar zu reduzieren und langfristig im privaten wie im öffentlichen Straßenverkehr durch modernste Antriebstechnik komplett zu vermeiden.

abgasfreien Stadtbusses Citaro FuelCELL-Hybrid. Auch der batteriebetriebene Mercedes-Benz E-Vito wird 2010 in die erste Kleinserie gehen. Aber noch gibt es eine Reihe von Herausforderungen, die Elektromobile daran hindern, schon morgen den Alltag zu bestimmen: etwa größere Reichweite und Leistung, Systemkosten und Infrastruktur.

**Herzstück für die künftige konsequente Elektrifizierung des Antriebs ist die Batterie.** Deshalb entwickelt Daimler modernste Lithium-Ionen-Batterien und ist damit weltweit der erste Automobilhersteller, der Batterien für automobiler Anwendungen selbst entwickelt und ab 2012 auch produziert und vertreibt. Mehr als 600 Patente zu batteriegetriebenen Fahrzeugen hat das Unternehmen in den letzten 30 Jahren bereits angemeldet – davon über 230 auf dem Gebiet der Lithium-Ionen-Technologie. Diese Batterietechnologie kommt auch in Brennstoffzellenfahrzeugen zum Einsatz. Seit 1994 forscht Daimler in diesem Bereich und hat mit 180 Patenten seine Pionierrolle eindrücklich unter Beweis gestellt.

**Flottentests weisen den Weg: Zehn Fuso Canter Eco Hybrid sind drei Jahre lang in London auf Erprobungsfahrt.**

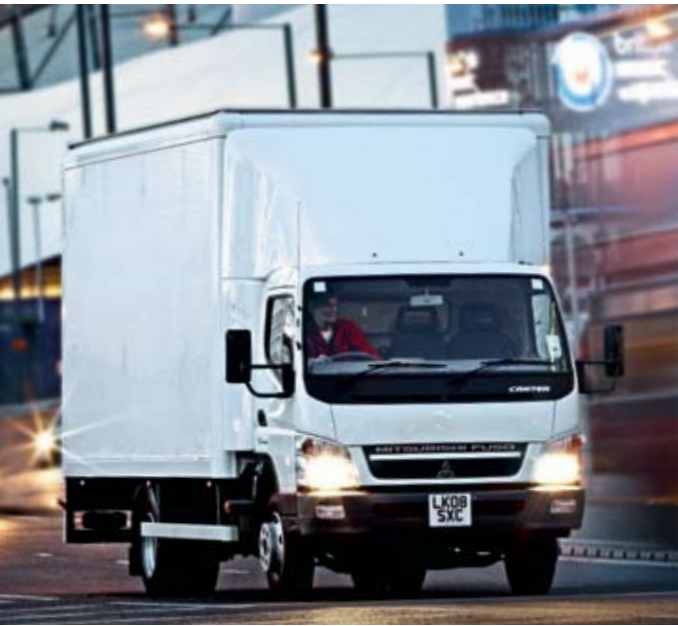

Im Nutzfahrzeugbereich gehen der abgasfreie Stadtbuss Citaro FuelCELL-Hybrid und der batteriebetriebene Mercedes-Benz E-Vito 2010 in die Kundenerprobung.

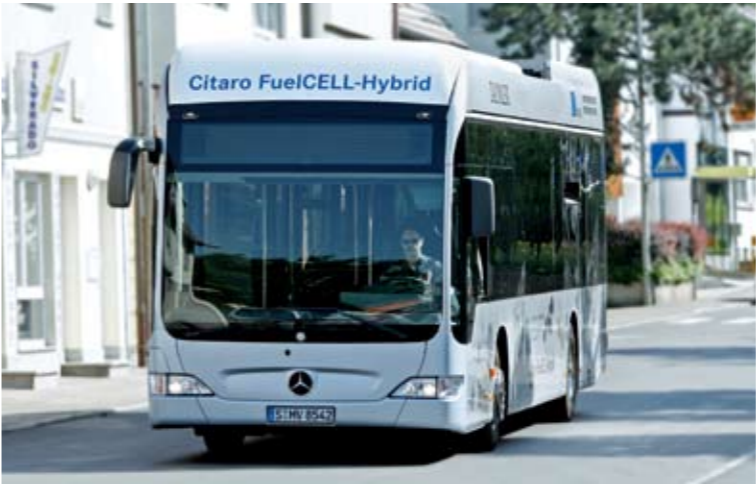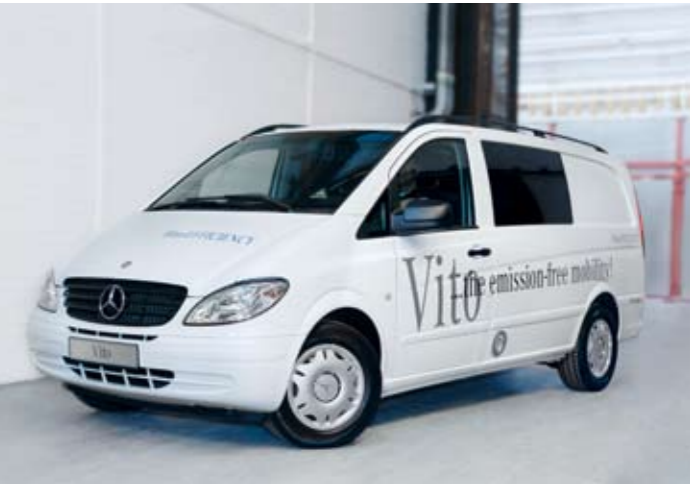

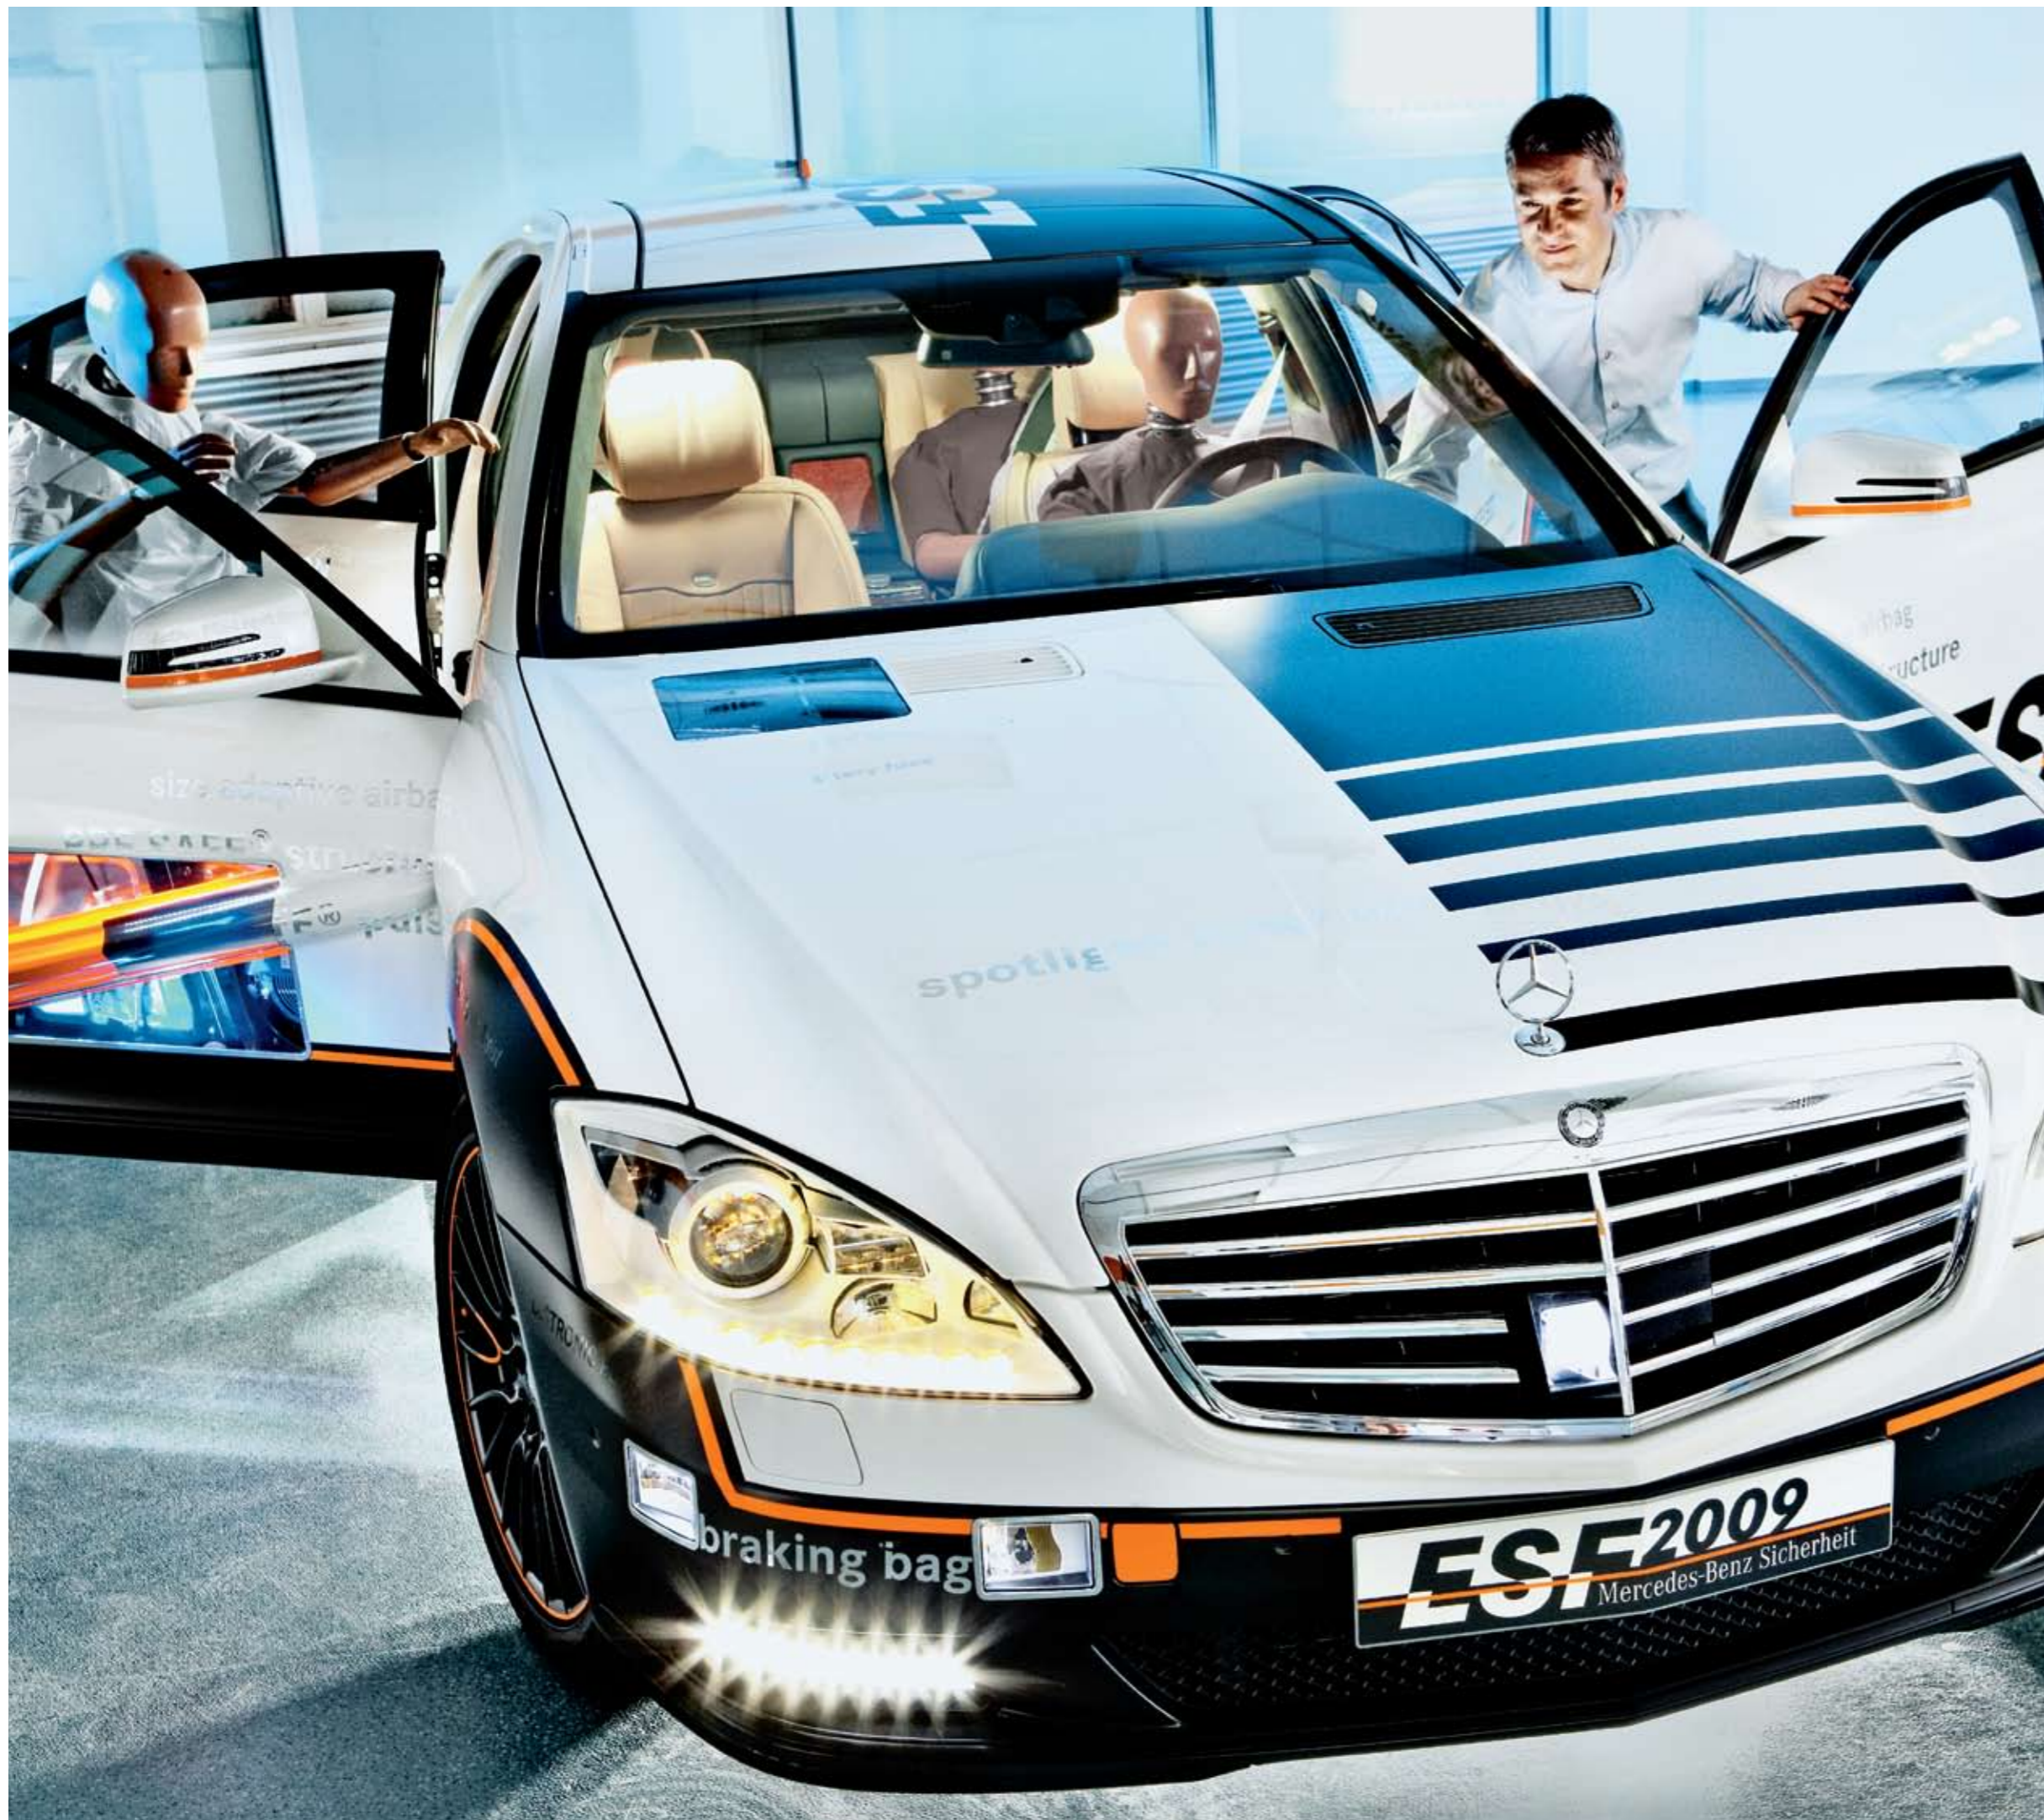

## Die Vision vom unfallfreien Fahren.

Seit vielen Jahrzehnten arbeitet Daimler an der **Optimierung der Automobilsicherheit**. Bis heute haben wir eine Vielzahl von Technologien und Systemen auf den Markt gebracht, die die Sicherheit in allen Fahrzeugen von Daimler, ob Pkw oder Nutzfahrzeug, nachweislich erhöhen. Viele dieser Systeme sind mit der Zeit auch von anderen Herstellern übernommen worden. Dadurch ließen sich zahlreiche Unfälle vermeiden oder deren Folgen mindern. Die Daimler Sicherheitslösungen kommen somit allen Verkehrsteilnehmern zugute. Doch das Thema ist für uns damit nicht abgeschlossen. Die Forschung geht trotz aller bisherigen Erfolge weiter, um der „Vision vom unfallfreien Fahren“ immer näher zu kommen.

# Von der ersten Knautschzone bis zum Fahrzeug als mitdenkender Partner. Daimler war und ist Vorreiter bei Entwicklungen der Fahrzeugsicherheit.

5,5 Milliarden Menschen sind täglich weltweit am Verkehrsgeschehen beteiligt. Für sie wollen wir die Mobilität der Zukunft so sicher wie möglich gestalten. Als Pionier in Sachen Sicherheit verfolgen wir dabei unsere Vision vom unfallfreien Fahren.

Als Vordenker der Passiven Sicherheit prägte Béla Barényi in den 1950er- Jahren bei Daimler die Vision des unfallfreien Fahrens. Ein Ergebnis war die „gestaltfeste Fahrgastzelle“ mit Knautschzonen, die 1959 in der S-Klasse debütierte. Ähnlich richtungsweisend war ab 1978 das Anti-Blockiersystem, 1981 der Airbag und die erste elektronische Stabilitätsregelung (ESP), mit der seit 1999 alle Mercedes-Benz Pkw serienmäßig ausgestattet sind. Beeindrucken des Ergebnis dieser Sicherheitsinnovationen: Die Unfallstatistik wies im Jahr 2008 nur noch ein Drittel der Unfalldoten von 1953 aus – und das, obwohl sich die Anzahl der Fahrzeuge auf Deutschlands Straßen seitdem verdreifacht hat.

Verkehrssicherheit ist eine ganzheitliche Aufgabe. Alle Verkehrsteilnehmer in allen Situationen zu schützen und zu unterstützen ist das Ziel der Integralen Sicherheitsphilosophie von Daimler. Bei der Entwicklung aktiver Sicherheitssysteme

zur Gefahrenvermeidung und bei Systemen zur Unfallfolgenminderung orientieren wir uns im Sinne der „Real Life Safety“-Philosophie am realen Unfallgeschehen. Seit 1969 untersuchen wir Unfälle auf deutschen Straßen. Diese Erkenntnisse geben wichtige Impulse für die Entwicklung neuer Sicherheitstechnologien. Durch deren Einsatz ist die Anzahl der in Deutschland häufigsten Unfallarten – Unfälle im Kreuzungsbereich, Auffahrunfälle und Abkommen von der Fahrbahn – deutlich gesunken. Sollte der schlimmste Fall dennoch eintreten, helfen Warn- und Sicherheitssysteme, Folgeunfälle zu verhindern. Speziell entwickelte Rettungsleitfäden unterstützen Feuerwehr und Rettungsdienste bei der schnellen Bergung der Insassen.

Partnerschutz ist ein weiterer wichtiger Bestandteil der Sicherheitsphilosophie. Seit Jahren entwickeln Ingenieure bei Daimler Technologien, die Fußgängern und Radfahrern mehr Schutz bei Unfällen bieten. Glattflächige Karosserien, energieabsorbierende Stoßfänger sowie der Unterfahrschutz beim Lkw sind hier nur einige Beispiele.

Passive Sicherheit für Insassen und andere Verkehrsteilnehmer. Die Weiterentwicklung der Knautschzone sorgt nach wie vor für den sicheren Fahrzeuginnenraum. Adaptive Airbags, Gurtstraffer und Gurtkraftbegrenzer sowie sensorgesteuerte crashaktive NECK-Pro-Kopfstützen leisten ein Übriges, um Fahrzeuginsassen zu schützen.

Serienmäßig in allen Mercedes-Benz Pkw ist heute auch das präventive Insassenschutzsystem PRE-SAFE®, eine einzigartige Synergie von Aktiver und Passiver Sicherheit. Erkennt das System anhand von Sensorinformationen eine unfallkritische Situation, aktiviert es reflexartig Schutzmaßnahmen für die Insassen. So können Gurte und Airbags beim Aufprall ihre volle Schutzwirkung entfalten. Einzigartige Sicherheit für Fahrer und Begleiter bei einem Frontalaufprall im Omnibus erreicht das System Front Collision Guard (FCG), serienmäßig eingesetzt in den Reisebussen Mercedes-Benz Travego und Setra TopClass 400.

Aktive Sicherheit, die den Fahrer in allen Situationen unterstützt. Das Zusammenspiel moderner Radar- und Bremstechnik verhindert rund 36 Prozent aller Auffahrunfälle auf Autobahnen. Daimler baut ganz bewusst auf Radar zur Erkennung des Fahrzeugumfeldes, unter

anderem weil er bei fast allen Witterungsverhältnissen einsetzbar und wenig stör anfällig ist. Beispiele für radargestützte Sicherheitssysteme sind der Abstandsregelautomat DISTRONIC PLUS, der Bremsassistent PLUS und die PRE-SAFE® Bremse im Pkw sowie der Totwinkel-Assistent, der Active Brake Assist und der Abstandsregel-Tempomat im Lkw und Reisebus.

Rund jeder sechste Unfall in Deutschland passiert, weil das Auto von der Fahrbahn abkommt. Der Spurhalte-Assistent im Pkw, das Lane Departure Warning im Lkw sowie der Spurassistent (SPA) im Bus schaffen Abhilfe. Für bessere Sicht sorgt der adaptive Fernlicht-Assistent im Pkw. Seine Kamera erfasst das Verkehrsgeschehen und kann dank eines intelligenten Bildverarbeitungsalgorithmus andere beleuchtete Fahrzeuge nicht nur erkennen, sondern auch deren Entfernung berechnen. Der Nachtsicht-Assistent PLUS im Pkw ist eine weitere Sicherheitsinnovation. Zwei separate Scheinwerfer beleuchten die Fahrbahn mit unsichtbarem, blendfreiem Infrarotlicht. Eine Kamera überträgt das Geschehen vor dem Auto auf ein Display im Fahrzeug. Radfahrer und Hindernisse werden als Graustufendarstellung angezeigt und Fußgänger aufgrund einer speziell entwickelten Fußgängerdetektion auf der Displayanzeige zusätzlich markiert.

## Die Vision vom unfallfreien Fahren – Real Life Safety

|                                                                                 |                                                        |                                                |                                                                     |
|---------------------------------------------------------------------------------|--------------------------------------------------------|------------------------------------------------|---------------------------------------------------------------------|
| <b>Sicher fahren:</b><br>Gefahren vermeiden, rechtzeitig warnen und assistieren | <b>Bei Gefahr:</b><br>vorbeugend agieren mit PRE-SAFE® | <b>Beim Unfall:</b><br>bedarfsgerecht schützen | <b>Nach dem Unfall:</b><br>Schlimmeres vermeiden und schnell helfen |
| Aktive Sicherheit                                                               |                                                        | Passive Sicherheit                             |                                                                     |

Mit der Vision vom unfallfreien Fahren orientiert sich Daimler seit über 40 Jahren am realen Unfallgeschehen. Die Erkenntnisse geben Impulse für die Entwicklung neuer Sicherheitstechnologien, die allen Marken von Daimler zugute kommen.

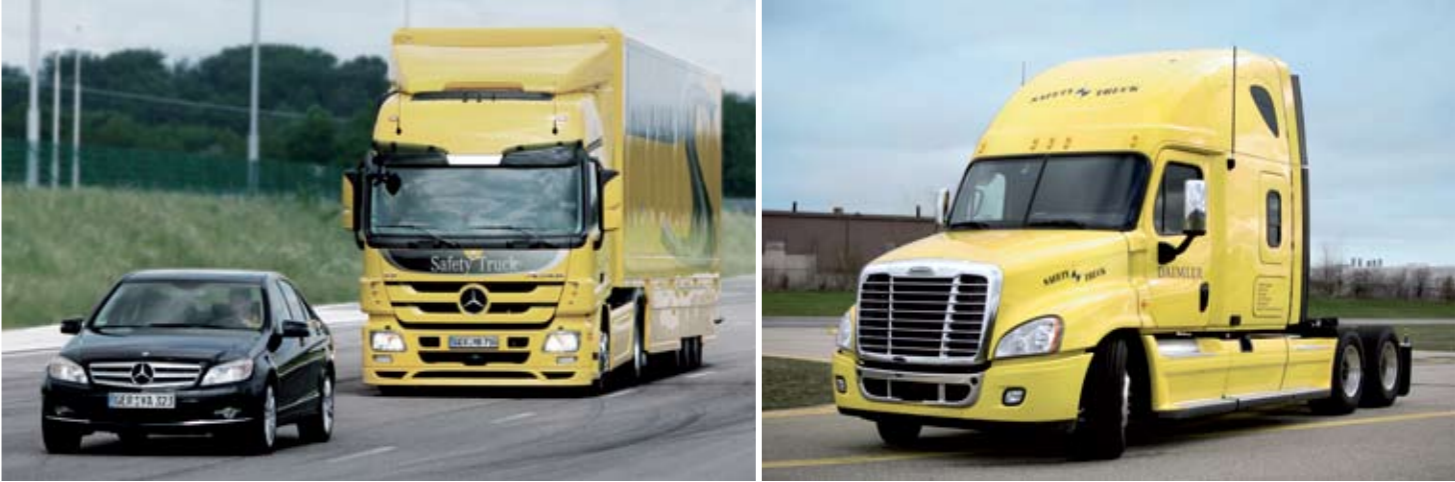

Unser Ziel: Den Fahrer fit halten, ihn entlasten und umfassend unterstützen.

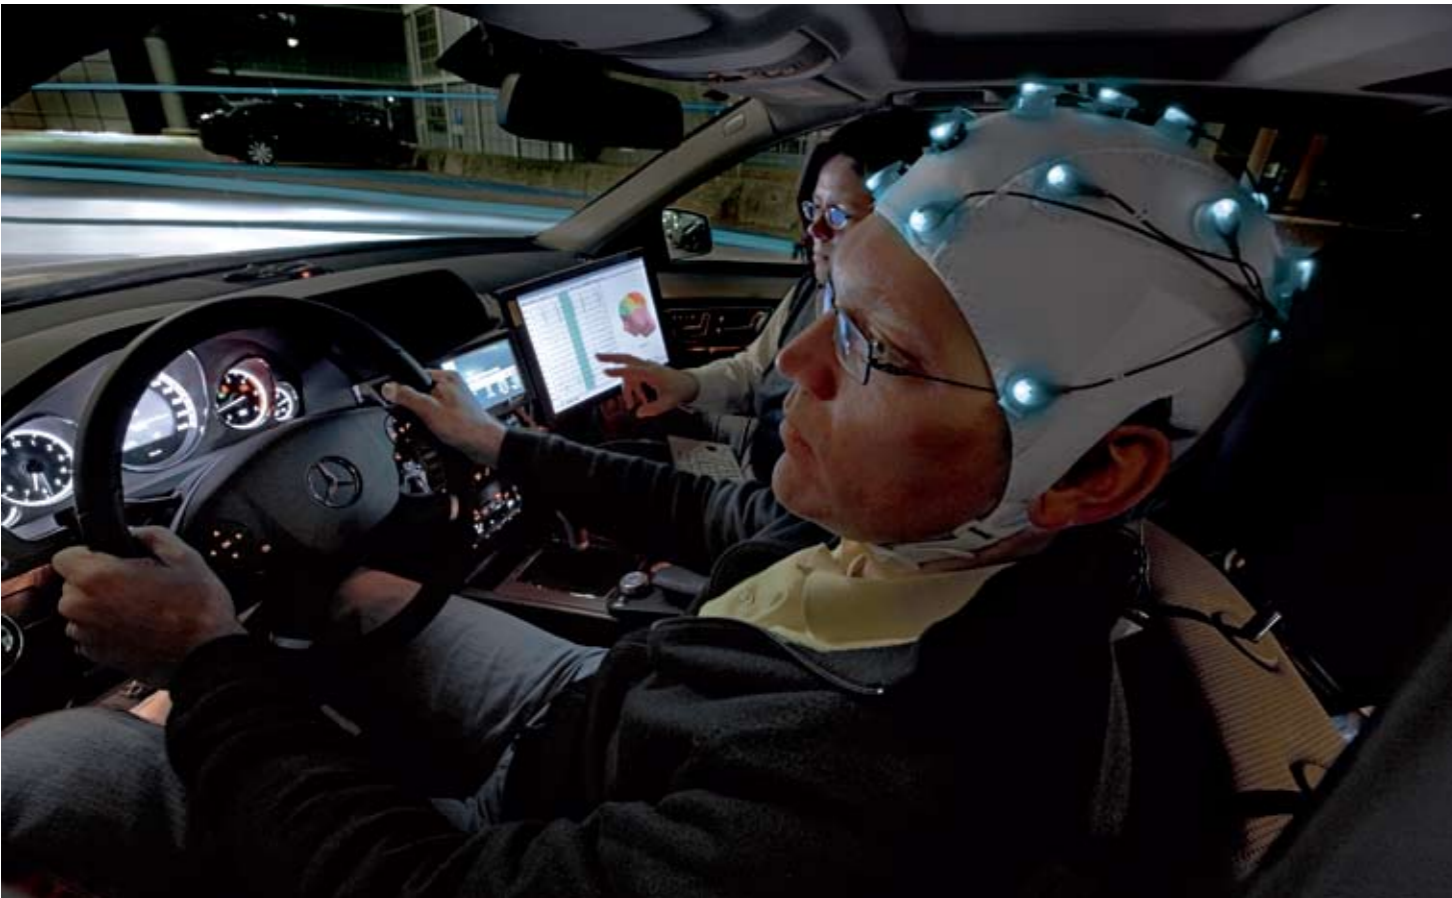

Ein wesentlicher Aspekt der „Vision vom unfallfreien Fahren“ ist die Fahrerfitness. Im rollenden Forschungslabor Mind-Lab untersuchen Daimler Wissenschaftler anhand neurophysiologischer Messungen das kognitive, unbewusste Fahrverhalten des Fahrers, um Assistenzsysteme weiter zu verbessern.

Mit radar- und kamerabasierten Assistenzsystemen verleiht Daimler dem Fahrzeug „Sinne“. Die Systeme reagieren vernetzt und tauschen aktiv Daten aus. Die „intelligenten“ Fahrzeuge werden zu „denkenden“ Partnern, die „sehen“, „fühlen“ und „selbstständig handeln“ können.

**Das Fahrzeug als intelligenter Partner.** Als weltweit einzige Automobilmarke bietet Daimler mit PRE-SAFE® und ATTENTION ASSIST Assistenzsysteme an, die „reflexartig“ und „intelligent“ handeln. Beide Systeme sind mit anderen des Fahrzeugs vernetzt und tauschen Daten aus. Aufgrund der Sensorinformationen von beispielsweise dem Bremskraftassistenten, dem elektronischen Stabilitätsprogramm ESP und DISTRONIC PLUS erkennen PRE-SAFE® und ATTENTION ASSIST die drohende Gefahr eines Unfalls frühzeitig und aktivieren sofort Schutzmaßnahmen für die Insassen. Eine weitere Innovation, die sich auch im neuen Mercedes-Benz Forschungsfahrzeug F 800 befindet, ist der Staufolgeassistent, eine aufgerüstete Version der Abstands- und Geschwindigkeitsregelung DISTRONIC PLUS.

**Der Fahrer bleibt in der Verantwortung.** Schon vor 15 Jahren hat Daimler den Leitbegriff „Konditionssicherheit“ als Teil der umfassenden Sicherheitsphilosophie des Unternehmens geprägt.

Konditionssicherheit beginnt bei der Maßkonzeption des Innenraums, umfasst alle Aspekte des Federungs-, Klima-, Sitz- und Geräuschkomforts und beinhaltet die Entwicklung intelligenter Assistenzsysteme, die während der Fahrt bestimmte Aufgaben übernehmen. Physiologische Messungen typischer Stressindikatoren und tiefenpsychologische Interviews der Fahrer vor und nach Testfahrten gehören ebenfalls dazu. Darüber hinaus ermöglichen an Bord eines rollenden Forschungslabors – des sogenannten Mind-Lab – auf neurophysiologischer Methodik basierende Messungen einen vom Fahrer nicht zu beeinflussenden Blick ins kognitive, unbewusste Fahrverhalten. Die Auswertungen aller Messungen helfen, Assistenzsysteme stetig zu verbessern. Aber trotz aller technischer Entwicklungen zur Unfallvermeidung: Letztlich sitzt immer ein Mensch am Steuer. Professionelle Fahr-sicherheitstrainings für Pkw- und Nutzfahrzeug-Fahrer sind daher eine weitere wichtige Ergänzung zur Unfallvermeidung.

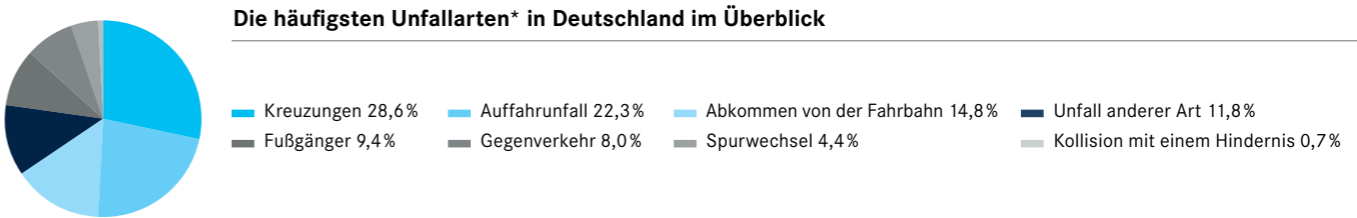

\*Unfälle mit Personenschäden gemäß deutscher Unfallstatistik 2007, Quelle: Statistisches Bundesamt

Ganzheitlich denken und handeln. Die Verkehrsteilnehmer in allen Situationen zu schützen und zu unterstützen, ist das Ziel der Integralen Sicherheitsphilosophie von Daimler.

**Das perfekte Zusammenspiel von Konditionssicherheit, Bediensicherheit, Assistenzsystemen und Fahrertraining dient einem Ziel: den Fahrer fit zu halten, ihn zu entlasten und umfassend zu unterstützen.**

**Blick in die Zukunft.** Eine Grundvoraussetzung für Verkehrssicherheit und Mobilität der Zukunft ist die gebündelte, zeitnahe und umfassende Information aller Verkehrsteilnehmer über Verkehrsfluss und Gefahrensituationen. Dies ist nur durch einen ganzheitlichen Ansatz zu erreichen. Die Herausforderung liegt für Daimler deshalb darin, innerhalb einer „intelligenten“ Verkehrsinfrastruktur mit-hilfe moderner Kommunikationssysteme Informationen aus dem

Fahrzeugumfeld mit innovativen Fahrerassistenzfunktionen zu verknüpfen. Dies ist nur durch intensive Zusammenarbeit mit anderen Automobilherstellern und Spezialisten aus den Bereichen Telekommunikation und Verkehrsmanagement möglich.

**Experimentieren für mehr Sicherheit.** Das Programm der Experimental-Sicherheits-Fahrzeuge (ESF) stammt aus den frühen 1970er- Jahren. In diesen Fahrzeugen entwickelte Daimler nahezu alle wesentlichen Systeme zur Verbesserung der Aktiven und Passiven Sicherheit. Auch das aktuelle ESF 2009 zeigt neue, unkonventionelle Ansatzpunkte zur Steigerung der Fahrzeugsicherheit und gibt einen detaillierten Einblick in die derzeitigen Entwicklungsprojekte.

**Partnerschutz steht bei der Daimler Sicherheitsphilosophie ganz vorn. Kamerabasierte Assistenzsysteme und umfangreiche Maßnahmen im Bereich Passive Sicherheit schützen die schwächsten Verkehrsteilnehmer.**

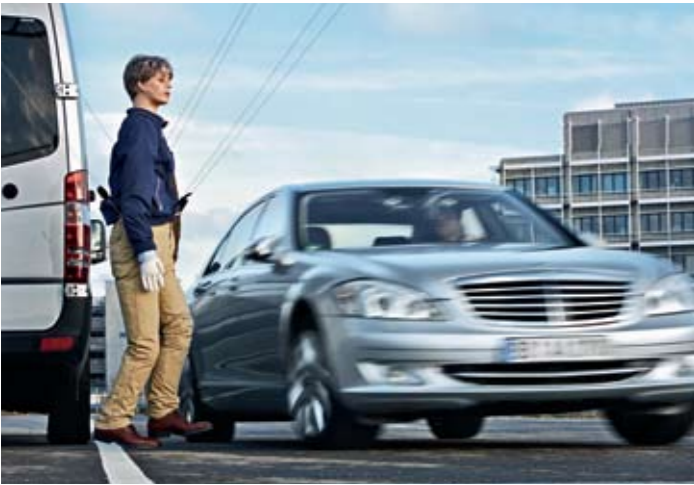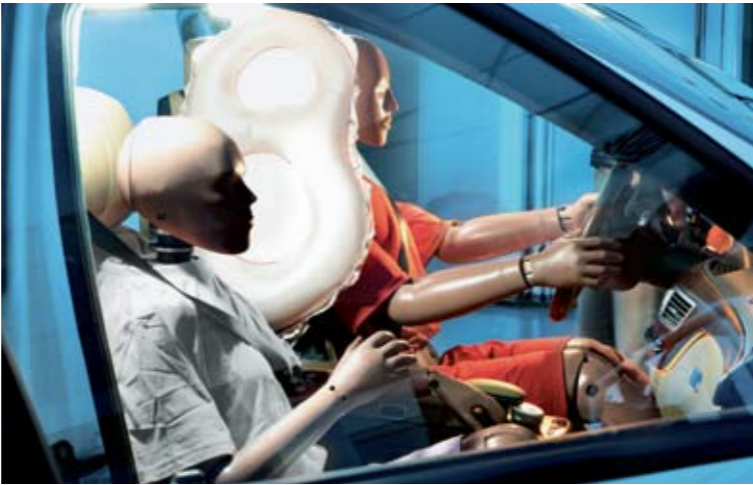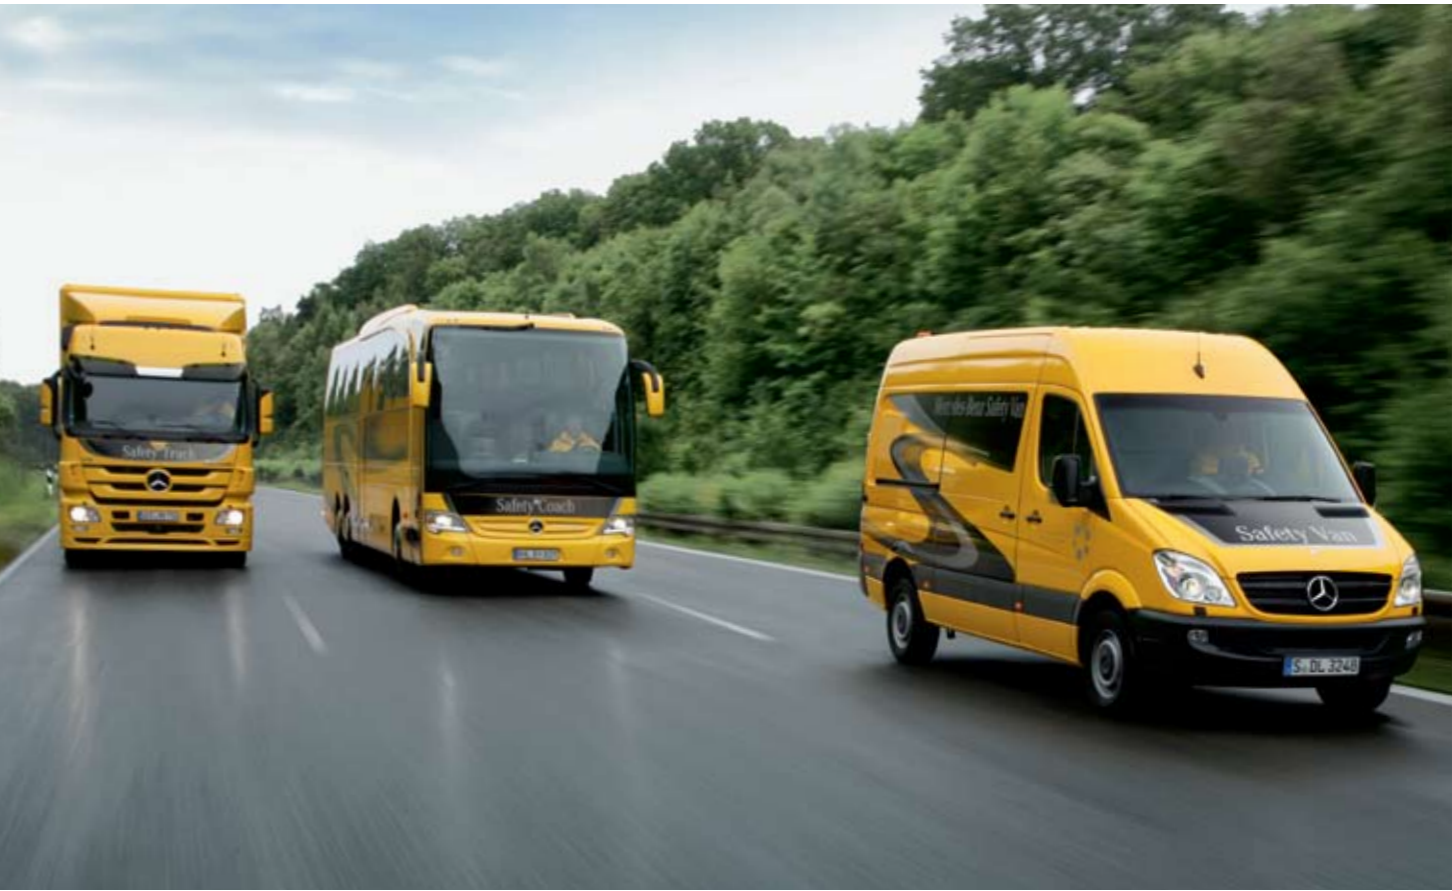

**Drei Nutzfahrzeuge der Marke Mercedes-Benz demonstrieren den neuesten Stand der Fahrsicherheitstechnologie:**

Der Safety Truck, ein Mercedes-Benz Actros, ist mit dem Notbremsassistenten Active Brake Assist ausgestattet. Er leitet im Bedarfsfall selbstständig eine Vollbremsung ein. Außerdem verfügt er unter anderem über eine Stabilitätsregelung für Lastzüge mit Anhänger sowie eine Rückfahrlilfe für das Rangieren mit Anhänger.

Bereits 2006 wurde der Premiumreisebus Mercedes-Benz Travego von Fachleuten als sicherster Reisebus der Welt bewertet. Das ist auch ein Verdienst von innovativen Technologien wie dem serienmäßig eingesetzten, einzigartigen System Front Collision Guard (FCG), das Fahrer und Begleiter im Falle eines Frontalaufpralls schützt.

Mit dem elektronischen Stabilitätsprogramm Adaptive ESP des Mercedes-Benz Sprinter Safety Vans lassen sich Waren und Personen noch sicherer transportieren. Das System verbessert nicht nur das Kurvenverhalten, sondern hilft auch, Wankbewegungen und Überschläge zu vermeiden.

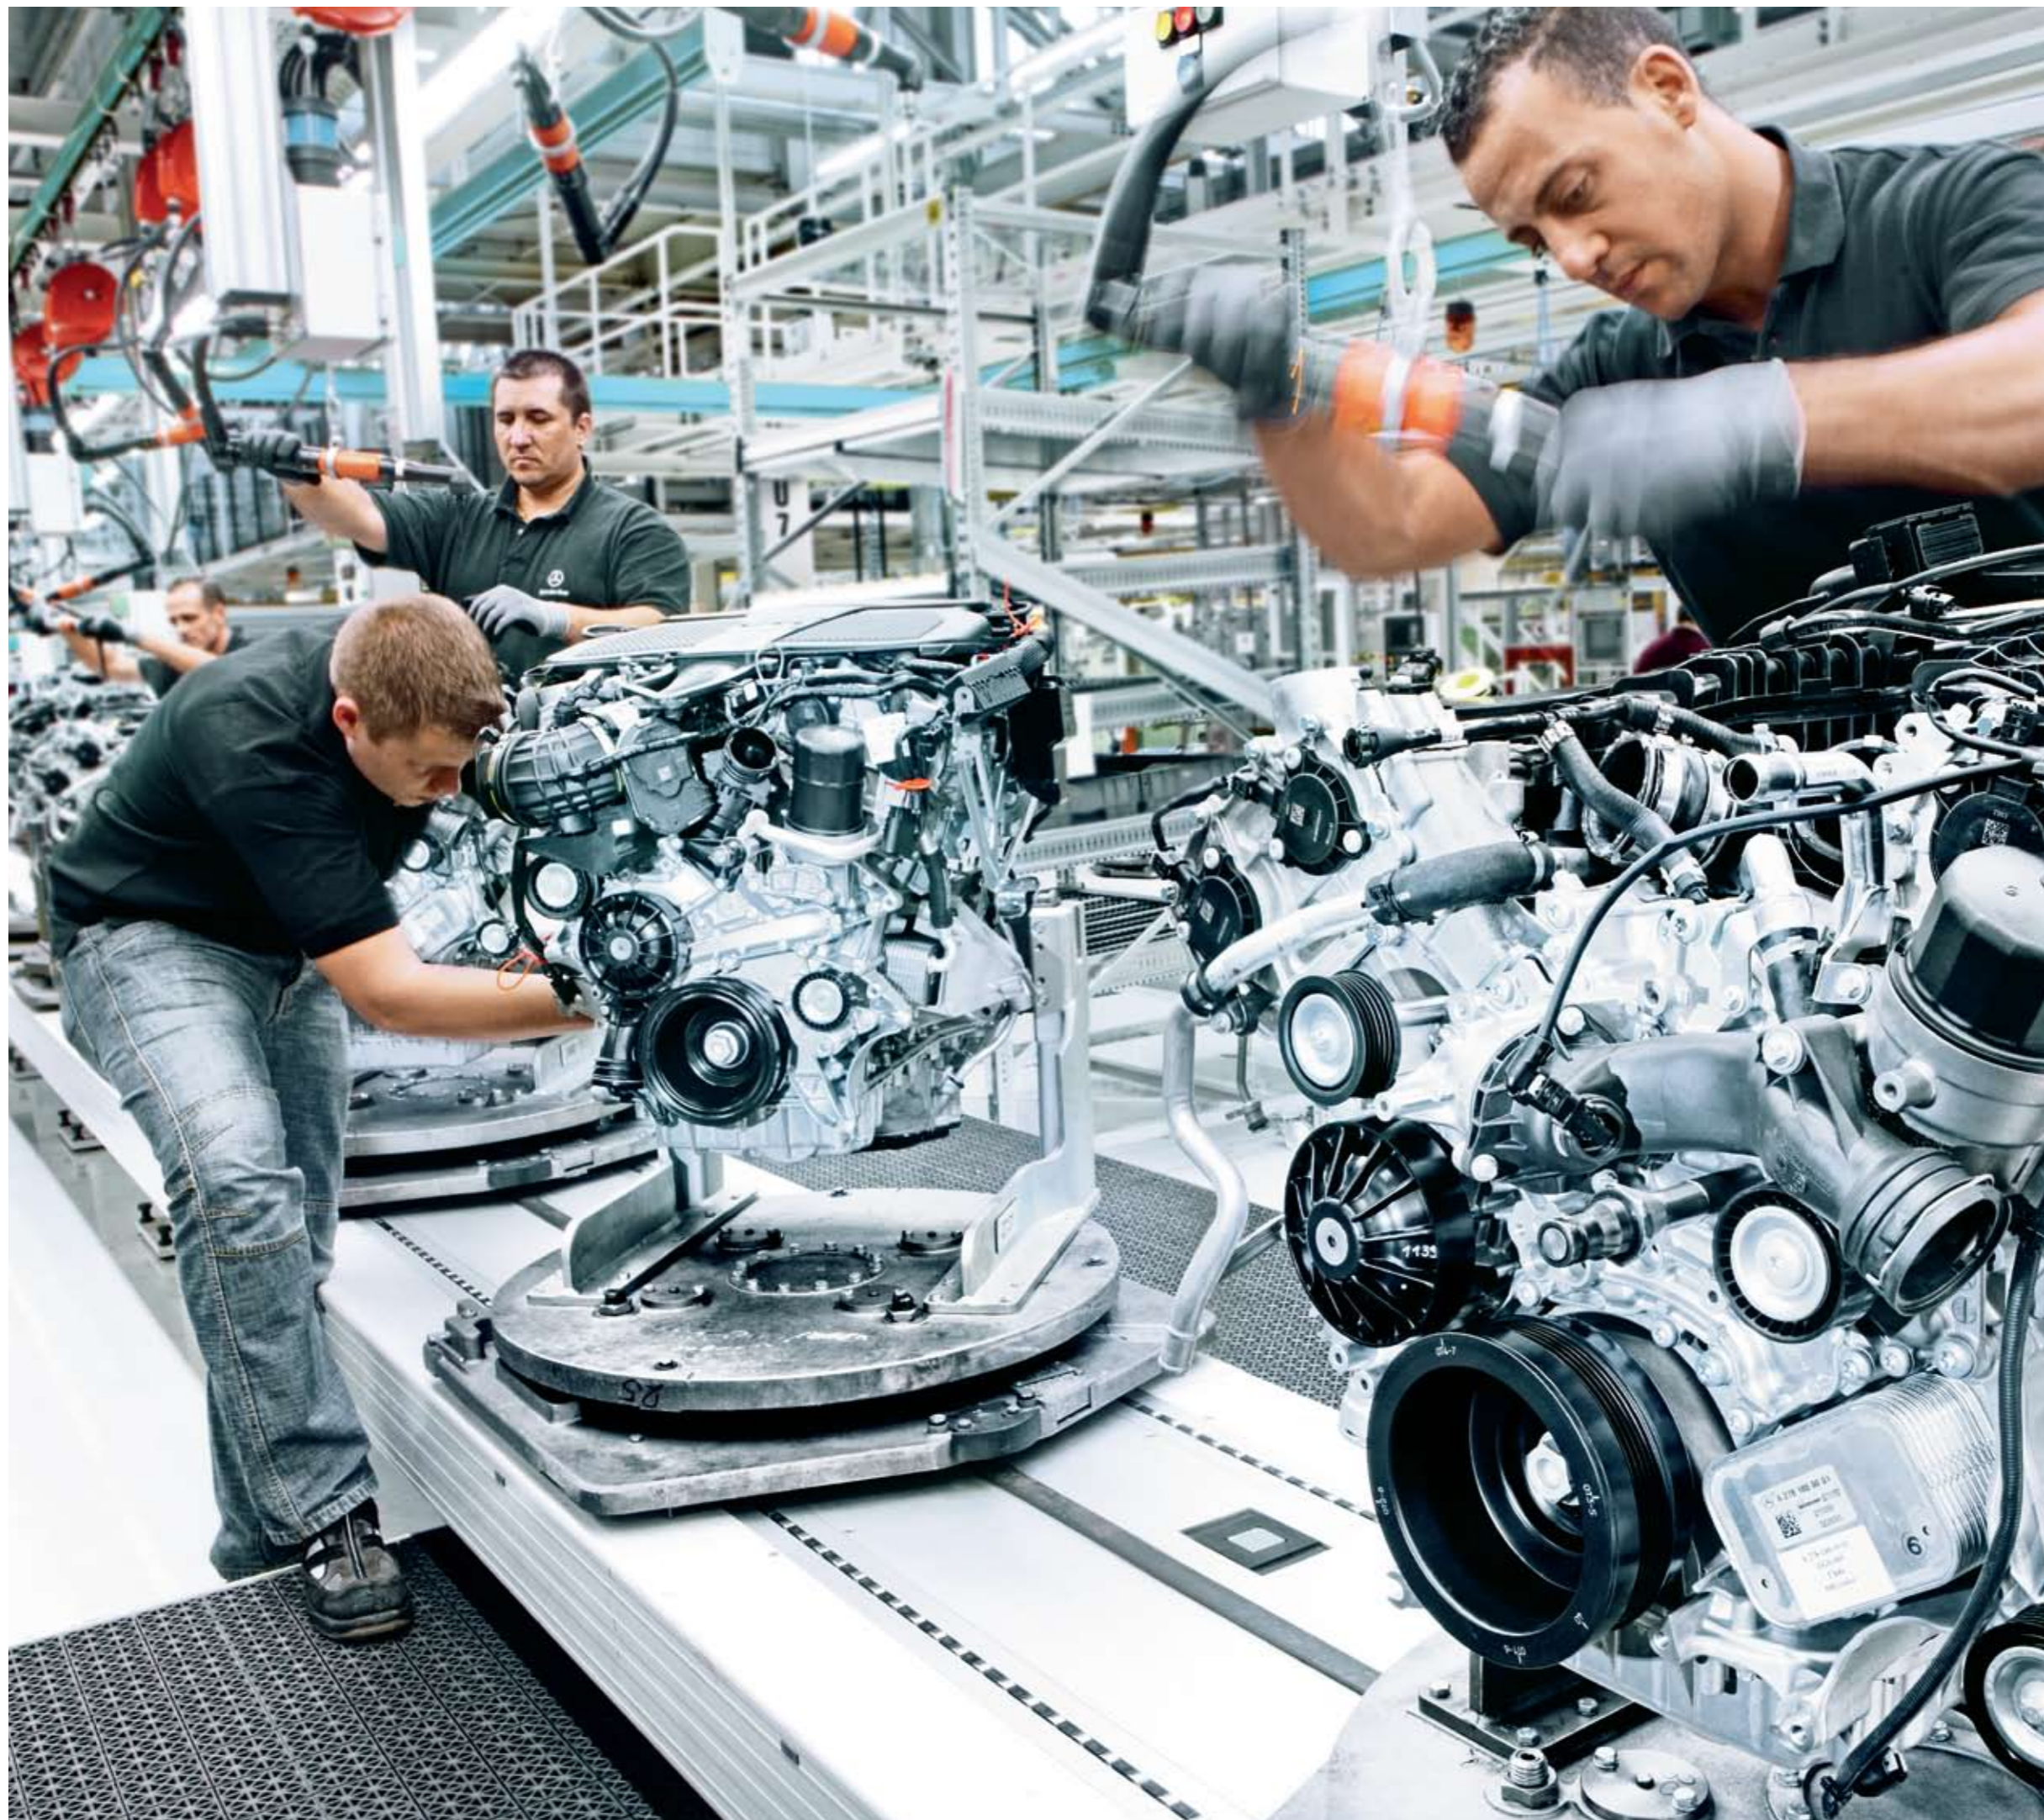

Vielfalt ist unser  
Wettbewerbsvorteil.

---

**Zukunftssicherung, Gesundheitsschutz und Arbeitssicherheit sind für Daimler zentrale Themen.**

Zugleich fördern wir nachhaltig die Vielfalt unserer Mitarbeiter. Denn erst durch regen Austausch und gute Zusammenarbeit entstehen neue Ideen und innovative Produkte, welche die Bandbreite unseres Unternehmens widerspiegeln.

Als aktiver Teil der Gesellschaft fühlen wir uns darüber hinaus vielen weiteren Anspruchsgruppen verpflichtet. Mit vollem Engagement wollen wir weiterhin helfen und unterstützen – überall auf der Welt.

# Wir machen Menschen auf der ganzen Welt mobil.

## Nicht nur mit unseren innovativen Produkten. Sondern auch als attraktiver Arbeitgeber.

Immer neue Ideen und Visionen haben die Daimler AG zu dem gemacht, was sie heute ist: ein weltweit führender Anbieter von Premium-Pkw und der größte Hersteller von Nutzfahrzeugen. Diese Ideen für zukunftsfähige Produkte und intelligente Lösungen entstehen in den Köpfen unserer Mitarbeiterinnen und Mitarbeiter. Sie sind unser Kompass für den besten Weg in die Zukunft des Automobils.

**Absolventen und Berufseinsteiger: erste Schritte auf der Karriereleiter.** Optimaler Start einer langfristigen Karriere bei Daimler ist das unternehmensweite Nachwuchsprogramm CAREer. Absolventen eines technischen oder kaufmännischen Studiengangs sowie Bewerber mit bis zu dreijähriger Berufserfahrung sind hier gleichermaßen willkommen. Das Programm dauert zwölf bis 15 Monate und bereitet in unterschiedlichen Funktionsfeldern und an Standorten im In- oder Ausland optimal auf verantwortungsvolle Aufgaben im Unternehmen vor. Neben dem praktischen Teil des Programms vertiefen die Teilnehmer ihr Know-how in ergänzenden Seminaren und Workshops. Immer an ihrer Seite: eine erfahrene Daimler Führungskraft, die sie als fachlicher und persönlicher Mentor während der gesamten Zeit unterstützt.

In der Produktion und in jedem anderen Fachbereich zeichnet unsere Mitarbeiterinnen und Mitarbeiter fachliche Qualifikation, unternehmerisches Handeln, Kommunikationsstärke und Teamgeist aus.

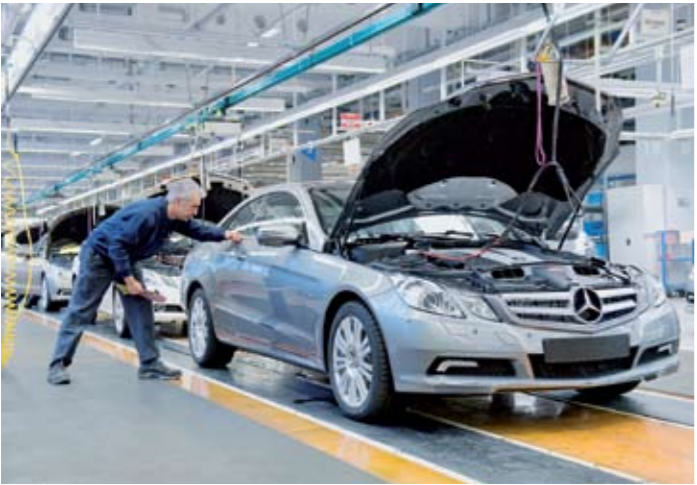

**Berufserfahrene: durchstarten bei Daimler.** Wer es sich zum Ziel gesetzt hat, gemeinsam mit über 250.000 Kolleginnen und Kollegen weltweit das Automobil immer wieder neu zu erfinden, ist bei Daimler genau richtig. Ob als Betriebswirt, Controllerin, in der Produktion oder in jedem anderen Fachbereich. Neben fachlicher Qualifikation sind unternehmerisches Handeln, Kommunikationsstärke und Teamgeist wichtige Werte, die zukünftige Daimler Mitarbeiter mitbringen sollten. Das jeweils individuell abgestimmte Einarbeitungsprogramm „Learning on the Job“ ermöglicht einen unkomplizierten Einstieg und die Chance, schnell das eigene Wissen einzubringen und zu vertiefen.

**Promotion: durch Forschung den Fortschritt vorantreiben.** Wer seine wissenschaftliche Arbeit mit der Praxis verknüpfen möchte, hat in Daimler einen Partner, der viele Türen öffnet. Wir investieren jährlich mehrere Milliarden Euro in die Forschung und ebnen Doktoranden mit Informationen und Kontakten, Einblicken in unsere Arbeit, Forschungsmaterialien sowie persönlichen Betreuern den Weg zu neuen Erkenntnissen. Die Voraussetzungen dafür: ein herausragend abgeschlossenes Studium, ein Doktorvater, der die wissenschaftliche Seite unterstützt, und nicht zuletzt: großes Engagement und Leidenschaft für ein Thema, das einen weiteren wichtigen Schritt in Richtung nachhaltige Mobilität bedeutet.

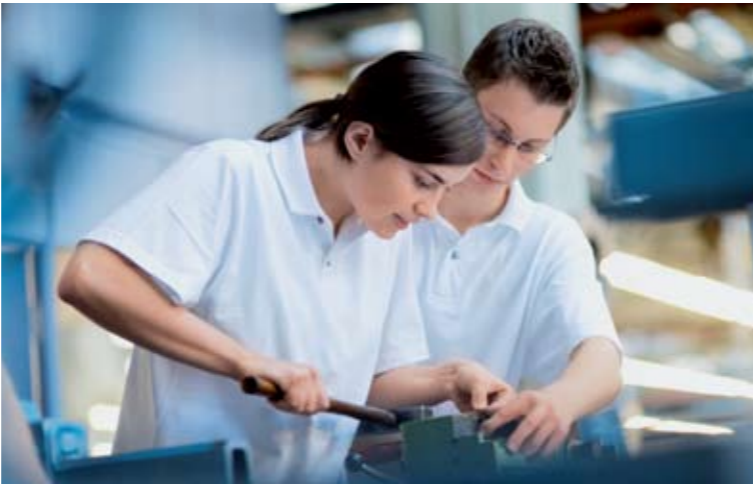

**Schüler und Studenten: von der Theorie in die Praxis.** Auch Praktikanten sind bei Daimler vom ersten Tag an mittendrin. Ob in der Entwicklung, im Einkauf oder der Informationstechnologie – bei einem Praktikum erleben sie die Arbeitsweise eines weltweit agierenden Konzerns hautnah. Gleichgültig, ob es sich um ein Schülerpraktikum oder erste Praxiserfahrungen während eines Studiums handelt: Praktikanten werden in wichtige Prozesse eingebunden und übernehmen verantwortungsvolle Aufgaben. Sie können ihr theoretisches Wissen einbringen – und profitieren zugleich von einer Erweiterung ihrer Praxiserfahrung: als Werkstudent oder während einer Ferienbeschäftigung. Als Pionier der

ersten Automobilstunde bietet Daimler auch neuen Pionierarbeiten Raum für ihre Entfaltung: Seminar-, Diplom-, Bachelor- oder Masterarbeiten, nicht nur in Forschung und Entwicklung, bieten vielfältige Vorteile für beide Seiten.

Für herausragende Studierende in technischen und kaufmännischen Studiengängen bieten wir außerdem das standortübergreifende Förderprogramm Daimler Student Partnership. Persönliche Betreuung, individuelle Förderung sowie Praxiseinsätze im In- und Ausland ebnen den Weg für einen erfolgreichen Berufsstart.

# Daimler ist ein Arbeitgeber, der viel zu bieten hat: Neben beruflichen Programmen und Entwicklungschancen gehören dazu auch Angebote, um Berufliches und Privates zu verbinden.

Daimler – ein Arbeitgeber, der viel zu bieten hat. Unsere Mitarbeiterinnen und Mitarbeiter sind die Grundlage unseres Erfolgs.

### Die eigene Entwicklung mitgestalten

- Herausfordernde Aufgaben, vielfältige Entwicklungsmöglichkeiten
- Individuelles Talentmanagement
- Internationale Teams
- Umfassendes Bildungs- und Qualifizierungsangebot

### Berufliches und Privates integrieren

- Flexibilität und individuelle Arbeitszeitgestaltung
- Angebote rund um Sport, Freizeit, Gesundheit, Vorsorge
- Betriebliche Kinderbetreuung
- Sonderkonditionen für Fahrzeuge

Konkurrenzfähiges Entgeltsystem

**Entwicklungschancen: Förderung und Weiterbildung nach Maß.** Die Bereitschaft, lebenslang zu lernen, ist in unserer sich schnell ändernden Welt eine Grundvoraussetzung. Dazu zählt, die eigene Leistung immer wieder auf den Prüfstand zu stellen und sich kontinuierlich weiterzuentwickeln: Das steckt hinter LEAD (Leadership Evaluation And Development), dem Programm zur individuellen Mitarbeiterförderung bei Daimler. Zielvereinbarungen und eine maßgeschneiderte Entwicklungsplanung unterstützen Mitarbeiter weltweit dabei, sich stetig weiterzubilden. Darüber hinaus bieten wir zahlreiche fachliche und persönliche Professionalisierungsmöglichkeiten: etwa Sprach- und IT-Kurse, Trainings zu Moderations- oder Arbeitstechnik sowie interkulturelle Programme.

**Work-Life-Balance: Arbeit und Freizeit im Einklang.** Mit flexiblen Arbeitsplätzen und unseren Krippenplätzen „sternchen“ für Kinder bis drei Jahre, die wir kontinuierlich ausbauen, fördern wir die Vereinbarkeit von Job und Familie. Zahlreiche Fitness- und Freizeitangebote unterstreichen unseren Anspruch, unseren Mitarbeitern die bestmögliche Work-Life-Balance zu bieten, ebenso wie unsere Sozialleistungen. Hier übernimmt Daimler eine Spitzenposition,

beispielsweise mit der Altersvorsorge Daimler Vorsorge Kapital. Ein hoch dotiertes Ideenmanagement sowie Sonderkonditionen und attraktive Finanzierungsmodelle auf alle unsere Pkw-Modelle runden das Leistungspaket ab.

**Diversity: Vielfalt ist unsere Stärke.** Um weiterhin Spitzenleistungen für nachhaltige Mobilität zu erbringen, setzen wir bei Daimler auf die Unterschiedlichkeit unserer Mitarbeiterinnen und Mitarbeiter. Wir nutzen vielfältige Erfahrungen, Perspektiven und Kompetenzen – weltweit und unternehmerisch. Sie spiegeln die Vielfalt unserer Kunden, Lieferanten, Investoren und der Umwelt wider. Jeder Einzelne trägt dazu bei, ein respektvolles und wertschätzendes Arbeitsumfeld zu schaffen. So gestalten wir gemeinsam die Zukunft von Daimler mit. Diese Kultur der Vielfalt wollen wir weiter ausbauen und auch von anderen lernen: Deshalb führte das Global Diversity Office im ersten Halbjahr 2009 ein externes Best Practice Sharing mit anderen Unternehmen durch, um Diversity-Management-Aktivitäten miteinander zu vergleichen und unsere eigenen Programme kontinuierlich zu optimieren.

Job oder Familie? Diese Frage stellt sich bei Daimler nicht. Flexible Arbeitsplätze und Krippenplätze ermöglichen eine perfekte Kombination von Karriere und Freizeit.

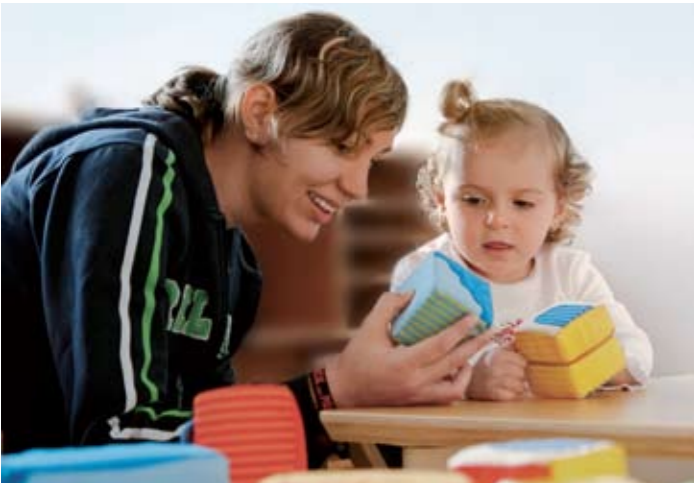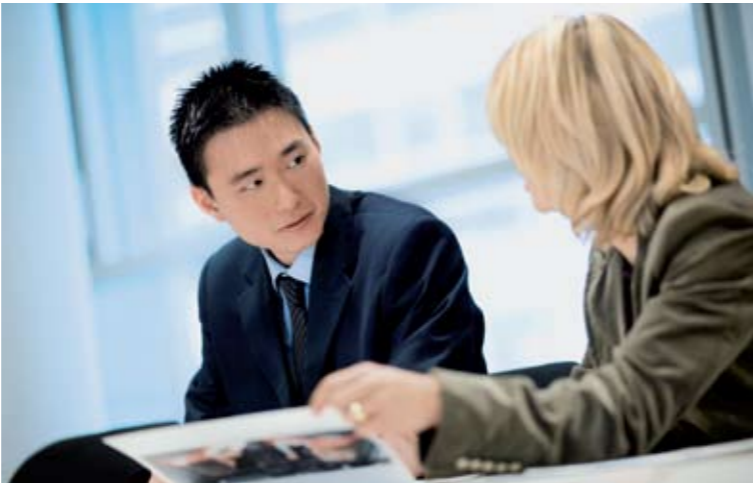

Wir bieten ein Arbeitsumfeld, in dem Chancengleichheit, Fairness, ehrliches Handeln und ein kollegiales Umfeld keine leeren Begriffe sind. Sondern von den Menschen bei Daimler jeden Tag mit Leben gefüllt werden. In allen Bereichen und weltweit.

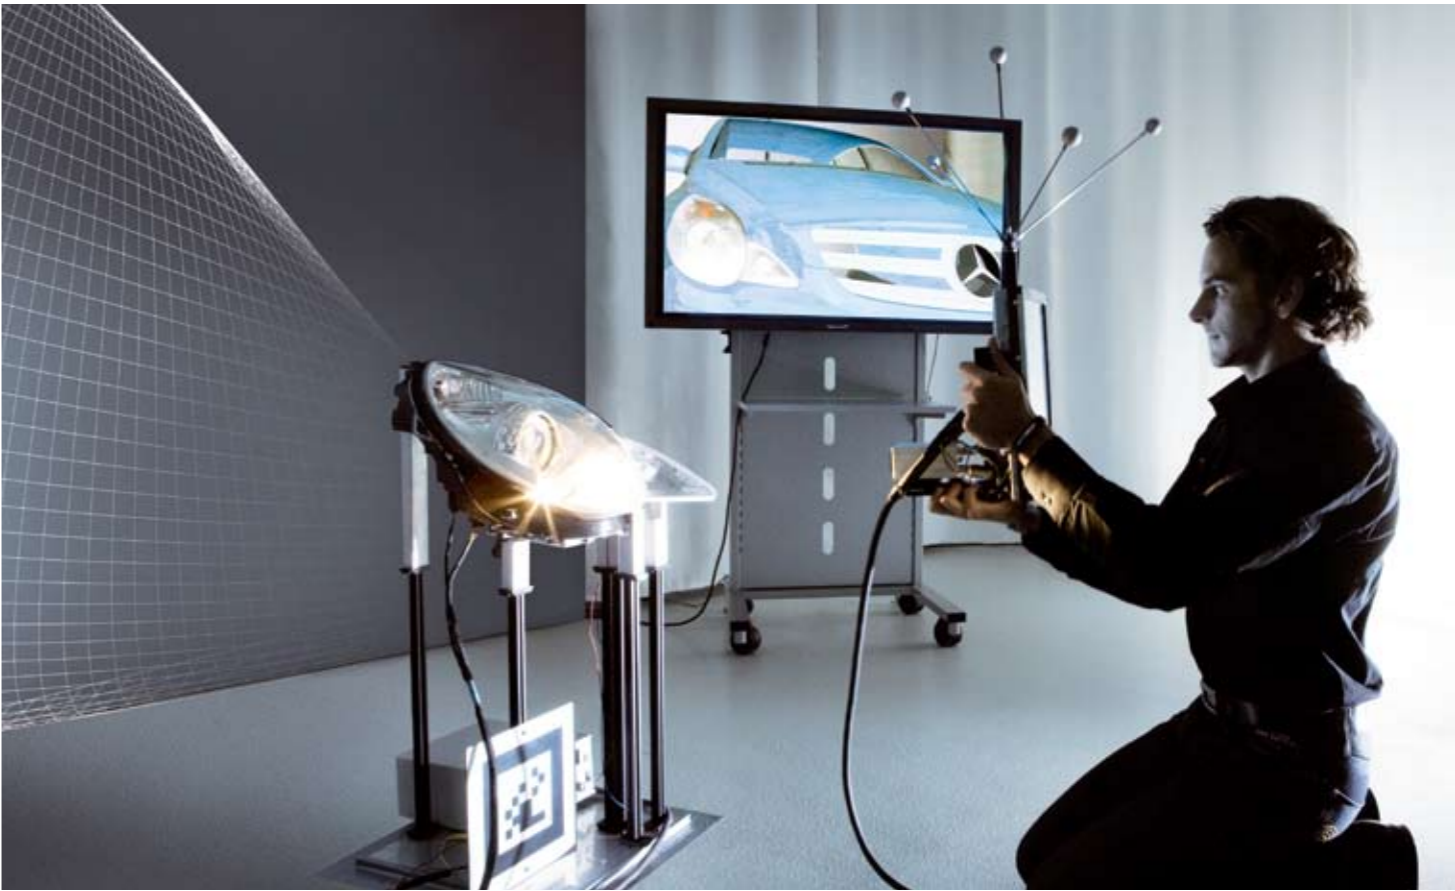

Gemeinsam die Zukunft des Automobils gestalten.

Daimler ist ein starker Partner für junge Pioniere, die ihre wissenschaftliche Arbeit mit der Praxis verknüpfen möchten. Ein Partner, der Türen öffnet, Kontakte, Forschungsmaterialien und Einblicke vermittelt und auf dem Weg in die Zukunft optimal unterstützt. Wir schätzen die unterschiedlichen Meinungen, Wertvorstellungen und Lebensentwürfe unserer Mitarbeiterinnen und Mitarbeiter und bieten vielfältige Möglichkeiten, Fähigkeiten und Talente einzusetzen und weiterzuentwickeln – weltweit. Die Vielfalt unserer Belegschaft vereint verschiedene Erfahrungen, Kompetenzen und Kulturen. Damit spiegeln wir die Vielfalt unserer Kunden, Lieferanten und Investoren sowie unserer Umwelt wider. So gewinnen wir im Wettlauf um die besten Lösungen und gestalten gemeinsam und mit Leidenschaft die Zukunft des Automobils.

# Wir übernehmen gesellschaftliche Verantwortung.

## Ganz praktisch mit Rat und Tat sowie durch die Förderung zahlreicher Projekte.

Als guter Unternehmensbürger blickt Daimler über die Konzerngrenzen hinaus und kümmert sich um positive und nachhaltige gesellschaftliche Entwicklungen. Die Förderung von Bildung und Ausbildung, die Unterstützung des weltweiten Klimaschutzes und nicht zuletzt der intensive Dialog mit unseren Kunden und Aktionären stehen im Mittelpunkt unseres Handelns.

**Unternehmenserfolge mit Nachhaltigkeitscharakter.** Mit der Einrichtung des Corporate Sustainability Board auf Vorstandsebene hat Daimler 2008 das Nachhaltigkeitsmanagement weiter gestärkt und Prozesse erfolgreich gebündelt. Denn der Finanz- und Wirtschaftskrise zum Trotz investieren wir auch weiterhin in neue Produkte, grüne Technologien und in wichtige Wachstumsmärkte. Gleichzeitig verstärken wir unsere Bemühungen um effizientes Wirtschaften mit dem Ziel, dauerhaften Erfolg und die Teilhabe unserer Aktionäre und Beschäftigten daran langfristig zu sichern. Nachhaltigkeit ist sowohl in der Produktion, in unseren automobilen Produkten und Finanzdienstleistungen als auch im wirtschaftlichen Handeln entscheidend. Auch für unsere Zulieferer

haben wir eine weltweit gültige „Nachhaltigkeitsrichtlinie“ formuliert, die ebenso für deren Lieferanten gilt. Dementsprechend wurde die Aktie der Daimler AG bereits zum vierten Mal in Folge in den Dow Jones Sustainability Index (DJSI), einen der weltweit renommiertesten Nachhaltigkeitsindizes, aufgenommen.

**Soziale Verantwortung für unsere Mitarbeiter.** Unsere weltweit über 250.000 Mitarbeiterinnen und Mitarbeiter gestalten den nachhaltigen Erfolg von Daimler. Bei ihnen beginnt unsere soziale Verantwortung. Wir halten an unseren hohen Ausbildungsstandards fest und bieten unseren Mitarbeitern die Möglichkeit, ihre interkulturellen und persönlichen Kompetenzen bedarfsgerecht und zukunftsfähig weiterzuentwickeln. Maßnahmen zur Vereinbarkeit von Beruf und Familie sowie unsere 2009 neu gestaltete betriebliche Altersvorsorge sind weitere Bausteine unserer Zukunftsinvestitionen. Ebenso erwarten wir von unseren Mitarbeitern verantwortliches Handeln und das Einhalten geltender gesetzlicher Bestimmungen und ethischer Grundsätze, zu denen wir uns – etwa im Rahmen der freiwilligen Wirtschaftsinitiative „Global Compact“ der Vereinten Nationen – freiwillig verpflichten.

Soziale Verantwortung beginnt bei unseren Mitarbeitern. Hohe Ausbildungsstandards bieten ihnen die Möglichkeit, ihre interkulturellen und persönlichen Kompetenzen weiterzuentwickeln.

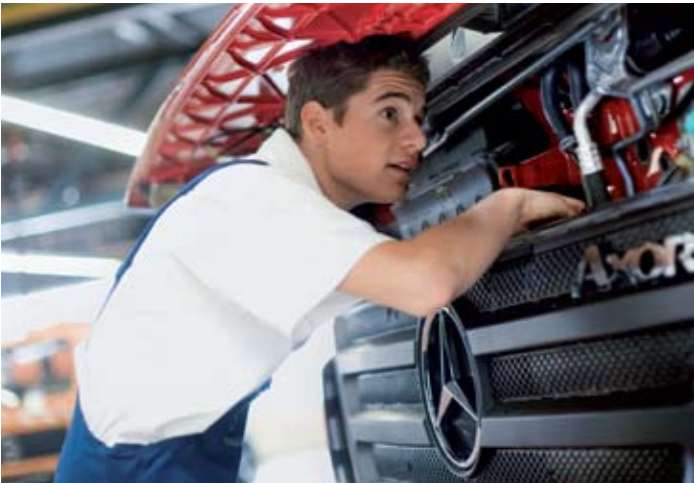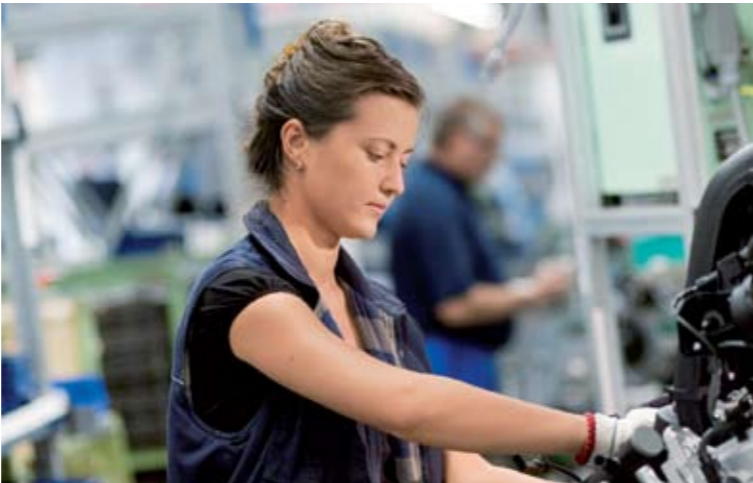

Nachhaltigkeit ist bei Daimler ein grundlegendes Prinzip. Nur wenn ökonomische, ökologische und soziale Ziele miteinander im Einklang stehen, ist dauerhafter wirtschaftlicher Erfolg möglich.

**Engagement für Kunden und Gesellschaft.** Kundenzufriedenheit steht für uns an höchster Stelle. Von der Entwicklung über den Service bis hin zur umweltgerechten Altfahrzeugverwertung berücksichtigen wir Kundenwünsche über den gesamten Produktlebenszyklus hinweg. Als global agierender Konzern engagieren wir uns zudem für gesellschaftliche Bedürfnisse: etwa durch die Förderung von Bildung, Wissenschaft, Umwelt, Kultur, Sport und Gesundheit, die Unterstützung karitativer Projekte sowie der Katastrophenhilfe. Daimler legt Wert auf den nationalen politischen Dialog und leistet darüber hinaus einen Beitrag zur internationalen und insbesondere zur transatlantischen Zusammenarbeit.

**Spielerisch fit für den Straßenverkehr.** Seit rund zehn Jahren engagieren wir uns im Bereich Verkehrssicherheit mit der internationalen Sicherheitsinitiative MobileKids. Im Jahr 2010 stellt Daimler ein weiterentwickeltes Konzept vor, um Schüler, Eltern und Lehrer noch stärker für die Gefahren des Straßenverkehrs zu sensibilisieren. Unser Ziel: aktiv Wissen rund um Verkehrssicherheit und Nachhaltigkeit vermitteln, das richtige Verhalten im Straßenverkehr zu schulen und die Interaktion zwischen Kindern, Lehrern und Eltern zu fördern.

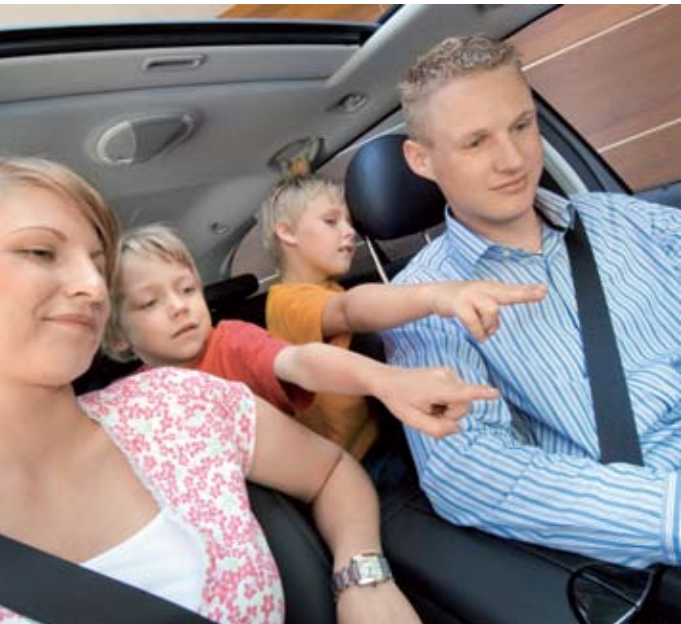

Unsere globale Tätigkeit ist Chance und Verpflichtung.

Wir wollen unser gesellschaftliches Umfeld aktiv mitgestalten und einen Beitrag zu Dialog und Verständigung zwischen den Kulturen leisten.

Grundsätzlich unterscheiden wir bei unseren Förderprojekten vier Formen der Unterstützung: Spenden, Sponsoring, Stiftungsförderung sowie die Unterstützung mit Rat und Tat – dazu zählen wir ehrenamtliche Tätigkeiten unserer Beschäftigten (Volunteering) und die Weitergabe von Know-how sowie andere praktische Hilfe durch unser Unternehmen. In unterschiedlicher Gewichtung setzen wir uns mit diesen Unterstützungsformen für Projekte in den Themenfeldern ein, die wir für unsere gesellschaftlichen Aktivitäten definiert haben: die Förderung von Bildung, Wissenschaft, Umwelt, Kultur, Sport und Gesundheit, die Unterstützung karitativer Projekte sowie die Katastrophenhilfe.

Pionierleistungen.

„Sie war wage-  
mutiger als ich und  
hat einst eine für  
die Weiterentwicklung  
des Motorwagens  
entscheidende, sehr  
strapaziöse Fahrt  
unternommen.“

---

Carl Benz über seine Frau Bertha, die als erster  
Mensch der Welt im August 1888 eine Fernfahrt von  
Mannheim nach Pforzheim im Benzinauto vornahm.

Der Weg zur emissionsfreien Mobilität.

Grün denken. Innovationen für weniger Verbrauch und mehr Effizienz.

Unsere Innovationen verbinden weniger Verbrauch und sicheres Fahren. Mit bahnbrechenden Ideen für eine noch höhere Aktive und Passive Sicherheit treiben wir den Fortschritt weiter voran. Wir haben den absoluten Willen, damit auch künftig die Automobilindustrie anzuführen.

Um den Verbrauch und die Emissionen unserer Fahrzeuge bereits heute deutlich zu reduzieren und langfristig ganz zu vermeiden, setzen wir auf:

- die Optimierung von Fahrzeugen mit modernsten Verbrennungsmotoren;
  - die weitere Effizienzsteigerung durch bedarfsgerechte Hybridisierung;
  - die lokal emissionsfreie Elektromobilität mit Batterie- und Brennstoffzellen-fahrzeugen;
- die Entwicklung von alternativen Kraftstoffen und Mobilitätskonzepten.
  - Eingebunden sind auch neuartige Finanzierungslösungen und Services.

| 1969 – 1978                                                                                                                                                                                                                                                                                                                  | 1979 – 1984                                                                                                                                                                                                                                                                                                                        | 1985 – 1996                                                                                                                                                                                                                                                                                                           | 1997 – 2002                                                                                                                                                                                                                                                                                                                                                                                                                                                                                                                                                                                                       | 2003 – 2004                                                                                                                                                                                                                                                                                                                                                                                                                                                                                                     | 2005                                                                                                                                                                                                                                                                                                             | 2006 – 2008                                                                                                                                                                                                                                                                                                                                                                                                                                                     | 2009                                                                                                                                                                                                                                                                                                                                                                                                                                                                                                                                                                                        | 2010                                                                                                                                                                                                                                                                                                                                                                                                                                                                                                                                                      | nach 2010                                                                                                                                                                                                                                                                                                                                                                                                                                                 |
|------------------------------------------------------------------------------------------------------------------------------------------------------------------------------------------------------------------------------------------------------------------------------------------------------------------------------|------------------------------------------------------------------------------------------------------------------------------------------------------------------------------------------------------------------------------------------------------------------------------------------------------------------------------------|-----------------------------------------------------------------------------------------------------------------------------------------------------------------------------------------------------------------------------------------------------------------------------------------------------------------------|-------------------------------------------------------------------------------------------------------------------------------------------------------------------------------------------------------------------------------------------------------------------------------------------------------------------------------------------------------------------------------------------------------------------------------------------------------------------------------------------------------------------------------------------------------------------------------------------------------------------|-----------------------------------------------------------------------------------------------------------------------------------------------------------------------------------------------------------------------------------------------------------------------------------------------------------------------------------------------------------------------------------------------------------------------------------------------------------------------------------------------------------------|------------------------------------------------------------------------------------------------------------------------------------------------------------------------------------------------------------------------------------------------------------------------------------------------------------------|-----------------------------------------------------------------------------------------------------------------------------------------------------------------------------------------------------------------------------------------------------------------------------------------------------------------------------------------------------------------------------------------------------------------------------------------------------------------|---------------------------------------------------------------------------------------------------------------------------------------------------------------------------------------------------------------------------------------------------------------------------------------------------------------------------------------------------------------------------------------------------------------------------------------------------------------------------------------------------------------------------------------------------------------------------------------------|-----------------------------------------------------------------------------------------------------------------------------------------------------------------------------------------------------------------------------------------------------------------------------------------------------------------------------------------------------------------------------------------------------------------------------------------------------------------------------------------------------------------------------------------------------------|-----------------------------------------------------------------------------------------------------------------------------------------------------------------------------------------------------------------------------------------------------------------------------------------------------------------------------------------------------------------------------------------------------------------------------------------------------------|
| <p>1969: <b>Erster Elektro-versuchsbus</b> Mercedes-Benz OE 302 mit hybrider Antriebs-technologie</p> <p>1972: <b>Erster Elektro-versuchstransporter</b> mit Batteriewechseltechnik: Mercedes-Benz LE 306</p> <p>1975: <b>Erstes Wasserstoff-Versuchsfahrzeug</b> Mercedes-Benz L 307 mit Hybrid- und Verbrennungs-motor</p> | <p>1979: <b>Erster Hybridbus</b> mit kombiniertem Diesel-/ Batteriebetrieb: Mercedes-Benz OE 305</p> <p>1979: Start eines fünfjährigen Modellversuchs: <b>13 Elektro-Hybridbusse</b> im Linienverkehr</p> <p>1982: <b>Erstes Elektro-Pkw-Versuchsfahrzeug</b> auf Basis des T-Modells der mittleren Baureihe von Mercedes-Benz</p> | <p>1985: <b>Geregelte Abgas-reinigungsanlage mit Dreiwegekatalysator</b></p> <p>1992: 20 Mercedes-Benz Fahrzeuge beim <b>Großprojekt zur Praxiserprobung von Elektrofahrzeugen</b></p> <p>1994: <b>Erstes Brennstoff-zellen-Fahrzeug NECAR</b> (New Electric Car) auf Basis des Mercedes-Benz Transporters MB 100</p> | <p>1997: <b>Erster Omnibus mit Brennstoffzellenantrieb: NEBUS</b> auf Basis des Mercedes-Benz O 405</p> <p>1997: Maßstab in puncto Effizienz: <b>CDI-Technologie</b> (Common Rail Direct Injection) im Mercedes-Benz C 220 CDI</p> <p>1998: Start der Dauer-erprobung: <b>alltagstaugliches Elektroversuchsfahrzeug</b> auf Basis der Mercedes-Benz A-Klasse</p> <p>1998: <b>Orion Stadtbusse</b> mit <b>Hybridantrieb</b> in der Alltags-erprobung in New York</p> <p>1999: Im NECAR 4 sind <b>Brennstoffzellenantrieb und Tankanlage erstmals im Sandwichboden</b> der Mercedes-Benz A-Klasse untergebracht</p> | <p>2003: <b>Brennstoffzellen-Stadtbusse</b> auf Basis des Mercedes-Benz Citaro im Linieneinsatz: 36 Fahrzeuge auf drei Kontinenten</p> <p>2003: <b>Dieselmotor mit Hybridmodul</b> im Forschungs-fahrzeug Mercedes-Benz F 500 Mind</p> <p>2004: <b>Erster BlueTec-Lkw</b> mit der Technologie für die saubersten Diesel der Welt</p> <p>2004: <b>Freightliner Transporter mit Hybrid-antrieb</b> im Alltagseinsatz in den USA</p> <p>2004: Weltweit sind <b>60 Mercedes-Benz A-Klasse F-CELL</b> im Einsatz</p> | <p>Auslieferung der ersten Mercedes-Benz Actros <b>Lkw</b> und <b>Sattelzugmaschinen mit BlueTec</b></p> <p>Erste Mercedes-Benz Citaro <b>Stadtbusse mit BlueTec-Technologie</b></p> <p><b>Weltrekordfahrt über 160.000 Kilometer</b> demonstriert die Leistungs-fähigkeit und Effizienz der CDI-Technologie</p> | <p>2006: Mercedes-Benz CLS 350 CGI mit sparsamer <b>Piezo-Benzindirekteinspritzung und strahlgeführtem Brenn-verfahren</b></p> <p>2006: <b>Erster Transporter in Europa mit Hybrid-technologie:</b> Mercedes-Benz Hybrid-Sprinter 316 CDI</p> <p>2006: <b>Fuso Canter Eco Hybrid</b> geht in Serie</p> <p>2007: <b>Orion VII Hybrid-busse</b> gehen in New York in den Linienverkehr</p> <p>2008: Der <b>Freightliner M2e-Hybrid</b> bewährt sich im Alltag</p> | <p><b>Erstes Automobil mit Hybridantrieb und Lithium-Ionen-Batterie:</b> Mercedes-Benz S 400 HYBRID</p> <p>Kleinserienproduktion: <b>Mercedes-Benz B-Klasse F-CELL</b> und <b>smart fortwo electric drive</b></p> <p><b>Effizienz-Paket BlueEFFICI-ENCY im Sprinter eingeführt</b></p> <p>Der Logistikkonzern DHL testet den <b>Mercedes-Benz Atego BlueTec Hybrid</b></p> <p><b>Serieller Diesel-Hybridbus für den Alltagseinsatz:</b> Mercedes-Benz Citaro BlueTec Hybrid</p> <p>e-mobility-Berlin, <b>der weltgrößte Elektroauto-Feldversuch</b>, startet mit Fahrzeugen von Daimler</p> | <p><b>Brennstoffzelle im Praxis-betrieb:</b> Mercedes-Benz Citaro FuelCELL-Hybrid sowie 200 Mercedes-Benz B-Klasse F-CELL</p> <p><b>Elektromobilität:</b> Weitere e-mobility-Projekte in acht Ländern</p> <p><b>Umweltfreundlich:</b> Auslieferung der ersten Mercedes-Benz Atego BlueTec Hybrid</p> <p><b>Neue BlueTec-Motoren bei Trucks NAFTA</b> erfüllen weltweit strengste Abgas-richtlinie</p> <p><b>E-Transporter:</b> Start der Kleinserie E-CELL Vito</p> <p>76 sparsame und <b>saubere BlueEFFICIENCY-Modelle</b> bis Ende 2010 eingeführt</p> | <p><b>Jährlich mindestens ein neues Hybridmodell</b>, darunter auch Fahrzeuge mit Dieselmotoren</p> <p>Souverän in <b>Leistung und Umweltschutz:</b> E 300 BlueTEC Hybrid</p> <p>Mercedes-Benz und smart Elektrofahrzeuge: mit <b>Lithium-Ionen-Batterie</b> aus <b>eigener Produktion</b></p> <p>S 500 Plug-in Hybrid auf der Straße: <b>Umweltschutz in der Premiumklasse</b></p> <p>Kleinserie des <b>Mercedes-Benz Sprinter mit Hybridantrieb</b></p> |

Die Vision vom unfallfreien Fahren.

Sicher fahren. Schutz für Mensch und Fahrzeug im Straßenverkehr.

Daimler wird weiterhin mit richtungsweisenden Meilensteinen die Mobilität der Zukunft sicher gestalten.

- Unsere ganzheitliche Strategie fokussiert folgende Aspekte:
- den Fahrer permanent entlasten;
  - schwierige Situationen aktiv mit dem Fahrzeug meistern;
  - die Verkehrsteilnehmer optimal schützen.

| 1959 – 1980                                                                                                                                                                                                                                                                                                                                                                                                                                                                                                              | 1981 – 1994                                                                                                                                                                                                                        | 1995 – 1997                                                                                                                                                                                                                                                                                                                                                                      | 1998                                                                                                                                          | 1999 – 2001                                                                                                                                                                                             | 2002 – 2005                                                                                                                                                                                                                                                                                                                                                                                 | 2006 – 2008                                                                                                                                                                                                                                                                                                                                                                                                                 | 2009                                                                                                                                                                                                                                                                                                                                                                                                                                                                                                                                                                                                               | 2010                                                                                                                                                                                                    | nach 2010                                                                                                                                                                                                                                                                                |
|--------------------------------------------------------------------------------------------------------------------------------------------------------------------------------------------------------------------------------------------------------------------------------------------------------------------------------------------------------------------------------------------------------------------------------------------------------------------------------------------------------------------------|------------------------------------------------------------------------------------------------------------------------------------------------------------------------------------------------------------------------------------|----------------------------------------------------------------------------------------------------------------------------------------------------------------------------------------------------------------------------------------------------------------------------------------------------------------------------------------------------------------------------------|-----------------------------------------------------------------------------------------------------------------------------------------------|---------------------------------------------------------------------------------------------------------------------------------------------------------------------------------------------------------|---------------------------------------------------------------------------------------------------------------------------------------------------------------------------------------------------------------------------------------------------------------------------------------------------------------------------------------------------------------------------------------------|-----------------------------------------------------------------------------------------------------------------------------------------------------------------------------------------------------------------------------------------------------------------------------------------------------------------------------------------------------------------------------------------------------------------------------|--------------------------------------------------------------------------------------------------------------------------------------------------------------------------------------------------------------------------------------------------------------------------------------------------------------------------------------------------------------------------------------------------------------------------------------------------------------------------------------------------------------------------------------------------------------------------------------------------------------------|---------------------------------------------------------------------------------------------------------------------------------------------------------------------------------------------------------|------------------------------------------------------------------------------------------------------------------------------------------------------------------------------------------------------------------------------------------------------------------------------------------|
| <p>1959: Erste Sicherheitskarosserie der Welt mit <b>gestaltfester Fahrgastzelle und Knautschzone</b> im Pkw</p> <p>1964: Erster <b>Omnibus mit verschleißfreier Bremse</b> (Retarder)</p> <p>1978: Weltpremiere des <b>Anti-Blockier-Systems (ABS) für Pkw</b></p> <p>1980: Erstmals <b>Airbag und Gurtstraffer</b> in einem Serien-Pkw verfügbar</p> <p>Das von Daimler entwickelte <b>ABS</b>-System verhindert, dass die Reifen beim Bremsen blockieren; das Fahrzeug bleibt auch bei einer Vollbremsung lenkbar</p> | <p>1981: Daimler bringt das <b>erste ABS für Nutzfahrzeuge</b> auf den Markt</p> <p>1984: <b>ABS serienmäßig</b> bei allen <b>Setra</b> Omnibussen</p> <p>1987: Erste <b>Antriebs-Schlupf-Regelung (ASR)</b> für Nutzfahrzeuge</p> | <p>1995: Erste <b>elektronische Stabilitätsregelung ESP®</b></p> <p>1996: Serieneinführung des <b>Bremsassistenten (BAS)</b> als Weltneuheit im Pkw</p> <p>Das Fahrerassistenzsystem <b>ESP®</b> bremst in kritischen Situationen gezielt einzelne Räder automatisch ab, um ein Schleudern des Fahrzeugs zu verhindern; der Fahrer behält so die Kontrolle über das Fahrzeug</p> | <p>Erste <b>Tridion-Sicherheitszelle</b> im smart</p> <p><b>Adaptiver Airbag</b> in der S-Klasse</p> <p><b>Window Bag</b> in der E-Klasse</p> | <p>1999: Alle <b>Mercedes-Benz Pkw serienmäßig mit ESP®</b> ausgestattet</p> <p>2000: Erster <b>Spurhalte-Assistent</b> für Lkw</p> <p>2001: <b>Telligent-Stabilitätsregelung</b> für Lkw und Busse</p> | <p>2002: Erstes präventives Insassenschutzsystem für Pkw: <b>PRE-SAFE®</b></p> <p>2003: <b>ESP® serienmäßig in allen Reisebussen</b></p> <p>2005: <b>Brems-Assistent-Plus</b> warnt optisch und akustisch bei drohendem Auffahrunfall</p> <p>2005: <b>Crashaktive Kopfstütze NECK-PRO</b> erstmals in der E-Klasse</p> <p>2005: <b>Adaptives Bremslicht</b> serienmäßig in der S-Klasse</p> | <p>2006: <b>PRE-SAFE®-Bremse im Pkw</b>: autonome Teilbremsung</p> <p>2006: Bremsassistent <b>Active Brake Assist (ABA)</b> für Mercedes-Benz Lkw</p> <p>2006: Vorausschauende Scheinwerfertechnik: <b>Intelligent Light System</b></p> <p>2007: <b>Front Collision Guard (FCG)</b> im Omnibus: Schutz beim Frontalaufprall</p> <p>2008: <b>Active Brake Assist (ABA)</b> erstmals im Mercedes-Benz Travego präsentiert</p> | <p>Neu in Mercedes-Benz Pkw: Müdigkeitserkennung <b>ATTENTION ASSIST</b>, in Gefahrensituation autonome Vollbremsung mit <b>PRE-SAFE®-Bremse</b> und <b>Nachtsicht-Assistent PLUS</b> mit Fußgängererkennung</p> <p>Vorreiter im Fußgängerschutz: Die <b>Adaptive Motorhaube</b> vergrößert den Deformationsraum bei einem Unfall</p> <p>In Mercedes-Benz E-Klasse und S-Klasse: <b>videobasierter Geschwindigkeitslimit-Assistent</b></p> <p>Experimental-Sicherheitsfahrzeug <b>ESF 2009</b> präsentiert</p> <p>Active Brake Assist (<b>ABA</b>) <b>serienmäßig in Reisebussen</b> mit Abstandsregeltempomat</p> | <p><b>Forschungsfahrzeug F 800</b> mit innovativer Sicherheitstechnologie wie zum Beispiel dem Staufolgeassistent</p> <p>Neue Setra TopClass mit <b>Front Collision Guard (FCG) für Nordamerika</b></p> | <p>Heute im Mercedes-Benz Experimental-Sicherheitsfahrzeug <b>ESF 2009</b> und morgen als weitere Meilensteine der Fahrzeugsicherheit von Daimler auf der Straße: <b>PRE-SAFE® Structure, Braking Bag, PRE-SAFE® Pulse, Interactive Vehicle Communication und Spotlight-Funktion</b></p> |

Daimler im Überblick. Die Daimler AG ist eines der weltweit führenden Automobilunternehmen. Mit den Geschäftsfeldern Mercedes-Benz Cars, Daimler Trucks, Mercedes-Benz Vans, Daimler Buses und Daimler Financial Services gehört der Fahrzeughersteller zu den größten Anbietern von Premium-Pkw und ist der größte weltweit aufgestellte Nutzfahrzeughersteller. Daimler Financial Services bietet ein umfassendes Finanzdienstleistungsangebot mit Finanzierung, Leasing, Versicherungen und Flottenmanagement.

#### Geschäftsfelder im Überblick.

---

1. **Mercedes-Benz Cars**

Das Produktangebot von Mercedes-Benz Cars reicht vom Kleinwagen der Marke smart über die Premiumfahrzeuge der Marke Mercedes-Benz bis hin zu den Luxuslimousinen von Maybach.

---

2. **Daimler Trucks**

Unter dem Dach von Daimler Trucks sind fünf starke Fahrzeugmarken gebündelt. Die Marken Mercedes-Benz, Freightliner, Western Star und Fuso sowie die amerikanische Schulbus-Marke Thomas Built Buses.

---

3. **Mercedes-Benz Vans**

Zum Produktangebot von Mercedes-Benz Vans zählen die Transporter-Modellreihen der Marke Mercedes-Benz: Vito und Viano, Sprinter (in der NAFTA-Region ab Januar 2010 unter den Marken Freightliner und Mercedes-Benz) und Vario.

---

4. **Daimler Buses**

Daimler Buses ist der weltweit führende Hersteller von Omnibussen über acht Tonnen mit den Marken Mercedes-Benz, Setra und Orion. Als Technologieführer mit Full-Line-Kompetenz bietet die Marke Mercedes-Benz Omnibusse eine vollständige Produktpalette.

---

5. **Daimler Financial Services**

Die Daimler Financial Services AG ist ein Tochterunternehmen der Daimler AG und unterstützt mit maßgeschneiderten Finanzdienstleistungen weltweit den Absatz von Fahrzeugen des Daimler Konzerns.

---

# Daimler AG. Mit bahnbrechenden Technologien, Produkten und Services gestalten wir die Zukunft der Mobilität.

Das Ziel der Daimler AG ist es, sich den Mobilitätsanforderungen der Zukunft erfolgreich zu stellen. Damit wollen wir dauerhaft Werte schaffen für unsere Aktionäre, Kunden, Mitarbeiter und die Gesellschaft insgesamt.

Mit unseren Geschäftsfeldern Mercedes-Benz Cars, Daimler Trucks, Mercedes-Benz Vans, Daimler Buses sowie Daimler Financial Services sind wir von Daimler weltweit führender Anbieter von Premium-Pkw und der größte Hersteller von Nutzfahrzeugen. Zudem bieten wir unseren Kunden mit Daimler Financial Services ein umfassendes, automobilnahes Finanzdienstleistungsangebot. Die Daimler AG vertreibt ihre Produkte in nahezu allen Ländern der Welt und hat Produktionsstätten auf fünf Kontinenten. Die Daimler Aktie ist an den Börsen Frankfurt, New York und Stuttgart notiert.

Der Firmensitz und die Konzernzentrale befinden sich in Stuttgart. Zu unserem heutigen Markenportfolio von Daimler zählen neben Mercedes-Benz – die wertvollste Premiumautomobilmarke der Welt – die Marken smart, Maybach, Freightliner, Fuso, Western Star, Detroit Diesel, Setra, Orion und Thomas Built Buses. Als Unternehmen mit Anspruch auf Spitzenleistung streben wir nachhaltiges Wachstum und Profitabilität auf dem Niveau der Branchenbesten an. Wir werden das Auto immer wieder neu erfinden. Mit Begeisterung und Leidenschaft. Durch innovative und nachhaltige Fahrzeugkonzepte wollen wir die Mobilität auch für kommende Generationen sichern. Mit einem einmaligen Produktmix und unterschiedlichsten Antriebskonzepten bieten wir Lösungen für die automobilen Ansprüche von heute und morgen.

Mitarbeiter nach Geschäftsfeldern 2009 (31.12.)

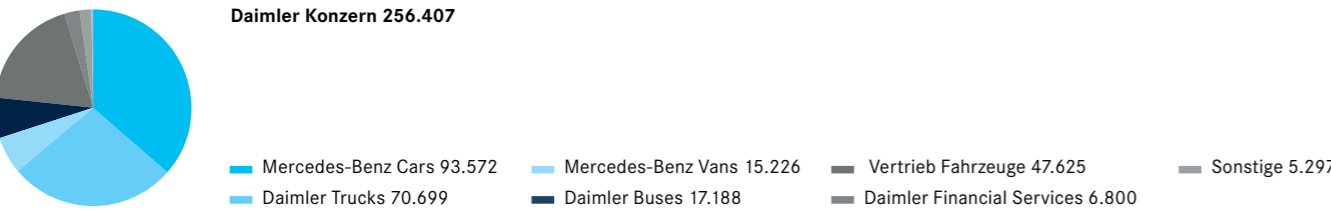

Quelle: Geschäftsbericht Daimler AG, 2009

Mit starken Marken und innovativen Produkten konzentrieren wir uns als Daimler AG auf das, was wir am besten können: begeisternde Premium-Pkw, erstklassige Trucks, Transporter und Busse mit maximalem Nutzwert für unsere Kunden sowie maßgeschneiderte Services rund um diese Produkte.

| Daimler AG                             | 2009                   | Konzernumsatz              | 2009                   |
|----------------------------------------|------------------------|----------------------------|------------------------|
|                                        | Werte in Millionen EUR |                            | Werte in Millionen EUR |
| Umsatz                                 | 78.924                 | nach Geschäftsfeldern      |                        |
| Sachinvestitionen                      | 2.423                  | Mercedes-Benz Cars         | 41.318                 |
| Forschungs- und Entwicklungsleistungen | 4.181                  | Daimler Trucks             | 18.360                 |
| Beschäftigte (31.12.)                  | 256.407                | Mercedes-Benz Vans         | 6.215                  |
| Cashflow aus Geschäftstätigkeit        | 10.961                 | Daimler Buses              | 4.238                  |
| EBIT                                   | (1.513)                | Daimler Financial Services | 11.996                 |
| Konzernergebnis                        | (2.644)                | Überleitung¹               | (3.203)                |
| Ergebnis je Aktie (in EUR)             | (2,63)                 |                            |                        |
| Dividendensumme                        | 0                      | nach Regionen              | Werte in Millionen EUR |
| Dividende je Aktie (in EUR)            | 0,00                   | Westeuropa                 | 36.458                 |
|                                        |                        | davon Deutschland          | 18.788                 |
|                                        |                        | NAFTA                      | 19.380                 |
|                                        |                        | davon USA                  | 16.569                 |
|                                        |                        | Asien                      | 12.435                 |
|                                        |                        | davon China                | 4.349                  |
|                                        |                        | Übrige Märkte              | 10.651                 |
|                                        |                        | Gesamt                     | 78.924                 |

¹ Die sonstigen Geschäftstätigkeiten, insbesondere die nach der Equity-Methode bilanzierten Beteiligungen Chrysler, EADS und Tognum, sind im Posten „Überleitung“ enthalten.

Konzernumsatz nach Geschäftsfeldern im Vergleich (Werte in Millionen EUR)

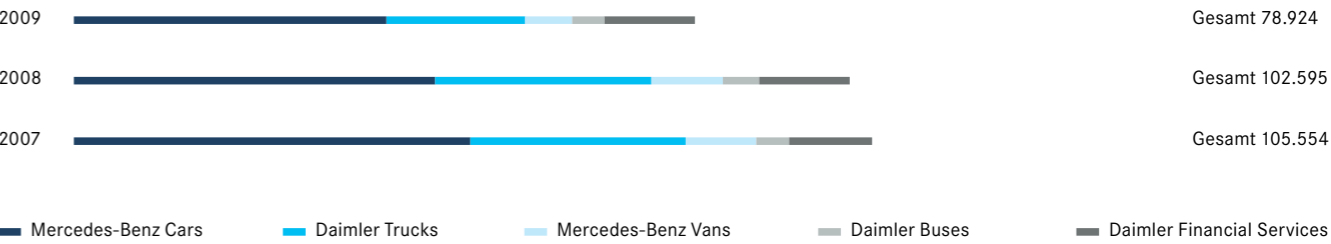

Quelle: Geschäftsbericht Daimler AG, 2009

## Mercedes-Benz Cars.

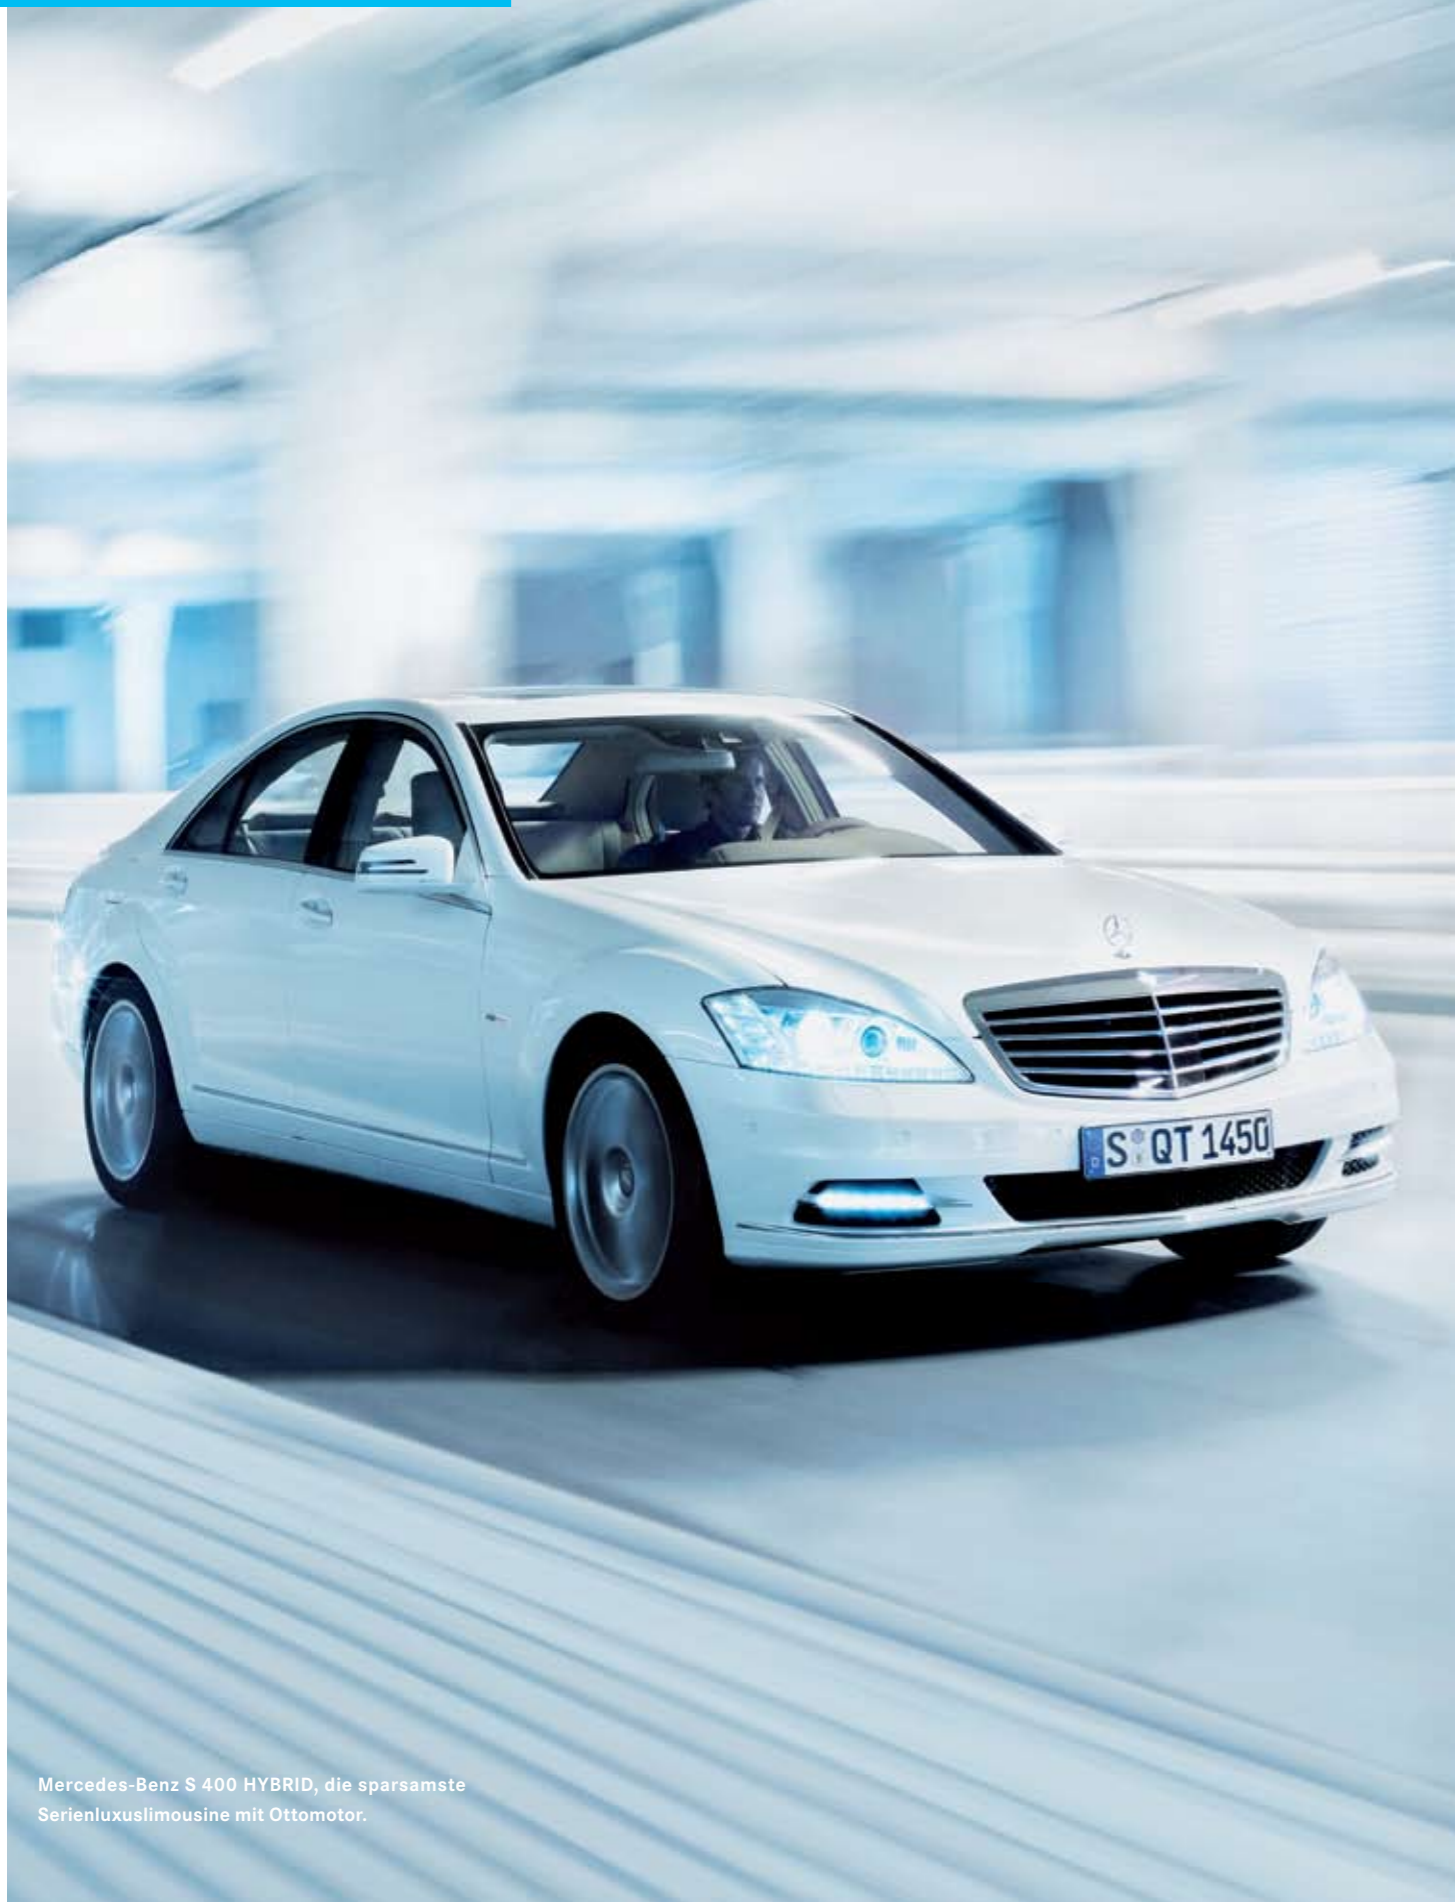

Mercedes-Benz S 400 HYBRID, die sparsamste Serienluxuslimousine mit Ottomotor.

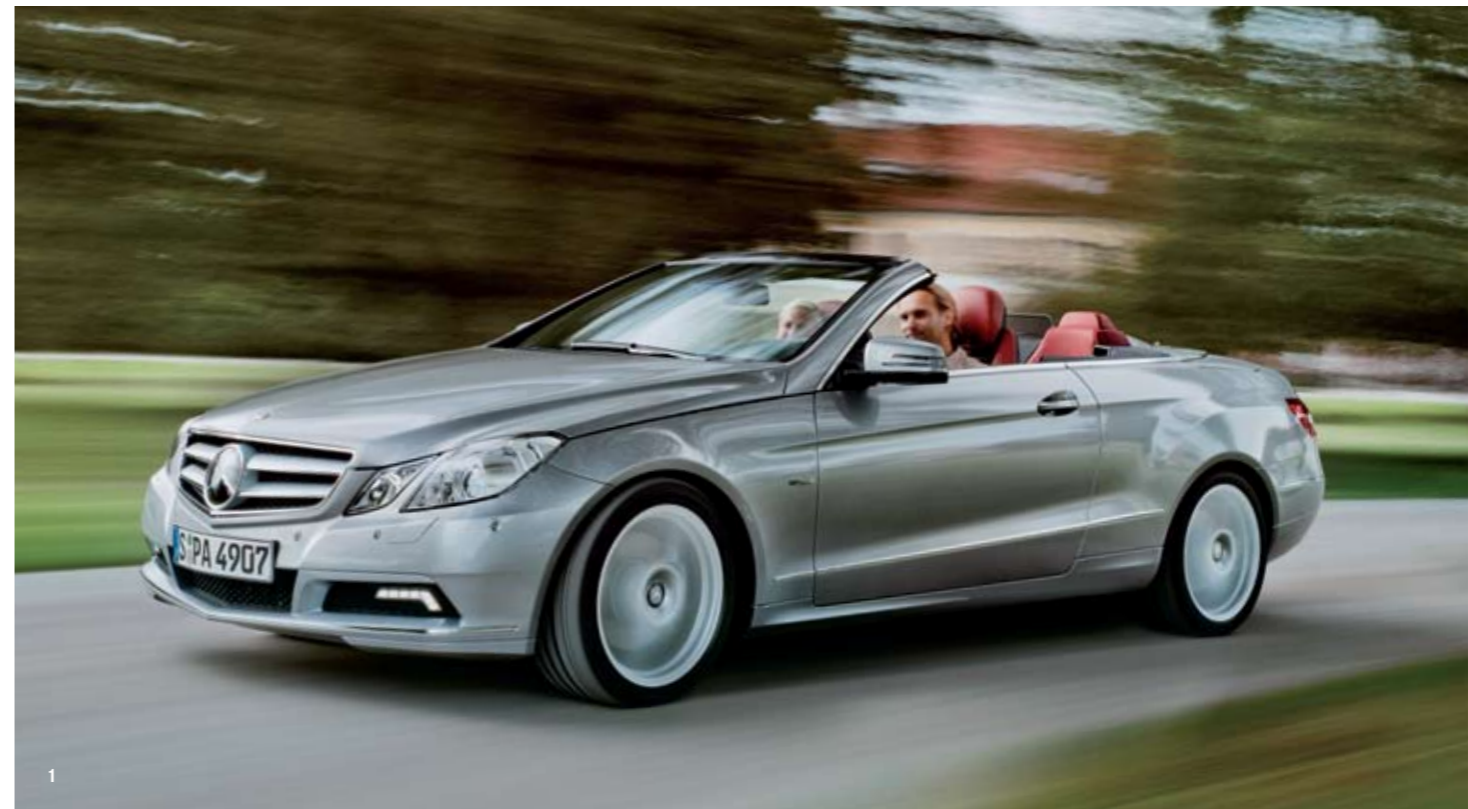

1

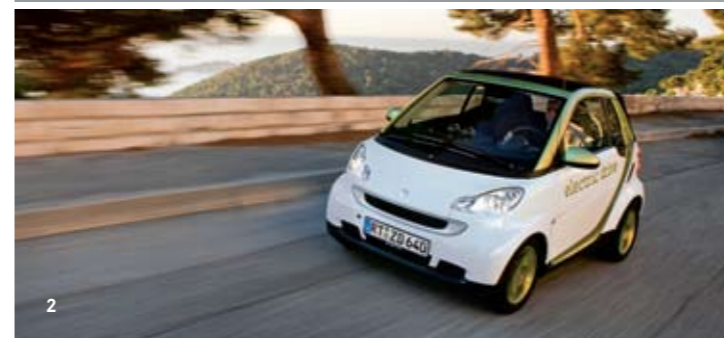

2

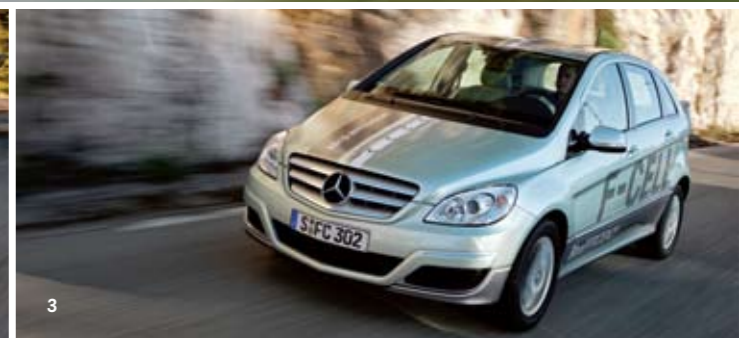

3

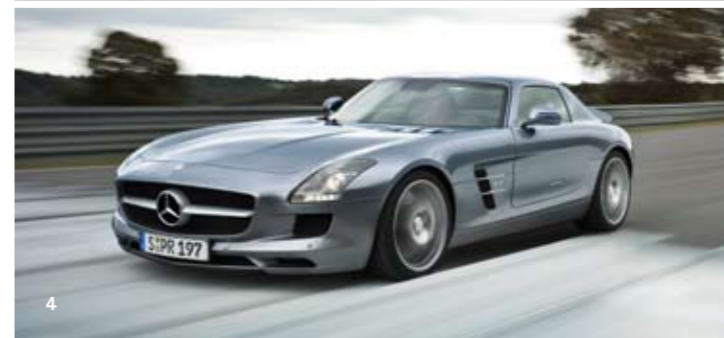

4

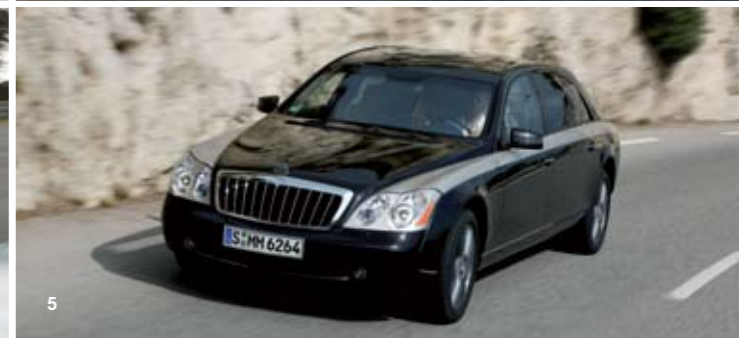

5

**Technologisch wegweisend – emotional faszinierend.**

**1** Das Mercedes-Benz E-Klasse Cabrio bietet Fahrspaß, der süchtig macht. **2** Dass ökologisch fahren Spaß machen kann, beweist der smart fortwo electric drive. **3** Beste Werte bei Leistung und Effizienz: die Mercedes-Benz B-Klasse F-CELL. **4** Ein Traumauto mit Bodenhaftung ist der Mercedes-Benz SLS AMG. **5** Ein Unikat der Luxusklasse ist der Maybach Zeppelin.

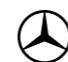

Mercedes-Benz

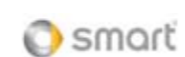

MAYBACH

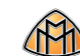

# Mercedes-Benz Cars. Vom Kleinwagen über Premiumfahrzeuge bis hin zur Luxuslimousine.

Bei Mercedes-Benz wissen wir: Das beste Mittel gegen schwierige Zeiten sind innovative Ideen und die Fähigkeit, immer wieder Automobile zu entwickeln, die technologisch wegweisend sind und emotional faszinieren. Weltweit verfügt der Geschäftsbereich über 17 Produktionsstätten, die alle ein Ziel verfolgen: die Entwicklung von sparsamen und umweltverträglichen Automobilen ohne Verzicht auf Sicherheit, Komfort und souveränen Fahrspaß.

**Mercedes-Benz: der Stern unter den Premiummarken.** Seit fast 125 Jahren steht der Stern für die Spitze des Automobilbaus und symbolisiert wie kein anderes Markenzeichen Perfektion, Faszination und Verantwortung. Der Name „Mercedes-Benz“ steht für den Führungsanspruch der Marke, den bedingungslosen Willen, die Zukunft des Automobils zu gestalten. Dabei prägt der Leitspruch Gottlieb Daimlers „Das Beste oder nichts“ das Handeln.

Die Fahrzeuge der Marke mit dem Stern zeichnen sich aus durch Sicherheit, Komfort, Qualität, Zuverlässigkeit sowie faszinierendes Design und nachhaltige Mobilität. Mit Engagements in den Bereichen Sport, Lifestyle und Mode ist die Marke Mercedes-Benz auch in anderen Lebenswelten von Kunden und Interessenten präsent und erlebbar.

**Smart: zukunftsweisende Mobilität mit Kultcharakter.** Die jüngste Automobilmarke Europas startet nach der erfolgreichen Eroberung des US-Marktes seit 2009 auch in Brasilien und China durch. Die umweltbewusste und unkonventionelle Automobilmarke, die für die Kombination von innovativer Technologie und urbaner Mobilität steht, ist in mehr als 40 Märkten weltweit vertreten.

**Maybach: Luxus und Komfort der Extraklasse.** Stets ein Unikat und ein Meisterwerk an Ästhetik, Perfektion und Eleganz: Die Luxusmarke Maybach bietet anspruchsvollen Kunden über zwei Millionen Individualisierungsmöglichkeiten. Von Hand gefertigt in der Maybach Manufaktur, ist das jüngste Angebot von 2009, der Maybach Zeppelin, Nachfolger des legendären und gleichnamigen Modells, der in den 1930er- Jahren weltweit als die Spitze des anspruchsvollen Automobilbaus galt.

Beschäftigte Mercedes-Benz Cars 2009 (31.12.)

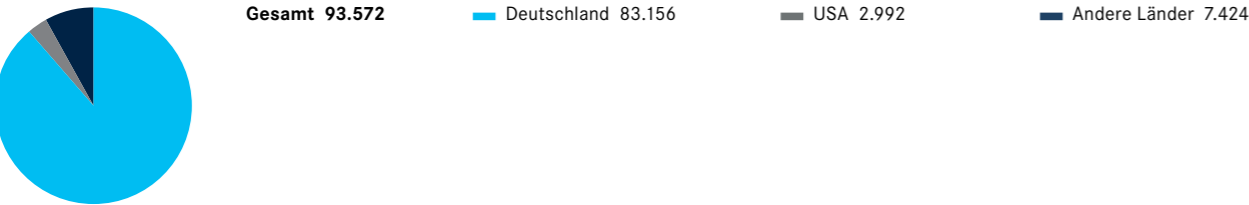

Quelle: Geschäftsbericht Daimler AG, 2009

| Mercedes-Benz Cars                          | 2009      | Absatz¹                                             | 2009      |
|---------------------------------------------|-----------|-----------------------------------------------------|-----------|
| Werte in Millionen EUR / Umsatzrendite in % |           | in Einheiten                                        |           |
| EBIT                                        | (500)     | nach Baureihen                                      |           |
| Umsatz                                      | 41.318    | Mercedes-Benz²                                      | 974.700   |
| Umsatzrendite                               | (1,2)     | davon: A-Klasse, B-Klasse                           | 215.500   |
| Sachinvestitionen                           | 1.618     | C-Klasse, CLK-Klasse, SLK-Klasse                    | 322.800   |
| Forschungs- und Entwicklungsleistungen      | 2.696     | E-Klasse, CLS-Klasse                                | 212.100   |
| Absatz (Einheiten)                          | 1.093.905 | S-Klasse, CL-Klasse, SL-Klasse, SLR, Maybach        | 57.100    |
| Beschäftigte (31.12.)                       | 93.572    | M-Klasse, R-Klasse, G-Klasse, GL-Klasse, GLK-Klasse | 167.200   |
|                                             |           | smart                                               | 113.900   |
|                                             |           | Gesamt                                              | 1.093.900 |

|                   |  |              |
|-------------------|--|--------------|
| nach Regionen     |  | in Einheiten |
| Westeuropa        |  | 623.500      |
| davon Deutschland |  | 297.800      |
| NAFTA             |  | 235.500      |
| davon USA         |  | 203.000      |
| Asien / Pazifik   |  | 155.900      |
| davon China       |  | 67.500       |
| davon Japan       |  | 26.700       |
| Gesamt            |  | 1.093.900    |

¹ Konzernabsatz (einschließlich verleaster Fahrzeuge und in Südafrika produzierter / verkaufter Mitsubishi-Fahrzeuge)  
² Summe auf Basis ungerundeter Zahlen

Mercedes-Benz Cars Absatz (in Einheiten)

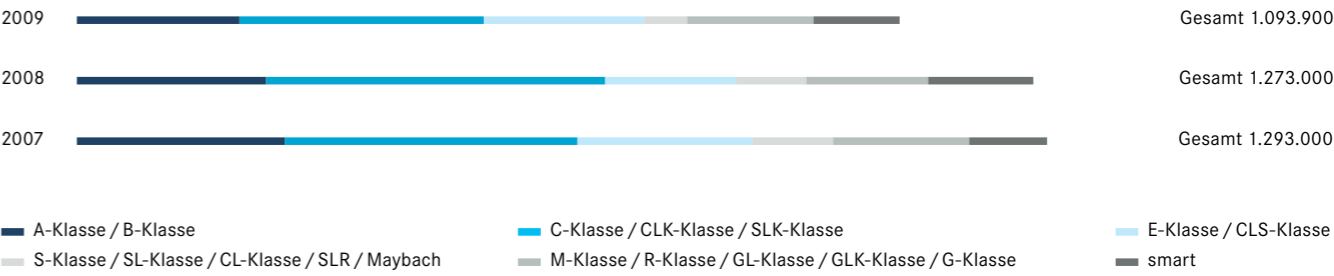

Quelle: Geschäftsbericht Daimler AG, 2009

Daimler Trucks.

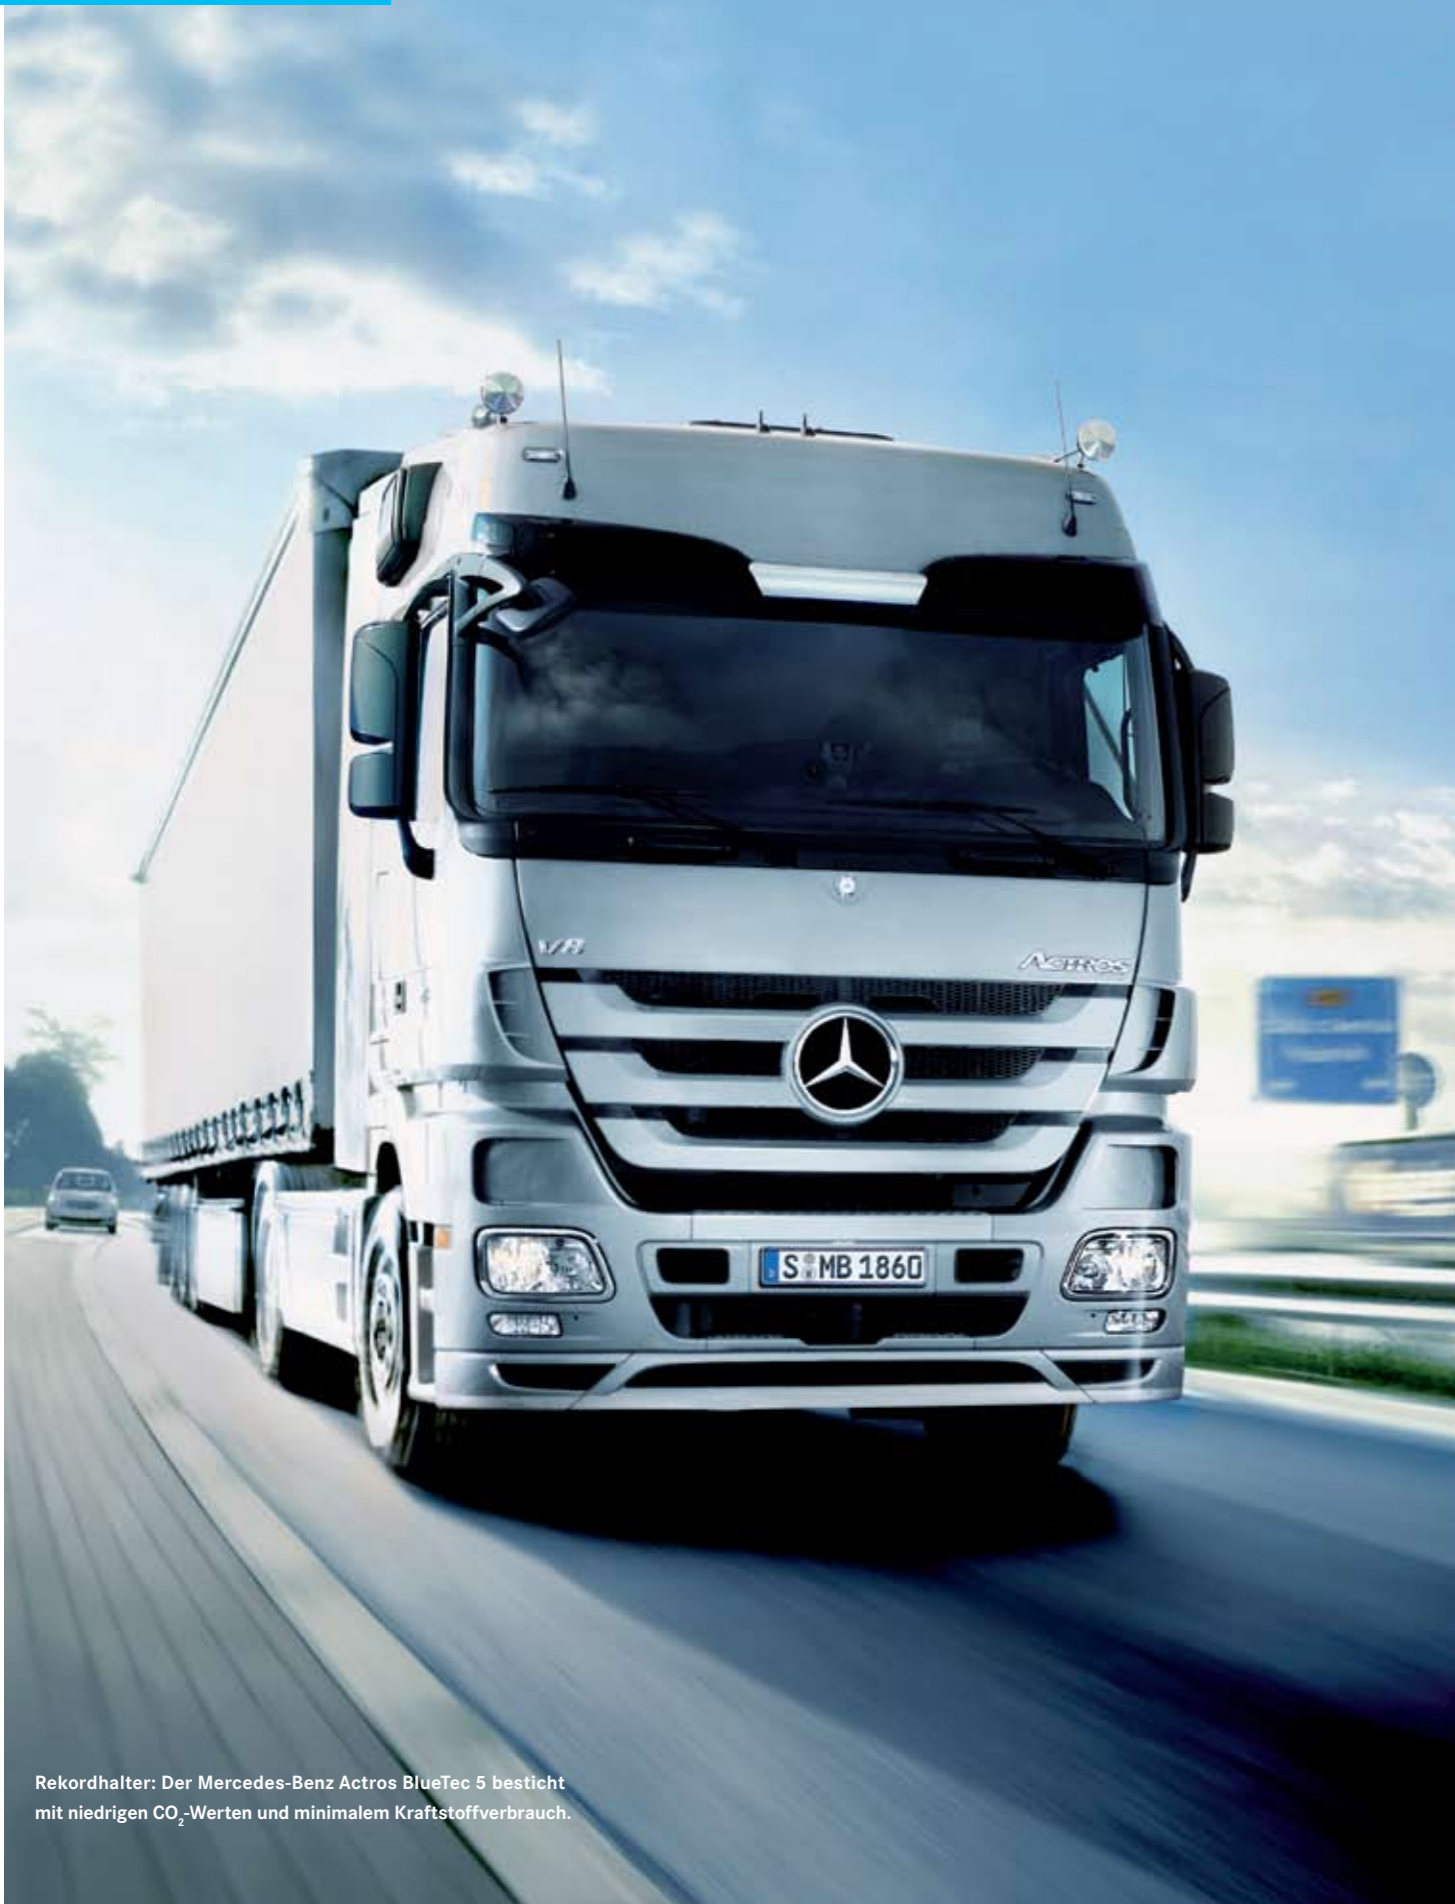

Rekordhalter: Der Mercedes-Benz Actros BlueTec 5 besticht mit niedrigen CO<sub>2</sub>-Werten und minimalem Kraftstoffverbrauch.

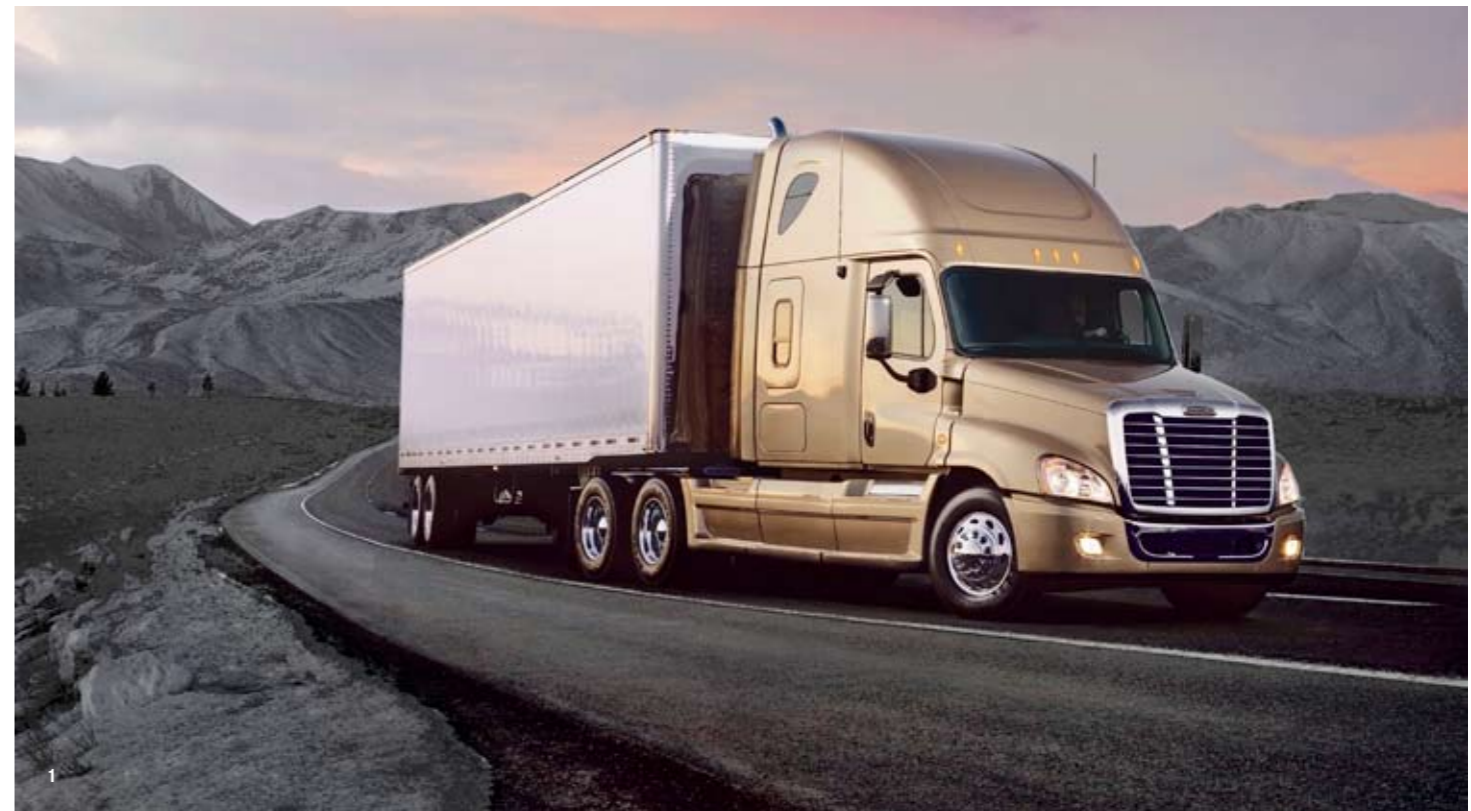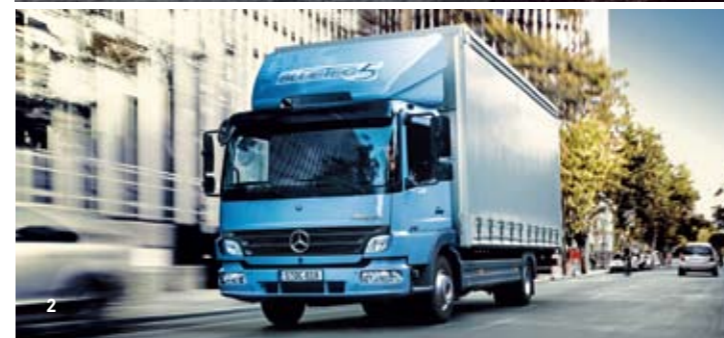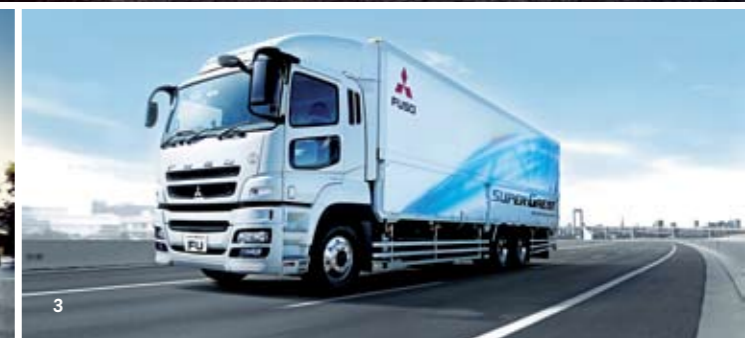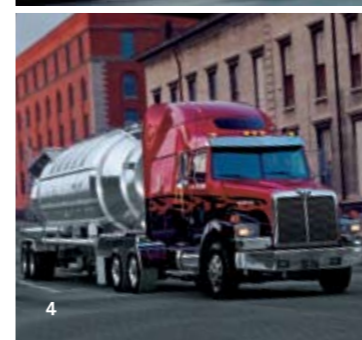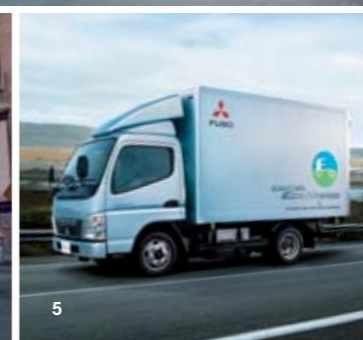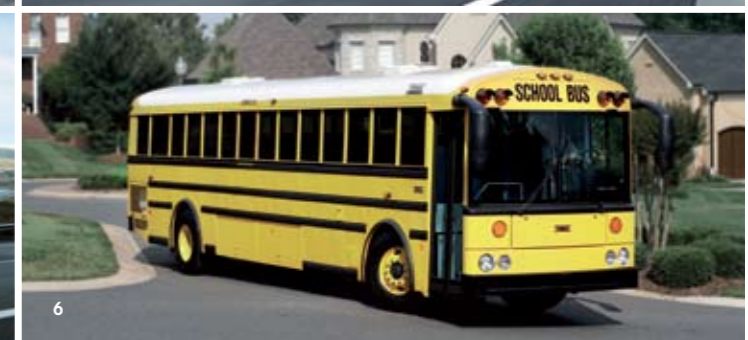

Wirtschaftlich, zuverlässig, nachhaltig.

1 Der Freightliner Cascadia setzt neue Maßstäbe auf dem amerikanischen Markt. 2 Dank BlueTec-Technologie besonders wirtschaftlich ist der Mercedes-Benz Atego BlueTec 5. 3 Der Fuso Super Great ist das schadstoffärmste Fahrzeug seiner Klasse in Asien. 4 Der Western Star ist ein Premiumfahrzeug für Marktnischen wie Spezial- und Bautransporte. 5 Der Fuso Canter Eco Hybrid ist der erste serienmäßig produzierte Hybrid-Lkw. 6 Die Marke Thomas Built Buses steht für die innovativsten Schulbusse Nordamerikas.

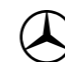

Mercedes-Benz

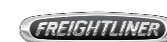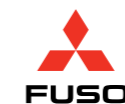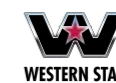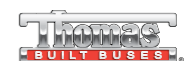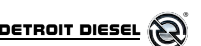

# Daimler Trucks. Fünf starke Fahrzeugmarken, gebündelt unter einem Dach.

Wir haben Daimler Trucks frühzeitig krisenfest gemacht – mit Effizienz, Flexibilität und einem aktiven Management der Marktzyklen. Als Weltmarktführer gilt für uns deshalb auch in schwierigen Zeiten das Motto „Trucks for the World!“

**Mercedes Benz: Qualität, auf die man sich verlassen kann.** „Trucks you can trust“ lautet unser Wertversprechen für Nutzfahrzeuge von Mercedes-Benz, aus dem Bereich Trucks Europa / Lateinamerika. Sie stehen für erstklassige Produkt- und Servicequalität, Wirtschaftlichkeit, Zuverlässigkeit und Nachhaltigkeit. Ob Fern-, Baustellen- oder Verteilerverkehr: Die Marke Mercedes-Benz bietet im mittleren und schweren Lkw-Segment individuelle Lösungen.

**Freightliner: vielfältiger Einsatz ganz nach Bedarf.** Freightliner Trucks, der größte Geschäftsbereich von Daimler Trucks North America, stellt Lkw der Klassen 5 bis 8 her, die ein breites Spektrum von Einsatzbereichen im Nutzfahrzeugsegment abdecken. Unter dem Motto „Run Smart“ setzt das Unternehmen auf Innovation, Technologie und kundenorientiertes Handeln.

**Western Star: markante Transporter für überzeugte Trucker.** Die Marke Western Star bedient Nischen wie den Spezial- und Bautransport genauso wie den Langstreckentransport. Die schweren Lkw sind Premiumfahrzeuge, die überwiegend von selbst fahrenden Unternehmern oder in kleinen Flotten betrieben werden. Getreu dem Motto „Serious Trucks for Serious Truckers“ überzeugen sie mit ihrem markanten Äußeren ebenso wie mit ihrer Einsatzbereitschaft für unwegsames Gelände.

**Thomas Built Buses: Schulbusse für Nordamerika.** Sie sind aus dem nordamerikanischen Straßenverkehr nicht wegzudenken: die gelben Schulbusse von Thomas Built Buses. Der führende Hersteller von Schulbussen in Nordamerika blickt auf eine lange Tradition zurück: Seit 1916 steht Thomas Built Buses für innovatives Design, Sicherheit und höchste Qualität.

**Fuso: kundenorientierte Lösungen nach Maß.** Weltweit überzeugen Fahrzeuge der Marke Fuso. Qualitativ hochwertig und wirtschaftlich orientiert sie sich an den individuellen Anforderungen der Kunden inklusive einem umfassenden Ersatzteil- und Werkstattservice. Fuso spielt daher bei Daimler Trucks eine wichtige Rolle als Kompetenzzentrum für leichte Lkw und modernste Hybridtechnologie.

| Daimler Trucks                              | 2009    |
|---------------------------------------------|---------|
| Werte in Millionen EUR / Umsatzrendite in % |         |
| EBIT                                        | (1.001) |
| Umsatz                                      | 18.360  |
| Umsatzrendite                               | (5,5)   |
| Sachinvestitionen                           | 597     |
| Forschungs- und Entwicklungsleistungen      | 1.116   |
| Absatz (Einheiten)                          | 259.328 |
| Beschäftigte (31.12.)                       | 70.699  |

Weltweit 33 Produktionsstätten sichern die Mobilität im Transportbereich nachhaltig. Vom internationalen Verbund aus Entwicklungs- und Produktionsstandorten profitieren Kunden auf der ganzen Welt.

| Absatz                                                                            | 2009           |
|-----------------------------------------------------------------------------------|----------------|
| nach Marken                                                                       |                |
| in Einheiten                                                                      |                |
| Daimler Trucks North America LLC (Freightliner, Western Star, Thomas Built Buses) | 63.558         |
| Mercedes-Benz                                                                     | 96.227         |
| Mitsubishi Fuso Truck and Bus Corporation                                         | 99.543         |
| <b>Gesamt</b>                                                                     | <b>259.328</b> |
| nach Regionen                                                                     |                |
| in Einheiten                                                                      |                |
| Westeuropa                                                                        | 44.000         |
| davon Deutschland                                                                 | 25.000         |
| Großbritannien                                                                    | 4.000          |
| Frankreich                                                                        | 5.000          |
| Italien                                                                           | 2.000          |
| NAFTA                                                                             | 62.000         |
| davon USA                                                                         | 52.000         |
| Lateinamerika (ohne Mexiko)                                                       | 37.000         |
| davon Brasilien                                                                   | 30.000         |
| Asien                                                                             | 87.000         |
| davon Japan                                                                       | 23.000         |
| <b>Gesamt</b>                                                                     | <b>259.000</b> |

Beschäftigte Daimler Trucks 2009 (31.12.)

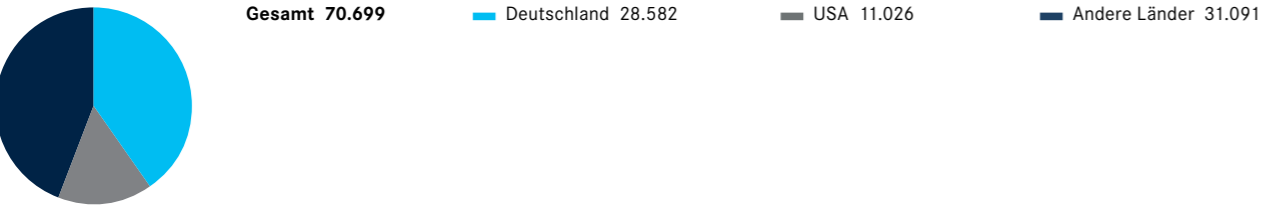

Quelle: Geschäftsbericht Daimler AG, 2009

Daimler Trucks Absatz (in Einheiten)

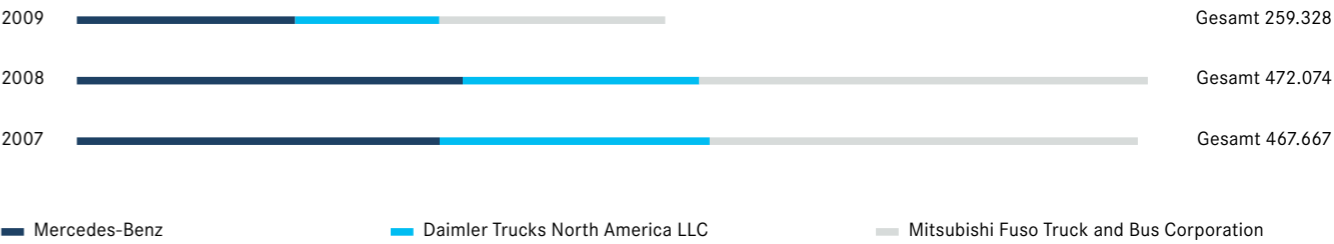

Quelle: Geschäftsbericht Daimler AG, 2009

## Mercedes-Benz Vans.

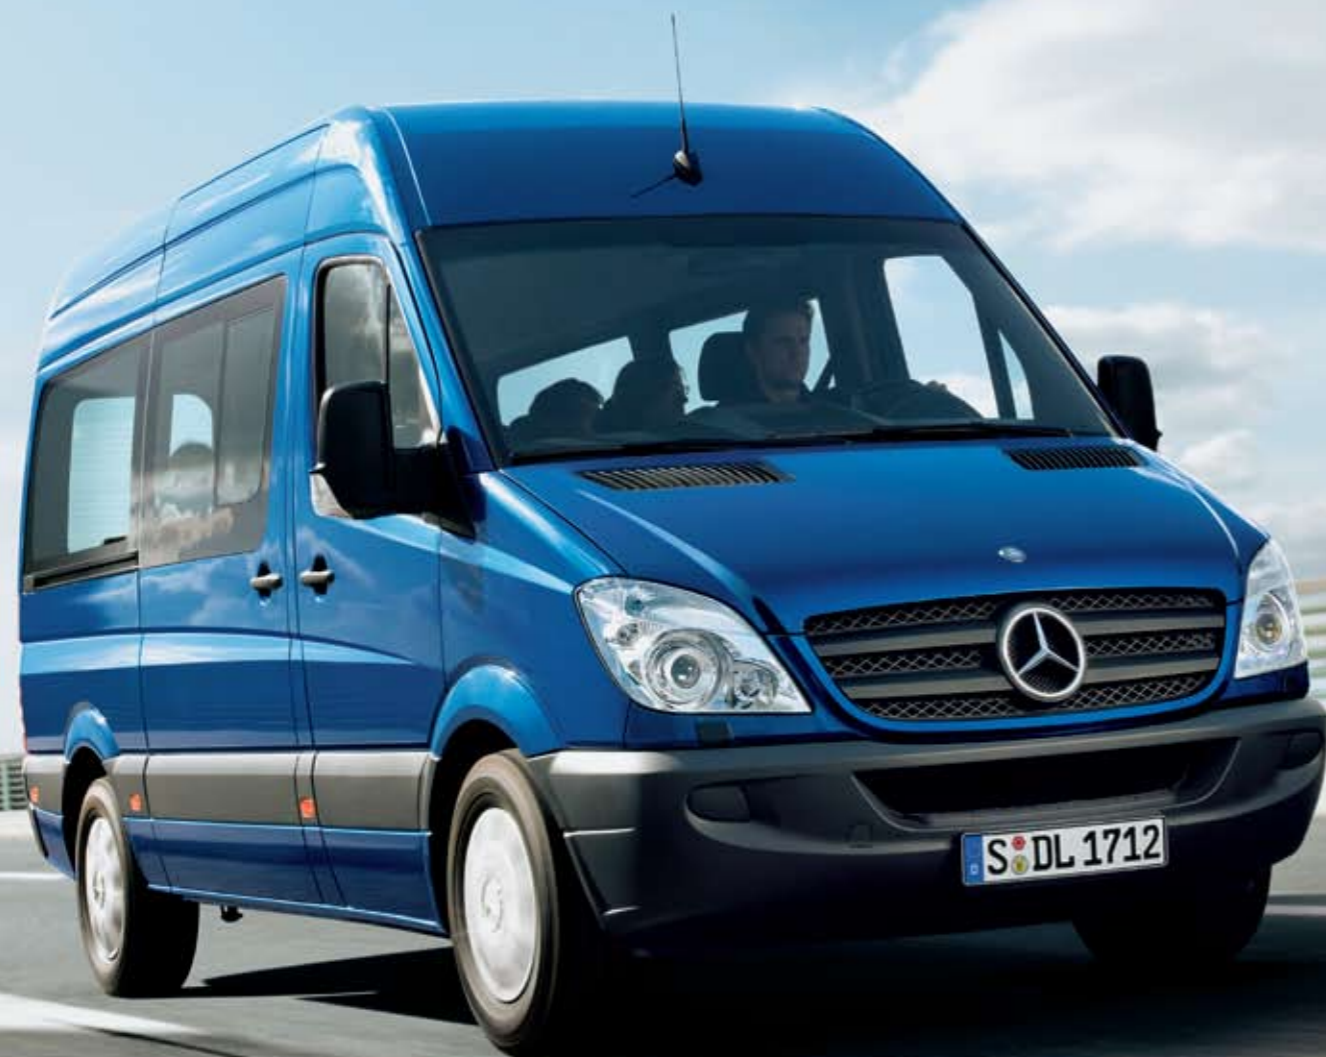

Sicherer, komfortabler Fahrspaß für  
alle Insassen im Sprinter Kombi.

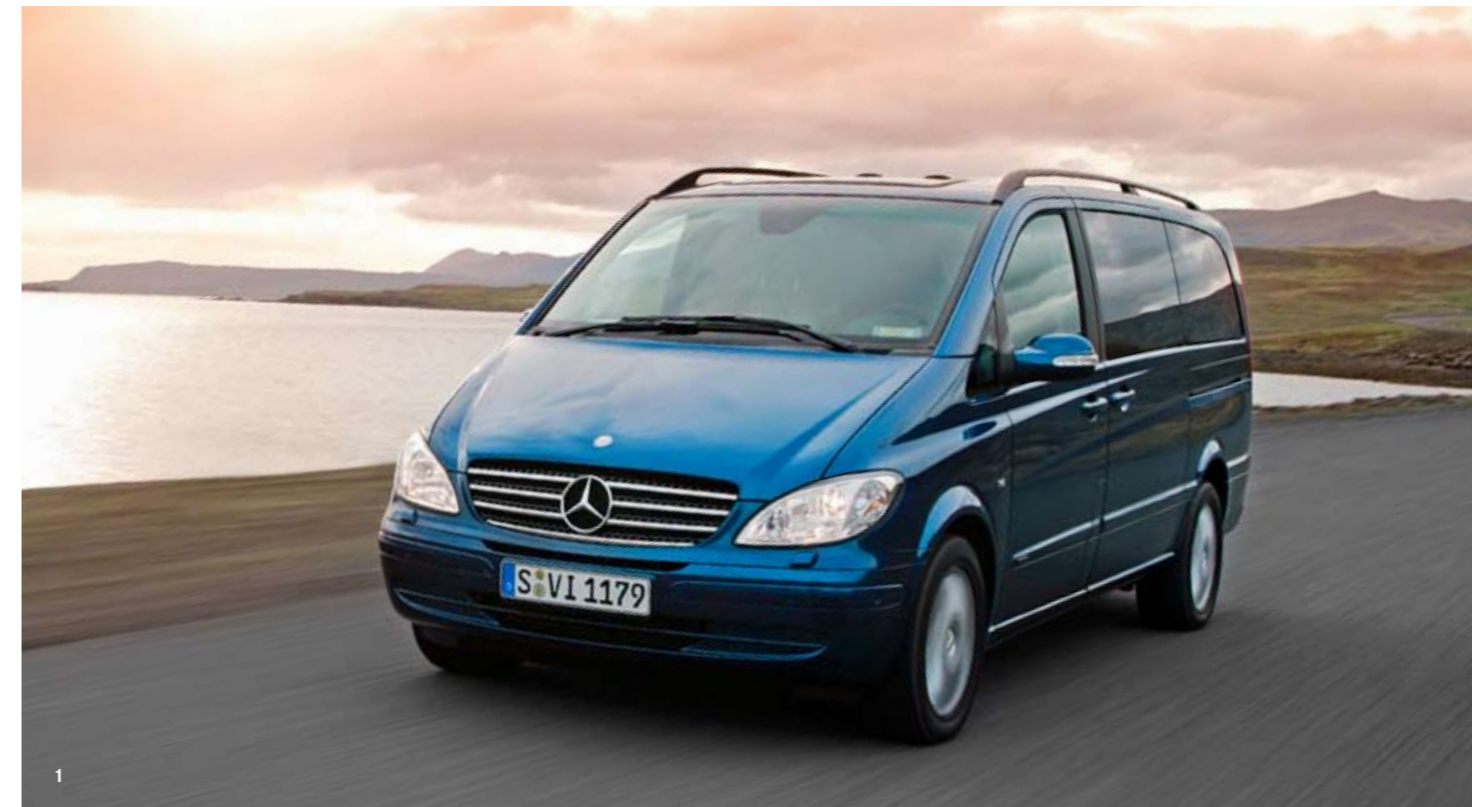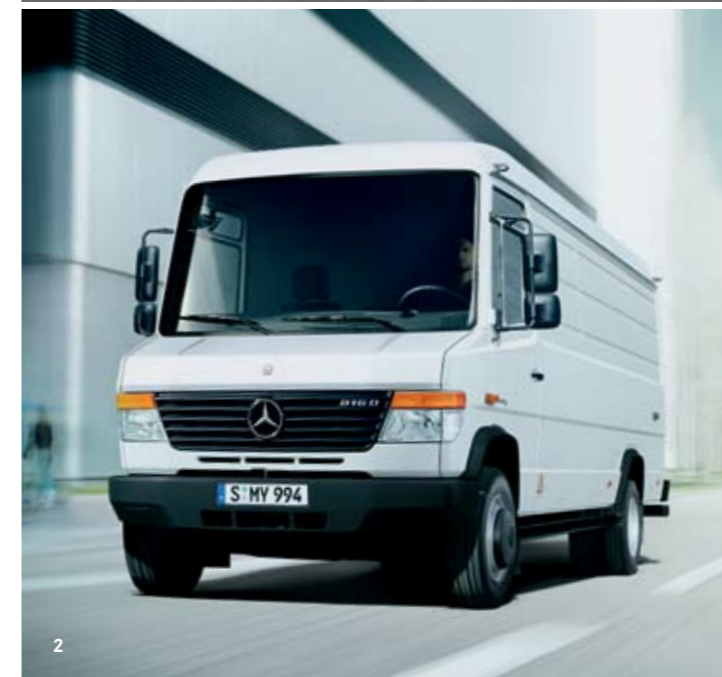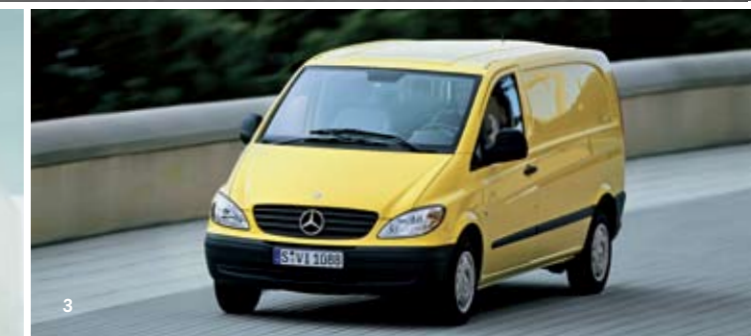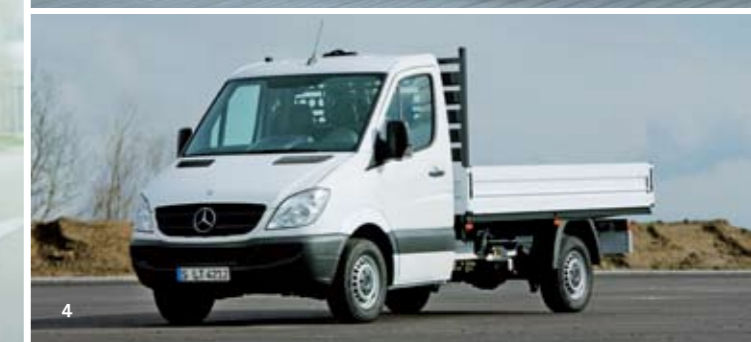

**Komfortabel, verlässlich, sparsam.**

**1** Komfort und Sicherheit für bis zu acht Personen: der Viano CDI 3.0. **2** Der Mercedes-Benz Vario löst flexibel auch größeren Transportbedarf. **3** Kombiniert Flexibilität und Design: der Mercedes-Benz Vito. **4** Der Mercedes-Benz Sprinter ist mit Karosserieaufbauten für jeden Bedarf erhältlich.

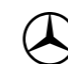

Mercedes-Benz

# Mercedes-Benz Vans. Zuverlässige und effiziente Transportspezialisten mit dem Erfolgsgarant „Sprinter“.

Durch Perfektion und Liebe zum Detail erreicht Mercedes-Benz Vans eine herausragende Produktqualität und setzt mit wegweisenden Innovationen und hoher Wertbeständigkeit immer wieder neue Maßstäbe. So schafft die Marke echten Mehrwert für den Kunden.

**Mercedes-Benz Sprinter: Produktprogramm mit Zukunftstechnologie.** Die Transporter-Baureihe Sprinter, in der NAFTA-Region unter den Marken Freightliner und seit Anfang 2010 auch unter Mercedes-Benz erhältlich, wartet mit einer zukunftsweisenden Technologie auf: Im Herbst 2009 haben wir das Produktprogramm mit verbrauchoptimierten BlueEFFICIENCY-Modellen erweitert. Die Verbrauchsreduzierung liegt bei diesen Modellen bei bis zu zwei Litern pro 100 Kilometern. Der Sprinter wurde in seiner Klasse bis 3,5 Tonnen erneut zum „Kurier-, Express- und Post-Transporter des Jahres“ gewählt.

**Mercedes-Benz Vito: Erfolg durch Funktionalität und Design.** Ebenfalls ein „KEP-Transporter des Jahres“ ist der Mercedes-Benz Vito, der in seiner Klasse der Transporter bis 3,2 Tonnen bereits zum vierten Mal in Folge siegte. In der Kategorie Großraumfahrzeuge

für das Handwerk ist der Vito das Modell der Wahl. Er ist in den Versionen Kastenwagen, Kombi und Mixto erhältlich. Außerdem prägt er das Straßenbild Londons: Dort macht er als einziger Wettbewerber den traditionellen „Black Cabs“ Konkurrenz.

**Mercedes-Benz Viano: Flexibilität ist Trumpf beim Transport.** Erhältlich in unterschiedlichen Längen, Motorisierungen und Dachhöhen bieten die Modelle des Mercedes-Benz Viano die individuell passende Transportlösung. Ebenso wie der Mercedes-Benz Vito laufen die Fahrzeuge im Werk Vitoria der Daimler AG im spanischen Baskenland vom Band. Der Rohbau des Viano ist zu 93 Prozent automatisiert. Lasertechnik zum Schneiden und Schweißen sowie Roboter in Produktion und Montage sind das Rückgrat des Produktionsablaufs.

**Mercedes-Benz Vario: gewappnet für jeden Bedarf.** Ob als Kombi-, Kasten- oder Pritschenwagen, als Kipper oder mit Doppelkabine: Die Modelle von Mercedes-Benz Vario mit einem zulässigen Gesamtgewicht von 5,99 bis 7,49 Tonnen sorgen dank vielfältiger Variationsmöglichkeiten auch bei größeren Transporten für eine zuverlässige und effiziente Beförderung.

Beschäftigte Mercedes-Benz Vans 2009 (31.12.)

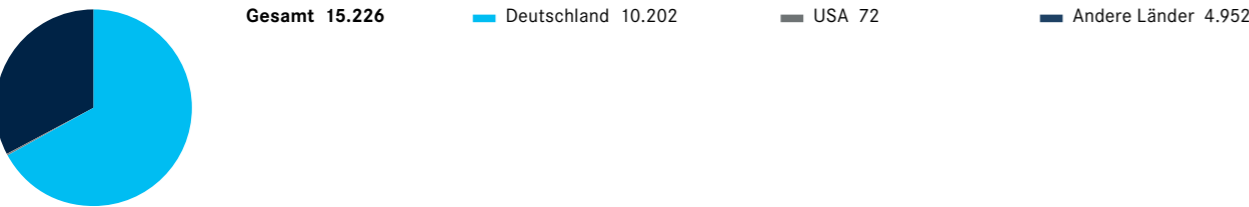

Quelle: Geschäftsbericht Daimler AG, 2009

| Mercedes-Benz Vans                          | 2009    | Absatz                      | 2009    |
|---------------------------------------------|---------|-----------------------------|---------|
| Werte in Millionen EUR / Umsatzrendite in % |         | in Einheiten                |         |
| EBIT                                        | 26      | nach Baureihen              |         |
| Umsatz                                      | 6.215   | Mid-Size Vans               | 57.928  |
| Umsatzrendite                               | 0,4     | Large Vans                  | 107.645 |
| Sachinvestitionen                           | 113     | Absatz sonstige             | 3       |
| Forschungs- und Entwicklungsleistungen      | 193     | Gesamt                      | 165.576 |
| Absatz (Einheiten)                          | 165.576 | nach Regionen               |         |
| Beschäftigte (31.12.)                       | 15.226  | in Einheiten                |         |
|                                             |         | Westeuropa                  | 128.134 |
|                                             |         | davon Deutschland           | 58.185  |
|                                             |         | Osteuropa                   | 10.980  |
|                                             |         | USA                         | 1.604   |
|                                             |         | Lateinamerika (ohne Mexiko) | 9.453   |
|                                             |         | Übrige Märkte               | 15.405  |
|                                             |         | Gesamt                      | 165.576 |

Trotz eines schwierigen Marktumfeldes hat Mercedes-Benz Vans seine führende Marktposition im europäischen Markt weiter ausgebaut und das Modellportfolio mit effizienten Technologien deutlich aufgewertet.

Mercedes-Benz Transporter Absatz (in Einheiten)

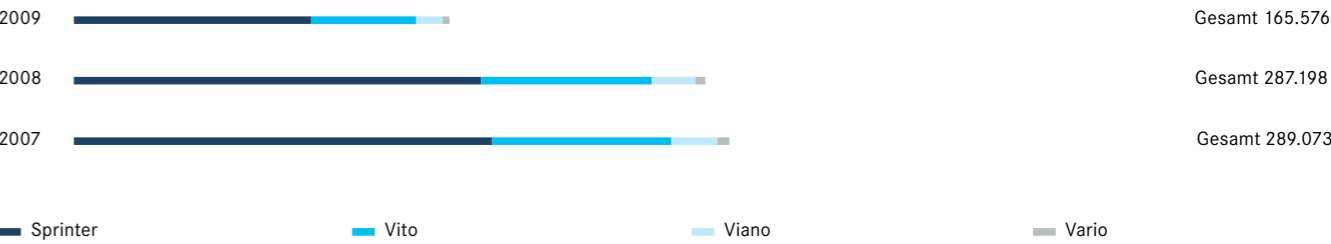

Quelle: Geschäftsbericht Daimler AG, 2009

Daimler Buses.

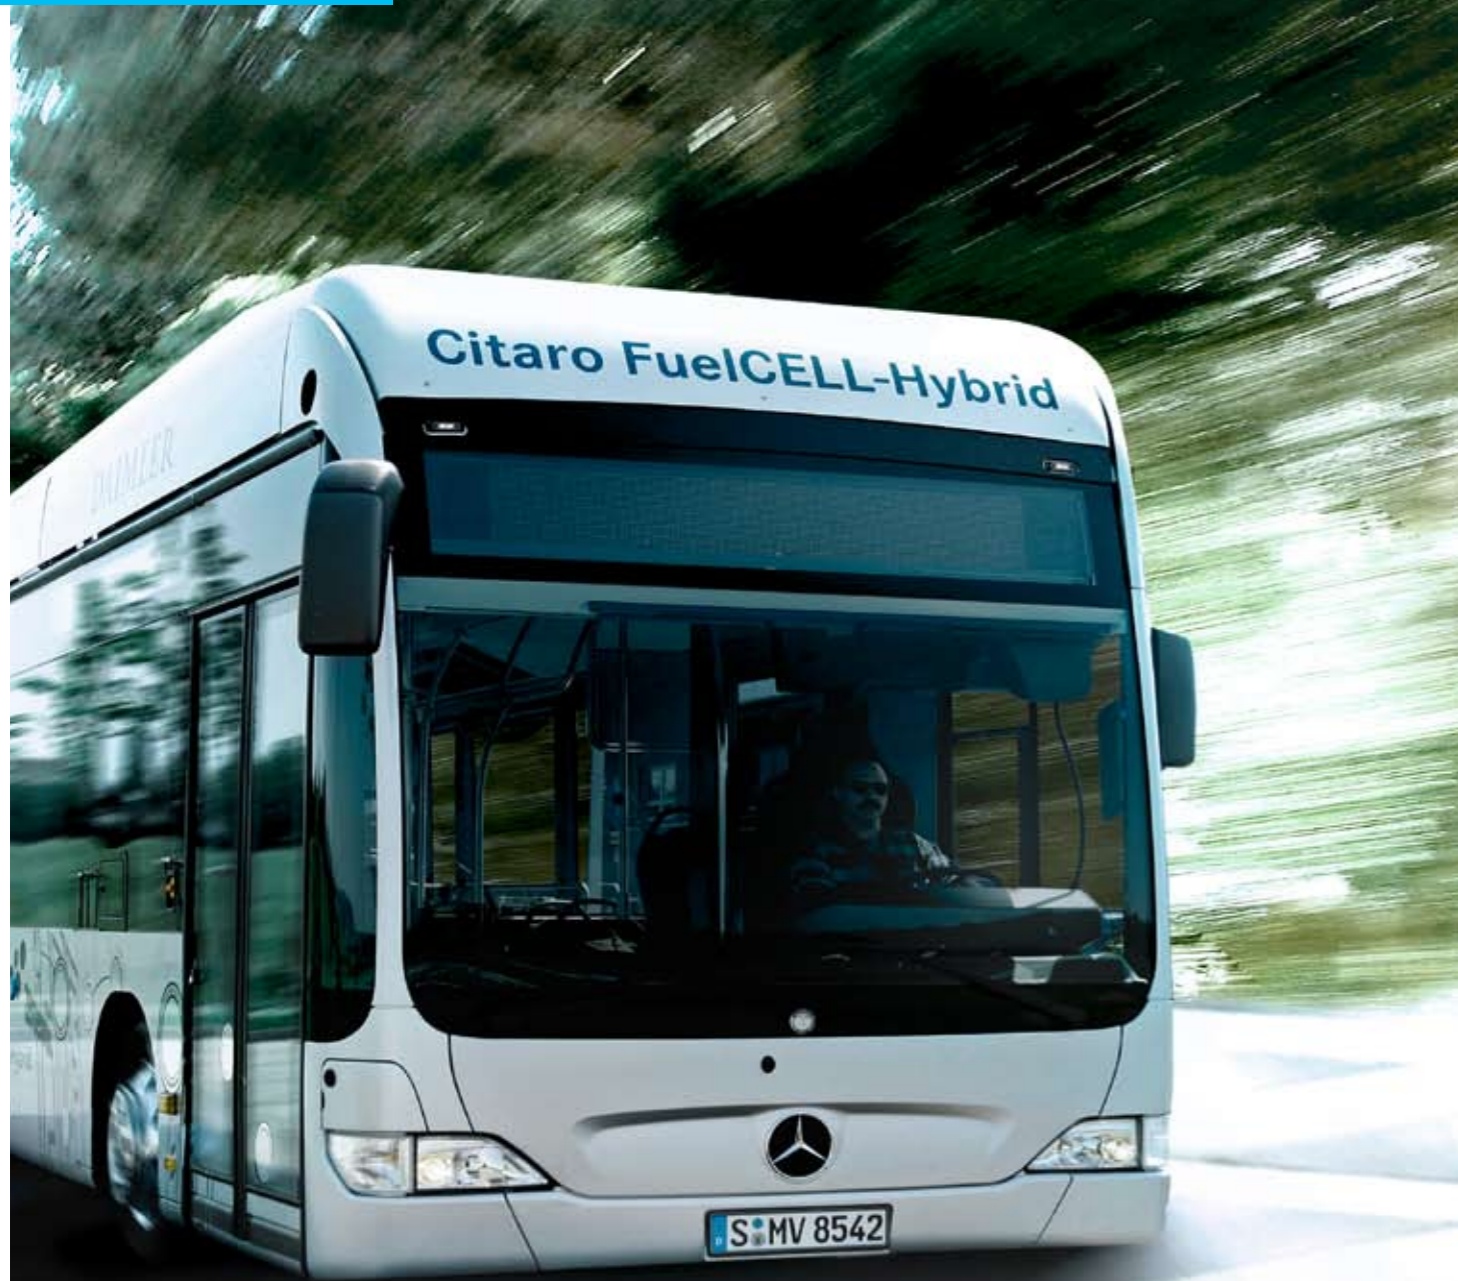

Von der Vision zur Realität: Der Mercedes-Benz Citaro FuelCELL Hybrid ist die neueste Generation emissionsfreier Busse.

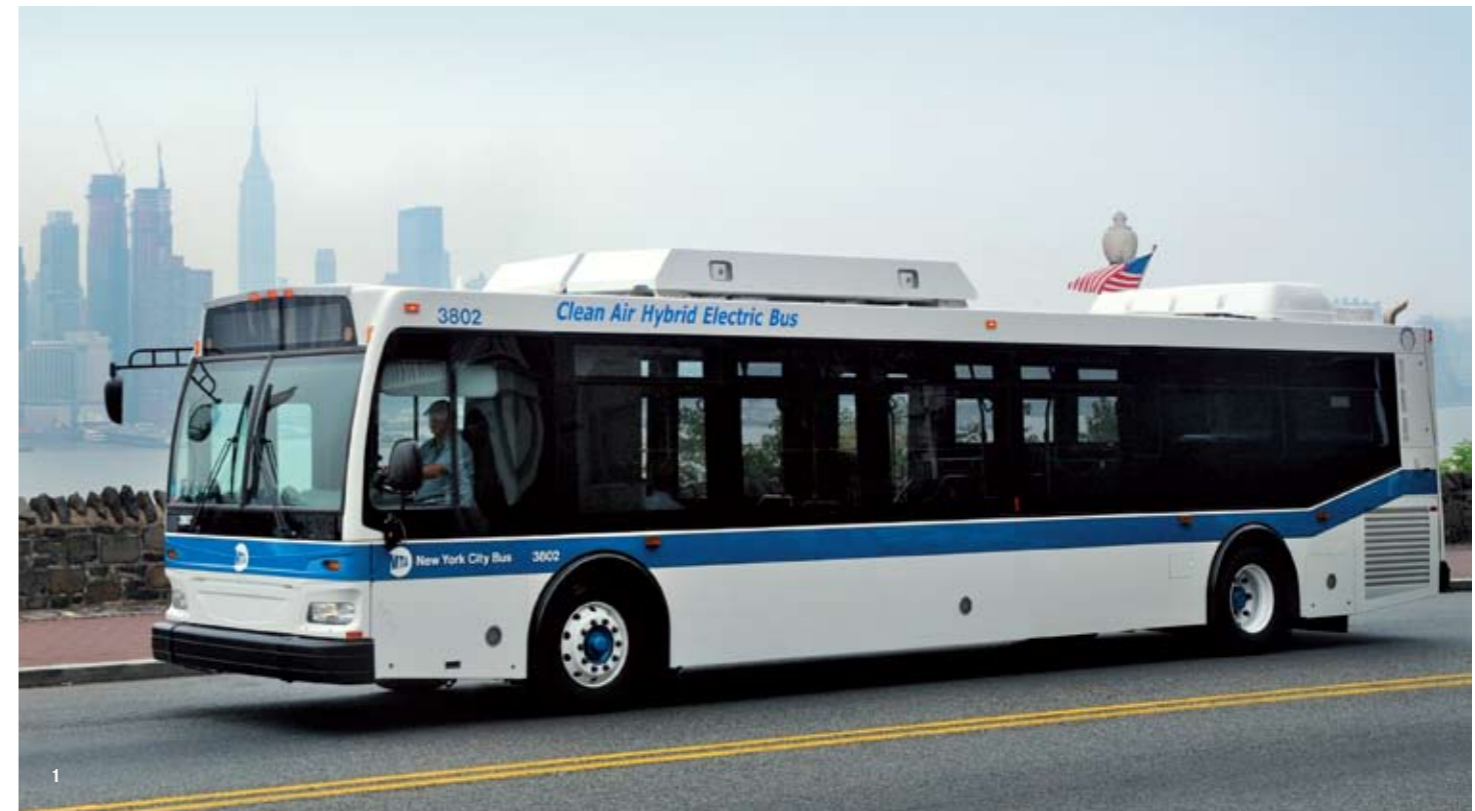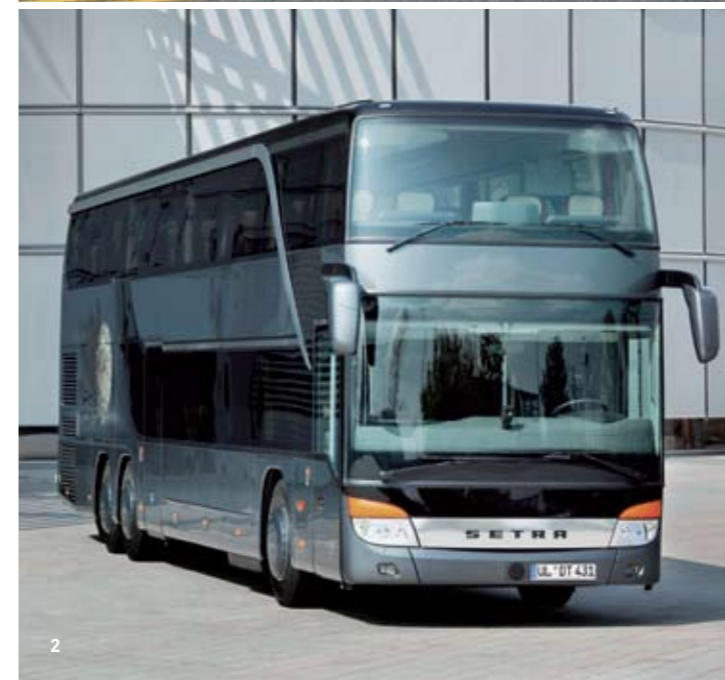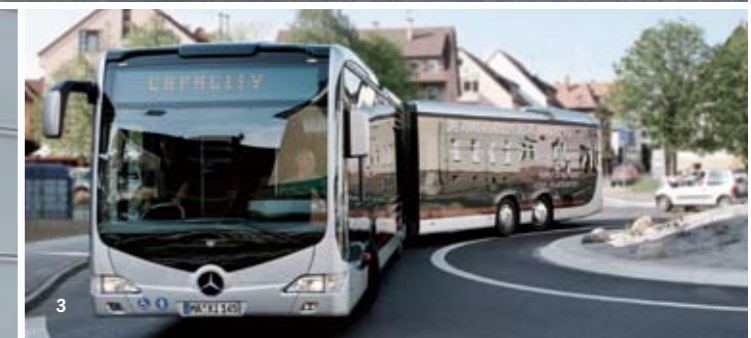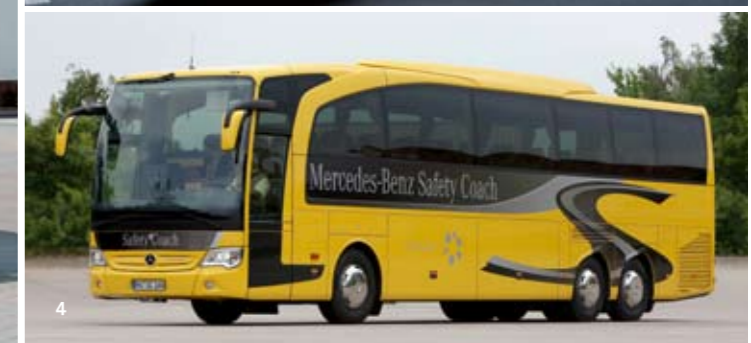

Sicher, bequem, sauber.

1 Der Orion Hybrid hat sich in Nordamerika bereits als Stadtbuss etabliert. 2 Der Setra TopClass 400 verspricht sicheres Reisen mit höchstem Komfort. 3 Seit April 2007 am Markt: der Groß-Linienbus Mercedes-Benz CapaCity. 4 Der Mercedes-Benz Travego wurde bereits 2006 von Fachleuten als sicherster Reisebus der Welt bewertet.

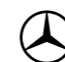

Mercedes-Benz

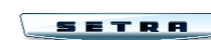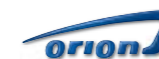

# Daimler Buses. Rund um den Globus vertrauen Kunden auf die weltweite Nummer eins im Busgeschäft.

Fahrzeuge von Daimler Buses verbinden Qualität mit sehr guter Wirtschaftlichkeit und höchsten Sicherheitsstandards. Bei der Entwicklung und Erprobung von alternativen Antrieben setzt der Geschäftsbereich seinen Weg konsequent fort.

**Mercedes-Benz: Busse, die für Sicherheit und Vertrauen stehen.** Mercedes-Benz bietet als Technologieführer eine vollständige Omnibus-Produktpalette. Alle Fahrzeuge verkörpern die Verbindung von Premiumqualität mit Wirtschaftlichkeit und höchsten Sicherheitsstandards. Eine professionelle und globale Vertriebsstruktur sorgt für eine lösungsorientierte, verantwortungsvolle Kundenbetreuung weltweit.

**Setra: „Best in Class“-Omnibusse für individuelle Ansprüche.** Setra erfüllt höchste Ansprüche an Komfort, Individualität sowie Qualität und setzt Akzente in Technik, Ausstattung und Design. Hohe Sicherheitsstandards, Wirtschaftlichkeit sowie ein umfassendes Serviceangebot zeichnen die Marke Setra ebenso aus wie eine persönliche und engagierte Kundenbetreuung.

**Orion: Weltmarktführer bei Hybridbussen.** Orion ist eine traditionelle Marke im großen nordamerikanischen Markt: Über 230 Städte und Metropolen in den Vereinigten Staaten verlassen sich seit Jahrzehnten auf Orion Busse. Mit der Hybridtechnologie ist die Marke Orion Weltmarktführer.

**OMNIplus: umfassender Service für den europäischen Markt.** OMNIplus ist die Dienstleistungsmarke für Mercedes-Benz und Setra Omnibusse. Hinter der Marke stehen Omnibusspezialisten sowie kundenorientierte Angebote und Leistungen, die in dem dichtesten Omnibus-ServiceNetz in Europa erbracht werden.

Beschäftigte Daimler Buses 2009 (31.12.)

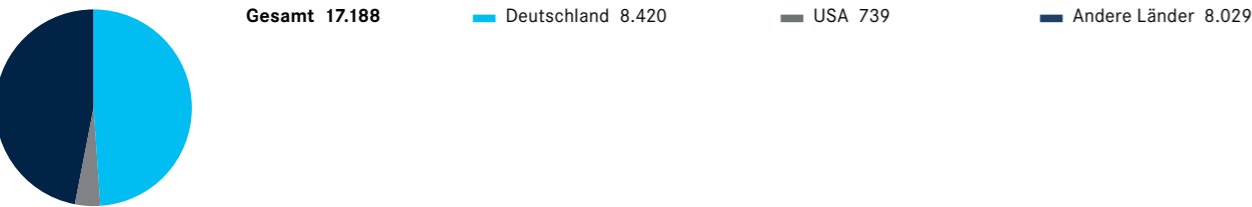

Quelle: Geschäftsbericht Daimler AG, 2009

| Daimler Buses                               | 2009   | Absatz                      | 2009   |
|---------------------------------------------|--------|-----------------------------|--------|
| Werte in Millionen EUR / Umsatzrendite in % |        | nach Regionen in Einheiten  |        |
| EBIT                                        | 183    | Westeuropa                  | 7.219  |
| Umsatz                                      | 4.238  | davon Deutschland           | 2.831  |
| Umsatzrendite                               | 4,3    | NAFTA                       | 3.899  |
| Sachinvestitionen                           | 78     | Lateinamerika (ohne Mexiko) | 16.286 |
| Forschungs- und Entwicklungsleistungen      | 212    | Übrige Märkte               | 5.078  |
| Absatz (Einheiten)                          | 32.482 | Gesamt                      | 32.482 |
| Beschäftigte (31.12.)                       | 17.188 |                             |        |

Daimler Buses ist weltweit führender Hersteller von Omnibussen über acht Tonnen. Im Fokus steht die Weiterentwicklung alternativer Antriebstechnologien.

Daimler Buses Absatz (in Einheiten)

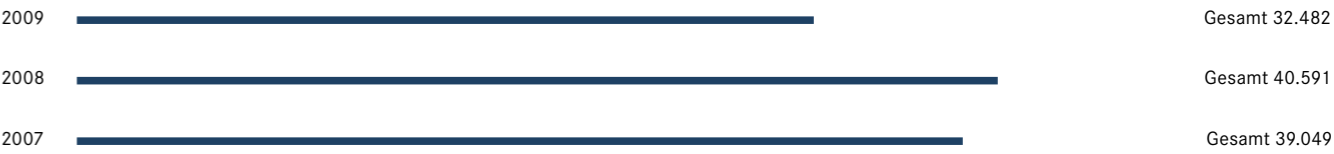

Quelle: Geschäftsbericht Daimler AG, 2009

Daimler Financial Services.

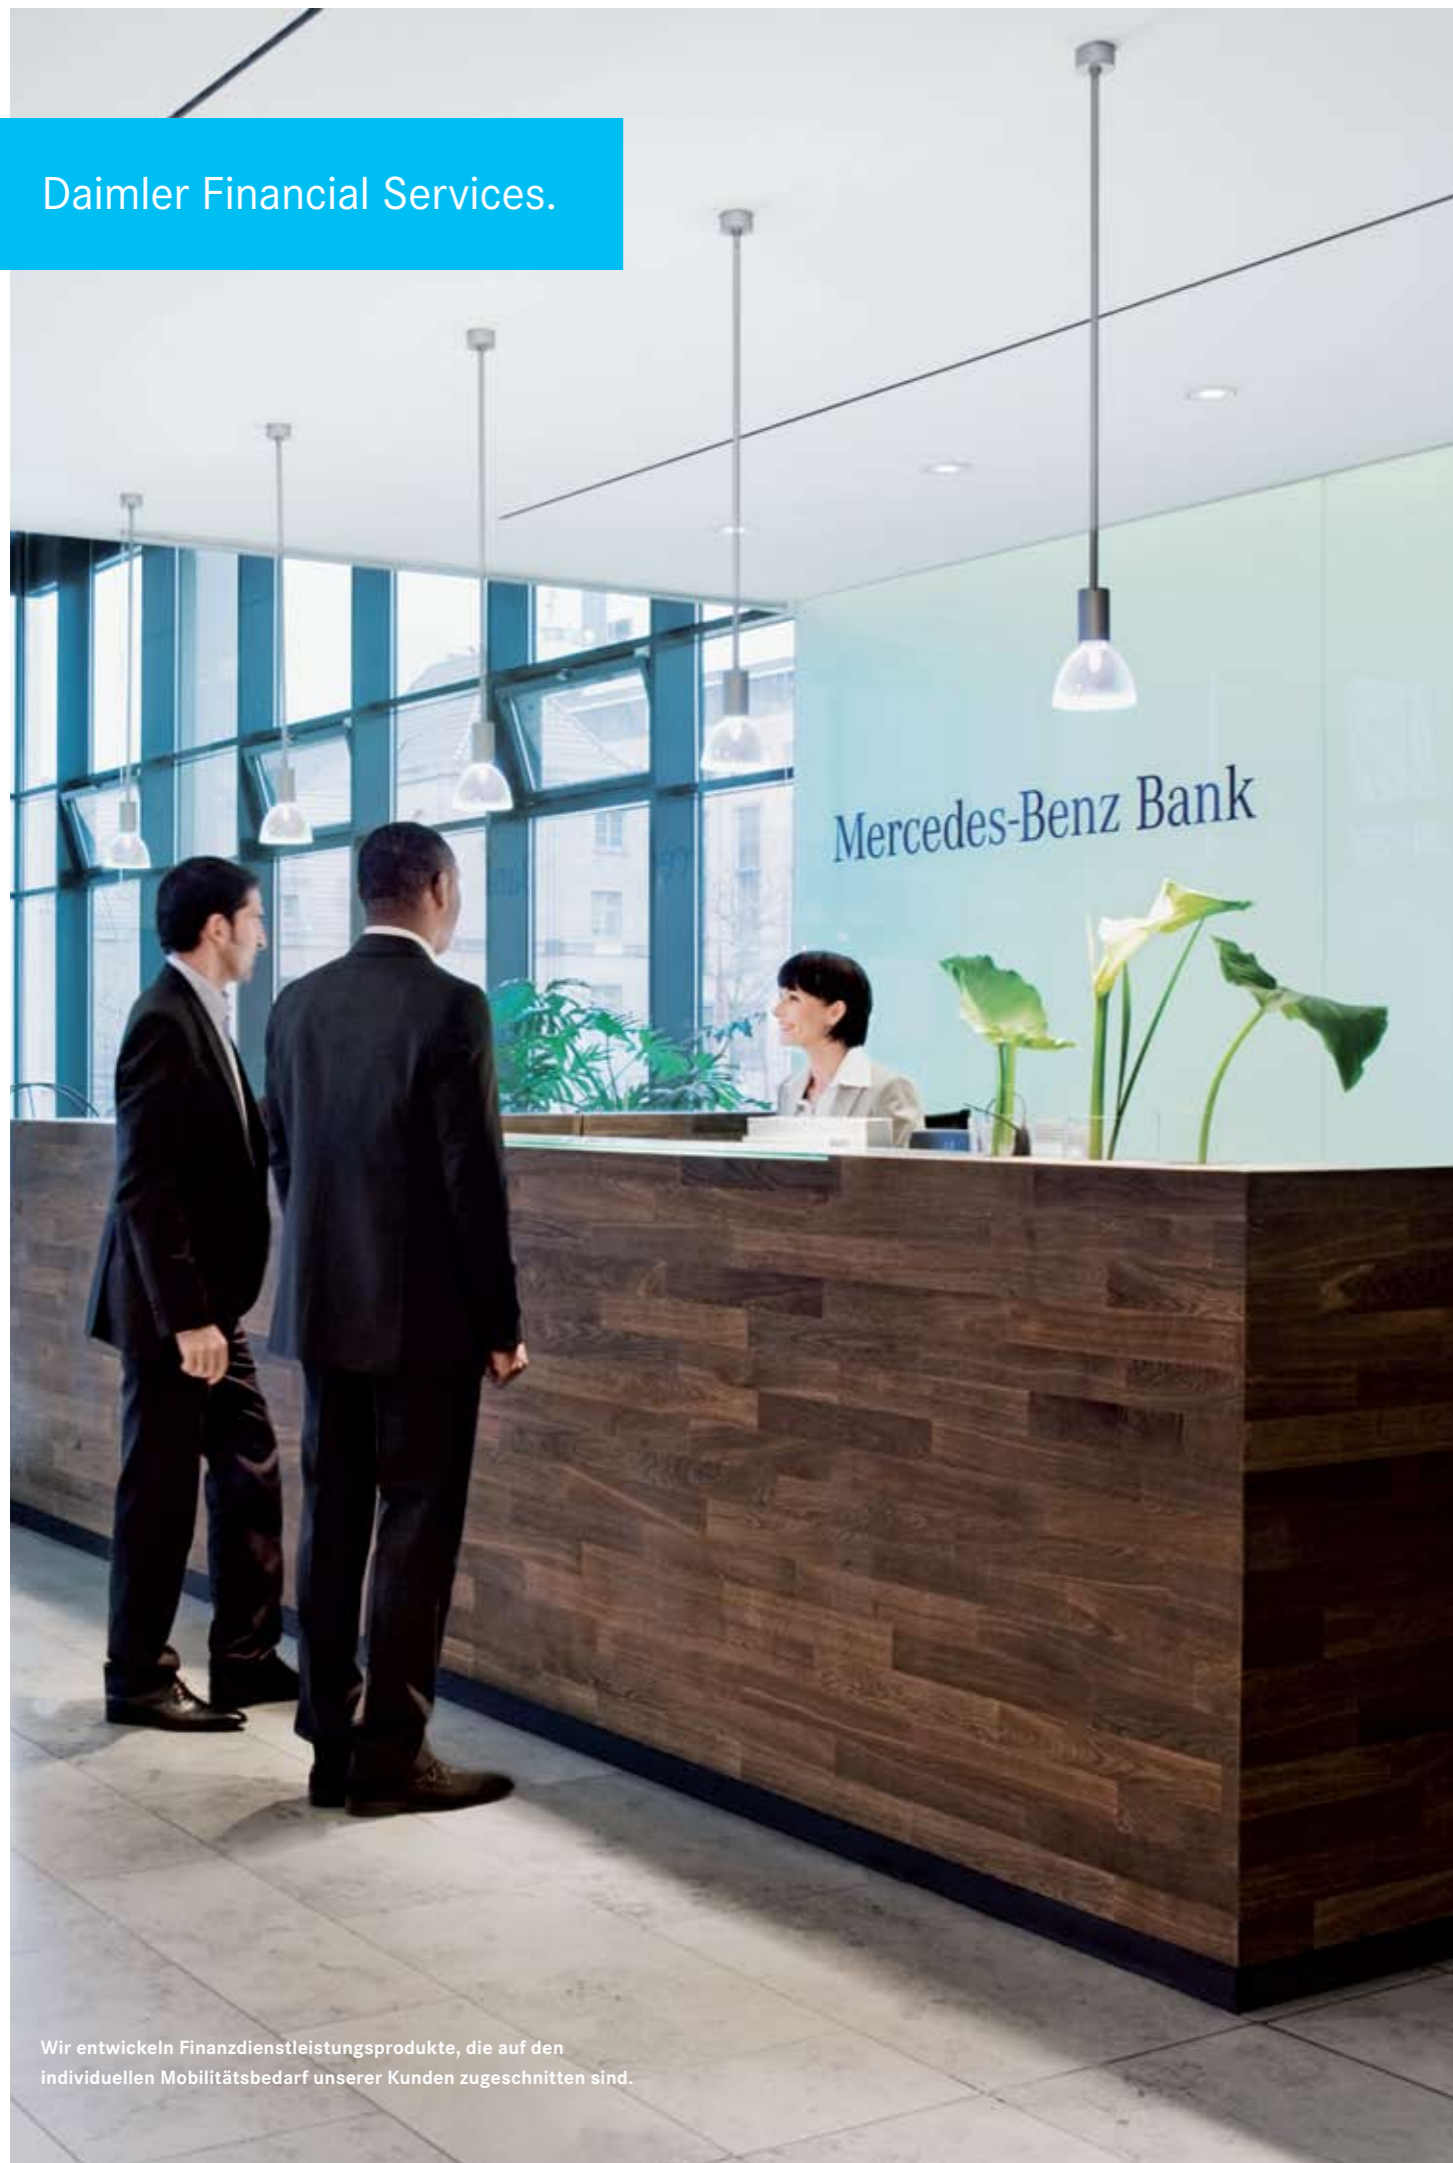

Wir entwickeln Finanzdienstleistungsprodukte, die auf den individuellen Mobilitätsbedarf unserer Kunden zugeschnitten sind.

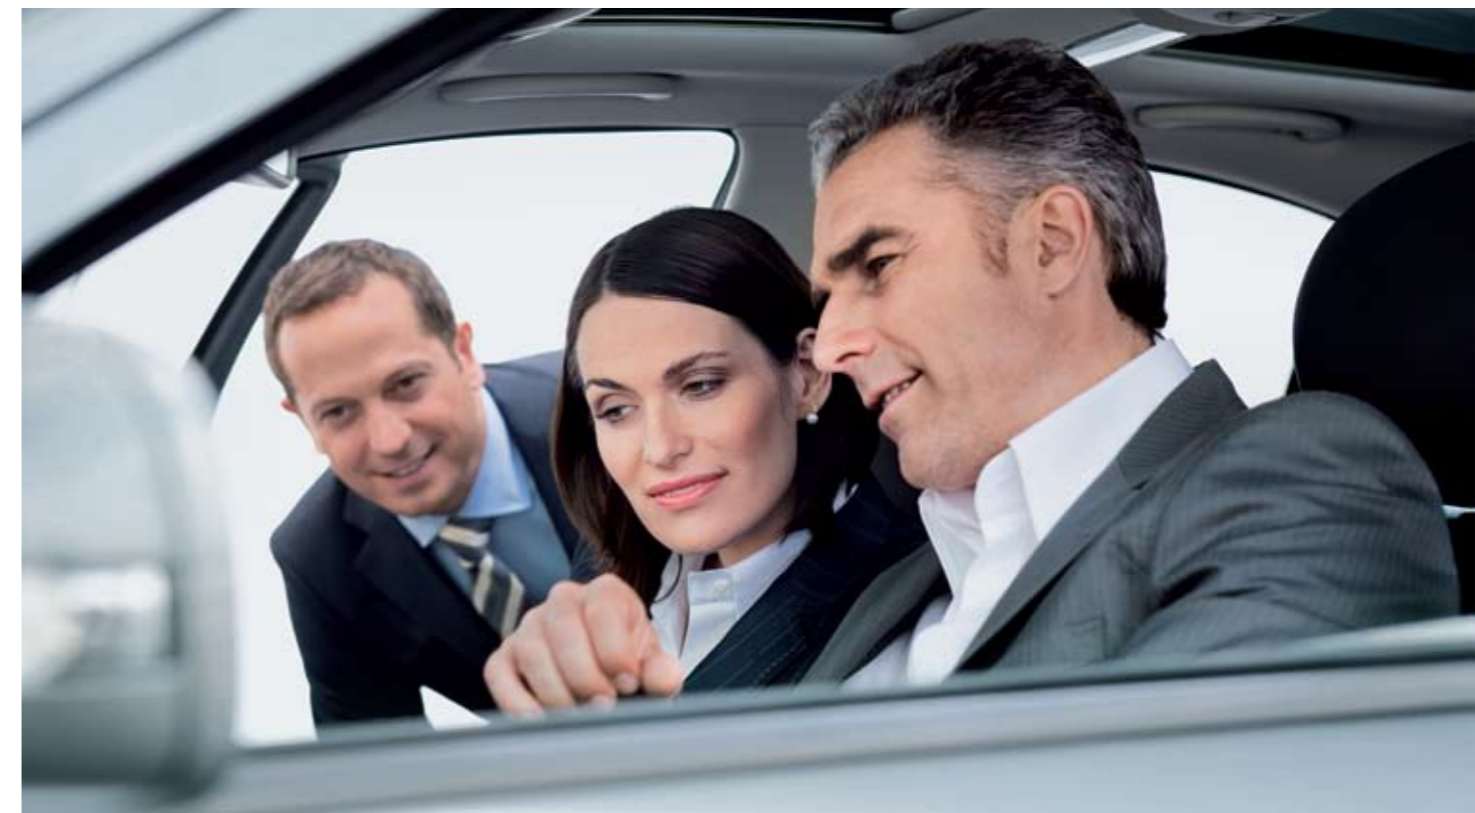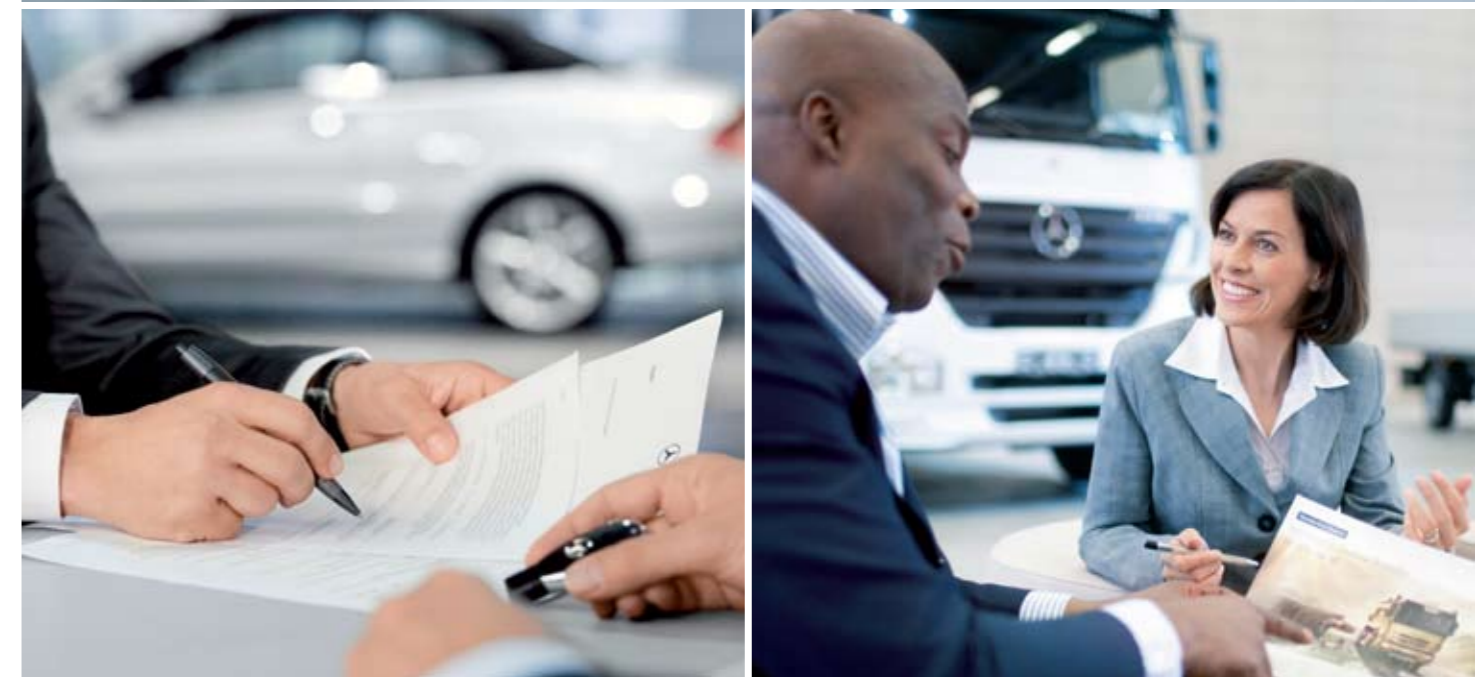

**Verantwortungsvoll, partnerschaftlich, weltweit führend.**

Beratung und individuelle Finanzdienstleistungsprodukte sind unsere Stärke. Unsere umfangreiche Leistungspalette umfasst unter anderem Finanzierung, Leasing, Versicherungen und Fuhrparkmanagement. Unsere weltweit über 6.000 Mitarbeiter sind in mehr als 40 Ländern im Einsatz und kompetenter Partner für Kunden und Händler.

Mercedes-Benz Bank

Mercedes-Benz Financial

Daimler Truck Financial

# Daimler Financial Services. Maßgeschneiderte Finanzdienstleistungen rund um das Automobil für Kunden und Händler weltweit.

Für langfristigen Erfolg braucht man heute neben faszinierenden Automobilen auch erstklassige Finanzdienstleistungen.

**Das Geschäftsfeld Financial Services.** Als einer der führenden herstellerverbundenen Finanzdienstleister im Automobilsektor und weltgrößter Nutzfahrzeugfinanzierer erbringt die Daimler Financial Services AG täglich weltweit ein breites Spektrum ausgezeichneter Finanzierungs- und Versicherungsleistungen. Unser Tochterunternehmen mit Hauptsitz in Berlin unterstützt so mit maßgeschneiderten Finanzdienstleistungen den Absatz unserer Fahrzeuge in mehr als 40 Ländern und beschäftigt weltweit fast 7.000 Mitarbeiter.

**Unser Erfolgsrezept: Premiumleistungen aus einer Hand.** Daimler Financial Services finanziert und verleast mehr als jedes dritte Fahrzeug aus der weltweiten Produktion von Daimler. Alle 30 Sekunden schließen wir einen Leasing- oder Finanzierungsvertrag für ein Fahrzeug des Konzerns ab. Unsere Leistungspalette umfasst

- Finanzierung
- Leasing
- Versicherungen
- Fuhrparkmanagement
- Geldanlagen und Kreditkarten

Wir betreuen über 2,4 Millionen laufende Verträge im Gesamtwert von über 58 Milliarden Euro. Dies macht uns zu einem integralen Bestandteil der Daimler Familie.

**Exzellenz verpflichtet.** Unsere Vision ist es, in enger Zusammenarbeit mit unseren Fahrzeugkollegen der beste Finanzdienstleister für unsere Kunden und Händler zu sein. Damit Autoträume für unsere Kunden wahr werden, entwickeln wir gemeinsam mit den Fahrzeugsparten und den Händlern Finanzdienstleistungsprodukte, die den individuellen Mobilitätsbedarf unserer Kunden erfüllen. Darüber hinaus ist gesellschaftliches Engagement fester Bestandteil unserer globalen Identität. Deswegen fördern wir rund um die Welt Initiativen, die Menschen zur Selbsthilfe verhelfen. Weil es naheliegt, bildet einen der Schwerpunkte der Umgang mit Finanzen: zum Beispiel bei Mikrofinanzierungsinitiativen oder Bildungsprojekten wie die Street UniverCity in Berlin. Im Rahmen von Community Relations ist der unternehmensweite „Day of Caring“ eine Gelegenheit für unsere Mitarbeiter, ihr persönliches Engagement zur Stärkung der Gemeinschaft herauszustellen: Hier werden zum Beispiel in Zusammenarbeit mit Habitat for Humanity in Korea, USA oder Kanada Unterkünfte für Bedürftige gebaut und gemeinnützige Institutionen für Jugendliche errichtet oder renoviert.

Beschäftigte Daimler Financial Services 2009 (31.12.)

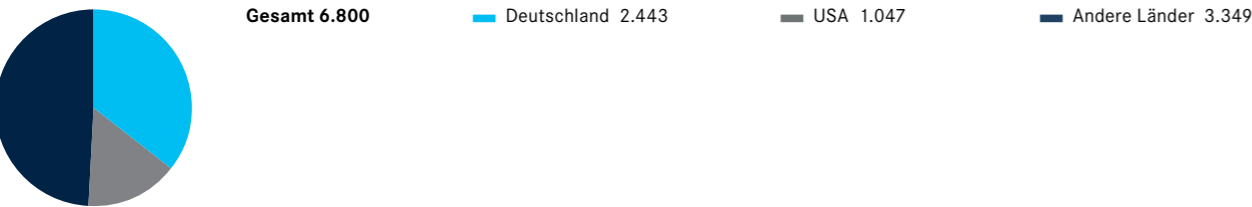

Quelle: Geschäftsbericht Daimler AG, 2009

| Daimler Financial Services                  | 2009   | Vertragsvolumen        | 2009      |
|---------------------------------------------|--------|------------------------|-----------|
| Werte in Millionen EUR / Umsatzrendite in % |        | in Einheiten           |           |
| EBIT                                        | 9      | nach Fahrzeugsegmenten |           |
| Umsatz                                      | 11.996 | Mercedes-Benz Cars     | 1.524.000 |
| Neugeschäft                                 | 25.066 | Daimler Trucks         | 279.000   |
| Vertragsvolumen                             | 58.350 | Mercedes-Benz Vans     | 262.000   |
| Sachinvestitionen                           | 14     | Daimler Buses          | 37.000    |
| Beschäftigte (31.12.)                       | 6.800  | Drittmarken            | 316.000   |
|                                             |        | Gesamt                 | 2.418.000 |

|  |  |                  |                        |
|--|--|------------------|------------------------|
|  |  | nach Märkten     | Werte in Millionen EUR |
|  |  | Deutschland      | 16.137                 |
|  |  | Frankreich       | 1.812                  |
|  |  | Italien          | 1.517                  |
|  |  | UK               | 2.826                  |
|  |  | USA              | 16.204                 |
|  |  | Japan            | 2.171                  |
|  |  | Kanada           | 2.002                  |
|  |  | Australien       | 1.624                  |
|  |  | Brasilien        | 2.264                  |
|  |  | Südafrika        | 1.429                  |
|  |  | Restliche Märkte | 10.363                 |
|  |  | Gesamt*          | 58.350                 |

\* Summe auf Basis ungerundeter Zahlen

Vertragsvolumen Daimler Financial Services (Werte in Millionen EUR)

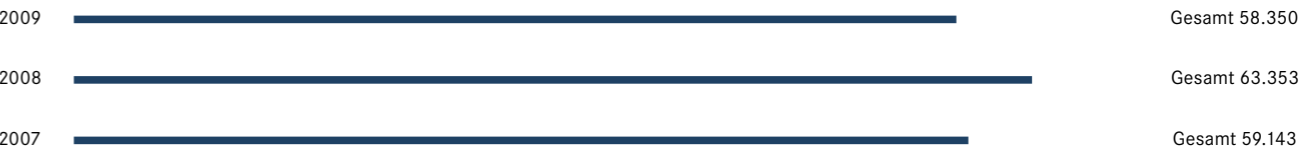

Quelle: Geschäftsbericht Daimler AG, 2009

Mercedes-Benz Cars

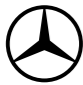

Mercedes-Benz

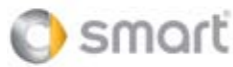

MAYBACH

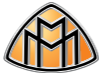

Daimler Trucks

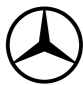

Mercedes-Benz

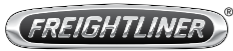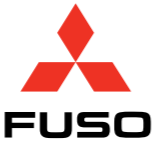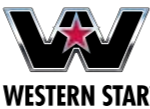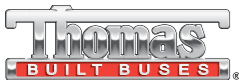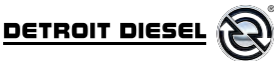

Mercedes-Benz Vans

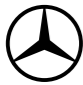

Mercedes-Benz

Daimler Buses

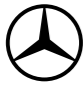

Mercedes-Benz

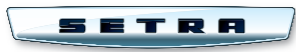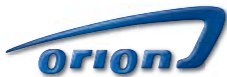

Daimler Financial Services

Mercedes-Benz Bank

Mercedes-Benz Financial

Daimler Truck Financial

Aktuelle Informationen zu Daimler:

Aktuelle Publikationen zum Herunterladen in der Rubrik „Downloads“:

Fragen und Anregungen an:

Bestellungen dieser Broschüre und anderer Publikationen unter:

[www.daimler.com](http://www.daimler.com)

[dialog@daimler.com](mailto:dialog@daimler.com)

[medialogistik@bts-spedition.de](mailto:medialogistik@bts-spedition.de)
