# Supplementary material
Source: publisher site journal article supplement (https://www.degruyterbrill.com/publication/isbn/9783110432879/downloadAsset/9783110432879_Elektronischer_Anhang_2.zip)
Supplement: Supplementary file 33 [file Daimler Verhaltensrichtlinien.pdf › Korpustexte/Korpustexte pdf/Daimler/Daimler Verhaltensrichtlinien.pdf]

DAIMLER

Verhaltensrichtlinie

## Der Spitzenleistung verpflichtet – Unsere Werte

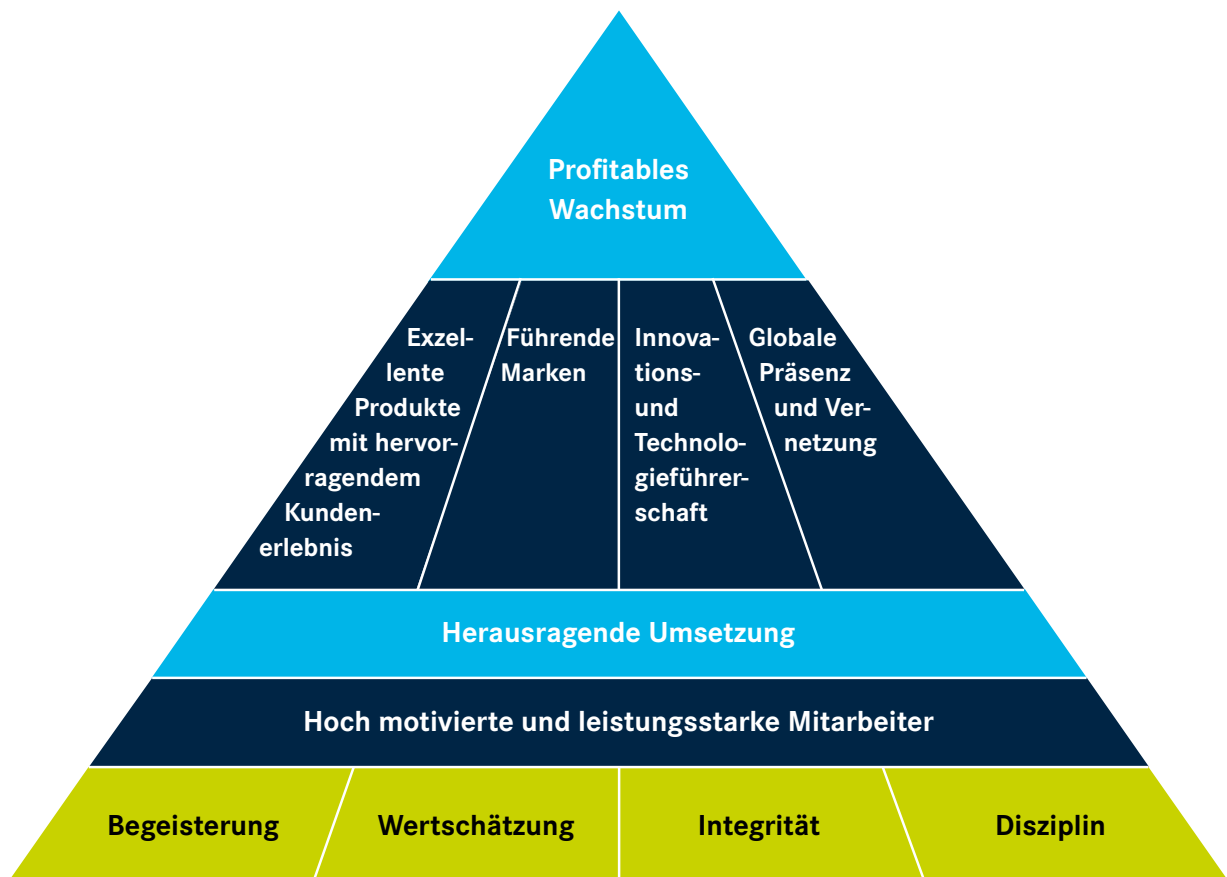

# Vorwort

**Liebe Kolleginnen, liebe Kollegen,**

Im Februar 2007

Der Schlüssel zu Spitzenleistungen, zu profitabilem Wachstum und Erfolg liegt nicht zuletzt in unserer Unternehmenskultur. Sie soll sich an Werten orientieren, die wir im Vorstand intensiv erörtert und verbindlich festgelegt haben: Begeisterung, Wertschätzung, Integrität und Disziplin. Wenn wir diese Werte leben, schaffen wir einen Orientierungsrahmen, der motiviert sowie Teamarbeit und vorbildliches Handeln in unserem Unternehmen fördert.

Integrität ist eine Voraussetzung für die Reputation und den wirtschaftlichen Erfolg eines global tätigen Konzerns, der im Fokus der Öffentlichkeit steht. Ein wesentliches Element von Integrität ist korrektes Verhalten im täglichen Geschäftsbetrieb und im Unternehmensalltag. Daimler befasst sich daher schon seit Jahren mit Fragen der Geschäfts- und Unternehmensethik sowie selbstverständlich der Einhaltung der rechtlichen Rahmenbedingungen.

Bereits im Juli 1999 hat der Konzern die erste für alle Mitarbeiter gültige Verhaltensrichtlinie veröffentlicht. 2003 wurde sie um die „Grundsätze zur sozialen Verantwortung“ ergänzt.

Seit 2006 wird die Verhaltensrichtlinie durch Konzernleitlinien und Konzernrichtlinien detailliert, die wir im Vorstand in enger Zusammenarbeit mit dem Compliance Committee erarbeitet und beschlossen haben. Die Konzernleitlinien und Konzernrichtlinien sollen einheitliche, praktisch anwendbare und inhaltlich schlüssige Hinweise für alltägliche Geschäftssituationen geben. Sie gelten wie die Verhaltensrichtlinie für alle Mitarbeiterinnen und Mitarbeiter; unsere Führungskräfte müssen dabei ihre Vorbildfunktion aktiv wahrnehmen.

Entscheidend ist, dass Sie alle die Unternehmenswerte, unsere Verhaltensrichtlinie sowie die dazugehörigen Konzernleitlinien und Konzernrichtlinien leben und als Maßstab Ihres Handelns nutzen sowie deren Inhalte aktiv kommunizieren. Nur so können wir den Erfolg von Daimler langfristig sichern.

Das gesamte Daimler Regelwerk ist auf den Seiten von Corporate Compliance im Mitarbeiterportal abrufbar unter: Unternehmen > Organisation > Konzernweite Funktionen > Corporate Compliance.



Dieter Zetsche



Rüdiger Grube

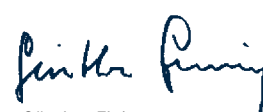

Günther Fleig



Bodo Uebber



Thomas Weber



Andreas Renschler

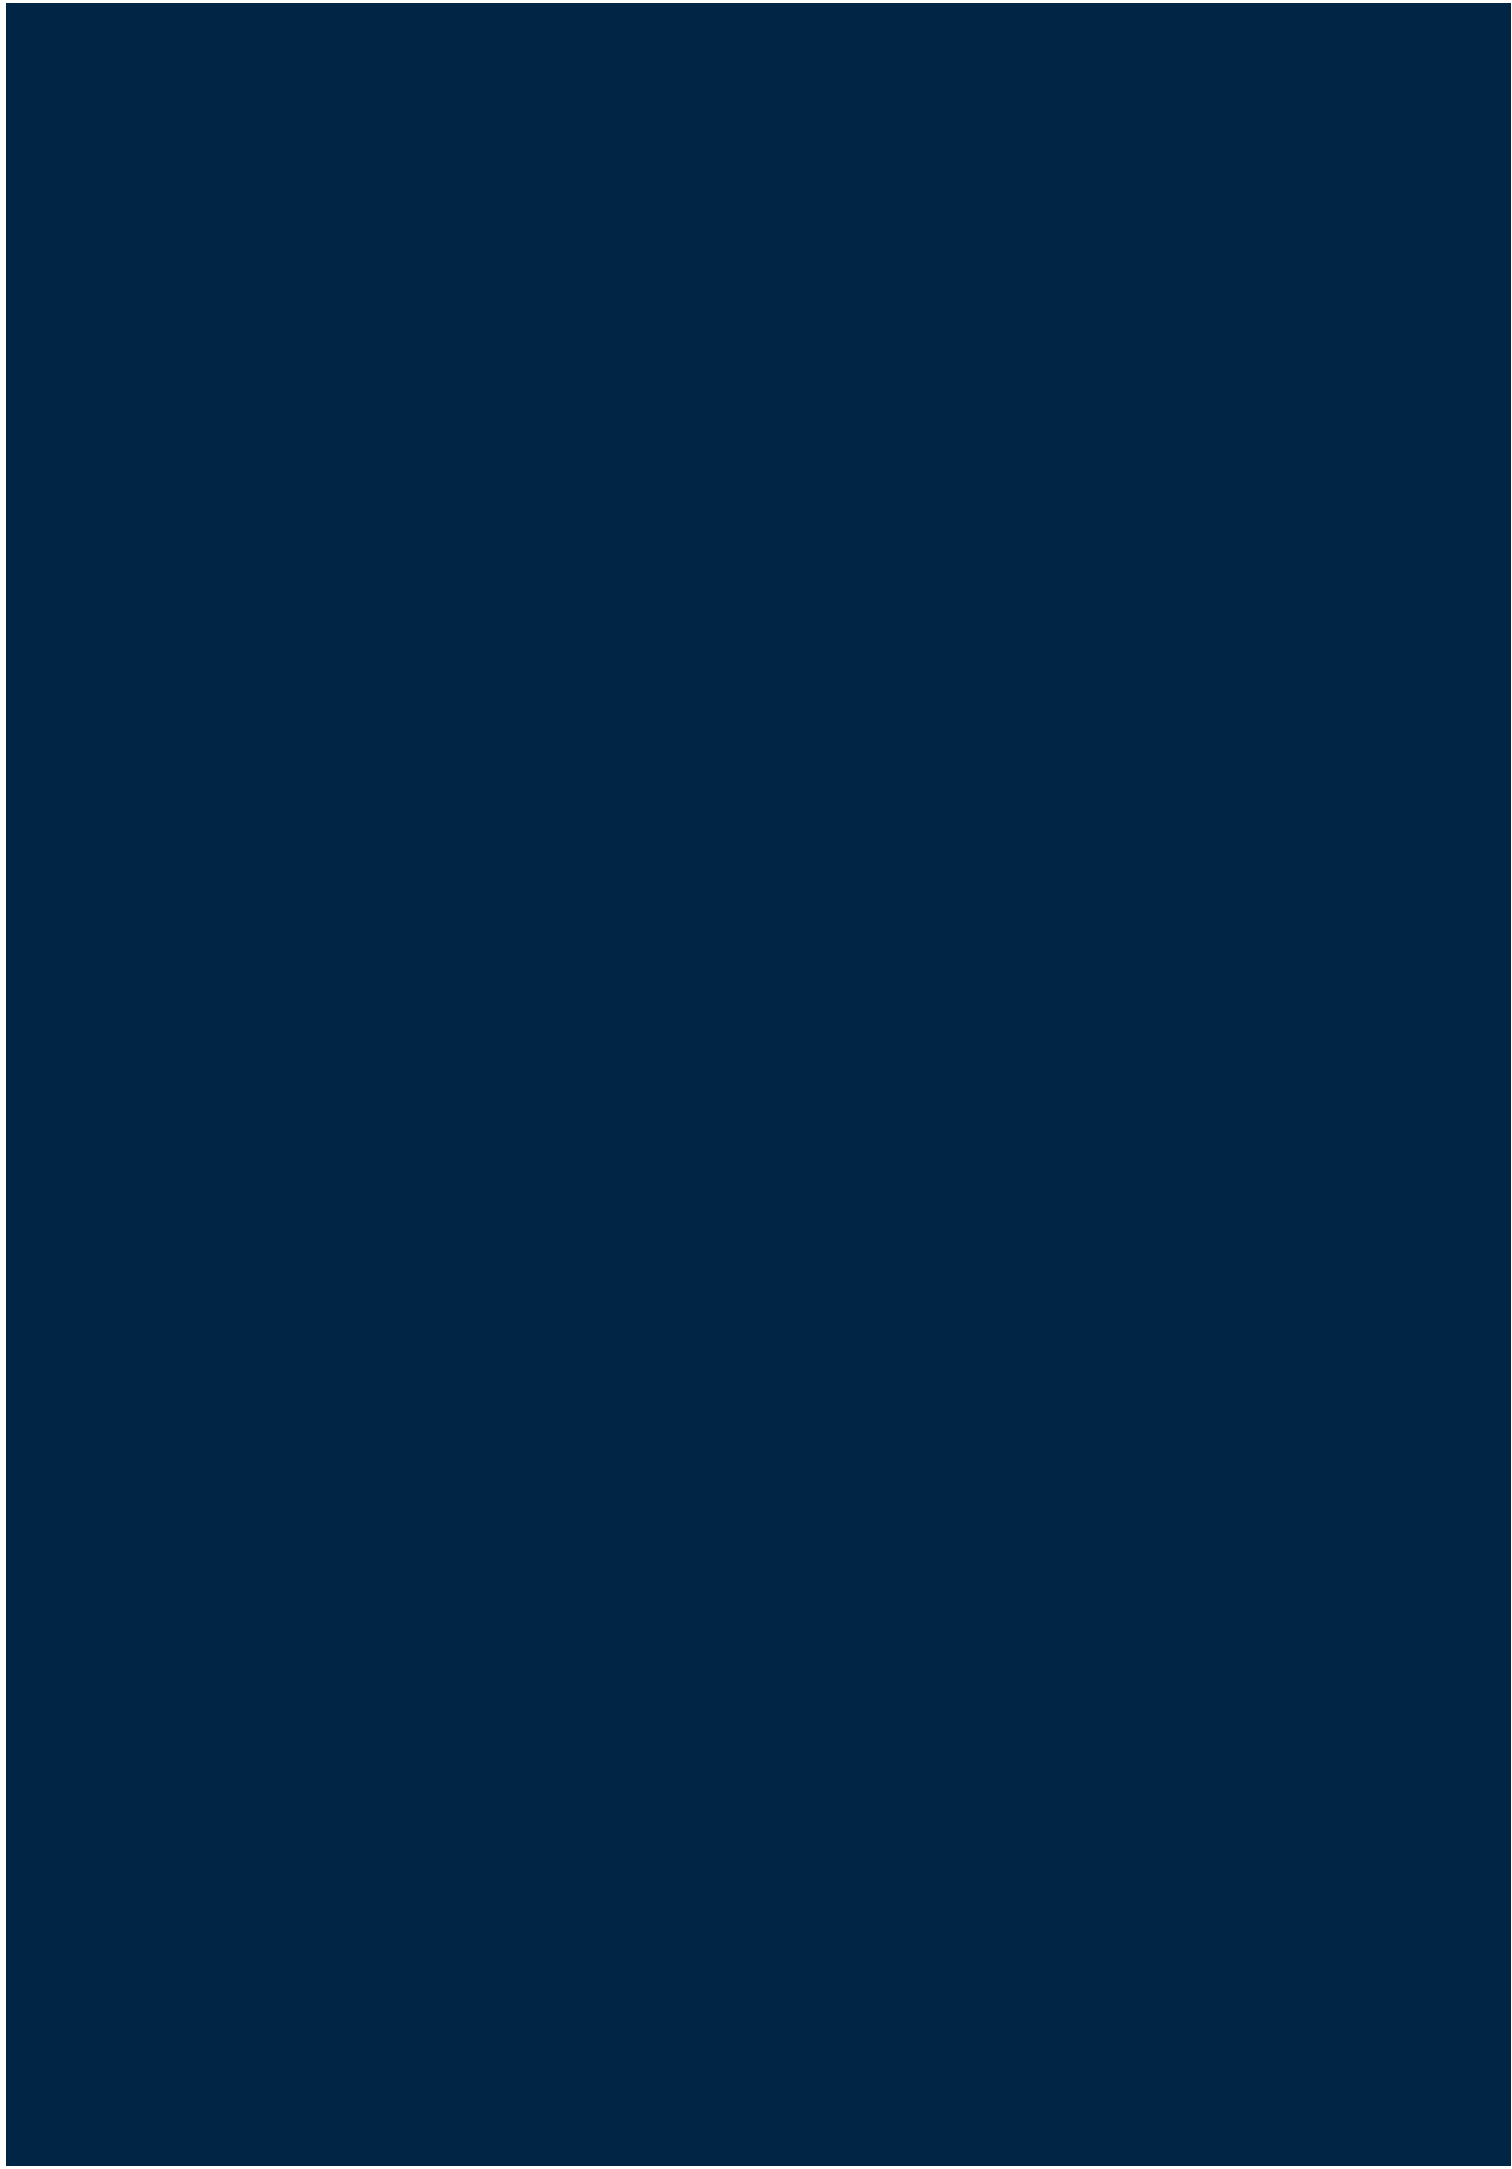

# Inhaltsverzeichnis

|                                                                                |          |                                                                   |           |
|--------------------------------------------------------------------------------|----------|-------------------------------------------------------------------|-----------|
| <b>I. Allgemeine Grundsätze</b>                                                |          | <b>VI. Qualität</b>                                               | <b>15</b> |
| 1 Der Global Compact und die Grundsätze zur sozialen Verantwortung von Daimler | 6        | <b>VII. Grundsätze zur sozialen Verantwortung bei Daimler</b>     | <b>16</b> |
| 2 Allgemeine Verhaltensregeln                                                  | 7        | <b>VIII. Umweltschutz</b>                                         | <b>18</b> |
| <b>II. Geltungsbereich</b>                                                     | <b>8</b> | <b>IX. Ächtung von Korruption in sämtlichen Ausprägungen</b>      | <b>19</b> |
| <b>III. Verhalten gegenüber Behörden und Amtsträgern</b>                       |          | <b>X. Verhalten gegenüber Wettbewerbern und Geschäftspartnern</b> | <b>20</b> |
| 1 Beziehungen zu Parteien und Politikern                                       | 9        | <b>XI. Umgang mit ausländischen Regierungen und Kunden</b>        | <b>21</b> |
| 2 Beziehungen zu Behörden und Beamten                                          | 9        | <b>XII. Einhaltung der Daimler Verhaltensrichtlinie</b>           |           |
| <b>IV. Interessenkonflikte</b>                                                 |          | 1 Fragen zur Verhaltensrichtlinie                                 | 22        |
| 1 Umgang mit Lieferanten, Händlern, Kunden und anderen Geschäftspartnern       | 10       | 2 Folgen bei Verstößen                                            | 23        |
| 2 Nebentätigkeiten und Spenden                                                 | 12       |                                                                   |           |
| 3 Finanzielle Beteiligungen                                                    | 12       |                                                                   |           |
| 4 Auftreten in der Öffentlichkeit                                              | 13       |                                                                   |           |
| <b>V. Interne Kontrolle</b>                                                    |          |                                                                   |           |
| 1 Schutz von betrieblichem Eigentum/ Verschwiegenheit                          | 14       |                                                                   |           |
| 2 Interne Kontrollsysteme/Berichte/Unterlagen                                  | 14       |                                                                   |           |
| 3 Investor Relations/Insiderhandel                                             | 14       |                                                                   |           |

## I. Allgemeine Grundsätze

### 1 Der Global Compact und die Grundsätze zur sozialen Verantwortung von Daimler.

Der *Global Compact* ist eine Initiative von UN-Generalsekretär Kofi Annan, mit der die Wirtschaft angeregt wird, sich zu so grundlegenden Prinzipien wie der Wahrung der Menschenrechte und dem Schutz von Arbeitsplätzen und Umwelt zu bekennen. Durch Vereinbarungen zwischen den Vereinten Nationen und Wirtschaftsunternehmen begründet der Global Compact einen globalen Rahmen für verantwortungsvolles Handeln im Sinne dieser Prinzipien. Unser Vorstandsvorsitzender Jürgen Schrempp hat im Herbst 2001 den Global Compact für Daimler unterzeichnet.

Im September 2002 verpflichteten sich Geschäftsleitung und Arbeitnehmervertreter von Daimler aus der ganzen Welt zu den *Grundsätzen zur sozialen Verantwortung*, damit Daimler den Global Compact umsetzt. Die Prinzipien umfassen die Verpflichtung des Unternehmens, international anerkannte Menschenrechte zu wahren, und den Grundsatz der Chancengleichheit bei der Beschäftigung aufrecht zu erhalten sowie rechtswidrige Diskriminierung zu unterlassen. Sie umfassen im Kontext einschlägiger Gesetze die Einhaltung des Prinzips „gleiche Bezahlung für gleichwertige Arbeit“ sowie die Ablehnung ausbeuterischer Arbeitsbedingungen durch Daimler.

Die Prinzipien bringen außerdem das Bemühen von Daimler um den Schutz der Sicherheit und Gesundheit der eigenen Mitarbeiter zum Ausdruck, die überall in der Welt arbeiten.

Daimler ist überzeugt, dass soziale Verantwortung ein wichtiger Faktor für den langfristigen Erfolg des Unternehmens ist. Sie ist zugleich Ergebnis und Bedingung einer wertorientierten und nachhaltig profitablen Unternehmensführung.

Die Grundsätze zur sozialen Verantwortung gelten weltweit; bei ihrer Aufstellung wurden unterschiedliche Kulturen und die Vielfalt gesellschaftlicher Wertvorstellungen anerkannt und berücksichtigt – denn Fairness und Chancengleichheit sind die Basis für eine gelungene, internationale Zusammenarbeit. Dies bedeutet, dass alle Beschäftigten ohne jede Diskriminierung, unabhängig von Geschlecht, Herkunft und Religion entsprechend ihrer Kompetenzen, Fähigkeiten und Leistungen eingesetzt, gefördert und weiterentwickelt werden.

Ein wichtiger Schritt, den „*Global Compact*“ und die „*Grundsätze zur sozialen Verantwortung*“ zum Erfolg zu führen, ist die Verankerung ihrer Ziele im Bewusstsein aller Beschäftigten. In der vorliegenden *Verhaltensrichtlinie* sind Maßstäbe für das Handeln von Führungskräften und Mitarbeitern verbindlich formuliert. Weiter ist der Umgang mit Lieferanten und anderen Geschäftspartnern sowie die Beziehungen zu Parteien und Behörden geregelt. Darüber hinaus sind Richtlinien zum Umweltschutz festgelegt.

## **2 Allgemeine Verhaltensregeln**

### **2.1 Verhaltensregeln, die die Beschäftigten des Konzerns betreffen**

Alle Beschäftigten des Konzerns tragen zu einer Unternehmenskultur bei, die von einer fairen und kooperativen Zusammenarbeit geprägt ist. Toleranz und der vertrauensvolle Umgang im täglichen Miteinander gehören zu den Grundüberzeugungen des Managements und der Mitarbeiter. Darüber hinaus bekennt sich jeder Beschäftigte zu verantwortungsbewusstem und integrem Verhalten. Die Persönlichkeit und Würde jedes Einzelnen ist zu achten. Gegenseitige Wertschätzung basiert auf innerer Überzeugung und Handlungsbereitschaft. Das bedeutet auch, dass Probleme am Arbeitsplatz angesprochen und Problemlösungen gemeinsam gesucht werden. Denn nur so kann sich ein durch Offenheit, Toleranz und Fairness geprägtes Umfeld entwickeln.

#### **2.1.1 Verhaltensregeln für Mitarbeiter**

Daimler erwartet von seinen Mitarbeitern, dass sie durch ihr Verhalten untereinander zu einer positiven Arbeitsatmosphäre beitragen. Die Möglichkeit, andere Kulturen und Denkweisen in der Zusammenarbeit kennen zu lernen, ist eine Bereicherung für alle Mitarbeiter. Sie trägt zudem zur Motivation und Begeisterung der Mitarbeiter bei und ist die Basis für den nachhaltigen Unternehmenserfolg sowie für die Wertsteigerung.

#### **2.1.2 Verhaltensregeln für Führungskräfte**

Mit der Umsetzung wertorientierter Führung und dem daraus notwendigerweise folgenden Führungsverhalten bzw. der Führungspraxis unterstützen Führungskräfte einen toleranten und fairen Umgang. Führungskräfte tragen mit ihrem Verhalten dazu bei, dass die Persönlichkeit und Würde aller Beschäftigten geachtet wird. Durch eine aufgeschlossene Haltung gegenüber ihren Mitarbeitern schaffen sie eine Arbeitsatmosphäre, die einen offenen Gedankenaustausch ermöglicht. Sie kultivieren den respektvollen Umgang miteinander durch Höflichkeit, Freundlichkeit und gegenseitige Rücksichtnahme.

Im Rahmen ihrer Führungsaufgabe beugen Führungskräfte nicht akzeptablem Verhalten vor. Sie agieren als Vermittler bei entsprechenden Konflikten.

#### **2.2 Verhaltensregeln im Umgang mit Dritten**

Alle Mitarbeiter, insbesondere Führungskräfte, sind sich bewusst, dass sie durch ihr Verhalten auch das Unternehmen repräsentieren und damit dessen Ruf nach außen und die Kultur nach innen prägen. Alle Beschäftigten behandeln andere in der gleichen Weise, wie sie es von anderen erwarten. Daraus resultiert ein fairer und respektvoller Umgang mit Kunden und anderen externen Personen, die mit dem Unternehmen in einer Geschäftsbeziehung stehen. Dies gilt selbstverständlich auch für alle im Unternehmen tätigen Fremdfirmenangehörigen.

Fairness und Wertschätzung gelten ebenfalls für die Werbung und die eigene Darstellung in der inner- und außerbetrieblichen Öffentlichkeit.

## II. Geltungsbereich

### Die Aufgabe der Mitarbeiter

Jeder Beschäftigte muss die gesetzlichen Bestimmungen, die seine Arbeit betreffen, kennen, sie beachten und die jeweiligen Regelungen auch seinen Mitarbeitern vermitteln. Darüber hinaus sind die Bestimmungen im Arbeitsvertrag und in einschlägigen betrieblichen Regelungen einzuhalten.

Um das gute Image von Daimler zu wahren, ist die Verhaltensrichtlinie nicht nur während der Arbeitszeit, sondern auch bei außerdienstlichen Aktivitäten einzuhalten, die die Belange des Unternehmens tangieren oder wenn der Mitarbeiter von Dritten als Repräsentant des Unternehmens wahrgenommen wird.

Wir bitten alle Mitarbeiter darum, auch andere Mitarbeiter bei der Einhaltung der Richtlinie zu unterstützen und mit dem Unternehmen bei der Anwendung der Bestimmungen zusammenzuarbeiten. Das Image und der Erfolg des Unternehmens können auf dem Spiel stehen.

### Geltungsbereich

Die Besonderheiten einiger Geschäftseinheiten können Verhaltensregeln erfordern, die weiter reichen als diejenigen, die in dieser Richtlinie aufgeführt sind. In solchen Fällen können zusätzliche Regeln für einzelne Geschäftseinheiten, Regionen oder einzelne Tätigkeitsfelder in Zusammenarbeit mit dem Personalbereich entwickelt werden.

### Verbindlichkeit

Die Daimler Verhaltensrichtlinie ist eine verbindliche interne Norm auf der Grundlage des geltenden Rechts für alle geschäftlichen Aktivitäten.



# Verhalten gegenüber Behörden und Amtsträgern

## **III. Verhalten gegenüber Behörden und Amtsträgern**

### **1 Beziehungen zu Parteien und Politikern**

Geschenke, Dienstleistungen, Zahlungen sowie Darlehen, die von Daimler oder einer Tochtergesellschaft an politische Parteien, Ausschüsse, Kandidaten oder Inhaber von politischen Ämtern gewährt werden, sind nur zulässig, sofern sie den geltenden Gesetzen und örtlichen Bestimmungen entsprechen und vorher vom Vorstand der Daimler AG als Jahresbudget im Rahmen der Operativen Planung genehmigt wurden.

### **2 Beziehungen zu Behörden und Beamten**

Zahlungen, Darlehen oder sonstige geldwerte Vorteile durch den Konzern, eine Tochtergesellschaft oder aus eigenen Mitteln an Beamte oder Mitarbeiter im öffentlichen Dienst mit dem Ziel, Aufträge oder Vorteile für die Daimler AG, ihre Tochtergesellschaften oder andere Personen zu erhalten, sind nicht erlaubt.

## IV. Interessenkonflikte

### 1 Umgang mit Lieferanten, Händlern, Kunden und anderen Geschäftspartnern

Private Geschäfte und finanzielle Transaktionen, die den Interessen von Daimler entgegenstehen oder die Entscheidungen der Mitarbeiter und deren Tätigkeit für das Unternehmen beeinflussen können, sind zu unterlassen. Insbesondere sind die folgenden Bestimmungen über Geschenke, Einladungen zu Essen und Veranstaltungen etc. einzuhalten.

**1.1** Daimler Mitarbeiter dürfen weder Einladungen zu Essen oder Veranstaltungen noch Geschenke, andere Zuwendungen, persönliche Dienste oder Gefälligkeiten von Geschäftspartnern fordern.

**1.2** Als Gast von Geschäftspartnern dürfen die Mitarbeiter Einladungen zu Veranstaltungen oder Geschäftsessen nur annehmen, wenn die Einladung freiwillig erfolgt, einem berechtigten geschäftlichen Zweck dient und das Essen im Rahmen der gewöhnlichen Zusammenarbeit stattfindet (z.B. ein Mittagessen während eines Seminars oder einer Besprechung, ein Empfang im Anschluss an eine Veranstaltung oder ein Abendessen bei mehrtägigen Veranstaltungen). Die Mitarbeiter haben ihre Vorgesetzten über die Häufigkeit und den Anlass der Essen und Unterhaltungsveranstaltungen, die von Geschäftspartnern bezahlt werden, zu informieren.\*

\*Funktional- und Geschäftsbereiche sollten die Erstellung bestimmter Richtlinien in Erwägung ziehen, soweit sie für ihre spezifischen Belange erforderlich sind.

**1.3** Eine Übernahme von Reise- und Übernachtungskosten durch Geschäftspartner ist nicht gestattet. Ausgenommen sind Geschäftsreisen im Flugzeug eines Geschäftspartners, wenn der direkte Vorgesetzte und eine weitere Führungskraft (mindestens Ebene C) zuvor die Erlaubnis erteilt haben.

Wenn ein Geschäftspartner die Übernachtung bezahlt oder eine Unterbringung in dessen Räumlichkeiten erfolgt, muss der marktübliche Preis festgestellt, an den Geschäftspartner bezahlt und eine interne Kostenerstattung veranlasst werden.

**1.4** Eine Teilnahme an Sportveranstaltungen oder der Besuch von Sportereignissen, Shows oder anderen Veranstaltungen als Gast ein und desselben Geschäftspartners ist höchstens zweimal pro Jahr gestattet. Ein Vertreter des gastgebenden Unternehmens muss anwesend sein.

**1.5** Wenn Mitarbeiter von Lieferanten, Händlern oder Kunden Waren oder Dienstleistungen für private Zwecke beziehen, ist der marktübliche Preis zu entrichten und die Zahlung zu dokumentieren.

**1.6** Es ist nicht zulässig, von Lieferanten, Händlern oder Kunden Zahlungen, Kredite oder andere finanzielle Leistungen jeglicher Art zum persönlichen Vorteil zu erbitten oder anzunehmen.

**1.7** Lieferanten, Händler oder andere Kunden dürfen nicht als Sponsoren von Daimler Veranstaltungen, von Feiern anlässlich der Verabschiedung von Mitarbeitern, bei Geburtstagsfeiern oder aus anderen Anlässen auftreten. Grundsätzlich darf ein Mitarbeiter weder im eigenen Namen noch im Namen des Unternehmens die Unterstützung von Lieferanten für Veranstaltungen zu wohltätigen oder vergleichbaren Zwecken verlangen oder annehmen. Andernfalls ist nicht auszuschließen, dass bei der Auswahl von Lieferanten auch andere Kriterien als Preis, Qualität und Leistung eine Rolle spielen.

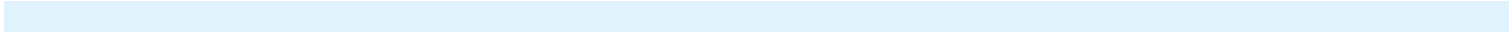

**1.8** Mitarbeiter dürfen von Lieferanten, Händlern und Kunden angebotene Rabatte und andere Vergünstigungen nur in Anspruch nehmen, sofern diese allen Daimler Mitarbeitern gewährt werden. Beim Ein- oder Verkauf von Waren oder Dienstleistungen im Namen von Daimler dürfen Rabatte oder Vergünstigungen zugunsten eines einzelnen oder einer Gruppe von Mitarbeitern weder verlangt noch angenommen werden.

**1.9** Mitarbeiter und ihre Angehörigen dürfen keine Geschenke oder andere persönliche Vorteile von Lieferanten, Händlern oder Kunden erbitten oder annehmen. Werbematerial und andere Artikel im Wert von höchstens € 30 / \$ 30 dürfen angenommen werden, wenn sie freiwillig gewährt werden und ausgeschlossen ist, dass dadurch Entscheidungen des Mitarbeiters beeinflusst werden. Geschenke, die den oben genannten Wert überschreiten, dürfen nicht angenommen werden und der Geschäftspartner ist auf diese Daimler Verhaltensrichtlinie hinzuweisen.

Falls hierzu Fragen bestehen (z.B. in einem internationalen Rahmen, in dem die Zurückweisung eines Geschenks als unhöflich angesehen würde), sollten diese mit dem Vorgesetzten oder mit einem der Ansprechpartner, die in Kapitel XII. genannt sind, besprochen werden.

## **2 Nebentätigkeiten und Spenden**

Mitarbeiter dürfen ohne ausdrückliche Zustimmung von Daimler nicht im Vorstand, Aufsichts- oder Beirat eines anderen Wirtschaftsunternehmens tätig werden.

Die Mitarbeiter dürfen keine regelmäßige Nebentätigkeit, die den berechtigten Interessen des Unternehmens entgegenstehen oder ihre Arbeitsleistung bei Daimler beeinträchtigen kann, ausüben. Darüber hinaus dürfen Mitarbeiter nicht ohne vorherige ausdrückliche Zustimmung für Geschäftspartner oder Wettbewerber tätig werden.

Das Engagement von Mitarbeitern in gemeinnützigen Einrichtungen, z.B. in Vereinen oder Bürgerinitiativen ist zulässig und von Seiten des Unternehmens erwünscht. Dieses Engagement darf den berechtigten Interessen des Unternehmens nicht entgegenstehen.

Einschränkungen bestehen jedoch dann, wenn der Mitarbeiter als Repräsentant von Daimler auftritt oder wahrgenommen wird. Führungskräfte unterliegen hierbei aufgrund ihrer Position und ihres Verantwortungsbereichs im Unternehmen einer stärkeren Einschränkung als Mitarbeiter im Tarifbereich.

## **3 Finanzielle Beteiligungen**

Daimler Mitarbeiter und ihre nahen Angehörigen dürfen sich nicht ohne vorherige Zustimmung unmittelbar oder mittelbar an Unternehmen beteiligen, die laufende Geschäftsbeziehungen mit Daimler pflegen oder anstreben. Ausgenommen hiervon sind Beteiligungen, die keinen Einfluss auf die Tätigkeit bei Daimler haben können.

*Hinweis:*

*Hervorzuheben ist, dass es sich nicht um ein generelles Verbot handelt, sondern die vorherige Zustimmung der Daimler AG erforderlich ist. Im Zweifel sollen die Mitarbeiter, die Beteiligung offen legen und die Möglichkeit eines Interessenkonflikts prüfen lassen.*

*Mit der Beschränkung finanzieller Beteiligungen soll sichergestellt werden, dass es nicht zu einem Interessenkonflikt für den Mitarbeiter kommt. Ein Interessenkonflikt ist vor allem dann wahrscheinlich, wenn der betroffene Mitarbeiter aufgrund seiner Aufgabe und Position Einfluss auf Unternehmensentscheidungen der Daimler AG nehmen kann oder aber wenn er aufgrund der Höhe seiner Beteiligung Entscheidungen eines externen Unternehmens beeinflussen kann.*

*Eine Einflussnahme bei börsennotierten Aktiengesellschaften ist regelmäßig nur dann möglich, wenn jemand gleichzeitig einen Sitz im Aufsichtsorgan innehat oder aber wenn er ein Aktienpaket in einem Umfang hält, das nach dem deutschen Aktiengesetz offenlegungspflichtig ist.*

#### **4 Auftreten in der Öffentlichkeit**

Daimler befürwortet grundsätzlich das Engagement seiner Mitarbeiter in öffentlichen Funktionen auf kommunaler oder überregionaler Ebene, in Vereinen oder Bürgerinitiativen. Wenn das Engagement mit der Tätigkeit bei Daimler in einem Zusammenhang steht, ist die vorherige Zustimmung des Personalbereichs erforderlich.

Führungskräfte von Daimler werden häufig gebeten, in Interviews, Vorträgen oder Veröffentlichungen Ausführungen zu unternehmensbezogenen Themen zu machen. Jeder Beschäftigte hat das Recht zur freien Meinungsäußerung. Dennoch muss sichergestellt werden, dass sowohl Zeitpunkt, Rahmen und Inhalt jeder Aussage in der Öffentlichkeit mit den Interessen und Zielen des Unternehmens übereinstimmen und mit den zuständigen Vorgesetzten und dem Bereich Communications abgestimmt sind.

Im Übrigen müssen die vom Gesetz, z.B. die durch das BetrVG, gezogenen Grenzen eingehalten werden. Demnach ist berechtigten Unternehmensinteressen angemessen Rechnung zu tragen.

Erhält der Mitarbeiter ein Honorar, eine Auslagenerstattung oder eine andere Vergütung, muss diese Daimler zur Verfügung gestellt werden. Ausnahmen hiervon erfordern die ausdrückliche Genehmigung durch eine Führungskraft (mindestens Ebene 2).

## V. Interne Kontrolle

### 1 Schutz von betrieblichem Eigentum/ Verschwiegenheit

Unternehmenseigentum darf nur für betriebliche Zwecke genutzt werden. Die Mitarbeiter sind verpflichtet, Eigentum des Unternehmens vor Verlust, Diebstahl oder Missbrauch zu schützen. Die Mitarbeiter haben über alle Betriebs- und Geschäftsgeheimnisse sowohl während der Dauer des Arbeitsverhältnisses als auch nach dessen Beendigung Stillschweigen zu bewahren.

Die Richtlinien für den Gebrauch, den Zugriff auf und die Sicherheit von Software, Informationstechnologie, E-Mail, Inter-/Intranet und von Voice-Mail-Systemen sind zu beachten. Alle Bestimmungen des Datenschutzes, einschließlich der unternehmensinternen, sind einzuhalten.

### 2 Interne Kontrollsysteme/ Berichte/Unterlagen

Daimler setzt interne Kontrollsysteme ein, die die Einhaltung von Gesetzen und internen Regelungen gewährleisten, das Unternehmenseigentum schützen, vor Missbrauch bewahren und sicherstellen sollen, dass Verfügungen und Handlungen im Namen des Unternehmens nur mit entsprechender Vollmacht erfolgen. Berichte, die das Unternehmen erstellt und veröffentlicht, müssen allen einschlägigen internationalen Standards und rechtlichen Vorschriften entsprechen; insbesondere muss die Rechnungslegung die finanzielle Lage des Unternehmens zutreffend wiedergeben. Daher haben die Mitarbeiter dafür zu sorgen, dass alle Geschäftsvorgänge sorgfältig und vollständig dokumentiert werden. Erforderliche Genehmigungen sind einzuholen. Bei betrieblichen Ausgaben hat eine sorgfältige und zügige Abrechnung zu erfolgen. Geschäftliche Unterlagen sind ausschließliches Eigentum von Daimler und müssen entsprechend den Bestimmungen des Unternehmens erstellt und aufbewahrt werden.

### 3 Investor Relations/Insiderhandel

Daimler veröffentlicht wichtige Unternehmensinformationen in Übereinstimmung mit deutschen, U.S.-amerikanischen und anderen einschlägigen börsenrechtlichen Bestimmungen, um einen geregelten Handel der Wertpapiere des Unternehmens zu fördern.

Diese Unternehmenspolitik setzt voraus, dass nicht veröffentlichte Informationen über das Unternehmen – bei denen anzunehmen ist, dass sie den Kurs dieser Wertpapiere beeinflussen (Insider-Informationen) – bis zu ihrer Veröffentlichung vertraulich behandelt werden. Es verstößt sowohl gegen geltendes Recht als auch gegen Unternehmensgrundsätze, öffentlich gehandelte Wertpapiere des Unternehmens oder seiner Geschäftspartner bei Kenntnis von wesentlichen Insider-Informationen zu erwerben, zu veräußern oder solche Informationen an Dritte weiterzugeben. Für Bereiche, in denen Insider-Kenntnisse eine wichtige Rolle spielen, gelten besondere, stärker detaillierte Regeln. Dies gilt insbesondere für den Finanzbereich.

## **VI. Qualität**

Höchste Qualität und ständige Qualitätsverbesserung sind wesentlich für Wachstum und Erfolg des Unternehmens. Die Mitarbeiter sollen die Erwartungen sowohl der internen als auch der externen Kunden erfüllen und die Qualität der Daimler Produkte und Leistungen ständig verbessern.

# Grundsätze zur sozialen Verantwortung bei Daimler

## VII. Grundsätze zur sozialen Verantwortung bei Daimler

Daimler bekennt sich zu seiner sozialen Verantwortung und zu den neun Prinzipien, die dem „Global Compact“ zugrunde liegen. Zur Verwirklichung dieser gemeinsamen Ziele hat Daimler mit der Welt-Arbeitnehmervertretung die nachfolgenden Grundsätze vereinbart.

Daimler unterstützt die Initiative der Vereinten Nationen und will gemeinsam mit anderen Unternehmen und Institutionen verhindern, dass der unumkehrbare Prozess der Globalisierung bei den Menschen auf dieser Welt Ängste auslöst; Daimler will das menschliche Gesicht der Globalisierung auch durch die Schaffung und den Erhalt von Arbeitsplätzen zeigen.

Daimler ist überzeugt, dass soziale Verantwortung ein wichtiger Faktor für den langfristigen Erfolg des Unternehmens ist; dies gilt auch für die Aktionäre, Geschäftspartner, Kunden und Beschäftigten der Daimler AG. Nur so kann zu weltweitem Frieden und weltweitem Wohlstand in der Zukunft beigetragen werden.

Voraussetzung für die Wahrnehmung dieser Verantwortung ist allerdings, dass Daimler wettbewerbsfähig ist und dauerhaft bleibt. Die Wahrnehmung sozialer Verantwortung ist auch unverzichtbarer Bestandteil wertorientierter Unternehmensführung.

Die folgenden Grundsätze, die sich an den Konventionen der Internationalen Arbeitsorganisation orientieren, gelten bei Daimler weltweit; bei ihrer Aufstellung wurden unterschiedliche Kulturen und die Vielfalt gesellschaftlicher Wertvorstellungen anerkannt und berücksichtigt.

### **Menschenrechte**

Daimler respektiert und unterstützt die Einhaltung der international anerkannten Menschenrechte.

### **Zwangsarbeit**

Daimler ächtet jegliche Form von Zwangsarbeit.

### **Kinderarbeit**

Daimler setzt sich für die effektive Abschaffung ausbeuterischer Kinderarbeit ein. Kinder dürfen in ihrer Entwicklung nicht gehemmt werden. Ihre Sicherheit und Gesundheit darf nicht beeinträchtigt werden. Ihre Würde ist zu respektieren.

### **Chancengleichheit**

Daimler verpflichtet sich, Chancengleichheit bei der Beschäftigung zu wahren und jegliche Diskriminierung zu unterlassen, sofern nicht nationales Recht ausdrücklich eine Auswahl nach bestimmten Kriterien vorsieht. Eine unterschiedliche Behandlung von Mitarbeitern wegen des Geschlechts, der Rasse, einer Behinderung, der Herkunft, der Religion, des Alters oder wegen der geschlechtlichen Ausrichtung darf nicht erfolgen.

### **Gleicher Lohn für gleichwertige Arbeit**

Daimler achtet im Rahmen nationaler Vorschriften den Grundsatz „Gleicher Lohn für gleichwertige Arbeit“, z.B. für Frauen und Männer.



### **Verhältnis zu Beschäftigten und Arbeitnehmervertretungen**

Daimler erkennt das Menschenrecht an, sich gewerkschaftlich zu organisieren. Bei Organisationskampagnen verhalten sich Unternehmen und Führungskräfte neutral; die Gewerkschaften und das Unternehmen halten demokratische Grundprinzipien ein und stellen damit sicher, dass die Beschäftigten eine freie Entscheidung treffen können. Das Recht auf Tarifverhandlungen wird respektiert.

Bei der Ausgestaltung dieses Menschenrechts sind nationale gesetzliche Regelungen und bestehende Vereinbarungen zu beachten, wobei das Recht auf Koalitionsfreiheit selbst in den Staaten gewährleistet wird, in denen die Koalitionsfreiheit nicht geschützt ist.

Die Zusammenarbeit mit Mitarbeitern, Arbeitnehmervertretern und Gewerkschaften wird konstruktiv gestaltet. Dabei wird ein fairer Ausgleich zwischen den wirtschaftlichen Interessen des Unternehmens und den Interessen der Beschäftigten angestrebt. Auch bei strittigen Auseinandersetzungen bleibt es das Ziel, eine tragfähige konstruktive Zusammenarbeit auf Dauer zu bewahren.

Es ist das Ziel des Unternehmens, den einzelnen Mitarbeiter möglichst unmittelbar einzubeziehen, zu informieren und zu beteiligen. Das Verhalten und der Umgangston gegenüber den Mitarbeitern sind von Respekt und Fairness geprägt.

### **Arbeitsbedingungen**

Daimler wendet sich gegen alle ausbeuterischen Arbeitsbedingungen.

### **Gesundheitsschutz**

Daimler gewährleistet Arbeitssicherheit und Gesundheitsschutz am Arbeitsplatz mindestens im Rahmen der nationalen Bestimmungen und unterstützt eine ständige Weiterentwicklung zur Verbesserung der Arbeitswelt.

### **Entlohnung**

Daimler achtet das Recht auf eine angemessene Entlohnung, die sich mindestens an den gesetzlich garantierten Mindestlöhnen und am jeweiligen Arbeitsmarkt orientiert.

### **Arbeitszeit**

Daimler gewährleistet die Einhaltung der jeweiligen nationalen Regelungen und Vereinbarungen zur Arbeitszeit und zu regelmäßigem bezahlten Erholungsurlaub.

### **Qualifizierung**

Daimler unterstützt die Qualifizierung der Beschäftigten, um so ein hohes Leistungsniveau und qualitativ hochwertige Arbeit zu ermöglichen.

### **Zulieferer**

Daimler unterstützt und ermutigt seine Zulieferer, in ihren Unternehmen vergleichbare Grundsätze einzuführen und umzusetzen. Daimler erwartet von seinen Zulieferern, diese Grundsätze als Basis für gegenseitige Beziehungen anzuwenden. Daimler sieht darin eine sehr gute Grundlage für dauerhafte Geschäftsbeziehungen.

## **VIII. Umweltschutz**

Die Umwelt für die heutige und für zukünftige Generationen zu schützen und alle geltenden Umweltschutzgesetze und -richtlinien einzuhalten, ist ein Grundanliegen von Daimler. Das Unternehmen erwartet und unterstützt umweltbewusstes Handeln der Mitarbeiter. Dies gilt besonders für den Einsatz und die Entwicklung von neuen Produkt- und Fertigungstechnologien, welche die natürlichen Ressourcen schonen, die Wiederverwertung ermöglichen, die Umweltverschmutzung weitestgehend reduzieren und die natürliche Umwelt bewahren.

# Ächtung von Korruption in sämtlichen Ausprägungen

## **IX. Ächtung von Korruption in sämtlichen Ausprägungen**

Die Daimler AG ist entschlossen, in ihren geschäftlichen Transaktionen höchste ethische Standards zu erreichen.

Daimler duldet keine unmoralischen oder korrupten Praktiken durch Mitarbeiter oder seitens der Geschäftspartner.

Daimler verbietet strengstens jede Beteiligung an oder Duldung von Bestechung oder jeder anderen Form von Korruption.

Innerhalb der Geschäftsbereiche wird Daimler fortlaufend angemessene Ressourcen dafür einsetzen, potenzielle Schwachstellen in internen Kontrollen aufzudecken und zu beheben.

# Verhalten gegenüber Wettbewerbern und Geschäftspartnern

## **X. Verhalten gegenüber Wettbewerbern und Geschäftspartnern**

Daimler hält die geltenden Kartell- und Handelsgesetze und die entsprechenden Gesetze zur Preisbildung, zum Wettbewerbsrecht und zum Verbraucherschutz ein. Diese Gesetze regeln den Umgang des Unternehmens mit seinen Wettbewerbern, Lieferanten, Händlern und Kunden.

Sie verbieten Absprachen und andere Aktivitäten, die Preise oder Konditionen beeinflussen, Verkaufsgebiete oder Kunden zuteilen oder den freien und offenen Wettbewerb in unzulässiger Weise behindern. Diese Gesetze schränken die Möglichkeiten des Unternehmens ein, rechtlich geschützte und wettbewerbsrelevante Informationen weiterzugeben sowie Lieferanten und andere Geschäftspartner vom Wettbewerb auszuschließen. Sie legen auch die Anforderungen an Verbraucherinformationen und an das Vorgehen bei Reklamationen fest. Die Kartell- und Handelsgesetze sind komplex und gelten für alle geschäftlichen Aktivitäten von Daimler im In- und Ausland. Die strafrechtlichen Folgen bei Verletzung dieser Gesetze können erheblich sein. Bei Fragen, inwieweit diese Gesetze den eigenen Verantwortungsbereich betreffen, können die Mitarbeiter sich an die Rechtsabteilung des Daimler Konzerns wenden.

Um Informationen über Wettbewerber zu erhalten, bedient sich Daimler aller zulässigen Mittel, vermeidet jedoch jede Vorgehensweise, die illegal ist oder Haftungsansprüche zur Folge haben kann.

# Umgang mit ausländischen Regierungen und Kunden

## **XI. Umgang mit ausländischen Regierungen und Kunden**

Daimler hält die Antikorruptions- und Zollgesetze sowie die Außenwirtschaftsbestimmungen strikt ein. Diese Regelungen betreffen weltweit alle Bereiche des Daimler Konzerns und seine Mitarbeiter.

Antikorruptionsgesetze verbieten es, ausländischen Regierungsmitgliedern, Beamten, politischen oder militärischen Stellen oder Vertretern von internationalen Organisationen (wie z.B. den Vereinten Nationen und der Weltbank) Zuwendungen zukommen zu lassen, um Aufträge oder andere Vorteile für Daimler zu erhalten. Diese Regelungen enthalten auch Anweisungen für die Dokumentation, das interne Rechnungswesen und die interne Kontrolle. Diese sollen, ebenso wie die internen Kontrollsysteme von Daimler, die Zuverlässigkeit und Genauigkeit der Aufzeichnungen und Berichte zu allen geschäftlichen Vorgängen sicherstellen.

Außenwirtschafts- und Zollgesetze bestimmen, wo und wie Daimler seine Produkte und Technologie verkaufen und Informationen weitergeben darf. In einigen Fällen ist es gesetzlich verboten, Geschäfte mit bestimmten Ländern zu tätigen; in anderen Fällen ist der Export von Waren oder die Weitergabe von Dienstleistungen und Technologien ohne behördliche Genehmigung untersagt. Zollgesetze erfordern eine genaue Beschreibung, lückenlose Aufstellung sowie eine zutreffende Wertangabe.

Antiboykottgesetze können die Teilnahme an Boykottmaßnahmen anderer Länder verbieten und die Weitergabe von Informationen über geschäftliche Aktivitäten und über Personen einschränken. Sie können auch festlegen, dass über bestimmte Aufforderungen zur Weitergabe von Informationen oder zur Teilnahme an Boykotts berichtet wird.

Diese internationalen Handelsgesetze sind komplex. Die Folgen bei Verletzung dieser Gesetze können für das Unternehmen und die handelnden Personen erheblich sein und schließen Bußgelder sowie Freiheitsstrafen ein. Bei Fragen zur Anwendung dieser Gesetze im eigenen Verantwortungsbereich sollen sich die Mitarbeiter an die Rechtsabteilung von Daimler wenden.

# Einhaltung der Daimler Verhaltensrichtlinie

## **XII. Einhaltung der Daimler Verhaltensrichtlinie**

### **1 Fragen zum Code**

Fragen zu dieser Daimler Verhaltensrichtlinie werden immer wieder auftauchen. Bei Unsicherheiten hinsichtlich des richtigen Verhaltens sollten die Mitarbeiter die Angelegenheit mit ihrem Vorgesetzten oder ihrem Personalbereich besprechen. Falls dies nicht zur Klärung führt, können sich die Mitarbeiter an folgende Ansprechpartner (die ihre Angelegenheit auf Wunsch vertraulich behandeln) wenden:

### **Ask us – Für Fragen**

Bei allen Fragen rund um Compliance konsultieren Sie bitte zunächst unseren umfassenden Intranet-Auftritt, in dem auch Antworten zu den am häufigsten gestellten Fragen (Anwendung „QulSS“) hinterlegt sind. Gerne können Sie auch persönlich mit uns Kontakt aufnehmen.

### **Compliance Consultation Desk (Stuttgart, Deutschland)**

Adresse: Daimler AG  
Compliance Consultation Desk (CCD)  
HPC: 0653  
70546 Stuttgart  
Deutschland  
Tel.: +49 7 11 17-7 76 77  
Nur USA: 248 957 2632  
Fax: +49 7 11 17-79 08 89 23  
E-Mail: Extern: CCD@daimler.com  
Intern: MBox\_CCD

### **Tell us – Für Meldungen**

Hinweise für ein vermutetes Fehlverhalten richten Sie bitte an das Business Practices Office (BPO). Jeder Hinweis und alle damit verbundenen Informationen werden vom BPO streng vertraulich und auf Wunsch auch anonym behandelt.

### **Business Practices Office (Stuttgart, Deutschland)**

Adresse: Daimler AG  
Business Practices Office (BPO)  
HPC: 0654  
70546 Stuttgart  
Deutschland  
Tel.: +49 7 11 17-9 65 28  
oder 0 800/2 89 46 43  
Fax: +49 7 11 17-79 05 43 23  
E-Mail: Extern: BPO.Germany@daimler.com  
Intern: BPO Germany Pool-ID

### **Business Practices Office (Farmington Hills, USA)**

Adresse: Daimler AG  
Business Practices Office (BPO)  
36455 Corporate Drive  
Farmington Hills, Mi 48331  
USA  
Tel.: +1 248 957 2630 oder +1 866 493 5562  
Fax: +1 248 957 2631 oder +1 866 493 5762  
E-Mail: Extern: BPO.Americas@daimler.com  
Intern: BPO Americas Pool-ID

## **2 Folgen bei Verstößen**

Die Verletzung der Daimler Verhaltensrichtlinie oder anderer Daimler Regelungen oder Richtlinien kann zu Disziplinarmaßnahmen, zu einer Beendigung des Arbeitsverhältnisses und zu anderen rechtlichen Schritten führen.

Es ist die Aufgabe jeder Führungskraft im Daimler Konzern sicherzustellen, dass alle Mitarbeiter diese Richtlinie kennen und ihre Bestimmungen einhalten. Führungskräfte, die dieser Verpflichtung nicht nachkommen, müssen auch in diesem Fall mit Disziplinarmaßnahmen und rechtlichen Konsequenzen rechnen.

Die Konzernrevision achtet bei ihren Prüfungen auf die Einhaltung dieser Grundsätze und nimmt sie in ihre Prüfkriterien auf.

Daimler behält sich das Recht vor, Regelungen der Daimler Verhaltensrichtlinie zu ändern und zu interpretieren.
