# Supplementary material
Source: publisher site journal article supplement (https://www.degruyterbrill.com/publication/isbn/9783110432879/downloadAsset/9783110432879_Elektronischer_Anhang_2.zip)
Supplement: Supplementary file 34 [file Deutsche Bank GB 2010.pdf › Korpustexte/Korpustexte pdf/Deutsche Bank/Deutsche Bank GB 2010.pdf]

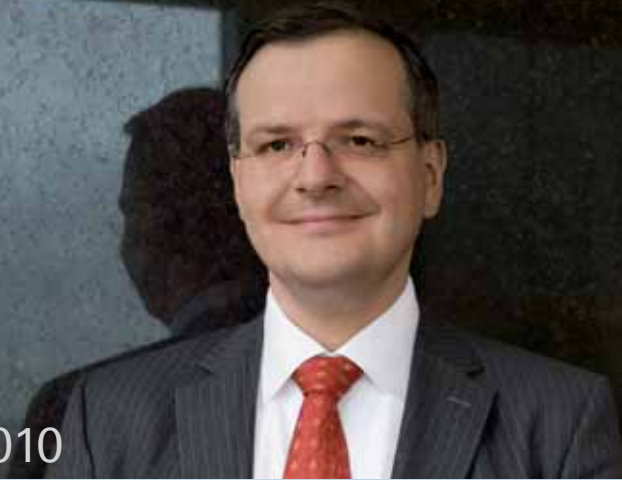

Jahresbericht 2010

Erfolgreich in unsicheren Zeiten

*Leistung aus Leidenschaft*

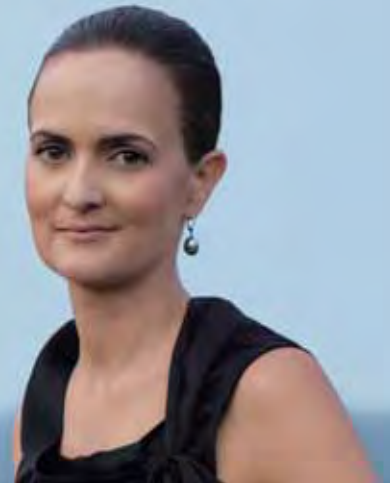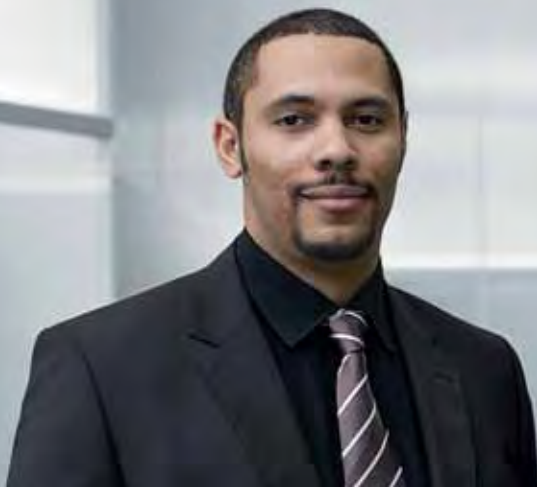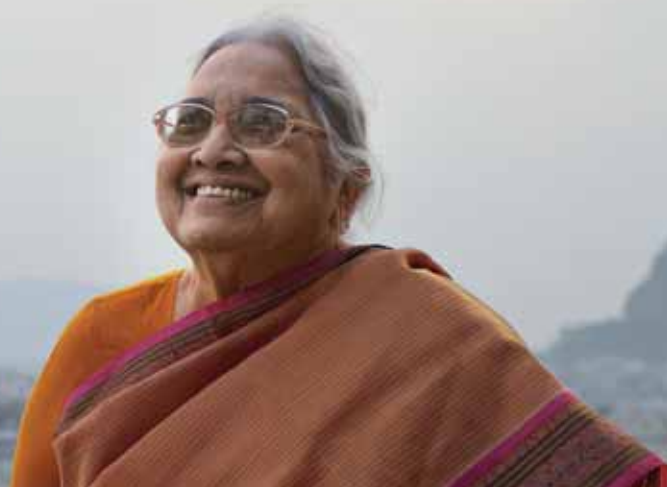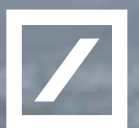

## Erfolgreich in unsicheren Zeiten

Das Jahr 2010 hat die Wirkungsmechanismen der global vernetzten Wirtschafts- und Finanzwelt sichtbar gemacht. Verwerfungen, die die Balance des weltwirtschaftlichen Gefüges massiv gefährden können, trafen auf unterschiedlich starke Fähigkeiten zum Gegensteuern.

Für die Deutsche Bank sind Unabhängigkeit und stringente regulatorische Vorgaben kein Gegensatz. Gerade in Zeiten gravierender Veränderungen geben stabile Rahmenbedingungen Sicherheit und schaffen Handlungsspielraum. Hohe soziale Kosten stören jedoch das gesamtwirtschaftliche Optimum. Wir konnten im vergangenen Jahr beweisen, dass tief gehender Wandel durchaus große Chancen bietet.

Als überlegener Gewinner der Krise fühlen wir uns nicht. Dennoch haben wir aufgrund unserer Marktstärke, unseres verantwortungsbewussten raschen Handelns und unserer motivierten, von Vielfalt geprägten Belegschaft heute eine deutlich solidere Position als zuvor. Und darauf sind wir stolz.

Über unser Jahresthema „Erfolgreich in unsicheren Zeiten“ sprachen wir mit unserem Aktionär Patrick Lemmens, Portfolio Manager, Robeco Institutional Asset Management B.V., Rotterdam (Seite 20/21); unserer Kundin Emma Quinn, Head of Dealing – Australien und Neuseeland, AllianceBernstein, Sydney (Seite 34/35); unserem Mitarbeiter Maurice Robinson, registrar services GmbH, Frankfurt am Main (Seite 58/59); und Chennupati Vidya, Vasavya Mahila Mandali (VMM), Vijayawada (Seite 64/65).

# Deutsche Bank

## Der Konzern im Überblick

|                                                                                      | 2010    | 2009    |
|--------------------------------------------------------------------------------------|---------|---------|
| Ergebnis je Aktie (basic) <sup>1</sup>                                               | 3,07 €  | 7,21 €  |
| Ergebnis je Aktie (verwässert) <sup>1</sup>                                          | 2,92 €  | 6,94 €  |
| Ausstehende Aktien (basic, Durchschnitt), in Mio <sup>1</sup>                        | 753     | 689     |
| Ausstehende Aktien (verwässert, Durchschnitt), in Mio <sup>1</sup>                   | 791     | 717     |
| Eigenkapitalrendite nach Steuern (basierend auf dem durchschnittlichen Eigenkapital) | 5,5%    | 14,6%   |
| Eigenkapitalrendite vor Steuern (basierend auf dem durchschnittlichen Eigenkapital)  | 9,5%    | 15,3%   |
| Eigenkapitalrendite vor Steuern (basierend auf dem durchschnittlichen Active Equity) | 9,6%    | 15,1%   |
| Nettovermögen je ausstehende Stammaktie (basic) <sup>2</sup>                         | 52,38 € | 52,65 € |
| Aufwand-Ertrag-Relation <sup>3</sup>                                                 | 81,6%   | 72,0%   |
| Personalaufwandsquote <sup>4</sup>                                                   | 44,4%   | 40,5%   |
| Sachaufwandsquote <sup>5</sup>                                                       | 37,3%   | 31,5%   |

| in Mio €                               | 2010   | 2009   |
|----------------------------------------|--------|--------|
| Erträge insgesamt                      | 28 567 | 27 952 |
| Risikovorsorge im Kreditgeschäft       | 1 274  | 2 630  |
| Zinsunabhängige Aufwendungen insgesamt | 23 318 | 20 120 |
| Ergebnis vor Steuern                   | 3 975  | 5 202  |
| Jahresüberschuss/Jahresfehlbetrag (–)  | 2 330  | 4 958  |

| in Mrd €                                                | 31.12.2010 | 31.12.2009 |
|---------------------------------------------------------|------------|------------|
| Bilanzsumme                                             | 1 906      | 1 501      |
| Den Deutsche Bank-Aktionären zurechenbares Eigenkapital | 48,8       | 36,6       |
| Tier-1-Kapitalquote ohne Hybridinstrumente <sup>6</sup> | 8,7%       | 8,7%       |
| Tier-1-Kapitalquote <sup>7</sup>                        | 12,3%      | 12,6%      |

| Anzahl                                      | 31.12.2010 | 31.12.2009 |
|---------------------------------------------|------------|------------|
| Niederlassungen                             | 3 083      | 1 964      |
| davon in Deutschland                        | 2 087      | 961        |
| Mitarbeiter (in Vollzeitkräfte umgerechnet) | 102 062    | 77 053     |
| davon in Deutschland                        | 49 265     | 27 321     |

## Langfristrating

|                           | 31.12.2010 | 31.12.2009 |
|---------------------------|------------|------------|
| Moody's Investors Service | Aa3        | Aa1        |
| Standard & Poor's         | A+         | A+         |
| Fitch Ratings             | AA–        | AA–        |

<sup>1</sup> Die Anzahl der durchschnittlich ausstehenden Aktien (basic und verwässert) wurde für alle Perioden vor dem 6. Oktober 2010 angepasst, um den Effekt der Bonuskomponente von Bezugsrechten, die im Rahmen der Kapitalerhöhung ausgegeben wurden, zu berücksichtigen

<sup>2</sup> Nettovermögen je ausstehende Stammaktie (basic) ergibt sich durch Division des den Deutsche Bank-Aktionären zurechenbaren Eigenkapitals durch die Anzahl der ausstehenden Stammaktien (basic, beide zum Bilanzstichtag)

<sup>3</sup> Prozentualer Anteil der zinsunabhängigen Aufwendungen insgesamt am Zinsüberschuss vor Risikovorsorge im Kreditgeschäft plus zinsunabhängige Erträge.

<sup>4</sup> Prozentualer Anteil des Personalaufwands am Zinsüberschuss vor Risikovorsorge im Kreditgeschäft plus zinsunabhängige Erträge

<sup>5</sup> Prozentualer Anteil des zinsunabhängigen Sachaufwands, der sich aus den zinsunabhängigen Aufwendungen abzüglich Personalaufwand zusammensetzt am Zinsüberschuss vor Risikovorsorge im Kreditgeschäft plus zinsunabhängige Erträge

<sup>6</sup> Die Kapitalquoten setzen das jeweilige Kapital in Beziehung zu den Risikoaktiva für das Kredit-, Markt- und operationelle Risiko. Die Tier-1-Kapitalquote enthält keine Übergangsposten gemäß § 64h Absatz 3 KWG

<sup>7</sup> Die Tier-1-Kapitalquote setzt das Tier-1-Kapital in Beziehung zu den Risikoaktiva für das Kredit-, Markt- und operationelle Risiko. Das Tier-1-Kapital enthält keine Übergangsposten gemäß § 64h Absatz 3 KWG

# Die Deutsche Bank-Aktie

## Wissenswertes über die Deutsche Bank-Aktie

### 2010

|                                                             |                |
|-------------------------------------------------------------|----------------|
| Gesamterendite (Total Return) <sup>1</sup> im Jahresverlauf | -11,72 %       |
| Anteil am Aktienumsatz (Xetra) <sup>1</sup>                 | 6,80 %         |
| Durchschnittlicher Börsenumsatz pro Tag <sup>2</sup>        | 8,0 Mio Aktien |
| Aktienkurs höchst <sup>3</sup>                              | 55,11 €        |
| Aktienkurs tiefst <sup>3</sup>                              | 35,93 €        |
| Dividende je Aktie (für 2010 vorgeschlagen)                 | 0,75 €         |

### Per 31.12.2010

|                         |                    |
|-------------------------|--------------------|
| Ausgegebene Aktien      | 929 499 640        |
| Ausstehende Aktien      | 919 062 360        |
| Grundkapital            | 2 379 519 078,40 € |
| Marktkapitalisierung    | 36,34 Mrd €        |
| Aktienkurs <sup>4</sup> | 39,10 €            |
| Gewicht im DAX          | 5,99 %             |
| Gewicht im STOXX 50     | 1,38 %             |

### Wertpapierkennung

|                |              |                         |                         |
|----------------|--------------|-------------------------|-------------------------|
| Deutsche Börse |              | New York Stock Exchange |                         |
| Emissionsart   | Namensaktie  | Emissionsart            | Global Registered Share |
| Symbol         | DBK          | Währung                 | US-\$                   |
| WKN            | 514000       | Symbol                  | DB                      |
| ISIN           | DE0005140008 | CINS                    | D 18190898              |
| Reuters        | DBKGn.DE     | Bloomberg               | DBK GR                  |

<sup>1</sup> Auf der Basis von Xetra

<sup>2</sup> Orderbuchstatistik (Xetra)

<sup>3</sup> Zu Vergleichszwecken wurden die Aktienkurse für alle Perioden vor dem 6. Oktober 2010 angepasst, um den Effekt der Bezugsrechtsemission im Rahmen der Kapitalerhöhung zu berücksichtigen

<sup>4</sup> Xetra-Schlusskurs

Brief des Vorstandsvorsitzenden – 02  
Group Executive Committee – 08  
Bericht des Aufsichtsrats – 10  
Aufsichtsrat – 18

## 01 – Der Deutsche Bank-Konzern

Unternehmensprofil und Überblick – 23  
Investitionen in die Zukunft  
Corporate Governance – 27  
Fundament für langfristigen Erfolg  
Im Interesse unserer Partner – 29  
Stark für unsere Aktionäre, Kunden, Mitarbeiter und die Gesellschaft

## 02 – Zielgruppen

Aktionäre – 37  
Reibungslose Kapitalerhöhung in Rekordhöhe  
Kunden – Corporate & Investment Bank – 41  
Wettbewerbsposition ausgebaut  
Kunden – Private Clients and Asset Management – 46  
Positiver Trend fortgesetzt  
Kunden – Corporate Investments – 51  
Beteiligung an Deutscher Postbank AG  
in Unternehmensbereich Private & Business Clients transferiert  
Kunden – Zentrale Infrastruktur – 52  
Führungsinstrument des Vorstands  
Mitarbeiter – 53  
Zuwachs durch Akquisitionen  
Gesellschaft – 56  
Soziales Kapital schaffen

## 03 – Konzernabschluss/Auszüge

Gewinn-und-Verlust-Rechnung – 61  
Bilanz – 62  
Der Konzern im Fünfjahresvergleich – 63

## 04 – Weitere Informationen

Glossar – 67  
Impressum/Publikationen – 71  
Wichtige Termine – 72



*Sehr geehrte Aktionäre und Aktionäre,*

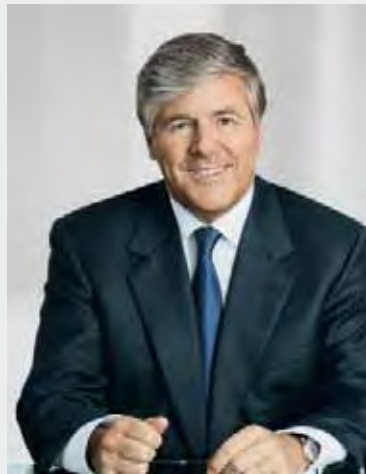

Dr. Josef Ackermann  
Vorsitzender des Vorstands und des  
Group Executive Committee

2010 war für die Deutsche Bank ein ganz besonderes Jahr. Es war ein Jahr der Investitionen und des Wandels, in dem wir unsere Wettbewerbsposition deutlich verbessert haben. Die Bank ist heute in vielerlei Hinsicht stärker als vor der Krise und hervorragend für neues Wachstum positioniert.

Die Weltwirtschaft hat sich im vergangenen Jahr zunehmend erholt. Das Schlimmste ist überstanden – aber wir sind noch nicht über den Berg. Die Wachstumsimpulse kamen hauptsächlich aus den Schwellenländern in Asien und Lateinamerika. Die Erholung in den meisten Industrieländern verlief dagegen langsam. In den USA wirken sich die notwendige Bereinigung auf den Immobilienmärkten und die hohe Verschuldung nach wie vor belastend aus. In der Eurozone sind erhebliche Ungleichgewichte zu beobachten: einerseits konjunkturelle und strukturelle Probleme in einigen sogenannten Peripheriestaaten, andererseits eine mit 3,6% kräftig wachsende Wirtschaft in unserem Heimatmarkt Deutschland.

Vor diesem Hintergrund beliefen sich die Gesamterträge der Bank im Jahr 2010 auf 28,6 Mrd €. Dies sind mit die höchsten Erträge, die wir jemals erzielt haben. Das berichtete Jahresergebnis vor

Steuern in Höhe von 4 Mrd € war durch Sondereffekte belastet: Ohne deren Berücksichtigung aus den drei Akquisitionen Postbank, Teilen der ABN AMRO und Sal. Oppenheim/BHF-BANK hätte das Ergebnis vor Steuern bei 6,5 Mrd € gelegen – verglichen mit 5,2 Mrd € im Vorjahr. Bezöge man darüber hinaus auch spezielle Investitionen und Sondereffekte wie Abschreibungen ein, hätte das Ergebnis vor Steuern 2010 über 7 Mrd € betragen.

Für unsere Konzernbereiche Corporate & Investment Bank (CIB) sowie Private Clients and Asset Management (PCAM) zusammengekommen beläuft sich das Ergebnis vor Steuern – bereinigt um Akquisitionseffekte – auf 7,2 Mrd €. Damit befinden wir uns schon in Sichtweite der für unsere operativen Geschäftseinheiten 2011 anvisierten 10 Mrd €.

CIB erzielte einen Gewinn vor Steuern von 6,0 Mrd €. Dies ist das zweitbeste Ergebnis des Bereichs in der Geschichte der Bank.

Unser Unternehmensbereich Corporate Banking & Securities (CB&S) hat im abgelaufenen Jahr einen Gewinn vor Steuern von 5,1 Mrd € erwirtschaftet. Konsequenter Kundenfokus und spürbare Fortschritte bei der Integration des Bereichs haben zu dieser erfreulichen Leistung beigetragen. Sie ist umso beeindruckender, als sie bei deutlich reduzierten Risiken erbracht wurde, die Staatsschuldenkrise die Finanzmärkte belastet und in der Wirtschaft für Zurückhaltung bei Kapitalmaßnahmen, Fusionen und Übernahmen gesorgt hat.

Die Erträge im Zins- und Geldmarktgeschäft haben sich erwartungsgemäß normalisiert. Im Anleihegeschäft führen wir in Europa die Rangliste der besten Bondhäuser an. Weltweit stehen wir auf Platz zwei und sind zudem die einzige Bank in der Spitzengruppe der drei Besten, die ihren Marktanteil ausbauen konnte. Das Devisengeschäft verlief weiterhin sehr erfreulich auf dem hohen Niveau des Vorjahres. Hier sind wir nunmehr schon im sechsten Jahr in Folge global die Nummer eins. Im Handel mit Kreditprodukten und im Geschäft mit Rohstoffen haben wir höhere Erträge erzielt. Im Aktiengeschäft hat sich der Schwung nach der Neuausrichtung des Derivategeschäfts fortgesetzt.

Auch im Emissions- und Beratungsgeschäft können wir große Erfolge vermelden. Hier haben wir erstmals unser lange verfolgtes strategisches Ziel erreicht und gehören nun zu den besten fünf Banken der Welt. Keine andere Bank hat im vergangenen Jahr hier mehr Marktanteile hinzugewonnen als die Deutsche Bank.

Im M&A-Geschäft haben wir unseren Marktanteil fast verdoppelt und liegen nun – gemessen an den Provisionseinnahmen – auf Rang fünf der Weltrangliste.

Im Unternehmensbereich Global Transaction Banking haben die anhaltend niedrigen Zinsen das Ergebnis belastet. Das Ergebnis vor Steuern erreichte 905 Mio € und wurde durch Sonderfaktoren beeinflusst. Im Cash Management konnten wir unseren Platz Nummer eins im Euro-Clearing und unter den führenden US-Dollar-Clearinghäusern festigen.

Der Konzernbereich PCAM hat 2010 den positiven Trend aus dem Vorjahr fortgesetzt und ein Ergebnis vor Steuern in Höhe von 1 Mrd € erwirtschaftet.

Im Gewinn vor Steuern von Asset and Wealth Management in Höhe von 100 Mio € sind Nettobelastungen im Zusammenhang mit Sal. Oppenheim/BHF-BANK in Höhe von 368 Mio € bereits verkräftet. Dieser Unternehmensbereich hat vor allem von gestiegenen erfolgs- und volumenabhängigen Provisionen sowie der günstigen Marktentwicklung profitiert. Gerade in unsicheren Zeiten schätzen die Kunden eine sichere, verlässliche und kompetente Bank wie die Deutsche Bank. Asset and Wealth Management wird mit einer weiteren Erholung der Märkte sein Ergebnis noch erheblich steigern können.

Unser Unternehmensbereich Private & Business Clients (PBC) konnte mit 890 Mio € seinen Gewinn gegenüber dem Vorjahr fast verdoppeln. Dabei wirkten sich die 2009 eingeleiteten Effizienzmaßnahmen positiv aus. Besonders aber trugen das bessere Kreditumfeld, höhere Margen sowie der Anstieg der Provisionseinnahmen im Brokeragegeschäft und erstmals auch die Postbank zu dem guten Ergebnis bei.



Ein weiterer wesentlicher Erfolgsfaktor ist unser Risiko- und Kapitalmanagement. Für Ende 2010 weisen wir trotz Konsolidierung von Sal. Oppenheim, ABN AMRO und Postbank eine Tier-1-Kapitalquote von 12,3% und eine Tier-1-Kernkapitalquote von 8,7% aus. Mit der größten Kapitalerhöhung in der Geschichte der Bank konnten wir sowohl die Finanzierung der Postbank-Übernahme sicherstellen als auch unsere Kapitalbasis im Hinblick auf die verschärften Anforderungen des Basel-III-Regimes weiter stärken. Aus heutiger Sicht rechnen wir damit, dass wir die für 2019 vorgesehenen Basel-III-Solvenzquoten bereits 2013 erfüllen können. Dazu werden wir mit unserem Kapital diszipliniert umgehen, eine angemessene Ausschüttungspolitik betreiben und zugleich unseren Wachstumsinitiativen Rechnung tragen.

Diesem Ziel dient auch unser Dividendenvorschlag: Im Einvernehmen schlagen Aufsichtsrat und Vorstand der Hauptversammlung für das Geschäftsjahr 2010 eine Dividende von 0,75 € pro Aktie vor. Das ist derselbe Betrag wie im Vorjahr, allerdings bezogen auf eine um 50% vergrößerte Kapitalbasis.

Dass wir die größte Kapitalerhöhung in der Geschichte der Bank so reibungslos durchführen konnten, ist ein klarer Vertrauensbeweis in die zukünftige Wertentwicklung der Deutschen Bank. Und dafür möchte ich mich an dieser Stelle im Namen der gesamten Bank bei Ihnen allen nochmals ausdrücklich bedanken. Wir werden alles tun, um die Erwartungen zu erfüllen, die Sie, unsere Aktionärinnen und Aktionäre, mit Ihrem Engagement verbinden.

Unsere Bank ist heute rund um die Welt angesehen wie nie zuvor. Bei Reputation und Markenstärke nehmen wir Spitzenplätze ein. Auch dies eröffnet uns neue Chancen für die Zukunft. Wir stehen zu unserer gesellschaftlichen Verantwortung. 2010 haben wir fast 100 Mio € dafür eingesetzt, weltweit Projekte in den Bereichen Bildung, Nachhaltigkeit, Soziales und Kunst zu fördern. Wir betrachten diese Investitionen in die Gesellschaft als Investitionen in unsere eigene Zukunft.

Das Jahr 2010 hat einmal mehr die Stärke unseres Geschäftsmodells mit seiner diversifizierten Geschäftsstruktur unter Beweis gestellt. In vielen Produktkategorien erbringen wir Spitzenleistungen und erhielten dafür eine Fülle von Auszeichnungen. Die renommierte Fachzeitschrift International Financing Review hat der Deutschen Bank kürzlich zum dritten Mal nach 2003 und 2005 die begehrteste Auszeichnung der Branche, „Bank of the Year“, verliehen. Darauf sind wir außerordentlich stolz.

2011 wird nun das Jahr, in dem wir unsere starke, zukunftsorientierte Aufstellung am Markt voll ausspielen wollen, für die wir 2010 mit der Umsetzung der Phase 4 unserer Managementagenda die Basis gelegt haben. Auch wenn Konjunktur und Finanzmärkte und damit das Umfeld, in dem sich unsere Kunden und wir uns bewegen, weiterhin mit Unwägbarkeiten behaftet bleiben – die Prioritäten sind klar.

*Erstens:* Unsere Investmentbank hat bewiesen, dauerhaft hervorragende Ergebnisse liefern zu können – und sie schafft das auch mit einem konservativeren Risikoprofil.

*Zweitens:* Erfolgreiche Akquisitionen in Deutschland und Europa erweitern unser Privatkunden- und Asset-Management-Geschäft. Wir profitieren von einem ausgewogeneren Ertragsmix, einer geringeren Ertragsvolatilität sowie von einer besseren Liquidität und breiteren Refinanzierungsmöglichkeiten. Mit dem Kauf der renommierten Privatbank Sal. Oppenheim haben wir die Führungsposition im inländischen Markt für Vermögensverwaltung verbessert.

Die Übernahme der Postbank ist die konsequente Fortsetzung unserer Strategie, die sogenannten stabilen Geschäftsbereiche weiter zu stärken. Mit ihr bauen wir unser Privatkundengeschäft zu einer soliden zweiten Säule neben dem Investment Banking aus. Deutsche Bank und Postbank ergänzen sich auf ideale Weise: Sie sprechen unterschiedliche Kundengruppen an. Auch als Teil des Deutsche Bank-Konzerns wird die Postbank beim Kunden aber die etablierte, eigenständige Marke bleiben, die sie schon immer war.

Wir sind – *drittens* – voll im Plan, 2011 in Asien Erträge und Gewinne gegenüber 2008 zu verdoppeln. Schließlich erwarten wir – *viertens* – aus der Integration unserer Investmentbank und der Konsolidierung der Postbank erhebliche Synergien sowie aus der Neubelebung unserer Leistungskultur beträchtliche Effizienzgewinne.

Die Deutsche Bank ist für die Zukunft sehr gut aufgestellt. Natürlich ist meinen Kollegen und mir bewusst, dass wir auch in diesem Jahr auf Herausforderungen und Unwägbarkeiten treffen werden. Aber die Vorarbeit des vergangenen Jahres und der Schwung der dabei erzielten Erfolge werden uns zum Ziel führen, wenn sich uns nicht unerwartet große Hindernisse in den Weg stellen. Wir werden uns auch 2011 mit aller Kraft für die Interessen unserer Aktionäre, Kunden, Mitarbeiter und der Gesellschaft einsetzen.

Mit freundlichen Grüßen



Dr. Josef Ackermann  
Vorsitzender des Vorstands und  
des Group Executive Committee

Frankfurt am Main, im März 2011

## Group Executive Committee

- 1 Stefan Krause, \*1962**  
Vorstandsmitglied seit 2008.  
Chief Financial Officer, verantwortlich für Finanzen, Steuern, Corporate Insurance, Investor Relations und Abteilung für Konzernentwicklung (AfK).
- 2 Rainer Neske, \*1964**  
Vorstandsmitglied seit 2009.  
Head of Private & Business Clients.
- 3 Dr. Josef Ackermann, \*1948**  
Vorstandsmitglied seit 1996.  
Vorsitzender des Vorstands und des Group Executive Committee, verantwortlich für Asset and Wealth Management, Corporate Investments, Kommunikation & Gesellschaftliche Verantwortung, Volkswirtschaftliche Abteilung/DB Research und Revision.
- 4 Hermann-Josef Lamberti, \*1956**  
Vorstandsmitglied seit 1999.  
Chief Operating Officer, verantwortlich für Personal, Informationstechnologie, Operations und Prozessmanagement, Gebäude- und Flächenmanagement sowie Einkauf.
- 5 Kevin Parker, \*1959**  
Head of Asset Management.
- 6 Seth Waugh, \*1958**  
Chief Executive Officer Deutsche Bank Americas.
- 7 Dr. Hugo Bänziger, \*1956**  
Vorstandsmitglied seit 2006.  
Chief Risk Officer, verantwortlich für Risikomanagement, Recht, Compliance, Unternehmenssicherheit, Treasury und Corporate Governance.
- 8 Werner Steinmüller, \*1954**  
Head of Global Transaction Banking.
- 9 Anshuman Jain, \*1963**  
Vorstandsmitglied seit 2009.  
Head of the Corporate & Investment Bank.
- 10 Robert Rankin, \*1963**  
Chief Executive Officer  
Deutsche Bank Asien/Pazifik (ohne Japan).
- 11 Pierre de Weck, \*1950**  
Head of Private Wealth Management.
- 12 Jürgen Fitschen, \*1948**  
Vorstandsmitglied seit 2009.  
Head of Regional Management weltweit.  
Vorsitzender des Management Committee Deutschland.

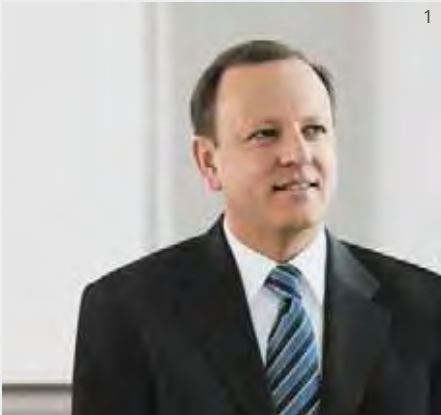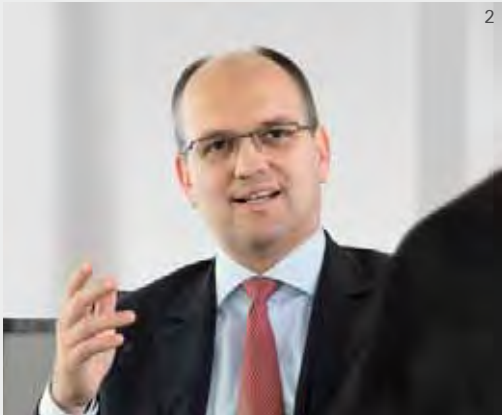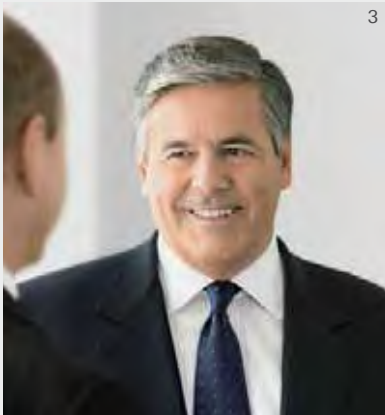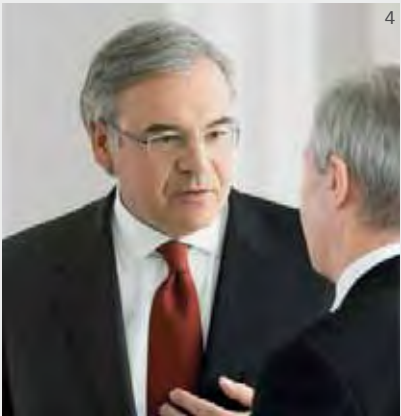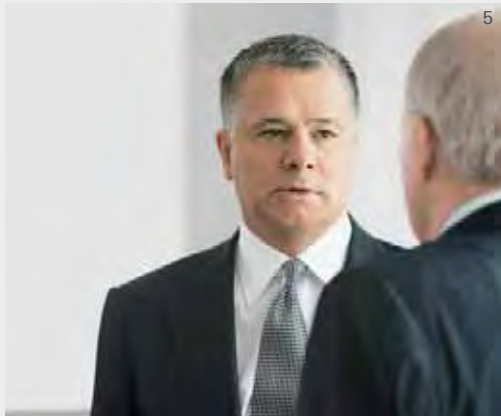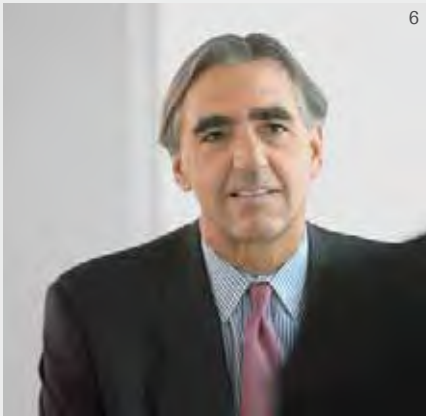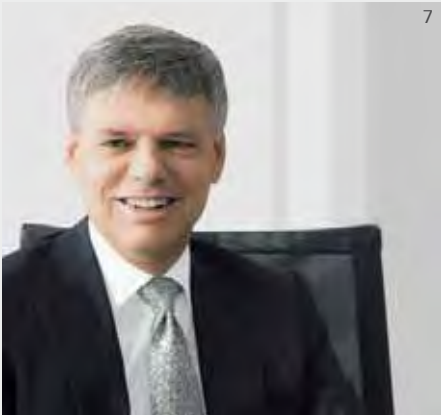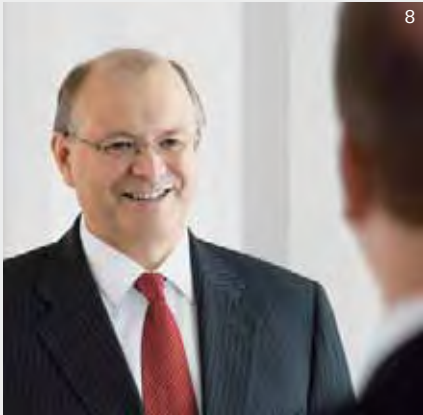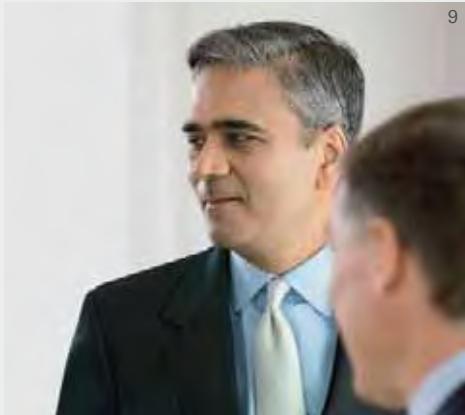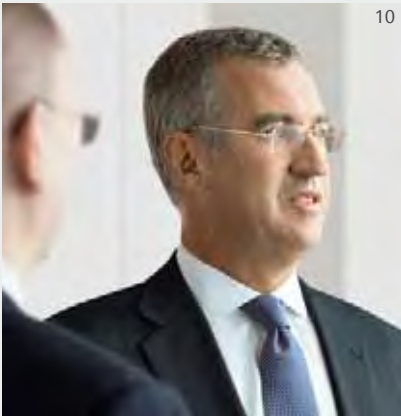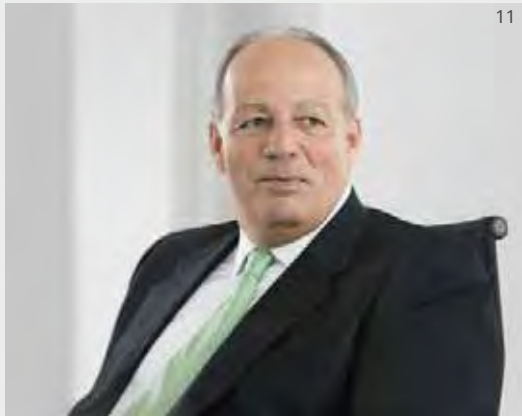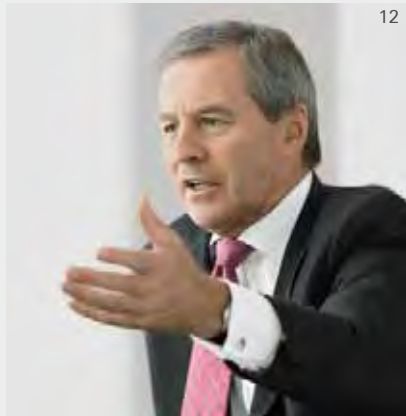

## Bericht des Aufsichtsrats

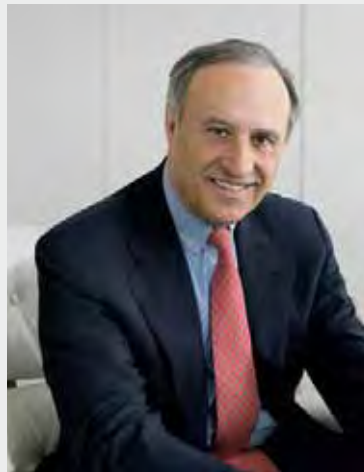

Dr. Clemens Börsig  
Vorsitzender des Aufsichtsrats

Im Jahr 2010 hat sich das wirtschaftliche Umfeld über unsere ursprünglichen Erwartungen hinaus weiter stabilisiert. Insbesondere unser Heimatmarkt Deutschland hat davon profitiert. In den wichtigsten Schwellenländern in Lateinamerika und Asien setzte sich das Wachstum fort. In der Eurozone wirkten sich straffere fiskalpolitische Maßnahmen und strukturelle Anpassungen belastend auf einige Länder aus. Weiterhin gibt es Unsicherheiten über die Stabilität des Finanzsystems, die angesichts der zu hohen Staatsverschuldungen an den Kapitalmärkten für große Schwankungen sorgten. Darüber hinaus konkretisieren sich die neuen regulatorischen Anforderungen nach der Krise. Das jüngst von der G20 gebilligte Regelwerk „Basel III“ ist jedoch erst der Anfang.

Für die Deutsche Bank war 2010 ein Jahr der Investitionen, in dem wir den Wandel vorangetrieben und unsere Wettbewerbsposition deutlich verbessert haben. Die Bank ist heute in vielerlei Hinsicht stärker als vor der Krise und hervorragend für neues Wachstum positioniert. Mit der Übernahme von Teilen der ABN AMRO Bank in den Niederlanden sowie von Sal. Oppenheim und der Postbank in Deutschland wurde die Marktpresenz erheblich ausgebaut. Die Bank verbessert damit zugleich die Ertragskraft besonders im Privat- und Mittelstandskundengeschäft und ergänzt das weltweit erfolgreiche Investment Banking durch eine zweite starke Ertragssäule.

Gleichzeitig hat sie die Kapitalbasis gestärkt. Aufgrund des gut gewählten Zeitpunkts konnte die Kapitalerhöhung mit einem Bruttoemissionserlös von 10,2 Mrd Euro im September sehr erfolgreich durchgeführt werden, um die entscheidende Phase der Übernahme der Postbank einzuleiten. Die Kapitalkraft der Bank hat für Vorstand und Aufsichtsrat auch in der Zukunft weiterhin hohe Priorität. Dies haben wir wie auch schon bei unserem Vorschlag im Vorjahr bei dem diesjährigen Dividendenvorschlag berücksichtigt. Die Integration der Postbank wird die Bank neben den neuen regulatorischen Vorgaben weiterhin vor große Herausforderungen stellen. Wir danken dem Vorstand sowie allen Mitarbeiterinnen und Mitarbeitern sehr herzlich für ihren großen persönlichen Einsatz.



Auch im Jahr 2010 haben wir uns mit zahlreichen gesetzlichen und regulatorischen Änderungen befasst. Eingehend behandelten wir im Berichtsjahr die wirtschaftliche und finanzielle Entwicklung der Bank, ihr Umfeld, das Risikosystem, die Planung und das interne Kontrollsystem sowie die Veränderungen des Vergütungssystems für den Vorstand. Ausführlich erörterten wir mit dem Vorstand die Strategie und die weitere Umsetzung der Maßnahmen von Phase 4 der Managementagenda. Der Vorstand unterrichtete uns regelmäßig, zeitnah und umfassend über die Geschäftspolitik und andere grundsätzliche Fragen der Unternehmensführung und -planung, die finanzielle Entwicklung und Ertragslage der Bank, das Risiko-, Liquiditäts- und Kapitalmanagement der Bank sowie über Geschäfte und Ereignisse, die für die Bank von erheblicher Bedeutung waren. Wir haben den Vorstand beraten und seine Geschäftsführung überwacht. Bei Entscheidungen von grundlegender Bedeutung waren wir eingebunden. Wichtige Themen und anstehende Entscheidungen wurden zudem in regelmäßigen Gesprächen zwischen dem Vorsitzenden des Aufsichtsrats und dem Vorsitzenden des Vorstands erörtert. Zwischen den Sitzungen wurden wir über wichtige Vorgänge schriftlich informiert. Beschlüsse wurden, soweit zwischen den Sitzungen erforderlich, im Umlaufverfahren herbeigeführt.

### Sitzungen des Aufsichtsrats

Im Geschäftsjahr 2010 haben neun Sitzungen des Aufsichtsrats stattgefunden.

In der ersten Sitzung des Jahres am 3. Februar 2010 erörterten wir die Geschäftsentwicklung im Jahr 2009, die Eckdaten des Jahresabschlusses 2009 und den Plan-Ist-Vergleich 2009. Den Dividendenvorschlag für das Jahr 2009 sowie die Unternehmensplanung für die Jahre 2010 bis 2012 haben wir zustimmend zur Kenntnis genommen. Außerdem erörterten wir den Prüfungsbericht von PricewaterhouseCoopers zur Ordnungsmäßigkeit der Geschäftsorganisation des Bereichs Corporate Security sowie den Corporate-Governance-Bericht und die Erklärung zur Unternehmensführung. Wir beschlossen, dass Herr Dr. Börsig und Herr Dr. Eick im Geschäftsbericht als Finanzexperten nach deutschem und US-amerikanischem Recht benannt werden und prüften die Unabhängigkeit der Mitglieder des Prüfungsausschusses. Schließlich beschlossen wir eine Fassungsänderung der Satzung und nach umfassender Erörterung auf Empfehlung des Präsidialausschusses die Neustrukturierung der Vorstandsvergütung.

In zwei weiteren Sitzungen am 10. Februar und 18. Februar 2010 erörterten wir die Bemessungsgrundlagen der variablen Vorstandsvergütung für das Geschäftsjahr 2009 unter anderem nach den Vorschriften des Gesetzes zur Angemessenheit der Vorstandsvergütung (VorstAG) und legten die Vorstandsvergütung anschließend unter Einbindung externer, unabhängiger Rechts- und Vergütungsberater unter Berücksichtigung der Empfehlungen des Präsidialausschusses fest.

In der Bilanzsitzung am 12. März 2010 billigten wir auf Empfehlung des Prüfungsausschusses und nach Erörterung mit dem Abschlussprüfer den Konzern- und Jahresabschluss 2009. Ferner wurde der Compliance- und Antigeldwäschebericht vorgestellt und eine mögliche Aufstockung unserer Beteiligung an der Hua Xia Bank in China erörtert. Herr Lamberti informierte uns über die Vergütungsstrukturen und -praktiken der Bank (Vergütungsbericht) nach den neuen Anforderungen der Bundesanstalt für Finanzdienstleistungsaufsicht. Über die wichtigsten Risikopositionen und das Risikomanagement im Konzern wurden wir ebenfalls eingehend unterrichtet. Veränderungen in den Regional Advisory Boards und den Bezirksbeiräten in Deutschland wurden uns vorgestellt und die Beschlussvorschläge für die Tagesordnung der Hauptversammlung 2010 verabschiedet.

In der Sitzung am Tag vor der Hauptversammlung erörterten wir den Ablauf der Hauptversammlung und die angekündigten Gegenanträge sowie den Stand der Rechtsstreitigkeiten im Zusammenhang mit den Hauptversammlungen der Jahre 2004 bis 2009. Soweit erforderlich, wurden Beschlüsse gefasst. Außerdem berichtete Herr Dr. Ackermann zusammenfassend über das Engagement der Bank in Griechenland und die weitere Vorgehensweise.

In einer außerordentlichen Sitzung am 15. Juni 2010 nahmen wir den Wunsch von Herrn Cohrs, sein Vorstandsmandat zum 30. September 2010 niederzulegen, zur Kenntnis und stimmten der Beendigung seines Anstellungsverhältnisses auf Basis bestimmter Eckdaten grundsätzlich zu. Außerdem stimmten wir den daraus resultierenden Anpassungen im Geschäftsverteilungsplan für den Vorstand auf Vorschlag des Präsidialausschusses grundsätzlich zu. Herr Dr. Ackermann informierte uns über die vorgesehenen Stresstests für Finanzinstitute.

In der Sitzung am 27. Juli 2010 wurden wir über die Entwicklung der Bank im ersten Halbjahr unterrichtet. Aufgrund der von der Regierungskommission im Mai 2010 beschlossenen Ergänzungen im Deutschen Corporate Governance Kodex wurden Anpassungen in den Geschäftsordnungen des Aufsichtsrats, des Präsidial- und des Nominierungsausschusses mit dem Ziel beschlossen, sämtliche neuen Kodexempfehlungen umzusetzen. Außerdem stimmten wir einer Anpassung der Planbedingungen für im Jahr 2010 ausgegebene Restricted Incentive und Equity Awards der Vorstandsmitglieder zu. Herr Lamberti berichtete uns über die IT-Infrastruktur der Bank, die GTO Governance sowie die weiteren Herausforderungen für die Bankenbranche. Herr Krause stellte die strategischen und finanziellen Ziele des Programms zur Reduzierung der Komplexität vor und gab Fortschrittsberichte zur Integration von Sal. Oppenheim und dem von der ABN AMRO Bank übernommenen Firmenkundengeschäft in den Niederlanden. Außerdem stimmten wir dem Beschluss des Vorstands, im Rahmen einer Kapitalerhöhung der Hua Xia Bank in China unsere Beteiligung auf 19,99% aufzustocken, und dem Vorschlag des Präsidialausschusses hinsichtlich der Vertragsbeendigung mit Herrn Cohrs zu.

In einer außerordentlichen Sitzung am 12. September 2010 stimmten wir auf Vorschlag des Präsidialausschusses den Beschlüssen des Vorstands vom selben Tag zur Abgabe eines öffentlichen Übernahmeangebots an die Aktionäre der Deutschen Postbank AG und zur Erhöhung des Grundkapitals der Bank zu.

In der letzten Sitzung des Jahres am 27. Oktober 2010 wurden wir über die geschäftliche Entwicklung im dritten Quartal und den Stand des Übernahmeangebots an die Aktionäre der Deutschen Postbank AG unterrichtet. Wir erörterten ausführlich mit dem Vorstand die strategische Weiterentwicklung der Bank mit den entsprechenden Zielen und geplanten Maßnahmen. Herr Lamberti stellte uns den Personalbericht der Deutschen Bank vor. Darüber hinaus wurden Anpassungen in der Geschäftsordnung für den Vorstand einschließlich des Geschäftsverteilungsplans sowie in der Geschäftsordnung für den Prüfungsausschuss aufgrund der neuen Mindestanforderungen an die Compliance-Funktion erörtert und beschlossen. Schließlich haben wir die Ziele für die Zusammensetzung des Aufsichtsrats festgelegt.

### Ausschüsse des Aufsichtsrats

Der Präsidialausschuss tagte im Berichtszeitraum zehnmal. Außerdem fanden zwei Telefonkonferenzen statt. Zwischen den Sitzungen besprach der Vorsitzende des Präsidialausschusses mit den Ausschussmitgliedern regelmäßig Themen von besonderer Bedeutung. Der Ausschuss befasste sich insbesondere mit den neuen gesetzlichen und regulatorischen Anforderungen an die Vorstandsvergütung und deren Umsetzung, der Vorbereitung zur Festlegung der variablen Vergütung für das Geschäftsjahr 2009, mit Fragen zur Nachfolgeplanung sowie der Beendigung der Vorstandsbestellung von Herrn Cohrs. Erforderliche Anpassungen in den Geschäftsordnungen des Vorstands, des Aufsichtsrats und seiner Ausschüsse sowie im Geschäftsverteilungsplan für den Vorstand wurden ebenfalls thematisiert. Zudem bereitete der Präsidialausschuss Beschlüsse des Aufsichtsrats vor und stimmte der Übernahme von Nebentätigkeiten sowie Mandaten von Vorstandsmitgliedern bei anderen Unternehmen zu. Außerdem hat er aufgrund einer entsprechenden Ermächtigung des Aufsichtsrats der finalen Ausgestaltung der Kapitalerhöhung der Bank zugestimmt. Schließlich behandelte er die Umsetzung der neuen Empfehlungen und Anregungen des Deutschen Corporate Governance Kodex.

Der Risikoausschuss befasste sich in sechs Sitzungen mit den nach Gesetz und Satzung vorlagepflichtigen Engagements der Bank und erteilte sofern erforderlich seine Zustimmung. Der Ausschuss befasste sich mit Kredit-, Liquiditäts-, Länder-, Markt- und operationellen Risiken sowie Rechts- und Reputationsrisiken. Ausführlich erörterte er die Risikosituation der Bank, die Entwicklungen der Staatsfinanzkrisen in Europa sowie deren Auswirkungen auf die Bank. Neben der Entwicklung der Risiken in den Bereichen Leveraged Finance, gewerbliche Immobilienfinanzierung und Monoline-Versicherer wurden auch die Auswirkungen der neuen aufsichtsrechtlichen Regeln auf die Bank und deren Risikopositionen eingehend diskutiert. Des Weiteren standen die Risikotragfähigkeit, das heißt das Verhältnis von Kapitalbedarf zu verfügbarem Kapital (ICAAP-Berichterstattung), einschließlich einer Gegenüberstellung der ökonomischen Risiken zum Risikodeckungspotenzial und dessen konsequente Verankerung im Risikomanagement sowie die Entwicklung der Refinanzierungs- und Liquiditätslage der Bank im Mittelpunkt. Ferner wurden globale Branchenportfolios nach einem festgelegten Plan vorgestellt und eingehend besprochen.

Der Prüfungsausschuss tagte 2010 sechsmal. Vertreter des Abschlussprüfers nahmen regelmäßig teil. Gegenstand der Sitzungen waren die Prüfung des Jahres- und des Konzernabschlusses 2009, die Quartalsabschlüsse, die Berichte 20-F und 6-K für die US-amerikanische Securities and Exchange Commission (SEC) sowie die Zwischenberichte. Der Ausschuss befasste sich mit dem Vorschlag zur Wahl des Abschlussprüfers für das Geschäftsjahr 2010, erteilte den Prüfungsauftrag, legte Prüfungsschwerpunkte fest, beschloss die Vergütung des Abschlussprüfers und überprüfte dessen Unabhängigkeit nach den Anforderungen des Deutschen Corporate Governance Kodex sowie den Vorschriften des US-amerikanischen Public Company Accounting Oversight Board (PCAOB). Der Prüfungsausschuss ist wie in den Vorjahren davon überzeugt, dass beim Abschlussprüfer keine Interessenkonflikte vorliegen. Er hat ausführlich überprüft, inwiefern unsere internen Kontrollsysteme den Vorgaben des Sarbanes-Oxley Act entsprechen. Von der Wirksamkeit des internen Kontroll-, des

Risikomanagement- und des internen Revisionssystems hat er sich überzeugt und den Rechnungslegungsprozess überwacht. Soweit erforderlich, wurden Beschlüsse gefasst oder dem Aufsichtsrat Empfehlungen zur Beschlussfassung gegeben. Regelmäßig wurde dem Prüfungsausschuss über die Beauftragung von Wirtschaftsprüfungsgesellschaften einschließlich des Abschlussprüfers mit prüfungsfremden Aufträgen, über die Arbeit der internen Revision und Fragen der Compliance, über Rechts- und Reputationsrisiken sowie über Sonderprüfungen und wesentliche Beanstandungen von Aufsichtsbehörden berichtet. Der Jahresplan der internen Revision wurde zustimmend zur Kenntnis genommen. Beschwerden in Bezug auf das Rechnungswesen, die internen Prüfverfahren zur Rechnungslegung und zu Fragen der Abschlussprüfung wurden dem Prüfungsausschuss nicht angezeigt. In der letzten Sitzung des Jahres ließ er sich die Schwerpunktthemen des bevorstehenden Jahresabschlusses 2010 vom Vorstand und vom Abschlussprüfer erläutern. Hierzu gehörten insbesondere die Erstkonsolidierungen der Deutschen Postbank AG, der Sal. Oppenheim und von Teilen der ABN AMRO Bank in den Niederlanden, die prüfungsvorbereitenden Maßnahmen zum Jahresabschluss und die Prüfungsschwerpunkte nach § 30 KWG. Außerdem wurde ihm über die Ablösung von IAS 39 und die Einführung von IFRS 9 für Finanzinstrumente sowie die erfolgten Schritte und weiteren Planungen des Programms zur Reduzierung der Komplexität berichtet.

Im Nominierungsausschuss fanden zwei Besprechungen zu Nachfolgefragen im Aufsichtsrat statt.

Sitzungen des nach den Vorschriften des Mitbestimmungsgesetzes gebildeten Vermittlungsausschusses waren im Jahr 2010 nicht erforderlich.

Die Vorsitzenden der Ausschüsse berichteten dem Aufsichtsrat regelmäßig über die Arbeit der Ausschüsse.

Alle Mitglieder des Aufsichtsrats nahmen im Jahr 2010 an den Sitzungen des Aufsichtsrats und der Ausschüsse mit nur wenigen Ausnahmen (durchschnittliche Präsenz: 95%) teil.

### Corporate Governance

Die Umsetzung der neuen Empfehlungen des Deutschen Corporate Governance Kodex wurde in den Sitzungen des Aufsichtsrats und des Präsidialausschusses im Juli 2010 erörtert. Der Aufsichtsrat beschloss, alle neuen Empfehlungen des Kodex umzusetzen, und passte die Geschäftsordnungen des Aufsichtsrats, des Präsidial- und des Nominierungsausschusses sowie des Vorstands, soweit erforderlich, entsprechend an.

Der Präsidialausschuss und der Aufsichtsrat befassten sich ferner in mehreren Sitzungen mit der Umsetzung der neuen Regelungen zur Vorstandsvergütung. Der Aufsichtsrat beschloss zur Überprüfung der Struktur der Vorstandsvergütung sowie der Angemessenheit der variablen Vergütung für das Geschäftsjahr 2010 je einen unabhängigen Rechts- und Vergütungsberater zu mandatieren.

Außerdem haben wir in der Sitzung im Oktober 2010 auf Vorschlag des Präsidialausschusses gemäß Ziffer 5.4.1 des Deutschen Corporate Governance Kodex die Ziele für die Zusammensetzung des Aufsichtsrats festgelegt. [Siehe Seiten 375 ff. des Corporate-Governance-Berichts im Finanzbericht 2010.](#)

Wie im Oktober 2009 beschlossen, wurden im Frühjahr 2010 sowohl im Plenum als auch im Präsidial-, Prüfungs- und Risikoausschuss Effizienzprüfungen mit unternehmensspezifischen Fragebögen durchgeführt und die Ergebnisse in den anschließenden Sitzungen im Detail präsentiert und erörtert. Wir sind der Auffassung, dass die Arbeit des Aufsichtsrats effizient erfolgt und ein hoher Standard erreicht wurde. Anregungen und Maßnahmen, die in der letzten Effizienzprüfung des Aufsichtsrats vorgeschlagen wurden, sind wirkungsvoll umgesetzt worden und haben zu einer weiteren Steigerung der Effizienz der Aufsichtsrats- und Ausschusstätigkeit geführt. Darüber hinaus wurden erste Anregungen aus den Effizienzprüfungen im Jahr 2010 bereits realisiert.

Wir haben festgestellt, dass dem Aufsichtsrat eine nach unserer Einschätzung ausreichende Anzahl unabhängiger Mitglieder angehört. Außerdem haben wir festgestellt, dass alle Mitglieder des Prüfungsausschusses gemäß Section 407 der Ausführungsbestimmungen der Securities and Exchange Commission (SEC) zum Sarbanes-Oxley Act 2002 unabhängig sind. Als Finanzexperten im Prüfungsausschuss wurden nach den Vorschriften der SEC sowie nach §§ 107 Abs. 4 und 100 Abs. 5 AktG Herr Dr. Börsig und Herr Dr. Eick benannt.

Die Entsprechenserklärung nach § 161 Aktiengesetz, die Aufsichtsrat und Vorstand zuletzt im Oktober 2009 abgegeben und im Januar 2010 aktualisiert hatten, wurde in der Aufsichtsratssitzung am 27. Oktober 2010 erneuert. Die Deutsche Bank AG entspricht allen Empfehlungen der Kodexfassung vom 26. Mai 2010 ohne Ausnahmen.

Eine zusammenfassende Darstellung der Corporate Governance der Bank einschließlich des Wortlauts der Entsprechenserklärung vom 27. Oktober 2010 ist im Finanzbericht 2010 Seiten 375ff. und auf unserer Homepage im Internet unter [http://www.deutsche-bank.de/ir/de/content/corporate\\_governance.htm](http://www.deutsche-bank.de/ir/de/content/corporate_governance.htm) veröffentlicht. Dort finden sich auch die Geschäftsordnungen des Aufsichtsrats und seiner Ausschüsse sowie die des Vorstands in der jeweils aktuellen Fassung.

### **Aus- und Fortbildungsmaßnahmen**

Mitglieder des Aufsichtsrats nahmen die für ihre Aufgaben erforderlichen Aus- und Fortbildungsmaßnahmen eigenverantwortlich wahr. Sie wurden dabei von der Deutschen Bank angemessen unterstützt. Die im Jahr 2010 neu in den Aufsichtsrat eingetretenen Mitglieder erhielten auf den individuellen Kenntnisstand zugeschnittene Einführungen, ein Informationspaket sowie Angebote für interne und externe Fortbildungsmaßnahmen, von denen Gebrauch gemacht wurde. Alle Mitglieder des Aufsichtsrats wurden im Rahmen eines Workshops durch einen externen Rechtsanwalt über die rechtlichen Grundlagen der Aufsichtsrats Tätigkeit informiert. Außerdem wurde ihnen von einem weiteren externen Rechtsanwalt über die Verantwortung und Aufgaben des Aufsichtsrats berichtet. Es fanden im Berichtsjahr zwei interne Workshops mit den Mitgliedern des Risikoausschusses zu den Themen Kredit-, Markt- und operationelle Risiken sowie zum Modell des Ökonomischen Kapitals (ICAAP) statt. Die Mitglieder des Prüfungsausschusses erörterten mit Mitarbeitern der Finance-Abteilung und des Abschlussprüfers neue Vorschriften zur Rechnungslegung und zur Bilanzierung. Zusätzlich wurden die Mitglieder des Aufsichtsrats über neue Entwicklungen auf dem Gebiet der Corporate Governance informiert.

### Interessenkonflikte und deren Behandlung

Der Risikoausschuss befasste sich mit den nach § 15 des Gesetzes über das Kreditwesen (KWG) erforderlichen Kreditgenehmigungen. Dabei nahmen diejenigen Aufsichtsratsmitglieder an der Erörterung und Abstimmung nicht teil, die zum Zeitpunkt der Beschlüsse Mitglieder der Organe des betreffenden Kreditnehmers oder aus anderen Gründen einem möglichen Interessenkonflikt ausgesetzt waren.

Herr Prof. Kagermann nahm im September 2010 an der Abstimmung und der Diskussion zur Abgabe eines öffentlichen Übernahmeangebots an die Aktionäre der Deutschen Postbank AG aufgrund seiner Mitgliedschaft im Aufsichtsrat der Deutschen Post AG und eines damit verbundenen möglichen Interessenkonflikts nicht teil.

Gelegentlich bestanden bei einzelnen Aufsichtsratsmitgliedern latente Interessenkonflikte. So waren im Berichtszeitraum Frau Förster und Frau Ruck als Arbeitnehmervertreterinnen auch Mitglied des Aufsichtsrats der Deutsche Bank Privat- und Geschäftskunden AG. Sie haben an Beratungen und Abstimmungen zu den entsprechenden Themen, die sich aus ihrer Tätigkeit ergaben, wie z.B. Beschlüsse nach § 32 MitbestG, nicht teilgenommen. Besonderer weiterer Maßnahmen im Hinblick auf diese latenten und lediglich punktuellen Interessenkonflikte bedurfte es nicht.

### Rechtsstreitigkeiten

Der Aufsichtsrat informierte sich wie in den Vorjahren regelmäßig über wichtige Rechtsstreitigkeiten und beriet über die weitere Vorgehensweise. Hierzu zählten die Anfechtungs- und Auskunftsklagen im Zusammenhang mit den Hauptversammlungen 2004, 2005, 2006, 2007, 2008, 2009 und 2010 sowie die Verfahren Dr. Kirch und KGL Pool GmbH gegen die Deutsche Bank und gegen Dr. Breuer. Die am 29. Mai 2008 durch die Hauptversammlung erfolgte Wahl der Anteilseignervertreter wurde von mehreren Aktionären angefochten. Das Verfahren liegt derzeit dem Bundesgerichtshof vor, der über die Zulassung der Revision gegen das klageabweisende Urteil des OLG Frankfurt am Main entscheiden wird.

Darüber hinaus ließen wir uns fortlaufend im Aufsichtsrat sowie detailliert im Prüfungs- und Risikoausschuss über bedeutende Rechtsstreitigkeiten berichten.

### Jahresabschluss

Die Buchführung, der Jahresabschluss mit Lagebericht für das Jahr 2010 sowie der Konzernabschluss mit Erläuterungen (Notes) und der Konzernlagebericht für das Jahr 2010 sind von der durch die Hauptversammlung als Abschlussprüfer gewählten KPMG Aktiengesellschaft Wirtschaftsprüfungsgesellschaft geprüft worden. Die Prüfungen haben zu einem jeweils uneingeschränkten Bestätigungsvermerk geführt. Der Prüfungsausschuss hat die Unterlagen zum Jahres- und Konzernabschluss unter Berücksichtigung des Prüfberichts des Abschlussprüfers und im Gespräch mit diesem ausführlich erörtert. Der Vorsitzende des Prüfungsausschusses hat uns hierüber in der heutigen Sitzung des Aufsichtsrats berichtet. Wir haben dem Ergebnis der Prüfungen nach Einsicht der Berichte des Abschlussprüfers und der Jahres- und Konzernabschlussunterlagen sowie eingehender Diskussion und auf Empfehlung des Prüfungsausschusses zugestimmt und festgestellt, dass auch nach dem abschließenden Ergebnis unserer Prüfungen Einwendungen nicht zu erheben sind.



Den vom Vorstand aufgestellten Jahresabschluss sowie den Konzernabschluss haben wir heute gebilligt, der Jahresabschluss ist damit festgestellt. Dem Vorschlag des Vorstands für die Gewinnverwendung schließen wir uns an.

### Personalia

Herr Cohrs ist mit Wirkung zum Ablauf des 30. September 2010 aus dem Vorstand ausgeschieden. Seine Ressortzuständigkeiten wurden von Herrn Jain zusätzlich zu seinen bestehenden Aufgaben übernommen.

Veränderungen haben sich auch im Aufsichtsrat ergeben. Herr Wunderlich war bis zum 30. Juni 2010 Mitglied des Aufsichtsrats. Er wurde für den Rest seiner Amtszeit durch Herrn Kazmierczak ersetzt. Frau Förster war bis zum 31. Juli 2010 Mitglied des Aufsichtsrats. Sie wurde für den Rest der Amtszeit durch Herrn Viertel ersetzt.

Wir danken den ausgeschiedenen Mitgliedern für ihr großes Engagement im Aufsichtsrat und für die konstruktive Begleitung des Unternehmens und des Vorstands während der vergangenen Jahre.

Für den Aufsichtsrat



Dr. Clemens Börsig  
Vorsitzender

Frankfurt am Main, 11. März 2011

## Aufsichtsrat

**Dr. Clemens Börsig**  
Vorsitzender,  
Frankfurt am Main

**Karin Ruck\***  
Stellvertretende Vorsitzende,  
Deutsche Bank AG,  
Bad Soden am Taunus

**Wolfgang Böhr\***  
Deutsche Bank AG,  
Düsseldorf

**Dr. Karl-Gerhard Eick**  
Unternehmensberater,  
KGE Asset Management Consulting Ltd.,  
London

**Heidrun Förster\***  
bis 31. Juli 2010,  
Deutsche Bank Privat- und  
Geschäftskunden AG,  
Berlin

**Alfred Herling\***  
Deutsche Bank AG,  
Wuppertal

**Gerd Herzberg\***  
Stellvertretender Vorsitzender der ver.di  
Vereinte Dienstleistungsgewerkschaft,  
Hamburg

**Sir Peter Job**  
London

**Prof. Dr. Henning Kagermann**  
Präsident acatech - Deutsche Akademie  
der Technikwissenschaften,  
Königs Wusterhausen

**Peter Kazmierczak\***  
ab 1. Juli 2010,  
Deutsche Bank AG,  
Herne

**Martina Klee\***  
Deutsche Bank AG,  
Frankfurt am Main

**Suzanne Labarge**  
Toronto

**Maurice Lévy**  
Chairman und Chief Executive  
Officer, Publicis Groupe S.A.,  
Paris

**Henriette Mark\***  
Deutsche Bank AG,  
München

**Gabriele Platscher\***  
Deutsche Bank Privat- und  
Geschäftskunden AG,  
Braunschweig

**Dr. Theo Siegert**  
Geschäftsführender Gesellschafter  
der de Haen Carstanjen & Söhne,  
Düsseldorf

**Dr. Johannes Teyssen**  
Vorsitzender des Vorstands  
der E.ON AG ab 1. Mai 2010,  
Oberding

**Marlehn Thieme\***  
Deutsche Bank AG,  
Bad Soden am Taunus

**Tilman Todenhöfer**  
Persönlich haftender  
Gesellschafter der Robert Bosch  
Industrietreuhand KG,  
Madrid

**Stefan Viertel\***  
ab 1. August 2010,  
Deutsche Bank AG,  
Bad Soden am Taunus

**Werner Wenning**  
Vorsitzender des Vorstands der  
Bayer AG bis 30. September 2010,  
Leverkusen

**Leo Wunderlich\***  
bis 30. Juni 2010,  
Deutsche Bank AG,  
Mannheim

\* Von den Arbeitnehmern in  
Deutschland gewählt.

## Aufsichtsratsausschüsse

### Präsidialausschuss

- Dr. Clemens Börsig  
Vorsitzender
- Heidrun Förster\*  
bis 31. Juli 2010
- Alfred Herling\*  
ab 1. August 2010
- Karin Ruck\*
- Tilman Todenhöfer

### Vermittlungsausschuss

- Dr. Clemens Börsig  
Vorsitzender
- Wolfgang Böhr\*
- Karin Ruck\*
- Tilman Todenhöfer

### Prüfungsausschuss

- Dr. Karl-Gerhard Eick  
Vorsitzender
- Dr. Clemens Börsig
- Sir Peter Job
- Henriette Mark\*
- Karin Ruck\*
- Marlehn Thieme\*

### Risikoausschuss

- Dr. Clemens Börsig  
Vorsitzender
- Sir Peter Job
- Prof. Dr. Henning Kagermann
- Suzanne Labarge  
Ersatzmitglied
- Dr. Theo Siegert  
Ersatzmitglied

### Nominierungsausschuss

- Dr. Clemens Börsig  
Vorsitzender
- Tilman Todenhöfer
- Werner Wenning

\* Von den Arbeitnehmern in  
Deutschland gewählt.

## Patrick Lemmens Rotterdam

Die guten Resultate der Deutschen Bank kommen all ihren Stakeholdern zugute: den Aktionären, Mitarbeitern, Kunden und der Gesellschaft. Unser konstruktiver Wunsch ist, dass die Bank bei zugleich stabilen und soliden Ergebnissen ihre Kosteneffizienz wahren kann.

Patrick Lemmens,  
Portfolio Manager,  
Robeco Institutional Asset Management B.V.,  
Rotterdam

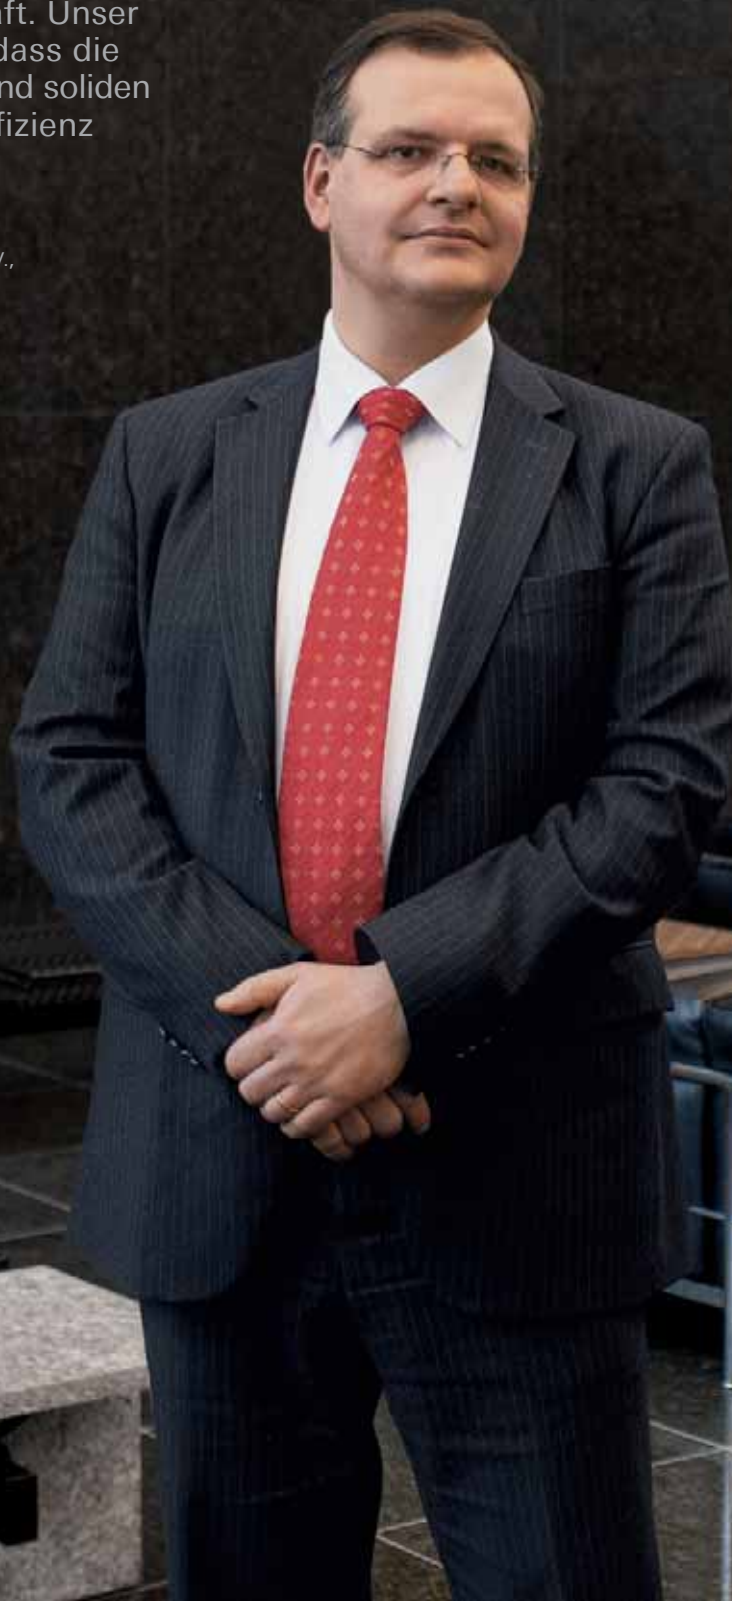

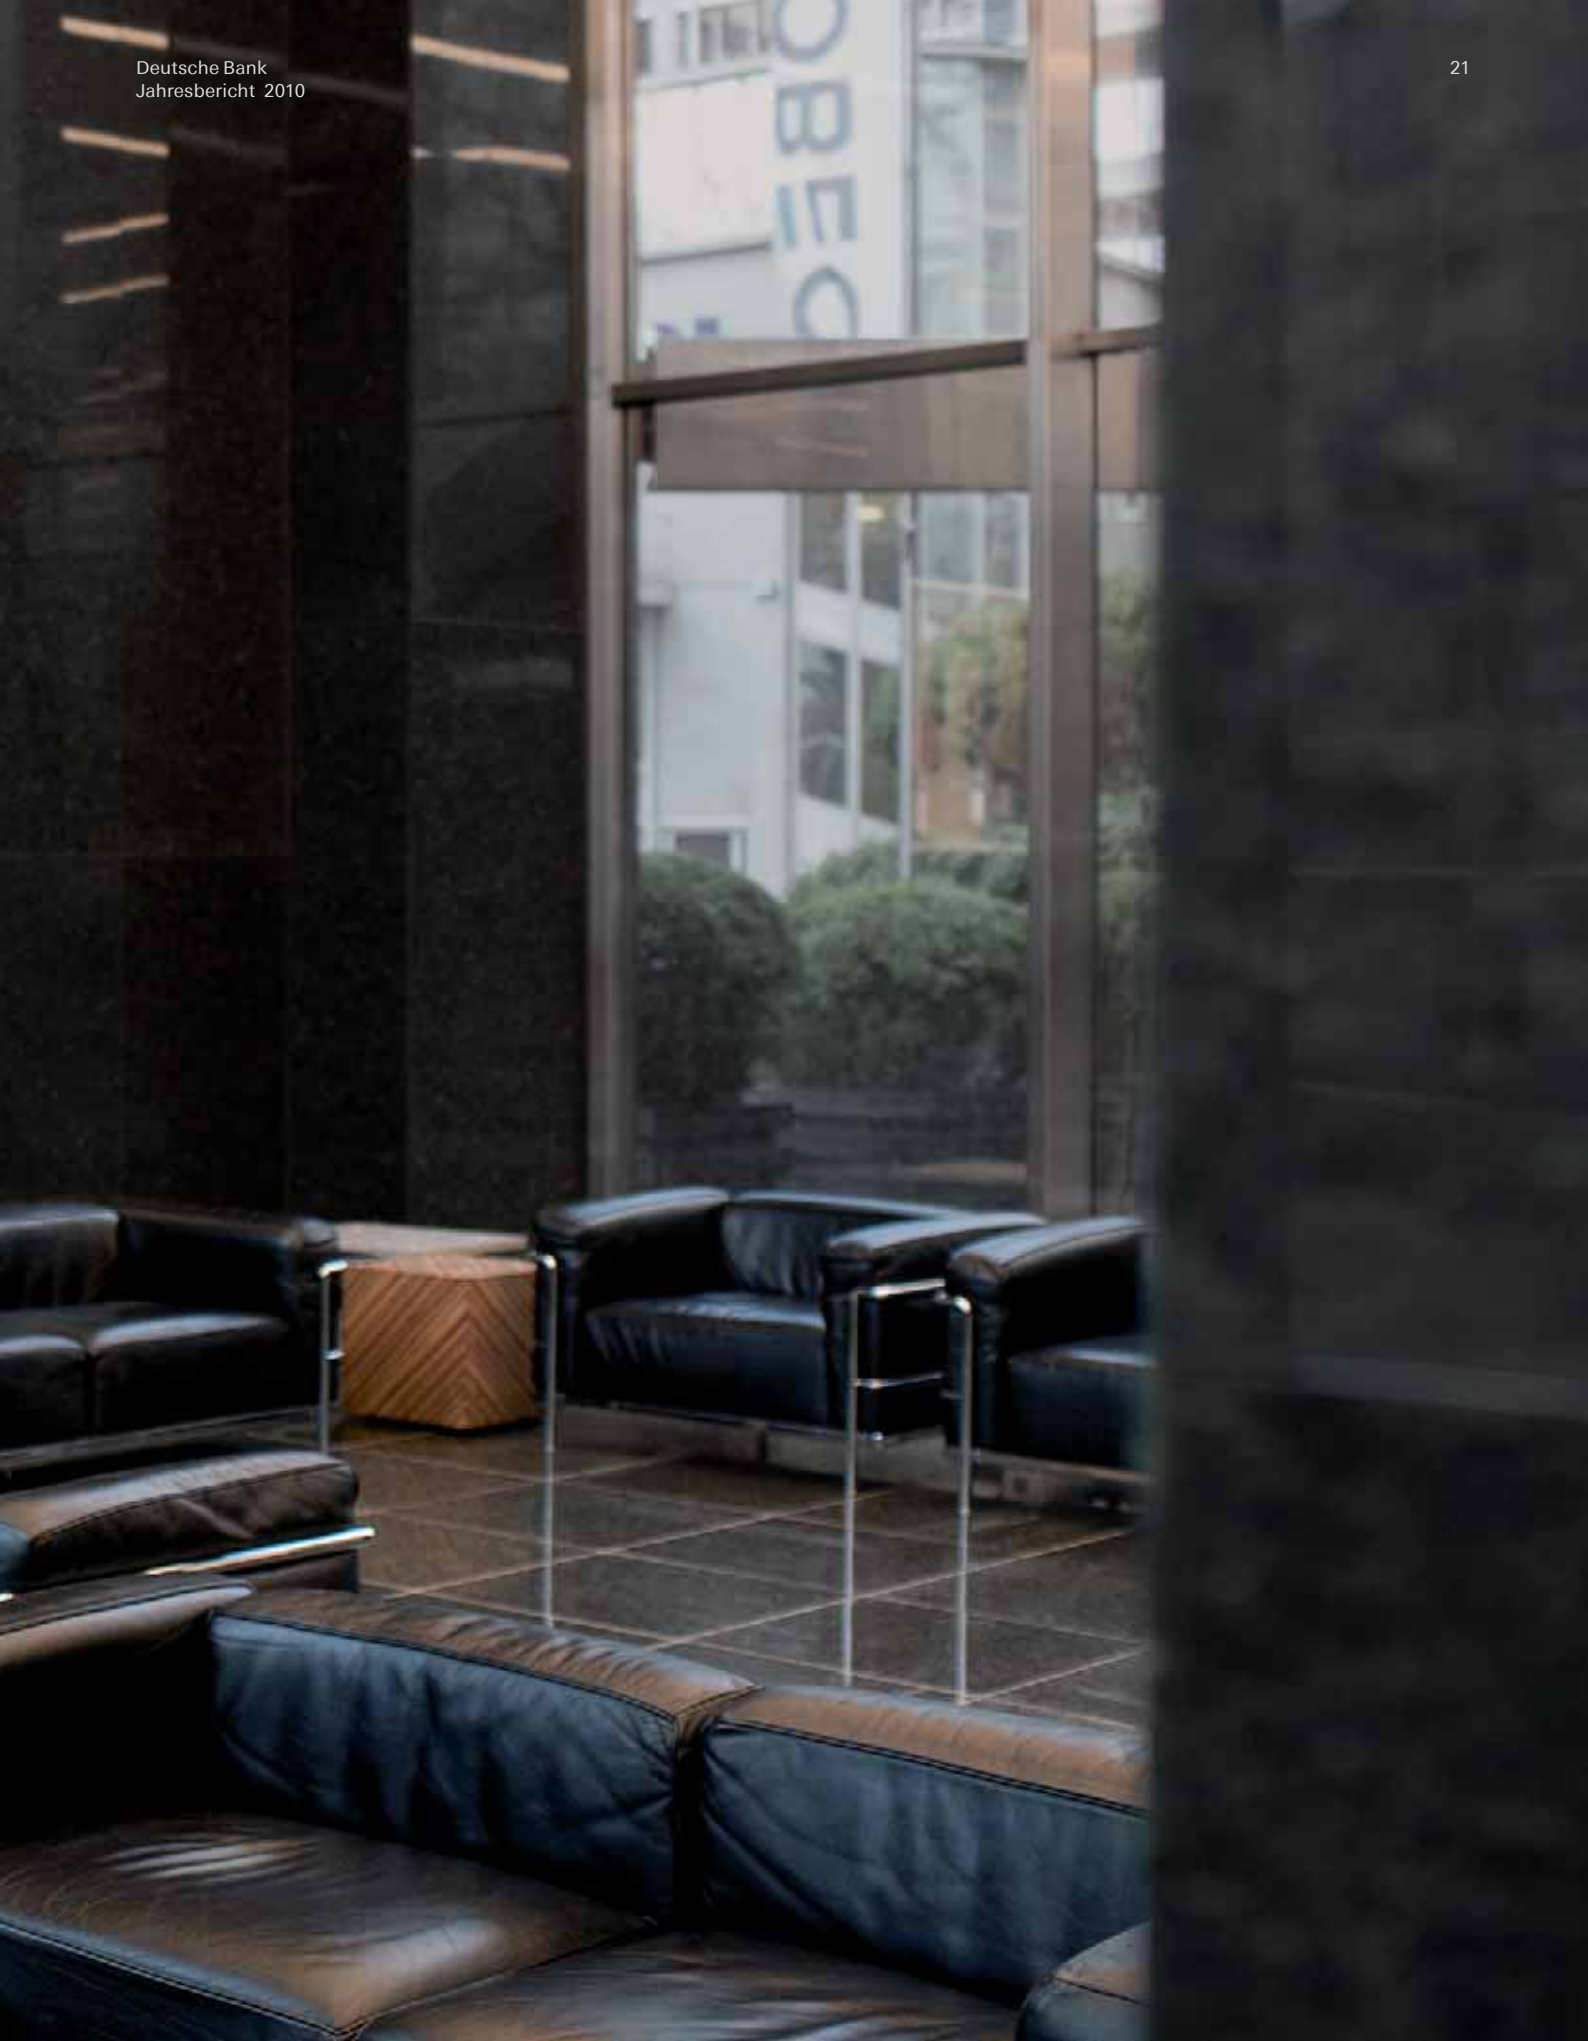



# 01 –

## Der Deutsche Bank-Konzern

Unternehmensprofil und Überblick – 23  
Investitionen in die Zukunft

Corporate Governance – 27  
Fundament für langfristigen Erfolg

Im Interesse unserer Partner – 29  
Stark für unsere Aktionäre, Kunden,  
Mitarbeiter und die Gesellschaft



## Unternehmensprofil und Überblick

### Investitionen in die Zukunft

Die Deutsche Bank ist eine führende globale Investmentbank mit einem bedeutenden Privatkundengeschäft sowie sich gegenseitig verstärkenden Geschäftsfeldern. Sie konnte sich mit ihrem diversifizierten Geschäftsmodell aus eigener Kraft in der Finanzkrise wesentlich besser behaupten als viele ihrer Wettbewerber. Aus dieser Position der Stärke heraus haben wir 2010 zukunftsweisende strategische Akquisitionen abgeschlossen, die sich auch in unserer Auszeichnung als Bank of the Year durch die renommierte Fachzeitschrift International Financing Review widerspiegeln.

#### Managementstruktur

Die Aufgaben des Vorstands der Deutschen Bank AG umfassen insbesondere die strategische Steuerung, Zuteilung der Ressourcen, Rechnungslegung und Finanzberichterstattung sowie das Risikomanagement und die Kontrolle des Konzerns. Der Vorstand nimmt seine Führungs- und Aufsichtsfunktion, in der ihn die zentrale Infrastruktur und ihm zugeordnete Stabs- und Serviceabteilungen unterstützen, auch über von ihm geleitete funktionale Gremien wahr.

Vorstandsmitglied Anshu Jain hat am 1. Juli 2010 die Zuständigkeit für Global Banking von Michael Cohrs übernommen und ist seitdem alleiniger Leiter des Konzernbereichs Corporate & Investment Bank. Michael Cohrs ist am 30. September 2010 aus dem Vorstand ausgeschieden.

Das Group Executive Committee (GEC) besteht aus den Mitgliedern des Vorstands sowie den nicht zum Vorstand gehörenden Leitern der Kerngeschäftsfelder und der Region Americas. Mit Wirkung zum 1. Januar 2011 wurde der Leiter der asiatisch-pazifischen Region (ohne Japan) in das Gremium berufen. Seine Ernennung unterstreicht die große Bedeutung dieser Region für unser künftiges Wachstum. In regelmäßigen Sitzungen analysiert das GEC die Entwicklung der Geschäftsbereiche, erörtert konzernstrategische Fragen und erarbeitet Empfehlungen für den Vorstand. Den Vorsitz im Vorstand und im GEC führt Josef Ackermann.

#### Managementstruktur

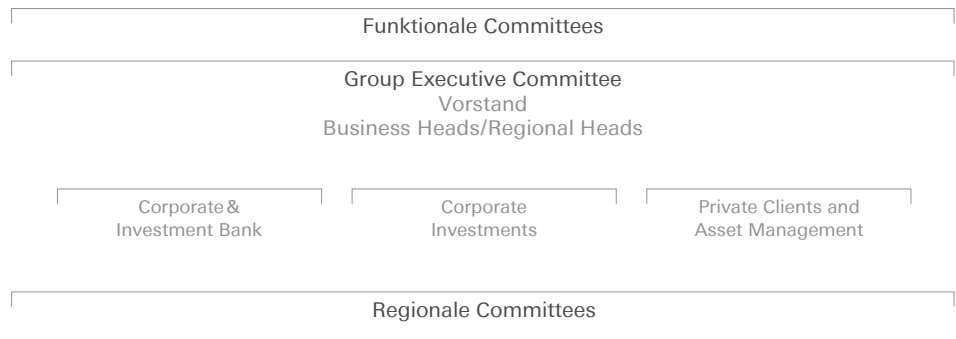

## Konzernbereiche

Die Deutsche Bank gliedert sich in die Konzernbereiche Corporate & Investment Bank (CIB), Private Clients and Asset Management (PCAM) sowie Corporate Investments (CI).

### Corporate & Investment Bank

Im Konzernbereich CIB betreiben wir das Kapitalmarktgeschäft einschließlich Emission, Verkauf und Handel von Kapitalmarktprodukten wie Aktien, Anleihen und anderen Wertpapieren, das Beratungs- und Kreditgeschäft sowie das Geschäft mit Transaktionsdienstleistungen. Unsere institutionellen Kunden kommen sowohl aus dem öffentlichen Sektor – wie souveräne Staaten und supranationale Einrichtungen – als auch aus der Privatwirtschaft. Wir betreuen Firmenkunden verschiedenster Größe, von mittelständischen Unternehmen bis hin zu multinationalen Konzernen. Der Konzernbereich CIB gliedert sich in die Unternehmensbereiche Corporate Banking & Securities (CB&S) und Global Transaction Banking (GTB). Der Unternehmensbereich CB&S besteht aus den Geschäftsbereichen Markets und Corporate Finance, die im Deutsche Bank-Konzern weltweit das Emissionsgeschäft, den Verkauf und Handel von Wertpapieren, das Beratungsgeschäft bei Fusionen und Übernahmen (M&A) sowie das Corporate-Finance-Geschäft abdecken. Zum Unternehmensbereich GTB gehört unser Produktangebot in den Geschäftszweigen Cash Management für Unternehmen und Finanzdienstleister, Trade Finance sowie Trust & Securities Services.

### Private Clients and Asset Management

Der Konzernbereich PCAM ist in die Unternehmensbereiche Asset and Wealth Management (AWM) und Private & Business Clients (PBC) gegliedert. Asset and Wealth Management umfasst die Geschäftsbereiche Asset Management (AM) und Private Wealth Management (PWM). Im Geschäftsbereich AM haben wir das weltweite Fondsgeschäft für Privatkunden unter der Marke DWS Investments zusammengeführt. An institutionelle Kunden einschließlich Pensionsfonds und Versicherungen wenden wir uns mit einer breiten Produktpalette, die von klassischen bis zu alternativen Anlageformen reicht. Der Geschäftsbereich PWM betreut vermögende Privatkunden und Familien. Dieser sehr anspruchsvollen Kundschaft bieten wir einen ganzheitlichen Service, zu dem die individuelle Vermögensverwaltung bis hin zur Beratung bei der Nachfolgeplanung und philanthropischen Überlegungen gehört.

Der Unternehmensbereich PBC richtet sich insbesondere an Privatkunden, Selbstständige und kleine bis mittlere Unternehmen, denen wir mit einem breiten Spektrum von Bankdienstleistungen wie Kontoführung, Kredit- und Einlagengeschäft sowie Vermögensanlage- und Vorsorgeberatung zur Verfügung stehen. Außerhalb Deutschlands ist PBC seit Langem in Italien, Spanien, Belgien und Portugal sowie seit einigen Jahren in Polen aktiv. Darüber hinaus investieren wir gezielt in die aufstrebenden Märkte China und Indien.

## Corporate Investments

Der Konzernbereich Corporate Investments umfasst unsere globalen Beteiligungen. Dies sind im Wesentlichen unsere verbliebenen Industriebeteiligungen, übrige Kapitalbeteiligungen sowie sonstige finanzielle Vermögenswerte, zu denen bestimmte Immobilien- und Kreditengagements gehören, die nicht Teil unseres Kerngeschäfts sind.

## Unsere Strategie – Managementagenda Phase 4

Im Berichtsjahr haben wir die im Dezember 2009 gestartete Phase 4 unserer Managementagenda konsequent umgesetzt. Sie verfolgt nachstehende Ziele:

- Verbesserung der Profitabilität und Ergebnisqualität des Konzernbereichs CIB bei zugleich anhaltend hoher Risiko- und Bilanzdisziplin. Durch eine engere Verzahnung von Markets, Corporate Finance und Global Transaction Banking können wir Ertrags- wie Kostenvorteile realisieren. Darüber hinaus sind wir dabei, das von ABN AMRO übernommene Firmenkundengeschäft in den Niederlanden einzugliedern und damit unser Mittelstandsgeschäft auszuweiten.
- Konzentration im Konzernbereich PCAM auf das Kerngeschäft und unsere Führungsrolle im Heimatmarkt. Im Geschäftsbereich AM gilt es, die abgeschlossenen effizienzsteigernden und kostensenkenden Maßnahmen in größere Gewinne und höheres Wachstum umzusetzen sowie unsere Stärken in Deutschland vermehrt zu nutzen. Mit der weit vorangekommenen Eingliederung von Sal. Oppenheim in PWM stellen wir unsere Marktführerschaft in der Beratung von vermögenden Kunden in Deutschland auf ein noch breiteres Fundament. Nach der Erstkonsolidierung der Deutschen Postbank im Dezember 2010 kommt nunmehr ihrer Integration im Unternehmensbereich PBC Priorität zu. Die Neuausrichtung des Konzernbereichs PCAM zielt darauf, unsere Führungsposition im deutschen Privatkundengeschäft in voller Breite zu festigen und unsere Ertragsstruktur insgesamt ausgewogener zu machen.
- Fokussierung auf Asien, das sich zu der treibenden Kraft für Wachstum und Dynamik weltweit entwickelt hat. Aufbauend auf unserer bereits vorhandenen Ausgangsbasis, wollen wir das enorme Potenzial dieser Region noch stärker nutzen, um in unserem Geschäft vor Ort überproportional zuzulegen. Wir streben, je nach Geschäftsbereich, eine Führungsposition unter den ersten drei bis fünf Anbietern an. Dazu nehmen wir die notwendigen Investitionen vor und stellen die erforderlichen Ressourcen zur Verfügung.

— Neubelebung unserer Leistungskultur. Um die Wirtschaftlichkeit in allen Bereichen der Bank zu steigern, behalten wir die Kostendisziplin bei, optimieren die Infrastrukturprozesse und reduzieren vermeidbare Komplexität. Für Letzteres haben wir Effizienzgewinne in Höhe von 1 Mrd € identifiziert, die 2012 in vollem Umfang zum Tragen kommen sollen.

Wir sind sehr zuversichtlich, dass wir mit unserer Strategie gut gewappnet sind, um auch in sich rasch wandelnden Märkten und unter verschärften aufsichtsrechtlichen Rahmenbedingungen erfolgreich zu sein.

#### Weltweite Präsenz

---

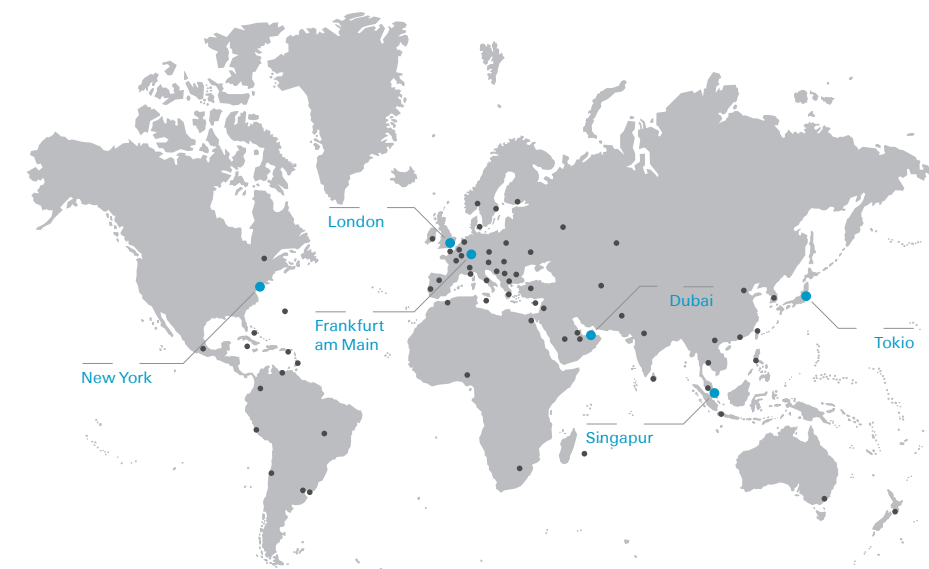

- 
- Regionale Hauptstandorte
  - Hauptstadt des Landes, in dem wir vertreten sind

## Corporate Governance Fundament für langfristigen Erfolg

Wirkungsvolle Corporate Governance, die hohen internationalen Standards entspricht, ist für uns eine Selbstverständlichkeit. Wesentliche Grundlagen sind vor allem das deutsche Aktiengesetz und der Deutsche Corporate Governance Kodex. Da unsere Aktie auch an der New Yorker Börse notiert ist, unterliegen wir zudem den betreffenden US-amerikanischen Kapitalmarktgesetzen und Bestimmungen der Securities and Exchange Commission (SEC) sowie der New York Stock Exchange.

Durch unsere Corporate Governance stellen wir eine verantwortungsbewusste, auf nachhaltige Wertschöpfung ausgerichtete Leitung und Kontrolle der Deutschen Bank sicher. Vier Elemente sind dafür kennzeichnend: gute Beziehungen zu den Aktionären, eine effektive Zusammenarbeit von Vorstand und Aufsichtsrat, ein am langfristigen Erfolg ausgerichtetes Vergütungssystem sowie eine transparente Rechnungslegung in Verbindung mit frühzeitiger Berichterstattung.

### Aktionäre

Unsere Aktionäre sind per Gesetz an wichtigen Unternehmensentscheidungen wie Satzungsänderungen, der Verwendung des Bilanzgewinns, der Ermächtigung zur Ausgabe neuer Aktien und wesentlichen Strukturveränderungen beteiligt. Die Deutsche Bank hat nur eine einzige Gattung von Aktien, die jeweils eine Stimme verbriefen. Um unseren Aktionären die Wahrnehmung ihrer Rechte zu erleichtern, setzen wir bei der Hauptversammlung neben der Briefwahl auch elektronische Medien ein. Insbesondere können Vollmachten und Weisungen an die Stimmrechtsvertreter der Deutschen Bank via Internet erteilt werden.

### Vorstand

Der Vorstand leitet die Gesellschaft in eigener Verantwortung und kontrolliert die Konzerngesellschaften. Er sorgt dafür, dass die gesetzlichen Bestimmungen sowie unternehmensinternen Richtlinien eingehalten werden, und achtet auf Vielfalt bei der Besetzung von Führungsfunktionen. Die Mitglieder des Vorstands, die nicht zum Vorstand gehörenden Leiter der Kerngeschäftsfelder sowie der Deutsche Bank Americas und der asiatisch-pazifischen Region (ohne Japan) bilden zusammen das Group Executive Committee. Dieses Gremium analysiert die Entwicklung der Geschäftsbereiche, erörtert konzernstrategische Fragen und erarbeitet Empfehlungen für den Vorstand zur abschließenden Entscheidung.

### Aufsichtsrat

Der Aufsichtsrat überwacht und berät den Vorstand bei der Geschäftsführung. Grundlegende Entscheidungen, welche die Bank betreffen, benötigen seine Zustimmung. Er legt die Informations- und Berichtspflichten des Vorstands fest, bestellt die Vorstandsmitglieder und plant gemeinsam mit dem Vorstand langfristig deren Nachfolge. Jährlich prüft der Aufsichtsrat die Effizienz seiner Arbeit. Neben dem gesetzlich zu bildenden Vermittlungsausschuss hat der Aufsichtsrat einen Präsidial-, einen Prüfungs-, einen Risiko- sowie einen Nominierungsausschuss eingerichtet.

Zur Wahrnehmung seiner Aufgaben achtet der Aufsichtsrat auf eine ausgewogene Zusammensetzung sowie darauf, dass seine Mitglieder die erforderlichen Kenntnisse und Fähigkeiten haben. Ebenso berücksichtigt er den Aspekt der Vielfalt im Vorstand und bei Wahlvorschlägen für den Aufsichtsrat. Angesichts unserer globalen Geschäftsaktivitäten gehört dem Aufsichtsrat eine angemessene Anzahl von Mitgliedern mit langjähriger internationaler Erfahrung an. Außerdem ist in unserem Aufsichtsrat eine ausreichende Anzahl unabhängiger Mitglieder vertreten.

## Vergütung

Die Vergütung unserer Vorstandsmitglieder orientiert sich in erster Linie am längerfristigen Erfolg der Deutschen Bank. Maßstab für die Bemessung der variablen Vergütung sind die individuelle Leistung sowie einerseits das Erreichen der geplanten Eigenkapitalrendite im Zweijahresdurchschnitt und andererseits unsere Aktienrendite in einem dreijährigen Zeitraum im Verhältnis zum entsprechenden Durchschnittswert einer Auswahl vergleichbarer Wettbewerber. Ein Großteil der variablen Vergütung wird aufgeschoben, mit Verfallmöglichkeit und überwiegend aktienbasiert gewährt. Die verzögert fällige variable Vergütung ist zu einem angemessenen Teil von der nachhaltigen Ergebnisentwicklung der Deutschen Bank sowohl positiv als auch negativ abhängig.

Die Vergütung der Aufsichtsratsmitglieder enthält eine feste und eine variable Komponente. Der variable Teil hängt ab von der Erfüllung festgelegter Ziele, von der Dividende und dem Gewinn je Aktie im Dreijahresdurchschnitt. Der Vorsitz beziehungsweise seine Stellvertretung im Aufsichtsrat sowie der Vorsitz beziehungsweise die Mitgliedschaft in einem der Ausschüsse werden extra honoriert.

Die individuelle Vergütung der Vorstands- und Aufsichtsratsmitglieder sowie die Grundzüge unseres Vergütungssystems sind im Vergütungsbericht veröffentlicht. [Siehe Finanzbericht 2010, Seite 128 ff.](#)

## Rechnungslegung

Anteilseigner und Öffentlichkeit werden regelmäßig durch den jährlichen Geschäftsbericht, der den Konzernabschluss enthält, sowie die Zwischenberichte informiert. Unsere Konzernrechnungslegung entspricht den International Financial Reporting Standards (IFRS). Dies sorgt für eine hohe Transparenz und internationale Vergleichbarkeit.

## Entsprechenserklärung

Vorstand und Aufsichtsrat haben am 27. Oktober 2010 die jährliche Entsprechenserklärung gemäß § 161 Aktiengesetz angepasst. Die Deutsche Bank AG entspricht allen Empfehlungen des Deutschen Corporate Governance Kodex in der Fassung vom 26. Mai 2010 ohne Ausnahmen.

Unser ausführlicher Corporate-Governance-Bericht beziehungsweise die Erklärung zur Unternehmensführung 2010 sowie weitere Dokumente zur Corporate Governance der Deutschen Bank wie die Geschäftsordnungen für Vorstand, Aufsichtsrat und seine Ausschüsse sind im Internet unter [www.deutsche-bank.de/corporate-governance](http://www.deutsche-bank.de/corporate-governance) abrufbar.

Wir überprüfen unsere Corporate Governance kontinuierlich und passen sie gegebenenfalls an. Dabei berücksichtigen wir neue Erfahrungen und gesetzliche Vorgaben sowie weiterentwickelte nationale und internationale Standards.



## Im Interesse unserer Partner Stark für unsere Aktionäre, Kunden, Mitarbeiter und die Gesellschaft

### 01–1

#### Unsere Partner

|              |
|--------------|
| Aktionäre    |
| Kunden       |
| Mitarbeiter  |
| Gesellschaft |

Die Deutsche Bank hat 2010 zukunftsweisende Investitionen auf den Weg gebracht und ihre Ertrags- wie auch Wachstumsstärke bewiesen. Diese Erfolge sind das Ergebnis einer hervorragenden Position an den Märkten, einer umsichtigen geschäftspolitischen Ausrichtung und einer stabilen Unternehmensstruktur, die von einer Vielfalt talentierter Mitarbeiter getragen wird. Davon profitieren Aktionäre, Kunden, Mitarbeiter und die Gesellschaft. [Grafik 01–1](#)

#### Aktionäre

Es liegt im besonderen Interesse unserer Aktionäre, die Risikoaktiva weiter zu reduzieren und die Eigenkapitalausstattung zu verbessern. Gezielte Akquisitionen tragen zur Stabilisierung und Balancierung der Ertragskraft bei. Da die Deutsche Bank weniger als viele Wettbewerber durch die Finanzkrise gelitten hat, kann sie direkt an der wirtschaftlichen Erholung partizipieren. Das nützt auch unseren Aktionären. Dies gilt ebenso für unser Engagement zur Schaffung eines leistungsfähigen regulatorischen Rahmens, der das Finanzsystem widerstandsfähiger macht, aber Wettbewerbsverzerrungen und unnötige soziale Kosten vermeidet.

#### Kunden

Unseren Kunden stehen wir als verlässlicher Partner mit einer Fülle von bedarfsgerechten finanzwirtschaftlichen Lösungen zur Seite. Die Straffung und forcierte Integration des Konzernbereichs Corporate & Investment Bank erhöhen unsere Servicequalität und das Produktangebot. Mit unserem international konkurrenzfähigen Geschäftsmodell helfen wir den Kunden, erfolgreich zu sein. Durch die Verbreiterung unseres Privatkundengeschäfts können wir nunmehr allen Kundengruppen in Deutschland ein genau passendes Angebot machen.

#### Mitarbeiter

Der Erfolg der Deutschen Bank ist in erster Linie das Verdienst der Mitarbeiter, die sich mit Leidenschaft und Kompetenz für das Unternehmensinteresse einsetzen. Die Vielfalt unserer Mitarbeiter empfinden wir als Stärke im internen Miteinander genauso wie im externen Verhältnis zu den Kunden. Wir investieren großzügig in die fachliche und persönliche Förderung der Mitarbeiter. Unsere leistungsorientierten Vergütungsstrukturen sind am nachhaltigen Erfolg orientiert und berücksichtigen auch die jüngsten Erkenntnisse aus der Finanzkrise.

#### Gesellschaft

Den Vertrauensverlust, den viele Banken seit Beginn der Finanzkrise erfahren haben, nehmen wir ernst. Als einer der Initiatoren und Erstunterzeichner verpflichtete sich die Deutsche Bank 2010 dem „Leitbild für verantwortliches Handeln in der Wirtschaft“. Damit wollen wir die gesellschaftliche Verantwortung noch entschiedener in unsere Geschäftspolitik sowie die zugrunde liegenden Prozesse integrieren und sie in unseren Entscheidungen berücksichtigen. Wir bekennen uns zu unserer gesellschaftlichen Verantwortung. Darauf kann sich die Gemeinschaft verlassen. Denn wir wissen: Die Deutsche Bank kann ohne die Akzeptanz der Gesellschaft, deren Teil sie ist, auf Dauer nicht erfolgreich bestehen.

# Aktionäre

## Kapitalerhöhung in Rekordhöhe

### Strukturdaten

|                                                                   |                                         | 2010           | 2009           | 2008           |
|-------------------------------------------------------------------|-----------------------------------------|----------------|----------------|----------------|
| <b>Anzahl</b>                                                     |                                         | <b>640 623</b> | <b>586 295</b> | <b>581 938</b> |
| <b>Aktionäre nach Gruppen</b> in % des Grundkapitals <sup>1</sup> | Institutionelle (einschließlich Banken) | 75             | 74             | 71             |
|                                                                   | Private                                 | 25             | 26             | 29             |
| <b>Regionale Aufteilung</b> in % des Grundkapitals <sup>1</sup>   | Deutschland                             | 47             | 46             | 55             |
|                                                                   | Europäische Union (ohne Deutschland)    | 31             | 31             | 25             |
|                                                                   | Schweiz                                 | 6              | 6              | 7              |
|                                                                   | USA                                     | 13             | 16             | 11             |
|                                                                   | Andere                                  | 3              | 1              | 2              |

### Leistungskennzahlen

|                                                                              | 2010              | 2009  | 2008   |
|------------------------------------------------------------------------------|-------------------|-------|--------|
| Gesamtrendite der Deutsche Bank-Aktie (Total Return) im Verlauf <sup>2</sup> | –11,7%            | 79,4% | –66,8% |
| Durchschnittlicher Börsenumsatz pro Tag (in Mio Aktien) <sup>3</sup>         | 8,0               | 8,4   | 10,0   |
| Dividende (in €) je Aktie für Geschäftsjahr                                  | 0,75 <sup>4</sup> | 0,75  | 0,50   |

### Besondere Projekte

|                                         |                                                                                                                                                                                                                               |
|-----------------------------------------|-------------------------------------------------------------------------------------------------------------------------------------------------------------------------------------------------------------------------------|
| Kapitalerhöhung aus genehmigtem Kapital | Emissionsrekord mit einem Bruttoerlös von 10,2 Mrd € vor allem zur Übernahme der Deutschen Postbank AG. Ausgabe von 308,6 Mio neuen Aktien im Bezugsverhältnis 2:1 zum Preis von 33 € je Stück.                               |
| Investoren- und Analystenbefragungen    | Wahrnehmungsanalysen bei institutionellen Investoren, um die Attraktivität der Deutsche Bank-Aktie als Anlageobjekt zu messen. Online-Befragung von Investoren und Analysten zur Qualität der Investor-Relations-Aktivitäten. |

<sup>1</sup>Angaben gerundet

<sup>2</sup>Auf der Basis von Xetra

<sup>3</sup>Orderbuchstatistik (Xetra)

<sup>4</sup>Vorschlag für die Hauptversammlung am 26. Mai 2011

## Kunden

Starke Kundenverbindungen wichtiger denn je

### Strukturdaten

|                                          |                                                              | 2010       | 2009                | 2008       |
|------------------------------------------|--------------------------------------------------------------|------------|---------------------|------------|
| <b>Anzahl der Kunden (gerundet)</b>      |                                                              |            |                     |            |
| Corporate & Investment Bank <sup>1</sup> |                                                              | 54 400     | 41 600              | 42 600     |
| Private Clients and Asset Management     | Private & Business Clients                                   | 28 787 000 | 14 600 000          | 14 600 000 |
|                                          | davon: Deutsche Postbank AG                                  | 14 150 000 | –                   | –          |
|                                          | Asset and Wealth Management                                  |            |                     |            |
|                                          | Retail Asset Management <sup>2</sup> (Deutschland/Luxemburg) | 2 225 000  | 2 119 000           | 1 937 000  |
|                                          | davon: in Kooperation                                        | 464 000    | 389 000             | 230 000    |
|                                          | Institutional Asset Management                               | 2 300      | 2 300               | 2 300      |
|                                          | Private Wealth Management <sup>3</sup>                       | 79 400     | 78 000 <sup>1</sup> | 92 000     |

### Leistungskennzahlen

|                                      |                                                           | 2010 | 2009 | 2008 |
|--------------------------------------|-----------------------------------------------------------|------|------|------|
| Corporate & Investment Bank          | Euromoney Primary Debt Poll, Rang                         | 3    | 3    | 1    |
|                                      | Euromoney FX Poll, Rang                                   | 1    | 1    | 1    |
|                                      | Zahl der Euromoney Awards for Excellence                  | 16   | 15   | 21   |
|                                      | Zahl der Risk Awards                                      | 5    | 2    | 3    |
|                                      | Zahl der IFR Awards                                       | 8    | 7    | 1    |
| Private Clients and Asset Management | DWS Investments                                           |      |      |      |
|                                      | Zahl der Fondsauszeichnungen (Wertentwicklung) in Europa  | 76   | 53   | 109  |
|                                      | Deutsche Insurance Asset Management                       |      |      |      |
|                                      | Award as Best Global Insurance Asset Manager <sup>4</sup> | 1    | 1    | 1    |

### Besondere Projekte

|                                      |                                                                                                                                                                                                                                                                                                                                                                                             |
|--------------------------------------|---------------------------------------------------------------------------------------------------------------------------------------------------------------------------------------------------------------------------------------------------------------------------------------------------------------------------------------------------------------------------------------------|
| Corporate & Investment Bank          | Verstärkte Integration der Corporate & Investment Bank durch straffere Strukturen, besser vernetzte Bereiche und höheres Wachstum.<br>Abschluss des Erwerbs von Teilen des Firmenkundengeschäfts der ABN AMRO in den Niederlanden.                                                                                                                                                          |
| Private Clients and Asset Management | Abschluss des Erwerbs der Sal. Oppenheim-Gruppe.<br>Hauptsponsor der „Green Auction“ des Auktionshauses Christie's im April 2010 in New York, deren Erlös von 1,5 Mio US-\$ vier gemeinnützigen Umweltorganisationen zugutekam.<br>Mehrheitliche Übernahme und Konsolidierung der Deutschen Postbank AG.<br>Transfer der Berliner Bank auf die IT-Plattform von Private & Business Clients. |

<sup>1</sup> Geänderte Zählweise

<sup>2</sup> Einschließlich Kunden, bei denen die Kundenbeziehung durch Kooperationspartner verwaltet wird

<sup>3</sup> Anzahl der Kundenbeziehungen ohne Private Client Services (USA), 2010 einschließlich Sal. Oppenheim

<sup>4</sup> Reactions Magazine

# Mitarbeiter

## Attraktiver Arbeitgeber

### Strukturdaten

|                                                 |                                                   | 2010           | 2009          | 2008          |
|-------------------------------------------------|---------------------------------------------------|----------------|---------------|---------------|
| <b>Mitarbeiter (Vollzeitkräfte)<sup>1</sup></b> |                                                   | <b>102 062</b> | <b>77 053</b> | <b>80 456</b> |
| Bereiche                                        | Private Clients and Asset Management              | 51,5%          | 39,7%         | 40,5%         |
|                                                 | Corporate & Investment Bank <sup>2</sup>          | 15,7%          | 18,5%         | 18,5%         |
|                                                 | Infrastructure/Regional Management                | 32,8%          | 41,8%         | 41,0%         |
| Regionen                                        | Deutschland                                       | 48,3%          | 35,5%         | 34,7%         |
|                                                 | Europa (ohne Deutschland), Naher Osten und Afrika | 23,3%          | 28,6%         | 28,7%         |
|                                                 | Nord- und Südamerika                              | 11,0%          | 14,5%         | 15,3%         |
|                                                 | Asien/Pazifik                                     | 17,4%          | 21,4%         | 21,3%         |
| Qualifikationen <sup>3,4</sup>                  | Hochschulabschluss                                | 63,9%          | 63,5%         | 64,0%         |
|                                                 | Hochschulreife                                    | 15,5%          | 19,1%         | 17,3%         |
|                                                 | Sonstige Schulabschlüsse                          | 20,6%          | 17,4%         | 18,7%         |
| Alter <sup>3,4</sup>                            | bis 24 Jahre                                      | 7,6%           | 8,4%          | 9,9%          |
|                                                 | 25–34 Jahre                                       | 34,1%          | 35,0%         | 35,5%         |
|                                                 | 35–44 Jahre                                       | 32,7%          | 32,2%         | 31,7%         |
|                                                 | 45–54 Jahre                                       | 19,9%          | 19,0%         | 17,9%         |
|                                                 | über 54 Jahre                                     | 5,8%           | 5,4%          | 5,0%          |

### Leistungskennzahlen<sup>4</sup>

|                                          | 2010 | 2009 | 2008 |
|------------------------------------------|------|------|------|
| Mitarbeiter-Commitment-Index             | 74   | 77   | 74   |
| Austritte wegen Stellenwechsels          | 6,6% | 4,8% | 7,3% |
| Weiterbildung (Aufwendungen in Mio €)    | 95   | 86   | 114  |
| Berufsausbildung (Aufwendungen in Mio €) | 41   | 41   | 41   |

### Besondere Projekte

|              |                                                                                                                                                                                                                             |
|--------------|-----------------------------------------------------------------------------------------------------------------------------------------------------------------------------------------------------------------------------|
| dbAGILE      | Initiative zur individuellen mittelfristigen Förderung von 60 oberen Führungskräften, bei der sich die Mitglieder des Group Executive Committee als Mentoren engagieren.                                                    |
| Check-up 40+ | Kostenloses, umfassendes Gesundheitsvorsorgeprogramm für alle Mitarbeiter ab dem 40. Lebensjahr in Deutschland, an dem bereits 8 700 Mitarbeiter teilgenommen haben. Ähnliche Programme existieren auch in anderen Ländern. |

<sup>1</sup> Vollzeitkräfte unter anteiliger Berücksichtigung von Teilzeitarbeitskräften, ohne Auszubildende und Volontäre/Praktikanten

<sup>2</sup> Einschließlich Corporate Investments

<sup>3</sup> Anzahl Mitarbeiter (Kopfzahlen)

<sup>4</sup> Ohne Deutsche Postbank

## Gesellschaft

### Soziales Kapital schaffen

#### Strukturdaten

|                                                                                                  | 2010 | 2009 | 2008 |
|--------------------------------------------------------------------------------------------------|------|------|------|
| Anzahl der Länder, in denen die Deutsche Bank vertreten ist (einschließlich Offshore-Standorten) | 74   | 72   | 72   |

#### Leistungskennzahlen

| in Mio €                                                             | 2010        | 2009        | 2008        |
|----------------------------------------------------------------------|-------------|-------------|-------------|
| <b>Ausgaben der Deutschen Bank für gesellschaftliches Engagement</b> | <b>91,7</b> | <b>74,8</b> | <b>75,9</b> |
| davon:                                                               |             |             |             |
| Deutsche Bank Americas Foundation                                    | 6,8         | 9,5         | 8,8         |
| Corporate Citizenship UK                                             | 5,1         | 4,7         | 4,3         |
| Deutsche Bank Asia Foundation                                        | 3,0         | 3,7         | 3,7         |
| <b>Ausgaben der Stiftungen der Deutschen Bank<sup>1</sup></b>        | <b>6,4</b>  | <b>6,3</b>  | <b>6,4</b>  |
| Deutsche Bank Stiftung                                               | 4,5         | 4,9         | 5,0         |
| Andere Stiftungen                                                    | 1,9         | 1,4         | 1,4         |
| <b>Gesamt</b>                                                        | <b>98,1</b> | <b>81,1</b> | <b>82,3</b> |

#### Besondere Projekte

|                           |                                                                                                                                                                                                 |
|---------------------------|-------------------------------------------------------------------------------------------------------------------------------------------------------------------------------------------------|
| Zukunftsfähigkeit sichern | Weltweit erste LEED(Leadership in Energy and Environmental Design)-Zertifizierung in Platin für die Sanierung eines Hochhauses, der Zentrale der Deutschen Bank in Frankfurt am Main.           |
| Talente fördern           | Start des Bildungsprogramms FairTalent, das begabten Kindern und Jugendlichen aus sozial benachteiligten Verhältnissen eine Ausbildung ermöglicht, die ihrer tatsächlichen Begabung entspricht. |
| Chancen eröffnen          | Soforthilfe und langfristiger Wiederaufbau bei den Naturkatastrophen in Haiti, Chile und Pakistan.                                                                                              |
| Kreativität entwickeln    | Auszeichnung von Wangechi Mutu als „Künstlerin des Jahres“.                                                                                                                                     |
| Engagement beweisen       | 17 000 Mitarbeiter engagieren sich ehrenamtlich in über 3 000 Projekten weltweit.                                                                                                               |

<sup>1</sup> Stiftungen mit eigenem Stiftungskapital

## Emma Quinn Sydney

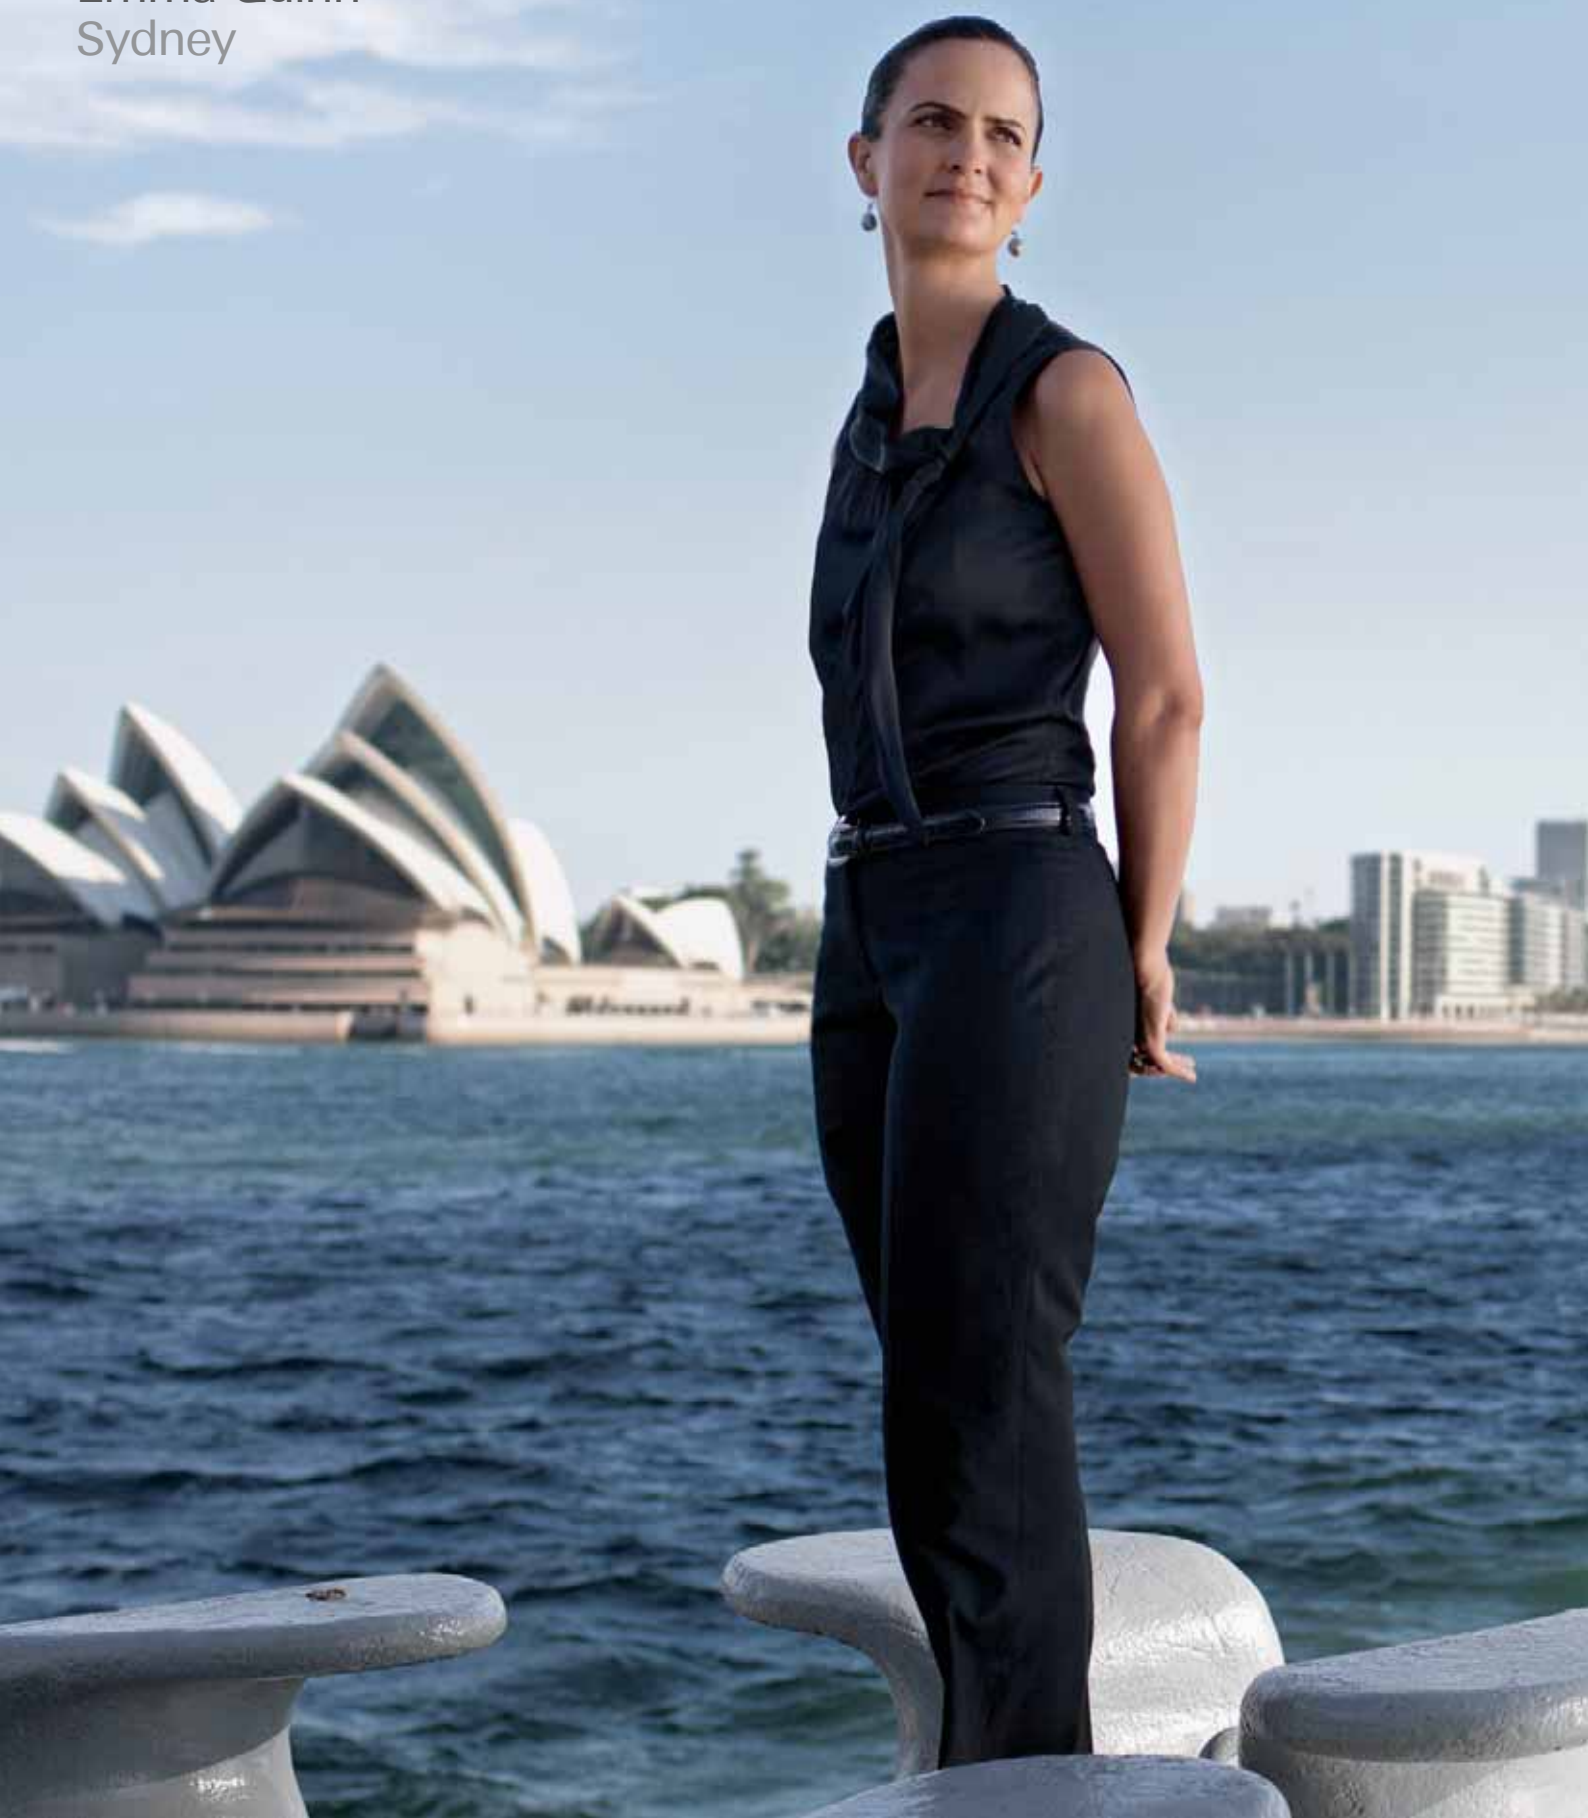



AllianceBernstein und die Deutsche Bank haben vieles gemeinsam, nicht zuletzt den Stolz auf unser global wie lokal starkes Geschäft. Diese Qualitäten haben uns gerade in unsicheren Zeiten gute Dienste geleistet und dazu beigetragen, dass aus einer Arbeitsbeziehung eine echte Partnerschaft geworden ist.

Emma Quinn,  
Head of Dealing – Australien und Neuseeland,  
AllianceBernstein,  
Sydney

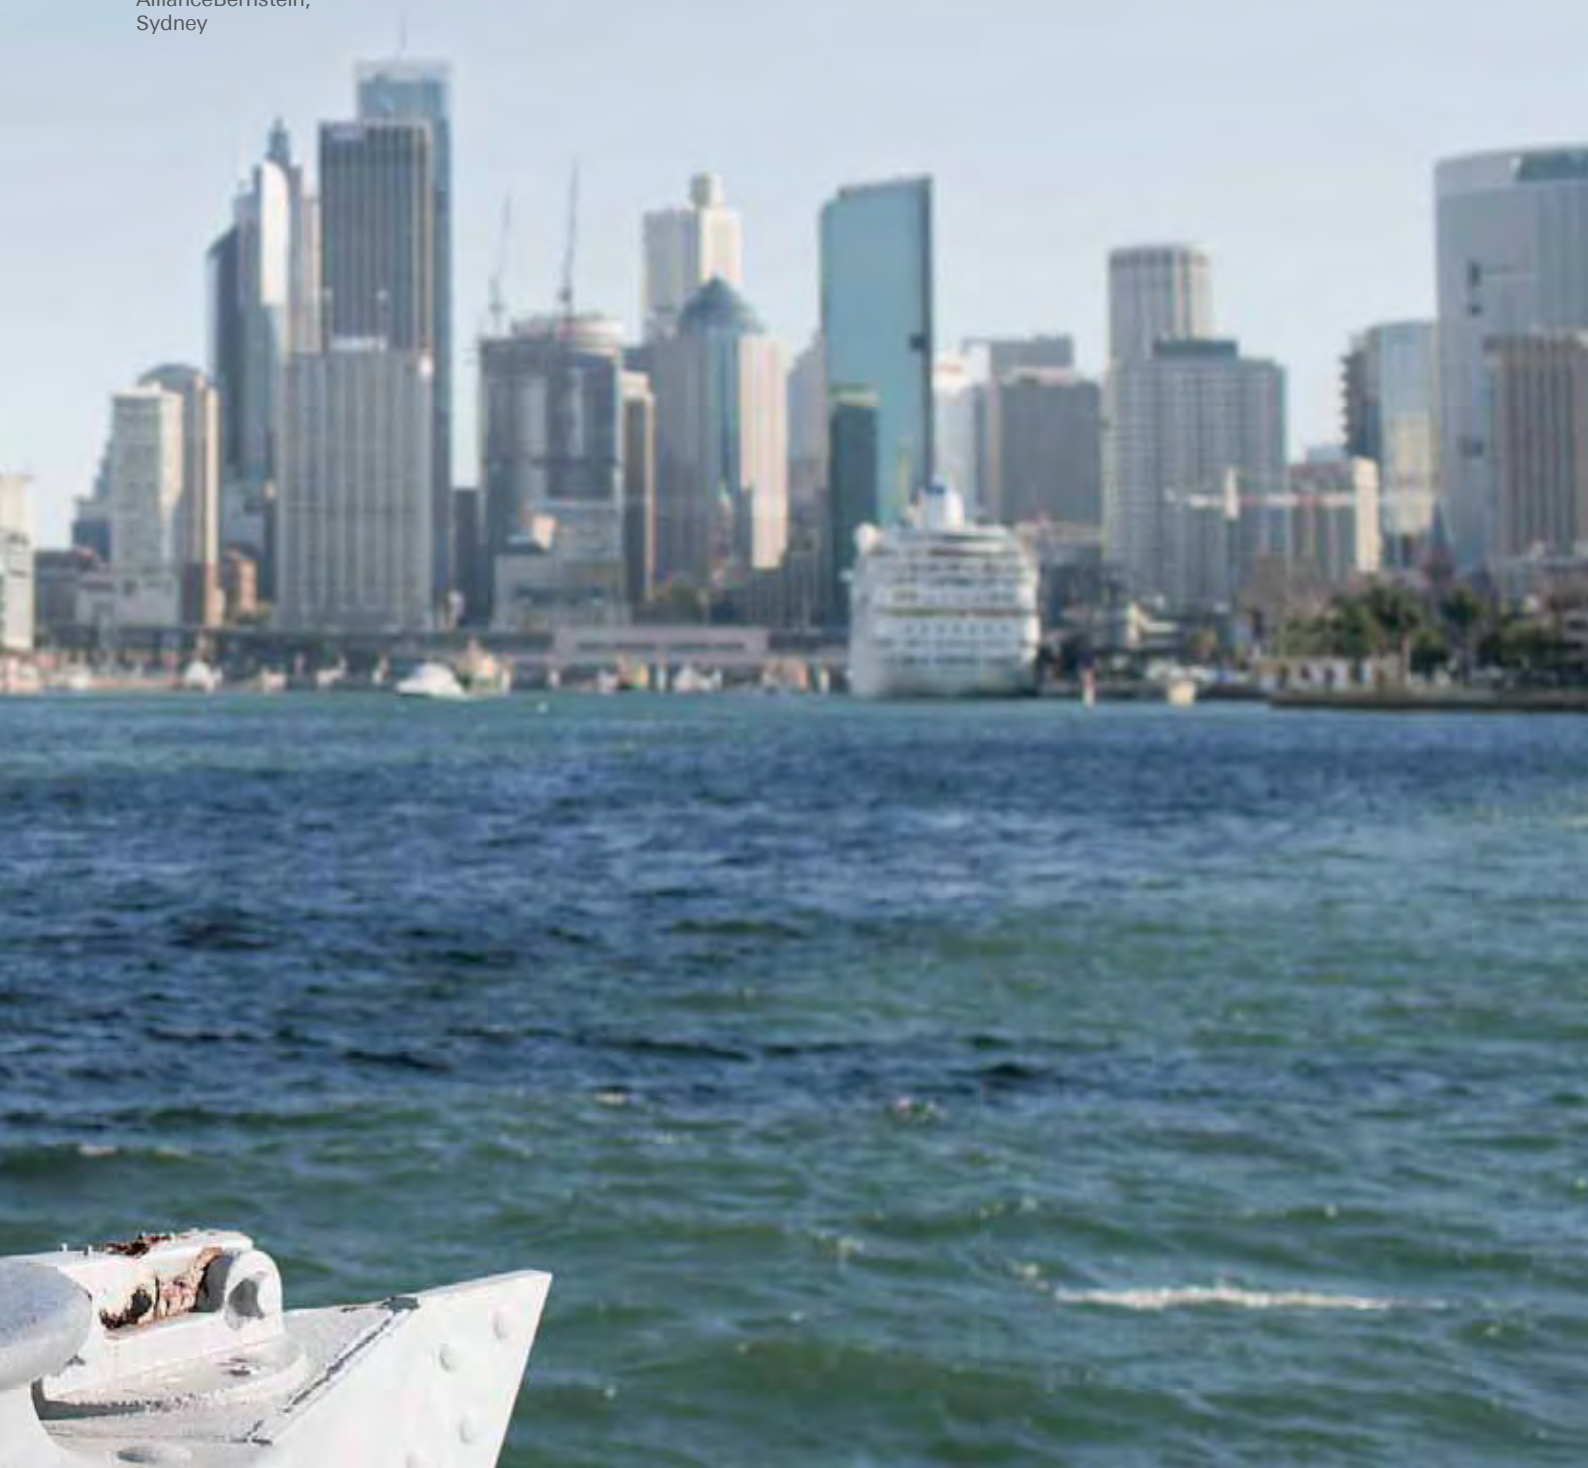



# 02 -

## Zielgruppen

### Aktionäre – 37

Reibungslose Kapitalerhöhung in Rekordhöhe

### Kunden – Corporate & Investment Bank – 41

Wettbewerbsposition ausgebaut

### Kunden – Private Clients and Asset Management – 46

Positiver Trend fortgesetzt

### Kunden – Corporate Investments – 51

Beteiligung an Deutscher Postbank AG

in Unternehmensbereich Private & Business Clients transferiert

### Kunden – Zentrale Infrastruktur – 52

Führungsinstrument des Vorstands

### Mitarbeiter – 53

Zuwachs durch Akquisitionen

### Gesellschaft – 56

Soziales Kapital schaffen

## Aktionäre

### Reibungslose Kapitalerhöhung in Rekordhöhe

02-1

#### Den Deutsche Bank-Aktionären zurechenbares Eigenkapital

In Mrd € zum Quartalsende

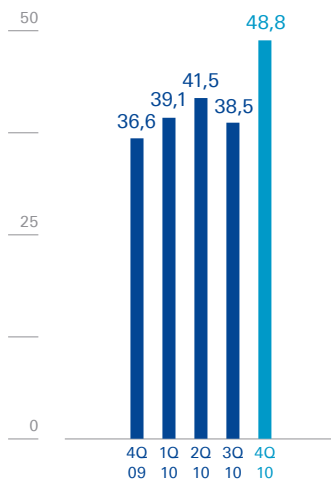

Am 12. September 2010 kündigte die Deutsche Bank zur Übernahme der Deutschen Postbank AG die größte Kapitalerhöhung ihrer Geschichte an. Dazu wurde beschlossen, in Deutschland und den USA aus genehmigtem Kapital gegen Bareinlagen insgesamt 308,6 Mio neue, auf den Namen lautende Stammaktien ohne Nennbetrag (Stückaktien) anzubieten. Über das eingeräumte Bezugsrecht konnten unsere Aktionäre für zwei von ihnen gehaltene Aktien eine neue erwerben (Bezugsverhältnis 2:1). Der vorgeschriebene Wertpapierprospekt mit allen Details wurde am 21. September 2010 veröffentlicht. Vom 22. September bis zum 5. Oktober 2010 konnten die Aktionäre dann ihre Bezugsrechte ausüben.

#### Emissionsrekord

Die Reaktion unserer Aktionäre auf dieses Angebot fiel sehr positiv aus. 306,51 Mio neue Deutsche Bank-Aktien wurden zum festgesetzten Bezugspreis von 33€ von den Inhabern der Bezugsrechte gezeichnet. Die restlichen 2,13 Mio Stück, für die Aktionäre ihre Bezugsrechte nicht ausgeübt hatten, sind über die Börse verkauft worden. Insgesamt konnten wir alle neu ausgegebenen Deutsche Bank-Aktien platzieren und einen Bruttoemissionserlös von 10,2 Mrd € erzielen, der damit sogar höher ausfiel als anfänglich erwartet.

Das Grundkapital der Deutschen Bank AG nahm um 790,1 Mio € auf 2379,5 Mio € zu und die Zahl der Stückaktien stieg per Jahresende 2010 auf 929 499 640 (Vorjahr: 620 859 015). Die reibungslose Kapitalaufbringung von über 10 Mrd € in einem besonders schwierigen Bankenumfeld unterstreicht das große Vertrauen unserer Aktionäre in die zukünftige Entwicklung der Deutschen Bank. [Grafik 02-1](#)

#### Gestiegene Marktkapitalisierung

Die Kapitalerhöhung trug dazu bei, dass sich unsere Marktkapitalisierung zum Jahresultimo auf 36,3 Mrd € (2009: 30,7 Mrd €) verbesserte. Das Gewicht unserer Aktie im DAX stieg auf 6,0% (Vorjahr: 5,8%). Der Börsenumsatz im Xetra-Handel lag im Berichtsjahr bei 160 Mrd €, womit wir den zweiten Rang unter den DAX-Titeln einnahmen. An der New Yorker Börse ging 2010 der mengenmäßige Umsatz in unserer Aktie durchschnittlich um 12% zurück.

#### Volatile Märkte

An den internationalen Börsen setzte sich 2010 die Erholung des vorausgegangenen Jahres fort, allerdings deutlich langsamer und mit großen Unterschieden zwischen den Ländern. In den ersten Monaten des Berichtsjahres stabilisierte sich die Weltwirtschaft weiter und auch die Situation an den Finanzmärkten entspannte sich angesichts einer unverändert reichlich bereitgestellten Liquidität. Die Ausweitung der Schuldenprobleme in der Eurozone belastete jedoch bereits im Frühjahr und erneut ab Herbst Stimmung wie Aktivitäten der Kapitalmarktteilnehmer. Während in Deutschland das Wachstum der Wirtschaft überdurchschnittlich hoch ausfiel, blieb die Dynamik in vielen anderen Industrieländern dahinter zurück. Die stärksten Impulse kamen aus den Schwellenländern in Asien und Lateinamerika. Zugleich erhöhte sich die Volatilität an den Finanzmärkten durch die immer wieder aufflammenden Diskussionen um die Gefährdung des Euro.

## 02–2

### Stark angestiegene Zahl der Aktionäre

In Tausend zum Jahresende

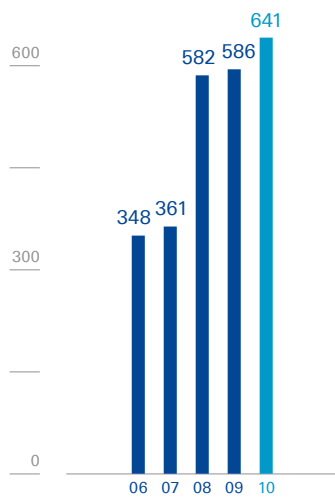

### Schwieriges Bankenjahr

In diesem Umfeld musste auch die Deutsche Bank-Aktie größere Schwankungen hinnehmen. Unsere Aktie eröffnete das Börsenjahr mit einem Kurs von 45,50€, erreichte im April bei 55,11€ ihr Jahreshoch und lag am Jahresende bei 39,10€. Alle Kursangaben sind um den rechnerischen Wert des Bezugsrechts bereinigt worden. Insgesamt schwächte sich der Kurs im Jahresverlauf um 13% ab. Angesichts der Unsicherheit über die geplanten aufsichtsrechtlichen Reformen der Bankenbranche sowie über länder- und sektorspezifische Fiskalabgaben gingen auch die Aktienkurse der meisten vergleichbaren Wettbewerber deutlich zurück. Dementsprechend büßte der STOXX Europe Banks im Berichtsjahr 12% ein.

Der deutsche Leitindex DAX schloss zum Jahresende 2010 bei 6914 Punkten. Das war ein Plus von 16%. Damit gehörte Deutschland zu den Industrieländern mit dem stärksten Anstieg. Die Wallstreet, gemessen am S&P 500, gewann 12,8% und der FTSE 100 in London 9%. Dagegen ging der Euro STOXX 50 um 5,8% zurück.

### Dividende unverändert

Die Deutsche Bank erwirtschaftete 2010 ein solides Ergebnis im laufenden Geschäft. Der Hauptversammlung 2011 schlagen wir daher eine Dividende von 0,75€ pro Aktie auf eine um knapp 50% vergrößerte Kapitalbasis vor. Damit tragen wir den verschärften regulatorischen Anforderungen an die Kapitalausstattung von Banken ebenso Rechnung wie künftigen Wachstumsinitiativen.

### Langfristige Rendite

Der Kursrückgang 2010 hat die langfristige Rendite unserer Aktie geschmälert. Ein Anleger, der zu Beginn des Jahres 1980 für umgerechnet 10000€ Deutsche Bank-Aktien erworben, die Bardividende zum Kauf neuer Aktien eingesetzt und sich an Kapitalerhöhungen ohne Einbringung zusätzlicher Mittel beteiligt hatte, besaß Ende 2010 ein Depot im Wert von 79314€. Dies entspricht einer Durchschnittsrendite von 7% pro Jahr, während zum Beispiel der DAX im gleichen Zeitraum auf ein jährliches Plus von 9% kam.

### Langfristige Wertentwicklung

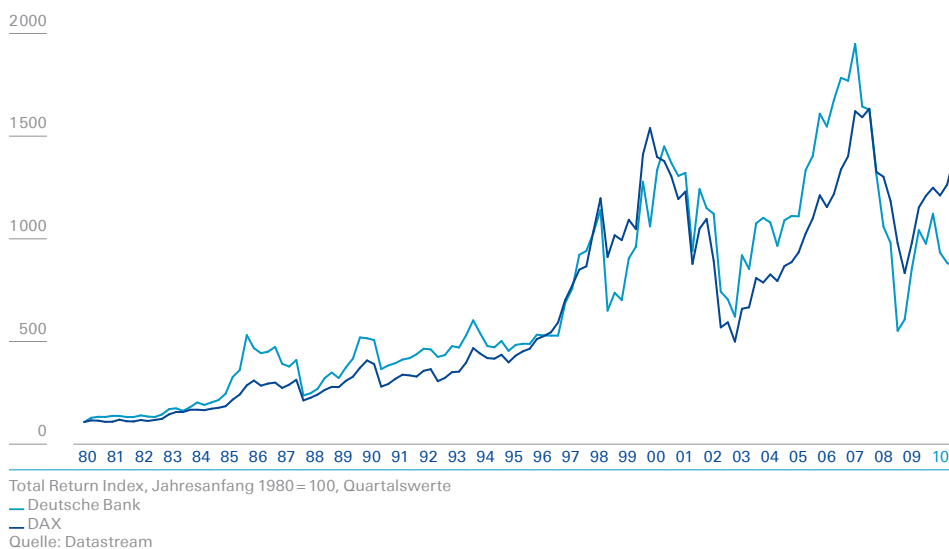

### 02–3

#### Leicht veränderte Aktionärsstruktur

In % des Grundkapitals zum Jahresende

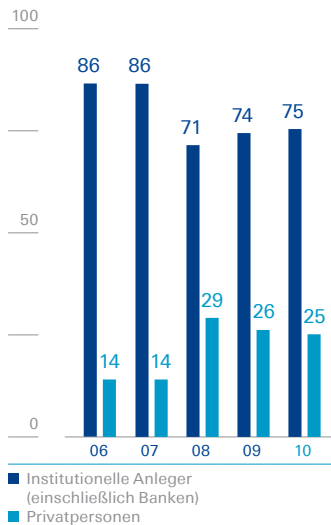

#### Europäische Investoren stärker engagiert

Die Zahl unserer Aktionäre hat im Jahresverlauf 2010 um gut 54 000 auf einen neuen Höchststand von 640 623 (Vorjahr: 586 295) zugenommen. [Grafik 02–2](#) Der Anstieg fand ausschließlich nach Ankündigung unserer Kapitalerhöhung am 12. September 2010 statt und wurde fast ausnahmslos von deutschen Privataktionären getragen. Das steht im Gegensatz zur generellen Entwicklung in Deutschland, wonach auch 2010 immer weniger Personen Aktien besaßen. Insgesamt hat sich der von Privataktionären gehaltene Anteil an unserem Grundkapital leicht auf 25% (Vorjahr: 26%) verringert. Spiegelbildlich dazu ist die Beteiligung der institutionellen Anleger (einschließlich Banken) auf 75% (Vorjahr: 74%) angewachsen. [Grafik 02–3](#) Vor allem in Europa einschließlich Deutschland stockten Investoren ihre Bestände an Deutsche Bank-Aktien auf. Dagegen verringerte sich der US-Anteil auf 13% (Vorjahr: 16%). In der Summe hat sich unsere regionale Aktionärsstruktur trotz der Kapitalerhöhung nur wenig verändert: 47% aller Deutsche Bank-Aktien (2009: 46%) waren in Inlandsbesitz und 53% (2009: 54%) entfielen auf Ausländer. [Grafik 02–4](#)

Die Deutsche Bank-Aktie befindet sich weiterhin fast vollständig in Streubesitz. Meldepflichtige Großaktionäre, deren Aktienposition am 31. Dezember 2010 über der Melde-schwelle von 3% lag, waren die Credit Suisse Group, Zürich, mit 3,86% und BlackRock Inc., New York, mit 5,14%.

#### Hauptversammlung mit lebhafter Diskussion

Zu unserer Hauptversammlung am 27. Mai 2010 in Frankfurt am Main, die erstmals auf klimaneutraler Grundlage stattfand, kamen 5 000 Aktionäre in die Festhalle – ein Viertel weniger als bei dem Besucherrekord von 6 700 im vorangegangenen Jahr. Dem Bericht des Vorstandsvorsitzenden über das abgelaufene Geschäftsjahr und die aktuellen Perspektiven folgte eine lebhaft diskutierte Diskussion zwischen Aktionären und Unternehmensleitung. Erstmals haben wir das System zur Vergütung unserer Vorstandsmitglieder den Anteilseignern zur Abstimmung vorgelegt. Die Hauptversammlung stimmte allen Tagesordnungspunkten mit klarer Mehrheit zu. Die Präsenz des stimmberechtigten Kapitals ging, ähnlich wie im Durchschnitt der DAX-30-Gesellschaften, gegenüber dem Vorjahr zurück: von 41,9% auf 35,1%.

#### Neue Aktienrückkäufe

Von der Hauptversammlung wurde die Deutsche Bank ermächtigt, eigene Aktien im Umfang von maximal 10% des Stammkapitals bis zum 30. November 2014 zu erwerben. Im verbleibenden Rest des Jahres 2010 haben wir 18,8 Mio Aktien zurückgekauft, von denen gut die Hälfte für die aktienbasierte Vergütung von Mitarbeitern verwendet wurde. Es wurden keine Aktien vernichtet. Am 31. Dezember des Berichtsjahres hatten wir noch 10,0 Mio Aktien im Bestand. Seit dem Start der Aktienrückkaufprogramme Mitte 2002 haben wir bis Ende 2010 insgesamt 264 Mio Aktien im Wert von 16,7 Mrd € zurückgekauft, 16 Mio Aktien im Wert von 0,5 Mrd € an den Markt abgegeben und 118 Mio Deutsche Bank-Aktien mit einem Wert von rund 7,2 Mrd € einge-zogen.

## 02–4

### Regionale Verteilung des Grundkapitals

In % zum Jahresende 2010

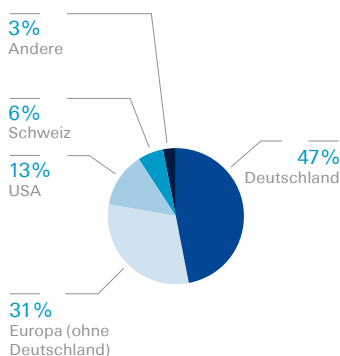

### Großes Interesse der Investoren

Das Interesse von Investoren und Finanzanalysten an unserer Aktie war 2010 besonders groß. Im Vordergrund standen dabei die strategische Ausrichtung, die Akquisitionen und die Kapitalausstattung der Deutschen Bank angesichts zukünftig strenger regulatorischer Anforderungen. Unser Investor-Relations-Team informierte die Anleger regelmäßig und beantwortete deren Fragen. In Analysten- und Telefonkonferenzen berichteten wir über unsere Ergebnisentwicklung und insbesondere das freiwillige Angebot zur Übernahme der Deutschen Postbank. Unter Beteiligung von Vorstandsmitgliedern wurden auf eigenen Veranstaltungen und internationalen Wertpapierkonferenzen 398 Einzel- oder Gruppengespräche mit Aktieninvestoren und Fremdkapitalgebern geführt (2009: 386). Allein in den ersten zwei Wochen nach Ankündigung unserer Kapitalerhöhung haben wir mit mehreren Vorständen in sogenannten Roadshows größere Aktienanleger in Deutschland, Großbritannien, der Schweiz, Frankreich, Italien, Spanien, den Niederlanden, Belgien, Skandinavien und den USA besucht. Im Mittelpunkt der Präsentationen standen vor allem die strategischen Beweggründe für unser Angebot zur Übernahme der Deutschen Postbank.

### Umfangreicher Internetservice

An die Privatanleger wenden wir uns vor allem über eine für Anrufer kostenlose Aktionärshotline und unser Internetportal. Auf der Homepage von Investor Relations bieten wir alle aktuellen Unternehmensnachrichten und Finanzberichte sowie die Möglichkeit, zum Beispiel den Kurs der Deutsche Bank-Aktie interaktiv zu analysieren. Unsere Investor-Relations-Veranstaltungen übertragen wir ausnahmslos und ohne Einschränkungen live. Darüber hinaus können Aktionäre sich online für die Teilnahme an unserer Hauptversammlung registrieren und im Vorfeld der Aktionärsversammlung online abstimmen. Die Zahl der per E-Mail versandten Einladungen zur Hauptversammlung haben wir auf 41 700 steigern können. Damit sparen wir Kosten und schonen die Umwelt.

### Ratings überprüft

Die internationalen Ratingagenturen haben auch 2010 die Bonitätseinschätzungen von Kreditinstituten weltweit überprüft. Die Deutsche Bank konnte ihre Langfristratings bei Standard & Poor's (A+) und Fitch (AA–) unverändert halten, während Moody's im März eine Herabstufung auf Aa3 vornahm. Dagegen wurde bei der Deutschen Postbank das Langfristrating von Standard & Poor's um eine Stufe (auf A) heraufgesetzt, nachdem die mehrheitliche Übernahme durch die Deutsche Bank Ende November feststand.

## Kunden – Corporate & Investment Bank

### Wettbewerbsposition ausgebaut

02–5

Corporate Finance: Finanzierungs-  
geschäft mit Eigenkapital in den  
USA stark verbessert

Marktanteile in %

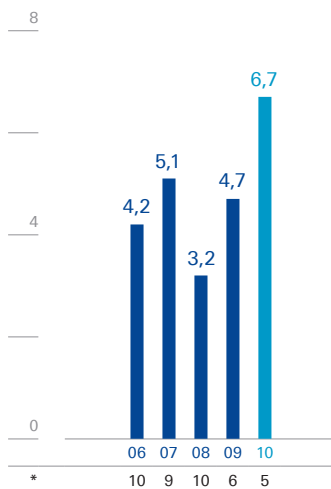

\* Rang im Wettbewerbsvergleich  
Quelle: Dealogic

Für den Konzernbereich Corporate & Investment Bank (CIB) war 2010 ein herausforderndes Jahr. Dennoch konnten wir Rekorderträge und unser zweitbestes Vorsteuerergebnis erzielen. Bei zeitweise ausgeprägter Kundenzurückhaltung, erheblichen Marktturbulenzen infolge der öffentlichen Verschuldungsprobleme etlicher Länder und anhaltend niedrigen Zinsen konnte CIB seine Wettbewerbsposition in allen Geschäftsfeldern festigen. Dazu trug auch die im Berichtsjahr eingeleitete stärkere Verzahnung der CIB-Geschäftsaktivitäten nach der erfolgreichen Neustrukturierung 2009 bei. Unsere hohe Reputation im Markt kommt zugleich darin zum Ausdruck, dass CIB 2010 von der Fachzeitschrift International Financing Review als Bank of the Year, von Euromoney als Best Global Investment Bank und von Risk als Derivatives House of the Year ausgezeichnet wurde.

CIB besteht aus den Unternehmensbereichen Corporate Banking & Securities und Global Transaction Banking. Corporate Banking & Securities gliedert sich in die Geschäftsbe-  
reiche Markets und Corporate Finance.

#### Auszug aus der Segmentberichterstattung (Corporate & Investment Bank<sup>1</sup>)

Der Konzernbereich Corporate & Investment Bank schloss das Jahr 2010 mit einem Gewinn vor Steuern in Höhe von 6,0 Mrd € ab. Im Unternehmensbereich Corporate Banking & Securities wurde ein Gewinn vor Steuern von 5,1 Mrd € nach 3,5 Mrd € im vorangegangenen Jahr erwirtschaftet. Insgesamt stiegen die Erträge im Vergleich zum Vorjahr an. Diese Entwicklung spiegelt hauptsächlich niedrigere negative Marktwertanpassungen, geringere Handelsverluste sowie höhere Kundenaktivitäten im Handel mit standardisierten und strukturierten Kreditprodukten sowie im Aktien-derivatengeschäft wider. Darüber hinaus ist die Risikovorsorge im Kreditgeschäft für gemäß IAS 39 umklassifizierte Vermögenswerte stark gesunken. Der Unternehmensbereich Global Transaction Banking erzielte einen Gewinn vor Steuern in Höhe von 0,9 Mrd € (2009: 0,8 Mrd €). Auch nach Bereinigung der positiven Effekte aus der erstmaligen Konsolidierung des von der ABN AMRO übernommenen Firmenkundengeschäfts in den Niederlanden erreichten die Erträge einen neuen Rekord. Dazu haben vor allem zunehmende Provisionserträge in den Bereichen Trust & Securities Services, Trade Finance und Cash Management beigetragen, wodurch die Auswirkungen des anhaltend niedrigen Zinsniveaus ausgeglichen werden konnten.

| in Mio €                             | 2010         | 2009         |
|--------------------------------------|--------------|--------------|
| Erträge insgesamt                    | 20 929       | 18 807       |
| Risikovorsorge im Kreditgeschäft     | 488          | 1 816        |
| Zinsunabhängige Aufwendungen         | 14 422       | 12 679       |
| <b>Ergebnis vor Steuern</b>          | <b>5 999</b> | <b>4 314</b> |
| Eigenkapitalrendite vor Steuern in % | 32           | 23           |
| Risikogewichtete Aktiva              | 211 115      | 203 962      |
| Aktiva                               | 1 519 983    | 1 343 824    |

<sup>1</sup>Auszug aus der Segmentberichterstattung, Erläuterungen und weitere Details siehe Finanzbericht 2010 (Lagebericht).



## 02–6

### Markets: Führungsposition im US-amerikanischen Handel mit Anleihen

Marktanteile in %

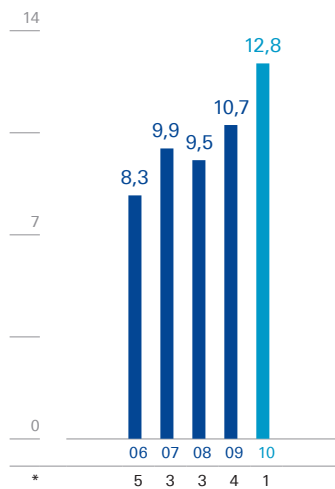

\* Rang im Wettbewerbsvergleich  
Quelle: Greenwich Associates

## Corporate Banking & Securities

Der Geschäftsbereich **Markets** vereint die Verkaufs-, Handels- und Strukturierungsaktivitäten in einem breiten Spektrum von Finanzprodukten. Hierzu gehören Anleihen, Aktien und aktienbezogene Produkte, börsennotierte und außerbörsliche Derivate, Devisen, Geldmarktinstrumente, verbriefte Forderungen sowie Rohstoffe. Institutionelle Kunden werden von der Institutional Client Group betreut. Research analysiert Märkte, Produkte und Handelsstrategien.

Anfang 2010 setzten sich die Marktbedingungen aus den letzten Monaten des Vorjahres zunächst fort. Die Volatilität war niedrig und die Risikoaufschläge für Anleihen gingen zurück. Die Liquidität in den Märkten nahm zu und die wechselseitigen Abhängigkeiten zwischen unterschiedlichen Anlagearten normalisierten sich. Allerdings waren die Märkte für verbriefte Wertpapiere weiterhin durch sehr geringe Umsätze gekennzeichnet. Im weiteren Jahresverlauf führten dann Ängste im Zusammenhang mit Verschuldungsproblemen einiger Länder zu einem Anstieg der Volatilität und der Risikoaufschläge (Credit Spreads). Die Investoren wurden vorsichtiger und die Emissionstätigkeit ging zurück. Insbesondere im Sommer nahmen die Volumina spürbar ab.

In diesem Umfeld hat Markets seinen Kundenstamm erweitert, ohne dabei die Kosten- und Risikodisziplin zu vernachlässigen.

Alle unsere umsatzstarken Geschäftssparten haben im Berichtsjahr außerordentlich gut abgeschnitten. Bei Anleihen in den USA gewannen wir deutliche Marktanteile und belegten zum ersten Mal Platz eins (Greenwich Associates). [Grafik 02–6](#) Bei Aktien und Rohstoffen profitierten wir von der anhaltend hohen Nachfrage. Mithilfe unserer innovativen, die Vermögensklassen übergreifenden Strukturierungsplattform sind wir in der Lage, unseren Kunden genau auf ihre Probleme zugeschnittene Produkte zur Verfügung zu stellen. Den Eigenhandel mit Aktien haben wir eingestellt.

Im festverzinslichen Bereich hatten wir ein Rekordjahr. Das Devisengeschäft konnte 2010 laut Fachmagazin Euromoney seine seit sechs Jahren global führende Position festigen. Eine positive Rolle für unsere Erträge spielten auch die Geschäfte mit Geldmarkt- und Zinsprodukten, die mehrfach von der Zeitschrift Risk ausgezeichnet wurden. In enger Kooperation mit Kunden erarbeiteten wir neue Lösungen, durch die zum Beispiel bei einem deutschen Automobilhersteller die Risiken aus einer zunehmenden Lebenserwartung (Langlebigkeitsrisiko) für die Pensionsverpflichtungen abgesichert werden. [Grafik 02–7](#)

## 02-7

### Markets: kontinuierliche Spitzenposition im weltweiten Devisenhandel

Rang im Wettbewerbsvergleich

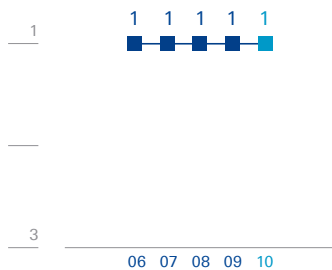

Unser Geschäft sowohl mit standardisierten als auch strukturierten Kreditprodukten hat sich 2010 markant erholt. Positionen in Altbeständen haben wir weiter abgebaut. Das Geschäft mit Schuldtiteln von Schwellenländern entwickelte sich gut; die Kapitalzuflüsse in Schwellenländer hielten an und wir profitierten von unserer weltweiten Präsenz. Im Rohstoffhandel konnten wir 2010 trotz widriger Marktbedingungen ein sehr gutes Ergebnis erwirtschaften.

In unserem Aktiengeschäft setzte sich die Erholung des vorangegangenen Jahres fort. Wir wurden zum dritten Mal nacheinander von der Zeitschrift Global Custodian in einer Umfrage unter Hedgefonds als weltweit bester Prime Broker benannt. In das US-amerikanische und asiatische Aktienkassageschäft, insbesondere den elektronischen Handel, haben wir weiter investiert. Unser Handelsgeschäft in Aktienderivaten konzentriert sich unverändert auf solche Produkte, die von institutionellen Kunden in großen Mengen nachgefragt werden.

Die Perspektiven für das Umfeld im Geschäftsbereich Markets bleiben unsicher. Wir sind jedoch davon überzeugt, dass wir mit unserem breit diversifizierten Geschäftsmodell auch auf unterschiedliche Marktbedingungen und regulatorische Veränderungen gut vorbereitet sind. [Auszeichnungen 2010](#)

#### Auszeichnungen 2010

International Financing Review  
Zum fünften Mal in sechs Jahren:  
„Derivatives House of the Year“  
Euromoney  
„Best Global Investment Bank“  
Im sechsten Jahr in Folge:  
„Forex Poll-No. 1 Forex Bank“

Risk  
Zum dritten Mal seit 2003:  
„Derivatives House of the Year“  
„Bank Risk Manager of the Year“  
Global Custodian  
Zum dritten Mal in Folge:  
„No. 1 Global Prime Broker“  
Greenwich Associates  
„No.1 in U.S. fixed income“

## 02–8

### Corporate Finance: Top-5-Position erreicht

Rang im Wettbewerbsvergleich

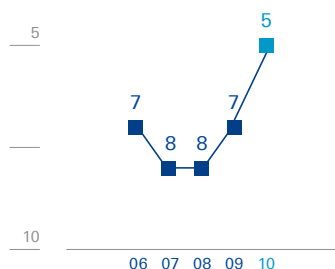

Quelle: Dealogic, auf Provisionsbasis

Der Geschäftsbereich **Corporate Finance** ist verantwortlich für die Beratung bei Fusionen und Übernahmen (Mergers and Acquisitions, M&A), für Anleihe- und Aktienemissionen sowie Kapitalmarkttransaktionen für große und mittelständische Unternehmen. Regionale und branchenspezifische Teams stellen sicher, dass unseren Kunden die gesamte Finanzdienstleistungspalette aus einer Hand zur Verfügung steht.

Im Berichtsjahr konnte der Geschäftsbereich seine Wettbewerbsstellung markant verbessern. Unter schwierigen Marktbedingungen realisierte Corporate Finance erstmals das langjährige Ziel, sich unter den ersten fünf Anbietern der Welt zu platzieren, gemessen am Provisionsaufkommen (Dealogic). Keine andere vergleichbare Bank hat 2010 hier mehr Marktanteile gewinnen können als die Deutsche Bank. Dieser Erfolg war maßgeblich auf unsere kontinuierlichen und antizyklischen Vorleistungen in den vorangegangenen Jahren zurückzuführen, mit denen wir fundiertes Beratungs-Knowhow zum Beispiel für Banken sowie Industrieunternehmen in den USA aufbauen konnten.

#### Grafik 02–8

Unser M&A-Geschäft nahm 2010 erheblich zu und rückte global von dem neunten auf den fünften Platz vor. In Europa waren wir die Nummer eins, unseren Marktanteil in den USA konnten wir verdoppeln. Insbesondere grenzüberschreitende Transaktionen, bei denen wir eine führende Position einnahmen, trugen wesentlich dazu bei. So waren wir als Berater an derartigen Transaktionen sowohl zwischen entwickelten Märkten als auch unter Einschluss von Schwellenländern in den Bereichen Energie, Arzneimittel und Konsumgüter beteiligt.

Unser Emissionsgeschäft verlief dank höherer Volumina sehr lebhaft, obwohl es am Markt immer wieder zu Turbulenzen wegen der hohen Staatsverschuldung einzelner Länder kam.

Im Finanzierungsgeschäft mit Eigenkapital (Equity Capital Markets, ECM) konnten wir in einem Markt mit hoher Volatilität ebenfalls Anteile hinzugewinnen. Wir waren 2010 die einzige große internationale Bank, der das gelang. Dies gilt ebenso für unsere Beteiligung an den drei größten Aktienemissionen des Jahres. Im weltweiten Vergleich und in den USA verbesserte sich unser ECM-Geschäft auf Platz fünf, in der Region Europa, Naher Osten und Afrika belegten wir erneut die Spitzenposition. [Grafik 02–5](#)

Besonders kräftig konnten wir im Berichtsjahr die Begebung sowohl von Anleihen mit guter Bonität (Investmentgrade) als auch von höher verzinslichen Titeln mit schlechterer Bonität steigern. Global stehen wir in beiden Geschäftssparten auf Rang vier und in der Region Europa, Naher Osten und Afrika an erster beziehungsweise zweiter Stelle. Zur Finanzierung von ausgewählten Unternehmensübernahmen haben wir Kreditzusagen gemacht, sofern das Verhältnis von Risiko und Ertrag wirtschaftlich überzeugend war. [Auszeichnungen 2010](#)

#### Auszeichnungen 2010

International Financing Review  
„EMEA High Yield Bond House“  
Finance Asia  
„Best High Yield Bond House“  
Financial News  
„DCM House of the Year“

## 02–9

### Global Transaction Banking: führend im Euro-Clearing

Marktanteile in %

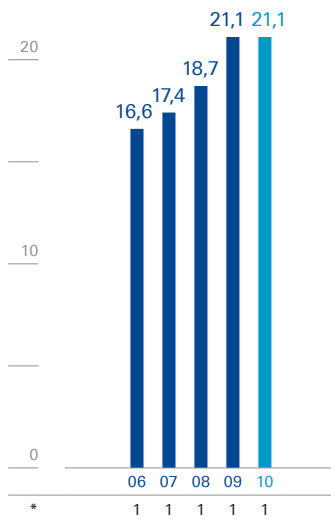

\* Rang im Wettbewerbsvergleich  
Quelle: Deutsche Bundesbank –  
„Target2 Germany“

## Global Transaction Banking

Der Unternehmensbereich Global Transaction Banking (GTB) ist weltweit für Firmen und Finanzdienstleister tätig. Seine Produkte und Leistungen unterstützen die Abwicklung inländischer und grenzüberschreitender Zahlungen wie auch die professionelle Risikosteuerung und Finanzierung von internationalen Handelsgeschäften. Außerdem stellt GTB Serviceleistungen im Treuhand-, Vermittlungs- sowie Wertpapierverwahrungs- und -verwaltungsgeschäft bereit. Der Unternehmensbereich gliedert sich in die Sparten Cash Management für Unternehmen und für Finanzdienstleister, Trade Finance und Trust & Securities Services.

2010 konnte GTB seine Erträge auf Rekordhöhe steigern und Marktanteile in wichtigen Geschäftssegmenten gewinnen. Wir haben außerdem weiter in neue Produkte und Technologien investiert sowie das Niederlassungsnetz erweitert. Durch die eingeleitete engere Verzahnung mit dem Unternehmensbereich Corporate Banking & Securities wollen wir unser Kundenpotenzial noch besser nutzen. Die Übernahme von Teilen des niederländischen Firmenkundengeschäfts von ABN AMRO mit rund 33 000 Kunden haben wir am 1. April abgeschlossen und mit der Eingliederung begonnen.

Unser Cash Management konnte seine Spitzenposition im Euro-Clearing und seinen Platz unter den führenden Häusern im US-Dollar-Clearing behaupten. Wir haben unsere Geschäftstätigkeit auf neue Branchen wie auch Segmente ausgedehnt und dabei die Zahl unserer Kunden sowie der Mandate erhöht. Unseren Spitzenplatz im Geschäft mit Finanzdienstleistern konnten wir festigen. [Grafik 02–9](#)

Dank des wachsenden Welthandelsvolumens nahm unser Trade-Finance-Geschäft 2010 kräftig zu. Die Nachfrage nach Produkten und Dienstleistungen, mit denen die Risiken unserer Kunden verringert werden, blieb hoch. Im internationalen Handel konnten wir das Geschäft mit standardisierten und strukturierten Finanzierungen, bei denen wir mit Exportkredit- und privaten Risikoversicherungen zusammenarbeiten, erheblich steigern.

Trust & Securities Services hat 2010 das im Jahr zuvor übernommene depotbankunabhängige Wertpapierleihegeschäft der Dresdner Bank erfolgreich integriert. Unser Wertpapierverwahrungs- und -verwaltungsgeschäft haben wir auf das Königreich Saudi-Arabien ausgedehnt. Das Volumen der Fonds in alternativen Anlagen, für die wir Verwaltungsdienstleistungen anbieten, konnten wir verdoppeln. Unseren Rang drei im Geschäft mit klassischen Dienstleistungen für Anleihen und strukturierte Finanzierungen haben wir gehalten, als Treuhänder für verbriefte Wertpapiere in den USA, die mit Finanzaktiva unterlegt sind, konnten wir die Spitzenposition erringen.

[Auszeichnungen 2010](#)

## Auszeichnungen 2010

The Banker  
„Cash Management House of the Year“  
Euromoney  
„Best Cash Management House in Europe“  
Trade Finance  
„Best Trade Bank in Europe“  
„Best Short-Term Trade Finance Bank“

## Kunden – Private Clients and Asset Management

### Positiver Trend fortgesetzt

#### 02–10

#### Asset Management: regionale Verteilung des verwalteten Vermögens

Insgesamt 549,9 Mrd € Ende 2010

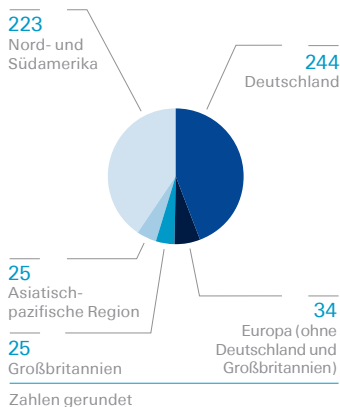

Der Konzernbereich Private Clients and Asset Management (PCAM) umfasst das Vermögensanlagegeschäft für private und institutionelle Kunden sowie das klassische Bankgeschäft für Privat- und kleine bis mittlere Geschäftskunden.

Für PCAM war 2010 ein Jahr, in dem wir mit zwei strategisch wichtigen Akquisitionen zukunftsweisende Weichenstellungen vorgenommen haben. Unsere ohnehin führende Position auf dem deutschen Heimatmarkt bauten wir mit dem Erwerb der Sal. Oppenheim-Gruppe und der Mehrheit an der Deutschen Postbank AG nochmals aus. Trotz damit verbundener Belastungen konnte der Konzernbereich in einem freundlicher werdenden Umfeld sein Ergebnis steigern. Das insgesamt betreute Vermögen nahm um 299 Mrd € auf 1 179 Mrd € zu. Von dem Gesamtbetrag entfallen 115 Mrd € auf Sal. Oppenheim einschließlich BHF-BANK und 105 Mrd € auf die Postbank.

PCAM besteht aus den Unternehmensbereichen Asset and Wealth Management und Private & Business Clients.

#### Asset and Wealth Management

Zum Unternehmensbereich Asset and Wealth Management gehören die Geschäftsbereiche Asset Management und Private Wealth Management. Asset Management umfasst sowohl das Geschäft mit Publikumsfonds und alternativen Anlagen für Privatkunden als auch das institutionelle Vermögensanlagegeschäft. Private Wealth Management betreut weltweit vermögende Privatpersonen und Familien.

Der Geschäftsbereich **Asset Management** (AM) konnte 2010 seinen Gewinnbeitrag erhöhen. Darin spiegelt sich eine weitere Normalisierung der Märkte, aber auch die erfolgreich abgeschlossene Restrukturierung, mit der wir die Rahmenbedingungen für unsere Vermögensverwaltung nachhaltig verbessert haben. Die Ausrichtung unseres Geschäfts auf sieben langfristige, für das Kapitalanlagemanagement bedeutsame makroökonomische „Megatrends“ hat sich bewährt und wurde fortgesetzt.

#### Auszug aus der Segmentberichterstattung (Private Clients and Asset Management<sup>1</sup>)

Der Konzernbereich Private Clients and Asset Management erzielte 2010 ein Ergebnis vor Steuern von 1,0 Mrd € nach 0,7 Mrd € im vorangegangenen Jahr. Im Unternehmensbereich Asset and Wealth Management lag der ausgewiesene Gewinn vor Steuern bei 0,1 Mrd € (2009: 0,2 Mrd €). Darin war ein Verlust im Zusammenhang mit Sal. Oppenheim/BHF-BANK enthalten. Der Unternehmensbereich Private & Business Clients konnte seinen Gewinn vor Steuern auf 0,9 Mrd € (2009: 0,5 Mrd €) steigern. Darin waren höhere Erträge durch die erstmalige Konsolidierung der Postbank sowie im Einlagengeschäft und Zahlungsverkehr enthalten. Die zinsunabhängigen Aufwendungen in Private & Business Clients lagen, bedingt durch die Konsolidierung der Deutschen Postbank, über ihrem Vorjahreswert. Ohne Berücksichtigung dieses Effekts gingen die zinsunabhängigen Aufwendungen zurück, insbesondere aufgrund niedrigerer Abfindungen.

| in Mio €                             | 2010       | 2009       |
|--------------------------------------|------------|------------|
| Erträge insgesamt                    | 10043      | 8261       |
| Risikovorsorge im Kreditgeschäft     | 789        | 806        |
| Zinsunabhängige Aufwendungen         | 8258       | 6803       |
| <b>Ergebnis vor Steuern</b>          | <b>989</b> | <b>658</b> |
| Eigenkapitalrendite vor Steuern in % | 9          | 8          |
| Risikogewichtete Aktiva              | 127827     | 49073      |
| Aktiva                               | 412477     | 174739     |

<sup>1</sup> Auszug aus der Segmentberichterstattung, Erläuterungen und weitere Details siehe Finanzbericht 2010 (Lagebericht).

## 02 – 11

### Asset Management: verwaltetes Vermögen nach Produkten

Insgesamt 549,9 Mrd € Ende 2010

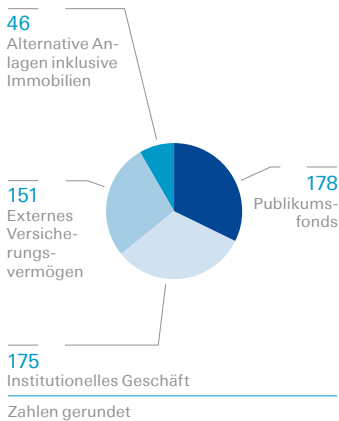

AM besteht hauptsächlich aus vier Geschäftsfeldern: DWS Investments vereint unser Geschäft mit Publikumsfonds und Altersvorsorgeprodukten; DB Advisors betreut Vermögen für institutionelle Kunden wie Pensionsfonds, Unternehmen, Staatsfonds und Regierungen, während Deutsche Insurance Asset Management sich auf Versicherungsgesellschaften als Kundengruppe und RREEF sich weltweit auf alternative Anlagen konzentriert. Darüber hinaus sind wir im Geschäft mit speziellen alternativen Anlageklassen durch DB Climate Change Advisors, DB Private Equity und RREEF Infrastructure präsent. Ende 2010 verwaltete AM Vermögenswerte in Höhe von insgesamt 550 Mrd € (2009: 496 Mrd €). [Grafik 02–11](#)

#### Publikumsfonds

DWS Investments ist in Deutschland der führende Anbieter von Investmentfonds und fondsgebundenen Altersvorsorgeprodukten für Privatkunden. In unserem Heimatmarkt haben wir nach wie vor den größten Marktanteil und in Europa gehören wir zu den zehn größten Publikumsfondsgesellschaften. Auch im Berichtsjahr erhielten wir zahlreiche Preise für gute Anlageergebnisse und hochwertigen Service. Global hat der Geschäftsbereich AM für Privatkunden Ende 2010 ein Fondsvermögen von 178 Mrd € verwaltet, 13 Mrd € mehr als ein Jahr zuvor. In den USA war DWS Investments beim Nettoabsatz ihrer Fonds in kurzfristigen Festzinstiteln, Kommunalanleihen und Rohstoffwerten erfolgreich. In Japan waren wir mit drei Investmentfonds im Volumen von jeweils über 1 Mrd € sehr erfolgreich.

#### Vermögensverwaltung für institutionelle Kunden

DB Advisors verwaltete zum Ende des Berichtsjahres ein Vermögen von insgesamt 175 Mrd € (2009: 173 Mrd €) und zählt bei Anleihen zu den fünf weltweit größten Anbietern. Neue Wege gingen wir mit einem festverzinslichen Themenfonds zum Klimawandel und einem Fonds in variabel verzinslichen Anleihen. Außerdem haben wir den auf Britische Pfund Sterling lautenden Geldmarktfonds von Henderson Global Investors erworben.

#### Asset Management für Versicherungsgesellschaften

Deutsche Insurance Asset Management (Deutsche Insurance) legte auch 2010 kräftig zu. Mit einem Marktanteil von 17% und einem verwalteten Vermögen von 151 Mrd € Ende 2010, 36 Mrd € mehr als im Vorjahr, sind wir global der zweitgrößte Vermögensverwalter in diesem Segment. Zum dritten Mal in Folge zeichnete uns das Fachmagazin Reactions als Best Global Insurance Asset Manager und zum zweiten Mal als Best Insurance Manager in London aus. Im Berichtsjahr haben wir außerdem die Oppenheim VAM Kapitalanlagegesellschaft mbH mit einem Volumen von rund 10 Mrd € integriert und uns verstärkt auf Versicherungsunternehmen in Europa konzentriert.



## 02–12

### Private Wealth Management: betreutes Vermögen gestiegen

Zum Jahresende in Mrd €

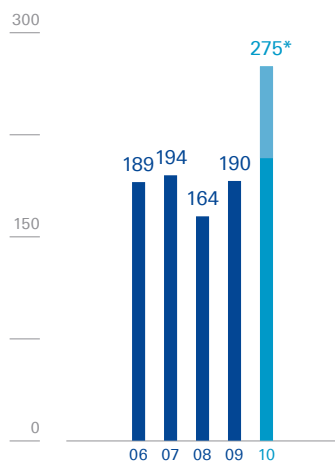

\* davon Sal. Oppenheim 67 Mrd €

### Immobilien und andere alternative Anlagen

Unser international hoch angesehener Immobilienanlagespezialist RREEF verwaltete am Jahresende 2010 ein Vermögen von 37 Mrd €. In einem sich erholenden Markt für Immobilieninvestments erzielten die meisten RREEF-Fonds eine positive Rendite. In Deutschland wurden unsere beiden offenen Immobilienfonds grundbesitz europa sowie grundbesitz global mit Spitzenplatzierungen ausgezeichnet.

Auch außerhalb von RREEF bietet AM alternative Anlagen an. So konnten wir unsere Position bei Investments in den Klimaschutz mit DB Climate Change Advisors festigen. Immer mehr institutionelle Investoren zeigen sich an Analysen zum Klimawandel und an Vermögensstrategien interessiert, die dem nachhaltigen Wirtschaften verpflichtet sind.

DB Private Equity umfasst unser Private-Equity-Geschäft sowohl in direkter Form als auch in Fonds für institutionelle und sehr vermögende Kunden. In dieser neu zusammengeführten Formation haben wir drei bestehende Geschäftseinheiten vereint: die Private Equity Group aus unserem Private Wealth Management, das im Sekundärmarkt tätige Team von RREEF und die ehemaligen Sal. Oppenheim Private Equity Partners. DB Private Equity ist global aktiv und mit einem Vermögen von insgesamt 2,4 Mrd € Ende 2010 die Nummer fünf in Europa und der Spitzenreiter im Dachfondsgeschäft in Deutschland.

Unser Geschäft in RREEF Infrastructure ist weiter gewachsen. Mit einem Anlagevolumen von 6,1 Mrd € liegen wir weltweit an vierter Stelle. Im Berichtsjahr haben wir erstmals im Sektor erneuerbare Energien Anteile an drei Windparks in Spanien erworben.

Der Geschäftsbereich **Private Wealth Management** (PWM) gehört zu den global führenden Anbietern von Dienstleistungen für das Anlagemanagement von vermögenden Kunden, Stiftungen und ausgewählten institutionellen Investoren. Mit dem im März 2010 abgeschlossenen Erwerb von Sal. Oppenheim haben wir unsere Position in Europa und insbesondere unsere klare Marktführerschaft in Deutschland weiter gestärkt. Annähernd 4600 Mitarbeiter sind an 109 Standorten in 30 Ländern für eine anspruchsvolle Klientel tätig. Zum Jahresende 2010 betreute PWM (einschließlich Sal. Oppenheim, aber ohne BHF-BANK) ein Vermögen von insgesamt 275 Mrd € (PWM 2009: 190 Mrd €). Im laufenden Ergebnis erreichte PWM im Berichtsjahr fast wieder das Vorkrisenniveau, nachdem es in den vorangegangenen zwei Jahren deutlich gesunken war. [Grafik 02–12](#)

Zu der Erholung haben neben der guten Marktentwicklung und einem zunehmenden Aktieninteresse der Anleger sowohl verringerte Kosten als auch die vermehrte Vergabe von Krediten an unsere Kunden beigetragen. Die Qualität unseres Kundenservice haben wir ebenso wie die Zusammenarbeit mit anderen Geschäftsbereichen innerhalb des Konzerns weiter verbessert. Im Ergebnis konnten wir unsere Marktstellung im Segment der sehr vermögenden Kunden (Ultra High Net Worth) verstärken.

Das Geschäft in unserem Heimatmarkt Deutschland verlief für PWM 2010 sehr erfolgreich. Wir konnten neue Mittelzuflüsse von 5 Mrd € gewinnen und die Erträge steigern. Die 20 Erstplatzierungen, die wir im Private Banking and Wealth Management Survey der Zeitschrift Euromoney erhalten haben, unterstreichen unsere herausragende Wettbewerbsfähigkeit in diesem Markt.

02–13

**Private & Business Clients:  
starkes Wachstum der  
Kundeneinlagen durch  
Übernahme der Postbank**

Spar-, Termin- und Sichteinlagen  
in Mrd € zum Jahresende

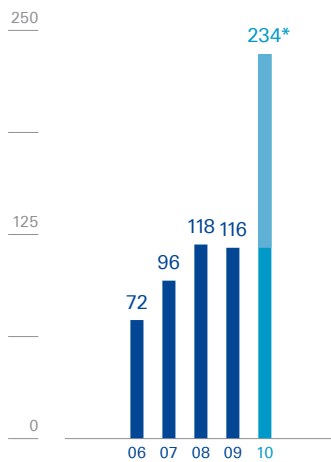

\* davon Deutsche Postbank AG 118 Mrd €

Im Berichtsjahr kamen die Neuausrichtung und Integration von Sal. Oppenheim gut voran. Wir haben das Geschäft auf die Vermögensverwaltung konzentriert, das Management neu ausgerichtet, Risikopositionen sowie Kosten abgebaut und die Kontrollfunktionen verstärkt.

Bei steigenden Nettomittelzuflüssen konnte PWM 2010 die Erträge in Großbritannien gegenüber dem Vorjahr um mehr als 20% steigern. Auch die Neuausrichtung unseres US-Geschäfts machte sich bezahlt: Die Erträge nahmen um 16% zu.

In mehreren Teilen der Welt modifizierten wir unsere Regionalstruktur, um künftig das geschäftliche Potenzial vor Ort noch gezielter ausschöpfen zu können. Auf den Wachstumsmärkten in Lateinamerika, im Nahen Osten, in Russland und in Asien konnten wir unser Geschäft erfolgreich ausweiten.

Den strategischen Prioritäten des Konzerns folgend, baute PWM das Geschäft im asiatisch-pazifischen Raum weiter aus und steigerte die Erträge im Vergleich zum Vorjahr um 25%. Die Zeitschrift Asiamoney ernannte uns zum vierten Mal in Folge zur Best Private Bank in India.

PWM hält unverändert an seinem Anspruch fest, für seine internationalen Kunden durch erstklassige Beratung und ein hochattraktives Produktangebot in allen Vermögensangelegenheiten nachhaltigen Wert zu schaffen.

### Private & Business Clients

Der Unternehmensbereich Private & Business Clients (PBC) betreibt international das Bankgeschäft mit Privatkunden, Selbstständigen sowie kleinen und mittleren Unternehmen. In Deutschland sind wir der führende Anbieter. Das Produktangebot umfasst neben Kontoführung und Zahlungsverkehr die Vermögensanlage- und Vorsorgeberatung, Fonds und Wertpapiere sowie private und geschäftliche Kredite.

PBC hat 2860 Filialen in Deutschland, Italien, Spanien, Belgien, Portugal, Polen, Indien und China, von denen 1 108 auf die Deutsche Postbank entfallen. Außerdem arbeiten wir mit freien Finanzberatern zusammen. Durch Kooperationen mit namhaften Partnern wie dem größten deutschen Automobilclub, ADAC, und der Finanzdienstleistungssparte der spanischen Post, Correos, erweitern wir unser Vertriebspotenzial zusätzlich. In einigen Ländern wie Deutschland und Polen sind wir mit mehreren Marken am Markt präsent.

2010 konnte PBC sein Geschäftsergebnis gegenüber dem Vorjahr signifikant steigern. Dazu trugen insbesondere die Erträge aus dem Wertpapiergeschäft und ein Rekordergebnis bei Einlagen sowie im Zahlungsverkehr bei. Positiv wirkten sich auch die bereits 2009 eingeleiteten Effizienzsteigerungsmaßnahmen sowie deutlich niedrigere Risikokosten aus.

Im deutschen Heimatmarkt machten wir 2010 einen historischen Schritt, um unsere Position im Privatkundengeschäft weiter zu verstärken: Wir haben die Deutsche Postbank AG mehrheitlich übernommen und im Dezember konsolidiert. Sie ist damit Teil unseres Privatkundengeschäfts. Die Kundengruppen der beiden Banken ergänzen sich in idealer Weise. Erleichtert wird die Konsolidierung der Deutschen Postbank in den Deutsche Bank-Konzern durch die bereits 2009 begonnene Zusammenarbeit im Vertrieb, Einkauf und IT-Bereich, die unsere Erwartungen übertroffen hat.

## 02–14

### Private & Business Clients: Anzahl der Filialen in Deutschland deutlich erhöht

Insgesamt 2052 zum Jahresende 2010

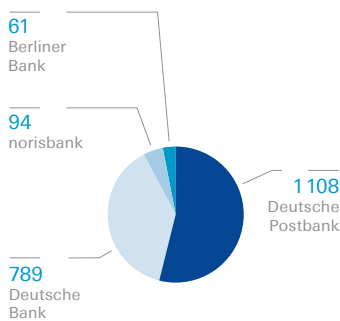

PBC betreut in Deutschland damit nun insgesamt 24 Mio Kunden. Ihnen stehen über 2000 Filialen zur Verfügung und mehr als 35000 Mitarbeiter sind für sie tätig. Durch den Erwerb der Deutschen Postbank stellen wir unsere Mehrmarkenstrategie auf ein noch breiteres Fundament. Mit zwei eigenständigen und am Markt national bestens eingeführten Marken können wir jetzt allen relevanten Kundengruppen in Deutschland ein genau passendes Angebot machen. Auch in Europa zählen wir, gemessen an Erträgen und Privatkundeneinlagen, zu den führenden Banken. [Grafik 02–14](#)

Die Berliner Bank, unsere regionale Marke in Berlin, haben wir im Berichtsjahr auf unsere einheitliche IT-Plattform transferiert, was einen deutlichen Modernisierungsschub zur Folge hatte. Die norisbank entwickelte sich 2010 erfreulich und wurde für ihr Kontoangebot mehrfach ausgezeichnet.

Im Filialgeschäft der Deutschen Bank konnten wir das Ergebnis 2010 kräftig steigern. Wir haben ein Programm gestartet, um unser Beratungsangebot weiterzuentwickeln. Mit Blick auf die Kundenzufriedenheit soll die Qualität unserer Dienstleistungen als der entscheidende Wettbewerbsfaktor verbessert werden. Gleichzeitig veränderten wir unsere betriebliche Steuerung dahin gehend, dass in der Erfolgsmessung jetzt auch der Kundennutzen gleichberechtigt neben der Profitabilität beziehungsweise der Wertschöpfung für Aktionäre steht. Unseren mobilen Vertrieb mit seinen rund 1400 selbstständigen Finanzberatern haben wir ebenfalls mit dem Ziel einer höheren Qualität neu ausgerichtet.

In den anderen europäischen Ländern konnte PBC ebenfalls kräftig zulegen. Die Erträge nahmen in allen Produktgruppen zu, die Risikokosten des Kreditgeschäfts gingen deutlich zurück. In Polen kehrten wir durch eine Neustrukturierung des Geschäftsmodells in die Gewinnzone zurück.

Die Ausweitung unserer Präsenz in Asien führten wir 2010 fort. So erhöhten wir – vorbehaltlich der Zustimmung durch die Regulierungsbehörden – unseren Anteil an der chinesischen Hua Xia Bank von 17,1 auf 19,99%. In Indien blieben wir im Berichtsjahr weiter auf Kurs und betreuen mittlerweile in 15 Filialen mehr als 415000 Kunden.

## Kunden – Corporate Investments

### Beteiligung an Deutscher Postbank AG in Unternehmensbereich Private & Business Clients transferiert

02–15

Corporate Investments:  
Entwicklung des Buchwerts  
der Beteiligungen

In Mrd € zum Jahresende

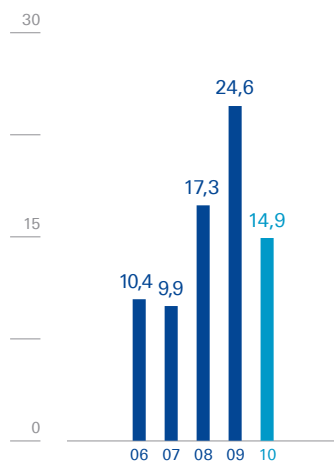

Der Konzernbereich Corporate Investments (CI) steuert die weltweiten Beteiligungen der Deutschen Bank. Dabei handelt es sich vor allem um die verbliebenen Industriebeteiligungen, unsere übrigen Kapitalbeteiligungen sowie sonstige finanzielle Vermögenswerte, zu denen bestimmte Immobilien- und Kreditengagements gehören, die nicht Teil des Kerngeschäfts sind. [Grafik 02–15](#)

Ende 2010 betrugen die in CI verwalteten Eigenkapitalbeteiligungen 3,0 Mrd €. Darin enthalten sind unsere Anteile am Hafenbetreiber Maher Terminals sowie am Immobilienobjekt The Cosmopolitan of Las Vegas. Beide Positionen gehören nicht zu unserem Kerngeschäft und werden deshalb als Finanzinvestments auf Zeit behandelt.

Nachdem wir die Mehrheit an der Deutschen Postbank AG übernommen hatten, wurde sie im Dezember 2010 von CI in den Unternehmensbereich Private & Business Clients übertragen.

Auf sonstige finanzielle Vermögenswerte entfielen zum Jahresende 11,9 Mrd €. Im Jahresverlauf 2010 wurde die im Dezember 2009 eingeräumte Liquiditätsfazilität an die Deutsche Pfandbriefbank AG (ehemals Hypo Real Estate Bank AG) in Höhe von 9,2 Mrd € vollständig zurückgezahlt. Zeitgleich mit der letzten Rückzahlung im Dezember 2010 haben wir eine neue Liquiditätsfazilität für die FMS Wertmanagement Anstalt des öffentlichen Rechts, die Abwicklungseinheit des Hypo Real Estate Konzerns, bereitgestellt. Dazu zeichneten wir Anleihen über 6,4 Mrd €, die in voller Höhe bei der Europäischen Zentralbank (EZB) beliehen werden können.

#### Auszug aus der Segmentberichterstattung (Corporate Investments<sup>1</sup>)

Der Konzernbereich Corporate Investments musste 2010 einen Verlust vor Steuern in Höhe von 2,6 Mrd € (2009: Gewinn von 0,5 Mrd €) hinnehmen. Dieses Ergebnis war im Wesentlichen auf eine Belastung im Zusammenhang mit der Deutschen Postbank in Höhe von 2,3 Mrd € im dritten Quartal zurückzuführen.

| in Mio. €                        | 2010          | 2009       |
|----------------------------------|---------------|------------|
| Erträge insgesamt                | -2 020        | 1 044      |
| Risikovorsorge im Kreditgeschäft | -4            | 8          |
| Zinsunabhängige Aufwendungen     | 637           | 581        |
| <b>Ergebnis vor Steuern</b>      | <b>-2 649</b> | <b>456</b> |
| Risikogewichtete Aktiva          | 4 580         | 16 935     |
| Aktiva                           | 17 766        | 28 456     |

<sup>1</sup>Auszug aus der Segmentberichterstattung, Erläuterungen und weitere Details siehe Finanzbericht 2010 (Lagebericht).

## Kunden – Zentrale Infrastruktur Führungsinstrument des Vorstands

02–16

### Stabile Tier-1-Kapitalquote auf hohem Niveau

In % zum Jahresende

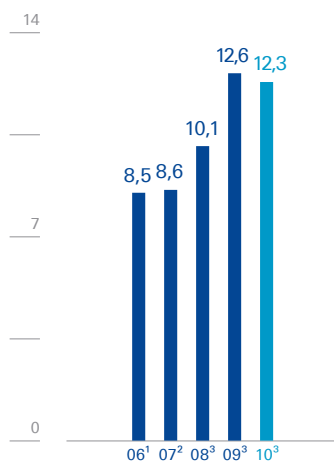

<sup>1</sup> nach IFRS

<sup>2</sup> nach IFRS, Basel I

<sup>3</sup> nach IFRS, Basel II

Unser zentraler Infrastrukturbereich unterstützt mit seinen strategischen, risikosteuernden und kontrollierenden Abteilungen den Vorstand bei der Führung des Deutsche Bank-Konzerns. Die entsprechenden Prozesse sind zum großen Teil global in die Geschäftsbereiche mit engem Kontakt zum Markt integriert, aber mit unabhängigen Berichtslinien. Dieses Grundprinzip, das ein langjähriger Eckpfeiler unserer Führungskultur und Organisation ist, hat sich 2010 erneut bewährt.

Zum zentralen Infrastrukturbereich gehören die Stabsbereiche Finance (Finanzen), Audit (Revision), Tax (Steuern), Legal, Risk & Capital (Recht, Risiko & Kapital), Investor Relations, Communications & Corporate Social Responsibility (Kommunikation & Gesellschaftliche Verantwortung), Human Resources (Personal), Group Strategy & Planning (Abteilung für Konzernentwicklung), Corporate Insurance (Versicherungsabteilung) und DB Research (Volkswirtschaftliche Abteilung).

### Aktuelle Anforderungen

Die Auswirkungen der globalen Finanz- und Wirtschaftskrise, strengere aufsichtsrechtliche Rahmenbedingungen sowie Vorbereitung und Abschluss unserer strategischen Unternehmenskäufe haben 2010 unseren Mitarbeitern ein außerordentlich hohes Arbeitspensum abverlangt. Um diese Aufgabenvielfalt zu bewältigen, arbeiteten alle Abteilungen eng zusammen.

Das Treasury-Team innerhalb von Legal, Risk & Capital sorgte im Berichtsjahr für jederzeit ausreichende Liquiditätsreserven und stellte den Zugang zum Markt für Fremdkapital sowie für Kundeneinlagen sicher. Unser Grundkapital haben wir durch die mit 10,2 Mrd € größte Bezugsrechtsemission in der deutschen Bankengeschichte erhöht. Sie diente vor allem zur Übernahme der Deutschen Postbank.

### Vielfältige Unterstützung

Im Stabsbereich Finance bestand einer der Schwerpunkte darin, unser wertorientiertes Steuerungskonzept (Value-Based-Management), das die Gesamtrendite aus Aktionärsicht (Total Shareholder Return) in den Mittelpunkt stellt, weiterzuentwickeln. Mit dieser Methode können wir für das Management die Faktoren transparent machen, die dazu beitragen, den Unternehmenswert zu steigern.

Group Strategy & Planning hat den Vorstand bei der Umsetzung unserer Managementagenda Phase 4 unterstützt und die Durchführung unserer zukunftsweisenden Akquisitionen im Berichtsjahr eng begleitet. Mit Studien über volkswirtschaftliche Themen wie Energie, Innovation und Nachhaltigkeit sowie die Identifikation neuer Geschäftsfelder informierte DB Research den Vorstand, die Geschäftsbereiche sowie unsere Kunden.

Ein vorrangiges Ziel der Personalarbeit blieb weiterhin, die Deutsche Bank als attraktiven Arbeitgeber zu positionieren. Wir wollen die besten Köpfe gewinnen und im Unternehmen halten. Besondere Anstrengungen haben wir im Berichtsjahr auf das Talentmanagement, die Anpassungen der Vergütungsstruktur sowie die Förderung von Frauen in Führungspositionen gerichtet.

## Mitarbeiter Zuwachs durch Akquisitionen

02–17

### Mitarbeiterzahl

In Tausend zum Jahresende\*

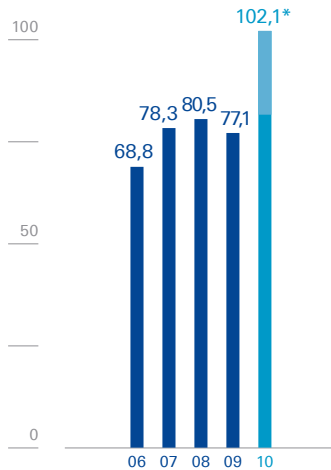

\* In Vollzeitkräfte umgerechnet  
\* davon Deutsche Postbank 20,4 Tsd

Die Zahl der Mitarbeiter des Deutsche Bank-Konzerns erhöhte sich 2010 um 25 009 auf 102 062 (Vollzeitkräfte). Hauptgrund waren zwei Akquisitionen in Deutschland. Bereinigt um den Saldo aus erworbenen und veräußerten Unternehmensteilen, wuchs der Personalbestand lediglich um 222 Mitarbeiter. [Grafik 02–17](#)

Im Konzernbereich Corporate & Investment Bank hat die Beschäftigtenanzahl im Berichtsjahr um 1 752 (12 %) zugenommen. Dies ist größtenteils auf den Kauf von Teilen des Firmenkundengeschäfts der ABN AMRO Bank in den Niederlanden zurückzuführen. Die Mitarbeiterzahl im Konzernbereich Private Clients and Asset Management stieg um 72 %, von 30 611 auf 52 584. Das Wachstum ist vor allem eine Folge der erstmals konsolidierten Deutschen Postbank mit 20 361 Beschäftigten. Außerdem kamen durch den Erwerb der Sal. Oppenheim-Gruppe 3 675 Mitarbeiter zur Deutschen Bank hinzu.

Personell ausgebaut haben wir unsere Service Center, in denen wir konzerninterne Dienstleistungsfunktionen gebündelt haben, insbesondere in Indien, auf den Philippinen, in Großbritannien und den USA; ihre Belegschaft legte 2010 um rund 1 200 Mitarbeiter zu. In unseren übrigen Infrastrukturbereichen verharnte der Personalbestand insgesamt auf Vorjahresniveau.

### Veränderte Personalstruktur

Die Akquisitionen haben die regionale Personalstruktur der Deutschen Bank markant verschoben. So hat sich der Mitarbeiteranteil in Deutschland von 35,5 % (2009) auf 48,3 % erhöht.

Der Nachwuchssicherung räumen wir weiter hohe Priorität ein. Im Berichtsjahr haben wir 634 Auszubildende (ohne Deutsche Postbank) eingestellt und damit deren Gesamtzahl per Ende 2010 auf 1 437 erhöht. 721 Hochschulabsolventen (ohne Deutsche Postbank) traten neu in die Bank ein. Bereits seit einigen Jahren bieten wir Praktikanten mit vielversprechendem Potenzial ein kompaktes Nachwuchsprogramm an, das ihnen über Vorträge und Workshops hinaus praxisnahe Einblicke in ausgewählte Geschäftsbereiche gewährt. 2010 nahmen an diesem Sommerpraktikum mehr als 600 Studenten aus aller Welt teil.

### Attraktiver Arbeitgeber

Es ist für die Deutsche Bank von größter Bedeutung, das Interesse der besten Köpfe zu wecken, sie für die Mitarbeit zu gewinnen und im Unternehmen zu halten. Zu diesem Zweck haben wir 2010 unsere Kampagne „Ein wacher Verstand“ durchgeführt, mit der wir potenzielle Bewerber direkt ansprechen. Unsere Attraktivität für talentierte Kräfte messen wir ständig durch Umfragen und Vergleichsstudien.

Wir wollen, auch im eigenen Interesse, unsere Mitarbeiter mit Gesundheitsvorsorge und flexiblen Arbeitszeitangeboten dabei unterstützen, ihre volle Arbeitskraft möglichst lange zu erhalten. Dieses Anliegen stößt auf eine große Resonanz: An unserem Gesundheitsvorsorgeprogramm für alle Beschäftigten über 40 Jahre in Deutschland haben bereits 8 700 Frauen und Männer teilgenommen. Seit 2010 gilt in allen unseren Räumen im deutschen Heimatmarkt ein generelles Rauchverbot. Im Berichtsjahr erhielt die Deutsche Bank zum zweiten Mal das Gütesiegel „Beruf und Familie“ der gemeinnützigen Hertie-Stiftung (Deutschland), das uns eine familienfreundliche Personalpolitik bescheinigt.



## 02–18

### Mitarbeiter-Commitment-Index\*

Indexmaximum = 100

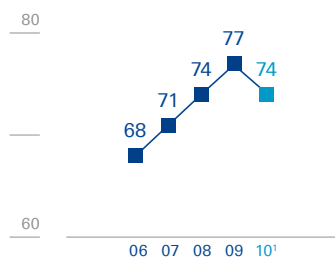

\* Jährliche anonyme Erhebung im Deutsche Bank-Konzern durch ein unabhängiges Institut  
<sup>1</sup> Ohne Deutsche Postbank

In Australien, China, Japan, Singapur und Sri Lanka haben wir 2010 unterschiedliche Formen flexibler Arbeitszeit möglich gemacht, die wir auf den gesamten asiatisch-pazifischen Raum ausdehnen wollen. Das Angebot dient dazu, unsere Wettbewerbsfähigkeit in dem schnell wachsenden und anspruchsvollen Markt für fähiges Personal zu erhöhen. Mit einer neuen Initiative hilft die Deutsche Bank in Asien Mitarbeiterinnen vor und während der Elternzeit sowie bei der Rückkehr der Mütter ins Berufsleben.

Der Commitment-Index, der die Verbundenheit unserer Mitarbeiter mit dem Arbeitgeber misst und seit mehr als zehn Jahren durch ein unabhängiges Institut konzernweit auf anonymer Basis erhoben wird, lag 2010 bei 74 weiter auf hohem Niveau. Das ist der zweithöchste Wert der Messreihe und Ausdruck der nach wie vor starken Identifikation mit der Deutschen Bank und der ausgeprägten Bereitschaft zur Leistung. In der leichten Abschwächung gegenüber dem vorangegangenen Rekordwert von 77 (2009) spiegelt sich vor allem die Entspannung beziehungsweise Normalisierung nach Überwindung der Finanzkrise wider. **Grafik 02–18**

### Vergütungsstruktur neuen Vorschriften angepasst

Die Deutsche Bank hat sich 2010 regelmäßig an den anhaltenden Diskussionen über Vergütungspraktiken und aufsichtsrechtliche Anforderungen, insbesondere in Europa, beteiligt. Initiativen der Aufsichtsbehörden und vielfältige gesetzgeberische Maßnahmen in etlichen Ländern haben zu neuen oder verschärften Vorgaben für die Vergütungsstrukturen in der Finanzdienstleistungsbranche geführt.

Im März 2010 hat die Deutsche Bank als eine von wenigen global aktiven Banken einen separaten Vergütungsbericht vorgelegt, um ihrer freiwilligen Selbstverpflichtung auf Basis der vom Financial Stability Board (FSB) festgelegten Grundsätze ordnungsgemäßer Vergütung und dem Rundschreiben der deutschen Finanzaufsichtsbehörde (BaFin) von Ende Dezember 2009 nachzukommen. Dieser Bericht über unser angepasstes Vergütungskonzept mit zum Teil zuvor unveröffentlichten Angaben wurde im Juni von dem Committee of European Banking Supervisors (CEBS) als beispielhaft bezeichnet.

Am 13. Oktober 2010 ist in Deutschland die Instituts-Vergütungsverordnung in Kraft getreten, mit der die neue europäische Kapitalanforderungsrichtlinie 3 umgesetzt wird. Als Interpretationshilfe dafür wurden im Dezember die sogenannten CEBS-Richtlinien publik gemacht. Die Deutsche Bank hat zeitgleich mit ihrem Geschäftsbericht 2010 im März 2011 den zweiten eigenständigen Vergütungsbericht vorgelegt, der unter [www.deutsche-bank.de/ir](http://www.deutsche-bank.de/ir) abrufbar ist. Darin wird aufgezeigt, dass unser aktuelles Vergütungssystem die seit Jahresbeginn 2011 geltenden Vorgaben vollständig erfüllt. Unser Bericht trägt dazu bei, die Transparenz der Vergütungspraxis der Deutschen Bank weiter zu erhöhen. Da die Regulierung der Vergütung in europäischen Banken damit wesentlich weiter fortgeschritten ist als in vielen anderen Ländern, wird das Problem der international ungleichen Wettbewerbsbedingungen immer dringlicher.

### Globaler Aktienkaufplan für Mitarbeiter

Am 1. April 2010 haben wir einen neuen globalen Aktienkaufplan eingeführt, der es allen berechtigten Mitarbeitern erlaubt, innerhalb eines Jahres für monatlich mindestens 25€ und höchstens 125€ Deutsche Bank-Aktien zu erwerben. Die Deutsche Bank stockt dann den so angeschafften Aktienbestand im Verhältnis eins zu eins um maximal zehn Gratisaktien auf, sofern der Mitarbeiter ein weiteres Jahr dem Konzern angehört. Zum Jahresende war der Plan in 27 Ländern in Kraft.

## 02 – 19

### Rückkehrerquote nach Beendigung der Elternzeit

In % im Deutsche Bank-Konzern Deutschland

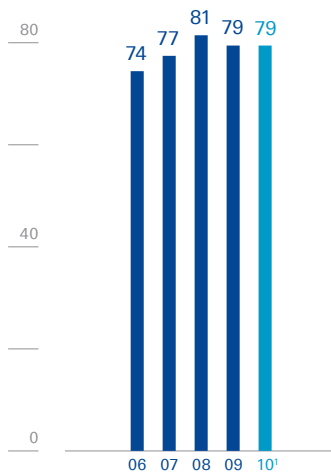

<sup>1</sup> Ohne Deutsche Postbank

## Potenziale erkennen und fördern

Um Talente zu erkennen und sie weiterzuentwickeln, führen wir in allen Bereichen des Konzerns sogenannte Talent Reviews durch. Im Berichtsjahr haben wir besondere Anstrengungen darauf gerichtet, unsere Führungskräfte zu schulen, damit sie Talente besser identifizieren, unterstützen und fördern können.

Ihr Weiterbildungsangebot hat die Deutsche Bank 2010 kontinuierlich ausgebaut. Es umfasst Themen wie Führung und Management, Wirtschaft und Finanzen sowie zum Beispiel Teamfähigkeit und soziale Kompetenzen. Für unsere vielversprechendsten Mitarbeiter bieten wir individuelles Coaching und Einzeltraining an.

## Kultur der Vielfalt

Vielfalt – Diversity – ist ein unverzichtbarer Teil unserer Unternehmenskultur. Sie ist zugleich ein wichtiger Erfolgsfaktor in einer global aktiven Bank. Wir können unserem Leistungsversprechen nur gerecht werden, wenn unsere Mitarbeiter ihr Potenzial voll entfalten können, ungeachtet von Nationalität, Religion, Rasse, sexueller Orientierung, Geschlecht, Alter oder ethnischer Herkunft. Gesellschaftlich-kulturell gemischte Teams sind im Vorteil, wenn es zum Beispiel darum geht, unseren vielfältigen Kundengruppen mit innovativen und maßgeschneiderten Dienstleistungen zur Seite zu stehen. Es ist unsere feste Überzeugung, dass unterschiedliche Perspektiven und Erfahrungen, die in einem vorurteilsfreien offenen Umfeld zusammenkommen, zu einer besseren Arbeitsqualität beitragen.

Im Berichtsjahr haben wir konzernweit Trainings für Führungskräfte angeboten, um deren Blick für unbewusste Verhaltensweisen zu schärfen. Unsere 2009 an internationalen Standorten eingeführten Diversity Councils, die unter lokaler Leitung stehen, bewährten sich und wurden ausgebaut.

Die Deutsche Bank ist mehrfach für ihre familienfreundlichen Leistungen und flexiblen Arbeitszeitregelungen ausgezeichnet worden, die dabei helfen, Beruf und Familie miteinander zu vereinbaren. In den USA gehören wir zu den „100 Best Companies for Working Mothers“ und erhielten den Preis der Dave Thomas Foundation für die Unterstützung von adoptionswilligen Eltern. In Großbritannien wurde die Deutsche Bank zum „Top Employer for Working Families“ im Finanzdienstleistungssektor gekürt. Besonders erwähnt wurde hier ihre Unterstützung von Frauen vor und während der Elternzeit sowie bei der Wiedereingliederung ins Berufsleben. Die International Gay & Lesbian Chamber of Commerce rechnet uns zu den „Top 25 Most LGBT-Friendly Corporations“. Im Corporate Equality Index der Human Rights Campaign erreichten wir den Höchstwert von 100%.

Ein vorrangiges Ziel unter dem Stichwort Gender Diversity blieb 2010, die berufliche Entwicklung von Frauen und ihre verstärkte Präsenz in Führungspositionen der Deutschen Bank zu fördern. Diese Absicht verfolgt auch das 2009 unter der Schirmherrschaft unseres Vorstandsvorsitzenden Josef Ackermann initiierte ATLAS-Programm (Accomplished Top Leaders Advancement Strategy), das erste Erfolge zeigt: 30% der Mitarbeiterinnen aus dem Anfangsjahrgang konnten inzwischen neue beziehungsweise anspruchsvollere Aufgaben übernehmen.

Im Berichtsjahr haben wir erstmals für 34 ausgewählte Direktorinnen ein einwöchiges Seminar (Women Global Leaders Program) an der INSEAD Business School in Paris ausgerichtet, das großen Zuspruch fand. Außerdem wollen wir durch ein mittlerweile auch in Deutschland aktives, aus Frauen bestehendes Gremium (Senior Women's Advisory Board) dem Thema „Frauen in Führungspositionen“ eine stärkere Geltung in unserem Hause verschaffen.

## Gesellschaft

### Soziales Kapital schaffen

#### 02–20

#### Weltweites Fördervolumen für gesellschaftliches Engagement nach Themen

2010 insgesamt 98,1 Mio €

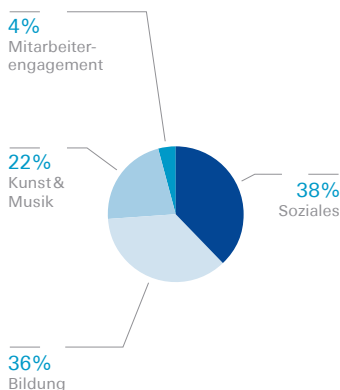

Als einer der Hauptinitiatoren und Erstunterzeichner hat sich die Deutsche Bank im November 2010 dem „Leitbild für verantwortliches Handeln in der Wirtschaft“ verpflichtet, das auf einer Initiative von 21 deutschen Unternehmen beruht. Damit wollen wir die gesellschaftliche Verantwortung noch stärker in unser Geschäft integrieren und sie bei allen Entscheidungen gebührend berücksichtigen.

Gesellschaftliches Engagement bedeutet für uns mehr, als Geld zu geben: Wir wollen soziales Kapital schaffen – auch zu unserem eigenen Wohl. Im Berichtsjahr haben sich Bank und Mitarbeiter bei einer Vielzahl gesellschaftlicher Projekte im In- und Ausland eingesetzt. Für Bildung, Soziales, Kunst & Musik sowie das ehrenamtliche Engagement unserer Mitarbeiter haben wir mit fast 100 Mio € mehr als je zuvor aufgewendet.

#### Grafik 02–20

#### Nachhaltigkeit: Zukunftsfähigkeit sichern

Die Deutsche Bank setzt das Prinzip der nachhaltigen Entwicklung in den Bereichen Umwelt, Soziales und Unternehmensführung konsequent um. Auf dem Weg zur vollständigen Klimaneutralität all unserer betrieblichen Aktivitäten ab 2013 haben wir unser CO<sub>2</sub>-Reduktionsziel für 2010 planmäßig erreicht. Unsere Unternehmenszentrale in Frankfurt am Main, die nach einer dreijährigen Modernisierung zu einem der umweltfreundlichsten Hochhäuser der Welt geworden ist, konnten wir zur Jahreswende 2010/11 wieder beziehen. Die internen Richtlinien für unser Risikomanagement ergänzten wir um einen „Green Filter“, mit dem wir die CO<sub>2</sub>-Auswirkungen von Transaktionen in unsere geschäftlichen Entscheidungen einbeziehen. Die hohe Bedeutung, die wir der Nachhaltigkeit beimessen, belegen auch unsere langjährige Mitgliedschaft beim UN Global Compact und die Unterzeichnung der Principles for Responsible Investment (PRI) der Vereinten Nationen.

Tragfähige und nachhaltige Wirtschaftskonzepte für Metropolregionen standen 2010 im Mittelpunkt des Global Metro Summit der Alfred Herrhausen Gesellschaft. Die Konferenz erweiterte unser bereits seit 2005 etabliertes Urban-Age-Netzwerk, in dem internationale Experten die Herausforderungen von Megametropolen diskutieren.

#### Bildung: Talente fördern

Nicht die Begabung, sondern die Herkunft entscheidet vielfach auch heute noch über den persönlichen Bildungserfolg. Die Deutsche Bank engagiert sich daher weltweit für mehr Chancengleichheit und Leistungsgerechtigkeit. Mit der 2010 gestarteten Initiative „FairTalent“ unterstützen wir sozial benachteiligte Kinder durch einen ganzheitlichen individuellen Förderplan. Auch Mitarbeiter der Deutschen Bank begleiten als Mentoren das Programm.

Um den Austausch zwischen Wissenschaft und Wirtschaft zu intensivieren, hat die Deutsche Bank an der Bocconi-Universität in Mailand und an der Luxembourg School of Finance je einen Lehrstuhl für Finanzen geschaffen. Im House of Finance der Goethe-Universität Frankfurt ermöglichten wir eine neue Stiftungsprofessur und unsere Unterstützung für die European School of Management and Technology in Berlin bauten wir deutlich aus.

## 02–21

### SAM-Nachhaltigkeitsrating: Vorsprung gegenüber globalem Durchschnitt ausgebaut

Differenz in Punkten

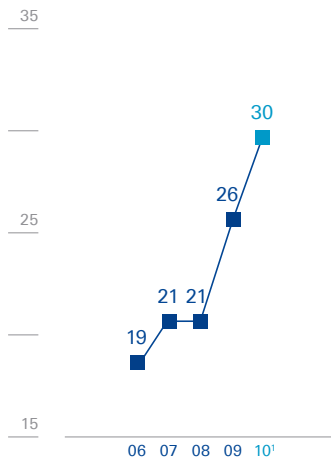

<sup>1</sup> Deutsche Bank 2010: 80 von 100  
Globaler Durchschnitt 2010: 50 von 100  
Quelle: SAM Research Inc.

### Soziales: Chancen eröffnen

Die Deutsche Bank hat 2010 erfolgreich den Eye Fund aufgelegt: einen innovativen Investmentfonds über 14,5 Mio US-\$, der Anschubfinanzierungen für den Ausbau von Augenkliniken in armen Weltregionen leistet. Mit Krediten und Investitionen unterstützten wir die Verbesserung der Infrastruktur in einkommensschwachen Gemeinden in den USA. Dafür erhielten wir von der US-Notenbank zum 19. Mal in Folge das Prädikat outstanding.

Mehrere Naturkatastrophen überschatteten das Jahr 2010, darunter Erdbeben in Haiti und Chile sowie die Flut in Pakistan. Die Deutsche Bank, ihre Stiftungen, Kunden und Mitarbeiter haben zusammen mehr als 5 Mio € für die Opfer zur Verfügung gestellt. Wo immer möglich, unterstützen unsere Mitarbeiter die Hilfsaktionen vor Ort und erfüllen damit unseren Anspruch, mehr als Geld zu geben.

### Kunst & Musik: Kreativität entwickeln

Jünger und internationaler als je zuvor präsentiert sich die Sammlung Deutsche Bank in der modernisierten Unternehmenszentrale in Frankfurt am Main. Rund 1500 Kunstwerke von 100 Künstlern aus über 40 Ländern laden zu einer Entdeckungsreise durch die zeitgenössische globale Kunstszene ein. Unser kontinuierliches Engagement für Kunst am Arbeitsplatz an weltweit über 900 Standorten wurde 2010 mit dem Art&Work Award ausgezeichnet.

Die in Kenia geborene und in New York lebende Künstlerin Wangechi Mutu war 2010 als erste „Künstlerin des Jahres“ mit einer Einzelausstellung im Deutsche Guggenheim, Berlin, vertreten. Mit dieser neuen Auszeichnung wollen wir gezielt junge Künstler fördern.

Eine exklusive Partnerschaft verbindet die Deutsche Bank seit Langem mit den Berliner Philharmonikern. 2010 besuchte das Orchester erstmals Australien und realisierte dort ein Zukunft@BPhil-Projekt. Zukunft@BPhil führt Kinder und Jugendliche über Workshops und Tanzprojekte an klassische Musik heran und eröffnet ihnen neue, kreative Erfahrungsräume. Weltweit haben seit 2002 über 18000 Kinder und Jugendliche teilgenommen.

### Ehrenamtliche Tätigkeit: Engagement beweisen

Im Berichtsjahr haben sich weltweit mehr als 17000 unserer Mitarbeiter in über 3000 Projekten für die Gesellschaft engagiert. Die Deutsche Bank unterstützt diesen ehrenamtlichen Einsatz durch Spenden oder bezahlte Freistellung.

Das Programm „Partners in Leadership“, in dem Führungskräfte der Deutschen Bank Schulleiter zu Managementthemen beraten, wurde mit dem „European Employee Volunteering Award – Deutschland“ ausgezeichnet. In Großbritannien haben wir im Rahmen der Initiative „Charity of the Year 2010“ die Rekordsumme von 1 Mio GBP für das Programm „AfriKids“ zur Verfügung gestellt. [Weitere Informationen zu unserem gesellschaftlichen Engagement finden Sie in dem Bericht „Gesellschaftliche Verantwortung 2010“ und unter \[www.deutsche-bank.de/csr\]\(http://www.deutsche-bank.de/csr\).](#)

## Maurice Robinson Frankfurt

Die Deutsche Bank hat eine starke Netzwerkkultur. Sie verbindet uns Mitarbeiter in dieser globalen und komplexen Organisation. Damit wird der bereichsübergreifende Ideenaustausch erleichtert, um schnelle und effiziente Lösungen für unsere Kunden zu erarbeiten.

Maurice Robinson,  
registrar services GmbH,  
Frankfurt am Main  
Global Transaction Banking

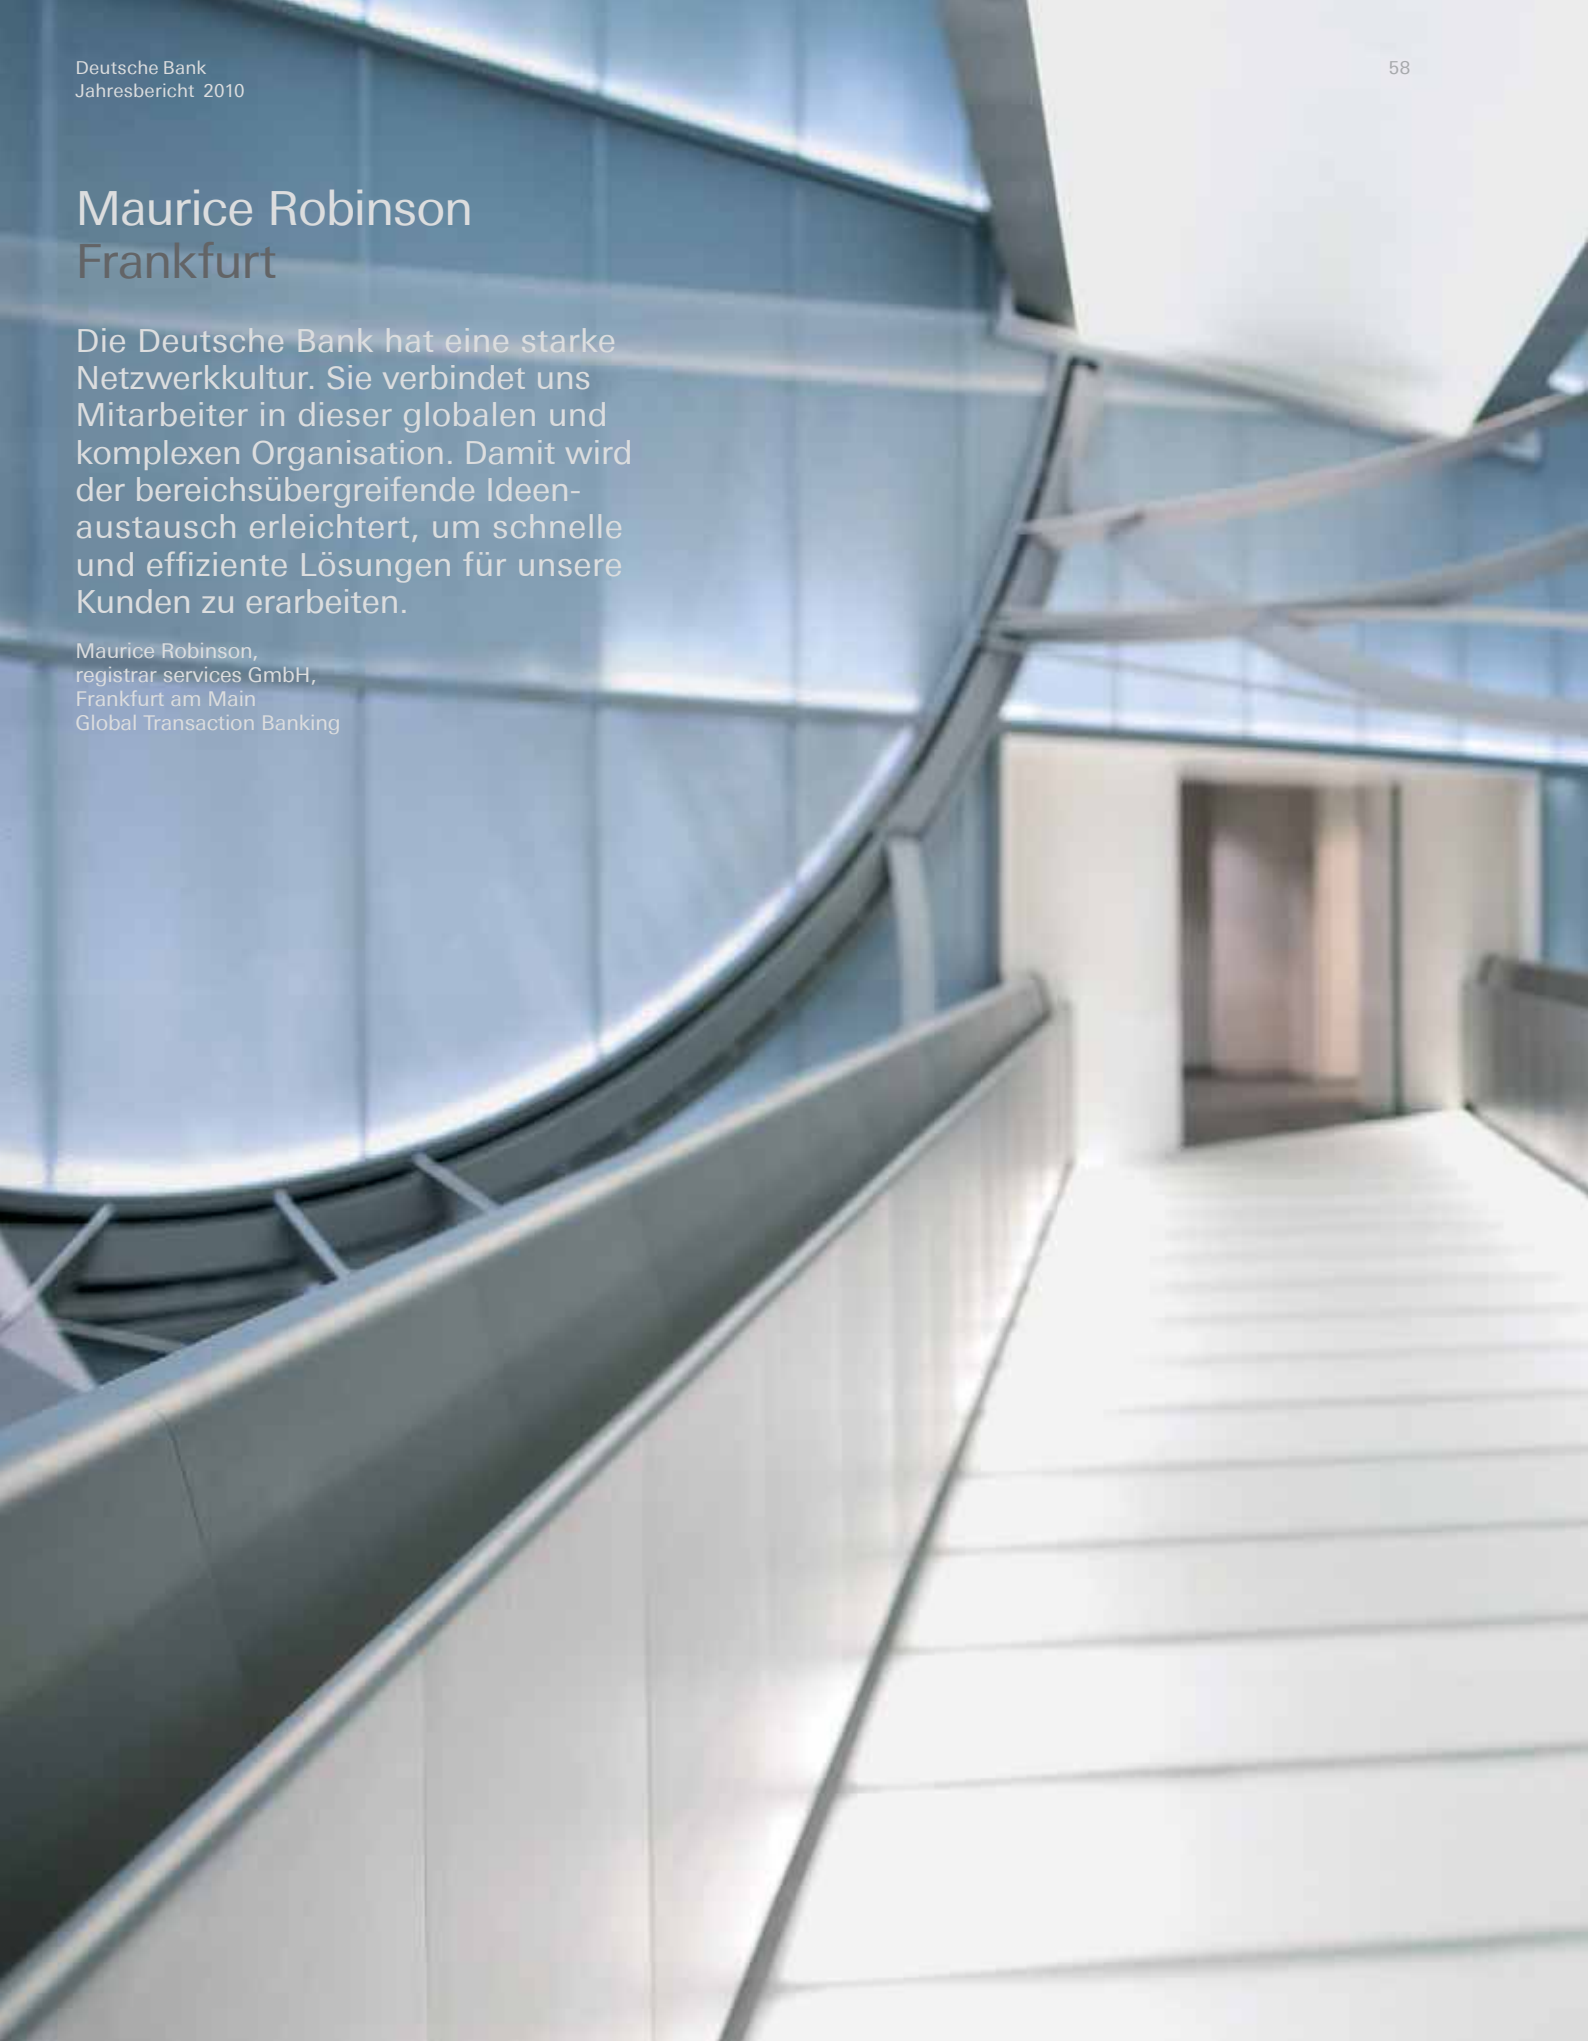



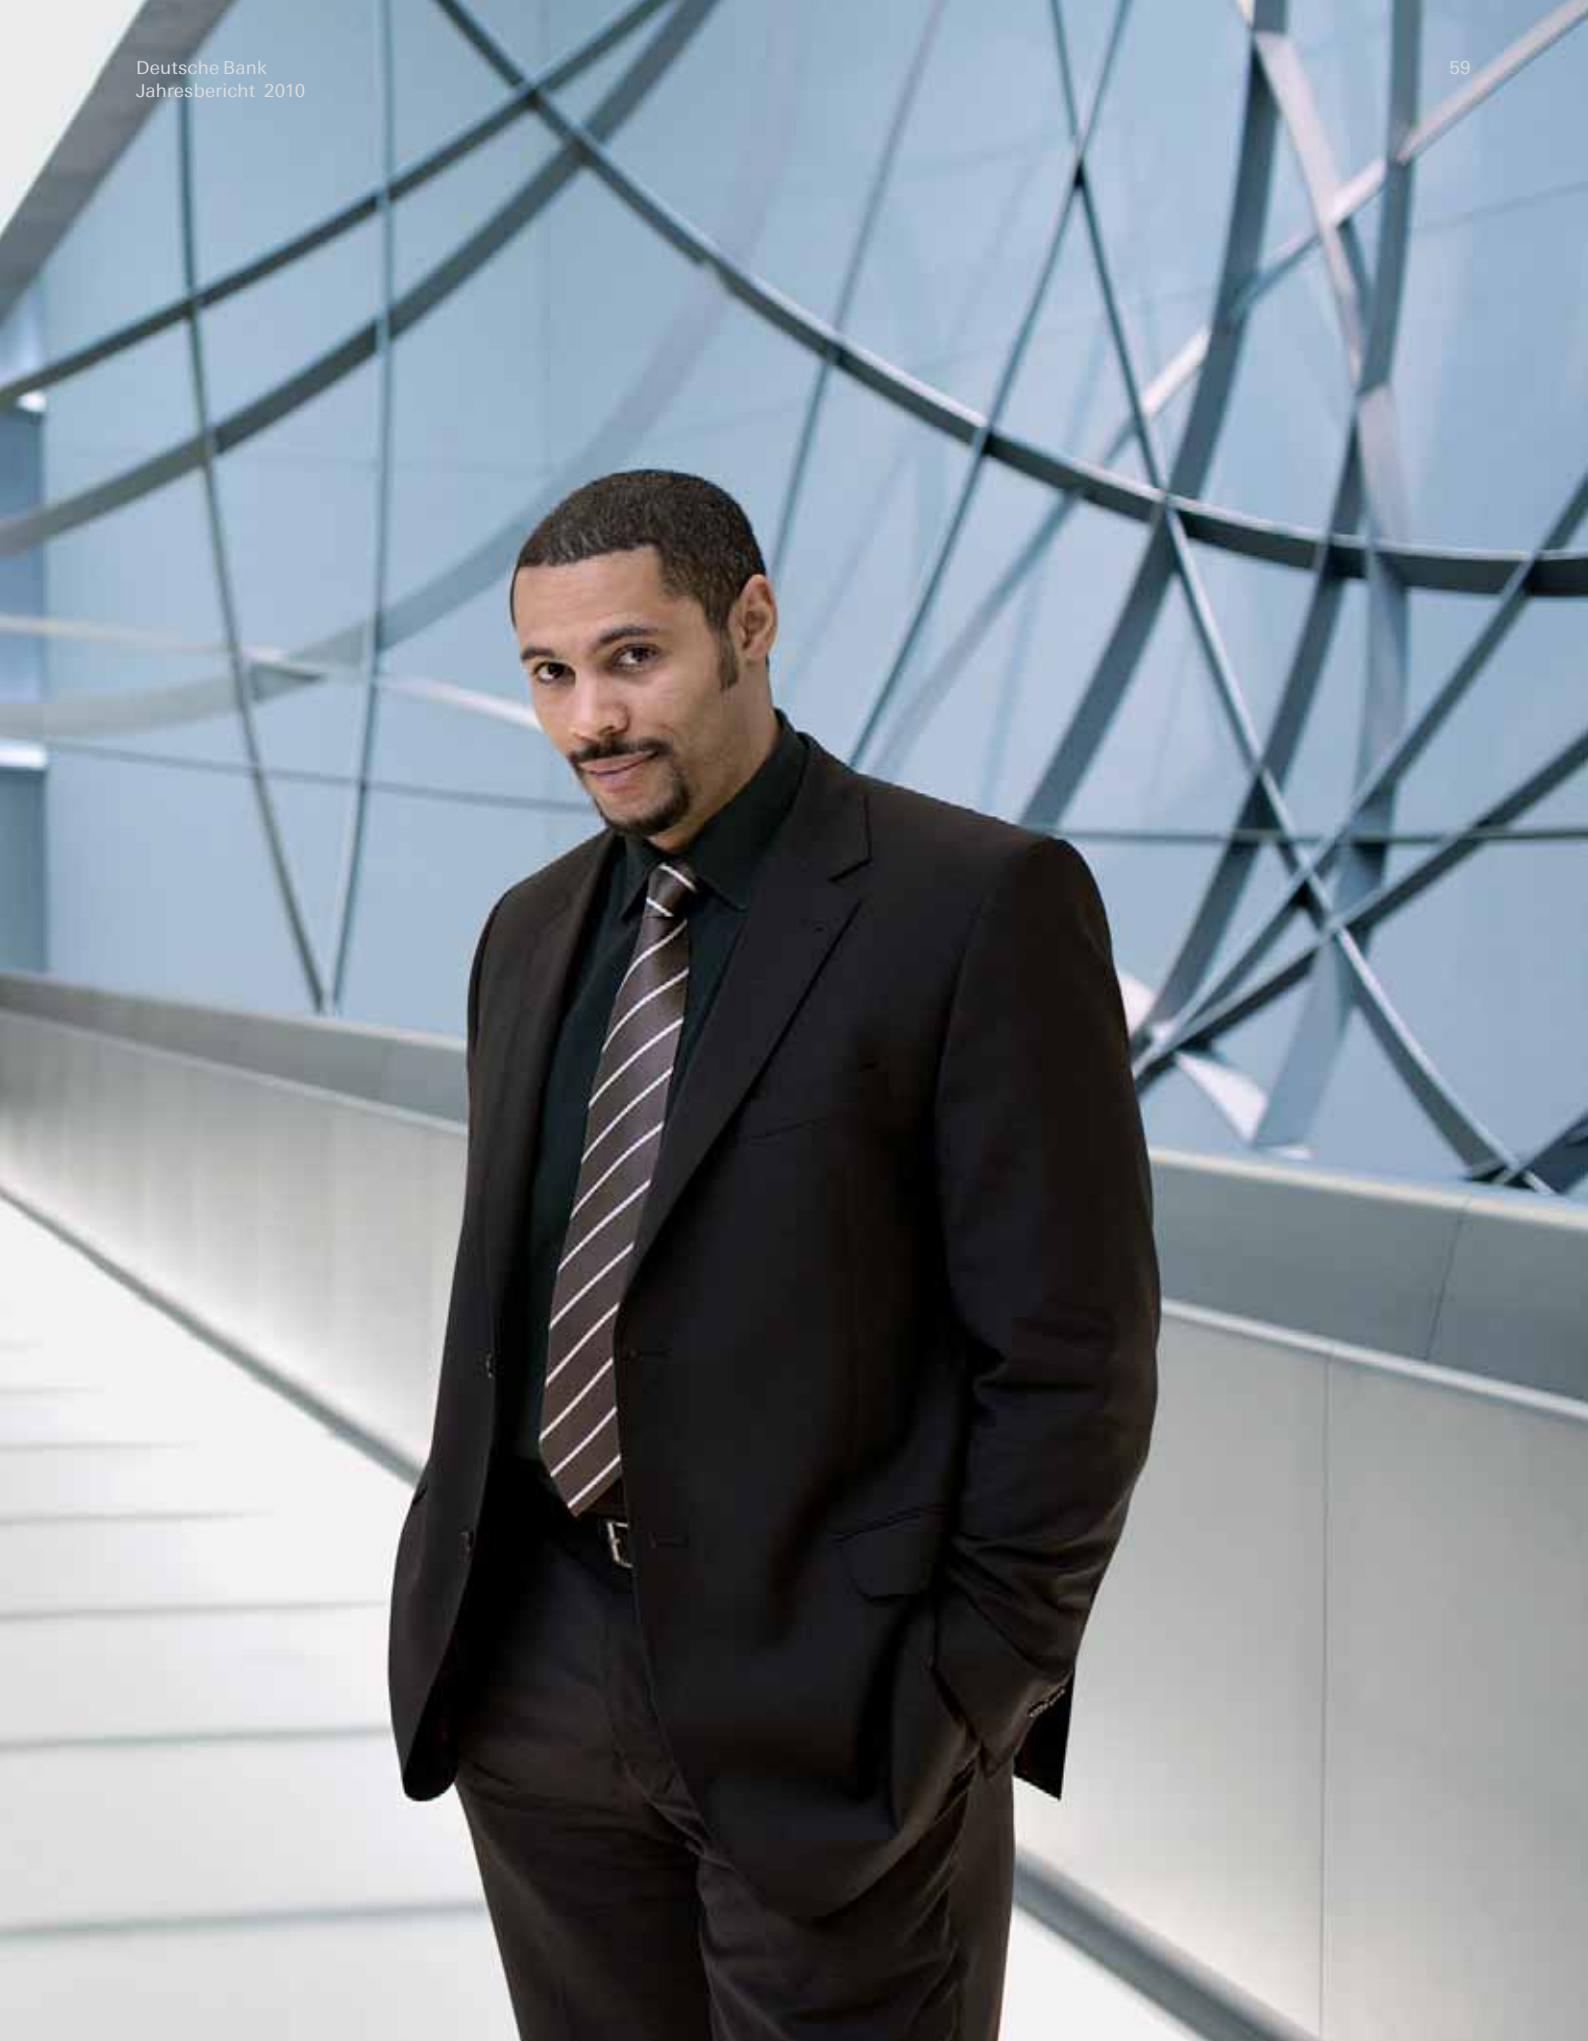

# 03 –

## Konzernabschluss/Auszüge

Gewinn-und-Verlust-Rechnung – 61

Bilanz – 62

Der Konzern im Fünfjahresvergleich – 63



## Gewinn-und-Verlust-Rechnung

### Gewinn-und-Verlust-Rechnung

| in Mio €                                                                                                                                                     | 2010          | 2009          | 2008          |
|--------------------------------------------------------------------------------------------------------------------------------------------------------------|---------------|---------------|---------------|
| Zinsen und ähnliche Erträge                                                                                                                                  | 28 779        | 26 953        | 54 549        |
| Zinsaufwendungen                                                                                                                                             | 13 196        | 14 494        | 42 096        |
| <b>Zinsüberschuss</b>                                                                                                                                        | <b>15 583</b> | <b>12 459</b> | <b>12 453</b> |
| Risikovorsorge im Kreditgeschäft                                                                                                                             | 1 274         | 2 630         | 1 076         |
| <b>Zinsüberschuss nach Risikovorsorge im Kreditgeschäft</b>                                                                                                  | <b>14 309</b> | <b>9 829</b>  | <b>11 377</b> |
| Provisionsüberschuss                                                                                                                                         | 10 669        | 8 911         | 9 741         |
| Ergebnis aus zum Fair Value bewerteten finanziellen Vermögenswerten/Verpflichtungen                                                                          | 3 354         | 7 109         | –9 992        |
| Ergebnis aus zur Veräußerung verfügbaren finanziellen Vermögenswerten                                                                                        | 201           | –403          | 666           |
| Ergebnis aus nach der Equitymethode bilanzierten Beteiligungen                                                                                               | – 2 004       | 59            | 46            |
| Sonstige Erträge                                                                                                                                             | 764           | –183          | 699           |
| <b>Zinsunabhängige Erträge insgesamt</b>                                                                                                                     | <b>12 984</b> | <b>15 493</b> | <b>1 160</b>  |
| Personalaufwand                                                                                                                                              | 12 671        | 11 310        | 9 606         |
| Sachaufwand und sonstiger Aufwand                                                                                                                            | 10 133        | 8 402         | 8 339         |
| Aufwendungen im Versicherungsgeschäft                                                                                                                        | 485           | 542           | –252          |
| Wertminderung auf immaterielle Vermögenswerte                                                                                                                | 29            | –134          | 585           |
| Restrukturierungsaufwand                                                                                                                                     | –             | –             | –             |
| <b>Zinsunabhängige Aufwendungen insgesamt</b>                                                                                                                | <b>23 318</b> | <b>20 120</b> | <b>18 278</b> |
| <b>Ergebnis vor Steuern</b>                                                                                                                                  | <b>3 975</b>  | <b>5 202</b>  | <b>–5 741</b> |
| Ertragsteueraufwand/-ertrag (–)                                                                                                                              | 1 645         | 244           | –1 845        |
| <b>Jahresüberschuss/Jahresfehlbetrag (–)</b>                                                                                                                 | <b>2 330</b>  | <b>4 958</b>  | <b>–3 896</b> |
| Den Anteilen ohne beherrschenden Einfluss zurechenbares Konzernergebnis                                                                                      | 20            | –15           | –61           |
| Den Deutsche Bank-Aktionären zurechenbares Konzernergebnis                                                                                                   | 2 310         | 4 973         | –3 835        |
| <b>Ergebnis je Aktie<sup>1</sup></b>                                                                                                                         |               |               |               |
| in €                                                                                                                                                         | 2010          | 2009          | 2008          |
| Basic                                                                                                                                                        | 3,07          | 7,21          | –6,87         |
| Verwässert <sup>2</sup>                                                                                                                                      | 2,92          | 6,94          | –6,87         |
| <b>Anzahl der Aktien in Millionen<sup>1</sup></b>                                                                                                            |               |               |               |
| Gewichteter Durchschnitt der ausstehenden Aktien –<br>Nenner für die Berechnung des Ergebnisses je Aktie                                                     | 753,3         | 689,4         | 558,5         |
| Bereinigter gewichteter Durchschnitt der ausstehenden Aktien nach angenommener Wandlung –<br>Nenner für die Berechnung des verwässerten Ergebnisses je Aktie | 790,8         | 716,7         | 558,6         |

<sup>1</sup> Die Anzahl der durchschnittlich ausstehenden Aktien (basic und verwässert) wurde für alle Perioden vor dem 6. Oktober 2010 angepasst, um den Effekt der Bonuskomponente von Bezugsrechten, die im Rahmen der Kapitalerhöhung ausgegeben wurden, zu berücksichtigen.

<sup>2</sup> Einschließlich Effekt auf den Zähler aus angenommener Wandlung. Weitere Informationen sind in Note 11 „Ergebnis je Aktie“ enthalten.

# Bilanz

|                                                                                                       |                  |                  |
|-------------------------------------------------------------------------------------------------------|------------------|------------------|
| <b>Aktiva</b>                                                                                         |                  |                  |
| in Mio €                                                                                              | 31.12.2010       | 31.12.2009       |
| Barreserve                                                                                            | 17 157           | 9 346            |
| Verzinsliche Einlagen bei Kreditinstituten                                                            | 92 377           | 47 233           |
| Forderungen aus übertragenen Zentralbankeinlagen und aus Wertpapierpensionsgeschäften (Reverse Repos) | 20 365           | 6 820            |
| Forderungen aus Wertpapierleihen                                                                      | 28 916           | 43 509           |
| Zum Fair Value bewertete finanzielle Vermögenswerte                                                   |                  |                  |
| Handelsaktiva                                                                                         | 271 291          | 234 910          |
| Positive Marktwerte aus derivativen Finanzinstrumenten                                                | 657 780          | 596 410          |
| Zum Fair Value klassifizierte finanzielle Vermögenswerte                                              | 171 926          | 134 000          |
| Zum Fair Value bewertete finanzielle Vermögenswerte insgesamt                                         |                  |                  |
| davon zum 31.12.2010 91 Mrd € (2009: 79 Mrd €) als Sicherheit hinterlegt,                             |                  |                  |
| frei zum Verkauf beziehungsweise zur weiteren Sicherheitenstellung durch den Sicherungsnehmer         | 1 100 997        | 965 320          |
| Zur Veräußerung verfügbare finanzielle Vermögenswerte                                                 |                  |                  |
| davon zum 31.12.2010 3,9 Mrd € (2009: 0,5 Mrd €) als Sicherheit hinterlegt,                           |                  |                  |
| frei zum Verkauf beziehungsweise zur weiteren Sicherheitenstellung durch den Sicherungsnehmer         | 54 266           | 18 819           |
| Nach der Equitymethode bilanzierte Beteiligungen                                                      | 2 608            | 7 788            |
| Forderungen aus dem Kreditgeschäft                                                                    | 407 729          | 258 105          |
| Sachanlagen                                                                                           | 5 802            | 2 777            |
| Goodwill und sonstige immaterielle Vermögenswerte                                                     | 15 594           | 10 169           |
| Sonstige Aktiva                                                                                       | 149 229          | 121 538          |
| Steuerforderungen aus laufenden Steuern                                                               | 2 249            | 2 090            |
| Steuerforderungen aus latenten Steuern                                                                | 8 341            | 7 150            |
| <b>Summe der Aktiva</b>                                                                               | <b>1 905 630</b> | <b>1 500 664</b> |
| <b>Passiva</b>                                                                                        |                  |                  |
| in Mio €                                                                                              | 31.12.2010       | 31.12.2009       |
| Einlagen                                                                                              | 533 984          | 344 220          |
| Verbindlichkeiten aus übertragenen Zentralbankeinlagen und aus Wertpapierpensionsgeschäften (Repos)   | 27 922           | 45 495           |
| Verbindlichkeiten aus Wertpapierleihen                                                                | 3 276            | 5 564            |
| Zum Fair Value bewertete finanzielle Verpflichtungen                                                  |                  |                  |
| Handelspassiva                                                                                        | 68 859           | 64 501           |
| Negative Marktwerte aus derivativen Finanzinstrumenten                                                | 647 171          | 576 973          |
| Zum Fair Value klassifizierte finanzielle Verpflichtungen                                             | 130 154          | 73 522           |
| Investmentverträge                                                                                    | 7 898            | 7 278            |
| Zum Fair Value bewertete finanzielle Verpflichtungen insgesamt                                        | 854 082          | 722 274          |
| Sonstige kurzfristige Geldaufnahmen                                                                   | 64 990           | 42 897           |
| Sonstige Passiva                                                                                      | 181 827          | 154 281          |
| Rückstellungen                                                                                        | 2 204            | 1 307            |
| Steuerverbindlichkeiten aus laufenden Steuern                                                         | 2 736            | 2 141            |
| Steuerverbindlichkeiten aus latenten Steuern                                                          | 2 307            | 2 157            |
| Langfristige Verbindlichkeiten                                                                        | 169 660          | 131 782          |
| Hybride Kapitalinstrumente (Trust Preferred Securities)                                               | 12 250           | 10 577           |
| Verpflichtung zum Erwerb Eigener Aktien                                                               | –                | –                |
| <b>Summe der Verbindlichkeiten</b>                                                                    | <b>1 855 238</b> | <b>1 462 695</b> |
| <b>Eigenkapital</b>                                                                                   |                  |                  |
| Stammaktien, ohne Nennwert, rechnerischer Nominalwert 2,56 €                                          | 2 380            | 1 589            |
| Kapitalrücklage                                                                                       | 23 515           | 14 830           |
| Gewinnrücklagen                                                                                       | 25 999           | 24 056           |
| Eigene Aktien im Bestand zu Anschaffungskosten                                                        | –450             | –48              |
| Verpflichtung zum Erwerb Eigener Aktien                                                               | –                | –                |
| Kumuliertes sonstiges Ergebnis (Accumulated other comprehensive income), nach Steuern                 | –2 601           | –3 780           |
| <b>Den Deutsche Bank-Aktionären zurechenbares Eigenkapital</b>                                        | <b>48 843</b>    | <b>36 647</b>    |
| Anteile ohne beherrschenden Einfluss                                                                  | 1 549            | 1 322            |
| <b>Eigenkapital einschließlich Anteile ohne beherrschenden Einfluss</b>                               | <b>50 392</b>    | <b>37 969</b>    |
| <b>Summe der Passiva</b>                                                                              | <b>1 905 630</b> | <b>1 500 664</b> |

## Der Konzern im Fünfjahresvergleich

### Bilanz

| in Mio €                                                | 31.12.2010 | 31.12.2009 | 31.12.2008 | 31.12.2007 | 31.12.2006 |
|---------------------------------------------------------|------------|------------|------------|------------|------------|
| Bilanzsumme                                             | 1 905 630  | 1 500 664  | 2 202 423  | 1 925 003  | 1 520 580  |
| Forderungen aus dem Kreditgeschäft                      | 407 729    | 258 105    | 269 281    | 198 892    | 178 524    |
| Summe der Verbindlichkeiten                             | 1 855 238  | 1 462 695  | 2 170 509  | 1 885 688  | 1 486 694  |
| Den Deutsche Bank-Aktionären zurechenbares Eigenkapital | 48 843     | 36 647     | 30 703     | 37 893     | 33 169     |
| Anteile ohne beherrschenden Einfluss                    | 1 549      | 1 322      | 1 211      | 1 422      | 717        |
| Tier-1-Kapital                                          | 42 565     | 34 406     | 31 094     | 28 320     | 23 539     |
| Aufsichtsrechtliches Eigenkapital insgesamt             | 48 688     | 37 929     | 37 396     | 38 049     | 34 309     |

### Gewinn- und Verlust-Rechnung

| in Mio €                                                                            | 2010          | 2009          | 2008          | 2007          | 2006          |
|-------------------------------------------------------------------------------------|---------------|---------------|---------------|---------------|---------------|
| Zinsüberschuss                                                                      | 15 583        | 12 459        | 12 453        | 8 849         | 7 008         |
| Risikovorsorge im Kreditgeschäft                                                    | 1 274         | 2 630         | 1 076         | 612           | 298           |
| Provisionsüberschuss                                                                | 10 669        | 8 911         | 9 741         | 12 282        | 11 192        |
| Ergebnis aus zum Fair Value bewerteten finanziellen Vermögenswerten/Verpflichtungen | 3 354         | 7 109         | –9 992        | 7 175         | 8 892         |
| Sonstige zinsunabhängige Erträge                                                    | –1 039        | –527          | 1 411         | 2 523         | 1 476         |
| <b>Zinsunabhängige Erträge insgesamt</b>                                            | <b>12 984</b> | <b>15 493</b> | <b>1 160</b>  | <b>21 980</b> | <b>21 560</b> |
| Personalaufwand                                                                     | 12 671        | 11 310        | 9 606         | 13 122        | 12 498        |
| Sachaufwand und sonstiger Aufwand                                                   | 10 133        | 8 402         | 8 339         | 8 038         | 7 143         |
| Aufwendungen im Versicherungsgeschäft                                               | 485           | 542           | –252          | 193           | 67            |
| Wertminderung auf immaterielle Vermögenswerte                                       | 29            | –134          | 585           | 128           | 31            |
| Restrukturierungsaufwand                                                            | –             | –             | –             | –13           | 192           |
| <b>Zinsunabhängige Aufwendungen insgesamt</b>                                       | <b>23 318</b> | <b>20 120</b> | <b>18 278</b> | <b>21 468</b> | <b>19 931</b> |
| <b>Ergebnis vor Steuern</b>                                                         | <b>3 975</b>  | <b>5 202</b>  | <b>–5 741</b> | <b>8 749</b>  | <b>8 339</b>  |
| Ertragsteueraufwand/-ertrag (–)                                                     | 1 645         | 244           | –1 845        | 2 239         | 2 260         |
| <b>Jahresüberschuss/Jahresfehlbetrag (–)</b>                                        | <b>2 330</b>  | <b>4 958</b>  | <b>–3 896</b> | <b>6 510</b>  | <b>6 079</b>  |
| Den Anteilen ohne beherrschenden Einfluss zurechenbares Konzernergebnis             | 20            | –15           | –61           | 36            | 9             |
| <b>Den Deutsche Bank-Aktionären zurechenbares Konzernergebnis</b>                   | <b>2 310</b>  | <b>4 973</b>  | <b>–3 835</b> | <b>6 474</b>  | <b>6 070</b>  |

### Kennziffern

|                                                                                      | 2010    | 2009   | 2008    | 2007    | 2006    |
|--------------------------------------------------------------------------------------|---------|--------|---------|---------|---------|
| Ergebnis je Aktie (basic) <sup>1</sup>                                               | 3,07 €  | 7,21 € | –6,87 € | 12,29 € | 11,66 € |
| Ergebnis je Aktie (verwässert) <sup>1</sup>                                          | 2,92 €  | 6,94 € | –6,87 € | 11,80 € | 10,44 € |
| Dividendenzahlung je Aktie, gezahlt in der Periode                                   | 0,75 €  | 0,50 € | 4,50 €  | 4,00 €  | 2,50 €  |
| Eigenkapitalrendite nach Steuern (basierend auf dem durchschnittlichen Eigenkapital) | 5,5%    | 14,6%  | –11,1%  | 17,9%   | 20,3%   |
| Eigenkapitalrendite vor Steuern (basierend auf dem durchschnittlichen Eigenkapital)  | 9,5%    | 15,3%  | –16,5%  | 24,1%   | 27,9%   |
| Aufwand-Ertrag-Relation                                                              | 81,6%   | 72,0%  | 134,3%  | 69,6%   | 69,8%   |
| Tier-1-Kapitalquote ohne Hybridinstrumente <sup>2</sup>                              | 8,7%    | 8,7%   | 7,0%    | 6,9%    | 6,9%    |
| Tier-1-Kapitalquote <sup>2</sup>                                                     | 12,3%   | 12,6%  | 10,1%   | 8,6%    | 8,5%    |
| Eigenkapitalquote <sup>2</sup>                                                       | 14,1%   | 13,9%  | 12,2%   | 11,6%   | 12,5%   |
| Mitarbeiter (in Vollzeitkräften umgerechnet)                                         | 102 062 | 77 053 | 80 456  | 78 291  | 68 849  |

<sup>1</sup>Die Anzahl der durchschnittlich ausstehenden Aktien (basic und verwässert) wurde für alle Perioden angepasst, um den Effekt der Bonuskomponente von Bezugsrechten, die im September 2010 im Rahmen der Kapitalerhöhung ausgegeben wurden, zu berücksichtigen.

<sup>2</sup>Quoten für 2009 und 2008 basieren auf dem überarbeiteten und vom Baseler Ausschuss 2004 präsentierten Eigenkapitalstandard (Basel II), der im deutschen Kreditwesengesetz und in der Solvabilitätsverordnung in deutsches Recht umgesetzt wurde. Quoten für 2007 und 2006 basieren auf dem Basel I-Standard und sind daher auf einer nicht vergleichbaren Basis berechnet. Die Kapitalquoten setzen das jeweilige Kapital in Beziehung zu den Risikoaktiva für das Kredit-, Markt- und Operationelle Risiko. Enthält keine Übergangsposten gemäß § 64h Absatz 3 KWG.

## Chennupati Vidya Vijayawada

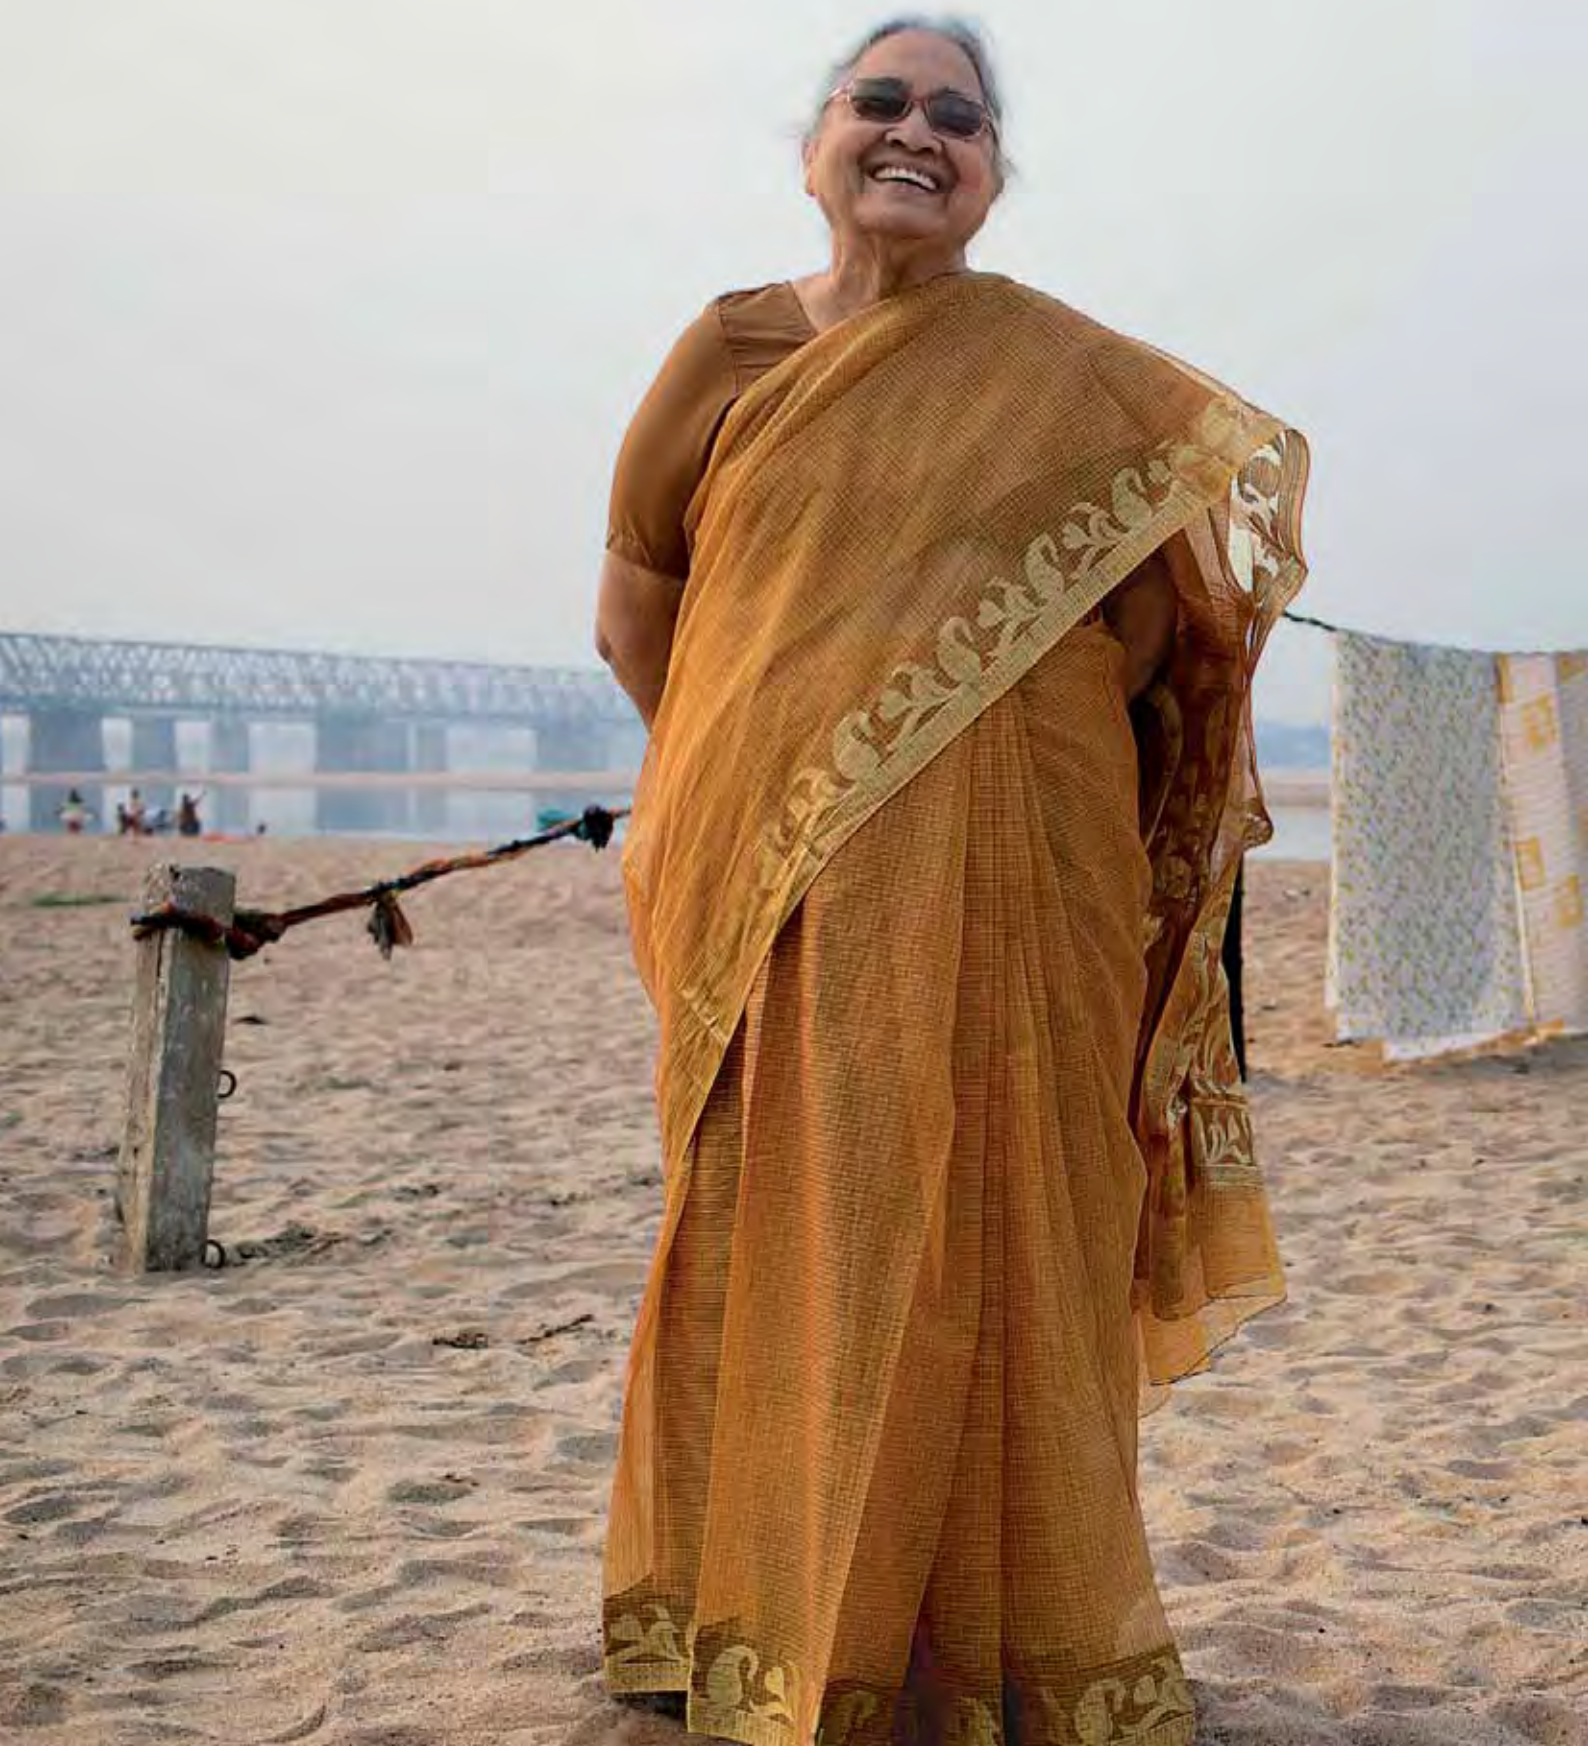



Ich habe nie aufgegeben, mich um ein Umfeld zu bemühen, in dem Chancengleichheit für Mädchen und Frauen herrscht. Die Deutsche Bank unterstützt unsere Institution VMM bereits seit sechs Jahren dabei, gefährdete Kinder zu schützen und ihnen zu einem deutlich besseren Leben zu verhelfen.

Chennupati Vidya,  
Vasavya Mahila Mandali (VMM),  
Vijayawada

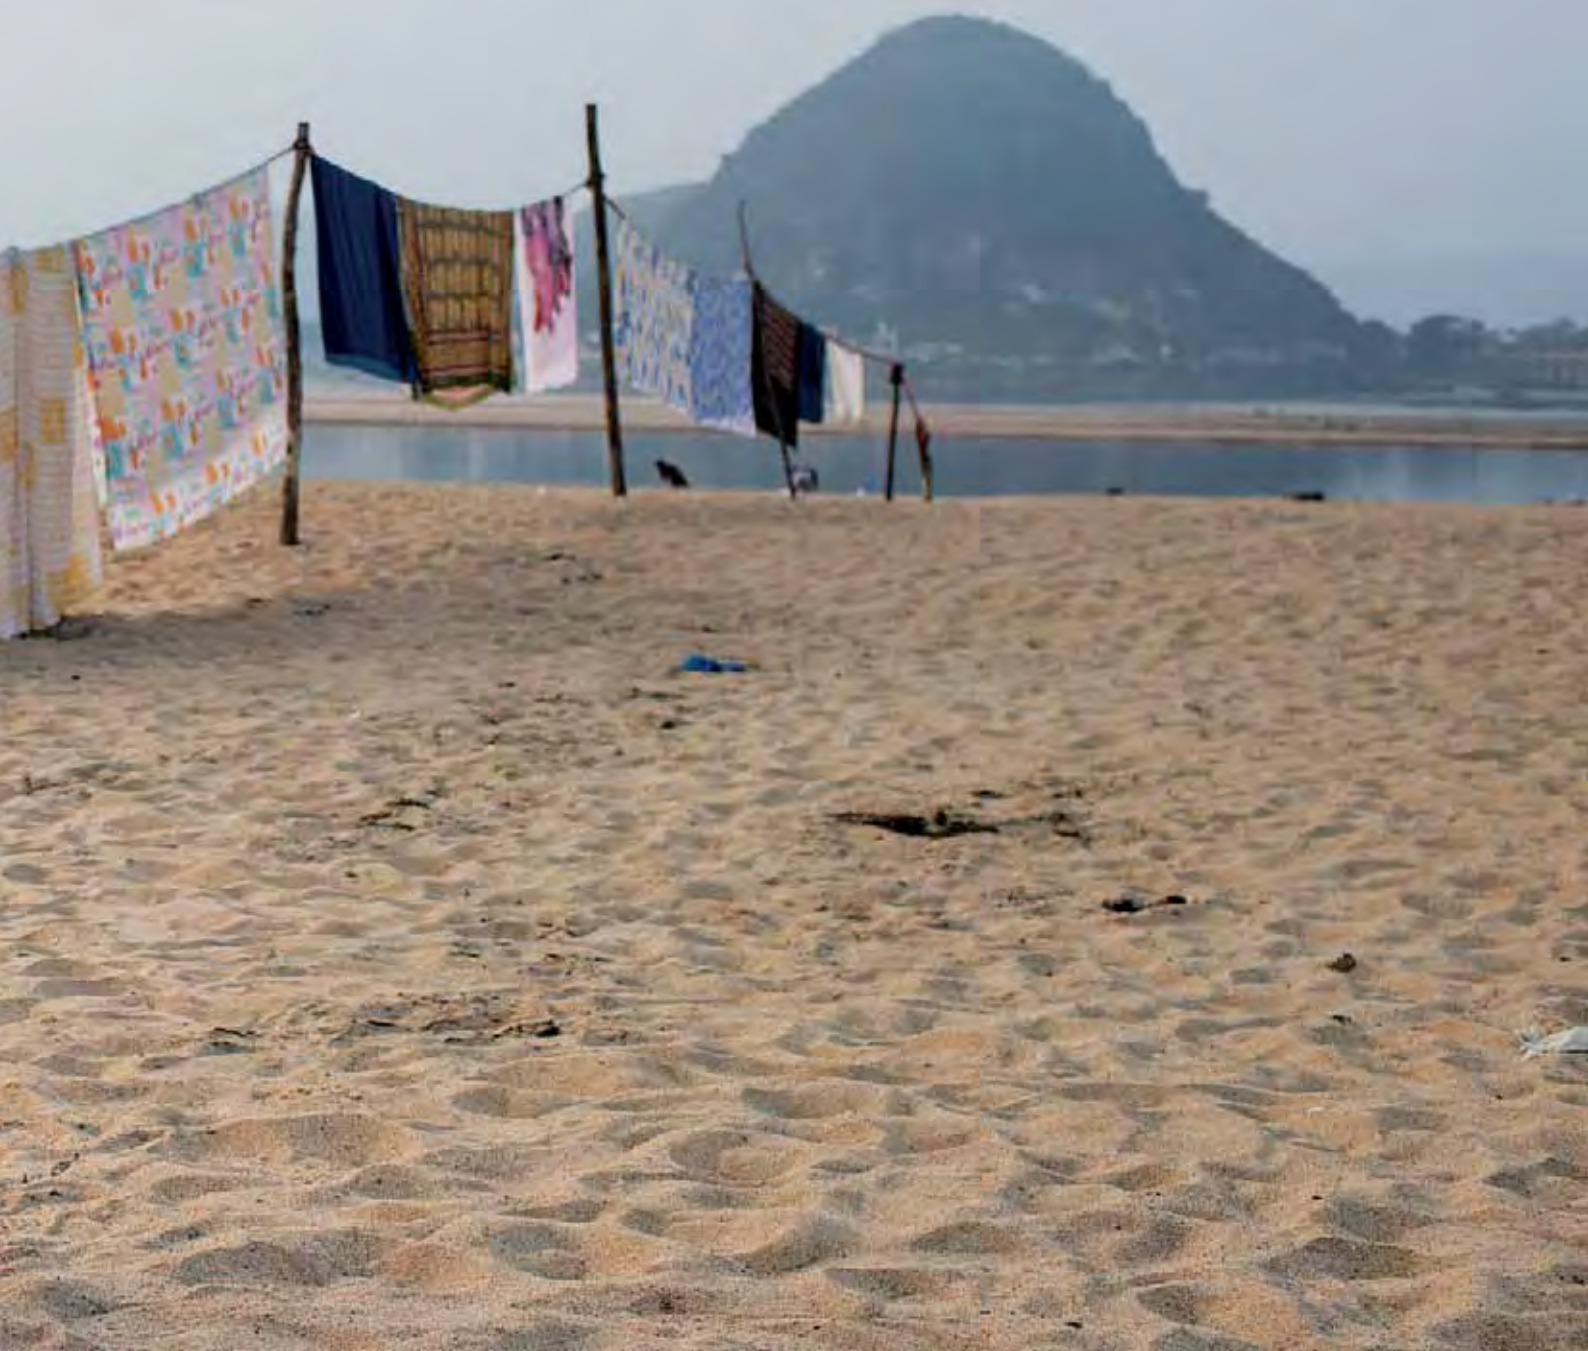

# 04 -

## Weitere Informationen

Glossar – 67

Impressum/Publikationen – 71

Wichtige Termine – 72

## Glossar

### A

#### Alpha

Anlagerendite, die den Referenzmaßstab übersteigt.

#### Alternative Anlagen/Investments

Direkte Investitionen in ►Private Equity, Wagniskapital, Mezzanine-Kapital, Immobilienanlagen und Anlagen in Leveraged-Buy-out-Fonds, Wagniskapitalfonds sowie ►Hedgefonds.

#### American Depositary Receipts (ADRs)

Von US-Banken ausgestellte handelbare Hinterlegungsscheine, die nicht US-amerikanische Aktien repräsentieren. ADRs dienen zur Erleichterung, Verbilligung und Beschleunigung des Handels an amerikanischen Börsen.

#### Asset-backed Securities (ABS)

Besondere Form verbriefter Zahlungsansprüche in Form von handelbaren Wertpapieren. Die entsprechenden Wertpapiere sind durch Zusammenfassung bestimmter Finanzaktiva entstanden.  
►Securitization.

#### Asset Finance & Leasing

Kompetenzzentrum, das hauptsächlich maßgeschneiderte und innovative Finanzierungslösungen für langlebige und hochwertige Wirtschaftsgüter strukturiert.

#### Aufwand-Ertrag-Relation

Kennzahl zur Kosteneffizienz eines Unternehmens, die das Verhältnis der betrieblichen Aufwendungen zu den betrieblichen Erträgen abbildet.

### B

#### Basel II

Eigenkapitalvorschriften des Baseler Ausschusses für Bankenaufsicht, die insbesondere die Ermittlung der aufsichtsrechtlichen Risikoposition nach Basel I ersetzt haben.

#### BIZ

Bank für Internationalen Zahlungsausgleich mit Sitz in Basel.

#### Bookbuilding

Emissionsverfahren, das die Nachfrage einzelner Investoren mit den speziellen Finanzierungsinteressen eines Emittenten bezüglich des Emissionspreises abstimmt.

#### Broker/Brokerage

Broker nehmen Wertpapieraufträge von Banken und privaten Investoren an und führen sie im Auftrag des Kunden aus. Für seine Tätigkeit (Brokerage) erhält der Broker üblicherweise eine Provision.

#### Buy-out

Kauf (vollständig oder teilweise) eines Unternehmens beziehungsweise bestimmter Unternehmensaktivitäten.

### C

#### Cash Management

Beinhaltet die Verwaltung von liquiden Mitteln in Dollar, Euro und sonstigen Währungen für Unternehmen und Finanzinstitute zur Optimierung von Finanztransaktionen.

#### Clearing

Die Übermittlung, Abstimmung und in bestimmten Fällen die Bestätigung von Zahlungsaufträgen.

#### Collateralized Debt Obligations (CDOs)

Anlagevehikel, basierend auf einem ►Portfolio, das Anleihen, Kredite oder ►Derivate enthalten kann.

#### Commercial Mortgage-backed Securities (CMBS)

Verbriefte Wertpapiere, die durch gewerbliche Hypothekendarlehen besichert sind.

#### Commitment

Die Identifikation mit dem Unternehmen, seinen Zielen und Werten sowie die Bereitschaft zur Leistung und die Neigung, bei diesem Unternehmen zu bleiben.

#### Compliance

Gesamtheit an Maßnahmen, um die Einhaltung einschlägiger Gesetze, Vorschriften und interner Regelungen sicherzustellen wie auch gerichtliche beziehungsweise aufsichtsrechtliche Sanktionen sowie finanzielle oder Reputationsschäden zu verhindern.

#### Corporate Finance

Sammelbezeichnung für kapitalmarktnahe innovative Finanzdienstleistungen mit speziellem Beratungsbedarf im Firmenkundengeschäft.

#### Credit Default Swap

Eine Vereinbarung zwischen zwei Parteien, gemäß der eine Partei einen festen Coupon über eine spezifizierte Periode zahlt. Die andere Partei nimmt so lange keine Zahlung vor, bis ein spezifiziertes Ereignis wie zum Beispiel ein Ausfall eintritt. Zu diesem Zeitpunkt wird dann eine Zahlung getätigt und der Credit Default Swap ist beendet.

#### Credit Trading

Handel mit Kredit- oder kreditnahen Produkten.

#### Custody

Verwahrung und Verwaltung von Wertpapieren sowie zusätzliche Dienste im Wertpapierbereich.

### D

#### Debt Products

Handelbare Instrumente, die eine Verbindlichkeit oder einen Anspruch bezüglich eines Vermögenswerts eines oder mehrerer Unternehmen im privaten beziehungsweise öffentlichen Sektor darstellen. Der Begriff beschreibt auch ein umfassenderes Angebot an Finanzinstrumenten einschließlich Devisen- und Warengeschäften.

#### Derivate

Produkte, deren Bewertung sich überwiegend vom Preis, von den Preisschwankungen und den Preiserwartungen der zugrunde liegenden Basisinstrumente (beispielsweise Aktien, Anleihen, Devisen, Indizes) ableitet. Zu den Derivaten zählen insbesondere ►Swaps, ►Optionen und ►Futures.

#### DJSI

Dow-Jones-Sustainability-Indizes sind eine Indexfamilie, welche die ökologische und soziale Leistung von Unternehmen abbildet. Seit Bestehen der Indizes ist die Deutsche Bank im DJSI World und DJSI STOXX gelistet. ►[www.sustainability-index.com](http://www.sustainability-index.com)



### Durchschnittliches Active Equity

Wir berechnen das Active Equity, um einen Vergleich mit unseren Konkurrenten zu vereinfachen. Dieses fließt in die Berechnung verschiedenster Kennziffern ein. Hierbei handelt es sich jedoch nicht um eine Messgröße nach ►International Financial Reporting Standards. Bei einem Vergleich unserer Kennzahlen, die auf dem Active Equity basieren, mit denen anderer Unternehmen sollten stets auch Abweichungen bei der Berechnung dieser Kennzahlen berücksichtigt werden. Die Positionen, um die wir unser durchschnittliches den Deutschen Bank-Aktionären zurechenbares Eigenkapital bereinigen, sind die durchschnittlichen unrealisierten Gewinne aus der Veräußerung verfügbaren finanziellen Vermögenswerten und die durchschnittlichen Fair-Value-Anpassungen von Cash Flow Hedges (beide Bestandteile nach darauf entfallenden Steuern). Gleiches gilt für die durchschnittliche Dividendenzahlung, für die jedes Quartal eine Abgrenzung vorgenommen und die nach Zustimmung der Hauptversammlung einmal jährlich ausbezahlt wird.

## E

### Eigenkapital gemäß Basel II

Bankenaufsichtsrechtlich anerkanntes Eigenkapital in Übereinstimmung mit der Baseler Eigenkapitalvereinbarung von 2004 für Kreditinstitute. Das Eigenkapital gemäß Basel II setzt sich zusammen aus:

- Tier-1-Kapital: vor allem Grundkapital, Rücklagen und bestimmte ►hybride Kapitalinstrumente,
  - Tier-2-Kapital: insbesondere Genussrechtskapital, kumulative Vorzugsaktien, langfristige nachrangige Verbindlichkeiten und nicht realisierte Gewinne aus notierten Wertpapieren,
  - Tier-3-Kapital: im Wesentlichen kurzfristige nachrangige Verbindlichkeiten und überschüssiges Tier-2-Kapital.
- Tier-2-Kapital kann nur bis zur Höhe des Tier-1-Kapitals angerechnet werden, wobei noch zusätzlich die Anrechenbarkeit der langfristigen nachrangigen Verbindlichkeiten im Tier-2-Kapital auf 50% des Tier-1-Kapitals beschränkt ist.

### Eigenkapitalrendite vor Steuern

(basierend auf dem ►durchschnittlichen Active Equity) Prozentualer Anteil des den Deutschen Bank-Aktionären zurechenbaren Ergebnisses vor Steuer- aufwand (annualisiert), das sich errechnet aus dem Ergebnis vor Steuern abzüglich Minderheitsanteilen am ►durchschnittlichen Active Equity.

### Emerging Markets

Aufstrebende Märkte von Schwellen- ländern, primär Finanzmärkte.

### Equity Capital Markets (ECM)

In erster Linie Aktivitäten rund um den Börsengang eines Unternehmens beziehungsweise um die Ausgabe neuer Aktien. Ebenso fallen Privatisierungen von staatseigenen Betrieben darunter.

### Ergebnis je Aktie

Nach ►International Financial Reporting Standards ermittelte Kennziffer, die den Gewinn, der den Aktionären der Gesellschaft zurechenbar ist, der durchschnittlichen Zahl an ausstehenden Stamm- aktien gegenüberstellt. Neben der Kennziffer Ergebnis je Aktie ist zusätzlich ein verwässertes Ergebnis je Aktie auszuweisen, wenn sich aus der Wand- lung und Ausübung ausstehender Aktien- optionen, zugeteilter Aktienrechte und Wandelschuldverschreibungen die Zahl der Aktien erhöhen kann.

### Euro Commercial Paper Program

Instrument zur flexiblen Begebung un- besicherter Schuldtitel mit kurzen Laufzeiten. In einem Programm können mehrere Anleiheemissionen innerhalb einer ge- gebenen Zeit erfolgen.

## F

### Fair Value

Betrag, zu dem Aktiva beziehungsweise Passiva zwischen sachkundigen, vertrags- willigen und voneinander unabhängigen Geschäftspartnern getauscht würden. Der Fair Value ist häufig identisch mit dem Marktpreis.

### Family Office

Für Familien mit sehr großen und komplexen Vermögen konzipierte Finanz- dienstleistung, die auf der Grundlage absoluter Unabhängigkeit durch eine optimale Steuerung und umfassende Koordination der einzelnen Vermögens- bestandteile die Kundeninteressen wahrnimmt.

### Financial Supply Chain Management

Optimierung der Finanzströme entlang der Lieferkette eines Unternehmens.

### Futures

Hinsichtlich Menge, Qualität und Liefer- termin standardisierte Terminkontrakte, bei denen zu einem bestimmten zukünftigen Zeitpunkt ein dem Geld- und Kapital-, Edelmetall- oder Devisenmarkt zugehöriges Handelsobjekt zum börsenmäßig festge- setzten Kurs zu liefern beziehungsweise abzunehmen ist. Häufig ist bei derartigen Kontrakten (beispielsweise Terminkon- trakten auf der Basis von Aktienindizes) zur Erfüllung der bestehenden Verpflich- tung anstelle einer Wertpapierlieferung oder -abnahme eine Ausgleichszahlung zu leisten.

## G

### Goodwill

Der Betrag, den ein Käufer bei Übernah- me eines Unternehmens unter Berück- sichtigung von Ertragserwartungen über den ►Fair Value der einzeln identifizier- baren Vermögensgegenstände und Schul- den hinaus zahlt.

## H

### Hedgefonds

Fonds, der normalerweise von Institutio- nen und vermögenden Privatpersonen gezeichnet wird. Er setzt Strategien ein, die für Investmentfonds nicht erlaubt sind. Beispiele sind Leerverkäufe, hohe Fremdvverschuldung und ►Derivate. Hedgefondsrenditen sind meist nicht mit den Renditen traditioneller Anlagewerte korreliert.

## Hybride Kapitalinstrumente (Trust Preferred Securities)

Kapitalinstrumente, die sich durch gewinnabhängige Zinszahlungen auszeichnen. Soweit im Verlustfall ausgefallene Zinszahlungen nicht nachgeholt werden (nicht kumulative Trust Preferred Securities) und die Papiere kein festgelegtes Fälligkeitsdatum besitzen beziehungsweise durch die Gläubiger nicht kündbar sind, gehören sie aufsichtsrechtlich zum Tier-1-Kapital. Anderenfalls sind sie dem Tier-2-Kapital zuzurechnen (zum Beispiel kumulative Trust Preferred Securities).

## I

### International Financial Reporting Standards (IFRS)

Rechnungslegungsregeln des International Accounting Standards Board, die eine weltweit transparente und vergleichbare Bilanzierung und Publizität sicherstellen sollen. Maßgeblicher Zweck ist die Bereitstellung entscheidungsrelevanter Informationen, insbesondere für Investoren.

### Investment Banking

Sammelbegriff für kapitalmarktorientierte Geschäfte. Hierunter fallen insbesondere Emission und Handel von Wertpapieren und ihren ►Derivaten, Zins- und Währungsmanagement, ►Corporate Finance, Beratung bei Übernahmen und Fusionen, strukturierte Finanzierungen und ►Private Equity.

### Investor Relations

Bezeichnet die systematische und kontinuierliche zweiseitige Kommunikation zwischen Unternehmen und aktuellen wie potenziellen Eigenkapital- beziehungsweise Fremdkapitalgebern. Informationen betreffen vor allem wichtige Unternehmensereignisse, finanzielle Ergebnisse und die Geschäftsstrategie sowie die Erwartungen des Kapitalmarkts an das Management. Ein wesentliches Ziel der Investor-Relations-Aktivitäten ist die angemessene Bewertung der Aktie.

## K

### Korrelation

Wechselbeziehung zwischen mindestens zwei Variablen (zum Beispiel Vermögenswerten), die positiv (gleichläufig) oder negativ (gegenläufig) sein kann, aber keine Aussage zum Kausalzusammenhang (Ursache – Wirkung) macht. Wichtige Größe bei der Vermögensstrukturierung, um Risiken zu streuen beziehungsweise abzusichern.

## L

### Leveraged Buy-out

Fremdfinanzierter Kauf (vollständig oder teilweise) eines Unternehmens beziehungsweise bestimmter Unternehmensaktivitäten. Zins- und Tilgungszahlungen werden aus dem zukünftigen Ertrag des übernommenen Unternehmens finanziert.

## M

### Management Buy-out

Übernahme aller umlaufenden Aktien durch das im Unternehmen tätige Management, welches die Börsennotierung beendet.

### Merger & Acquisitions (M & A)

Fusionen und Übernahmen von Unternehmen.

### Mezzanine

Flexible Mischform zwischen Eigen- und Fremdkapital.

### Mortgage-backed Securities (MBS)

Wertpapiere, die durch Hypothekendarlehen besichert sind. Unterformen sind ►Residential Mortgage-backed Securities (RMBS) und ►Commercial Mortgage-backed Securities (CMBS).

## N

### Namensaktien

Aktien, die auf den Namen einer bestimmten Person lauten. Diese Person wird entsprechend den aktienrechtlichen Vorgaben mit einigen persönlichen Angaben sowie ihrer Aktienanzahl in das Aktienregister der Gesellschaft eingetragen. Nur wer im Aktienregister eingetragen ist, gilt gegenüber der Gesellschaft als Aktionär und kann beispielsweise Rechte in der Hauptversammlung ausüben.

## O

### Option

Recht, den zugrunde liegenden Optionsgegenstand (beispielsweise Wertpapiere oder Devisen) von einem Vertragspartner (Stillhalter) zu einem vorweg fest vereinbarten Preis zu einem bestimmten Zeitpunkt beziehungsweise in einem bestimmten Zeitraum zu kaufen (Kaufoption/Call) oder an diesen zu verkaufen (Verkaufsoption/Put).

### OTC-Derivate

Finanzinstrumente (►Derivate), die nicht standardisiert sind und nicht an einer Börse, sondern direkt zwischen den Marktteilnehmern (Over the Counter) gehandelt werden.

## P

### Portfolio (Portefeuille)

Teil oder Gesamtheit einer oder aller Klassen von Vermögenswerten (zum Beispiel Wertpapiere, Kredite, Beteiligungen oder Immobilien). Die Portfoliobildung dient primär der Risikostreuung.

### Portfolio Management

Steuerung und Verwaltung eines Wertpapierportfolios für Kunden. Kann die ständige Überwachung des ►Portfolios und nach Absprache mit dem Kunden auch Käufe und Verkäufe einschließen.

### Prime Services/Brokerage

Ein spezielles Dienstleistungsangebot vor allem für ►Hedgefonds, das in erster Linie aus ►Clearing, Abwicklung von Handelsgeschäften, ►Custody, Aufstellung von Abschlüssen und Finanzierung besteht.

### Private Equity

Kapitalbeteiligung an nicht börsennotierten Unternehmen, zum Beispiel Wagniskapital und Buy-out-Fonds.

## Q

### Quantitative Anlagen

►Portfolios von Aktien- und Rentenwerten sowie von ►Hedgefonds. Das Management erfolgt systematisch und regelgesteuert, wobei hauptsächlich fundamentale Anlagekriterien angewandt werden. Die Auswahl beruht auf der Verarbeitung großer Datenmengen, für die quantitative Methoden und Techniken zum Einsatz kommen.

## R

### Rating

*Extern:* standardisierte Beurteilung der Bonität des Emittenten und seiner Schuld-titel durch spezialisierte Agenturen.

*Intern:* detaillierte Risikoeinschätzung eines Schuldners.

### Repogeschäft

#### (Repurchase Agreement)

Rückkaufvereinbarung bei Wertpapier-geschäften (echte Pensionsgeschäfte, deren Gegenstand weiterhin dem Pen-sionsgeber zuzurechnen ist). Aus Sicht des Pensionsnehmers wird von einem Reverse-Repo-Geschäft gesprochen.

### Residential Mortgage-backed Securities (RMBS)

Verbriefte Wertpapiere, die durch Wohnungsbaukredite besichert sind.

## S

### Sale and Leaseback

Transaktion, bei der eine Partei zum Bei-spiel eine Immobilie an eine andere Partei verkauft und anschließend zur weiteren Nutzung zurückmietet beziehungsweise least.

### Sarbanes-Oxley Act (SOX)

US-Kapitalmarktgesetz von 2002, das als Reaktion auf Bilanzskandale die Corporate Governance stärken und damit das Ver-trauen der Investoren in den Kapitalmarkt zurückgewinnen soll. Die Regelungen gelten für alle an einer US-Börse notierten Unternehmen und reichen von zusätzlichen Vorstandsaufgaben bis zu strafrechtlichen Bestimmungen.

### Scharia-konform

Im Einklang mit der islamischen Gesetz-gebung.

### Securitization (Verbriefung)

Verkörperung von Rechten in Wertpapieren (beispielsweise Aktien und Schuldver-schreibungen). Häufig Ersatz von Krediten oder Finanzierung von Forderungen verschiedener Art durch die Ausgabe von Wertpapieren (etwa Schuldverschreibun-gen oder Commercial Paper).

### Shareholder Value

Managementkonzept, das dauerhafte Wertsteigerungen des Unternehmens in den Mittelpunkt strategischer und operativer Entscheidungen stellt. Kernge-danke ist, dass nur Renditen, die über den Eigenkapitalkosten liegen, Wert für die Aktionäre schaffen.

### SPAC (Special Purpose Acquisition Company)

Börsennotierte Gesellschaft, die Kapital beschafft, um ein bestehendes Unterneh-men zu übernehmen.

### Stakeholder

Anspruchs- beziehungsweise Interessen-gruppen eines Unternehmens, die häufig mit Eigentümern (Aktionären), Kunden, Mitarbeitern und der Gesellschaft gleich-gesetzt werden.

### Subprime

Begriff, unter dem im Zusammenhang mit dem US-amerikanischen Hypotheken-markt Kredite an Kreditnehmer mit geringer Bonität verstanden werden.

### Sustainability (Nachhaltigkeit)

Bezeichnet das Zusammenspiel von Öko-nomie, Ökologie und gesellschaftlicher Verantwortung mit dem Ziel, die Lebens-grundlagen der Menschheit nachhaltig und zukunftsfähig weiterzuentwickeln.

### Swaps

Austausch von Zahlungsströmen. Zins-swaps: Tausch von Zinszahlungsströmen gleicher Währung mit unterschiedlichen Konditionen (beispielsweise fest/variabel). Währungsswaps: Tausch von Zinszah-lungsströmen und Kapitalbeträgen in unterschiedlichen Währungen.

## T

### Talent Pool

Gruppe von Mitarbeitern, die für höhere Führungspositionen identifiziert wurden.

### Trade Finance

Umfasst alle Dienstleistungen in den Bereichen Trade Finance Services sowie Trade and Risk Services. Der Geschäfts-bereich betreut das Exportfinanzierungs- und Risikoabsicherungsgeschäft mit Finanzinstituten und Firmenkunden. Dazu gehören multinationale Unternehmen, etablierte und aufstrebende Unternehmen sowie Unternehmen des öffentlichen Sektors.

### Trust & Securities Services

Breite Palette von administrativen Dienst-leistungen für Wertpapiere. Dazu gehören zum Beispiel Wertpapierverwaltung und -verwahrung (►Custody), Treuhandverwal-tung von Wertpapieren, Emissions- und Zahlstellendienste, Depotbankfunktion für ►American Depositary Receipts (ADRs).

## U

### US GAAP (United States Generally Accepted Accounting Principles)

Rechnungslegungsregeln der USA, die in engerem Sinne durch Verlautbarungen des Financial Accounting Standards Board (FASB) sowie des American Institute of Certified Public Accountants (AICPA) gebildet werden. Darüber hinaus sind insbesondere für börsennotierte Unter-nehmen die von der Wertpapieraufsichts-behörde Securities and Exchange Com-mission (SEC) entwickelten Interpretationen und Auslegungen von Relevanz. Ähnlich den ►International Financial Reporting Standards liegt die maßgebliche Ziel-setzung in der Bereitstellung entschei-dungsrelevanter Informationen im Jahresabschluss, die insbesondere für Investoren nützlich sein sollen.

## Impressum/Publikationen

Deutsche Bank Aktiengesellschaft  
Taunusanlage 12  
60262 Frankfurt am Main  
Telefon: (069) 91000  
deutsche.bank@db.com

Aktionärshotline  
(0800) 9108000

Hauptversammlungshotline  
(0800) 1004798

Investor Relations  
(069) 91038080  
db.ir@db.com

### Fotos

- Martin Joppen, Frankfurt  
Seite 02
- Andreas Pohlmann, München  
Seite 09
- Matthias Ziegler, München  
Seiten 09, 10, 20/21, 34/35, 58/59,  
64/65 und Titel

**Publikationen zum Jahresabschluss**  
Bitte beachten Sie, dass der Geschäftsbericht des Deutsche Bank-Konzerns aus zwei separaten Teilen, dem Jahresbericht 2010 und dem Finanzbericht 2010, besteht.

- Jahresbericht 2010  
(in Deutsch und Englisch)
- Finanzbericht 2010  
(in Deutsch und Englisch)
- Annual Report 2010 on Form 20-F  
(in Englisch)
- Jahresabschluss und Lagebericht der Deutschen Bank AG 2010  
(in Deutsch und Englisch)
- Verzeichnis der Beiratsmitglieder  
(in Deutsch)
- Gesellschaftliche Verantwortung – Bericht 2010  
(ab Mai 2011 in Deutsch/Englisch)

### Bestellmöglichkeiten

E-Mail – Internet  
service-center@bertelsmann.de  
www.deutsche-bank.de/10

Fax  
(01805) 070808

Telefon  
(01805) 802200

postalisch  
arvato logistics services  
Bestellservice Deutsche Bank  
Gottlieb-Daimler-Straße 1  
33428 Harsewinkel

### Online

Alle Publikationen zum Jahresabschluss sind abrufbar unter:  
www.deutsche-bank.de/10

**Hinweis in Bezug auf zukunftsgerichtete Aussagen:**  
Dieser Bericht enthält zukunftsgerichtete Aussagen. Zukunftsgerichtete Aussagen sind Aussagen, die nicht Tatsachen der Vergangenheit beschreiben, sie umfassen auch Aussagen über unsere Annahmen und Erwartungen sowie die zugrunde liegenden Annahmen. Diese Aussagen beruhen auf Planungen, Schätzungen und Prognosen, die der Geschäftsleitung der Deutschen Bank derzeit zur Verfügung stehen. Zukunftsgerichtete Aussagen beziehen sich deshalb nur auf den Tag, an dem sie gemacht werden. Wir übernehmen keine Verpflichtung, solche Aussagen angesichts neuer Informationen oder künftiger Ereignisse weiterzuentwickeln.

Zukunftsgerichtete Aussagen beinhalten naturgemäß Risiken und Unsicherheitsfaktoren. Eine Vielzahl wichtiger Faktoren kann dazu beitragen, dass die tatsächlichen Ergebnisse erheblich von zukunftsgerichteten Aussagen abweichen. Solche Faktoren sind etwa die Verfassung der Finanzmärkte in Deutschland, Europa, den USA und anderenorts, wo wir einen erheblichen Teil unserer Erträge aus dem Wertpapierhandel erzielen, der mögliche Ausfall von Kreditnehmern oder Kontrahenten von Handelsgeschäften, die Umsetzung unserer Managementagenda, die Verlässlichkeit unserer Grundsätze, Verfahren und Methoden zum Risikomanagement sowie andere Risiken, die in den von uns bei der US Securities and Exchange Commission (SEC) hinterlegten Unterlagen dargestellt sind. Diese Faktoren sind in unserem SEC-Bericht nach „Form 20-F“ vom 15. März 2011 im Abschnitt „Risk Factors“ im Detail dargestellt. Dieses Dokument ist auf Anfrage bei uns erhältlich oder unter [www.deutsche-bank.com/ir](http://www.deutsche-bank.com/ir) verfügbar.

### Klimaneutrale Herstellung:

Dieser Bericht wurde klimaneutral gestellt. Durch Herstellung und Verteilung verursachte Treibhausgasemissionen in Höhe von 73 t Kohlendioxid-äquivalenten wurden durch zusätzliche Investitionen in ein hochwertiges Klimaschutzprojekt kompensiert.

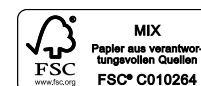

## Wichtige Termine

### 2011

28. April 2011

Zwischenbericht zum 31. März 2011

26. Mai 2011

Hauptversammlung in der Festhalle  
Frankfurt am Main (Messegelände)

27. Mai 2011

Dividendenzahlung

26. Juli 2011

Zwischenbericht zum 30. Juni 2011

25. Oktober 2011

Zwischenbericht zum 30. September 2011

### 2012

02. Februar 2012

Vorläufiges Jahresergebnis für das Geschäftsjahr 2011

20. März 2012

Geschäftsbericht 2011 und Form 20-F

26. April 2012

Zwischenbericht zum 31. März 2012

31. Mai 2012

Hauptversammlung in der Festhalle  
Frankfurt am Main (Messegelände)

01. Juni 2012

Dividendenzahlung

31. Juli 2012

Zwischenbericht zum 30. Juni 2012

30. Oktober 2012

Zwischenbericht zum 30. September 2012

Wir sind da, wo unsere Kunden sind

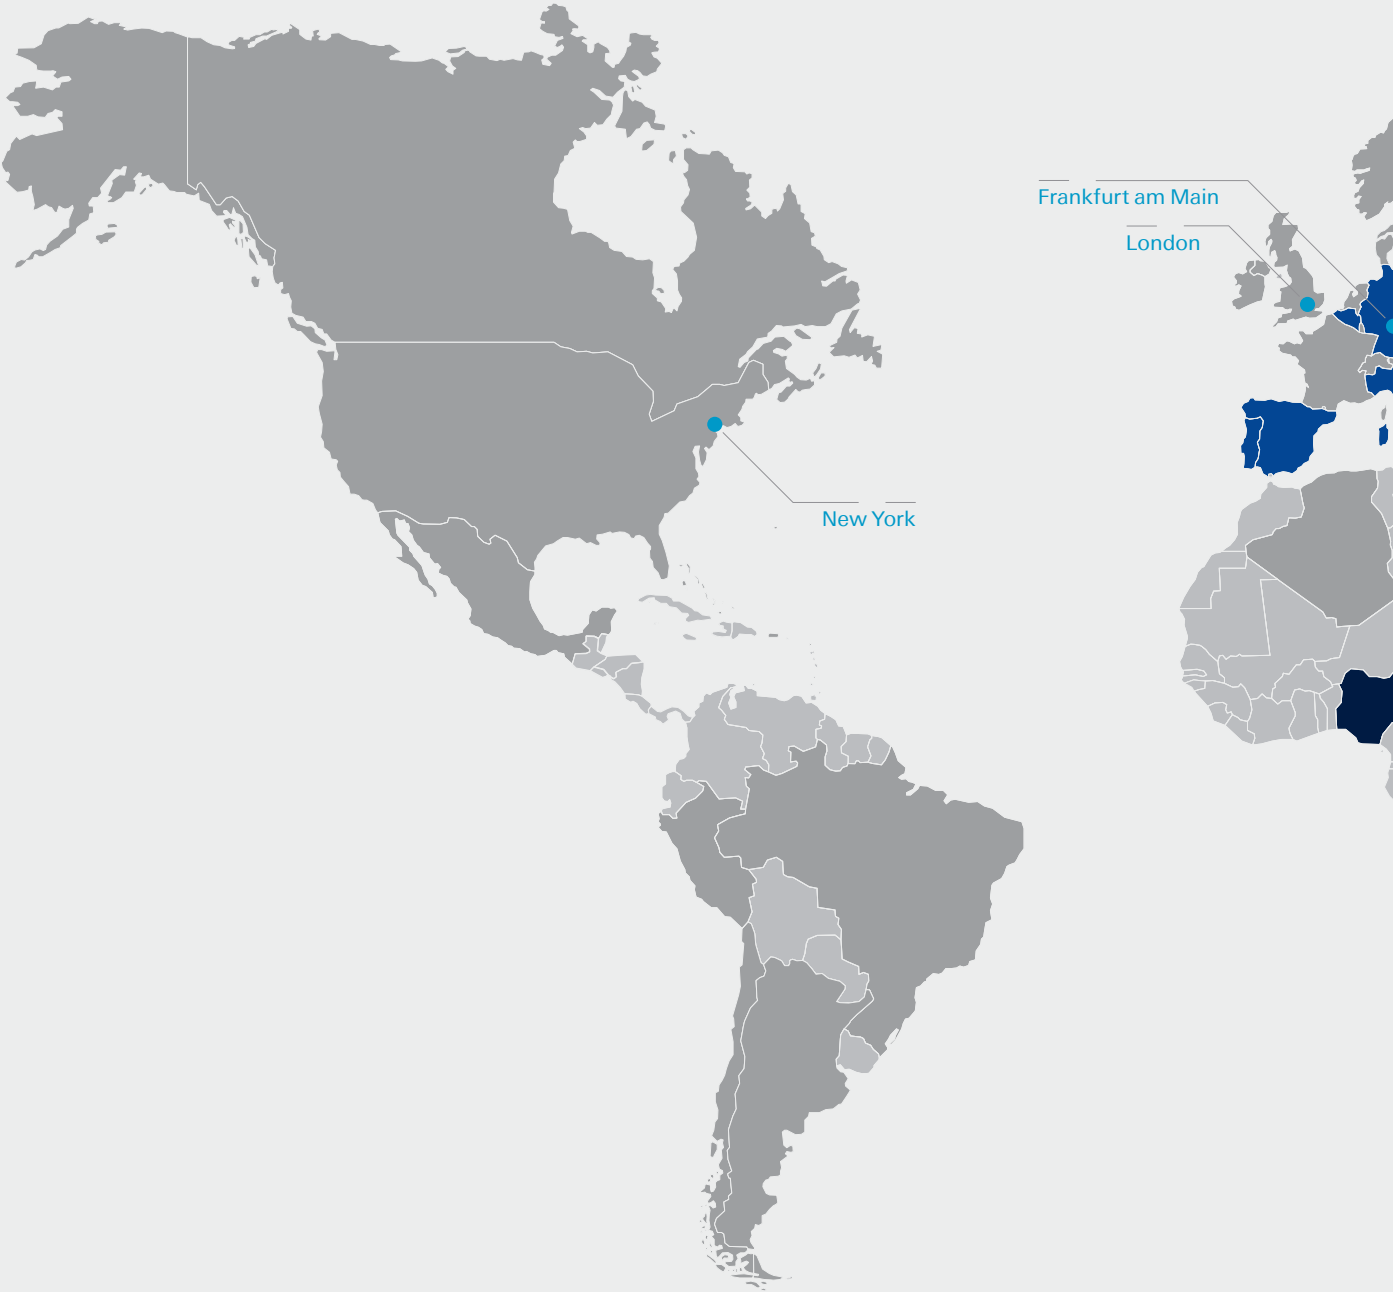

- Filiengeschäft mit Privat- und Geschäftskunden
- Filiälen und/oder Tochtergesellschaften
- Repräsentanzen (ausschließlich)
- Regionale Hauptstandorte



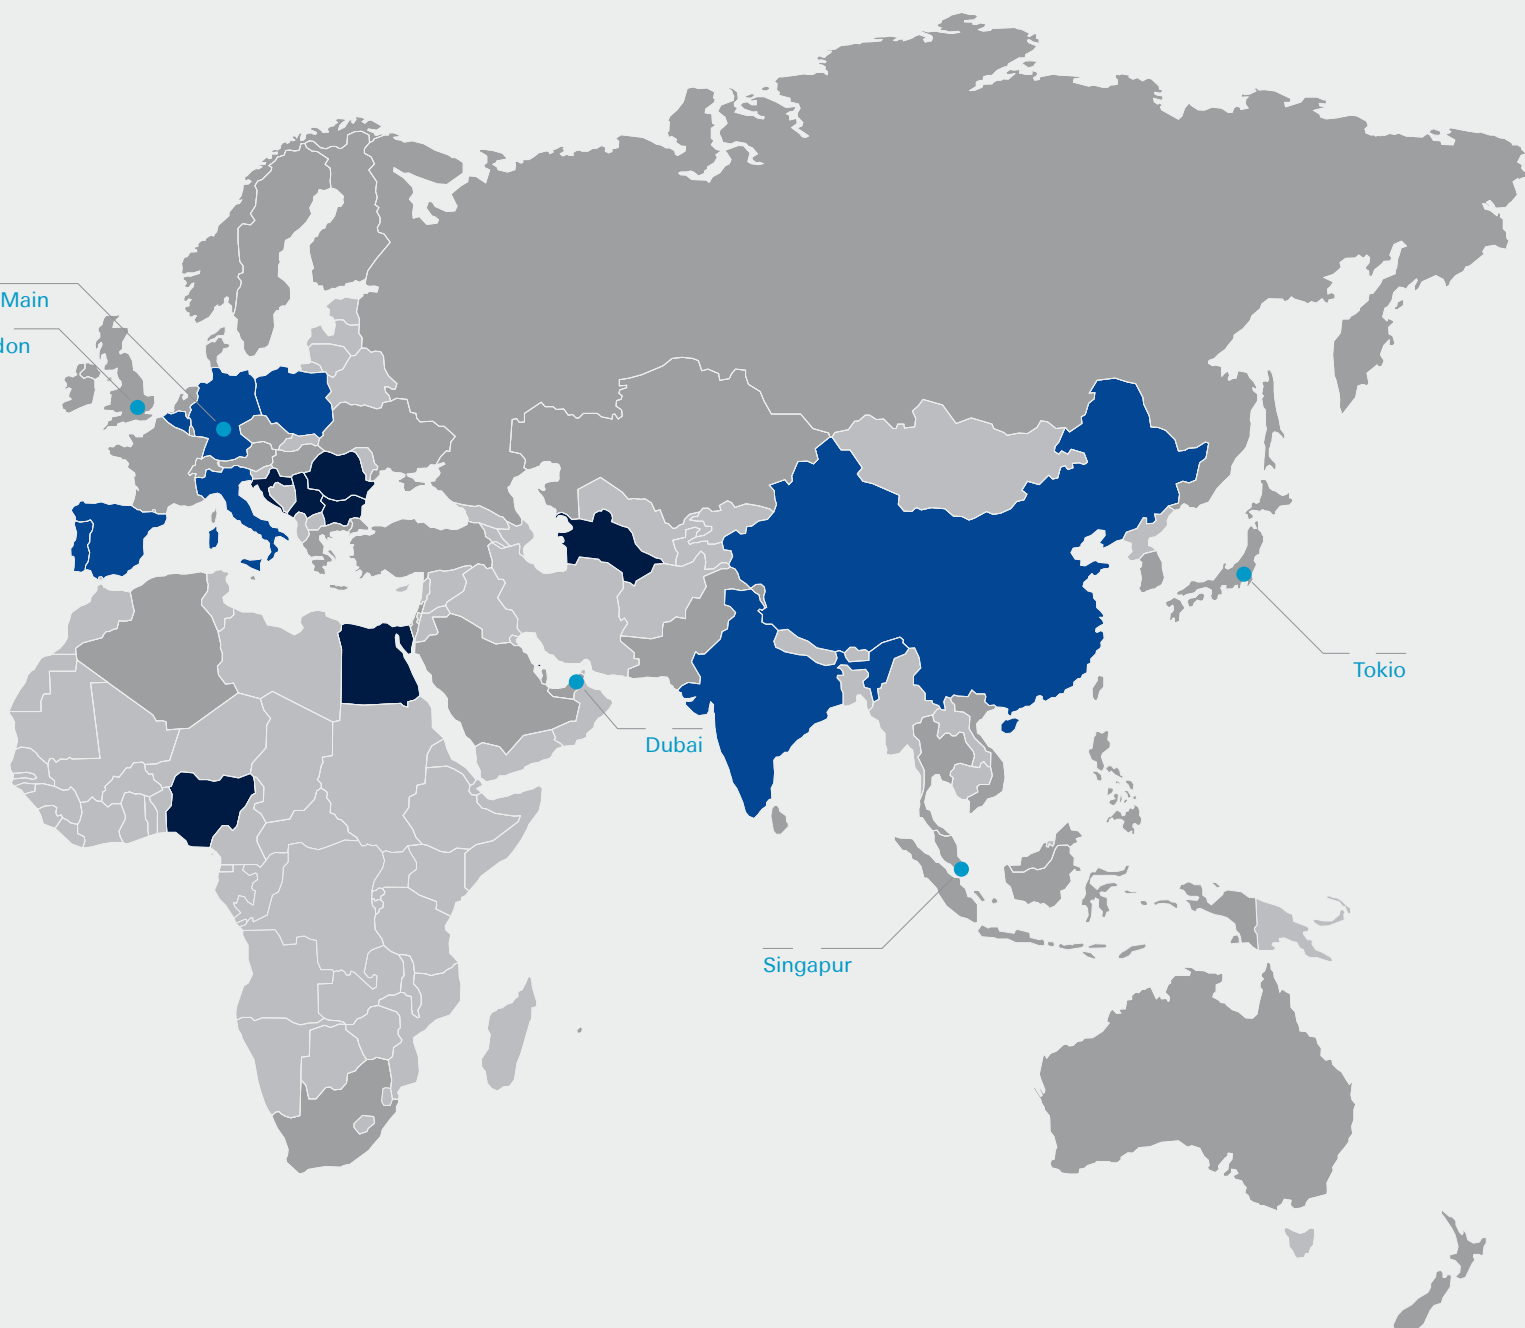

Main  
lon

Dubai

Singapur

Tokio



Unsichere Zeiten mahnen uns, noch wachsamer zu sein, sensibler auf Veränderungen zu achten und Möglichkeiten konsequent zu nutzen. Zum Vorteil aller: unserer Aktionäre, unserer Kunden, unserer Mitarbeiter sowie der Gesellschaft. Ohne ökonomischen Erfolg wären wir für diese, unsere vier wichtigsten Zielgruppen, auf Dauer kein nützlicher Partner. Und der möchten wir gerade in diesen Zeiten, aber auch in Zukunft sein.

Das Jahr 2010 hat die Deutsche Bank ein gutes Stück vorangebracht. Wir sind heute in einer deutlich stärkeren Position als vor der Krise und auf dem Weg, die selbst gesteckten Ertrags- und Wachstumsziele entschlossen zu realisieren. Dafür haben wir investiert und daran arbeiten wir mit Leidenschaft.

**Erfolgreich in unsicheren Zeiten**

## Unsere Identität

### Unser Leitbild

Wir wollen der weltweit führende Anbieter von Finanzlösungen sein und nachhaltig Wert schaffen – für unsere Kunden, unsere Aktionäre, unsere Mitarbeiter und für die Gesellschaft als Ganzes.

### Unser Versprechen

Spitzenleistungen — bei der Entwicklung und Umsetzung von Konzepten, in der Beratung, bei Produkten und im Service, stets EINE Bank repräsentierend mit all ihren Fähigkeiten und Ressourcen.

Kundenorientierte Lösungen — unterschiedliche Kundenbedürfnisse verstehen, Mehrwert bieten, Vertrauen bilden und anhaltende Partnerschaften aufbauen.

Verantwortung — heute handeln, an morgen denken, transparent agieren und Führung zeigen.

### Unsere Marke

Die Deutsche Bank hat ein klares Profil: Wir stehen für Leistung – im Geschäft und darüber hinaus. Wir verbinden Passion und Präzision auf einzigartige Weise.

Das gibt uns das Selbstvertrauen, Herkömmliches infrage zu stellen und Neues offensiv anzugehen – zum Vorteil aller, mit denen wir zusammenarbeiten.

Deutsche Bank

## Finanzbericht 2010

*Leistung aus Leidenschaft*

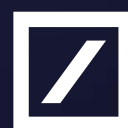

# Deutsche Bank

## Der Konzern im Überblick

|                                                                                      | 2010       | 2009       |
|--------------------------------------------------------------------------------------|------------|------------|
| Aktienkurs zum Ende der Berichtsperiode <sup>1</sup>                                 | € 39,10    | € 44,98    |
| Aktienkurs höchst <sup>1</sup>                                                       | € 55,11    | € 53,05    |
| Aktienkurs tiefst <sup>1</sup>                                                       | € 35,93    | € 14,00    |
| Ergebnis je Aktie (basic) <sup>2</sup>                                               | € 3,67     | € 7,21     |
| Ergebnis je Aktie (verwässert) <sup>2</sup>                                          | € 2,92     | € 6,94     |
| Ausstehende Aktien (basic, Durchschnitt), in Mio <sup>2</sup>                        | 753        | 689        |
| Ausstehende Aktien (verwässert, Durchschnitt), in Mio <sup>2</sup>                   | 791        | 717        |
| Eigenkapitalrendite nach Steuern (basierend auf dem durchschnittlichen Eigenkapital) | 5,5 %      | 14,6 %     |
| Eigenkapitalrendite vor Steuern (basierend auf dem durchschnittlichen Eigenkapital)  | 9,5 %      | 15,3 %     |
| Eigenkapitalrendite vor Steuern (basierend auf dem durchschnittlichen Active Equity) | 9,6 %      | 15,1 %     |
| Nettovermögen je ausstehende Stammaktie (basic) <sup>3</sup>                         | € 52,38    | € 52,65    |
| Aufwand-Ertrag-Relation <sup>4</sup>                                                 | 81,6 %     | 72,0 %     |
| Personalaufwandsquote <sup>5</sup>                                                   | 44,4 %     | 40,5 %     |
| Sachaufwandsquote <sup>6</sup>                                                       | 37,3 %     | 31,5 %     |
|                                                                                      | in Mio €   | in Mio €   |
| Erträge insgesamt                                                                    | 28.567     | 27.952     |
| Risikovorsorge im Kreditgeschäft                                                     | 1.274      | 2.630      |
| Zinsunabhängige Aufwendungen insgesamt                                               | 23.318     | 20.120     |
| Ergebnis vor Steuern                                                                 | 3.975      | 5.202      |
| Jahresüberschuss/Jahresfehlbetrag (–)                                                | 2.330      | 4.958      |
|                                                                                      | 31.12.2010 | 31.12.2009 |
|                                                                                      | in Mrd €   | in Mrd €   |
| Bilanzsumme                                                                          | 1.908      | 1.501      |
| Den Deutsche Bank-Aktionären zurechenbares Eigenkapital                              | 45,8       | 36,6       |
| Tier-1-Kapitalquote ohne Hybridinstrumente <sup>7</sup>                              | 8,7 %      | 8,7 %      |
| Tier-1-Kapitalquote <sup>8</sup>                                                     | 12,3 %     | 12,6 %     |
|                                                                                      | Anzahl     | Anzahl     |
| Niederlassungen                                                                      | 3.083      | 1.964      |
| davon in Deutschland                                                                 | 2.087      | 961        |
| Mitarbeiter (in Vollzeitkräfte umgerechnet)                                          | 102.062    | 77.053     |
| davon in Deutschland                                                                 | 49.265     | 27.321     |
| Langfristrating                                                                      |            |            |
| Moody's Investors Service                                                            | Aa3        | Aa1        |
| Standard & Poor's                                                                    | A+         | A+         |
| Fitch Ratings                                                                        | AA–        | AA–        |

<sup>1</sup> Zu Vergleichszwecken wurde der Aktienkurs für alle Perioden vor dem 6. Oktober 2010 angepasst, um den Effekt der im Rahmen der Kapitalerhöhung ausgegebenen Bezugsrechte zu berücksichtigen.

<sup>2</sup> Die Anzahl der durchschnittlich ausstehenden Aktien (basic und verwässert) wurde für alle Perioden vor dem 6. Oktober 2010 angepasst, um den Effekt der Bonuskomponente von Bezugsrechten, die im Rahmen der Kapitalerhöhung ausgegeben wurden, zu berücksichtigen.

<sup>3</sup> Nettovermögen je ausstehende Stammaktie (basic) ergibt sich durch Division des den Deutsche Bank-Aktionären zurechenbaren Eigenkapitals durch die Anzahl der ausstehenden Stammaktien (basic, beide zum Bilanzstichtag).

<sup>4</sup> Prozentualer Anteil der zinsunabhängigen Aufwendungen insgesamt am Zinsüberschuss vor Risikovorsorge im Kreditgeschäft plus zinsunabhängige Erträge.

<sup>5</sup> Prozentualer Anteil des Personalaufwands am Zinsüberschuss vor Risikovorsorge im Kreditgeschäft plus zinsunabhängige Erträge.

<sup>6</sup> Prozentualer Anteil des zinsunabhängigen Sachaufwands, der sich aus den zinsunabhängigen Aufwendungen abzüglich Personalaufwand zusammensetzt, am Zinsüberschuss vor Risikovorsorge im Kreditgeschäft plus zinsunabhängige Erträge.

<sup>7</sup> Die Kapitalquoten setzen das jeweilige Kapital in Beziehung zu den Risikoaktiva für das Kredit-, Markt- und Operationelle Risiko. Die Tier-1-Kapitalquote enthält keine Übergangsposten gemäß § 64h Absatz 3 KWG.

<sup>8</sup> Die Tier-1-Kapitalquote setzt das Tier-1-Kapital in Beziehung zu den Risikoaktiva für das Kredit-, Markt- und Operationelle Risiko. Das Tier-1-Kapital enthält keine Übergangsposten gemäß § 64h Absatz 3 KWG.

Aufgrund von Rundungen können sich im vorliegenden Bericht bei Summenbildungen und bei der Berechnung von Prozentangaben geringfügige Abweichungen ergeben.

## 01 –

### Lagebericht und Bericht des Aufsichtsrats

Überblick über die Geschäftsentwicklung – 4

Bericht des Aufsichtsrats – 43

Risikobericht – 50

Internes Kontrollsystem bezogen auf die Rechnungslegung – 118

Angaben nach § 315 Absatz 4 HGB und erläuternder Bericht – 123

Vergütungsbericht – 128

Gesellschaftliche und soziale Verantwortung – 138

Ausblick – 141

## 02 –

### Konzernabschluss

Konzern-Gewinn- und Verlustrechnung – 151

Konzern-Gesamtergebnisrechnung – 152

Konzernbilanz – 153

Konzern-Eigenkapitalveränderungsrechnung – 154

Konzern-Kapitalflussrechnung – 156

Konzernanhang mit Inhaltsverzeichnis – 157

## 03 –

### Bestätigungen

Bestätigungsvermerk des Abschlussprüfers – 372

Versicherung der gesetzlichen Vertreter – 374

## 04 –

### Erklärung zur Unternehmensführung / Corporate-Governance-Bericht

Vorstand und Aufsichtsrat – 376

Rechnungslegung und Transparenz – 386

Geschäfte mit nahestehenden Dritten – 387

Wirtschaftsprüfung und Controlling – 387

Einhaltung des Deutschen Corporate Governance Kodex – 389

## 05 –

### Ergänzende Informationen

Vorstand – 392

Aufsichtsrat – 393

Advisory Boards – 395

Der Konzern im Fünfjahresvergleich – 400

Patronatserklärung – 401

Glossar – 402

Impressum – Publikationen – 408

# 01 -

## Lagebericht und Bericht des Aufsichtsrats

### Überblick über die Geschäftsentwicklung

Der Deutsche Bank-Konzern – 4

Wirtschaftliche Entwicklung – 5

Geschäftsergebnisse – 9

Vermögenslage – 28

Liquiditäts- und Kapitalmanagement – 40

Wertorientierte Steuerung – 42

Ereignisse nach dem Bilanzstichtag – 42

### Bericht des Aufsichtsrats – 43

#### Risikobericht

Risikomanagement – Überblick – 50

Risiko- und Kapitalmanagement – 52

Risiko- und Kapitalstrategie – 55

Arten von Risiken – 55

Risikosteuerungsinstrumente – 58

Kreditrisiko – 60

Marktrisiko – 88

Operationelles Risiko – 101

Liquiditätsrisiko Deutsche Bank-Konzern (ohne Postbank) – 105

Kapitalmanagement – 113

Bilanzmanagement – 115

Gesamtrisikoposition – 116

Internes Kontrollsystem bezogen auf die Rechnungslegung – 118

Angaben nach § 315 Absatz 4 HGB und erläuternder Bericht – 123

#### Vergütungsbericht

Grundzüge des Vergütungssystems für die Mitglieder des Vorstands – 128

Grundzüge des Vergütungssystems für die Mitglieder des Aufsichtsrats – 136

#### Gesellschaftliche und soziale Verantwortung

Mitarbeiter und soziale Verantwortung – 138

Gesellschaftliche Verantwortung (Corporate Social Responsibility) – 139

Ausblick – 141



## Überblick über die Geschäftsentwicklung

Die nachfolgenden Erläuterungen sollten im Zusammenhang mit dem Konzernabschluss und den zugehörigen Erläuterungen (Notes) gesehen werden. Unsere Konzernabschlüsse für die Geschäftsjahre 2010 und 2009 wurden von der KPMG AG Wirtschaftsprüfungsgesellschaft geprüft und mit einem uneingeschränkten Bestätigungsvermerk versehen.

### Der Deutsche Bank-Konzern

#### Geschäftstätigkeit

Die Deutsche Bank, die ihren Hauptsitz in Frankfurt am Main hat, ist Deutschlands größte Bank und gehört mit einer Bilanzsumme von 1.906 Mrd € (Stand: 31. Dezember 2010) zu den führenden Finanzdienstleistern in Europa und weltweit. Zum Jahresende 2010 beschäftigte die Bank 102.062 Mitarbeiter (gerechnet auf Basis von Vollzeitkräften), die in 74 Ländern und 3.083 Niederlassungen (68 % davon in Deutschland) tätig sind. Wir bieten Privat-, Firmen- und institutionellen Kunden weltweit eine Vielzahl von Investment-, Finanz- und damit verbundenen Produkten und Dienstleistungen an.

#### Konzernbereiche

Die Deutsche Bank gliedert sich in die Konzernbereiche Corporate & Investment Bank (CIB), Private Clients and Asset Management (PCAM) sowie Corporate Investments (CI).

#### Corporate & Investment Bank

In CIB betreiben wir das Kapitalmarktgeschäft einschließlich Emission, Verkauf und Handel von Kapitalmarktprodukten wie Aktien, Anleihen und anderen Wertpapieren, das Beratungs- und das Kreditgeschäft sowie das Geschäft mit Transaktionsdienstleistungen. Unsere institutionellen Kunden kommen sowohl aus dem öffentlichen Sektor – wie souveräne Staaten und supranationale Einrichtungen – als auch aus der Privatwirtschaft, von mittelständischen Unternehmen bis hin zu multinationalen Großkonzernen.

CIB gliedert sich in die Unternehmensbereiche Corporate Banking & Securities (CB&S) und Global Transaction Banking (GTB).

CB&S besteht aus den Geschäftsbereichen Markets und Corporate Finance, die im Deutsche Bank-Konzern weltweit das Emissionsgeschäft, den Verkauf und Handel von Wertpapieren, das Beratungsgeschäft bei Fusionen und Übernahmen sowie die Corporate-Finance-Geschäfte abdecken.

Zu GTB gehört unser Produktangebot in den Geschäftszweigen Trade Finance, Cash Management und Trust & Securities Services für Finanzdienstleister und andere Unternehmen.

#### Private Clients and Asset Management

PCAM ist in die Unternehmensbereiche Asset and Wealth Management (AWM) und Private & Business Clients (PBC) gegliedert.

AWM umfasst die beiden Geschäftsbereiche Asset Management (AM) und Private Wealth Management (PWM). AM beinhaltet das weltweite Publikumsfondsgeschäft unserer Tochtergesellschaft DWS Investments. An institutionelle Kunden, einschließlich Pensionsfonds und Versicherungen, wenden wir uns mit einer breiten Produktpalette, die von klassischen Anlagen über Hedgefonds bis zu speziellen Immobilienanlagen reicht. PWM betreut weltweit vermögende und sehr vermögende Privatkunden, deren Familien sowie ausgewählte Institutionen. Dieser sehr anspruchsvollen Kundschaft bieten wir einen ganzheitlichen Service, zu dem die

individuelle Vermögensverwaltung, einschließlich der Beratung bei der Nachfolgeplanung und bei philanthropischen Überlegungen, gehört.

PBC richtet sich an Privatkunden und kleine bis mittlere Unternehmen, denen wir ein breites Spektrum von Bankdienstleistungen wie Kontoführung, Kredit- und Einlagengeschäft sowie Vermögensanlageberatung zur Verfügung stellen. In unserem deutschen Heimatmarkt haben wir mit der Akquisition der Postbank unsere führende Marktposition gefestigt. Außerhalb Deutschlands ist PBC seit Langem in Italien, Spanien, Belgien und Portugal sowie seit einigen Jahren in Polen aktiv. Darüber hinaus investieren wir gezielt in die Erschließung aufstrebender Märkte in Asien, beispielsweise in China und Indien.

### Corporate Investments

Der Konzernbereich CI betreut unsere wesentlichen globalen Beteiligungen.

## Wirtschaftliche Entwicklung

### Die Weltwirtschaft

Nach dem deutlichen wirtschaftlichen Einbruch im Jahr 2009 mit einem Rückgang des globalen Bruttoinlandsprodukts um fast 1 % dürfte die Weltwirtschaft im Jahr 2010 wieder um 4,75 % gewachsen sein. Dabei spielten drei Faktoren eine entscheidende Rolle: die Impulse der expansiven Geld- und Fiskalpolitik, Effekte aus im Jahr 2009 aufgeschobenen und in 2010 nachgeholten Investitionen sowie der Aufbau von Vorratsbeständen. Allerdings hat sich die Wachstumsdynamik etwa seit Herbst 2010 verlangsamt, da sich die Faktoren abgeschwächt haben.

Während die Wirtschaft der USA im Jahresdurchschnitt 2010 wohl um fast 3 % gewachsen ist, blieb die Eurozone mit einer realen Zunahme von nur 1,75 % der Nachzügler im internationalen konjunkturellen Vergleich. In einigen Ländern der Eurozone machten sich die Dämpfungseffekte der massiven Konsolidierungsprogramme sowie strukturelle Anpassungen, insbesondere im Immobiliensektor, bemerkbar. Zudem hat die Besorgnis an den Finanzmärkten hinsichtlich der langfristigen Zahlungsfähigkeit einiger Länder der Eurozone trotz der Finanzierungshilfen für Griechenland und Irland sowie der geplanten Einrichtung eines dauerhaften Krisenmechanismus bis zum Jahresende zugenommen. Entsprechend haben sich die Renditeabstände von Staatsanleihen dieser Länder gegenüber deutschen Bundesanleihen extrem ausgeweitet. Dagegen erreichte die deutsche Wirtschaft, gestützt von Außenhandel und einer sich erholenden Binnenkonjunktur, mit 3,6 % das höchste Wirtschaftswachstum seit der Wiedervereinigung. Die im internationalen Vergleich außergewöhnlich gute Arbeitsmarktentwicklung setzte sich fort.

Die Schwellenländer dürften im vergangenen Jahr um 7,5 % gewachsen sein, nach 2,5 % in 2009. Das Wachstum der asiatischen Schwellenländer dürfte sogar nahezu 9,5 % betragen haben. Die Wirtschaft Chinas, deren Wachstum sich 2009 nur leicht auf 8,7 % abgeschwächt hatte, hat 2010 um 10,3 % zugelegt.

### Die Bankenbranche

Das vergangene Jahr war für die Bankenbranche weltweit vor allem von drei Themen geprägt: der Erholung des Geschäfts nach dem tiefen Einbruch während der Finanzkrise, der Vorbereitung auf die umfassendsten Reformen des rechtlichen und regulatorischen Rahmenwerks seit Jahrzehnten und schließlich den wachsenden Risiken aus der hohen Staatsverschuldung zahlreicher Industrieländer.

Operativ erreichten die Banken insgesamt gute Fortschritte, allerdings kommend von einem niedrigen Niveau. Im klassischen Kreditgeschäft konnte die Risikovorsorge deutlich verringert werden, die absoluten Belastungen blieben aber weiterhin hoch. Gleichzeitig stabilisierte sich im Jahresverlauf durch eine etwas anziehende Nachfrage auch das Kreditvolumen, nachdem es im Vorjahr noch rückläufig war. Hierzu trug nicht zuletzt die anhaltend expansive Geldpolitik der Notenbanken bei.

Im Kapitalmarktgeschäft fiel der Vergleich mit dem sehr guten Jahr 2009 unterschiedlich aus. Das Volumen von Anleiheemissionen von Unternehmen und Staaten ging im Vergleich zu einem hohen Vorjahreswert etwas zurück. High-Yield-Emissionen konnten gegen diesen Trend zulegen. Aktienemissionen erwiesen sich als robust, mit Wachstum vor allem bei Börsengängen. Das Geschäft mit Fusionen und Übernahmen verbesserte sich, blieb aber schwach. Insgesamt war das Investment Banking von einer Rückkehr von Marktteilnehmern gekennzeichnet, die ihre Aktivitäten in der Finanzkrise reduziert hatten. Dadurch wurde der Wettbewerb intensiver und die Margen sanken.

In der Vermögensverwaltung profitierten die Banken von einer positiven Wertentwicklung der meisten Anlageklassen und von wachsenden Mittelzuflüssen. Im Transaktionsgeschäft wirkten sich die wieder steigende wirtschaftliche Aktivität und die dynamische Rückkehr des Welthandels auf nahezu das Vorkrisenniveau positiv aus.

Insgesamt war die Bankenbranche trotz dieser Zuwächse weiterhin nur mäßig profitabel. Die Eigenkapitalrenditen erreichten überwiegend einstellige Werte. Fast alle europäischen und US-amerikanischen Großbanken erreichten die Gewinnzone, während der Marktanteil der unprofitablen kleineren Institute deutlich sank.

Neben den operativen Fortschritten prägten vor allem die weitreichenden Regulierungsvorhaben der Gesetzgeber und Aufsichtsbehörden das Jahr 2010. Die Reform der Eigenkapitalregeln, Basel III, dürfte sich langfristig als wichtigste Neuerung erweisen. Deren Details wurden bereits zum Großteil ausgearbeitet und stehen nun vor der Umsetzung in fast allen wichtigen Finanzmärkten der Welt. Noch ist allerdings unklar, ob es gelingen wird, in allen Ländern harmonisierte Vorschriften einzuführen, und wie sich das neue Rahmenwerk konkret auf das Geschäft der Banken auswirken wird.

Darüber hinaus war das Umfeld für die Bankenbranche im Jahr 2010 ebenfalls stark durch die europäische Staatsschuldenkrise sowie von der Sorge um einen schwachen Aufschwung oder sogar einen Rückfall bedeutender Volkswirtschaften in die Rezession bestimmt. Während sich die Konjunktur in den letzten Monaten robust zeigte und sich damit auch die Aussichten für das Bankgeschäft aufhellten, belasteten die Schuldenproblematik insbesondere einiger Euroländer und deren mangelnde Wettbewerbsfähigkeit dauerhaft die Märkte. Dies führte zeitweise auch zu Belastungen im Bankensektor. Die Refinanzierungsmärkte für Institute der am stärksten betroffenen Länder trockneten aus und es kam zu Kritik an den umfangreichen grenzüberschreitenden Aktivitäten vor allem europäischer Banken sowie generell zu hoher Volatilität an den Finanzmärkten.

## Deutsche Bank

In diesem Umfeld hat die Deutsche Bank im Geschäftsjahr 2010 einen Jahresüberschuss von 2,3 Mrd € erzielt. Unter Berücksichtigung signifikanter Sonderfaktoren ist das ein sehr solides Ergebnis im Vergleich zu 5,0 Mrd € im Jahr 2009. Zu diesen Sonderfaktoren zählen erstens bestimmte bewertungs- und integrationsbezogene Aufwendungen im Zusammenhang mit den Akquisitionen des Firmenkundengeschäfts der ABN AMRO in den Niederlanden, der Sal. Oppenheim/BHF-BANK und der Postbank, inklusive einer Belastung von 2,3 Mrd € bezüglich der Postbank. Zweitens haben wir im Jahresverlauf gezielte Investitionen in die CIB-Integration, in unsere IT-Plattform und in andere Wachstumsinitiativen getätigt und drittens waren im Jahr 2010 die Aufwendungen für aufgeschobene Vergütungen aufgrund von im Vorjahr vorgenommenen Änderungen in der Vergütungsstruktur deutlich erhöht. Darüber hinaus führte die Konsolidierung der vorgenannten Akquisitionen zu

einem Anstieg sowohl unserer laufenden Erträge und Aufwendungen als auch unserer Bilanzsumme, der risikogewichteten Aktiva und der Invested Assets. Aufgrund von Wechselkursveränderungen, insbesondere zwischen dem US-Dollar und dem Euro, stiegen im Jahr 2010 unsere in Euro berichteten Erträge und Aufwendungen deutlich an, mit einer insgesamt positiven Auswirkung auf den Jahresüberschuss.

Die Erträge im Geschäftsjahr 2010 gehören mit 28,6 Mrd € zu den höchsten je erwirtschafteten Erträgen. Dies entspricht einem Anstieg von 615 Mio € gegenüber 28,0 Mrd € im Vorjahr. In CIB stiegen die Erträge von 18,8 Mrd € im Jahr 2009 auf 20,9 Mrd € im Jahr 2010. Sales & Trading verzeichnete im Gesamtjahr 2010 Erträge von 12,8 Mrd € nach 12,2 Mrd € im Vorjahr. Diese Entwicklung spiegelt hauptsächlich niedrigere negative Marktwertanpassungen aus Altbeständen, geringere Handelsverluste im Aktienderivategeschäft sowie eine höhere Kundenaktivität bei standardisierten Produkten und strukturierten Lösungen im Handel mit Kreditprodukten wider. Dem standen im Geldmarkt- und Zinsgeschäft Effekte aus der Normalisierung der Geld-/Briefspannen und aus einer verhalteneren Kundenaktivität in Money Markets und Rates gegenüber. Die Erträge im Emissions- und Beratungsgeschäft beliefen sich im Berichtsjahr auf 2,5 Mrd € nach 2,2 Mrd € im Vorjahr. In PCAM stiegen die Erträge im Jahr 2010 um 1,8 Mrd € auf 10,0 Mrd €. Diese Entwicklung war hauptsächlich auf die erstmalige Konsolidierung der Postbank und die Akquisition von Sal. Oppenheim/BHF-BANK zurückzuführen. Außerdem stiegen die Erträge von PBC infolge höherer Margen im Einlagengeschäft. AWM verzeichnete einen Ertragsanstieg, der auf im Vorjahr vorgenommene Abschreibungen bei RREEF Investments sowie auf im Berichtsjahr höhere Provisionseinnahmen aufgrund eines günstigeren Marktumfelds zurückzuführen war. In CI beliefen sich die Erträge 2010 auf negative 2,0 Mrd € gegenüber positiven Erträgen in Höhe von 1,0 Mrd € im Jahr 2009. In beiden Jahren waren die Erträge im Wesentlichen durch die Beteiligung an der Postbank beeinflusst und enthielten im dritten Quartal 2010 die vorgenannte Belastung. Im Vorjahr waren mehrere positive Effekte im Zusammenhang mit der Postbank entstanden.

Die Risikovorsorge im Kreditgeschäft belief sich 2010 auf 1,3 Mrd € gegenüber 2,6 Mrd € im Vorjahr. Dieser Rückgang resultierte im Wesentlichen aus deutlich geringeren Wertberichtigungen für gemäß IAS 39 umklassifizierte Vermögenswerte.

Im Gesamtjahr 2010 beliefen sich die Zinsunabhängigen Aufwendungen auf 23,3 Mrd €, verglichen mit 20,1 Mrd € im Vorjahr. Rund die Hälfte des Anstiegs entfiel auf die Akquisitionen im Jahr 2010. Darüber hinaus ergaben sich im Personalaufwand höhere Aufwendungen für aufgeschobene Vergütungskomponenten infolge der Ende 2009 vorgenommenen Änderungen in der Vergütungsstruktur (einschließlich des Effekts aus der beschleunigten Erfassung von Aufwendungen für Mitarbeiter, deren Ansprüche zum Zeitpunkt der Begebung aufgrund der für sie geltenden Planbedingungen unverfallbar waren). Der übrige Anstieg war auf die vorgenannten Investitionen in die CIB-Integration, in unsere IT-Plattform und in andere Wachstumsinitiativen zurückzuführen.

Das Ergebnis vor Steuern belief sich im Jahr 2010 auf 4,0 Mrd €. Darin enthalten war die vorgenannte bewertungsbezogene Belastung im Zusammenhang mit der Postbank im dritten Quartal 2010 in Höhe von 2,3 Mrd €. Dies vergleicht sich zu einem Ergebnis vor Steuern von 5,2 Mrd € im Vorjahr. Die Eigenkapitalrendite (basierend auf dem durchschnittlichen Active Equity) belief sich im Jahr 2010 auf 9,6 % beziehungsweise auf 9,5 % (basierend auf dem durchschnittlichen Eigenkapital). Im Jahr 2009 betrug die Eigenkapitalrendite (basierend auf dem durchschnittlichen Active Equity) 15,1 % beziehungsweise 15,3 % (basierend auf dem durchschnittlichen Eigenkapital). Das Ergebnis je Aktie (verwässert) belief sich im Berichtsjahr, nach Sondereffekten, auf 2,92 € im Vergleich zu 6,94 € im Vorjahr.

Die vorgenannten Umrechnungseffekte trugen auch zu einem Anstieg der Aktiva, Passiva und der Invested Assets im Vergleich zum 31. Dezember 2009 bei. Nach erfolgreichem Abschluss unserer Kapitalerhöhung lag die Tier-1-Kapitalquote zum 31. Dezember 2010 bei 12,3 %. Die Tier-1-Kernkapitalquote betrug zum selben Zeitpunkt 8,7 %. Die risikogewichteten Aktiva lagen zum Bilanzstichtag bei 346 Mrd € im Vergleich zu 273 Mrd € am Jahresende 2009. Hauptursache für den Anstieg war mit 60 Mrd € die erstmalige Konsolidierung der Postbank.

Die folgende Tabelle gibt einen Überblick über die Gewinn- und Verlustrechnung des Konzerns für 2010 und 2009.

| in Mio €<br>(sofern nicht anders angegeben)                                         | 2010          | 2009          | Veränderung 2010<br>gegenüber 2009 |             |
|-------------------------------------------------------------------------------------|---------------|---------------|------------------------------------|-------------|
|                                                                                     |               |               | in Mio €                           | in %        |
| Zinsüberschuss                                                                      | 15.583        | 12.459        | 3.124                              | 25          |
| Risikovorsorge im Kreditgeschäft                                                    | 1.274         | 2.630         | – 1.356                            | – 52        |
| <b>Zinsüberschuss nach Risikovorsorge im Kreditgeschäft</b>                         | <b>14.309</b> | <b>9.829</b>  | <b>4.480</b>                       | <b>46</b>   |
| Provisionsüberschuss                                                                | 10.669        | 8.911         | 1.758                              | 20          |
| Ergebnis aus zum Fair Value bewerteten finanziellen Vermögenswerten/Verpflichtungen | 3.354         | 7.109         | – 3.755                            | – 53        |
| Ergebnis aus zur Veräußerung verfügbaren finanziellen Vermögenswerten               | 201           | – 403         | 604                                | N/A         |
| Ergebnis aus nach der Equitymethode bilanzierten Beteiligungen                      | – 2.004       | 59            | – 2.063                            | N/A         |
| Sonstige Erträge                                                                    | 764           | – 183         | 947                                | N/A         |
| <b>Zinsunabhängige Erträge insgesamt</b>                                            | <b>12.984</b> | <b>15.493</b> | <b>– 2.509</b>                     | <b>– 16</b> |
| <b>Summe Erträge insgesamt</b>                                                      | <b>27.293</b> | <b>25.322</b> | <b>1.971</b>                       | <b>8</b>    |
| Personalaufwand                                                                     | 12.671        | 11.310        | 1.361                              | 12          |
| Sachaufwand und sonstiger Aufwand                                                   | 10.133        | 8.402         | 1.731                              | 21          |
| Aufwendungen im Versicherungsgeschäft                                               | 485           | 542           | – 57                               | – 11        |
| Wertminderung auf immaterielle Vermögenswerte                                       | 29            | – 134         | 163                                | N/A         |
| Restrukturierungsaufwand                                                            | –             | –             | –                                  | N/A         |
| <b>Zinsunabhängige Aufwendungen insgesamt</b>                                       | <b>23.318</b> | <b>20.120</b> | <b>3.198</b>                       | <b>16</b>   |
| <b>Ergebnis vor Steuern</b>                                                         | <b>3.975</b>  | <b>5.202</b>  | <b>– 1.227</b>                     | <b>– 24</b> |
| Ertragsteueraufwand/-ertrag (–)                                                     | 1.645         | 244           | 1.401                              | N/A         |
| <b>Jahresüberschuss/Jahresfehlbetrag (–)</b>                                        | <b>2.330</b>  | <b>4.958</b>  | <b>– 2.628</b>                     | <b>– 53</b> |
| Den Anteilen ohne beherrschenden Einfluss zurechenbares Konzernergebnis             | 20            | – 15          | 35                                 | N/A         |
| Den Deutsche Bank-Aktionären zurechenbares Konzernergebnis                          | 2.310         | 4.973         | – 2.663                            | – 54        |

N/A – nicht aussagefähig

## Geschäftsergebnisse

### Konzernergebnisse

Die nachfolgenden Erläuterungen sind im Zusammenhang mit dem Konzernabschluss zu sehen.

### Zinsüberschuss

Die folgende Tabelle enthält Informationen zu unserem Zinsüberschuss.

| in Mio €<br>(sofern nicht anders angegeben)             | 2010          | 2009          | Veränderung 2010<br>gegenüber 2009 |           |
|---------------------------------------------------------|---------------|---------------|------------------------------------|-----------|
|                                                         |               |               | in Mio €                           | in %      |
| Zinsen und ähnliche Erträge insgesamt                   | 28.779        | 26.953        | 1.826                              | 7         |
| Summe der Zinsaufwendungen                              | 13.196        | 14.494        | - 1.298                            | - 9       |
| <b>Zinsüberschuss</b>                                   | <b>15.583</b> | <b>12.459</b> | <b>3.124</b>                       | <b>25</b> |
| Verzinsliche Aktiva im Jahresdurchschnitt <sup>1</sup>  | 993.780       | 879.601       | 114.179                            | 13        |
| Verzinsliche Passiva im Jahresdurchschnitt <sup>1</sup> | 933.537       | 853.383       | 80.154                             | 9         |
| Zinsertragssatz <sup>2</sup>                            | 2,90 %        | 3,06 %        | - 0,16 Ppkt.                       | - 5       |
| Zinsaufwandssatz <sup>3</sup>                           | 1,41 %        | 1,70 %        | - 0,29 Ppkt.                       | - 17      |
| Zinsspanne <sup>4</sup>                                 | 1,48 %        | 1,37 %        | 0,11 Ppkt.                         | 8         |
| Zinsmarge <sup>5</sup>                                  | 1,57 %        | 1,42 %        | 0,15 Ppkt.                         | 11        |

Ppkt. – Prozentpunkte

<sup>1</sup> Der durchschnittliche Jahreswert wird jeweils auf Basis der Monatsendwerte ermittelt.

<sup>2</sup> Der Zinsertragssatz ist der durchschnittlich erzielte Zins auf unsere verzinslichen Aktiva im Jahresdurchschnitt.

<sup>3</sup> Der Zinsaufwandssatz ist der durchschnittlich gezahlte Zins auf unsere verzinslichen Passiva im Jahresdurchschnitt.

<sup>4</sup> Die Zinsspanne ist die Differenz zwischen dem durchschnittlich erzielten Zins auf unsere verzinslichen Aktiva im Jahresdurchschnitt und dem durchschnittlich gezahlten Zins auf unsere verzinslichen Passiva im Jahresdurchschnitt.

<sup>5</sup> Die Zinsmarge ist der Zinsüberschuss im Verhältnis zu unseren verzinslichen Aktiva im Jahresdurchschnitt.

Der Zinsüberschuss belief sich 2010 auf 15,6 Mrd € und stieg damit gegenüber dem Vorjahr um 3,1 Mrd € (25%). Dieser Anstieg war in erster Linie auf rückläufige Zinsaufwendungen zurückzuführen, da höher verzinsliche Verbindlichkeiten aus Vorjahren durch Verbindlichkeiten zu einem niedrigeren aktuellen Marktzins ersetzt wurden. Darüber hinaus lag das Marktzinsniveau zu Beginn des Jahres 2009 auf höherem Niveau. Außerdem erhöhte sich der Zinsertrag infolge einer Zunahme der durchschnittlichen verzinslichen Aktiva um 114 Mrd € (hauptsächlich im Konzernbereich Corporate Banking & Securities), die damit stärker wuchsen als die durchschnittlichen verzinslichen Passiva. Insgesamt führten diese Entwicklungen zu einer Ausweitung unserer Zinsspanne um 11 Basispunkte und einem Anstieg unserer Nettozinsspanne um 15 Basispunkte.

Die Entwicklung unseres Zinsüberschusses wird von der Bilanzierung einiger unserer zu Absicherungszwecken abgeschlossenen Derivategeschäfte beeinflusst. Derivategeschäfte, die keinen Handelszwecken dienen, werden vorwiegend zur wirtschaftlichen Absicherung gegen Zinsänderungsrisiken unserer Nichthandelsaktiva beziehungsweise -passiva abgeschlossen. Einige dieser Derivategeschäfte erfüllen die Anforderungen an eine Bilanzierung als Absicherungsgeschäft. In diesem Fall werden erhaltene oder gezahlte Zinsen aus den Derivaten in den Zinserträgen beziehungsweise -aufwendungen ausgewiesen, wo sie die Zinsströme aus den abgesicherten Finanzinstrumenten ausgleichen („Hedge Accounting“). Erfüllen Derivate die bilanziellen Anforderungen an Absicherungsgeschäfte nicht, werden die Zinsströme aus diesen Derivaten dem Handelsergebnis zugerechnet.



## Ergebnis aus zum Fair Value bewerteten finanziellen Vermögenswerten/Verpflichtungen

Die folgende Tabelle enthält Informationen zu unserem Ergebnis aus zum Fair Value bewerteten finanziellen Vermögenswerten/Verpflichtungen.

| in Mio €<br>(sofern nicht anders angegeben)                                                | 2010         | 2009         | Veränderung 2010<br>gegenüber 2009 |             |
|--------------------------------------------------------------------------------------------|--------------|--------------|------------------------------------|-------------|
|                                                                                            |              |              | in Mio €                           | in %        |
| CIB – Sales & Trading (Equity)                                                             | 451          | 1.125        | – 674                              | – 60        |
| CIB – Sales & Trading (Debt und sonstige Produkte)                                         | 2.912        | 4.130        | – 1.218                            | – 29        |
| Sonstige                                                                                   | – 9          | 1.854        | – 1.863                            | N/A         |
| <b>Ergebnis aus zum Fair Value bewerteten finanziellen Vermögenswerten/Verpflichtungen</b> | <b>3.354</b> | <b>7.109</b> | <b>– 3.755</b>                     | <b>– 53</b> |

N/A – nicht aussagefähig

Der Rückgang im Ergebnis aus zum Fair Value bewerteten finanziellen Vermögenswerten/Verpflichtungen um 3,8 Mrd € gegenüber dem Vorjahr wurde durch einen Anstieg des Zinsüberschusses weitgehend ausgeglichen. Sales & Trading (Debt und sonstige Produkte) verzeichnete im Jahr 2010 einen Gewinn aus zum Fair Value bewerteten finanziellen Vermögenswerten/Verpflichtungen in Höhe von 2,9 Mrd € nach 4,1 Mrd € im Jahr 2009. Ursächlich für diesen Rückgang waren in erster Linie im Vergleich zum Vorjahr schwierigere Marktbedingungen im Geldmarkt- und Zinsgeschäft sowie im Geschäft mit Schwellenländern. Dem standen niedrigere Marktwertanpassungen aus Altbeständen im Handel mit Kreditprodukten gegenüber. Sales & Trading (Equity) verzeichnete ein Ergebnis aus zum Fair Value bewerteten finanziellen Vermögenswerten/Verpflichtungen von 451 Mio € gegenüber 1,1 Mrd € in 2009. Dieser Rückgang war vor allem auf gesunkene Handelserträge aus dem Cash Trading infolge einer rückläufigen Kundenaktivität zurückzuführen, wurde aber teilweise durch geringere Handelsverluste im Geschäft mit Aktienderivaten ausgeglichen. Das Ergebnis aus zum Fair Value bewerteten finanziellen Vermögenswerten/Verpflichtungen unter der Position „Sonstige“ belief sich 2010 auf negative 9 Mio € gegenüber positiven 1,9 Mrd € im Vorjahr. Diese Entwicklung beinhaltete folgende Faktoren: Im Vorjahr waren in CI Marktwertgewinne im Zusammenhang mit der Beteiligung an der Postbank angefallen. Im Vorjahr beinhaltete C&A Gewinne aus Derivaten, mit denen Auswirkungen aus aktienbasierten Vergütungsplänen auf das Eigenkapital abgesichert worden waren. Außerdem fielen im Kreditgeschäft von CIB Marktwertverluste aus neu begebenen, zum Fair Value bewerteten Krediten und Kreditzusagen an.

## Zinsüberschuss und Ergebnis aus zum Fair Value bewerteten finanziellen Vermögenswerten/Verpflichtungen

Unsere Handels- und Risikomanagementaktivitäten umfassen wesentliche Aktivitäten in Zinsinstrumenten und zugehörigen Derivaten. Nach IFRS werden Zinsen und ähnliche Erträge aus Handelsinstrumenten und zum Fair Value klassifizierten Finanzinstrumenten (zum Beispiel Coupon- und Dividendenerträge) sowie die Refinanzierungskosten für Handelspositionen als Bestandteil des Zinsüberschusses ausgewiesen. Abhängig von unterschiedlichen Faktoren, zu denen auch Risikomanagementstrategien gehören, werden die Erträge aus unseren Handelsaktivitäten entweder unter Zinsen und ähnlichen Erträgen oder im Ergebnis aus zum Fair Value bewerteten finanziellen Vermögenswerten/Verpflichtungen ausgewiesen.

Um diese Entwicklung, bezogen auf die Geschäftstätigkeit des Konzerns, besser analysieren zu können, untergliedern wir im Folgenden die Summe aus Zinsüberschuss und Ergebnis aus zum Fair Value bewerteten finanziellen Vermögenswerten/Verpflichtungen nach Konzernbereichen beziehungsweise innerhalb des Konzernbereichs Corporate & Investment Bank nach Produkten.

| in Mio €<br>(sofern nicht anders angegeben)                                                                             | 2010          | 2009          | Veränderung 2010<br>gegenüber 2009 |           |
|-------------------------------------------------------------------------------------------------------------------------|---------------|---------------|------------------------------------|-----------|
|                                                                                                                         |               |               | in Mio €                           | in %      |
| Zinsüberschuss                                                                                                          | 15.583        | 12.459        | 3.124                              | 25        |
| Ergebnis aus zum Fair Value bewerteten finanziellen Vermögenswerten/Verpflichtungen                                     | 3.354         | 7.109         | –3.755                             | –53       |
| <b>Zinsüberschuss und Ergebnis aus zum Fair Value bewerteten finanziellen Vermögenswerten/Verpflichtungen insgesamt</b> | <b>18.937</b> | <b>19.568</b> | <b>–631</b>                        | <b>–3</b> |
| <b>Aufgliederung nach Konzernbereich/CIB-Produkt:<sup>1</sup></b>                                                       |               |               |                                    |           |
| Sales & Trading (Equity)                                                                                                | 2.266         | 2.047         | 218                                | 11        |
| Sales & Trading (Debt und sonstige Produkte)                                                                            | 9.204         | 9.725         | –521                               | –5        |
| Sales & Trading insgesamt                                                                                               | 11.469        | 11.772        | –302                               | –3        |
| Kreditgeschäft <sup>2</sup>                                                                                             | 778           | 777           | 1                                  | 0         |
| Transaction Services                                                                                                    | 1.497         | 1.180         | 317                                | 27        |
| Übrige Produkte <sup>3</sup>                                                                                            | 336           | 240           | 97                                 | 40        |
| Corporate & Investment Bank insgesamt                                                                                   | 14.081        | 13.969        | 112                                | 1         |
| Private Clients and Asset Management                                                                                    | 4.708         | 4.157         | 550                                | 13        |
| Corporate Investments                                                                                                   | –184          | 793           | –977                               | N/A       |
| Consolidation & Adjustments                                                                                             | 331           | 649           | –317                               | –49       |
| <b>Zinsüberschuss und Ergebnis aus zum Fair Value bewerteten finanziellen Vermögenswerten/Verpflichtungen insgesamt</b> | <b>18.937</b> | <b>19.568</b> | <b>–631</b>                        | <b>–3</b> |

N/A – nicht aussagefähig

<sup>1</sup> Diese Aufgliederung reflektiert lediglich den Zinsüberschuss und das Ergebnis aus zum Fair Value bewerteten finanziellen Vermögenswerten/Verpflichtungen. Die Erläuterung der Segmenterträge insgesamt nach Produkten erfolgt im Abschnitt „Segmentberichterstattung“.

<sup>2</sup> Enthält sowohl die Zinsspanne für Forderungen aus dem Kreditgeschäft als auch die Veränderungen im Fair Value von Credit Default Swaps und zum Fair Value klassifizierten Forderungen aus dem Kreditgeschäft.

<sup>3</sup> Enthält den Zinsüberschuss und das Ergebnis aus zum Fair Value bewerteten finanziellen Vermögenswerten/Verpflichtungen aus dem Emissions- und Beratungsgeschäft sowie aus sonstigen Produkten.

**Corporate & Investment Bank (CIB).** Die Summe aus Zinsüberschuss und Ergebnis aus zum Fair Value bewerteten finanziellen Vermögenswerten/Verpflichtungen aus Sales & Trading belief sich im Jahr 2010 auf 11,5 Mrd € nach 11,8 Mrd € im Vorjahr. Haupttreiber dieses Rückgangs waren niedrigere Erträge im Geldmarkt- und Zinsgeschäft, die vor allem auf deutlich gesunkene Geld-/Briefspannen und eine verhaltene Kundenaktivität infolge der Staatsschuldenkrise zurückzuführen waren. Darüber hinaus war die Summe aus Zinsüberschuss und Ergebnis aus zum Fair Value bewerteten finanziellen Vermögenswerten/Verpflichtungen im Geschäft in Schwellenländern rückläufig, was aus gegenüber dem Vorjahr verschlechterten Marktbedingungen resultierte. Dem standen niedrigere Marktwertanpassungen aus Altbeständen im Handel mit Kreditprodukten und im Vergleich zu 2009 niedrigere Handelsverluste im Geschäft mit Aktienderivaten gegenüber. Im Kreditgeschäft blieb die Summe aus Zinsüberschuss und Ergebnis aus zum Fair Value bewerteten finanziellen Vermögenswerten/Verpflichtungen nahezu unverändert, während sie bei Transaction Services um 317 Mio € anstieg. Diese Zunahme spiegelt das Geschäftswachstum in allen Bereichen von Global Transaction Banking (inklusive der vorgenannten Akquisition) wider. Der Anstieg bei den Übrigen Produkten um 97 Mio € war hauptsächlich auf das Emissions- und Beratungsgeschäft zurückzuführen.

**Private Clients and Asset Management (PCAM).** Die Summe aus Zinsüberschuss und Ergebnis aus zum Fair Value bewerteten finanziellen Vermögenswerten/Verpflichtungen stieg gegenüber 2009 um 550 Mio € (13 %) auf 4,7 Mrd €. Diese Zunahme war in erster Linie auf die erstmalige Konsolidierung der Postbank zurückzuführen. Daneben beinhaltete die Zunahme auch höhere Zinserträge aus dem Kredit- und Einlagengeschäft sowie aus dem Zahlungsverkehr.

**Corporate Investments (CI).** Die Summe aus Zinsüberschuss und Ergebnis aus zum Fair Value bewerteten finanziellen Vermögenswerten/Verpflichtungen belief sich 2010 auf negative 184 Mio € nach positiven 793 Mio € im Vorjahr. Im Vorjahr waren hier Gewinne im Zusammenhang mit unserer Minderheitsbeteiligung an der Postbank angefallen.

**Consolidation & Adjustments (C&A).** Die Summe aus Zinsüberschuss und Ergebnis aus zum Fair Value bewerteten finanziellen Vermögenswerten/Verpflichtungen belief sich 2010 auf 331 Mio € nach 649 Mio € im Vorjahr. Dieser Rückgang resultierte im Wesentlichen aus den 2009 bilanzierten Gewinnen aus Derivaten, mit denen Auswirkungen aus Verpflichtungen im Zusammenhang mit aktienbasierten Vergütungsplänen auf das Eigenkapital abgesichert wurden. Zudem enthielt das Vorjahr einen höheren Zinsüberschuss für nicht bereichsbezogene Aktiva und Passiva, einschließlich Steuerpositionen.

### Risikovorsorge im Kreditgeschäft

Die Risikovorsorge im Kreditgeschäft belief sich im Jahr 2010 auf 1,3 Mrd €, verglichen mit 2,6 Mrd € im Vorjahr. Die Risikovorsorge im Kreditgeschäft in CIB betrug 488 Mio €, verglichen mit 1,8 Mrd € im Jahr 2009. Darin spiegelt sich insbesondere ein deutlicher Rückgang der Risikovorsorge für gemäß IAS 39 umklassifizierte Vermögenswerte wider. Die Risikovorsorge in PCAM belief sich auf 789 Mio € einschließlich 56 Mio € bei der Postbank. Ohne die Postbank belief sich die Risikovorsorge auf 733 Mio € nach 806 Mio € im Vorjahr. Diese Verbesserung wurde durch Maßnahmen beeinflusst, die auf Portfolio- und Länderebene getroffen wurden. Im Vorjahr war die Risikovorsorge im Kreditgeschäft durch eine Überarbeitung bestimmter Parameter und Modellannahmen positiv beeinflusst, was zu einer Reduzierung der Risikovorsorge um 87 Mio € in CIB und um 146 Mio € in PCAM führte.

Weitere Informationen über die Risikovorsorge im Kreditgeschäft enthält der Risikobericht im Abschnitt „Kreditrisiko – Veränderungen im Wertberichtigungsbestand“.

### Übrige zinsunabhängige Erträge

Die nachfolgende Tabelle enthält Informationen zu den Übrigen zinsunabhängigen Erträgen.

| in Mio €<br>(sofern nicht anders angegeben)                           | 2010         | 2009         | Veränderung 2010<br>gegenüber 2009 |           |
|-----------------------------------------------------------------------|--------------|--------------|------------------------------------|-----------|
|                                                                       |              |              | in Mio €                           | in %      |
| Provisionsüberschuss <sup>1</sup>                                     | 10.669       | 8.911        | 1.758                              | 20        |
| Ergebnis aus zur Veräußerung verfügbaren finanziellen Vermögenswerten | 201          | – 403        | 604                                | N/A       |
| Ergebnis aus nach der Equitymethode bilanzierten Beteiligungen        | – 2.004      | 59           | – 2.063                            | N/A       |
| Sonstige Erträge                                                      | 764          | – 183        | 947                                | N/A       |
| <b>Übrige zinsunabhängige Erträge</b>                                 | <b>9.630</b> | <b>8.384</b> | <b>1.246</b>                       | <b>15</b> |

N/A – nicht aussagefähig

<sup>1</sup> beinhaltet:

|                                                           | 2010          | 2009         | in Mio €     | in %      |
|-----------------------------------------------------------|---------------|--------------|--------------|-----------|
| Provisionsüberschuss aus Treuhandgeschäften               |               |              |              |           |
| Provisionsüberschuss aus Verwaltungstätigkeiten           | 491           | 392          | 99           | 25        |
| Provisionsüberschuss aus Vermögensverwaltung              | 2.833         | 2.319        | 514          | 22        |
| Provisionsüberschuss aus sonstigen Wertpapiergeschäften   | 205           | 214          | – 9          | – 4       |
| <b>Insgesamt</b>                                          | <b>3.529</b>  | <b>2.925</b> | <b>604</b>   | <b>21</b> |
| Provisionsüberschuss des Wertpapiergeschäfts              |               |              |              |           |
| Provisionsüberschuss aus Emissions- und Beratungsgeschäft | 2.148         | 1.767        | 381          | 22        |
| Provisionsüberschuss aus Maklergeschäften                 | 1.725         | 1.682        | 43           | 3         |
| <b>Insgesamt</b>                                          | <b>3.873</b>  | <b>3.449</b> | <b>424</b>   | <b>12</b> |
| Provisionsüberschuss für sonstige Dienstleistungen        | 3.267         | 2.537        | 730          | 29        |
| <b>Provisionsüberschuss insgesamt</b>                     | <b>10.669</b> | <b>8.911</b> | <b>1.758</b> | <b>20</b> |

**Provisionsüberschuss.** Der Provisionsüberschuss lag im Geschäftsjahr 2010 mit 10,7 Mrd € um 1,8 Mrd € (20 %) über dem Vorjahreswert. Der Provisionsüberschuss aus Treuhandgeschäften stieg gegenüber dem Vorjahr um 604 Mio €. Ursächlich dafür waren höhere volumen- und erfolgsabhängige Provisionen in AM. Der Provisionsüberschuss aus dem Emissions- und Beratungsgeschäft erhöhte sich um 381 Mio € (22 %), vor allem infolge unserer Beteiligung bei zahlreichen großen Börsengängen (IPOs). Der Provisionsüberschuss aus Maklergeschäften wuchs um 43 Mio € (3 %), im Wesentlichen infolge der erstmaligen Konsolidierung von Sal. Oppenheim/BHF-BANK sowie eines gegenüber dem Vorjahr verbesserten Ergebnisses in PBC. Dieser positiven Entwicklung stand teilweise ein Rückgang in CB&S gegenüber. Der Provisionsüberschuss für sonstige Dienstleistungen stieg infolge einer höheren Geschäftsaktivität um 730 Mio € (29 %).

**Ergebnis aus zur Veräußerung verfügbaren finanziellen Vermögenswerten.** Die Gewinne aus zur Veräußerung verfügbaren finanziellen Vermögenswerten beliefen sich 2010 auf 201 Mio € nach Verlusten von 403 Mio € im Vorjahr. Die Gewinne im Berichtsjahr resultierten vor allem aus dem Verkauf von Aktien der Axel Springer AG in CB&S, die als Kreditsicherheit verpfändet wurden, sowie aus dem Verkauf einer Wertpapierposition in PBC. Die Verluste im Vorjahr waren vor allem auf Wertberichtigungen auf Positionen in CB&S sowie im Immobilieninvestmentgeschäft von AM zurückzuführen.

**Ergebnis aus nach der Equitymethode bilanzierten Beteiligungen.** Der Verlust aus nach der Equitymethode bilanzierten Beteiligungen betrug im Berichtsjahr 2,0 Mrd € nach einem Gewinn von 59 Mio € in 2009. Der Verlust im Jahr 2010 resultierte aus unserer Beteiligung an der Postbank und beinhaltete eine Belastung von 2,3 Mrd €, die teilweise durch anteilige Gewinne kompensiert wurde. Im Vorjahr beinhaltete das Ergebnis aus nach der Equitymethode bilanzierten Beteiligungen ebenfalls Gewinne aus unserer Beteiligung an der Postbank, die teilweise durch Abschreibungen auf nach der Equitymethode bilanzierten Beteiligungen im gewerblichen Immobiliengeschäft von CB&S kompensiert wurden.

**Sonstige Erträge.** Die Sonstigen Erträge beliefen sich in 2010 auf positive 764 Mio € nach negativen 183 Mio € im Jahr 2009. Diese Entwicklung war hauptsächlich auf folgende Faktoren zurückzuführen: deutlich niedrigere Abschreibungen im Jahr 2010 bezüglich der Immobilie The Cosmopolitan of Las Vegas, höhere Erträge aus zu Sicherungszwecken gehaltenen Derivaten und ein Sonderertrag aus negativem Goodwill im Zusammenhang mit den von ABN AMRO übernommenen Aktivitäten im Firmenkundengeschäft in den Niederlanden.

## Zinsunabhängige Aufwendungen

Die nachfolgende Tabelle enthält Informationen zu den Zinsunabhängigen Aufwendungen.

| in Mio €<br>(sofern nicht anders angegeben)    | Veränderung 2010<br>gegenüber 2009 |               |              |           |
|------------------------------------------------|------------------------------------|---------------|--------------|-----------|
|                                                | 2010                               | 2009          | in Mio €     | in %      |
| Personalaufwand                                | 12.671                             | 11.310        | 1.361        | 12        |
| Sachaufwand und sonstiger Aufwand <sup>1</sup> | 10.133                             | 8.402         | 1.731        | 21        |
| Aufwendungen im Versicherungsgeschäft          | 485                                | 542           | –57          | –11       |
| Wertminderung auf immaterielle Vermögenswerte  | 29                                 | –134          | 163          | N/A       |
| Restrukturierungsaufwand                       | –                                  | –             | –            | N/A       |
| <b>Zinsunabhängige Aufwendungen insgesamt</b>  | <b>23.318</b>                      | <b>20.120</b> | <b>3.198</b> | <b>16</b> |

N/A – nicht aussagefähig

<sup>1</sup> beinhaltet:

|                                                                         | 2010          | 2009         | in Mio €     | in %      |
|-------------------------------------------------------------------------|---------------|--------------|--------------|-----------|
| EDV-Aufwendungen                                                        | 2.274         | 1.759        | 515          | 29        |
| Mieten und Aufwendungen für Gebäude, Betriebs- und Geschäftsausstattung | 1.665         | 1.457        | 208          | 14        |
| Aufwendungen für Beratungs- und ähnliche Dienstleistungen               | 1.616         | 1.088        | 528          | 49        |
| Kommunikation und Datenadministration                                   | 785           | 672          | 113          | 17        |
| Aufwendungen für Reisen und Repräsentation                              | 558           | 408          | 150          | 37        |
| Zahlungsverkehrs-, Abwicklungs- und Depotdienstleistungen               | 418           | 406          | 12           | 3         |
| Marketingaufwendungen                                                   | 341           | 278          | 63           | 23        |
| Sonstige Aufwendungen                                                   | 2.476         | 2.334        | 142          | 6         |
| <b>Sachaufwand und sonstiger Aufwand insgesamt</b>                      | <b>10.133</b> | <b>8.402</b> | <b>1.731</b> | <b>21</b> |

**Personalaufwand.** Der Anstieg des Personalaufwands um 1,4 Mrd € (12 %) im Berichtsjahr gegenüber 2009 beinhaltete 660 Mio € im Zusammenhang mit den vorgenannten Akquisitionen im Jahr 2010. Darüber hinaus reflektierte die Zunahme höhere Aufwendungen für aufgeschobene Vergütungskomponenten infolge von Änderungen der Vergütungsstruktur im Jahr 2009, vor allem im Hinblick auf einen höheren Anteil aufgeschobener Vergütungskomponenten (einschließlich des Effekts aus der beschleunigten Erfassung von Aufwendungen für Mitarbeiter, deren Ansprüche zum Zeitpunkt der Begebung aufgrund der für sie geltenden Planbedingungen unverfallbar waren).

**Sachaufwand und sonstiger Aufwand.** Die Zunahme des Sachaufwands und sonstigen Aufwands von 1,7 Mrd € gegenüber 2009 enthielt 1,0 Mrd € aus den Akquisitionen im Berichtsjahr, inklusive höherer Aufwendungen für Beratungs- und ähnliche Dienstleistungen. Der übrige Anstieg im Jahr 2010 war auf Effekte von Wechselkursänderungen sowie auf höhere Investitionen in unsere IT-Plattform und in das Geschäftswachstum im Jahr 2010 zurückzuführen. Daneben beinhaltete der Anstieg auch höhere operative Kosten aus konsolidierten Beteiligungen, insbesondere für die Immobilie The Cosmopolitan of Las Vegas, die im Dezember 2010 eröffnet wurde. Im Jahr 2009 beinhaltete der Sachaufwand und sonstige Aufwand 316 Mio € aus dem Abschluss eines Vergleichs mit Huntsman Corp. sowie Aufwendungen von 200 Mio € für ein Angebot zum Rückkauf bestimmter Produkte von Privatanlegern.

**Aufwendungen im Versicherungsgeschäft.** Die Aufwendungen im Versicherungsgeschäft beliefen sich 2010 auf 485 Mio €. Der Rückgang um 57 Mio € gegenüber dem Vorjahr stand vor allem mit unserem Abbey Life-Versicherungsgeschäft in Zusammenhang. Diesen versicherungsbezogenen Aufwendungen lagen Erträge aus zum Fair Value bewerteten finanziellen Vermögenswerten/Verpflichtungen zugrunde.

**Wertminderung auf immaterielle Vermögenswerte.** Im Geschäftsjahr 2010 wurde in GTB eine Wertminderung auf immaterielle Vermögenswerte in Höhe von 29 Mio € im Zusammenhang mit dem Kundenportfolio eines erworbenen Wertpapierverwahrungsgeschäfts bilanziert. Im Geschäftsjahr 2009 erfolgte in AM eine Wertaufholung für eine Abschreibung von 291 Mio € auf immaterielle Vermögenswerte bei DWS Investments in den USA (vormals: DWS Scudder). Dieser positive Effekt wurde durch Goodwillabschreibungen von 151 Mio € auf ein konsolidiertes RREEF-Infrastrukturinvestment teilweise kompensiert.

### **Ertragsteueraufwand**

Der Ertragsteueraufwand von 1,6 Mrd € im Berichtsjahr führte zu einer effektiven Ertragsteuerquote von 41,4 %. Im Jahr 2009 belief sich der Ertragsteueraufwand auf 244 Mio € mit einer effektiven Ertragsteuerquote von 4,7 %. Die Ertragsteuerquoten waren in beiden Jahren von Sonderfaktoren beeinflusst: Im Jahr 2010 hatte die Belastung im Zusammenhang mit der Postbank in Höhe von 2,3 Mrd €, mit der kein entsprechender Steuerertrag verbunden war, einen wesentlichen Einfluss. Verbesserte Ertragsteuerpositionen in den USA und eine vorteilhafte geografische Verteilung des Konzernergebnisses wirkten zum Teil gegenläufig. Im Jahr 2009 war die Ertragsteuerquote dagegen durch die Wertaufholung aktiver latenter Steuern in den USA sowie den Abschluss von Steuerprüfungen für vorangegangene Jahre begünstigt.



## Segmentergebnisse

Im Folgenden werden die Ergebnisse unserer Konzernbereiche dargestellt. Informationen zu folgenden Sachverhalten sind in Note 05 „Segmentberichterstattung“ des Konzernabschlusses enthalten:

- Änderungen in unserer Organisationsstruktur,
- Auswirkungen wesentlicher Akquisitionen und Desinvestitionen auf die Segmentergebnisse,
- Änderungen des Formats der Segmentberichterstattung,
- Rahmenwerk unserer Managementberichtssysteme,
- Überleitungsposition zum Konzernabschluss und
- Definitionen der für die Geschäftsergebnisse unserer Segmente verwendeten Finanzzahlen.

Grundlage für die Segmentierung ist die am 31. Dezember 2010 gültige Konzernstruktur. Die Ergebnisse der Bereiche wurden auf Basis unserer Managementberichtssysteme ermittelt.

| 2010<br>in Mio €<br>(sofern nicht anders angegeben)                                               | Corporate &<br>Investment<br>Bank | Private<br>Clients and<br>Asset<br>Management | Corporate<br>Investments  | Management<br>Reporting<br>insgesamt | Consoli-<br>dation &<br>Adjustments | Konzern<br>insgesamt |
|---------------------------------------------------------------------------------------------------|-----------------------------------|-----------------------------------------------|---------------------------|--------------------------------------|-------------------------------------|----------------------|
| <b>Erträge insgesamt</b>                                                                          | <b>20.929<sup>1</sup></b>         | <b>10.043</b>                                 | <b>-2.020<sup>2</sup></b> | <b>28.953</b>                        | <b>-386</b>                         | <b>28.567</b>        |
| <b>Risikovorsorge im Kreditgeschäft</b>                                                           | <b>488</b>                        | <b>789</b>                                    | <b>-4</b>                 | <b>1.273</b>                         | <b>0</b>                            | <b>1.274</b>         |
| <b>Zinsunabhängige Aufwendungen</b>                                                               | <b>14.422</b>                     | <b>8.258</b>                                  | <b>637</b>                | <b>23.318</b>                        | <b>1</b>                            | <b>23.318</b>        |
| davon/darin:                                                                                      |                                   |                                               |                           |                                      |                                     |                      |
| Aufwendungen im Versicherungsgeschäft                                                             | 486                               | 0                                             | –                         | 486                                  | –                                   | 485                  |
| Wertminderung auf immaterielle Vermögenswerte                                                     | 29                                | –                                             | –                         | 29                                   | –                                   | 29                   |
| Restrukturierungsaufwand                                                                          | –                                 | –                                             | –                         | –                                    | –                                   | –                    |
| <b>Anteile ohne beherrschenden Einfluss</b>                                                       | <b>20</b>                         | <b>6</b>                                      | <b>-2</b>                 | <b>24</b>                            | <b>-24</b>                          | <b>–</b>             |
| <b>Ergebnis vor Steuern</b>                                                                       | <b>5.999</b>                      | <b>989</b>                                    | <b>-2.649</b>             | <b>4.339</b>                         | <b>-363</b>                         | <b>3.975</b>         |
| Aufwand-Ertrag-Relation                                                                           | 69 %                              | 82 %                                          | N/A                       | 81 %                                 | N/A                                 | 82 %                 |
| Aktiva <sup>3</sup>                                                                               | 1.519.983                         | 412.477                                       | 17.766                    | 1.894.282                            | 11.348                              | 1.905.630            |
| Durchschnittliches Active Equity <sup>4</sup>                                                     | 18.644                            | 10.635                                        | 4.168                     | 33.446                               | 7.907                               | 41.353               |
| Eigenkapitalrendite vor Steuern (basierend auf dem durchschnittlichen Active Equity) <sup>5</sup> | 32 %                              | 9 %                                           | -64 %                     | 13 %                                 | N/A                                 | 10 %                 |

N/A – nicht aussagefähig

<sup>1</sup> Beinhaltet einen Gewinn aus der Vereinnahmung von negativem Goodwill im Zusammenhang mit dem Erwerb bestimmter Teile des niederländischen Firmenkundengeschäfts von ABN AMRO Bank N.V. in Höhe von 208 Mio € im zweiten Quartal, der nicht in Zielgrößendefinition berücksichtigt ist.

<sup>2</sup> Beinhaltet eine Belastung bezüglich der Beteiligung an der Deutschen Postbank AG in Höhe von 2.338 Mio €, welche für die Berechnung der Zielgrößendefinition unberücksichtigt bleibt.

<sup>3</sup> Die Summe der Aktiva der Unternehmensbereiche entspricht aufgrund von Konsolidierungstatbeständen zwischen den Unternehmensbereichen nicht notwendigerweise den Aktiva des korrespondierenden Konzernbereichs. Dies gilt auch für die Summe der Aktiva der Konzernbereiche im Vergleich zu den im Konzern insgesamt ausgewiesenen Aktiva, die ebenfalls Konsolidierungstatbestände zwischen den Konzernbereichen berücksichtigen.

<sup>4</sup> Für Zwecke der Managementberichterstattung werden Goodwill und sonstige immaterielle Vermögenswerte mit unbestimmter Nutzungsdauer explizit den jeweiligen Unternehmensbereichen zugewiesen. Das nach Berücksichtigung dieser Komponenten verbleibende durchschnittliche Active Equity wird den Segmenten anteilig gemäß ihrem ökonomischen Kapital zugewiesen.

<sup>5</sup> Für die Berechnung der Eigenkapitalrendite vor Steuern (basierend auf dem durchschnittlichen Active Equity) siehe Note 05 „Segmentberichterstattung“. Für den Konzern insgesamt beträgt die Eigenkapitalrendite vor Steuern (basierend auf dem durchschnittlichen Eigenkapital) 10 %.

2009

in Mio €  
(sofern nicht anders angegeben)

|                                                                                                   | Corporate &<br>Investment<br>Bank | Private<br>Clients and<br>Asset<br>Management | Corporate<br>Investments | Management<br>Reporting<br>insgesamt | Consoli-<br>dation &<br>Adjustments | Konzern<br>insgesamt     |
|---------------------------------------------------------------------------------------------------|-----------------------------------|-----------------------------------------------|--------------------------|--------------------------------------|-------------------------------------|--------------------------|
| <b>Erträge insgesamt</b>                                                                          | <b>18.807</b>                     | <b>8.261</b>                                  | <b>1.044</b>             | <b>28.112</b>                        | <b>- 159</b>                        | <b>27.952</b>            |
| <b>Risikovorsorge im Kreditgeschäft</b>                                                           | <b>1.816</b>                      | <b>806</b>                                    | <b>8</b>                 | <b>2.630</b>                         | <b>- 0</b>                          | <b>2.630</b>             |
| <b>Zinsunabhängige Aufwendungen</b>                                                               | <b>12.679</b>                     | <b>6.803</b>                                  | <b>581</b>               | <b>20.063</b>                        | <b>57</b>                           | <b>20.120</b>            |
| davon/darin:                                                                                      |                                   |                                               |                          |                                      |                                     |                          |
| Aufwendungen im Versicherungsgeschäft                                                             | 541                               | -                                             | -                        | 541                                  | 2                                   | 542                      |
| Wertminderung auf immaterielle Vermögenswerte                                                     | 5                                 | -291                                          | 151                      | -134                                 | -                                   | -134                     |
| Restrukturierungsaufwand                                                                          | -                                 | -                                             | -                        | -                                    | -                                   | -                        |
| <b>Anteile ohne beherrschenden Einfluss</b>                                                       | <b>-2</b>                         | <b>-7</b>                                     | <b>-1</b>                | <b>-10</b>                           | <b>10</b>                           | <b>-</b>                 |
| <b>Ergebnis vor Steuern</b>                                                                       | <b>4.314</b>                      | <b>658</b>                                    | <b>456</b>               | <b>5.428</b>                         | <b>-226</b>                         | <b>5.202<sup>1</sup></b> |
| Aufwand-Ertrag-Relation                                                                           | 67 %                              | 82 %                                          | 56 %                     | 71 %                                 | N/A                                 | 72 %                     |
| Aktiva <sup>2</sup>                                                                               | 1.343.824                         | 174.739                                       | 28.456                   | 1.491.108                            | 9.556                               | 1.500.664                |
| Durchschnittliches Active Equity <sup>3</sup>                                                     | 19.041                            | 8.408                                         | 4.323                    | 31.772                               | 2.840                               | 34.613                   |
| Eigenkapitalrendite vor Steuern (basierend auf dem durchschnittlichen Active Equity) <sup>4</sup> | 23 %                              | 8 %                                           | 11 %                     | 17 %                                 | N/A                                 | 15 %                     |

N/A – nicht aussagefähig

<sup>1</sup> Beinhaltet einen Gewinn aus dem Verkauf von Industriebeteiligungen (Daimler AG) in Höhe von 236 Mio €, eine Wertaufholung auf immaterielle Vermögenswerte (Asset Management) in Höhe von 291 Mio € (die zugehörige Abschreibung war im Jahr 2008 verbucht worden), eine Abschreibung in Höhe von 278 Mio € auf Industriebeteiligungen und eine Abschreibung auf immaterielle Vermögenswerte (Corporate Investments) in Höhe von 151 Mio €. Diese Positionen werden in der Zielgrößendefinition nicht berücksichtigt.

<sup>2</sup> Die Summe der Aktiva der Unternehmensbereiche entspricht aufgrund von Konsolidierungstatbeständen zwischen den Unternehmensbereichen nicht notwendigerweise den Aktiva des korrespondierenden Konzernbereichs. Dies gilt auch für die Summe der Aktiva der Konzernbereiche im Vergleich zu den im Konzern insgesamt ausgewiesenen Aktiva, die ebenfalls Konsolidierungstatbestände zwischen den Konzernbereichen berücksichtigen.

<sup>3</sup> Für Zwecke der Managementberichterstattung werden Goodwill und sonstige immaterielle Vermögenswerte mit unbestimmter Nutzungsdauer explizit den jeweiligen Unternehmensbereichen zugewiesen. Das nach Berücksichtigung dieser Komponenten verbleibende durchschnittliche Active Equity wird den Segmenten anteilig gemäß ihrem Ökonomischen Kapital zugewiesen.

<sup>4</sup> Für die Berechnung der Eigenkapitalrendite vor Steuern (basierend auf dem durchschnittlichen Active Equity) siehe Note 05 „Segmentberichterstattung“. Für den Konzern insgesamt beträgt die Eigenkapitalrendite vor Steuern (basierend auf dem durchschnittlichen Eigenkapital) 15 %.

## Konzernbereiche

### Konzernbereich Corporate & Investment Bank

Die nachstehende Tabelle enthält die Geschäftsergebnisse unseres Konzernbereichs Corporate & Investment Bank (CIB) für die Geschäftsjahre 2010 und 2009 auf Basis unserer Managementberichtssysteme.

|                                                                                                           |               |               |
|-----------------------------------------------------------------------------------------------------------|---------------|---------------|
| in Mio €<br>(sofern nicht anders angegeben)                                                               | 2010          | 2009          |
| <b>Erträge insgesamt:</b>                                                                                 |               |               |
| Sales & Trading (Equity)                                                                                  | 3.108         | 2.650         |
| Sales & Trading (Debt und sonstige Produkte)                                                              | 9.740         | 9.557         |
| Emissionsgeschäft (Equity)                                                                                | 706           | 663           |
| Emissionsgeschäft (Debt)                                                                                  | 1.199         | 1.127         |
| Beratung                                                                                                  | 573           | 402           |
| Kreditgeschäft                                                                                            | 1.736         | 1.949         |
| Transaction Services                                                                                      | 3.223         | 2.609         |
| Sonstige Produkte                                                                                         | 644           | – 151         |
| <b>Summe Erträge insgesamt</b>                                                                            | <b>20.929</b> | <b>18.807</b> |
| davon/darin:                                                                                              |               |               |
| Zinsüberschuss und Ergebnis aus zum Fair Value bewerteten<br>finanziellen Vermögenswerten/Verpflichtungen | 14.081        | 13.969        |
| <b>Risikovorsorge im Kreditgeschäft</b>                                                                   | <b>488</b>    | <b>1.816</b>  |
| <b>Zinsunabhängige Aufwendungen</b>                                                                       | <b>14.422</b> | <b>12.679</b> |
| davon/darin:                                                                                              |               |               |
| Aufwendungen im Versicherungsgeschäft                                                                     | 486           | 541           |
| Wertminderung auf immaterielle Vermögenswerte                                                             | 29            | 5             |
| Restrukturierungsaufwand                                                                                  | –             | –             |
| <b>Anteile ohne beherrschenden Einfluss</b>                                                               | <b>20</b>     | <b>– 2</b>    |
| <b>Ergebnis vor Steuern</b>                                                                               | <b>5.999</b>  | <b>4.314</b>  |
| Aufwand-Ertrag-Relation                                                                                   | 69 %          | 67 %          |
| Aktiva                                                                                                    | 1.519.983     | 1.343.824     |
| Durchschnittliches Active Equity <sup>1</sup>                                                             | 18.644        | 19.041        |
| Eigenkapitalrendite vor Steuern (basierend auf dem durchschnittlichen Active Equity)                      | 32 %          | 23 %          |

<sup>1</sup> Eine Beschreibung der Allokation des durchschnittlichen Active Equity auf die Segmente ist in Note 05 „Segmentberichterstattung“ des Konzernabschlusses enthalten.

Nachfolgend stellen wir den Beitrag der einzelnen Unternehmensbereiche zum Gesamtergebnis des Konzernbereichs CIB dar.

## Unternehmensbereich Corporate Banking & Securities

Die nachstehende Tabelle stellt die Geschäftsergebnisse unseres Unternehmensbereichs Corporate Banking & Securities (CB&S) für die Geschäftsjahre 2010 und 2009 auf Basis unserer Managementberichtssysteme dar.

| in Mio €<br>(sofern nicht anders angegeben)                                          | 2010          | 2009          |
|--------------------------------------------------------------------------------------|---------------|---------------|
| <b>Erträge insgesamt:</b>                                                            |               |               |
| Sales & Trading (Equity)                                                             | 3.108         | 2.650         |
| Sales & Trading (Debt und sonstige Produkte)                                         | 9.740         | 9.557         |
| Emissionsgeschäft (Equity)                                                           | 706           | 663           |
| Emissionsgeschäft (Debt)                                                             | 1.199         | 1.127         |
| Beratung                                                                             | 573           | 402           |
| Kreditgeschäft                                                                       | 1.736         | 1.949         |
| Sonstige Produkte                                                                    | 428           | -151          |
| <b>Summe Erträge insgesamt</b>                                                       | <b>17.490</b> | <b>16.197</b> |
| <b>Risikovorsorge im Kreditgeschäft</b>                                              | <b>348</b>    | <b>1.789</b>  |
| <b>Zinsunabhängige Aufwendungen</b>                                                  | <b>12.028</b> | <b>10.891</b> |
| davon/darin:                                                                         |               |               |
| Aufwendungen im Versicherungsgeschäft                                                | 486           | 541           |
| Wertminderung auf immaterielle Vermögenswerte                                        | –             | 5             |
| Restrukturierungsaufwand                                                             | –             | –             |
| <b>Anteile ohne beherrschenden Einfluss</b>                                          | <b>20</b>     | <b>-2</b>     |
| <b>Ergebnis vor Steuern</b>                                                          | <b>5.094</b>  | <b>3.520</b>  |
| Aufwand-Ertrag-Relation                                                              | 69 %          | 67 %          |
| Aktiva                                                                               | 1.468.863     | 1.308.222     |
| Durchschnittliches Active Equity <sup>1</sup>                                        | 17.096        | 17.881        |
| Eigenkapitalrendite vor Steuern (basierend auf dem durchschnittlichen Active Equity) | 30 %          | 20 %          |

<sup>1</sup> Eine Beschreibung der Allokation des durchschnittlichen Active Equity auf die Segmente ist in Note 05 „Segmentberichterstattung“ des Konzernabschlusses enthalten.

In 2010 stiegen die Erträge in Sales & Trading (Debt und sonstige Produkte) von 9,6 Mrd € im Jahr 2009 um 2 % auf 9,7 Mrd €. Die Erträge im Vorjahr waren durch negative Marktwertanpassungen von 1,0 Mrd € belastet, die hauptsächlich auf Vorsorgen für Monolineversicherer zurückzuführen waren. Demgegenüber beinhaltete das Berichtsjahr keine wesentlichen negativen Marktwertanpassungen. In den Erträgen waren Belastungen in Höhe von 360 Mio € im Zusammenhang mit Ocala Funding LLC verkraftet, hier waren im Vorjahr Belastungen von 350 Mio € angefallen. Die Erträge im Geldmarkt- und Zinsgeschäft waren aufgrund deutlich gesunkener Geld-/Briefspannen und einer verhalteneren Kundenaktivität vor dem Hintergrund der Staatsschuldenkrise wesentlich niedriger. Im Handel mit Kreditprodukten konnten deutlich höhere Erträge erzielt werden, die auf niedrigere negative Marktwertanpassungen aus Altbeständen und eine erhöhte Kundenaktivität hinsichtlich standardisierter und strukturierter Kreditlösungen zurückzuführen waren. Die Erträge im Devisengeschäft waren stabil und reflektierten starke Marktanteile (Quelle: Euromoney) sowie höhere Volumina, die den Rückgang der Geld-/Briefspannen in einem sich normalisierenden Marktumfeld kompensierten. Die Erträge im Rohstoffhandel lagen trotz eines schwierigeren Marktumfelds über jenen des Vorjahres. Im Anleihegeschäft in Schwellenländern waren die Erträge rückläufig, was ungünstigere Marktbedingungen im Vergleich zum Vorjahr widerspiegelte.

Die Erträge in Sales & Trading (Equity) stiegen von 2,7 Mrd € im Jahr 2009 um 458 Mio € (17 %) auf 3,1 Mrd € im Geschäftsjahr 2010. Im Aktienhandel lagen die Erträge leicht unter dem Wert des Vorjahres, da eine geringere Aktivität während der Sommermonate nicht vollständig durch eine Erholung gegen Ende des Jahres ausgeglichen wurde. Die Erträge im Aktienderivategeschäft waren wesentlich höher und spiegelten die Neuausrichtung des Geschäfts wider, in dem sich die Handelsverluste des ersten Quartals 2009 nicht wiederholten. In Prime Finance lagen die Erträge aufgrund gestiegener Volumina im Kundengeschäft, einer besseren Wettbewerbsposition (Quelle: Global Custodian) und der Platzierung neuer Produkte und Dienstleistungen leicht über

dem Vorjahresniveau. Im designierten Eigenhandel ergaben sich im Berichtsjahr keine materiellen Erträge und das Geschäft wurde im dritten Quartal 2010 eingestellt.

Im Emissions- und Beratungsgeschäft konnten die Erträge im Berichtsjahr im Vergleich zum Vorjahr um 286 Mio € (13 %) auf 2,5 Mrd € gesteigert werden. Im Geschäftsjahr 2010 haben wir unser Ziel erreicht, einen Platz unter den besten fünf Investmentbanken weltweit einzunehmen und diese Position zu behaupten. So verbesserten wir uns von Platz sieben weltweit im Geschäftsjahr 2009 auf Platz fünf. Wir konnten zudem in allen Produktbereichen des Emissions- und Beratungsgeschäfts einen Platz unter den weltweit besten fünf Marktteilnehmern einnehmen. Im Beratungsgeschäft wurden Erträge von 573 Mio € erzielt, was gegenüber 2009 einem Anstieg von 43 % entsprach. Im M&A-Geschäft erreichten wir in den Ranglisten Platz eins in der Region EMEA, Platz sechs in Nord- und Südamerika und Platz fünf weltweit. Dies stellt eine deutliche Verbesserung gegenüber dem Vorjahr dar. Die Erträge im Emissionsgeschäft (Debt) stiegen gegenüber dem Vorjahr um 6 % auf 1,2 Mrd €. In den Ranglisten für Investment-Grade- und High-Yield-Anleihen erreichten wir Platz vier und für Leveraged Loans Platz fünf. Die Erträge im Emissionsgeschäft (Equity) stiegen trotz geringerer Marktaktivität im Vergleich zum Vorjahreszeitraum um 6 % auf 706 Mio €. Wir belegten in den Ranglisten Platz eins in der Region EMEA und Platz fünf in den USA. Weltweit verbesserten wir uns von Platz neun 2009 auf Platz fünf 2010 (Quelle für alle Positionen und Marktanteile: Dealogic).

Für das Gesamtjahr 2010 wurden Erträge aus dem Kreditgeschäft in Höhe von 1,7 Mrd € erzielt, was einem Rückgang um 213 Mio € (11 %) gegenüber 2009 entsprach. Diese Entwicklung war in erster Linie auf Marktwertverluste auf zum Fair Value bewertete Kredite und Kreditzusagen im Zusammenhang mit Neugeschäft zurückzuführen.

Die Erträge aus Sonstigen Produkten beliefen sich im Berichtsjahr auf 428 Mio € und stiegen damit um 579 Mio € gegenüber dem Vorjahr, das eine Abschreibung von 500 Mio € auf die Immobilie The Cosmopolitan of Las Vegas sowie Verluste aus Private-Equity-Beteiligungen im ersten Quartal 2009 beinhaltete.

Die Risikovorsorge im Kreditgeschäft belief sich im Gesamtjahr 2010 auf 348 Mio € nach 1,8 Mrd € im Jahr 2009. Der Rückgang gegenüber dem Vorjahr war in erster Linie auf niedrigere Nettoneubildungen für gemäß IAS 39 umklassifizierte Vermögenswerte zurückzuführen.

Im Geschäftsjahr 2010 stiegen die zinsunabhängigen Aufwendungen gegenüber dem Vorjahr um 1,1 Mrd € (10 %) auf 12,0 Mrd €. Der Personalaufwand im Jahr 2010 spiegelte höhere Aufwendungen für aufgeschobene Vergütungskomponenten infolge von Änderungen in den Vergütungsstrukturen (einschließlich des Effekts aus der beschleunigten Erfassung von Ansprüchen für Mitarbeiter, deren Ansprüche zum Zeitpunkt der Begebung aufgrund der für sie geltenden Planbedingungen unverfallbar waren) wider. Demgegenüber war das Vorjahr von Änderungen in der Vergütungsstruktur, die einen höheren Anteil aufgeschobener Vergütungskomponenten zur Folge hatten, positiv beeinflusst. Der Anstieg war darüber hinaus auf das Geschäftswachstum, Kosten für strategische Initiativen und Maßnahmen zur Komplexitätsreduktion sowie auf Auswirkungen von Wechselkursänderungen zurückzuführen. Diese Entwicklung wurde teilweise durch Effekte aus Sonderfaktoren im Vorjahr kompensiert. Diese umfassten 316 Mio € aus dem Abschluss eines Vergleichs sowie 200 Mio € für ein Angebot zum Rückkauf bestimmter Produkte von Privatanlegern.

## Änderungen zu IAS 39 und IFRS 7, „Reclassification of Financial Assets“

In Übereinstimmung mit den Änderungen zu IAS 39 und IFRS 7, die im Oktober 2008 veröffentlicht worden waren, wurden im zweiten Halbjahr 2008 und im ersten Quartal 2009 bestimmte finanzielle Vermögenswerte aus den Bilanzkategorien „zum Fair Value bewertet“ und „zur Veräußerung verfügbar“ in die Bilanzposition „Forderungen aus dem Kreditgeschäft“ umgewidmet. Umgewidmet wurde jeweils, wenn nach Einschätzung der Bank zum Umwidmungsstichtag die erwartete Rückzahlung der Vermögenswerte den aufgrund der mangelnden Liquidität in den Finanzmärkten niedrigen Fair Value der umgewidmeten Vermögenswerte überstieg und durch ein Halten der Position die Rendite optimiert wurde. Da zum Umwidmungsstichtag eine eindeutig geänderte Zweckbestimmung der Vermögenswerte vorlag sowie weder eine Beschränkung der Haltefähigkeit noch der Refinanzierung für diese Vermögenswerte bestand, spiegelt die geänderte Bilanzierung den Geschäftszweck dieser Vermögenswerte besser wider.

Die nachfolgenden Tabellen stellen den von uns ermittelten Einfluss der Umwidmung auf den Unternehmensbereich CB&S dar. Im Geschäftsjahr 2010 führte die Umwidmung zu einem zusätzlichen Verlust von 753 Mio € in der Gewinn- und Verlustrechnung und zu einem zusätzlichen Verlust von 325 Mio € im „Sonstigen Ergebnis (Other comprehensive income)“. Für das Geschäftsjahr 2009 führte die Umwidmung zu einem zusätzlichen Verlust von 273 Mio € in der Gewinn- und Verlustrechnung sowie zu einem zusätzlichen Verlust von 1,2 Mrd € im „Sonstigen Ergebnis (Other comprehensive income)“. Die hieraus resultierenden Auswirkungen auf Marktrisikopositionen sind im Abschnitt „Wesentliche Risikopositionen an den Kreditmärkten“ dargestellt.

|                                                                                                              | 31.12.2010           |                        | 2010                                                      |                                                                                             |
|--------------------------------------------------------------------------------------------------------------|----------------------|------------------------|-----------------------------------------------------------|---------------------------------------------------------------------------------------------|
|                                                                                                              | Buchwert<br>in Mrd € | Fair Value<br>in Mrd € | Auswirkungen auf<br>den Gewinn vor<br>Steuern<br>in Mio € | Auswirkungen auf<br>das Sonstige<br>Ergebnis (Other<br>comprehensive<br>income)<br>in Mio € |
| <b>Auswirkungen in 2010 aus der Umklassifizierung</b>                                                        |                      |                        |                                                           |                                                                                             |
| <b>Sales &amp; Trading – Debt</b>                                                                            |                      |                        |                                                           |                                                                                             |
| Handelsaktiva, umklassifiziert zu Forderungen aus dem Kreditgeschäft                                         | 16,6                 | 14,7                   | – 582                                                     | –                                                                                           |
| Zur Veräußerung verfügbare finanzielle Vermögenswerte, umklassifiziert zu Forderungen aus dem Kreditgeschäft | 8,7                  | 7,8                    | 2                                                         | – 325                                                                                       |
| <b>Emissions- und Beratungsgeschäft</b>                                                                      |                      |                        |                                                           |                                                                                             |
| Handelsaktiva, umklassifiziert zu Forderungen aus dem Kreditgeschäft <sup>1</sup>                            | 1,4                  | 1,2                    | – 173                                                     | –                                                                                           |
| <b>Kreditgeschäft</b>                                                                                        |                      |                        |                                                           |                                                                                             |
| Zur Veräußerung verfügbare finanzielle Vermögenswerte, umklassifiziert zu Forderungen aus dem Kreditgeschäft | –                    | –                      | –                                                         | –                                                                                           |
| <b>Insgesamt</b>                                                                                             | <b>26,7</b>          | <b>23,7</b>            | <b>– 753<sup>2</sup></b>                                  | <b>– 325</b>                                                                                |

<sup>1</sup> Der signifikante Rückgang des Buchwerts und des Fair Value im Emissions- und Beratungsgeschäft seit Dezember 2009 ist hauptsächlich auf eine Restrukturierung von Forderungen gegenüber Actavis im Geschäftsjahr 2010 mit einem Buchwert von 4,2 Mrd € zurückzuführen. Es wurde kein Gewinn oder Verlust aus dieser Restrukturierung verbucht. Für weitere Details zu dieser Restrukturierung verweisen wir auf die Note 17 „Nach der Equitymethode bilanzierte Beteiligungen“.

<sup>2</sup> Zusätzlich zur Auswirkung auf CB&S verringerte sich der Gewinn vor Steuern um 3 Mio € in PBC.



|                                                                                                                    | 31.12.2009           |                        | 2009                                                      |                                                                                             |
|--------------------------------------------------------------------------------------------------------------------|----------------------|------------------------|-----------------------------------------------------------|---------------------------------------------------------------------------------------------|
|                                                                                                                    | Buchwert<br>in Mrd € | Fair Value<br>in Mrd € | Auswirkungen auf<br>den Gewinn vor<br>Steuern<br>in Mio € | Auswirkungen auf<br>das Sonstige<br>Ergebnis (Other<br>comprehensive<br>income)<br>in Mio € |
| Auswirkungen in 2009 aus der Umklassifizierung                                                                     |                      |                        |                                                           |                                                                                             |
| Sales & Trading – Debt                                                                                             |                      |                        |                                                           |                                                                                             |
| Handelsaktiva, umklassifiziert zu Forderungen<br>aus dem Kreditgeschäft                                            | 18,2                 | 15,9                   | 407                                                       | –                                                                                           |
| Zur Veräußerung verfügbare finanzielle<br>Vermögenswerte, umklassifiziert zu Forderungen<br>aus dem Kreditgeschäft | 9,3                  | 8,2                    | – 16                                                      | – 1.102                                                                                     |
| Emissions- und Beratungsgeschäft                                                                                   |                      |                        |                                                           |                                                                                             |
| Handelsaktiva, umklassifiziert zu Forderungen<br>aus dem Kreditgeschäft                                            | 6,1                  | 5,7                    | – 664                                                     | –                                                                                           |
| Kreditgeschäft                                                                                                     |                      |                        |                                                           |                                                                                             |
| Zur Veräußerung verfügbare finanzielle<br>Vermögenswerte, umklassifiziert zu Forderungen<br>aus dem Kreditgeschäft | –                    | –                      | –                                                         | – 114 <sup>1</sup>                                                                          |
| <b>Insgesamt</b>                                                                                                   | <b>33,6</b>          | <b>29,8</b>            | <b>– 273<sup>2</sup></b>                                  | <b>– 1.216</b>                                                                              |

<sup>1</sup> Der negative Betrag in der Position Auswirkungen auf das Sonstige Ergebnis (Other comprehensive income) resultiert aus der Abschreibung eines finanziellen Vermögenswerts im Geschäftsjahr. Wäre der Vermögenswert nicht umklassifiziert worden, hätte die Wertminderung zu einer Umgliederung der Veränderung des Fair Value aus dem Eigenkapital in die Gewinn- und Verlustrechnung geführt.

<sup>2</sup> Zusätzlich zur Auswirkung auf CB&S erhöhte sich der Gewinn vor Steuern um 18 Mio € in PBC.

In 2010 wurden reklassifizierte Vermögenswerte mit einem Buchwert von 2,0 Mrd € verkauft. Die Verkäufe führten zu einem Veräußerungsverlust von 3 Mio € und wurden aufgrund von zum Zeitpunkt der Umwidmung unvorhergesehenen Ereignissen durchgeführt.

Bei den umgewidmeten Vermögenswerten handelt es sich zum einen um Kredite im Zusammenhang mit der Finanzierung von Unternehmensübernahmen mit einem Fair Value von 7,5 Mrd € am Umwidmungstichtag, welche im Rahmen einer Originate-to-Distribute-Strategie begeben wurden. Zum anderen wurden Vermögenswerte in konsolidierten Asset-backed Commercial Paper Conduits mit einem Fair Value von 9,4 Mrd € und gewerbliche Immobilienkredite mit einem Fair Value von 9,1 Mrd € umgewidmet. Diese Forderungen sollten ursprünglich zum Zeitpunkt der Begebung oder des Erwerbs verbrieft werden. Die verbleibenden umgewidmeten Vermögenswerte, zu denen sonstige zum Zweck der Verbriefung erworbene oder begebene Vermögenswerte gehörten, hatten am Umwidmungstichtag einen Fair Value von 11,9 Mrd €.

## Unternehmensbereich Global Transaction Banking (GTB)

Die nachstehende Tabelle zeigt die Geschäftsergebnisse unseres Unternehmensbereichs Global Transaction Banking für die Geschäftsjahre 2010 und 2009 auf Basis unserer Managementberichtssysteme.

in Mio €  
(sofern nicht anders angegeben)

|                                                                                      | 2010         | 2009         |
|--------------------------------------------------------------------------------------|--------------|--------------|
| <b>Erträge insgesamt:</b>                                                            |              |              |
| Transaction Services                                                                 | 3.223        | 2.609        |
| Sonstige Produkte                                                                    | 216          | –            |
| <b>Summe Erträge insgesamt</b>                                                       | <b>3.439</b> | <b>2.609</b> |
| <b>Risikovorsorge im Kreditgeschäft</b>                                              | <b>140</b>   | <b>27</b>    |
| <b>Zinsunabhängige Aufwendungen</b>                                                  | <b>2.394</b> | <b>1.788</b> |
| davon/darin:                                                                         |              |              |
| Restrukturierungsaufwand                                                             | –            | –            |
| Wertminderung auf immaterielle Vermögenswerte                                        | 29           | –            |
| <b>Anteile ohne beherrschenden Einfluss</b>                                          | <b>–</b>     | <b>–</b>     |
| <b>Ergebnis vor Steuern</b>                                                          | <b>905</b>   | <b>795</b>   |
| Aufwand-Ertrag-Relation                                                              | 70 %         | 69 %         |
| Aktiva                                                                               | 71.877       | 47.414       |
| Durchschnittliches Active Equity <sup>1</sup>                                        | 1.548        | 1.160        |
| Eigenkapitalrendite vor Steuern (basierend auf dem durchschnittlichen Active Equity) | 58 %         | 68 %         |

<sup>1</sup> Eine Beschreibung der Allokation des durchschnittlichen Active Equity auf die Segmente ist in Note 05 „Segmentberichterstattung“ des Konzernabschlusses enthalten.

Im Gesamtjahr erreichten die Erträge in GTB mit 3,4 Mrd € einen neuen Rekord, was einem Anstieg um 830 Mio € (32 %) gegenüber dem Vorjahr entsprach. Auch nach Bereinigung der Effekte aus dem von der ABN AMRO übernommenen Firmenkundengeschäft in den Niederlanden, zu denen auch Erträge in Höhe von 216 Mio € im Zusammenhang mit einem negativen Goodwill aus der erstmaligen Konsolidierung des 2010 erworbenen Geschäfts gehörten, erwirtschaftete GTB Erträge auf Rekordniveau. Diese gute Performance war vor allem auf die Zunahme der Provisionserträge in den Bereichen Trust & Securities Services, Trade Finance und Cash Management zurückzuführen, welche die Auswirkungen des anhaltend niedrigen Zinsniveaus besonders im letztgenannten Bereich ausgleichen konnte. Der Bereich Trust & Securities Services konnte dabei von der positiven Geschäftsentwicklung, insbesondere in Asien im vierten Quartal, profitieren.

Im Gesamtjahr 2010 betrug die Risikovorsorge im Kreditgeschäft 140 Mio €. Ursächlich für die Zunahme um 113 Mio € gegenüber dem Vorjahr war auch hier vor allem das von ABN AMRO erworbene Firmenkundengeschäft.

Die zinsunabhängigen Aufwendungen im Berichtsjahr stiegen gegenüber dem Vorjahr um 606 Mio € (34 %) auf 2,4 Mrd €. Diese Zunahme war sowohl auf die vorgenannte Akquisition als auch auf um 130 Mio € erheblich höhere Abfindungszahlungen zurückzuführen. Letztere waren vor allem im vierten Quartal infolge spezifischer Maßnahmen im Zusammenhang mit der Neuausrichtung von Infrastrukturbereichen und Vertriebseinheiten angefallen.

## Konzernbereich Private Clients and Asset Management

Die nachstehende Tabelle zeigt die Geschäftsergebnisse unseres Konzernbereichs Private Clients and Asset Management (PCAM) für die Geschäftsjahre 2010 und 2009 auf Basis unserer Managementberichtssysteme.

|                                                                                                                     |               |              |
|---------------------------------------------------------------------------------------------------------------------|---------------|--------------|
| in Mio €<br>(sofern nicht anders angegeben)                                                                         | 2010          | 2009         |
| <b>Erträge insgesamt:</b>                                                                                           |               |              |
| Diskretionäres Portfolio Management/Fund Management                                                                 | 2.560         | 2.083        |
| Beratungs-/Brokeragegeschäft                                                                                        | 1.745         | 1.531        |
| Kreditgeschäft                                                                                                      | 2.708         | 2.605        |
| Einlagengeschäft und Zahlungsverkehr                                                                                | 2.029         | 1.875        |
| Sonstige Produkte                                                                                                   | 1.001         | 167          |
| <b>Summe Erträge insgesamt</b>                                                                                      | <b>10.043</b> | <b>8.261</b> |
| davon/darin: Zinsüberschuss und Ergebnis aus zum Fair Value bewerteten finanziellen Vermögenswerten/Verpflichtungen | 4.708         | 4.157        |
| <b>Risikovorsorge im Kreditgeschäft</b>                                                                             | <b>789</b>    | <b>806</b>   |
| <b>Zinsunabhängige Aufwendungen</b>                                                                                 | <b>8.258</b>  | <b>6.803</b> |
| davon/darin:                                                                                                        |               |              |
| Aufwendungen im Versicherungsgeschäft                                                                               | –             | –            |
| Wertminderung auf immaterielle Vermögenswerte                                                                       | –             | – 291        |
| Restrukturierungsaufwand                                                                                            | –             | –            |
| <b>Anteile ohne beherrschenden Einfluss</b>                                                                         | <b>6</b>      | <b>–7</b>    |
| <b>Ergebnis vor Steuern</b>                                                                                         | <b>989</b>    | <b>658</b>   |
| Aufwand-Ertrag-Relation                                                                                             | 82 %          | 82 %         |
| Aktiva                                                                                                              | 412.477       | 174.739      |
| Durchschnittliches Active Equity <sup>1</sup>                                                                       | 10.635        | 8.408        |
| Eigenkapitalrendite vor Steuern (basierend auf dem durchschnittlichen Active Equity)                                | 9 %           | 8 %          |
| Invested Assets <sup>2</sup> (in Mrd €)                                                                             | 1.179         | 880          |

<sup>1</sup> Eine Beschreibung der Allokation des durchschnittlichen Active Equity auf die Segmente ist in Note 05 „Segmentberichterstattung“ des Konzernabschlusses enthalten.

<sup>2</sup> Wir definieren Invested Assets als (a) Vermögen, das wir im Namen unserer Kunden zu Anlagezwecken betreuen, und/oder (b) als Vermögenswerte der Kunden, die von uns verwaltet werden. Wir verwalten Invested Assets interessenswährend, auf Beratungsbasis oder als Einlagen.

Nachfolgend erläutern wir den Beitrag der einzelnen Unternehmensbereiche zum Gesamtergebnis des Konzernbereichs PCAM.

## Unternehmensbereich Asset and Wealth Management

Die nachstehende Tabelle zeigt die Geschäftsergebnisse unseres Unternehmensbereichs Asset and Wealth Management (AWM) für die Geschäftsjahre 2010 und 2009 auf Basis unserer Managementberichtssysteme.

in Mio €  
(sofern nicht anders angegeben)

|                                                                                      | 2010         | 2009         |
|--------------------------------------------------------------------------------------|--------------|--------------|
| <b>Erträge insgesamt:</b>                                                            |              |              |
| Diskretionäres Portfolio Management/Fund Management (AM)                             | 1.733        | 1.562        |
| Diskretionäres Portfolio Management/Fund Management (PWM)                            | 515          | 264          |
| <b>Diskretionäres Portfolio Management/Fund Management insgesamt</b>                 | <b>2.247</b> | <b>1.826</b> |
| Beratungs-/Brokeragegeschäft                                                         | 857          | 689          |
| Kreditgeschäft                                                                       | 383          | 255          |
| Einlagengeschäft und Zahlungsverkehr                                                 | 138          | 169          |
| Sonstige Produkte                                                                    | 282          | -255         |
| <b>Summe Erträge insgesamt</b>                                                       | <b>3.907</b> | <b>2.685</b> |
| <b>Risikovorsorge im Kreditgeschäft</b>                                              | <b>43</b>    | <b>17</b>    |
| <b>Zinsunabhängige Aufwendungen</b>                                                  | <b>3.765</b> | <b>2.475</b> |
| davon/darin:                                                                         |              |              |
| Aufwendungen im Versicherungsgeschäft                                                | –            | –            |
| Wertminderung auf immaterielle Vermögenswerte                                        | –            | -291         |
| Restrukturierungsaufwand                                                             | –            | –            |
| <b>Anteile ohne beherrschenden Einfluss</b>                                          | <b>-1</b>    | <b>-7</b>    |
| <b>Ergebnis vor Steuern</b>                                                          | <b>100</b>   | <b>200</b>   |
| Aufwand-Ertrag-Relation                                                              | 96 %         | 92 %         |
| Aktiva                                                                               | 65.508       | 43.761       |
| Durchschnittliches Active Equity <sup>1</sup>                                        | 6.737        | 4.791        |
| Eigenkapitalrendite vor Steuern (basierend auf dem durchschnittlichen Active Equity) | 1 %          | 4 %          |
| Invested Assets <sup>2</sup> (in Mrd €)                                              | 873          | 686          |

<sup>1</sup> Eine Beschreibung der Allokation des durchschnittlichen Active Equity auf die Segmente ist in Note 05 „Segmentberichterstattung“ des Konzernabschlusses enthalten.

<sup>2</sup> Wir definieren Invested Assets als (a) Vermögen, das wir im Namen unserer Kunden zu Anlagezwecken betreuen, und/oder (b) als Vermögenswerte der Kunden, die von uns verwaltet werden. Wir verwalten Invested Assets interessenswährend, auf Beratungsbasis oder als Einlagen.

Im Gesamtjahr 2010 lagen die Erträge von AWM in Höhe von 3,9 Mrd € um 1,2 Mrd € (46 %) über dem Wert des Vorjahres und enthielten einen Beitrag von 646 Mio € aus der Akquisition von Sal. Oppenheim/BHF-BANK. Im Geschäftsbereich Private Wealth Management (PWM) war dieser Beitrag ursächlich für den Anstieg der Erträge aus dem Diskretionären Portfolio Management/Fund Management (Anstieg um 250 Mio € beziehungsweise 95 %), aus dem Kreditgeschäft (Anstieg um 128 Mio € beziehungsweise 50 %) und aus Sonstigen Produkten (Anstieg um 537 Mio € nach negativen 255 Mio € im Geschäftsjahr 2009). Zudem stiegen die Erträge in AWM aufgrund höherer volumen- und erfolgsabhängiger Provisionen im Diskretionären Portfolio Management/Fund Management im Geschäftsbereich Asset Management (AM) (Anstieg um 171 Mio € beziehungsweise 11 %). Das Beratungs-/Brokeragegeschäft (Anstieg um 168 Mio € beziehungsweise 24 %) profitierte von einer stärkeren Kundenaktivität und einem verbesserten Marktumfeld. Im Einlagengeschäft und Zahlungsverkehr sanken die Erträge im Vergleich zum Vorjahr um 31 Mio € (18 %), was in erster Linie auf niedrigere Margen zurückzuführen war.

Die Risikovorsorge im Kreditgeschäft belief sich im Gesamtjahr 2010 auf 43 Mio €. Die Erhöhung um 27 Mio € gegenüber dem Vorjahr war hauptsächlich auf Sal. Oppenheim/BHF-BANK zurückzuführen.

Die Zinsunabhängigen Aufwendungen lagen 2010 mit 3,8 Mrd € um 1,3 Mrd € (52 %) über dem Vorjahreswert. Diese Entwicklung resultierte aus einer Wertaufholung für eine Abschreibung von 291 Mio €, die im Geschäftsjahr 2009 in AM auf immaterielle Vermögenswerte bei DWS Investments in den USA (vormals: DWS Scudder) vorgenommen worden war. Die Zinsunabhängigen Aufwendungen 2010 enthielten ferner 986 Mio € aus der Akquisition von Sal. Oppenheim/BHF-BANK.

Im Gesamtjahr 2010 verzeichnete AWM einen Zuwachs der Invested Assets von 188 Mrd € auf 873 Mrd €. In dem Anstieg waren 112 Mrd € im Zusammenhang mit Sal. Oppenheim/BHF-BANK (68 Mrd € Sal. Oppenheim und 45 Mrd € BHF-BANK) enthalten. Der verbleibende Anstieg war auf positive Marktwertentwicklungen sowie die Abschwächung des Euro zurückzuführen. AWM verzeichnete im Gesamtjahr 2010 Nettomittelabflüsse von 2,5 Mrd €, im Wesentlichen durch Abflüsse in Nord- und Südamerika, welche weitestgehend durch Zuflüsse in Europa und im amerikanischen Versicherungsgeschäft ausgeglichen wurden.

## Unternehmensbereich Private & Business Clients

Die nachstehende Tabelle stellt die Geschäftsergebnisse unseres Unternehmensbereichs Private & Business Clients (PBC) für die Geschäftsjahre 2010 und 2009 auf Basis unserer Managementberichtssysteme dar.

| in Mio €<br>(sofern nicht anders angegeben)                                          | 2010         | 2009         |
|--------------------------------------------------------------------------------------|--------------|--------------|
| <b>Erträge insgesamt:</b>                                                            |              |              |
| Diskretionäres Portfolio Management/Fund Management                                  | 313          | 257          |
| Beratungs-/Brokeragegeschäft                                                         | 887          | 841          |
| Kreditgeschäft                                                                       | 2.325        | 2.350        |
| Einlagengeschäft und Zahlungsverkehr                                                 | 1.891        | 1.706        |
| Sonstige Produkte                                                                    | 720          | 422          |
| <b>Summe Erträge insgesamt</b>                                                       | <b>6.136</b> | <b>5.576</b> |
| <b>Risikovorsorge im Kreditgeschäft</b>                                              | <b>746</b>   | <b>790</b>   |
| <b>Zinsunabhängige Aufwendungen</b>                                                  | <b>4.493</b> | <b>4.328</b> |
| davon/darin:                                                                         |              |              |
| Restrukturierungsaufwand                                                             | –            | –            |
| <b>Anteile ohne beherrschenden Einfluss</b>                                          | <b>8</b>     | <b>0</b>     |
| <b>Ergebnis vor Steuern</b>                                                          | <b>890</b>   | <b>458</b>   |
| Aufwand-Ertrag-Relation                                                              | 73 %         | 78 %         |
| Aktiva                                                                               | 346.998      | 131.014      |
| Durchschnittliches Active Equity <sup>1</sup>                                        | 3.897        | 3.617        |
| Eigenkapitalrendite vor Steuern (basierend auf dem durchschnittlichen Active Equity) | 23 %         | 13 %         |
| Invested Assets <sup>2</sup> (in Mrd €)                                              | 306          | 194          |
| Kreditvolumen (in Mrd €)                                                             | 255          | 96           |
| Einlagenvolumen (in Mrd €)                                                           | 229          | 109          |

<sup>1</sup> Eine Beschreibung der Allokation des durchschnittlichen Active Equity auf die Segmente ist in Note 05 „Segmentberichterstattung“ des Konzernabschlusses enthalten.

<sup>2</sup> Wir definieren Invested Assets als (a) Vermögen, das wir im Namen unserer Kunden zu Anlagezwecken betreuen, und/oder (b) als Vermögenswerte der Kunden, die von uns verwaltet werden. Wir verwalten Invested Assets interessenswährend, auf Beratungsbasis oder als Einlagen.

In PBC stiegen die Erträge gegenüber dem Vorjahr um 560 Mio € (10 %) auf 6,1 Mrd €. Die erstmalige Konsolidierung der Postbank zum 3. Dezember 2010 führte zu zusätzlichen Erträgen von 414 Mio €, die bis auf Weiteres unter den Erträgen aus Sonstigen Produkten ausgewiesen werden. Die Konsolidierung der Postbank war der Hauptgrund für den Anstieg der Erträge aus Sonstigen Produkten um 298 Mio €. Diese Verbesserung wurde durch im Vergleich zum Vorjahr niedrigere Erträge aus der Aktiv- und Passivsteuerung teilweise ausgeglichen. Die Erträge aus dem Diskretionären Portfolio Management/Fund Management stiegen um 56 Mio € (22 %) und im Beratungs-/Brokeragegeschäft war eine Verbesserung um 46 Mio € (5 %) zu verzeichnen. Beide Produktkategorien profitierten sowohl von einer erhöhten Aktivität der privaten Anleger in einem günstigeren Marktumfeld als auch von höheren Erträgen bei Versicherungsprodukten. Die Erträge aus dem Kreditgeschäft gingen aufgrund geringerer Margen gegenüber dem Vorjahr um 25 Mio € (1 %) zurück. Im Einlagengeschäft und Zahlungsverkehr waren die Erträge um 185 Mio € (11 %) besser, hauptsächlich infolge verbesserter Margen im Einlagengeschäft.

Die Risikovorsorge im Kreditgeschäft betrug 746 Mio €, von denen 56 Mio € auf die Postbank entfielen. Ohne die Postbank ging die Risikovorsorge im Kreditgeschäft, verglichen mit 2009, um 100 Mio € (13 %) zurück. Dies war hauptsächlich auf die Maßnahmen, die auf Portfolio- und Länderebene ergriffen wurden, zurückzuführen.

Die Zinsunabhängigen Aufwendungen waren mit 4,5 Mrd € um 165 Mio € (4 %) höher als im Jahr 2009. Der wesentliche Grund für den Anstieg war mit 320 Mio € die bereits erwähnte erstmalige Konsolidierung der Postbank. Ohne die Postbank gingen die Zinsunabhängigen Aufwendung um 155 Mio € (4 %) zurück. Hauptursache hierfür waren geringere Abfindungszahlungen.

Die Invested Assets beliefen sich zum 31. Dezember 2010 auf 306 Mrd €. Dies entspricht einem Anstieg von 112 Mrd € gegenüber dem 31. Dezember 2009, der insbesondere auf die Konsolidierung der Postbank zurückzuführen war. Ohne diese Konsolidierung stiegen die Invested Assets um 7 Mrd €. Darin enthalten waren 5 Mrd € infolge positiver Marktwertentwicklungen und 2 Mrd €, die im Wesentlichen auf Nettomittelzuflüsse im Einlagengeschäft zurückzuführen waren.

Die Kundenzahl von PBC belief sich zum 31. Dezember 2010 auf 28,8 Millionen, einschließlich 14,2 Millionen Kunden der Postbank.

### Konzernbereich Corporate Investments

In der nachfolgenden Tabelle sind die Ergebnisse unseres Konzernbereichs Corporate Investments (CI) für die Geschäftsjahre 2010 und 2009 auf Basis unserer Managementberichtssysteme aufgeführt.

in Mio €  
(sofern nicht anders angegeben)

|                                                                                                               | 2010          | 2009         |
|---------------------------------------------------------------------------------------------------------------|---------------|--------------|
| <b>Erträge insgesamt</b>                                                                                      | <b>-2.020</b> | <b>1.044</b> |
| darin: Zinsüberschuss und Ergebnis aus zum Fair Value bewerteten finanziellen Vermögenswerten/Verpflichtungen | -184          | 793          |
| <b>Risikovorsorge im Kreditgeschäft</b>                                                                       | <b>-4</b>     | <b>8</b>     |
| <b>Zinsunabhängige Aufwendungen</b>                                                                           | <b>637</b>    | <b>581</b>   |
| darin:                                                                                                        |               |              |
| Wertminderung auf immaterielle Vermögenswerte                                                                 | -             | 151          |
| Restrukturierungsaufwand                                                                                      | -             | -            |
| <b>Anteile ohne beherrschenden Einfluss</b>                                                                   | <b>-2</b>     | <b>-1</b>    |
| <b>Ergebnis vor Steuern</b>                                                                                   | <b>-2.649</b> | <b>456</b>   |
| Aufwand-Ertrag-Relation                                                                                       | N/A           | 56 %         |
| Aktiva                                                                                                        | 17.766        | 28.456       |
| Durchschnittliches Active Equity <sup>1</sup>                                                                 | 4.168         | 4.323        |
| Eigenkapitalrendite vor Steuern (basierend auf dem durchschnittlichen Active Equity)                          | -64 %         | 11 %         |

N/A – nicht aussagefähig

<sup>1</sup> Eine Beschreibung der Allokation des durchschnittlichen Active Equity auf die Segmente ist in Note 05 „Segmentberichterstattung“ des Konzernabschlusses enthalten.

Im Konzernbereich Corporate Investments betrugen die Erträge in 2010 negative 2,0 Mrd € gegenüber positiven 1,0 Mrd € im Vorjahr. Im Geschäftsjahr 2010 waren die Erträge hauptsächlich durch die im dritten Quartal verzeichnete Belastung in Bezug auf die Postbank in Höhe von 2,3 Mrd € beeinflusst. Zudem enthielten die Erträge eine Abschreibung von 124 Mio € auf die Immobilie The Cosmopolitan of Las Vegas. Im Geschäftsjahr 2009 waren in den Erträgen 1,0 Mrd € im Zusammenhang mit der Postbank-Transaktion, Marktwertgewinne von 83 Mio € aus der Option zur Erhöhung unserer Beteiligung an der Hua Xia Bank Co. Ltd. und eine Abschreibung von 75 Mio € auf die Immobilie The Cosmopolitan of Las Vegas enthalten.

Die Zinsunabhängigen Aufwendungen von 637 Mio € lagen um 56 Mio € über dem Vorjahreswert. Dieser Anstieg resultierte im Wesentlichen aus höheren Aufwendungen im Zusammenhang mit der Optimierung der Flächen- und Gebäudenutzung sowie aus höheren operativen Kosten bei unserer konsolidierten Beteiligung an der Immobilie The Cosmopolitan of Las Vegas, die im Dezember 2010 eröffnet wurde. Die Zinsunabhängigen Aufwendungen im Jahr 2009 beinhalteten eine Goodwillabschreibung in Höhe von 151 Mio € auf unsere Beteiligung an Maher Terminals.



## Consolidation & Adjustments

Erläuterungen zu „Consolidation & Adjustments“ im Rahmen unserer Segmentberichterstattung sind in Note 05 „Segmentberichterstattung“ des Konzernabschlusses enthalten.

## Vermögenslage

Die nachfolgende Tabelle zeigt Informationen zur Entwicklung der Vermögenslage.

| in Mio €                                                                                                               | 31.12.2010       | 31.12.2009       |
|------------------------------------------------------------------------------------------------------------------------|------------------|------------------|
| Barreserve                                                                                                             | 17.157           | 9.346            |
| Verzinsliche Einlagen bei Kreditinstituten                                                                             | 92.377           | 47.233           |
| Forderungen aus übertragenen Zentralbankeinlagen,<br>Wertpapierpensionsgeschäften (Reverse Repos) und Wertpapierleihen | 49.281           | 50.329           |
| Handelsaktiva                                                                                                          | 271.291          | 234.910          |
| Positive Marktwerte aus derivativen Finanzinstrumenten                                                                 | 657.780          | 596.410          |
| Zum Fair Value klassifizierte finanzielle Vermögenswerte <sup>1</sup>                                                  | 171.926          | 134.000          |
| Forderungen aus dem Kreditgeschäft                                                                                     | 407.729          | 258.105          |
| Forderungen aus Handelsgeschäften und Wertpapierabwicklung                                                             | 103.423          | 93.452           |
| Übrige Aktiva                                                                                                          | 134.666          | 76.879           |
| <b>Summe der Aktiva</b>                                                                                                | <b>1.905.630</b> | <b>1.500.664</b> |
| Einlagen                                                                                                               | 533.984          | 344.220          |
| Verbindlichkeiten aus übertragenen Zentralbankeinlagen, Wertpapierpensionsgeschäften<br>(Repos) und Wertpapierleihen   | 31.198           | 51.059           |
| Handelspassiva                                                                                                         | 68.859           | 64.501           |
| Negative Marktwerte aus derivativen Finanzinstrumenten                                                                 | 647.171          | 576.973          |
| Zum Fair Value klassifizierte finanzielle Verpflichtungen <sup>2</sup>                                                 | 130.154          | 73.522           |
| Sonstige kurzfristige Geldaufnahmen                                                                                    | 64.990           | 42.897           |
| Langfristige Verbindlichkeiten                                                                                         | 169.660          | 131.782          |
| Verbindlichkeiten aus Handelsgeschäften und Wertpapierabwicklung                                                       | 116.146          | 110.797          |
| Übrige Passiva                                                                                                         | 93.076           | 66.944           |
| <b>Summe der Verbindlichkeiten</b>                                                                                     | <b>1.855.238</b> | <b>1.462.695</b> |
| <b>Eigenkapital einschließlich Anteile ohne beherrschenden Einfluss</b>                                                | <b>50.392</b>    | <b>37.969</b>    |

<sup>1</sup> Beinhaltet zum Fair Value klassifizierte Forderungen aus Wertpapierpensionsgeschäften (Reverse Repos) in Höhe von 108.912 Mio € zum 31. Dezember 2010 (2009: 89.977 Mio €) und zum Fair Value klassifizierte Forderungen aus Wertpapierleihen in Höhe von 27.887 Mio € zum 31. Dezember 2010 (2009: 19.987 Mio €).

<sup>2</sup> Beinhaltet zum Fair Value klassifizierte Verbindlichkeiten aus Wertpapierpensionsgeschäften (Repos) in Höhe von 107.999 Mio € zum 31. Dezember 2010 (2009: 52.795 Mio €).

## Aktiva und Verbindlichkeiten

Zum 31. Dezember 2010 betrug die Summe der Aktiva 1.906 Mrd €. Mehr als die Hälfte des Anstiegs von 405 Mrd € (27 %) gegenüber dem Wert zum 31. Dezember 2009 steht in Verbindung mit unseren Akquisitionen. Währungskursbewegungen, insbesondere zwischen US-Dollar und Euro, trugen weitere 20 % zum Gesamtanstieg unseres Bilanzvolumens in 2010 bei.

Der Anstieg unserer Bilanzsumme resultierte im Wesentlichen aus der Ausweitung unseres Kreditbuchs, das um 150 Mrd € über dem Wert zum Vorjahresende lag. Unsere Akquisitionen, insbesondere die der Postbank, trugen mit 141 Mrd € (94 %) zu dieser Erhöhung bei.

Positive Marktwerte derivativer Finanzinstrumente stiegen um 61 Mrd €, davon entfielen 23 Mrd € auf Währungsumrechnungseffekte und 21 Mrd € auf Akquisitionen.

Ferner haben sich unsere verzinslichen Einlagen bei Kreditinstituten vom Jahresende 2009 zum Jahresende 2010 fast verdoppelt, vorrangig um unsere Liquiditätsreserve zu verstärken.

Die Summe der Verbindlichkeiten stieg im Berichtszeitraum um 393 Mrd € auf 1.855 Mrd €.

Im Wesentlichen resultierte diese Ausweitung aus einer Erhöhung der Einlagen um 190 Mrd €, zu der in erster Linie unsere Akquisitionen mit 146 Mrd € (77 %) beitrugen.

Negative Marktwerte derivativer Finanzinstrumente erhöhten sich um 70 Mrd €, ebenfalls überwiegend bedingt durch Währungsumrechnungseffekte und neue Akquisitionen.

### Eigenkapital

Das Eigenkapital stieg zum 31. Dezember 2010 auf 50,4 Mrd € und lag damit um 12,4 Mrd € (33 %) über dem Wert zum 31. Dezember 2009 von 38,0 Mrd €. Dieser Anstieg resultierte in erster Linie aus der Kapitalerhöhung von 10,1 Mrd € (nach Kosten von etwa 0,1 Mrd €), dem den Deutsche Bank-Aktionären zurechenbaren Konzernergebnis von 2,3 Mrd € und aus im Kumulierten sonstigen Ergebnis (Other comprehensive income) erfassten Gewinnen von 1,2 Mrd €. Diese positive Entwicklung wurde durch Dividendenzahlungen in Höhe von 465 Mio € sowie durch eine Erhöhung unseres Bestands in Eigenen Aktien, die vom Eigenkapital abgezogen werden, um 403 Mio € teilweise ausgeglichen. Die vorgenannten, im sonstigen Ergebnis (Other comprehensive income) erfassten Gewinne waren vorwiegend auf positive Effekte aus Wechselkursänderungen in Höhe von 1,2 Mrd € (vor allem US-Dollar) zurückzuführen.

### Aufsichtsrechtliches Eigenkapital

Das gemäß Basel II ausgewiesene aufsichtsrechtliche Kapital insgesamt (Tier-1- und Tier-2-Kapital) betrug 48,7 Mrd € zum Jahresende 2010 gegenüber 37,9 Mrd € am Jahresende 2009. Der Anstieg reflektierte im Wesentlichen die durchgeführte Kapitalerhöhung über 10,2 Mrd € im vierten Quartal sowie unsere Akquisitionen in 2010. Das Tier-1-Kapital erhöhte sich auf 42,6 Mrd € zum Jahresende 2010 gegenüber 34,4 Mrd € am Jahresende 2009. Das Tier-1-Kapital ohne Hybridinstrumente erhöhte sich zum 31. Dezember 2010 auf 30,0 Mrd € im Vergleich zu 23,8 Mrd € am Jahresende 2009.

### Wesentliche Risikopositionen an den Kreditmärkten

Der nachfolgende Abschnitt gibt einen aktualisierten Überblick über die Entwicklung bestimmter Risikopositionen an den Kreditmärkten (einschließlich erworbener Monolineabsicherungen) in jenen CB&S-Geschäftsbereichen, für die wir bereits in Vorperioden zusätzliche Risikoangaben gemacht haben. Es handelt sich dabei um die Positionen, die während der Finanzmarktkrise die Performance der CB&S-Geschäftsbereiche wesentlich beeinflusst haben. Zusätzlich zu diesen CB&S-Positionen haben wir außerdem Informationen zu den im Rahmen der Postbank-Akquisition erworbenen Positionen dargestellt.

**Risikopositionen aus Wohnungsbaukrediten:** Risikopositionen aus Wohnungsbaukrediten in einigen unserer Geschäftsbereiche, einschließlich unseres CDO-Handels- und Emissionsgeschäfts sowie des US-amerikanischen und europäischen Hypothekenmarkts, stellt die nachfolgende Tabelle unter Berücksichtigung von Hedges und sonstigen Absicherungsgeschäften dar. Hedges bestehen aus einer Vielzahl verschiedener Finanzinstrumente darunter Monolineabsicherungen, Single-Name Credit Default Swaps mit Marktkontrahenten und index-basierte Verträge.

Risikopositionen aus Wohnungsbaukrediten im CDO-Handels- und -Emissionsgeschäft, im US-amerikanischen und europäischen Hypothekenmarkt

| in Mio €                                                                                                    | 31.12.2010              |                                           |                        | 31.12.2009              |                                           |                        |
|-------------------------------------------------------------------------------------------------------------|-------------------------|-------------------------------------------|------------------------|-------------------------|-------------------------------------------|------------------------|
|                                                                                                             | Brutto-Risikopositionen | Hedges und sonstige Absicherungsgeschäfte | Netto-Risikopositionen | Brutto-Risikopositionen | Hedges und sonstige Absicherungsgeschäfte | Netto-Risikopositionen |
| <b>Subprime<sup>1</sup>- und Alt-A<sup>2</sup>-Risikopositionen im CDO-Handels- und -Emissionsgeschäft:</b> |                         |                                           |                        |                         |                                           |                        |
| CDO-Subprime-Risikopositionen (Handelsbestand)                                                              | 420                     | 75                                        | 345                    | 688                     | 371                                       | 317                    |
| CDO-Subprime-Risikopositionen (zur Veräußerung verfügbar bilanziert)                                        | 34                      | –                                         | 34                     | 34                      | –                                         | 34                     |
| CDO-Alt-A-Risikopositionen (Handelsbestand)                                                                 | 56                      | 49                                        | 7                      | 77                      | 55                                        | 22                     |
| <b>Hypothekenmarkt (Handelspositionen):</b>                                                                 |                         |                                           |                        |                         |                                           |                        |
| Sonstige Risikopositionen im US-amerikanischen Hypothekenmarkt <sup>3,4</sup>                               | 3.428                   | 3.153                                     | 275                    | 4.315                   | 3.201                                     | 1.114                  |
| Risikopositionen im europäischen Hypothekenmarkt                                                            | 169                     | –                                         | 169                    | 179                     | –                                         | 179                    |

<sup>1</sup> Zur Bestimmung von Subprime-Risikopositionen wenden wir bankspezifische Standards wie FICO-Bewertungen (Kreditwürdigkeit) und Loan-to-Value-Kennzahlen (Beleihungswerte), an. In begrenztem Umfang klassifizieren wir Risikopositionen auch als Subprime, wenn 50 % oder mehr der jeweils zugrunde liegenden Sicherheiten Subprime-Wohnungsbaukredite darstellen.

<sup>2</sup> Alt-A-Kredite sind Kredite, die an Kreditnehmer vergeben werden, die grundsätzlich eine gute Kreditwürdigkeit haben. Auf diese Kredite bezogene Kennzahlen oder andere Charakteristika entsprechen jedoch nicht dem Standard für erstklassige Hypothekenkredite. Diese beinhalten niedrigere FICO-Bewertungen, höhere Beleihungswerte sowie einen prozentual höheren Anteil an Krediten mit geringer oder gar keiner Dokumentation.

<sup>3</sup> Von den Netto-Risikopositionen entfielen am 31. Dezember 2010 minus 267 Mio € auf Alt-A, 10 Mio € auf Subprime, 52 Mio € auf Sonstige und 480 Mio € auf Handelspositionen (netto). Zum 31. Dezember 2009 entfielen 202 Mio € auf Alt-A, 71 Mio € auf Subprime, 244 Mio € auf Sonstige und 597 Mio € auf Handelspositionen (netto).

<sup>4</sup> Die in den Sonstigen Risikopositionen im US-amerikanischen Hypothekenmarkt enthaltenen Wertanpassungen wurden adjustiert und berücksichtigen eine aktualisierte Berechnung des Kreditrisikos, die den Fair Value der zugrunde liegenden Vermögenswerte besser abbildet. Wir haben die Risikoposition zum 31. Dezember 2009 entsprechend neu berechnet, was zu einer Reduzierung um 187 Mio € auf 1,1 Mrd € führte. Die Netto-Risikopositionen zum 31. Dezember 2010 wurden ebenfalls auf dieser Basis berechnet, was zu einer Reduzierung um 320 Mio € auf 275 Mio € führte.

In der obigen Tabelle gibt die Nettorisikoposition den theoretisch möglichen Verlust für den Fall an, dass die Wertpapiere und entsprechenden Hedges komplett ausfallen und keine Verwertungsgewinne erzielt werden können. Sie liefern keinen Anhaltspunkt für unsere um das „Net Delta“ adjustierte Risikoposition im Handel. Diese „Net-Delta“-adjustierte Risikoposition im Handel ist eine Kennzahl, die die Vergleichbarkeit zwischen verschiedenen Risikopositionen herstellt. Sie gibt für jede Position die Position in den entsprechenden Wertpapieren an, welche die gleiche Sensitivität gegenüber Marktveränderungen hat.

Die oben angeführte Tabelle bezieht sich auf wesentliche Risikopositionen an den Kreditmärkten, die erfolgswirksam zum Fair Value bewertet werden. Handelsaktiva oder zur Veräußerung verfügbare Vermögenswerte, die aufgrund der Änderungen von IAS 39 in die Forderungen aus dem Kreditgeschäft umklassifiziert wurden, sind nicht enthalten. Der Buchwert dieser Risikopositionen belief sich zum 31. Dezember 2010 auf 1,8 Mrd € (davon entfielen 1,0 Mrd € auf den europäischen Hypothekenmarkt, 339 Mio € auf sonstige Risikopositionen im US-amerikanischen Hypothekenmarkt und 402 Mio € auf CDO-Subprime-Risikopositionen (Handelsbestand)). Der Vergleichswert zum 31. Dezember 2009 betrug 1,9 Mrd € (davon entfielen 1,1 Mrd € auf den europäischen Hypothekenmarkt, 370 Mio € auf sonstige Risikopositionen im US-amerikanischen Hypothekenmarkt und 432 Mio € auf CDO-Subprime-Risikopositionen (Handelsbestand)).

Zusätzlich zu diesen CB&S-Positionen hat die Postbank Risikopositionen aus Wertpapieren auf den europäischen gewerblichen Hypothekenmarkt in Höhe von 192 Mio € und Risikopositionen aus Wertpapieren auf Wohnungsbaukredite in Höhe von 428 Mio € (davon 398 Mio € in Europa und 27 Mio € in den USA). Außerdem hat die Postbank Risikopositionen aus non-corporate CDOs in Höhe von 69 Mio € mit Basiswerten teilweise im gewerblichen Hypothekenmarkt und teilweise im Wohnungsbaumarkt. Diese Positionen sind hauptsächlich als Forderungen aus dem Kreditgeschäft beziehungsweise als zur Veräußerung verfügbare finanzielle Vermögenswerte klassifiziert.

Die Tabelle enthält weder verbrieft Forderungen öffentlich-rechtlicher Emittenten noch Kredite, die grundsätzlich zum Ankauf durch solche Institutionen qualifizieren, da wir diese als nicht kreditrisikosensitive Engagements erachten. Auch tilgungsfreie und inverse tilgungsfreie Positionen, die negativ mit der Verschlechterung der Marktsituation korrelieren, sind aufgrund des Effekts eines reduzierten Anteils vorzeitiger Tilgungen auf die Position nicht enthalten. Durch eine niedrigere Rückzahlungsrate verlängert sich die durchschnittliche Tilgungsdauer dieser tilgungsfreien Positionen, was wiederum zu einem höheren Wert infolge des längeren Zinszahlungszeitraums führt.

Die einzelnen Bruttobestandteile unserer oben genannten Nettorisikopositionen beinhalten Positionen aus verschiedenen Jahren der Kreditvergabe, Lokationen und Bonitätsklassen der Schuldner sowie weitere marktabhängige Faktoren. Während die vorgenannten Werte das maximale Risiko im Fall extremer Marktentwicklungen beschreiben, hängen die effektiven zukünftigen Gewinne und Verluste aus diesen Positionen von den tatsächlichen Marktbewegungen ab, inklusive der Basisbewegungen zwischen den verschiedenen Komponenten unserer Risikopositionen und der Möglichkeit, entsprechende Absicherungsgeschäfte diesen Umständen anzupassen.

**Ocala Funding LLC:** Wir halten 71,4 % der von Ocala Funding LLC (Ocala) emittierten Commercial Paper. Ocala ist eine von Taylor Bean & Whitaker Mortgage Corp. (TBW) gesponserte Commercial-Paper-Gesellschaft, die im August 2009 ihre Pfandbriefaktivitäten einstellte und Insolvenz beantragte. Wir klassifizieren die Commercial Paper als Handelsaktiva und bewerten sie erfolgswirksam zum Fair Value. Zum 31. Dezember 2010 betrug der Nominalwert der von Ocala emittierten und von uns gehaltenen Commercial Paper 904 Mio €. Als Ergebnis der beantragten Insolvenz und basierend auf den zum damaligen Zeitpunkt vorliegenden Informationen, realisierten wir im Jahr 2009 einen Verlust aus der Fair-Value-Bewertung der Ocala Commercial Paper in Höhe von circa 350 Mio €. Zum 1. Juli 2010 beinhaltete ein beim Insolvenzgericht eingereichter Asset Reconciliation Report über den TBW-Besitz zusätzliche Informationen über die durch Ocala gehaltenen Sicherheiten. Auf Basis dieser Informationen und bestimmter Einschätzungen des Managements zur Werthaltigkeit von Forderungen, die gegenüber dem Insolvenzverwalter angemeldet wurden, wiesen wir im zweiten Quartal 2010 einen zusätzlichen Verlust aus der Fair-Value-Bewertung in Höhe von circa 270 Mio € aus. Im dritten Quartal 2010 wurde ein weiterer Verlust aus der Fair-Value-Bewertung in Höhe von circa 90 Mio € berichtet, so dass aus der Fair-Value-Bewertung für 2010 insgesamt ein Verlust in Höhe von circa 360 Mio € resultierte.

**Risikopositionen gegenüber Monolineversicherern:** Die Verwerfungen am US-amerikanischen Subprime-Hypothekenmarkt und an mit diesem verbundenen Märkten haben bei Anbietern von Finanzgarantien wie Monolineversicherern zu hohen Risikopositionen geführt, wenn sie den Wert eines Pools von Sicherheiten, auf den CDOs oder andere gehandelte Wertpapiere referenzieren, versichert oder garantiert haben. Ansprüche gegenüber Monolineversicherern werden nur dann fällig, wenn der Bank Verluste dadurch entstehen, Aktiva (oder Kreditsicherheiten) ausfallen. Es besteht weiterhin eine gewisse Verunsicherung darüber, ob abgesicherte manche Monolineversicherer ihre Verpflichtungen gegenüber Banken und anderen Käufern von Absicherungen erfüllen können. Unter bestimmten Umständen, beispielsweise bei der Liquidation, können wir Forderungen unabhängig von tatsächlichen Verlusten aus den abgesicherten Aktiva vorzeitig geltend machen.

Die folgenden Tabellen fassen unser Nettoausfallrisiko gegenüber Monolineversicherern, bezogen auf Aktivitäten in US-amerikanischen Wohnungsbaukrediten und anderen Aktivitäten, zusammen. Die gezeigten Beträge basieren auf den aktuellen Marktwerten der Vermögenspositionen, denen die von Monolineversicherern garantierten Nominalwerte gegenübergestellt werden. Die sonstigen Risikopositionen, die in der zweiten Tabelle beschrieben sind, resultieren aus verschiedenen kunden- und handelsbezogenen Aktivitäten und umfassen Collateralized Loan Obligations, gewerbliche verbriefte Hypothekenkredite, Trust Preferred Securities, Studentenkredite und Schuldtitel des öffentlichen Sektors. Die Tabellen zeigen die zugehörigen kreditrisikobezogenen Bewertungsanpassungen, die wir für diese Positionen vorgenommen haben. Die Bewertungsanpassungen werden anhand eines Modellansatzes mit diversen Parametern für jeden Kontrahenten ermittelt, einschließlich potenzieller Ereignisse (entweder einer Restrukturierung oder einer Insolvenz), einer Abschätzung der möglichen Ausgleichszahlungen im Fall einer Restrukturierung und von Erlösquoten im Fall einer Restrukturierung oder einer Insolvenz. Die Zuordnung zu den unten genannten Ratingklassen basiert jeweils auf dem niedrigeren verfügbaren Rating von Standard & Poor's, Moody's oder unserem internen Rating zum 31. Dezember 2010 beziehungsweise 31. Dezember 2009.

Risikoposition gegenüber Monolineversicherern,  
bezogen auf US-amerikanische  
Wohnungsbaukredite

| in Mio €                      | 31.12.2010   |                                                 |                            |                                                  | 31.12.2009   |                                                 |                            |                                                  |
|-------------------------------|--------------|-------------------------------------------------|----------------------------|--------------------------------------------------|--------------|-------------------------------------------------|----------------------------|--------------------------------------------------|
|                               | Nominalwert  | Fair Value<br>vor<br>Bewertungs-<br>anpassungen | Bewertungs-<br>anpassungen | Fair Value<br>nach<br>Bewertungs-<br>anpassungen | Nominalwert  | Fair Value<br>vor<br>Bewertungs-<br>anpassungen | Bewertungs-<br>anpassungen | Fair Value<br>nach<br>Bewertungs-<br>anpassungen |
| AA Monolines:                 |              |                                                 |                            |                                                  |              |                                                 |                            |                                                  |
| Sonstige Subprime             | 139          | 60                                              | –6                         | 54                                               | 142          | 70                                              | –6                         | 64                                               |
| Alt-A                         | 4.069        | 1.539                                           | –308                       | 1.231                                            | 4.337        | 1.873                                           | –172                       | 1.701                                            |
| <b>AA Monolines insgesamt</b> | <b>4.208</b> | <b>1.599</b>                                    | <b>–314</b>                | <b>1.285</b>                                     | <b>4.479</b> | <b>1.943</b>                                    | <b>–178</b>                | <b>1.765</b>                                     |

Sonstige Risikoposition  
gegenüber  
Monolineversicherern

| in Mio €                                                  | 31.12.2010    |                                                 |                            |                                                  | 31.12.2009    |                                                 |                            |                                                  |
|-----------------------------------------------------------|---------------|-------------------------------------------------|----------------------------|--------------------------------------------------|---------------|-------------------------------------------------|----------------------------|--------------------------------------------------|
|                                                           | Nominalwert   | Fair Value<br>vor<br>Bewertungs-<br>anpassungen | Bewertungs-<br>anpassungen | Fair Value<br>nach<br>Bewertungs-<br>anpassungen | Nominalwert   | Fair Value<br>vor<br>Bewertungs-<br>anpassungen | Bewertungs-<br>anpassungen | Fair Value<br>nach<br>Bewertungs-<br>anpassungen |
| AA Monolines:                                             |               |                                                 |                            |                                                  |               |                                                 |                            |                                                  |
| TPS-CLO                                                   | 2.988         | 837                                             | – 84                       | 753                                              | 2.717         | 925                                             | – 85                       | 840                                              |
| CMBS                                                      | 1.084         | 12                                              | – 1                        | 11                                               | 1.004         | 68                                              | – 6                        | 62                                               |
| Corporate Single<br>Name/Corporate<br>CDO                 | 602           | – 1                                             | –                          | – 1                                              | 2.033         | – 3                                             | –                          | – 3                                              |
| Studentenkredite                                          | 295           | 19                                              | – 2                        | 17                                               | 232           | 39                                              | – 4                        | 35                                               |
| Sonstige                                                  | 925           | 226                                             | – 23                       | 203                                              | 902           | 249                                             | – 23                       | 226                                              |
| <b>AA Monolines<br/>insgesamt</b>                         | <b>5.894</b>  | <b>1.093</b>                                    | <b>– 110</b>               | <b>983</b>                                       | <b>6.888</b>  | <b>1.277</b>                                    | <b>– 117</b>               | <b>1.160</b>                                     |
| Nicht-Investment<br>Grade Monolines:                      |               |                                                 |                            |                                                  |               |                                                 |                            |                                                  |
| TPS-CLO                                                   | 917           | 215                                             | – 49                       | 166                                              | 876           | 274                                             | – 100                      | 174                                              |
| CMBS                                                      | 6.024         | 547                                             | – 273                      | 274                                              | 5.932         | 813                                             | – 355                      | 458                                              |
| Corporate Single<br>Name/Corporate<br>CDO                 | 2.180         | 12                                              | – 6                        | 6                                                | 4.366         | 26                                              | – 12                       | 14                                               |
| Studentenkredite                                          | 1.308         | 597                                             | – 340                      | 257                                              | 1.221         | 560                                             | – 319                      | 241                                              |
| Sonstige                                                  | 1.807         | 226                                             | – 94                       | 132                                              | 1.645         | 278                                             | – 102                      | 176                                              |
| <b>Nicht-Investment<br/>Grade Monolines<br/>insgesamt</b> | <b>12.236</b> | <b>1.597</b>                                    | <b>– 762</b>               | <b>835</b>                                       | <b>14.040</b> | <b>1.950</b>                                    | <b>– 887</b>               | <b>1.063</b>                                     |
| <b>Insgesamt</b>                                          | <b>18.130</b> | <b>2.690</b>                                    | <b>– 872</b>               | <b>1.818</b>                                     | <b>20.928</b> | <b>3.227</b>                                    | <b>– 1.004</b>             | <b>2.223</b>                                     |

Die Tabellen berücksichtigen nicht das Nettoausfallrisiko gegenüber Monolineversicherern aus sogenannten „Wrapped Bonds“. Dies sind Schuldverschreibungen, die von Dritten versichert oder garantiert werden. Solche Risikopositionen beliefen sich, bezogen auf US-amerikanische Wohnungsbaukredite, zum Ende des Berichtsjahres auf 67 Mio € (2009: 100 Mio €). Die Risikopositionen von „Wrapped Bonds“, die sich nicht auf US-amerikanische Wohnungsbaukredite beziehen, betrugen 58 Mio € (2009: 54 Mio €). In jedem Fall stellen die Werte eine Schätzung der möglichen Wertanpassungen auf solche Schuldverschreibungen im Fall eines Ausfalls der Versicherer dar.

Ein Teil des Marktwerts der erworbenen Monolineabsicherungen wurde durch Credit Default Swaps mit anderen Marktteilnehmern oder durch andere Instrumente wirtschaftlich abgesichert.

Zum 31. Dezember 2010 betrugen die Bewertungsanpassungen auf Risikopositionen gegenüber Monolineversicherern insgesamt 1.186 Mio € (2009: 1.182 Mio €).



**Risikopositionen im Bereich Commercial Real Estate:** Im Commercial-Real-Estate-Geschäft entstehen Risiken aus gewerblichen Immobilienkrediten, die entweder zum Zweck des Verkaufs, der Syndizierung, Verbriefung oder sonstiger Strategien begeben beziehungsweise gehalten oder als Forderungen aus dem Kreditgeschäft bilanziert werden. Die folgende Tabelle beinhaltet eine Zusammenfassung unserer Risikoposition für gewerbliche Immobilienkredite zum 31. Dezember 2010 und 31. Dezember 2009. Unser Handelsportfolio aus Sekundärmarktpositionen in CMBS-Papieren, die aktiv gehandelt und bewertet werden, ist nicht enthalten.

Commercial-Real-Estate-Kredite

| in Mio €                                                                                     | 31.12.2010 | 31.12.2009 |
|----------------------------------------------------------------------------------------------|------------|------------|
| Zum Fair Value bewertete Kredite, nach Risikoabbaumaßnahmen <sup>1</sup>                     | 2.265      | 1.806      |
| Im Zusammenhang mit den Änderungen von IAS 39 umklassifizierte Kredite <sup>2</sup>          | 4.941      | 6.453      |
| Kredite im Zusammenhang mit dem Verkauf von Vermögenspositionen <sup>3</sup>                 | 2.186      | 2.083      |
| Andere Kredite, die als Forderungen aus dem Kreditgeschäft klassifiziert wurden <sup>4</sup> | 15.814     | –          |

<sup>1</sup> Risikoabbaumaßnahmen umfassen Derivate und sonstige Transaktionen, die zum Zweck der Risikoreduzierung bei gewerblichen Krediten eingegangen wurden. Der darauf bezogene Fair Value belief sich auf 689 Mio € zum 31. Dezember 2010 (2009: 1,0 Mrd €).

<sup>2</sup> Buchwert zum jeweiligen Stichtag.

<sup>3</sup> Buchwert der Finanzierungen, die im Zusammenhang mit dem Verkauf von Krediten seit dem 1. Januar 2008 bestehen, zum jeweiligen Stichtag.

<sup>4</sup> Buchwert der Kredite, die im Rahmen der Postbank-Akquisition erworben wurden.

**Risikopositionen im Leveraged-Finance-Bereich:** Die folgende Tabelle ist eine Zusammenfassung unserer Risikopositionen im Leveraged-Finance-Bereich zum 31. Dezember 2010 und 31. Dezember 2009, die sich aus Krediten und Kreditzusagen im Zusammenhang mit der Finanzierung von Unternehmensübernahmen (inklusive Private-Equity-Transaktionen und sonstiger Buy-out-Vereinbarungen) ergeben. In der nachfolgenden Tabelle sind Kredite, die vor dem 1. Januar 2007 begeben und vor den Marktverwerfungen vereinbart wurden, sowie Kredite, die seit Entstehung unter den Forderungen aus dem Kreditgeschäft ausgewiesen wurden, nicht enthalten.

Leveraged Finance

| in Mio €                                                                            | 31.12.2010 | 31.12.2009 |
|-------------------------------------------------------------------------------------|------------|------------|
| Zum Fair Value bewertete Kredite                                                    | 2.263      | 505        |
| davon: seit 1. Januar 2008 begebene Kredite                                         | 2.230      | 385        |
| Im Zusammenhang mit den Änderungen von IAS 39 umklassifizierte Kredite <sup>1</sup> | 1.367      | 6.152      |
| Kredite im Zusammenhang mit dem Verkauf von Vermögenspositionen <sup>2</sup>        | 5.863      | 5.804      |

<sup>1</sup> Buchwert zum jeweiligen Stichtag. Der signifikante Rückgang des Buchwerts ist hauptsächlich auf die Restrukturierung der Kredite mit dem Actavis-Konzern zurückzuführen, die in der Note 17 „Nach der Equitymethode bilanzierte Beteiligungen“ beschrieben wird.

<sup>2</sup> Buchwert der Finanzierungen, die im Zusammenhang mit dem Verkauf von Krediten seit dem 1. Januar 2008 bestehen, zum jeweiligen Stichtag.

## Zweckgesellschaften

Zur Durchführung unserer Geschäftsaktivitäten nutzen wir unter anderem sogenannte Zweckgesellschaften („SPEs“), die einem bestimmten Geschäftszweck dienen. SPEs ermöglichen in erster Linie den Kunden Zugang zu spezifischen Portfolios von Vermögenswerten und Risiken und stellen ihnen durch die Verbriefung von Vermögenswerten Marktliquidität bereit. SPEs können als Kapital-, Investment- oder Personengesellschaften gegründet werden.

SPEs, die wir gegründet oder gesponsert haben beziehungsweise mit denen wir eine Vertragsbeziehung unterhalten, sind unter bestimmten Umständen zu konsolidieren. Wir konsolidieren eine SPE, wenn wir ihre Finanz- und Geschäftspolitik bestimmen können. Dies ist in der Regel dann der Fall, wenn wir direkt oder indirekt über mehr als die Hälfte der Stimmrechte verfügen. Wenn die Geschäftsaktivitäten sehr eng umrissen sind oder es nicht eindeutig ist, wer die Finanz- und Geschäftspolitik der betreffenden SPE bestimmt, berücksichtigen wir eine Reihe weiterer Faktoren, um festzulegen, ob uns die Mehrheit der verbundenen Risiken und Chancen zuzurechnen ist. Wir überprüfen unsere Konsolidierungsentscheidung für SPEs, wenn sich die Vereinbarungen mit der SPE ändern oder sich die Geschäftsbeziehung zwischen uns und einer SPE substantiell verändert. Für weitere Informationen zu unseren Rechnungslegungsgrundsätzen bezüglich der Konsolidierung

von SPEs sowie der Überprüfung getroffener Konsolidierungsentscheidungen siehe Note 01 „Wesentliche Rechnungslegungsgrundsätze“ unseres Konzernabschlusses.

In einigen wenigen Fällen konsolidieren wir bestimmte SPEs für Zwecke sowohl des Handelsrechts als auch des deutschen Aufsichtsrechts. In allen anderen Fällen unterlegen wir sämtliche SPE-bezogenen Transaktionen wie Derivategeschäfte, Kreditzusagen oder Garantien und die mit ihnen verbundenen Risiken mit regulatorischem Eigenkapital. Bislang hatten die Risikopositionen gegenüber nicht konsolidierten Zweckgesellschaften keine wesentlichen Auswirkungen auf die Bedingungen unserer Finanzierungsvereinbarungen, Kapitalkennziffern, Bonitätsbeurteilungen oder Dividenden.

Die folgenden Abschnitte zeigen Details zu den Vermögenswerten (nach Konsolidierungsbuchungen) der von uns konsolidierten SPEs sowie die maximal verbleibenden zu finanzierenden Risikopositionen gegenüber bestimmten nicht konsolidierten SPEs. Diese sollten zusammen mit dem Abschnitt „Wesentliche Risikopositionen an den Kreditmärkten“, der Teil des Abschnitts „Vermögenslage“ ist, gelesen werden.

## Vermögenswerte von konsolidierten SPEs

31.12.2010

| in Mio €                              | Art des Vermögenswerts                                           |                                                       |                                    |                                                           |                 |                  |
|---------------------------------------|------------------------------------------------------------------|-------------------------------------------------------|------------------------------------|-----------------------------------------------------------|-----------------|------------------|
|                                       | Zum Fair Value bewertete finanzielle Vermögenswerte <sup>1</sup> | Zur Veräußerung verfügbare finanzielle Vermögenswerte | Forderungen aus dem Kreditgeschäft | Barreserve und verzinsliche Einlagen bei Kreditinstituten | Sonstige Aktiva | Summe der Aktiva |
| <b>Kategorie:</b>                     |                                                                  |                                                       |                                    |                                                           |                 |                  |
| Vom Konzern gesponserte ABCP-Conduits | –                                                                | 431                                                   | 15.304                             | –                                                         | 59              | 15.794           |
| Vom Konzern gesponserte Verbriefungen | 3.168                                                            | 369                                                   | 1.250                              | 20                                                        | 23              | 4.830            |
| Von Dritten gesponserte Verbriefungen | 189                                                              | –                                                     | 507                                | 2                                                         | 18              | 716              |
| Repackaging und Investmentprodukte    | 6.606                                                            | 1.053                                                 | 206                                | 2.211                                                     | 664             | 10.740           |
| Investmentfonds                       | 4.135                                                            | 9                                                     | –                                  | 465                                                       | 654             | 5.263            |
| Strukturierte Transaktionen           | 2.533                                                            | 269                                                   | 5.315                              | 386                                                       | 381             | 8.884            |
| Operative Einheiten                   | 1.676                                                            | 3.522                                                 | 3.309                              | 514                                                       | 3.582           | 12.603           |
| Sonstige                              | 199                                                              | 300                                                   | 556                                | 117                                                       | 304             | 1.476            |
| <b>Insgesamt</b>                      | <b>18.506</b>                                                    | <b>5.953</b>                                          | <b>26.447</b>                      | <b>3.715</b>                                              | <b>5.685</b>    | <b>60.306</b>    |

<sup>1</sup> Der Fair Value der Derivatepositionen beträgt 158 Mio €.

31.12.2009

| in Mio €                              | Art des Vermögenswerts                                           |                                                       |                                    |                                                           |                 |                  |
|---------------------------------------|------------------------------------------------------------------|-------------------------------------------------------|------------------------------------|-----------------------------------------------------------|-----------------|------------------|
|                                       | Zum Fair Value bewertete finanzielle Vermögenswerte <sup>1</sup> | Zur Veräußerung verfügbare finanzielle Vermögenswerte | Forderungen aus dem Kreditgeschäft | Barreserve und verzinsliche Einlagen bei Kreditinstituten | Sonstige Aktiva | Summe der Aktiva |
| <b>Kategorie:</b>                     |                                                                  |                                                       |                                    |                                                           |                 |                  |
| Vom Konzern gesponserte ABCP-Conduits | 30                                                               | 279                                                   | 15.222                             | –                                                         | 33              | 15.564           |
| Vom Konzern gesponserte Verbriefungen | 3.409                                                            | –                                                     | 1.175                              | 4                                                         | 57              | 4.645            |
| Von Dritten gesponserte Verbriefungen | 200                                                              | –                                                     | 516                                | 3                                                         | 73              | 792              |
| Repackaging und Investmentprodukte    | 5.789                                                            | 1.973                                                 | 36                                 | 661                                                       | 557             | 9.016            |
| Investmentfonds                       | 5.163                                                            | –                                                     | –                                  | 1.313                                                     | 35              | 6.511            |
| Strukturierte Transaktionen           | 2.531                                                            | 108                                                   | 5.207                              | 26                                                        | 423             | 8.295            |
| Operative Einheiten                   | 1.603                                                            | 3.319                                                 | 1.898                              | 501                                                       | 2.416           | 9.737            |
| Sonstige                              | 610                                                              | 240                                                   | 786                                | 59                                                        | 453             | 2.148            |
| <b>Insgesamt</b>                      | <b>19.335</b>                                                    | <b>5.919</b>                                          | <b>24.840</b>                      | <b>2.567</b>                                              | <b>4.047</b>    | <b>56.708</b>    |

<sup>1</sup> Der Fair Value der Derivatepositionen beträgt 250 Mio €.

### **Vom Konzern gesponserte Asset-backed Commercial Paper („ABCP“) Conduits**

Wir arrangieren, sponsern und verwalten unsere eigenen Asset-backed-Commercial-Paper-Programme („ABCP“). Diese Programme gewähren unseren Kunden Zugang zu Liquidität am Commercial-Paper-Markt und schaffen neue Investmentprodukte für unsere Kunden. Als Verwalter von Commercial-Paper-Programmen unterstützen wir den Kauf von nicht vom Deutsche Bank-Konzern gewährten Krediten sowie von Wertpapieren und sonstigen Forderungen durch ein Commercial Paper Conduit („Conduit“), das anschließend zur Finanzierung dieses Kaufs kurzfristige Commercial Paper hoher Bonität am Markt verkauft. Diese sind durch die zugrunde liegenden Vermögenswerte besichert. Um ein hohes Rating („Investment Grade Rating“) für die Commercial Paper aufrechtzuerhalten, benötigen die Conduits ausreichende Sicherheiten, Kreditverbesserungen („Credit Enhancements“) und Liquiditätsfazilitäten. Wir stellen diesen Conduits Liquidität bereit und sind deshalb Schwankungen des Buchwerts der Vermögenswerte der Conduits ausgesetzt. Wir konsolidieren die Mehrzahl der von uns gesponserten Conduitprogramme, da wir über einen beherrschenden Einfluss verfügen.

Unsere Liquiditätszusagen gegenüber den Conduits entsprechen dem Gesamtvolumen der in 2010 begebenen Commercial Paper von 16,3 Mrd €, von denen wir zum 31. Dezember 2010 2,2 Mrd € hielten. Das Gesamtvolumen der in 2009 begebenen Commercial Paper betrug 16,2 Mrd €, von dem wir zum 31. Dezember 2009 8,2 Mrd € hielten. Der Rückgang der gehaltenen Commercial Paper ist durch die im Laufe des Jahres verbesserte Liquidität im Markt begründet.

Zu den als Sicherheiten dienenden, in den Conduits enthaltenen Vermögenswerten gehören verbriefte Kredite und Wertpapiere, darunter Flugzeugleasing, Studentenkredite, Trust Preferred Securities sowie verbriefte private und gewerbliche Immobilienkredite. Im Berichtszeitraum gab es keine wesentlichen Veränderungen bei den Sicherheiten in den Conduits.

### **Vom Konzern gesponserte Verbriefungen**

Wir sponsern SPEs, für die wir Vermögenswerte generieren oder kaufen. Bei diesen Vermögenswerten handelt es sich überwiegend um private und gewerbliche Immobilienkredite sowie deren Verbriefungen. Die SPEs finanzieren solche Käufe durch die Begebung verschiedener Tranchen von Wertpapieren, deren Rückzahlung an die Performance der Vermögenswerte der Zweckgesellschaft geknüpft ist. In den Fällen, in denen wir einen nachrangigen Anspruch an den verbrieften Vermögenswerten behalten, wird anhand der relevanten Faktoren geprüft, ob ein beherrschender Einfluss vorliegt. Ist das der Fall, sind die SPEs zu konsolidieren. Der Fair Value der von uns bei diesen Verbriefungen zurückbehaltenen Risikopositionen belief sich am 31. Dezember 2010 auf 3,2 Mrd € (2009: 3,0 Mrd €).

### **Von Dritten gesponserte Verbriefungen**

In Verbindung mit unseren Handelsaktivitäten und Emissionsgeschäften erwerben wir von konzernfremden Verbriefungsgesellschaften begebene Wertpapiere. Diese Gesellschaften investieren die Mittel in diversifizierte Pools von gewerblichen und privaten Immobilienkrediten sowie deren Verbriefungen. Die Gesellschaften finanzieren solche Käufe durch die Emission verschiedener Tranchen von Wertpapieren, deren Rückzahlung an die Wertentwicklung der von ihnen gehaltenen Vermögenswerte gebunden ist. In den Fällen, in denen wir einen nachrangigen Anspruch an den verbrieften Vermögenswerten haben, ist zu prüfen, ob ein beherrschender Einfluss vorliegt. Liegt dieser vor, sind die SPEs zu konsolidieren. Der Fair Value der von uns zurückbehaltenen Risikopositionen bei diesen Verbriefungen belief sich am 31. Dezember 2010 auf 0,7 Mrd € (2009: 0,7 Mrd €).

### Repackaging und Investmentprodukte

Das Repackaging ist konzeptionell mit der Verbriefung vergleichbar. Der Hauptunterschied besteht darin, dass die zugrunde liegenden Produkte keine unverbrieften finanziellen Vermögenswerte, sondern Wertpapiere und Derivate sind, die in anderer Form neu zusammengesetzt werden, um bestimmte Anlegerbedürfnisse zu erfüllen. Wir konsolidieren diese SPEs, wenn uns die Mehrheit der mit ihnen verbundenen Risiken und Chancen zuzurechnen ist. Investmentprodukte ermöglichen Kunden den Zugang zu bestimmten Portfolios von Vermögenswerten und Risiken durch den Kauf unserer strukturierten Anleihen. Wir sichern unser Engagement durch den Kauf von Anteilen an den SPEs ab, deren Rendite der für die Anleihen festgelegten Rendite entspricht. Wir konsolidieren die SPEs, wenn wir einen beherrschenden Einfluss besitzen oder die Mehrheit der Risiken und Chancen halten. In 2010 nahmen die konsolidierten Vermögenswerte infolge von Neugeschäft in der Berichtsperiode um 1,7 Mrd € zu.

### Investmentfonds

Wir bieten Kunden Investmentfonds und investmentfondsbezogene Produkte an, deren Rendite an die Performance der in den Fonds gehaltenen Vermögenswerte geknüpft ist. Wir geben Garantien für ausgewählte Fonds, in deren Rahmen wir den Anlegern zu bestimmten Zeitpunkten ein bestimmtes Nettofondsvermögen garantieren. Unser Risiko als Garantiegeber besteht darin, dass wir die Anleger entschädigen müssen, falls die Marktwerte dieser Produkte an den Garantiestichtagen unter dem garantierten Niveau liegen. Für die Vermögensverwaltung dieser Produkte erhalten wir Management- und teilweise erfolgsabhängige Gebühren. Wir sind zur Unterstützung solcher Fonds nicht vertraglich verpflichtet und haben in diesem Geschäftsjahr auch keine solche Unterstützung geleistet. Im Jahr 2009 haben wir uns entschlossen, die Erreichung der für diese Fonds angestrebten Zielrenditen durch eine Zuführung von Barmitteln in Höhe von 16 Mio € zu unterstützen.

Im Geschäftsjahr 2010 gingen die Vermögenswerte in den konsolidierten Investmentfonds um 1,2 Mrd € zurück. Der Rückgang war im Wesentlichen auf den Abfluss von Barmitteln zurückzuführen.

### Strukturierte Transaktionen

Wir beteiligen uns an ausgewählten Transaktionen, die Kunden Finanzierungsmöglichkeiten zu günstigen Konditionen bieten. Die Finanzierung erfolgt vorwiegend auf besicherter Basis. Die strukturierten Transaktionen sind speziell auf die Bedürfnisse unserer Kunden zugeschnitten. Wir konsolidieren die SPEs, wenn wir einen beherrschenden Einfluss besitzen oder über Residualansprüche und/oder eine Liquiditätsfazilität die Mehrheit der Risiken und Chancen tragen. Die Bilanzstruktur der von uns konsolidierten SPEs wird zum einen durch das Eingehen neuer Transaktionen beeinflusst. Zum anderen wirken sich Endfälligkeiten, Restrukturierungen und die vorzeitige Abwicklung infolge der Ausübung von Optionen auf die bestehenden Transaktionen aus.

### Operative Einheiten

In einigen für uns vorteilhaften Fällen gründen wir SPEs, um über sie einen Teil unseres operativen Geschäfts durchzuführen. Zu den damit verbundenen Aktivitäten, bei denen sich unser Engagement auf unsere Investition in die SPE beschränkt, gehören das Halten von Beteiligungen und die Begebung von Credit Default Swaps. Wir konsolidieren diese Einheiten, wenn wir einen beherrschenden Einfluss besitzen oder die Mehrheit der Risiken und Chancen an der SPE halten. Im Jahr 2009 wurde unsere Risikoposition von Maher Terminal LLC und Maher Terminal of Canada Corp. aus Repackaging und Investmentprodukten zu Operativen Einheiten umgegliedert. Im Jahr 2010 stieg der Betrag der in Operativen Einheiten gehaltenen Aktiva um 2,9 Mrd € an. Diese Veränderung resultierte im Wesentlichen aus der Konsolidierung der Postbank-SPEs in Höhe von 1,4 Mrd € sowie in Höhe von 1,1 Mrd € aus der Fertigstellung der The Cosmopolitan of Las Vegas.

## Risikopositionen mit nicht konsolidierten SPEs

| in Mrd €                                                      | 31.12.2010 | 31.12.2009       |
|---------------------------------------------------------------|------------|------------------|
| <b>Maximal verbleibende zu finanzierende Risikopositionen</b> |            |                  |
| Vom Konzern gesponserte ABCP-Conduits                         | 2,5        | 2,7              |
| ABCP-Conduits Dritter <sup>1</sup>                            | 2,4        | 2,5 <sup>1</sup> |
| Von Dritten gesponserte Verbriefungen                         |            |                  |
| US-amerikanische                                              | 1,5        | 3,9              |
| Nicht US-amerikanische                                        | 1,2        | 2,5              |
| Garantierte Investmentfonds <sup>2</sup>                      | 10,7       | 12,4             |
| Immobilienleasingfonds                                        | 0,8        | 0,8              |

<sup>1</sup> Zum 31. Dezember 2010 beinhaltet dies eine als Sicherheitsleistung zu erbringende Kreditlinie in Höhe von 1,8 Mrd € (2009: 1,6 Mrd €) infolge der Restrukturierung des kanadischen Asset-backed-Commercial-Paper-Programms im Januar 2009. Es gab keine Inanspruchnahme aus dieser Sicherheitsleistung.

<sup>2</sup> Nominalbetrag der Garantien.

### Vom Konzern gesponserte Asset-backed Commercial Paper („ABCP“) Conduits

Wir sponsern und verwalten fünf in Australien gegründete ABCP-Conduits, die nicht konsolidiert werden, da wir nicht die Mehrheit der Risiken und Chancen halten. Solche Conduits ermöglichen unseren Kunden den Zugang zu Liquidität im Commercial-Paper-Markt in Australien. Die Aktiva der Conduits, die sich zum 31. Dezember 2010 auf insgesamt 1,9 Mrd € (2009: 2,3 Mrd €) beliefen, bestehen aus Wertpapieren, die durch Hypotheken auf Wohnimmobilien außerhalb der USA unterlegt sind und die von Warehouse SPEs begeben werden, welche die Kunden gegründet haben, um den Erwerb dieser Vermögenswerte durch die Conduits zu unterstützen. Diese Wertpapiere verfügen über ein Rating von mindestens AA–. Das zur Erreichung des Ratings erforderliche Credit Enhancement wird in der Regel über eine Hypothekenversicherung erreicht, die ein Drittversicherer gegenüber den SPEs übernimmt.

Die gewichtete durchschnittliche Laufzeit der in den Conduits gehaltenen Vermögenswerte beträgt fünf Jahre. Die durchschnittliche Laufzeit der Commercial Paper, die durch außerbilanziell erfasste Conduits emittiert werden, beträgt einen Monat bis drei Monate.

Unser Engagement bei diesen Gesellschaften ist auf die zugesagten Liquiditätsfazilitäten beschränkt, die sich zum 31. Dezember 2010 auf insgesamt 2,5 Mrd € (2009: 2,7 Mrd €) beliefen. Keine dieser Liquiditätsfazilitäten ist bisher in Anspruch genommen worden. Da die Inanspruchnahme von Liquiditätsfazilitäten durch die in den Conduits gehaltenen Vermögenswerte besichert ist, ist eine in Anspruch genommene Fazilität den Wertschwankungen der zugrunde liegenden Vermögenswerte ausgesetzt. Sollten die Vermögenswerte deutlich im Wert zurückgehen, könnten nicht mehr genügend Mittel zur Rückzahlung der ausgezahlten Gelder zur Verfügung stehen. Zum 31. Dezember 2010 hatten wir keine materiellen Bestände an Commercial Paper oder an Wertpapieren, die durch solche Conduits begeben wurden.

### ABCP-Conduits Dritter

Neben dem Sponsoring unserer Commercial-Paper-Programme unterstützen wir Dritte bei der Auflegung und dem fortlaufenden Risikomanagement ihrer Commercial-Paper-Programme. Wir konsolidieren keine ABCP-Conduits Dritter, da wir bei diesen nicht über einen beherrschenden Einfluss verfügen.

Unsere Leistungen für Conduits Dritter dienen vorwiegend Finanzierungszwecken und bestehen in der Zusage von Liquiditätsfazilitäten und Wertpapierpensionsgeschäften, die für den Fall von Störungen am Commercial-Paper-Markt bereitgestellt werden. Die Liquiditätsfazilitäten und zugesagten Wertpapierpensionsgeschäfte werden außerbilanziell erfasst. Dies gilt nicht, wenn eine eventuelle Zahlung wahrscheinlich sowie deren Höhe abschätzbar ist, sodass eine Verbindlichkeit bilanziert werden muss. Zum 31. Dezember 2010 belief sich der Nominalwert der von uns zugesagten und gegenwärtig nicht in Anspruch genommenen Fazilitäten auf 2,4 Mrd € (2009: 2,5 Mrd €). Diese Fazilitäten sind durch die Vermögenswerte der SPEs besichert. Die Veränderung des Fair Value der entsprechenden Vermögenswerte beeinflusst die Rückzahlung des in Anspruch genommenen Betrags.

### Von Dritten gesponserte Verbriefungen

Bei von Dritten gesponserten Verbriefungsgesellschaften, für die wir und in einigen Fällen auch Dritte Finanzierungsmittel bereitstellen, handelt es sich um von Dritten verwaltete Investmentgesellschaften, die diversifizierte Pools von Vermögenswerten kaufen, darunter festverzinsliche Wertpapiere, Firmenkredite, Asset-backed Securities (vorwiegend verbriefte gewerbliche und private Immobilienkredite und Forderungen aus Kreditkartengeschäften) sowie Forderungen aus Filmrechten. Die Gesellschaften finanzieren diese Käufe durch die Emission verschiedener Tranchen von Schuld- und Eigenkapitaltiteln, deren Rückzahlung an die Wertentwicklung der Vermögenswerte der Zweckgesellschaften geknüpft ist.

Der Nominalbetrag der von uns bereitgestellten Liquiditätsfazilitäten, einschließlich des nicht in Anspruch genommenen Anteils, belief sich zum 31. Dezember 2010 auf 7,0 Mrd € (2009: 11,1 Mrd €). Davon wurden 4,3 Mrd € (2009: 4,7 Mrd €) in Anspruch genommen. Damit standen 2,7 Mrd € (2009: 6,4 Mrd €), wie in der Tabelle aufgeführt, noch zur Verfügung. Der Rückgang des Nominalwerts in der Berichtsperiode war hauptsächlich auf endfällige Fazilitäten zurückzuführen. Alle Fazilitäten stehen für eine Inanspruchnahme zur Verfügung, sobald bestimmte Kriterien hinsichtlich der Vermögenswerte erfüllt und die Performanceziele nicht erreicht sind. Diese Fazilitäten sind durch die Vermögenswerte der SPEs besichert, sodass die Veränderung des Fair Value dieser Vermögenswerte die Rückzahlung des in Anspruch genommenen Betrags beeinflusst.

### Investmentfonds

Wir übernehmen Fondsgarantien, in deren Rahmen wir den Anlegern zu bestimmten Zeitpunkten einen bestimmten Wert des Nettofondsvermögens garantieren. Solche Garantien führen nicht zu einer Konsolidierung der Fonds. Die Garantien werden bilanzwirksam als Derivate zum Fair Value erfasst und Fair-Value-Änderungen werden erfolgswirksam ausgewiesen. Der Fair Value der Garantien betrug zum 31. Dezember 2010 5,3 Mio € (2009: 2,5 Mio €). Zum 31. Dezember 2010 beliefen sich die von diesen nicht konsolidierten Fonds verwalteten Vermögenswerte auf 12,0 Mrd € (2009: 13,7 Mrd €) und die von ihnen begebenen Garantien auf 10,7 Mrd € (2009: 12,4 Mrd €). Der Rückgang der verwalteten Vermögenswerte wurde in erster Linie durch Liquiditätsabflüsse in der Berichtsperiode verursacht.

### Immobilienleasingfonds

Wir begeben Garantien für SPEs, die in Immobilienvermögen (Gewerbe- und Wohnimmobilien sowie Infrastrukturinvestitionen in Deutschland) investieren, das von Dritten finanziert und an unsere Kunden vermietet wird. Derartige Garantien werden nur in Anspruch genommen, falls das Immobilienvermögen zerstört wurde und das Versicherungsunternehmen nicht für den daraus resultierenden Verlust aufkommt. Wird die Garantie in Anspruch genommen, haben wir eine Forderung gegenüber dem Versicherungsunternehmen. Darüber hinaus schreiben wir Verkaufsoptionen für von uns aufgelegte geschlossene Immobilienfonds, die Gewerbeimmobilien oder Infrastrukturinvestitionen in Deutschland erwerben, welche dann von Dritten geleast werden. Die Verkaufsoption gibt dem Anteilseigner das Recht, die Immobilie am Ende der Leasingfrist zu einem festen Preis an uns zu verkaufen. Der Nominalbetrag der von uns begebenen Garantien betrug zum 31. Dezember 2010 514 Mio €



(2009: 525 Mio €) und der Nominalwert der geschriebenen Verkaufsoptionen belief sich zum 31. Dezember 2010 auf 246 Mio € (2009: 246 Mio €). Der Fair Value der begebenen Garantien und der geschriebenen Verkaufsoptionen ist nicht materiell. Wir konsolidieren diese SPEs nicht, da wir bei ihnen nicht die Mehrheit der Risiken und Chancen tragen.

## Liquiditäts- und Kapitalmanagement

Erläuterungen zu unserem Liquiditätsrisikomanagement sind im Risikobericht und in Note 36 „Aufsichtsrechtliches Kapital“ des Konzernabschlusses enthalten.

### Langfristratings

Die Beibehaltung unserer Kreditwürdigkeit ist wesentlicher Teil des Mehrwerts, den wir unseren Kunden, Anleihegläubigern und Aktionären bieten. Die nachfolgende Tabelle zeigt unsere Langfristratings, die im Jahr 2010 mit Ausnahme von Moody's unverändert geblieben sind.

Am 4. März 2010 stufte Moody's Investors Service das Langfristrating der Deutschen Bank AG von Aa1 auf Aa3 herab. Moody's nannte als Gründe für die Herabstufung die erhebliche Abhängigkeit der Bank vom Kapitalmarktgeschäft und die sich daraus ergebenden Herausforderungen für das Risikomanagement, die Verzögerung der Akquisition der Deutschen Postbank AG und den damit einhergehenden Aufschub der positiven Effekte dieser Akquisition, sowie den volatiler als erwartet ausgefallenen Ergebnisbeitrag der anderen Geschäftsbereiche der Deutschen Bank.

|                                                  | 31.12.2010 | 31.12.2009 | 31.12.2008 |
|--------------------------------------------------|------------|------------|------------|
| Moody's Investors Service, New York <sup>1</sup> | Aa3        | Aa1        | Aa1        |
| Standard & Poor's, New York <sup>2</sup>         | A+         | A+         | A+         |
| Fitch Ratings, New York <sup>3</sup>             | AA–        | AA–        | AA–        |

<sup>1</sup> Das „Aa“-Rating von Moody's kennzeichnet Anleihen, die in allen Kriterien hohe Qualitätsanforderungen erfüllen. Moody's stuft „Aa“-Anleihen niedriger ein als die höchstbewerteten Anleihen (die ein „Aaa“ erhalten), da Sicherheitsmargen eventuell nicht so hoch wie bei „Aaa“-Papieren sind, die Schwankungsbreite schützender Faktoren größer ist oder es sonstige Kriterien gibt, die die langfristigen Risiken höher erscheinen lassen als bei „Aaa“-Papieren. Die Zahl 1 zeigt an, dass Moody's die Anleihe am oberen Ende der „Aa“-Kategorie einstuft. Die Zahl 3 zeigt an, dass Moody's die Anleihe am unteren Ende der „Aa“-Kategorie einstuft.

<sup>2</sup> Standard & Poors beschreibt Anleihen der A-Ratingkategorie als anfälliger für negative Entwicklungen im Markt- und wirtschaftlichen Umfeld, verglichen mit denen höherer Ratingkategorien. Allerdings gilt die Fähigkeit des Schuldners, seine finanziellen Verpflichtungen zu erfüllen, nach wie vor als gut.

<sup>3</sup> Ein „AA“-Rating von Fitch Ratings belegt eine sehr hohe Bonität. Das „AA“-Rating von Fitch Ratings kennzeichnet die sehr geringe Wahrscheinlichkeit eines Kreditrisikos. Fitch Ratings zufolge deuten „AA“-Ratings auf eine sehr hohe Fähigkeit hin, finanziellen Verpflichtungen termingerecht nachzukommen. Die Beeinträchtigung dieser Fähigkeit durch vorhersehbare Ereignisse ist gering. Die „AA“-Kategorie ist die zweithöchste Ratingkategorie von Fitch Ratings, das Minuszeichen zeigt die Einstufung am unteren Ende der „AA“-Kategorie an.

Jedes Rating verdeutlicht die Einschätzung der Ratingagentur lediglich zum Zeitpunkt, zu dem uns das Rating mitgeteilt wurde. Es wird empfohlen, jedes Rating getrennt zu bewerten und für die Bedeutung der einzelnen Ratings die Erklärungen der Ratingagenturen heranzuziehen. Die Ratingagenturen können ihre Ratings jederzeit ändern, wenn sie der Meinung sind, dass die Umstände dies rechtfertigen. Diese langfristigen Bonitätsratings dienen nicht als Empfehlung zum Kauf, Halten oder Verkauf unserer Wertpapiere.

## Vertragliche Verpflichtungen

Die nachfolgende Tabelle zeigt die am 31. Dezember 2010 bestehenden, aber noch nicht fälligen Barleistungsverpflichtungen aus vertraglichen Verpflichtungen.

### Vertragliche Verpflichtungen

| in Mio €                                                                | Zahlungsfälligkeit nach Periode |               |               |               |                  |
|-------------------------------------------------------------------------|---------------------------------|---------------|---------------|---------------|------------------|
|                                                                         | Insgesamt                       | Bis 1 Jahr    | 1 bis 3 Jahre | 3 bis 5 Jahre | Mehr als 5 Jahre |
| Verpflichtungen aus langfristigen Verbindlichkeiten                     | 169.660                         | 28.870        | 44.296        | 35.703        | 60.791           |
| Hybride Kapitalinstrumente (Trust Preferred Securities)                 | 12.250                          | 1.334         | 2.736         | 1.745         | 6.435            |
| Langfristige zum Fair Value klassifizierte Verpflichtungen <sup>1</sup> | 16.383                          | 3.675         | 4.711         | 3.040         | 4.957            |
| Finanzleasingverpflichtungen                                            | 155                             | 17            | 29            | 36            | 73               |
| Operating-Lease-Verpflichtungen                                         | 5.221                           | 831           | 1.341         | 975           | 2.074            |
| Kaufverpflichtungen                                                     | 2.643                           | 578           | 1.407         | 585           | 73               |
| Langfristige Einlagen                                                   | 58.729                          | –             | 22.461        | 12.969        | 23.299           |
| Sonstige langfristige Verbindlichkeiten                                 | 13.298                          | 662           | 732           | 1.044         | 10.860           |
| <b>Insgesamt</b>                                                        | <b>278.339</b>                  | <b>35.967</b> | <b>77.713</b> | <b>56.097</b> | <b>108.562</b>   |

<sup>1</sup> Beinhaltet im Wesentlichen zum Fair Value klassifizierte langfristige Verbindlichkeiten und langfristige Einlagen.

In den oben genannten Zahlen sind die Erträge aus nicht kündbaren Untervermietungen in Höhe von 248 Mio € für Operating Leases nicht enthalten. Kaufverpflichtungen für Waren und Dienstleistungen umfassen zukünftige Zahlungen, unter anderem für Zahlungsverkehr und Wertpapierabwicklung, Informationstechnologie und Depotverwaltung. Einige der unter Kaufverpflichtungen ausgewiesenen Beträge stellen vertragliche Mindestzahlungen dar. In den langfristigen Einlagen sind Einlagen mit einer Restlaufzeit von weniger als einem Jahr nicht enthalten. Unter bestimmten Bedingungen können zukünftige Zahlungen aus einigen langfristigen zum Fair Value klassifizierten Verpflichtungen früher fällig werden. Weitere Informationen finden sich in den folgenden Erläuterungen (Notes) des Konzernabschlusses: Note 12 „Zum Fair Value bewertete finanzielle Vermögenswerte und Verpflichtungen“, Note 23 „Leasingverhältnisse“, Note 27 „Einlagen“ und Note 30 „Langfristige Verbindlichkeiten und hybride Kapitalinstrumente (Trust Preferred Securities)“.

## Wertorientierte Steuerung

Die Deutsche Bank hat seit 2009 ihre wertorientierte Steuerung (Value-based Management) weiterentwickelt. Sie stellt dabei den Total Shareholder Return (TSR) in den Mittelpunkt. Auf Basis eines TSR-Modells, das die Determinanten der Wertentwicklung der Bank empirisch fundiert, wurden die zentralen Kennzahlen für die interne Steuerung abgeleitet und mit geschäftsmodellspezifischen Werttreibern verbunden.

Die zentralen Kennzahlen umfassen Indikatoren für Profitabilität und Wachstum, und betrachten die Entwicklung des Konzerns und der Unternehmensbereiche unter Beachtung der Einhaltung bestimmter Restriktionen (zum Beispiel hinsichtlich des gebundenen Kapitals und des Bilanzhebels).

### Übersicht der zentralen Kennzahlen

|   |                                 |   |                           |    |                                               |    |                                      |
|---|---------------------------------|---|---------------------------|----|-----------------------------------------------|----|--------------------------------------|
| 1 | Eigenkapitalrendite vor Steuern | 5 | Ertragswachstum           | 9  | Tier 1-Kapitalquote (ohne Hybrid-Instrumente) | 13 | Anteil des klassischen Bankgeschäfts |
| 2 | Ergebnis vor Steuern            | 6 | Ergebniswachstum          | 10 | Bilanzhebel                                   | 14 | Erträge in Wachstumsregionen         |
| 3 | Aufwand/Ertrag-Relation         | 7 | Wachstum der Aktiva       | 11 | Liquidität                                    |    |                                      |
| 4 | Wertbeitrag                     | 8 | Wachstum des Wertbeitrags | 12 | Ökonomisches Kapital                          |    |                                      |

Die Ableitung von geschäftsmodellspezifischen Werttreibern, zusätzlich zu den genannten Kennzahlen, wurde für jeden Geschäftsbereich individuell vorgenommen. Als Werttreiber werden hierbei die wesentlichen internen und externen Einflussfaktoren für die geschäftliche Entwicklung verstanden. Sie umfassen finanzielle und nichtfinanzielle Indikatoren wie zum Beispiel die Kundenanzahl, Geschäftsvolumina, Margen, Marktanteile, externe Indizes oder volkswirtschaftliche Parameter. Die Selektion der Werttreiber erfolgte dabei auf Basis von empirischen Analysen. Sie wurden im Dialog mit der jeweiligen Geschäftsbereichsleitung festgelegt.

Das weiterentwickelte Konzept wurde im Berichtsjahr in den Planungsprozess eingebracht und stellt künftig die Basis für Plan-Ist-Vergleiche im Rahmen der monatlichen Finanzberichterstattung sowie für die quartalsweise stattfindende Diskussion über die geschäftlichen Erwartungen der einzelnen Bereiche dar.

## Ereignisse nach dem Bilanzstichtag

Nach dem Bilanzstichtag gab es keine Vorgänge von besonderer Bedeutung, die einen wesentlichen Einfluss auf unsere Ertrags-, Finanz- und Vermögenslage hatten.

## Bericht des Aufsichtsrats

Im Jahr 2010 hat sich das wirtschaftliche Umfeld über unsere ursprünglichen Erwartungen hinaus weiter stabilisiert. Insbesondere unser Heimatmarkt Deutschland hat davon profitiert. In den wichtigsten Schwellenländern in Lateinamerika und Asien setzte sich das Wachstum fort. In der Eurozone wirkten sich straffere fiskalpolitische Maßnahmen und strukturelle Anpassungen belastend auf einige Länder aus. Weiterhin gibt es Unsicherheiten über die Stabilität des Finanzsystems, die angesichts der zu hohen Staatsverschuldungen an den Kapitalmärkten für große Schwankungen sorgten. Darüber hinaus konkretisieren sich die neuen regulatorischen Anforderungen nach der Krise. Das jüngst von der G 20 gebilligte Regelwerk „Basel III“ ist jedoch erst der Anfang.

Für die Deutsche Bank war 2010 ein Jahr der Investitionen, in dem wir den Wandel vorangetrieben und unsere Wettbewerbsposition deutlich verbessert haben. Die Bank ist heute in vielerlei Hinsicht stärker als vor der Krise und hervorragend für neues Wachstum positioniert. Mit der Übernahme von Teilen der ABN AMRO Bank in den Niederlanden sowie von Sal. Oppenheim und der Postbank in Deutschland wurde die Marktpräsenz erheblich ausgebaut. Die Bank verbessert damit zugleich die Ertragskraft besonders im Privat- und Mittelstandskundengeschäft und ergänzt das weltweit erfolgreiche Investment Banking durch eine zweite starke Ertragssäule.

Gleichzeitig hat sie die Kapitalbasis gestärkt. Aufgrund des gut gewählten Zeitpunkts konnte die Kapitalerhöhung mit einem Bruttoemissionserlös von 10,2 Mrd € im September sehr erfolgreich durchgeführt werden, um die entscheidende Phase der Übernahme der Postbank einzuleiten. Die Kapitalkraft der Bank hat für Vorstand und Aufsichtsrat auch in der Zukunft weiterhin hohe Priorität. Dies haben wir wie auch schon bei unserem Vorschlag im Vorjahr bei dem diesjährigen Dividendenvorschlag berücksichtigt. Die Integration der Postbank wird die Bank neben den neuen regulatorischen Vorgaben weiterhin vor große Herausforderungen stellen. Wir danken dem Vorstand sowie allen Mitarbeiterinnen und Mitarbeitern sehr herzlich für ihren großen persönlichen Einsatz.

Auch im Jahr 2010 haben wir uns mit zahlreichen gesetzlichen und regulatorischen Änderungen befasst. Eingehend behandelten wir im Berichtsjahr die wirtschaftliche und finanzielle Entwicklung der Bank, ihr Umfeld, das Risikosystem, die Planung und das interne Kontrollsystem sowie die Veränderungen des Vergütungssystems für den Vorstand. Ausführlich erörterten wir mit dem Vorstand die Strategie und die weitere Umsetzung der Maßnahmen von Phase 4 der Managementagenda. Der Vorstand unterrichtete uns regelmäßig, zeitnah und umfassend über die Geschäftspolitik und andere grundsätzliche Fragen der Unternehmensführung und -planung, die finanzielle Entwicklung und Ertragslage der Bank, das Risiko-, Liquiditäts- und Kapitalmanagement der Bank sowie über Geschäfte und Ereignisse, die für die Bank von erheblicher Bedeutung waren. Wir haben den Vorstand beraten und seine Geschäftsführung überwacht. Bei Entscheidungen von grundlegender Bedeutung waren wir eingebunden. Wichtige Themen und anstehende Entscheidungen wurden zudem in regelmäßigen Gesprächen zwischen dem Vorsitzenden des Aufsichtsrats und dem Vorsitzenden des Vorstands erörtert. Zwischen den Sitzungen wurden wir über wichtige Vorgänge schriftlich informiert. Beschlüsse wurden, soweit zwischen den Sitzungen erforderlich, im Umlaufverfahren herbeigeführt.

## Sitzungen des Aufsichtsrats

Im Geschäftsjahr 2010 haben neun Sitzungen des Aufsichtsrats stattgefunden.

In der ersten Sitzung des Jahres am 3. Februar 2010 erörterten wir die Geschäftsentwicklung im Jahr 2009, die Eckdaten des Jahresabschlusses 2009 und den Plan-Ist-Vergleich 2009. Den Dividendenvorschlag für das Jahr 2009 sowie die Unternehmensplanung für die Jahre 2010 bis 2012 haben wir zustimmend zur Kenntnis genommen. Außerdem erörterten wir den Prüfungsbericht von PricewaterhouseCoopers zur Ordnungsmäßigkeit der Geschäftsorganisation des Bereichs Corporate Security sowie den Corporate-Governance-Bericht und die Erklärung zur Unternehmensführung. Wir beschlossen, dass Herr Dr. Börsig und Herr Dr. Eick im Geschäftsbericht als Finanzexperten nach deutschem und US-amerikanischem Recht benannt werden und prüften die Unabhängigkeit der Mitglieder des Prüfungsausschusses. Schließlich beschlossen wir eine Fassungsänderung der Satzung und nach umfassender Erörterung auf Empfehlung des Präsidialausschusses die Neustrukturierung der Vorstandsvergütung.

In zwei weiteren Sitzungen am 10. Februar und 18. Februar 2010 erörterten wir die Bemessungsgrundlagen der variablen Vorstandsvergütung für das Geschäftsjahr 2009 unter anderem nach den Vorschriften des Gesetzes zur Angemessenheit der Vorstandsvergütung (VorstAG) und legten die Vorstandsvergütung anschließend unter Einbindung externer, unabhängiger Rechts- und Vergütungsberater unter Berücksichtigung der Empfehlungen des Präsidialausschusses fest.

In der Bilanzsitzung am 12. März 2010 billigten wir auf Empfehlung des Prüfungsausschusses und nach Erörterung mit dem Abschlussprüfer den Konzern- und Jahresabschluss 2009. Ferner wurde der Compliance- und Antigeldwäschebericht vorgestellt und eine mögliche Aufstockung unserer Beteiligung an der Hua Xia Bank in China erörtert. Herr Lamberti informierte uns über die Vergütungsstrukturen und -praktiken der Bank (Vergütungsbericht) nach den neuen Anforderungen der Bundesanstalt für Finanzdienstleistungsaufsicht. Über die wichtigsten Risikopositionen und das Risikomanagement im Konzern wurden wir ebenfalls eingehend unterrichtet. Veränderungen in den Regional Advisory Boards und den Bezirksbeiräten in Deutschland wurden uns vorgestellt und die Beschlussvorschläge für die Tagesordnung der Hauptversammlung 2010 verabschiedet.

In der Sitzung am Tag vor der Hauptversammlung erörterten wir den Ablauf der Hauptversammlung und die angekündigten Gegenanträge sowie den Stand der Rechtsstreitigkeiten im Zusammenhang mit den Hauptversammlungen der Jahre 2004 bis 2009. Soweit erforderlich, wurden Beschlüsse gefasst. Außerdem berichtete Herr Dr. Ackermann zusammenfassend über das Engagement der Bank in Griechenland und die weitere Vorgehensweise.

In einer außerordentlichen Sitzung am 15. Juni 2010 nahmen wir den Wunsch von Herrn Cohrs, sein Vorstandsmandat zum 30. September 2010 niederzulegen, zur Kenntnis und stimmten der Beendigung seines Anstellungsverhältnisses auf Basis bestimmter Eckdaten grundsätzlich zu. Außerdem stimmten wir den daraus resultierenden Anpassungen im Geschäftsverteilungsplan für den Vorstand auf Vorschlag des Präsidialausschusses grundsätzlich zu. Herr Dr. Ackermann informierte uns über die vorgesehenen Stresstests für Finanzinstitute.

In der Sitzung am 27. Juli 2010 wurden wir über die Entwicklung der Bank im ersten Halbjahr unterrichtet. Aufgrund der von der Regierungskommission im Mai 2010 beschlossenen Ergänzungen im Deutschen Corporate Governance Kodex wurden Anpassungen in den Geschäftsordnungen des Aufsichtsrats, des Präsidial- und des Nominierungsausschusses mit dem Ziel beschlossen, sämtliche neuen Kodexempfehlungen umzusetzen. Außerdem stimmten wir einer Anpassung der Planbedingungen für im Jahr 2010 ausgegebene Restricted

Incentive und Equity Awards der Vorstandsmitglieder zu. Herr Lamberti berichtete uns über die IT-Infrastruktur der Bank, die GTO-Governance sowie die weiteren Herausforderungen für die Bankenbranche. Herr Krause stellte die strategischen und finanziellen Ziele des Programms zur Reduzierung der Komplexität vor und gab Fortschrittsberichte zur Integration von Sal. Oppenheim und dem von der ABN AMRO Bank übernommenen Firmenkundengeschäft in den Niederlanden. Außerdem stimmten wir dem Beschluss des Vorstands, im Rahmen einer Kapitalerhöhung der Hua Xia Bank in China unsere Beteiligung auf 19,99 % aufzustocken, und dem Vorschlag des Präsidialausschusses hinsichtlich der Vertragsbeendigung mit Herrn Cohrs zu.

In einer außerordentlichen Sitzung am 12. September 2010 stimmten wir auf Vorschlag des Präsidialausschusses den Beschlüssen des Vorstands vom selben Tag zur Abgabe eines öffentlichen Übernahmeangebots an die Aktionäre der Deutschen Postbank AG und zur Erhöhung des Grundkapitals der Bank zu.

In der letzten Sitzung des Jahres am 27. Oktober 2010 wurden wir über die geschäftliche Entwicklung im dritten Quartal und den Stand des Übernahmeangebots an die Aktionäre der Deutschen Postbank AG unterrichtet. Wir erörterten ausführlich mit dem Vorstand die strategische Weiterentwicklung der Bank mit den entsprechenden Zielen und geplanten Maßnahmen. Herr Lamberti stellte uns den Personalbericht der Deutschen Bank vor. Darüber hinaus wurden Anpassungen in der Geschäftsordnung für den Vorstand einschließlich des Geschäftsverteilungsplans sowie in der Geschäftsordnung für den Prüfungsausschuss aufgrund der neuen Mindestanforderungen an die Compliance-Funktion erörtert und beschlossen. Schließlich haben wir die Ziele für die Zusammensetzung des Aufsichtsrats festgelegt.

## Ausschüsse des Aufsichtsrats

Der Präsidialausschuss tagte im Berichtszeitraum zehnmal. Außerdem fanden zwei Telefonkonferenzen statt. Zwischen den Sitzungen besprach der Vorsitzende des Präsidialausschusses mit den Ausschussmitgliedern regelmäßig Themen von besonderer Bedeutung. Der Ausschuss befasste sich insbesondere mit den neuen gesetzlichen und regulatorischen Anforderungen an die Vorstandsvergütung und deren Umsetzung, der Vorbereitung zur Festlegung der variablen Vergütung für das Geschäftsjahr 2009, mit Fragen zur Nachfolgeplanung sowie der Beendigung der Vorstandsbestellung von Herrn Cohrs. Erforderliche Anpassungen in den Geschäftsordnungen des Vorstands, des Aufsichtsrats und seiner Ausschüsse sowie im Geschäftsverteilungsplan für den Vorstand wurden ebenfalls thematisiert. Zudem bereitete der Präsidialausschuss Beschlüsse des Aufsichtsrats vor und stimmte der Übernahme von Nebentätigkeiten sowie Mandaten von Vorstandsmitgliedern bei anderen Unternehmen zu. Außerdem hat er aufgrund einer entsprechenden Ermächtigung des Aufsichtsrats der finalen Ausgestaltung der Kapitalerhöhung der Bank zugestimmt. Schließlich behandelte er die Umsetzung der neuen Empfehlungen und Anregungen des Deutschen Corporate Governance Kodex.

Der Risikoausschuss befasste sich in sechs Sitzungen mit den nach Gesetz und Satzung vorlagepflichtigen Engagements der Bank und erteilte – sofern erforderlich – seine Zustimmung. Der Ausschuss befasste sich mit Kredit-, Liquiditäts-, Länder-, Markt- und operationellen Risiken sowie Rechts- und Reputationsrisiken. Ausführlich erörterte er die Risikosituation der Bank, die Entwicklungen der Staatsfinanzkrisen in Europa sowie deren Auswirkungen auf die Bank. Neben der Entwicklung der Risiken in den Bereichen Leveraged Finance, gewerbliche Immobilienfinanzierung und Monoline-Versicherer wurden auch die Auswirkungen der neuen aufsichtsrechtlichen Regeln auf die Bank und deren Risikopositionen eingehend diskutiert. Des Weiteren standen die Risikotragfähigkeit, das heißt das Verhältnis von Kapitalbedarf zu verfügbarem Kapital (ICAAP-Berichterstattung), einschließlich einer Gegenüberstellung der ökonomischen Risiken zum Risikodeckungspotenzial und dessen konsequente Verankerung im Risikomanagement sowie die Entwicklung der Refinanzierungs- und Liquiditäts-



lage der Bank im Mittelpunkt. Ferner wurden globale Branchenportfolios nach einem festgelegten Plan vorgestellt und eingehend besprochen.

Der Prüfungsausschuss tagte 2010 sechsmal. Vertreter des Abschlussprüfers nahmen regelmäßig teil. Gegenstand der Sitzungen waren die Prüfung des Jahres- und des Konzernabschlusses 2009, die Quartalsabschlüsse, die Berichte 20-F und 6-K für die US-amerikanische Securities and Exchange Commission (SEC) sowie die Zwischenberichte. Der Ausschuss befasste sich mit dem Vorschlag zur Wahl des Abschlussprüfers für das Geschäftsjahr 2010, erteilte den Prüfungsauftrag, legte Prüfungsschwerpunkte fest, beschloss die Vergütung des Abschlussprüfers und überprüfte dessen Unabhängigkeit nach den Anforderungen des Deutschen Corporate Governance Kodex sowie den Vorschriften des US-amerikanischen Public Company Accounting Oversight Board (PCAOB). Der Prüfungsausschuss ist wie in den Vorjahren davon überzeugt, dass beim Abschlussprüfer keine Interessenkonflikte vorliegen. Er hat ausführlich überprüft, inwiefern unsere internen Kontrollsysteme den Vorgaben des Sarbanes-Oxley Act entsprechen. Von der Wirksamkeit des internen Kontroll-, des Risikomanagement- und des internen Revisionssystems hat er sich überzeugt und den Rechnungslegungsprozess überwacht. Soweit erforderlich, wurden Beschlüsse gefasst oder dem Aufsichtsrat Empfehlungen zur Beschlussfassung gegeben. Regelmäßig wurde dem Prüfungsausschuss über die Beauftragung von Wirtschaftsprüfungsgesellschaften einschließlich des Abschlussprüfers mit prüfungsfremden Aufträgen, über die Arbeit der internen Revision und Fragen der Compliance, über Rechts- und Reputationsrisiken sowie über Sonderprüfungen und wesentliche Beanstandungen von Aufsichtsbehörden berichtet. Der Jahresplan der internen Revision wurde zustimmend zur Kenntnis genommen. Beschwerden in Bezug auf das Rechnungswesen, die internen Prüfverfahren zur Rechnungslegung und zu Fragen der Abschlussprüfung wurden dem Prüfungsausschuss nicht angezeigt. In der letzten Sitzung des Jahres ließ er sich die Schwerpunktthemen des bevorstehenden Jahresabschlusses 2010 vom Vorstand und vom Abschlussprüfer erläutern. Hierzu gehörten insbesondere die Erstkonsolidierungen der Deutschen Postbank AG, der Sal. Oppenheim und von Teilen der ABN AMRO Bank in den Niederlanden, die prüfungsvorbereitenden Maßnahmen zum Jahresabschluss und die Prüfungsschwerpunkte nach § 30 KWG. Außerdem wurde ihm über die Ablösung von IAS 39 und die Einführung von IFRS 9 für Finanzinstrumente sowie die erfolgten Schritte und weiteren Planungen des Programms zur Reduzierung der Komplexität berichtet.

Im Nominierungsausschuss fanden zwei Besprechungen zu Nachfolgefragen im Aufsichtsrat statt.

Sitzungen des nach den Vorschriften des Mitbestimmungsgesetzes gebildeten Vermittlungsausschusses waren im Jahr 2010 nicht erforderlich.

Die Vorsitzenden der Ausschüsse berichteten dem Aufsichtsrat regelmäßig über die Arbeit der Ausschüsse.

Alle Mitglieder des Aufsichtsrats nahmen im Jahr 2010 an den Sitzungen des Aufsichtsrats und der Ausschüsse mit nur wenigen Ausnahmen (durchschnittliche Präsenz: 95 %) teil.

## Corporate Governance

Die Umsetzung der neuen Empfehlungen des Deutschen Corporate Governance Kodex wurde in den Sitzungen des Aufsichtsrats und des Präsidialausschusses im Juli 2010 erörtert. Der Aufsichtsrat beschloss, alle neuen Empfehlungen des Kodex umzusetzen, und passte die Geschäftsordnungen des Aufsichtsrats, des Präsidial- und des Nominierungsausschusses sowie des Vorstands, soweit erforderlich, entsprechend an.

Der Präsidialausschuss und der Aufsichtsrat befassten sich ferner in mehreren Sitzungen mit der Umsetzung der neuen Regelungen zur Vorstandsvergütung. Der Aufsichtsrat beschloss zur Überprüfung der Struktur der Vorstandsvergütung sowie der Angemessenheit der variablen Vergütung für das Geschäftsjahr 2010 je einen unabhängigen Rechts- und Vergütungsberater zu mandatieren.

Außerdem haben wir in der Sitzung im Oktober 2010 auf Vorschlag des Präsidialausschusses gemäß Ziffer 5.4.1 des Deutschen Corporate Governance Kodex die Ziele für die Zusammensetzung des Aufsichtsrats festgelegt (siehe Seiten 375 ff. des Corporate-Governance-Berichts im Finanzbericht 2010).

Wie im Oktober 2009 beschlossen, wurden im Frühjahr 2010 sowohl im Plenum als auch im Präsidial-, Prüfungs- und Risikoausschuss Effizienzprüfungen mit unternehmensspezifischen Fragebögen durchgeführt und die Ergebnisse in den anschließenden Sitzungen im Detail präsentiert und erörtert. Wir sind der Auffassung, dass die Arbeit des Aufsichtsrats effizient erfolgt und ein hoher Standard erreicht wurde. Anregungen und Maßnahmen, die in der letzten Effizienzprüfung des Aufsichtsrats vorgeschlagen wurden, sind wirkungsvoll umgesetzt worden und haben zu einer weiteren Steigerung der Effizienz der Aufsichtsrats- und Ausschusstätigkeit geführt. Darüber hinaus wurden erste Anregungen aus den Effizienzprüfungen im Jahr 2010 bereits realisiert.

Wir haben festgestellt, dass dem Aufsichtsrat eine nach unserer Einschätzung ausreichende Anzahl unabhängiger Mitglieder angehört. Außerdem haben wir festgestellt, dass alle Mitglieder des Prüfungsausschusses gemäß Section 407 der Ausführungsbestimmungen der Securities and Exchange Commission (SEC) zum Sarbanes-Oxley Act 2002 unabhängig sind. Als Finanzexperten im Prüfungsausschuss wurden nach den Vorschriften der SEC sowie nach §§ 107 Absatz 4 und 100 Absatz 5 AktG Herr Dr. Börsig und Herr Dr. Eick benannt.

Die Entsprechenserklärung nach § 161 Aktiengesetz, die Aufsichtsrat und Vorstand zuletzt im Oktober 2009 abgegeben und im Januar 2010 aktualisiert hatten, wurde in der Aufsichtsratssitzung am 27. Oktober 2010 erneuert. Die Deutsche Bank AG entspricht allen Empfehlungen der Kodexfassung vom 26. Mai 2010 ohne Ausnahmen.

Eine zusammenfassende Darstellung der Corporate Governance der Bank einschließlich des Wortlauts der Entsprechenserklärung vom 27. Oktober 2010 ist im Finanzbericht 2010 auf den Seiten 375 ff. und auf unserer Homepage im Internet unter [http://www.deutsche-bank.de/ir/de/content/corporate\\_governance.htm](http://www.deutsche-bank.de/ir/de/content/corporate_governance.htm) veröffentlicht. Dort finden sich auch die Geschäftsordnungen des Aufsichtsrats und seiner Ausschüsse sowie die des Vorstands in der jeweils aktuellen Fassung.

## Aus- und Fortbildungsmaßnahmen

Mitglieder des Aufsichtsrats nahmen die für ihre Aufgaben erforderlichen Aus- und Fortbildungsmaßnahmen eigenverantwortlich wahr. Sie wurden dabei von der Deutschen Bank angemessen unterstützt. Die im Jahr 2010 neu in den Aufsichtsrat eingetretenen Mitglieder erhielten auf den individuellen Kenntnisstand zugeschnittene Einführungen, ein Informationspaket sowie Angebote für interne und externe Fortbildungsmaßnahmen, von denen Gebrauch gemacht wurde. Alle Mitglieder des Aufsichtsrats wurden im Rahmen eines Workshops durch einen externen Rechtsanwalt über die rechtlichen Grundlagen der Aufsichtsrats Tätigkeit informiert. Außerdem wurde ihnen von einem weiteren externen Rechtsanwalt über die Verantwortung und Aufgaben des Aufsichtsrats berichtet. Es fanden im Berichtsjahr zwei interne Workshops mit den Mitgliedern des Risikoausschusses zu den Themen Kredit-, Markt- und operationelle Risiken sowie zum Modell des Ökonomischen Kapitals (ICAAP) statt. Die Mitglieder des Prüfungsausschusses erörterten mit Mitarbeitern der Finance-Abteilung und des Abschlussprüfers neue Vorschriften zur Rechnungslegung und zur Bilanzierung.

Zusätzlich wurden die Mitglieder des Aufsichtsrats über neue Entwicklungen auf dem Gebiet der Corporate Governance informiert.

## Interessenkonflikte und deren Behandlung

Der Risikoausschuss befasste sich mit den nach § 15 des Gesetzes über das Kreditwesen (KWG) erforderlichen Kreditgenehmigungen. Dabei nahmen diejenigen Aufsichtsratsmitglieder an der Erörterung und Abstimmung nicht teil, die zum Zeitpunkt der Beschlüsse Mitglieder der Organe des betreffenden Kreditnehmers oder aus anderen Gründen einem möglichen Interessenkonflikt ausgesetzt waren.

Herr Prof. Kagermann nahm im September 2010 an der Abstimmung und der Diskussion zur Abgabe eines öffentlichen Übernahmeangebots an die Aktionäre der Deutschen Postbank AG aufgrund seiner Mitgliedschaft im Aufsichtsrat der Deutschen Post AG und eines damit verbundenen möglichen Interessenkonflikts nicht teil.

Gelegentlich bestanden bei einzelnen Aufsichtsratsmitgliedern latente Interessenkonflikte. So waren im Berichtszeitraum Frau Förster und Frau Ruck als Arbeitnehmervertreterinnen auch Mitglied des Aufsichtsrats der Deutsche Bank Privat- und Geschäftskunden AG. Sie haben an Beratungen und Abstimmungen zu den entsprechenden Themen, die sich aus ihrer Tätigkeit ergaben, wie zum Beispiel Beschlüsse nach § 32 MitbestG, nicht teilgenommen. Besonderer weiterer Maßnahmen im Hinblick auf diese latenten und lediglich punktuellen Interessenkonflikte bedurfte es nicht.

## Rechtsstreitigkeiten

Der Aufsichtsrat informierte sich wie in den Vorjahren regelmäßig über wichtige Rechtsstreitigkeiten und beriet über die weitere Vorgehensweise. Hierzu zählten die Anfechtungs- und Auskunftsklagen im Zusammenhang mit den Hauptversammlungen 2004, 2005, 2006, 2007, 2008, 2009 und 2010 sowie die Verfahren Dr. Kirch und KGL Pool GmbH gegen die Deutsche Bank und gegen Dr. Breuer. Die am 29. Mai 2008 durch die Hauptversammlung erfolgte Wahl der Anteilseignervertreter wurde von mehreren Aktionären angefochten. Das Verfahren liegt derzeit dem Bundesgerichtshof vor, der über die Zulassung der Revision gegen das klageabweisende Urteil des OLG Frankfurt am Main entscheiden wird.

Darüber hinaus ließen wir uns fortlaufend im Aufsichtsrat sowie detailliert im Prüfungs- und Risikoausschuss über bedeutende Rechtsstreitigkeiten berichten.

## Jahresabschluss

Die Buchführung, der Jahresabschluss mit Lagebericht für das Jahr 2010 sowie der Konzernabschluss mit Erläuterungen (Notes) und der Konzernlagebericht für das Jahr 2010 sind von der durch die Hauptversammlung als Abschlussprüfer gewählten KPMG Aktiengesellschaft Wirtschaftsprüfungsgesellschaft geprüft worden. Die Prüfungen haben zu einem jeweils uneingeschränkten Bestätigungsvermerk geführt. Der Prüfungsausschuss hat die Unterlagen zum Jahres- und Konzernabschluss unter Berücksichtigung des Prüfberichts des Abschlussprüfers und im Gespräch mit diesem ausführlich erörtert. Der Vorsitzende des Prüfungsausschusses hat uns hierüber in der heutigen Sitzung des Aufsichtsrats berichtet. Wir haben dem Ergebnis der Prüfungen nach Einsicht der Berichte des Abschlussprüfers und der Jahres- und Konzernabschlussunterlagen sowie eingehender Diskussion und auf Empfehlung des Prüfungsausschusses zugestimmt und festgestellt, dass auch nach dem abschließenden Ergebnis unserer Prüfungen Einwendungen nicht zu erheben sind.

Den vom Vorstand aufgestellten Jahresabschluss sowie den Konzernabschluss haben wir heute gebilligt, der Jahresabschluss ist damit festgestellt. Dem Vorschlag des Vorstands für die Gewinnverwendung schließen wir uns an.

## Personalia

Herr Cohrs ist mit Wirkung zum Ablauf des 30. September 2010 aus dem Vorstand ausgeschieden. Seine Ressortzuständigkeiten wurden von Herrn Jain zusätzlich zu seinen bestehenden Aufgaben übernommen.

Veränderungen haben sich auch im Aufsichtsrat ergeben. Herr Wunderlich war bis zum 30. Juni 2010 Mitglied des Aufsichtsrats. Er wurde für den Rest seiner Amtszeit durch Herrn Kazmierczak ersetzt. Frau Förster war bis zum 31. Juli 2010 Mitglied des Aufsichtsrats. Sie wurde für den Rest der Amtszeit durch Herrn Viertel ersetzt.

Wir danken den ausgeschiedenen Mitgliedern für ihr großes Engagement im Aufsichtsrat und für die konstruktive Begleitung des Unternehmens und des Vorstands während der vergangenen Jahre.

Frankfurt am Main, den 11. März 2011

Für den Aufsichtsrat



Dr. Clemens Börsig  
Vorsitzender

## Risikobericht

Der folgende Abschnitt über quantitative und qualitative Angaben zu Kredit-, Markt- und sonstigen Risiken enthält Informationen, die Bestandteil des Konzernabschlusses der Deutschen Bank sind und daher durch Referenzierung in den Konzernabschluss dieses Berichts einbezogen werden. Diese Informationen sind in diesem Berichtsteil durch eine seitliche Klammer markiert.

Mit Wirkung zum 3. Dezember 2010 hat der Deutsche Bank-Konzern die Deutsche Postbank-Gruppe („Postbank“) konsolidiert. Der folgende Abschnitt über quantitative und qualitative Risikoangaben vermittelt ein umfassendes Bild des Risikoprofils des Deutsche Bank-Konzerns nach Integration der Postbank. Insbesondere die quantitativen Informationen spiegeln in der Regel den Deutsche Bank-Konzern inklusive der Postbank zum Bilanzstichtag 31. Dezember 2010 oder den entsprechenden Berichtszeitraum seit dem 3. Dezember 2010 wider. In einzelnen Fällen, in denen eine konsolidierte Darstellung nicht erfolgt, werden, sofern angemessen, separate Risikoangaben zur Postbank oder entsprechend qualitative Kommentare gegeben.

Die Postbank führt entsprechend der gesetzlichen Regelungen ihre Risikomanagementaktivitäten eigenverantwortlich durch. Der Deutsche Bank-Konzern berät die Postbank in bestimmten Bereichen des Risikomanagements. Es ist beabsichtigt, im Laufe der Zeit die Risikomanagementprinzipien des Deutsche Bank-Konzerns und der Postbank anzugleichen. Dies entspricht auch den regulatorischen Anforderungen, denen die Deutsche Bank AG als Muttergesellschaft des Gesamtkonzerns gerecht werden muss.

### Risikomanagement – Überblick

Insgesamt lag der Fokus des Risiko- und Kapitalmanagements im Jahr 2010 darauf, unser Risikoprofil im Rahmen unserer Risikostrategie zu halten, unsere Kapitalbasis zu stärken und die strategischen Initiativen des Konzerns gemäß der 4. Phase unserer Managementagenda zu unterstützen. Dieser Ansatz spiegelt sich wie folgt in den unterschiedlichen, unten dargestellten Risikometriken wider.

#### Kreditrisiko

- Die gewissenhafte Einhaltung unserer zentralen Kreditprinzipien eines proaktiven und umsichtigen Risikomanagements zusammen mit der wirtschaftlichen Erholung unserer Hauptmärkte in 2010 führte zu niedrigeren Kreditverlusten und einer weiter verbesserten Qualität unseres Kreditportfolios vor Berücksichtigung der Postbank. Dies wurde erreicht durch die stringente Anwendung unserer existierenden Managementphilosophie von strikten Standards bei der Eingehung von Risiken, einem aktiven Management von Konzentrationsrisiken sowie Strategien zur Reduzierung von Risiken mittels Sicherheiten, Hedging, Netting und Credit-Support-Vereinbarungen.
- Unsere Wertberichtigungen für Kreditausfälle betrugen im Jahr 2010 1,3 Mrd € und sind damit deutlich niedriger als 2,6 Mrd € in 2009. Die 1,3 Mrd € beinhalteten 278 Mio € an neuen gebildeten Wertberichtigungen für die nach IAS 39 reklassifizierten Aktiva. Unsere Wertberichtigungen für die Nicht-IAS 39-Vermögenswerte verringerten sich ebenfalls im Laufe des Jahres auf 996 Mio € (einschließlich 56 Mio € an Wertberichtigungen in 2010, die auf die Postbank entfielen) verglichen mit 1,4 Mrd € in 2009.
- Der Anteil der Kredite mit Investment Grade Rating in unserem Firmenkreditbuch erhöhte sich von 61 % am 31. Dezember 2009 auf 69 % am 31. Dezember 2010. Dieses spiegelt positive Ratingbewegungen und die erstmalige Einbeziehung der Postbank wider.

- Ohne Berücksichtigung von Akquisitionen ist unser Kreditportfolio um 3 % oder 8 Mrd € unter Beachtung strikter Risiko-Ertrags-Anforderungen gewachsen.
- Mit Konsolidierung der Postbank per 3. Dezember 2010 wuchs unser Kreditportfolio um 129 Mrd €, überwiegend im deutschen Retailgeschäft, aber mit einem Anteil von 15 Mrd € auch im Bereich gewerblicher Immobilienkredite.

### Marktrisiko

- In 2010 haben wir Anzahl und Spezialisierung unserer Mitarbeiter im Marktrisikomanagement weiter erhöht.
- Der ökonomische Kapitalbedarf für das handelsbezogene Marktrisiko betrug 6,4 Mrd € am Jahresende 2010, verglichen mit 4,6 Mrd € am Jahresende 2009. Dieser Anstieg reflektiert Modellanpassungen und konservativere Liquiditätsannahmen. Diese wurden teilweise durch einen Rückgang in unseren gehandelten Altbestandskreditportfolios ausgeglichen.
- Der Rückgang in unserem durchschnittlichen Value-at-Risk in 2010 wurde im Wesentlichen bestimmt durch eine reduzierte Risikoübernahme und niedrigere historische Volatilitäten. Ergänzend haben wir unser Geschäftsmodell im Handelsbereich weiter dahin gehend verändert, weniger Risiken in illiquiden oder komplexen Strukturen einzugehen.

### Operationelle Risiken

- Unser ökonomischer Kapitalbedarf für operationelle Risiken stieg um 189 Mio € oder 5 % auf 3,7 Mrd € zum 31. Dezember 2010 und lässt sich vollständig über die getätigten Akquisitionen erklären.

### Liquiditätsrisiken

- Unsere Liquiditätsreserve am 31. Dezember 2010 überstieg 145 Mrd € (ohne Berücksichtigung von Postbank).
- 2010 haben wir Kapitalmarktinstrumente in Höhe von 22,9 Mrd € begeben, während unser Emissionsplan 19 Mrd € vorsah (ohne Berücksichtigung von Postbank).
- Die Akquisition der Postbank führte zu einer signifikanten Zunahme der stabilen Refinanzierungsquellen.

### Kapitalmanagement

- Wir haben die Kapitalerhöhung im Oktober 2010 mit Nettozuflüssen in Höhe von 10,1 Mrd € erfolgreich abgeschlossen.
- Die Kern-Tier-1-Kapitalquote, die keine hybriden Instrumente beinhaltet, lag am Jahresende 2010 bei 8,7 % und damit auf gleichem Niveau wie am Jahresende 2009.
- Die Tier-1-Kapitalquote lag mit 12,3 % zum Jahresende 2010, (12,6 % am Jahresende 2009) deutlich über unserem veröffentlichten Zielniveau von mindestens 10,0 %.
- Die risikogewichteten Aktiva stiegen um 73 Mrd € auf 346 Mrd € am Jahresende 2010, hauptsächlich durch die Konsolidierung der Postbank.

### Bilanzmanagement

- Zum 31. Dezember 2010 war unsere Leverage Ratio gemäß Zielgrößendefinition mit 23 auf dem gleichen Stand wie zum 31. Dezember 2009 und damit unter unserer Zielgröße von 25. Bezogen auf die Leverage Ratio, wurden die Auswirkungen unserer Akquisitionen auf unser gesamtes Forderungsvolumen hierbei vollständig durch unsere Kapitalerhöhung kompensiert.



## Risiko- und Kapitalmanagement

Vor dem Hintergrund unserer breit gefächerten Geschäftsaktivitäten ist es unerlässlich, Risiken effektiv zu identifizieren, messen, aggregieren und zu steuern sowie die verschiedenen Geschäftsaktivitäten angemessen mit Eigenkapital zu unterlegen. Wir steuern unsere Risiken und unser Kapital mithilfe eines Rahmenwerks von Grundsätzen, Organisationsstrukturen sowie Mess- und proaktiven Überwachungsprozessen, die eng auf die Tätigkeiten der Konzernbereiche ausgerichtet sind. Die Bedeutung eines starken Risiko- und Kapitalmanagements und die kontinuierliche Notwendigkeit zur Weiterentwicklung der Risikomanagementpraxis wurde insbesondere während der Finanzmarktkrise deutlich. Obwohl wir kontinuierlich bestrebt sind, unser Risiko- und Kapitalmanagement zu verbessern, ist es möglich, dass wir nicht alle Marktentwicklungen, insbesondere der extremen Art vorhersehen können.

### Grundsätze für das Risiko- und Kapitalmanagement

Unser Risiko- und Kapitalmanagementansatz baut auf den folgenden Grundsätzen auf:

- Der Vorstand trägt die Gesamtverantwortung für die Überwachung des Risiko- und Kapitalmanagements im Konzern. Der Aufsichtsrat überprüft regelmäßig unser Risiko- und Kapitalprofil.
- Wir managen Kredit-, Markt-, Liquiditäts-, operationelle, Geschäfts- und Reputationsrisiken sowie unser Kapital in einem koordinierten Prozess auf allen relevanten Ebenen der Bank. Das gilt auch für komplexe Produkte, die wir üblicherweise innerhalb unseres Rahmenwerks für Handelsengagements steuern.
- Die Struktur unserer integrierten Legal, Risk & Capital-Funktion ist eng auf die Struktur der Konzernbereiche ausgerichtet.
- Die Legal, Risk & Capital-Funktion ist unabhängig von den Konzernbereichen.

Vergleichbare Risikomanagementgrundsätze bestehen bei der Postbank innerhalb der eigenen Organisationsstrukturen.

## Organisation des Risiko- und Kapitalmanagements

Die folgende Grafik gibt einen schematischen Überblick über die Risikomanagement-Überwachungsstruktur des Deutsche Bank-Konzerns.

### Risiko und Kapitalmanagement – Schematischer Überblick der Governance-Struktur des Konzerns

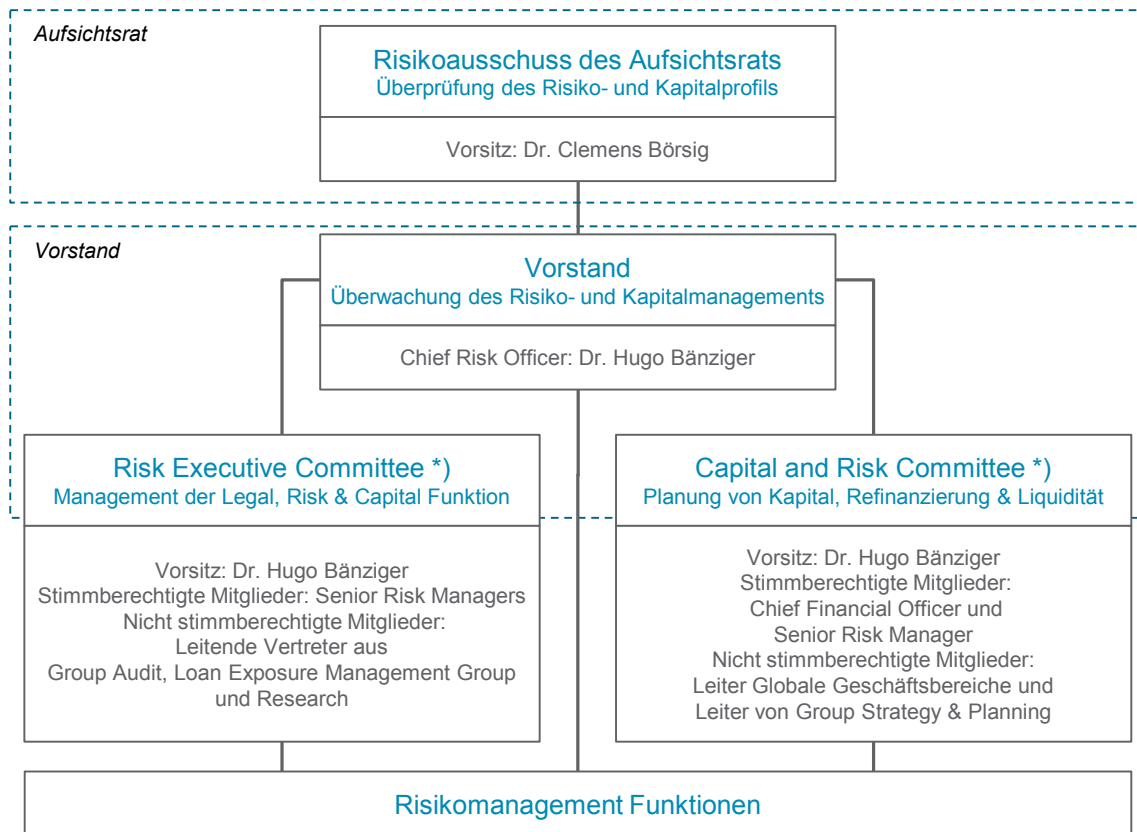

\*) Unterstützt durch mehrere Unterkomitees

Der Chief Risk Officer, ein Mitglied unseres Vorstands, trägt die Verantwortung für das konzernweite Risikomanagement in Bezug auf unsere Kredit-, Markt-, operationellen, Liquiditäts-, Geschäfts-, Rechts- und Reputationsrisiken sowie für die Kapitalmanagementaktivitäten. Er leitet unsere integrierte Legal, Risk & Capital-Funktion.

Zwei funktionale Komitees, deren Vorsitz bei unserem Chief Risk Officer liegt, sind von zentraler Bedeutung für die Legal, Risk & Capital-Funktion.

— Unser Risk Executive Committee ist für die Steuerung und Kontrolle der zuvor genannten Risiken im Konzern zuständig. Bei der Umsetzung dieser Aufgabe wird das Risk Executive Committee von Unterkomitees unterstützt, die für bestimmte Bereiche des Risikomanagements verantwortlich sind. Dazu gehören unter anderem Komitees für Grundsätze und das Group Reputational Risk Committee.

- Die Verantwortlichkeiten des Capital and Risk Committee beinhalten die Risikoprofil- und Kapitalplanung, die Überwachung der Kapitaltragfähigkeit und die Optimierung der Refinanzierung. Zudem beaufsichtigt es unsere nicht handelsbezogenen Marktrisikopositionen.

Mehrere Mitglieder des Capital and Risk Committee gehören auch dem Group Investment Committee an. Dadurch wird eine enge Kooperation zwischen beiden Gremien sichergestellt, da das Group Investment Committee Vorschläge für strategische Beteiligungen beurteilt. Je nach Größe der vorgeschlagenen strategischen Beteiligung muss diese durch das Group Investment Committee, den Vorstand oder sogar den Aufsichtsrat genehmigt werden. Die Entwicklung unserer strategischen Beteiligungen wird vom Group Investment Committee regelmäßig überprüft.

Es sind spezifische Legal, Risk & Capital-Einheiten mit den folgenden Aufgaben etabliert:

- Steuerung der Geschäftsaktivitäten der Konzernbereiche im Einklang mit der vom Capital and Risk Committee festgelegten Risikoneigung, die sich im Rahmen der Vorstandsvorgaben befindet;
- Formulierung und Umsetzung angemessener Risiko- und Kapitalmanagementgrundsätze, -verfahren und -methoden für die verschiedenen Geschäftsaktivitäten der Konzernbereiche;
- Genehmigung von Kreditrisiko-, Marktrisiko- und Liquiditätsrisikolimiten;
- regelmäßige Überprüfung der Portfolios, um sicherzustellen, dass sich die Risiken innerhalb annehmbarer Parameter bewegen; sowie
- Entwicklung und Einführung geeigneter Risiko- und Kapitalmanagementinfrastrukturen und -systeme für die jeweiligen Konzernbereiche.

Die Leiter der Legal, Risk & Capital-Einheiten, die auch dem Risk Executive Committee angehören, sind für die Performance der Risikomanagementeinheiten verantwortlich und berichten unmittelbar an den Chief Risk Officer.

Unsere Finance- und Revisionsabteilungen sind unabhängig von den Konzernbereichen und der Legal, Risk & Capital-Funktion. Finance hilft bei der Quantifizierung und Verifizierung der von uns eingegangenen Risiken und ist für die Sicherstellung der Qualität und Korrektheit der risikorelevanten Daten zuständig. Die Revision überprüft risikoorientiert den Aufbau und die operative Effektivität unseres internen Kontrollsystems.

Die konzernweite Risikomanagementorganisation der Postbank misst und bewertet unabhängig alle wesentlichen Risiken und Risikotreiber. In 2010 berichtete der Chief Risk Officer direkt an den Vorstand der Postbank. Mit Wirkung vom 1. März 2011 hat die Postbank die Funktion des Chief Risk Officer auf Vorstandsebene etabliert.

Die wesentlichen Risikomanagement Komitees der Postbank, in denen der Chief Risk Officer der Postbank ein stimmberechtigtes Mitglied ist, sind:

- Das in 2010 neu gegründete Bank Risk Committee, das den Vorstand mit Blick auf die Festlegung der Risikoneigung und Risikoordnung berät.
- Das Credit Risk Committee, das für die Limitzuordnung und die Festlegung eines angemessenen Limit-Rahmenwerks verantwortlich ist.
- Das Market Risk Committee, das über die Limitzuordnung und die strategische Positionierung des Bankbuchs und das Management des Liquiditätsrisikos entscheidet.
- Das Operational Risk Committee, das ein angemessenes Risiko-Rahmenwerk und die Kapitalzuordnung für die verschiedenen Geschäftsbereiche definiert.

## Risiko- und Kapitalstrategie

Die Legal, Risk & Capital-Funktion entwickelt jedes Jahr in einem integrierten Prozess zusammen mit den Konzernbereichen und Finance eine Risiko- und Kapitalstrategie. Dadurch wird eine konzernweite Koordination der Risiko- und Performanceziele gewährleistet. Die Strategie wird in letzter Instanz dem Vorstand vorgelegt und von ihm genehmigt. Anschließend wird der Plan ebenfalls dem Risikoausschuss des Aufsichtsrats vorgestellt und mit ihm diskutiert.

Unser Risikoappetit ist in verschiedenen Parametern und auf unterschiedlichen Ebenen des Konzerns ausgedrückt. Die Zielerreichung wird regelmäßig überprüft und dem Chief Risk Officer, dem Capital and Risk Committee und/oder dem Vorstand in Form eines Berichts über ausgewählte Ziele von vorrangiger Bedeutung direkt zur Kenntnis gebracht. Im Fall einer signifikanten Abweichung von den Zielen obliegt es den divisionalen Legal, Risk & Capital-Einheiten, diese ihren Vorgesetzten und in letzter Instanz dem Chief Risk Officer zu melden, wenn auf untergeordneter Ebene keine sofortige Risikominderung erreicht beziehungsweise keine Strategie zur zukünftigen Risikominderung gefunden werden kann.

Änderungen der Risiko- und Kapitalstrategie sind je nach Bedeutung vom Chief Risk Officer beziehungsweise vom gesamten Vorstand zu genehmigen.

Bei der Postbank sind vergleichbare fundamentale Prinzipien etabliert in dem Sinne, dass der Vorstand der Postbank für das Risikoprofil und die Risikostrategie der Postbank verantwortlich ist und diese regelmäßig an den Aufsichtsrat der Postbank berichtet. Mit Beginn des Jahres 2011 wird der Kapitalbedarf der Postbank in der Risiko- und Kapitalstrategie des gesamten konsolidierten Konzerns abgebildet.

## Arten von Risiken

Im Rahmen unserer Geschäftsaktivitäten sind wir einer Vielzahl von Risiken ausgesetzt, von denen die wesentlichsten, beginnend mit dem Kreditrisiko, im Folgenden in eigenen Sektionen beschrieben werden. Diese Risiken können in verschiedene Kategorien eingeteilt werden. Aus aufsichtsrechtlicher Sicht unterlegen wir drei Arten von Risiken, das Kreditrisiko, das Marktrisiko und das operationelle Risiko, mit regulatorischem Eigenkapital. Als Teil unseres internen Kapitaladäquanzprozesses berechnen wir die Menge Ökonomischen Kapitals, die benötigt wird, um die aus unseren Geschäftsaktivitäten resultierenden Risiken abzudecken. Wir berechnen und überwachen auch das Liquiditätsrisiko, das wir mittels eines separaten Risikomanagementrahmenwerks steuern.

## Kreditrisiko

Das Kreditrisiko entsteht im Zusammenhang mit allen Transaktionen, aus denen sich tatsächliche, eventuelle oder künftige Ansprüche gegenüber einem Geschäftspartner, Kreditnehmer oder Schuldner (im Folgenden einheitlich „Geschäftspartner“ genannt) ergeben, einschließlich von Forderungen, für die ein Weiterverkauf vorgesehen ist. Diese Transaktionen gehören in der Regel zu unserem traditionellen nicht handelsbezogenen Kreditgeschäft (wie Kredite und Eventualverbindlichkeiten) oder unseren direkten Handelsaktivitäten mit Kunden (wie OTC-Derivate, FX Forwards und Forward Rate Agreements) oder stehen im Zusammenhang mit unseren Positionen in gehandelten Kreditprodukten (wie Anleihen). Dieses letztgenannte Risiko, das wir „gehandeltes Ausfallrisiko“ nennen, wird sowohl anhand von Kredit- als auch Marktrisikoparametern gesteuert. Wir unterscheiden drei Arten von Kreditrisiken:

- Ausfallrisiko ist das Risiko, dass Geschäftspartner vertragliche Zahlungsverpflichtungen nicht erfüllen.
- Länderrisiko ist das Risiko, dass uns in einem beliebigen Land aus einem der folgenden Gründe ein Verlust entsteht: eine mögliche Verschlechterung der wirtschaftlichen Rahmenbedingungen, politische und soziale Unruhen, Verstaatlichung und Enteignung von Vermögenswerten, staatliche Nichtanerkennung von Auslandsschulden, Devisenkontrollen und Ab- oder Entwertung der Landeswährung. Das Länderrisiko beinhaltet das Transferrisiko. Dieses entsteht, wenn Schuldner aufgrund direkter staatlicher Intervention nicht in der Lage sind, Vermögenswerte zur Erfüllung ihrer fälligen Verpflichtungen an Nichtgebietsansässige zu übertragen.
- Abwicklungsrisiko ist das Risiko, dass die Abwicklung oder Verrechnung von Transaktionen scheitert. Es entsteht immer dann, wenn liquide Mittel, Wertpapiere und/oder andere Werte nicht zeitgleich ausgetauscht werden.

## Marktrisiko

Das Marktrisiko resultiert aus der Unsicherheit über Veränderungen von Marktpreisen und -kursen (inklusive Zinsen, Aktienkursen, Wechselkursen und Rohwarenpreisen), den zwischen ihnen bestehenden Korrelationen und ihren Volatilitäten. Im Rahmen unserer Risikomanagementprozesse unterteilen wir das Marktrisiko ferner in

- Marktrisiko aus Handelspositionen, das in erster Linie durch Marketmaking und Handelsaktivitäten in den unterschiedlichen Cash- und Derivatemärkten entsteht
- Marktrisiko aus Nichthandelspositionen, das durch Aktiva und Passiva entsteht, die in der Regel für längere Zeit in unseren Büchern enthalten sind (das heißt unkonsolidierte strategische Beteiligungen, Investments in alternative Assets, Sicht- und Sparguthaben und aktienbasierte Vergütung), deren inhärenter Wert jedoch immer noch von der Bewegung der Finanzmärkte und Parameter abhängig ist. Wir schließen das Risiko aus der Laufzeitmodellierung von Sicht- und Sparguthaben und das Risiko aus unserem Deutsche Bank Bauspargeschäft in unser nichthandelsbezogenes Marktrisiko mit ein. Ebenfalls enthalten sind die entsprechenden Risiken, die die Postbank als Geschäfts- beziehungsweise Kollektivrisiken bezeichnet.

## Operationelles Risiko

Das operationelle Risiko bezeichnet den potenziellen Eintritt von Verlusten im Zusammenhang mit Mitarbeitern, vertraglichen Vereinbarungen und deren Dokumentation, Technologie, Versagen oder Zusammenbruch der Infrastruktur, externen Einflüssen und Kundenbeziehungen. Diese Definition schließt rechtliche wie auch aufsichtsrechtliche Risiken ein, jedoch nicht das allgemeine Geschäfts- und das Reputationsrisiko.

## Liquiditätsrisiko

Das Liquiditätsrisiko ist das Risiko, dass wir möglicherweise nicht oder nur zu überhöhten Kosten in der Lage sind, unsere Zahlungsverpflichtungen bei Fälligkeit zu erfüllen.

## Allgemeines Geschäftsrisiko

Das allgemeine Geschäftsrisiko bezeichnet das Risiko, das aufgrund von möglichen Veränderungen der allgemeinen wirtschaftlichen Rahmenbedingungen entsteht. Dazu gehören beispielsweise das Marktumfeld, das Kundenverhalten und der technische Fortschritt. Wenn wir uns nicht rechtzeitig auf veränderte Bedingungen einstellen, können diese unsere Geschäftsergebnisse beeinträchtigen.

Neben den oben genannten gibt es eine Reihe weiterer Risiken wie das Reputationsrisiko, das Versicherungsrisiko sowie das Konzentrationsrisiko. Diese stehen im Wesentlichen in Zusammenhang mit einer oder mehreren der oben genannten Risikoarten.

## Reputationsrisiko

Für unsere Risikomanagementprozesse definieren wir Reputationsrisiko als die Gefahr, dass durch die öffentliche Berichterstattung über eine Transaktion, einen Geschäftspartner oder eine Geschäftspraxis, an der ein Kunde beteiligt ist, das öffentliche Vertrauen in unser Unternehmen negativ beeinflusst wird.

Eine Reihe von Konzernrichtlinien und Vorschriften bildet das Rahmenwerk für unser Reputationsrisikomanagement. Die Hauptverantwortung für die Identifizierung, Eskalation und Klärung von Fragen, die das Reputationsrisiko betreffen, liegt bei den Geschäftsbereichen. Die Risikomanagementeinheiten unterstützen und beraten die Geschäftsbereiche bei der Identifizierung, Eskalation und Lösung von Problemen, die das Reputationsrisiko betreffen.

Das höchste spezialisierte Gremium für Fragen zu Reputationsrisiken ist das Group Reputational Risk Committee (GRRC). Es ist ein ständiger Unterausschuss des Risk Executive Committee und wird vom Chief Risk Officer geleitet. Das GRRC prüft und entscheidet alle das Reputationsrisiko betreffenden Fragen, deren Eskalation von der Geschäftsleitung und dem Regional Management als notwendig erachtet wird oder aufgrund anderer Konzernrichtlinien und -verfahren erforderlich ist.

## Versicherungsrisiko

Unser Versicherungsrisiko entsteht durch Abbey Life Assurance Company Limited (ALAC) sowie den Verpflichtungen aus der leistungsdefinierten Versorgungszusage des Konzerns. Im Rahmen unseres Risikomanagements betrachten wir die versicherungsbezogenen Risiken in erster Linie als Marktrisiko aus Nichthandelspositionen. Wir überwachen die zugrundeliegenden Annahmen in der Berechnung dieses Risikos regelmäßig und suchen risikomindernde Maßnahmen wie Rückversicherungen, wenn wir diese für angemessen halten. Wir sind insbesondere folgenden versicherungsbezogenen Risiken ausgesetzt:

- **Langlebigkeitsrisiko** – Das Risiko, dass die Lebenserwartung schneller oder langsamer steigt als angenommen und sich sowohl auf gegenwärtige als auch zukünftige Rentenzahlungen auswirkt. Zu Risikomanagementzwecken werden im Rahmen unseres Marktrisiko-Rahmenwerks und der Marktrisikoprozesse sowohl für ALAC als auch für unsere Verpflichtungen aus der betrieblichen Altersvorsorge des Konzerns monatlich Stresstests durchgeführt und auf deren Basis Ökonomisches Kapital allokiert. Das Langlebigkeitsrisiko für ALAC wird durch Abschluss von Rückversicherungen gemildert. Untersuchungen zu Sterblichkeitsverlauf und Sensitivitäten der Verpflichtungen aus Veränderungen der Lebensdauer werden einmal jährlich von ALAC und dem globalen Aktuar TowersWatson zur Verfügung gestellt.
- **Sterblichkeits- und Invaliditätsrisiken** – Das Risiko, dass die Anzahl der Versicherungsansprüche aus Todesfällen oder Berufsunfähigkeit höher oder niedriger als erwartet ist und ein oder mehrere umfangreiche Ansprüche geltend gemacht werden.
- **Kostenrisiko** – Das Risiko, dass die Verwaltung von Versicherungsverträgen höhere oder niedrigere Kosten als erwartet verursacht.

— **Bestandsrisiko** – Das Risiko, dass der Prozentsatz der stornierten Verträge höher oder niedriger als erwartet ist.

Sofern die tatsächlichen Erfahrungen ungünstiger als die zugrunde gelegten Annahmen sind oder aufgrund verschlechterter Annahmen mehr Rückstellungen erforderlich sind, kann dies zu Änderungen in der Höhe des benötigten Kapitals der Versicherungsgesellschaften führen.

### Konzentrationsrisiko

Risikokonzentrationen sind keine isolierten Risikoarten, sondern sind im Wesentlichen in das Management von Kredit-, Markt-, operationelle und Liquiditätsrisiken integriert. Risikokonzentrationen beschreiben das Verlustpotenzial der Bank aus der unausgewogenen Verteilung von Abhängigkeiten von spezifischen Risikotreibern. Risikokonzentrationen treten innerhalb von oder über Kunden, Regionen/Länder, Industrien, und Produkte hinweg auf und beeinflussen die vorgenannten Risiken. Risikokonzentrationen werden aktiv gesteuert, zum Beispiel durch das Eingehen von ausgleichenden oder risikobegrenzenden Transaktionen. Das Management von Risikokonzentrationen über Risikoarten hinweg bezieht Expertengruppen, qualitative Einschätzungen, quantitative Instrumente (wie Ökonomisches Kapital und Stresstests) und umfassende Berichterstattung ein.

## Risikosteuerungsinstrumente

Zur Überwachung und Steuerung von Risiken verwenden wir ein umfassendes Instrumentarium quantitativer Kenngrößen und Messinstrumente. Es gehört zu unseren Grundsätzen, dass wir die Angemessenheit und Zuverlässigkeit der quantitativen Kenngrößen und Messinstrumente mit Blick auf das sich ändernde Risikoumfeld ständig überprüfen. Manche dieser Instrumente sind auf mehrere Risikoarten anwendbar, andere auf die besonderen Merkmale bestimmter Risikokategorien zugeschnitten. Nachstehend sind die wichtigsten quantitativen Kenngrößen und Messinstrumente aufgeführt, die wir derzeit zur Messung, Steuerung und Berichterstattung der Risiken verwenden:

— **Ökonomisches Kapital.** Das Ökonomische Kapital ist eine Messgröße zur Ermittlung der Höhe des Eigenkapitals, das benötigt wird, um extreme unerwartete Verluste aus unserem Portfolio aufzufangen. „Extrem“ bedeutet hier, dass das berechnete Ökonomische Kapital mit einer Wahrscheinlichkeit von 99,98 % die innerhalb eines Jahres aggregierten unerwarteten Verluste abdeckt. Wir berechnen das Ökonomische Kapital für das Ausfall-, Transfer- und Abwicklungsrisiko als Komponenten des Kreditrisikos, für das Marktrisiko, einschließlich des gehandelten Ausfallrisikos, sowie für das operationelle und das allgemeine Geschäftsrisiko. Wir überprüfen und erweitern unser Modell für die Berechnung des Ökonomischen Kapitals kontinuierlich, wie es angemessen ist. Insbesondere haben wir über die Jahre 2009-2010 das Korrelationsmodell, das unserem Kreditrisikoportfoliomodell zugrunde liegt, angepasst, um es in engere Übereinstimmung mit den feststellbaren Ausfallkorrelationen zu bringen. Zusätzlich ist das Modell jetzt in der Lage, unser Verlustpotenzial für mehrere Zeitscheiben abzuleiten. Dies sollte es dem Modell erwartungsgemäß auch ermöglichen, zukünftig die regulatorische „Incremental Risk Charge“ zu bestimmen. Innerhalb des Rahmenwerks für unser Ökonomisches Kapital erfassen wir die Auswirkungen von Ratingmigrationen sowie Gewinne und Verluste aus der Anwendung der Fair-Value-Bewertung. Wir verwenden das Ökonomische Kapital zur zusammenfassenden Darstellung der Risikopositionen der Bank von einzelnen Geschäftssparten bis zur Konzernebene. Ferner nutzen wir das Ökonomische Kapital (sowie Goodwill und sonstige nicht amortisierende immaterielle Vermögenswerte) für die Zuweisung des Buchkapitals an die Geschäftssparten. Dadurch können wir die risikobereinigte Profitabilität der einzelnen Geschäftseinheiten beurteilen, die eine zentrale Rolle im Rahmen der Steuerung unserer Finanzressourcen darstellt. Zudem setzen wir das Ökonomische Kapital



– insbesondere für Kreditrisiken – zur Messung der risikobereinigten Profitabilität unserer Kundenbeziehungen ein. Für Konsolidierungszwecke wurde das Ökonomische Kapital für die Postbank auf einer Basis kalkuliert, die konsistent ist mit der von der Deutschen Bank verwendeten Methodik. Allerdings können Limitierungen in der Datenverfügbarkeit dazu führen, dass Portfolioeffekte nicht vollständig abgeschätzt werden können, was zu einer Über- oder Unterschätzung führen kann. Eine quantitative Darstellung unseres Ökonomischen Kapitalbedarfs findet sich im Abschnitt „Gesamtrisikoposition“.

Mit einem ähnlichen Konzept quantifiziert die Postbank ihren „Risikokapital“ genannten Kapitalbedarf, der ihr aus schweren unerwarteten Verlusten entsteht. Hierzu verwendet die Postbank einheitliche Parameter um Risiken zu messen, die als materiell eingestuft werden. Diese Parameter orientieren sich am Value-at-Risk-Ansatz, das heißt an dem Verlust (abzüglich dem erwarteten Gewinn oder Verlust), der mit einer Wahrscheinlichkeit von 99,93 % innerhalb der vorgegebenen Halteperiode nicht überschritten wird. Die Halteperiode ist üblicherweise ein Jahr, für Marktrisiken jedoch 90 Tage.

- **Erwarteter Verlust.** Wir nutzen den Erwarteten Verlust zur Messung unseres Kredit- und operationellen Risikos. Der Erwartete Verlust misst auf der Grundlage historischer Verlustdaten den Verlust, der innerhalb eines Jahres zum jeweiligen Berichtstermin aus diesen Risiken zu erwarten ist. Für die Berechnung des Erwarteten Verlusts aus dem Kreditrisiko werden Kreditrisikoratings, erhaltene Sicherheiten, Fälligkeiten und statistische Durchschnittsverfahren berücksichtigt, um die Risikoeigenschaften unserer unterschiedlichen Arten von Engagements und Fazilitäten zu erfassen. Alle Parameterannahmen basieren auf bis zu siebenjährigen statistischen Durchschnittswerten unserer historisch erlittenen Ausfälle und Verluste sowie auf externen Orientierungsgrößen. Wir setzen den Erwarteten Verlust als Instrument in unseren Risikomanagementprozessen ein und er ist auch Bestandteil unseres Management-Reporting-Systems. Die relevanten Ergebnisse der Berechnung des Erwarteten Verlusts werden darüber hinaus zur Ermittlung der kollektiv ermittelten Wertberichtigungen für Kreditausfälle in Betracht gezogen, die in unserem Jahresabschluss enthalten sind. Für das operationelle Risiko bestimmen wir den Erwarteten Verlust aus statistischen Durchschnitten unserer internen Verlusthistorie, jüngeren Risikoentwicklungen sowie zukunftsgerichteten Expertenschätzungen.
- **Value-at-Risk.** Wir verwenden ein Value-at-Risk-Verfahren, um ein quantitatives Maß für unsere Marktrisiken im Handelsbuch unter normalen Marktbedingungen abzuleiten. Die Value-at-Risk-Werte sind Teil sowohl der internen als auch der externen aufsichtsrechtlichen Berichterstattung. Für ein bestimmtes Portfolio misst der Value-at-Risk den potenziellen künftigen Verlust (bezogen auf den Marktwert), der unter normalen Marktbedingungen mit einem vorher definierten Konfidenzniveau in einer bestimmten Periode nicht überschritten wird. Der Value-at-Risk für ein Gesamtportfolio misst unser diversifiziertes Marktrisiko (aggregiert unter Verwendung zuvor ermittelter Korrelationen) in diesem Portfolio.  
Bei der Postbank wird der Value-at-Risk sowohl für das Handelsbuch als auch für das Anlagebuch verwendet. Die Postbank hat die materielle Basis gelegt, um das interne Marktrisikomodell, das für die Messung und das Management der Marktrisiken in Übereinstimmung mit der deutschen Solvabilitätsverordnung („SolvV“) eingesetzt wird, nach aufsichtsrechtlicher Genehmigung für die Bestimmung der Eigenkapitalanforderungen zu verwenden.

- **Stresstests.** Unsere Analyse der Kredit-, Markt-, operationellen und Liquiditätsrisiken ergänzen wir um Stresstests. Für das Kreditrisikomanagement führen wir Stresstests durch, um den Einfluss von Änderungen der wirtschaftlichen Rahmenbedingungen oder spezifischer Parameter auf unser Kreditengagement beziehungsweise auf Teile davon einzuschätzen. Auch der Einfluss auf die Bonitätsbeurteilung unseres Portfolios wird berücksichtigt. Für das Marktrisikomanagement führen wir Stresstests durch, da die Value-at-Risk-Berechnung auf Daten der jüngeren Vergangenheit basiert, ausschließlich Risiken bis zu einem bestimmten Konfidenzniveau ermittelt und von einer guten Verwertbarkeit der Aktiva ausgeht. Sie spiegelt daher nur das Verlustpotenzial unter relativ normalen Marktbedingungen wider. Stresstests helfen uns, die Auswirkungen von potenziellen extremen Marktbewegungen auf die Werte unserer marktrisikosensitiven Aktiva einzuschätzen. Das betrifft sowohl unsere hochliquiden als auch unsere weniger liquiden Handelspositionen sowie unsere Investments. Die Schätzung der Korrelationen zwischen den in unseren aktuellen Stresstests genutzten Marktrisikofaktoren ist von volatilen Marktverhältnissen abgeleitet. Hierzu wird ein Algorithmus genutzt und die angenommenen Korrelationen entsprechen im Wesentlichen denen, die während der jüngsten Stresssituationen an den Märkten beobachtet wurden. Mithilfe von Stresstests ermitteln wir die Höhe des Ökonomischen Kapitals, das zur Unterlegung der Marktrisiken unter extremen Marktbedingungen, die wir für unsere Simulationen auswählen, erforderlich ist. Für das operationelle Risikomanagement führen wir Stresstests in Bezug auf unser Ökonomisches Kapitalmodell durch, um dessen Sensitivitäten bei Änderungen wesentlicher Modellkomponenten, einschließlich externer Verluste, einzuschätzen. Für das Liquiditätsrisikomanagement verwenden wir Stresstests und Szenarioanalysen zur Untersuchung des Einflusses von plötzlich auftretenden Stressereignissen auf unsere Liquiditätsposition. Im Jahr 2010 haben wir die Einführung unseres konzernweiten Rahmenwerks für Stresstests über die verschiedenen Risikoarten hinweg abgeschlossen. Dies beinhaltet auch Reverse Stresstests, das heißt Analysen, in denen Szenarien beschrieben werden, unter denen das Geschäftsmodell nicht fortgeführt werden kann. Bei der Postbank werden alle wesentlichen und aktiv gemanagten Risikokategorien (Kredit-, Markt-, Liquiditäts- und operationelles Risiko) definierten Stresstests unterworfen.
- **Aufsichtsrechtliche Risikobeurteilung.** Die Beurteilung der Risikotragfähigkeit der Bank durch die deutschen Aufsichtsbehörden erfolgt über unterschiedliche Kenngrößen, die in Note 36 „Aufsichtsrechtliches Kapital“ des Konzernabschlusses näher erläutert werden.

## Kreditrisiko

Wir messen und steuern unser Kreditrisiko anhand der nachstehend beschriebenen Philosophie und Grundsätze:

- Das Grundprinzip für Kreditrisikomanagement ist die Kundenanalyse, welche zugleich ausgerichtet ist an unseren Portfoliostrategien für Länder- und Branchen. In Zusammenarbeit mit den Partnern aus den Geschäftsbereichen wird als erste Verteidigungslinie eine umsichtige Kundenselektion erreicht. In allen unseren Konzernbereichen werden einheitliche Standards für die jeweiligen Kreditentscheidungsprozesse angewandt.
- Unser aktiv angestrebtes Ziel ist die Sicherstellung eines diversifizierten und handelsfähigen Kreditportfolios, um unangemessene Konzentrationen und Langzeitrisiken (große unerwartete Verluste) zu verhindern, um damit das Kapital der Bank in allen Marktsituationen effektiv zu schützen. Kunden-, Branchen-, Länder- und produktspezifische Konzentrationen werden aktiv im Vergleich zu unserer Risikoneigung bewertet und gesteuert.

- Durch Anwendung stringenter Genehmigungsstandards, kombiniert mit einem proaktiven Absicherungs- und Verteilungsmodell und mit dem Ziel, unser Bestandsportfolio zu besichern, wollen wir große gebündelte Kreditrisiken auf Kreditnehmer- und Portfolioebene vermeiden.
- Wir sind selektiv mit Blick auf das Eingehen offener Barrisiken, sofern sie nicht mit Sicherheiten unterlegt, garantiert und/oder angemessen abgesichert sind. Ausnahmen zu diesem Grundprinzip gibt es bei geringerem Risiko, kurzfristigen Transaktionen und Linien, in Verbindung mit speziellen Handelsfinanzierungen sowie Geschäfte geringen Risikos, wenn die Margen eine angemessene Verlustabdeckung gewährleisten.
- Für unser Derivateportfolio streben wir nach einer Absicherung durch angemessene Besicherungsvereinbarungen und schließen möglicherweise auch zusätzliche Sicherungsgeschäfte gegen Konzentrationsrisiken ab um Kreditrisiken aus Marktbewegungen weiter zu reduzieren.
- Jede Kreditgewährung und jegliche materielle Veränderung einer Kreditfazilität gegenüber einem Geschäftspartner (wie zum Beispiel Laufzeit, Sicherheitenstruktur oder wichtige Vertragsbedingungen) erfordern eine Kreditgenehmigung auf der angemessenen Kompetenzebene. Kreditgenehmigungskompetenzen erhalten Mitarbeiter, die über eine entsprechende Qualifikation, Erfahrung und Ausbildung verfügen. Diese Kreditkompetenzen werden regelmäßig überprüft.
- Wir messen unsere gesamten Kreditengagements gegenüber einer Kreditnehmergruppe und fassen sie weltweit in Übereinstimmung mit dem deutschen Kreditwesengesetz konzernweit auf konsolidierter Basis zusammen.

Bei der Postbank sind vergleichbare einheitliche Standards aufgestellt.

### Kreditrisikoeinstufung

Ein wichtiges Grundelement des Kreditgenehmigungsprozesses ist eine detaillierte Risikobeurteilung jedes Kreditengagements eines Geschäftspartners. Wir verfügen über interne Bewertungsmethoden, Score Cards und unsere 26-stufige Ratingskala zur Beurteilung der Bonität unserer Geschäftspartner. Der Großteil unserer Methoden zur Risikobeurteilung sind zur Nutzung im fortgeschrittenen internen ratingbasierten Ansatz unter Basel II-Regeln genehmigt. Unsere Ratingskala ermöglicht uns eine Vergleichbarkeit sowohl unserer internen Ratings mit der Marktpraxis als auch eine verbesserte Vergleichbarkeit unserer verschiedenen Teilportfolios untereinander. Mehrere Ausfallratingstufen ermöglichen uns auch, die erwarteten Rückflüsse von ausgefallenen unbesicherten Engagements auszudrücken. Wir bewerten unsere Kreditengagements generell einzeln. Eine Ausnahme stellen bestimmte Portfolios verbriefter Forderungen dar, die auf Pool-Ebene bewertet werden.

In unserem Retailgeschäft werden die Kreditrisikoprüfungen und Kreditnehmereinstufungen in den homogenen Portfolios über die Nutzung einer automatisierten Decision Engine ermittelt. Diese Decision Engine integriert quantitative Aspekte (wie zum Beispiel Finanzdaten), Verhaltensinformationen, Kreditauskünfte (wie SCHUFA in Deutschland) und allgemeine Kundendaten. Diese Eingangsfaktoren werden von unserer Decision Engine zur Ermittlung der Kreditwürdigkeit des Kreditnehmers verwendet und unter Einbeziehung der Sicherheitenbewertung wird der erwartete Verlust berechnet sowie die weiter notwendigen Schritte zur Bearbeitung der abschließenden Kreditentscheidung bestimmt. Die etablierten Ratingmethoden, die wir in unserem Retailgeschäft einsetzen, basieren auf multivariaten statistischen Methoden und werden zur Unterstützung unserer individuellen Kreditentscheidungen für dieses Portfolio und auch zum Management des Retailportfolios eingesetzt.

Die Algorithmen der Ratingverfahren werden immer wieder auf Basis der Ausfallhistorie sowie weiterer externer und interner Faktoren und Schätzungen neu justiert.

Die Postbank verwendet interne Ratingsysteme, die für die Verwendung im auf internen Ratings basierenden Basisansatz unter Basel II zugelassen sind. Ähnlich wie bei uns basieren die internen Ratings und Einstufun-

gen auf einer einheitlichen Masterskala, die jedem Rating oder Einstufungsergebnis die für die jeweilige Stufe festgelegte Ausfallwahrscheinlichkeit zuordnet.

### Kreditlimite und Genehmigungen

Kreditlimite legen die Obergrenze für Kreditengagements fest, die wir für bestimmte Zeiträume einzugehen bereit sind. Bei der Festlegung der Kreditlimite für einen Geschäftspartner berücksichtigen wir die Bonität des Geschäftspartners mit Blick auf seine interne Bonitätseinstufung (Rating). Kreditlimite werden von der Kreditrisikomanagementfunktion in Ausübung von erteilten Kreditgenehmigungskompetenzen eingerichtet. Eine Kreditgenehmigungskompetenz wird generell als persönliche Kreditgenehmigungskompetenz in Abhängigkeit von fachlicher Qualifikation und Erfahrung vergeben. Alle erteilten Kreditgenehmigungskompetenzen unterliegen einer regelmäßigen Überprüfung auf Angemessenheit mit Blick auf die individuelle Leistung des Kompetenzträgers. Die Ergebnisse dieser Überprüfung werden dem Group Credit Policy Committee präsentiert und dem Risk Executive Committee berichtet.

Wenn die persönliche Kreditgenehmigungskompetenz nicht ausreichend ist, um ein notwendiges Kreditlimit einzurichten, wird die Transaktion an einen Mitarbeiter mit einer höheren Kreditgenehmigungskompetenz weitergeleitet oder, falls notwendig, an ein angemessenes Kreditkomitee wie das CRM Underwriting Committee. Wenn die persönliche Kreditgenehmigungskompetenz und die von Komitees nicht ausreicht, um angemessene Limite einzurichten, wird der Fall dem Vorstand zur Genehmigung vorgelegt.

Die Postbank wendet vergleichbare Kreditlimitrichtlinien an.

## Kreditrisikoreduzierungen

In Ergänzung zur Festlegung der Kreditwürdigkeit der Geschäftspartner und der eigenen Risikoneigung verwenden wir auch verschiedene Risikoreduzierungstechniken, um das Kreditrisikoengagement zu optimieren und potenzielle Kreditverluste zu reduzieren. Kreditrisikoreduzierungsinstrumente, die nachstehend näher beschrieben werden, können die folgenden Formen annehmen:

- Gehaltene Sicherheiten, um durch Erhöhung der Rückflüsse Verluste zu reduzieren.
- Risikotransfers, mit denen die Wahrscheinlichkeit des Ausfallrisikos eines Schuldners auf eine dritte Partei übertragen wird einschließlich der Absicherungen durch unsere Loan Exposure Management Group.
- Netting- und Sicherheitenvereinbarungen, die das Kreditrisiko aus Derivaten sowie Repo- und repoähnlichen Transaktionen reduzieren.

## Für Kredite gehaltene Sicherheiten

Wir vereinbaren in Verträgen mit Kunden, die ein Kreditrisiko beinhalten, regelmäßig die Hereinnahme oder das Stellen von Sicherheiten. In Verträgen mit Kreditnehmern wird regelmäßig das Stellen von Sicherheiten vereinbart. Diese Sicherheiten werden in Form von Vermögenswerten oder Drittverpflichtungen gestellt, die das inhärente Risiko von Kreditausfällen mindern, indem sie das Ausfallrisiko des Kreditnehmers abdecken oder bei Ausfällen die Rückflüsse erhöhen. Während Sicherheiten eine alternative Rückzahlungsquelle bilden können, ersetzen sie nicht die Notwendigkeit hoher Standards im Kreditgeschäft.

Wir unterteilen erhaltene Sicherheiten in die folgenden zwei Kategorien:

- Finanzielle und andere Sicherheiten, die es uns ermöglichen, das ausstehende Engagement vollständig oder in Teilen zurückzuführen, indem der als Sicherheit hinterlegte Vermögenswert verwertet wird, wenn der Kreditnehmer seine Hauptverpflichtungen nicht erfüllen kann oder will. Zu dieser Kategorie gehören in der Regel Barsicherheiten, Wertpapiere (Aktien, Anleihen), Sicherungsübereignungen von Forderungen oder Beständen, Sachmittel (zum Beispiel Anlagen, Maschinen, Flugzeuge) sowie Immobilien.
- Garantiesicherheiten, die die Fähigkeit des Kreditnehmers ergänzen, seine Verpflichtungen gemäß dem Kreditvertrag zu erfüllen, und die von Dritten bereitgestellt werden. Zu dieser Kategorie gehören üblicherweise Akkreditive, Versicherungsverträge, Exportkreditversicherungen, erhaltene Garantien und Risikobeteiligungen.

## Risikotransfers

Risikotransfers an dritte Parteien bilden eine Hauptfunktion unseres Risikomanagementprozesses und werden in verschiedenen Formen durchgeführt. Dazu gehören Komplettverkäufe, Einzeladressen- und Portfoliohedging und Verbriefungen. Sie werden von den jeweiligen Geschäftsbereichen und durch unsere Loan Exposure Management Group („LEMG“) in Übereinstimmung mit speziell genehmigten Vollmachten durchgeführt.

LEMG ist vor allem für die Steuerung des Kreditrisikos für Kredite und ausleihebezogene Zusagen des internationalen Investment-Grade-Kreditportfolios sowie des Portfolios für Kredite an Unternehmen des deutschen Mittelstands innerhalb unseres Konzernbereichs Corporate & Investment Bank zuständig.

Als zentrale Preisreferenzstelle stellt die LEMG den jeweiligen Geschäftsfeldern des Konzernbereichs Corporate & Investment Bank die entsprechenden beobachteten oder abgeleiteten Kapitalmarktkonditionen für neue Kreditanträge bereit. Die Entscheidung über die Kreditvergabe durch die Geschäftseinheit bleibt jedoch dem Kreditrisikomanagement vorbehalten.

Innerhalb dieses Kreditrisikokonzepts konzentriert sich die LEMG auf zwei wesentliche Initiativen, die zur Verbesserung der Risikomanagementdisziplin, zur Renditesteigerung sowie zum effizienteren Kapitaleinsatz beitragen sollen:

- Verringerung der einzeladressen- und branchenbezogenen Kreditrisikokonzentrationen innerhalb des Kreditportfolios sowie
- aktives Management der Kreditengagements durch Anwendung von Techniken wie etwa Kreditverkäufen, Verbriefung von Kreditforderungen mittels Collateralized Loan Obligations, Ausfallversicherungen sowie Einzeladressen- und Portfolio Credit Default Swaps.

### Netting und Sicherheitenvereinbarungen für Derivate

Um das Kreditrisiko aus Transaktionen mit OTC-Derivaten zu reduzieren, wenn kein OTC Clearing erfolgen kann, sind wir grundsätzlich bemüht, Rahmenverträge mit unseren Kunden abzuschließen (wie beispielsweise den Rahmenvertrag für Derivate der International Swaps and Derivatives Association, Inc (ISDA) oder den deutschen Rahmenvertrag für Finanztermingeschäfte). Ein Rahmenvertrag ermöglicht, die Ansprüche und Verpflichtungen sämtlicher vom Rahmenvertrag erfassten Derivatetransaktionen zu netten, wenn der Geschäftspartner seinen Verpflichtungen nicht nachkommt, sodass eine einzige Nettoforderung oder -verbindlichkeit gegenüber dem Geschäftspartner verbleibt („Close-out Netting“). Für bestimmte Teile unseres Derivategeschäfts (wie etwa Devisengeschäfte) schließen wir auch Rahmenverträge ab, im Rahmen derer wir am gleichen Tag in derselben Währung fällige Beträge für Transaktionen verrechnen, die unter solchen Verträgen geschlossen wurden („Payment Netting“), was zur Verringerung unseres Abwicklungsrisikos führt. Im Rahmen unserer Risikomes- und Risikobeurteilungsprozesse wenden wir das Netting nur in dem Maße an, in dem wir uns von der rechtlichen Validität und Durchsetzbarkeit des Rahmenvertrags in allen betreffenden Jurisdiktionen überzeugt haben.

Darüber hinaus vereinbaren wir Credit Support Annexes („CSA“) zu Rahmenverträgen, um das derivatebezogene Kreditrisiko weiter zu senken. Diese Anhänge mit den entsprechenden Sicherheitenvereinbarungen bieten grundsätzlich eine Risikominderung durch die regelmäßigen (gewöhnlich täglichen) Sicherheitennachschüsse für die besicherten Risikopositionen. Die CSA verbriefen darüber hinaus das Recht auf Kündigung der zugrunde liegenden Derivatetransaktionen, falls der Kontrahent einer Aufforderung zum Sicherheitennachschuss nicht nachkommt. Wenn wir davon ausgehen, dass der Anhang durchsetzbar ist, spiegelt sich dies, wie auch beim Netting, in unserer Beurteilung der besicherten Position wider.

Bestimmte CSA zu Rahmenverträgen legen ratingabhängige Grenzen fest, die die Stellung von zusätzlicher Besicherung auslösen, wenn ein Partner herabgestuft wird. Wir schließen auch Rahmenverträge ab, die als weiteren Kündigungsgrund die Herabstufung eines Partners festlegen. Wir analysieren und überwachen in unserem Stresstestansatz für Liquiditätsrisiken laufend mögliche Eventualzahlungsverpflichtungen, die aus einer Herabstufung resultieren.

Um das Kreditrisiko aus OTC-Derivatetransaktionen zu reduzieren, strebt die Postbank regelmäßig den Abschluss von Rahmenverträgen an, (wie beispielsweise den deutschen Rahmenvertrag für Finanztermingeschäfte). Die Postbank wendet das Netting nur in dem Maße an, wie sie sich vom rechtlichen Bestand und der Durchsetzbarkeit in den relevanten Jurisdiktionen überzeugt hat. Mit den meisten der Hauptgeschäftspartner in ihrem Financial-Markets-Portfolio hat die Postbank CSA zu den Rahmenverträgen abgeschlossen, um ihr auf Derivate bezogenes Kreditrisiko weiter zu reduzieren. Wie auch beim Netting reflektiert die Postbank dies in ihrer Berechnung der Kapitalanforderung, sofern sie davon überzeugt ist, dass der Anhang durchsetzbar ist.

Zum Zweck der Berechnung der aufsichtsrechtlichen Anforderungen für ihr Derivateportfolio nutzt die Postbank die „Current Exposure Methode“, das heißt sie berechnet ihr „Exposure At Default“ als Summe des positiven Fair Value ihrer Derivatepositionen und des aufsichtsrechtlichen Zuschlags.

In Einzelfällen hat die Postbank Klauseln in ihren CSA zu den Rahmenvereinbarungen vereinbart, welche zu einer Erhöhung der Sicherheitenstellung bei einer Verschlechterung des externen Ratings der Postbank führen. Die Ratingverschlechterung durch Moody's (von Aa3 auf A1) im ersten Halbjahr 2010 hatte jedoch keinen direkten Einfluss auf die notwendige Stellung von Sicherheiten und damit keinen Einfluss auf die Risikotragfähigkeit der Postbank.

### Überwachung des Ausfallrisikos

Eine anhaltende aktive Überwachung und Verwaltung der Kreditrisikopositionen sind integrale Bestandteile des Kreditrisikomanagements. Die Überwachung erfolgt vorwiegend durch die divisionalen Risikomanagementeinheiten in enger Kooperation mit der Portfolio-Management-Funktion.

Die Geschäftspartner im Kreditgeschäft werden den Mitarbeitern des Kreditrisikomanagements innerhalb bestimmter divisionaler Risikoeinheiten zugewiesen, die entsprechend den Kundenarten (wie etwa Kreditinstitute oder Firmenkunden) zugeordnet sind. Die einzelnen Mitarbeiter des Kreditrisikomanagements in den divisionalen Risikoeinheiten verfügen über die höchste Fachkompetenz und Erfahrung hinsichtlich der Steuerung von Kreditrisiken im Zusammenhang mit diesen Geschäftspartnern und ihren kreditbezogenen Transaktionen. Jeder Mitarbeiter des Kreditrisikomanagements ist für die ständige kreditseitige Überwachung des ihm übertragenen Portfolios von Kreditnehmern verantwortlich. Darüber hinaus stehen uns Verfahren zur Verfügung, mit denen wir versuchen, frühzeitig Kreditengagements zu erkennen, die möglicherweise einem erhöhten Verlustrisiko ausgesetzt sind. Wenn wir Kreditnehmer identifizieren, bei denen Probleme entstehen könnten, werden die betroffenen Engagements generell auf eine Watchlist gesetzt. Wir sind bestrebt, Geschäftspartner, bei denen auf Basis der Anwendung unserer Risikosteuerungsinstrumente potenzielle Probleme erkannt werden, frühzeitig zu identifizieren, um das Kreditengagement effektiv zu steuern und die Rückflüsse zu maximieren. Der Zweck dieses Frühwarnsystems liegt darin, potenzielle Probleme anzugehen, solange adäquate Handlungsalternativen zur Verfügung stehen. Diese Früherkennung potenzieller Risiken ist ein Grundprinzip unserer Kreditkultur und soll sicherstellen, dass größere Aufmerksamkeit auf solche Engagements gelenkt wird.

Bei der Postbank sind weitgehend ähnliche Prozesse implementiert.

Ein zentraler Schwerpunkt unseres Risikomanagementansatzes ist die Vermeidung von unangemessenen Konzentrationen in unserem Portfolio. Erhebliche Konzentrationen des Kreditrisikos liegen vor, wenn wir wesentliche Engagements mit einer Vielzahl von Geschäftspartnern mit ähnlichen wirtschaftlichen Rahmenbedingungen oder vergleichbaren Geschäftsaktivitäten unterhalten, wobei diese Gemeinsamkeiten dazu führen können, dass die Geschäftspartner ihre vertraglichen Verpflichtungen nicht erfüllen können, falls sich wirtschaftliche oder branchenbezogene Rahmenbedingungen ändern. Eine Konzentration des Kreditrisikos kann auch gegenüber einem einzelnen Geschäftspartner bestehen. Unser Portfolio-Management-Rahmenwerk stellt ein direktes Maß für Konzentrationen innerhalb unseres Kreditrisiko Portfolios bereit.

Die Steuerung von Branchen- und Länderrisiken ist eine der wichtigsten Komponenten unseres Managementansatzes für Risikokonzentrationen für unsere Portfolios außerhalb der Postbank. Abwicklungsrisiken berücksichtigen wir im Rahmen aller unserer Kreditrisikomanagement-Aktivitäten.



Im Jahr 2010 hat die Postbank die Steuerung von Konzentrationen im Kreditbereich verbessert durch die systematische Identifizierung von Kreditkonzentrationen auf Basis einzelner Kundenbeziehungen wie auch auf Basis von Sektoren (zum Beispiel Branchen, Regionen, Sicherheitenarten).

### Management von Branchenrisiken

Für die Steuerung von Branchenrisiken haben wir unsere aus Unternehmen und Finanzinstitutionen bestehenden Geschäftspartner in verschiedene Branchen-Unterportfolios gruppiert. Für jedes dieser Unterportfolios wird üblicherweise auf Jahresbasis ein „Industry Batch Report“ erstellt. Dieser Bericht zeigt Branchenentwicklungen, Trends und Risiken für unser Kreditportfolio, zeigt Risikokonzentrationen, umfasst Stresstests zur Bestimmung der Sensitivitäten des jeweiligen Unterportfolios gegenüber einem wirtschaftlichen Abschwungsszenario. Die Auswertung wird genutzt bei der Festlegung von Strategien sowohl für Branchenportfolios wie auch einzelne Geschäftspartner innerhalb des Portfolios, basierend auf ihrem jeweiligen Chance/Risiko-Profil und Potenzial.

Die Industry Batch Reports werden dem Group Credit Policy Committee, einem Unterkomitee des Risk Executive Committee, präsentiert und danach an den Vorstand geleitet. In Übereinstimmung mit einem vereinbarten Zeitplan wird eine selektierte Anzahl dieser Industry Batch Reports auch dem Risikoausschuss des Aufsichtsrats zugeleitet. In Ergänzung zu diesen Industry Batch Reports wird die Entwicklung der Branchen-Unterportfolios während des Jahres konstant überwacht und mit den genehmigten Strategien für die Unterportfolios verglichen. Regelmäßig werden Überblicke für das Group Credit Policy Committee erstellt, um die aktuellsten Entwicklungen zu besprechen und Maßnahmen einzuleiten, sofern dies notwendig erscheint.

### Steuerung des Länderrisikos

Die Vermeidung von unerwünschten Konzentrationen auf regionaler Ebene ist ein integraler Bestandteil unseres Kreditrisikomanagementkonzepts. Zur Steuerung des Länderrisikos stützen wir uns auf eine Reihe von Risikomessinstrumenten und -limiten. Dazu gehören insbesondere:

- **Gesamtengagement gegenüber Geschäftspartnern.** Hierzu zählen wir alle Forderungen aus dem Kreditgeschäft sowie Forderungen aus OTC-Derivaten an Geschäftspartner, die in einem beliebigen Land ansässig sind und die wir für gefährdet halten, falls wirtschaftliche oder politische Ereignisse eintreten („Country Risk Event“). Es schließt Tochterunternehmen ausländischer Muttergesellschaften ein, die nicht durch Patronatserklärung abgedeckt sind, sowie ausländische Niederlassungen von lokalen Geschäftspartnern.
- **Transferrisikoengagement.** Das Kreditrisiko, das entsteht, wenn ein grundsätzlich zahlungsfähiger und zahlungswilliger Schuldner seine Zahlungsverpflichtungen nicht erfüllen kann, da er wegen der Auferlegung staatlicher oder aufsichtsrechtlicher Kontrollen keine Devisen beschaffen oder Vermögenswerte an Nichtgebietsansässige übertragen kann („Transfer Risk Event“). Dazu zählen alle Forderungen aus dem Kreditgeschäft sowie Forderungen aus OTC-Derivaten, die von einer unserer Stellen in einem Land an einen Geschäftspartner in einem anderen Land ausgereicht werden.
- **Event-Risk-Szenarien mit hohem Stressfaktor.** Wir verwenden Stresstests zur Messung von potenziellen Risiken unserer Handelspositionen und betrachten diese als Marktrisiken.

Unsere Länderrisikoratings sind ein wesentliches Instrument für das Länderrisikomanagement. Sie werden von einem unabhängigen Länderrisiko-Research-Team im Kreditrisikomanagement ermittelt und beinhalten:

- **Sovereign Rating.** Eine Messgröße der Wahrscheinlichkeit, dass ein Staat seinen Verpflichtungen in Fremdwährung oder seiner eigenen Währung nicht nachkommt.
- **Transferrisikoring.** Eine Messgröße der Wahrscheinlichkeit, dass ein „Transfer Risk Event“ eintritt.
- **Event Risk Rating.** Eine Messgröße der Wahrscheinlichkeit, dass es zu wesentlichen Störungen der Marktrisikofaktoren eines Landes kommt.

Sämtliche Sovereign- und Transferrisikoratings werden mindestens einmal im Jahr vom Group Credit Policy Committee, einem Unterkomitee des Risk Executive Committee, überprüft. Zudem überprüft unser Länderrisiko-Research-Team mindestens vierteljährlich unsere Ratings für die wichtigsten Emerging-Markets-Länder. Ratings für Länder, die wir für besonders volatil halten, sowie sämtliche Event Risk Ratings werden einer laufenden Überprüfung unterzogen.

Ferner vergleichen wir unsere internen Risikoeinstufungen regelmäßig mit den Einschätzungen der wichtigsten internationalen Ratingagenturen.

Länderrisikolimits werden in gemeinsam mit Länderrisikoratings mindestens einmal im Jahr überprüft. Länderrisikolimits werden entweder durch den Vorstand oder unser Cross Risk Review Committee, ein Unterkomitee unseres Risk Executive Committee, in Übereinstimmung mit delegierten Befugnissen, festgelegt.

Unsere Konzernbereiche sind für die Steuerung ihrer Länderrisiken innerhalb der genehmigten Limits verantwortlich. Die regionalen Einheiten im Kreditrisikomanagement überwachen unser Länderrisiko auf der Grundlage von Daten, die Finance zur Verfügung stellt. Das Group Credit Policy Committee überprüft ebenfalls Informationen zum Transferrisiko.

Wichtige Elemente der Länderrisikosteuerung in der Postbank sind Country Risk-Ratings und Country Risk-Limits. Die Ratings werden mit Hilfe eines Ratings-Tools monatlich überprüft und bei Bedarf angepasst. Country-Risk-Limits und Sovereign-Risk-Limits für alle relevanten Länder werden vom Gesamtvorstand einmal im Jahr genehmigt. Bei Bedarf findet unterjährig eine Anpassung der Limits statt. Forderungen werden als Brutto-Nominalwerte auf die Limits angerechnet und dem Sitz des Kreditnehmers entsprechend einzelnen Ländern zugeordnet.

### Abwicklungsrisiko

Bei unseren Handelsaktivitäten können wir zum Zeitpunkt der Abwicklung dieser Geschäfte Risiken ausgesetzt sein. Das Abwicklungsrisiko (Settlement Risk) ist das Risiko, einen Verlust zu erleiden, wenn ein Kontrahent seinen vertraglichen Verpflichtungen zur Lieferung von liquiden Mitteln, Wertpapieren oder anderen Werten nicht nachkommt.

Für viele Transaktionsarten verringern wir das Abwicklungsrisiko, indem wir das Geschäft über eine Clearingstelle abschließen, die als Vermittler im Sinne beider Parteien handelt und das jeweilige Geschäft erst abwickelt, wenn beide Parteien ihre Vertragspflichten erfüllt haben.

Steht ein solches Abwicklungssystem nicht zur Verfügung, stellt die simultane Initialisierung der Zahlung und Lieferung im Rahmen der Transaktion die übliche Praxis unter Geschäftspartnern dar (Free Settlement). In solchen Fällen versuchen wir das Abwicklungsrisiko dadurch zu senken, dass wir bilaterale Nettingvereinbarungen für Zahlungen eingehen. Außerdem beteiligen wir uns aktiv an Brancheninitiativen zur Reduzierung des Abwicklungsrisikos. Die Übernahme eines Abwicklungsrisikos für Geschäfte im „Free-Settlement“-Verfahren bedarf der Zustimmung aus dem Kreditrisikobereich, und zwar entweder in Form vorab genehmigter Abwicklungsrisikolimits oder durch Einholung einer gesonderten Genehmigung für den jeweiligen Geschäftsvorfall. Für Kreditgenehmigungszwecke aggregieren wir Abwicklungsrisikolimits nicht mit anderen Kreditengagements, berücksichtigen jedoch das gesamte Engagement bei der Überlegung, ob ein bestimmtes Abwicklungsrisiko annehmbar ist.

### Kreditrisikoinstrumente – Ökonomisches Kapital für das Kreditrisiko

Wir berechnen das Ökonomische Kapital für das Ausfall-, Transfer- und Abwicklungsrisiko als Komponenten des Kreditrisikos. Übereinstimmend mit dem Rahmenwerk des Konzerns für das Ökonomische Kapital soll das berechnete Ökonomische Kapital für Kreditrisiken mit einer Wahrscheinlichkeit von 99,98 % extreme aggregierte unerwartete Verluste innerhalb eines Jahres abdecken. Per 31. Dezember 2010 haben wir die Postbank in unsere Berechnung des Ökonomischen Kapitals auf einer mit der Deutschen Bank-Methode konsistenten Basis einbezogen. Einschränkungen bei der Verfügbarkeit von Daten können aber in Portfolioeffekten resultieren, die nicht vollständig abgeschätzt werden und daher zu Über- oder Unterschätzung führen können.

Das Ökonomische Kapital für Kreditrisiken richtet sich nach der Verlustverteilung des Konzernportfolios, die mithilfe einer Monte Carlo-Simulation von korrelierten Ratingmigrationen ermittelt wird. Die Verlustverteilung wird in zwei Schritten modelliert. Zunächst werden individuelle Kreditengagements aufgrund von Parametern für Ausfallwahrscheinlichkeit, „Exposure-at-Default“ (Engagementhöhe bei Ausfall) und „Loss-given Default“ (Verlustschwere) bestimmt. In einem zweiten Schritt wird die Wahrscheinlichkeit eines gemeinsamen Ausfalls mithilfe ökonomischer Faktoren modelliert, die den geografischen Regionen und Branchen entsprechen. Unter Verwendung eines eigenentwickelten Modells, das Ratingmigrationen und Laufzeiteffekte berücksichtigt, wird dann eine Simulation der Portfolioverluste durchgeführt. Effekte durch negativ korrelierte („Wrong Way“) Derivatrisiken (d.h. das Kreditexposure eines Derivats ist im Ausfall höher, als in einem Szenario ohne Ausfall) wird modelliert durch Anwendung unseres eigenen Alpha-Faktors, festgelegt für unsere Nutzung der Basel II-Interne-Modell-Methode. Erwartete Verluste und Ökonomisches Kapital aus dieser Verlustverteilung werden bis auf Transaktionsebene zugewiesen, um eine Steuerung auf Transaktions-, Kunden- und Geschäftsebene zu ermöglichen.

Mit einem ähnlichen Ansatz ermittelt die Postbank einen Kredit-Value-at-Risk („CVaR“) mit einem Konfidenzniveau von 99,93 % über einen Zeitraum von einem Jahr für alle dem Kreditrisiko unterliegenden Engagements der Postbank.

### Kreditrisikoengagement

Kreditengagements gegenüber Geschäftspartnern resultieren aus dem traditionellen nicht handelsbezogenen Kreditgeschäft, wozu Kredite und Eventualverbindlichkeiten zählen. Kreditengagements gegenüber Geschäftspartnern sind auch das Ergebnis unserer direkten Handelsaktivitäten mit Kunden in bestimmten Instrumenten wie OTC-Derivaten, FX Forwards und Forward Rate Agreements. Ausfallrisiken entstehen auch im Zusammenhang mit unseren Positionen in gehandelten Kreditprodukten wie beispielsweise Anleihen.

Wir definieren unser Kreditengagement, indem wir sämtliche Transaktionen berücksichtigen, bei denen Verluste, verursacht durch die Nichteinhaltung der Zahlungsverpflichtungen des Geschäftspartners, eintreten können.

## Maximales Kreditrisiko

Die folgende Tabelle zeigt unser maximales Kreditrisiko ohne Berücksichtigung etwaiger gehaltener Sicherheiten oder sonstiger Kreditverbesserungen (Credit Enhancements), die nicht für eine Verrechnung in der Bilanz des Konzerns infrage kommen.

| in Mio € <sup>1</sup>                                                                                 | 31.12.2010       | 31.12.2009       |
|-------------------------------------------------------------------------------------------------------|------------------|------------------|
| Täglich fällige Forderungen gegenüber Banken                                                          | 17.157           | 9.346            |
| Verzinsliche Einlagen bei Kreditinstituten                                                            | 92.377           | 47.233           |
| Forderungen aus übertragenen Zentralbankeinlagen und aus Wertpapierpensionsgeschäften (Reverse Repos) | 20.365           | 6.820            |
| Forderungen aus Wertpapierleihen                                                                      | 28.916           | 43.509           |
| Zum Fair Value bewertete finanzielle Vermögenswerte <sup>2</sup>                                      | 1.026.494        | 900.800          |
| Zur Veräußerung verfügbare finanzielle Vermögenswerte <sup>2</sup>                                    | 48.587           | 14.852           |
| Forderungen aus dem Kreditgeschäft <sup>3</sup>                                                       | 411.025          | 261.448          |
| Sonstige Aktiva mit Kreditrisiko                                                                      | 61.441           | 52.457           |
| Finanzgarantien und andere kreditrisikobezogene Eventualverbindlichkeiten <sup>4</sup>                | 68.055           | 52.183           |
| Unwiderrufliche Kreditzusagen und andere ausleihebezogene Zusagen <sup>4</sup>                        | 123.881          | 104.125          |
| <b>Maximales Kreditrisiko</b>                                                                         | <b>1.898.297</b> | <b>1.492.773</b> |

<sup>1</sup> Alle Beträge zum Buchwert, sofern nicht anders angegeben.

<sup>2</sup> Ohne Aktien, sonstige Kapitalbeteiligungen und Rohstoffe.

<sup>3</sup> Forderungen aus dem Kreditgeschäft brutto abzüglich abgegrenzter Aufwendungen (–)/unrealisierter Erträge vor Abzug der Wertberichtigungen für Kreditausfälle.

<sup>4</sup> Finanzgarantien, sonstige kreditbezogene Eventualverbindlichkeiten und unwiderrufliche Kreditzusagen (einschließlich zum Fair Value bewerteter Zusagen) sind mit den Nominalbeträgen wiedergegeben.

In der Kategorie, der zum Fair Value bewerteten finanziellen Vermögenswerten sind Wertpapiere in Höhe von 109 Mrd € enthalten, für die Rückkaufsvereinbarungen bestanden sowie für 28 Mrd € geliehene Wertpapiere, beide mit nur geringem Kreditrisiko aufgrund sehr hoher Besicherungen. Daneben sind in dieser Position Schuldtitel in Höhe von 171 Mrd € enthalten, die zu mehr als 83 % als „Investment Grade“ eingestuft sind. Die oben genannte Kategorie der zur Veräußerung verfügbaren finanziellen Vermögenswerte reflektierte überwiegend Schuldtitel, die zu mehr als 83 % als „Investment Grade“ eingestuft waren.

Der Anstieg des maximalen Kreditrisikos zum 31. Dezember 2010 war vornehmlich getrieben durch Akquisitionen, die per 31. Dezember 2010 einen Betrag von 235 Mrd € widerspiegeln, davon 211 Mrd €, die auf die Postbank zurückzuführen sind. Ein signifikanter Anteil dieses Beitrags der Postbank ist in den Forderungen aus dem Kreditgeschäft reflektiert.

Ohne den Einfluss der Akquisitionen erhöhte sich das maximale Kreditrisiko um 171 Mrd € überwiegend in den verzinslichen Einlagen bei Kreditinstituten und den zum Fair Value bewerteten finanziellen Vermögenswerten.

In den folgenden Tabellen zeigen wir Details zu mehreren unserer wesentlichen Kreditrisikoengagement-Kategorien, und zwar Kredite, unwiderrufliche Kreditzusagen, Eventualverbindlichkeiten und OTC-Derivate:

- „Kredite“ sind Nettoforderungen aus dem Kreditgeschäft wie in unserer Bilanz ausgewiesen, jedoch vor Abzug des Wertberichtigungsbestands für Kreditausfälle.
- „Unwiderrufliche Kreditzusagen“ umfassen die nicht in Anspruch genommenen Anteile der unwiderruflichen ausleihebezogenen Zusagen.
- „Eventualverbindlichkeiten“ umfassen Finanz- und Performancegarantien, Kreditbriefe und Haftungsübernahmeerklärungen.
- „OTC-Derivate“ bezeichnen unser Kreditengagement aus Over-the-Counter(OTC)-Derivatetransaktionen nach Netting und erhaltenen Barsicherheiten. Diese werden in unserer Bilanz entweder als Handelsaktiva oder unter den sonstigen Aktiva als Derivate, die die Anforderungen für Hedge Accounting erfüllen, ausgewiesen, in jedem Fall aber vor Netting und erhaltenen Barsicherheiten.

Die nachstehende Tabelle zeigt mehrere unserer wesentlichen Kreditrisikoengagement-Kategorien nach geografischen Regionen. Hierbei wurde das Kreditrisikoengagement den verschiedenen Regionen entsprechend dem Sitz des Geschäftspartners zugeordnet, ungeachtet etwaiger Zugehörigkeiten zu Konzernen mit anderweitigem Firmensitz.

| Kreditrisikoprofil<br>nach Regionen<br>in Mio € | Kredite <sup>1</sup> |                | Unwiderrufliche<br>Kreditzusagen <sup>2</sup> |                | Eventual-<br>verbindlichkeiten |               | OTC-Derivate <sup>3</sup> |               | Insgesamt      |                |
|-------------------------------------------------|----------------------|----------------|-----------------------------------------------|----------------|--------------------------------|---------------|---------------------------|---------------|----------------|----------------|
|                                                 | 31.12.2010           | 31.12.2009     | 31.12.2010                                    | 31.12.2009     | 31.12.2010                     | 31.12.2009    | 31.12.2010                | 31.12.2009    | 31.12.2010     | 31.12.2009     |
| Deutschland                                     | 207.129              | 105.297        | 24.273                                        | 14.112         | 15.758                         | 12.126        | 3.018                     | 3.455         | 250.178        | 134.990        |
| Westeuropa (ohne<br>Deutschland)                | 110.930              | 81.954         | 30.239                                        | 27.006         | 18.019                         | 13.128        | 22.213                    | 21.081        | 181.401        | 143.169        |
| Osteuropa                                       | 8.103                | 6.986          | 1.844                                         | 1.306          | 1.319                          | 1.428         | 836                       | 690           | 12.102         | 10.410         |
| Nordamerika                                     | 54.887               | 45.717         | 59.506                                        | 55.337         | 22.063                         | 17.018        | 26.765                    | 30.805        | 163.221        | 148.877        |
| Mittel- und Südamerika                          | 4.121                | 3.325          | 575                                           | 214            | 1.427                          | 777           | 1.792                     | 831           | 7.915          | 5.147          |
| Asien/Pazifik                                   | 23.562               | 16.921         | 6.651                                         | 5.793          | 8.532                          | 7.086         | 7.247                     | 7.060         | 45.992         | 36.860         |
| Afrika                                          | 961                  | 947            | 419                                           | 233            | 911                            | 620           | 421                       | 458           | 2.712          | 2.258          |
| Sonstige <sup>4</sup>                           | 1.332                | 301            | 373                                           | 124            | 27                             | –             | 13                        | 160           | 1.745          | 585            |
| <b>Insgesamt</b>                                | <b>411.025</b>       | <b>261.448</b> | <b>123.880</b>                                | <b>104.125</b> | <b>68.056</b>                  | <b>52.183</b> | <b>62.305</b>             | <b>64.540</b> | <b>665.266</b> | <b>482.296</b> |

<sup>1</sup> Beinhaltet wertgeminderte Kredite von 6,3 Mrd € zum 31. Dezember 2010 und 7,2 Mrd € zum 31. Dezember 2009.

<sup>2</sup> Beinhaltet unwiderrufliche Kreditzusagen von 4,5 Mrd € zum 31. Dezember 2010 und 2,9 Mrd € zum 31. Dezember 2009 im Zusammenhang mit dem Konsumentenkreditengagement.

<sup>3</sup> Beinhaltet den Effekt von Nettingverträgen und erhaltenen Barsicherheiten, soweit anwendbar.

<sup>4</sup> Beinhaltet supranationale Organisationen und andere Engagements, die wir keiner bestimmten Region zugeordnet haben.

Die größten Konzentrationen des Kreditrisikos im Zusammenhang mit Krediten bestehen gegenüber Westeuropa und Nordamerika, wobei der bedeutendste Anteil auf private Haushalte entfällt. Die Konzentration in Westeuropa lag in erster Linie im Heimatmarkt Deutschland, der auch den Großteil des Immobilienfinanzierungsgeschäfts umfasst. Bei OTC-Derivaten bestanden die größten Konzentrationen ebenfalls in Nordamerika und Westeuropa mit einem signifikanten Anteil bei Banken und Versicherungen mit gutem Rating, bei denen wir von einem begrenzten Kreditrisiko ausgehen.

Der Anstieg bei Krediten zum Jahresende 2010 ist vorwiegend auf die erstmalige Konsolidierung der Postbank zurückzuführen. Der Beitrag der Postbank zu unserem Kreditvolumen zum 31. Dezember 2010 betrug 129 Mrd €, von denen mit 103 Mrd € der Hauptteil auf Deutschland entfällt.

Zum 31. Dezember 2010 können auf Seiten der Postbank Risikokonzentrationen bei Banken mit gutem Rating und dem strukturierten Kreditportfolio erkannt werden.

Die nachfolgende Tabelle zeigt einen Überblick über unser Nettokreditengagement gegenüber den Staaten verschiedener europäischer Länder.

| Nettorisikoposition gegenüber Staaten<br>in Mio € | 31.12.2010    |
|---------------------------------------------------|---------------|
| Portugal                                          | – 12          |
| Irland                                            | 237           |
| Italien                                           | 8.011         |
| Griechenland                                      | 1.601         |
| Spanien                                           | 2.283         |
| <b>Insgesamt</b>                                  | <b>12.120</b> |

Die oben gezeigten Zahlen reflektieren insoweit eine Netto-„Rechnungslegungssicht“ gegenüber Staaten, da sie auf den Brutto-IFRS-Werten beruhen, welche zusätzlich mit Blick auf zum Beispiel Netting und zugrunde liegende Risiken bereinigt wurden, um so ein Netto-Engagement zeigen zu können. Von unseren Nettokreditengagements in Höhe von 12,1 Mrd € gegenüber den Sovereigns der Länder Portugal, Irland, Italien, Griechenland und Spanien entfallen 6,9 Mrd € auf die Konsolidierung der Postbank. Ebenso wie die Postbank überwachen wir diese Engagements zeitnah.

Die folgende Tabelle zeigt mehrere unserer wesentlichen Kreditrisikoengagement-Kategorien nach Branchenzugehörigkeit unserer Geschäftspartner.

| Kreditrisikoprofil<br>nach Branchen<br>in Mio € | Kredite <sup>1</sup> |                | Unwiderrufliche<br>Kreditzusagen <sup>2</sup> |                | Eventual-<br>verbindlichkeiten |               | OTC-Derivate <sup>3</sup> |               | Insgesamt      |
|-------------------------------------------------|----------------------|----------------|-----------------------------------------------|----------------|--------------------------------|---------------|---------------------------|---------------|----------------|
|                                                 | 31.12.2010           | 31.12.2009     | 31.12.2010                                    | 31.12.2009     | 31.12.2010                     | 31.12.2009    | 31.12.2010                | 31.12.2009    | 31.12.2009     |
| Banken und Versicherungen                       | 38.798               | 22.002         | 22.241                                        | 25.289         | 17.801                         | 11.315        | 32.315                    | 27.948        | 111.155        |
| Fund Management                                 | 27.964               | 26.462         | 6.435                                         | 11.135         | 2.392                          | 540           | 9.318                     | 12.922        | 46.109         |
| Verarbeitendes Gewerbe                          | 20.748               | 17.314         | 31.560                                        | 24.814         | 18.793                         | 16.809        | 3.270                     | 2.169         | 74.371         |
| Handel                                          | 13.637               | 10.938         | 7.369                                         | 6.027          | 5.022                          | 3.443         | 517                       | 604           | 26.545         |
| Private Haushalte                               | 167.352              | 85.675         | 9.573                                         | 4.278          | 2.537                          | 1.820         | 842                       | 801           | 180.304        |
| Gewerbliche Immobilien                          | 44.119               | 28.959         | 3.210                                         | 1.876          | 2.196                          | 2.194         | 1.577                     | 1.286         | 51.102         |
| Öffentliche Haushalte                           | 24.113               | 9.572          | 858                                           | 520            | 57                             | 19            | 6.510                     | 5.527         | 31.538         |
| Sonstige <sup>4</sup>                           | 74.294               | 60.526         | 42.634                                        | 30.186         | 19.258                         | 16.043        | 7.956                     | 13.283        | 144.142        |
| <b>Insgesamt</b>                                | <b>411.025</b>       | <b>261.448</b> | <b>123.880</b>                                | <b>104.125</b> | <b>68.056</b>                  | <b>52.183</b> | <b>62.305</b>             | <b>64.540</b> | <b>665.266</b> |

<sup>1</sup> Beinhaltet wertgeminderte Kredite von 6,3 Mrd € zum 31. Dezember 2010 und 7,2 Mrd € zum 31. Dezember 2009.

<sup>2</sup> Beinhaltet unwiderrufliche Kreditzusagen von 4,5 Mrd € zum 31. Dezember 2010 und 2,9 Mrd € zum 31. Dezember 2009 im Zusammenhang mit dem Konsumentenkreditengagement.

<sup>3</sup> Beinhaltet den Effekt von Nettingverträgen und erhaltenen Barsicherheiten, soweit anwendbar.

<sup>4</sup> Kredite in der Kategorie „Sonstige“ beinhalten Leasingfinanzierungen.

Die Zusammensetzung unseres Kreditrisikoprofils nach Branchen blieb in 2010, abgesehen von den Effekten durch die Konsolidierung der Postbank, vorwiegend unverändert. Die Effekte der Postbankkonsolidierung beinhalteten in Höhe von 75 Mrd € Kredite an private Haushalte, 21 Mrd € Kredite an Banken und Versicherungsunternehmen, 15 Mrd € Kredite für gewerbliche Immobilienfinanzierungen sowie 8 Mrd € Kredite an den öffentlichen Sektor.

Unsere auf Kredite, unwiderrufliche Kreditzusagen, Eventualverbindlichkeiten und OTC-Derivate bezogenen Kreditengagements gegenüber unseren zehn größten Kreditnehmern umfassten 5 % unseres gesamten Kreditengagements in diesen Kategorien zum 31. Dezember 2010 gegenüber 7 % am 31. Dezember 2009. Diese Engagements gegenüber den zehn größten Kreditnehmern bestehen mehrheitlich gegenüber gut gerateten Kreditnehmern oder beziehen sich auf strukturierte Transaktionen, die einen hohen Grad an Besicherung aufweisen, mit Ausnahme eines Kreditengagements in Leveraged Finance.

### Ausleihebezogene Kreditrisikoengagements

Einige Kreditarten tragen ein höheres Rückzahlungsrisiko als andere. In unserem Portfolio aus Krediten, die zu fortgeführten Anschaffungskosten bewertet werden, ordnen wir daher die Ausleihungen auf Basis relevanter Kriterien bestimmten Kategorien zu. Diese beinhalten die Verlusterwartung über den Kreditlebenszyklus, die Stabilität des Verhältnisses von Risiko und Ertrag und die Markteinschätzung einer bestimmten Anlageklasse.

Die nachstehende Tabelle gibt einen Überblick über die Kategorien unseres Kreditbuchs und die Unterscheidung nach niedrigem, mittlerem und höherem Risiko.

| in Mio €                                                   | 31.12.2010     | 31.12.2009     |
|------------------------------------------------------------|----------------|----------------|
| <b>Segment niedrigere Risiken</b>                          |                |                |
| PBC-Immobilienfinanzierungen                               | 140.727        | 67.311         |
| Investment Grade/German Mid-Cap                            | 69.436         | 32.615         |
| GTB                                                        | 38.353         | 19.823         |
| PWM                                                        | 24.468         | 17.977         |
| PBC Kleinbetrieb                                           | 17.550         | 15.127         |
| Staatsbesicherte Transaktionen/strukturierte Transaktionen | 9.074          | 7.674          |
| Corporate Investments                                      | 7.966          | 12.774         |
| <b>Zwischensumme Segment niedrigere Risiken</b>            | <b>307.574</b> | <b>173.301</b> |
| <b>Segment moderate Risiken</b>                            |                |                |
| PBC Konsumentenfinanzierungen                              | 18.902         | 15.032         |
| Asset Finance (DB-gesponserte Conduits)                    | 18.465         | 19.415         |
| Besicherte gehegte strukturierte Transaktionen             | 12.960         | 14.564         |
| Finanzierung von Pipeline Assets                           | 8.050          | 7.886          |
| <b>Zwischensumme Segment moderate Risiken</b>              | <b>58.377</b>  | <b>56.897</b>  |
| <b>Segment höhere Risiken</b>                              |                |                |
| Gewerbliche Immobilienfinanzierungen                       | 29.024         | 12.990         |
| CF Leveraged Finance                                       | 7.018          | 11.768         |
| Sonstige                                                   | 9.032          | 6.492          |
| <b>Zwischensumme Segment höhere Risiken</b>                | <b>45.074</b>  | <b>31.250</b>  |
| <b>Kreditbuch insgesamt</b>                                | <b>411.025</b> | <b>261.448</b> |

Der Hauptteil unseres Kreditvolumens mit geringerem Kreditrisiko entsteht aus unserem Private & Business Clients-Retailgeschäft. Zum 31. Dezember 2010 waren 75 % unserer Kredite im Segment mit niedrigerem Kreditrisiko, deutlich mehr als die 66 % zum 31. Dezember 2009. Der Anstieg in diesem Segment wurde bestimmt durch die erstmalige Einbeziehung der Postbank-Engagements, die 109 Mrd € zum Anstieg beitrugen. Die Mehrheit dieser Engagements der Postbank besteht aus Immobilienfinanzierungen.

Das Wachstum unseres Private & Business Clients-Portfolios (ohne Postbank-Konsolidierung) in 2010 war fokussiert auf besicherte Kredite innerhalb des Segments mit geringerem Kreditrisiko, insbesondere Immobilienfinanzierungen, während das Konsumentenkreditportfolio sich reduzierte. Der gezeigte Anstieg des Konsumentenkreditportfolios ist ebenfalls auf die Konsolidierung der Postbank zurückzuführen, deren Konsumentenkreditportfolio 4 Mrd € zum 31. Dezember 2010 betrug. Ohne die Postbank sank unser Konsumentenkreditgeschäft in Übereinstimmung mit unserer festgelegten Strategie und umfasste insbesondere Kunden in Deutschland und Italien.

Unser Segment mit höherem Risiko wird dominiert durch unsere gewerblichen Immobilienfinanzierungen und Leveraged Finance. Unser Kreditrisikomanagement-Ansatz legt großes Augenmerk besonders auf die Portfolios, die aus unserer Sicht höhere Risiken beinhalten. Wir haben für diese spezielle Portfoliostrategien und eine sorgfältige Kreditüberwachung etabliert. Der Anstieg der gewerblichen Immobilienfinanzierungen ist auf die Konsolidierung der gewerblichen Immobilienfinanzierungen der Postbank mit einem Volumen von 15 Mrd € zum 31. Dezember 2010 zurückzuführen. Eine Kundengruppenkonzentration trug rund 50 % zum Kreditengagement in der Kategorie CF Leveraged Finance bei.



Die folgende Übersicht zeigt die wertgeminderten Kredite und die entsprechenden Wertberichtigungen für Kreditausfälle in unserer höheren Kreditrisikokategorie.

| in Mio €                             | 31.12.2010             |                                       | 31.12.2009             |                                       |
|--------------------------------------|------------------------|---------------------------------------|------------------------|---------------------------------------|
|                                      | Wertgeminderte Kredite | Wertberichtigungen für Kreditausfälle | Wertgeminderte Kredite | Wertberichtigungen für Kreditausfälle |
| Gewerbliche Immobilienfinanzierungen | 421                    | 297                                   | 460                    | 274                                   |
| CF Leveraged Finance                 | 336                    | 180                                   | 2.122                  | 815                                   |
| Sonstige                             | 798                    | 466                                   | 934                    | 377                                   |
| <b>Insgesamt</b>                     | <b>1.555</b>           | <b>943</b>                            | <b>3.516</b>           | <b>1.466</b>                          |

Der oben gezeigte Rückgang wertgeminderter Kredite und der Wertberichtigungen für Kreditausfälle in unserer Kategorie Kredite mit höherem Risiko wurde hauptsächlich verursacht durch die Restrukturierung einer einzelnen Kundenbeziehung im Leveraged-Finance-Portfolio unseres Firmenkreditgeschäfts.

### Klassifizierung des Kreditrisikoengagements

Wir teilen unser Kreditrisikoengagement zudem in zwei Gruppen auf: das Firmenkreditengagement und das Konsumentenkreditengagement.

- Unser Konsumentenkreditengagement besteht aus kleineren standardisierten homogenen Krediten, insbesondere in Deutschland, Italien und Spanien. Es umfasst persönliche Kredite, Immobilienfinanzierungen für Wohnungsbau und Gewerbe sowie Kreditlinien und Ratenkredite an Selbstständige und Kleingewerbetreibende aus unserem Privatkunden- und Retailgeschäft.
- Unser Firmenkreditengagement setzt sich aus allen Engagements zusammen, die nicht als Konsumentenkreditengagements definiert werden.

### Firmenkreditengagement

Die folgende Tabelle zeigt mehrere unserer wesentlichen Kategorien des Firmenkreditengagements, gegliedert nach den Bonitätsklassen unserer Geschäftspartner.

| Firmenkreditengagement<br>Kreditrisikoprofil nach<br>Bonitätsklasse | Kredite <sup>1</sup> |                | Unwiderrufliche<br>Kreditzusagen <sup>2</sup> |                | Eventual-<br>verbindlichkeiten |               | OTC-Derivate <sup>3</sup> |               | Insgesamt      |                |
|---------------------------------------------------------------------|----------------------|----------------|-----------------------------------------------|----------------|--------------------------------|---------------|---------------------------|---------------|----------------|----------------|
|                                                                     | 31.12.2010           | 31.12.2009     | 31.12.2010                                    | 31.12.2009     | 31.12.2010                     | 31.12.2009    | 31.12.2010                | 31.12.2009    | 31.12.2010     | 31.12.2009     |
| in Mio €                                                            |                      |                |                                               |                |                                |               |                           |               |                |                |
| AAA–AA                                                              | 62.603               | 28.134         | 23.068                                        | 22.211         | 7.334                          | 6.573         | 23.967                    | 23.966        | 116.972        | 80.884         |
| A                                                                   | 48.467               | 29.634         | 31.945                                        | 22.758         | 21.318                         | 13.231        | 16.724                    | 13.793        | 118.454        | 79.416         |
| BBB                                                                 | 56.096               | 46.889         | 36.542                                        | 28.814         | 20.391                         | 15.753        | 8.408                     | 7.600         | 121.437        | 99.056         |
| BB                                                                  | 44.809               | 43.401         | 22.083                                        | 23.031         | 11.547                         | 9.860         | 7.905                     | 12.785        | 86.344         | 89.077         |
| B                                                                   | 12.594               | 9.090          | 7.775                                         | 5.935          | 5.454                          | 4.290         | 2.960                     | 1.952         | 28.783         | 21.267         |
| CCC und schlechter                                                  | 17.425               | 14.633         | 2.467                                         | 1.376          | 2.012                          | 2.476         | 2.341                     | 4.444         | 24.245         | 22.929         |
| <b>Insgesamt</b>                                                    | <b>241.994</b>       | <b>171.781</b> | <b>123.880</b>                                | <b>104.125</b> | <b>68.056</b>                  | <b>52.183</b> | <b>62.305</b>             | <b>64.540</b> | <b>496.235</b> | <b>392.629</b> |

<sup>1</sup> Beinhaltet vor allem in der Kategorie „CCC und schlechter“ wertgeminderte Kredite von 3,6 Mrd € zum 31. Dezember 2010 und 4,9 Mrd € zum 31. Dezember 2009.

<sup>2</sup> Beinhaltet unwiderrufliche Kreditzusagen von 4,5 Mrd € zum 31. Dezember 2010 und 2,9 Mrd € zum 31. Dezember 2009 im Zusammenhang mit dem Konsumentenkreditengagement.

<sup>3</sup> Beinhaltet den Effekt von Nettingverträgen und erhaltenen Barsicherheiten, soweit anwendbar.

Die obige Tabelle zeigt einen Anstieg in unserem Firmenkreditbuch und den unwiderruflichen Kreditzusagen, der vornehmlich auf die Konsolidierung der Postbank zurückzuführen ist. Der Anteil der Kredite mit Investment Grade Rating an unserem Firmenkreditbuch erhöhte sich von 61 % am 31. Dezember 2009 auf 69 % am 31. Dezember 2010 und reflektierte die erstmalige Einbeziehung der Postbank-Positionen sowie die Verbesserung in der Kreditrisikoeinstufung, nachdem Geschäftspartner sich von der Kreditkrise erholten, und auch proaktive Risikomanagementaktivitäten. Das in der Tabelle dargestellte Kreditvolumen berücksichtigt jedoch weder Kreditsicherheiten, Kreditverbesserungen noch andere Maßnahmen zur Reduzierung des Kreditrisikos.

Wir sind der Meinung, dass wir nach Berücksichtigung solcher risikoreduzierender Maßnahmen ein gut diversifiziertes Kreditportfolio haben. Der leichte Rückgang des Engagements in OTC-Derivaten, insbesondere in der Kategorie „BB“ war weitgehend auf straffere Aktivitäten zur Risikoreduzierung zurückzuführen. Das in der Tabelle dargestellte Volumen aus OTC-Derivaten berücksichtigt weder Risikoreduzierungsmaßnahmen (außer Master-Netting-Vereinbarungen) noch Kreditsicherheiten (außer erhaltenen Barsicherheiten). Nach Berücksichtigung solcher Risikoreduzierungen verringert sich das verbleibende Kreditrisiko signifikant, ist adäquat strukturiert, nach unserer Beurteilung gut diversifiziert und besteht überwiegend gegenüber Geschäftspartnern im Investment-Grade-Rating-Bereich.

Unsere Loan Exposure Management Group (LEMG) hilft, unser Firmenkreditengagement einzuschränken. Der Nominalbetrag der Aktivitäten der LEMG zur Risikoreduzierung ist um 4 % von 52,9 Mrd € am 31. Dezember 2009 auf 54,9 Mrd € am 31. Dezember 2010 gestiegen.

Zum Jahresende 2010 hatte die LEMG Kreditderivate mit einem zugrunde liegenden Nominalwert von 34,6 Mrd € im Bestand. Zum 31. Dezember 2009 betrug diese Position 32,7 Mrd €.

Die im Rahmen unserer Portfoliomanagementaktivitäten verwendeten Kreditderivate werden mit dem Fair Value bewertet.

Zudem hat die LEMG zum 31. Dezember 2010 das Kreditrisiko von Krediten und ausleihebezogenen Zusagen in Höhe von 20,3 Mrd € vorwiegend durch mit Finanzgarantien und in geringerem Maße auch mit Kreditderivaten unterlegte synthetische besicherte Kreditverbriefungen abgesichert, bei denen die Erstverlustpositionen verkauft wurden. Zum 31. Dezember 2009 betrug diese Position 20,2 Mrd €.

LEMG hat sich entschlossen, die Fair Value Option gemäß IAS 39 für die Bewertung von Krediten und Kreditzusagen zum Fair Value zu nutzen, sofern die Kriterien dieses Standards erfüllt werden. Das Nominalvolumen der zum Fair Value ausgewiesenen Kredite und Kreditzusagen der LEMG stieg im Jahresverlauf auf 54,1 Mrd € am 31. Dezember 2010 (31. Dezember 2009: 48,9 Mrd €). Durch die Bewertung von Krediten und Kreditzusagen zum Fair Value hat die LEMG die Volatilität der Gewinne und Verluste aus der Inkonsistenz bei Bewertung oder Ansatz (Accounting Mismatch) erheblich reduziert. Diese war entstanden, als derivative Hedges bereits zum Fair Value, Kredite und Kreditzusagen jedoch noch zu ursprünglichen Anschaffungskosten bewertet wurden.

## Konsumentenkreditengagement

Die nachstehende Tabelle zeigt unser Konsumentenkreditengagement insgesamt, die sich mindestens 90 Tage im Zahlungsverzug befindlichen Konsumentenkredite sowie die Nettokreditkosten des Konzerns. Letztere stellen die im Abrechnungszeitraum gebuchten Nettowertberichtigungen nach Eingängen auf abgeschriebene Kredite dar. Die Angaben zu Krediten, die 90 Tage oder mehr überfällig sind, und zu den Nettokreditkosten sind in Prozent des Gesamtengagements ausgedrückt. Unabhängig vom Überfälligkeitsstatus individueller Kredite wurden das Baufinanzierungsgeschäft und die Kredite an kleine Geschäftskunden in unserem Konsumentenkreditportfolio bezüglich der Kreditqualität der Kategorie geringer Risiken zugeordnet. Darüber hinaus wird das Konsumentenkreditengagement zum Segment moderater Risiken allokiert. Dieser Aspekt der Kreditrisikoqualität wird ebenfalls reflektiert durch unsere Nettokreditkosten als Prozentsatz des Gesamtengagements, die das Hauptinstrument im Kreditrisikomanagement dieser Engagements ist.

|                                                          | Gesamt-<br>engagement<br>in Mio € | Gesamtengagement<br>exklusive Postbank<br>in Mio € | 90 Tage oder mehr<br>überfällig in %<br>exklusive Postbank | Nettokreditkosten in %<br>des Gesamtengagements<br>exklusive Postbank |
|----------------------------------------------------------|-----------------------------------|----------------------------------------------------|------------------------------------------------------------|-----------------------------------------------------------------------|
|                                                          | 31.12.2010                        | 31.12.2010<br>31.12.2009                           |                                                            |                                                                       |
| Konsumentenkreditengagement Deutschland                  | 130.317                           | 60.706                                             | 59.804                                                     | 1,77 %                                                                |
| Konsumenten- und<br>Kleinbetriebsfinanzierungen          | 19.055                            | 12.733                                             | 13.556                                                     | 3,16 %                                                                |
| Immobilienfinanzierungen                                 | 111.262                           | 47.973                                             | 46.248                                                     | 1,41 %                                                                |
| Konsumentenkreditengagement außerhalb<br>Deutschlands    | 38.713                            | 33.027                                             | 29.864                                                     | 3,84 %                                                                |
| <b>Konsumentenkreditengagement insgesamt<sup>1</sup></b> | <b>169.030</b>                    | <b>93.733</b>                                      | <b>89.668</b>                                              | <b>2,50 %</b>                                                         |

<sup>1</sup> Beinhaltet wertgeminderte Kredite von 2,7 Mrd € zum 31. Dezember 2010 und 2,3 Mrd € zum 31. Dezember 2009.

Das Volumen unseres Konsumentenkreditengagements erhöhte sich in 2010 aufgrund der Konsolidierung der Postbank um 75,3 Mrd € (89 %) im Wesentlichen in Immobilienfinanzierungen. Nachdem diese Kredite zu ihrem Fair Value konsolidiert wurden, der unsere erwarteten zukünftigen Cash Flows reflektierte, wurden zum 31. Dezember 2010 keine der konsolidierten Kredite als 90 Tage oder mehr überfällig betrachtet. Die Nettokreditkosten für die Konsumentenkredite der Postbank seit Konsolidierung waren verglichen zum konsolidierten Kreditvolumen unbedeutend. Das Volumen unseres Konsumentenkreditengagements ohne Postbank erhöhte sich um 4 Mrd € (4,5 %) vom Jahresende 2009 zum 31. Dezember 2010. Dieser Anstieg erfolgte in Deutschland (902 Mio €), Polen (1.034 Mio €), Italien (949 Mio €) und Portugal (547 Mio €), überwiegend im Bereich der Immobilienfinanzierungen. Auf Portfolio- und Länderebene getroffene Maßnahmen führten zu einer deutlichen Reduzierung der Nettokreditkosten in Spanien und Indien, die teilweise durch Erhöhungen in unserem Konsumentenkreditgeschäft in Polen kompensiert wurden. Überarbeitete Parameter und Modellannahmen in 2009 führten zu einer einmaligen Sonderauflösung von Wertberichtigungen im ersten Quartal 2009 in Höhe von 60 Mio € und zu einer um 28 Mio € niedrigeren Risikovorsorge im Kreditgeschäft im ersten Quartal 2010.

## Kreditrisikoengagement aus Derivaten

Die folgende Tabelle zeigt die Nominalbeträge und Bruttomarktwerte von OTC- und börsengehandelten Derivatekontrakten für Handels- und Nichthandelszwecke zum 31. Dezember 2010. Die Tabelle enthält die OTC- und börsengehandelte Derivatekontrakte der Postbank, die nur einen vernachlässigbaren Einfluss auf die Gesamtsummen haben.

| in Mio €                                                                            | Nominalbetrag nach Laufzeiten |                       |                   |                   | Positiver<br>Marktwert | Negativer<br>Marktwert | Netto-<br>marktwert |
|-------------------------------------------------------------------------------------|-------------------------------|-----------------------|-------------------|-------------------|------------------------|------------------------|---------------------|
|                                                                                     | Bis 1 Jahr                    | > 1 Jahr<br>≤ 5 Jahre | Über 5 Jahre      | Insgesamt         |                        |                        |                     |
| <b>Zinsbezogene Geschäfte:</b>                                                      |                               |                       |                   |                   |                        |                        |                     |
| OTC-Produkte                                                                        | 16.942.302                    | 15.853.777            | 11.080.457        | 43.876.536        | 419.196                | 401.179                | 18.017              |
| Börsengehandelte Produkte                                                           | 1.120.579                     | 276.258               | 2.272             | 1.399.109         | 128                    | 110                    | 18                  |
| <b>Zwischensumme</b>                                                                | <b>18.062.881</b>             | <b>16.130.035</b>     | <b>11.082.729</b> | <b>45.275.645</b> | <b>419.324</b>         | <b>401.289</b>         | <b>18.035</b>       |
| <b>Währungsbezogene Geschäfte:</b>                                                  |                               |                       |                   |                   |                        |                        |                     |
| OTC-Produkte                                                                        | 3.805.544                     | 1.325.473             | 607.743           | 5.738.760         | 110.440                | 118.452                | -8.012              |
| Börsengehandelte Produkte                                                           | 13.113                        | 970                   | -                 | 14.083            | 104                    | 221                    | -117                |
| <b>Zwischensumme</b>                                                                | <b>3.818.657</b>              | <b>1.326.443</b>      | <b>607.743</b>    | <b>5.752.843</b>  | <b>110.544</b>         | <b>118.673</b>         | <b>-8.129</b>       |
| <b>Aktien-/indexbezogene Geschäfte:</b>                                             |                               |                       |                   |                   |                        |                        |                     |
| OTC-Produkte                                                                        | 362.294                       | 333.108               | 95.785            | 791.187           | 31.084                 | 38.297                 | -7.213              |
| Börsengehandelte Produkte                                                           | 256.942                       | 100.475               | 4.332             | 361.749           | 2.933                  | 1.995                  | 938                 |
| <b>Zwischensumme</b>                                                                | <b>619.236</b>                | <b>433.583</b>        | <b>100.117</b>    | <b>1.152.936</b>  | <b>34.017</b>          | <b>40.292</b>          | <b>-6.275</b>       |
| <b>Kreditderivate</b>                                                               | <b>308.387</b>                | <b>2.545.673</b>      | <b>537.759</b>    | <b>3.391.819</b>  | <b>81.095</b>          | <b>73.036</b>          | <b>8.059</b>        |
| <b>Sonstige Geschäfte:</b>                                                          |                               |                       |                   |                   |                        |                        |                     |
| OTC-Produkte                                                                        | 143.323                       | 150.068               | 8.831             | 302.222           | 18.587                 | 17.879                 | 708                 |
| Börsengehandelte Produkte                                                           | 72.437                        | 41.874                | 839               | 115.150           | 2.742                  | 2.621                  | 121                 |
| <b>Zwischensumme</b>                                                                | <b>215.760</b>                | <b>191.942</b>        | <b>9.670</b>      | <b>417.372</b>    | <b>21.329</b>          | <b>20.500</b>          | <b>829</b>          |
| <b>OTC-Geschäft insgesamt</b>                                                       | <b>21.561.850</b>             | <b>20.208.099</b>     | <b>12.330.575</b> | <b>54.100.524</b> | <b>660.402</b>         | <b>648.843</b>         | <b>11.559</b>       |
| <b>Börsengehandeltes Geschäft insgesamt</b>                                         | <b>1.463.071</b>              | <b>419.577</b>        | <b>7.443</b>      | <b>1.890.091</b>  | <b>5.907</b>           | <b>4.947</b>           | <b>960</b>          |
| <b>Insgesamt</b>                                                                    | <b>23.024.921</b>             | <b>20.627.676</b>     | <b>12.338.018</b> | <b>55.990.615</b> | <b>666.309</b>         | <b>653.790</b>         | <b>12.519</b>       |
| Positive Marktwerte nach<br>Nettingvereinbarungen und erhaltenen<br>Barsicherheiten |                               |                       |                   |                   | 63.942                 |                        |                     |

Transaktionen mit börsengehandelten Derivaten (beispielsweise Futures und Optionen) werden regelmäßig über einen zentralen Kontrahenten (zum Beispiel LCH Clearnet Ltd. oder Eurex Clearing AG) abgewickelt, dessen Richtlinien und Vorschriften einen täglichen Sicherheitennachschuss für alle aktuellen und künftigen Risikopositionen vorsehen, welche sich aus diesen Transaktionen ergeben. Wir nehmen auch bei Transaktionen mit OTC-Derivaten so weit wie möglich die Abwicklungsleistungen eines zentralen Kontrahenten („OTC Clearing“) in Anspruch. Dabei profitieren wir von der durch das Abwicklungssystem des zentralen Kontrahenten erzielten Kreditrisikominderung.

Da die Wiederbeschaffungswerte von Derivateportfolios aufgrund von Marktpreisbewegungen und Änderungen der Transaktionen im Portfolio schwanken, berechnen wir auch potenzielle künftige Wiederbeschaffungskosten der Portfolios über die gesamte Laufzeit beziehungsweise bei besicherten Portfolios über angemessene Verwertungszeiträume. Unser potenzielles künftiges Engagement messen wir anhand von separaten Limiten. Die Analyse des potenziellen künftigen Engagements wird durch Stresstests ergänzt, mit denen die unmittelbare Auswirkung extremer Marktereignisse auf unser Gesamtengagement geschätzt werden kann (wie beispielsweise Eventrisiken im Emerging-Markets-Portfolio).

Als Messgröße für potenzielle zukünftige Beträge wenden wir in der Regel ein Zeitprofil simulierter positiver Marktwerte des Derivateportfolios jedes Kontrahenten an, bei dem das Netting und die Besicherung berücksichtigt werden. Für die Überwachung von Limiten wenden wir ein Konfidenzniveau von 95 % dieser simulierten Verteilung von Marktwerten an, intern bezeichnet als Potential Future Exposure („PFE“). Die im Rahmen desselben Verfahrens generierten durchschnittlichen Engagementprofile werden zur Ermittlung des sogenannten Average Expected Exposure („AEE“) verwendet. Dieses nutzen wir, um potenzielle zukünftige Wiederbeschaffungskosten in unserem Ökonomischen Kapital für das Kreditrisiko abzubilden. Das Expected Positive Exposure („EPE“) als wesentlicher Treiber unserer aufsichtsrechtlichen Kapitalanforderungen wird ebenfalls auf Basis dieses Verfahrens ermittelt. Während AEE und EPE grundsätzlich auf einem Einjahreszeithorizont berechnet werden, wird das PFE über die Gesamtlaufzeit einer Transaktion oder Nettingkonstruktion gemessen. Die zuvor erwähnten Berechnungsmethoden setzen wir auch ein, um damit gestresste Risikopositionen für unsere Kreditportfolio-Stresstests abzuleiten.

### Nichtderivative Handelsaktiva

Die nachfolgende Tabelle macht Angaben zur Zusammensetzung unserer nichtderivativen Handelsaktiva für die angegebenen Zeiträume.

| in Mio €                                           | 31.12.2010     | 31.12.2009     |
|----------------------------------------------------|----------------|----------------|
| Staatspapiere und staatlich geförderte Unternehmen | 92.866         | 76.318         |
| Finanzinstitute und Unternehmen                    | 73.711         | 69.408         |
| Aktien                                             | 66.868         | 58.798         |
| Handelbare Kredite                                 | 23.080         | 21.847         |
| Sonstige                                           | 14.766         | 8.539          |
| <b>Nichtderivative Handelsaktiva</b>               | <b>271.291</b> | <b>234.910</b> |

Gehandelte Kreditprodukte, wie zum Beispiel Anleihen in unserem Handelsbuch Developed Markets (ohne Postbank), werden durch eine spezialisierte Risikomanagement-Einheit gesteuert, die unsere Kredit- und Marktexpertise vereinigt. Wir nutzen angemessene Portfoliolimite und ratingbasierte Schwellenwerte auf Einzelermitteltenbasis in Kombination mit unseren Marktrisikomanagementinstrumenten zur Risikosteuerung solcher Positionen. Die Risikosteuerung für gehandelte Kreditprodukte Emerging Markets erfolgt unter Nutzung von Fachwissen, welches in unseren jeweiligen Emerging-Markets-Kreditrisikomanagement und Marktrisikomanagement-Einheiten vorhanden ist.

### Steuerung des Weiterverkaufsrisikos

Wir gehen häufig Verpflichtungen mit der Intention ein, diese zu verkaufen oder Teile der Risiken an Drittparteien zu verteilen. Diese Verpflichtungen beinhalten die Vorhaben des Funding von Bankkrediten und Überbrückungskrediten für die Auflage öffentlicher Anleihen. Das daraus resultierende Risiko besteht darin, dass wir gegebenenfalls keinen Erfolg haben bei der Verteilung der Kreditlinien. In diesem Fall müssten wir mehr des zugrunde liegenden Risikos für einen längeren Zeitraum halten als ursprünglich vorgesehen.

Zum Zweck der Risikosteuerung behandeln wir den Gesamtbetrag all dieser Verpflichtungen als Kreditengagement, welches einer Kreditgenehmigung bedarf. Die Genehmigung beinhaltet auch den angestrebten final zu haltenden Betrag. Beträge, die zum Verkauf vorgesehen sind, werden als Handelsaktiva klassifiziert und unterliegen dem Fair Value Accounting. Die Preisschwankungen werden über unseren Marktrisikoprozess überwacht. Wir schützen den Wert dieser Aktiva gegen negative Marktbewegungen über angemessene Kreditdokumentation der Transaktionen und Marktrisiko-Hedges (meistens über entsprechende Indizes), die ebenfalls in unseren Marktrisikoprozess einbezogen sind.

## Problemkredite

Unsere Problemkredite bestehen in erster Linie aus wertgeminderten Krediten. Unser Kreditrisikomanagement beurteilt regelmäßig, ob objektive Hinweise auf eine Wertminderung eines Kredits oder einer Gruppe von Krediten vorliegen. Ein Kredit oder eine Gruppe von Krediten gilt als wertgemindert und ein Wertminderungsverlust als entstanden, wenn:

- objektive Hinweise auf eine Wertminderung infolge eines Verlustereignisses vorliegen, das nach der erstmaligen Erfassung des Finanzinstruments bis zum Bilanzstichtag eingetreten ist („Verlustereignis“);
- das Verlustereignis einen Einfluss auf die geschätzten zukünftigen Cashflows des finanziellen Vermögenswerts oder der Gruppe finanzieller Vermögenswerte hatte und
- eine verlässliche Schätzung des Verlustbetrags vorgenommen werden kann.

Die Verlusteinschätzungen unseres Kreditrisikomanagements unterliegen einer regelmäßigen Überprüfung in Zusammenarbeit mit Group Finance. Die Ergebnisse dieser Prüfung werden an ein Aufsichtskomitee berichtet und von diesem genehmigt. Es setzt sich aus der höheren Führungsebene von Group Finance und Legal, Risk & Capital zusammen.

Der Wertminderungsverlust wird in der Regel auf Basis der erwarteten künftigen Cashflows unter Verwendung des ursprünglichen Effektivzinssatzes des Kredits ermittelt. Bei notleidenden Krediten im Prozess der Restrukturierung (zur Definition siehe unten) wird der ursprüngliche Effektivzinssatz vor einer Anpassung der Konditionen angewandt.

Während wir die Wertminderungen für unsere Firmenkreditengagements individuell bewerten, nehmen wir in unserem Konsumentenkreditengagement eine kollektive Beurteilung der Wertminderung der Kredite vor.

Bei der Mehrheit unseres Private & Business Client Portfolios basiert die Methode der Wertberichtigungsermittlung auf statistischen Modellen. Unser Kreditportfolio wird in homogene und nicht-homogene Anteile unterteilt. Diese Anteile werden weiter in Teilportfolios unterschieden, je nach Art des Engagements und Klassifizierung des Kunden. Unter Verwendung historischer Daten wird die Höhe der Wertberichtigung für das homogene Portfolio automatisiert auf Basis von statistischen Modellen kalkuliert, die auf Wertberichtigungskennzahlen für einzelne Überfälligkeitsklassen beruhen (Tage überfällig). Das nicht-homogene Portfolio ist gekennzeichnet durch große Kreditlinien oder bestimmte Kreditkategorien, die aufgrund von Größe, Komplexität oder Qualität nicht vergleichbar sind. Diese Kreditfazilitäten unterliegen einer regelmäßigen fallweisen Prüfung und sofern eine Wertminderung festgestellt wurde, wird eine Wertberichtigung auf Basis des erwarteten Verlusts festgesetzt.

Die bei der Postbank verwendete Methodik zur Wertberichtigungsermittlung ist ähnlich zu unserer Vorgehensweise. Ausnahmen bestehen einerseits darin, dass die Postbank direkte Abschreibungen ohne vorherige Wertberichtigungsbildung vornimmt und andererseits, dass die Wertberichtigungen im Hypothekengeschäft mit Privatkunden einzeln ermittelt werden für Kredite, die 180 Tage oder länger überfällig sind. In unseren konsolidierten Ergebnissen, einschließlich Postbank, wurden die genannten Unterschiede für Berichtszwecke an unsere Grundsätze angeglichen.

Wertberichtigungen für Kreditausfälle, die vor Konsolidierung von Postbank, Sal. Oppenheim/BHF-BANK und Teilen des niederländischen Firmenkundengeschäfts von ABN AMRO gebildet wurden, sind nicht in unseren Wertberichtigungsbestand konsolidiert worden. Vielmehr wurden diese Wertberichtigungen bei der Bestimmung des Fair Value, der die Bemessungsgrundlage der neu konsolidierten Kredite repräsentiert, berücksichtigt. Spätere Verbesserungen in der Kreditqualität dieser Kredite werden als Wertaufholung in ihrem Buchwert reflektiert, wobei der korrespondierende Gewinn in sonstigen Erträgen ausgewiesen wird. Wertberichtigungen für Kreditausfälle, die nach Konsolidierung von Postbank, Sal. Oppenheim/BHF-BANK und Teilen des niederländischen Firmenkundengeschäfts von ABN AMRO gebildet wurden, sind dagegen in unseren Wertberichtigungen für Kreditausfälle und unserem Wertberichtigungsbestand enthalten.

Die zweite Komponente unserer Problemkredite umfasst nicht wertgeminderte Problemkredite, für die kein Wertminderungsverlust festgestellt wurde, bei denen jedoch entweder das Management aufgrund bekannter Informationen über mögliche Kreditprobleme der Kreditnehmer erheblich daran zweifelt, dass diese ihre vertraglichen Rückzahlungsvereinbarungen erfüllen können, oder Kredite, die 90 Tage oder mehr überfällig sind, bei denen aber noch Zinsen abgegrenzt werden.

Im Einklang mit der Industry Guidance der Securities and Exchange Commission setzen wir darüber hinaus die Überwachung und die Berichterstattung der nachstehenden Kategorien in unseren Problemkrediten fort.

- **Kredite ohne Zinsabgrenzung.** Die Zinsabgrenzung für Kredite wird eingestellt, wenn die vereinbarten Zins- oder Tilgungszahlungen 90 Tage oder mehr überfällig sind und der Kredit weder hinreichend abgesichert ist, noch sich im Inkassoprozess befindet oder es nach Einschätzung des Managements hinsichtlich der Einbringlichkeit der vertraglichen Cashflows ratsam ist, die Zinsabgrenzung einzustellen. Im Fall von Krediten ohne Zinsabgrenzung wird die Zinsabgrenzung auf Basis der kreditvertraglichen Bedingungen eingestellt. Dabei wird jedoch der auf den Zeitablauf zurückzuführende Anstieg des Nettobarwerts des wertgeminderten Kredits auf Basis des ursprünglichen Effektivzinssatzes des Kredits als Zinsertrag erfasst. Auf Kredite ohne Zinsabgrenzung eingehende Zinsen buchen wir als Ermäßigung der Kapitalforderung.
- **Kredite 90 Tage oder mehr überfällig, mit Zinsabgrenzung.** Hier handelt es sich um Kredite, bei denen die vertraglich vereinbarten Zins- oder Tilgungszahlungen 90 Tage oder mehr überfällig sind, bei denen wir aber noch Zinsen abgrenzen, da sie nicht wertgemindert sind.
- **Notleidende Kredite im Prozess der Restrukturierung.** Hierbei handelt es sich um Kredite, die wir aufgrund einer Verschlechterung der finanziellen Situation des Kreditnehmers restrukturiert haben. Dabei wurden Konditionen vereinbart, die wir sonst nicht in Betracht gezogen hätten. Wenn ein Kreditnehmer einen restrukturierten Kredit ein Jahr lang zufriedenstellend bedient, behandeln wir den Kredit nicht länger als notleidenden Kredit im Prozess der Restrukturierung – es sei denn, der zum Zeitpunkt der Restrukturierung vereinbarte neue Zinssatz war niedriger als der Marktzins für ähnliche Kreditrisiken.

Mit Konsolidierung der Postbank, der Teile des niederländischen Firmenkundengeschäfts von ABN AMRO und Sal. Oppenheim/BHF-BANK haben wir bestimmte Kredite angekauft, für die zuvor eine spezifische Einzelwertberichtigung bei der Postbank, ABN AMRO oder Sal. Oppenheim/BHF-BANK gebildet worden war. Diese Kredite haben wir zu Fair Values in unsere Bilanz übernommen, die anhand der erwarteten Cash Flows ermittelt wurden und die die Qualität dieser Kredite zum Zeitpunkt der Akquisition widerspiegeln. Sofern sich unsere Cash Flow-Erwartungen für diese Kredite seit der Akquisition nicht verschlechtert haben, werden diese Kredite nicht als wertgeminderte oder als Problemkredite berücksichtigt.



Die nachfolgenden beiden Tabellen zeigen unsere Problemkredite zum angegebenen Stichtag.

| 31.12.2010                                               | Wertgeminderte Kredite |                     |              | Nicht wertgeminderte Kredite |                     |              | Problemkredite |
|----------------------------------------------------------|------------------------|---------------------|--------------|------------------------------|---------------------|--------------|----------------|
|                                                          | Inländische Kunden     | Ausländische Kunden | Insgesamt    | Inländische Kunden           | Ausländische Kunden | Insgesamt    | Insgesamt      |
| in Mio €                                                 |                        |                     |              |                              |                     |              |                |
| <b>Einzeln ermittelt</b>                                 | <b>996</b>             | <b>2.556</b>        | <b>3.552</b> | <b>239</b>                   | <b>1.635</b>        | <b>1.874</b> | <b>5.426</b>   |
| Kredite ohne Zinsabgrenzung                              | 902                    | 2.374               | 3.276        | 153                          | 897                 | 1.051        | 4.327          |
| Kredite 90 Tage oder mehr überfällig, mit Zinsabgrenzung | –                      | –                   | –            | 36                           | 8                   | 44           | 44             |
| Notleidende Kredite im Prozess der Restrukturierung      | 94                     | 182                 | 276          | 50                           | 729                 | 779          | 1.055          |
| <b>Kollektiv ermittelt</b>                               | <b>1.010</b>           | <b>1.703</b>        | <b>2.713</b> | <b>267</b>                   | <b>29</b>           | <b>296</b>   | <b>3.009</b>   |
| Kredite ohne Zinsabgrenzung                              | 1.009                  | 1.583               | 2.591        | –                            | –                   | –            | 2.591          |
| Kredite 90 Tage oder mehr überfällig, mit Zinsabgrenzung | –                      | –                   | –            | 252                          | 5                   | 258          | 258            |
| Notleidende Kredite im Prozess der Restrukturierung      | 1                      | 120                 | 121          | 15                           | 24                  | 38           | 160            |
| <b>Problemkredite insgesamt</b>                          | <b>2.006</b>           | <b>4.258</b>        | <b>6.265</b> | <b>506</b>                   | <b>1.664</b>        | <b>2.170</b> | <b>8.435</b>   |
| davon: gemäß IAS 39 reklassifizierte Problemkredite      | 84                     | 1.150               | 1.234        | –                            | 979                 | 979          | 2.213          |

| 31.12.2009                                               | Wertgeminderte Kredite |                     |              | Nicht wertgeminderte Kredite |                     |              | Problemkredite |
|----------------------------------------------------------|------------------------|---------------------|--------------|------------------------------|---------------------|--------------|----------------|
|                                                          | Inländische Kunden     | Ausländische Kunden | Insgesamt    | Inländische Kunden           | Ausländische Kunden | Insgesamt    | Insgesamt      |
| in Mio €                                                 |                        |                     |              |                              |                     |              |                |
| <b>Einzeln ermittelt</b>                                 | <b>758</b>             | <b>4.145</b>        | <b>4.903</b> | <b>304</b>                   | <b>1.037</b>        | <b>1.341</b> | <b>6.244</b>   |
| Kredite ohne Zinsabgrenzung                              | 707                    | 4.027               | 4.734        | 200                          | 1.003               | 1.203        | 5.937          |
| Kredite 90 Tage oder mehr überfällig, mit Zinsabgrenzung | –                      | –                   | –            | 50                           | 5                   | 55           | 55             |
| Notleidende Kredite im Prozess der Restrukturierung      | 51                     | 118                 | 169          | 54                           | 29                  | 83           | 252            |
| <b>Kollektiv ermittelt</b>                               | <b>907</b>             | <b>1.391</b>        | <b>2.298</b> | <b>274</b>                   | <b>97</b>           | <b>371</b>   | <b>2.669</b>   |
| Kredite ohne Zinsabgrenzung                              | 905                    | 1.281               | 2.186        | –                            | –                   | –            | 2.186          |
| Kredite 90 Tage oder mehr überfällig, mit Zinsabgrenzung | –                      | –                   | –            | 260                          | 6                   | 266          | 266            |
| Notleidende Kredite im Prozess der Restrukturierung      | 2                      | 110                 | 112          | 14                           | 91                  | 105          | 217            |
| <b>Problemkredite insgesamt</b>                          | <b>1.665</b>           | <b>5.536</b>        | <b>7.201</b> | <b>578</b>                   | <b>1.134</b>        | <b>1.712</b> | <b>8.913</b>   |
| davon: gemäß IAS 39 reklassifizierte Problemkredite      | 28                     | 2.750               | 2.778        | –                            | 159                 | 159          | 2.937          |

Der Gesamtbestand unser Problemkredite reduzierte sich im Berichtsjahr 2010 um insgesamt 478 Mio € oder 5 %, bedingt durch Abschreibungen in Höhe von 1,4 Mrd €, die teilweise durch einen Bruttoanstieg von Problemkrediten in Höhe von 716 Mio € und einen Wechselkursbedingten Anstieg von 248 Mio € ausgeglichen wurden.

Der Rückgang der Problemkredite insgesamt war überwiegend auf eine Restrukturierung von Krediten an einen Geschäftspartner zurückzuführen, die aus einer gescheiterten Syndizierung hervorgingen und zu den gemäß IAS 39 umklassifizierten Krediten gehörten. Dies führte zu einer Reduzierung an wertgeminderten Krediten in Höhe von 1,4 Mrd €, wovon 545 Mio € auf Abschreibungen zurückzuführen waren. Nach der Restrukturierung haben wir weiterhin erst- und nachrangige Fremdfinanzierungen ausgereicht, aber bestimmte Minderheitsbeteiligungsrechte, Einwilligungen und Veto-Rechte über finanzielle und operative Entscheidungen der Gesellschaft behalten. Die nachrangige Finanzierungsvereinbarung haben wir in der Rechnungslegung als Investment nach der Equitymethode behandelt und wiesen sie nicht als Problemkredit aus.

Einzelne ermittelte wertgeminderte Kredite verzeichneten einen Rückgang um insgesamt 1,4 Mrd €, bedingt durch Abschreibungen in Höhe von 934 Mio € und Bruttoreduzierungen in Höhe von 609 Mio €, die teilweise durch einen Wechselkursbedingten Anstieg von 191 Mio € ausgeglichen wurden. Hauptursache für den Rückgang an einzelnen ermittelten wertgeminderten Krediten war die oben erwähnte Restrukturierung. Unsere kollektiv ermittelten wertgeminderten Kredite erhöhten sich um 415 Mio €, bedingt durch unsere Akquisition der Postbank sowie Erhöhungen in den Portfolios in Italien und Polen. Der Bruttoanstieg an kollektiv ermittelten wertgeminderten Krediten in Höhe von 909 Mio € sowie ein Wechselkursbedingter Anstieg von 15 Mio € wurden teilweise durch 509 Mio € Abschreibungen kompensiert.

Diese Effekte führten insgesamt zu einem Rückgang an wertgeminderten Krediten in Höhe von 937 Mio € oder 13 %, während sich die nicht wertgeminderten Problemkredite um 459 Mio € erhöhten, verursacht durch zahlreiche Kredite, die als ausgefallen eingestuft wurden, für die wir aber vorwiegend wegen werthaltiger Besicherung keinen Verlust erwarteten.

Unsere Problemkredite beinhalten 2,2 Mrd € an Problemkrediten, die gemäß IAS 39 als Forderungen aus dem Kreditgeschäft umklassifiziert wurden. Für diese Kredite verzeichneten wir Abschreibungen von 607 Mio € und Bruttoreduzierungen in Problemkrediten von 219 Mio €, die teilweise durch Wechselkursbedingten Anstieg von 101 Mio € ausgeglichen wurden.

Unsere Zusagen, neue Gelder an Kreditnehmer mit Problemkrediten zu geben, beliefen sich zum 31. Dezember 2010 auf 184 Mio €, was einem Rückgang von 7 Mio € (4 %) gegenüber dem 31. Dezember 2009 entspricht. Von diesen Zusagen entfielen 40 Mio € auf Kreditnehmer mit notleidenden Krediten im Prozess der Restrukturierung. Dies entspricht einem Rückgang von 11 Mio € gegenüber dem 31. Dezember 2009.

Zusätzlich beliefen sich zum 31. Dezember 2010 unsere leistungsgestörten Leasingfinanzierungen auf 8 Mio €. Das entspricht einem Anstieg um 1 Mio € (14 %) gegenüber dem 31. Dezember 2009. Diese Beträge sind nicht in unseren Problemkrediten enthalten.

Die folgende Tabelle liefert einen Überblick über unsere nicht wertgeminderten notleidenden Kredite im Prozess der Restrukturierung, deren Bedingungen neu verhandelt wurden und die ansonsten überfällig oder wertgemindert wären.

| in Mio €                                                                 | 31.12.2010 | 31.12.2009 |
|--------------------------------------------------------------------------|------------|------------|
| Nicht wertgeminderte notleidende Kredite im Prozess der Restrukturierung | 818        | 188        |

Die folgende Tabelle unterteilt die zu fortgeführten Anschaffungskosten bewerteten nicht wertgeminderten Kredite nach Anzahl der überfälligen Tage, einschließlich nicht wertgeminderte Kredite mit einer Überfälligkeit von mehr als 90 Tagen, bei denen keine Zweifel hinsichtlich der Kreditwürdigkeit des Kunden bestehen.

| in Mio €                                                       | 31.12.2010   | 31.12.2009   |
|----------------------------------------------------------------|--------------|--------------|
| Kredite, weniger als 30 Tage überfällig                        | 4.092        | 6.192        |
| Kredite 30 Tage oder mehr, aber weniger als 60 Tage überfällig | 973          | 941          |
| Kredite 60 Tage oder mehr, aber weniger als 90 Tage überfällig | 384          | 558          |
| Kredite 90 Tage oder mehr überfällig                           | 981          | 925          |
| <b>Überfällige Kredite ohne Wertminderung insgesamt</b>        | <b>6.430</b> | <b>8.616</b> |

Die nachfolgende Tabelle zeigt den aggregierten Wert der Sicherheiten – mit einer Fair-Value-Obergrenze beim besicherten Kreditvolumen –, die wir zur Absicherung unserer überfälligen, aber nicht wertgeminderten Kredite halten.

| in Mio €                                                                                           | 31.12.2010   | 31.12.2009   |
|----------------------------------------------------------------------------------------------------|--------------|--------------|
| Finanzielle und andere Sicherheiten                                                                | 3.484        | 3.965        |
| Erhaltene Garantien                                                                                | 244          | 330          |
| <b>Sicherheiten mit Fair-Value-Obergrenze für überfällige Kredite ohne Wertminderung insgesamt</b> | <b>3.728</b> | <b>4.295</b> |

### Wertgeminderte Kredite

Die folgende Tabelle zeigt unsere wertgeminderten Kredite, die Komponenten unserer Wertberichtigung für Kreditausfälle und die dazugehörigen Abdeckungsgrade nach Regionen, basierend auf dem Sitz des Geschäftspartners, zu den angegebenen Stichtagen.

| in Mio €                      | Wertgeminderte Kredite |                        |              | Wertberichtigung für Kreditausfälle |                        |              | Impaired loan coverage ratio in % |
|-------------------------------|------------------------|------------------------|--------------|-------------------------------------|------------------------|--------------|-----------------------------------|
|                               | Einzel<br>ermittelt    | Kollektiv<br>ermittelt | Insgesamt    | Einzel<br>ermittelt                 | Kollektiv<br>ermittelt | Insgesamt    |                                   |
| Deutschland                   | 996                    | 1.010                  | 2.006        | 559                                 | 453                    | 1.012        | 50                                |
| Westeuropa (ohne Deutschland) | 1.153                  | 1.441                  | 2.594        | 640                                 | 997                    | 1.637        | 63                                |
| Osteuropa                     | 22                     | 245                    | 267          | 6                                   | 186                    | 192          | 72                                |
| Nordamerika                   | 1.146                  | 4                      | 1.150        | 339                                 | 4                      | 343          | 30                                |
| Mittel- und Südamerika        | 43                     | –                      | 43           | 27                                  | –                      | 27           | 63                                |
| Asien/Pazifik                 | 169                    | 13                     | 182          | 68                                  | 13                     | 81           | 45                                |
| Afrika                        | 23                     | –                      | 23           | 4                                   | –                      | 4            | 17                                |
| Sonstige                      | –                      | –                      | –            | –                                   | –                      | –            | –                                 |
| <b>Insgesamt</b>              | <b>3.552</b>           | <b>2.713</b>           | <b>6.265</b> | <b>1.643</b>                        | <b>1.653</b>           | <b>3.296</b> | <b>53</b>                         |

| in Mio €                      | Wertgeminderte Kredite |                        |              | Wertberichtigung für Kreditausfälle |                        |              | Impaired loan coverage ratio in % |
|-------------------------------|------------------------|------------------------|--------------|-------------------------------------|------------------------|--------------|-----------------------------------|
|                               | Einzel<br>ermittelt    | Kollektiv<br>ermittelt | Insgesamt    | Einzel<br>ermittelt                 | Kollektiv<br>ermittelt | Insgesamt    |                                   |
| Deutschland                   | 758                    | 907                    | 1.665        | 498                                 | 454                    | 952          | 57                                |
| Westeuropa (ohne Deutschland) | 2.457                  | 1.245                  | 3.702        | 1.035                               | 741                    | 1.776        | 48                                |
| Osteuropa                     | 30                     | 121                    | 151          | 17                                  | 94                     | 111          | 74                                |
| Nordamerika                   | 1.392                  | 3                      | 1.395        | 397                                 | 3                      | 400          | 29                                |
| Mittel- und Südamerika        | 84                     | 1                      | 85           | 21                                  | 1                      | 22           | 26                                |
| Asien/Pazifik                 | 136                    | 21                     | 157          | 51                                  | 21                     | 72           | 46                                |
| Afrika                        | 27                     | –                      | 27           | 7                                   | –                      | 7            | 26                                |
| Sonstige                      | 19                     | –                      | 19           | 3                                   | –                      | 3            | 16                                |
| <b>Insgesamt</b>              | <b>4.903</b>           | <b>2.298</b>           | <b>7.201</b> | <b>2.029</b>                        | <b>1.314</b>           | <b>3.343</b> | <b>46</b>                         |

Die folgende Tabelle stellt unsere wertgeminderten Kredite, die Komponenten unserer Wertberichtigung für Kreditausfälle und die dazugehörigen Abdeckungsgrade nach Branchenzugehörigkeit unserer Geschäftspartner zu den angegebenen Stichtagen dar.

| 31.12.2010                | Wertgeminderte Kredite |                     |              | Wertberichtigung für Kreditausfälle |                     |              | Impaired loan coverage ratio in % |
|---------------------------|------------------------|---------------------|--------------|-------------------------------------|---------------------|--------------|-----------------------------------|
|                           | Einzel ermittelt       | Kollektiv ermittelt | Insgesamt    | Einzel ermittelt                    | Kollektiv ermittelt | Insgesamt    |                                   |
| in Mio €                  |                        |                     |              |                                     |                     |              |                                   |
| Banken und Versicherungen | 81                     | –                   | 81           | 82                                  | –                   | 82           | 100                               |
| Fund Management           | 841                    | –                   | 841          | 298                                 | 97                  | 395          | 41                                |
| Verarbeitendes Gewerbe    | 603                    | 139                 | 742          | 332                                 | 125                 | 457          | 62                                |
| Handel                    | 199                    | 113                 | 312          | 147                                 | 111                 | 258          | 83                                |
| Private Haushalte         | 163                    | 1.810               | 1.973        | 105                                 | 965                 | 1.070        | 54                                |
| Gewerbliche Immobilien    | 740                    | 229                 | 969          | 259                                 | 83                  | 342          | 35                                |
| Öffentliche Haushalte     | –                      | –                   | –            | –                                   | –                   | –            | –                                 |
| Sonstige                  | 925                    | 422                 | 1.347        | 420                                 | 272                 | 692          | 56                                |
| <b>Insgesamt</b>          | <b>3.552</b>           | <b>2.713</b>        | <b>6.265</b> | <b>1.643</b>                        | <b>1.653</b>        | <b>3.296</b> | <b>53</b>                         |

  

| 31.12.2009                | Wertgeminderte Kredite |                     |              | Wertberichtigung für Kreditausfälle |                     |              | Impaired loan coverage ratio in % |
|---------------------------|------------------------|---------------------|--------------|-------------------------------------|---------------------|--------------|-----------------------------------|
|                           | Einzel ermittelt       | Kollektiv ermittelt | Insgesamt    | Einzel ermittelt                    | Kollektiv ermittelt | Insgesamt    |                                   |
| in Mio €                  |                        |                     |              |                                     |                     |              |                                   |
| Banken und Versicherungen | 101                    | –                   | 101          | 82                                  | –                   | 82           | 81                                |
| Fund Management           | 848                    | –                   | 848          | 281                                 | –                   | 281          | 33                                |
| Verarbeitendes Gewerbe    | 582                    | 116                 | 698          | 307                                 | 116                 | 423          | 61                                |
| Handel                    | 255                    | 91                  | 346          | 117                                 | 71                  | 188          | 54                                |
| Private Haushalte         | 103                    | 1.556               | 1.659        | 49                                  | 750                 | 799          | 48                                |
| Gewerbliche Immobilien    | 710                    | 250                 | 960          | 314                                 | 92                  | 406          | 42                                |
| Öffentliche Haushalte     | 45                     | –                   | 45           | 6                                   | –                   | 6            | 13                                |
| Sonstige <sup>1</sup>     | 2.259                  | 285                 | 2.544        | 873                                 | 285                 | 1.158        | 46                                |
| <b>Insgesamt</b>          | <b>4.903</b>           | <b>2.298</b>        | <b>7.201</b> | <b>2.029</b>                        | <b>1.314</b>        | <b>3.343</b> | <b>46</b>                         |

<sup>1</sup> Zum 31. Dezember 2009 beinhaltete die Kategorie „Sonstige“ in erster Linie eine wertgeminderte nachrangige Forderung im Leveraged Finance-Geschäft, die gemäß IAS 39 umklassifiziert worden war.

Die nachfolgende Tabelle zeigt den aggregierten Wert der von uns zur Absicherung unserer wertgeminderten Kredite gehaltenen Sicherheiten – mit einer Fair-Value-Obergrenze beim besicherten Kreditvolumen.

| in Mio €                                                                           | 31.12.2010   | 31.12.2009   |
|------------------------------------------------------------------------------------|--------------|--------------|
| Finanzielle und andere Sicherheiten                                                | 1.502        | 1.757        |
| Erhaltene Garantien                                                                | 77           | 57           |
| <b>Sicherheiten mit Fair-Value-Obergrenze für wertgeminderte Kredite insgesamt</b> | <b>1.579</b> | <b>1.814</b> |

Der Abdeckungsgrad für wertgeminderte Kredite unter Hinzunahme von Sicherheiten und Wertberichtigungen für Kreditausfälle betrug 78 % zum 31. Dezember 2010 und 72 % zum 31. Dezember 2009. Der Anstieg war primär verursacht durch eine Reduzierung der gemäß IAS 39 umklassifizierten Kredite. Diese erforderten einen geringeren Wertberichtigungsbedarf durch ihren Fair-Value-Abschlag vor ihrer Reklassifizierung und führten dadurch zu einem geringeren durchschnittlichen Abdeckungsgrad.

## Übernommene Sicherheiten

Die nachstehende Tabelle zeigt den aggregierten Wert der Sicherheiten, die wir während der Berichtsperioden in die Bilanz aufgenommen haben, indem wir zur Risikominderung dienende Sicherheiten übernommen oder andere Kreditverbesserungen in Anspruch genommen haben.

| in Mio €                                                         | 2010      | 2009      |
|------------------------------------------------------------------|-----------|-----------|
| Gewerbliche Immobilien                                           | 32        | 78        |
| Private Immobilien                                               | 47        | 10        |
| Sonstige                                                         | 1         | –         |
| <b>In der Berichtsperiode übernommene Sicherheiten insgesamt</b> | <b>80</b> | <b>88</b> |

Die übernommenen Sicherheiten werden in einem geordneten Verfahren oder im Rahmen einer öffentlichen Auktion veräußert. Die Erlöse werden zur Rückzahlung oder Reduzierung ausstehender Verschuldung genutzt. In der Regel nutzen wir übernommene Gebäude nicht für eigene geschäftliche Zwecke.

In 2010 haben wir in Bezug auf zwei Kreditengagements in unserem Portfolio in den USA Gewerbeimmobilien übernommen, während die Übernahme von privaten Immobilien sich überwiegend auf Engagements in Spanien und ein paar Fälle in den USA erstreckte, wo wir die Sicherheit in Ausübung der Zwangsvollstreckung übernommen haben.

Die in der Tabelle gezeigten übernommenen privaten Immobilien beinhalten keine der infolge der Konsolidierung von Securitization Trusts gemäß SIC-12 sowie IAS 27 übernommenen Sicherheiten. Die Jahresendwerte, bezogen auf diese Trusts, beliefen sich zum 31. Dezember 2010 auf 25 Mio € nach 33 Mio € zum 31. Dezember 2009.

## Veränderungen im Wertberichtigungsbestand

Eine Erhöhung unseres Wertberichtigungsbestands für Kreditausfälle geht als Erhöhung der Wertberichtigungen für Kreditausfälle in unsere Konzern-Gewinn- und Verlustrechnung ein. Abschreibungen führen zu einer Ermäßigung des Wertberichtigungsbestands, während Eingänge aus abgeschriebenen Forderungen den Wertberichtigungsbestand erhöhen. Auflösungen von Wertberichtigungen, die als nicht mehr notwendig erachtet werden, führen zu einem entsprechenden Rückgang des Wertberichtigungsbestands und zu einer Reduzierung der Wertberichtigungen für Kreditausfälle in unserer Konzern-Gewinn- und Verlustrechnung.

Die nachfolgende Tabelle zeigt die Veränderungen in unserem Wertberichtigungsbestand für Kreditausfälle in den angegebenen Zeiträumen.

| in Mio €                               | 2010                |                        |              | 2009                |                        |              |
|----------------------------------------|---------------------|------------------------|--------------|---------------------|------------------------|--------------|
|                                        | Einzel<br>ermittelt | Kollektiv<br>ermittelt | Insgesamt    | Einzel<br>ermittelt | Kollektiv<br>ermittelt | Insgesamt    |
| <b>Bestand am Jahresanfang</b>         | <b>2.029</b>        | <b>1.314</b>           | <b>3.343</b> | <b>977</b>          | <b>961</b>             | <b>1.938</b> |
| Wertberichtigungen für Kreditausfälle  | 562                 | 751                    | 1.313        | 1.789               | 808                    | 2.597        |
| Nettoabschreibungen                    | –896                | –404                   | –1.300       | –637                | –419                   | –1.056       |
| Abschreibungen                         | –934                | –509                   | –1.443       | –670                | –552                   | –1.222       |
| Eingänge aus abgeschriebenen Krediten  | 38                  | 104                    | 143          | 33                  | 133                    | 166          |
| Veränderung des Konsolidierungskreises | –                   | –                      | –            | –                   | –                      | –            |
| Wechselkursveränderungen/Sonstige      | –52                 | –8                     | –60          | –101                | –36                    | –137         |
| <b>Bestand am Jahresende</b>           | <b>1.643</b>        | <b>1.653</b>           | <b>3.296</b> | <b>2.029</b>        | <b>1.314</b>           | <b>3.343</b> |

Die nachfolgende Tabelle zeigt die Entwicklung unserer Wertberichtigungen für Kreditausfälle in den angegebenen Zeiträumen unter besonderer Berücksichtigung von Abschreibungen und Eingängen auf abgeschriebenen Forderungen. Inländische Kreditnehmer werden zusätzlich nach Branchen aufgeteilt. Die Zuordnung zu inländischen und ausländischen Kreditnehmern richtet sich nach dem Sitz des Geschäftspartners.

|                                                                                                          |               |               |
|----------------------------------------------------------------------------------------------------------|---------------|---------------|
| in Mio €<br>(sofern nicht anders angegeben)                                                              | 2010          | 2009          |
| <b>Bestand am Jahresanfang</b>                                                                           | <b>3.343</b>  | <b>1.938</b>  |
| <b>Abschreibungen:</b>                                                                                   |               |               |
| Inländische Kunden:                                                                                      |               |               |
| Banken und Versicherungen                                                                                | –5            | –2            |
| Fund Management                                                                                          | –             | –             |
| Verarbeitendes Gewerbe                                                                                   | –43           | –43           |
| Handel                                                                                                   | –32           | –23           |
| Private Haushalte (ohne Hypothekenkredite)                                                               | –338          | –340          |
| Private Haushalte – Hypothekenkredite                                                                    | –26           | –23           |
| Gewerbliche Immobilien                                                                                   | –22           | –6            |
| Öffentliche Haushalte                                                                                    | –             | –             |
| Sonstige                                                                                                 | –49           | –72           |
| Inländische Kunden insgesamt                                                                             | –515          | –509          |
| Ausländische Kunden insgesamt                                                                            | –928          | –713          |
| <b>Abschreibungen insgesamt</b>                                                                          | <b>–1.443</b> | <b>–1.222</b> |
| <b>Eingänge aus abgeschriebenen Krediten:</b>                                                            |               |               |
| Inländische Kunden:                                                                                      |               |               |
| Banken und Versicherungen                                                                                | 1             | 1             |
| Fund Management                                                                                          | –             | –             |
| Verarbeitendes Gewerbe                                                                                   | 14            | 11            |
| Handel                                                                                                   | 6             | 7             |
| Private Haushalte (ohne Hypothekenkredite)                                                               | 63            | 83            |
| Private Haushalte – Hypothekenkredite                                                                    | 4             | 1             |
| Gewerbliche Immobilien                                                                                   | 4             | 7             |
| Öffentliche Haushalte                                                                                    | –             | –             |
| Sonstige                                                                                                 | 20            | 25            |
| Inländische Kunden insgesamt                                                                             | 112           | 135           |
| Ausländische Kunden insgesamt                                                                            | 31            | 31            |
| <b>Eingänge aus abgeschriebenen Krediten insgesamt</b>                                                   | <b>143</b>    | <b>166</b>    |
| <b>Nettoabschreibungen</b>                                                                               | <b>–1.300</b> | <b>–1.056</b> |
| Wertberichtigungen für Kreditausfälle                                                                    | 1.313         | 2.597         |
| Andere Veränderungen (zum Beispiel Wechselkursänderungen, Veränderungen des Konsolidierungskreises)      | –60           | –137          |
| <b>Bestand am Jahresende</b>                                                                             | <b>3.296</b>  | <b>3.343</b>  |
| Anteil der Nettoabschreibungen insgesamt an den Forderungen aus dem Kreditgeschäft im Jahresdurchschnitt | 0,45 %        | 0,39 %        |

Unser Wertberichtigungsbestand für Kreditausfälle betrug 3,3 Mrd € am 31. Dezember 2010. Dies entspricht einem Rückgang von 1 % im Vergleich zum Vorjahr. Diese Reduzierung resultierte in erster Linie aus Abschreibungen, Rückgängen aufgrund von Währungskurs- und Wertaufholungseffekten, die unsere Wertberichtigungen übertrafen.

Unsere Nettoabschreibungen im Jahr 2010 betrugen 1,3 Mrd €. Davon entfielen 896 Mio € auf unser Firmenkreditgeschäft, von denen 607 Mio € gemäß IAS 39 umklassifizierte Vermögenswerte in unseren Portfolios in Großbritannien und Asien/Pazifik betrafen. Weitere 404 Mio € entfallen auf unser Konsumentenkreditengagement, hier vor allem resultierend aus unseren deutschen Portfolios.

Unsere Wertberichtigungen für Kreditausfälle betrugen im Berichtsjahr 1,3 Mrd €. Dabei entfielen 562 Mio € auf unsere Firmenkreditengagements, bei denen Wertberichtigungen in Höhe von 278 Mio € für nach IAS 39 umklassifizierte Vermögenswerte gebildet wurden, die in erster Linie Positionen im Corporate Banking & Securities darstellen. Die übrige Neubildung ist zurückzuführen auf Vorsorgen gegenüber einer Vielzahl von Engagements in Nord- und Südamerika und in Europa vor dem Hintergrund eines günstigeren globalen Kreditumfelds. Die kollektiv ermittelten Wertberichtigungen beliefen sich auf 751 Mio €. Sie zeigen eine signifikante Reduzierung unserer Nettokreditkosten in Spanien und Indien, welche teilweise durch entsprechende Anstiege in Polen ausgeglichen wurden. Sie sind damit niedriger als die 808 Mio €, die im Vorjahr eingestellt wurden und im Wesentlichen das schwierige Kreditumfeld in Spanien und Polen im Jahr 2009 widerspiegeln.

Am 31. Dezember 2010 betrug unser Bestand an einzeln ermittelten Wertberichtigungen 1,6 Mrd €. Die Reduzierung um 386 Mio € ergab sich aus Nettozuführungen von 562 Mio € (einschließlich der vorgenannten Auswirkungen der Umklassifizierungen gemäß IAS 39), Nettoabschreibungen von 896 Mio € und einem Rückgang von 52 Mio € aus Wechselkursänderungen und Wertaufholungseffekten.

Der Bestand an kollektiv ermittelten Wertberichtigungen lag am 31. Dezember 2010 bei 1,7 Mrd € und damit um 339 Mio € über dem Stand zum Ende des Vorjahres (1,3 Mrd €). Diese Veränderung reflektiert Zuführungen zu Wertberichtigungen in Höhe von 751 Mio €. Den Wertberichtigungen standen Nettoabschreibungen von 404 Mio € und ein Rückgang von 8 Mio € aus Wechselkursänderungen und Wertaufholungseffekten gegenüber.

Unser Wertberichtigungsbestand für Kreditausfälle betrug am 31. Dezember 2009 3,3 Mrd € und lag somit um 72 % über dem zum Ende 2008 ausgewiesenen Bestand von 1,9 Mrd €. Dieser Anstieg resultiert in erster Linie aus Wertberichtigungen, die unsere Abschreibungen deutlich übertrafen.

Unsere Bruttoabschreibungen im Jahr 2009 betrugen 1,2 Mrd €. Davon entfielen 637 Mio € auf unser Firmenkreditgeschäft, von denen 414 Mio € gemäß IAS 39 umklassifizierte Vermögenswerte in unseren Portfolios in den USA und Großbritannien betrafen, sowie 419 Mio € auf unser Konsumentenkreditengagement, hier vor allem resultierend aus unseren deutschen Portfolios.

Unsere Wertberichtigungen für Kreditausfälle betrugen 2,6 Mrd € in 2009. Davon entfielen 1,8 Mrd € auf unsere Firmenkreditengagements, bei denen Wertberichtigungen in Höhe von 1,3 Mrd € für Vermögenswerte gebildet wurden, die gemäß IAS 39 umklassifiziert worden waren. Dabei handelte es sich in erster Linie um Risikopositionen im Bereich Leveraged Finance. Der übrige Anstieg entstand durch die Neubildung von Vorsorgen gegenüber einer Vielzahl von Engagements in Nord- und Südamerika und Europa infolge eines sich verschlechternden Kreditumfelds. Die Wertberichtigungen in PCAM beliefen sich auf 805 Mio € und spiegelten im Wesentlichen das schwierigere Kreditumfeld in Spanien und Polen wider. Die Risikovorsorge war im Gesamtjahr 2009 durch eine Überarbeitung bestimmter Parameter und Modellannahmen positiv beeinflusst, was zu einer Reduzierung der Risikovorsorge um 87 Mio € im Bereich CIB und 146 Mio € im Bereich PCAM führte.

Am 31. Dezember 2009 betrug unser Bestand an einzeln ermittelten Wertberichtigungen 2,0 Mrd €. Der Anstieg um 1,1 Mrd € in 2009 ergab sich aus Nettozuführungen von 1,8 Mrd € (einschließlich der vorgenannten Auswirkungen der Umklassifizierungen gemäß IAS 39), Nettoabschreibungen von 637 Mio € und einem Rückgang von 101 Mio € aus Wechselkursänderungen und Wertaufholungseffekten.



Der Bestand an kollektiv ermittelten Wertberichtigungen lag am 31. Dezember 2009 bei 1,3 Mrd € und damit um 353 Mio € über dem Stand zum Ende des Jahres 2008 (961 Mio €). Diese Veränderung reflektiert Zuführungen zu Wertberichtigungen in Höhe von 808 Mio €, einschließlich eines positiven Effekts durch Überarbeitung bestimmter Parameter und Modellannahmen, die zu einer Reduzierung der Risikovorsorge von 87 Mio € führte. Den Wertberichtigungen standen Nettoabschreibungen von 419 Mio € und ein Rückgang von 36 Mio € aus Wechselkursänderungen und Wertaufholungseffekten gegenüber.

### Ausländische Komponente des Wertberichtigungsbestands

Die nachstehende Tabelle enthält eine Analyse der Veränderungen in der ausländischen Komponente der Wertberichtigungen für Kreditausfälle. Zum 31. Dezember 2010 entfielen 69 % unseres gesamten Wertberichtigungsbestands auf ausländische Kunden im Vergleich zu 72 % zum 31. Dezember 2009.

| in Mio €                                                                                            | 2010         | 2009         |
|-----------------------------------------------------------------------------------------------------|--------------|--------------|
| <b>Bestand am Jahresanfang</b>                                                                      | <b>2.391</b> | <b>995</b>   |
| Wertberichtigungen für Kreditausfälle                                                               | 820          | 2.182        |
| Nettoabschreibungen                                                                                 | – 897        | – 682        |
| Abschreibungen                                                                                      | – 928        | – 713        |
| Eingänge aus abgeschriebenen Krediten                                                               | 31           | 31           |
| Andere Veränderungen (zum Beispiel Wechselkursänderungen, Veränderungen des Konsolidierungskreises) | – 30         | – 104        |
| <b>Bestand am Jahresende</b>                                                                        | <b>2.284</b> | <b>2.391</b> |

### Rückstellungen für außerbilanzielle Verpflichtungen im Kreditgeschäft

Die nachstehende Tabelle zeigt die Veränderungen in den Rückstellungen für außerbilanzielle Verpflichtungen im Kreditgeschäft, in denen Eventualverbindlichkeiten und ausleihebezogene Zusagen enthalten sind.

| in Mio €                                                              | 2010                |                        |            | 2009                |                        |            |
|-----------------------------------------------------------------------|---------------------|------------------------|------------|---------------------|------------------------|------------|
|                                                                       | Einzel<br>ermittelt | Kollektiv<br>ermittelt | Insgesamt  | Einzel<br>ermittelt | Kollektiv<br>ermittelt | Insgesamt  |
| <b>Bestand am Jahresanfang</b>                                        | <b>83</b>           | <b>124</b>             | <b>207</b> | <b>98</b>           | <b>112</b>             | <b>210</b> |
| Rückstellungen für außerbilanzielle Verpflichtungen im Kreditgeschäft | – 18                | – 21                   | – 39       | 21                  | 12                     | 33         |
| Zweckbestimmter Verbrauch                                             | –                   | –                      | –          | – 45                | –                      | – 45       |
| Veränderung des Konsolidierungskreises                                | 42                  | –                      | 42         | –                   | –                      | –          |
| Wechselkursveränderungen                                              | 1                   | 7                      | 8          | 10                  | –                      | 10         |
| <b>Bestand am Jahresende</b>                                          | <b>108</b>          | <b>110</b>             | <b>218</b> | <b>83</b>           | <b>124</b>             | <b>207</b> |

In 2010 hat der Konzern aufgrund der Konsolidierung von Akquisitionen Rückstellungen für außerbilanzielle Verpflichtungen im Kreditgeschäft als Veränderung des Konsolidierungskreises verzeichnet, für die Postbank 34 Mio € und für Sal. Oppenheim/BHF-BANK 8 Mio €.

### Behandlung von Kreditausfällen im Derivategeschäft

Anders als in unserem Standardkreditgeschäft haben wir in der Regel mehr Möglichkeiten, das Kreditrisiko bei unseren OTC-Derivaten zu steuern, wenn Veränderungen in den aktuellen Wiederbeschaffungskosten der Derivatetransaktionen und das Verhalten unserer Geschäftspartner auf die Gefahr hindeuten, dass ausstehende Zahlungsverpflichtungen aus den Transaktionen möglicherweise nicht erfüllt werden. In diesen Situationen sind wir bei den üblichen Verträgen häufig in der Lage, zusätzliche Sicherheiten zu erhalten oder die Transaktionen beziehungsweise die entsprechende Rahmenvereinbarung kurzfristig zu kündigen.

## Derivate – Bewertungsanpassung

Für OTC-Derivatetransaktionen nehmen wir eine Bewertungsanpassung beim Ausfallrisiko vor, um erwartete Verluste im Kreditgeschäft abzudecken. Diese Bewertungsanpassung wird an jedem Bilanzstichtag bestimmt durch die Bewertung des potenziellen Kreditrisikos gegenüber allen Kontrahenten und unter Berücksichtigung von gehaltenen Sicherheiten, der sich aus Rahmenverträgen ergebenden Nettingeffekte, des erwarteten Verlusts bei Ausfall und des Kreditrisikos jedes Geschäftspartners basierend auf den historischen Ausfällen.

Die Bewertungsanpassungen beim Ausfallrisiko sind für einige Monolineversicherer signifikant. Diese Bewertungsanpassungen werden auf Basis eines internen Modellansatzes ermittelt, der verschiedene Inputfaktoren für jeden Kontrahenten berücksichtigt. Diese umfassen Marktdaten, die Wahrscheinlichkeit eines Ereigniseintritts (entweder Restrukturierung oder Insolvenz), die Beurteilung einer möglichen Glattstellung im Fall einer Restrukturierung und auch mögliche Rückflüsse im Fall der Restrukturierung oder Insolvenz. In 2010 haben wir Bewertungsanpassungen in Höhe von 1,2 Mrd € auf unser Engagement gegenüber Monolineversicherern vorgenommen, verglichen mit 1,2 Mrd € in 2009.

Die mit unseren Kunden geschlossenen Rahmenvereinbarungen sehen in der Regel eine breite Palette an Standard- oder spezifischen Kündigungsrechten vor, sodass wir bei Ausfällen eines Geschäftspartners oder in anderen Fällen, die auf eine hohe Ausfallwahrscheinlichkeit hinweisen, schnell reagieren können. Führt unsere Entscheidung, Derivatetransaktionen beziehungsweise die entsprechende Rahmenvereinbarung zu kündigen, dazu, dass eine Nettoverpflichtung des Geschäftspartners verbleibt, strukturieren wir die Verpflichtung in eine nicht derivative Forderung um. Diese wird dann im Rahmen unseres regulären Work-out-Prozesses abgewickelt. Infolgedessen weisen wir in der Regel in der Bilanz keine leistungsgestörten Derivate aus.

## Marktrisiko

Ein Großteil unserer Geschäftsaktivitäten unterliegt Marktrisiken, das heißt dem Risiko, dass sich der Marktwert unserer Handels- und Anlagepositionen verändert. Risiken können aus nachteiligen Änderungen bei Zinssätzen, Credit Spreads, Wechselkursen, Aktienkursen, Rohstoffpreisen und anderen relevanten Parametern, wie der Marktvolatilität, entstehen.

Marktrisiko, welches sich aus der Postbank ergibt, ist ebenfalls berücksichtigt und soweit möglich wird unser Risikomethoden-Rahmenwerk angewandt. Jedoch steuert die Deutsche Bank hiermit in keinerlei Hinsicht ein Risiko der Postbank.

Oberstes Ziel von Market Risk Management ist es, sicherzustellen, dass die Geschäftseinheiten der Bank das Chance-Risiko-Verhältnis optimieren und die Bank nicht unannehmbaren Verlusten ausgesetzt wird. Um dieses Ziel zu erreichen, arbeitet Market Risk Management eng mit den Risikonehmern (den Geschäftseinheiten) und anderen Kontroll- und Supportfunktionen zusammen. Diese Aktivitäten sind auf die Deutsche Bank-Gruppe beschränkt und schließen die Postbank aus.

Wir unterscheiden zwei grundsätzlich verschiedene Arten von Marktrisiken:

- Das Marktrisiko aus Handelspositionen entsteht in erster Linie durch Marketmaking im Konzernbereich Corporate & Investment Bank. Dazu gehört das Eingehen von Positionen in Schuldtiteln, Aktien, Fremdwährungen, sonstigen Wertpapieren und Rohwaren sowie in entsprechenden Derivaten.
- Das Marktrisiko aus Nichthandelsaktivitäten in verschiedenen Formen: Das Aktienkursänderungsrisiko entsteht vorwiegend durch nicht konsolidierte strategische Beteiligungen im Portfolio des Konzernbereichs Corporate Investments, Alternative Asset Investments und Aktienvergütungen. Das Zinsrisiko der Nichthandelsaktivitäten entsteht aus unseren Aktiva und Passiva. Andere Elemente des nicht handelsbezogenen Marktrisikos entstehen in Verbindung mit unseren Asset Management- und Fondsaktivitäten sowie durch Modellrisiken in PBC, GTB und PWM, die sich aus Stressannahmen zum Kundenverhalten in Verbindung mit Zinsschwankungen ableiten. Die Postbank klassifiziert das Risiko aus der Modellierung von Einlagen als Geschäftsrisiko und das Risiko aus ihrer Bausparkasse BHW als Kollektivrisiken während die Deutsche Bank-Gruppe ohne die Postbank diese Risiken als Teil des Marktrisikos aus Nichthandelsaktivitäten ansieht.

### Grundkonzept der Steuerung des handelsbezogenen Marktrisikos innerhalb der Deutsche Bank Gruppe (ohne Postbank)

Unser wichtigstes Instrument zur Steuerung unseres Marktrisikos aus Handelspositionen besteht in der Festlegung von Limiten, die jedoch nicht für die Postbank gelten. Der Vorstand legt, unterstützt von Market Risk Management als Teil unserer unabhängigen Legal, Risk & Capital-Funktion, ein konzernweites Value-at-Risk-Limit sowie ein Risikolimit für das Ökonomische Kapital für die Marktrisiken im Handelsbuch fest. Market Risk Management teilt dieses Gesamtlimit auf die Geschäftsbereiche und einzelne Geschäftssparten innerhalb von CIB (zum Beispiel Global Rates, Equity, etc.) auf. Grundlage hierfür sind voraussichtliche Geschäftspläne und Risikoneigung. Innerhalb der einzelnen Geschäftssparten können die Geschäftsleiter geschäftsspezifische Limite, sogenannte Business Limits, festlegen, indem sie das von Market Risk Management festgelegte Limit auf einzelne Portfolios oder geografische Regionen aufteilen.

Value-at-Risk-Limite und Limite für das Ökonomische Kapital werden für das Management aller Arten von Marktrisiken auf Gesamtportfolioebene verwendet. Zusätzlich wendet Market Risk Management Sensitivitäts- und Konzentrations-/Liquiditätslimite als ein weiteres und ergänzendes Instrument zur Steuerung bestimmter Portfolios und Risikoarten an. Unterschieden wird zwischen den von Market Risk Management festgelegten Limiten und den Business Limits für Sensitivitäten und Konzentration/Liquidität. In der Praxis handelt es sich bei den von Market Risk Management festgelegten Limiten um eine relativ kleine Zahl wesentlicher Limite, die für die Erfassung bestimmter Risikofaktoren erforderlich sind und eher global als nur für eine bestimmte geografische Region oder für spezifische Portfolios gelten.

Zur Steuerung ihrer Risikopositionen innerhalb der vorgegebenen Limite wenden die Risikonehmer unterschiedliche Maßnahmen zur Risikominderung an. Dazu zählen insbesondere:

- **Portfoliomanagement.** Risikodiversifikation entsteht in Portfolios, welche aus einer Vielfalt von Positionen bestehen. Da einige Positionen voraussichtlich an Wert zunehmen, während andere an Wert verlieren, kann Diversifikation dazu beitragen, das Gesamtrisikoprofil für ein bestimmtes Portfolio zu reduzieren.
- **Absicherungsgeschäfte („Hedging“).** Hedging beinhaltet das Eingehen von Positionen in verwandten Wertpapieren, einschließlich derivativer Produkte, wie Terminkontrakten, Swaps und Optionen. Hedgingaktivitäten sind nicht immer ein effektiver Schutz vor Verlusten, da es zwischen dem Sicherungsinstrument und der abzusichernden Position Unterschiede bei den Konditionen, spezifischen Merkmalen oder anderen Basisrisiken geben kann.

In 2010 haben wir weiterhin deutlich in unsere Market Risk Management-Funktion investiert und den Personalstand um nahezu 30 % erhöht. In wesentlichen Forderungsklassen wurde spezifische Expertise in Marktrisikomanagement hinzugefügt, die zentralen Teams wurden weiter ausgebaut und eine dedizierte Managementfunktion zur Durchführung von Veränderungen eingeführt.

### Grundkonzept der Steuerung des handelsbezogenen Marktrisikos bei der Postbank

Das Marktrisikomanagement-Rahmenwerk der Postbank-Gruppe basiert auf den folgenden wesentlichen Prinzipien: Grundsätzlich erfolgt die Steuerung des handelsbezogenen Marktrisikos zentral im Bereich Financial Markets der Deutsche Postbank AG, basierend auf separat definierten Risikolimiten für Deutsche Postbank AG und ihre ausländische Tochtergesellschaft Luxemburg.

Die Gesamtlime werden vom Gesamtvorstand der Postbank beschlossen und vom Marktrisikokomitee als Sublime den einzelnen operativen Einheiten zugeteilt. Die Allokationsmechanismen für Marktrisikolime bei der Postbank-Gruppe ähneln dem Deutsche Bank-Ansatz des Ökonomischen Kapitals. Die den spezifischen Geschäftsaktivitäten zugewiesenen Risikokapitallime stellen den Umfang der Marktrisiken dar, der für die Postbank verträglich und unter Ertragsgesichtspunkten gewünscht ist.

Auf täglicher Basis überwacht die Postbank die Marktrisiken auf Basis eines Limitsystems, welches auf der Value-at-Risk-Methode beruht. Zusätzlich hat das Market Risk Committee der Postbank Sensitivitätslime für das Handels- und Bankbuch wie auch für spezifische Sub-Portfolios definiert.

### Quantitative Risikosteuerungsinstrumente

#### Value-at-Risk innerhalb der Deutschen Bank-Gruppe (ohne Postbank)

Value-at-Risk ist ein quantitatives Maß für den potenziellen Wertverlust einer Handelsposition aufgrund von Marktschwankungen, der über einen vorgegebenen Zeitraum und mit einem bestimmten Konfidenzniveau nicht überschritten wird.

Unser Value-at-Risk für die Handelsgeschäfte erfolgt auf Basis unseres eigenen internen Value-at-Risk-Modells. Im Oktober 1998 hat das Bundesaufsichtsamt für das Kreditwesen, eines der Vorgängerinstitute der Bundesanstalt für Finanzdienstleistungsaufsicht, unser Value-at-Risk-Modell zur Berechnung des regulatorischen Kapitalbedarfs für das allgemeine und spezifische Marktrisiko genehmigt, dies wird jedoch nicht auf die Postbank angewandt. Das Modell wurde seitdem regelmäßig überarbeitet und die Genehmigung aufrechterhalten.

Wir berechnen den Value-at-Risk mit einem Konfidenzniveau von 99 % und einer Haltedauer von einem Tag. Das bedeutet, wir gehen von einer Wahrscheinlichkeit von 1 zu 100 aus, dass ein Mark-to-Market-Verlust aus unseren Handelspositionen mindestens so hoch sein wird wie der berichtete Value-at-Risk-Wert. Für aufsichtsrechtliche Meldezwecke beträgt die Haltedauer zehn Tage.

Wir verwenden historische Marktdaten, um den Value-at-Risk zu bestimmen. Als Basis dient eine historische Beobachtung über 261 gleich gewichtete Handelstage. Bei der Berechnung wird ein Monte Carlo-Simulationsverfahren angewandt, wobei wir davon ausgehen, dass Änderungen in den Risikofaktoren einer bestimmten Verteilung folgen, zum Beispiel der Normalverteilung oder logarithmischen Normalverteilung. Zur Berechnung des aggregierten Value-at-Risk benutzen wir über denselben 261-Tages-Zeitraum beobachtete Korrelationen zwischen den Risikofaktoren.

Unser Value-at-Risk-Modell ist auf die Erfassung der folgenden Risikofaktoren ausgerichtet: Zinssätze, Credit Spreads, Aktienkurse, Wechselkurse und Rohwarenpreise sowie deren implizite Volatilitäten und das allgemeine Basisrisiko. Das Modell berücksichtigt sowohl lineare als auch, insbesondere für Derivate, nicht lineare Einflüsse der Risikofaktoren auf den Wert eines Portfolios.

Mithilfe des Value-at-Risk-Ansatzes können wir ein konstantes und einheitliches Risikomaß auf sämtliche Handelsgeschäfte und Produkte anwenden. Der Value-at-Risk ermöglicht einen Vergleich von Risiken in verschiedenen Geschäftsfeldern sowie die Aggregation und die Verrechnung (Netting) von Positionen in einem Portfolio, um Korrelationen und Ausgleichswirkungen zwischen verschiedenen Vermögensklassen zu berücksichtigen. Darüber hinaus ermöglicht er einen Vergleich unseres Marktrisikos sowohl über bestimmte Zeiträume hinweg als auch gegenüber unseren täglichen Handelsergebnissen.

Bei der Verwendung von Value-at-Risk-Schätzungen ist eine Reihe von Faktoren in Betracht zu ziehen. Diese beinhalten:

- Die Verwendung historischer Marktdaten ist unter Umständen kein guter Indikator für zukünftige Ereignisse, vor allem wenn diese extrem sind. Diese auf die Vergangenheit bezogene Betrachtungsweise kann im Value-at-Risk zu einer Unterbewertung der Risiken führen (wie 2008). Sie kann aber auch zu einer Überbewertung führen.
- Annahmen in Bezug auf die Verteilung von Änderungen der Risikofaktoren und die Korrelation zwischen verschiedenen Risikofaktoren können sich als falsch erweisen, insbesondere bei extremen Marktereignissen. Es gibt für den Value-at-Risk keine Standardmethode und die Zugrundelegung anderer Annahmen würde zu anderen Ergebnissen führen.
- Die Haltedauer von einem Tag führt in Zeiten erhöhter Illiquidität zu einer unvollständigen Erfassung des Marktrisikos, wenn Positionen nicht innerhalb eines Tages geschlossen oder abgesichert werden können.
- Der Value-at-Risk gibt keinen Hinweis auf den potenziellen Verlust jenseits des 99 %-Quantils.
- Das Intradayrisiko wird nicht erfasst.
- Es kann Risiken in Handelsbüchern geben, die unser Value-at-Risk-Modell nicht oder nicht vollständig einbezieht.

Wir analysieren fortlaufend potenzielle Schwächen unseres Value-at-Risk-Modells unter Anwendung statistischer Verfahren wie Backtesting, berücksichtigen aber auch Erfahrungen aus dem Risikomanagement und Einschätzungen von Risikoexperten. Beim Backtesting wird die Prognosegüte unserer Value-at-Risk-Berechnungen auf Basis der tatsächlichen Erfahrungen überprüft. Wir vergleichen die hypothetischen täglichen Gewinne und Verluste nach der Buy-and-Hold-Annahme (entsprechend den deutschen aufsichtsrechtlichen Vorgaben) mit den durch unser Value-at-Risk-Modell prognostizierten Werten.

Ein Komitee, unter Beteiligung von Market Risk Management, Market Risk Operations, Risk Analytics and Instruments, Finance und anderer Bereiche trifft sich vierteljährlich, um die Backtestingergebnisse für den Konzern und die verschiedenen Geschäftsbereiche zu überprüfen. Das Komitee analysiert die aufgetretenen Ertragsschwankungen und überprüft die Prognosegüte des Value-at-Risk-Modells. Dies wiederum erlaubt es uns, den Prozess der Risikoeinschätzung zu verbessern und anzupassen.

Wir sind verpflichtet, unsere eigenen Risikomodelle ständig weiterzuentwickeln, und stellen umfangreiche Ressourcen zur Überprüfung und Verbesserung dieser Modelle bereit. Ein besonderer Fokus wird auf die Verbesserung jener Bestandteile des Value-at-Risk-Modells gelegt, die sich auf Bereiche beziehen, in denen in der jüngeren Vergangenheit Verluste aufgetreten sind. In 2010 wurden die Methoden zur Berechnung des Value-at-Risk verbessert, unter anderem durch:

- Berücksichtigung von Aktiendividendenrisiken
- Verfeinerte Methode für Verbriefungspositionen
- Berücksichtigung des Marktrisikos von Sal. Oppenheim und BHF-BANK.

Darüber hinaus haben wir einen Prozess zur systematischen Erfassung und Evaluierung immaterieller Risiken eingeführt, die derzeit nicht in unserem Value-at-Risk-Modell erfasst werden.

#### Value-at-Risk bei der Postbank

Die Postbank verwendet ebenfalls ein Value-at-Risk-Konzept, um die eingegangenen Marktrisiken zu quantifizieren und zu überwachen. Der Value-at-Risk im Handelsbuch wird auf Basis einer Monte Carlo-Simulation ermittelt, die heterogene Arten von Marktrisiken in eine einzelne Messung des Risikos überführt. Die berücksichtigten Risikofaktoren im Value-at-Risk umfassen Zinskurven, Aktienkurse, Fremdwährungen und Volatilitäten zusammen mit Risiken, die sich aus Veränderungen von Credit Spreads ergeben. Die Korrelationseffekte zwischen den Risikofaktoren werden aus historischen Daten abgeleitet.

Der Value-at-Risk der Postbank wird derzeit noch nicht in den Value-at-Risk des Deutsche Bank-Konzerns konsolidiert.

#### Ökonomisches Kapital für das Marktrisiko

Das Ökonomische Kapital für Marktrisiko misst die Höhe des benötigten Kapitals, um extreme unerwartete Verluste aus unseren Risikopositionen über einen Zeithorizont von einem Jahr aufzufangen. „Extrem“ bedeutet hier, dass das berechnete Ökonomische Kapital mit einer Wahrscheinlichkeit von 99,98 % die innerhalb eines Jahres aggregierten unerwarteten Verluste abdeckt. Die Marktrisiken der Postbank sind in unser Ökonomisches Kapital aufgenommen worden.

Wir berechnen das Ökonomische Kapital mithilfe von Stresstests und Szenarioanalysen. Die Stresstests werden aus in der Vergangenheit beobachteten gravierenden Marktereignissen abgeleitet. Die aus diesen Stressszenarien resultierenden Verluste werden unter Berücksichtigung von Korrelationen aggregiert, die in Krisenzeiten beobachtet wurden, um den Anstieg der Korrelationen widerzuspiegeln, der bei einem gravierenden Abschwung auftritt.

Diese Stresstests werden mit subjektiven Einschätzungen angereichert, wenn nur begrenzte historische Daten zur Verfügung stehen oder wenn die Beurteilung der Marktentwicklungen zu der Erkenntnis führt, dass historische Daten ein mangelhafter Indikator für potenzielle künftige Marktszenarien sind.

Die Berechnung des Ökonomischen Kapitals für Marktrisiken aus den Handelsbereichen wird wöchentlich durchgeführt. Das Modell berücksichtigt die folgenden Risikofaktoren: Zinssätze, Credit Spreads, Aktienkurse, Wechselkurse und Rohstoffpreise. Volatilität, Kreditkorrelation und allgemeine Basisrisiken werden ebenfalls einbezogen.

Im Jahresverlauf 2010 haben wir signifikante Methodenverbesserungen für das Ökonomische Kapitalmodell implementiert. Diese beinhalten:

- Erweiterung der Stresstest um Verbriefungs- und Korrelationsrisiken
- Verbesserte Granularität für Aktiendividenden- und Wertpapierleiherisiken
- Verbesserte Abdeckung von Basisrisiken

Die Ergebnisse unserer Stresstests und Berechnungen des Ökonomischen Kapitals sind in ihrer Aussagekraft zwangsläufig durch die Zahl der durchgeführten Stresstests und die Tatsache begrenzt, dass nicht alle „Downside“-Szenarien vorhergesagt und simuliert werden können. Obwohl Worst-Case-Szenarien von unseren Risikomanagern nach bestem Ermessen und unter Berücksichtigung extremer historischer Marktbewegungen definiert werden, ist es dennoch möglich, dass der Wertverlust aus den Marktrisikopositionen selbst die Schätzungen für unser Ökonomisches Kapital übersteigt. Darüber hinaus arbeiten wir fortlaufend an der Überprüfung und Verfeinerung unserer Stresstests, um sicherzustellen, dass wesentliche Risiken erfasst und eventuelle extreme Marktveränderungen abgebildet werden.

Die Postbank führt ebenso Szenarioanalysen und Stresstests zusätzlich zu ihren Value-at-Risk-Berechnungen durch. Die Annahmen, die diesen Stresstests unterliegen, werden auf fortlaufender Basis validiert.

#### Value-at-Risk der Handelsbereiche des Konzernbereichs Corporate & Investment Bank

Die folgende Tabelle zeigt den Value-at-Risk (mit einem Konfidenzniveau von 99 % und einer Haltedauer von einem Tag) der Handelsbereiche im Konzernbereich Corporate & Investment Bank, ohne Berücksichtigung des Value-at-Risks der Postbank. Das handelsbezogene Marktrisiko des Konzerns außerhalb dieser Handelsbereiche ohne Berücksichtigung der Postbank ist unwesentlich. „Diversifikationseffekt“ bezeichnet den Effekt, dass an einem beliebigen Tag der aggregierte Value-at-Risk niedriger ausfällt als die Summe der Value-at-Risk-Werte für die einzelnen Risikoklassen. Würde man zur Berechnung des aggregierten Value-at-Risk einfach die Value-at-Risk-Werte der einzelnen Risikoklassen addieren, so müsste davon ausgegangen werden, dass die Verluste in allen Risikokategorien gleichzeitig auftreten.

| in Mio €                                 | 31.12.2010  | 31.12.2009   |
|------------------------------------------|-------------|--------------|
| <b>Value-at-Risk der Handelsbereiche</b> |             |              |
| Zinsrisiko                               | 77,4        | 111,0        |
| Aktienkursrisiko                         | 21,3        | 37,0         |
| Währungsrisiko                           | 29,0        | 23,9         |
| Rohwarenpreisrisiko                      | 13,3        | 14,8         |
| Diversifikationseffekt                   | -70,1       | -65,7        |
| <b>Insgesamt</b>                         | <b>70,9</b> | <b>121,0</b> |

Die folgende Tabelle zeigt den maximalen, minimalen und durchschnittlichen Value-at-Risk (mit einem Konfidenzniveau von 99 % und einer Haltedauer von einem Tag) der Handelsbereiche im Konzernbereich Corporate & Investment Bank nach Risikokategorie für die angegebenen Zeiträume, jedoch ohne Berücksichtigung der Postbank.

| Value-at-Risk der Handelsbereiche | Insgesamt |       | Diversifikationseffekt |        | Zinsrisiko |       | Aktienkursrisiko |      | Währungsrisiko |      | Rohwarenpreisrisiko |      |
|-----------------------------------|-----------|-------|------------------------|--------|------------|-------|------------------|------|----------------|------|---------------------|------|
| in Mio €                          | 2010      | 2009  | 2010                   | 2009   | 2010       | 2009  | 2010             | 2009 | 2010           | 2009 | 2010                | 2009 |
| Durchschnitt                      | 95,6      | 126,8 | -48,6                  | -61,6  | 86,8       | 117,6 | 21,9             | 26,9 | 22,9           | 28,7 | 12,7                | 15,1 |
| Maximum                           | 126,4     | 180,1 | -88,5                  | -112,3 | 113,0      | 169,2 | 33,6             | 47,3 | 46,4           | 64,4 | 21,2                | 34,7 |
| Minimum                           | 67,5      | 91,9  | -26,4                  | -35,9  | 65,8       | 83,2  | 13,6             | 14,5 | 10,8           | 11,9 | 6,2                 | 8,5  |



Unser Value-at-Risk für die Handelsbereiche bewegte sich in einer Bandbreite von € 67,5 Mio bis € 126,4 Mio. Der durchschnittliche Value-at-Risk im Jahr 2010 lag mit 95,6 Mio € um 25 % unter dem Vorjahresdurchschnittswert von 126,8 Mio €.

Die 2010 verzeichnete Abnahme des durchschnittlichen Value-at-Risk wurde primär getrieben durch geringere eingegangene Risiken und niedrigere historische Volatilitäten. Zusätzlich haben die Handelsbereiche die Weiterentwicklung ihres Geschäftsmodells fortgeführt, hin zu geringeren Risikopositionen in illiquiden oder komplexen Engagements.

Die nachfolgende Tabelle zeigt den Value-at-Risk des Handelsbuchs der Postbank (mit einem Konfidenzniveau von 99 % und einer eintägigen Haltedauer). Der „Diversifikationseffekt“ reflektiert den Umstand, dass der gesamte Value-at-Risk an einem gegebenen Tag geringer sein wird, als die Summe des Value-at-Risk bezogen auf die einzelnen Risikoklassen. Einfache Addition der Zahlen für die einzelnen Risikoklassen zur Erlangung eines aggregierten Value-at-Risk würde die Annahme zugrundelegen, dass die Verluste in allen Risikokategorien gleichzeitig eintreten.

| in Mio €                          | 31.12.2010 |
|-----------------------------------|------------|
| <b>Value-at-Risk der Postbank</b> |            |
| Zinsrisiko                        | 1,8        |
| Aktienkursrisiko                  | 0,2        |
| Währungsrisiko                    | 0,0        |
| Rohwarenpreissrisiko              | –          |
| Diversifikationseffekt            | –0,0       |
| <b>Insgesamt</b>                  | <b>2,0</b> |

### Aufsichtsrechtliches Backtesting des Trading Market Risk

Beim Backtesting wird die Prognosegüte unserer Value-at-Risk-Berechnungen auf Basis der tatsächlichen Erfahrungen überprüft. Wir vergleichen die hypothetischen täglichen Gewinne und Verluste nach der Buy-and-Hold-Annahme mit den durch unser Value-at-Risk-Modell prognostizierten Werten. Ein Ausreißer ist ein hypothetischer Buy-and-Hold-Verlust, der unsere Value-at-Risk-Schätzungen übersteigt. Im Durchschnitt würden wir bei einem Konfidenzniveau von 99 % zwei oder drei Ausreißer während eines beliebigen Jahres erwarten. Im Durchschnitt würden wir bei einem Konfidenzniveau von 99 % zwei bis drei Ausreißern pro Jahr erwarten. Im Rahmen unseres aufsichtsrechtlichen Backtesting 2010 wurden zwei Ausreißer gegenüber einem Ausreißer in 2009 beobachtet. Beide Ausreißer wurden Ende Mai im Rahmen erhöhter Marktvolatilität beobachtet. Wir sind weiterhin davon überzeugt, dass durch die deutlich verbesserte Methodologie, der Berechnungsparameter und Modellgüte, die seit den Marktunruhen erzielt wurden, unser Value-at-Risk Modell weiterhin ein angemessenes Maß für unser Trading Market Risk unter normalen Marktbedingungen darstellt.

Das folgende Schaubild zeigt die täglichen Buy-and-Hold-Handelsergebnisse im Vergleich zum Value-at-Risk gegenüber dem jeweiligen Vortag. Beide Zahlen werden in Mio € angegeben und umfassen nicht den für die Postbank separat berechneten Value-at-Risk.

#### Buy-and-hold Erträge der Handelsbereiche und Value-at-Risk in 2010

in Mio €

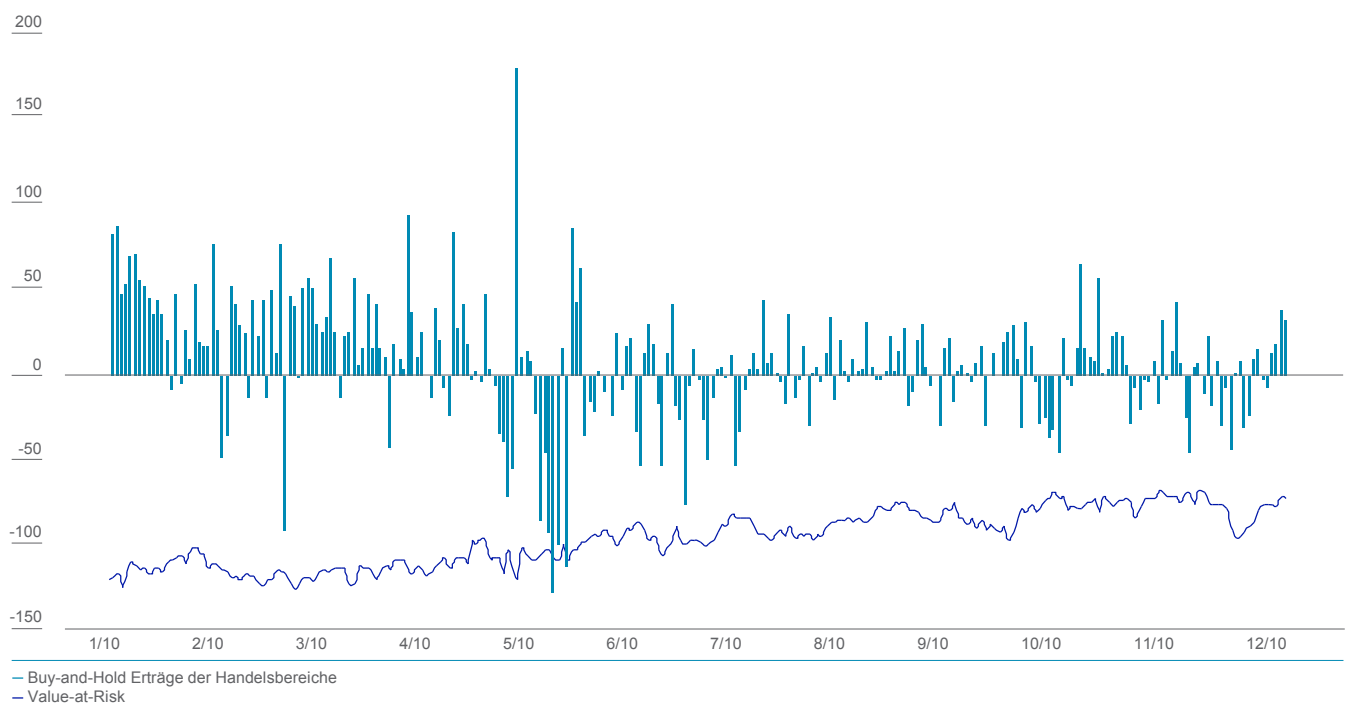

## Erträge der Handelsbereiche in 2010

Das folgende Balkendiagramm zeigt die Verteilung der tatsächlichen täglichen Erträge unserer Handelsbereiche, ohne Postbank, im Jahr 2010. Die Balkenhöhe gibt die Anzahl der Handelstage an, an denen der auf der horizontalen Achse in Mio € angegebene Handelsertrag erzielt wurde.

### Erträge der Handelsbereiche in 2010

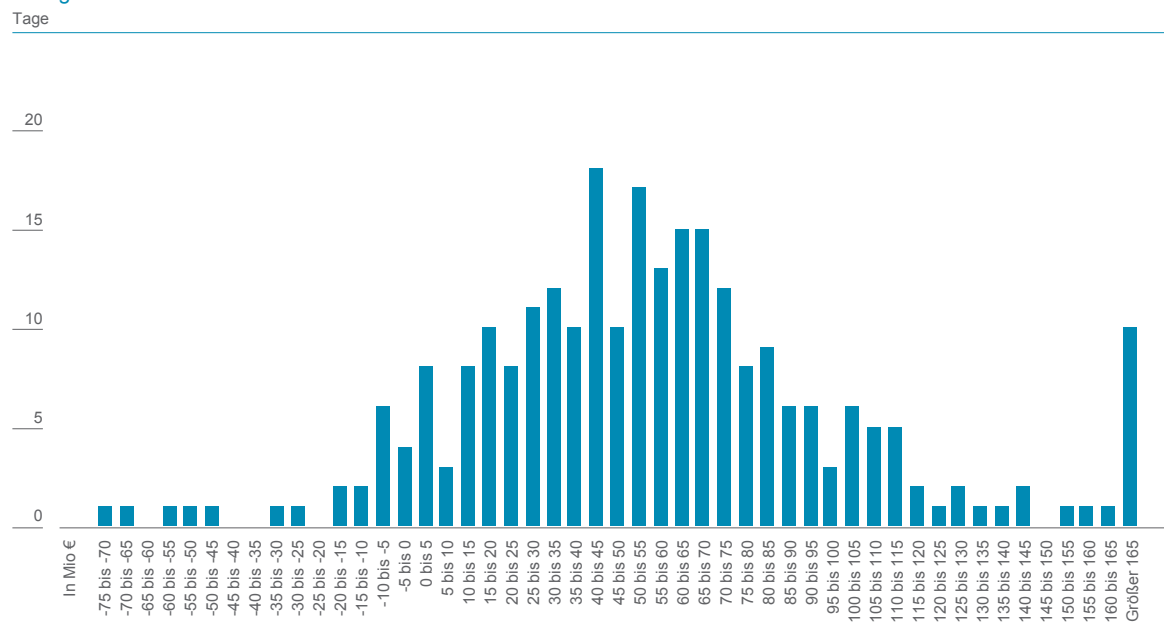

Im Jahr 2010 erzielten unsere Handelsbereiche an 92 % der Handelstage einen positiven Ertrag (versus 91 % in 2009).

## Ökonomischer Kapitalbedarf für unser Trading Market Risk

Der aus unseren Handelsbereichen resultierende Ökonomische Kapitalbedarf für das Marktrisiko betrug 6,4 Mrd € zum Jahresende 2010 gegenüber 4,6 Mrd € zum Jahresende 2009. Das gehandelte Ausfallrisiko stieg um 1,0 Mrd €, in erster Linie aufgrund von Modellverbesserungen und konservativerer Liquiditätsannahmen. Das Traded Market Risk stieg um 0,8 Mrd €, getrieben durch Modellverbesserungen, teilweise ausgeglichen durch einen Abbau von Altbestandsportfolios (Legacy Portfolios). Der Beitrag der Postbank zu unserem Ökonomischen Kapitalbedarf für unser Trading Market Risk war minimal.

## Steuerung des Marktrisikos aus Nichthandelsaktivitäten

Unsere Nontrading Market Risk Management-Teams sind verantwortlich für eine Anzahl von Marktrisiken, die aus verschiedenen Geschäftsaktivitäten und Initiativen hervorgehen. Aufgrund der Komplexität und Vielfalt der Risiken, die im Bereich Marktrisiko aus Nichthandelsaktivitäten abzudecken sind, teilen sich drei Teams die Verantwortung für das Management dieser Risiken:

- Das Nontrading Market Risk Management-Team innerhalb unserer Market Risk Management-Funktion deckt Marktrisiken in PBC, GTB, PWM, Corporate Investments sowie strukturelle Risiken aus Währungsgeschäften, Aktienvergütungen und Pensionsverpflichtungen ab.
- Das Principal Investments-Team innerhalb der Kreditrisikomanagement-Funktion ist auf die Risikoaspekte unserer Nichthandelsaktivitäten im Bereich Alternative Assets spezialisiert und überprüft monatlich das Risikoprofil der diesbezüglichen Portfolios.
- Die Asset Management Risk-Einheit innerhalb unserer Kreditrisikomanagement-Funktion konzentriert sich auf die Risikoaspekte unseres Asset Management- und Fondsgeschäfts. Beachtenswerte Risiken in diesem Bereich entstehen beispielsweise aus Erfolgs- und/oder Kapitalgarantien sowie Reputationsrisiken im Zusammenhang mit der Verwaltung von Kundengeldern.

Die Konsolidierung der Postbank im Dezember 2010 hat zu einer signifikanten Änderung in unserem Aktienkursrisikoprofil aus Nichthandelsaktivitäten geführt. Früher wurde, einzig basierend auf der Höhe unseres Minderheitsanteils, ein Zuschlag für Ökonomisches Kapital auf unser Strategic Investment Portfolio gerechnet. Seit der Konsolidierung, wird das Ökonomische Kapital für alle Risikokategorien (Kreditrisiko, Marktrisiko auf Handels- und Nichthandelsaktivitäten, Operationelles Risiko und Allgemeines Geschäftsrisiko) für die gesamte Postbank eingerechnet.

Der überwiegende Teil der Zins- und Währungsrisiken aus nicht handelsbezogenen Aktiva und Passiva, exklusive Postbank, wurde durch interne Absicherungsgeschäfte auf Handelsbücher im Konzernbereich Corporate & Investment Bank übertragen. Somit wird das Risiko dort auf Value-at-Risk-Basis gesteuert und in unseren handelsbezogenen Value-at-Risk-Zahlen wiedergegeben. Hinsichtlich der verbleibenden Risiken, die durch diese Absicherungsgeschäfte nicht übertragen wurden, werden Währungsrisiken in der Regel durch währungskongruente Refinanzierungen ausgeglichen, sodass in den Portfolios lediglich Restrisiken verbleiben. Ferner sind bei diesen verbleibenden Positionen nur moderate Zinsrisiken vorhanden, die sich aus Fristeninkongruenzen zwischen Verbindlichkeiten und Investments ergeben. Im Gegensatz zu diesem Vorgehen führt die Postbank den überwiegenden Teil der offenen Zinsrisikoposition im Anlagebuch. Obwohl dieses Zinsrisiko für sich betrachtet als materiell einzustufen ist, wird der Einfluss vernachlässigbar, wenn es mit den Risikopositionen der Deutschen Bank verbunden wird.

Es gibt jedoch eine wichtige Ausnahme bezüglich des Währungsrisikos, den wir als strukturelles Währungsrisiko bezeichnen. Diese Risikoposition ergibt sich aus Kapital- und Gewinnrücklagen in Nicht-Euro-Währungen in bestimmten Tochtergesellschaften, vorwiegend in den USA und Großbritannien. Sie repräsentiert den Großteil des Währungsrisikos in unseren Nichthandelsaktivitäten.

Abgesehen von den genannten Risikoarten hat unsere Nontrading Market Risk Management-Funktion auch die Aufgabe, andere Risikopositionen zu überwachen und zu steuern, die sich aus der Aktienvergütung und Pensionsverpflichtungen ergeben. Sie managt zudem die Risiken aus den Asset Management-Aktivitäten, insbesondere resultierend aus Garantiefonds. Zudem unterliegen unsere Geschäfte in PBC, GTB und PWM hinsichtlich der Kundeneinlagen einem Modellrisiko. Dieses Risiko tritt zutage, wenn das Kundenverhalten bei Zinsschwankungen substanziell von den historischen Erfahrungswerten abweicht.

Das Capital and Risk Committee beaufsichtigt unsere nicht handelsbezogenen Marktrisikopositionen. Das Group Investment Committee beurteilt strategische Beteiligungsvorschläge. Je nach Größe der vorgeschlagenen strategischen Akquisitionen müssen diese vom Group Investment Committee, vom Vorstand oder sogar vom Aufsichtsrat genehmigt werden. Die Entwicklung unserer strategischen Beteiligungen wird vom Group Investment Committee regelmäßig überprüft. Mehrere Mitglieder des Capital and Risk Committee gehören auch dem Group Investment Committee an, wodurch eine enge Verknüpfung der beiden Gremien gewährleistet wird.

### Bewertung des Marktrisikos in unseren Nichthandelsportfolios

Aufgrund der grundsätzlich statischen Eigenschaften dieser Positionen benutzen wir den Value-at-Risk nicht als Risikomaß für unsere Nichthandelsportfolios. Stattdessen verwenden wir zur Bewertung des Risikos Stresstestverfahren, die für jede Risikoklasse spezifisch sind und die unter anderem ausgeprägte historische Marktbewegungen, die Liquidität der jeweiligen Anlageklasse und Änderungen des Kundenverhaltens im Zusammenhang mit Einlagenprodukten berücksichtigen. Diese Bewertung bildet die Grundlage für die Berechnung des Ökonomischen Kapitals, mithilfe dessen wir das Marktrisiko in unseren Nichthandelsportfolios aktiv überwachen und steuern. Zum Jahresende 2009 wurden mehrere Verbesserungen bezüglich der Abdeckung unseres nicht handelsbezogenen Marktrisikoportfolios durch das Ökonomische Kapitalmodell eingeführt. Im Jahr 2010 wurde die Abdeckung des Marktrisikos aus Nichthandelsaktivitäten durch Ökonomisches Kapital durch Einbeziehung einer Belastung mit Ökonomischem Kapital für die Pensionsverpflichtungen der Deutschen Bank vervollständigt.

### Ökonomischer Kapitalbedarf für unsere nicht handelsbezogenen Marktrisikoportfolios nach Geschäftsbereich

Die folgende Tabelle zeigt den Ökonomischen Kapitalbedarf für unsere Nichthandelsportfolios nach Geschäftsbereichen und schließt den Bedarf an ökonomischem Kapital für die Postbank, berechnet auf Basis unserer Methodologie, mit ein.

| in Mio €                                                                                  | 31.12.2010   | 31.12.2009   |
|-------------------------------------------------------------------------------------------|--------------|--------------|
| <b>Ökonomischer Kapitalbedarf für unsere nicht handelsbezogenen Marktrisikoportfolios</b> |              |              |
| CIB                                                                                       | 1.351        | 890          |
| PCAM                                                                                      | 3.524        | 2.246        |
| Corporate Investments                                                                     | 1.051        | 5.043        |
| Consolidation & Adjustments                                                               | 814          | -277         |
| <b>Insgesamt</b>                                                                          | <b>6.740</b> | <b>7.902</b> |

Der Anstieg im Bereich CIB um 461 Mio € beruhte auf verschiedenen neuen Investitionen.

Der überwiegende Teil der Änderungen in 2010 ist auf die Konsolidierung der Postbank zurückzuführen, die zu einer Verminderung des nicht handelsbezogenen Ökonomischen Kapitals um 3,3 Mrd € führte. In diesem Zusammenhang wurde der Ökonomische Kapitalbedarf für die Postbank von Corporate Investments (4,3 Mrd €) auf Private & Business Clients (1 Mrd €) übertragen. Zusätzlich führte die Integration von Sal. Oppenheim zu einem Anstieg von 313 Mio € in PCAM.

Der überwiegende Teil der Consolidation & Adjustment-Änderung beruht auf einem Anstieg des strukturellen Währungsrisikos um 625 Mio €.

**Buchwert und Ökonomischer Kapitalbedarf für unsere nicht handelsbezogenen Marktrisikoportfolios**  
Die folgende Tabelle zeigt die Buchwerte und den Ökonomischen Kapitalbedarf separat für unsere Nichthandelsportfolios.

| in Mrd €                                           | Buchwert    |             | Ökonomischer Kapitalbedarf |            |
|----------------------------------------------------|-------------|-------------|----------------------------|------------|
|                                                    | 31.12.2010  | 31.12.2009  | 31.12.2010                 | 31.12.2009 |
| <b>Nicht handelsbezogene Marktrisikoportfolios</b> |             |             |                            |            |
| Strategische Beteiligungen                         | 1,8         | 7,6         | 0,6                        | 4,9        |
| Wichtigste Unternehmensbeteiligungen <sup>1</sup>  | 0,2         | 0,2         | –                          | –          |
| Sonstige Unternehmensbeteiligungen                 | 4,4         | 0,9         | 1,8                        | 0,2        |
| darunter: neu integrierte Geschäftsbereiche        | 2,6         | –           | 1,3                        | –          |
| Alternative Assets                                 | 4,4         | 3,8         | 1,6                        | 1,3        |
| Principal Investments                              | 2,0         | 2,0         | 0,7                        | 0,7        |
| Immobilien                                         | 2,3         | 1,7         | 0,9                        | 0,6        |
| Hedgefonds <sup>2</sup>                            | 0,1         | 0,1         | –                          | –          |
| Sonstige nichtgehandelte Marktrisiken <sup>3</sup> | N/A         | N/A         | 2,7                        | 1,5        |
| <b>Insgesamt</b>                                   | <b>10,8</b> | <b>12,5</b> | <b>6,7</b>                 | <b>7,9</b> |

<sup>1</sup> Es bestand ein geringfügiger Ökonomischer Kapitalbedarf in Höhe von 4 Mio € am 31. Dezember 2010 und von 28 Mio € am 31. Dezember 2009.

<sup>2</sup> Es bestand ein geringfügiger Ökonomischer Kapitalbedarf in Höhe von 13 Mio € am 31. Dezember 2010 und von 17 Mio € am 31. Dezember 2009.

<sup>3</sup> N/A gibt an, dass das Risiko mehrheitlich bezogen ist auf außerbilanzielle Positionen oder Verbindlichkeiten.

Unser Ökonomischer Kapitalbedarf für diese nicht handelsbezogenen Marktrisikoportfolios belief sich zum Jahresende 2010 auf insgesamt 6,7 Mrd € und war damit um 1,2 Mrd € oder 15 % niedriger als der Ökonomische Kapitalbedarf zum Jahresende 2009.

- **Strategische Beteiligungen.** Unser Ökonomischer Kapitalbedarf zum 31. Dezember 2010 in Höhe von 0,6 Mrd € resultierte hauptsächlich aus unseren Beteiligungen an der Hua Xia Bank Company Ltd. sowie Abbey Life Assurance Company.
- **Wichtigste Industriebeteiligungen.** Unser Ökonomischer Kapitalbedarf zum 31. Dezember 2010 betrug 4 Mio €. Da die meisten dieser wichtigsten Industriebeteiligungen in den Vorjahren veräußert wurden, markieren die verbleibenden Positionen für uns kein materielles Risiko mehr.
- **Sonstige Unternehmensbeteiligungen.** Unser Ökonomischer Kapitalbedarf für unsere sonstigen Unternehmensbeteiligungen zum Jahresende 2010 belief sich auf 1,8 Mrd €. Von dem Anstieg von insgesamt 1,6 Mrd € entfielen 1,3 Mrd € auf das neu konsolidierte Geschäft der Postbank und von Sal. Oppenheim/BHF-BANK. Der ökonomische Kapitalbedarf wurde an unsere Methodologie für das Ökonomische Kapital angepasst. Neu hinzugerechnet zu dieser Kategorie wurde eine restrukturierte nachrangige Kreditfazilität mit signifikantem Eigenmittelcharakter. Nach Diversifikation entfielen auf diese 253 Mio €.
- **Alternative Assets.** Unsere Alternative Assets umfassen Principal Investments, Immobilieninvestments (einschließlich Mezzanine Debt) sowie kleine Investments in Hedgefonds. Principal Investments setzen sich zusammen aus direkten Investments in Private Equity, Mezzanine Debt, kurzfristigen Investments in Financial Sponsor Leveraged Buy-out-Fonds, Bridge Capital für Leveraged Buy-out-Fonds sowie Private-Equity-bezogenen Geschäften. Das Alternative-Asset-Portfolio weist eine gewisse Konzentration bei Infrastruktur- und Immobilienanlagen auf. Die jüngsten Marktentwicklungen haben jedoch die Möglichkeiten zur Reduzierung dieses Portfolios limitiert. Dies bleibt dennoch unsere Absicht – vorausgesetzt, günstige Marktkonditionen ermöglichen es.

— Sonstige nicht handelsbezogene Marktrisiken:

- Zinsrisiko. Das Zinsrisiko ist hauptsächlich getrieben durch die Fristentransformation der vertraglich kurzfristigen Einlagen. Die effektive Laufzeit der vertraglich kurzfristigen Einlagen basiert auf beobachtbarem Kundenverhalten, der Elastizität der Einlagen bezüglich der Marktzinssätze (DRE), der Volatilität der Einlagenhöhe und der eigenen Deutsche Bank Credit Spreads. Der Ökonomische Kapitalbedarf wird abgeleitet durch Stressen der Modellannahmen, insbesondere des DER, für die effektive Laufzeit täglich fälliger Einlagen. Am 31. Dezember 2010 betrug unser Ökonomischer Kapitalbedarf 435 Mio € und wurde hauptsächlich durch PBC, unter Einbeziehung der DB Bauspar, getrieben. Verhaltens- und wirtschaftliche Profile werden bei der Berechnung der effektiven Laufzeit berücksichtigt, ebenso wie optionale Ziehungen in unserem Baufinanzierungsgeschäft.
- Aktienvergütungsrisiken. Risiko aufgrund einer strukturellen Shortposition in Bezug auf den Kurs der Deutsche Bank-Aktie aus Restricted Equity Units. Unser Ökonomischer Kapitalbedarf zum 31. Dezember 2010 betrug minus 272 Mio € auf diversifizierter Basis. Der negative Beitrag zu unserem diversifizierten Ökonomischen Kapital leitet sich daraus ab, dass eine Reduzierung unseres Aktienkurses in einem Downsideszenario, wie es durch das Ökonomische Kapital dargestellt wird, zu einem verringerten negativen Einfluss der Verpflichtungen zur Aktienvergütung auf unser Kapital führen würde.
- Pensionsrisiken. Das Risiko resultierend aus unseren leistungsdefinierten Versorgungszusagen inklusive Zinsrisiko und Inflationsrisiko, Kreditmargenrisiko, Aktienkursrisiko und Langlebigkeitsrisiko. Unser Ökonomischer Kapitalbedarf, ohne Postbank, betrug 146 Mio € zum 31. Dezember 2010. Der Ökonomische Kapitalbedarf auf der Ebene der Deutsche Bank Gruppe für die Pensionsrisiken der Postbank betrug 33 Mio €.
- Strukturelle Währungsrisiken. Unser Währungsrisiko aus nicht währungskursgesicherten Kapital und Gewinnrücklagen in Nicht-Euro-Währungen in bestimmten Tochtergesellschaften. Unser Ökonomischer Kapitalbedarf auf diversifizierter Basis betrug 927 Mio € zum 31. Dezember 2009.
- Asset Management-Garantiefonds. Unser Ökonomischer Kapitalbedarf belief sich zum 31. Dezember 2010 auf 1,4 Mrd €.

In den Gesamtzahlen des Ökonomischen Kapitals für nichthandelsbezogene Marktrisiken ist gegenwärtig kein Diversifikationseffekt zwischen diesen unterschiedlichen Vermögensklassen berücksichtigt, mit Ausnahme von Aktienvergütungsprogrammen und strukturellen Währungsrisiken sowie Risiken aus Pensionsverpflichtungen.



## Operationelles Risiko

### Organisationsstruktur

Der Head of Operational Risk & Business Continuity Management führt den Vorsitz im Operational Risk Management Committee, das ein ständiger Unterausschuss des Risk Executive Committee ist und sich aus den Operational Risk Officers unserer Geschäftsbereiche und Infrastrukturfunktionen zusammensetzt. Es ist das Hauptentscheidungs-gremium für alle Fragen des operationellen Risikomanagements.

Während die Geschäftsbereiche und Infrastrukturfunktionen für das tägliche Management operationeller Risiken verantwortlich sind, ist die Operational Risk & Business Continuity Management-Funktion für die Steuerung bereichs- und regionenübergreifender operationeller Risiken sowie Risikokonzentrationen und die einheitliche Anwendung der Strategie für das operationelle Risikomanagement in allen Bereichen der Bank zuständig. Auf der Grundlage des nachfolgend dargestellten Business-Partnership-Modells gewährleisten wir eine enge Überwachung und ein verstärktes Bewusstsein für operationelle Risiken.

### Business-Partnership-Modell des Operationellen Risikomanagements

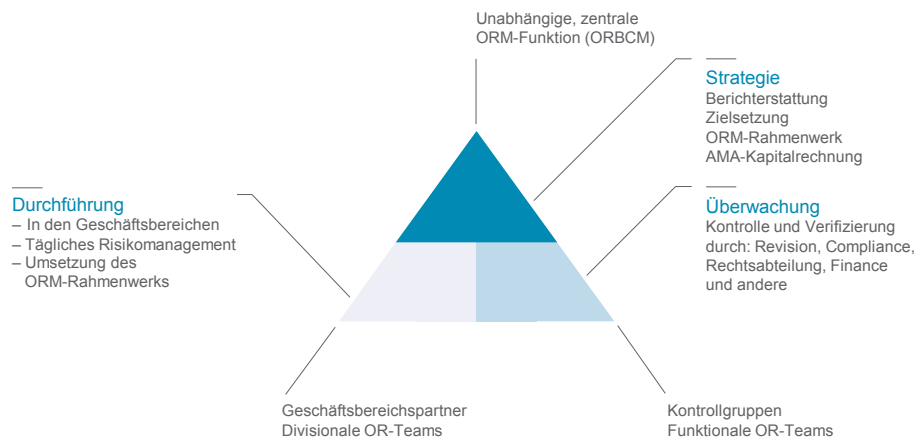

## Steuerung unseres operationellen Risikos

Wir steuern das operationelle Risiko auf Basis eines konzernweiten konsistenten Rahmenwerks, mit dem wir unser operationelles Risikoprofil im Vergleich zu unserer Risikoneigung bestimmen und operationelle Risikothemen und -konzentrationen systematisch identifizieren, um Maßnahmen wie auch Prioritäten zur Risikominimierung definieren zu können.

Wir wenden verschiedene Techniken zur effizienten Steuerung des operationellen Risikos an. Einige Beispiele:

- Wir führen systematische Risikoanalysen, Ursachenanalysen und Lessons-Learned-Aktivitäten bei Ereignissen von über 1 Mio € durch, um risikobehaftete Bereiche festzustellen und angemessene risikomindernde Maßnahmen zu definieren, deren Umsetzung anschließend überwacht wird. Voraussetzung für diese eingehenden Analysen und die zeitnahe Weitergabe von Informationen über die Entwicklung operationeller Risikoereignisse und über größere Einzelereignisse an den Konzernvorstand ist die kontinuierliche Erfassung sämtlicher Verluste über 10.000 €, die aus operationellen Risikoereignissen entstanden sind, in unserem „db-Incident Reporting System“.
- Wir nutzen systematisch Informationen über externe Ereignisse in der Bankenbranche, um sicherzustellen, dass vergleichbare Vorfälle nicht bei uns vorkommen.
- Wir verwenden Key Risk Indicators („KRI“), um unsere Organisation zeitnah auf mögliche bevorstehende Probleme aufmerksam zu machen. Sie ermöglichen uns die Überwachung der Kontrollkultur und des operationellen Risikoprofils und lösen risikomindernde Maßnahmen aus. Im KRI-System erfassen wir Daten auf Detailebene. Dies ermöglicht die Überwachung des geschäftlichen Umfelds und die vorausschauende Steuerung operationeller Risiken auf Basis von Frühwarnsignalen, die durch die KRIs angezeigt werden. Wir erfassen und überwachen wichtige operationelle Risikoindikatoren mit unserem System „db-Score“.
- In unserem Risk-and-Control-Self-Assessment („RCSA“-)Prozess, den wir mindestens jährlich und nach einem Bottom-up-Ansatz durchführen, werden Bereiche mit hohem Risikopotenzial identifiziert und Maßnahmen zur Risikominderung festgelegt. In der Regel werden RCSAs in unserem System „db-SAT“ durchgeführt. Wir führen regelmäßig Country Risk Workshops durch, um Risiken zu bewerten, die für Länder, in denen der Konzern operiert, und für lokale rechtliche Einheiten spezifisch sind, sowie um entsprechende Maßnahmen zur Risikominderung einzuleiten.
- Wir führen Szenarioanalysen durch, um interne und externe Verlustinformationen zu ergänzen und Maßnahmen aus diesen abzuleiten. Desgleichen führen wir regelmäßig Stresstests durch, um die Auswirkungen von extremen Situationen auf unser Kapital und unsere Gewinn- und Verlustrechnung zu analysieren.
- Die für die Geschäftsbereiche, die Länder, in denen der Konzern operiert, und ausgewählte Infrastrukturgruppen regelmäßig erstellten Berichte über unser operationelles Risikoprofil werden mit dem Senior Management der Abteilung besprochen und diskutiert. Die regelmäßige Überprüfung des Risikoprofils ermöglicht es uns, Änderungen des Risikoprofils der Geschäftseinheiten sowie Risikokonzentrationen im Konzern frühzeitig zu erkennen und entsprechende Korrekturmaßnahmen einzuleiten.
- Wir bewerten die Auswirkung von Änderungen unseres Risikoprofils zum Beispiel durch neue Produkte, Outsourcing und Akquisitionen.
- Mit unserem System „db-Track“ überwachen wir die Abarbeitung der identifizierten Maßnahmen zur Risikominderung, die über dieses System identifiziert wurden.
- Aufgrund des heterogenen Charakters von operationellen Risiken können diese in bestimmten Fällen nicht vollständig reduziert werden. In diesen Fällen werden operationelle Risiken dem „so niedrig wie wirtschaftlich sinnvoll“-Prinzip folgend reduziert, wobei die Kosten der Risikominderung den sich ergebenden Vorteilen gegenübergestellt und die Restrisiken formell akzeptiert werden.

— Wir führen sogenannte „Top-Risk“-Analysen durch, in denen die Ergebnisse der vorgenannten Aktivitäten berücksichtigt werden. Die „Top-Risk“-Analysen tragen vor allem zum jährlichen Strategie- und Planungsprozess für das operationelle Risikomanagement bei. Neben der strategischen und taktischen Planung des operationellen Risikomanagements legen wir Zielgrößen für unser Kapital und unseren erwarteten Verlust fest, die im Rahmen unseres vierteljährlichen Prognoseprozesses regelmäßig überwacht werden.

### Messung unseres operationellen Risikos

Im Jahr 2010 haben wir Sal. Oppenheim (außer für die Teile, die zum Verkauf stehen) und die von der ABN AMRO erworbenen Commercial Banking Aktivitäten in den Niederlanden sowie das Global Agency Securities Lending-Geschäft der Dresdner Bank in unseren Prozess zum Management operationeller Risiken mit einbezogen. Obwohl die Postbank selbst ihr operationelles Risiko steuert, wurde die Postbank bereits in die Berechnung unseres Ökonomischen Kapitals auf einer mit der Methodologie der Deutschen Bank konsistenten Basis einbezogen. Begrenzungen der Datenverfügbarkeit können jedoch zu Portfolioeffekten führen, die nicht vollständig abgeschätzt werden können und dadurch zu Über- beziehungsweise Unterschätzung führen können. Die nachstehende Tabelle zeigt den Bedarf an ökonomischem Kapital für operationelle Risiken unserer Geschäftsbereiche für die angegebenen Perioden.

| in Mio €                                                      | 31.12.2010   | 31.12.2009   |
|---------------------------------------------------------------|--------------|--------------|
| <b>Ökonomischer Kapitalbedarf (für operationelle Risiken)</b> |              |              |
| CIB                                                           | 2.735        | 2.822        |
| PCAM                                                          | 939          | 654          |
| CI                                                            | 8            | 17           |
| <b>Insgesamt</b>                                              | <b>3.682</b> | <b>3.493</b> |

Das Ökonomische Kapital des Konzerns für operationelle Risiken erhöhte sich per 31. Dezember 2010 um 189 Mio € oder 5 % auf 3,7 Mrd €. Der insbesondere durch Akquisitionen (Postbank, BHF-BANK, die von der ABN AMRO erworbenen Commercial Banking-Aktivitäten in den Niederlanden sowie Sal. Oppenheim) erhöhte Bedarf an Ökonomischem Kapital wurde nur teilweise durch niedrigere Verlusthäufigkeiten aufgrund pro-aktiven operationellen Risikomanagements ausgeglichen.

Wir berechnen und messen das Ökonomische und aufsichtsrechtliche Kapital für operationelle Risiken mittels des internen AMA-Modells. Das Ökonomische Kapital wird dabei aus dem 99,98 %-Quantil abgeleitet, den Geschäftsbereichen zugeordnet und zur Performancemessung sowie Ressourcenallokation genutzt und bietet einen Anreiz zum Management operationeller Risiken und zur Optimierung des Ökonomischen Kapitalbedarfs. Das aufsichtsrechtliche Kapital für operationelle Risiken basiert auf dem 99,9 %-Quantil. Unsere interne Berechnung des AMA-Kapitals basiert auf dem Verlustverteilungsansatz. Bruttoverluste bereinigt um direkte Rückerstattungen aus historischen internen und externen Verlustdaten (vom Operational Riskdata eXchange Association „ORX“ Konsortium und einer öffentlichen Datenbank) sowie Szenariodaten werden für die Bewertung des Risikoprofils (das heißt Verteilung von Verlusthäufigkeit und -höhe) genutzt. Anschließend wird die Verteilung von Verlusthäufigkeit und Verlusthöhe in einer Monte Carlo-Simulation zusammengeführt, um über einen Zeitraum von einem Jahr Verluste zu prognostizieren. Schließlich werden die risikomindernden Versicherungseffekte auf jeden in der Monte Carlo-Simulation generierten Verlust angewandt. Die positiven Effekte aus der Korrelation und Diversifikation werden gemäß aufsichtsrechtlichen Anforderungen auf den Nettoverlust angewandt, um eine Verteilung von Nettoverlusten auf Konzernebene zu ermitteln, die erwartete und unerwartete Verluste abdeckt. Das Kapital wird anschließend den Geschäftsbereichen zugeordnet und es werden sowohl die qualitative Anpassung (QA) als auch der Abzug erwarteter Verluste vorgenommen.

Die QA spiegelt die Effektivität und den Erfolg der täglichen Steuerung operationeller Risiken durch KRIs und RCSAs wider, die auf das Geschäftsumfeld und interne Kontrollfaktoren fokussieren. Die QA wird als prozentuale Anpassung an den finalen Kapitalwert angewandt. Dieser Ansatz macht die QA für das Management der Geschäftsbereiche erkennbar und gibt Feedback zu deren Risikoprofil und Erfolg bei der Steuerung operationeller Risiken. Er schafft damit einen Anreiz für die Geschäftsbereiche, das Management der operationellen Risiken in ihren Bereichen kontinuierlich zu verbessern.

Der erwartete Verlust aus dem operationellen Risiko basiert auf der historischen Verlusterfahrung und Expertenmeinung, wobei geschäftliche Veränderungen berücksichtigt werden, welche die erwarteten Kosten von operationellen Verlusten der Geschäftstätigkeit kennzeichnen. Soweit der erwartete Verlust in den Geschäftsbereichsplänen berücksichtigt wurde, wird dieser vom AMA-Kapitalwert abgezogen.

Die unerwarteten Verluste für die Geschäftsbereiche (nach QA und erwartetem Verlust) werden zusammengefasst, um den AMA-Kapitalwert des Konzerns zu ermitteln.

Seit dem Geschäftsjahr 2008 haben wir die Genehmigung der BaFin für den Advanced Measurement Approach („AMA“) aufrechterhalten. Die aufsichtsrechtliche Genehmigung zur Integration der Postbank in unsere Berechnung des aufsichtsrechtlichen Kapitals wird unsererseits noch erwartet.

### Unser Stresstestkonzept für das Operationelle Risikomanagement

Im Rahmen unseres Stresstestkonzepts sorgen wir dafür, dass operationelle Risiken hinreichenden und angemessenen Tests unterzogen werden. Unsere AMA-Methodik beinhaltet bereits Stresstestelemente wie externe Daten, die extreme Datenpunkte sowie historische Verlusterfahrung aus mindestens 25 Jahren enthalten. Beide Faktoren werden herangezogen, um die Verteilung der Verlusthöhe darzustellen. Ergänzend führen wir Sensitivitätsanalysen und konzernweite Stresstests einschließlich Reverse Stresstests durch.

### Aufgabe von Corporate Insurance/Deukona

Für die Definition der Versicherungsstrategie des Konzerns und die Erstellung der dazugehörigen Konzernrichtlinien und Vorschriften zeichnet unser Expertenteam von Corporate Insurance/Deukona („CI/D“) verantwortlich. CI/D ist für die Erstellung der Konzernrichtlinie Corporate Insurance verantwortlich, die vom Konzernvorstand genehmigt wird.

CI/D ist für den Erwerb von Versicherungsschutz und die Verhandlung von Vertragsbedingungen sowie Versicherungsprämien verantwortlich. Zu den Aufgaben von CI/D gehört darüber hinaus die Zuordnung von Versicherungsprämien auf die Geschäftsbereiche. Die Experten von CI/D unterstützen bei der Entwicklung der Methode zur Darstellung des Versicherungsschutzes in den Kapitalberechnungen und bei der Ermittlung von Parametern, welche die aufsichtsrechtlichen Anforderungen widerspiegeln. Sie validieren die Einstellungen der Versicherungsparameter, die im AMA-Modell genutzt werden und liefern relevante Aktualisierungen. CI/D beteiligt sich aktiv an den Initiativen der Branche, den Versicherungseffekt in den Ergebnissen der Kapitalberechnungen zu reflektieren.

Wir erwerben Versicherungsschutz, um uns gegen unerwartete und erhebliche unvorhersehbare Verluste abzusichern. Die eingesetzten Verfahren zur Feststellung sowie Definition und Schätzung des Versicherungsumfangs basieren auf den anerkannten sinnvollsten, aktuellsten und/oder Vergleichsmaßstäbe setzenden Versicherungsbedingungen. Die maximale Leistung für ein versichertes Risiko berücksichtigt die Verlässlichkeit des Versicherers und das Kosten-Nutzen-Verhältnis, insbesondere in Fällen, in denen der Versicherungsmarkt versucht, den Versicherungsschutz mithilfe von einschränkenden/eingrenzenden Formulierungen in Versicherungsverträgen und spezifischen Ausschlussklauseln einzuschränken.

Wir betreiben eine Reihe von eigenen Versicherungsunternehmen, die sowohl Erst- als auch Rückversicherer sind. Die Versicherungsverträge werden jedoch erst dann zur Modellierung/Berechnung der versicherungsbezogenen Verringerung von Kapitalanforderungen für das operationelle Risiko herangezogen, wenn das Risiko am externen Versicherungsmarkt rückversichert ist.

Das regulatorische Kapital beinhaltet eine Reduzierung aufgrund von Versicherungsdeckung in Höhe von 467 Mio €. Aktuell werden außer Versicherungen keine anderen Risikotransfertechniken im AMA-Modell berücksichtigt.

CI/D wählt die Versicherungspartner unter strenger Einhaltung aufsichtsrechtlicher Anforderungen gemäß der Solvabilitätsverordnung und der „Empfehlung des Fachgremiums Operationelle Risiken zur Berücksichtigung von Versicherungen im fortgeschrittenen Messansatz“. Das Versicherungsportfolio sowie CI/D-Aktivitäten werden von Group Audit regelmäßig geprüft.

### Operationelle Risiken der Postbank

Der Ansatz der Postbank bezüglich des Managements operationeller Risiken ist weitgehend mit dem Ansatz der Deutschen Bank vergleichbar. Der Vorstand der Postbank ist alleinverantwortlich für das Management, die Kontrolle und die Überwachung der operationellen Risiken. Das Operational Risk Committee („ORK“), das vom Vorstand der Postbank eingesetzt wurde, definiert die Strategie und das Rahmenwerk zur Überwachung operationeller Risiken. Das tägliche Management operationeller Risiken liegt in der Verantwortung der einzelnen Geschäftseinheiten der Postbank. Strategische Parameter zum Management operationeller Risiken, sowohl qualitative als auch quantitative, sind Teil der Gesamtstrategie.

Innerhalb der Postbank wurde der Bedarf an Ökonomischem Kapital für operationelle Risiken sowohl für die Postbank als Ganzes als auch für die vier Geschäftsbereiche individuell unter Nutzung eines internen Kapitalmodells zur Berechnung der Kapitalanforderungen für operationelle Risiken bestimmt. Die Postbank hat für ihr AMA-Modell im Dezember 2010 die Genehmigung der BaFin erhalten.

Im Rahmen der Konsolidierung der Postbank wurde der Bedarf an Ökonomischem Kapital für operationelle Risiken unter Nutzung der Deutsche Bank Methodik zur Berechnung des Ökonomischen Kapitals für operationelle Risiken neu berechnet. Diese Berechnung basiert auf zusammengefassten Daten der Deutsche Bank Gruppe und der Postbank. Das Ergebnis dieser Berechnung wird in diesem Bericht in aggregierter Form im Kapitel „Gesamtrisikoposition“ wiedergegeben.

## Liquiditätsrisiko Deutsche Bank-Konzern (ohne Postbank)

Das Liquiditätsrisikomanagement stellt sicher, dass wir stets in der Lage sind, unsere Zahlungsverpflichtungen zeitgerecht zu erfüllen. Im Jahr 2010 hat unser Liquiditätsrisikomanagement einen wichtigen Beitrag zur Sicherung der Liquidität und zum Management einer soliden Finanzierungsstruktur geleistet.

### Konzept des Liquiditätsrisikomanagements

Der Vorstand legt die Liquiditätsrisikostategie fest, die im Besonderen die Risikotoleranz für Liquiditätsrisiken enthält, die von der Treasury und dem Capital and Risk Committee vorgeschlagen wird. Mindestens einmal im Jahr überprüft und genehmigt der Vorstand die gruppenweiten Limite zur Messung und Kontrolle von Liquiditätsrisiken sowie den langfristigen Refinanzierungs- und Emissionsplan.

Wie in der Liquiditätsrisikostategie dargelegt, ist unsere Treasury-Funktion für die Steuerung des Liquiditäts- und Refinanzierungsrisikos der Deutschen Bank weltweit verantwortlich. Aufgabe des Liquiditätsrisikomanagements ist es, die Liquiditätsrisikoposition der Gruppe zu identifizieren, zu messen und zu steuern. Treasury berichtet die Liquiditäts- und Refinanzierungslage der Bank mindestens wöchentlich im Rahmen der Liquidity Scorecard an den Vorstand. Unser Liquiditätsrisikomanagement beginnt regelmäßig mit der Steuerung der täglichen Zahlungen, der Planung erwarteter Cashflows und der Sicherstellung unseres Zugangs zu Zentralbanken (operative Liquidität). Anschließend folgt das taktische Liquiditätsrisikomanagement, das sich mit dem Zugang zu besicherten und unbesicherten Marktfinanzierungsquellen beschäftigt. Schließlich findet im Rahmen der strategischen Komponente das Aufstellen eines Fälligkeitsprofils sämtlicher Aktiva und Passiva in unserer Bilanz (Liquiditätsablaufbilanz) sowie die Festlegung unserer Emissionsstrategie statt.

Unser cashflowbezogenes Reportingsystem liefert tägliche Liquiditätsrisikoinformationen für das globale und regionale Management.

Stresstests und Szenarioanalysen spielen in unserem Konzept des Liquiditätsrisikomanagements eine zentrale Rolle. Hierzu gehört auch eine Bewertung der Liquidität der Aktiva, das heißt der Liquiditätseigenschaften unseres Bestands an Vermögenswerten, unter verschiedenen Stressszenarien, sowie die Analyse von bedingten Zahlungsverpflichtungen aus außerbilanziellen Verpflichtungen. Die monatlichen Stresstestergebnisse dienen dazu, unsere kurzfristigen Wholesale-Refinanzierungslimits (sowohl für unbesicherte als auch für besicherte Refinanzierung) festzulegen, und somit sicherzustellen, dass die Bank innerhalb der generellen Liquiditätsrisikotoleranz des Vorstands bleibt.

### Kurzfristige Liquidität und Refinanzierung über den Wholesalemarkt

Unser gruppenweites Reportingsystem verfolgt alle vertraglichen Cashflows aus der Refinanzierung über den Wholesalemarkt auf täglicher Basis über eine Zeitspanne von 12 Monaten. Das System erfasst sämtliche Cashflows sowohl aus unseren unbesicherten als auch aus unseren besicherten Finanzierungstransaktionen. Die Limite für eine Refinanzierung über den Wholesalemarkt, die von den Ergebnissen unserer Stresstests abgeleitet und vom Vorstand genehmigt werden, stellen unsere Maximaltoleranz für Liquiditätsrisiken dar. Diese Limite werden auf die globalen Nettoabflüsse angewandt und täglich überwacht. Unsere Liquiditätsreserven stellen die primären Gegensteuerungsmaßnahmen für Stress in den kurzfristigen Wholesale Refinanzierungsmärkten dar. Auf Ebene der rechtlichen Einheiten können wo es zweckmäßig und angemessen erscheint einzelne Liquiditätsabflusslimits gesetzt werden, die ein breiteres Spektrum an Cashflows begrenzen.

### Unbesicherte Finanzierungsmittel

Die Aufnahme unbesicherter Finanzierungsmittel ist nur in begrenztem Umfang möglich. Unbesicherte Finanzierungsmittel setzen sich zusammen aus allen externen am Markt aufgenommenen Verbindlichkeiten, unabhängig von Instrument, Währung oder Laufzeit. Die unbesicherten Finanzierungsmittel werden auf regionaler Basis erfasst und in einem globalen Bericht zusammengeführt. Im Rahmen der Liquiditätsrisikostategie genehmigt der Vorstand Limite, um unseren Zugang zu unbesicherten Finanzierungsmitteln zu attraktiven Konditionen zu sichern.

### Diversifikation der Finanzierungsmittel

Die Diversifikation unseres Refinanzierungsprofils nach Anlegerkategorien, Regionen, Produkten und Instrumenten ist ein wesentlicher Bestandteil unseres Liquiditätsrisikomanagements. Unsere Kernfinanzierungsmittel stammen von Privatkunden, langfristigen Kapitalmarktinvestoren und den Kunden von Transaction Banking. Andere Kundeneinlagen sowie Geldaufnahmen von anderen Banken sind weitere Finanzierungsquellen.

Letztere werden primär zur Finanzierung der liquiden Aktiva eingesetzt. Um die weitgehende Diversifizierung der Refinanzierungsmittel sicherzustellen, halten wir eine Pfandbrieflizenz die uns die Emission von Hypothekendarlehen ermöglicht.

In 2010 haben wir unseren Schwerpunkt weiterhin auf den Ausbau unserer stabilen Kernfinanzierungsquellen gesetzt, und die Nutzung der kurzfristigen diskretionären Wholesalerefinanzierung dessen ungeachtet auf einem relativ niedrigen Niveau gehalten. Der Anteil der diskretionären Wholesalerefinanzierung ist über verschiedene Produkte (zum Beispiel CD, CP sowie Termin, Call- und Tagesgelder) sowie Laufzeiten diversifiziert. Die Akquisition der Postbank erhöhte deutlich das Volumen der stabilsten Refinanzierungsmittel. Der Status der Postbank als regulierte Bank und gelistetes Unternehmen, kann unseren Zugang zu dieser Liquidität einschränken.

Das Gesamtvolumen an diskretionärer Wholesalerefinanzierung und besicherter Refinanzierung schwankte zwischen den Berichtszeitpunkten basierend auf den zugrunde liegenden Geschäftsaktivitäten. Die höheren Volumina, vor allem in der besicherten Refinanzierung sind größtenteils durch höhere kundenbezogene Wertpapierfinanzierungsgeschäfte sowie einen Anstieg der Handelsbestände zwischen den Quartalsenden getrieben. Der Anstieg innerhalb der diskretionären Wholesalerefinanzierungen im Jahr 2010 reflektierte im Wesentlichen den Anstieg in Geldanlagen und liquiden Handelsaktiva im Konzernbereich Corporate Banking & Securities.

Um eine ungewollte Abhängigkeit von diesen kurzfristigen Refinanzierungsquellen zu vermeiden und ein gesundes Refinanzierungsprofil am kurzen Ende sicherzustellen, das im Einklang mit der definierten Risikotoleranz steht, haben wir Limite (über die Zeitachse) für diese Finanzierungsquellen implementiert, die von der Stresstestanalyse abgeleitet sind.



Die folgende Grafik zeigt die Zusammensetzung unserer externen Finanzierungsquellen (auf konsolidierter Basis unter Berücksichtigung der Postbank, die separat in der Grafik ausgewiesen ist), die zur Liquiditätsrisikoposition zum 31. Dezember 2010 und zum 31. Dezember 2009 beitragen. Sie sind jeweils in Mrd € sowie als prozentualer Anteil an den externen Finanzierungsquellen insgesamt dargestellt.

### Zusammensetzung externer Finanzierungsquellen

in Mrd €

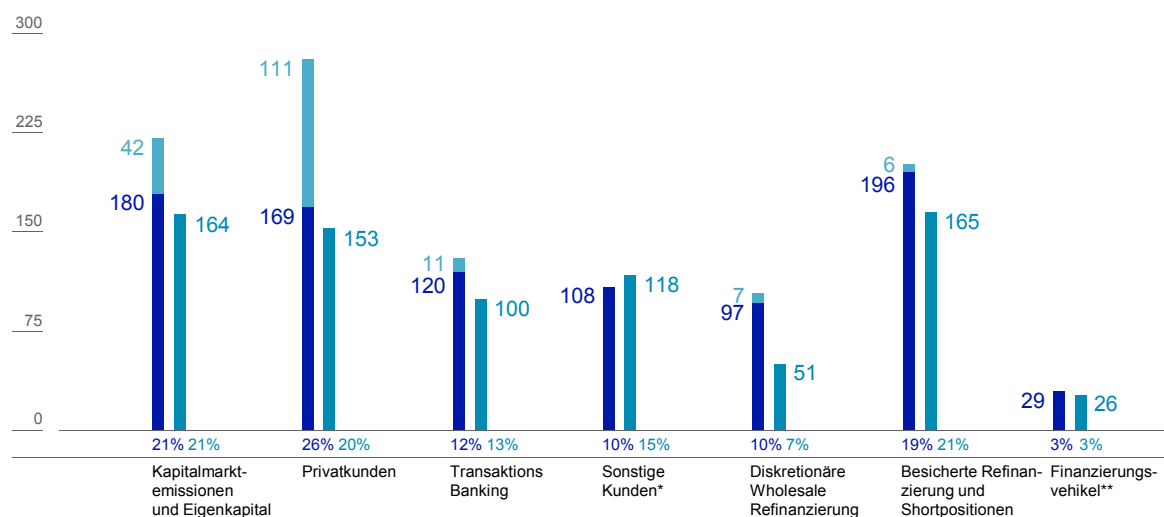

am 31. Dezember 2010: Deutsche Bank 897 Mrd €, Postbank 178 Mrd €; gesamt 1.075 Mrd €;  
am 31. Dezember 2009: gesamt 777 Mrd €

\* Sonstige Kunden enthält treuhänderische, sich selbst finanzierende Strukturen (zum Beispiel X-Markets), Mergen/Barguthaben aus dem Prime Brokerage-Geschäft (netto).

\*\* Enthält ABCP-Conduits.

Hinweis: Abgleich zur Bilanzsumme: Derivat- & Abwicklungssalden 706 Mrd € (620 Mrd €), Hinzurechnung Nettingeffekte für Margin & Prime Brokerage Barsalden (auf Nettobasis) 61 Mrd € (51 Mrd €), sonstige nicht der Refinanzierung dienende Verbindlichkeiten 63 Mrd € (53 Mrd €), jeweils zum 31. Dezember 2010 und 31. Dezember 2009; Beträge können aufgrund Rundungen Summenabweichungen ergeben.

### Liquiditätsablaufbilanz

In die Liquiditätsablaufbilanz (Funding Matrix) stellen wir alle für das Refinanzierungsprofil relevanten Aktiva und Passiva nach ihrer Laufzeit in Zeitbänder ein. Da handelbare Wertpapiere in der Regel liquider sind, als ihre vertraglichen Laufzeiten erkennen lassen, haben wir individuelle Liquiditätsprofile erstellt, die deren relativen Liquiditätswert zeigen. Aktiva und Passiva aus dem Retail Banking, die üblicherweise unabhängig von den geltenden Kapitalmarktbedingungen erneuert oder verlängert werden (Immobilienfinanzierungen und Retail-einlagen), ordnen wir entsprechend der erwarteten Prolongation bestimmten Zeitbändern zu. Wholesaleprodukte stellen wir entsprechend ihren vertraglichen Laufzeiten ein.

Die Liquiditätsablaufbilanz zeigt für jedes Zeitband einen Überschuss beziehungsweise Fehlbestand an Finanzierungsmitteln und ermöglicht die Steuerung offener Liquiditätspositionen. Die Liquiditätsablaufbilanz bildet zusammen mit der strategischen Liquiditätsplanung, die das Angebot und die Nachfrage nach Refinanzierungsmitteln über alle Geschäftsbereiche hinweg prognostiziert, eine wichtige Grundlage für unseren jährlichen Emissionsplan. Nach Genehmigung durch das Capital and Risk Committee und den Vorstand werden unsere

Emissionsziele nach Laufzeit, Volumen und Instrument festlegt. Per Jahresende 2010 haben wir in allen jährlichen Laufzeitbändern der Liquiditätsablaufbilanz (Jahr 2 – 10) Überschüsse ausgewiesen.

Insgesamt hat Treasury im Jahr 2010 Kapitalmarktinstrumente in Höhe von etwa 22,9 Mrd € begeben, 3,9 Mrd € mehr, als im ursprünglichen Emissionsplan vorgesehen.

Für Informationen bezüglich des Laufzeitprofils unserer langfristigen Verbindlichkeiten verweisen wir auf Note 30 „Langfristige Verbindlichkeiten und hybride Kapitalinstrumente (Trust Preferred Securities)“ des Konzernabschlusses.

### Transfer Pricing

Wir unterhalten ein Transfer-Pricing-Konzept, das für alle Geschäftsbereiche bindend ist. Somit wird sicherstellt, dass die Preise (i) für Aktiva im Einklang mit deren zugrunde liegendem Liquiditätsrisiko, (ii) für Passiva im Einklang mit deren Liquiditätswert und (iii) für bedingte Zahlungsverpflichtungen im Einklang mit den Kosten für die Bereitstellung von ausreichenden Liquiditätsreserven gestellt werden, die benötigt werden, um die unerwarteten Zahlungsrisiken abzudecken.

In diesem Transfer-Pricing-Konzept allokalieren wir die Refinanzierungs- und Liquiditätskosten und Beiträge an alle Geschäftsbereiche und setzen im Rahmen der Liquiditätsrisikorichtlinien finanzielle Anreize. Transferpreise unterliegen den Laufzeitaufschlägen in Abhängigkeit der Marktbedingungen. Die Liquiditätsprämien werden von Treasury festgelegt und in einem segregierten Liquiditätskonto ausgewiesen. Das Treasury-Liquiditätskonto spiegelt die aggregierten langfristigen Liquiditätskosten wider. Die Steuerung und Kostenallokation des Liquiditätskontos ist die wichtigste Stellgröße für die Transferpreis-Refinanzierungskosten in der Deutschen Bank.

### Stresstests und Szenarioanalysen

Wir verwenden Stresstests und Szenarioanalysen zur Untersuchung des Einflusses von plötzlich auftretenden Stressereignissen auf unsere Liquiditätsposition. Diese Szenarien beruhen entweder auf historischen Ereignissen (wie dem Börsencrash des Jahres 1987, dem US-amerikanischen Liquiditätsengpass von 1990 und den Terrorangriffen des 11. September 2001), auf Fallstudien von Liquiditätskrisen oder auf hypothetischen Modellen.

Diese Szenarien berücksichtigen auch neue Treiber des Liquiditätsrisikos, die sich aus der letzten Finanzmarktkrise ergeben haben: länger anhaltende Disfunktionalität des Geldmarkts, Ablehnung von Sicherheiten, eingeschränkte Fungibilität von Währungen, nicht absetzbare Syndizierungen, und sonstige systemische Nebewirkungseffekte. Die Szenario-Typen umfassen institutsspezifische Ereignisse (zum Beispiel Bonitätsherabsetzung), marktbedingte Ereignisse (zum Beispiel systemisches Marktschockszenario) sowie die Kombination beider Ereignisse. Dieses Szenario analysiert ein systemisches Marktschockszenario in Kombination mit einer mehrstufigen Bonitätsherabsetzung.

Bei jedem dieser Szenarien wird angenommen, dass alle fällig werdenden Forderungen an Kunden vollständig prolongiert und refinanziert werden müssen, wobei die Prolongation der Verbindlichkeiten teilweise eingeschränkt ist und somit eine Finanzierungslücke entsteht. Darüber hinaus analysieren wir den potenziellen Refinanzierungsbedarf aus außerbilanziellen Verbindlichkeiten (zum Beispiel Ziehungen unter Kreditfazilitäten und gestiegene Besicherungsanforderungen), die unter Stress entstehen können. Danach werden die notwendigen Schritte bestimmt, um den Nettobedarf an Finanzierungsmitteln auszugleichen. Die Gegenmaßnahmen beinhalten den Bestand an unbesicherten Vermögenswerten in den Geschäftsbereichen, die verfügbaren liquiden Zahlungsmittel (die zusätzlich zu den liquiden Zahlungsmitteln vorhanden sind, die integraler Bestandteil der Clearing- und Settlement-Aktivitäten sind), sowie die strategische Liquiditätsreserve.

Die Analyse der Liquidität der Aktiva ist daher ein integraler Bestandteil von Stresstests, mithilfe derer wir die Volumina und Verbuchungsorte unseres konsolidierten Bestands an ohne Sicherheiten refinanzierten liquiden Aktiva bestimmen, die wir zur Generierung von Liquidität über besicherte Finanzierungstransaktionen einsetzen können. Die Wertpapierbestände setzen sich aus einer breiten Palette unterschiedlicher Wertpapierklassen zusammen. Zunächst trennen wir in jedem Bestand die illiquiden von den liquiden Wertpapieren. Anschließend werden den liquiden Wertpapierklassen Liquiditätswerte zugeordnet. Die Liquidität dieser Aktiva ist ein entscheidender Schutz vor kurzfristigen Liquiditätsengpässen.

Darüber hinaus hält die Bank vorwiegend mit Zentralbanken umfangreiche liquide Mittel, die zusätzlich zu den erforderlichen Reserven zur Unterstützung ihrer Clearingaktivitäten in Euro, US-Dollar und anderen Währungen weltweit vorgehalten werden.

Als separate Gegensteuerungsmaßnahme unterhalten wir eine spezielle strategische Liquiditätsreserve in Form hochliquider und zentralbankfähiger Wertpapiere in den führenden Weltwährungen zur Unterstützung unseres Liquiditätsprofils für den Fall potenziell sich verschlechternder Marktbedingungen. Das Volumen dieser strategischen Liquiditätsreserve ist eine Funktion der erwarteten Stresstestergebnisse. Die Größe und Komposition unterliegen der regelmäßigen Überprüfung durch den Konzernvorstand.

Die kurzfristig liquidesten Bestandteile mit der höchsten Qualität innerhalb der oben beschriebenen drei Kategorien werden aggregiert und separat als Liquiditätsreserven identifiziert. Diese Liquiditätsreserven beinhalten freie liquide Zahlungsmittel, hochliquide Staatsanleihen und andere zentralbankfähige Aktiva. Zum 31. Dezember 2010 überstiegen unsere Liquiditätsreserven ein Volumen von 145 Mrd €.

Stresstests sind vollständig in unser Liquiditätsrisikomanagement-Konzept integriert. Wir verfolgen unsere vertraglich vereinbarten Zahlungsströme pro Währung und Produkt über einen achtwöchigen Zeitraum (welchen wir als die kritischste Zeitspanne in einer Liquiditätskrise einschätzen) und wenden den jeweiligen Stressfall auf alle potenziellen Treiber der Risiken aus bilanziellen und außerbilanziellen Produkten an. Über den achtwöchigen Zeitraum hinaus bis zu zwölf Monate analysieren wir quartalsweise die Auswirkungen einer erweiterten Stressperiode, zusammen mit Gegensteuerungsmaßnahmen, die eine Veränderung des Geschäftsmodells beinhalten können. Die Stresstests des Liquiditätsrisikos liefern die Basis für unsere vom Vorstand genehmigten Notfallrefinanzierungspläne.

Unsere Stresstestanalysen geben Aufschluss darüber, ob wir unter kritischen Umständen genügend Liquidität aufbringen könnten, und liefern wichtige Informationen für die Festlegung unserer angestrebten Liquiditätsrisikoposition. Wir führen die Analyse monatlich durch. Die nachstehende Übersicht veranschaulicht diese angewandten Stresstestergebnisse zum 31. Dezember 2010. Für jedes Szenario zeigt sie unsere kumulative Finanzierungslücke über einen achtwöchigen Zeitraum nach Eintritt des auslösenden Ereignisses, die Liquidität, die wir zur Schließung der Lücke hätten aufbringen können, sowie die resultierende Nettoliquiditätsposition.

Szenario

| in Mrd €                                         | Finanzierungslücke <sup>1</sup> | Positionsschließung <sup>2</sup> | Netto Liquiditätsposition |
|--------------------------------------------------|---------------------------------|----------------------------------|---------------------------|
| Systemisches Marktrisiko                         | 50                              | 164                              | 114                       |
| Emerging Markets                                 | 14                              | 169                              | 155                       |
| Ereignisschock                                   | 15                              | 138                              | 123                       |
| Operationelles Risiko (DB-spezifisch)            | 12                              | 167                              | 155                       |
| Ratingherabstufung um eine Stufe (DB-spezifisch) | 33                              | 169                              | 136                       |
| Ratingherabstufung auf A-2/P-2 (DB-spezifisch)   | 135                             | 186                              | 51                        |
| Kombiniert <sup>3</sup>                          | 142                             | 173                              | 31                        |

<sup>1</sup> Finanzierungslücke verursacht durch eingeschränkte Prolongation der Verbindlichkeiten und weitere erwartete Abflüsse.

<sup>2</sup> Liquiditätsgenerierung durch Gegensteuerung.

<sup>3</sup> Kombiniertes Risiko aus systemischen Marktrisiken und Ratingherabstufung auf A-2/P-2.

Angesichts der wachsenden Bedeutung des Liquiditätsmanagements im Finanzsektor betrachten wir es als wichtigen Beitrag zur Finanzstabilität, liquiditätsrisikobezogene Themen mit Zentralbanken, Aufsichtsbehörden, Ratingagenturen und Marktteilnehmern zu diskutieren. Wir sind in einer Reihe von Liquiditätsarbeitsgruppen engagiert und beteiligen uns an Initiativen zur Schaffung eines Branchenstandards zur angemessenen Bewertung und Steuerung des Liquiditätsrisikos bei Finanzdienstleistern. Neben der internen Liquiditätssteuerung unterliegt die Liquidität deutscher Banken den Bestimmungen des Kreditwesengesetzes sowie den Vorschriften der Bundesanstalt für Finanzdienstleistungsaufsicht. Wir halten alle anwendbaren Liquiditätsbestimmungen ein.

### Liquiditätsrisiko – Postbank

Die operative Liquiditätsrisikosteuerung erfolgt grundsätzlich zentral im Ressort Financial Markets der Deutschen Postbank AG. Die BHW Bausparkasse AG, die ausländischen Tochtergesellschaften in New York und Luxemburg sowie die Niederlassung London steuern ihre Risiken eigenständig im Rahmen konzernweit einheitlicher Verfahren und Prozesse. Im Liquiditätsnotfall besteht eine eindeutige Verantwortung und Weisungsbefugnis des Liquiditätsnotfall-Krisengremiums gegenüber sämtlichen Bestandsverantwortlichen der Postbank sowie den Bestandsverantwortlichen der Tochtergesellschaften und Auslandsniederlassungen.

Der Postbank-Konzern hat in der übergreifenden Risikostrategie unter anderem die Grundlagen für den Umgang mit Liquiditätsrisiken definiert. Aufgabe des Liquiditätsmanagements ist es, die jederzeitige Zahlungsfähigkeit der Postbank nicht nur unter Normalbedingungen, sondern auch in Stresssituationen zu gewährleisten. Die Postbank verfügt aufgrund ihrer geschäftspolitischen Ausrichtung als Retail-Bank über eine breite Refinanzierungsbasis im Kundengeschäft und weist daher nur eine vergleichsweise geringe Abhängigkeit vom Geld- und Kapitalmarkt auf. Für den Fall eines unerwarteten Liquiditätsabflusses wird ein erheblicher Bestand an freien EZB-fähigen Wertpapieren vorgehalten, der kurzfristig zur Liquiditätsbeschaffung genutzt werden kann. Zur weiteren Diversifikation der Refinanzierungsbasis besitzt die Postbank die Pfandbrieflizenz zur Emission von öffentlichen Pfandbriefen und Hypothekenpfandbriefen.

In der Postbank analysiert der Bereich Markt Risiko Controlling geschäftstäglich den Liquiditätsstatus des Postbank-Konzerns auf Basis von Liquiditätsablaufbilanzen und Cashflow-Prognosen anhand dessen die operative Steuerung erfolgt. Darüber hinaus basiert die Steuerung neben einer regelmäßigen konzernweiten Liquiditäts- und Emissionsplanung auf einer Reihe von weitergehenden Analysen der Liquiditätssteuerung sowie regelmäßigen Stresstests. Basierend auf den Stresstestergebnissen ist die Postbank der Auffassung, dass die Liquiditätsposition solide ist. Dies ist nicht zuletzt das Ergebnis eines Anstiegs der Kundeneinlagen und des erheblichen Bestandes an EZB-fähigen Wertpapieren.

## Fälligkeitsanalyse finanzieller Verpflichtungen

Die folgenden Tabellen zeigen eine Fälligkeitsanalyse der frühestmöglichen undiskontierten vertraglichen Cashflows finanzieller Verpflichtungen zum 31. Dezember 2010 beziehungsweise 31. Dezember 2009.

31.12.2010

| in Mio €                                                                                                                 | Täglich fällig   | Bis 3 Monate   | Mehr als<br>3 Monate bis<br>1 Jahr | Mehr als<br>1 Jahr bis<br>5 Jahre | Mehr als<br>5 Jahre |
|--------------------------------------------------------------------------------------------------------------------------|------------------|----------------|------------------------------------|-----------------------------------|---------------------|
| Unverzinsliche Einlagen                                                                                                  | 89.068           | –              | –                                  | –                                 | –                   |
| Verzinsliche Einlagen                                                                                                    | 120.154          | 233.469        | 32.564                             | 35.430                            | 23.299              |
| Handelspassiva <sup>1</sup>                                                                                              | 68.859           | –              | –                                  | –                                 | –                   |
| Negative Marktwerte aus derivativen Finanzinstrumenten <sup>1</sup>                                                      | 647.171          | –              | –                                  | –                                 | –                   |
| Zum Fair Value klassifizierte finanzielle Verpflichtungen                                                                | 32.332           | 101.163        | 8.474                              | 8.056                             | 3.736               |
| Investmentverträge <sup>2</sup>                                                                                          | –                | 572            | 888                                | 1.367                             | 5.071               |
| Negative Marktwerte aus derivativen Finanzinstrumenten, die die Anforderungen für Hedge Accounting erfüllen <sup>3</sup> | 852              | 141            | 256                                | 1.113                             | 4.257               |
| Verbindlichkeiten aus übertragenen Zentralbankeinlagen                                                                   | 4.456            | 1.848          | –                                  | –                                 | –                   |
| Verbindlichkeiten aus Wertpapierpensionsgeschäften (Repos)                                                               | 2.384            | 14.570         | 3.056                              | 1.585                             | 23                  |
| Verbindlichkeiten aus Wertpapierleihen                                                                                   | 3.024            | 54             | –                                  | –                                 | 198                 |
| Sonstige kurzfristige Geldaufnahmen                                                                                      | 49.904           | 13.439         | 1.495                              | –                                 | –                   |
| Langfristige Verbindlichkeiten                                                                                           | 1.695            | 11.647         | 16.879                             | 80.713                            | 58.153              |
| Hybride Kapitalinstrumente (Trust Preferred Securities)                                                                  | –                | –              | 2.434                              | 4.481                             | 5.335               |
| Sonstige Finanzpassiva                                                                                                   | 119.693          | 6.160          | 268                                | 516                               | 22                  |
| Unwiderrufliche Kreditzusagen                                                                                            | 100.273          | –              | –                                  | –                                 | –                   |
| Finanzgarantien                                                                                                          | 28.941           | –              | –                                  | –                                 | –                   |
| <b>Insgesamt<sup>4</sup></b>                                                                                             | <b>1.268.806</b> | <b>383.063</b> | <b>66.314</b>                      | <b>133.261</b>                    | <b>100.094</b>      |

<sup>1</sup> Handelspassiva und Derivatebestände, die die Anforderungen für Hedge Accounting nicht erfüllen, werden zum Fair Value ausgewiesen. Der Konzern hält dies für die geeignete Darstellung der Cashflows, die zur Zahlung anstünden, wenn diese Positionen geschlossen werden müssten. Handels- und Derivatebestände, die die Anforderungen für Hedge Accounting nicht erfüllen, werden der Kategorie täglich fällig zugeordnet, da dies nach Meinung des Managements am besten die Kurzfristigkeit der Handelsaktivitäten widerspiegelt. Dagegen kann sich die vertragliche Laufzeit dieser Kontrakte auf deutlich längere Zeiträume ausdehnen.

<sup>2</sup> Aufgrund der Vertragsbedingungen entspricht bei diesen Investmentverträgen der Rückkaufswert dem Fair Value. Siehe Note 39 „Versicherungs- und Investmentverträge“ für nähere Informationen zu diesen Verträgen.

<sup>3</sup> Für das Hedge Accounting designierte Derivate sind mit ihrem Fair Value verzeichnet und werden in dem Zeitraum dargestellt, in dem die Absicherung in unserer Erwartung auslaufen wird.

<sup>4</sup> Die Beträge in der Tabelle stimmen nicht mit den Beträgen in der Konzernbilanz überein, da es sich um undiskontierte Cashflows handelt. Diese Analyse stellt ein Worst-Case-Szenario für den Konzern dar, wenn alle Verbindlichkeiten früher als erwartet zurückzuzahlen sind. Wir halten die Wahrscheinlichkeit, dass ein solches Ereignis eintritt, für gering. Zinszahlungsströme sind in der Tabelle nicht berücksichtigt.

31.12.2009

| in Mio €                                                                                                                 | Täglich fällig   | Bis 3 Monate   | Mehr als<br>3 Monate bis<br>1 Jahr | Mehr als<br>1 Jahr bis<br>5 Jahre | Mehr als<br>5 Jahre |
|--------------------------------------------------------------------------------------------------------------------------|------------------|----------------|------------------------------------|-----------------------------------|---------------------|
| Unverzinsliche Einlagen                                                                                                  | 51.731           | –              | –                                  | –                                 | –                   |
| Verzinsliche Einlagen                                                                                                    | 117.960          | 126.598        | 14.649                             | 21.362                            | 11.987              |
| Handelsspassiva <sup>1</sup>                                                                                             | 64.501           | –              | –                                  | –                                 | –                   |
| Negative Marktwerte aus derivativen Finanzinstrumenten <sup>1</sup>                                                      | 576.973          | –              | –                                  | –                                 | –                   |
| Zum Fair Value klassifizierte finanzielle Verpflichtungen                                                                | 64.920           | 33.785         | 4.806                              | 5.797                             | 4.826               |
| Investmentverträge <sup>2</sup>                                                                                          | –                | 514            | 806                                | 1.247                             | 4.710               |
| Negative Marktwerte aus derivativen Finanzinstrumenten, die die Anforderungen für Hedge Accounting erfüllen <sup>3</sup> | 946              | –              | 10                                 | 392                               | 2.455               |
| Verbindlichkeiten aus übertragenen Zentralbankeinlagen                                                                   | 3.824            | 1.884          | –                                  | –                                 | –                   |
| Verbindlichkeiten aus Wertpapierpensionsgeschäften (Repos)                                                               | 1.349            | 38.292         | 104                                | 37                                | 5                   |
| Verbindlichkeiten aus Wertpapierleihen                                                                                   | 5.028            | 54             | 16                                 | –                                 | 466                 |
| Sonstige kurzfristige Geldaufnahmen                                                                                      | 24.830           | 17.370         | 632                                | –                                 | –                   |
| Langfristige Verbindlichkeiten                                                                                           | 1.856            | 2.044          | 20.373                             | 67.837                            | 41.011              |
| Hybride Kapitalinstrumente (Trust Preferred Securities)                                                                  | –                | –              | 746                                | 3.991                             | 5.840               |
| Sonstige Finanzpassiva                                                                                                   | 120.731          | 6.705          | 375                                | 233                               | 60                  |
| Unwiderrufliche Kreditzusagen                                                                                            | 63.662           | –              | –                                  | –                                 | –                   |
| Finanzgarantien                                                                                                          | 21.719           | –              | –                                  | –                                 | –                   |
| <b>Insgesamt<sup>4</sup></b>                                                                                             | <b>1.120.030</b> | <b>227.246</b> | <b>42.517</b>                      | <b>100.896</b>                    | <b>71.360</b>       |

<sup>1</sup> Handelsspassiva und Derivatebestände, die die Anforderungen für Hedge Accounting nicht erfüllen, werden zum Fair Value ausgewiesen. Der Konzern hält dies für die geeignete Darstellung der Cashflows, die zur Zahlung anstünden, wenn diese Positionen geschlossen werden müssten. Handels- und Derivatebestände, die die Anforderungen für Hedge Accounting nicht erfüllen, werden der Kategorie täglich fällig zugeordnet, da dies nach Meinung des Managements am besten die Kurzfristigkeit der Handelsaktivitäten widerspiegelt. Dagegen kann sich die vertragliche Laufzeit dieser Kontrakte auf deutlich längere Zeiträume ausdehnen.

<sup>2</sup> Aufgrund der Vertragsbedingungen entspricht bei diesen Investmentverträgen der Rückkaufswert dem Fair Value. Siehe Note 39 „Versicherungs- und Investmentverträge“ für nähere Informationen zu diesen Verträgen.

<sup>3</sup> Für das Hedge Accounting designierte Derivate sind mit ihrem Fair Value verzeichnet und werden in dem Zeitraum dargestellt, in dem die Absicherung in unserer Erwartung auslaufen wird.

<sup>4</sup> Die Beträge in der Tabelle stimmen nicht mit den Beträgen in der Konzernbilanz überein, da es sich um undiskontierte Cashflows handelt. Diese Analyse stellt ein Worst-Case-Szenario für den Konzern dar, wenn alle Verbindlichkeiten früher als erwartet zurückzuzahlen sind. Wir halten die Wahrscheinlichkeit, dass ein solches Ereignis eintritt, für gering. Zinszahlungsströme sind in der Tabelle nicht berücksichtigt.

## Kapitalmanagement

Unsere Treasury-Funktion managt das Kapital konzernweit sowie lokal in jeder Region, mit Ausnahme der Postbank. Die Allokation von Finanzressourcen im Allgemeinen und Kapital im Besonderen hat zum Ziel, profitable Geschäftsbereiche zu unterstützen, die den größtmöglichen positiven Effekt auf unsere Rentabilität und unseren Shareholder Value aufweisen. Aus diesem Grund ordnet unsere Treasury-Funktion den Geschäftsbe-  
reichen das Kapital in regelmäßigen Abständen neu zu.

Treasury implementiert unsere Kapitalstrategie, die durch das Capital and Risk Committee entwickelt und vom Vorstand genehmigt wird. Dies umfasst auch die Emission und den Rückkauf von Aktien. Es ist unser Ziel, stets eine solide Kapitalisierung vorzuweisen. Kapitalnachfrage und -angebot werden permanent überwacht und, falls notwendig, angepasst, um den Kapitalbedarf unter verschiedenen Aspekten abzudecken. Dazu gehören das ausgewiesene Buchkapital nach IFRS, das aufsichtsrechtliche Kapital sowie das Ökonomische Kapital. Seit Oktober 2008 liegt die Zielgröße des Konzerns für die Tier-1-Kapitalquote weiterhin bei oder über 10 %.

Die Allokation des Kapitals, die Festlegung unseres Finanzierungsplans und ähnliche Fragen werden vom Capital and Risk Committee erörtert.

Regionale Kapitalpläne, die den Kapitalbedarf der Filialen und Tochtergesellschaften abdecken, werden halbjährlich erstellt und dem Group Investment Committee vorgelegt. Die meisten unserer Tochtergesellschaften unterliegen gesetzlichen und aufsichtsrechtlichen Kapitalanforderungen. Lokale Asset and Liability Committees sorgen für die Einhaltung dieser Anforderungen unter Führung regionaler Treasury-Teams. Ferner stellen sie die Einhaltung weiterer Anforderungen sicher wie beispielsweise Ausschüttungsbegrenzungen für die Dividende an die Deutsche Bank AG oder Begrenzungen des Kreditvolumens von Tochtergesellschaften an ihre Muttergesellschaft. Bei der Entwicklung, Umsetzung und Prüfung des Kapitals und der Liquidität des Konzerns werden solche gesetzlichen und aufsichtsrechtlichen Anforderungen berücksichtigt.

Am 6. Oktober 2010 schloss die Deutsche Bank AG eine Kapitalerhöhung aus genehmigtem Kapital gegen Bareinlagen ab. Insgesamt wurden 308,6 Millionen neue registrierte nennwertlose Stammaktien ausgegeben, die zu einem Bruttoemissionserlös in Höhe von 10,2 Mrd € führten. Der Nettoemissionserlös betrug 10,1 Mrd € (nach Abzug der Aufwendungen von annähernd 0,1 Mrd € nach Steuern) und wurde vorwiegend zur Abdeckung des Kapitalbedarfs für die Konsolidierung der Postbank sowie ergänzend zur Erhöhung des bestehenden Kapitals verwendet.

Treasury führt den Rückkauf von Aktien durch. Zum 1. Januar 2010 betrug der Bestand an zurückgekauften Aktien in Treasury 0,6 Millionen. Die ordentliche Hauptversammlung 2009 erteilte dem Vorstand die Ermächtigung, bis zu 62,1 Millionen Aktien bis Ende Oktober 2010 zurückzukaufen. In der Zeit vom 1. Januar 2010 bis zur ordentlichen Hauptversammlung 2010 wurden 11,1 Millionen Aktien (2 % der emittierten Aktien) zurückgekauft. Davon wurden 10,6 Millionen Aktien zu Aktienvergütungszwecken eingesetzt. Zur ordentlichen Hauptversammlung 2010 am 27. Mai 2010 betrug der Bestand an zurückgekauften Aktien in Treasury 1,0 Millionen. Die ordentliche Hauptversammlung 2010 erteilte dem Vorstand die Ermächtigung, bis zu 62,1 Millionen Aktien bis Ende November 2014 zurückzukaufen. Davon können 31,0 Millionen über den Einsatz von Derivaten erworben werden. Während des Zeitraums von der Hauptversammlung 2010 bis zum 31. Dezember 2010 wurden 18,8 Millionen Aktien zurückgekauft, davon 0,5 Millionen über verkaufte Put-Optionen, die von der Gegenpartei zum Fälligkeitstermin ausgeübt wurden. 9,8 Millionen Aktien der insgesamt 18,8 Millionen zurückgekauften Aktien wurden in 2010 zu Aktienvergütungszwecken und 9,0 Millionen Aktien zur Erhöhung unseres Treasury-Bestands für zukünftige aktienbasierte Vergütungspläne verwendet. Zum 31. Dezember 2010 betrug der Bestand an zurückgekauften Aktien in Treasury 10,0 Millionen.

Das insgesamt ausstehende hybride Tier-1-Kapital (im Wesentlichen nicht kumulative Vorzugsanteile, „Non-Cumulative Trust Preferred Securities“) belief sich am 31. Dezember 2010 auf 12,6 Mrd €, verglichen mit 10,6 Mrd € zum 31. Dezember 2009. Dieser Anstieg war im Wesentlichen auf die Konsolidierung von 1,6 Mrd € durch die Postbank emittiertem hybridem Kapital sowie auf Währungskurseffekte auf unser in US-Dollar begebenes hybrides Tier-1-Kapital infolge des Anstiegs des US-Dollars zurückzuführen. Im ersten Halbjahr 2010 hat der Konzern durch die Aufstockung einer ausstehenden Emission hybrides Tier-1-Kapital in Höhe von 0,1 Mrd € begeben.

In 2010 hat der Konzern nachrangiges Tier-2-Kapital in Höhe von 1,2 Mrd € begeben (anrechenbare nachrangige Verbindlichkeiten). Die Konsolidierung von durch die Postbank begebenem Tier-2-Kapital erhöhte das nachrangige Tier-2-Kapital um 2,2 Mrd € und das Genussscheinkapital um 1,2 Mrd €. Das Genussscheinkapital betrug nach der Konsolidierung 1,2 Mrd € und war vor der Konsolidierung der Postbank null. Die anrechenbaren nachrangigen Verbindlichkeiten beliefen sich am 31. Dezember 2010 auf 10,7 Mrd €, verglichen mit 7,1 Mrd €



zum 31. Dezember 2009. Die kumulativen Vorzugsanteile betrugen 0,3 Mrd € zum 31. Dezember 2010 und waren unverändert gegenüber dem Vorjahresende.

### Kapitalmanagement der Postbank

Entsprechend managed die Postbank ihr Kapital im Rahmen einer kontinuierlichen Überwachung des verfügbaren und benötigten Kapitals. Bei der Steuerung des Kapitals im Rahmen des Risikotragfähigkeitskonzepts stellen die regulatorischen Anforderungen an die Eigenmittelausstattung und die ökonomische Kapitalanforderungen gleichberechtigte Zielgrößen dar. Die Allokation des Kapitals wird auf Basis einer Mehrjahresplanung vom Gesamtvorstand beschlossen.

Der Kapitalbedarf (regulatorisch und ökonomisch) wird permanent überwacht, um das verfügbare Kapital nötigenfalls anzupassen. Hierfür werden laufend auf Basis geplanter Entwicklungen von Geschäftsvolumen und Ergebnissen sowie Erwartungen von Veränderungen der Risikoparameter Prognosen des Kapitalbedarfs erstellt und fortgeschrieben. Das operative Management der Eigenkapitalquoten im Rahmen der vom Gesamtvorstand verabschiedeten Vorgaben erfolgt durch Steuerung des Bestands- und Neugeschäfts, die Emission von Tier-1- oder Tier-2 Anleihen oder durch den Abschluss von Transaktionen am Kapitalmarkt, die sich entlastend auf den Eigenkapitalbedarf auswirken.

### Bilanzmanagement

Wir steuern unsere Bilanz auf konsolidierter Gruppenebene (exklusive Postbank) und gegebenenfalls in den einzelnen Regionen auf lokaler Basis. Bei der Allokation von Finanzressourcen steht die Unterstützung profitabler Geschäftsbereiche, die den größtmöglichen positiven Effekt auf unsere Rentabilität und unseren Shareholder Value aufweisen, im Vordergrund. Unsere Bilanzmanagementfunktion hat das Mandat zur Überwachung und Analyse von Bilanzentwicklungen sowie zur Beobachtung bestimmter vom Markt wahrgenommener Bilanzkennzahlen. Auf dieser Basis initiieren wir Diskussionen und Managemententscheidungen des Capital and Risk Committee. Wir beobachten die Entwicklungen der Bilanz nach IFRS, fokussieren unser Bilanzmanagement jedoch in erster Linie auf angepasste Werte, auf deren Basis die Relation der angepassten Bilanzsumme zum angepassten Eigenkapital (Leverage Ratio) gemäß Zielgrößendefinition bestimmt wird.

Die Postbank betreibt ebenfalls ein an der Geschäftsstrategie ausgerichtetes wertorientiertes Finanzmanagement, das das Bilanzmanagement umfasst.

Auf konsolidierter Basis am 31. Dezember 2010 war unsere Leverage Ratio gemäß Zielgrößendefinition mit 23 auf dem gleichen Stand wie zum 31. Dezember 2009, und damit unter unserer Zielgröße von 25. Die Auswirkungen unserer Akquisitionen auf unser gesamtes Forderungsvolumen wurden hierbei vollständig durch den Effekt unserer Kapitalerhöhung auf das zugrunde liegende Eigenkapital kompensiert. Unsere Leverage Ratio berechnet auf Basis der gesamten IFRS-Aktiva im Vergleich zum gesamten IFRS-Eigenkapital betrug 38 zum 31. Dezember 2010. Dies entspricht einem leichten Rückgang gegenüber 40 zum Jahresende 2009.

## Gesamtrisikoposition

Zur Ermittlung unserer (nicht aufsichtsrechtlichen) Gesamtrisikoposition ziehen wir in der Regel Diversifikationseffekte zwischen den Risikoklassen in Betracht. Eine Ausnahme ist das Geschäftsrisiko, welches wir durch einfache Addition hinzuzählen.

Die folgende Tabelle zeigt unsere Gesamtrisikoposition zum 31. Dezember 2010 und zum 31. Dezember 2009, gemessen am Ökonomischen Kapital, das für Kredit-, Markt-, Geschäfts- und operationelle Risiken berechnet wird.

| in Mio €                                                                   | 31.12.2010    | 31.12.2009    |
|----------------------------------------------------------------------------|---------------|---------------|
| <b>Ökonomischer Kapitalbedarf</b>                                          |               |               |
| Kreditrisiko                                                               | 12.785        | 7.453         |
| Marktrisiko                                                                | 13.160        | 12.515        |
| Marktrisiko aus Handelspositionen                                          | 6.420         | 4.613         |
| Marktrisiko aus Nichthandelspositionen                                     | 6.740         | 7.902         |
| Operationelles Risiko                                                      | 3.682         | 3.493         |
| Diversifikationseffekte zwischen Kredit-, Markt- und operationellem Risiko | -3.534        | -3.166        |
| <b>Zwischensumme Kredit-, Markt- und operationelle Risiken</b>             | <b>26.093</b> | <b>20.295</b> |
| Geschäftsrisiko                                                            | 1.085         | 501           |
| <b>Ökonomischer Kapitalbedarf insgesamt</b>                                | <b>27.178</b> | <b>20.796</b> |

Zum 31. Dezember 2010 betrug unser gesamter Ökonomischer Kapitalbedarf 27,2 Mrd €, was einem Anstieg um 6,4 Mrd € (31 %) gegenüber den 20,8 Mrd € an Ökonomischem Kapitalbedarf zum 31. Dezember 2009 entspricht. Die Erhöhung des Ökonomischen Kapitals reflektierte die Effekte aus den Akquisitionen der Postbank, von Sal. Oppenheim/BHF-BANK und bestimmter Teile des niederländischen Firmenkundengeschäfts von ABN AMRO, aus erhöhten Risikopositionen sowie aus Änderungen aufgrund verschiedener Verfeinerungen der Modelle für das Kreditrisiko und das Marktrisiko.

Zum 31. Dezember 2010 entfielen 4,6 Mrd € des Ökonomischen Kapitals auf die Postbank, das auf Basis einer mit der Deutschen Bank konsistenten Methodik berechnet wurde. Einschränkungen bezüglich der Verfügbarkeit von Daten können zu Effekten auf Ebene des Gesamtportfolios führen, die nicht vollständig abgeschätzt wurden und somit zu einer Über- beziehungsweise Unterschätzung des Ökonomischen Kapitals führen. Zum 31. Dezember 2009 entfielen 4,2 Mrd € des Ökonomischen Kapitals auf die Postbank.

Der Ökonomische Kapitalbedarf für das Kreditrisiko betrug 12,8 Mrd € zum 31. Dezember 2010. Der Anstieg um 5,3 Mrd € (72 %) war im Wesentlichen auf die Akquisitionen zurückzuführen. Die Konsolidierung der Postbank sowie von Sal. Oppenheim/BHF-BANK und bestimmter Teile des niederländischen Firmenkundengeschäfts von ABN AMRO erhöhte den Ökonomischen Kapitalbedarf um 3,7 Mrd €. Die übrigen Änderungen waren auf erhöhte Risikopositionen, den Einfluss der regelmäßigen Neukalibrierung der Kreditrisikoparameter sowie weitere Verfeinerungen des Kreditrisikomodells zurückzuführen.

Der Ökonomische Kapitalbedarf für das gesamte Marktrisiko stieg um 645 Mio € (5 %) auf 13,2 Mrd € zum 31. Dezember 2010. Dieser Anstieg reflektierte unser Marktrisiko aus Handelspositionen, das sich um 1,8 Mrd € (39 %) erhöhte, und spiegelte im Wesentlichen Methodenänderungen wider. Der Rückgang des Ökonomischen Kapitalbedarfs aus Nichthandelspositionen um 1,2 Mrd € (minus 15 %) ist vor allem durch die Eliminierung unserer bisherigen Minderheitsbeteiligung an der Postbank im Zuge der Konsolidierung der Postbank begründet, das mit 3,3 Mrd € zum Rückgang beitrug. Demgegenüber führten Veränderungen in anderen Nichthandelsmarktrisiken zu einem Anstieg von 1,8 Mrd € sowie die Akquisition von Sal. Oppenheim/BHF-BANK zu weiteren 313 Mio €.

Der Anstieg des Ökonomischen Kapitals für das operationelle Risiko zum 31. Dezember 2010 um 189 Mio € (5 %) auf 3,7 Mrd € reflektierte vollständig den Effekt aus den Akquisitionen.

Der Ökonomische Kapitalbedarf für das allgemeine Geschäftsrisiko, bestehend aus dem strategischen Risiko und einer Steuerrisikokomponente, betrug 1,1 Mrd € zum 31. Dezember 2010. Die Erhöhung des Ökonomischen Kapitalbedarfs für das Strategische Risiko um 450 Mio € resultierte hauptsächlich aus der Akquisition der Postbank, welche 400 Mio € zum Anstieg beitrug.

Der Diversifikationseffekt des Ökonomischen Kapitalbedarfs über das Kredit-, Markt- und operationelle Risiko hinweg stieg zum 31. Dezember 2010 um 368 Mio € (12 %).

Die nachstehende Tabelle zeigt den Ökonomischen Kapitalbedarf unserer Geschäftssegmente zum 31. Dezember 2010.

| in Mio €                                    | 31.12.2010    | 31.12.2009    |
|---------------------------------------------|---------------|---------------|
| Corporate & Investment Bank                 | 16.119        | 11.974        |
| Corporate Banking & Securities              | 14.828        | 11.242        |
| GTB                                         | 1.291         | 732           |
| Private Clients and Asset Management        | 9.394         | 4.434         |
| Asset and Wealth Management                 | 2.717         | 1.878         |
| Private & Business Clients                  | 6.677         | 2.556         |
| Corporate Investments                       | 902           | 4.641         |
| Consolidation & Adjustments                 | 762           | -253          |
| <b>Ökonomischer Kapitalbedarf insgesamt</b> | <b>27.178</b> | <b>20.796</b> |

Die zukünftige Allokation des Ökonomischen Kapitals kann sich im Zeitablauf durch eine Verfeinerung unserer Methoden zur Risikomessung verändern.

Eine von uns verwendete primäre Messgröße zur Ermittlung unserer Risikotragfähigkeit ist das Verhältnis des Active Book Equity zum Ökonomischen Kapital (siehe vorhergehende Tabelle) zuzüglich Goodwill und immaterieller Vermögenswerte (42,8 Mrd € zum 31. Dezember 2010 und 31,0 Mrd € zum 31. Dezember 2009). Das Active Book Equity, das sich zum 31. Dezember 2010 auf 48,4 Mrd € und zum 31. Dezember 2009 auf 36,4 Mrd € belief, wird ermittelt, in dem das den Deutsche Bank-Aktionären zurechenbare Eigenkapital um unrealisierte Gewinne/Verluste aus zur Veräußerung verfügbaren finanziellen Vermögenswerten und aus Cashflow Hedges, sowie um abgegrenzte zukünftige Dividenden bereinigt wird (für weitere Informationen siehe Note 36 „Aufsichtsrechtliches Kapital“). Eine Quote von mehr als 100 % bestätigt, dass das Active Book Equity die zuvor genannten Risikopositionen angemessen übersteigt. Diese Quote betrug 113 % zum 31. Dezember 2010 im Vergleich mit 118 % zum 31. Dezember 2009, da Effekte auf das Ökonomische Kapital und den Goodwill aus der Akquisition der Deutsche Postbank AG, von Sal. Oppenheim/BHF-BANK und bestimmter Teile des niederländischen Firmenkundengeschäfts von ABN AMRO die Erhöhungen des Active Book Equity, im Wesentlichen beruhend auf der Kapitalerhöhung, Gewinnrücklagen und Effekten aus Währungskursänderungen, mehr als kompensierten.

## Internes Kontrollsystem bezogen auf die Rechnungslegung

### Allgemeine Informationen

Das Management der Deutschen Bank und ihrer konsolidierten Tochtergesellschaften ist für die Einrichtung, Anwendung und Weiterentwicklung eines angemessenen internen Kontrollsystems bezogen auf den Rechnungslegungsprozess („IKSRL“) verantwortlich. Unser rechnungslegungsbezogenes internes Kontrollsystem steht unter der Aufsicht unseres Vorstandsvorsitzenden und unseres Chief Financial Officer. Es soll hinreichende Sicherheit darüber gewähren, dass die Aufstellung des Konzernabschlusses im Einklang mit den International Financial Reporting Standards (IFRS) steht und die externe Finanzberichterstattung zuverlässig ist. Unser IKSRL umfasst dabei alle diejenigen Kontrollen und Prozesse, die zur Vermeidung und Entdeckung von Fehlern im Konzernabschluss und im Konzernlagebericht eingerichtet wurden.

### Risiken im Hinblick auf den Rechnungslegungsprozess

Die Hauptrisiken im Rechnungslegungsprozess bestehen darin, dass Abschlüsse aufgrund unbeabsichtigter Fehler oder vorsätzlichen Handelns (Betrug) nicht ein den tatsächlichen Verhältnissen entsprechendes Bild der Vermögens-, Finanz- und Ertragslage vermitteln oder dass ihre Veröffentlichung verspätet erfolgt. Diese Risiken können dazu führen, dass das Vertrauen der Investoren oder die Reputation der Bank beeinträchtigt wird. Darüber hinaus können sie Sanktionen wie zum Beispiel Interventionen der Bankenaufsicht nach sich ziehen. Die Rechnungslegung vermittelt kein den tatsächlichen Verhältnissen entsprechendes Bild der Vermögens-, Finanz- und Ertragslage, wenn in den Abschlüssen enthaltene Zahlen oder Anhangangaben wesentlich von den korrekten Angaben abweichen. Abweichungen werden als wesentlich eingestuft, wenn sie einzeln oder insgesamt die auf Basis der Abschlüsse getroffenen wirtschaftlichen Entscheidungen der Abschlussadressaten beeinflussen könnten.

Das Management des Konzerns hat das IKSRL eingerichtet, um diese Risiken zu begrenzen. Ein solches System kann aber nur eine angemessene und keine absolute Sicherheit darüber bieten, dass die Abschlüsse frei von Fehlern sind. Die Ausgestaltung unseres Kontrollsystems basiert auf dem Rahmenwerk für interne Kontrollsysteme des Committee of Sponsoring Organizations of the Treadway Commission („COSO“). COSO empfiehlt die Festlegung von spezifischen Zielen, die die Konzeption eines Kontrollsystems fördern und die Überwachung seiner Wirksamkeit ermöglichen. Im Rahmen der Einrichtung des internen Kontrollsystems hat das Management die nachstehenden Ziele für das IKSRL festgelegt:

- **Existenz** – Bilanzierte Vermögenswerte und Verbindlichkeiten sind vorhanden und die erfassten Transaktionen wurden auch durchgeführt.
- **Vollständigkeit** – Sämtliche Transaktionen wurden erfasst und alle Kontensalden sind in den Abschlüssen berücksichtigt.
- **Bewertung** – Vermögenswerte, Verbindlichkeiten und Transaktionen sind mit dem zutreffenden Wert in den Finanzberichten ausgewiesen.
- **Rechte, Verpflichtungen und Eigentum** – Wirtschaftliches Eigentum an Vermögenswerten oder bestehende Verpflichtungen werden zutreffend als Vermögenswerte beziehungsweise Verbindlichkeiten abgebildet.
- **Darstellung und Berichterstattung** – Der Ausweis, die Präsentation und Gliederung sowie die Anhangangaben der Finanzberichte entsprechen den gesetzlichen Anforderungen.
- **Sicherung von Vermögenswerten** – Nicht autorisierte Käufe, Nutzung oder Verkäufe von Vermögenswerten werden verhindert oder zeitnah festgestellt.

Wie jedes interne Kontrollsystem kann das rechnungslegungsbezogene interne Kontrollsystem unabhängig davon, wie sorgfältig es ausgestaltet ist und betrieben wird, nur eine hinreichende, jedoch keine absolute Sicherheit bezüglich des Erreichens der entsprechenden Ziele geben. Im Rahmen des IKSRL durchgeführte Kontrollen, Prozesse oder eingerichtete Systeme können daher Fehler oder Betrugsfälle nicht vollständig ausschließen. Darüber hinaus ist bei der Einrichtung eines IKSRL die Wirtschaftlichkeit zu beachten, das heißt, der Nutzen eines Kontrollsystems soll in einem angemessenen Verhältnis zu den anfallenden Kosten stehen.

### Organisation des internen Kontrollsystems

#### In das interne Kontrollsystem im Hinblick auf den Rechnungslegungsprozess eingebundene Funktionen

Da die Führung der Handelsbücher die Grundlage für die Abschlüsse bildet, sind die Kontrollen im Rahmen des IKSRL von den Geschäftsbereichen und Infrastrukturfunktionen durchzuführen, die an den Prozessen und Kontrollen zur Erstellung der Handelsbücher beteiligt sind. Die Ausführung des rechnungslegungsbezogenen internen Kontrollsystems obliegt überwiegend den Mitarbeitern aus den Funktionen Finance, Group Technology and Operations, Legal, Risk & Capital sowie Tax.

Finance ist dabei als eine von den Geschäftsbereichen unabhängige Funktion für die regelmäßige Erstellung der Abschlüsse verantwortlich. Die Verantwortlichkeiten im Rahmen des Kontrollprozesses sind im Bereich Finance wie folgt unterteilt:

- **Für bestimmte Geschäftsbereiche oder Konzerngesellschaften zuständige Mitarbeiter** von Finance stellen durch Validierungs- und Kontrollmaßnahmen sicher, dass die Finanzdaten den Qualitätsanforderungen entsprechen. Durch ihre spezifischen Kenntnisse über den betreffenden Geschäftsbereich, die Infrastrukturfunktion oder die Konzerngesellschaft sind sie in der Lage, eventuelle Schwächen in der Finanzberichterstattung dieser Bereiche zu identifizieren. Darüber hinaus validieren sie Bewertungsanpassungen und andere auf Schätzungen basierende Bewertungen. Sie überprüfen ferner die Durchführung von Kontrollen über einzelne Transaktionen und Kontensalden. Für die betreffende Gesellschaft beziehungsweise den Geschäftsbereich verantwortliche Mitarbeiter stimmen ihre jeweiligen Sichtweisen miteinander ab und zeichnen die Einzelabschlüsse der Gesellschaften frei.
- **Group Reporting** verantwortet die Konzernberichterstattung, einschließlich der Erstellung konzernweiter Finanz- und Managementinformationen, Plandaten und Plananpassungen sowie der Risikoberichterstattung. Group Reporting legt den Zeitplan für die Berichterstattung fest, aggregiert die Einzelabschlüsse der Gesellschaften, führt Konsolidierungsmaßnahmen durch, eliminiert konzerninterne Transaktionen und überwacht die ordnungsgemäße Umsetzung und Genehmigung von Korrekturprozessen. Kommentare der Geschäftsleitung, von Mitgliedern des SOx and Disclosure Steering Committee und von externen Beratern zu Inhalt und Darstellung werden von Group Reporting bei der Erstellung der Konzernberichte berücksichtigt und verarbeitet.
- **Die Accounting Policy and Advisory Group („APAG“)** ist für die Erarbeitung der konzernweiten Bilanzierungsrichtlinien auf Basis der internationalen Rechnungslegungsstandards sowie für deren einheitliche Anwendung im Konzern zuständig. APAG berät Finance sowie die Geschäftsbereiche, insbesondere in Bilanzierungsfragen, und stellt sicher, dass bank- und transaktionsspezifische Bilanzierungsfragen zeitnah gelöst werden.
- **Die Global Valuation Oversight Group („GVO“)** sowie Bewertungsexperten für die einzelnen Geschäftsbereiche sind für die Entwicklung von Richtlinien und Mindeststandards für die Bewertung sowie die Durchführung von Bewertungskontrollen verantwortlich. Ferner prüfen und beurteilen sie Ergebnisse von Bewertungskontrollen und fungieren als zentrale Ansprechpartner für Bewertungsfragen externer Dritter (wie Aufsichtsbehörden und Wirtschaftsprüfer).

Der operative Betrieb des IKSRL wird durch Group Technology and Operations, Legal, Risk & Capital und Group Tax unterstützt. Obwohl diese Funktionen nicht direkt an der Aufstellung des Abschlusses beteiligt sind, leisten sie einen wichtigen Beitrag zur Kontrolle der Finanzinformationen:

- **Group Technology and Operations („GTO“)** bestätigt die Transaktionen mit unseren Kontrahenten und ist sowohl für die interne als auch externe Abstimmung von Finanzinformationen zwischen Systemen, Depot- und Börsengeschäften zuständig. GTO wickelt für den Konzern die zum Abschluss von Transaktionen notwendigen Zahlungen ab und ist für die Abstimmung der Nostrokonten verantwortlich.
- **Legal, Risk & Capital („LRC“)** ist für die Entwicklung von Richtlinien und Standards für das Kredit-, Markt- und operationelle Risikomanagement zuständig. LRC ermittelt die Notwendigkeit beziehungsweise überprüft die Angemessenheit etwaiger Wertberichtigungen und Rückstellungen für Kreditrisiken und operationelle Risiken. Die Rechtsabteilung ist für das Management und die Identifizierung von Rechtsrisiken verantwortlich. Darüber hinaus bestimmt die Rechtsabteilung den Ansatz und die Höhe etwaiger Rückstellungen für Rechtsrisiken.
- **Group Tax** ist mit Unterstützung von Finance für die korrekte Berechnung ertragsteuerbezogener Finanzdaten verantwortlich. Dies umfasst die Bewertung und Planung von laufenden und latenten Steuern sowie die Erhebung steuerlich relevanter Informationen. Group Tax überwacht die Ertragsteuerposition und die Rückstellungen für Steuerrisiken.

### Kontrollen zur Minimierung des Risikos von Fehlern in der Rechnungslegung

Das rechnungslegungsbezogene interne Kontrollsystem umfasst eine Vielzahl von internen Kontrollen und Prozessen, die das Risiko von Fehlern in den Abschlüssen minimieren sollen. Hierzu zählen unter anderem Kontrollen, die:

- fortlaufend oder permanent erfolgen, wie beispielsweise Kontrollen zur Einhaltung von internen Richtlinien und Anweisungen oder zur Funktionstrennung;
- regelmäßig durchgeführt werden, wie beispielsweise die Kontrollen im Rahmen der jährlichen Abschluss-erstellung;
- der Fehlervermeidung oder nachträglichen Fehlerfeststellung dienen;
- direkte oder indirekte Auswirkungen auf den Konzernabschluss haben. Kontrollen, die indirekte Auswirkungen auf den Konzernabschluss haben, sind unter anderem allgemeine IT-Kontrollen, zum Beispiel Kontrollen über den Zugang zu und die Einführung von EDV-Systemen. Zu den Kontrollen mit direkten Auswirkungen zählt beispielsweise die Verifizierung einer spezifischen Bilanzposition;
- automatisierte und/oder manuelle Komponenten umfassen. Automatisierte Kontrollen sind in einen Kontrollprozess eingebunden wie zum Beispiel eine im System hinterlegte Funktionstrennung, automatisierte Datenschnittstellen, die die Vollständigkeit und Richtigkeit von Eingabedaten sicherstellen. Manuelle interne Kontrollen, wie die Genehmigung von Transaktionen, werden von einem Mitarbeiter oder einem Team durchgeführt.

Die sich daraus ergebende Gesamtheit individueller Kontrollen umfasst alle nachfolgenden Aspekte des IKSRL:

- **Erstellung und Anwendung von Bilanzierungsrichtlinien.** Sicherstellung einer weltweit konsistenten Berichterstattung über die Geschäftsaktivitäten des Konzerns und der entsprechenden Berichterstattung im Einklang mit genehmigten Bilanzierungsrichtlinien.
- **Referenzdaten.** Kontrollen der für das Hauptbuch, die bilanziellen und außerbilanziellen Positionen sowie für die Produkte benötigten Referenzdaten.
- **Transaktionsgenehmigung, -erfassung und -bestätigung.** Kontrollen, die die Vollständigkeit und Richtigkeit erfasster Transaktionen sowie deren ordnungsgemäße Genehmigung sicherstellen. Dazu zählt die Kontrolle von Transaktionsbestätigungen, die von und an Kontrahenten gesendet werden, um zu gewährleisten, dass die Transaktionsdaten extern bestätigt sind.
- **Kontrollen externer und interner Abstimmungen.** Abstimmungen erfolgen zwischen relevanten Systemen für alle Geschäfte, Transaktionen, Positionen oder relevante Parameter. Im Rahmen externer Abstimmungen werden unter anderem die Nostrokonten, Depot- und Börsengeschäfte geprüft.
- **Bewertung, einschließlich unabhängiger Bewertungskontrollen.** Finance führt mindestens einmal im Monat Bewertungskontrollen durch, um sich von der Angemessenheit der Bewertung durch das Front Office zu überzeugen. Die Ergebnisse dieser Bewertungskontrollen werden durch die vom Front Office unabhängige Global Valuation Oversight Group geprüft und einmal pro Monat im Valuation Control Oversight Committee beurteilt. Bewertungsspezialisten für einen Geschäftsbereich befassen sich insbesondere mit Bewertungsansätzen und -methoden für verschiedene Klassen von Vermögenswerten und führen unabhängige Bewertungskontrollen für komplexe Derivate und strukturierte Produkte durch.
- **Steuerberechnung.** Diese Kontrollen stellen sicher, dass die Berechnungen der Steuern ordnungsgemäß durchgeführt werden und Steuerpositionen im Abschluss korrekt erfasst sind.
- **Bewertungsanpassungen und andere Schätzungen.** Kontrollprozesse, die sicherstellen sollen, dass Bewertungsanpassungen und auf Schätzungen basierende Anpassungen autorisiert wurden und gemäß den genehmigten Richtlinien berichtet werden.
- **Nachweis von Bilanzposten.** Um die Vollständigkeit von Bilanzposten zu garantieren, sind die zugrunde liegenden Salden auf den Hauptbuchkonten nachzuweisen.
- **Konsolidierungskontrollen und andere Kontrollen im Rahmen der Abschlusserstellung.** Zum Meldestichtag übermitteln alle Geschäftsbereiche und Regionen ihre Finanzdaten zwecks Konsolidierung an den Konzern. Konsolidierungskontrollen umfassen die Validierung von Buchungen zur Eliminierung von konzerninternen Transaktionen. Bei den Kontrollen im Rahmen der Abschlusserstellung werden die Prozesse zum Abschluss von Hauptbuchkonten am Monatsende und Korrekturbuchungen überprüft.
- **Berichterstattung und Darstellung.** Bearbeitung und Zertifizierung von Checklisten zu den Offenlegungspflichten. Der vom Vorstand aufgestellte Konzernabschluss und -lagebericht unterliegt der Überprüfung und Genehmigung durch den Aufsichtsrat und dessen Prüfungsausschuss.



## Überwachung der Wirksamkeit des internen Kontrollsystems

Der Konzernvorstand überprüft jedes Jahr die Angemessenheit und Wirksamkeit des rechnungslegungsbezogenen internen Kontrollsystems. Diese Prüfung beinhaltet nicht die internen Kontrollen der Deutschen Postbank AG. Die Deutsche Postbank AG wurde zum 3. Dezember 2010 erstmalig in den Konzernabschluss der Deutschen Bank AG einbezogen. Diese Überwachung umfasst die Bewertung sowohl der Wirksamkeit des Kontrollumfelds als auch der einzelnen Kontrollen und schließt folgende Faktoren ein:

- Das Risiko eines Fehlers in einer der im Abschluss ausgewiesenen Positionen unter Berücksichtigung von Faktoren wie Wesentlichkeit und Fehleranfälligkeit dieser Position;
- Die Fehleranfälligkeit der Kontrolle unter Berücksichtigung von Faktoren wie Automatisierungsgrad, Komplexität, Risiko der Außerkraftsetzung durch das Management, Kompetenz der Mitarbeiter und Grad der erforderlichen subjektiven Beurteilung.

Diese Faktoren bestimmen in ihrer Gesamtheit Art und Umfang der Nachweise, die das Management benötigt, um zu beurteilen, ob das eingerichtete IKSRL wirksam ist oder nicht. Die Nachweise selbst ergeben sich entweder aus im normalen Geschäftsbetrieb verankerten Prozessen oder aus Prozessen, die speziell für die Beurteilung der Wirksamkeit des IKSRL eingerichtet wurden. Daneben sind Informationen aus anderen Quellen eine wichtige Komponente der Managementbewertung, da sie dem Management Kontrollmängel aufzeigen oder die Kontrollergebnisse bestätigen können. Zu diesen Informationsquellen gehören:

- Berichte von der Konzernrevision;
- Berichte zu Prüfungen, die von Aufsichtsbehörden oder in deren Auftrag durchgeführt wurden;
- Berichte externer Prüfer;
- Berichte, die in Auftrag gegeben wurden, um die Wirksamkeit von an Dritte ausgelagerten Prozessen zu beurteilen.

Die vom Management durchgeführte fokussierte Überprüfung mit der oben angesprochenen Ausnahme und die Informationen aus anderen Quellen führten im Geschäftsjahr 2010 zu der Feststellung, dass das IKSRL geeignet ist und die Kontrollen wirksam sind.

Zur Gewährleistung der Funktionalität des IKSRL erfolgt zusätzlich eine Aufbau- und Funktionsprüfung der Kontrollen im Rahmen regelmäßiger oder eigens zu diesem Zweck von der Konzernrevision durchgeführten risikoorientierten Prüfungen. Für alle von der Konzernrevision durchgeführten Prüfungen werden Berichte mit zusammengefassten Prüfungsergebnissen erstellt. Diese Berichte werden zusammen mit den Ergebnissen weiterer Prüfungshandlungen der Konzernrevision dem Management zur Kenntnisnahme vorgelegt, um dieses bei der jährlichen Beurteilung der operativen Funktionalität des IKSRL zu unterstützen.

## Angaben nach § 315 Absatz 4 HGB und erläuternder Bericht

### Zusammensetzung des Gezeichneten Kapitals

Zum 31. Dezember 2010 betrug das Grundkapital der Deutschen Bank AG 2.379.519.078,40 €, eingeteilt in 929.499.640 Stammaktien ohne Nennwert. Die Aktien sind voll eingezahlt und in Form von Namensaktien begeben. Jede Aktie gewährt eine Stimme.

### Beschränkungen, die Stimmrechte oder die Übertragung von Aktien betreffen

In den Fällen des § 136 AktG ist das Stimmrecht aus den betroffenen Aktien von Gesetzes wegen ausgeschlossen. Soweit die Bank zum 31. Dezember 2010 Eigene Aktien in ihrem Bestand hielt, konnten daraus gemäß § 71b AktG keine Rechte ausgeübt werden. Sonstige Beschränkungen, die Stimmrechte oder die Übertragung von Aktien betreffen, sind uns nicht bekannt.

### Beteiligungen am Kapital, die mehr als 10 % der Stimmrechte überschreiten

Nach dem Wertpapierhandelsgesetz muss jeder Anleger, der durch Erwerb, Veräußerung oder auf sonstige Weise bestimmte Anteile an Stimmrechten erreicht, überschreitet oder unterschreitet, dies uns und der Bundesanstalt für Finanzdienstleistungsaufsicht („BaFin“) anzeigen. Der niedrigste Schwellenwert für diese Anzeigepflicht beträgt 3 %. Uns sind hiernach keine direkten oder indirekten Beteiligungen am Kapital bekannt, die 10 % der Stimmrechte erreichen oder überschreiten.

### Aktien mit Sonderrechten, die Kontrollbefugnisse verleihen

Aktien mit Sonderrechten, die Kontrollbefugnisse verleihen, wurden nicht ausgegeben.

### Art der Stimmrechtskontrolle, wenn Arbeitnehmer am Kapital beteiligt sind und ihre Kontrollrechte nicht unmittelbar ausüben

Die Arbeitnehmer, die Aktien der Deutschen Bank halten, üben ihre Kontrollrechte wie andere Aktionäre nach Maßgabe der gesetzlichen Vorschriften und der Satzung aus.

### Bestimmungen über die Ernennung und Abberufung von Vorstandsmitgliedern

Nach dem Aktiengesetz (§ 84 AktG) und der Satzung der Deutschen Bank (§ 6) werden die Mitglieder des Vorstands vom Aufsichtsrat bestellt. Die Zahl der Vorstandsmitglieder wird vom Aufsichtsrat bestimmt. Nach der Satzung besteht der Vorstand mindestens aus drei Mitgliedern. Der Aufsichtsrat kann ein Vorstandsmitglied zum Vorsitzenden des Vorstands ernennen. Vorstandsmitglieder dürfen für höchstens fünf Jahre bestellt werden. Eine wiederholte Bestellung oder Verlängerung der Amtszeit, jeweils für höchstens fünf Jahre, ist zulässig. Nach dem Mitbestimmungsgesetz (§ 31) ist für die Bestellung von Vorstandsmitgliedern eine Mehrheit von mindestens zwei Dritteln der Mitglieder des Aufsichtsrats erforderlich. Kommt hiernach eine Bestellung nicht zustande, so hat der Vermittlungsausschuss innerhalb eines Monats dem Aufsichtsrat einen Vorschlag für die Bestellung zu machen. Der Aufsichtsrat bestellt dann die Mitglieder des Vorstands mit der Mehrheit der Stimmen seiner Mitglieder. Kommt auch hiernach eine Bestellung nicht zustande, so hat bei einer erneuten Abstimmung der Aufsichtsratsvorsitzende zwei Stimmen. In dringenden Fällen hat das Amtsgericht Frankfurt am Main auf Antrag eines Beteiligten ein fehlendes Vorstandsmitglied zu bestellen (§ 85 AktG).

Nach dem Kreditwesengesetz muss der Bundesanstalt für Finanzdienstleistungsaufsicht und der Deutschen Bundesbank vor der beabsichtigten Bestellung von Vorstandsmitgliedern nachgewiesen werden, dass diese in ausreichendem Maße theoretische und praktische Kenntnisse in den Geschäften der Bank sowie Leitungserfahrung haben (§§ 24 Absatz 1 Nr. 1, 33 Absatz 2 KWG).

Der Aufsichtsrat kann die Bestellung zum Vorstandsmitglied und die Ernennung zum Vorsitzenden des Vorstands widerrufen, wenn ein wichtiger Grund vorliegt. Solche Gründe sind namentlich grobe Pflichtverletzung, Unfähigkeit zur ordnungsgemäßen Geschäftsführung oder Vertrauensentzug durch die Hauptversammlung – es sei denn, dass das Vertrauen aus offensichtlich unsachlichen Gründen entzogen worden ist.

Die BaFin kann einen Sonderbeauftragten bestellen und diesem die Wahrnehmung der Aufgaben und Befugnisse einzelner Mitglieder des Vorstands übertragen, wenn diese Mitglieder nicht zuverlässig sind oder nicht die erforderliche fachliche Eignung haben oder wenn das Kreditinstitut nicht mehr über die erforderliche Anzahl von Vorstandsmitgliedern verfügt. Wenn Mitglieder des Vorstands nicht zuverlässig sind oder nicht die erforderliche Sachkunde besitzen oder wenn ihnen wesentliche Verstöße gegen die Grundsätze einer ordnungsgemäßen Geschäftsführung verborgen geblieben sind oder sie festgestellte Verstöße nicht beseitigt haben, kann die BaFin dem Sonderbeauftragten die Aufgaben und Befugnisse des Vorstands insgesamt übertragen. In allen diesen Fällen ruhen die Aufgaben und Befugnisse des Vorstands oder der betroffenen Vorstandsmitglieder (§ 45c Absatz 1 bis 3 KWG).

Besteht Gefahr für die Erfüllung der Verpflichtungen eines Kreditinstituts gegenüber seinen Gläubigern oder der begründete Verdacht, dass eine wirksame Aufsicht über das Kreditinstitut nicht möglich ist, kann die BaFin zur Abwendung dieser Gefahr einstweilige Maßnahmen treffen. Sie kann dabei auch Mitgliedern des Vorstands die Ausübung ihrer Tätigkeit untersagen oder beschränken (§ 46 Absatz 1 KWG). In diesem Fall hat das Amtsgericht Frankfurt am Main auf Antrag der BaFin die erforderlichen Vorstandsmitglieder zu bestellen, wenn infolge der Untersagung der Vorstand nicht mehr über die für die Führung der Geschäfte erforderliche Anzahl von Mitgliedern verfügt (§ 46 Absatz 2 KWG).

### Bestimmungen über die Änderung der Satzung

Jede Änderung der Satzung bedarf eines Beschlusses der Hauptversammlung (§ 179 AktG). Die Befugnis zu Änderungen, die nur die Fassung betreffen, wie zum Beispiel Änderungen des Grundkapitals infolge Ausnutzung von genehmigtem Kapital ist in der Satzung der Deutschen Bank dem Aufsichtsrat übertragen worden (§ 20 Absatz 3). Die Beschlüsse der Hauptversammlung werden gemäß der Satzung mit einfacher Stimmenmehrheit und, soweit eine Kapitalmehrheit erforderlich ist, mit einfacher Kapitalmehrheit gefasst, falls nicht das Gesetz oder die Satzung zwingend etwas anderes vorschreibt (§ 20 Absatz 1). Satzungsänderungen werden mit der Eintragung in das Handelsregister wirksam (§ 181 Absatz 3 AktG).

### Befugnis des Vorstands, Aktien auszugeben oder zurückzukaufen

Der Vorstand ist derzeit nicht ermächtigt, das Grundkapital durch Ausgabe neuer Aktien gegen Geld- oder Sacheinlagen zu erhöhen.

Von der Hauptversammlung am 29. Mai 2008 wurde der Vorstand ermächtigt, bis zum 30. April 2013 einmalig oder mehrmals auf den Inhaber oder Namen lautende Genussscheine, denen Inhaberoptionsrechte beigelegt sind oder die mit einem Wandlungsrecht für den Inhaber verbunden werden können, sowie Options- und/oder Wandelschuldverschreibungen zu begeben. Zu diesem Zweck wurde das Grundkapital um bis zu 150.000.000 € bedingt erhöht. Dieses bedingte Kapital wurde am 25. Juni 2009 mit der Eintragung ins Handelsregister wirksam.

Von der Hauptversammlung am 26. Mai 2009 wurde der Vorstand ermächtigt, bis zum 30. April 2014 einmalig oder mehrmals auf den Inhaber oder Namen lautende Genussscheine, denen Inhaberoptionsrechte beigelegt sind oder die mit einem Wandlungsrecht für den Inhaber verbunden werden können, sowie Options- und/oder Wandelschuldverschreibungen zu begeben. Zu diesem Zweck wurde das Grundkapital um bis zu 256.000.000 € bedingt erhöht. Dieses bedingte Kapital wurde am 9. September 2009 mit der Eintragung ins Handelsregister wirksam.

Von der Hauptversammlung am 27. Mai 2010 wurde der Vorstand ermächtigt, bis zum 30. April 2015 einmalig oder mehrmals auf den Inhaber oder Namen lautende Genussscheine, denen Inhaberoptionsrechte beigelegt oder die mit einem Wandlungsrecht für den Inhaber verbunden werden können, sowie Options- und/oder Wandelschuldverschreibungen zu begeben. Zu diesem Zweck wurde das Grundkapital um bis zu 230.400.000 € bedingt erhöht. Dieses bedingte Kapital wurde am 13. September 2010 mit der Eintragung ins Handelsregister wirksam.

Der Vorstand wurde von der Hauptversammlung am 27. Mai 2010 nach § 71 Absatz 1 Nr. 7 AktG ermächtigt, bis zum 30. November 2014 zum Zweck des Wertpapierhandels Eigene Aktien zu Preisen, die den Mittelwert der Aktienkurse (Schlussauktionspreise der Deutsche Bank-Aktie im Xetra-Handel beziehungsweise in einem vergleichbaren Nachfolgesystem an der Frankfurter Wertpapierbörse) an den jeweils drei vorangehenden Börsentagen nicht um mehr als 10 % über- beziehungsweise unterschreiten, zu kaufen und zu verkaufen. Dabei darf der Bestand der zu diesem Zweck erworbenen Aktien am Ende eines Tages 5 % des Grundkapitals der Deutschen Bank AG übersteigen.

Der Vorstand wurde von der Hauptversammlung am 27. Mai 2010 nach § 71 Absatz 1 Nr. 8 AktG ermächtigt, bis zum 30. November 2014 Eigene Aktien bis zu 10 % des derzeitigen Grundkapitals zu erwerben. Zusammen mit den für Handelszwecke und aus anderen Gründen erworbenen Eigenen Aktien, die sich jeweils im Besitz der Gesellschaft befinden oder ihr nach §§ 71a ff. AktG zuzurechnen sind, dürfen die aufgrund dieser Ermächtigung erworbenen Aktien zu keinem Zeitpunkt 10 % des Grundkapitals der Gesellschaft übersteigen. Der Erwerb darf über die Börse oder mittels eines an alle Aktionäre gerichteten öffentlichen Kaufangebots erfolgen. Der Gegenwert für den Erwerb der Aktien (ohne Erwerbsnebenkosten) darf bei Erwerb über die Börse den Mittelwert der Aktienkurse (Schlussauktionspreise der Deutsche Bank-Aktie im Xetra-Handel beziehungsweise in einem vergleichbaren Nachfolgesystem an der Frankfurter Wertpapierbörse) an den letzten drei Handelstagen vor der Verpflichtung zum Erwerb nicht um mehr als 10 % über- beziehungsweise unterschreiten. Bei einem öffentlichen Kaufangebot darf er den Mittelwert der Aktienkurse (Schlussauktionspreise der Deutsche Bank-Aktie im Xetra-Handel beziehungsweise in einem vergleichbaren Nachfolgesystem an der Frankfurter Wertpapierbörse) an den letzten drei Handelstagen vor dem Tag der Veröffentlichung des Angebots nicht um mehr als 10 % über- oder unterschreiten. Sollte bei einem öffentlichen Kaufangebot das Volumen der angebotenen Aktien das vorgesehene Rückkaufvolumen überschreiten, muss die Annahme im Verhältnis der jeweils angebotenen Aktien erfolgen. Eine bevorrechtigte Annahme geringer Stückzahlen bis zu 50 Stück zum Erwerb angebotener Aktien der Gesellschaft je Aktionär kann vorgesehen werden.

Der Vorstand wurde auch ermächtigt, eine Veräußerung der erworbenen Aktien sowie etwa aufgrund vorangehender Ermächtigungen nach § 71 Absatz 1 Nr. 8 AktG erworbener Aktien in anderer Weise als über die Börse oder durch Angebot an alle Aktionäre vorzunehmen, soweit dies gegen Sachleistung unter Ausschluss des Bezugsrechts der Aktionäre zu dem Zweck erfolgt, Unternehmen oder Beteiligungen an Unternehmen zu erwerben. Darüber hinaus wurde der Vorstand ermächtigt, bei einer Veräußerung solcher Eigenen Aktien durch Angebot an alle Aktionäre den Inhabern der von der Gesellschaft ausgegebenen Optionsrechte, Wandelschuldverschreibungen und Wandelgenussrechte ein Bezugsrecht auf die Aktien in dem Umfang zu gewähren, wie es ihnen nach Ausübung des Options- beziehungsweise Wandlungsrechts zustehen würde. Für diese Fälle und in diesem Umfang wurde das Bezugsrecht der Aktionäre ausgeschlossen.

Der Vorstand wurde weiter unter Ausschluss des Bezugsrechts der Aktionäre ermächtigt, solche Eigenen Aktien als Belegschaftsaktien an Mitarbeiter und Pensionäre der Gesellschaft und mit ihr verbundener Unternehmen auszugeben oder zur Bedienung von Optionsrechten beziehungsweise Erwerbsrechten oder Erwerbspflichten auf Aktien der Gesellschaft zu verwenden, die Mitarbeitern oder Organmitgliedern der Gesellschaft und verbundener Unternehmen eingeräumt wurden.

Ferner wurde der Vorstand ermächtigt, unter Ausschluss des Bezugsrechts der Aktionäre solche Eigenen Aktien an Dritte gegen Barzahlung zu veräußern, wenn der Kaufpreis den Börsenpreis der Aktien zum Zeitpunkt der Veräußerung nicht wesentlich unterschreitet. Von dieser Ermächtigung darf nur Gebrauch gemacht werden, wenn sichergestellt ist, dass die Zahl der aufgrund dieser Ermächtigung veräußerten Aktien zusammen zum Zeitpunkt der Ausübung der Ermächtigung 10 % des vorhandenen Grundkapitals der Gesellschaft nicht übersteigt. Auf die Höchstgrenze von 10 % des Grundkapitals sind Aktien anzurechnen, die während der Laufzeit dieser Ermächtigung unter Ausschluss des Bezugsrechts in direkter oder indirekter Anwendung des § 186 Absatz 3 Satz 4 AktG ausgegeben oder veräußert werden. Ebenfalls anzurechnen sind Aktien, die zur Bedienung von Options- und/oder Wandlungsrechten aus Wandel- oder Optionsschuldverschreibungen oder -genussrechten auszugeben sind, sofern diese Schuldverschreibungen oder Genussrechte während der Laufzeit dieser Ermächtigung unter Ausschluss des Bezugsrechts in entsprechender Anwendung des § 186 Absatz 3 Satz 4 AktG ausgegeben werden.

Der Vorstand wurde weiter ermächtigt, aufgrund dieser Ermächtigung erworbene Aktien einzuziehen, ohne dass die Durchführung der Einziehung eines weiteren Hauptversammlungsbeschlusses bedarf.

Der Vorstand wurde von der Hauptversammlung am 27. Mai 2010 ergänzend ermächtigt, den Aktienerwerb unter der beschlossenen Ermächtigung auch unter Einsatz von Put- oder Call-Optionen oder Terminkaufverträgen durchzuführen. Die Gesellschaft kann danach auf physische Belieferung gerichtete Put-Optionen an Dritte verkaufen und Call-Optionen von Dritten kaufen, wenn durch die Optionsbedingungen sichergestellt ist, dass diese nur mit Aktien beliefert werden, die ihrerseits unter Wahrung des Gleichbehandlungsgrundsatzes erworben wurden. Alle Aktienerwerbe unter Einsatz von Put- oder Call-Optionen sind dabei auf Aktien im Umfang von höchstens 5 % des zum Zeitpunkt der Beschlussfassung der Hauptversammlung über diese Ermächtigung vorhandenen Grundkapitals beschränkt. Die Laufzeiten der Optionen müssen spätestens am 30. November 2014 enden.

Der bei Ausübung der Put-Optionen beziehungsweise bei Fälligkeit des Terminkaufs zu zahlende Kaufpreis je Aktie darf den Mittelwert der Aktienkurse (Schlussauktionspreise der Deutsche Bank-Aktie im Xetra-Handel beziehungsweise in einem vergleichbaren Nachfolgesystem an der Frankfurter Wertpapierbörse) an den letzten drei Handelstagen vor Abschluss des betreffenden Optionsgeschäfts nicht um mehr als 10 % über- oder unterschreiten, jeweils ohne Erwerbsnebenkosten, aber unter Berücksichtigung der erhaltenen beziehungsweise gezahlten Optionsprämie. Eine Ausübung der Call-Optionen darf nur erfolgen, wenn der zu zahlende Kaufpreis den Mittelwert der Aktienkurse (Schlussauktionspreise der Deutsche Bank-Aktie im Xetra-Handel beziehungsweise in einem vergleichbaren Nachfolgesystem an der Frankfurter Wertpapierbörse) an den letzten drei Handelstagen vor Abschluss des betreffenden Optionsgeschäfts nicht um mehr als 10 % über- oder unterschreitet.

Für die Veräußerung und Einziehung von Aktien, die unter Einsatz von Derivaten erworben wurden, gelten die von der Hauptversammlung festgesetzten allgemeinen Regeln.

#### Wesentliche Vereinbarungen, die unter der Bedingung eines Kontrollwechsels infolge eines Übernahmeangebots stehen

Wesentliche Vereinbarungen, die unter der Bedingung eines Kontrollwechsels infolge eines Übernahmeangebots stehen, wurden nicht getroffen.

### Entschädigungsvereinbarungen für den Fall eines Übernahmeangebots

Sofern ein Mitglied des Vorstands im Rahmen eines Kontrollerwerbs ausscheidet, erhält es eine einmalige Vergütung ausgezahlt, die im nachfolgenden Vergütungsbericht näher dargestellt ist.

Sofern das Anstellungsverhältnis bestimmter Führungskräfte mit globaler oder strategisch bedeutender Verantwortung im Rahmen eines Kontrollerwerbs innerhalb einer definierten Frist beendet wird, ohne dass ein von den Führungskräften zu vertretender Grund vorliegt, oder diese Führungskräfte ihr Anstellungsverhältnis kündigen, weil das Unternehmen bestimmte Maßnahmen ergriffen hat, die zu einer Einschränkung der Verantwortlichkeiten führen, steht den Führungskräften eine Abfindungszahlung zu. Die Berechnung der Abfindung bemisst sich grundsätzlich nach dem 1,5- bis 2,5-Fachen der letzten Jahresgesamtvergütung (Grundgehalt und variable – bar und aktienbasierte – Vergütung) vor dem Kontrollerwerb. Dabei findet die Entwicklung der Gesamtvergütung in den drei Kalenderjahren vor dem Kontrollerwerb entsprechende Berücksichtigung.

## Vergütungsbericht

Der Vergütungsbericht erläutert die Grundzüge, die auf die Festlegung der Vergütung von Vorstand und Aufsichtsrat der Deutschen Bank AG Anwendung finden, sowie Höhe und Struktur der Vorstands- und Aufsichtsratsvergütung. Der Vergütungsbericht richtet sich nach den Vorgaben des § 314 Absatz 1 Nr. 6 HGB, des Deutschen Rechnungslegungs Standards („DRS“) 17 „Berichterstattung über die Vergütung der Organmitglieder“ sowie den Empfehlungen des Deutschen Corporate Governance Kodex.

### Grundzüge des Vergütungssystems für die Mitglieder des Vorstands

#### Zuständigkeit

Die Entscheidungen über das Vergütungssystem einschließlich der wesentlichen Vertragselemente sowie die Festsetzung der Bezüge der Vorstandsmitglieder werden seit dem Inkrafttreten des Gesetzes zur Angemessenheit der Vorstandsvergütung (VorstAG) am 5. August 2009 vom Aufsichtsrat als Plenum getroffen. Der Präsidialausschuss des Aufsichtsrats nimmt dabei eine wichtige beratende Funktion wahr und bereitet die Beschlussfassungen des Aufsichtsrats vor.

#### Grundsätze

Das Vergütungssystem berücksichtigt die gesetzlichen und regulatorischen Vorgaben. Der Aufsichtsrat hat sich bereits 2009 intensiv mit den Neuerungen des VorstAG befasst und die Anstellungsverträge der Vorstandsmitglieder entsprechend angepasst. In jüngster Zeit wurden eingehend die zum 13. Oktober 2010 in Kraft getretenen Vorschriften der Instituts-Vergütungsverordnung (InstitutsVergV) sowie deren Auswirkungen auf das geltende Vergütungssystem geprüft. Die Anstellungsverträge der Vorstandsmitglieder wurden entsprechend modifiziert und die variable Vergütung für 2010 bereits auf Basis dieser neuen Anforderungen festgelegt.

Zentrale Kriterien der Ausgestaltung der Vergütungsstruktur für die Vorstandsmitglieder sind die Angemessenheit und Nachhaltigkeit, verbunden mit dem Ziel, Anreize zur Eingehung unverhältnismäßig hoher Risiken zu vermeiden. Hierzu ist eine Obergrenze für das Verhältnis von fixer zu variabler Vergütung festzulegen. Gleichzeitig ist die variable Vergütung jedoch so zu bemessen, dass sie die Vorstandsmitglieder wirksam motiviert, die in den Strategien der Bank niedergelegten Ziele zu erreichen und damit zur nachhaltigen Unternehmensentwicklung beizutragen. Die Vergütung für den Vorstand wird anhand mehrerer Kriterien festgelegt. Dazu zählen der Gesamterfolg der Deutschen Bank AG sowie die relative Performance der Deutschen Bank-Aktie gegenüber ausgewählten Vergleichsinstituten. Ferner werden auch Risikoaspekte, Kapitalkosten, Erfolgsbeiträge der jeweiligen Organisationseinheit sowie individuelle Erfolgsbeiträge der Vorstandsmitglieder, die anhand finanzieller wie nichtfinanzieller Parameter bemessen werden, berücksichtigt. Die variablen Bezüge-Komponenten werden unter Berücksichtigung von mehrjährigen Bemessungsgrundlagen festgesetzt.

Die Vergütungsstruktur der Vorstandsmitglieder wird vom Aufsichtsrat regelmäßig überprüft und erforderlichenfalls angepasst. Der Aufsichtsrat bedient sich dabei – ebenso wie für die Festlegung der variablen Vergütung – auch der Expertise externer unabhängiger Vergütungs- und Rechtsberater.



## Vergütungsstruktur

Die Vergütungsstruktur ist in den Anstellungsverträgen mit den Vorstandsmitgliedern geregelt und sieht erfolgsunabhängige sowie erfolgsabhängige Komponenten vor.

### Erfolgsunabhängige Komponenten

Bei den erfolgsunabhängigen Komponenten handelt es sich in erster Linie um das Grundgehalt. Darüber hinaus zählen hierzu die sonstigen Leistungen.

Das Grundgehalt eines ordentlichen Vorstandsmitglieds beträgt 1.150.000 € brutto pro Jahr, das des Vorstandsvorsitzenden 1.650.000 € brutto pro Jahr. Die Grundgehälter werden jeweils in gleichen monatlichen Raten ausgezahlt und wurden das letzte Mal zum 1. Januar 2010 angepasst.

Die sonstigen Leistungen umfassen den geldwerten Vorteil von Sachbezügen wie Firmenwagen und Fahrer-gestellung, Versicherungsprämien, geschäftsbezogene Repräsentationsaufwendungen und Sicherheitsmaß-nahmen, inklusive der gegebenenfalls hierauf übernommenen Steuern, sowie steuerpflichtige Aufwands-erstattungen.

### Erfolgsabhängige Komponenten (Variable Vergütung)

Hierzu zählen der Bonus und der Long-Term Performance Award („LTPA“). Vorstandsmitgliedern, die für den Konzernbereich CIB verantwortlich sind, wird zusätzlich noch eine bereichsbezogene Vergütungskomponente („Division Incentive“) gewährt.

Der Bonus, für den eine individuelle Zielgröße (ordentliches Vorstandsmitglied 1.150.000 €, Vorstandsvorsitzen-der 4.000.000 €) definiert ist, setzt sich aus zwei Komponenten zusammen, die eine mehrjährige Bemessungs-grundlage haben und deren Höhe jeweils anhand der hälftigen Zielgröße und einem Faktor berechnet wird. Der eine Faktor wird von dem zweijährigen Durchschnitt der erreichten Eigenkapitalrendite im Vergleich zu der jeweils geplanten Eigenkapitalrendite bestimmt. Der zweite Faktor bestimmt sich nach dem zweijährigen Durchschnitt der erreichten Eigenkapitalrendite, an dessen Höhe ein vorab bestimmter Multiplikator geknüpft ist. Für das Geschäftsjahr 2010 wird für den zweiten Faktor nur die Eigenkapitalrendite für das Jahr 2010 berücksichtigt, da für das Vorjahr noch keine entsprechende Messgröße vertraglich festgelegt worden war. Bei der Bestimmung der den Faktoren zugrunde liegenden Eigenkapitalrendite bleiben außerordentliche Effekte unberücksichtigt. Für den so berechneten Bonus besteht eine Obergrenze (Cap) von 150 % der Zielgröße. Bei Unterschreiten be-stimmter vorab definierter Untergrenzen entfällt die Zahlung eines Bonus. Insbesondere zur Berücksichtigung individueller Erfolgsbeiträge sowie risikobezogener Faktoren kann der rechnerisch ermittelte Betrag um bis zu 50 % erhöht oder gekürzt werden. Maximal kann der Bonus demnach 225 % der Zielgröße betragen.

Der LTPA basiert auf der Performance der Deutschen Bank-Aktie. Er wird – bezogen auf einen Dreijahreszeit-raum – aus dem Verhältnis der Aktienrendite der Bank zum entsprechenden Durchschnittswert der Aktienren-di-ten einer ausgewählten Vergleichsgruppe von sechs führenden Banken berechnet. Von diesen stammen zwei aus dem Euro-Raum, zwei aus dem europäischen Nicht-Euro-Raum sowie zwei weitere aus den USA (Euro-Raum: Banco Santander und BNP Paribas; europäischer Nicht-Euro-Raum: Barclays und Credit Suisse; USA: Goldman Sachs und J.P. Morgan Chase). Ausgehend von einer individuellen Zielgröße (ordentliches Vorstands-mitglied 2.175.000 €, Vorstandsvorsitzender 4.800.000 €) und abgeleitet aus der erreichten relativen Aktien-rendite, bestimmt sich der auszuzahlende Betrag des LTPA für die Vorstandsmitglieder. Für den Fall einer Überperformance existiert eine Obergrenze in Höhe von 125 % der Zielgröße. Sofern die beschriebene Aktien-rendite der Bank geringer als der entsprechende Durchschnitt der Vergleichsgruppe ist, vermindert sich die Auszahlung des LTPA überproportional. Unterschreitet das vorbeschriebene Verhältnis einen definierten Min-destwert, entfällt eine Auszahlung vollständig.

Die Höhe des Division Incentive wird unter Berücksichtigung des individuellen Erfolgsbeitrags des berechtigten Vorstandsmitglieds und des Erfolgs des Konzernbereichs CIB (gemessen zum Beispiel am Ergebnis vor Steuern), auch im Verhältnis zum Wettbewerb und zu den gesetzten Zielen, sowie anhand von Risikoaspekten (gemessen zum Beispiel an der Entwicklung der risikogewichteten Aktiva oder des Value-at-Risk) festgelegt.

### Langfristige Anreizwirkung

Mindestens 60 % der variablen Vergütung (Bonus, LTPA und gegebenenfalls Division Incentive) werden aufgeschoben gewährt, das heißt über einen längeren Zurückbehaltungszeitraum gestreckt, und können, solange sie zurückbehalten sind, verfallen. Mindestens 50 % der aufgeschobenen Vergütung werden dabei als aktienbasierte Vergütung (Restricted Equity Awards) gewährt. Der endgültige Wert der Restricted Equity Awards bestimmt sich nach dem Wert der Deutschen Bank-Aktie bei Zuteilung. Der Teil der aufgeschobenen Vergütung, der nicht aktienbasiert gewährt wird, wird als aufgeschobene Barvergütung (Restricted Incentive Awards) vergeben.

Sowohl die Restricted Equity Awards als auch die Restricted Incentive Awards werden in vier gleichen Tranchen, beginnend etwa eineinhalb Jahre nach Vergabe und dann im Abstand von jeweils einem Jahr, damit insgesamt über einen Zeitraum von etwa viereinhalb Jahren gestreckt, unverfallbar. Alle zurückbehaltenen Vergütungskomponenten (Restricted Equity Awards und Restricted Incentive Awards) erzielen eine langfristige Anreizwirkung, da sie bis zu deren Unverfallbarkeit bestimmten Verfallbedingungen unterliegen. Die Awards können bei einem negativen Ergebnis des Konzerns, aber auch bei individuellem Fehlverhalten (zum Beispiel bei Verstoß gegen Regularien) oder individuellen negativen Erfolgsbeiträgen verfallen. Den Mitgliedern des Vorstands ist es nicht gestattet, die Risikoorientierung der aufgeschobenen Vergütungskomponenten mit Absicherungsgeschäften oder anderen Gegenmaßnahmen einzuschränken oder aufzuheben.

### Haltefristen (Retention Periods)

Die einzelnen Tranchen der Restricted Equity Awards sind im Anschluss an den Eintritt der Unverfallbarkeit zusätzlich noch mit einer weiteren Haltefrist versehen, nach deren Verstreichen frühestens über die jeweilige Tranche verfügt werden darf. Die Haltefrist der ersten Tranche der Restricted Equity Awards, die nach etwa eineinhalb Jahren unverfallbar wird, beträgt drei Jahre, die Haltefrist der zweiten Tranche, die nach etwa zweieinhalb Jahren unverfallbar wird, beträgt zwei Jahre und die Haltefrist der dritten und vierten Tranche, die nach etwa dreieinhalb beziehungsweise viereinhalb Jahren unverfallbar werden, beträgt jeweils ein Jahr. Demzufolge können die Vorstandsmitglieder über die ersten drei Tranchen der Restricted Equity Awards erst etwa vier Jahre nach der Gewährung und über die vierte Tranche sogar erst nach etwa fünf Jahren verfügen. Die Restricted Equity Awards unterliegen nicht nur bis zur Unverfallbarkeit, sondern auch während der Haltefristen der Kursentwicklung der Deutschen Bank-Aktie und hängen damit von einer nachhaltigen Wertentwicklung ab.

Von dem Teil der variablen Vergütung, der sofort unverfallbar ist, also maximal 40 % der Summe aller variablen Vergütungskomponenten, werden maximal 50 % sofort bar ausgezahlt und wiederum mindestens 50 % als aktienbasierte Vergütung in Form von Equity Upfront Awards gewährt. Die Equity Upfront Awards unterliegen, im Gegensatz zu den Restricted Equity Awards, keinen Verfallbedingungen; sie sind jedoch mit einer Haltefrist von drei Jahren versehen, nach deren Verstreichen erst über die Awards verfügt werden darf. Sie unterliegen in dieser Zeit durch die Bindung an die Entwicklung der Deutschen Bank-Aktie ebenfalls der nachhaltigen Wertentwicklung.

Die Gewährung der Restricted Equity Awards sowie der Equity Upfront Awards erfolgt auf Basis des DB Equity Plan, die Gewährung der Restricted Incentive Awards auf Basis des DB Restricted Incentive Plan. Weitere Informationen zu dem DB Equity Plan und dem DB Restricted Incentive Plan sind in Note 32 „Aktienbasierte Vergütung“ und Note 33 „Leistungen an Arbeitnehmer“ des Konzernabschlusses enthalten.

### **Begrenzungen**

Im Fall außergewöhnlicher Entwicklungen ist die Gesamtvergütung jedes Vorstandsmitglieds einschließlich aller variablen Komponenten auf einen Maximalbetrag begrenzt. Eine Auszahlung variabler Vergütungsbestandteile erfolgt nicht, wenn die Bundesanstalt für Finanzdienstleistungsaufsicht die Auszahlung variabler Vergütungsbestandteile im Einklang mit bestehenden gesetzlichen Regelungen untersagt beziehungsweise einschränkt.

Vorstehend wurde die Vergütungsstruktur für das Geschäftsjahr 2010 dargestellt. Die Vergütungsstruktur für das Geschäftsjahr 2009 unterscheidet sich davon in einzelnen Aspekten und wurde in der letztjährigen Veröffentlichung beschrieben. Für die Vergütung für das Geschäftsjahr 2009 galt unter anderem, dass für die Bemessung des Bonus die tatsächlich erreichte Eigenkapitalrendite im Vergleich zu einer vorab festgelegten Plangröße relevant war, dass für den damaligen MTI der Durchschnittswert der Aktienrendite auf der Basis eines Zweijahreszeitraums errechnet wurde, dass der Zurückbehaltungszeitraum für die Restricted Equity Awards und die Restricted Incentive Awards jeweils knapp unter vier Jahren lag, wobei die Restricted Equity Awards überwiegend als Einmaltranche im November 2013 (der verbleibende geringere Teil in neun gleichen Tranchen) und die Restricted Incentive Awards in drei gleichen Tranchen fällig wurden, und dass es zudem keine zusätzlichen Haltefristen gab.

### **Bezüge der Mitglieder des Vorstands**

Die Mitglieder des Vorstands erhielten für das Geschäftsjahr 2010 für ihre Vorstandstätigkeit Bezüge in Höhe von insgesamt 32.434.836 € (2009: 34.174.619 €). Davon betrafen 9.412.500 € (2009: 5.950.000 €) das Grundgehalt, 17.816.227 € (2009: 18.637.350 €) erfolgsabhängige Komponenten mit langfristiger Anreizwirkung und 5.206.109 € (2009: 9.587.269 €) erfolgsabhängige Komponenten ohne langfristige Anreizwirkung. Hinzu kommen sonstige Leistungen in Höhe von insgesamt 795.338 € (2009: 849.346 €), sodass sich für die Vorstandsmitglieder Gesamtbezüge in Höhe von insgesamt 33.230.174 € (2009: 35.023.965 €) ergeben. Die einzelnen Vorstandsmitglieder erhielten für die Jahre 2010 und 2009 die nachstehenden Bezüge für ihre Tätigkeit im Vorstand.

| Mitglieder des Vorstands     |      | Erfolgs-<br>unabhängige<br>Komponenten | Erfolgsabhängige Komponenten                    |                                                             |                                                                                                  | Summe      |
|------------------------------|------|----------------------------------------|-------------------------------------------------|-------------------------------------------------------------|--------------------------------------------------------------------------------------------------|------------|
|                              |      |                                        | ohne langfristige<br>Anreizwirkung <sup>1</sup> | mit langfristiger Anreizwirkung                             |                                                                                                  |            |
|                              |      |                                        |                                                 | Equity Upfront<br>Award(s) (mit<br>Haltefrist) <sup>2</sup> | Restricted Equity<br>Award(s)<br>(zurückbehalten<br>mit zusätzlicher<br>Haltefrist) <sup>2</sup> |            |
| in €                         |      | Grundgehalt                            |                                                 |                                                             |                                                                                                  |            |
| Dr. Josef Ackermann          | 2010 | 1.650.000                              | 1.034.322                                       | 1.086.038                                                   | 2.534.089                                                                                        | 6.304.449  |
|                              | 2009 | 1.150.000                              | 1.575.000                                       | –                                                           | 4.747.500                                                                                        | 7.472.500  |
| Dr. Hugo Bänziger            | 2010 | 1.150.000                              | 523.428                                         | 549.599                                                     | 824.399                                                                                          | 3.047.426  |
|                              | 2009 | 800.000                                | 1.231.425                                       | –                                                           | 1.657.500                                                                                        | 3.688.925  |
| Michael Cohrs <sup>3</sup>   | 2010 | 862.500                                | 577.533                                         | 606.410                                                     | 1.350.943                                                                                        | 3.397.386  |
|                              | 2009 | 600.000                                | 905.428                                         | –                                                           | 1.546.575                                                                                        | 3.052.003  |
| Jürgen Fitschen <sup>4</sup> | 2010 | 1.150.000                              | 507.790                                         | 533.180                                                     | 799.770                                                                                          | 2.990.740  |
|                              | 2009 | 600.000                                | 923.569                                         | –                                                           | 1.243.125                                                                                        | 2.766.694  |
| Anshuman Jain <sup>4</sup>   | 2010 | 1.150.000                              | 992.752                                         | 1.042.390                                                   | 4.367.413                                                                                        | 7.552.555  |
|                              | 2009 | 600.000                                | 1.565.428                                       | –                                                           | 4.884.525                                                                                        | 7.049.953  |
| Stefan Krause                | 2010 | 1.150.000                              | 539.066                                         | 566.019                                                     | 849.029                                                                                          | 3.104.114  |
|                              | 2009 | 800.000                                | 1.231.425                                       | –                                                           | 1.657.500                                                                                        | 3.688.925  |
| Hermann-Josef Lamberti       | 2010 | 1.150.000                              | 507.790                                         | 533.180                                                     | 799.770                                                                                          | 2.990.740  |
|                              | 2009 | 800.000                                | 1.231.425                                       | –                                                           | 1.657.500                                                                                        | 3.688.925  |
| Rainer Neske <sup>4</sup>    | 2010 | 1.150.000                              | 523.428                                         | 549.599                                                     | 824.399                                                                                          | 3.047.426  |
|                              | 2009 | 600.000                                | 923.569                                         | –                                                           | 1.243.125                                                                                        | 2.766.694  |
| Summe                        | 2010 | 9.412.500                              | 5.206.109                                       | 5.466.415                                                   | 12.349.812                                                                                       | 32.434.836 |
| Summe                        | 2009 | 5.950.000                              | 9.587.269                                       | –                                                           | 18.637.350                                                                                       | 34.174.619 |

<sup>1</sup> Unmittelbar ausgezahlt.

<sup>2</sup> Die Anzahl der im Jahr 2011 für das Geschäftsjahr 2010 den Mitgliedern des Vorstands in Form von Equity Upfront Awards (EUA) und Restricted Equity Awards (REA) gewährten Aktienanwartschaften wurde mittels Division der jeweiligen Eurobeträge durch den Betrag von 44,42 €, dem Xetra-Schlusskurs der Deutschen Bank-Aktie am 2. Februar 2011, ermittelt. Hieraus ergab sich die folgende Anzahl gewährter Aktienanwartschaften (gerundet): Herr Dr. Ackermann: 24.449 EUA und 57.048 REA, Herr Dr. Bänziger: 12.372 EUA und 18.559 REA, Herr Cohrs: 13.651 EUA und 30.412 REA, Herr Fitschen: 12.003 EUA und 18.004 REA, Herr Jain: 23.466 EUA und 98.320 REA, Herr Krause: 12.742 EUA und 19.113 REA, Herr Lamberti: 12.003 EUA und 18.004 REA und Herr Neske: 12.372 EUA und 18.559 REA.

<sup>3</sup> Mitglied des Vorstands vom 1. April 2009 bis zum 30. September 2010. Aufgrund steuerrechtlicher Bestimmungen in den USA, denen Herr Cohrs unterliegt, wurden bei seinem Ausscheiden alle für das Geschäftsjahr 2009 vergebenen Awards fällig gestellt, unmittelbar versteuert und dann mit dem Netto-Euro-Betrag in ein zugunsten der Bank gesperrtes Konto und mit der Netto-Aktien-Anzahl in ein zugunsten der Bank gesperrtes Depot eingebucht. Dort unterliegen sie den Auszahlungs- und Verfallbedingungen, die bereits zuvor für die Awards ohne die vorzeitige Fälligkeit gegolten haben. Dieses Verfahren gilt entsprechend auch für die für die Tätigkeit im Geschäftsjahr 2010 zugesagten Awards.

<sup>4</sup> Mitglied des Vorstands seit 1. April 2009.

Im Februar 2011 wurden den Vorstandsmitgliedern für ihre Leistung im Geschäftsjahr 2010 insgesamt 401.077 Aktien in Form von Restricted Equity Awards und Equity Upfront Awards gewährt (2009: 405.349 Aktien nur in Form von Restricted Equity Awards).

Nach dem Deutschen Rechnungslegungs Standard Nr. 17 sind Ansprüche aus hinausgeschobener Barvergütung, die Bedingungen unterliegen, nicht mit der Zusage, sondern erst im Geschäftsjahr der Gewährung (das heißt bedingungsfreie Auszahlung) in die Gesamtbezüge einzubeziehen. Dies wurde auch bei der jetzigen Darstellung der letztjährigen Vergütungsdaten entsprechend berücksichtigt.

Mit Bedingungen versehene hinausgeschobene Barvergütungen wurden den Mitgliedern des Vorstands für das Geschäftsjahr 2010 als Restricted Incentive Awards in Höhe von insgesamt 12.349.812 € zugesagt. Sie werden dem jeweiligen Vorstandsmitglied ab August 2012 in jeweils vier gleichen jährlichen Tranchen gewährt, die in folgender Gesamthöhe zugesagt wurden: Herrn Dr. Ackermann 2.534.089 €, Herrn Dr. Bänziger 824.399 €, Herrn Cohrs 1.350.943 € (Verfahrensweise wie oben unter Fußnote 3 der Tabelle beschrieben), Herrn Fitschen 799.770 €, Herrn Jain 4.367.413 €, Herrn Krause 849.029 €, Herrn Lamberti 799.770 € und Herrn Neske 824.399 €.

Für das Geschäftsjahr 2009 wurden den Mitgliedern des Vorstands insgesamt Restricted Incentive Awards in Höhe von insgesamt 3.955.007 € zugesagt, die dem jeweiligen Vorstandsmitglied ab Februar 2011 in jeweils drei gleichen jährlichen Tranchen gewährt werden und in folgender Gesamthöhe zugesagt wurden: Herrn Dr. Ackermann 1.925.000 €, Herrn Dr. Bänziger 268.575 €, Herrn Cohrs 130.210 € (Verfahrensweise wie oben unter Fußnote 3 der Tabelle beschrieben), Herrn Fitschen 201.431 €, Herrn Jain 691.210 €, Herrn Krause 268.575 €, Herrn Lamberti 268.575 € und Herrn Neske 201.431 €.

Die folgende Tabelle zeigt die sonstigen erfolgsunabhängigen Leistungen für die Geschäftsjahre 2010 und 2009.

| Mitglieder des Vorstands<br>in € | Sonstige Leistungen |                |
|----------------------------------|---------------------|----------------|
|                                  | 2010                | 2009           |
| Dr. Josef Ackermann              | 148.723             | 154.030        |
| Dr. Hugo Bänziger                | 54.833              | 51.388         |
| Michael Cohrs <sup>1</sup>       | 56.218              | 39.661         |
| Jürgen Fitschen <sup>2</sup>     | 130.171             | 131.111        |
| Anshuman Jain <sup>2</sup>       | 77.671              | 52.697         |
| Stefan Krause                    | 136.953             | 58.267         |
| Hermann-Josef Lamberti           | 91.505              | 102.123        |
| Rainer Neske <sup>2</sup>        | 99.264              | 260.069        |
| <b>Insgesamt</b>                 | <b>795.338</b>      | <b>849.346</b> |

<sup>1</sup> Mitglied des Vorstands vom 1. April 2009 bis zum 30. September 2010.

<sup>2</sup> Mitglied des Vorstands seit 1. April 2009.

Aus Mandaten für konzerneigene Gesellschaften erhalten die Mitglieder des Vorstands keine Vergütung.

### Alters-/Übergangsleistungen

Die Mitglieder des Vorstands haben eine beitragsorientierte Versorgungszusage. Im Rahmen dieses beitragsorientierten Pensionsplans wurde für jedes Vorstandsmitglied nach Berufung in den Vorstand ein persönliches Versorgungskonto eingerichtet, in das jedes Jahr ein Versorgungsbaustein eingestellt wird. Der Versorgungsbaustein wird mit einem individuellen Beitragssatz auf Basis des Grundgehalts sowie des Bonus bis zu einer Obergrenze errechnet und enthält durch einen altersabhängigen Faktor eine Vorabverzinsung von durchschnittlich 6 % pro Jahr bis zum Alter von 60. Ab dem Alter von 61 wird das Versorgungskonto jährlich mit 6 % bis zum Pensionierungszeitpunkt verzinst. Die jährlichen Versorgungsbausteine bilden zusammen das Versorgungskapital, das im Versorgungsfall zur Verfügung steht. Die Versorgungsleistung kann unter bestimmten Bedingungen auch vor Eintritt eines der Regel-Versorgungsfälle (Altersgrenze, Invalidität oder Tod) fällig werden. Die Versorgungsanwartschaft ist von Beginn an unverfallbar. Vorstandsmitglieder, die einen Division Incentive erhalten, nehmen an diesem Plan nicht teil.

Aufgrund früherer vertraglicher Regelungen gibt es für einzelne Vorstandsmitglieder noch zusätzliche Ansprüche:

Den Herren Dr. Ackermann und Lamberti steht unter bestimmten Voraussetzungen nach ihrem Ausscheiden aus dem Vorstand jeweils ein zusätzliches monatliches Ruhegeld von 29.400 € aus einer früheren Pensionszusage zu.

Den Herren Dr. Ackermann, Dr. Bänziger und Lamberti steht unter bestimmten Voraussetzungen für die Dauer von sechs Monaten eine Übergangszahlung zu. Ausgenommen ist beispielsweise der Fall, dass das Vorstandsmitglied durch sein Verschulden einen Grund zur fristlosen Entlassung gibt. Die Übergangszahlung, die ein Vorstandsmitglied für diesen Zeitraum von sechs Monaten erhalten hätte, wenn es zum 31. Dezember 2010 oder zum 31. Dezember 2009 aus dem Vorstand ausgeschieden wäre, belief sich für Herrn Dr. Ackermann auf 2.825.000 € sowie für Herrn Dr. Bänziger und Herrn Lamberti auf jeweils 1.150.000 €.

Sofern Herr Dr. Ackermann und Herr Lamberti nach Vollendung des 60. Lebensjahres ausscheiden, steht ihnen unter bestimmten Voraussetzungen im Anschluss an die sechsmonatige Übergangszeit die Zahlung von zunächst 75 % und dann 50 % der Summe aus Grundgehalt und Bonus (letzte Zielgröße) für die Dauer von jeweils 24 Monaten zu. Die Übergangszahlung endet spätestens sechs Monate nach Ablauf der Hauptversammlung des Jahres, in dem das Vorstandsmitglied das Alter von 65 erreicht.

Die folgende Tabelle zeigt die jährlichen Zuführungsbeträge zu den Rückstellungen für Altersleistungen und Übergangszahlungen für die Jahre 2010 und 2009 sowie die entsprechende Verpflichtungshöhe jeweils zum 31. Dezember 2010 und 31. Dezember 2009 für die einzelnen Mitglieder des Vorstands. Die unterschiedliche Höhe der Beträge resultiert aus der unterschiedlichen Dauer der Vorstandstätigkeit, den jeweiligen altersabhängigen Faktoren, den unterschiedlichen Beitragssätzen sowie den individuellen versorgungsfähigen Bezügen und den vorher beschriebenen weiteren individuellen Ansprüchen.

Mitglieder des Vorstands<sup>1</sup>

| in €                         |      | Zu den Rückstellungen für<br>Altersleistungen und<br>Übergangszahlungen<br>zugeführter Betrag im<br>Geschäftsjahr | Barwert der Verpflichtung am<br>Ende des Geschäftsjahres aus<br>zugesagten Altersleistungen<br>und Übergangszahlungen |
|------------------------------|------|-------------------------------------------------------------------------------------------------------------------|-----------------------------------------------------------------------------------------------------------------------|
| Dr. Josef Ackermann          | 2010 | 1.263.161                                                                                                         | 13.236.187                                                                                                            |
|                              | 2009 | — <sup>3</sup>                                                                                                    | 11.973.026                                                                                                            |
| Dr. Hugo Bänziger            | 2010 | 670.727                                                                                                           | 2.161.491                                                                                                             |
|                              | 2009 | 342.949                                                                                                           | 1.490.764                                                                                                             |
| Jürgen Fitschen <sup>2</sup> | 2010 | 244.364                                                                                                           | 307.348                                                                                                               |
|                              | 2009 | 62.984                                                                                                            | 62.984                                                                                                                |
| Stefan Krause                | 2010 | 550.405                                                                                                           | 825.181                                                                                                               |
|                              | 2009 | 166.891                                                                                                           | 274.776                                                                                                               |
| Hermann-Josef Lamberti       | 2010 | 1.223.474                                                                                                         | 11.177.275                                                                                                            |
|                              | 2009 | 2.488.164                                                                                                         | 9.953.801                                                                                                             |
| Rainer Neske <sup>2</sup>    | 2010 | 461.013                                                                                                           | 575.398                                                                                                               |
|                              | 2009 | 114.385                                                                                                           | 114.385                                                                                                               |

<sup>1</sup> Andere Mitglieder des Vorstands erhielten keine Zusagen auf entsprechende Leistungen nach ihrer Bestellung in den Vorstand.

<sup>2</sup> Mitglied des Vorstands seit 1. April 2009.

<sup>3</sup> Im Geschäftsjahr 2009 war keine Zuführung erforderlich.

### Sonstige Leistungen für den Fall des vorzeitigen Ausscheidens

Die Vorstandsmitglieder haben bei vorzeitiger Beendigung der Bestellung auf Veranlassung der Bank, ohne dass diese berechtigt ist, die Bestellung aus wichtigem Grund zu widerrufen oder den Anstellungsvertrag fristlos zu kündigen, grundsätzlich Anspruch auf eine Abfindung. Diese beläuft sich in der Regel auf den jeweils niedrigeren Betrag von zwei Jahresvergütungen beziehungsweise der Vergütung für die Restlaufzeit des Anstellungsvertrags (als Basis für die Berechnung der Vergütung dient die Jahresvergütung für das vorangegangene Geschäftsjahr).

Sofern Vorstandsmitglieder im Zusammenhang mit einem Kontrollerwerb ausscheiden, haben sie unter bestimmten Voraussetzungen grundsätzlich ebenfalls Anspruch auf eine Abfindung. Diese beträgt in der Regel den jeweils niedrigeren Betrag von drei Jahresvergütungen beziehungsweise der Vergütung für die Restlaufzeit des Anstellungsvertrags. Als Basis für die Berechnung der Vergütung dient die Jahresvergütung für das vorangegangene Geschäftsjahr.

Die Festlegung einer Abfindung in den vorgenannten Fällen erfolgt nach billigem Ermessen durch den Aufsichtsrat. Die Auszahlung der Abfindung erfolgt grundsätzlich in zwei Raten, wobei die zweite Rate bis zur Fälligkeit bestimmten Verfallregelungen unterliegt.

## Aufwand für Komponenten mit langfristiger Anreizwirkung

In der folgenden Tabelle wird der in den jeweiligen Geschäftsjahren gebuchte Aufwand für die für die Vorstandstätigkeit gewährten Vergütungskomponenten mit langfristiger Anreizwirkung dargestellt.

| Mitglieder des Vorstands<br>in € | Aufgewandter Betrag |           |
|----------------------------------|---------------------|-----------|
|                                  | 2010                | 2009      |
| Dr. Josef Ackermann              | 2.822.092           | 2.013.402 |
| Dr. Hugo Bänziger                | 710.357             | 810.967   |
| Michael Cohrs <sup>1,2</sup>     | 1.610.543           | –         |
| Jürgen Fitschen <sup>2,3</sup>   | 399.153             | –         |
| Anshuman Jain <sup>2,3</sup>     | 2.227.846           | –         |
| Stefan Krause <sup>2</sup>       | 529.864             | –         |
| Hermann-Josef Lamberti           | 729.448             | 902.559   |
| Rainer Neske <sup>2,3</sup>      | 399.153             | –         |

<sup>1</sup> Mitglied des Vorstands vom 1. April 2009 bis zum 30. September 2010.

<sup>2</sup> Vergütungskomponenten mit langfristiger Anreizwirkung für Vorstandstätigkeit wurden vor dem Jahr 2009 nicht gewährt.

<sup>3</sup> Mitglied des Vorstands seit 1. April 2009.

## Aktienbesitz der Mitglieder des Vorstands

Am 18. Februar 2011 beziehungsweise 19. Februar 2010 hielten die derzeitigen Vorstandsmitglieder die folgende Anzahl an Aktien und Aktienanwartschaften.

| Mitglieder des Vorstands |             | Anzahl           |                                   |
|--------------------------|-------------|------------------|-----------------------------------|
|                          |             | Aktien           | Aktienanwartschaften <sup>1</sup> |
| Dr. Josef Ackermann      | 2011        | 560.589          | 259.596                           |
|                          | 2010        | 355.474          | 197.260                           |
| Dr. Hugo Bänziger        | 2011        | 55.531           | 100.520                           |
|                          | 2010        | 36.116           | 89.402                            |
| Jürgen Fitschen          | 2011        | 169.008          | 92.671                            |
|                          | 2010        | 98.339           | 86.747                            |
| Anshuman Jain            | 2011        | 457.192          | 414.906                           |
|                          | 2010        | 338.717          | 433.046                           |
| Stefan Krause            | 2011        | –                | 71.363                            |
|                          | 2010        | –                | 36.049                            |
| Hermann-Josef Lamberti   | 2011        | 125.291          | 98.626                            |
|                          | 2010        | 97.740           | 78.190                            |
| Rainer Neske             | 2011        | 60.509           | 90.875                            |
|                          | 2010        | 42.547           | 75.395                            |
| <b>Insgesamt</b>         | <b>2011</b> | <b>1.428.120</b> | <b>1.128.557<sup>2</sup></b>      |
| <b>Insgesamt</b>         | <b>2010</b> | <b>968.933</b>   | <b>996.089</b>                    |

<sup>1</sup> Einschließlich der Aktienanwartschaften von Herrn Fitschen, Herrn Jain und Herrn Neske, die diese jeweils im Zusammenhang mit dem vor der Bestellung zum Vorstand bestehenden Anstellungsverhältnis erhalten haben. Die in der Tabelle erfassten Aktienanwartschaften haben unterschiedliche Unverfallbarkeits- und Zuteilungsdaten. Die letzten Aktienanwartschaften werden im August 2016 zugeteilt.

<sup>2</sup> Davon 89.904 unverfallbar.



Die durch die im September 2010 vorgenommene Kapitalerhöhung eingetretenen wirtschaftlichen Nachteile für die Inhaber von Aktienanwartschaften wurden durch die Vergabe von zusätzlichen Aktienanwartschaften ausgeglichen. Hierzu erhielt jedes im September 2010 bestellte Vorstandsmitglied auf seine per 21. September 2010 ausstehenden Aktienanwartschaften zusätzlich rund 9,59 % Aktienanwartschaften gleicher Ausstattung (in Summe für alle Vorstandsmitglieder zusammen 76.767 Aktienanwartschaften). Die entsprechenden Aktienanwartschaften sind in der Anzahl der in der obigen Tabelle für 2011 genannten Aktienanwartschaften enthalten.

Die derzeitigen Mitglieder des Vorstands hielten zum 18. Februar 2011 insgesamt 1.428.120 Aktien, was rund 0,16 % der an diesem Stichtag ausgegebenen Aktien entsprach. Zum 19. Februar 2010 hielten sie insgesamt 968.933 Aktien, was rund 0,16 % der an diesem Stichtag ausgegebenen Aktien entsprach.

Die Anzahl der den im Geschäftsjahr 2010 tätigen Mitgliedern des Vorstands in diesem Geschäftsjahr aus in früheren Jahren gewährten Aktienanwartschaften zugeteilten Aktien betrug 726.208.

Weitere Informationen zu den zugrunde liegenden Plänen der in der vorstehenden Tabelle aufgeführten Aktienanwartschaften sind in Note 32 „Aktienbasierte Vergütungen“ des Konzernabschlusses enthalten.

## Grundzüge des Vergütungssystems für die Mitglieder des Aufsichtsrats

Die Vergütung des Aufsichtsrats ist in der Satzung geregelt, die bei Bedarf durch die Hauptversammlung angepasst werden kann. Neue Vergütungsregelungen wurden zuletzt in der Hauptversammlung am 24. Mai 2007 beschlossen. Danach gelten die folgenden Regelungen:

Die Vergütung besteht aus einer festen Vergütung in Höhe von 60.000 € pro Jahr und einem dividendenabhängigen Bonus in Höhe von 100 € pro Jahr je 0,01 € ausgeschüttete Dividende, die 1,00 € je Aktie übersteigt. Die Mitglieder des Aufsichtsrats erhalten ferner eine auf den langfristigen Unternehmenserfolg bezogene jährliche Vergütung. Diese Vergütung beträgt 100 € für jede 0,01 €, um die der Durchschnitt der im Finanzbericht der Gesellschaft im Einklang mit den jeweils anwendbaren Rechnungslegungsvorschriften für den Konzern ausgewiesenen Ergebnisse je Aktie (verwässert) aus dem Jahresüberschuss nach Steuern für die letzten drei abgelaufenen Geschäftsjahre den Betrag von 4,00 € übersteigt.

Diese Beträge erhöhen sich um 100 % je Mitgliedschaft in einem Ausschuss des Aufsichtsrats. Für den Vorsitz in einem Ausschuss beträgt der Erhöhungssatz 200 %. Beides gilt nicht für den nach § 27 Absatz 3 MitbestG gebildeten Ausschuss. Der Aufsichtsratsvorsitzende erhält das Vierfache, sein Stellvertreter das Eineinhalbfache der Gesamtvergütung eines ordentlichen Mitglieds. Für den Aufsichtsratsvorsitzenden stellt dies gleichzeitig die Obergrenze dar. Die Mitglieder des Aufsichtsrats erhalten ein Sitzungsgeld in Höhe von 1.000 € für jede Sitzung des Aufsichtsrats und seiner Ausschüsse, an der sie teilnehmen. Darüber hinaus werden die Mitglieder des Aufsichtsrats in unserem Interesse in angemessener Höhe in eine von der Deutschen Bank abgeschlossene Vermögensschaden-Haftpflichtversicherung einbezogen, soweit eine solche besteht. Die Prämien hierfür werden von der Bank entrichtet.

Wir erstatten den Mitgliedern des Aufsichtsrats sämtliche Barauslagen sowie etwaige Umsatzsteueraufwendungen (derzeit 19 %), die ihnen in Verbindung mit ihren Aufgaben als Mitglied des Aufsichtsrats entstehen. Die bei der Deutschen Bank angestellten Arbeitnehmervertreter des Aufsichtsrats erhalten außerdem ihre Mitarbeiter-

vergütung. Die Vergütung für Aufsichtsratsmitglieder, die dem Aufsichtsrat nicht während des ganzen Geschäftsjahres angehören, wird im Verhältnis zur Amtsdauer berücksichtigt, wobei eine Aufrundung auf volle Monate erfolgt.

Die Mitglieder des Nominierungsausschusses, der sich im Anschluss an die Hauptversammlung 2008 konstituiert hat, haben wie schon in den Vorjahren auf sämtliche Vergütungen für den Nominierungsausschuss für 2009 und die Folgejahre, einschließlich des Sitzungsgelds, verzichtet.

### Vergütung der Mitglieder des Aufsichtsrats für das Geschäftsjahr 2010

Die Mitglieder des Aufsichtsrats erhalten ihre Vergütung nach Ablauf des jeweiligen Geschäftsjahres. Im Januar 2011 haben wir jedem Aufsichtsratsmitglied für seine Tätigkeit im Jahr 2010 die feste Vergütung und die Sitzungsgelder überwiesen. Zusätzlich erhält grundsätzlich jedes Aufsichtsratsmitglied nach der Hauptversammlung im Mai 2011 für seine Tätigkeit im Jahr 2010 die an unseren langfristigen Unternehmenserfolg geknüpfte Vergütung sowie die dividendenabhängige Vergütung. Unter der Annahme, dass die Hauptversammlung im Mai 2011 der vorgeschlagenen Dividende von 0,75 € pro Aktie zustimmen wird, erhält der Aufsichtsrat keine variable Vergütung für 2010. Die Gesamtvergütung beträgt demzufolge 2.453.000 € (2009: 2.561.316 €).

Die individuelle Vergütung der Mitglieder des Aufsichtsrats für das Geschäftsjahr 2010 setzt sich wie folgt zusammen (ohne gesetzliche Umsatzsteuer).

| Mitglieder des Aufsichtsrats<br>in € | Vergütung für das Geschäftsjahr 2010 |          |                   |                  | Vergütung für das Geschäftsjahr 2009 |                |                   |                  |
|--------------------------------------|--------------------------------------|----------|-------------------|------------------|--------------------------------------|----------------|-------------------|------------------|
|                                      | Fest                                 | Variabel | Sitzungs-<br>geld | Insgesamt        | Fest                                 | Variabel       | Sitzungs-<br>geld | Insgesamt        |
| Dr. Clemens Börsig                   | 240.000                              | –        | 31.000            | 271.000          | 240.000                              | 13.733         | 28.000            | 281.733          |
| Karin Ruck                           | 210.000                              | –        | 25.000            | 235.000          | 210.000                              | 12.017         | 23.000            | 245.017          |
| Wolfgang Böhr                        | 60.000                               | –        | 9.000             | 69.000           | 60.000                               | 3.433          | 7.000             | 70.433           |
| Dr. Karl-Gerhard Eick                | 180.000                              | –        | 13.000            | 193.000          | 180.000                              | 10.300         | 16.000            | 206.300          |
| Heidrun Förster <sup>1</sup>         | 70.000                               | –        | 14.000            | 84.000           | 120.000                              | 6.867          | 14.000            | 140.867          |
| Alfred Herling                       | 85.000                               | –        | 12.000            | 97.000           | 60.000                               | 3.433          | 7.000             | 70.433           |
| Gerd Herzberg                        | 60.000                               | –        | 9.000             | 69.000           | 60.000                               | 3.433          | 7.000             | 70.433           |
| Sir Peter Job                        | 180.000                              | –        | 14.000            | 194.000          | 180.000                              | 10.300         | 22.000            | 212.300          |
| Prof. Dr. Henning Kagermann          | 120.000                              | –        | 13.000            | 133.000          | 120.000                              | 6.867          | 12.000            | 138.867          |
| Peter Kazmierczak <sup>2</sup>       | 30.000                               | –        | 3.000             | 33.000           | –                                    | –              | –                 | –                |
| Martina Klee                         | 60.000                               | –        | 9.000             | 69.000           | 60.000                               | 3.433          | 7.000             | 70.433           |
| Suzanne Labarge                      | 120.000                              | –        | 13.000            | 133.000          | 120.000                              | 6.867          | 12.000            | 138.867          |
| Maurice Lévy                         | 60.000                               | –        | 7.000             | 67.000           | 60.000                               | 3.433          | 6.000             | 69.433           |
| Henriette Mark                       | 120.000                              | –        | 15.000            | 135.000          | 120.000                              | 6.867          | 16.000            | 142.867          |
| Gabriele Platscher                   | 60.000                               | –        | 9.000             | 69.000           | 60.000                               | 3.433          | 7.000             | 70.433           |
| Dr. Theo Siebert                     | 120.000                              | –        | 12.000            | 132.000          | 120.000                              | 6.867          | 12.000            | 138.867          |
| Dr. Johannes Teyssen                 | 60.000                               | –        | 8.000             | 68.000           | 60.000                               | 3.433          | 7.000             | 70.433           |
| Marlehn Thieme                       | 120.000                              | –        | 13.000            | 133.000          | 120.000                              | 6.867          | 15.000            | 141.867          |
| Tilman Todenhöfer                    | 120.000                              | –        | 18.000            | 138.000          | 120.000                              | 6.867          | 14.000            | 140.867          |
| Stefan Viertel <sup>3</sup>          | 25.000                               | –        | 2.000             | 27.000           | –                                    | –              | –                 | –                |
| Werner Wenning                       | 60.000                               | –        | 8.000             | 68.000           | 60.000                               | 3.433          | 7.000             | 70.433           |
| Leo Wunderlich <sup>4</sup>          | 30.000                               | –        | 6.000             | 36.000           | 60.000                               | 3.433          | 7.000             | 70.433           |
| <b>Insgesamt</b>                     | <b>2.190.000</b>                     | <b>–</b> | <b>263.000</b>    | <b>2.453.000</b> | <b>2.190.000</b>                     | <b>125.316</b> | <b>246.000</b>    | <b>2.561.316</b> |

<sup>1</sup> Mitglied bis 31. Juli 2010.

<sup>2</sup> Mitglied seit 1. Juli 2010.

<sup>3</sup> Mitglied seit 1. August 2010.

<sup>4</sup> Mitglied bis 30. Juni 2010.

## Gesellschaftliche und soziale Verantwortung

### Mitarbeiter und soziale Verantwortung

#### Mitarbeiter

Zum 31. Dezember 2010 beschäftigte die Bank insgesamt 102.062 Mitarbeiter, verglichen mit 77.053 zum 31. Dezember 2009. Wir berechnen unsere Mitarbeiterzahlen auf Basis von Vollzeitkräften, das heißt, Teilzeitkräfte sind in diesen Zahlen entsprechend der vereinbarten Arbeitszeit anteilig enthalten.

Die nachfolgende Tabelle zeigt die Anzahl unserer Vollzeitkräfte zum 31. Dezember 2010, 2009 und 2008.

| Mitarbeiter <sup>1</sup>                              | 31.12.2010     | 31.12.2009    | 31.12.2008    |
|-------------------------------------------------------|----------------|---------------|---------------|
| Deutschland                                           | 49.265         | 27.321        | 27.942        |
| Europa (ohne Deutschland), Mittlerer Osten und Afrika | 23.806         | 22.031        | 23.073        |
| Asien/Pazifik                                         | 17.779         | 16.518        | 17.120        |
| Nordamerika <sup>2,3</sup>                            | 10.811         | 10.815        | 11.947        |
| Mittel- und Südamerika                                | 401            | 368           | 374           |
| <b>Mitarbeiter insgesamt<sup>3</sup></b>              | <b>102.062</b> | <b>77.053</b> | <b>80.456</b> |

<sup>1</sup> Vollzeitkräfte. In 2010 wurden die Mitarbeiter von Kasachstan, die zuvor in Asien/Pazifik ausgewiesen wurden, der Region Europa (ohne Deutschland, Mittlerer Osten und Afrika) zugeordnet; die Angaben für 2009 (6 Mitarbeiter) und 2008 (6 Mitarbeiter) wurden rückwirkend angepasst.

<sup>2</sup> Vorwiegend USA.

<sup>3</sup> Die nominelle Zahl der Beschäftigten von The Cosmopolitan of Las Vegas beträgt 4.147 zum 31. Dezember 2010 und umfasst Vollzeit- und Teilzeitbeschäftigte und ist nicht Teil der Vollzeitkräfte.

Die Zahl unserer Mitarbeiter stieg 2010 um 25.009 oder 32,5 %. Diese Entwicklung beruht auf folgenden Faktoren:

- Die Anzahl der Mitarbeiter im Konzernbereich Corporate & Investment Bank stieg um 1.752. Dies ist größtenteils auf den Kauf von Teilen von ABN AMRO in den Niederlanden zurückzuführen (1.195). Darüber hinaus erhöhte sich im Bereich Markets der Personalbestand um 374 Mitarbeiter vor dem Hintergrund der Erholung an den internationalen Finanzmärkten.
- Die Anzahl unserer Mitarbeiter in Private Clients and Asset Management stieg um 21.973 vor allem aufgrund der Akquisitionen der Deutschen Postbank in Deutschland (20.361) und der Sal. Oppenheim-Gruppe (2.910 per Jahresende 2010).
- Im Bereich Infrastruktur erhöhte sich die Anzahl der Mitarbeiter in unseren globalen Service Centern, insbesondere in Indien, auf den Philippinen, in Birmingham (U.K.) und in Jacksonville (US) um rund 1.200 Mitarbeiter. In unseren übrigen Infrastrukturbereichen blieb der Personalbestand insgesamt auf Vorjahresniveau.

Der Commitment-Index, der die Verbundenheit unserer Mitarbeiter mit ihrem Arbeitgeber misst und der seit mehr als 10 Jahren durch ein unabhängiges Institut konzernweit auf anonymer Basis erhoben wird, lag 2010 bei 74 weiter auf hohem Niveau. Das ist der zweithöchste Wert der Messreihe und Ausdruck der weiterhin starken Identifikation mit der Deutschen Bank und der ausgeprägten Bereitschaft zur Leistung. In der leichten Abschwächung gegenüber dem vorangegangenen Rekordwert von 77 (2009) spiegelt sich vor allem die Entspannung beziehungsweise Normalisierung nach Überwindung der Finanzkrise wider.

#### Leistungen an Arbeitnehmer nach Beendigung des Arbeitsverhältnisses

Wir bieten eine Reihe von Plänen für Leistungen nach Beendigung des Arbeitsverhältnisses an. Zusätzlich zu beitragsdefinierten Plänen gibt es Pläne, die in der Rechnungslegung als leistungsdefinierte Pläne gelten.

Unser global koordinierter Rechnungslegungsprozess umfasst leistungsdefinierte Pläne mit einer Verpflichtungshöhe im Sinne der Defined Benefit Obligation (DBO) von mehr als 2 Mio €. Die Bewertungen durch lokale Aktuarien in den einzelnen Ländern werden von unserem globalen Aktuar nachgeprüft.

Durch die Anwendung globaler Grundsätze zur Festlegung der ökonomischen und demografischen Bewertungsparameter stellen wir sicher, dass diese gemäß den Grundsätzen der bestmöglichen Einschätzung und Planfortführung unvoreingenommen gewählt und aufeinander abgestimmt sind.

Eine weiter gehende Erörterung unserer Pläne für Leistungen an Mitarbeiter ist in den Erläuterungen des Finanzberichts unter Note 33 „Leistungen an Arbeitnehmer“ zu finden.

## Gesellschaftliche Verantwortung (Corporate Social Responsibility)

### Soziales Kapital schaffen

Als einer der Hauptinitiatoren und Erstunterzeichner hat sich die Deutsche Bank im November 2010 dem „Leitbild für verantwortliches Handeln in der Wirtschaft“ verpflichtet, das 21 deutsche Unternehmen ins Leben gerufen haben. Damit wollen wir die gesellschaftliche Verantwortung noch stärker in unsere Geschäftspolitik und unsere Geschäftsprozesse integrieren und sie bei allen Entscheidungen gebührend berücksichtigen.

Gesellschaftliches Engagement bedeutet für uns mehr, als Geld zu geben: Wir wollen soziales Kapital schaffen – zu unserem eigenen Wohl. Im Berichtsjahr haben sich Bank und Mitarbeiter bei einer Vielzahl gesellschaftlicher Projekte im In- und Ausland eingesetzt. Für Bildung, Soziales, Kunst & Musik sowie das ehrenamtliche Engagement unserer Mitarbeiter haben wir mit fast 100 Mio € – mehr als je zuvor – aufgewendet.

### Nachhaltigkeit: Zukunftsfähigkeit sichern

Die Deutsche Bank setzt das Prinzip der nachhaltigen Entwicklung in den Bereichen Umwelt, Soziales und Unternehmensführung konsequent um. Auf dem Weg zur vollständigen Klimaneutralität all unserer betrieblichen Aktivitäten ab 2013 haben wir unser CO<sub>2</sub>-Reduktionsziel für 2010 planmäßig erreicht. Unsere Unternehmenszentrale in Frankfurt am Main, die nach einer dreijährigen Modernisierung zu einem der umweltfreundlichsten Hochhäuser der Welt geworden ist, konnten wir zur Jahreswende 2010/2011 wieder beziehen. Die internen Richtlinien für unser Risikomanagement haben wir um einen „Green Filter“ erweitert, mit dem wir die CO<sub>2</sub>-Auswirkungen von Transaktionen in unsere geschäftlichen Entscheidungen einbeziehen. Die hohe Bedeutung, die wir der Nachhaltigkeit beimessen, belegen auch unsere langjährige Mitgliedschaft beim UN Global Compact und die Unterzeichnung der Principles for Responsible Investment (PRI) der Vereinten Nationen.

Tragfähige und nachhaltige Wirtschaftskonzepte für Metropolenregionen standen 2010 im Mittelpunkt des Global Metro Summit der Alfred Herrhausen Gesellschaft. Die Konferenz erweiterte unser bereits seit 2005 etabliertes Urban-Age-Netzwerk, in dem internationale Experten die Herausforderungen von Megametropolen diskutieren.

### Bildung: Talente fördern

Nicht die Begabung, sondern die Herkunft entscheidet vielfach auch heute noch über den persönlichen Bildungserfolg. Die Deutsche Bank engagiert sich weltweit für mehr Chancen- und Leistungsgerechtigkeit. Mit der 2010 gestarteten Initiative „FairTalent“ unterstützen wir sozial benachteiligte Kinder durch einen ganzheitlichen individuellen Förderplan. Auch Mitarbeiter der Deutschen Bank begleiten als Mentoren das Programm.

Um den Austausch zwischen Wissenschaft und Wirtschaft zu intensivieren, hat die Deutsche Bank an der Bocconi Universität in Mailand und an der Luxembourg School of Finance je einen Lehrstuhl für Finanzen geschaffen. Im House of Finance der Goethe-Universität Frankfurt haben wir eine neue Stiftungsprofessur ermöglicht. Gleichzeitig haben wir unsere Unterstützung für die European School of Management and Technology in Berlin deutlich ausgebaut.

### Soziales: Chancen eröffnen

Die Deutsche Bank hat 2010 erfolgreich den Eye Fund aufgelegt, einen innovativen Investmentfonds über 14,5 Mio US-Dollar, der Anschubfinanzierungen für den Ausbau von Augenkliniken in armen Weltregionen leistet. Mit Krediten und Investitionen haben wir die Verbesserung der Infrastruktur in einkommensschwachen Gemeinden in den USA unterstützt. Dafür erhielten wir von der US-Notenbank zum 19. Mal in Folge das Prädikat „outstanding“.

Das Jahr 2010 wurde von mehreren Naturkatastrophen überschattet, darunter Erdbeben in Haiti und Chile sowie die Flut in Pakistan. Die Deutsche Bank, ihre Stiftungen, Kunden und Mitarbeiter haben zusammen mehr als 5 Mio € für die Opfer zur Verfügung gestellt. Wo immer möglich, unterstützen unsere Mitarbeiter die Hilfsaktionen vor Ort und erfüllen damit unseren Anspruch, mehr als Geld zu geben.

### Kunst und Musik: Kreativität entwickeln

Jünger und internationaler als je zuvor präsentiert sich die Sammlung Deutsche Bank in der modernisierten Unternehmenszentrale in Frankfurt am Main. Rund 1.500 Kunstwerke von 100 Künstlern aus über 40 Ländern laden zu einer Entdeckungsreise durch die zeitgenössische globale Kunstszene ein. Unser kontinuierliches Engagement für Kunst am Arbeitsplatz an weltweit über 900 Standorten wurde 2010 mit dem Art & Work Award ausgezeichnet.

Die in Kenia geborene und in New York lebende Künstlerin Wangechi Mutu war 2010 als erste „Künstlerin des Jahres“ mit einer Einzelausstellung im Deutsche Guggenheim, Berlin, vertreten. Mit dieser neuen Auszeichnung wollen wir gezielt junge Künstler fördern.

Eine exklusive Partnerschaft verbindet die Deutsche Bank seit Langem mit den Berliner Philharmonikern. 2010 besuchte das Orchester erstmals Australien und realisierte dort ein Zukunft@BPhil-Projekt. Zukunft@BPhil führt Kinder und Jugendliche über Workshops und Tanzprojekte an klassische Musik heran und eröffnet ihnen neue, kreative Erfahrungsräume. Weltweit haben seit 2002 über 18.000 Kinder und Jugendliche teilgenommen.

### Ehrenamtliche Tätigkeit: Engagement beweisen

Im Berichtsjahr haben sich weltweit mehr als 17.000 unserer Mitarbeiter in über 3.000 Projekten für die Gesellschaft engagiert. Die Deutsche Bank unterstützt diesen ehrenamtlichen Einsatz durch Spenden oder bezahlte Freistellung.

Das Programm „Partners in Leadership“, in dem Führungskräfte der Deutschen Bank Schulleiter zu Managementthemen beraten, wurde mit dem „European Employee Volunteering Award – Deutschland“ ausgezeichnet. In Großbritannien haben wir im Rahmen der Initiative „Charity of the Year 2010“ die Rekordsumme von 1 Mio GBP für das Programm „AfriKids“ zur Verfügung gestellt.

Weitere Informationen zu unserem gesellschaftlichen Engagement finden Sie in dem Bericht „Gesellschaftliche Verantwortung 2010“ und unter [www.deutsche-bank.de/csr](http://www.deutsche-bank.de/csr).

## Ausblick

### Die Weltwirtschaft

Die durch eine V-Form charakterisierte Erholung in wichtigen Industrie- und vor allem Schwellenländern ist etwa seit dem Herbst 2010 beendet, als der Einfluss der Sonderfaktoren nachließ und sich das Wachstum normalisierte. Zudem haben einige Länder, insbesondere in der Peripherie der Eurozone, eine restriktivere Fiskalpolitik begonnen und viele andere werden im Verlauf des Jahres 2011 folgen. Das Gleiche gilt auch für die Geldpolitik. Einige Länder haben die geldpolitische Kehrtwende schon vollzogen, wie beispielsweise Australien, Norwegen, China und viele andere Schwellenländer. Die Europäische Zentralbank dürfte den Ausstieg aus ihrer extrem lockeren Geldpolitik etwa zur Jahresmitte einleiten und die amerikanische Notenbank könnte gegen Jahresende folgen. Das Wachstum der Weltwirtschaft dürfte sich daher im laufenden Jahr auf rund 4,25 % abschwächen. Damit würde das globale Wachstum allerdings noch merklich über dem Durchschnitt der letzten drei Jahrzehnte liegen. Die Risiken für das Wachstum in den USA haben sich zuletzt angesichts besserer Konjunkturindikatoren merklich verringert. Die amerikanische Wirtschaft könnte im laufenden Jahr um rund 3,75 % zulegen. Ein ausgewogeneres und langfristig tragbares Wachstum von rund 8 % nach 9,5 % in 2010 erwarten wir für die asiatischen Schwellenländer.

Risiken für die Weltwirtschaft könnten sich aus der außergewöhnlichen Situation der Geld- und Fiskalpolitik infolge der Krise ergeben. Ein reibungsloser Ausstieg aus der stark expansiven Geld- und Fiskalpolitik wäre zwar wünschenswert, um Inflationsrisiken zu begegnen, stellt allerdings eine große Herausforderung dar, solange große Unsicherheiten über die zugrunde liegende wirtschaftliche Situation, die Stabilität einzelner Bereiche des Finanzsystems und die Reaktionen der Märkte auf konkrete Ausstiegsmaßnahmen bestehen. Die Kreditwürdigkeit einzelner Staaten könnte weiter ein Thema sein, sollte es den Regierungen nicht gelingen, die Finanzmärkte zu überzeugen, dass sie ihre Staatshaushalte langfristig stabilisieren können. Eine Verschärfung der Schuldenkrise in einzelnen Euroländern könnte zudem zu einer Destabilisierung der Bankensysteme führen, was den Kurswechsel in der Geldpolitik erheblich belasten würde. In China und einigen anderen Schwellenländern besteht die Gefahr, dass es zu Preisblasen im Immobiliensektor oder aber auch zu einer generellen Beschleunigung der Inflation kommt. Diese Faktoren könnten Verwerfungen an den Finanzmärkten zur Folge haben, die wiederum die Geschwindigkeit der weltweiten Konjunkturerholung schwächen würden.

In den Industrieländern dürften die noch immer nicht ausgelasteten Produktionskapazitäten den Preisauftrieb in Grenzen halten, der vor allem aus der Verteuerung von Energie und Nahrungsmitteln resultiert. In den USA erwarten wir 2011 einen Anstieg der Inflationsrate auf gut 2 %. Auch in der Eurozone dürfte sich der Preisanstieg von 1,6 % auf 2,25 % beschleunigen, teilweise bedingt durch kräftige Steuererhöhungen in den Peripherieländern.

Das Wirtschaftswachstum in der Eurozone dürfte sich 2011 auf knapp 1,5 % verlangsamen, wobei sich hier weiterhin eine uneinheitliche Entwicklung zeigt. Während die Wirtschaften Griechenlands und Portugals im laufenden Jahr mit Blick auf die drastischen Konsolidierungsmaßnahmen wohl schrumpfen werden und die Spaniens und Irlands mehr oder weniger stagnieren, dürfte Deutschland unter den größeren Euroländern mit 2,5 % erneut das höchste Wachstum aufweisen und weiter mehr als die relevante Potenzialrate wachsen. Dabei dürfte der private Konsum um fast 1,5 % expandieren, nachdem er in den vergangenen Jahren nahezu stagnierte. Die Arbeitslosigkeit wird sich in Deutschland voraussichtlich weiter zurückbilden. Die Zahl der Arbeitslosen könnte im Jahresdurchschnitt 2011 unter die 3-Millionen-Grenze sinken und die Arbeitslosenquote in Richtung 7 % fallen, nach 7,7 % in 2010. Die kräftige Konjunktur sowie die Wirkungen des Sparpakets dürften dafür sorgen, dass das gesamtstaatliche Budgetdefizit in Deutschland schon im laufenden Jahr unter die Maastrichter 3 %-Marke fällt.

Für Deutschland gehen wir 2011 von einem Preisanstieg von 2 % aus, nach 1,1 % in 2010. Steigende Nahrungsmittelpreise stellen insbesondere für einige Schwellenländer ein Risiko für die Inflation dar, da der Anteil von Nahrungsmitteln am Warenkorb dort höher ist als in den Industrieländern.

Für 2012 erwarten wir eine leichte Erhöhung des Wachstums der Weltwirtschaft um circa 0,25 Prozentpunkte auf 4,5 % wobei alle wesentlichen Regionen einen Zuwachs verzeichnen dürften. Unter den Industrieländern dürfte Japan den größten Aufschwung erleben, während sich das Wachstum der deutschen Wirtschaft Richtung Potenzialrate verlangsamen dürfte. In den Schwellenländern dürfte das Wirtschaftswachstum in Asien und Lateinamerika im Vergleich zu 2011 mehr oder weniger unverändert bleiben, aber in den EMEA-Ländern leicht stärker sein.

Nach der diesjährigen, durch Energie- und Nahrungsmittelpreise verursachten Spitze erwarten wir für 2012 eine leicht verringerte Inflationsrate. Die Industrieländer dürften, mit Ausnahme von Japan, ihre Geld- und Fiskalpolitik weiter verschärfen. In den Schwellenländern sollte sich mit Blick auf die aktivere Politik in 2010 und 2011 die Geldpolitik 2012 im Allgemeinen nicht deutlich verändern.

### Die Bankenbranche

Die Banken stehen 2011 und 2012 weltweit vor entscheidenden Weichenstellungen. Zum einen liegt ihr Fokus auf der weiteren Steigerung von Erträgen und Profitabilität im neuen makroökonomischen Umfeld bei gleichzeitiger Wahrung der Kostendisziplin. Zum anderen müssen sich die Institute auf die Einführung einer Vielzahl neuer regulatorischer Bestimmungen vorbereiten, die teilweise substanzielle Anpassungen der Geschäftsmodelle erfordern werden.

Im Kreditgeschäft mit privaten Haushalten und Unternehmen dürfte sich die bereits abzeichnende Erholung fortsetzen. Angesichts auch weiterhin niedriger Zinsen und besserer Einkommens- beziehungsweise Ertragsperspektiven könnte die Risikoneigung zunehmen und das Kreditvolumen erstmals seit der Finanzkrise wieder nennenswert ansteigen. Gleichzeitig bleibt das Wachstumspotenzial begrenzt, da der Privatsektor in vielen Ländern weiterhin stark verschuldet ist und sich bei einer beginnenden Zinsnormalisierung die Schuldendienstzahlungen wieder erhöhen werden. Zudem dürfte eine immer noch recht hohe Arbeitslosigkeit in einer Reihe von Ländern auf die Kreditnachfrage drücken.

Das Einlagengeschäft wird voraussichtlich von mehreren gegenläufigen Entwicklungen geprägt sein. Zum einen steigt aufgrund der über die nächsten Jahre umzusetzenden Liquiditäts- und Refinanzierungsbestimmungen unter Basel III die Bedeutung stabiler Finanzierungsquellen für Banken, deren Nachfrage nach Einlagen des Privatsektors damit zunehmen dürfte. Zum anderen sinkt mit einem anhaltenden Wirtschaftsaufschwung und einem steigenden Inflationsrisiko die Attraktivität dieser stabilen, aber wenig rentablen Anlageform für Privathaushalte und Unternehmen. Das Resultat dürften in jedem Fall höhere Kosten der Einlagenfinanzierung für Banken sein.

Die vorstehend beschriebenen Faktoren sollten auch für die Entwicklung der Vermögensverwaltung in den nächsten beiden Jahren ausschlaggebend sein: Die bessere gesamtwirtschaftliche Lage mit höheren Einkommen und fallender Arbeitslosigkeit, steigende Bewertungen und eine zunehmende Risikobereitschaft dürften zu wachsenden Mittelzuflüssen führen und diese wiederum selbst einen positiven Effekt auf die Bewertungen haben.



Im Gegensatz dazu werden die Einnahmen und Gewinne im Investment Banking vorerst wahrscheinlich unter Druck bleiben, auch wenn die Kundenaktivitäten relativ günstig sein dürften. Die Konsolidierung der Anbieter ist trotz der Finanzkrise bislang kaum vorangekommen. Im Gegenteil haben manche Marktteilnehmer nach dem Ende der Krise wieder in einen Ausbau ihrer Kapazitäten investiert und sorgen für einen intensiven Wettbewerb. Darüber hinaus hat sich die Kostenbasis der Institute nicht zuletzt aufgrund regulatorischer Vorgaben in Richtung einer weniger flexiblen Struktur und eines höheren Fixkostenanteils verschoben, der die Banken anfälliger für eine volatile Ertragsentwicklung macht. Hinzu kommen die von Banken wie Aufsehern und Gesetzgebern befürwortete Rückführung des Eigenhandels und eine Konzentration auf das Auftragsgeschäft für Kunden. Schließlich werden die unter Basel 2,5 und Basel III zusammengefassten neuen Regulierungen zweifelsohne zu höheren (Kapital-) Kosten, niedrigeren Margen (etwa im Derivategeschäft) und höheren Hürden für Verbriefungen führen und die Volumina in bestimmten Marktsegmenten deutlich verringern.

Auch der generelle Marktausblick für das Kapitalmarktgeschäft ist gemischt. Obwohl das Geschäft mit Fremdkapitalemissionen bei Finanzinstituten und Firmenkunden stark sein dürfte, bestehen erhebliche Risiken einer Verschlechterung insbesondere im High-Yield-Segment. Auf der anderen Seite dürften sich Eigenkapitalplatzierungen weiterhin auf einem hohen Niveau halten und Firmen ihre Fusions- und Übernahmeaktivitäten deutlich intensivieren.

Globale Risiken für die Bankenbranche ergeben sich vor allem aus einer unerwartet schwachen Erholung der Weltwirtschaft von der Finanz- und Wirtschaftskrise, einem möglichen Ausfall eines staatlichen Schuldners und einer übermäßig kostenintensiven und international zersplitterten neuen Regulierung. Im letzteren Fall geht es nicht nur um eine möglichst einheitliche Einführung der neuen Baseler Regelungen, sondern auch um klare Vorgaben mit Blick auf bessere Abwicklungsmöglichkeiten für gescheiterte Finanzinstitute sowie die Vermeidung von diskriminierenden spezifischen Bankenabgaben.

### Der Deutsche Bank-Konzern

Das Management der Deutschen Bank hat eine Reihe von Maßnahmen ergriffen, damit die Bank gut aufgestellt ist und die sich nach der Krise ergebenden Geschäftsmöglichkeiten nutzt. Wir haben Fortschritte bei allen vier Elementen der Phase 4 unserer Management-Agenda gemacht und somit sind die Grundlagen für das Erreichen der Ziele für 2011 gegeben. Insbesondere in den Unternehmensbereichen von CIB haben wir die Integration der Investmentbank weiter vorangetrieben, was im Jahr 2011 zu einer Entlastung von 0,5 Mrd € netto führen sollte. Außerdem haben wir mit der Übernahme des Firmenkundengeschäfts von ABN AMRO unsere Marktpräsenz in den Niederlanden vergrößert. Diese Fortschritte wurden unter Wahrung unserer Risikodisziplin erreicht. Im Konzernbereich PCAM haben wir mit der Übernahme der Postbank unsere führende Position im Heimatmarkt gefestigt, sowie den Erwerb von Sal. Oppenheim und die Restrukturierung unseres Asset Management-Geschäfts abgeschlossen. Zwischenzeitlich haben wir unsere Geschäftsplattform in Asien, wo wir in allen unseren Kerngeschäftsfeldern bereits gut positioniert sind, weiter ausgebaut und uns entschieden, unseren Anteil an der Hua Xia Bank zu erhöhen. Wir konzentrieren uns weiterhin auf unsere Performance sowie die Verbesserung unserer Effizienz und der Verantwortlichkeiten durch unser Programm zur Komplexitätsreduktion. Dieses Programm wurde auf den Weg gebracht, um Ende 2011 sicherzustellen, dass beginnend 2012 Effizienzgewinne in Höhe von 1 Mrd € pro Jahr erzielt werden können. Im Jahr 2011 dürfte das Programm zu einer Entlastung von 0,6 Mrd € netto führen.

Der sich verändernde Wettbewerb und ein strengeres aufsichtsrechtliches Umfeld werden die Deutsche Bank, ebenso wie vergleichbare Institute des Bankensektors, weiterhin beeinflussen. Die Auswirkung eventueller Bankenabgaben, die derzeit in einigen Ländern diskutiert werden, kann noch nicht mit hinreichender Genauigkeit prognostiziert werden. Wir werden die Diskussionen mit Gesetzgebern und Aufsichtsbehörden weiter konstruktiv begleiten und einen global abgestimmten Ansatz unterstützen. Nachdem wir erfolgreich unser bilanzielles und regulatorisches Kapital erhöht haben, fühlen wir uns gut mit Eigenkapital ausgestattet. Wir gehen davon aus, dass wir die neuen Kapitalanforderungen gemäß Basel III, die bis 2019 umgesetzt werden sollen, bereits ab 2013 erfüllen werden. Die Eigenkapitalausstattung sowie die Risikomanagement- und Bilanzeffizienz werden weiterhin eine wichtige Rolle als Differenzierungsfaktoren im Wettbewerb spielen. Die Deutsche Bank wird eine ausgewogene Dividendenpolitik beibehalten, die auch diese Faktoren berücksichtigt.

Als Teil der Phase 4 der Deutsche Bank-Management-Agenda setzten wir ein Ziel von 10 Mrd € für den Jahresüberschuss vor Steuern aus unseren Kerngeschäftsbereichen CIB und PCAM. Die Zielerreichung hängt von der erfolgreichen Umsetzung des Programms zur Komplexitätsreduktion, der Integration der Investmentbank sowie von bestimmten Faktoren hinsichtlich des Wettbewerbsumfelds ab. Diese Faktoren beinhalten neben einer anhaltenden gesamtwirtschaftlichen Erholung das Ausbleiben weiterer Marktverwerfungen und eine Normalisierung bei der Bewertung von Vermögenswerten. Während die Zinssätze auf dem derzeitigen niedrigen Niveau verbleiben dürften, erwarten wir einen Anstieg des globalen Provisionsaufkommens und der Margen auf Vorkrisenniveau. Weitere Faktoren und die Beiträge der einzelnen Geschäftsbereiche zum Gesamtziel sind den unten stehenden Abschnitten zu entnehmen.

Unser Konzernbereich Corporate Investments, der nicht in unser Ziel für 2011 einbezogen ist, hat die Managementverantwortung für bestimmte Vermögenswerte, die von anderen Geschäftsbereichen übertragen wurden. Dieser Bereich ist den Chancen und Risiken des wirtschaftlichen Umfelds, in dem diese Firmen agieren, sowie dem Aktienkursänderungsrisiko nicht konsolidierter Beteiligungen ausgesetzt.

Über 2011 hinaus sollten wir von unserer starken Aufstellung als Marktführer im Heimatmarkt und als weltweit agierende Investmentbank weiter profitieren. Die neue Deutsche Bank wird mit einer erwarteten Tier-1-Kernkapitalquote von mehr als 8 % eine gute Kapitalausstattung aufweisen. Wir erwarten außerdem eine ausgeglichene Verteilung unserer Gewinne mit 40 % des Vorsteuerergebnisses aus unserem klassischen Bankgeschäft in PCAM und GTB und eine höhere operative Effizienz mit einer Aufwand-Ertrag-Relation um 65 %.

### Corporate Banking & Securities

Im Investment Banking wird das Umfeld 2011 und 2012 wahrscheinlich relativ günstig bleiben, obwohl die anhaltende Unsicherheit über die Folgen der regulatorischen Reformen und der Schuldenkrise sich auf die Geschäftsaktivität in diesem Bereich auswirken dürfte. Dennoch sollten die Aktivitäten an den Kapitalmärkten, insbesondere in den Schwellenländern, stabil bleiben. Das Provisionsaufkommen in Corporate Finance wird sich 2011 und 2012 voraussichtlich weiter erholen, da die Unternehmen solide Bilanzen vorweisen können und Unternehmen im High-Yield-Segment und Finanzinstitute weiterhin Anleihen ausgeben. Die Handelsvolumina sollten stabil bleiben und möglicherweise ansteigen, wenn das Vertrauen der Anleger wieder wächst. Außerdem dürfte die Zentralisierung des Clearings von OTC-Derivaten die Anzahl der Transaktionen in diesen Produkten ebenfalls ansteigen lassen. Nach signifikanter Normalisierung auf ein niedrigeres Niveau in den letzten zwei Jahren sollten die Margen stabil bleiben, könnten aber auch steigen, falls regulatorische Reformen den Zugang zur Branche einschränken.

Corporate Banking & Securities (CB&S) dürfte von der weiteren Integration der Investmentbank profitieren. Diese wird uns helfen, unseren Firmenkunden für eine breite Produktpalette einen besseren Service anzubieten, Doppelaktivitäten im Front Office und in den Supportfunktionen zu vermeiden und die Zusammenarbeit zwischen allen Geschäftsbereichen, einschließlich Global Transaction Banking, zu verbessern. Unser Schwerpunkt wird weiterhin auf einer guten Effizienz der Vermögenswerte und einem sorgfältigen Management der Risikopositionen liegen, insbesondere derjenigen, die durch das sich verändernde regulatorische Umfeld in den kommenden zwei Jahren beeinflusst werden.

Im Bereich Sales & Trading werden die Erträge im kundenbezogenen Geschäft, unter anderem mit Devisen-, Geldmarkt- und Zinsprodukten und im Aktienkassageschäft, durch die weltweit zunehmenden Marktaktivitäten unterstützt. Wir erwarten, dass wir weiterhin hohe Erträge erzielen können, da wir bei diesen Produkten eine führende Position im kundenbezogenen Geschäft einnehmen. Ferner gehen wir davon aus, dass wir von unseren kontinuierlichen Investitionen in den elektronischen Handel und in Plattformen mit direktem Marktzugang profitieren werden. Da wir unseren strategischen Schwerpunkt auf die Prime Finance-Plattform gelegt haben, konnten wir in diesem Bereich die Marktführerschaft erringen. Der Handel mit Anleihen aus Schwellenländern und das Rohstoffgeschäft bleiben die wichtigsten Wachstumsfelder, da die Nachfrage nach diesen Produkten steigt. Wir haben den Handel mit Kreditprodukten und das Geschäft mit Aktienderivaten nach erheblichen Verlusten während der Krise neu ausgerichtet und den Schwerpunkt auf den kundenbezogenen Handel und Lösungen mit angemessener Risikoneigung und Ressourcennutzung gelegt. Nach der Einstellung des designierten Eigenhandels mit Kreditprodukten in 2009 haben wir uns 2010 aus dem designierten Aktieneigenhandel zurückgezogen. In der vor Kurzem integrierten Corporate & Investment Bank wird unsere einzigartige anlageklassenübergreifende Strukturierungsgruppe eine wichtige Rolle bei der Bereitstellung von Sales & Trading-Produkten sowie von Lösungen für Firmen- und institutionelle Kunden spielen.

Unter der Voraussetzung, dass das gesamtwirtschaftliche Umfeld stabil bleibt, wird das Provisionsaufkommen in Corporate Finance ansteigen. Wir erwarten hohe Volumina bei den Anleiheemissionen von Finanzinstituten und Unternehmen, da diese weiterhin einen hohen Refinanzierungsbedarf haben und die günstigen Marktbedingungen nutzen wollen, um Akquisitionen zu finanzieren. Bei den Aktienemissionen erwarten wir aufgrund der geplanten Börsengänge, des Wachstums in Asien und der anhaltenden Rekapitalisierung der Finanzinstitute ebenfalls hohe Volumina. Die M&A-Aktivitäten dürften zunehmen, da wir eine zyklische Erholung durchlaufen und Firmenkunden sich neu positionieren. Die Deutsche Bank ist bestrebt, von diesen Trends zu profitieren und auf der zunehmenden Dynamik im Geschäftsbereich Corporate Finance aufzubauen, der 2010 sein Ziel erreicht hat, gemessen am Provisionsaufkommen, zu den besten fünf zu gehören (Quelle: Dealogic).

Auf der Grundlage der vorgenannten Annahmen verfolgt CB&S das Ziel, im Jahr 2011 ein Ergebnis vor Steuern von 6,4 Mrd € zu erreichen. Diese Prognose unterliegt unter anderem dem Risiko niedrigerer Margen und der Fluktuation von wichtigen Fachkräften aufgrund gesteigerten Wettbewerbs, des Risikos geringerer Volumina und der anhaltenden Unsicherheit eines sich verändernden regulatorischen Umfelds und dessen potenzieller Auswirkungen, einschließlich höherer Kosten oder Kapitalanforderungen. Eine massive Veränderung des gesamtwirtschaftlichen Umfelds hätte ebenfalls Auswirkungen auf die Emittenten- und Anlegeraktivität. Obwohl bereits Fortschritte bei der weiteren Integration der Investmentbank erzielt wurden, würde ein Ausbleiben des erfolgreichen Abschlusses dieses Programms zu geringeren Ertrags- und Kostensynergien führen.

## Global Transaction Banking

Die Entwicklung im globalen Transaction Banking dürfte in den nächsten zwei Jahren durch negative wie positive Faktoren beeinflusst werden. Das niedrige Zinsniveau, das die meisten Märkte 2009 und 2010 geprägt hat, dürfte die Zinserträge auch kurzfristig weiter belasten, während die anhaltende Erholung des globalen BIP, der Volumina im internationalen Handel, im grenzüberschreitenden Zahlungsverkehr und bei Kapitalmaßnahmen der Unternehmen die oben genannte Entwicklung teilweise kompensieren sollte. Eine erneute Rezession mit zwei Talsohlen würde die Wachstumsprognosen jedoch gefährden. Außerdem stellt die neue Basel-Regulierung eine Herausforderung für die gesamte Bankenbranche dar.

Das beschriebene schwierige Marktumfeld dürfte sich ebenfalls auf Global Transaction Banking auswirken. Durch das anhaltende profitable Wachstum und die Ausweitung der Kundenbasis in den vergangenen Jahren sowie aufgrund der führenden Position in wichtigen Märkten ist Global Transaction Banking gut aufgestellt, um auch unter schwierigen Bedingungen neue Kunden zu gewinnen. Der Bereich legt seinen Schwerpunkt auf die Vertiefung seiner Geschäftsbeziehungen mit komplexen Unternehmen und institutionellen Kunden in bestehenden Regionen und das verstärkte Wachstum des Geschäfts in Asien. Zusätzlich wurden Initiativen ergriffen, um unseren Ertragsmix noch ausgewogener zu gestalten und dadurch die Abhängigkeit vom Zinsniveau zu reduzieren. Die erfolgreiche Konsolidierung von Teilen des Firmenkundengeschäfts von ABN AMRO in den Niederlanden in 2010 wird die Position von Global Transaction Banking in Europa weiter stärken, da der Bereich einen zweiten Heimatmarkt für Firmenkunden aufbauen, seine Kundenbetreuung intensivieren und komplementäre Produkte anbieten kann. Der Bereich erwartet, von Synergien aus der Integration der Aktivitäten im Corporate and Investment Banking zu profitieren. Als Teil der Integration wird die engere Zusammenarbeit mit anderen Bereichen der Corporate & Investment Bank sicherstellen, dass eine größere Zahl von Kunden die Dienstleistungen von Global Transaction Banking in Anspruch nehmen kann.

Global Transaction Banking ist gut aufgestellt, um seinen Beitrag zum Konzernziel für 2011 und 2012 zu leisten, und verfolgt auf der Grundlage der vorgenannten Annahmen das Ziel, im Jahr 2011 ein Ergebnis vor Steuern von 1,0 Mrd € zu erreichen.

## Asset and Wealth Management

Der Ausblick für das Vermögensverwaltungsgeschäft wird 2011 und 2012 durch verschiedene Faktoren beeinflusst. Die Erholung der Aktienmärkte, die Ende 2009 einsetzte und sich 2010 beschleunigte, dürfte, sofern sie in den kommenden zwei Jahren anhält, zu einer Zunahme der Erträge aus erfolgs- und volumenabhängigen Provisionen beitragen. Das Bestreben der Marktteilnehmer, die Verluste der vergangenen Jahre wieder auszugleichen, dürfte das Anlegerinteresse an Multi-Asset-Produkten, alternativen Anlagen und Aktienprodukten stimulieren. Ferner sollten die ersten Anzeichen einer umfassenden Erholung des Immobilienmarkts auch im Laufe der kommenden zwei Jahre die Aussichten für alternative Anlagen verbessern. Langfristige Trends, einschließlich der anhaltenden Verschiebung der Abhängigkeit von staatlichen Rentenversicherungssystemen hin zu privat finanzierter Altersvorsorge, des demografischen Wandels in den entwickelten Volkswirtschaften und des steigenden Wohlstands in Schwellenländern, werden sich ebenfalls positiv auf die Erträge auswirken und in den kommenden zwei Jahren neue Möglichkeiten für Geschäfte mit Vermögensanlagen schaffen. Allerdings könnten die Erträge kurzfristig unter Druck geraten, falls die Märkte wieder volatil werden und die Flucht der Kunden in liquide Mittel oder einfachere Produkte mit niedrigeren Provisionserträgen anhält.

Der Unternehmensbereich Asset and Wealth Management (AWM) der Deutschen Bank ist auch weiterhin ein führender und gut diversifizierter Dienstleister mit globaler Präsenz, der dank seiner starken Position von den genannten Marktindikatoren profitieren sollte.

Der Unternehmensbereich AWM besteht aus den Geschäftsbereichen Asset Management und Private Wealth Management.

Der Geschäftsbereich Asset Management (AM) hat mit seiner 2008 begonnenen und 2009 sowie 2010 fortgesetzten Restrukturierung der Geschäftsplattform sowie seinen Bemühungen um Kosteneffizienz und Umsatzrentabilität seine Fähigkeit gestärkt, die verbesserte Kapitalmarktlage und das Wirtschaftswachstum zu nutzen und das Risiko von Schwankungen an den Märkten beziehungsweise eines verstärkten Anlegerinteresses an Rentenfonds und anderen Produkten mit niedrigen Provisionserträgen aufzufangen. Darüber hinaus ist der Geschäftsbereich AM gut aufgestellt, um von den vorgenannten langfristigen Branchentrends profitieren zu können.

Der Geschäftsbereich Private Wealth Management (PWM) wird voraussichtlich 2011 bis 2012 von wachsenden Märkten im Vermögensverwaltungsgeschäft profitieren und seinen Marktanteil in einem fragmentierten wettbewerbsintensiven Umfeld halten oder sogar steigern können. Angesichts der Tatsache, dass die Invested Assets zum Jahresende 2010 das Vorkrisenniveau überstiegen hatten, ist es das Ziel von PWM, mittelfristig hauptsächlich durch die Beschaffung von Vermögenswerten und Allokationsverlagerungen zu wachsen. Die grundlegende wirtschaftliche Erholung in den vergangenen Monaten zeigt jedoch erhebliche Divergenzen zwischen Regionen und Märkten. In der Eurozone wird PWM dank seiner beiden starken Marken Deutsche Bank und Sal. Oppenheim von seiner führenden Position im Heimatmarkt profitieren. Die Wachstumsstrategie in der Region Asien/Pazifik ist an der Management-Agenda der Deutschen Bank ausgerichtet, wonach organisches Wachstum durch Neueinstellungen und eine intensive Kooperation mit CIB erreicht werden soll. Dank des Geschäftsmodells von PWM, das insbesondere auf Schwellenmärkte fokussiert, können Herausforderungen in etablierten Märkten, der strengere Regulierungsrahmen und das zunehmend schwierige politische Umfeld ausgeglichen werden. Die Fiskalpolitik wird einen entscheidenden Einfluss auf die Finanzmärkte im Jahr 2011 haben. Die Regionen Nord- und Südamerika sowie Großbritannien werden weiterhin ein solides Wachstum erzielen, während die restliche Eurozone (mit Ausnahme des Heimatmarkts) weitere Abflüsse von Invested Assets verzeichnen dürfte.

Der Trend im Anlageverhalten der Kunden hin zu einfacheren Produkten mit niedrigeren Provisionserträgen und zu Produkten mit Kapitalgarantien wurde 2010 bestätigt und eine kurzfristige Umkehr dieser Situation für PWM ist unwahrscheinlich. Unwägbarkeiten im Euro- und US-Dollar-Raum hinsichtlich erwarteter nachhaltiger Kundenerträge werden sich auf das Ergebnis von PWM im Segment der sehr vermögenden Kunden auswirken. Der Schwerpunkt auf das Segment der sehr vermögenden Kunden und der Key Clients wird das Ergebnis aufgrund der intensiven Nutzung bestehender Plattformen im Deutsche Bank-Konzern und der engen Zusammenarbeit mit Corporate & Investment Bank (CIB) erheblich beeinflussen. Für alle Kundensegmente wird PWM einen flexibleren Vermögensallokationsprozess bereitstellen, um auf neue Chancen vorbereitet zu sein, aber auch um Risiken zu begrenzen. Durch die Implementierung einer globalen Plattform, die in regionalen Märkten Beratung und diskretionäres Portfolio-Management anbietet, wird PWM kundenorientierte Bereiche unterstützen und Empfehlungen des Group Investment Committee (GIC) umsetzen. Diese Anpassungen werden zu einer Verringerung der Komplexität und Verbesserung der Effizienz beitragen. Margenverbesserungen werden ausschließlich für selektive Produkte erwartet. Der Zuwachs an Invested Assets durch sehr vermögende Kunden und Key Clients wird zusammen mit Effizienz- und Produktivitätsverbesserungen die wichtigsten Treiber für den Geschäftserfolg darstellen.

Die Integration von Sal. Oppenheim und deren Positionierung innerhalb des Deutsche Bank-Konzerns wurden 2010 erfolgreich abgeschlossen und dürften sich ab 2011 positiv auf die Erträge auswirken.

Die beschriebene Entwicklung, insbesondere die hohen Nettozuflüsse an neuen Vermögenswerten und das gesteigerte Aktivgeschäft mit verbessertem Risikoprofil und einem Schwerpunkt auf operativer Effizienz, sollten die Kostenbasis von PWM verändern und so das Erreichen des Ziels von 0,4 Mrd € als Ergebnis vor Steuern ermöglichen.

Auf der Grundlage der vorgenannten Annahmen verfolgt der Unternehmensbereich Asset and Wealth Management im Jahr 2011 das Ziel, ein Ergebnis vor Steuern in Höhe von 1 Mrd € zu erreichen.

### Private & Business Clients

Der Erfolg im Privat- und Firmenkundengeschäft basiert auf einem soliden Geschäftsmodell mit einer führenden Stellung in unserem Heimatmarkt Deutschland, einer starken Positionierung in anderen wichtigen europäischen Märkten und Wachstumsoptionen in den asiatischen Kernmärkten. Dank unserer hervorragenden Angebotspalette im Beratungsgeschäft sollten wir in Deutschland Marktanteile durch Gewinnung neuer Kunden und Volumensteigerung erzielen können, insbesondere im risikoarmen Hypothekengeschäft. Auf der Kosten- seite sollten positive Ergebnisse aus dem im Jahr 2009 gestarteten Effizienzprogramm realisiert werden. Zudem wird die Akquisition der Postbank eine wichtige Säule im deutschen Markt schaffen, durch die wir wesentliche Synergien generieren können.

Das profitable europäische Geschäft von PBC wollen wir mittels unserer Stärke im Beratungsgeschäft auf vermögende Kunden in wohlhabenden Regionen ausrichten. Die Erweiterung unseres Filialnetzes in Indien und die Erhöhung unserer Beteiligung an der Hua Xia Bank in China auf 19,99 % werden die Chancen auf starkes Wachstum in Asien noch verbessern.

PBC wird 2011 und 2012 weiterhin mit Unsicherheiten in seinem Geschäftsumfeld rechnen müssen, insbesondere im Hinblick auf die Entwicklung bei Anlageprodukten, obgleich sich diese 2010 weiter stabilisiert haben. Aus makroökonomischer Sicht ist der Ausblick für das BIP-Wachstum im Heimatmarkt für 2011 und 2012 generell positiv, jedoch könnte ein starker Rückgang des Wirtschaftswachstums zu einer höheren Arbeitslosenquote und einer steigenden Risikovorsorge im Kreditgeschäft führen. Anhaltend niedrige Zinsen könnten 2011 die Erträge in PBC ebenfalls weiterhin beeinträchtigen.

Zu den künftigen Prioritäten von PBC gehört es, innerhalb einer Zeitspanne von fünf Jahren Ertrags- und Kostensynergien zwischen der Deutschen Bank und der Postbank zu realisieren. Die Generierung von Synergien hat sich bisher sehr günstig entwickelt. Gleichwohl bestehen die oben genannten wirtschaftlich begründeten Risiken auch für die Kooperation zwischen der Deutschen Bank und der Postbank. Bezüglich der Kosten besteht das Risiko, dass Synergien nicht oder später als prognostiziert realisiert werden können. Außerdem besteht das Risiko, dass die mit der Schaffung der Synergien verbundenen Kosten höher als prognostiziert sind. Diese Risiken werden durch eine ständige Neubewertung der Synergiemaßnahmen gemäß dem Bottom-up-Ansatz sowie durch Überwachung und Bericht an das Senior Management gemindert.

Auf der Grundlage der vorgenannten Annahmen, unter Einbeziehung der Postbank und mit höheren Beiträgen der Hua Xia Bank verfolgt PBC im Jahr 2011 das Ziel ein Ergebnis vor Steuern von 1,6 Mrd € zu erreichen. Nach erfolgreicher vollständiger Integration der Postbank strebt PBC ein Ergebnis vor Steuern von 3 Mrd € an.

# 02 -

## Konzernabschluss

Konzern-Gewinn- und Verlustrechnung – 151

Konzern-Gesamtergebnisrechnung – 152

Konzernbilanz – 153

Konzern-Eigenkapitalveränderungsrechnung – 154

Konzern-Kapitalflussrechnung – 156

Konzernanhang mit Inhaltsverzeichnis – 157



(Diese Seite wurde absichtlich freigelassen)

## Konzern-Gewinn- und Verlustrechnung

| in Mio €                                                                            | Notes    | 2010          | 2009          | 2008           |
|-------------------------------------------------------------------------------------|----------|---------------|---------------|----------------|
| Zinsen und ähnliche Erträge                                                         | 6        | 28.779        | 26.953        | 54.549         |
| Zinsaufwendungen                                                                    | 6        | 13.196        | 14.494        | 42.096         |
| <b>Zinsüberschuss</b>                                                               | <b>6</b> | <b>15.583</b> | <b>12.459</b> | <b>12.453</b>  |
| Risikovorsorge im Kreditgeschäft                                                    | 19       | 1.274         | 2.630         | 1.076          |
| <b>Zinsüberschuss nach Risikovorsorge im Kreditgeschäft</b>                         |          | <b>14.309</b> | <b>9.829</b>  | <b>11.377</b>  |
| Provisionsüberschuss                                                                | 7        | 10.669        | 8.911         | 9.741          |
| Ergebnis aus zum Fair Value bewerteten finanziellen Vermögenswerten/Verpflichtungen | 6        | 3.354         | 7.109         | – 9.992        |
| Ergebnis aus zur Veräußerung verfügbaren finanziellen Vermögenswerten               | 8        | 201           | – 403         | 666            |
| Ergebnis aus nach der Equitymethode bilanzierten Beteiligungen                      | 17       | – 2.004       | 59            | 46             |
| Sonstige Erträge                                                                    | 9        | 764           | – 183         | 699            |
| <b>Zinsunabhängige Erträge insgesamt</b>                                            |          | <b>12.984</b> | <b>15.493</b> | <b>1.160</b>   |
| Personalaufwand                                                                     | 32, 33   | 12.671        | 11.310        | 9.606          |
| Sachaufwand und sonstiger Aufwand                                                   | 10       | 10.133        | 8.402         | 8.339          |
| Aufwendungen im Versicherungsgeschäft                                               |          | 485           | 542           | – 252          |
| Wertminderung auf immaterielle Vermögenswerte                                       | 24       | 29            | – 134         | 585            |
| Restrukturierungsaufwand                                                            | 28       | –             | –             | –              |
| <b>Zinsunabhängige Aufwendungen insgesamt</b>                                       |          | <b>23.318</b> | <b>20.120</b> | <b>18.278</b>  |
| <b>Ergebnis vor Steuern</b>                                                         |          | <b>3.975</b>  | <b>5.202</b>  | <b>– 5.741</b> |
| Ertragsteueraufwand/-ertrag (–)                                                     | 34       | 1.645         | 244           | – 1.845        |
| <b>Jahresüberschuss/Jahresfehlbetrag (–)</b>                                        |          | <b>2.330</b>  | <b>4.958</b>  | <b>– 3.896</b> |
| Den Anteilen ohne beherrschenden Einfluss zurechenbares Konzernergebnis             |          | 20            | – 15          | – 61           |
| <b>Den Deutsche Bank-Aktionären zurechenbares Konzernergebnis</b>                   |          | <b>2.310</b>  | <b>4.973</b>  | <b>– 3.835</b> |

## Ergebnis je Aktie

| in €                                                                                                                                                      | Notes     | 2010   | 2009   | 2008     |
|-----------------------------------------------------------------------------------------------------------------------------------------------------------|-----------|--------|--------|----------|
| <b>Ergebnis je Aktie:<sup>1</sup></b>                                                                                                                     | <b>11</b> |        |        |          |
| Basic                                                                                                                                                     |           | € 3,07 | € 7,21 | € – 6,87 |
| Verwässert <sup>2</sup>                                                                                                                                   |           | € 2,92 | € 6,94 | € – 6,87 |
| <b>Anzahl der Aktien in Millionen:<sup>1</sup></b>                                                                                                        |           |        |        |          |
| Gewichteter Durchschnitt der ausstehenden Aktien – Nenner für die Berechnung des Ergebnisses je Aktie                                                     |           | 753,3  | 689,4  | 558,5    |
| Bereinigter gewichteter Durchschnitt der ausstehenden Aktien nach angenommener Wandlung – Nenner für die Berechnung des verwässerten Ergebnisses je Aktie |           | 790,8  | 716,7  | 558,6    |

<sup>1</sup> Die Anzahl der durchschnittlich ausstehenden Aktien (basic und verwässert) wurde für alle Perioden vor dem 6. Oktober 2010 angepasst, um den Effekt der Bonuskomponente von Bezugsrechten, die im Rahmen der Kapitalerhöhung ausgegeben wurden, zu berücksichtigen.

<sup>2</sup> Einschließlich Effekt auf den Zähler aus angenommener Wandlung. Weitere Informationen sind in Note 11 „Ergebnis je Aktie“ enthalten.

Der nachfolgende Konzernanhang ist integraler Bestandteil des Konzernabschlusses.

## Konzern-Gesamtergebnisrechnung

| in Mio €                                                                                                          | 2010                     | 2009                     | 2008                      |
|-------------------------------------------------------------------------------------------------------------------|--------------------------|--------------------------|---------------------------|
| In der Gewinn- und Verlustrechnung berücksichtigter Jahresüberschuss/Jahresfehlbetrag (–)                         | 2.330                    | 4.958                    | –3.896                    |
| Versicherungsmathematische Gewinne/Verluste (–) in Bezug auf leistungsdefinierte Versorgungszusagen, nach Steuern | 106                      | –679                     | –1                        |
| <b>Sonstiges Ergebnis (Other comprehensive income)</b>                                                            |                          |                          |                           |
| Unrealisierte Gewinne/Verluste (–) aus zur Veräußerung verfügbaren finanziellen Vermögenswerten: <sup>1</sup>     |                          |                          |                           |
| Unrealisierte Gewinne/Verluste (–) der Periode, vor Steuern                                                       | 83                       | 523                      | –4.516                    |
| In die Gewinn- und Verlustrechnung umgegliederte Gewinne (–)/Verluste, vor Steuern                                | 39                       | 556                      | –666                      |
| Unrealisierte Gewinne/Verluste (–) aus Derivaten, die Schwankungen zukünftiger Cashflows absichern: <sup>1</sup>  |                          |                          |                           |
| Unrealisierte Gewinne/Verluste (–) der Periode, vor Steuern                                                       | –78                      | 118                      | –263                      |
| In die Gewinn- und Verlustrechnung umgegliederte Gewinne (–)/Verluste, vor Steuern                                | 4                        | 6                        | 2                         |
| Unrealisierte Gewinne/Verluste (–) aus zum Verkauf bestimmten Vermögenswerten, vor Steuern <sup>2</sup>           | –25                      | –                        | –                         |
| Anpassungen aus der Währungsumrechnung: <sup>1</sup>                                                              |                          |                          |                           |
| Unrealisierte Gewinne/Verluste (–) der Periode, vor Steuern                                                       | 920                      | 40                       | –1.144                    |
| In die Gewinn- und Verlustrechnung umgegliederte Gewinne (–)/Verluste, vor Steuern                                | –6                       | 11                       | –3                        |
| Unrealisierte Gewinne/Verluste (–) aus nach der Equitymethode bilanzierten Beteiligungen <sup>1</sup>             | –26                      | 85                       | –15                       |
| Steuern auf Gewinne/Verluste (–) im sonstigen Ergebnis (Other comprehensive income)                               | 240                      | –254                     | 731                       |
| <b>Sonstiges Ergebnis (Other comprehensive income), nach Steuern</b>                                              | <b>1.151<sup>3</sup></b> | <b>1.085<sup>4</sup></b> | <b>–5.874<sup>5</sup></b> |
| <b>Gesamtergebnis, nach Steuern</b>                                                                               | <b>3.587</b>             | <b>5.364</b>             | <b>–9.771</b>             |
| Zurechenbar:                                                                                                      |                          |                          |                           |
| den Anteilen ohne beherrschenden Einfluss                                                                         | 4                        | –1                       | –37                       |
| den Deutsche Bank-Aktionären                                                                                      | 3.583                    | 5.365                    | –9.734                    |

<sup>1</sup> Unrealisierte Gewinne/Verluste aus nach der Equitymethode bilanzierten Beteiligungen werden ab dem 31. Dezember 2009 separat ausgewiesen. In Vorperioden wurden die entsprechenden Beträge innerhalb der anderen Kategorien im sonstigen Ergebnis (Other comprehensive income) mit ausgewiesen.

<sup>2</sup> Für weitere Informationen wird auf Note 25 „Zum Verkauf bestimmte Vermögenswerte“ verwiesen.

<sup>3</sup> Stellt die Veränderung des in der Bilanz ausgewiesenen kumulierten sonstigen Ergebnisses (nach Steuern) zwischen dem 31. Dezember 2009 (minus 3.780 Mio €) und dem 31. Dezember 2010 (minus 2.601 Mio €) dar, angepasst um die Veränderung von Anteilen ohne beherrschenden Einfluss in Höhe von minus 28 Mio €.

<sup>4</sup> Stellt die Veränderung des in der Bilanz ausgewiesenen kumulierten sonstigen Ergebnisses (nach Steuern) zwischen dem 31. Dezember 2008 (minus 4.851 Mio €) und dem 31. Dezember 2009 (minus 3.780 Mio €) dar, angepasst um die Veränderung von Anteilen ohne beherrschenden Einfluss in Höhe von 14 Mio €.

<sup>5</sup> Stellt die Veränderung des in der Bilanz ausgewiesenen kumulierten sonstigen Ergebnisses (nach Steuern) zwischen dem 31. Dezember 2007 (1.047 Mio €) und dem 31. Dezember 2008 (minus 4.851 Mio €) dar, angepasst um die Veränderung von Anteilen ohne beherrschenden Einfluss in Höhe von 24 Mio €.

Der nachfolgende Konzernanhang ist integraler Bestandteil des Konzernabschlusses.

# Konzernbilanz

| in Mio €                                                                                                                                                                  | Notes          | 31.12.2010       | 31.12.2009       |
|---------------------------------------------------------------------------------------------------------------------------------------------------------------------------|----------------|------------------|------------------|
| <b>Aktiva:</b>                                                                                                                                                            |                |                  |                  |
| Barreserve                                                                                                                                                                |                | 17.157           | 9.346            |
| Verzinsliche Einlagen bei Kreditinstituten                                                                                                                                |                | 92.377           | 47.233           |
| Forderungen aus übertragenen Zentralbankeinlagen und aus Wertpapierpensionsgeschäften (Reverse Repos)                                                                     | 20, 21         | 20.365           | 6.820            |
| Forderungen aus Wertpapierleihen                                                                                                                                          | 20, 21         | 28.916           | 43.509           |
| Zum Fair Value bewertete finanzielle Vermögenswerte                                                                                                                       |                |                  |                  |
| Handelsaktiva                                                                                                                                                             |                | 271.291          | 234.910          |
| Positive Marktwerte aus derivativen Finanzinstrumenten                                                                                                                    |                | 657.780          | 596.410          |
| Zum Fair Value klassifizierte finanzielle Vermögenswerte                                                                                                                  |                | 171.926          | 134.000          |
| Zum Fair Value bewertete finanzielle Vermögenswerte insgesamt                                                                                                             |                |                  |                  |
| davon zum 31.12.2010 91 Mrd € (2009: 79 Mrd €) als Sicherheit hinterlegt, frei zum Verkauf beziehungsweise zur weiteren Sicherheitenstellung durch den Sicherungsnehmer   | 12, 14, 21, 35 | 1.100.997        | 965.320          |
| Zur Veräußerung verfügbare finanzielle Vermögenswerte                                                                                                                     |                |                  |                  |
| davon zum 31.12.2010 3,9 Mrd € (2009: 0,5 Mrd €) als Sicherheit hinterlegt, frei zum Verkauf beziehungsweise zur weiteren Sicherheitenstellung durch den Sicherungsnehmer | 16, 20, 21     | 54.266           | 18.819           |
| Nach der Equitymethode bilanzierte Beteiligungen                                                                                                                          | 17             | 2.608            | 7.788            |
| Forderungen aus dem Kreditgeschäft                                                                                                                                        | 18, 19         | 407.729          | 258.105          |
| Sachanlagen                                                                                                                                                               | 22             | 5.802            | 2.777            |
| Goodwill und sonstige immaterielle Vermögenswerte                                                                                                                         | 24             | 15.594           | 10.169           |
| Sonstige Aktiva                                                                                                                                                           | 25, 26         | 149.229          | 121.538          |
| Steuerforderungen aus laufenden Steuern                                                                                                                                   | 34             | 2.249            | 2.090            |
| Steuerforderungen aus latenten Steuern                                                                                                                                    | 34             | 8.341            | 7.150            |
| <b>Summe der Aktiva</b>                                                                                                                                                   |                | <b>1.905.630</b> | <b>1.500.664</b> |
| <b>Passiva:</b>                                                                                                                                                           |                |                  |                  |
| Einlagen                                                                                                                                                                  | 27             | 533.984          | 344.220          |
| Verbindlichkeiten aus übertragenen Zentralbankeinlagen und aus Wertpapierpensionsgeschäften (Repos)                                                                       | 20, 21         | 27.922           | 45.495           |
| Verbindlichkeiten aus Wertpapierleihen                                                                                                                                    | 20, 21         | 3.276            | 5.564            |
| Zum Fair Value bewertete finanzielle Verpflichtungen                                                                                                                      | 12, 14, 35     |                  |                  |
| Handelspassiva                                                                                                                                                            |                | 68.859           | 64.501           |
| Negative Marktwerte aus derivativen Finanzinstrumenten                                                                                                                    |                | 647.171          | 576.973          |
| Zum Fair Value klassifizierte finanzielle Verpflichtungen                                                                                                                 |                | 130.154          | 73.522           |
| Investmentverträge                                                                                                                                                        |                | 7.898            | 7.278            |
| Zum Fair Value bewertete finanzielle Verpflichtungen insgesamt                                                                                                            |                | 854.082          | 722.274          |
| Sonstige kurzfristige Geldaufnahmen                                                                                                                                       | 29             | 64.990           | 42.897           |
| Sonstige Passiva                                                                                                                                                          | 25, 26         | 181.827          | 154.281          |
| Rückstellungen                                                                                                                                                            | 19, 28         | 2.204            | 1.307            |
| Steuerverbindlichkeiten aus laufenden Steuern                                                                                                                             | 34             | 2.736            | 2.141            |
| Steuerverbindlichkeiten aus latenten Steuern                                                                                                                              | 34             | 2.307            | 2.157            |
| Langfristige Verbindlichkeiten                                                                                                                                            | 30             | 169.660          | 131.782          |
| Hybride Kapitalinstrumente (Trust Preferred Securities)                                                                                                                   | 30             | 12.250           | 10.577           |
| Verpflichtung zum Erwerb Eigener Aktien                                                                                                                                   |                | –                | –                |
| <b>Summe der Verbindlichkeiten</b>                                                                                                                                        |                | <b>1.855.238</b> | <b>1.462.695</b> |
| Stammaktien, ohne Nennwert, rechnerischer Nominalwert 2,56 €                                                                                                              | 31             | 2.380            | 1.589            |
| Kapitalrücklage                                                                                                                                                           |                | 23.515           | 14.830           |
| Gewinnrücklagen                                                                                                                                                           |                | 25.999           | 24.056           |
| Eigene Aktien im Bestand zu Anschaffungskosten                                                                                                                            | 31             | –450             | –48              |
| Verpflichtung zum Erwerb Eigener Aktien                                                                                                                                   |                | –                | –                |
| Kumuliertes sonstiges Ergebnis (Accumulated other comprehensive income), nach Steuern                                                                                     |                | –2.601           | –3.780           |
| <b>Den Deutsche Bank-Aktionären zurechenbares Eigenkapital</b>                                                                                                            |                | <b>48.843</b>    | <b>36.647</b>    |
| Anteile ohne beherrschenden Einfluss                                                                                                                                      |                | 1.549            | 1.322            |
| <b>Eigenkapital einschließlich Anteile ohne beherrschenden Einfluss</b>                                                                                                   |                | <b>50.392</b>    | <b>37.969</b>    |
| <b>Summe der Passiva</b>                                                                                                                                                  |                | <b>1.905.630</b> | <b>1.500.664</b> |

Der nachfolgende Konzernanhang ist integraler Bestandteil des Konzernabschlusses.

# Konzern-Eigenkapitalveränderungsrechnung

| in Mio €                                                                                                          | Stammaktien<br>(ohne Nennwert) | Kapitalrücklage | Gewinn-<br>rücklagen <sup>1</sup> | Eigene Aktien<br>im Bestand zu<br>Anschaffungs-<br>kosten | Verpflichtung<br>zum Erwerb<br>Eigener<br>Aktien |
|-------------------------------------------------------------------------------------------------------------------|--------------------------------|-----------------|-----------------------------------|-----------------------------------------------------------|--------------------------------------------------|
| <b>Bestand zum 31. Dezember 2007</b>                                                                              | <b>1.358</b>                   | <b>15.808</b>   | <b>26.051</b>                     | <b>-2.819</b>                                             | <b>-3.552</b>                                    |
| Gesamtergebnis <sup>2</sup>                                                                                       | –                              | –               | -3.835                            | –                                                         | –                                                |
| Begebene Stammaktien                                                                                              | 102                            | 2.098           | –                                 | –                                                         | –                                                |
| Gezahlte Bardividende                                                                                             | –                              | –               | -2.274                            | –                                                         | –                                                |
| Dividende bezüglich der Verpflichtung zum Erwerb Eigener Aktien                                                   | –                              | –               | 226                               | –                                                         | –                                                |
| Versicherungsmathematische Gewinne/Verluste (–) in Bezug auf leistungsdefinierte Versorgungszusagen, nach Steuern | –                              | –               | -1                                | –                                                         | –                                                |
| Nettoveränderung der aktienbasierten Vergütung in der Berichtsperiode                                             | –                              | 225             | –                                 | –                                                         | –                                                |
| Im Rahmen von aktienbasierten Vergütungsplänen ausgegebene Eigene Aktien                                          | –                              | –               | –                                 | 1.072                                                     | –                                                |
| Steuervorteile im Zusammenhang mit aktienbasierten Vergütungsplänen                                               | –                              | -136            | –                                 | –                                                         | –                                                |
| Veränderung derivativer Finanzinstrumente auf Deutsche Bank-Aktien                                                | –                              | -1.815          | –                                 | –                                                         | 2.690                                            |
| Im Rahmen von aktienbasierten Vergütungsplänen begebene Stammaktien                                               | 1                              | 17              | –                                 | –                                                         | –                                                |
| Zugänge zu der Verpflichtung zum Erwerb Eigener Aktien                                                            | –                              | –               | –                                 | –                                                         | -366                                             |
| Abgänge von der Verpflichtung zum Erwerb Eigener Aktien                                                           | –                              | –               | –                                 | –                                                         | 1.225                                            |
| Optionsprämien und sonstige Veränderungen aus Optionen auf Deutsche Bank-Aktien                                   | –                              | 3               | -4                                | –                                                         | –                                                |
| Kauf Eigener Aktien                                                                                               | –                              | –               | –                                 | -21.736                                                   | –                                                |
| Verkauf Eigener Aktien                                                                                            | –                              | –               | –                                 | 22.544                                                    | –                                                |
| Gewinne/Verluste (–) aus dem Verkauf Eigener Aktien                                                               | –                              | -1.191          | –                                 | –                                                         | –                                                |
| Sonstige                                                                                                          | –                              | -48             | -89                               | –                                                         | –                                                |
| <b>Bestand zum 31. Dezember 2008</b>                                                                              | <b>1.461</b>                   | <b>14.961</b>   | <b>20.074</b>                     | <b>-939</b>                                               | <b>-3</b>                                        |
| Gesamtergebnis <sup>2</sup>                                                                                       | –                              | –               | 4.973                             | –                                                         | –                                                |
| Begebene Stammaktien                                                                                              | 128                            | 830             | –                                 | –                                                         | –                                                |
| Gezahlte Bardividende                                                                                             | –                              | –               | -309                              | –                                                         | –                                                |
| Dividende bezüglich der Verpflichtung zum Erwerb Eigener Aktien                                                   | –                              | –               | –                                 | –                                                         | –                                                |
| Versicherungsmathematische Gewinne/Verluste (–) in Bezug auf leistungsdefinierte Versorgungszusagen, nach Steuern | –                              | –               | -679                              | –                                                         | –                                                |
| Nettoveränderung der aktienbasierten Vergütung in der Berichtsperiode                                             | –                              | -688            | –                                 | –                                                         | –                                                |
| Im Rahmen von aktienbasierten Vergütungsplänen ausgegebene Eigene Aktien                                          | –                              | –               | –                                 | 1.313                                                     | –                                                |
| Steuervorteile im Zusammenhang mit aktienbasierten Vergütungsplänen                                               | –                              | 35              | –                                 | –                                                         | –                                                |
| Veränderung derivativer Finanzinstrumente auf Deutsche Bank-Aktien                                                | –                              | –               | –                                 | –                                                         | –                                                |
| Im Rahmen von aktienbasierten Vergütungsplänen begebene Stammaktien                                               | –                              | –               | –                                 | –                                                         | –                                                |
| Zugänge zu der Verpflichtung zum Erwerb Eigener Aktien                                                            | –                              | –               | –                                 | –                                                         | -5                                               |
| Abgänge von der Verpflichtung zum Erwerb Eigener Aktien                                                           | –                              | –               | –                                 | –                                                         | 8                                                |
| Optionsprämien und sonstige Veränderungen aus Optionen auf Deutsche Bank-Aktien                                   | –                              | -149            | –                                 | –                                                         | –                                                |
| Kauf Eigener Aktien                                                                                               | –                              | –               | –                                 | -19.238                                                   | –                                                |
| Verkauf Eigener Aktien                                                                                            | –                              | –               | –                                 | 18.816                                                    | –                                                |
| Gewinne/Verluste (–) aus dem Verkauf Eigener Aktien                                                               | –                              | -177            | –                                 | –                                                         | –                                                |
| Sonstige                                                                                                          | –                              | 18              | -3                                | –                                                         | –                                                |
| <b>Bestand zum 31. Dezember 2009</b>                                                                              | <b>1.589</b>                   | <b>14.830</b>   | <b>24.056</b>                     | <b>-48</b>                                                | <b>–</b>                                         |
| Gesamtergebnis <sup>2</sup>                                                                                       | –                              | –               | 2.310                             | –                                                         | –                                                |
| Begebene Stammaktien                                                                                              | 791                            | 9.413           | –                                 | –                                                         | –                                                |
| Gezahlte Bardividende                                                                                             | –                              | –               | -465                              | –                                                         | –                                                |
| Dividende bezüglich der Verpflichtung zum Erwerb Eigener Aktien                                                   | –                              | –               | –                                 | –                                                         | –                                                |
| Versicherungsmathematische Gewinne/Verluste (–) in Bezug auf leistungsdefinierte Versorgungszusagen, nach Steuern | –                              | –               | 94                                | –                                                         | –                                                |
| Nettoveränderung der aktienbasierten Vergütung in der Berichtsperiode                                             | –                              | -296            | –                                 | –                                                         | –                                                |
| Im Rahmen von aktienbasierten Vergütungsplänen ausgegebene Eigene Aktien                                          | –                              | –               | –                                 | 1.439                                                     | –                                                |
| Steuervorteile im Zusammenhang mit aktienbasierten Vergütungsplänen                                               | –                              | -11             | –                                 | –                                                         | –                                                |
| Veränderung derivativer Finanzinstrumente auf Deutsche Bank-Aktien                                                | –                              | –               | –                                 | –                                                         | –                                                |
| Im Rahmen von aktienbasierten Vergütungsplänen begebene Stammaktien                                               | –                              | –               | –                                 | –                                                         | –                                                |
| Zugänge zu der Verpflichtung zum Erwerb Eigener Aktien                                                            | –                              | –               | –                                 | –                                                         | -93                                              |
| Abgänge von der Verpflichtung zum Erwerb Eigener Aktien                                                           | –                              | –               | –                                 | –                                                         | 93                                               |
| Optionsprämien und sonstige Veränderungen aus Optionen auf Deutsche Bank-Aktien                                   | –                              | -115            | –                                 | –                                                         | –                                                |
| Kauf Eigener Aktien                                                                                               | –                              | –               | –                                 | -15.366                                                   | –                                                |
| Verkauf Eigener Aktien                                                                                            | –                              | –               | –                                 | 13.525                                                    | –                                                |
| Gewinne/Verluste (–) aus dem Verkauf Eigener Aktien                                                               | –                              | –               | –                                 | –                                                         | –                                                |
| Sonstige                                                                                                          | –                              | -306            | 4                                 | –                                                         | –                                                |
| <b>Bestand zum 31. Dezember 2010</b>                                                                              | <b>2.380</b>                   | <b>23.515</b>   | <b>25.999</b>                     | <b>-450</b>                                               | <b>–</b>                                         |

<sup>1</sup> Der Bestand zum 31. Dezember 2007 wurde in 2008 aufgrund einer Änderung der Bilanzierungsmethode (unmittelbare Berücksichtigung von versicherungsmathematischen Gewinnen und Verluste im Eigenkapital im Gegensatz zu der „Korridor“-Methode) sowie aufgrund einer rückwirkenden Anpassung der Steuerverbindlichkeiten aus laufenden Steuern um 935 Mio € erhöht.

<sup>2</sup> Ohne versicherungsmathematische Gewinne/Verluste in Bezug auf leistungsdefinierte Versorgungszusagen, nach Steuern.

| Unrealisierte<br>Gewinne/Verluste (–)<br>aus zur Veräußerung<br>verfügbaren finanziellen<br>Vermögenswerten,<br>nach darauf entfallenden<br>Steuern und sonstigen<br>Anpassungen <sup>3</sup> | Unrealisierte<br>Gewinne/Verluste (–)<br>aus Derivaten,<br>die Schwankungen<br>zukünftiger Cash-<br>flows absichern,<br>nach Steuern <sup>3</sup> | Unrealisierte<br>Gewinne/Verluste (–)<br>aus zum Verkauf<br>bestimmten<br>Vermögenswerten,<br>nach Steuern | Anpassungen<br>aus der<br>Währungs-<br>umrechnung,<br>nach<br>Steuern <sup>3,4</sup> | Unrealisierte<br>Gewinne/Verluste (–)<br>aus nach der<br>Equitymethode<br>bilanzierten<br>Beteiligungen | Kumuliertes<br>sonstiges Ergebnis<br>(Accumulated other<br>comprehensive<br>income),<br>nach Steuern | Den<br>Deutsche Bank-<br>Aktionären<br>zurechenbares<br>Eigenkapital | Anteile ohne<br>beherrschenden<br>Einfluss | Eigenkapital<br>einschließlich<br>Anteile ohne<br>beherrschenden<br>Einfluss |
|-----------------------------------------------------------------------------------------------------------------------------------------------------------------------------------------------|---------------------------------------------------------------------------------------------------------------------------------------------------|------------------------------------------------------------------------------------------------------------|--------------------------------------------------------------------------------------|---------------------------------------------------------------------------------------------------------|------------------------------------------------------------------------------------------------------|----------------------------------------------------------------------|--------------------------------------------|------------------------------------------------------------------------------|
| 3.629                                                                                                                                                                                         | –52                                                                                                                                               | –                                                                                                          | –2.524                                                                               | –6                                                                                                      | 1.047                                                                                                | 37.893                                                               | 1.422                                      | 39.315                                                                       |
| –4.484                                                                                                                                                                                        | –294                                                                                                                                              | –                                                                                                          | –1.104                                                                               | –16                                                                                                     | –5.898                                                                                               | –9.733                                                               | –37                                        | –9.770                                                                       |
| –                                                                                                                                                                                             | –                                                                                                                                                 | –                                                                                                          | –                                                                                    | –                                                                                                       | –                                                                                                    | 2.200                                                                | –                                          | 2.200                                                                        |
| –                                                                                                                                                                                             | –                                                                                                                                                 | –                                                                                                          | –                                                                                    | –                                                                                                       | –                                                                                                    | –2.274                                                               | –                                          | –2.274                                                                       |
| –                                                                                                                                                                                             | –                                                                                                                                                 | –                                                                                                          | –                                                                                    | –                                                                                                       | –                                                                                                    | 226                                                                  | –                                          | 226                                                                          |
| –                                                                                                                                                                                             | –                                                                                                                                                 | –                                                                                                          | –                                                                                    | –                                                                                                       | –                                                                                                    | –1                                                                   | –                                          | –1                                                                           |
| –                                                                                                                                                                                             | –                                                                                                                                                 | –                                                                                                          | –                                                                                    | –                                                                                                       | –                                                                                                    | 225                                                                  | –                                          | 225                                                                          |
| –                                                                                                                                                                                             | –                                                                                                                                                 | –                                                                                                          | –                                                                                    | –                                                                                                       | –                                                                                                    | 1.072                                                                | –                                          | 1.072                                                                        |
| –                                                                                                                                                                                             | –                                                                                                                                                 | –                                                                                                          | –                                                                                    | –                                                                                                       | –                                                                                                    | –136                                                                 | –                                          | –136                                                                         |
| –                                                                                                                                                                                             | –                                                                                                                                                 | –                                                                                                          | –                                                                                    | –                                                                                                       | –                                                                                                    | 875                                                                  | –                                          | 875                                                                          |
| –                                                                                                                                                                                             | –                                                                                                                                                 | –                                                                                                          | –                                                                                    | –                                                                                                       | –                                                                                                    | 18                                                                   | –                                          | 18                                                                           |
| –                                                                                                                                                                                             | –                                                                                                                                                 | –                                                                                                          | –                                                                                    | –                                                                                                       | –                                                                                                    | –366                                                                 | –                                          | –366                                                                         |
| –                                                                                                                                                                                             | –                                                                                                                                                 | –                                                                                                          | –                                                                                    | –                                                                                                       | –                                                                                                    | 1.225                                                                | –                                          | 1.225                                                                        |
| –                                                                                                                                                                                             | –                                                                                                                                                 | –                                                                                                          | –                                                                                    | –                                                                                                       | –                                                                                                    | –1                                                                   | –                                          | –1                                                                           |
| –                                                                                                                                                                                             | –                                                                                                                                                 | –                                                                                                          | –                                                                                    | –                                                                                                       | –                                                                                                    | –21.736                                                              | –                                          | –21.736                                                                      |
| –                                                                                                                                                                                             | –                                                                                                                                                 | –                                                                                                          | –                                                                                    | –                                                                                                       | –                                                                                                    | 22.544                                                               | –                                          | 22.544                                                                       |
| –                                                                                                                                                                                             | –                                                                                                                                                 | –                                                                                                          | –                                                                                    | –                                                                                                       | –                                                                                                    | –1.191                                                               | –                                          | –1.191                                                                       |
| –                                                                                                                                                                                             | –                                                                                                                                                 | –                                                                                                          | –                                                                                    | –                                                                                                       | –                                                                                                    | –137                                                                 | –174                                       | –311                                                                         |
| –855                                                                                                                                                                                          | –346                                                                                                                                              | –                                                                                                          | –3.628                                                                               | –22                                                                                                     | –4.851                                                                                               | 30.703                                                               | 1.211                                      | 31.914                                                                       |
| 669                                                                                                                                                                                           | 212                                                                                                                                               | –                                                                                                          | 107                                                                                  | 83                                                                                                      | 1.071                                                                                                | 6.044                                                                | –1                                         | 6.043                                                                        |
| –                                                                                                                                                                                             | –                                                                                                                                                 | –                                                                                                          | –                                                                                    | –                                                                                                       | –                                                                                                    | 958                                                                  | –                                          | 958                                                                          |
| –                                                                                                                                                                                             | –                                                                                                                                                 | –                                                                                                          | –                                                                                    | –                                                                                                       | –                                                                                                    | –309                                                                 | –                                          | –309                                                                         |
| –                                                                                                                                                                                             | –                                                                                                                                                 | –                                                                                                          | –                                                                                    | –                                                                                                       | –                                                                                                    | –                                                                    | –                                          | –                                                                            |
| –                                                                                                                                                                                             | –                                                                                                                                                 | –                                                                                                          | –                                                                                    | –                                                                                                       | –                                                                                                    | –679                                                                 | –                                          | –679                                                                         |
| –                                                                                                                                                                                             | –                                                                                                                                                 | –                                                                                                          | –                                                                                    | –                                                                                                       | –                                                                                                    | –688                                                                 | –                                          | –688                                                                         |
| –                                                                                                                                                                                             | –                                                                                                                                                 | –                                                                                                          | –                                                                                    | –                                                                                                       | –                                                                                                    | 1.313                                                                | –                                          | 1.313                                                                        |
| –                                                                                                                                                                                             | –                                                                                                                                                 | –                                                                                                          | –                                                                                    | –                                                                                                       | –                                                                                                    | 35                                                                   | –                                          | 35                                                                           |
| –                                                                                                                                                                                             | –                                                                                                                                                 | –                                                                                                          | –                                                                                    | –                                                                                                       | –                                                                                                    | –                                                                    | –                                          | –                                                                            |
| –                                                                                                                                                                                             | –                                                                                                                                                 | –                                                                                                          | –                                                                                    | –                                                                                                       | –                                                                                                    | –5                                                                   | –                                          | –5                                                                           |
| –                                                                                                                                                                                             | –                                                                                                                                                 | –                                                                                                          | –                                                                                    | –                                                                                                       | –                                                                                                    | 8                                                                    | –                                          | 8                                                                            |
| –                                                                                                                                                                                             | –                                                                                                                                                 | –                                                                                                          | –                                                                                    | –                                                                                                       | –                                                                                                    | –149                                                                 | –                                          | –149                                                                         |
| –                                                                                                                                                                                             | –                                                                                                                                                 | –                                                                                                          | –                                                                                    | –                                                                                                       | –                                                                                                    | –19.238                                                              | –                                          | –19.238                                                                      |
| –                                                                                                                                                                                             | –                                                                                                                                                 | –                                                                                                          | –                                                                                    | –                                                                                                       | –                                                                                                    | 18.816                                                               | –                                          | 18.816                                                                       |
| –                                                                                                                                                                                             | –                                                                                                                                                 | –                                                                                                          | –                                                                                    | –                                                                                                       | –                                                                                                    | –177                                                                 | –                                          | –177                                                                         |
| –                                                                                                                                                                                             | –                                                                                                                                                 | –                                                                                                          | –                                                                                    | –                                                                                                       | –                                                                                                    | 15                                                                   | 112                                        | 127                                                                          |
| –186                                                                                                                                                                                          | –134                                                                                                                                              | –                                                                                                          | –3.521                                                                               | 61                                                                                                      | –3.780                                                                                               | 36.647                                                               | 1.322                                      | 37.969                                                                       |
| 73                                                                                                                                                                                            | –45                                                                                                                                               | –11                                                                                                        | 1.188                                                                                | –26                                                                                                     | 1.179                                                                                                | 3.489                                                                | –8                                         | 3.481                                                                        |
| –                                                                                                                                                                                             | –                                                                                                                                                 | –                                                                                                          | –                                                                                    | –                                                                                                       | –                                                                                                    | 10.204                                                               | –                                          | 10.204                                                                       |
| –                                                                                                                                                                                             | –                                                                                                                                                 | –                                                                                                          | –                                                                                    | –                                                                                                       | –                                                                                                    | –465                                                                 | –                                          | –465                                                                         |
| –                                                                                                                                                                                             | –                                                                                                                                                 | –                                                                                                          | –                                                                                    | –                                                                                                       | –                                                                                                    | –                                                                    | –                                          | –                                                                            |
| –                                                                                                                                                                                             | –                                                                                                                                                 | –                                                                                                          | –                                                                                    | –                                                                                                       | –                                                                                                    | 94                                                                   | 12                                         | 106                                                                          |
| –                                                                                                                                                                                             | –                                                                                                                                                 | –                                                                                                          | –                                                                                    | –                                                                                                       | –                                                                                                    | –296                                                                 | –                                          | –296                                                                         |
| –                                                                                                                                                                                             | –                                                                                                                                                 | –                                                                                                          | –                                                                                    | –                                                                                                       | –                                                                                                    | 1.439                                                                | –                                          | 1.439                                                                        |
| –                                                                                                                                                                                             | –                                                                                                                                                 | –                                                                                                          | –                                                                                    | –                                                                                                       | –                                                                                                    | –11                                                                  | –                                          | –11                                                                          |
| –                                                                                                                                                                                             | –                                                                                                                                                 | –                                                                                                          | –                                                                                    | –                                                                                                       | –                                                                                                    | –                                                                    | –                                          | –                                                                            |
| –                                                                                                                                                                                             | –                                                                                                                                                 | –                                                                                                          | –                                                                                    | –                                                                                                       | –                                                                                                    | –93                                                                  | –                                          | –93                                                                          |
| –                                                                                                                                                                                             | –                                                                                                                                                 | –                                                                                                          | –                                                                                    | –                                                                                                       | –                                                                                                    | 93                                                                   | –                                          | 93                                                                           |
| –                                                                                                                                                                                             | –                                                                                                                                                 | –                                                                                                          | –                                                                                    | –                                                                                                       | –                                                                                                    | –115                                                                 | –                                          | –115                                                                         |
| –                                                                                                                                                                                             | –                                                                                                                                                 | –                                                                                                          | –                                                                                    | –                                                                                                       | –                                                                                                    | –15.366                                                              | –                                          | –15.366                                                                      |
| –                                                                                                                                                                                             | –                                                                                                                                                 | –                                                                                                          | –                                                                                    | –                                                                                                       | –                                                                                                    | 13.525                                                               | –                                          | 13.525                                                                       |
| –                                                                                                                                                                                             | –                                                                                                                                                 | –                                                                                                          | –                                                                                    | –                                                                                                       | –                                                                                                    | –                                                                    | –                                          | –                                                                            |
| –                                                                                                                                                                                             | –                                                                                                                                                 | –                                                                                                          | –                                                                                    | –                                                                                                       | –                                                                                                    | –302                                                                 | 223                                        | –79                                                                          |
| –113                                                                                                                                                                                          | –179                                                                                                                                              | –11                                                                                                        | –2.333                                                                               | 35                                                                                                      | –2.601                                                                                               | 48.843                                                               | 1.549                                      | 50.392                                                                       |

<sup>3</sup> Ohne unrealisierte Gewinne/Verluste aus der nach der Equitymethode bilanzierten Beteiligung.

<sup>4</sup> Der Bestand zum 31. Dezember 2007 wurde in 2008 aufgrund einer Änderung der Bilanzierungsmethode (unmittelbare Berücksichtigung von versicherungsmathematischen Gewinnen und Verlusten im Eigenkapital im Gegensatz zu der „Korridor“-Methode) sowie aufgrund einer rückwirkenden Anpassung der Steuerverbindlichkeiten aus laufenden Steuern um 86 Mio € vermindert.

Der nachfolgende Konzernanhang ist integraler Bestandteil des Konzernabschlusses.

# Konzern-Kapitalflussrechnung

| in Mio €                                                                                                                                                                | 2010          | 2009           | 2008          |
|-------------------------------------------------------------------------------------------------------------------------------------------------------------------------|---------------|----------------|---------------|
| <b>Jahresüberschuss/Jahresfehlbetrag (-)</b>                                                                                                                            | <b>2.330</b>  | <b>4.958</b>   | <b>-3.896</b> |
| Cashflow aus operativer Geschäftstätigkeit:                                                                                                                             |               |                |               |
| Überleitung auf den Cashflow aus operativer Geschäftstätigkeit:                                                                                                         |               |                |               |
| Risikovorsorge im Kreditgeschäft                                                                                                                                        | 1.274         | 2.630          | 1.076         |
| Restrukturierungsaufwand                                                                                                                                                | –             | –              | –             |
| Ergebnis aus dem Verkauf von zur Veräußerung verfügbaren finanziellen Vermögenswerten, nach der Equitymethode bilanzierten Beteiligungen und Sonstigem                  | –363          | –656           | –1.732        |
| Latente Ertragsteuern, netto                                                                                                                                            | 315           | –296           | –1.525        |
| Abschreibungen, Wertberichtigungen und Zuschreibungen                                                                                                                   | 4.255         | 1.782          | 3.047         |
| Anteilige Gewinne aus nach der Equitymethode bilanzierten Beteiligungen                                                                                                 | –457          | –189           | –53           |
| <b>Jahresüberschuss/Jahresfehlbetrag (-), bereinigt um nicht liquiditätswirksamen Aufwand/Ertrag und sonstige Posten</b>                                                | <b>7.354</b>  | <b>8.229</b>   | <b>-3.083</b> |
| Anpassungen aufgrund einer Nettoveränderung der operativen Vermögenswerte und Verbindlichkeiten:                                                                        |               |                |               |
| Verzinsliche Termineinlagen bei Kreditinstituten                                                                                                                        | –34.806       | 4.583          | –3.964        |
| Forderungen aus übertragenen Zentralbankeinlagen, aus Wertpapierpensionsgeschäften (Reverse Repos) und Wertpapierleihen                                                 | 26.368        | –4.203         | 24.363        |
| Handelsaktiva und positive Marktwerte aus derivativen Finanzinstrumenten                                                                                                | –27.237       | 726.237        | –472.203      |
| Zum Fair Value klassifizierte finanzielle Vermögenswerte                                                                                                                | –24.502       | 24.890         | 169.423       |
| Forderungen aus dem Kreditgeschäft                                                                                                                                      | –2.823        | 17.213         | –37.981       |
| Sonstige Aktiva                                                                                                                                                         | –5.894        | 21.960         | 38.573        |
| Einlagen                                                                                                                                                                | 22.656        | –57.330        | –56.918       |
| Handelspassiva und negative Marktwerte aus derivativen Finanzinstrumenten                                                                                               | 9.549         | –686.214       | 655.218       |
| Zum Fair Value bewertete finanzielle Verpflichtungen und Investmentverträge                                                                                             | 53.450        | –7.061         | –159.613      |
| Verbindlichkeiten aus übertragenen Zentralbankeinlagen, aus Wertpapierpensionsgeschäften (Repos) und aus Wertpapierleihen                                               | –40.709       | –40.644        | –97.009       |
| Sonstige kurzfristige Geldaufnahmen                                                                                                                                     | 18.509        | 2.592          | –14.216       |
| Sonstige Passiva                                                                                                                                                        | 2.851         | –15.645        | –15.482       |
| Vorrangige langfristige Verbindlichkeiten                                                                                                                               | –3.457        | –7.150         | 12.769        |
| Sonstige, per Saldo                                                                                                                                                     | –4.985        | –1.243         | –2.760        |
| <b>Nettocashflow aus operativer Geschäftstätigkeit</b>                                                                                                                  | <b>–3.676</b> | <b>–13.786</b> | <b>37.117</b> |
| Cashflow aus Investitionstätigkeit:                                                                                                                                     |               |                |               |
| Erlöse aus:                                                                                                                                                             |               |                |               |
| Verkauf von zur Veräußerung verfügbaren finanziellen Vermögenswerten                                                                                                    | 10.652        | 9.023          | 19.433        |
| Endfälligkeit von zur Veräußerung verfügbaren finanziellen Vermögenswerten                                                                                              | 4.181         | 8.938          | 18.713        |
| Verkauf von nach der Equitymethode bilanzierten Beteiligungen                                                                                                           | 250           | 574            | 680           |
| Verkauf von Sachanlagen                                                                                                                                                 | 108           | 39             | 107           |
| Erwerb von:                                                                                                                                                             |               |                |               |
| Zur Veräußerung verfügbaren finanziellen Vermögenswerten                                                                                                                | –14.087       | –12.082        | –37.819       |
| Nach der Equitymethode bilanzierten Beteiligungen                                                                                                                       | –145          | –3.730         | –881          |
| Sachanlagen                                                                                                                                                             | –873          | –592           | –939          |
| Nettocashflow aus Unternehmensakquisitionen und -verkäufen                                                                                                              | 8.580         | –20            | –24           |
| Sonstige, per Saldo                                                                                                                                                     | –1.189        | –1.749         | –39           |
| <b>Nettocashflow aus Investitionstätigkeit</b>                                                                                                                          | <b>7.477</b>  | <b>401</b>     | <b>–769</b>   |
| Cashflow aus Finanzierungstätigkeit:                                                                                                                                    |               |                |               |
| Emission von nachrangigen langfristigen Verbindlichkeiten                                                                                                               | 1.341         | 457            | 523           |
| Rückzahlung/Rücklauf nachrangiger langfristiger Verbindlichkeiten                                                                                                       | –229          | –1.448         | –659          |
| Emission von hybriden Kapitalinstrumenten (Trust Preferred Securities)                                                                                                  | 90            | 1.303          | 3.404         |
| Rückzahlung/Rücklauf hybrider Kapitalinstrumente (Trust Preferred Securities)                                                                                           | –51           | –              | –             |
| Im Rahmen von aktienbasierten Vergütungsplänen begebene Stammaktien                                                                                                     | –             | –              | 19            |
| Kapitalerhöhung                                                                                                                                                         | 10.060        | –              | 2.200         |
| Kauf Eigener Aktien                                                                                                                                                     | –15.366       | –19.238        | –21.736       |
| Verkauf Eigener Aktien                                                                                                                                                  | 13.519        | 18.111         | 21.426        |
| Dividendenzahlung an Anteile ohne beherrschenden Einfluss                                                                                                               | –7            | –5             | –14           |
| Nettoveränderung der Anteile ohne beherrschenden Einfluss                                                                                                               | 200           | 109            | 331           |
| Gezahlte Bardividende                                                                                                                                                   | –465          | –309           | –2.274        |
| <b>Nettocashflow aus Finanzierungstätigkeit</b>                                                                                                                         | <b>9.092</b>  | <b>–1.020</b>  | <b>3.220</b>  |
| <b>Nettoeffekt aus Wechselkursänderungen der Zahlungsmittel und Zahlungsmitteläquivalente</b>                                                                           | <b>1.911</b>  | <b>690</b>     | <b>–402</b>   |
| Nettoveränderung der Zahlungsmittel und Zahlungsmitteläquivalente                                                                                                       | 14.804        | –13.715        | 39.166        |
| Anfangsbestand der Zahlungsmittel und Zahlungsmitteläquivalente                                                                                                         | 51.549        | 65.264         | 26.098        |
| Endbestand der Zahlungsmittel und Zahlungsmitteläquivalente                                                                                                             | 66.353        | 51.549         | 65.264        |
| <b>Der Cashflow aus operativer Geschäftstätigkeit beinhaltet</b>                                                                                                        |               |                |               |
| Gezahlte/erhaltene (-) Ertragsteuern, netto                                                                                                                             | 784           | –520           | –2.495        |
| Gezahlte Zinsen                                                                                                                                                         | 13.740        | 15.878         | 43.724        |
| Erhaltene Zinsen und Dividenden                                                                                                                                         | 29.456        | 28.211         | 54.549        |
| <b>Zahlungsmittel und Zahlungsmitteläquivalente beinhalten</b>                                                                                                          |               |                |               |
| Barreserve                                                                                                                                                              | 17.157        | 9.346          | 9.826         |
| Verzinsliche Sichteinlagen bei Banken (nicht eingeschlossen: Termineinlagen in Höhe von 43.181 Mio € per 31.12.2010 (31.12.2009: 5.030 Mio €, 31.12.2008: 9.301 Mio €)) | 49.196        | 42.203         | 55.438        |
| <b>Insgesamt</b>                                                                                                                                                        | <b>66.353</b> | <b>51.549</b>  | <b>65.264</b> |

Der nachfolgende Konzernanhang ist integraler Bestandteil des Konzernabschlusses.

Der Erwerb von Aktien der Deutschen Postbank AG in 2009, einschließlich des nicht zahlungswirksamen Teils, ist in Note 04 „Akquisitionen und Veräußerungen“ beschrieben. Die Restrukturierung der von der Deutschen Bank an den isländischen Generikahersteller Actavis Group hf ausgegebenen Kredite führte für die Zwecke der Konzern-Kapitalflussrechnung zu einer nicht zahlungswirksamen Umgliederung der nachrangigen Finanzierungen von operativer Geschäftstätigkeit zu Investitionstätigkeit. Die Transaktion ist im Einzelnen in Note 17 „Nach der Equitymethode bilanzierte Beteiligungen“ beschrieben.



# Konzernanhang

## Konzernanhang

- 01 – Wesentliche Rechnungslegungsgrundsätze – 158
- 02 – Wesentliche Rechnungslegungseinschätzungen – 188
- 03 – Erstmals angewandte und neue Rechnungslegungsvorschriften – 196
- 04 – Akquisitionen und Veräußerungen – 198
- 05 – Segmentberichterstattung – 216

## Anhangangaben zur Gewinn- und Verlustrechnung

- 06 – Zinsüberschuss und Ergebnis aus zum Fair Value bewerteten finanziellen Vermögenswerten/Verpflichtungen – 228
- 07 – Provisionsüberschuss – 230
- 08 – Ergebnis aus zur Veräußerung verfügbaren finanziellen Vermögenswerten – 231
- 09 – Sonstige Erträge – 231
- 10 – Sachaufwand und sonstiger Aufwand – 232
- 11 – Ergebnis je Aktie – 232

## Anhangangaben zur Bilanz

- 12 – Zum Fair Value bewertete finanzielle Vermögenswerte und Verpflichtungen – 235
- 13 – Änderungen zu IAS 39 und IFRS 7, „Reclassification of Financial Assets“ – 238
- 14 – Zum Fair Value bewertete Finanzinstrumente – 240
- 15 – Fair Value von Finanzinstrumenten, die nicht zum Fair Value ausgewiesen werden – 254
- 16 – Zur Veräußerung verfügbare finanzielle Vermögenswerte – 257
- 17 – Nach der Equitymethode bilanzierte Beteiligungen – 258
- 18 – Forderungen aus dem Kreditgeschäft – 260
- 19 – Risikovorsorge im Kreditgeschäft – 261
- 20 – Ausbuchung von finanziellen Vermögenswerten – 262
- 21 – Als Sicherheit verpfändete und erhaltene Vermögenswerte – 263
- 22 – Sachanlagen – 264
- 23 – Leasingverhältnisse – 265
- 24 – Goodwill und sonstige immaterielle Vermögenswerte – 267
- 25 – Zum Verkauf bestimmte Vermögenswerte – 278
- 26 – Sonstige Aktiva und Passiva – 282
- 27 – Einlagen – 283
- 28 – Rückstellungen – 284
- 29 – Sonstige kurzfristige Geldaufnahmen – 288
- 30 – Langfristige Verbindlichkeiten und hybride Kapitalinstrumente (Trust Preferred Securities) – 289

## Zusätzliche Anhangangaben

- 31 – Stammaktien – 290
- 32 – Aktienbasierte Vergütungen – 291
- 33 – Leistungen an Arbeitnehmer – 296
- 34 – Ertragsteuern – 303
- 35 – Derivative Finanzinstrumente – 307
- 36 – Aufsichtsrechtliches Kapital – 309
- 37 – Geschäfte mit nahestehenden Dritten – 314
- 38 – Informationen zu Tochtergesellschaften – 317
- 39 – Versicherungs- und Investmentverträge – 319
- 40 – Kurz- und langfristige Vermögenswerte und Verbindlichkeiten – 322
- 41 – Ergänzende Erläuterungen zum Konzernabschluss gemäß § 315a HGB – 324
- 42 – Anteilsbesitz – 326

## 01 – Wesentliche Rechnungslegungsgrundsätze

### Grundlage der Darstellung

Die Deutsche Bank Aktiengesellschaft („Deutsche Bank“ oder „Muttergesellschaft“) ist eine Aktiengesellschaft nach deutschem Recht. Zusammen mit den Gesellschaften, bei denen die Deutsche Bank über beherrschenden Einfluss verfügt, bietet die Deutsche Bank (der „Konzern“) weltweit das gesamte Spektrum von Produkten und Dienstleistungen der Konzernbereiche Corporate & Investment Bank sowie Private Clients and Asset Management an. Einzelheiten zu den Unternehmensbereichen des Konzerns sind in Note 05 „Segmentberichterstattung“ dargestellt.

Der beigefügte Konzernabschluss wird in Euro, der Berichtswährung des Konzerns, erstellt. Alle Angaben wurden auf die nächste Million gerundet. Der Konzernabschluss steht im Einklang mit den International Financial Reporting Standards („IFRS“), wie sie vom International Accounting Standards Board („IASB“) veröffentlicht und durch die Europäische Union („EU“) in europäisches Recht übernommen wurden. Die Anwendung der IFRS führt zu keinen Unterschieden zwischen den von der EU übernommenen IFRS und den vom IASB veröffentlichten IFRS.

Risikoangaben gemäß IFRS 7, „Financial Instruments: Disclosures“, für das Geschäftsjahr 2010 zu Art und Umfang von Risiken aus Finanzinstrumenten sind durch Verweis auf durch seitliche Klammern entsprechend gekennzeichnete Teile des Risikoberichts weiterhin Bestandteil des Konzernanhangs.

Die Erstellung des Jahresabschlusses gemäß IFRS verlangt vom Management, Beurteilungen und Annahmen hinsichtlich bestimmter Kategorien von Vermögenswerten und Verbindlichkeiten zu treffen. Bereiche, in denen dies notwendig ist, beinhalten die Bestimmung des Fair Value bestimmter finanzieller Vermögenswerte und Verbindlichkeiten, die Wertberichtigung für Kreditausfälle, die Wertminderung („Impairment“) von Vermögenswerten mit Ausnahme von Krediten, von Goodwill und sonstigen immateriellen Vermögenswerten, den Ansatz und die Bewertung von aktiven latenten Steuern, Rückstellungen für ungewisse Steuerpositionen, ungewisse gesetzliche und regulatorische Verpflichtungen, Rückstellungen für Versicherungs- und Kapitalanlageverträge sowie die Rückstellungen für Pensionen und ähnliche Verpflichtungen. Diese Beurteilungen und Annahmen beeinflussen den Ausweis von Aktiva und Passiva, von Eventualforderungen und -verbindlichkeiten am Bilanzstichtag sowie von Erträgen und Aufwendungen der Berichtsperiode. Die tatsächlichen Ergebnisse können von den Einschätzungen des Managements abweichen. Eine Beschreibung der bei der Erstellung des Jahresabschlusses verwendeten wesentlichen Rechnungslegungseinschätzungen und -annahmen ist in Note 02 „Wesentliche Rechnungslegungseinschätzungen“ enthalten.

### Finanzgarantien

Im zweiten Quartal 2009 wurde die Konzern-Gewinn- und Verlustrechnung rückwirkend angepasst, um Prämien für Finanzgarantien als Aufwand darzustellen, anstatt sie gegen die Erträge zu verrechnen, da sie in keinem direkten Bezug zu ertragsgenerierenden Aktivitäten stehen. Diese Anpassungen hatten keine Auswirkungen auf das Ergebnis nach Steuern oder das Eigenkapital, aber einen Anstieg der Sonstigen Erträge und des Sachaufwands und sonstigen Aufwands in Höhe von jeweils 36 Mio € im Geschäftsjahr 2009 sowie jeweils 131 Mio € im Geschäftsjahr 2008 zur Folge.

### **Zuordnung von Ertragskomponenten in CIB**

Im ersten Halbjahr 2010 wurde die Darstellung der Vorperiodenerträge des Konzernbereichs CIB infolge einer Überprüfung der Zuordnung von bestimmten Ertragskomponenten zu den Produktkategorien angepasst. Die Überprüfung führte für das Geschäftsjahr 2009 zu einem Transfer von 325 Mio € negativen Erträgen sowie für das Geschäftsjahr 2008 zu einem Transfer von 97 Mio € Erträgen von Kreditgeschäft zu Sales & Trading (Debt und sonstige Produkte). Die Erträge aus Sales & Trading (Equity) wurden für das Geschäftsjahr 2009 um 83 Mio € beziehungsweise für das Geschäftsjahr 2008 um 105 Mio € reduziert, mit entsprechenden Gegeneffekten in Sales & Trading (Debt und sonstige Produkte). Diese Anpassungen hatten keine Auswirkungen auf die Gesamterträge des Konzernbereichs CIB.

### **Versicherungsgeschäft**

Im zweiten Quartal 2010 änderte der Konzern die Darstellung der Gebühren und der Nettoausgleiche im Zusammenhang mit Langlebigekeitsversicherungs- und Langlebigekeitsrückversicherungsverträgen. Es wurde festgestellt, dass eine Nettodarstellung von Cashflows aus individuellen Langlebigekeitsversicherungs- und Langlebigekeitsrückversicherungsverträgen der tatsächlichen Regulierung dieser Cashflows entspricht und daher den Charakter solcher Verträge reflektiert. Diese Änderung des Ausweises führte zu einem Transfer von Aufwendungen in Höhe von 117 Mio € im Geschäftsjahr 2010 aus den Sonstigen Erträgen in die Aufwendungen im Versicherungsgeschäft.

### **Abschreibungsdauern für Software**

Im zweiten Quartal 2010 änderte der Konzern die Abschreibungsdauern für aktivierte Aufwendungen für bestimmte erworbene oder selbst erstellte Software von drei Jahren auf fünf oder zehn Jahre. Die Änderung hatte im Geschäftsjahr 2010 keine wesentlichen Auswirkungen auf den Konzernabschluss.

### **Wertberichtigungen für Kreditausfälle**

Der Konzern wendet Schätzungen bei der Ermittlung der Wertberichtigung für homogene Kreditportfolios an, die auf historischen Erfahrungswerten basierende statistische Modelle verwenden. In regelmäßigen Abständen führt der Konzern Maßnahmen durch, um die verwendeten Eingangsparameter und Modellannahmen an historisch nachgewiesene Verlusthöhen anzugleichen. Entsprechende Anpassungen im Geschäftsjahr 2009 führten in 2010 zu einer niedrigeren Nettozuführung zur Wertberichtigung in Höhe von 28 Mio € sowie in 2009 zu einer niedrigeren Nettozuführung zur Wertberichtigung in Höhe von 145,8 Mio €.

### **Wechsel der funktionalen Währung eines wesentlichen Geschäftsbetriebs**

Am 1. Januar 2010 wechselte die funktionale Währung der Filiale London der Deutschen Bank Aktiengesellschaft („Filiale London“) und bestimmter anderer in London ansässiger Tochtergesellschaften von Britischem Pfund zu Euro.

Die funktionale Währung dieser Tochtergesellschaften war zuvor auf das Britische Pfund festgelegt, da es sich hierbei um die Währung des primären Wirtschaftsumfelds handelte. Während des Geschäftsjahres 2009 stellte man jedoch fest, dass sich das wirtschaftliche Umfeld, die Struktur der Geschäftsfelder und der Bilanz der Filiale London im Laufe der Zeit sukzessive gewandelt haben. Um dieser Änderung gerecht zu werden, führt das Management der Filiale London deren Geschäfte seit dem 1. Januar 2010 in Euro durch. Zur Implementierung dieser Entscheidung wurden in der Filiale London Maßnahmen zur Absicherung aller Nicht-Euro-Risiken, zur Umwandlung von Gewinnen in Euro und zur Umstellung der internen Managementberichterstattung auf Euro ergriffen.

Die Änderung der funktionalen Währung in Euro wurde prospektiv für diesen Konzernabschluss angewandt. Der Konzern hat alle Sachverhalte mit dem Wechselkurs am 1. Januar 2010 in die neue funktionale Währung umgerechnet. Wechselkursdifferenzen infolge der Umrechnung des ausländischen Geschäftsbetriebs, die zuvor im „Sonstigen Ergebnis (Other comprehensive income)“ erfasst wurden, verbleiben im „Sonstigen Ergebnis (Other comprehensive income)“ und werden erst im Fall einer Veräußerung des Geschäftsbetriebs ergebniswirksam berücksichtigt.

### Wesentliche Rechnungslegungsgrundsätze

Im Folgenden werden die wesentlichen vom Konzern angewandten Rechnungslegungsgrundsätze beschrieben. Diese Grundsätze wurden in den Geschäftsjahren 2008, 2009 und 2010 mit Ausnahme der zuvor beschriebenen Änderungen konsistent angewandt.

### Grundsätze der Konsolidierung

Die Finanzinformationen im Konzernabschluss beinhalten Daten der Muttergesellschaft, Deutsche Bank Aktiengesellschaft zusammen mit ihren Tochtergesellschaften, unter Einbeziehung bestimmter Zweckgesellschaften („SPEs“), dargestellt als eine wirtschaftliche Einheit.

### Tochtergesellschaften

Tochtergesellschaften des Konzerns sind die von ihm beherrschten Einheiten. Der Konzern verfügt über einen beherrschenden Einfluss auf Tochtergesellschaften, wenn er deren Finanz- und Geschäftspolitik bestimmen kann. Dies wird in der Regel bei einer direkten oder indirekten Kapitalbeteiligung von mehr als der Hälfte der Stimmrechte an den Unternehmen angenommen. Das Bestehen potenzieller Stimmrechte, die aktuell ausübbar oder wandelbar sind, wird bei der Prüfung, ob der Konzern ein anderes Unternehmen beherrscht, berücksichtigt.

Der Konzern unterstützt die Gründung von SPEs und interagiert mit nicht von ihm gesponserten SPEs aus einer Vielzahl von Gründen. Auf diese Weise können Kunden Investitionen in rechtlich selbstständige Gesellschaften oder gemeinsame Investitionen in alternative Vermögensanlagen vornehmen. Es werden aber auch die Verbriefung von Vermögenswerten und der Kauf oder Verkauf von Kreditsicherungsinstrumenten ermöglicht. Um festzustellen, ob eine SPE zu konsolidieren ist, gilt es eine Reihe von Faktoren zu prüfen. Diese beinhalten eine Untersuchung, (1) ob die Aktivitäten der SPE zugunsten des Konzerns entsprechend seinen spezifischen Geschäftsbedürfnissen durchgeführt werden, sodass dieser aus der Geschäftstätigkeit der SPE Nutzen zieht; (2) ob der Konzern über die Entscheidungsmacht zur Erzielung der Mehrheit des Nutzens verfügt; (3) ob der Konzern die Mehrheit des Nutzens aus der Geschäftstätigkeit der SPE zieht oder (4) ob der Konzern die Mehrheit der mit den Vermögenswerten verbundenen Residual- oder Eigentumsrisiken behält, um Nutzen aus ihrer Geschäftstätigkeit zu ziehen. Eine SPE ist zu konsolidieren, wenn die Prüfung der wesentlichen Faktoren zeigt, dass die SPE durch den Konzern beherrscht wird.

Tochterunternehmen werden ab dem Zeitpunkt konsolidiert, an dem der Konzern einen beherrschenden Einfluss erlangt. Die Konsolidierung endet mit dem Zeitpunkt, zu dem keine beherrschende Einflussnahme mehr vorliegt.

Der Konzern überprüft mindestens zu jedem Quartalsabschluss die Angemessenheit zuvor getroffener Konsolidierungsentscheidungen. Entsprechend werden etwaige organisatorische Veränderungen unmittelbar berücksichtigt. Dazu gehören neben Änderungen der Eigentumsverhältnisse jegliche Änderungen von bestehenden oder mit einer Einheit neu abgeschlossenen vertraglichen Verpflichtungen des Konzerns.

Der Konzern überprüft die Konsolidierungsentscheidung für SPEs, wenn sich eine Änderung in den Vereinbarungen der SPE ergibt oder wenn eine substantielle Änderung der Geschäftsbeziehungen zwischen dem Konzern und einer SPE vorliegt. Zu den Sachverhalten, die Anlass zur Notwendigkeit einer Überprüfung der Konsolidierungsentscheidung geben würden, gehören unter anderem:

- substantielle Veränderungen der Eigentumsverhältnisse der SPE, beispielsweise Kauf eines nicht unwesentlichen zusätzlichen Anteils oder Verkauf eines nicht unwesentlichen Anteils an der SPE;
- Veränderungen der vertraglichen Vereinbarungen oder Unternehmensführungsstrukturen der SPE;
- zusätzliche Aktivitäten in Bezug auf die Struktur der Gesellschaft, beispielsweise die Bereitstellung einer Liquiditätsfazilität über die ursprünglich vereinbarten Bedingungen hinaus, oder der Abschluss ursprünglich nicht geplanter Geschäfte mit einer SPE und
- Veränderungen in der Finanzierungsstruktur der Einheit.

Ferner wird die Angemessenheit einer Konsolidierungsentscheidung erneut überprüft, wenn der Konzern feststellt, dass die SPE zusätzlicher, ursprünglich nicht vorgesehener Unterstützung zur Weiterführung ihres Geschäfts bedarf und der Konzern eine solche Unterstützung aus Reputations- oder sonstigen Gründen leisten würde.

Die Neueinschätzung des Vorliegens eines beherrschenden Einflusses über bestehende SPEs führt nicht zwangsläufig zu einer Konsolidierung oder Entkonsolidierung. Bei einer solchen Überprüfung muss der Konzern unter Umständen seine Wahrscheinlichkeitsannahmen für Verluste, die Möglichkeit einer zukünftigen Inanspruchnahme zusätzlicher Liquiditätsfazilitäten sowie für künftige, aus Reputations- oder anderen Gründen resultierende Maßnahmen anpassen. Eine Neueinschätzung der Konsolidierungspflicht wird auf der Grundlage aller gegenwärtig verfügbaren Informationen, einschließlich aktueller Marktparameter und Erwartungen (wie zum Beispiel Erwartungen zu Verlusten aus Vermögenswerten), sowie unter Berücksichtigung jeglicher Änderungen der Marktbedingungen seit Gründung der SPE vorgenommen.

Alle konzerninternen Transaktionen, Salden und nicht realisierten Gewinne aus Transaktionen zwischen Konzerngesellschaften werden bei der Konsolidierung eliminiert. Im Rahmen der Konzernabschlusserstellung kommen konzernweit einheitliche Rechnungslegungsgrundsätze zur Anwendung. Die Ausgabe von Aktien einer Tochtergesellschaft an Dritte wird als Anteile ohne beherrschenden Einfluss behandelt.

Zu dem Zeitpunkt, an dem der Konzern die Beherrschung über ein Tochterunternehmen verliert, werden a) die Vermögenswerte (einschließlich des Goodwill) und Verpflichtungen des Tochterunternehmens zu deren Buchwerten ausgebucht, b) der Buchwert aller Anteile ohne beherrschenden Einfluss an dem ehemaligen Tochterunternehmen (inklusive aller diesen zuzuordnenden im Kumulierten sonstigen Ergebnis (Accumulated other comprehensive income) ausgewiesenen Bestandteile) ausgebucht, c) der Fair Value der erhaltenen Gegenleistung sowie eventuelle Ausschüttungen der Anteile des Tochterunternehmens erfasst, d) die Anteile, die am ehemaligen Tochterunternehmen behalten werden, zum Fair Value erfasst und e) jede daraus resultierende Differenz als ein Gewinn oder Verlust in der Konzern-Gewinn- und Verlustrechnung erfasst. In früheren Perioden im Sonstigen Ergebnis (Other comprehensive income) erfasste Beträge, die im Zusammenhang mit dieser Tochtergesellschaft stehen, werden zu dem Zeitpunkt in die Konzern-Gewinn- und Verlustrechnung umgebucht, an dem der Konzern den beherrschenden Einfluss verliert.

Im Rahmen eines Beratungs- oder Treuhandverhältnisses gehaltene Vermögenswerte gelten nicht als Vermögenswerte des Konzerns und sind nicht in der Konzernbilanz ausgewiesen.

### Unternehmenszusammenschlüsse und Anteile ohne beherrschenden Einfluss

Zur bilanziellen Erfassung von Unternehmenszusammenschlüssen wendet der Konzern die Erwerbsmethode an. Zu dem Zeitpunkt, an dem der Konzern die Beherrschung über ein erworbenes Unternehmen erlangt, werden die Anschaffungskosten der Akquisition zum Fair Value der übertragenen Gegenleistung bemessen. Hierzu gehören jegliche Zahlungsmittel oder ausgegebene Eigenkapitalanteile, bedingte Gegenleistungen, bereits zuvor am erworbenen Unternehmen gehaltene Eigenkapitalanteile sowie eingegangene und übernommene Verpflichtungen. Der Betrag, um den die Summe aus Anschaffungskosten einer Akquisition und Anteilen ohne beherrschenden Einfluss des erworbenen Unternehmens den Anteil des Konzerns an dem Fair Value des erworbenen identifizierbaren Reinvermögens übersteigt, wird als Goodwill bilanziert. Sofern die Summe aus Anschaffungskosten einer Akquisition und Anteilen ohne beherrschenden Einfluss unter dem Fair Value des erworbenen identifizierbaren Nettovermögens liegt (negativer Goodwill), kann ein Gewinn in den Sonstigen Erträgen erfasst werden. Anschaffungsnebenkosten werden als Aufwand der Periode erfasst, in der sie anfallen.

Bei einem sukzessiven Unternehmenszusammenschluss (sogenannter „schrittweiser Erwerb“) wird der zuvor an dem erworbenen Unternehmen gehaltene Eigenkapitalanteil im Erwerbszeitpunkt zum Fair Value neubewertet und ein daraus gegebenenfalls resultierender Gewinn oder Verlust in der Konzern-Gewinn- und Verlustrechnung erfasst. In früheren Perioden im Sonstigen Ergebnis (Other comprehensive income) erfasste Beträge, die im Zusammenhang mit zuvor an dem erworbenen Unternehmen gehaltenen Eigenkapitalanteilen stehen, werden zum Erwerbszeitpunkt in die Konzern-Gewinn- und Verlustrechnung umgebucht, wie dies erforderlich wäre, wenn der Konzern die zuvor an dem erworbenen Unternehmen gehaltenen Eigenkapitalanteile veräußert hätte.

Anteile ohne beherrschenden Einfluss werden in der Konzernbilanz als Bestandteil des Eigenkapitals, aber getrennt von dem den Deutsche Bank-Aktionären zurechenbaren Eigenkapital ausgewiesen. Das den Anteilen ohne beherrschenden Einfluss zurechenbare Konzernergebnis wird in der Konzern-Gewinn- und Verlustrechnung separat ausgewiesen. Veränderungen in der Beteiligungsquote an Tochterunternehmen ohne Verlust der Beherrschung werden als Transaktionen zwischen Eigenkapitalgebern behandelt und erfolgsneutral in der Kapitalrücklage erfasst.

### Assoziierte Unternehmen und gemeinschaftlich geführte Unternehmen

Ein assoziiertes Unternehmen ist ein Unternehmen, bei welchem der Konzern über maßgeblichen Einfluss verfügt, aber keinen beherrschenden Einfluss auf die finanz- und geschäftspolitischen Entscheidungen besitzt. In der Regel wird ein maßgeblicher Einfluss vermutet, wenn der Konzern zwischen 20 % und 50 % der Stimmrechte hält. Bei der Beurteilung, ob der Konzern die Möglichkeit besitzt, einen maßgeblichen Einfluss auf ein anderes Unternehmen auszuüben, werden die Existenz sowie der Effekt potenzieller Stimmrechte, die aktuell ausübbar oder wandelbar sind, berücksichtigt. Weitere Faktoren, die zur Beurteilung eines maßgeblichen Einflusses herangezogen werden, sind beispielsweise die Vertretung in Leitungs- und Aufsichtsgremien (bei deutschen Aktiengesellschaften im Aufsichtsrat) des Beteiligungsunternehmens sowie wesentliche Geschäftsvorfälle mit dem Beteiligungsunternehmen. Liegen solche Faktoren vor, könnte die Anwendung der Equitymethode auch dann erforderlich sein, wenn die Beteiligung des Konzerns weniger als 20 % der Stimmrechte umfasst.

Ein gemeinschaftlich geführtes Unternehmen besteht, wenn der Konzern mit einer Partei oder mehreren Parteien Verträge über Geschäftsaktivitäten geschlossen hat, die durch von ihnen gemeinschaftlich geführte Unternehmen wahrgenommen werden.

Anteile an assoziierten Unternehmen und gemeinschaftlich geführten Unternehmen werden nach der Equitymethode bilanziert. Der Anteil des Konzerns an den Ergebnissen assoziierter und gemeinschaftlich geführter Unternehmen wird angepasst, um mit den Rechnungslegungsgrundsätzen des Konzerns übereinzustimmen, und in der Konzern-Gewinn- und Verlustrechnung im Ergebnis aus nach der Equitymethode bilanzierten Beteiligungen ausgewiesen. Der Anteil des Konzerns an den Gewinnen und Verlusten des assoziierten Unternehmens, die aus konzerninternen Verkäufen resultieren, wird bei der Konsolidierung eliminiert.

Wenn der Konzern zuvor einen Eigenkapitalanteil (zum Beispiel einen zur Veräußerung verfügbaren finanziellen Vermögenswert) gehalten hat und nun maßgeblichen Einfluss auf das Unternehmen ausüben kann, wird der zuvor gehaltene Eigenkapitalanteil zum Fair Value Neubewertet und ein daraus gegebenenfalls resultierender Gewinn oder Verlust in der Konzern-Gewinn- und Verlustrechnung erfasst. In früheren Perioden im Sonstigen Ergebnis (Other comprehensive income) erfasste Beträge, die im Zusammenhang mit dem Eigenkapitalanteil stehen, werden zum Erwerbszeitpunkt in die Konzern-Gewinn- und Verlustrechnung umgebucht, wie dies erforderlich wäre, wenn der Konzern den zuvor gehaltenen Eigenkapitalanteil veräußert hätte.

Nach der Equitymethode werden die Anteile des Konzerns an assoziierten Unternehmen und gemeinschaftlich geführten Unternehmen anfänglich mit ihren Anschaffungskosten angesetzt und nachfolgend um den Anteil des Konzerns an dem nach der Akquisition anfallenden Gewinn (oder Verlust) oder an sonstigen Reinvermögensänderungen des betreffenden assoziierten oder gemeinschaftlich geführten Unternehmens erhöht (oder vermindert). Goodwill, der bei der Akquisition eines assoziierten oder gemeinschaftlich geführten Unternehmens entsteht, ist im Buchwert der Beteiligung (abzüglich aufgelaufener Verluste aus Wertminderungen) enthalten. Daher erfolgt keine separate Überprüfung des Goodwill auf Wertminderung. Stattdessen wird die Beteiligung insgesamt auf eine etwaige Wertminderung hin überprüft.

An jedem Bilanzstichtag beurteilt der Konzern, inwiefern objektive Hinweise auf eine Wertminderung einer Beteiligung an einem assoziierten oder gemeinschaftlich geführten Unternehmen vorliegen. Wenn objektive Hinweise auf eine Wertminderung vorliegen, wird eine Werthaltigkeitsprüfung durchgeführt, indem der erzielbare Betrag der Beteiligung, der dem jeweils höheren Wert aus dem Nutzungswert und dem Fair Value abzüglich Verkaufskosten entspricht, mit deren Bilanzwert verglichen wird. Ein in Vorperioden erfasster Wertminderungsverlust wird nur rückgängig gemacht, wenn sich die bei der Bestimmung des erzielbaren Betrags der Beteiligung zugrunde liegenden Annahmen seit der letzten Erfassung eines Wertminderungsverlusts geändert haben. In diesem Fall wird der Bilanzwert der Beteiligung auf ihren höheren erzielbaren Betrag zugeschrieben. Diese Erhöhung stellt eine Wertaufholung des zuvor erfassten Wertminderungsverlusts dar.

Übersteigen die Verluste den Buchwert der jeweiligen Beteiligung, werden sie mit anderen Vermögenswerten des Konzerns, die dem Beteiligungsunternehmen zuzuordnen sind, verrechnet. Falls diese anderen Vermögenswerte vollständig abgeschrieben sind, wird geprüft, ob zusätzlich Verluste auszuweisen sind, weil der Konzern verpflichtet ist, diese auszugleichen.

Wenn der Konzern den maßgeblichen Einfluss auf ein assoziiertes oder gemeinschaftlich geführtes Unternehmen verliert, wird ein Gewinn oder Verlust aus der Veräußerung der nach der Equitymethode bilanzierten Beteiligung erfasst, der der Differenz zwischen der Summe aus dem Fair Value des zurückbehaltenen Investments und den Veräußerungserlösen und dem Buchwert des Investments zu diesem Zeitpunkt entspricht. In früheren Perioden im Sonstigen Ergebnis (Other comprehensive income) erfasste Beträge, die im Zusammenhang mit dem assoziierten oder gemeinschaftlich geführten Unternehmen stehen, werden in die Konzern-Gewinn- und Verlustrechnung umgebucht.



Ein zurückbehaltenes Investment wird als Finanzinstrument bilanziert, wie im Abschnitt „Finanzielle Vermögenswerte und Verpflichtungen“ erläutert.

### Währungsumrechnung

Der Konzernabschluss wird in Euro, der Berichtswährung des Konzerns, erstellt. Eine Reihe von Konzerngesellschaften verwendet eine andere funktionale Währung, die der Währung des wirtschaftlichen Umfelds entspricht, in dem die Gesellschaft tätig ist.

Eine Gesellschaft bilanziert Erträge, Aufwendungen, Gewinne und Verluste in Fremdwährung in ihrer jeweiligen funktionalen Währung und legt die am Tag der bilanziellen Erfassung geltenden Wechselkurse zugrunde.

Monetäre Vermögenswerte und Verbindlichkeiten, die auf eine andere als die funktionale Währung der jeweiligen Einzelgesellschaft lauten, werden mit dem Kurs am Bilanzstichtag umgerechnet. Realisierte und unrealisierte Wechselkursgewinne und -verluste werden in der Konzern-Gewinn- und Verlustrechnung im Ergebnis aus zum Fair Value bewerteten finanziellen Vermögenswerten/Verpflichtungen ausgewiesen, um die Umrechnungsbeträge den erfassten Beträgen aus den zugehörigen währungsspezifischen Transaktionen (Derivate), die diese monetären Vermögenswerte und Verbindlichkeiten absichern, anzugleichen.

Nicht monetäre Posten, die zu historischen Anschaffungskosten bewertet werden, werden zum historischen Kurs am Tag des Geschäftsvorfalles umgerechnet. Umrechnungsdifferenzen aus nicht monetären Posten, die zum Fair Value bewertet werden, werden erfolgswirksam erfasst. Umrechnungsdifferenzen aus nicht monetären Posten, die als zur Veräußerung verfügbare finanzielle Vermögenswerte klassifiziert sind (Eigenkapitaltitel), werden im Sonstigen Ergebnis (Other comprehensive income) erfasst. Bei der Veräußerung eines solchen Vermögenswerts werden die kumulierten Umrechnungsdifferenzen in die Konzern-Gewinn- und Verlustrechnung übertragen und sind Bestandteil des dort ausgewiesenen Gesamtgewinns oder -verlusts aus der Veräußerung des Vermögenswerts.

Zum Zweck der Umrechnung in die Berichtswährung werden Vermögenswerte, Verbindlichkeiten sowie das Eigenkapital von ausländischen Geschäftsbetrieben zum Bilanzstichtagskurs umgerechnet. Die Ertrags- und Aufwandsposten werden zu den bei Abschluss der Transaktion geltenden Wechselkursen oder zu Durchschnittskursen, sofern diese annähernd einer Umrechnung zu Transaktionskursen entsprechen, in Euro umgerechnet. Wechselkursdifferenzen infolge der Umrechnung eines ausländischen Geschäftsbetriebs werden im Sonstigen Ergebnis (Other comprehensive income) erfasst. Wechselkursdifferenzen, die den Anteilen ohne beherrschenden Einfluss bei ausländischen Tochtergesellschaften zuzurechnen sind, werden unmittelbar als Anteile ohne beherrschenden Einfluss ausgewiesen.

Bei Verkauf einer ausländischen Tochtergesellschaft oder eines ausländischen assoziierten Unternehmens, das heißt bei Verlust der Beherrschung oder des maßgeblichen Einflusses über diesen Geschäftsbetrieb, werden die im Sonstigen Ergebnis (Other comprehensive income) erfassten kumulierten Umrechnungsdifferenzen in die Konzern-Gewinn- und Verlustrechnung umgegliedert.

### Zinsen, Gebühren und Provisionen

Erträge werden berücksichtigt, wenn die Höhe der Erträge und der dazugehörigen Aufwendungen verlässlich bestimmbar ist, der wirtschaftliche Nutzen der Transaktion mit großer Wahrscheinlichkeit realisiert wird und der Fertigstellungsgrad der Transaktion verlässlich bestimmt werden kann. Dieses Konzept wird auf die wesentlichen ertragsgenerierenden Konzernaktivitäten wie folgt angewandt:

**Zinsüberschuss.** Zinsen aus allen verzinslichen Vermögenswerten und Verbindlichkeiten werden nach der Effektivzinismethode erfasst und im Zinsüberschuss ausgewiesen. Die Effektivzinismethode ist ein Verfahren zur Berechnung der fortgeführten Anschaffungskosten eines finanziellen Vermögenswerts oder einer finanziellen Verbindlichkeit, bei dem Zinserträge oder Zinsaufwendungen unter Verwendung der erwarteten zukünftigen Cashflows über den relevanten Zeitraum verteilt werden. Die zur Berechnung des Effektivzinses herangezogenen Cashflows berücksichtigen alle vertraglichen Vereinbarungen im Zusammenhang mit dem Vermögenswert oder der Verbindlichkeit sowie alle Gebühren, die integraler Teil des Effektivzinssatzes sind, die direkten und inkrementellen Transaktionskosten sowie alle sonstigen Agios und Disagios.

Sobald eine Wertminderung für einen Kredit oder ein zur Veräußerung verfügbares festverzinsliches Wertpapier erfasst wurde, wird die Zinsabgrenzung auf Basis der vertraglichen Bedingungen des Finanzinstruments eingestellt. Dessen ungeachtet erfolgt die Erfassung von Zinserträgen auf Basis des Zinssatzes, der zur Abzinsung zukünftiger Cashflows für die Ermittlung des Wertminderungsverlusts verwendet wurde. Bei einem Kredit würde der ursprüngliche Effektivzinssatz verwendet. Bei einem zur Veräußerung verfügbaren festverzinslichen Wertpapier hingegen würde jeweils bei Vorliegen eines Wertminderungsbedarfs ein neuer Effektivzinssatz festgelegt, da die Wertminderung auf Basis des Fair Value bemessen wird und somit auf dem aktuellen Marktzinssatz beruht.

Im Fall einer Umklassifizierung von finanziellen Vermögenswerten aus den Kategorien „Handelsaktiva“ oder „zur Veräußerung verfügbar“ zu Forderungen aus dem Kreditgeschäft wird ein neuer Effektivzinssatz auf Grundlage des Fair Value am Umwidmungsstichtag und des besten Schätzwerts der zukünftigen Cashflows festgelegt.

**Provisionsüberschuss.** Die Erfassung von Provisionserträgen richtet sich nach dem Zweck, für den diese erhoben wurden, sowie nach der Bilanzierungsmethode für mögliche zugehörige Finanzinstrumente. In den Fällen, in denen ein zugehöriges Finanzinstrument existiert, werden Provisionen, die integraler Bestandteil des Effektivzinssatzes dieses Finanzinstruments sind, in die Bestimmung des Effektivzinses einbezogen. Sofern jedoch das Finanzinstrument zum Fair Value bewertet wird, werden die zugehörigen Provisionen ergebniswirksam zum Zeitpunkt des erstmaligen Ansatzes des Finanzinstruments vereinnahmt, wenn der Bestimmung ihres Fair Value keine signifikanten unbeobachtbaren Eingangsparameter zugrunde liegen. Die Vereinnahmung von Gebühren für Leistungen, die über einen bestimmten Zeitraum erbracht werden, erfolgt über die Periode der Leistungserbringung. Gebühren, die mit der vollständigen Erbringung einer bestimmten Dienstleistung oder einem signifikanten Ereignis verbunden sind, werden vereinnahmt, wenn die Dienstleistung vollständig erbracht wurde oder das signifikante Ereignis eingetreten ist.

Kreditbereitstellungsgebühren im Zusammenhang mit Zusagen, die nicht als zum Fair Value bewertet bilanziert werden, werden über die Laufzeit der Zusage im Provisionsüberschuss erfasst, wenn es unwahrscheinlich ist, dass die zugehörige Kreditvergabe erfolgen wird. Wenn es wahrscheinlich ist, dass der zugesagte Kredit in Anspruch genommen wird, wird die Kreditbereitstellungsgebühr bis zur Gewährung eines Kredits abgegrenzt und als Anpassung des Effektivzinssatzes des Darlehens berücksichtigt.

Leistungsabhängige Provisionen oder Provisionskomponenten werden erfasst, wenn die Leistungskriterien erfüllt sind.

Die folgenden Provisionserträge resultieren primär aus über einen bestimmten Zeitraum erbrachten Dienstleistungen: Investmentfondsmanagement-, Treuhand-, Depot-, Portfolio-, sonstige Verwaltungs- und Beratungsprovisionen sowie kreditbezogene Gebühren und Provisionserträge. Zu den Provisionen, die primär über die Erbringung von transaktionsbezogenen Serviceleistungen erzielt werden, gehören Provisionen aus dem Emissionsgeschäft, dem Corporate-Finance- sowie dem Brokeragegeschäft.

**Vertragsverhältnisse, die Lieferungen mehrerer Dienstleistungen oder Produkte vorsehen.** Für Vertragsverhältnisse, bei denen sich der Konzern zur Lieferung mehrerer Produkte, Dienstleistungen oder Rechte an einen Vertragspartner verpflichtet, ist zu untersuchen, ob die insgesamt erhaltene Gebühr für Zwecke der Ertragsrealisierung aufgeteilt und den verschiedenen Komponenten des Vertragsverhältnisses zugeordnet werden sollte. Vom Konzern durchgeführte strukturierte Transaktionen sind die wichtigsten Beispiele für solche Arrangements und werden auf Einzeltransaktionsbasis untersucht. Diese Untersuchung berücksichtigt den Wert der bereits gelieferten Elemente und Leistungen, um sicherzustellen, dass das andauernde Engagement des Konzerns in Bezug auf andere Aspekte des Vertragsverhältnisses nicht wesentlich für die bereits erbrachten Dienstleistungen oder Produkte ist. Es werden außerdem der Wert der noch nicht gelieferten Elemente und, sofern Rückgaberechte für die gelieferten Elemente bestehen, die Wahrscheinlichkeit der Erbringung der verbleibenden, noch nicht gelieferten Elemente überprüft. Sofern festgestellt wird, dass es angemessen ist, die Teilelemente als separate Komponenten zu betrachten, wird die erhaltene Gegenleistung auf Basis der relativen Werte der einzelnen Elemente aufgeteilt.

Liegt für den Wert der gelieferten Elemente kein verlässlicher und objektiver Nachweis vor oder ist ein individuelles Element mit dem Fair Value anzusetzen, wird der Residualansatz verwendet. Unter dem Residualansatz entspricht der für die gelieferte Leistung zu vereinnahmende Ertrag dem Restbetrag, der verbleibt, nachdem ein angemessener Ertrag allen anderen Komponenten des Gesamtarrangements zugeordnet wurde.

### Finanzielle Vermögenswerte und Verpflichtungen

Der Konzern teilt seine finanziellen Vermögenswerte und Verpflichtungen in die nachstehenden Kategorien ein: zum Fair Value bewertete finanzielle Vermögenswerte und Verpflichtungen, Forderungen aus dem Kreditgeschäft, zur Veräußerung verfügbare finanzielle Vermögenswerte und sonstige finanzielle Verpflichtungen. Der Konzern klassifiziert seine finanziellen Vermögenswerte nicht als „bis zur Endfälligkeit gehalten“. Die angemessene Klassifizierung von finanziellen Vermögenswerten und Verpflichtungen wird zum Zeitpunkt des erstmaligen Bilanzansatzes oder der Umgliederung festgelegt.

Finanzinstrumente, die als zum Fair Value bewertet eingestuft werden, beziehungsweise finanzielle Vermögenswerte, die als zur Veräußerung verfügbar klassifiziert werden, werden am Handelstag erfasst. Als Handelstag gilt das Datum, an dem sich der Konzern dazu verpflichtet, die betreffenden Vermögenswerte zu kaufen oder zu verkaufen respektive die finanziellen Verpflichtungen zu begeben oder zurückzuerwerben. Alle anderen Finanzinstrumente gehen am Erfüllungstag zu oder ab.

### Zum Fair Value bewertete finanzielle Vermögenswerte und Verpflichtungen

Der Konzern klassifiziert bestimmte finanzielle Vermögenswerte und Verpflichtungen zum Zeitpunkt der Erstfassung entweder als zu Handelszwecken gehalten oder als zum Fair Value bewertet. Diese finanziellen Vermögenswerte und Verpflichtungen werden zum Fair Value angesetzt und als zum Fair Value bewertete finanzielle Vermögenswerte beziehungsweise Verpflichtungen dargestellt. Die entsprechenden realisierten und unrealisierten Gewinne/Verluste sind im Ergebnis aus zum Fair Value bewerteten finanziellen Vermögenswerten/Verpflichtungen enthalten. Für zum Fair Value bewertete Finanzinstrumente werden Zinsen aus verzinslichen Aktiva wie Handelskrediten und festverzinslichen Wertpapieren sowie Dividenden aus Aktien in den Zinsen und ähnlichen Erträgen ausgewiesen.

**Handelsaktiva und -passiva.** Finanzinstrumente werden als zu Handelszwecken gehalten klassifiziert, wenn sie hauptsächlich für den Zweck der kurzfristigen Veräußerung begeben oder erworben oder zum Zweck des kurzfristigen Rückkaufs eingegangen wurden oder wenn sie Teil eines Portfolios eindeutig identifizierter und gemeinsam gesteuerter Finanzinstrumente sind, für die in der jüngeren Vergangenheit Nachweise hinsichtlich kurzfristiger Gewinnmitnahmen bestehen. Physische Rohstoffe, die vom Warenderminhandelsbereich des Konzerns gehalten werden, sind ebenfalls dieser Kategorie zugeordnet und werden zum Fair Value, vermindert um Veräußerungskosten, bewertet.

**Zum Fair Value klassifizierte finanzielle Vermögenswerte und Verpflichtungen.** Bestimmte finanzielle Vermögenswerte und Verpflichtungen, die nicht die Definition von Handelsaktiva und -passiva erfüllen, werden nach der Fair Value Option als zum Fair Value bewertet klassifiziert. Diese Vermögenswerte und Verpflichtungen müssen eine der folgenden Bedingungen erfüllen: (1) Durch die Klassifizierung werden Inkongruenzen bei der Bewertung oder beim Ansatz beseitigt oder erheblich verringert; (2) eine Gruppe finanzieller Vermögenswerte und/oder finanzieller Verpflichtungen wird gemäß einer dokumentierten Risikomanagement- oder Anlagestrategie auf Fair-Value-Basis gesteuert und ihre Wertentwicklung auf dieser Basis gemessen oder (3) das Finanzinstrument enthält ein eingebettetes Derivat oder mehrere eingebettete Derivate. Letzteres gilt nicht, wenn (a) das eingebettete Derivat keine wesentliche Modifizierung der nach Maßgabe des Vertrags erforderlichen Cashflows bewirkt oder (b) ohne jegliche oder bereits nach oberflächlicher Prüfung feststeht, dass eine Trennung verboten ist. Darüber hinaus sieht der Konzern eine Klassifizierung als zum Fair Value bewertet nur für diejenigen Finanzinstrumente vor, für die der Fair Value verlässlich bestimmbar ist.

### Kreditzusagen

Bestimmte Kreditzusagen werden nach der Fair Value Option als zum Fair Value bewertet klassifiziert. Wie in dem Abschnitt „Bilanzierung von Derivaten und Sicherungsbeziehungen“ erläutert, sind einige Kreditzusagen als zum Fair Value bewertete finanzielle Verpflichtungen zu bilanzieren. Alle anderen Kreditzusagen werden bilanziell nicht erfasst. Daher werden für diese außerbilanziellen Kreditzusagen Änderungen des Fair Value infolge von Änderungen der Zinssätze oder Kreditspannen nicht berücksichtigt. Jedoch werden diese außerbilanziellen Kreditzusagen wie im Abschnitt „Wertminderung von Krediten und Rückstellungen für außerbilanzielle Verpflichtungen im Kreditgeschäft“ ausgeführt, individuell und, sofern angemessen, kollektiv auf Wertminderung untersucht.

### Forderungen aus dem Kreditgeschäft

Kredite umfassen selbst begebene und erworbene nicht derivative finanzielle Vermögenswerte mit festen oder bestimmbaren Zahlungen. Diese finanziellen Vermögenswerte werden weder an einem aktiven Markt gehandelt noch als zum Fair Value bewertete oder als zur Veräußerung verfügbare finanzielle Vermögenswerte klassifiziert. Ein aktiver Markt liegt vor, wenn notierte Preise an einer Börse, von einem Händler, Broker, einer Branchengruppe, einem Pricingservice oder einer Aufsichtsbehörde leicht und regelmäßig erhältlich sind und diese Preise aktuelle und regelmäßig auftretende Markttransaktionen wie unter unabhängigen Dritten darstellen.

Kredite, die nicht im Rahmen eines Unternehmenszusammenschlusses oder separat erworben wurden, werden bei der Ersterfassung zum Transaktionspreis ausgewiesen, der dem dem Kreditnehmer zur Verfügung gestellten Geldbetrag entspricht. Der Buchwert von Krediten bei Ersterfassung beinhaltet außerdem den Saldo aus direkten und inkrementellen Transaktionskosten und Provisionen. In der Folge werden die Kredite zu fortgeführten Anschaffungskosten unter Anwendung der Effektivzinsmethode, reduziert um Wertminderungen, bewertet.

Kredite, die entweder im Rahmen eines Unternehmenszusammenschlusses oder separat erworben wurden, werden zunächst mit ihrem Fair Value zum Erwerbszeitpunkt erfasst. Der Fair Value zum Erwerbszeitpunkt spiegelt erwartete Cashflows wider, die die Kreditwürdigkeit dieser Kredite inklusive eingetretener Verluste berücksichtigen. Die Erfassung von Zinserträgen erfolgt nach der Effektivzinsmethode. Nach dem Erwerbszeitpunkt beurteilt der Konzern, inwiefern in Übereinstimmung mit den im Abschnitt „Wertminderung von Krediten und Rückstellungen für außerbilanzielle Verpflichtungen im Kreditgeschäft“ dargelegten Bilanzierungsgrundsätzen objektive Hinweise auf eine Wertminderung vorliegen. Sobald ein Kredit als wertgemindert identifiziert ist, wird eine Wertberichtigung für Kreditausfälle mit entsprechender Gegenbuchung des Verlustbetrags als Bestandteil der Risikovorsorge im Kreditgeschäft in der Konzern-Gewinn- und Verlustrechnung erfasst. Nachfolgende Verbesserungen der Kreditwürdigkeit dieser Kredite über ihren Buchwert zum Erwerbszeitpunkt hinaus werden als Erhöhung des Buchwerts der Kredite behandelt und der korrespondierende Gewinn wird in den Zinserträgen erfasst.

### **Zur Veräußerung verfügbare finanzielle Vermögenswerte**

Finanzielle Vermögenswerte, die weder als zum Fair Value bewertete finanzielle Vermögenswerte noch als Forderungen aus dem Kreditgeschäft klassifiziert werden, werden als zur Veräußerung verfügbare finanzielle Vermögenswerte eingestuft. Zur Veräußerung verfügbare finanzielle Vermögenswerte werden zunächst mit ihrem Fair Value zuzüglich der dem Kauf direkt zuordenbaren Transaktionskosten angesetzt. Auflösungen von Agios und Disagios werden im Zinsüberschuss ausgewiesen. Zukünftige Änderungen des Fair Value werden im Sonstigen Ergebnis (Other comprehensive income) ausgewiesen – es sei denn, sie sind Gegenstand eines Fair Value Hedge. In diesem Fall werden Änderungen des Fair Value, die auf das abgesicherte Risiko zurückzuführen sind, in den Sonstigen Erträgen berücksichtigt. Bei monetären zur Veräußerung verfügbaren finanziellen Vermögenswerten (Schuldtiteln) werden Änderungen des Buchwerts, die auf Wechselkursänderungen zurückzuführen sind, ergebniswirksam erfasst, während sonstige Änderungen des Buchwerts wie oben beschrieben im Sonstigen Ergebnis (Other comprehensive income) ausgewiesen werden. Bei nicht monetären zur Veräußerung verfügbaren finanziellen Vermögenswerten (Eigenkapitalinstrumenten) beinhaltet die im Sonstigen Ergebnis (Other comprehensive income) berücksichtigte Wertänderung auch den Fremdwährungsbestandteil.

Zur Veräußerung verfügbare finanzielle Vermögenswerte werden auf ihre Werthaltigkeit überprüft, wie im Abschnitt „Wertminderung von zur Veräußerung verfügbaren finanziellen Vermögenswerten“ beschrieben. Realisierte Gewinne und Verluste werden als Ergebnis aus zur Veräußerung verfügbaren finanziellen Vermögenswerten ausgewiesen. Bei der Ermittlung der Anschaffungskosten für zur Veräußerung verfügbare finanzielle Vermögenswerte wird im Allgemeinen die Methode der gewichteten Durchschnittskosten herangezogen. Bislang im Sonstigen Ergebnis (Other comprehensive income) erfasste Gewinne und Verluste werden bei Verkauf eines zur Veräußerung verfügbaren finanziellen Vermögenswerts in der Konzern-Gewinn- und Verlustrechnung erfasst und im Ergebnis aus zur Veräußerung verfügbaren finanziellen Vermögenswerten ausgewiesen.

### **Finanzielle Verpflichtungen**

Mit Ausnahme der zum Fair Value bewerteten finanziellen Verpflichtungen werden finanzielle Verpflichtungen zu fortgeführten Anschaffungskosten unter Anwendung der Effektivzinsmethode bewertet.

Finanzielle Verpflichtungen umfassen emittierte langfristige und kurzfristige Schuldtitel, die bei Ersterfassung zum Fair Value bewertet werden, welcher dem erhaltenen Gegenwert, abzüglich der entstandenen Transaktionskosten, entspricht. Rückkäufe von am Markt platzierten Schuldtiteln gelten als Tilgung. Bei Rückkäufen entstehende Gewinne oder Verluste werden in der Konzern-Gewinn- und Verlustrechnung erfasst. Ein späterer Verkauf eigener Schuldverschreibungen am Markt wird als Neuplatzierung von Schuldtiteln behandelt.

## Umgliederung von finanziellen Vermögenswerten

Der Konzern kann bestimmte finanzielle Vermögenswerte aus den Kategorien „zum Fair Value bewertete finanzielle Vermögenswerte (Handelsaktiva)“ und „zur Veräußerung verfügbare finanzielle Vermögenswerte“ in die Kategorie „Forderungen aus dem Kreditgeschäft“ umgliedern. Für die umzuklassifizierenden Vermögenswerte muss sich seit deren erstmaligem Ansatz die vom Management festgelegte Zweckbestimmung geändert haben und der finanzielle Vermögenswert am Umgliederungsstichtag die Definition einer Forderung aus dem Kreditgeschäft erfüllen. Außerdem müssen am Umwidmungsstichtag die Absicht und Möglichkeit bestehen, die umgewidmeten Vermögenswerte auf absehbare Zeit zu halten. Die Definition des Kriteriums „auf absehbare Zeit“ lässt sich nicht auf eine allgemeingültige Zeitspanne festlegen, sondern erfordert Beurteilungen seitens des Managements. Zur Beurteilung hat der Konzern die nachfolgenden Mindestanforderungen festgelegt:

- Es darf keine Absicht bestehen, den Vermögenswert innerhalb eines Jahres zu verkaufen oder zu verbrieften, und es darf keine internen oder externen Auflagen geben, die die Halteabsicht einschränken oder einen Verkauf erforderlich machen würden; und
- der Geschäftsplan darf zukünftig nicht darauf ausgerichtet sein, von kurzfristigen Preisveränderungen zu profitieren.

Sind die Voraussetzungen erfüllt, wird auf Basis der individuellen Gegebenheiten die Umgliederung vorgenommen. Die Möglichkeit und Wahrscheinlichkeit, die Haltestrategie einzuhalten, sind vom Management zu bestätigen.

Zusätzlich zu den obigen Kriterien muss außerdem ein überzeugender Nachweis vorliegen, der bestätigt, dass die erwartete Rückzahlung des Vermögenswerts den geschätzten Fair Value übersteigt und dass die Renditen aus dem Vermögenswert optimiert werden, indem er auf absehbare Zeit gehalten wird.

Finanzielle Vermögenswerte werden zu ihrem Fair Value am Umgliederungsstichtag umgebucht. Gewinne oder Verluste, die bereits in der Konzern-Gewinn- und Verlustrechnung erfasst wurden, werden nicht rückgängig gemacht. Der Fair Value des Finanzinstruments am Umwidmungsstichtag repräsentiert die neuen fortgeführten Anschaffungskosten des Instruments. Die erwarteten Cashflows des Finanzinstruments werden am Umbuchungsstichtag geschätzt und diese Schätzungen zur Berechnung der neuen Effektivverzinsung der Instrumente verwendet. Erhöhen sich zu einem späteren Zeitpunkt die erwarteten zukünftigen Cashflows der umklassifizierten Vermögenswerte aufgrund einer Werterholung, wird der Effekt dieser Erhöhung als Anpassung der Effektivverzinsung und nicht als Anpassung des Buchwerts zum Zeitpunkt der Änderung der Schätzung berücksichtigt. Bei einem anschließenden Rückgang der erwarteten zukünftigen Cashflows wird der Vermögenswert auf Vorliegen einer Wertminderung analysiert, wie im Abschnitt „Wertminderung von Krediten und Rückstellungen für außerbilanzielle Verpflichtungen im Kreditgeschäft“ erläutert. Jede Änderung des zeitlichen Anfalls der Cashflows der umklassifizierten Vermögenswerte, die nicht als wertgemindert erachtet werden, wird durch Anpassung des Buchwerts erfasst.

Bei Instrumenten, die aus den zur Veräußerung verfügbaren finanziellen Vermögenswerten in die Forderungen aus dem Kreditgeschäft umklassifiziert wurden, wird der im Sonstigen Ergebnis (Other comprehensive income) erfasste unrealisierte Gewinn oder Verlust anschließend unter Anwendung der Effektivverzinsung des Instruments als Zinsertrag erfasst. Wenn später eine Wertminderung des Instruments vorliegt, wird der an diesem Stichtag im Sonstigen Ergebnis (Other comprehensive income) ausgewiesene unrealisierte Verlust des Instruments sofort in der Konzern-Gewinn- und Verlustrechnung als Wertberichtigung für Kreditausfälle erfasst.



In den Fällen, in denen Vermögenswerte, die als Forderungen aus dem Kreditgeschäft klassifiziert wurden, zurückgezahlt, restrukturiert oder unter Umständen verkauft werden und in denen der dabei erhaltene Betrag unter dem aktuellen Buchwert liegt, wird ein Verlust in der Konzern-Gewinn- und Verlustrechnung entweder als Bestandteil der Risikovorsorge im Kreditgeschäft verbucht, wenn eine Wertminderung des Instruments vorliegt, oder in den Sonstigen Erträgen erfasst, wenn keine Wertminderung des Instruments vorliegt.

### Ermittlung des Fair Value

Der Fair Value ist definiert als der Preis, zu dem ein Vermögenswert oder eine Verbindlichkeit im Rahmen einer Transaktion zwischen sachverständigen und vertragswilligen Geschäftspartnern (ausgenommen im Rahmen eines Zwangsverkaufs oder einer Notabwicklung) zum jetzigen Zeitpunkt ausgetauscht werden könnte. Der Fair Value von in aktiven Märkten notierten Finanzinstrumenten wird auf Grundlage der Preisnotierungen ermittelt, sofern diese im Rahmen von regelmäßigen und aktuellen Transaktionen verwendete Preise darstellen. Der Konzern verwendet Bewertungsverfahren für die Ermittlung des Fair Value von Finanzinstrumenten, sofern keine in aktiven Märkten notierten Preise verfügbar sind. Folglich basieren in Bewertungsverfahren verwendete Eingangsparameter, wenn möglich, auf beobachtbaren Daten, die von Preisen relevanter, in aktiven Märkten gehandelter Finanzinstrumente abgeleitet werden. Die Anwendung dieser Modelle erfordert Annahmen und Einschätzungen aufseiten des Managements, deren Umfang von der Preistransparenz in Bezug auf das Finanzinstrument und dessen Markt sowie von der Komplexität des Instruments abhängt. Weitere Informationen zu den bei der Bestimmung des Fair Value verwendeten wesentlichen Rechnungslegungseinschätzungen und -annahmen sind in Note 02 „Wesentliche Rechnungslegungseinschätzungen – Bestimmung des Fair Value beziehungsweise Methoden zur Bestimmung des Fair Value“ enthalten.

### Erfassung des „Trade Date Profit“

Soweit für die Bewertungsmodelle in erheblichem Umfang nicht beobachtbare Informationen verwendet werden, erfolgt die Erfassung des betreffenden Finanzinstruments zum Transaktionspreis. Jeglicher am Handelstag durch Anwendung des Bewertungsmodells ermittelte Gewinn wird abgegrenzt. Die Abgrenzung erfolgt auf Basis systematischer Methoden entweder über die Zeitspanne zwischen dem Handelstag und dem Zeitpunkt, an dem voraussichtlich beobachtbare Marktinformationen vorliegen, oder über die Laufzeit der Transaktion (je nachdem, welcher Zeitraum kürzer ist). Der Konzern wendet diese Abgrenzungsmethode an, weil sie die Veränderung der wirtschaftlichen Rahmenbedingungen und des Risikoprofils des Finanzinstruments, wie sie sich aus Marktbewegungen oder der abnehmenden Restlaufzeit des Instruments ergeben, angemessen widerspiegelt. Ein verbleibender abgegrenzter Handelstaggewinn wird in der Konzern-Gewinn- und Verlustrechnung erfasst, wenn beobachtbare Marktdaten vorliegen oder der Konzern in ein gegenläufiges Geschäft eintritt, welches das Risiko des Instruments im Wesentlichen eliminiert. In den seltenen Fällen, in denen ein Handelstagverlust entsteht, würde dieser sogleich erfasst, wenn es wahrscheinlich ist, dass ein Verlust eingetreten ist und der Betrag verlässlich geschätzt werden kann. Weitere Informationen zu den bei der Prüfung der Beobachtbarkeit von Inputparametern und bei den Maßnahmen für die Minderung von Risiken angewandten Schätzungen und Beurteilungen sind in Note 02 „Wesentliche Rechnungslegungseinschätzungen – Bestimmung des Fair Value beziehungsweise Methoden zur Bestimmung des Fair Value“ enthalten.

### Bilanzierung von Derivaten und Sicherungsbeziehungen

Derivate werden zur Steuerung von Zins-, Währungs-, Kredit- und sonstigen Marktpreisrisiken, einschließlich Risiken aus geplanten Transaktionen, eingesetzt. Alle frei stehenden Kontrakte, die für Rechnungslegungszwecke als Derivate klassifiziert werden, sind in der Konzernbilanz mit ihrem Fair Value angesetzt – unabhängig davon, ob sie zu Handels- oder anderen Zwecken gehalten werden.

Gewinne und Verluste aus zu Handelszwecken gehaltenen Derivaten werden im Ergebnis aus zum Fair Value bewerteten finanziellen Vermögenswerten/Verpflichtungen ausgewiesen.



Der Konzern gibt Kreditzusagen, deren resultierende Kreditforderungen zum Verkauf bestimmt sind. Diese Posten werden als zum Fair Value bewertete finanzielle Vermögenswerte/Verpflichtungen klassifiziert und die zugehörigen Gewinne und Verluste im Ergebnis aus zum Fair Value bewerteten finanziellen Vermögenswerten/Verpflichtungen ausgewiesen. Kreditzusagen, die durch Barausgleich oder durch die Lieferung beziehungsweise Begebung eines anderen Finanzinstruments erfüllt werden können, werden als Derivate klassifiziert. Spezielle vom Konzern für angebotene Investmentfondsprodukte abgegebene Marktwertgarantien werden ebenfalls als Derivate klassifiziert und demzufolge zum Fair Value angesetzt, wobei Veränderungen des Fair Value im Ergebnis aus zum Fair Value bewerteten finanziellen Vermögenswerten/Verpflichtungen berücksichtigt werden.

Bestimmte Derivate, die weder zu Handelszwecken gehalten werden noch die Anforderungen für eine Bilanzierung als Sicherungsbeziehung erfüllen, aber Effekte aus Transaktionen ausgleichen, die in die zinsunabhängigen Erträge und Aufwendungen einfließen, werden unter den Sonstigen Aktiva oder Sonstigen Passiva ausgewiesen. Die realisierten und unrealisierten Änderungen des Fair Value dieser Derivate werden in denselben Positionen der zinsunabhängigen Erträge und Aufwendungen ausgewiesen, in die auch die abgesicherte Transaktion einfließt. Die Änderungen des Fair Value aller anderen Derivate, die die Anforderungen für eine Bilanzierung als Sicherungsbeziehung nicht erfüllen, werden im Ergebnis aus zum Fair Value klassifizierten finanziellen Vermögenswerten/Verpflichtungen erfasst.

### Eingebettete Derivate

Einige hybride Verträge enthalten sowohl eine derivative als auch eine nicht derivative Komponente. In diesen Fällen wird die derivative Komponente als eingebettetes Derivat und die nicht derivative Komponente als Basisvertrag bezeichnet. Sind die wirtschaftlichen Merkmale und die Risiken eingebetteter Derivate nicht eng mit denjenigen des Basisvertrags verknüpft und wird der betreffende hybride Vertrag nicht als zum Fair Value bewertet erfasst, wird das eingebettete Derivat vom Basisvertrag getrennt und zum Fair Value erfasst, wobei Wertänderungen im Ergebnis aus zum Fair Value bewerteten finanziellen Vermögenswerten/Verpflichtungen ausgewiesen werden. Der Basisvertrag wird weiterhin in Übereinstimmung mit dem entsprechenden Rechnungslegungsstandard bewertet. Der Buchwert eines eingebetteten Derivats wird in der Bilanz zusammen mit dem Basisvertrag ausgewiesen. Einzelne hybride Instrumente wurden unter Anwendung der Fair Value Option als zum Fair Value bewertet klassifiziert.

### Bilanzierung von Sicherungsbeziehungen („Hedge Accounting“)

Im Rahmen der Rechnungslegung werden drei Arten von Sicherungsbeziehungen unterschieden, die bilanziell unterschiedlich behandelt werden: (1) Absicherung von Veränderungen des Fair Value von Vermögenswerten, Verbindlichkeiten oder bilanzunwirksamen verbindlichen Zusagen („Fair Value Hedges“); (2) Absicherung von Schwankungen zukünftiger Cashflows aus hochwahrscheinlichen geplanten Transaktionen wie auch variabel verzinslichen Vermögenswerten und Verbindlichkeiten („Cash Flow Hedges“) sowie (3) Absicherung von Fremdwährungsrisiken aus der Umrechnung von Abschlüssen ausländischer Geschäftsbetriebe von deren funktionaler Währung in die Berichtswährung der Muttergesellschaft („Hedges of Net Investments in Foreign Operations“).

Wird Hedge Accounting angewandt, designiert und dokumentiert der Konzern die Beziehung zwischen dem Sicherungsinstrument und dem gesicherten Geschäft sowie Risikomanagementziel und -strategie, die der Sicherungsbeziehung zugrunde liegen, und auch die Art des abgesicherten Risikos. Teil dieser Dokumentation ist eine Beschreibung, wie der Konzern die Wirksamkeit des Sicherungsinstruments hinsichtlich der Kompensation von Risiken aus Änderungen des Fair Value des abgesicherten Grundgeschäfts oder aus Cashflows bestimmt, die dem abgesicherten Risiko zurechenbar sind. Die Effektivität wird für jede Sicherungsbeziehung sowohl zu Beginn als auch während der Laufzeit bestimmt. Selbst bei übereinstimmenden Vertragsbedingungen zwischen dem Derivat und dem abgesicherten Grundgeschäft wird die Hedgeeffektivität immer berechnet.

Zu Sicherungszwecken gehaltene Derivate werden als Sonstige Aktiva beziehungsweise Sonstige Passiva ausgewiesen. Wird ein Derivat später nicht mehr zu Sicherungszwecken eingesetzt, wird es in die zum Fair Value bewerteten finanziellen Vermögenswerte/Verpflichtungen übertragen. Anschließende Änderungen des Fair Value werden im Ergebnis aus zum Fair Value bewerteten finanziellen Vermögenswerten/Verpflichtungen erfasst.

Beim Fair Value Hedge werden die dem abgesicherten Risiko zuzurechnenden Änderungen des Fair Value des Grundgeschäfts beziehungsweise eines Teils davon zusammen mit der gesamten Änderung des Fair Value des Sicherungsderivats in der Konzern-Gewinn- und Verlustrechnung erfasst. Bei der Absicherung von Zinsrisiken werden abgegrenzte oder gezahlte Zinsen aus dem Derivat und dem abgesicherten Grundgeschäft als Zinsertrag oder -aufwand ausgewiesen. Unrealisierte Gewinne oder Verluste aus den Anpassungen des Fair Value durch Anwendung von Hedge Accounting werden in den Sonstigen Erträgen erfasst. Wird das Fremdwährungsrisiko eines als zur Veräußerung verfügbaren finanziellen Vermögenswerts abgesichert, wird die aus Währungskursschwankungen resultierende Änderung des Fair Value des Wertpapiers ebenfalls in den Sonstigen Erträgen ausgewiesen. Die Hedgeineffektivität wird in den Sonstigen Erträgen berücksichtigt. Sie wird gemessen als Saldo der Änderungen des Fair Value aus dem Sicherungsinstrument und dem abgesicherten Grundgeschäft, welche auf die dem abgesicherten Risiko/den abgesicherten Risiken zugrunde liegenden Veränderungen der Marktwerte oder -preise zurückzuführen sind.

Wird eine Beziehung zur Absicherung von Änderungen des Fair Value vor Fälligkeit des Instruments beendet, weil das zugrunde liegende Derivat vorzeitig beendet oder anderen Zwecken zugeführt wird, werden die im Buchwert des gesicherten Schuldtitels enthaltenen zinsbezogenen Anpassungen des Fair Value über die Restlaufzeit der ursprünglichen Sicherungsbeziehung amortisiert und mit den Zinserträgen oder -aufwendungen verrechnet. Für andere Arten von Fair-Value-Anpassungen beziehungsweise bei Veräußerung oder anderweitiger Ausbuchung der durch einen Fair Value Hedge gesicherten Vermögenswerte oder Verbindlichkeiten werden die Fair-Value-Anpassungen bei der Ermittlung des bei Ausbuchung realisierten Gewinns oder Verlusts berücksichtigt.

Bei der Absicherung von Schwankungen der zukünftigen Cashflows ändern sich die Bewertungsregeln für das Grundgeschäft nicht. Das Sicherungsderivat wird mit seinem Fair Value angesetzt, wobei Wertänderungen zunächst in dem Umfang, in dem die Sicherungsbeziehung effektiv ist, im Sonstigen Ergebnis (Other comprehensive income) ausgewiesen werden. Die dort erfassten Beträge werden in den Perioden in die Konzern-Gewinn- und Verlustrechnung umbucht, in denen auch die geplante Transaktion ergebniswirksam erfasst wird. Daher werden die Beträge für die Sicherung des Zinsrisikos zum gleichen Zeitpunkt wie die Zinsabgrenzungen für das abgesicherte Geschäft in den Zinserträgen oder Zinsaufwendungen erfasst.

Die Hedgeineffektivität wird in den Sonstigen Erträgen erfasst. Sie ergibt sich aus den Veränderungen des Unterschiedsbetrags zwischen den kumulierten Fair-Value-Änderungen des eingesetzten Sicherungsderivats und denen eines hypothetisch perfekten Sicherungsgeschäfts.

Bei der Beendigung von Beziehungen zur Absicherung von Schwankungen der Cashflows, die auf Zinsrisiken zurückzuführen sind, werden die im Kumulierten sonstigen Ergebnis (Accumulated other comprehensive income) ausgewiesenen Beträge über die Restlaufzeit der ursprünglichen Sicherungsbeziehung als Zinserträge beziehungsweise -aufwendungen abgegrenzt. Wird der Eintritt des abgesicherten Geschäfts allerdings nicht mehr erwartet, werden die Beträge sofort in die Sonstigen Erträge umbucht. Werden Beziehungen zur Absicherung von Schwankungen der Cashflows, die auf andere Arten von Risiken zurückzuführen sind, vorzeitig beendet, werden die im Kumulierten sonstigen Ergebnis (Accumulated other comprehensive income) enthaltenen Beträge in der gleichen Periode und in der gleichen Position der Konzern-Gewinn- und Verlustrechnung erfasst wie das geplante Grundgeschäft. Wird der Eintritt der geplanten Transaktion allerdings nicht mehr erwartet, werden die Beträge in den Sonstigen Erträgen ausgewiesen.

Bei der Absicherung von Fremdwährungsrisiken aus der Umrechnung der Abschlüsse ausländischer Geschäftsbetriebe von deren funktionalen Währung in die funktionale Währung der Muttergesellschaft („Hedges of Net Investments in Foreign Operations“) wird die auf Änderungen des Devisenkassakurses beruhende Änderung des Fair Value des Sicherungsderivats in dem Umfang, in dem der Hedge effektiv ist, als Anpassung aus der Währungsumrechnung im Sonstiges Ergebnis (Other comprehensive income) ausgewiesen. Der verbleibende Teil der Änderung des Fair Value wird in die Sonstigen Erträge eingestellt.

Änderungen des Fair Value des Sicherungsinstruments, bezogen auf den effektiven Teil des Hedge, werden bei Verkauf der ausländischen Geschäftsbetriebe erfolgswirksam erfasst.

### Wertminderungen (Impairment) finanzieller Vermögenswerte

An jedem Bilanzstichtag beurteilt der Konzern, inwiefern objektive Hinweise auf eine Wertminderung eines finanziellen Vermögenswerts oder einer Gruppe finanzieller Vermögenswerte vorliegen. Ein finanzieller Vermögenswert oder eine Gruppe finanzieller Vermögenswerte gilt als wertgemindert und ein Wertminderungsverlust als entstanden, wenn:

- objektive Hinweise auf eine Wertminderung infolge eines Verlustereignisses vorliegen, das nach der erstmaligen Erfassung des Finanzinstruments und bis zum Bilanzstichtag eingetreten ist („Verlustereignis“);
- das Verlustereignis einen Einfluss auf die geschätzten zukünftigen Cashflows des finanziellen Vermögenswerts oder der Gruppe finanzieller Vermögenswerte hatte und
- eine verlässliche Schätzung des Betrags vorgenommen werden kann.

### Wertminderung von Krediten und Rückstellungen für außerbilanzielle Verpflichtungen im Kreditgeschäft

Der Konzern beurteilt zunächst für Kredite, die für sich gesehen bedeutsam sind, ob auf individueller Ebene objektive Hinweise auf eine Wertminderung vorliegen. Anschließend erfolgt eine kollektive Beurteilung für Kredite, die für sich gesehen nicht bedeutsam sind, und für Kredite, die zwar für sich gesehen bedeutsam sind, für die aber im Rahmen der Einzelbetrachtung kein Hinweis auf eine Wertminderung vorliegt.

Damit das Management beurteilen kann, ob auf individueller Ebene ein Verlustereignis eingetreten ist, werden alle bedeutsamen Kreditbeziehungen in regelmäßigen Zeitabständen überprüft. Dabei werden aktuelle Informationen und kontrahentenbezogene Ereignisse wie erhebliche finanzielle Schwierigkeiten des Schuldners oder Vertragsbrüche, die sich beispielsweise im Ausfall oder Verzug von Zins- und Tilgungszahlungen äußern, berücksichtigt.

Sofern für eine einzelne Kreditbeziehung ein Wertminderungshinweis vorliegt, der zu einem Wertminderungsverlust führt, wird der Verlustbetrag als Differenz zwischen dem Buchwert des Kredits (der Kredite), einschließlich aufgelaufener Zinsen, und dem Barwert der erwarteten zukünftigen Cashflows unter Verwendung des ursprünglichen Effektivzinses oder im Fall einer Umklassifizierung des am Umbuchungsstichtag festgelegten Effektivzinses des Kredits ermittelt. In die Cashflows einzubeziehen sind auch solche, die aus einer Sicherheitenverwertung nach Abzug der Kosten der Aneignung und des Verkaufs resultieren können. Der Buchwert der Kredite wird mittels einer Wertberichtigung reduziert. Der Verlustbetrag wird in der Konzern-Gewinn- und Verlustrechnung als Bestandteil der Risikovorsorge im Kreditgeschäft erfasst.

Der Zweck der kollektiven Beurteilung besteht in der Bildung einer Wertberichtigung für Kredite, die entweder für sich gesehen bedeutsam sind, für die jedoch kein objektiver Hinweis auf eine Wertminderung vorliegt, oder die für sich gesehen nicht bedeutsam sind, für die jedoch auf Portfolioebene wahrscheinlich ein Verlust eingetreten und verlässlich bestimmbar ist. Der Verlustbetrag setzt sich aus drei Komponenten zusammen. Die erste Komponente berücksichtigt einen Betrag für Transfer- und Konvertierungsrisiken im Zusammenhang mit Kreditenga-

gements in Ländern, bei denen erhebliche Zweifel daran bestehen, dass die dort ansässigen Kontrahenten aufgrund der wirtschaftlichen oder politischen Situation ihre Rückzahlungsverpflichtungen erfüllen können. Dieser Betrag wird unter Verwendung von Ratings für Länder- und Transferrisiken ermittelt, welche regelmäßig für jedes Land, in dem der Konzern Geschäfte tätigt, erhoben und überwacht werden. Der zweite Bestandteil stellt einen Wertberichtigungsbetrag dar, der die auf Portfolioebene für kleinere homogene Kredite, das heißt für Kredite an Privatpersonen und kleine Unternehmen im Privatkunden- und Retailgeschäft, eingetretenen Verluste widerspiegelt. Die Kredite werden entsprechend ähnlichen Kreditrisikomerkmale zusammengefasst und die Wertberichtigung für jede Gruppe von Krediten wird unter Verwendung statistischer Modelle auf Basis von historischen Erfahrungswerten ermittelt. Die dritte Komponente beinhaltet eine Schätzung der im Kreditportfolio inhärenten Verluste, die weder auf individueller Ebene identifiziert noch bei der Bestimmung der Wertberichtigung für kleinere homogene Kredite berücksichtigt wurden. Kredite, die bei individueller Beurteilung nicht als wertgemindert gelten, sind ebenfalls in dieser Komponente der Wertberichtigung enthalten.

Sobald ein Kredit als wertgemindert identifiziert ist, wird die Zinsabgrenzung auf Basis der kreditvertraglichen Bedingungen eingestellt. Dessen ungeachtet wird aber der auf den Zeitablauf zurückzuführende Anstieg des Nettobarwerts des wertgeminderten Kredits auf Basis des ursprünglichen Effektivzinssatzes des Kredits als Zinsertrag erfasst.

Alle wertberichtigten Kredite werden zu jedem Bilanzstichtag auf Veränderungen des Barwerts der erwarteten zukünftigen Cashflows unter Verwendung des ursprünglichen Effektivzinses des Kredits untersucht. Die Veränderung eines bereits erfassten Wertminderungsverlusts wird als Veränderung der Wertberichtigung erfasst und in der Konzern-Gewinn- und Verlustrechnung als Bestandteil der Risikovorsorge im Kreditgeschäft ausgewiesen.

Wenn davon ausgegangen wird, dass keine realistische Aussicht auf eine Rückzahlung der Forderung besteht, und die Sicherheiten verwertet oder auf den Konzern übertragen wurden, wird der Kredit abgeschrieben. Zahlungseingänge aus abgeschriebenen Forderungen werden in der Konzern-Gewinn- und Verlustrechnung als Bestandteil der Risikovorsorge im Kreditgeschäft erfasst.

Das Verfahren zur Bestimmung von Rückstellungen für außerbilanzielle Verpflichtungen im Kreditgeschäft ähnelt der Methodik, die für Forderungen aus dem Kreditgeschäft verwendet wird. Wertminderungsverluste werden in der Konzernbilanz als Rückstellungen für außerbilanzielle Verpflichtungen im Kreditgeschäft unter den Sonstigen Passiva und in der Konzern-Gewinn- und Verlustrechnung als Bestandteil der Risikovorsorge im Kreditgeschäft erfasst.

Verringert sich die Höhe einer früher erfassten Wertberichtigung in einer der folgenden Berichtsperioden und ist diese Verringerung auf einen nach der Erfassung der Wertminderung aufgetretenen Sachverhalt zurückzuführen, wird die Wertberichtigung durch eine Reduzierung des Wertberichtigungskontos rückgängig gemacht. Eine solche Wertaufholung wird ergebniswirksam erfasst.

#### **Wertminderung von zur Veräußerung verfügbaren finanziellen Vermögenswerten**

Für zur Veräußerung verfügbare finanzielle Vermögenswerte beurteilt das Management zu jedem Bilanzstichtag, ob objektive Hinweise auf eine Wertminderung eines einzelnen Vermögenswerts vorliegen.

Für Eigenkapitaltitel, die als zur Veräußerung verfügbare finanzielle Vermögenswerte klassifiziert wurden, stellt ein signifikanter oder dauerhafter Rückgang des Fair Value der Investition unter die Anschaffungskosten einen objektiven Wertminderungshinweis dar. Für Schuldtitel, die als zur Veräußerung verfügbare finanzielle Vermögenswerte klassifiziert wurden, wird das Vorliegen einer Wertminderung auf Basis der gleichen Kriterien wie für Kredite bestimmt.

Wenn ein Wertminderungshinweis vorliegt, so sind sämtliche Beträge, die zuvor im Sonstigen Ergebnis (Other comprehensive income) erfasst wurden, in die Konzern-Gewinn- und Verlustrechnung für die Berichtsperiode umzugliedern und im Ergebnis aus zur Veräußerung verfügbaren finanziellen Vermögenswerten zu erfassen. Der aus dem Kumulierten sonstigen Ergebnis (Accumulated other comprehensive income) umzugliedernde Betrag entspricht der Differenz zwischen den Anschaffungskosten (gekürzt um Tilgungen und Amortisationen) und dem aktuellen Fair Value abzüglich zuvor ergebniswirksam erfasster Wertminderungsverluste dieses Vermögenswerts.

Nachfolgende Rückgänge des Fair Value eines wertgeminderten zur Veräußerung verfügbaren Schuldtitels werden erfolgswirksam erfasst, da sie als weitere Wertminderung angesehen werden. Nachfolgende Erhöhungen des Fair Value werden ebenfalls erfolgswirksam erfasst, bis der Vermögenswert nicht länger als wertgemindert angesehen wird. Ein zur Veräußerung verfügbarer Schuldtitel wird nicht länger als wertgemindert eingestuft, wenn sein Fair Value sich mindestens bis zur Höhe der ohne Berücksichtigung einer Wertminderung bestehenden fortgeführten Anschaffungskosten erholt hat. Nachfolgende Änderungen des Fair Value werden im Sonstigen Ergebnis (Other comprehensive income) erfasst.

Wertminderungen von zur Veräußerung verfügbaren Eigenkapitalinstrumenten werden nicht ergebniswirksam rückgängig gemacht; Erhöhungen des Fair Value nach einer Wertminderung werden im Sonstigen Ergebnis (Other comprehensive income) erfasst.

## Ausbuchung von finanziellen Vermögenswerten und Verpflichtungen

### Ausbuchung von finanziellen Vermögenswerten

Die Ausbuchung eines finanziellen Vermögenswerts wird in Betracht gezogen, wenn die vertraglich vereinbarten Ansprüche auf Cashflows aus dem finanziellen Vermögenswert erlöschen oder der Konzern diese übertragen oder bei Eintritt bestimmter Kriterien die Verpflichtung übernommen hat, diese Cashflows an einen oder mehrere Empfänger weiterzuleiten.

Der Konzern bucht einen übertragenen Vermögenswert aus, wenn alle wesentlichen Risiken und Chancen, die mit dem Eigentum an dem Vermögenswert verbunden sind, übertragen werden.

Der Konzern schließt Transaktionen ab, bei denen er zuvor erfasste finanzielle Vermögenswerte überträgt, jedoch alle wesentlichen mit diesen Vermögenswerten verbundenen Risiken und Chancen zurückbehält. Beispielsweise schließt er beim Verkauf eines Vermögenswerts an einen Dritten ein korrespondierendes Total-Return-Swap-Geschäft mit demselben Kontrahenten ab. Diese Art von Transaktionen wird als besicherte Finanzierung („Secured Financing“) bilanziert.

Im Fall von Transaktionen, bei denen alle wesentlichen Risiken und Chancen, die mit dem Eigentum an dem finanziellen Vermögenswert verbunden sind, weder zurückbehalten noch übertragen werden, bucht der Konzern den übertragenen Vermögenswert aus, wenn die Verfügungsmacht, das heißt die Fähigkeit, den Vermögenswert zu verkaufen, über diesen Vermögenswert aufgegeben wird. Die im Rahmen der Übertragung zurückbehaltenen Ansprüche und Verpflichtungen werden getrennt als Vermögenswerte und Verbindlichkeiten erfasst. Bleibt die Verfügungsmacht über den besagten Vermögenswert erhalten, weist der Konzern den Vermögenswert entsprechend dem Umfang des fortgeführten Engagements weiterhin aus. Dieser Umfang bestimmt sich nach dem Ausmaß der Wertschwankungen des übertragenen Vermögenswerts, denen der Konzern weiterhin ausgesetzt bleibt.

Die Ausbuchungskriterien werden, sofern angebracht, auch angewandt, wenn ein Teil eines Vermögenswerts anstelle des gesamten Vermögenswerts oder eine Gruppe ähnlicher finanzieller Vermögenswerte in ihrer Gesamtheit übertragen wird. Wird ein Teil eines Vermögenswerts übertragen, muss es sich dabei um einen spezifisch identifizierten Cashflow, einen exakt proportionalen Anteil des Vermögenswerts oder einen exakt proportionalen Anteil eines spezifisch identifizierten Cashflows handeln.

Wenn ein bestehender finanzieller Vermögenswert durch einen anderen Vermögenswert mit demselben Kontrahenten zu wesentlich abweichenden Vertragsbedingungen ersetzt wird, oder die Vertragsbedingungen des Vermögenswerts wesentlich geändert werden, dann wird der bestehende finanzielle Vermögenswert ausgebucht und ein neuer Vermögenswert eingebucht. Die Differenz zwischen den beiden Buchwerten wird ergebniswirksam erfasst.

### Verbriefungstransaktionen

Der Konzern verbrieft verschiedene finanzielle Vermögenswerte aus Transaktionen mit privaten und gewerblichen Kunden durch den Verkauf an eine Zweckgesellschaft („SPE“), die ihrerseits Wertpapiere an Investoren ausgibt. Die übertragenen Vermögenswerte können bei Anwendung der entsprechenden Rechnungslegungsgrundsätze vollständig oder teilweise für eine Ausbuchung qualifizieren. Synthetische Verbriefungsstrukturen beinhalten üblicherweise derivative Finanzinstrumente, für die die oben genannten Grundsätze für die Bilanzierung von Derivaten und Sicherungsbeziehungen zur Anwendung kommen würden. Übertragungen, die nicht die Ausbuchungskriterien erfüllen, können als besicherte Finanzierung („Secured Financing“) bilanziert werden oder führen zur Bilanzierung von Verbindlichkeiten im Rahmen eines fortgeführten Engagements. Investoren und Verbriefungsgesellschaften haben grundsätzlich keinen Rückgriff auf die sonstigen Vermögenswerte des Konzerns, wenn die Emittenten der finanziellen Vermögenswerte nicht in der Lage sind, ihre Verpflichtungen gemäß den ursprünglichen Bedingungen für diese Vermögenswerte zu erfüllen.

Rechte an den verbrieften finanziellen Vermögenswerten können in Form von erst- oder nachrangigen Tranchen, Zinsansprüchen oder sonstigen Residualansprüchen zurückbehalten werden („zurückbehaltene Rechte“). Soweit die vom Konzern zurückbehaltenen Rechte weder zu einer Konsolidierung der betreffenden Zweckgesellschaft noch zu einer Bilanzierung der transferierten Vermögenswerte führen, werden die Ansprüche in der Regel als zum Fair Value bewertete finanzielle Vermögenswerte erfasst und zum Fair Value ausgewiesen. In Übereinstimmung mit der Bewertung für gleichartige Finanzinstrumente wird der Fair Value der zurückbehaltenen Tranchen oder finanziellen Vermögenswerte beim erstmaligen Ansatz und in der Folge unter Verwendung von Marktpreisen, sofern verfügbar, oder internen Bewertungsmodellen, die Variablen wie Zinsstrukturkurven, vorzeitige Tilgungen, Ausfallraten, Größe der Verluste, Zinsschwankungen und -spannen zugrunde legen, ermittelt. Die für das Bewertungsmodell herangezogenen Annahmen basieren auf beobachtbaren Transaktionen mit ähnlichen Wertpapieren und werden anhand externer Quellen verifiziert, soweit diese vorhanden sind. Wenn beobachtbare Transaktionen mit ähnlichen Wertpapieren und andere externe Quellen nicht vorhanden sind, sind bei der Ermittlung des Fair Value Einschätzungen durch das Management erforderlich, wie im Abschnitt „Ermittlung des Fair Value“ beschrieben.

Gewinne oder Verluste aus Verbriefungstransaktionen hängen teilweise von dem Buchwert der übertragenen finanziellen Vermögenswerte ab, wobei eine Allokation zwischen den ausgebuchten finanziellen Vermögenswerten und den zurückbehaltenen Rechten auf der Grundlage ihres relativen Fair Value am Stichtag der Übertragung erfolgt.



### Ausbuchung von finanziellen Verpflichtungen

Eine Verbindlichkeit wird ausgebucht, wenn die mit ihr verbundene Verpflichtung beglichen oder aufgehoben wird sowie bei Fälligkeit. Falls eine bestehende finanzielle Verbindlichkeit durch eine Verbindlichkeit gegenüber demselben Kreditgeber mit wesentlich abweichenden Vertragsbedingungen ersetzt wird oder die Vertragsbedingungen einer bestehenden Verbindlichkeit wesentlich geändert werden, dann wird ein solcher Austausch beziehungsweise eine solche Modifikation als Ausbuchung der ursprünglichen Verbindlichkeit und Ansatz einer neuen Verbindlichkeit behandelt. Die Differenz zwischen den beiden Buchwerten wird ergebniswirksam erfasst.

### Forderungen und Verbindlichkeiten aus Wertpapierpensionsgeschäften

Wertpapiere, die mit einer Verpflichtung zur Rückübertragung erworben („Reverse Repos“), beziehungsweise Wertpapiere, die mit einer Rücknahmeverpflichtung verkauft wurden („Repos“), werden als besicherte Finanzierungen behandelt und zum Fair Value in Höhe der gezahlten oder erhaltenen Barmittel angesetzt. Die Partei, welche die Barmittel zur Verfügung stellt, nimmt die Wertpapiere in Verwahrung, die als Sicherheit für die Finanzierung dienen und deren Marktwert dem verliehenen Betrag entspricht oder diesen übersteigt. Die im Rahmen von Vereinbarungen über Reverse Repos erhaltenen Wertpapiere werden nicht in der Konzernbilanz erfasst, sofern die Risiken und Chancen, die mit dem Eigentum an den Wertpapieren verbunden sind, nicht erlangt wurden. Die im Rahmen von Vereinbarungen über Repos gelieferten Wertpapiere werden nicht aus der Konzernbilanz ausgebucht, sofern die entsprechenden Risiken und Chancen nicht übertragen wurden. Im Rahmen von Vereinbarungen über Repos gelieferte Wertpapiere, die nicht aus der Konzernbilanz ausgebucht werden und bei denen der Kontrahent ein vertragliches Recht oder Gewohnheitsrecht zur Weiterveräußerung oder -verpfändung besitzt, werden in der Konzernbilanz separat ausgewiesen.

Für bestimmte Portfolios von Repos und Reverse Repos, die auf Fair-Value-Basis gesteuert werden, wendet der Konzern die Fair Value Option an.

Zinserträge aus Reverse Repos und Zinsaufwendungen für Repos werden im Zinsüberschuss ausgewiesen.

### Wertpapierleihe

Tritt der Konzern als Entleiher von Wertpapieren auf, so ist gegenüber dem Verleiher in der Regel eine Barsicherheit zu hinterlegen. Ist der Konzern Verleiher von Wertpapieren, erhält er üblicherweise entweder Wertpapiere oder eine Barsicherheit, die dem Marktwert der verliehenen Wertpapiere entsprechen oder diesen übersteigen. Der Konzern überwacht die Entwicklung des Fair Value entliehener und verliehener Wertpapiere und fordert beziehungsweise leistet, soweit erforderlich, zusätzliche Sicherheiten.

Die gezahlten oder empfangenen Barmittel werden in der Konzernbilanz als entliehene beziehungsweise verliehene Wertpapiere ausgewiesen.

Die entliehenen Wertpapiere selbst werden nicht in der Bilanz des Entleihers ausgewiesen. Sofern sie an Dritte verkauft werden, wird die Rückgabeverpflichtung in den zum Fair Value bewerteten finanziellen Verpflichtungen erfasst und anschließende Gewinne oder Verluste werden im Ergebnis aus zum Fair Value bewerteten finanziellen Vermögenswerten/Verpflichtungen ausgewiesen. An Kontrahenten verliehene Wertpapiere werden weiterhin in der Bilanz des Verleihers ausgewiesen.

Erhaltene oder gezahlte Gebühren werden in den Zinserträgen beziehungsweise Zinsaufwendungen erfasst. An Kontrahenten verliehene Wertpapiere, die nicht aus der Konzernbilanz ausgebucht werden und bei denen der Kontrahent ein vertragliches Recht oder Gewohnheitsrecht zur Weiterveräußerung oder -verpfändung besitzt, werden in der Konzernbilanz separat ausgewiesen.



## Aufrechnung von Finanzinstrumenten

Finanzielle Vermögenswerte und Verpflichtungen werden aufgerechnet und in der Konzernbilanz mit dem Nettowert ausgewiesen, wenn, und nur wenn, eine Saldierung der bilanzierten Beträge zum gegenwärtigen Zeitpunkt vom Konzern rechtlich durchsetzbar und es beabsichtigt ist, die Abwicklung auf Nettobasis vorzunehmen oder gleichzeitig den Vermögenswert zu verwerten und die Verbindlichkeit abzulösen. In allen anderen Fällen erfolgt ein Bruttoausweis. Wenn finanzielle Vermögenswerte und Verpflichtungen in der Konzernbilanz netto dargestellt werden, werden die dazugehörigen Erträge und Aufwendungen in der Konzern-Gewinn- und Verlustrechnung ebenfalls aufgerechnet, es sei denn, eine Aufrechnung ist explizit durch einen anwendbaren Rechnungslegungsstandard untersagt.

## Sachanlagen

Zu den Sachanlagen gehören selbst genutzte Immobilien, Einbauten in gemietete Räume, Betriebs- und Geschäftsausstattung sowie Software (nur Betriebssysteme). Selbst genutzte Immobilien werden zu Anschaffungskosten, vermindert um kumulierte planmäßige Abschreibungen und kumulierte Wertminderungen, ausgewiesen. Die planmäßige Abschreibung erfolgt in der Regel linear über die erwartete betriebsgewöhnliche Nutzungsdauer des Vermögenswerts. Die erwartete betriebsgewöhnliche Nutzungsdauer beträgt bei Gebäuden 25 bis 50 Jahre und bei Betriebs- und Geschäftsausstattung drei bis zehn Jahre. Einbauten in gemietete Räume werden linear über den kürzeren Zeitraum von Mietdauer und erwarteter betriebsgewöhnlicher Nutzungsdauer der Einbauten, in der Regel drei bis zehn Jahre, abgeschrieben. Die Abschreibungen der Gebäude sowie der Betriebs- und Geschäftsausstattung sind im Sachaufwand und sonstigen Aufwand ausgewiesen. Kosten für Instandhaltung und Reparaturen werden als Aufwand erfasst. Gewinne und Verluste aus Verkäufen werden in den Sonstigen Erträgen ausgewiesen.

Sachanlagen werden mindestens einmal im Jahr auf ihre Werthaltigkeit geprüft. Eine Wertminderung wird in Höhe des Betrags ausgewiesen, um den der erzielbare Betrag, das heißt der jeweils höhere Wert aus dem Fair Value abzüglich Verkaufskosten und dem Nutzungswert, den entsprechenden Buchwert unterschreitet. Der Nutzungswert ist der Barwert der geschätzten zukünftigen Cashflows aus dem Vermögenswert. Nach der Erfassung einer Wertminderung wird der Abschreibungsaufwand in künftigen Berichtsperioden angepasst, um den geänderten Buchwert des Vermögensgegenstands entsprechend zu reflektieren. Erfolgt zu einem späteren Zeitpunkt eine Wertaufholung, wird der Abschreibungsaufwand prospektiv angepasst.

Im Rahmen eines Finanzierungsleasings geleaste Anlagen werden als Sachanlagen aktiviert und über die Leasingdauer abgeschrieben.

## Als Finanzinvestition gehaltene Immobilien

Der Konzern wendet für die Bewertung von als Finanzinvestition gehaltenen Immobilien grundsätzlich das Anschaffungskostenmodell an und der Buchwert ist in der Konzernbilanz unter den Sonstigen Aktiva ausgewiesen. Emittiert der Konzern Verbindlichkeiten, welche durch als Finanzinvestition gehaltene Immobilien unterlegt sind und eine direkt an den Fair Value oder die Rendite dieser Immobilien gekoppelte Rendite vorsehen, erfolgt eine Bewertung der als Finanzinvestition gehaltenen Immobilien zum Fair Value. Der Konzern beauftragt, sofern angebracht, externe Immobilienexperten zur Bestimmung des Fair Value der als Finanzinvestition gehaltenen Immobilien mittels anerkannter Bewertungstechniken. Sollten Preise von kurz zuvor am Markt getätigten Transaktionen mit vergleichbaren Immobilien verfügbar sein, werden diese Transaktionen als Referenz für die Bestimmung des Fair Value herangezogen.

## Goodwill und sonstige immaterielle Vermögenswerte

Goodwill entsteht bei der Akquisition von Tochtergesellschaften, assoziierten Unternehmen und gemeinschaftlich geführten Unternehmen und stellt den Betrag dar, um den die Summe aus Anschaffungskosten einer Akquisition und Anteilen ohne beherrschenden Einfluss des erworbenen Unternehmens den Anteil des Konzerns an dem Fair Value des erworbenen identifizierbaren Reinvermögens übersteigt. Im Rahmen jedes Unternehmenszusammenschlusses können die Anteile ohne beherrschenden Einfluss entweder zum Fair Value zum Erwerbszeitpunkt oder zum Fair Value des anteiligen identifizierbaren Reinvermögens des erworbenen Unternehmens bewertet werden.

Für die Ermittlung des Goodwill werden die Fair Values der erworbenen Vermögenswerte, der Verbindlichkeiten sowie der Eventualverbindlichkeiten auf Basis von am Markt beobachtbaren Preisen bestimmt oder als Barwert der erwarteten zukünftigen Cashflows ermittelt. Die Abzinsung erfolgt entweder mit Marktzinsen oder beruht auf risikofreien Zinssätzen und risikoadjustierten erwarteten zukünftigen Cashflows.

Der Goodwill aus der Akquisition von Tochtergesellschaften wird aktiviert und jährlich auf seine Werthaltigkeit hin überprüft. Die Überprüfung erfolgt öfter, wenn Ereignisse oder veränderte Rahmenbedingungen darauf hindeuten, dass sich der Wert des Goodwill vermindert haben könnte. Bei einem Unternehmenszusammenschluss erworbener Goodwill wird für die Überprüfung der Werthaltigkeit den zahlungsmittelgenerierenden Einheiten zugewiesen, das heißt den kleinsten identifizierbaren Gruppen von Vermögenswerten, die Cashinflows generieren, welche größtenteils unabhängig von den Cashinflows aus anderen Vermögenswerten oder Gruppen von Vermögenswerten sind, und die aus den Synergien des Zusammenschlusses Nutzen ziehen sollen, wobei die Geschäftsbereichsebene, auf der Goodwill für interne Managementzwecke überwacht wird, ebenfalls berücksichtigt wird. Bei der Identifizierung, ob ein Vermögenswert (oder eine Gruppe von Vermögenswerten) größtenteils unabhängige Cashinflows von anderen Vermögenswerten (oder Gruppen von Vermögenswerten) generiert, werden verschiedene Faktoren berücksichtigt, einschließlich der Frage, wie das Management die Unternehmenstätigkeiten steuert, oder wie das Management Entscheidungen über die Fortsetzung oder den Abgang der Vermögenswerte beziehungsweise die Einstellung von Unternehmenstätigkeiten trifft. Die primären zahlungsmittelgenerierenden Einheiten des Konzerns sind demzufolge Corporate Banking & Securities, Global Transaction Banking, Asset Management und Private Wealth Management im Segment Asset and Wealth Management sowie Private & Business Clients und Corporate Investments.

Darüber hinaus wird Goodwill, der aus nicht integrierten Investments resultiert und deshalb nicht den primären zahlungsmittelgenerierenden Einheiten der jeweiligen Segmente zugeordnet wurde, einzeln auf der Ebene des nicht integrierten Investments auf seine Werthaltigkeit hin untersucht.

Der Goodwill aus Akquisitionen von assoziierten Unternehmen und gemeinschaftlich geführten Unternehmen ist im Buchwert der Beteiligung enthalten und dieser wird jährlich auf seine Werthaltigkeit überprüft. Sofern ein Anhaltspunkt vorliegt, dass eine Wertminderung eingetreten sein könnte, erfolgt die Überprüfung häufiger.

Wenn ein Goodwill einer zahlungsmittelgenerierenden Einheit zugeordnet wurde und ein Geschäftsbereich dieser Einheit veräußert wird, ist der mit diesem veräußerten Geschäftsbereich verbundene Goodwill bei der Ermittlung des Gewinns oder Verlusts aus der Veräußerung im Buchwert des Geschäftsbereichs enthalten.

Sonstige immaterielle Vermögenswerte werden vom Goodwill getrennt ausgewiesen, wenn sie separierbar sind oder auf vertraglichen oder sonstigen rechtlichen Ansprüchen beruhen und ihr Fair Value zuverlässig ermittelt werden kann. Immaterielle Vermögenswerte mit einer bestimmbaren Nutzungsdauer werden mit ihren Anschaffungs- oder Herstellungskosten abzüglich kumulierter Abschreibungen und kumulierter Wertberichtigungen angesetzt. Kundenbezogene immaterielle Vermögenswerte mit einer bestimmbaren Nutzungsdauer

werden auf Basis ihrer erwarteten Nutzungsdauer linear über Zeiträume von einem Jahr bis zu 20 Jahren amortisiert. Ansprüche aus der Verwaltung von Hypothekendarlehen werden zu Anschaffungskosten bilanziert und proportional über den erwarteten Zeitraum, in dem die Erträge aus den Verträgen anfallen, amortisiert. Diese Vermögenswerte werden mindestens jährlich auf ihre Werthaltigkeit überprüft, wobei auch die Angemessenheit ihrer Nutzungsdauer bestätigt wird.

Bestimmte immaterielle Vermögenswerte haben eine unbestimmte Nutzungsdauer. Es handelt sich dabei primär um Rechte aus Vermögensverwaltungsverträgen mit Publikumsfonds. Immaterielle Vermögenswerte mit unbestimmter Nutzungsdauer werden nicht abgeschrieben, sondern mindestens jährlich auf ihre Werthaltigkeit überprüft. Die Überprüfung erfolgt öfter, wenn Ereignisse oder veränderte Rahmenbedingungen darauf hindeuten, dass eine Wertminderung vorliegen könnte.

Aufwendungen für zur eigenen Nutzung erworbene oder selbst erstellte Software werden aktiviert, wenn es wahrscheinlich ist, dass der Konzern daraus wirtschaftliche Vorteile ziehen kann und sich die Aufwendungen zuverlässig bestimmen lassen. Aktivierte Aufwendungen werden linear über die betriebsgewöhnliche Nutzungsdauer des Vermögenswerts, die entweder einen Zeitraum von drei, fünf oder zehn Jahren umfasst, abgeschrieben. Die aktivierungsfähigen Kosten für selbst erstellte Software umfassen externe direkt zurechenbare Kosten für Material und Dienstleistungen sowie Personal- und Personalnebenkosten für Mitarbeiter, die unmittelbar mit der Erstellung von selbst genutzter Software befasst sind. Gemeinkosten und alle während der Forschung oder nach Fertigstellung der Software anfallenden Ausgaben werden als Aufwand erfasst.

Bei einem Erwerb von Versicherungsgeschäft wird der Betrag des Kaufpreises, der den Anteil des Erwerbers am Nettowert der identifizierbaren Vermögenswerte, Verbindlichkeiten und Eventualverbindlichkeiten übersteigt, als immaterieller Vermögenswert bilanziert. Dieser immaterielle Vermögenswert repräsentiert den die zum Erwerbszeitpunkt bilanzierte Verbindlichkeit übersteigenden Barwert der zukünftigen Cashflows. Dieser Betrag wird als Wert des erworbenen Versicherungsgeschäfts bezeichnet.

Der Wert des erworbenen Versicherungsgeschäfts wird abgeschrieben. Die Wahl der verwendeten Abschreibungsrate berücksichtigt die Besonderheiten des erworbenen Versicherungsgeschäfts sowie den erwarteten Wertverzehr. Der Wert des erworbenen Versicherungsgeschäfts wird regelmäßig auf Wertminderungen untersucht, die als Aufwand in der Konzern-Gewinn- und Verlustrechnung erfasst werden.

## Finanzgarantien

Finanzgarantien sind vertragliche Vereinbarungen, die den Garantiegeber dazu verpflichten, bestimmte Zahlungen zu leisten, um den Garantiennehmer für einen Verlust zu entschädigen, der dadurch entsteht, dass ein bestimmter Schuldner unter den Bedingungen eines Schuldtitels fällige Zahlungen nicht leistet. Solche Garantiezusagen werden Banken, Finanzinstituten und sonstigen Vertragspartnern im Auftrag von Kunden eingeräumt, um Kredite, Kreditlinien und sonstige Bankfazilitäten zu besichern.

Für bestimmte geschriebene Finanzgarantien, die auf Fair-Value-Basis gesteuert werden, wendet der Konzern die Fair Value Option an. Nicht zum Fair Value klassifizierte Finanzgarantien werden beim bilanziellen Erstan-satz mit ihrem Fair Value bei Garantiebegebung ausgewiesen. Danach werden die Verbindlichkeiten aus diesen Garantien zum jeweils höheren Wert aus dem ursprünglich angesetzten Wert abzüglich der kumulativen Amortisierung sowie dem bestmöglichen Schätzwert der zur Begleichung der finanziellen Verpflichtungen zum Bilanzstichtag erforderlichen finanziellen Aufwendungen bilanziert. Bei der Festlegung dieser Schätzwerte werden Erfahrungen mit vergleichbaren Transaktionen und Zeitreihen von Verlusten der Vergangenheit sowie die diesbezüglichen Entscheidungen des Managements zugrunde gelegt.

Jede Erhöhung von Verbindlichkeiten im Zusammenhang mit Garantien wird in der Konzern-Gewinn- und Verlustrechnung in der Risikovorsorge im Kreditgeschäft ausgewiesen.

### Leasinggeschäfte

Der Konzern schließt sowohl als Leasinggeber als auch -nehmer Leasingverträge – vor allem über Gebäude – ab. Basierend auf einer Analyse der Konditionen dieser Verträge werden die Leasingverhältnisse aufgrund ihres wirtschaftlichen Gehalts entweder als Operating Leases oder Finanzierungsleasingverhältnisse klassifiziert.

#### Leasinggeber

Vermögenswerte, die Kunden im Rahmen von Leasingverhältnissen überlassen werden, werden ungeachtet des Rechtsanspruchs als Finanzierungsleasingverhältnisse klassifiziert, wenn alle wesentlichen Risiken und Chancen, die mit dem Eigentum an dem Vermögenswert verbunden sind, übertragen werden. Werden Vermögenswerte im Rahmen eines Finanzierungsleasingverhältnisses übertragen, so wird der vermietete Vermögenswert ausgebucht und eine Forderung bilanziert, deren Höhe dem Barwert der Mindestleasingzahlungen, abgezinst mit dem dem Leasingvertrag zugrunde liegenden Zinssatz, entspricht. Direkt zurechenbare Kosten, die bei der Verhandlung sowie für die Ausgestaltung eines Finanzierungsleasings anfallen, werden als Bestandteil der Forderung durch den Diskontierungzinssatz, der dem Leasingvertrag zugrunde gelegt wird, erfasst. Der Finanzierungsertrag wird über die Dauer des Leasingverhältnisses in der Weise erfasst, dass er eine konstante periodische Verzinsung der Nettoinvestition in das Finanzierungsleasingverhältnis widerspiegelt.

Leasingverhältnisse, bei denen Kunden Vermögenswerte überlassen werden, ohne dass alle wesentlichen Risiken und Chancen, die mit dem Eigentum an dem Vermögenswert verbunden sind, auf sie übertragen werden, werden als Operating Leases klassifiziert. Die vermieteten Vermögenswerte sind in dem Posten Sachanlagen in der Konzernbilanz enthalten und werden über die betriebsgewöhnliche Nutzungsdauer abgeschrieben. Mieterträge werden linear über die Laufzeit des Leasingvertrags erfasst. Direkt zurechenbare Kosten, die bei der Verhandlung sowie für die Ausgestaltung eines Operating Lease anfallen, werden dem Bilanzwert des vermieteten Vermögenswerts zugeschlagen und linear über die Laufzeit des Leasingvertrags als Aufwand erfasst.

#### Leasingnehmer

Vermögenswerte, die im Rahmen eines Finanzierungsleasingverhältnisses gehalten werden, werden anfangs mit einem Betrag, der dem Fair Value des gemieteten Sachanlagegegenstands oder, sofern geringer, dem Barwert der Mindestleasingzahlungen entspricht, erfasst. Die korrespondierende Verbindlichkeit wird bilanziell als Verbindlichkeit aus Finanzierungsleasingverhältnissen erfasst. Bei der Berechnung des Barwerts der Mindestleasingzahlungen wird der dem Leasingverhältnis zugrunde liegende Zinssatz als Abzinsungssatz verwendet, sofern er in praktikabler Weise ermittelt werden kann. Anderenfalls wird der Grenzfremdkapitalzinssatz verwendet. Bedingte Mietzahlungen werden in den Perioden als Aufwand erfasst, in denen sie anfallen.

Bei Sachanlagen, die Gegenstand von Operating Leases sind, werden Mietaufwendungen linear über die Mietdauer erfasst. Die Mietdauer beginnt, sobald der Leasingnehmer die physische Nutzung des Leasinggegenstands kontrolliert. Mietvergünstigungen werden als Minderung der Mietaufwendungen behandelt und ebenfalls linear über die Mietdauer erfasst. Im Rahmen von Operating Leases anfallende bedingte Mietzahlungen werden in den Perioden als Aufwand erfasst, in denen sie anfallen.

#### Sale-und-Leaseback-Transaktionen

Sofern eine Sale-und-Leaseback-Transaktion zu einem Finanzierungsleasingverhältnis führt, wird jeglicher Überschuss des Verkaufserlöses über den Bilanzwert des Vermögensgegenstands durch den Verkäufer nicht sofort als Ertrag erfasst, sondern abgegrenzt und über die Dauer des Leasingvertrags erfasst.

Bei Sale-und-Leaseback-Transaktionen, die einen Operating Lease begründen, hängt der Zeitpunkt der Realisierung des Verkaufsgewinns oder -verlusts vom Verhältnis des Verkaufspreises zum Fair Value ab. Entspricht der Verkaufspreis eindeutig dem Fair Value, wird der Gewinn oder Verlust (Unterschiedsbetrag aus Verkaufspreis und Bilanzwert) unmittelbar erfasst. Liegt der Verkaufspreis hingegen unter dem Fair Value, so wird ein Gewinn unmittelbar erfasst, während ein Verlust nur dann unmittelbar zu erfassen ist, wenn er nicht durch zukünftige unter dem Marktpreis liegende Mietzahlungen ausgeglichen wird. Anderenfalls ist der Verlust abzugrenzen und im Verhältnis zu den Mietzahlungen über die voraussichtliche Nutzungsdauer des Vermögenswerts ergebniswirksam zu verteilen. Übersteigt der Verkaufspreis den Fair Value, wird der den Fair Value übersteigende Betrag abgegrenzt und ergebniswirksam über die voraussichtliche Nutzungsdauer des Vermögensgegenstands verteilt.

### Mitarbeitervergütungen

#### Pensionszusagen

Der Konzern bietet eine Reihe von Pensionszusagen an. Zusätzlich zu beitragsdefinierten Plänen gibt es Pläne, die in der Rechnungslegung als leistungsdefinierte Pläne behandelt werden. Das Vermögen sämtlicher beitragsdefinierter Pläne wird von unabhängig verwalteten Fonds gehalten. Die Höhe der Beiträge ist in der Regel vom Gehalt abhängig. Die Beiträge werden im Allgemeinen im Jahr der Beitragszahlung auf der Grundlage der geleisteten Dienste des Mitarbeiters als Aufwand erfasst.

Um den Barwert der Pensionsverpflichtung und den damit verbundenen Dienstzeitaufwand zu ermitteln, werden sämtliche leistungsdefinierten Pensionspläne nach der Methode der laufenden Einmalprämien („Projected Unit Credit Method“) bewertet. Die Bewertung im Rahmen dieses Verfahrens beruht auf versicherungsmathematischen Berechnungen, in die Annahmen über demografische Entwicklungen, Gehaltssteigerungen sowie Zinssätze und Inflationsraten einfließen. Versicherungsmathematische Gewinne und Verluste werden unmittelbar im Eigenkapital erfasst und in der Konzern-Gesamtergebnisrechnung ausgewiesen. Die Mehrheit der leistungsdefinierten Versorgungszusagen des Konzerns ist unternehmensextern finanziert („funded“).

#### Sonstige Versorgungszusagen

Darüber hinaus unterhält der Konzern intern finanzierte Gesundheitsfürsorgepläne für derzeit tätige und pensionierte Mitarbeiter, vornehmlich in den USA. Im Rahmen dieser Zusagen wird den Pensionären ein bestimmter Prozentsatz der erstattungsfähigen medizinischen und zahnmedizinischen Aufwendungen unter Berücksichtigung eines Selbstbehalts gewährt. Der Konzern dotiert diese Pläne bei Fälligkeit der zu erbringenden Leistungen. Analog zu den leistungsdefinierten Pensionszusagen werden diese Pläne gemäß der Methodik der laufenden Einmalprämien bewertet. Versicherungsmathematische Gewinne und Verluste werden unmittelbar im Eigenkapital erfasst und in der Konzern-Gesamtergebnisrechnung ausgewiesen.

Weitere Informationen zu den Pensions- und sonstigen Versorgungszusagen sind in Note 33 „Leistungen an Arbeitnehmer“ enthalten.

#### Leistungen aus Anlass der Beendigung des Arbeitsverhältnisses

Leistungen anlässlich der Beendigung des Arbeitsverhältnisses fallen an, wenn der Konzern beschlossen hat, das Arbeitsverhältnis eines oder mehrerer Mitarbeiter vor dem Zeitpunkt der regulären Pensionierung zu beenden, oder ein Arbeitnehmer im Austausch für diese Leistungen freiwillig das Angebot annimmt, vorzeitig auszuscheiden. Solche Leistungen sind dann als Schuld und im Aufwand zu erfassen, wenn der Konzern einen detaillierten formalen Plan besitzt und keine realistische Möglichkeit hat, sich der Verpflichtung zu entziehen. Im Falle eines freiwilligen vorzeitigen Ausscheidens werden die Leistungen auf Basis der Anzahl von Mitarbeitern, die das Angebot voraussichtlich annehmen werden, bewertet. Leistungen, die mehr als 12 Monate nach dem Abschlussstichtag fällig sind, werden zu ihrem Barwert angesetzt. Der Zinssatz wird auf Basis der Rendite hochwertiger Unternehmensanleihen abgeleitet.

## Aktienbasierte Vergütungen

Personalaufwand für als Eigenkapitalinstrumente klassifizierte Vergütungen wird auf Basis des Fair Value der aktienbasierten Vergütung am Tag der Gewährung ermittelt. Bei aktienbasierten Vergütungen entspricht der Fair Value dem Börsenkurs der zugrunde liegenden Aktien, vermindert um den Barwert der erwarteten Dividenden, die nicht an den Mitarbeiter weitergereicht werden, und nach Berücksichtigung etwaiger Restriktionen, die nach Eintritt der Unverfallbarkeit des Anspruchs bestehen. Wenn eine Vergütung so modifiziert wird, dass ihr Fair Value unmittelbar nach der Modifizierung ihren Fair Value direkt vor der Modifizierung übersteigt, wird eine Neubewertung vorgenommen und der daraus resultierende Anstieg des Fair Value als zusätzlicher Personalaufwand ausgewiesen.

Die Gegenbuchung zum ausgewiesenen Personalaufwand erfolgt in der Kapitalrücklage. Der Personalaufwand wird linear über den Zeitraum erfasst, in welchem der Mitarbeiter die Dienste erbringt, die mit dieser Vergütung abgegolten werden. Bei Vergütungen, die in Tranchen abgegolten werden, erfolgt die Verteilung über die Laufzeit der jeweiligen Tranche. Einschätzungen hinsichtlich voraussichtlich verfallender Ansprüche werden regelmäßig angepasst und berücksichtigen sowohl tatsächlich verfallene Ansprüche als auch sich verändernde Erwartungen. Aufwendungen für Vergütungen, die dem Begünstigten einen vorgezogenen Ruhestand erlauben und deswegen eine nominale, aber nicht substanzielle Dienstzeitregelung vorsehen, werden nicht über den Zeitraum vom Tag der Gewährung bis zur Unverfallbarkeit erfasst, sondern über den kürzeren Zeitraum, bis der Mitarbeiter die Anspruchsvoraussetzungen für die Vergütung erfüllt. Bei Vergütungen, die in Tranchen abgegolten werden, wird jede Tranche als separate Vergütung angesehen und gesondert im Personalaufwand erfasst.

Verpflichtungen aus aktienbasierter Vergütung, die entgeltlich abgegolten werden, werden zu jedem Bilanzstichtag ergebniswirksam zum Fair Value bewertet und über die Anwartschaftsfrist erfasst, in der der Mitarbeiter einen unverfallbaren Anspruch auf die Vergütung erwirbt. Die Verpflichtungen werden bis zur Zahlung in den Sonstigen Passiva ausgewiesen.

## Verpflichtung zum Erwerb Eigener Aktien

Terminkäufe sowie geschriebene Verkaufsoptionen, bei denen dem Kontrakt Aktien der Deutschen Bank zugrunde liegen, werden als Verpflichtung zum Erwerb Eigener Aktien ausgewiesen, sofern die Erfüllung durch die Lieferung einer festen Anzahl von Aktien gegen einen festen Betrag an flüssigen Mitteln erfolgen muss. Die Verpflichtung wird bei Entstehung mit dem Barwert des Erfüllungsbetrags des Termingeschäfts oder der Option angesetzt. Für Terminkäufe und geschriebene Verkaufsoptionen auf Aktien der Deutschen Bank erfolgt eine entsprechende Verringerung des Eigenkapitals, die innerhalb des Eigenkapitalpostens Verpflichtung zum Erwerb Eigener Aktien ausgewiesen wird.

Die Verbindlichkeiten werden nach dem Prinzip der Periodenabgrenzung („Accrual Basis“) angesetzt und die abzugrenzenden Zinsen, die Zeitwert und Dividenden beinhalten, werden als Zinsaufwendungen erfasst. Mit Erfüllung der Terminkäufe und geschriebenen Verkaufsoptionen erlischt die Verbindlichkeit, während die Verringerung des Eigenkapitals bestehen bleibt, aber eine Reklassifizierung von der Verpflichtung zum Erwerb Eigener Aktien zu den Eigenen Aktien im Bestand erfolgt.

Stammaktien der Deutschen Bank, die entsprechenden Termingeschäften unterliegen, gelten nicht als ausstehende Aktien für die Berechnung des unverwässerten Ergebnisses je Aktie, sind aber bei der Berechnung des verwässerten Ergebnisses zu berücksichtigen, sofern sie de facto einen verwässernden Effekt haben.



Kauf- und Verkaufsoptionen, denen Aktien der Deutschen Bank zugrunde liegen, werden dann nicht als Derivate klassifiziert, wenn die Erfüllung durch die Lieferung einer festgelegten Anzahl von Aktien erfolgen muss. Diese Geschäfte werden vielmehr als Transaktionen mit Eigenkapitalinstrumenten des Konzerns erfasst. Alle anderen derivativen Kontrakte, bei denen Aktien der Deutschen Bank dem Kontrakt zugrunde liegen, werden als zum Fair Value bewertete finanzielle Vermögenswerte/Verpflichtungen ausgewiesen.

### Ertragsteuern

Im Konzernabschluss werden laufende und latente Steuern auf Grundlage der Steuergesetze der jeweils betroffenen Steuerjurisdiktionen berücksichtigt. Laufende und latente Steuern werden im Sonstigen Ergebnis (Other comprehensive income) erfasst, soweit sie Geschäftsvorfälle betreffen, die direkt dem Sonstigen Ergebnis (Other comprehensive income) belastet oder gutgeschrieben werden.

Aktive und passive latente Steuern werden für zukünftige Steuereffekte gebildet, die aus temporären Differenzen zwischen dem Bilanzansatz von Vermögenswerten und Schulden und deren Steuerwert resultieren oder sich aus noch nicht genutzten steuerlichen Verlustvorträgen und Steuergutschriften ergeben. Latente Steuerforderungen werden nur in dem Umfang ausgewiesen, in dem es wahrscheinlich ist, dass zukünftig zu versteuernde Ergebnisse zur Verfügung stehen werden, mit denen diese steuerlichen Verlustvorträge, Steuerguthaben oder steuerlich abzugsfähigen temporären Differenzen verrechnet werden können.

Aktive und passive latente Steuern werden mit den Steuersätzen bewertet, die voraussichtlich in der Berichtsperiode gelten, in der der entsprechende Vermögenswert realisiert oder die entsprechende Schuld erfüllt wird. Dabei erfolgt die Bewertung auf Basis der am Bilanzstichtag gültigen oder in Kürze geltenden Steuersätze beziehungsweise Steuergesetze.

Laufende Steuerforderungen und Steuerverbindlichkeiten werden saldiert, wenn (1) sie dieselbe steuerpflichtige Einheit oder Steuergruppe betreffen, (2) ein einklagbares Recht zur Aufrechnung gegenüber der Steuerbehörde besteht und (3) ein Ausgleich auf Nettobasis beabsichtigt ist.

Aktive und passive latente Steuern werden saldiert, wenn ein einklagbares Recht zur Aufrechnung von laufenden Steuerforderungen und Steuerverbindlichkeiten besteht und wenn es sich bei den aktiven und passiven latenten Steuern um Ertragsteuern handelt, die von derselben Steuerbehörde gegenüber derselben steuerpflichtigen Einheit oder Steuergruppe erhoben werden.

Latente Steuerverbindlichkeiten werden für zu versteuernde temporäre Differenzen in Verbindung mit Anteilen an Tochtergesellschaften, Zweigniederlassungen, assoziierten Unternehmen und Anteilen an gemeinschaftlich geführten Unternehmen gebildet, es sei denn, der Zeitpunkt der Umkehrung der temporären Differenz wird durch den Konzern gesteuert und es ist wahrscheinlich, dass sich die Differenz nicht in absehbarer Zukunft ausgleicht. Latente Steuerforderungen auf steuerlich abzugsfähige temporäre Differenzen in Verbindung mit solchen Investitionen werden nur in dem Umfang ausgewiesen, in dem es wahrscheinlich ist, dass sich die Differenzen in absehbarer Zukunft ausgleichen werden und zukünftig ausreichend zu versteuerndes Einkommen erzielt wird, mit dem diese steuerlich abzugsfähigen temporären Differenzen verrechnet werden können.

Latente Steuern im Zusammenhang mit der Neubewertung von zur Veräußerung verfügbaren finanziellen Vermögenswerten, Cash Flow Hedges und anderen Positionen, die im Sonstigen Ergebnis (Other comprehensive income) ausgewiesen werden, werden ebenfalls direkt im Sonstigen Ergebnis (Other comprehensive income) bilanziert und erst dann in der Konzern-Gewinn- und Verlustrechnung erfasst, wenn der zugrunde liegende Gewinn oder Verlust, auf den sich die latente Steuer bezieht, realisiert wird.



Aktienbasierte Vergütungen können steuerlich abzugsfähig sein. Der steuerlich abzugsfähige Betrag kann dabei von dem ausgewiesenen kumulierten Personalaufwand abweichen. Zu jedem Bilanzstichtag ist auf Basis des aktuellen Aktienkurses der steuerlich abzugsfähige Betrag zu schätzen. Übersteigt der tatsächliche oder erwartete steuerlich abzugsfähige Betrag den des kumulierten Personalaufwands, wird der auf diesen Unterschied entfallende Steuervorteil ins Sonstige Ergebnis (Other comprehensive income) eingestellt. Unterschreitet der tatsächliche oder erwartete steuerlich abzugsfähige Betrag den des kumulierten Personalaufwands, wird der entsprechende Steuernachteil als Steueraufwand in der Konzern-Gewinn- und Verlustrechnung des Berichtszeitraums erfasst.

Die Anlagerenditen im Lebensversicherungsgeschäft des Konzerns in Großbritannien (Abbey Life Assurance Company Limited) unterliegen neben der regulären Körperschaftsteuer einer zusätzlichen Ertragsteuer für Versicherungsnehmer („Policyholder Tax“). Obwohl diese Steuer aus ökonomischer Sicht eine Ertragsteuer zulasten oder zugunsten des Versicherungsnehmers darstellt, ist sie im Ertragsteueraufwand des Konzerns enthalten und reduziert beziehungsweise erhöht die ausgewiesenen Verpflichtungen gegenüber den Versicherungsnehmern.

### Rückstellungen

Rückstellungen werden erfasst, wenn der Konzern aufgrund früherer Ereignisse gegenwärtig eine rechtliche oder faktische Verpflichtung hat, es wahrscheinlich ist, dass Ressourcen zur Erfüllung der Verpflichtung abfließen werden, und sich die Höhe der Verpflichtung verlässlich schätzen lässt.

Die Höhe der Rückstellung entspricht der bestmöglichen Schätzung des Betrags, der notwendig wäre, um die Verpflichtung am Bilanzstichtag zu begleichen. Bei der Bestimmung werden die Risiken und Unsicherheiten in Bezug auf die Verpflichtung berücksichtigt.

Bei einer wesentlichen Auswirkung des Zinseffekts werden Rückstellungen diskontiert und zum Barwert der zur Begleichung der Verpflichtung erwarteten Ausgaben angesetzt. Dabei wird ein Abzinsungssatz vor Steuern verwendet, der die aktuellen Markteinschätzungen im Hinblick auf den Zinseffekt und die für die Verpflichtung spezifischen Risiken widerspiegelt. Der mit dem Zeitablauf verbundene Anstieg der Rückstellungen wird als Zinsaufwand erfasst.

Sofern erwartet wird, dass die zur Erfüllung der zurückgestellten Verpflichtung erforderlichen Ausgaben ganz oder teilweise von einer dritten Partei erstattet werden (zum Beispiel, weil für die Verpflichtung ein Versicherungsvertrag besteht), wird ein Vermögenswert dann erfasst, wenn es so gut wie sicher ist, dass eine Erstattung gezahlt werden wird.

### Konzern-Kapitalflussrechnung

Für Zwecke der Konzern-Kapitalflussrechnung umfassen die Zahlungsmittel und Zahlungsmitteläquivalente des Konzerns hochliquide Vermögenswerte, die unmittelbar in liquide Mittel umgewandelt werden können und mit einem unwesentlichen Wertänderungsrisiko behaftet sind. Dabei handelt es sich um die Barreserve sowie Sichteinlagen bei Banken.

Der Konzern ordnet Cashflows den Kategorien operative Geschäftstätigkeit, Investitionstätigkeit oder Finanzierungstätigkeit auf Basis des Geschäftsmodells zu („Managementansatz“). Die operative Tätigkeit des Konzerns besteht vor allem darin, finanzielle Vermögenswerte und Verbindlichkeiten zu managen. So gehören beispielsweise die Begebung und das Management langfristiger Schuldtitel zum Kern der operativen Geschäftstätigkeiten, während sie bei Nichtfinanzunternehmen nicht den wesentlichen ertragswirksamen Tätigkeiten, sondern den Finanzierungstätigkeiten zuzurechnen sind.

Der Konzern ordnet die Emission vorrangiger langfristiger Verbindlichkeiten der operativen Geschäftstätigkeit zu. Vorrangige Verbindlichkeiten beinhalten strukturierte Schuldverschreibungen und Asset-backed Securities, die seitens CIB konzipiert und umgesetzt werden und insofern Bestandteil der ertragswirksamen Tätigkeiten sind. Ebenfalls enthalten sind seitens Treasury begebene Schuldtitel, die auch durch andere Finanzierungsquellen ersetzt werden können und deren Finanzierungskosten auf die jeweiligen Geschäftsfelder verrechnet werden, um deren Ertragskraft zu bestimmen.

Cashflows aus nachrangigen langfristigen Verbindlichkeiten und hybriden Kapitalinstrumenten („Trust Preferred Securities“) unterscheiden sich von den Cashflows aus vorrangigen langfristigen Verbindlichkeiten, da sie als Bestandteil des Kapitals gesteuert werden, insbesondere um die aufsichtsrechtlichen Kapitalanforderungen erfüllen zu können. Demzufolge lassen sie sich nicht durch andere operative Verbindlichkeiten, sondern nur durch Eigenkapital ersetzen und werden daher den Cashflows aus der Finanzierungstätigkeit zugeordnet.

Die in der Konzern-Kapitalflussrechnung gezeigten Beträge stimmen nur bedingt mit den von einer Berichtsperiode zur nächsten zu beobachtenden Bilanzveränderungen überein, da sie nicht zahlungswirksame Sachverhalte wie etwa Wechselkursänderungen oder Veränderungen des Konsolidierungskreises nicht berücksichtigen.

Bewegungen der zum Fair Value ausgewiesenen Bilanzposten sind auf Veränderungen zurückzuführen, die den Buchwert beeinflussen, das heißt sowohl auf Marktbewegungen als auch Einzahlungen und Auszahlungen. Bewegungen der zum Fair Value ausgewiesenen Bilanzposten werden grundsätzlich den Cashflows aus operativer Tätigkeit zugeordnet.

### Versicherungsgeschäft

Der Konzern schließt zwei Arten von Verträgen ab.

**Versicherungsverträge.** Dabei handelt es sich um Renten- und Universal-Life-Versicherungsverträge, bei denen der Konzern von einer anderen Partei (dem Versicherungsnehmer) ein signifikantes Versicherungsrisiko übernimmt, indem er vereinbart, dem Versicherungsnehmer eine Entschädigung zu leisten, wenn ein spezifiziertes ungewisses zukünftiges Ereignis den Versicherungsnehmer nachteilig betrifft. Die Verträge qualifizieren so lange als Versicherungsverträge, bis alle Ansprüche und Verpflichtungen erfüllt oder erloschen sind. Im Einklang mit IFRS hat der Konzern seine Rechnungslegungsgrundsätze beibehalten, die für die Bilanzierung von Versicherungsgeschäften vor der Umstellung der Rechnungslegung auf IFRS angewandt wurden. Diese Rechnungslegungsgrundsätze werden nachfolgend weiter beschrieben.

**Nicht überschussberechtigte Investmentverträge („Investmentverträge“).** Diese Verträge beinhalten weder ein signifikantes Versicherungsrisiko noch eine ermessensabhängige Überschussbeteiligung. Derartige Verträge werden als zum Fair Value klassifizierte finanzielle Verbindlichkeiten bilanziert und ausgewiesen.

Finanzielle Vermögenswerte, die zur Deckung der Ansprüche aus Versicherungsverträgen gehalten werden, sind als zur Veräußerung verfügbare finanzielle Vermögenswerte klassifiziert, wohingegen solche für andere Versicherungs- und Investmentverträge gehaltene finanzielle Vermögenswerte unter Nutzung der Fair Value Option als zum Fair Value klassifizierte Vermögenswerte ausgewiesen werden.

## Versicherungsverträge

Beiträge für Versicherungsverträge in Form von Einmalprämien werden bei Erhalt als Erträge erfasst. Der Zeitpunkt der Ertragserfassung entspricht dem Tag, ab dem der Versicherungsschutz besteht. Bei Verträgen mit laufender Beitragszahlung werden die Erträge bei Fälligkeit der Zahlung berücksichtigt. Beiträge werden vor Abzug von Gebühren ausgewiesen. Wenn Versicherungsverträge aufgrund nicht erbrachter Beiträge storniert werden, werden die bis zum Zeitpunkt der Vertragsaufhebung abgegrenzten Beitragsforderungen ebenso wie die entsprechenden Erträge und die damit verbundenen Aufwendungen storniert.

Aufwendungen im Versicherungsgeschäft werden erfasst, wenn sie angefallen sind, und beinhalten sowohl die Entschädigungszahlungen des laufenden Geschäftsjahres als auch die den Versicherungsnehmern im Vorgriff auf die endgültige Feststellung zugeordnete Überschussbeteiligung.

Die Deckungsrückstellung für Universal-Life-Versicherungsverträge ergibt sich als Saldo aus eingenommenen Beiträgen und den den Versicherungsnehmern gutgeschriebenen Anlageerträgen abzüglich der Aufwendungen für Sterbefälle und sonstiger Aufwendungen. Für sonstige fondsgebundene Versicherungsverträge entspricht die Deckungsrückstellung dem Fair Value der zugrunde liegenden Vermögenswerte.

Im Fall von Rentenversicherungsverträgen wird die Rückstellung dergestalt berechnet, dass für die derzeit aktiven Verträge die zukünftigen Zahlungen geschätzt und unter Berücksichtigung ihrer Eintrittswahrscheinlichkeit auf den Bilanzstichtag abgezinst werden. Die Annahmen werden bei Vertragsabschluss unter Berücksichtigung einer angemessenen Sicherheitsmarge („Provisions for Adverse Deviations“) festgelegt. Der so ermittelte Rückstellungsbetrag wird mit jenem Wert verglichen, der sich ergibt, wenn man aktuelle Annahmen, einschließlich des Effektivzinses der zugrunde liegenden Vermögenswerte zugrunde legt. Ergäbe sich aufgrund dieses Vergleichs ein höherer Wert, wäre der Rückstellungsbetrag entsprechend anzupassen.

Die Deckungsrückstellung beinhaltet auch Rückstellungen für bestimmte im Zusammenhang mit fondsgebundenen Rentenversicherungsprodukten des Konzerns stehende Optionen. Diese Rückstellungen werden auf Basis der vertraglichen Verpflichtungen unter Zugrundelegung versicherungsmathematischer Annahmen ermittelt.

Die Angemessenheit der bilanzierten Versicherungsrückstellungen wird unter Berücksichtigung der erwarteten Schadensfälle, Kosten, verdienten Beiträge und anteiligen Kapitalanlageerträge ermittelt. Für langfristige Verträge ist dann eine Drohverlustrückstellung zu bilden, wenn die tatsächlichen Erfahrungen hinsichtlich Rendite der Investments, Sterblichkeit, Invalidität, Stornierungen sowie Aufwand darauf hinweisen, dass die bereits bilanzierten Rückstellungen zuzüglich des Barwerts der zukünftigen Beiträge nicht ausreichen werden, um den Barwert zukünftiger Leistungen sowie die aktivierten Abschlusskosten zu decken.

Die dem Kauf von zusätzlichem Versicherungs- und Investmentgeschäft direkt zuordenbaren Kosten werden abgegrenzt, wenn erwartet wird, dass sie aus zukünftigen Margen in den Erträgen aus diesen Verträgen erzielbar sind. Diese Kosten werden über einen Zeitraum systematisch abgegrenzt, der nicht länger ist als die Zeitdauer, innerhalb deren man erwartet, sie aus zukünftigen Margen erzielen zu können.

## Investmentverträge

Sämtliche seitens des Konzerns abgeschlossenen Investmentverträge sind fondsgebunden. Verbindlichkeiten für fondsgebundene Verträge werden ermittelt, indem zum Bilanzstichtag die Preise für die Fondsanteile mit der Anzahl der den Versicherungsnehmern zuzurechnenden Fondsanteile multipliziert werden.

Der Ausweis der Verbindlichkeiten erfolgt zum Fair Value unter den zum Fair Value bewerteten finanziellen Verpflichtungen. Im Rahmen von Investmentverträgen erhaltene Einlagen führen zu einer Anpassung der Verbindlichkeiten für fondsgebundene Verträge. Die auf die Verträge entfallenden Anlageerträge werden in der Konzern-Gewinn- und Verlustrechnung erfasst. Die Forderungen aus Investmentverträgen spiegeln einen etwaigen Überschuss ausgezahlter Beträge über die bilanzierten Verbindlichkeiten wider. Den Versicherungsnehmern von Investmentverträgen werden Gebühren für die Verwaltung der Versicherungspolice und der Kapitalanlagen sowie für Rückkäufe und sonstige Vertragsleistungen in Rechnung gestellt.

Die finanziellen Vermögenswerte für Investmentverträge werden zum Fair Value bilanziert und die damit verbundenen Fair-Value-Änderungen werden ebenso wie die Fair-Value-Änderungen der entsprechenden Verpflichtungen in der Konzern-Gewinn- und Verlustrechnung erfasst.

### Rückversicherungsgeschäft

Sowohl die im Rahmen der Rückversicherung abgegebenen Beiträge als auch die in diesem Zusammenhang empfangenen Einnahmen für erbrachte Versicherungsleistungen werden von den Beiträgen respektive Aufwendungen im Versicherungsgeschäft abgezogen. Vermögenswerte und Verbindlichkeiten im Zusammenhang mit Rückversicherungsverträgen werden brutto ausgewiesen, wenn sie wesentlich sind. An Rückversicherer abgetretene Teile der Versicherungsrückstellungen werden konsistent mit dem rückversicherten Risiko geschätzt. Ebenso werden die im Zusammenhang mit Rückversicherungsvereinbarungen stehenden Erträge und Aufwendungen im Einklang mit dem zugrunde liegenden Risiko des rückversicherten Geschäfts erfasst.

## 02 – Wesentliche Rechnungslegungseinschätzungen

Die Anwendung einiger der in Note 01 „Wesentliche Rechnungslegungsgrundsätze“ beschriebenen Rechnungslegungsgrundsätze setzt wesentliche Einschätzungen voraus, die auf komplexen und subjektiven Beurteilungen sowie Annahmen beruhen und die sich auf Fragestellungen beziehen können, die Unsicherheiten aufweisen und für Änderungen anfällig sind. Solche wesentlichen Einschätzungen können sich von Zeit zu Zeit ändern und sich erheblich auf die Finanzlage sowie ihre Veränderung auswirken beziehungsweise das Geschäftsergebnis beeinflussen. Als wesentliche Einschätzungen gelten auch solche, die das Management in der aktuellen Berichtsperiode bei sachgerechter Ermessensausübung anders hätte treffen können. Der Konzern hat die nachstehend aufgeführten Rechnungslegungsgrundsätze, deren Anwendung in erheblichem Umfang auf Einschätzungen basiert, als wesentlich identifiziert.

### Bestimmung des Fair Value

Bestimmte Finanzinstrumente werden zum Fair Value ausgewiesen, wobei Veränderungen des Fair Value erfolgswirksam erfasst werden. Hierzu gehören Handelsaktiva und -passiva sowie zum Fair Value klassifizierte finanzielle Vermögenswerte und Verpflichtungen. Des Weiteren werden zur Veräußerung verfügbare finanzielle Vermögenswerte zum Fair Value bilanziert, wobei die Änderungen des Fair Value im Sonstigen Ergebnis (Other comprehensive income) ausgewiesen werden. Nicht zu Handelszwecken gehaltene Derivate werden erfolgswirksam zum Fair Value bilanziert, es sei denn, sie sind Bestandteil von Cashflow- oder Net Investments in Foreign Operations-Hedge-Beziehungen, wobei Wertänderungen in dem Umfang, in dem die Sicherungsbeziehung effektiv ist, direkt im Sonstigen Ergebnis (Other comprehensive income) ausgewiesen werden.

Zu den Handelsaktiva gehören Schuldtitel, Aktien, zu Handelszwecken gehaltene Derivate, Rohwaren und Handelskredite. Handelspassiva umfassen hauptsächlich Verbindlichkeiten aus Derivategeschäften und Shortpositionen. Zu den finanziellen Vermögenswerten und Verpflichtungen, die nach der Fair Value Option als zum Fair Value bewertet klassifiziert werden, zählen Repos und Reverse Repos, bestimmte Kredite und Kreditzusagen, Schuldtitel und Aktien sowie Verbindlichkeiten aus strukturierten Schuldverschreibungen. Private-Equity-Beteiligungen, bei denen der Konzern nicht über beherrschenden oder maßgeblichen Einfluss verfügt, werden ebenfalls zum Fair Value bilanziert und entweder als Handelsinstrumente, zum Fair Value klassifizierte finanzielle Vermögenswerte oder als zur Veräußerung verfügbare finanzielle Vermögenswerte klassifiziert.

Der Fair Value ist definiert als der Preis, zu dem ein Vermögenswert oder eine Verbindlichkeit im Rahmen einer Transaktion zwischen sachverständigen und vertragswilligen Geschäftspartnern (ausgenommen im Rahmen eines Zwangsverkaufs oder einer Notabwicklung) zum jetzigen Zeitpunkt ausgetauscht werden könnte.

Bei der Ermittlung des Fair Value sind Einschätzungen durch das Management erforderlich. Die Bereiche, für welche Managemententscheidungen in signifikantem Umfang erforderlich sind, werden identifiziert, dokumentiert und im Rahmen von Bewertungskontrollen und des monatlichen Berichtszyklus an das Senior Management gemeldet. Die für die Modellvalidierung und Bewertung verantwortlichen Spezialistenteams befassen sich vor allem mit Subjektivitäts- und Einschätzungsfragen.

Für die Ermittlung des Fair Value von Finanzinstrumenten, deren Preise in einem aktiven Markt notieren, sind nur in geringem Umfang Einschätzungen des Managements erforderlich. In ähnlicher Weise bedarf es nur weniger subjektiver Bewertungen beziehungsweise Einschätzungen für Finanzinstrumente, die mit branchenüblichen Modellen bewertet werden und deren sämtliche Eingangsparameter in aktiven Märkten notiert sind.

Das erforderliche Maß an subjektiver Bewertung und Einschätzungen durch das Management hat für diejenigen Finanzinstrumente ein höheres Gewicht, die anhand spezieller und komplexer Modelle bewertet werden und bei denen einige oder alle Eingangsparameter nicht beobachtbar sind. Die Auswahl und Anwendung angemessener Parameter, Annahmen und Modellierungstechniken bedürfen einer Beurteilung durch das Management. Insbesondere wenn Daten aus selten vorkommenden Markttransaktionen stammen, müssen Extrapolations- und Interpolationsverfahren angewandt werden. Sind darüber hinaus keine Marktdaten vorhanden, werden die Parameter durch Untersuchung anderer relevanter Informationsquellen bestimmt wie historische Daten, Fundamentalanalyse der wirtschaftlichen Eckdaten der Transaktion und Informationen aus vergleichbaren Transaktionen. Dazu werden angemessene Anpassungen vorgenommen, um das tatsächlich zu bewertende Finanzinstrument sowie die aktuellen Marktbedingungen zu reflektieren. Führen unterschiedliche Bewertungsmodelle zu einer Bandbreite von verschiedenen potenziellen Fair Values für ein Finanzinstrument, muss das Management entscheiden, welcher dieser Schätzwerte innerhalb der Bandbreite den Fair Value am besten widerspiegelt. Ferner können bestimmte Wertanpassungen Einschätzungen des Managements erfordern, um die Ermittlung des Fair Value sicherzustellen.

### Methoden zur Bestimmung des Fair Value

Ein wesentlicher Prozentsatz der zum Fair Value bilanzierten finanziellen Vermögenswerte und Verpflichtungen basiert auf beobachtbaren Preisen oder Parametern beziehungsweise wird aus ihnen abgeleitet. Die Verfügbarkeit von beobachtbaren Preisen oder Parametern variiert je nach Produkt und Markt und kann sich im Zeitablauf ändern. So sind beispielsweise beobachtbare Preise oder Parameter in der Regel für liquide Wertpapiere, börsengehandelte Derivate, OTC-Derivate, die an liquiden Märkten gehandelt werden – wie Zinsswaps, Devisentermingeschäfte und Optionskontrakte in G-7-Währungen –, sowie Aktienswaps und Optionskontrakte auf notierte Wertpapiere oder Indizes verfügbar. Sind beobachtbare Preise oder Parameter verfügbar, werden sie für die Bestimmung des Fair Value genutzt, ohne dass Einschätzungen in großem Umfang erforderlich wären. Hierzu gehören Instrumente, für die der Fair Value mittels branchenüblicher Bewertungsmodelle ermittelt wird, deren Parameter direkt beobachtbar sind. Dies trifft auf viele generische Swap- und Optionskontrakte zu.

In anderen Märkten oder für bestimmte Finanzinstrumente stehen keine beobachtbaren Preise oder Parameter zur Verfügung, weswegen der Fair Value anhand von Bewertungsmodellen ermittelt wird, die für das jeweilige Instrument angemessen sind. Zu diesen Instrumenten gehören unter anderem Handelskredite und sonstige Kredite oder Kreditzusagen, die nach der Fair Value Option als zum Fair Value bewertet klassifiziert werden; neue, komplexe und langfristige OTC-Derivate; Transaktionen in wenig entwickelten oder limitierten Märkten; notleidende Schultitel und Kredite; Private-Equity-Wertpapiere und zurückbehaltene Rechte an verbrieften finanziellen Vermögenswerten. Die Anwendung von Bewertungsmodellen zur Ermittlung des Fair Value erfordert Einschätzungen und Beurteilungen vonseiten des Managements, deren Umfang von der Komplexität und Liquidität des Markts abhängt. Die Bewertungsmethoden umfassen zum Branchenstandard gehörende Modelle, die auf der Analyse abgezinster zukünftiger Cashflows beruhen, welche wiederum von geschätzten zukünftigen Cashflows sowie dem angewandten Diskontierungszinssatz abhängen. Bewertungsmodelle für komplexere Produkte beinhalten komplexere Modellierungstechniken, Parameter und Annahmen wie Volatilität, Korrelationen, vorzeitige Tilgung sowie Ausfallraten und die Höhe der Verluste. Die Auswahl und Anwendung der angemessenen Parameter, Annahmen und Modellierungstechniken erfordern eine Beurteilung durch das Management. Das Ziel der Anwendung einer Bewertungsmethode ist es, den Preis festzulegen, zu dem ein Marktteilnehmer zum jetzigen Zeitpunkt ein Geschäft abschließen würde. Daher umfassen die Bewertungsmethoden sämtliche Faktoren, die nach Überzeugung des Konzerns bei der Festsetzung des Transaktionspreises von den Marktteilnehmern in Erwägung gezogen würden.

Wertanpassungen sind ein weiterer integraler Bestandteil des Prozesses zur Fair-Value-Bestimmung, bei dem Einschätzungen getroffen werden müssen. Für angemessene Wertanpassungen wendet der Konzern Verfahren an, die Faktoren wie Bewertungsanpassungen der Spanne zwischen Ausgabe- und Rücknahmekurs, Liquidität und Kreditrisiko (sowohl mit dem Vertragskontrahenten verbundene Kreditrisiken von finanziellen Vermögenswerten als auch ihr Kreditrisiko im Zusammenhang mit zum Fair Value bewerteten finanziellen Verbindlichkeiten) berücksichtigen.

Der Fair Value der zum Fair Value bewerteten finanziellen Verpflichtungen des Konzerns (beispielsweise Verbindlichkeiten aus OTC-Derivategeschäften und zum Fair Value klassifizierte Verpflichtungen aus strukturierten Schuldverschreibungen) bezieht die Veränderung des eigenen Kreditrisikos aus dieser finanziellen Verpflichtung mit ein. Bei derivativen Verpflichtungen berücksichtigt der Konzern seine eigene Bonität, indem er diese Bonität dem potenziellen künftigen Risiko aller Kontrahenten gegenüberstellt. Dabei werden bereitgestellte Sicherheiten, der Effekt von Nettingrahmenverträgen, die erwarteten Verluste bei Ausfall und sein eigenes Kreditrisiko auf der Grundlage historischer Ausfälle von Gesellschaften mit vergleichbarer Bonität berücksichtigt. Die Veränderung des eigenen Kreditrisikos für Verpflichtungen aus strukturierten Schuldverschreibungen wird durch Abzinsung der vertraglichen Cashflows des Instruments mithilfe des Zinssatzes berechnet, zu dem ähnliche Finanzinstrumente zum Bewertungsstichtag begeben werden würden. Der ermittelte Fair Value ist eine Schätzung des Preises, zu dem die spezifische Verpflichtung zum Bewertungsstichtag mit anderen Marktteilnehmern ausgetauscht werden würde.

Soweit für die am Handelstag angewandten Bewertungsmodelle in erheblichem Umfang nicht beobachtbare Informationen verwendet werden, erfolgt gemäß IFRS die Erfassung des betreffenden Finanzinstruments zum Transaktionspreis. Jeglicher am Handelstag durch Anwendung des Bewertungsmodells ermittelte Gewinn wird abgegrenzt. Die Entscheidung, inwieweit in erheblichem Umfang nicht beobachtbare Informationen in den Bewertungstechniken enthalten sind, erfordert eine Beurteilung durch das Management. Die Entscheidung über die anschließende Erfassung des zuvor abgegrenzten Gewinns wird nach sorgfältiger Prüfung der zu diesem Zeitpunkt vorliegenden Fakten und Umstände getroffen, die die Beobachtbarkeit von Parametern und/oder Maßnahmen für die Minderung von Risiken unterstützen.



Der Konzern hat interne Kontrollverfahren für den Bewertungsprozess eingeführt, um die Angemessenheit der angewandten Fair Values sicherzustellen. Basiert der Fair Value auf Bewertungsmodellen, werden die Modellannahmen und -techniken von einem Spezialistenteam unabhängig geprüft. Die Preis- und Parameterangaben, Annahmen und Wertanpassungen unterliegen Verifizierungs- und Überprüfungsprozessen. Soweit die Preis- und Parameterangaben beobachtbar sind, werden sie anhand unabhängiger Quellen verifiziert.

Fehlen beobachtbare Preis- und Parameterangaben beziehungsweise Annahmen, wird die Angemessenheit des Fair Value anhand von zusätzlichen Verfahren überprüft. Zu diesen Verfahren gehören die Durchführung einer Neubewertung mithilfe unabhängig entwickelter Modelle, die Prüfung der Bewertungsergebnisse mittels geeigneter vergleichbarer Instrumente, die Anwendung von Sensitivitätsanalysen und Extrapolationsverfahren sowie die Berücksichtigung sonstiger Richtgrößen. Durch eine Kalibrierung der Ergebnisse der Bewertungsmodelle unter Zuhilfenahme von Markttransaktionen wird eingeschätzt, ob die Bewertungsmodelle eine Fair-Value-Bestimmung ermöglichen, die den Marktmechanismen entspricht. Diese Verfahren unterliegen der Beurteilung durch das Management.

Andere Bewertungskontrollen beinhalten die Prüfung und Analyse der auf täglicher Basis erzielten Gewinne und Verluste, die Validierung von Bewertungen durch Close-out-Gewinne und -Verluste sowie Value-at-Risk Backtesting.

### Anhangangaben zur Fair-Value-Bestimmung

Nach den IFRS müssen die zum Fair Value klassifizierten finanziellen Vermögenswerte und Verpflichtungen unterteilt nach der für die Bestimmung des Fair Value verwendeten Bewertungsmethode offengelegt werden. Insbesondere ist zwischen solchen zu unterscheiden, die anhand von notierten Preisen in einem aktiven Markt (Level 1), Bewertungsmethoden, die auf beobachtbaren Parametern basieren (Level 2), sowie Bewertungsmethoden, die signifikante nicht beobachtbare Parameter verwenden (Level 3), bestimmt werden. Diese Angaben finden sich in Note 14 „Zum Fair Value bewertete Finanzinstrumente“. Der Bilanzwert der zum Fair Value ausgewiesenen finanziellen Vermögenswerte der Level-3-Kategorie betrug am 31. Dezember 2010 47,3 Mrd € (2009: 58,2 Mrd €). Der Bilanzwert der zum Fair Value ausgewiesenen finanziellen Verpflichtungen der Level-3-Kategorie betrug am 31. Dezember 2010 13,0 Mrd € (2009: 18,2 Mrd €). Für die Bestimmung der Kategorie, der bestimmte Finanzinstrumente zuzuordnen sind, ist eine Beurteilung seitens des Managements erforderlich. Eine Beurteilung wird insbesondere dann vorgenommen, wenn die Bewertung durch eine Reihe von Parametern bestimmt wird, von denen einige beobachtbar und andere nicht beobachtbar sind. Ferner kann sich die Klassifizierung eines Finanzinstruments im Laufe der Zeit ändern, um Änderungen der Marktliquidität und damit der Preistransparenz zu reflektieren.

Zusätzlich zu den Angaben zur Fair-Value-Hierarchie in Note 14 „Zum Fair Value bewertete Finanzinstrumente“ stellt der Konzern eine Sensitivitätsanalyse bereit, die die Auswirkung der Verwendung angemessener möglicher Alternativen für die nicht beobachtbaren Parameter auf die in der dritten Kategorie der Fair-Value-Hierarchie enthaltenen Finanzinstrumente darstellt. Bei der Bestimmung der angemessenen möglichen Alternativen sind signifikante Einschätzungen durch das Management erforderlich.

Für Finanzinstrumente, die zu fortgeführten Anschaffungskosten bewertet werden, veröffentlicht der Konzern den Fair Value. Diese Angaben finden sich in Note 15 „Fair Value von Finanzinstrumenten, die nicht zum Fair Value ausgewiesen werden“. Grundsätzlich besteht bei diesen Instrumenten eine geringe oder keine Handelsaktivität, weshalb bei der Bestimmung des Fair Value signifikante Einschätzungen durch das Management erforderlich sind.



### Umgliederung von finanziellen Vermögenswerten

Die finanziellen Vermögenswerte des Konzerns werden in die nachstehenden Kategorien eingeteilt: zum Fair Value bewertete finanzielle Vermögenswerte, zur Veräußerung verfügbare finanzielle Vermögenswerte oder Forderungen aus dem Kreditgeschäft. Die sachgerechte Klassifizierung von finanziellen Vermögenswerten wird zum Zeitpunkt des erstmaligen Bilanzansatzes festgelegt. Darüber hinaus ist es gemäß den Änderungen zu IAS 39 und IFRS 7, „Reclassification of Financial Assets“, die im Oktober 2008 seitens des IASB verabschiedet und von der EU in europäisches Recht übernommen wurden, erlaubt, bestimmte finanzielle Vermögenswerte aus den Kategorien zum Fair Value bewertete finanzielle Vermögenswerte (Handelsaktiva) und zur Veräußerung verfügbare finanzielle Vermögenswerte in die Kategorie Forderungen aus dem Kreditgeschäft umzugliedern. Für die umzuklassifizierenden Vermögenswerte muss sich seit deren erstmaligem Ansatz die vom Management festgelegte Zweckbestimmung geändert haben und der finanzielle Vermögenswert muss am Umgliederungstichtag die Definition einer Forderung aus dem Kreditgeschäft erfüllen. Außerdem müssen am Umgliederungstichtag die Absicht und die Möglichkeit bestehen, den Vermögenswert auf absehbare Zeit zu halten. Es ist nicht möglich, den finanziellen Vermögenswert zu einem späteren Zeitpunkt in die Handelsaktiva oder in die zur Veräußerung verfügbaren finanziellen Vermögenswerte zurückzuklassifizieren. Weitere Informationen zu den vom Konzern umgegliederten Vermögenswerten sind in Note 13 „Änderungen zu IAS 39 und IFRS 7, Reclassification of Financial Assets“ enthalten.

Um die Vermögenswerte, die unter die Änderungen fallen und bei denen die erwartete Rückzahlung deren geschätzten Fair Value übersteigt, zu identifizieren, sind wesentliche Einschätzungen seitens des Managements sowie das Treffen von Annahmen erforderlich. Das Gleiche gilt, um den Fair Value der identifizierten Vermögenswerte am Umgliederungstichtag zu bestimmen (wie im Abschnitt „Bestimmung des Fair Value“ beschrieben). Dieser Fair Value repräsentiert die neuen fortgeführten Anschaffungskosten des Instruments als Forderung aus dem Kreditgeschäft. In beiden Bereichen können die Anforderungen an das Management in einem hoch volatilen und unsicheren wirtschaftlichen und finanziellen Marktumfeld besonders anspruchsvoll sein, wie es im dritten und vierten Quartal des Geschäftsjahres 2008 der Fall war. Festzustellen, ob das Kriterium „Absicht, den Vermögenswert auf absehbare Zeit zu halten“ erfüllt ist, erfordert ebenfalls wesentliche Beurteilungen durch das Management. Für die Änderung der Zweckbestimmung reicht es nicht aus, dass keine attraktiven Preise vorliegen. Ebenso ist der Terminus „auf absehbare Zeit“ nicht als der Zeitraum definiert, bis zu dem wieder attraktive Preise vorliegen. Die vom Konzern festgelegten Mindestanforderungen zur Beurteilung, ob das Kriterium „Absicht, den Vermögenswert auf absehbare Zeit zu halten“ erfüllt ist, sind in Note 01 „Wesentliche Rechnungslegungsgrundsätze“ enthalten.

### Wertminderung von Krediten und Rückstellungen für außerbilanzielle Verpflichtungen im Kreditgeschäft

Die bei der Ermittlung der Wertminderung von Krediten und Rückstellungen für außerbilanzielle Verpflichtungen im Kreditgeschäft angewandten Rechnungslegungseinschätzungen und -beurteilungen werden für die Unternehmensbereiche Corporate Banking & Securities und Private & Business Clients als wesentlich erachtet, da sich die zugrunde liegenden Annahmen sowohl der einzeln als auch der kollektiv ermittelten Wertberichtigungen von Zeit zu Zeit ändern und das Geschäftsergebnis des Konzerns maßgeblich beeinflussen können.

Die Beurteilung, ob eine Wertminderung vorliegt, erfordert Einschätzungen durch das Management. Dies gilt insbesondere bei Vorliegen ökonomischer und finanzieller Unsicherheit wie zum Beispiel während der jüngsten Finanzkrise. In solchen Fällen verändern und entwickeln sich die erwarteten Cashflows schneller und sind weniger vorhersagbar.

Zum 31. Dezember 2010 betrug die Risikovorsorge im Kreditgeschäft 1.273 Mio € (2009: 2.630 Mio €, 2008: 1.075 Mio €).

Die Bestimmung der notwendigen Wertberichtigungen für Kredite, die für sich gesehen bedeutsam sind, erfordert oftmals erhebliche Einschätzungen durch das Management hinsichtlich verschiedener Einflussfaktoren wie zum Beispiel lokale wirtschaftliche Rahmenbedingungen, die finanzielle Performance des Kontrahenten sowie der Wert gehaltener Sicherheiten, für die es keinen leicht zugänglichen Markt gibt. In bestimmten Fällen, etwa bei bestimmten Leveraged Loans, wird zur Beurteilung der Wertminderung der Unternehmenswert des Kreditnehmers ermittelt. Dies erfordert erhebliche Einschätzungen durch das Management in Hinblick auf den Verkaufszeitpunkt und den Marktwert des kreditnehmenden Unternehmens. Der tatsächliche Betrag der zukünftigen Cashflows sowie deren zeitlicher Anfall können von den vom Management verwendeten Schätzungen abweichen und folglich dazu führen, dass die tatsächlichen Verluste von den berichteten Wertminderungen abweichen.

Die Wertberichtigung für Portfolios kleinerer homogener Kredite wie beispielsweise Kredite an Privatpersonen und kleine Unternehmen im Privatkunden- und Retailgeschäft sowie für Kredite, die für sich gesehen bedeutsam sind, für die aber kein objektiver Hinweis auf eine Wertminderung vorliegt, wird auf kollektiver Basis ermittelt. Die kollektiv ermittelte Wertberichtigung wird auf Portfolioebene mithilfe von statistischen Modellen ermittelt, in die zahlreiche Einschätzungen und Beurteilungen einfließen. Der Konzern überprüft die Modelle und deren zugrunde liegende Daten und Annahmen in regelmäßigen Zeitabständen. Diese Überprüfung berücksichtigt unter anderem die Ausfallwahrscheinlichkeit, erwartete Rückflüsse von Verlusten sowie Beurteilungen hinsichtlich der Fähigkeit ausländischer Kreditnehmer zum Transfer von Fremdwährung zur Erfüllung ihrer Rückzahlungsverpflichtungen. Eine weitergehende Erläuterung der zur Bestimmung der Risikovorsorge im Kreditgeschäft angewandten Methoden ist in Note 01 „Wesentliche Rechnungslegungsgrundsätze“ enthalten.

### Wertminderungen (Impairment) sonstiger finanzieller Vermögenswerte

Nach der Equitymethode bilanzierte Beteiligungen und zur Veräußerung verfügbare finanzielle Vermögenswerte werden quartalsweise auf ihre Werthaltigkeit überprüft. Die Überprüfung erfolgt öfter, wenn Ereignisse oder veränderte Rahmenbedingungen darauf hindeuten, dass sich der Wert dieser Vermögenswerte vermindert haben könnte. Wenn objektive Hinweise auf eine Wertminderung einer Beteiligung an einem assoziierten oder gemeinschaftlich geführten Unternehmen vorliegen, wird eine Werthaltigkeitsprüfung durchgeführt, indem der erzielbare Betrag der Beteiligung, der dem jeweils höheren Wert aus dem Nutzungswert und dem Fair Value abzüglich Verkaufskosten entspricht, mit deren Bilanzwert verglichen wird. Für Eigenkapitaltitel, die als zur Veräußerung verfügbare finanzielle Vermögenswerte klassifiziert wurden, stellt ein signifikanter oder dauerhafter Rückgang des Fair Value der Investition unter die Anschaffungskosten einen objektiven Wertminderungshinweis dar. Hierzu können bestimmte Bedingungen in einer Branche oder einer geografischen Region beziehungsweise bestimmte Informationen zur Finanzlage des Unternehmens wie zum Beispiel eine Ratingherabstufung gehören. Für Schuldtitel, die als zur Veräußerung verfügbare finanzielle Vermögenswerte klassifiziert wurden, wird das Vorliegen einer Wertminderung auf Basis der gleichen Kriterien wie für Kredite bestimmt. Wenn Informationen erst nach Abschluss der Überprüfung des Konzerns verfügbar werden, können zukünftig Abschreibungen für Wertminderungen erforderlich sein. Da sich die Einschätzungen von Wertminderungen im Zeitablauf in Abhängigkeit von zukünftigen Ereignissen ändern können, werden diese als wesentlich erachtet. Die Werthaltigkeitsprüfungen für nach der Equitymethode bilanzierte Beteiligungen und zur Veräußerung verfügbare finanzielle Vermögenswerte führten im Geschäftsjahr 2010 zu Wertminderungen von 2.588 Mio € (2009: 1.125 Mio €, 2008: 970 Mio €). Weitere Informationen über zur Veräußerung verfügbare finanzielle Vermögenswerte sind in Note 08 „Ergebnis aus zur Veräußerung verfügbaren finanziellen Vermögenswerten“ und über nach der Equitymethode bilanzierte Beteiligungen in Note 17 „Nach der Equitymethode bilanzierte Beteiligungen“ enthalten.

### Wertminderungen (Impairment) nicht finanzieller Vermögenswerte

Bestimmte nicht finanzielle Vermögenswerte wie Goodwill und sonstige immaterielle Vermögenswerte unterliegen einer Werthaltigkeitsprüfung. Wertminderungen werden erfolgswirksam erfasst, wenn der Konzern der Ansicht ist, dass die Buchwerte dieser Vermögenswerte möglicherweise nicht mehr einbringlich sind. Wertaufholungen von vorgenommenen Wertminderungen (außer auf Goodwill) werden umgehend erfolgswirksam erfasst.

Goodwill und sonstige immaterielle Vermögenswerte werden jährlich auf ihre Werthaltigkeit überprüft. Die Überprüfung erfolgt öfter, wenn Ereignisse oder veränderte Rahmenbedingungen wie etwa eine Verschlechterung des Wirtschaftsklimas darauf hindeuten, dass bei den Vermögenswerten eine Wertminderung vorliegen könnte. Die Bestimmung des erzielbaren Betrags im Rahmen der Werthaltigkeitsprüfung erfordert Schätzungen auf Basis von Börsenkursen, Preisen vergleichbarer Geschäfte, Barwert- oder sonstigen Bewertungsverfahren oder einer Kombination hieraus, die Einschätzungen und Beurteilungen vonseiten des Managements erforderlich machen. Da durch Änderungen in den zugrunde liegenden Bedingungen und Annahmen erhebliche Unterschiede zu den bilanzierten Werten auftreten können, werden derartige Einschätzungen als wesentlich erachtet. Zum 31. Dezember 2010 betrug der Goodwill 10,8 Mrd € (2009: 7,4 Mrd €) und die sonstigen immateriellen Vermögenswerte wurden zum Jahresende 2010 mit 4,8 Mrd € ausgewiesen (2009: 2,7 Mrd €). Die Beurteilung der Werthaltigkeit dieser Vermögenswerte erfordert wesentliche Einschätzungen in mehreren Unternehmensbereichen.

Im Geschäftsjahr 2010 wurden Wertminderungen auf sonstige immaterielle Vermögenswerte in Höhe von 41 Mio € erfasst, von denen 29 Mio € im Zusammenhang mit kundenbezogenen immateriellen Vermögenswerten im Bereich GTB standen und 12 Mio € sich auf erworbene Software im Bereich AWM bezogen. Im Geschäftsjahr 2009 wurden Wertminderungen auf Goodwill und sonstige immaterielle Vermögenswerte in Höhe von 157 Mio € erfasst. Diese enthielten Wertminderungen in Höhe von 151 Mio €, die im Zusammenhang mit Investments im Konzernbereich Corporate Investments standen. Weiterhin wurden Wertaufholungen in Höhe von 291 Mio € auf sonstige immaterielle Vermögenswerte im Unternehmensbereich Asset and Wealth Management erfasst, die zuvor im vierten Quartal 2008 abgeschrieben worden waren. Im Geschäftsjahr 2008 wurden Wertminderungen auf Goodwill und sonstige immaterielle Vermögenswerte in Höhe von 586 Mio € erfasst, von denen 580 Mio € im Zusammenhang mit Investments im Unternehmensbereich Asset and Wealth Management standen. Weitere Informationen zum Goodwill und zu sonstigen immateriellen Vermögenswerten sind in Note 24 „Goodwill und sonstige immaterielle Vermögenswerte“ enthalten.

### Latente Steuerforderungen

Latente Steuerforderungen werden für zukünftige Steuereffekte gebildet, die aus temporären Differenzen zwischen dem Bilanzansatz von Vermögenswerten und Schulden und deren Steuerwert resultieren oder sich aus noch nicht genutzten steuerlichen Verlustvorträgen und Steuergutschriften ergeben. Latente Steuerforderungen werden nur in dem Umfang ausgewiesen, in dem es wahrscheinlich ist, dass zukünftig ausreichend zu versteuernde Ergebnisse zur Verfügung stehen werden, mit denen diese steuerlichen Verlustvorträge, Steuerguthaben oder steuerlich abzugsfähigen temporären Differenzen verrechnet werden können. Diese Bewertung erfordert in maßgeblichem Umfang Beurteilungen und Einschätzungen seitens des Managements. Das Management verwendet für die Bestimmung der auszuweisenden Beträge latenter Steuerforderungen historische Erkenntnisse zu Steuerkapazität beziehungsweise Profitabilität und gegebenenfalls Informationen über prognostizierte Geschäftsergebnisse auf Basis genehmigter Geschäftspläne, einschließlich einer Prüfung der zulässigen Übertragsperioden steuerlicher Verlustvorträge und Gutschriften, Steuerplanungsmöglichkeiten sowie sonstiger maßgeblicher Überlegungen. In jedem Quartal werden die Einschätzungen hinsichtlich der latenten Steuerforderungen, einschließlich der Annahmen des Konzerns über die zukünftige Ertragskraft, einer Neubewertung unterzogen. Zum 31. Dezember 2010 betrug der Wert nicht angesetzter latenter Steuerforderungen 2,6 Mrd € (2009: 1,3 Mrd €) und der Wert angesetzter Steuerforderungen 8,3 Mrd € (2009: 7,2 Mrd €).

Der Konzern erachtet die im Rahmen der vorzunehmenden Bewertung latenter Steuerforderungen getroffenen Beurteilungen als wesentliche Einschätzungen, da sich die zugrunde liegenden Annahmen in jeder Berichtsperiode ändern können. Zum Beispiel könnten Steuergesetzänderungen oder Abweichungen der erwarteten künftigen Ergebnisse der Geschäftstätigkeit eine Veränderung der latenten Steuerforderungen bewirken. Falls aktive latente Steuern nicht oder nur zum Teil realisierbar sind, wird eine Wertberichtigung der aktiven latenten Steuern zulasten des Ertragsteueraufwands oder des Eigenkapitals in der Periode vorgenommen, in der eine solche Feststellung getroffen wird. Falls der Konzern in der Zukunft bisher nicht angesetzte latente Steuerforderungen aktiviert, wird die Anpassung der aktiven latenten Steuern zugunsten des Ertragsteueraufwands oder des Eigenkapitals in der Periode ausgewiesen, in der diese Feststellung getroffen wird.

Weitere Informationen zu den latenten Steuerforderungen finden sich in Note 34 „Ertragsteuern“.

### Ungewisse Verpflichtungen aus Gerichts- und aufsichtsbehördlichen Verfahren sowie ungewisse Steuerpositionen

Der Konzern übt seine Geschäftsaktivitäten in zahlreichen unterschiedlichen rechtlichen, aufsichtsrechtlichen und steuerlichen Umgebungen aus. Dementsprechend können sich hieraus rechtliche Ansprüche, aufsichtsbehördliche Verfahren oder ungewisse Steuerpositionen ergeben.

Die Verwendung von Schätzwerten ist bei der Ermittlung des Rückstellungsbedarfs für potenzielle Verluste aus Gerichts- und aufsichtsbehördlichen Verfahren und ungewissen Steuerpositionen wichtig. Der Konzern bemisst diese potenziellen Verluste, soweit sie wahrscheinlich und schätzbar sind, nach Maßgabe von IAS 37, „Provisions, Contingent Liabilities and Contingent Assets“ oder IAS 12, „Income Taxes“. Die Bezifferung von Rückstellungen erfordert Einschätzungen in großem Umfang. Die endgültigen Verbindlichkeiten können hiervon letztlich erheblich abweichen.

Ungewisse Verbindlichkeiten in Bezug auf rechtliche Verfahren unterliegen zahlreichen Unwägbarkeiten; das Ergebnis der einzelnen Verfahren kann nicht mit Gewissheit vorhergesagt werden. Die Beurteilung der Wahrscheinlichkeit und die Bezifferung von ungewissen Verbindlichkeiten erfordern in großem Umfang Einschätzungen, die endgültige Verbindlichkeit kann hiervon erheblich abweichen. Die bilanzierten Gesamtverbindlichkeiten bezüglich Gerichts-, Schiedsgerichts- und aufsichtsbehördlicher Verfahren werden auf Basis der Einzelfälle festgelegt und sind eine Einschätzung der wahrscheinlichen Verluste unter Berücksichtigung des Fortgangs der einzelnen Verfahren, der Erfahrungen der Deutschen Bank und der Erfahrungen Dritter in vergleichbaren Fällen, der Gutachten von Rechtsanwälten und anderer Faktoren. Den Ausgang der Rechtsstreitigkeiten des Konzerns zu prognostizieren ist naturgemäß schwierig, insbesondere in Fällen, in denen die Anspruchsteller erhebliche oder unbezifferte Schadensersatzansprüche geltend machen. Für weitere Informationen zu Gerichts-, Schiedsgerichts- und aufsichtsbehördlichen Verfahren siehe Note 28 „Rückstellungen“.

## 03 – Erstmals angewandte und neue Rechnungslegungsvorschriften

### Erstmals angewandte Rechnungslegungsvorschriften

Nachstehend werden diejenigen Rechnungslegungsvorschriften erläutert, die für den Konzern von Bedeutung sind und bei der Erstellung dieses Konzernabschlusses in 2010 zur Anwendung kamen.

#### IFRS 3 und IAS 27

Im Januar 2008 veröffentlichte der IASB eine überarbeitete Fassung von IFRS 3, „Business Combinations“ („IFRS 3 R“), und eine geänderte Fassung von IAS 27, „Consolidated and Separate Financial Statements“ („IAS 27 R“). Zu den wesentlichen Änderungen dieser Standards zählen, dass a) Anschaffungsnebenkosten als Aufwand der Periode erfasst werden, in der sie anfallen, b) bedingte Kaufpreisbestandteile zum Erwerbszeitpunkt zum Fair Value in die Bestimmung des Kaufpreises einbezogen und anschließende Änderungen des Fair Value ergebniswirksam erfasst werden, c) zuvor gehaltene Eigenkapitalanteile zum Erwerbszeitpunkt ergebniswirksam zum Fair Value Neubewertet werden, und d) Veränderungen in der Beteiligungsquote ohne Verlust der Beherrschung an einem Tochterunternehmen erfolgsneutral im Eigenkapital erfasst werden. Der Konzern hat IFRS 3 R und IAS 27 R prospektiv auf alle Unternehmenszusammenschlüsse angewandt, die ab dem 1. Januar 2010 abgeschlossen waren. Effekte aus der erstmaligen Anwendung dieser Standards ergaben sich unter anderem aus dem Erwerb der Sal. Oppenheim-Gruppe, von Teilen des niederländischen Firmenkundengeschäfts von ABN AMRO in den Niederlanden und der Deutsche Postbank AG. Im Zusammenhang mit diesen Erwerben wurden im Geschäftsjahr 2010 akquisitionsbezogene Kosten in Höhe von 29 Mio € als Aufwand erfasst. Fair-Value-Änderungen der bedingten Kaufpreisbestandteile bezogen auf Akquisitionen in 2010 führten zu keinen wesentlichen Anpassungen in der Konzern-Gewinn- und Verlustrechnung. Hinsichtlich der aufgrund des Erwerbs der Kontrollmehrheit erfolgten Neubewertung zuvor gehaltener Eigenkapitalanteile zum Fair Value wurde ein Verlust von 22 Mio € erfasst. Ferner wurde das Eigenkapital aufgrund von Veränderungen in den Beteiligungsquoten des Konzerns ohne Verlust der Beherrschung an einem Tochterunternehmen um 45 Mio € erhöht. Weitere Informationen sind in Note 04 „Akquisitionen und Veräußerungen“ enthalten.

#### Änderungen der IFRS 2009 („Improvements to IFRS 2009“)

Im April 2009 veröffentlichte der IASB im Rahmen seines Annual-Improvements-Projekts Änderungen bestehender IFRS. Diese umfassen sowohl Änderungen verschiedener IFRS mit Auswirkung auf den Ansatz, die Bewertung und den Ausweis von Geschäftsvorfällen als auch terminologische oder redaktionelle Korrekturen. Die Änderungen treten für die Geschäftsjahre in Kraft, die spätestens am oder nach dem 1. Januar 2010 begonnen haben. Die Anwendung dieser Änderungen hatte keine wesentlichen Auswirkungen auf den Konzernabschluss.

### Neue Rechnungslegungsvorschriften

Die nachfolgenden Rechnungslegungsvorschriften sind für den Konzern von Bedeutung, waren zum 31. Dezember 2010 aber noch nicht in Kraft getreten und kamen daher bei der Erstellung dieses Konzernabschlusses nicht zur Anwendung.

#### Änderungen der IFRS 2010 („Improvements to IFRS 2010“)

Im Mai 2010 veröffentlichte der IASB im Rahmen seines Annual-Improvements-Projekts Änderungen bestehender IFRS. Diese umfassen sowohl Änderungen verschiedener IFRS mit Auswirkung auf den Ansatz, die Bewertung und den Ausweis von Geschäftsvorfällen als auch terminologische oder redaktionelle Korrekturen. Die meisten der Änderungen treten für Geschäftsjahre in Kraft, die am oder nach dem 1. Januar 2011 beginnen. Eine vorzeitige Anwendung ist zulässig. Die Anwendung dieser Änderungen wird voraussichtlich keine wesentlichen Auswirkungen auf den Konzernabschluss haben.

## IAS 24

Im November 2009 veröffentlichte der IASB eine überarbeitete Fassung von IAS 24, „Related Party Disclosures“ („IAS 24 R“). IAS 24 R gewährt eine teilweise Ausnahme von den Offenlegungspflichten für Unternehmen, die unter der Beherrschung, der gemeinschaftlichen Führung oder dem maßgeblichen Einfluss der öffentlichen Hand stehen (sogenannte „Government-related Entities“). Die Definition von nahestehenden Dritten wurde geändert, um klarzustellen, dass die Tochtergesellschaften der assoziierten Unternehmen und die Tochtergesellschaften der Joint Ventures auch zum Kreis der nahestehenden Dritten gehören. Infolge dieser Klarstellung erwartet der Konzern, dass der Kreis der nahestehenden Dritten erweitert wird. Die überarbeitete Fassung von IAS 24 tritt für die Geschäftsjahre in Kraft, die am oder nach dem 1. Januar 2011 beginnen. Eine vorzeitige Anwendung ist zulässig. Die Anwendung dieser Änderungen wird keine wesentlichen Auswirkungen auf den Konzernabschluss haben.

## IFRS 7

Im Oktober 2010 veröffentlichte der IASB Änderungen zu IFRS 7, „Disclosures – Transfers of Financial Assets“. Die neuen Regelungen beinhalten zusätzliche Offenlegungspflichten bei Übertragungen von finanziellen Vermögenswerten (zum Beispiel Verbriefungen) einschließlich möglicher Effekte aus jeglichen Risiken, die bei der übertragenden Gesellschaft verbleiben. Zudem wird die Offenlegung zusätzlicher Informationen verlangt, falls ein unverhältnismäßig großer Teil von Übertragungen zum Ende einer Berichtsperiode erfolgt. Die Änderungen treten für die Geschäftsjahre in Kraft, die am oder nach dem 1. Juli 2011 beginnen. Eine vorzeitige Anwendung ist zulässig. Die Änderungen sind seitens des IASB verabschiedet worden, bedürfen aber noch der Übernahme in europäisches Recht durch die EU. Der Konzern prüft gegenwärtig die möglichen Auswirkungen der Umsetzung der geänderten Offenlegungsvorschriften auf die Anhangangaben im Konzernabschluss.

## IFRS 9

Im November 2009 veröffentlichte der IASB IFRS 9, „Financial Instruments“, der einen ersten Schritt seines Projekts zur Ablösung von IAS 39, „Financial Instruments: Recognition and Measurement“, repräsentiert. Mit IFRS 9 werden neue Vorschriften für die Klassifizierung und Bewertung von finanziellen Vermögenswerten, die im Anwendungsbereich von IAS 39 liegen, eingeführt. Danach werden alle finanziellen Vermögenswerte auf Basis des Geschäftsmodells des Unternehmens zur Steuerung seiner finanziellen Vermögenswerte sowie der Charakteristika der Zahlungsströme des jeweiligen finanziellen Vermögenswerts klassifiziert. Ein finanzieller Vermögenswert wird zu fortgeführten Anschaffungskosten bewertet, wenn die folgenden zwei Kriterien erfüllt sind: (a) Die Zielsetzung des Geschäftsmodells des Unternehmens liegt darin, die finanziellen Vermögenswerte zu halten, um damit die vertraglich festgelegten Zahlungsströme zu erzielen; und (b) die Vertragsbedingungen des finanziellen Vermögenswerts führen zu Zahlungsströmen, die ausschließlich Tilgungen und Zinszahlungen darstellen. Ein finanzieller Vermögenswert, der die Kriterien für die Bewertung zu fortgeführten Anschaffungskosten erfüllt, kann nach der Fair Value Option als zum Fair Value bewertet klassifiziert werden, wenn hierdurch Inkongruenzen bei der Bewertung oder beim Ansatz erheblich verringert oder beseitigt werden. Ein finanzieller Vermögenswert, der nicht beide Kriterien für die Bewertung zu fortgeführten Anschaffungskosten erfüllt, wird in der Folge zum Fair Value bewertet. Ferner ist unter IFRS 9 für finanzielle Basisverträge eine Trennung eingebetteter Derivate nicht mehr erforderlich. Ein hybrider Vertrag, der einen finanziellen Basisvertrag beinhaltet, ist in seiner Gesamtheit entweder zu fortgeführten Anschaffungskosten oder zum Fair Value zu klassifizieren. Nach IFRS 9 ist eine Umklassifizierung zwingend vorzunehmen, wenn sich das Geschäftsmodell des Unternehmens ändert. Solche Änderungen sind selten zu erwarten. In diesem Fall hat eine Umgliederung der betreffenden finanziellen Vermögenswerte prospektiv zu erfolgen. Für vertraglich verknüpfte Instrumente, bei denen Konzentrationen des Kreditrisikos vorliegen, wie es häufig bei Tranchen von Investments in Verbriefungen der Fall ist, gibt es spezifische Regelungen. Zusätzlich zu der Beurteilung der Klassifizierungskriterien von IFRS 9 für das einzelne Finanzinstrument ist eine Durchschau auf die Zahlungsstrom-eigenschaften des zugrunde liegenden Pools von Finanzinstrumenten erforderlich. Um zu fortgeführten



Anschaffungskosten bewertet zu werden, muss das Kreditrisiko der Tranche gleich oder geringer sein als das durchschnittliche Kreditrisiko des zugrunde liegenden Pools von Finanzinstrumenten und diese Finanzinstrumente müssen bestimmte Kriterien erfüllen. Ist eine Durchschau praktisch nicht möglich, muss die Tranche als zum Fair Value bewertet klassifiziert werden. Nach IFRS 9 sind alle Eigenkapitaltitel grundsätzlich zum Fair Value zu bewerten. Allerdings besteht für Eigenkapitaltitel, die nicht zu Handelszwecken gehalten werden, ein Wahlrecht, unrealisierte und realisierte Fair-Value-Gewinne und -Verluste im Sonstigen Ergebnis (Other comprehensive income) auszuweisen. Dieses Wahlrecht ist nur zum Zeitpunkt des erstmaligen Bilanzansatzes fallweise ausübbar und nicht revidierbar. Fair-Value-Gewinne und -Verluste werden in den Folgeperioden nicht erfolgswirksam, Dividenden aus solchen Investments hingegen weiterhin erfolgswirksam in der Konzern-Gewinn- und Verlustrechnung erfasst.

IFRS 9 tritt für die Geschäftsjahre in Kraft, die am oder nach dem 1. Januar 2013 beginnen. Eine vorzeitige Anwendung ist zulässig. IFRS 9 ist retrospektiv anzuwenden, jedoch ist bei einer Anwendung vor dem 1. Januar 2012 keine Anpassung der Vergleichsperioden notwendig. IFRS 9 ist – wie unten erwähnt – durch IFRS 9 R abgelöst worden. Für Geschäftsjahre, die vor dem 1. Januar 2013 beginnen, hat ein Unternehmen jedoch das Wahlrecht, entweder IFRS 9 oder IFRS 9 R anzuwenden. IFRS 9 ist seitens des IASB verabschiedet worden, bedarf aber noch der Übernahme in europäisches Recht durch die EU. Der Konzern prüft gegenwärtig die möglichen Auswirkungen der Umsetzung von IFRS 9 auf den Konzernabschluss.

#### IFRS 9 R

Im Oktober 2010 veröffentlichte der IASB eine überarbeitete Fassung von IFRS 9, „Financial Instruments“ („IFRS 9 R“). Der überarbeitete Standard ergänzt neue Vorschriften für die Klassifizierung und Bewertung von finanziellen Verpflichtungen. Nach IFRS 9 R muss ein Unternehmen Fair Value-Änderungen von zum Fair Value klassifizierten finanziellen Verpflichtungen, die auf Änderungen des Kreditrisikos der Verpflichtung zurückzuführen sind, direkt im Sonstigen Ergebnis (Other comprehensive income) ausweisen. Führt die Erfassung dieser Änderungen im Sonstigen Ergebnis (Other comprehensive income) jedoch zu Inkongruenzen bei der Bewertung, ist die gesamte Fair-Value-Änderung erfolgswirksam in der Konzern-Gewinn- und Verlustrechnung zu erfassen. Im Sonstigen Ergebnis (Other comprehensive income) erfasste Beträge werden in Folgeperioden nicht erfolgswirksam erfasst, können aber kumuliert innerhalb des Eigenkapitals übertragen werden. IFRS 9 R löst IFRS 9 ab und tritt für die Geschäftsjahre in Kraft, die am oder nach dem 1. Januar 2013 beginnen. Eine vorzeitige Anwendung ist zulässig. Für Geschäftsjahre, die vor dem 1. Januar 2013 beginnen, hat ein Unternehmen das Wahlrecht, entweder IFRS 9 R oder IFRS 9 anzuwenden. IFRS 9 R ist seitens des IASB verabschiedet worden, bedarf aber noch der Übernahme in europäisches Recht durch die EU. Der Konzern prüft gegenwärtig die möglichen Auswirkungen der Umsetzung von IFRS 9 R auf den Konzernabschluss.

## 04 – Akquisitionen und Veräußerungen

Folgende Unternehmenszusammenschlüsse, die im Jahr 2010 erfolgten, werden gemäß der überarbeiteten Fassung des IFRS 3 R, „Unternehmenszusammenschlüsse“ bilanziert, den der Konzern seit dem 1. Januar 2010 anwendet. Dementsprechend werden die Angaben zu diesen Transaktionen auf der Grundlage des IFRS 3 R bereitgestellt. Für die Bilanzierung von und die Angaben zu Unternehmenszusammenschlüssen, die vor dem 1. Januar 2010 abgeschlossen wurden, gelten jedoch weiter die Bestimmungen des IFRS 3, der früheren Version des Standards aus dem Jahr 2004.



Im Hinblick auf ihre Bedeutung sind Angaben bezüglich der Postbank in den jeweils anderen Notes zum Konzernabschluss einzeln genannt, in denen die Postbank einen materiellen Einfluss auf die jeweilige Note hat.

## Im Jahr 2010 getätigte Unternehmenszusammenschlüsse

### Deutsche Postbank

Nach der erfolgreichen Vorlage eines freiwilligen öffentlichen Übernahmeangebots („Übernahmeangebot“) an die Aktionäre der Deutschen Postbank AG („Postbank“) wurde das Angebot am 3. Dezember 2010 angenommen („Abschlussdatum“). Zusammen mit den Postbank-Aktien, die der Konzern bereits vor dem Übernahmeangebot besaß, erlangte er mit 113,7 Millionen Postbank-Aktien (51,98 % der Stimmrechte des Unternehmens) eine Mehrheit an der Postbank. Infolgedessen begann der Konzern zum 3. Dezember 2010 mit der Konsolidierung des Postbank-Konzerns. Unter Berücksichtigung bestimmter Finanzinstrumente auf Postbank-Aktien, die der Konzern bereits vor dem Abschlussdatum hielt (siehe nachstehender Abschnitt „Behandlung der Beteiligung an der Postbank in Form von Aktien und sonstigen Finanzinstrumenten, die der Konzern am Abschlussdatum hielt“), erfolgt die Konsolidierung ab dem Abschlussdatum auf der Grundlage eines Anteils an der Postbank von insgesamt 79,40 %.

Die folgenden Abschnitte liefern detaillierte Angaben über die Akquisition der Postbank, insbesondere zu den Geschäftsaktivitäten der Postbank und den erwarteten Auswirkungen, die deren Integration für den Konzern hat, dem Übernahmeangebot, der Kapitalerhöhung der Deutschen Bank, der Behandlung der Beteiligung an der Postbank in Form von Aktien und sonstigen Finanzinstrumenten, die der Konzern am Abschlussdatum hielt, der Kaufpreisallokation sowie weiteren akquisitionsbezogenen Informationen.

**Beschreibung der Geschäftsaktivitäten der Postbank und der erwarteten Auswirkungen aus deren Integration für den Konzern.** Mit rund 14 Millionen inländischen Kunden, über 20.000 Mitarbeitern, 1.100 Filialen und einer Bilanzsumme von 240 Mrd € ist der Postbank-Konzern einer der großen Anbieter von Bank- und Finanzdienstleistungen in Deutschland. Die Geschäftstätigkeit der Postbank umfasst das Geschäft mit Privat- und Firmenkunden, Geld- und Kapitalmarktaktivitäten sowie Bausparfinanzierungen (über die zum Postbank-Konzern gehörende BHW-Gruppe). In ihrem Bereich Transaction Banking bietet die Postbank Back-Office-Services für andere Finanzdienstleister an. Ihre Geschäftsaktivitäten konzentrieren sich auf Deutschland und werden um ausgewählte Geschäftseinheiten, vorwiegend in Westeuropa und Nordamerika, ergänzt.

Die Phase 4 der Management Agenda des Konzerns sieht die Fokussierung auf Kerngeschäftsfelder im Konzernbereich Private Clients and Asset Management (PCAM) sowie den Ausbau der führenden Stellung im Heimatmarkt vor. In diesem Zusammenhang stärkt die Mehrheitsbeteiligung an der Postbank den Konzernbereich PCAM, vor allem den Unternehmensbereich Private & Business Clients (PBC). Darüber hinaus ermöglicht sie dem Konzern, seine Führungsposition auf dem deutschen Heimatmarkt zu festigen und auszubauen. Der Zusammenschluss aus Deutscher Bank und Postbank bietet wesentliches Potenzial für Kosten- und Ertragssynergien und Wachstumschancen. Darüber hinaus wird durch die Einbeziehung der Postbank-Geschäftseinheiten in den Konzernabschluss der Anteil der aus dem Privatkundengeschäft generierten Erträge erhöht. Schließlich wird durch den Anstieg der Privatkundeneinlagen die Finanzierungsbasis des Konzerns gestärkt und auf eine breitere Basis gestellt.

**Übernahmeangebot.** Der im Rahmen des Übernahmeangebots unterbreitete Preis je Postbank-Aktie belief sich auf 25,00 €. Die Annahmefrist des Übernahmeangebots begann mit der Veröffentlichung des Angebotsdokuments am 7. Oktober 2010 und endete mit Ablauf der weiteren Annahmefrist am 24. November 2010. Das Angebot wurde für 48,2 Millionen Postbank-Aktien angenommen. Dies entspricht einem Anteil von 22,03 % des Grundkapitals und der Stimmrechte der Postbank. Demzufolge belief sich der am 3. Dezember 2010 für die im Rahmen des Übernahmeangebots erworbenen Postbank-Aktien entrichtete Gesamtkaufpreis auf 1.205 Mio €.

Am 30. November 2010 und am 3. Dezember 2010 hat die Deutsche Bank bekannt gegeben, dass sie 0,5 Millionen beziehungsweise 3,9 Millionen Postbank-Aktien zu einem Preis von 23,96 € beziehungsweise 21,75 € je Aktie an eine Drittpartei verkauft hatte. Durch den Verkauf, welcher eine etwaige Verzögerung des Vollzugs des Angebotes durch das amerikanische Fusionskontrollverfahren vermeiden sollte, sank die rechtliche Beteiligung an der Postbank zwischenzeitlich auf unter 50 %. Zusammen mit dem Verkauf schloss die Deutsche Bank Terminkaufkontrakte in Höhe der zuvor genannten Anzahl von Postbank-Aktien mit der erwähnten Drittpartei ab. Die erhaltene Gegenleistung belief sich auf 23,96 € beziehungsweise 21,75 € je Postbank-Aktie, zuzüglich einer Transaktionsgebühr von rund 0,03 € beziehungsweise 0,015 € je Aktie. Die Terminkäufe wurden am 10. Dezember 2010 nach Erfüllung kartellrechtlicher Anforderungen in den USA sowie bankaufsichtsrechtlicher Genehmigungen erfüllt. Im Ergebnis erhöhte der Konzern seinen Anteil an der Postbank auf 51,98 % (entsprechend auf 113,7 Millionen Postbank-Aktien), was dem erzielten Beteiligungsniveau aus dem Übernahmeangebot entsprach. Obwohl die Aktien rechtsverbindlich an eine Drittpartei verkauft worden waren, behielt der Konzern die mit diesen Aktien verbundenen Risiken und Chancen. Die Zustimmung der US-Kartellbehörden galt als so gut wie sicher, sodass die potenziellen Stimmrechte aus diesen Aktien in die Konsolidierungsanalyse zu Zwecken der Finanzberichterstattung mit einbezogen wurden. Entsprechend wurde als Datum der Übernahme des Postbank-Konzerns der 3. Dezember 2010 festgelegt.

**Kapitalerhöhung der Deutschen Bank.** In enger Abstimmung mit dem Übernahmeangebot führte die Deutsche Bank eine Kapitalerhöhung aus genehmigtem Kapital gegen Bareinlagen durch. Diese Kapitalerhöhung wurde am 6. Oktober 2010 abgeschlossen. Es wurden insgesamt 308,6 Millionen neue, auf den Namen lautende Stammaktien ohne Nennbetrag ausgegeben. Der Bruttoemissionserlös betrug 10,2 Mrd €. Der aus der Kapitalerhöhung resultierende Nettoemissionserlös von 10,1 Mrd € (nach Aufwendungen von rund 0,1 Mrd € nach Steuern) dient in erster Linie zur Deckung der Kapitalanforderungen aus der Konsolidierung des Postbank-Konzerns sowie zur Stärkung der bestehenden Kapitalbasis. Für weitere Informationen zur Kapitalerhöhung wird auf Note 31 „Stammaktien“ verwiesen.

**Behandlung der Beteiligung an der Postbank in Form von Aktien und sonstigen Finanzinstrumenten, die der Konzern am Abschlussdatum hielt.** Vor dem Erwerb der Kontrollmehrheit hielt der Konzern direkt 29,95 % der Aktien und Stimmrechte der Postbank, wodurch er die Finanz- und Geschäftspolitik des Unternehmens maßgeblich mitbestimmen konnte. Demzufolge wurde diese Beteiligung nach der Equitymethode bilanziert.

Zusätzlich hat der Konzern eine durch die Deutsche Post emittierte Pflichtumtauschanleihe gezeichnet. Diese wurde im Rahmen eines breiter angelegten Übernahmevertrags für Postbank-Aktien erworben, den die Deutsche Bank im Februar 2009 mit der Deutschen Post abgeschlossen hatte. Gemäß diesem Übernahmevertrag wird die Pflichtumtauschanleihe 2012 vollständig in 60 Millionen Postbank-Aktien getauscht, was einem Anteil von 27,42 % entspricht. Die Pflichtumtauschanleihe stellt zu Bilanzierungszwecken ein Eigenkapitalinstrument dar. Sie weist ein Risiko-/Chancen-Profil auf, das im Wesentlichen mit einem Eigentumsanteil an der Postbank übereinstimmt, und wurde deshalb nach der Equitymethode bilanziert. Mit Erfassung der Pflichtumtauschanleihe enthielt das nach der Equitymethode bilanzierte Investment weiterhin ein eingebettetes derivatives Finanzinstrument. Dieses stand in Zusammenhang mit einer mit der Deutschen Post vereinbarten Ergebnisbeteiligung über Deutsche Bank-Aktien, welche die Deutsche Post als Gegenleistung erhalten hatte. Das eingebettete Derivat wurde vom Basisinstrument separiert, da Risiken und Chancen aus der Ergebnisbeteiligung nicht eng mit dem Basisvertrag verknüpft sind. Der ursprüngliche Fair Value des eingebetteten Derivats betrug 201 Mio € und verminderte die Anschaffungskosten der nach der Equitymethode bilanzierten Beteiligung an der Postbank. Nachfolgende Anpassungen des Fair Value der Option wurden in der Gewinn- und Verlustrechnung erfasst. Der abschließende Wert der Forderung aus dem eingebetteten Derivat, welches wegen des Verkaufs der Deutsche Bank-Aktien durch die Deutsche Post, die diese Aktien als Gegenleistung für den ursprünglichen Erwerb von 50 Millionen Postbank-Aktien erhalten hatte, nicht mehr neu bewertet wird, betrug 677 Mio €. Die

Forderung wird separat unter den Sonstigen Aktiva ausgewiesen und mit der erhaltenen Sicherheitsleistung (Verbindlichkeit) aufgerechnet werden, sobald die Pflichtumtauschanleihe fällig wird.

Im dritten Quartal 2010 war der Bilanzwert der nach der Equitymethode bilanzierten Beteiligung um einen Aufwand von rund 2,3 Mrd € angepasst worden, der in der Gewinn- und Verlustrechnung des Konzerns im „Ergebnis aus nach der Equitymethode bilanzierten Beteiligungen“ erfasst worden war. Da der Konzern eine klar dokumentierte Absicht zur Kontrollerlangung über die Postbank und deren Konsolidierung im vierten Quartal 2010 dargelegt hatte, war dies bei der Bestimmung des Nutzungswertes der nach der Equitymethode bilanzierten Anteile zu berücksichtigen. Dieser Aufwand war daher auf Basis des Bilanzwerts der nach der Equitymethode bilanzierten Beteiligung an der Postbank zum 30. September 2010 und eines unterstellten Fair Value der Postbank-Aktien in Höhe des von der Deutschen Bank in ihrem Übernahmeangebot genannten Angebotspreises von 25,00 € bestimmt worden. Der Aufwand wurde dem Konzernbereich Corporate Investments zugewiesen.

Am 3. Dezember 2010, dem Datum, an dem der Konzern Kontrolle über die Postbank erlangte, wurde die bestehende, nach der Equitymethode bilanzierte Beteiligung an der Postbank gemäß IFRS 3 R zum Fair Value neu bewertet. Der Fair Value der nach der Equitymethode bilanzierten Beteiligung wurde auf der Grundlage des Angebotspreises von 25,00 € ermittelt, woraus sich ein Fair Value zum Erwerbszeitpunkt von 3.139 Mio € ergab. Unter Berücksichtigung des anteiligen Ergebnisses aus der bestehenden Postbank-Beteiligung im vierten Quartal 2010 war der Wert der nach der Equitymethode bilanzierten Beteiligung um rund 22 Mio € gestiegen. Dementsprechend führte die Neubewertung zum Abschlussdatum zu einem Verlust von 22 Mio €, der in der Gewinn- und Verlustrechnung des Konzerns für das vierte Quartal 2010 im „Ergebnis aus nach der Equitymethode bilanzierten Beteiligungen“ erfasst wurde. Im Einklang mit IFRS 3 R wurde ein Verlust nach Steuern von 6 Mio €, welcher im Sonstigen Ergebnis der Konzern-Gesamtergebnisrechnung ausgewiesen wurde und welcher der nach der Equitymethode bilanzierten Beteiligung des Konzerns an der Postbank bis zum Abschlussdatum zuzuordnen war, in die Gewinn- und Verlustrechnung des Konzerns für das vierte Quartal 2010 umklassifiziert. Diese Effekte wurden dem Konzernbereich Corporate Investments zugewiesen.

Neben der Pflichtumtauschanleihe haben die Deutsche Bank und die Deutsche Post Kauf- und Verkaufsoptionen für weitere von der Deutschen Post gehaltene 26,4 Millionen Postbank-Aktien (Anteil von 12,07 %) abgeschlossen, die zwischen Februar 2012 und Februar 2013 ausgeübt werden können. Die Kauf- und Verkaufsoptionen wurden als zum Fair Value bewertete derivative Finanzinstrumente ausgewiesen.

Ab Beginn der Konsolidierung wurden die Kauf- und Verkaufsoptionen für von der Deutschen Post gehaltene Postbank-Aktien in Eigenkapitalinstrumente umklassifiziert, da sie zu einem Derivat geworden waren, dem die physische Lieferung von Aktien einer konsolidierten Tochtergesellschaft gegen einen festen Geldbetrag zugrunde liegt. Aus diesem Grund wurde der Fair Value des Derivats (Verbindlichkeit) in Höhe von 560 Mio € in Eigenkapital (Kapitalrücklage) umklassifiziert. Dementsprechend entstand für die jeweiligen Aktien aus den Kauf- und Verkaufsoptionen eine Verbindlichkeit, die zum Barwert des erwarteten Kaufpreises erfasst wurde, da diese Aktien gemäß der Optionsvereinbarung erworben werden. In Höhe der erfassten Verbindlichkeit zum Kauf von 1.286 Mio € wurde das Eigenkapital (Kapitalrücklage) entsprechend vermindert.

Die folgende Tabelle beschreibt die direkte Beteiligung und die Anteile aus der Pflichtumtauschanleihe, die der Konzern an der Postbank zum Erwerbszeitpunkt hielt, sowie die Anteile mit nicht beherrschendem Einfluss.

|                                                              | Anzahl der<br>Postbank-Aktien<br>(in Mio) | Anteil<br>in % |
|--------------------------------------------------------------|-------------------------------------------|----------------|
| Direkte Beteiligung an der Postbank vor dem Übernahmeangebot | 65,5                                      | 29,95          |
| Im Rahmen des Übernahmeangebots erworbene Aktien             | 48,2                                      | 22,03          |
| <b>Direkter Eigentumsanteil</b>                              | <b>113,7</b>                              | <b>51,98</b>   |
| Pflichtumtauschanleihe                                       | 60,0                                      | 27,42          |
| <b>Eigenkapitalinstrumente des Konzerns</b>                  | <b>173,7</b>                              | <b>79,40</b>   |
| Anteile an Postbank mit nicht beherrschendem Einfluss        | 45,1                                      | 20,60          |
| <b>Gesamtzahl Postbank-Aktien</b>                            | <b>218,8</b>                              | <b>100,00</b>  |

**Kaufpreisallokation und weitere akquisitionsbezogene Informationen.** Die folgende Tabelle erläutert die übertragene Gegenleistung und den Fair Value der nach der Equitymethode bilanzierten Postbank-Beteiligung vor dem Unternehmenszusammenschluss. Ferner enthält sie die vorläufigen Fair-Value-Beträge der vom Postbank-Konzern erworbenen Vermögenswerte und übernommenen Verbindlichkeiten, die Anteile mit nicht beherrschendem Einfluss und den bei dem Unternehmenszusammenschluss erworbenen Goodwill mit Stand vom 3. Dezember 2010.

#### Vorläufiger Fair Value der erworbenen Vermögenswerte und übernommenen Verbindlichkeiten zum Erwerbszeitpunkt

in Mio €

|                                                                                                          |              |
|----------------------------------------------------------------------------------------------------------|--------------|
| <b>Übertragene Gegenleistung</b>                                                                         |              |
| Beim Abschluss des Übernahmeangebots in bar übertragene Gegenleistung                                    | 1.205        |
| Abzug für Erfüllung zuvor bestehender Beziehungen                                                        | 176          |
| <b>Übertragene Nettogegenleistung</b>                                                                    | <b>1.029</b> |
| <b>Fair Value der Beteiligung des Konzerns an der Postbank vor dem Unternehmenszusammenschluss</b>       |              |
| Nach der Equitymethode bilanzierte Beteiligung <sup>1</sup> (ohne eingebettetes Derivat)                 | 3.139        |
| <b>Gesamtkaufpreis</b>                                                                                   | <b>4.168</b> |
| <b>Identifizierbare erworbene Vermögenswerte und übernommene Verbindlichkeiten<sup>2</sup></b>           |              |
| Barreserve und verzinsliche Sichteinlagen bei Kreditinstituten                                           | 8.752        |
| Zum Fair Value bewertete finanzielle Vermögenswerte                                                      | 36.961       |
| Zur Veräußerung verfügbare finanzielle Vermögenswerte                                                    | 33.716       |
| Forderungen aus dem Kreditgeschäft                                                                       | 129.300      |
| Immaterielle Vermögenswerte                                                                              | 1.557        |
| Alle sonstigen Vermögenswerte                                                                            | 27.840       |
| Einlagen                                                                                                 | 139.859      |
| Zum Fair Value bewertete finanzielle Verpflichtungen                                                     | 31.983       |
| Langfristige Verbindlichkeiten                                                                           | 38.577       |
| Alle sonstigen Verbindlichkeiten                                                                         | 24.813       |
| <b>Identifizierbares Nettovermögen insgesamt</b>                                                         | <b>2.894</b> |
| Anteile ohne beherrschenden Einfluss an der Postbank                                                     | 599          |
| Abzug für Erfüllung zuvor bestehender Beziehungen                                                        | 176          |
| <b>Identifizierbares den DB Aktionären zurechenbares Nettovermögen insgesamt</b>                         | <b>2.119</b> |
| Vorläufiger vom Konzern erworbener Goodwill                                                              | 2.049        |
| <b>Erworbenes identifizierbares den DB Aktionären zurechenbares Nettovermögen und Goodwill insgesamt</b> | <b>4.168</b> |

<sup>1</sup> Einschließlich einer direkten Beteiligung von 29,95 % und der Pflichtumtauschanleihe, die beide nach der Equitymethode bilanziert wurden.

<sup>2</sup> Nach Hauptklassen der erworbenen Vermögenswerte und übernommenen Verbindlichkeiten.

Verglichen mit der wirtschaftlichen Darstellung des Kaufpreises („Illustrative economic purchase price value“) für die gesamte Postbank in Höhe von 6,4 Mrd €, wie sie in der Investorenpräsentation vom 22. September 2010 bekanntgegeben wurde, repräsentiert der Unterschied zwischen diesem Wert und dem oben genannten Gesamtkaufpreis von 4,2 Mrd € im Wesentlichen Effekte aus der Bilanzierung nach der Equitymethode bezüglich der Postbankbeteiligung, die im dritten und vierten Quartal 2010 erfassten Bewertungseffekte, eine geringere Anzahl von Aktien, die im Rahmen des Übernahmeangebots verglichen mit einer Vollabnahme erworben wurden, und enthält nicht die Kaufs- und Verkaufsoptionen.

Die folgende Tabelle zeigt die wesentlichen Kategorien der Forderungen, die von der Postbank am 3. Dezember 2010 erworben und von der Deutschen Bank als Forderungen aus dem Kreditgeschäft zum Erwerbszeitpunkt klassifiziert wurden.

|                                                                                                                                        |                |
|----------------------------------------------------------------------------------------------------------------------------------------|----------------|
| in Mio €                                                                                                                               |                |
| Vertraglich festgelegte Cashflows, einschließlich Zinsen (undiskontiert)                                                               | 118.062        |
| Abzüglich: Nach bester Schätzung zum Erwerbszeitpunkt ermittelte voraussichtlich nicht zu erzielende vertraglich festgelegte Cashflows | 3.910          |
| <b>Voraussichtlich zu erzielende Cashflows<sup>1</sup></b>                                                                             | <b>114.152</b> |

<sup>1</sup> Repräsentiert undiskontierte erwartete Cashflows aus Tilgungen und Zinszahlungen nach Erwerb.

Der vom Konzern zum Erwerbszeitpunkt ermittelte Fair Value dieser Forderungen betrug 106,8 Mrd € und beinhaltete Forderungen aus dem Kreditgeschäft sowohl mit Kunden als auch mit Banken. Dieser Betrag beinhaltet nicht Wertpapiere, welche der Konzern als Forderungen klassifizierte und die einen Fair Value von 22,5 Mrd € sowie einen Nominalwert von 23,2 Mrd € aufwiesen. Der vorgenannte vertragliche Bruttowert von 118,1 Mrd € stellt die bestmögliche Schätzung für die vertraglich festgelegten Cashflows dieser Forderungen dar. In Übereinstimmung mit dem Fair Value zum Erwerbszeitpunkt von 106,8 Mrd € enthält dieser Wert nicht die Wertpapiere, welche der Konzern als Forderungen klassifizierte.

Im Rahmen der vorläufigen Kaufpreisallokation wurden immaterielle Vermögenswerte von ungefähr 1,6 Mrd € als Teil des Fair Value des erworbenen identifizierten Nettovermögens erfasst. Diese Beträge stellen sowohl die bereits in der Bilanz der Postbank befindlichen immateriellen Vermögenswerte als auch die im Rahmen der Kaufpreisallokation identifizierten immateriellen Vermögenswerte dar. Die immateriellen Vermögenswerte setzen sich im Wesentlichen aus Kundenbeziehungen (836 Mio €), der Postbank-Marke (382 Mio €) und Software (298 Mio €) zusammen.

Der im Rahmen der Übernahme der Postbank entstehende Goodwill wurde gemäß der Neubewertungsmethode („Partial Goodwill Method“) nach Maßgabe der überarbeiteten Fassung des IFRS 3 bestimmt und bezieht sich lediglich auf die Mehrheitsbeteiligung des Konzerns an der Postbank. Der Goodwill repräsentiert größtenteils den Wert der erwarteten Ertrags- und Kostensynergien aus dem Erwerb der Postbank. Er wurde PBC zugewiesen und wird voraussichtlich nicht steuerlich abzugsfähig sein.

Die Eröffnungsbilanz beinhaltet in der Position alle sonstigen Verbindlichkeiten den vorläufigen Fair Value der Eventualverbindlichkeiten für bestimmte, in der Kaufpreisallokation enthaltene Verpflichtungen. Deren aggregierter Betrag belief sich insgesamt auf rund 110 Mio €. Der Zeitraum und die tatsächliche Höhe der Mittelabflüsse lassen sich nicht voraussagen. Es ist davon auszugehen, dass der Großteil der Verbindlichkeiten in den kommenden 5 bis 14 Jahren beglichen werden wird. Der Konzern analysiert weiterhin die Entwicklung dieser Verpflichtungen und den möglichen Zeitrahmen für die Mittelabflüsse.

Die Anteile ohne beherrschenden Einfluss von 599 Mio € wurden in der oben genannten Darstellung des Fair Value der erworbenen Vermögenswerte und Verbindlichkeiten auf der Basis deren Anteils am identifizierbaren Nettovermögen der Postbank ermittelt („Partial Goodwill Method“), das zum Fair Value am Erwerbszeitpunkt bewertet wurde.

Noch vor dem Unternehmenserwerb waren die Deutsche Bank und die Postbank an bestimmten Transaktionen beteiligt, die als zuvor bestehende Beziehungen (gemäß IFRS 3 R) galten. Dazu gehörten verschiedene Geschäfte mit Finanzinstrumenten im Rahmen der regulären Interbanken- und Hedgingaktivitäten der Parteien, bestimmte Anleihen, die vom Konzern oder von der Postbank begeben und von der jeweils anderen Seite gehalten wurden sowie spezifische Zahlungsverkehrsleistungen, die die Postbank dem Konzern zur Verfügung gestellt hat. Zum Erwerbszeitpunkt führte die Aufrechnung bestimmter vom Konzern begebener und von der Postbank gehaltener Finanzinstrumente zu einem Verlust von 1 Mio €, der unter den sonstigen Erträgen in der Gewinn- und Verlustrechnung des Konzerns im vierten Quartal 2010 erfasst wurde. Dementsprechend wurde die Bestimmung der übertragenen Gegenleistung und deren Zuordnung zu dem erworbenen Nettovermögen der Postbank um 176 Mio €, dem Fair Value der betreffenden Finanzinstrumente zum Erwerbszeitpunkt, angepasst.

Weiterhin besteht zwischen dem Konzern und der Postbank eine umfassende, für beide Seiten vorteilhafte Kooperationsvereinbarung. Diese Vereinbarung wurde 2008 im Zusammenhang mit dem Erwerb einer Minderheitsbeteiligung an der Postbank geschlossen und umfasst die Bereiche Finanzierungs- und Investmentprodukte, das Firmenkundengeschäft und die gewerbliche Finanzierung sowie kundennahe Serviceleistungen. Darüber hinaus beinhaltet sie die Zusammenarbeit in den Bereichen Einkauf und IT-Infrastruktur.

Ab Beginn der Konsolidierung zum 3. Dezember 2010 wurden aus dem Postbank-Konzern Erträge von 423 Mio € und ein Ergebnis nach Steuern von 62 Mio € (einschließlich der Amortisation von Fair-Value-Anpassungen aus der vorläufigen Kaufpreisallokation) in der Gewinn- und Verlustrechnung des Konzerns erfasst. Unter Berücksichtigung bestimmter, auf Ebene des Konzerns erfasster Transaktions- und Integrationskosten von 48 Mio € führte die Konsolidierung der Postbank im Konzernbereich PBC zu einem den Deutsche Bank-Aktionären zustehenden Ergebnis vor Steuern von 30 Mio €.

Wäre die Konsolidierung zum 1. Januar 2010 wirksam geworden, hätte die Postbank mit Pro-forma-Erträgen von 3.805 Mio € und einem Pro-forma-Ergebnis nach Steuern von 138 Mio € zur Gewinn- und Verlustrechnung des Konzerns beigetragen. Diese Pro-forma-Beträge wurden auf der Grundlage der von der Postbank als eigenständiger Konzern berichteten vorläufigen Ergebnisse für das Jahr 2010 ermittelt und berücksichtigen weder die angenommene Amortisation von Fair-Value-Anpassungen aus der Kaufpreisallokation für den Zeitraum vom 1. Januar 2010 bis zum 31. Dezember 2010, Anpassungen aus der Konsolidierung, noch die Wertminderungen aus der Neubewertung, die der Konzern im dritten und vierten Quartal 2010 auf seine frühere, nach der Equity-methode bilanzierte Beteiligung an der Postbank erfasst hatte.

Akquisitionsbezogene, vom Konzern als Erwerber selbst getragene Kosten von 12 Mio € wurden als Sachaufwand und sonstiger Aufwand in der Gewinn- und Verlustrechnung des Konzerns für 2010 ausgewiesen.

Da die Transaktion erst kurz vor Ende des Geschäftsjahres abgeschlossen wurde und sehr komplex ist, wurde die erstmalige Bilanzierung dieses Unternehmenserwerbs noch nicht abgeschlossen.



## ABN AMRO

Am 1. April 2010 hat die Deutsche Bank den Erwerb bestimmter Teile des niederländischen Firmenkundengeschäfts von ABN AMRO Bank N.V. („ABN AMRO“) zu einem anfänglichen Kaufpreis von 700 Mio € abgeschlossen, der im zweiten Quartal 2010 bar gezahlt wurde. Dieser Kaufpreis wurde im vierten Quartal 2010 infolge vorläufiger Anpassungen der Schlussbilanz der erworbenen Geschäftseinheiten um 13 Mio € reduziert. Der angepasste Kaufpreis von insgesamt 687 Mio € wird als vorläufig angesehen, bis die Schlussbilanz abgeschlossen ist. Der Abschluss des Erwerbs erfolgte nach der Genehmigung durch die Europäische Kommission und andere Aufsichtsbehörden. Mit Wirkung zum Abschlussdatum erlangte die Deutsche Bank Kontrolle über die erworbenen Geschäftseinheiten und hat diese entsprechend im zweiten Quartal 2010 erstmalig konsolidiert. Die Übernahme ist ein wichtiges Element in der Strategie der Deutschen Bank, ihr klassisches Bankgeschäft weiter auszubauen. Mit der Übernahme ist die Deutsche Bank zum viertgrößten Anbieter von Bankdienstleistungen für Firmenkunden in den Niederlanden geworden.

Die Übernahme beinhaltetete den Erwerb von 100 % der stimmberechtigten Eigenkapitalanteile an den erworbenen Geschäftseinheiten und umfasst die folgenden Aktivitäten:

- zwei Firmenkundeneinheiten in Amsterdam und Eindhoven, die Großkunden betreuen,
- 13 Filialen, die kleine und mittelständische Unternehmen betreuen,
- die Hollandsche Bank Unie N.V. („HBU“) mit Sitz in Rotterdam und
- die IFN Finance B.V., der niederländische Teil des zu ABN AMRO gehörenden Factoringdienstleisters IFN Group.

Die beiden Firmenkundeneinheiten, die 13 Filialen und die HBU waren bereits vor dem Erwerb in einer separaten rechtlichen Einheit zusammengefasst, die unmittelbar nach der Übernahme in Deutsche Bank Nederland N.V. umfirmiert wurde. Sowohl die Deutsche Bank Nederland N.V. als auch die IFN Finance B.V. sind jetzt direkte Tochtergesellschaften der Deutschen Bank. Die übernommenen Geschäftseinheiten, die mehr als 34.000 Kunden betreuen und 1.300 Mitarbeiter beschäftigen, verwenden den Markennamen Deutsche Bank und sind innerhalb des Konzerns in den Unternehmensbereich Global Transaction Banking integriert.

Da die erstmalige Bilanzierung des Unternehmenserwerbs noch nicht abgeschlossen ist, sind die Kaufpreisallokation sowie die Bestimmung des Netto-Fair-Value der zum Zeitpunkt der Akquisition identifizierbaren Vermögenswerte und Verbindlichkeiten von ABN AMRO zum Bilanzstichtag noch nicht abgeschlossen. Dies umfasst die Fertigstellung der Schlussbilanz und die abschließende Bestimmung von Fair-Value-Anpassungen für bestimmte Teile der Eröffnungsbilanz der erworbenen Geschäftseinheiten. Dementsprechend ist der Unternehmenszusammenschluss im maßgeblichen Bewertungszeitraum noch nicht abgeschlossen.



Am Jahresende 2010 wurden die vorläufigen Fair-Value-Beträge für ABN AMRO zum Erwerbszeitpunkt wie folgt erfasst:

**Vorläufiger Fair Value der erworbenen Vermögenswerte und übernommenen Verbindlichkeiten zum Erwerbszeitpunkt**

in Mio €

|                                                                                                |            |
|------------------------------------------------------------------------------------------------|------------|
| <b>Übertragene Gegenleistung</b>                                                               |            |
| Übertragene Gegenleistung in bar                                                               | 700        |
| Vorläufige Kaufpreisanpassung                                                                  | – 13       |
| <b>Gesamtkaufpreis</b>                                                                         | <b>687</b> |
| <b>Identifizierbare erworbene Vermögenswerte und übernommene Verbindlichkeiten<sup>1</sup></b> |            |
| Barreserve und verzinsliche Sichteinlagen bei Kreditinstituten                                 | 113        |
| Verzinsliche Termineinlagen bei Kreditinstituten                                               | 71         |
| Zum Fair Value bewertete finanzielle Vermögenswerte                                            | 779        |
| Forderungen aus dem Kreditgeschäft                                                             | 9.802      |
| Immaterielle Vermögenswerte                                                                    | 168        |
| Alle sonstigen Vermögenswerte                                                                  | 810        |
| Einlagen                                                                                       | 8.211      |
| Zum Fair Value bewertete finanzielle Verpflichtungen                                           | 786        |
| Alle sonstigen Verbindlichkeiten                                                               | 1.843      |
| <b>Identifizierbares Nettovermögen insgesamt</b>                                               | <b>903</b> |
| Vorläufiger negativer Goodwill                                                                 | 216        |
| <b>Erworbenes identifizierbares Nettovermögen insgesamt, abzüglich des negativen Goodwill</b>  | <b>687</b> |

<sup>1</sup> Nach Hauptklassen der erworbenen Vermögenswerte und übernommenen Verbindlichkeiten.

Im Rahmen der Kaufpreisallokation wurden Kundenbeziehungen im Umfang von 168 Mio € als abzuschreibende immaterielle Vermögenswerte ausgewiesen.

Aufgrund des Unterschieds zwischen dem Fair Value identifizierbarer erworbener Nettovermögenswerte und dem Fair Value der übertragenen Gegenleistung wurde ein negativer Goodwill von 216 Mio € erfasst, der in der Gewinn- und Verlustrechnung des Konzerns für 2010 als Gewinn in den Sonstigen Erträgen ausgewiesen wurde. Der Hauptgrund für die Erfassung des negativen Goodwill war der Verkauf von Teilen des niederländischen Firmenkunden- und Factoringgeschäfts von ABN AMRO gemäß den Auflagen der Europäischen Kommission, nachdem die ABN AMRO Holding N.V. im Oktober 2007 von einem Konsortium, bestehend aus The Royal Bank of Scotland, Fortis Bank und Banco Santander, übernommen worden war. Der erfasste Gewinn ist steuerfrei.

Im Rahmen der Akquisition stellt ABN AMRO eine anfängliche Absicherung für Kreditrisiken über 75 % der abschließenden Verluste aus dem übernommenen Forderungsportfolio (exklusive IFN Finance B.V.) bereit. Die maximale Absicherung ist auf 10 % des Portfoliovolumens begrenzt. Zum Zeitpunkt des Erwerbs belief sich der Fair Value der Garantie auf 544 Mio €, welcher über die erwartete durchschnittliche Laufzeit des zugrunde liegenden Portfolios abgeschrieben wird.

Die folgende Tabelle zeigt die finanziellen Vermögenswerte, die von ABN AMRO am 1. April 2010 erworben und von der Deutschen Bank als Forderungen aus dem Kreditgeschäft zum Erwerbszeitpunkt klassifiziert wurden.

|                                                                                                                                        |               |
|----------------------------------------------------------------------------------------------------------------------------------------|---------------|
| in Mio €                                                                                                                               |               |
| Vertraglich festgelegte Cashflows, einschließlich Zinsen (undiskontiert)                                                               | 11.503        |
| Abzüglich: Nach bester Schätzung zum Erwerbszeitpunkt ermittelte voraussichtlich nicht zu erzielende vertraglich festgelegte Cashflows | 245           |
| <b>Voraussichtlich zu erzielende Cashflows<sup>1</sup></b>                                                                             | <b>11.258</b> |

<sup>1</sup> Repräsentiert undiskontierte erwartete Cashflows aus Tilgungen und Zinszahlungen nach Erwerb.

Hinsichtlich akquisitionsbezogener Kosten wurden für 2010 in der Gewinn- und Verlustrechnung des Konzerns 15 Mio € als Sachaufwand und sonstiger Aufwand ausgewiesen. Die Jahre 2009 und 2008 enthielten 8 Mio € für in diesem Zeitraum entstandene und erfasste akquisitionsbezogene Aufwendungen.

Seit der Übernahme und ohne Berücksichtigung des oben erwähnten Gewinns aus dem negativen Goodwill haben die übernommenen Geschäftsaktivitäten mit Erträgen von 405 Mio € und einem Ergebnisbeitrag nach Steuern von 35 Mio € zur Gewinn- und Verlustrechnung des Konzerns beigetragen. Wäre die Akquisition zum 1. Januar 2010 wirksam gewesen, hätte der Konzern daraus für 2010 (ohne die Berücksichtigung des oben erwähnten Gewinns aus dem negativen Goodwill) Erträge in Höhe von 501 Mio € und ein Ergebnis nach Steuern in Höhe von 77 Mio € ausgewiesen.

### Sal. Oppenheim

Am 15. März 2010 schloss die Deutsche Bank den Erwerb von 100 % der stimmberechtigten Eigenkapitalanteile an der in Luxemburg ansässigen Sal. Oppenheim jr. & Cie. S.C.A. („Sal. Oppenheim S.C.A.“), der Holdinggesellschaft der Sal. Oppenheim-Gruppe, zu einem in bar entrichteten Kaufpreis von insgesamt 1.261 Mio € ab. Vom Kaufpreis entfielen 275 Mio € auf die BHF Asset Servicing GmbH („BAS“), die zum Zeitpunkt des Erwerbs bereits als zum Verkauf bestimmt klassifiziert worden war und daher von der übrigen Sal. Oppenheim-Gruppe getrennt bilanziert wurde. Da am 29. Januar 2010 alle wesentlichen rechtlichen und regulatorischen Genehmigungen vorlagen, wurde der Erwerbszeitpunkt auf diesen Tag festgesetzt und die Sal. Oppenheim entsprechend in den Konzernabschluss des ersten Quartals 2010 einbezogen. Gemäß der im vierten Quartal 2009 geschlossenen Rahmenvereinbarung wurde den früheren Gesellschaftern der Sal. Oppenheim S.C.A. die Option gewährt, sich mit bis zu 20 % langfristig an der deutschen Tochtergesellschaft Sal. Oppenheim jr. & Cie. AG & Co. KGaA zu beteiligen. Bezogen auf den Erwerbszeitpunkt hatte die Option zum Bilanzstichtag einen Fair Value von null.

Der Erwerb stärkt die Asset and Wealth Management-Aktivitäten des Konzerns im Bereich des gehobenen Privatkundengeschäfts sowie der Familienvermögen und Stiftungen in Europa, insbesondere in Deutschland. Die eigenständigen Vermögensverwaltungsaktivitäten der Sal. Oppenheim-Gruppe werden unter der etablierten Marke der traditionsreichen Privatbank ausgebaut. Dabei soll der Charakter der Privatbank erhalten bleiben. Das integrierte Vermögensverwaltungskonzept für private und institutionelle Kunden bleibt bestehen.

Mit dem Erwerb erlangte der Konzern einen beherrschenden Einfluss über die Sal. Oppenheim S.C.A., die anschließend eine hundertprozentige Tochter der Deutschen Bank wurde. Sämtliche Geschäftsaktivitäten der Sal. Oppenheim-Gruppe, darunter die gesamte Vermögensverwaltung, die Investmentbank, die BHF-BANK Gruppe („BHF-BANK“), die BAS und das in einer eigenständigen Holding geführte Private-Equity-Dachfondsgeschäft der Sal. Oppenheim Private Equity Partners S.A., gingen auf die Deutsche Bank über. Im Zuge der Akquisition wurden alle Geschäftseinheiten der Sal. Oppenheim-Gruppe in den Unternehmensbereich Asset and Wealth Management (AWM) integriert, mit Ausnahme der BHF-BANK und der BAS, die zunächst dem Konzernbereich Corporate Investments zugeordnet wurden. Im zweiten Quartal 2010 wurden auch diese Einheiten in AWM übertragen.

Der Verkauf der BAS an die Bank of New York Mellon wurde im August 2010 abgeschlossen. Ferner erwarb der Konzern im Rahmen der Übernahme der Sal. Oppenheim-Gruppe die Services Généraux de Gestion S.A. und ihre Tochtergesellschaften, die im ersten Quartal 2010 weiterverkauft wurden. Im Jahresverlauf 2010 stellte die Sal. Oppenheim-Gruppe den größten Teil ihres Investmentbanking-Geschäfts durch Verkauf oder Auflösung ein. Die Bereiche Equity Trading & Derivatives sowie Capital Markets Sales and Research wurden im zweiten Quartal 2010 von der australischen Macquarie-Gruppe übernommen. Am 23. Dezember 2010 gab die Deutsche Bank bekannt, dass sie sich mit der liechtensteinischen LGT Group über wesentliche Eckpunkte des Verkaufs der BHF-BANK geeinigt hat und in Bezug auf den geplanten Verkauf der BHF-BANK exklusive Verhandlungen mit der LGT Group führen wird. Die Verhandlungen zur Finalisierung der vertraglichen Details sollen im Laufe des ersten Quartals 2011 abgeschlossen werden. Dementsprechend klassifiziert der Konzern die BHF-BANK seit dem 31. Dezember 2010 als zum Verkauf bestimmte Veräußerungsgruppe. Für weitere Informationen wird auf Note 25 „Zum Verkauf bestimmte Vermögenswerte“ verwiesen.

Zum Bilanzstichtag wurde ein zum Erwerbszeitpunkt ermittelter Fair Value des für die Sal. Oppenheim-Gruppe und die BAS entrichteten Gesamtkaufpreises von 1.261 Mio € ausgewiesen. Gemäß der mit den früheren Gesellschaftern der Sal. Oppenheim S.C.A. geschlossenen Rahmenvereinbarung könnte sich der Kaufpreis per Saldo um bis zu 476 Mio € (zahlbar im Jahr 2015) erhöhen, vorausgesetzt, dass bestimmte Risikopositionen (insbesondere Rechts- und Kreditrisiken) bis 2015 nicht auftreten. Zum Bilanzstichtag hatte diese bedingte Gegenleistung einen geschätzten Fair Value von null.

Die Fair Value-Beträge für die Sal. Oppenheim-Gruppe (ohne die BAS) zum Erwerbszeitpunkt wurden wie folgt erfasst:

**Fair Value der erworbenen Vermögenswerte und übernommenen Verbindlichkeiten zum Erwerbszeitpunkt**

in Mio €

|                                                                                                          |            |
|----------------------------------------------------------------------------------------------------------|------------|
| <b>Übertragene Gegenleistung</b>                                                                         |            |
| Übertragene Gegenleistung in bar                                                                         | 986        |
| Fair Value der bedingten Gegenleistung                                                                   | 0          |
| <b>Gesamtkaufpreis</b>                                                                                   | <b>986</b> |
| <b>Identifizierbare erworbene Vermögenswerte und übernommene Verbindlichkeiten<sup>1</sup></b>           |            |
| Barreserve und verzinsliche Sichteinlagen bei Kreditinstituten                                           | 2.638      |
| Verzinsliche Termineinlagen bei Kreditinstituten                                                         | 3.298      |
| Forderungen aus übertragenen Zentralbankeinlagen und aus Wertpapierpensionsgeschäften (Reverse Repos)    | 889        |
| Zum Fair Value bewertete finanzielle Vermögenswerte                                                      | 6.626      |
| Zur Veräußerung verfügbare finanzielle Vermögenswerte                                                    | 6.174      |
| Forderungen aus dem Kreditgeschäft                                                                       | 5.609      |
| Immaterielle Vermögenswerte                                                                              | 162        |
| Zum Verkauf bestimmte Vermögenswerte                                                                     | 1.884      |
| Alle sonstigen Vermögenswerte                                                                            | 2.677      |
| Einlagen                                                                                                 | 18.461     |
| Verbindlichkeiten aus übertragenen Zentralbankeinlagen und aus Wertpapierpensionsgeschäften (Repos)      | 796        |
| Zum Fair Value bewertete finanzielle Verpflichtungen                                                     | 5.443      |
| Langfristige Verbindlichkeiten                                                                           | 1.737      |
| Zum Verkauf bestimmte Verbindlichkeiten                                                                  | 1.836      |
| Alle sonstigen Verbindlichkeiten                                                                         | 1.534      |
| <b>Identifizierbares Nettovermögen insgesamt</b>                                                         | <b>150</b> |
| Anteile ohne beherrschenden Einfluss an der Sal. Oppenheim-Gruppe                                        | 8          |
| <b>Identifizierbares den DB Aktionären zurechenbares Nettovermögen insgesamt</b>                         | <b>142</b> |
| Goodwill                                                                                                 | 844        |
| <b>Erworbenes identifizierbares den DB Aktionären zurechenbares Nettovermögen und Goodwill insgesamt</b> | <b>986</b> |

<sup>1</sup> Nach Hauptklassen der erworbenen Vermögenswerte und übernommenen Verbindlichkeiten.

Der im Rahmen der Akquisition entstandene Goodwill von 844 Mio € setzt sich hauptsächlich aus Synergien zusammen, die durch die Zusammenlegung bestimmter Geschäftsaktivitäten in den Bereichen der Vermögensverwaltung sowie aufgrund einer größeren Marktpräsenz in diesen Geschäftsbereichen in Deutschland, Luxemburg, der Schweiz und Österreich zu erwarten sind. Der Goodwill wird voraussichtlich nicht steuerlich abzugsfähig sein. Zu den immateriellen Vermögenswerten, die unter dem identifizierbaren Nettovermögen ausgewiesen wurden, zählen hauptsächlich Software, Kundenbeziehungen und die Sal. Oppenheim-Marke. Bei der Allokation des Kaufpreises setzte die Deutsche Bank eine Eventualverbindlichkeit von 251 Mio € für eine umfassende Anzahl von Sachverhalten an, die im Zusammenhang mit bestimmten von Sal. Oppenheim erworbenen Geschäftseinheiten stehen. Der Zeitraum und die Höhe der Mittelabflüsse lassen sich nicht voraussagen. Derzeit ist davon auszugehen, dass diese Verbindlichkeiten in den kommenden fünf Jahren beglichen werden. Der Konzern analysiert weiterhin die Risiken und den möglichen Zeitrahmen der Mittelabflüsse.

Die folgende Tabelle zeigt die finanziellen Vermögenswerte, die von der Sal. Oppenheim erworben und von der Deutschen Bank als Forderungen aus dem Kreditgeschäft zum Erwerbszeitpunkt klassifiziert wurden.

|                                                                                                                                        |              |
|----------------------------------------------------------------------------------------------------------------------------------------|--------------|
| in Mio €                                                                                                                               |              |
| Vertraglich festgelegte Cashflows, einschließlich Zinsen (undiskontiert)                                                               | 6.940        |
| Abzüglich: Nach bester Schätzung zum Erwerbszeitpunkt ermittelte voraussichtlich nicht zu erzielende vertraglich festgelegte Cashflows | 1.187        |
| <b>Voraussichtlich zu erzielende Cashflows<sup>1</sup></b>                                                                             | <b>5.753</b> |

<sup>1</sup> Repräsentiert undiskontierte erwartete Cashflows aus Tilgungen und Zinszahlungen nach Erwerb.

Im Anschluss an die Akquisition, aber noch am Abschlusstag des Erwerbs, führte die Deutsche Bank bei ihrer neuen Tochtergesellschaft Sal. Oppenheim S.C.A. eine Kapitalerhöhung über 195 Mio € durch. Dieser Betrag ist nicht Bestandteil des Kaufpreises und dementsprechend nicht in der zuvor genannten Ermittlung des Goodwill enthalten.

Hinsichtlich akquisitionsbezogener Kosten wurden für 2010 in der Gewinn- und Verlustrechnung des Konzerns 2 Mio € als Sachaufwand und sonstiger Aufwand ausgewiesen. Im Geschäftsjahr 2009 entstandene und erfasste akquisitionsbezogene Aufwendungen betrugen 11 Mio €.

Nach der Übernahme hat die Sal. Oppenheim-Gruppe (exklusive BAS) Erträge von 568 Mio € und einen Verlust nach Steuern von 308 Mio € zur Gewinn- und Verlustrechnung des Konzerns beigetragen. Wäre die Akquisition zum 1. Januar 2010 wirksam gewesen, hätte der Konzern daraus für 2010 Erträge in Höhe von 599 Mio € und einen Verlust in Höhe von 336 Mio € ausgewiesen.

### Sonstige im Jahr 2010 getätigte Unternehmenszusammenschlüsse

Im Jahr 2010 abgeschlossene Unternehmenszusammenschlüsse, die einzeln betrachtet nicht wesentlich waren, beinhalten den sukzessiven Erwerb von weiteren 47,5 % der Anteile an einem bestehenden assoziierten Unternehmen auf den Philippinen. Dieser Erwerb führte zu einer Kontrollmehrheit von 95 % und der Konsolidierung des Unternehmens im ersten Quartal 2010. Der in bar entrichtete Gesamtkaufpreis von 6 Mio € wurde dem erworbenen Nettovermögen (einschließlich übernommener Verbindlichkeiten) in Höhe von 10 Mio € zugeordnet, sodass sich ein negativer Goodwill von 4 Mio € ergab. Dieser wurde in der Gewinn- und Verlustrechnung des Konzerns im ersten Quartal 2010 unter den Sonstigen Erträgen ausgewiesen. Die Beteiligung ist in CB&S zugeordnet.

Ebenfalls in 2010 erwarb der Konzern für einen Kaufpreis von 2 Mio € 100 % der Stimmrechte an einem in den USA ansässigen Anlageberatungsunternehmen. Der Kaufpreis wurde vollständig dem Goodwill zugeordnet. Die Konsolidierung des Unternehmens begann im vierten Quartal 2010. Die Beteiligung ist in CB&S zugeordnet.

Die Fair-Value-Beträge für diese Unternehmenszusammenschlüsse zum Erwerbszeitpunkt wurden wie folgt erfasst.

in Mio €

|                                                                                                                                         |           |
|-----------------------------------------------------------------------------------------------------------------------------------------|-----------|
| <b>Gesamtkaufpreis, einschließlich Fair Value der Beteiligung des Konzerns vor dem Unternehmenszusammenschluss</b>                      | <b>8</b>  |
| <b>Identifizierbare erworbene Vermögenswerte und übernommene Verbindlichkeiten<sup>1</sup>:</b>                                         |           |
| Barreserve und verzinsliche Sichteinlagen bei Kreditinstituten                                                                          | 3         |
| Zur Veräußerung verfügbare finanzielle Vermögenswerte                                                                                   | 14        |
| Alle sonstigen Vermögenswerte                                                                                                           | 1         |
| Langfristige Verbindlichkeiten                                                                                                          | 7         |
| Alle sonstigen Verbindlichkeiten                                                                                                        | 1         |
| <b>Identifizierbares Nettovermögen insgesamt</b>                                                                                        | <b>10</b> |
| Anteile ohne beherrschenden Einfluss                                                                                                    | 0         |
| <b>Identifizierbares den DB Aktionären zurechenbares Nettovermögen insgesamt</b>                                                        | <b>10</b> |
| Goodwill                                                                                                                                | 2         |
| Negativer Goodwill                                                                                                                      | 4         |
| <b>Erworbenes identifizierbares Nettovermögen insgesamt sowie Goodwill, den DB Aktionären zurechenbar, abzüglich negativer Goodwill</b> | <b>8</b>  |

<sup>1</sup> Nach Hauptklassen der erworbenen Vermögenswerte und übernommenen Verbindlichkeiten.

Seit dem Erwerb haben die übernommenen Geschäftsaktivitäten insgesamt mit Erträgen und einem Ergebnis nach Steuern von jeweils 2 Mio € zur Gewinn- und Verlust-Rechnung des Konzerns beigetragen. Wären die Akquisitionen zum 1. Januar 2010 wirksam gewesen, hätte der Konzern für 2010 Erträge und ein Ergebnis nach Steuern von jeweils 2 Mio € ausgewiesen.

### Im Jahr 2009 getätigte Unternehmenszusammenschlüsse

Im Geschäftsjahr 2009 tätigte der Konzern mehrere Akquisitionen, die als Unternehmenszusammenschlüsse bilanziert wurden. Von diesen Transaktionen war einzeln betrachtet keine wesentlich. Sie werden deshalb zusammengefasst dargestellt. Diese Akquisitionen umfassten den Erwerb von Beteiligungen von jeweils 100 % zu einem Gesamtkaufpreis von 22 Mio €, der sich zusammensetzt aus einem bar zu entrichtenden Kaufpreis von 20 Mio € und Anschaffungsnebenkosten von 2 Mio €. Auf Basis vorläufiger Werte wurden vom Gesamtkaufpreis 21 Mio € aus Kundenbeziehungen den sonstigen immateriellen Vermögenswerten und 1 Mio € dem Goodwill zugewiesen. Zu diesen Transaktionen gehört die am 30. November 2009 abgeschlossene Akquisition des globalen Agency Securities Lending-Geschäfts der Dresdner Bank. Das Geschäft wird von London, New York und Frankfurt aus getätigt und wurde in den Unternehmensbereich Global Transaction Banking integriert. Mit dem Abschluss dieser Transaktion erweiterte der Konzern seine Custodyplattform um einen der größten depotbankunabhängigen Anbieter von Agency Securities Lending-Dienstleistungen und schloss eine strategische Produktlücke im Wertpapierdienstleistungsgeschäft.

Die nachfolgende Übersicht zeigt zusammengefasst die Auswirkungen dieser Akquisitionen auf die Konzernbilanz des Geschäftsjahres 2009.

| in Mio €                             | Buchwert vor der Akquisition | Anpassungen auf den Fair Value | Fair Value |
|--------------------------------------|------------------------------|--------------------------------|------------|
| <b>Aktiva:</b>                       |                              |                                |            |
| Barreserve                           | –                            | –                              | –          |
| Goodwill                             | –                            | 1                              | 1          |
| Sonstige immaterielle Vermögenswerte | –                            | 21                             | 21         |
| Übrige Vermögenswerte                | –                            | –                              | –          |
| <b>Summe der Aktiva</b>              | <b>–</b>                     | <b>22</b>                      | <b>22</b>  |
| <b>Passiva:</b>                      |                              |                                |            |
| Langfristige Verbindlichkeiten       | –                            | –                              | –          |
| Übrige Verbindlichkeiten             | –                            | 3                              | 3          |
| <b>Summe der Verbindlichkeiten</b>   | <b>–</b>                     | <b>3</b>                       | <b>3</b>   |
| <b>Nettovermögen</b>                 | <b>–</b>                     | <b>19</b>                      | <b>19</b>  |
| <b>Summe der Passiva</b>             | <b>–</b>                     | <b>22</b>                      | <b>22</b>  |

Nach Fertigstellung dieser Unternehmenszusammenschlüsse im Geschäftsjahr 2010 wurden die Gesamtkaufpreise mit 16 Mio € den als sonstige immaterielle Vermögenswerte erfassten Kundenbeziehungen und mit 6 Mio € dem Goodwill zugewiesen.

Im Zusammenhang mit diesen Akquisitionen wies der Konzern für 2009 Erträge von 1 Mio € und einen Verlust nach Steuern von 1 Mio € aus.

### Mögliche Auswirkungen der 2009 getätigten Unternehmenszusammenschlüsse auf die Gewinn- und Verlustrechnung

Wären die zuvor aufgeführten im Berichtsjahr 2009 abgeschlossenen Unternehmenszusammenschlüsse zum 1. Januar 2009 wirksam gewesen, hätte der Konzern dafür in 2009 Erträge von 22 Mio € und ein Ergebnis nach Steuern von weniger als 1 Mio € ausgewiesen.

### Im Jahr 2008 getätigte Unternehmenszusammenschlüsse

Im Geschäftsjahr 2008 tätigte der Konzern mehrere Akquisitionen, die als Unternehmenszusammenschlüsse bilanziert wurden. Von diesen Transaktionen waren der Rückerwerb der Maher Terminals LLC und Maher Terminals of Canada Corp. sowie die Übernahme der DB HedgeWorks, LLC einzeln betrachtet wesentlich und werden deshalb separat dargestellt. Die sonstigen Unternehmenszusammenschlüsse, die einzeln betrachtet nicht wesentlich waren, werden zusammengefasst dargestellt.

#### Maher Terminals LLC und Maher Terminals of Canada Corp.

Zum 30. Juni 2008 konsolidierte der Konzern die Maher Terminals LLC und die Maher Terminals of Canada Corp. (zusammen und nachfolgend als „Maher Terminals“ bezeichnet), einen privaten Betreiber von Containerterminals in Nordamerika. Maher Terminals wurde als Gründungsvermögen für den North American Infrastructure Fund erworben. Nachdem der Konzern 2007 einen Minderheitsanteil von 11,4 % seiner ursprünglich hundertprozentigen Beteiligung am RREEF North America Infrastructure Fund verkauft hatte, behielt er lediglich einen Anteil ohne beherrschenden Einfluss an Maher Terminals. Dieser wurde zum 31. Dezember 2007 nach der Equitymethode als zum Verkauf bestimmter Vermögenswert bilanziert. Im Geschäftsjahr 2008 kaufte die RREEF Infrastructure zur Restrukturierung des North America Infrastructure Fund, dessen einziges Investment Maher Terminals ist, alle ausstehenden Anteile zu einem Kaufpreis von 109 Mio € in bar zurück.



Am Ende des dritten Quartals 2008 wurde die Beteiligung nicht länger als zum Verkauf bestimmt bilanziert, sodass die Vermögenswerte und Verbindlichkeiten von Maher Terminals nicht länger als zum Verkauf bestimmt klassifiziert wurden und der Rückkauf als Erwerbstransaktion verbucht wurde. Die Anschaffungskosten wurden in Höhe von 33 Mio € dem Goodwill und in Höhe von 76 Mio € dem Nettovermögen zugewiesen. Beim Erwerb wurde Maher Terminals dem Unternehmensbereich AWM zugeordnet. Aufgrund von veränderten Managementverantwortlichkeiten wurde Maher Terminals zum 1. Januar 2009 auf CI übertragen.

Zum Erwerbszeitpunkt ergaben sich folgende Auswirkungen auf die Konzernbilanz.

| in Mio €                                         | Buchwert vor der<br>Akquisition (als zum<br>Verkauf bestimmt) | Umklassifizierung von<br>zum Verkauf bestimmt<br>sowie Anpassungen<br>auf den Fair Value | Fair Value   |
|--------------------------------------------------|---------------------------------------------------------------|------------------------------------------------------------------------------------------|--------------|
| <b>Aktiva:</b>                                   |                                                               |                                                                                          |              |
| Verzinsliche Termineinlagen bei Kreditinstituten | –                                                             | 30                                                                                       | 30           |
| Sachanlagen                                      | –                                                             | 169                                                                                      | 169          |
| Goodwill                                         | –                                                             | 597                                                                                      | 597          |
| Sonstige immaterielle Vermögenswerte             | –                                                             | 770                                                                                      | 770          |
| Übrige Vermögenswerte                            | 1.840                                                         | – 1.656                                                                                  | 184          |
| <b>Summe der Aktiva</b>                          | <b>1.840</b>                                                  | <b>–90</b>                                                                               | <b>1.750</b> |
| <b>Passiva:</b>                                  |                                                               |                                                                                          |              |
| Langfristige Verbindlichkeiten                   | –                                                             | 839                                                                                      | 839          |
| Übrige Verbindlichkeiten                         | 983                                                           | – 845                                                                                    | 138          |
| <b>Summe der Verbindlichkeiten</b>               | <b>983</b>                                                    | <b>– 6</b>                                                                               | <b>977</b>   |
| <b>Nettovermögen</b>                             | <b>857</b>                                                    | <b>–84</b>                                                                               | <b>773</b>   |
| <b>Summe der Passiva</b>                         | <b>1.840</b>                                                  | <b>–90</b>                                                                               | <b>1.750</b> |

Nach der Akquisition entfielen auf Maher Terminals für 2008 negative Erträge in Höhe von 7 Mio € und ein Verlust nach Steuern von 256 Mio €. Letzterer enthält eine Belastung nach Steuern in Höhe von 175 Mio € aus der erfassten Wertminderung des Goodwill von Maher Terminals im vierten Quartal 2008.

### DB HedgeWorks, LLC

Zum 31. Januar 2008 erwarb der Konzern eine Beteiligung von 100 % am Hedgefondsadministrator HedgeWorks, LLC mit Sitz in den Vereinigten Staaten, der nach der Übernahme in DB HedgeWorks, LLC („DB HedgeWorks“) umfirmiert wurde. Durch die Akquisition baute der Konzern sein Serviceangebot im Hedgefondsgeschäft weiter aus. Der Kaufpreis setzte sich aus einer Barvergütung in Höhe von 19 Mio € und weiteren 15 Mio € zusammen, die unter der Voraussetzung gezahlt werden, dass das erworbene Unternehmen in den nächsten drei Jahren bestimmte Ergebnisziele übertrifft. Von dem Gesamtkaufpreis wurden 28 Mio € dem Goodwill, 5 Mio € den sonstigen immateriellen Vermögenswerten und 1 Mio € dem Nettovermögen zugewiesen. DB HedgeWorks ist dem Unternehmensbereich GTB zugeordnet. Die nachfolgende Übersicht zeigt die Auswirkungen dieser Akquisition auf die Konzernbilanz.

| in Mio €                             | Buchwert vor der Akquisition | Anpassungen auf den Fair Value | Fair Value |
|--------------------------------------|------------------------------|--------------------------------|------------|
| <b>Aktiva:</b>                       |                              |                                |            |
| Barreserve                           | 1                            | –                              | 1          |
| Goodwill                             | –                            | 28                             | 28         |
| Sonstige immaterielle Vermögenswerte | –                            | 5                              | 5          |
| Übrige Vermögenswerte                | 1                            | –                              | 1          |
| <b>Summe der Aktiva</b>              | <b>2</b>                     | <b>33</b>                      | <b>35</b>  |
| <b>Passiva:</b>                      |                              |                                |            |
| Langfristige Verbindlichkeiten       | –                            | 15                             | 15         |
| Übrige Verbindlichkeiten             | 1                            | –                              | 1          |
| <b>Summe der Verbindlichkeiten</b>   | <b>1</b>                     | <b>15</b>                      | <b>16</b>  |
| <b>Nettovermögen</b>                 | <b>1</b>                     | <b>18</b>                      | <b>19</b>  |
| <b>Summe der Passiva</b>             | <b>2</b>                     | <b>33</b>                      | <b>35</b>  |

Seit dem Erwerb im Geschäftsjahr 2008 wurden für DB HedgeWorks Erträge von 6 Mio € und ein Verlust nach Steuern von 2 Mio € ausgewiesen.

### Sonstige im Jahr 2008 getätigte Unternehmenszusammenschlüsse

Im Jahr 2008 getätigte sonstige Unternehmenszusammenschlüsse, die einzeln betrachtet nicht wesentlich waren, werden zusammengefasst dargestellt. Dies betrifft unter anderem die Akquisition des taiwanesischen Vermögensverwalters Far Eastern Alliance Asset Management Co. Limited sowie die Übernahme der Geschäftsplattform der Pago eTransaction GmbH, eines deutschen Anbieters von Dienstleistungen im Bereich Cash Management und Merchant Acquiring. Diese Transaktionen umfassten den Erwerb von Mehrheitsbeteiligungen zwischen mehr als 50 % und 100 % zu einem Gesamtaufpreis von 7 Mio € einschließlich Anschaffungsnebenkosten von weniger als 1 Mio €.

Die nachfolgende Übersicht zeigt die Auswirkungen dieser Akquisitionen auf die Konzernbilanz.

| in Mio €                                         | Buchwert vor der Akquisition | Anpassungen auf den Fair Value | Fair Value |
|--------------------------------------------------|------------------------------|--------------------------------|------------|
| <b>Aktiva:</b>                                   |                              |                                |            |
| Barreserve                                       | 4                            | 6                              | 10         |
| Verzinsliche Sichteinlagen bei Kreditinstituten  | 6                            | 3                              | 9          |
| Verzinsliche Termineinlagen bei Kreditinstituten | 2                            | 3                              | 5          |
| Sonstige immaterielle Vermögenswerte             | –                            | 1                              | 1          |
| Übrige Vermögenswerte                            | 20                           | 2                              | 22         |
| <b>Summe der Aktiva</b>                          | <b>32</b>                    | <b>15</b>                      | <b>47</b>  |
| <b>Passiva:</b>                                  |                              |                                |            |
| Sonstige Passiva                                 | 1                            | 7                              | 8          |
| Übrige Verbindlichkeiten                         | –                            | 1                              | 1          |
| <b>Summe der Verbindlichkeiten</b>               | <b>1</b>                     | <b>8</b>                       | <b>9</b>   |
| <b>Nettovermögen</b>                             | <b>31</b>                    | <b>7</b>                       | <b>38</b>  |
| <b>Summe der Passiva</b>                         | <b>32</b>                    | <b>15</b>                      | <b>47</b>  |

Für diese Akquisitionen wies der Konzern für 2008 Erträge von 2 Mio € und einen Verlust nach Steuern von 4 Mio € aus.

## Mögliche Auswirkungen der in 2008 getätigten Unternehmenszusammenschlüsse auf die Gewinn- und Verlustrechnung

Wären alle oben aufgeführten im Berichtsjahr 2008 getätigten Unternehmenszusammenschlüsse zum 1. Januar 2008 wirksam gewesen, hätte der Konzern dafür Erträge von 44 Mio € und einen Verlust nach Steuern von 223 Mio € ausgewiesen. Letzterer enthielt eine Belastung nach Steuern in Höhe von 175 Mio € aus der erfassten Wertminderung des Goodwill von Maher Terminals im vierten Quartal 2008.

## Akquisitionen und Veräußerungen von Minderheitsbeteiligungen ohne Kontrollwechsel

Im Geschäftsjahr 2010 hat der Konzern Akquisitionen und Veräußerungen von Minderheitsbeteiligungen an Tochtergesellschaften abgeschlossen, bei denen der Konzern nicht der alleinige Eigentümer ist. Diese Transaktionen führten nicht zu einem Verlust der Kontrolle über die jeweiligen Tochtergesellschaften. Gemäß IAS 27 R wurden sie als Eigenkapitaltransaktionen zwischen dem Konzern und außenstehenden Aktionären bilanziert, bei denen kein Gewinn oder Verlust in der Gewinn- und Verlustrechnung erfasst wurde. Die im Rahmen dieser Transaktionen per Saldo gezahlte Barvergütung betrug insgesamt 13 Mio €. Die Bilanzwerte der jeweiligen Mehrheits- oder Minderheitsbeteiligungen wurden angepasst, um die Veränderung der Beteiligungen des Konzerns an diesen Tochtergesellschaften darzustellen. Differenzen zwischen dem Fair Value der übertragenen oder erhaltenen Gegenleistungen und den Beträgen, um die die Minderheitsbeteiligungen angepasst wurden, werden direkt im Eigenkapital erfasst.

Die folgende Tabelle beschreibt die Auswirkungen der 2010 bilanzierten Veränderungen der Beteiligungen des Konzerns an diesen Tochtergesellschaften.

| in Mio €                                                             | 2010 |
|----------------------------------------------------------------------|------|
| Beteiligungen des Konzerns zum 1. Januar 2010                        | 136  |
| Nettoeffekt aus der Veränderung der Beteiligungen der Deutschen Bank | 76   |
| Anteil des Konzerns am Gewinn oder Verlust                           | - 11 |
| Anteil des Konzerns am sonstigen Ergebnis                            | 29   |
| Anteil des Konzerns an den sonstigen Veränderungen des Eigenkapitals | -49  |
| Beteiligung des Konzerns zum 31. Dezember 2010                       | 181  |

## Veräußerungen

In den Geschäftsjahren 2010, 2009 und 2008 veräußerte der Konzern mehrere Tochtergesellschaften/Geschäftseinheiten. Diese Veräußerungen enthielten den Verkauf der BAS im dritten Quartal 2010. Das betreffende Geschäft war als Teil des Sal. Oppenheim Erwerbs im ersten Quartal 2010 bereits als zum Verkauf bestimmt klassifiziert worden. Eine Liste und weitere Einzelheiten zu diesen Veräußerungen befinden sich in Note 05 „Segmentberichterstattung“. Die gesamte für diese Veräußerungen in bar erhaltene Gegenleistung belief sich in den Jahren 2010, 2009 und 2008 auf 281 Mio €, 51 Mio € beziehungsweise 182 Mio €. Die folgende Tabelle enthält die Vermögenswerte und Verbindlichkeiten, die in diesen Veräußerungen enthalten waren.

| in Mio €                                                       | 2010         | 2009      | 2008         |
|----------------------------------------------------------------|--------------|-----------|--------------|
| Barreserve und verzinsliche Sichteinlagen bei Kreditinstituten | 45           | 49        | 66           |
| Übrige Vermögenswerte                                          | 2.180        | 15        | 4.079        |
| <b>Summe der veräußerten Aktiva</b>                            | <b>2.225</b> | <b>64</b> | <b>4.145</b> |
| <b>Summe der veräußerten Verbindlichkeiten</b>                 | <b>1.932</b> | <b>73</b> | <b>3.490</b> |

Diese 2010 abgeschlossenen Transaktionen beinhalteten ebenfalls mehrere Veräußerungen, bei denen der Konzern eine Minderheitsbeteiligung an den ehemaligen Tochtergesellschaften behalten hat. Keine dieser Veräußerungen war einzeln betrachtet wesentlich. Die verbleibenden Beteiligungen an den ehemaligen Tochtergesellschaften wurden in der Gewinn- und Verlustrechnung im Zeitpunkt des Verlusts des beherrschenden Einflusses zum Fair Value ausgewiesen. Ab diesem Datum wurden die Beteiligungen nach der Equitymethode bilanziert. Der ausgewiesene Gewinn aus diesen Transaktionen betrug 15 Mio € und wird in den sonstigen Erträgen ausgewiesen. Von diesem Ergebnis entfallen 5 Mio € auf die Neubewertung zum Fair Value der verbleibenden Beteiligung an diesen ehemaligen Tochtergesellschaften.

## 05 – Segmentberichterstattung

Die nachfolgenden Segmentinformationen basieren auf dem sogenannten „Management Approach“, der verlangt, Segmentinformationen auf Basis der internen Berichterstattung so darzustellen, wie sie vom sogenannten „Chief Operating Decision Maker“ regelmäßig zur Entscheidung über die Zuteilung von Ressourcen zu einem Segment und zur Beurteilung seiner Performance herangezogen werden.

### Segmente

Die folgenden Segmente stellen die Organisationsstruktur des Konzerns dar, wie sie in der internen Managementberichterstattung abgebildet wird.

Die Deutsche Bank ist in drei Konzernbereiche gegliedert, die sich weiter in Unternehmensbereiche untergliedern. Zum 31. Dezember 2010 bestanden folgende Konzern- und Unternehmensbereiche:

Der Konzernbereich **Corporate & Investment Bank (CIB)** beinhaltet die Corporate-Banking- und Wertpapieraktivitäten (einschließlich Handel mit und Vertrieb von Kapitalmarktprodukten und Corporate-Finance-Aktivitäten) sowie die Transaction-Banking-Aktivitäten des Konzerns. CIB betreut Firmen- und institutionelle Kunden: von mittelständischen Firmen bis hin zu multinationalen Unternehmen einschließlich Banken und staatlicher Organisationen. Diese Aktivitäten werden im Konzernbereich CIB in den globalen Unternehmensbereichen Corporate Banking & Securities (CB&S) und Global Transaction Banking (GTB) gesteuert.

- CB&S besteht aus den Geschäftsbereichen Markets und Corporate Finance. Diese Bereiche bieten weltweit Finanzprodukte an, angefangen bei der Emission von Aktien und festverzinslichen Wertpapieren bis hin zur Erarbeitung maßgeschneiderter strukturierter Lösungen für komplexe Finanzierungsbedürfnisse.
- GTB bietet seinen Kunden weltweit in erster Linie die Beschaffung, den Transfer, die Verwahrung und die Kontrolle von Vermögenswerten an. In diesem Zusammenhang stellt der Bereich Unternehmen, Finanzinstituten sowie Staaten (einschließlich deren Institutionen) Bearbeitungs- und Treuhandleistungen zur Verfügung.

Im Konzernbereich **Private Clients and Asset Management (PCAM)** sind die Aktivitäten des Konzerns im Asset Management, im Private Wealth Management sowie im Privat- und Geschäftskundenbereich zusammengefasst. Diese Aktivitäten werden innerhalb von PCAM in den beiden globalen Unternehmensbereichen Asset and Wealth Management (AWM) und Private & Business Clients (PBC) gesteuert.

- AWM besteht aus den Geschäftsbereichen Asset Management (AM), der das Vermögen institutioneller Kunden verwaltet und Investmentfonds und andere Anlageprodukte für Privatkunden anbietet, und Private Wealth Management (PWM), der für die Betreuung anspruchsvoller vermögender Privatkunden und ihrer Familien sowie ausgewählter institutioneller Kunden zuständig ist.
- PBC stellt Privatkunden und vermögenden Kunden sowie kleineren Firmenkunden die gesamte Produktpalette des Privatkundengeschäfts bereit.

Der Konzernbereich **Corporate Investments (CI)** steuert bestimmte Alternative Assets des Konzerns sowie andere Fremd- und Eigenkapitalanlagen.

Änderungen in der Segmentstruktur können aus veränderten Managementverantwortungen sowie aus Akquisitionen oder Desinvestitionen resultieren.

Es gab folgende Veränderungen der Managementverantwortungen mit wesentlichen Auswirkungen auf die Segmentberichterstattung.

- Mit Wirkung zum 1. Juli 2010 wurde eine integrierte Managementstruktur für den gesamten Konzernbereich Corporate & Investment Bank (CIB) infolge der Veränderungen im Vorstand sowie der Verantwortung für die Bereiche Corporate Finance und Global Transaction Banking eingeführt. Die neue Struktur soll das Wachstum der Deutschen Bank als einer der weltweit führenden Geschäfts- und Investmentbanken beschleunigen und die Erreichung der Konzernziele ermöglichen. Hieraus ergeben sich jedoch keine Auswirkungen auf die Zusammensetzung der Geschäftssegmente.
- Am 1. April 2009 wurde die Managementverantwortung für die Immobilie The Cosmopolitan of Las Vegas vom Unternehmensbereich CB&S auf den Unternehmensbereich CI übertragen.
- Im Verlauf des ersten Quartals 2009 wurde die Managementverantwortung bestimmter Vermögenswerte vom Unternehmensbereich Asset and Wealth Management auf den Unternehmensbereich CI übertragen. Diese Vermögenswerte beinhalteten Maher Terminals, ein konsolidiertes Infrastrukturinvestment, und RREEF Global Opportunity Fund III, einen konsolidierten Immobilienfonds.

Die folgenden Akquisitionen und Desinvestitionen hatten wesentlichen Einfluss auf die Segmentergebnisse:

- Zum 3. Dezember 2010 konsolidierte der Konzern erstmalig die Postbank AG, nachdem das freiwillige öffentliche Übernahmeangebot vorgelegt und erfolgreich angenommen wurde. Von diesem Zeitpunkt an ist die Beteiligung an der Postbank dem Unternehmensbereich PBC zugeordnet.
- Am 1. April 2010 hat der Konzern den Erwerb von Teilen des niederländischen Firmenkundengeschäfts der ABN AMRO Bank N.V. („ABN AMRO“) abgeschlossen. Dieses Geschäft wurde dem Unternehmensbereich GTB zugeordnet.

- Zum 15. März 2010 erwarb der Konzern die Sal. Oppenheim Gruppe, die mit Ausnahme des Geschäfts der BHF-BANK dem Unternehmensbereich AWM zugeordnet wurde. Das Geschäft der BHF-BANK wurde dem Konzernbereich Corporate Investments zugeordnet. Im zweiten Quartal 2010 wurde das Geschäft der BHF-BANK auf den Geschäftsbereich PWM im Unternehmensbereich AWM übertragen. Diese Änderung wurde für die Darstellung zum 31. Dezember 2010 berücksichtigt.
- Im November 2009 hat der Konzern den Erwerb des globalen Agency-Securities-Lending-Geschäfts der Dresdner Bank von der Commerzbank AG abgeschlossen. Diese Geschäftsaktivität ist dem Unternehmensbereich GTB zugeordnet.
- Am 25. Februar 2009 schloss der Konzern den Erwerb eines Minderheitsanteils an der Deutschen Postbank AG, einem führenden Anbieter von Finanzdienstleistungen in Deutschland, ab. Ebenfalls zu diesem Datum hat der Konzern eine Pflichtumtauschleihe sowie Optionen erworben, um den Anteil an der Deutschen Postbank AG in Zukunft zu erhöhen. Alle Teile der Transaktion wurden bis zur Erstkonsolidierung der Postbank am 3. Dezember 2010 dem Konzernbereich CI zugeordnet.
- Im Dezember 2008 wurde von RREEF Alternative Investments eine wesentliche Minderheitsbeteiligung an Rosen Real Estate Securities LLC (RRES), einem Berater für Immobilienanlagen, erworben. Die Beteiligung ist dem Unternehmensbereich AWM zugeordnet.
- Im November 2008 wurde ein Anteil von 40 % an UFG Invest erworben, verbunden mit der Option, den Anteil in der Zukunft auf 100 % zu erhöhen. UFG Invest ist das russische Wertpapierverwaltungsunternehmen von UFG Asset Management. Das Geschäft firmiert unter Deutsche UFG Capital Management. Die Beteiligung ist dem Unternehmensbereich AWM zugeordnet.
- Im Oktober 2008 wurde der Kauf der operativen Plattform der Pago eTransaction GmbH durch die Deutsche Card Services GmbH abgeschlossen. Die Transaktion fand in Deutschland statt und ist dem Unternehmensbereich GTB zugeordnet.
- Im Juni 2008 konsolidierte der Konzern die Maher Terminals LLC und die Maher Terminals of Canada Corp. (zusammen „Maher Terminals“). Maher Terminals ist ein privater Betreiber von Containerterminals in Nordamerika. RREEF Infrastructure erwarb alle Anteile konzernexterner Investoren am North America Infrastructure Fund, dessen einzige Beteiligung Maher Terminals war. Diese Beteiligung ist seit dem ersten Quartal 2009 dem Konzernbereich CI zugeordnet.
- Mit Wirkung ab Juni 2008 verkaufte der Konzern die DWS Investments Schweiz AG, die das schweizerische Fondsverwaltungsgeschäft des Unternehmensbereichs AWM umfasst, an die State Street Bank.
- Mit Wirkung ab Juni 2008 verkaufte der Konzern die italienische Lebensversicherungsgesellschaft DWS Vita S.p.A. an die Zurich Financial Services Group. Dieses Geschäft war Bestandteil des Unternehmensbereichs AWM.
- Mit Wirkung ab März 2008 schloss der Konzern den Erwerb einer Beteiligung von 60 % an dem taiwanesischen Vermögensverwalter Far Eastern Alliance Asset Management Co. Limited ab. Das erworbene Unternehmen ist dem Unternehmensbereich AWM zugeordnet.
- Im Februar 2008 verkaufte RREEF Alternative Investments seinen Anteil von 50 % an der australischen DEXUS Property Group an andere Anteilseigner von DEXUS. Die Beteiligung wurde im Unternehmensbereich AWM gehalten.
- Im Januar 2008 erwarb der Konzern HedgeWorks LLC, einen Hedgefondsadministrator mit Sitz in den Vereinigten Staaten. Das Geschäft wurde in den Unternehmensbereich GTB integriert.
- Im Januar 2008 erhöhte AM seinen Anteil an Harvest Fund Management, einer Publikumsfondsgesellschaft in China, auf 30 %. Diese Beteiligung ist dem Unternehmensbereich AWM zugeordnet.

### Bemessung von Segmentgewinnen oder -verlusten

Die Segmentberichterstattung zeigt die Segmentergebnisse auf Basis der Managementberichterstattung, ergänzt um eine Überleitung der Segmentergebnisse auf den Konzernabschluss. Erforderliche Anpassungen im Rahmen dieser Überleitung werden im Abschnitt „Überleitung der Segmentergebnisse auf den Konzernabschluss“ dieser Note berichtet. Die dargestellten Segmentinformationen basieren auf der internen Managementberichterstattung von Segmentgewinnen oder -verlusten, Aktiva und anderen Informationen, welche dem „Chief Operating Decision Maker“ regelmäßig berichtet werden.

Die Managementberichterstattung der Deutschen Bank beruht grundsätzlich auf IFRS. In einigen Ausnahmefällen werden für die interne Managementberichterstattung Bilanzierungsmethoden angewandt, die nicht IFRS-konform sind und zu Bewertungs- und Ausweisunterschieden führen. Die größten Bewertungsunterschiede stehen im Zusammenhang mit Positionen, die in der Managementberichterstattung zum Fair Value (Mark-to-market) ausgewiesen und im Konzernabschluss nach IFRS abgegrenzt werden (zum Beispiel bestimmte Finanzinstrumente in den Treasurybüchern von CB&S und PBC). Ein weiterer Bewertungsunterschied ergibt sich aufgrund der erfolgswirksamen Erfassung von Handelsergebnissen aus Eigenen Aktien in der Managementberichterstattung (hauptsächlich in CB&S), wohingegen unter IFRS eine erfolgsneutrale Berücksichtigung im Eigenkapital erfolgt. Ausweisunterschiede bestehen im Wesentlichen bei der Behandlung der Anteile ohne beherrschenden Einfluss, welche dem Nettoanteil der Minderheitsaktionäre an Erträgen, Risikovorsorgen im Kreditgeschäft, Zinsunabhängige Aufwendungen und Ertragsteueraufwand entsprechen. Diese werden in den Segmenten im Ergebnis vor Steuern berücksichtigt, während sie für den Konzernabschluss über Consolidation & Adjustments (C&A) in das den Anteilen ohne beherrschenden Einfluss zurechenbare Konzernergebnis umgegliedert werden.

Erträge aus Transaktionen zwischen den Segmenten werden auf der Grundlage gegenseitiger Vereinbarungen zugeordnet. Interne Serviceanbieter, die nicht als Profit Center geführt werden, weisen ihre zinsunabhängigen Aufwendungen den jeweiligen Serviceempfängern zu. Die Allokationskriterien beruhen in der Regel auf Vereinbarungen zwischen den beteiligten Bereichen und werden auf der Basis „Menge × Preis“, „auf Festpreisbasis“ oder „zu vereinbarten Prozentsätzen“ ermittelt. Da der Konzern in den operativen Einheiten unterschiedliche Geschäftsaktivitäten integriert hat, unterliegt die Zuordnung der Erträge und Aufwendungen zu den Unternehmensbereichen bestimmten Annahmen und Schätzungen.

Die Managementberichterstattung folgt der Marktzinsmethode, nach welcher der externe Zinsüberschuss des Konzerns kalkulatorisch den Unternehmensbereichen zugeordnet wird. Eine solche Zuordnung unterstellt, dass sämtliche Positionen über den Geld- und Kapitalmarkt refinanziert beziehungsweise angelegt werden. Um eine Vergleichbarkeit der Unternehmensbereiche mit denjenigen Wettbewerbern zu ermöglichen, die rechtlich selbstständige Einheiten mit zugehöriger Eigenkapitalfinanzierung haben, wird der Nettozinsnutzen auf das konsolidierte Eigenkapital des Konzerns (nach Verrechnung mit bestimmten zugehörigen Belastungen, zum Beispiel aus der Währungsabsicherung des Kapitals bestimmter ausländischer Tochtergesellschaften) im Verhältnis zu dem jeweils zugeordneten durchschnittlichen Active Equity den Geschäftsbereichen anteilig zugerechnet.

Die Finanzkrise führte zu erheblichen Veränderungen in den Konditionen, zu denen sich bestimmte Geschäftstätigkeiten refinanzieren können. Die Bank veranlasste daraufhin eine Überprüfung ihrer internen Refinanzierungssysteme und beschloss im Geschäftsjahr 2009 eine Verfeinerung ihrer internen Refinanzierungssätze, die eine angemessenere Vergütung für Liquidität aus unbesicherten Finanzierungsquellen vorsieht und die Risiken bestimmter Vermögenswerte stärker berücksichtigt.



Nachfolgend sind die finanziellen Auswirkungen auf die Geschäftsbereiche im Geschäftsjahr 2010 beschrieben:

- GTB (106 Mio €), AWM (16 Mio €) und PBC (1 Mio €) erhielten zusätzliche Gutschriften.
- CB&S (93 Mio €) und CI (30 Mio €) erhielten zusätzliche Belastungen.

Nachfolgend sind die finanziellen Auswirkungen auf die Geschäftsbereiche im Geschäftsjahr 2009 beschrieben:

- GTB (160 Mio €), AWM (32 Mio €) und PBC (4 Mio €) erhielten zusätzliche Gutschriften.
- CB&S (167 Mio €) und CI (30 Mio €) erhielten zusätzliche Belastungen.

Das Management nutzt bestimmte Messgrößen für das Kapital und darauf bezogene Kennziffern im Rahmen des internen Managementberichtssystems, weil es der Überzeugung ist, dass damit die Darstellung der finanziellen Performance der Segmente transparenter und aussagekräftiger ist. Durch die Veröffentlichung dieser Messgrößen erhalten Investoren und Analysten einen tieferen Einblick in die Steuerung der Geschäftsaktivitäten des Konzerns. Des Weiteren dienen sie dem besseren Verständnis der Konzernergebnisse. Diese Messgrößen beinhalten:

- **Durchschnittliches Active Equity:** Der Konzern berechnet das Active Equity, um besser mit seinen Wettbewerbern vergleichbar zu sein. Das durchschnittliche Active Equity fließt in die Berechnung verschiedener Kennziffern ein. Hierbei handelt es sich jedoch nicht um eine Messgröße nach IFRS. Bei einem Vergleich der Kennzahlen des Konzerns, die auf dem durchschnittlichen Active Equity basieren, mit denen anderer Unternehmen sollten stets auch Abweichungen bei der Berechnung dieser Kennzahlen berücksichtigt werden. Die Positionen, um die das durchschnittliche den Deutsche Bank-Aktionären zurechenbare Eigenkapital bereinigt wird, sind das durchschnittliche Kumulierte sonstige Ergebnis (Accumulated other comprehensive income) ohne Anpassungen aus der Währungsumrechnung (alle Bestandteile nach darauf entfallenden Steuern). Gleiches gilt für die durchschnittliche Dividendenzahlung, für die jedes Quartal auf Basis eines Vorschlags eine Abgrenzung vorgenommen und die nach Zustimmung der im folgenden Jahr stattfindenden Hauptversammlung ausgezahlt wird. Die Berechnung des durchschnittlichen Active Equity basiert auf den im Jahresabschluss für die jeweiligen Sachverhalte verwendeten Steuersätzen und nicht auf einem generellen Durchschnittssteuersatz. Die Allokation des durchschnittlichen Active Equity des Konzerns auf die Segmente und C&A erfolgt im Verhältnis ihrer ökonomischen Risiken, die sich aus dem Ökonomischen Kapital, Goodwill und nicht abzuschreibenden sonstigen immateriellen Vermögenswerten zusammensetzen. Der zuzurechnende Gesamtbetrag entspricht dem höheren Wert von ökonomischem Risiko und aufsichtsrechtlichem Kapitalbedarf des Konzerns. Für 2008 hat der Konzern den internen Bedarf an aufsichtsrechtlichem Kapital anhand einer Tier-1-Kapitalquote von 8,5 % abgeleitet. In den Geschäftsjahren 2009 und 2010 wurde dieser interne Bedarf aus einer Tier-1-Kapitalquote von 10 % abgeleitet. Überschreitet das durchschnittliche Active Equity des Konzerns den zuzurechnenden Gesamtbetrag, so wird der Mehrbetrag C&A zugeordnet.
- **Eigenkapitalrendite in %**, basierend auf dem durchschnittlichen Active Equity, ist definiert als der prozentuale Anteil des Ergebnisses vor Steuern, reduziert um Anteile ohne beherrschenden Einfluss am durchschnittlichen Active Equity. Beim Vergleich dieser auf Basis des durchschnittlichen Active Equity ermittelten Renditen mit denen anderer Unternehmen sind die unterschiedlichen Berechnungsweisen der jeweiligen Kennzahlen zu berücksichtigen.

## Segmentergebnisse

Die nachstehenden Tabellen enthalten Informationen zu den Segmentergebnissen einschließlich der Überleitung auf den Konzernabschluss nach IFRS für die Geschäftsjahre 2010, 2009 und 2008. Im Zusammenhang mit den in Note 01 „Wesentliche Rechnungslegungsgrundsätze“ dargestellten Änderungen der Bilanzierungsmethoden von Prämien für Finanzgarantien wurde in 2009 der Ausweis der Erträge und der zinsunabhängigen Aufwendungen für die Vorjahre angepasst.

| 2010                                                                                    | Corporate & Investment Bank    |                            |               | Private Clients and Asset Management |                            |               | Corporate Investments     | Management Reporting insgesamt |
|-----------------------------------------------------------------------------------------|--------------------------------|----------------------------|---------------|--------------------------------------|----------------------------|---------------|---------------------------|--------------------------------|
| in Mio €<br>(sofern nicht anders angegeben)                                             | Corporate Banking & Securities | Global Transaction Banking | Insgesamt     | Asset and Wealth Management          | Private & Business Clients | Insgesamt     |                           |                                |
| <b>Erträge insgesamt<sup>1</sup></b>                                                    | <b>17.490</b>                  | <b>3.439<sup>5</sup></b>   | <b>20.929</b> | <b>3.907</b>                         | <b>6.136</b>               | <b>10.043</b> | <b>-2.020<sup>6</sup></b> | <b>28.953</b>                  |
| <b>Risikovorsorge im Kreditgeschäft</b>                                                 | <b>348</b>                     | <b>140</b>                 | <b>488</b>    | <b>43</b>                            | <b>746</b>                 | <b>789</b>    | <b>-4</b>                 | <b>1.273</b>                   |
| <b>Zinsunabhängige Aufwendungen</b>                                                     | <b>12.028</b>                  | <b>2.394</b>               | <b>14.422</b> | <b>3.765</b>                         | <b>4.493</b>               | <b>8.258</b>  | <b>637</b>                | <b>23.318</b>                  |
| davon/darin:                                                                            |                                |                            |               |                                      |                            |               |                           |                                |
| Abschreibungen und Amortisation                                                         | 74                             | 6                          | 80            | 87                                   | 74                         | 161           | 8                         | 248                            |
| Abfindungszahlungen                                                                     | 215                            | 71                         | 286           | 117                                  | 33                         | 149           | 1                         | 436                            |
| Aufwendungen im Versicherungsgeschäft                                                   | 486                            | –                          | 486           | 0                                    | –                          | 0             | –                         | 486                            |
| Wertminderung auf immaterielle Vermögenswerte                                           | –                              | 29                         | 29            | –                                    | –                          | –             | –                         | 29                             |
| Restrukturierungsaufwand                                                                | –                              | –                          | –             | –                                    | –                          | –             | –                         | –                              |
| <b>Anteile ohne beherrschenden Einfluss</b>                                             | <b>20</b>                      | <b>–</b>                   | <b>20</b>     | <b>-1</b>                            | <b>8</b>                   | <b>6</b>      | <b>-2</b>                 | <b>24</b>                      |
| <b>Ergebnis vor Steuern</b>                                                             | <b>5.094</b>                   | <b>905</b>                 | <b>5.999</b>  | <b>100</b>                           | <b>890</b>                 | <b>989</b>    | <b>-2.649</b>             | <b>4.339</b>                   |
| Aufwand-Ertrag-Relation                                                                 | 69 %                           | 70 %                       | 69 %          | 96 %                                 | 73 %                       | 82 %          | N/A                       | 81 %                           |
| Aktiva <sup>2, 3</sup>                                                                  | 1.468.863                      | 71.877                     | 1.519.983     | 65.508                               | 346.998                    | 412.477       | 17.766                    | 1.894.282                      |
| Investitionen in langlebige Aktiva                                                      | 52                             | 1                          | 53            | 11                                   | 67                         | 78            | 776                       | 907                            |
| Risikogewichtete Aktiva                                                                 | 185.784                        | 25.331                     | 211.115       | 23.339                               | 104.488                    | 127.827       | 4.580                     | 343.522                        |
| Durchschnittliches Active Equity <sup>4</sup>                                           | 17.096                         | 1.548                      | 18.644        | 6.737                                | 3.897                      | 10.635        | 4.168                     | 33.446                         |
| Eigenkapitalrendite vor Steuern<br>(basierend auf dem durchschnittlichen Active Equity) | 30 %                           | 58 %                       | 32 %          | 1 %                                  | 23 %                       | 9 %           | -64 %                     | 13 %                           |
| <b>1 beinhaltet:</b>                                                                    |                                |                            |               |                                      |                            |               |                           |                                |
| Zinsüberschuss                                                                          | 9.848                          | 1.281                      | 11.128        | 668                                  | 3.850                      | 4.518         | -118                      | 15.528                         |
| Erträge mit externen Kunden                                                             | 18.069                         | 3.222                      | 21.290        | 3.945                                | 5.707                      | 9.652         | -2.033                    | 28.910                         |
| Intersegmenterträge                                                                     | -578                           | 217                        | -361          | -38                                  | 429                        | 391           | 13                        | 43                             |
| Ergebnis aus nach der Equitymethode bilanzierten Beteiligungen                          | -57                            | 1                          | -56           | 6                                    | -12                        | -6            | -1.947                    | -2.010                         |
| <b>2 beinhaltet:</b>                                                                    |                                |                            |               |                                      |                            |               |                           |                                |
| nach der Equitymethode bilanzierte Beteiligungen                                        | 2.108                          | 41                         | 2.149         | 259                                  | 34                         | 292           | 116                       | 2.558                          |

N/A – nicht aussagefähig

<sup>3</sup> Die Summe der Unternehmensbereiche entspricht aufgrund von Konsolidierungstatbeständen zwischen den Unternehmensbereichen nicht notwendigerweise dem korrespondierenden Konzernbereich. Dies gilt auch für die Summe der Konzernbereiche im Vergleich zum Management Reporting insgesamt.

<sup>4</sup> Zu Zwecken der Managementberichterstattung werden Goodwill und sonstige immaterielle Vermögenswerte mit unbestimmter Nutzungsdauer explizit den jeweiligen Unternehmensbereichen zugewiesen. Das durchschnittliche Active Equity des Konzerns wird den Segmenten sowie Consolidation & Adjustments anteilig gemäß ihrem ökonomischen Risikoprofil zugewiesen, welches das Ökonomische Kapital, Goodwill und nicht abzuschreibende sonstige immaterielle Vermögenswerte beinhaltet.

<sup>5</sup> Beinhaltet einen Gewinn aus der Vereinnahmung von negativem Goodwill im Zusammenhang mit dem Erwerb bestimmter Teile des niederländischen Firmenkundengeschäfts von ABN AMRO in Höhe von 208 Mio € aus dem zweiten Quartal 2010. Dieser Gewinn wurde nicht in der Zielgrößendefinition berücksichtigt.

<sup>6</sup> Beinhaltet eine Belastung bezüglich der Beteiligung an der Deutschen Postbank AG in Höhe von 2.338 Mio €, die in der Zielgrößendefinition nicht berücksichtigt wird.

| 2009                                                                                    | Corporate & Investment Bank    |                            |               | Private Clients and Asset Management |                            |              | Corporate Investments | Management Reporting insgesamt <sup>5</sup> |
|-----------------------------------------------------------------------------------------|--------------------------------|----------------------------|---------------|--------------------------------------|----------------------------|--------------|-----------------------|---------------------------------------------|
| in Mio €<br>(sofern nicht anders angegeben)                                             | Corporate Banking & Securities | Global Transaction Banking | Insgesamt     | Asset and Wealth Management          | Private & Business Clients | Insgesamt    |                       |                                             |
| <b>Erträge insgesamt<sup>1</sup></b>                                                    | <b>16.197</b>                  | <b>2.609</b>               | <b>18.807</b> | <b>2.685</b>                         | <b>5.576</b>               | <b>8.261</b> | <b>1.044</b>          | <b>28.112</b>                               |
| <b>Risikovorsorge im Kreditgeschäft</b>                                                 | <b>1.789</b>                   | <b>27</b>                  | <b>1.816</b>  | <b>17</b>                            | <b>790</b>                 | <b>806</b>   | <b>8</b>              | <b>2.630</b>                                |
| <b>Zinsunabhängige Aufwendungen</b>                                                     | <b>10.891</b>                  | <b>1.788</b>               | <b>12.679</b> | <b>2.475</b>                         | <b>4.328</b>               | <b>6.803</b> | <b>581</b>            | <b>20.063</b>                               |
| davon/darin:                                                                            |                                |                            |               |                                      |                            |              |                       |                                             |
| Abschreibungen und Amortisation                                                         | 72                             | 5                          | 77            | 18                                   | 69                         | 87           | 8                     | 172                                         |
| Abfindungszahlungen                                                                     | 138                            | 7                          | 145           | 105                                  | 192                        | 297          | 0                     | 442                                         |
| Aufwendungen im Versicherungsgeschäft                                                   | 541                            | –                          | 541           | 0                                    | –                          | 0            | –                     | 541                                         |
| Wertminderung auf immaterielle Vermögenswerte                                           | 5                              | –                          | 5             | –291                                 | –                          | –291         | 151                   | –134                                        |
| Restrukturierungsaufwand                                                                | –                              | –                          | –             | –                                    | –                          | –            | –                     | –                                           |
| <b>Anteile ohne beherrschenden Einfluss</b>                                             | <b>–2</b>                      | <b>–</b>                   | <b>–2</b>     | <b>–7</b>                            | <b>0</b>                   | <b>–7</b>    | <b>–1</b>             | <b>–10</b>                                  |
| <b>Ergebnis vor Steuern</b>                                                             | <b>3.520</b>                   | <b>795</b>                 | <b>4.314</b>  | <b>200</b>                           | <b>458</b>                 | <b>658</b>   | <b>456</b>            | <b>5.428</b>                                |
| Aufwand-Ertrag-Relation                                                                 | 67 %                           | 69 %                       | 67 %          | 92 %                                 | 78 %                       | 82 %         | 56 %                  | 71 %                                        |
| Aktiva <sup>2, 3</sup>                                                                  | 1.308.222                      | 47.414                     | 1.343.824     | 43.761                               | 131.014                    | 174.739      | 28.456                | 1.491.108                                   |
| Investitionen in langlebige Aktiva                                                      | 73                             | 17                         | 89            | 56                                   | 42                         | 98           | 395                   | 583                                         |
| Risikogewichtete Aktiva                                                                 | 188.118                        | 15.844                     | 203.962       | 12.201                               | 36.872                     | 49.073       | 16.935                | 269.969                                     |
| Durchschnittliches Active Equity <sup>4</sup>                                           | 17.881                         | 1.160                      | 19.041        | 4.791                                | 3.617                      | 8.408        | 4.323                 | 31.772                                      |
| Eigenkapitalrendite vor Steuern<br>(basierend auf dem durchschnittlichen Active Equity) | 20 %                           | 68 %                       | 23 %          | 4 %                                  | 13 %                       | 8 %          | 11 %                  | 17 %                                        |
| 1 beinhaltet:                                                                           |                                |                            |               |                                      |                            |              |                       |                                             |
| Zinsüberschuss                                                                          | 7.480                          | 1.040                      | 8.519         | 379                                  | 3.493                      | 3.871        | –108                  | 12.283                                      |
| Erträge mit externen Kunden                                                             | 17.000                         | 2.127                      | 19.127        | 2.528                                | 5.372                      | 7.900        | 1.053                 | 28.079                                      |
| Intersegmenterträge                                                                     | –802                           | 479                        | –323          | 160                                  | 204                        | 364          | –9                    | 33                                          |
| Ergebnis aus nach der Equitymethode bilanzierten Beteiligungen                          | –77                            | 1                          | –76           | –14                                  | 1                          | –12          | 155                   | 67                                          |
| 2 beinhaltet:                                                                           |                                |                            |               |                                      |                            |              |                       |                                             |
| nach der Equitymethode bilanzierte Beteiligungen                                        | 1.543                          | 40                         | 1.584         | 202                                  | 42                         | 244          | 5.911                 | 7.739                                       |

<sup>3</sup> Die Summe der Unternehmensbereiche entspricht aufgrund von Konsolidierungstatbeständen zwischen den Unternehmensbereichen nicht notwendigerweise dem korrespondierenden Konzernbereich. Dies gilt auch für die Summe der Konzernbereiche im Vergleich zum Management Reporting insgesamt.

<sup>4</sup> Zu Zwecken der Managementberichterstattung werden Goodwill und sonstige immaterielle Vermögenswerte mit unbestimmter Nutzungsdauer explizit den jeweiligen Unternehmensbereichen zugewiesen. Das durchschnittliche Active Equity des Konzerns wird den Segmenten sowie Consolidation & Adjustments anteilig gemäß ihrem ökonomischen Risikoprofil zugewiesen, welches das Ökonomische Kapital, Goodwill und nicht abzuschreibende sonstige immaterielle Vermögenswerte beinhaltet.

<sup>5</sup> Beinhaltet einen Gewinn aus dem Verkauf von Industriebeteiligungen (Daimler AG) in Höhe von 236 Mio €, eine Wertaufholung auf immaterielle Vermögenswerte (Asset Management) in Höhe von 291 Mio € (die zugehörige Abschreibung war im Jahr 2008 verbucht worden), eine Abschreibung in Höhe von 278 Mio € auf Industriebeteiligungen und eine Abschreibung auf immaterielle Vermögenswerte (Corporate Investments) in Höhe von 151 Mio €. Diese Positionen werden in der Zielgrößendefinition nicht berücksichtigt.

| 2008                                                                                    | Corporate & Investment Bank    |                            |                | Private Clients and Asset Management |                            |              | Corporate Investments | Management Reporting insgesamt <sup>5</sup> |
|-----------------------------------------------------------------------------------------|--------------------------------|----------------------------|----------------|--------------------------------------|----------------------------|--------------|-----------------------|---------------------------------------------|
| in Mio €<br>(sofern nicht anders angegeben)                                             | Corporate Banking & Securities | Global Transaction Banking | Insgesamt      | Asset and Wealth Management          | Private & Business Clients | Insgesamt    |                       |                                             |
| <b>Erträge insgesamt<sup>1</sup></b>                                                    | <b>428</b>                     | <b>2.784</b>               | <b>3.211</b>   | <b>3.254</b>                         | <b>5.777</b>               | <b>9.031</b> | <b>1.290</b>          | <b>13.532</b>                               |
| <b>Risikovorsorge im Kreditgeschäft</b>                                                 | <b>402</b>                     | <b>5</b>                   | <b>408</b>     | <b>15</b>                            | <b>653</b>                 | <b>668</b>   | <b>- 1</b>            | <b>1.075</b>                                |
| <b>Zinsunabhängige Aufwendungen</b>                                                     | <b>8.568</b>                   | <b>1.646</b>               | <b>10.214</b>  | <b>3.793</b>                         | <b>4.178</b>               | <b>7.971</b> | <b>95</b>             | <b>18.279</b>                               |
| davon/darin:                                                                            |                                |                            |                |                                      |                            |              |                       |                                             |
| Abschreibungen und Amortisation                                                         | 52                             | 6                          | 58             | 16                                   | 77                         | 93           | 8                     | 159                                         |
| Abfindungszahlungen                                                                     | 334                            | 3                          | 337            | 29                                   | 84                         | 113          | 0                     | 450                                         |
| Aufwendungen im Versicherungsgeschäft                                                   | - 273                          | -                          | - 273          | 18                                   | -                          | 18           | -                     | - 256                                       |
| Wertminderung auf immaterielle Vermögenswerte                                           | 5                              | -                          | 5              | 580                                  | -                          | 580          | -                     | 585                                         |
| Restrukturierungsaufwand                                                                | -                              | -                          | -              | -                                    | -                          | -            | -                     | -                                           |
| <b>Anteile ohne beherrschenden Einfluss</b>                                             | <b>- 48</b>                    | <b>-</b>                   | <b>- 48</b>    | <b>- 20</b>                          | <b>0</b>                   | <b>- 20</b>  | <b>2</b>              | <b>- 66</b>                                 |
| <b>Ergebnis vor Steuern</b>                                                             | <b>- 8.494</b>                 | <b>1.132</b>               | <b>- 7.362</b> | <b>- 534</b>                         | <b>945</b>                 | <b>411</b>   | <b>1.194</b>          | <b>- 5.756</b>                              |
| Aufwand-Ertrag-Relation                                                                 | N/A                            | 59 %                       | N/A            | 117 %                                | 72 %                       | 88 %         | 7 %                   | 135 %                                       |
| Aktiva <sup>2,3</sup>                                                                   | 2.012.002                      | 49.469                     | 2.047.181      | 50.473                               | 138.350                    | 188.785      | 18.297                | 2.189.313                                   |
| Investitionen in langlebige Aktiva                                                      | 1.167                          | 38                         | 1.205          | 13                                   | 56                         | 70           | 0                     | 1.275                                       |
| Risikogewichtete Aktiva                                                                 | 234.389                        | 15.355                     | 249.744        | 16.051                               | 37.482                     | 53.533       | 2.677                 | 305.953                                     |
| Durchschnittliches Active Equity <sup>4</sup>                                           | 19.181                         | 1.081                      | 20.262         | 4.870                                | 3.445                      | 8.315        | 403                   | 28.979                                      |
| Eigenkapitalrendite vor Steuern<br>(basierend auf dem durchschnittlichen Active Equity) | - 44 %                         | 105 %                      | - 36 %         | - 11 %                               | 27 %                       | 5 %          | N/A                   | - 20 %                                      |
| 1 beinhaltet:                                                                           |                                |                            |                |                                      |                            |              |                       |                                             |
| Zinsüberschuss                                                                          | 7.683                          | 1.167                      | 8.850          | 486                                  | 3.249                      | 3.736        | 7                     | 12.592                                      |
| Erträge mit externen Kunden                                                             | 546                            | 2.814                      | 3.359          | 3.418                                | 5.463                      | 8.881        | 1.259                 | 13.499                                      |
| Intersegmenterträge                                                                     | - 118                          | - 40                       | - 158          | - 154                                | 314                        | 160          | 31                    | 33                                          |
| Ergebnis aus nach der Equitymethode bilanzierten Beteiligungen                          | - 110                          | 2                          | - 108          | 87                                   | 2                          | 88           | 62                    | 42                                          |
| 2 beinhaltet:                                                                           |                                |                            |                |                                      |                            |              |                       |                                             |
| nach der Equitymethode bilanzierte Beteiligungen                                        | 1.687                          | 40                         | 1.727          | 321                                  | 44                         | 365          | 71                    | 2.163                                       |

N/A – nicht aussagefähig

<sup>3</sup> Die Summe der Unternehmensbereiche entspricht aufgrund von Konsolidierungstatbeständen zwischen den Unternehmensbereichen nicht notwendigerweise dem korrespondierenden Konzernbereich. Dies gilt auch für die Summe der Konzernbereiche im Vergleich zum Management Reporting insgesamt.

<sup>4</sup> Zu Zwecken der Managementberichterstattung werden Goodwill und sonstige immaterielle Vermögenswerte mit unbestimmter Nutzungsdauer explizit den jeweiligen Unternehmensbereichen zugewiesen. Das durchschnittliche Active Equity des Konzerns wird den Segmenten sowie Consolidation & Adjustments anteilig gemäß ihrem ökonomischen Risikoprofil zugewiesen, welches das ökonomische Kapital, Goodwill und nicht abzuschreibende sonstige immaterielle Vermögenswerte beinhaltet.

<sup>5</sup> Beinhaltet Gewinne aus dem Verkauf von Industriebeteiligungen (Daimler AG, Allianz SE und Linde AG) in Höhe von 1.228 Mio €, einen Gewinn aus der Veräußerung der Beteiligung an Arcor AG & Co. KG in Höhe von 97 Mio € sowie eine Abschreibung auf immaterielle Vermögenswerte (Asset Management) in Höhe von 572 Mio €. Diese Positionen werden in der Zielgrößendefinition nicht berücksichtigt.

## Überleitung der Segmentergebnisse auf den Konzernabschluss

In der nachstehenden Tabelle werden die auf Basis der Managementberichtssysteme ermittelten Segmentergebnisse und -aktiva auf den Konzernabschluss für die Geschäftsjahre 2010, 2009 und 2008 übergeleitet.

| in Mio €                             | 2010                           |                             |                   | 2009                           |                             |                   | 2008                           |                             |                   |
|--------------------------------------|--------------------------------|-----------------------------|-------------------|--------------------------------|-----------------------------|-------------------|--------------------------------|-----------------------------|-------------------|
|                                      | Management Reporting insgesamt | Consolidation & Adjustments | Konzern insgesamt | Management Reporting insgesamt | Consolidation & Adjustments | Konzern insgesamt | Management Reporting insgesamt | Consolidation & Adjustments | Konzern insgesamt |
| Erträge insgesamt <sup>1</sup>       | 28.953                         | – 386                       | 28.567            | 28.112                         | – 159                       | 27.952            | 13.532                         | 82                          | 13.613            |
| Risikovorsorge im Kreditgeschäft     | 1.273                          | 0                           | 1.274             | 2.630                          | – 0                         | 2.630             | 1.075                          | 1                           | 1.076             |
| Zinsunabhängige Aufwendungen         | 23.318                         | 1                           | 23.318            | 20.063                         | 57                          | 20.120            | 18.279                         | – 0                         | 18.278            |
| Anteile ohne beherrschenden Einfluss | 24                             | – 24                        | –                 | – 10                           | 10                          | –                 | – 66                           | 66                          | –                 |
| <b>Ergebnis vor Steuern</b>          | <b>4.339</b>                   | <b>– 363</b>                | <b>3.975</b>      | <b>5.428</b>                   | <b>– 226</b>                | <b>5.202</b>      | <b>– 5.756</b>                 | <b>15</b>                   | <b>– 5.741</b>    |
| Aktiva                               | 1.894.282                      | 11.348                      | 1.905.630         | 1.491.108                      | 9.556                       | 1.500.664         | 2.189.313                      | 13.110                      | 2.202.423         |
| Risikogewichtete Aktiva              | 343.522                        | 2.683                       | 346.204           | 269.969                        | 3.507                       | 273.476           | 305.953                        | 1.779                       | 307.732           |
| Durchschnittliches Active Equity     | 33.446                         | 7.907                       | 41.353            | 31.772                         | 2.840                       | 34.613            | 28.979                         | 3.100                       | 32.079            |

<sup>1</sup> Zinsüberschuss und zinsunabhängige Erträge.

Im Geschäftsjahr 2010 verzeichnete Consolidation & Adjustments (C&A) einen Verlust vor Steuern von 363 Mio €. Die zinsunabhängigen Aufwendungen enthielten Versicherungsleistungen, die zum Teil durch die Neubildung von Rückstellungen für Rechtsstreitigkeiten ausgeglichen wurden, sowie weitere Sachverhalte außerhalb der Managementverantwortung der Segmente. Die Anpassungen der Erträge in C&A im Geschäftsjahr 2010 beinhalteten im Wesentlichen folgende Sachverhalte:

- Überleitungen für Positionen, die in den Managementberichtssystemen zum Fair Value (Mark-to-market) ausgewiesen und nach IFRS abgegrenzt wurden. Diese Überleitungen, die die Erträge um circa 210 Mio € verminderten, betrafen ökonomisch abgesicherte kurzfristige Positionen sowie ökonomisch abgesicherte Anleiheemissionen und resultieren aus der Veränderung von Euro- und US-Dollar-Zinssätzen.
- Die Währungsabsicherung des Kapitals bestimmter ausländischer Tochtergesellschaften führte zu einer Verminderung der Erträge um circa 245 Mio €.
- Die übrigen Erträge stammten aus Zinsaufwendungen (per Saldo), die nicht den Segmenten zugeordnet wurden, und aus Sachverhalten, die außerhalb der Managementverantwortung der Segmente liegen. Diese Sachverhalte beinhalten Refinanzierungsaufwendungen (per Saldo) für nicht bereichsbezogene Aktiva/Passiva, zum Beispiel latente Steuerforderungen/-verbindlichkeiten, und Zinsaufwendungen (per Saldo) im Zusammenhang mit Steuererstattungen beziehungsweise -abgrenzungen.

Im Geschäftsjahr 2009 belief sich der Verlust vor Steuern in C&A auf 226 Mio €. Die zinsunabhängigen Aufwendungen enthielten Rückstellungen für Rechtsstreitigkeiten sowie weitere Sachverhalte außerhalb der Managementverantwortung der Segmente. Diese wurden zum Teil durch Umsatzsteuererstattungen ausgeglichen. Die Anpassungen der Erträge in C&A im Geschäftsjahr 2009 beinhalteten im Wesentlichen folgende Sachverhalte:

- Überleitungen für Positionen, die in den Managementberichtssystemen zum Fair Value (Mark-to-market) ausgewiesen und nach IFRS abgegrenzt wurden. Diese Überleitungen, die die Erträge um circa 535 Mio € verminderten, betrafen ökonomisch abgesicherte kurzfristige Positionen sowie ökonomisch abgesicherte Anleiheemissionen und resultieren aus der Veränderung kurzfristiger Euro- und US-Dollar-Zinssätze.
- Die Währungsabsicherung des Kapitals bestimmter ausländischer Tochtergesellschaften führte zu einer Verminderung der Erträge um circa 225 Mio €.
- Derivate, mit denen Auswirkungen aus Verpflichtungen im Zusammenhang mit aktienbasierten Vergütungsplänen auf das Eigenkapital abgesichert wurden, führten zu einer Erhöhung um rund 460 Mio €.
- Die übrigen Erträge stammten aus Zinsaufwendungen (per Saldo), die nicht den Segmenten zugeordnet wurden, und aus Sachverhalten, die außerhalb der Managementverantwortung der Segmente liegen. Diese Sachverhalte beinhalten Refinanzierungsaufwendungen (per Saldo) für nicht bereichsbezogene Aktiva/Passiva, zum Beispiel latente Steuerforderungen/-verbindlichkeiten, und Zinsaufwendungen (per Saldo) im Zusammenhang mit Steuererstattungen beziehungsweise -abgrenzungen.

Im Geschäftsjahr 2008 belief sich das Ergebnis vor Steuern in C&A auf 15 Mio €. Die zinsunabhängigen Aufwendungen enthielten Rückstellungen für Rechtsstreitigkeiten, die durch positive Effekte im Zusammenhang mit Umsatzsteuererstattungen kompensiert wurden. Die Anpassungen der Erträge in C&A im Geschäftsjahr 2008 beinhalteten im Wesentlichen folgende Sachverhalte:

- Überleitungen für Positionen, die in den Managementberichtssystemen zum Fair Value (Mark-to-market) ausgewiesen und nach IFRS abgegrenzt wurden. Diese Überleitungen, die die Erträge um circa 450 Mio € erhöhten, betrafen ökonomisch abgesicherte kurzfristige Positionen und resultierten aus hohen Volatilitäten und allgemein gesunkenen kurzfristigen Zinssätzen.
- Die Währungsabsicherung des Kapitals bestimmter ausländischer Tochtergesellschaften führte zu einer Verminderung der Erträge um rund 160 Mio €.
- Handelsergebnisse aus Eigenen Aktien des Konzerns sowie bestimmten Derivaten auf Eigene Aktien werden im Unternehmensbereich CB&S ausgewiesen. Die Eliminierung dieser Ergebnisse gemäß IFRS führte zu einem Anstieg von etwa 80 Mio €.
- Eine Verringerung im Zusammenhang mit der Eliminierung von konzerninternen Mieterträgen belief sich auf 37 Mio €.
- Die übrigen Erträge stammten aus Zinsaufwendungen (per Saldo), die nicht den Segmenten zugeordnet wurden, und aus Sachverhalten, die außerhalb der Managementverantwortung der Segmente liegen. Diese Sachverhalte beinhalten Refinanzierungsaufwendungen (per Saldo) für nicht bereichsbezogene Aktiva/Passiva, zum Beispiel latente Steuerforderungen/-verbindlichkeiten, und Zinsaufwendungen (per Saldo) im Zusammenhang mit Steuererstattungen beziehungsweise -abgrenzungen.

Aktiva und risikogewichtete Aktiva enthalten Sachverhalte, die außerhalb der Managementverantwortung der Segmente lagen, wie zum Beispiel latente Steuern und bereichsübergreifende Abrechnungskonten.

Das durchschnittliche Active Equity in C&A reflektiert den verbleibenden, nicht den Segmenten zugeordneten Eigenkapitalbetrag, wie in dieser Note unter dem Abschnitt „Bemessung von Segmentgewinnen oder -verlusten“ beschrieben wird.

### Angaben auf Unternehmensebene

Die nachstehenden Tabellen enthalten die Ertragskomponenten der Konzernbereiche CIB und PCAM für die Geschäftsjahre 2010, 2009 und 2008.

| in Mio €                                     | Corporate & Investment Bank |               |              |
|----------------------------------------------|-----------------------------|---------------|--------------|
|                                              | 2010                        | 2009          | 2008         |
| Sales & Trading (Equity)                     | 3.108                       | 2.650         | – 736        |
| Sales & Trading (Debt und sonstige Produkte) | 9.740                       | 9.557         | 323          |
| <b>Sales &amp; Trading insgesamt</b>         | <b>12.849</b>               | <b>12.208</b> | <b>– 413</b> |
| Emissionsgeschäft (Equity)                   | 706                         | 663           | 334          |
| Emissionsgeschäft (Debt)                     | 1.199                       | 1.127         | – 717        |
| <b>Emissionsgeschäft insgesamt</b>           | <b>1.904</b>                | <b>1.790</b>  | <b>– 383</b> |
| Beratung                                     | 573                         | 402           | 589          |
| Kreditgeschäft                               | 1.736                       | 1.949         | 1.296        |
| Transaction Services                         | 3.223                       | 2.609         | 2.784        |
| Sonstige Produkte                            | 644                         | – 151         | – 661        |
| <b>Insgesamt<sup>1</sup></b>                 | <b>20.929</b>               | <b>18.807</b> | <b>3.211</b> |

<sup>1</sup> Die oben dargestellten Erträge beinhalten den Zinsüberschuss, das Ergebnis aus zum Fair Value bewerteten finanziellen Vermögenswerten/Verpflichtungen und andere Erträge wie zum Beispiel den Provisionsüberschuss.

Im ersten Halbjahr 2010 wurde die Zuordnung von Erträgen zu Produktkategorien überprüft. Diese Überprüfung führte in CIB zu einer Umgliederung von bestimmten Produkterträgen, die in Note 01 „Wesentliche Rechnungslegungsgrundsätze“ im Abschnitt „Grundlage der Darstellung“ näher erläutert wird.

| in Mio €                                            | Private Clients and Asset Management |              |              |
|-----------------------------------------------------|--------------------------------------|--------------|--------------|
|                                                     | 2010                                 | 2009         | 2008         |
| Diskretionäres Portfolio Management/Fund Management | 2.560                                | 2.083        | 2.433        |
| Beratungs-/Brokeragegeschäft                        | 1.745                                | 1.531        | 2.045        |
| Kreditgeschäft                                      | 2.708                                | 2.605        | 2.232        |
| Einlagengeschäft und Zahlungsverkehr                | 2.029                                | 1.875        | 1.968        |
| Sonstige Produkte                                   | 1.001                                | 167          | 353          |
| <b>Insgesamt<sup>1</sup></b>                        | <b>10.043</b>                        | <b>8.261</b> | <b>9.031</b> |

<sup>1</sup> Die oben dargestellten Erträge beinhalten den Zinsüberschuss, das Ergebnis aus zum Fair Value bewerteten finanziellen Vermögenswerten/Verpflichtungen und andere Erträge wie zum Beispiel den Provisionsüberschuss.



Die Darstellung der Erträge in PCAM wurde im ersten Halbjahr 2010 aufgrund einer Überprüfung und Verfeinerung der Produktklassifizierungen angepasst. Die Änderungen betrafen vor allem die Erträge des Einlagengeschäfts, die bisher zusammen mit Erträgen aus dem Kreditgeschäft berichtet wurden. Für das Berichtsjahr 2009 wurden Erträge des Einlagengeschäfts in Höhe von 1.501 Mio € mit Erträgen aus Zahlungsverkehr zusammengefasst. Erträge aus Kreditprodukten werden jetzt separat berichtet. Erträge aus der Vermittlung von Versicherungen in Höhe von 143 Mio € im Berichtsjahr 2009, die zuvor unter Zahlungsverkehr, Kontoführung und übrige Finanzdienstleistungen ausgewiesen wurden, werden jetzt unter Beratungs-/ Brokeragegeschäft berichtet. Diese Änderungen erhöhen die Transparenz und bilden das Management der Produkte besser ab. Die Vorperioden wurden entsprechend angepasst. Die Erträge von PCAM blieben insgesamt unverändert.

In der nachfolgenden Tabelle sind die Erträge (vor Risikovorsorge im Kreditgeschäft) nach geografischen Bereichen für die Geschäftsjahre 2010, 2009 und 2008 aufgeführt. Für CIB und PCAM erfolgt die Verteilung auf die Regionen im Wesentlichen nach dem Standort der jeweiligen Konzerngesellschaft, welche die Erträge bilanziell erfasst. Die Angaben zu CI und C&A werden nur auf globaler Ebene ausgewiesen, da die Managementverantwortung für diese Bereiche zentral wahrgenommen wird.

| in Mio €                                                        | 2010          | 2009          | 2008          |
|-----------------------------------------------------------------|---------------|---------------|---------------|
| Deutschland:                                                    |               |               |               |
| CIB                                                             | 2.864         | 2.353         | 2.997         |
| PCAM                                                            | 5.932         | 4.769         | 5.208         |
| <b>Deutschland insgesamt</b>                                    | <b>8.796</b>  | <b>7.122</b>  | <b>8.205</b>  |
| Europa, Mittlerer Osten und Afrika:                             |               |               |               |
| CIB                                                             | 8.258         | 8.485         | – 619         |
| PCAM                                                            | 2.693         | 2.479         | 2.381         |
| <b>Europa, Mittlerer Osten und Afrika insgesamt<sup>1</sup></b> | <b>10.951</b> | <b>10.964</b> | <b>1.762</b>  |
| Amerika (insbesondere Vereinigte Staaten):                      |               |               |               |
| CIB                                                             | 6.420         | 5.295         | – 838         |
| PCAM                                                            | 1.032         | 724           | 971           |
| <b>Amerika insgesamt</b>                                        | <b>7.452</b>  | <b>6.020</b>  | <b>133</b>    |
| Asien/Pazifik:                                                  |               |               |               |
| CIB                                                             | 3.387         | 2.672         | 1.671         |
| PCAM                                                            | 387           | 289           | 471           |
| <b>Asien/Pazifik insgesamt</b>                                  | <b>3.774</b>  | <b>2.961</b>  | <b>2.142</b>  |
| CI                                                              | – 2.020       | 1.044         | 1.290         |
| Consolidation & Adjustments                                     | – 386         | – 159         | 82            |
| <b>Konsolidierte Nettoerträge insgesamt<sup>2</sup></b>         | <b>28.567</b> | <b>27.952</b> | <b>13.613</b> |

<sup>1</sup> In den Geschäftsjahren 2010 und 2009 trug Großbritannien rund 60 % zu diesen Erträgen bei. Im Geschäftsjahr 2008 wies Großbritannien negative Erträge aus.

<sup>2</sup> Die konsolidierten Erträge insgesamt umfassen die Zinserträge, Zinsaufwendungen und die zinsunabhängigen Erträge insgesamt (einschließlich des Provisionsüberschusses). Das Ergebnis ist je nach Standort der bilanzierenden Geschäftsstelle den entsprechenden Ländern zugeordnet. Der Standort eines bilanzierten Geschäfts kann sich von der Hauptgeschäftsstelle beziehungsweise von sonstigen Geschäftsstellen des Kunden und den Standorten der Deutsche Bank-Mitarbeiter, welche das Geschäft abgeschlossen beziehungsweise arrangiert haben, unterscheiden. Der Standort eines bilanzierten Geschäfts, an dem die Mitarbeiter, Kunden und sonstige Dritte an unterschiedlichen Standorten beteiligt sind, hängt häufig von anderen Erwägungen wie beispielsweise der Art des Geschäfts sowie aufsichtsrechtlichen und abwicklungstechnischen Aspekten ab.

## Anhangangaben zur Gewinn- und Verlustrechnung

### 06 – Zinsüberschuss und Ergebnis aus zum Fair Value bewerteten finanziellen Vermögenswerten/Verpflichtungen

#### Zinsüberschuss

Die folgende Tabelle zeigt die Komponenten der Zinsen und ähnlichen Erträge sowie der Zinsaufwendungen.

| in Mio €                                                                                              | 2010          | 2009          | 2008          |
|-------------------------------------------------------------------------------------------------------|---------------|---------------|---------------|
| <b>Zinsen und ähnliche Erträge:</b>                                                                   |               |               |               |
| Verzinsliche Einlagen bei Kreditinstituten                                                            | 691           | 633           | 1.313         |
| Forderungen aus übertragenen Zentralbankeinlagen und aus Wertpapierpensionsgeschäften (Reverse Repos) | 446           | 320           | 964           |
| Forderungen aus Wertpapierleihen                                                                      | 133           | 67            | 1.011         |
| Zum Fair Value bewertete finanzielle Vermögenswerte                                                   | 15.589        | 13.634        | 34.938        |
| Zinserträge aus zur Veräußerung verfügbaren finanziellen Vermögenswerten                              | 700           | 496           | 1.260         |
| Dividendenerträge aus zur Veräußerung verfügbaren finanziellen Vermögenswerten                        | 137           | 91            | 312           |
| Forderungen aus dem Kreditgeschäft                                                                    | 10.222        | 10.555        | 12.269        |
| Sonstige                                                                                              | 861           | 1.157         | 2.482         |
| <b>Zinsen und ähnliche Erträge insgesamt</b>                                                          | <b>28.779</b> | <b>26.953</b> | <b>54.549</b> |
| <b>Zinsaufwendungen:</b>                                                                              |               |               |               |
| Verzinsliche Einlagen                                                                                 | 3.800         | 5.119         | 13.015        |
| Verbindlichkeiten aus übertragenen Zentralbankeinlagen und aus Wertpapierpensionsgeschäften (Repos)   | 301           | 280           | 4.425         |
| Verbindlichkeiten aus Wertpapierleihen                                                                | 278           | 269           | 304           |
| Zum Fair Value bewertete finanzielle Verpflichtungen                                                  | 6.019         | 4.503         | 14.811        |
| Sonstige kurzfristige Geldaufnahmen                                                                   | 375           | 798           | 1.905         |
| Langfristige Verbindlichkeiten                                                                        | 1.490         | 2.612         | 5.273         |
| Hybride Kapitalinstrumente (Trust Preferred Securities)                                               | 781           | 680           | 571           |
| Sonstige                                                                                              | 152           | 233           | 1.792         |
| <b>Zinsaufwendungen insgesamt</b>                                                                     | <b>13.196</b> | <b>14.494</b> | <b>42.096</b> |
| <b>Zinsüberschuss</b>                                                                                 | <b>15.583</b> | <b>12.459</b> | <b>12.453</b> |

Die Zinserträge aus wertgeminderten finanziellen Vermögenswerten beliefen sich für das Geschäftsjahr 2010 auf 146 Mio € (2009: 133 Mio €, 2008: 65 Mio €).

## Ergebnis aus zum Fair Value bewerteten finanziellen Vermögenswerten/Verpflichtungen

Die folgende Tabelle zeigt die Komponenten des Ergebnisses aus zum Fair Value bewerteten finanziellen Vermögenswerten/Verpflichtungen.

| in Mio €                                                                                                  | 2010         | 2009         | 2008            |
|-----------------------------------------------------------------------------------------------------------|--------------|--------------|-----------------|
| <b>Handelsergebnis:</b>                                                                                   |              |              |                 |
| Sales & Trading (Equity)                                                                                  | 198          | 2.148        | – 9.615         |
| Sales & Trading (Debt und sonstige Produkte)                                                              | 3.429        | 5.440        | – 25.212        |
| Sales & Trading insgesamt                                                                                 | 3.627        | 7.588        | – 34.827        |
| Sonstige                                                                                                  | 31           | – 1.954      | 998             |
| <b>Handelsergebnis insgesamt</b>                                                                          | <b>3.658</b> | <b>5.634</b> | <b>– 33.829</b> |
| <b>Ergebnis aus zum Fair Value klassifizierten finanziellen Vermögenswerten/Verpflichtungen:</b>          |              |              |                 |
| Aufgliederung nach Kategorie finanzieller Vermögenswerte/Verbindlichkeiten                                |              |              |                 |
| Forderungen/Verbindlichkeiten aus Wertpapierpensionsgeschäften                                            | 35           | – 73         | –               |
| Forderungen/Verbindlichkeiten aus Wertpapierleihen                                                        | –            | – 2          | – 4             |
| Forderungen aus dem Kreditgeschäft und Kreditzusagen                                                      | – 331        | 3.929        | – 4.016         |
| Einlagen                                                                                                  | – 13         | – 162        | 139             |
| Langfristige Verbindlichkeiten <sup>1</sup>                                                               | 83           | – 2.550      | 28.630          |
| Sonstige zum Fair Value klassifizierte finanzielle Vermögenswerte/Verpflichtungen                         | – 78         | 333          | – 912           |
| <b>Ergebnis aus zum Fair Value klassifizierten finanziellen Vermögenswerten/Verpflichtungen insgesamt</b> | <b>– 304</b> | <b>1.475</b> | <b>23.837</b>   |
| <b>Ergebnis aus zum Fair Value bewerteten finanziellen Vermögenswerten/Verpflichtungen</b>                | <b>3.354</b> | <b>7.109</b> | <b>– 9.992</b>  |

<sup>1</sup> Beinhaltet 39 Mio € in 2010 (2009: minus 176 Mio €, 2008: 17,9 Mrd €) aus strukturierten Verbriefungen. Die Fair-Value-Änderungen korrespondierender Instrumente in Höhe von 163 Mio € in 2010 (2009: minus 49 Mio €, 2008: minus 20,1 Mrd €) werden im Handelsergebnis gezeigt. Beide Komponenten werden unter Sales & Trading (Debt und sonstige Produkte) ausgewiesen. Die Summe dieser Gewinne und Verluste stellt den Anteil der Deutschen Bank an den Verlusten dieser konsolidierten strukturierten Verbriefungen dar.

## Gesamtüberblick

Die Handels- und Risikomanagementaktivitäten des Konzerns schließen erhebliche Aktivitäten in Zinsinstrumenten und zugehörigen Derivaten ein. Nach IFRS werden Zinsen und ähnliche Erträge aus Handelsinstrumenten und aus zum Fair Value klassifizierten finanziellen Vermögenswerten/Verpflichtungen (beispielsweise Coupon- und Dividendenerträge) sowie Refinanzierungskosten für Handelspositionen als Bestandteil des Zinsüberschusses ausgewiesen. Abhängig von zahlreichen Faktoren, zu denen auch Risikomanagementstrategien gehören, werden die Erträge aus Handelsaktivitäten entweder unter dem Zinsüberschuss oder unter dem Ergebnis aus zum Fair Value bewerteten finanziellen Vermögenswerten/Verpflichtungen ausgewiesen. Diese Faktoren können von Periode zu Periode unterschiedlich gelagert sein. Um diese Entwicklung, bezogen auf die Geschäftstätigkeit des Konzerns, besser analysieren zu können, werden im Folgenden die Summe aus Zinsüberschuss und Ergebnis aus zum Fair Value bewerteten finanziellen Vermögenswerten/Verpflichtungen nach Konzernbereichen beziehungsweise innerhalb des Konzernbereichs Corporate & Investment Bank nach Produkten untergliedert.

Die folgende Tabelle zeigt den Zinsüberschuss zusammen mit dem Ergebnis aus zum Fair Value bewerteten finanziellen Vermögenswerten/Verpflichtungen des Konzerns nach Konzernbereichen beziehungsweise innerhalb des Konzernbereichs Corporate & Investment Bank nach Produkten in 2010, 2009 und 2008.

| in Mio €                                                                                                                                              | 2010          | 2009          | 2008         |
|-------------------------------------------------------------------------------------------------------------------------------------------------------|---------------|---------------|--------------|
| Zinsüberschuss                                                                                                                                        | 15.583        | 12.459        | 12.453       |
| Ergebnis aus zum Fair Value bewerteten finanziellen Vermögenswerten/Verpflichtungen                                                                   | 3.354         | 7.109         | – 9.992      |
| <b>Zinsüberschuss und Ergebnis aus zum Fair Value bewerteten finanziellen Vermögenswerten/Verpflichtungen insgesamt</b>                               | <b>18.937</b> | <b>19.568</b> | <b>2.461</b> |
| Zinsüberschuss und Ergebnis aus zum Fair Value bewerteten finanziellen Vermögenswerten/Verpflichtungen aufgegliedert nach Konzernbereich/CIB-Produkt: |               |               |              |
| Sales & Trading (Equity)                                                                                                                              | 2.266         | 2.047         | – 1.895      |
| Sales & Trading (Debt und sonstige Produkte)                                                                                                          | 9.204         | 9.725         | 409          |
| Sales & Trading insgesamt                                                                                                                             | 11.469        | 11.772        | – 1.486      |
| Kreditgeschäft <sup>1</sup>                                                                                                                           | 778           | 777           | 922          |
| Transaction Services                                                                                                                                  | 1.497         | 1.180         | 1.368        |
| Übrige Produkte <sup>2</sup>                                                                                                                          | 336           | 240           | – 1.821      |
| Corporate & Investment Bank insgesamt                                                                                                                 | 14.081        | 13.969        | – 1.017      |
| Private Clients and Asset Management                                                                                                                  | 4.708         | 4.157         | 3.861        |
| Corporate Investments                                                                                                                                 | – 184         | 793           | – 172        |
| Consolidation & Adjustments                                                                                                                           | 331           | 649           | – 211        |
| <b>Zinsüberschuss und Ergebnis aus zum Fair Value bewerteten finanziellen Vermögenswerten/Verpflichtungen insgesamt</b>                               | <b>18.937</b> | <b>19.568</b> | <b>2.461</b> |

<sup>1</sup> Enthält sowohl die Zinsspanne für Forderungen aus dem Kreditgeschäft als auch die Veränderungen des Fair Value von Credit Default Swaps und zum Fair Value klassifizierten Forderungen aus dem Kreditgeschäft.

<sup>2</sup> Enthält den Zinsüberschuss und das Ergebnis aus zum Fair Value bewerteten finanziellen Vermögenswerten/Verpflichtungen aus dem Emissions- und Beratungsgeschäft sowie sonstigen Produkten.

## 07 – Provisionsüberschuss

Die folgende Tabelle zeigt die Komponenten des Provisionsüberschusses.

| in Mio €                              | 2010          | 2009         | 2008         |
|---------------------------------------|---------------|--------------|--------------|
| <b>Provisionsertrag und -aufwand:</b> |               |              |              |
| Provisionsertrag                      | 13.652        | 11.377       | 12.449       |
| Provisionsaufwand                     | 2.983         | 2.466        | 2.708        |
| <b>Provisionsüberschuss</b>           | <b>10.669</b> | <b>8.911</b> | <b>9.741</b> |

| in Mio €                                     | 2010          | 2009         | 2008         |
|----------------------------------------------|---------------|--------------|--------------|
| <b>Provisionsüberschuss:</b>                 |               |              |              |
| Provisionsüberschuss aus Treuhandgeschäften  | 3.529         | 2.925        | 3.414        |
| Provisionsüberschuss des Wertpapiergeschäfts | 3.873         | 3.449        | 3.790        |
| Gebühren für sonstige Dienstleistungen       | 3.267         | 2.537        | 2.537        |
| <b>Provisionsüberschuss</b>                  | <b>10.669</b> | <b>8.911</b> | <b>9.741</b> |

## 08 – Ergebnis aus zur Veräußerung verfügbaren finanziellen Vermögenswerten

Die folgende Tabelle zeigt die Komponenten des Ergebnisses aus zur Veräußerung verfügbaren finanziellen Vermögenswerten.

| in Mio €                                                                      | 2010       | 2009         | 2008       |
|-------------------------------------------------------------------------------|------------|--------------|------------|
| <b>Ergebnis aus zur Veräußerung verfügbaren finanziellen Vermögenswerten:</b> |            |              |            |
| Ergebnis aus festverzinslichen Wertpapieren:                                  | 58         | 37           | – 534      |
| Gewinne/Verluste (–) aus Verkäufen                                            | 74         | 119          | 17         |
| Wertminderungen                                                               | – 16       | – 82         | – 551      |
| Ergebnis aus nicht festverzinslichen Wertpapieren:                            | 120        | – 295        | 1.156      |
| Gewinne/Verluste (–) aus Verkäufen                                            | 164        | 443          | 1.428      |
| Wertminderungen                                                               | – 44       | – 738        | – 272      |
| Ergebnis aus Forderungen aus dem Kreditgeschäft:                              | 18         | – 56         | – 63       |
| Gewinne/Verluste (–) aus Verkäufen                                            | 36         | 9            | – 12       |
| Wertminderungen                                                               | – 18       | – 81         | – 52       |
| Wertaufholungen                                                               | 0          | 16           | 1          |
| Ergebnis aus sonstigem Anteilsbesitz:                                         | 5          | – 89         | 107        |
| Gewinne/Verluste (–) aus Verkäufen                                            | 40         | –            | 108        |
| Wertminderungen                                                               | – 35       | – 89         | – 1        |
| <b>Ergebnis aus zur Veräußerung verfügbaren finanziellen Vermögenswerten</b>  | <b>201</b> | <b>– 403</b> | <b>666</b> |

## 09 – Sonstige Erträge

Die folgende Tabelle zeigt die Komponenten der sonstigen Erträge.

| in Mio €                                                                               | 2010       | 2009         | 2008       |
|----------------------------------------------------------------------------------------|------------|--------------|------------|
| <b>Sonstige Erträge:</b>                                                               |            |              |            |
| Ergebnis aus als Finanzinvestitionen gehaltenen Immobilien                             | – 3        | – 117        | 8          |
| Gewinne/Verluste (–) aus dem Verkauf von als Finanzinvestitionen gehaltenen Immobilien | 5          | – 2          | –          |
| Gewinne/Verluste (–) aus der Veräußerung konsolidierter Tochtergesellschaften          | 18         | 61           | 85         |
| Gewinne/Verluste (–) aus der Veräußerung von Forderungen aus dem Kreditgeschäft        | – 87       | 2            | 50         |
| Beiträge im Versicherungsgeschäft <sup>1,2</sup>                                       | 252        | 129          | 308        |
| Übrige sonstige Erträge <sup>3</sup>                                                   | 579        | – 256        | 248        |
| <b>Sonstige Erträge insgesamt</b>                                                      | <b>764</b> | <b>– 183</b> | <b>699</b> |

<sup>1</sup> Versicherungsprämien abzüglich an Rückversicherer gezahlter Prämien. Die Entwicklung ist im Wesentlichen auf Abbey Life Assurance Company Limited zurückzuführen.

<sup>2</sup> Enthält eine Ausweisänderung von Rückversicherungsverträgen und Mortalitätsrisiko. Aufgrund dieser Ausweisänderung wurden in 2010 Aufwendungen in Höhe von 117 Mio € aus den sonstigen Erträgen in die Aufwendungen im Versicherungsgeschäft umgegliedert.

<sup>3</sup> Der Anstieg der Übrigen sonstigen Erträge in 2010 ist zurückzuführen auf signifikant geringere Abschreibungen bezüglich der Immobilie The Cosmopolitan of Las Vegas, ein höheres Ergebnis aus zu Sicherungszwecken gehaltenen Derivaten sowie einen Gewinn aus einem negativen Goodwill im Zusammenhang mit dem von ABN AMRO übernommenen Aktivitäten im Firmenkundengeschäft in den Niederlanden. Der Rückgang von 2008 auf 2009 in den Übrigen sonstigen Erträgen resultierte im Wesentlichen aus einer Abschreibung in Höhe von 575 Mio € auf die Immobilie The Cosmopolitan of Las Vegas in 2009.

## 10 – Sachaufwand und sonstiger Aufwand

Die folgende Tabelle zeigt die Komponenten des Sachaufwands und sonstigen Aufwands.

| in Mio €                                                                | 2010          | 2009         | 2008         |
|-------------------------------------------------------------------------|---------------|--------------|--------------|
| <b>Sachaufwand und sonstiger Aufwand:</b>                               |               |              |              |
| EDV-Aufwendungen                                                        | 2.274         | 1.759        | 1.818        |
| Mieten und Aufwendungen für Gebäude, Betriebs- und Geschäftsausstattung | 1.665         | 1.457        | 1.434        |
| Aufwendungen für Beratungsleistungen                                    | 1.616         | 1.088        | 1.164        |
| Kommunikation und Datenadministration                                   | 785           | 672          | 698          |
| Aufwendungen für Reisen und Repräsentation                              | 558           | 408          | 504          |
| Zahlungsverkehrs-, Abwicklungs- und Depotdienstleistungen               | 418           | 406          | 415          |
| Marketingaufwendungen                                                   | 341           | 278          | 373          |
| Sonstige Aufwendungen                                                   | 2.476         | 2.334        | 1.933        |
| <b>Sachaufwand und sonstiger Aufwand insgesamt</b>                      | <b>10.133</b> | <b>8.402</b> | <b>8.339</b> |

Die sonstigen Aufwendungen beinhalten unter anderem Kosten im Zusammenhang mit konsolidierten Investments, regulatorischen Anforderungen, andere Steuern und Versicherungen, operative Verluste sowie sonstige mitarbeiterbezogene Aufwendungen.

In 2010 ist der Anstieg der sonstigen Aufwendungen auf höhere regulatorische Anforderungen und höhere operative Kosten bei den konsolidierten Beteiligungen, insbesondere an The Cosmopolitan of Las Vegas, das im Dezember 2010 eröffnet wurde, zurückzuführen.

In 2009 resultierte der Anstieg der sonstigen Aufwendungen hauptsächlich aus einem Aufwand von 316 Mio € im Zusammenhang mit einem Vergleichsverfahren mit der Huntsman Corp. und 200 Mio € im Zusammenhang mit einem Angebot zum Rückkauf bestimmter Produkte von Privatanlegern.

## 11 – Ergebnis je Aktie

Das Ergebnis je Aktie wird mittels Division des den Deutsche Bank-Aktionären zurechenbaren Konzernergebnisses durch die durchschnittliche Anzahl der im Berichtsjahr ausstehenden Stammaktien ermittelt. Die durchschnittliche Anzahl der ausstehenden Stammaktien ergibt sich aus dem Durchschnitt der ausgegebenen Stammaktien, vermindert um die durchschnittliche Anzahl an Aktien im Eigenbestand und um die durchschnittliche Anzahl an Aktien, die über Terminkäufe erworben werden, welche durch Lieferung in Aktien erfüllt werden, und zuzüglich noch nicht zugeteilter unverfallbarer Aktien aus aktienbasierten Vergütungsplänen.

Dem verwässerten Ergebnis je Aktie liegt die Annahme der Wandlung ausstehender Wertpapiere in Stammaktien oder die Ausübung sonstiger Kontrakte zur Emission von Stammaktien wie Aktienoptionen, wandelbaren Schuldtiteln, noch nicht unverfallbaren Aktienrechten und Terminkontrakten zugrunde. Die oben genannten Finanzinstrumente werden bei der Berechnung des verwässerten Ergebnisses je Aktie nur berücksichtigt, wenn sie in dem jeweiligen Berichtszeitraum einen verwässernden Effekt haben.

Im Dezember 2008 hat der Konzern beschlossen, bestehende Terminkaufkontrakte über insgesamt 33,6 Millionen Deutsche Bank-Aktien von der bisherigen Lieferung von Aktien auf Geldausgleich umzustellen. Diese Terminkaufkontrakte sind damit nicht weiter in der Berechnung des Ergebnisses je Aktie (basic) und (verwässert) berücksichtigt.

Die nachfolgende Tabelle beinhaltet die Berechnung des Ergebnisses je Aktie für die Geschäftsjahre 2010, 2009 und 2008.

| in Mio €                                                                                                                                                     | 2010  | 2009  | 2008    |
|--------------------------------------------------------------------------------------------------------------------------------------------------------------|-------|-------|---------|
| Den Deutsche Bank-Aktionären zurechenbares Konzernergebnis –<br>Zähler zur Berechnung des Ergebnisses je Aktie (basic)                                       | 2.310 | 4.973 | – 3.835 |
| Verwässerungseffekt aus:                                                                                                                                     |       |       |         |
| Termingeschäften und Optionen                                                                                                                                | –     | –     | –       |
| wandelbaren Schuldtiteln                                                                                                                                     | 3     | 2     | – 1     |
| Den Deutsche Bank-Aktionären zurechenbares Konzernergebnis nach angenommener<br>Wandlung – Zähler zur Berechnung des verwässerten Ergebnisses je Aktie       | 2.313 | 4.975 | – 3.836 |
| Anzahl der Aktien in Mio                                                                                                                                     |       |       |         |
| Gewichteter Durchschnitt der ausstehenden Aktien –<br>Nenner für die Berechnung des Ergebnisses je Aktie (basic)                                             | 753,3 | 689,4 | 558,5   |
| Verwässerungseffekt aus:                                                                                                                                     |       |       |         |
| Termingeschäften                                                                                                                                             | 0,0   | 0,0   | 0,0     |
| Aktienoptionen aus aktienbasierter Vergütung                                                                                                                 | 0,0   | 0,1   | 0,0     |
| wandelbaren Schuldtiteln                                                                                                                                     | 2,1   | 0,7   | 0,1     |
| gewährten Aktienrechten                                                                                                                                      | 35,4  | 26,4  | 0,0     |
| Sonstigem (einschließlich Optionen im Handel)                                                                                                                | 0,0   | 0,1   | 0,0     |
| Potenziell verwässernde Stammaktien                                                                                                                          | 37,5  | 27,3  | 0,1     |
| Bereinigter gewichteter Durchschnitt der ausstehenden Aktien nach angenommener<br>Wandlung – Nenner für die Berechnung des verwässerten Ergebnisses je Aktie | 790,8 | 716,7 | 558,6   |
| in €                                                                                                                                                         | 2010  | 2009  | 2008    |
| Ergebnis je Aktie (basic)                                                                                                                                    | 3,07  | 7,21  | – 6,87  |
| Ergebnis je Aktie (verwässert)                                                                                                                               | 2,92  | 6,94  | – 6,87  |

Am 6. Oktober 2010 schloss die Deutsche Bank AG eine Kapitalerhöhung mit der Ausgabe von Bezugsrechten ab. Da der Preis der Bezugsrechte der neuen Aktien unterhalb des Marktpreises der bestehenden Aktien lag, beinhaltet die Kapitalerhöhung eine Bonuskomponente. Gemäß IAS 33 ergibt sich diese Bonuskomponente aus einer impliziten Veränderung der ausstehenden Aktien für alle Perioden vor der Kapitalerhöhung, ohne dass es zu einer proportionalen Änderung der Ressourcen kam. Infolgedessen wurden die durchschnittlich ausstehenden Aktien für alle Berichtsperioden vor dem 6. Oktober 2010 rückwirkend angepasst.

Aufgrund der Verlustsituation wurden potenziell verwässernde Finanzinstrumente bei der Berechnung des Ergebnisses je Aktie (verwässert) für das Geschäftsjahr 2008 grundsätzlich nicht berücksichtigt, da dies ansonsten eine nicht verwässernde Wirkung gehabt hätte. In einer Gewinnsituation hingegen wäre der bereinigte gewichtete Durchschnitt der ausstehenden Aktien nach angenommener Wandlung für das Geschäftsjahr 2008 um 31,2 Millionen Aktien höher gewesen.



Zum 31. Dezember 2010, 2009 und 2008 waren die folgenden Instrumente ausstehend. Diese Instrumente wurden bei der Ermittlung des verwässerten Ergebnisses je Aktie nicht berücksichtigt, da sie eine nicht verwässernde Wirkung gehabt hätten.

| Anzahl der Aktien in Mio                     | 2010 | 2009 | 2008 |
|----------------------------------------------|------|------|------|
| Terminkäufe                                  | 0,0  | 0,0  | 0,0  |
| geschriebene Verkaufsoptionen                | 0,0  | 0,0  | 0,1  |
| geschriebene Kaufoptionen                    | 0,0  | 0,0  | 0,3  |
| Aktienoptionen aus aktienbasierter Vergütung | 0,4  | 0,3  | 1,8  |
| gewährte Aktienrechte                        | 0,0  | 0,0  | 26,9 |

## Anhangangaben zur Bilanz

### 12 – Zum Fair Value bewertete finanzielle Vermögenswerte und Verpflichtungen

Die folgende Tabelle zeigt die Komponenten der zum Fair Value bewerteten finanziellen Vermögenswerte/Verpflichtungen.

| in Mio €                                                                  | 31.12.2010          | 31.12.2009     |
|---------------------------------------------------------------------------|---------------------|----------------|
| <b>Handelsaktiva:</b>                                                     |                     |                |
| Wertpapiere                                                               | 238.283             | 206.710        |
| Sonstige Handelsaktiva <sup>1</sup>                                       | 33.008              | 28.200         |
| <b>Handelsaktiva insgesamt</b>                                            | <b>271.291</b>      | <b>234.910</b> |
| <b>Positive Marktwerte aus derivativen Finanzinstrumenten</b>             | <b>657.780</b>      | <b>596.410</b> |
| <b>Zum Fair Value klassifizierte finanzielle Vermögenswerte:</b>          |                     |                |
| Forderungen aus Wertpapierpensionsgeschäften (Reverse Repos)              | 108.912             | 89.977         |
| Forderungen aus Wertpapierleihen                                          | 27.887              | 19.987         |
| Forderungen aus dem Kreditgeschäft                                        | 23.254 <sup>2</sup> | 12.964         |
| Sonstige zum Fair Value klassifizierte finanzielle Vermögenswerte         | 11.873              | 11.072         |
| <b>Zum Fair Value klassifizierte finanzielle Vermögenswerte insgesamt</b> | <b>171.926</b>      | <b>134.000</b> |
| <b>Zum Fair Value bewertete finanzielle Vermögenswerte insgesamt</b>      | <b>1.100.997</b>    | <b>965.320</b> |

<sup>1</sup> Einschließlich handelbarer Kredite in Höhe von 23.080 Mio € zum 31.12.2010 (2009: 21.847 Mio €).

<sup>2</sup> Einschließlich 8 Mrd € zum Fair Value klassifizierte Forderungen aus dem Kreditgeschäft der Postbank.

| in Mio €                                                                   | 31.12.2010     | 31.12.2009     |
|----------------------------------------------------------------------------|----------------|----------------|
| <b>Handelspassiva:</b>                                                     |                |                |
| Wertpapiere                                                                | 65.183         | 62.402         |
| Sonstige Handelspassiva                                                    | 3.676          | 2.099          |
| <b>Handelspassiva insgesamt</b>                                            | <b>68.859</b>  | <b>64.501</b>  |
| <b>Negative Marktwerte aus derivativen Finanzinstrumenten</b>              | <b>647.171</b> | <b>576.973</b> |
| <b>Zum Fair Value klassifizierte finanzielle Verpflichtungen:</b>          |                |                |
| Verbindlichkeiten aus Wertpapierpensionsgeschäften (Repos)                 | 107.999        | 52.795         |
| Kreditzusagen                                                              | 572            | 447            |
| Langfristige Verbindlichkeiten                                             | 15.280         | 15.395         |
| Sonstige zum Fair Value klassifizierte finanzielle Verpflichtungen         | 6.303          | 4.885          |
| <b>Zum Fair Value klassifizierte finanzielle Verpflichtungen insgesamt</b> | <b>130.154</b> | <b>73.522</b>  |
| Investmentverträge <sup>1</sup>                                            | 7.898          | 7.278          |
| <b>Zum Fair Value bewertete finanzielle Verpflichtungen insgesamt</b>      | <b>854.082</b> | <b>722.274</b> |

<sup>1</sup> Aufgrund der Vertragsbedingungen entspricht bei diesen Investmentverträgen der Rückkaufswert dem Fair Value. Siehe Note 39 „Versicherungs- und Investmentverträge“ für nähere Informationen zu diesen Verträgen.

#### Zum Fair Value klassifizierte Kredite und Kreditzusagen

Der Konzern hat unterschiedliche Kreditbeziehungen zum Fair Value klassifiziert. Die Kreditbeziehungen umfassen in Anspruch genommene Kredite und nicht in Anspruch genommene unwiderrufliche Verpflichtungen aus Kreditzusagen. Das maximale Kreditrisiko eines in Anspruch genommenen Kredits entspricht seinem Fair Value. Das maximale Kreditrisiko des Konzerns aus in Anspruch genommenen Krediten und Forderungen aus Wertpapierpensionsgeschäften und Wertpapierleihen belief sich zum 31. Dezember 2010 auf 160 Mrd € (2009: 123 Mrd €). Nicht in Anspruch genommene unwiderrufliche Kreditzusagen können ebenfalls zu einem Kreditrisiko führen.

Das Kreditrisiko aus den zum Fair Value klassifizierten Forderungen aus Wertpapierpensionsgeschäften und Wertpapierleihen belief sich zum 31. Dezember 2010 auf 136,8 Mrd € (2009: 110,0 Mrd €). Dieses Kreditrisiko wird durch das Halten von Sicherheiten gemindert. Die Bewertung der Instrumente berücksichtigt die Kreditverbesserung durch die erhaltene Sicherheit. Dadurch ergeben sich für diese Instrumente keine materiellen Schwankungen des Kontrahentenrisikos, weder während des Jahres noch kumulativ. Das in den zum Fair Value klassifizierten Kreditbeziehungen enthaltene Kreditrisiko belief sich zum 31. Dezember 2010 auf 23,3 Mrd € (2009: 13,0 Mrd €) und wird auf vielerlei Weise verringert. Der größte Teil des Kreditrisikos aus in Anspruch genommenen Krediten wird durch den Erwerb von Credit Default Swaps gemindert, während das verbleibende Kreditrisiko durch das Halten von Sicherheiten reduziert wird.

Die Bewertung der besicherten Kredite berücksichtigt die erhaltenen Sicherheiten. Wenn die Sicherheiten den Kreditbetrag übersteigen, ergeben sich für diese Instrumente keine materiellen Schwankungen des Kontrahentenrisikos, weder während des Jahres noch kumulativ. Die Fair-Value-Änderungen dieser Instrumente ergeben sich vielmehr aus den Wertveränderungen der Sicherheiten infolge von Veränderungen des Marktrisikos und der Zinssätze.

Zur Reduzierung des Kreditrisikos aus in Anspruch genommenen Krediten und nicht in Anspruch genommenen unwiderruflichen Kreditzusagen, die zum Fair Value klassifiziert wurden, erwarb der Konzern Credit Default Swaps für Kreditbeziehungen mit einem Nominalwert von 57,3 Mrd € zum 31. Dezember 2010 (2009: 50,9 Mrd €). Der Nominalwert von Kreditderivaten, die speziell zur Reduzierung des Kreditrisikos dieser in Anspruch genommenen Kredite und nicht in Anspruch genommenen unwiderruflichen Kreditzusagen eingesetzt und die zum Fair Value klassifiziert wurden, betrug zum 31. Dezember 2010 38,0 Mrd € (2009: 34,7 Mrd €).

Die folgende Tabelle zeigt die der Änderung des Kreditrisikos zurechenbare Veränderung im Fair Value der Finanzinstrumente, die am Bilanzstichtag gehalten wurden.

| in Mio €                                                                                                             | 31.12.2010                               |               | 31.12.2009 <sup>1</sup>                  |               |
|----------------------------------------------------------------------------------------------------------------------|------------------------------------------|---------------|------------------------------------------|---------------|
|                                                                                                                      | Forderungen<br>aus dem<br>Kreditgeschäft | Kreditzusagen | Forderungen<br>aus dem<br>Kreditgeschäft | Kreditzusagen |
| <b>Veränderung im Fair Value von Forderungen aus dem Kreditgeschäft und Kreditzusagen aufgrund von Kreditrisiken</b> |                                          |               |                                          |               |
| Kumulative Veränderung im Fair Value                                                                                 | 3                                        | 490           | 143                                      | 66            |
| Fair-Value-Änderung in 2010/2009                                                                                     | –                                        | 394           | 938                                      | 1.703         |
| <b>Veränderung im Fair Value der Kreditderivate, die zur Senkung von Kreditrisiken benutzt werden</b>                |                                          |               |                                          |               |
| Kumulative Veränderung im Fair Value                                                                                 | –9                                       | –151          | –47                                      | –82           |
| Fair-Value-Änderung in 2010/2009                                                                                     | –27                                      | –230          | –1.250                                   | –1.470        |

<sup>1</sup> Die Vorjahreswerte wurden angepasst.

Die Fair-Value-Änderung der Kredite und Kreditzusagen, die aus der Änderung des Kontrahentenrisikos resultiert, wird als der nicht auf Veränderungen von Marktrisikobedingungen zurückgehende Anteil der Fair-Value-Änderung bestimmt. Für besicherte Kredite, einschließlich Forderungen aus Wertpapierpensionsgeschäften (Reverse Repos) und Wertpapierleihen, dient die erhaltene Kreditsicherheit zur Reduzierung des in diesen Geschäften enthaltenen Kontrahentenrisikos. Die Fair-Value-Änderung, die sich aus dem in den Reverse Repos enthaltenen Kontrahentenrisiko ergab, war aufgrund der erhaltenen Kreditsicherheit unwesentlich.

### Zum Fair Value bewertete finanzielle Verpflichtungen

Der Fair Value einer finanziellen Verpflichtung berücksichtigt das Kreditrisiko dieser finanziellen Verpflichtung. Die folgende Tabelle zeigt die auf das Kreditrisiko zurückzuführenden Fair-Value-Änderungen von zum Fair Value bewerteten finanziellen Verpflichtungen zum Bilanzstichtag. Die Fair-Value-Änderungen von zum Fair Value bewerteten finanziellen Verpflichtungen, die durch konsolidierte SPEs begeben wurden, sind nicht enthalten. Die Fair-Value-Änderungen dieser Instrumente sind nicht vom Kreditrisiko des Konzerns abhängig, sondern von der in der rechtlich eigenständigen SPE gehaltenen Sicherheit.

| in Mio €                             | 31.12.2010 | 31.12.2009 |
|--------------------------------------|------------|------------|
| Kumulative Veränderung im Fair Value | 76         | 30         |
| Fair-Value-Änderung in 2010/2009     | 43         | – 264      |

Der Fair Value der begebenen Verpflichtungen berücksichtigt das Kreditrisiko des Konzerns. Wenn ein solches Instrument einen auf einem aktiven Markt notierten Preis hat, ist die auf das Kreditrisiko zurückzuführende Veränderung des Fair Value jener Teil der Fair-Value-Änderung, der nicht aus Veränderungen von Marktrisikobedingungen resultiert. Hat ein solches Instrument keinen auf einem aktiven Markt notierten Preis, wird der Fair Value mithilfe einer Bewertungsmethode bestimmt. Eine solche Bewertungsmethode berücksichtigt das Kreditrisiko durch eine Diskontierung der vertraglich festgelegten Zahlungsströme der Verbindlichkeit auf Basis einer risikoadjustierten Zinskurve, die das Zinsniveau abbildet, zu dem der Konzern am Bilanzstichtag ähnliche Instrumente begeben könnte.

Das in den nicht in Anspruch genommenen unwiderruflichen Kreditzusagen enthaltene Kreditrisiko entspricht in erster Linie dem Kontrahentenrisiko. Die Fair-Value-Änderung, die dem Kontrahentenrisiko der nicht in Anspruch genommenen unwiderruflichen Kreditzusagen zurechenbar ist, wurde mit dem Kontrahentenrisiko der in Anspruch genommenen Kredite offengelegt.

Für sämtliche zum Fair Value klassifizierten finanziellen Verpflichtungen lag der bei Fälligkeit vom Konzern zu zahlende vertragliche Rückzahlungsbetrag um 23,7 Mrd € über dem Bilanzwert zum 31. Dezember 2010 (2009: 36,8 Mrd €). Der bei Fälligkeit zu zahlende vertragliche Rückzahlungsbetrag entspricht dem Betrag, den der Konzern zum frühestmöglichen vertraglichen Fälligkeitstermin zurückzahlen müsste. Ist der Rückzahlungsbetrag nicht festgelegt, wird der vom Konzern laut Vertrag zurückzuzahlende Betrag unter Verweis auf die am Bilanzstichtag bestehenden Bedingungen bestimmt.

Der größte Teil der Differenz zwischen dem Fair Value von zum Fair Value klassifizierten finanziellen Verpflichtungen und den vertraglich vereinbarten Cashflows bei Fälligkeit entfällt auf nicht in Anspruch genommene Kreditzusagen, für die dem vertraglich vereinbarten Cashflow bei Fälligkeit eine vollständige Inanspruchnahme der Kreditzusage unterstellt wird. Die Differenz zwischen dem Fair Value und dem vertraglichen Rückzahlungsbetrag bei Fälligkeit, ohne Berücksichtigung der zum Fair Value klassifizierten nicht in Anspruch genommenen Kreditzusagen, betrug zum 31. Dezember 2010 0,6 Mrd € (2009: 0,6 Mrd €).

### 13 – Änderungen zu IAS 39 und IFRS 7, „Reclassification of Financial Assets“

In Übereinstimmung mit den Änderungen zu IAS 39 und IFRS 7, „Reclassification of Financial Assets“ wurden im zweiten Halbjahr 2008 und im ersten Quartal 2009 bestimmte finanzielle Vermögenswerte aus den Bilanzkategorien „zum Fair Value bewertet“ und „zur Veräußerung verfügbar“ in die Bilanzposition „Forderungen aus dem Kreditgeschäft“ umgewidmet. Die Vermögenswerte wurden zum Fair Value zum Umwidmungszeitpunkt umgewidmet. Im Jahr 2010 wurden keine Umwidmungen vorgenommen. Umgewidmet wurde jeweils, wenn nach Einschätzung der Bank zum Umwidmungstichtag die erwartete Rückzahlung der Vermögenswerte den aufgrund der mangelnden Liquidität in den Finanzmärkten niedrigen Fair Value der umgewidmeten Vermögenswerte überstieg und durch ein Halten der Position die Rendite optimiert wird. Da zum Umwidmungstichtag eine eindeutig geänderte Zweckbestimmung der Vermögenswerte vorlag sowie weder eine Beschränkung der Haltefähigkeit noch der Refinanzierung für diese Vermögenswerte bestanden, spiegelt die geänderte Bilanzierung nach Einschätzung des Konzerns den Geschäftszweck dieser Vermögenswerte besser wider.

Die folgende Tabelle zeigt die Buchwerte, die unrealisierten Fair-Value-Verluste, die direkt im Kumulierten Sonstigen Ergebnis (Accumulated other comprehensive income) erfasst wurden, die Bandbreiten der Effektivzinssätze, basierend auf gewichteten Durchschnittssätzen einzelner Geschäftsbereiche, sowie die erwarteten erzielbaren Cashflows jeweils zum Umbuchungstichtag:

| in Mrd €<br>(sofern nicht anders angegeben)                                                                                          | Handelsaktiva,<br>umklassifiziert zu<br>Forderungen aus dem<br>Kreditgeschäft | Zur Veräußerung<br>verfügbare finanzielle<br>Vermögenswerte,<br>umklassifiziert zu<br>Forderungen aus dem<br>Kreditgeschäft |
|--------------------------------------------------------------------------------------------------------------------------------------|-------------------------------------------------------------------------------|-----------------------------------------------------------------------------------------------------------------------------|
| Buchwert am Umbuchungstichtag                                                                                                        | 26,6                                                                          | 11,4                                                                                                                        |
| Unrealisierte Verluste aus der Fair-Value-Bewertung, die direkt im<br>Sonstigen Ergebnis (Other comprehensive income) erfasst wurden | –                                                                             | – 1,1                                                                                                                       |
| <b>Effektivzinssätze am Umbuchungstichtag:</b>                                                                                       |                                                                               |                                                                                                                             |
| obere Grenze                                                                                                                         | 13,1 %                                                                        | 9,9 %                                                                                                                       |
| untere Grenze                                                                                                                        | 2,8 %                                                                         | 3,9 %                                                                                                                       |
| <b>Erwartete erzielbare Cashflows am Umbuchungstichtag</b>                                                                           | <b>39,6</b>                                                                   | <b>17,6</b>                                                                                                                 |

Die nachfolgende Tabelle zeigt die Buchwerte und Fair Values zum 31. Dezember 2010 und 2009 der in 2008 und 2009 umgewidmeten Vermögenswerte:

| in Mio €                                                                                                        | 31.12.2010    |               | 31.12.2009    |               |
|-----------------------------------------------------------------------------------------------------------------|---------------|---------------|---------------|---------------|
|                                                                                                                 | Buchwert      | Fair Value    | Buchwert      | Fair Value    |
| Handelsaktiva,<br>umklassifiziert zu Forderungen aus dem Kreditgeschäft                                         | 17.998        | 15.903        | 24.287        | 21.552        |
| Zur Veräußerung verfügbare finanzielle Vermögenswerte,<br>umklassifiziert zu Forderungen aus dem Kreditgeschäft | 8.684         | 7.805         | 9.267         | 8.290         |
| <b>Summe der finanziellen Vermögenswerte, die zu Forderungen aus dem Kreditgeschäft umklassifiziert wurden</b>  | <b>26.682</b> | <b>23.708</b> | <b>33.554</b> | <b>29.842</b> |

Die folgende Tabelle zeigt die unrealisierten Fair-Value-Gewinne/-Verluste, die in der Gewinn- und Verlustrechnung vereinnahmt worden wären, sowie Nettogewinne/-verluste, die im Sonstigen Ergebnis (Other comprehensive income) erfasst worden wären, hätte keine Umwidmung stattgefunden:

| in Mio €                                                                                                                                                                                                               | 2010 | 2009  | 2008 <sup>1</sup> |
|------------------------------------------------------------------------------------------------------------------------------------------------------------------------------------------------------------------------|------|-------|-------------------|
| Unrealisierte Fair-Value-Gewinne/-Verluste (–) aus umklassifizierten Handelsaktiva – vor Risikovorsorge im Kreditgeschäft                                                                                              | 120  | – 884 | – 3.230           |
| Verluste aus der Wertberichtigung umgewidmeter, zur Veräußerung verfügbarer finanzieller Vermögenswerte, die wertberichtigt wurden                                                                                     | – 7  | – 9   | – 209             |
| Unrealisierte Fair-Value-Gewinne/-Verluste (–) im Sonstigen Ergebnis (Other comprehensive income) aus umklassifizierten zur Veräußerung verfügbaren finanziellen Vermögenswerten, bei denen keine Wertminderung vorlag | 251  | 1.147 | – 1.826           |

<sup>1</sup> Umklassifizierungen wurden ab 1. Juli 2008 vorgenommen und somit repräsentieren die Zahlen für das Geschäftsjahr 2008 einen Sechsmonatszeitraum.

Nach der Umwidmung haben die umgewidmeten finanziellen Vermögenswerte wie folgt zu dem Ergebnis vor Steuern beigetragen.

| in Mio €                                                                                      | 2010       | 2009       | 2008 <sup>1</sup> |
|-----------------------------------------------------------------------------------------------|------------|------------|-------------------|
| Zinserträge                                                                                   | 1.154      | 1.368      | 659               |
| Risikovorsorge im Kreditgeschäft                                                              | – 278      | – 1.047    | – 166             |
| Sonstige Erträge <sup>2</sup>                                                                 | 1          | –          | –                 |
| <b>Ergebnis vor Steuern aus umklassifizierten Handelsaktiva</b>                               | <b>877</b> | <b>321</b> | <b>493</b>        |
| Zinserträge                                                                                   | 146        | 227        | 258               |
| Risikovorsorge im Kreditgeschäft                                                              | –          | – 205      | – 91              |
| Sonstige Erträge <sup>2</sup>                                                                 | – 1        | –          | –                 |
| <b>Ergebnis vor Steuern aus umklassifizierten zur Veräußerung verfügbaren Vermögenswerten</b> | <b>145</b> | <b>22</b>  | <b>167</b>        |

<sup>1</sup> Umklassifizierungen wurden ab 1. Juli 2008 vorgenommen und somit repräsentieren die Zahlen für das Geschäftsjahr 2008 einen Sechsmonatszeitraum.

<sup>2</sup> Die Verluste aus der Veräußerung von Forderungen in 2010 betrugen 3 Mio €. Der Betrag entspricht 3 Mio € Risikovorsorge im Kreditgeschäft. Es war kein Gewinn oder Verlust in Sonstigen Erträgen zu berücksichtigen.

Aus im Geschäftsjahr 2009 umgewidmeten Vermögenswerten waren vor ihrer Umwidmung entstandene unrealisierte Fair-Value-Verluste von 252 Mio € in der Gewinn- und Verlustrechnung für das Geschäftsjahr 2008 und unrealisierte Fair-Value-Verluste von 48 Mio € in der Gewinn- und Verlustrechnung für das Geschäftsjahr 2009 enthalten.

Handelsaktiva, die im Geschäftsjahr 2008 umgewidmet wurden, trugen vor ihrer Umwidmung mit einem Fair-Value-Verlust in Höhe von 1,8 Mrd € zur Gewinn- und Verlustrechnung des Konzerns für das Geschäftsjahr 2008 bei. Vor der Umwidmung entstandene Wertminderungsverluste aus zur Veräußerung verfügbaren Vermögenswerten, die im Geschäftsjahr 2008 umgewidmet wurden, beliefen sich auf 174 Mio € und wurden in der Gewinn- und Verlustrechnung des Konzerns für das Geschäftsjahr 2008 berücksichtigt. Aus diesen Vermögenswerten waren vor der Umwidmung im Geschäftsjahr 2008 zusätzliche unrealisierte Fair-Value-Verluste in Höhe von 736 Mio € entstanden, die im sonstigen Ergebnis (Other comprehensive income) berücksichtigt wurden.

## 14 – Zum Fair Value bewertete Finanzinstrumente

### Bewertungsmethoden und Kontrolle

Der Konzern verfügt über ein etabliertes Kontrollsystem im Rahmen des Bewertungsprozesses, welches interne Kontrollstandards, -methoden und -verfahren enthält.

**In aktiven Märkten notierte Preise:** Der Fair Value von in aktiven Märkten notierten Finanzinstrumenten wird auf Grundlage von Preisnotierungen ermittelt, sofern diese im Rahmen von regelmäßigen und aktuellen Transaktionen verwendete Preise darstellen.

**Bewertungsverfahren:** Der Konzern verwendet Bewertungsverfahren für die Ermittlung des Fair Value von Finanzinstrumenten, sofern keine in aktiven Märkten notierten Preise verfügbar sind. Zu den für die Bewertung von Finanzinstrumenten verwendeten Verfahren gehören Modellierungstechniken, die Anwendung indikativer Preisangaben für ähnliche Instrumente, Preisangaben aus weniger aktuellen und regelmäßigen Transaktionen sowie Kursgebote von Brokern.

Für einige Finanzinstrumente liegt statt eines Preises eine Kursnotierung oder ein sonstiger notierter Parameter vor. In solchen Fällen wird für die Ermittlung des Fair Value der Marktkurs oder Parameter als Eingangsgröße in einem Bewertungsmodell verwendet. Für einige Finanzinstrumente werden branchenübliche Modellierungstechniken wie die Discounted-Cashflow-Analyse und gängige Optionspreismodelle verwendet. Diese Modelle sind abhängig von geschätzten zukünftigen Cashflows, Diskontierungsfaktoren und der Volatilität. Für komplexere oder einzigartige Finanzinstrumente werden differenziertere Modellierungstechniken benötigt, die auf Annahmen und komplexeren Parametern, wie Korrelationen, Annahmen über vorzeitige Tilgungsgeschwindigkeiten, Ausfallraten und die Höhe der Verluste beruhen.

Häufig müssen in Bewertungsmodellen mehrere Eingangsparameter verwendet werden. Soweit möglich, basieren diese auf beobachtbaren Informationen oder werden aus den Preisen relevanter, in aktiven Märkten gehandelter Finanzinstrumente abgeleitet. Sind für die Eingangsparameter keine beobachtbaren Informationen verfügbar, werden andere Marktinformationen berücksichtigt. Beispielsweise werden Eingangsparameter durch indikative Kursgebote von Brokern und Konsenspreisangaben gestützt, sofern diese Informationen zur Verfügung stehen. Sind keine beobachtbaren Informationen verfügbar, basieren die Eingangsparameter auf anderen relevanten Informationsquellen wie Preisen für ähnliche Transaktionen, historischen Daten, wirtschaftlichen Eckdaten sowie wissenschaftlichen Informationen, die entsprechend angepasst werden, um die Ausgestaltung des tatsächlich zu bewertenden Finanzinstruments und die derzeitigen Marktbedingungen zu reflektieren.



**Wertanpassungen:** Wertanpassungen sind ein integraler Bestandteil des Bewertungsprozesses. Für die Ermittlung angemessener Wertanpassungen wendet der Konzern Verfahren an, die Faktoren wie Geld-/Briefspannen, Liquidität und Kontrahentenrisiko berücksichtigen. Wertanpassungen bezüglich der Geld-/Briefspanne sind erforderlich, um auf Mittelkursen basierende Bewertungen der entsprechenden Geld-/Briefbewertung anzupassen. Die Geld-/Briefbewertung stellt den Fair Value für ein Finanzinstrument am besten dar und entspricht daher dessen Fair Value. Der Buchwert einer Kaufposition wird vom Mittel- auf den Geldkurs und der Buchwert einer Verkaufsposition vom Mittel- auf den Briefkurs angepasst. Die Geld-/Briefkursanpassung wird von den Geld-/Briefkursen, die in der relevanten Handelsaktivität beobachtet werden, und von Kursgeboten sonstiger Broker/Dealer oder sonstiger sachverständiger Kontrahenten abgeleitet. Entspricht der notierte Preis für das Finanzinstrument bereits dem Geld-/Briefkurs, ist keine Geld-/Briefanpassung erforderlich. Sofern der Fair Value eines Finanzinstruments aus einer Modellierungstechnik abgeleitet wird, basieren die in diesem Modell verwendeten Parameter in der Regel auf einem Mittelkurs. Solche Finanzinstrumente werden generell auf Portfoliobasis gesteuert und Wertanpassungen werden vorgenommen, um die Kosten der Schließung der Nettorisikoposition der Bank bezüglich der einzelnen Eingangsparameter abzubilden. Diese Wertanpassungen werden aus den Geld-/Briefkursen, die in relevanten Handelsaktivitäten beobachtet werden, und aus Kursgeboten sonstiger Broker/Dealer bestimmt.

Wenn komplexe Bewertungsmodelle genutzt oder weniger liquide Positionen bewertet werden, sind Geld-/Briefspannen für diese Positionen möglicherweise nicht direkt am Markt verfügbar und deshalb müssen die Abschlusskosten dieser Geschäfte, die Modelle und Parameter geschätzt werden. Wenn die Anpassungen festgelegt werden, untersucht der Konzern die Bewertungsrisiken, die mit dem Modell und den Positionen verbunden sind. Die resultierenden Anpassungen werden regelmäßig überprüft.

Wertanpassungen bezüglich Kontrahentenrisiken sind erforderlich, um die erwarteten Kreditverluste zu berücksichtigen, soweit ein solcher Faktor im Rahmen der Modellierungstechnik nicht bereits enthalten ist. So wird beispielsweise eine Wertanpassung erforderlich, um die erwarteten Kreditverluste für OTC-Derivate abzudecken, welche in der Regel nicht in Mittelkursen oder Geld-/Briefkursen reflektiert sind. Der Betrag der Wertanpassung wird an jedem Bilanzstichtag durch die Bewertung des potenziellen Kreditrisikos gegenüber allen Kontrahenten unter Berücksichtigung von gehaltenen Sicherheiten, des Effekts von Nettingrahmenverträgen, des erwarteten Ausfallrisikos („Loss Given Default“) und des Kreditrisikos für jeden Kontrahenten auf der Grundlage von Marktanzeichen wie historischen Ausfällen, Fundamentalanalysen von Wirtschaftsinformationen und CDS Spreads bestimmt.

In ähnlicher Weise berücksichtigt der Konzern für die Ermittlung des Fair Value von derivativen Verpflichtungen die eigene Bonität, indem das potenzielle künftige Risiko aller Kontrahenten gegenüber dem Konzern bewertet wird. Dabei werden gehaltene Sicherheiten, der Effekt von Nettingrahmenverträgen, die erwarteten Ausfallrisiken und das Kreditrisiko des Konzerns auf der Grundlage historischer Ausfälle von Gesellschaften mit vergleichbarer Bonität berücksichtigt. Infolge dieser Wertanpassung wurde im Geschäftsjahr 2010 ein unwesentlicher Gewinn ausgewiesen.

Bestehen Unsicherheiten bei den im Rahmen einer Modellierungstechnik verwendeten Annahmen, wird eine zusätzliche Anpassung vorgenommen, um den kalkulierten Preis dem erwarteten Marktpreis des Finanzinstruments anzugleichen. Solche Transaktionen haben typischerweise keine regelmäßig beobachtbaren Geld-/Briefspannen und die Anpassungen dienen der Schätzung der Geld-/Briefspannen durch Kalkulation der zur Transaktion gehörigen Risikoprämie. Sofern ein Finanzinstrument Bestandteil einer Gruppe von Transaktionen ist, deren Risikosteuerung auf Portfoliobasis erfolgt, die Transaktion selbst jedoch so komplex ist, dass die Kosten der Schließung für diese Transaktion höher wären als die entsprechenden Kosten für die dazugehörigen Einzelrisiken, wird eine zusätzliche Anpassung vorgenommen, um diesen Umstand zu berücksichtigen.

**Validierung und Kontrolle:** Ein unabhängiges Spezialistenteam im Bereich Finance hat die Aufgabe, das Kontrollsystem für Bewertungen zu überwachen und weiterzuentwickeln sowie die entsprechenden Prozesse zu steuern. Dieses Spezialistenteam ist unter anderem damit betraut, Bewertungskontrollprozesse für das Geschäft mit komplexen Derivaten durchzuführen sowie die Bewertungskontrollmethoden und das Rahmenwerk der Bewertungsrichtlinien kontinuierlich weiterzuentwickeln. Die Ergebnisse des Bewertungskontrollprozesses werden im Rahmen des monatlichen Berichtszyklus zusammengestellt und analysiert. Abweichungen, die vordefinierte und genehmigte Toleranzgrenzen überschreiten, werden sowohl innerhalb des Bereichs Finance als auch mit den Führungskräften der jeweiligen Geschäftsbereiche eskaliert, um diese zu überprüfen beziehungsweise zu klären und gegebenenfalls Anpassungen zu veranlassen.

Für Finanzinstrumente, deren Fair Value anhand von Bewertungsmodellen ermittelt wird, werden die im Rahmen des Modells verwendeten Annahmen und Verfahren durch ein unabhängiges für die Modellvalidierung zuständiges Spezialistenteam, das dem Bereich Risikomanagement des Konzerns angehört, validiert.

Kurs- und Preisangaben sowie Parameter für Transaktionen stammen aus einer Reihe von Drittquellen einschließlich Börsen, Pricing-Service-Anbietern, verbindlicher Kursangaben von Brokern sowie Konsens-Pricing-Services. Die Preisquellen werden geprüft und bewertet, um die Qualität der Fair-Value-Informationen zu beurteilen und denen, die größere Bewertungssicherheit und Relevanz liefern, mehr Gewichtung zu verleihen. Die Ergebnisse werden, sofern möglich, mit tatsächlichen Transaktionen am Markt verglichen, um eine Kalibrierung der Modellbewertungen anhand von Marktpreisen sicherzustellen.

Die in Bewertungsmodellen verwendeten Eingangspreise und -parameter, Annahmen sowie Wertanpassungen werden anhand unabhängiger Quellen verifiziert. Ist eine solche Verifizierung aufgrund fehlender beobachtbarer Daten nicht möglich, werden Verfahren angewendet, um die Angemessenheit des Fair-Value-Schätzwerts zu überprüfen. Zu diesen Verfahren gehören die Durchführung einer Neubewertung mithilfe unabhängig entwickelter Modelle (einschließlich existierender Modelle, die unabhängig nachkalibriert wurden), die Prüfung der Bewertungsergebnisse anhand geeigneter vergleichbarer Instrumente und sonstiger Richtgrößen sowie die Anwendung von Extrapolationsverfahren. Die Kalibrierung der Ergebnisse der Bewertungsmodelle anhand von Markttransaktionen erlaubt eine Einschätzung, ob die Bewertungsmodelle eine Fair-Value-Bestimmung ermöglichen, die Marktpreisen entspricht.

**Einschätzung durch das Management:** Bei der Ermittlung des Fair Value sind Einschätzungen durch das Management erforderlich. Die Bereiche, für die Managemententscheidungen in signifikantem Umfang erforderlich sind, werden identifiziert, dokumentiert und im Rahmen von Bewertungskontrollen und des monatlichen Berichtszyklus an das Senior Management gemeldet. Die für die Modellvalidierung und Bewertung verantwortlichen Spezialistenteams befassen sich vor allem mit Subjektivitäts- und Einschätzungsfragen.

Für die Ermittlung des Fair Value von Finanzinstrumenten, deren Preise in einem aktiven Markt notieren, sind üblicherweise nur in geringem Umfang Einschätzungen seitens des Managements erforderlich. In ähnlicher Weise bedarf es nur weniger subjektiver Bewertungen beziehungsweise Einschätzungen für Finanzinstrumente, die mit branchenüblichen Modellen bewertet werden und deren sämtliche Eingangsparameter in aktiven Märkten notiert sind.

Das erforderliche Maß an subjektiver Bewertung und Einschätzungen durch das Management hat für diejenigen Finanzinstrumente ein höheres Gewicht, die anhand spezieller und komplexer Modelle bewertet werden und bei denen einige oder alle Eingangsparameter nicht beobachtbar sind. Die Auswahl und Anwendung angemessener Parameter, Annahmen und Modellierungstechniken bedürfen einer Beurteilung durch das Management. Insbesondere wenn Daten aus selten vorkommenden Markttransaktionen stammen, müssen Extrapolations- und Interpolationsverfahren angewandt werden. Sind darüber hinaus keine Marktdaten vorhanden, werden die Parameter durch Untersuchung anderer relevanter Informationsquellen bestimmt wie historische Daten, Fundamentalanalyse der wirtschaftlichen Eckdaten der Transaktion und Informationen aus vergleichbaren Transaktionen. Dazu werden angemessene Anpassungen vorgenommen, um das tatsächlich zu bewertende Finanzinstrument sowie die aktuellen Marktbedingungen zu reflektieren. Führen unterschiedliche Bewertungsmodelle zu einer Bandbreite von verschiedenen potenziellen Fair Values für ein Finanzinstrument, muss das Management entscheiden, welcher dieser Schätzwerte innerhalb der Bandbreite den Fair Value am besten widerspiegelt. Ferner können bestimmte Wertanpassungen Einschätzungen vonseiten des Managements erfordern, um die Ermittlung des Fair Value sicherzustellen.

### Fair-Value-Hierarchie

Die zum Fair Value ausgewiesenen Finanzinstrumente wurden den drei Fair-Value-Kategorien gemäß der IFRS-Fair-Value-Hierarchie zugeordnet.

**Level 1** – mittels notierter Preise in aktiven Märkten bewertete Finanzinstrumente: Dabei handelt es sich um Finanzinstrumente, deren Fair Value direkt von Preisen an aktiven, liquiden Märkten abgeleitet werden kann und bei denen das im Markt beobachtbare Finanzinstrument repräsentativ für das im Inventar des Konzerns zu bewertende ist.

Zu diesen Finanzinstrumenten zählen hochliquide Schatzanweisungen sowie Derivate, Eigenkapitaltitel und Anleihen, die in sehr liquiden Märkten gehandelt werden.

**Level 2** – mittels Bewertungsverfahren auf Basis beobachtbarer Marktdaten bewertete Finanzinstrumente: Dabei handelt es sich um Finanzinstrumente, deren Fair Value aus gleichartigen, an aktiven Märkten gehandelten Finanzinstrumenten oder mittels Bewertungsverfahren, dessen sämtliche Eingangsparameter beobachtbar sind, ermittelt werden kann.

Zu diesen Finanzinstrumenten zählen eine Vielzahl der OTC-Derivate (over the counter derivatives), gelistete Investment Grade Kreditanleihen, einige CDSs (Credit Defaults Swaps), eine Vielzahl der CDOs (collateralized debt obligations) sowie viele der weniger liquiden Aktien.

**Level 3** – mittels Bewertungsverfahren auf Basis nicht beobachtbarer Parameter: Dabei handelt es sich um Finanzinstrumente, deren Fair Value nicht aus am Markt beobachtbaren Daten ermittelt werden kann und die ein anderes Bewertungsverfahren benötigen. Die Finanzinstrumente dieser Kategorie weisen ein Element auf, das nicht beobachtbar ist und einen wesentlichen Einfluss auf den Fair Value hat.

Zu diesen Finanzinstrumenten zählen komplexere OTC-Derivate, notleidende Kredite, hochgradig strukturierte Anleihen, illiquide ABS (Asset-backed Securities einschließlich einiger, die auf Wohnungsbaukrediten basieren), illiquide CDOs (Kassa und synthetisch), Risikopositionen gegenüber Monolineversicherern, Private Equity Investments, viele gewerbliche Immobilienkredite, illiquide Kredite und einige Kommunalanleihen.

Die folgende Tabelle zeigt den Buchwert der zum Fair Value ausgewiesenen Finanzinstrumente, aufgeteilt auf die drei Kategorien der Fair-Value-Hierarchie. Die Beträge in dieser Tabelle werden generell brutto ausgewiesen. Dies steht im Einklang mit den in Note 01 „Wesentliche Rechnungslegungsgrundsätze“ dargestellten Rechnungslegungsgrundsätzen zur Aufrechnung von Finanzinstrumenten des Konzerns.

|                                                                            | 31.12.2010                                            |                                                                        |                                                                              | 31.12.2009                                            |                                                                        |                                                                              |
|----------------------------------------------------------------------------|-------------------------------------------------------|------------------------------------------------------------------------|------------------------------------------------------------------------------|-------------------------------------------------------|------------------------------------------------------------------------|------------------------------------------------------------------------------|
|                                                                            | In aktiven<br>Märkten<br>notierte Preise<br>(Level 1) | Auf<br>Marktdaten<br>basierende<br>Bewertungs-<br>methode<br>(Level 2) | Nicht auf<br>Marktdaten<br>basierende<br>Bewertungs-<br>methode<br>(Level 3) | In aktiven<br>Märkten<br>notierte Preise<br>(Level 1) | Auf<br>Marktdaten<br>basierende<br>Bewertungs-<br>methode<br>(Level 2) | Nicht auf<br>Marktdaten<br>basierende<br>Bewertungs-<br>methode<br>(Level 3) |
| in Mio €                                                                   |                                                       |                                                                        |                                                                              |                                                       |                                                                        |                                                                              |
| <b>Zum Fair Value bewertete finanzielle Vermögenswerte:</b>                |                                                       |                                                                        |                                                                              |                                                       |                                                                        |                                                                              |
| Wertpapiere des Handelsbestands                                            | 96.828                                                | 126.594                                                                | 14.861                                                                       | 84.833                                                | 106.268                                                                | 15.609                                                                       |
| Positive Marktwerte aus derivativen Finanzinstrumenten                     | 14.976                                                | 624.961                                                                | 17.843                                                                       | 19.684                                                | 551.514                                                                | 25.211                                                                       |
| Sonstige Handelsaktiva                                                     | 692                                                   | 26.249                                                                 | 6.067                                                                        | 456                                                   | 16.963                                                                 | 10.782                                                                       |
| Zum Fair Value klassifizierte finanzielle Vermögenswerte                   | 7.674                                                 | 160.966                                                                | 3.286                                                                        | 5.698                                                 | 124.892                                                                | 3.410                                                                        |
| Zur Veräußerung verfügbare finanzielle Vermögenswerte                      | 17.186                                                | 31.858                                                                 | 5.222                                                                        | 10.789                                                | 4.863                                                                  | 3.167                                                                        |
| Sonstige zum Fair Value bewertete finanzielle Vermögenswerte <sup>1</sup>  | –                                                     | 8.504                                                                  | –623                                                                         | –                                                     | 7.014                                                                  | 41                                                                           |
| <b>Zum Fair Value bewertete finanzielle Vermögenswerte insgesamt</b>       | <b>137.356</b>                                        | <b>979.132</b>                                                         | <b>46.656</b>                                                                | <b>121.460</b>                                        | <b>811.514</b>                                                         | <b>58.220</b>                                                                |
| <b>Zum Fair Value bewertete finanzielle Verpflichtungen:</b>               |                                                       |                                                                        |                                                                              |                                                       |                                                                        |                                                                              |
| Wertpapiere des Handelsbestands                                            | 43.967                                                | 20.966                                                                 | 251                                                                          | 43.182                                                | 18.787                                                                 | 431                                                                          |
| Negative Marktwerte aus derivativen Finanzinstrumenten                     | 12.379                                                | 623.876                                                                | 10.916                                                                       | 18.699                                                | 542.683                                                                | 15.591                                                                       |
| Sonstige Handelspassiva                                                    | 1                                                     | 3.669                                                                  | 5                                                                            | 1                                                     | 1.817                                                                  | 283                                                                          |
| Zum Fair Value klassifizierte finanzielle Verpflichtungen                  | 348                                                   | 127.736                                                                | 2.070                                                                        | 177                                                   | 70.724                                                                 | 2.621                                                                        |
| Investmentverträge <sup>2</sup>                                            | –                                                     | 7.898                                                                  | –                                                                            | –                                                     | 7.278                                                                  | –                                                                            |
| Sonstige zum Fair Value bewertete finanzielle Verpflichtungen <sup>1</sup> | –                                                     | 6.526                                                                  | –239                                                                         | –                                                     | 2.698                                                                  | –757                                                                         |
| <b>Zum Fair Value bewertete finanzielle Verpflichtungen insgesamt</b>      | <b>56.695</b>                                         | <b>790.671</b>                                                         | <b>13.003</b>                                                                | <b>62.059</b>                                         | <b>643.987</b>                                                         | <b>18.169</b>                                                                |

<sup>1</sup> Derivate, die in Verträge eingebettet sind, deren Basisvertrag nicht zum Fair Value bewertet wird, für die das eingebettete Derivat jedoch getrennt ausgewiesen wird, werden unter Sonstigen zum Fair Value bewerteten finanziellen Vermögenswerten/Verpflichtungen ausgewiesen. Die getrennt ausgewiesenen eingebetteten Derivate können sowohl positive als auch negative Marktwerte aufweisen, werden aber aus Konsistenzgründen in obiger Tabelle in der Fair-Value-Kategorie des Basisvertrags ausgewiesen. Die getrennt ausgewiesenen eingebetteten Derivate werden laufend zum Fair Value bewertet. Zum Zweck dieser Angabe wird das getrennt ausgewiesene eingebettete Derivat auf verschiedene Fair-Value-Kategorien aufgeteilt.

<sup>2</sup> Aufgrund der Vertragsbedingungen entspricht bei diesen Investmentverträgen der Rückkaufswert dem Fair Value. Siehe Note 39 „Versicherungs- und Investmentverträge“ für nähere Informationen zu diesen Verträgen.

Es gab keine signifikanten Transfers von Finanzinstrumenten zwischen Level 1 und Level 2 der Fair-Value-Hierarchie.

### Bewertungsverfahren

Nachstehend folgt eine Erläuterung der Bewertungsmethoden, die zur Ermittlung des Fair Value der wesentlichen Arten von Finanzinstrumenten eingesetzt werden.

**Festverzinsliche Wertpapiere von staatlichen und quasistaatlichen Emittenten und Unternehmen sowie Eigenkapitaltitel:** Sofern es keine in jüngster Zeit durchgeführten Transaktionen gibt, kann der Fair Value auf Basis des letzten Marktpreises, bereinigt um alle seither erfolgten Risiko- und Informationsänderungen, ermittelt werden. Werden auf einem aktiven Markt vergleichbare Instrumente notiert, wird der Fair Value durch Anpassung des Vergleichswerts an die jeweiligen Differenzen in den Risikoprofilen dieser Instrumente bestimmt. Sind keine vergleichbaren Werte verfügbar, wird der Fair Value anhand komplexerer Modellierungstechniken bestimmt. Diese Techniken umfassen Discounted-Cashflow-Modelle, die die aktuellen Marktkonditionen für Kredit-, Zins-, Liquiditäts- und sonstige Risiken berücksichtigen. Bei Modellierungstechniken für Eigenkapitaltitel können auch Ertragsmultiplikatoren eingesetzt werden.

**Hypothekarisch besicherte und durch andere Vermögenswerte unterlegte Wertpapiere („ABS“):** Zu diesen Instrumenten gehören durch private und gewerbliche Immobilien besicherte Wertpapiere und sonstige Asset-backed Securities einschließlich Collateralized Debt Obligations („CDOs“). Asset-backed Securities weisen besondere Merkmale auf, da sie mit unterschiedlichen zugrunde liegenden Vermögenswerten besichert sind und die Kapitalstruktur der Emittenten variiert. Die Komplexität steigt weiter, wenn die zugrunde liegenden Vermögenswerte selbst Asset-backed Securities sind, wie dies beispielsweise bei vielen CDO-Instrumenten der Fall ist.

Wenn es keine zuverlässigen externen Preisermittlungen gibt, werden Asset-backed Securities entweder anhand einer Relative-Value-Analyse auf der Grundlage ähnlicher am Markt beobachtbarer Transaktionen oder anhand branchenüblicher Modelle unter Berücksichtigung verfügbarer beobachtbarer Daten bewertet. Die externen, zum Branchenstandard gehörenden Modelle berechnen Zins- und Tilgungszahlungen im Rahmen einer Transaktion auf der Grundlage von Annahmen, die unabhängigen Preistests unterzogen werden können. Die Eingangsparameter beinhalten Annahmen über vorzeitige Tilgungen, Verlustannahmen (Zeitpunkt und Verlustgröße) und einen Diskontierungszinssatz (Spread, Rendite oder Diskontierungsmarge). Diese Eingangsgrößen/Annahmen basieren auf tatsächlichen Transaktionen, externen Marktanalysen und gegebenenfalls Marktindizes.

**Kredite:** Bei bestimmten Krediten lässt sich der Fair Value anhand des Marktpreises einer erst kürzlich erfolgten Transaktion unter Einbeziehung sämtlicher Risiko- und Informationsveränderungen seit dem Transaktionsdatum ermitteln. Sofern keine erst vor Kurzem durchgeführten Transaktionen vorliegen, wird der Fair Value anhand von Kursangaben von Brokern, Konsenspreisfeststellungen, vergleichbaren Instrumenten oder mithilfe von Discounted-Cashflow-Modellen bestimmt. In den Discounted-Cashflow-Modellen werden je nach Angemessenheit Eingangsparameter für Kreditrisiken, Zinsrisiken, Währungsrisiken, geschätzte Ausfallverluste und die bei Ausfällen ausgenutzten Beträge verwendet. Die Parameter Kreditrisiko, geschätzte Ausfallverluste und Ausnutzung zum Zeitpunkt des Ausfalls werden, sofern verfügbar und angemessen, anhand von Informationen über die betreffenden Kredit- oder CDS-Märkte ermittelt.

Leveraged-Finance-Kredite können sich durch transaktionsspezifische Merkmale auszeichnen, die die Relevanz der am Markt beobachtbaren Transaktionen einschränken. Gibt es vergleichbare Transaktionen, für die beobachtbare Parameter externer Pricing Services vorliegen, werden diese Informationen entsprechend den Transaktionsunterschieden angepasst. Gibt es keine vergleichbaren Transaktionen, wird eine Discounted-Cashflow-Bewertungsmethode angewandt, bei der die Credit Spreads aus dem entsprechenden Index für Leveraged-Finance-Kredite abgeleitet werden. Dabei werden die Branchenklassifizierung, die Nachrangigkeit des Kredits sowie sonstige relevante Informationen über den Kredit und den jeweiligen Kontrahenten berücksichtigt.

**Over-The-Counter (OTC)-derivative Finanzinstrumente:** Transaktionen, die dem Marktstandard entsprechen und an liquiden Märkten gehandelt werden – wie Zinsswaps, Devisentermingeschäfte und Optionskontrakte in G-7-Währungen –, sowie Aktienswaps und Optionskontrakte auf börsennotierte Wertpapiere oder Indizes werden anhand von branchenüblichen Standardmodellen mit notierten Eingangsparametern bewertet. Die Eingangsparameter können, soweit möglich, von Pricing Services oder Konsens-Pricing-Services eingeholt beziehungsweise aus kürzlich durchgeführten Transaktionen an aktiven Märkten abgeleitet werden.

Für komplexere Finanzinstrumente werden differenziertere Modellierungstechniken verwendet, die für das Finanzinstrument spezifisch und anhand verfügbarer Marktpreise kalibriert sind. Ist eine Kalibrierung des Bewertungsergebnisses anhand relevanter Marktreferenzen nicht möglich, werden Bewertungsanpassungen genutzt, um das Bewertungsergebnis um alle Differenzen zu bereinigen. In weniger aktiven Märkten werden Informationen aus weniger häufig stattfindenden Markttransaktionen, Kursangaben von Brokern sowie Extrapolations- und Interpolationsverfahren abgeleitet. Sind keine beobachtbaren Preise oder Eingangsgrößen vorhanden, ist eine Einschätzung durch das Management erforderlich, um den Fair Value mithilfe anderer relevanter Informationsquellen zu bestimmen, die historische Daten, die Fundamentalanalyse der wirtschaftlichen Eckdaten der Transaktion und vergleichbare Daten von ähnlichen Transaktionen beinhalten.

**Zum Fair Value klassifizierte finanzielle Verpflichtungen unter der Fair Value Option:** Der Fair Value der zum Fair Value klassifizierten finanziellen Verpflichtungen, die unter Anwendung der Fair Value Option in diese Kategorie klassifiziert wurden, enthält sämtliche Marktrisikofaktoren einschließlich des mit dieser finanziellen Verpflichtung in Verbindung stehenden Kreditrisikos des Konzerns. Zu den finanziellen Verpflichtungen gehören strukturierte Anleihen, strukturierte Einlagen und sonstige durch konsolidierte Gesellschaften emittierte strukturierte Wertpapiere, die unter Umständen nicht an einem aktiven Markt gehandelt werden. Der Fair Value dieser finanziellen Verpflichtungen wird durch die Abzinsung der vertraglichen Cashflows mithilfe der relevanten kreditrisikoadjustierten Zinsstrukturkurve ermittelt. Die Marktrisikoparameter werden entsprechend vergleichbaren Finanzinstrumenten bewertet, die als Vermögenswerte gehalten werden. So werden Derivate, die in die strukturierten Finanzinstrumente eingebettet sind, anhand der unter dem Abschnitt „OTC-derivative Finanzinstrumente“ erläuterten Methode bewertet.

Sind die zum Fair Value klassifizierten finanziellen Verpflichtungen, die unter der Fair Value Option klassifiziert wurden, wie beispielsweise Verbindlichkeiten aus Wertpapierleihen und aus Wertpapierpensionsgeschäften (Repos), besichert, wird die Verbesserung der Kreditqualität bei der Bestimmung des Fair Value der Verpflichtung berücksichtigt.

**Verbindlichkeiten aus Investmentverträgen:** Der Konzern hält Vermögenswerte, die mit Verbindlichkeiten aus Investmentverträgen im Zusammenhang stehen. Der Konzern ist vertraglich verpflichtet, diese Vermögenswerte zu nutzen, um seinen Verpflichtungen nachzukommen. Aus diesem Grund wird der Fair Value für die Verbindlichkeiten aus den Investmentverträgen, das heißt der Rückkaufswert der Verträge, durch den Fair Value der zugrunde liegenden Vermögenswerte bestimmt.

**Analyse der Finanzinstrumente mit einem Fair Value, der mithilfe von Bewertungsmodellen ermittelt wurde, die wesentliche nicht beobachtbare Parameter enthalten (Level 3)**

Die folgende Tabelle zeigt die Finanzinstrumente, die der dritten Kategorie zugeordnet wurden. Im Anschluss folgen eine Analyse und Erläuterung der entsprechend klassifizierten Finanzinstrumente. Zu einigen der Finanzinstrumente in der dritten Kategorie der Fair-Value-Hierarchie bestehen identische oder ähnliche kompensierende Positionen bezüglich der nicht beobachtbaren Parameter. Trotzdem wird durch die diesbezügliche IFRS-Ausweissvorschrift gefordert, diese Vermögenswerte und Verbindlichkeiten brutto darzustellen.



| in Mio €                                                                         | 31.12.2010    | 31.12.2009    |
|----------------------------------------------------------------------------------|---------------|---------------|
| <b>Zum Fair Value bewertete finanzielle Vermögenswerte:</b>                      |               |               |
| Wertpapiere des Handelsbestands:                                                 |               |               |
| Schuldtitel staatlicher und quasistaatlicher Emittenten                          | 576           | 335           |
| Hypothekarisch besicherte und durch andere Vermögenswerte unterlegte Wertpapiere | 6.302         | 7.068         |
| Unternehmensschuldinstrumente und andere Schuldtitel                             | 7.406         | 7.444         |
| Eigenkapitaltitel                                                                | 577           | 762           |
| Zu Handelszwecken gehaltene Wertpapiere insgesamt                                | 14.861        | 15.609        |
| Positive Marktwerte aus derivativen Finanzinstrumenten                           | 17.843        | 25.211        |
| Sonstige Handelsaktiva                                                           | 6.067         | 10.782        |
| <b>Zum Fair Value klassifizierte finanzielle Vermögenswerte:</b>                 |               |               |
| Forderungen aus dem Kreditgeschäft                                               | 2.740         | 2.905         |
| Sonstige zum Fair Value klassifizierte finanzielle Vermögenswerte                | 546           | 505           |
| Zum Fair Value klassifizierte finanzielle Vermögenswerte insgesamt               | 3.286         | 3.410         |
| Zur Veräußerung verfügbare finanzielle Vermögenswerte                            | 5.222         | 3.167         |
| Sonstige zum Fair Value bewertete finanzielle Vermögenswerte                     | -623          | 41            |
| <b>Zum Fair Value bewertete finanzielle Vermögenswerte insgesamt</b>             | <b>46.656</b> | <b>58.220</b> |
| <b>Zum Fair Value bewertete finanzielle Verpflichtungen:</b>                     |               |               |
| Wertpapiere des Handelsbestands                                                  | 251           | 431           |
| Negative Marktwerte aus derivativen Finanzinstrumenten                           | 10.916        | 15.591        |
| Sonstige Handelspassiva                                                          | 5             | 283           |
| <b>Zum Fair Value klassifizierte finanzielle Verpflichtungen:</b>                |               |               |
| Kreditzusagen                                                                    | 572           | 447           |
| Langfristige Verbindlichkeiten                                                   | 1.481         | 1.723         |
| Sonstige zum Fair Value klassifizierte finanzielle Verpflichtungen               | 17            | 451           |
| Zum Fair Value klassifizierte finanzielle Verpflichtungen insgesamt              | 2.070         | 2.621         |
| Sonstige zum Fair Value bewertete finanzielle Verpflichtungen                    | -239          | -757          |
| <b>Zum Fair Value bewertete finanzielle Verpflichtungen insgesamt</b>            | <b>13.003</b> | <b>18.169</b> |

**Zu Handelszwecken gehaltene Wertpapiere:** In dieser Kategorie der Fair-Value-Hierarchie sind bestimmte illiquide Unternehmensanleihen aus Schwellenländern und illiquide strukturierte Unternehmensanleihen enthalten. Darüber hinaus werden hier bestimmte Bestände an Anleihen ausgewiesen, die von Verbriefungsgesellschaften emittiert wurden, sowie durch private und gewerbliche Immobilien besicherte Wertpapiere, Collateralized Debt Obligations („CDO“) und andere Asset-backed Securities.

**Positive und negative Marktwerte aus derivativen Instrumenten:** Derivate, die dieser Kategorie der Fair-Value-Hierarchie zugeordnet sind, werden auf Basis eines oder mehrerer wesentlicher nicht beobachtbarer Parameter bewertet. Diese nicht beobachtbaren Parameter können bestimmte Korrelationen umfassen, bestimmte langfristige Volatilitäten, bestimmte Raten für vorzeitige Tilgungen sowie bestimmte Kreditrisikoaufschläge („Credit Spreads“) und andere transaktionsspezifische Faktoren.

In dieser Kategorie der Fair-Value-Hierarchie sind die folgenden Derivate enthalten: kundenspezifische CDO-Derivate, deren zugrunde liegender Referenzpool aus Unternehmensvermögenswerten nicht mit regelmäßig gehandelten Indizes vergleichbar ist, bestimmte Tranchen von Indexkreditderivaten, bestimmte Optionen, deren Volatilität nicht beobachtbar ist, bestimmte Basketoptionen, in denen die Korrelationen zwischen den zugrunde liegenden Vermögenswerten nicht beobachtbar sind, langfristige Zinsoptionen und Fremdwährungsderivate, die sich auf mehrere Währungen beziehen, sowie bestimmte Credit Default Swaps, für die der Kreditrisikoaufschlag nicht beobachtbar ist.

Im Jahresverlauf 2010 ging der Marktwert der derivativen Instrumente in der Level-3-Kategorie der Fair-Value-Hierarchie zurück. Dies wurde hauptsächlich durch die Änderung der Parameter, insbesondere der geringeren Kreditrisikoaufschläge („Credit Spreads“), verursacht. Die im Jahresverlauf beobachtbare zunehmende Liquidität der Märkte für einige Instrumente führte dazu, dass diese Instrumente von der Level-3-Kategorie in die Level-2-Kategorie der Fair-Value-Hierarchie umgegliedert wurden.

**Andere zu Handelszwecken gehaltene Instrumente:** Zu den anderen in der dritten Kategorie der Fair-Value-Hierarchie enthaltenen Handelsinstrumenten gehören in erster Linie handelbare Kredite, deren Wert anhand von Bewertungsmodellen auf Basis eines oder mehrerer wesentlicher nicht beobachtbarer Parameter bestimmt wird. Die in dieser Kategorie der Fair-Value-Hierarchie enthaltenen Kredite umfassen illiquide Leveraged Loans und illiquide private und gewerbliche Hypothekendarlehen. Der Bestand ist im Jahresverlauf hauptsächlich durch Umgliederung in Level 2 der Hierarchie aufgrund zunehmend beobachtbarer Eingangsdaten in Bewertungsmodelle zurückgegangen.

**Zum Fair Value klassifizierte Vermögenswerte/Verpflichtungen:** Bestimmte Unternehmenskredite und strukturierte Verbindlichkeiten, welche unter der Fair Value Option als zum Fair Value klassifiziert designiert wurden, sind in dieser Kategorie der Fair-Value-Hierarchie enthalten. Die Unternehmenskredite werden mithilfe von Bewertungstechniken bewertet, die beobachtbare Kreditrisikoaufschläge, Erlösquoten und nicht beobachtbare Ausnutzungsgrade berücksichtigen. Revolvierende Kreditzusagen werden der dritten Kategorie der Hierarchie zugewiesen, da der Ausnutzungsgrad bei einem Ausfall einen wesentlichen Parameter darstellt, der nicht beobachtbar ist.

Darüber hinaus enthalten bestimmte emittierte Hybridanleihen, die zum Fair Value klassifiziert wurden, eingebettete Derivate, die auf Basis wesentlicher nicht beobachtbarer Parameter bewertet wurden. Diese nicht beobachtbaren Parameter umfassen die Korrelationen der Volatilitäten einzelner Aktien.

**Zur Veräußerung verfügbare finanzielle Vermögenswerte:** Nicht börsennotierte Eigenkapitalinstrumente werden in dieser Kategorie der Fair-Value-Hierarchie ausgewiesen, wenn es keine angemessenen Vergleichsinstrumente gibt und der Markt als sehr illiquide angesehen wird. Die Erhöhung der Level-3-Vermögenswerte in der Berichtsperiode ist hauptsächlich durch die Konsolidierung der Postbank begründet.

### Überleitung der Finanzinstrumente der Kategorie Level 3

Die Tabelle auf der nächsten Seite zeigt eine Überleitung der Finanzinstrumente in der Level-3-Kategorie der Fair-Value-Hierarchie. Zu einigen dieser Finanzinstrumente bestehen identische oder ähnliche kompensierende Positionen bezüglich der nicht beobachtbaren Parameter. Trotzdem verlangen die diesbezüglichen Vorschriften für diese Anhangangabe, die Vermögenswerte und Verbindlichkeiten brutto aufzuführen. Weitere Finanzinstrumente sind durch Instrumente der Level-1- oder Level-2-Kategorie der Fair-Value-Hierarchie abgesichert, die zugehörige Tabelle beinhaltet aber nicht die Gewinne und Verluste aus diesen Absicherungsinstrumenten. Zur Bestimmung des Fair Value eines Instruments in der Level-3-Kategorie der Fair-Value-Hierarchie werden beobachtbare und nicht beobachtbare Parameter herangezogen. Die Gewinne und Verluste, die in der Tabelle gezeigt werden, sind auf Veränderungen sowohl der beobachtbaren als auch der nicht beobachtbaren Parameter zurückzuführen.

Umgliederungen in die und Umgliederungen aus der Fair-Value-Hierarchie Level 3 im Jahresverlauf werden zu ihrem Fair Value zum Jahresanfang ausgewiesen. Für Instrumente, die in die Level-3-Kategorie der Fair-Value-Hierarchie transferiert wurden, zeigt die Tabelle die Gewinne und Verluste und die Cashflows der Instrumente, als hätte der Wechsel zum Jahresanfang stattgefunden. Ebenso werden Gewinne und Verluste sowie Cashflows der Instrumente, die im Jahresverlauf aus der Fair-Value-Hierarchie Level 3 transferiert wurden, nicht berücksichtigt, weil sie in der Tabelle so dargestellt sind, als hätte der Wechsel zum Jahresanfang stattgefunden.

| in Mio €                                                              | Bestand am Jahresanfang | Veränderung des Konsolidierungskreises <sup>1</sup> | Gewinne/-Verluste insgesamt <sup>2</sup> | Käufe        | Verkäufe      | Emissionen <sup>6</sup> | Abwicklungen <sup>7</sup> | Umklassifizierungen in Level 3 | Umklassifizierungen aus Level 3 | Bestand am Jahresende |
|-----------------------------------------------------------------------|-------------------------|-----------------------------------------------------|------------------------------------------|--------------|---------------|-------------------------|---------------------------|--------------------------------|---------------------------------|-----------------------|
| <b>Zum Fair Value bewertete finanzielle Vermögenswerte:</b>           |                         |                                                     |                                          |              |               |                         |                           |                                |                                 |                       |
| Wertpapiere des Handelsbestands                                       | 15.609                  | 6                                                   | 1.437                                    | 5.479        | -6.292        | -                       | -1.412                    | 4.299                          | -4.265                          | 14.861                |
| Positive Marktwerte aus derivativen Finanzinstrumenten                | 25.211                  | 74                                                  | 589                                      | 32           | -71           | -                       | -2.997                    | 1.111                          | -6.106                          | 17.843                |
| Sonstige Handelsaktiva                                                | 10.782                  | -                                                   | -1                                       | 1.439        | -1.427        | 173                     | -1.511                    | 424                            | -3.812                          | 6.067                 |
| Zum Fair Value klassifizierte finanzielle Vermögenswerte              | 3.410                   | -                                                   | -97                                      | 294          | -23           | 1.627                   | -1.909                    | 54                             | -70                             | 3.286                 |
| Zur Veräußerung verfügbare finanzielle Vermögenswerte                 | 3.167                   | 1.340                                               | 151 <sup>3</sup>                         | 1.648        | -491          | -                       | -351                      | 881                            | -1.123                          | 5.222                 |
| Sonstige zum Fair Value bewertete finanzielle Vermögenswerte          | 41                      | -623                                                | -                                        | -            | -             | -                       | -41                       | -                              | -                               | -623                  |
| <b>Zum Fair Value bewertete finanzielle Vermögenswerte insgesamt</b>  | <b>58.220</b>           | <b>797</b>                                          | <b>2.079<sup>4,5</sup></b>               | <b>8.892</b> | <b>-8.304</b> | <b>1.800</b>            | <b>-8.221</b>             | <b>6.769<sup>8</sup></b>       | <b>-15.376<sup>8</sup></b>      | <b>46.656</b>         |
| <b>Zum Fair Value bewertete finanzielle Verpflichtungen:</b>          |                         |                                                     |                                          |              |               |                         |                           |                                |                                 |                       |
| Wertpapiere des Handelsbestands                                       | 431                     | -                                                   | 119                                      | -            | -             | -                       | -182                      | 3                              | -120                            | 251                   |
| Negative Marktwerte aus derivativen Finanzinstrumenten                | 15.591                  | 11                                                  | 2.092                                    | -            | -             | -                       | -1.952                    | 1.531                          | -6.357                          | 10.916                |
| Sonstige Handelspassiva                                               | 283                     | 17                                                  | -271                                     | -            | -             | -                       | -                         | -                              | -24                             | 5                     |
| Zum Fair Value klassifizierte finanzielle Verpflichtungen             | 2.621                   | -                                                   | 258                                      | -            | -             | 448                     | -977                      | 180                            | -460                            | 2.070                 |
| Sonstige zum Fair Value bewertete finanzielle Verpflichtungen         | -757                    | -                                                   | 40                                       | -            | -             | -                       | 32                        | 446                            | -                               | -239                  |
| <b>Zum Fair Value bewertete finanzielle Verpflichtungen insgesamt</b> | <b>18.169</b>           | <b>28</b>                                           | <b>2.238<sup>4,5</sup></b>               | <b>-</b>     | <b>-</b>      | <b>448</b>              | <b>-3.079</b>             | <b>2.160</b>                   | <b>-6.961</b>                   | <b>13.003</b>         |

<sup>1</sup> Die Beträge, die unter Veränderung des Konsolidierungskreises ausgewiesen werden, beziehen sich hauptsächlich auf die Erstkonsolidierung der Postbank zum 3. Dezember 2010.

<sup>2</sup> Die Gewinne und Verluste sind im Wesentlichen im Ergebnis aus zum Fair Value bewerteten finanziellen Vermögenswerten/Verpflichtungen in der Gewinn- und Verlustrechnung enthalten. Der Betrag umfasst ebenfalls Gewinne und Verluste, die in der Gewinn- und Verlustrechnung im Ergebnis aus zur Veräußerung verfügbaren finanziellen Vermögenswerten ausgewiesen sind, sowie Gewinne/Verluste (-) im Sonstigen Ergebnis (Other comprehensive income) aus zur Veräußerung verfügbaren finanziellen Vermögenswerten, nach Steuern, und Wechselkursänderungen, die im Sonstigen Ergebnis (Other comprehensive income), nach Steuern, erfasst werden.

<sup>3</sup> Das Ergebnis aus zur Veräußerung verfügbaren finanziellen Vermögenswerten enthält einen Gewinn von 21 Mio €, der in der Position Sonstiges Ergebnis (Other comprehensive income), nach Steuern, ausgewiesen wird, sowie einen Gewinn von 38 Mio €, der in der Gewinn- und Verlustrechnung im Ergebnis aus zur Veräußerung verfügbaren finanziellen Vermögenswerten ausgewiesen wird.

<sup>4</sup> Der Betrag beinhaltet Wechselkursänderungen. Für Zum Fair Value bewertete finanzielle Vermögenswerte beträgt die Veränderung positive 1,3 Mrd € und für Zum Fair Value bewertete finanzielle Verpflichtungen negative 184 Mio €. Diese Effekte resultieren im Wesentlichen aus derivativen Finanzinstrumenten. Die Wechselkursänderungen werden im Kumulierten Sonstigen Ergebnis (accumulated other comprehensive income), nach Steuern, ausgewiesen.

<sup>5</sup> Bei den Vermögenswerten stehen positive Beträge für Gewinne und negative Beträge für Verluste. Bei den Verbindlichkeiten stehen positive Beträge für Verluste und negative Beträge für Gewinne.

<sup>6</sup> Die Spalte Emissionen zeigt die bei einer Begebung von Schuldtiteln erhaltenen Barmittel sowie den an den Kreditnehmer gezahlten Barbetrag bei der Gewährung eines Kredits.

<sup>7</sup> Die Spalte Abwicklungen beinhaltet die Zahlungen, die bei der Abwicklung der finanziellen Vermögenswerte/Verpflichtungen fällig sind. Für Schuldtitel und Kredite beinhaltet dies den Rückzahlungsbetrag zum Fälligkeitstermin, Abschreibungen auf den Kapitalbetrag sowie Tilgungen. Für Derivate werden in dieser Spalte alle Zahlungen berücksichtigt.

<sup>8</sup> Beinhaltet 2,0 Mrd € Vermögenswerte, die 2009 nicht korrekt klassifiziert wurden. Dies wurde in den Spalten „Umklassifizierungen in Level 3“ und „Umklassifizierungen aus Level 3“ dargestellt und hat keinen Einfluss auf die Vorjahreswerte oder den Gesamtbestand der Vermögenswerte in Level 3.

| 31.12.2009                                                            | Bestand<br>am<br>Jahres-<br>anfang | Gewinne/-<br>Verluste<br>insgesamt <sup>1</sup> | Käufe        | Verkäufe       | Emissionen <sup>5</sup> | Abwick-<br>lungen <sup>6</sup> | Umklassi-<br>fizierungen<br>in Level 3 | Umklassi-<br>fizierungen<br>aus Level 3 | Bestand<br>am<br>Jahresende |
|-----------------------------------------------------------------------|------------------------------------|-------------------------------------------------|--------------|----------------|-------------------------|--------------------------------|----------------------------------------|-----------------------------------------|-----------------------------|
| in Mio €                                                              |                                    |                                                 |              |                |                         |                                |                                        |                                         |                             |
| <b>Zum Fair Value bewertete finanzielle Vermögenswerte:</b>           |                                    |                                                 |              |                |                         |                                |                                        |                                         |                             |
| Wertpapiere des Handelsbestands                                       | 17.268                             | – 2.304                                         | 2.883        | – 5.084        | –                       | – 1.570                        | 8.410                                  | – 3.994                                 | 15.609                      |
| Positive Marktwerte aus derivativen Finanzinstrumenten                | 48.792                             | – 15.563 <sup>7</sup>                           | –            | –              | –                       | – 6.397                        | 7.510                                  | – 9.131                                 | 25.211                      |
| Sonstige Handelsaktiva                                                | 13.560                             | 1.832                                           | 1.919        | – 3.057        | 246                     | – 3.184                        | 2.309                                  | – 2.843                                 | 10.782                      |
| Zum Fair Value klassifizierte finanzielle Vermögenswerte              | 5.805                              | 1.507                                           | 222          | – 60           | 952                     | – 5.267                        | 695                                    | – 444                                   | 3.410                       |
| Zur Veräußerung verfügbare finanzielle Vermögenswerte                 | 1.450                              | – 221 <sup>2</sup>                              | 136          | – 143          | –                       | – 97                           | 2.135                                  | – 93                                    | 3.167                       |
| Sonstige zum Fair Value bewertete finanzielle Vermögenswerte          | 788                                | 70                                              | 9            | –              | –                       | –                              | –                                      | – 826                                   | 41                          |
| <b>Zum Fair Value bewertete finanzielle Vermögenswerte insgesamt</b>  | <b>87.663</b>                      | <b>– 14.679<sup>3,4</sup></b>                   | <b>5.169</b> | <b>– 8.344</b> | <b>1.198</b>            | <b>– 16.515</b>                | <b>21.059</b>                          | <b>– 17.331</b>                         | <b>58.220</b>               |
| <b>Zum Fair Value bewertete finanzielle Verpflichtungen:</b>          |                                    |                                                 |              |                |                         |                                |                                        |                                         |                             |
| Wertpapiere des Handelsbestands                                       | 666                                | 26                                              | –            | –              | –                       | 113                            | 186                                    | – 560                                   | 431                         |
| Negative Marktwerte aus derivativen Finanzinstrumenten                | 28.738                             | – 4.374 <sup>7</sup>                            | –            | –              | –                       | – 5.546                        | 5.034                                  | – 8.261                                 | 15.591                      |
| Sonstige Handelspassiva                                               | 174                                | 68                                              | –            | –              | –                       | 205                            | –                                      | – 164                                   | 283                         |
| Zum Fair Value klassifizierte finanzielle Verpflichtungen             | 6.030                              | – 1.753                                         | –            | –              | 208                     | – 269                          | 1.443                                  | – 3.038                                 | 2.621                       |
| Sonstige zum Fair Value bewertete finanzielle Verpflichtungen         | – 1.249                            | 649                                             | –            | –              | –                       | 93                             | – 253                                  | 3                                       | – 757                       |
| <b>Zum Fair Value bewertete finanzielle Verpflichtungen insgesamt</b> | <b>34.359</b>                      | <b>– 5.384<sup>3,4</sup></b>                    | <b>–</b>     | <b>–</b>       | <b>208</b>              | <b>– 5.404</b>                 | <b>6.410</b>                           | <b>– 12.020</b>                         | <b>18.169</b>               |

- <sup>1</sup> Die Gewinne und Verluste sind im Wesentlichen im Ergebnis aus zum Fair Value bewerteten finanziellen Vermögenswerten/Verpflichtungen in der Gewinn- und Verlustrechnung enthalten. Der Betrag umfasst ebenfalls Gewinne und Verluste, die in der Gewinn- und Verlustrechnung im Ergebnis aus zur Veräußerung verfügbaren finanziellen Vermögenswerten ausgewiesen sind, sowie Gewinne/Verluste (–) im Sonstigen Ergebnis (Other comprehensive income) aus zur Veräußerung verfügbaren finanziellen Vermögenswerten, nach Steuern, und Wechselkursänderungen, die im Sonstigen Ergebnis (Other comprehensive income), nach Steuern, erfasst werden.
- <sup>2</sup> Das Ergebnis aus zur Veräußerung verfügbaren finanziellen Vermögenswerten enthält einen Gewinn von 177 Mio €, der in der Position Sonstiges Ergebnis (Other comprehensive income), nach Steuern, ausgewiesen wird, sowie einen Verlust von 398 Mio €, der in der Gewinn- und Verlustrechnung im Ergebnis aus zur Veräußerung verfügbaren finanziellen Vermögenswerten ausgewiesen wird.
- <sup>3</sup> Der Betrag beinhaltet Wechselkursänderungen. Für Zum Fair Value bewertete finanzielle Vermögenswerte beträgt die Veränderung positive 6,6 Mrd € und für Zum Fair Value bewertete finanzielle Verpflichtungen negative 2,3 Mrd €. Diese Effekte resultieren im Wesentlichen aus derivativen Finanzinstrumenten. Die Wechselkursänderungen werden in der Eigenkapitalposition Anpassungen aus der Währungsumrechnung, nach Steuern, ausgewiesen.
- <sup>4</sup> Bei den Vermögenswerten stehen positive Beträge für Gewinne und negative Beträge für Verluste. Bei den Verbindlichkeiten stehen positive Beträge für Verluste und negative Beträge für Gewinne.
- <sup>5</sup> Die Spalte Emissionen zeigt die bei einer Begebung von Schuldtiteln erhaltenen Barmittel sowie den an den Kreditnehmer gezahlten Barbetrag bei der Gewährung eines Kredits.
- <sup>6</sup> Die Spalte Abwicklungen beinhaltet die Zahlungen, die bei der Abwicklung der finanziellen Vermögenswerte/Verpflichtungen fällig sind. Für Schuldtitel und Kredite beinhaltet dies den Rückzahlungsbetrag zum Fälligkeitstermin, Abschreibungen auf den Kapitalbetrag sowie Tilgungen. Für Derivate werden in dieser Spalte alle Zahlungen berücksichtigt.
- <sup>7</sup> Gewinne und Verluste aus Derivaten resultieren aus der Veränderung der Bewertungsparameter, insbesondere aus geringeren Kreditrisikoaufschlägen („Credit Spreads“).

## Sensitivitätsanalyse von nicht beobachtbaren Parametern

Basiert der Wert eines Finanzinstruments auf nicht beobachtbaren Eingangsparametern, kann der hierfür zu verwendende Wert dieser Parameter zum Bilanzstichtag aus einer Bandbreite von angemessenen möglichen Alternativen ausgewählt werden. Im Rahmen der Erstellung des Konzernabschlusses werden für diese nicht beobachtbaren Parameter angemessene Werte ausgewählt, die den herrschenden Marktgegebenheiten und dem vorstehend ausgeführten Bewertungskontrollansatz des Konzerns entsprechen. Hätte der Konzern am 31. Dezember 2010 zur Bewertung der betreffenden Finanzinstrumente Parameterwerte zugrunde gelegt, die am äußeren Ende der Bandbreite von angemessenen möglichen Alternativen lagen und zu diesem Zeitpunkt verfügbar waren, hätte sich der ausgewiesene Fair Value um bis zu 3,6 Mrd € erhöht beziehungsweise um bis zu 3,9 Mrd € verringert. Zum 31. Dezember 2009 wäre der Fair Value um bis zu 4,3 Mrd € gestiegen beziehungsweise um bis zu 3,9 Mrd € gesunken. Um diese Auswirkungen zu berechnen, bewertet der Konzern bestimmte Finanzinstrumente neu, indem bestmögliche alternative Parameter herangezogen werden, oder nutzt eine Bewertungsmethode, die Wertanpassungen bezüglich der Geld-/Briefspanne berücksichtigt. Die Wertanpassung für Kosten der Vertragsaufhebung basiert auf der Geld-/Briefspanne, die gezahlt werden muss,

um eine gehaltene Position in Finanzinstrumenten oder eine Risikokomponente zu schließen, und spiegelt als solche Faktoren wie Illiquidität oder Unsicherheit am Markt wider.

Die vorliegenden Angaben sollen die möglichen Auswirkungen darstellen, die sich aus der relativen Unsicherheit bei der Bestimmung der Fair Values von Finanzinstrumenten ergeben, deren Bewertung auf nicht beobachtbaren Parametern basiert. Dennoch ist es unwahrscheinlich, dass in der Praxis alle nicht beobachtbaren Parameter gleichzeitig am jeweils äußeren Ende ihrer Bandbreite von angemessenen möglichen Alternativen liegen. Aus diesem Grund dürften die vorgenannten Schätzwerte bezüglich der Unsicherheitsfaktoren die tatsächlichen Unsicherheitsfaktoren bei der Ermittlung des Fair Value zum Bilanzstichtag übertreffen. Ferner sind die vorliegenden Angaben keine Vorhersage oder Indikation für künftige Fair-Value-Änderungen.

Für viele der hier berücksichtigten Finanzinstrumente, insbesondere für Derivate, stellen nicht beobachtbare Parameter lediglich eine Teilmenge der Parameter dar, die für die Preisermittlung des Finanzinstruments erforderlich sind. Bei der verbliebenen Teilmenge handelt es sich um beobachtbare Parameter. Daher dürfte der Gesamteffekt für diese Instrumente, der aus der Verschiebung der nicht beobachtbaren Parameter an das äußere Ende ihrer Bandbreite resultiert, im Vergleich zum gesamten Fair Value relativ gering ausfallen. Für andere Instrumente wird der Fair Value auf der Grundlage des Preises für das gesamte Instrument ermittelt. Dies erfolgt beispielsweise durch Anpassung des Fair Value eines angemessenen Vergleichsinstruments. Zusätzlich werden alle Finanzinstrumente bereits zu solchen Fair Values bilanziert, die Bewertungsanpassungen für die Kosten der Schließung beinhalten und daher bereits die Unsicherheitsfaktoren berücksichtigen, mit denen Marktpreise behaftet sind. Ein in den vorliegenden Angaben ermittelter negativer Effekt aus diesen Unsicherheitsfaktoren wird daher stets das Ausmaß der Auswirkungen übersteigen, das bereits für die Fair-Value-Berechnung im Konzernabschluss berücksichtigt wird.

Die nachfolgende Tabelle enthält eine Aufgliederung der Sensitivitätsanalyse nach Arten von Finanzinstrumenten. Gleichet sich eine aufgrund eines nicht beobachtbaren Parameters bestehende Risikoposition innerhalb verschiedener Instrumente aus, wird lediglich der Nettoeffekt in der Tabelle ausgewiesen.

|                                                                         | 31.12.2010                                                                     |                                                                                | 31.12.2009                                                                     |                                                                                |
|-------------------------------------------------------------------------|--------------------------------------------------------------------------------|--------------------------------------------------------------------------------|--------------------------------------------------------------------------------|--------------------------------------------------------------------------------|
|                                                                         | Positive Fair-Value-Änderung durch Nutzung angemessener möglicher Alternativen | Negative Fair-Value-Änderung durch Nutzung angemessener möglicher Alternativen | Positive Fair-Value-Änderung durch Nutzung angemessener möglicher Alternativen | Negative Fair-Value-Änderung durch Nutzung angemessener möglicher Alternativen |
| in Mio €                                                                |                                                                                |                                                                                |                                                                                |                                                                                |
| <b>Derivate:</b>                                                        |                                                                                |                                                                                |                                                                                |                                                                                |
| Kreditderivate                                                          | 2.065                                                                          | 2.724                                                                          | 2.585                                                                          | 2.689                                                                          |
| Aktienderivate                                                          | 185                                                                            | 103                                                                            | 213                                                                            | 106                                                                            |
| Zinsderivate                                                            | 143                                                                            | 157                                                                            | 103                                                                            | 117                                                                            |
| Hybride Derivate                                                        | 321                                                                            | 121                                                                            | 342                                                                            | 168                                                                            |
| Sonstige                                                                | 117                                                                            | 69                                                                             | 264                                                                            | 314                                                                            |
| <b>Wertpapiere:</b>                                                     |                                                                                |                                                                                |                                                                                |                                                                                |
| Schuldtitel                                                             | 303                                                                            | 282                                                                            | 311                                                                            | 277                                                                            |
| Eigenkapitaltitel                                                       | 91                                                                             | 60                                                                             | 36                                                                             | 28                                                                             |
| Durch Grundpfandrechte und andere Vermögenswerte unterlegte Wertpapiere | 77                                                                             | 59                                                                             | 206                                                                            | 50                                                                             |
| <b>Forderungen aus dem Kreditgeschäft:</b>                              |                                                                                |                                                                                |                                                                                |                                                                                |
| Leveraged Loans                                                         | 3                                                                              | 3                                                                              | 5                                                                              | 5                                                                              |
| Gewerbliche Kredite                                                     | 51                                                                             | 9                                                                              | 88                                                                             | 88                                                                             |
| Handelbare Kredite                                                      | 278                                                                            | 287                                                                            | 136                                                                            | 83                                                                             |
| <b>Insgesamt</b>                                                        | <b>3.634</b>                                                                   | <b>3.874</b>                                                                   | <b>4.289</b>                                                                   | <b>3.925</b>                                                                   |

### Ergebnis aus zum Bilanzstichtag gehaltenen Finanzinstrumenten der Level-3-Kategorie

Diese Ergebnisse lassen sich nicht ausschließlich auf nicht beobachtbare Parameter zurückführen. Viele der Parameter, die zur Bewertung der Finanzinstrumente in dieser Kategorie der Fair-Value-Hierarchie herangezogen werden, sind beobachtbar. Somit basiert die Veränderung der Ergebnisse auf Veränderungen solcher beobachtbaren Parameter im Laufe der Berichtsperiode. Viele der Positionen in dieser Kategorie der Fair-Value-Hierarchie sind ökonomisch durch Finanzinstrumente abgesichert, die den anderen Kategorien der Fair-Value-Hierarchie zugeordnet sind. Die kompensierenden Gewinne und Verluste, die aus den entsprechenden Absicherungsgeschäften erfasst wurden, sind nicht in der folgenden Tabelle reflektiert. Diese beinhaltet gemäß IFRS 7 nur die Gewinne und Verluste, die aus den originären Level-3-Instrumenten resultieren.

Nachstehend die Ergebnisse, die in der Gewinn- und Verlustrechnung berichtet werden.

Im Ergebnis aus zum Fair Value bewerteten finanziellen Vermögenswerten/Verpflichtungen berichtetes Ergebnis insgesamt

| in Mio €                                                              | 31.12.2010   | 31.12.2009      |
|-----------------------------------------------------------------------|--------------|-----------------|
| <b>Zum Fair Value bewertete finanzielle Vermögenswerte:</b>           |              |                 |
| Wertpapiere des Handelsbestands                                       | 943          | – 433           |
| Positive Marktwerte aus derivativen Finanzinstrumenten                | 2.755        | – 10.325        |
| Sonstige Handelsaktiva                                                | 150          | – 404           |
| Zum Fair Value klassifizierte finanzielle Vermögenswerte              | – 61         | 554             |
| Zur Veräußerung verfügbare finanzielle Vermögenswerte <sup>1</sup>    | – 30         | – 200           |
| Sonstige zum Fair Value bewertete finanzielle Vermögenswerte          | – 31         | – 8             |
| <b>Zum Fair Value bewertete finanzielle Vermögenswerte insgesamt</b>  | <b>3.726</b> | <b>– 10.816</b> |
| <b>Zum Fair Value bewertete finanzielle Verpflichtungen:</b>          |              |                 |
| Wertpapiere des Handelsbestands                                       | – 109        | – 15            |
| Negative Marktwerte aus derivativen Finanzinstrumenten                | – 75         | 2.226           |
| Sonstige Handelspassiva                                               | – 4          | – 35            |
| Zum Fair Value klassifizierte finanzielle Verpflichtungen             | – 194        | 1.121           |
| Sonstige zum Fair Value bewertete finanzielle Verpflichtungen         | 29           | – 197           |
| <b>Zum Fair Value bewertete finanzielle Verpflichtungen insgesamt</b> | <b>– 353</b> | <b>3.100</b>    |
| <b>Insgesamt</b>                                                      | <b>3.373</b> | <b>– 7.716</b>  |

<sup>1</sup> Der Betrag resultiert aus Wertberichtigungen von zur Veräußerung verfügbaren Vermögenswerten.

### Erfassung des Handelstaggewinns („Trade Date Profit“)

Soweit im Einklang mit dem in Note 01 „Wesentliche Rechnungslegungsgrundsätze“ beschriebenen Rechnungslegungsgrundsatz des Konzerns in erheblichem Umfang nicht beobachtbare Parameter für Bewertungsmodelle zugrunde gelegt werden, erfolgt die Erfassung des betreffenden Finanzinstruments zum Transaktionspreis und jeglicher am Handelstag ermittelte Gewinn wird abgegrenzt. Die nachfolgende Tabelle zeigt im Jahresvergleich die Veränderung der Handelstaggewinne, die aufgrund der Anwendung wesentlicher nicht beobachtbarer Parameter für zum Fair Value ausgewiesene Finanzinstrumente abgegrenzt wurden. Die Bestände setzen sich vorwiegend aus Derivaten zusammen.

| in Mio €                                      | 2010       | 2009       |
|-----------------------------------------------|------------|------------|
| <b>Bestand am Jahresanfang</b>                | <b>822</b> | <b>697</b> |
| Neue Geschäfte während der Periode            | 268        | 467        |
| Abschreibung                                  | – 243      | – 182      |
| Ausgelaufene Geschäfte                        | – 135      | – 138      |
| Nachträgliche Veränderung der Beobachtbarkeit | – 117      | – 41       |
| Wechselkursveränderungen                      | 27         | 19         |
| <b>Bestand am Jahresende</b>                  | <b>622</b> | <b>822</b> |

## 15 – Fair Value von Finanzinstrumenten, die nicht zum Fair Value ausgewiesen werden

Die Bewertungstechniken zur Ermittlung des Fair Value von Finanzinstrumenten des Konzerns, die in der Bilanz nicht zum Fair Value ausgewiesen werden, entsprechen jenen, die in Note 14 „Zum Fair Value bewertete Finanzinstrumente“ aufgeführt sind.

Wie in Note 13 „Änderungen zu IAS 39 und IFRS 7, Reclassification of Financial Assets“ erläutert, hat der Konzern bestimmte geeignete Vermögenswerte aus zu Handelszwecken gehalten und zur Veräußerung verfügbar in Forderungen aus dem Kreditgeschäft umgegliedert. Der Konzern wendet weiterhin die in Note 14 „Zum Fair Value bewertete Finanzinstrumente“ erläuterten relevanten Bewertungstechniken auf die umgegliederten Vermögenswerte an.

Andere Finanzinstrumente, die nicht zum Fair Value bewertet werden, werden nicht auf Fair-Value-Basis gesteuert. Dies beinhaltet zum Beispiel Konsumentenkredite, Einlagen und an Firmenkunden ausgegebene Kreditfazilitäten. Für solche Instrumente wird der Fair Value nur zu Ausweiszwecken kalkuliert und hat weder einen Einfluss auf die Konzernbilanz noch auf die Konzern-Gewinn- und Verlustrechnung. Zusätzlich sind zur Fair-Value-Ermittlung in erheblichem Umfang Einschätzungen durch das Management notwendig, da diese Instrumente nicht gehandelt werden.

Der Konzern wendet die folgenden Bewertungstechniken an:

**Kurzfristige Finanzinstrumente:** Der Buchwert stellt eine angemessene Schätzung des Fair Value für die folgenden Finanzinstrumente dar, die überwiegend kurzfristig sind.

| Aktiva                                                                                                | Passiva                                                                                             |
|-------------------------------------------------------------------------------------------------------|-----------------------------------------------------------------------------------------------------|
| Barreserve                                                                                            | Einlagen                                                                                            |
| Verzinsliche Einlagen bei Kreditinstituten                                                            | Verbindlichkeiten aus übertragenen Zentralbankeinlagen und aus Wertpapierpensionsgeschäften (Repos) |
| Forderungen aus übertragenen Zentralbankeinlagen und aus Wertpapierpensionsgeschäften (Reverse Repos) | Verbindlichkeiten aus Wertpapierleihen                                                              |
| Forderungen aus Wertpapierleihen                                                                      | Sonstige kurzfristige Geldaufnahmen                                                                 |
| Sonstige Aktiva                                                                                       | Sonstige Passiva                                                                                    |

Für längerfristige Finanzinstrumente in diesen Kategorien wird der Fair Value durch Abzinsung der vertraglichen Cashflows unter Verwendung von Zinssätzen berechnet, die für Aktiva mit ähnlichen Restlaufzeiten und Ausfallrisiken hätten erzielt werden können. Im Fall von Passiva werden Zinssätze zugrunde gelegt, zu denen entsprechende Verbindlichkeiten mit ähnlichen Restlaufzeiten am Bilanzstichtag hätten aufgenommen werden können.



**Forderungen aus dem Kreditgeschäft:** Der Fair Value wird unter Anwendung von Discounted-Cashflow-Modellen ermittelt, die Parameter für Kreditrisiken, Zinsrisiken, Währungsrisiken, geschätzte Ausfallverluste und die bei Ausfällen ausgenutzten Beträge berücksichtigen. Die Parameter Kreditrisiko, Ausfallrisiko und Ausnutzung zum Zeitpunkt des Ausfalls werden, sofern verfügbar und geeignet, anhand von Informationen über die betreffenden Kredit- oder CDS-Märkte ermittelt.

Bei Kreditportfolios für Privatkunden mit einer großen Zahl homogener Kredite (zum Beispiel deutsche private Immobilienkredite) wird der Fair Value auf Portfoliobasis durch Abzinsung vertraglicher Cashflows unter Verwendung risikoloser Zinssätze berechnet. Der ermittelte Barwert wird dann um das Kreditrisiko bereinigt, indem die Kredite zu Zinssätzen abgezinst werden, zu denen ähnliche Kredite zum Bilanzstichtag begeben werden könnten. Für andere Kreditportfolios wird der Barwert ermittelt, indem der erwartete Verlust über die geschätzte Lebensdauer des Kredits unter Berücksichtigung verschiedener Parameter berechnet wird. Diese Parameter beinhalten die Ausfallwahrscheinlichkeit, den Verlust bei Ausfall und den Grad der Besicherung. Der Fair Value von Unternehmenskreditportfolios wird durch Abzinsung einer prognostizierten Marge über die erwarteten Laufzeiten ermittelt. Dabei werden Parameter aus aktuellen Marktwerten von Collateralized-Lending-Obligation (CLO)-Transaktionen verwendet, welche mit Kreditportfolios besichert wurden, die vergleichbar mit dem Unternehmenskreditportfolio des Konzerns sind.

**Wertpapiere, die mit einer Verpflichtung zur Rückübertragung erworben wurden (Reverse Repos), entliehene Wertpapiere, Wertpapiere, die mit einer Rücknahmeverpflichtung verkauft wurden (Repos), und verliehene Wertpapiere:** Der Fair Value wird mit Bewertungstechniken durch Abzinsung zukünftiger Cashflows unter Verwendung des entsprechenden um das Kreditrisiko adjustierten Diskontierungssatzes ermittelt. Der um das Kreditrisiko adjustierte Diskontierungssatz berücksichtigt die bei der Transaktion erhaltenen oder verpfändeten Sicherheiten. Diese Produkte sind typischerweise kurzfristig und hoch besichert, weshalb der Fair Value sich nicht signifikant vom Buchwert unterscheidet.

**Langfristige Verbindlichkeiten und Trust Preferred Securities:** Sofern verfügbar, wird der Fair Value auf der Grundlage von notierten Marktpreisen ermittelt. Stehen diese nicht zur Verfügung, wird für die Ermittlung des Fair Value eine Bewertungstechnik verwendet, bei der die verbleibenden vertraglichen Cashflows mit einem Zinssatz abgezinst werden, zu dem Instrumente mit ähnlichen Eigenschaften am Bilanzstichtag hätten emittiert werden können.

Die folgende Tabelle zeigt die ermittelten Fair Values der Finanzinstrumente des Konzerns, die in der Bilanz nicht zum Fair Value ausgewiesen werden.

| in Mio €                                                                                              | 31.12.2010 |            | 31.12.2009 |            |
|-------------------------------------------------------------------------------------------------------|------------|------------|------------|------------|
|                                                                                                       | Buchwert   | Fair Value | Buchwert   | Fair Value |
| <b>Finanzaktiva:</b>                                                                                  |            |            |            |            |
| Barreserve                                                                                            | 17.157     | 17.157     | 9.346      | 9.346      |
| Verzinsliche Einlagen bei Kreditinstituten                                                            | 92.377     | 92.378     | 47.233     | 47.236     |
| Forderungen aus übertragenen Zentralbankeinlagen und aus Wertpapierpensionsgeschäften (Reverse Repos) | 20.365     | 20.310     | 6.820      | 6.820      |
| Forderungen aus Wertpapierleihen                                                                      | 28.916     | 28.916     | 43.509     | 43.509     |
| Forderungen aus dem Kreditgeschäft                                                                    | 407.729    | 401.813    | 258.105    | 249.661    |
| Sonstige Aktiva <sup>1</sup>                                                                          | 116.589    | 116.565    | 105.004    | 104.995    |
| <b>Finanzpassiva:</b>                                                                                 |            |            |            |            |
| Einlagen                                                                                              | 533.984    | 534.442    | 344.220    | 344.700    |
| Verbindlichkeiten aus übertragenen Zentralbankeinlagen und aus Wertpapierpensionsgeschäften (Repos)   | 27.922     | 27.954     | 45.495     | 45.511     |
| Verbindlichkeiten aus Wertpapierleihen                                                                | 3.276      | 3.276      | 5.564      | 5.564      |
| Sonstige kurzfristige Geldaufnahmen                                                                   | 64.990     | 64.912     | 42.897     | 42.833     |
| Sonstige Passiva <sup>1</sup>                                                                         | 135.389    | 135.386    | 127.777    | 127.789    |
| Langfristige Verbindlichkeiten                                                                        | 169.660    | 168.211    | 131.782    | 132.577    |
| Hybride Kapitalinstrumente (Trust Preferred Securities)                                               | 12.250     | 11.462     | 10.577     | 9.518      |

<sup>1</sup> Beinhaltet lediglich finanzielle Vermögenswerte beziehungsweise finanzielle Verpflichtungen.

Die Beträge in der vorstehenden Tabelle werden generell brutto ausgewiesen. Dies steht im Einklang mit dem in Note 01 „Wesentliche Rechnungslegungsgrundsätze“ dargestellten Rechnungslegungsgrundsatz zur Aufrechnung von Finanzinstrumenten des Konzerns.

Die Akquisition der Postbank trug zum Anstieg der nicht zum Fair Value ausgewiesenen Vermögenswerte und Verbindlichkeiten im Vergleich zum 31. Dezember 2009 bei. Der Beitrag der Postbank bezog sich primär auf Forderungen aus dem Kreditgeschäft, Einlagen und langfristige Verbindlichkeiten, die zum Erwerbszeitpunkt zum Fair Value in die Konzernbilanz übernommen wurden. Zum 31. Dezember 2010 betrug der Bilanzwert dieser Finanzinstrumente 129,4 Mrd €, 131,6 Mrd € beziehungsweise 33,5 Mrd €. Da seit dem Erwerbszeitpunkt keine wesentliche Veränderung des Fair Value der Forderungen aus dem Kreditgeschäft der Postbank aufgetreten ist, stellt der Bilanzwert zum 31. Dezember 2010 eine angemessene Schätzung des Fair Value dar. Für Einlagen bei der Postbank entsprach nach Einschätzung des Konzerns der Buchwert dem Fair Value. Für langfristige Verbindlichkeiten war der Fair Value nach Schätzung des Konzerns um 48 Mio € niedriger als der Bilanzwert zum 31. Dezember 2010.

**Forderungen aus dem Kreditgeschäft:** Die Differenz zwischen dem Fair Value und dem Buchwert entspricht nicht dem wirtschaftlichen Nutzen und den Kosten, die der Konzern aus diesen Instrumenten erwartet. Die Differenz ergab sich in erster Linie aus einem Anstieg der vom Markt erwarteten Ausfallraten und einem Rückgang der Liquidität seit der erstmaligen Bilanzierung. Diese Wertminderungen werden teilweise durch einen Anstieg des Fair Value aufgrund von Zinsschwankungen bei festverzinslichen Instrumenten ausgeglichen.

**Langfristige Verbindlichkeiten und Trust Preferred Securities:** Die Differenz zwischen dem Fair Value und dem Buchwert resultierte aus der Veränderung der Zinssätze, zu denen der Konzern am Bilanzstichtag Schuldinstrumente mit einer ähnlichen Laufzeit und Nachrangigkeit hätte emittieren können.

## 16 – Zur Veräußerung verfügbare finanzielle Vermögenswerte

Die folgende Tabelle zeigt den Fair Value von zur Veräußerung verfügbaren finanziellen Vermögenswerten.

| in Mio €                                                                               | 31.12.2010    | 31.12.2009    |
|----------------------------------------------------------------------------------------|---------------|---------------|
| <b>Festverzinsliche Wertpapiere:</b>                                                   |               |               |
| Deutsche öffentliche Emittenten                                                        | 4.053         | 2.585         |
| US-Treasury und US-Regierungsbehörden                                                  | 1.633         | 901           |
| US-Kommunalbehörden                                                                    | 563           | 1             |
| Sonstige ausländische staatliche Emittenten                                            | 17.688        | 3.832         |
| Unternehmen                                                                            | 19.901        | 4.280         |
| Sonstige Asset-backed Securities                                                       | 1.780         | 999           |
| Mortgage-backed Securities, einschließlich Schuldverschreibungen von US-Bundesbehörden | 154           | 815           |
| Sonstige festverzinsliche Wertpapiere                                                  | 442           | 438           |
| <b>Festverzinsliche Wertpapiere insgesamt</b>                                          | <b>46.214</b> | <b>13.851</b> |
| <b>Nicht festverzinsliche Wertpapiere:</b>                                             |               |               |
| Aktien                                                                                 | 3.296         | 3.192         |
| Investmentanteile                                                                      | 132           | 76            |
| <b>Nicht festverzinsliche Wertpapiere insgesamt</b>                                    | <b>3.428</b>  | <b>3.268</b>  |
| <b>Sonstiger Anteilsbesitz</b>                                                         | <b>2.251</b>  | <b>699</b>    |
| <b>Forderungen aus dem Kreditgeschäft</b>                                              | <b>2.373</b>  | <b>1.001</b>  |
| <b>Zur Veräußerung verfügbare finanzielle Vermögenswerte insgesamt</b>                 | <b>54.266</b> | <b>18.819</b> |

Der Erwerb der Postbank trug zum Anstieg der zur Veräußerung verfügbaren finanziellen Vermögenswerte, insbesondere der festverzinslichen Wertpapiere, 33 Mrd € bei.

Am 6. Mai 2010 gab die Deutsche Bank bekannt, dass sie eine verbindliche Vereinbarung über die Zeichnung neu emittierter Aktien der Hua Xia Bank Co. Ltd. („Hua Xia Bank“) zu einem Gesamtpreis von bis zu 5,7 Mrd RMB (entsprechend 649 Mio € zum 31. Dezember 2010) unterzeichnet hat. Die Zeichnung ist Teil einer Privatplatzierung von Aktien, die an die drei größten Aktionäre der Hua Xia Bank gerichtet ist. Die Emission hat einen Gesamtwert von bis zu 20,8 Mrd RMB (entsprechend 2,4 Mrd € zum 31. Dezember 2010). Vorbehaltlich aufsichtsrechtlicher Genehmigungen und mit Abschluss der Transaktion durch Registrierung der Aktien wird sich die gegenwärtige Beteiligung der Deutschen Bank an der Hua Xia Bank, die als zur Veräußerung verfügbarer finanzieller Vermögenswert bilanziert ist, von 17,12 % auf 19,99 % des ausgegebenen Kapitals erhöhen. Dies ist der höchste Anteil, der gemäß den in China geltenden Vorschriften auf einen einzelnen ausländischen Investor entfallen darf.

## 17 – Nach der Equitymethode bilanzierte Beteiligungen

Beteiligungen an assoziierten Unternehmen und gemeinschaftlich geführten Unternehmen werden grundsätzlich nach der Equitymethode bilanziert.

Am 31. Dezember 2010 waren folgende Beteiligungen wesentlich – sie repräsentierten 75% des Buchwerts der nach der Equitymethode bilanzierten Beteiligungen.

| Beteiligung <sup>1</sup>                                                     | Anteil am Kapital |
|------------------------------------------------------------------------------|-------------------|
| Actavis Equity S.à r.l., Luxemburg <sup>2</sup>                              | 0,00 %            |
| AKA Ausfuhrkredit-Gesellschaft mit beschränkter Haftung, Frankfurt           | 28,85 %           |
| BATS Global Markets, Inc., Wilmington <sup>3</sup>                           | 8,46 %            |
| BrisConnections Investment Trust, Kedron                                     | 35,59 %           |
| Challenger Infrastructure Fund, Sydney                                       | 20,21 %           |
| Compañía Logística de Hidrocarburos CLH, S.A., Madrid <sup>3</sup>           | 5,00 %            |
| DMG & Partners Securities Pte Ltd, Singapur                                  | 49,00 %           |
| Gemeng International Energy Group Company Limited, Taiyuan <sup>3</sup>      | 9,00 %            |
| Harvest Fund Management Company Limited, Schanghai                           | 30,00 %           |
| HHG Private Capital Portfolio No.1 L.P., London <sup>3</sup>                 | 17,57 %           |
| Huamao Property Holdings Ltd., Georgetown <sup>3</sup>                       | 0,00 %            |
| K & N Kenanga Holdings Bhd, Kuala Lumpur <sup>3</sup>                        | 16,55 %           |
| Marblegate Special Opportunities Master Fund, L.P., Georgetown               | 44,62 %           |
| MFG Flughafen-Grundstücksverwaltungsgesellschaft mbH & Co. BETA KG, Grünwald | 29,58 %           |
| Nexus LLC, Wilmington <sup>3</sup>                                           | 12,22 %           |
| Rongde Asset Management Company Limited, Peking                              | 40,70 %           |
| Spark Infrastructure Group, Sydney <sup>3</sup>                              | 2,28 %            |

<sup>1</sup> Alle wesentlichen nach der Equitymethode bilanzierten Beteiligungen sind assoziierte Unternehmen.

<sup>2</sup> Die Bilanzierung nach der Equitymethode basiert auf der nachrangigen Fremdfinanzierung, weitere Informationen sind weiter unten verfügbar.

<sup>3</sup> Der Konzern übt über Positionen in Aufsichtsgremien oder durch andere Maßnahmen einen maßgeblichen Einfluss auf das Beteiligungsunternehmen aus.

**Actavis.** Am 24. November 2010 hat die Deutsche Bank die Restrukturierung ihrer an den isländischen Generikahersteller Actavis Group hf. („Actavis“) ausgegebenen Kredite abgeschlossen.

Nach dem Abschluss der Restrukturierung stellt die Deutsche Bank Actavis weiterhin vor- und nachrangige Fremdfinanzierungen sowie eine neue PIK-Finanzierung („Payment in Kind“) bereit. Gemäß den Bedingungen für die nachrangige Finanzierung hält die Deutsche Bank eine nach der Equitymethode bilanzierte Beteiligung an Actavis Equity S.à r.l. („Actavis Equity“), einer hundertprozentigen Holdinggesellschaft von Actavis.

Die Bedingungen für die nachrangige Finanzierung umfassen bestimmte Minderheits-, Zustimmungs- und Vetorechte, durch die die Deutsche Bank die Finanz- und Geschäftspolitik von Actavis Equity mitbestimmen kann. Darüber hinaus stellen sie Rückzahlungen ausstehender Beträge im Rang nach, die von zahlungsunfähigen Kreditnehmern geschuldet beziehungsweise nach dem Verkauf von Actavis oder deren Tochtergesellschaften fällig werden. Unter Berücksichtigung des Effekts dieser Rechte und Beschränkungen wurde die nachrangige Finanzierung zu Bilanzzwecken als Eigenkapital ausgewiesen.

Die Bedingungen für die PIK-Finanzierung sehen auch die Nachrangigkeit von Beträgen vor, die der Deutschen Bank (in Form einer Zins- oder Rückzahlungsprämie) bei der Zahlungsunfähigkeit von Kreditnehmern beziehungsweise nach dem Verkauf von Actavis oder deren Tochtergesellschaften zustehen.

Der Buchwert von Actavis, welcher die nachrangige Fremdfinanzierung widerspiegelt, wird auf der Grundlage der Bilanz von Actavis zum 30. September 2010 ermittelt, welche um wesentliche Transaktionen nach diesem Stichtag bereinigt wurde.

**Postbank.** Am 31. Dezember 2009 war die Beteiligung an der Deutschen Postbank AG wesentlich, sie allein repräsentierte ungefähr 75 % des Buchwerts aller nach der Equitymethode bilanzierten Beteiligungen. Da die Deutsche Bank am 3. Dezember 2010 einen beherrschenden Einfluss gewonnen hat, hat sie den Postbank-Konzern ab diesem Zeitpunkt vollkonsolidiert. Die Equitymethode kommt nicht mehr zur Anwendung. Weitere Informationen über den Abschluss dieses Unternehmenserwerbs enthält Note 04 „Akquisitionen und Veräußerungen“.

Die folgende Tabelle zeigt eine Zusammenfassung der aggregierten Finanzinformationen der wesentlichen nach der Equitymethode bilanzierten Beteiligungen.

| in Mio €                    | 31.12.2010 | 31.12.2009 |
|-----------------------------|------------|------------|
| Summe der Aktiva            | 17.317     | 15.945     |
| Summe der Verbindlichkeiten | 12.393     | 11.415     |
| Erträge                     | 3.145      | 3.385      |
| Gewinn/Verlust (–)          | 428        | 378        |

Die nachstehende Tabelle zeigt das Ergebnis aus allen nach der Equitymethode bilanzierten Beteiligungen.

| in Mio €                                                                            | 2010          | 2009      |
|-------------------------------------------------------------------------------------|---------------|-----------|
| <b>Ergebnis aus den nach der Equitymethode bilanzierten Beteiligungen:</b>          |               |           |
| Anteiliges Ergebnis der Beteiligungsunternehmen                                     | 457           | 189       |
| Gewinne/Verluste (–) aus der Veräußerung von Beteiligungen                          | 14            | 21        |
| Wertminderungen                                                                     | –2.475        | –151      |
| <b>Ergebnis aus den nach der Equitymethode bilanzierten Beteiligungen insgesamt</b> | <b>–2.004</b> | <b>59</b> |

Im Geschäftsjahr war ein Aufwand von rund 2,3 Mrd € aus der nach der Equitymethode bilanzierten Beteiligung an der Deutschen Postbank AG vor der Konsolidierung eingeschlossen. Weitere Informationen sind in Note 04 „Akquisitionen und Veräußerungen“ enthalten.

Es gab keine anteiligen unrealisierten Verluste aus den nach der Equitymethode bilanzierten Beteiligungen, weder in 2010 noch kumuliert.

Die nach der Equitymethode bilanzierten Beteiligungen, für die veröffentlichte Preisnotierungen vorlagen, hatten zum 31. Dezember 2010 einen Buchwert von 280 Mio € (2009: 6,1 Mrd €) und einen Fair Value von 561 Mio € (2009: 3,8 Mrd €).

Der Konzern ist keinen signifikanten Verpflichtungen aus Eventualverbindlichkeiten der Beteiligungsunternehmen ausgesetzt.

Sofern nicht anders beschrieben, unterlag sowohl im Geschäftsjahr 2010 als auch im Geschäftsjahr 2009 keines der Beteiligungsunternehmen Transferbeschränkungen hinsichtlich Zahlungen von Dividenden oder der Rückzahlung von Krediten.

## 18 – Forderungen aus dem Kreditgeschäft

Die nachfolgende Übersicht stellt die Zusammensetzung der Forderungen aus dem Kreditgeschäft nach Branchen dar.

| in Mio €                                                                                                  | 31.12.2010     | 31.12.2009     |
|-----------------------------------------------------------------------------------------------------------|----------------|----------------|
| Banken und Versicherungen                                                                                 | 38.798         | 22.002         |
| Verarbeitendes Gewerbe                                                                                    | 20.748         | 17.314         |
| Private Haushalte (ohne Hypothekenkredite)                                                                | 35.115         | 27.002         |
| Private Haushalte – Hypothekenkredite                                                                     | 132.235        | 58.673         |
| Öffentliche Haushalte                                                                                     | 24.113         | 9.572          |
| Handel                                                                                                    | 13.637         | 10.938         |
| Gewerbliche Immobilien                                                                                    | 44.120         | 28.959         |
| Leasingfinanzierungen                                                                                     | 2.321          | 2.078          |
| Fund Management                                                                                           | 27.964         | 26.462         |
| Sonstige                                                                                                  | 72.841         | 59.698         |
| <b>Forderungen aus dem Kreditgeschäft, brutto</b>                                                         | <b>411.892</b> | <b>262.698</b> |
| Abgegrenzte Aufwendungen (–)/unrealisierte Erträge                                                        | 867            | 1.250          |
| <b>Forderungen aus dem Kreditgeschäft, abzüglich abgegrenzter Aufwendungen (–)/unrealisierter Erträge</b> | <b>411.025</b> | <b>261.448</b> |
| Abzüglich: Wertberichtigungen für Kreditausfälle                                                          | 3.296          | 3.343          |
| <b>Forderungen aus dem Kreditgeschäft</b>                                                                 | <b>407.729</b> | <b>258.105</b> |

### Zusagen und Eventualverbindlichkeiten

Die nachstehende Tabelle zeigt den Nominalwert der unwiderruflichen Kreditzusagen und Eventualverbindlichkeiten. Eventualverbindlichkeiten beinhalten im Wesentlichen Finanz- und Performancegarantien, Kreditbriefe und Haftungsübernahmeerklärungen. Der Nominalwert dieser Verpflichtungen entspricht dem maximalen Ausfallrisiko des Konzerns für den Fall, dass der Kunde seinen Verpflichtungen nicht nachkommt. Wahrscheinliche Verluste im Rahmen dieser Verträge werden als Rückstellungen erfasst.

| in Mio €                      | 31.12.2010     | 31.12.2009     |
|-------------------------------|----------------|----------------|
| Unwiderrufliche Kreditzusagen | 123.881        | 104.125        |
| Eventualverbindlichkeiten     | 68.055         | 52.183         |
| <b>Insgesamt</b>              | <b>191.936</b> | <b>156.308</b> |

Die hier gezeigten Kreditzusagen und Eventualverbindlichkeiten bilden nicht die zukünftig zu erwartenden Zahlungsströme aus diesen Verträgen ab, da viele dieser Vereinbarungen ohne Inanspruchnahme fällig werden. Eventuell verlangt der Konzern die Stellung von Sicherheiten, um das Kreditrisiko dieser Verpflichtungen zu mindern.

### Staatliche Unterstützung

Im Rahmen seiner Geschäftsaktivitäten beantragt und erhält der Konzern regelmäßig staatliche Unterstützung in Form von Gewährleistungen von Exportversicherungen (Export Credit Agencies; ECAs). Diese decken Transfer- und Ausfallrisiken aus der Finanzierung von Exporten und Investitionen in Emerging Markets sowie in geringerem Maße in entwickelten Märkten ab, die im Bereich Structured Trade & Export Finance entstehen. Nahezu alle exportorientierten Staaten haben solche ECAs zur Unterstützung ihrer inländischen Exporteure gegründet. Die ECAs handeln im Namen und Auftrag der Regierung ihres jeweiligen Landes und wurden entweder direkt als Regierungsstelle eingerichtet oder haben als privatrechtliche Gesellschaften das offizielle Mandat des jeweiligen Staats, in dessen Auftrag zu handeln. Die Bedingungen dieser ECA-Gewährleistungen, die für kurz-, mittel- und langfristige Finanzierungen zur Verfügung gestellt werden, sind relativ vergleichbar. Das ist darauf zurückzuführen, dass die meisten der ECAs innerhalb des von der Organisation für wirtschaftli-

che Zusammenarbeit und Entwicklung (OECD) entwickelten Regelwerks agieren. Dieser sogenannte OECD-Konsensus als zwischenstaatliche Vereinbarung der OECD-Mitgliedsstaaten legt Richtgrößen fest, anhand derer ein fairer Wettbewerb zwischen den verschiedenen Exportländern sichergestellt wird.

In einigen Ländern werden für ECA-gedekte Finanzierungen zweckbestimmte Refinanzierungsprogramme mit staatlicher Unterstützung angeboten. In ausgewählten Fällen macht der Konzern von diesen Programmen Gebrauch. Bei bestimmten Finanzierungen erhält der Konzern auch staatliche Garantien von nationalen und internationalen staatlichen Einrichtungen als Sicherheiten, um Finanzierungen zu unterstützen, die im Interesse der jeweiligen Regierungen liegen. Die Mehrheit der vom Konzern erhaltenen ECA-Gewährleistungen wurde vergeben entweder von der Euler Hermes Kreditversicherungs-AG, die im Auftrag der Bundesrepublik Deutschland tätig ist, oder von der Commodity Credit Corporation, die im Auftrag der Vereinigten Staaten tätig ist.

## 19 – Risikovorsorge im Kreditgeschäft

Die Risikovorsorge im Kreditgeschäft setzt sich aus Wertberichtigungen für Kreditausfälle und Rückstellungen für außerbilanzielle Verpflichtungen im Kreditgeschäft zusammen.

Die nachstehende Tabelle zeigt die Entwicklung der Wertberichtigungen für Kreditausfälle für die angegebenen Zeiträume.

| in Mio €                               | 2010                |                        |              | 2009                |                        |              | 2008                |                        |              |
|----------------------------------------|---------------------|------------------------|--------------|---------------------|------------------------|--------------|---------------------|------------------------|--------------|
|                                        | Einzel<br>ermittelt | Kollektiv<br>ermittelt | Insgesamt    | Einzel<br>ermittelt | Kollektiv<br>ermittelt | Insgesamt    | Einzel<br>ermittelt | Kollektiv<br>ermittelt | Insgesamt    |
| <b>Bestand am Jahresanfang</b>         | <b>2.029</b>        | <b>1.314</b>           | <b>3.343</b> | <b>977</b>          | <b>961</b>             | <b>1.938</b> | <b>930</b>          | <b>775</b>             | <b>1.705</b> |
| Wertberichtigungen für Kreditausfälle  | 562                 | 751                    | 1.313        | 1.789               | 808                    | 2.597        | 382                 | 702                    | 1.084        |
| Nettoabschreibungen:                   |                     |                        |              |                     |                        |              |                     |                        |              |
| Abschreibungen                         | – 896               | – 404                  | – 1.300      | – 637               | – 419                  | – 1.056      | – 301               | – 477                  | – 778        |
| Eingänge aus abgeschriebenen Krediten  | – 934               | – 509                  | – 1.443      | – 670               | – 552                  | – 1.222      | – 364               | – 626                  | – 990        |
| Veränderung des Konsolidierungskreises | 38                  | 104                    | 143          | 33                  | 133                    | 166          | 63                  | 149                    | 212          |
| Wechselkursveränderungen/Sonstige      | –                   | –                      | –            | –                   | –                      | –            | –                   | –                      | –            |
| Veränderung des Konsolidierungskreises | – 52                | – 8                    | – 60         | – 101               | – 36                   | – 137        | – 34                | – 39                   | – 74         |
| <b>Bestand am Jahresende</b>           | <b>1.643</b>        | <b>1.653</b>           | <b>3.296</b> | <b>2.029</b>        | <b>1.314</b>           | <b>3.343</b> | <b>977</b>          | <b>961</b>             | <b>1.938</b> |

Die nachstehende Tabelle zeigt die Veränderungen in den Rückstellungen für außerbilanzielle Verpflichtungen im Kreditgeschäft des Konzerns, die sich aus Eventualverbindlichkeiten und ausleihebezogenen Zusagen zusammensetzen.

| in Mio €                                                              | 2010                |                        |            | 2009                |                        |            | 2008                |                        |            |
|-----------------------------------------------------------------------|---------------------|------------------------|------------|---------------------|------------------------|------------|---------------------|------------------------|------------|
|                                                                       | Einzel<br>ermittelt | Kollektiv<br>ermittelt | Insgesamt  | Einzel<br>ermittelt | Kollektiv<br>ermittelt | Insgesamt  | Einzel<br>ermittelt | Kollektiv<br>ermittelt | Insgesamt  |
| <b>Bestand am Jahresanfang</b>                                        | <b>83</b>           | <b>124</b>             | <b>207</b> | <b>98</b>           | <b>112</b>             | <b>210</b> | <b>101</b>          | <b>118</b>             | <b>219</b> |
| Rückstellungen für außerbilanzielle Verpflichtungen im Kreditgeschäft | – 18                | – 21                   | – 39       | 21                  | 12                     | 33         | – 2                 | – 6                    | – 8        |
| Zweckbestimmter Verbrauch                                             | –                   | –                      | –          | – 45                | –                      | – 45       | –                   | –                      | –          |
| Veränderung des Konsolidierungskreises                                | 42                  | –                      | 42         | –                   | –                      | –          | –                   | –                      | –          |
| Wechselkursveränderungen/Sonstige                                     | 1                   | 7                      | 8          | 10                  | –                      | 10         | – 1                 | –                      | – 1        |
| <b>Bestand am Jahresende</b>                                          | <b>108</b>          | <b>110</b>             | <b>218</b> | <b>83</b>           | <b>124</b>             | <b>207</b> | <b>98</b>           | <b>112</b>             | <b>210</b> |

In 2010 hat der Konzern aufgrund der Konsolidierung von Akquisitionen Rückstellungen für außerbilanzielle Verpflichtungen im Kreditgeschäft als Veränderung des Konsolidierungskreises verzeichnet, die für die Postbank 34 Mio € und für Sal. Oppenheim/BHF-BANK 8 Mio € ausmachten.



## 20 – Ausbuchung von finanziellen Vermögenswerten

Der Konzern tritt in Transaktionen ein, bei denen er zuvor erfasste finanzielle Vermögenswerte wie festverzinsliche Wertpapiere, Aktien und Forderungen des Handelsbestands überträgt, bei denen er aber alle wesentlichen mit diesen Vermögenswerten verbundenen Risiken und Chancen zurückbehält. Infolgedessen werden solche Vermögenswerte nicht ausgebucht, sondern als besicherte Kreditvergabe („Secured Financing“) bilanziert. Vom Konzern abgeschlossene Transaktionen dieser Art sind vor allem Wertpapierpensionsgeschäfte (Repos), Wertpapierleihen und Total-Return-Swap-Geschäfte. Bei derartigen Transaktionen behält der Konzern im Wesentlichen alle Kredit-, Aktienkurs-, Zins- und Währungsrisiken zurück, die mit den Vermögenswerten und den daraus resultierenden Ergebnissen verbunden sind.

Die folgende Tabelle zeigt die Arten der übertragenen Vermögenswerte und die zugrunde liegenden Transaktionen, die nicht für eine Ausbuchung qualifizieren, sowie die damit verbundenen Verbindlichkeiten.

| in Mio €                                                      | 31.12.2010     | 31.12.2009 <sup>1</sup> |
|---------------------------------------------------------------|----------------|-------------------------|
| <b>Buchwert der übertragenen Vermögenswerte</b>               |                |                         |
| <b>Nicht ausgebuchte Wertpapiere des Handelsbestands aus:</b> |                |                         |
| Wertpapierpensionsgeschäften <sup>1</sup>                     | 54.022         | 56.831                  |
| Wertpapierleihen <sup>1</sup>                                 | 39.454         | 26.858                  |
| Total Return Swaps                                            | 8.854          | 10.028                  |
| <b>Wertpapiere des Handelsbestands insgesamt</b>              | <b>102.330</b> | <b>93.717</b>           |
| Sonstige Handelsaktiva                                        | 2.455          | 2.915                   |
| Zur Veräußerung verfügbare finanzielle Vermögenswerte         | 4.391          | 492                     |
| Forderungen aus dem Kreditgeschäft                            | 3.700          | 2.049                   |
| <b>Insgesamt</b>                                              | <b>112.876</b> | <b>99.173</b>           |
| <b>Buchwert der damit verbundenen Verbindlichkeit</b>         | <b>99.957</b>  | <b>90.543</b>           |

<sup>1</sup> Die Vorjahreswerte wurden angepasst.

Vermögenswerte werden in der Regel im Rahmen eines fortgeführten Engagements bilanziert, wenn der Konzern Ansprüche auf Cashflows aus einem Vermögenswert beibehält, weiterhin einem aus dem übertragenen Vermögenswert resultierenden Ausfallrisiko ausgesetzt bleibt, sonstige Residualansprüche hält oder Derivatekontrakte mit Verbriefungs- oder Zweckgesellschaften eingeht.

Die folgende Tabelle enthält weitere Angaben zum Buchwert der übertragenen Vermögenswerte, in denen der Konzern ein fortgeführtes Engagement eingegangen ist.

| in Mio €                                                        | 31.12.2010   | 31.12.2009 <sup>1</sup> |
|-----------------------------------------------------------------|--------------|-------------------------|
| <b>Buchwert der übertragenen ursprünglichen Vermögenswerte:</b> |              |                         |
| Wertpapiere des Handelsbestands                                 | 2.197        | 4.688                   |
| Sonstige Handelsaktiva                                          | 6.011        | 5.007                   |
| <b>Buchwert der weiterhin bilanzierten Vermögenswerte:</b>      |              |                         |
| Wertpapiere des Handelsbestands                                 | 2.186        | 2.899                   |
| Sonstige Handelsaktiva                                          | 1.713        | 1.429                   |
| <b>Buchwert der damit verbundenen Verbindlichkeit</b>           | <b>3.910</b> | <b>4.253</b>            |

<sup>1</sup> Die Vorjahreswerte wurden angepasst.

## 21 – Als Sicherheit verpfändete und erhaltene Vermögenswerte

Der Konzern verpfändet Vermögenswerte als Sicherheit für Verbindlichkeiten aus Wertpapierpensions- und -leihgeschäften. Diese Geschäfte werden in der Regel zu handelsüblichen, in Standardverträgen für durch Wertpapiere unterlegte Leihgeschäfte festgelegten Bedingungen ausgeführt. Zusätzlich verpfändet der Konzern Vermögenswerte im Rahmen von sonstigen Leihgeschäften und als Sicherheitsleistungen für Verbindlichkeiten aus OTC-Derivategeschäften. Der Buchwert der vom Konzern als Sicherheit verpfändeten Vermögenswerte für Verbindlichkeiten oder Eventualverbindlichkeiten stellt sich wie folgt dar.

| in Mio €                                                           | 31.12.2010     | 31.12.2009 <sup>1</sup> |
|--------------------------------------------------------------------|----------------|-------------------------|
| Verzinsliche Einlagen bei Kreditinstituten                         | 930            | 59                      |
| Zum Fair Value bewertete finanzielle Vermögenswerte                | 101.109        | 97.088                  |
| Zur Veräußerung verfügbare finanzielle Vermögenswerte <sup>2</sup> | 3.362          | 558                     |
| Forderungen aus dem Kreditgeschäft                                 | 15.867         | 19.537                  |
| Sonstige <sup>3</sup>                                              | 181            | 56                      |
| <b>Insgesamt</b>                                                   | <b>121.449</b> | <b>117.298</b>          |

<sup>1</sup> Die Vorjahreswerte wurden angepasst.

<sup>2</sup> Die Erhöhung der zur Veräußerung verfügbaren finanziellen Vermögenswerte ist hauptsächlich auf die Konsolidierung der Postbank zurückzuführen.

<sup>3</sup> Beinhaltet als Sicherheit verpfändete Sachanlagen.

In der Konzernbilanz gesondert ausgewiesen sind verpfändete Vermögenswerte, bei denen der Sicherungsnehmer das vertragliche Recht oder Gewohnheitsrecht besitzt, die Sicherheit zu veräußern oder weiterzupfänden. Am 31. Dezember 2010 belief sich ihr Wert auf 95 Mrd € (2009: 80 Mrd €).

Zum 31. Dezember 2010 hat der Konzern Sicherheiten mit einem Fair Value von 269 Mrd € (2009: 225 Mrd €) aus Wertpapierpensions- und -leihgeschäften, Derivategeschäften, Krediten gegen Wertpapiersicherheiten und anderen Transaktionen erhalten. Diese Geschäfte werden in der Regel zu Bedingungen ausgeführt, die für standardisierte durch Wertpapiere unterlegte Leihgeschäfte und für die sonstigen beschriebenen Transaktionen üblich sind. Der Konzern hat als Sicherungsnehmer das Recht zur Veräußerung oder Weiterverpfändung der erhaltenen Sicherheiten, sofern er bei Beendigung der Transaktion gleichwertige Wertpapiere zurückgibt. Von diesen Sicherheiten waren zum 31. Dezember 2010 249 Mrd € (2009: 200 Mrd €) veräußert oder verpfändet, um insbesondere Leerverkäufe sowie Wertpapierpensions- und -leihgeschäfte zu bedienen.

## 22 – Sachanlagen

| in Mio €                                                          | Eigen-<br>genutzte<br>Immobilien | Betriebs- und<br>Geschäfts-<br>ausstattung | Einbauten in<br>gemieteten<br>Räumen | Anlagen im Bau | Insgesamt     |
|-------------------------------------------------------------------|----------------------------------|--------------------------------------------|--------------------------------------|----------------|---------------|
| <b>Anschaffungskosten:</b>                                        |                                  |                                            |                                      |                |               |
| <b>Bestand zum 1. Januar 2009</b>                                 | <b>1.467</b>                     | <b>2.500</b>                               | <b>1.513</b>                         | <b>1.317</b>   | <b>6.797</b>  |
| Veränderung des Konsolidierungskreises                            | 5                                | –2                                         | –2                                   | –              | 1             |
| Zugänge                                                           | 4                                | 242                                        | 70                                   | 276            | 592           |
| Umklassifizierung                                                 | 2                                | 23                                         | 20                                   | –1.121         | –1.076        |
| Umklassifizierung in/aus zur Veräußerung<br>gehaltene Sachanlagen | –2                               | –                                          | –                                    | –              | –2            |
| Abgänge                                                           | 11                               | 75                                         | 34                                   | –              | 120           |
| Wechselkursveränderungen                                          | 4                                | 53                                         | 25                                   | –6             | 76            |
| <b>Bestand zum 31. Dezember 2009</b>                              | <b>1.469</b>                     | <b>2.741</b>                               | <b>1.592</b>                         | <b>466</b>     | <b>6.268</b>  |
| Veränderung des Konsolidierungskreises                            | 1.045                            | 200                                        | –8                                   | 4              | 1.241         |
| Zugänge                                                           | 115                              | 417                                        | 156                                  | 185            | 873           |
| Umklassifizierung                                                 | 2.208                            | 398                                        | 60                                   | –361           | 2.305         |
| Umklassifizierung in/aus zur Veräußerung<br>gehaltene Sachanlagen | –161                             | –21                                        | –4                                   | –              | –186          |
| Abgänge                                                           | 33                               | 247                                        | 55                                   | –              | 335           |
| Wechselkursveränderungen                                          | 3                                | 133                                        | 72                                   | 4              | 212           |
| <b>Bestand zum 31. Dezember 2010</b>                              | <b>4.646</b>                     | <b>3.621</b>                               | <b>1.813</b>                         | <b>298</b>     | <b>10.378</b> |
| <b>Kumulierte Abschreibungen und<br/>Wertminderungen:</b>         |                                  |                                            |                                      |                |               |
| <b>Bestand zum 1. Januar 2009</b>                                 | <b>556</b>                       | <b>1.705</b>                               | <b>824</b>                           | <b>–</b>       | <b>3.085</b>  |
| Veränderung des Konsolidierungskreises                            | –1                               | –3                                         | –2                                   | –              | –6            |
| Abschreibungen                                                    | 35                               | 232                                        | 150                                  | –              | 417           |
| Wertminderungen                                                   | 5                                | –                                          | 11                                   | 5              | 21            |
| Wertaufholungen                                                   | –                                | –                                          | –                                    | –              | –             |
| Umklassifizierung                                                 | –1                               | 10                                         | 3                                    | –              | 12            |
| Umklassifizierung in/aus zur Veräußerung<br>gehaltene Sachanlagen | –                                | –                                          | –                                    | –              | –             |
| Abgänge                                                           | 5                                | 55                                         | 25                                   | –              | 85            |
| Wechselkursveränderungen                                          | –                                | 37                                         | 10                                   | –              | 47            |
| <b>Bestand zum 31. Dezember 2009</b>                              | <b>589</b>                       | <b>1.926</b>                               | <b>971</b>                           | <b>5</b>       | <b>3.491</b>  |
| Veränderung des Konsolidierungskreises                            | –                                | –1                                         | –13                                  | –              | –14           |
| Abschreibungen                                                    | 47                               | 293                                        | 154                                  | –              | 494           |
| Wertminderungen                                                   | 6                                | 22                                         | –                                    | –              | 28            |
| Wertaufholungen                                                   | –                                | –                                          | –                                    | –              | –             |
| Umklassifizierung                                                 | 704                              | –13                                        | –4                                   | –5             | 682           |
| Umklassifizierung in/aus zur Veräußerung<br>gehaltene Sachanlagen | –2                               | –                                          | –                                    | –              | –2            |
| Abgänge                                                           | 16                               | 187                                        | 39                                   | –              | 242           |
| Wechselkursveränderungen                                          | 2                                | 92                                         | 45                                   | –              | 139           |
| <b>Bestand zum 31. Dezember 2010</b>                              | <b>1.330</b>                     | <b>2.132</b>                               | <b>1.114</b>                         | <b>–</b>       | <b>4.576</b>  |
| <b>Bilanzwert:</b>                                                |                                  |                                            |                                      |                |               |
| <b>Bestand zum 31. Dezember 2009</b>                              | <b>880</b>                       | <b>815</b>                                 | <b>621</b>                           | <b>461</b>     | <b>2.777</b>  |
| <b>Bestand zum 31. Dezember 2010</b>                              | <b>3.316</b>                     | <b>1.489</b>                               | <b>699</b>                           | <b>298</b>     | <b>5.802</b>  |

Im Geschäftsjahr 2009 wurde aufgrund geänderter Bilanzierungsregeln für im Bau befindliche Gebäude ein Objekt von Sachanlagen zu als Finanzinvestitionen gehaltene Immobilien umgewidmet, welche unter den Sonstigen Vermögenswerten ausgewiesen werden. Dieses Objekt wurde im Geschäftsjahr 2010, ausgelöst durch die Änderung seiner ökonomischen Charakteristika, wieder in die Sachanlagen umgegliedert.

Die ausgewiesenen Wertminderungen auf Sachanlagen werden in Sachaufwendungen und sonstigen Aufwendungen gezeigt.

Die Buchwerte von Sachanlagen, die einer Verkaufsrestriktion unterliegen, beliefen sich zum 31. Dezember 2010 auf 192 Mio €.

Zum Jahresende 2010 beliefen sich bestehende Verpflichtungen zum Erwerb von Sachanlagen auf 18 Mio €.

## 23 – Leasingverhältnisse

Der Konzern tritt als Leasingnehmer für Sachanlagen auf.

### Finanzierungsleasingverhältnisse

Die Mehrzahl der vom Konzern abgeschlossenen Finanzierungsleasingverträge wurde zu geschäftsüblichen Konditionen getätigt. Der Konzern hat einen materiellen Finanzierungsleasingvertrag, der eine für den Konzern günstige Kaufoption zum Erwerb der Immobilie am Ende der Laufzeit des Vertrages enthält.

Die folgende Tabelle zeigt den Nettobuchwert für die jeweilige Anlageklasse, der im Rahmen der Finanzierungsleasingverhältnisse gehalten wird.

| in Mio €                           | 31.12.2010 | 31.12.2009 |
|------------------------------------|------------|------------|
| Grundstücke und Gebäude            | 87         | 91         |
| Betriebs- und Geschäftsausstattung | 2          | 2          |
| Sonstige                           | 3          | –          |
| <b>Buchwert am Jahresende</b>      | <b>92</b>  | <b>93</b>  |

Darüber hinaus hat der Konzern Untermietverträge mit einem Volumen von 5 Mio € zum 31. Dezember 2010 (2009: 67 Mio €) abgeschlossen, die als Finanzierungsleasing klassifiziert werden.

Die nachfolgende Tabelle enthält die künftigen Mindestmietzahlungen aus den Finanzierungsleasingverhältnissen des Konzerns.

| in Mio €                                                            | 31.12.2010 | 31.12.2009 |
|---------------------------------------------------------------------|------------|------------|
| <b>Künftige Mindestleasingzahlungen:</b>                            |            |            |
| bis 1 Jahr                                                          | 17         | 25         |
| 1 bis 5 Jahre                                                       | 65         | 106        |
| länger als 5 Jahre                                                  | 73         | 144        |
| <b>Künftige Mindestleasingzahlungen insgesamt</b>                   | <b>155</b> | <b>275</b> |
| abzüglich Zinsanteil                                                | 111        | 108        |
| <b>Barwert der Mindestleasingzahlungen aus Finanzierungsleasing</b> | <b>44</b>  | <b>167</b> |

Zum 31. Dezember 2010 betrug die Summe der künftigen Mindestleasingzahlungen, die aus unkündbaren Untermietverhältnissen erwartet wurde, 105 Mio € (2009 111 Mio €). Zum 31. Dezember 2010 betrugen die in der Gewinn- und Verlustrechnung ausgewiesenen bedingten Mietzahlungen 1 Mio € (2009: minus 0,7 Mio €). Die bedingten Mietzahlungen orientieren sich an Referenzzinssätzen, wie den Drei-Monats-EURIBOR; unterhalb eines bestimmten Zinssatzes erhält der Konzern eine Rückerstattung.

### Operating-Lease-Verhältnisse

Der Konzern mietet den größten Teil seiner Büros und Filialen langfristig. Die Mehrzahl der vom Konzern abgeschlossenen Operating-Lease-Verträge wurde zu geschäftsüblichen Konditionen getätigt. Der Konzern hat einen materiellen Operating-Lease-Vertrag, der fünf Verlängerungsoptionen für jeweils fünf weitere Jahre und keine Kaufoption enthält.

Die nachfolgende Tabelle enthält die künftigen Mindestleasingzahlungen aus den Operating-Lease-Verhältnissen des Konzerns.

| in Mio €                                                        | 31.12.2010   | 31.12.2009   |
|-----------------------------------------------------------------|--------------|--------------|
| <b>Künftige Mindestleasingzahlungen:</b>                        |              |              |
| bis 1 Jahr                                                      | 831          | 728          |
| 1 bis 5 Jahre                                                   | 2.316        | 2.046        |
| länger als 5 Jahre                                              | 2.074        | 2.352        |
| <b>Künftige Mindestleasingzahlungen insgesamt</b>               | <b>5.221</b> | <b>5.126</b> |
| abzüglich Leasingeinnahmen aus Weitervermietung (Mindestbetrag) | 248          | 255          |
| <b>Nettomindestleasingzahlungen<sup>1</sup></b>                 | <b>4.973</b> | <b>4.871</b> |

<sup>1</sup> Von den Zahlungen in 2010 entfielen 425 Mio € auf die Postbank.

Im Geschäftsjahr 2010 wurden im Rahmen von Miet- und Untermietverhältnissen insgesamt 890 Mio € gezahlt, davon wurden 927 Mio € für Mindestleasingzahlungen zuzüglich 2 Mio € für bedingte Mietzahlungen abzüglich erhaltener Zahlungen aus Untermietverhältnissen in Höhe von 39 Mio € geleistet.

## 24 – Goodwill und sonstige immaterielle Vermögenswerte

### Goodwill

#### Veränderungen des Goodwill

Der Bilanzwert des Goodwill sowie die Bruttobeträge und die kumulierten Wertminderungen des Goodwill haben sich in den Geschäftsjahren 2010 und 2009 pro Segment wie folgt entwickelt.

| in Mio €                                                               | Corporate<br>Banking &<br>Securities | Global<br>Transaction<br>Banking | Asset and<br>Wealth<br>Management | Private &<br>Business<br>Clients | Corporate<br>Investments | Insgesamt     |
|------------------------------------------------------------------------|--------------------------------------|----------------------------------|-----------------------------------|----------------------------------|--------------------------|---------------|
| <b>Bestand zum 1. Januar 2009</b>                                      | <b>3.128</b>                         | <b>456</b>                       | <b>2.975</b>                      | <b>974</b>                       | <b>–</b>                 | <b>7.533</b>  |
| Anpassungen von im Vorjahr erworbenem<br>Goodwill zum Erwerbszeitpunkt | –                                    | –                                | –                                 | –                                | –                        | –             |
| Zugänge                                                                | 2                                    | 1                                | –                                 | –                                | –                        | 3             |
| Umklassifizierungen                                                    | –                                    | –                                | – 306                             | –                                | 306                      | –             |
| Umklassifizierung aus/in (–) zum Verkauf<br>bestimmte Vermögenswerte   | – 14                                 | –                                | –                                 | –                                | –                        | – 14          |
| Abgänge, die nicht als zum Verkauf bestimmt<br>klassifiziert werden    | –                                    | –                                | –                                 | –                                | –                        | –             |
| Wertminderungen <sup>1</sup>                                           | –                                    | –                                | –                                 | –                                | – 151                    | – 151         |
| Wechselkursveränderungen/Sonstige                                      | – 11                                 | – 4                              | 46                                | –                                | 18                       | 49            |
| <b>Bestand zum 31. Dezember 2009</b>                                   | <b>3.105</b>                         | <b>453</b>                       | <b>2.715</b>                      | <b>974</b>                       | <b>173</b>               | <b>7.420</b>  |
| <b>Bruttobetrag des Goodwill</b>                                       | <b>3.109</b>                         | <b>453</b>                       | <b>2.715</b>                      | <b>974</b>                       | <b>849</b>               | <b>8.100</b>  |
| <b>Kumulierte Wertminderungen</b>                                      | <b>– 4</b>                           | <b>–</b>                         | <b>–</b>                          | <b>–</b>                         | <b>– 676</b>             | <b>– 680</b>  |
| <b>Bestand zum 1. Januar 2010</b>                                      | <b>3.105</b>                         | <b>453</b>                       | <b>2.715</b>                      | <b>974</b>                       | <b>173</b>               | <b>7.420</b>  |
| Anpassungen von im Vorjahr erworbenem<br>Goodwill zum Erwerbszeitpunkt | –                                    | 5                                | – 4                               | –                                | –                        | 1             |
| Zugänge                                                                | 2                                    | –                                | 844                               | 2.049                            | –                        | 2.895         |
| Umklassifizierungen                                                    | –                                    | 3                                | – 3                               | –                                | –                        | –             |
| Umklassifizierung aus/in (–) zum Verkauf<br>bestimmte Vermögenswerte   | –                                    | –                                | – 20                              | –                                | –                        | – 20          |
| Abgänge, die nicht als zum Verkauf bestimmt<br>klassifiziert werden    | –                                    | –                                | –                                 | –                                | –                        | –             |
| Wertminderungen                                                        | –                                    | –                                | –                                 | –                                | –                        | –             |
| Wechselkursveränderungen/Sonstige                                      | 225                                  | 26                               | 192                               | 2                                | 21                       | 466           |
| <b>Bestand zum 31. Dezember 2010</b>                                   | <b>3.332</b>                         | <b>487</b>                       | <b>3.724</b>                      | <b>3.025</b>                     | <b>194</b>               | <b>10.762</b> |
| <b>Bruttobetrag des Goodwill</b>                                       | <b>3.337</b>                         | <b>487</b>                       | <b>3.724</b>                      | <b>3.025</b>                     | <b>903</b>               | <b>11.476</b> |
| <b>Kumulierte Wertminderungen</b>                                      | <b>– 5</b>                           | <b>–</b>                         | <b>–</b>                          | <b>–</b>                         | <b>– 709</b>             | <b>– 714</b>  |

<sup>1</sup> Wertminderungen auf Goodwill werden als Wertminderung auf immaterielle Vermögenswerte in der Gewinn- und Verlustrechnung ausgewiesen.

Im Geschäftsjahr 2010 belief sich der Zugang beim Goodwill auf rund 2,9 Mrd €. Darin enthalten war ein Betrag von 2.049 Mio € im Zusammenhang mit dem Erwerb einer Mehrheitsbeteiligung an der Deutschen Postbank AG („Postbank“) im Dezember 2010, der dem Unternehmensbereich Private & Business Clients (PBC) zugeordnet wurde. Durch den Erwerb der Sal. Oppenheim-Gruppe (einschließlich deren Tochtergesellschaft BHF-BANK AG („BHF-BANK“) und ohne die BHF Asset Servicing GmbH) im ersten Quartal 2010 wurde ein Goodwill von 844 Mio € ausgewiesen, der dem Unternehmensbereich Asset and Wealth Management (AWM) zugerechnet wurde. Aufgrund des geplanten Verkaufs der BHF-BANK und deren Klassifizierung als Veräußerungsgruppe wurde im vierten Quartal 2010 Goodwill in Höhe von 13 Mio €, der auf den Erwerb dieser Einheit entfällt, in die Veräußerungsgruppe umgegliedert. Ferner trug der Erwerb eines Anlageberatungsunternehmens in den USA mit 2 Mio € zu einem Zugang beim Goodwill im Unternehmensbereich Corporate Banking & Securities (CB&S) bei. Aufgrund des geplanten Verkaufs einer Tochtergesellschaft im Unternehmensbereich AWM war der entsprechenden zum Verkauf bestimmten Veräußerungsgruppe ein Betrag von 7 Mio € zugewiesen worden.

Im Geschäftsjahr 2010 kam es zu keiner Wertminderung des Goodwill.

Im Geschäftsjahr 2009 belief sich der Zugang beim Goodwill auf 3 Mio € und beinhaltete 2 Mio € in CB&S, welche aus dem Erwerb der noch ausstehenden Anteile ohne beherrschenden Einfluss an einer algerischen Finanzberatungsfirma resultierten, und 1 Mio € in Global Transaction Banking (GTB), die auf den Erwerb des globalen Agency-Securities-Lending-Geschäfts der Dresdner Bank zurückgehen. Mit Wirkung zum 1. Januar 2009 und infolge eines Übertrags in der Managementverantwortung wurde Goodwill in Höhe von 306 Mio €, welcher im Zusammenhang mit Maher Terminals LLC und Maher Terminals of Canada Corp. (zusammen „Maher Terminals“) steht, von AWM auf Corporate Investments (CI) übertragen. Im dritten Quartal 2009 wurde Goodwill in Höhe von 14 Mio € in CB&S in die Kategorie Zum Verkauf bestimmte Vermögenswerte umgegliedert. Dieser Goodwill bezog sich auf ein nicht integriertes Investment in ein Entwicklungsprojekt für erneuerbare Energien und wurde als Teil der Veräußerungsgruppe in die Kategorie Sonstige Aktiva übertragen (siehe auch Note 25 „Zum Verkauf bestimmte Vermögenswerte“).

CI verzeichnete im zweiten Quartal 2009 eine Wertminderung des Goodwill in Höhe von 151 Mio €. Diese entfiel auf das nicht integrierte Investment in Maher Terminals und wurde infolge anhaltend negativer Aussichten für den Containerumschlag beziehungsweise das Geschäftsvolumen ausgelöst. Der Fair Value abzüglich Verkaufskosten des Investments wurde auf Basis einer Discounted-Cashflow-Methode ermittelt.

Im Geschäftsjahr 2008 wurde insgesamt eine Wertminderung des Goodwill von 275 Mio € erfasst. Von diesem Gesamtbetrag entfielen 270 Mio € auf ein Investment in AWM und weitere 5 Mio € auf ein börsennotiertes Investment in CB&S. Beide Wertminderungen entfielen auf Investments, die nicht in die jeweiligen primären zahlungsmittelgenerierenden Einheiten innerhalb von AWM und CB&S integriert waren. Die Werthaltigkeitsprüfung des Investments Maher Terminals in AWM wurde aufgrund eines signifikanten Rückgangs des Geschäftsvolumens infolge der damaligen Wirtschaftslage ausgelöst. Der Fair Value abzüglich Verkaufskosten des Investments wurde auf Basis einer Discounted-Cashflow-Methode ermittelt. Die Werthaltigkeitsprüfung des Investments in CB&S wurde aufgrund von Wertminderungen bestimmter anderer Aktiva sowie der negativen Geschäftsaussichten des Investments vorgenommen. Der Fair Value abzüglich Verkaufskosten des börsennotierten Investments wurde basierend auf dessen Marktpreis bestimmt.

### Werthaltigkeitsprüfung des Goodwill

Ein bei Unternehmenszusammenschluss erworbener Goodwill wird für die Überprüfung der Werthaltigkeit den zahlungsmittelgenerierenden Einheiten zugewiesen, das heißt den kleinsten identifizierbaren Gruppen von Vermögenswerten, die Cashinflows generieren, welche größtenteils unabhängig von den Cashinflows aus anderen Vermögenswerten oder Gruppen von Vermögenswerten sind, und die aus den Synergien des Zusammenschlusses Nutzen ziehen sollen. Bei der Identifizierung, ob ein Vermögenswert (oder eine Gruppe von Vermögenswerten) größtenteils unabhängige Cashinflows von anderen Vermögenswerten (oder Gruppen von Vermögenswerten) generiert, werden verschiedene Faktoren berücksichtigt, einschließlich der Frage, wie das Management die Unternehmenstätigkeiten steuert, oder wie das Management Entscheidungen über die Fortsetzung oder den Abgang der Vermögenswerte beziehungsweise die Einstellung von Unternehmenstätigkeiten trifft.

Seit dem Mitte 2010 bekannt gegebenen Wechsel in der Führungsverantwortung für die Corporate & Investment Bank (CIB) hat die Reorganisation zur Schaffung einer integrierten Struktur für CIB wesentliche Fortschritte erzielt. Durch diese Integration werden Synergien, unter anderem in Form einer koordinierteren Betreuung von Firmenkunden, der Maximierung von Cross-Selling-Möglichkeiten und der bereichsübergreifenden Zusammenführung von Best-Practice-Lösungen, erwartet. In diesem Zusammenhang wurden die beiden ehemaligen zahlungsmittelgenerierenden Einheiten Global Markets und Corporate Finance mit Wirkung vom 1. Oktober



2010 zu der zahlungsmittelgenerierenden Einheit Corporate Banking & Securities zusammengefasst. Der Konzern bestätigte, dass die Änderung in der Struktur der zahlungsmittelgenerierenden Einheiten innerhalb von CB&S weder eine Wertminderung des Goodwill auslöste, noch verzögerte oder vermied.

Die primären zahlungsmittelgenerierenden Einheiten des Konzerns sind demzufolge Corporate Banking & Securities, Global Transaction Banking, Asset Management und Private Wealth Management im Segment Asset and Wealth Management sowie Private & Business Clients und Corporate Investments.

Die Bilanzwerte des Goodwill sowie deren relativer Anteil für die Geschäftsjahre 2010 und 2009 in den einzelnen zahlungsmittelgenerierenden Einheiten sind in der folgenden Tabelle dargestellt.

|                              | Corporate<br>Banking &<br>Securities | Global<br>Transaction<br>Banking | Asset<br>Management | Private<br>Wealth<br>Management | Private &<br>Business<br>Clients | Corporate<br>Investments | Sonstige | Goodwill<br>insgesamt |
|------------------------------|--------------------------------------|----------------------------------|---------------------|---------------------------------|----------------------------------|--------------------------|----------|-----------------------|
| <b>Zum 31. Dezember 2009</b> |                                      |                                  |                     |                                 |                                  |                          |          |                       |
| in Mio €                     | 3.105                                | 453                              | 1.788               | 927                             | 974                              | –                        | 174      | 7.420                 |
| in %                         | 42 %                                 | 6 %                              | 24 %                | 12 %                            | 13 %                             | N/A                      | 2 %      | 100 %                 |
| <b>Zum 31. Dezember 2010</b> |                                      |                                  |                     |                                 |                                  |                          |          |                       |
| in Mio €                     | 3.332                                | 487                              | 1.988               | 1.736                           | 3.025                            | –                        | 194      | 10.762                |
| in %                         | 31 %                                 | 5 %                              | 18 %                | 16 %                            | 28 %                             | N/A                      | 2 %      | 100 %                 |

N/A – nicht aussagefähig

Neben den primären zahlungsmittelgenerierenden Einheiten weisen die Segmente CB&S und CI Goodwill aus, der aus dem Erwerb von nicht integrierten Investments resultiert und deshalb nicht den primären zahlungsmittelgenerierenden Einheiten der jeweiligen Segmente zugeordnet wurde. Ein solcher Goodwill wird einzeln auf der Ebene jedes nicht integrierten Investments auf seine Werthaltigkeit hin untersucht und in der obigen Tabelle unter Sonstige zusammengefasst. Das nicht integrierte Investment in CI besteht aus der Beteiligung an Maher Terminals, die mit Wirkung zum 1. Januar 2009 von AWM auf CI übertragen wurde.

Der Goodwill wird im vierten Quartal jedes Geschäftsjahres auf seine Werthaltigkeit hin überprüft, indem der erzielbare Betrag jeder zahlungsmittelgenerierenden Einheit, die Goodwill ausweist, mit deren Bilanzwert verglichen wird. Der Bilanzwert einer zahlungsmittelgenerierenden Einheit ergibt sich aus dem Betrag an Eigenkapital, der einer zahlungsmittelgenerierenden Einheit zugeordnet wird. Dabei wird auch die Höhe des Goodwill sowie der nicht abzuschreibenden immateriellen Vermögenswerte einer zahlungsmittelgenerierenden Einheit berücksichtigt. Der erzielbare Betrag entspricht dem jeweils höheren Wert aus dem Fair Value einer zahlungsmittelgenerierenden Einheit abzüglich Verkaufskosten und Nutzungswert. Die jährliche Werthaltigkeitsprüfung des Goodwill für die primären zahlungsmittelgenerierenden Einheiten führte in den Geschäftsjahren 2010, 2009 und 2008 zu keiner Wertminderung, da der erzielbare Betrag für diese zahlungsmittelgenerierenden Einheiten deren Bilanzwert überstieg.

Die folgenden Abschnitte erläutern, wie der Konzern den erzielbaren Betrag seiner primären zahlungsmittelgenerierenden Einheiten, die Goodwill ausweisen, ermittelt. Ferner werden Informationen über bestimmte wesentliche Annahmen gegeben, die das Management für die Ermittlung des erzielbaren Betrags zugrunde legt.

### Erzielbarer Betrag

Der Konzern ermittelt den erzielbaren Betrag aller primären zahlungsmittelgenerierenden Einheiten auf der Grundlage des Nutzungswerts und verwendet dazu ein Bewertungsmodell auf Discounted-Cashflow-Basis (DCF). Das vom Konzern angewandte DCF-Modell reflektiert die Besonderheiten des Bankgeschäfts und dessen aufsichtsrechtliches Umfeld. Mithilfe des Modells wird der Barwert der geschätzten zukünftigen Ergebnisse berechnet, die nach Erfüllung der entsprechenden aufsichtsrechtlichen Kapitalanforderungen an die Anteilseigner ausgeschüttet werden können.

Das DCF-Modell verwendet Ergebnisprognosen und entsprechende Kapitalisierungsannahmen auf der Grundlage von Finanzplänen. Diese wurden vom Management beschlossen und werden zum Zweck der Werthaltigkeitsprüfung des Goodwill auf einen Fünfjahreszeitraum extrapoliert und auf ihren Barwert abgezinst. Die Schätzung der zukünftigen Ergebnisse und Kapitalanforderungen erfordert neben einer Berücksichtigung der bisherigen und tatsächlichen Performance eine Einschätzung der voraussichtlichen Entwicklungen der entsprechenden Märkte sowie des gesamtwirtschaftlichen und aufsichtsrechtlichen Umfelds. Die Ergebnisprognosen über den ursprünglichen Fünfjahreszeitraum hinaus werden, sofern erforderlich, auf ein nachhaltiges Ergebnissniveau angepasst. Danach wird von einem konstanten oder einem Übergang auf einen konstanten Anstieg ausgegangen. Grundlage hierfür ist eine langfristige Wachstumsrate in Höhe von 3,7 %, die auf den Erwartungen für die Entwicklung des Bruttoinlandsprodukts und der Inflationsrate basiert. Der Barwert dieser Ergebnisprognosen wird mithilfe einer ewigen Rente erfasst.

### Wesentliche Annahmen und Sensitivitäten

**Wesentliche Annahmen:** Der Nutzungswert einer zahlungsmittelgenerierenden Einheit reagiert sensibel auf die Schätzung der zukünftigen Ergebnisse, auf den Diskontierungszinssatz sowie in deutlich geringerem Maße auf die langfristige Wachstumsrate. Die angewandten Diskontierungszinssätze wurden auf Basis des Capital Asset Pricing Model ermittelt, das einen risikolosen Zinssatz, eine Marktrisikoprämie und einen Faktor für das systematische Marktrisiko (Betafaktor) beinhaltet. Die Werte für den risikolosen Zinssatz, die Marktrisikoprämie und die Betafaktoren werden mithilfe externer Informationsquellen festgelegt. Geschäftsspezifische Betafaktoren basieren auf den Daten einer entsprechenden Gruppe von Vergleichsunternehmen. Schwankungen der vorgenannten Komponenten könnten sich auf die Berechnung der Diskontierungszinssätze auswirken.

Die folgende Tabelle beinhaltet eine Beschreibung wesentlicher Annahmen, auf der das Management seine Cashflow-Prognosen aufgebaut hat, eine Beschreibung des Managementansatzes zur Bestimmung der zugewiesenen Werte sowie mögliche Ereignisse und Umstände, die sich negativ auf die primären zahlungsmittelgenerierenden Einheiten des Konzerns auswirken könnten.

| Primäre zahlungsmittel-generierende Einheit | Beschreibung der wesentlichen Annahmen                                                                                                                                                                                                                                                                                                                                                                                                                                                                                                                                                                                                                                                                               | Managementansatz zur Bestimmung der zugewiesenen Werte                                                                                                                                                                                                                                                                                                                                                                                         | Unsicherheiten, die mit den wesentlichen Annahmen einhergehen, sowie mögliche Ereignisse und Umstände, die negative Auswirkungen haben könnten                                                                                                                                                                                                                                                                                                                                                                                        |
|---------------------------------------------|----------------------------------------------------------------------------------------------------------------------------------------------------------------------------------------------------------------------------------------------------------------------------------------------------------------------------------------------------------------------------------------------------------------------------------------------------------------------------------------------------------------------------------------------------------------------------------------------------------------------------------------------------------------------------------------------------------------------|------------------------------------------------------------------------------------------------------------------------------------------------------------------------------------------------------------------------------------------------------------------------------------------------------------------------------------------------------------------------------------------------------------------------------------------------|---------------------------------------------------------------------------------------------------------------------------------------------------------------------------------------------------------------------------------------------------------------------------------------------------------------------------------------------------------------------------------------------------------------------------------------------------------------------------------------------------------------------------------------|
| Corporate Banking & Securities              | <ul style="list-style-type: none"> <li>- Kosteneinsparungen durch das konzernweite Programm zur Erhöhung der Infrastruktureffizienz und zur Komplexitätsreduktion</li> <li>- Erfolgreiche Integration der Investmentbank</li> <li>- Stabile, möglicherweise steigende Handelsvolumina und Margen</li> <li>- Fokus auf das kundenbezogene Geschäft und Nutzung der führenden Marktposition, gemessen am Kundenvolumen</li> <li>- Erhöhte Konzentration auf das Anleihegeschäft in Schwellenländern, Rohstoffe und den elektronischen Handel</li> <li>- Provisionsaufkommen in Corporate Finance erhöht sich weiter</li> </ul>                                                                                         | <ul style="list-style-type: none"> <li>- Die wesentlichen Annahmen basieren auf einer Kombination aus internen und externen Studien (Beratungs-, Research-unternehmen)</li> <li>- Managementschätzungen zu der Integration von CIB und dem Kosten-senkungsprogramm beruhen auch auf den bislang bei verschiedenen Initiativen erzielten Fortschritten</li> </ul>                                                                               | <ul style="list-style-type: none"> <li>- Unsicherheiten in Bezug auf das aufsichtsrechtliche Umfeld und deren mögliche Auswirkungen zum jetzigen Zeitpunkt noch nicht vorhersehbar</li> <li>- Unvorhergesehene Entwicklung im gesamtwirtschaftlichen Umfeld und einhergehender Rückgang der Marktaktivitäten</li> <li>- Fluktuation und Verlust von Mitarbeitern in Schlüsselpositionen in bestimmten Sektoren sowie Wiederaufleben des Wettbewerbs</li> <li>- Kosteneinsparungen werden nicht im geplanten Umfang erzielt</li> </ul> |
|                                             | <ul style="list-style-type: none"> <li>- Kosteneinsparungen durch das konzernweite Programm zur Erhöhung der Infrastruktureffizienz und zur Komplexitätsreduktion</li> <li>- Nutzung von Synergien aus der Integration von CIB</li> <li>- Stabiles gesamtwirtschaftliches Umfeld</li> <li>- Zinsniveau</li> <li>- Erholung der Volumina im internationalen Handel, im grenzüberschreitenden Zahlungsverkehr und bei Kapitalmaßnahmen</li> <li>- Vertiefung der Geschäftsbeziehungen mit Complex Corporates und institutionellen Kunden in bestehenden Regionen sowie verstärktes Wachstum in Asien</li> <li>- Erfolgreiche Integration von Teilen des niederländischen Firmenkundengeschäfts der ABN AMRO</li> </ul> | <ul style="list-style-type: none"> <li>- Die wesentlichen Annahmen basieren auf einer Kombination aus internen und externen Quellen</li> <li>- Makroökonomische Trends werden durch Studien belegt, während interne Wachstumspläne und Auswirkungen von Effizienzinitiativen auf Management-annahmen/übergeordneten Geschäfts-szenarien beruhen</li> </ul>                                                                                     | <ul style="list-style-type: none"> <li>- Unerwartet schwache Erholung der Weltwirtschaft und Auswirkungen auf die Handelsvolumina, Zinssätze und Wechselkurse</li> <li>- Verzögerte Umsetzung von Effizienzmaßnahmen</li> <li>- Unsicherheiten in Bezug auf das aufsichtsrechtliche Umfeld und deren mögliche Auswirkungen zum jetzigen Zeitpunkt noch nicht vorhersehbar</li> </ul>                                                                                                                                                  |
| Global Transaction Banking                  | <ul style="list-style-type: none"> <li>- Kosteneinsparungen durch das konzernweite Programm zur Erhöhung der Infrastruktureffizienz und zur Komplexitätsreduktion sowie die umstrukturierte AM-Plattform</li> <li>- Das Bestreben der Marktteilnehmer, die Verluste der vergangenen Jahre wettzumachen, stimuliert das Interesse an alternativen Anlagen</li> <li>- Zunehmende Allokation in alternative Anlagen</li> </ul>                                                                                                                                                                                                                                                                                          | <ul style="list-style-type: none"> <li>- Die Wachstumsannahmen für die Aktienmärkte basieren auf internen Studien von DB Research</li> <li>- Sonstige Annahmen zu Geschäftswachstum und Effizienz beruhen auf Einschätzungen der Geschäftsbereichsleitung, welche von interner, unabhängiger Funktion validiert wurden</li> <li>- Annahmen für die Reduzierung der Plattformkosten basieren auf Wettbewerbs- und PCAM-Trendanalysen</li> </ul> | <ul style="list-style-type: none"> <li>- Erneuter Anstieg der Marktvolatilität</li> <li>- Anhaltende Flucht der Anleger in liquide Mittel oder einfachere Produkte mit niedrigeren Provisionserträgen</li> <li>- Kosteneinsparungen werden nicht im geplanten Umfang erzielt</li> </ul>                                                                                                                                                                                                                                               |
| Asset Management                            | <ul style="list-style-type: none"> <li>- Anhaltende Erholung an den Aktien- und Immobilienmärkten</li> <li>- Kontinuierlicher Vermögenszuwachs in Schwellenländern und bei Sovereign Wealth Funds</li> <li>- Anhaltender Trend zur privaten Altersvorsorge und Vorteile durch Produktinnovationen</li> <li>- Outsourcing der Vermögensverwaltung durch Versicherungsgesellschaften</li> <li>- Gestiegenes Interesse an Investitionen in den Klimaschutz</li> </ul>                                                                                                                                                                                                                                                   |                                                                                                                                                                                                                                                                                                                                                                                                                                                |                                                                                                                                                                                                                                                                                                                                                                                                                                                                                                                                       |

| Primäre zahlungsmittel-generierende Einheit | Beschreibung der wesentlichen Annahmen                                                                                                                                                                                                                                                                                                                                                                                                                                                                                                                                                                                                                                                                                                                                                                                                                                                                                                                                                                          | Managementansatz zur Bestimmung der zugewiesenen Werte                                                                                                                                                                                                                                                                                                                                                                                                                               | Unsicherheiten, die mit den wesentlichen Annahmen einhergehen, sowie mögliche Ereignisse und Umstände, die negative Auswirkungen haben könnten                                                                                                                                                                                    |
|---------------------------------------------|-----------------------------------------------------------------------------------------------------------------------------------------------------------------------------------------------------------------------------------------------------------------------------------------------------------------------------------------------------------------------------------------------------------------------------------------------------------------------------------------------------------------------------------------------------------------------------------------------------------------------------------------------------------------------------------------------------------------------------------------------------------------------------------------------------------------------------------------------------------------------------------------------------------------------------------------------------------------------------------------------------------------|--------------------------------------------------------------------------------------------------------------------------------------------------------------------------------------------------------------------------------------------------------------------------------------------------------------------------------------------------------------------------------------------------------------------------------------------------------------------------------------|-----------------------------------------------------------------------------------------------------------------------------------------------------------------------------------------------------------------------------------------------------------------------------------------------------------------------------------|
| Private Wealth Management                   | <ul style="list-style-type: none"> <li>- Kosteneinsparungen durch das konzernweite Programm zur Erhöhung der Infrastruktureffizienz und zur Komplexitätsreduktion</li> <li>- Das Bestreben der Marktteilnehmer, die Verluste der vergangenen Jahre wettzumachen, stimuliert das Interesse an alternativen Anlagen</li> <li>- Anhaltende Erholung an den Aktien- und Immobilienmärkten</li> <li>- Vermögenswachstum in entwickelten Volkswirtschaften und in Schwellenländern</li> <li>- Marktanteil steigt in einem fragmentierten, wettbewerbsintensiven Umfeld</li> <li>- Akquise von Vermögen und Allokationsverlagerungen</li> <li>- Vorteile aus der Führungsposition im Heimatmarkt</li> <li>- Positive Resultate aus der Integration von Sal. Oppenheim</li> <li>- Organisches Wachstum in der Region Asien/Pazifik durch Neueinstellungen und intensivere Zusammenarbeit mit CIB</li> <li>- Komplexitätsabbau und Effizienzverbesserungen durch Implementierung einer globalen PWM-Plattform</li> </ul> | <ul style="list-style-type: none"> <li>- Annahmen zur Komplexitätsreduktion basieren auf internen Annahmen</li> <li>- Makroökonomische und Marktannahmen (zum Beispiel anlageklassenspezifische Annahmen) basieren auf DB Research-Prognosen</li> <li>- Marktübergreifende Wachstumspotenziale basieren auf externen Quellen (Strategieberatungen) und historischer Performance</li> <li>- Sal. Oppenheim-Ziele basieren auf separater Integrationsanalyse und -strategie</li> </ul> | <ul style="list-style-type: none"> <li>- Ungünstige Fiskalpolitik für Offshore-Banking</li> <li>- Unsicherheiten in der Euro- und USD-Zone und instabile Wechselkursumgebung</li> <li>- Volatilität in Schwellenländern</li> </ul>                                                                                                |
| Private & Business Clients                  | <ul style="list-style-type: none"> <li>- Kosteneinsparungen durch das konzernweite Programm zur Erhöhung der Infrastruktureffizienz und zur Komplexitätsreduktion</li> <li>- Führende Stellung auf dem Heimatmarkt Deutschland, starke Positionierung in anderen europäischen Märkten und Wachstumschancen in Schwellenländern Asiens</li> <li>- Generierung von Ertrags- und Kostensynergien zwischen Deutscher Bank und Postbank</li> <li>- Erhöhung des Marktanteils in Deutschland durch Kundenakquisitionen und Volumensteigerungen über die starke Angebotspalette im Beratungsgeschäft</li> <li>- Nutzung der Vorteile aus der Erweiterung des Filialnetzes in Indien und der Erhöhung der Beteiligung an der Hua Xia Bank in China</li> </ul>                                                                                                                                                                                                                                                           | <ul style="list-style-type: none"> <li>- Allen Annahmen zur zukünftigen Entwicklung von PBC liegen entsprechende Projekte und Initiativen zugrunde</li> <li>- Alle Initiativen wurden vom Management entwickelt sowie durch interne und externe Daten validiert</li> </ul>                                                                                                                                                                                                           | <ul style="list-style-type: none"> <li>- Starker Rückgang des Wirtschaftswachstums</li> <li>- Anhaltend niedrige Zinssätze</li> <li>- Risiko, dass Synergien im Zusammenhang mit der Postbank nicht oder später als prognostiziert realisiert werden</li> <li>- Kosten zur Erreichung der Synergien höher als erwartet</li> </ul> |

Die in den Geschäftsjahren 2010 und 2009 zur Ermittlung des Nutzungswerts der primären zahlungsmittel-generierenden Einheiten angewandten Diskontierungszinssätze vor Steuern sind wie folgt.

### Primäre zahlungsmittelgenerierende Einheiten

|                                             | Diskontierungszinssatz (vor Steuern) |                  |
|---------------------------------------------|--------------------------------------|------------------|
|                                             | 2010                                 | 2009             |
| <b>Corporate &amp; Investment Bank</b>      |                                      |                  |
| Corporate Banking & Securities              | 13,9 %                               | N/A <sup>1</sup> |
| Global Transaction Banking                  | 11,7 %                               | 12,5 %           |
| <b>Private Clients and Asset Management</b> |                                      |                  |
| Asset Management                            | 12,5 %                               | 13,5 %           |
| Private Wealth Management                   | 12,2 %                               | 13,2 %           |
| Private & Business Clients                  | 13,1 %                               | 13,1 %           |

N/A – nicht anwendbar

<sup>1</sup> Die jeweiligen Diskontierungszinssätze im Jahr 2009 betrugen 14,7 % für Global Markets und 14,5 % für Corporate Finance.

**Sensitivitäten:** Bei der Validierung der für die zahlungsmittelgenerierenden Einheiten ermittelten Nutzungswerte werden die wesentlichen Werttreiber jeder zahlungsmittelgenerierenden Einheit jährlich überprüft. Zusätzlich werden die für das DCF-Modell herangezogenen wesentlichen Annahmen, wie beispielsweise Diskontierungszinssatz und Ergebnisprognosen, einer Sensitivitätsprüfung unterzogen, um die Belastbarkeit der Nutzungswerte zu testen. Die erzielbaren Beträge aller primären zahlungsmittelgenerierenden Einheiten lagen deutlich über ihren jeweiligen Bilanzwerten. Vor diesem Hintergrund ist das Management der Auffassung, dass realistische Änderungen der wesentlichen Annahmen für die Ermittlung des erzielbaren Betrags der primären zahlungsmittelgenerierenden Einheiten des Konzerns nicht zu einer Wertminderung führen würden.

Globale Risiken für die Bankenbranche wie zum Beispiel eine unerwartet schwache Erholung der Weltwirtschaft, ein möglicher Ausfall eines staatlichen Schuldners und eine übermäßig kostenintensive und international zersplitterte neue Regulierung könnten die erwarteten künftigen Ergebnisse in einigen zahlungsmittelgenerierenden Einheiten des Konzerns jedoch negativ beeinflussen. Dies könnte in der Zukunft zu einer Wertminderung des Goodwill führen.

### Sonstige immaterielle Vermögenswerte

Sonstige immaterielle Vermögenswerte werden in erworbene und selbst erstellte immaterielle Vermögenswerte unterteilt. Während erworbene immaterielle Vermögenswerte weiter in nicht abzuschreibende und abzuschreibende sonstige immaterielle Vermögenswerte aufgeteilt werden, umfassen die selbst erstellten immateriellen Vermögenswerte ausschließlich intern entwickelte Software.

Die folgende Tabelle zeigt die Veränderungen bei den sonstigen immateriellen Vermögenswerten nach Anlageklassen in den Geschäftsjahren 2010 und 2009.

|                                                                        | Erworbene immaterielle Vermögenswerte                                                        |            |                                                                                             |                                                            |                                                            |                                                              |                             |                                                                                       | Selbst<br>erstellte<br>immaterielle<br>Vermögens-<br>werte | Sonstige<br>immaterielle<br>Vermögens-<br>werte<br>insgesamt |
|------------------------------------------------------------------------|----------------------------------------------------------------------------------------------|------------|---------------------------------------------------------------------------------------------|------------------------------------------------------------|------------------------------------------------------------|--------------------------------------------------------------|-----------------------------|---------------------------------------------------------------------------------------|------------------------------------------------------------|--------------------------------------------------------------|
|                                                                        | Nicht abzuschreibende                                                                        |            |                                                                                             |                                                            | Abzuschreibende                                            |                                                              |                             |                                                                                       |                                                            |                                                              |
|                                                                        | Rechte aus<br>Vermögens-<br>verwaltungs-<br>verträgen im<br>Publikums-<br>fonds-<br>geschäft | Sonstige   | Nicht abzu-<br>schreibende<br>erworbene<br>immaterielle<br>Vermögens-<br>werte<br>insgesamt | Kunden-<br>bezogene<br>immaterielle<br>Vermögens-<br>werte | Wert des<br>erworbenen<br>Versiche-<br>rungs-<br>geschäfts | Vertrags-<br>basierte<br>immaterielle<br>Vermögens-<br>werte | Software<br>und<br>Sonstige | Abzu-<br>schreibende<br>erworbene<br>immaterielle<br>Vermögens-<br>werte<br>insgesamt |                                                            |                                                              |
| in Mio €                                                               |                                                                                              |            |                                                                                             |                                                            |                                                            |                                                              |                             |                                                                                       | Software                                                   |                                                              |
| <b>Anschaffungs-/Herstellungskosten:</b>                               |                                                                                              |            |                                                                                             |                                                            |                                                            |                                                              |                             |                                                                                       |                                                            |                                                              |
| <b>Bestand zum 1. Januar 2009</b>                                      | <b>817</b>                                                                                   | <b>17</b>  | <b>834</b>                                                                                  | <b>563</b>                                                 | <b>654</b>                                                 | <b>708</b>                                                   | <b>495</b>                  | <b>2.420</b>                                                                          | <b>411</b>                                                 | <b>3.665</b>                                                 |
| Zugänge                                                                | –                                                                                            | –          | –                                                                                           | 37                                                         | 12                                                         | 15                                                           | 35                          | 99                                                                                    | 128                                                        | 227                                                          |
| Veränderung des<br>Konsolidierungskreises                              | –                                                                                            | –          | –                                                                                           | –                                                          | –                                                          | –                                                            | – 1                         | – 1                                                                                   | –                                                          | – 1                                                          |
| Abgänge                                                                | –                                                                                            | –          | –                                                                                           | –                                                          | –                                                          | 28                                                           | 3                           | 31                                                                                    | 14                                                         | 45                                                           |
| Umklassifizierungen aus/in (–) zum<br>Verkauf bestimmte Vermögenswerte | –                                                                                            | – 11       | – 11                                                                                        | –                                                          | –                                                          | –                                                            | –                           | –                                                                                     | –                                                          | – 11                                                         |
| Umklassifizierung                                                      | –                                                                                            | –          | –                                                                                           | –                                                          | 14                                                         | –                                                            | 21                          | 35                                                                                    | – 22                                                       | 13                                                           |
| Wechselkursveränderungen                                               | – 9                                                                                          | 3          | – 6                                                                                         | 9                                                          | 63                                                         | – 5                                                          | 4                           | 71                                                                                    | 4                                                          | 69                                                           |
| <b>Bestand zum 31. Dezember 2009</b>                                   | <b>808</b>                                                                                   | <b>9</b>   | <b>817</b>                                                                                  | <b>609</b>                                                 | <b>743</b>                                                 | <b>690</b>                                                   | <b>551</b>                  | <b>2.593</b>                                                                          | <b>507</b>                                                 | <b>3.917</b>                                                 |
| Zugänge                                                                | –                                                                                            | 2          | 2                                                                                           | 29                                                         | 11                                                         | 13                                                           | 68                          | 121                                                                                   | 316                                                        | 439                                                          |
| Veränderung des<br>Konsolidierungskreises                              | –                                                                                            | 413        | 413                                                                                         | 1.055                                                      | –                                                          | 14                                                           | 251                         | 1.320                                                                                 | 163                                                        | 1.896                                                        |
| Abgänge                                                                | –                                                                                            | 10         | 10                                                                                          | –                                                          | –                                                          | 6                                                            | 16                          | 22                                                                                    | 52                                                         | 84                                                           |
| Umklassifizierungen aus/in (–) zum<br>Verkauf bestimmte Vermögenswerte | –                                                                                            | 3          | 3                                                                                           | – 27                                                       | –                                                          | –                                                            | – 30                        | – 57                                                                                  | – 7                                                        | – 61                                                         |
| Umklassifizierung                                                      | –                                                                                            | –          | –                                                                                           | – 10                                                       | –                                                          | –                                                            | 3                           | – 7                                                                                   | – 2                                                        | – 9                                                          |
| Wechselkursveränderungen                                               | 62                                                                                           | 1          | 63                                                                                          | 33                                                         | 26                                                         | 52                                                           | 30                          | 141                                                                                   | 30                                                         | 234                                                          |
| <b>Bestand zum 31. Dezember 2010</b>                                   | <b>870</b>                                                                                   | <b>418</b> | <b>1.288</b>                                                                                | <b>1.689</b>                                               | <b>780</b>                                                 | <b>763</b>                                                   | <b>857</b>                  | <b>4.089</b>                                                                          | <b>955</b>                                                 | <b>6.332</b>                                                 |
| <b>Kumulierte Abschreibungen und<br/>Wertminderungen:</b>              |                                                                                              |            |                                                                                             |                                                            |                                                            |                                                              |                             |                                                                                       |                                                            |                                                              |
| <b>Bestand zum 1. Januar 2009</b>                                      | <b>380</b>                                                                                   | <b>–</b>   | <b>380</b>                                                                                  | <b>221</b>                                                 | <b>40</b>                                                  | <b>100</b>                                                   | <b>251</b>                  | <b>612</b>                                                                            | <b>329</b>                                                 | <b>1.321</b>                                                 |
| Abschreibungen für das<br>Geschäftsjahr                                | –                                                                                            | –          | –                                                                                           | 61                                                         | 29                                                         | 40                                                           | 31                          | 161                                                                                   | 13                                                         | 174 <sup>1</sup>                                             |
| Veränderung des<br>Konsolidierungskreises                              | –                                                                                            | –          | –                                                                                           | –                                                          | –                                                          | –                                                            | – 1                         | – 1                                                                                   | –                                                          | – 1                                                          |
| Abgänge                                                                | –                                                                                            | –          | –                                                                                           | –                                                          | –                                                          | 27                                                           | 2                           | 29                                                                                    | 14                                                         | 43                                                           |
| Umklassifizierungen aus/in (–) zum<br>Verkauf bestimmte Vermögenswerte | –                                                                                            | – 2        | – 2                                                                                         | –                                                          | –                                                          | –                                                            | –                           | –                                                                                     | –                                                          | – 2                                                          |
| Wertminderungen                                                        | –                                                                                            | 1          | 1                                                                                           | –                                                          | –                                                          | 4                                                            | –                           | 4                                                                                     | –                                                          | 5 <sup>2</sup>                                               |
| Wertaufholungen                                                        | 287                                                                                          | –          | 287                                                                                         | 4                                                          | –                                                          | –                                                            | –                           | 4                                                                                     | –                                                          | 291 <sup>3</sup>                                             |
| Umklassifizierung                                                      | –                                                                                            | –          | –                                                                                           | –                                                          | –                                                          | –                                                            | – 1                         | – 1                                                                                   | –                                                          | – 1                                                          |
| Wechselkursveränderungen                                               | – 4                                                                                          | 1          | – 3                                                                                         | 1                                                          | 4                                                          | – 3                                                          | 4                           | 6                                                                                     | 3                                                          | 6                                                            |
| <b>Bestand zum 31. Dezember 2009</b>                                   | <b>89</b>                                                                                    | <b>–</b>   | <b>89</b>                                                                                   | <b>279</b>                                                 | <b>73</b>                                                  | <b>114</b>                                                   | <b>282</b>                  | <b>748</b>                                                                            | <b>331</b>                                                 | <b>1.168</b>                                                 |
| Abschreibungen für das<br>Geschäftsjahr                                | –                                                                                            | –          | –                                                                                           | 80                                                         | 28                                                         | 41                                                           | 77                          | 226                                                                                   | 36                                                         | 262 <sup>4</sup>                                             |
| Veränderung des<br>Konsolidierungskreises                              | –                                                                                            | –          | –                                                                                           | –                                                          | –                                                          | –                                                            | 36                          | 36                                                                                    | –                                                          | 36                                                           |
| Abgänge                                                                | –                                                                                            | –          | –                                                                                           | – 1                                                        | –                                                          | 5                                                            | 13                          | 17                                                                                    | 49                                                         | 66                                                           |
| Umklassifizierungen aus/in (–) zum<br>Verkauf bestimmte Vermögenswerte | –                                                                                            | –          | –                                                                                           | – 2                                                        | –                                                          | –                                                            | – 2                         | – 4                                                                                   | – 1                                                        | – 5                                                          |
| Wertminderungen                                                        | –                                                                                            | –          | –                                                                                           | 29                                                         | –                                                          | –                                                            | 12                          | 41                                                                                    | –                                                          | 41 <sup>5</sup>                                              |
| Wertaufholungen                                                        | –                                                                                            | –          | –                                                                                           | –                                                          | –                                                          | –                                                            | –                           | –                                                                                     | –                                                          | –                                                            |
| Umklassifizierung                                                      | –                                                                                            | –          | –                                                                                           | – 1                                                        | –                                                          | –                                                            | 3                           | 2                                                                                     | 2                                                          | 4                                                            |
| Wechselkursveränderungen                                               | 7                                                                                            | 1          | 8                                                                                           | 15                                                         | 3                                                          | 7                                                            | 11                          | 36                                                                                    | 15                                                         | 59                                                           |
| <b>Bestand zum 31. Dezember 2010</b>                                   | <b>96</b>                                                                                    | <b>1</b>   | <b>97</b>                                                                                   | <b>401</b>                                                 | <b>104</b>                                                 | <b>157</b>                                                   | <b>406</b>                  | <b>1.068</b>                                                                          | <b>334</b>                                                 | <b>1.499</b>                                                 |
| <b>Bilanzwert:</b>                                                     |                                                                                              |            |                                                                                             |                                                            |                                                            |                                                              |                             |                                                                                       |                                                            |                                                              |
| <b>Zum 31. Dezember 2009</b>                                           | <b>719</b>                                                                                   | <b>9</b>   | <b>728</b>                                                                                  | <b>330</b>                                                 | <b>670</b>                                                 | <b>576</b>                                                   | <b>269</b>                  | <b>1.845</b>                                                                          | <b>176</b>                                                 | <b>2.749</b>                                                 |
| <b>Zum 31. Dezember 2010</b>                                           | <b>774</b>                                                                                   | <b>417</b> | <b>1.191</b>                                                                                | <b>1.288</b>                                               | <b>676</b>                                                 | <b>606</b>                                                   | <b>451</b>                  | <b>3.021</b>                                                                          | <b>621</b>                                                 | <b>4.833</b>                                                 |

<sup>1</sup> Davon waren 162 Mio € in Sachaufwand und sonstiger Aufwand und 12 Mio € in Provisionsüberschuss enthalten. Letzterer Betrag bezog sich auf die Abschreibung von Ansprüchen aus der Verwaltung von Hypothekendarlehen.

<sup>2</sup> Davon wurden 5 Mio € als Wertminderung auf immaterielle Vermögenswerte erfasst.

<sup>3</sup> 291 Mio € wurden als Umkehrung einer Wertminderung aus dem Vorjahr erfasst und werden unter Wertminderungen auf immaterielle Vermögenswerte ausgewiesen.

<sup>4</sup> Davon wurden 249 Mio € in Sachaufwand und sonstiger Aufwand und 12 Mio € in Provisionsüberschuss erfasst. Letzterer Betrag bezog sich auf die Abschreibung von Ansprüchen aus der Verwaltung von Hypothekendarlehen.

<sup>5</sup> Davon wurden 29 Mio € als Wertminderung auf immaterielle Vermögenswerte erfasst.

### Abzuschreibende immaterielle Vermögenswerte

Nach den Akquisitionen der Postbank, Sal. Oppenheims (einschließlich der BHF-BANK, ohne BAS) und des Firmenkundengeschäfts der ABN AMRO in den Niederlanden im Jahresverlauf 2010 ergaben die Kaufpreisallokationen für diese Transaktionen abzuschreibende immaterielle Vermögenswerte von rund 1,3 Mrd €, die in der Konzernbilanz aktiviert wurden. Diese Summe enthielt vorwiegend kundenbezogene immaterielle Vermögenswerte von rund 1,1 Mrd € (davon entfielen auf die Postbank 836 Mio €, auf ABN AMRO 168 Mio € und auf Sal. Oppenheim 66 Mio €) und erworbene Software von rund 214 Mio € (davon Postbank 142 Mio € und Sal. Oppenheim 72 Mio €). Ferner resultierte aus diesen Akquisitionen die Aktivierung von 163 Mio € für selbst erstellte Software in der Konzernbilanz. Von diesem Betrag entfielen 156 Mio € auf die Postbank.

Darüber hinaus erfasste der Konzern Zugänge zu abzuschreibenden immateriellen Vermögenswerten von 121 Mio €. Diese beinhalteten hauptsächlich aktivierte Aufwendungen für erworbene Software in Höhe von 68 Mio €, kundenbezogene immaterielle Vermögenswerte in Höhe von 29 Mio € und aktivierte Abschlusskosten für das Versicherungsgeschäft in Höhe von 11 Mio € im Zusammenhang mit den inkrementellen Kosten des Erwerbs von Investmentverträgen. Diese Abschlusskosten stellen an Vertriebs- und Geschäftspartner des Versicherungsgeschäfts des Konzerns zu zahlende Provisionen dar (siehe auch Note 39 „Versicherungs- und Investmentverträge“). Da der Konzern seine Tochtergesellschaft BHF-BANK als zum Verkauf bestimmte Veräußerungsgruppe klassifizierte, wurden die entsprechenden Bilanzwerte für abzuschreibende immaterielle Vermögenswerte in Höhe von 55 Mio € in die Sonstigen Aktiva umgegliedert.

Im Geschäftsjahr 2010 ergaben sich Wertminderungen auf immaterielle Vermögenswerte in Höhe von 41 Mio €. Diese beinhalteten eine Wertminderung auf immaterielle Vermögenswerte in Höhe von 29 Mio € im Zusammenhang mit dem Kundenportfolio eines erworbenen inländischen Wertpapierverwahrungsgeschäfts, die im Unternehmensbereich GTB erfasst wurde, sowie einen Verlust von 12 Mio €, der als Abschreibung auf erworbene Software dem Unternehmensbereich AWM zugeordnet wurde.

Im Geschäftsjahr 2009 beliefen sich die Zugänge und Umklassifizierungen zu abzuschreibenden immateriellen Vermögenswerten auf insgesamt 134 Mio €. Diese beinhalteten hauptsächlich erworbene Software in Höhe von 35 Mio €, aktivierte Abschlusskosten in Höhe von 26 Mio € für das Versicherungsgeschäft im Zusammenhang mit inkrementellen Kosten des Erwerbs von Investmentverträgen, welche an Vertriebs- und Geschäftspartner des Versicherungsgeschäfts des Konzerns zu zahlende Provisionen darstellen, sowie die Erfassung von Kundenbeziehungen aus dem Erwerb des globalen Agency-Securities-Lending-Geschäfts der Dresdner Bank in Höhe von 21 Mio € (siehe auch Note 04 „Akquisitionen und Veräußerungen“).

Im Geschäftsjahr 2009 enthielten die Wertminderungen auf immaterielle Vermögenswerte in der Gewinn- und Verlustrechnung Wertminderungen in Höhe von 4 Mio € auf vertragsbasierte immaterielle Vermögenswerte sowie Wertaufholungen von 4 Mio € auf kundenbezogene immaterielle Vermögenswerte, die zuvor im vierten Quartal 2008 abgeschrieben worden waren. Die Wertminderungen wurden in CB&S, die Wertaufholungen in AWM erfasst.

Im Geschäftsjahr 2008 wurden Wertminderungen auf kundenbezogene immaterielle Vermögenswerte sowie vertragsbasierte immaterielle Vermögenswerte (Ansprüche aus der Verwaltung von Hypothekendarlehen) von 6 Mio € beziehungsweise 1 Mio € verzeichnet und als Wertminderung auf immaterielle Vermögenswerte beziehungsweise im Provisionsüberschuss in der Gewinn- und Verlustrechnung erfasst. Die Wertminderung auf kundenbezogene immaterielle Vermögenswerte wurde in AWM und die Wertminderung auf vertragsbasierte immaterielle Vermögenswerte in CB&S erfasst.



Sonstige immaterielle Vermögenswerte mit begrenzter Nutzungsdauer werden in der Regel linear über ihre Nutzungsdauer abgeschrieben (mit Ausnahme des Werts des erworbenen Versicherungsgeschäfts, wie in Note 01 „Wesentliche Rechnungslegungsgrundsätze“ und in Note 39 „Versicherungs- und Investmentverträge“ erläutert, und der Ansprüche aus der Verwaltung von Hypothekendarlehen).

Ansprüche aus der Verwaltung von Hypothekendarlehen werden proportional über den erwarteten Zeitraum, in dem die Erträge aus der Verwaltung anfallen, abgeschrieben. Die folgende Tabelle zeigt die Nutzungsdauer der sonstigen abzuschreibenden immateriellen Vermögenswerte nach Anlageklassen.

|                                                     | Nutzungsdauer<br>in Jahren |
|-----------------------------------------------------|----------------------------|
| <b>Selbst erstellte immaterielle Vermögenswerte</b> |                            |
| Software                                            | bis zu 10                  |
| <b>Erworbene immaterielle Vermögenswerte:</b>       |                            |
| Kundenbezogene immaterielle Vermögenswerte          | bis zu 25                  |
| Vertragsbasierte immaterielle Vermögenswerte        | bis zu 40                  |
| Wert des erworbenen Versicherungsgeschäfts          | bis zu 30                  |
| Sonstige                                            | bis zu 20                  |

### Nicht abzuschreibende immaterielle Vermögenswerte

Innerhalb dieser Anlageklasse erfasst der Konzern bestimmte vertragsbasierte und marketingbezogene immaterielle Vermögenswerte, bei welchen von einer unbegrenzten Nutzungsdauer ausgegangen werden kann. Im Einzelnen umfasst diese Anlageklasse Vermögensverwaltungsverträge im Publikumsfondsgeschäft und bestimmte Markennamen. Aufgrund der Besonderheiten dieser immateriellen Vermögenswerte sind Marktpreise in der Regel nicht verfügbar. Daher bewertet der Konzern solche Vermögenswerte anhand des Ertragswertverfahrens („Income Approach“) auf Grundlage einer Discounted-Cashflow-Methode nach Steuern.

**Vermögensverwaltungsverträge im Publikumsfondsgeschäft:** Dieser Vermögenswert mit einem Bilanzwert von 774 Mio € bezieht sich auf das Publikumsfondsgeschäft des Konzerns in den USA und ist der zahlungsmittelgenerierenden Einheit Asset Management zugewiesen. Er umfasst Vermögensverwaltungsverträge im Publikumsfondsgeschäft, die DWS Investments das ausschließliche Recht einräumen, eine Vielzahl von Investmentfonds für einen bestimmten Zeitraum zu verwalten. Da eine Verlängerung dieser Verträge einfach ist, die dafür anfallenden Kosten minimal sind und die Verträge bereits häufig verlängert wurden, rechnet der Konzern in absehbarer Zukunft nicht mit einer Begrenzung der Vertragsdauer. Deshalb dürften die Rechte für die Verwaltung der zugrunde liegenden Vermögenswerte für einen unbegrenzten Zeitraum Cashflows generieren. Der immaterielle Vermögenswert wurde im Geschäftsjahr 2002 zum Zeitpunkt der Akquisition von Zurich Scudder Investments, Inc. für den Konzern von unabhängiger Seite zum Fair Value bewertet.

Im Geschäftsjahr 2010 wurde keine Wertminderung erfasst, da der erzielbare Betrag des Vermögenswerts, der dem Fair Value abzüglich Verkaufskosten entspricht, den Bilanzwert überstieg. Der Fair Value wurde anhand der Residualwertmethode ermittelt.

Im Geschäftsjahr 2009 wurde eine Wertaufholung in Höhe von 287 Mio € verzeichnet und in der Gewinn- und Verlust-Rechnung als Wertminderung auf immaterielle Vermögenswerte erfasst. Eine entsprechende Wertminderung war im vierten Quartal 2008 erfasst worden. Die Wertaufholung stand im Zusammenhang mit Vermögensverwaltungsverträgen im Publikumsfondsgeschäft für bestimmte offene Fonds und wurde in AWM ausgewiesen. Sie resultierte aus einem höheren Fair Value infolge des Anstiegs sowohl der Marktwerte der Invested Assets als auch der laufenden und künftigen operativen Ergebnisse und Cashflows aus diesen Vermögensverwaltungsverträgen. Der erzielbare Betrag des Vermögenswerts wurde auf der Grundlage des Fair Value abzüglich Verkaufskosten anhand der Residualwertmethode ermittelt.

Im Geschäftsjahr 2008 wurde eine Wertminderung in Höhe von 304 Mio € verzeichnet und in der Gewinn- und Verlust-Rechnung als Wertminderung auf immaterielle Vermögenswerte ausgewiesen. Die Wertminderung im Zusammenhang mit Vermögensverwaltungsverträgen im Publikumsfondsgeschäft wurde in AWM erfasst und resultierte aus einem niedrigeren Fair Value infolge von Rückgängen sowohl der Marktwerte der Invested Assets als auch der laufenden und künftigen operativen Ergebnisse und Cashflows aus diesen Vermögensverwaltungsverträgen. Die Wertminderung war auf bestimmte offene und geschlossene Fonds zurückzuführen. Die erzielbaren Beträge der Vermögenswerte wurden auf der Grundlage des Fair Value abzüglich Verkaufskosten anhand der Residualwertmethode ermittelt.

**Markenname Postbank:** Als Resultat der vorläufigen Kaufpreisallokation identifizierte und verbuchte der Konzern im Dezember 2010 die Marke „Postbank“ (siehe Note 04 „Akquisitionen und Veräußerungen“) mit einem Wert von 382 Mio €. Der Vermögenswert ist der zahlungsmittelgenerierenden Einheit Private & Business Clients zugewiesen. Da dieser Markenname für einen unbegrenzten Zeitraum Cashflows generieren dürfte, wurde er als nicht abzuschreibender immaterieller Vermögenswert klassifiziert. Die Marke wurde zum Fair Value, basierend auf einer vorläufigen externen Bewertung zum Erwerbszeitpunkt, bewertet, die im entsprechenden Bewertungszeitraum finalisiert wird.

Im Geschäftsjahr 2010 gab es keine Indikation, dass der Fair Value der Marke „Postbank“ von der ursprünglichen Ermittlung des Fair Value abweicht. Die Ermittlung des Fair Value für die Marke fiel mit der regulären Werthaltigkeitsprüfung zeitlich zusammen, da die Konsolidierung der Postbank im Dezember 2010 stattfand. Der Fair Value der Marke wurde anhand der Methode der Lizenzpreisanalogie ermittelt. Da die Kaufpreisallokation innerhalb der regulären Bewertungsperiode fertigzustellen ist, kann sich der Fair Value der Marke Postbank innerhalb der Zwölfmonatsperiode nach dem Erwerbszeitpunkt ändern.

**Markenname Sal. Oppenheim:** Im Rahmen der im Zusammenhang mit dem Erwerb des Sal. Oppenheim Konzerns 2010 durchgeführten Kaufpreisallokation wurde die Marke „Sal. Oppenheim“ mit einem Wert von 27 Mio € identifiziert. Der Vermögenswert ist der zahlungsmittelgenerierenden Einheit Private Wealth Management zugewiesen. Die Nutzungsdauer der Marke wird als unbegrenzt angesehen, weshalb keine planmäßigen Abschreibungen durchgeführt werden. Der immaterielle Vermögenswert wurde zum Fair Value basierend auf einer externen Bewertung zum Erwerbszeitpunkt bewertet.

Im Geschäftsjahr 2010 gab es keine Indikation, dass der Fair Value der Marke von der ursprünglichen Ermittlung des Fair Value in der Kaufpreisallokation abweicht. Die Bewertung der Marke als immaterieller Vermögenswert wurde im Zusammenhang mit der entsprechenden Kaufpreisallokation für den Erwerb der Sal. Oppenheim durchgeführt. Der Fair Value der Marke Sal. Oppenheim wurde anhand der Methode der Lizenzpreisanalogie ermittelt.

## 25 – Zum Verkauf bestimmte Vermögenswerte

### Zum Verkauf bestimmte Vermögenswerte zum 31. Dezember 2010

Zum Bilanzstichtag betrugen die zum Verkauf bestimmten Vermögenswerte insgesamt 13.468 Mio €. Sie wurden unter den Sonstigen Aktiva ausgewiesen. Der Konzern hat die zum Verkauf bestimmten langfristigen Vermögenswerte und Veräußerungsgruppen mit dem niedrigeren Wert aus Buchwert und Fair Value, vermindert um Veräußerungskosten, bewertet. Finanzinstrumente wurden nach den Grundsätzen des IAS 39 bewertet.

#### BHF-BANK

Am 23. Dezember 2010 hat die Deutsche Bank bekanntgegeben, dass sie sich mit der liechtensteinischen LGT Group über wesentliche Eckpunkte des Verkaufs der BHF-BANK AG („BHF-BANK“) geeinigt hat und in Bezug auf den geplanten Verkauf der BHF-BANK exklusive Verhandlungen mit der LGT Group führen wird. Die Verhandlungen zur Finalisierung der vertraglichen Details sollen im Laufe des ersten Quartals 2011 abgeschlossen werden und der Konzern erwartet, dass die BHF-BANK innerhalb eines Jahres verkauft wird. Dem entsprechend klassifizierte der Konzern die BHF-BANK ab dem 31. Dezember 2010 als zum Verkauf bestimmte Veräußerungsgruppe. Die BHF-BANK wurde im Rahmen der Akquisition der Sal. Oppenheim Gruppe erworben und dem Unternehmensbereich Asset and Wealth Management (AWM) zugeordnet. Die Reklassifizierung in die Kategorie Zum Verkauf bestimmt hat zu einer Wertminderung in Höhe von 62 Mio € vor Steuern geführt, die in der Gewinn- und Verlustrechnung des Konzerns für das vierte Quartal 2010 unter den Sonstigen Erträgen berücksichtigt wurde. Die Wertminderung führte zu einer Entlastung in Höhe von 16 Mio € bei den latenten Steuern.

Nachfolgend sind die wesentlichen Komponenten der vom Konzern zum Verkauf bestimmten Vermögenswerte und Verbindlichkeiten der BHF-BANK zum 31. Dezember 2010 dargestellt.

| in Mio €                                                                                                      | 31.12.2010    |
|---------------------------------------------------------------------------------------------------------------|---------------|
| Barreserve und Einlagen bei Kreditinstituten,                                                                 |               |
| Forderungen aus übertragenen Zentralbankeinlagen und Wertpapierpensionsgeschäften                             | 1.109         |
| Zum Fair Value bewertete Handelsaktiva, Derivate und finanzielle Vermögenswerte                               | 3.653         |
| Zur Veräußerung verfügbaren finanziellen Vermögenswerten                                                      | 4.253         |
| Forderungen aus dem Kreditgeschäft                                                                            | 1.763         |
| Sonstige Aktiva                                                                                               | 1.501         |
| <b>Summe der zum Verkauf bestimmten Aktiva</b>                                                                | <b>12.280</b> |
| Einlagen, Verbindlichkeiten aus übertragenen Zentralbankeinlagen und aus Wertpapierpensionsgeschäften (Repos) | 7.534         |
| Zum Fair Value bewertete Handelspassiva (ohne Derivate), Derivate und finanzielle Verpflichtungen             | 2.650         |
| Sonstige Passiva                                                                                              | 608           |
| Langfristige Verbindlichkeiten                                                                                | 981           |
| <b>Summe der zum Verkauf bestimmten Verbindlichkeiten</b>                                                     | <b>11.773</b> |

Im Zusammenhang mit dem zur Veräußerung verfügbaren Portfolio der BHF-BANK wurden unrealisierte Verluste von 27 Mio € direkt im Kumulierten sonstigen Ergebnis (accumulated other comprehensive income) ausgewiesen. Diese unrealisierten Verluste verbleiben bis zum Verkauf der Beteiligung an der BHF-BANK im Eigenkapital. Ab dem Verkaufszeitpunkt werden die Verluste nicht mehr im Eigenkapital, sondern in der Gewinn- und Verlustrechnung ausgewiesen.

### Andere zum Verkauf bestimmte langfristige Vermögenswerte und Veräußerungsgruppen

Mit dem Erwerb einer Mehrheitsbeteiligung an der Postbank am 3. Dezember 2010 erlangte die Deutsche Bank Kontrolle über die indische Postbank-Tochtergesellschaft Deutsche Postbank Home Finance Ltd. („DPHFL“), die dem Unternehmensbereich Private & Business Clients (PBC) zugeordnet ist. Wie die Postbank bereits am 1. Dezember 2010 bekanntgab, beabsichtigt sie, mit einem von der Dewan Housing Finance Ltd. geführten Käuferkonsortium eine Vereinbarung über den Verkauf der DPHFL zu schließen. Die Transaktion wird voraussichtlich im ersten Quartal 2011 abgeschlossen sein und unterliegt der Genehmigung durch die indische Aufsichtsbehörde, National Housing Bank.

Mit dem Erwerb des Sal. Oppenheim Konzerns erwarb der Konzern mehrere Beteiligungen, die dem Unternehmensbereich AWM zugeordnet sind und deren Verkauf innerhalb eines Jahres erwartet wird. Entsprechend hat der Konzern mehrere dem Unternehmensbereich AWM zugeordnete Private Equity Investments, die zuvor im Rahmen der Akquisition der Sal. Oppenheim Gruppe erworben wurden, zum 31. Dezember 2010 zum Verkauf bestimmt.

Zum 31. Dezember 2010 hat der Konzern eine dem Unternehmensbereich AWM zugeordnete Tochtergesellschaft zum Verkauf bestimmt. Die Transaktion wurde bereits durch die lokalen Behörden genehmigt und der Abschluss der Transaktion wird im ersten Quartal 2011 erwartet. Die Reklassifizierung in die Kategorie „Zum Verkauf bestimmt“ löste eine Umwidmung des entsprechenden Goodwill von 7 Mio € in die Kategorie „Zum Verkauf bestimmte Vermögenswerte“ zum 31. Dezember 2010 aus.

Zum 31. Dezember 2010 hat der Konzern ebenfalls eine Beteiligung an einem assoziierten Unternehmen, die dem Unternehmensbereich Corporate Banking & Securities (CB&S) zugeordnet war, zum Verkauf bestimmt. Die ursprüngliche Reklassifizierung der Beteiligung am 30. September 2010 führte zu einer Wertminderung von 72 Mio € im dritten Quartal 2010, die unter dem Ergebnis aus nach der Equitymethode bilanzierten Beteiligungen ausgewiesen wurde. Im vierten Quartal 2010 haben die anderen Minderheitsaktionäre dem Verkauf ihrer Anteile zugestimmt. Die Deutsche Bank könnte gemäß den Bedingungen des Gesellschaftervertrags gezwungen sein, ihren Anteil zum gleichen Preis zu verkaufen. Dementsprechend wurde die Beteiligung zum Fair Value, vermindert um Veräußerungskosten, abgeschrieben, was zu zusätzlichen Belastungen von 40 Mio € führte, die im vierten Quartal 2010 unter den Sonstigen Erträgen ausgewiesen wurden. Der Verkauf des Unternehmens, einschließlich des Anteils der Deutschen Bank, wurde am 11. Januar 2011 abgeschlossen.

Zum 31. Dezember 2010 hat die Deutsche Bank ebenfalls eine Tochtergesellschaft als zum Verkauf bestimmte Veräußerungsgruppe klassifiziert und die entsprechenden Bilanzpositionen unter den Sonstigen Aktiva und Sonstigen Passiva ausgewiesen. Die Veräußerungsgruppe ist dem Unternehmensbereich CB&S zugeordnet und beinhaltet hauptsächlich eine als Finanzinvestition gehaltene deutsche Immobilie. Der Verkauf der Tochtergesellschaft wird innerhalb eines Jahres erwartet.

Nachfolgende Tabelle fasst die wesentlichen Komponenten der sonstigen vom Konzern zum Verkauf bestimmten langfristigen Vermögenswerte und Veräußerungsgruppen zum 31. Dezember 2010 sowie zum 31. Dezember 2009 zusammen.

| in Mio €                                                                               | 31.12.2010   | 31.12.2009 |
|----------------------------------------------------------------------------------------|--------------|------------|
| Barreserve, Forderungen an Kreditinstitute, verzinsliche Einlagen bei Kreditinstituten | 15           | 16         |
| Zur Veräußerung verfügbare finanzielle Vermögenswerte                                  | 235          | –          |
| Anteile an assoziierten Unternehmen                                                    | –            | 18         |
| Forderungen aus dem Kreditgeschäft                                                     | 867          | –          |
| Sachanlagen                                                                            | 45           | 21         |
| Sonstige Aktiva                                                                        | 25           | 51         |
| <b>Summe der zum Verkauf bestimmten Aktiva</b>                                         | <b>1.188</b> | <b>106</b> |
| Langfristige Verbindlichkeiten                                                         | 815          | 21         |
| Sonstige Passiva                                                                       | 10           | 2          |
| <b>Summe der zum Verkauf bestimmten Verbindlichkeiten</b>                              | <b>825</b>   | <b>23</b>  |

Unrealisierte Gewinne von 16 Mio € im Zusammenhang mit den sonstigen zum Verkauf bestimmten, langfristigen Vermögenswerten und Veräußerungsgruppen wurden direkt im Kumulierten sonstigen Ergebnis (accumulated other comprehensive income) ausgewiesen. Diese unrealisierten Gewinne verbleiben bis zum Verkauf der Beteiligungen im Eigenkapital. Ab dem Verkaufszeitpunkt werden die Gewinne nicht mehr im Eigenkapital sondern in der Gewinn- und Verlustrechnung ausgewiesen.

### Veräußerungen in 2010

Im August 2010 verkaufte der Konzern seine Tochtergesellschaft BHF Asset Servicing GmbH, die AWM zugeordnet und zum Verkauf bestimmt war. Der Kauf dieser Tochtergesellschaft wurde als separate Transaktion neben dem Erwerb der Sal. Oppenheim Gruppe im ersten Quartal 2010 behandelt. Im Geschäftsjahr 2010 wurde eine Wertminderung von 4 Mio € vorgenommen und unter den Sonstigen Erträgen ausgewiesen.

Im vierten Quartal 2010 verkaufte der Konzern mehrere zum Verkauf bestimmte Vermögenswerte, die dem Unternehmensbereich AWM zugeordnet waren. Diese Beteiligungen wurden zuvor im Rahmen der Akquisition der Sal. Oppenheim Gruppe erworben.

Eine weitere Wertminderung von 2 Mio €, die im zweiten Quartal 2010 in CB&S ausgewiesen wurde, bezog sich auf eine im Juni 2010 verkaufte Veräußerungsgruppe.

### Umwidmungen in 2010

Im dritten Quartal 2010 hat der Konzern mehrere Veräußerungsgruppen, assoziierte Unternehmen sowie einen Kredit in CB&S nicht mehr als zum Verkauf bestimmt bilanziert. Aufgrund der aktuellen Marktgegebenheiten ist der Zeitpunkt des Verkaufs dieser Beteiligungen nicht vorhersehbar. Diese Umwidmungen führten zu keiner zusätzlichen Wertminderung. Im zweiten Quartal 2010 wurde eine Wertminderung von 3 Mio € vorgenommen und unter den Sonstigen Erträgen in CB&S ausgewiesen.

### Zum Verkauf bestimmte Vermögenswerte zum 31. Dezember 2009

Zum 31. Dezember 2009 hatte der Konzern mehrere Veräußerungsgruppen (bestehend aus 19 Tochtergesellschaften), drei Beteiligungen an assoziierten Unternehmen, einen Kredit sowie Immobilienvermögen im Unternehmensbereich Corporate Banking & Securities (CB&S) zum Verkauf bestimmt. Der Konzern hat die betreffenden Aktiva und Passiva unter Sonstige Aktiva beziehungsweise Sonstige Passiva ausgewiesen und mit dem niedrigeren Wert aus Buchwert oder Fair Value, vermindert um Veräußerungskosten, bewertet. Dies führte zu einer Wertminderung von 10 Mio € aus der Bewertung der Veräußerungsgruppen, die unter den Sonstigen Erträgen in CB&S ausgewiesen wurde. Die Veräußerungsgruppen, die Beteiligungen an den drei assoziierten Unternehmen sowie der Kredit waren Bestandteil einer Reihe von Projekten zur Entwicklung erneuerbarer Energien. Das Immobilienvermögen umfasste Gewerbe- und Wohnimmobilien aus Rettungserwerben in Nordamerika. Im Jahr 2010 wurden diese Vermögenswerte nicht mehr als zum Verkauf bestimmt bilanziert, da aufgrund der aktuellen Marktgegebenheiten der Zeitpunkt des Verkaufs nicht mehr vorhersehbar war.

### Zum Verkauf bestimmte Vermögenswerte zum 31. Dezember 2008

Zum 31. Dezember 2008 hatte der Konzern Immobilienvermögen zum Verkauf bestimmt. Der Konzern hat die betreffenden Aktiva unter Sonstige Aktiva ausgewiesen und mit dem niedrigeren Wert aus Buchwert oder Fair Value, vermindert um Veräußerungskosten, bewertet. Dies führte zu keiner Wertminderung in 2008. Das Immobilienvermögen umfasste Gewerbe- und Wohnimmobilien aus Rettungserwerben in Deutschland und Nordamerika in CB&S. Die Immobilien in Deutschland sowie der größte Teil der Immobilien in Nordamerika wurden 2009 verkauft.

Zum 31. Dezember 2007 hatte der Konzern drei Veräußerungsgruppen (zwei Tochtergesellschaften und einen konsolidierten Fonds) sowie mehrere langfristige Vermögenswerte zum Verkauf bestimmt. Der Konzern hat die betreffenden Aktiva und Passiva unter Sonstige Aktiva und Sonstige Passiva ausgewiesen und mit dem niedrigeren Wert aus Buchwert oder Fair Value, vermindert um Veräußerungskosten, bewertet. Im Geschäftsjahr 2007 führte dies zu einer Wertminderung von 2 Mio €, die im Vorsteuerergebnis des Konzernbereichs Corporate Investments (CI) ausgewiesen wurde.

Zwei der drei Veräußerungsgruppen waren AWM zugeordnet. Dabei handelte es sich zum einen um eine italienische Lebensversicherungsgesellschaft, für die im Dezember 2007 ein Verkaufsvertrag unterzeichnet und die im ersten Halbjahr 2008 verkauft wurde. Die zweite Veräußerungsgruppe bezog sich auf einen Immobilienfonds in Nordamerika, der zum 31. Dezember 2008 nicht mehr als zum Verkauf bestimmt klassifiziert war. Die Aufwendungen, die während der Klassifizierung als zum Verkauf bestimmte Vermögenswerte nicht anzusetzen waren, wurden zum Termin der Reklassifizierung in der Gewinn- und Verlustrechnung ausgewiesen. Dies führte zu einem Anstieg des Sonstigen Aufwands um 13 Mio € in AWM in 2008. Der Betrag beinhaltete einen Aufwand von 3 Mio €, der auf das Geschäftsjahr 2007 entfiel. Aufgrund der aktuellen Marktgegebenheiten ist der Zeitpunkt des Verkaufs nicht vorhersehbar. Die dritte Veräußerungsgruppe – eine Tochtergesellschaft in CI – war bereits zum 31. Dezember 2006 zum Verkauf bestimmt worden. Da 2007 Umstände eintraten, die vorher für unwahrscheinlich erachtet worden waren, wurde die Gesellschaft im Geschäftsjahr 2007 nicht verkauft. 2008 hat der Konzern seinen Veräußerungsplan geändert, da der beabsichtigte Verkauf aufgrund einer geänderten Interessenlage des potenziellen Käufers nicht erfolgte. Aufgrund des schwachen Marktumfelds bestehen derzeit keine Verkaufsaktivitäten bezüglich dieser Tochtergesellschaft. Die Reklassifizierung hatte keinen Einfluss auf die Erträge und Aufwendungen des Konzerns.

Die zum 31. Dezember 2007 zum Verkauf bestimmten langfristigen Vermögenswerte umfassten zwei in Nordamerika gehaltene Alternative Investments in AWM, mehrere Bürogebäude in CI und PBC sowie Grundbesitz aus Rettungserwerben in Nordamerika in CB&S. Während die Bürogebäude in CI und PBC sowie der größte Teil des Grundbesitzes in CB&S 2008 verkauft wurden, wurde die Anteilseignerstruktur der beiden Alternativen Investments Maher Terminals LLC und Maher Terminals of Canada Corp. geändert. Dies führte zur Erstkonsolidierung der Investments durch den Konzern zum 30. Juni 2008. Aufgrund der aktuellen Marktgegebenheiten ist der Zeitpunkt des Verkaufs dieser Beteiligungen nicht vorhersehbar. Aus diesem Grund wurden diese Aktiva und Passiva zum Ende des dritten Quartals 2008 nicht mehr als zum Verkauf bestimmt klassifiziert. Die Erträge und Aufwendungen, die während der Klassifizierung als zum Verkauf bestimmte Vermögenswerte nicht anzusetzen waren, wurden zum Termin der Reklassifizierung in der Gewinn- und Verlustrechnung ausgewiesen. Daraus resultierte ein Rückgang der Sonstigen Erträge um 62 Mio € und ein Anstieg der Sonstigen Aufwendungen um 38 Mio € in AWM in 2008. Diese Beträge beinhalten eine Belastung der Erträge von 20 Mio € sowie Aufwendungen von 21 Mio €, die das Geschäftsjahr 2007 betrafen.

## 26 – Sonstige Aktiva und Passiva

Die folgenden Tabellen zeigen die Zusammensetzung der sonstigen Aktiva und Passiva.

| in Mio €                                                                    | 31.12.2010     | 31.12.2009     |
|-----------------------------------------------------------------------------|----------------|----------------|
| <b>Sonstige Aktiva:</b>                                                     |                |                |
| Forderungen aus Handelsgeschäften und Wertpapierabwicklung                  |                |                |
| Forderungen aus Bar- und Ausgleichszahlungen                                | 46.132         | 43.890         |
| Forderungen aus Prime-Brokerage-Geschäften                                  | 11.324         | 6.837          |
| Forderungen aus nicht termingerecht abgewickelten Wertpapierkassageschäften | 4.834          | 9.229          |
| Forderungen aus Wertpapierkassageschäften                                   | 41.133         | 33.496         |
| Forderungen aus Handelsgeschäften und Wertpapierabwicklung insgesamt        | 103.423        | 93.452         |
| Forderungen aus Zinsabgrenzungen                                            | 3.941          | 3.426          |
| Zum Verkauf bestimmte Vermögenswerte                                        | 13.468         | 106            |
| Sonstige                                                                    | 28.397         | 24.554         |
| <b>Sonstige Aktiva insgesamt</b>                                            | <b>149.229</b> | <b>121.538</b> |

Zum 31. Dezember 2009 beinhaltete die Position „Sonstige“ in der oben aufgeführten Tabelle die als Finanzinvestition gehaltene Immobilie The Cosmopolitan of Las Vegas mit einem Buchwert in Höhe von 946 Mio €. (bezüglich der Bewertungsmethode für als Finanzinvestition gehaltene Immobilien wird auf die Note 01 „Wesentliche Rechnungslegungsgrundsätze“ verwiesen). Zum Zeitpunkt der Aufnahme der Geschäftstätigkeit im Dezember 2010 wurde dieses Investment in Sachanlagen umklassifiziert.

Für weitere Einzelheiten bezüglich der zum Verkauf bestimmten Vermögenswerte wird auf Note 25 „Zum Verkauf bestimmte Vermögenswerte“ verwiesen.



| in Mio €                                                                          | 31.12.2010     | 31.12.2009     |
|-----------------------------------------------------------------------------------|----------------|----------------|
| <b>Sonstige Passiva:</b>                                                          |                |                |
| Verbindlichkeiten aus Handelsgeschäften und Wertpapierabwicklung                  |                |                |
| Verbindlichkeiten aus Bar- und Ausgleichszahlungen                                | 42.596         | 40.448         |
| Verbindlichkeiten aus Prime-Brokerage-Geschäften                                  | 27.772         | 31.427         |
| Verbindlichkeiten aus nicht termingerecht abgewickelten Wertpapierkassageschäften | 3.137          | 5.708          |
| Verbindlichkeiten aus Wertpapierkassageschäften                                   | 42.641         | 33.214         |
| Verbindlichkeiten aus Handelsgeschäften und Wertpapierabwicklung insgesamt        | 116.146        | 110.797        |
| Verbindlichkeiten aus Zinsabgrenzungen                                            | 3.956          | 3.713          |
| Zum Verkauf bestimmte Verbindlichkeiten                                           | 12.598         | 23             |
| Sonstige                                                                          | 49.127         | 39.748         |
| <b>Sonstige Passiva insgesamt</b>                                                 | <b>181.827</b> | <b>154.281</b> |

Für weitere Einzelheiten bezüglich der zum Verkauf bestimmten Verbindlichkeiten verweisen wir auf Note 25 „Zum Verkauf bestimmte Vermögenswerte“.

## 27 – Einlagen

Die Einlagen setzen sich wie folgt zusammen.

| in Mio €                        | 31.12.2010     | 31.12.2009     |
|---------------------------------|----------------|----------------|
| Unverzinsliche Sichteinlagen    | 89.068         | 51.731         |
| Verzinsliche Einlagen           |                |                |
| Sichteinlagen                   | 120.154        | 117.955        |
| Termineinlagen                  | 183.861        | 108.730        |
| Spareinlagen                    | 140.901        | 65.804         |
| Verzinsliche Einlagen insgesamt | 444.916        | 292.489        |
| <b>Summe der Einlagen</b>       | <b>533.984</b> | <b>344.220</b> |

Der Anstieg der Einlagen ist im Wesentlichen auf die Erstkonsolidierung der Postbank zurückzuführen.

## 28 – Rückstellungen

Die nachstehende Tabelle zeigt die Entwicklung der einzelnen Rückstellungsarten.

| in Mio €                                                               | Operationelle Risiken/Rechtsstreitigkeiten | Sonstige           | Insgesamt <sup>1</sup> |
|------------------------------------------------------------------------|--------------------------------------------|--------------------|------------------------|
| <b>Bestand zum 1. Januar 2009</b>                                      | <b>762</b>                                 | <b>446</b>         | <b>1.208</b>           |
| Veränderung des Konsolidierungskreises                                 | 2                                          | 4                  | 6                      |
| Zuführungen zu Rückstellungen                                          | 338                                        | 152                | 490                    |
| Verwendungen von Rückstellungen                                        | – 164                                      | – 155              | – 319                  |
| Auflösungen von Rückstellungen                                         | – 183                                      | – 115              | – 298                  |
| Effekte aus Wechselkursveränderungen/Änderung des Diskontierungssatzes | 3                                          | 9                  | 12                     |
| Sonstige                                                               | –                                          | –                  | –                      |
| <b>Bestand zum 31. Dezember 2009</b>                                   | <b>758</b>                                 | <b>341</b>         | <b>1.099</b>           |
| Veränderung des Konsolidierungskreises                                 | 44                                         | 1.148 <sup>2</sup> | 1.192                  |
| Zuführungen zu Rückstellungen                                          | 318                                        | 225                | 543                    |
| Verwendungen von Rückstellungen                                        | – 511                                      | – 141              | – 652                  |
| Auflösungen von Rückstellungen                                         | – 130                                      | – 102              | – 232                  |
| Effekte aus Wechselkursveränderungen/Änderung des Diskontierungssatzes | 44                                         | 15                 | 59                     |
| Sonstige <sup>3</sup>                                                  | – 7                                        | – 17               | – 24                   |
| <b>Bestand zum 31. Dezember 2010</b>                                   | <b>516</b>                                 | <b>1.469</b>       | <b>1.985</b>           |

<sup>1</sup> Für die übrigen in der Bilanz ausgewiesenen Rückstellungen wird auf Note 19 „Risikovorsorge im Kreditgeschäft“ verwiesen, in der die Rückstellungen für außerbilanzielle Verpflichtungen im Kreditgeschäft offengelegt werden.

<sup>2</sup> Der Anstieg ist hauptsächlich auf die Konsolidierung der Deutsche Postbank AG zurückzuführen. Darin sind Rückstellungen im Bauspargeschäft in Höhe von € 842 Mio € enthalten.

<sup>3</sup> Enthält hauptsächlich Umklassifizierungen in zum Verkauf bestimmte Vermögenswerte.

### Rückstellungen für operationelle Risiken und Rechtsrisiken

Der Konzern definiert das operationelle Risiko als den potenziellen Eintritt von Verlusten im Zusammenhang mit Mitarbeitern, Technologie, Projekten, Vermögenswerten sowie den Beziehungen zu Kunden, anderen Dritten oder Aufsichtsbehörden, die unter anderem durch unvorhersehbare Ereignisse, Geschäftsunterbrechungen, unangemessen definierte oder fehlgeschlagene Prozesse beziehungsweise einen Ausfall von Kontrollmechanismen und Systemen ausgelöst werden.

Das rechtliche und regulatorische Umfeld, in dem sich die Gruppe bewegt, birgt erhebliche Prozessrisiken. Als Folge davon ist der Konzern in Deutschland und in einer Reihe von anderen Ländern, darunter den Vereinigten Staaten, in Gerichts-, Schiedsgerichts- und aufsichtsbehördliche Verfahren verwickelt, wie sie im normalen Geschäftsverlauf vorkommen. Der Konzern bildet für potenzielle Verluste aus ungewissen Verbindlichkeiten, einschließlich ungewisser Verbindlichkeiten bezüglich dieser Verfahren, Rückstellungen, wenn der Bestand einer Zahlungsverpflichtung wahrscheinlich ist und die Höhe der Zahlung zuverlässig abgeschätzt werden kann. Zu bestimmten Rechtsstreitigkeiten werden gemäß IAS 37, „Provisions, Contingent Liabilities and Contingent Assets“, geforderte Angaben nicht gemacht, sofern der Konzern zu dem Schluss kommt, dass diese Angaben das Ergebnis des jeweiligen Rechtsstreits ernsthaft beeinträchtigen können.

Ungewisse Verbindlichkeiten in Bezug auf rechtliche Verfahren unterliegen zahlreichen Unwägbarkeiten; das Ergebnis der einzelnen Verfahren kann nicht mit Gewissheit vorhergesagt werden. Die Beurteilung der Wahrscheinlichkeit und die Bezifferung von ungewissen Verbindlichkeiten erfordern in großem Umfang Einschätzungen, die endgültige Verbindlichkeit des Konzerns kann hiervon erheblich abweichen. Die bilanzierten Gesamtverbindlichkeiten des Konzerns bezüglich Gerichts-, Schiedsgerichts- und aufsichtsbehördlicher Verfahren werden auf Basis der Einzelfälle festgelegt und sind eine Einschätzung der wahrscheinlichen Verluste unter Berücksichtigung des Fortgangs der einzelnen Verfahren, der Erfahrungen des Konzerns und der Erfahrungen

Dritter in vergleichbaren Fällen, der Gutachten von Rechtsanwälten und anderer Faktoren. Obwohl die endgültige Erledigung dieser Fälle wesentliche Auswirkungen auf das Konzernergebnis für einen bestimmten Berichtszeitraum haben kann, ist der Konzern der Überzeugung, dass seine Finanzlage davon nicht wesentlich beeinflusst werden wird. Hinsichtlich jedes der nachstehend dargestellten Verfahren, von denen die Mehrzahl mehrere Streitgegenstände umfasst, sind nach Einschätzung des Konzerns die voraussichtlich jeweils möglichen Verluste in Bezug auf jede Streitigkeit, welche die Rückstellungen übersteigen, entweder nicht wesentlich oder nicht schätzbar.

Im Folgenden werden die wesentlichen Rechtsstreitigkeiten des Konzerns gemäß den Anforderungen des IAS 37 beschrieben.

**Kirch.** Im Mai 2002 erhob Dr. Leo Kirch aus behauptetem eigenem und abgetretenem Recht zweier ehemals zur Kirch-Gruppe gehörender Unternehmen, der PrintBeteiligungs GmbH und der Konzernholdinggesellschaft TaurusHolding GmbH & Co. KG, Klage gegen Dr. Rolf-E. Breuer und die Deutsche Bank AG und machte geltend, eine Äußerung von Dr. Breuer (seinerzeit Vorstandssprecher der Deutschen Bank AG), die dieser in einem Interview mit Bloomberg TV am 4. Februar 2002 zur Kirch-Gruppe gemacht hatte, sei rechtswidrig und habe Vermögensschäden verursacht.

Am 24. Januar 2006 hat der Bundesgerichtshof („BGH“) dieser Schadensersatzfeststellungsklage, die nicht den Nachweis eines durch die Interviewäußerung verursachten Vermögensschadens voraussetzt, nur aus abgetretenem Recht der PrintBeteiligungs GmbH stattgegeben. Die PrintBeteiligungs GmbH ist die einzige Gesellschaft der Kirch-Gruppe, die seinerzeit Kreditnehmerin der Deutschen Bank AG war. Ansprüche von Herrn Dr. Kirch persönlich und der TaurusHolding GmbH & Co. KG wurden abgewiesen. Im Mai 2007 erhob Dr. Kirch Zahlungsklage aus abgetretenem Recht der PrintBeteiligungs GmbH gegen die Deutsche Bank AG und Dr. Breuer. Zwischenzeitlich hat Herr Dr. Kirch die Grundlage seiner Schadensberechnung geändert und fordert nun circa 1,3 Mrd € zuzüglich Zinsen. Am 22. Februar 2011 hat das Landgericht München I die Klage in erster Instanz vollständig abgewiesen. Gegen die Entscheidung kann Dr. Kirch Berufung einlegen. In diesem Verfahren hätte Dr. Kirch im Einzelnen nachweisen müssen, dass und in welcher Höhe der PrintBeteiligungs GmbH durch die Äußerung ein finanzieller Schaden entstanden ist.

Am 31. Dezember 2005 erhob die KGL Pool GmbH Klage gegen die Deutsche Bank AG und Dr. Breuer. Die KGL Pool GmbH hat sich angebliche Ansprüche diverser Tochtergesellschaften der Kirch-Gruppe abtreten lassen. Die Klage zielt auf die Feststellung einer gesamtschuldnerischen Schadensersatzpflicht der Deutschen Bank AG und von Dr. Breuer wegen jenes Interviews und des Verhaltens der Deutschen Bank AG in Bezug auf verschiedene Unternehmen der Kirch-Gruppe. Im Dezember 2007 erweiterte die KGL Pool GmbH ihre Klage um einen Antrag auf Zahlung von Schadensersatz in Höhe von etwa 2,0 Mrd € nebst Zinsen als Entschädigung für behauptete Schäden, die zwei Unternehmen der ehemaligen Kirch-Gruppe angeblich aufgrund der Äußerung von Dr. Breuer erlitten hätten. Am 31. März 2009 hat das Landgericht München I die Klage in erster Instanz vollständig abgewiesen. Der Kläger hat gegen das Urteil Berufung eingelegt. Nach Meinung der Deutschen Bank besteht für solche Ansprüche mangels einer entsprechenden Vertragsbeziehung zu irgendeiner dieser Gesellschaften keine Grundlage. Im Übrigen sind weder die Kausalität für Grund und Höhe des geltend gemachten Schadens noch die wirksame Abtretung der behaupteten Ansprüche an die KGL Pool GmbH ausreichend dargelegt worden.

**Asset-backed Securities.** Die Deutsche Bank AG und einige ihrer Tochtergesellschaften (zusammen die „Deutsche Bank“) haben Vorladungen und Informationsanfragen von Aufsichtsbehörden und Regierungsbehörden erhalten, die sich auf die Aktivitäten der Deutschen Bank bei der Gewährung, dem Erwerb, der Verbriefung, dem Verkauf von und dem Handel mit Asset-backed Securities (verzinslichen strukturierten Wertpapieren, die mit Forderungsrechten besichert sind), Asset-backed Commercial Paper und Kreditderivaten, einschließlich, unter anderem, Residential Mortgage-backed Securities (verzinslicher strukturierter Wertpapiere, die mit Grundpfandrechten auf Wohnimmobilien besichert sind), Collateralized Debt Obligations und Credit Default Swaps, beziehen. Die Deutsche Bank kooperiert in Bezug auf diese Vorladungen und Informationsanfragen in vollem Umfang mit den Behörden. Ferner ist die Deutsche Bank hinsichtlich des Geschäfts mit Residential Mortgage-backed Securities Beklagte in diversen zivilrechtlichen Verfahren (darunter als Sammelklagen bezeichnete Verfahren) sowohl nach Bundesrecht als auch dem Recht einzelner Bundesstaaten sowie allgemeiner Rechtsgrundsätze (Common Law) in Einzelstaaten. Zu diesen Verfahren gehören (1) ein als Sammelklage bezeichnetes Verfahren bei dem California Superior Court in Los Angeles County, das sich auf die Rolle der Deutsche Bank-Tochtergesellschaft Deutsche Bank Securities Inc. (die „DBSI“) und anderer Finanzinstitute als Platzeure bestimmter von der Countrywide Financial Corporation („Countrywide“) oder einem mit ihr verbundenen Unternehmen begebener Wertpapiere bezieht und zu dem es eine vom Gericht vorläufig genehmigte Vergleichsvereinbarung gibt, sowie ein als Sammelklage bezeichnetes Verfahren bei dem United States District Court for the Central District of California, das sich auf die Rolle der Deutsche Bank-Tochtergesellschaft Deutsche Bank Securities Inc. (die „DBSI“) und anderer Finanzinstitute als Platzeure bestimmter Mortgage Pass-through Certificates von der Countrywide bezieht; (2) ein als Sammelklage bezeichnetes Verfahren bei dem United States District Court for the Southern District of New York, das sich auf die Rolle der DBSI und anderer Finanzinstitute als Platzeure bestimmter von verbundenen Unternehmen der Novastar Mortgage Funding Corporation begebener Mortgage Pass-through Certificates bezieht; (3) ein als Sammelklage bezeichnetes Verfahren bei dem United States District Court for the Southern District of New York, das sich auf die Rolle der DBSI und anderer Finanzinstitute als Platzeure bestimmter von verbundenen Unternehmen der IndyMac MBS, Inc. begebener Mortgage Pass-through Certificates bezieht; (4) ein als Sammelklage bezeichnetes Verfahren bei dem United States District Court for the Northern District of California, das sich auf die Rolle der DBSI und anderer Finanzinstitute als Platzeure bestimmter von verbundenen Unternehmen der Wells Fargo Asset Securities Corporation begebener Mortgage Pass-through Certificates bezieht; und (5) ein als Sammelklage bezeichnetes Verfahren bei dem United States District Court for the Southern District of New York, das sich auf die Rolle etlicher Finanzinstitute, darunter auch der DBSI, als Platzeure verschiedener Mortgage Pass-through Certificates bezieht, welche von verbundenen Unternehmen der Residential Accredit Loans, Inc. begeben wurden; und (6) eine von der Federal Home Loan Bank of San Francisco („FHLB SF“) beim United States District Court for the Northern District of California anhängige Klage bezüglich der Rolle etlicher Finanzinstitute, darunter auch Tochtergesellschaften der Deutschen Bank, als Emittenten und Platzeure verschiedener von der FHLB SF erworbener Mortgage Pass-through Certificates. Ferner sind einige Konzerngesellschaften der Deutschen Bank, einschließlich der DBSI, Beklagte in einem als Sammelklage bezeichneten Verfahren bei dem United States District Court for the Eastern District of New York, das sich auf ihre Rollen als Emittenten und Platzeure für bestimmte Mortgage Pass-through Securities bezieht. Am 5. April 2010 hat das Gericht dem Abweisungsantrag der Deutschen Bank teilweise stattgegeben und ihn teilweise abgelehnt. Ansonsten befinden sich diese zivilrechtlichen Verfahren in einem frühen Stadium.

Von 2005 bis 2008, hat die Deutsche Bank im Rahmen ihres auf Wohnimmobilien abgesicherten Hypothekarkreditgeschäfts in den USA Kredite in Höhe von circa 85 Mrd US-\$ in Form von Verbriefungen mit einem Dritten und circa 71 Mrd US-\$ durch Veräußerung von Krediten einschließlich aller Nebenrechte unter anderem an von der U.S.-Regierung geförderte Gesellschaften wie die Federal Home Loan Mortgage Corporation und die Federal National Mortgage Association verkauft. Gegenüber der Deutschen Bank werden Forderungen geltend gemacht, Kredite zurückzukaufen oder die Käufer, andere Investoren oder Kreditversicherer von Verlusten freizustellen, die angeblich durch eine wesentliche Verletzung von Zusicherungen und Gewährleistungen verursacht wurden. Be-

gründete Rückkaufansprüche, die in Übereinstimmung mit den vertraglichen Rechten geltend gemacht werden, werden von der Deutschen Bank erfüllt. Wenn die Deutsche Bank der Ansicht ist, dass es keine Anspruchsgrundlage für Rückkaufansprüche gibt, weist sie diese zurück und betrachtet sie für Zwecke der Weiterverfolgung nicht länger als offen. Zum 31. Dezember 2010 bestehen gegenüber der Deutschen Bank circa 588 Mio US-\$ noch offene Rückkaufforderungen (berechnet auf der Grundlage des ursprünglichen Gesamtkreditbetrags). Für diese Forderungen hat die Deutsche Bank Rückstellungen in nicht erheblicher und ihrer Ansicht nach angemessener Höhe gebildet. Zum 31. Dezember 2010 hat die Deutsche Bank für Kredite mit einem ursprünglichen Kreditbetrag, in Höhe von 1,8 Mrd US-\$, berechnet auf den ursprünglichen Kreditbetrag Rückkäufe getätigt oder Ansprüche auf andere Weise beigelegt. Im Zusammenhang mit diesen Rückkäufen und beigelegten Ansprüchen ist die Deutsche Bank aus möglichen Ansprüchen, die aus den oben geschilderten Kreditverkäufen resultieren würden, in Höhe von circa 21,9 Mrd US-\$ entlastet.

**Auction Rate Securities.** Die Deutsche Bank AG und DBSI sind an einem als Sammelklage bezeichneten Verfahren beteiligt, das bei dem United States District Court for the Southern District of New York eingereicht wurde und in dem Ansprüche nach den US-Bundeswertpapiergesetzen für alle Personen und Stellen geltend gemacht werden, die von der Deutschen Bank AG und DBSI zwischen dem 17. März 2003 und dem 13. Februar 2008 angebotene Auction Rate Preferred Securities und Auction Rate Securities (Wertpapiere mit variablem, in Auktionen festgesetztem Zinssatz – zusammen „ARS“) gekauft haben und noch halten. Am 9. Dezember 2010 hat das Gericht das als Sammelklage bezeichnete Verfahren rechtskräftig abgewiesen. Aufgrund einer Vereinbarung können die Kläger bis zum 18. August 2011 Rechtsmittel gegen die Klageabweisung einlegen. Die Deutsche Bank AG, DBSI und/oder Deutsche Bank Alex. Brown, ein Geschäftsbereich der DBSI, sind auch Beklagte in 17 Einzelklagen, in denen im Zusammenhang mit dem Verkauf von ARS verschiedene Ansprüche nach den US-Bundeswertpapiergesetzen und allgemeinen Rechtsgrundsätzen in Einzelstaaten behauptet werden. Neun der Einzelklagen sind noch rechtshängig, während sich acht der Einzelklagen durch rechtskräftige Abweisung erledigt haben. Die Deutsche Bank AG war auch gemeinsam mit zehn weiteren Finanzinstituten Beklagte in zwei als Sammelklagen bezeichneten und beim United States District Court for the Southern District of New York eingereichten Klagen, welche die Verletzung kartellrechtlicher Bestimmungen behaupten. In den als Sammelklage bezeichneten Klagen wurde behauptet, die Beklagten hätten konspiriert, um den ARS-Markt zu stützen und schließlich im Februar 2008 zu beschränken. Diese zwei als Sammelklagen bezeichneten Klagen wurden jedoch am 26. Januar 2010 vom Gericht abgewiesen. Die Kläger haben hiergegen Rechtsmittel eingelegt.

Die Deutsche Bank AG und DBSI waren auch Parteien in Verfahren vor einzel- und bundesstaatlichen Aufsichts- und Strafverfolgungsbehörden, bei denen es um das Angebot und den Vertrieb von ARS ging. Im August 2008 schlossen die Deutsche Bank AG und ihre Tochtergesellschaften Grundsatzvereinbarungen mit dem New York Attorney General's Office („NYAG“) und der North American Securities Administration Association ab, die ein Konsortium anderer Einzelstaaten und US-Besitzungen vertraten, in denen sich die Deutsche Bank AG und ihre Tochtergesellschaften dazu verpflichteten, von ihren Privatkunden, kleineren und mittleren institutionellen sowie Kunden, die wohltätige Organisationen sind, ARS zu kaufen, die diese Kunden vor dem 13. Februar 2008 erworben hatten, sowie zügig Lösungen für die Liquidität ihrer größeren institutionellen Kunden, welche ARS von der Deutschen Bank AG und ihren Tochtergesellschaften erworben hatten, zu erarbeiten, eine Strafe in einer Gesamtsumme von 15 Mio US-\$ an die einzelstaatlichen Aufsichtsbehörden zu zahlen und weitere einzelstaatliche Anordnungen zur zukünftigen Einhaltung von anwendbaren einzelstaatlichen Rechtsvorschriften zu befolgen. Am 3. Juni 2009 hat die DBSI die Absprachen aus der Grundsatzvereinbarung vom August 2008 gegenüber dem NYAG und dem New Jersey Bureau of Securities erfüllt und einen Vergleich mit der Securities and Exchange Commission („SEC“) abgeschlossen, der die Absprachen aus der Grundsatzvereinbarung mit den Einzelstaaten berücksichtigt. Seitdem hat die DBSI von einigen einzelstaatlichen und innerstaatlichen Behörden Zahlungsaufforderungen erhalten, in denen diese Behörden ihren Anteil an der Strafe in einer Gesamt-

summe von 15 Mio US-\$ geltend machen. Die DBSI erwartet, dass sie Zahlungsaufforderungen in den nächsten Monaten abwickeln kann und die geltend gemachten Anteile an der Gesamtstrafe an die jeweiligen Einzelstaaten zahlt.

**Trust Preferred Securities.** Die Deutsche Bank AG und einige ihrer Tochtergesellschaften und leitenden Angestellten sind in einem zusammengefassten und als Sammelklage bezeichneten Verfahren beteiligt, das beim United States District Court for the Southern District of New York eingereicht wurde und in dem Ansprüche nach den US-Bundeswertpapiergesetzen im Auftrag von Personen geltend gemacht werden, die bestimmte zwischen Oktober 2006 und Mai 2008 von der Deutschen Bank und ihren Tochtergesellschaften begebene Trust Preferred Securities erworben haben. Die Ansprüche werden nach Section 11, 12(a)(2) und 15 des U.S. Securities Act von 1933 erhoben. Am 25. Januar 2010 ist eine erweiterte zusammengefasste Klage eingereicht worden. Ein Klageabweisungsantrag ist derzeit anhängig.

### Sonstige Rückstellungen

Sonstige Rückstellungen umfassen in erster Linie Rückstellungen im Bauspargeschäft der Deutsche Postbank-Gruppe, die aufgrund von Zahlungen für Zinsboni, Rückerstattungen von Abschlussgebühren für Kunden und Zinssatzwechsel gebildet worden sind. Sonstige Rückstellungen umfassen zusätzlich verschiedene personal-unabhängige Rückstellungen, die nicht in den sonstigen speziellen Rückstellungen erfasst werden.

## 29 – Sonstige kurzfristige Geldaufnahmen

Die nachstehende Tabelle enthält eine Zusammenfassung der sonstigen kurzfristigen Geldaufnahmen des Konzerns.

| in Mio €                                               | 31.12.2010    | 31.12.2009    |
|--------------------------------------------------------|---------------|---------------|
| <b>Sonstige kurzfristige Geldaufnahmen:</b>            |               |               |
| Commercial Paper                                       | 31.322        | 20.906        |
| Sonstige                                               | 33.668        | 21.991        |
| <b>Summe der sonstigen kurzfristigen Geldaufnahmen</b> | <b>64.990</b> | <b>42.897</b> |

## 30 –

### Langfristige Verbindlichkeiten und hybride Kapitalinstrumente (Trust Preferred Securities)

#### Langfristige Verbindlichkeiten

Die folgende Tabelle fasst die langfristigen Verbindlichkeiten des Konzerns, gegliedert nach vertraglichen Laufzeiten, zusammen.

| in Mio €                                                         | Fällig in<br>2011 | Fällig in<br>2012 | Fällig in<br>2013 | Fällig in<br>2014 | Fällig in<br>2015 | Fällig nach<br>2015 | Insgesamt<br>31.12.2010 | Insgesamt<br>31.12.2009 |
|------------------------------------------------------------------|-------------------|-------------------|-------------------|-------------------|-------------------|---------------------|-------------------------|-------------------------|
| <b>Vorrangige Verbindlichkeiten:<sup>1</sup></b>                 |                   |                   |                   |                   |                   |                     |                         |                         |
| Anleihen und                                                     |                   |                   |                   |                   |                   |                     |                         |                         |
| Schuldverschreibungen:                                           |                   |                   |                   |                   |                   |                     |                         |                         |
| mit fester Verzinsung                                            | 15.096            | 13.570            | 10.480            | 10.636            | 16.130            | 39.799              | 105.711                 | 76.536                  |
| mit variabler Verzinsung                                         | 10.446            | 11.432            | 6.127             | 3.205             | 3.374             | 17.012              | 51.596                  | 47.646                  |
| <b>Nachrangige Verbindlichkeiten:<sup>1</sup></b>                |                   |                   |                   |                   |                   |                     |                         |                         |
| Anleihen und                                                     |                   |                   |                   |                   |                   |                     |                         |                         |
| Schuldverschreibungen:                                           |                   |                   |                   |                   |                   |                     |                         |                         |
| mit fester Verzinsung                                            | 446               | 439               | 1.637             | 689               | 845               | 3.157               | 7.213                   | 3.548                   |
| mit variabler Verzinsung                                         | 2.882             | 509               | 102               | 277               | 547               | 823                 | 5.140                   | 4.052                   |
| <b>Summe der langfristigen<br/>Verbindlichkeiten<sup>1</sup></b> | <b>28.870</b>     | <b>25.950</b>     | <b>18.346</b>     | <b>14.807</b>     | <b>20.896</b>     | <b>60.791</b>       | <b>169.660</b>          | <b>131.782</b>          |

<sup>1</sup> Die Konsolidierung der Postbank erhöhte die langfristigen Verbindlichkeiten im Jahr 2010 um 38 Mrd €.

In den Geschäftsjahren 2010 und 2009 war der Konzern mit keiner seiner Tilgungs- oder Zinszahlungen in Verzug und kam allen Verpflichtungen nach.

#### Hybride Kapitalinstrumente (Trust Preferred Securities)

Die folgende Tabelle fasst die fest und variabel verzinslichen hybriden Kapitalinstrumente (Trust Preferred Securities) des Konzerns zusammen. Diese stellen Finanzinstrumente ohne festgelegtes Fälligkeitsdatum dar und können im Ermessen des Konzerns zu bestimmten Zeitpunkten in der Zukunft getilgt werden.

| in Mio €                                                                  | 31.12.2010    | 31.12.2009    |
|---------------------------------------------------------------------------|---------------|---------------|
| mit fester Verzinsung                                                     | 11.218        | 9.971         |
| mit variabler Verzinsung                                                  | 1.032         | 606           |
| <b>Summe der hybriden Kapitalinstrumente (Trust Preferred Securities)</b> | <b>12.250</b> | <b>10.577</b> |



## Zusätzliche Anhangangaben

### 31 – Stammaktien

#### Stammaktien

Das Gezeichnete Kapital der Deutschen Bank besteht aus nennwertlosen Namensaktien. Nach deutschem Recht entspricht jede Aktie einem gleich hohen Anteil am Gezeichneten Kapital. Demnach beträgt der rechnerische Nominalwert jeder Aktie 2,56 €, der sich mittels Division des Gezeichneten Kapitals durch die Anzahl der Aktien ergibt.

| Anzahl der Aktien                                                       | Ausgegeben und voll eingezahlt | Im Eigenbestand    | Ausstehende        |
|-------------------------------------------------------------------------|--------------------------------|--------------------|--------------------|
| <b>Stammaktien, 1. Januar 2009</b>                                      | <b>570.859.015</b>             | <b>–8.192.060</b>  | <b>562.666.955</b> |
| Ausgabe von Aktien im Zusammenhang mit aktienbasierten Vergütungsplänen | –                              | –                  | –                  |
| Kapitalerhöhung                                                         | 50.000.000                     | –                  | 50.000.000         |
| Erwerb Eigener Aktien                                                   | –                              | –476.284.991       | –476.284.991       |
| Verkauf oder Zuteilung Eigener Aktien                                   | –                              | 483.793.356        | 483.793.356        |
| <b>Stammaktien, 31. Dezember 2009</b>                                   | <b>620.859.015</b>             | <b>–683.695</b>    | <b>620.175.320</b> |
| Ausgabe von Aktien im Zusammenhang mit aktienbasierten Vergütungsplänen | –                              | –                  | –                  |
| Kapitalerhöhung                                                         | 308.640.625                    | –                  | 308.640.625        |
| Erwerb Eigener Aktien                                                   | –                              | –325.966.381       | –325.966.381       |
| Verkauf oder Zuteilung Eigener Aktien                                   | –                              | 316.212.796        | 316.212.796        |
| <b>Stammaktien, 31. Dezember 2010</b>                                   | <b>929.499.640</b>             | <b>–10.437.280</b> | <b>919.062.360</b> |

Alle ausgegebenen Stammaktien sind voll eingezahlt.

Für den Eigenbestand erworbene Aktien beinhalten sowohl Aktien, die vom Konzern über einen bestimmten Zeitraum gehalten wurden, als auch Aktien, die mit der Absicht erworben wurden, sie kurzfristig wieder zu veräußern. Darüber hinaus hat der Konzern Aktien für die Verwendung im Rahmen der aktienbasierten Vergütung erworben sowie zur Umsetzung eines Bezugsverhältnisses von 2:1 in der Kapitalerhöhung des Geschäftsjahres 2010. Alle derartigen Transaktionen wurden im Eigenkapital ausgewiesen, Gewinne und Verluste aus diesen Aktivitäten wurden nicht ergebniswirksam. Zum 31. Dezember 2010 betrug der Bestand Eigener Aktien 10.437.280 Stück. Diese werden für zukünftige aktienbasierte Vergütung genutzt.

Am 6. Oktober 2010 schloss die Deutsche Bank AG eine Kapitalerhöhung aus genehmigtem Kapital gegen Geldeinlage ab. Insgesamt wurden 308.640.625 neue nennwertlose Namensaktien begeben, die zu Nettoerlösen von 10,1 Mrd € führten (nach Aufwendungen von etwa 0,1 Mrd € nach Steuern). Die neuen Aktien wurden über Bezugsrechte mit voller Dividendenberechtigung für das Jahr 2010 begeben. Die Bezugsrechte wurden zu 99,31 % ausgeübt, und somit wurden 306.511.140 neue Aktien zu einem Bezugspreis von 33,00 € pro Aktie begeben. Die verbleibenden 2.129.485 neuen Aktien wurden zu einem gewichteten Durchschnittspreis von 41,34 € im Xetra-Handel platziert.

#### Genehmigtes und bedingtes Kapital

Das Gezeichnete Kapital der Deutschen Bank wurde durch die zuvor erwähnte Kapitalerhöhung gegen Geldeinlage erhöht. Die Hauptversammlung hat den Vorstand ermächtigt, das Grundkapital mit Zustimmung des Aufsichtsrats durch die Begebung neuer Aktien um bis zu 790.120.000 € zu erhöhen. Zum 31. Dezember 2010 wurde das bereits genehmigte, aber nicht begebene Kapital vollständig aufgebraucht.

Die Deutsche Bank verfügte zum 31. Dezember 2010 ebenfalls über bedingtes Kapital von 636.400.000 €. Bedingtes Kapital wird durch eine Vielzahl von Instrumenten bereitgestellt, die potenziell in Aktien wandelbar sind.

Der Vorstand wurde von der Hauptversammlung am 27. Mai 2010 ermächtigt, einmalig oder mehrmals auf den Inhaber oder Namen lautende Genussscheine, denen Inhaberoptionsscheine beigelegt oder die mit einem Wandlungsrecht für den Inhaber verbunden werden können, sowie Options- und/oder Wandelschuldverschreibungen bis einschließlich 30. April 2015 zu begeben. Zu diesem Zweck wurde das Grundkapital bedingt um bis zu 230.400.00 € erhöht.

### Dividendenzahlungen

Die folgende Tabelle zeigt die vorgeschlagenen oder beschlossenen Dividendenzahlungen für die Geschäftsjahre 2010, 2009 und 2008.

|                                      | 2010<br>(vorgeschlagen) | 2009 | 2008 |
|--------------------------------------|-------------------------|------|------|
| Bardividende <sup>1</sup> (in Mio €) | 697                     | 466  | 309  |
| Bardividende je Aktie (in €)         | 0,75                    | 0,75 | 0,50 |

<sup>1</sup> Die Bardividende für 2010 basiert auf der Anzahl der ausgegebenen Aktien zum 31. Dezember 2010.

Seit dem Bilanzstichtag wurden keine Dividendenzahlungen beschlossen.

## 32 – Aktienbasierte Vergütungen

### Für Neubegabungen in 2010 genutzte aktienbasierte Vergütungspläne

Im Jahr 2010 hat der Konzern aktienbasierte Vergütungen unter dem DB Equity Plan gewährt. Alle Pläne gewähren das Recht, unter bestimmten Bedingungen Deutsche Bank-Stammaktien nach Ablauf einer festgelegten Zeit zu erhalten. Die Teilnehmer an einem aktienbasierten Vergütungsplan besitzen keinen Anspruch auf die Ausschüttung von Dividenden, solange die Stammaktien noch nicht an sie ausgegeben wurden. Die nachstehende Übersicht fasst die wesentlichen Merkmale des DB Equity Plans zusammen.

Die Aktienrechte, die nach den Planregeln des DB Equity Plan begeben werden, können ganz oder teilweise verfallen, wenn der Teilnehmer sein Arbeitsverhältnis vor Ablauf der relevanten Anwartschaftsfrist auf eigenen Wunsch beendet. In bestimmten Fällen wie der betriebsbedingten Beendigung des Arbeitsverhältnisses oder beim Eintritt in den Ruhestand bleibt die Anwartschaft in der Regel bestehen. Die Anwartschaftsdauer wird abgekürzt, wenn das Arbeitsverhältnis aufgrund des Verlusts der Erwerbsfähigkeit oder durch Tod beendet wird.

Auf der Grundlage neuer regulatorischer Vorgaben beinhalten die Aktienrechte von ausgewählten Mitarbeitern des Senior Managements zusätzliche Verfallsklauseln im Fall des Verstoßes gegen interne Vorgaben oder Gesetze.

In Ländern, in denen rechtliche oder sonstige Einschränkungen die Begebung von Aktien verhindern, wurde von 2007 an die Vergütung unter dem DB Equity Plan in einer Planvariante gewährt, die einen Barausgleich vorsieht.

Im Jahr 2010 führte der Konzern ein neues Mitarbeiterbeteiligungsprogramm namens Global Share Purchase Plan (GSPP) ein. Per 31. Dezember 2010 war der neue Plan in 27 Ländern von Konzerneinheiten eingeführt.

| Plan                              |                                 | Anwartschaftsfrist                                                                                                                                   | Spezielle Regelungen für vorgezogenen Ruhestand | Anspruchsberechtigung                                                                  |
|-----------------------------------|---------------------------------|------------------------------------------------------------------------------------------------------------------------------------------------------|-------------------------------------------------|----------------------------------------------------------------------------------------|
| DB Equity Plan                    | Jährliche Vergütungskomponente  | Gestaffelte Zuteilung in neun gleichen Tranchen im Zeitraum zwischen 12 und 45 Monaten nach Gewährung<br>Zuteilung als Einmaltranche nach 45 Monaten | Ja                                              | Jährlich gewährte Bleibepremie für ausgewählte Mitarbeiter                             |
|                                   | Bleibepremie/Akquisitionsprämie | Individuelle Festlegung <sup>1</sup>                                                                                                                 |                                                 | Ausgewählte Mitarbeiter mit dem Ziel, Schlüsselkompetenzen zu gewinnen oder zu halten. |
| Global Share Purchase Plan (GSPP) | Mitarbeiterbeteiligungsprogramm | 100 % : 12 Monate                                                                                                                                    | Nein                                            | Mitarbeitern in bestimmten Ländern werden jeweils bis zu 10 Aktienrechte gewährt.      |

<sup>1</sup> Gewichteter Durchschnitt der maßgeblichen Dienstzeit: 28 Monate.

Der Konzern verfügt über weitere lokale aktienbasierte Vergütungspläne, die weder einzeln noch insgesamt wesentlich für den Konzernabschluss sind.

## Für Behebungen vor 2010 genutzte aktienbasierte Vergütungspläne

### Aktienprogramme

Vor dem Jahr 2010 hat der Konzern aktienbasierte Vergütungen im Rahmen einer Reihe anderer Pläne gewährt. Die nachstehende Übersicht fasst die wesentlichen Merkmale dieser Altprogramme zusammen.

| Plan                                 |                                       | Anwartschaftsfrist                                       | Spezielle Regelungen für vorgezogenen Ruhestand | Anspruchsberechtigung                                                                         | Letztmalig gewährt in                     |
|--------------------------------------|---------------------------------------|----------------------------------------------------------|-------------------------------------------------|-----------------------------------------------------------------------------------------------|-------------------------------------------|
| Restricted Equity Units (REU) Plan   | Jährliche Vergütungskomponente        | 80 % : 48 Monate <sup>1</sup><br>20 % : 54 Monate        | Ja                                              | Jährlich gewährte Bleibepremie für ausgewählte Mitarbeiter                                    | 2006                                      |
| DB Share Scheme                      | Jährliche Vergütungskomponente        | 1/3 : 6 Monate<br>1/3 : 18 Monate<br>1/3 : 30 Monate     | Nein                                            | Jährlich gewährte Bleibepremie für ausgewählte Mitarbeiter                                    | 2006                                      |
|                                      | Außerordentliche Vergütungskomponente | Individuelle Festlegung                                  | Nein                                            | Ausgewählte Mitarbeiter mit dem Ziel, Schlüsselkompetenzen zu gewinnen oder zu halten.        | 2006                                      |
| DB Key Employee Equity (KEEP) Plan   | –                                     | Individuelle Festlegung                                  | Nein                                            | Ausgewählte Führungskräfte                                                                    | 2005                                      |
| Global Share Plan                    | –                                     | 100 % : 12 Monate                                        | Nein                                            | Alle Mitarbeiter, Gewährung von bis zu 10 Rechten je Mitarbeiter                              | 2007                                      |
| Global Partnership Plan Equity Units | Jährliche Vergütungskomponente        | 80 % : 24 Monate <sup>2</sup><br>20 % : 42 Monate        | Nein                                            | Vorstand                                                                                      | 2008                                      |
| Global Share Plan – Deutschland      | –                                     | 100 % : 12 Monate                                        | Nein                                            | Mitarbeiter in Deutschland, Gewährung von bis zu 10 Aktienrechten je Mitarbeiter <sup>3</sup> | 2008                                      |
| DB Equity Plan                       | Jährliche Vergütungskomponente        | 50 % : 24 Monate<br>25 % : 36 Monate<br>25 % : 48 Monate | Nein                                            | Jährlich gewährte Bleibepremie für ausgewählte Mitarbeiter                                    | 2009<br>(mit diesen Anwartschaftsfristen) |
|                                      | Bleibepremie/Akquisitionsprämie       | Individuelle Festlegung                                  | Nein                                            | Ausgewählte Mitarbeiter mit dem Ziel, Schlüsselkompetenzen zu gewinnen oder zu halten.        |                                           |

<sup>1</sup> Auslieferung erfolgt nach weiteren 6 Monaten.

<sup>2</sup> Auslieferung erfolgt nach weiteren 18 Monaten.

<sup>3</sup> Teilnehmer müssen zum Zeitpunkt der Gewährung mindestens ein Jahr für den Konzern gearbeitet haben und in einem ungekündigten Arbeitsverhältnis stehen.

Sämtliche Pläne gewähren das Recht, unter bestimmten Bedingungen Deutsche Bank-Stammaktien nach Ablauf einer festgelegten Zeit zu erhalten. Die Teilnehmer an einem aktienbasierten Vergütungsplan besitzen keinen Anspruch auf die Ausschüttung von Dividenden, solange die Stammaktien noch nicht an sie ausgegeben wurden.

Die Aktienrechte können ganz oder teilweise verfallen, wenn der Teilnehmer sein Arbeitsverhältnis vor Ablauf der relevanten Anwartschaftsfrist auf eigenen Wunsch beendet. Die Planregeln des REU Plans oder des DB Equity Plans für einen vorgezogenen Ruhestand erlauben jedoch auch im Fall eines Ausscheidens auf eigenen Wunsch den Fortbestand der Anwartschaft, wenn bestimmte Bedingungen bezüglich Alter und Dienstzeit erfüllt sind. In bestimmten Fällen wie der betriebsbedingten Beendigung des Arbeitsverhältnisses oder beim Eintritt in den Ruhestand bleibt die Anwartschaft in der Regel bestehen. Die Anwartschaftsdauer wird abgekürzt, wenn das Arbeitsverhältnis aufgrund des Verlusts der Erwerbsfähigkeit oder durch Tod beendet wird.

In Ländern, in denen rechtliche oder sonstige Einschränkungen die Begebung von Aktien verhindern, wurde von 2007 an die Vergütung unter dem DB Equity Plan und dem Global Share Plan in einer Planvariante gewährt, die einen Barausgleich vorsieht.

### Entwicklung ausstehender Aktienrechte

Die nachfolgende Übersicht fasst die Entwicklung der ausstehenden Aktienrechte für die Pläne zusammen, die das Recht gewähren, unter bestimmten Bedingungen Deutsche Bank-Stammaktien nach Ablauf einer bestimmten Zeit zu erhalten. Die Übersicht enthält auch die Rechte, die unter den Planvarianten des DB Equity Plan und DB Global Share Plan gewährt wurden, die einen Barausgleich vorsehen. Ferner beinhaltet die Übersicht die Anzahl der zusätzlichen Aktienrechte, die Mitarbeitern zum Ausgleich des wirtschaftlichen Nachteils aus der im September vorgenommenen Kapitalerhöhung gewährt wurden. Der wirtschaftliche Effekt wurde auf der Grundlage einer anerkannten Berechnungsmethode kalkuliert und führte zu einer Anpassung in Höhe von 9,59% der zum 21. September 2010 ausstehenden Awards. Die neuen Awards unterliegen den Planbedingungen und Unverfallbarkeitsfristen der ursprünglich vergebenen Awards.

| in Tsd Einheiten<br>(ausgenommen Fair Value) | Global Partnership<br>Plan Equity Units | DB Share Scheme/<br>DB KEEP/REU/<br>DB Equity Plan | Global Share Plan/<br>Global Share<br>Purchase Plan | Insgesamt     | Gewichteter<br>Durchschnitt des<br>Fair Value je Recht<br>am Tag der<br>Gewährung |
|----------------------------------------------|-----------------------------------------|----------------------------------------------------|-----------------------------------------------------|---------------|-----------------------------------------------------------------------------------|
| <b>Bestand zum 31. Dezember 2008</b>         | <b>335</b>                              | <b>48.267</b>                                      | <b>258</b>                                          | <b>48.860</b> | <b>€ 70,22</b>                                                                    |
| Gewährt                                      | –                                       | 23.809                                             | –                                                   | 23.809        | € 22,02                                                                           |
| Ausgegeben                                   | –93                                     | –18.903                                            | –253                                                | –19.249       | € 68,76                                                                           |
| Verfallen                                    | –                                       | –3.059                                             | –5                                                  | –3.064        | € 43,51                                                                           |
| <b>Bestand zum 31. Dezember 2009</b>         | <b>242</b>                              | <b>50.114</b>                                      | <b>–</b>                                            | <b>50.356</b> | <b>€ 49,61</b>                                                                    |
| Gewährt                                      | –                                       | 43.942                                             | 151                                                 | 44.093        | € 43,46                                                                           |
| Ausgegeben                                   | –92                                     | –20.668                                            | –                                                   | –20.760       | € 69,75                                                                           |
| Verfallen                                    | –                                       | –4.774                                             | –                                                   | –4.774        | € 39,19                                                                           |
| <b>Bestand zum 31. Dezember 2010</b>         | <b>150</b>                              | <b>68.614</b>                                      | <b>151</b>                                          | <b>68.915</b> | <b>€ 40,31</b>                                                                    |

Im Februar 2011 wurden ungefähr 12,1 Millionen Aktien an Begünstigte aus früheren Gewährungen im Rahmen des DB Equity Plan und des DB Share Scheme ausgegeben.

Zusätzlich zu den in der obigen Tabelle enthaltenen Aktienrechten gewährte der Konzern im Februar 2011 im Rahmen des DB Equity Plan unter für 2011 modifizierten Planbedingungen ungefähr 25,0 Millionen Aktienrechte mit einem durchschnittlichen Fair Value von 42,02 € je Aktienrecht. Davon wurden ungefähr 0,7 Millionen Aktienrechte unter der Planvariante des DB Equity Plan gewährt, die einen Barausgleich vorsieht.

### Performanceoptionen

Die Deutsche Bank hat Performanceoptionen unter dem Global Partnership Plan und dem Global Share Plan (vor 2004) zu Vergütungszwecken eingesetzt. Nach Februar 2004 wurden unter diesen Plänen keine neuen Optionen ausgegeben.

Die nachstehende Übersicht fasst die wesentlichen Merkmale der unter dem Global Share Plan (vor 2004) und dem Global Partnership Plan gewährten Performanceoptionen zusammen.

| Plan                         | Gewährt im Jahr | Ausübungspreis | Zusätzliche Partnership Appreciation Rights | Ausüßbar bis | Anspruchsberechtigung         |
|------------------------------|-----------------|----------------|---------------------------------------------|--------------|-------------------------------|
| Global Share Plan (vor 2004) | 2002            | € 55,39        | Nein                                        | Nov 2008     | Alle Mitarbeiter <sup>1</sup> |
| Performanceoptionen          | 2003            | € 75,24        | Nein                                        | Dez 2009     | Alle Mitarbeiter <sup>1</sup> |
| Global Partnership Plan      | 2002            | € 89,96        | Ja                                          | Feb 2008     | Ausgewählte Führungskräfte    |
| Performanceoptionen          | 2003            | € 47,53        | Ja                                          | Feb 2009     | Ausgewählte Führungskräfte    |
|                              | 2004            | € 76,61        | Ja                                          | Feb 2010     | Vorstand                      |

<sup>1</sup> Teilnehmer müssen zum Zeitpunkt der Gewährung mindestens ein Jahr für den Konzern gearbeitet haben und in einem ungekündigten Arbeitsverhältnis stehen.

Jede der im Rahmen der beiden Pläne gewährten Optionen berechtigt zum Erwerb einer Deutsche Bank-Stammaktie. Der Ausübungspreis beträgt 120 % des Referenzpreises. Als Referenzpreis wurde der jeweils höhere Wert aus dem Börsenkurs der Stammaktie am Tag der Gewährung oder dem Durchschnitt der Börsenkurse der Stammaktie an der Frankfurter Wertpapierbörse in einem Zeitraum von zehn Handelstagen bis einschließlich des Tages der Gewährung bestimmt.

Im Rahmen des Global Partnership Plan wurden von 2002 bis 2004 Performanceoptionen an ausgewählte Führungskräfte gewährt. Für jede Option wurde den Teilnehmern ein Partnership Appreciation Right (PAR) gewährt. PARs verkörpern das Recht auf eine Barzahlung in Höhe von 20 % des Referenzpreises. Die Feststellung des Referenzpreises erfolgte dabei auf gleiche Weise wie zuvor für die Performanceoptionen dargestellt. PARs wurden zum gleichen Zeitpunkt und im selben Umfang wie die Performanceoptionen ausübbar. Sie werden automatisch zur gleichen Zeit und in gleichem Umfang wie die Performanceoptionen ausgeübt.

Unter dem Global Share Plan (vor 2004), einem breit angelegten Mitarbeiterplan, wurden in den Jahren 2002 bis 2003 Performanceoptionen begeben. Der Plan gewährte die Möglichkeit, in den Jahren 2002 und 2003 jeweils bis zu 20 Aktien zu erwerben. Für jede erworbene Aktie erhielten die Teilnehmer in den Jahren 2002 und 2003 jeweils fünf Performanceoptionen. Performanceoptionen unter dem Global Share Plan (vor 2004) verfallen bei Beendigung des Arbeitsverhältnisses. Teilnehmer, die in den Ruhestand gehen oder dauerhaft erwerbsunfähig werden, behalten ihren Anspruch auf Ausübung der Performanceoptionen.

### Entwicklung ausstehender Performanceoptionen

Die nachfolgende Übersicht zeigt die Entwicklung der ausstehenden Performanceoptionen, die unter dem Global Partnership Plan und dem Global Share Plan (vor 2004) gewährt wurden.

| in Tsd Einheiten<br>(ausgenommen Ausübungspreise) | Global Partnership Plan<br>Performance-<br>optionen | Gewichteter durch-<br>schnittlicher<br>Ausübungspreis <sup>1</sup> | DB Global Share<br>Plan (vor 2004)<br>Performance-<br>optionen | Gewichteter<br>durchschnittlicher<br>Ausübungspreis |
|---------------------------------------------------|-----------------------------------------------------|--------------------------------------------------------------------|----------------------------------------------------------------|-----------------------------------------------------|
| <b>Bestand zum 31. Dezember 2008</b>              | <b>980</b>                                          | <b>€ 47,53</b>                                                     | <b>510</b>                                                     | <b>€ 75,24</b>                                      |
| Ausgeübt                                          | –                                                   | –                                                                  | –                                                              | –                                                   |
| Verfallen                                         | –                                                   | –                                                                  | –9                                                             | € 75,24                                             |
| Abgelaufen                                        | –980                                                | € 47,53                                                            | –501                                                           | € 75,24                                             |
| <b>Bestand zum 31. Dezember 2009</b>              | <b>–</b>                                            | <b>–</b>                                                           | <b>–</b>                                                       | <b>–</b>                                            |
| Ausgeübt                                          | –                                                   | –                                                                  | –                                                              | –                                                   |
| Verfallen                                         | –                                                   | –                                                                  | –                                                              | –                                                   |
| Abgelaufen                                        | –                                                   | –                                                                  | –                                                              | –                                                   |
| <b>Bestand zum 31. Dezember 2010</b>              | <b>–</b>                                            | <b>–</b>                                                           | <b>–</b>                                                       | <b>–</b>                                            |

<sup>1</sup> Der gewichtete durchschnittliche Ausübungspreis enthält keine Effekte aus den im Rahmen des DB Global Partnership Plan begebenen Partnership Appreciation Rights.

Der gewichtete durchschnittliche Aktienkurs am Ausübungstag betrug 64,31 € im Geschäftsjahr 2008. Zum 31. Dezember 2009 stehen keine Performanceoptionen mehr aus, da solche, welche im Jahr 2004 begeben wurden, bereits ausgeübt wurden, und alle übrigen, welche nicht bereits ausgeübt wurden, im Jahr 2009 verfallen sind.

### Personalaufwand

Personalaufwand für Vergütungen, die durch Eigenkapitalinstrumente beglichen werden, wird auf Basis des Fair Value der aktienbasierten Vergütung am Tag der Gewährung ermittelt.

Der Personalaufwand für aktienbasierte Vergütungen, die in bar abgegolten werden, wird zu jedem Bilanzstichtag zum Fair Value neu bewertet und die entsprechende Verpflichtung wird bis zur Zahlung als sonstige Verbindlichkeit ausgewiesen. Für Rechte, die unter den Planvarianten des DB Equity Plan und DB Global Share Plan gewährt wurden und die einen Barausgleich vorsehen, basiert die Neubewertung auf dem aktuellen Börsenkurs der Deutsche Bank-Stammaktie.

Weitere Informationen zu den zugrunde liegenden Rechnungslegungsprinzipien sind in Note 01 „Wesentliche Rechnungslegungsgrundsätze“ enthalten.

Der Konzern berücksichtigte den Personalaufwand für seine wesentlichen aktienbasierten Vergütungspläne wie folgt.

| in Mio €                                                            | 2010         | 2009       | 2008         |
|---------------------------------------------------------------------|--------------|------------|--------------|
| DB Global Partnership Plan                                          | 1            | 4          | 10           |
| DB Global Share Plan/DB Global Share Purchase Plan                  | 3            | 6          | 39           |
| DB Share Scheme/Restricted Equity Units Plan/DB KEEP/DB Equity Plan | 1.173        | 637        | 1.249        |
| <b>Insgesamt</b>                                                    | <b>1.177</b> | <b>647</b> | <b>1.298</b> |

Der Personalaufwand für aktienbasierte Vergütung im Geschäftsjahr 2010 enthält ungefähr 24 Mio € (2009: 22 Mio €, 2008: 4 Mio €) aus den Planvarianten des DB Equity Plan und DB Global Share Plan, die einen Barausgleich vorsehen.

Durch aktienbasierte Vergütungstransaktionen, die in bar abgegolten werden, entstehen Verbindlichkeiten. Zum 31. Dezember 2010 beliefen sich diese Verbindlichkeiten auf ungefähr 33 Mio € (31. Dezember 2009: 26 Mio €, 31. Dezember 2008: 10 Mio €).

Zum 31. Dezember 2010 belief sich der noch nicht abgegrenzte Personalaufwand für ausstehende aktienbasierte Vergütungen auf ungefähr 1,0 Mrd € (31. Dezember 2009: 0,4 Mrd €, 31. Dezember 2008: 0,6 Mrd €).

## 33 – Leistungen an Arbeitnehmer

### Aufgeschobene Vergütung

Der Konzern gewährte ausgewählten Mitarbeitern Zusagen auf aufgeschobene Barvergütung. Jede Zusage besteht aus drei Tranchen in Höhe jeweils eines Drittels des Gesamtbetrags. Die drei Tranchen werden nach jeweils einem, zwei beziehungsweise drei Jahren unverfallbar und unmittelbar nach Erreichen der Unverfallbarkeit ausgezahlt abzüglich der bis dahin nach den Planregelungen verfallenen Beträge. Der Aufwand für jede Tranche wird grundsätzlich über die jeweilige Anwartschaftsfrist verteilt. Die zugesagten Beträge kommen im Regelfall nur dann zur Auszahlung an den Mitarbeiter, wenn dieser sich zum entsprechenden Unverfallbarkeitstermin in einem ungekündigten Anstellungsverhältnis mit der Deutschen Bank befindet. Des Weiteren unterliegen die Zusagen weiteren Verfallsregelungen, zum Beispiel wenn Mitarbeiter durch ihr Verhalten gegen interne Richtlinien oder Gesetze verstoßen.

Seit 2010 enthalten die Zusagen an einen näher definierten Mitarbeiterkreis des Senior Managements darüber hinaus auf Basis der regulatorischen Anforderungen performanceindizierte Verfallsregelungen mit der Konsequenz, dass Teile der Zusagen bei Nichterreichen definierter Kennziffern nicht zur Auszahlung kommen.

Das Zusagevolumen im Februar 2010 (begeben nach den Regelungen des DB Restricted Incentive Plan) betrug ungefähr 0,5 Mrd €. Im Februar 2009 wurden nach den Regelungen des Restricted Cash Plan ungefähr 1,0 Mrd € zugesagt.

Für Zusagen ab dem Jahr 2011 gelten bestimmte Verfallsregelungen ausschließlich für die Gruppe von Geschäftsleitern und Mitarbeitern, die gemäß den Vorgaben der neuen deutschen „Instituts-Vergütungsverordnung“ (InstitutsVergV) gesondert identifiziert werden.

Insgesamt wurden im Februar 2011 Zusagen in Höhe von ungefähr 1,0 Mrd € nach den Regelungen des DB Restricted Incentive Plan begeben.

Darüber hinaus gewährte der Konzern Aktienrechte, die in Note 32 „Aktienbasierte Vergütungen“ beschrieben sind.



## Leistungen nach Beendigung des Arbeitsverhältnisses

### Charakterisierung der Pläne

Der Konzern bietet seinen Mitarbeitern eine Reihe von Plänen für Leistungen nach Beendigung des Arbeitsverhältnisses an, die gemäß ihrer Art und Beschaffenheit in der Rechnungslegung zwischen beitragsdefinierten und leistungsdefinierten Pläne unterschieden werden. Die leistungsdefinierten Versorgungszusagen des Konzerns werden in Pensionspläne und Gesundheitsfürsorgepläne unterteilt.

Die Mehrheit der Anspruchsberechtigten der Pensionspläne befindet sich in Deutschland, Großbritannien und den USA. Die Höhe der Versorgungszusagen an die Mitarbeiter basiert in erster Linie auf deren Vergütung und der Dauer ihrer Konzernzugehörigkeit. Der Konzern finanziert große Teile der Pensionsverpflichtungen in verschiedenen externen Treuhandvermögensanlagen aus.

Der Konzern verfolgt eine Finanzierungsstrategie, die – unter Beachtung spezifischer gesetzlicher und vertraglicher Regelungen – auf eine nahezu vollständige Deckung der leistungsdefinierten Verpflichtung im Sinne der „Defined Benefit Obligation“ durch das Planvermögen in einem Rahmen von 90 % bis 100 % abzielt. Dennoch entschied der Konzern, einige Verpflichtungen nicht auszufinanzieren, zum Beispiel wenn dies steuerlich nicht sinnvoll ist. Für derartige Verpflichtungen werden entsprechende Rückstellungen gebildet.

Darüber hinaus gibt es im Konzern intern finanzierte Gesundheitsfürsorgepläne für derzeit tätige und pensionierte Mitarbeiter, vornehmlich in den USA. Im Rahmen dieser Pläne wird den Pensionären ein bestimmter Prozentsatz der erstattungsfähigen medizinischen und zahnmedizinischen Aufwendungen unter Berücksichtigung eines Selbstbehalts gewährt. Der Konzern bildet über die aktive Dienstzeit Rückstellungen und zahlt Leistungen bei Fälligkeit aus.

Das Pensions Risk Committee des Konzerns überwacht die Risiken aller Pensionspläne des Konzerns weltweit. In diesem Rahmen erlässt es Richtlinien über die Steuerung und das Risikomanagement und entwickelt sie fort, insbesondere in Bezug auf Ausfinanzierung, Portfoliostruktur und Bestimmung der versicherungsmathematischen Annahmen.

## Überleitung von Verpflichtungen und Vermögenswerten – Auswirkung auf die Bilanz

Die folgende Tabelle stellt die Entwicklung der Pensionsverpflichtung und des Fair Value des Planvermögens des Konzerns für die beiden Geschäftsjahre 2010 und 2009, den Finanzierungsstatus sowie dessen Überleitung zu den in der Bilanz erfassten Beträgen zum Ende der jeweiligen Jahre dar.

| in Mio €                                                                    | Pensionspläne |              | Gesundheitsfürsorgepläne |             |
|-----------------------------------------------------------------------------|---------------|--------------|--------------------------|-------------|
|                                                                             | 2010          | 2009         | 2010                     | 2009        |
| <b>Entwicklung der Verpflichtung:</b>                                       |               |              |                          |             |
| <b>Verpflichtung am Jahresanfang</b>                                        | <b>9.416</b>  | <b>8.189</b> | <b>136</b>               | <b>119</b>  |
| Laufender Dienstzeitaufwand                                                 | 243           | 186          | 3                        | 3           |
| Zinsaufwand                                                                 | 527           | 457          | 9                        | 7           |
| Zuführungen der Planteilnehmer                                              | 14            | 6            | –                        | –           |
| Versicherungsmathematischer Verlust/Gewinn (–)                              | 81            | 846          | 3                        | 14          |
| Wechselkursveränderungen                                                    | 231           | 181          | 10                       | –           |
| Gezahlte Leistungen                                                         | –465          | –467         | –7                       | –7          |
| Nachzuverrechnender Dienstzeitaufwand/-ertrag (–)                           | –77           | 18           | –                        | –           |
| Akquisitionen <sup>1</sup>                                                  | 2.129         | –            | –                        | –           |
| Veräußerungen                                                               | –             | –            | –                        | –           |
| Planabgeltungen/Plankürzungen                                               | –30           | –            | –                        | –           |
| Sonstige <sup>2</sup>                                                       | 2             | –            | –                        | –           |
| <b>Verpflichtung am Jahresende</b>                                          | <b>12.071</b> | <b>9.416</b> | <b>154</b>               | <b>136</b>  |
| davon: intern finanziert                                                    | 1.124         | 201          | 154                      | 136         |
| davon: extern finanziert                                                    | 10.947        | 9.215        | –                        | –           |
| <b>Entwicklung des Planvermögens:</b>                                       |               |              |                          |             |
| <b>Fair Value des Planvermögens am Jahresanfang</b>                         | <b>9.352</b>  | <b>8.755</b> | <b>–</b>                 | <b>–</b>    |
| Erwarteter Ertrag aus Planvermögen                                          | 490           | 403          | –                        | –           |
| Versicherungsmathematischer Gewinn/Verlust (–)                              | 224           | 92           | –                        | –           |
| Wechselkursveränderungen                                                    | 210           | 231          | –                        | –           |
| Zuführungen des Arbeitgebers                                                | 388           | 264          | –                        | –           |
| Zuführungen der Planteilnehmer                                              | 14            | 6            | –                        | –           |
| Gezahlte Leistungen <sup>3</sup>                                            | –423          | –398         | –                        | –           |
| Akquisitionen <sup>1</sup>                                                  | 846           | –            | –                        | –           |
| Veräußerungen                                                               | –             | –            | –                        | –           |
| Planabgeltungen                                                             | –17           | –1           | –                        | –           |
| Sonstige <sup>2</sup>                                                       | –8            | –            | –                        | –           |
| <b>Fair Value des Planvermögens am Jahresende</b>                           | <b>11.076</b> | <b>9.352</b> | <b>–</b>                 | <b>–</b>    |
| <b>Finanzierungsstatus am Jahresende</b>                                    | <b>–995</b>   | <b>–64</b>   | <b>–154</b>              | <b>–136</b> |
| Noch nicht erfasster nachzuverrechnender Dienstzeit-<br>aufwand/-ertrag (–) | –             | –            | –                        | –           |
| Begrenzung des Ansatzes von Vermögenswerten                                 | –3            | –7           | –                        | –           |
| Umklassifizierung in zum Verkauf bestimmte Vermögenswerte <sup>4</sup>      | 5             | –            | –                        | –           |
| <b>Nettobilanzwert Vermögen/Schuld (–)</b>                                  | <b>–993</b>   | <b>–71</b>   | <b>–154</b>              | <b>–136</b> |
| davon: bilanziert als sonstige Aktiva                                       | 609           | 276          | –                        | –           |
| davon: bilanziert als sonstige Passiva                                      | –1.602        | –347         | –154                     | –136        |

<sup>1</sup> Postbank, Sal. Oppenheim, BHF-BANK.

<sup>2</sup> Beinhaltet die Startwerte von erstmals berücksichtigten kleineren Plänen.

<sup>3</sup> Nur für extern finanzierte Pensionspläne.

<sup>4</sup> BHF-BANK.

## Versicherungsmathematische Methoden und Annahmen

Bewertungsstichtag für alle Pläne ist der 31. Dezember. Sämtliche Pläne werden gemäß der Methode des Verfahrens der laufenden Einmalprämien („Projected Unit Credit Method“) bewertet.

Den Berechnungen liegen folgende wesentliche versicherungsmathematische Annahmen zugrunde. Diese werden als gewichtete Durchschnitte dargestellt.

|                                                                | 2010  | 2009  | 2008  |
|----------------------------------------------------------------|-------|-------|-------|
| <b>Zugrunde gelegte Annahmen bei Pensionsplänen</b>            |       |       |       |
| <b>zur Ermittlung der Verpflichtung am Jahresende</b>          |       |       |       |
| Diskontierungszinssatz                                         | 5,1 % | 5,4 % | 5,6 % |
| Inflationsrate                                                 | 2,5 % | 2,7 % | 2,1 % |
| Nominale Gehaltssteigerungsrate                                | 3,3 % | 3,4 % | 3,0 % |
| Nominale Pensionssteigerungsrate                               | 2,4 % | 2,4 % | 1,8 % |
| <b>zur Ermittlung des Aufwands für das Geschäftsjahr</b>       |       |       |       |
| Diskontierungszinssatz                                         | 5,4 % | 5,6 % | 5,5 % |
| Inflationsrate                                                 | 2,7 % | 2,1 % | 2,1 % |
| Nominale Gehaltssteigerungsrate                                | 3,4 % | 3,0 % | 3,3 % |
| Nominale Pensionssteigerungsrate                               | 2,4 % | 1,8 % | 1,8 % |
| Erwartete Rendite des Planvermögens <sup>1</sup>               | 5,0 % | 4,5 % | 5,0 % |
| <b>Zugrunde gelegte Annahmen bei Gesundheitsfürsorgeplänen</b> |       |       |       |
| <b>zur Ermittlung der Verpflichtung am Jahresende</b>          |       |       |       |
| Diskontierungszinssatz                                         | 5,3 % | 5,9 % | 6,1 % |
| <b>zur Ermittlung des Aufwands für das Geschäftsjahr</b>       |       |       |       |
| Diskontierungszinssatz                                         | 5,9 % | 6,1 % | 6,1 % |
| <b>Zugrunde gelegte Lebenserwartung im Alter von 65 Jahren</b> |       |       |       |
| für zum Bewertungsstichtag 65-jährige Männer                   | 19,4  | 19,4  | 19,1  |
| für zum Bewertungsstichtag 45-jährige Männer                   | 21,6  | 21,5  | 21,1  |
| für zum Bewertungsstichtag 65-jährige Frauen                   | 22,8  | 22,8  | 22,6  |
| für zum Bewertungsstichtag 45-jährige Frauen                   | 24,9  | 24,8  | 24,5  |

<sup>1</sup> Die erwartete Rendite des Planvermögens zur Bestimmung des Aufwands beträgt 4,9 % für das Jahr 2011.

Für die bedeutendsten Pläne des Konzerns wird der Diskontierungszinssatz zum Bewertungsstichtag über einen sogenannten „Yield-curve“-Ansatz über hochrangige Unternehmensanleihen ermittelt, der den tatsächlichen Zeitpunkt zukünftiger Leistungen und deren Höhe für jeden Plan berücksichtigt. Für die Eurozone wird ein einheitlicher Ansatz basierend auf der maßgeblichen Annahme für Deutschland gewählt. Für andere Pläne wird der Diskontierungszinssatz zum Bewertungsstichtag auf Grundlage hochrangiger Unternehmens- oder Staatsanleihen in Einklang mit den aus den Verpflichtungen resultierenden Fälligkeiten festgesetzt.

Die Annahmen zur Preissteigerungsrate in Großbritannien und der Eurozone werden mit Bezug auf am Kapitalmarkt gehandelte Inflationsprodukte bestimmt. Maßgeblich sind die Inflationsswapsätze in den betreffenden Märkten zum Bewertungsstichtag. In anderen Ländern liegt der Bezug üblicherweise auf den Inflationsprognosen von Consensus Economics Inc.

Die Annahmen zur Gehaltssteigerung werden für jeden Plan getrennt, falls sachgerecht, nach einem modularen Ansatz von der Inflationsrate abgeleitet und spiegeln die Vergütungsstruktur oder -grundsätze eines jeden Marktes wider.

Die Annahmen zur Pensionssteigerung werden für jeden Plan getrennt, falls sachgerecht, nach einem modularen Ansatz von der Inflationsrate abgeleitet und spiegeln die lokalen gesetzlichen Anforderungen oder planspezifischen Regelungen wider.

Die erwartete Rendite des Planvermögens wird gesondert für jeden Plan mithilfe eines modularen Ansatzes entwickelt, der die jeweilige Zielallokation der Portfoliostruktur sowie die erwartete Rendite jeder Anlageklasse zum Bewertungsstichtag berücksichtigt. Prinzipiell wird eine risikofreie Rendite mit Anpassungen bezüglich Duration und bestimmter relevanter Faktoren für jede größere Anlageklasse als Maßstab benutzt. Zum Beispiel wird die erwartete Rendite für Aktien und Immobilien dadurch abgeleitet, dass eine jeweilige Risikoprämie zur Rendite von Staatsanleihen mit einer Restlaufzeit von zehn Jahren hinzugefügt wird.

Die Lebenserwartung ist eine wesentliche Annahme zur Bestimmung der Verpflichtung aus leistungsdefinierten Plänen und folgt den in den jeweiligen Ländern üblichen Ansätzen. Wenn möglich, wurden zukünftige Steigerungen der Lebenserwartung in die Annahmen mit einbezogen.

Zur Ermittlung des Aufwands für Gesundheitsfürsorgepläne wurde eine gewichtete durchschnittliche Zunahme von 8,2% für die im Rahmen dieser Pläne pro Person zu erbringenden Leistungen für das Jahr 2011 angenommen. Für diese Steigerungsrate werden ein allmählicher Rückgang auf 4,9% bis zum Ende des Jahres 2017 und eine anschließende Stabilisierung auf diesem Niveau erwartet.

## Anlage des Pensionsvermögens

Vorrangiges Anlageziel des Konzerns ist es im Wesentlichen, die Bank vor starken Schwankungen des Finanzierungsstatus seiner Pensionspläne abzusichern, wobei Risiken infolge von Durationsdisparitäten und Diversifizierung der Anlageklassen in begrenztem Umfang eingegangen werden, um langfristig die Kosten des Konzerns für Leistungen an Arbeitnehmer zu reduzieren. Das Ziel besteht darin, die Erträge innerhalb des Risikotoleranzbereichs des Konzerns zu maximieren.

Die folgende nach Anlagekategorien gegliederte Tabelle zeigt die gewichtete durchschnittliche Portfoliostruktur der Pensionspläne des Konzerns zum 31. Dezember 2010 und zum 31. Dezember 2009 sowie die Zielallokation.

|                                                             | Zielallokation | Prozentualer Anteil am Planvermögen |              |
|-------------------------------------------------------------|----------------|-------------------------------------|--------------|
|                                                             |                | 31.12.2010                          | 31.12.2009   |
| <b>Anlagekategorien:</b>                                    |                |                                     |              |
| Aktien                                                      | 11 %           | 9 %                                 | 8 %          |
| Verzinsliche Wertpapiere (inklusive Barmittel und Derivate) | 85 %           | 88 %                                | 90 %         |
| Alternative Anlageinstrumente (inklusive Immobilien)        | 4 %            | 3 %                                 | 2 %          |
| <b>Anlagekategorien insgesamt</b>                           | <b>100 %</b>   | <b>100 %</b>                        | <b>100 %</b> |

Der tatsächliche Ertrag aus Planvermögen betrug 714 Mio € im Jahr 2010 (2009: 495 Mio €).

Im Planvermögen zum 31. Dezember 2010 sind konzernintern abgeschlossene Derivate mit einem negativen Marktwert von 2 Mio € enthalten. Des Weiteren sind im Planvermögen vom Konzern emittierte Wertpapiere im Wert von 99 Mio € enthalten.

## Auswirkung auf den Kapitalfluss

Die erwarteten Zuführungen zum Planvermögen der leistungsdefinierten Pensionspläne des Konzerns werden im Geschäftsjahr 2011 voraussichtlich 300 Mio € betragen. Rückübertragungen von Anteilen aus dem Planvermögen an den Konzern während des Geschäftsjahres 2011 werden nicht erwartet.

Die folgende Übersicht zeigt die voraussichtlich zu zahlenden Versorgungsleistungen für jedes der nächsten fünf Jahre sowie die Leistungen für die darauf folgenden fünf Jahre insgesamt. Bei der Berechnung der Höhe der Leistungen werden zurückliegende und angenommene zukünftige Dienstzeiten berücksichtigt. Die Werte beinhalten sowohl Auszahlungen aus den Pensionsvermögen des Konzerns für ausfinanzierte Pläne als auch direkte Auszahlungen für nicht ausfinanzierte Pläne.

| in Mio €    | Pensionspläne | Gesundheitsfürsorgepläne |                           |
|-------------|---------------|--------------------------|---------------------------|
|             |               | Bruttobetrag             | Erstattungen <sup>1</sup> |
| 2011        | 517           | 11                       | – 1                       |
| 2012        | 522           | 11                       | – 2                       |
| 2013        | 538           | 12                       | – 2                       |
| 2014        | 547           | 12                       | – 2                       |
| 2015        | 568           | 13                       | – 2                       |
| 2016 – 2020 | 3.229         | 69                       | – 11                      |

<sup>1</sup> Voraussichtliche Rückerstattungen aus Zuzahlungen für verschreibungspflichtige Medikamente im Rahmen des Versicherungsprogramms Medicare.

## Auswirkung auf das Eigenkapital

Gemäß den Rechnungslegungsgrundsätzen des Konzerns für leistungsdefinierte Pläne werden versicherungsmathematische Gewinne und Verluste in der Periode ihrer Entstehung direkt im Eigenkapital erfasst und in der Konzern-Gesamtergebnisrechnung und in der Konzern-Eigenkapitalveränderungsrechnung dargestellt.

Die folgende Tabelle zeigt den zum 31. Dezember 2010 seit dem Übergangsstichtag zu IFRS kumulierten erfassten Betrag sowie die in den Jahren 2010 und 2009 erfassten Beträge ohne Beachtung latenter Steuern. Latente Steuern werden in Note 34 „Ertragsteuern“ in einer separaten Tabelle für Ertragsteuern, die im Eigenkapital erfasst werden, ausgewiesen.

| in Mio €                                       | Erfassung im Gesamtergebnis (Comprehensive income) |            |              |
|------------------------------------------------|----------------------------------------------------|------------|--------------|
|                                                | 31.12.2010 <sup>1</sup>                            | 2010       | 2009         |
| <b>Pensionspläne:</b>                          |                                                    |            |              |
| Versicherungsmathematischer Gewinn/Verlust (–) | 28                                                 | 143        | – 754        |
| Begrenzung des Ansatzes von Vermögenswerten    | – 3                                                | 4          | 1            |
| <b>Pensionspläne insgesamt</b>                 | <b>25</b>                                          | <b>147</b> | <b>– 753</b> |
| <b>Gesundheitsfürsorgepläne:</b>               |                                                    |            |              |
| Versicherungsmathematischer Gewinn/Verlust (–) | 37                                                 | – 3        | – 14         |
| <b>Gesundheitsfürsorgepläne insgesamt</b>      | <b>37</b>                                          | <b>– 3</b> | <b>– 14</b>  |
| <b>Insgesamt erfasster Betrag</b>              | <b>62</b>                                          | <b>144</b> | <b>– 767</b> |

<sup>1</sup> Kumuliert seit dem Übergangsstichtag zu IFRS und einschließlich Wechselkursveränderungen.

## Erfahrungsbedingte Anpassungen in den Verpflichtungen und Vermögenswerten

Die folgende Tabelle zeigt für die laufende und die vorangegangenen vier Bewertungsstichtage die Beträge der Verpflichtung, des Fair Value des Planvermögens und des Finanzierungsstatus sowie die erfahrungsbedingten Anpassungen, die in Bezug auf Verpflichtung und Planvermögen in den jeweils zum Bewertungsstichtag abgelaufenen Jahren entstanden.

| in Mio €                                                   | 31.12.2010  | 31.12.2009  | 31.12.2008  | 31.12.2007  | 31.12.2006  |
|------------------------------------------------------------|-------------|-------------|-------------|-------------|-------------|
| <b>Pensionspläne:</b>                                      |             |             |             |             |             |
| Verpflichtung                                              | 12.071      | 9.416       | 8.189       | 8.518       | 9.129       |
| davon: erfahrungsbedingte Anpassungen (Verlust/Gewinn (-)) | -83         | -72         | 24          | -68         | 18          |
| Fair Value des Planvermögens                               | 11.076      | 9.352       | 8.755       | 9.331       | 9.447       |
| davon: erfahrungsbedingte Anpassungen (Gewinn/Verlust (-)) | 224         | 92          | -221        | -266        | -368        |
| <b>Finanzierungsstatus</b>                                 | <b>-995</b> | <b>-64</b>  | <b>566</b>  | <b>813</b>  | <b>318</b>  |
| <b>Gesundheitsfürsorgepläne:</b>                           |             |             |             |             |             |
| Verpflichtung                                              | 154         | 136         | 119         | 116         | 147         |
| davon: erfahrungsbedingte Anpassungen (Verlust/Gewinn (-)) | 1           | -           | -5          | -17         | -27         |
| <b>Finanzierungsstatus</b>                                 | <b>-154</b> | <b>-136</b> | <b>-119</b> | <b>-116</b> | <b>-147</b> |

## Auswirkung auf den Aufwand

Der in der Konzern-Gewinn- und Verlustrechnung erfasste Personalaufwand für leistungsdefinierte Pläne und andere ausgewählte Leistungen der Geschäftsjahre 2008 bis 2010 setzte sich aus den nachstehenden Komponenten zusammen.

| in Mio €                                                                                                                | 2010       | 2009       | 2008       |
|-------------------------------------------------------------------------------------------------------------------------|------------|------------|------------|
| <b>Aufwendungen für Pensionspläne:</b>                                                                                  |            |            |            |
| Laufender Dienstzeitaufwand                                                                                             | 243        | 186        | 264        |
| Zinsaufwand                                                                                                             | 527        | 457        | 453        |
| Erwarteter Ertrag aus Planvermögen                                                                                      | -490       | -403       | -446       |
| Sofort erfasster nachzuverrechnender Dienstzeitaufwand/-ertrag (-)                                                      | -77        | 18         | 14         |
| Planabgeltungen/Plankürzungen                                                                                           | -14        | 1          | -          |
| Sofort erfasster versicherungsmathematischer Verlust/Gewinn (-) aufgrund von Planabgeltungen/Plankürzungen <sup>1</sup> | -          | -          | 9          |
| Amortisation versicherungsmathematischen Verlusts/Gewinns (-) <sup>1</sup>                                              | -          | -          | 1          |
| Begrenzung des Ansatzes von Vermögenswerten <sup>1</sup>                                                                | -          | -          | -2         |
| <b>Pensionspläne insgesamt</b>                                                                                          | <b>189</b> | <b>259</b> | <b>293</b> |
| <b>Aufwendungen für Gesundheitsfürsorgepläne:</b>                                                                       |            |            |            |
| Laufender Dienstzeitaufwand                                                                                             | 3          | 3          | 2          |
| Zinsaufwand                                                                                                             | 9          | 7          | 7          |
| Amortisation versicherungsmathematischen Verlusts/Gewinns (-) <sup>1</sup>                                              | -          | -          | 2          |
| <b>Aufwendungen für Gesundheitsfürsorgepläne insgesamt</b>                                                              | <b>12</b>  | <b>10</b>  | <b>11</b>  |
| <b>Gesamtaufwand für leistungsdefinierte Pläne</b>                                                                      | <b>201</b> | <b>269</b> | <b>304</b> |
| <b>Aufwendungen für beitragsdefinierte Pläne</b>                                                                        | <b>239</b> | <b>203</b> | <b>206</b> |
| <b>Pensionsaufwendungen insgesamt</b>                                                                                   | <b>440</b> | <b>472</b> | <b>510</b> |
| <b>Ausweis anderer ausgewählter Leistungen</b>                                                                          |            |            |            |
| Arbeitgeberbeiträge zur gesetzlichen Rentenversicherung in Deutschland                                                  | 171        | 162        | 159        |
| Aufwendungen für Cash-Retention-Pläne                                                                                   | 662        | 688        | 13         |
| Aufwendungen für Abfindungszahlungen                                                                                    | 588        | 629        | 555        |

<sup>1</sup> Komponenten, die nach dem Korridorverfahren in den Jahren 2006 und 2007 gebucht und im Jahr 2008 aufgrund der Änderung der Rechnungslegung storniert wurden.

Der für 2011 erwartete Aufwand beträgt 320 Mio € für die Pensionspläne und 11 Mio € für die Gesundheitsfürsorgepläne. Der erwartete Anstieg gegenüber 2010 ist maßgeblich begründet durch die Konsolidierung der Postbank und die Veränderung der Indexierung von Anwartschaften betrieblicher Altersvorsorgesysteme aufgrund eines Regierungserlasses in Großbritannien, welcher im Jahr 2010 zu nachträglichem Dienstzeitertrag von 104 Mio € führte.

Die gewichtete durchschnittliche Restdienstzeit der aktiven Planteilnehmer beträgt zehn Jahre bei den Pensions- und sechs Jahre bei den Gesundheitsfürsorgeplänen.

### Sensitivitäten auf wesentliche Annahmen

Die nachfolgende Übersicht zeigt planspezifische Sensitivitäten der Verpflichtung zum jeweils angegebenen Stichtag und der Kernelemente des Aufwands (Dienstzeitaufwand, Zinsaufwand, erwarteter Ertrag aus Planvermögen) in den angegebenen Perioden für leistungsdefinierte Pläne hinsichtlich der jeweils isolierten Veränderung wesentlicher Annahmen.

| Anstieg/Reduzierung (–)<br>in Mio €                               | 31.12.2010 | Verpflichtung zum<br>31.12.2009 | Aufwendungen für das Jahr<br>2011 | 2010 |
|-------------------------------------------------------------------|------------|---------------------------------|-----------------------------------|------|
| <b>Sensitivität bei Pensionsplänen:</b>                           |            |                                 |                                   |      |
| Diskontierungszinssatz (Rückgang um 50 Basispunkte)               | 935        | 695                             | 5                                 | 5    |
| Inflationsrate (Anstieg um 50 Basispunkte)                        | 545        | 420                             | 35                                | 30   |
| Reale Gehaltssteigerungsrate (Anstieg um 50 Basispunkte)          | 105        | 80                              | 10                                | 10   |
| Lebenserwartung (Verbesserung um 10 %) <sup>1</sup>               | 245        | 175                             | 15                                | 10   |
| Erwartete Rendite (Reduzierung um 50 Basispunkte)                 | –          | –                               | 55                                | 45   |
| <b>Sensitivität bei Gesundheitsfürsorgeplänen:</b>                |            |                                 |                                   |      |
| Gesundheitskostensteigerungsrate (Anstieg um 100 Basispunkte)     | 19         | 16                              | 2                                 | 2    |
| Gesundheitskostensteigerungsrate (Reduzierung um 100 Basispunkte) | – 17       | – 14                            | – 2                               | – 1  |

<sup>1</sup> Eine Verbesserung der Lebenserwartung um 10 % bedeutet eine Reduzierung der Sterbewahrscheinlichkeit für jedes Alter um 10 %. Diese Sensitivität führt zu einer im Durchschnitt um ein Jahr erhöhten Lebenserwartung im Alter von 65 Jahren.

## 34 – Ertragsteuern

Der Ertragsteueraufwand/-ertrag für die Jahre 2010, 2009 und 2008 setzt sich wie folgt zusammen.

| in Mio €                                                                                                                          | 2010         | 2009         | 2008           |
|-----------------------------------------------------------------------------------------------------------------------------------|--------------|--------------|----------------|
| <b>Laufender Steueraufwand/-ertrag (–):</b>                                                                                       |              |              |                |
| Steueraufwand/-ertrag (–) für das laufende Jahr                                                                                   | 1.339        | 970          | – 32           |
| Periodenfremder laufender Steueraufwand/-ertrag (–)                                                                               | – 9          | – 430        | – 288          |
| <b>Laufender Steueraufwand/-ertrag (–) insgesamt</b>                                                                              | <b>1.330</b> | <b>540</b>   | <b>– 320</b>   |
| <b>Latenter Steueraufwand/-ertrag (–):</b>                                                                                        |              |              |                |
| Effekt aus der Entstehung und Umkehrung temporärer Differenzen, noch nicht genutzter steuerlicher Verluste und Steuergutschriften | 700          | 570          | – 1.346        |
| Effekt aus Steuersatzänderungen                                                                                                   | 7            | 3            | 26             |
| Periodenfremder latenter Steueraufwand/-ertrag (–)                                                                                | – 392        | – 869        | – 205          |
| <b>Latenter Steueraufwand/-ertrag (–) insgesamt</b>                                                                               | <b>315</b>   | <b>– 296</b> | <b>– 1.525</b> |
| <b>Ertragsteueraufwand/-ertrag (–) insgesamt</b>                                                                                  | <b>1.645</b> | <b>244</b>   | <b>– 1.845</b> |



Der Ertragsteueraufwand für das Jahr 2010 beinhaltet einen Steueraufwand aus einer Steuer im Zusammenhang mit dem Versicherungsgeschäft von Abbey Life („Policyholder Tax“) in Höhe von 37 Mio € (2009: 1 Mio €, 2008: 79 Mio €, jeweils Steuerertrag), der durch Einkünfte entsteht, die dem Versicherungsnehmer zuzurechnen sind.

Der laufende Steueraufwand ist aufgrund der Nutzung bisher nicht berücksichtigter steuerlicher Verluste, Steuergutschriften und abzugsfähiger temporärer Differenzen im Geschäftsjahr 2010 um einen Steuerertrag in Höhe von 6 Mio € vermindert (2009: Verminderung des laufenden Steueraufwands um 0,2 Mio €; 2008: Erhöhung des laufenden Steuerertrags um 45 Mio €).

Der latente Steueraufwand ist aufgrund von Abwertungen aktiver latenter Steuern und der Nutzung bisher nicht berücksichtigter steuerlicher Verluste, Steuergutschriften und abzugsfähiger temporärer Differenzen sowie aufgrund der Wertaufholung aktiver latenter Steuern aus Vorjahren im Geschäftsjahr 2010 per Saldo um einen latenten Steueraufwand in Höhe von 173 Mio € erhöht (Erhöhung des latenten Steuerertrags um 537 Mio € in 2009 und Minderung des latenten Steuerertrags um 971 Mio € in 2008).

Die nachstehende Übersicht zeigt eine Analyse des Unterschiedsbetrags zwischen dem Steueraufwand/-ertrag, der sich bei Anwendung des deutschen Ertragsteuersatzes auf das Ergebnis vor Steuern ergeben würde, und dem tatsächlich ausgewiesenen Steueraufwand/-ertrag des Konzerns.

| in Mio €                                                                                                                    | 2010         | 2009         | 2008           |
|-----------------------------------------------------------------------------------------------------------------------------|--------------|--------------|----------------|
| <b>Erwarteter Steueraufwand/-ertrag (–) bei einem Ertragsteuersatz von 30,7 % in Deutschland (30,7 % für 2009 und 2008)</b> | <b>1.219</b> | <b>1.595</b> | <b>– 1.760</b> |
| Steuersatzdifferenzen auf ausländische Ergebnisse                                                                           | 63           | – 63         | – 665          |
| Steuerbefreite Einnahmen                                                                                                    | – 556        | – 763        | – 746          |
| Steuereffekt aus mit der Equitymethode konsolidierten Beteiligungen                                                         | – 87         | – 29         | – 36           |
| Nicht abzugsfähige Aufwendungen                                                                                             | 335          | 624          | 403            |
| Belastung Deutsche Postbank AG ohne korrespondierenden Steuerertrag                                                         | 668          | –            | –              |
| Nicht temporäre Wertminderungen des Goodwill                                                                                | –            | –            | 1              |
| Änderungen des Ansatzes und der Bewertung aktiver latenter Steuern                                                          | 167          | – 537        | 926            |
| Effekt aus Änderungen der Steuergesetzgebung                                                                                | 7            | 3            | 26             |
| Effekt aus aktienbasierter Vergütung                                                                                        | 48           | – 95         | 227            |
| Effekt aus der „Policyholder Tax“                                                                                           | 37           | – 1          | – 79           |
| Sonstige                                                                                                                    | – 256        | – 490        | – 142          |
| <b>Ausgewiesener Steueraufwand/-ertrag (–)</b>                                                                              | <b>1.645</b> | <b>244</b>   | <b>– 1.845</b> |

In der vorstehenden Tabelle sind unter der Position Sonstige für 2010 im Wesentlichen Effekte aufgrund verbesserter Ertragsteuerpositionen in den USA einschließlich geänderter Grundlagen für die US-Körperschaftsteuererklärung und für 2009 überwiegend die Einmaleffekte aufgrund abgeschlossener Steuerprüfungen enthalten.

Der in Deutschland maßgebliche Ertragsteuersatz, der für die Berechnung latenter Steuerforderungen und -verbindlichkeiten angewandt wurde, setzt sich aus der Körperschaftsteuer, dem Solidaritätszuschlag und der Gewerbesteuer zusammen und hat in den Geschäftsjahren 2010, 2009 und 2008 30,7 % betragen.

Ertragsteuern sind dem Eigenkapital (sonstiges Ergebnis/Kapitalrücklage) wie folgt belastet oder gutgeschrieben worden.

| in Mio €                                                                                                                                        | 2010       | 2009        | 2008       |
|-------------------------------------------------------------------------------------------------------------------------------------------------|------------|-------------|------------|
| <b>Steuerbelastung (–)/-gutschrift infolge versicherungsmathematischer Gewinne/Verluste in Bezug auf leistungsdefinierte Versorgungszusagen</b> | <b>–29</b> | <b>113</b>  | <b>1</b>   |
| Zur Veräußerung verfügbare finanzielle Vermögenswerte                                                                                           |            |             |            |
| Unrealisierte Gewinne/Verluste (–) der Periode                                                                                                  | –59        | –195        | 892        |
| Umklassifizierung aufgrund von Gewinn- (–)/Verlustrealisierungen                                                                                | –47        | –214        | –194       |
| Derivate, die Schwankungen zukünftiger Cashflows absichern                                                                                      |            |             |            |
| Unrealisierte Gewinne/Verluste (–) der Periode                                                                                                  | 30         | 90          | –34        |
| Umklassifizierung aufgrund von Gewinn- (–)/Verlustrealisierungen                                                                                | –1         | –2          | –          |
| Sonstige Veränderungen im Eigenkapital                                                                                                          |            |             |            |
| Unrealisierte Gewinne/Verluste (–) der Periode                                                                                                  | 320        | 54          | 67         |
| Umklassifizierung aufgrund von Gewinn- (–)/Verlustrealisierungen                                                                                | –3         | 13          | –          |
| <b>Ertragsteuern, die dem sonstigen Ergebnis belastet (–) beziehungsweise gutgeschrieben wurden</b>                                             | <b>240</b> | <b>–254</b> | <b>731</b> |
| <b>Ertragsteuern, die darüber hinaus dem Eigenkapital belastet(–) beziehungsweise gutgeschrieben wurden</b>                                     | <b>30</b>  | <b>–35</b>  | <b>–75</b> |

Nachfolgend sind die latenten Steuerforderungen und -verbindlichkeiten vor bilanzieller Saldierung für jede Art temporärer Differenzen, bisher nicht genutzte steuerliche Verluste und Steuergutschriften dargestellt.

| in Mio €                                         | 31.12.2010    | 31.12.2009    |
|--------------------------------------------------|---------------|---------------|
| <b>Latente Steuerforderungen:</b>                |               |               |
| Noch nicht genutzte steuerliche Verlustvträge    | 2.637         | 2.986         |
| Noch nicht genutzte Steuergutschriften           | 189           | 218           |
| Abzugsfähige temporäre Differenzen:              |               |               |
| Handelsaktiva/-passiva                           | 8.627         | 7.244         |
| Sachanlagen                                      | 450           | 654           |
| Sonstige Aktiva                                  | 1.522         | 1.544         |
| Bewertung von Wertpapieren                       | 1.117         | 563           |
| Wertberichtigungen für Kreditausfälle            | 593           | 353           |
| Sonstige Rückstellungen                          | 1.314         | 1.088         |
| Sonstige Passiva                                 | 1.941         | 439           |
| <b>Latente Steuerforderungen insgesamt</b>       | <b>18.390</b> | <b>15.089</b> |
| <b>Latente Steuerverbindlichkeiten:</b>          |               |               |
| Zu versteuernde temporäre Differenzen:           |               |               |
| Handelsaktiva/-passiva                           | 8.070         | 6.666         |
| Sachanlagen                                      | 62            | 55            |
| Sonstige Aktiva                                  | 1.669         | 652           |
| Bewertung von Wertpapieren                       | 758           | 652           |
| Wertberichtigungen für Kreditausfälle            | 124           | 122           |
| Sonstige Rückstellungen                          | 897           | 932           |
| Sonstige Passiva                                 | 776           | 1.017         |
| <b>Latente Steuerverbindlichkeiten insgesamt</b> | <b>12.356</b> | <b>10.096</b> |

Nach bilanzieller Saldierung wurden diese Beträge wie folgt ausgewiesen.

| in Mio €                                              | 31.12.2010   | 31.12.2009   |
|-------------------------------------------------------|--------------|--------------|
| Latente Steuerforderungen                             | 8.341        | 7.150        |
| Latente Steuerverbindlichkeiten                       | 2.307        | 2.157        |
| <b>Latente Steuerforderungen, rechnerischer Saldo</b> | <b>6.034</b> | <b>4.993</b> |

Die Änderung der Differenz zwischen latenten Steuerforderungen und latenten Steuerverbindlichkeiten entspricht nicht dem latenten Steueraufwand. Die Gründe hierfür sind (1) latente Steuern, die direkt dem Eigenkapital belastet beziehungsweise gutgeschrieben werden, (2) Effekte durch Wechselkursänderungen auf Steuerforderungen und -verbindlichkeiten, die in anderen Währungen als Euro notieren, (3) der Erwerb und Verkauf von Gesellschaften im Rahmen der gewöhnlichen Geschäftstätigkeit und (4) die Umgliederungen von latenten Steuerforderungen und -verbindlichkeiten, die in der Bilanz als Bestandteile der Posten Sonstige Aktiva und Sonstige Passiva dargestellt werden.

Für die folgenden Posten wurden keine latenten Steuerforderungen per 31. Dezember 2010 (31. Dezember 2009) ausgewiesen.<sup>1</sup>

| in Mio €                                               | 31.12.2010 <sup>1</sup> | 31.12.2009 <sup>1</sup> |
|--------------------------------------------------------|-------------------------|-------------------------|
| <b>Abzugsfähige temporäre Differenzen</b>              | <b>-676</b>             | <b>-69</b>              |
| Unverfallbar                                           | -4.206                  | -1.598                  |
| Verfall in der folgenden Periode                       | -6                      | 0                       |
| Verfall nach der folgenden Periode                     | -1.801                  | -659                    |
| <b>Noch nicht genutzte steuerliche Verlustvorträge</b> | <b>-6.013</b>           | <b>-2.257</b>           |
| Verfall in der folgenden Periode                       | -                       | -                       |
| Verfall nach der folgenden Periode                     | -67                     | -87                     |
| <b>Noch nicht genutzte Steuergutschriften</b>          | <b>-67</b>              | <b>-87</b>              |

<sup>1</sup> Die Beträge in der Tabelle beziehen sich hinsichtlich der abzugsfähigen temporären Differenzen, noch nicht genutzten steuerlichen Verluste und Steuergutschriften auf Körperschaftsteuern.

Latente Steuerforderungen wurden für diese Posten nicht erfasst, da es nicht wahrscheinlich ist, dass zukünftig zu versteuernde Ergebnisse vorliegen, mit denen die noch nicht genutzten steuerlichen Verluste, noch nicht genutzten Steuergutschriften und abzugsfähigen temporären Differenzen verrechnet werden können.

Zum 31. Dezember 2010 beziehungsweise zum 31. Dezember 2009 hat der Konzern für Gesellschaften, die einen Verlust in der laufenden Periode oder in der Vorperiode erlitten haben, latente Steuerforderungen ausgewiesen, die die latenten Steuerverbindlichkeiten um 3,3 Mrd € beziehungsweise 6 Mrd € überstiegen. Grundlage für die Bildung latenter Steuern ist die Einschätzung des Managements, gemäß welcher es wahrscheinlich ist, dass die jeweiligen Gesellschaften zu versteuernde Ergebnisse erzielen werden, mit denen noch nicht genutzte steuerliche Verluste, Steuergutschriften und abzugsfähige temporäre Differenzen verrechnet werden können. In der Regel verwendet das Management für die Bestimmung der auszuweisenden Beträge latenter Steuerforderungen Informationen zu historischer Profitabilität und gegebenenfalls Informationen über prognostizierte Geschäftsergebnisse auf Basis genehmigter Geschäftspläne einschließlich einer Aufstellung über die Vortragsperioden ungenutzter steuerlicher Verluste und Steuergutschriften, Steuerplanungsmöglichkeiten sowie sonstiger maßgeblicher Überlegungen.

Die Konzernobergesellschaft hat zum 31. Dezember 2010 keine latenten Steuerverbindlichkeiten für temporäre Differenzen in Höhe von 106 Mio € im Zusammenhang mit Beteiligungen an Tochtergesellschaften, Filialen und assoziierten Unternehmen sowie Beteiligungen an gemeinschaftlich geführten Unternehmen ausgewiesen (2009: 105 Mio €).

## 35 – Derivative Finanzinstrumente

### Derivative Finanzinstrumente und Sicherungsgeschäfte

Zu den vom Konzern eingesetzten derivativen Kontrakten zählen Swaps, standardisierte Terminkontrakte, Termingeschäfte, Optionen und ähnliche Kontraktarten. Im Rahmen der üblichen Geschäftstätigkeit wickelt der Konzern unterschiedliche Transaktionen mit derivativen Finanzinstrumenten sowohl zu Handels- als auch zu Sicherungszwecken ab. Der Konzern setzt derivative Instrumente ein, um den Bedürfnissen der Kunden hinsichtlich des Risikomanagements Rechnung zu tragen, Risiken des Konzernobligos zu steuern und abzusichern sowie um Erträge im Eigenhandel zu generieren.

Im Einklang mit den Rechnungslegungsgrundsätzen des Konzerns zur Bilanzierung von Derivaten und Sicherungsbeziehungen, wie sie in Note 01 „Wesentliche Rechnungslegungsgrundsätze“ beschrieben sind, werden alle Derivate zum Marktwert bilanziert, gleichgültig, ob sie für Handels- oder Nichthandelszwecke gehalten werden.

### Zu Handelszwecken gehaltene Derivate

#### Verkaufs- und Handelsaktivitäten

Die Mehrzahl der Derivatetransaktionen des Konzerns steht im Zusammenhang mit Verkaufs- und Handelsaktivitäten. Zu den Verkaufsaktivitäten gehören die Strukturierung und Vermarktung derivativer Produkte an Kunden, um diesen die Übernahme, Übertragung, Modifizierung oder Reduzierung von gegenwärtigen oder zukünftigen Risiken zu ermöglichen. Die Handelsaktivitäten umfassen Marktpflege- und Arbitrageaktivitäten sowie das Eingehen von Eigenhandelspositionen. Marktpflege beinhaltet das Stellen von Geld- und Briefkursen für andere Marktteilnehmer mit der Absicht, mithilfe von Margen und Volumina Erträge zu erwirtschaften. Durch Eingehen von Eigenhandelspositionen steuert der Konzern seine Risikopositionen in der Erwartung, von günstigen Entwicklungen der Preise, Zinsen oder Indizes zu profitieren. Bei Arbitrageaktivitäten werden Preisabweichungen zwischen Märkten und Produkten ermittelt, um daraus Gewinne zu erzielen.

#### Risikomanagement

Im Rahmen seines Aktiv-Passiv-Managements setzt der Konzern Derivate zu Sicherungszwecken ein, um sein Kredit- und Marktrisiko zu reduzieren. Dies erfolgt durch Absicherung spezifischer Portfolios festverzinslicher Finanzinstrumente und geplanter Transaktionen sowie durch eine strategische Absicherung des gesamten Bilanzrisikos. Der Konzern steuert Zinsrisiken aktiv, unter anderem durch den Einsatz derivativer Kontrakte. Der Einsatz derivativer Finanzinstrumente wird von Zeit zu Zeit innerhalb vorgeschriebener Grenzen entsprechend den Veränderungen der Marktbedingungen sowie den Charakteristika und der Zusammensetzung der betreffenden Aktiva und Passiva angepasst.

### Derivate, die die Anforderungen an Sicherungsbeziehungen (Hedge Accounting) erfüllen

Für Derivate, für die die in Note 01 „Wesentliche Rechnungslegungsgrundsätze“ beschriebenen Anforderungen erfüllt sind, wendet der Konzern Hedge Accounting an.

## Fair Value Hedge Accounting

Der Konzern wendet Fair Value Hedge Accounting mittels Zinsswaps und Optionen an, um sich gegen Veränderungen des Fair Value festverzinslicher Finanzinstrumente infolge von Bewegungen der Marktzinssätze abzusichern.

Die nachstehende Tabelle zeigt den Wert der Derivate, die im Rahmen von Fair Value Hedges gehalten werden.

| in Mio €                                                             | Aktiva<br>2010 | Passiva<br>2010 | Aktiva<br>2009 | Passiva<br>2009 |
|----------------------------------------------------------------------|----------------|-----------------|----------------|-----------------|
| Derivate als Sicherungsinstrumente in Fair Value Hedges <sup>1</sup> | 8.447          | 5.823           | 6.726          | 3.240           |

<sup>1</sup> Die Konsolidierung der Postbank erhöhte die Aktiva im Jahr 2010 um 0,7 Mrd € und die Passiva um 1,5 Mrd €.

Im Geschäftsjahr 2010 wies der Konzern einen Gewinn von 0,7 Mrd € (2009: Verlust in Höhe von 1,6 Mrd €) aus Sicherungsinstrumenten aus. Im gleichen Zeitraum belief sich der Verlust aus den abgesicherten Grundgeschäften, der auf das abgesicherte Risiko zurückzuführen war, auf 0,6 Mrd € (2009: Gewinn von 1,5 Mrd €).

Seit ihrer Konsolidierung ist die Postbank mit einem Gewinn in Höhe von 0,3 Mrd € aus Sicherungsinstrumenten und einem Verlust in Höhe von 0,3 Mrd € aus den abgesicherten Grundgeschäften, der auf das abgesicherte Risiko zurückzuführen war, in den vorstehend genannten Zahlen enthalten.

## Cash Flow Hedge Accounting

Der Konzern wendet Cash Flow Hedge Accounting mittels Terminkontrakten auf Aktien, Zinsswaps und Devisentermingeschäfte an, um sich gegen Risiken aus Schwankungen von Aktienindizes, Zinssätzen und Wechselkursen zu schützen.

Die nachstehende Tabelle zeigt den Wert der Derivate, die im Rahmen von Cash Flow Hedges gehalten werden.

| in Mio €                                               | Aktiva<br>2010 | Passiva<br>2010 | Aktiva<br>2009 | Passiva<br>2009 |
|--------------------------------------------------------|----------------|-----------------|----------------|-----------------|
| Derivate als Sicherungsinstrumente in Cash Flow Hedges | 1              | 268             | 2              | 197             |

Die folgende Tabelle zeigt, in welchen Berichtszeiträumen mit dem Auftreten der abgesicherten Cashflows gerechnet wird und wann diese voraussichtlich ergebniswirksam werden.

| in Mio €                     | Bis 1 Jahr | 1 bis 3 Jahre | 3 bis 5 Jahre | über 5 Jahre |
|------------------------------|------------|---------------|---------------|--------------|
| <b>Zum 31. Dezember 2010</b> |            |               |               |              |
| Cashflow aus Aktiva          | 47         | 84            | 56            | 254          |
| Cashflow aus Passiva         | -27        | -50           | -39           | -63          |
| <b>Nettocashflow</b>         | <b>20</b>  | <b>34</b>     | <b>17</b>     | <b>191</b>   |
| <b>Zum 31. Dezember 2009</b> |            |               |               |              |
| Cashflow aus Aktiva          | 42         | 79            | 65            | 106          |
| Cashflow aus Passiva         | -40        | -58           | -27           | -140         |
| <b>Nettocashflow</b>         | <b>2</b>   | <b>21</b>     | <b>38</b>     | <b>-34</b>   |

Diese erwarteten zukünftigen Zahlungsströme stehen im Wesentlichen im Zusammenhang mit den zwei größten Hedgeprogrammen des Konzerns, mit Maher Terminals LLC und mit Abbey Life Assurance Company Limited.

Im Geschäftsjahr 2010 wies der Konzern einen Saldo von minus 321 Mio € (2009: minus 217 Mio €) im Zusammenhang mit Cash Flow Hedges im Eigenkapital aus. Von diesem Saldo entfielen im Jahr 2010 minus 44 Mio € (2009: minus 48 Mio €) auf bereits beendete Programme. Diese Beträge werden zu gegebener Zeit erfolgswirksam aufgelöst.

Im Geschäftsjahr 2010 wurde ein Verlust von 44 Mio € (2009: Gewinn von 119 Mio €) wegen effektiver Cash Flow Hedges im sonstigen Ergebnis (Other comprehensive income) berücksichtigt.

Im Geschäftsjahr 2010 wurde ein Gewinn von 60 Mio € (2009: Verlust von 6 Mio €) vom Eigenkapital in die Gewinn- und Verlustrechnung überführt.

Im Geschäftsjahr 2010 wurde ein Verlust von 3 Mio € (2009: Verlust von 7 Mio €) wegen Hedgeineffektivität erfolgswirksam erfasst.

Mit Stand vom 31. Dezember 2010 wird der Zahlungsstrom mit der längsten Laufzeit im Jahr 2027 fällig.

### Net Investment Hedge Accounting

Der Konzern sichert sich über Devisentermingeschäfte und -swaps gegen Risiken aus der Umrechnung von Abschlüssen ausländischer Tochterunternehmen in die Bilanzwährung der Muttergesellschaft zu Kassakursen am Reportingstichtag ab.

Die nachstehende Tabelle zeigt den Wert der Derivate, die zur Absicherung einer Nettoinvestition in einen ausländischen Geschäftsbetrieb gehalten werden.

| in Mio €                                                    | Aktiva<br>2010 | Passiva<br>2010 | Aktiva<br>2009 | Passiva<br>2009 |
|-------------------------------------------------------------|----------------|-----------------|----------------|-----------------|
| Derivate als Sicherungsinstrumente in Net Investment Hedges | 81             | 528             | 94             | 364             |

Im Geschäftsjahr 2010 wies der Konzern Verluste von 197 Mio € (2009: Verluste von 238 Mio €) aus Hedgeineffektivität aus, was das Forwardelement des Sicherungsinstruments enthält.

## 36 – Aufsichtsrechtliches Kapital

### Kapitalmanagement

Die Treasury Funktion des Konzerns führt das Kapitalmanagement konzernweit sowie regional durch, mit der Ausnahme, dass die Postbank ihr Kapitalmanagement konzernweit sowie regional selbst durchführt. Die Allokation von Finanzressourcen im Allgemeinen und Kapital im Besonderen hat zum Ziel, Geschäftsbereiche zu unterstützen, die den größtmöglichen positiven Effekt auf die Rentabilität und den Shareholder Value des Konzerns aufweisen. Aus diesem Grund ordnet Treasury den Geschäftsbereichen das Kapital in regelmäßigen Abständen neu zu.

Treasury implementiert die Kapitalstrategie des Konzerns, die vom Capital and Risk Committee entwickelt und vom Vorstand genehmigt wird. Dies umfasst auch die Emission und den Rückkauf von Aktien. Es ist Ziel des Konzerns, stets eine solide Kapitalisierung vorzuweisen. Kapitalbedarf und -verfügbarkeit werden permanent überwacht und, falls notwendig, angepasst, um den Bedarf an Kapital unter verschiedenen Aspekten abzudecken. Dazu gehören das ausgewiesene Buchkapital nach IFRS, das Active Book Equity, das aufsichtsrechtliche Kapital sowie das Ökonomische Kapital. Die Zielgröße für die Tier-1-Kapitalquote liegt weiterhin bei oder mehr als 10 %.

Die Allokation des Kapitals, die Festlegung des Finanzierungsplans des Konzerns und ähnliche Ressourcenfragen werden vom Capital and Risk Committee gestaltet.

Regionale Kapitalpläne, die den Kapitalbedarf der Filialen und Tochtergesellschaften des Konzerns abdecken, werden halbjährlich erstellt und dem Group Investment Committee vorgelegt. Die meisten Tochtergesellschaften des Konzerns unterliegen gesetzlichen und aufsichtsrechtlichen Kapitalanforderungen. Lokale Asset and Liability Committees sorgen für die Einhaltung dieser Anforderungen unter Führung regionaler Treasury Teams. Ferner stellen sie die Einhaltung weiterer Anforderungen sicher wie beispielsweise Ausschüttungsbegrenzungen für die Dividende an die Deutsche Bank AG oder Begrenzungen des Kreditvolumens von Tochtergesellschaften an ihre Muttergesellschaft. Bei der Entwicklung, Umsetzung und Prüfung des Kapitals und der Liquidität des Konzerns werden solche gesetzlichen und aufsichtsrechtlichen Anforderungen berücksichtigt.

Am 6. Oktober 2010 schloss die Deutsche Bank AG eine Kapitalerhöhung aus genehmigtem Kapital gegen Bareinlagen ab. Insgesamt wurden 308,6 Millionen neue registrierte nennwertlose Stammaktien ausgegeben, die zu einem Bruttoemissionserlös in Höhe von 10,2 Mrd € führten. Der Nettoemissionserlös betrug 10,1 Mrd € (nach Abzug der Aufwendungen von annähernd 0,1 Mrd € nach Steuern) und wurde vorwiegend zur Abdeckung des Kapitalbedarfs für die Konsolidierung der Postbank Gruppe sowie ergänzend zur Erhöhung des bestehenden Kapitals verwendet.

Treasury führt den Rückkauf von Aktien durch. Zum 1. Januar 2010 betrug der Bestand an zurückgekauften Aktien in Treasury 0,6 Millionen. Die ordentliche Hauptversammlung 2009 erteilte dem Konzernvorstand die Ermächtigung, bis zu 62,1 Millionen Aktien bis Ende Oktober 2010 zurückzukaufen. In der Zeit vom 1. Januar 2010 bis zur ordentlichen Hauptversammlung 2010 wurden 11,1 Millionen Aktien zurückgekauft. Davon wurden 10,6 Millionen Aktien zu Aktienvergütungszwecken eingesetzt. Zur ordentlichen Hauptversammlung 2010 am 27. Mai 2010 betrug der Bestand an zurückgekauften Aktien in Treasury 1,0 Millionen. Die ordentliche Hauptversammlung 2010 erteilte dem Konzernvorstand die Ermächtigung, bis zu 62,1 Millionen Aktien bis Ende November 2014 zurückzukaufen. Davon können 31,0 Millionen über den Einsatz von Derivaten erworben werden. Während des Zeitraums von der Hauptversammlung 2010 bis zum 31. Dezember 2010 wurden 18,8 Millionen Aktien zurückgekauft, davon 0,5 Million über verkaufte Put-Optionen, die von der Gegenpartei zum Fälligkeitstermin ausgeübt wurden. 9,8 Millionen Aktien der insgesamt 18,8 Millionen zurückgekauften Aktien wurden in 2010 zu Aktienvergütungszwecken und 9,0 Millionen Aktien zur Erhöhung des Treasury Bestands des Konzerns für zukünftige aktienbasierte Vergütungspläne verwendet. Zum 31. Dezember 2010 betrug der Bestand an zurückgekauften Aktien in Treasury 10,0 Millionen.

Das insgesamt ausstehende hybride Tier-1-Kapital (im Wesentlichen nicht kumulative Vorzugsanteile, „Non-Cumulative Trust Preferred Securities“) belief sich am 31. Dezember 2010 auf 12,6 Mrd €, verglichen mit 10,6 Mrd € zum 31. Dezember 2009. Dieser Anstieg war im Wesentlichen auf die Konsolidierung von 1,6 Mrd € durch die Postbank emittierten hybridem Tier-1-Kapital sowie auf Währungskurseffekte auf das in US-Dollar begebene hybride Tier-1-Kapital infolge des Anstiegs des US-Dollar zurückzuführen. Im ersten Halbjahr 2010 hat der Konzern durch die Aufstockung einer ausstehenden Emission hybrides Tier-1-Kapital in Höhe von 0,1 Mrd € begeben.



In 2010 hat der Konzern nachrangiges Tier-2-Kapital in Höhe von 1,2 Mrd € begeben (anrechenbare nachrangige Verbindlichkeiten). Die Konsolidierung von durch die Postbank begebenem Tier-2-Kapital erhöhte das nachrangige Tier-2-Kapital um 2,2 Mrd € und das Genussscheinkapital um 1,2 Mrd €. Das Genussscheinkapital betrug nach der Konsolidierung 1,2 Mrd € und war vor der Konsolidierung der Postbank null. Das nachrangige Tier-2-Kapital belief sich am 31. Dezember 2010 auf 10,7 Mrd €, verglichen mit 7,1 Mrd € zum 31. Dezember 2009. Die kumulativen Vorzugsanteile betrugen 0,3 Mrd € zum 31. Dezember 2010 und waren unverändert gegenüber dem Vorjahresende.

### Kapitaladäquanz

Seit 2008 berechnete und veröffentlichte der Deutsche Bank-Konzern Kapitalquoten für die Deutsche Bank-Institutgruppe gemäß dem überarbeiteten Kapitalregelwerk des Baseler Ausschusses von 2004 („Basel II“), das im Kreditwesengesetz und in der Solvabilitätsverordnung in deutsches Recht eingeführt wurde.

Zu den für bankaufsichtsrechtliche Meldezwecke konsolidierten Gesellschaften („Institutgruppe“) zählen gemäß Kreditwesengesetz alle Tochtergesellschaften, die als Kreditinstitute, Finanzdienstleistungsinstitute, Kapitalanlagegesellschaften, Finanzunternehmen, Zahlungsinstitute sowie Anbieter von Nebendienstleistungen einzustufen sind. Davon ausgenommen sind Versicherungsgesellschaften oder Unternehmen außerhalb des Finanzsektors.

Bei Finanzkonglomeraten werden Versicherungsgesellschaften jedoch in die zusätzliche Berechnung der Kapitaladäquanz (auch „Solvabilitätsspanne“) einbezogen. Der Konzern ist seit Oktober 2007 ein Finanzkonglomerat. Die Solvabilitätsspanne des Konzerns als Finanzkonglomerat wird weiterhin von den Bankaktivitäten des Konzerns dominiert.

Das aufsichtsrechtliche Kapital einer Bank, auch Eigenmittel genannt, wird in drei Komponenten unterteilt: Tier-1-Kapital, Tier-2-Kapital und Tier-3-Kapital – und die Summe aus Tier-1-Kapital und Tier-2-Kapital wird auch haftendes Eigenkapital genannt.

- Das Tier-1-Kapital besteht in erster Linie aus dem Stammkapital, den Kapital- und Gewinnrücklagen sowie verschiedenen hybriden Kapitalbestandteilen wie zum Beispiel nicht kumulativen Vorzugsanteilen („Non-cumulative Trust Preferred Securities“), die auch als „Zusätzliches Tier-1-Kapital“ bezeichnet werden. Eigene Aktien im Bestand, Goodwill und sonstige immaterielle Vermögenswerte werden vom Tier-1-Kapital abgezogen. Weitere aufsichtsrechtliche Anpassungen umfassen den Ausschluss des Kapitals von Gesellschaften außerhalb der Institutgruppe und die Umkehrung der Eigenkapitaleffekte aus einer Veränderung des eigenen Kreditrisikos unter der Fair Value Option auf finanzielle Verbindlichkeiten aufgrund des eigenen Kreditrisikos. Das Tier-1-Kapital ohne die hybriden Kapitalbestandteile wird als „Tier-1-Kapital ohne Hybridinstrumente“ bezeichnet.
- Das Tier-2-Kapital umfasst in erster Linie kumulative Vorzugsanteile („Cumulative Trust Preferred Securities“), verschiedene Genussscheine, langfristige nachrangige Verbindlichkeiten sowie 45 % der unrealisierten Gewinne aus bestimmten börsennotierten Wertpapieren.

Bestimmte Posten müssen vom Tier-1- und Tier-2-Kapital in Abzug gebracht werden. Diese umfassen in erster Linie abzugsfähige Investitionen in Banken, Finanzinstitute oder Versicherungsgesellschaften, an denen der Konzern einen Kapitalanteil von mehr als 10 % hält (im Fall der Versicherungsgesellschaften einen Kapital- oder Stimmrechtsanteil von mehr als 20 %, es sei denn, diese werden in die Berechnung der Solvabilitätsspanne des Finanzkonglomerats einbezogen). Weitere Abzugsposten sind darüber hinaus der Betrag, um den der erwartete Verlust für die Forderungsklassen Zentralregierungen, Institute, Unternehmen sowie Mengengeschäft, die auf Basis des Internal Ratings Based Approach („IRBA“) des Konzerns berechnet wurden, die Wertanpassungen und Rückstellungen für diese Positionen übersteigt; die erwarteten

Verluste für bestimmte Beteiligungspositionen („Equity Exposures“); Verbriefungspositionen, die in der Berechnung der risikogewichteten Aktiva nicht enthalten sind; und der Wert der an eine Gegenpartei gelieferten Wertpapiere zuzüglich eventueller Wiederbeschaffungskosten, sofern die geforderte Zahlung nicht innerhalb von fünf Arbeitstagen nach Lieferung von der Gegenpartei geleistet und die Transaktion dem Handelsbuch der Bank zugewiesen wurde.

— Das Tier-3-Kapital besteht überwiegend aus kurzfristigen nachrangigen Verbindlichkeiten.

Nachrangige Verbindlichkeiten können nur in Höhe von maximal 50 % des Tier-1-Kapitals als Tier-2-Kapital angerechnet werden. Das gesamte Tier-2-Kapital ist auf 100 % des Tier-1-Kapitals begrenzt.

Die Tier-1-Kapitalquote ohne Hybridkapital und die Tier-1-Kapitalquote sind die zentralen Kennzahlen für die Kapitaladäquanz international tätiger Banken. Mit diesen Kennzahlen werden das Tier-1-Kapital ohne Hybridkapital und das Tier-1-Kapital einer Bank ins Verhältnis zu ihren Kredit-, Markt- und operationellen Risiken gemäß Basel II (im Konzern insgesamt als „risikogewichtete Aktiva“ oder „RWA“ bezeichnet) gesetzt. Bei der Berechnung der risikogewichteten Aktiva verwendet der Konzern für alle drei Risikoarten interne, von der Bundesanstalt für Finanzdienstleistungsaufsicht (BaFin) genehmigte Modelle. Mehr als 90 % der Engagements des Konzerns, die sich auf bilanzwirksame und bilanzunwirksame Kreditrisiken beziehen, werden mithilfe eines internen Ratingmodells im Rahmen des sogenannten IRBA bewertet. Der überwiegende Teil der Marktrisikokomponente des Konzerns ist ein Vielfaches des ermittelten Value-at-Risk, der für aufsichtsrechtliche Zwecke auf der Grundlage von konzerninternen Modellen berechnet wird. Für den restlichen Teil wird das Standardverfahren angewandt. Für die Ermittlung des operationellen Risikos wendet der Konzern den fortgeschrittenen Messansatz („AMA“) gemäß KWG an.

Die beiden folgenden Tabellen geben einen Überblick über das aufsichtsrechtliche Eigenkapital und die RWA des Konzerns ohne Berücksichtigung der Übergangsposten gemäß § 64h Absatz 3 KWG.

| in Mio €<br>(sofern nicht anders angegeben)        | 31.12.2010     | 31.12.2009     |
|----------------------------------------------------|----------------|----------------|
| Kreditrisiko                                       | 285.218        | 217.003        |
| Marktrisiko <sup>1</sup>                           | 23.660         | 24.880         |
| Operationelles Risiko                              | 37.326         | 31.593         |
| <b>Risikogewichtete Aktiva insgesamt</b>           | <b>346.204</b> | <b>273.476</b> |
| Tier-1-Kapital ohne Hybridinstrumente              | 29.972         | 23.790         |
| Zusätzliches Tier-1-Kapital                        | 12.593         | 10.616         |
| Tier-1-Kapital                                     | 42.565         | 34.406         |
| Tier-2-Kapital                                     | 6.123          | 3.523          |
| Tier-3-Kapital                                     | –              | –              |
| <b>Aufsichtsrechtliches Eigenkapital insgesamt</b> | <b>48.688</b>  | <b>37.929</b>  |
| Tier-1-Kapitalquote ohne Hybridinstrumente         | 8,7 %          | 8,7 %          |
| Tier-1-Kapitalquote                                | 12,3 %         | 12,6 %         |
| Eigenkapitalquote                                  | 14,1 %         | 13,9 %         |

<sup>1</sup> Ein Vielfaches des Value-at-Risk des Konzerns, berechnet mit einem Konfidenzniveau von 99 % und einer Haltedauer von zehn Tagen.

Am 31. Dezember 2010 lag die Gesamtkapitalquote des Konzerns mit 14,1 % sowie mit 13,9 % am 31. Dezember 2009 deutlich über der geforderten Mindestquote von 8 %.

Das Tier-1-Kapital ohne Hybridinstrumente des Konzerns lag am 31. Dezember 2010 bei 30,0 Mrd € und am 31. Dezember 2009 bei 23,8 Mrd € mit einer unveränderten Tier-1-Kapitalquote ohne Hybridinstrumente von 8,7 %. Das Tier-1-Kapital des Konzerns lag am 31. Dezember 2010 bei 42,6 Mrd € und am 31. Dezember 2009 bei 34,4 Mrd €. Die Tier-1-Kapitalquote betrug 12,3 % am 31. Dezember 2010 und 12,6 % am 31. Dezember 2009, jeweils über dem Ziel des Konzerns von 10 %.

Das Tier-2-Kapital des Konzerns lag am 31. Dezember 2010 bei 6,1 Mrd € und am 31. Dezember 2009 bei 3,5 Mrd €. Dies entsprach 14 % beziehungsweise 10 % des Tier-1-Kapitals.

Das Kreditwesengesetz und die Solvabilitätsverordnung verlangten, dass der Konzern sein Marktpreisrisiko zum 31. Dezember 2010 mit aufsichtsrechtlichem Kapital (Tier-1 + Tier-2 + Tier-3) in Höhe von 1.893 Mio € unterlegt (31. Dezember 2009: 1.990 Mio €). Der Konzern hat diese Anforderung vollständig mit Tier-1- und Tier-2-Kapital erfüllt, das für die Mindestabdeckung des Kredit- und operationellen Risikos nicht erforderlich war.

In der nachstehenden Tabelle sind die Komponenten des Tier-1-Kapitals ohne Hybridinstrumente, des Tier-1- und Tier-2-Kapitals der für aufsichtsrechtliche Zwecke konsolidierten Gesellschaften zum 31. Dezember 2010 und 31. Dezember 2009 ohne Berücksichtigung der Übergangsposten gemäß § 64h Absatz 3 KWG aufgeführt.

| in Mio €                                                                                                                                                                                        | 31.12.2010    | 31.12.2009    |
|-------------------------------------------------------------------------------------------------------------------------------------------------------------------------------------------------|---------------|---------------|
| <b>Tier-1-Kapital:</b>                                                                                                                                                                          |               |               |
| <b>Tier-1-Kapital ohne Hybridinstrumente</b>                                                                                                                                                    |               |               |
| Stammaktien                                                                                                                                                                                     | 2.380         | 1.589         |
| Kapitalrücklage                                                                                                                                                                                 | 23.515        | 14.830        |
| Gewinnrücklagen, Eigene Aktien im Bestand, als Verpflichtung zum Erwerb Eigener Aktien ausgewiesenes Eigenkapital, Anpassungen aus der Währungsumrechnung, Anteile ohne beherrschenden Einfluss | 24.797        | 21.807        |
| Vollständig vom Tier-1-Kapital gem. § 10 (2a) KWG in Abzug gebrachte Posten (unter anderem Goodwill und sonstige immaterielle Vermögenswerte)                                                   | - 14.489      | - 10.238      |
| Teilweise vom Tier-1-Kapital gem. § 10 (6) und (6a) KWG in Abzug gebrachte Posten                                                                                                               |               |               |
| Abzugsfähige Investitionen in Banken, Finanzunternehmen und Versicherungsgesellschaften                                                                                                         | - 954         | - 2.120       |
| Verbriefungspositionen, nicht in risikogewichteten Aktiva enthalten                                                                                                                             | - 4.850       | - 1.033       |
| Überschuss von erwarteten Verlusten über Risikovorsorge                                                                                                                                         | - 427         | - 1.045       |
| Teilweise vom Tier-1-Kapital gem. § 10 (6) und (6a) KWG in Abzug gebrachte Posten                                                                                                               | - 6.231       | - 4.198       |
| <b>Tier-1-Kapital ohne Hybridinstrumente</b>                                                                                                                                                    | <b>29.972</b> | <b>23.790</b> |
| <b>Zusätzliches Tier-1-Kapital</b>                                                                                                                                                              |               |               |
| Nicht kumulative Vorzugsanteile <sup>1</sup>                                                                                                                                                    | 12.593        | 10.616        |
| <b>Zusätzliches Tier-1-Kapital</b>                                                                                                                                                              | <b>12.593</b> | <b>10.616</b> |
| <b>Tier-1-Kapital insgesamt gem. § 10 (2a) KWG</b>                                                                                                                                              | <b>42.565</b> | <b>34.406</b> |
| <b>Tier-2-Kapital:</b>                                                                                                                                                                          |               |               |
| Unrealisierte Gewinne aus notierten Wertpapieren (45 % angerechnet)                                                                                                                             | 224           | 331           |
| Genussscheine                                                                                                                                                                                   | 1.151         | -             |
| Kumulative Vorzugsanteile                                                                                                                                                                       | 299           | 294           |
| Anrechenbare nachrangige Verbindlichkeiten                                                                                                                                                      | 10.680        | 7.096         |
| Teilweise vom Tier-2-Kapital gem. § 10 (6) und (6a) KWG in Abzug gebrachte Posten                                                                                                               | - 6.231       | - 4.198       |
| <b>Tier-2-Kapital insgesamt gem. § 10 (2b) KWG</b>                                                                                                                                              | <b>6.123</b>  | <b>3.523</b>  |

<sup>1</sup> Enthielt 20 Mio € stille Beteiligungen zum 31. Dezember 2010.

In der folgenden Tabelle wird die Überleitung des Eigenkapitals nach IFRS auf das Tier-1-Kapital gemäß Basel II ohne Berücksichtigung der Übergangsposten gemäß § 64h Absatz 3 KWG dargestellt.

| in Mio €                                                                                        | 31.12.2010    | 31.12.2009    |
|-------------------------------------------------------------------------------------------------|---------------|---------------|
| <b>Den Deutsche Bank-Aktionären zurechenbares Eigenkapital</b>                                  | <b>48.843</b> | <b>36.647</b> |
| Unrealisierte Gewinne/Verluste (–) aus zur Veräußerung verfügbaren finanziellen Vermögenswerten | 298           | 257           |
| Abgegrenzte künftige Dividende                                                                  | –697          | –466          |
| <b>Active Book Equity</b>                                                                       | <b>48.444</b> | <b>36.438</b> |
| Goodwill und immaterielle Vermögenswerte                                                        | –15.594       | –10.169       |
| Anteile ohne beherrschenden Einfluss                                                            | 1.549         | 1.322         |
| Sonstiges (Konsolidierungs- und aufsichtsrechtliche Anpassungen)                                | 1.804         | 397           |
| Nicht kumulative Vorzugsanteile <sup>1</sup>                                                    | 12.593        | 10.616        |
| Teilweise vom Tier-1-Kapital in Abzug gebrachte Posten                                          | –6.231        | –4.198        |
| <b>Tier-1-Kapital</b>                                                                           | <b>42.565</b> | <b>34.406</b> |

<sup>1</sup> Enthielt 20 Mio € stille Beteiligungen zum 31. Dezember 2010.

Basel II verlangt den Abzug des Goodwill vom Tier-1-Kapital. Für eine Übergangszeit ist es jedoch gemäß § 64h Absatz 3 KWG zulässig, bestimmte Goodwillkomponenten teilweise in das Tier-1-Kapital einzubeziehen. Solche Goodwillkomponenten sind zwar nicht im oben erwähnten aufsichtsrechtlichen Eigenkapital und in den Kapitaladäquanzquoten enthalten, der Konzern nutzt diese Übergangsregelung jedoch für die Meldung seiner Kapitaladäquanzquoten an die deutschen Aufsichtsbehörden.

Am 31. Dezember 2010 betrug der Übergangsposten 390 Mio €, verglichen mit 462 Mio € am 31. Dezember 2009. Für aufsichtsrechtliche Meldezwecke in Deutschland wurden das Tier-1-Kapital, das aufsichtsrechtliche Eigenkapital und die gesamten risikogewichteten Aktiva um diesen Betrag erhöht. Dementsprechend beliefen sich die an die deutschen Aufsichtsbehörden gemeldete Tier-1-Kapitalquote und die Eigenkapitalquote unter Berücksichtigung dieses Postens auf 12,4 % beziehungsweise 14,2 % am 31. Dezember 2010, verglichen zu 12,7 % beziehungsweise 14,0 % am 31. Dezember 2009.

Die Nichteinhaltung der Mindestkapitalanforderungen kann Verfügungen und weitere Maßnahmen seitens der BaFin nach sich ziehen, wie beispielsweise Dividendenzahlungen oder andere Gewinnausschüttungen auf das aufsichtsrechtliche Eigenkapital zu reduzieren oder auszusetzen. Diese könnten erhebliche Auswirkungen auf die Geschäftsaktivitäten des Konzerns haben. Der Deutsche Bank-Konzern hat 2010 die aufsichtsrechtlichen Kapitaladäquanzvorschriften eingehalten.

## 37 – Geschäfte mit nahestehenden Dritten

Dritte Parteien gelten als nahestehend, sofern eine Partei die andere mittelbar oder unmittelbar kontrolliert oder maßgeblichen Einfluss auf deren geschäftliche oder operative Entscheidungen ausüben kann. Zu den nahestehenden Dritten des Konzerns gehören:

- Personen in Schlüsselpositionen, deren nahe Familienangehörige sowie Gesellschaften, die von diesen Personen oder deren nahen Familienangehörigen kontrolliert oder maßgeblich beeinflusst werden oder an denen dieser Personenkreis bedeutende Stimmrechte hält,
- Tochtergesellschaften, Joint Ventures und assoziierte Unternehmen und
- Pensionspläne für Deutsche Bank-Mitarbeiter, die nach Beendigung des Arbeitsverhältnisses in Anspruch genommen werden.

Der Konzern unterhält Geschäftsbeziehungen mit einer Reihe von nahestehenden Dritten. Geschäfte mit diesen Dritten werden im Rahmen des normalen Geschäftsverlaufs durchgeführt und es gelten grundsätzlich die gleichen Bedingungen – einschließlich Zinssätzen und Sicherheiten – wie für im selben Zeitraum getätigte vergleichbare Geschäfte mit Dritten. Diese Geschäfte waren nicht mit ungewöhnlich hohen Einbringlichkeitsrisiken oder anderen ungünstigen Eigenschaften behaftet.

### Geschäfte mit Personen in Schlüsselpositionen

Personen in Schlüsselpositionen sind Personen, die für die Planung, Leitung und Überwachung der Tätigkeiten der Deutschen Bank direkt oder indirekt zuständig und verantwortlich sind. Der Konzern zählt die Mitglieder des Vorstands und des Aufsichtsrats für Zwecke des IAS 24 zu Personen in Schlüsselpositionen.

Die folgende Tabelle zeigt den Personalaufwand für die Personen in Schlüsselpositionen.

| in Mio €                                                      | 2010      | 2009      | 2008      |
|---------------------------------------------------------------|-----------|-----------|-----------|
| Kurzfristig fällige Leistungen                                | 23        | 22        | 9         |
| Leistungen nach Beendigung des Arbeitsverhältnisses           | 3         | 3         | 3         |
| Andere langfristig fällige Leistungen                         | 3         | –         | –         |
| Leistungen aus Anlass der Beendigung des Arbeitsverhältnisses | 2         | –         | –         |
| Aktienbasierte Vergütungen                                    | 6         | 7         | 8         |
| <b>Insgesamt</b>                                              | <b>37</b> | <b>32</b> | <b>20</b> |

Am 31. Dezember 2010 hat der Konzern Kredite und Zusagen in Höhe von 10 Mio € an Personen in Schlüsselpositionen vergeben und Einlagen in Höhe von 9 Mio € von Personen in Schlüsselpositionen erhalten.

Daneben bietet der Konzern Personen in Schlüsselpositionen und deren nahen Familienangehörigen Bankdienstleistungen wie zum Beispiel Zahlungsverkehrs- und Kontoführungsdienstleistungen sowie Anlageberatung an.

Im Geschäftsjahr 2010 erhielt eine Person in Schlüsselposition Zahlungen von einem Konzernunternehmen. Die vertraglich durchsetzbaren Zahlungen sind nicht in dem oben offengelegten Personalaufwand für die Personen in Schlüsselpositionen enthalten. Zum Zeitpunkt der Entstehung der vertraglichen Vereinbarung gehörte das zahlende Unternehmen nicht dem Konsolidierungskreis des Konzerns an.

### Geschäfte mit Tochtergesellschaften, Joint Ventures und assoziierten Unternehmen

Geschäfte zwischen der Deutschen Bank AG und deren Tochtergesellschaften gelten als Geschäfte mit nahestehenden Dritten. Sofern diese Transaktionen bei Konsolidierung eliminiert werden, werden sie nicht als Geschäfte mit nahestehenden Dritten offengelegt. Geschäfte zwischen dem Konzern und seinen assoziierten Unternehmen und Joint Ventures gelten ebenfalls als Geschäfte mit nahestehenden Dritten und werden nachfolgend offengelegt.

## Kredite

| in Mio €                                                                     | 2010         | 2009       |
|------------------------------------------------------------------------------|--------------|------------|
| <b>Bestand am Jahresanfang</b>                                               | <b>965</b>   | <b>834</b> |
| Im Laufe des Jahres begebene Forderungen aus dem Kreditgeschäft <sup>1</sup> | 3.564        | 366        |
| Rückzahlungen von Forderungen aus dem Kreditgeschäft                         | 148          | 209        |
| Veränderung des Konsolidierungskreises <sup>2</sup>                          | – 179        | – 83       |
| Wechselkursveränderungen/Sonstige                                            | 16           | 57         |
| <b>Bestand am Jahresende<sup>3</sup></b>                                     | <b>4.218</b> | <b>965</b> |
| <b>Sonstige kreditrisikobehaftete Transaktionen:</b>                         |              |            |
| Wertberichtigungsbestand für Kreditausfälle                                  | 31           | 4          |
| Wertberichtigungen für Kreditausfälle                                        | 26           | 31         |
| Garantien und sonstige Verpflichtungen <sup>4</sup>                          | 231          | 135        |

<sup>1</sup> Der Anstieg der Forderungen aus dem Kreditgeschäft zum 31. Dezember 2010 resultiert hauptsächlich aus der Restrukturierung eines Kreditgeschäfts. Weitere Informationen sind in Note 17 „Nach der Equitymethode bilanzierte Beteiligungen“ enthalten. Im Zusammenhang mit diesem Geschäft entstandene Zinserträge beliefen sich auf 24 Mio €.

<sup>2</sup> Im Jahr 2010 wurden einige Unternehmen vollkonsolidiert. Im Jahr 2009 ist ein Unternehmen, das nach der Equitymethode bilanziert wurde, verkauft worden. Kredite, die diesen Unternehmen bereitgestellt wurden, wurden bei der Konsolidierung eliminiert.

<sup>3</sup> Im Jahr 2010 war keine dieser Forderungen überfällig. Im Jahr 2009 waren in dieser Summe 15 Mio € überfällig. Für die Forderungen aus dem Kreditgeschäft hielt der Konzern zum 31. Dezember 2010 Sicherheiten in Höhe von 299 Mio € (2009: 375 Mio €). Von den Forderungen aus dem Kreditgeschäft entfielen zum 31. Dezember 2010 4 Mio € (2009: 4 Mio €) auf Joint Ventures. Für diese Forderungen aus dem Kreditgeschäft bestand kein Wertberichtigungsbedarf.

<sup>4</sup> Beinhaltet Finanz- und Performancegarantien, Kreditbriefe, Haftungsübernahmeerklärungen und unwiderrufliche ausleihebezogene Zusagen.

## Einlagen

| in Mio €                                            | 2010       | 2009       |
|-----------------------------------------------------|------------|------------|
| <b>Bestand am Jahresanfang</b>                      | <b>367</b> | <b>246</b> |
| Einlagenzuflüsse                                    | 160        | 287        |
| Einlagenabflüsse                                    | 220        | 161        |
| Veränderung des Konsolidierungskreises <sup>1</sup> | – 93       | – 6        |
| Wechselkursveränderungen/Sonstige                   | 2          | 1          |
| <b>Bestand am Jahresende<sup>2</sup></b>            | <b>216</b> | <b>367</b> |

<sup>1</sup> Im Jahr 2010 wurden einige Unternehmen vollkonsolidiert. Im Jahr 2009 ist ein Unternehmen, das nach der Equitymethode bilanziert wurde, verkauft worden.

<sup>2</sup> Die Einlagen sind unbesichert. Zum 31. Dezember 2010 waren im Bestand 0,4 Mio € (2009: 0,4 Mio €) Einlagen von Joint Ventures enthalten.

## Sonstige Geschäfte

Zum 31. Dezember 2010 bestanden Handelsaktiva und positive Marktwertsalden aus derivativen Finanztransaktionen mit assoziierten Unternehmen in Höhe von 140 Mio € (Dezember 2009: 3,7 Mrd €). Zum 31. Dezember 2010 bestanden Handelspassiva und negative Marktwertsalden aus derivativen Finanztransaktionen mit assoziierten Unternehmen in Höhe von 15 Mio € (Dezember 2009: 3,0 Mrd €). Der Rückgang resultierte hauptsächlich aus der Vollkonsolidierung eines Unternehmens, das vormals nach der Equitymethode bilanziert wurde. Weitere Transaktionen mit nahestehenden Dritten betreffen folgende Ereignisse:

**Xchanging etb GmbH:** Im Zusammenhang mit dem Erwerb der Sal. Oppenheim-Gruppe erhöhte der Konzern seinen Anteil an der Xchanging etb GmbH von 44 % auf 49 %. Der Konzern bilanziert diesen Anteil nach der Equitymethode. Die Xchanging etb GmbH ist die Muttergesellschaft der Xchanging Transaction Bank GmbH („XTB“). Zwei der fünf Geschäftsführer der Xchanging etb GmbH und zwei Mitglieder des Aufsichtsrats der XTB sind Mitarbeiter des Deutsche Bank-Konzerns. Die zwischen dem Konzern und Xchanging getroffenen Vereinbarungen beinhalten einen Auslagerungsvertrag über zwölf Jahre mit der XTB über Wertpapierabwicklungsdienstleistungen und einen Auslagerungsvertrag über zehn Jahre über die Bereitstellung von Wertpapierabwicklungsdienstleistungen für Sal. Oppenheim. Die Auslagerungsverträge zielen auf die Reduzierung der Kosten des Konzerns bei gleichzeitiger Sicherstellung der Servicequalität ab. 2010 belief sich das Volumen der vom Konzern von der XTB erhaltenen Serviceleistungen auf 113 Mio € (2009: 104 Mio €). In 2010 stellte der Konzern der XTB Unterstützungsleistungen (zum Beispiel in Form von EDV- und verschiedenen Immobilienbetreuungsdienstleistungen) im Volumen von 20 Mio € (2009: 29 Mio €) zur Verfügung.

## Geschäfte mit Pensionsplänen

Bestimmte Pläne für Leistungen an Arbeitnehmer nach Beendigung des Arbeitsverhältnisses werden nach IFRS als nahestehende Dritte erachtet. Der Konzern unterhält Geschäftsbeziehungen zu einer Reihe seiner Pensionspläne, für die er Finanzdienstleistungen, einschließlich der Vermögensanlage, erbringt. Pensionspläne des Konzerns können Aktien oder andere Wertpapiere der Deutschen Bank halten oder mit diesen handeln. Die nachfolgende Tabelle zeigt eine Zusammenfassung der Geschäfte mit nahestehenden Pensionsplänen.

| in Mio €                                                                  | 2010      | 2009      |
|---------------------------------------------------------------------------|-----------|-----------|
| <b>Wertpapiere der Deutschen Bank im Planvermögen:</b>                    |           |           |
| Aktien                                                                    | –         | –         |
| Schuldverschreibungen                                                     | 16        | –         |
| Sonstige Wertpapiere                                                      | 83        | 26        |
| <b>Insgesamt</b>                                                          | <b>99</b> | <b>26</b> |
| Von der Deutschen Bank selbst genutzte Immobilien/sonstige Vermögenswerte | –         | –         |
| Marktwert der Derivate mit konzerninternen Kontrahenten                   | –2        | 177       |
| Nominalbetrag der Derivate mit konzerninternen Kontrahenten               | 14.966    | 11.604    |
| Von Pensionsfonds an Deutsche Bank Vermögensverwaltung gezahlte Gebühren  | 24        | 21        |

## 38 – Informationen zu Tochtergesellschaften

Die Anteile an Tochtergesellschaften des Konzerns werden von der Deutschen Bank AG direkt oder indirekt gehalten.

### Wesentliche Tochtergesellschaften

Die folgende Tabelle zeigt die wesentlichen Tochtergesellschaften, an denen die Deutsche Bank AG direkt oder indirekt beteiligt ist.

| Tochtergesellschaft                                                       | Sitz der Gesellschaft                    |
|---------------------------------------------------------------------------|------------------------------------------|
| Taunus Corporation <sup>1</sup>                                           | Delaware, Vereinigte Staaten von Amerika |
| Deutsche Bank Trust Company Americas <sup>2</sup>                         | New York, Vereinigte Staaten von Amerika |
| Deutsche Bank Securities Inc. <sup>3</sup>                                | Delaware, Vereinigte Staaten von Amerika |
| Deutsche Bank Luxembourg S.A. <sup>4</sup>                                | Luxemburg                                |
| Deutsche Bank Privat- und Geschäftskunden Aktiengesellschaft <sup>5</sup> | Frankfurt am Main, Deutschland           |
| DB Valoren S.á.r.l. <sup>6</sup>                                          | Luxemburg                                |
| DB Equity S.á.r.l. <sup>7</sup>                                           | Luxemburg                                |
| Deutsche Postbank AG <sup>8</sup>                                         | Bonn, Deutschland                        |

<sup>1</sup> Holdinggesellschaft für die meisten Tochtergesellschaften in den Vereinigten Staaten von Amerika.

<sup>2</sup> Tochtergesellschaft der Taunus Corporation. Deutsche Bank Trust Company Americas ist eine in New York State zugelassene Bank, die im Kredit- und Einlagengeschäft tätig ist und zahlreiche Bank- und Finanzdienstleistungen erbringt.

<sup>3</sup> Tochtergesellschaft der Taunus Corporation. Deutsche Bank Securities Inc. ist eine bei der amerikanischen Börsenaufsicht (SEC) als Broker registrierte Gesellschaft, Mitglied der New Yorker Börse (New York Stock Exchange) und wird von der Financial Industry Regulatory Authority reguliert. Daneben unterliegt sie den Bestimmungen einzelner staatlicher Wertpapieraufsichtsbehörden in den Staaten, in denen sie ihr Geschäft betreibt.

<sup>4</sup> Die Gesellschaft ist vor allem in den Bereichen Treasury und Markets aktiv und stellt im Deutsche Bank-Konzern insbesondere Euroliquidität zur Verfügung. Weitere Geschäftsfelder sind das Internationale Kreditgeschäft, wo sie als kreditausreichende Stelle für Kontinentaleuropa und seit 2010 als Risikozentrale für den Bereich Loan Exposure Management Group aktiv ist, sowie das Private Banking.

<sup>5</sup> Die Gesellschaft erbringt Bankdienstleistungen für Privat- und Geschäftskunden.

<sup>6</sup> Holdinggesellschaft für die Deutsche Bank-Teilkonzerne in Australien, Neuseeland und Singapur und Holdinggesellschaft der DB Equity S.á.r.l.

<sup>7</sup> Holdinggesellschaft für einen Teil des Anteils an der Deutsche Postbank AG.

<sup>8</sup> Die Geschäftsaktivitäten von diesem Unternehmen umfassen das Privat- und Geschäftskundengeschäft, die Geld- und Kapitalmarktaktivitäten sowie das Bauspargeschäft.



Der Konzern hält 100 % der Kapital- und Stimmrechtsanteile an den zuvor genannten wesentlichen Tochtergesellschaften mit Ausnahme der Deutschen Postbank AG. Der Konzern hält zum 31. Dezember 2010 52,03 % der Kapital- und Stimmrechtsanteile an der Deutschen Postbank AG und unter Berücksichtigung bestimmter Finanzinstrumente einen gesamten Kapitalanteil in Höhe von 79,45 %. Die wesentlichen Tochtergesellschaften erstellen Jahresabschlüsse zum 31. Dezember und sind in den Konzernjahresabschluss einbezogen. Der Schwerpunkt ihrer Geschäftstätigkeit liegt in den Ländern, in denen sie ihren Sitz haben.

Tochtergesellschaften können in ihrer Fähigkeit zum Mitteltransfer, etwa bei Dividendenzahlungen und Darlehenstilgungen, an die Deutsche Bank AG beschränkt sein. Gründe für derartige Beschränkungen sind zum Beispiel:

- Beschränkungen der Zentralbanken aufgrund von lokalen Gesetzen zur Devisenbewirtschaftung,
- Anforderungen der Zentralbanken hinsichtlich einer angemessenen Kapitalausstattung,
- lokale gesellschaftsrechtliche Bestimmungen. Zum Beispiel bestehen Beschränkungen bezüglich des Mitteltransfers zum Mutterunternehmen, wenn die betreffende Einheit einen Verlustvortrag hat, der nicht durch Gewinnrücklagen oder andere Kapitalbestandteile gedeckt ist.

#### Tochtergesellschaften, an denen der Konzern 50 % oder weniger der Stimmrechte hält

Der Konzern konsolidiert einige Tochtergesellschaften, an denen er 50 % oder weniger der Stimmrechte hält. Hierbei handelt es sich im Wesentlichen um Zweckgesellschaften („SPEs“), deren Gründung der Konzern für eine Vielzahl von Zielsetzungen unterstützt.

Geschäftsbeziehungen zu SPEs ergeben sich im Rahmen der üblichen Geschäftstätigkeit vor allem aus Verbriefungen von Vermögenswerten, Commercial-Paper-Programmen, Repackaging und Investmentprodukten, dem Management von Investmentfonds, strukturierten Transaktionen, gewerblichem Immobilienleasing sowie dem Management von geschlossenen Fonds. Zu den diesbezüglichen Aktivitäten des Konzerns zählen die Übertragung von Vermögenswerten auf die Zweckgesellschaften, der Abschluss von Derivatekontrakten mit den SPEs, die Bereitstellung von Garantien und Liquiditätsfazilitäten an die SPEs, das Erbringen von Anlagemanagement- und Verwaltungsleistungen für die SPEs sowie das Halten von Beteiligungen an den SPEs.

#### Gesellschaften, an denen der Konzern mehr als 50 % der Stimmrechte hält

Der Konzern hält direkt oder indirekt mehr als die Hälfte der Stimmrechte von Gesellschaften, beherrscht diese aber nicht, wenn

- ein anderer Investor die Möglichkeit hat, kraft einer mit dem Konzern abgeschlossenen Vereinbarung über mehr als die Hälfte der Stimmrechte zu verfügen;
- ein anderer Investor die Möglichkeit hat, gemäß einer Satzung oder sonstigen Vereinbarung die Finanz- und Geschäftspolitik der Gesellschaft zu bestimmen;
- ein anderer Investor die Möglichkeit hat, die Mehrheit der Mitglieder des Geschäftsführungs- und/oder Aufsichtsorgans zu ernennen oder abzuberufen, wobei die Verfügungsgewalt über die Gesellschaft bei diesen Organen liegt;
- ein anderer Investor die Möglichkeit hat, die Mehrheit der Stimmen bei Sitzungen des Geschäftsführungs- und/oder Aufsichtsorgans oder eines gleichwertigen Leitungsgremiums zu bestimmen, wobei die Verfügungsgewalt über die Gesellschaft bei diesen Organen liegt.

## 39 – Versicherungs- und Investmentverträge

### Verbindlichkeiten aus Versicherungs- und Investmentverträgen

| in Mio €              | 31.12.2010    |                       |               | 31.12.2009    |                       |               |
|-----------------------|---------------|-----------------------|---------------|---------------|-----------------------|---------------|
|                       | Bruttowert    | Rück-<br>versicherung | Nettowert     | Bruttowert    | Rück-<br>versicherung | Nettowert     |
| Versicherungsverträge | 4.899         | – 158 <sup>1</sup>    | 4.741         | 4.613         | – 1.534               | 3.079         |
| Investmentverträge    | 7.898         | –                     | 7.898         | 7.278         | –                     | 7.278         |
| <b>Insgesamt</b>      | <b>12.797</b> | <b>– 158</b>          | <b>12.639</b> | <b>11.891</b> | <b>– 1.534</b>        | <b>10.357</b> |

<sup>1</sup> Im Zusammenhang mit der Änderung in der Darstellung der Rückversicherungen auf Erlebensfallversicherungen, die der Darstellung der netto Cashflows dient, stellen die für Rückversicherungen oben dargestellten Beträge die erwarteten Nettozahlungen aus solchen Verträgen dar. In der Folge reduzieren sich die Beträge 2010 um einen Betrag, der dem Brutto-Bilanzwert der Rentenversicherungen mit Rückversicherungsbezug in Höhe von 1.423 Mio € entspricht.

Generell werden Beträge, die aus Rückversicherungsverträgen resultieren, brutto ausgewiesen, es sei denn, sie haben einen unwesentlichen Einfluss auf die entsprechenden Bilanzpositionen.

### Buchwert

Die folgende Übersicht zeigt eine Analyse der Änderung von Verbindlichkeiten aus Versicherungs- und Investmentverträgen.

| in Mio €                        | 2010                       |                         | 2009                       |                         |
|---------------------------------|----------------------------|-------------------------|----------------------------|-------------------------|
|                                 | Versicherungs-<br>verträge | Investment-<br>verträge | Versicherungs-<br>verträge | Investment-<br>verträge |
| <b>Buchwert am Jahresanfang</b> | <b>4.613</b>               | <b>7.278</b>            | <b>3.963</b>               | <b>5.977</b>            |
| Zugänge                         | 257                        | 153                     | 121                        | 171                     |
| Inanspruchnahmen                | – 463                      | – 609                   | – 285                      | – 549                   |
| Sonstige Veränderungen          | 331                        | 843                     | 427                        | 1.145                   |
| Wechselkursveränderungen        | 161                        | 233                     | 387                        | 534                     |
| <b>Buchwert am Jahresende</b>   | <b>4.899</b>               | <b>7.898</b>            | <b>4.613</b>               | <b>7.278</b>            |

Die Sonstigen Veränderungen der Vermögenswerte in Investmentverträgen in Höhe von 843 Mio € im Geschäftsjahr 2010 (2009: 1.145 Mio €) gehen hauptsächlich auf Marktwertveränderungen der zugrunde liegenden Vermögenswerte zurück.

### Wesentliche Annahmen im Versicherungsgeschäft

Die Verbindlichkeiten ändern sich in Abhängigkeit von Veränderungen der Zinssätze (dies gilt insbesondere für garantierte zukünftige Leistungen), der Anlageerträge sowie der Aufwendungen für Lebensversicherungs- und Rentenversicherungsverträge, für die sich die künftige Sterbewahrscheinlichkeit nicht mit Sicherheit vorhersagen lässt.

Annahmen werden für alle Faktoren getroffen, die zukünftige Cashflows wesentlich beeinflussen. Dazu gehören Annahmen über zukünftige Zinssätze, Sterblichkeitsraten und Kosten. Die Annahmen, die langfristige Versicherungsaktivitäten am stärksten beeinflussen, sind die zur Abzinsung der Cashflows verwendeten Zinssätze und die Sterbewahrscheinlichkeiten, diese insbesondere für Rentenversicherungsverträge.

Die Annahmen werden im Folgenden erläutert:

## Zinssätze

In den zugrunde gelegten Zinssätzen spiegeln sich Schätzungen über zukünftige Anlageerträge wider. Sie beinhalten insofern Annahmen über Art und Laufzeit der zur Deckung der Verbindlichkeiten dienenden Vermögenswerte. Darüber hinaus werden angemessene Risikoabschläge zur Berücksichtigung von Ausfallrisiken berücksichtigt.

## Sterbewahrscheinlichkeit

Die Sterbewahrscheinlichkeiten basieren auf veröffentlichten Sterbetafeln, die entsprechend angepasst wurden, um sowohl den Änderungen der Daten seit Veröffentlichung als auch unternehmensspezifischen Erfahrungswerten und aktualisierten Prognosewerten Rechnung zu tragen. Wenn erforderlich, wird eine angemessene Sicherheitsmarge hinzugefügt, um zukünftige nachteilige Abweichungen von den Erwartungswerten zu berücksichtigen. Die Sterbewahrscheinlichkeit für Rentenversicherungsverträge wird so angepasst, dass sie zukünftigen Erhöhungen der Lebenserwartung von Begünstigten Rechnung trägt. Derzeit wird bei Rentenversicherungsverträgen für die Ermittlung der Erhöhung der Lebenserwartung eine mittelfristige Kohortenprognose genutzt, wobei von einer Mindesterhöhung von 1,25 % pro anno ausgegangen wird.

## Aufwendungen

Für Verträge, die nicht fondsgebunden sind, werden Aufwendungen für zukünftige Versicherungskosten in Abzug gebracht.

## Sonstige Annahmen

Zum Jahresende 2010 wird davon ausgegangen, dass im Rentenversicherungsgeschäft Optionen auf garantierte Rentenzahlungen zu 64 % (2009: 60 %) in Anspruch genommen werden.

## Wesentliche Annahmen zum Wert des erworbenen Versicherungsgeschäfts

Der Wert des erworbenen Versicherungsgeschäfts im Zusammenhang mit der Akquisition der Abbey Life Assurance Company Limited entspricht dem Barwert der zukünftigen Zahlungsströme für den Versicherungsbestand zum Erwerbszeitpunkt. Die in diesem Zusammenhang zu treffenden Annahmen berücksichtigen die geschäftsspezifischen Erfahrungswerte für zukünftige Sterbewahrscheinlichkeiten, Invaliditätsraten, Bestandsfestigkeit und sonstige Aufwendungen. Des Weiteren wurden bei Erwerb auch grundsätzliche Annahmen anhand gesamtwirtschaftlicher Indikatoren zugrunde gelegt.

Der Wert des erworbenen Versicherungsgeschäfts wird über die erwartete Nutzungsdauer des Abbey Life-Geschäfts abgeschrieben, und zwar entweder proportional zu den erwarteten Gewinnen oder dem erwarteten Wert der zu erbringenden Versicherungszahlungen. Zum Ende jeder Berichtsperiode ist der noch bilanzierte Wert des erworbenen Versicherungsgeschäfts mit dem Barwert der zukünftigen Zahlungsströme für den Versicherungsbestand zum Erwerbszeitpunkt zu vergleichen.

Sollten die erwarteten zukünftigen Zahlungsströme unzureichend sein und der Barwert der zukünftigen Zahlungsströme den Bilanzwert unterschreiten, ist der Wert des erworbenen Versicherungsgeschäfts entsprechend zu verringern.

## Wesentliche Änderungen der Annahmen

Bei der Akquisition der Abbey Life Assurance Company Limited im Oktober 2007 wurden deren bis dahin auf Basis regulativer Anforderungen berechneten Verbindlichkeiten für Versicherungsverträge, in Übereinstimmung mit den Vorschriften von IFRS 4, auf Basis von bestmöglicher Schätzung neu berechnet. Die zu diesem Zeitpunkt getroffenen Annahmen für nicht wirtschaftliche Faktoren haben sich nicht geändert. Allerdings wurden die für wirtschaftliche Faktoren getroffenen Annahmen unter Berücksichtigung von Veränderungen wesentlicher Wirtschaftsindikatoren überprüft. Die Verbindlichkeit für Rentenversicherungsverträge wurde mit dem bei erstmaliger Bilanzierung ermittelten Wert angesetzt.

## Sensitivitätsanalyse für Versicherungsverträge

Die folgende Tabelle zeigt die Auswirkung von Änderungen der wesentlichen Annahmen, die der Berechnung der Verbindlichkeiten des Versicherungsgeschäfts zugrunde liegen, auf das Ergebnis vor Steuern und das Eigenkapital. Die Veränderung einer jeden Annahme erfolgt ceteris paribus.

| in Mio €                                                         | Veränderung des Ergebnisses vor Steuern |                   | Veränderung des Eigenkapitals |                   |
|------------------------------------------------------------------|-----------------------------------------|-------------------|-------------------------------|-------------------|
|                                                                  | 2010                                    | 2009 <sup>2</sup> | 2010                          | 2009 <sup>2</sup> |
| <b>Annahme:</b>                                                  |                                         |                   |                               |                   |
| Sterbewahrscheinlichkeit <sup>1</sup> (Verschlechterung um 10 %) | – 12                                    | – 11              | – 9                           | – 8               |
| Aufwand (Anstieg um 10 %)                                        | – 2                                     | – 2               | – 1                           | – 1               |
| Zinssätze (Anstieg um 1 %)                                       | 14                                      | 7                 | – 112                         | – 108             |

<sup>1</sup> Dem Effekt der Sterbewahrscheinlichkeit liegen ein Rückgang im Rentenversicherungsgeschäft um 10 % und ein Anstieg im sonstigen Geschäft um 10 % zugrunde.

<sup>2</sup> Vorjahreswerte wurden angepasst.

Für bestimmte Versicherungsverträge enthält die Bewertungsgrundlage eine sogenannte Sicherheitsmarge („Provision for Adverse Deviations“). Für diese Verträge würde eine Verschlechterung der Annahmen für die Einflussfaktoren so lange keine Anpassung der Rückstellung zur Folge haben, bis die Sicherheitsmarge aufgezehrt ist. Ebenso bewirkte eine Verbesserung der Annahmen für die Einflussfaktoren keine Erhöhung der Rückstellung. Deshalb handelt es sich bei den in der Sensitivitätsanalyse gezeigten Auswirkungen im Fall einer angenommenen Verschlechterung der Einflussfaktoren um jenen Betrag, um den die Verbindlichkeit die Sicherheitsmarge am Bilanzstichtag überschreitet. Aus diesem Grund sollten die in dieser Tabelle bereitgestellten Informationen nicht dazu verwendet werden, Rückschlüsse auf die Auswirkungen anderweitiger Veränderungen zu ziehen. Ebenso lässt sich daraus nicht ableiten, welche Veränderungen zu einem anderen Zeitpunkt auftreten könnten.

## 40 – Kurz- und langfristige Vermögenswerte und Verbindlichkeiten

Die folgenden Tabellen zeigen die Gliederung der zum 31. Dezember 2010 und zum 31. Dezember 2009 in der Bilanz ausgewiesenen Vermögenswerte nach ihren Realisierungs- oder Erfüllungszeitpunkten.

Die Aktivpositionen zum 31. Dezember 2010 gliedern sich wie folgt:

| in Mio €                                                                                              | Realisierung oder Erfüllung |                | Insgesamt        |
|-------------------------------------------------------------------------------------------------------|-----------------------------|----------------|------------------|
|                                                                                                       | in 2011                     | nach 2011      | 31.12.2010       |
| Barreserve                                                                                            | 17.157                      | –              | 17.157           |
| Verzinsliche Einlagen bei Kreditinstituten                                                            | 91.471                      | 906            | 92.377           |
| Forderungen aus übertragenen Zentralbankeinlagen und aus Wertpapierpensionsgeschäften (Reverse Repos) | 19.923                      | 442            | 20.365           |
| Forderungen aus Wertpapierleihen                                                                      | 28.916                      | –              | 28.916           |
| Zum Fair Value bewertete finanzielle Vermögenswerte                                                   | 1.069.579                   | 31.418         | 1.100.997        |
| Zur Veräußerung verfügbare finanzielle Vermögenswerte                                                 | 7.859                       | 46.407         | 54.266           |
| Nach der Equitymethode bilanzierte Beteiligungen                                                      | –                           | 2.608          | 2.608            |
| Forderungen aus dem Kreditgeschäft                                                                    | 128.157                     | 279.572        | 407.729          |
| Sachanlagen                                                                                           | –                           | 5.802          | 5.802            |
| Goodwill und sonstige immaterielle Vermögenswerte                                                     | –                           | 15.594         | 15.594           |
| Sonstige Aktiva                                                                                       | 137.751                     | 11.478         | 149.229          |
| Steuerforderungen aus laufenden Steuern                                                               | 2.048                       | 201            | 2.249            |
| <b>Summe der Aktiva vor Steuerforderungen aus latenten Steuern</b>                                    | <b>1.502.861</b>            | <b>394.428</b> | <b>1.897.289</b> |
| Steuerforderungen aus latenten Steuern                                                                | –                           | –              | 8.341            |
| <b>Summe der Aktiva</b>                                                                               | <b>–</b>                    | <b>–</b>       | <b>1.905.630</b> |

Die Verbindlichkeiten zum 31. Dezember 2010 gliedern sich wie folgt:

| in Mio €                                                                                            | Realisierung oder Erfüllung |                | Insgesamt        |
|-----------------------------------------------------------------------------------------------------|-----------------------------|----------------|------------------|
|                                                                                                     | in 2011                     | nach 2011      | 31.12.2010       |
| Einlagen                                                                                            | 475.255                     | 58.729         | 533.984          |
| Verbindlichkeiten aus übertragenen Zentralbankeinlagen und aus Wertpapierpensionsgeschäften (Repos) | 26.314                      | 1.608          | 27.922           |
| Verbindlichkeiten aus Wertpapierleihen                                                              | 3.078                       | 198            | 3.276            |
| Zum Fair Value bewertete finanzielle Verpflichtungen                                                | 833.642                     | 20.440         | 854.082          |
| Sonstige kurzfristige Geldaufnahmen                                                                 | 64.990                      | –              | 64.990           |
| Sonstige Passiva                                                                                    | 169.192                     | 12.635         | 181.827          |
| Rückstellungen                                                                                      | 2.204                       | –              | 2.204            |
| Steuerverbindlichkeiten aus laufenden Steuern                                                       | 960                         | 1.776          | 2.736            |
| Langfristige Verbindlichkeiten                                                                      | 28.870                      | 140.790        | 169.660          |
| Hybride Kapitalinstrumente (Trust Preferred Securities)                                             | 1.334                       | 10.916         | 12.250           |
| Verpflichtung zum Erwerb Eigener Aktien                                                             | –                           | –              | –                |
| <b>Summe der Verbindlichkeiten vor Steuerverbindlichkeiten aus latenten Steuern</b>                 | <b>1.605.839</b>            | <b>247.092</b> | <b>1.852.931</b> |
| Steuerverbindlichkeiten aus latenten Steuern                                                        | –                           | –              | 2.307            |
| <b>Summe der Verbindlichkeiten</b>                                                                  | <b>–</b>                    | <b>–</b>       | <b>1.855.238</b> |

Die Aktivpositionen zum 31. Dezember 2009 gliedern sich wie folgt:

| in Mio €                                                                                              | Realisierung oder Erfüllung |                | Insgesamt        |
|-------------------------------------------------------------------------------------------------------|-----------------------------|----------------|------------------|
|                                                                                                       | in 2010                     | nach 2010      | 31.12.2009       |
| Barreserve                                                                                            | 9.346                       | –              | 9.346            |
| Verzinsliche Einlagen bei Kreditinstituten                                                            | 46.383                      | 850            | 47.233           |
| Forderungen aus übertragenen Zentralbankeinlagen und aus Wertpapierpensionsgeschäften (Reverse Repos) | 6.587                       | 233            | 6.820            |
| Forderungen aus Wertpapierleihen                                                                      | 43.509                      | –              | 43.509           |
| Zum Fair Value bewertete finanzielle Vermögenswerte                                                   | 943.143                     | 22.177         | 965.320          |
| Zur Veräußerung verfügbare finanzielle Vermögenswerte                                                 | 3.605                       | 15.214         | 18.819           |
| Nach der Equitymethode bilanzierte Beteiligungen                                                      | –                           | 7.788          | 7.788            |
| Forderungen aus dem Kreditgeschäft                                                                    | 93.781                      | 164.324        | 258.105          |
| Sachanlagen                                                                                           | –                           | 2.777          | 2.777            |
| Goodwill und sonstige immaterielle Vermögenswerte                                                     | –                           | 10.169         | 10.169           |
| Sonstige Aktiva                                                                                       | 113.255                     | 8.283          | 121.538          |
| Steuerforderungen aus laufenden Steuern                                                               | 1.247                       | 843            | 2.090            |
| <b>Summe der Aktiva vor Steuerforderungen aus latenten Steuern</b>                                    | <b>1.260.856</b>            | <b>232.658</b> | <b>1.493.514</b> |
| Steuerforderungen aus latenten Steuern                                                                | –                           | –              | 7.150            |
| <b>Summe der Aktiva</b>                                                                               | <b>–</b>                    | <b>–</b>       | <b>1.500.664</b> |

Die Verbindlichkeiten zum 31. Dezember 2009 gliedern sich wie folgt:

| in Mio €                                                                                            | Realisierung oder Erfüllung |                | Insgesamt        |
|-----------------------------------------------------------------------------------------------------|-----------------------------|----------------|------------------|
|                                                                                                     | in 2010                     | nach 2010      | 31.12.2009       |
| Einlagen                                                                                            | 310.805                     | 33.415         | 344.220          |
| Verbindlichkeiten aus übertragenen Zentralbankeinlagen und aus Wertpapierpensionsgeschäften (Repos) | 45.453                      | 42             | 45.495           |
| Verbindlichkeiten aus Wertpapierleihen                                                              | 5.098                       | 466            | 5.564            |
| Zum Fair Value bewertete finanzielle Verpflichtungen                                                | 702.804                     | 19.470         | 722.274          |
| Sonstige kurzfristige Geldaufnahmen                                                                 | 42.897                      | –              | 42.897           |
| Sonstige Passiva                                                                                    | 147.506                     | 6.775          | 154.281          |
| Rückstellungen                                                                                      | 1.307                       | –              | 1.307            |
| Steuerverbindlichkeiten aus laufenden Steuern                                                       | 729                         | 1.412          | 2.141            |
| Langfristige Verbindlichkeiten                                                                      | 18.895                      | 112.887        | 131.782          |
| Hybride Kapitalinstrumente (Trust Preferred Securities)                                             | 746                         | 9.831          | 10.577           |
| Verpflichtung zum Erwerb Eigener Aktien                                                             | –                           | –              | –                |
| <b>Summe der Verbindlichkeiten vor Steuerverbindlichkeiten aus latenten Steuern</b>                 | <b>1.276.240</b>            | <b>184.298</b> | <b>1.460.538</b> |
| Steuerverbindlichkeiten aus latenten Steuern                                                        | –                           | –              | 2.157            |
| <b>Summe der Verbindlichkeiten</b>                                                                  | <b>–</b>                    | <b>–</b>       | <b>1.462.695</b> |

## 41 – Ergänzende Erläuterungen zum Konzernabschluss gemäß § 315a HGB

Gemäß § 315a Handelsgesetzbuch („HGB“) sind in einem Konzernabschluss nach IFRS die nachfolgenden Zusatzangaben bereitzustellen.

### Personalaufwand

| in Mio €                    | 2010          | 2009          |
|-----------------------------|---------------|---------------|
| <b>Personalaufwand:</b>     |               |               |
| Löhne und Gehälter          | 10.786        | 9.336         |
| Soziale Abgaben             | 1.885         | 1.974         |
| davon: für Altersversorgung | 440           | 472           |
| <b>Insgesamt</b>            | <b>12.671</b> | <b>11.310</b> |

### Mitarbeiterinnen und Mitarbeiter

Die durchschnittliche Anzahl der während des Geschäftsjahres beschäftigten Mitarbeiter (arbeitswirksam) betrug insgesamt 82.434 (2009: 79.098), darunter befanden sich 34.529 (2009: 33.400) Mitarbeiterinnen. Teilzeitkräfte sind in diesen Zahlen entsprechend der geleisteten Arbeitszeit anteilig enthalten. Im Ausland waren im Durchschnitt 51.268 (2009: 51.183) Mitarbeiterinnen und Mitarbeiter tätig.

### Bezüge des Vorstands und Aufsichtsrats

Im Jahr 2010 beliefen sich die Gesamtbezüge des Vorstands auf 33.230.174 € (2009: 35.023.965 €), davon entfielen im Geschäftsjahr 2010 23.022.336 € (2009: 28.224.619 €) auf variable Vergütungsbestandteile.

An frühere Vorstandsmitglieder der Deutschen Bank AG oder deren Hinterbliebene wurden im Jahr 2010 18.083.535 € (2009: 19.849.430 €) gezahlt.

Der Aufsichtsrat erhielt für 2010 exklusive Umsatzsteuer eine feste Vergütung (inklusive Sitzungsgeld) von 2.453.000 € (2009: 2.436.000 €). Eine variable, erfolgsabhängige Vergütung wurde für 2010 nicht gezahlt, da die in der Satzung festgeschriebenen Hürden hinsichtlich der Dividende und des Gewinns pro Aktie (verwässert) nicht erreicht wurden (variable Vergütung für 2009: 125.316 €).

Die Pensionsverpflichtungen gegenüber früheren Mitgliedern des Vorstands und ihren Hinterbliebenen betrugen am 31. Dezember 2010 insgesamt 167.660.106 € (2009: 171.135.197 €).

Am 31. Dezember 2010 beliefen sich die gewährten Vorschüsse, Kredite sowie eingegangenen Haftungsverhältnisse für Vorstandsmitglieder auf 7.321.343 € (2009: 8.128.645 €) und für Aufsichtsratsmitglieder der Deutschen Bank AG auf 2.633.122 € (2009: 1.166.445 €). Aufsichtsratsmitglieder zahlten 2010 Kredite in Höhe von 174.314 € zurück.



## Corporate Governance

Die Deutsche Bank Aktiengesellschaft hat die nach § 161 Aktiengesetz vorgeschriebene Erklärung abgegeben und unter <http://www.deutsche-bank.de/ir/de/content/entsprechenserklaerungen.htm> publiziert.

## Wesentliche Prüfungshonorare und -leistungen

Die Tabelle zeigt die vom Abschlussprüfer abgerechneten Honorare für die Geschäftsjahre 2010 und 2009 in den folgenden Kategorien.

| Kategorie in Mio €                         | 2010      | 2009      |
|--------------------------------------------|-----------|-----------|
| Prüfungshonorare                           | 53        | 45        |
| davon an KPMG Europe LLP                   | 37        | 29        |
| Honorare für prüfungsnahе Dienstleistungen | 9         | 6         |
| davon an KPMG Europe LLP                   | 7         | 4         |
| Honorare für Steuerberatung                | 7         | 5         |
| davon an KPMG Europe LLP                   | 4         | 2         |
| Sonstige Honorare                          | 2         | –         |
| davon an KPMG Europe LLP                   | 1         | –         |
| <b>Summe der Honorare</b>                  | <b>71</b> | <b>56</b> |

Weitere Informationen zu den Prüfungshonoraren sind in der Erklärung zur Unternehmensführung/Corporate-Governance-Bericht enthalten.

## 42 – Anteilsbesitz

Verbundene Unternehmen – 327

Zweckgesellschaften und ähnliche Strukturen – 349

Nach der Equitymethode bilanzierte Beteiligungen – 364

Andere Unternehmen, an denen mindestens 20% der Kapitalanteile gehalten werden – 368

Beteiligungen an großen Kapitalgesellschaften, bei denen die Beteiligung 5%  
der Stimmrechte überschreitet – 370

Nachfolgende Seiten zeigen den Anteilsbesitz des Konzerns Deutsche Bank gemäß § 313 Absatz 2 HGB.

Fußnoten:

- 1 Control-Verhältnis über geschäftsführenden Komplementär.
- 2 Control-Verhältnis durch Repräsentanz im Leitungsgremium.
- 3 Control-Verhältnis, da jederzeit ausübbarer Optionen gehalten werden, die den Anteil des Deutsche Bank-Konzerns auf über 50% erhöhen können.
- 4 Spezialfonds.
- 5 Control-Verhältnis.
- 6 Gemäß IFRS 5 als zur Veräußerung gehaltener Vermögenswert klassifiziert.
- 7 Von dieser Gesellschaft wurden nur spezifische Aktiva und darauf bezogene Passiva (Silos) konsolidiert.
- 8 Bestehend aus 768 eigenständigen Trusts (nur abweichend in Nummer / Laufzeit), die kommunale Schuldverschreibungen kaufen und hierfür Short Puttable Exempt Adjusted Receipts (SPEARs) und Long Inverse Floating Exempt Receipts (LIFERs) ausgeben, die dann an Investoren verkauft werden.
- 9 Nach der Equitymethode bilanzierte Beteiligung wegen signifikantem Einfluss.
- 10 Name der Gesellschaft per 18.01.2011 geändert von Argon New S.à r.l.
- 11 Kein Control-Verhältnis.
- 12 Nach IFRS als nicht zu konsolidierende Zweckgesellschaft klassifiziert.
- 13 Nach IFRS als nicht nach der Equitymethode zu bilanzierende Zweckgesellschaft klassifiziert.
- 14 Nicht konsolidiert oder als nach der Equitymethode bilanzierte Beteiligung bewertet, da zur Veräußerung verfügbare Wertpapiere.
- 15 Anteile werden als Sicherheit gehalten.
- 16 Nicht nach der Equitymethode bilanzierte Beteiligung, sondern mit beizulegendem Zeitwert (Fair Value) bewertet.
- 17 Muttergesellschaft ist als nach der Equitymethode bilanzierte Beteiligung bewertet.

| Lfd. Nr. | Name der Gesellschaft                                                              | Sitz der Gesellschaft | Fußnote | Anteil am Kapital in % |
|----------|------------------------------------------------------------------------------------|-----------------------|---------|------------------------|
| 1        | Deutsche Bank Aktiengesellschaft                                                   | Frankfurt am Main     |         |                        |
| 2        | A-AT Gestion                                                                       | Paris                 |         | 99,9                   |
| 3        | Abbey Life Assurance Company Limited                                               | London                |         | 100,0                  |
| 4        | Abbey Life Trust Securities Limited                                                | London                |         | 100,0                  |
| 5        | Abbey Life Trustee Services Limited                                                | London                |         | 100,0                  |
| 6        | ABFS I Incorporated                                                                | Baltimore             |         | 100,0                  |
| 7        | ABS Leasing Services Company                                                       | Chicago               |         | 100,0                  |
| 8        | ABS MB Limited                                                                     | Baltimore             |         | 100,0                  |
| 9        | Absolute Energy S.r.l.                                                             | Rom                   |         | 100,0                  |
| 10       | AC VII Privatkunden GmbH & Co. KG                                                  | München               | 1       | 0,0                    |
| 11       | Acanfeld Limited                                                                   | Bangkok               |         | 99,9                   |
| 12       | Accounting Solutions Holding Company, Inc.                                         | Wilmington            |         | 100,0                  |
| 13       | ADARA Beteiligungs- und Verwaltungs GmbH                                           | Köln                  |         | 100,0                  |
| 14       | ADD ONE GmbH & Co. KG                                                              | München               | 1       | 0,0                    |
| 15       | Advent Chestnut VI GmbH & Co. KG                                                   | München               | 1       | 0,1                    |
| 16       | Affordable Housing I LLC                                                           | Wilmington            |         | 100,0                  |
| 17       | Agripower Buddosò Società Agricola a Responsabilità Limitata                       | Pesaro                | 2, 3    | 9,0                    |
| 18       | AheadCom Beteiligungs-GmbH                                                         | Frankfurt             |         | 100,0                  |
| 19       | Airport Club für International Executives GmbH                                     | Frankfurt             |         | 84,0                   |
| 20       | Alex. Brown Financial Services Incorporated                                        | Baltimore             |         | 100,0                  |
| 21       | Alex. Brown Investments Incorporated                                               | Baltimore             |         | 100,0                  |
| 22       | Alex. Brown Management Services, Inc.                                              | Baltimore             |         | 100,0                  |
| 23       | Alfred Herrhausen Gesellschaft - Das internationale Forum der Deutschen Bank - mbH | Berlin                |         | 100,0                  |
| 24       | Allsar Inc.                                                                        | Wilmington            |         | 100,0                  |
| 25       | Alpha Investment Management S.A.M.                                                 | Monte Carlo           |         | 100,0                  |
| 26       | Altamira LLC                                                                       | Wilmington            |         | 100,0                  |
| 27       | "Alwa" Gesellschaft für Vermögensverwaltung mit beschränkter Haftung               | Frankfurt             |         | 100,0                  |
| 28       | AMADEUS II 'D' GmbH & Co. KG                                                       | München               |         | 99,9                   |
| 29       | America/Asia Private Equity Portfolio (PE-US/ASIA) GmbH & Co. KG                   | München               | 1       | 0,2                    |
| 30       | Americas Trust Servicios de Consultoria, S.A.                                      | Madrid                |         | 100,0                  |
| 31       | Anemos ITA 1 S.r.l.                                                                | Rom                   |         | 100,0                  |
| 32       | Annandale LLC                                                                      | Wilmington            |         | 100,0                  |
| 33       | Antelope Pension Trustee Services Limited                                          | London                |         | 100,0                  |
| 34       | AO DB Securities (Kazakhstan)                                                      | Alma Ata              |         | 100,0                  |
| 35       | Apex Fleet Inc.                                                                    | Wilmington            |         | 100,0                  |
| 36       | APOLLON Vermögensverwaltungsgesellschaft mbH                                       | Köln                  |         | 100,0                  |
| 37       | Aqueduct Capital S.à r.l.                                                          | Luxemburg             |         | 100,0                  |
| 38       | Arche Investments Limited                                                          | London                |         | 100,0                  |
| 39       | Argent Incorporated                                                                | Baltimore             |         | 100,0                  |
| 40       | ATHOS Beteiligungs- und Verwaltungs-GmbH                                           | Köln                  |         | 100,0                  |
| 41       | Atlantic No. 1 Limited (in member's voluntary liquidation)                         | London                |         | 100,0                  |
| 42       | Autumn Leasing Limited                                                             | London                |         | 100,0                  |
| 43       | Avatar Finance                                                                     | Georgetown            |         | 100,0                  |
| 44       | AXOS Beteiligungs- und Verwaltungs-GmbH                                            | Köln                  |         | 100,0                  |
| 45       | B.T. Vordertaunus (Luxembourg), S.à r.l.                                           | Luxemburg             |         | 100,0                  |
| 46       | B.T.I. Investments                                                                 | London                |         | 100,0                  |
| 47       | B.V. Matura Handelsmaatschappij                                                    | Amsterdam             |         | 100,0                  |
| 48       | BAG                                                                                | Frankfurt             | 4       | 100,0                  |
| 49       | BAG 2                                                                              | Frankfurt             | 4       | 100,0                  |
| 50       | Baincor Nominees Pty. Limited                                                      | Sydney                |         | 100,0                  |
| 51       | Bainpro Nominees Pty. Limited                                                      | Sydney                |         | 100,0                  |
| 52       | Bainsec Nominees Pty. Limited                                                      | Sydney                |         | 100,0                  |
| 53       | BAL Servicing Corporation                                                          | Wilmington            |         | 100,0                  |
| 54       | Bank Sal. Oppenheim jr. & Cie. (Schweiz) AG                                        | Zürich                |         | 100,0                  |
| 55       | Bankers Company, Inc.                                                              | Trenton               |         | 100,0                  |
| 56       | Bankers International Corporation                                                  | New York              |         | 100,0                  |

| Lfd.<br>Nr. | Name der Gesellschaft                                                                     | Sitz der Gesellschaft | Fußnote | Anteil am<br>Kapital<br>in % |
|-------------|-------------------------------------------------------------------------------------------|-----------------------|---------|------------------------------|
| 57          | Bankers International Corporation (Brasil) Ltda.                                          | Sao Paulo             |         | 100,0                        |
| 58          | Bankers Trust Caribe Capital Markets, Inc.                                                | Hato Rey              |         | 100,0                        |
| 59          | Bankers Trust International Finance (Jersey) Limited                                      | St. Helier            |         | 100,0                        |
| 60          | Bankers Trust International Limited                                                       | London                |         | 100,0                        |
| 61          | Bankers Trust Investments Limited                                                         | London                |         | 100,0                        |
| 62          | Bankers Trust Nominees Limited                                                            | London                |         | 100,0                        |
| 63          | Barkly Investments Ltd.                                                                   | St. Helier            |         | 100,0                        |
| 64          | Bayan Delinquent Loan Recovery 1 (SPV-AMC), Inc.                                          | Makati Stadt          |         | 100,0                        |
| 65          | Beachwood Properties Corp.                                                                | Wilmington            | 5       | 0,0                          |
| 66          | Bebek Varlik Yönetim A.S.                                                                 | Istanbul              |         | 100,0                        |
| 67          | Beheer- en Beleggingsmaatschappij Evergreen Global Intellectual Transaction Services B.V. | Amsterdam             |         | 100,0                        |
| 68          | Bellstead Holdings Limited                                                                | Gibraltar             |         | 100,0                        |
| 69          | Berliner Bank Beteiligungs AG                                                             | Berlin                |         | 100,0                        |
| 70          | Beteiligungsgesellschaft für Flugzeugleasing mit beschränkter Haftung i.L.                | Frankfurt             |         | 100,0                        |
| 71          | Betriebs-Center für Banken AG                                                             | Frankfurt             |         | 100,0                        |
| 72          | Betriebs-Center für Banken Processing GmbH                                                | Frankfurt             |         | 100,0                        |
| 73          | BfI-Beteiligungsgesellschaft für Industrierwerte mbH                                      | Frankfurt             |         | 100,0                        |
| 74          | BHF Club Deal GmbH                                                                        | Frankfurt             |         | 100,0                        |
| 75          | BHF Grundbesitz-Verwaltungsgesellschaft mbH                                               | Frankfurt             |         | 100,0                        |
| 76          | BHF Grundbesitz-Verwaltungsgesellschaft mbH & Co. am Kaiserlei OHG                        | Frankfurt             |         | 100,0                        |
| 77          | BHF Immobilien-GmbH                                                                       | Frankfurt             |         | 100,0                        |
| 78          | BHF Lux Immo S.A.                                                                         | Luxemburg             |         | 100,0                        |
| 79          | BHF PEP I Beteiligungsgesellschaft mbH                                                    | München               |         | 100,0                        |
| 80          | BHF PEP II Beteiligungsgesellschaft mbH                                                   | München               |         | 100,0                        |
| 81          | BHF PEP III Beteiligungsgesellschaft mbH                                                  | München               |         | 100,0                        |
| 82          | BHF Private Equity Management GmbH                                                        | Frankfurt             |         | 100,0                        |
| 83          | BHF Private Equity Portfolio GmbH & Co. Beteiligungs KG Nr. 1                             | München               | 1       | 0,4                          |
| 84          | BHF Private Equity Portfolio GmbH & Co. Beteiligungs KG Nr. 2                             | München               | 1       | 0,3                          |
| 85          | BHF Private Equity Portfolio GmbH & Co. Beteiligungs KG Nr. 3                             | München               | 1       | 0,4                          |
| 86          | BHF Private Equity Treuhand- und Beratungsgesellschaft mbH                                | Frankfurt             |         | 100,0                        |
| 87          | BHF Trust Management Gesellschaft für Vermögensverwaltung mbH                             | Frankfurt             |         | 100,0                        |
| 88          | BHF Zurich Family Office AG                                                               | Zürich                |         | 100,0                        |
| 89          | BHF-BANK (Schweiz) AG                                                                     | Zürich                |         | 100,0                        |
| 90          | BHF-BANK Aktiengesellschaft                                                               | Frankfurt             |         | 100,0                        |
| 91          | BHF-BANK International S.A.                                                               | Luxemburg             |         | 100,0                        |
| 92          | BHF-Betriebsservice GmbH                                                                  | Frankfurt             |         | 100,0                        |
| 93          | BHW - Gesellschaft für Wohnungswirtschaft mbH                                             | Hameln                |         | 100,0                        |
| 94          | BHW - Gesellschaft für Wohnungswirtschaft mbH & Co. Immobilienverwaltungs KG              | Hameln                |         | 100,0                        |
| 95          | BHW Bausparkasse Aktiengesellschaft                                                       | Hameln                |         | 100,0                        |
| 96          | BHW Direktservice GmbH                                                                    | Hameln                |         | 100,0                        |
| 97          | BHW Eurofinance B.V.                                                                      | Amheim                |         | 100,0                        |
| 98          | BHW Financial S.r.l.                                                                      | Verona                |         | 100,0                        |
| 99          | BHW Gesellschaft für Vorsorge mbH                                                         | Hameln                |         | 100,0                        |
| 100         | BHW Holding Aktiengesellschaft                                                            | Berlin                |         | 100,0                        |
| 101         | BHW Immobilien GmbH                                                                       | Hameln                |         | 100,0                        |
| 102         | BHW Invest, Société à responsabilité limitée                                              | Luxemburg             |         | 100,0                        |
| 103         | Billboard Partners L.P.                                                                   | Georgetown            |         | 99,9                         |
| 104         | Biomass Holdings S.à r.l.                                                                 | Luxemburg             |         | 100,0                        |
| 105         | Bleeker Investments Limited                                                               | Wilmington            |         | 100,0                        |
| 106         | Blue Cork, Inc.                                                                           | Wilmington            |         | 100,0                        |
| 107         | Blue Ridge CLO Holding Company LLC                                                        | Wilmington            |         | 100,0                        |
| 108         | Bluewater Creek Management Co.                                                            | Wilmington            |         | 100,0                        |
| 109         | BNA Nominees Pty. Limited                                                                 | Sydney                |         | 100,0                        |
| 110         | Bonsai Investment AG                                                                      | Frauenfeld            |         | 100,0                        |
| 111         | Borfield S.A.                                                                             | Montevideo            |         | 100,0                        |
| 112         | BRIMCO, S. de R.L. de C.V.                                                                | Mexiko Stadt          |         | 100,0                        |

| Lfd.<br>Nr. | Name der Gesellschaft                                                   | Sitz der Gesellschaft | Fußnote | Anteil am<br>Kapital<br>in % |
|-------------|-------------------------------------------------------------------------|-----------------------|---------|------------------------------|
| 113         | Britannia Limited                                                       | London                |         | 100,0                        |
| 114         | Broome Investments Limited                                              | Wilmington            |         | 100,0                        |
| 115         | BT (Far East) Limited                                                   | Hongkong              |         | 100,0                        |
| 116         | BT American Securities (Luxembourg), S.à r.l.                           | Luxemburg             |         | 100,0                        |
| 117         | BT Azure No. 1 Limited                                                  | Georgetown            |         | 100,0                        |
| 118         | BT Ben Nevis Limited                                                    | Georgetown            |         | 100,0                        |
| 119         | BT Cayman Income No. 1                                                  | Georgetown            |         | 100,0                        |
| 120         | BT Commercial Corporation                                               | Wilmington            |         | 100,0                        |
| 121         | BT CTAG Nominees Limited                                                | London                |         | 100,0                        |
| 122         | BT Devonport Limited                                                    | Georgetown            |         | 100,0                        |
| 123         | BT Globenet Nominees Limited                                            | London                |         | 100,0                        |
| 124         | BT Harborside Urban Renewal Corporation                                 | West Trenton          |         | 100,0                        |
| 125         | BT International (Nigeria) Limited                                      | Lagos                 |         | 100,0                        |
| 126         | BT Maulbronn GmbH                                                       | Eschborn              |         | 100,0                        |
| 127         | BT McKinley Limited                                                     | Georgetown            |         | 100,0                        |
| 128         | BT Milford (Cayman) Limited                                             | Georgetown            |         | 100,0                        |
| 129         | BT Money Markets Fund No. 1 Limited (in member's voluntary liquidation) | London                |         | 100,0                        |
| 130         | BT Muritz GmbH                                                          | Eschborn              |         | 100,0                        |
| 131         | BT Nominees (Singapore) Pte Ltd                                         | Singapur              |         | 100,0                        |
| 132         | BT Opera Trading S.A.                                                   | Paris                 |         | 100,0                        |
| 133         | BT Pension Fund Trustees Limited                                        | London                |         | 100,0                        |
| 134         | BT Sable LLC                                                            | Wilmington            |         | 100,0                        |
| 135         | BT Vorderaunus Verwaltungs- und Beteiligungsgesellschaft mbH            | Eschborn              |         | 100,0                        |
| 136         | BT/ABKB Partnership Management                                          | Los Angeles           |         | 99,9                         |
| 137         | BTAS Cayman GP                                                          | Georgetown            |         | 100,0                        |
| 138         | BTD Nominees Pty. Limited                                               | Sydney                |         | 100,0                        |
| 139         | BTFIC - Portugal, Gestao e Investimentos (Sociedade Unipessoal) S.A.    | Funchal               |         | 100,0                        |
| 140         | BTVR Investments No. 1 Limited                                          | St. Helier            |         | 100,0                        |
| 141         | Buxtal Pty Limited                                                      | Sydney                |         | 100,0                        |
| 142         | C. J. Lawrence Inc.                                                     | Wilmington            |         | 100,0                        |
| 143         | CAM DREI Initiator GmbH & Co. KG                                        | Köln                  | 1       | 14,5                         |
| 144         | CAM Initiator Treuhand GmbH & Co. KG                                    | Köln                  |         | 100,0                        |
| 145         | CAM PE Verwaltungs GmbH & Co. KG                                        | Köln                  |         | 100,0                        |
| 146         | CAM Private Equity Consulting & Verwaltungs-GmbH                        | Köln                  |         | 100,0                        |
| 147         | CAM Private Equity Evergreen GmbH & Co. KG UBG                          | Köln                  | 1       | 0,0                          |
| 148         | CAM Private Equity Nominee GmbH & Co. KG                                | Köln                  |         | 100,0                        |
| 149         | CAM Private Equity Verwaltungs-GmbH                                     | Köln                  |         | 100,0                        |
| 150         | CAM Secondary Select I Beteiligungs GmbH                                | Köln                  |         | 100,0                        |
| 151         | CAM Secondary Select I GmbH & Co. KG                                    | Köln                  | 1       | 0,0                          |
| 152         | CAM SEL I Initiator GmbH & Co. KG                                       | Köln                  | 1       | 15,3                         |
| 153         | CAM SEL II Initiator GmbH & Co. KG                                      | Köln                  | 1       | 15,3                         |
| 154         | CAM Select I Beteiligungs GmbH                                          | Köln                  |         | 100,0                        |
| 155         | CAM Select I GmbH & Co. KG                                              | Köln                  | 1       | 0,0                          |
| 156         | CAM Select II Beteiligungs GmbH                                         | Köln                  |         | 100,0                        |
| 157         | CAM Select II GmbH & Co. KG                                             | Köln                  | 1       | 0,0                          |
| 158         | Campanology Leasing Limited                                             | Georgetown            |         | 100,0                        |
| 159         | 3160343 Canada Inc.                                                     | Toronto               |         | 100,0                        |
| 160         | 3613950 Canada, Inc.                                                    | Toronto               |         | 100,0                        |
| 161         | Caneel Bay Holding Corp.                                                | Chicago               | 5       | 0,0                          |
| 162         | Cape Acquisition Corp.                                                  | Wilmington            |         | 100,0                        |
| 163         | CapeSuccess LLC                                                         | Wilmington            |         | 82,6                         |
| 164         | CapeSuccess, Inc.                                                       | Wilmington            |         | 100,0                        |
| 165         | Capital Solutions Exchange Inc.                                         | Wilmington            |         | 100,0                        |
| 166         | Cardales UK Limited                                                     | Liverpool             |         | 100,0                        |
| 167         | Career Blazers Consulting Services, Inc.                                | Albany                |         | 100,0                        |
| 168         | Career Blazers Contingency Professionals, Inc.                          | Albany                |         | 100,0                        |

| Lfd.<br>Nr. | Name der Gesellschaft                                               | Sitz der Gesellschaft | Fußnote | Anteil am<br>Kapital<br>in % |
|-------------|---------------------------------------------------------------------|-----------------------|---------|------------------------------|
| 169         | Career Blazers Learning Center of Los Angeles, Inc.                 | Los Angeles           |         | 100,0                        |
| 170         | Career Blazers LLC                                                  | Wilmington            |         | 100,0                        |
| 171         | Career Blazers Management Company, Inc.                             | Albany                |         | 100,0                        |
| 172         | Career Blazers New York, Inc.                                       | Albany                |         | 100,0                        |
| 173         | Career Blazers of Ontario, Inc.                                     | London, Ontario       |         | 100,0                        |
| 174         | Career Blazers Personnel Services of Washington, D.C., Inc.         | Washington D.C.       |         | 100,0                        |
| 175         | Career Blazers Personnel Services, Inc.                             | Albany                |         | 100,0                        |
| 176         | Career Blazers Service Company, Inc.                                | Wilmington            |         | 100,0                        |
| 177         | Caribbean Resort Holdings, Inc.                                     | New York              | 5       | 0,0                          |
| 178         | Cashforce International Credit Support B.V.                         | Rotterdam             |         | 100,0                        |
| 179         | Castlewood Expansion Partners, L.P.                                 | Wilmington            |         | 87,5                         |
| 180         | Castor LLC                                                          | Wilmington            | 5       | 0,0                          |
| 181         | Cathay Advisory (Beijing) Company Ltd                               | Peking                |         | 100,0                        |
| 182         | Cathay Asset Management Company Limited                             | Port Louis            |         | 100,0                        |
| 183         | Cathay Capital Company (No 2) Limited                               | Port Louis            |         | 67,6                         |
| 184         | CBI NY Training, Inc.                                               | Albany                |         | 100,0                        |
| 185         | Cedar Investment Co.                                                | Wilmington            |         | 100,0                        |
| 186         | CELENA Beteiligungs- und Verwaltungs GmbH                           | Köln                  |         | 100,0                        |
| 187         | Centennial River 1 Inc.                                             | Denver                |         | 100,0                        |
| 188         | Centennial River 2 Inc.                                             | Austin                |         | 100,0                        |
| 189         | Centennial River Acquisition I Corporation                          | Wilmington            |         | 100,0                        |
| 190         | Centennial River Acquisition II Corporation                         | Wilmington            |         | 100,0                        |
| 191         | Centennial River Corporation                                        | Wilmington            |         | 100,0                        |
| 192         | Channel Nominees Limited                                            | London                |         | 100,0                        |
| 193         | Charlton (Delaware), Inc.                                           | Wilmington            |         | 100,0                        |
| 194         | China Recovery Fund LLC                                             | Wilmington            |         | 85,0                         |
| 195         | Cinda - DB NPL Securitization Trust 2003-1                          | Wilmington            | 5       | 0,0                          |
| 196         | CITAN Beteiligungsgesellschaft mbH                                  | Frankfurt             |         | 100,0                        |
| 197         | City Leasing (Avonside) Limited                                     | London                |         | 100,0                        |
| 198         | City Leasing (Clydeside) Limited                                    | London                |         | 100,0                        |
| 199         | City Leasing (Donside) Limited                                      | London                |         | 100,0                        |
| 200         | City Leasing (Fleetside) Limited                                    | London                |         | 100,0                        |
| 201         | City Leasing (Medwayside) Limited                                   | London                |         | 100,0                        |
| 202         | City Leasing (Severnside) Limited                                   | London                |         | 100,0                        |
| 203         | City Leasing (Thameside) Limited                                    | London                |         | 100,0                        |
| 204         | City Leasing (Wearside) Limited                                     | London                |         | 100,0                        |
| 205         | City Leasing and Partners                                           | London                |         | 100,0                        |
| 206         | City Leasing and Partners Limited                                   | London                |         | 100,0                        |
| 207         | City Leasing Limited                                                | London                |         | 100,0                        |
| 208         | Civic Investments Limited                                           | St. Helier            |         | 100,0                        |
| 209         | Clark GmbH & Co. KG                                                 | Frankfurt             |         | 100,0                        |
| 210         | ClarksonX Inc.                                                      | Wilmington            |         | 100,0                        |
| 211         | CNS Cayman Holdings One Ltd.                                        | Georgetown            |         | 100,0                        |
| 212         | Consumo Finance S.p.A.                                              | Mailand               |         | 100,0                        |
| 213         | Coronus L.P.                                                        | St. Helier            |         | 100,0                        |
| 214         | CREDA Objektanlage- und verwaltungsgesellschaft mbH                 | Bonn                  |         | 100,0                        |
| 215         | Crosby Investments Limited                                          | Wilmington            |         | 100,0                        |
| 216         | CTXL Achtzehnte Vermögensverwaltung GmbH                            | München               |         | 100,0                        |
| 217         | Custom Leasing Limited                                              | London                |         | 100,0                        |
| 218         | Cyrus J. Lawrence Capital Holdings, Inc.                            | Wilmington            |         | 100,0                        |
| 219         | D B Rail Holdings (UK) No. 1 Limited                                | London                |         | 100,0                        |
| 220         | D F Japan Godo Kaisha                                               | Tokio                 |         | 100,0                        |
| 221         | D.B. International Delaware, Inc.                                   | Wilmington            |         | 100,0                        |
| 222         | Dahlbusch Projektentwicklungsgesellschaft Leipzig/Lindenau mbH i.L. | Frankfurt             |         | 100,0                        |
| 223         | DAHOC (UK) Limited                                                  | London                |         | 100,0                        |
| 224         | DAHOC Beteiligungsgesellschaft mbH                                  | Frankfurt             |         | 100,0                        |

| Lfd.<br>Nr. | Name der Gesellschaft                                    | Sitz der Gesellschaft | Fußnote | Anteil am<br>Kapital<br>in % |
|-------------|----------------------------------------------------------|-----------------------|---------|------------------------------|
| 225         | Dark Blue Investments Limited                            | Georgetown            |         | 100,0                        |
| 226         | DB (Gibraltar) Holdings Limited                          | Gibraltar             |         | 100,0                        |
| 227         | DB (Malaysia) Nominee (Asing) Sdn. Bhd.                  | Kuala Lumpur          |         | 100,0                        |
| 228         | DB (Malaysia) Nominee (Tempatan) Sdn. Bhd.               | Kuala Lumpur          |         | 100,0                        |
| 229         | DB (Pacific) Limited                                     | Wilmington            |         | 100,0                        |
| 230         | DB (Pacific) Limited, New York                           | New York              |         | 100,0                        |
| 231         | DB (Tip Top) Limited Partnership                         | Toronto               |         | 99,9                         |
| 232         | DB Advisors Risk Managed Alpha (RMA) Investment Trust    | Salem                 |         | 100,0                        |
| 233         | DB Advisors US Large Cap Core Investment Trust           | Salem                 |         | 100,0                        |
| 234         | DB Advisors US Large Cap Value Investment Trust          | Salem                 |         | 100,0                        |
| 235         | DB Advisors US Small Cap Growth Investment Trust         | Salem                 |         | 100,0                        |
| 236         | DB Alex. Brown Exchange Fund I, L.P.                     | Baltimore             | 5       | 4,1                          |
| 237         | DB Alex. Brown Holdings Incorporated                     | Wilmington            |         | 100,0                        |
| 238         | DB Alternative Trading Inc.                              | Wilmington            |         | 100,0                        |
| 239         | DB Americas Funding Corp.                                | Wilmington            |         | 100,0                        |
| 240         | DB Americas Infrastructure Holdings, L.L.C.              | Wilmington            |         | 100,0                        |
| 241         | DB Anton Limited                                         | St. Helier            |         | 100,0                        |
| 242         | DB Aotearoa Investments Limited                          | Georgetown            |         | 100,0                        |
| 243         | DB Athena S.à r.l.                                       | Luxemburg             |         | 100,0                        |
| 244         | DB Bedford Investments Limited                           | Wilmington            |         | 100,0                        |
| 245         | DB Beteiligungs-Holding GmbH                             | Frankfurt             |         | 100,0                        |
| 246         | DB Bluebell Investments (Cayman) Partnership             | Georgetown            |         | 100,0                        |
| 247         | DB Broker GmbH                                           | Frankfurt             |         | 100,0                        |
| 248         | DB Canada GIPF - I Corp.                                 | Calgary               |         | 100,0                        |
| 249         | DB Capital Advisers, Inc.                                | Wilmington            |         | 100,0                        |
| 250         | DB Capital Management, Inc.                              | Wilmington            |         | 100,0                        |
| 251         | DB Capital Markets (Deutschland) GmbH                    | Frankfurt             |         | 100,0                        |
| 252         | DB Capital Partners (Asia), L.P.                         | Georgetown            |         | 99,7                         |
| 253         | DB Capital Partners (Europe) 2000 - A Founder Partner LP | Wilmington            |         | 80,0                         |
| 254         | DB Capital Partners (Europe) 2000 - B Founder Partner LP | Wilmington            |         | 80,0                         |
| 255         | DB Capital Partners Asia GP, Limited                     | Georgetown            |         | 100,0                        |
| 256         | DB Capital Partners Europe 2002 Founder Partner LP       | Wilmington            |         | 80,0                         |
| 257         | DB Capital Partners General Partner Limited              | London                |         | 100,0                        |
| 258         | DB Capital Partners Latin America, G.P. Limited          | Georgetown            |         | 100,0                        |
| 259         | DB Capital Partners, Inc.                                | Wilmington            |         | 100,0                        |
| 260         | DB Capital Partners, Latin America, LP                   | Georgetown            |         | 80,2                         |
| 261         | DB Capital, Inc.                                         | Wilmington            |         | 100,0                        |
| 262         | DB Cartera de Inmuebles 1, S.A.U.                        | Pozuelo de Alarcón    |         | 100,0                        |
| 263         | DB Cartera de Inmuebles 2, S.A.U.                        | Pozuelo de Alarcón    |         | 100,0                        |
| 264         | DB Chambers LLC                                          | Wilmington            |         | 100,0                        |
| 265         | DB Chestnut Holdings Limited                             | Georgetown            |         | 100,0                        |
| 266         | DB Commodities Canada Ltd.                               | Toronto               |         | 100,0                        |
| 267         | DB Commodity Services LLC                                | Wilmington            |         | 100,0                        |
| 268         | DB Concerto (LP) Limited                                 | Georgetown            |         | 100,0                        |
| 269         | DB Concerto Limited                                      | Georgetown            |         | 100,0                        |
| 270         | DB Consortium S. Cons. a r.l. in liquidazione            | Mailand               |         | 100,0                        |
| 271         | DB Consorzio S. Cons. a r. l.                            | Mailand               |         | 100,0                        |
| 272         | DB Crest Limited                                         | St. Helier            |         | 100,0                        |
| 273         | DB Delaware Holdings (Europe) Limited                    | Wilmington            |         | 100,0                        |
| 274         | DB Delaware Holdings (UK) Limited                        | London                |         | 100,0                        |
| 275         | DB Depositor Inc.                                        | Wilmington            |         | 100,0                        |
| 276         | DB Elara LLC                                             | Wilmington            |         | 100,0                        |
| 277         | DB Emerald Limited                                       | Dublin                |         | 100,0                        |
| 278         | DB Energy Commodities Limited                            | London                |         | 100,0                        |
| 279         | DB Energy Trading LLC                                    | Wilmington            |         | 100,0                        |
| 280         | DB Enfield Infrastructure Holdings Limited               | St. Helier            |         | 100,0                        |



| Lfd.<br>Nr. | Name der Gesellschaft                                    | Sitz der Gesellschaft | Fußnote | Anteil am<br>Kapital<br>in % |
|-------------|----------------------------------------------------------|-----------------------|---------|------------------------------|
| 281         | DB Enfield Infrastructure Investments Limited            | St. Helier            |         | 100,0                        |
| 282         | DB Enterprise GmbH                                       | Sössen-Gostau         |         | 100,0                        |
| 283         | DB Enterprise GmbH & Co. Zweite Beteiligungs KG          | Sössen-Gostau         |         | 100,0                        |
| 284         | DB Equipment Leasing, Inc.                               | New York              |         | 100,0                        |
| 285         | DB Equity Limited                                        | London                |         | 100,0                        |
| 286         | DB Equity S.à r.l.                                       | Luxemburg             |         | 100,0                        |
| 287         | DB ESC Corporation                                       | Wilmington            |         | 100,0                        |
| 288         | DB Export-Leasing GmbH                                   | Frankfurt             |         | 100,0                        |
| 289         | DB Fillmore Lender Corp.                                 | Wilmington            |         | 100,0                        |
| 290         | DB Finance (Delaware), LLC                               | Wilmington            |         | 100,0                        |
| 291         | DB Finance Holdings, Inc.                                | Wilmington            |         | 100,0                        |
| 292         | DB Finance International GmbH                            | Eschborn              |         | 100,0                        |
| 293         | DB Finanz-Holding GmbH                                   | Frankfurt             |         | 100,0                        |
| 294         | DB Franklin Investments Inc.                             | Wilmington            |         | 100,0                        |
| 295         | DB Funding Corporation # 1                               | Wilmington            |         | 100,0                        |
| 296         | DB Funding Corporation # 3                               | Wilmington            |         | 100,0                        |
| 297         | DB Funding LLC #4                                        | Wilmington            |         | 100,0                        |
| 298         | DB Funding LLC #5                                        | Wilmington            |         | 100,0                        |
| 299         | DB Funding LLC #6                                        | Wilmington            |         | 100,0                        |
| 300         | DB Funding, L.P.                                         | Baltimore             |         | 100,0                        |
| 301         | DB Galil Finance, Inc.                                   | Wilmington            |         | 100,0                        |
| 302         | DB Gamla (Cayman)                                        | Georgetown            |         | 100,0                        |
| 303         | DB Ganymede 2006 L.P.                                    | Georgetown            |         | 100,0                        |
| 304         | DB Global Alternative Agribusiness Master Portfolio Ltd. | Georgetown            |         | 100,0                        |
| 305         | DB Global Markets Multi-Strategy Fund I Limited          | Georgetown            |         | 100,0                        |
| 306         | DB Global Processing Services, Inc.                      | Wilmington            |         | 100,0                        |
| 307         | DB Global Technology, Inc.                               | Wilmington            |         | 100,0                        |
| 308         | DB Green Holdings Corp.                                  | Wilmington            |         | 100,0                        |
| 309         | DB Green, Inc.                                           | New York              |         | 100,0                        |
| 310         | DB Group Services (UK) Limited                           | London                |         | 100,0                        |
| 311         | DB Hawks Nest, Inc.                                      | Wilmington            |         | 100,0                        |
| 312         | DB Hedgeworks Fund Services Limited                      | Georgetown            |         | 100,0                        |
| 313         | DB HedgeWorks, LLC                                       | Wilmington            |         | 100,0                        |
| 314         | DB Holdings (New York), Inc.                             | New York              |         | 100,0                        |
| 315         | DB Holdings (South America) Limited                      | Wilmington            |         | 100,0                        |
| 316         | db home lending holdings llc                             | Wilmington            |         | 100,0                        |
| 317         | db home lending llc                                      | Lake Forest           |         | 100,0                        |
| 318         | DB Horizon, Inc.                                         | Wilmington            |         | 100,0                        |
| 319         | DB HR Solutions GmbH                                     | Eschborn              |         | 100,0                        |
| 320         | DB Hubert Investments Limited                            | Wilmington            |         | 100,0                        |
| 321         | DB Hypernova LLC                                         | Wilmington            |         | 100,0                        |
| 322         | DB iCON Investments Limited                              | London                |         | 100,0                        |
| 323         | DB Industrial Holdings Beteiligungs GmbH & Co. KG        | Sössen-Gostau         |         | 100,0                        |
| 324         | DB Industrial Holdings GmbH                              | Sössen-Gostau         |         | 100,0                        |
| 325         | DB Infrastructure Holdings (UK) No.1 Limited             | London                |         | 100,0                        |
| 326         | DB Infrastructure Holdings (UK) No.2 Limited             | London                |         | 100,0                        |
| 327         | DB Infrastructure Holdings (UK) No.3 Limited             | London                |         | 100,0                        |
| 328         | DB International (Asia) Limited                          | Singapur              |         | 100,0                        |
| 329         | DB International Investments Limited                     | London                |         | 100,0                        |
| 330         | DB International Trust (Singapore) Limited               | Singapur              |         | 100,0                        |
| 331         | DB Invest Fundo de Investimento Multimercado             | Sao Paulo             |         | 100,0                        |
| 332         | DB Investment Management, Inc.                           | Wilmington            |         | 100,0                        |
| 333         | DB Investment Managers, Inc.                             | Wilmington            |         | 100,0                        |
| 334         | DB Investment Partners, Inc.                             | Wilmington            |         | 100,0                        |
| 335         | DB Investment Resources (US) Corporation                 | Wilmington            |         | 100,0                        |
| 336         | DB Investment Resources Holdings Corp.                   | Wilmington            |         | 100,0                        |

| Lfd.<br>Nr. | Name der Gesellschaft                                                                               | Sitz der Gesellschaft | Fußnote | Anteil am<br>Kapital<br>in % |
|-------------|-----------------------------------------------------------------------------------------------------|-----------------------|---------|------------------------------|
| 337         | DB Investments (GB) Limited                                                                         | London                |         | 100,0                        |
| 338         | DB Io LP                                                                                            | Wilmington            |         | 100,0                        |
| 339         | DB IROC Leasing Corp.                                                                               | New York              |         | 100,0                        |
| 340         | DB Jasmine (Cayman) Limited                                                                         | Georgetown            |         | 100,0                        |
| 341         | DB Jefferson Investments Limited                                                                    | Wilmington            |         | 100,0                        |
| 342         | DB Kamchatka Limited                                                                                | Georgetown            |         | 100,0                        |
| 343         | DB Keystone, LLC                                                                                    | Wilmington            |         | 100,0                        |
| 344         | DB King Investments Limited                                                                         | Wilmington            |         | 100,0                        |
| 345         | DB Kredit Service GmbH                                                                              | Berlin                |         | 100,0                        |
| 346         | DB Lafayette Investments Limited                                                                    | Wilmington            |         | 100,0                        |
| 347         | DB Laight Investments Limited                                                                       | Wilmington            |         | 100,0                        |
| 348         | DB Leasing Services GmbH                                                                            | Frankfurt             |         | 100,0                        |
| 349         | DB Legal, Risk & Capital Services GmbH                                                              | Berlin                |         | 100,0                        |
| 350         | DB Leroy Investments LLC                                                                            | Wilmington            |         | 100,0                        |
| 351         | DB Lexington Investments Inc.                                                                       | Wilmington            |         | 100,0                        |
| 352         | DB Liberty, Inc.                                                                                    | Wilmington            |         | 100,0                        |
| 353         | DB Like-Kind Exchange Services Corp.                                                                | Wilmington            |         | 100,0                        |
| 354         | DB Litigation Fee LLC                                                                               | Wilmington            |         | 100,0                        |
| 355         | DB Madison, LLC                                                                                     | Wilmington            |         | 100,0                        |
| 356         | DB Maia LLC                                                                                         | Wilmington            |         | 100,0                        |
| 357         | DB Malta Commercial Services One Ltd.                                                               | St. Julians           |         | 100,0                        |
| 358         | DB Malta Commercial Services Two Ltd.                                                               | St. Julians           |         | 100,0                        |
| 359         | DB Malta Holdings Ltd.                                                                              | St. Julians           |         | 100,0                        |
| 360         | DB Management Partners, L.P.                                                                        | Wilmington            |         | 100,0                        |
| 361         | DB Management Support GmbH                                                                          | Frankfurt             |         | 100,0                        |
| 362         | DB Managers, LLC                                                                                    | West Trenton          |         | 100,0                        |
| 363         | DB Marcassin (Cayman) Holdings Limited                                                              | Georgetown            |         | 100,0                        |
| 364         | DB Master Fundo de Investimento em Direitos Creditórios Não-Padronizados de Precatórios<br>Federais | Rio de Janeiro        |         | 100,0                        |
| 365         | DB Mezzanine Fund Managing Member, LLC                                                              | New York              |         | 100,0                        |
| 366         | DB Moore Investments Limited                                                                        | Wilmington            |         | 100,0                        |
| 367         | DB Mortgage Investment Inc.                                                                         | Baltimore             |         | 100,0                        |
| 368         | DB Mortgage Services, LLC                                                                           | Wilmington            |         | 100,0                        |
| 369         | DB Nexus Iberian Investments (UK) Limited                                                           | London                |         | 100,0                        |
| 370         | DB Nexus Investments (UK) Limited                                                                   | London                |         | 100,0                        |
| 371         | DB Nominees (Hong Kong) Limited                                                                     | Hongkong              |         | 100,0                        |
| 372         | DB Nominees (Singapore) Pte Ltd                                                                     | Singapur              |         | 100,0                        |
| 373         | DB Operaciones y Servicios Interactivos, A.I.E.                                                     | Barcelona             |         | 99,9                         |
| 374         | DB Overseas Finance Delaware, Inc.                                                                  | Wilmington            |         | 100,0                        |
| 375         | DB Overseas Holdings Limited                                                                        | London                |         | 100,0                        |
| 376         | DB Paris Investissements                                                                            | Paris                 |         | 100,0                        |
| 377         | DB Partnership Management II, LLC                                                                   | Wilmington            |         | 100,0                        |
| 378         | DB Partnership Management Ltd.                                                                      | Wilmington            |         | 100,0                        |
| 379         | DB Perry Investments Limited                                                                        | Wilmington            |         | 100,0                        |
| 380         | DB Platinum Advisors                                                                                | Luxemburg             |         | 100,0                        |
| 381         | DB Portfolio Southwest, Inc.                                                                        | Houston               |         | 100,0                        |
| 382         | DB Print GmbH                                                                                       | Frankfurt             |         | 100,0                        |
| 383         | DB Private Clients Corp.                                                                            | Wilmington            |         | 100,0                        |
| 384         | DB Private Equity GmbH                                                                              | Köln                  |         | 100,0                        |
| 385         | DB Private Wealth Mortgage Ltd.                                                                     | New York              |         | 100,0                        |
| 386         | DB PWM Collective Management Limited                                                                | Liverpool             |         | 100,0                        |
| 387         | DB Pyrus (Cayman) Limited                                                                           | Georgetown            |         | 100,0                        |
| 388         | DB Rail Trading (UK) Limited                                                                        | London                |         | 100,0                        |
| 389         | DB RE Global Real Estate Management 1A, Ltd.                                                        | Georgetown            |         | 100,0                        |
| 390         | DB RE Global Real Estate Management 1B, Ltd.                                                        | Georgetown            |         | 100,0                        |
| 391         | DB Re S.A.                                                                                          | Luxemburg             |         | 100,0                        |

| Lfd.<br>Nr. | Name der Gesellschaft                                    | Sitz der Gesellschaft | Fußnote | Anteil am<br>Kapital<br>in % |
|-------------|----------------------------------------------------------|-----------------------|---------|------------------------------|
| 392         | DB Real Estate Canadainvest 1 Inc.                       | Toronto               |         | 100,0                        |
| 393         | DB Real Estate Opportunities Group Advisors (UK) Limited | London                |         | 100,0                        |
| 394         | DB Realty Resources, Inc.                                | New York              | 5       | 0,0                          |
| 395         | DB Renewable Holdings B.V.                               | Amsterdam             |         | 100,0                        |
| 396         | DB Rivington Investments Limited                         | Georgetown            |         | 100,0                        |
| 397         | DB RMS Leasing (Cayman) L.P.                             | Georgetown            |         | 100,0                        |
| 398         | DB Road (UK) Limited                                     | Georgetown            |         | 100,0                        |
| 399         | DB Rugby Finance (Cayman)                                | Georgetown            |         | 100,0                        |
| 400         | DB Samay Finance No. 2, Inc.                             | Wilmington            |         | 100,0                        |
| 401         | DB Saturn Investments Limited                            | London                |         | 100,0                        |
| 402         | DB Second Funding Corp.                                  | Wilmington            |         | 100,0                        |
| 403         | DB Securities S.A.                                       | Warschau              |         | 100,0                        |
| 404         | DB Securities Services NJ Inc.                           | New York              |         | 100,0                        |
| 405         | DB Sedanka Limited                                       | Georgetown            |         | 100,0                        |
| 406         | DB Service Centre Limited                                | Dublin                |         | 100,0                        |
| 407         | DB Service Uruguay S.A.                                  | Montevideo            |         | 100,0                        |
| 408         | DB Services Americas, Inc.                               | Wilmington            |         | 100,0                        |
| 409         | DB Services New Jersey, Inc.                             | West Trenton          |         | 100,0                        |
| 410         | DB Servicios México, S.A. de C.V.                        | Mexiko Stadt          |         | 100,0                        |
| 411         | DB Servizi Amministrativi S.r.l.                         | Mailand               |         | 100,0                        |
| 412         | DB Shenandoah LLC                                        | Wilmington            |         | 100,0                        |
| 413         | DB Sirius (Cayman) Limited                               | Georgetown            |         | 100,0                        |
| 414         | DB Stanton Investments LLC                               | Wilmington            |         | 100,0                        |
| 415         | DB Sterling Finance Limited                              | Georgetown            |         | 100,0                        |
| 416         | DB Strategic Advisors, Inc.                              | Makati Stadt          |         | 100,0                        |
| 417         | DB Structured Derivative Products, LLC                   | Wilmington            |         | 100,0                        |
| 418         | DB Structured Products, Inc.                             | Wilmington            |         | 100,0                        |
| 419         | DB Structured Transaction VH-OJL Pty Limited             | Sydney                |         | 100,0                        |
| 420         | DB Trips Investments Limited                             | Georgetown            | 5       | 0,0                          |
| 421         | DB Trust Company Limited Japan                           | Tokio                 |         | 100,0                        |
| 422         | DB Trustee Services Limited                              | London                |         | 100,0                        |
| 423         | DB Trustees (Hong Kong) Limited                          | Hongkong              |         | 100,0                        |
| 424         | DB Tweed Limited                                         | Georgetown            |         | 100,0                        |
| 425         | DB U.K. Nominees Limited                                 | London                |         | 100,0                        |
| 426         | DB U.S. Financial Markets Holding Corporation            | Wilmington            |         | 100,0                        |
| 427         | DB UK (Saturn) Limited                                   | London                |         | 100,0                        |
| 428         | DB UK Australia Finance Limited                          | Georgetown            |         | 100,0                        |
| 429         | DB UK Australia Holdings Limited                         | London                |         | 100,0                        |
| 430         | DB UK Bank Limited                                       | London                |         | 100,0                        |
| 431         | DB UK Holdings Limited                                   | London                |         | 100,0                        |
| 432         | DB UK PCAM Holdings Limited                              | London                |         | 100,0                        |
| 433         | DB Valiant (Cayman) Limited                              | Georgetown            |         | 100,0                        |
| 434         | DB Valoren S.à r.l.                                      | Luxemburg             |         | 100,0                        |
| 435         | DB Vandam Investments Limited                            | Wilmington            |         | 100,0                        |
| 436         | DB Vanquish (UK) Limited                                 | London                |         | 100,0                        |
| 437         | DB Vantage (UK) Limited                                  | London                |         | 100,0                        |
| 438         | DB Vantage No.2 (UK) Limited                             | London                |         | 100,0                        |
| 439         | DB Vantage No.3 (UK) Limited                             | London                |         | 100,0                        |
| 440         | DB Venture Partners (Europe) 2000 Founder Partner LP     | Wilmington            |         | 80,0                         |
| 441         | DB Venture Partners (Europe) 2001 Founder Partner LP     | Wilmington            |         | 80,0                         |
| 442         | DB Venture Partners General Partner Limited              | London                |         | 100,0                        |
| 443         | DB Vestry Investments Limited                            | Wilmington            |         | 100,0                        |
| 444         | DB Vita S.A.                                             | Luxemburg             |         | 75,0                         |
| 445         | DB Warren Investments Limited                            | Georgetown            |         | 100,0                        |
| 446         | DB Waverly Investments Limited                           | Wilmington            |         | 100,0                        |
| 447         | DB West Financing LLC                                    | Wilmington            |         | 100,0                        |

| Lfd.<br>Nr. | Name der Gesellschaft                                      | Sitz der Gesellschaft | Fußnote | Anteil am<br>Kapital<br>in % |
|-------------|------------------------------------------------------------|-----------------------|---------|------------------------------|
| 448         | DB Willow (UK) Limited (in member's voluntary liquidation) | London                |         | 100,0                        |
| 449         | DB Wilton Holdings, LLC                                    | Wilmington            | 5       | 0,0                          |
| 450         | DBAB Wall Street, LLC                                      | Wilmington            |         | 100,0                        |
| 451         | DBAH Capital, LLC                                          | Wilmington            |         | 100,0                        |
| 452         | DBAH Funding Corp.                                         | Wilmington            |         | 100,0                        |
| 453         | DBAS Cayman Holdings 1 Limited                             | Georgetown            |         | 100,0                        |
| 454         | DBAS Cayman Holdings 2 Limited                             | Georgetown            |         | 100,0                        |
| 455         | DBC Continuance Inc.                                       | Toronto               |         | 100,0                        |
| 456         | DBCCA Investment Partners, Inc.                            | Wilmington            |         | 100,0                        |
| 457         | DBCIBZ1                                                    | Georgetown            |         | 100,0                        |
| 458         | DBCIBZ2                                                    | Georgetown            |         | 100,0                        |
| 459         | DBD Mezzanine Corp.                                        | Wilmington            |         | 100,0                        |
| 460         | DBD Pilgrim America Corp.                                  | Wilmington            |         | 100,0                        |
| 461         | DBFIC, Inc.                                                | Wilmington            |         | 100,0                        |
| 462         | DBG Vermögensverwaltungsgesellschaft mbH                   | Frankfurt             |         | 100,0                        |
| 463         | DBGB Finance (No. 2) Limited                               | London                |         | 100,0                        |
| 464         | DBNY Brazil Invest Co.                                     | Wilmington            |         | 100,0                        |
| 465         | DBNZ Overseas Investments (No.1) Limited                   | Georgetown            |         | 100,0                        |
| 466         | DBOI Global Services (UK) Limited                          | London                |         | 100,0                        |
| 467         | DBOI Global Services Private Limited                       | Mumbai                |         | 100,0                        |
| 468         | DBP Commercial Mortgage LLC                                | Wilmington            |         | 100,0                        |
| 469         | DBRMS4                                                     | Georgetown            |         | 100,0                        |
| 470         | DBRMSGP1                                                   | Georgetown            |         | 100,0                        |
| 471         | DBRMSGP2                                                   | Georgetown            |         | 100,0                        |
| 472         | DBS Technology Ventures, L.L.C.                            | Wilmington            |         | 100,0                        |
| 473         | DBUKH Finance Limited                                      | London                |         | 100,0                        |
| 474         | DBUSBZ1, LLC                                               | Wilmington            |         | 100,0                        |
| 475         | DBUSBZ2, LLC                                               | Wilmington            |         | 100,0                        |
| 476         | DBUSH Funding Corp.                                        | Wilmington            |         | 100,0                        |
| 477         | DBUSH Markets, Inc.                                        | Wilmington            |         | 100,0                        |
| 478         | DBVR Investments No. 3 Ltd.                                | Wilmington            |         | 100,0                        |
| 479         | DBX Advisors LLC                                           | Wilmington            |         | 100,0                        |
| 480         | DBX Strategic Advisors LLC                                 | Wilmington            |         | 100,0                        |
| 481         | De Meng Innovative (Beijing) Consulting Company Limited    | Peking                |         | 100,0                        |
| 482         | DeAM Infrastructure Limited                                | London                |         | 100,0                        |
| 483         | DeAM Investor Services, Inc.                               | Boston                |         | 100,0                        |
| 484         | DEBEKO Immobilien GmbH & Co Grundbesitz OHG                | Eschborn              |         | 100,0                        |
| 485         | DEE Deutsche Erneuerbare Energien GmbH                     | Düsseldorf            |         | 100,0                        |
| 486         | Deer River, L.P.                                           | Wilmington            |         | 100,0                        |
| 487         | DEGRU Erste Beteiligungsgesellschaft mbH                   | Eschborn              |         | 100,0                        |
| 488         | DeKon Service GmbH                                         | Eschborn              |         | 100,0                        |
| 489         | Delowrezham de México S. de R.L. de C.V.                   | Mexiko Stadt          |         | 100,0                        |
| 490         | DEMOS Beteiligungs- und Verwaltungs GmbH                   | Köln                  |         | 100,0                        |
| 491         | DEUFRAN Beteiligungs GmbH                                  | Frankfurt             |         | 100,0                        |
| 492         | DEUKONA Versicherungs-Vermittlungs-GmbH                    | Frankfurt             |         | 100,0                        |
| 493         | Deutsche (Aotearoa) Capital Holdings New Zealand           | Auckland              |         | 100,0                        |
| 494         | Deutsche (Aotearoa) Foreign Investments New Zealand        | Auckland              |         | 100,0                        |
| 495         | Deutsche (New Munster) Holdings New Zealand Limited        | Auckland              |         | 100,0                        |
| 496         | Deutsche (SRV) Investment Corporation                      | Wilmington            |         | 100,0                        |
| 497         | Deutsche Aeolia Power Production S.A.                      | Athen                 |         | 80,0                         |
| 498         | Deutsche Alt-A Securities, Inc.                            | Wilmington            |         | 100,0                        |
| 499         | Deutsche Alternative Asset Management (Global) Limited     | London                |         | 100,0                        |
| 500         | Deutsche Alternative Asset Management (UK) Limited         | London                |         | 100,0                        |
| 501         | Deutsche Asia Pacific Finance, Inc.                        | Wilmington            |         | 100,0                        |
| 502         | Deutsche Asia Pacific Holdings Pte Ltd                     | Singapur              |         | 100,0                        |
| 503         | Deutsche Asset Management (Asia) Limited                   | Singapur              |         | 100,0                        |

| Lfd.<br>Nr. | Name der Gesellschaft                                                                                            | Sitz der Gesellschaft | Fußnote | Anteil am<br>Kapital<br>in % |
|-------------|------------------------------------------------------------------------------------------------------------------|-----------------------|---------|------------------------------|
| 504         | Deutsche Asset Management (Australia) Limited                                                                    | Sydney                |         | 100,0                        |
| 505         | Deutsche Asset Management (Hong Kong) Limited                                                                    | Hongkong              |         | 100,0                        |
| 506         | Deutsche Asset Management (India) Private Limited                                                                | Mumbai                |         | 100,0                        |
| 507         | Deutsche Asset Management (Japan) Limited                                                                        | Tokio                 |         | 100,0                        |
| 508         | Deutsche Asset Management (Jersey) Limited                                                                       | St. Helier            |         | 100,0                        |
| 509         | Deutsche Asset Management (Korea) Company Limited                                                                | Seoul                 |         | 100,0                        |
| 510         | Deutsche Asset Management (UK) Limited                                                                           | London                |         | 100,0                        |
| 511         | Deutsche Asset Management Canada Limited                                                                         | Toronto               |         | 100,0                        |
| 512         | Deutsche Asset Management Group Limited                                                                          | London                |         | 100,0                        |
| 513         | Deutsche Asset Management International GmbH                                                                     | Frankfurt             |         | 100,0                        |
| 514         | Deutsche Asset Management Investmentgesellschaft mbH vormals DEGEF Deutsche Gesellschaft für Fondsverwaltung mbH | Frankfurt             |         | 100,0                        |
| 515         | Deutsche Asset Management Schweiz                                                                                | Zürich                |         | 100,0                        |
| 516         | Deutsche Auskunftei Service GmbH                                                                                 | Hamburg               |         | 100,0                        |
| 517         | Deutsche Australia Limited                                                                                       | Sydney                |         | 100,0                        |
| 518         | Deutsche Aviation Leasing Limited                                                                                | London                |         | 100,0                        |
| 519         | Deutsche Bank (Cayman) Limited                                                                                   | Georgetown            |         | 100,0                        |
| 520         | DEUTSCHE BANK (CHILE) S.A.                                                                                       | Santiago              |         | 100,0                        |
| 521         | Deutsche Bank (China) Co., Ltd.                                                                                  | Peking                |         | 100,0                        |
| 522         | Deutsche Bank (Malaysia) Berhad                                                                                  | Kuala Lumpur          |         | 100,0                        |
| 523         | Deutsche Bank (Malta) Ltd                                                                                        | St. Julians           |         | 100,0                        |
| 524         | Deutsche Bank (Mauritius) Limited                                                                                | Port Louis            |         | 100,0                        |
| 525         | Deutsche Bank (Perú) S.A.                                                                                        | Lima                  |         | 100,0                        |
| 526         | Deutsche Bank (Portugal), S.A.                                                                                   | Lissabon              |         | 100,0                        |
| 527         | Deutsche Bank (Suisse) SA                                                                                        | Genf                  |         | 100,0                        |
| 528         | Deutsche Bank (Uruguay) Sociedad Anónima Institución Financiera Externa                                          | Montevideo            |         | 100,0                        |
| 529         | DEUTSCHE BANK A.S.                                                                                               | Istanbul              |         | 100,0                        |
| 530         | Deutsche Bank Americas Finance LLC                                                                               | Wilmington            |         | 100,0                        |
| 531         | Deutsche Bank Americas Holding Corp.                                                                             | Wilmington            |         | 100,0                        |
| 532         | Deutsche Bank Bauspar-Aktiengesellschaft                                                                         | Frankfurt             |         | 100,0                        |
| 533         | Deutsche Bank Berkshire Mortgage, Inc.                                                                           | Wilmington            |         | 100,0                        |
| 534         | Deutsche Bank Capital Holdings, Inc.                                                                             | Wilmington            |         | 100,0                        |
| 535         | Deutsche Bank Capital Markets S.r.l.                                                                             | Mailand               |         | 100,0                        |
| 536         | Deutsche Bank Corretora de Valores S.A.                                                                          | Sao Paulo             |         | 100,0                        |
| 537         | Deutsche Bank Europe GmbH                                                                                        | Frankfurt             |         | 100,0                        |
| 538         | Deutsche Bank Financial Inc.                                                                                     | Wilmington            |         | 100,0                        |
| 539         | Deutsche Bank Financial LLC                                                                                      | Wilmington            |         | 100,0                        |
| 540         | Deutsche Bank Holdings, Inc.                                                                                     | Wilmington            |         | 100,0                        |
| 541         | Deutsche Bank Insurance Agency Incorporated                                                                      | Baltimore             |         | 100,0                        |
| 542         | Deutsche Bank Insurance Agency of Delaware                                                                       | Wilmington            |         | 100,0                        |
| 543         | Deutsche Bank Insurance Agency of Massachusetts Incorporated                                                     | Boston                |         | 100,0                        |
| 544         | Deutsche Bank International Limited                                                                              | St. Helier            |         | 100,0                        |
| 545         | Deutsche Bank International Trust Co. (Cayman) Limited                                                           | Georgetown            |         | 100,0                        |
| 546         | Deutsche Bank International Trust Co. (Jersey) Limited                                                           | St. Helier            |         | 100,0                        |
| 547         | Deutsche Bank International Trust Co. Limited                                                                    | St. Peter Port        |         | 100,0                        |
| 548         | Deutsche Bank Investments (Guernsey) Limited                                                                     | St. Peter Port        |         | 100,0                        |
| 549         | Deutsche Bank Luxembourg S.A.                                                                                    | Luxemburg             |         | 100,0                        |
| 550         | Deutsche Bank Mutui S.p.A.                                                                                       | Mailand               |         | 100,0                        |
| 551         | Deutsche Bank México S.A. Institución de Banca Múltiple                                                          | Mexiko Stadt          |         | 100,0                        |
| 552         | Deutsche Bank National Trust Company                                                                             | Los Angeles           |         | 100,0                        |
| 553         | Deutsche Bank Nederland N.V.                                                                                     | Amsterdam             |         | 100,0                        |
| 554         | Deutsche Bank Nominees (Jersey) Limited                                                                          | St. Helier            |         | 100,0                        |
| 555         | Deutsche Bank PBC Spółka Akcyjna                                                                                 | Warschau              |         | 100,0                        |
| 556         | Deutsche Bank Polska Spółka Akcyjna                                                                              | Warschau              |         | 100,0                        |
| 557         | Deutsche Bank Privat- und Geschäftskunden Aktiengesellschaft                                                     | Frankfurt             |         | 100,0                        |
| 558         | Deutsche Bank Real Estate (Japan) Y.K.                                                                           | Tokio                 |         | 100,0                        |

| Lfd.<br>Nr. | Name der Gesellschaft                                    | Sitz der Gesellschaft | Fußnote | Anteil am<br>Kapital<br>in % |
|-------------|----------------------------------------------------------|-----------------------|---------|------------------------------|
| 559         | Deutsche Bank Realty Advisors, Inc.                      | New York              |         | 100,0                        |
| 560         | Deutsche Bank S.A.                                       | Buenos Aires          |         | 100,0                        |
| 561         | Deutsche Bank S.A. - Banco Alemão                        | Sao Paulo             |         | 100,0                        |
| 562         | Deutsche Bank S.A. / N.V.                                | Brüssel               |         | 100,0                        |
| 563         | Deutsche Bank Securities Inc.                            | Wilmington            |         | 100,0                        |
| 564         | Deutsche Bank Securities Limited                         | Toronto               |         | 100,0                        |
| 565         | Deutsche Bank Services (Jersey) Limited                  | St. Helier            |         | 100,0                        |
| 566         | Deutsche Bank Società per Azioni                         | Mailand               |         | 99,8                         |
| 567         | Deutsche Bank Trust Company Americas                     | New York              |         | 100,0                        |
| 568         | Deutsche Bank Trust Company Delaware                     | Wilmington            |         | 100,0                        |
| 569         | Deutsche Bank Trust Company New Jersey Ltd.              | Jersey City           |         | 100,0                        |
| 570         | Deutsche Bank Trust Company, National Association        | New York              |         | 100,0                        |
| 571         | Deutsche Bank Trust Corporation                          | New York              |         | 100,0                        |
| 572         | Deutsche Bank Trustee Services (Guernsey) Limited        | St. Peter Port        |         | 100,0                        |
| 573         | Deutsche Bank Zártkörűen Működő Részvénytársaság         | Budapest              |         | 100,0                        |
| 574         | Deutsche Bank Österreich AG                              | Wien                  |         | 100,0                        |
| 575         | Deutsche Bank, Sociedad Anónima Española                 | Madrid                |         | 99,7                         |
| 576         | Deutsche Berri                                           | Paris                 |         | 100,0                        |
| 577         | Deutsche Capital Finance (2000) Limited                  | Georgetown            |         | 100,0                        |
| 578         | Deutsche Capital Financing (Singapore) Pte Ltd           | Singapur              |         | 100,0                        |
| 579         | Deutsche Capital Hong Kong Limited                       | Hongkong              |         | 100,0                        |
| 580         | Deutsche Capital Markets Algeria SPA                     | Algier                |         | 100,0                        |
| 581         | Deutsche Capital Markets Australia Limited               | Sydney                |         | 100,0                        |
| 582         | Deutsche Capital Singapore Limited                       | Singapur              |         | 100,0                        |
| 583         | Deutsche Card Services GmbH                              | Frankfurt             |         | 100,0                        |
| 584         | Deutsche Cayman Ltd.                                     | Georgetown            |         | 100,0                        |
| 585         | Deutsche Climate Change Fixed Income QP Trust            | Salem                 |         | 100,0                        |
| 586         | Deutsche Clubholding GmbH                                | Frankfurt             |         | 95,0                         |
| 587         | Deutsche Colombia S.A.                                   | Bogota                |         | 100,0                        |
| 588         | Deutsche Commodities Trading Co., Ltd.                   | Schanghai             |         | 100,0                        |
| 589         | Deutsche Courcelles                                      | Paris                 |         | 100,0                        |
| 590         | Deutsche Custody Global B.V.                             | Amsterdam             |         | 100,0                        |
| 591         | Deutsche Custody N.V.                                    | Amsterdam             |         | 100,0                        |
| 592         | Deutsche Custody Nederland B.V.                          | Amsterdam             |         | 100,0                        |
| 593         | Deutsche Domus New Zealand Limited                       | Auckland              |         | 100,0                        |
| 594         | Deutsche Emerging Markets Investments (Netherlands) B.V. | Amsterdam             |         | 99,9                         |
| 595         | Deutsche Equities India Private Limited                  | Mumbai                |         | 100,0                        |
| 596         | Deutsche Equity Funds Holdings Limited                   | London                |         | 100,0                        |
| 597         | Deutsche Family Office GmbH                              | Frankfurt             |         | 100,0                        |
| 598         | Deutsche Far Eastern Asset Management Company Limited    | Taipeh                |         | 60,0                         |
| 599         | Deutsche Fiduciary Services (Suisse) SA                  | Genf                  |         | 100,0                        |
| 600         | Deutsche Finance Co 1 Pty Limited                        | Sydney                |         | 100,0                        |
| 601         | Deutsche Finance Co 2 Pty Limited                        | Sydney                |         | 100,0                        |
| 602         | Deutsche Finance Co 3 Pty Limited                        | Sydney                |         | 100,0                        |
| 603         | Deutsche Finance Co 4 Pty Limited                        | Sydney                |         | 100,0                        |
| 604         | Deutsche Finance No. 1 Limited                           | London                |         | 100,0                        |
| 605         | Deutsche Finance No. 2 (UK) Limited                      | London                |         | 100,0                        |
| 606         | Deutsche Finance No. 2 Limited                           | Georgetown            |         | 100,0                        |
| 607         | Deutsche Finance No. 3 (UK) Limited                      | London                |         | 100,0                        |
| 608         | Deutsche Finance No. 4 (UK) Limited                      | London                |         | 100,0                        |
| 609         | Deutsche Finance No. 6 (UK) Limited                      | London                |         | 100,0                        |
| 610         | Deutsche Financial Services Puerto Rico Corporation      | San Juan              |         | 100,0                        |
| 611         | Deutsche Foras New Zealand Limited                       | Auckland              |         | 100,0                        |
| 612         | Deutsche Friedland                                       | Paris                 |         | 100,0                        |
| 613         | Deutsche Futures Singapore Pte Ltd                       | Singapur              |         | 100,0                        |
| 614         | Deutsche Global Markets Limited                          | Tel Aviv              |         | 100,0                        |

| Lfd.<br>Nr. | Name der Gesellschaft                                              | Sitz der Gesellschaft | Fußnote | Anteil am<br>Kapital<br>in % |
|-------------|--------------------------------------------------------------------|-----------------------|---------|------------------------------|
| 615         | Deutsche Group Holdings (SA) (Proprietary) Limited                 | Johannesburg          |         | 100,0                        |
| 616         | Deutsche Group Services Pty Limited                                | Sydney                |         | 100,0                        |
| 617         | Deutsche Grundbesitz Beteiligungsgesellschaft mbH                  | Eschborn              |         | 100,0                        |
| 618         | Deutsche Grundbesitz-Anlagegesellschaft mbH & Co Löwenstein Palais | Eschborn              |         | 100,0                        |
| 619         | Deutsche Grundbesitz-Anlagegesellschaft mit beschränkter Haftung   | Eschborn              |         | 99,8                         |
| 620         | Deutsche Haussmann, S.à r.l.                                       | Luxemburg             |         | 100,0                        |
| 621         | Deutsche Holdings (BTI) Limited                                    | London                |         | 100,0                        |
| 622         | Deutsche Holdings (Chile) S.A.                                     | Santiago              |         | 100,0                        |
| 623         | Deutsche Holdings (Malta) Ltd.                                     | St. Julians           |         | 100,0                        |
| 624         | Deutsche Holdings (SA) (Proprietary) Limited                       | Johannesburg          |         | 100,0                        |
| 625         | Deutsche Holdings Limited                                          | London                |         | 100,0                        |
| 626         | Deutsche Holdings No. 2 Limited                                    | London                |         | 100,0                        |
| 627         | Deutsche Holdings No. 3 Limited                                    | London                |         | 100,0                        |
| 628         | Deutsche Holdings No. 4 Limited                                    | London                |         | 100,0                        |
| 629         | Deutsche Hume Investments Pty Limited                              | Sydney                |         | 100,0                        |
| 630         | Deutsche Immobilien Leasing GmbH                                   | Düsseldorf            |         | 100,0                        |
| 631         | Deutsche India Holdings Private Limited                            | Mumbai                |         | 100,0                        |
| 632         | Deutsche International Corporate Services (Delaware) LLC           | Wilmington            |         | 100,0                        |
| 633         | Deutsche International Corporate Services (Ireland) Limited        | Dublin                |         | 100,0                        |
| 634         | Deutsche International Corporate Services Limited                  | St. Helier            |         | 100,0                        |
| 635         | Deutsche International Custodial Services Limited                  | St. Helier            |         | 100,0                        |
| 636         | Deutsche International Finance (Ireland) Limited                   | Dublin                |         | 100,0                        |
| 637         | Deutsche International Holdings (UK) Limited                       | London                |         | 100,0                        |
| 638         | Deutsche International Trust Company N.V.                          | Amsterdam             |         | 100,0                        |
| 639         | Deutsche International Trust Corporation (Mauritius) Limited       | Port Louis            |         | 100,0                        |
| 640         | Deutsche Inversiones Dos S.A.                                      | Santiago              |         | 100,0                        |
| 641         | Deutsche Inversiones Limitada                                      | Santiago              |         | 100,0                        |
| 642         | Deutsche Investment Management Americas Inc.                       | Wilmington            |         | 100,0                        |
| 643         | Deutsche Investments (Holland) B.V.                                | Amsterdam             |         | 100,0                        |
| 644         | Deutsche Investments (Netherlands) N.V.                            | Amsterdam             |         | 100,0                        |
| 645         | Deutsche Investments Australia Limited                             | Sydney                |         | 100,0                        |
| 646         | Deutsche Investments India Private Limited                         | Mumbai                |         | 100,0                        |
| 647         | Deutsche Investor Services Private Limited                         | Mumbai                |         | 100,0                        |
| 648         | Deutsche IT License GmbH                                           | Eschborn              |         | 100,0                        |
| 649         | Deutsche Knowledge Services Pte. Ltd.                              | Singapur              |         | 100,0                        |
| 650         | Deutsche Leasing New York Corp.                                    | New York              |         | 100,0                        |
| 651         | Deutsche Long Duration Government/Credit QP Trust                  | Salem                 |         | 100,0                        |
| 652         | Deutsche Managed Investments Limited                               | Sydney                |         | 100,0                        |
| 653         | Deutsche Master Funding Corporation                                | Wilmington            |         | 100,0                        |
| 654         | Deutsche Morgan Grenfell Group Public Limited Company              | London                |         | 100,0                        |
| 655         | Deutsche Morgan Grenfell Nominees Pte Ltd                          | Singapur              |         | 100,0                        |
| 656         | Deutsche Mortgage & Asset Receiving Corporation                    | Wilmington            |         | 100,0                        |
| 657         | Deutsche Mortgage Securities, Inc.                                 | Wilmington            |         | 100,0                        |
| 658         | Deutsche New Zealand Limited                                       | Auckland              |         | 100,0                        |
| 659         | Deutsche Nominees Limited                                          | London                |         | 100,0                        |
| 660         | Deutsche Overseas Issuance New Zealand Limited                     | Auckland              |         | 100,0                        |
| 661         | Deutsche PM Nominees Pty Limited                                   | Sydney                |         | 100,0                        |
| 662         | Deutsche Postbank AG                                               | Bonn                  |         | 52,0                         |
| 663         | Deutsche Postbank Finance Center Objekt GmbH                       | Munzbach              |         | 100,0                        |
| 664         | Deutsche Postbank Financial Services GmbH                          | Frankfurt             |         | 100,0                        |
| 665         | Deutsche Postbank Home Finance Limited                             | Neu Delhi             |         | 100,0                        |
| 666         | Deutsche Postbank International S.A.                               | Munzbach              |         | 100,0                        |
| 667         | Deutsche Postbank Vermögens-Management S.A.                        | Munzbach              |         | 100,0                        |
| 668         | Deutsche Private Asset Management Limited                          | London                |         | 100,0                        |
| 669         | Deutsche Representaciones y Mandatos S.A.                          | Buenos Aires          |         | 100,0                        |
| 670         | Deutsche Securities (India) Private Limited                        | Neu Delhi             |         | 75,0                         |



| Lfd.<br>Nr. | Name der Gesellschaft                                                       | Sitz der Gesellschaft | Fußnote | Anteil am<br>Kapital<br>in % |
|-------------|-----------------------------------------------------------------------------|-----------------------|---------|------------------------------|
| 671         | Deutsche Securities (Perú) S.A.                                             | Lima                  |         | 100,0                        |
| 672         | Deutsche Securities (Proprietary) Limited                                   | Johannesburg          |         | 75,0                         |
| 673         | Deutsche Securities (SA) (Proprietary) Limited                              | Johannesburg          |         | 75,0                         |
| 674         | Deutsche Securities Algeria SPA                                             | Algier                |         | 100,0                        |
| 675         | Deutsche Securities Asia Limited                                            | Hongkong              |         | 100,0                        |
| 676         | Deutsche Securities Australia Limited                                       | Sydney                |         | 100,0                        |
| 677         | Deutsche Securities Corredores de Bolsa Ltda.                               | Santiago              |         | 100,0                        |
| 678         | Deutsche Securities Inc.                                                    | Tokio                 |         | 100,0                        |
| 679         | Deutsche Securities Israel Ltd.                                             | Tel Aviv              |         | 100,0                        |
| 680         | Deutsche Securities Korea Co.                                               | Seoul                 |         | 100,0                        |
| 681         | Deutsche Securities Limited                                                 | Hongkong              |         | 100,0                        |
| 682         | Deutsche Securities Mauritius Limited                                       | Port Louis            |         | 100,0                        |
| 683         | Deutsche Securities Menkul Degerler A.S.                                    | Istanbul              |         | 100,0                        |
| 684         | Deutsche Securities New Zealand Limited                                     | Auckland              |         | 100,0                        |
| 685         | Deutsche Securities Nominees Hong Kong Limited                              | Hongkong              |         | 100,0                        |
| 686         | Deutsche Securities Saudi Arabia LLC                                        | Riad                  |         | 100,0                        |
| 687         | Deutsche Securities Sociedad de Bolsa S.A.                                  | Buenos Aires          |         | 100,0                        |
| 688         | Deutsche Securities Venezuela S.A.                                          | Caracas               |         | 100,0                        |
| 689         | Deutsche Securities, S.A. de C.V., Casa de Bolsa                            | Mexiko Stadt          |         | 100,0                        |
| 690         | Deutsche Securitisation Australia Pty Ltd                                   | Sydney                |         | 100,0                        |
| 691         | Deutsche StiftungsTrust GmbH                                                | Frankfurt             |         | 100,0                        |
| 692         | Deutsche Transaction France                                                 | Paris                 |         | 100,0                        |
| 693         | Deutsche Transnational Trustee Corporation Inc                              | Charlottetown         |         | 100,0                        |
| 694         | Deutsche Trustee Company Limited                                            | London                |         | 100,0                        |
| 695         | Deutsche Trustee Services (India) Private Limited                           | Mumbai                |         | 100,0                        |
| 696         | Deutsche Trustees Malaysia Berhad                                           | Kuala Lumpur          |         | 100,0                        |
| 697         | Deutsche Ultra Core Fixed Income QP Trust                                   | Salem                 |         | 100,0                        |
| 698         | Deutsches Institut für Altersvorsorge GmbH                                  | Frankfurt             |         | 78,0                         |
| 699         | DFC Residual Corp.                                                          | Reno                  |         | 100,0                        |
| 700         | DI Deutsche Immobilien Baugesellschaft mbH                                  | Eschborn              |         | 100,0                        |
| 701         | DI Deutsche Immobilien Baugesellschaft mbH & Co. Vermietungs KG             | Eschborn              |         | 100,0                        |
| 702         | DI Deutsche Immobilien Treuhandgesellschaft mbH                             | Eschborn              |         | 100,0                        |
| 703         | DIB-Consult Deutsche Immobilien- und Beteiligungs-Beratungsgesellschaft mbH | Düsseldorf            |         | 100,0                        |
| 704         | DIL CONTRACT Projektmanagement GmbH                                         | Düsseldorf            |         | 100,0                        |
| 705         | DIL Deutsche Baumanagement GmbH                                             | Düsseldorf            |         | 100,0                        |
| 706         | DIL Financial Services GmbH & Co. KG                                        | Düsseldorf            |         | 100,0                        |
| 707         | DISCA Beteiligungsgesellschaft mbH                                          | Düsseldorf            |         | 100,0                        |
| 708         | DIV Holding GmbH                                                            | Frankfurt             |         | 100,0                        |
| 709         | DMG Technology Management, L.L.C.                                           | Wilmington            |         | 100,0                        |
| 710         | DMJV                                                                        | New York              | 5       | 0,0                          |
| 711         | DNU Nominees Pty Limited                                                    | Sydney                |         | 100,0                        |
| 712         | DowningX LLC                                                                | Wilmington            |         | 100,0                        |
| 713         | DPB Financial Consultants Limited                                           | Gurgaon               |         | 100,0                        |
| 714         | DPB Regent's Park Estates (GP) Holding Limited                              | London                |         | 100,0                        |
| 715         | DPB Regent's Park Estates (LP) Holding Limited                              | London                |         | 100,0                        |
| 716         | DPBI Immobilien KGaA                                                        | Munsbach              |         | 100,0                        |
| 717         | Dritte DB Immobilienfonds Beta Dr. Rühl KG                                  | Eschborn              |         | 94,2                         |
| 718         | Drolla GmbH                                                                 | Frankfurt             |         | 100,0                        |
| 719         | DRT Limited International SRL                                               | Bukarest              |         | 100,0                        |
| 720         | DSL Holding Aktiengesellschaft                                              | Bonn                  |         | 100,0                        |
| 721         | DSL Portfolio GmbH & Co. KG                                                 | Bonn                  |         | 100,0                        |
| 722         | DSL Portfolio Verwaltungs GmbH                                              | Bonn                  |         | 100,0                        |
| 723         | DTS Nominees Pty. Limited                                                   | Sydney                |         | 100,0                        |
| 724         | DVCG Deutsche Venture Capital Gesellschaft mbH & Co. Fonds II KG i.L.       | München               |         | 69,2                         |
| 725         | DWS (Austria) Investmentgesellschaft mbH                                    | Wien                  |         | 100,0                        |
| 726         | DWS Finanz-Service GmbH                                                     | Frankfurt             |         | 100,0                        |

| Lfd.<br>Nr. | Name der Gesellschaft                                                   | Sitz der Gesellschaft | Fußnote | Anteil am<br>Kapital<br>in % |
|-------------|-------------------------------------------------------------------------|-----------------------|---------|------------------------------|
| 727         | DWS Helios                                                              | Luxemburg             |         | 99,7                         |
| 728         | DWS Holding & Service GmbH                                              | Frankfurt             |         | 100,0                        |
| 729         | DWS Investment GmbH                                                     | Frankfurt             |         | 100,0                        |
| 730         | DWS Investment S.A.                                                     | Luxemburg             |         | 100,0                        |
| 731         | DWS Investments (Spain), S.G.I.I.C., S.A.                               | Madrid                |         | 100,0                        |
| 732         | DWS Investments Annuities and Life Services Inc.                        | Wilmington            |         | 100,0                        |
| 733         | DWS Investments Distributors, Inc.                                      | Wilmington            |         | 100,0                        |
| 734         | DWS Investments Fund Accounting Corporation                             | Wilmington            |         | 100,0                        |
| 735         | DWS Investments Service Company                                         | Wilmington            |         | 100,0                        |
| 736         | DWS Polska TFI S.A.                                                     | Warschau              |         | 100,0                        |
| 737         | DWS Schweiz GmbH                                                        | Zürich                |         | 100,0                        |
| 738         | DWS Società di Intermediazione Mobiliare S.p.A.                         | Mailand               |         | 100,0                        |
| 739         | DWS Trust Company                                                       | Salem                 |         | 100,0                        |
| 740         | easyhyp GmbH                                                            | Hameln                |         | 100,0                        |
| 741         | EC EUROPA IMMOBILIEN FONDS NR. 3 GmbH & CO. KG                          | Hamburg               |         | 65,2                         |
| 742         | ECT Holdings Corp.                                                      | Wilmington            |         | 100,0                        |
| 743         | EDORA Funding GmbH                                                      | Frankfurt             |         | 100,0                        |
| 744         | Elba Finance GmbH                                                       | Eschborn              |         | 100,0                        |
| 745         | ELBI Funding GmbH                                                       | Frankfurt             |         | 100,0                        |
| 746         | ELDO ACHTE Vermögensverwaltungs GmbH                                    | Eschborn              |         | 100,0                        |
| 747         | ELDO ERSTE Vermögensverwaltungs GmbH                                    | Eschborn              |         | 100,0                        |
| 748         | Elizabethan Holdings Limited                                            | Georgetown            |         | 100,0                        |
| 749         | Elizabethan Management Limited                                          | Georgetown            |         | 100,0                        |
| 750         | Emerald GmbH                                                            | Frankfurt             |         | 100,0                        |
| 751         | Enterprise Fleet Management Exchange, Inc.                              | Wilmington            |         | 100,0                        |
| 752         | ERATO Beteiligungs- und Verwaltungs GmbH                                | Köln                  |         | 100,0                        |
| 753         | Erda Funding GmbH                                                       | Eschborn              |         | 100,0                        |
| 754         | Ero Properties, Inc.                                                    | New York              |         | 100,0                        |
| 755         | Erste DB Immobilienfonds Beta Dr. Rühl KG                               | Eschborn              |         | 94,2                         |
| 756         | Estate Holdings, Inc.                                                   | St. Thomas            | 5       | 0,0                          |
| 757         | EUROKNIGHTS IV GmbH & Co. Beteiligungs KG                               | München               | 1       | 0,0                          |
| 758         | European Asian Bank (Hong Kong) Nominees Limited                        | Hongkong              |         | 100,0                        |
| 759         | European Private Equity Portfolio S.A., SICAR                           | Luxemburg             | 1       | 1,1                          |
| 760         | Evergreen International Holdings B.V.                                   | Amsterdam             |         | 100,0                        |
| 761         | Evergreen International Investments B.V.                                | Amsterdam             |         | 100,0                        |
| 762         | Evergreen International Leasing B.V.                                    | Amsterdam             |         | 100,0                        |
| 763         | Evergreen Overseas Investments B.V.                                     | Amsterdam             |         | 100,0                        |
| 764         | Exinor SA                                                               | Malmedy               |         | 100,0                        |
| 765         | Exporterra GmbH                                                         | Frankfurt             |         | 100,0                        |
| 766         | EXTOREL Private Equity Advisers GmbH                                    | München               |         | 100,0                        |
| 767         | FARAMIR Beteiligungs- und Verwaltungs GmbH                              | Köln                  |         | 100,0                        |
| 768         | Farezco I, S. de R.L. de C.V.                                           | Zapopan               |         | 100,0                        |
| 769         | Farezco II, S. de R.L. de C.V.                                          | Zapopan               |         | 100,0                        |
| 770         | Fenix Administración de Activos S. de R.L. de C.V.                      | Mexiko Stadt          |         | 100,0                        |
| 771         | Fiduciaria Sant' Andrea S.r.L.                                          | Mailand               |         | 100,0                        |
| 772         | Filaine, Inc.                                                           | Wilmington            | 5       | 0,0                          |
| 773         | Finanza & Futuro Banca SpA                                              | Mailand               |         | 100,0                        |
| 774         | Firstee Investments LLC                                                 | Wilmington            |         | 100,0                        |
| 775         | FJC Property Corp.                                                      | Wilmington            |         | 100,0                        |
| 776         | Fondo de Inversión Privado NPL Fund Two                                 | Santiago              | 4       | 70,0                         |
| 777         | FRANKFURT CONSULT GmbH                                                  | Frankfurt             |         | 100,0                        |
| 778         | Frankfurt Family Office GmbH                                            | Frankfurt             |         | 100,0                        |
| 779         | Frankfurt Finanz-Software GmbH                                          | Frankfurt             |         | 100,0                        |
| 780         | FRANKFURT-TRUST Invest Luxemburg AG                                     | Luxemburg             |         | 100,0                        |
| 781         | FRANKFURT-TRUST Investment-Gesellschaft mit beschränkter Haftung        | Frankfurt             |         | 100,0                        |
| 782         | Frankfurter Beteiligungs-Treuhand Gesellschaft mit beschränkter Haftung | Frankfurt             |         | 100,0                        |

| Lfd.<br>Nr. | Name der Gesellschaft                                                                                                | Sitz der Gesellschaft | Fußnote | Anteil am<br>Kapital<br>in % |
|-------------|----------------------------------------------------------------------------------------------------------------------|-----------------------|---------|------------------------------|
| 783         | Frankfurter Vermögens-Treuhand Gesellschaft mit beschränkter Haftung                                                 | Frankfurt             |         | 100,0                        |
| 784         | Franz Urbig- und Oscar Schlitter-Stiftung Gesellschaft mit beschränkter Haftung                                      | Frankfurt             |         | 100,0                        |
| 785         | Fundo de Investimento em Direitos Creditórios Nao-Padronizados-Precatório Federal 4870-1                             | Rio de Janeiro        |         | 100,0                        |
| 786         | Fundo de Investimento em Direitos Creditórios Nao-Padronizados-Precatórios Federais DB I                             | Rio de Janeiro        |         | 100,0                        |
| 787         | Fundo de Investimento em Direitos Creditórios Nao-Padronizados-Precatórios Federais DB II                            | Rio de Janeiro        |         | 100,0                        |
| 788         | Fundo de Investimento em Quotas de Fundos de Investimento em Direitos Creditórios<br>Nao-Padronizados Global Markets | Rio de Janeiro        |         | 100,0                        |
| 789         | Funds Nominees Limited                                                                                               | London                |         | 100,0                        |
| 790         | Fünfte DB Immobilienfonds Beta Dr. Rühl KG                                                                           | Eschborn              |         | 94,2                         |
| 791         | Fünfte SAB Treuhand und Verwaltung GmbH & Co. Suhl >>Rimbachzentrum<< KG                                             | Bad Homburg           |         | 74,0                         |
| 792         | G Finance Holding Corp.                                                                                              | Wilmington            |         | 100,0                        |
| 793         | GACC Funding Corporation                                                                                             | Wilmington            |         | 100,0                        |
| 794         | GAFCo Funding Corp.                                                                                                  | Wilmington            |         | 100,0                        |
| 795         | GAVDOS GmbH                                                                                                          | Wuppertal             |         | 100,0                        |
| 796         | GbR Goethestraße                                                                                                     | Köln                  |         | 94,0                         |
| 797         | Gemini Technology Services Inc.                                                                                      | Wilmington            |         | 100,0                        |
| 798         | German American Capital Corporation                                                                                  | Baltimore             |         | 100,0                        |
| 799         | German European VCP II GmbH & Co. KG                                                                                 | München               | 1       | 0,0                          |
| 800         | Glacier Mountain, L.P.                                                                                               | Wilmington            |         | 100,0                        |
| 801         | Global Alliance Finance Company, L.L.C.                                                                              | Wilmington            |         | 100,0                        |
| 802         | Global Commercial Real Estate Special Opportunities Limited                                                          | St. Helier            |         | 100,0                        |
| 803         | Global Markets Centre Private Limited                                                                                | Mumbai                |         | 100,0                        |
| 804         | Global Markets Fundo de Investimento Multimercado                                                                    | Rio de Janeiro        |         | 100,0                        |
| 805         | Global Markets III Fundo de Investimento Multimercado - Crédito Privado e Investimento No<br>Exterior                | Rio de Janeiro        |         | 100,0                        |
| 806         | GlobalX LLC                                                                                                          | Wilmington            |         | 100,0                        |
| 807         | Greene Investments Limited                                                                                           | Georgetown            |         | 100,0                        |
| 808         | GreenwichX LLC                                                                                                       | Wilmington            |         | 100,0                        |
| 809         | Greenwood Properties Corp.                                                                                           | New York              | 5       | 0,0                          |
| 810         | Grundstücksgesellschaft Frankfurt Bockenheimer Landstraße GbR                                                        | Troisdorf             |         | 94,9                         |
| 811         | Grundstücksgesellschaft Köln-Ossendorf VI mbH                                                                        | Köln                  |         | 100,0                        |
| 812         | Grundstücksgesellschaft Wiesbaden Luisenstraße/Kirchgasse GbR                                                        | Troisdorf             |         | 59,7                         |
| 813         | Gulara Pty Ltd                                                                                                       | Sydney                |         | 100,0                        |
| 814         | Guo Mao International Hotels BV                                                                                      | Amsterdam             |         | 100,0                        |
| 815         | Gut Kaden Golf und Land Club GmbH                                                                                    | Alveslohe             |         | 100,0                        |
| 816         | Hac Investments Ltd.                                                                                                 | Wilmington            |         | 100,0                        |
| 817         | HAC Investments Portugal - Servicos de Consultadoria e Gestao Ltda.                                                  | Lissabon              |         | 100,0                        |
| 818         | HAH Limited                                                                                                          | London                |         | 100,0                        |
| 819         | Hakkeijima Godo Kaisha                                                                                               | Tokio                 |         | 95,0                         |
| 820         | Herengracht Financial Services B.V.                                                                                  | Amsterdam             |         | 100,0                        |
| 821         | Hertz Car Exchange Inc.                                                                                              | Wilmington            |         | 100,0                        |
| 822         | Hessische Immobilien-Verwaltungs-Gesellschaft mit beschränkter Haftung                                               | Eschborn              |         | 100,0                        |
| 823         | Home Closer LLC                                                                                                      | New York              |         | 100,0                        |
| 824         | HTB Spezial GmbH & Co. KG                                                                                            | Köln                  |         | 100,0                        |
| 825         | Hudson GmbH                                                                                                          | Eschborn              |         | 100,0                        |
| 826         | HudsonX Inc.                                                                                                         | Wilmington            |         | 100,0                        |
| 827         | Hypotheken-Verwaltungs-Gesellschaft mbH                                                                              | Frankfurt             |         | 100,0                        |
| 828         | I Synfuels, LLC                                                                                                      | Wilmington            |         | 100,0                        |
| 829         | IB Associate, LLC                                                                                                    | New York              |         | 100,0                        |
| 830         | IC Chicago Associates LLC                                                                                            | Wilmington            | 5       | 0,0                          |
| 831         | Ifigal Gestion                                                                                                       | Paris                 |         | 100,0                        |
| 832         | IFN Finance B.V.                                                                                                     | Rotterdam             |         | 100,0                        |
| 833         | IFN Finance N.V.                                                                                                     | Antwerpen             |         | 100,0                        |
| 834         | IKARIA Beteiligungs- und Verwaltungsgesellschaft mbH                                                                 | Köln                  |         | 100,0                        |
| 835         | IMM Associate, LLC                                                                                                   | New York              |         | 100,0                        |
| 836         | Imobal - Imobiliária e Administradora Ltda.                                                                          | Sao Paulo             |         | 100,0                        |

| Lfd.<br>Nr. | Name der Gesellschaft                                        | Sitz der Gesellschaft | Fußnote | Anteil am<br>Kapital<br>in % |
|-------------|--------------------------------------------------------------|-----------------------|---------|------------------------------|
| 837         | Imodan Limited                                               | Port Louis            |         | 100,0                        |
| 838         | Indigo (Cayman) Holding Limited                              | Georgetown            |         | 100,0                        |
| 839         | Industrie-Beteiligungs-Gesellschaft mit beschränkter Haftung | Frankfurt             |         | 100,0                        |
| 840         | International Operator Limited                               | London                |         | 100,0                        |
| 841         | IOS Finance EFC, S.A.                                        | Barcelona             |         | 100,0                        |
| 842         | Iphigenie Verwaltungs GmbH                                   | Bonn                  |         | 100,0                        |
| 843         | Ironland Limited                                             | London                |         | 100,0                        |
| 844         | ISTRON Beteiligungs- und Verwaltungs-GmbH                    | Köln                  |         | 100,0                        |
| 845         | ITAPEVA II Multicarteira FIDC Não-Padronizado                | Sao Paulo             |         | 100,0                        |
| 846         | IVAF I Manager, S.à r.l.                                     | Luxemburg             |         | 100,0                        |
| 847         | IVAF II Manager, S.à r.l.                                    | Luxemburg             |         | 100,0                        |
| 848         | Ivy Kroner Unit Trust I                                      | Georgetown            | 4       | 0,0                          |
| 849         | JADE Residential Property AG                                 | Eschborn              |         | 100,0                        |
| 850         | JPCB-Bero GmbH                                               | Oberhausen            | 6       | 100,0                        |
| 851         | JR Nominees (Proprietary) Limited                            | Johannesburg          |         | 100,0                        |
| 852         | Jyogashima Godo Kaisha                                       | Tokio                 |         | 100,0                        |
| 853         | KAPPA IT VENTURES Zweite Beteiligungs GmbH i.L.              | Bonn                  |         | 93,5                         |
| 854         | KAPPA IT VENTURES Zweite Holding GmbH i.L.                   | Bonn                  |         | 100,0                        |
| 855         | KARPATOS Beteiligungs- und Verwaltungsgesellschaft mbH       | Köln                  |         | 100,0                        |
| 856         | KEBA Gesellschaft für interne Services mbH                   | Frankfurt             |         | 100,0                        |
| 857         | KHP Knüppe, Huntebrinker & Co. GmbH                          | Osnabrück             |         | 100,0                        |
| 858         | Kidson Pte Ltd                                               | Singapur              |         | 100,0                        |
| 859         | Kiewo Ltd.                                                   | Georgetown            |         | 100,0                        |
| 860         | Kingfisher Nominees Limited                                  | Auckland              |         | 100,0                        |
| 861         | KITHOS Beteiligungs- und Verwaltungsgesellschaft mbH         | Köln                  |         | 100,0                        |
| 862         | Klöckner Industriebeteiligungsgesellschaft mbH               | Frankfurt             |         | 100,0                        |
| 863         | Konsul Inkasso GmbH                                          | Essen                 |         | 100,0                        |
| 864         | KOS Beteiligungs- und Verwaltungsgesellschaft mbH            | Köln                  |         | 100,0                        |
| 865         | LA Water Holdings Limited                                    | Georgetown            |         | 75,0                         |
| 866         | Lammermuir Leasing Limited                                   | London                |         | 100,0                        |
| 867         | Laser Leasing Limited                                        | Georgetown            |         | 100,0                        |
| 868         | Latin America Recovery Fund LLC                              | Wilmington            |         | 100,0                        |
| 869         | LAWL Pte. Ltd.                                               | Singapur              |         | 100,0                        |
| 870         | Leasing Verwaltungsgesellschaft Waltersdorf mbH              | Schönefeld            |         | 100,0                        |
| 871         | LGB Beteiligungs GmbH                                        | Köln                  |         | 100,0                        |
| 872         | Liberty Investments Limited                                  | Georgetown            |         | 100,0                        |
| 873         | Licorne Gestion                                              | Paris                 |         | 100,0                        |
| 874         | Linder LP                                                    | Georgetown            |         | 100,0                        |
| 875         | Lindoro LLC                                                  | Wilmington            |         | 100,0                        |
| 876         | Lokki Verwaltungsgesellschaft mbH                            | Frankfurt             |         | 100,0                        |
| 877         | London Industrial Leasing Limited                            | London                |         | 100,0                        |
| 878         | Long-Tail Risk Insurers, Ltd.                                | Hamilton              |         | 100,0                        |
| 879         | Luxembourg Family Office S.A.                                | Luxemburg             |         | 100,0                        |
| 880         | LWC Nominees Limited                                         | Auckland              |         | 100,0                        |
| 881         | MAC Investments Ltd.                                         | Georgetown            |         | 100,0                        |
| 882         | MacDougal Investments Limited                                | Wilmington            |         | 100,0                        |
| 883         | Makapuu Inc.                                                 | Wilmington            |         | 100,0                        |
| 884         | Mallard Place, Inc.                                          | Wilmington            |         | 100,0                        |
| 885         | Marine Investments YK                                        | Tokio                 |         | 100,0                        |
| 886         | Matura Vermögensverwaltung mit beschränkter Haftung          | Frankfurt             |         | 100,0                        |
| 887         | Maxblue Americas Holdings, S.A.                              | Madrid                |         | 100,0                        |
| 888         | Mayfair Center, Inc.                                         | Wilmington            |         | 100,0                        |
| 889         | Media Entertainment Filmmanagement GmbH                      | Pullach               |         | 100,0                        |
| 890         | MEF I Manager, S.à r.l.                                      | Luxemburg             |         | 100,0                        |
| 891         | Mercer Investments Limited                                   | Wilmington            |         | 100,0                        |
| 892         | Merkur I SICAV-FIS                                           | Luxemburg             |         | 100,0                        |

| Lfd.<br>Nr. | Name der Gesellschaft                                                                        | Sitz der Gesellschaft | Fußnote | Anteil am<br>Kapital<br>in % |
|-------------|----------------------------------------------------------------------------------------------|-----------------------|---------|------------------------------|
| 893         | Merkur II SICAV-FIS                                                                          | Luxemburg             |         | 100,0                        |
| 894         | Metis Properties Limited                                                                     | London                |         | 100,0                        |
| 895         | Mezzanine Capital Europe (MC-EU) GmbH & Co. KG                                               | München               | 1       | 0,1                          |
| 896         | Mezzanine Capital Europe II (MC-EU II) GmbH & Co. KG                                         | München               | 1       | 0,0                          |
| 897         | Mezzanine Capital USA (MC-US) GmbH & Co. KG                                                  | München               | 1       | 0,1                          |
| 898         | Mezzanine Capital USA II (MC-US II) GmbH & Co. KG                                            | München               | 1       | 0,1                          |
| 899         | MHL Reinsurance Ltd.                                                                         | Burlington            |         | 100,0                        |
| 900         | Miami MEI, LLC                                                                               | Dover                 | 5       | 0,0                          |
| 901         | Mira GmbH & Co. KG                                                                           | Frankfurt             |         | 100,0                        |
| 902         | MIT Holdings, Inc.                                                                           | Baltimore             |         | 100,0                        |
| 903         | MMDB Noonmark L.L.C.                                                                         | Wilmington            |         | 100,0                        |
| 904         | "modernes Frankfurt" private Gesellschaft für Stadtentwicklung mbH                           | Frankfurt             |         | 100,0                        |
| 905         | Morgan Grenfell & Co. Limited                                                                | London                |         | 100,0                        |
| 906         | Morgan Grenfell (Local Authority Finance) Limited                                            | London                |         | 100,0                        |
| 907         | Morgan Grenfell (Local Authority Services) Limited (in member's voluntary liquidation)       | London                |         | 100,0                        |
| 908         | Morgan Grenfell Capital (G.P.) Limited (in member's voluntary liquidation)                   | Edinburgh             |         | 100,0                        |
| 909         | Morgan Grenfell Development Capital Holdings Limited                                         | London                |         | 100,0                        |
| 910         | Morgan Grenfell Development Capital Nominees Limited (in member's voluntary liquidation)     | London                |         | 100,0                        |
| 911         | Morgan Grenfell Development Capital Syndications Limited (in member's voluntary liquidation) | London                |         | 100,0                        |
| 912         | Morgan Grenfell Private Equity Limited                                                       | London                |         | 100,0                        |
| 913         | Morgan Nominees Limited                                                                      | London                |         | 100,0                        |
| 914         | Mortgage Trading (UK) Limited                                                                | London                |         | 100,0                        |
| 915         | MortgageIT Securities Corp.                                                                  | Wilmington            |         | 100,0                        |
| 916         | MortgageIT, Inc.                                                                             | New York              |         | 100,0                        |
| 917         | MXB U.S.A., Inc.                                                                             | Wilmington            |         | 100,0                        |
| 918         | Navegator - SGFTC, S.A.                                                                      | Lissabon              |         | 100,0                        |
| 919         | NEPTUNO Verwaltungs- und Treuhand-Gesellschaft mit beschränkter Haftung                      | Köln                  |         | 100,0                        |
| 920         | New Prestitempo S.p.A.                                                                       | Mailand               |         | 100,0                        |
| 921         | Newhall LLC                                                                                  | Wilmington            |         | 100,0                        |
| 922         | Newport Harbor Corporation, Delaware                                                         | Wilmington            |         | 100,0                        |
| 923         | NewportX Inc.                                                                                | Wilmington            |         | 100,0                        |
| 924         | NIDDA Grundstücks- und Beteiligungs-Gesellschaft mit beschränkter Haftung                    | Frankfurt             |         | 100,0                        |
| 925         | Nordwestdeutscher Wohnungsbau-träger Gesellschaft mit beschränkter Haftung                   | Frankfurt             |         | 100,0                        |
| 926         | norisbank GmbH                                                                               | Berlin                |         | 100,0                        |
| 927         | North American Income Fund PLC                                                               | Dublin                |         | 67,1                         |
| 928         | Novoquote Limited                                                                            | London                |         | 100,0                        |
| 929         | Oakwood Properties Corp.                                                                     | Wilmington            |         | 100,0                        |
| 930         | Office Grundstücksverwaltungsgesellschaft mbH                                                | Frankfurt             |         | 100,0                        |
| 931         | OOO "Deutsche Bank"                                                                          | Moskau                |         | 100,0                        |
| 932         | OP Cash Euro Plus                                                                            | Luxemburg             | 4       | 61,7                         |
| 933         | OP-Fonds OPAL                                                                                | Köln                  | 4       | 100,0                        |
| 934         | OP-INVEST CHF Management S.A.                                                                | Luxemburg             |         | 100,0                        |
| 935         | OPB KRITI GmbH                                                                               | Königstein            |         | 100,0                        |
| 936         | OPB Verwaltungs- und Beteiligungs-GmbH                                                       | Köln                  |         | 100,0                        |
| 937         | OPB Verwaltungs- und Treuhand GmbH                                                           | Köln                  |         | 100,0                        |
| 938         | OPB-Decima GmbH                                                                              | Köln                  |         | 100,0                        |
| 939         | OPB-Holding GmbH                                                                             | Köln                  |         | 100,0                        |
| 940         | OPB-Mosel GmbH                                                                               | Köln                  |         | 100,0                        |
| 941         | OPB-Nona GmbH                                                                                | Frankfurt             |         | 100,0                        |
| 942         | OPB-Oktava GmbH                                                                              | Köln                  |         | 100,0                        |
| 943         | OPB-Quarta GmbH                                                                              | Köln                  |         | 100,0                        |
| 944         | OPB-Quinta GmbH                                                                              | Köln                  |         | 100,0                        |
| 945         | OPB-Rhein GmbH                                                                               | Köln                  |         | 100,0                        |
| 946         | OPB-Septima GmbH                                                                             | Köln                  |         | 100,0                        |
| 947         | OPB-SIKINOS GmbH i.L.                                                                        | Köln                  |         | 100,0                        |

| Lfd.<br>Nr. | Name der Gesellschaft                                                 | Sitz der Gesellschaft | Fußnote | Anteil am<br>Kapital<br>in % |
|-------------|-----------------------------------------------------------------------|-----------------------|---------|------------------------------|
| 948         | OPB-Structuring GmbH                                                  | Köln                  |         | 100,0                        |
| 949         | Open joint-stock company "Deutsche Bank DBU"                          | Kiew                  |         | 100,0                        |
| 950         | Oppenheim ACA GmbH                                                    | Frankfurt             |         | 100,0                        |
| 951         | Oppenheim AM GmbH                                                     | Wien                  |         | 100,0                        |
| 952         | OPPENHEIM Asia Select GmbH & Co. KG                                   | Köln                  |         | 100,0                        |
| 953         | Oppenheim Asset Management Services S.à r.l.                          | Luxemburg             |         | 100,0                        |
| 954         | Oppenheim Beteiligungs-AG                                             | Köln                  |         | 100,0                        |
| 955         | OPPENHEIM Beteiligungs-Treuhand GmbH                                  | Köln                  |         | 100,0                        |
| 956         | OPPENHEIM Capital Advisory GmbH                                       | Köln                  |         | 100,0                        |
| 957         | Oppenheim Capital Management GmbH                                     | Köln                  |         | 100,0                        |
| 958         | Oppenheim Eunomia GmbH                                                | Köln                  |         | 100,0                        |
| 959         | OPPENHEIM Flottenfonds IV GmbH & Co. KG                               | Köln                  | 1       | 0,0                          |
| 960         | OPPENHEIM Flottenfonds V GmbH & Co. KG                                | Köln                  |         | 83,3                         |
| 961         | Oppenheim Fonds Trust GmbH                                            | Köln                  |         | 100,0                        |
| 962         | OPPENHEIM Immobilien Dachfonds III GmbH & Co. KG                      | Köln                  |         | 100,0                        |
| 963         | Oppenheim Immobilienfonds Rüttenscheider Tor GmbH & Co. KG            | Köln                  | 1       | 5,4                          |
| 964         | Oppenheim International Finance                                       | Dublin                |         | 100,0                        |
| 965         | OPPENHEIM Internet Fonds Manager GmbH i.L.                            | Köln                  |         | 100,0                        |
| 966         | Oppenheim Kapitalanlagegesellschaft mbH                               | Köln                  |         | 100,0                        |
| 967         | OPPENHEIM Mezzanine GmbH & Co. KG                                     | Frankfurt             | 1       | 2,6                          |
| 968         | OPPENHEIM PRIVATE EQUITY Manager GmbH                                 | Köln                  |         | 100,0                        |
| 969         | OPPENHEIM PRIVATE EQUITY Verwaltungsgesellschaft mbH                  | Köln                  |         | 100,0                        |
| 970         | Oppenheim Research GmbH                                               | Köln                  |         | 100,0                        |
| 971         | Oppenheim VAM Kapitalanlagegesellschaft mbH                           | Köln                  |         | 100,0                        |
| 972         | Oppenheim Vermögenstreuhand GmbH                                      | Köln                  |         | 100,0                        |
| 973         | OPS Nominees Pty. Limited                                             | Sydney                |         | 100,0                        |
| 974         | OVT Trust 1 GmbH                                                      | Köln                  |         | 100,0                        |
| 975         | OVV Beteiligungs GmbH                                                 | Köln                  |         | 100,0                        |
| 976         | PacificX LLC                                                          | Wilmington            |         | 100,0                        |
| 977         | PADUS Grundstücks-Vermietungsgesellschaft mbH                         | Düsseldorf            |         | 100,0                        |
| 978         | Pan Australian Nominees Pty. Limited                                  | Sydney                |         | 100,0                        |
| 979         | Paribus Köln I GmbH                                                   | Köln                  |         | 100,0                        |
| 980         | PB (USA) Holdings, Inc.                                               | Wilmington            |         | 100,0                        |
| 981         | PB (USA) Realty Corporation                                           | New York              |         | 94,7                         |
| 982         | PB Capital Corporation                                                | Wilmington            |         | 100,0                        |
| 983         | PB EuroTurks Finanzdienstleistungen GmbH i.L.                         | Bonn                  |         | 100,0                        |
| 984         | PB Factoring GmbH                                                     | Bonn                  |         | 100,0                        |
| 985         | PB Finance (Delaware) Inc.                                            | Wilmington            |         | 100,0                        |
| 986         | PB Firmenkunden AG                                                    | Bonn                  |         | 100,0                        |
| 987         | PB Hollywood I Hollywood Station, LLC                                 | Dover                 | 5       | 0,0                          |
| 988         | PB Hollywood II Lofts, LLC                                            | Dover                 | 5       | 0,0                          |
| 989         | PB Sechste Beteiligungen GmbH                                         | Bonn                  |         | 100,0                        |
| 990         | PB Spezial-Investmentaktiengesellschaft mit Teilgesellschaftsvermögen | Frankfurt             |         | 99,6                         |
| 991         | PBC Carnegie, LLC                                                     | Wilmington            | 5       | 0,0                          |
| 992         | PBC Services GmbH der Deutschen Bank                                  | Frankfurt             |         | 100,0                        |
| 993         | PE-US/ASIA Beteiligungsgesellschaft mbH                               | München               |         | 100,0                        |
| 994         | PEIF II (Manager) Limited                                             | St. Helier            |         | 100,0                        |
| 995         | Pelleport Investors, Inc.                                             | New York              |         | 100,0                        |
| 996         | Pembol Nominees Limited                                               | London                |         | 100,0                        |
| 997         | Percy Limited                                                         | Gibraltar             |         | 100,0                        |
| 998         | PHARMA/wHEALTH Management Company S.A.                                | Luxemburg             |         | 99,9                         |
| 999         | Philippine Opportunities for Growth and Income (SPV-AMC), INC.        | Manila                |         | 95,0                         |
| 1000        | Phoebus Investments LP                                                | Wilmington            |         | 100,0                        |
| 1001        | Phoebus Leasing Limited                                               | Georgetown            |         | 100,0                        |
| 1002        | Pilgrim Financial Services LLP                                        | Wilmington            |         | 100,0                        |
| 1003        | PLAKIAS Beteiligungs- und Verwaltungs-GmbH                            | Köln                  |         | 100,0                        |

| Lfd.<br>Nr. | Name der Gesellschaft                                                 | Sitz der Gesellschaft | Fußnote | Anteil am<br>Kapital<br>in % |
|-------------|-----------------------------------------------------------------------|-----------------------|---------|------------------------------|
| 1004        | Plantation Bay, Inc.                                                  | St. Thomas            |         | 100,0                        |
| 1005        | Plinius Verwaltungs AG                                                | Zürich                |         | 100,0                        |
| 1006        | PMG Collins, LLC                                                      | Tallahassee           | 5       | 0,0                          |
| 1007        | Pollus L.P.                                                           | St. Helier            |         | 100,0                        |
| 1008        | Polydeuce LLC                                                         | Wilmington            |         | 100,0                        |
| 1009        | POND VENTURES II GmbH & Co. KG                                        | München               |         | 99,9                         |
| 1010        | POSEIDON Vermögensverwaltungsgesellschaft mbH                         | Köln                  |         | 100,0                        |
| 1011        | Postbank Akademie und Service GmbH                                    | Hameln                |         | 100,0                        |
| 1012        | Postbank Beteiligungen GmbH                                           | Bonn                  |         | 100,0                        |
| 1013        | Postbank Direkt GmbH                                                  | Bonn                  |         | 100,0                        |
| 1014        | Postbank Filial GmbH                                                  | Bonn                  |         | 100,0                        |
| 1015        | Postbank Filialvertrieb AG                                            | Bonn                  |         | 100,0                        |
| 1016        | Postbank Finanzberatung AG                                            | Hameln                |         | 100,0                        |
| 1017        | Postbank Immobilien und Baumanagement GmbH                            | Bonn                  |         | 100,0                        |
| 1018        | Postbank Immobilien und Baumanagement GmbH & Co. Objekt Leipzig KG    | Bonn                  |         | 90,0                         |
| 1019        | Postbank Leasing GmbH                                                 | Bonn                  |         | 100,0                        |
| 1020        | Postbank P.O.S. Transact GmbH                                         | Eschborn              |         | 100,0                        |
| 1021        | Postbank Support GmbH                                                 | Köln                  |         | 100,0                        |
| 1022        | Postbank Systems AG                                                   | Bonn                  |         | 100,0                        |
| 1023        | Postbank Versicherungsvermittlung GmbH                                | Bonn                  |         | 100,0                        |
| 1024        | Primelux Insurance S.A.                                               | Luxemburg             |         | 100,0                        |
| 1025        | Private Equity Asia Select Company III S.à r.l.                       | Luxemburg             |         | 100,0                        |
| 1026        | Private Equity Global Select Company IV S.à r.l.                      | Luxemburg             |         | 100,0                        |
| 1027        | Private Equity Global Select Company V S.à r.l.                       | Luxemburg             |         | 100,0                        |
| 1028        | Private Equity Select Company S.à r.l.                                | Luxemburg             |         | 100,0                        |
| 1029        | Private Financing Initiatives, S.L.                                   | Barcelona             |         | 51,0                         |
| 1030        | PS plus Portfolio Software + Consulting GmbH                          | Rödermark             |         | 80,2                         |
| 1031        | PT. Deutsche Securities Indonesia                                     | Jakarta               |         | 99,0                         |
| 1032        | Pyramid Acquisitions B.V.                                             | Amsterdam             |         | 100,0                        |
| 1033        | Pyramid Investments Limited (in member's voluntary liquidation)       | London                |         | 100,0                        |
| 1034        | Pyramid Office Properties Limited (in member's voluntary liquidation) | London                |         | 100,0                        |
| 1035        | Pyramid Ventures, Inc.                                                | Wilmington            |         | 100,0                        |
| 1036        | RALOS Verwaltung GmbH & Co. Vermietungs-KG                            | Pullach               |         | 94,0                         |
| 1037        | RBM Nominees Pty. Limited                                             | Sydney                |         | 100,0                        |
| 1038        | Reade, Inc.                                                           | Wilmington            |         | 100,0                        |
| 1039        | Red Lodge, L.P.                                                       | Wilmington            |         | 100,0                        |
| 1040        | registrar services GmbH                                               | Eschborn              |         | 100,0                        |
| 1041        | Regula Limited                                                        | Road Town             |         | 100,0                        |
| 1042        | REIB Europe Investments Limited                                       | London                |         | 100,0                        |
| 1043        | REIB International Holdings Limited                                   | London                |         | 100,0                        |
| 1044        | REO Properties Corporation                                            | Wilmington            |         | 100,0                        |
| 1045        | RHODOS Beteiligungs- und Verwaltungsgesellschaft mbH                  | Köln                  |         | 100,0                        |
| 1046        | Rimvalley Limited                                                     | Dublin                |         | 100,0                        |
| 1047        | Ripple Creek, L.P.                                                    | Wilmington            |         | 100,0                        |
| 1048        | Riverton Investments LLC                                              | Wilmington            |         | 100,0                        |
| 1049        | RMS Investments (Cayman)                                              | Georgetown            |         | 100,0                        |
| 1050        | RoCal, L.L.C.                                                         | Wilmington            |         | 100,0                        |
| 1051        | RoCalwest, Inc.                                                       | Wilmington            |         | 100,0                        |
| 1052        | Romeo U.S. Group, Inc.                                                | Wilmington            |         | 100,0                        |
| 1053        | RoPro U.S. Holding, Inc.                                              | Wilmington            |         | 100,0                        |
| 1054        | RoSmart LLC                                                           | Wilmington            |         | 100,0                        |
| 1055        | Route 28 Receivables, LLC                                             | Wilmington            |         | 100,0                        |
| 1056        | RREEF Agency S.r.l.                                                   | Mailand               |         | 100,0                        |
| 1057        | RREEF America L.L.C.                                                  | Wilmington            |         | 100,0                        |
| 1058        | RREEF China REIT Management Limited                                   | Hongkong              |         | 100,0                        |
| 1059        | RREEF European Value Added I (G.P.) Limited                           | London                |         | 100,0                        |



| Lfd.<br>Nr. | Name der Gesellschaft                                                             | Sitz der Gesellschaft | Fußnote | Anteil am<br>Kapital<br>in % |
|-------------|-----------------------------------------------------------------------------------|-----------------------|---------|------------------------------|
| 1060        | RREEF Fondimmobiliari Società di Gestione del Risparmio S.p.A.                    | Mailand               |         | 100,0                        |
| 1061        | RREEF India Advisors Private Limited                                              | Mumbai                |         | 100,0                        |
| 1062        | RREEF Investment GmbH                                                             | Eschborn              |         | 99,9                         |
| 1063        | RREEF Management Company                                                          | Wilmington            |         | 100,0                        |
| 1064        | RREEF Management GmbH                                                             | Eschborn              |         | 100,0                        |
| 1065        | RREEF Management L.L.C.                                                           | Wilmington            |         | 100,0                        |
| 1066        | RREEF North American Infrastructure Onshore Fund A, L.P.                          | Wilmington            |         | 99,9                         |
| 1067        | RREEF Opportunities Management S.r.l.                                             | Mailand               |         | 100,0                        |
| 1068        | RREEF REFlex Fund L.P.                                                            | Wilmington            |         | 86,7                         |
| 1069        | RREEF REFlex Fund Ltd.                                                            | Georgetown            |         | 92,3                         |
| 1070        | RREEF Shanghai Investment Consultancy Company                                     | Schanghai             |         | 100,0                        |
| 1071        | RREEF Spezial Invest GmbH                                                         | Eschborn              |         | 100,0                        |
| 1072        | RREEFSmart, L.L.C.                                                                | Wilmington            |         | 95,0                         |
| 1073        | RTS Nominees Pty Limited                                                          | Sydney                |         | 100,0                        |
| 1074        | Rüd Blass Vermögensverwaltung AG                                                  | Zürich                |         | 100,0                        |
| 1075        | SAB Real Estate Verwaltungs GmbH                                                  | Hameln                |         | 100,0                        |
| 1076        | Sagamore Limited                                                                  | London                |         | 100,0                        |
| 1077        | SAGITA Grundstücks-Vermietungsgesellschaft mbH                                    | Düsseldorf            |         | 100,0                        |
| 1078        | Sal. Oppenheim (France)                                                           | Paris                 |         | 100,0                        |
| 1079        | Sal. Oppenheim Alternative Asset Management S.A.                                  | Luxemburg             |         | 100,0                        |
| 1080        | Sal. Oppenheim Alternative Investments GmbH                                       | Köln                  |         | 100,0                        |
| 1081        | Sal. Oppenheim Asia Alternative Investments GmbH                                  | Köln                  |         | 100,0                        |
| 1082        | Sal. Oppenheim Boulevard Konrad Adenauer S.à r.l.                                 | Luxemburg             |         | 100,0                        |
| 1083        | Sal. Oppenheim Corporate Finance North America Holding LLC                        | Wilmington            |         | 100,0                        |
| 1084        | Sal. Oppenheim Global Invest GmbH                                                 | Köln                  |         | 100,0                        |
| 1085        | Sal. Oppenheim Healthcare Beteiligungs GmbH                                       | Köln                  |         | 100,0                        |
| 1086        | Sal. Oppenheim Investments GmbH                                                   | Köln                  |         | 100,0                        |
| 1087        | Sal. Oppenheim jr. & Cie. AG & Co. Kommanditgesellschaft auf Aktien               | Köln                  |         | 100,0                        |
| 1088        | Sal. Oppenheim jr. & Cie. Beteiligungen S.A. (Luxembourg)                         | Luxemburg             |         | 100,0                        |
| 1089        | Sal. Oppenheim jr. & Cie. Beteiligungs GmbH                                       | Köln                  |         | 100,0                        |
| 1090        | Sal. Oppenheim jr. & Cie. Corporate Finance (Schweiz) AG                          | Zürich                |         | 100,0                        |
| 1091        | Sal. Oppenheim jr. & Cie. Komplementär AG                                         | Köln                  |         | 100,0                        |
| 1092        | Sal. Oppenheim jr. & Cie. Komplementär S.A.                                       | Luxemburg             |         | 100,0                        |
| 1093        | Sal. Oppenheim jr. & Cie. S.C.A.                                                  | Luxemburg             |         | 100,0                        |
| 1094        | Sal. Oppenheim jr. & Cie. Securities Inc.                                         | Wilmington            |         | 100,0                        |
| 1095        | Sal. Oppenheim PEP International S.à r.l.                                         | Luxemburg             |         | 100,0                        |
| 1096        | Sal. Oppenheim PEP Treuhand GmbH                                                  | München               |         | 100,0                        |
| 1097        | Sal. Oppenheim Private Equity Partners S.A.                                       | Luxemburg             |         | 100,0                        |
| 1098        | Sal. Oppenheim Private Equity Partners US L.P.                                    | Wilmington            |         | 100,0                        |
| 1099        | Sal. Oppenheim Private Equity Partners US LLC                                     | Wilmington            |         | 100,0                        |
| 1100        | SALOMON OPPENHEIM GmbH i.L.                                                       | Köln                  |         | 100,0                        |
| 1101        | SAMOS Vermögensverwaltungs GmbH                                                   | Köln                  |         | 100,0                        |
| 1102        | SAPIO Grundstücks-Vermietungsgesellschaft mbH                                     | Düsseldorf            |         | 100,0                        |
| 1103        | Sapphire Aircraft Leasing and Trading Limited (in member's voluntary liquidation) | London                |         | 100,0                        |
| 1104        | Schiffsbetriebsgesellschaft Brunswik mit beschränkter Haftung                     | Hamburg               |         | 100,0                        |
| 1105        | Sechste DB Immobilienfonds Beta Dr. Rühl KG                                       | Eschborn              |         | 100,0                        |
| 1106        | SENA Grundstücks-Vermietungsgesellschaft mbH & Co. Objekt Fehrenbach KG           | Düsseldorf            |         | 94,7                         |
| 1107        | SENA Grundstücks-Vermietungsgesellschaft mbH & Co. Objekt Halle II KG             | Düsseldorf            |         | 100,0                        |
| 1108        | Seneca Delaware, Inc.                                                             | Wilmington            |         | 100,0                        |
| 1109        | Seneca Leasing Partners, L.P.                                                     | Wilmington            |         | 99,0                         |
| 1110        | Service Company Two Limited                                                       | Hongkong              |         | 100,0                        |
| 1111        | Serviced Office Investments Limited                                               | St. Helier            |         | 100,0                        |
| 1112        | Servicegesellschaft der Deutschen Bank Privat- und Geschäftskunden mbH            | Frankfurt             |         | 100,0                        |
| 1113        | Sharps SP I LLC                                                                   | Wilmington            |         | 100,0                        |
| 1114        | Sherwood Properties Corp.                                                         | Wilmington            |         | 100,0                        |
| 1115        | Shopready Limited                                                                 | London                |         | 100,0                        |

| Lfd.<br>Nr. | Name der Gesellschaft                                                 | Sitz der Gesellschaft | Fußnote | Anteil am<br>Kapital<br>in % |
|-------------|-----------------------------------------------------------------------|-----------------------|---------|------------------------------|
| 1116        | Silver Leaf 1 LLC                                                     | Wilmington            |         | 100,0                        |
| 1117        | SIMA Private Equity 1 Beteiligungs GmbH                               | Köln                  |         | 100,0                        |
| 1118        | SIMA Private Equity 1 GmbH & Co. KG                                   | Hamburg               | 1       | 0,0                          |
| 1119        | SOAR European Equity Fund Public Limited Company                      | Dublin                |         | 100,0                        |
| 1120        | SolRenovable Fotov., S.L.                                             | Palma de Mallorca     |         | 67,7                         |
| 1121        | SOPEP Global Infrastructure Fund, SICAV-FIS                           | Luxemburg             |         | 100,0                        |
| 1122        | Spring Leasing Limited (in member's voluntary liquidation)            | London                |         | 100,0                        |
| 1123        | SSG Middle Market CLO LLC                                             | Wilmington            |         | 100,0                        |
| 1124        | Stoneridge Apartments, Inc.                                           | Wilmington            | 5       | 0,0                          |
| 1125        | Stores International Limited                                          | Georgetown            |         | 100,0                        |
| 1126        | Story L.P.                                                            | Georgetown            |         | 100,0                        |
| 1127        | Structured Finance Americas, LLC                                      | Wilmington            |         | 100,0                        |
| 1128        | Sunbelt Rentals Exchange Inc.                                         | Wilmington            |         | 100,0                        |
| 1129        | Süddeutsche Vermögensverwaltung Gesellschaft mit beschränkter Haftung | Frankfurt             |         | 100,0                        |
| 1130        | Tapeorder Limited                                                     | London                |         | 100,0                        |
| 1131        | Taunus Corporation                                                    | Wilmington            |         | 100,0                        |
| 1132        | Technology Ventures Five GmbH i.L.                                    | Bonn                  |         | 100,0                        |
| 1133        | Technology Ventures Six GmbH i.L.                                     | Bonn                  |         | 100,0                        |
| 1134        | Telefon-Servicegesellschaft der Deutschen Bank mbH                    | Frankfurt             |         | 100,0                        |
| 1135        | TELO Beteiligungsgesellschaft mbH                                     | Schönefeld            |         | 100,0                        |
| 1136        | Tempurrite Leasing Limited                                            | London                |         | 100,0                        |
| 1137        | Tenedora de Valores S.A.                                              | Santiago              |         | 100,0                        |
| 1138        | TeraGate Beteiligungs-GmbH                                            | Frankfurt             |         | 100,0                        |
| 1139        | Tertia Büromaschinen Vermiet- und Leasing-Verwaltungsgesellschaft mbH | Düsseldorf            |         | 100,0                        |
| 1140        | TESATUR Beteiligungsgesellschaft mbH & Co. Objekt Halle I KG          | Düsseldorf            |         | 100,0                        |
| 1141        | TESATUR Beteiligungsgesellschaft mbH & Co. Objekt Nordhausen I KG     | Düsseldorf            |         | 100,0                        |
| 1142        | Thai Asset Enforcement and Recovery Asset Management Company Limited  | Bangkok               |         | 100,0                        |
| 1143        | The World Markets Company GmbH i.L.                                   | Frankfurt             |         | 74,8                         |
| 1144        | THEMIS Beteiligungs- und Verwaltungs GmbH                             | Köln                  |         | 100,0                        |
| 1145        | Tilney (Ireland) Limited                                              | Dublin                |         | 100,0                        |
| 1146        | Tilney Acquisitions Limited                                           | Liverpool             |         | 100,0                        |
| 1147        | Tilney Asset Management International Limited                         | St. Peter Port        |         | 100,0                        |
| 1148        | Tilney Funding Limited                                                | Liverpool             |         | 100,0                        |
| 1149        | Tilney Group Limited                                                  | Liverpool             |         | 100,0                        |
| 1150        | Tilney Holdings Limited                                               | Liverpool             |         | 100,0                        |
| 1151        | Tilney International Limited                                          | Hamilton              |         | 100,0                        |
| 1152        | Tilney Investment Management                                          | Liverpool             |         | 100,0                        |
| 1153        | Tilney Management Limited                                             | Liverpool             |         | 100,0                        |
| 1154        | TILOS Vermögensverwaltungs GmbH                                       | Köln                  |         | 100,0                        |
| 1155        | TIM (London) Limited                                                  | Liverpool             |         | 100,0                        |
| 1156        | TOKOS GmbH                                                            | Sössen-Gostau         |         | 100,0                        |
| 1157        | TQI Exchange, LLC                                                     | Wilmington            |         | 100,0                        |
| 1158        | Treuinvest Service GmbH                                               | Frankfurt             |         | 100,0                        |
| 1159        | Trevona Limited                                                       | Road Town             |         | 100,0                        |
| 1160        | Triplereason Limited                                                  | London                |         | 100,0                        |
| 1161        | TTM Investor GmbH                                                     | Frankfurt             |         | 100,0                        |
| 1162        | U.F.G.I.S. Holdings (Cyprus) Limited                                  | Larnaka               |         | 100,0                        |
| 1163        | Unter Sachsenhausen Beteiligungs GmbH i.L.                            | Köln                  |         | 100,0                        |
| 1164        | Urbistar Settlement Services, LLC                                     | Wilmington            |         | 100,0                        |
| 1165        | US Real Estate Beteiligungs GmbH                                      | Frankfurt             |         | 100,0                        |
| 1166        | Varick Investments Limited                                            | Wilmington            |         | 100,0                        |
| 1167        | VB Glas-Großhandelsgesellschaft mit beschränkter Haftung              | Köln                  |         | 100,0                        |
| 1168        | VCG Venture Capital Fonds III Verwaltungs GmbH                        | München               |         | 100,0                        |
| 1169        | VCG Venture Capital Gesellschaft mbH                                  | München               |         | 100,0                        |
| 1170        | VCM Capital Management GmbH                                           | München               |         | 100,0                        |
| 1171        | VCM Golding Mezzanine GmbH & Co. KG                                   | München               | 1       | 0,0                          |

| Lfd.<br>Nr. | Name der Gesellschaft                                                    | Sitz der Gesellschaft | Fußnote | Anteil am<br>Kapital<br>in % |
|-------------|--------------------------------------------------------------------------|-----------------------|---------|------------------------------|
| 1172        | VCM III Institutional Beteiligungsgesellschaft mbH                       | München               |         | 100,0                        |
| 1173        | VCM III Institutional Equity Partners GmbH & Co. KG                      | München               | 1       | 0,1                          |
| 1174        | VCM MIP 2001 GmbH & Co. KG                                               | München               | 1       | 0,0                          |
| 1175        | VCM MIP 2002 GmbH & Co. KG                                               | München               | 1       | 0,0                          |
| 1176        | VCM MIP II GmbH & Co. KG                                                 | München               | 1       | 0,0                          |
| 1177        | VCM MIP III GmbH & Co. KG                                                | München               | 1       | 8,0                          |
| 1178        | VCM MIP IV GmbH & Co. KG                                                 | München               | 1       | 0,0                          |
| 1179        | VCM PEP I Beteiligungsgesellschaft mbH                                   | München               |         | 100,0                        |
| 1180        | VCM PEP II Beteiligungsverwaltung GmbH                                   | München               |         | 100,0                        |
| 1181        | VCM Private Equity Portfolio GmbH & Co. Beteiligungs KG II               | München               | 1       | 4,8                          |
| 1182        | VCM Private Equity Portfolio GmbH & Co. KG                               | München               | 1       | 0,0                          |
| 1183        | VCM Private Equity Portfolio GmbH & Co. KG IV                            | München               | 1       | 2,1                          |
| 1184        | VCM REE Beteiligungstreuhand GmbH                                        | München               |         | 100,0                        |
| 1185        | VCM Treuhand Beteiligungsverwaltung GmbH                                 | München               |         | 100,0                        |
| 1186        | VCM VI Institutional Private Equity (B) GmbH & Co. KG                    | München               | 1       | 0,0                          |
| 1187        | VCP Treuhand Beteiligungsgesellschaft mbH                                | München               |         | 100,0                        |
| 1188        | VCP Verwaltungsgesellschaft mbH                                          | München               |         | 100,0                        |
| 1189        | VCPII Beteiligungsverwaltungsgesellschaft mbH                            | Tutzing               |         | 100,0                        |
| 1190        | Vertriebsgesellschaft mbH der Deutschen Bank Privat- und Geschäftskunden | Berlin                |         | 100,0                        |
| 1191        | VEXCO, LLC                                                               | Wilmington            |         | 100,0                        |
| 1192        | VI Resort Holdings, Inc.                                                 | New York              | 5       | 0,0                          |
| 1193        | Vierte DB Immobilienfonds Beta Dr. Rühl KG                               | Eschborn              |         | 94,2                         |
| 1194        | VÖB-ZVD Bank für Zahlungsverkehrsdienstleistungen GmbH                   | Bonn                  |         | 75,0                         |
| 1195        | Wealthspur Investment Company Limited                                    | Labuan                |         | 100,0                        |
| 1196        | WEBA Beteiligungsgesellschaft mbH                                        | Frankfurt             |         | 100,0                        |
| 1197        | Welsh, Carson, Anderson & Stowe IX GmbH & Co. KG                         | München               | 1       | 0,0                          |
| 1198        | WEPLA Beteiligungsgesellschaft mbH                                       | Frankfurt             |         | 100,0                        |
| 1199        | WERDA Beteiligungsgesellschaft mbH                                       | Frankfurt             |         | 100,0                        |
| 1200        | WestX Inc.                                                               | Wilmington            |         | 100,0                        |
| 1201        | Whale Holdings S.à r.l.                                                  | Luxemburg             |         | 100,0                        |
| 1202        | Whispering Woods LLC                                                     | Wilmington            |         | 100,0                        |
| 1203        | Whistling Pines LLC                                                      | Wilmington            |         | 100,0                        |
| 1204        | Wilhelm von Finck AG                                                     | Grasbrunn             |         | 100,0                        |
| 1205        | Wilmington Trust B6                                                      | Wilmington            |         | 100,0                        |
| 1206        | Wintercrest Inc.                                                         | Wilmington            |         | 100,0                        |
| 1207        | WMH (No. 1) Limited (in member's voluntary liquidation)                  | London                |         | 100,0                        |
| 1208        | WMH (No. 10) Limited (in member's voluntary liquidation)                 | London                |         | 100,0                        |
| 1209        | WMH (No. 15) Limited                                                     | London                |         | 100,0                        |
| 1210        | WMH (No. 16) Limited                                                     | London                |         | 100,0                        |
| 1211        | WMH (No. 17) Limited (in member's voluntary liquidation)                 | London                |         | 100,0                        |
| 1212        | WMH (No. 4) Limited (in member's voluntary liquidation)                  | London                |         | 100,0                        |
| 1213        | WMH (No. 5) Limited (in member's voluntary liquidation)                  | London                |         | 100,0                        |
| 1214        | WMH (No. 7) Limited (in member's voluntary liquidation)                  | London                |         | 100,0                        |
| 1215        | Woodwardia LLC                                                           | Wilmington            |         | 100,0                        |
| 1216        | World Trading (Delaware) Inc.                                            | Wilmington            |         | 100,0                        |
| 1217        | 5000 Yonge Street Toronto Inc.                                           | Toronto               |         | 100,0                        |
| 1218        | ZAO "Deutsche Securities"                                                | Moskau                |         | 100,0                        |
| 1219        | ZELLU Grundstücks-Vermietungsgesellschaft mbH                            | Schönefeld            |         | 100,0                        |
| 1220        | Zweite DB Immobilienfonds Beta Dr. Rühl KG                               | Eschborn              |         | 94,2                         |
| 1221        | Zweite Industrie-Beteiligungs-Gesellschaft mbH                           | Frankfurt             |         | 100,0                        |
| 1222        | Zürich - Swiss Value AG                                                  | Zürich                |         | 50,1                         |
| 1223        | Zürich - Swiss Value Invest AG                                           | Steinhausen           |         | 100,0                        |

| Lfd.<br>Nr. | Name der Gesellschaft                                              | Sitz der Gesellschaft | Fußnote | Anteil am<br>Kapital<br>in % |
|-------------|--------------------------------------------------------------------|-----------------------|---------|------------------------------|
| 1224        | ABATE Grundstücks-Vermietungsgesellschaft mbH                      | Düsseldorf            |         | 50,0                         |
| 1225        | ABATIS Beteiligungsgesellschaft mbH                                | Düsseldorf            |         | 50,0                         |
| 1226        | ABRI Beteiligungsgesellschaft mbH                                  | Düsseldorf            |         | 50,0                         |
| 1227        | ACHAP Beteiligungsgesellschaft mbH                                 | Düsseldorf            |         | 50,0                         |
| 1228        | ACHTE PAXAS Treuhand- und Beteiligungsgesellschaft mbH             | Düsseldorf            |         | 50,0                         |
| 1229        | ACHTUNDZWANZIGSTE PAXAS Treuhand- und Beteiligungsgesellschaft mbH | Düsseldorf            |         | 50,0                         |
| 1230        | ACHTZEHNTE PAXAS Treuhand- und Beteiligungsgesellschaft mbH        | Düsseldorf            |         | 50,0                         |
| 1231        | ACIS Beteiligungsgesellschaft mbH                                  | Düsseldorf            |         | 50,0                         |
| 1232        | ACTIO Grundstücks-Vermietungsgesellschaft mbH                      | Düsseldorf            |         | 50,0                         |
| 1233        | ACTIUM Leasobjekt GmbH & Co. Objekt Bietigheim OHG                 | Düsseldorf            |         |                              |
| 1234        | ADEO Beteiligungsgesellschaft mbH                                  | Düsseldorf            |         | 50,0                         |
| 1235        | ADLAT Beteiligungsgesellschaft mbH                                 | Düsseldorf            |         | 50,0                         |
| 1236        | ADMANU Beteiligungsgesellschaft mbH                                | Düsseldorf            |         | 50,0                         |
| 1237        | AETAS Beteiligungsgesellschaft mbH                                 | Düsseldorf            |         | 50,0                         |
| 1238        | Affiliated Loan Program for Students Funding Trust 2009-1          | Wilmington            |         |                              |
| 1239        | AGLOM Beteiligungsgesellschaft mbH                                 | Düsseldorf            |         | 50,0                         |
| 1240        | AGUM Beteiligungsgesellschaft mbH                                  | Düsseldorf            |         | 50,0                         |
| 1241        | AKRUN Beteiligungsgesellschaft mbH                                 | Düsseldorf            |         | 50,0                         |
| 1242        | ALANUM Beteiligungsgesellschaft mbH                                | Düsseldorf            |         | 50,0                         |
| 1243        | ALMO Beteiligungsgesellschaft mbH                                  | Düsseldorf            |         | 50,0                         |
| 1244        | Almutkirk Limited                                                  | Dublin                |         |                              |
| 1245        | ALTA Beteiligungsgesellschaft mbH                                  | Düsseldorf            |         | 50,0                         |
| 1246        | Alternative LN TR 2007-HY9                                         | New York              |         |                              |
| 1247        | Ameriquist NIM 05-RN111                                            | New York              |         |                              |
| 1248        | ANDOT Grundstücks-Vermietungsgesellschaft mbH                      | Düsseldorf            |         | 50,0                         |
| 1249        | Andramad Limited                                                   | Dublin                |         |                              |
| 1250        | Annapolis Funding Trust                                            | Toronto               |         |                              |
| 1251        | Apexel LLC                                                         | Wilmington            |         | 100,0                        |
| 1252        | APUR Beteiligungsgesellschaft mbH                                  | Düsseldorf            |         | 50,0                         |
| 1253        | AQ FIN NIM Trust 2001-2                                            | New York              |         |                              |
| 1254        | AQNIM 2001-2                                                       | New York              |         |                              |
| 1255        | Asian Hybrid Investments LLP                                       | Singapur              |         | 0,0                          |
| 1256        | Aspen Funding Corp.                                                | Charlotte             |         |                              |
| 1257        | Asset Repackaging Trust B.V.                                       | Amsterdam             | 7       |                              |
| 1258        | Asset Repackaging Trust Five B.V.                                  | Amsterdam             | 7       |                              |
| 1259        | ATAUT Beteiligungsgesellschaft mbH                                 | Düsseldorf            |         | 50,0                         |
| 1260        | Atlas Investment Company 1 S.à r.l.                                | Luxemburg             |         |                              |
| 1261        | Atlas Investment Company 2 S.à r.l.                                | Luxemburg             |         |                              |
| 1262        | Atlas Investment Company 3 S.à r.l.                                | Luxemburg             |         |                              |
| 1263        | Atlas Investment Company 4 S.à r.l.                                | Luxemburg             |         |                              |
| 1264        | Atlas Portfolio Select SPC                                         | Georgetown            |         | 0,0                          |
| 1265        | Atlas SICAV - FIS                                                  | Luxemburg             | 7       |                              |
| 1266        | Avizandum Limited                                                  | Dublin                |         |                              |
| 1267        | AVOC Beteiligungsgesellschaft mbH                                  | Düsseldorf            |         | 50,0                         |
| 1268        | Avon Investments S.à r.l.                                          | Luxemburg             |         | 100,0                        |
| 1269        | BAKTU Beteiligungsgesellschaft mbH                                 | Schönefeld            |         | 50,0                         |
| 1270        | BALIT Beteiligungsgesellschaft mbH                                 | Schönefeld            |         | 50,0                         |
| 1271        | BAMAR Beteiligungsgesellschaft mbH                                 | Schönefeld            |         | 50,0                         |
| 1272        | BARDA Beteiligungsgesellschaft mbH                                 | Schönefeld            |         | 50,0                         |
| 1273        | BIMES Beteiligungsgesellschaft mbH                                 | Schönefeld            |         | 50,0                         |
| 1274        | BLI Beteiligungsgesellschaft für Leasinginvestitionen mbH          | Düsseldorf            |         | 33,2                         |
| 1275        | Blue Ridge CLO 2009-1                                              | Wilmington            |         |                              |
| 1276        | BNP Paribas Flexi III - Fortis Bond Taiwan                         | Luxemburg             |         |                              |
| 1277        | BNP Paribas Flexi III - RMB Corporate Bonds                        | Luxemburg             |         | 100,0                        |
| 1278        | Bolsena Holding GmbH & Co. KG                                      | Frankfurt             |         | 100,0                        |
| 1279        | Bozarche Limited                                                   | Georgetown            |         |                              |

| Lfd.<br>Nr. | Name der Gesellschaft                                                    | Sitz der Gesellschaft | Fußnote | Anteil am<br>Kapital<br>in % |
|-------------|--------------------------------------------------------------------------|-----------------------|---------|------------------------------|
| 1280        | Bridge No.1 Pty Limited                                                  | Sydney                |         |                              |
| 1281        | BS 2 Y.K.                                                                | Tokio                 |         | 100,0                        |
| 1282        | Business Support One Y.K.                                                | Tokio                 |         | 100,0                        |
| 1283        | Canadian Asset Acquisition Trust 2                                       | Toronto               | 7       |                              |
| 1284        | Canal New Orleans Holdings LLC                                           | Dover                 |         |                              |
| 1285        | Canal New Orleans Hotel LLC                                              | Wilmington            |         |                              |
| 1286        | Canal New Orleans Mezz LLC                                               | Dover                 |         |                              |
| 1287        | Cathay Capital (Labuan) Company Limited                                  | Labuan                |         |                              |
| 1288        | Cathay Capital Company Limited                                           | Port Louis            |         | 9,5                          |
| 1289        | Cathay Strategic Investment Company Limited                              | Hongkong              |         |                              |
| 1290        | Cathay Strategic Investment Company No. 2 Limited                        | Georgetown            |         |                              |
| 1291        | Cepangie Limited                                                         | Dublin                |         |                              |
| 1292        | Charitable Luxembourg Four S.à r.l.                                      | Luxemburg             |         |                              |
| 1293        | Charitable Luxembourg Three S.à r.l.                                     | Luxemburg             |         |                              |
| 1294        | Charitable Luxembourg Two S.à r.l.                                       | Luxemburg             |         |                              |
| 1295        | CIBI Beteiligungsgesellschaft mbH                                        | Düsseldorf            |         | 50,0                         |
| 1296        | CIG (Jersey) Limited                                                     | St. Helier            |         |                              |
| 1297        | CLASS Limited                                                            | St. Helier            | 7       |                              |
| 1298        | Compartment AXA PLAN 2005 Global of the FCPE Shareplan AXA Direct Global | Paris                 |         | 90,0                         |
| 1299        | Comprehensive Trust - IBP                                                | Osaka                 |         |                              |
| 1300        | Comprehensive Trust - Sumitomo Chemical Co., Ltd.                        | Tokio                 |         |                              |
| 1301        | Comprehensive Trust - Wakachiku Construction Co., Ltd.                   | Kita-Kyushu           |         |                              |
| 1302        | Concept Fund Solutions PLC                                               | Dublin                | 7       | 19,6                         |
| 1303        | Coriolanus Limited                                                       | Dublin                | 7       |                              |
| 1304        | COUNTS Trust Series 2007 - 3                                             | Newark                | 7       |                              |
| 1305        | Cranfield Aircraft Leasing Limited                                       | Georgetown            |         |                              |
| 1306        | Crystal CLO, Ltd.                                                        | Georgetown            |         |                              |
| 1307        | D & S Capital Y.K.                                                       | Tokio                 |         | 100,0                        |
| 1308        | DAGOBÄ Beteiligungsgesellschaft mbH                                      | Düsseldorf            |         |                              |
| 1309        | DAINA Beteiligungsgesellschaft mbH                                       | Düsseldorf            |         |                              |
| 1310        | Dariconic Limited                                                        | Dublin                |         |                              |
| 1311        | DARKU Beteiligungsgesellschaft mbH                                       | Düsseldorf            |         |                              |
| 1312        | DARUS Beteiligungsgesellschaft mbH                                       | Düsseldorf            |         |                              |
| 1313        | Dawn-BV LLC                                                              | Wilmington            |         | 100,0                        |
| 1314        | Dawn-BV-Helios LLC                                                       | Wilmington            |         | 100,0                        |
| 1315        | Dawn-G LLC                                                               | Wilmington            |         | 100,0                        |
| 1316        | Dawn-G-Helios LLC                                                        | Wilmington            |         | 100,0                        |
| 1317        | DB Aircraft Leasing Master Trust                                         | Wilmington            |         | 0,0                          |
| 1318        | DB Aircraft Leasing Master Trust II                                      | Wilmington            |         | 0,0                          |
| 1319        | DB Akela, S.à r.l.                                                       | Luxemburg             |         | 100,0                        |
| 1320        | DB Alternative Strategies Limited                                        | Georgetown            |         | 100,0                        |
| 1321        | DB Artemis Investments GP                                                | Wilmington            |         | 68,1                         |
| 1322        | DB Asia Pacific Holdings Limited                                         | Georgetown            |         | 100,0                        |
| 1323        | DB Bagheera, S.à r.l.                                                    | Luxemburg             |         | 100,0                        |
| 1324        | DB CRE Empire Hawkeye HoldCo LLC                                         | Wilmington            |         | 100,0                        |
| 1325        | DB Cross Limited                                                         | St. Helier            |         | 100,0                        |
| 1326        | DB Dawn, Inc.                                                            | Wilmington            |         | 100,0                        |
| 1327        | db ETC Index plc                                                         | St. Helier            | 7       |                              |
| 1328        | db ETC plc                                                               | St. Helier            | 7       |                              |
| 1329        | DB Global Masters Multi-Strategy Trust                                   | Georgetown            |         | 100,0                        |
| 1330        | DB Immobilienfonds 1 Wieland KG                                          | Eschborn              |         |                              |
| 1331        | DB Immobilienfonds 4 GmbH & Co. KG                                       | Frankfurt             |         | 0,2                          |
| 1332        | DB Immobilienfonds 5 Wieland KG                                          | Frankfurt             |         |                              |
| 1333        | db Investor Solutions                                                    | Dublin                | 7       |                              |
| 1334        | DB Jasmine Holdings Limited                                              | London                |         | 100,0                        |
| 1335        | DB Platinum                                                              | Luxemburg             | 7       | 4,7                          |

| Lfd.<br>Nr. | Name der Gesellschaft                        | Sitz der Gesellschaft | Fußnote | Anteil am<br>Kapital<br>in % |
|-------------|----------------------------------------------|-----------------------|---------|------------------------------|
| 1336        | DB Platinum II                               | Luxemburg             | 7       | 1,1                          |
| 1337        | DB Platinum III                              | Luxemburg             | 7       | 1,9                          |
| 1338        | DB Platinum IV                               | Luxemburg             | 7       | 4,5                          |
| 1339        | DB Platinum V                                | Luxemburg             | 7       | 100,0                        |
| 1340        | DB Safe Harbour Investment Projects Limited  | London                |         | 100,0                        |
| 1341        | DB Silver Finance (Luxembourg) S.à r.l.      | Luxemburg             |         | 100,0                        |
| 1342        | DB Sylvester Funding Limited                 | Georgetown            |         | 100,0                        |
| 1343        | DB Venture Partners (Europe) 2000 LP         | St. Helier            |         | 20,0                         |
| 1344        | db x-trackers                                | Luxemburg             | 7       | 2,5                          |
| 1345        | db x-trackers (Proprietary) Limited          | Johannesburg          |         | 100,0                        |
| 1346        | db x-trackers Holdings (Proprietary) Limited | Johannesburg          |         | 100,0                        |
| 1347        | db x-trackers II                             | Luxemburg             | 7       | 9,4                          |
| 1348        | DB Xylophone Holdings Limited                | Georgetown            |         | 100,0                        |
| 1349        | DB-New York Nuclear Uranium Fund             | Wilmington            |         | 100,0                        |
| 1350        | DBARN Series 2007-AR3N1 Trust                | Georgetown            |         |                              |
| 1351        | DBARN Series 2007-OA3N Trust                 | Georgetown            |         |                              |
| 1352        | DBARN Series 2007-OA4N Trust                 | Georgetown            |         |                              |
| 1353        | DBARN Series 2007-OA5N Trust                 | Georgetown            |         |                              |
| 1354        | DBVP Europe GP (Jersey) Limited              | St. Helier            |         | 20,0                         |
| 1355        | De Heng Asset Management Company Limited     | Peking                |         |                              |
| 1356        | Deco 17 - Pan Europe 7 Limited               | Dublin                |         |                              |
| 1357        | Decofinance S.A.                             | Luxemburg             |         | 66,2                         |
| 1358        | Defeased Loan Trust 2010-2                   | Wilmington            |         |                              |
| 1359        | Deutsche Alt-A Series 2007-2                 | Wilmington            |         |                              |
| 1360        | Deutsche Alt-A Series 2007-3                 | Wilmington            |         |                              |
| 1361        | Deutsche Alt-A Series 2007-OA5               | Wilmington            |         |                              |
| 1362        | Deutsche Alt-A Series 2007-RS1               | New York              |         |                              |
| 1363        | Deutsche Bank Capital Finance LLC I          | Wilmington            |         | 100,0                        |
| 1364        | Deutsche Bank Capital Finance Trust I        | Wilmington            |         | 0,0                          |
| 1365        | Deutsche Bank Capital Funding LLC I          | Wilmington            |         | 100,0                        |
| 1366        | Deutsche Bank Capital Funding LLC IV         | Wilmington            |         | 100,0                        |
| 1367        | Deutsche Bank Capital Funding LLC IX         | Wilmington            |         | 100,0                        |
| 1368        | Deutsche Bank Capital Funding LLC V          | Wilmington            |         | 100,0                        |
| 1369        | Deutsche Bank Capital Funding LLC VI         | Wilmington            |         | 100,0                        |
| 1370        | Deutsche Bank Capital Funding LLC VII        | Wilmington            |         | 100,0                        |
| 1371        | Deutsche Bank Capital Funding LLC VIII       | Wilmington            |         | 100,0                        |
| 1372        | Deutsche Bank Capital Funding LLC X          | Wilmington            |         | 100,0                        |
| 1373        | Deutsche Bank Capital Funding LLC XI         | Wilmington            |         | 100,0                        |
| 1374        | Deutsche Bank Capital Funding LLC XII        | Wilmington            |         | 100,0                        |
| 1375        | Deutsche Bank Capital Funding LLC XIII       | Wilmington            |         | 100,0                        |
| 1376        | Deutsche Bank Capital Funding LLC XIV        | Wilmington            |         | 100,0                        |
| 1377        | Deutsche Bank Capital Funding LLC XV         | Wilmington            |         | 100,0                        |
| 1378        | Deutsche Bank Capital Funding LLC XVI        | Wilmington            |         | 100,0                        |
| 1379        | Deutsche Bank Capital Funding Trust I        | Newark                |         | 0,0                          |
| 1380        | Deutsche Bank Capital Funding Trust IV       | Wilmington            |         | 0,0                          |
| 1381        | Deutsche Bank Capital Funding Trust IX       | Wilmington            |         | 0,0                          |
| 1382        | Deutsche Bank Capital Funding Trust V        | Wilmington            |         | 0,0                          |
| 1383        | Deutsche Bank Capital Funding Trust VI       | Wilmington            |         | 0,0                          |
| 1384        | Deutsche Bank Capital Funding Trust VII      | Wilmington            |         | 0,0                          |
| 1385        | Deutsche Bank Capital Funding Trust VIII     | Wilmington            |         | 0,0                          |
| 1386        | Deutsche Bank Capital Funding Trust X        | Wilmington            |         | 0,0                          |
| 1387        | Deutsche Bank Capital Funding Trust XI       | Wilmington            |         | 0,0                          |
| 1388        | Deutsche Bank Capital Funding Trust XII      | Wilmington            |         | 100,0                        |
| 1389        | Deutsche Bank Capital Funding Trust XIII     | Wilmington            |         | 100,0                        |
| 1390        | Deutsche Bank Capital Funding Trust XIV      | Wilmington            |         | 100,0                        |
| 1391        | Deutsche Bank Capital Funding Trust XV       | Wilmington            |         | 100,0                        |

| Lfd.<br>Nr. | Name der Gesellschaft                                                 | Sitz der Gesellschaft | Fußnote | Anteil am<br>Kapital<br>in % |
|-------------|-----------------------------------------------------------------------|-----------------------|---------|------------------------------|
| 1392        | Deutsche Bank Capital Funding Trust XVI                               | Wilmington            |         | 100,0                        |
| 1393        | Deutsche Bank Capital LLC I                                           | Wilmington            |         | 100,0                        |
| 1394        | Deutsche Bank Capital LLC II                                          | Wilmington            |         | 100,0                        |
| 1395        | Deutsche Bank Capital LLC III                                         | Wilmington            |         | 100,0                        |
| 1396        | Deutsche Bank Capital LLC IV                                          | Wilmington            |         | 100,0                        |
| 1397        | Deutsche Bank Capital LLC V                                           | Wilmington            |         | 100,0                        |
| 1398        | Deutsche Bank Capital Trust I                                         | Newark                |         | 0,0                          |
| 1399        | Deutsche Bank Capital Trust II                                        | Newark                |         | 0,0                          |
| 1400        | Deutsche Bank Capital Trust III                                       | Newark                |         | 0,0                          |
| 1401        | Deutsche Bank Capital Trust IV                                        | Newark                |         | 0,0                          |
| 1402        | Deutsche Bank Capital Trust V                                         | Newark                |         | 0,0                          |
| 1403        | Deutsche Bank Contingent Capital LLC I                                | Wilmington            |         | 100,0                        |
| 1404        | Deutsche Bank Contingent Capital LLC II                               | Wilmington            |         | 100,0                        |
| 1405        | Deutsche Bank Contingent Capital LLC III                              | Wilmington            |         | 100,0                        |
| 1406        | Deutsche Bank Contingent Capital LLC IV                               | Wilmington            |         | 100,0                        |
| 1407        | Deutsche Bank Contingent Capital LLC V                                | Wilmington            |         | 100,0                        |
| 1408        | Deutsche Bank Contingent Capital Trust I                              | Wilmington            |         | 0,0                          |
| 1409        | Deutsche Bank Contingent Capital Trust II                             | Wilmington            |         | 0,0                          |
| 1410        | Deutsche Bank Contingent Capital Trust III                            | Wilmington            |         | 0,0                          |
| 1411        | Deutsche Bank Contingent Capital Trust IV                             | Wilmington            |         | 0,0                          |
| 1412        | Deutsche Bank Contingent Capital Trust V                              | Wilmington            |         | 0,0                          |
| 1413        | Deutsche Bank SPEARs/LIFERs Trusts (DB Series)                        | New York              | 8       |                              |
| 1414        | Deutsche Beta Finance GmbH                                            | Frankfurt             |         | 100,0                        |
| 1415        | Deutsche Gesellschaft für Immobilien-Leasing mit beschränkter Haftung | Düsseldorf            |         | 100,0                        |
| 1416        | Deutsche GUO Mao Investments (Netherlands) B.V.                       | Amsterdam             |         | 100,0                        |
| 1417        | Deutsche Mortgage Securities, Inc. Series 2007-RS1                    | New York              |         |                              |
| 1418        | Deutsche Mortgage Securities, Inc. Series 2007-RS3                    | New York              |         |                              |
| 1419        | Deutsche Mortgage Securities, Inc. Series 2007-RS4                    | New York              |         |                              |
| 1420        | Deutsche Mortgage Securities, Inc. Series 2007-RS5                    | New York              |         |                              |
| 1421        | Deutsche Mortgage Securities, Inc. Series 2007-RS6                    | New York              |         |                              |
| 1422        | Deutsche Mortgage Securities, Inc. Series 2007-RS7                    | New York              |         |                              |
| 1423        | Deutsche Mortgage Securities, Inc. Series 2007-RS8                    | New York              |         |                              |
| 1424        | Deutsche Mortgage Securities, Inc. Series 2008-RS1                    | New York              |         |                              |
| 1425        | Deutsche Mortgage Securities, Inc. Series 2009-RS4                    | Santa Ana             |         |                              |
| 1426        | Deutsche OBU Pty Limited                                              | Sydney                |         | 100,0                        |
| 1427        | Deutsche Postbank Funding LLC I                                       | Wilmington            |         | 100,0                        |
| 1428        | Deutsche Postbank Funding LLC II                                      | Wilmington            |         | 100,0                        |
| 1429        | Deutsche Postbank Funding LLC III                                     | Wilmington            |         | 100,0                        |
| 1430        | Deutsche Postbank Funding LLC IV                                      | Wilmington            |         | 100,0                        |
| 1431        | Deutsche Postbank Funding Trust I                                     | Wilmington            |         | 100,0                        |
| 1432        | Deutsche Postbank Funding Trust II                                    | Wilmington            |         | 100,0                        |
| 1433        | Deutsche Postbank Funding Trust III                                   | Wilmington            |         | 100,0                        |
| 1434        | Deutsche Postbank Funding Trust IV                                    | Wilmington            |         | 100,0                        |
| 1435        | DI 2 Y.K.                                                             | Tokio                 |         | 100,0                        |
| 1436        | DI Investments Corporation Y.K.                                       | Tokio                 |         | 100,0                        |
| 1437        | DIL Beteiligungs-Stiftung                                             | Düsseldorf            |         |                              |
| 1438        | DIL Europa-Beteiligungsgesellschaft mbH i.L.                          | Düsseldorf            |         | 100,0                        |
| 1439        | DIL Fonds-Beteiligungsgesellschaft mbH                                | Düsseldorf            |         | 100,0                        |
| 1440        | DONARUM Holding GmbH                                                  | Düsseldorf            |         | 50,0                         |
| 1441        | DREIUNDZWANZIGSTE PAXAS Treuhand- und Beteiligungsgesellschaft mbH    | Düsseldorf            |         | 50,0                         |
| 1442        | DREIZEHNTE PAXAS Treuhand- und Beteiligungsgesellschaft mbH           | Düsseldorf            |         | 50,0                         |
| 1443        | DRITTE Fonds-Beteiligungsgesellschaft mbH                             | Düsseldorf            |         | 50,0                         |
| 1444        | DRITTE PAXAS Treuhand- und Beteiligungsgesellschaft mbH               | Düsseldorf            |         | 50,0                         |
| 1445        | Dusk LLC                                                              | Wilmington            |         | 100,0                        |
| 1446        | DWS Bond Flexible                                                     | Luxemburg             |         | 100,0                        |
| 1447        | DWS Institutional Money plus                                          | Luxemburg             |         |                              |



| Lfd.<br>Nr. | Name der Gesellschaft                                              | Sitz der Gesellschaft | Fußnote | Anteil am<br>Kapital<br>in % |
|-------------|--------------------------------------------------------------------|-----------------------|---------|------------------------------|
| 1448        | DWS Institutional USD Money plus                                   | Luxemburg             |         |                              |
| 1449        | Dyna Holding GmbH                                                  | Eschborn              |         | 100,0                        |
| 1450        | Earls Eight Limited                                                | Georgetown            | 7       |                              |
| 1451        | EARLS Trading Limited                                              | Georgetown            |         |                              |
| 1452        | Earls Twelve Limited                                               | Georgetown            | 7       |                              |
| 1453        | 1221 East Denny Owner, LLC                                         | Wilmington            |         |                              |
| 1454        | EBEMUS Beteiligungsgesellschaft mbH                                | Schönefeld            |         |                              |
| 1455        | EGOM Beteiligungsgesellschaft mbH                                  | Schönefeld            |         |                              |
| 1456        | EINATUS Beteiligungsgesellschaft mbH                               | Schönefeld            |         | 10,0                         |
| 1457        | EINUNDZWANZIGSTE PAXAS Treuhand- und Beteiligungsgesellschaft mbH  | Düsseldorf            |         | 50,0                         |
| 1458        | Eirles Four Limited                                                | Dublin                | 7       |                              |
| 1459        | Eirles Three Limited                                               | Dublin                | 7       |                              |
| 1460        | Eirles Two Limited                                                 | Dublin                | 7       |                              |
| 1461        | ELC Logistik-Centrum Verwaltungs-GmbH                              | Erfurt                |         | 50,0                         |
| 1462        | ELFTE PAXAS Treuhand- und Beteiligungsgesellschaft mbH             | Düsseldorf            |         | 50,0                         |
| 1463        | Elmo Funding GmbH                                                  | Eschborn              |         | 100,0                        |
| 1464        | Elmo Leasing Achte GmbH                                            | Eschborn              |         | 100,0                        |
| 1465        | Elmo Leasing Dreiundzwanzigste GmbH                                | Eschborn              |         | 100,0                        |
| 1466        | Elmo Leasing Dreizehnte GmbH                                       | Eschborn              |         | 100,0                        |
| 1467        | Elmo Leasing Dritte GmbH                                           | Eschborn              |         | 100,0                        |
| 1468        | Elmo Leasing Elfte GmbH                                            | Eschborn              |         | 100,0                        |
| 1469        | Elmo Leasing Neunte GmbH                                           | Eschborn              |         | 100,0                        |
| 1470        | Elmo Leasing Sechste GmbH                                          | Eschborn              |         | 100,0                        |
| 1471        | Elmo Leasing Siebte GmbH                                           | Eschborn              |         | 100,0                        |
| 1472        | Elmo Leasing Vierzehnte GmbH                                       | Eschborn              |         | 100,0                        |
| 1473        | Elmo Leasing Zwölfte GmbH                                          | Eschborn              |         | 100,0                        |
| 1474        | Emerging Markets Capital Protected Investments Ltd                 | Georgetown            | 7       |                              |
| 1475        | EOP Manager, LLC                                                   | Wilmington            |         | 100,0                        |
| 1476        | EOP Pool 1 Manager, LLC                                            | Wilmington            |         | 100,0                        |
| 1477        | Equinox Credit Funding Public Limited Company                      | Dublin                | 7       |                              |
| 1478        | Equipment Management Services LLC                                  | Wilmington            |         | 100,0                        |
| 1479        | Erste Frankfurter Hoist GmbH                                       | Frankfurt             |         | 100,0                        |
| 1480        | Escoyla Limited                                                    | Dublin                |         |                              |
| 1481        | Eurohome (Italy) Mortgages S.r.l.                                  | Conegliano            |         |                              |
| 1482        | Fandaro Limited                                                    | Dublin                |         |                              |
| 1483        | Farsala Investment SRL                                             | Bukarest              |         |                              |
| 1484        | Film Asset Securitization Trust 2009-1                             | New York              |         |                              |
| 1485        | Fortis Flexi IV - Bond Medium Term RMB                             | Luxemburg             |         | 100,0                        |
| 1486        | FÜNFTE Fonds-Beteiligungsgesellschaft mbH                          | Düsseldorf            |         | 50,0                         |
| 1487        | FÜNFTE PAXAS Treuhand- und Beteiligungsgesellschaft mbH            | Düsseldorf            |         | 50,0                         |
| 1488        | FÜNFUNDZWANZIGSTE PAXAS Treuhand- und Beteiligungsgesellschaft mbH | Düsseldorf            |         | 50,0                         |
| 1489        | FÜNFZEHNTE PAXAS Treuhand- und Beteiligungsgesellschaft mbH        | Düsseldorf            |         | 50,0                         |
| 1490        | G.O. III Luxembourg Oxford S.à r.l.                                | Luxemburg             |         |                              |
| 1491        | GC Re                                                              | Hamilton              | 7       |                              |
| 1492        | GEM ERI Limited                                                    | Georgetown            |         |                              |
| 1493        | Gemini Securitization Corp., LLC                                   | Boston                |         |                              |
| 1494        | Gestione Partecipazioni S.p.A.                                     | Mailand               |         | 100,0                        |
| 1495        | GEWE-Falkenberg Beteiligungsgesellschaft mbH                       | Düsseldorf            |         | 50,0                         |
| 1496        | Global Diversified Investment Grade Private Trust                  | Toronto               |         | 100,0                        |
| 1497        | Global Kamala, S.L.                                                | Madrid                |         | 100,0                        |
| 1498        | Global Opportunities Co-Investment Feeder, LLC                     | Wilmington            |         |                              |
| 1499        | Global Opportunities Co-Investment, LLC                            | Wilmington            |         |                              |
| 1500        | GMS Global Investment Strategy Fund                                | Frankfurt             |         | 100,0                        |
| 1501        | Godo Kaisha Jupiter Two                                            | Tokio                 |         |                              |
| 1502        | Godo Kaisha Mars Capital                                           | Tokio                 |         | 50,0                         |
| 1503        | GOPLA Beteiligungsgesellschaft mbH                                 | Hannover              |         | 38,6                         |

| Lfd.<br>Nr. | Name der Gesellschaft                                                             | Sitz der Gesellschaft | Fußnote | Anteil am<br>Kapital<br>in % |
|-------------|-----------------------------------------------------------------------------------|-----------------------|---------|------------------------------|
| 1504        | Gottex ABI II Fund Limited                                                        | Georgetown            |         |                              |
| 1505        | HABILIS Grundstücks-Vermietungsgesellschaft mbH & Co. Objekt Solingen KG          | Düsseldorf            |         |                              |
| 1506        | Hamildak Limited                                                                  | Dublin                |         |                              |
| 1507        | Harbour Finance Limited                                                           | Dublin                |         |                              |
| 1508        | Hatsushima Godo Kaisha                                                            | Tokio                 |         | 50,0                         |
| 1509        | HAWSER Trust Series 2007-1                                                        | Santa Ana             | 7       |                              |
| 1510        | Herodotus Limited                                                                 | Georgetown            | 5       | 0,0                          |
| 1511        | HESTA Grundstücks-Vermietungsgesellschaft mbH & Co. Objekt Frankfurt KG           | Düsseldorf            |         |                              |
| 1512        | Hotel Majestic LLC                                                                | Wilmington            |         | 100,0                        |
| 1513        | HSBC Funding (Deutschland) GmbH                                                   | Bad Soden am Taunus   |         | 14,4                         |
| 1514        | Huron Leasing, LLC                                                                | Wilmington            |         | 98,5                         |
| 1515        | IKB Leasing Limited Partnership                                                   | London                |         | 100,0                        |
| 1516        | ILV Anlagen Vermietungsgesellschaft mbH                                           | Düsseldorf            |         |                              |
| 1517        | Immobilien-Vermietungsgesellschaft von Quistorp GmbH & Co. Objekt Altlandsberg KG | Düsseldorf            |         |                              |
| 1518        | Infigate GmbH i.K.                                                                | Essen                 |         | 48,0                         |
| 1519        | Infrastructure Holdings (Cayman) SPC                                              | Georgetown            |         |                              |
| 1520        | IQ-Markets SA                                                                     | Luxemburg             |         |                              |
| 1521        | IRADO Funding, S.à r.l                                                            | Luxemburg             |         | 100,0                        |
| 1522        | IRADO Holding Limited                                                             | Georgetown            |         | 100,0                        |
| 1523        | Ital Gas Storage S.r.l.                                                           | Rom                   |         | 60,0                         |
| 1524        | IVAF (Jersey) Limited                                                             | St. Helier            |         |                              |
| 1525        | Ixon Public Limited Company                                                       | Dublin                | 7       |                              |
| 1526        | Izumo Capital YK                                                                  | Tokio                 |         | 100,0                        |
| 1527        | Japan Asset Eleven Holding Tokutei Mokuteki Kaisha                                | Tokio                 |         |                              |
| 1528        | Kelsey Street LLC                                                                 | Wilmington            |         | 100,0                        |
| 1529        | Kelvivo Limited                                                                   | Dublin                |         |                              |
| 1530        | Kingfisher (Ontario) LP                                                           | Toronto               |         | 100,0                        |
| 1531        | Kingfisher Canada Holdings LLC                                                    | Wilmington            |         | 100,0                        |
| 1532        | Kingfisher Holdings I (Nova Scotia) ULC                                           | Halifax               |         | 100,0                        |
| 1533        | Kingfisher Holdings II (Nova Scotia) ULC                                          | Halifax               |         | 100,0                        |
| 1534        | Kingfisher Holdings LLC                                                           | Wilmington            |         | 100,0                        |
| 1535        | KOMPASS 3 Beteiligungsgesellschaft mbH                                            | Düsseldorf            |         | 50,0                         |
| 1536        | KOMPASS 3 Erste Beteiligungsgesellschaft mbH & Co. Euro KG                        | Düsseldorf            |         |                              |
| 1537        | KOMPASS 3 Zweite Beteiligungsgesellschaft mbH & Co. USD KG                        | Düsseldorf            |         |                              |
| 1538        | Kradavim UK Lease Holdings Limited                                                | London                |         | 100,0                        |
| 1539        | La Fayette Dedicated Basket Ltd.                                                  | Road Town             |         |                              |
| 1540        | Labuan (Cranfield) Aircraft Leasing Limited                                       | Labuan                |         |                              |
| 1541        | Lambourn Spółka z ograniczona odpowiedzialnoscia                                  | Warschau              |         | 100,0                        |
| 1542        | LARS Grundstücks-Vermietungsgesellschaft mbH & Co. Objekt Hagen KG                | Düsseldorf            |         |                              |
| 1543        | Lebus L.P.                                                                        | Georgetown            |         | 100,0                        |
| 1544        | LECTIO Grundstücks-Vermietungsgesellschaft mbH & Co. Objekt Weimar KG             | Düsseldorf            |         |                              |
| 1545        | Legacy BCC Receivables, LLC                                                       | Wilmington            |         | 100,0                        |
| 1546        | Leo Consumo 1 S.r.l.                                                              | Conegliano            |         |                              |
| 1547        | Leo Consumo 2 S.r.l.                                                              | Conegliano            |         |                              |
| 1548        | Leonardo Charitable 1 LLC                                                         | Wilmington            |         | 9,9                          |
| 1549        | Linker Finance plc                                                                | Dublin                | 7       |                              |
| 1550        | Luscina Limited                                                                   | Dublin                |         |                              |
| 1551        | Maestrale Projects (Holding) S.A.                                                 | Luxemburg             |         | 49,7                         |
| 1552        | Maher 1210 Corbin LLC                                                             | Wilmington            |         | 100,0                        |
| 1553        | Maher Chassis Management LLC                                                      | Wilmington            |         | 100,0                        |
| 1554        | Maher Terminals Holding Corp.                                                     | Toronto               |         | 100,0                        |
| 1555        | Maher Terminals LLC                                                               | Wilmington            |         | 100,0                        |
| 1556        | Maher Terminals Logistics Systems LLC                                             | Wilmington            |         | 100,0                        |
| 1557        | Maher Terminals USA, LLC                                                          | Wilmington            |         | 100,0                        |
| 1558        | MAN Investments SAC Limited                                                       | Hamilton              |         |                              |
| 1559        | Maritime Indemnity Insurance Co                                                   | Hamilton              |         | 100,0                        |

| Lfd.<br>Nr. | Name der Gesellschaft                                                      | Sitz der Gesellschaft | Fußnote | Anteil am<br>Kapital<br>in % |
|-------------|----------------------------------------------------------------------------|-----------------------|---------|------------------------------|
| 1560        | Mars Investment Trust II                                                   | New York              |         | 100,0                        |
| 1561        | Mars Investment Trust III                                                  | New York              |         | 100,0                        |
| 1562        | Master Aggregation Trust                                                   | Wilmington            |         |                              |
| 1563        | Maxima Alpha Bomaral Limited                                               | St. Helier            |         |                              |
| 1564        | Mazuma Capital Funds Limited                                               | Hamilton              | 7       |                              |
| 1565        | MEFIS Beteiligungsgesellschaft mbH                                         | Frankfurt             |         | 43,0                         |
| 1566        | Merlin I                                                                   | Georgetown            |         |                              |
| 1567        | Merlin II                                                                  | Georgetown            |         |                              |
| 1568        | Merlin XI                                                                  | Georgetown            |         |                              |
| 1569        | Micro-E Finance S.r.l.                                                     | Rom                   |         |                              |
| 1570        | Mikrofinanz Beteiligungsgesellschaft ZWEI GmbH i.L.                        | Düsseldorf            |         | 50,0                         |
| 1571        | MIRABILIS Grundstücks-Vermietungsgesellschaft mbH & Co. Objekt Berching KG | Düsseldorf            | 7       |                              |
| 1572        | Montage Funding LLC                                                        | Dover                 |         |                              |
| 1573        | Monterey Funding LLC                                                       | Wilmington            |         |                              |
| 1574        | Moon Leasing Limited                                                       | London                |         | 100,0                        |
| 1575        | MortgageIT Capital Trust I                                                 | Newark                |         | 3,0                          |
| 1576        | MortgageIT Capital Trust III                                               | Wilmington            |         | 3,0                          |
| 1577        | MortgageIT Trust 2004-1                                                    | New York              |         |                              |
| 1578        | MortgageIT Trust 2005-1                                                    | New York              |         |                              |
| 1579        | MortgageIT Trust 2005-2                                                    | New York              |         |                              |
| 1580        | Motion Picture Productions One GmbH & Co. KG                               | Frankfurt             |         | 100,0                        |
| 1581        | Mountain Recovery Fund I Y.K.                                              | Tokio                 |         | 100,0                        |
| 1582        | MPP Beteiligungsgesellschaft mbH                                           | Frankfurt             |         | 100,0                        |
| 1583        | MRF2 Y.K.                                                                  | Tokio                 |         | 100,0                        |
| 1584        | MSN 22952 Delaware Statutory Trust                                         | Wilmington            |         |                              |
| 1585        | MSN 22953 Delaware Statutory Trust                                         | Wilmington            |         |                              |
| 1586        | MSN 22955 Delaware Statutory Trust                                         | Wilmington            |         |                              |
| 1587        | MSN 22957 Delaware Statutory Trust                                         | Wilmington            |         |                              |
| 1588        | MSN 23316 Delaware Statutory Trust                                         | Wilmington            |         |                              |
| 1589        | MSN 23317 Delaware Statutory Trust                                         | Wilmington            |         |                              |
| 1590        | MSN 23318 Delaware Statutory Trust                                         | Wilmington            |         |                              |
| 1591        | MSN 23319 Delaware Statutory Trust                                         | Wilmington            |         |                              |
| 1592        | MSTC Y.K.                                                                  | Tokio                 |         | 100,0                        |
| 1593        | Muni Structured Products Collapsible TOB Trust                             | New York              |         |                              |
| 1594        | Muni Structured Products Credit Enhanced TOB Trust                         | New York              |         |                              |
| 1595        | Nanba PJ Tokutei Mokuteki Kaisha                                           | Tokio                 |         |                              |
| 1596        | Nantucket Funding Corp., LLC                                               | Wilmington            |         |                              |
| 1597        | Nashville Capital Yugen Kaisha                                             | Tokio                 |         |                              |
| 1598        | NBG Grundstücks-Vermietungsgesellschaft mbH                                | Düsseldorf            |         | 50,0                         |
| 1599        | NC Finance Trust 2003-2                                                    | New York              |         |                              |
| 1600        | NCW Holding Inc.                                                           | Vancouver             |         | 100,0                        |
| 1601        | NeoAnemos S.r.l.                                                           | Mailand               |         |                              |
| 1602        | Netron Investment SRL                                                      | Bukarest              |         |                              |
| 1603        | NEUNTE PAXAS Treuhand- und Beteiligungsgesellschaft mbH                    | Düsseldorf            |         | 50,0                         |
| 1604        | NEUNZEHNTE PAXAS Treuhand- und Beteiligungsgesellschaft mbH                | Düsseldorf            |         | 50,0                         |
| 1605        | Nevada Mezz 1 LLC                                                          | Wilmington            |         | 100,0                        |
| 1606        | Nevada Parent 1 LLC                                                        | Wilmington            |         | 100,0                        |
| 1607        | Nevada Property 1 LLC                                                      | Wilmington            |         | 100,0                        |
| 1608        | Nevada Restaurant Venture 1 LLC                                            | Wilmington            |         | 100,0                        |
| 1609        | Nevada Retail Venture 1 LLC                                                | Wilmington            |         | 100,0                        |
| 1610        | New Hatsushima Godo Kaisha                                                 | Tokio                 |         | 50,0                         |
| 1611        | NewLands Capital Corp Limited                                              | Hamilton              |         |                              |
| 1612        | NewLands Financial Limited                                                 | Hamilton              |         |                              |
| 1613        | NewLands Holdings Limited                                                  | Hamilton              |         |                              |
| 1614        | Newport Funding Corp.                                                      | Charlotte             |         |                              |
| 1615        | Nexus Infrastruktur Beteiligungsgesellschaft mbH                           | Düsseldorf            |         | 50,0                         |

| Lfd.<br>Nr. | Name der Gesellschaft                                                            | Sitz der Gesellschaft | Fußnote | Anteil am<br>Kapital<br>in % |
|-------------|----------------------------------------------------------------------------------|-----------------------|---------|------------------------------|
| 1616        | Nineco Leasing Limited                                                           | London                |         | 100,0                        |
| 1617        | NOFA Grundstücks-Vermietungsgesellschaft mbH                                     | Düsseldorf            |         | 50,0                         |
| 1618        | North Las Vegas Property LLC                                                     | Wilmington            |         | 100,0                        |
| 1619        | Norvadano Limited                                                                | Dublin                |         |                              |
| 1620        | Novelties Distribution LLC                                                       | Wilmington            |         | 100,0                        |
| 1621        | NYLIMAC 2010-SS-1, LLC                                                           | Wilmington            |         | 100,0                        |
| 1622        | Odin Mortgages Limited                                                           | London                |         |                              |
| 1623        | Okanagan Funding Trust                                                           | Toronto               |         |                              |
| 1624        | Oona Solutions, Fonds Commun de Placement                                        | Luxemburg             | 7       |                              |
| 1625        | OP Bonds Global Opportunities T                                                  | Köln                  |         | 30,0                         |
| 1626        | OPAL                                                                             | Luxemburg             | 7       |                              |
| 1627        | Optima Emerging Markets Fund Limited                                             | Hamilton              |         |                              |
| 1628        | Option One Mortgage Loan Trust 2002-4                                            | New York              |         |                              |
| 1629        | Opus One Private Real Estate Fund                                                | Seoul                 |         |                              |
| 1630        | Oran Limited                                                                     | Georgetown            |         |                              |
| 1631        | Ornegin Investment SRL                                                           | Bukarest              |         |                              |
| 1632        | OTM Capital GK                                                                   | Tokio                 |         | 100,0                        |
| 1633        | Owner Trust MSN 199                                                              | Salt Lake City        |         |                              |
| 1634        | Owner Trust MSN 23336                                                            | Salt Lake City        |         |                              |
| 1635        | Owner Trust MSN 23337                                                            | Salt Lake City        |         |                              |
| 1636        | Owner Trust MSN 23338                                                            | Salt Lake City        |         |                              |
| 1637        | Owner Trust MSN 23344                                                            | Salt Lake City        |         |                              |
| 1638        | Owner Trust MSN 23887                                                            | Salt Lake City        |         |                              |
| 1639        | Owner Trust MSN 240                                                              | Salt Lake City        |         |                              |
| 1640        | Owner Trust MSN 241                                                              | Salt Lake City        |         |                              |
| 1641        | Owner Trust MSN 24452                                                            | Salt Lake City        |         |                              |
| 1642        | Owner Trust MSN 24453                                                            | Salt Lake City        |         |                              |
| 1643        | Owner Trust MSN 24788                                                            | Salt Lake City        |         |                              |
| 1644        | Owner Trust MSN 25120                                                            | Salt Lake City        |         |                              |
| 1645        | Owner Trust MSN 25259                                                            | Salt Lake City        |         |                              |
| 1646        | Owner Trust MSN 25884                                                            | Salt Lake City        |         |                              |
| 1647        | Owner Trust MSN 264                                                              | Salt Lake City        |         |                              |
| 1648        | Owner Trust MSN 27833                                                            | Salt Lake City        |         |                              |
| 1649        | Owner Trust MSN 87                                                               | Salt Lake City        |         |                              |
| 1650        | Owner Trust MSN 88                                                               | Salt Lake City        |         |                              |
| 1651        | Oystermouth Holding Limited                                                      | Nikosia               |         |                              |
| 1652        | PADEM Grundstücks-Vermietungsgesellschaft mbH                                    | Düsseldorf            |         | 50,0                         |
| 1653        | PADOS Grundstücks-Vermietungsgesellschaft mbH                                    | Düsseldorf            |         | 50,0                         |
| 1654        | PAGUS Beteiligungsgesellschaft mbH                                               | Düsseldorf            |         | 50,0                         |
| 1655        | PALDO Grundstücks-Vermietungsgesellschaft mbH                                    | Düsseldorf            |         | 50,0                         |
| 1656        | Palladium Securities 1 S.A.                                                      | Luxemburg             |         |                              |
| 1657        | PALLO Grundstücks-Vermietungsgesellschaft mbH                                    | Düsseldorf            |         | 50,0                         |
| 1658        | PALLO Grundstücks-Vermietungsgesellschaft mbH & Co. Objekt Seniorenresidenzen KG | Düsseldorf            |         |                              |
| 1659        | PanAsia Funds Investments Ltd.                                                   | Georgetown            | 7       |                              |
| 1660        | PANIS Grundstücks-Vermietungsgesellschaft mbH                                    | Düsseldorf            |         | 50,0                         |
| 1661        | PANTIS Beteiligungsgesellschaft mbH i.L.                                         | Düsseldorf            |         | 50,0                         |
| 1662        | PANTUR Grundstücks-Vermietungsgesellschaft mbH                                   | Düsseldorf            |         | 50,0                         |
| 1663        | PARTS Student Loan Trust 2007-CT2                                                | Wilmington            |         | 100,0                        |
| 1664        | PAXAS Treuhand- und Beteiligungsgesellschaft mbH                                 | Düsseldorf            |         | 50,0                         |
| 1665        | PB Consumer 2008-1 GmbH                                                          | Frankfurt             |         |                              |
| 1666        | PB Consumer 2009-1 GmbH                                                          | Frankfurt             |         |                              |
| 1667        | PEDIS Grundstücks-Vermietungsgesellschaft mbH                                    | Düsseldorf            |         | 50,0                         |
| 1668        | PEDIS Grundstücks-Vermietungsgesellschaft mbH & Co. Objekt Briloner KG           | Düsseldorf            |         |                              |
| 1669        | PEDUM Beteiligungsgesellschaft mbH                                               | Düsseldorf            |         | 50,0                         |
| 1670        | PEIF II S.C.A.                                                                   | Luxemburg             |         | 99,9                         |
| 1671        | PENDIS Grundstücks-Vermietungsgesellschaft mbH                                   | Düsseldorf            |         | 50,0                         |

| Lfd.<br>Nr. | Name der Gesellschaft                                                   | Sitz der Gesellschaft | Fußnote | Anteil am<br>Kapital<br>in % |
|-------------|-------------------------------------------------------------------------|-----------------------|---------|------------------------------|
| 1672        | PENTOS Grundstücks-Vermietungsgesellschaft mbH                          | Düsseldorf            |         | 50,0                         |
| 1673        | PENTUM Beteiligungsgesellschaft mbH                                     | Düsseldorf            |         | 50,0                         |
| 1674        | PERGOS Beteiligungsgesellschaft mbH                                     | Düsseldorf            |         | 50,0                         |
| 1675        | PERGUM Grundstücks-Vermietungsgesellschaft mbH                          | Düsseldorf            |         | 50,0                         |
| 1676        | PERLIT Mobilien-Vermietungsgesellschaft mbH                             | Düsseldorf            |         | 50,0                         |
| 1677        | PERLU Grundstücks-Vermietungsgesellschaft mbH                           | Düsseldorf            |         | 50,0                         |
| 1678        | PERNIO Grundstücks-Vermietungsgesellschaft mbH                          | Düsseldorf            |         | 50,0                         |
| 1679        | Pertwee Leasing Limited Partnership                                     | London                |         | 100,0                        |
| 1680        | Peruda Leasing Limited                                                  | London                |         | 100,0                        |
| 1681        | Perus 1 S.à r.l.                                                        | Luxemburg             |         |                              |
| 1682        | Perus 2 S.à r.l.                                                        | Luxemburg             |         |                              |
| 1683        | Perus Investments S.à r.l.                                              | Luxemburg             |         |                              |
| 1684        | PERXIS Beteiligungsgesellschaft mbH                                     | Düsseldorf            |         | 50,0                         |
| 1685        | PETA Grundstücks-Vermietungsgesellschaft mbH                            | Düsseldorf            |         | 50,0                         |
| 1686        | Picture Financial Funding (No.2) Limited                                | Newport               |         |                              |
| 1687        | Picture Financial Jersey (No.2) Limited                                 | St. Helier            |         |                              |
| 1688        | Picture Home Loans (No.2) Limited                                       | London                |         |                              |
| 1689        | PONTUS Grundstücks-Vermietungsgesellschaft mbH                          | Düsseldorf            |         | 50,0                         |
| 1690        | Port Elizabeth Holdings LLC                                             | Wilmington            |         | 100,0                        |
| 1691        | PRADUM Beteiligungsgesellschaft mbH                                     | Düsseldorf            |         | 50,0                         |
| 1692        | PRASEM Beteiligungsgesellschaft mbH                                     | Düsseldorf            |         | 50,0                         |
| 1693        | PRATES Grundstücks-Vermietungsgesellschaft mbH                          | Schönefeld            |         | 50,0                         |
| 1694        | Prince Rupert Luxembourg S.à r.l.                                       | Senningerberg         |         | 100,0                        |
| 1695        | PRISON Grundstücks-Vermietungsgesellschaft mbH                          | Schönefeld            |         | 50,0                         |
| 1696        | Private Equity Invest Beteiligungs GmbH                                 | Düsseldorf            |         | 50,0                         |
| 1697        | Private Equity Life Sciences Beteiligungsgesellschaft mbH               | Düsseldorf            |         | 50,0                         |
| 1698        | PROVIDE Domicile 2009-1 GmbH                                            | Frankfurt             |         |                              |
| 1699        | PUDU Grundstücks-Vermietungsgesellschaft mbH                            | Düsseldorf            |         | 50,0                         |
| 1700        | PUKU Grundstücks-Vermietungsgesellschaft mbH                            | Düsseldorf            |         | 50,0                         |
| 1701        | PUKU Grundstücks-Vermietungsgesellschaft mbH & Co. Objekt Velbert KG    | Düsseldorf            |         |                              |
| 1702        | PURIM Grundstücks-Vermietungsgesellschaft mbH                           | Düsseldorf            |         | 50,0                         |
| 1703        | PURIM Grundstücks-Vermietungsgesellschaft mbH & Co. Objekt Burscheid KG | Düsseldorf            |         |                              |
| 1704        | QUANTIS Grundstücks-Vermietungsgesellschaft mbH                         | Schönefeld            |         | 50,0                         |
| 1705        | Quartz No. 1 S.A.                                                       | Luxemburg             | 5       | 0,0                          |
| 1706        | QUELLUM Grundstücks-Vermietungsgesellschaft mbH                         | Düsseldorf            |         | 50,0                         |
| 1707        | QUOTAS Grundstücks-Vermietungsgesellschaft mbH                          | Düsseldorf            |         | 50,0                         |
| 1708        | R/H Hawthorne Plaza Associates, LLC                                     | Wilmington            |         |                              |
| 1709        | Reference Capital Investments Limited                                   | London                |         | 100,0                        |
| 1710        | Regal Limited                                                           | Georgetown            | 7       |                              |
| 1711        | Residential Mortgage Funding Trust                                      | Toronto               |         |                              |
| 1712        | Rhein - Main Securitisation Limited                                     | St. Helier            |         |                              |
| 1713        | Rhein Main Sussex Ltd                                                   | Dublin                |         |                              |
| 1714        | Rhein-Main No. 12 Limited                                               | St. Helier            |         |                              |
| 1715        | Rhein-Main No. 14 Limited                                               | St. Helier            |         |                              |
| 1716        | Rhein-Main No. 5 Mortgage Purchase Limited                              | St. Helier            |         |                              |
| 1717        | Rheingold No.1 Limited                                                  | St. Helier            |         |                              |
| 1718        | Rheingold No.10 Limited                                                 | St. Helier            |         |                              |
| 1719        | Rheingold No.14 (Jersey) Limited                                        | St. Helier            |         |                              |
| 1720        | Rheingold No.9 Limited                                                  | St. Helier            |         |                              |
| 1721        | Rheingold Securitisation Limited                                        | St. Helier            |         |                              |
| 1722        | RHOEN 2008-1 GmbH                                                       | Frankfurt             |         |                              |
| 1723        | Riverside Funding LLC                                                   | Dover                 |         |                              |
| 1724        | RM Ayr Delaware LLC                                                     | Dover                 |         |                              |
| 1725        | RM Ayr Limited                                                          | Dublin                |         |                              |
| 1726        | RM Cheshire Delaware LLC                                                | Dover                 |         |                              |
| 1727        | RM Cheshire Limited                                                     | Dublin                |         |                              |

| Lfd.<br>Nr. | Name der Gesellschaft                                                                    | Sitz der Gesellschaft | Fußnote | Anteil am<br>Kapital<br>in % |
|-------------|------------------------------------------------------------------------------------------|-----------------------|---------|------------------------------|
| 1728        | RM Chestnut Delaware LLC                                                                 | Dover                 |         |                              |
| 1729        | RM Chestnut Limited                                                                      | Dublin                |         |                              |
| 1730        | RM Delaware Multi-Asset LLC                                                              | Wilmington            |         |                              |
| 1731        | RM Delaware Triple-A LLC                                                                 | Dover                 |         |                              |
| 1732        | RM Fife Delaware LLC                                                                     | Dover                 |         |                              |
| 1733        | RM Fife Limited                                                                          | Dublin                |         |                              |
| 1734        | RM Multi-Asset Limited                                                                   | Dublin                |         |                              |
| 1735        | RM Sussex Delaware LLC                                                                   | Dover                 |         |                              |
| 1736        | RM Triple-A Limited                                                                      | Dublin                |         |                              |
| 1737        | RREEF G.O. III Luxembourg One S.à r.l.                                                   | Luxemburg             |         |                              |
| 1738        | RREEF G.O. III Malta Limited                                                             | Valletta              |         |                              |
| 1739        | RREEF Global Opportunities Fund III, LLC                                                 | Wilmington            |         |                              |
| 1740        | RREEF GO III Mauritius One Limited                                                       | Port Louis            |         |                              |
| 1741        | RREEF GO III Mauritius Two Limited                                                       | Port Louis            |         |                              |
| 1742        | RREEF North American Infrastructure Fund A, L.P.                                         | Wilmington            |         | 99,9                         |
| 1743        | RREEF North American Infrastructure Fund B, L.P.                                         | Wilmington            |         | 99,9                         |
| 1744        | SABIS Grundstücks-Vermietungsgesellschaft mbH                                            | Düsseldorf            |         | 50,0                         |
| 1745        | SABRE Securitisation Limited                                                             | Sydney                |         |                              |
| 1746        | SAITA Grundstücks-Vermietungsgesellschaft mbH i.L.                                       | Düsseldorf            |         | 60,0                         |
| 1747        | Sajima Godo Kaisha                                                                       | Tokio                 |         |                              |
| 1748        | SALIX Grundstücks-Vermietungsgesellschaft mbH                                            | Düsseldorf            |         | 50,0                         |
| 1749        | SALUS Grundstücks-Vermietungsgesellschaft mbH                                            | Düsseldorf            |         | 50,0                         |
| 1750        | SALUS Grundstücks-Vermietungsgesellschaft mbH & Co. Objekt Brandenburg KG                | Düsseldorf            |         |                              |
| 1751        | SALUS Grundstücks-Vermietungsgesellschaft mbH & Co. Objekt Dresden KG                    | Düsseldorf            |         | 58,5                         |
| 1752        | SALUS Grundstücks-Vermietungsgesellschaft mbH & Co. Objekt Schwarzheide KG               | Düsseldorf            |         |                              |
| 1753        | SANCTOR Grundstücks-Vermietungsgesellschaft mbH                                          | Düsseldorf            |         | 50,0                         |
| 1754        | SANCTOR Grundstücks-Vermietungsgesellschaft mbH & Co. Objekt Nürnberg KG                 | Düsseldorf            |         |                              |
| 1755        | SANDIX Grundstücks-Vermietungsgesellschaft mbH                                           | Düsseldorf            |         | 50,0                         |
| 1756        | SANDIX Grundstücks-Vermietungsgesellschaft mbH & Co. Objekt Hafen KG                     | Düsseldorf            |         |                              |
| 1757        | SANO Grundstücks-Vermietungsgesellschaft mbH                                             | Düsseldorf            |         | 50,0                         |
| 1758        | Saratoga Funding Corp., LLC                                                              | Wilmington            |         |                              |
| 1759        | SARIO Grundstücks-Vermietungsgesellschaft mbH                                            | Düsseldorf            |         | 50,0                         |
| 1760        | SATINA Mobilien-Vermietungsgesellschaft mbH                                              | Düsseldorf            |         | 50,0                         |
| 1761        | SCANDO Grundstücks-Vermietungsgesellschaft mbH                                           | Düsseldorf            |         | 50,0                         |
| 1762        | SCANDO Grundstücks-Vermietungsgesellschaft mbH & Co. Objekt Datteln KG                   | Düsseldorf            |         |                              |
| 1763        | SCANDO Grundstücks-Vermietungsgesellschaft mbH & Co. Objekt Eisenach KG                  | Düsseldorf            | 7       |                              |
| 1764        | SCANDO Grundstücks-Vermietungsgesellschaft mbH & Co. Objekt Iserlohn KG                  | Düsseldorf            |         |                              |
| 1765        | SCANDO Grundstücks-Vermietungsgesellschaft mbH & Co. Objekt Osnabrück KG                 | Düsseldorf            |         |                              |
| 1766        | SCANDO Grundstücks-Vermietungsgesellschaft mbH & Co. Objekt Siekmann KG                  | Düsseldorf            |         |                              |
| 1767        | SCHEDA Grundstücks-Vermietungsgesellschaft mbH                                           | Düsseldorf            |         | 50,0                         |
| 1768        | Schiffsbetriebsgesellschaft FINNA mbH                                                    | Hamburg               |         | 100,0                        |
| 1769        | Schiffsbetriebsgesellschaft GRIMA mbH                                                    | Hamburg               |         | 100,0                        |
| 1770        | SCITOR Grundstücks-Vermietungsgesellschaft mbH                                           | Düsseldorf            |         | 50,0                         |
| 1771        | SCLF Godo Kaisha                                                                         | Tokio                 |         |                              |
| 1772        | Scottish Widows Investment Partnership Investment Funds ICVC - European Fund             | London                |         | 61,5                         |
| 1773        | Scottish Widows Investment Partnership Investment Funds ICVC - Global Fund               | London                |         | 50,7                         |
| 1774        | Scottish Widows Investment Partnership Investment Funds ICVC - Japanese Fund             | London                |         | 53,0                         |
| 1775        | Scottish Widows Tracker and Specialist Investment Funds ICVC - American Smaller Cos Fund | London                |         | 88,5                         |
| 1776        | SCUDO Grundstücks-Vermietungsgesellschaft mbH                                            | Düsseldorf            |         | 100,0                        |
| 1777        | SCUDO Grundstücks-Vermietungsgesellschaft mbH & Co. Objekt Kleine Alexanderstraße KG     | Düsseldorf            |         | 95,0                         |
| 1778        | SECHSTE Fonds-Beteiligungsgesellschaft mbH                                               | Düsseldorf            |         | 50,0                         |
| 1779        | SECHSTE PAXAS Treuhand- und Beteiligungsgesellschaft mbH                                 | Düsseldorf            |         | 50,0                         |
| 1780        | SECHSUNDZWANZIGSTE PAXAS Treuhand- und Beteiligungsgesellschaft mbH                      | Düsseldorf            |         |                              |
| 1781        | SECHZEHNTE PAXAS Treuhand- und Beteiligungsgesellschaft mbH                              | Düsseldorf            |         | 50,0                         |
| 1782        | SEDO Grundstücks-Vermietungsgesellschaft mbH                                             | Düsseldorf            |         | 100,0                        |

| Lfd.<br>Nr. | Name der Gesellschaft                                                             | Sitz der Gesellschaft | Fußnote | Anteil am<br>Kapital<br>in % |
|-------------|-----------------------------------------------------------------------------------|-----------------------|---------|------------------------------|
| 1783        | Sedona Capital Funding Corp., LLC                                                 | Charlotte             |         |                              |
| 1784        | SEGES Grundstücks-Vermietungsgesellschaft mbH                                     | Düsseldorf            |         | 50,0                         |
| 1785        | SEGU Grundstücks-Vermietungsgesellschaft mbH                                      | Düsseldorf            |         | 50,0                         |
| 1786        | SELEKTA Grundstücksverwaltungs-gesellschaft mbH                                   | Düsseldorf            |         | 50,0                         |
| 1787        | SENA Grundstücks-Vermietungsgesellschaft mbH                                      | Düsseldorf            |         | 50,0                         |
| 1788        | SERICA Grundstücks-Vermietungsgesellschaft mbH                                    | Düsseldorf            |         | 50,0                         |
| 1789        | SERICA Grundstücks-Vermietungsgesellschaft mbH & Co. Objekt Frankfurt KG          | Düsseldorf            |         |                              |
| 1790        | SGP Capital YK                                                                    | Tokio                 |         | 50,0                         |
| 1791        | Sharps CDO II Limited                                                             | New York              |         |                              |
| 1792        | SIDA Grundstücks-Vermietungsgesellschaft mbH                                      | Düsseldorf            |         | 50,0                         |
| 1793        | SIEBENUNDZWANZIGSTE PAXAS Treuhand- und Beteiligungsgesellschaft mbH              | Düsseldorf            |         |                              |
| 1794        | SIEBTE PAXAS Treuhand- und Beteiligungsgesellschaft mbH                           | Düsseldorf            |         | 50,0                         |
| 1795        | SIEBZEHNTE PAXAS Treuhand- und Beteiligungsgesellschaft mbH                       | Düsseldorf            |         | 50,0                         |
| 1796        | SIFA Grundstücks-Vermietungsgesellschaft mbH                                      | Düsseldorf            |         | 100,0                        |
| 1797        | SILANUS Grundstücks-Vermietungsgesellschaft mbH                                   | Düsseldorf            |         | 50,0                         |
| 1798        | SILANUS Grundstücks-Vermietungsgesellschaft mbH & Co. Objekt Bonn KG              | Düsseldorf            |         |                              |
| 1799        | SILEX Grundstücks-Vermietungsgesellschaft mbH                                     | Düsseldorf            |         | 50,0                         |
| 1800        | SILEX Grundstücks-Vermietungsgesellschaft mbH & Co. Objekt Rostock und Leipzig KG | Düsseldorf            |         |                              |
| 1801        | SILEX Grundstücks-Vermietungsgesellschaft mbH Objekt Eduard Dyckerhoff OHG        | Düsseldorf            |         |                              |
| 1802        | SILIGO Mobilien-Vermietungsgesellschaft mbH                                       | Düsseldorf            |         | 50,0                         |
| 1803        | SILUR Grundstücks-Vermietungsgesellschaft mbH                                     | Düsseldorf            |         | 50,0                         |
| 1804        | SILUR Grundstücks-Vermietungsgesellschaft mbH & Co. Objekt Markdorf KG            | Düsseldorf            |         |                              |
| 1805        | SILUR Grundstücks-Vermietungsgesellschaft mbH & Co. Objekt Tübingen KG            | Düsseldorf            |         |                              |
| 1806        | SILUR Grundstücks-Vermietungsgesellschaft mbH & Co. Objekt Uhingen KG             | Düsseldorf            |         |                              |
| 1807        | SIMILA Grundstücks-Vermietungsgesellschaft mbH                                    | Düsseldorf            |         | 50,0                         |
| 1808        | Singer Island Tower Suite LLC                                                     | Wilmington            |         | 100,0                        |
| 1809        | SIRES-STAR Limited                                                                | Georgetown            | 7       |                              |
| 1810        | Sixco Leasing Limited                                                             | London                |         | 100,0                        |
| 1811        | SMART SME CLO 2006-1 Ltd                                                          | Georgetown            |         |                              |
| 1812        | SOLATOR Grundstücks-Vermietungsgesellschaft mbH                                   | Düsseldorf            |         | 50,0                         |
| 1813        | SOLIDO Grundstücks-Vermietungsgesellschaft mbH                                    | Düsseldorf            |         | 100,0                        |
| 1814        | OLON Grundstücks-Vermietungsgesellschaft mbH                                      | Schönefeld            |         | 50,0                         |
| 1815        | SOLUM Grundstücks-Vermietungsgesellschaft mbH                                     | Düsseldorf            |         | 50,0                         |
| 1816        | SOMA Grundstücks-Vermietungsgesellschaft mbH                                      | Düsseldorf            |         | 50,0                         |
| 1817        | SOMA Grundstücks-Vermietungsgesellschaft mbH & Co. Objekt Heidelberg KG           | Düsseldorf            |         |                              |
| 1818        | Sonata Securities S.A.                                                            | Luxemburg             | 7       |                              |
| 1819        | SOREX Grundstücks-Vermietungsgesellschaft mbH                                     | Düsseldorf            |         | 50,0                         |
| 1820        | SOREX Grundstücks-Vermietungsgesellschaft mbH & Co. Objekt Hutschenreuther KG     | Düsseldorf            |         |                              |
| 1821        | SOREX Grundstücks-Vermietungsgesellschaft mbH & Co. Objekt Lüdenscheid KG         | Düsseldorf            |         |                              |
| 1822        | SOREX Grundstücks-Vermietungsgesellschaft mbH & Co. Objekt Mainz KG               | Düsseldorf            |         |                              |
| 1823        | SOSPITA Grundstücks-Vermietungsgesellschaft mbH                                   | Düsseldorf            |         | 50,0                         |
| 1824        | SOSPITA Grundstücks-Vermietungsgesellschaft mbH & Co. Objekte Prima KG            | Düsseldorf            | 7       |                              |
| 1825        | SOSPITA Grundstücks-Vermietungsgesellschaft mbH & Co. Objekte Sekunda KG          | Düsseldorf            | 7       |                              |
| 1826        | SPAN No.5 Pty Limited                                                             | Sydney                |         |                              |
| 1827        | SPESSART 2009-1 GmbH                                                              | Frankfurt             |         |                              |
| 1828        | SphinX Limited                                                                    | Georgetown            |         | 50,2                         |
| 1829        | SPINO Grundstücks-Vermietungsgesellschaft mbH                                     | Düsseldorf            |         | 100,0                        |
| 1830        | SPLENDOR Grundstücks-Vermietungsgesellschaft mbH                                  | Schönefeld            |         | 50,0                         |
| 1831        | Spring Asset Funding LLC                                                          | Wilmington            |         |                              |
| 1832        | Spring Asset Funding Ltd                                                          | Georgetown            |         |                              |
| 1833        | SS Aggregation Trust                                                              | Wilmington            |         |                              |
| 1834        | STABLON Grundstücks-Vermietungsgesellschaft mbH                                   | Düsseldorf            |         | 100,0                        |
| 1835        | STAGIRA Grundstücks-Vermietungsgesellschaft mbH                                   | Düsseldorf            |         | 50,0                         |
| 1836        | STATOR Heizkraftwerk Frankfurt (Oder) Beteiligungsgesellschaft mbH                | Schönefeld            |         | 100,0                        |
| 1837        | Stewart-Denny Holdings, LLC                                                       | Wilmington            |         |                              |
| 1838        | Stichting Perus Investments                                                       | Amsterdam             |         |                              |



| Lfd.<br>Nr. | Name der Gesellschaft                                                       | Sitz der Gesellschaft | Fußnote | Anteil am<br>Kapital<br>in % |
|-------------|-----------------------------------------------------------------------------|-----------------------|---------|------------------------------|
| 1839        | STUPA Heizwerk Frankfurt (Oder) Nord Beteiligungsgesellschaft mbH           | Schönefeld            |         | 100,0                        |
| 1840        | SUBLICA Grundstücks-Vermietungsgesellschaft mbH                             | Düsseldorf            |         | 50,0                         |
| 1841        | SUBU Mobilien-Vermietungsgesellschaft mbH                                   | Düsseldorf            |         | 50,0                         |
| 1842        | SULPUR Grundstücks-Vermietungsgesellschaft mbH                              | Schönefeld            |         | 50,0                         |
| 1843        | Sunflower Fund                                                              | Luxemburg             |         |                              |
| 1844        | Sunrise Beteiligungsgesellschaft mbH                                        | Frankfurt             |         | 100,0                        |
| 1845        | SUPERA Grundstücks-Vermietungsgesellschaft mbH                              | Düsseldorf            |         | 50,0                         |
| 1846        | SUPERA Grundstücks-Vermietungsgesellschaft mbH & Co. Objekt Speyer KG       | Düsseldorf            |         |                              |
| 1847        | SUPLION Beteiligungsgesellschaft mbH                                        | Düsseldorf            |         | 50,0                         |
| 1848        | Survey Solutions B.V.                                                       | Amsterdam             |         |                              |
| 1849        | Survey Trust                                                                | Wilmington            |         |                              |
| 1850        | SUSA Mobilien-Vermietungsgesellschaft mbH                                   | Düsseldorf            |         | 50,0                         |
| 1851        | SUSIK Grundstücks-Vermietungsgesellschaft mbH                               | Düsseldorf            |         | 50,0                         |
| 1852        | SUSIK Grundstücks-Vermietungsgesellschaft mbH & Co. Objekt Cottbus KG       | Düsseldorf            |         |                              |
| 1853        | Swabia 1 Limited                                                            | Dublin                |         |                              |
| 1854        | Swabia 1. Vermögensbesitz-GmbH                                              | Frankfurt             |         | 100,0                        |
| 1855        | SWIP Capital Trust                                                          | London                |         | 100,0                        |
| 1856        | Sylvester (2001) Limited                                                    | Georgetown            |         | 100,0                        |
| 1857        | TABA Grundstücks-Vermietungsgesellschaft mbH                                | Schönefeld            |         | 50,0                         |
| 1858        | TACET Grundstücks-Vermietungsgesellschaft mbH                               | Düsseldorf            |         | 50,0                         |
| 1859        | TACET Grundstücks-Vermietungsgesellschaft mbH & Co. Objekt Hameln KG        | Düsseldorf            |         |                              |
| 1860        | TACET Grundstücks-Vermietungsgesellschaft mbH & Co. Objekt Nordsternpark KG | Düsseldorf            |         |                              |
| 1861        | TACET Grundstücks-Vermietungsgesellschaft mbH & Co. Objekt Osnabrück KG     | Düsseldorf            |         |                              |
| 1862        | TACET Grundstücks-Vermietungsgesellschaft mbH & Co. Objekt Ulm KG           | Düsseldorf            |         |                              |
| 1863        | TACET Grundstücks-Vermietungsgesellschaft mbH & Co. Objekt Wendelstein KG   | Düsseldorf            |         |                              |
| 1864        | TAF 2 Y.K.                                                                  | Tokio                 |         | 100,0                        |
| 1865        | TAGO Grundstücks-Vermietungsgesellschaft mbH                                | Düsseldorf            |         | 50,0                         |
| 1866        | Tagus - Sociedade de Titularização de Créditos, S.A.                        | Lissabon              |         | 100,0                        |
| 1867        | TAGUS Beteiligungsgesellschaft mbH                                          | Düsseldorf            |         | 50,0                         |
| 1868        | Tahoe Funding Corp., LLC                                                    | Melville              |         |                              |
| 1869        | TAKIR Grundstücks-Vermietungsgesellschaft mbH                               | Düsseldorf            |         | 100,0                        |
| 1870        | TARES Beteiligungsgesellschaft mbH                                          | Düsseldorf            |         | 100,0                        |
| 1871        | Taunus 2008-1 GmbH                                                          | Frankfurt             |         |                              |
| 1872        | Taunus 2009-1 GmbH                                                          | Frankfurt             |         |                              |
| 1873        | TEBA Beteiligungsgesellschaft mbH                                           | Schönefeld            |         | 100,0                        |
| 1874        | TEBOR Grundstücks-Vermietungsgesellschaft mbH                               | Düsseldorf            |         | 50,0                         |
| 1875        | TEMATIS Grundstücks-Vermietungsgesellschaft mbH                             | Düsseldorf            |         | 100,0                        |
| 1876        | Tennessee Capital Godo Kaisha                                               | Tokio                 |         | 50,0                         |
| 1877        | TERGO Grundstücks-Vermietungsgesellschaft mbH                               | Düsseldorf            |         | 100,0                        |
| 1878        | TERRUS Grundstücks-Vermietungsgesellschaft mbH                              | Düsseldorf            |         | 100,0                        |
| 1879        | TERRUS Grundstücks-Vermietungsgesellschaft mbH & Co. Objekt Bernbach KG     | Düsseldorf            |         | 0,0                          |
| 1880        | TESATUR Beteiligungsgesellschaft mbH                                        | Düsseldorf            |         | 50,0                         |
| 1881        | Thaumat Holdings Limited                                                    | Nikosia               |         |                              |
| 1882        | The Admiral Charitable Trust                                                | St. Peter Port        |         |                              |
| 1883        | The CAP Accumulation Trust                                                  | Wilmington            |         |                              |
| 1884        | The CIG Trust                                                               | St. Helier            |         |                              |
| 1885        | The GIII Accumulation Trust                                                 | Wilmington            |         |                              |
| 1886        | The Glanmore Property Euro Fund Limited                                     | St. Peter Port        |         |                              |
| 1887        | The GPR Accumulation Trust                                                  | Wilmington            |         |                              |
| 1888        | The Life Accumulation Trust                                                 | Wilmington            |         |                              |
| 1889        | The Life Accumulation Trust II                                              | Wilmington            |         |                              |
| 1890        | The Life Accumulation Trust III                                             | Wilmington            |         |                              |
| 1891        | The Life Accumulation Trust IV                                              | Wilmington            |         |                              |
| 1892        | The Life Accumulation Trust IX                                              | Wilmington            |         |                              |
| 1893        | The Life Accumulation Trust V                                               | Wilmington            |         |                              |
| 1894        | The Life Accumulation Trust VIII                                            | Wilmington            |         |                              |

| Lfd.<br>Nr. | Name der Gesellschaft                               | Sitz der Gesellschaft | Fußnote | Anteil am<br>Kapital<br>in % |
|-------------|-----------------------------------------------------|-----------------------|---------|------------------------------|
| 1895        | The Life Accumulation Trust X                       | Wilmington            |         |                              |
| 1896        | The Life Accumulation Trust XI                      | Wilmington            |         |                              |
| 1897        | The Life Accumulation Trust XII                     | Wilmington            |         |                              |
| 1898        | The PEB Accumulation Trust                          | Wilmington            |         |                              |
| 1899        | The SLA Accumulation Trust                          | Wilmington            |         |                              |
| 1900        | THRENI Grundstücks-Vermietungsgesellschaft mbH i.L. | Düsseldorf            |         | 50,0                         |
| 1901        | Tilney Group Limited Employee Incentive Trust       | St. Peter Port        |         |                              |
| 1902        | Tintin II SPC                                       | Georgetown            |         |                              |
| 1903        | Tintin III SPC                                      | Georgetown            |         |                              |
| 1904        | TONGA Grundstücks-Vermietungsgesellschaft mbH       | Düsseldorf            |         | 50,0                         |
| 1905        | TOREUT Grundstücks-Vermietungsgesellschaft mbH i.L. | Düsseldorf            |         | 50,0                         |
| 1906        | TOSSA Grundstücks-Vermietungsgesellschaft mbH       | Düsseldorf            |         | 100,0                        |
| 1907        | TRAGO Grundstücks-Vermietungsgesellschaft mbH       | Düsseldorf            |         | 50,0                         |
| 1908        | TREMA Grundstücks-Vermietungsgesellschaft mbH       | Berlin                |         | 50,0                         |
| 1909        | TRENTO Grundstücks-Vermietungsgesellschaft mbH      | Düsseldorf            |         | 50,0                         |
| 1910        | TRINTO Beteiligungsgesellschaft mbH                 | Schönefeld            |         | 50,0                         |
| 1911        | TRIPLA Grundstücks-Vermietungsgesellschaft mbH      | Düsseldorf            |         | 100,0                        |
| 1912        | Triplepoint Special Opportunities Financing Trust   | Wilmington            | 7       |                              |
| 1913        | TRS 1 LLC                                           | Wilmington            |         | 100,0                        |
| 1914        | TRS Aria LLC                                        | Wilmington            |         | 100,0                        |
| 1915        | TRS Babson I LLC                                    | Wilmington            |         | 100,0                        |
| 1916        | TRS Bluebay LLC                                     | Wilmington            |         | 100,0                        |
| 1917        | TRS Bruin LLC                                       | Wilmington            |         | 100,0                        |
| 1918        | TRS Callisto LLC                                    | Wilmington            |         | 100,0                        |
| 1919        | TRS Camulos LLC                                     | Wilmington            |         | 100,0                        |
| 1920        | TRS Cypress LLC                                     | Wilmington            |         | 100,0                        |
| 1921        | TRS DB OH CC Fund Financing LLC                     | Wilmington            |         | 100,0                        |
| 1922        | TRS Eclipse LLC                                     | Wilmington            |         | 100,0                        |
| 1923        | TRS Elara LLC                                       | Wilmington            |         | 100,0                        |
| 1924        | TRS Elgin LLC                                       | Wilmington            |         | 100,0                        |
| 1925        | TRS Elm LLC                                         | Wilmington            |         | 100,0                        |
| 1926        | TRS Feingold O'Keeffe LLC                           | Wilmington            |         | 100,0                        |
| 1927        | TRS Fore LLC                                        | Wilmington            |         | 100,0                        |
| 1928        | TRS Ganymede LLC                                    | Wilmington            |         | 100,0                        |
| 1929        | TRS GSC Credit Strategies LLC                       | Wilmington            |         | 100,0                        |
| 1930        | TRS Haka LLC                                        | Wilmington            |         | 100,0                        |
| 1931        | TRS HY FNDS LLC                                     | Wilmington            |         | 100,0                        |
| 1932        | TRS Io LLC                                          | Wilmington            |         | 100,0                        |
| 1933        | TRS Landsbanki Islands LLC                          | Wilmington            |         | 100,0                        |
| 1934        | TRS Leda LLC                                        | Wilmington            |         | 100,0                        |
| 1935        | TRS Metis LLC                                       | Wilmington            |         | 100,0                        |
| 1936        | TRS Plainfield LLC                                  | Wilmington            |         | 100,0                        |
| 1937        | TRS Poplar LLC                                      | Wilmington            |         | 100,0                        |
| 1938        | TRS Quogue LLC                                      | Wilmington            |         | 100,0                        |
| 1939        | TRS Scorpio LLC                                     | Wilmington            |         | 100,0                        |
| 1940        | TRS SeaCliff LLC                                    | Wilmington            |         | 100,0                        |
| 1941        | TRS Stag LLC                                        | Wilmington            |         | 100,0                        |
| 1942        | TRS Stark LLC                                       | Wilmington            |         | 100,0                        |
| 1943        | TRS SVCO LLC                                        | Wilmington            |         | 100,0                        |
| 1944        | TRS Sycamore LLC                                    | Wilmington            |         | 100,0                        |
| 1945        | TRS Thebe LLC                                       | Wilmington            |         | 100,0                        |
| 1946        | TRS Tupelo LLC                                      | Wilmington            |         | 100,0                        |
| 1947        | TRS Venor LLC                                       | Wilmington            |         | 100,0                        |
| 1948        | TRS Watermill LLC                                   | Wilmington            |         | 100,0                        |
| 1949        | Tsubasa Angel Fund Y.K.                             | Tokio                 |         | 100,0                        |
| 1950        | Tucson Funding LLC                                  | Dover                 |         |                              |

| Lfd.<br>Nr. | Name der Gesellschaft                                              | Sitz der Gesellschaft | Fußnote | Anteil am<br>Kapital<br>in % |
|-------------|--------------------------------------------------------------------|-----------------------|---------|------------------------------|
| 1951        | TUDO Grundstücks-Vermietungsgesellschaft mbH                       | Düsseldorf            |         | 50,0                         |
| 1952        | TUGA Grundstücks-Vermietungsgesellschaft mbH                       | Düsseldorf            |         | 50,0                         |
| 1953        | TXH Trust                                                          | Wilmington            |         |                              |
| 1954        | TYRAS Beteiligungsgesellschaft mbH                                 | Düsseldorf            |         | 50,0                         |
| 1955        | UDS Capital Y.K.                                                   | Tokio                 |         | 100,0                        |
| 1956        | Varapradha Real Estates Private Limited                            | Hyderabad             |         |                              |
| 1957        | VARIS Beteiligungsgesellschaft mbH                                 | Düsseldorf            |         | 50,0                         |
| 1958        | Varta Aktiengesellschaft                                           | Hannover              |         |                              |
| 1959        | VIERTE Fonds-Beteiligungsgesellschaft mbH                          | Düsseldorf            |         | 50,0                         |
| 1960        | VIERTE PAXAS Treuhand- und Beteiligungsgesellschaft mbH            | Düsseldorf            |         | 50,0                         |
| 1961        | VIERUNDZWANZIGSTE PAXAS Treuhand- und Beteiligungsgesellschaft mbH | Düsseldorf            |         | 50,0                         |
| 1962        | VIERZEHNTE PAXAS Treuhand- und Beteiligungsgesellschaft mbH        | Düsseldorf            |         | 50,0                         |
| 1963        | Village Hospitality LLC                                            | Wilmington            |         | 100,0                        |
| 1964        | Volga Investments Limited                                          | Dublin                |         |                              |
| 1965        | Warwick Lane Investments B.V.                                      | London                |         | 25,0                         |
| 1966        | Wheatfield GmbH & Co. KG                                           | Frankfurt             |         | 100,0                        |
| 1967        | Winchester House Master Trust                                      | Hamilton              | 7       | 100,0                        |
| 1968        | Wohnungs-Verwaltungsgesellschaft Moers mbH                         | Düsseldorf            |         | 50,0                         |
| 1969        | Wohnungsgesellschaft HEGEMAG GmbH                                  | Düsseldorf            |         | 50,0                         |
| 1970        | XARUS Grundstücks-Vermietungsgesellschaft mbH                      | Schönefeld            |         | 50,0                         |
| 1971        | XELLUM Grundstücks-Vermietungsgesellschaft mbH                     | Düsseldorf            |         | 50,0                         |
| 1972        | XENTIS Grundstücks-Vermietungsgesellschaft mbH                     | Düsseldorf            |         | 50,0                         |
| 1973        | XERA Grundstücks-Vermietungsgesellschaft mbH                       | Düsseldorf            |         | 50,0                         |
| 1974        | XERIS Grundstücks-Vermietungsgesellschaft mbH                      | Düsseldorf            |         | 50,0                         |
| 1975        | Y.K. Agura Partners                                                | Tokio                 |         | 50,0                         |
| 1976        | ZABATUS Grundstücks-Vermietungsgesellschaft mbH                    | Düsseldorf            |         | 50,0                         |
| 1977        | ZAKATUR Grundstücks-Vermietungsgesellschaft mbH                    | Düsseldorf            |         | 50,0                         |
| 1978        | ZALLUS Beteiligungsgesellschaft mbH                                | Düsseldorf            |         | 50,0                         |
| 1979        | Zamalik Limited                                                    | Dublin                |         |                              |
| 1980        | ZANTOS Grundstücks-Vermietungsgesellschaft mbH                     | Düsseldorf            |         | 50,0                         |
| 1981        | ZARAT Beteiligungsgesellschaft mbH                                 | Düsseldorf            |         | 50,0                         |
| 1982        | ZARAT Beteiligungsgesellschaft mbH & Co. Objekt Leben II KG        | Düsseldorf            |         | 93,2                         |
| 1983        | ZARGUS Grundstücks-Vermietungsgesellschaft mbH                     | Düsseldorf            |         | 50,0                         |
| 1984        | ZEА Beteiligungsgesellschaft mbH                                   | Schönefeld            |         | 25,0                         |
| 1985        | ZEDORA 3 GmbH & Co. KG                                             | München               |         |                              |
| 1986        | ZEDORA 36 GmbH & Co. KG                                            | München               |         |                              |
| 1987        | ZEHNTE PAXAS Treuhand- und Beteiligungsgesellschaft mbH            | Düsseldorf            |         | 50,0                         |
| 1988        | ZELAS Beteiligungsgesellschaft mbH                                 | Düsseldorf            |         | 50,0                         |
| 1989        | ZELAS Beteiligungsgesellschaft mbH & Co. Leben I KG                | Düsseldorf            |         | 93,0                         |
| 1990        | ZENO Grundstücks-Vermietungsgesellschaft mbH                       | Düsseldorf            |         | 50,0                         |
| 1991        | ZEPTOS Grundstücks-Vermietungsgesellschaft mbH                     | Düsseldorf            |         | 50,0                         |
| 1992        | ZEREVIS Grundstücks-Vermietungsgesellschaft mbH                    | Düsseldorf            |         | 50,0                         |
| 1993        | ZERGUM Grundstücks-Vermietungsgesellschaft mbH                     | Düsseldorf            |         | 50,0                         |
| 1994        | ZIBE Grundstücks-Vermietungsgesellschaft mbH                       | Düsseldorf            |         | 50,0                         |
| 1995        | ZIDES Grundstücks-Vermietungsgesellschaft mbH                      | Schönefeld            |         | 50,0                         |
| 1996        | ZIMBEL Grundstücks-Vermietungsgesellschaft mbH                     | Schönefeld            |         | 50,0                         |
| 1997        | ZINUS Grundstücks-Vermietungsgesellschaft mbH                      | Schönefeld            |         | 50,0                         |
| 1998        | ZIRAS Grundstücks-Vermietungsgesellschaft mbH                      | Schönefeld            |         | 50,0                         |
| 1999        | ZITON Grundstücks-Vermietungsgesellschaft mbH                      | Düsseldorf            |         | 50,0                         |
| 2000        | ZITRAL Beteiligungsgesellschaft mbH                                | Düsseldorf            |         | 50,0                         |
| 2001        | ZITUS Grundstücks-Vermietungsgesellschaft mbH                      | Schönefeld            |         | 50,0                         |
| 2002        | ZONTUM Grundstücks-Vermietungsgesellschaft mbH                     | Düsseldorf            |         | 50,0                         |
| 2003        | ZORUS Grundstücks-Vermietungsgesellschaft mbH                      | Düsseldorf            |         | 50,0                         |
| 2004        | Zugspitze 2008-1 GmbH                                              | Frankfurt             |         |                              |
| 2005        | Zumirez Drive LLC                                                  | Wilmington            |         | 100,0                        |
| 2006        | ZURET Beteiligungsgesellschaft mbH                                 | Düsseldorf            |         | 50,0                         |

| Lfd.<br>Nr. | Name der Gesellschaft                                              | Sitz der Gesellschaft | Fußnote | Anteil am<br>Kapital<br>in % |
|-------------|--------------------------------------------------------------------|-----------------------|---------|------------------------------|
| 2007        | ZWANZIGSTE PAXAS Treuhand- und Beteiligungsgesellschaft mbH        | Düsseldorf            |         | 50,0                         |
| 2008        | ZWEITE Fonds-Beteiligungsgesellschaft mbH                          | Düsseldorf            |         | 50,0                         |
| 2009        | ZWEITE PAXAS Treuhand- und Beteiligungsgesellschaft mbH            | Düsseldorf            |         | 50,0                         |
| 2010        | ZWEIUNDZWANZIGSTE PAXAS Treuhand- und Beteiligungsgesellschaft mbH | Düsseldorf            |         | 50,0                         |
| 2011        | ZWÖLFTE PAXAS Treuhand- und Beteiligungsgesellschaft mbH           | Düsseldorf            |         | 50,0                         |
| 2012        | ZYLUM Beteiligungsgesellschaft mbH                                 | Schönefeld            |         | 25,0                         |

| Lfd.<br>Nr. | Name der Gesellschaft                                                                                                         | Sitz der Gesellschaft | Fußnote | Anteil am<br>Kapital<br>in % |
|-------------|-------------------------------------------------------------------------------------------------------------------------------|-----------------------|---------|------------------------------|
| 2013        | AcadiaSoft, Inc.                                                                                                              | Wilmington            |         | 8,8                          |
| 2014        | Actavis New S.à r.l.                                                                                                          | Luxemburg             | 9, 10   | 0,0                          |
| 2015        | Admiral Private Equity SL                                                                                                     | Madrid                |         | 45,0                         |
| 2016        | Advent Chestnut VII GmbH & Co. KG                                                                                             | München               |         | 36,7                         |
| 2017        | Afinia Capital Group Limited                                                                                                  | Hamilton              |         | 40,0                         |
| 2018        | AKA Ausfuhrkredit-Gesellschaft mit beschränkter Haftung                                                                       | Frankfurt             |         | 28,8                         |
| 2019        | Alpha Trains (Malta) Holdco 1 Limited                                                                                         | Valletta              |         | 15,0                         |
| 2020        | Alternative Investment Strategies Mauritius Ltd.                                                                              | Grand Bay             |         | 31,2                         |
| 2021        | Aqueduct Capital (UK) Limited                                                                                                 | Redhill               |         | 10,0                         |
| 2022        | Argantis GmbH                                                                                                                 | Köln                  |         | 50,0                         |
| 2023        | Argantis Private Equity GmbH & Co. KG                                                                                         | Köln                  |         | 25,1                         |
| 2024        | Argantis Private Equity Gründer GmbH & Co. KG                                                                                 | Köln                  |         | 27,8                         |
| 2025        | Arvoreda Investments Limited                                                                                                  | Georgetown            |         | 47,1                         |
| 2026        | Asia Retail Group Limited                                                                                                     | Douglas               |         | 9,4                          |
| 2027        | Atriax Holdings Limited (in member's voluntary liquidation)                                                                   | Southend-on-Sea       |         | 25,0                         |
| 2028        | Baigo Capital Partners Fund 1 Parallel 1 GmbH & Co. KG                                                                        | Frankfurt             |         | 49,8                         |
| 2029        | BANKPOWER GmbH Personaldienstleistungen                                                                                       | Frankfurt             |         | 30,0                         |
| 2030        | BATS Global Markets, Inc.                                                                                                     | Wilmington            |         | 8,5                          |
| 2031        | Bestra Gesellschaft für Vermögensverwaltung mit beschränkter Haftung                                                          | Düsseldorf            |         | 49,0                         |
| 2032        | BHS tabletop AG                                                                                                               | Selb                  |         | 28,9                         |
| 2033        | Bocaina L.P.                                                                                                                  | Georgetown            | 11      | 53,3                         |
| 2034        | BrisConnections Holding Trust                                                                                                 | Kedron                |         | 35,6                         |
| 2035        | BrisConnections Investment Trust                                                                                              | Kedron                |         | 35,6                         |
| 2036        | BVT-CAM Private Equity Beteiligungs GmbH                                                                                      | Grünwald              |         | 50,0                         |
| 2037        | BVT-CAM Private Equity Management & Beteiligungs GmbH                                                                         | Grünwald              |         | 50,0                         |
| 2038        | Caherciveen Partners, LLC                                                                                                     | Chicago               |         | 20,0                         |
| 2039        | Challenger Infrastructure Fund                                                                                                | Sydney                |         | 20,2                         |
| 2040        | Cipio Partners Fund V GmbH & Co. KG                                                                                           | München               |         | 21,1                         |
| 2041        | Cipio Partners Fund Va GmbH & Co. KG                                                                                          | München               |         | 21,1                         |
| 2042        | CKI RREEF JV Holdings Pty Limited                                                                                             | Sydney                |         | 50,0                         |
| 2043        | Coalition Development Limited                                                                                                 | London                |         | 9,7                          |
| 2044        | Comfund Consulting Limited                                                                                                    | Bangalore             |         | 30,0                         |
| 2045        | Compañía Logística de Hidrocarburos CLH, S.A.                                                                                 | Madrid                |         | 5,0                          |
| 2046        | Craigs Investment Partners Limited                                                                                            | Tauranga              |         | 49,9                         |
| 2047        | Crescent Gold Limited                                                                                                         | Subiaco               |         | 35,2                         |
| 2048        | Danube Properties S.à r.l.                                                                                                    | Luxemburg             |         | 25,0                         |
| 2049        | DB Alpha Discovery Fund Limited                                                                                               | Georgetown            | 9       | 0,0                          |
| 2050        | DB Development Holdings Limited                                                                                               | Lamaka                |         | 49,0                         |
| 2051        | DB Funding (Gibraltar) Limited                                                                                                | Gibraltar             | 12      | 100,0                        |
| 2052        | DB Real Estate Global Opportunities IB (Offshore), L.P.                                                                       | Camana Bay            |         | 34,5                         |
| 2053        | DB Secondary Opportunities Fund II, LP                                                                                        | Georgetown            |         | 50,0                         |
| 2054        | DBG Eastern Europe II Limited Partnership                                                                                     | St. Helier            |         | 25,9                         |
| 2055        | DBG Osteuropa-Holding GmbH i.L.                                                                                               | Frankfurt             |         | 50,0                         |
| 2056        | DD Konut Finansman A.S.                                                                                                       | Istanbul              |         | 49,0                         |
| 2057        | Deutsche Börse Commodities GmbH                                                                                               | Eschborn              |         | 16,2                         |
| 2058        | Deutsche Financial Capital I Corp.                                                                                            | Greensboro            |         | 50,0                         |
| 2059        | Deutsche Financial Capital Limited Liability Company                                                                          | Greensboro            |         | 50,0                         |
| 2060        | Deutsche Grundbesitz-Beteiligungsgesellschaft Dr. Rühl & Co. -Anlagefonds<br>2/Verwaltungsgebäude Stuttgart-Möhringen-KG i.L. | Frankfurt             |         | 23,7                         |
| 2061        | Deutsche Private Equity Fund                                                                                                  | Sydney                |         | 8,0                          |
| 2062        | Deutsche Regis Partners Inc                                                                                                   | Makati Stadt          |         | 49,0                         |
| 2063        | Deutsche Zurich Pensiones Entidad Gestora de Fondos de Pensiones, S.A.                                                        | Barcelona             |         | 50,0                         |
| 2064        | Deutscher Pensionsfonds Aktiengesellschaft                                                                                    | Bonn                  |         | 25,1                         |
| 2065        | DFM Deutsche Fonds Management GmbH                                                                                            | Grünwald              |         | 40,0                         |
| 2066        | DIL Czech Baumanagement Koncernová s.r.o. i.L.                                                                                | Prag                  |         | 49,0                         |
| 2067        | DIL Czech Contract Koncernova s.r.o.                                                                                          | Prag                  |         | 49,0                         |

| Lfd. Nr. | Name der Gesellschaft                                                                      | Sitz der Gesellschaft | Fußnote | Anteil am Kapital in % |
|----------|--------------------------------------------------------------------------------------------|-----------------------|---------|------------------------|
| 2068     | DIL Internationale Leasinggesellschaft mbH                                                 | Düsseldorf            |         | 50,0                   |
| 2069     | DMG & Partners Securities Pte Ltd                                                          | Singapur              |         | 49,0                   |
| 2070     | Domus Beteiligungsgesellschaft der Privaten Bausparkassen mbH                              | Berlin                |         | 21,1                   |
| 2071     | DPG Deutsche Performancemessungs-Gesellschaft für Wertpapierportfolios mbH                 | Frankfurt             |         | 20,0                   |
| 2072     | Duxton Asset Management Pte. Ltd.                                                          | Singapur              |         | 20,0                   |
| 2073     | DWS Global Agricultural Land & Opportunities Fund Limited                                  | Georgetown            |         | 8,5                    |
| 2074     | Edmonton Holding Limited                                                                   | Georgetown            | 9       | 0,0                    |
| 2075     | Elbe Properties S.à r.l.                                                                   | Luxemburg             |         | 25,0                   |
| 2076     | EOL2 Holding B.V.                                                                          | Amsterdam             |         | 45,0                   |
| 2077     | eolec                                                                                      | Issy-les-Moulineaux   |         | 33,3                   |
| 2078     | equiNotes Management GmbH                                                                  | Düsseldorf            |         | 50,0                   |
| 2079     | Erica Società a Responsabilità Limitata                                                    | Mailand               |         | 40,0                   |
| 2080     | EVROENERGIAMI S.A.                                                                         | Alexandroupolis       |         | 40,0                   |
| 2081     | Exchange Place Holdings, L.P.                                                              | Wilmington            |         | 21,2                   |
| 2082     | Fondo Immobiliare Chiuso Piramide Globale                                                  | Mailand               | 4       | 42,5                   |
| 2083     | FREUNDE DER EINTRACHT FRANKFURT Aktiengesellschaft                                         | Frankfurt             |         | 30,8                   |
| 2084     | Fünfte SAB Treuhand und Verwaltung GmbH & Co. >>Leipzig-Magdeburg<< KG                     | Bad Homburg           |         | 40,7                   |
| 2085     | Fünfte SAB Treuhand und Verwaltung GmbH & Co. Dresden >>Louisenstraße<< KG                 | Bad Homburg           |         | 30,6                   |
| 2086     | G.O. IB-SIV Feeder, L.L.C.                                                                 | Wilmington            |         | 15,7                   |
| 2087     | Gemeng International Energy Group Company Limited                                          | Taiyuan               |         | 9,0                    |
| 2088     | German Public Sector Finance B.V.                                                          | Amsterdam             |         | 50,0                   |
| 2089     | Gesellschaft bürgerlichen Rechts Industrie- und Handelskammer/Rheinisch-Westfälische Börse | Düsseldorf            |         | 10,0                   |
| 2090     | Gesellschaft für Kreditsicherung mit beschränkter Haftung                                  | Berlin                |         | 36,7                   |
| 2091     | GIPF-I Holding Corp.                                                                       | Calgary               |         | 2,0                    |
| 2092     | giropay GmbH                                                                               | Frankfurt             |         | 33,3                   |
| 2093     | Global Salamina, S.L.                                                                      | Madrid                |         | 50,0                   |
| 2094     | Global Skyline Capital GmbH                                                                | Frankfurt             |         | 15,0                   |
| 2095     | Gordian Knot Limited                                                                       | London                |         | 32,4                   |
| 2096     | Great Future International Limited                                                         | Road Town             |         | 43,0                   |
| 2097     | Grundstücksgesellschaft Köln-Ossendorf VI GbR                                              | Troisdorf             |         | 44,9                   |
| 2098     | Grundstücksgesellschaft Leipzig Petersstraße GbR                                           | Troisdorf             |         | 33,2                   |
| 2099     | Grundstücksgesellschaft Schlossplatz 1 mbH & Co. KG                                        | Berlin                |         | 18,4                   |
| 2100     | Grundstücksverwaltungsgesellschaft Tankstelle Troisdorf Spich GbR                          | Troisdorf             |         | 33,0                   |
| 2101     | Gulf Home Finance                                                                          | Riad                  |         | 40,0                   |
| 2102     | Hanoi Building Commercial Joint Stock Bank                                                 | Hanoi                 |         | 10,0                   |
| 2103     | Harvest Fund Management Company Limited                                                    | Schanghai             |         | 30,0                   |
| 2104     | Helios AMC, LLC                                                                            | Wilmington            | 9       | 0,0                    |
| 2105     | HHG Private Capital Portfolio No.1 L.P.                                                    | London                |         | 17,6                   |
| 2106     | Huamao Property Holdings Ltd.                                                              | Georgetown            | 9       | 0,0                    |
| 2107     | Hydro S.r.l.                                                                               | Rom                   |         | 45,0                   |
| 2108     | I.B.T. Lighting S.p.A.                                                                     | Mailand               |         | 39,0                   |
| 2109     | iCON Infrastructure Management Limited                                                     | St. Peter Port        | 11      | 99,9                   |
| 2110     | iFast India Investments Pte. Ltd.                                                          | Singapur              |         | 49,0                   |
| 2111     | IG BCE Mitglieder-Service GmbH                                                             | Hannover              |         | 50,0                   |
| 2112     | IGCF General Partner Limited                                                               | Georgetown            |         | 24,5                   |
| 2113     | ILV Immobilien-Leasing Verwaltungsgesellschaft Düsseldorf mbH                              | Düsseldorf            |         | 50,0                   |
| 2114     | Immobilienfonds Büro-Center Erfurt Am Flughafen Bindersleben II GbR                        | Troisdorf             |         | 50,0                   |
| 2115     | Inn Properties S.à r.l.                                                                    | Luxemburg             |         | 25,0                   |
| 2116     | Interessengemeinschaft Frankfurter Kreditinstitute GmbH                                    | Frankfurt             |         | 23,3                   |
| 2117     | Investcorp Coinvestment Partners I, L.P.                                                   | Wilmington            |         | 20,2                   |
| 2118     | Iperval                                                                                    | Laroque d'Olmes       |         | 50,0                   |
| 2119     | Isar Properties S.à r.l.                                                                   | Luxemburg             |         | 25,0                   |
| 2120     | IZI Düsseldorf Informations-Zentrum Immobilien Gesellschaft mit beschränkter Haftung       | Düsseldorf            |         | 20,0                   |
| 2121     | IZI Düsseldorf Informations-Zentrum Immobilien GmbH & Co. Kommanditgesellschaft            | Düsseldorf            |         | 21,6                   |
| 2122     | Japan Value Added Fund II Limited                                                          | Tokio                 | 9       | 0,0                    |

| Lfd.<br>Nr. | Name der Gesellschaft                                              | Sitz der Gesellschaft | Fußnote | Anteil am<br>Kapital<br>in % |
|-------------|--------------------------------------------------------------------|-----------------------|---------|------------------------------|
| 2123        | Japan Value Added Fund One Limited                                 | Tokio                 | 9       | 0,0                          |
| 2124        | K & N Kenanga Holdings Bhd                                         | Kuala Lumpur          |         | 16,6                         |
| 2125        | Kenanga Deutsche Futures Sdn Bhd                                   | Kuala Lumpur          |         | 27,0                         |
| 2126        | Key Capital Private Limited                                        | Dublin                |         | 50,0                         |
| 2127        | Kinneil Leasing Company                                            | London                |         | 35,0                         |
| 2128        | KölnArena Beteiligungsgesellschaft mbH                             | Köln                  |         | 20,8                         |
| 2129        | Liegenschaft Hainstraße GbR                                        | Frankfurt             | 9       | 0,0                          |
| 2130        | Lion Indian Real Estate Fund L.P.                                  | Georgetown            | 9       | 0,0                          |
| 2131        | Lion Residential Holdings S.à r.l.                                 | Luxemburg             |         | 17,4                         |
| 2132        | London Dry Bulk Limited                                            | London                |         | 49,0                         |
| 2133        | Magyar RTL Televízió Zártkörűen Működő Részvénytársaság            | Budapest              |         | 2,0                          |
| 2134        | Main Properties S.à r.l.                                           | Luxemburg             |         | 25,0                         |
| 2135        | Manuseamento de Cargas - Manicargas, S.A.                          | Matosinhos            |         | 38,3                         |
| 2136        | Marblegate Special Opportunities Master Fund, L.P.                 | Georgetown            |         | 44,6                         |
| 2137        | Markit Group Holdings Limited                                      | London                |         | 6,4                          |
| 2138        | MFG Flughafen-Grundstücksverwaltungsgesellschaft mbH & Co. BETA KG | Grünwald              |         | 29,6                         |
| 2139        | MidOcean (Europe) 2000-A LP                                        | St. Helier            |         | 19,9                         |
| 2140        | MidOcean (Europe) 2000-B LP                                        | St. Helier            |         | 19,9                         |
| 2141        | MidOcean (Europe) 2002 LP                                          | St. Helier            |         | 15,9                         |
| 2142        | MidOcean (Europe) 2003 LP                                          | St. Helier            |         | 20,0                         |
| 2143        | MidOcean Partners, LP                                              | New York              |         | 20,0                         |
| 2144        | Millennium Marine Rail, L.L.C.                                     | Elizabeth             |         | 50,0                         |
| 2145        | Miller Brothers Retail Limited (in member's voluntary liquidation) | Doncaster             |         | 40,0                         |
| 2146        | Millexim                                                           | Paris                 |         | 35,0                         |
| 2147        | Motion Picture Markets Holding GmbH i.L.                           | Grünwald              |         | 33,3                         |
| 2148        | Nexus LLC                                                          | Wilmington            |         | 12,2                         |
| 2149        | North Coast Wind Energy Corp.                                      | Vancouver             | 11      | 93,4                         |
| 2150        | Novacare                                                           | Laval-sur-Vologne     |         | 23,7                         |
| 2151        | Oder Properties S.à r.l.                                           | Luxemburg             |         | 25,0                         |
| 2152        | Omnium Leasing Company                                             | London                |         | 7,1                          |
| 2153        | OPPENHEIM PRIVATE EQUITY Holding GmbH & Co. KG                     | Köln                  |         | 0,4                          |
| 2154        | Otto Lilienthal Fünfte GmbH & Co. KG                               | München               |         | 19,6                         |
| 2155        | P.F.A.B. Passage Frankfurter Allee Betriebsgesellschaft mbH        | Berlin                |         | 22,2                         |
| 2156        | Pago e Transaction Services GmbH                                   | Köln                  |         | 50,0                         |
| 2157        | Parkhaus an der Börse GbR                                          | Köln                  |         | 37,7                         |
| 2158        | PERILLA Beteiligungsgesellschaft mbH                               | Düsseldorf            |         | 50,0                         |
| 2159        | Pilgrim America High Income Investments Ltd.                       | Georgetown            |         | 14,9                         |
| 2160        | Plenary Group (Canada) Limited                                     | Vancouver             |         | 20,0                         |
| 2161        | Plenary Group Pty Limited                                          | Melbourne             |         | 20,9                         |
| 2162        | Private Partners AG                                                | Zürich                |         | 30,0                         |
| 2163        | PT. Deutsche Verdhana Indonesia                                    | Jakarta               |         | 40,0                         |
| 2164        | PX Holdings Limited                                                | Stockton on Tees      |         | 43,0                         |
| 2165        | QPL Lux, S.à r.l.                                                  | Luxemburg             |         | 6,0                          |
| 2166        | QW Holdings, LLC                                                   | Wilmington            |         | 12,2                         |
| 2167        | Rama Cylinders Private Limited                                     | Mumbai                |         | 20,0                         |
| 2168        | Regent's Park Estates (GP) Limited                                 | Douglas               |         | 50,0                         |
| 2169        | Regent's Park Estates Limited Partnership                          | Douglas               |         | 48,8                         |
| 2170        | Relax Holding S.à r.l.                                             | Luxemburg             |         | 20,0                         |
| 2171        | Relax Wind Park II Sp.z o.o.                                       | Warschau              |         | 49,0                         |
| 2172        | Relax Wind Park IV Sp.z o.o.                                       | Warschau              |         | 49,0                         |
| 2173        | REON - Park Wiatrowy I Sp. z o.o.                                  | Warschau              |         | 50,0                         |
| 2174        | REON-Park Wiatrowy II Sp. z o.o.                                   | Warschau              |         | 50,0                         |
| 2175        | REON-Park Wiatrowy IV Sp. z o.o.                                   | Warschau              |         | 50,0                         |
| 2176        | Residential Real Estate Partners III, LLC                          | Wilmington            |         | 10,0                         |
| 2177        | Rhine Properties S.à r.l.                                          | Luxemburg             |         | 25,0                         |
| 2178        | Roc Capital Group, LLC                                             | Wilmington            |         | 8,5                          |



| Lfd.<br>Nr. | Name der Gesellschaft                                                   | Sitz der Gesellschaft | Fußnote | Anteil am<br>Kapital<br>in % |
|-------------|-------------------------------------------------------------------------|-----------------------|---------|------------------------------|
| 2179        | Roc Capital Management, L.P.                                            | Wilmington            |         | 8,5                          |
| 2180        | Rongde Asset Management Company Limited                                 | Peking                |         | 40,7                         |
| 2181        | Rosen Consulting Group, LLC                                             | Wilmington            |         | 40,0                         |
| 2182        | Rosen Real Estate Securities LLC                                        | Wilmington            |         | 33,3                         |
| 2183        | RPWire LLC                                                              | Wilmington            |         | 33,3                         |
| 2184        | S/D Partnership                                                         | Johannesburg          | 9       | 0,0                          |
| 2185        | Sakaras Holding Limited                                                 | Birkirkara            | 9       | 0,0                          |
| 2186        | Satrix Managers (Pty) Ltd                                               | Johannesburg          |         | 50,0                         |
| 2187        | Schiffahrtsgesellschaft MS "Simon Braren" GmbH & Co KG                  | Kollmar               |         | 25,5                         |
| 2188        | Schumacher Beteiligungsgesellschaft mbH                                 | Köln                  |         | 33,2                         |
| 2189        | Shunfeng Catering & Hotel Management Co., Ltd.                          | Peking                |         | 6,4                          |
| 2190        | Spark Infrastructure Group                                              | Sydney                |         | 2,3                          |
| 2191        | Spin Holdco Inc.                                                        | Wilmington            |         | 35,0                         |
| 2192        | SRC Security Research & Consulting GmbH                                 | Bonn                  |         | 22,5                         |
| 2193        | Starpool Finanz GmbH                                                    | Berlin                |         | 50,0                         |
| 2194        | SunAmerica Affordable Housing Partners 47                               | Los Angeles           |         | 10,3                         |
| 2195        | Teesside Gas Processing Plant Limited                                   | London                |         | 49,0                         |
| 2196        | Teesside Gas Transportation Limited                                     | London                |         | 45,0                         |
| 2197        | TeraGate AG Storage Optical Network                                     | München               |         | 49,2                         |
| 2198        | The Glanmore Property Fund Limited                                      | St. Peter Port        |         | 5,3                          |
| 2199        | The Portal Alliance LLC                                                 | Wilmington            |         | 10,0                         |
| 2200        | The Porterbrook Partnership                                             | Edinburgh             |         | 16,7                         |
| 2201        | The Topiary Fund II Public Limited Company                              | Dublin                |         | 3,7                          |
| 2202        | The Topiary Select Equity Trust                                         | Georgetown            | 11      | 59,1                         |
| 2203        | THG Beteiligungsverwaltung GmbH                                         | Hamburg               |         | 50,0                         |
| 2204        | TIP (Guernsey) GP Limited                                               | St. Peter Port        |         | 9,1                          |
| 2205        | TLDB Partners Limited                                                   | Tokio                 |         | 50,0                         |
| 2206        | Trave Properties S.à r.l.                                               | Luxemburg             |         | 25,0                         |
| 2207        | Triton Gesellschaft für Beteiligungen mbH                               | Frankfurt             |         | 33,1                         |
| 2208        | Turquoise Global Holdings Limited                                       | London                |         | 7,1                          |
| 2209        | U.F.G.I.S. Advisors Limited                                             | Larnaka               |         | 40,0                         |
| 2210        | VCG Venture Capital Gesellschaft mbH & Co. Fonds III KG                 | München               |         | 37,0                         |
| 2211        | VCG Venture Capital Gesellschaft mbH & Co. Fonds III Management KG      | München               |         | 26,7                         |
| 2212        | VCM / BHF Initiatoren GmbH & Co. Beteiligungs KG                        | München               |         | 48,8                         |
| 2213        | VCM Shott Private Equity Advisors, LLC                                  | Wilmington            |         | 50,0                         |
| 2214        | VCM VII European Mid-Market Buyout GmbH & Co. KG                        | München               |         | 28,8                         |
| 2215        | Verwaltung ABL Immobilienbeteiligungsgesellschaft mbH                   | Hamburg               |         | 50,0                         |
| 2216        | Volbroker.com Limited                                                   | London                |         | 23,8                         |
| 2217        | VR Bavaria GmbH                                                         | Ingolstadt            |         | 1,0                          |
| 2218        | VR Maasmechelen Tourist Outlets Comm. VA                                | Antwerpen             |         | 25,0                         |
| 2219        | W2001/Fifty-Two B.V.                                                    | Amsterdam             |         | 50,0                         |
| 2220        | Welsh Power Group Limited                                               | Cardiff               |         | 19,9                         |
| 2221        | WERSE Schifffahrts GmbH & Co. KG MS "DYCKBURG"                          | Münster               |         | 41,5                         |
| 2222        | Weser Properties S.à r.l.                                               | Luxemburg             |         | 25,0                         |
| 2223        | WestLB Venture Capital Management GmbH & Co. KG                         | München               |         | 50,0                         |
| 2224        | Wilson HTM Investment Group Ltd                                         | Brisbane              |         | 19,5                         |
| 2225        | WohnBauEntwicklungsgesellschaft München-Haidhausen mbH & Co. KG i.L.    | Eschborn              |         | 33,3                         |
| 2226        | WohnBauEntwicklungsgesellschaft München-Haidhausen Verwaltungs-mbH i.L. | Eschborn              |         | 33,3                         |
| 2227        | Xchanging etb GmbH                                                      | Frankfurt             |         | 49,0                         |
| 2228        | Zapf GmbH                                                               | Bayreuth              |         | 24,1                         |
| 2229        | zeitinvest-Service GmbH                                                 | Frankfurt             |         | 25,0                         |
| 2230        | Zhong De Securities Co., Ltd                                            | Peking                |         | 33,3                         |
| 2231        | ZINDUS Beteiligungsgesellschaft mbH                                     | Düsseldorf            |         | 50,0                         |
| 2232        | ZYRUS Beteiligungsgesellschaft mbH                                      | Schönefeld            |         | 25,0                         |

| Lfd.<br>Nr. | Name der Gesellschaft                                                         | Sitz der Gesellschaft | Fußnote | Anteil am<br>Kapital<br>in % |
|-------------|-------------------------------------------------------------------------------|-----------------------|---------|------------------------------|
| 2233        | AFFIRMATUM Beteiligungsgesellschaft mbH                                       | Düsseldorf            | 13      | 50,0                         |
| 2234        | Alpha DB Lindsell Limited S.C.S.                                              | Luxemburg             | 12      | 100,0                        |
| 2235        | AV America Grundbesitzverwaltungsgesellschaft mbH i.L.                        | Frankfurt             | 12      | 75,0                         |
| 2236        | Avacomm GmbH i.L.                                                             | Holzkirchen           | 14      | 27,5                         |
| 2237        | B.L.E. Laboratory Equipment GmbH i.L.                                         | Radolfzell            | 14      | 30,5                         |
| 2238        | Belzen Pty. Limited                                                           | Sydney                | 12      | 100,0                        |
| 2239        | Benefit Trust GmbH                                                            | Sössen-Gostau         | 12      | 100,0                        |
| 2240        | Beta DB Lindsell Limited S.C.S.                                               | Luxemburg             | 12      | 100,0                        |
| 2241        | Beteiligungsgesellschaft für Deutsche Handelsimmobilien mbH & Co. Alpha KG    | Düsseldorf            | 14      | 50,0                         |
| 2242        | BLI Internationale Beteiligungsgesellschaft mbH                               | Düsseldorf            | 13      | 32,0                         |
| 2243        | Blue Ridge Trust                                                              | Wilmington            | 13      | 26,7                         |
| 2244        | CANDOR Vermietungsgesellschaft mbH & Co. Kommanditgesellschaft i.L.           | Düsseldorf            | 13      | 34,4                         |
| 2245        | DB (Barbados) SRL                                                             | Christ Church         | 12      | 100,0                        |
| 2246        | DB (Gibraltar) Holdings No. 2 Limited                                         | Gibraltar             | 12      | 100,0                        |
| 2247        | DB Advisors SICAV                                                             | Luxemburg             | 12      | 100,0                        |
| 2248        | DB Funding (Gibraltar) No. 2 Limited                                          | Gibraltar             | 12      | 100,0                        |
| 2249        | DB Lindsell Limited                                                           | Gibraltar             | 12      | 100,0                        |
| 2250        | DB Petri LLC                                                                  | Wilmington            | 12      | 100,0                        |
| 2251        | DBR Investments Co. Limited                                                   | Georgetown            | 12      | 100,0                        |
| 2252        | 3-DD Digital Media AG i.L.                                                    | München               | 14      | 27,1                         |
| 2253        | Deutsche River Investment Management Company S.à r.l.                         | Luxemburg             | 13      | 49,0                         |
| 2254        | Deutz-Mülheim Grundstücksgesellschaft mbH                                     | Düsseldorf            | 13      | 40,2                         |
| 2255        | Dogan Gazetecilik A.S.                                                        | Istanbul              | 15      | 23,1                         |
| 2256        | EQR-Vantage Pointe B Limited Partnership                                      | Wilmington            | 12      | 100,0                        |
| 2257        | EQR-Vantage Pointe B, LLC                                                     | Wilmington            | 12      | 100,0                        |
| 2258        | EQR-Vantage Pointe F Limited Partnership                                      | Wilmington            | 12      | 100,0                        |
| 2259        | EQR-Vantage Pointe F, LLC                                                     | Wilmington            | 12      | 100,0                        |
| 2260        | EQR-Vantage Pointe G Limited Partnership                                      | Wilmington            | 12      | 100,0                        |
| 2261        | EQR-Vantage Pointe G, LLC                                                     | Wilmington            | 12      | 100,0                        |
| 2262        | EQR-Vantage Pointe H Limited Partnership                                      | Wilmington            | 12      | 100,0                        |
| 2263        | EQR-Vantage Pointe H, LLC                                                     | Wilmington            | 12      | 100,0                        |
| 2264        | EQR-Vantage Pointe I Limited Partnership                                      | Wilmington            | 12      | 100,0                        |
| 2265        | EQR-Vantage Pointe I, LLC                                                     | Wilmington            | 12      | 100,0                        |
| 2266        | Euro 7 Investment                                                             | Georgetown            | 14      | 21,2                         |
| 2267        | European Private Equity Portfolio (PE-EU) GmbH & Co. KG                       | München               | 14      | 20,4                         |
| 2268        | FRM Levered Diversified Fund LP                                               | Wilmington            | 16      | 49,2                         |
| 2269        | Gettysburg Investments LP                                                     | Georgetown            | 12      | 100,0                        |
| 2270        | Goldman Sachs Multi-Strategy Portfolio XI, LLC                                | Wilmington            | 11      | 100,0                        |
| 2271        | Gottex ABI Master Fund Limited                                                | Georgetown            | 13      | 35,3                         |
| 2272        | Grundstücksvermietungsgesellschaft Wilhelmstr. mbH                            | Düsseldorf            | 12      | 100,0                        |
| 2273        | HealthCap 1999 GbR                                                            | Berlin                | 14      | 41,5                         |
| 2274        | Helios AMC California, Inc.                                                   | Wilmington            | 17      | 100,0                        |
| 2275        | HQ Limited Partnership                                                        | Tokio                 | 13      | 37,5                         |
| 2276        | iCON Founder Partner, L.P.                                                    | St. Peter Port        | 12      | 100,0                        |
| 2277        | iCON GP Limited                                                               | St. Peter Port        | 12      | 100,0                        |
| 2278        | iCON Infrastructure Partners, L.P.                                            | St. Peter Port        | 14      | 83,6                         |
| 2279        | iCON Master Holdings (EUR) S.à r.l.                                           | Luxemburg             | 11      | 100,0                        |
| 2280        | iCON Master Holdings (GBP) S.à r.l.                                           | Luxemburg             | 11      | 100,0                        |
| 2281        | Immobilien-Vermietungsgesellschaft Schumacher GmbH & Co. Objekt Rolandufer KG | Berlin                | 13      | 20,5                         |
| 2282        | JG Japan Grundbesitzverwaltungsgesellschaft mbH i.L.                          | Eschborn              | 12      | 100,0                        |
| 2283        | LEA Grundstücks-Vermietungsgesellschaft mbH & Co. Objekt Esslingen OHG        | Düsseldorf            | 13      | 48,4                         |
| 2284        | Leyou.com Co., Ltd.                                                           | Georgetown            | 14      | 30,9                         |
| 2285        | Lindsell Finance Limited                                                      | Valletta              | 12      | 100,0                        |
| 2286        | Lindsell Malta Investments Limited                                            | Valletta              | 12      | 80,7                         |
| 2287        | Lion Global Infrastructure Fund Limited                                       | St. Peter Port        | 13      | 50,0                         |
| 2288        | M Cap Finance Mittelstandsfonds GmbH & Co. KG                                 | Frankfurt             | 14      | 99,7                         |

| Lfd.<br>Nr. | Name der Gesellschaft                                                                                            | Sitz der Gesellschaft | Fußnote | Anteil am<br>Kapital<br>in % |
|-------------|------------------------------------------------------------------------------------------------------------------|-----------------------|---------|------------------------------|
| 2289        | Mariscal LLC                                                                                                     | Wilmington            | 17      | 100,0                        |
| 2290        | Memax Pty. Limited                                                                                               | Sydney                | 12      | 100,0                        |
| 2291        | Merit Capital Advance, LLC                                                                                       | Wilmington            | 14      | 20,0                         |
| 2292        | Metro plus Grundstücks-Vermietungsgesellschaft mbH                                                               | Düsseldorf            | 13      | 40,0                         |
| 2293        | Midisel Limited                                                                                                  | London                | 12      | 100,0                        |
| 2294        | moderne stadt Gesellschaft zur Förderung des Städtebaues und der Gemeindeentwicklung<br>mit beschränkter Haftung | Köln                  | 14      | 50,0                         |
| 2295        | Mount Hope Community Center Fund, LLC                                                                            | Wilmington            | 14      | 50,0                         |
| 2296        | MRF Financing Ippan Shadan Hojin                                                                                 | Tokio                 | 13      | 50,0                         |
| 2297        | Nortfol Pty. Limited                                                                                             | Sydney                | 12      | 100,0                        |
| 2298        | OPPENHEIM Buy Out GmbH & Co. KG                                                                                  | Köln                  | 13      | 27,7                         |
| 2299        | PARTS Funding, LLC                                                                                               | Wilmington            | 12      | 100,0                        |
| 2300        | Paternoster Limited                                                                                              | Douglas               | 14      | 40,3                         |
| 2301        | Public Propaganda Music Group AG i.l.                                                                            | Düsseldorf            | 14      | 41,2                         |
| 2302        | Safron AMD Partners, LP                                                                                          | Georgetown            | 14      | 22,0                         |
| 2303        | Safron NetOne Partners, L.P.                                                                                     | Georgetown            | 14      | 21,7                         |
| 2304        | SCITOR Grundstücks-Vermietungsgesellschaft mbH & Co. Objekt Heiligenstadt KG                                     | Düsseldorf            | 12      | 71,1                         |
| 2305        | SENA Grundstücks-Vermietungsgesellschaft mbH & Co. Objekt Kamenz KG                                              | Düsseldorf            | 12      | 100,0                        |
| 2306        | SOLOON Grundstücks-Vermietungsgesellschaft mbH & Co. Objekt Heizkraftwerk Halle KG i.L.                          | Halle/Saale           | 13      | 30,5                         |
| 2307        | STC Financing Ippan Shadan Hojin                                                                                 | Tokio                 | 13      | 50,0                         |
| 2308        | SUBLICA Grundstücks-Vermietungsgesellschaft mbH & Co. Objekt Promohypermarkt<br>Gelsenkirchen KG                 | Düsseldorf            | 13      | 48,7                         |
| 2309        | Sundial Beteiligungsgesellschaft mbH                                                                             | Frankfurt             | 12      | 100,0                        |
| 2310        | TIEDO Grundstücks-Vermietungsgesellschaft mbH                                                                    | Düsseldorf            | 13      | 50,0                         |
| 2311        | TIEDO Grundstücks-Vermietungsgesellschaft mbH & Co. Objekt Lager Nord KG                                         | Düsseldorf            | 13      | 25,0                         |
| 2312        | Twirlx Internet Technologies GmbH                                                                                | Frankfurt             | 14      | 32,7                         |
| 2313        | Unibanco Participacoes Societárias S.A.                                                                          | Sao Paulo             | 13      | 49,0                         |
| 2314        | Value Retail Barcelona, S.L.                                                                                     | Barcelona             | 14      | 23,4                         |
| 2315        | Value Retail Madrid, S.L.                                                                                        | Las Rozas de Madrid   | 14      | 26,9                         |
| 2316        | Zenwix Pty. Limited                                                                                              | Sydney                | 12      | 100,0                        |

| Lfd.<br>Nr. | Name der Gesellschaft                                                             | Sitz der Gesellschaft | Fußnote | Anteil am<br>Kapital<br>in % |
|-------------|-----------------------------------------------------------------------------------|-----------------------|---------|------------------------------|
| 2317        | Abode Mortgage Holdings Corporation                                               | Vancouver             |         | 8,5                          |
| 2318        | Abraaj Capital Holdings Limited                                                   | Georgetown            |         | 8,8                          |
| 2319        | BBB Bürgschaftsbank zu Berlin-Brandenburg GmbH                                    | Berlin                |         | 5,6                          |
| 2320        | Bürgschaftsbank Brandenburg GmbH                                                  | Potsdam               |         | 8,5                          |
| 2321        | Bürgschaftsbank Mecklenburg-Vorpommern GmbH                                       | Schwerin              |         | 8,4                          |
| 2322        | Bürgschaftsbank Sachsen GmbH                                                      | Dresden               |         | 6,3                          |
| 2323        | Bürgschaftsbank Sachsen-Anhalt GmbH                                               | Magdeburg             |         | 8,2                          |
| 2324        | Bürgschaftsbank Schleswig-Holstein Gesellschaft mit beschränkter Haftung          | Kiel                  |         | 5,7                          |
| 2325        | Bürgschaftsbank Thüringen GmbH                                                    | Erfurt                |         | 8,7                          |
| 2326        | Bürgschaftsgemeinschaft Hamburg GmbH                                              | Hamburg               |         | 8,7                          |
| 2327        | ConCardis Gesellschaft mit beschränkter Haftung                                   | Frankfurt             |         | 16,8                         |
| 2328        | EFG Eurobank Properties S.A.                                                      | Athen                 |         | 5,8                          |
| 2329        | EURO Kartensysteme Gesellschaft mit beschränkter Haftung                          | Frankfurt             |         | 16,8                         |
| 2330        | Hayes Lemmerz International, Inc.                                                 | Wilmington            |         | 10,1                         |
| 2331        | Hua Xia Bank Company Limited                                                      | Peking                |         | 17,1                         |
| 2332        | HumanOptics AG                                                                    | Erlangen              |         | 11,2                         |
| 2333        | HYPOPORT AG                                                                       | Berlin                |         | 9,7                          |
| 2334        | Ingenious Media Active Capital Limited                                            | St. Peter Port        |         | 13,9                         |
| 2335        | IVG Institutional Funds GmbH                                                      | Wiesbaden             |         | 6,0                          |
| 2336        | Liquiditäts-Konsortialbank Gesellschaft mit beschränkter Haftung                  | Frankfurt             |         | 8,5                          |
| 2337        | Net Sol Holdings LLC                                                              | Dover                 |         | 6,5                          |
| 2338        | NexPak Corporation                                                                | Wilmington            |         | 6,5                          |
| 2339        | NÜRNBERGER Beteiligungs-Aktiengesellschaft                                        | Nürnberg              |         | 6,6                          |
| 2340        | Philipp Holzmann Aktiengesellschaft i.I.                                          | Frankfurt             |         | 19,5                         |
| 2341        | Prader Bank S.p.A.                                                                | Bozen                 |         | 10,0                         |
| 2342        | Private Export Funding Corporation                                                | Wilmington            |         | 7,5                          |
| 2343        | Reorganized RFS Corporation                                                       | Wilmington            |         | 6,2                          |
| 2344        | Saarländische Investitionskreditbank Aktiengesellschaft                           | Saarbrücken           |         | 11,8                         |
| 2345        | SearchMedia Holdings Limited                                                      | Georgetown            |         | 10,3                         |
| 2346        | Società per il Mercato dei Titoli di Stato - Borsa Obbligazionaria Europea S.p.A. | Rom                   |         | 5,0                          |
| 2347        | The Clearing House Association L.L.C.                                             | Wilmington            |         | 9,1                          |
| 2348        | United Information Technology Co. Ltd                                             | Georgetown            |         | 12,2                         |
| 2349        | 3W Power Holdings S.A.                                                            | Luxemburg             |         | 9,2                          |
| 2350        | W.E.T. Automotive Systems Aktiengesellschaft                                      | Odelzhausen           |         | 9,2                          |

# 03 -

## Bestätigungen

Bestätigungsvermerk des Abschlussprüfers – 372

Versicherung der gesetzlichen Vertreter – 374

## Bestätigungsvermerk des Abschlussprüfers

An die Deutsche Bank Aktiengesellschaft, Frankfurt am Main

### Vermerk zum Konzernabschluss

Wir haben den beigegeführten Konzernabschluss der Deutsche Bank Aktiengesellschaft und ihrer Tochtergesellschaften – bestehend aus Konzern-Gewinn- und Verlustrechnung, Konzern-Gesamtergebnisrechnung, Konzernbilanz, Konzern-Eigenkapitalveränderungsrechnung, Konzern-Kapitalflussrechnung und Anhang (Notes) für das Geschäftsjahr vom 1. Januar bis zum 31. Dezember 2010 – geprüft.

#### Verantwortung der gesetzlichen Vertreter für den Konzernabschluss

Die gesetzlichen Vertreter der Deutsche Bank Aktiengesellschaft sind verantwortlich für die Aufstellung dieses Konzernabschlusses. Diese Verantwortung umfasst, dass dieser Konzernabschluss in Übereinstimmung mit den IFRS, wie sie in der EU anzuwenden sind, den ergänzend nach § 315a Abs. 1 HGB anzuwendenden deutschen gesetzlichen Vorschriften sowie den IFRS insgesamt aufgestellt wird und unter Beachtung dieser Vorschriften ein den tatsächlichen Verhältnissen entsprechendes Bild der Vermögens-, Finanz- und Ertragslage des Konzerns vermittelt. Die gesetzlichen Vertreter sind auch verantwortlich für die internen Kontrollen, die sie als notwendig erachten, um die Aufstellung eines Konzernabschlusses zu ermöglichen, der frei von wesentlichen – beabsichtigten oder unbeabsichtigten – falschen Darstellungen ist.

#### Verantwortung des Abschlussprüfers

Unsere Aufgabe ist es, auf der Grundlage unserer Prüfung ein Urteil zu diesem Konzernabschluss abzugeben. Wir haben unsere Abschlussprüfung in Übereinstimmung mit § 317 HGB unter Beachtung der vom Institut der Wirtschaftsprüfer (IDW) festgestellten deutschen Grundsätze ordnungsmäßiger Abschlussprüfung sowie unter ergänzender Beachtung der Standards des Public Company Accounting Oversight Board (United States) durchgeführt. Danach haben wir die Berufspflichten einzuhalten und die Abschlussprüfung so zu planen und durchzuführen, dass hinreichende Sicherheit darüber erlangt wird, ob der Konzernabschluss frei von wesentlichen falschen Darstellungen ist.

Eine Abschlussprüfung umfasst die Durchführung von Prüfungshandlungen, um Prüfungsnachweise für die im Konzernabschluss enthaltenen Wertansätze und sonstigen Angaben zu erlangen. Die Auswahl der Prüfungshandlungen liegt im pflichtgemäßen Ermessen des Abschlussprüfers. Dies schließt die Beurteilung der Risiken wesentlicher – beabsichtigter oder unbeabsichtigter – falscher Darstellungen im Konzernabschluss ein. Bei der Beurteilung dieser Risiken berücksichtigt der Abschlussprüfer das interne Kontrollsystem, das relevant ist für die Aufstellung eines Konzernabschlusses, der ein den tatsächlichen Verhältnissen entsprechendes Bild vermittelt. Ziel hierbei ist es, Prüfungshandlungen zu planen und durchzuführen, die unter den gegebenen Umständen angemessen sind, jedoch nicht, ein Prüfungsurteil zur Wirksamkeit des internen Kontrollsystems des Konzerns abzugeben. Eine Abschlussprüfung umfasst auch die Beurteilung der Angemessenheit der angewandten Rechnungslegungsmethoden und der Vertretbarkeit der von den gesetzlichen Vertretern ermittelten geschätzten Werte in der Rechnungslegung sowie die Beurteilung der Gesamtdarstellung des Konzernabschlusses.

Wir sind der Auffassung, dass die von uns erlangten Prüfungsnachweise ausreichend und geeignet sind, um als Grundlage für unser Prüfungsurteil zu dienen.

## Prüfungsurteil

Gemäß § 322 Abs. 3 Satz 1 HGB erklären wir, dass unsere Prüfung des Konzernabschlusses zu keinen Einwendungen geführt hat.

Nach unserer Beurteilung aufgrund der bei der Prüfung gewonnenen Erkenntnisse entspricht der Konzernabschluss in allen wesentlichen Belangen den IFRS, wie sie in der EU anzuwenden sind, den ergänzend nach § 315a Abs. 1 HGB anzuwendenden deutschen gesetzlichen Vorschriften sowie den IFRS insgesamt und vermittelt unter Beachtung dieser Vorschriften ein den tatsächlichen Verhältnissen entsprechendes Bild der Vermögens- und Finanzlage des Konzerns zum 31. Dezember 2010 sowie der Ertragslage für das an diesem Stichtag endende Geschäftsjahr.

## Vermerk zum Konzernlagebericht

Wir haben den beigefügten Konzernlagebericht der Deutsche Bank Aktiengesellschaft für das Geschäftsjahr vom 1. Januar bis 31. Dezember 2010 geprüft. Die gesetzlichen Vertreter der Deutsche Bank Aktiengesellschaft sind verantwortlich für die Aufstellung des Konzernlageberichts in Übereinstimmung mit den nach § 315a Abs. 1 HGB anzuwendenden deutschen gesetzlichen Vorschriften. Wir haben unsere Prüfung in Übereinstimmung mit § 317 Abs. 2 HGB und unter Beachtung der für die Prüfung des Konzernlageberichts vom Institut der Wirtschaftsprüfer (IDW) festgestellten deutschen Grundsätze ordnungsmäßiger Abschlussprüfung durchgeführt. Danach ist die Prüfung des Konzernlageberichts so zu planen und durchzuführen, dass hinreichende Sicherheit darüber erlangt wird, ob der Konzernlagebericht mit dem Konzernabschluss sowie mit den bei der Abschlussprüfung gewonnenen Erkenntnissen in Einklang steht, insgesamt ein zutreffendes Bild von der Lage des Konzerns vermittelt und die Chancen und Risiken der zukünftigen Entwicklung zutreffend darstellt.

Gemäß § 322 Abs. 3 Satz 1 HGB erklären wir, dass unsere Prüfung des Konzernlageberichts zu keinen Einwendungen geführt hat.

Nach unserer Beurteilung aufgrund der bei der Prüfung des Konzernabschlusses und Konzernlageberichts gewonnenen Erkenntnisse steht der Konzernlagebericht in Einklang mit dem Konzernabschluss, vermittelt insgesamt ein zutreffendes Bild von der Lage des Konzerns und stellt die Chancen und Risiken der zukünftigen Entwicklung zutreffend dar.

Frankfurt am Main, 4. März 2011

KPMG AG  
Wirtschaftsprüfungsgesellschaft



Dielehner  
Wirtschaftsprüfer



Bose  
Wirtschaftsprüfer



## Versicherung der gesetzlichen Vertreter

Wir versichern nach bestem Wissen, dass gemäß den anzuwendenden Rechnungslegungsgrundsätzen der Konzernabschluss ein den tatsächlichen Verhältnissen entsprechendes Bild der Vermögens-, Finanz- und Ertragslage des Konzerns vermittelt und im Konzernlagebericht der Geschäftsverlauf einschließlich des Geschäftsergebnisses und die Lage des Konzerns so dargestellt sind, dass ein den tatsächlichen Verhältnissen entsprechendes Bild vermittelt wird, sowie die wesentlichen Chancen und Risiken der voraussichtlichen Entwicklung des Konzerns beschrieben sind.

Frankfurt am Main, den 1. März 2011



Josef Ackermann



Hugo Bänziger



Jürgen Fitschen



Anshuman Jain



Stefan Krause



Hermann-Josef Lamberti



Rainer Neske

# 04.-

## Erklärung zur Unternehmensführung / Corporate-Governance-Bericht

Vorstand und Aufsichtsrat – 376

Rechnungslegung und Transparenz – 386

Geschäfte mit nahestehenden Dritten – 387

Wirtschaftsprüfung und Controlling – 387

Einhaltung des Deutschen Corporate Governance Kodex – 389

## Erklärung zur Unternehmensführung / Corporate-Governance-Bericht

Alle in dieser Erklärung zur Unternehmensführung/Corporate-Governance-Bericht enthaltenen Angaben geben den Stand vom 18. Februar 2011 wieder.

### Vorstand und Aufsichtsrat

#### Vorstand

Der Vorstand leitet das Unternehmen in eigener Verantwortung. Die Mitglieder des Vorstands tragen gemeinsam die Verantwortung für die Geschäftsleitung. Die Aufgaben, Verantwortlichkeiten und Verfahrensregeln des Vorstands und der von ihm eingesetzten Ausschüsse sind in seiner Geschäftsordnung niedergelegt, die in der jeweils aktuellen Fassung auf der Webseite der Deutschen Bank ([www.deutsche-bank.de/corporate-governance](http://www.deutsche-bank.de/corporate-governance)) zur Verfügung steht.

Mit Ablauf des 30. September 2010 ist Michael Cohrs aus dem Vorstand ausgeschieden. Seine Ressortzuständigkeiten hat Anshuman Jain zusätzlich zu seinen bestehenden Aufgaben übernommen. Nachstehend folgen nähere Informationen zu den derzeitigen Mitgliedern des Vorstands einschließlich ihres Alters, des Jahres ihrer ersten Bestellung und des Jahres, in dem ihre Bestellung endet, ihrer aktuellen Position und ihres Verantwortungsbereichs sowie ihrer sonstigen Mandate außerhalb der Bank, wobei sich unsere Vorstandsmitglieder verpflichtet haben, keinen Aufsichtsratsvorsitz außerhalb des Konzerns anzunehmen.

#### Dr. Josef Ackermann

Alter: 63

Erste Bestellung: 1996

Bestellt bis: 2013

Dr. Josef Ackermann wurde mit seinem Eintritt in die Deutsche Bank AG im Jahr 1996 Mitglied unseres Vorstands, wo er für den Bereich Investment Banking zuständig war. Am 22. Mai 2002 übernahm er die Funktion des Vorstandssprechers. Am 1. Februar 2006 wurde Dr. Ackermann zum Vorsitzenden des Vorstands ernannt.

Nach dem Studium der Volkswirtschaft und Sozialwissenschaften an der Universität St. Gallen war er dort am Volkswirtschaftlichen Institut als wissenschaftlicher Mitarbeiter tätig und promovierte zum Dr. oec. Dr. Ackermann begann seine berufliche Laufbahn 1977 mit Eintritt in die Schweizerische Kreditanstalt (SKA), für die er in London, New York und in der Schweiz in verschiedenen Bereichen des Corporate Banking, Foreign Exchange/Money Markets und Treasury, Investment Banking sowie Multinational Services tätig war. Von 1993 bis 1996 war er Präsident der Generaldirektion der SKA, der er seit 1990 angehörte.

Dr. Ackermann ist Mitglied des Aufsichtsrats der Siemens AG (2. stellvertretender Vorsitzender), Vizepräsident des Verwaltungsrats der Belenos Clean Power Holding Ltd.; Non-executive Mitglied des Board of Directors der Royal Dutch Shell Plc und Vizepräsident des Verwaltungsrats der Zurich Financial Services Ltd.

### **Dr. Hugo Bänziger**

Alter: 55

Erste Bestellung: 2006

Bestellt bis: 2014

Dr. Hugo Bänziger wurde am 4. Mai 2006 Mitglied unseres Vorstands. Er ist unser Chief Risk Officer. Er trat als Leiter Global Markets Credit im Jahr 1996 in die Deutsche Bank in London ein. Im Jahr 2000 wurde er zum Chief Credit Officer und in 2004 zum Chief Risk Officer for Credit and Operational Risk ernannt.

Dr. Bänziger begann seinen beruflichen Werdegang 1983 bei der Eidgenössischen Bankenkommission in Bern. Von 1985 bis 1996 arbeitete er bei der Schweizerischen Kreditanstalt (SKA) in Zürich und London, zunächst im Bereich Retail Banking und anschließend als Relationship Manager im Bereich Corporate Finance. 1990 wurde er zum Global Head of Credit für CS Financial Products ernannt.

Er studierte moderne Geschichte, Recht und Volkswirtschaft an der Universität Bern und promovierte dort anschließend in Wirtschaftsgeschichte.

Dr. Bänziger ist Mitglied des Aufsichtsrats der EUREX Clearing AG, Mitglied des Aufsichtsrats der EUREX Frankfurt AG und Mitglied des Verwaltungsrats der EUREX Zürich AG.

### **Jürgen Fitschen**

Alter: 62

Bestellung: 2009

Bestellt bis: 2012

Jürgen Fitschen wurde am 1. April 2009 Mitglied unseres Vorstands. Herr Fitschen ist seit 1987 bei der Deutschen Bank, war bereits von 2001 bis Anfang 2002 Mitglied des Vorstands und ist seit 2002 Mitglied des Group Executive Committee und seit 2005 Leiter Regional Management. Als Mitglied unseres Vorstands ist er für den Bereich Regional Management verantwortlich.

Herr Fitschen studierte Wirtschaftswissenschaften an der Universität Hamburg und schloss das Studium 1975 als Diplom-Kaufmann ab.

Von 1975 bis 1987 hatte er verschiedene Positionen bei der Citibank in Hamburg und Frankfurt am Main inne. 1983 wurde er in die Geschäftsleitung Deutschland der Citibank berufen.

Herr Fitschen ist Mitglied des Verwaltungsrats der Kühne + Nagel International AG, Mitglied des Aufsichtsrats der METRO AG und Mitglied des Aufsichtsrats der Schott AG.

### **Anshuman Jain**

Alter: 48

Erste Bestellung: 2009

Bestellt bis: 2012

Anshuman Jain wurde am 1. April 2009 Mitglied unseres Vorstands. Herr Jain kam 1995 zur Deutschen Bank und wurde 2001 Leiter von Global Markets sowie 2002 Mitglied des Group Executive Committee. Als Mitglied unseres Vorstands ist er für den Bereich Corporate und Investment Bank Group Division zuständig.

Herr Jain studierte Wirtschaftswissenschaften am Shri Ram College der Universität Delhi und machte 1983 einen BA-Abschluss. Danach folgte ein Studium der Finanzwissenschaften an der Universität von Massachusetts, das er 1985 mit einem MBA in Finanzen abschloss.

Nach Abschluss seines Studiums arbeitete Herr Jain bis 1988 für Kidder Peabody, New York im Bereich Derivatives Research. Von 1988 bis 1995 war er für den Aufbau und die Leitung des globalen Hedgefonds Betreuungsteams bei Merrill Lynch, New York, zuständig.

Herr Jain war Non-executive Director der Sasol Ltd. bis November 2010.

### **Stefan Krause**

Alter: 48

Erste Bestellung: 2008

Bestellt bis: 2013

Stefan Krause wurde am 1. April 2008 Mitglied unseres Vorstands. Er ist unser Chief Financial Officer.

Zuvor war Herr Krause über 20 Jahre in der Automobilindustrie tätig und hatte verschiedene Senior-Management-Positionen mit einem starken Fokus auf die Bereiche Finance und Financial Services inne. Er begann seine Karriere 1987 im Controlling von BMW in München und ging 1993 in die USA, wo er den Financial-Services-Bereich des Unternehmens in Nord- und Südamerika aufbaute und schließlich leitete. 2001 kehrte er nach München zurück und übernahm den Posten des Head of Sales Western Europe (ohne Deutschland). Im Mai 2002 wurde er zum Mitglied des Vorstands der BMW Group ernannt. Dort war er bis September 2007 für das Ressort Finanzen und danach für das Ressort Vertrieb und Marketing zuständig.

Herr Krause studierte Betriebswirtschaftslehre in Würzburg und schloss das Studium 1986 als Diplom-Kaufmann ab.

Herr Krause hat keine zu veröffentlichenden externen Mandate.

### **Hermann-Josef Lamberti**

Alter: 55

Erste Bestellung: 1999

Bestellt bis: 2014

Hermann-Josef Lamberti wurde 1999 Mitglied unseres Vorstands. Er ist unser Chief Operating Officer. Er trat 1998 als Executive Vice President in die Deutsche Bank in Frankfurt am Main ein.

Herr Lamberti begann seine berufliche Laufbahn 1982 bei Touche Ross in Toronto und wechselte anschließend zur Chemical Bank in Frankfurt. 1985 bis 1998 war er bei IBM tätig, zunächst in Deutschland in den Bereichen Controlling, Interne Anwendungsentwicklung und Sales Banken/Versicherungen. 1993 wurde er zum General Manager der Abteilung Personal Software für Europa, den Nahen Osten und Afrika bei IBM Europe in Paris bestellt. Als Vice President für Marketing und Brand Management war Herr Lamberti ab 1995 für IBM in den USA tätig. 1997 kehrte er nach Deutschland zurück und übernahm den Vorsitz der Geschäftsführung von IBM Deutschland in Stuttgart.

Herr Lamberti studierte Betriebswirtschaftslehre an den Universitäten in Köln und Dublin und schloss das Studium 1982 als Diplom-Kaufmann ab.

Herr Lamberti ist Mitglied der Aufsichtsräte des BVV Versicherungsvereins des Bankgewerbes a.G., der BVV Versorgungskasse des Bankgewerbes e.V., der BVV Pensionsfonds des Bankgewerbes AG, der Deutsche Börse AG, Mitglied des Board of Directors der European Aeronautic Defence and Space Company EADS N.V. und Mitglied des Aufsichtsrats der Carl Zeiss AG.

### **Rainer Neske**

Alter: 46

Erste Bestellung: 2009

Bestellt bis: 2012

Rainer Neske wurde am 1. April 2009 Mitglied unseres Vorstands. Er begann seine Tätigkeit für die Deutsche Bank in 1990 und wurde 2000 zum Mitglied des Vorstands der Deutschen Bank Privat- und Geschäftskunden AG bestellt. Seit 2003 ist er Mitglied des Group Executive Committee und Sprecher des Vorstands der Deutschen Bank Privat- und Geschäftskunden AG. In unserem Vorstand verantwortet er den Bereich Privat- und Geschäftskunden.

Herr Neske studierte Informatik und Betriebswirtschaftslehre an der Universität Karlsruhe und erlangte 1990 den Abschluss des Diplom-Informatikers.

Herr Neske hat keine zu veröffentlichenden externen Mandate.

## Group Executive Committee

Das Group Executive Committee wurde im Jahr 2002 gebildet. Es besteht aus den Mitgliedern des Vorstands sowie Führungskräften unserer Regionen und Geschäftsbereiche innerhalb unserer kundenorientierten Konzernbereiche, die vom Vorstand ernannt wurden. Dr. Ackermann, Vorsitzender des Vorstands, ist auch Vorsitzender des Group Executive Committee.

Das Group Executive Committee dient der Koordination der globalen Geschäftsbereiche und Regionen und hat folgende Aufgaben und Verantwortlichkeiten:

- fortlaufende Unterrichtung des Vorstands über Geschäftsentwicklungen und spezifische Transaktionen;
- regelmäßige Überprüfung der Geschäftssegmente der Bank;
- Erörterung strategischer Fragen mit dem Vorstand sowie Beratung desselben;
- Vorbereitung von Vorstandsentscheidungen.

## Aufsichtsrat

Der Aufsichtsrat bestellt, überwacht und berät den Vorstand und ist in Entscheidungen, die von grundlegender Bedeutung für die Bank sind, unmittelbar eingebunden. Regelmäßig wird er vom Vorstand über die beabsichtigte Geschäftspolitik sowie grundsätzliche Fragen zur Vermögens-, Finanz- und Ertragslage, die Risikolage, das Risikomanagement und das Risikocontrolling unterrichtet. Mindestens einmal jährlich wird ihm über die Unternehmensplanung berichtet. Der Aufsichtsrat setzt auf Vorschlag des Präsidialausschusses die Vergütung der einzelnen Vorstandsmitglieder fest, beschließt das Vergütungssystem für den Vorstand, einschließlich der wesentlichen Vertragselemente, und überprüft es regelmäßig. Der Aufsichtsratsvorsitzende koordiniert die Arbeit im Aufsichtsrat. Er hält mit dem Vorstand, insbesondere dem Vorsitzenden des Vorstands, regelmäßig Kontakt und berät mit ihm die Strategie, die Geschäftsentwicklung und das Risikomanagement. Über wichtige Ereignisse, die für die Lage und Entwicklung sowie die Leitung der Deutsche Bank-Gruppe von wesentlicher Bedeutung sind, wird er vom Vorsitzenden des Vorstands unverzüglich informiert. Geschäfte, zu deren Vornahme die Zustimmung des Aufsichtsrats erforderlich ist, sind in § 13 unserer Satzung aufgeführt. Bei Bedarf tagt der Aufsichtsrat ohne den Vorstand. Der Aufsichtsrat kann zur Erfüllung seiner Aufgaben nach eigenem Ermessen Wirtschaftsprüfer, Rechts- und sonstige interne und externe Berater hinzuziehen.

Die Aufgaben, Verfahrensregeln und Ausschüsse des Aufsichtsrats sind in seiner Geschäftsordnung niedergelegt, die in der jeweils aktuellen Fassung auf der Webseite der Deutschen Bank ([www.deutsche-bank.de/corporate-governance](http://www.deutsche-bank.de/corporate-governance)) zur Verfügung steht.

Die als Vertreter unserer Aktionäre fungierenden Mitglieder wurden auf der Hauptversammlung am 29. Mai 2008 gewählt, mit Ausnahme von Herrn Dr. Siegert, der von der Hauptversammlung 2007 bis zum Ablauf der ordentlichen Hauptversammlung im Jahr 2012 gewählt worden war. Die Wahl der Arbeitnehmervertreter erfolgte am 8. Mai 2008. Die nachstehende Tabelle enthält nähere Angaben zu den derzeitigen Mitgliedern des Aufsichtsrats. Aufgeführt sind Angaben zu ihrem Alter, dem Jahr ihrer erstmaligen Wahl oder Bestellung, dem Jahr, in dem ihr Mandat endet, ihrer Haupttätigkeit, ihrer Mitgliedschaft in Aufsichtsräten anderer Gesellschaften und sonstigen Mandaten.



| Name                                                                                           | Haupttätigkeiten                                                                                                                                                                                                                                                                   | Aufsichtsratsmandate und sonstige Mandate                                                                                                                                                                                    |
|------------------------------------------------------------------------------------------------|------------------------------------------------------------------------------------------------------------------------------------------------------------------------------------------------------------------------------------------------------------------------------------|------------------------------------------------------------------------------------------------------------------------------------------------------------------------------------------------------------------------------|
| <b>Wolfgang Böhr*</b><br>Alter: 48<br>Erstmals gewählt: 2008<br>Gewählt bis: 2013              | Vorsitzender des Gemeinschaftsbetriebsrats Düsseldorf der Deutschen Bank;<br>Mitglied des Gesamtbetriebsrats der Deutschen Bank; Mitglied des Konzernbetriebsrats der Deutschen Bank (seit Juni 2010)                                                                              | Keine zu veröffentlichenden Mandate                                                                                                                                                                                          |
| <b>Dr. Clemens Börsig</b><br>Alter: 62<br>Gerichtlich bestellt: 2006<br>Gewählt bis: 2013      | Vorsitzender des Aufsichtsrats der Deutschen Bank AG, Frankfurt                                                                                                                                                                                                                    | Linde AG; Bayer AG; Daimler AG; Emerson Electric Company                                                                                                                                                                     |
| <b>Dr. Karl-Gerhard Eick</b><br>Alter: 57<br>Gerichtlich bestellt: 2004<br>Gewählt bis: 2013   | Unternehmensberater, KGE Asset Management Consulting Ltd., London                                                                                                                                                                                                                  | CORPUS SIREO Holding GmbH & Co. KG (Vorsitzender)                                                                                                                                                                            |
| <b>Alfred Herling*</b><br>Alter: 58<br>Erstmals gewählt: 2008<br>Gewählt bis: 2013             | Vorsitzender des Gemeinschaftsbetriebsrats Wuppertal/Sauerland der Deutschen Bank;<br>Vorsitzender des Gesamtbetriebsrats der Deutschen Bank; Vorsitzender des Europäischen Betriebsrats (bis März 2010); Vorsitzender des Konzernbetriebsrats der Deutschen Bank (seit Juni 2010) | Keine zu veröffentlichenden Mandate                                                                                                                                                                                          |
| <b>Gerd Herzberg*</b><br>Alter: 60<br>Gerichtlich bestellt: 2006<br>Gewählt bis: 2013          | Stellvertretender Vorsitzender der ver.di Vereinte Dienstleistungsgewerkschaft, Berlin                                                                                                                                                                                             | Franz Haniel & Cie GmbH (stellv. Vorsitzender); BGAG – Beteiligungsgesellschaft der Gewerkschaften AG; Vattenfall Europe AG (stellv. Vorsitzender)                                                                           |
| <b>Sir Peter Job</b><br>Alter: 69<br>Gerichtlich bestellt: 2001<br>Gewählt bis: 2011           |                                                                                                                                                                                                                                                                                    | Schroders Plc (bis Juli 2010); Tibco Software Inc.; Royal Dutch Shell Plc (bis Mai 2010)                                                                                                                                     |
| <b>Prof. Dr. Henning Kagermann</b><br>Alter: 63<br>Erstmals gewählt: 2000<br>Gewählt bis: 2013 | Präsident der acatech – Deutsche Akademie der Technikwissenschaften, München                                                                                                                                                                                                       | Münchener Rückversicherungs-Gesellschaft Aktiengesellschaft; Nokia Corporation; Deutsche Post AG; Wipro Technologies; BMW Bayerische Motoren Werke AG (seit Mai 2010)                                                        |
| <b>Peter Kazmierczak*</b><br>Alter: 53<br>Erstmals gewählt: 2002<br>Gewählt bis: 2013          | Mitarbeiter der Deutschen Bank AG, Essen                                                                                                                                                                                                                                           | Keine zu veröffentlichenden Mandate                                                                                                                                                                                          |
| <b>Martina Klee*</b><br>Alter: 48<br>Erstmals gewählt: 2008<br>Gewählt bis: 2013               | Vorsitzende des Betriebsrats GTO Eschborn/Frankfurt der Deutschen Bank;<br>Mitglied des Gesamtbetriebsrats der Deutschen Bank; Mitglied des Konzernbetriebsrats der Deutschen Bank (seit Juni 2010)                                                                                | Sterbekasse für die Angestellten der Deutschen Bank VVa.G.                                                                                                                                                                   |
| <b>Suzanne Labarge</b><br>Alter: 64<br>Erstmals gewählt: 2008<br>Gewählt bis: 2013             |                                                                                                                                                                                                                                                                                    | Coca-Cola Enterprises Inc.                                                                                                                                                                                                   |
| <b>Maurice Lévy</b><br>Alter: 69<br>Erstmals gewählt: 2006<br>Gewählt bis: 2012                | Chairman und Chief Executive Officer Publicis Groupe S.A., Paris                                                                                                                                                                                                                   | Publicis Conseil S.A. (Vorsitzender); Medias et Régies Europe S.A.; MMS USA Holdings, Inc.; Zenith Optimedia Group Ltd. (UK); Publicis Groupe U.S. Investments LLC; MMS USA Investments, Inc.; MMS USA LLC Investments, Inc. |
| <b>Henriette Mark*</b><br>Alter: 53<br>Erstmals gewählt: 2003<br>Gewählt bis: 2013             | Vorsitzende des Gemeinschaftsbetriebsrats München und Südbayern der Deutschen Bank; Mitglied des Konzern- und des Gesamtbetriebsrats der Deutschen Bank; Vorsitzende des Europäischen Betriebsrats                                                                                 | Keine zu veröffentlichenden Mandate                                                                                                                                                                                          |

\* Von den Arbeitnehmern in Deutschland gewählt.

| Name                                                                                     | Haupttätigkeiten                                                                                                                                                                                            | Aufsichtsratsmandate und sonstige Mandate                                                                                                                                                                                                                                                                         |
|------------------------------------------------------------------------------------------|-------------------------------------------------------------------------------------------------------------------------------------------------------------------------------------------------------------|-------------------------------------------------------------------------------------------------------------------------------------------------------------------------------------------------------------------------------------------------------------------------------------------------------------------|
| <b>Gabriele Platscher*</b><br>Alter: 53<br>Erstmals gewählt: 2003<br>Gewählt bis: 2013   | Vorsitzende des Gemeinschaftsbetriebsrats Braunschweig/Hildesheim der Deutschen Bank; Mitglied des Konzern- und des Gesamtbetriebsrats der Deutschen Bank (bis April 2010)                                  | BVV Versicherungsverein des Bankgewerbes a.G. (stellv. Vorsitzende);<br>BVV Versorgungskasse des Bankgewerbes e.V. (stellv. Vorsitzende);<br>BVV Pensionsfonds des Bankgewerbes AG (stellv. Vorsitzende)                                                                                                          |
| <b>Karin Ruck*</b><br>Alter: 45<br>Erstmals gewählt: 2003<br>Gewählt bis: 2013           | Stellvertretende Vorsitzende des Aufsichtsrats der Deutschen Bank AG; Senior Vertriebscoach in der Region Frankfurt/Hessen-Ost; Mitglied des Gemeinschaftsbetriebsrats Filiale Frankfurt der Deutschen Bank | Deutsche Bank Privat- und Geschäftskunden AG (bis Dezember 2010);<br>BVV Versicherungsverein des Bankgewerbes a.G.;<br>BVV Versorgungskasse des Bankgewerbes e.V.;<br>BVV Pensionsfonds des Bankgewerbes AG                                                                                                       |
| <b>Dr. Theo Siegert</b><br>Alter: 63<br>Gerichtlich bestellt: 2006<br>Gewählt bis: 2012  | Geschäftsführender Gesellschafter der de Haen Carstanjen & Söhne, Düsseldorf                                                                                                                                | E.ON AG; ERGO AG (bis Mai 2010); Merck KGaA; E. Merck OHG (Mitglied des Gesellschafterrats);<br>DKSH Holding Ltd. (Mitglied des Verwaltungsrats);<br>Henkel AG & Co. KGaA                                                                                                                                         |
| <b>Dr. Johannes Teyssen</b><br>Alter: 51<br>Erstmals gewählt: 2008<br>Gewählt bis: 2013  | Vorsitzender des Vorstands der E.ON AG, Düsseldorf (seit Mai 2010)                                                                                                                                          | E.ON Energie AG; E.ON Ruhrgas AG; E.ON Energy Trading SE (Vorsitzender) (bis Juni 2010); Salzgitter AG; E.ON Nordic AB (bis Juni 2010); E.ON Sverige AB (bis August 2010); E.ON Italia S.p.A. (vormals E.ON Italia Holding s.r.l.) (bis August 2010);<br>E.ON US Investments Corp. (Vorsitzender) (seit Mai 2010) |
| <b>Marlehn Thieme*</b><br>Alter: 53<br>Erstmals gewählt: 2008<br>Gewählt bis: 2013       | Director Infrastructure/Regional Management Communications Corporate Citizenship Deutsche Bank AG, Frankfurt                                                                                                | Keine zu veröffentlichenden Mandate                                                                                                                                                                                                                                                                               |
| <b>Tilman Todenhöfer</b><br>Alter: 67<br>Gerichtlich bestellt: 2001<br>Gewählt bis: 2013 | Persönlich haftender Gesellschafter der Robert Bosch Industrietreuhand KG, Stuttgart                                                                                                                        | Robert Bosch GmbH; Robert Bosch Internationale Beteiligungen AG (Präsident des Verwaltungsrats);<br>HOCHTIEF AG                                                                                                                                                                                                   |
| <b>Stefan Viertel*</b><br>Alter: 46<br>Erstmals gewählt: 2008<br>Gewählt bis: 2013       | Senior Sales Manager CIB/GTB Cash Management Financial Institutions, Leiter CMFI Österreich und Ungarn Deutsche Bank AG, Frankfurt                                                                          | Keine zu veröffentlichenden Mandate                                                                                                                                                                                                                                                                               |
| <b>Werner Wenning</b><br>Alter: 64<br>Erstmals gewählt: 2008<br>Gewählt bis: 2013        | Vorsitzender des Vorstands der Bayer AG, Leverkusen (bis September 2010)                                                                                                                                    | E.ON AG; Henkel AG & Co. KGaA (Mitglied des Gesellschafterausschusses); HDI VVa.G.; Talanx AG                                                                                                                                                                                                                     |

\* Von den Arbeitnehmern in Deutschland gewählt.

Leo Wunderlich war als Arbeitnehmervertreter bis zum 30. Juni 2010 Mitglied des Aufsichtsrats. Nach seinem Ausscheiden aus der Bank wurde er für den Rest seiner Amtszeit durch sein gewähltes Ersatzmitglied Peter Kazmierczak ersetzt, der 2002 erstmals in den Aufsichtsrat gewählt wurde und dessen erstes Mandat 2003 endete. Von 2006 bis 2008 war er wiederum Mitglied des Aufsichtsrats.

Heidrun Förster war als Arbeitnehmervertreterin bis zum 31. Juli 2010 Mitglied des Aufsichtsrats. Nach ihrem Ausscheiden aus der Bank wurde sie für den Rest ihrer Amtszeit durch ihr gewähltes Ersatzmitglied Stefan Viertel ersetzt.

Dr. Clemens Börsig war bis zum 3. Mai 2006 Mitglied des Vorstands der Deutsche Bank AG. Dr. Börsig hat erklärt, in seiner Funktion als Mitglied des Aufsichtsrats und seiner Ausschüsse bei allen Fragen, die seine frühere Mitgliedschaft im Vorstand betreffen und einen Interessenkonflikt begründen könnten, an den diesbezüglichen Erörterungen und Abstimmungen nicht teilzunehmen.

Nach dem Kreditwesengesetz müssen die Mitglieder des Aufsichtsrats zuverlässig sein und die zur Wahrnehmung der Kontrollfunktion sowie zur Beurteilung und Überwachung der Geschäfte, die das Unternehmen be-

treibt, erforderliche Sachkunde besitzen. Der Aufsichtsrat hat unter Berücksichtigung dieser Anforderungen gem. Ziffer 5.4.1 des Deutschen Corporate Governance Kodex die nachfolgenden Ziele für seine Zusammensetzung festgelegt, die auch in § 4 der Geschäftsordnung für den Aufsichtsrat übernommen wurden ([www.deutsche-bank.de/corporate-governance](http://www.deutsche-bank.de/corporate-governance)):

Der Aufsichtsrat soll so besetzt sein, dass seine Mitglieder insgesamt über die zur ordnungsgemäßen Wahrnehmung der Aufgaben erforderlichen Kenntnisse, Fähigkeiten und fachlichen Erfahrungen verfügen. Insbesondere sollen die Aufsichtsratsmitglieder für die Wahrnehmung des Mandats ausreichend Zeit haben. Die Besetzung des Aufsichtsrats soll eine qualifizierte Kontrolle und Beratung des Vorstands in einer international tätigen, breit aufgestellten Bank durch den Aufsichtsrat sicherstellen und das Ansehen des Deutsche Bank-Konzerns in der Öffentlichkeit wahren. Dabei soll insbesondere auf die Integrität, Persönlichkeit, Leistungsbereitschaft, Professionalität und Unabhängigkeit der zur Wahl vorgeschlagenen Personen geachtet werden. Ziel ist es, dass im Aufsichtsrat insgesamt sämtliche Kenntnisse und Erfahrungen vorhanden sind, die angesichts der Aktivitäten des Deutsche Bank-Konzerns als wesentlich erachtet werden.

Dem Aufsichtsrat sollen ferner eine ausreichende Anzahl an unabhängigen Mitgliedern und nicht mehr als zwei ehemalige Mitglieder des Vorstands der Deutschen Bank AG angehören. Die Mitglieder des Aufsichtsrats sollen keine Organfunktionen oder Beratungsaufgaben bei wesentlichen Wettbewerbern ausüben. Wesentliche und nicht nur vorübergehende Interessenkonflikte sollen vermieden werden. Diejenigen Mitglieder des Aufsichtsrats, die Mitglieder des Vorstands einer börsennotierten Aktiengesellschaft sind, nehmen – außerhalb des Kreises der abhängigen Gesellschaften dieser Aktiengesellschaft – insgesamt nicht mehr als drei Aufsichtsratsmandate beziehungsweise Mandate in Aufsichtsgremien von Gesellschaften mit vergleichbaren Anforderungen wahr.

Es besteht für die Mitglieder des Aufsichtsrats eine Regelaltersgrenze von 70 Jahren. In begründeten Einzelfällen kann ein Aufsichtsratsmitglied für einen Zeitraum gewählt beziehungsweise bestellt werden, der längstens bis zur Beendigung der dritten ordentlichen Hauptversammlung reicht, die nach Vollendung seines 70. Lebensjahres stattfindet. Bei den Wahlvorschlägen an die Hauptversammlungen wurde diese Altersgrenze berücksichtigt und soll auch bei den nächsten Aufsichtsratswahlen beziehungsweise der Nachbesetzung vakant werdender Aufsichtsratspositionen Berücksichtigung finden.

Der Aufsichtsrat achtet auf Vielfalt bei der Besetzung des Aufsichtsrats. Mit Blick auf die internationale Ausrichtung der Deutschen Bank soll darauf geachtet werden, dass dem Aufsichtsrat eine ausreichende Anzahl an Mitgliedern mit internationaler Erfahrung angehören. Derzeit haben fünf Mitglieder des Aufsichtsrats ihren beruflichen und privaten Mittelpunkt im Ausland. Darüber hinaus verfügen alle Anteilseignervertreter des Aufsichtsrats aufgrund ihrer derzeitigen oder ehemaligen Tätigkeit als Vorstand/CEO international tätiger Konzerne über langjährige internationale Erfahrung. Nach Auffassung des Aufsichtsrats wird der internationalen Tätigkeit des Unternehmens auf beiden Wegen hinreichend Rechnung getragen. Es ist das Ziel, das derzeit bestehende internationale Profil beizubehalten.

Bei den Wahlvorschlägen an die Hauptversammlung wird der Aufsichtsrat auf eine angemessene Beteiligung von Frauen achten. Bereits bei den letzten Aufsichtsratswahlen im Jahr 2008 wurde hierauf im Auswahlprozess besonders Wert gelegt. Bei der Prüfung potenzieller Kandidaten für eine Neuwahl oder Nachbesetzung vakant werdender Aufsichtsratspositionen sollen wiederum qualifizierte Frauen in den Auswahlprozess einbezogen und bei den Wahlvorschlägen angemessen berücksichtigt werden. Seit den Aufsichtsratswahlen im Jahr 2003 waren zwischen 25 % und 35 % der Mitglieder des Aufsichtsrats Frauen. Derzeit gehören sechs Frauen dem Aufsichtsrat an. Dies entspricht 30 %. Der Aufsichtsrat ist bestrebt, diese Anzahl mindestens zu wahren und die Anzahl der Frauen wenn möglich auf der Anteilseignerseite zu erhöhen. Dabei ist zu berücksichtigen, dass der Aufsichtsrat lediglich durch seine Wahlvorschläge an die Hauptversammlung Einfluss auf die Beset-

zung des Aufsichtsrats nehmen kann (zu den verschiedenen Diversity Initiativen der Deutschen Bank siehe auch Seite 55 im Jahresbericht 2010, verfügbar unter [http://www.deutsche-bank.de/ir/de/content/berichte\\_2010.htm](http://www.deutsche-bank.de/ir/de/content/berichte_2010.htm), unter [http://www.banking-on-green.com/de/content/nachhaltig\\_handeln/diversity.html](http://www.banking-on-green.com/de/content/nachhaltig_handeln/diversity.html) sowie im Karriereportal auf den Internet-Seiten der Deutschen Bank unter [http://www.deutsche-bank.de/careers/content/de/to\\_diversity.html](http://www.deutsche-bank.de/careers/content/de/to_diversity.html)).

Der Aufsichtsrat hat gemäß Ziffer 5.4.2 des Deutschen Corporate Governance Kodex festgestellt, dass ihm eine nach seiner Einschätzung ausreichende Anzahl unabhängiger Mitglieder angehört.

### Ausschüsse des Aufsichtsrats

Unser Aufsichtsrat hat die folgenden fünf ständigen Ausschüsse eingerichtet. Über die konkrete Ausschussarbeit im vergangenen Geschäftsjahr informiert der Bericht des Aufsichtsrats (siehe dazu die Seiten 43 bis 49 im Finanzbericht 2010).

**Präsidialausschuss:** Der Präsidialausschuss ist insbesondere für Vorstands- und Aufsichtsratsangelegenheiten zuständig. Er bereitet die Entscheidungen des Aufsichtsrats über die Bestellung und Abberufung von Vorstandsmitgliedern, einschließlich der langfristigen Nachfolgeplanung vor. Außerdem unterbreitet er dem Aufsichtsrat einen Vorschlag für die Bezüge der Vorstandsmitglieder. Er ist zuständig für den Abschluss, die Änderung und Beendigung der Dienst- und anderen Verträge unter Beachtung der alleinigen Entscheidungszuständigkeit des Aufsichtsratsplenums zu den Bezügen der Vorstandsmitglieder und für die Erteilung der Zustimmung des Aufsichtsrats zur Übernahme von Mandaten, Ehrenämtern oder Sonderaufgaben außerhalb des Konzerns durch einzelne Mitglieder des Vorstands nach § 112 AktG und zu bestimmten Verträgen mit Aufsichtsratsmitgliedern nach § 114 AktG. Darüber hinaus bereitet er die Entscheidungen des Aufsichtsrats auf dem Gebiet der Corporate Governance vor. Im Geschäftsjahr 2010 fanden zehn Sitzungen sowie zwei Telefonkonferenzen des Präsidialausschusses statt.

Die derzeitigen Mitglieder des Präsidialausschusses sind Dr. Clemens Börsig (Vorsitzender), Alfred Herling (seit August 2010), Karin Ruck und Tilman Todenhöfer.

**Nominierungsausschuss:** Der Nominierungsausschuss bereitet den Vorschlag des Aufsichtsrats für die Wahl beziehungsweise die Bestellung der Aufsichtsratsmitglieder der Anteilseigner vor. Dabei orientiert er sich an den vom Aufsichtsrat benannten Kriterien für die Zusammensetzung. Im Geschäftsjahr 2010 fanden keine Sitzungen des Nominierungsausschusses statt.

Die derzeitigen Mitglieder des Nominierungsausschusses sind Dr. Clemens Börsig (Vorsitzender), Tilman Todenhöfer und Werner Wenning.

**Prüfungsausschuss:** Der Prüfungsausschuss befasst sich insbesondere mit der Überwachung der Rechnungslegung, inklusive des Rechnungslegungsprozesses und der Wirksamkeit des internen Kontrollsystems, Fragen des Risikomanagements und insbesondere der Wirksamkeit des Risikomanagementsystems, der Wirksamkeit des internen Revisionssystems, der Compliance sowie der Abschlussprüfung. Dem Prüfungsausschuss obliegen die Vorprüfung der Unterlagen zum Jahres- und Konzernabschluss sowie die Erörterung der Prüfungsberichte mit dem Abschlussprüfer. Er bereitet die Entscheidungen des Aufsichtsrats über die Feststellung des Jahresabschlusses und die Billigung des Konzernabschlusses vor und erörtert wesentliche Änderungen der Prüfungs- und Bilanzierungsmethoden. Der Prüfungsausschuss erörtert ferner die Zwischenberichte und die Berichte über die prüferische Durchsicht der Zwischenberichte vor ihrer Veröffentlichung mit dem Vorstand und dem Abschlussprüfer. Zudem erteilt der Prüfungsausschuss den Prüfungsauftrag an den von der Hauptversammlung gewählten Abschlussprüfer. Er beschließt über die Vergütung des Abschlussprüfers und überwacht

dessen Unabhängigkeit, Qualifikation und Effizienz. Der Vorsitzende des Prüfungsausschusses ist neben dem Vorsitzenden des Aufsichtsrats berechtigt, Auskünfte direkt beim Leiter der Compliance-Abteilung einzuholen. Der Prüfungsausschuss ist zuständig für die für die Kenntnisnahme von Mitteilungen über wesentliche Kürzungen des Compliance-Budgets und die Entgegennahme und Behandlung des Berichts des Leiters der Compliance-Abteilung über die Angemessenheit und Wirksamkeit der Grundsätze, Mittel und Verfahren nach § 33 Abs.1 Satz 2 Nr. 5 WpHG (Compliance-Bericht). Der Compliance-Bericht erfolgt mindestens einmal jährlich. Der Leiter der internen Revision berichtet regelmäßig über die Tätigkeit der Revision. Der Prüfungsausschuss wird über etwaige Sonderprüfungen und erhebliche Beanstandungen sowie sonstige außergewöhnliche Maßnahmen der Bankaufsichtsbehörden unterrichtet. Er ist zuständig für die Entgegennahme und Behandlung von Beschwerden im Zusammenhang mit der Rechnungslegung sowie internen Prüfverfahren und Fragen der Abschlussprüfung. Er gibt nach Prüfung seine Zustimmung zu Aufträgen für nicht prüfungsnahe Dienstleistungen an den Abschlussprüfer (siehe dazu auch wesentliche Prüfungshonorare und -leistungen auf den Seiten 387 bis 389 der Erklärung zur Unternehmensführung/Corporate-Governance-Bericht). Im Geschäftsjahr 2010 fanden sechs Sitzungen des Prüfungsausschusses statt.

Die derzeitigen Mitglieder des Prüfungsausschusses sind Dr. Karl-Gerhard Eick (Vorsitzender), Dr. Clemens Börsig, Sir Peter Job, Henriette Mark, Karin Ruck und Marlehn Thieme.

**Risikoausschuss:** Der Risikoausschuss ist zuständig für die Behandlung von Krediten, die gemäß Gesetz oder unserer Satzung eines Beschlusses des Aufsichtsrats bedürfen. Er gibt nach Prüfung seine Zustimmung zum Erwerb von Beteiligungen an anderen Unternehmen in Höhe von 2 % bis zu 3 % unseres haftenden Eigenkapitals, wenn es sich um eine Beteiligung handelt, die voraussichtlich nicht länger als zwölf Monate im vollen oder teilweisen Besitz der Bank verbleiben soll. In seinen Sitzungen berichtet der Vorstand über Kredit-, Markt-, Liquiditäts-, operationelle sowie Rechts- und Reputationsrisiken. Er berichtet ferner über die Risikostrategie, Kreditportfolios, Kredite, die nach Gesetz oder Satzung eines Aufsichtsratsbeschlusses bedürfen, Fragen der Kapitalausstattung und Angelegenheiten, die nach den damit verbundenen Risiken von besonderer Bedeutung sind. Im Geschäftsjahr 2010 fanden sechs Sitzungen des Risikoausschusses statt.

Die derzeitigen Mitglieder des Risikoausschusses sind Dr. Clemens Börsig (Vorsitzender), Prof. Dr. Henning Kagermann und Sir Peter Job. Suzanne Labarge und Dr. Theo Siegert sind Ersatzmitglieder des Risikoausschusses und werden zu allen Sitzungen eingeladen und nehmen regelmäßig an ihnen teil.

**Vermittlungsausschuss:** Zusätzlich zu diesen vier Ausschüssen unterbreitet der gesetzlich zu bildende Vermittlungsausschuss Personalvorschläge an den Aufsichtsrat, wenn für die Bestellung oder Abberufung von Vorstandsmitgliedern eine Zweidrittelmehrheit nicht erreicht wurde. Er tagt nur bei Bedarf. Im Geschäftsjahr 2010 fanden keine Sitzungen des Vermittlungsausschusses statt.

Die derzeitigen Mitglieder des Vermittlungsausschusses sind Dr. Clemens Börsig (Vorsitzender), Wolfgang Böhr, Karin Ruck und Tilman Todenhöfer.

Weitere Details zum Präsidialausschuss, Nominierungsausschuss, Risikoausschuss und Prüfungsausschuss sind in Geschäftsordnungen geregelt, die wie die Geschäftsordnung für den Aufsichtsrat in der jeweils aktuellen Fassung auf der Webseite der Deutschen Bank ([www.deutsche-bank.de/corporate-governance](http://www.deutsche-bank.de/corporate-governance)) veröffentlicht sind.

### Erfolgsorientierte Vergütung

Zur Vergütung des Vorstands und des Aufsichtsrats für das Geschäftsjahr 2010 verweisen wir auf den ausführlichen Vergütungsbericht, der aufgrund der Bestimmungen des Vorstandsvergütungs-Offenlegungsgesetzes auf den Seiten 128 bis 137 des Lageberichts abgedruckt ist.

## Aktienprogramme

Informationen zu unseren aktienbasierten Vergütungsplänen sind in Note 32 „Aktienbasierte Vergütungen“ des Konzernabschlusses enthalten.

## Rechnungslegung und Transparenz

### Aktienbesitz von Vorstands- und Aufsichtsratsmitgliedern

**Vorstand.** Zum Aktienbesitz des Vorstands verweisen wir auf den ausführlichen Vergütungsbericht, der im Lagebericht abgedruckt ist.

**Aufsichtsrat.** Der individuelle Aktienbesitz (einschließlich Aktienanwartschaften gemäß unseren Aktienvergütungsprogrammen) der Mitglieder des Aufsichtsrats setzt sich wie folgt zusammen:

| Mitglieder des Aufsichtsrats    | Anzahl der Aktien | Anzahl Ansprüche auf Aktien |
|---------------------------------|-------------------|-----------------------------|
| Wolfgang Böhr                   | 30                | –                           |
| Dr. Clemens Börsig <sup>1</sup> | 137.919           | –                           |
| Dr. Karl-Gerhard Eick           | –                 | –                           |
| Alfred Herling                  | 996               | 10                          |
| Gerd Herzberg                   | –                 | –                           |
| Sir Peter Job                   | 4.000             | –                           |
| Prof. Dr. Henning Kagermann     | –                 | –                           |
| Peter Kazmierczak               | 122               | 10                          |
| Martina Klee                    | 615               | 10                          |
| Suzanne Labarge                 | –                 | –                           |
| Maurice Lévy                    | –                 | –                           |
| Henriette Mark                  | 525               | 10                          |
| Gabriele Platscher              | 827               | 4                           |
| Karin Ruck                      | 165               | –                           |
| Dr. Theo Siegert                | –                 | –                           |
| Dr. Johannes Teyssen            | –                 | –                           |
| Marlehn Thieme                  | 190               | 10                          |
| Tilman Todenhöfer               | 1.541             | –                           |
| Stefan Viertel                  | 54                | –                           |
| Werner Wenning                  | –                 | –                           |
| <b>Insgesamt</b>                | <b>146.984</b>    | <b>54</b>                   |

<sup>1</sup> Darin nicht enthalten sind 270 Deutsche Bank-Aktien, die einer in Familienbesitz befindlichen Gesellschaft bürgerlichen Rechts beziehungsweise Erbengemeinschaft zuzurechnen sind, an der Dr. Börsig mit 25 % beteiligt ist, und 16.018 Deutsche Bank-Aktien, die einer gemeinnützigen und rechtsfähigen Stiftung, der Gerhild- und Clemens Börsig Jugend- und Sozialstiftung, zuzurechnen sind.

Die Mitglieder des Aufsichtsrats halten 146.984 Aktien, was weniger als 0,02 % der am 18. Februar 2011 ausgegebenen Aktien entspricht.

Die Spalte „Anzahl Ansprüche auf Aktien“ in der Tabelle zeigt diejenigen Aktienansprüche der Aufsichtsratsmitglieder, die Mitarbeiter der Deutschen Bank sind, die im Rahmen des Global Share Purchase Plan Gratisaktien („Matching Awards“) erhalten haben, die ihnen am 1. November 2011 zugeteilt werden.

## Geschäfte mit nahestehenden Dritten

Informationen zu Geschäften mit nahestehenden Dritten sind in Note 37 „Geschäfte mit nahestehenden Dritten“ enthalten.

## Wirtschaftsprüfung und Controlling

### Finanzexperten des Prüfungsausschusses

Der Aufsichtsrat hat die folgenden Mitglieder des Prüfungsausschusses zu „Finanzexperten des Prüfungsausschusses“ gemäß der Begriffsdefinition in Section 407 der Ausführungsbestimmungen der Securities and Exchange Commission zum Sarbanes-Oxley Act 2002 benannt: Dr. Clemens Börsig und Dr. Karl-Gerhard Eick. Die genannten Finanzexperten des Prüfungsausschusses sind entsprechend der Rule 10A-3 des US-amerikanischen Börsengesetzes (Securities Exchange Act) von 1934 und § 100 Absatz 5 AktG von der Bank „unabhängig“. Entsprechend §§ 107 Absatz 4, 100 Absatz 5 AktG verfügen sie über Sachverstand auf den Gebieten Rechnungslegung und Abschlussprüfung.

### Verhaltens- und Ethikkodex

Der Verhaltens und Ethikkodex gilt für alle Mitarbeiter der Deutschen Bank und behält eine Selbstverpflichtung von Vorstand und Aufsichtsrat. Zielsetzung und Identität ist es, der weltweit führende Anbieter von Finanzlösungen für anspruchsvolle Kunden zu sein und damit nachhaltig Mehrwert für unsere Aktionäre und Mitarbeiter zu schaffen. Er beinhaltet die grundlegenden Anforderungen an das Verhalten jedes Einzelnen. Gleichzeitig stellt er den verbindlichen Rahmen für alle Organisationseinheiten dar, die spezielle Richtlinien und Regelwerke herausgeben.

Entsprechend Section 406 des Sarbanes-Oxley Act 2002 enthält der Verhaltens- und Ethikkodex besondere Verpflichtungen für Senior Financial Officers. Derzeit sind dies bei der Deutschen Bank der Vorsitzende des Vorstands, der Chief Financial Officer und der Head of Group Accounting sowie die Mitglieder des Group Finance Committee. Der Verhaltens- und Ethikkodex ist auf der Webseite der Deutschen Bank in der jeweils aktuellen Fassung unter [www.deutsche-bank.de/corporate-governance](http://www.deutsche-bank.de/corporate-governance) veröffentlicht. Im Berichtsjahr 2010 wurden dem Corporate-Governance-Beauftragten keine Verstöße gegen den Ethikkodex angezeigt.

### Wesentliche Prüfungshonorare und -leistungen

Nach deutschem Recht wird der Abschlussprüfer von der Hauptversammlung auf Vorschlag des Aufsichtsrats gewählt. Der Prüfungsausschuss unseres Aufsichtsrats bereitet den Vorschlag des Aufsichtsrats für die Wahl des Abschlussprüfers vor. Nach der Wahl des Abschlussprüfers erteilt der Prüfungsausschuss das Mandat, genehmigt in eigener Verantwortung Bedingungen und Umfang der Abschlussprüfung sowie sämtliche Prüfungshonorare und überwacht die Unabhängigkeit des Abschlussprüfers. 2009 und 2010 wählte die Hauptversammlung die KPMG AG Wirtschaftsprüfungsgesellschaft, die seit Jahren als unser Abschlussprüfer fungiert, als Abschlussprüfer für die Geschäftsjahre 2009 und 2010.

Die unten stehende Tabelle zeigt die gesamten von unserem Abschlussprüfer abgerechneten Honorare für die letzten beiden Geschäftsjahre in den folgenden Kategorien: (1) Prüfungshonorare, das heißt Honorare im Zusammenhang mit der gesetzlichen Abschlussprüfung durch den Abschlussprüfer, in Verbindung mit satzungsmäßigen und aufsichtsrechtlichen Prüfungen, die in den betreffenden Geschäftsjahren in Rechnung gestellt wurden; (2) Honorare für prüfungsnahe Dienstleistungen, das heißt Honorare für Gutachten und zugehörige Dienstleistungen, die in engem Bezug zu der Durchführung der Abschlussprüfung stehen und nicht



unter Prüfungshonorare ausgewiesen werden; (3) Honorare für Steuerberatung, das heißt Honorare für professionelle Dienstleistungen zur Sicherstellung der Einhaltung von Steuervorschriften, Steuerberatung und Steuerplanung; sowie (4) alle sonstigen Honorare für Produkte und Dienstleistungen, die nicht unter Prüfungshonorare, Honorare für prüfungsnahe Dienstleistungen und Steuerberatung fallen. In diesen Beträgen sind Aufwendungen eingeschlossen, Umsatzsteuer ist nicht eingeschlossen.

| Kategorie in Mio €                         | 2010      | 2009      |
|--------------------------------------------|-----------|-----------|
| Prüfungshonorare                           | 53        | 45        |
| Honorare für prüfungsnahe Dienstleistungen | 9         | 6         |
| Honorare für Steuerberatung                | 7         | 5         |
| Sonstige Honorare                          | 2         | –         |
| <b>Summe der Honorare</b>                  | <b>71</b> | <b>56</b> |

Der Anstieg der Summe der Honorare in Höhe von 15 Mio € resultierte hauptsächlich aus in 2010 getätigten Akquisitionen. Die Honorare für prüfungsnahe Dienstleistungen enthielten Honorare für Beratungsleistungen, Due-Diligence-bezogene Leistungen im Zusammenhang mit aktuellen oder geplanten Zukäufen und Verkäufen, Gutachtertätigkeiten und sonstige vereinbarte Dienstleistungen. Die Honorare für Steuerberatung, inklusive Dienstleistungshonoraren, enthielten Honorare für Beratungs- und Unterstützungsleistungen bei der Erstellung der Steuererklärung sowie für Beratungsleistungen im Zusammenhang mit der Erarbeitung von Strategien und Initiativen für die konzernweite Steuerplanung unter Beachtung der jeweiligen steuerlichen Regelungen. Die sonstigen Honorare umfassten projektbezogene Beratungsleistungen.

US-amerikanische Gesetze und Vorschriften sowie unsere eigenen Richtlinien sehen generell vor, dass jede Beauftragung unseres Abschlussprüfers vorab durch unseren Prüfungsausschuss oder gemäß den von diesem verabschiedeten Richtlinien und Weisungen genehmigt wird. Für prüfungsfremde Dienstleistungen unseres Abschlussprüfers hat unser Prüfungsausschuss folgende Richtlinien und Weisungen festgelegt: Anfragen zur Beauftragung müssen in erster Instanz unserem Group Finance Committee vorgelegt werden, das sich aus unserem Chief Financial Officer und leitenden Mitarbeitern unserer Finance- und Steuerabteilungen zusammensetzt. Bezieht sich eine Anfrage auf Dienstleistungen, welche die Unabhängigkeit unseres Abschlussprüfers gefährden würden, muss diese abgelehnt werden. Für bestimmte zulässige Gutachter- und Finanzberatungsleistungen sowie Steuerberatungsleistungen hat der Prüfungsausschuss eine Vorabgenehmigung erteilt, soweit die erwarteten Honorare für die einzelnen Leistungen 1 Mio € nicht übersteigen. Entsprechende Anfragen kann das Group Finance Committee genehmigen, hat darüber aber regelmäßig dem Prüfungsausschuss zu berichten. Betrifft eine Anfrage zur Beauftragung weder unzulässige noch vorab genehmigte prüfungsfremde Dienstleistungen, muss sie vom Group Finance Committee zur Prüfung an den Prüfungsausschuss weitergeleitet werden. Um die Prüfung von Anfragen zur Beauftragung zwischen den Ausschusssitzungen zu erleichtern, hat der Prüfungsausschuss zudem die Genehmigungskompetenz an mehrere seiner Mitglieder delegiert, die gemäß Definition der Securities and Exchange Commission und der New York Stock Exchange „unabhängig“ sind. Diese Mitglieder berichten dem Prüfungsausschuss über jede von ihnen erteilte Genehmigung in der jeweils nächsten Sitzung.

Darüber hinaus kann nach den geltenden US-amerikanischen Gesetzen und Vorschriften für die Beauftragung von prüfungsfremden Dienstleistungen, die insgesamt nicht mehr als 5 % der an unseren Abschlussprüfer bezahlten Honorare ausmachen, auf die Notwendigkeit der Vorabgenehmigung verzichtet werden, wenn der entsprechende Auftrag von uns zum Zeitpunkt der Beauftragung nicht berücksichtigt und unverzüglich dem Prüfungsausschuss oder einem dafür zuständigen Ausschussmitglied gemeldet sowie vor Abschluss der Prüfung genehmigt wurde. In den Geschäftsjahren 2009 und 2010 lag der Prozentsatz der an unseren Abschlussprüfer gezahlten Honorare, die durch Nichtprüfungsleistungen in den einzelnen Kategorien anfielen und für die auf eine Vorabgenehmigung verzichtet werden konnte, unter 5 %.

## Einhaltung des Deutschen Corporate Governance Kodex

### Erklärung gemäß § 161 des Aktiengesetzes (Entsprechenserklärung 2010)

Vorstand und Aufsichtsrat haben am 27. Oktober 2010 die Entsprechenserklärung 2010 gemäß § 161 des Aktiengesetzes abgegeben. Demnach hat die Bank den Empfehlungen der „Regierungskommission Deutscher Corporate Governance Kodex“ wie folgt entsprochen:

„Die letzte Entsprechenserklärung erfolgte am 28. Oktober 2009. Eine Anpassung erfolgte zum 1. Januar 2010. Nach diesem Zeitpunkt hat die Deutsche Bank AG allen Empfehlungen der „Regierungskommission Deutscher Corporate Governance Kodex“ in der Kodexfassung vom 18. Juni 2009, veröffentlicht im elektronischen Bundesanzeiger am 5. August 2009, bis zum Inkrafttreten der neuen Kodexfassung am 2. Juli 2010 ohne Ausnahmen entsprochen. Vor dem 1. Januar 2010 hat die Deutsche Bank AG den Empfehlungen mit der folgenden Ausnahme entsprochen:

Für die Mitglieder des Aufsichtsrats bestand traditionell eine D&O Versicherung ohne Selbstbehalt (Kodex Ziffer 3.8). Bei der D&O Versicherung der Bank handelt es sich um eine Gruppenversicherung für eine Vielzahl von Personen im In- und Ausland. Im Ausland ist ein Selbstbehalt unüblich. Im Hinblick auf die erforderliche Vereinbarung eines Selbstbehalts für den Vorstand wurde ein solcher auch für den Aufsichtsrat diskutiert und letztlich im Rahmen der Erneuerung der bestehenden D&O Versicherung zum 1. Januar 2010 eingeführt.

Die „Regierungskommission Deutscher Corporate Governance Kodex“ legte am 26. Mai 2010 eine neue Kodexfassung vor, die am 2. Juli 2010 im elektronischen Bundesanzeiger veröffentlicht wurde. Auch der neuen Fassung entsprach die Deutsche Bank mit Ausnahme der neu gefassten Ziffer 5.4.1:

Aufgrund der Neuregelung hinsichtlich der Zielsetzungen bei der Zusammensetzung des Aufsichtsrats wurden in der Aufsichtsratssitzung am 27. Juli 2010 in einem ersten Schritt die Geschäftsordnungen des Aufsichtsrats, des Präsidial- und des Nominierungsausschusses angepasst. Nach der erforderlichen eingehenden Diskussion wurden die konkreten Ziele in der Aufsichtsratssitzung am 27. Oktober 2010 beschlossen.

Ab heute entspricht die Deutsche Bank AG den Empfehlungen der „Regierungskommission Deutscher Corporate Governance Kodex“ in der Kodexfassung vom 26. Mai 2010 ohne Ausnahmen.“

Die Entsprechenserklärung 2010 und alle früheren Entsprechenserklärungen sind auf der Webseite der Deutschen Bank unter [www.deutsche-bank.de/corporate-governance](http://www.deutsche-bank.de/corporate-governance) veröffentlicht, wo auch die aktuelle Fassung des Deutschen Corporate Governance Kodex zu finden ist.

### Stellungnahme zu den Anregungen des Deutschen Corporate Governance Kodex

Die Bank entspricht freiwillig den Anregungen des Kodex in der Fassung vom 26. Mai 2010 mit folgenden Ausnahmen:

- Die von der Bank benannten Stimmrechtsvertreter sind für Teilnehmer der Hauptversammlung bis zur Abstimmung erreichbar. Aktionäre, die den Stimmrechtsvertretern schon zuvor Vollmacht erteilt haben, erreichen diese am Tag der Hauptversammlung bis 12.00 Uhr über das Weisungstool im Internet (Kodex Ziffer 2.3.3). So kann das Risiko aus etwaigen technischen Störungen unmittelbar vor der Abstimmung weitgehend ausgeschlossen werden. Zudem endet auch die Übertragung der Hauptversammlung im Internet spätestens zu diesem Zeitpunkt, so dass für die Meinungsbildung der nur über Stimmrechtsvertreter teilnehmenden Aktionäre keine verwertbaren Informationen nach diesem Zeitpunkt mehr zu erwarten sind.
- Die Übertragung der Hauptversammlung im Internet (Kodex Ziffer 2.3.4) erfolgt für die Eröffnung durch den Versammlungsleiter und den Bericht des Vorstands. Die Aktionäre haben so die Möglichkeit, unbelastet von einer weitgehend öffentlichen Übertragung mit der Verwaltung zu diskutieren.

# 05 -

## Ergänzende Informationen

Vorstand – 392

Aufsichtsrat – 393

Advisory Boards – 395

Der Konzern im Fünfjahresvergleich – 400

Patronatserklärung – 401

Glossar – 402

Impressum – Publikationen – 408

## Vorstand

Dr. Josef Ackermann  
Vorsitzender

Dr. Hugo Bänziger

Michael Cohrs  
bis 30. September 2010

Jürgen Fitschen

Anshuman Jain

Stefan Krause

Hermann-Josef Lamberti

Rainer Neske

## Aufsichtsrat

**Dr. Clemens Börsig**  
– Vorsitzender,  
Frankfurt am Main

**Karin Ruck\***  
– Stellvertretende Vorsitzende  
Deutsche Bank AG,  
Bad Soden am Taunus

**Wolfgang Böhr\***  
Deutsche Bank AG,  
Düsseldorf

**Dr. Karl-Gerhard Eick**  
Unternehmensberater, KGE Asset  
Management Consulting Ltd.,  
London

**Heidrun Förster\***  
bis 31. Juli 2010,  
Deutsche Bank Privat- und  
Geschäftskunden AG,  
Berlin

**Alfred Herling\***  
Deutsche Bank AG,  
Wuppertal

**Gerd Herzberg\***  
Stellvertretender Vorsitzender  
der ver.di Vereinte Dienst-  
leistungsgewerkschaft,  
Hamburg

**Sir Peter Job**  
London

**Prof. Dr. Henning Kagermann**  
Präsident acatech - Deutsche Akade-  
mie der Technikwissenschaften,  
Königs Wusterhausen

**Peter Kazmierczak\***  
ab 1. Juli 2010,  
Deutsche Bank AG,  
Herne

**Martina Klee\***  
Deutsche Bank AG,  
Frankfurt am Main

**Suzanne Labarge**  
Toronto

**Maurice Lévy**  
Chairman und Chief Executive  
Officer, Publicis Groupe S.A.,  
Paris

**Henriette Mark\***  
Deutsche Bank AG,  
München

**Gabriele Platscher\***  
Deutsche Bank Privat- und  
Geschäftskunden AG,  
Braunschweig

**Dr. Theo Siegert**  
Geschäftsführender Gesellschafter  
der de Haen Carstanjen & Söhne,  
Düsseldorf

**Dr. Johannes Teyssen**  
Vorsitzender des Vorstands  
der E.ON AG ab 1. Mai 2010,  
Oberding

**Marlehn Thieme\***  
Deutsche Bank AG,  
Bad Soden am Taunus

**Tilman Todenhöfer**  
Persönlich haftender  
Gesellschafter der Robert Bosch  
Industrietreuhand KG,  
Madrid

**Stefan Viertel\***  
ab 1. August 2010,  
Deutsche Bank AG,  
Bad Soden am Taunus

**Werner Wenning**  
Vorsitzender des Vorstands der  
Bayer AG bis 30. September 2010,  
Leverkusen

**Leo Wunderlich\***  
bis 30. Juni 2010,  
Deutsche Bank AG,  
Mannheim

\* Von den Arbeitnehmern in  
Deutschland gewählt.

## Aufsichtsratsausschüsse

**Präsidialausschuss**  
Dr. Clemens Börsig  
– Vorsitzender

Heidrun Förster\*  
bis 31. Juli 2010

Alfred Herling\*  
ab 1. August 2010

Karin Ruck\*

Tilman Todenhöfer

**Vermittlungsausschuss**  
Dr. Clemens Börsig  
– Vorsitzender

Wolfgang Böhr\*

Karin Ruck\*

Tilman Todenhöfer

**Prüfungsausschuss**  
Dr. Karl-Gerhard Eick  
– Vorsitzender

Dr. Clemens Börsig

Sir Peter Job

Henriette Mark\*

Karin Ruck\*

Marlehn Thieme\*

**Risikoausschuss**  
Dr. Clemens Börsig  
– Vorsitzender

Sir Peter Job

Prof. Dr. Henning Kagermann

Suzanne Labarge  
– Ersatzmitglied

Dr. Theo Siegert  
– Ersatzmitglied

**Nominierungsausschuss**  
Dr. Clemens Börsig  
– Vorsitzender

Tilman Todenhöfer

Werner Wenning

\* Von den Arbeitnehmern in  
Deutschland gewählt.



## Advisory Boards

### European Advisory Board

**Professor Dr.-Ing.  
Wolfgang Reitzle**  
– Vorsitzender  
Vorsitzender des Vorstands der  
Linde AG, München

**Professor Dr. h.c.  
Roland Berger**  
Roland Berger Strategy  
Consultants GmbH, München

**Dr. Kurt Bock**  
Mitglied des Vorstands der  
BASF SE, Ludwigshafen

**Lord John Browne of Madingley**  
Managing Director und Managing  
Partner (Europe),  
Riverstone Holdings LLC;  
ehemaliger Chief Executive Officer, BP,  
London

**Michael Cohrs**  
ab 1. Oktober 2010  
Ehemaliges Vorstandsmitglied der  
Deutsche Bank AG, London

**Dr. Karl-Ludwig Kley**  
Vorsitzender der Geschäftsleitung und  
persönlich haftender Gesellschafter  
der Merck KGaA,  
Darmstadt

**Peter Löscher**  
Vorsitzender des Vorstands der  
Siemens Aktiengesellschaft,  
München

**Francis Mer**  
Ehemaliger französischer  
Minister für Ökonomie,  
Finanzen und Industrie,  
Bourg-la-Reine

**Alexey A. Mordashov**  
Vorsitzender des Vorstands,  
Severstal;  
Generaldirektor der Severstal-Group,  
Cherepovets

**Dr. h.c. August Oetker**  
Persönlich haftender  
Gesellschafter der  
Dr. August Oetker KG, Bielefeld

**Eckhard Pfeiffer**  
Ehemaliger Präsident und Chief  
Executive Officer von Compaq  
Computer Corporation,  
Kitzbühel

**Dr. Bernd Pischetsrieder**  
Urfahrn

**Antonio Puri Purini**  
ab 1. September 2010  
Ehemaliger Botschafter von Italien in  
der Bundesrepublik Deutschland,  
Rom

**Dr. rer. pol. Michael Rogowski**  
Vorsitzender des  
Aufsichtsrats der J. M. Voith AG  
bis 5. März 2010,  
Heidenheim

**Håkan Samuelsson**  
bis 29. April 2010,  
München

**Maria-Elisabeth Schaeffler**  
Gesellschafterin und Vorsitzende des  
Aufsichtsrats der  
INA-Holding Schaeffler KG,  
Herzogenaurach

**Jürgen R. Thumann**  
Vorsitzender des Gesellschafteraus-  
schusses der Heitkamp & Thumann KG,  
Düsseldorf

**Dr. Dieter Zetsche**  
Vorsitzender des Vorstands der  
Daimler AG und Leiter  
Mercedes-Benz Cars, Stuttgart

## Americas Advisory Board

**Norman Augustine**  
Ehemaliger Chief Executive  
Officer und Chairman,  
Lockheed Martin

**John E. Bryson**  
Chairman, BrightSource Energy;  
ehemaliger Chairman und  
Chief Executive Officer,  
Edison International

**Michael D. Capellas**  
Chief Executive Officer, Acadia;  
ehemaliger Chairman und  
Chief Executive Officer,  
First Data Corp.

**James Ireland Cash, Jr., Ph. D.**  
Emeritus Professor und  
Senior Associate  
Dean, Harvard Business School

**Anthony W. Deering**  
Chairman, Exeter Capital LLC;  
ehemaliger Chairman & Chief  
Executive Officer, The Rouse Co.

**Archie W. Dunham**  
Ehemaliger Chairman,  
ConocoPhillips

**Benjamin H. Griswold**  
Chairman, Brown Advisory;  
ehemaliger Senior Chairman,  
Deutsche Banc Alex. Brown

**The Honorable Chuck Hagel**  
Distinguished Professor, Georgetown  
Universität und Universität von  
Nebraska in Omaha;  
ehemaliger US-Senator, (R-NE)

**William R. Howell**  
Ehemaliger Chairman und  
Chief Executive Officer,  
J.C. Penney, Inc.

**Robert L. Johnson**  
Gründer und Chairman,  
The RLJ Cos.; Gründer und  
ehemaliger Chairman,  
Black Entertainment Television (BET)

**Edward A. Kangas**  
Ehemaliger Chairman und  
Chief Executive Officer, Deloitte

**Ellen R. Marram**  
Präsidentin, The Barnegat Group LLC;  
ehemalige Präsidentin und Chief  
Executive Officer, Tropicana und  
Nabisco Biscuit Cos.

**The Honorable Lynn M. Martin**  
Präsidentin, Martin Hall Group LLC;  
ehemalige US-amerikanische  
Arbeitsministerin

**Robert P. May**  
Ehemaliger Chief Executive  
Officer, Calpine Corp.; ehemaliger  
Chairman und Chief Executive Officer,  
HealthSouth Corp.

**Michael E. J. Phelps**  
bis 30. September 2010  
Chairman, Dornoch Capital Inc.

**The Honorable John W. Snow**  
Chairman, Cerberus Capital  
Management LP;  
ehemaliger US-amerikanischer  
Finanzminister

### Latin American Advisory Board

**Mauricio Novis Botelho**  
bis 15. März 2010  
Chairman und ehemaliger  
Präsident und Chief Executive Officer,  
Embraer

**Fernando Henrique Cardoso**  
Ehemaliger Präsident  
der Föderativen Republik  
von Brasilien

**Armando Garza Sada**  
Chairman, Alfa

**Enrique Iglesias**  
Generalsekretär der ibero-  
amerikanischen Gemeinschaft;  
ehemaliger Außenminister  
von Uruguay

**Pedro Pablo Kuczynski**  
Partner und Senior Advisor,  
The Rohatyn Group;  
ehemaliger Premierminister  
von Peru

**The Honorable Lynn M. Martin**  
Präsidentin, Martin Hall Group LLC;  
ehemalige US-amerikanische  
Arbeitsministerin

**Luis Alejandro Pagani**  
Präsident, Arcor Group

**Horst Paulmann**  
Gründer und Präsident,  
Cencosud S.A.

**Jesús Reyes-Heroles**  
ab 1. Juni 2010  
Ehemaliger Chairman und Chief  
Executive Officer, Petroleos  
Mexicanos (Pemex); ehemaliger  
Botschafter von Mexico in den  
Vereinigten Staaten von Amerika

**Miguel Urrutia Montoya**  
Professor, Universidad  
de los Andes;  
ehemaliger Gouverneur der  
Zentralbank von Kolumbien

### Asia Pacific Advisory Board

**Pham Thanh Binh**

bis 31. Dezember 2010  
Ehemaliger Chairman und Chief  
Executive Officer, Vinashin Group,  
Vietnam

**Robert E. Fallon**

Assistenzprofessor, Finanz- und  
Wirtschaftslehre, Columbia  
Business School, International

**Toru Hashimoto**

Ehemaliger Präsident und Chief  
Executive Officer sowie ehemaliger  
Chairman, The Fuji Bank Ltd.;  
ehemaliger Chairman,  
Deutsche Securities Inc., Japan

**Nobuyuki Idei**

Gründer und Chief Executive Officer,  
Quantum Leaps Corporation;  
Vorsitzender des Beraterkreises,  
Sony Corporation, Japan

**Gang-Yon Lee**

Chairman, Korea Gas Corporation,  
Korea

**Dr. David K.P. Li**

Chairman und Chief Executive Officer,  
The Bank of East Asia, Hong Kong

**Dr. Li Qingyuan**

Generaldirektor, Office of Strategy and  
Development Committee, Chinesische  
Wertpapieraufsichtsbehörde, China

**Subramanian Ramadorai**

Vice Chairman, Tata Consultancy  
Services Limited, Indien

**Dr. Tony Tan Keng Yam**

Deputy Chairman und Executive  
Director, The Government of  
Singapore Investment Corp. Pte. Ltd.,  
Singapur

**Sofjan Wanandi**

Chairman, Santini Group;  
Chairman des Arbeitgeberverbands  
von Indonesien (APINDO), Indonesien

**Professor Zhang Yunling**

Professor für internationale  
Ökonomie und Akademiemitglied,  
Chinese Academy of Social  
Science, China

## Climate Change Advisory Board

**Lord John Browne of Madingley**  
Managing Director und Managing  
Partner (Europe),  
Riverstone Holdings LLC;  
ehemaliger Chief Executive  
Officer, BP

**John Coomber**  
Mitglied des Board of Directors,  
Swiss Re;  
Chairman, The Climate Group

**Fabio Feldmann**  
Chief Executive Officer,  
Fabio Feldmann Consultores;  
ehemaliger Vorstandssekretär,  
Brazilian Forum on Climate Change

**Amory B. Lovins**  
Chairman und Chief Scientist,  
Rocky Mountain Institute

**Lord Oxburgh**  
Mitglied des Beraterkreises,  
Climate Change Capital;  
ehemaliger Chairman, Shell

**Dr. R. K. Pachauri**  
Chairman, Intergovernment Panel on  
Climate Change

**Professor Hans Joachim  
Schellnhuber**  
Gründungsdirektor, Potsdam-Institut  
für Klimafolgenforschung (PIK)

**Professor Robert Socolow**  
Co-Director, The Carbon  
Mitigation Initiative;  
Professor, Princeton University

**Professor Dr. Dr. h.c. mult.  
Klaus Töpfer**  
Bundesminister für Umwelt, Natur-  
schutz und Reaktorsicherheit sowie  
Raumordnung, Bauwesen und  
Städtebau a.D.; ehemaliger Exekutiv-  
direktor des Umweltprogramms der  
Vereinten Nationen (UNEP)

**Professor Hongren Zhang**  
Ehemaliger Präsident,  
International Union of Geological  
Science;  
ehemaliger chinesischer  
Vizeminister für Geologie und  
Mineralressourcen

## Der Konzern im Fünfjahresvergleich

| <b>Bilanz in Mio €</b>                                                               | <b>31.12.2010</b> | <b>31.12.2009</b> | <b>31.12.2008</b> | <b>31.12.2007</b> | <b>31.12.2006</b> |
|--------------------------------------------------------------------------------------|-------------------|-------------------|-------------------|-------------------|-------------------|
| Bilanzsumme                                                                          | 1.905.630         | 1.500.664         | 2.202.423         | 1.925.003         | 1.520.580         |
| Forderungen aus dem Kreditgeschäft                                                   | 407.729           | 258.105           | 269.281           | 198.892           | 178.524           |
| Summe der Verbindlichkeiten                                                          | 1.855.238         | 1.462.695         | 2.170.509         | 1.885.688         | 1.486.694         |
| Den Deutsche Bank-Aktionären zurechenbares Eigenkapital                              | 48.843            | 36.647            | 30.703            | 37.893            | 33.169            |
| Anteile ohne beherrschenden Einfluss                                                 | 1.549             | 1.322             | 1.211             | 1.422             | 717               |
| Tier-1-Kapital                                                                       | 42.565            | 34.406            | 31.094            | 28.320            | 23.539            |
| Aufsichtsrechtliches Eigenkapital insgesamt                                          | 48.688            | 37.929            | 37.396            | 38.049            | 34.309            |
| <b>Gewinn- und Verlustrechnung in Mio €</b>                                          | <b>2010</b>       | <b>2009</b>       | <b>2008</b>       | <b>2007</b>       | <b>2006</b>       |
| Zinsüberschuss                                                                       | 15.583            | 12.459            | 12.453            | 8.849             | 7.008             |
| Risikovorsorge im Kreditgeschäft                                                     | 1.274             | 2.630             | 1.076             | 612               | 298               |
| Provisionsüberschuss                                                                 | 10.669            | 8.911             | 9.741             | 12.282            | 11.192            |
| Ergebnis aus zum Fair Value bewerteten finanziellen Vermögenswerten/Verpflichtungen  | 3.354             | 7.109             | -9.992            | 7.175             | 8.892             |
| Sonstige zinsunabhängige Erträge                                                     | -1.039            | -527              | 1.411             | 2.523             | 1.476             |
| <b>Zinsunabhängige Erträge insgesamt</b>                                             | <b>12.984</b>     | <b>15.493</b>     | <b>1.160</b>      | <b>21.980</b>     | <b>21.560</b>     |
| Personalaufwand                                                                      | 12.671            | 11.310            | 9.606             | 13.122            | 12.498            |
| Sachaufwand und sonstiger Aufwand                                                    | 10.133            | 8.402             | 8.339             | 8.038             | 7.143             |
| Aufwendungen im Versicherungsgeschäft                                                | 485               | 542               | -252              | 193               | 67                |
| Wertminderung auf immaterielle Vermögenswerte                                        | 29                | -134              | 585               | 128               | 31                |
| Restrukturierungsaufwand                                                             | -                 | -                 | -                 | -13               | 192               |
| <b>Zinsunabhängige Aufwendungen insgesamt</b>                                        | <b>23.318</b>     | <b>20.120</b>     | <b>18.278</b>     | <b>21.468</b>     | <b>19.931</b>     |
| <b>Ergebnis vor Steuern</b>                                                          | <b>3.975</b>      | <b>5.202</b>      | <b>-5.741</b>     | <b>8.749</b>      | <b>8.339</b>      |
| Ertragsteueraufwand/-ertrag (-)                                                      | 1.645             | 244               | -1.845            | 2.239             | 2.260             |
| <b>Jahresüberschuss/Jahresfehlbetrag (-)</b>                                         | <b>2.330</b>      | <b>4.958</b>      | <b>-3.896</b>     | <b>6.510</b>      | <b>6.079</b>      |
| Den Anteilen ohne beherrschenden Einfluss zurechenbares Konzernergebnis              | 20                | -15               | -61               | 36                | 9                 |
| Den Deutsche Bank-Aktionären zurechenbares Konzernergebnis                           | 2.310             | 4.973             | -3.835            | 6.474             | 6.070             |
| <b>Kennziffern</b>                                                                   | <b>2010</b>       | <b>2009</b>       | <b>2008</b>       | <b>2007</b>       | <b>2006</b>       |
| Ergebnis je Aktie (basic) <sup>1</sup>                                               | 3,07 €            | 7,21 €            | -6,87 €           | 12,29 €           | 11,66 €           |
| Ergebnis je Aktie (verwässert) <sup>1</sup>                                          | 2,92 €            | 6,94 €            | -6,87 €           | 11,80 €           | 10,44 €           |
| Dividendenzahlung je Aktie, gezahlt in der Periode                                   | 0,75 €            | 0,50 €            | 4,50 €            | 4,00 €            | 2,50 €            |
| Eigenkapitalrendite nach Steuern (basierend auf dem durchschnittlichen Eigenkapital) | 5,5 %             | 14,6 %            | -11,1 %           | 17,9 %            | 20,3 %            |
| Eigenkapitalrendite vor Steuern (basierend auf dem durchschnittlichen Eigenkapital)  | 9,5 %             | 15,3 %            | -16,5 %           | 24,1 %            | 27,9 %            |
| Aufwand-Ertrag-Relation                                                              | 81,6 %            | 72,0 %            | 134,3 %           | 69,6 %            | 69,8 %            |
| Tier-1-Kapitalquote ohne Hybridinstrumente <sup>2</sup>                              | 8,7 %             | 8,7 %             | 7,0 %             | 6,9 %             | 6,9 %             |
| Tier-1-Kapitalquote <sup>2</sup>                                                     | 12,3 %            | 12,6 %            | 10,1 %            | 8,6 %             | 8,5 %             |
| Eigenkapitalquote <sup>2</sup>                                                       | 14,1 %            | 13,9 %            | 12,2 %            | 11,6 %            | 12,5 %            |
| Mitarbeiter (in Vollzeitkräfte umgerechnet)                                          | 102.062           | 77.053            | 80.456            | 78.291            | 68.849            |

<sup>1</sup> Die Anzahl der durchschnittlich ausstehenden Aktien (basic und verwässert) wurde für alle Perioden angepasst, um den Effekt der Bonuskomponente von Bezugsrechten, die im September 2010 im Rahmen der Kapitalerhöhung ausgegeben wurden, zu berücksichtigen.

<sup>2</sup> Quoten für 2009 und 2008 basieren auf dem überarbeiteten und vom Baseler Ausschuss 2004 präsentierten Eigenkapitalstandard (Basel II), der im deutschen Kreditwesengesetz und in der Solvabilitätsverordnung in deutsches Recht umgesetzt wurde. Quoten für 2007 und 2006 basieren auf dem Basel I-Standard und sind daher auf einer nicht vergleichbaren Basis berechnet. Die Kapitalquoten setzen das jeweilige Kapital in Beziehung zu den Risikoaktiva für das Kredit-, Markt- und Operationelle Risiko. Enthält keine Übergangsposten gemäß 64h Absatz 3 KWG.

## Patronatserklärung<sup>1</sup>

Die Deutsche Bank AG trägt für die folgenden Gesellschaften, abgesehen vom Fall des politischen Risikos, dafür Sorge, dass sie ihre vertraglichen Verbindlichkeiten erfüllen können:

|                                                                                                                                      |                                                     |
|--------------------------------------------------------------------------------------------------------------------------------------|-----------------------------------------------------|
| DB Investments (GB) Limited, London                                                                                                  | Deutsche Bank S.A./N.V., Brüssel                    |
| Deutsche Asset Management International GmbH, Frankfurt am Main                                                                      | Deutsche Bank, Sociedad Anónima Española, Barcelona |
| Deutsche Asset Management Investmentgesellschaft mbH, vormals DEGEF Deutsche Gesellschaft für Fondsverwaltung mbH, Frankfurt am Main | Deutsche Bank Società per Azioni, Mailand           |
|                                                                                                                                      | Deutsche Bank (Suisse) S.A., Genf                   |
| Deutsche Australia Limited, Sydney                                                                                                   | Deutsche Bank Trust Company Americas, New York      |
| Deutsche Bank A.Ş., Istanbul                                                                                                         | Deutsche Futures Singapore Pte Ltd., Singapur       |
| Deutsche Bank Americas Holding Corp., Wilmington                                                                                     | Deutsche Holdings (Malta) Ltd., St. Julians         |
| Deutsche Bank (China) Co., Ltd., Peking                                                                                              | Deutsche Morgan Grenfell Group plc, London          |
| Deutsche Bank Europe GmbH, Frankfurt am Main                                                                                         | Deutsche Securities Asia Limited, Hongkong          |
| Deutsche Bank Luxembourg S.A., Luxemburg                                                                                             | Deutsche Securities Limited, Hongkong               |
| Deutsche Bank (Malaysia) Berhad, Kuala Lumpur                                                                                        | DWS Holding & Service GmbH, Frankfurt am Main       |
| Deutsche Bank Polska S.A., Warschau                                                                                                  | DWS Investment GmbH, Frankfurt am Main              |
| Deutsche Bank (Portugal), S.A., Lissabon                                                                                             | DWS Investment S.A., Luxemburg                      |
| Deutsche Bank ZRt., Budapest                                                                                                         | IFN Finance B.V., Rotterdam                         |
| Deutsche Bank S.A., Buenos Aires                                                                                                     | VAT Deutsche Bank DBU, Kiew                         |
| Deutsche Bank S.A. – Banco Alemão, Sao Paulo                                                                                         | OOO Deutsche Bank, Moskau                           |

<sup>1</sup> Gesellschaften, mit denen ein Ergebnisabführungsvertrag besteht, sind in Note 42 „Anteilsbesitz“ gekennzeichnet.



# Glossar

## A

### Alternative A (Alt-A)

Begriff, unter dem im Zusammenhang mit dem US-amerikanischen Hypothekenmarkt Kredite an Kreditnehmer mit einer Bonität besser als ▶ Subprime, aber schlechter als ▶ Prime verstanden werden. Zur Bestimmung von Alt-A Positionen werden bankenspezifische Standards wie ▶ FICO-Bewertungen und ▶ Loan-to-Value-Kennzahlen angewandt.

### Alternative Assets/Investments

Direkte Investitionen in ▶ Private Equity, Wagniskapital, ▶ Mezzaninekapital, Immobilienkapitalanlagen und Anlagen in Leveraged-Buy-out-Fonds, Wagniskapitalfonds sowie ▶ Hedgefonds.

### Anteile ohne beherrschenden Einfluss

Die ehemals als Minderheitsanteile bezeichneten Beträge des Eigenkapitals eines Tochterunternehmens, das einem Mutterunternehmen weder unmittelbar noch mittelbar zugeordnet wird.

### Asset-backed Securities

Besondere Form verbriefter Zahlungsansprüche in Form von handelbaren Wertpapieren. Die entsprechenden Wertpapiere sind durch Strukturierung bestimmter Finanzaktiva entstanden (▶ Verbriefungen).

### Auction Rate Securities

Lang laufende Anleihen (meist 20 bis 30 Jahre) mit variablem Zinssatz. Die Höhe dieses Zinssatzes wird in regelmäßigen Auktionen festgesetzt.

### Aufrechnungsvereinbarungen

Bilaterale Vereinbarungen zwischen dem Konzern und einem Vertragspartner, welche für die einbezogenen Geschäfte sicherstellen, dass im Fall der Eröffnung eines Insolvenz- oder Konkursverfahrens nach der Aufrechnung von sämtlichen Forderungen und Verbindlichkeiten nur ein einziger Nettobetrag von einer Partei an die andere Partei geschuldet wird.

### Aufsichtsrechtliche Kapitalquote

Zentrale Kennzahl für Banken, dargestellt als prozentuales Verhältnis zwischen dem ▶ aufsichtsrechtlichen Kapital und der zusammengefassten aufsichtsrechtlichen Risikoposition, bestehend aus ▶ Kredit-, ▶ Markt- und ▶ operationellen Risiken nach Basel II. Die einzuhaltende Mindestkapitalquote beträgt 8 %. Grundsätzlich muss mindestens die Hälfte des regulatorischen Kapitals aus Kernkapital bestehen, was zu einer Mindestkernkapitalquote von 4 % führt.

### Aufsichtsrechtliches Handels- und Anlagebuch

Das aufsichtsrechtliche Handelsbuch ist definiert in § 1a KWG. Es umfasst Finanzinstrumente und Waren, die mit Handelsabsicht oder zum Zweck der Absicherung des ▶ Marktrisikos aus anderen Handelsbuchpositionen gehalten werden, ferner Pensions- und Darlehensgeschäfte, welche sich auf Handelsbuchpositionen beziehen, sowie Aufgabengeschäfte und Forderungen, die mit Positionen des Handelsbuchs unmittelbar verknüpft sind. Finanzinstrumente und Waren, die dem Handelsbuch zugerechnet werden, müssen handelbar oder absicherungsfähig sein. Das aufsichtsrechtliche Anlagebuch umfasst alle Positionen und Geschäfte, die nicht dem Handelsbuch zugerechnet werden.

### Aufsichtsrechtliches Kapital

Bankaufsichtsrechtlich anerkanntes Eigenkapital in Übereinstimmung mit der Baseler Eigenkapitalvereinbarung von 2004 für Kreditinstitute. Das Eigenkapital gemäß ▶ Basel II setzt sich zusammen aus:

- Tier-1-Kapital: vor allem Grundkapital, Rücklagen und bestimmte ▶ hybride Kapitalinstrumente,
- Tier-2-Kapital: insbesondere Genussrechtskapital, kumulative Vorzugsaktien, langfristige nachrangige Verbindlichkeiten und nicht realisierte Gewinne aus notierten Wertpapieren,
- Tier-3-Kapital: im Wesentlichen kurzfristige nachrangige Verbindlichkeiten und überschüssiges Tier-2-Kapital.

Tier-2-Kapital kann nur bis zur Höhe des Tier-1-Kapitals angerechnet werden, wobei noch zusätzlich die Anrechenbarkeit der langfristigen nachrangigen Verbindlichkeiten im Tier-2-Kapital auf 50 % des Tier-1-Kapitals beschränkt ist.

### Aufwand-Ertrag-Relation

Kennzahl zur Kosteneffizienz eines Unternehmens, die das Verhältnis der betrieblichen Aufwendungen zu den betrieblichen Erträgen abbildet.

### Ausfallwahrscheinlichkeit

Die Wahrscheinlichkeit des Ausfalls eines Geschäftspartners wird für den Zeitraum der nächsten zwölf Monate bestimmt und als Prozentsatz angegeben. Der Konzern beurteilt diese nicht für die Gesamtlauzeit der Transaktion. Die Ausfallwahrscheinlichkeit ist die primäre Messgröße für die Kreditwürdigkeit eines Geschäftspartners. Die numerischen Wahrscheinlichkeiten werden in eine 26-stufige Ratingskala überführt, welche den von internationalen Ratingagenturen verwendeten Ratingskalen ähnlich ist.

## B

### Backtesting

Verfahren zur Überprüfung der Vorhersagekraft der ▶ Value-at-Risk-Berechnungen. Hierbei werden auf täglicher Basis hypothetisch erzielte Gewinne und Verluste unter einer Buy-and-hold-Annahme mit den durch das Value-at-Risk-Modell prognostizierten Werten verglichen.

### Basel II

Eigenkapitalvorschriften des Baseler Ausschusses für Bankenaufsicht, auch Basel II genannt, welche die aufsichtsrechtlichen Kapitalanforderungen stärker auf die zugrunde liegenden Risiken ausrichten.

### Basel III

Beim G20-Gipfel im November 2010 verabschiedete Neufassung der internationalen Standards zur Kapitaladäquanz des Baseler Ausschusses für Bankenaufsicht. Ziel dieser Neufassung ist es, die globalen Kapital- und Liquiditätsvorschriften zu stärken, um die Stabilität des Bankensektors zu erhöhen. Bis 2019 werden durch die überarbeiteten Standards schrittweise die Mindestkapitalanforderungen für Banken erhöht und ein zusätzlicher Kapitalerhaltungspuffer sowie ein bankspezifischer antizyklischer Kapitalpuffer eingeführt. Darüber hinaus wird Basel III erstmals international abgestimmte Anforderungen an die Liquidität mit strengen kurz- und langfristigen Kennzahlen beinhalten. Die Umsetzung der neuen Vorschriften in deutsches Recht wird über die ► Solvabilitätsverordnung erfolgen.

### Broker/Brokerage

Broker nehmen Wertpapieraufträge von Banken und privaten Investoren an und führen sie im Auftrag des Kunden aus. Für seine Tätigkeit (Brokerage) erhält der Broker üblicherweise eine Provision.

### Buy-out

Kauf (vollständig oder teilweise) eines Unternehmens beziehungsweise bestimmter Unternehmensaktivitäten.

## C

### Cash Management

Beinhaltet die Verwaltung von liquiden Mitteln in Dollar, Euro und sonstigen Währungen für Unternehmen und Finanzinstitute zur Optimierung von Finanztransaktionen.

### Clearing

Die Übermittlung, Abstimmung und in bestimmten Fällen die Bestätigung von Zahlungsaufträgen.

### Collateralized Debt Obligations (CDOs)

► Asset-backed Securities, die mit Krediten, Schuldverschreibungen oder ► Derivaten besichert wurden.

### Commercial Mortgage-backed Securities (CMBS)

► Mortgage-backed Securities (MBS), die Kredite für gewerbliche Immobilien verbriefen.

### Credit Default Swap

Ein ► Kreditderivat, welches Kreditrisiken im Zusammenhang mit Darlehen, Schuldverschreibungen oder anderen kreditbezogenen Wertpapieren absichert. Die besicherte Partei zahlt im Allgemeinen einen festen Coupon über eine festgelegte Periode und erhält nur dann eine Zahlung, wenn ein bestimmtes im Kreditvertrag definiertes Ereignis, beispielsweise ein Zahlungsausfall aufgrund der Insolvenz eines Kreditnehmers, eintritt.

### Credit Linked Note

Wertpapiere, die ein ► Kreditderivat, meist einen ► Credit Default Swap, enthalten.

### Custody

Verwahrung und Verwaltung von Wertpapieren sowie zusätzliche Dienste im Wertpapierbereich.

## D

### Derivate

Finanzinstrumente, deren Bewertung sich überwiegend vom Preis, von den Preisschwankungen und den Preiserwartungen der zugrunde liegenden Basisinstrumente (beispielsweise Aktien, Anleihen, Devisen, Indizes) ableitet. Zu den Derivaten zählen insbesondere ► Swaps, ► Optionen und ► Futures.

### Durchschnittliches Active Equity

Der Konzern berechnet das Active Equity, um besser mit seinen Wettbewerbern vergleichbar zu sein. Das durchschnittliche Active Equity fließt in die Berechnung verschiedener Kennziffern ein. Hierbei handelt es sich jedoch nicht um eine Messgröße nach ► IFRS. Bei einem Vergleich der Kennzahlen des Konzerns, die auf dem durchschnittlichen Active Equity basieren, mit denen anderer Unternehmen sollten stets auch Abweichungen bei der Berechnung dieser Kennzahlen berücksichtigt werden. Die Positionen, um die das durchschnittliche den Deutsche Bank-Aktionären

zurechenbare Eigenkapital bereinigt wird, sind die durchschnittlichen unrealisierten Gewinne aus zur Veräußerung verfügbaren finanziellen Vermögenswerten und die durchschnittlichen Fair-Value-Anpassungen von Cash Flow Hedges (beide Bestandteile nach darauf entfallenden Steuern). Gleiches gilt für die durchschnittliche Dividendenzahlung, für die jedes Quartal eine Abgrenzung vorgenommen und die nach Zustimmung der Hauptversammlung einmal jährlich ausgezahlt wird.

## E

### Eigenkapitalrendite

(Return on Equity, RoE)

Grundsätzlich: Kennziffer zur Ertragslage eines Unternehmens, die das Ergebnis (Jahresüberschuss) im Verhältnis zum eingesetzten Eigenkapital darstellt. Hier: Ergebnis in Prozent des im Jahresdurchschnitt eingesetzten Eigenkapitals.

### Eigenkapitalrendite vor Steuern

(basierend auf dem ► durchschnittlichen Active Equity)

Prozentualer Anteil des den Deutsche Bank-Aktionären zurechenbaren Ergebnisses vor Steuern (annualisiert), das sich errechnet aus dem Ergebnis vor Steuern abzüglich von Anteilen ohne beherrschenden Einfluss, am ► durchschnittlichen Active Equity.

### Equitymethode

Bewertungsmethode für Beteiligungen an Unternehmen, auf die ein maßgeblicher Einfluss ausgeübt werden kann. Anteilige Jahresüberschüsse/(-fehlbeträge) des Beteiligungsunternehmens erhöhen (vermindern) den Beteiligungsbuchwert und gehen in die Gewinn- und Verlustrechnung ein. Ausschüttungen/Dividenden vermindern den Beteiligungsbuchwert, ohne die Gewinn- und Verlustrechnung zu berühren.

### Ergebnis je Aktie

Nach ► IFRS ermittelte Kennziffer, die den Gewinn, der den Aktionären der Gesellschaft zurechenbar ist, der durchschnittlichen Zahl an ausstehenden Stammaktien gegenüberstellt. Neben der Kennziffer Ergebnis je Aktie ist zusätzlich ein verwässertes Ergebnis je Aktie auszuweisen, wenn sich aus der angenommenen Wandlung und Ausübung ausstehender Aktienoptionen, noch nicht unverfallbarer zugeteilter Aktienrechte und wandelbarer Schuldtitel und bestimmter Terminkontrakte die Zahl der Aktien erhöhen kann.

### Erwarteter Verlust

Messung für Verluste, die durch ► Kredit- und ► operationelle Risiken innerhalb eines Jahres auf der Grundlage historischer Verlustdaten zu erwarten sind.

### Event-Risk-Szenarien

Szenarien, die erhebliche Ereignisse wie beispielsweise große Bewegungen in Zinsen oder Wechselkursen darstellen.

### Exposure

Geldbetrag, welcher der Bank bei Eintritt eines Verlusts aus einem eingegangenen Risiko, beispielsweise beim Ausfall eines Kreditnehmers oder Vertragspartners, verloren gehen kann.

## F

### Fair Value

Betrag, zu dem ein Vermögenswert oder eine Verbindlichkeit im Rahmen einer aktuellen Transaktion zwischen sachverständigen, vertragswilligen und unabhängigen Geschäftspartnern (ausgenommen im Rahmen eines Zwangsverkaufs oder einer Notabwicklung) ausgetauscht werden könnte.

### FICO-Bewertung

FICO ist die Abkürzung für die Fair Isaac Corporation, der Urheber der FICO Scores. Unter Anwendung mathematischer Modelle, berücksichtigen die FICO Scores verschiedene Faktoren in den folgenden fünf Kategorien, um die Kreditwürdigkeit zu bestimmen: Zahlungshistorie, aktuelle Schuldensituation, in Anspruch genommene

Kreditarten, Länge der Kredithistorie sowie neu aufgenommene Kredite. Ein FICO Score kann zwischen 300 und 850 liegen. Grundsätzlich indiziert ein FICO Score über 650, dass der Kreditnehmer eine sehr gute Kreditwürdigkeit hat. Bei FICO Scores unter 620 wird es substanziell schwieriger, eine Finanzierung zu günstigen Zinsen zu erhalten.

### Futures

Hinsichtlich Menge, Qualität und Liefertermin standardisierte Terminkontrakte, bei welchen zu einem bestimmten zukünftigen Zeitpunkt ein dem Geld- und Kapital-, Edelmetall- oder Devisenmarkt zugehöriges Handelsobjekt zum festgesetzten Kurs zu liefern beziehungsweise abzunehmen ist. Häufig ist bei derartigen Kontrakten (beispielsweise Terminkontrakten auf Basis von Aktienindizes) zur Erfüllung der bestehenden Verpflichtung anstelle einer Wertpapierlieferung oder -abnahme eine Ausgleichszahlung zu leisten.

## G

### Geschäftsrisiko (Business Risk)

Risiko, das aufgrund potenzieller Änderungen in den Rahmenbedingungen wie Marktumfeld, Kundenverhalten sowie technischem Fortschritt entsteht und die Ertragslage des Konzerns beeinträchtigen kann, wenn sich dieser nicht zügig auf die veränderten Bedingungen einstellt.

### Goodwill

Ein Vermögenswert, der den zukünftigen wirtschaftlichen Nutzen aus anderen, bei einem ► Unternehmenszusammenschluss erworbenen Vermögenswerten darstellt, die nicht einzeln identifizierbar sind. Goodwill (auch Geschäfts- oder Firmenwert) wird erfasst als positiver Unterschiedsbetrag zwischen den ► Fair Values der vom Erwerber übertragenen Gegenleistung und den identifizierbaren Vermögenswerten und Schulden des erworbenen Geschäftsbetriebs.

## H

### Hedge Accounting

Bilanzielle Abbildung von Absicherungsge-  
schäften, die bestimmten Bedingungen unterliegt. Solche Geschäfte sichern bestimmte, meist finanzielle Risiken ab, indem

sie diese gegenläufig abbilden. Aufgrund dieser Gestaltung können Risiken teilweise oder vollständig kompensiert werden. Unterschieden wird zwischen dem Grundgeschäft, welches das Risiko beziehungsweise die Risiken begründet, und dem Sicherungs- oder Hedgegeschäft, welches die Risiken mindert.

### Hedgefonds

Fonds, der normalerweise von institutionellen Anlegern und vermögenden Privatpersonen gezeichnet wird. Hedgefonds zählen zu den sogenannten ► Alternativen Investments. Sie unterliegen keinen oder zumindest keinen strengen regulatorischen Anforderungen und haben daher die Möglichkeit, sich Anlageinstrumenten und -strategien zu bedienen, die für Investmentfonds nicht erlaubt sind. Beispiele sind Leerverkäufe, hohe Fremdverschuldung und ► Derivate. Hedgefonds bieten die Chance auf eine hohe Rendite, bergen aber auch ein Risiko des Kapitalverlusts in sich; ihre Renditen sind daher nicht mit den Renditen traditioneller Anlagewerte vergleichbar.

### High-Yield-Anleihen

Festverzinsliche Wertpapiere, bei denen der Emittent einer niedrigen Bonitätseinstufung unterliegt. Sie bieten eine im Vergleich zu Papieren mit besserer Bonitätseinstufung höhere Verzinsung, unterliegen jedoch größeren Risiken.

### Hybride Kapitalinstrumente (Trust Preferred Securities)

Kapitalinstrumente, die sich durch gewinnabhängige Zinszahlungen auszeichnen. Soweit im Verlustfall ausgefallene Zinszahlungen nicht nachgeholt werden (nicht kumulative Trust Preferred Securities) und die Papiere kein festgelegtes Fälligkeitsdatum besitzen beziehungsweise durch die Gläubiger nicht kündbar sind, gehören sie aufsichtsrechtlich zum Tier-1-Kapital. Andernfalls sind sie dem Tier-2-Kapital zuzurechnen (zum Beispiel kumulative Trust Preferred Securities).

## **I** **IFRS (International Financial Reporting Standards)/vornorms IAS (International Accounting Standards)**

Rechnungslegungsstandards des International Accounting Standards Board, die eine weltweit transparente und vergleichbare Bilanzierung und Publizität sicherstellen sollen. Maßgeblicher Zweck ist die Bereitstellung entscheidungsrelevanter Informationen, insbesondere für Investoren.

## **Investment Banking**

Sammelbegriff für kapitalmarktorientierte Geschäfte. Hierunter fallen insbesondere Emission und Handel von Wertpapieren und ihren ► Derivaten, Zins- und Währungsmanagement, Corporate Finance, Beratung bei Übernahmen und Fusionen, strukturierte Finanzierungen und ► Private Equity.

## **K**

### **Konfidenzniveau**

Im Rahmen des ► Value-at-Risk-Konzepts sowie des ► Ökonomischen Kapitals die berechnete Wahrscheinlichkeit, mit der ein tatsächlicher Verlust den potenziellen Verlust, wie er durch den Value-at-Risk oder das Ökonomische Kapital geschätzt wurde, nicht übersteigt.

### **Kreditderivate**

Finanzinstrumente, mittels derer das mit Darlehen, Anleihen oder anderen Risikoaktiva beziehungsweise Marktrisikopositionen verbundene ► Kreditrisiko auf als sogenannte Sicherungsgeber auftretende Parteien übertragen wird. Dabei werden die ursprünglichen Kreditbeziehungen der Sicherungsnehmer (die Parteien, welche die Kreditrisiken abgeben) weder verändert noch neu begründet.

### **Kreditrisiko**

Risiko, dass Kunden ihren vertraglich vereinbarten Zahlungsverpflichtungen nicht nachkommen. Das Kreditrisiko umfasst Ausfall-, ► Länder- und Abwicklungsrisiken.

## **L** **Länderrisiko**

Risiko, dass dem Konzern in einem beliebigen Land ein Verlust aufgrund verschlechterter ökonomischer Bedingungen, politischer und sozialer Unruhen, Verstaatlichungen und Enteignungen, staatlicher Nichtanerkennung von Auslandsschulden, durch Devisenkontrollen oder eine Abwertung der Landeswährung entsteht.

### **Latente Steuern**

Zukünftig zu zahlende oder zu erstattende Ertragsteuern, die aus unterschiedlichen Wertansätzen zwischen Steuer- und Handelsbilanz resultieren, oder der Wert nicht genutzter steuerlicher Verlustvorträge oder anderer steuerlicher Anrechnungsguthaben. Sie stellen zum Zeitpunkt der Bilanzierung noch keine tatsächlichen Forderungen oder Verbindlichkeiten gegenüber den Finanzämtern dar.

### **Leverage Ratio**

Verhältnis von Bilanzsumme zu Eigenkapital.

### **Leveraged-Finance-Aktivitäten**

Finanzierung eines Unternehmenskaufs mittels hoher Fremdkapitalaufnahme (Leverage).

### **Liquiditätsrisiko**

Risiko, dass der Konzern möglicherweise nicht oder nur zu überhöhten Kosten in der Lage ist, seine Zahlungsverpflichtungen bei Fälligkeit zu erfüllen.

### **Loan-to-Value-Kennzahl**

Kennzahl, die den Beleihungswert zeigt, in dem der Kreditbetrag in Relation zum Wert der Immobilie gesetzt wird.

## **M**

### **Mark-to-market-Bewertung**

Bewertung zu aktuellen Marktpreisen. Gilt zum Beispiel für Handelsaktivitäten.

### **Marktrisiko**

Resultiert aus der Unsicherheit über Veränderungen von Marktpreisen und -kursen (inklusive Zinsen, Aktienkursen, Wechselkursen und Rohwarenpreisen) sowie den zwischen ihnen bestehenden Korrelationen und ihren Volatilitätsniveaus.

### **Methode der laufenden Einmalprämien (Projected Unit Credit Method)**

Die gemäß IAS 19 vorgeschriebene versicherungsmathematische Bewertungsmethode zur Bewertung von Pensionsverpflichtungen und dem damit verbundenen Dienstzeitaufwand. Es handelt sich um ein Ansammlungsverfahren, nach dem die Verpflichtung mit dem versicherungsmathematischen Barwert des am Bewertungsstichtag erdienten Versorgungsanspruchs unter Berücksichtigung anzunehmender zukünftiger Leistungssteigerungen anzusetzen ist.

### **Mezzanine**

Flexible Mischform zwischen Eigen- und Fremdkapital. Hier: langfristiges nachrangiges Finanzierungsinstrument zur Wachstumsfinanzierung, das gleichzeitig die wirtschaftliche Eigenkapitalbasis stärkt.

### **Monolineversicherer**

Versicherer, die Kreditversicherungen für Emittenten von Schuldverschreibungen und andere Marktteilnehmer anbieten.

### **Monte Carlo-Simulation**

Monte Carlo-Methoden werden verwendet, um (komplexe) Instrumente, Portfolios und Investments zu bewerten und zu analysieren. Dies erfolgt durch Simulation der verschiedenen unsicheren Einflüsse auf den Wert des Instruments und anschließende Bestimmung des durchschnittlichen Werts aus der Bandbreite der resultierenden Ergebnisse.

### **Mortgage-backed Securities (MBS)**

► Asset-backed Securities, die Hypothekenkredite verbriefen. Unterkategorien sind ► Residential Mortgage-backed Securities (RMBS) und ► Commercial Mortgage-backed Securities (CMBS).

## N

### Negativer Goodwill

Im Rahmen eines ► Unternehmenszusammenschlusses als Ertrag in der Gewinn- und Verlustrechnung erfasster Unterschiedsbetrag zwischen dem Anteil des Erwerbers an dem Nettobetrag des ► Fair Value der erworbenen Vermögenswerte und Schulden und dem Betrag der übertragenen Gegenleistung.

### Nettovermögen je ausstehende Stammaktie

Nettovermögen je ausstehende Stammaktie (basic) ergibt sich durch Division des den Deutsche Bank-Aktionären zurechenbaren Eigenkapitals durch die Anzahl der ausstehenden Stammaktien (basic, beide zum Bilanzstichtag).

## O

### Ökonomisches Kapital

Messgröße, anhand derer mit einem hohen Maß an Sicherheit das Eigenkapital ermittelt werden kann, das zu einem beliebigen Zeitpunkt benötigt wird, um unerwartete Verluste aus dem aktuellen Engagement aufzufangen.

### Operationelles Risiko

Potenzieller Eintritt von Verlusten im Zusammenhang mit Mitarbeitern, vertraglichen Vereinbarungen und deren Dokumentation, Technologie, Versagen oder Zusammenbruch der Infrastruktur, externen Einflüssen und Kundenbeziehungen. Diese Definition schließt rechtliche und aufsichtsrechtliche Risiken ein, jedoch nicht das allgemeine ► Geschäfts- und ► Reputationsrisiko.

### Option

Recht, den zugrunde liegenden Optionsgegenstand (beispielsweise Wertpapiere oder Devisen) von einem Vertragspartner (Stillhalter) zu einem vorweg fest vereinbarten Preis zu einem bestimmten Zeitpunkt beziehungsweise in einem bestimmten Zeitraum zu kaufen (Kaufoption/Call) oder an diesen zu verkaufen (Verkaufsoption/Put).

## OTC-Derivate

Finanzinstrumente (► Derivate), die nicht standardisiert sind und nicht an einer Börse, sondern direkt zwischen den Marktteilnehmern (Over-the-Counter) gehandelt werden.

## P

### Personalaufwandsquote

Prozentualer Anteil des Personalaufwands an den Erträgen insgesamt, die als Zinsüberschuss vor Risikovorsorge im Kreditgeschäft plus zinsunabhängige Erträge definiert sind.

### Portfolio

Allgemein: Teil oder Gesamtheit einer oder aller Klassen von Vermögenswerten (zum Beispiel Wertpapiere, Kredite, Beteiligungen oder Immobilien). Die Portfoliobildung dient primär der Risikostreuung. Hier: Zusammenfassung ähnlicher Geschäfte, insbesondere von Wertpapieren und/oder ► Derivaten, unter Preisrisikoaspekten.

### Positionswert

Der erwartete ausstehende Kreditbetrag gegenüber einem Kreditnehmer zum Zeitpunkt seines Ausfalls.

### Prime

Begriff, unter dem im Zusammenhang mit dem US-amerikanischen Hypothekenmarkt Kredite an Kreditnehmer mit hoher Bonität verstanden werden.

### Prime Brokerage

Eine Dienstleistung, die ► Clearing, Abwicklung von Handelsgeschäften, ► Custody, Aufstellung von Abschlüssen und Finanzierung für institutionelle Anleger beinhaltet.

### Private Banking

Geschäft mit anlageorientierten vermögenden Kunden.

### Private Equity

Kapitalbeteiligung an nicht börsennotierten Unternehmen, zum Beispiel Wagniskapital und Buy-out-Fonds.

## R

### Rating

Die objektive Beurteilung der zukünftigen wirtschaftlichen Situation – insbesondere der Ausfallwahrscheinlichkeit – von Kunden, die von aktuellen Charakteristika und Annahmen ausgeht. Die Methoden für die Zuordnung von Ratings hängen von der Kundenart und den verfügbaren Informationen ab. Eine große Methodenanzahl wird für die Beurteilung des ► Kreditrisikos angewendet wie zum Beispiel Expertensysteme und ökonomische Ansätze.

### Repogeschäft

#### (Repurchase Agreement)

Rückkaufvereinbarung bei Wertpapiergeschäften (echte Pensionsgeschäfte, deren Gegenstand weiterhin dem Pensionsgeber zuzurechnen ist). Aus Sicht des Pensionsnehmers wird von einem Reverse-Repo-Geschäft gesprochen.

### Reputationsrisiko

Risiko, dass durch die öffentliche Berichterstattung über eine Transaktion, einen Geschäftspartner oder eine Geschäftspraxis, an der ein Kunde beteiligt ist, das öffentliche Vertrauen in den Konzern negativ beeinflusst wird.

### Residential Mortgage-backed Securities (RMBS)

► Mortgage-backed Securities (MBS), die Wohnungsbaukredite verbrieft.

### Risikogewichtete Aktiva

#### (Risk-weighted Assets, RWA)

Risikogewichtete Aktiva sind mit ► Kredit-, ► Markt- und/oder ► operationellen Risiken behaftete Positionen, die entsprechend aufsichtsrechtlichen Anforderungen gewichtet wurden. RWA ergeben sich aus den aufsichtsrechtlichen Eigenkapitalanforderungen, multipliziert mit dem Faktor 12,5. Anders ausgedrückt, betragen die Kapitalanforderungen 8 % der RWA.

## S

### Sachaufwandsquote

Prozentualer Anteil des zinsunabhängigen Sachaufwands, der sich aus den zinsunabhängigen Aufwendungen abzüglich Personalaufwand zusammensetzt, an den Erträgen insgesamt, die als Zinsüberschuss vor Risikovorsorge im Kreditgeschäft plus zinsunabhängige Erträge definiert sind.

### Sarbanes-Oxley Act (SOx)

US-Kapitalmarktgesetz aus dem Jahr 2002, das als Reaktion auf eine Anzahl von Bilanzskandalen die Corporate Governance stärken und damit das Vertrauen der Investoren in den Kapitalmarkt zurückgewinnen soll. Die neuen und erweiterten Regelungen gelten für alle an einer US-Börse gelisteten Unternehmen und reichen von zusätzlichen Vorstandsaufgaben bis zu strafrechtlichen Bestimmungen.

### Seed Investments

Anfängliche Aufwendungen für Marktforschung und/oder Maßnahmen im Zusammenhang mit Investmentfonds.

### Segmentberichterstattung

Offenlegung von Vermögens-, Ergebnis- und sonstigen Informationen eines Unternehmens, untergliedert nach Tätigkeitsbereichen (Unternehmensbereichen) und geografischen Merkmalen (Regionen).

### Shareholder Value

Managementkonzept, das dauerhafte Wertsteigerungen des Unternehmens in den Mittelpunkt strategischer und operativer Entscheidungen stellt. Kerngedanke ist, dass nur Renditen, die über den Eigenkapitalkosten liegen, Wert für die Aktionäre schaffen.

### Solvabilitätsverordnung

Deutsche Verordnung über die angemessene Eigenkapitalausstattung von Instituten, Institutgruppen und Finanzholdinggruppen, mit der das überarbeitete Kapitalregelwerk des Baseler Ausschusses von 2004, auch bekannt als ▶ Basel II, in deutsches Recht umgesetzt wurde.

## Subprime

Begriff, unter dem im Zusammenhang mit dem US-amerikanischen Hypothekenmarkt Kredite an Kreditnehmer mit geringer Bonität verstanden werden. Zur Bestimmung von Subprime-Risikopositionen werden bankenspezifische Standards wie ▶ FICO-Bewertungen und ▶ Loan-to-Value-Kennzahlen angewandt.

### Sukzessiver Erwerb

Bei einem sukzessiven Erwerb erlangt der Erwerber die Beherrschung eines erworbenen Unternehmens, an welchem er unmittelbar vor dem Erwerbszeitpunkt bereits einen Eigenkapitalanteil hält (auch als schrittweiser ▶ Unternehmenszusammenschluss bezeichnet). Bei solchen Transaktionen hat der Erwerber seinen zuvor an dem erworbenen Unternehmen gehaltenen Eigenkapitalanteil zu dem zum Erwerbszeitpunkt geltenden beizulegenden ▶ Fair Value neu zu bestimmen und den daraus resultierenden Gewinn oder Verlust gegebenenfalls in der Gewinn- und Verlustrechnung zu erfassen.

### Swaps

Grundsätzlich: Austausch von Zahlungsströmen. Zinsswaps: Tausch von Zinszahlungsströmen gleicher Währung mit unterschiedlichen Konditionen (beispielsweise fest/variabel). Währungsswaps: Tausch von Zinszahlungsströmen und Kapitalbeträgen in unterschiedlichen Währungen.

## U

### Unternehmenszusammenschluss

Eine Transaktion, durch die ein Erwerber die Beherrschung über einen Geschäftsbetrieb erlangt. Dies betrifft den Erwerb von Anteilen an einer Gesellschaft oder deren einzelner Vermögenswerte und Schulden, ebenso wie die Aufstockung bestehender Eigenkapitalanteile (▶ sukzessiver Erwerb). Häufig beinhaltet dies auch den Ansatz eines ▶ Goodwill.

## V

### Value-at-Risk

Misst für ein gegebenes ▶ Portfolio den potenziellen künftigen Verlust (bezogen auf den Marktwert), der unter normalen Marktbedingungen in einer bestimmten Periode und mit einem bestimmten ▶ Konfidenzniveau nicht überschritten wird.

### Verbriefungen

Schaffung von handelbaren Wertpapieren aus Forderungen, Einlagen (das heißt zukünftigen Zahlungsströmen) oder Eigentumsrechten im weiteren Sinne. Beispiele sind ▶ Asset-backed Securities und ▶ Mortgage-backed Securities. Diese Wertpapiere werden häufig von Zweckgesellschaften ausgegeben, die allein der Begebung solcher Wertpapiere dienen und deren Vermögen aus den dazu eingebrachten Vermögenswerten besteht.

### Verlustquote bei Ausfall

Die Verlustquote bei Ausfall bemisst das wahrscheinliche Verlustausmaß bei einem Ausfall des Geschäftspartners. Sie ist eine Schätzung des Risikopositionsteils in Prozent, der bei einem Ausfallereignis uneinbringlich ist, und stellt daher die Schwere eines Verlusts dar.

## W

### Wrapped Bond

Schuldverschreibung, die von Dritten versichert oder garantiert wird.

## Z

### Zielgrößendefinition

Bestimmte signifikante Gewinne (wie Gewinne aus dem Verkauf von Industriebeteiligungen, Geschäftsfeldern oder Immobilien) oder signifikante Aufwendungen (wie Restrukturierungsaufwendungen, Goodwillabschreibungen oder Aufwendungen aus Rechtsstreitigkeiten) werden in der Zielgrößendefinition des Konzerns unberücksichtigt gelassen, wenn sie keine Bedeutung für den zukünftigen Erfolg der Kerngeschäftsfelder der Deutschen Bank haben.



## Impressum – Publikationen

Deutsche Bank Aktiengesellschaft  
Taunusanlage 12  
60262 Frankfurt am Main  
Telefon: (0 69) 9 10 00  
[deutsche.bank@db.com](mailto:deutsche.bank@db.com)

Aktionärshotline:  
(08 00) 9 10 80 00

Hauptversammlungshotline:  
(08 00) 1 00 47 98

Investor Relations:  
(0 69) 9 10 3 80 80  
[db.ir@db.com](mailto:db.ir@db.com)

**Publikationen zum Jahresabschluss**  
Bitte beachten Sie, dass der Geschäftsbericht des Deutsche Bank-Konzerns aus zwei separaten Teilen, dem Jahresbericht 2010 und dem Finanzbericht 2010, besteht.

- **Jahresbericht 2010**  
(in Deutsch und Englisch)
- **Finanzbericht 2010**  
(in Deutsch und Englisch)
- **Annual Report 2010 on Form 20-F**  
(in Englisch)
- **Jahresabschluss und Lagebericht der Deutschen Bank AG 2010**  
(in Deutsch und Englisch)
- **Verzeichnis der Beiratsmitglieder**  
(in Deutsch)
- **Gesellschaftliche Verantwortung – Bericht 2010**  
(ab Mai 2011 in Deutsch und Englisch)

**Bestellmöglichkeiten:**  
E-Mail – Internet  
[service-center@bertelsmann.de](mailto:service-center@bertelsmann.de)  
[www.deutsche-bank.de/10](http://www.deutsche-bank.de/10)

Fax  
(0 18 05) 07 08 08

Telefon  
(0 18 05) 80 22 00

postalisch  
arvato logistics services  
Bestellservice Deutsche Bank  
Gottlieb-Daimler-Straße 1  
D-33428 Harsewinkel

Online  
Jahresbericht 2010 und  
Finanzbericht 2010 im Internet:  
[www.deutsche-bank.de/10](http://www.deutsche-bank.de/10)

### Hinweis in Bezug auf zukunftsgerichtete Aussagen

Dieser Bericht enthält zukunftsgerichtete Aussagen. Zukunftsgerichtete Aussagen sind Aussagen, die nicht Tatsachen der Vergangenheit beschreiben, sie umfassen auch Aussagen über unsere Annahmen und Erwartungen sowie die zugrunde liegenden Annahmen. Diese Aussagen beruhen auf Planungen, Schätzungen und Prognosen, die der Geschäftsleitung der Deutschen Bank derzeit zur Verfügung stehen. Zukunftsgerichtete Aussagen beziehen sich deshalb nur auf den Tag, an dem sie gemacht werden. Wir übernehmen keine Verpflichtung, solche Aussagen angesichts neuer Informationen oder künftiger Ereignisse weiterzuentwickeln.

Zukunftsgerichtete Aussagen beinhalten naturgemäß Risiken und Unsicherheitsfaktoren. Eine Vielzahl wichtiger Faktoren kann dazu beitragen, dass die tatsächlichen Ergebnisse erheblich von zukunftsgerichteten Aussagen abweichen. Solche Faktoren sind etwa die Verfassung der Finanzmärkte in Deutschland, Europa, den USA und andernorts, wo wir einen erheblichen Teil unserer Erträge aus dem Wertpapierhandel erzielen, der mögliche Ausfall von Kreditnehmern oder Kontrahenten von Handelsgeschäften, die Umsetzung unserer Managementagenda, die Verlässlichkeit unserer Grundsätze, Verfahren und Methoden zum Risikomanagement sowie andere Risiken, die in den von uns bei der US Securities and Exchange Commission (SEC) hinterlegten Unterlagen dargestellt sind. Diese Faktoren sind in unserem SEC-Bericht nach „Form 20-F“ vom 15. März 2011 im Abschnitt „Risk Factors“ im Detail dargestellt. Dieses Dokument ist auf Anfrage bei uns erhältlich oder unter [www.deutsche-bank.com/ir](http://www.deutsche-bank.com/ir) verfügbar.





## 2011

28. April 2011

Zwischenbericht zum 31. März 2011

26. Mai 2011

Hauptversammlung in der Festhalle  
Frankfurt am Main (Messegelände)

27. Mai 2011

Dividendenzahlung

26. Juli 2011

Zwischenbericht zum 30. Juni 2011

25. Oktober 2011

Zwischenbericht zum 30. September 2011

## 2012

02. Februar 2012

Vorläufiges Jahresergebnis für das Geschäftsjahr 2011

20. März 2012

Geschäftsbericht 2011 und Form 20-F

26. April 2012

Zwischenbericht zum 31. März 2012

31. Mai 2012

Hauptversammlung in der Festhalle  
Frankfurt am Main (Messegelände)

01. Juni 2012

Dividendenzahlung

31. Juli 2012

Zwischenbericht zum 30. Juni 2012

30. Oktober 2012

Zwischenbericht zum 30. September 2012
