# Supplementary material
Source: publisher site journal article supplement (https://www.degruyterbrill.com/publication/isbn/9783110432879/downloadAsset/9783110432879_Elektronischer_Anhang_2.zip)
Supplement: Supplementary file 35 [file Deutsche Bank Leitbild und Marke.pdf › Korpustexte/Korpustexte pdf/Deutsche Bank/Deutsche Bank Leitbild und Marke.pdf]

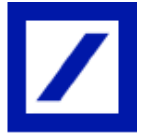

## Leitbild und Marke

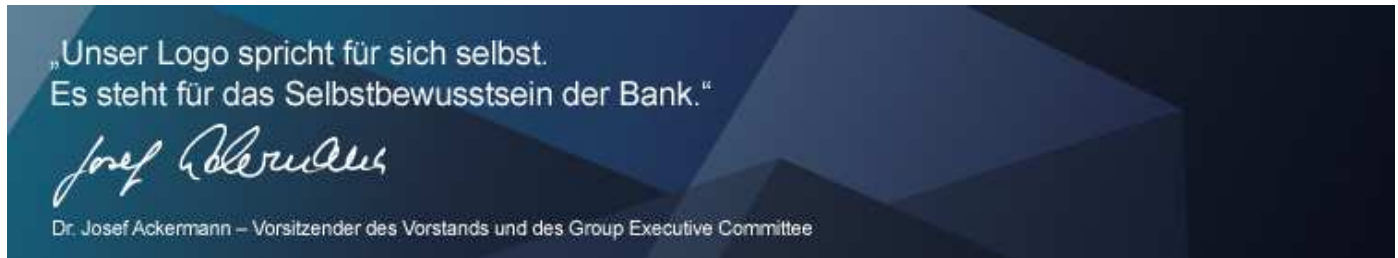

### Unser Leitbild

Wir wollen der weltweit führende Anbieter von Finanzlösungen sein und nachhaltig Wert schaffen – für unsere Kunden, unsere Aktionäre, unsere Mitarbeiter und für die Gesellschaft als Ganzes.

Unser Leitbild gibt unserem Geschäftsmodell eine klare Ausrichtung. Grundlage unseres Leitbildes ist unsere Marke. Jede große Marke hat einen eindeutigen Kern – eine zentrale Idee, die sie prägt und trägt. Diese Idee drückt aus, wofür man steht.

Sie ist Richtschnur und Maßstab für alle Aktivitäten – von den Produkten über den Service, das Handeln der Mitarbeiter bis hin zur Kommunikation des Unternehmens. Die Idee, die die Marke Deutsche Bank prägt, ist stark und unmissverständlich.

### Unsere Marke

Die Deutsche Bank hat ein klares Profil: Sie steht für Leistung – im Geschäft und darüber hinaus. Die Verbindung von Passion und Präzision macht unsere Leistung aus und gibt uns das Selbstbewusstsein, Neues offensiv anzugehen. Wir stellen Herkömmliches immer wieder in Frage und entwickeln neue Lösungen für alle, die mit uns zusammenarbeiten.

Starke Marken schaffen starke Gefühle. Persönlichkeit entscheidet über Attraktivität. Das ist bei Marken nicht anders als bei Menschen. Charakter und Persönlichkeit helfen zu entscheiden, wem wir vertrauen, wen wir bewundern und mit wem wir arbeiten möchten.

Unser Claim war schon immer mehr als ein Werbespruch. Er steht für die Art, wie wir handeln, er beschreibt unsere Haltung und unsere Leistungsfähigkeit bei allem, was wir für unsere Kunden tun - weit über Zahlen und Produkte hinaus. Visuell bringen wir dies noch emotionaler, passionierter und stärker zum Ausdruck, indem unser Claim eine prominentere Rolle spielt: Handgeschrieben verleiht er dem Versprechen der Marke - Leistung aus Leidenschaft - noch mehr Gewicht und gibt ihm eine persönliche Note.

*Leistung aus Leidenschaft*

### Unsere Persönlichkeit

/ir sind:  
assioniert

istung ist unsere Leidenschaft.

„Wenn diese Leidenschaft beruht auf dem Vertrauen, das Menschen in uns setzen. Dabei kommt es auf jeden Einzelnen an. Jeder macht einen Unterschied.“

„Leistung aus Leidenschaft“ ist deshalb mehr als ein Slogan – es ist die Art, wie wir handeln. Als EINE Bank.

**/ir sind:**

**Präzise**

Wir sind – aus Deutschland heraus – ein weltweit agierendes Unternehmen. Damit stehen wir für Präzision und Qualität. Wir gehen den Dingen auf den Grund. Darum können wir Sachverhalte einfach und klar darstellen. Unser Streben nach Spitzenleistungen ist das Fundament für alles, was wir tun. Die einzigartige Verbindung von Passion und Präzision sorgt für eine Stabilität, die Stärke und den Erfolg der Deutschen Bank.

**/ir sind:**

**Selbstbewusst**

„Die meritokratische Kultur und Tradition prägen das Selbstvertrauen der Deutschen Bank. Wir verstehen uns als zuverlässiger Partner für die Menschen, die ehrgeizige Ziele verfolgen – im Geschäftsleben und darüber hinaus. Für uns sind Führung und eine offene Haltung die Grundlage, um soziales Kapital zu schaffen.“

**/ir sind:**

**Offen für Neues**

„In unserem Verständnis von Leistung gehört es, Neuem gegenüber aufgeschlossen zu sein. Wir stellen Herkömmliches in Frage. Die Veränderungen, die die Globalisierung mit sich bringt, gehen wir offensiv an. Vielfalt ist unsere Stärke. Wir begreifen Innovation als gesellschaftliche Ressource und schaffen so Mehrwert für alle, die mit uns arbeiten.“

**Unsere Werte**

Was uns wichtig ist und unser Handeln im Sinne der Marke prägt:

**Leistung** – Leistung bestimmt unser Handeln. **Vertrauen** – Unser Handeln ist von Verlässlichkeit, Fairness und Ehrlichkeit geprägt. **Teamwork** – die Vielfalt unserer Mitarbeiter und Geschäftsfelder macht uns in der Zusammenarbeit erfolgreich. **Innovation** – Wir stellen herkömmliche Ansätze immer wieder in Frage und entwickeln neue Lösungen zum Nutzen unserer Kunden. **Kundenfokus** – Der Kunde steht im Mittelpunkt all unserer Aktivitäten. Wir orientieren uns kompromisslos an seinen Zielen und Wünschen.

**Unser Versprechen**

Was unsere Zielgruppen von unserer Marke erwarten können:

**Spitzenleistungen**

„In der Entwicklung und Umsetzung von Konzepten, in der Beratung, bei Produkten und im Service – stets EINE Bank präsentierend mit all ihren Fähigkeiten und Ressourcen“

**Kundenorientierte Lösungen**

„Verschiedene Kundenbedürfnisse verstehen, Mehrwert bieten, Vertrauen bilden und anhaltende Partnerschaften aufbauen“

**Verantwortung**

„Richtig handeln, an morgen denken, transparent agieren und Führung zeigen“
