# Supplementary material
Source: publisher site journal article supplement (https://www.degruyterbrill.com/publication/isbn/9783110432879/downloadAsset/9783110432879_Elektronischer_Anhang_2.zip)
Supplement: Supplementary file 37 [file Lufthansa Leitlinien.pdf › Korpustexte/Korpustexte pdf/Deutsche Lufthansa/Lufthansa Leitlinien.pdf]

# **Leitlinien**

## **Langfristige Profitabilität**

Das herausragende strategische Leitbild des Konzerns ist die langfristige Wertschaffung bei profitabilem Wachstum. Die Lufthansa soll hinsichtlich dieser Wertschaffung zur führenden europäischen Netzwerk-Fluggesellschaft ausgebaut werden. Als Messgröße dient die in der Wertorientierten Konzernsteuerung definierte Kennzahl Cash Value Added (CVA).

## **Fokus auf Kundennutzen**

Der Kunde steht im Zentrum. Wir richten uns an den Kundenbedürfnissen aus und bieten darauf zugeschnittene Produkte an.

## **Ausrichtung an Kernkompetenzen**

Wir richten unsere Aktivitäten konsequent an unseren Kernkompetenzen aus. Dazu gehören das Management von Flugnetzen, Partnerschaften und operativen Abläufen am Boden und in der Luft sowie die Bereitstellung und Pflege von Infrastruktur und Produktionsfaktoren.

## **Vorsprung durch Systemintegration**

Wir bauen unsere Wettbewerbsfähigkeit gegenüber anderen Standorten, Fluggesellschaften und Allianzen durch eine starke Systemintegration aus. Wir arbeiten mit wesentlichen Partnern, Lieferanten und Infrastruktur-Anbietern eng zusammen, um die Kernprozesse zu integrieren und zu optimieren.

## **Attraktives Arbeitsumfeld**

Unsere Mitarbeiter sind ein wesentlicher Erfolgsfaktor. Wir bieten ihnen gute Arbeitsbedingungen, angemessene Weiterentwicklungsmöglichkeiten und eine fördernde und internationale Unternehmenskultur. Dadurch sind wir ein attraktiver Arbeitgeber für qualifizierte, motivierte und dienstleistungsorientierte Mitarbeiter.

## **Gesellschaftliche Verantwortung**

Balance halten ist für uns Verpflichtung. Umweltschutz und nachhaltige Entwicklung sind vorrangige Ziele unserer Unternehmenspolitik. Zudem engagieren wir uns aktiv in sozialen Projekten.

<http://investor-relations.lufthansa.com/fakten-zum-unternehmen/konzernstrategie/leitlinien.html>
