# Supplementary material
Source: publisher site journal article supplement (https://www.degruyterbrill.com/publication/isbn/9783110432879/downloadAsset/9783110432879_Elektronischer_Anhang_2.zip)
Supplement: Supplementary file 38 [file Deutsche Post Daten und Fakten.pdf › Korpustexte/Korpustexte pdf/Deutsche Post/Deutsche Post Daten und Fakten.pdf]

## Deutsche Post

|                    |                                                                                                                                                                                                                                                                                                                                                                                                                                                                                                                                                                                                                                                                                                                                                                                                                                                                                                                                                                                                                                                                                |
|--------------------|--------------------------------------------------------------------------------------------------------------------------------------------------------------------------------------------------------------------------------------------------------------------------------------------------------------------------------------------------------------------------------------------------------------------------------------------------------------------------------------------------------------------------------------------------------------------------------------------------------------------------------------------------------------------------------------------------------------------------------------------------------------------------------------------------------------------------------------------------------------------------------------------------------------------------------------------------------------------------------------------------------------------------------------------------------------------------------|
| <b>Unternehmen</b> | Deutsche Post AG (DPAG)                                                                                                                                                                                                                                                                                                                                                                                                                                                                                                                                                                                                                                                                                                                                                                                                                                                                                                                                                                                                                                                        |
| <b>Bereich</b>     | BRIEF                                                                                                                                                                                                                                                                                                                                                                                                                                                                                                                                                                                                                                                                                                                                                                                                                                                                                                                                                                                                                                                                          |
| <b>Hauptsitz</b>   | Bonn, Deutschland                                                                                                                                                                                                                                                                                                                                                                                                                                                                                                                                                                                                                                                                                                                                                                                                                                                                                                                                                                                                                                                              |
| <b>Profil</b>      | <p>Die Deutsche Post ist der einzige Universaldienstleister von Postdiensten in Deutschland. Der Briefdienstleister ist Teil des globalen Logistikkonzerns Deutsche Post DHL.</p> <p>Die Deutsche Post befördert Briefe und Pakete in Deutschland und international, ist Spezialist für Dialogmarketing, die Verteilung von Presseerzeugnissen und Gesamtlösungen für die physische und elektronische Unternehmenskommunikation.</p> <p>Mit dem E-Postbrief, den die Deutsche Post Mitte Juli 2010 erfolgreich an den Markt gebracht hat, können Privatpersonen, Unternehmen und Behörden auch in der elektronischen Welt verbindlich, vertraulich und verlässlich miteinander kommunizieren.</p> <p>In Deutschland unterhält das Unternehmen ein flächendeckendes Transport- und Zustellnetz. 2010 hat die Deutsche Post 13,8 Milliarden Euro Umsatz erwirtschaftet. Der Unternehmensbereich BRIEF beschäftigt rund 180.000 Mitarbeiter, einen großen Teil der rund 470.000 Mitarbeiter des Konzerns. Damit ist Deutsche Post DHL einer der größten Arbeitgeber weltweit.</p> |
| <b>Leistungen</b>  | Nationale und internationale Brief- und Paketangebote sowie Informationsdienstleistungen                                                                                                                                                                                                                                                                                                                                                                                                                                                                                                                                                                                                                                                                                                                                                                                                                                                                                                                                                                                       |
| <b>Entwicklung</b> | Vom defizitären Staatsunternehmen Deutsche Bundespost (1990) über den profitablen europäischen Brief- und Paketdienstleister entwickelte sich Deutsche Post DHL zum globalen, börsennotierten Konzern und Weltmarktführer in der Logistik mit der Deutschen Post als starker Säule.                                                                                                                                                                                                                                                                                                                                                                                                                                                                                                                                                                                                                                                                                                                                                                                            |
| <b>Mitarbeiter</b> | rund 180.000                                                                                                                                                                                                                                                                                                                                                                                                                                                                                                                                                                                                                                                                                                                                                                                                                                                                                                                                                                                                                                                                   |
| <b>Filialen</b>    | rund 13.250                                                                                                                                                                                                                                                                                                                                                                                                                                                                                                                                                                                                                                                                                                                                                                                                                                                                                                                                                                                                                                                                    |

Stand: August 2011
