# Supplementary material
Source: publisher site journal article supplement (https://www.degruyterbrill.com/publication/isbn/9783110432879/downloadAsset/9783110432879_Elektronischer_Anhang_2.zip)
Supplement: Supplementary file 39 [file Deutsche Post GB 2010.pdf › Korpustexte/Korpustexte pdf/Deutsche Post/Deutsche Post GB 2010.pdf]

Deutsche Post DHL

SENDUNGSGEWICHT: 1.139 g

SEITENZAHL: 234

VERÖFFENTLICHT AM 10. MÄRZ 2011

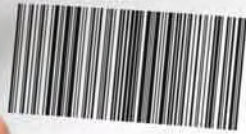

**IHRE WAHL  
SEIN**

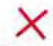

Bevorzugter Anbieter

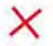

Attraktives Investment

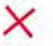

Präferierter Arbeitgeber

www.dp-dhl.de

# GESCHÄFTSBERICHT 2010

Deutsche Post DHL

## Deutsche Post DHL

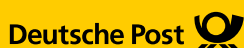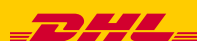

Deutsche Post DHL ist der weltweit führende Post- und Logistikdienstleister. Die Konzernmarken Deutsche Post und DHL verfügen über ein einzigartiges Portfolio rund um Logistik (DHL) und Kommunikation (Deutsche Post). Die Gruppe bietet ihren Kunden sowohl einfach zu handhabende Standardprodukte als auch maßgeschneiderte, innovative Lösungen – vom Dialogmarketing bis zur industriellen Versorgungskette. Dabei bilden die rund 470.000 Mitarbeiter in mehr als 220 Ländern und Territorien ein globales Netzwerk, das auf Service, Qualität und Nachhaltigkeit ausgerichtet ist. Mit seinen Programmen in den Bereichen Klimaschutz, Katastrophenhilfe und Bildung übernimmt der Konzern gesellschaftliche Verantwortung.

Die Post für Deutschland. The Logistics company for the world.

@ dp-dhl.com

## 01.1 Ausgewählte Kennzahlen (fortgeführte Geschäftsbereiche)

|                                                                |       | 2009    | 2010               | +/- % | Q4 2009 | Q4 2010 | +/- % |
|----------------------------------------------------------------|-------|---------|--------------------|-------|---------|---------|-------|
| Ergebnis der betrieblichen Tätigkeit (EBIT) vor Einmaleffekten | MIO € | 1.473   | 2.205              | 49,7  | 526     | 593     | 12,7  |
| Einmaleffekte                                                  | MIO € | 1.242   | 370                | -70,2 | 662     | 68      | -89,7 |
| Ergebnis der betrieblichen Tätigkeit (EBIT)                    | MIO € | 231     | 1.835              | > 100 | -136    | 525     | -     |
| Umsatz                                                         | MIO € | 46.201  | 51.481             | 11,4  | 12.389  | 13.871  | 12,0  |
| Umsatzrendite <sup>1)</sup>                                    | %     | 0,5     | 3,6                | -     | -1,1    | 3,8     | -     |
| Konzernjahresergebnis <sup>2)</sup>                            | MIO € | 644     | 2.541              | > 100 | -283    | 487     | -     |
| Operativer Cashflow                                            | MIO € | 1.244   | 1.927              | 54,9  | 974     | 1.025   | 5,2   |
| Nettoliquidität (-)/Nettofinanzverschuldung (+) <sup>3)</sup>  | MIO € | -1.690  | -1.382             | -18,2 | -       | -       | -     |
| Eigenkapitalrendite vor Steuern (Return on Equity)             | %     | 3,0     | 29,8               | -     | -       | -       | -     |
| Ergebnis je Aktie <sup>4)</sup>                                | €     | 0,53    | 2,10               | > 100 | -0,24   | 0,40    | -     |
| Dividende je Aktie                                             | €     | 0,60    | 0,65 <sup>5)</sup> | 8,3   | -       | -       | -     |
| Zahl der Mitarbeiter <sup>6)</sup>                             |       | 436.651 | 421.274            | -3,5  | -       | -       | -     |

1) EBIT/Umsatz 2) Nach Abzug von nicht beherrschenden Anteilen, inklusive Postbank 3) Berechnung → siehe Konzernlagebericht, Seite 49 4) Inklusive Postbank 5) Vorschlag

6) Im Durchschnitt (Teilzeit- auf Vollzeitkräfte umgerechnet)

## IHRE WAHL SEIN

Die „Strategie 2015“ greift. Wir sind auf einem guten Weg, bevorzugter Anbieter, attraktives Investment und präferierter Arbeitgeber zu werden. Kunden bieten wir in allen Geschäftsbereichen Lösungen an, die ihnen das Leben einfacher machen und die nachhaltig wirken. Investoren überzeugen wir mit Transparenz, verbesserter Profitabilität und organischem Wachstum. Mitarbeitern bieten wir attraktive Entwicklungsperspektiven, eine sichere, gesunde Arbeitsumgebung und inspirierenden Austausch von Ideen. Wir möchten in jeder Hinsicht Ihre Wahl sein.

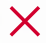

Bevorzugter Anbieter

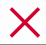

Attraktives Investment

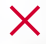

Präferierter Arbeitgeber

## 02 KONZERNSTRUKTUR

## Deutsche Post DHL

## Corporate Center

## Ressort

## Vorstandsvorsitz

Finanzen,  
Global Business Services

## Personal

## Vorstand

## Dr. Frank Appel

## Lawrence Rosen

## Walter Scheurle

## Funktionen

Konzernbüro  
 Konzernrecht  
 Konzernführungskräfte  
 Konzernkommunikation  
 Konzernentwicklung  
 Regulierungsmanagement  
 Konzern  
 Corporate First Choice  
 Politik & Unternehmens-  
 verantwortung  
 Global Customer Solutions  
 (GCS)  
 HR DHL International  
 DHL Solutions & Innovations  
 (DSI)

Konzerncontrolling  
 Konzernrechnungswesen &  
 Reporting  
 Investor Relations  
 Corporate Finance  
 Konzernrevision & Sicherheit  
 Steuern  
 Global Business Services  
 (konzernweite Services:  
 Procurement, Real Estate,  
 Finance Operations etc.)

HR Standards Deutschland  
 HR Richtlinien Personnel &  
 Labour Management  
 HR BRIEF

## Unternehmensbereiche

## Ressort

## BRIEF

## EXPRESS

GLOBAL  
FORWARDING,  
FREIGHT

## SUPPLY CHAIN

## Vorstand

## Jürgen Gerdes

## Ken Allen

## Hermann Ude

## Bruce Edwards

## Marken

## Deutsche Post

## DHL

## DHL

## DHL

## DHL

Geschäftsfelder/  
Regionen

Brief Kommu-  
 nikation  
 Dialog  
 Marketing  
 Presse Services  
 Mehrwert-  
 leistungen  
 Filialen  
 Renten-Service

Global Mail  
 Paket  
 Deutsch-  
 land

Europe  
 Americas  
 Asia Pacific  
 EEMEA  
 (Eastern Europe,  
 the Middle East  
 and Africa)

Global Forwarding  
 Freight

Supply Chain  
 Williams Lea

## 2010

## ZIELE

**EBIT vor Einmaleffekten<sup>1)</sup>**

Konzern: 2,0 MRD € bis 2,1 MRD €

Unternehmensbereich BRIEF:

1,1 MRD € bis 1,2 MRD €

DHL-Unternehmensbereiche:

über 1,3 MRD €

Corporate Center/Anderes:

rund -0,4 MRD €

**Konzernjahresergebnis**

Verbessertes Nettoergebnis nach  
Abzug von nicht beherrschenden  
Anteilen gegenüber dem Vorjahr  
(644 MIO €)

**Investitionen (Capex)**

Ausgaben für Investitionen  
von 1,17 MRD € (2009) auf nicht  
mehr als 1,3 MRD € erhöhen

**Restrukturierung**

Mittelabfluss durch die im Jahr 2009  
getroffenen Maßnahmen von rund  
1 MRD €

## ERGEBNISSE

**EBIT vor Einmaleffekten**

Konzern: 2,2 MRD €

Unternehmensbereich BRIEF:

1,15 MRD €

DHL-Unternehmensbereiche:

1,45 MRD €

Corporate Center/Anderes:

rund -0,4 MRD € **Konzernjahresergebnis**

Nettoergebnis nach Abzug von  
nicht beherrschenden Anteilen:  
2,54 MRD € 

**Investitionen (Capex)**

Ausgaben für Investitionen:  
1,26 MRD € 

**Restrukturierung**

Mittelabfluss durch die im  
Vorjahr getroffenen Maßnahmen:  
0,8 MRD € 

## 2011

## ZIELE

**EBIT**

Konzern: 2,2 MRD € bis 2,4 MRD €

Unternehmensbereich BRIEF:

1,0 MRD € bis 1,1 MRD €

DHL-Unternehmensbereiche:

1,6 MRD € bis 1,7 MRD €

Corporate Center/Anderes:

rund -0,4 MRD €

**Konzernjahresergebnis**

Nettoergebnis vor Effekten aus  
der Bewertung der Postbank-  
Instrumente verbessert sich analog  
zum operativen Geschäft weiter

**Investitionen (Capex)**

Ausgaben für Investitionen auf  
nicht mehr als 1,6 MRD € erhöhen

**Umsatz**

Umsatz besonders der DHL-Unter-  
nehmensbereiche steigt etwa in  
Höhe der von uns mittelfristig erwar-  
teten Wachstumsraten um 7 % bis 9 %

1) Prognose unterjährig angehoben

|   |                    |    |
|---|--------------------|----|
| A | KONZERNLAGEBERICHT | 19 |
|---|--------------------|----|

|   |                      |     |
|---|----------------------|-----|
| B | CORPORATE GOVERNANCE | 111 |
|---|----------------------|-----|

|   |                  |     |
|---|------------------|-----|
| C | KONZERNABSCHLUSS | 137 |
|---|------------------|-----|

|   |                       |     |
|---|-----------------------|-----|
| D | WEITERE INFORMATIONEN | 229 |
|---|-----------------------|-----|

INHALT

|                              |     |
|------------------------------|-----|
| Der Konzern .....            | I   |
| Konzernstruktur .....        | II  |
| Soll-Ist-Vergleich .....     | III |
| Ihre Wahl sein .....         | 2   |
| Brief an die Aktionäre ..... | 15  |

A

|                          |    |
|--------------------------|----|
| KONZERNLAGEBERICHT ..... | 19 |
|--------------------------|----|

|                                             |    |
|---------------------------------------------|----|
| Geschäft und Umfeld .....                   | 21 |
| Deutsche-Post-Aktie .....                   | 34 |
| Wirtschaftliche Lage .....                  | 37 |
| Unternehmensbereiche .....                  | 50 |
| Nichtfinanzielle Leistungsindikatoren ..... | 70 |
| Nachtrag .....                              | 87 |
| Prognose .....                              | 88 |

B

|                            |     |
|----------------------------|-----|
| CORPORATE GOVERNANCE ..... | 111 |
|----------------------------|-----|

|                                    |     |
|------------------------------------|-----|
| Bericht des Aufsichtsrats .....    | 113 |
| Aufsichtsrat .....                 | 117 |
| Vorstand .....                     | 118 |
| Mandate des Vorstands .....        | 122 |
| Mandate des Aufsichtsrats .....    | 123 |
| Corporate-Governance-Bericht ..... | 124 |

C

|                        |     |
|------------------------|-----|
| KONZERNABSCHLUSS ..... | 137 |
|------------------------|-----|

|                                        |     |
|----------------------------------------|-----|
| Gewinn-und-Verlust-Rechnung .....      | 139 |
| Gesamtergebnisrechnung .....           | 140 |
| Bilanz .....                           | 141 |
| Kapitalflussrechnung .....             | 142 |
| Eigenkapitalveränderungsrechnung ..... | 143 |
| Anhang .....                           | 144 |

D

|                             |     |
|-----------------------------|-----|
| WEITERE INFORMATIONEN ..... | 229 |
|-----------------------------|-----|

|                                       |     |
|---------------------------------------|-----|
| Stichwortverzeichnis .....            | 231 |
| Glossar .....                         | 232 |
| Grafik- und Tabellenverzeichnis ..... | 233 |
| Kontakte .....                        | 234 |
| Mehrjahresübersicht .....             | IV  |
| Termine .....                         | VI  |



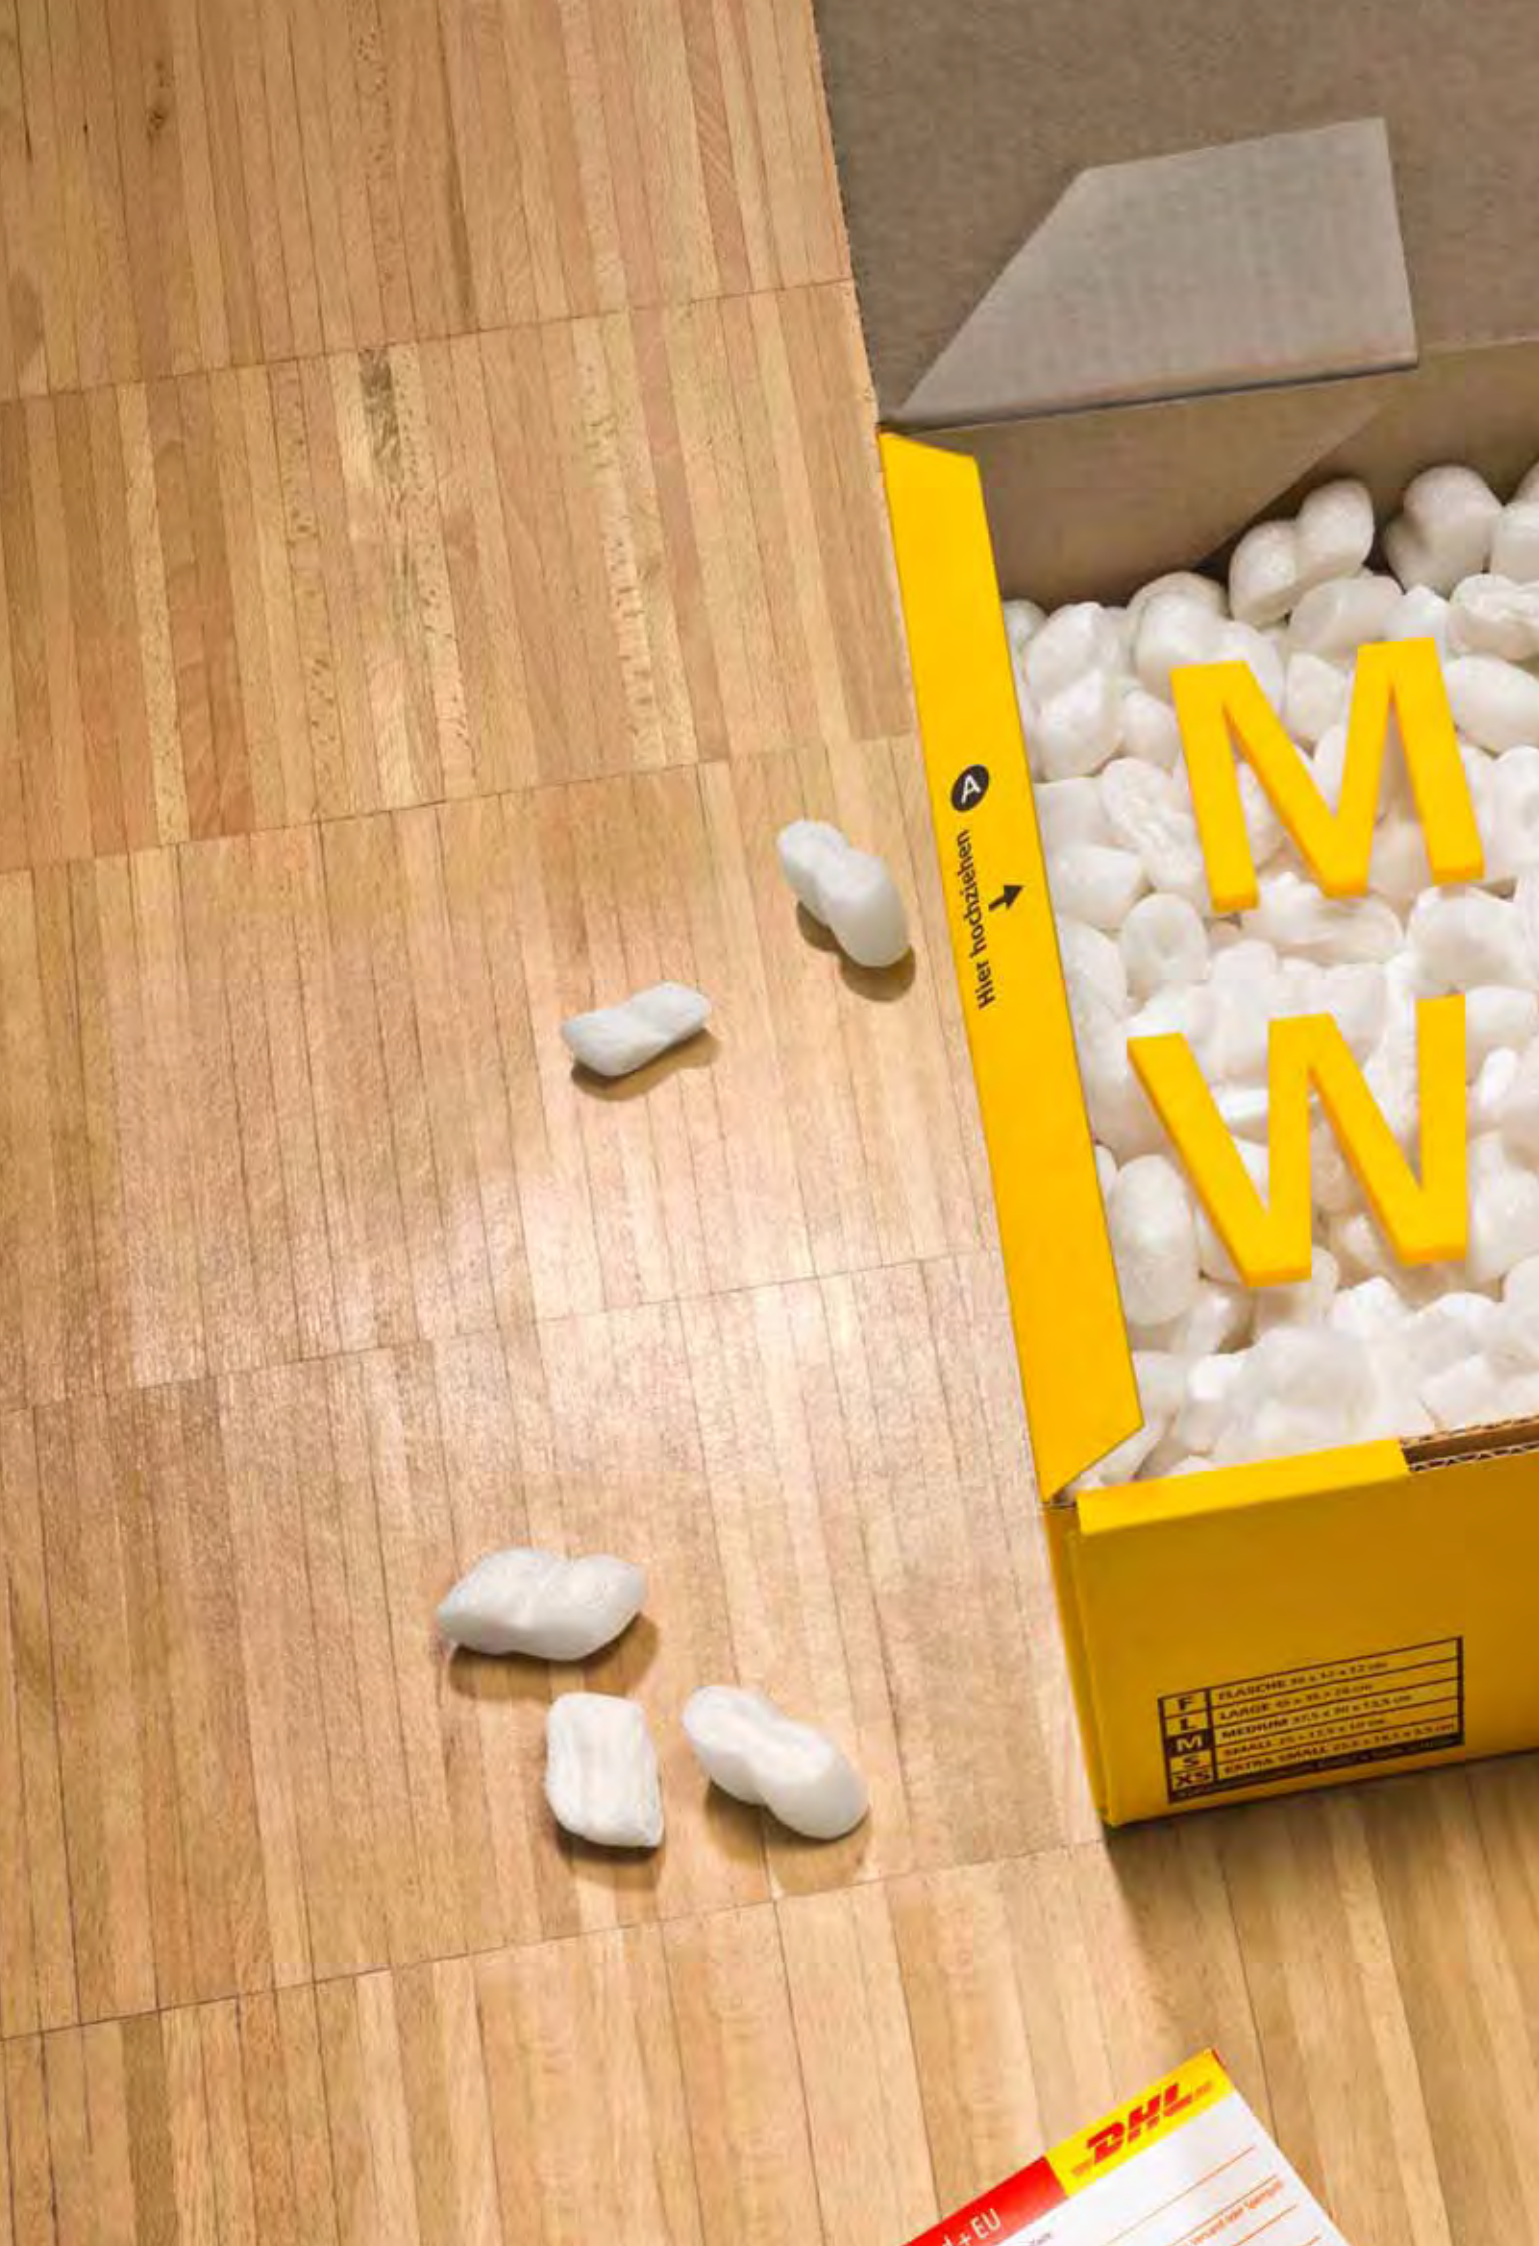

Hier hochziehen 

|    |                            |
|----|----------------------------|
| F  | FLASCHE 30 x 17 x 12 cm    |
| L  | LARGE 40 x 25 x 20 cm      |
| M  | MEDIUM 30 x 20 x 15 cm     |
| S  | SMALL 20 x 15 x 10 cm      |
| XS | EXTRA SMALL 10 x 10 x 5 cm |

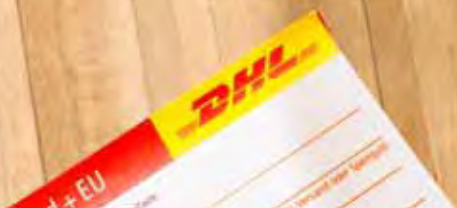



EINE  
AHL

Briefkommunikation, die Zukunft neu gestaltet S. 4  
Logistiklösungen, die Grenzen überwinden S. 6  
Verlässlichkeit, die Werte schafft S. 8  
Förderung, die Potenziale entwickelt S. 10

Das Unternehmen meiner Wahl



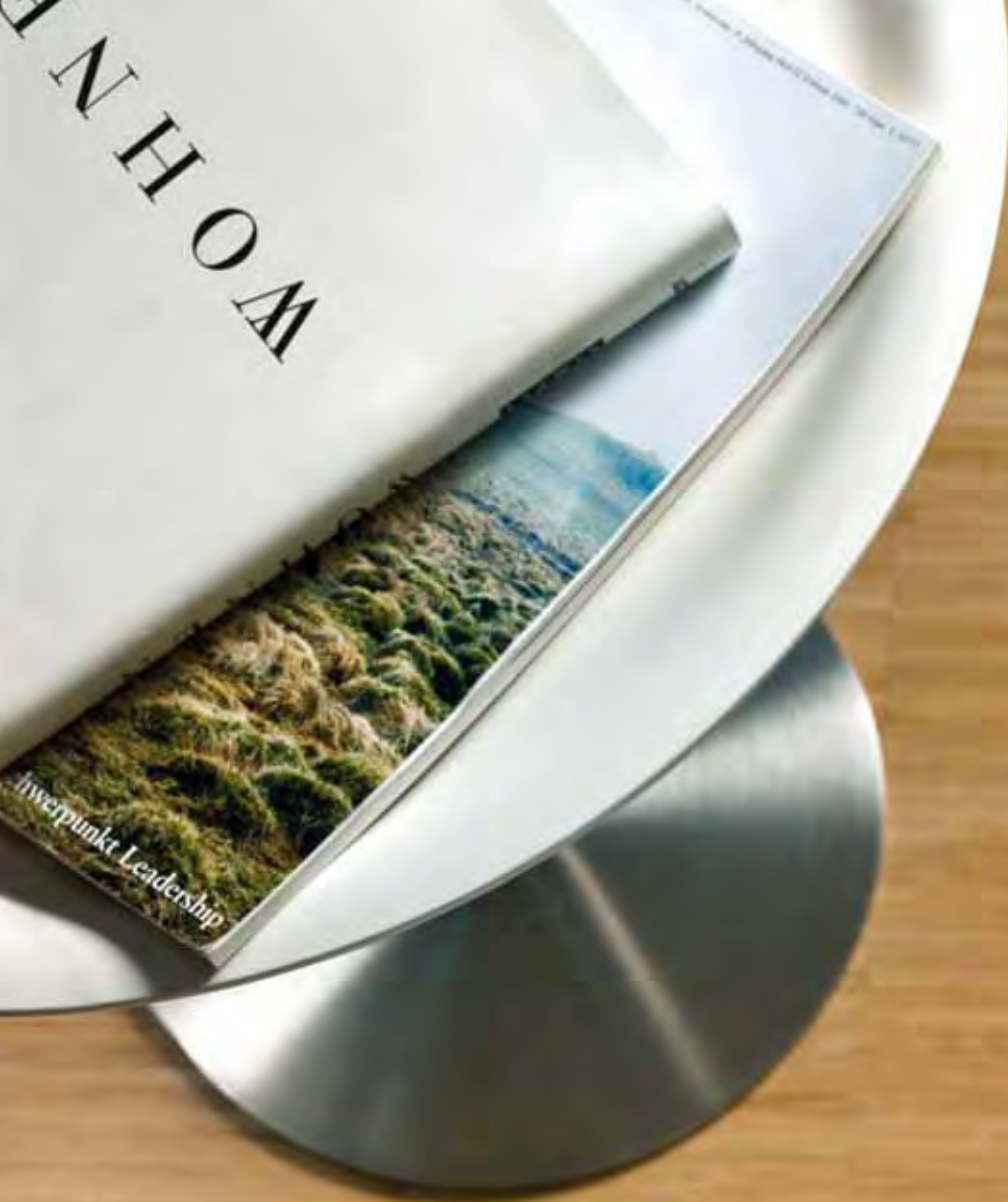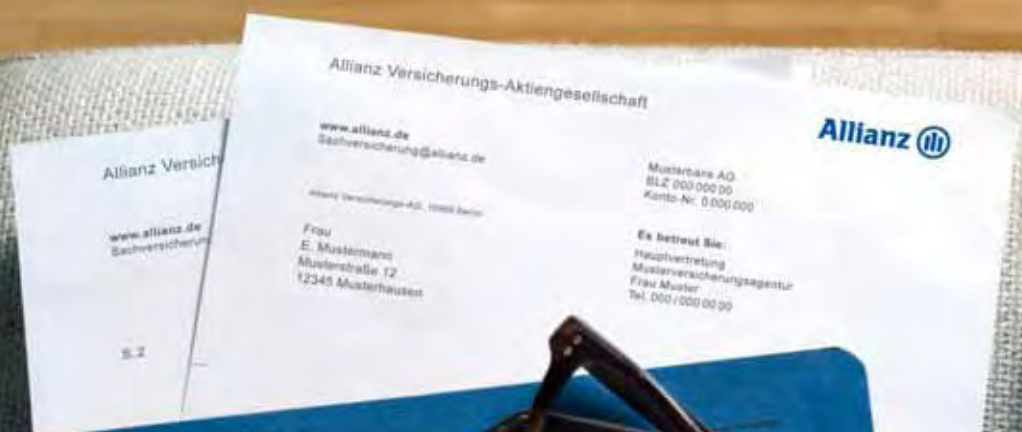

Versicherungen

Bevorzugter Anbieter

## BRIEFKOMMUNIKATION, DIE ZUKUNFT NEU GESTALTET

66 Millionen Briefe, die in Deutschland an jedem Werktag zugestellt werden, machen die Deutsche Post zum größten Postunternehmen Europas. Es sind verlässliche Qualität, eine leistungsfähige Infrastruktur, jahrzehntelange Erfahrung und Nähe, die Kunden täglich überzeugen. Unser Angebot ergänzen wir um innovative Produkte.

Eine dieser Innovationen ist der E-Postbrief, den wir im Jahr 2010 in Deutschland erfolgreich eingeführt haben. Mit dem E-Postbrief ist jetzt auch im Internet eine sichere, vertrauliche und verlässliche Kommunikation möglich.

Ihre Wahl sein durch:

- ☒ Sicherheit
- ☒ Vertrauen
- ☒ Zuverlässigkeit

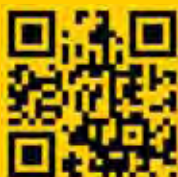

Wenn Ihr Mobiltelefon über eine QR-Erkennungssoftware verfügt, gelangen Sie nach dem Abfotografieren dieses Codes direkt zu weiteren Informationen auf unserer Website.

WEITERE INFORMATIONEN: [WWW.EPOST.DE](http://WWW.EPOST.DE)

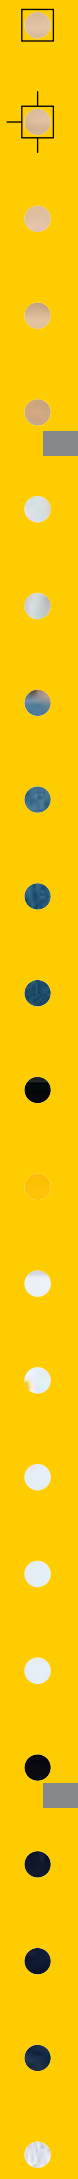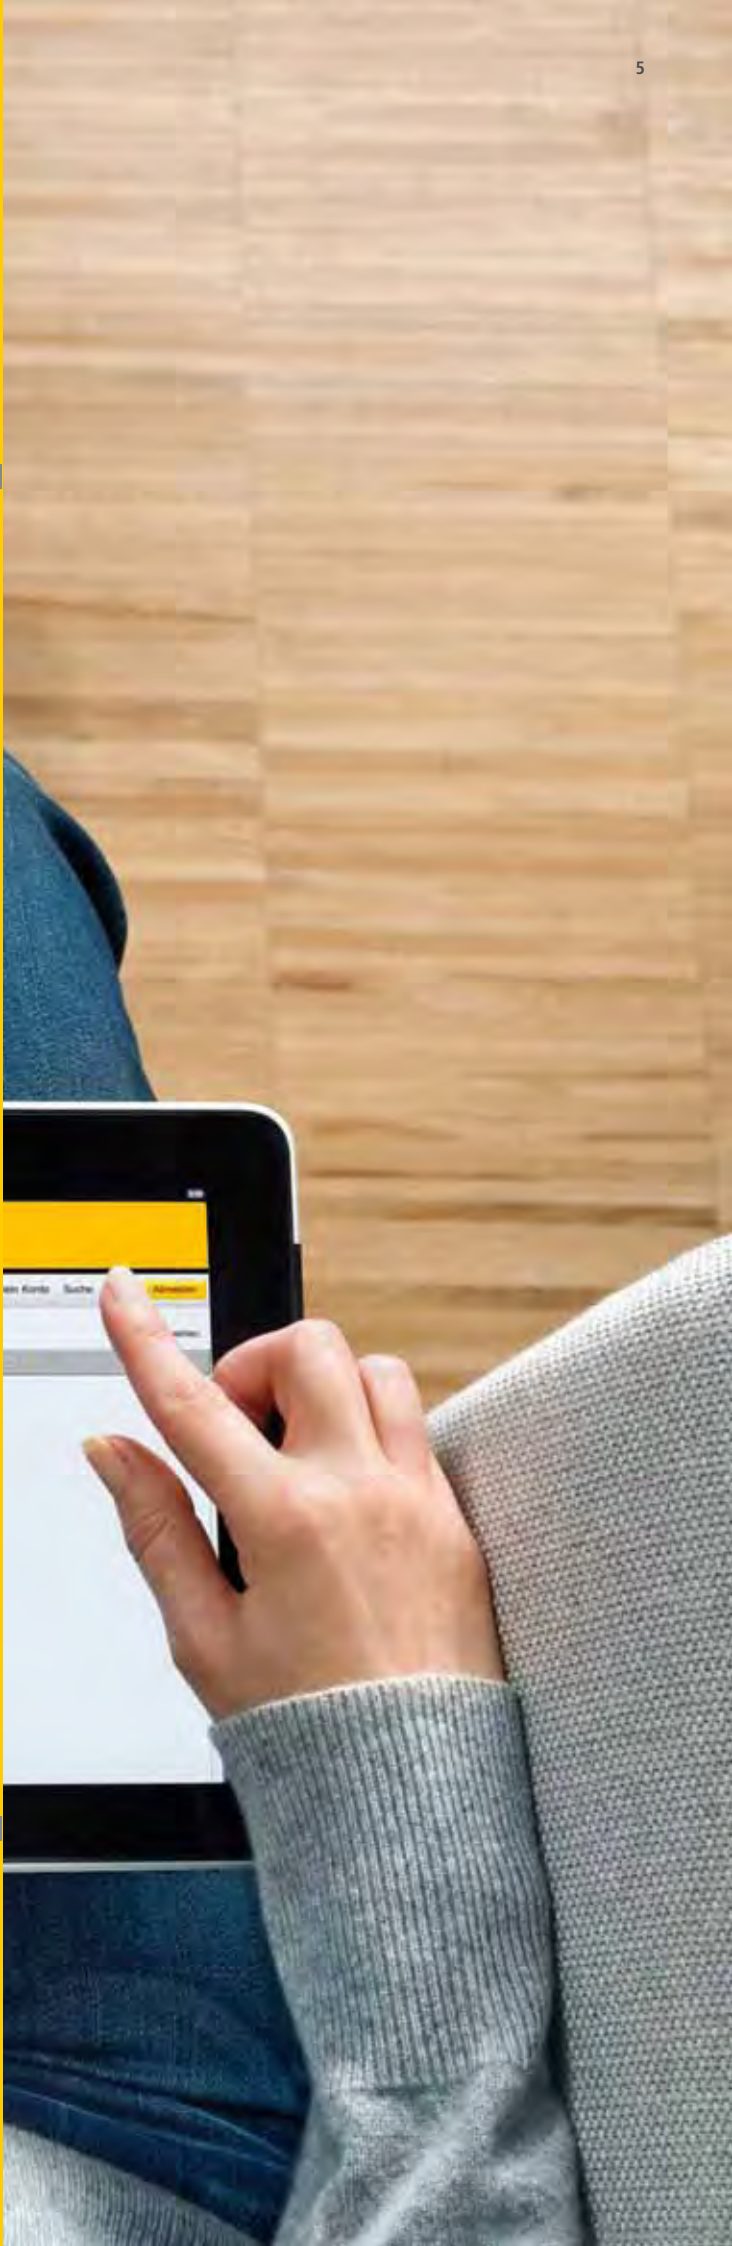



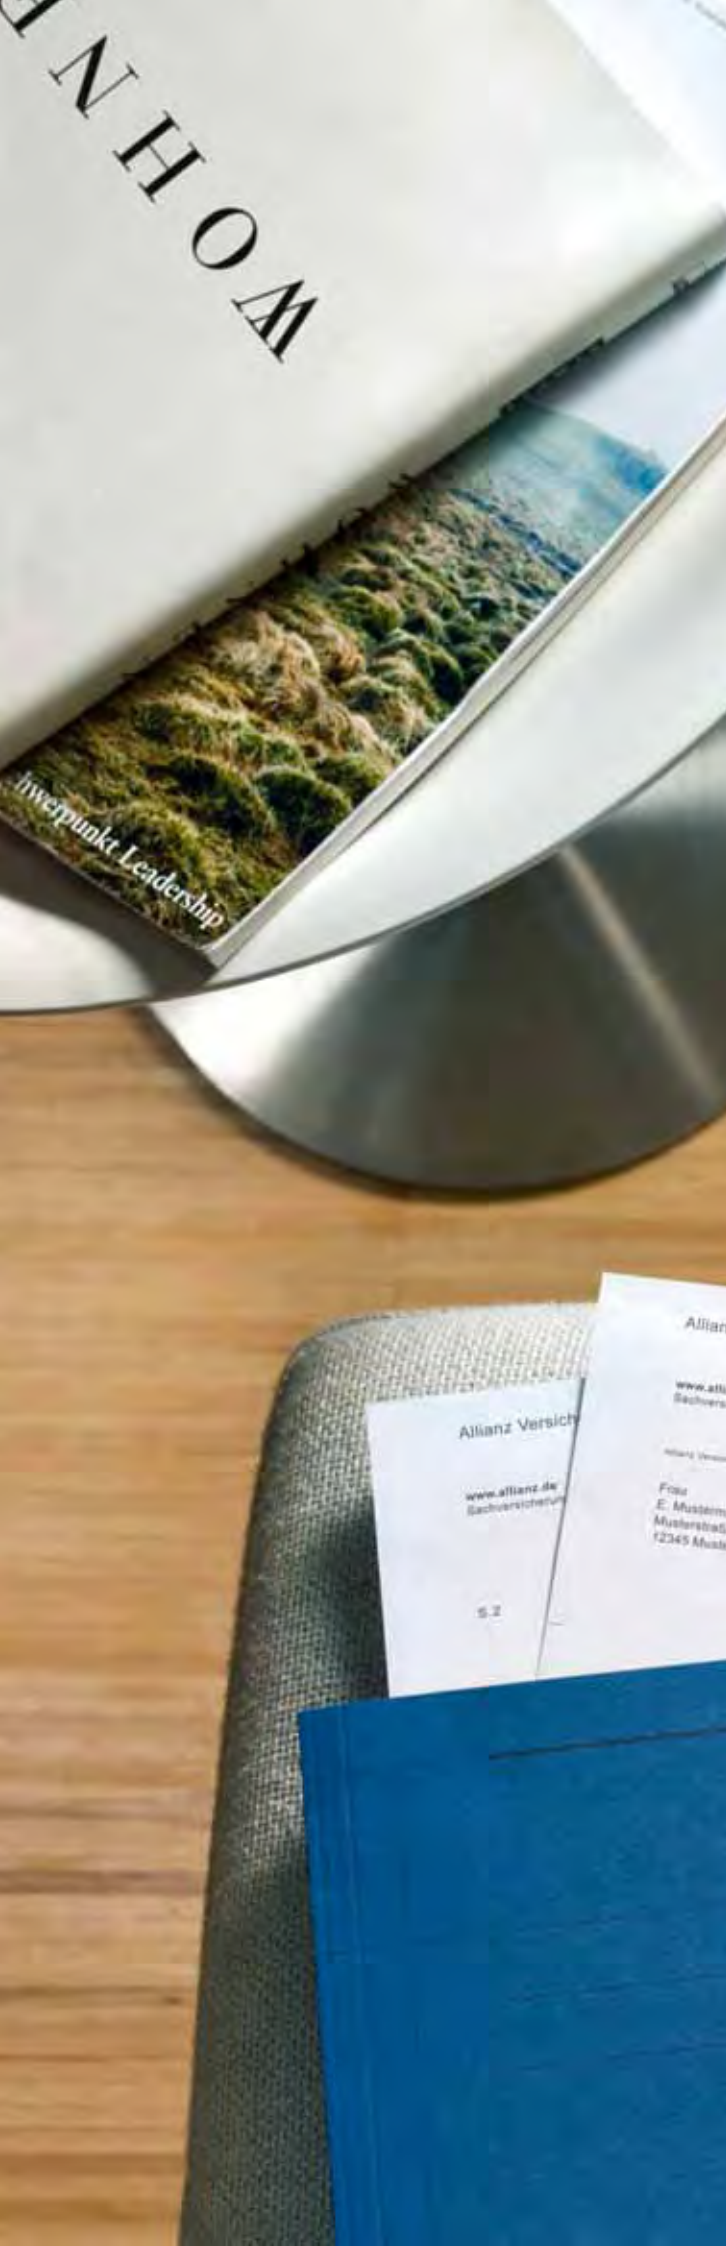

Ihre Wahl in der Praxis

## AUS GUTEM GRUND MEINE WAHL

### Die Aufgabe:

Eine private Kundin möchte das Angebot ihrer Versicherung annehmen und eine Hausratversicherung abschließen.

### Unsere Lösung:

Online sendet sie einen E-Postbrief an das Versicherungsunternehmen.

### Der Vorteil:

Durch den E-Postbrief identifiziert sich die Kundin gegenüber der Versicherung eindeutig. Beide Seiten sparen Zeit und profitieren vom vereinfachten Ablauf.

Mit dem E-Postbrief versenden auch private Kunden ihre Dokumente schnell, sicher, vertraulich und verlässlich.

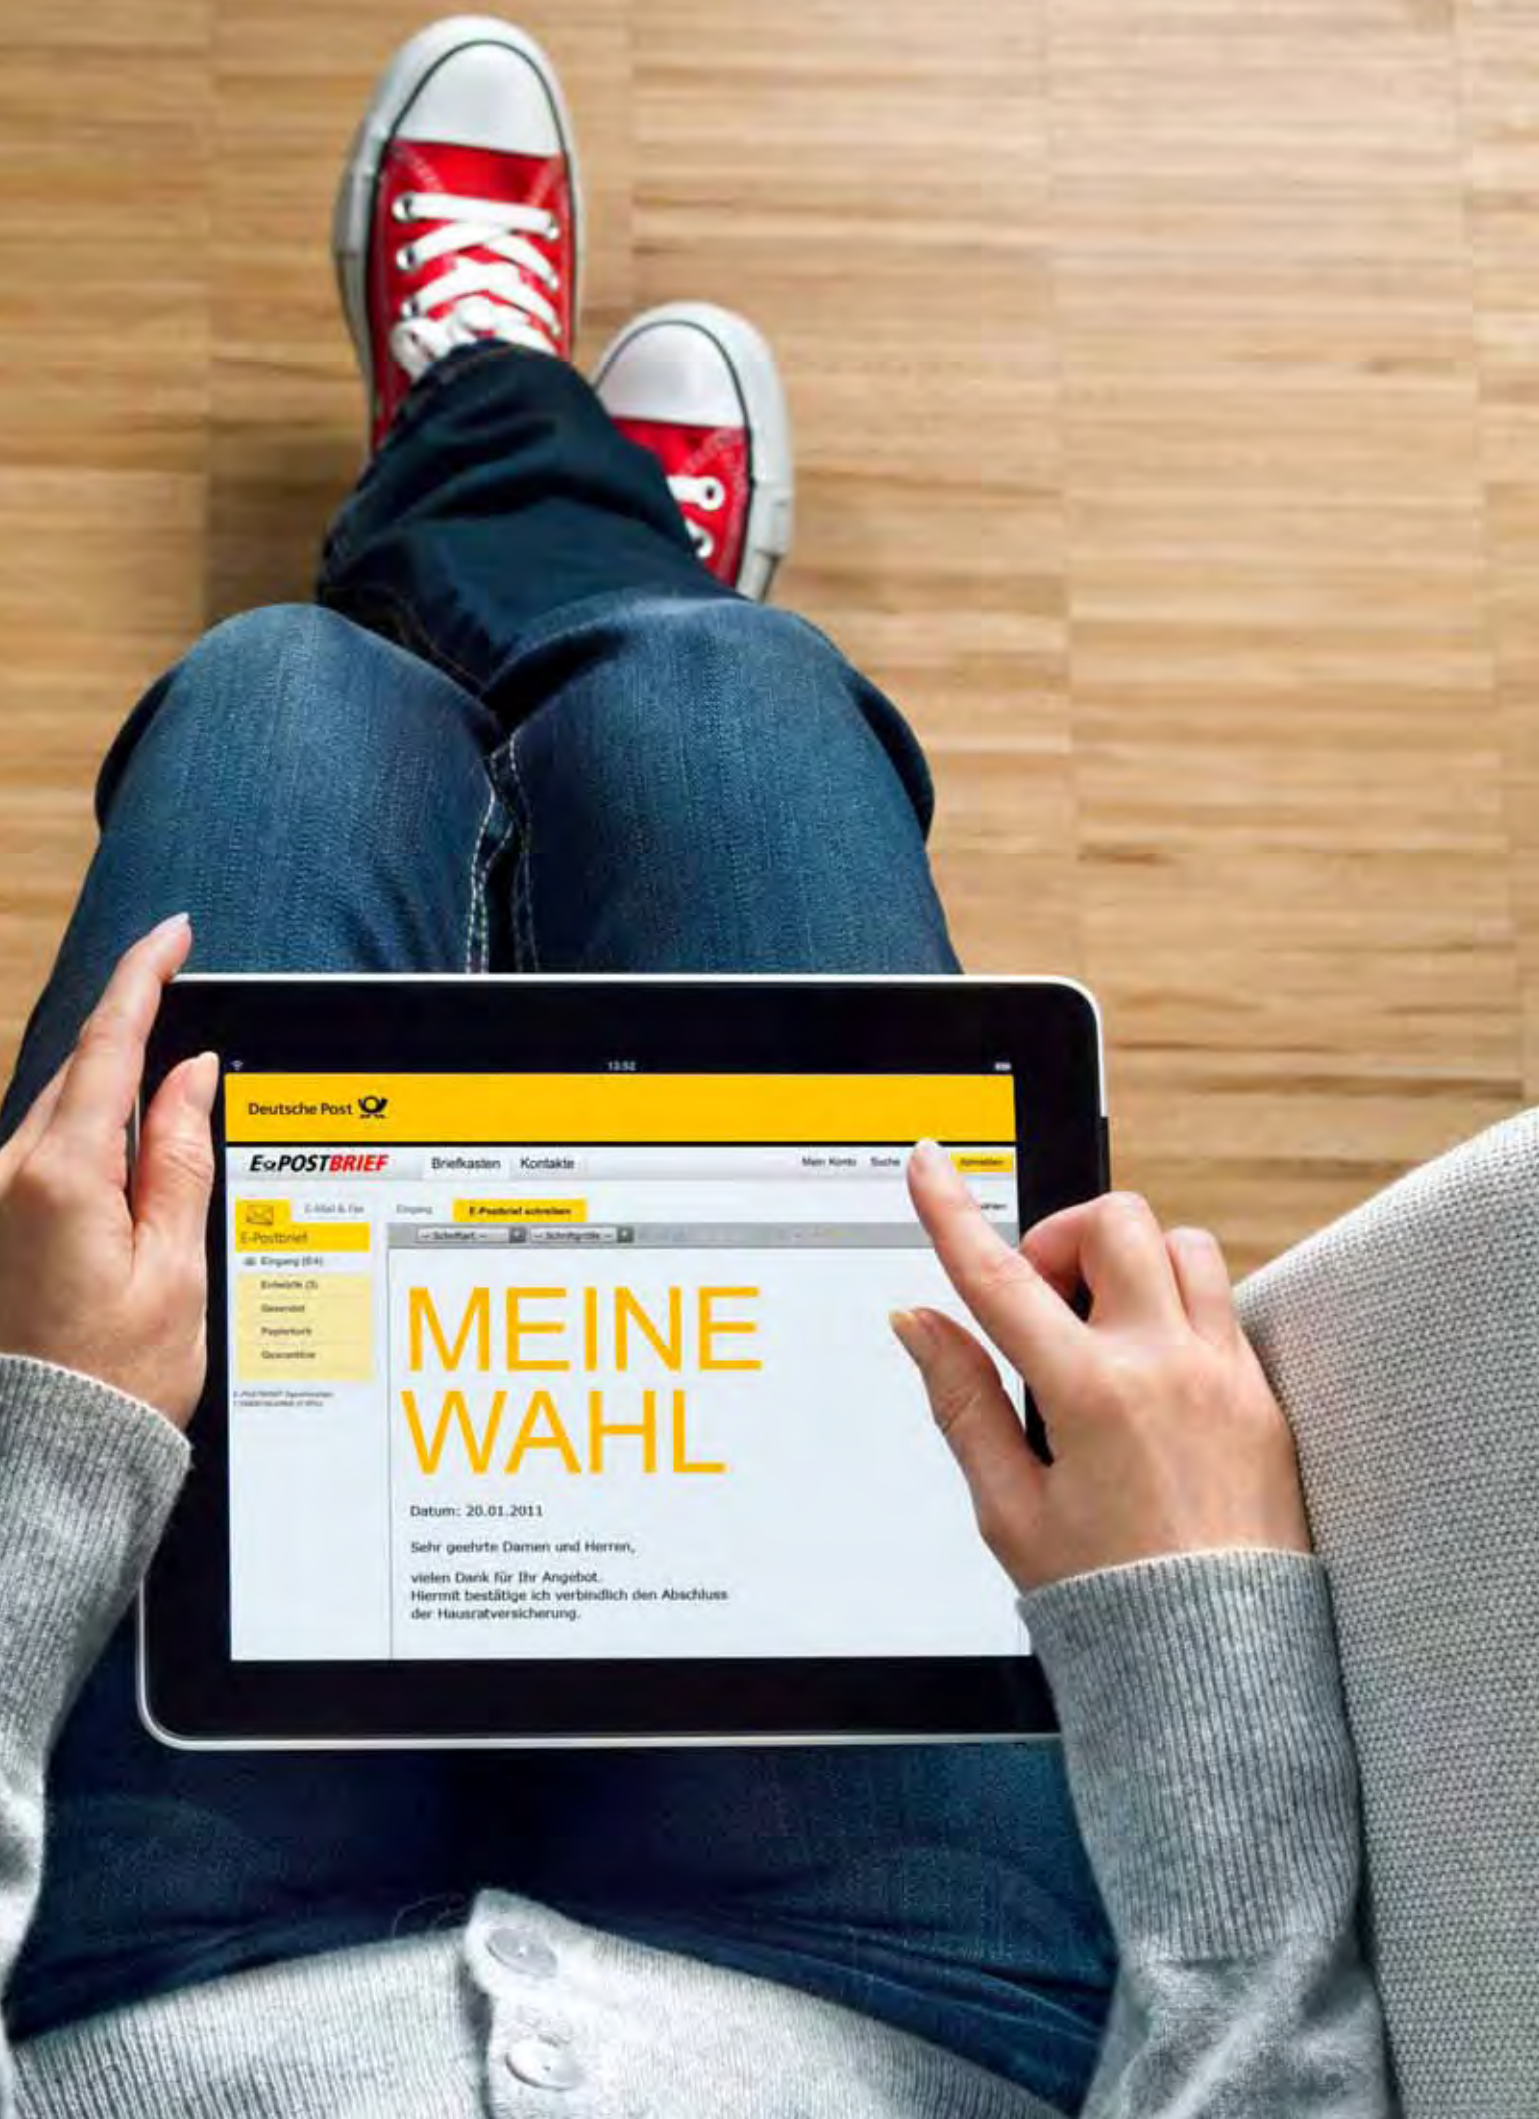



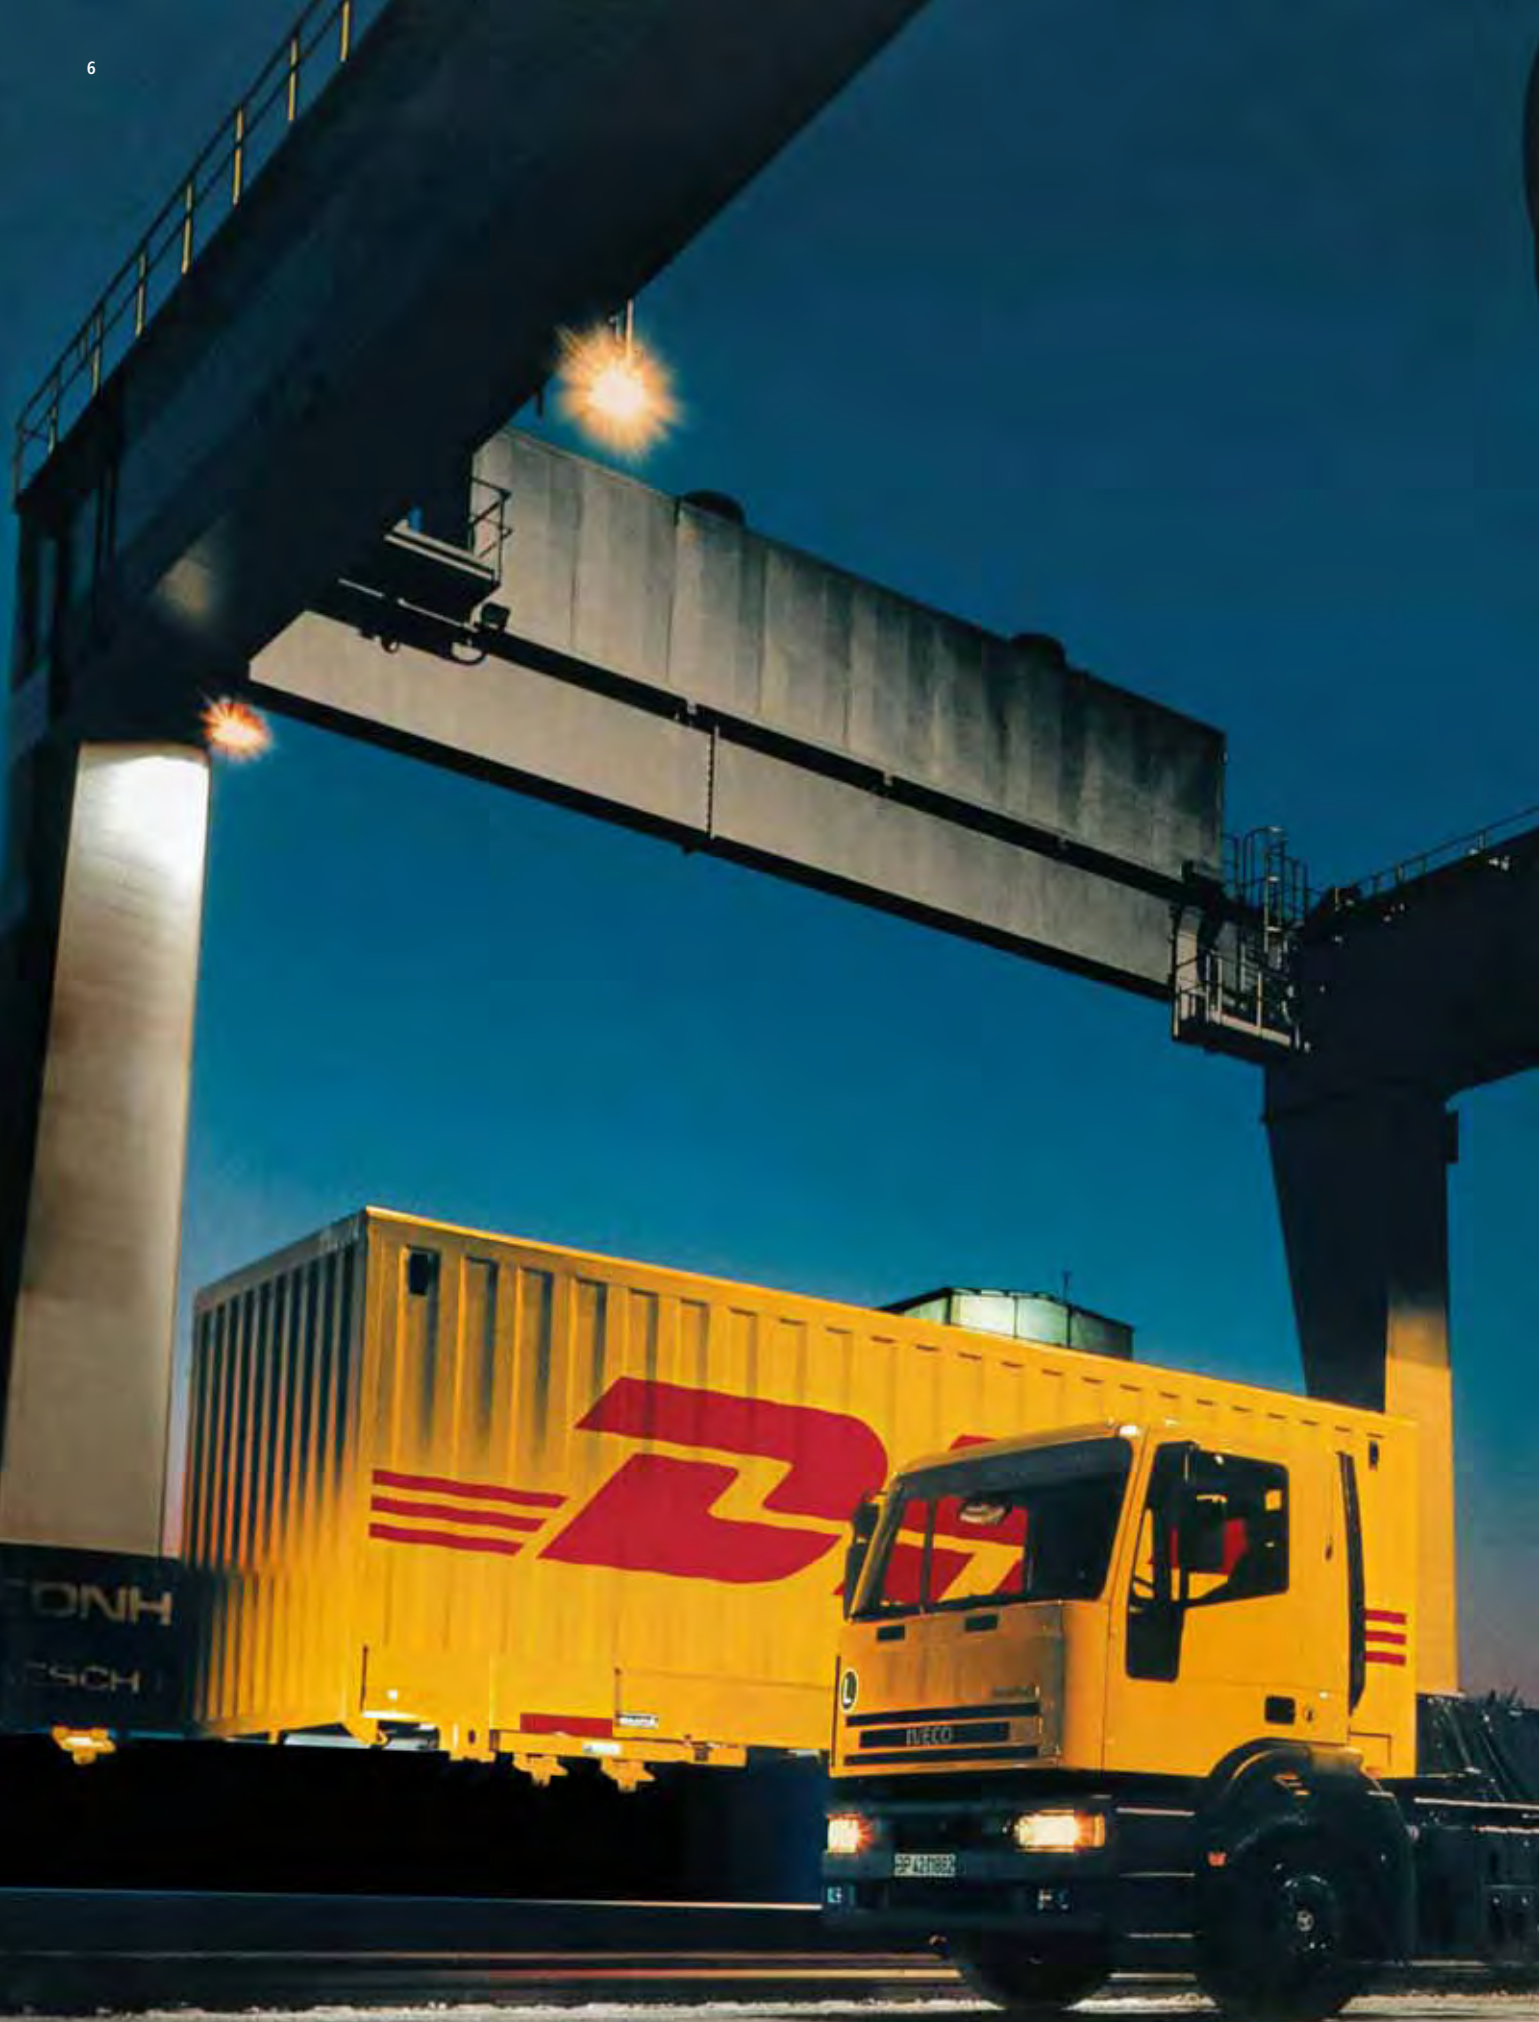

Bevorzugter Anbieter

## LOGISTIKLÖSUNGEN, DIE GRENZEN ÜBERWINDEN

Als international führendes Logistikunternehmen vereinfacht DHL komplexe Abläufe und erleichtert so das Leben der Kunden. Der Weltmarktführer in der Luftfracht und die Nummer zwei in der Seefracht sorgt dafür, dass Sendungen aller Art mit Flugzeug oder Schiff befördert werden – vom Produktionsstandort bis zum Bestimmungsort der Waren.

Im Speditionsgeschäft entwickeln wir individuelle Transportlösungen für unsere Kunden, stellen Kapazitäten bereit und koordinieren den Versand von Waren und Informationen in mehr als 150 Ländern. Ein globales Netzwerk, engagierte Mitarbeiter und innovative Transportlösungen sind dafür Voraussetzung.

Ihre Wahl sein durch:

|                                     |            |
|-------------------------------------|------------|
| <input checked="" type="checkbox"/> | Kundennähe |
| <input checked="" type="checkbox"/> | Engagement |
| <input checked="" type="checkbox"/> | Innovation |

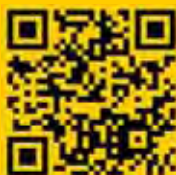

Wenn Ihr Mobiltelefon über eine QR-Erkennungssoftware verfügt, gelangen Sie nach dem Abfotografieren dieses Codes direkt zu weiteren Informationen auf unserer Website.

WEITERE INFORMATIONEN: [WWW.DHL.DE/DE.HTML](http://WWW.DHL.DE/DE.HTML)

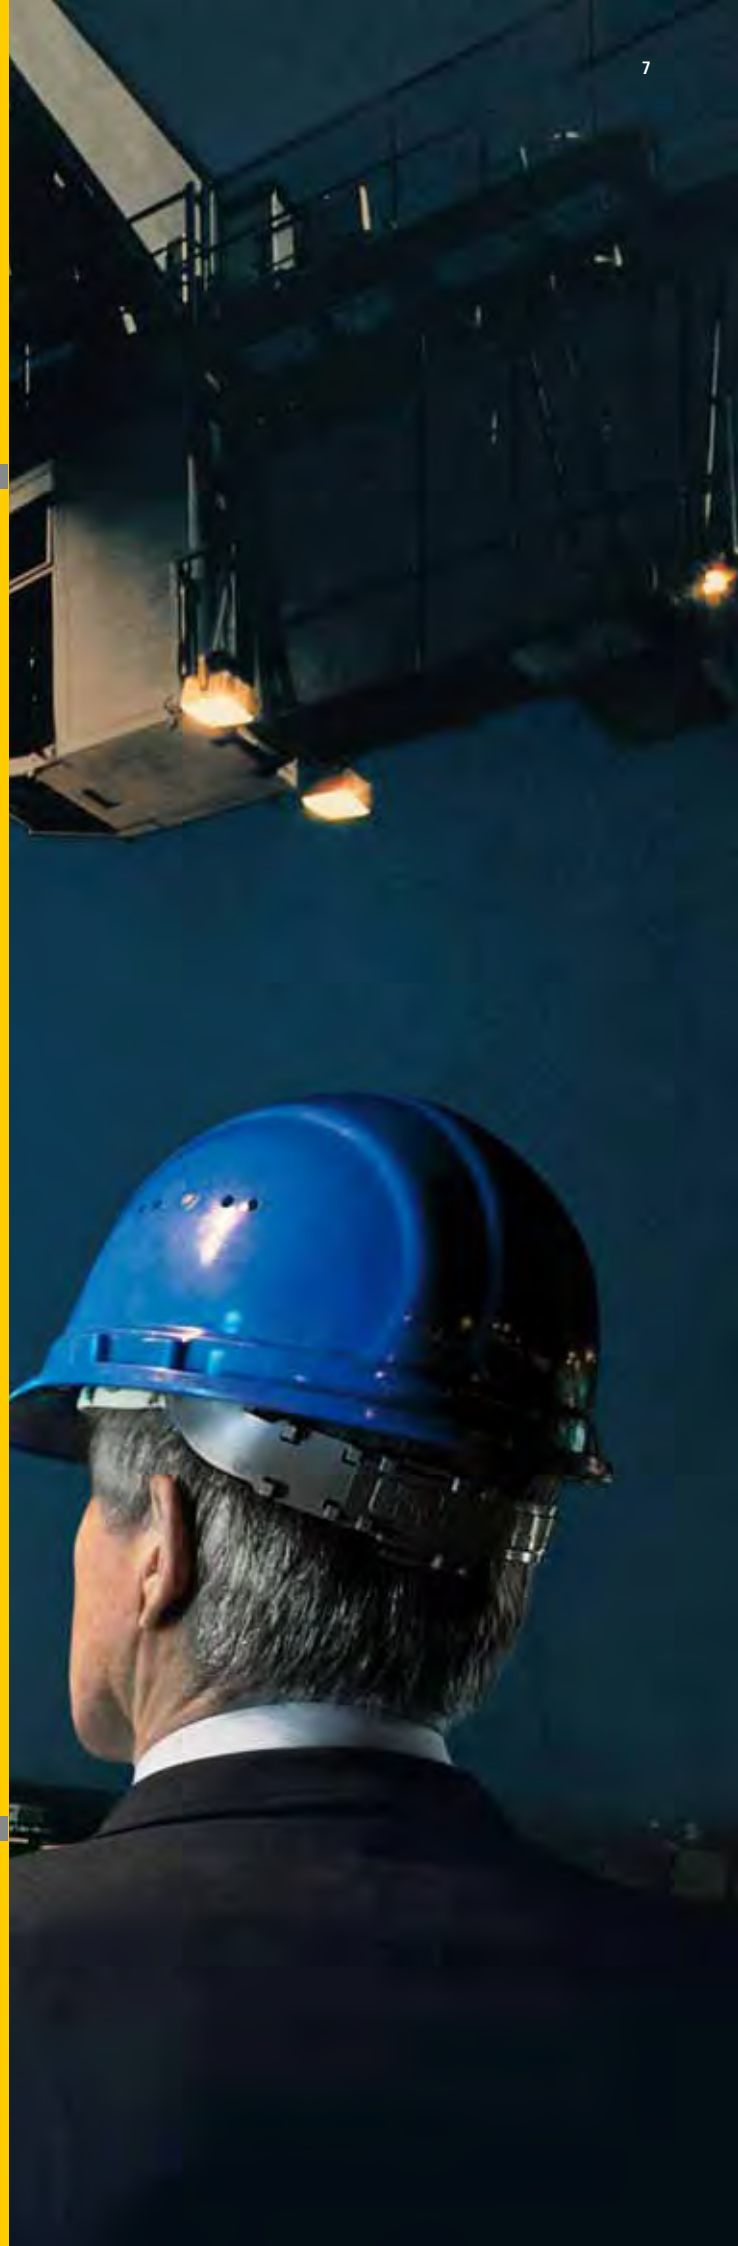



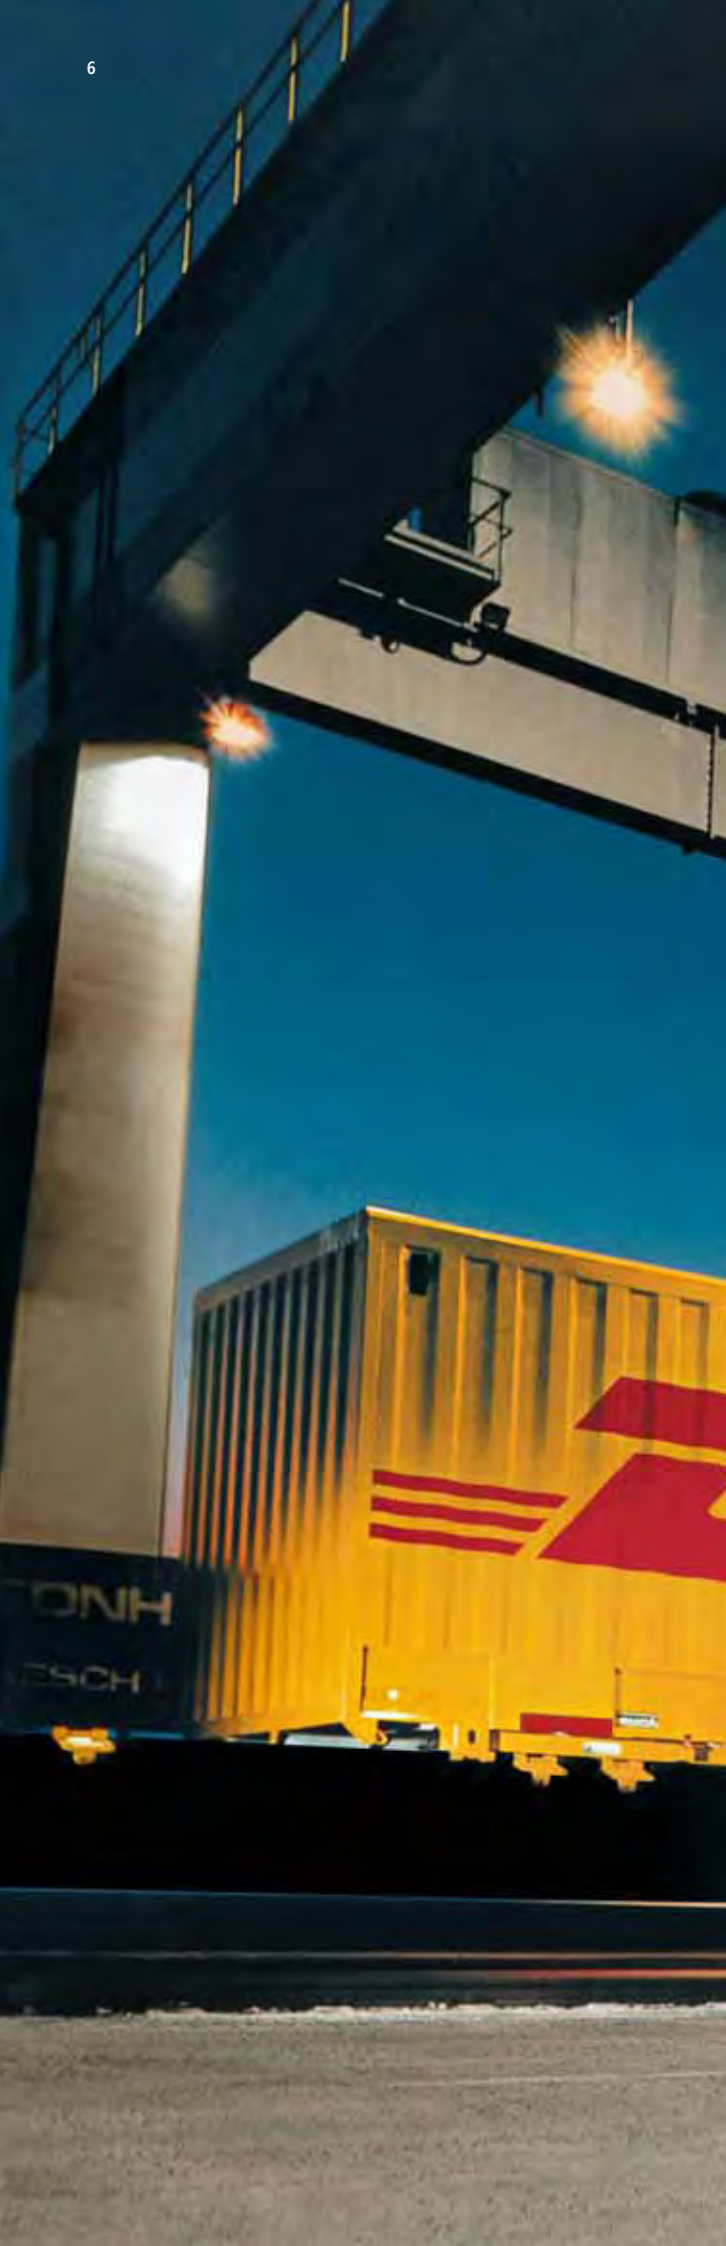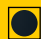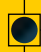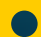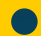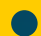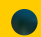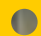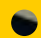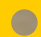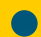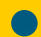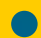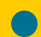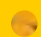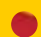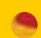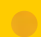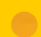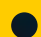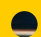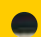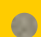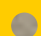

Ihre Wahl in der Praxis

## AUS GUTEM GRUND MEINE WAHL

### Die Aufgabe:

Eine europäische Handelskette benötigt für den Import elektronischer Bauteile aus Asien kürzere Transitzeiten als bei der Seefracht, will jedoch hohe Luftfrachtkosten vermeiden.

### Die Lösung:

Mit DHL SEAIR wird eine See- und Luftfracht verbindende Multimodal-Lösung entwickelt, die geringere Transportkosten mit einer höheren Geschwindigkeit kombiniert.

### Der Vorteil:

Diese zuverlässige und kostengünstige Lösung bedeutet für den Importeur einen wesentlichen Wettbewerbsvorteil und senkt die CO<sub>2</sub>-Emissionen im Vergleich zum reinen Lufttransport.

Businesskunden finden bei DHL persönliches Engagement und maßgeschneiderte Logistiklösungen, die rundum überzeugen.

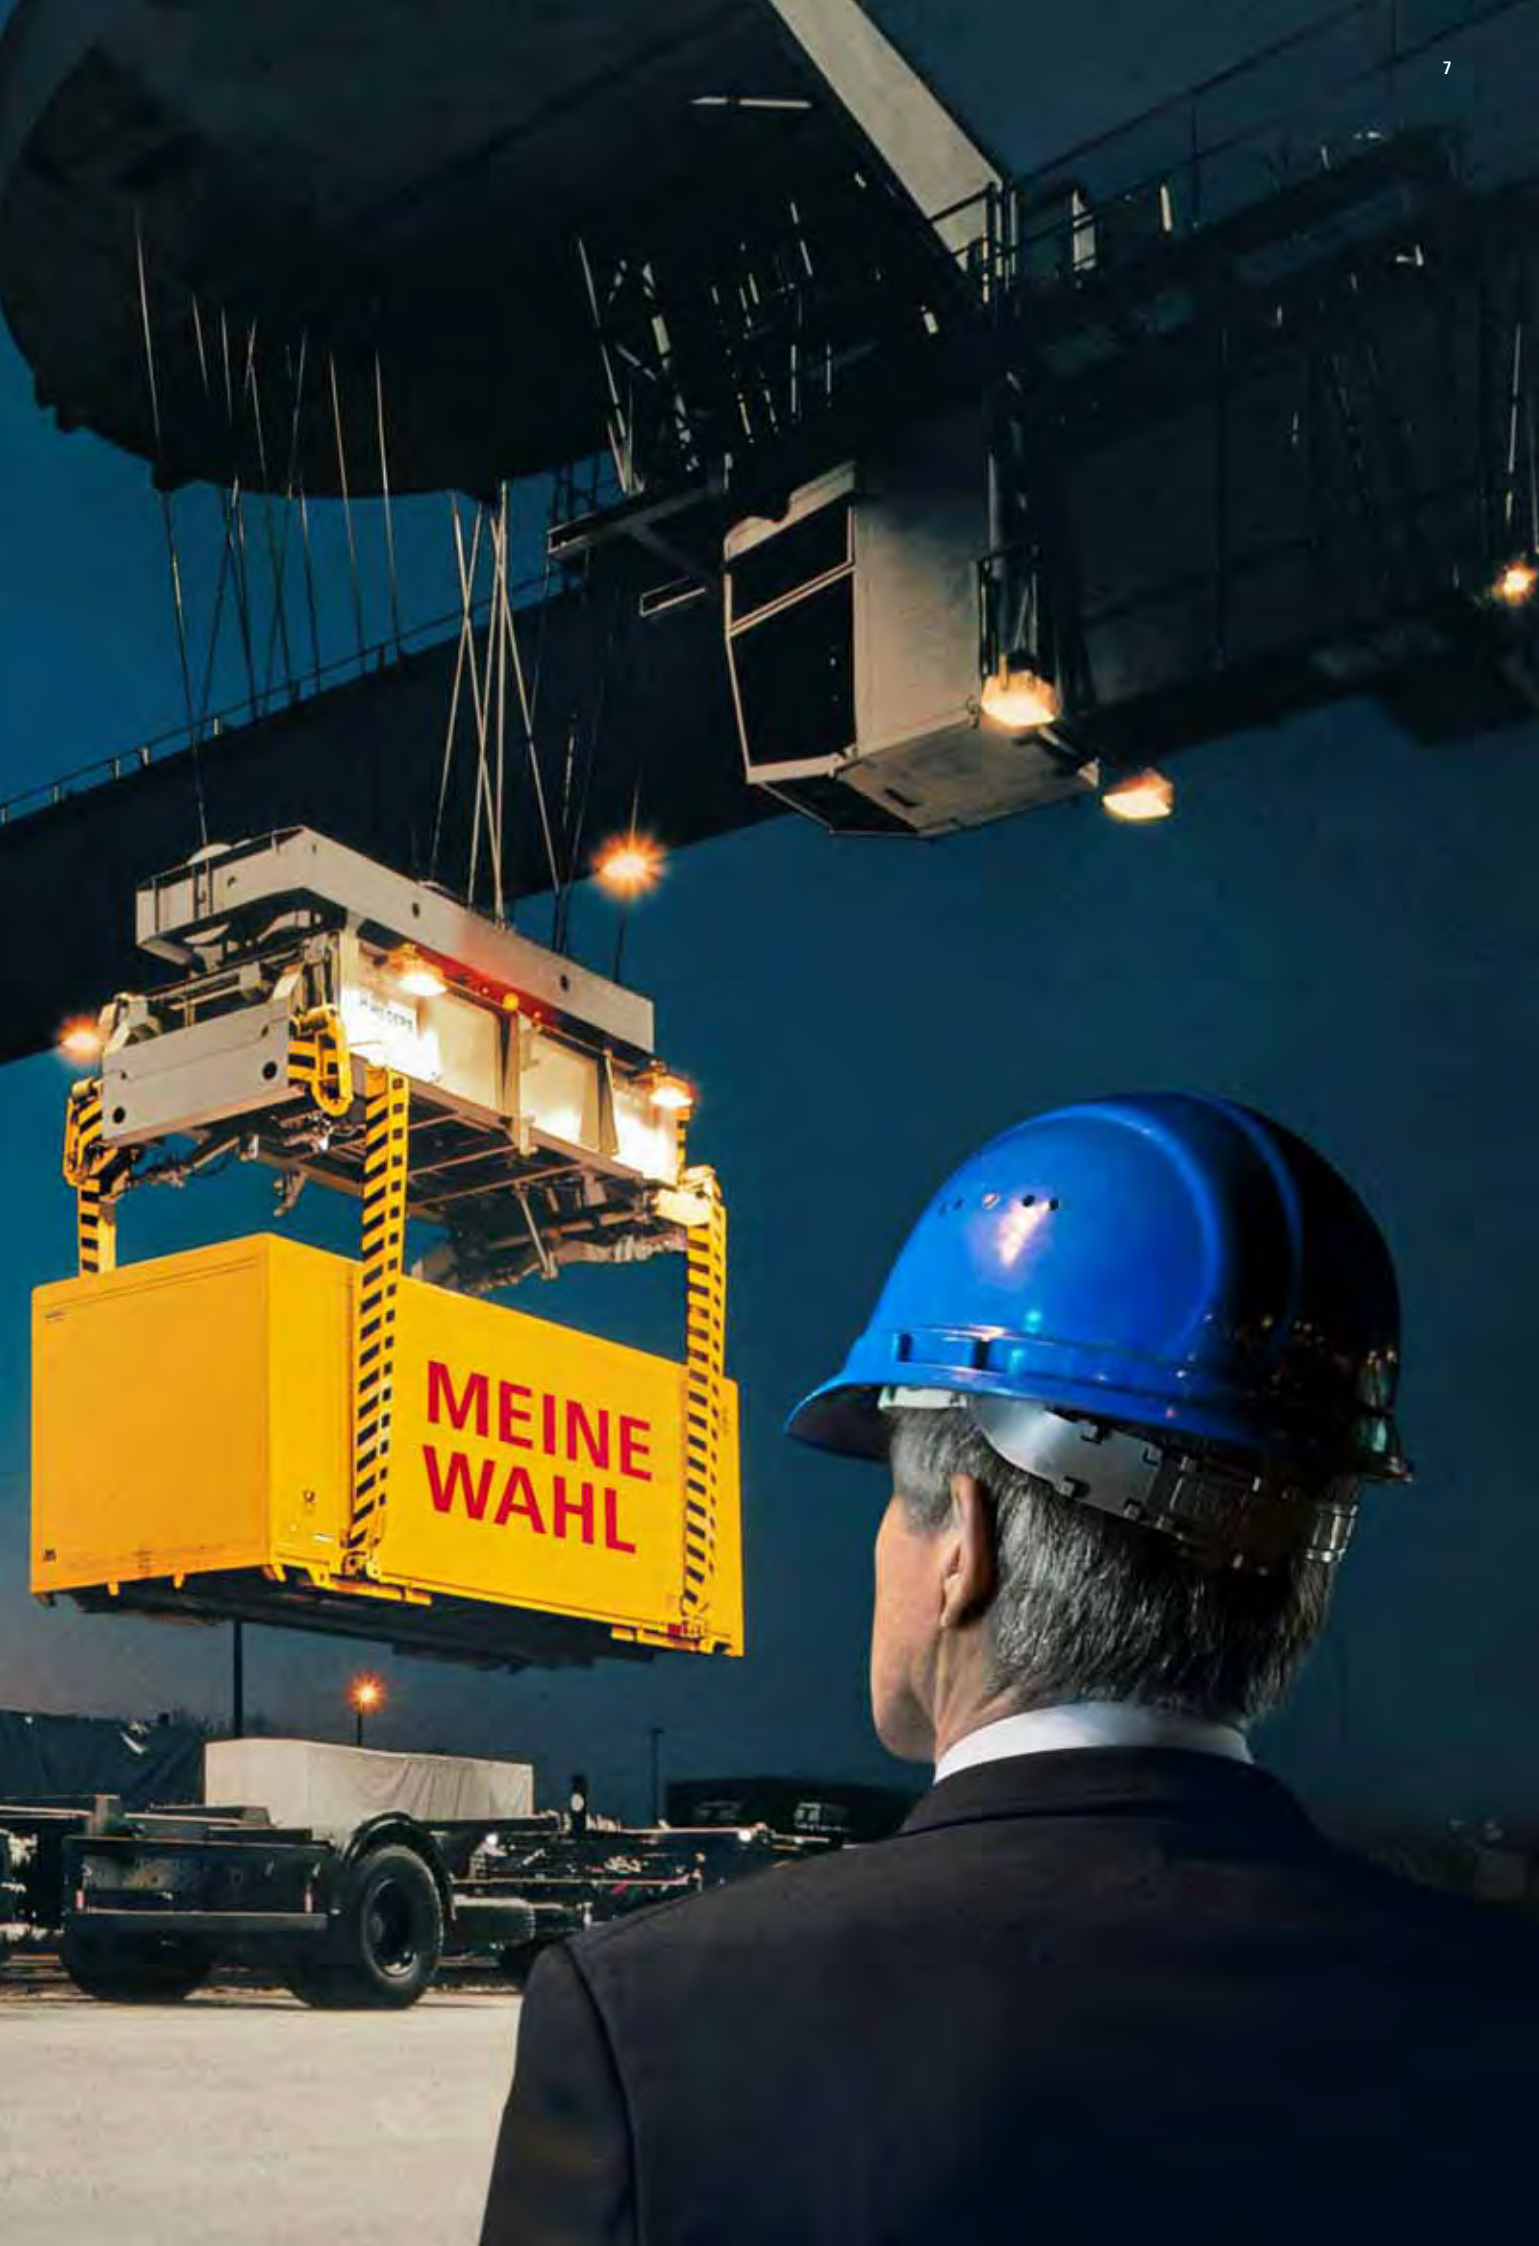



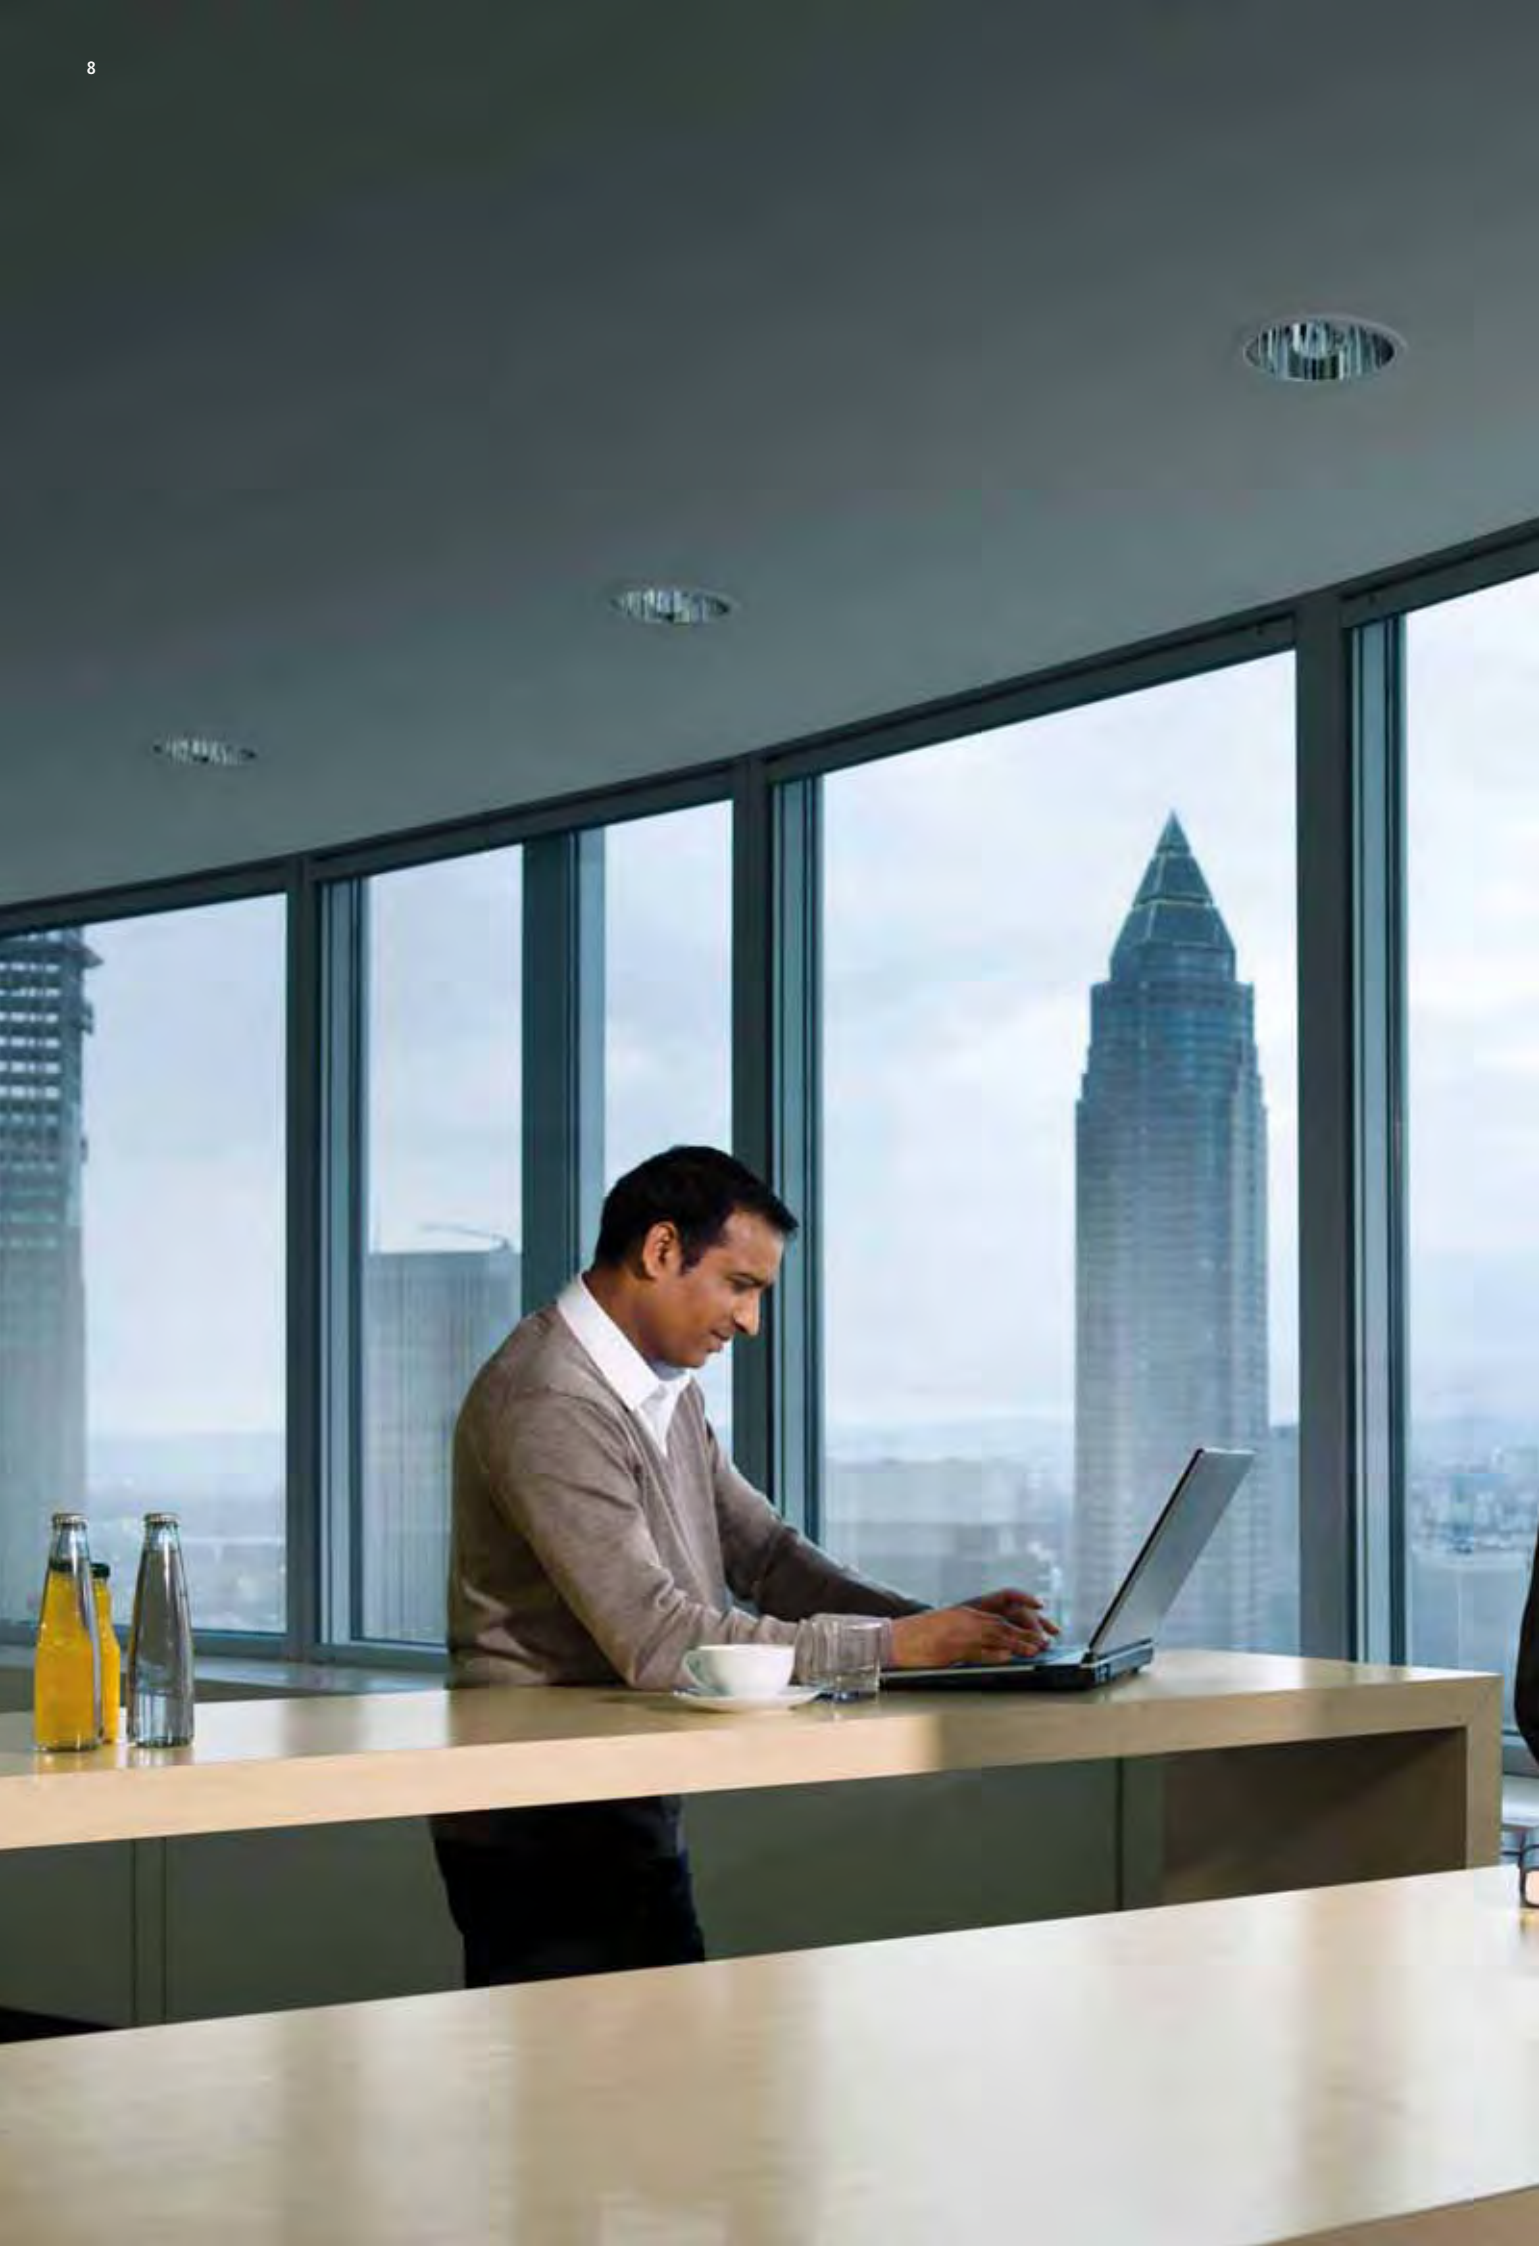



Attraktives Investment

## VERLÄSSLICHKEIT, DIE WERTE SCHAFFT

Deutsche Post DHL möchte ein attraktives Investment für Investoren sein und dafür auch bei der Profitabilität die führende Position in der Branche erreichen. Während dazu in den vergangenen Jahren die Effizienz mit umfangreichen Maßnahmen gesteigert wurde, liegt nun der Fokus auf organischem Umsatz- und Ergebniswachstum.

Das Geschäftsportfolio wurde optimiert und die sich verändernden Bedürfnisse der Kunden stärker in den Fokus des Handelns gestellt. Auch der Ausbau einer offenen Führungskultur und gezielte Investitionen in die Weiterentwicklung des Geschäftsmodells unterstützen die Wachstumsziele aller Konzernbereiche und unterstreichen die Zukunftsaussichten eines Investments in Deutsche Post DHL.

Ihre Wahl sein durch:

- ☒ Profitabilität
- ☒ Wachstum
- ☒ Zukunftsaussichten

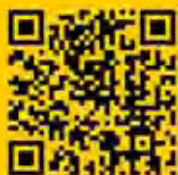

Wenn Ihr Mobiltelefon über eine QR-Erkennungssoftware verfügt, gelangen Sie nach dem Abfotografieren dieses Codes direkt zu weiteren Informationen auf unserer Website.

WEITERE INFORMATIONEN: [WWW.DP-DHL.COM/DE/INVESTOREN.HTML](http://WWW.DP-DHL.COM/DE/INVESTOREN.HTML)

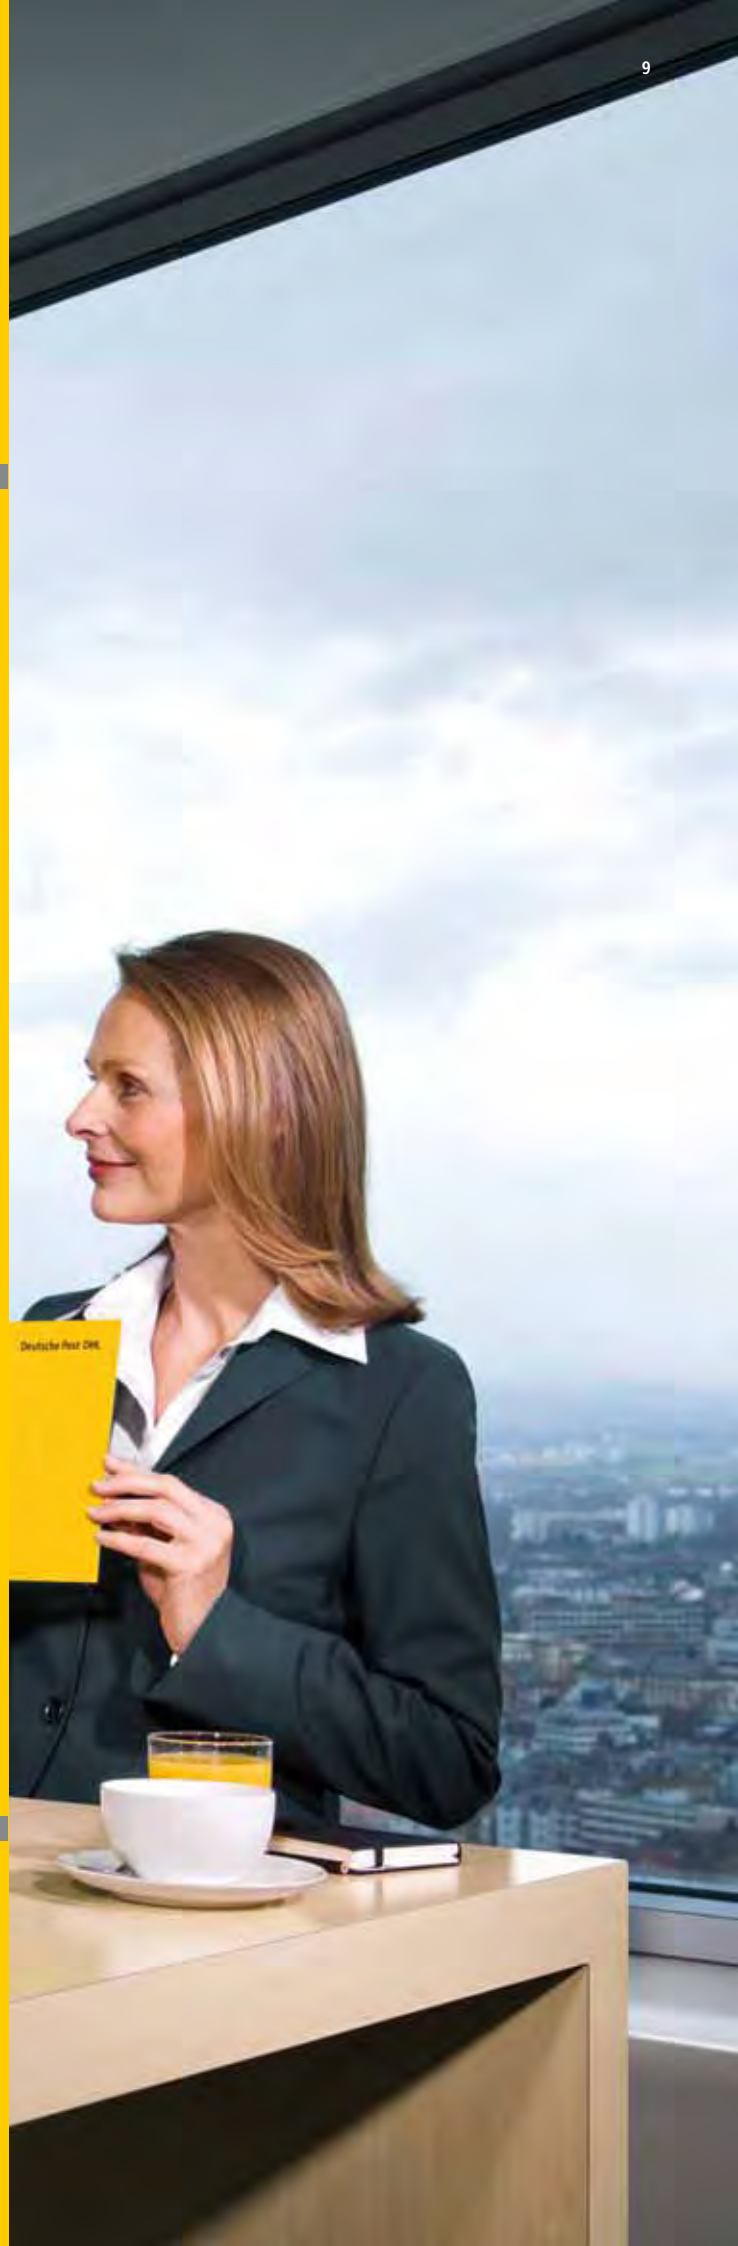

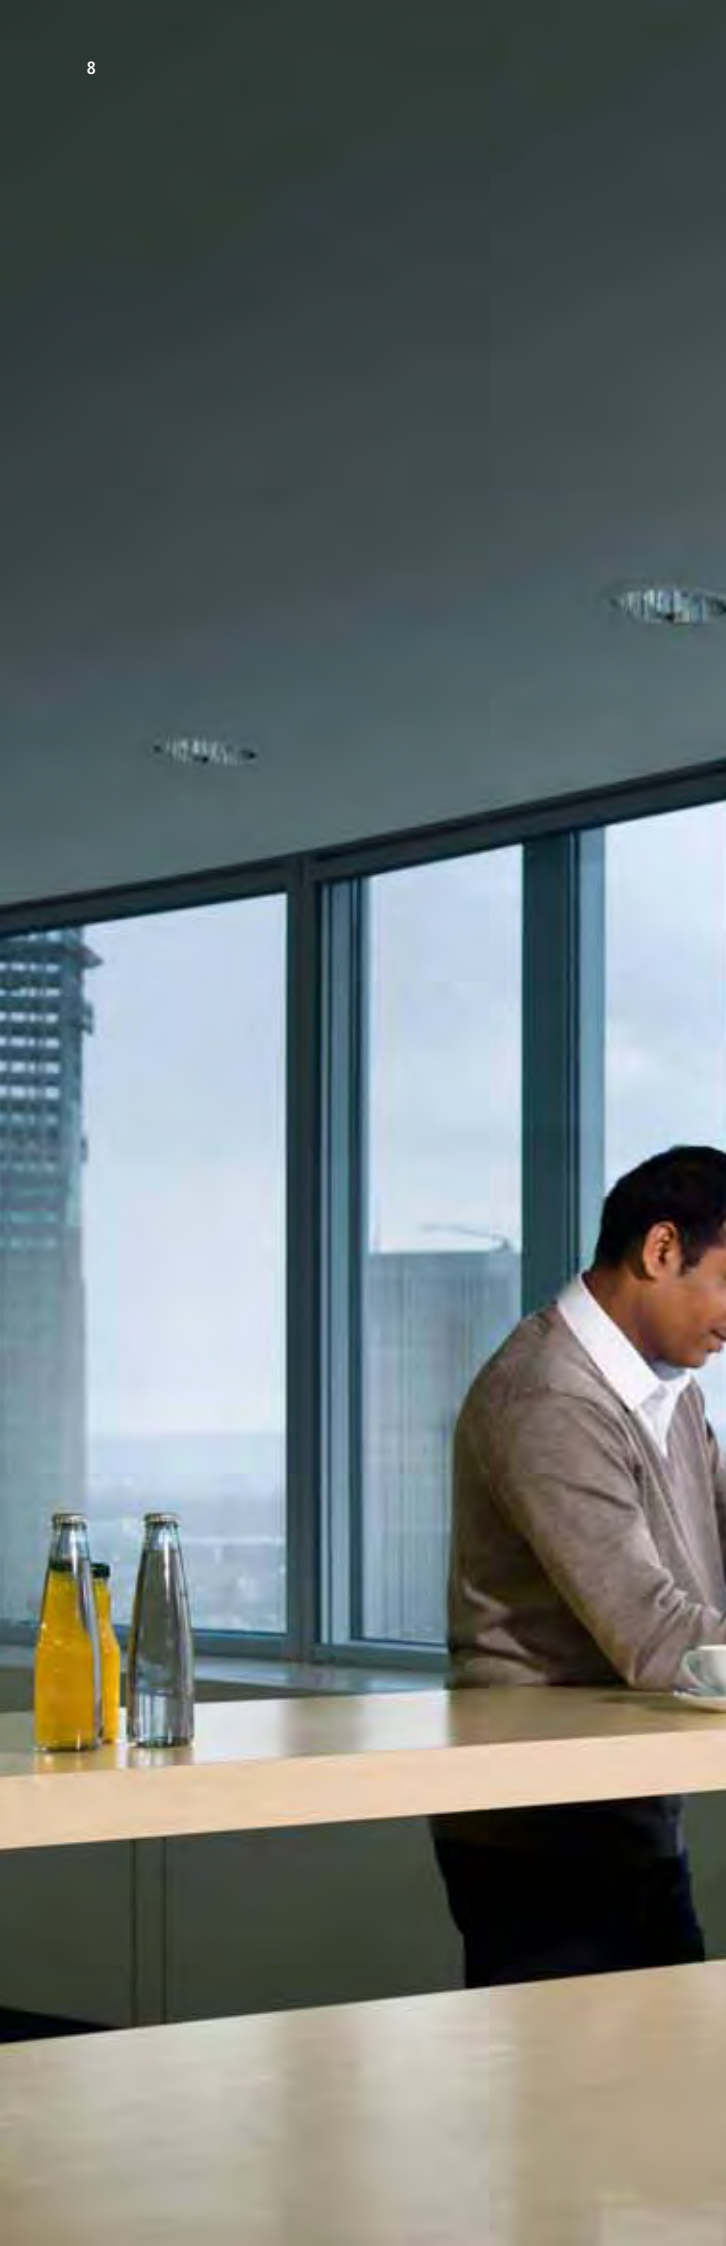

Ihre Wahl in der Praxis

## AUS GUTEM GRUND MEINE WAHL

### Die Aufgabe:

Deutsche Post DHL möchte sich bei Investoren als attraktives Investment mit guten Renditechancen positionieren.

### Die Lösung:

Das Unternehmen hat sein Portfolio bereinigt, sich strategisch klar ausgerichtet und eine neue Finanzstrategie entwickelt. Es ist unter anderem angestrebt, künftig 40 bis 60 Prozent des Nettogewinns als Dividende auszuschütten.

### Der Vorteil:

Investoren erhalten ein hohes Maß an Zuverlässigkeit und Kontinuität sowie Prognostizierbarkeit von zu erwartenden Ausschüttungen.

Nachhaltiges Investieren setzt einen offenen Dialog zwischen Investoren, Analysten und Deutsche Post DHL voraus. Die Basis dieses Vertrauens sind zeitnahe, umfassende und kontinuierliche Informationen für Investoren.

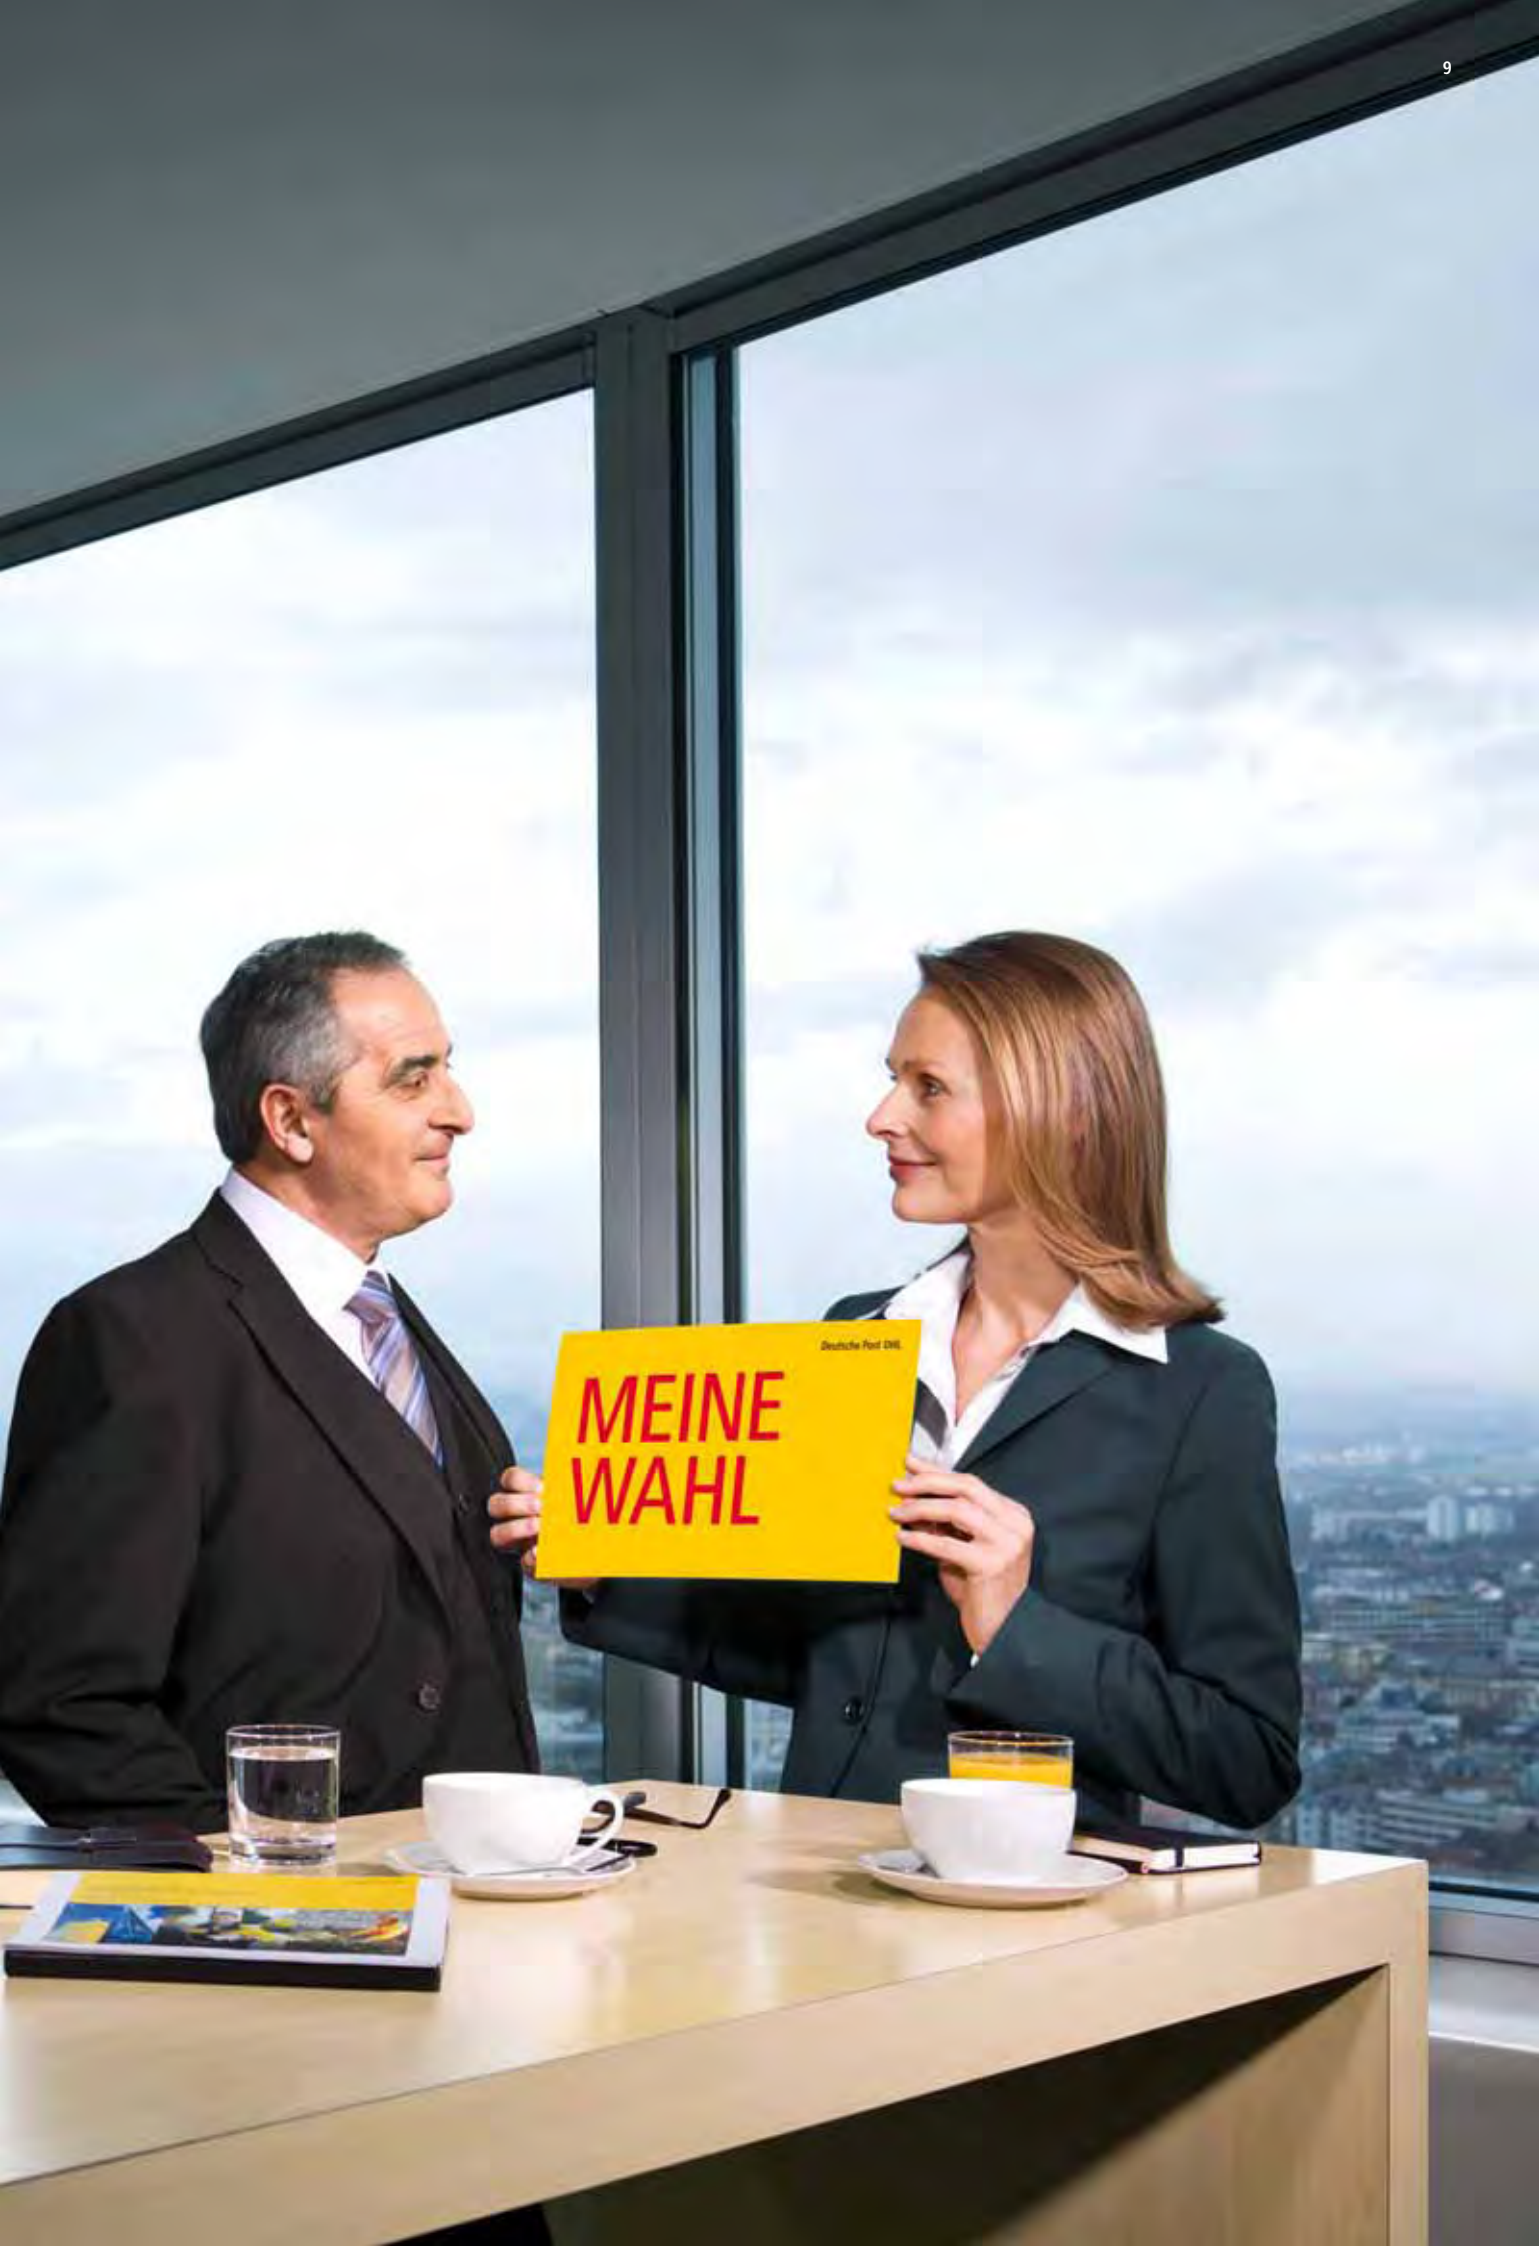



Deutsche Post DHL

Deutsche Post 

**DHL**

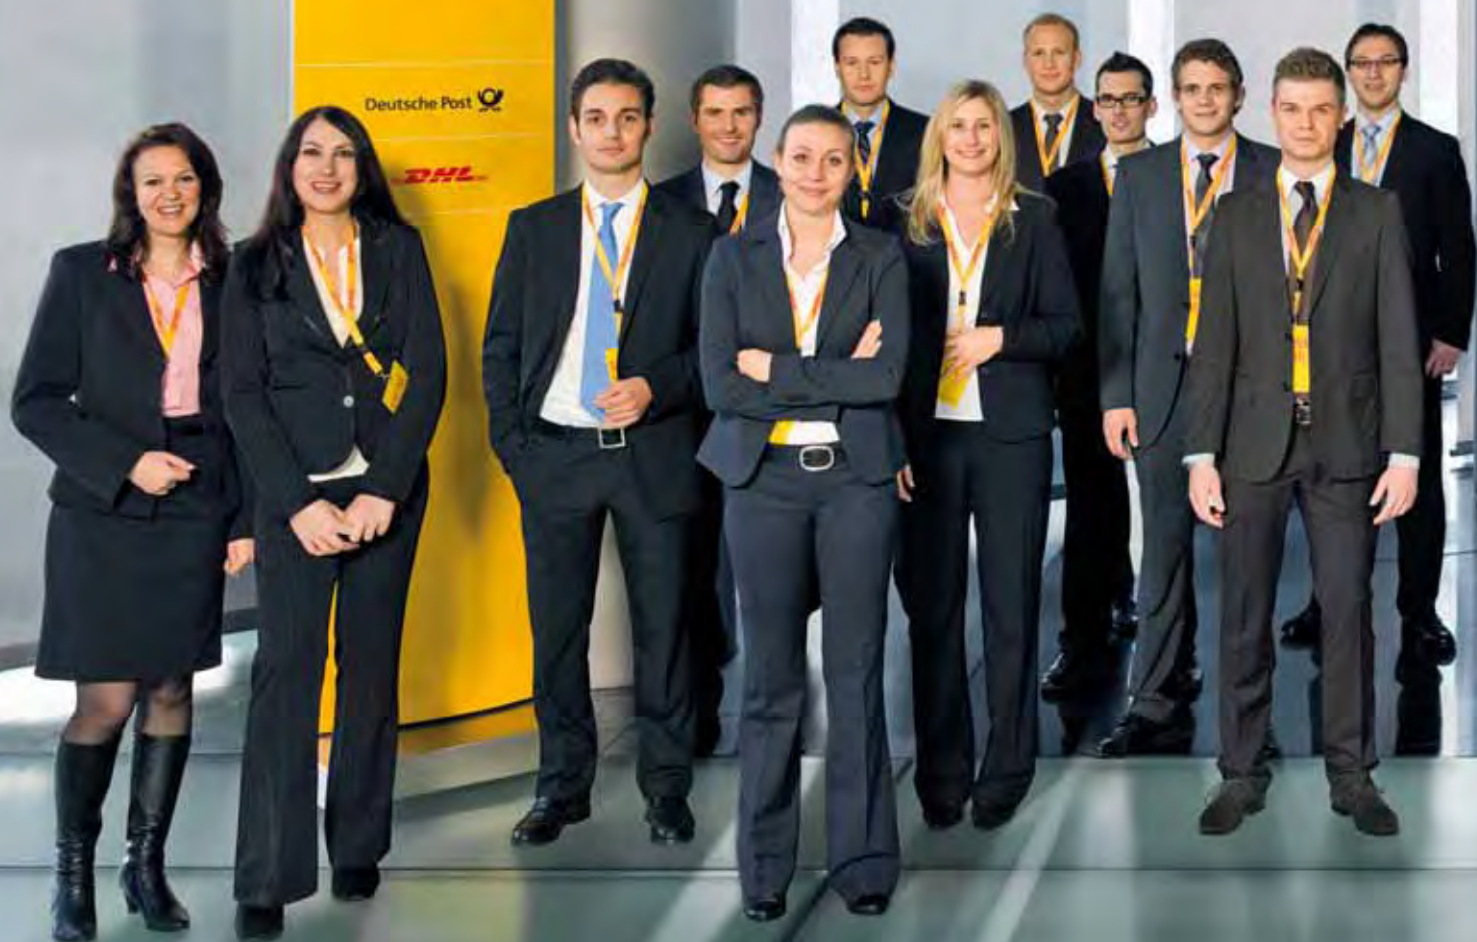

Präferierter Arbeitgeber

## FÖRDERUNG, DIE POTENZIALE ENTWICKELT

Deutsche Post DHL ist mit rund 470.000 Mitarbeitern in mehr als 220 Ländern und Territorien einer der größten Arbeitgeber der Welt. Ausschlaggebend für den langfristigen Erfolg sind qualifizierte und engagierte Mitarbeiter. Übergeordnetes Ziel unserer Mitarbeiterstrategie ist es deshalb, zum bevorzugten Arbeitgeber zu werden.

Um dieses Ziel zu erreichen, investiert das Unternehmen in Aus- und Weiterbildung, sorgt für eine sichere und gesunde Arbeitsumgebung, fördert Vielfalt und den internationalen Austausch von Ideen. Unsere jährliche Mitarbeiterbefragung zeigt uns, welche Fortschritte wir auf dem Weg zum bevorzugten Arbeitgeber machen.

Ihre Wahl sein durch:

- ☒ Aus- und Weiterbildung
- ☒ Gesundheit und Sicherheit
- ☒ Vielfalt und Kreativität

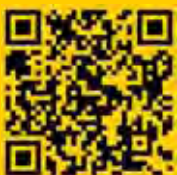

Wenn Ihr Mobiltelefon über eine QR-Erkennungssoftware verfügt, gelangen Sie nach dem Abfotografieren dieses Codes direkt zu weiteren Informationen auf unserer Website.

WEITERE INFORMATIONEN: [WWW.DP-DHL.COM/DE/KARRIERE.HTML](http://WWW.DP-DHL.COM/DE/KARRIERE.HTML)

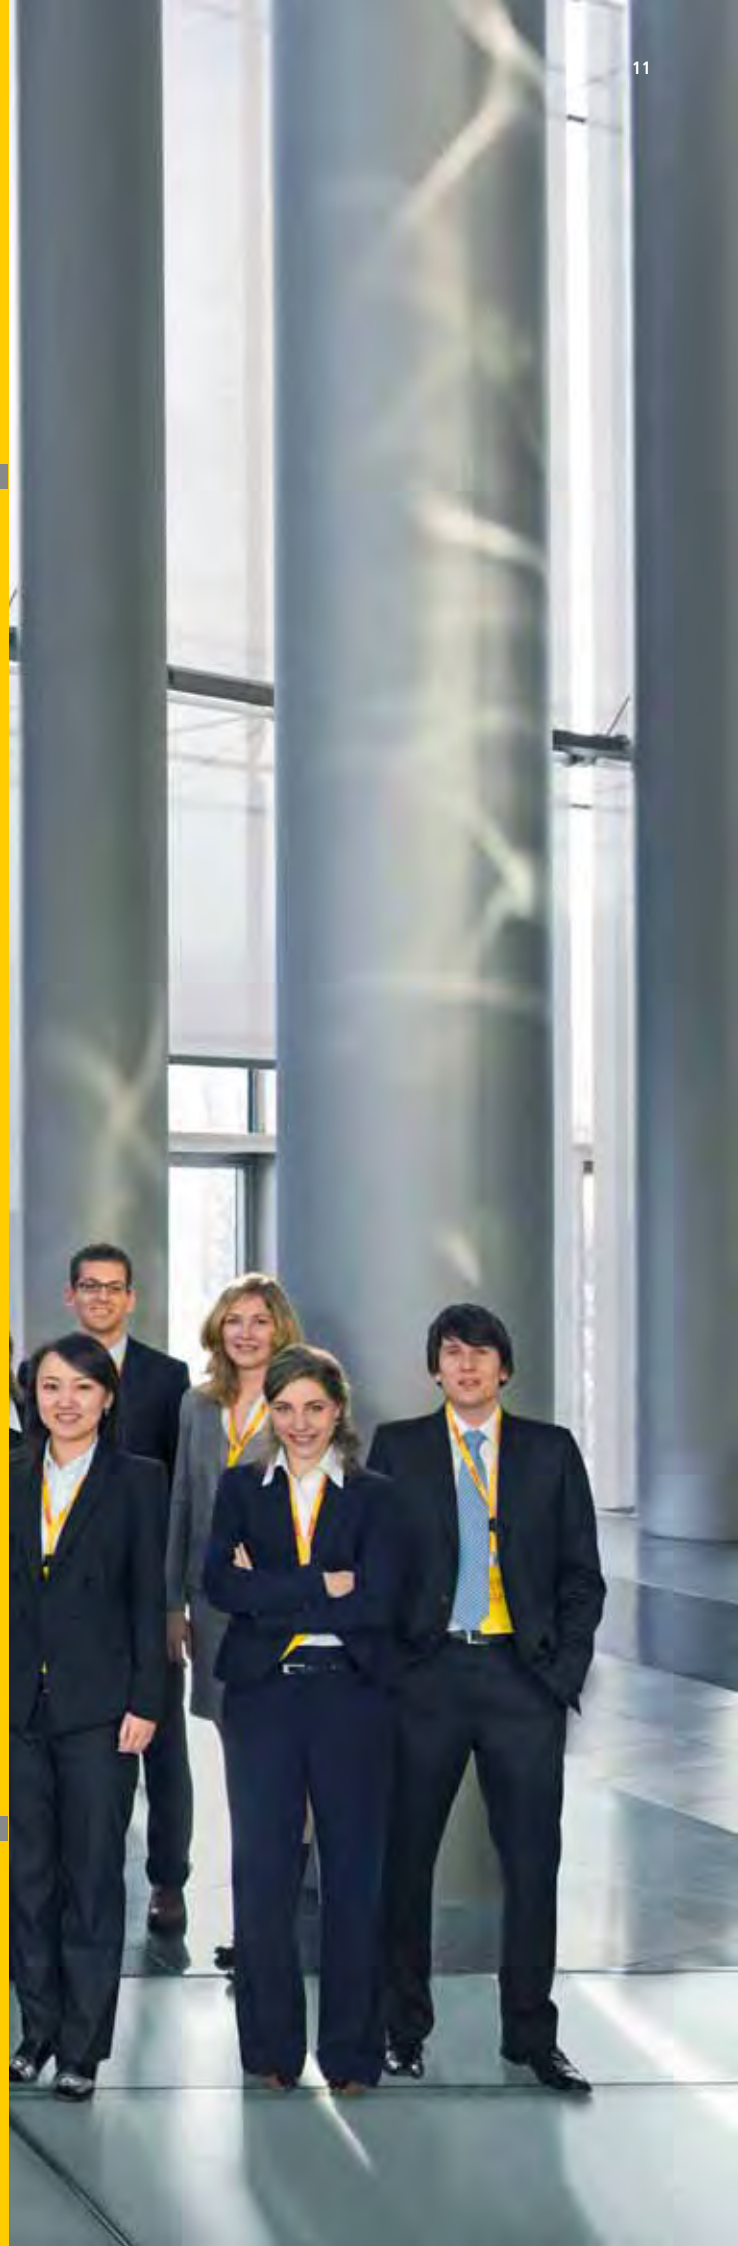



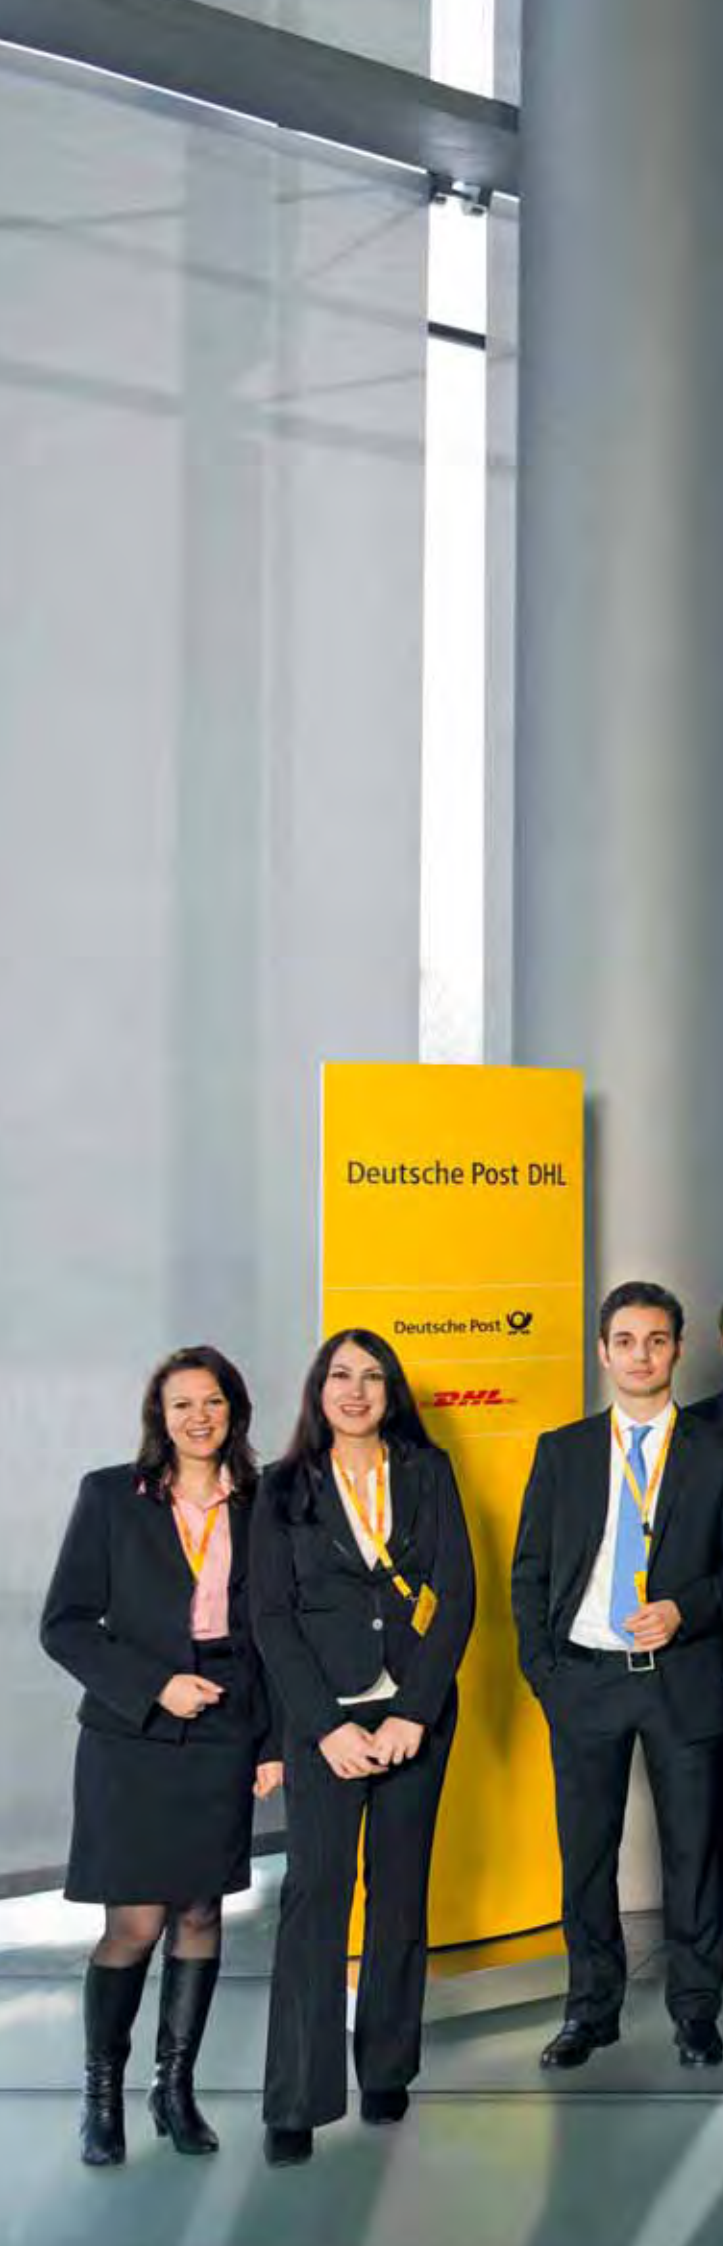

Ihre Wahl in der Praxis

## AUS GUTEM GRUND MEINE WAHL

### Die Aufgabe:

Eine Studentin der Wirtschaftswissenschaften möchte nach ihrem Studienabschluss in ein breit aufgestelltes, internationales Unternehmen einsteigen.

### Die Lösung:

Sie bewirbt sich um die Teilnahme am konzernweiten Trainee-Programm für potenzielle Nachwuchsführungskräfte bei Deutsche Post DHL.

### Der Vorteil:

Junge Menschen übernehmen Verantwortung und können von Anfang an die eigenen Stärken in einem internationalen Konzern mit zahlreichen Karriereoptionen einbringen.

Mit unserem Trainee-Programm „GROW“ (Graduate Opportunities Worldwide) gewinnen wir Nachwuchskräfte für Fach- und Führungspositionen. Der Jahrgang 2010 absolviert ein anspruchsvolles, breit gefächertes Entwicklungsprogramm, das vielfältige Zukunftschancen bei einem der weltweit größten Arbeitgeber eröffnet.

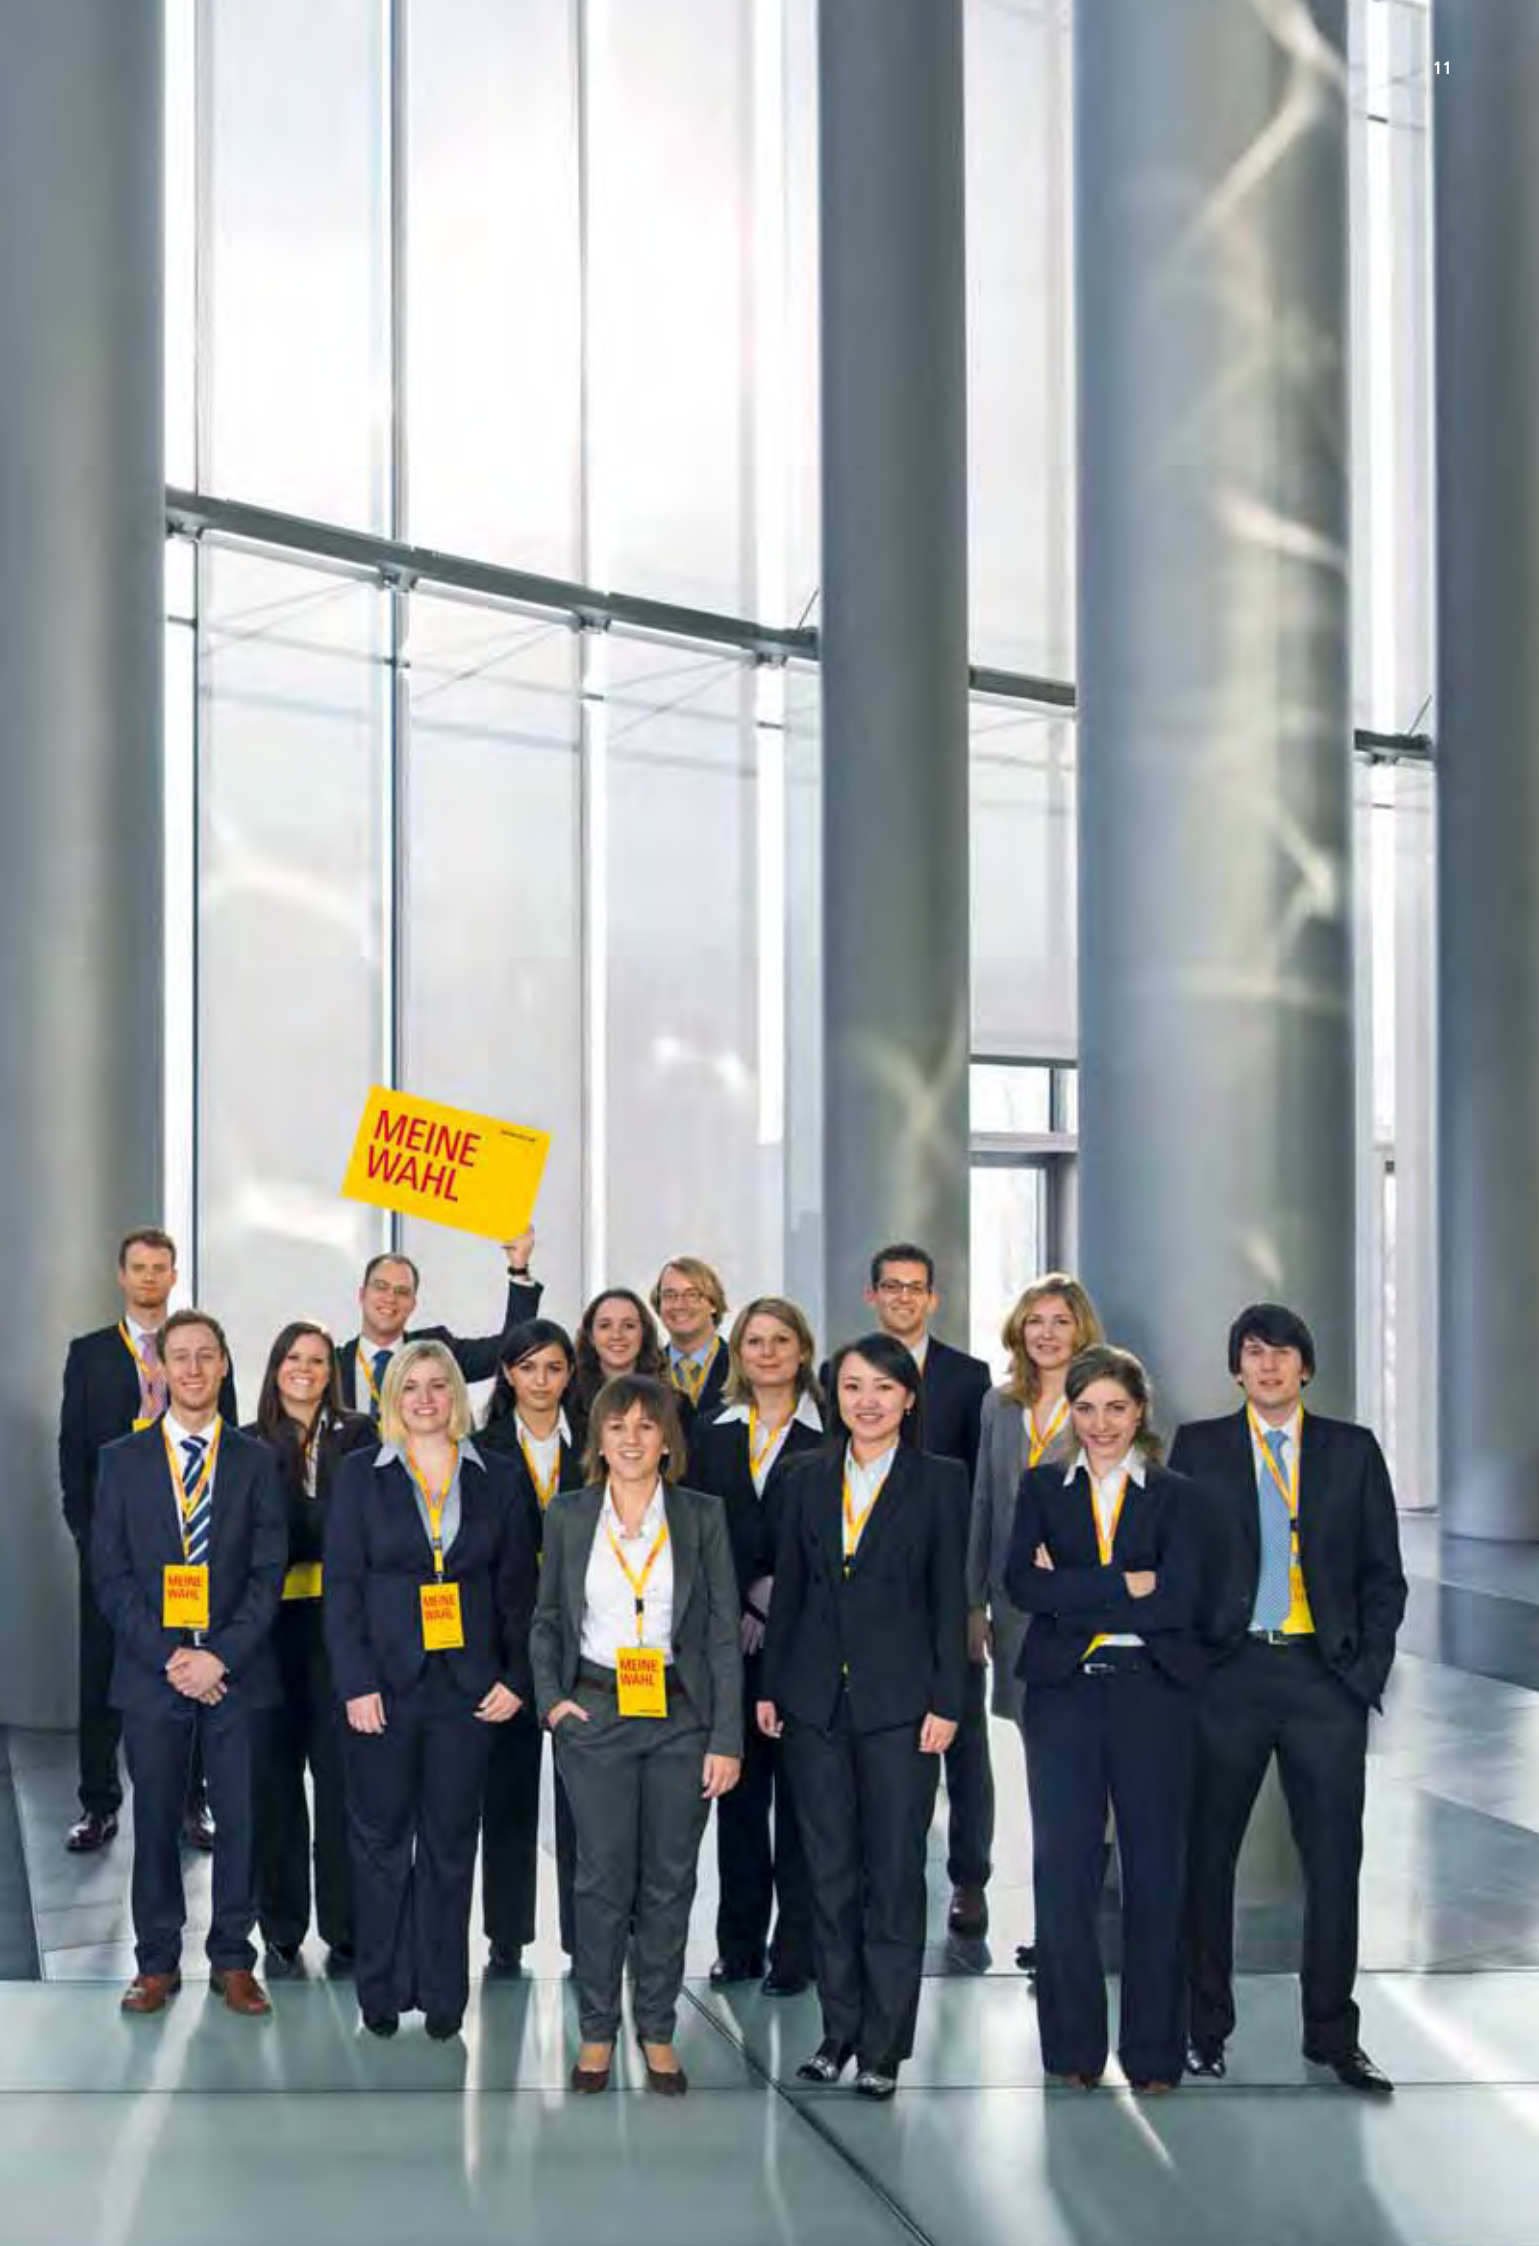

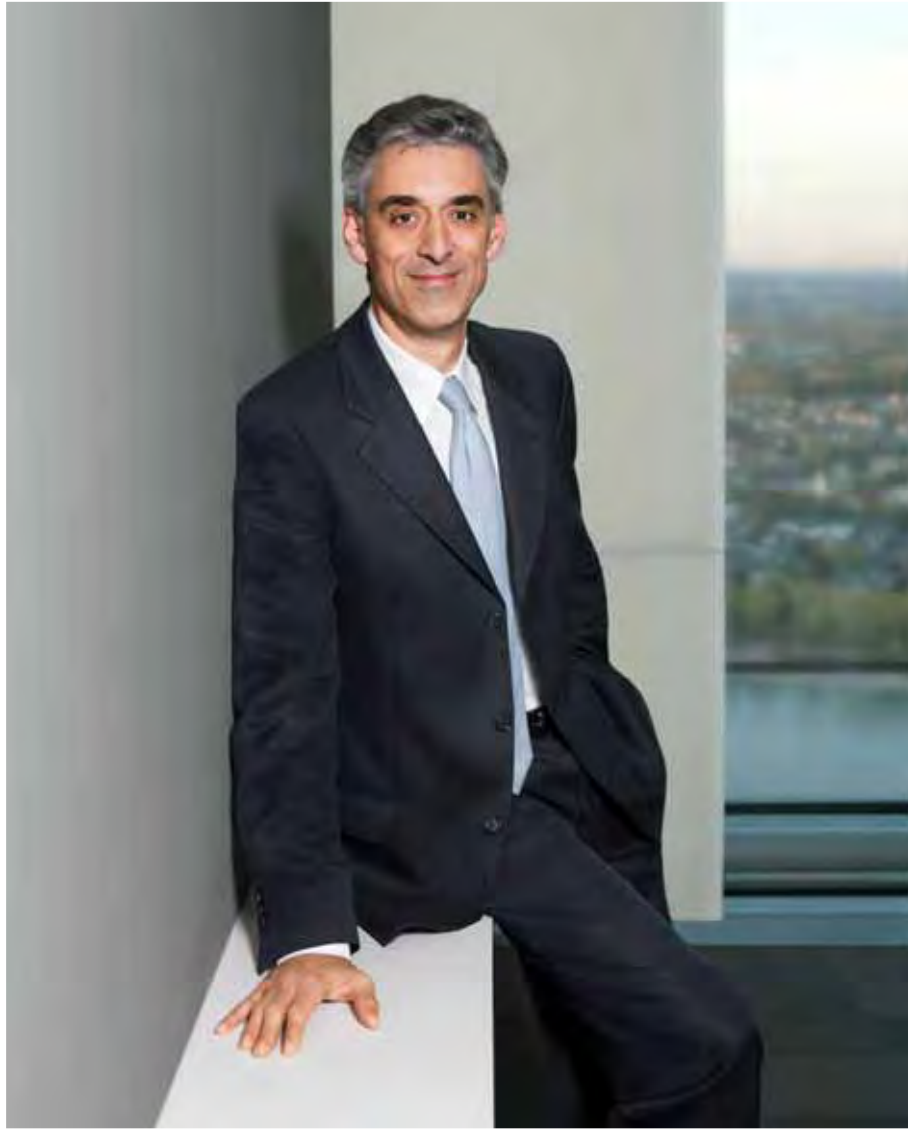

**DR. FRANK APPEL**  
Vorstandsvorsitzender

1. März 2011  
Geschäftsjahr 2010

*Sehr geehrte Aktionärinnen und Aktionäre,*



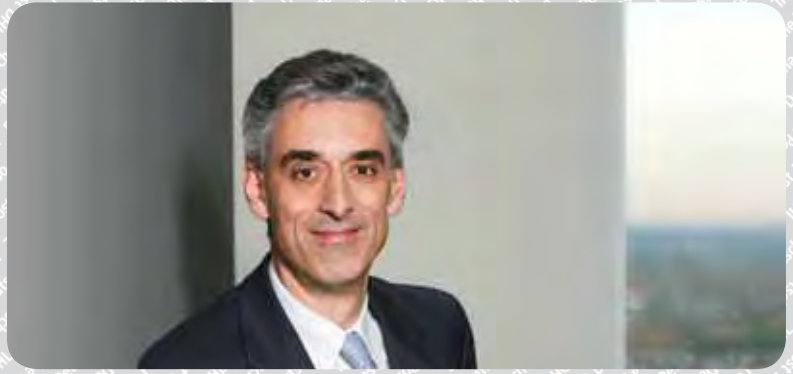



1. März 2011  
Geschäftsjahr 2010

*Sehr geehrte Damen und Herren,*

als Unternehmen die bevorzugte Wahl für Kunden, Mitarbeiter und Investoren zu werden – das ist ein logisches, aber auch ehrgeiziges Ziel. Umso mehr freut es mich, dass wir hierbei gute Fortschritte gemacht haben.

Im Jahr 2010 hat sich die Wirtschaft in weiten Teilen der Welt spürbar belebt; Transportvolumina und Nachfrage nach Logistikleistungen sind deutlich gestiegen. Mit strategischen und operativen Maßnahmen haben wir in fast allen Geschäftsbereichen deutliche Fortschritte erzielt und von der konjunkturellen Erholung in vollem Umfang profitiert – wovon ich übrigens stets überzeugt war.

Der Konzernumsatz ist zweistellig um 11,4 % auf 51,5 MRD € gestiegen. Die im Vorjahr erzielten Einsparungen haben in fast allen Unternehmensbereichen die Rentabilität mit zum Teil stark gestiegenen Margen erhöht. Beim Ergebnis vor Einmaleffekten hatten wir im Jahresverlauf unsere ursprüngliche Prognose bereits zweimal angehoben und lagen am Ende mit 2,2 MRD € trotzdem noch einmal um 100 MIO € über unseren Erwartungen. Mit einer beträchtlichen Nettoliquidität ausgestattet, befinden wir uns in einer sehr stabilen finanziellen Lage.

Im Briefgeschäft müssen wir zwar seit Mitte 2010 Mehrwertsteuer auf Umsätze mit Geschäftskunden erheben. Das hat Umsatz und Ergebnis in der zweiten Jahreshälfte belastet. Im Gegensatz dazu entwickelt sich das Paketgeschäft dank des regen Internethandels besonders gut. Wir haben sogar den Wegfall des Quelle-Geschäfts mehr als ausgleichen können.

Die DHL-Unternehmensbereiche, deren Umbau nun weitgehend abgeschlossen ist, wachsen, besonders in Boommärkten wie Asien. Sie haben erstmals den größten Beitrag zum Konzernergebnis geleistet.

Insgesamt hat Ihr Unternehmen im Geschäftsjahr 2010 alle gesteckten finanziellen Ziele erreicht. Ich danke Ihnen, dass Sie mir und meinen Vorstandskollegen erneut Ihr Vertrauen ausgesprochen haben. Das erzielte Ergebnis ermöglicht es uns, der Hauptversammlung vorzuschlagen, Ihnen eine auf 0,65 € je Aktie erhöhte Dividende auszus zahlen.

Ein herzlicher Dank geht an unsere rund 470.000 Mitarbeiter, deren Leistung wir auch mit einer Sonderzahlung zum Jahresende honoriert haben.

1/2



Im Rahmen unserer Strategie 2015 verfolgen wir drei Ziele: Wir wollen bevorzugter Anbieter für Kunden werden. Wir wollen für Investmententscheidungen von Anlegern erste Adresse sein und als Arbeitgeber haben wir den Ehrgeiz, überdurchschnittlich viele qualifizierte Mitarbeiter an uns zu binden.

Unseren Kunden möchten wir Lösungen anbieten, die ihnen das Leben einfacher machen. Bestes Beispiel dafür ist der E-Postbrief. Mit ihm haben wir unser Angebot für eine sichere, vertrauliche und verlässliche elektronische Kommunikation erfolgreich auf den Markt gebracht. Innerhalb von DHL gelingt es uns zudem immer besser, integrierte Lösungen für Regionen, Branchen und Kundengruppen zu entwickeln.

Die Ergebnisse der jährlichen Mitarbeiterbefragung zeigen, dass wir auch auf dem Weg zum bevorzugten Arbeitgeber mit großen Schritten vorankommen. Das ist für mich ein besonderes Anliegen. Mit 79 % war die Teilnahme an der letzten Befragung sehr hoch. In allen Bereichen wurden Verbesserungen erzielt.

Ich weiß aus vielen Gesprächen mit Ihnen, dass für Sie als Investoren neben Profitabilität und Renditen vor allem Verlässlichkeit und Kontinuität zählen. Im Rahmen unserer Finanzstrategie wollen wir künftig 40 % bis 60 % des Nettogewinns als Dividende ausschütten und in der Berichterstattung noch transparenter werden. Nachdem die Restrukturierungen weitgehend abgeschlossen sind, werden wir vom ersten Quartal 2011 an das Ergebnis nicht mehr bereinigt um Einmaleffekte betrachten.

Für das laufende Geschäftsjahr erwarten wir ein Konzern-EBIT in Höhe von 2,2 MRD € bis 2,4 MRD €. Dazu sollte der Unternehmensbereich BRIEF 1,0 MRD € bis 1,1 MRD € beitragen. Für die DHL-Unternehmensbereiche erwarten wir insgesamt eine Ergebnisverbesserung um 10 % bis 17 % auf 1,6 MRD € bis 1,7 MRD €. Und auch das Konzernergebnis sollte sich analog zum operativen Geschäft weiter verbessern.

Ich bin davon überzeugt, dass wir auch mittelfristig stärker wachsen werden als der Markt, sofern es uns gelingt, den Blick auf die wesentlichen Treiber unseres unternehmerischen Erfolges zu richten: zufriedene Kunden, engagierte Mitarbeiter und loyale Investoren.

Ihr

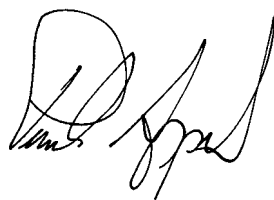





## KONZERNLAGEBERICHT

A

E-Postbrief

Luftpost

Einschreiben

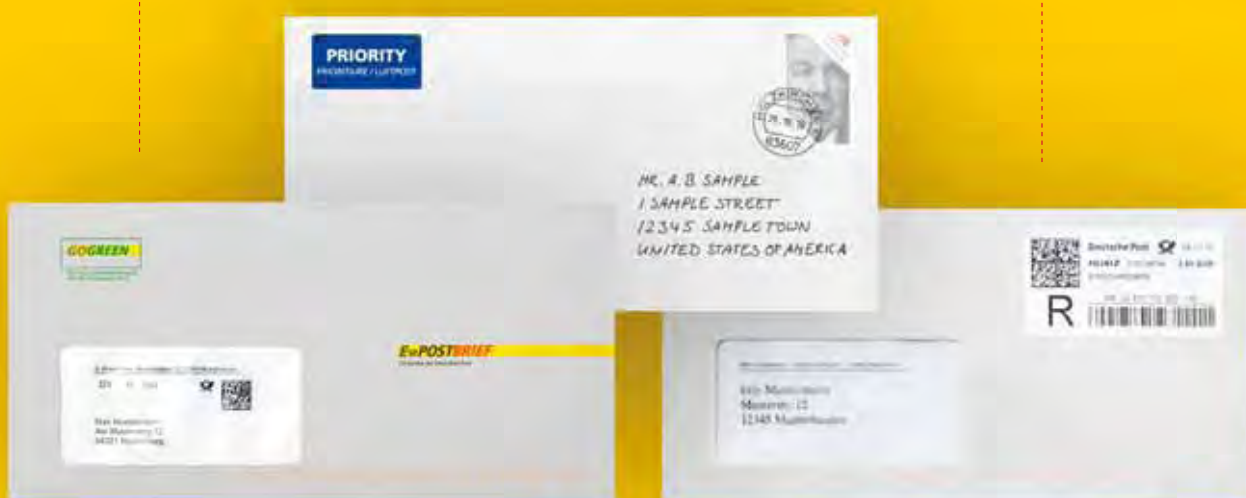

## Deutsche Post

## IHRE WAHL. WEIL PERSÖNLICHES VERTRAUEN VORAUSSETZT.

66 Millionen Sendungen täglich stellt die Deutsche Post an sechs Tagen in der Woche zu, das macht sie zur Nummer eins auf dem deutschen Briefmarkt. Ein Grund dafür ist ihre Zuverlässigkeit: Wer einen Brief mit der Deutschen Post verschickt, kann darauf vertrauen, dass er den Empfänger sicher und schnell erreicht. Zudem sorgen Angebote wie das Handyporto, die Internetmarke und der Plusbrief für eine effektive Kommunikation. Der E-Postbrief schließlich vereint viele Vorzüge des papiergebundenen Briefes mit der Schnelligkeit der E-Mail.

|                            |           |
|----------------------------|-----------|
| <b>GESCHÄFT UND UMFELD</b> | <b>21</b> |
|----------------------------|-----------|

|                                               |    |
|-----------------------------------------------|----|
| Geschäftstätigkeit und Organisation .....     | 21 |
| Übernahmerechtliche Angaben .....             | 23 |
| Vergütung von Vorstand und Aufsichtsrat ..... | 26 |
| Rahmenbedingungen .....                       | 27 |
| Unternehmenssteuerung .....                   | 32 |

|                            |           |
|----------------------------|-----------|
| <b>DEUTSCHE-POST-AKTIE</b> | <b>34</b> |
|----------------------------|-----------|

|                             |           |
|-----------------------------|-----------|
| <b>WIRTSCHAFTLICHE LAGE</b> | <b>37</b> |
|-----------------------------|-----------|

|                                   |    |
|-----------------------------------|----|
| Gesamtaussage des Vorstands ..... | 37 |
| Wesentliche Ereignisse .....      | 37 |
| Ertragslage .....                 | 37 |
| Finanzlage .....                  | 40 |
| Vermögenslage .....               | 48 |

|                             |           |
|-----------------------------|-----------|
| <b>UNTERNEHMENSBEREICHE</b> | <b>50</b> |
|-----------------------------|-----------|

|                                                      |    |
|------------------------------------------------------|----|
| Überblick .....                                      | 50 |
| Unternehmensbereich BRIEF .....                      | 51 |
| Unternehmensbereich EXPRESS .....                    | 57 |
| Unternehmensbereich GLOBAL FORWARDING, FREIGHT ..... | 62 |
| Unternehmensbereich SUPPLY CHAIN .....               | 66 |

|                                                  |           |
|--------------------------------------------------|-----------|
| <b>NICHTFINANZIELLE<br/>LEISTUNGSINDIKATOREN</b> | <b>70</b> |
|--------------------------------------------------|-----------|

|                                      |    |
|--------------------------------------|----|
| Mitarbeiter .....                    | 70 |
| Unternehmerische Verantwortung ..... | 75 |
| Beschaffung .....                    | 79 |
| Forschung und Entwicklung .....      | 82 |
| Kunden und Qualität .....            | 82 |
| Marken .....                         | 85 |

|                 |           |
|-----------------|-----------|
| <b>NACHTRAG</b> | <b>87</b> |
|-----------------|-----------|

|                        |    |
|------------------------|----|
| Nachtragsbericht ..... | 87 |
|------------------------|----|

|                 |           |
|-----------------|-----------|
| <b>PROGNOSE</b> | <b>88</b> |
|-----------------|-----------|

|                                                |     |
|------------------------------------------------|-----|
| Gesamtaussage zur erwarteten Entwicklung ..... | 88  |
| Chancen und Risiken .....                      | 88  |
| Strategische Ausrichtung .....                 | 99  |
| Künftige Rahmenbedingungen .....               | 106 |
| Umsatz- und Ergebnisprognose .....             | 109 |
| Erwartete Finanzlage .....                     | 109 |



# GESCHÄFT UND UMFELD

## Geschäftstätigkeit und Organisation

### Der führende Post- und Logistikkonzern

Deutsche Post DHL unterhält ein globales Netzwerk, das dem Kunden vom Standardprodukt bis zur maßgeschneiderten Lösung alle Möglichkeiten bietet, Waren und Informationen zu transportieren, zu lagern und zu verarbeiten. Wir legen größten Wert auf Service, Qualität und Nachhaltigkeit und übernehmen mit Programmen für Klimaschutz, Katastrophenhilfe und Bildung gesellschaftliche Verantwortung.

Im Unternehmensbereich BRIEF sind wir der einzige postalische Universaldienstleister in Deutschland. Wir befördern bundesweit sowie international Briefe und Pakete, sind Spezialist für Dialogmarketing, die flächendeckende Verteilung von Presseprodukten und elektronische Dienstleistungen rund um den Briefversand. Darüber hinaus waren wir mit dem E-Postbrief als erster Anbieter für den gesicherten, anwenderidentifizierten Versand von Dokumenten im Internet am Markt.

→ Glossar, Seite 232

→ Glossar, Seite 232

Im Unternehmensbereich EXPRESS bieten wir Kurier- und Expressdienstleistungen für Geschäfts- und Privatkunden in mehr als 220 Ländern und Territorien. Unser Netzwerk ist damit das umfassendste weltweit.

Im Unternehmensbereich GLOBAL FORWARDING, FREIGHT befördern wir Güter über Schiene, Straße, Luft und See. Wir sind auf der Welt die Nummer eins für Luftfracht, die Nummer zwei für Seefracht und einer der führenden Landfrachttransporteure in Europa.

Im Unternehmensbereich SUPPLY CHAIN erbringen wir als Weltmarktführer in der Kontraktlogistik Lager-, Transport- und Mehrwertleistungen entlang der gesamten Lieferkette für Kunden verschiedener Branchen. Überdies bieten wir Gesamtlösungen für das Informations- und Kommunikationsmanagement in Unternehmen.

Interne Dienstleistungen wie Finanzen, IT und Einkauf haben wir konzernweit im Bereich Global Business Services (GBS) gebündelt. Dadurch können wir unsere Ressourcen effizient nutzen und zugleich auf die sich schnell ändernden Anforderungen unseres Geschäfts flexibel reagieren.

### Vier operative Unternehmensbereiche

Der Konzern ist in vier operative Unternehmensbereiche gegliedert, die durch eigene Zentralen (Divisional Headquarters) gesteuert werden und für die Berichtsstruktur in Geschäftsfelder gegliedert sind. Aufgaben der Konzernführung werden im Corporate Center wahrgenommen.

### A.01 Organisationsstruktur Deutsche Post DHL

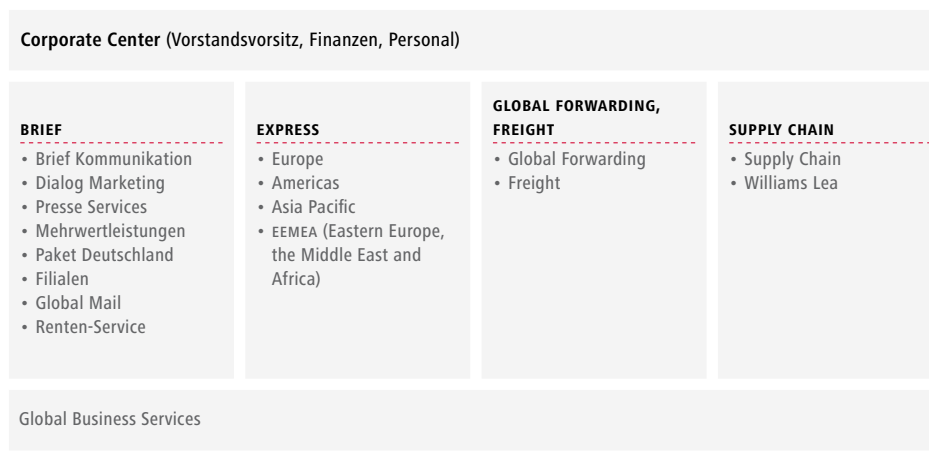

### A.02 Konzernstruktur aus verschiedenen Perspektiven

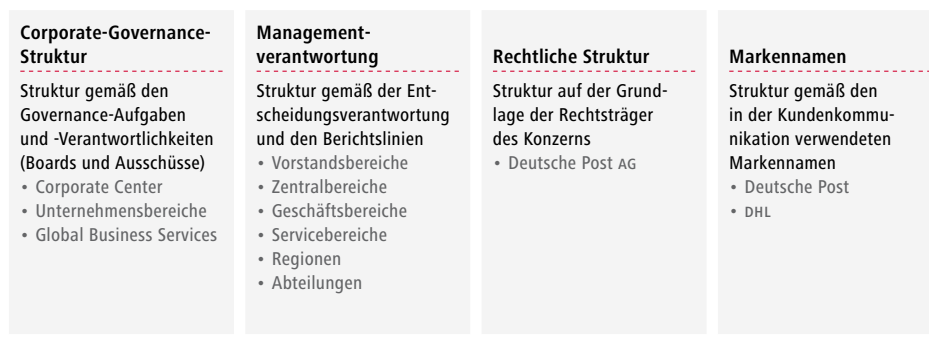

#### Divisionale Organisation angepasst

Wie im Vorjahr angekündigt, haben wir in der ersten Jahreshälfte 2010 die europäischen Zentralfunktionen im Unternehmensbereich EXPRESS an unseren Standorten in Deutschland zusammengefasst. Dadurch verbessert sich auch die Zusammenarbeit mit den Globalfunktionen des Bereichs.

Zum 1. Juli 2010 haben wir die Managementstruktur bei Williams Lea Deutschland verändert und im Wesentlichen im Unternehmensbereich BRIEF zusammengeführt. Dadurch werden beide Bereiche, die viele Schnittstellen aufweisen, vor allem bei briefnahen Mehrwertleistungen (Drucken, Scannen, Poststellenservices), nun einheitlich gesteuert.

Darüber hinaus haben wir im letzten Quartal 2010 unsere gesamten Aktivitäten für den E-Postbrief in einem eigenen Geschäftsbereich zusammengefasst. Damit geben wir diesem für den Unternehmensbereich BRIEF wichtigen Produkt auch organisatorisch eine seiner strategischen Bedeutung entsprechende Struktur.

## Übernahmerechtliche Angaben

Angaben nach §§ 289 Abs. 4, 315 Abs. 4 HGB und erläuternder Bericht

### **Zusammensetzung des gezeichneten Kapitals, Stimmrechte und Übertragung von Aktien**

Zum 31. Dezember 2010 betrug das Grundkapital der Gesellschaft 1.209.015.874 €, eingeteilt in ebenso viele auf den Namen lautende Stückaktien (Aktien ohne Nennbetrag). Jede Aktie gewährt die gleichen gesetzlich vorgesehenen Rechte und Pflichten und in der Hauptversammlung je eine Stimme. Keinem Aktionär und keiner Aktionärsgruppe stehen Sonderrechte, insbesondere solche, die Kontrollbefugnisse verleihen, zu.

Die Ausübung der Stimmrechte und die Übertragung der Aktien richten sich nach den allgemeinen gesetzlichen Bestimmungen und der Satzung der Gesellschaft, die beides nicht beschränkt. § 19 der Satzung bestimmt, welche Voraussetzungen erfüllt sein müssen, um als Aktionär an der Hauptversammlung teilzunehmen und sein Stimmrecht auszuüben. Gegenüber der Gesellschaft gilt als Aktionär nur, wer als solcher im Aktienregister eingetragen ist. Dem Vorstand sind keine Vereinbarungen zwischen Aktionären bekannt, die das Stimmrecht oder die Aktienübertragung beschränken.

Mitglieder des Vorstands erhalten als langfristige Vergütungskomponente im Rahmen des Long-Term-Incentive-Plans jährlich Stock Appreciation Rights (SAR) unter der Voraussetzung, dass sie für jede Tranche ein Eigeninvestment in Geld oder in Aktien der Deutsche Post AG leisten. Veräußert ein Vorstandsmitglied Aktien des Eigeninvestments seiner Tranche oder verfügt er über das Eigeninvestment in Geld vor Ablauf der vorgesehenen Wartezeit von vier Jahren (für die Tranche 2008: Wartezeit von drei Jahren), verfallen sämtliche SAR aus der entsprechenden Tranche.

Teilnahmeberechtigte Führungskräfte des Konzerns erhalten im Rahmen des aktienorientierten Vergütungssystems (Share Matching Scheme) von der Gesellschaft Aktien, die nach den zugrunde liegenden Bedingungen einer vierjährigen Veräußerungssperre unterliegen.

### **Kapitalbeteiligungen von mehr als 10 %**

Die KfW Bankengruppe (KfW), Frankfurt am Main, ist mit einer Beteiligung von rund 30,5 % am Grundkapital unser größter Aktionär. Die Bundesrepublik Deutschland ist mittelbar über die KfW an der Deutsche Post AG beteiligt. KfW und Bund sind gemäß den uns vorliegenden Mitteilungen nach §§ 21 ff. WpHG die einzigen Aktionäre, die direkt oder indirekt mehr als 10 % des Grundkapitals halten.

### **Ernennung und Abberufung der Vorstandsmitglieder**

Die Mitglieder des Vorstands werden nach den gesetzlichen Vorschriften bestellt und abberufen (§§ 84, 85 AktG, § 31 MitbestG). Gemäß § 84 AktG, § 31 MitbestG erfolgt die Bestellung durch den Aufsichtsrat auf höchstens fünf Jahre. Eine wiederholte Bestellung oder Verlängerung der Amtszeit, jeweils für höchstens fünf Jahre, ist zulässig. Gemäß § 6 der Satzung besteht der Vorstand aus mindestens zwei Mitgliedern. Im Übrigen wird die Zahl der Vorstandsmitglieder durch den Aufsichtsrat bestimmt, der auch einen Vorsitzenden und einen stellvertretenden Vorsitzenden des Vorstands ernennen kann.



### **Satzungsänderungen**

Die Satzung kann gemäß §§ 119 Abs. 1 Ziff. 5, 179 Abs. 1 Satz 1 AktG durch Beschluss der Hauptversammlung geändert werden. Gemäß § 21 Abs. 2 der Satzung in Verbindung mit §§ 179 Abs. 2, 133 Abs. 1 AktG beschließt die Hauptversammlung über Satzungsänderungen grundsätzlich mit der einfachen Mehrheit der abgegebenen Stimmen und mit der einfachen Mehrheit des bei der Beschlussfassung vertretenen Grundkapitals. Soweit das Gesetz für Satzungsänderungen zwingend eine größere Mehrheit vorschreibt, ist diese Mehrheit entscheidend.

Gemäß § 14 Abs. 7 der Satzung ist der Aufsichtsrat ermächtigt, Satzungsänderungen, die nur die Fassung betreffen, zu beschließen. Ferner ist der Aufsichtsrat durch Hauptversammlungsbeschlüsse vom 8. Mai 2007 (Bedingtes Kapital III) und 21. April 2009 (Genehmigtes Kapital 2009) jeweils ermächtigt worden, die Fassung der Satzung entsprechend der jeweiligen Ausgabe von Aktien bzw. der Ausnutzung des genehmigten Kapitals sowie nach Ablauf des jeweiligen Ermächtigungszeitraums bzw. im Falle der Nichtausnutzung des bedingten Kapitals nach Ablauf der Fristen für die Ausübung von Options- oder Wandlungsrechten anzupassen. Der Aufsichtsrat ist durch den Hauptversammlungsbeschluss zum Bedingten Kapital III weiterhin ermächtigt worden, alle sonstigen im Zusammenhang mit der Ausgabe der Bezugsaktien stehenden Anpassungen der Satzung vorzunehmen, die nur die Fassung betreffen. Darüber hinaus ist der Aufsichtsrat durch Hauptversammlungsbeschlüsse vom 28. April 2010 (Ermächtigung zum Erwerb eigener Aktien und zur Verwendung eigener Aktien sowie zum Erwerb eigener Aktien durch Derivate) für den Fall der Einziehung der erworbenen eigenen Aktien ermächtigt, die Fassung der Satzung entsprechend der Einziehung der Aktien und der Herabsetzung des Grundkapitals anzupassen. Der Vorstand ist zur Anpassung der Angabe der Zahl der Aktien in der Satzung ermächtigt, wenn er bestimmt, dass sich durch die Einziehung der Anteil der übrigen Aktien am Grundkapital erhöht.

### **Befugnisse des Vorstands, insbesondere zu Aktienausgabe und Aktienrückkauf**

Der Vorstand ist ermächtigt, mit Zustimmung des Aufsichtsrats bis zum 20. April 2014 bis zu 240 MIO neue, auf den Namen lautende Stückaktien gegen Bar- und/oder Sacheinlagen auszugeben und hierdurch das Grundkapital der Gesellschaft um bis zu 240 MIO € zu erhöhen (Genehmigtes Kapital 2009, § 5 Abs. 2 der Satzung). Der Vorstand hat diese Ermächtigung bisher nicht ausgenutzt.

Den Aktionären steht bei Ausgabe von neuen Aktien aus dem genehmigten Kapital 2009 grundsätzlich ein Bezugsrecht zu, das nur unter den in § 5 Abs. 2 der Satzung genannten Voraussetzungen mit Zustimmung des Aufsichtsrats ausgeschlossen werden kann. Die Einzelheiten dazu ergeben sich aus § 5 Abs. 2 der Satzung der Gesellschaft.

Das Genehmigte Kapital 2009 ist ein Finanzierungs- und Akquisitionsinstrument entsprechend den internationalen Standards, das der Gesellschaft die Möglichkeit gibt, schnell, flexibel und kostengünstig Eigenkapital aufzunehmen. Das genehmigte Kapital entspricht einem Anteil von weniger als 20 % des Grundkapitals.

Der Vorstand ist durch Beschluss der Hauptversammlung vom 8. Mai 2007 ermächtigt, mit Zustimmung des Aufsichtsrats bis zum 7. Mai 2012 einmal oder mehrmals Options-, Wandel- und/oder Gewinnschuldverschreibungen bzw. Kombinationen dieser Instrumente (nachfolgend zusammen „Options- und/oder Wandelanleihen“) im Gesamtnennbetrag von bis zu 1 MRD € auszugeben und dabei Options- und/oder Wandlungsrechte auf neue Aktien mit einem anteiligen Betrag am Grundkapital von insgesamt bis zu 56 MIO € zu gewähren. Hierzu ist das Grundkapital um bis zu 56 MIO €

bedingt erhöht (Bedingtes Kapital III, § 5 Abs. 3 der Satzung). Das Bezugsrecht der Aktionäre kann bei der Ausgabe von Options- und/oder Wandelanleihen nur unter den in dem vorgenannten Ermächtigungsbeschluss aufgeführten Voraussetzungen mit Zustimmung des Aufsichtsrats ausgeschlossen werden. Die Einzelheiten dazu ergeben sich aus dem von der Hauptversammlung beschlossenen Beschlussvorschlag zu Tagesordnungspunkt 7 der Hauptversammlung vom 8. Mai 2007.

Die Ermächtigung zur Ausgabe von Options- und/oder Wandelanleihen entspricht der üblichen Unternehmenspraxis bei börsennotierten Aktiengesellschaften. Sie eröffnet der Gesellschaft die Möglichkeit zur flexiblen und zeitnahen Finanzierung ihrer Aktivitäten und gibt den notwendigen Handlungsspielraum, um günstige Marktsituationen kurzfristig und schnell zu nutzen, indem beispielsweise Aktien oder Options-/Wandelanleihen der Gesellschaft im Rahmen von Unternehmenszusammenschlüssen, beim Erwerb von Unternehmen oder von Beteiligungen an Unternehmen als Gegenleistung angeboten werden können. Der Vorstand hat diese Ermächtigung bisher nicht ausgenutzt.

Vorstand und Aufsichtsrat werden der ordentlichen Hauptversammlung der Deutsche Post AG am 25. Mai 2011 vorschlagen, eine neue Ermächtigung zur Ausgabe von Options-, Wandel- und/oder Gewinnschuldverschreibungen sowie Genussrechten mit einer Laufzeit bis zum 24. Mai 2016 zu beschließen.

Schließlich hat die Hauptversammlung vom 28. April 2010 die Gesellschaft ermächtigt, bis zum 27. April 2015 eigene Aktien im Umfang von bis zu 10 % des bei Beschlussfassung bestehenden Grundkapitals zu erwerben. Dabei gilt die Maßgabe, dass die so erworbenen Aktien zusammen mit Aktien, die die Gesellschaft bereits erworben hat und noch besitzt, zu keinem Zeitpunkt mehr als 10 % des Grundkapitals darstellen dürfen. Der Erwerb der Aktien kann über die Börse, aufgrund eines öffentlichen Kaufangebots, mittels einer an die Aktionäre der Gesellschaft gerichteten öffentlichen Aufforderung zur Abgabe von Verkaufsangeboten oder auf andere Weise nach Maßgabe des § 53a AktG erfolgen. Die Ermächtigung kann zu jedem gesetzlich zulässigen Zweck ausgeübt werden; insbesondere ist der Vorstand ermächtigt, die erworbenen eigenen Aktien ohne weiteren Hauptversammlungsbeschluss mit Zustimmung des Aufsichtsrats einzuziehen. Die Einzelheiten ergeben sich aus dem von der Hauptversammlung beschlossenen Beschlussvorschlag zu Tagesordnungspunkt 6 der Hauptversammlung vom 28. April 2010.

 [dp-dhl.com/de/investoren.html](http://dp-dhl.com/de/investoren.html)

In Ergänzung zu dieser Ermächtigung hat die Hauptversammlung vom 28. April 2010 den Vorstand ermächtigt, in dem zu Tagesordnungspunkt 6 der Hauptversammlung vom 28. April 2010 beschlossenen Rahmen eigene Aktien auch unter Einsatz von Derivaten zu erwerben, nämlich in Erfüllung von Optionsrechten, die die Gesellschaft zum Erwerb der eigenen Aktien bei Ausübung der Option verpflichten („Put-Optionen“), in Ausübung von Optionsrechten, die der Gesellschaft das Recht vermitteln, eigene Aktien bei Ausübung der Option zu erwerben („Call-Optionen“), oder unter Einsatz einer Kombination von Put- und Call-Optionen. Dabei sind alle Aktienerwerbe unter Einsatz von Put-Optionen, Call-Optionen oder einer Kombination aus Put- und Call-Optionen auf höchstens 5 % des bei Beschlussfassung vorhandenen Grundkapitals beschränkt. Die Laufzeiten der Optionen dürfen nicht mehr als 18 Monate betragen, müssen spätestens am 27. April 2015 enden und so gewählt werden, dass der Erwerb der eigenen Aktien in Ausübung der Optionen nicht nach dem 27. April 2015 erfolgen kann. Die Einzelheiten ergeben sich aus dem von der Hauptversammlung beschlossenen Beschlussvorschlag zu Tagesordnungspunkt 7 der Hauptversammlung vom 28. April 2010.

 [dp-dhl.com/de/investoren.html](http://dp-dhl.com/de/investoren.html)

Die Erteilung einer Ermächtigung zum Erwerb eigener Aktien durch die Hauptversammlung entspricht einer verbreiteten Praxis bei börsennotierten Aktiengesellschaften in Deutschland. Die Ermächtigung zum Erwerb eigener Aktien unter Einsatz von Derivaten soll das Instrumentarium des Aktienrückkaufs lediglich ergänzen und der Gesellschaft die Gelegenheit geben, einen Rückkauf optimal zu strukturieren.

Bei öffentlichen Angeboten zum Erwerb von Aktien der Gesellschaft gelten ausschließlich Gesetz und Satzung einschließlich der Bestimmungen des deutschen Wertpapiererwerbs- und Übernahmegesetzes. Die Hauptversammlung hat den Vorstand nicht zur Vornahme von in ihre Zuständigkeit fallenden Handlungen ermächtigt, um den Erfolg von etwaigen Übernahmeangeboten zu verhindern.

**Wesentliche Vereinbarungen, die unter der Bedingung eines Kontrollwechsels infolge eines Übernahmeangebots stehen, und Entschädigungsvereinbarungen für den Fall eines Übernahmeangebots mit Vorstandsmitgliedern oder Arbeitnehmern**

Die Deutsche Post AG hat mit einem Bankenkonsortium einen Vertrag über eine syndizierte Kreditlinie in Höhe von 2 MRD € abgeschlossen. Im Fall des Kontrollwechsels hat jedes Mitglied des Bankenkonsortiums unter bestimmten Voraussetzungen das Recht, seinen Anteil an der Kreditlinie sowie seinen jeweiligen Anteil an ausstehenden Krediten zu kündigen und deren Rückzahlung zu verlangen.

Für den Fall eines Kontrollwechsels ist allen Mitgliedern des Vorstands das Recht eingeräumt, innerhalb eines Zeitraums von sechs Monaten nach dem Kontrollwechsel mit einer Frist von drei Monaten zum Monatsende ihr Amt jeweils aus wichtigem Grund niederzulegen und den Vorstandsvertrag zu kündigen (Sonderkündigungsrecht). Bei Ausübung des Sonderkündigungsrechts oder einvernehmlicher Aufhebung des Vorstandsvertrags innerhalb von neun Monaten seit Kontrollwechsel hat das Mitglied des Vorstands Anspruch auf Abfindung seiner Vergütungsansprüche für die Restlaufzeit des Vorstandsvertrags, begrenzt durch die vom Deutschen Corporate Governance Kodex (Ziff. 4.2.3 in der Fassung vom 26. Mai 2010) empfohlenen Caps. Die Vereinbarungen sind im Vergütungsbericht dargestellt.

 Corporate Governance, Seite 128 f.

## Vergütung von Vorstand und Aufsichtsrat

Die Grundzüge des Vergütungssystems für Vorstand und Aufsichtsrat schildern wir im Vergütungsbericht des Corporate-Governance-Berichts, der gleichzeitig Bestandteil des Konzernlageberichts ist.

 Corporate Governance, Seite 128 f.



## Rahmenbedingungen

### Weltwirtschaft erholt sich von der Krise

Die Weltwirtschaft hat sich im Jahr 2010 von der schweren Rezession des Vorjahres erholt. Besonders in der ersten Jahreshälfte wurden hohe Wachstumsraten erzielt, im zweiten Halbjahr war die Entwicklung dagegen verhaltener. Robust gewachsen sind die aufstrebenden Volkswirtschaften Asiens. Auch in den meisten Industrieländern überwogen die Erholungstendenzen, wenngleich regional sehr unterschiedlich. Insgesamt ist die globale Wirtschaftsleistung im Berichtsjahr um 5 % gewachsen, im Vorjahr war sie um 0,6 % geschrumpft. Noch deutlicher hat sich der Welthandel erholt: Er hat um rund 12 % zugelegt (IWF: 12,0 %, OECD: 12,3 %).

#### A.03 Weltwirtschaft: Wachstumsindikatoren 2010

| %           | Bruttoinlands-<br>produkt (BIP) | Export | Binnen-<br>nachfrage |
|-------------|---------------------------------|--------|----------------------|
| China       | 10,3                            | 31,3   | k. A.                |
| Japan       | 4,0                             | 24,2   | 2,1                  |
| USA         | 2,9                             | 11,7   | 3,2                  |
| Euroraum    | 1,7                             | 9,9    | 1,7                  |
| Deutschland | 3,6                             | 14,2   | 2,6                  |

Daten teilweise geschätzt, Stand: 15. Februar 2011

Quelle: Postbank Research, nationale Statistiken

Die Länder Asiens haben den globalen Aufschwung im Berichtsjahr angeführt. Allerdings ist das Wachstum mit rund 9,3 % nicht mehr so hoch ausgefallen wie vor der Wirtschaftskrise.

Mit einem BIP-Zuwachs um 10,3 % hat China erneut einen Spitzenwert erreicht. Die Industrie konnte die Belebung des Welthandels sowie die wachsende Nachfrage am Binnenmarkt nutzen. Die Exporte sind im Vergleich zum Vorjahr um 31,3 %, die Importe sogar um 38,7 % gestiegen. Der Handelsbilanzüberschuss ist daher leicht von 196 MRD US-\$ auf rund 183 MRD US-\$ gesunken. Das Land bleibt für ausländische Investoren weiterhin attraktiv: Deren Direktinvestitionen haben mit fast 106 MRD US-\$ sogar das hohe Niveau des Vorjahres übertroffen.

Auch die japanische Wirtschaft befand sich im Jahr 2010 im Aufschwung. Die Exporte sind, verglichen mit dem Vorjahr, um fast ein Viertel gestiegen. Zudem haben die Verbraucher ihre Ausgaben spürbar erhöht. So ist das BIP trotz nahezu stagnierender Investitionen um 4,0 % gewachsen.

Die Wirtschaft in den Vereinigten Staaten ist zu Beginn des Jahres 2010 zunächst mit Schwung aus der Rezession herausgekommen, im weiteren Verlauf hat das Wachstumstempo aber wieder spürbar nachgelassen. Vor allem die Ausrüstungsinvestitionen haben mit rund 15 % stark zugelegt – allerdings von einem sehr niedrigen Niveau aus. Der private Verbrauch ist dagegen nur verhalten gewachsen, während die Bauinvestitionen erneut kräftig nachgegeben haben. Auch der Außenhandel hat das Wachstum gebremst, da die Einfuhren noch stärker gestiegen sind als die Ausfuhren. Das BIP ist deshalb nur um 2,9 % gewachsen, während die Binnennachfrage um 3,2 % zugelegt hat.

Der Euroraum hat sich von der tiefen Rezession des Vorjahres erholt. Das BIP ist aber nur um 1,7 % gewachsen. Die Bruttoanlageinvestitionen sind nochmals leicht gesunken, während der private Verbrauch moderat gewachsen ist. Die Exporte sind kräftig gestiegen, die Importe aber ebenfalls. Zwischen den Ländern gab es erhebliche Unterschiede: Deutschland verzeichnete ein sehr starkes Wachstum, in Frankreich und Italien ist es dagegen deutlich niedriger ausgefallen. In Spanien und Griechenland ist die Wirtschaftsleistung sogar weiter gesunken. Die Gründe für diese Ungleichgewichte sind einmal im starken Wachstum der exportorientierten Industriezweige zu sehen, wovon Deutschland stark profitiert hat. Zudem hatten einige Länder mit massiven strukturellen Problemen, gepaart mit hoher Staatsverschuldung, zu kämpfen. Das hat zu massiven Einschnitten bei öffentlichen Ausgaben und zu Steuererhöhungen geführt, was das Wachstum zusätzlich belastet hat.

Die deutsche Wirtschaft hat im Berichtsjahr kräftig zugelegt, vor allem die Investitionsgüterindustrie, die den weltweiten Nachfrageboom nach Ausrüstung aller Art nutzen konnte. So sind Produktion und Ausfuhr außergewöhnlich stark gestiegen. Im Jahresverlauf haben sich dann auch die Ausrüstungsinvestitionen kräftig belebt. Bauinvestitionen und privater Verbrauch wurden ebenfalls ausgeweitet. So konnte Deutschland mit 3,6 % das höchste BIP-Wachstum seit der Wiedervereinigung erzielen. Überdies ist die Zahl der Arbeitslosen im Jahresdurchschnitt um rund 179.000 auf 3,244 Millionen Personen gesunken.

#### Höhere Notierungen für Rohöl

Am Jahresende 2010 kostete ein Fass Rohöl der Sorte Brent 94,70 US-\$ (Vorjahr: 77,70 US-\$). Im Jahresdurchschnitt lag der Ölpreis mit rund 80 US-\$ um 28,5 % über dem Niveau des Vorjahres. Im Jahresverlauf unterlag er kräftigen Schwankungen. Das robuste Wirtschaftswachstum in den Schwellenländern und die damit steigende Nachfrage nach Energie ließen ihn steigen. Ein Gegengewicht bildete das Ölangebot der OPEC-Staaten, die ihre Förderquoten durchgehend überschritten haben.

A.04 Brentöl-Spotpreis und Wechselkurs Euro/us-Dollar 2010

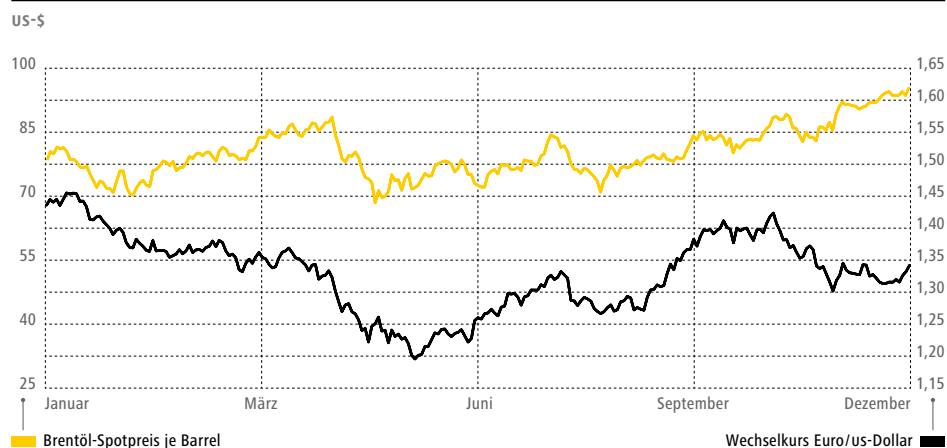

### Euro tendiert leichter

Die führenden Notenbanken haben im Jahr 2010 an ihrer sehr expansiven Geldpolitik festgehalten. Die US-Notenbank beließ ihren Leitzins bei 0 % bis 0,25 %. Zudem wurde im Herbst beschlossen, Staatsanleihen im Gesamtvolumen von 600 MRD US-\$ anzukaufen. Die Europäische Zentralbank hat ihren Leitzins konstant bei 1 % belassen. Zudem hatte sie im Mai erstmals damit begonnen, Staatsanleihen hochverschuldeter Mitgliedsländer des Euroraumes anzukaufen.

Staatsschulden in Europa und konjunkturelle Erwartungen in den Vereinigten Staaten haben die Kursentwicklungen von Euro und US-Dollar geprägt. Notierte der Euro zu Beginn des Jahres 2010 noch bei rund 1,43 US-\$, hat er sich mit Zuspitzung der Schuldenkrise Griechenlands bis auf knapp 1,20 US-\$ abgeschwächt. Im Herbst haben Rezessionsängste in den Vereinigten Staaten den Euro vorübergehend wieder auf gut 1,40 US-\$ aufgewertet, bevor er erneut unter Druck geraten ist. Zum Jahresende hat der Euro bei rund 1,34 US-\$ gelegen und gegenüber dem Vorjahr 6,7 % verloren. Gegenüber dem Britischen Pfund hat der Euro 3,4 % eingebüßt.

### Kaum Veränderungen bei Unternehmensanleihen

Die Rendite zehnjähriger Bundesanleihen ist bis in den Spätsommer auf das Tief von 2,12 % gefallen, bevor sie im weiteren Verlauf des Jahres infolge anziehender US-Renditen wieder spürbar anstieg und zum Jahresende bei 2,96 % lag (Vorjahr: 3,39 %). Die Rendite zehnjähriger US-Staatsanleihen ist im Jahr 2010 um 0,54 Prozentpunkte auf 3,29 % gefallen. Unternehmensanleihen bewegten sich im Spannungsfeld zwischen konjunktureller Erholung und Staatsschuldenkrise. Die Risikoaufschläge haben sich im Verlauf des Jahres 2010 nur geringfügig verändert.

### Internationaler Handel zieht rasch an

Die internationalen Handelsströme haben im Berichtsjahr vom globalen Wirtschaftsaufschwung profitiert. So sind die Handelsvolumina weltweit um etwa 9 % gestiegen. Dies gilt besonders für die europäischen und amerikanischen Exporte. Der asiatisch-pazifische Raum, der deutlich weniger unter der Krise gelitten hatte, hat seine Vormachtstellung im internationalen Handel weiter ausgebaut.

A.05 Handelsvolumina: Durchschnittliche annualisierte Wachstumsrate 2009 bis 2010

| %<br>Export \ Import |        |               |        |               |                 |             |
|----------------------|--------|---------------|--------|---------------|-----------------|-------------|
|                      | Afrika | Asien/Pazifik | Europa | Lateinamerika | Mittlerer Osten | Nordamerika |
| Afrika               | 4,5    | 13,1          | 5,0    | 9,7           | 4,5             | 9,1         |
| Asien/Pazifik        | 7,9    | 11,5          | 7,2    | 9,5           | 6,9             | 9,9         |
| Europa               | 6,9    | 12,8          | 8,2    | 10,2          | 9,5             | 5,6         |
| Lateinamerika        | 8,7    | 19,6          | 11,2   | 5,5           | 17,8            | 1,0         |
| Mittlerer Osten      | 5,1    | 7,5           | 1,2    | 6,3           | 0,0             | 1,3         |
| Nordamerika          | 4,8    | 11,1          | 15,4   | 11,5          | 6,6             | 7,9         |

Quelle: Copyright © Global Insight (Deutschland) GmbH, 2010. All rights reserved, Stand: 21. Dezember 2010



## A.06 Wesentliche Handelsströme: Volumina 2010<sup>1)</sup>

MIO Tonnen

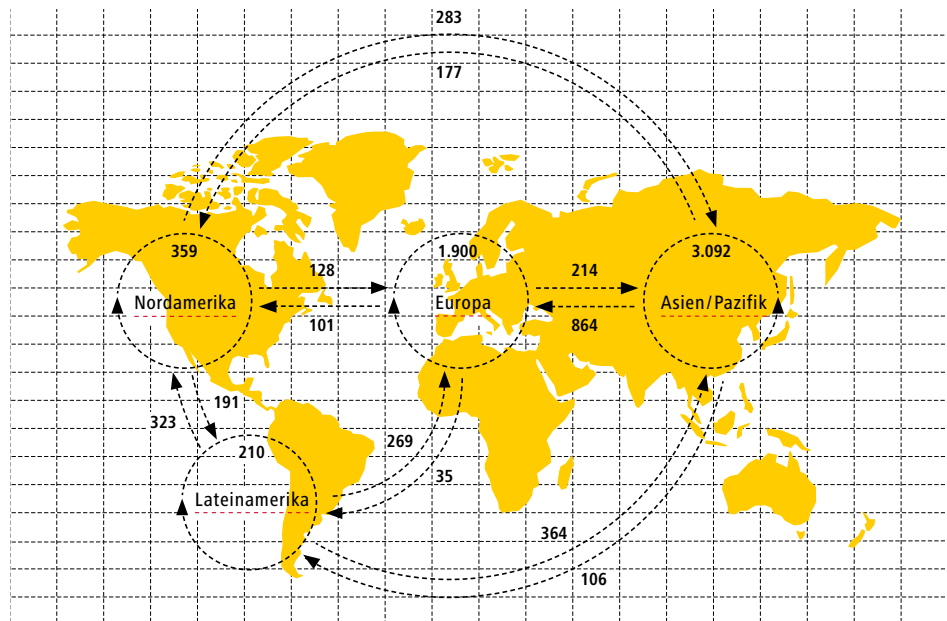

1) Ohne Berücksichtigung preisbezogener Effekte

Quelle: Copyright © Global Insight (Deutschland) GmbH, 2010. All rights reserved, Stand: 21. Dezember 2010

### Unsere Märkte

Deutsche Post DHL ist in mehr als 220 Ländern und Territorien vertreten. Eine Übersicht über die wichtigsten Märkte zeigen wir in der folgenden Tabelle. Der Zuschnitt der Regionen entspricht unserer Geschäftsstruktur. Die jeweiligen Rahmenbedingungen in den Märkten sowie unsere Marktanteile schildern wir im Kapitel Unternehmensbereiche.

Seite 50 ff.

## A.07 Marktvolumina

| Global                                                                                                                                                                                                                                                                                          | Europa                                                                                                                                                                                                                                                                                                                       | Amerika                                                                                                                                                                              | Asien/Pazifik, Osteuropa, Afrika und Mittlerer Osten                                                                                                                                                                                       |
|-------------------------------------------------------------------------------------------------------------------------------------------------------------------------------------------------------------------------------------------------------------------------------------------------|------------------------------------------------------------------------------------------------------------------------------------------------------------------------------------------------------------------------------------------------------------------------------------------------------------------------------|--------------------------------------------------------------------------------------------------------------------------------------------------------------------------------------|--------------------------------------------------------------------------------------------------------------------------------------------------------------------------------------------------------------------------------------------|
| <ul style="list-style-type: none"> <li>• Internationaler Briefmarkt (outbound, 2010): 6,4 MRD €<sup>1)</sup></li> <li>• Luftfracht (2009): 18,5 MIO t<sup>2)</sup></li> <li>• Seefracht (2009): 25,3 MIO TEU<sup>3)</sup></li> <li>• Kontraktlogistik (2009): 135 MRD €<sup>4)</sup></li> </ul> | <ul style="list-style-type: none"> <li>• Briefkommunikation Deutschland (2010): 6,0 MRD €<sup>1)</sup></li> <li>• Dialogmarketing Deutschland (2010): 18,7 MRD €<sup>1)</sup></li> <li>• Internationaler Expressmarkt (2009): 5,3 MRD €<sup>5)</sup></li> <li>• Straßentransport (2009): 148,4 MRD €<sup>6)</sup></li> </ul> | <ul style="list-style-type: none"> <li>• Nationaler Briefmarkt USA (2010): 43,5 MRD €<sup>7)</sup></li> <li>• Internationaler Expressmarkt (2009): 4,0 MRD €<sup>8)</sup></li> </ul> | <ul style="list-style-type: none"> <li>• Internationaler Expressmarkt Asien/Pazifik (2009): 4,4 MRD €<sup>9)</sup></li> <li>• Internationaler Expressmarkt Osteuropa, Afrika und Mittlerer Osten (2009): 0,4 MRD €<sup>9)</sup></li> </ul> |

1) Unternehmensschätzung 2) Daten basieren ausschließlich auf Export-Frachttonnen. Quelle: Enthält Inhalt bereitgestellt von Copyright © Global Insight (Deutschland) GmbH, 2010. All rights reserved, Geschäftsberichte, Pressemitteilungen und Unternehmensschätzungen 3) Twenty-foot Equivalent Units (20-Fuß-Container-Einheiten); geschätzter Anteil des Gesamtmarktes, der von Speditionen kontrolliert wird. Quelle: Enthält Inhalt bereitgestellt von Copyright © Global Insight (Deutschland) GmbH, 2010. All rights reserved, Geschäftsberichte, Pressemitteilungen und Unternehmensschätzung 4) Quelle: Transport Intelligence 5) Umfasst das Expressprodukt Time Definite International. Länderbasis: BE, CH, DE, ES, FR, IT, NL, PL, SE, UK. Quelle: Market Intelligence 2010 6) Länderbasis: Gesamtmarktzahl für 20 europäische Länder ohne Schüttgut- und Spezialtransporte. Quelle: MRSC MI Freight Reports 2008/2009 und Prognosen für 2009, Eurostat 2009 7) Quelle: usps-Produktumsätze 2010 8) Umfasst das Expressprodukt Time Definite International. Länderbasis: CA, MX, BR, US. Quelle: Market Intelligence 2010 9) Umfasst das Expressprodukt Time Definite International. Länderbasis: AU, CN, HK, ID, IN, JP, KR, SG sowie AE, RU, ZA. Quelle: Market Intelligence 2010

### Einflussgrößen unseres Geschäfts

In den vergangenen Geschäftsjahren hat sich das geschäftliche und konjunkturelle Umfeld erheblich verändert. Viele Faktoren haben unser Brief- und Logistikgeschäft beeinflusst. Im Rahmen der „Strategie 2015“ überprüfen wir systematisch und kontinuierlich die wichtigen Einflussgrößen. Nach wie vor gehen wir davon aus, dass vier langfristige Trends unser Geschäft maßgeblich beeinflussen:

- ❶ **Globalisierung** Die Logistikindustrie wird auch in Zukunft stärker wachsen als die jeweiligen Volkswirtschaften. Handelsströme und -volumina von und nach Asien sowie innerhalb des asiatischen Raumes legen weiter kräftig zu. Dies gilt auch für andere aufstrebende Regionen wie Südamerika oder den Mittleren Osten. Mit unseren DHL-Unternehmensbereichen sind wir in diesen Regionen überdurchschnittlich gut positioniert, ebenso wie in Europa und Nordamerika. Wie kaum ein Unternehmen unserer Branche bieten wir integrierte Logistiklösungen für alle Transportmittel und in allen Teilen der Erde an.
- ❷ **Outsourcing** In wirtschaftlich unsicheren Zeiten steigt der Druck auf Unternehmen, Kosten zu senken und Geschäftsprozesse zu straffen. Aktivitäten, die nicht dem Kerngeschäft zuzurechnen sind, werden zunehmend ausgelagert. Zudem werden Lieferketten immer komplexer und internationaler und – wie das vergangene Jahr erneut gezeigt hat – damit auch anfälliger für etwaige Störungen. Dementsprechend verlangen Kunden nach integrierten Lösungen, über die sie Zugriff auf eine breite Palette an Dienstleistungen und Transportmodi erhalten und die ihre Lieferkette absichern können. Von dieser Entwicklung profitieren wir dank unserer führenden Marktpositionen im Express- und Speditionsgeschäft sowie in der Kontraktlogistik.
- ❸ **Digitalisierung** Das Internet verändert die Übertragung von Informationen weiterhin nachhaltig. Statt physisch wird immer mehr elektronisch kommuniziert. Dadurch sinken Menge und Umsatz vor allem im klassischen Briefgeschäft. Andererseits überwindet das Internet die Entfernung zwischen Händlern und Kunden und schafft neuen Bedarf für den Transport von Waren, Werbematerialien und Vertragsdokumenten. Auf dem virtuellen Markt wächst der Wunsch nach sicherer, vertraulicher und verlässlicher elektronischer Kommunikation. Wir haben hierauf mit der Einführung des E-Postbriefes reagiert. Überdies gehen wir davon aus, auch in anderen Geschäftsfeldern die zunehmende Digitalisierung nutzen zu können.
- ❹ **Klimawandel** Das vergangene Jahr hat erneut gezeigt, dass das gestiegene Bewusstsein für Umwelt und Klima die Logistikbranche maßgeblich beeinflusst. In allen Geschäftsbereichen fragen Kunden vermehrt klimaneutrale Produkte nach. Als weltweit führendes Logistikunternehmen ist es für uns selbstverständlich, dass wir einen Beitrag dazu leisten, CO<sub>2</sub>-Emissionen zu senken. Wir bieten unseren Kunden ein umfassendes Angebot energiesparender Transporte und klimaneutraler Produkte an und haben uns selbst ein ehrgeiziges Klimaschutzziel gesetzt.

### Rechtliche Rahmenbedingungen

Als Marktführer unterliegen viele unserer Dienstleistungen der sektorspezifischen Regulierung nach dem Postgesetz. Angaben hierzu sowie zu rechtlichen Risiken finden Sie im Anhang zum Konzernabschluss.

 Textziffer 53

## Unternehmenssteuerung

### A.08 Berechnung des EAC

Berichtetes EBIT

#### ● Kapitalkosten (Asset Charge)

= Nettovermögensbasis  
× Konzernkapitalkostensatz (WACC)

#### ⊖ EBIT after Asset Charge (EAC, Gewinn nach Kapitalkosten)

### A.09 Berechnung der Nettovermögensbasis

Operative Vermögenswerte

- Immaterielle Vermögenswerte einschließlich Goodwill
- Sachanlagen
- Forderungen aus L/L, andere operative Vermögenswerte

#### ● Operative Verbindlichkeiten

- Operative Rückstellungen
- Verbindlichkeiten aus L/L, andere operative Verbindlichkeiten

#### ⊖ Nettovermögensbasis

### Gewinn nach Kapitalkosten deutlich erhöht

Seit dem Jahr 2008 verwendet der Konzern Deutsche Post DHL das „EBIT after Asset Charge“ (EAC, Gewinn nach Kapitalkosten) als eine wesentliche Steuerungsgröße. Sie basiert auf dem Ergebnis der betrieblichen Tätigkeit (EBIT), ergänzt es aber um eine Kapitalkostenkomponente, die als „Asset Charge“ vom berichteten EBIT abgezogen wird.

Indem wir Kapitalkosten in unternehmerische Entscheidungen einbeziehen, fördern wir einen effizienten Einsatz der Ressourcen in allen Unternehmensbereichen und richten das operative Geschäft auf nachhaltige Wertsteigerung und Cashflow-Generierung aus. Im Berichtsjahr war das EAC neben dem EBIT eine entscheidende Steuerungskennzahl, nach der auch die Managementvergütung bemessen wird.

Um die Kapitalkosten zu ermitteln, wird das betriebliche Nettovermögen mit dem gewichteten durchschnittlichen Kapitalkostensatz („Weighted Average Cost of Capital“, WACC) multipliziert. Dies geschieht monatlich auf Basis unkonsolidierter Werte, sodass auch unterjährige Schwankungen im betrieblichen Nettovermögen berücksichtigt werden.

Die Nettovermögensbasis ist für alle Unternehmensbereiche einheitlich definiert. Die wesentlichen Größen des operativen Vermögens sind immaterielle Vermögensgegenstände einschließlich Firmenwert, Sachanlagen und kurzfristiges Nettoumlaufvermögen (Net Working Capital). Bei der Berechnung der Nettovermögensbasis werden davon Rückstellungen und operative Verbindlichkeiten abgezogen. Sie mindern die Vermögensbasis entsprechend.

Der Konzernkapitalkostensatz (WACC) wird aus dem gewichteten Durchschnitt der Nettokosten für verzinsliches Fremdkapital und Eigenkapital berechnet. Dabei werden gemäß „Capital Asset Pricing Model“ unternehmensbereichsspezifische Risikofaktoren berücksichtigt, die durch den Beta-Faktor abgebildet werden.

Um den optimalen Verschuldungsgrad für einen niedrigen WACC zu erreichen, sind folgende zwei Faktoren gegeneinander abzuwägen:

- ❶ Da Eigenkapitalinvestoren höhere Renditen erwarten als Fremdkapitalinvestoren, sinkt der WACC mit einem höheren Verschuldungsgrad („leverage effect“).
- ❷ Mit einem höheren Verschuldungsgrad verschlechtert sich jedoch tendenziell das Kredit-Rating des Unternehmens, die Fremdkapitalkosten erhöhen sich und überkompensieren den ersten Effekt von einem gewissen Punkt an.

Im Jahr 2008 wurde ein für alle Unternehmensbereiche einheitlicher Kapitalkostensatz von 8,5 % ermittelt, der zugleich auch eine Mindestzielgröße für Projekte und Investitionen im Konzern darstellt. Die derzeit niedrigen Zinssätze am Kapitalmarkt würden es zwar erlauben, den Kapitalkostensatz zu senken. Wir haben ihn im Berichtsjahr aber nicht verändert, damit die konzerninterne Ressourcenallokation nicht durch kurzfristige Schwankungen der Kapitalmarktzinsen beeinflusst wird und zugleich das EAC mit den Vorjahren vergleichbar bleibt.



Im Jahr 2010 hat sich das EAC von –959 MIO € auf 666 MIO € erhöht, vor allem weil die Ertragskraft der DHL-Unternehmensbereiche deutlich gestiegen ist. Darüber hinaus war das EBIT im Vorjahr durch höhere Einmaleffekte aus Restrukturierungen belastet.

**A.10 EBIT after Asset Charge (EAC, Gewinn nach Kapitalkosten)**

| MIO €            | 2009   | 2010   | +/- % |
|------------------|--------|--------|-------|
| Berichtetes EBIT | 231    | 1.835  | >100  |
| ⊖ Kapitalkosten  | –1.190 | –1.169 | 1,8   |
| ⊖ EAC            | –959   | 666    | >100  |

Die Kapitalkosten haben sich im Berichtsjahr leicht um 21 MIO € verringert, während die Nettovermögensbasis um 900 MIO € über dem Endsaldo des Vorjahres lag. Ursächlich für die gegensätzliche Entwicklung von Kapitalkosten und Nettovermögensbasis ist ein anderer Verlauf der Höhe der Vermögensbasis innerhalb der Berichtsjahre. Im Jahr 2009 konnte die Nettovermögensbasis reduziert werden und weist zum Jahresende einen besonders niedrigen Wert aus, die durchschnittliche Vermögensbasis war jedoch höher.

Grund für den Anstieg der Nettovermögensbasis im Jahresvergleich ist vor allem ein gestiegenes kurzfristiges Nettoumlaufvermögen. So haben sich die Forderungen aus Lieferungen und Leistungen um 23,2 % gegenüber dem Vorjahr erhöht. Der Anstieg bei den immateriellen Vermögenswerten ist vorwiegend auf Währungseffekte zurückzuführen, die den Firmenwert erhöht haben. Ein weiterer Grund für den Anstieg der Vermögensbasis ist der Verbrauch von Rückstellungen für Restrukturierungen in den Vereinigten Staaten, die als operative Verbindlichkeiten das Nettovermögen im Vorjahr entsprechend verringert haben.

Abgemildert wurde der Anstieg der Nettovermögensbasis durch einen leichten Rückgang bei den Sachanlagen infolge einer eher moderaten Investitionstätigkeit im Berichtsjahr.

**A.11 Nettovermögensbasis (unkonsolidiert)**

| MIO €                                                 | 2009   | 2010   | +/- % |
|-------------------------------------------------------|--------|--------|-------|
| Immaterielle Vermögenswerte einschließlich Firmenwert | 11.538 | 11.852 | 2,7   |
| ⊕ Sachanlagen                                         | 6.216  | 6.125  | –1,5  |
| ⊕ Forderungen aus Lieferungen und Leistungen          | 4.881  | 6.011  | 23,2  |
| ⊕ Andere operative Vermögenswerte                     | 2.139  | 2.400  | 12,2  |
| ⊖ Operative Rückstellungen                            | –3.881 | –3.620 | 6,7   |
| ⊖ Verbindlichkeiten aus Lieferungen und Leistungen    | –4.848 | –5.672 | –17,0 |
| ⊖ Andere operative Verbindlichkeiten                  | –4.525 | –4.676 | –3,3  |
| ⊖ Nettovermögensbasis                                 | 11.520 | 12.420 | 7,8   |

# DEUTSCHE-POST-AKTIE

## Finanzmärkte erholen sich in der zweiten Jahreshälfte deutlich

Obwohl sich die Wirtschaft spürbar erholt hat, sind die Aktienmärkte schleppend in das Jahr 2010 gestartet. Die Schuldenkrise Griechenlands, die sich bereits im ersten Quartal abzeichnete, hat die Stimmung getrübt; der DAX sank auf seinen Jahrestiefstand von 5.434 Zählern. Die Zuversicht kehrte zurück, nachdem die Regierungschefs der Eurozone zugesichert hatten, Griechenland mit bilateralen Krediten zu unterstützen. Zudem bewegten staatliche Konjunkturprogramme und eine expansive Geldpolitik den DAX wieder nach oben. Zur Jahresmitte ist dann die Furcht vor einer neuen Rezession gewachsen – die Aktienmärkte reagierten mit Unsicherheit. Obwohl viele Unternehmen zum Halbjahr bessere Ergebnisse als erwartet vorgelegt hatten, setzte sich der Seitwärtstrend an den Aktienmärkten zunächst fort. Erst Anfang September begannen die Kurse wieder zu steigen. Die deutsche Wirtschaft profitierte von der wachsenden Weltkonjunktur, vor allem dank ihrer Exportindustrie. So ist der DAX bis zum Jahresende auf 6.914 Zähler gestiegen. Das entspricht einer Wertentwicklung von 16,1 % gegenüber dem Schlusskurs des Vorjahres. Die unterschiedliche Entwicklung im Euroraum spiegelte sich im EURO STOXX 50 wider, der im Jahresverlauf um –5,8 % zurückgegangen war. Der Dow Jones hat sich hingegen um 11,0 % verbessert.

### A.12 Mehrjahresübersicht Deutsche-Post-Aktie

|                                            |           | 2004      | 2005      | 2006                  | 2007                  | 2008                  | 2009      | 2010               |
|--------------------------------------------|-----------|-----------|-----------|-----------------------|-----------------------|-----------------------|-----------|--------------------|
| Jahresschlusskurs                          | €         | 16,90     | 20,48     | 22,84                 | 23,51                 | 11,91                 | 13,49     | 12,70              |
| Höchstkurs                                 | €         | 19,80     | 21,23     | 23,75                 | 25,65                 | 24,18                 | 13,79     | 14,46              |
| Tiefstkurs                                 | €         | 14,92     | 16,48     | 18,55                 | 19,95                 | 7,18                  | 6,65      | 11,18              |
| Anzahl der Aktien                          | MIO Stück | 1.112,8   | 1.193,9   | 1.204,0 <sup>1)</sup> | 1.208,2 <sup>1)</sup> | 1.209,0 <sup>1)</sup> | 1.209,0   | 1.209,0            |
| Marktkapitalisierung zum 31. Dezember      | MIO €     | 18.840    | 24.425    | 27.461                | 28.388                | 14.399                | 16.309    | 15.354             |
| Durchschnittliches Handelsvolumen je Tag   | Stück     | 2.412.703 | 3.757.876 | 5.287.529             | 6.907.270             | 7.738.509             | 5.446.920 | 5.329.779          |
| Jahresperformance mit Dividende            | %         | 6,4       | 24,1      | 14,9                  | 6,9                   | –45,5                 | 18,3      | –1,4               |
| Jahresperformance ohne Dividende           | %         | 3,4       | 21,2      | 11,5                  | 2,9                   | –49,3                 | 13,3      | –5,9               |
| Beta-Faktor <sup>2)</sup>                  |           | 0,84      | 0,75      | 0,80                  | 0,68                  | 0,81                  | 0,91      | 0,95               |
| Ergebnis je Aktie <sup>3)</sup>            | €         | 1,44      | 1,99      | 1,60                  | 1,15                  | –1,40                 | 0,53      | 2,10               |
| Cashflow je Aktie <sup>4)</sup>            | €         | 2,10      | 3,23      | 3,28                  | 4,27                  | 1,60                  | –0,48     | 1,59               |
| Kurs-Gewinn-Verhältnis <sup>5)</sup>       |           | 11,7      | 10,3      | 14,3                  | 20,4                  | –8,5                  | 25,5      | 6,0                |
| Kurs-Cashflow-Verhältnis <sup>4), 6)</sup> |           | 8,1       | 6,4       | 7,0                   | 5,5                   | 7,4                   | –28,1     | 8,0                |
| Ausschüttungssumme                         | MIO €     | 556       | 836       | 903                   | 1.087                 | 725                   | 725       | 786 <sup>7)</sup>  |
| Ausschüttungsquote                         | %         | 34,8      | 37,4      | 47,1                  | 78,6                  | –                     | 112,6     | 30,9               |
| Dividende je Aktie                         | €         | 0,50      | 0,70      | 0,75                  | 0,90                  | 0,60                  | 0,60      | 0,65 <sup>7)</sup> |
| Dividendenrendite                          | %         | 3,0       | 3,4       | 3,3                   | 3,8                   | 5,0                   | 4,4       | 5,1                |

1) Erhöhung aufgrund der Ausübung von Aktienoptionen ➔ Anhang: Textziffer 39 2) Ab 2006: Beta 3 Jahre; Quelle: Bloomberg 3) Bezogen auf das Jahresergebnis nach Abzug von nicht beherrschenden Anteilen ➔ Anhang: Textziffer 24 4) Cashflow aus operativer Geschäftstätigkeit 5) Jahresschlusskurs ÷ Ergebnis je Aktie 6) Jahresschlusskurs ÷ Cashflow je Aktie 7) Vorschlag

### A.13 Peergroup-Vergleich: Schlusskurse am 30. Dezember

|                   |       | 2009   | 2010   | +/- % |
|-------------------|-------|--------|--------|-------|
| Deutsche Post DHL | €     | 13,49  | 12,70  | –5,9  |
| TNT               | €     | 21,36  | 19,21  | –10,1 |
| FedEx             | US-\$ | 85,17  | 92,96  | 9,1   |
| UPS               | US-\$ | 58,18  | 72,68  | 24,9  |
| Kühne + Nagel     | CHF   | 100,50 | 130,00 | 29,4  |

#### A.14 Kursverlauf

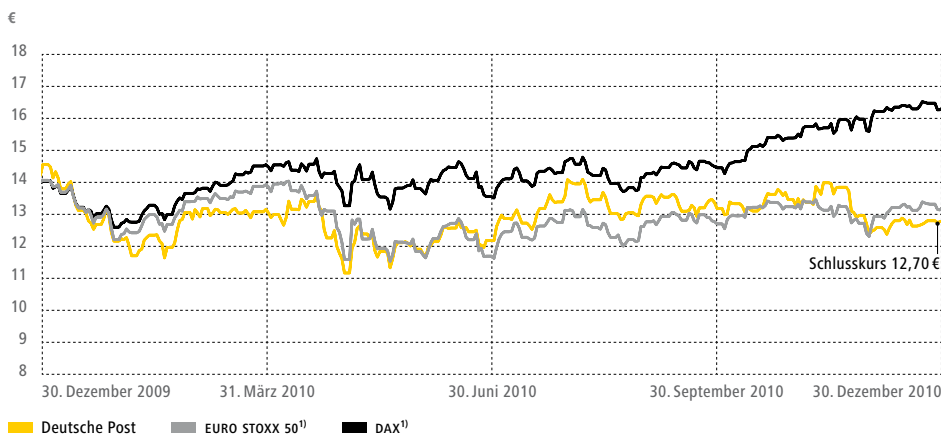

1) Indiziert auf den Schlusskurs der Deutsche-Post-Aktie zum 30. Dezember 2009

#### Kurs unserer Aktie hinter dem DAX zurückgeblieben

Bereits am 8. Januar 2010 hatte die Deutsche-Post-Aktie ihren Jahreshöchststand mit 14,46 € erreicht, war danach aber dem allgemeinen Trend nach unten gefolgt. Nach Vorlage unserer Ergebnisse für das Geschäftsjahr 2009 am 9. März 2010 hatte sich der Kurs der Deutsche-Post-Aktie bis zur Hauptversammlung am 28. April 2010 seitwärts bewegt, der DAX insgesamt dagegen konnte wieder zulegen. Am Kapitalmarkt überwog die Skepsis, ob es unserem Konzern gelingen würde, mit dem Mengenzuwachs auch mehr profitables Wachstum zu erzielen. So ist der Kurs unserer Aktie gefallen und erreichte sein Jahrestief am 7. Mai 2010 mit 11,18 €. Mit den Geschäftszahlen für das erste Quartal konnten wir jedoch positiv überraschen. Dank einer guten Berichtssaison hat unsere Aktie bis Anfang August gegenüber dem DAX kräftig aufgeholt – zeitweise wurden fast 14 € erreicht. Nach dem Kapitalmarkttag am 23. November ist sie allerdings auf den Jahresschlusskurs von 12,70 € gefallen, während der DAX weiter zulegen konnte. Im gesamten Jahresverlauf hat unsere Aktie somit 5,9 % an Wert eingebüßt. Das durchschnittlich gehandelte Volumen ist mit 5,3 MIO Stück (Vorjahr: 5,4 MIO Stück) stabil geblieben.

#### A.15 Kerzengrafik/Gleitender Durchschnitt 30 Tage

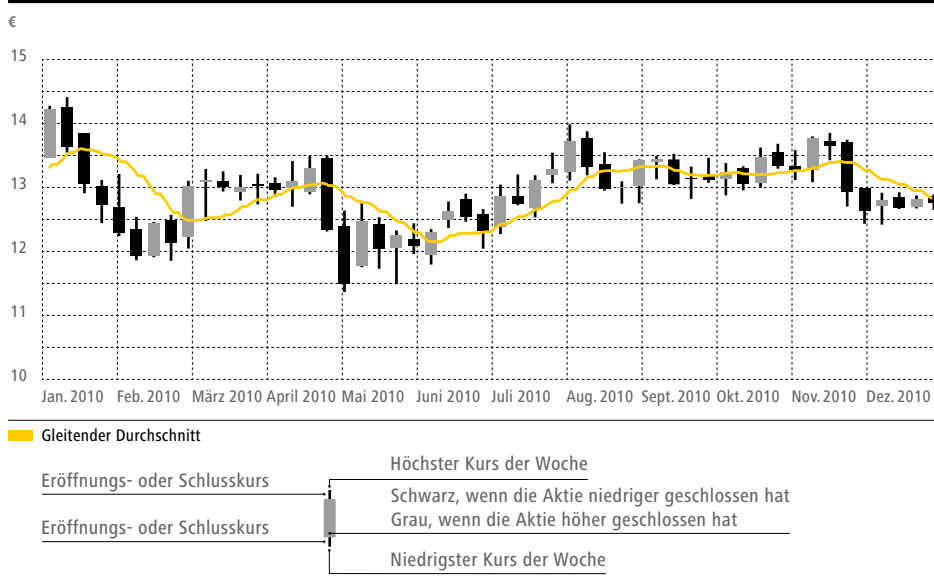



A.16 Aktionärsstruktur<sup>1)</sup>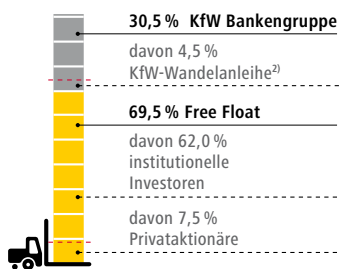

1) Stand: 31. Dezember 2010

2) Am 23. Juli 2009 hat die KfW eine Wandelanleihe auf Aktien der Deutsche Post AG begeben (Volumen 54,1 Mio Stück). Die Anleger haben die Möglichkeit, diese Anleihe ab dem ersten Zinstermin bis 30. Juli 2014 zu wandeln.

### Analysten empfehlen Deutsche-Post-Aktie

Zum Jahresende wurde unsere Aktie von 33 Analysten beobachtet und bewertet. 26 Analysten empfahlen unsere Aktie zum Kauf – acht mehr als vor einem Jahr. Fünf Analysten gaben eine neutrale Empfehlung ab und nur zwei haben zum Verkauf geraten. Das durchschnittliche Kursziel lag zum Jahresende mit 16,35 € deutlich höher als im Vorjahr.

### Privataktionäre stocken auf

Die Anzahl der von Privataktionären gehaltenen Aktien ist gegenüber dem Vorjahr wieder gestiegen, und zwar von 6,6 % auf 7,5 % des Streubesitzes. Unverändert hält die KfW Bankengruppe 30,5 % der Aktien. Der Streubesitz beträgt weiterhin 69,5 %, wovon 14,5 % in den Vereinigten Staaten, 12,1 % in Deutschland und 26,5 % in Großbritannien gehalten werden.

### Intensiven Kontakt zum Kapitalmarkt gepflegt

Zu Beginn des Jahres 2010 waren die Kapitalmarktteilnehmer vor allem daran interessiert, wie sich die Volumina in den Unternehmensbereichen und Regionen entwickelten. Darüber hinaus stand die neue Finanzstrategie im Fokus, die der Vorstand mit den Ergebnissen für das Geschäftsjahr 2009 am 9. März 2010 vorgestellt hatte. Während sich im Vorjahr Investorengespräche um den geplanten Verkauf der Postbank, die Auswirkungen der Wirtschaftskrise und Restrukturierungsmaßnahmen drehten, galt das Interesse nun vor allem der Möglichkeit, weiter zu wachsen und bessere Margen zu erzielen.

Im November haben wir einen Kapitalmarkttag veranstaltet, auf dem die Finanzstrategie präzisiert worden ist. Mitglieder des Vorstands haben die Entwicklung der letzten zwölf Monate kommentiert, die Strategie des Konzerns und der einzelnen Unternehmensbereiche erläutert. Die Mitglieder des Vorstands und das Investor-Relations-Team haben zudem in zahlreichen Einzelgesprächen und auf Konferenzen intensiven Kontakt zum Kapitalmarkt gepflegt. Unsere Arbeit auf diesem Gebiet wurde im Jahr 2010 von der Zeitschrift „Institutional Investor“ als drittbeste in Europa ausgezeichnet.

# WIRTSCHAFTLICHE LAGE

## Gesamtaussage des Vorstands

Das Geschäftsjahr 2010 stand im Zeichen einer weltwirtschaftlichen Belebung, von der Deutsche Post DHL als global operierender Logistikdienstleister mit beachtlichen Volumen- und Umsatzsteigerungen profitieren konnte. Die im Vorjahr erzielten Einsparungen haben in fast allen Unternehmensbereichen die Rentabilität mit zum Teil stark gestiegenen Margen verbessert. Insgesamt konnte dadurch ein Ergebnisanstieg auf 1,8 MRD € erzielt werden. Auch der operative Cashflow hat sich im Vergleich zum Vorjahr deutlich auf 1,9 MRD € verbessert. Mit einer verfügbaren Nettoliquidität von 1,4 MRD € stellt sich unsere finanzielle Lage nach wie vor als sehr stabil dar. Der erfolgreiche Geschäftsverlauf erlaubt es uns, den Aktionären auf der Hauptversammlung am 25. Mai 2011 vorzuschlagen, für das Berichtsjahr eine Dividende von 0,65 € je Aktie auszuschütten.

### A.17 Ausgewählte Kennzahlen zur Ertragslage (fortgeführte Geschäftsbereiche)

|                                                                |       | 2009   | 2010               |
|----------------------------------------------------------------|-------|--------|--------------------|
| Umsatz                                                         | MIO € | 46.201 | 51.481             |
| Ergebnis der betrieblichen Tätigkeit (EBIT) vor Einmaleffekten | MIO € | 1.473  | 2.205              |
| Ergebnis der betrieblichen Tätigkeit (EBIT)                    | MIO € | 231    | 1.835              |
| Umsatzrendite <sup>1)</sup>                                    | %     | 0,5    | 3,6                |
| Konzernjahresergebnis <sup>2)</sup>                            | MIO € | 644    | 2.541              |
| Ergebnis je Aktie <sup>3)</sup>                                | €     | 0,53   | 2,10               |
| Dividende je Aktie                                             | €     | 0,60   | 0,65 <sup>4)</sup> |

1) EBIT ÷ Umsatz 2) Nach Abzug von nicht beherrschenden Anteilen, inklusive Postbank 3) Inklusive Postbank 4) Vorschlag

## Wesentliche Ereignisse

### Keine wesentlichen Ereignisse

Ereignisse mit wesentlichen Auswirkungen auf die Ertrags-, Finanz- und Vermögenslage des Konzerns lagen im Berichtsjahr nicht vor.

## Ertragslage

### Berichtsweise und Portfolio geändert

Zu Beginn des Jahres 2010 haben wir das Inlandsgeschäft der DHL Express Schweden in die DHL Freight Schweden überführt und die Vorjahreszahlen der Segmentberichterstattung entsprechend angepasst.

Anfang März hat DHL Express UK, Großbritannien, den Verkauf ihres Geschäfts mit nationalen taggenauen Sendungen vollzogen. Sämtliche Vermögenswerte und Verbindlichkeiten waren zuvor als zur Veräußerung klassifiziert worden.

#### A.18 Konzernumsatz der fortgeführten Geschäftsbereiche

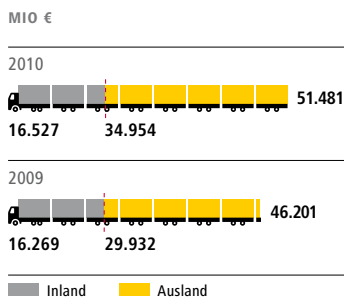

Im April hat DHL Supply Chain Austria, Österreich, Teile ihrer Kontraktlogistik veräußert. Die Transaktion betraf das Geschäftsfeld der temperaturgeführten Logistik und Transporte.

Ende Juni hat sich DHL Express France, Frankreich, von ihrem Geschäft mit nationalen taggenauen Sendungen getrennt. Die entsprechenden Vermögenswerte und Verbindlichkeiten waren bereits zum 31. Dezember 2009 als zur Veräußerung klassifiziert worden.

Zum 1. Juli 2010 haben wir wesentliche Teile von Williams Lea Deutschland aus dem Unternehmensbereich SUPPLY CHAIN in den Unternehmensbereich BRIEF verlagert. Beide Bereiche sind durch vielfältige strategische und operative Schnittstellen geprägt, beispielsweise im Zusammenhang mit dem E-Postbrief. Die Vorjahreszahlen der Segmentberichterstattung wurden entsprechend angepasst.

Im August haben wir den Online-Werbedienstleister nugg.ad AG predictive behavioral targeting, Deutschland, erworben und vollständig in den Konzernabschluss einbezogen.

Gemäß überarbeitetem IAS 39 ist der bisher nicht bilanzierte Terminkontrakt (Forward) von 27,4 % der Postbank-Aktien an die Deutsche Bank mit seinem Marktwert seit dem 1. Januar 2010 erfolgswirksam im Finanzergebnis enthalten.

#### Konzernumsatz der fortgeführten Geschäftsbereiche gestiegen

Der Konzernumsatz der fortgeführten Geschäftsbereiche ist im Vergleich zum Vorjahr um 11,4 % auf 51.481 MIO € gestiegen (Vorjahr: 46.201 MIO €). Dazu haben Währungseffekte mit 2.081 MIO € positiv beigetragen. Der im Ausland erzielte Anteil am Konzernumsatz hat sich von 64,8 % auf 67,9 % erhöht.

#### Höhere Volumina lassen Aufwendungen steigen

Die im Vorjahr begonnenen Restrukturierungen haben im Berichtsjahr zu Einmal-aufwendungen von 370 MIO € (Vorjahr: 1.242 MIO €) geführt und sind mit 288 MIO € größtenteils im Unternehmensbereich EXPRESS angefallen.

Die sonstigen betrieblichen Erträge lagen mit 2.217 MIO € leicht über dem Vorjahresniveau (2.141 MIO €).

Volumenzuwächse und ein höherer Ölpreis ließen den Materialaufwand im Berichtsjahr von 25.774 MIO € auf 29.473 MIO € steigen.

Dagegen haben vor allem die Restrukturierungen im Expressbereich den Personalaufwand um 412 MIO € bzw. 2,4 % auf 16.609 MIO € verringert. Gegenläufig wirkte sich mit 70 MIO € die Gewährung einer einmaligen Jahresendankennung für alle Mitarbeiter des Konzerns aus.

Mit 324 MIO € fielen die Abschreibungen um 20,0 % niedriger aus als im Vorjahr (1.620 MIO €). Die im Vorjahr erfolgten Restrukturierungen hatten einen Teil der Abschreibungen vorweggenommen.

Dagegen überstiegen die sonstigen betrieblichen Aufwendungen mit 4.485 MIO € den Vorjahreswert um 789 MIO €, vor allem weil sich die Aufwendungen aus Abgängen von Vermögenswerten erhöht haben. Darin enthalten sind Effekte aus den genannten Verkäufen in Großbritannien, Frankreich und Österreich.

➔ Anhang, Textziffer 12

➔ Anhang, Textziffer 13

➔ Anhang, Textziffer 14

➔ Anhang, Textziffer 15

➔ Anhang, Textziffer 16

### EBIT und Finanzergebnis erheblich verbessert

Das Ergebnis der betrieblichen Tätigkeit (EBIT) der fortgeführten Geschäftsbereiche lag mit 1.835 MIO € um 1.604 MIO € über dem Wert des Vorjahres (231 MIO €). Im Vorjahr war das Ergebnis durch Einmaleffekte in Höhe von 1.242 MIO € belastet; im Berichtsjahr führten die Restrukturierungen noch zu einmaligen Aufwendungen von 370 MIO €. Bereinigt um diese Effekte konnte das EBIT von 1.473 MIO € um 732 MIO € auf 2.205 MIO € gesteigert werden.

Das Finanzergebnis hat sich von 45 MIO € auf 989 MIO € erheblich verbessert. Darin enthalten ist seit Januar 2010 erstmals die Bewertung des Forward aus der zweiten Tranche des beabsichtigten Postbank-Verkaufs in Höhe von 1.653 MIO €.

Das Ergebnis vor Ertragsteuern ist um 2.548 MIO € auf 2.824 MIO € gestiegen. Ertragsteuern sind in Höhe von 194 MIO € angefallen (Vorjahr: 15 MIO €). Die Bewertung der Derivate aus dem geplanten Postbank-Verkauf hat sich steuerlich nicht ausgewirkt. Insgesamt hat sich das Ergebnis der fortgeführten Geschäftsbereiche im Berichtsjahr deutlich um 2.369 MIO € auf 2.630 MIO € verbessert (Vorjahr: 261 MIO €).

### Postbank im Ergebnis aus assoziierten Unternehmen enthalten

Da die Postbank Ende Februar 2009 entkonsolidiert worden ist, enthielt das Ergebnis aufgegebenen Geschäftsbereiche im Vorjahr das Nettoergebnis der ersten beiden Monate sowie den Entkonsolidierungseffekt in Höhe von 444 MIO €. Im Berichtsjahr ist das anteilige Ergebnis der Postbank im Ergebnis aus assoziierten Unternehmen enthalten.

### Konzernjahresergebnis und Ergebnis je Aktie deutlich höher

Das Konzernjahresergebnis hat sich von 693 MIO € auf 2.630 MIO € verbessert. Davon stehen 2.541 MIO € den Aktionären der Deutsche Post AG und 89 MIO € den nicht beherrschenden Anteilseignern zu. Sowohl das unverwässerte als auch das verwässerte Ergebnis je Aktie ist deutlich von 0,53 € auf 2,10 € gestiegen.

### Dividende von 0,65 € je Aktie vorgeschlagen

Vorstand und Aufsichtsrat werden den Aktionären auf der Hauptversammlung am 25. Mai 2011 vorschlagen, für das Geschäftsjahr 2010 eine Dividende von 0,65 € je Aktie (Vorjahr: 0,60 €) auszuschütten. Die Ausschüttungsquote bezogen auf das Konzernjahresergebnis, das auf die Aktionäre der Deutsche Post AG entfällt, beträgt 30,9 %. Berechnet auf den Jahresschlusskurs unserer Aktie ergibt sich eine Netto-Dividendenrendite von 5,1 %. Die Dividende wird am 26. Mai 2011 ausgezahlt und ist für inländische Investoren steuerfrei.

A.19 Konzern-EBIT der fortgeführten Geschäftsbereiche

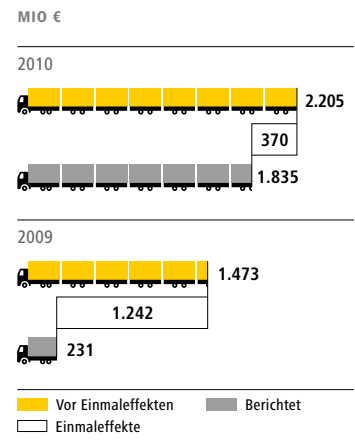

A.20 Ausschüttungssumme und Dividende je Stückaktie

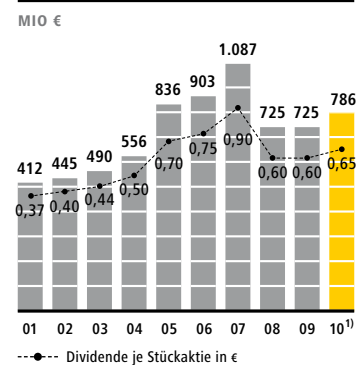

1) Vorschlag



## Finanzlage

### Grundsätze und Ziele des Finanzmanagements

Das Finanzmanagement des Konzerns umfasst das Steuern von Cash und Liquidität, das Absichern von Zins-, Währungs- und Rohstoffpreissrisiken, die Konzernfinanzierung, die Vergabe von Bürgschaften und Patronatserklärungen sowie die Kommunikation mit den Rating-Agenturen. Wir steuern die Abläufe zentral und können so effizient arbeiten und Risiken erfolgreich kontrollieren.

Die Verantwortung dafür trägt Corporate Finance in der Bonner Konzernzentrale, unterstützt durch drei regionale Treasury Center in Bonn (Deutschland), Fort Lauderdale (USA) und Singapur. Sie bilden die Schnittstelle zwischen der Zentrale und den operativen Gesellschaften, beraten diese in allen Fragen des Finanzmanagements und stellen sicher, dass die konzernweiten Vorgaben umgesetzt werden. Diese Richtlinien und Prozesse stimmen mit dem Gesetz zur Kontrolle und Transparenz im Unternehmensbereich (KonTraG) vom 27. April 1998 überein.

Hauptaufgabe von Corporate Finance ist es, finanzielle Risiken und Kapitalkosten zu minimieren und dabei die nachhaltige finanzielle Stabilität und Flexibilität des Konzerns zu erhalten. Um auch in Zukunft ungehindert Zugang zu den Kapitalmärkten zu haben, strebt der Konzern weiterhin ein der Branche angemessenes Kredit-Rating an. Daher prüfen wir vor allem, wie sich unser operativer Cashflow im Verhältnis zur angepassten Verschuldung entwickelt. Diese entspricht den Nettofinanzverbindlichkeiten des Konzerns unter Berücksichtigung der nicht direkt mit Kapital unterlegten Pensionsverpflichtungen und Verbindlichkeiten aus operativem Leasing.

### Neue Finanzstrategie für den Konzern

Aufbauend auf den Grundsätzen und Zielen des Finanzmanagements hat der Aufsichtsrat im März 2010 für den Konzern eine neue Finanzstrategie verabschiedet. Sie berücksichtigt neben den Interessen der Aktionäre auch die Ansprüche der Fremdkapitalgeber. Durch ein hohes Maß an Kontinuität und Berechenbarkeit für die Investoren sollen die finanzielle Flexibilität und niedrige Kapitalkosten für den Konzern erhalten bleiben.

Wesentlicher Bestandteil der Strategie ist ein Ziel-Rating von „BBB+“, das über die dynamische Steuerungsgröße „FFO to Debt“ (Funds from Operations to Debt, Finanzmittel aus dem operativen Geschäft im Verhältnis zur Verschuldung) gesteuert wird. Diese Steuerungsgröße wird auf rollierender 12-Monatsbasis berechnet. Weitere Bestandteile der Strategie sind eine nachhaltige Dividendenpolitik und klare Prioritäten, wie überschüssige Liquidität verwendet wird. Sie wird zunächst für Investitionen in das operative Geschäft genutzt. Weiterhin werden damit die Pensionsverbindlichkeiten teilweise ausfinanziert. Danach würde angestrebt, das Rating auf „A–“ zu verbessern, bevor verfügbare Liquidität für zusätzliche Dividendenzahlungen oder Aktienrückkäufe genutzt würde.

## A.21 Finanzstrategie

|                                                                                                                                                                                                                                                                                                                    |                                                                                                                                                                                      |
|--------------------------------------------------------------------------------------------------------------------------------------------------------------------------------------------------------------------------------------------------------------------------------------------------------------------|--------------------------------------------------------------------------------------------------------------------------------------------------------------------------------------|
| <b>Kredit-Rating</b><br><ul style="list-style-type: none"> <li>• „BBB+“ bzw. „Baa1“ Bewertung halten</li> <li>• Dynamische Steuerungsgröße „FFO to Debt“ eingeführt</li> </ul>                                                                                                                                     | <b>Investoren</b><br><ul style="list-style-type: none"> <li>• Zuverlässigkeit und Kontinuität von Unternehmensaussagen</li> <li>• Planbarkeit von zu erwartenden Renditen</li> </ul> |
| <b>Dividendenpolitik</b><br><ul style="list-style-type: none"> <li>• 40 % – 60 % des Nettogewinns ausschütten</li> <li>• Cashflow und Kontinuität beachten</li> </ul>                                                                                                                                              | <b>Konzern</b><br><ul style="list-style-type: none"> <li>• Finanzielle und strategische Flexibilität wahren</li> <li>• Niedrige Kapitalkosten (WACC)<sup>1)</sup> sichern</li> </ul> |
| <b>Überschüssige Liquidität</b><br><ol style="list-style-type: none"> <li>1. In das operative Geschäft investieren</li> <li>2. Planvermögen deutscher Pensionspläne erhöhen</li> <li>3. Kredit-Rating von „A–“ bzw. „A3“ anstreben</li> <li>4. Sonderdividende ausschütten oder Aktienrückkäufe tätigen</li> </ol> |                                                                                                                                                                                      |
| <b>Verschuldungsportfolio</b><br><ul style="list-style-type: none"> <li>• Syndizierte Kreditlinie als Liquiditätsreserve vereinbart</li> <li>• Gegebenenfalls Anleihen zur Deckung des langfristigen Kapitalbedarfs begeben</li> </ul>                                                                             |                                                                                                                                                                                      |

<sup>1)</sup> Gewichtete durchschnittliche Kapitalkosten (Weighted Average Cost of Capital) ➔ Unternehmenssteuerung, Seite 32

Finanzmittel aus dem operativen Geschäft (Funds from Operations, FFO) stellen den um operatives Leasing, Pensionen und Einmaleffekte korrigierten operativen Cashflow vor Veränderungen des kurzfristigen Nettovermögens zuzüglich erhaltener Zinsen und Dividenden und abzüglich gezahlter Zinsen dar, wie die folgende Berechnung zeigt. Die Verschuldung (Debt) schließt neben den Finanzschulden und verfügbaren liquiden Mitteln auch Verbindlichkeiten aus operativem Leasing und ungedeckte Pensionsverbindlichkeiten ein. Die Definition von „FFO to Debt“ sowie die Berechnung der einzelnen Bestandteile entspricht der Methodik der Rating-Agentur Standard & Poor's.

@ standardandpoors.com

## A.22 FFO to Debt

| MIO €                                                                                             | 2009         | 2010          |
|---------------------------------------------------------------------------------------------------|--------------|---------------|
| Operativer Cashflow vor Veränderung des kurzfristigen Nettovermögens                              | 763          | 2.109         |
| ⊕ Erhaltene Zinsen und Dividenden                                                                 | 103          | 59            |
| ⊖ Gezahlte Zinsen                                                                                 | 291          | 183           |
| ⊕ Anpassung auf operatives Leasing                                                                | 1.082        | 1.055         |
| ⊕ Anpassung auf Pensionen                                                                         | 153          | 198           |
| ⊕ Einmaleffekte                                                                                   | 1.415        | 531           |
| ⊖ <b>Finanzmittel aus dem operativen Geschäft (Funds from Operations, FFO)</b>                    | <b>3.225</b> | <b>3.769</b>  |
| Berichtete Finanzverbindlichkeiten <sup>1)</sup>                                                  | 7.439        | 7.022         |
| ⊖ Finanzverbindlichkeiten im Zusammenhang mit dem Verkauf der Deutschen Postbank AG <sup>1)</sup> | 3.990        | 4.164         |
| ⊖ Finanzverbindlichkeiten erfolgswirksam zum beizulegenden Zeitwert erfasst <sup>1)</sup>         | 141          | 115           |
| ⊕ Anpassung auf operatives Leasing <sup>1)</sup>                                                  | 4.933        | 5.527         |
| ⊕ Anpassung auf Pensionen <sup>1)</sup>                                                           | 5.221        | 5.323         |
| ⊖ Verfügbare liquide Mittel <sup>1), 2)</sup>                                                     | 3.864        | 2.893         |
| ⊖ <b>Verschuldung (Debt)<sup>1)</sup></b>                                                         | <b>9.598</b> | <b>10.700</b> |
| <b>FFO to Debt (%)</b>                                                                            | <b>33,6</b>  | <b>35,2</b>   |

<sup>1)</sup> Zum Stichtag 31. Dezember

<sup>2)</sup> Verfügbare liquide Mittel sind definiert als ausgewiesene flüssige Mittel und Zahlungsmitteläquivalente sowie jederzeit kündbare Investment Funds abzüglich operativ gebundener flüssiger Mittel.

Aufgrund der deutlich gestiegenen Finanzmittel aus dem operativen Geschäft hat sich „FFO to Debt“ gegenüber dem Vorjahr verbessert, obwohl unsere Liquidität durch Zahlungen für Restrukturierungen belastet war und die Verschuldung zudem durch die gestiegenen operativen Leasingverpflichtungen höher ausgefallen ist. Mit einem Wert von 35,2 % liegt die Steuerungsgröße im Rahmen der Erwartungen von uns und Standard & Poor's.

### **Zentrales Cash- und Liquiditätsmanagement**

Das Cash- und Liquiditätsmanagement der weltweit tätigen Tochtergesellschaften erfolgt zentral über das Corporate Treasury. 84 % des konzernexternen Umsatzes wird in Cash Pools konzentriert und zum internen Liquiditätsausgleich genutzt. In Ländern, in denen dies aus rechtlichen Gründen nicht möglich ist, werden interne oder externe Kredite und Anlagen zentral vom Corporate Treasury vermittelt. Dabei achten wir auf eine ausgeglichene Bankenpolitik, um unabhängig von einzelnen Banken zu bleiben. Der konzerninterne Umsatz der Tochtergesellschaften wird ebenfalls konzentriert und über die Inhouse-Bank abgewickelt. So vermeiden wir externe Bankgebühren und -margen (Inter-Company Clearing). Der Zahlungsverkehr erfolgt nach einheitlichen Richtlinien, mit standardisierten Abläufen und IT-Systemen.

### **Management von Marktpreisrisiken**

Um Marktpreisrisiken zu begrenzen, nutzt der Konzern originäre und derivative Finanzinstrumente. Zinsrisiken werden nur mit Hilfe von Swaps abgesichert. Im Währungsbereich kommen zusätzlich auch Termingeschäfte, Cross-Currency Swaps und Optionen zum Einsatz. Risiken aus Rohstoffpreisschwankungen geben wir weitgehend an unsere Kunden weiter, das Restrisiko steuern wir mit Rohstoffpreis-Swaps. Die für den Einsatz von Derivaten nötigen Rahmenbedingungen, Kompetenzen und Kontrollen sind in internen Richtlinien geregelt.

### **Flexibel und stabil finanziert**

Der Konzern deckt seinen Finanzierungsbedarf langfristig durch ein ausgewogenes Verhältnis von Eigenkapital zu Fremdkapital. Dadurch werden sowohl die finanzielle Stabilität als auch eine hinreichende Flexibilität sichergestellt. Unsere wichtigste Finanzierungsquelle ist grundsätzlich der Mittelzufluss aus laufender Geschäftstätigkeit.

Im Berichtsjahr wurden durchschnittlich lediglich rund 7 % der fest zugesagten, unbesicherten bilateralen Kreditlinien des Konzerns ausgenutzt; ihr Gesamtvolumen betrug im Jahresdurchschnitt 2,7 MRD €. Im Dezember 2010 haben wir im Rahmen unserer Finanzstrategie eine fünfjährige syndizierte Kreditlinie mit einem Volumen von 2 MRD € vereinbart, die die bisher bestehenden bilateralen Kreditverträge vollständig ersetzt. Die syndizierte Kreditlinie sichert uns die derzeit günstigen Marktkonditionen und bildet eine langfristig sichere Liquiditätsreserve. Sie enthält keine weitergehenden Zusagen, was die Finanzkennziffern des Konzerns betrifft, und wurde zum Bilanzstichtag nicht in Anspruch genommen.

Bei unserer Bankenpolitik achten wir darauf, das zu vergebende Geschäftsvolumen breit zu streuen und mit den Kreditinstituten langfristige Geschäftsbeziehungen zu unterhalten. Den Fremdmittelbedarf decken wir neben den Kreditlinien auch über andere unabhängige Finanzierungsquellen. Dazu zählen Anleihen, strukturierte Finanzierungen sowie operatives Leasing. Die Fremdmittel werden weitgehend zentral aufgenommen, um Größen- und Spezialisierungsvorteile zu nutzen und so die Kapitalkosten zu minimieren.

### Bürgschaften und Patronatserklärungen

Die Deutsche Post AG besichert bei Bedarf Kredit-, Leasing- oder Lieferantenverträge, die von Konzerngesellschaften, assoziierten Unternehmen oder Joint-Venture-Gesellschaften abgeschlossen werden, indem sie Patronatserklärungen, Bürgschaften oder Garantien begibt. Dadurch lassen sich lokal bessere Konditionen durchsetzen. Die Herauslage und Überwachung der Besicherungen erfolgt zentral.

### Kreditwürdigkeit des Konzerns

Kredit-Ratings stellen ein unabhängiges und aktuelles Urteil über die Kreditwürdigkeit eines Unternehmens dar. Dazu werden der Geschäftsbericht sowie entsprechende Plandaten quantitativ analysiert und bewertet. Zusätzlich werden qualitative Faktoren wie Branchenspezifika, Marktposition sowie Produkte und Dienstleistungen des Unternehmens berücksichtigt. Die Kreditwürdigkeit unseres Konzerns wird von den Rating-Agenturen Standard & Poor's und Moody's Investors Service laufend überprüft.

Standard & Poor's hat im ersten Halbjahr 2010 den Ausblick von „negativ“ auf „stabil“ angehoben und bewertet die langfristige Fähigkeit unseres Konzerns, seinen finanziellen Verpflichtungen nachzukommen, weiterhin mit „BBB +“ und damit als angemessen. Moody's bewertet uns gleichermaßen. Mit diesem Rating ist Deutsche Post DHL in der Transport- und Logistikbranche gut positioniert. Die folgende Tabelle zeigt die Bewertungen zum Bilanzstichtag sowie die zugrunde liegenden Faktoren. Die vollständigen und aktuellen Analysen der Rating-Agenturen sowie die Rating-Definitionen finden Sie auf unserer Internetseite.

@ [standardandpoors.com](http://standardandpoors.com),  
[moody's.com](http://moody's.com)

@ [dp-dhl.com/de/investoren.html](http://dp-dhl.com/de/investoren.html)

#### A.23 Bewertung der Rating-Agenturen

|                                                                                                                                                                                                                                                                                                                                                                                                    |                                                                                                                                                                                                                                                                                                                                          |
|----------------------------------------------------------------------------------------------------------------------------------------------------------------------------------------------------------------------------------------------------------------------------------------------------------------------------------------------------------------------------------------------------|------------------------------------------------------------------------------------------------------------------------------------------------------------------------------------------------------------------------------------------------------------------------------------------------------------------------------------------|
| <b>Standard &amp; Poor's</b><br>Langfristig: BBB+<br>Kurzfristig: A-2<br>Ausblick: stabil                                                                                                                                                                                                                                                                                                          | <b>Moody's Investors Service</b><br>Langfristig: Baa1<br>Kurzfristig: P-2<br>Ausblick: stabil                                                                                                                                                                                                                                            |
| <b>+ Bewertungsfaktoren</b> <ul style="list-style-type: none"> <li>• Globales Netzwerk mit führenden Marktpositionen im Bereich der internationalen Expressdienstleistungen in Europa und Asien</li> <li>• Marktbeherrschende Position im deutschen Briefmarkt stärkt den Cashflow auf Konzernebene</li> <li>• Weltweit führender integrierter Logistikanbieter</li> </ul>                         | <b>+ Bewertungsfaktoren</b> <ul style="list-style-type: none"> <li>• Globale Präsenz und Reichweite als größter europäischer Logistikkonzern</li> <li>• Großes und vergleichsweise solides Briefgeschäft</li> <li>• Zu erwartende Steigerung der Profitabilität auf Konzernebene und besonders im Unternehmensbereich EXPRESS</li> </ul> |
| <b>- Bewertungsfaktoren</b> <ul style="list-style-type: none"> <li>• Regulatorische Risiken und strukturelle Volumentrübkänge im Briefgeschäft</li> <li>• Rentabilität der Geschäftsbereiche außerhalb des inländischen Briefgeschäfts geringer als die der Wettbewerber</li> <li>• Anfälligkeit für Rückgang der Handelsvolumina aufgrund hoher Fixkosten für globalen Netzwerkbetrieb</li> </ul> | <b>- Bewertungsfaktoren</b> <ul style="list-style-type: none"> <li>• Bei einer negativen Volumenentwicklung im Brief- und Expressgeschäft dämpft die hohe Fixkostenbasis die operative Marge</li> <li>• Gesättigtes, rückläufiges Briefgeschäft</li> <li>• Relativ schwache Rating-Kennzahlen für das Geschäftsjahr 2009</li> </ul>      |



### Liquidität und Mittelherkunft

Zum Bilanzstichtag verfügte der Konzern über flüssige Mittel und Zahlungsmittel-äquivalente in Höhe von 3,4 MRD € (Vorjahr: 3,1 MRD €), wovon ein Großteil auf die Deutsche Post AG entfällt. Die flüssigen Mittel werden weitgehend zentral am Geldmarkt angelegt. Das Volumen dieser kurzfristigen Geldmarktanlagen betrug zum Bilanzstichtag 1,9 MRD €. Zu den flüssigen Mitteln und Zahlungsmitteläquivalenten kommen jederzeit kündbare Investment Funds in Höhe von 0,4 MRD € hinzu, die in der Bilanz als kurzfristige finanzielle Vermögenswerte ausgewiesen werden.

Der Anteil der Investment Funds ist zurückgegangen, besonders weil im Berichtsjahr außerordentliche Mittelabflüsse für Restrukturierungen in Höhe von 0,8 MRD € angefallen sind und durch die Rückführung von Finanzverbindlichkeiten, wie etwa die vorzeitige Rückzahlung der Kommunalanleihe (Municipal Bond), die zur Finanzierung der Investitionen auf dem Flughafen Wilmington begeben worden war (0,2 MRD €). Die in unserer Bilanz ausgewiesenen Finanzschulden gliedern sich wie folgt:

#### A.24 Finanzverbindlichkeiten

| MIO €                                                                 | 2009         | 2010         |
|-----------------------------------------------------------------------|--------------|--------------|
| Anleihen                                                              | 1.870        | 1.682        |
| Verbindlichkeiten gegenüber Kreditinstituten                          | 577          | 359          |
| Verbindlichkeiten aus Finanzierungsleasing                            | 269          | 210          |
| Verbindlichkeiten gegenüber Konzernunternehmen                        | 126          | 137          |
| Erfolgswirksam zum beizulegenden Zeitwert bewertete Verbindlichkeiten | 141          | 115          |
| Sonstige                                                              | 4.456        | 4.519        |
|                                                                       | <b>7.439</b> | <b>7.022</b> |

Die größten Einzelpositionen sind die beiden börsennotierten Anleihen der Deutsche Post Finance B.V. sowie Projektfinanzierungen der Europäischen Investitionsbank für Briefsortierzentren in Deutschland und für ein IT-Zentrum in Tschechien.

Die sonstigen Finanzverbindlichkeiten bestehen hauptsächlich aufgrund der Transaktion mit Aktien der Deutsche Postbank AG in Form einer Pflichtumtauschanleihe, einer Barsicherheit und einer Hedging-Verbindlichkeit. Weitere Angaben zu den bilanzierten Finanzverbindlichkeiten enthält der Anhang.

Weiterhin stellt auch das operative Leasing eine wichtige Finanzierungsquelle für den Konzern dar. Wir nutzen es vor allem, um Immobilien zu finanzieren, aber auch für Flugzeuge, Fuhrparks und IT-Ausstattung.

#### A.25 Operative Leasingverpflichtungen nach Anlageklassen

| MIO €                                                                          | 2009         | 2010         |
|--------------------------------------------------------------------------------|--------------|--------------|
| Grundstücke und Bauten                                                         | 5.359        | 5.554        |
| Technische Anlagen und Maschinen                                               | 106          | 115          |
| Andere Anlagen, Betriebs- und Geschäftsausstattung, Transportmittel, Sonstiges | 416          | 471          |
| Flugzeuge                                                                      | 312          | 951          |
|                                                                                | <b>6.193</b> | <b>7.091</b> |

Die operativen Leasingverpflichtungen sind mit 7,1 MRD € gegenüber dem Vorjahr deutlich gestiegen, vor allem weil sich die Wirtschaft allgemein erholt hat und wir unsere Flugzeugflotte verstärkt haben.

### Investitionen geringer als erwartet

Die Capital Expenditure (Capex) im Konzern belief sich Ende 2010 auf insgesamt 1.262 MIO € (Vorjahr: 1.171 MIO €) und lag damit 10 % unter den ursprünglich geplanten 1,4 MRD €. Die Mittel flossen vorwiegend in Ersatzinvestitionen und Geschäftswachstum.

Zu Beginn des Jahres haben wir mit Blick auf die unsichere wirtschaftliche Entwicklung zunächst nur zurückhaltend investiert. Im weiteren Verlauf des Jahres hat sich der Schwerpunkt von reinen Ersatzinvestitionen auf Wachstumsinvestitionen verlagert. Damit wurden im Wesentlichen folgende Vermögenswerte ersetzt und erweitert: 1.058 MIO € flossen in Sachanlagen und 204 MIO € in immaterielle Vermögenswerte ohne Firmenwerte. Die Investitionen in Sachanlagen bezogen sich vorwiegend auf geleistete Anzahlungen und Anlagen im Bau (279 MIO €), technische Anlagen und Maschinen (265 MIO €), Transportausrüstung (212 MIO €), IT-Ausrüstung (97 MIO €) und Flugzeuge (68 MIO €).

Zunächst haben wir uns auf Ersatzinvestitionen konzentriert, insbesondere in Europa und Amerika, wie die nebenstehende Grafik zeigt. Schwerpunkte in Europa waren Deutschland und Großbritannien.

### A.26 Capex nach Regionen

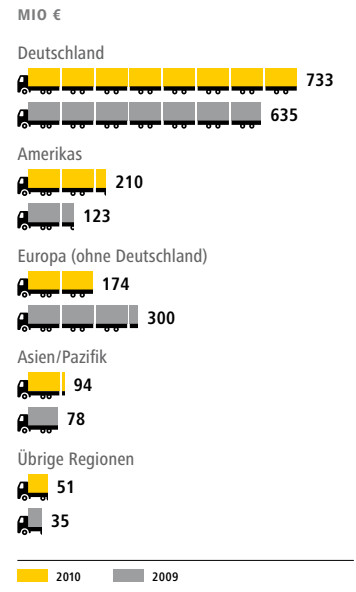

### A.27 Capex und Abschreibungen, Gesamtjahr

|                                              | BRIEF             |      | EXPRESS           |      | GLOBAL FORWARDING,<br>FREIGHT |      | SUPPLY CHAIN      |      | Corporate Center/<br>Anderes |      | Fortgeführte<br>Geschäftsbereiche |       |
|----------------------------------------------|-------------------|------|-------------------|------|-------------------------------|------|-------------------|------|------------------------------|------|-----------------------------------|-------|
|                                              | 2009<br>angepasst | 2010 | 2009<br>angepasst | 2010 | 2009<br>angepasst             | 2010 | 2009<br>angepasst | 2010 | 2009<br>angepasst            | 2010 | 2009                              | 2010  |
| Capex (MIO €)                                | 338               | 445  | 370               | 286  | 92                            | 102  | 195               | 215  | 176                          | 214  | 1.171                             | 1.262 |
| Abschreibungen auf Vermögenswerte<br>(MIO €) | 332               | 323  | 483               | 373  | 114                           | 98   | 392               | 298  | 299                          | 204  | 1.620                             | 1.296 |
| Verhältnis Capex zu Abschreibungen           | 1,02              | 1,38 | 0,77              | 0,77 | 0,81                          | 1,04 | 0,50              | 0,72 | 0,59                         | 1,05 | 0,72                              | 0,97  |

### A.28 Capex und Abschreibungen, 4. Quartal

|                                              | BRIEF             |      | EXPRESS           |      | GLOBAL FORWARDING,<br>FREIGHT |      | SUPPLY CHAIN      |      | Corporate Center/<br>Anderes |      | Fortgeführte<br>Geschäftsbereiche |      |
|----------------------------------------------|-------------------|------|-------------------|------|-------------------------------|------|-------------------|------|------------------------------|------|-----------------------------------|------|
|                                              | 2009<br>angepasst | 2010 | 2009<br>angepasst | 2010 | 2009<br>angepasst             | 2010 | 2009<br>angepasst | 2010 | 2009<br>angepasst            | 2010 | 2009                              | 2010 |
| Capex (MIO €)                                | 133               | 146  | 95                | 134  | 36                            | 34   | 60                | 81   | 61                           | 104  | 385                               | 499  |
| Abschreibungen auf Vermögenswerte<br>(MIO €) | 79                | 99   | 169               | 87   | 29                            | 25   | 89                | 78   | 83                           | 48   | 449                               | 337  |
| Verhältnis Capex zu Abschreibungen           | 1,68              | 1,47 | 0,56              | 1,54 | 1,24                          | 1,36 | 0,67              | 1,04 | 0,73                         | 2,17 | 0,86                              | 1,48 |

### BRIEF investiert in Internetgeschäft

Die Investitionen im Unternehmensbereich BRIEF sind im Berichtsjahr von 338 MIO € (angepasst) auf 445 MIO € gestiegen. Geflossen sind sie vor allem in technische Anlagen und Maschinen (210 MIO €), selbsterstellte Software (96 MIO €) sowie sonstige Betriebs- und Geschäftsausstattung (40 MIO €). Im nationalen Briefgeschäft wurden vor allem Ersatzinvestitionen für technische Anlagen und Briefsortiermaschinen getätigt. Überdies wurde die Plattform für den E-Postbrief entwickelt.

Im nationalen Paketgeschäft wurde vorwiegend in eine neue Kamera- und Lese-technik in den Paketzentren investiert, mit der wir die Abläufe stärker automatisiert haben. Das Netz der Packstationen wurde ausgebaut und die dafür benötigte Software erneuert. Zudem haben wir das Shopping-Portal „MeinPaket.de“ aufgebaut und damit unsere Leistungen für den Internethandel erweitert.

Im Bereich Filialen haben wir das Netz neu geordnet und die dort eingesetzte Software verbessert.

#### **Nach wie vor niedrige Investitionen bei EXPRESS**

Im Unternehmensbereich EXPRESS wurden insgesamt 286 MIO € investiert (Vorjahr angepasst: 370 MIO €), gegenüber dem Vorjahr ein Rückgang von 23 %. Die Investitionen waren vor allem auf die gesetzlich vorgeschriebene Wartung der Flugzeuge und die Netzwerkoptimierung zurückzuführen. Im Mittelpunkt der Investitionen in Sachanlagen standen Flugzeuge (68 MIO €), geleistete Anzahlungen und Anlagen im Bau (118 MIO €), technische Anlagen und Maschinen (23 MIO €) und IT-Ausstattung (20 MIO €).

Im Bereich der immateriellen Vermögenswerte ist besonders in geleistete Anzahlungen und immaterielle Anlagen in Entwicklung (6 MIO €) sowie in Software (6 MIO €) investiert worden.

Regional lagen unsere Prioritäten darauf, in Italien und den Niederlanden Terminals zu modernisieren und in Deutschland die „Network Operations Services“ zu verbessern. In der Region Asia Pacific haben wir vornehmlich in Indien und China investiert. In der Region Americas war die Investitionstätigkeit auf die Umrüstung von Flugzeugen in den Vereinigten Staaten sowie auf technische Anlagen und Maschinen in Mexiko und Kanada ausgerichtet.

#### **GLOBAL FORWARDING, FREIGHT modernisiert Infrastruktur**

Im Unternehmensbereich GLOBAL FORWARDING, FREIGHT wurden im Berichtsjahr 102 MIO € investiert (Vorjahr angepasst: 92 MIO €). Davon entfielen auf das Geschäftsfeld Global Forwarding 75 MIO €. Wie im Vorjahr haben wir unsere IT-Infrastruktur erneuert und unsere Abläufe vor allem in den globalen Anwendungen vereinfacht.

Für das Geschäftsfeld Freight wurden Mittel in Höhe von 27 MIO € eingesetzt, vor allem für Sachanlagen, darunter Transportausrüstung, in Großbritannien.

#### **SUPPLY CHAIN investiert in Neugeschäft**

Im Unternehmensbereich SUPPLY CHAIN beliefen sich die Investitionen auf 215 MIO €, was einem Anstieg um 10 % entspricht (Vorjahr angepasst: 195 MIO €). Davon entfielen 198 MIO € auf das Supply-Chain-Geschäft, 15 MIO € auf das Geschäft von Williams Lea und 2 MIO € auf zentrale Einheiten. Im zweiten Halbjahr verstärkte sich die Investitionstätigkeit, hauptsächlich für neue Geschäftsaktivitäten in den Regionen Americas und Asia Pacific. Im Gesamtjahr 2010 wurden rund 65 % der Mittel für Neugeschäft eingesetzt und 35 % für Ersatz- und Erneuerungsinvestitionen. Die Investitionen in der Region Americas entfielen überwiegend auf Neugeschäft in den Sektoren „Retail“, „Consumer“ und „Automotive“. Schwerpunkt der Ersatzinvestitionen waren hier kundenfinanzierte Projekte in den Sektoren „Retail“ und „Energy“. In Großbritannien investierten wir weiterhin in Lager und damit verbundene Transportlösungen für Neu- und Bestandskunden, wobei größere Investitionsprojekte im Sektor „Life Sciences & Healthcare“ und bei den Airline-Business-Lösungen erfolgten. Die Investitionen in anderen Teilen Europas waren auf neue und bestehende Lösungen für

Unternehmen und erforderliche Ersatzinvestitionen beschränkt, womit sich insgesamt der Aufwand um 27 % gegenüber dem Vorjahr verringert hat. Im Geschäftsfeld Williams Lea haben wir in Softwareentwicklung und moderne IT investiert.

#### Bereichsübergreifende Investitionen gestiegen

Die bereichsübergreifenden Investitionen sind von 176 MIO € im Vorjahr auf nun 214 MIO € gestiegen. Die Ausgaben entfielen überwiegend auf den Kauf von Fahrzeugen, da hier im Vorjahr erheblich gespart worden war. So war die Betriebsdauer von Fahrzeugen verlängert und die Bestellung neuer Fahrzeuge ausgesetzt worden. Die Investitionen in IT-Ausstattung sind zurückgegangen, in erster Linie in Folge der vorjährigen Restrukturierungen.

#### Kapitalflussrechnung der fortgeführten Geschäftsbereiche

Im Geschäftsjahr 2010 konnte der Mittelzufluss aus operativer Geschäftstätigkeit im Vergleich zum Vorjahr um 683 MIO € auf 1.927 MIO € gesteigert werden. Diese Zunahme ist vor allem geprägt durch das um 1.604 MIO € höhere EBIT. Daneben werden die Verluste aus dem Abgang von Vermögenswerten, die das EBIT um 279 MIO € gemindert haben, in der Zeile „Ergebnis aus dem Abgang von langfristigen Vermögenswerten“ korrigiert und stattdessen im „Mittelabfluss aus Investitionstätigkeit“ gezeigt. Die im EBIT enthaltenen Abschreibungen sind nicht zahlungswirksam und werden daher wieder korrigiert. Sie sind um 324 MIO € geringer als im Vorjahreszeitraum ausgefallen. Der Anstieg des Working Capital (kurzfristiges Nettovermögen) hat zu einem Mittelabfluss von 182 MIO € geführt, wozu maßgeblich der Aufbau von Forderungen und sonstigen kurzfristigen Vermögenswerten beigetragen hat. Im Vorjahr hat die Veränderung des Working Capital zu einem Mittelzufluss von 481 MIO € geführt.

#### A.29 Operativer Cashflow nach Unternehmensbereichen 2010

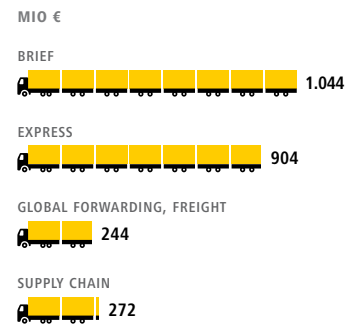

#### A.30 Ausgewählte Kennzahlen zur Finanzlage (fortgeführte Geschäftsbereiche)

| MIO €                                                     | 2009   | 2010   |
|-----------------------------------------------------------|--------|--------|
| Liquide Mittel am 31. Dezember                            | 3.064  | 3.415  |
| Veränderung flüssige Mittel und Zahlungsmitteläquivalente | 1.456  | 284    |
| Mittelzufluss aus operativer Geschäftstätigkeit           | 1.244  | 1.927  |
| Mittelabfluss/-zufluss aus Investitionstätigkeit          | -1.457 | 8      |
| Mittelzufluss/-abfluss aus Finanzierungstätigkeit         | 1.669  | -1.651 |

Die Investitionstätigkeit hat im Jahr 2010 zu einem Mittelzufluss von 8 MIO € geführt; im Vorjahr waren Mittel in Höhe von 1.457 MIO € abgeflossen. Hauptgrund dafür war der Verkauf von Geldmarktfonds, der zu einem Zufluss liquider Mittel aus kurzfristigen finanziellen Vermögenswerten geführt hat. Die Verkäufe des Expressgeschäfts mit nationalen taggenauen Sendungen in Großbritannien und Frankreich haben Mittel abfließen lassen. Zudem sind 1.174 MIO € in Sachanlagen und immaterielle Vermögenswerte investiert worden, was dem Vorjahresniveau entspricht. Die Mittelabflüsse für Tochterunternehmen und sonstige Geschäftseinheiten sind unter anderem für die übernommene nugg.ad AG sowie für nachträgliche Zahlungen für die im Jahr 2008 erworbene Flying Cargo angefallen.

Die Mittelveränderungen aus operativer Geschäftstätigkeit und Investitionstätigkeit addieren sich zu einem Free Cashflow von 1.935 MIO €. Das entspricht einer Verbesserung um 2.148 MIO € gegenüber dem Vorjahreswert, der mit -213 MIO € noch negativ war.



Die Finanzierungstätigkeit hat im Berichtsjahr zu einem Mittelabfluss von 1.651 MIO € geführt. Größter Posten in diesem Bereich war mit 725 MIO € die Dividendenzahlung an unsere Aktionäre. Liquide Mittel in Höhe von netto 641 MIO € sind verwendet worden, um die Finanzverschuldung zu verringern. Der Mittelzufluss des Vorjahres war geprägt durch die Zeichnung der Pflichtumtauschleihe durch die Deutsche Bank sowie die Zahlung der Besicherung der Verkaufsoption für die verbleibenden Postbank-Anteile.

Aufgrund der Veränderungen in den einzelnen Tätigkeitsbereichen ist der Bestand an flüssigen Mitteln und Zahlungsmitteläquivalenten im Vergleich zum 31. Dezember 2009 von 3.064 MIO € auf 3.415 MIO € gestiegen.

## Vermögenslage

### Konzernbilanzsumme übersteigt Vorjahresniveau

Zum 31. Dezember 2010 betrug die Bilanzsumme des Konzerns 37.763 MIO € und lag um 3.025 MIO € bzw. 8,7 % über dem Stand zum 31. Dezember 2009.

Die langfristigen Vermögenswerte sind von 22.022 MIO € auf 24.493 MIO € gestiegen, vor allem weil die langfristigen finanziellen Vermögenswerte besonders aufgrund der Bewertung der Derivate aus dem beabsichtigten Postbank-Verkauf um 1.745 MIO € auf 3.193 MIO € zugenommen haben. Die immateriellen Vermögenswerte haben sich um 314 MIO € auf 11.848 MIO € ebenfalls erhöht, vornehmlich weil die Firmenwerte wechselkursbedingt zugenommen haben. Dagegen haben die Sachanlagen um 90 MIO € auf 6.130 MIO € abgenommen, wozu Abschreibungen und Umklassifizierungen als „Zur Veräußerung gehalten“ beigetragen haben. Die Beteiligungen an assoziierten Unternehmen sind von 1.772 MIO € auf 1.847 MIO € gestiegen, unter anderem weil das Ergebnis der Postbank sich positiv entwickelt hat. Die aktiven latenten Steuern lagen zum Bilanzstichtag mit 973 MIO € um 305 MIO € über dem Vorjahr.

➔ Anhang, Textziffern 33 bis 38

Die kurzfristigen Vermögenswerte haben sich von 12.716 MIO € auf 13.270 MIO € verändert. Vor allem die Forderungen aus Lieferungen und Leistungen haben bei gestiegenem Absatz um 1.137 MIO € auf 6.046 MIO € zugenommen. Dagegen haben sich die kurzfristigen finanziellen Vermögenswerte um 1.239 MIO € auf 655 MIO € verringert, vor allem weil wir Wertpapiere der Kategorie „Zur Veräußerung verfügbar“ verkauft haben. Die Vorräte sind mit 223 MIO € zum Bilanzstichtag im Vorjahresvergleich fast unverändert geblieben. Die flüssigen Mittel und Zahlungsmitteläquivalente haben um 351 MIO € bzw. 11,5 % auf 3.415 MIO € zugenommen. Während sie unter anderem durch die Dividendenzahlung an die Aktionäre um 725 MIO € gemindert wurden, hat der Verkauf von kurzfristigen finanziellen Vermögenswerten sie erhöht. Die zur Veräußerung gehaltenen Vermögenswerte sind dagegen um 66 MIO € auf 113 MIO € zurückgegangen, nachdem der Verkauf des Geschäfts mit nationalen taggenauen Sendungen durch DHL Express in Großbritannien und Frankreich vollzogen worden ist.

➔ Anhang, Textziffer 42

Das den Aktionären der Deutsche Post AG zustehende Eigenkapital hat sich im Vergleich zum 31. Dezember 2009 um 2.335 MIO € bzw. 28,6 % auf 10.511 MIO € erhöht. Es wurde in erster Linie durch ein besseres Konzernjahresergebnis und durch Währungsumrechnungsdifferenzen gestärkt, während die Dividendenzahlung für das Geschäftsjahr 2009 es gemindert hat.

➔ Anhang, Textziffern 46 bis 48

Die lang- und kurzfristigen Verbindlichkeiten sind von 16.788 MIO € auf 17.640 MIO € gestiegen, vor allem weil die Verbindlichkeiten aus Lieferungen und Leistungen um 846 MIO € auf 5.707 MIO € zugenommen haben. Der Anstieg der sonstigen kurzfristigen Verbindlichkeiten von 3.674 MIO € auf 4.047 MIO € ist im Wesentlichen auf die auf-

gehobene Mehrwertsteuerbefreiung für Geschäftskunden im Unternehmensbereich BRIEF zurückzuführen. Die Finanzschulden konnten um 417 MIO € auf 7.022 MIO € verringert werden. Dies gilt besonders für die langfristigen Finanzverbindlichkeiten, unter anderem weil wir in den Vereinigten Staaten eine Kommunalanleihe in Höhe von 178 MIO € zurückgezahlt haben. Die lang- und kurzfristigen Rückstellungen lagen mit 9.427 MIO € ebenfalls unter dem Vorjahresniveau (9.677 MIO €). Sie wurden vorrangig für Restrukturierungen verbraucht, die besonders das US-Expressgeschäft betrafen.

Unternehmensbereiche, Seite 54

### Kennzahlen der fortgeführten Geschäftsbereiche

Unsere Nettoliquidität hat sich von 1.690 MIO € zum 31. Dezember 2009 auf 1.382 MIO € zum 31. Dezember 2010 reduziert, da unter anderem die Dividendenzahlung und die Restrukturierungen zu Mittelabflüssen geführt haben. Die Eigenkapitalquote hat sich dagegen um 4,5 Prozentpunkte auf 28,3 % verbessert.

Inwieweit die Nettozinsverpflichtung durch das EBIT gedeckt ist, zeigt die Kennzahl Net Interest Cover; sie wird berechnet als Quotient aus EBIT und dem Saldo aus erhaltenen und gezahlten Zinsen. Durch das stark gestiegene EBIT hat sich diese Kennzahl von 1,2 auf 14,3 ebenfalls verbessert.

Das Net Gearing zeigt an, in welchem Verhältnis die Nettofinanzverschuldung zur Summe aus Nettofinanzverschuldung und Eigenkapital steht. Der dynamische Verschuldungsgrad gibt als Indikator für die Innenfinanzierungskraft an, wie viele Jahre ein Unternehmen durchschnittlich benötigt, um seine Schulden zu tilgen, wenn es dazu den im Berichtsjahr erwirtschafteten Mittelzufluss aus operativer Geschäftstätigkeit einsetzt. Da wir über eine Nettoliquidität verfügen, ist die Aussagekraft dieser Kennzahlen allerdings eingeschränkt. Wir verzichten daher darauf, sie hier darzustellen und zu kommentieren.

#### A.31 Ausgewählte Kennzahlen zur Vermögenslage (fortgeführte Geschäftsbereiche)

|                                                 |       | 2009   | 2010   |
|-------------------------------------------------|-------|--------|--------|
| Eigenkapitalquote (Equity Ratio)                | %     | 23,8   | 28,3   |
| Nettoliquidität (-)/Nettofinanzverschuldung (+) | MIO € | -1.690 | -1.382 |
| Net Interest Cover                              |       | 1,2    | 14,3   |
| FFO to Debt <sup>1)</sup>                       | %     | 33,6   | 35,2   |

1) Berechnung → Finanzlage, Seite 41

#### A.32 Nettoliquidität (-)/Nettofinanzverschuldung (+)

| MIO €                                                                 | 2009   | 2010   |
|-----------------------------------------------------------------------|--------|--------|
| Langfristige Finanzschulden                                           | 6.699  | 6.275  |
| ⊕ Kurzfristige Finanzschulden                                         | 740    | 747    |
| ⊖ Finanzschulden                                                      | 7.439  | 7.022  |
| ⊖ Flüssige Mittel und Zahlungsmitteläquivalente                       | 3.064  | 3.415  |
| ⊖ Kurzfristige finanzielle Vermögenswerte                             | 1.894  | 655    |
| ⊖ Long-term Deposits <sup>1)</sup>                                    | 120    | 120    |
| ⊖ Positiver Marktwert langfristiger Finanzderivate <sup>1)</sup>      | 805    | 2.531  |
| ⊖ Finanzielle Vermögenswerte                                          | 5.883  | 6.721  |
| ⊖ Finanzschulden gegenüber den Minderheitsaktionären von Williams Lea | 23     | 28     |
| ⊖ Pflichtumtauschleihe <sup>2)</sup>                                  | 2.670  | 2.796  |
| ⊖ Besicherung Verkaufsoption <sup>2)</sup>                            | 1.200  | 1.248  |
| ⊕ Nettoeffekt aus der Bewertung der Postbank-Derivate <sup>3)</sup>   | 647    | 2.389  |
| ⊖ Nicht liquiditätswirksame Anpassungen                               | 3.246  | 1.683  |
| Nettoliquidität (-)/Nettofinanzverschuldung (+)                       | -1.690 | -1.382 |

1) In der Bilanz ausgewiesen unter den langfristigen finanziellen Vermögenswerten 2) In der Bilanz ausgewiesen unter den langfristigen Finanzschulden 3) In der Bilanz ausgewiesen unter den langfristigen finanziellen Vermögenswerten und Finanzschulden

# UNTERNEHMENSBEREICHE

## Überblick

### A.33 Kennzahlen der operativen Unternehmensbereiche

| MIO €                                                          | 2009<br>angepasst | 2010   | +/- % | Q4 2009<br>angepasst | Q4 2010 | +/- % |
|----------------------------------------------------------------|-------------------|--------|-------|----------------------|---------|-------|
| <b>BRIEF</b>                                                   |                   |        |       |                      |         |       |
| Umsatz                                                         | 13.912            | 13.821 | -0,7  | 3.776                | 3.809   | 0,9   |
| davon Brief Kommunikation                                      | 5.820             | 5.597  | -3,8  | 1.554                | 1.487   | -4,3  |
| Dialog Marketing                                               | 2.678             | 2.595  | -3,1  | 710                  | 713     | 0,4   |
| Presse Services                                                | 819               | 797    | -2,7  | 209                  | 209     | 0,0   |
| Mehrwertleistungen                                             | 328               | 339    | 3,4   | 95                   | 88      | -7,4  |
| Paket Deutschland                                              | 2.574             | 2.732  | 6,1   | 768                  | 835     | 8,7   |
| Filialen                                                       | 806               | 800    | -0,7  | 218                  | 217     | -0,5  |
| Global Mail                                                    | 1.679             | 1.735  | 3,3   | 453                  | 480     | 6,0   |
| Renten-Service                                                 | 98                | 102    | 4,1   | 21                   | 24      | 14,3  |
| Konsolidierung/Sonstiges                                       | -890              | -876   | 1,6   | -252                 | -244    | 3,2   |
| Ergebnis der betrieblichen Tätigkeit (EBIT) vor Einmaleffekten | 1.423             | 1.152  | -19,0 | 515                  | 257     | -50,1 |
| Ergebnis der betrieblichen Tätigkeit (EBIT)                    | 1.391             | 1.118  | -19,6 | 504                  | 227     | -55,0 |
| Umsatzrendite (%) <sup>1)</sup>                                | 10,0              | 8,1    | -     | 13,3                 | 6,0     | -     |
| Operativer Cashflow                                            | 1.156             | 1.044  | -9,7  | 634                  | 608     | -4,1  |
| <b>EXPRESS</b>                                                 |                   |        |       |                      |         |       |
| Umsatz                                                         | 9.917             | 11.111 | 12,0  | 2.672                | 2.904   | 8,7   |
| davon Europe                                                   | 5.207             | 4.960  | -4,7  | 1.367                | 1.270   | -7,1  |
| Americas                                                       | 1.473             | 1.831  | 24,3  | 391                  | 478     | 22,3  |
| Asia Pacific                                                   | 2.580             | 3.374  | 30,8  | 724                  | 897     | 23,9  |
| EEMEA (Eastern Europe, the Middle East and Africa)             | 1.054             | 1.216  | 15,4  | 280                  | 326     | 16,4  |
| Konsolidierung/Sonstiges                                       | -397              | -270   | 32,0  | -90                  | -67     | 25,6  |
| Ergebnis der betrieblichen Tätigkeit (EBIT) vor Einmaleffekten | 235               | 785    | >100  | 159                  | 239     | 50,3  |
| Ergebnis der betrieblichen Tätigkeit (EBIT)                    | -790              | 497    | -     | -358                 | 218     | -     |
| Umsatzrendite (%) <sup>1)</sup>                                | -8,0              | 4,5    | -     | -13,4                | 7,5     | -     |
| Operativer Cashflow                                            | -454              | 904    | >100  | 160                  | 251     | 56,9  |
| <b>GLOBAL FORWARDING, FREIGHT</b>                              |                   |        |       |                      |         |       |
| Umsatz                                                         | 11.243            | 14.341 | 27,6  | 3.098                | 3.898   | 25,8  |
| davon Global Forwarding                                        | 7.913             | 10.725 | 35,5  | 2.212                | 2.914   | 31,7  |
| Freight                                                        | 3.419             | 3.735  | 9,2   | 908                  | 1.018   | 12,1  |
| Konsolidierung/Sonstiges                                       | -89               | -119   | -33,7 | -22                  | -34     | -54,5 |
| Ergebnis der betrieblichen Tätigkeit (EBIT) vor Einmaleffekten | 275               | 390    | 41,8  | 70                   | 132     | 88,6  |
| Ergebnis der betrieblichen Tätigkeit (EBIT)                    | 174               | 383    | >100  | 6                    | 131     | >100  |
| Umsatzrendite (%) <sup>1)</sup>                                | 1,5               | 2,7    | -     | 0,2                  | 3,4     | -     |
| Operativer Cashflow                                            | 524               | 244    | -53,4 | 14                   | 141     | >100  |
| <b>SUPPLY CHAIN</b>                                            |                   |        |       |                      |         |       |
| Umsatz                                                         | 12.183            | 13.301 | 9,2   | 3.129                | 3.568   | 14,0  |
| davon Supply Chain                                             | 11.302            | 12.237 | 8,3   | 2.909                | 3.274   | 12,5  |
| Williams Lea                                                   | 881               | 1.062  | 20,5  | 222                  | 294     | 32,4  |
| Konsolidierung/Sonstiges                                       | 0                 | 2      | -     | -2                   | 0       | -     |
| Ergebnis der betrieblichen Tätigkeit (EBIT) vor Einmaleffekten | -132              | 274    | -     | -102                 | 59      | -     |
| Ergebnis der betrieblichen Tätigkeit (EBIT)                    | -216              | 233    | -     | -172                 | 43      | -     |
| Umsatzrendite (%) <sup>1)</sup>                                | -1,8              | 1,8    | -     | -5,5                 | 1,2     | -     |
| Operativer Cashflow                                            | 424               | 272    | -35,8 | 204                  | 110     | -46,1 |

1) EBIT ÷ Umsatz

## Unternehmensbereich BRIEF

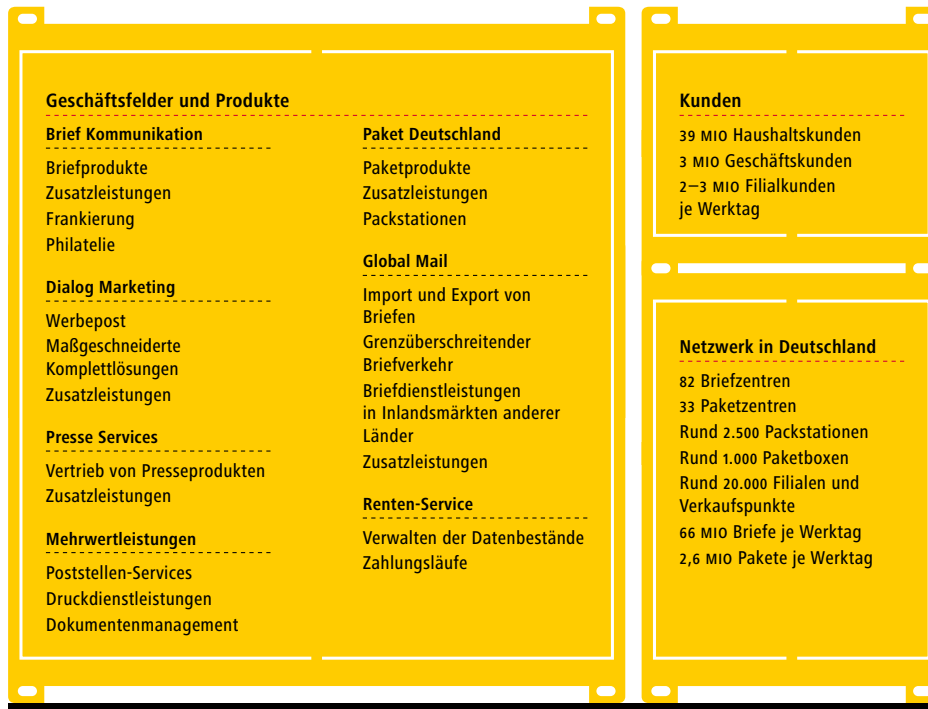

## GESCHÄFTSFELDER UND MARKTPPOSITIONEN

### Die Post für Deutschland

66 Millionen Briefe, die wir in Deutschland jeden Werktag zustellen, machen uns zum größten Postunternehmen Europas. Unser Angebot für Privat- und Geschäftskunden reicht vom Standardbrief über die Warensendung bis zu Zusatzleistungen wie Nachnahme oder Einschreiben. Briefmarken können heute in der Filiale, am Automaten, im Internet oder per SMS mit dem Mobiltelefon gekauft werden.

Im Juli 2010 haben wir unser Angebot für eine sichere, vertrauliche und verlässliche elektronische Kommunikation auf den Markt gebracht: den e-Postbrief. Innerhalb von vier Monaten haben sich bereits eine Million Privatkunden für dieses neue Produkt entschieden. Überdies haben die ersten 100 Geschäftskunden Verträge dafür abgeschlossen. Jeder Teilnehmer registriert sich zunächst und erhält eine Adresse mit Zugangsdaten. Nachdem er sich identifiziert hat, wird er zum Nutzer der Post im Internet. Das Besondere hierbei: Auch Kunden, die noch nicht an das elektronische Portal der Post angeschlossen sind, erreicht der e-Postbrief in seiner hybriden Variante. Hierfür drucken wir das elektronisch erstellte Schreiben aus und der Zusteller stellt es gewohnt verlässlich zu.

Der Schwerpunkt unseres Briefgeschäfts liegt in Deutschland. Hier ist der Briefmarkt seit Anfang 2008 vollständig liberalisiert. Seither hat sich der Wettbewerb verschärft. Zugleich schrumpft der nationale Briefmarkt, weil zunehmend elektronische Kommunikationsformen genutzt werden. Der Markt belief sich im Berichtsjahr auf rund 6,0 MRD €, 4,8 % weniger als im Vorjahr (6,3 MRD €). Unser Anteil ist auf 86,6 % leicht gesunken.

### A.34 Nationaler Markt für Briefkommunikation 2010

Marktvolumen: 6,0 MRD €

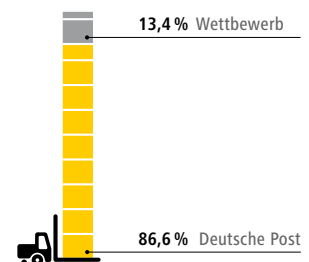

Quelle: Unternehmensschätzung



### A.35 Nationaler Markt für Dialogmarketing 2010

Marktvolumen: 18,7 MRD €

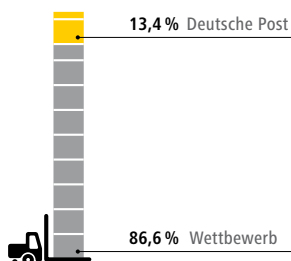

Quelle: Unternehmensschätzung

### Zielgruppengenau und medienübergreifend werben

Wir bieten Unternehmen Lösungen an, mit denen sie ihre Werbung selbst gestalten und drucken sowie das dafür benötigte Porto zum jeweils günstigsten Preis berechnen können. Dialogmarketing ist nur dann erfolgreich, wenn die Kunden vorhandene Adressen ständig aktualisieren können und wir alle Datenschutzbestimmungen streng einhalten. Wir stellen unseren Kunden Online-Tools und Dienstleistungen bereit, mit denen die Adressqualität gesichert wird oder Zielgruppen sich effizient ermitteln lassen. Bei Bedarf können Unternehmen Adressen in der ermittelten Zielgruppe für eigene Werbemaßnahmen von uns mieten. Zudem bieten wir unseren Kunden ein breites Portfolio an digitalen Dialogmarketing-Lösungen an, mit denen sie medienübergreifend und zielgruppengerecht werben können.

Der deutsche Markt für Dialogmarketing umfasst Werbepost, Telefon- und E-Mail-Marketing. Er ist im Berichtsjahr gegenüber dem Vorjahr um 3,1 % auf ein Volumen von 18,7 MRD € geschrumpft. Unternehmen haben ihre Werbeausgaben deutlich verringert, allen voran Versandhändler und Finanzdienstleister. Unseren Anteil in diesem stark fragmentierten Markt haben wir mit 13,4 % gehalten.

### A.36 Nationaler Markt für Pressepost 2010

Marktvolumen: 16,4 MRD Stück

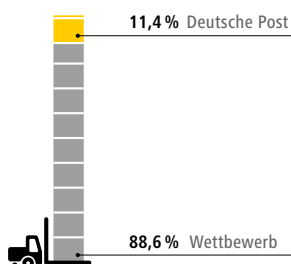

Quelle: Unternehmensschätzung

### Presseprodukte im Abonnement

Wir stellen Zeitungen und Zeitschriften flächendeckend und auf den Tag genau zu. Im Geschäftsfeld Presse Services bieten wir zwei Produkte an: Mit dem Postvertriebsstück versenden Verlage traditionell ihre abonnierten Auflagen. Die Pressesendung wird vorwiegend von Unternehmen genutzt, die Kunden- oder Mitarbeiterzeitschriften über uns verteilen. Als Zusatzleistungen bieten wir unter anderem die elektronische Aktualisierung von Adressen und ein Reklamations- und Qualitätsmanagement an. Daneben vertreiben wir mit dem Deutsche Post Leserservice als Partner der Zeitungs- und Zeitschriftenverlage erfolgreich Abonnements von 4.500 Zeitungen und Zeitschriften online und offline.

Das Gesamtvolumen des deutschen Marktes für Pressepost betrug im Jahr 2010 nach Unternehmensschätzung 16,4 MRD Stück, 3,5 % weniger als im Vorjahr. Presseerzeugnisse haben an Auflage verloren, die Gewichte sind jedoch stabil geblieben. Unsere Wettbewerber sind vornehmlich die Zustellgesellschaften der regionalen Tageszeitungsverlage. In einem schrumpfenden Gesamtmarkt konnten wir unseren Anteil von 11,4 % weiterhin halten.

### Mehrwertleistungen unterstützen Produktion des E-Postbriefs

Zum 1. Juli 2010 haben wir wesentliche Teile von Williams Lea Deutschland aus dem Unternehmensbereich SUPPLY CHAIN in den Unternehmensbereich BRIEF verlagert, über die wir im neuen Geschäftsfeld Mehrwertleistungen berichten. Unsere Kunden vertrauen uns Teile der Wertschöpfungskette ihrer Briefkommunikation an. Wir betreiben ihre Poststellen, drucken, kuvertieren und scannen für sie. Darüber hinaus übernimmt Williams Lea mit ihrer modernen IT-Plattform den Druck und die Kuvertierung für die hybride Variante unseres E-Postbriefs.

### Pakete rund um die Uhr aufgeben und abholen

Wir befördern werktätlich rund 2,6 Millionen Pakete in Deutschland. Für unsere Privat- und Geschäftskunden sind wir immer und überall verfügbar: Rund 20.000 Filialen und Verkaufspunkte, mehr als 2.500 Packstationen und rund 1.000 Paketboxen bieten ihnen die Möglichkeit, Pakete und Päckchen aufzugeben und abzuholen. Unsere Packstationen befinden sich in rund 1.600 Ortschaften. Damit können fast 90 % der Bundesbürger eine Packstation innerhalb von etwa 10 Minuten erreichen. Privatkunden können zudem im Internet Versandkartons kaufen, Pakete frankieren, Abholaufträge erteilen und Sendungen nachverfolgen.

Auch unsere Leistungen für Geschäftskunden entwickeln wir ständig weiter. Im stark wachsenden Internethandel legen Anbieter wie Kunden Wert darauf, dass Bestellungen schnell, einfach und sicher ausgeführt werden. Daher befördern wir für sie nicht nur Kataloge, Waren und Retouren. Wir unterstützen sie von der Bestellung über Kauf und Versand bis zur Absicherung gegen Zahlungsausfälle: zum Beispiel mit unserem neuen Shopping-Portal „MeinPaket.de“, über das vor allem kleinere und mittelgroße Händler Produkte im Internet platzieren können. Neben Vielseitigkeit und hohem Erlebniswert durch redaktionelle Zusatzinformationen steht bei „MeinPaket.de“ Sicherheit für Händler und Käufer im Vordergrund. Ein zentrales Check-out-Modul ermöglicht den Kunden, Einkäufe sicher zu bezahlen.

Dem grenzüberschreitenden Internethandel bieten wir neben dem klassischen Export von Paketen seit November 2010 zunächst in zehn Ländern Europas auch Retouren an. Dieses Angebot werden wir im Jahr 2011 weiter ausbauen.

Der deutsche Paketmarkt belief sich im Jahr 2010 auf ein Volumen von rund 6,8 MRD €, etwa 7,9 % mehr als im Vorjahr. Der Internethandel ist seit Jahren einer seiner zentralen Wachstumstreiber. Weder die Finanz- und Wirtschaftskrise noch die Insolvenz des Versandhauses Quelle konnten das Wachstum in der für Paketdienste wichtigen Kundengruppe Versandhandel bremsen. Immer mehr Deutsche kaufen Waren im Internet ein; zudem hat sich zuletzt das Konsumklima verbessert. Im Ergebnis wuchs der Internethandel im Jahr 2010 erneut zweistellig. Auch der B2B-Markt hat vom konjunkturellen Aufschwung profitiert. Insgesamt lag unser Marktanteil im Berichtsjahr mit rund 39 % auf Vorjahresniveau.

### Internationaler Versand von Briefen und Päckchen

Wir befördern Briefe und bieten Dialogmarketing grenzüberschreitend an. Für Geschäftskunden sind wir außerdem in bedeutenden nationalen Briefmärkten tätig, darunter in den Vereinigten Staaten, Großbritannien, den Niederlanden und Spanien.

Unseren Kunden bieten wir eine hohe Servicequalität: Bei den Laufzeiten zählen wir international zur Spitzengruppe der Postunternehmen. Von unseren Wettbewerbern unterscheiden wir uns durch innovative Produkte, mit denen wir auf die Anforderungen von Kunden und Märkten reagieren. So bieten wir schriftliche Kommunikation physisch, hybrid und voll elektronisch an – je nach Wunsch des Kunden. Kunden mit Sitz im Ausland nutzen unser Know-how, um auf dem deutschen Markt erfolgreich zu handeln. Auf dem asiatischen Markt, der als wesentlicher Treiber für grenzüberschreitende Sendungsmengen gilt, haben wir ein neues Produkt eingeführt, ein Päckchen für den Internethandel.

#### A.37 Nationaler Paketmarkt 2010

Marktvolumen: 6,8 MRD €

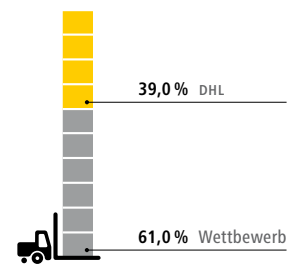

Quelle: Unternehmensschätzung

→ Glossar, Seite 232

#### A.38 Internationaler Briefmarkt (outbound) 2010

Marktvolumen: 6,4 MRD €

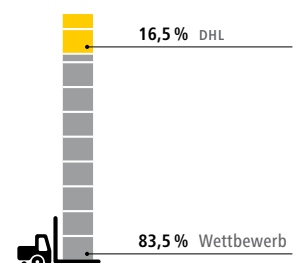

Quelle: Unternehmensschätzung

Weltweit lag das Marktvolumen für den internationalen Briefverkehr (outbound) im Jahr 2010 bei rund 6,4 MRD €. Die anhaltende Wirtschaftsschwäche und ein schärferer Wettbewerb haben das Geschäftsumfeld im Berichtsjahr geprägt. Trotz dieses schwierigen Marktumfelds konnten wir uns behaupten und Marktanteile zurückgewinnen. Insgesamt erwarten wir für das Jahr 2010 einen Marktanteil von 16,5 %.

## UMSATZ- UND ERGEBNISENTWICKLUNG

### Umsatz leicht unter Vorjahresniveau

Zum 1. Juli 2010 haben wir wesentliche Teile von Williams Lea Deutschland aus dem Unternehmensbereich SUPPLY CHAIN in den Unternehmensbereich BRIEF verlagert, über die wir im neuen Geschäftsfeld Mehrwertleistungen berichten. Die Vorjahreszahlen der Segmentberichterstattung wurden entsprechend angepasst.

Im Berichtsjahr lag der Umsatz mit 13.821 MIO € bei 1,3 zusätzlichen Arbeitstagen leicht unter dem Niveau des Vorjahres (13.912 MIO €). Seit dem 1. Juli 2010 müssen wir Mehrwertsteuer auf Umsätze mit Geschäftskunden erheben. Um diese wichtige Kundengruppe zu halten, haben wir unsere Rabattstaffeln erhöht, wodurch unser Umsatz im zweiten Halbjahr belastet wurde. Positive Währungseffekte fielen im Gesamtjahr in Höhe von 37 MIO € an.

### Ausgleich für Mehrwertsteuer belastet Briefgeschäft

Im Geschäftsfeld Brief Kommunikation ist der Jahresumsatz von 5.820 MIO € auf 5.597 MIO € zurückgegangen, vor allem weil wir mit der Mehrwertsteuererhebung für Geschäftskunden unsere Rabatte erhöht haben. Wir haben qualitätsbewusste Kunden gehalten und zurückgewonnen, aber auch preissensible Kunden an den Wettbewerb verloren.

Im regulierten Briefbereich haben wir die Preise unter der Maßgabe des Price-Cap-Verfahrens stabil gehalten. Unser Porto zählt nach wie vor zu den günstigsten in Europa – so das Ergebnis einer von uns erhobenen Vergleichsstudie. Sie bezieht neben den Nominalpreisen für einen Standardbrief (20 Gramm) der schnellsten Kategorie auch wesentliche makroökonomische Faktoren mit ein, wie Kaufkraft und Arbeitskosten.

**A.39 Brief Kommunikation: Volumina**

| MIO Stück             | 2009         | 2010         | +/- %       | Q4 2009      | Q4 2010      | +/- %      |
|-----------------------|--------------|--------------|-------------|--------------|--------------|------------|
| Geschäftskundenbriefe | 6.663        | 6.566        | -1,5        | 1.732        | 1.742        | 0,6        |
| Privatkundenbriefe    | 1.292        | 1.260        | -2,5        | 386          | 378          | -2,1       |
| <b>Gesamt</b>         | <b>7.955</b> | <b>7.826</b> | <b>-1,6</b> | <b>2.118</b> | <b>2.120</b> | <b>0,1</b> |

### Umsatz und Volumina der Werbesendungen zuletzt leicht gestiegen

Die Werbeausgaben unserer Kunden sind zum Jahresende zwar wieder leicht angestiegen, im Berichtsjahr insgesamt aber gering geblieben. Vor allem der Versandhandel investiert weniger in papiergebundene Werbung und nutzt verstärkt das Internet, um neue Kunden zu gewinnen. Zudem hatte es im Vorfeld der Bundestagswahl 2009 einen erhöhten Versand von Wahlunterlagen gegeben. Insgesamt sind die Volumina bei adressierten wie unadressierten Werbesendungen im Berichtsjahr gesunken. Der Umsatz ist mit 2.595 MIO € um 3,1 % hinter dem Vorjahr (2.678 MIO €) zurückgeblieben.

Im vierten Quartal sehen wir einen leichten Umsatz- und Volumenanstieg bei den Werbesendungen, vor allem bei unserem Produkt „Einkaufaktuell“.

#### A.40 Dialog Marketing: Volumina

| MIO Stück                    | 2009          | 2010          | +/- %       | Q4 2009      | Q4 2010      | +/- %      |
|------------------------------|---------------|---------------|-------------|--------------|--------------|------------|
| Adressierte Werbesendungen   | 6.323         | 6.074         | -3,9        | 1.732        | 1.697        | -2,0       |
| Unadressierte Werbesendungen | 4.580         | 4.285         | -6,4        | 1.209        | 1.247        | 3,1        |
| <b>Gesamt</b>                | <b>10.903</b> | <b>10.359</b> | <b>-5,0</b> | <b>2.941</b> | <b>2.944</b> | <b>0,1</b> |

#### Sinkende Umsätze auf dem Markt für Pressepost

Im Geschäftsfeld Presse Services lag der Umsatz im Berichtsjahr mit 797 MIO € um 2,7 % unter dem Wert des Vorjahres (819 MIO €). Auf dem deutschen Markt für Pressepost sind die Auflagen weiter gesunken und Titel eingestellt worden; die durchschnittlichen Heftgewichte sind dagegen stabil geblieben. Im vierten Quartal hat sich der Umsatz auf dem vergleichbaren Vorjahresniveau stabilisiert.

#### Mehr Umsatz mit Mehrwertleistungen

Mit 339 MIO € überstieg der Umsatz im neuen Geschäftsfeld Mehrwertleistungen den Vorjahreswert (328 MIO €) um 3,4 %. Dieses Wachstum ist im Wesentlichen auf Zuwächse in den Bereichen Dokumenten- und Poststellenmanagement zurückzuführen. Im vierten Quartal ist der Umsatz aufgrund von Verschiebungen bei der Abrechnung von Großprojekten verglichen mit dem Vorjahr von 95 MIO € auf 88 MIO € gesunken.

#### Paketgeschäft profitiert vom Internethandel

Im Geschäftsfeld Paket Deutschland überstieg der Umsatz im Berichtsjahr mit 2.732 MIO € das hohe Niveau des Vorjahres (2.574 MIO €) um 6,1 %. Noch deutlicher fiel der Umsatzzanstieg im vierten Quartal aus. Hier zeigt sich, dass der Versandhandel vom wirtschaftlichen Aufschwung profitiert. Die Verluste aus der Insolvenz des Kunden Quelle GmbH konnten mehr als ausgeglichen werden. Daneben wächst der Versandhandel mit dem zunehmenden Internethandel, was sich in den gestiegenen Volumina der Geschäftskunden widerspiegelt.

#### A.41 Paket Deutschland: Volumina

| MIO Stück             | 2009       | 2010       | +/- %      | Q4 2009    | Q4 2010    | +/- %      |
|-----------------------|------------|------------|------------|------------|------------|------------|
| Geschäftskundenpakete | 648        | 680        | 4,9        | 183        | 202        | 10,4       |
| Privatkundenpakete    | 113        | 113        | 0,0        | 37         | 37         | 0,0        |
| <b>Gesamt</b>         | <b>761</b> | <b>793</b> | <b>4,2</b> | <b>220</b> | <b>239</b> | <b>8,6</b> |

#### Filialumsatz leicht gesunken

Der in den rund 20.000 Filialen und Verkaufspunkten erzielte Umsatz ist vor allem durch reduzierte Innenumsätze leicht von 806 MIO € auf 800 MIO € gesunken.



### Umsatz im internationalen Briefgeschäft gestiegen

Im Geschäftsfeld Global Mail lag der Umsatz im Berichtsjahr aufgrund der sich zunehmend erholenden Weltwirtschaft und positiver Währungseffekte mit 1.735 MIO € um 3,3 % über dem Vorjahresniveau (1.679 MIO €); der Umsatz im vierten Quartal ist sogar um 6,0 % gestiegen. Die Sendungsvolumina entwickelten sich rückläufig. Dies ist auf den Verkauf unseres französischen Tochterunternehmens DHL Global Mail Services SAS im Jahr 2009 und rückläufige Volumina im Geschäft mit unadressierten Sendungen in den Niederlanden zurückzuführen.

#### A.42 Brief International: Volumina

| MIO Stück   |       |       |       |         |         |       |
|-------------|-------|-------|-------|---------|---------|-------|
|             | 2009  | 2010  | +/- % | Q4 2009 | Q4 2010 | +/- % |
| Global Mail | 6.654 | 6.005 | -9,8  | 1.705   | 1.497   | -12,2 |

### Ergebnis unter anderem durch Mehrwertsteuereinführung belastet

Das EBIT für den Unternehmensbereich ist im Gesamtjahr 2010 mit 1.118 MIO € um 19,6 % hinter dem Vorjahreswert (1.391 MIO €) zurückgeblieben, im vierten Quartal betrug es 227 MIO € nach 504 MIO € im Vorjahr. Neben der allgemeinen Marktentwicklung haben besonders der Mehrwertsteuereffekt sowie die Aufwendungen für den Aufbau unserer digitalen Geschäfte unser Ergebnis im zweiten Halbjahr wesentlich belastet. Bereinigt um Einmaleffekte von -34 MIO € (Vorjahr: -32 MIO €), die vorwiegend für die Schließung unserer Tochtergesellschaft Interlanden in den Niederlanden angefallen sind, ist das EBIT im Berichtsjahr um 19,0 % auf 1.152 MIO € (Vorjahr: 1.423 MIO €) gesunken. Die Umsatzrendite lag für das Gesamtjahr bei 8,1 %.

Auch der operative Cashflow spiegelt mit 1.044 MIO € (Vorjahr: 1.156 MIO €) die Effekte aus der Marktentwicklung, der Mehrwertsteuereinführung und die Aufwendungen für den Aufbau unserer digitalen Geschäfte wider. Das Working Capital betrug -895 MIO € und lag damit auf dem niedrigen Niveau des Vorjahres (-878 MIO €).

## Unternehmensbereich EXPRESS

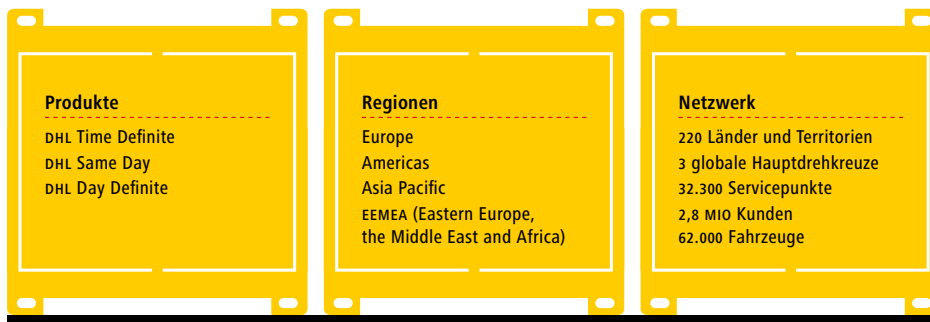

## GESCHÄFTSFELDER UND MARKTPPOSITIONEN

### Weltumspannendes Netz für zeitkritische Sendungen

Der Unternehmensbereich EXPRESS befördert eilige Dokumente und Waren zuverlässig von Tür zu Tür – auf festen Routen und mit standardisierten Abläufen. Unser Netzwerk umspannt mehr als 220 Länder und Territorien, in denen rund 100.000 Mitarbeiter über 2,8 Millionen Kunden bedienen. Kunden können Sendungen, die wir garantiert vor 12 Uhr zustellen, in 675 Städte der Welt verschicken.

Als globaler Netzwerkbetreiber wissen wir, dass die Qualität unserer Leistungen und die Zufriedenheit der Kunden über den Erfolg entscheiden. Daher verbessern wir kontinuierlich unseren Service, um die den Kunden erteilten Zusagen einzuhalten. Im Berichtsjahr wurde uns in einer unabhängigen Studie der Unternehmensberatung PA Consulting bestätigt, der zuverlässigste Dienstleister für Express-Sendungen weltweit zu sein. DHL ist Weltmarktführer im Bereich internationaler Expressdienstleistungen.

### Standardisierte zeitkritische Produkte

Unser Kerngeschäft sind internationale zeitkritische Kurier- und Express-Sendungen. Mit „Time Definite“ und „Same Day“ bieten wir Dienste mit entweder zeitgenauer oder schnellstmöglicher Zustellung an. Ergänzt wird das Angebot in einzelnen Märkten um „Day Definite“ – das Geschäft mit der taggenauen Zustellung – sowie um spezielle Dienstleistungen wie Customs Brokerage, Clinical Trial oder Repair and Return.

In der Regel bestellen Kunden Transporte über unsere Servicenummern oder das Internet. Kunden erreichen uns auch über unser umfangreiches Netz an Servicepunkten, das in Deutschland primär aus Filialen der Deutschen Post besteht. An diesen Verkaufspunkten vertreiben wir zudem seit dem Jahr 2010 ein internationales Time-Definite-Produkt namens „DHL Express Easy“. Es ist besonders einfach zu handhaben und erleichtert weniger geübten Kunden Versand und Bezahlung. Fortschritte haben wir auch im Geschäft mit speziellen Industrielösungen gemacht – so haben wir für unsere Dienstleistung „DHL Medical Express“ neue Kunden gewonnen.

In einer Zeit, in der die Auswirkungen der Globalisierung auf Klima und Natur besonders in der Logistik kritisch diskutiert werden, bieten wir unter dem Namen „GoGreen“ seit dem Jahr 2006 als erster Expressdienstleister in mehr als 30 Ländern einen klimaneutralen Versandservice an. Zudem besteht unsere Flotte in einigen Märkten bereits zum Teil aus Fahrzeugen, die mit Biomethan betrieben werden.

➔ Glossar, Seite 232

➔ Unternehmerische Verantwortung, Seite 77

### Unsere Flugzeugflotte – wirtschaftlich und ökologisch

Im Jahr 2010 haben wir unsere AeroLogic-Flugzeugflotte um vier weitere Boeing-Maschinen des Typs 777 erweitert. Damit besteht die gegenwärtige interkontinentale Flotte aus acht Maschinen des Typs 777, drei des Typs 767 und neun des Typs 747. Bis zum Jahr 2012 sollen noch drei weitere Flugzeuge des Typs 767 hinzukommen. Alle Maschinen entsprechen den neuesten ökologischen Anforderungen.

Während der Ladefaktor im Branchendurchschnitt bei rund 54 % liegt, beträgt er auf unseren interkontinentalen Strecken etwa 80 %. Mit der optimalen Auslastung der Maschinen handeln wir im Sinne der Nachhaltigkeitsstrategie des Konzerns und tragen dazu bei, die Klimaschutzziele zu erfüllen. Mit der erweiterten Flugzeugflotte haben wir zudem unsere eigene Kapazität um 40 % aufgestockt, um noch größere Auftragsmengen gleichzeitig abfertigen zu können.

Außerdem haben wir mit mehr als 450 angeflogenen Flughäfen außerhalb der Vereinigten Staaten die größte Reichweite im Wettbewerbsvergleich. Durch neue Direktflüge auf den Strecken Hongkong–Leipzig, Paris–Cincinnati und Frankfurt/Leipzig–Cincinnati können wir den Kunden in Europa beziehungsweise in den Vereinigten Staaten eine Zustellung am nächsten Tag anbieten.

### Im globalen Expressgeschäft gut aufgestellt

DHL ist im internationalen Expressgeschäft schon seit vielen Jahren weltweit sehr gut positioniert und in allen Regionen außerhalb Nordamerikas Marktführer für internationale Express-Sendungen. Zudem bauen wir unsere Präsenz und Infrastruktur in Wachstumsmärkten wie Asien weiter aus, beispielsweise durch den Bau des nordasiatischen Drehkreuzes Schanghai.

#### A.43 Europäischer internationaler Expressmarkt 2009<sup>1)</sup>, 2<sup>2)</sup>: Top 4

Marktvolumen: 5.288 MIO €

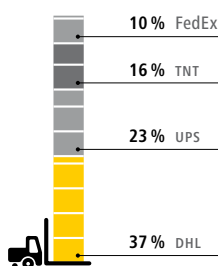

1) Umfasst das Expressprodukt TDI

2) Länderbasis: BE, CH, DE, ES, FR, IT, NL, PL, SE, UK

Quelle: MRSC, Geschäftsberichte und Sekundäranalyse

### Führende Position in Europa behauptet

Im Krisenjahr 2009 haben wir unsere führende Stellung im internationalen zeitkritischen Expressbereich mit einem Marktanteil von rund 37 % behauptet. Dies haben wir durch stetig verbesserten Service erreicht. Ausdrücklich haben uns die Kunden für unseren Einsatz gelobt, als die Aschewolke des isländischen Vulkans Eyjafjallajökull den Flugbetrieb empfindlich beeinträchtigte. Die aktuelle Studie der PA Consulting belegt zudem, dass wir für Sendungen nach Asien beim Thema Zuverlässigkeit vor unseren Wettbewerbern liegen – ein weiterer Grund für die Loyalität unserer Kunden.

Im Jahr 2010 haben wir unser Portfolio bereinigt und das Geschäft mit nationalen taggenauen Sendungen in Großbritannien und Frankreich verkauft. Seither konzentrieren sich unsere lokalen Teams erfolgreich auf das Kerngeschäft des Produktbereichs „Time Definite“.

Durch den Ausbau des AeroLogic-Express-Netzwerkes zwischen Europa und den Regionen Asien und Emerging Markets gewinnt das Drehkreuz Leipzig, über das mittlerweile mehr als 90 % der internationalen Sendungen in Europa laufen, ebenfalls international an Bedeutung.

### Internationales Angebot in der Region Americas erweitert

Im Berichtsjahr haben wir unser Serviceversprechen voll und ganz eingehalten. DHL gilt als der zuverlässigste Anbieter internationaler Sendungen zwischen Nordamerika und Asien. Neue wie bestehende Kunden honorieren dies mit großer Loyalität. Die Rückbesinnung auf das internationale Expressgeschäft und der Rückzug aus dem nationalen US-Expressgeschäft haben sich als erfolgreich erwiesen.

Des Weiteren können unsere Kunden in den Vereinigten Staaten seit Oktober 2010 Sendungen, die vor 9 Uhr bzw. vor 12 zugestellt werden, nach Europa, Lateinamerika, in den Mittleren Osten und nach Asien verschicken. Auch in Sachen Umweltschutz können wir Fortschritte verzeichnen: Im Berichtsjahr haben wir begonnen, unsere Flotte durch Elektro- und Hybridfahrzeuge zu ersetzen.

In den weiteren Subregionen der Region Americas – Lateinamerika (Mexiko, Zentralamerika, Brasilien und das Spanisch sprechende Südamerika), Kanada und die Karibik – haben wir uns ebenfalls gut behauptet. Mit dem Ausbau unseres Hubs in Panama konnten wir unsere Kapazität mehr als verdoppeln und zugleich die Dichte der Verbindungen erhöhen. Im Berichtsjahr hat unser Katastrophenteam, das „Disaster Response Team“, in den von Erdbeben erschütterten Gebieten in weniger als 48 Stunden Hilfe geleistet, was extern besonders anerkannt wurde.

### DHL dominiert weiter den asiatischen Expressmarkt

Asien bleibt der Wachstumsmotor für das Expressgeschäft. Wir haben unsere führende Marktposition im Bereich „Time Definite International“ mit 34 % behauptet.

Nach der genannten Studie der PA Consulting sind wir der verlässlichste Kurierdienstleister für Sendungen innerhalb Asiens und auf interkontinentalen Strecken von und nach Asien.

In China, einem Kernmarkt der Region Asia Pacific, hat DHL sich nachweislich als der zuverlässigste und schnellste internationale Expressdienstleister erwiesen. Zudem arbeitet unser globales Management eng mit erfahrenen lokalen Managern zusammen. So wurde unser Vorstandsmitglied Ken Allen in den Vorstand des Gemeinschaftsunternehmens von DHL und Sinotrans berufen.

Was die Zufriedenheit der Kunden betrifft, liegt DHL in Indien und in China in der Gesamtwertung wie auch in entscheidenden Schlüsselkategorien vor den Wettbewerbern. Dies unterstreichen zahlreiche Auszeichnungen, die wir in der Region gewonnen haben. Zwei der drei Länder weltweit, in denen wir höchste Werte für die Qualität unseres Kundenservice erreichen, liegen in Asien.

### Führende Position in aufstrebenden Märkten behauptet

Auch in der Region EEMEA (Eastern Europe, the Middle East and Africa) haben wir unsere Marktführerschaft im internationalen zeitkritischen Expressbereich mit einem Anteil von 46 % behauptet, was nicht zuletzt mit unserer langjährigen Präsenz und unserer guten Infrastruktur zu erklären ist. Neben einem gut ausgebauten Luftfrachtnetz unterhalten wir ein effizientes Landverkehrsnetz, das bereichsübergreifend genutzt wird.

Im Jahr 2010 konnten wir unser 30-jähriges Bestehen in Katar und sogar unser 35-jähriges Jubiläum im Libanon feiern – zwei Belege für unsere Pionierleistung.

#### A.44 Amerikanischer internationaler Expressmarkt 2009<sup>1), 2)</sup>: Top 4

Marktvolumen: 4.018 MIO €

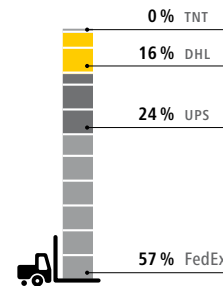

1) Umfasst das Expressprodukt TDI

2) Länderbasis: CA, MX, BR, US

Quelle: MRSC, Geschäftsberichte und Sekundäranalyse

#### A.45 Asiatisch-pazifischer internationaler Expressmarkt 2009<sup>1), 2)</sup>: Top 4

Marktvolumen: 4.361 MIO €

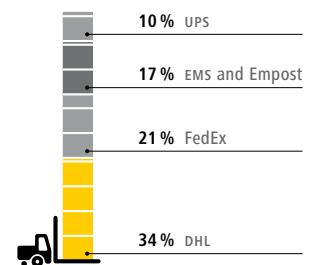

1) Umfasst das Expressprodukt TDI

2) Länderbasis: AU, CN, HK, IN, JP, KR, SG

Quelle: MRSC, Geschäftsberichte und Sekundäranalyse

#### A.46 Internationaler Expressmarkt der Region EEMEA 2009<sup>1), 2)</sup>: Top 4

Marktvolumen: 360 MIO €

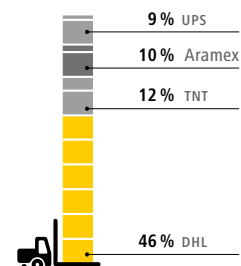

1) Umfasst das Expressprodukt TDI

2) Länderbasis: AE, RU, ZA

Quelle: MRSC, Geschäftsberichte und Sekundäranalyse

## UMSATZ- UND ERGEBNISENTWICKLUNG

### Im internationalen Geschäft gut behauptet

Der im Unternehmensbereich EXPRESS erzielte Umsatz ist im Geschäftsjahr 2010 gegenüber dem Vorjahr um 12,0 % auf 11.111 MIO € (Vorjahr: 9.917 MIO €) gestiegen. Erreicht haben wir dies vor allem mit Hilfe der sich weiter erholenden Weltwirtschaft, einer verbesserten Servicequalität und unserer Ausrichtung auf das internationale Expressgeschäft. Der Umsatz hat sich um 9,8 % erhöht, bereinigt man ihn um positive Währungseffekte in Höhe von 612 MIO €, die Übernahme der Shanghai Quanyi Express Co. Ltd. und den Verkauf des nationalen taggenauen Geschäfts in Großbritannien und Frankreich.

Hauptgrund für das organische Wachstum ist der Anstieg der täglichen Sendungsvolumina im Produktbereich TDI um 6,0 %; zudem haben wir höhere Erlöse aus Treibstoffzuschlägen erzielt. Das Gewicht je Sendungseinheit im Produktbereich TDI konnte gegenüber dem Vorjahr deutlich um 11,4 % gesteigert werden und liegt signifikant über dem Niveau vor der Wirtschaftskrise – ein Beleg dafür, dass wir uns im internationalen Geschäft auch weiterhin behaupten.

Im vierten Quartal ist der Umsatz organisch um 7,5 % und damit etwas weniger als im Gesamtjahr gewachsen, weil sich im Vergleichszeitraum des Vorjahres die Wirtschaft bereits wieder zu erholen begonnen hatte. Die täglichen Sendungsvolumina im Produktbereich TDI sind um 6,4 % gestiegen. Vornehmlich durch den Verkauf des nationalen taggenauen Geschäfts in Großbritannien und Frankreich waren Umsatz und Volumina im Produktbereich DDD rückläufig.

**A.47 EXPRESS: Umsatz nach Produkten**

| MIO € je Tag                      | 2009<br>angepasst | 2010 | +/- % | Q4 2009<br>angepasst | Q4 2010 | +/- % |
|-----------------------------------|-------------------|------|-------|----------------------|---------|-------|
| Time Definite International (TDI) | 22,5              | 24,9 | 10,7  | 24,4                 | 26,3    | 7,8   |
| Time Definite Domestic (TDD)      | 4,4               | 4,5  | 2,3   | 4,8                  | 4,8     | 0,0   |
| Day Definite Domestic (DDD)       | 6,2               | 4,5  | -27,4 | 6,4                  | 4,0     | -37,5 |

**A.48 EXPRESS: Volumina nach Produkten**

| Tausend Stück je Tag              | 2009<br>angepasst | 2010 | +/- % | Q4 2009<br>angepasst | Q4 2010 | +/- % |
|-----------------------------------|-------------------|------|-------|----------------------|---------|-------|
| Time Definite International (TDI) | 463               | 491  | 6,0   | 487                  | 518     | 6,4   |
| Time Definite Domestic (TDD)      | 589               | 643  | 9,2   | 634                  | 679     | 7,1   |
| Day Definite Domestic (DDD)       | 771               | 501  | -35,0 | 827                  | 468     | -43,4 |

### Konsolidierungen in der Region Europe

In der Region Europe hat sich der Umsatz im Berichtsjahr um 4,7 % auf 4.960 MIO € (Vorjahr: 5.207 MIO €) verringert. Ursache hierfür war der Verkauf des nationalen taggenauen Geschäfts in Großbritannien und Frankreich. Bereinigt darum und um positive Währungseffekte von 93 MIO €, die zum Großteil aus der Geschäftstätigkeit in Mitteleuropa, Großbritannien und Skandinavien stammen, ist der Umsatz organisch um 1,4 % gestiegen.



Auch im vierten Quartal hat sich der Umsatz organisch mit einem Zuwachs um 3,1 % gegenüber dem Vorjahr positiv entwickelt, wozu die täglichen Sendungsvolumina im Produktbereich TDI wesentlich beigetragen haben: Sie sind mit 7,0 % noch stärker gewachsen als in den ersten drei Quartalen und stiegen somit auf ein höheres Niveau als vor dem Krisenjahr 2009.

#### **Umsatzzuwächse in der Region Americas**

Der Umsatz der Region Americas übertraf im Berichtsjahr mit 1.831 MIO € den Vorjahreswert (1.473 MIO €) um 24,3 %. Darin enthalten sind positive Währungseffekte in Höhe von 114 MIO €. Bereinigt darum ist der Umsatz organisch immer noch um beachtliche 16,6 % gestiegen. Vor allem das US-Geschäft lag mit einem organischen Umsatzwachstum von 24,7 % erheblich über unseren Erwartungen. Auch im vierten Quartal hielt dieser erfreuliche Wachstumstrend an.

#### **Erheblich höhere Volumina in der Region Asia Pacific**

In der Region Asia Pacific haben wir im Berichtsjahr von der rasanten Konjunktur-entwicklung profitiert und unseren Umsatz deutlich um 30,8 % auf 3.374 MIO € (Vorjahr: 2.580 MIO €) gesteigert. Bereinigt um positive Währungseffekte in Höhe von 331 MIO € und die Übernahme der Shanghai Quanyi Express Co. Ltd. übertraf der Umsatz mit einem Plus von 16,9 % die allgemeine Konjunkturlage der Region. Ursachen hierfür sind die über alle Produktbereiche hinweg erheblich höheren Sendungsvolumina sowie gestiegene Erlöse aus Treibstoffzuschlägen.

#### **Geschäft in der Region EEMEA stetig verbessert**

Das Geschäft in der Region EEMEA (Eastern Europe, the Middle East and Africa) hat im Jahr 2010 weiter zugelegt. Der Umsatz ist um 15,4 % auf 1.216 MIO € (Vorjahr: 1.054 MIO €) gewachsen. Bereinigt um positive Währungseffekte in Höhe von 74 MIO € ist der Umsatz organisch um 8,3 % gewachsen. In allen Produktbereichen haben sich die täglichen Sendungsvolumina kontinuierlich verbessert.

#### **Ergebnis vor Einmaleffekten signifikant höher**

Die Neuausrichtung unseres Expressgeschäfts schreitet weiter planmäßig voran. Der Umsatz ist verglichen mit dem Vorjahr deutlich gestiegen und die erzielten Kosteneinsparungen schlagen sich in unserem Ergebnis nieder. Das EBIT für den Unternehmensbereich ist von -790 MIO € im Vorjahr auf 497 MIO € gestiegen. Bereinigt um Restrukturisierungskosten hat sich das EBIT signifikant um 550 MIO € auf 785 MIO € (Vorjahr: 235 MIO €) bei einer Marge von 7,1 % (Vorjahr: 2,4 %) verbessert.

Im vierten Quartal 2010 hat sich das EBIT im Vergleich zum Vorjahr von -358 MIO € auf 218 MIO € erhöht. Bereinigt um Restrukturisierungskosten wurde im vierten Quartal ein EBIT von 239 MIO € (Vorjahr: 159 MIO €) bei einer Marge von 8,2 % (Vorjahr: 6,0 %) erzielt.

Der operative Cashflow, in dem der Mittelabfluss aus Restrukturierungen enthalten ist, hat sich deutlich verbessert: im Gesamtjahr von -454 MIO € auf 904 MIO € und im vierten Quartal von 160 MIO € auf 251 MIO €. Während das operative Ergebnis erheblich gestiegen ist, konnten die Restrukturisierungskosten im Vorjahresvergleich gesenkt werden.

## Unternehmensbereich GLOBAL FORWARDING, FREIGHT

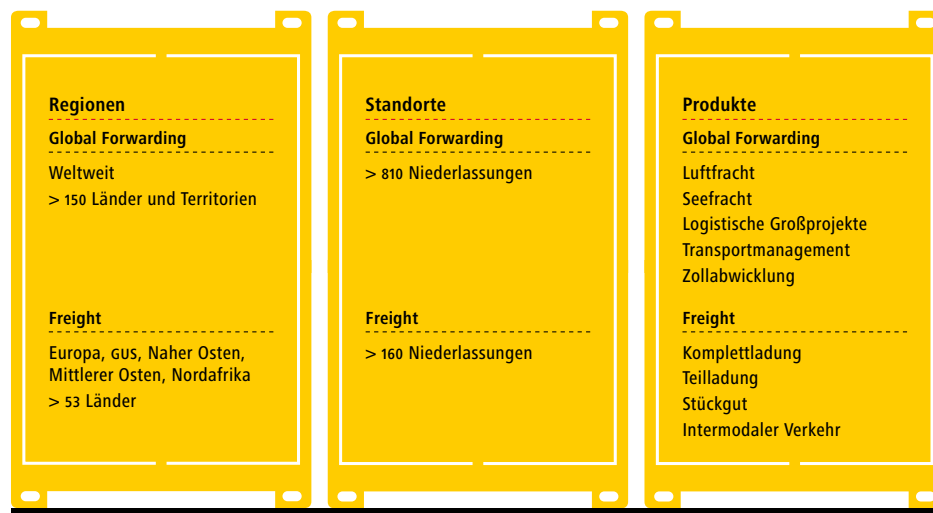

## GESCHÄFTSFELDER UND MARKTPPOSITIONEN

### Weltweit individuelle Transportlösungen

Mit den Geschäftsfeldern Global Forwarding und Freight ist DHL der weltweit führende Anbieter für Luft- und Seefracht und einer der führenden Landfrachtspediteure in Europa, dem Mittleren Osten und Nordafrika. Wir entwickeln individuelle Transportlösungen für unsere Kunden, stellen Kapazitäten bereit und koordinieren den Versand von Waren und Informationen in mehr als 150 Ländern. Dabei setzen wir auf die Kompetenz von rund 41.000 Mitarbeitern sowie auf verlässliche Partner.

Wir makeln als Spediteur zwischen Kunden und Frachtunternehmen, bündeln deren Nachfrage und erzielen ein Volumen, mit dem wir Laderaum und Charterkapazitäten bei Fluggesellschaften, Reedereien und Frachtführern zu wettbewerbsfähigen Konditionen sichern können. Dabei nutzen wir auch die Luftfrachtkapazitäten des Unternehmensbereichs EXPRESS. Da wir Transportleistungen nicht selbst erbringen, sondern einkaufen, können wir unser Geschäft mit sehr niedrigem Anlagevermögen betreiben.

A.49 Luftfrachtmarkt 2009<sup>1)</sup>: Top 4

Tausend Tonnen<sup>2)</sup>

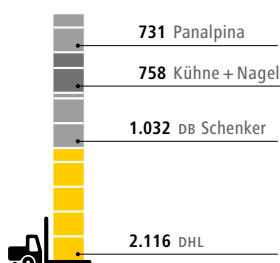

1) Darstellung der Marktanteile geändert, da Marktvolumendaten durch die Krise verzerrt wurden und die Forschungsinstitute die Marktgröße inkonsistent definieren.

2) Daten basieren ausschließlich auf Export-Frachttonnen.

Quelle: Geschäftsberichte, Pressemitteilungen und Unternehmensschätzungen

### Weltmarktführer in der Luftfracht und Nummer zwei in der Seefracht

DHL ist im Geschäftsfeld Global Forwarding der weltweit führende Anbieter von Luftfracht und einer der führenden Anbieter für Seefracht. Rund 30.000 Mitarbeiter sorgen dafür, dass Sendungen aller Art mit Flugzeug oder Schiff befördert werden. Unsere Logistiklösungen umfassen die gesamte Lieferkette – vom Produktionsstandort bis zum Bestimmungsort der Waren. Sie beinhalten auch transportnahe Zusatzleistungen: Wir lagern die Waren, holen sie ab, liefern sie aus, regeln Zollformalitäten, versichern den Transport und stellen produktrelevante Informationen bereit. So gewährleisten wir Sicherheit und Zuverlässigkeit über Landesgrenzen hinweg. Unsere Kunden stammen aus Unternehmen aller Größenklassen. Sie sind vor allem in den Branchen „Technology“, „Pharmaceuticals“, „Automotive“, „Engineering & Manufacturing“, „Consumer“ und „Fashion & Apparel“ tätig. Zudem planen und realisieren wir weltweit logistische Großprojekte, besonders für die Energiewirtschaft. Im Rahmen von Transportmanagement-Kontrakten kombinieren wir in steigendem Umfang für unsere Kunden auch alle Transportmittel, mit dem Ziel, Komplexität zu reduzieren, Qualität zu verbessern und Kosten zu senken.

### Kapazitätsengpässe prägten Luftfrachtmarkt

Der Luftfrachtmarkt hat sich im Jahr 2010 im Vergleich zum Vorjahr positiv entwickelt. Die Nachfrage ist gestiegen, jedoch bestanden Engpässe bei den Frachtkapazitäten. Diese ließen die Frachtraten erheblich ansteigen. Auch aus diesem Grund wurde das Chartergeschäft unserer Tochtergesellschaft StarBroker beträchtlich ausgebaut. Dank des gut ausgebauten Netzwerks konnten wir unseren Kunden helfen, die Herausforderung zu meistern, vor die der Ausbruch des isländischen Vulkans Eyjafjallajökull die Luftfrachtindustrie gestellt hat.

### Volumen im Seefrachtgeschäft gesteigert

In der Seefracht sind wir im Teilladungsgeschäft (Less than Container Load, LCL) weltweit führend und zählen zu den beiden führenden Anbietern für Komplettladungen (Full Container Load, FCL). Das Volumen im Seefrachtmarkt war im Jahr 2009 gegenüber dem Vorjahr rückläufig. Wir konnten unser Volumen im Jahr 2010 jedoch von 2,615 MIO TEU auf 2,772 MIO TEU steigern und damit fast auf das Niveau vor der Wirtschaftskrise zurückbringen.

Vor allem im ersten Halbjahr 2010 wurde ein erheblich gesteigertes Volumen im Markt bewegt. Besonders auf den Routen zwischen Asien und Europa sowie zwischen Asien und Nordamerika stellten die knappen Kapazitäten im Markt eine Herausforderung dar.

### Marktanteil im europäischen Landverkehr leicht ausgebaut

Mit rund 11.000 Mitarbeitern in 53 Ländern zählt DHL im Geschäftsfeld Freight zu den größten Landverkehrsspediteuren in Europa, dem Nahen und Mittlerem Osten und in Nordafrika. Auch im Frachtgeschäft verstehen wir uns als Makler von Kapazitäten. Im Landverkehr transportieren wir Komplettladungen, Teilladungen und Stückgut. Darüber hinaus bieten wir die Kombination mit anderen Verkehrsträgern an, vor allem dem Schienenverkehr. Ergänzt wird unser Angebot um Zusatzleistungen wie Zolldienste und Versicherungen.

Durch die Finanz- und Wirtschaftskrise im Jahr 2009 ist der europäische Markt für Straßentransporte gegenüber dem Vorjahr um rund 16 % geschrumpft. Unseren Anteil konnten wir eigenen Berechnungen zufolge leicht ausbauen. Seit Beginn des Jahres 2011 ist jedoch wieder ein deutlicher Volumenanstieg zu verzeichnen.

## UMSATZ- UND ERGEBNISENTWICKLUNG

### Speditionsgeschäft verbessert Umsatz und Ergebnis deutlich

Im Unternehmensbereich GLOBAL FORWARDING, FREIGHT haben wir im Berichtsjahr den Umsatz um 27,6 % auf 14.341 MIO € (Vorjahr: 11.243 MIO €) gesteigert. Darin waren positive Währungseffekte in Höhe von 752 MIO € enthalten. Organisch ist der Umsatz im Berichtsjahr um 20,9 % gewachsen. Unser Speditionsgeschäft hat sich besonders in der zweiten Jahreshälfte gut entwickelt.

Das Geschäftsfeld Global Forwarding hat mit 10.725 MIO € einen Umsatz erzielt, der den Vorjahreswert von 7.913 MIO € um 35,5 % überstieg. Bereinigt um 648 MIO € positive Währungseffekte betrug der Zuwachs 27,3 %. Frachtraten und Treibstoffpreise sind im gesamten Geschäftsjahr 2010 auf einem hohen Niveau gewesen. Dennoch konnten wir das Bruttoergebnis um 18,0 % von 1.948 MIO € auf 2.298 MIO € verbessern.

A.50 Seefrachtmarkt 2009<sup>1)</sup>: Top 4

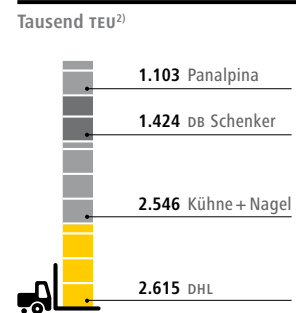

1) Darstellung der Marktanteile geändert, da Marktvolumendaten durch die Krise verzerrt wurden und die Forschungsinstitute die Marktgröße inkonsistent definieren.  
2) Twenty-foot Equivalent Units (20-Fuß-Container-Einheiten)

Quelle: Geschäftsberichte, Pressemitteilungen und Unternehmensschätzungen

A.51 Europäischer Markt für Straßentransport 2009: Top 5

Marktvolumen: 148,4 MRD €<sup>1)</sup>

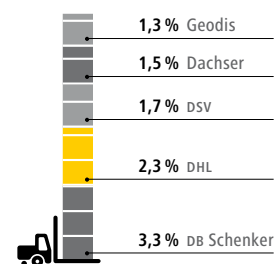

1) Länderbasis: Gesamtmarktzahl für 20 europäische Länder ohne Schüttgut- und Spezialtransporte

Quelle: MRSC-Marktstudien und Prognosen 2008 bis 2010, Eurostat 2009, Geschäftsberichte, Internetseiten der Unternehmen und Schätzungen

### Volumina und Umsatz in der Luft- und Seefracht gestiegen

Gegenüber dem Vorjahr haben sich die Transportvolumina besonders im Luftfrachtgeschäft im Berichtsjahr sehr positiv entwickelt, wenngleich der Zuwachs im vierten Quartal etwas geringer ausgefallen ist als in den vorangegangenen. Es bestehen noch Engpässe bei den Frachtkapazitäten, sodass die Transportdienstleistungen teurer geworden sind. Die Frachtraten befanden sich im Berichtsjahr insgesamt auf einem hohen Niveau und haben nur im vierten Quartal leicht nachgegeben. Von den hohen Preisen waren vor allem die Handelsrouten zwischen Asien und Europa sowie über den Pazifik betroffen. Wir konnten Preissteigerungen in den ersten neun Monaten nur leicht verzögert an die Kunden weitergeben. Im vierten Quartal haben sich die Margen stabilisiert, was sich in der Bruttoergebnismarge für das Gesamtjahr widerspiegelt.

Die Luftfrachtvolumina sind im Jahr 2010 verglichen mit dem Vorjahr um 18,8 % gestiegen. Im vierten Quartal konnten sie um 5,8 % gegenüber dem bereits sehr erfolgreichen Vorquartal zulegen. Volumina und Umsätze zogen besonders in unseren Wachstumsmärkten Südamerika, Nordasien und dem Mittleren Osten sowie Mitteleuropa an. Unser Umsatz in der Luftfracht ist im Berichtsjahr gegenüber dem Vorjahr um 37,3 % gestiegen.

#### A.52 Global Forwarding: Umsatz

| MIO €         | 2009<br>angepasst | 2010          | +/- %       | Q4 2009<br>angepasst | Q4 2010      | +/- %       |
|---------------|-------------------|---------------|-------------|----------------------|--------------|-------------|
| Luftfracht    | 3.957             | 5.431         | 37,3        | 1.209                | 1.500        | 24,1        |
| Seefracht     | 2.450             | 3.446         | 40,7        | 621                  | 925          | 49,0        |
| Sonstiges     | 1.506             | 1.848         | 22,7        | 382                  | 489          | 28,0        |
| <b>Gesamt</b> | <b>7.913</b>      | <b>10.725</b> | <b>35,5</b> | <b>2.212</b>         | <b>2.914</b> | <b>31,7</b> |

#### A.53 Global Forwarding: Volumina

| Tausend      |                   | 2009  | 2010  | +/- % | Q4 2009 | Q4 2010 | +/- % |
|--------------|-------------------|-------|-------|-------|---------|---------|-------|
| Luftfracht   | Tonnen            | 3.734 | 4.435 | 18,8  | 1.135   | 1.185   | 4,4   |
| davon Export | Tonnen            | 2.116 | 2.458 | 16,2  | 640     | 656     | 2,5   |
| Seefracht    | TEU <sup>1)</sup> | 2.615 | 2.772 | 6,0   | 687     | 682     | -0,7  |

1) Twenty-foot Equivalent Unit (20-Fuß-Container-Einheit)

In der Seefracht haben wir uns im Gesamtjahr mit einem Volumenzuwachs um 6,0 % verglichen mit dem Vorjahr weiterhin positiv entwickelt. Im vierten Quartal lagen die Volumina auf dem hohen Vorjahresniveau, weil sie sich im vergleichbaren Vorjahreszeitraum bereits von der Wirtschaftskrise erholt hatten. Der Umsatz ist im Gesamtjahr um 40,7 % gestiegen, da wir vornehmlich in den letzten Monaten die höheren Preise aufgrund der sehr hohen Frachtraten an die Kunden weitergeben konnten. Besonders erfreulich hat sich auch hier das Geschäft in unseren Wachstumsmärkten Südamerika, Mittlerer Osten und Nordasien entwickelt.

Im industriellen Projektgeschäft konnten wir den Umsatz und das Bruttoergebnis besonders in Nord- und Südamerika sowie in Nordasien gegenüber dem Vorjahr weiter erfreulich verbessern.

### **Turnaround im europäischen Landverkehr erfolgreich abgeschlossen**

Das Geschäftsfeld Freight weist für das Jahr 2010 mit 3.735 MIO € einen Umsatz aus, der den Vorjahreswert von 3.419 MIO € um 9,2 % übersteigt. Vor allem in Deutschland, Süd- und Osteuropa konnten wir beim Umsatz zulegen. Bereinigt um positive Währungseffekte in Höhe von 106 MIO € lag der Umsatz organisch um 6,1 % über dem Vorjahr. Das Bruttoergebnis überstieg mit 991 MIO € das Vorjahresniveau um 1,4 %. Nachdem das Ergebnis im Vorjahr von Restrukturierungskosten belastet war, ist im Berichtsjahr dank deutlich erhöhter Gesamtproduktivität und erfolgreichem Turnaround verlustbringender Ländergesellschaften die Rückkehr in die Gewinnzone gelungen.

Zum 1. Januar 2010 ist die Verantwortung für das nationale Frachtgeschäft in Schweden vom Unternehmensbereich EXPRESS auf Freight übergegangen. Die Vorjahreszahlen wurden entsprechend angepasst.

### **Positive EBIT-Entwicklung durch starkes viertes Quartal gefestigt**

Dank strenger Kostendisziplin, Margenstabilisierung und positiver Währungseffekte hat sich das EBIT für den Unternehmensbereich gegenüber dem Vorjahr erheblich verbessert. Im Berichtsjahr hat es sich um 120,1 % auf 383 MIO € (Vorjahr: 174 MIO €) erhöht. Bereinigt um Restrukturierungskosten (7 MIO €; Vorjahr: 101 MIO €) überstieg das EBIT vor Einmaleffekten mit 390 MIO € den vergleichbaren Vorjahreswert um 41,8 %. Die EBIT-Marge betrug 2,7 %.

Allein im vierten Quartal ist das EBIT von 6 MIO € auf 131 MIO € gewachsen. Bereinigt um Restrukturierungskosten (1 MIO €; Vorjahr: 64 MIO €) belief sich das EBIT vor Einmaleffekten im Quartal auf 132 MIO €. Die EBIT-Marge im Quartal betrug 3,4 %.

Im gesamten Jahr 2010 konnten wir unsere operativen und indirekten Kosten relativ zum Volumenwachstum verringern, sodass die Produktivität das Niveau vor der Wirtschaftskrise übertrifft. Wir haben den Vertrieb erweitert und stärker nach Sektoren ausgerichtet. So konnten wir erfolgreich Neugeschäft abschließen, das Volumen mit Bestandskunden steigern und damit den derzeitigen und zukünftigen Ergebnisbeitrag sichern.

Bei weiterem Volumenzuwachs hat sich das Net Working Capital im vierten Quartal gegenüber dem Vorquartal nur leicht erhöht. Dennoch ließen der daraus resultierende Effekt sowie Auszahlungen für Restrukturierungen den operativen Cashflow im Gesamtjahr auf 244 MIO € (Vorjahr: 524 MIO €) sinken. Verglichen mit dem Vorquartal hat er sich im vierten Quartal um mehr als 40 % verbessert.



## Unternehmensbereich SUPPLY CHAIN

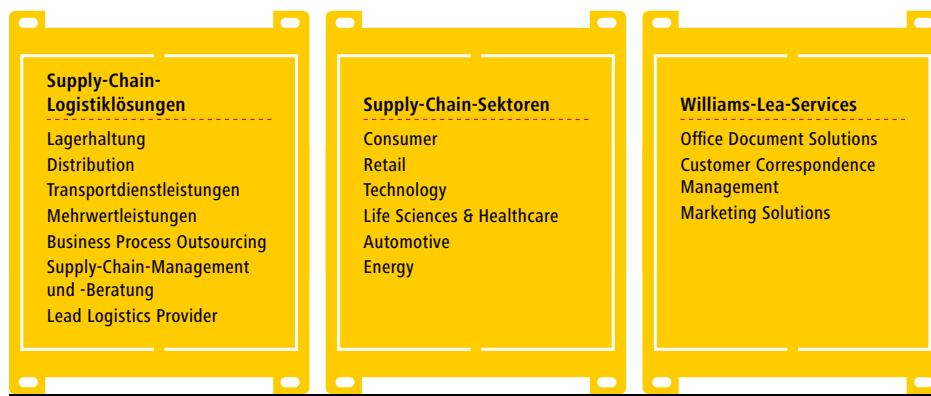

## GESCHÄFTSFELDER UND MARKTPositionEN

### Zwei Geschäftsfelder mit kundenorientierten Lösungen

Der Unternehmensbereich SUPPLY CHAIN umfasst zwei Geschäftsfelder: Supply Chain und Williams Lea. Im Geschäftsfeld Supply Chain bieten wir Kunden vieler Branchen Kontraktlogistiklösungen entlang der gesamten Lieferkette. Williams Lea ist als globales Unternehmen im Bereich Business Process Outsourcing tätig – der Fremdvergabe von Geschäftsprozessen – und hat sich auf Corporate Information Solutions spezialisiert, worunter man das Informations- und Kommunikationsmanagement von Unternehmen versteht.

→ Glossar, Seite 232

### Branchenübergreifende Supply-Chain-Leistungen

Wir versorgen Kunden vieler Branchen mit Leistungen entlang der gesamten Lieferkette. Von der Planung über Beschaffung, Produktion, Lagerung und Auslieferung bis hin zu Retourenlogistik und Kundendienst verlassen sich unsere Kunden darauf, dass die Logistikabläufe stimmen. Wir bieten Lager-, Distributions-, Transport- und Mehrwertleistungen an sowie Lösungen in den Bereichen Business Process Outsourcing, Supply-Chain-Management und -Beratung und agieren als Lead Logistics Provider. So sorgen wir dafür, dass Produkte und Informationen der Kunden die Märkte schnell und effizient erreichen, und sichern ihnen entscheidende Wettbewerbsvorteile. Da wir die lokalen Märkte kennen und global vernetzt sind, bedienen wir Kunden in mehr als 60 Ländern und unterstützen sie bei komplexen Optimierungen ihrer Abläufe.

→ Glossar, Seite 232

Unser Supply-Chain-Geschäft ist auf Leistungen in sechs strategischen Schlüsselbranchen spezialisiert: Sie heißen „Consumer“, „Retail“, „Technology“, „Life Sciences & Healthcare“, „Automotive“ und „Energy“. Jede wird von einem Branchenleiter betreut, dem ein globales Expertenteam zur Seite steht, das Kundenprojekte steuert und branchenspezifische Logistiklösungen entwickelt.

Zwei unserer größten Sektoren sind „Consumer“ und „Retail“; sie bieten großes Wachstumspotenzial für den Unternehmensbereich. Für Kunden in diesen Sektoren betreuen wir die Lieferketten von der Bezugsquelle bis in die Filiale. Hier sind Flexibilität, Zuverlässigkeit und Kosteneffizienz kritische Werttreiber unseres Angebots, das von internationaler Inbound-Logistik über Lager- und Transportdienste bis zu Verpackung und anderen Mehrwertleistungen reicht.

→ Glossar, Seite 232

Für Kunden im Bereich „Technology“ sind schnelle, flexible und effiziente Lieferketten von größter Bedeutung. Zudem steigt die Nachfrage nach integrierter Produkt- und Servicelogistik. Unser Portfolio reicht von Inbound-to-Manufacturing-Leistungen über Lager- und Transportdienste bis zu integrierten Verpackungslösungen, Retourenmanagement und technischem Service. Dies ist einer der Sektoren, in dem die Kunden zunehmend nach integrierten Lösungen fragen, die wir über alle DHL-Unternehmensbereiche hinweg gemeinsam entwickeln.

Im Bereich „Life Sciences & Healthcare“ bieten wir ebenfalls zunehmend übergreifende, integrierte Lösungen an. Lieferketten und logistische Abläufe befinden sich in dieser Branche in vielen Teilen der Welt noch in einer frühen Entwicklungsphase. Der Kostendruck nimmt ständig zu und unsere Kunden erwarten ein Höchstmaß an Qualitätskontrolle.

„Automotive“ bleibt eine unserer globalsten Branchen. In den vergangenen Jahren ist dieser Bereich in den Industrieländern schwächer gewachsen, während sich die Produktion in aufstrebende Länder wie China, Indien und Brasilien verlagert hat. Für unser Angebot in den Bereichen Inbound-to-Manufacturing und Aftermarket-Logistik sowie Lead Logistics Provider ist es entscheidend, dass wir geringere Kosten und ein hohes Maß an Flexibilität und Zuverlässigkeit bieten können.

In der wachstumsstarken Branche „Energy“ bieten die DHL-Unternehmensbereiche ebenfalls integrierte Logistiklösungen für die Entwicklungs- und Betriebsphasen großer Energieprojekte.

#### Spezialist für Corporate Information Solutions

Williams Lea ist Spezialist für fremdvergebenes Kommunikations- und Informationsmanagement von Unternehmen. Dazu zählen Dokumenten- und Marketinglösungen sowie Lösungen für Kundenkorrespondenz. Wir sind für Kunden in den Bereichen Finanzdienstleistungen, Einzelhandel, Konsumgüter, Pharmazeutik, Verlagswesen, im öffentlichen Sektor und im Rechtsbereich tätig. Zum 1. Juli 2010 wurden Teile von Williams Lea Deutschland in den Unternehmensbereich BRIEF verlagert.

#### Weltmarktführer in der Kontraktlogistik

DHL ist mit einem Marktanteil von 8,4 % (2009) globaler Marktführer in der Kontraktlogistik. Auf diesem stark fragmentierten Markt vereinen die zehn größten Anbieter gerade einmal 25 % des Gesamtmarkts mit einem geschätzten Volumen von 135 MRD € auf sich. In unseren beiden größten Märkten – Nordamerika und Europa – sind wir der führende Anbieter. In allen Regionen stehen wir im Wettbewerb mit starken lokalen Anbietern, besonders im Wachstumsraum Asien/Pazifik. Wir sind zuversichtlich, unser globales Know-how und unsere guten Beziehungen zu multinationalen Unternehmen für die weitere Expansion nutzen zu können.

Mit Williams Lea sind wir Marktführer für fremdvergebenes Dokumentenmanagement. Dieser Markt ist ebenfalls stark fragmentiert und geprägt von Spezialanbietern, die entweder nur über ein begrenztes Angebot verfügen oder spezielle Nischen besetzen. Dank unseres breiten, internationalen Angebots und langjähriger Kundenbeziehungen haben wir unsere marktführende Position ausgebaut. Wir nutzen auch die sehr guten Kundenbeziehungen von DHL, um Neugeschäft für Williams Lea zu gewinnen.

➔ Glossar, Seite 232

➔ Glossar, Seite 232

#### A.54 Kontraktlogistikmarkt 2009: Top 7

Marktvolumen: 135 MRD €

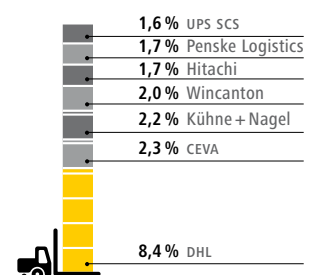

Quelle: Transport Intelligence

#### A.55 SUPPLY CHAIN: Umsatz nach Sektoren 2010

Gesamtumsatz: 13.301 MIO €

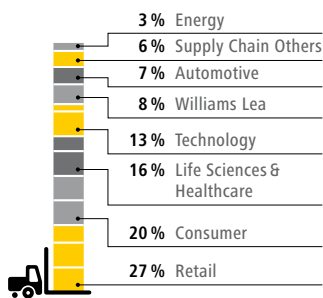

#### A.56 SUPPLY CHAIN: Umsatz nach Regionen 2010

Gesamtumsatz: 13.301 MIO €

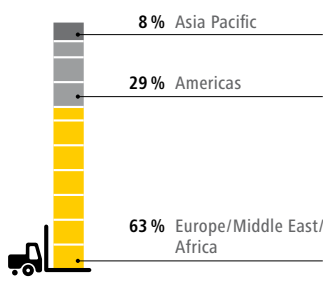

## UMSATZ- UND ERGEBNISENTWICKLUNG

### Umsatzzuwächse in fast allen Sektoren und Regionen erzielt

Zum 1. Juli 2010 haben wir wesentliche Teile von Williams Lea Deutschland aus dem Unternehmensbereich SUPPLY CHAIN in den Unternehmensbereich BRIEF verlagert. Die Vorjahreszahlen der Segmentberichterstattung wurden entsprechend angepasst.

Im Unternehmensbereich SUPPLY CHAIN haben sich im Jahr 2010 Umsatz und Ergebnis positiv entwickelt. Der Umsatz für das Gesamtjahr ist um 9,2 % auf 13.301 MIO € (Vorjahr: 12.183 MIO €) gestiegen. Bereinigt um positive Währungseffekte in Höhe von 707 MIO € ist der Umsatz organisch um 3,4 % gewachsen. Das Wachstum wurde durch zwei Faktoren gedämpft: den Verlust von Handelsvolumen mit der Arcandor-Gruppe in Deutschland und den Ausstieg aus unrentablen Verträgen.

Im vierten Quartal betrug der Umsatz 3.568 MIO €, 14,0 % mehr als im Vorjahr (3.129 MIO €). Bereinigt um positive Währungseffekte (225 MIO €) ist er organisch um 6,8 % gewachsen.

Im Geschäftsfeld Supply Chain haben wir im Berichtsjahr einen Umsatz von 12.237 MIO € (Vorjahr: 11.302 MIO €) erzielt. Außer im Bereich „Retail“ sind wir in allen Sektoren stark gewachsen, allen voran „Automotive“, dicht gefolgt von „Consumer“, „Life Sciences & Healthcare“ und „Energy“. Die Entwicklung im Sektor „Retail“ wurde durch den Verlust von Volumen mit der Arcandor-Gruppe gebremst, im Wesentlichen durch die Insolvenz von Quelle und geringeres Handelsvolumen von Karstadt.

In der Region Americas hat sich nach einer Periode des wirtschaftlichen Abschwungs und der Insolvenzunsicherheit wesentlicher Automotive-Kunden im Vorjahr die Lage im Berichtsjahr vor allem in den Sektoren „Automotive“ und „Consumer“ sowie im Transportbereich erholt. Zuwächse resultierten auch aus neuen Vertragsabschlüssen in den Sektoren „Consumer“ sowie „Life Sciences & Healthcare“ und wurden auch durch den starken US-Dollar unterstützt. In der Region Asia Pacific erreichten wir mit Zuwächsen im Neu- und Bestandsgeschäft – vor allem in Australien, China und Thailand – ein erhebliches Umsatzwachstum. In Europa profitierten wir von zusätzlichem Umsatz aus Neu- und Bestandsgeschäft im „Life Sciences & Healthcare“-Sektor Großbritanniens. In Deutschland ist der Umsatz vor allem durch den Verlust von Handelsvolumen mit der Arcandor-Gruppe gesunken. Insgesamt wurde das Umsatzwachstum in Europa durch den Ausstieg aus unrentablen Verträgen gebremst.

Williams Lea hat im Berichtsjahr einen Umsatz erzielt, der mit 1.062 MIO € den Vorjahreswert (881 MIO €) um 20,5 % überstieg. Der Zuwachs stammt besonders aus den Bereichen „Marketing Solutions“ und „Legal Services“ (Dienstleistungen für Anwaltskanzleien und Notare).

### Neugeschäft im Wert von 1,1 MRD € generiert

Im Geschäftsfeld Supply Chain wurden mit Neu- und Bestandskunden zusätzliche Verträge im Wert von 1,1 MRD € (Umsatz auf Jahresbasis) geschlossen. Dies entspricht dem Vorjahresniveau. Wir haben alle wesentlichen Neugeschäfte des Geschäftsjahres 2010 untersucht, mit dem Ergebnis, dass der Umsatzverlauf insgesamt die Erwartungen um mehr als 10 % überstieg. Die annualisierte Vertragsverlängerungsrate blieb auf einem mit dem Vorjahr vergleichbaren hohen Niveau.

### **EBIT verbessert sich erheblich**

Das EBIT für den Unternehmensbereich hat sich dank gestiegener Volumina im Bestandsgeschäft und zusätzlicher Gewinne aus dem Neugeschäft erheblich verbessert. Unterstützt wurde diese Entwicklung durch Kostensenkungen und günstige Wechselkurse. Im Vorjahr wurde das Ergebnis zudem durch Aufwendungen in Höhe von 310 MIO € belastet, die aus der Arcandor-Insolvenz, dem Ausstieg aus unrentablen Verträgen und Wertminderungen bei übernommenen Immobilien in Europa stammten.

Das EBIT für den Unternehmensbereich SUPPLY CHAIN ist von –216 MIO € um 449 MIO € auf 233 MIO € gestiegen. Die Restrukturierungskosten beliefen sich im Berichtsjahr auf 41 MIO € (Vorjahr: 84 MIO €). Bereinigt darum belief sich das EBIT vor Einmaleffekten auf 274 MIO € (Vorjahr: –132 MIO €). Die EBIT-Marge vor Einmaleffekten für das Gesamtjahr stieg von –1,1 % auf 2,1 %.

Im vierten Quartal betrug das EBIT 43 MIO € (Vorjahr: –172 MIO €); es enthielt Restrukturierungskosten von 16 MIO € (Vorjahr: 70 MIO €) und einen Aufwand von 21 MIO € für eine Jahresendanererkennung für die Arbeitnehmer. Die Aufwendungen, die das EBIT des vierten Quartals im Vorjahr belastet hatten, betrugen 144 MIO €.

Das EBIT vor Einmaleffekten belief sich auf 59 MIO € (Vorjahr: –102 MIO €). Die EBIT-Marge vor Einmaleffekten für das vierte Quartal betrug 1,7 %; sie wurde durch den Aufwand für die Jahresendanererkennung um 0,5 Prozentpunkte reduziert.

Der operative Cashflow betrug im Berichtsjahr 272 MIO € (Vorjahr: 424 MIO €) und war belastet durch die im Vorjahr eingeleiteten Restrukturierungsmaßnahmen. Trotz steigenden Umsatzes wurde unsere effiziente Working-Capital-Position gehalten.

# NICHTFINANZIELLE LEISTUNGSINDIKATOREN

## Mitarbeiter

### Zahl der Mitarbeiter leicht gesunken

„Employer of Choice“ – erste Wahl als Arbeitgeber zu werden, ist eines der Kernziele unserer „Strategie 2015“. Indem wir talentierte und motivierte Mitarbeiter gewinnen, fördern und an uns binden, unterstützen wir die beiden anderen Kernziele unserer Strategie – bevorzugter Anbieter zu werden und uns für Anleger noch attraktiver zu machen. Zum 31. Dezember 2010 haben wir in mehr als 220 Ländern und Territorien 418.946 Vollzeitkräfte beschäftigt, 1,4 % weniger als im Vorjahr. Wesentlicher Grund für den Rückgang waren der Verkauf des Geschäfts mit nationalen taggenauen Sendungen von DHL Express in Großbritannien und Frankreich. Die Personalaufwendungen haben sich auch infolgedessen um 2,4 % auf 16.609 MIO € (Vorjahr: 17.021 MIO €) verringert.

A.57 Anzahl der Mitarbeiter (fortgeführte Geschäftsbereiche)

|                                                    | 2009           | 2010           | +/- %       |
|----------------------------------------------------|----------------|----------------|-------------|
| <b>Am Jahresende</b>                               |                |                |             |
| Kopfzahl <sup>1)</sup>                             | 477.280        | 467.088        | -2,1        |
| <b>Auf Vollzeitkräfte umgerechnet<sup>2)</sup></b> | <b>424.686</b> | <b>418.946</b> | <b>-1,4</b> |
| davon BRIEF <sup>3)</sup>                          | 144.968        | 144.640        | -0,2        |
| EXPRESS <sup>3)</sup>                              | 95.048         | 87.536         | -7,9        |
| GLOBAL FORWARDING, FREIGHT <sup>3)</sup>           | 40.331         | 41.359         | 2,5         |
| SUPPLY CHAIN <sup>3)</sup>                         | 130.441        | 132.075        | 1,3         |
| Corporate Center/Anderes                           | 13.898         | 13.336         | -4,0        |
| davon Deutschland                                  | 166.880        | 165.781        | -0,7        |
| Europa (ohne Deutschland)                          | 120.074        | 110.462        | -8,0        |
| Amerikas                                           | 66.833         | 68.268         | 2,1         |
| Asien/Pazifik                                      | 57.897         | 61.239         | 5,8         |
| Übrige Regionen                                    | 13.002         | 13.196         | 1,5         |
| <b>Im Jahresdurchschnitt</b>                       |                |                |             |
| Kopfzahl                                           | 488.518        | 464.471        | -4,9        |
| davon Arbeitnehmer                                 | 435.072        | 413.830        | -4,9        |
| Beamte                                             | 49.691         | 46.866         | -5,7        |
| Auszubildende                                      | 3.755          | 3.775          | 0,5         |
| <b>Auf Vollzeitkräfte umgerechnet</b>              | <b>436.651</b> | <b>421.274</b> | <b>-3,5</b> |

1) Mit Auszubildenden

2) Ohne Auszubildende

3) Angepasst



Im Unternehmensbereich BRIEF ist die Zahl der Mitarbeiter um 0,2 % auf 144.640 leicht gesunken.

Im Unternehmensbereich EXPRESS beschäftigen wir mit 87.536 Mitarbeitern 7,9 % weniger als im Vorjahr. Hauptgründe waren der Verkauf des Geschäfts mit nationalen taggenauen Sendungen von DHL Express in Großbritannien und Frankreich sowie weitere Restrukturierungen in Europa.

Im Unternehmensbereich GLOBAL FORWARDING, FREIGHT ist die Zahl der Vollzeitkräfte um 2,5 % auf 41.359 gestiegen, weil das Geschäft organisch gewachsen ist.

Im Unternehmensbereich SUPPLY CHAIN nahm die Mitarbeiterzahl um 1,3 % auf 132.075 zu. Grund dafür waren Zuwächse im Neu- und Bestandsgeschäft insbesondere in den Regionen Amerikas und Asien/Pazifik. Dieser Effekt hat den Personalabbau überkompensiert, der durch die Insolvenz der Arcandor-Gruppe in Deutschland und den Ausstieg aus unrentablen Verträgen in Europa erforderlich geworden war.

Im Segment Corporate Center/Anderes ist die Belegschaft weiter um 4,0 % auf 13.336 gesunken. Kosten konnten vor allem durch Einsparungen bei indirekten Funktionen wie IT und Rechnungswesen gesenkt werden.

Der größte Teil unserer Mitarbeiter ist nach wie vor in Deutschland tätig, wo die Anzahl stabil geblieben ist. Im übrigen Europa ist die Beschäftigung gesunken, vor allem durch den Verkauf des nationalen taggenauen Expressgeschäfts in Großbritannien und Frankreich. Dagegen ist die Belegschaft in Amerika, Asien/Pazifik und den übrigen Regionen gewachsen.

Nach unserer jetzigen Planung wird sich die Zahl der Mitarbeiter im Geschäftsjahr 2011 insgesamt auf dem derzeitigen Niveau stabilisieren.

#### Auf dem Weg zum bevorzugten Arbeitgeber

Den richtigen Mitarbeiter zur richtigen Zeit für die richtige Position zu gewinnen ist entscheidend für die Zukunft des Konzerns Deutsche Post DHL. Übergeordnetes Ziel unserer im Jahr 2009 eingeführten Mitarbeiterstrategie ist es deshalb, zum bevorzugten Arbeitgeber der Branche zu werden. Dafür haben wir fünf Prioritäten festgelegt. Wir wollen

- eine Führungskultur einführen, die dem Leitbild „Respekt und Resultate“ folgt,
- unsere Mitarbeiter motivieren,
- die Zusammenarbeit innerhalb des Konzerns stärken,
- das Wachstum unseres Geschäfts fördern und
- die Effizienz unserer Personalarbeit steigern.

Führungskräfte sind Vorbilder und tragen wesentlich dazu bei, die „Strategie 2015“ erfolgreich umzusetzen. Ganz im Sinne dieser Strategie haben wir im Berichtsjahr fünf Kompetenzen definiert, die eine Führungskraft aufweisen sollte: Kunden erfolgreicher zu machen, Richtung zu geben und vorzuleben, ein Umfeld für Höchstleistungen zu schaffen, die Entwicklung anderer zu fördern, sowie die Bereitschaft, sich selbst weiterzuentwickeln.

A.58 Mitarbeiter nach Regionen 2010<sup>1)</sup>

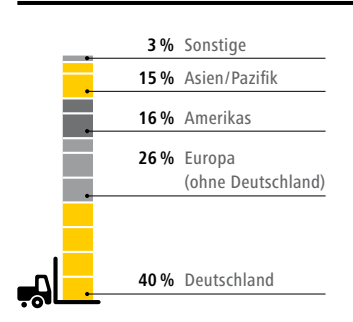

<sup>1)</sup> Zum 31. Dezember; auf Vollzeitkräfte umgerechnet

**A.59 Krankenstand<sup>1)</sup>**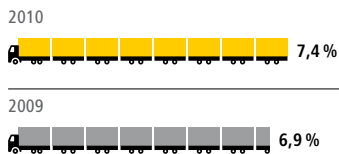

1) Alle Organisationseinheiten in Deutschland

**Aktiv für Gesundheit und Sicherheit sorgen**

Wir investieren in die Gesundheit und Sicherheit unserer Mitarbeiter und verwenden eine konzernweite Systematik, die eng mit dem Risikomanagement verknüpft ist. Sie umfasst beispielsweise unseren „Corporate Health Award“, mit dem wir jährlich vorbildliche Gesundheitsinitiativen im Konzern prämiieren. Im Jahr 2010 haben wir mit gezielten Programmen dazu beigetragen, die Gesundheit unserer Mitarbeiter zu stärken – von der Früherkennung von Krankheiten bis zur Stressprävention. In Deutschland ist es uns gelungen, den Krankenstand mit 7,4 % (Vorjahr: 6,9 %) weiter auf niedrigem Niveau zu halten. Der Anstieg gegenüber dem Vorjahr entspricht der allgemeinen Entwicklung im Land, berücksichtigt man den Altersstruktureffekt.

Im Bereich des Arbeitsschutzes setzen wir konzernweit Verkehrssicherheitsmaßnahmen um, die unsere Mitarbeiter für Gefahren sensibilisieren und Unfälle vermeiden helfen. Im März 2010 haben wir unsere Selbstverpflichtung im Rahmen der „Europäischen Charta für die Straßenverkehrssicherheit“ erneuert und damit unser Engagement in diesem Bereich bekräftigt.

Unser Gesundheitsmanagement wurde erneut ausgezeichnet: Die EU-Kommission und der BKK-Bundesverband haben uns den „Unternehmenspreis Gesundheit“ sowie den Sonderpreis „Psychische Gesundheit“ verliehen. Die Wirtschaftszeitung „Handelsblatt“ und das Marktforschungsinstitut EuPD Research honorierten mit dem „Corporate Health Award“, dass wir unser Gesundheitsmanagement in alle Abläufe und Leitlinien integriert haben. Das Qualitätsmanagementsystem unserer Arbeits- und Gesundheitsschutzorganisation wurde im Berichtsjahr erneut nach ISO 9001:2008 durch den TÜV Rheinland zertifiziert.

**A.60 Arbeitsschutz<sup>1)</sup>**

|                                                              | 2009                  | 2010 <sup>4)</sup> |
|--------------------------------------------------------------|-----------------------|--------------------|
| Anzahl der Arbeitsunfälle <sup>2)</sup>                      | 13.014 <sup>3)</sup>  | 17.283             |
| Unfallquote (Unfälle pro 1.000 Mitarbeiter pro Jahr)         | 71                    | 96                 |
| Anzahl unfallbedingter Ausfalltage (Kalendertage)            | 275.351 <sup>3)</sup> | 376.873            |
| Ausfalltage pro Unfall                                       | 21,2                  | 21,8               |
| Anzahl bei Arbeitsunfällen tödlich verunglückter Mitarbeiter | 1                     | 0                  |

1) Umfasst Mitarbeiter der Deutsche Post AG 2) Unfälle mit mindestens einem Ausfalltag, einschließlich Unfälle auf dem Weg von und zur Arbeitsstätte 3) Angepasst 4) Stand: 3. Februar 2011, da Unfälle auch nach dem Bilanzstichtag gemeldet werden können

**A.61 Ausbildungsberufe Konzern Deutsche Post DHL weltweit<sup>1)</sup>**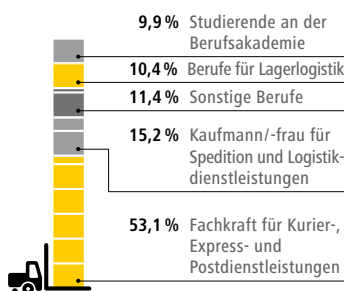

1) Auszubildende im Jahresdurchschnitt: 3.775

**Ausbildung – Investition in die Zukunft**

Mit der Ausbildung und Qualifizierung junger Menschen sichern wir unseren Bedarf an Fachkräften und übernehmen gesellschaftliche Verantwortung. Im Berichtsjahr haben wir in Deutschland rund 1.700 Auszubildende und Studierende eingestellt. Wir haben rund 70 % der geeigneten Nachwuchskräfte einen Vertrag angeboten. Mit dem „Top-Azubi-Programm“ fördern wir die besten 5 % unserer rund 3.600 Auszubildenden in Deutschland. Wir bieten ihnen spezielle Seminare und eine unbefristete Übernahme nach erfolgreichem Abschluss. Mit dem Förderprogramm „Perspektive Gelb“ eröffnen wir Jugendlichen mit schwierigen Startchancen auf dem Ausbildungsmarkt die Aussicht auf einen Ausbildungsplatz. Von den 221 Teilnehmern des Jahrgangs 2009 haben wir im Berichtsjahr knapp 80 % übernommen.

### **Talente finden und frühzeitig binden**

Mit unserem konzernweiten Trainee-Programm „GROW“ (Graduate Opportunities Worldwide) gewinnen wir Nachwuchskräfte für Fach- und Führungspositionen. Im Berichtsjahr haben wir 29 Hochschulabsolventen eingestellt. Um uns als bevorzugter Arbeitgeber bei Studierenden zu positionieren, haben wir das Programm „JOIN“ aufgelegt. Praktikanten erhalten dabei Projektverantwortung und einen persönlichen Mentor. Das Programm ergänzt unsere Partnerschaft mit der größten internationalen Studentenorganisation, der AIESEC. Seit dem Jahr 2002 haben wir mehr als 600 Studierende für ein AIESEC-Praktikum in unserem Konzern gewonnen.

Wir nutzen zunehmend das Internet, um Bewerber anzusprechen: Jährlich schreiben wir mehr als 12.000 Stellen elektronisch aus und erhalten durchschnittlich über 120.000 Bewerbungen. Unser Online-Karriereportal ist im Ranking „Top Employer Web Benchmark 2010“ des Marktforschungsinstituts Potentialpark Communications unter den besten fünf in Deutschland und in Europa platziert.

### **Mitarbeiter fördern und weiterbilden**

Im Berichtsjahr nutzten 75.000 Mitarbeiter weltweit unsere mehr als 2.000 Trainingseinheiten umfassende Plattform „mylearningworld.net“, um sich beruflich oder persönlich weiterzuentwickeln. Ausgewählte Leistungsträger fördern wir, etwa mit einem MBA-Studium an einer Business School oder Talentprogrammen wie „ACTIVATE“. Es ist unser Ziel, Führungspositionen mit Mitarbeitern aus den eigenen Reihen zu besetzen. Unsere interne Besetzungsquote ist, bezogen auf die Grade B bis F unseres internen Systems zur Leistungsbeurteilung, im Berichtsjahr auf 88,9 % (Vorjahr: 89,9 %) gesunken. Wir ermuntern unsere Mitarbeiter, Erfahrungen in verschiedenen Bereichen des Unternehmens zu sammeln. Im Jahr 2010 waren 24,8 % (2009: 19,1 %) der internen Stellenbesetzungen von Top-Führungskräften bereichsübergreifend.

Die Unternehmensbereiche bieten zudem Programme an, die auf ihre spezifischen Anforderungen ausgerichtet sind. Im Unternehmensbereich BRIEF begann im Berichtsjahr beispielsweise das „Betriebslenkerprogramm“. Auf Grundlage einer systematischen Nachfolgeplanung werden 156 Mitarbeiter auf dem Karrierepfad vom Zusteller zur Führungskraft begleitet. Der Unternehmensbereich EXPRESS hat mit dem „Certified International Specialist“ ein umfassendes Trainingsprogramm aufgelegt. Auf dem Einführungsmodul, das alle 100.000 Mitarbeiter des Unternehmensbereichs absolvieren, bauen vertiefende Trainings auf. Der Unternehmensbereich GLOBAL FORWARDING, FREIGHT hat seine „DHL Freight Forwarding Academy“ weiterentwickelt und die Kursbeteiligungen am weltweiten e-Learning-Programm von 48.000 auf rund 124.000 erhöht. Und im Unternehmensbereich SUPPLY CHAIN lag im Berichtsjahr der Fokus auf bereichsübergreifenden Trainings für Vertriebsmitarbeiter.

### **Incentivesystem ausgeweitet**

Wir haben im Jahr 2009 ein neues, variables Incentive- und Beteiligungssystem für Führungskräfte eingeführt, um die Leistungsfähigkeit unserer Organisation nachhaltig zu stärken. Es legt den Schwerpunkt der Anreize auf die Konzernleistung, gestaltet die Vergütung der Führungskräfte noch leistungsorientierter und honoriert herausragende Leistungen. So beteiligen wir die Führungskräfte mit Firmenaktien am Erfolg. Im Berichtsjahr haben wir den Geltungsbereich des Systems ausgeweitet.

#### A.62 Geschlechterverteilung im Top-Management<sup>1)</sup> 2010

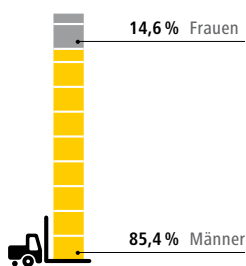

<sup>1)</sup> Bezogen auf die erste und zweite Managementebene

#### Vorsprung durch Vielfalt

Wir wollen bevorzugter Arbeitgeber für alle Mitarbeiter und Bewerber werden – unabhängig von Geschlecht, Herkunft, Religion, Alter, Behinderung oder sexueller Neigung. Diversity Management ist als Bestandteil der Beschäftigungspolitik im Verhaltenskodex unseres Konzerns verankert. Wir beteiligen uns an dem Pilotprojekt „Anonymisiertes Bewerbungsverfahren“ der Antidiskriminierungsstelle des Bundes, um zu prüfen, ob wir auf diesem Wege neue Bewerbergruppen gewinnen können.

Mit Blick auf den demografischen Wandel wollen wir alle Bewerberpotenziale ausschöpfen. Wir wissen, dass der Anteil älterer Menschen an der Bevölkerung weiter zunimmt und sich auch auf unsere Mitarbeiterstruktur auswirken wird. In einem Pilotprojekt analysieren wir, wie sich dadurch Rekrutierung sowie Bedarf an Aus- und Weiterbildung verändern. Zudem haben wir in Kooperation mit der Universität Münster altersbedingte Unterschiede bei Arbeitsmotivation und -zufriedenheit untersucht. Aus den Ergebnissen werden wir Maßnahmen ableiten.

Vor allem in Führungspositionen wollen wir den Anteil der Frauen erhöhen. Im Berichtsjahr lag er im Top-Management bei 14,6 % (Vorjahr: 15,6 %). Wir haben die Rahmenbedingungen für die Vereinbarkeit von Familie und Beruf weiter verbessert. Am Standort Bonn erweiterten wir unser Betreuungsangebot um einen betrieblich unterstützten Kindergarten. Bundesweit arbeiten wir mit dem Dienstleister pme Familienservice zusammen, der unter anderem Tagesmütter vermittelt, Kinder von Mitarbeitern im Notfall betreut und Ferienprogramme anbietet.

Wir setzen uns dafür ein, dass Menschen mit Schwerbehinderung gleichberechtigt am Arbeitsleben teilhaben können. Ihre Beschäftigungsquote im Jahresdurchschnitt liegt bei der Deutsche Post AG mit 7,9 % (Stand: 18. Januar 2011) deutlich über der vergleichbaren Quote der privaten Wirtschaft in Deutschland (3,7 % im Jahr 2008, Quelle: Bundesagentur für Arbeit).

#### A.63 Work-Life-Balance<sup>1)</sup>

Kopfzahl

|                                         | 2009   | 2010   |
|-----------------------------------------|--------|--------|
| Erziehungs-/Elternurlaub                | 2.302  | 2.036  |
| Familienbedingte unbezahlte Beurlaubung | 2.559  | 2.419  |
| Teilzeitbeschäftigte <sup>2)</sup>      | 67.010 | 63.126 |
| Anteil Teilzeitbeschäftigte (%)         | 38,4   | 36,9   |

<sup>1)</sup> Umfasst Mitarbeiter der Deutsche Post AG

<sup>2)</sup> Ohne Beschäftigte in Altersteilzeit in der Freistellungsphase

#### Mitarbeiterbefragung als Motor für Verbesserungen

Unsere jährliche Mitarbeiterbefragung zeigt uns, welche Fortschritte wir auf dem Weg zum bevorzugten Arbeitgeber machen. An der vierten konzernweiten Befragung haben sich im Berichtsjahr mit 79 % deutlich mehr Mitarbeiter beteiligt als im Vorjahr (76 %). Die Ergebnisse haben sich über alle elf Kennzahlen hinweg verbessert: Am besten bewertet wurden Kundenversprechen mit 77 % (Vorjahr: 70 %), Zusammenarbeit mit 74 % (Vorjahr: 71 %) und Arbeitsbedingungen mit 73 % (Vorjahr: 67 %). Zwar haben sich auch die Werte für Maßnahmen, die in Folge der Mitarbeiterbefragung ergriffen werden (53 %, Vorjahr: 44 %), und für die Umsetzung unserer Konzerninitiative „First Choice“ (59 %, Vorjahr: 51 %) erheblich verbessert, wir sehen hier aber nach wie vor Handlungsbedarf.

### Kreatives Potenzial nutzen

Mitarbeiter tragen mit ihren Ideen und Verbesserungsvorschlägen zu unserem Erfolg bei. Im Berichtsjahr haben sie 227.803 Vorschläge eingereicht, mit denen wir Abläufe verbessert, Reparatur- und Energiekosten gesenkt und einen Beitrag zum Umweltschutz geleistet haben. So konnten wir allein durch den Einsatz günstigerer Behälterwagen für den Transport von Sendungen in Briefzentren rund 400.000 € einsparen. Zudem haben wir das Ideenmanagement in weiteren Ländern Europas, Asiens und Nordamerikas eingeführt.

#### A.64 Ideenmanagement

|                                     |       | 2009    | 2010    |
|-------------------------------------|-------|---------|---------|
| Einsparung je Mitarbeiter           | €     | 550,24  | 470,83  |
| Verbesserungsvorschläge             | Stück | 226.993 | 227.803 |
| Angenommene Verbesserungsvorschläge | Stück | 178.303 | 183.323 |
| Nutzen                              | MIO € | 262,6   | 219,5   |
| Kosten <sup>1)</sup>                | MIO € | 12,0    | 9,3     |

1) Basiert zum Teil auf Hochrechnungen

## Unternehmerische Verantwortung

### Gelebte Verantwortung für Gesellschaft und Umwelt

Unternehmerische Verantwortung ist fester Bestandteil unserer „Strategie 2015“. Unter dem Motto „Living Responsibility“ haben wir unsere Programme und Maßnahmen in den Bereichen Umweltschutz, Katastrophenmanagement und Bildung gebündelt und so ausgerichtet, dass sie unsere strategischen Ziele unterstützen.

### Die Umwelt schützen

Mit dem Programm „GoGreen“ wollen wir die Auswirkungen unseres Geschäfts auf die Umwelt minimieren. Als zentrales Ziel des Programms wollen wir unsere CO<sub>2</sub>-Effizienz bis zum Jahr 2020 gegenüber 2007 um 30 % verbessern. Das schließt auch die Emissionen aus Transportleistungen von Subunternehmern ein, die derzeit einen Anteil von rund 75 % am gesamten CO<sub>2</sub>-Fußabdruck des Konzerns haben. Damit verringern wir auch unsere Abhängigkeit von fossilen Energieträgern, reduzieren Kostenrisiken bei Energie und Kraftstoffen und wappnen uns für eine Zukunft, in der CO<sub>2</sub>-Emissionen bepreist werden und Kunden zunehmend nach „grünen“ Lösungen fragen.

Wir ermitteln und berechnen die CO<sub>2</sub>-Emissionen nach dem international anerkannten Standard „Greenhouse Gas (GHG) Protocol“. Dieser unterscheidet zwischen Emissionen, die direkt aus eigenen Quellen („Scope 1“) stammen, und solchen, die indirekt durch den Bezug von Energie („Scope 2“) oder in unserem Auftrag durch Subunternehmer („Scope 3“) verursacht werden.

Im Berichtsjahr betrugen unsere CO<sub>2</sub>-Emissionen aus „Scope 1“ und „Scope 2“ rund 6,0 MIO Tonnen (Vorjahr: 5,6 MIO Tonnen). Diese Emissionen resultieren aus dem eigenen Verbrauch von rund 490 MIO Liter flüssigen Kraftstoffen (Diesel, Benzin etc.), 15 MIO kWh gasförmigen Kraftstoffen (Erdgas, Biogas), 1.500 MIO Liter Kerosin und 3.600 MIO kWh Energie (Strom, Erdgas etc.) in unseren Immobilien.

#### A.65 CO<sub>2</sub>-Emissionen 2010

Gesamt: rund 6,0 MIO Tonnen<sup>1)</sup>

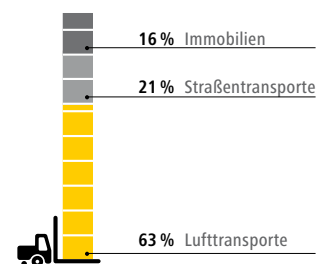

1) Scopes 1 und 2



Der Anstieg unserer direkten Emissionen ist vornehmlich durch Lufttransporte bedingt, die wir zunehmend selbst durchführen, statt Subunternehmer zu beauftragen.

Um auch nach der Einbeziehung der Luftfahrt in das Emissionshandelssystem der EU (EU-ETS) eine konsistente Darstellung zu wahren, werden wir die Abgrenzung zwischen eigenen und fremdvergebenen Transporten im Luftverkehr („Scope 1“ bzw. „Scope 3“) an die Regeln des EU-ETS anpassen. Dadurch werden sich voraussichtlich insgesamt Emissionen in signifikanter Höhe von „Scope 1“ nach „Scope 3“ verschieben.

Die angepassten Emissionsdaten einschließlich Angaben zum CO<sub>2</sub>-Ausstoß aus fremdvergebenen Transportleistungen werden im nächsten „Bericht zur Unternehmensverantwortung“ spezifiziert, der auch eine Aussage zu unserer CO<sub>2</sub>-Effizienz im Jahr 2010 enthalten wird.

#### **Die fünf Handlungsfelder des „GoGreen“-Programms**

Das Konzernprogramm „GoGreen“ ist gleichsam das Dach für unsere Umweltaktivitäten. Es umfasst fünf Handlungsfelder, auf denen wir im Berichtsjahr unter anderem folgende Fortschritte erzielt haben:

- **Transparenz schaffen.** Die eigenen CO<sub>2</sub>-Emissionen erfassen wir über das Finanzsystem. Hierzu verknüpfen wir konzernweit Rechnungsdaten mit Verbrauchsdaten für Kraftstoffe und Energie. Vom Jahr 2012 an sollen auch die CO<sub>2</sub>-Emissionen von Subunternehmern für alle Divisionen vereinheitlicht über unser Finanzsystem berichtet werden. CO<sub>2</sub>-Effizienz ist eine wichtige Größe in unserer strategischen Planung und ein Entscheidungskriterium bei größeren Investitionen. Dies wurde in der im Jahr 2010 aktualisierten Investitionsrichtlinie des Konzerns bekräftigt, die im Februar 2011 in Kraft trat.
- **Effizienz verbessern.** Wir verbessern kontinuierlich die CO<sub>2</sub>-Effizienz von Flotte, Gebäuden und Netzwerken, und zwar mit folgenden Maßnahmen: Aerodynamik, Antriebstechnik, Flottenerneuerung, Beleuchtungstechnik, Netzwerkoptimierung, Routenplanung, Kapazitätsauslastung und Kombination verschiedener Transportmittel. Im Jahr 2010 wurden Pilotprojekte für rund 150 Elektro- und Hybridfahrzeuge freigegeben, die bis 2011 realisiert werden.
- **Mitarbeiter mobilisieren.** Unsere rund 470.000 Mitarbeiter weltweit können mit umweltbewusstem und damit Ressourcen schonendem Verhalten entscheidend dazu beitragen, unsere CO<sub>2</sub>-Effizienz zu verbessern. Wir haben sie dafür mit verschiedenen Maßnahmen mobilisiert: So haben wir die Richtlinie aktualisiert, nach der Recyclingpapier im Konzern zu bevorzugen ist, und Veranstaltungen zum Weltumwelttag der UN durchgeführt. Seit dem Jahr 2010 müssen zudem alle Unternehmensbereiche im Rahmen ihrer Geschäftsplanung unterjährig über die CO<sub>2</sub>-Effizienz berichten.

- **Grüne Lösungen anbieten.** Mit unserem GoGreen-Versand haben wir als erster Logistikdienstleister den Kunden angeboten, die durch den Transport entstehenden Emissionen mit CO<sub>2</sub>-Zertifikaten aus Klimaschutzprojekten auszugleichen. Dieser Versandservice ist bereits in mehr als 30 Ländern verfügbar und umfasst neben Brief-, Paket- und Expressprodukten auch das Speditionsgeschäft. Im Berichtsjahr haben wir unser erstes eigenes Klimaschutzprojekt gestartet: Mit dem Verkauf effizienter, Brennholz sparender Kocher in Lesotho werden wir CO<sub>2</sub>-Zertifikate zum Ausgleich der CO<sub>2</sub>-Emissionen generieren.
- **Vorreiterrolle einnehmen.** Durch aktiven Dialog mit Vertretern aus Politik, Wirtschaft, Verbänden und Wirtschaftsinitiativen treiben wir den Umwelt- und Klimaschutz weiter voran. Im Jahr 2010 sind wir eine europäische Allianz eingegangen, die die CO<sub>2</sub>-Transparenz im Straßentransport erhöhen möchte. Global setzen wir uns weiterhin für angemessene Rahmenbedingungen zur Bepreisung von CO<sub>2</sub> ein sowie für Standards, nach denen Kohlendioxid gemessen wird. Wir befürworten Investitionsanreize für CO<sub>2</sub>-effiziente Lösungen und entsprechende Forschungsprojekte. Zudem haben wir im Jahr 2010 die Studie „Delivering Tomorrow: Zukunftstrend Nachhaltige Logistik“ veröffentlicht und dazu beigetragen, dass die maßgebliche Rolle unserer Industrie beim Klimaschutz öffentlich wahrgenommen wird.

#### Hilfe bei Naturkatastrophen leisten

Mit dem Programm „GoHelp“ nutzen wir globale Präsenz, logistische Kompetenz und Engagement der Mitarbeiter, um bei Naturkatastrophen die Logistik an den Flughäfen der betroffenen Regionen zu unterstützen. Gemeinsam mit den Vereinten Nationen betreiben wir zwei globale Programme: „DHL Disaster Response Teams“ zum Katastropheneinsatz vor Ort und „Get Airports Ready for Disaster“, mit dem lokale Behörden und Mitarbeiter von Flughäfen in durch Katastrophen gefährdeten Regionen auf den Ernstfall vorbereitet werden.

Um Menschenleben nach einer Naturkatastrophe zu retten, müssen Hilfsgüter schnell und gezielt verteilt werden. Flughäfen stellen dabei oft ein „Nadelöhr“ dar. Unsere Katastropheneinsatzteams bestehen aus rund 300 speziell geschulten DHL-Logistikexperten, die den Umschlag eintreffender Hilfsgüter organisieren. Die Sendungen werden von ihnen fachgerecht für den Weitertransport palettiert, sortiert und gelagert. Anschließend werden die Güter den Hilfsorganisationen übergeben. So können Engpässe und Zeitverzögerungen vor dem Weitertransport zu den Hilfsbedürftigen verhindert werden. Dank unseres globalen Netzwerks ist ein „DHL Disaster Response Team“ innerhalb von maximal 72 Stunden einsatzbereit. Im Jahr 2010 gab es vier Einsätze: die Erdbeben in Haiti und Chile sowie die Überflutungen in Guatemala und Pakistan. Insgesamt waren 105 freiwillige Helfer an 83 Tagen im Einsatz und haben dabei rund 7.000 Tonnen Hilfsgüter kostenlos umgeschlagen.

Im Rahmen des Projekts „Get Airports Ready for Disaster“ wurde gemeinsam mit dem Entwicklungsprogramm der Vereinten Nationen das Bereitschaftstraining in Nepal am Hauptflughafen „Kathmandu Tribhuvan International“ und vier weiteren regionalen Flughäfen durchgeführt. Weitere Schulungen in gefährdeten Gebieten Asiens sind für das Jahr 2011 geplant.

Deutsche Post DHL und UNICEF, das Kinderhilfswerk der Vereinten Nationen, haben in den vergangenen fünf Jahren gemeinsam gegen Kindersterblichkeit auf der Welt gekämpft. In diesem Zeitraum hat unser Konzern zahlreiche Projekte von UNICEF unterstützt, vor allem in Kenia, Peru und Indien. Diese Partnerschaft im Bereich Gesundheit ist Ende des Berichtsjahres ausgelaufen, da wir uns auf die Programme „GoGreen“, „GoHelp“ und „GoTeach“ fokussieren.

### **Bildung fördern**

Mit dem Programm „GoTeach“ setzen wir uns für bessere Bildung und gerechte Bildungschancen ein. Als Gründungspartner und größter Förderer aus der Wirtschaft unterstützen wir seit Februar 2009 die gemeinnützige Bildungsinitiative „Teach First Deutschland“. Sie gewinnt herausragende Hochschulabsolventen für einen zweijährigen Einsatz als sogenannte „Fellows“ an Schulen in sozialen Brennpunkten. Dort helfen sie den Lehrkräften im Unterricht und unterstützen die Schüler. So werden Arbeitsgemeinschaften gebildet, Sprechstunden abgehalten, Nachhilfe und Betreuung von Hausaufgaben angeboten. Mit dieser Partnerschaft wollen wir dazu beitragen, dass weniger privilegierte Kinder und Jugendliche in Deutschland gefördert werden. Außerdem lernen wir in den „Fellows“ junge Menschen kennen, die durch dieses Engagement neben ihren fachlichen Qualifikationen soziale Kompetenzen erwerben, die sie zu interessanten Nachwuchstalenten für unser Unternehmen machen.

Im Jahr 2010 haben wir zwei Mentorenprogramme entwickelt, in denen sich unsere Mitarbeiter freiwillig engagieren können. Für die Dauer von 15 Monaten unterstützen sie zunächst 25 Schüler von Teach-First-Deutschland-Schulen und 23 „Fellows“ in ihrer persönlichen und beruflichen Weiterentwicklung. Darüber hinaus helfen wir ausgewählten „Fellows“ bei ihrem beruflichen Einstieg und organisieren seit dem Vorjahr zweiwöchige Sommercamps, an denen im Jahr 2010 insgesamt 300 Kinder unserer Mitarbeiter und Schüler assoziierter Schulen teilgenommen haben.

Im September 2010 sind wir eine Partnerschaft mit „Teach For All“ eingegangen – dem Netzwerk von derzeit 18 nationalen Partnerorganisationen, die nach dem Modell von „Teach First Deutschland“ arbeiten. Gemeinsam wollen wir es auf mehr als 30 Partnerorganisationen erweitern und so zu einer besseren Bildung beitragen. Auf Länderebene werden wir mit den Organisationen in Peru, Chile, Argentinien, Indien, Spanien und Brasilien zusammenarbeiten. Im Rahmen von „GoTeach“ unterstützen wir auch Kinder unserer Mitarbeiter dabei, einen höheren Bildungsabschluss zu erreichen. So werden Stipendiaten des neuen Programms „UPstairs“ nicht nur finanziell gefördert, sondern auch mit Mentoring, Praktika im Konzern und zusätzlichen Kursen, zum Beispiel Fremdsprachen oder IT. Im Jahr 2011 beginnt „UPstairs“ mit zunächst 50 Stipendien in Südafrika, Indonesien, Mexiko und Rumänien. Bis 2014 wollen wir insgesamt 600 Stipendien vergeben.

### Eigene Leistung extern bewertet

Unsere Leistungen auf dem Gebiet der Nachhaltigkeit wurden auch im Jahr 2010 von Fachagenturen und Institutionen bewertet. Nachhaltiges Wirtschaften und sichtbare Wahrnehmung der Unternehmensverantwortung wird auch an den Finanzmärkten immer wichtiger für Investmententscheidungen. Sustainable Asset Management hat uns mit 85 (Vorjahr: 91) von 100 Punkten bewertet. Bestnoten haben wir in den Kategorien „Betriebliche Öko-Effizienz“, „Kraftstoffeffizienz“ sowie „Umweltberichterstattung“ erhalten. Unternehmen der Transport- und Logistikbranche haben im Durchschnitt 58 Punkte (Vorjahr: 61) erreicht. Der FTSE4Good-Index hat uns als Mitglied bestätigt. Wir werden weiterhin von der französischen Rating-Agentur Vigeo im „Advanced Sustainability Performance Index Eurozone“ geführt und sind im „FTSE KLD Global Climate 100 Index“ sowie weiteren Indices der FTSE-KLD-Indexserie aufgeführt. Das „Carbon Disclosure Project“ hat uns mit 97 (Vorjahr: 63) von 100 Punkten bewertet. Wir wurden damit als zweitbestes Unternehmen weltweit eingestuft und im Carbon Disclosure Leadership Index (CDLI) gelistet. Zusätzlich sind wir eines von nur etwa 10 % der von CDP weltweit bewerteten Unternehmen, deren Leistung im Klimaschutz mit der Bestnote „A“ bewertet wurde. Wir wurden folglich auch im Carbon Performance Leadership Index (CPLI) aufgenommen.

### Nachhaltigkeitsbericht erfüllt internationale Richtlinien

Ergänzende Informationen und Kennzahlen zum Thema Nachhaltigkeit, die nicht Bestandteil des Konzernlageberichts sind, schildern wir in unserem „Bericht zur Unternehmensverantwortung“, der im April 2010 auf unserer Internetseite erschienen ist. Er wurde, wie die vorhergehenden Nachhaltigkeitsberichte, auf der Grundlage der „Global Reporting Initiative (GRI) Sustainability Reporting Guidelines“, ergänzt durch das „GRI Sector Supplement for the Logistics and Transport Sector“, erstellt. Er erreicht gemäß der nach GRI vorgesehenen Selbstbewertung den „GRI-Level B +“, erfüllt also wesentliche Anforderungen und bietet durch unabhängige externe Prüfer verifizierte Informationen. Unser nächster „Bericht zur Unternehmensverantwortung“ wird im zweiten Quartal 2011 ebenfalls auf unserer Internetseite erscheinen.

@ [dp-dhl.de/verantwortung](http://dp-dhl.de/verantwortung)

## Beschaffung

### Ausgaben leicht gestiegen

Im Jahr 2010 hat der Konzern Waren und Dienstleistungen im Wert von rund 8,5 MRD € (Vorjahr: 7,7 MRD €) zentral eingekauft. Wie in den vergangenen Jahren sind Transportleistungen nicht in der Gesamtsumme enthalten, weil diese generell von den Geschäftsbereichen beschafft werden. Der Einkauf ist hier jedoch zunehmend eingebunden.

In Anbetracht der im Berichtsjahr noch nachwirkenden weltweiten Rezession hat der Einkauf weiter daran gearbeitet, die Kosten im Konzern zu senken. Wie in den Vorjahren haben wir Produkte und Dienstleistungen gebündelt und regional wie international als Gesamtpaket bei leistungsstarken Lieferanten eingekauft.

### A.66 Beschaffungsausgaben 2010

Volumen: 8,5 MRD €

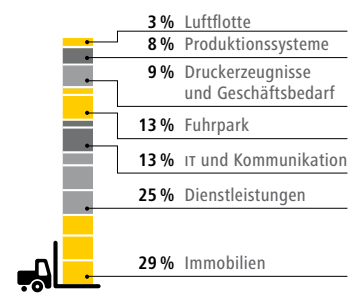

Im Rahmen des weltweiten Programms zur Effizienzsteigerung im Bereich Telekommunikation haben wir in drei weiteren Regionen Verträge mit leistungsstarken Partnern abgeschlossen: Vodafone deckt die Datendienste der DHL-Unternehmensbereiche in 67 Ländern der Emerging Markets ab und übernimmt zudem Mobilfunk und Datendienste in der Region Asia Pacific. Dort haben wir außerdem mit British Telekom ein Abkommen über Datendienste und das Festnetz geschlossen. In Lateinamerika wird der mexikanische Anbieter Telmex für die DHL-Unternehmensbereiche in Argentinien, Brasilien, Chile, Kolumbien und Mexiko tätig. Durch das weltweite Programm sollen in den nächsten fünf Jahren insgesamt mehr als 190 Mio € eingespart werden.

In Europa und den Vereinigten Staaten haben wir Rahmenverträge mit Hewlett Packard abgeschlossen: Statt Drucker kaufen wir komplette Druckleistungen ein, wodurch wir den Bedarf transparenter machen und optimieren. Diese Umstellung wird Kosten sparen und zudem den Stromverbrauch und die CO<sub>2</sub>-Emissionen des Konzerns verringern.

Erstmals haben wir einen globalen Rahmenvertrag für die Beschaffung von Transport- und Verladegeräten, zum Beispiel Gabelstaplern, mit einem neuen Betriebskonzept abgeschlossen. So wurde ein Mietmodell vereinbart, mit dem wir flexibler agieren und die Kosten für unsere Geräteflotte optimieren können. Der Vertrag wird zunächst vom Unternehmensbereich SUPPLY CHAIN in der Region Europa, Mittlerer Osten und Afrika genutzt.

Wesentlicher Bestandteil der Einkaufsaktivitäten war es wiederum, wichtige Lieferanten zu bewerten und die Beziehungen zu ihnen weiterzuentwickeln. Außerdem testen wir seit dem Berichtsjahr in Deutschland und weiteren europäischen Ländern gemeinsam mit einer Bank ein neues Finanzierungs- und Bezahlmodell, von dem sowohl der Konzern als auch die Lieferanten profitieren werden. Es unterstützt die Unternehmensbereiche unter anderem dabei, ihr Working Capital zu optimieren. Den Lieferanten eröffnet das Programm günstige Finanzierungsmöglichkeiten.

#### **Profil der Einkaufsorganisation weiterentwickelt**

Der Einkauf wird im Konzern zentral gesteuert. Die Leiter des Global Sourcing und ihre 16 Materialgruppenmanager arbeiten eng mit den Einkaufsleitern der Regionen zusammen und berichten an den Leiter des Konzerneinkaufs. So können wir den Bedarf im Konzern weltweit bündeln und gleichzeitig auch den lokalen Anforderungen der Geschäftseinheiten gerecht werden.

Der strategische Einkauf wurde zudem neu in die beiden Bereiche „Global Sourcing Operations“ und „Global Sourcing Services“ gegliedert. So können wir Synergien in der Zusammenarbeit der Materialgruppenmanager besser nutzen. Die strategische Beschaffung und deren Abwicklung werden zunehmend von regionalen Kompetenzzentren übernommen.

Das im Vorjahr eröffnete „DHL Procurement Office China“ in Schanghai hat eine Reihe von Projekten erfolgreich durchgeführt. Es verfolgt das Prinzip des „Best Cost Country Sourcing“, das eine optimale Balance zwischen Kosten, Qualität und Risiko anstrebt. Verpackungsmaterialien, Druckerzeugnisse, Unternehmensbekleidung und Werbematerialien gehören zu den Materialgruppen, die über dieses Büro beschafft werden können. Es arbeitet eng mit allen Regionen zusammen. Seine Lieferanten werden von dem unabhängigen Anbieter STR (Specialized Technology Resources) regelmäßig geprüft.



Der Einkauf entwickelt seine internen Dienstleistungen ständig weiter und unterstützt die Geschäftsbereiche in einigen Fällen beim Angebot von Beschaffungsdienstleistungen für Kunden. In Ländern, in denen wir langjährige Erfahrung im Einkauf besitzen, bieten wir diese als integrierte Beschaffungs- und Logistikleistung an, besonders im Supply-Chain-Geschäft.

#### **Unser Einkauf ist umweltbewusst**

Um ökologische Aspekte des Einkaufs kümmern sich Mitarbeiter verschiedener Regionen und Materialgruppen in einem „Grünen Team“. Es arbeitet unter anderem daran, ökologische Kennzahlen im Beschaffungsprozess zu verankern. So ist die Energie- und CO<sub>2</sub>-Effizienz in die Berechnung der „Total Cost of Ownership“ eingeflossen. Vielfach werden umweltrelevante Aspekte bereits bei der Einkaufsentscheidung berücksichtigt.

Beispielsweise wird der Anbieter „Office Depot“ alle Geschäftseinheiten in den Vereinigten Staaten künftig mit Büromaterialien beliefern. Er bietet unter anderem ein großes Sortiment an „grünen“ Produkten. Zudem ist es möglich, die Menge an CO<sub>2</sub>-Emissionen zu bestimmen, die durch deren Verbrauch entstanden sind. In Deutschland wurden in unserem elektronischen Bestellsystem umweltfreundliche Artikel für den internen Nutzer leichter erkennbar gemacht.

Wir haben eine globale Papierrichtlinie eingeführt, wonach grundsätzlich Recyclingpapier einzukaufen ist. Dies gilt für Papier, Papierprodukte, Druckerzeugnisse und Verpackungsmaterial auch dann, wenn Dienstleister für den Konzern einkaufen. Damit leisten wir einen Beitrag zum schonenden Umgang mit Ressourcen. Zudem haben wir uns dazu verpflichtet, Papier und Papierprodukte im Konzern so sparsam und effizient wie möglich einzusetzen.

Wie in den Vorjahren haben wir erneut Lagerhäuser in verschiedenen Regionen auf energieeffiziente Beleuchtung umgerüstet. Die neuen Lampen sorgen neben geringeren Energiekosten und CO<sub>2</sub>-Emissionen auch für helleres Licht. In Asien wurde die Initiative auch auf Büroräume ausgeweitet.

Der Einsatz von Fahrzeugen mit umweltfreundlichen Antrieben wird in verschiedenen Pilotprojekten getestet. Beispielsweise wurden 10 Fahrzeuge des Typs Iveco Electric Daily eingekauft. Diese europaweit ersten 3,5-Tonnen-Transporter sollen im kommenden Jahr in der Paketzustellung in Deutschland eingesetzt werden. Außerdem wurden 15 Mercedes-Benz Vito e-Cell gekauft, und in Großbritannien testen wir zusammen mit Volvo Trucks den weltweit ersten 18-Tonnen-Hybridlastwagen im täglichen Einsatz.

#### **Einkaufssysteme stärker nutzen**

Im Berichtsjahr haben wir den Einsatz von IT-Anwendungen verstärkt, mit denen Waren und Dienstleistungen effizient beschafft werden können. Unser elektronisches Bestellsystem „GeT“ wurde bisher vor allem in Deutschland und den Vereinigten Staaten, aber auch in Mexiko und einigen europäischen Ländern eingesetzt. Seit dem Jahr 2010 nutzen es auch Anwender in Spanien, Portugal, Luxemburg, Italien, Ungarn und der Tschechischen Republik.

Außerdem setzen wir verstärkt „eSourcing“ ein, um unsere Einkaufsprozesse effizienter und transparenter zu machen. Hier laufen alle wichtigen Schritte einer Ausschreibung elektronisch ab – einschließlich Bieterauktionen. Wir haben dafür im Berichtsjahr eine entsprechende Struktur geschaffen und rund 350 interne Nutzer geschult. Überall dort, wo es sinnvoll ist, wird seitdem elektronisch eingekauft.

Im Jahr 2011 wollen wir den elektronischen Einkauf intensivieren und auch die Anzahl der Bieterauktionen erhöhen. Dies wird zunehmend auch den Einkauf von Transportleistungen einschließen und damit zur Effizienz und Transparenz der Einkaufsprozesse beitragen.

Außerdem ist geplant, die Partnerschaften mit wichtigen Lieferanten zu intensivieren, um neue Produkte und Konzepte schnell nutzen zu können.

## Forschung und Entwicklung

Da der Konzern als Dienstleistungsunternehmen keine Forschung und Entwicklung im engeren Sinne betreibt, sind hierzu keine nennenswerten Aufwendungen zu berichten.

## Kunden und Qualität

### **Innovative Technik als Wettbewerbsvorteil im Briefgeschäft**

In Deutschland unterhalten wir ein flächendeckendes Transport- und Zustellnetz mit 82 Brief- und 33 Paketzentren, in denen werktäglich 66 Millionen Brief- und rund 2,6 Millionen Paketsendungen qualitativ hochwertig, effizient und umweltschonend bearbeitet werden. Die hohe Automationsquote im Briefbereich haben wir mit mehr als 90 % gehalten.

Unsere Kunden erwarten von uns höchste Qualität. Sie bewerten unsere Leistung danach, ob ihre Sendungen schnell, zuverlässig und unbeschädigt ankommen. Unser Qualitätsmanagement basiert auf einem System, das jährlich vom Technischen Überwachungsverein (TÜV) Nord zertifiziert wird. Bei der Laufzeit von Briefen in Deutschland haben wir erneut eine sehr hohe Qualität erzielt: Nach Erhebungen des Qualitätsforschungsinstituts Quotas wurden deutlich mehr als 94 % der Briefe, die uns während der täglichen Annahmezeiten oder bis zur letzten Briefkastenleerung erreicht haben, dem Empfänger bereits am nächsten Tag zugestellt.

Im Paketbereich konnten die guten Laufzeitergebnisse des Vorjahres von fast 90 % im Berichtsjahr wieder erreicht werden. Gemessen werden Pakete, die wir bei gewerblichen Kunden abgeholt haben und die schon am nächsten Tag zugestellt wurden. Unser internes Laufzeitmesssystem für den Paketversand wird seit 2008 durch den TÜV Rheinland zertifiziert.

Die Laufzeiten der internationalen Briefe werden von der International Post Cooperation (IPC) ermittelt. Nach Vorgabe der Europäischen Union müssen 85 % aller grenzüberschreitenden Sendungen in der EU innerhalb von drei Tagen nach Einlieferung zugestellt sein. Diese Vorgabe werden wir wieder deutlich übertreffen und die Marke 96 % erreichen.

Die durchschnittliche Wochenöffnungszeit unserer rund 20.000 Filialen und Verkaufspunkte ist dank der Kooperation mit dem Handel von 46 auf 49 Stunden gestiegen. Der „Kundenmonitor Deutschland“, die größte Zufriedenheitsstudie für Privatkunden in Deutschland, befragt unsere Filialkunden jährlich danach, wie zufrieden sie mit unseren Leistungen sind. Unsere Servicequalität erreicht insgesamt bereits seit Jahren Spitzenwerte. Im Berichtsjahr legten vor allem die Postfilialen noch einmal zu. Unsere Partnerfilialen erreichten den besten Zufriedenheitswert seit Beginn der Studie im Jahr 1997: Mehr als 90 % der Kunden werden innerhalb von drei Minuten bedient. Das bestätigen neutrale Testkunden von TNS Infratest, die in unserem Auftrag die Filialen etwa 30.000 Mal im Jahr nach einem vom TÜV Rheinland zertifizierten Verfahren prüfen.

Wir betrachten umweltschonendes Arbeiten als zentrales Qualitätsmerkmal. In Deutschland arbeiten wir deshalb im Brief- und Paketbereich mit einem vom TÜV Nord zertifizierten Umweltmanagementsystem. Im Rahmen der „GoGreen“-Initiative bieten wir Privat- und Geschäftskunden einen klimaneutralen Versand an und testen Elektro- und Hybridantriebe im Transport sowie energiesparende Beleuchtung in Gebäuden.

#### Servicequalität als Wettbewerbsvorteil im Expressgeschäft

Als eine wesentliche Komponente unserer Initiative „Focus 2010“ wollen wir die Servicequalität kontinuierlich verbessern. Dazu verfolgen wir die sich ständig ändernden Kundenanforderungen und kontrollieren unsere Leistungen, zum Beispiel durch „Mystery Shopper“. So konnten wir im Berichtsjahr 90 % der eingegangenen Beschwerden in der vorgegebenen Zeit klären. Unsere Bemühungen haben sich ausgezahlt: In China sind wir beispielsweise mit dem „Best Call Center Award 2010“ ausgezeichnet worden und in Großbritannien standen wir an erster Stelle für „Overall Email Service 2010“ und zählten zu den 50 führenden Call-Centern.

Wir verbessern kontinuierlich unsere Abläufe, um schnell, effektiv und kosteneffizient zu arbeiten. Standardisierte Abläufe sind dabei entscheidend. So haben wir im Mai 2010 global eine standardisierte Internetplattform eingeführt. Kunden erhalten darüber weltweit einen einfachen und einheitlichen Zugang zu unseren Serviceleistungen – unabhängig davon, ob sie diese als Einzelperson oder als global tätige Organisation in Anspruch nehmen. Zeitgleich haben wir Lösungen weiterentwickelt, mit denen Kunden ihre eigenen IT-Systeme mit unseren verbinden können, um so unsere Zustelldienste direkt zu erreichen.

Im Rahmen unseres First-Choice-Programms haben wir mehr als 400 Initiativen umgesetzt und uns damit zum Beispiel bei Rechnungsstellung und Verzollung von Sendungen nach Ankunft im Zielland verbessert. Dies wiederum hat die Zustellgenauigkeit beim Kunden erhöht und die Laufzeit verkürzt.

Mit modern ausgestatteten Zentren zur Qualitätskontrolle können wir Sendungen weltweit verfolgen und unsere Abläufe dynamisch anpassen. Bei unvorhersehbaren Ereignissen werden zum Beispiel Flug- und Sendungsrouten unmittelbar angepasst, um sicherzustellen, dass Sendungen zur vereinbarten Zeit die Empfänger erreichen. Eine neue Studie der PA Consulting zeigt: Wir sind weltweit der zuverlässigste Anbieter von Expressdienstleistungen – ein Beleg dafür, dass wir unser Kundenversprechen einhalten!

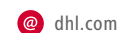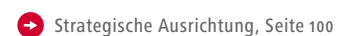

Strategische Ausrichtung, Seite 100

Betriebliche Sicherheit, Einhaltung von Standards sowie Servicequalität unserer Standorte werden regelmäßig überprüft. Rund 170 Standorte sind zudem von der „Transported Asset Protection Association“ (TAPA), einer der weltweit angesehensten Sicherheitsorganisationen, zertifiziert. Im Jahr 2010 wurden zudem die ersten Einrichtungen in Nordamerika zertifiziert. Außerdem hat die CBP (US Customs and Border Protection) im Rahmen eines Audits die Sicherheitseinrichtungen des Drehkreuzes Leipzig in mehrfacher Hinsicht als vorbildlich bezeichnet. Denn: Die Sicherheit unserer Kunden, ihrer Sendungen und unserer Mitarbeiter ist und bleibt für uns entscheidend.

#### **Kundennähe als Wettbewerbsvorteil im Speditionsgeschäft**

Als Dienstleistungsunternehmen ist die Zufriedenheit der Kunden Maßstab unseres Handelns. Im Berichtsjahr haben wir erneut mehr als 19.000 Kunden in 49 Ländern danach befragt. Aus den Ergebnissen haben wir rund 1.000 First-Choice-Maßnahmen abgeleitet, von denen wir 200 gemeinsam mit unseren Kunden umgesetzt haben. Mit einem Schlüsselkunden im Bereich Technologie haben wir die Produktivität seiner Werkslogistik um 33 % gesteigert und zugleich die Umlaufzeiten von zehn auf zwei Stunden gesenkt, womit der Kunde seine Kosten an einem Standort allein um rund 50.000 € jährlich verringern konnte.

Bis November 2010 sind mehr als 4.500 unserer Mitarbeiter in der First-Choice-Methodik zertifiziert worden, darunter das gesamte Managementteam. Auf dieser Basis wollen wir im Jahr 2011 noch mehr Verbesserungsmaßnahmen für unsere Kunden umsetzen.

Die im Vorjahr eingeführte einheitliche „Qualitäts-Scorecard“ für unsere Niederlassungen haben wir so gut wie flächendeckend im Geschäftsfeld Global Forwarding implementiert.

Dass Kunden unsere Bemühungen um noch bessere Qualität anerkennen, bestätigt nicht zuletzt die Auszeichnung des Technologiekonzerns Huawei: Bereits zum dritten Mal in Folge erhielten wir als einziges Logistikunternehmen den „Excellent Core Partner Award“ für hervorragende bereichsübergreifende Leistungen. Zudem konnten wir mit verbesserten Zolldienstleistungen in Brasilien die Auszeichnung „Phoenix Trophy of Efficiency“ gewinnen, die zuvor zehn Jahre lang einem lokalen Wettbewerber verliehen worden war. Insgesamt bestätigen unsere Kunden, dass sich die Qualität unseres Angebots verbessert hat. Die Kundenzufriedenheit hat sich gegenüber dem Vorjahr in vielen Ländern erheblich erhöht.

#### **Kundenzufriedenheit als Wettbewerbsfaktor im Supply-Chain-Geschäft**

In der Supply-Chain-Industrie wollen wir führend darin sein, Verfahren und Methoden anzuwenden, die unseren Kunden den besten Service und den höchsten Mehrwert gewährleisten. Weltweit konsistente Prozesse unterstützen uns dabei, unseren Kunden in aller Welt replizierbare Lösungen und einheitlich hohe Servicestandards zu bieten. Die Prozesse verbessern wir kontinuierlich und erfolgreich: Gemäß einer Kundenbefragung im Jahr 2010 hat sich die Kundenzufriedenheit erheblich verbessert – acht von zehn Kunden bestätigen DHL im Supply-Chain-Geschäft als Anbieter ihrer Wahl.

Wir haben eine Reihe von Leistungsindikatoren festgelegt, an denen wir die Qualität unserer Leistung messen und überwachen, darunter Sicherheit, Produktivität und Lagergenauigkeit. Im Jahr 2010 haben wir weltweit unsere Servicestandards zu mehr als 95 % erreicht.

Für den nachhaltigen Geschäftserfolg ist unsere Servicequalität besonders in den ersten zwölf Monaten eines neuen Kundenprojekts entscheidend. Um die Kundenerwartungen während dieser Implementierungsphase zu erfüllen, sind in jeder Region, in der wir tätig sind, spezielle Teams von Projektmanagern tätig, die in führenden Methoden des Projektmanagements geschult und mit einem Set an Standardtools ausgestattet sind.

Ein weiterer Schlüssel für den langfristigen Erfolg ist es, Qualität und Effizienz unseres Bestandsgeschäfts kontinuierlich zu verbessern. Wir haben im Berichtsjahr mehr als 1.400 entsprechende Projekte abgeschlossen, oft in Zusammenarbeit mit unseren Kunden. Angeleitet durch unsere Prozessexperten, „Process Improvement Advisors“ genannt, wurden Maßnahmen entwickelt und geplant, mit denen die Leistung verbessert, Abläufe vereinfacht und Kosten gesenkt werden konnten. Auf diese Weise haben wir mehr als 100 Mio € eingespart, die wir mit unseren Kunden teilen.

## Marken

### A.67 Marken und Geschäftsfelder

| Deutsche Post DHL   |                                                                                                                                                                                                                          |                                                                                              |                                                             |                                                                                          |                                                                  |
|---------------------|--------------------------------------------------------------------------------------------------------------------------------------------------------------------------------------------------------------------------|----------------------------------------------------------------------------------------------|-------------------------------------------------------------|------------------------------------------------------------------------------------------|------------------------------------------------------------------|
| Unternehmensbereich | BRIEF                                                                                                                                                                                                                    |                                                                                              | EXPRESS                                                     | GLOBAL FORWARDING, FREIGHT                                                               | SUPPLY CHAIN                                                     |
| Leistungsmarke      | Deutsche Post                                                                                                                                                                                                            | DHL                                                                                          | DHL                                                         | DHL                                                                                      | DHL                                                              |
| Leistungsfeld       | <ul style="list-style-type: none"> <li>• Brief</li> <li>• Kommunikation</li> <li>• Dialog Marketing</li> <li>• Mehrwertleistungen</li> <li>• Presse Services</li> <li>• Philatelie</li> <li>• Renten-Services</li> </ul> | <ul style="list-style-type: none"> <li>• Global Mail</li> <li>• Paket Deutschland</li> </ul> | <ul style="list-style-type: none"> <li>• Express</li> </ul> | <ul style="list-style-type: none"> <li>• Global Forwarding</li> <li>• Freight</li> </ul> | <ul style="list-style-type: none"> <li>• Supply Chain</li> </ul> |
| Segmentmarke        |                                                                                                                                                                                                                          |                                                                                              |                                                             |                                                                                          | <ul style="list-style-type: none"> <li>• Williams Lea</li> </ul> |

### Hoher Bekanntheitsgrad und guter Ruf

Für uns als weltweit tätiges Dienstleistungsunternehmen gehören gut geführte Marken zu den zentralen Elementen unserer Strategie. Ein hoher Bekanntheitsgrad und ein guter Ruf unserer Marken Deutsche Post und DHL machen uns für Aktionäre, Mitarbeiter, Kunden und Lieferanten attraktiv und tragen so zum wirtschaftlichen Erfolg des Konzerns bei. Laut einer im Dezember 2010 selbst durchgeführten Umfrage verfügt die Marke DHL bei internationalen Express- und Logistikentscheidern bereits über einen sehr hohen Bekanntheitsgrad von 89 %.



➔ Strategische Ausrichtung, Seite 99

Seit dem Jahr 2010 steht die Marke DHL unter dem Anspruch „Excellence. Simply Delivered.“ Direkt, sachlich und effizient fasst er unser Versprechen zusammen, mit unseren Leistungen für den Kunden leicht erreichbar zu sein und zu seinem Erfolg beizutragen. Damit unterstützt er die „Strategie 2015“ und unser Ziel, das Logistikunternehmen Nummer eins für die Welt zu werden.

#### **Markenwelt erlebbar machen**

Für den Markenauftritt ist entscheidend, wie Kunden den Umgang mit den weltweit rund 470.000 Mitarbeitern erleben. Dafür sind Mitarbeiter im Kundenkontakt überall mit Unternehmensbekleidung ausgestattet sowie Fahrzeuge, Gebäude, Werbe- und Informationsmedien einheitlich und einprägsam gestaltet. Wir wollen die gesamte Belegschaft weiterhin zu aktiven Botschaftern unserer Marken machen.

@ dhl-brandworld.com

Im Jahr 2010 ging die „DHL Brand World“ ans Netz. Auf dieser Internetplattform können Kunden, Mitarbeiter und Interessenten die Welt der Marke DHL erleben. Wir stellen Neuigkeiten, Erfolgsstorys und Aktivitäten vor – von Werbung über Partnerschaften bis zu gesellschaftlichem Engagement. Kaum beworben, nutzen nach wenigen Monaten schon bis zu 80.000 Besucher je Monat die Plattform. Die „DHL Brand World“ ist mit dem „Annual Multimedia Award 2011“ ausgezeichnet worden.

#### **Markteinführung des E-Postbriefs erfolgreich beworben**

Unsere Marken stehen im harten Wettbewerb mit nationalen und internationalen Anbietern. Klar und einprägsam aufgestellt, erleichtern sie Kauf- und Investitionsentscheidungen. Begleitet von Marktforschung haben wir im Berichtsjahr über 100 Mio € in den Ausbau und die Bewerbung unserer Markenleistung investiert.

Unter dem Ansatz „One DHL“ haben wir unsere Markenarbeit systematisch verstärkt. Im April startete die erste Werbekampagne, die auf dem globalen, integrierten Werbekonzept basiert. Mehr als 1.600 Anzeigen in über 250 Publikationen sind in 21 Ländern und 16 Sprachen erschienen.

➔ Unternehmensbereich BRIEF, Seite 51

Als bedeutende Innovation der Deutschen Post ist im Jahr 2010 der E-Postbrief auf dem Markt eingeführt worden. Zwischen Juli und September wurde das Produkt mit einer bundesweiten Kampagne über reichweitenstarke Medien beworben. Mit TV-Spots, Anzeigen, Plakaten, Internetbannern, Werbung in den Filialen, Postwurfsendungen und Promotions wurde die Bevölkerung dazu aufgefordert, sich persönliche Adressen zu sichern. Seit November können sich die Kunden direkt im Internet registrieren.

@ epost.de

Bis Ende Oktober 2010 hatten sich bereits eine Million Kunden ihre persönliche Adresse gesichert. Die begleitende regelmäßige Kundenbefragung zeigt einen kontinuierlichen Anstieg der Produktbekanntheit: Anfang November kannten bereits 62 % der deutschen Bevölkerung den E-Postbrief. Die Kampagne ist somit ein großer Erfolg und verschafft der Deutschen Post einen Wettbewerbsvorsprung.

### **Partner aufmerksamkeitsstarker Veranstaltungen**

Parallel zur klassischen Werbung verstärken wir unseren Außenauftritt seit Jahren durch Partnerschaften mit hochklassigen Marken und Veranstaltungen, für die wir als offizieller Logistikpartner immer auch anspruchsvolle Logistikleistungen erbringen. Dazu zählen die Formel 1, das Leipziger Gewandhausorchester und die „IMG Fashion Week“, die unter anderem in Berlin, London, New York, Miami und Moskau stattfindet. Die Deutsche Post ist Partner des DFB und der DTM.

Mit 240 ausstellenden Ländern und Organisationen auf 5,4 km<sup>2</sup> Ausstellungsfläche und mehr als 73 Millionen Besuchern war die „Expo Shanghai 2010“ die größte und meistbesuchte Expo aller Zeiten. Allein der zentrale chinesische Themenpavillon zog mehr als acht Millionen Besucher an und war damit einer der beliebtesten. DHL gehörte zu den Ideengebern für „Urban Planet“, der das Motto der Expo „Better City. Better Life.“ beleuchtete.

Im Jahr 2011 sind wir Partner zweier bedeutender Sportveranstaltungen: Während der Rugby-Weltmeisterschaft in Neuseeland wird DHL die Ausrüstung der 20 teilnehmenden Mannschaften zwischen den 48 Trainings- und 13 Austragungsstandorten transportieren. Und für das „Volvo Ocean Race“ gewährleistet DHL den Transport von Segelausrüstung zwischen den zehn Häfen auf allen fünf Kontinenten.

### **Konsequent den Wert steigern**

Der Erfolg lässt sich quantifizieren: Für die Deutsche Post ermittelte das Beratungsunternehmen Semion Brand-Broker 2010 einen Markenwert von 12.692 MIO € – wie im Vorjahr Platz sechs im Ranking der wertvollsten deutschen Marken. Analysiert wurden unter anderem Finanzwert, Markenschutz, Markenimage und Markenstärke. Im Jahr 2011 wollen wir die erfolgreiche Markenarbeit fortsetzen. Wir werden den Ansatz „One DHL“ weiterführen und ein einheitliches Image etablieren, mit dem wir die Marke DHL klar vom Wettbewerb abgrenzen. Wir wollen die gestützte Bekanntheit von DHL in allen Segmenten des Logistiksektors auf über 90 % und die ungestützte im Logistiksektor und in Schlüsselmärkten auf über 70 % steigern. Ende 2011 sollen 60 % der Entscheider für Logistikleistungen DHL als Anbieter in Betracht ziehen. Unser Ziel ist es, zu den 50 wertvollsten Marken der Welt zu gehören.

# **NACHTRAG**

## **Nachtragsbericht**

### **Keine weiteren wesentlichen Ereignisse**

Berichtspflichtige Ereignisse nach dem Bilanzstichtag lagen nicht vor.

# PROGNOSE

## Gesamtaussage zur erwarteten Entwicklung

Unsere starke Position als Marktführer im deutschen Briefgeschäft und in fast allen Geschäftsfeldern des Logistikbereichs ist die beste Voraussetzung für weiteres Wachstum. Unter der Annahme, dass die Weltwirtschaft um 3 % bis 4 % wächst und der Welthandel diesen Zuwachs um den Faktor 1,5 bis 2 übertrifft, erwarten wir für das Gesamtjahr 2011 ein Konzern-EBIT in Höhe von 2,2 MRD € bis 2,4 MRD €. Dazu sollten der Unternehmensbereich BRIEF 1,0 MRD € bis 1,1 MRD € und die DHL-Unternehmensbereiche 1,6 MRD € bis 1,7 MRD € beitragen. Das Ergebnis von Corporate Center/Anderes sollte mit rund –0,4 MRD € etwa auf dem Vorjahresniveau liegen. Das Konzernergebnis vor Effekten aus der Bewertung der Postbank-Instrumente sollte sich im Jahr 2011 analog zum operativen Geschäft weiter verbessern.

## Chancen und Risiken

### CHANCEN- UND RISIKOCONTROLLING

#### Chancen- und Risikocontrolling mit einheitlichem Berichtsstandard

Als international tätiges Logistikunternehmen sind wir einer Reihe von Veränderungen und Unsicherheiten ausgesetzt. Wir wollen die sich daraus ergebenden Chancen und Risiken früh erkennen und so steuern, dass dadurch der Unternehmenswert nachhaltig gesteigert wird. Dieses Ziel unterstützen wir mit einem konzernweiten Chancen- und Risikocontrolling. Quartalsweise schätzen Manager die möglichen Effekte von künftigen Szenarien ein und bewerten die Chancen und Risiken ihrer Bereiche. Risiken können jederzeit auch ad hoc gemeldet werden. Eine Freigabe entlang der Steuerungsprozesse bindet das Management in den Ablauf ein.

Unser Prozess zur Früherkennung verknüpft das Risikomanagement im Konzern zu einem einheitlichen Berichtsstandard. Dafür wurde die IT-Anwendung stetig weiterentwickelt. Bei den Standardauswertungen steht uns auch die Monte-Carlo-Simulation als stochastische Methode zur Risikoaggregation zur Verfügung.

A.68 Chancen- und Risikomanagementprozess im Ablauf

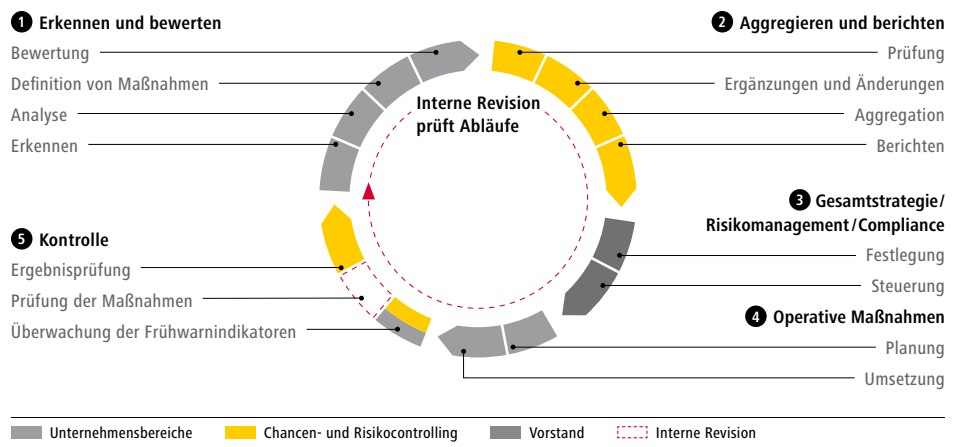

Die wichtigsten Schritte im Ablauf:

- ❶ **Erkennen und bewerten:** Chancen und Risiken sind definiert als potenzielle Abweichung vom geplanten Unternehmensergebnis. Quartalsweise schätzen Führungskräfte aller Unternehmensbereiche und Regionen unsere Chancen- und Risikosituation ein und dokumentieren entsprechende Maßnahmen. Sie bewerten in Form von Szenarien beste, erwartete und schlechteste Fälle. Für jedes Risiko wird mindestens ein Verantwortlicher benannt, der es bewertet, überwacht, mögliche Vorgehensweisen benennt, um es zu steuern, und darüber berichtet. Dies gilt ebenso für die Chancen. Die Ergebnisse werden in einer Datenbank dokumentiert.
- ❷ **Aggregieren und berichten:** Die verantwortlichen Controllingeinheiten sammeln diese Ergebnisse, werten sie aus und prüfen ihre Plausibilität. Sollten sich einzelne finanzielle Effekte überschneiden, werden diese in unserer Datenbank vermerkt und bei der anschließenden Aggregation berücksichtigt. Nach Freigabe durch den Bereichsverantwortlichen werden alle Ergebnisse an die nächste Hierarchieebene weitergegeben. Auf der letzten Stufe berichtet das Konzerncontrolling dem Konzernvorstand über die wesentlichen Chancen und Risiken sowie über die möglichen Gesamteffekte je Unternehmensbereich.
- ❸ **Gesamtstrategie:** Der Konzernvorstand legt fest, welchen grundlegenden Chancen und Risiken die Unternehmensbereiche ausgesetzt und wie diese erfolgreich zu steuern sind. Die Berichte des Konzerncontrollings bieten eine regelmäßige Informationsbasis für die Gesamtsteuerung von Chancen und Risiken. Das Compliance-Management ergänzt das Risikomanagement. Im Rahmen des Compliance-Managements berichtet der „Chief Compliance Officer“ direkt an den Finanzvorstand. Das von ihm geführte „Global Compliance Office“ entwickelt konzernweit Standards und unterstützt die entsprechenden Aktivitäten der Unternehmensbereiche.
- ❹ **Operative Maßnahmen:** Im Rahmen der Strategie legen die Unternehmensbereiche Maßnahmen fest, mit denen Chancen genutzt und Risiken gesteuert werden. Sie bewerten in Kosten-Nutzen-Analysen, ob Chancen zu ergreifen sind und ob Risiken vermieden, verringert oder auf Dritte übertragen werden können.
- ❺ **Kontrolle:** Für wichtige Chancen und Risiken sind Frühwarnindikatoren definiert, die von den Verantwortlichen kontinuierlich beobachtet werden. Ob die Vorgaben des Vorstands dabei eingehalten werden, überwacht in seinem Auftrag die Konzernrevision. Sie prüft auch die Qualität des gesamten Chancen- und Risikomanagements sowie des Compliance-Managements. Die Controllingeinheiten analysieren regelmäßig alle Komponenten des Prozesses sowie die Prüfberichte der Internen Revision und des Abschlussprüfers auf mögliche Verbesserungspotenziale und passen sie, wo nötig, an.

### **Internes auf die Rechnungslegung bezogenes Kontroll- und Risikomanagementsystem (Angaben nach § 315 Abs. 2 Nr. 5 HGB und erläuternder Bericht)**

Deutsche Post DHL stellt die Ordnungsmäßigkeit der Konzernrechnungslegung mit Hilfe eines internen darauf bezogenen Kontrollsystems (IKS) sicher. Es soll gewährleisten, dass die gesetzlichen Regelungen eingehalten werden und die interne wie externe Rechnungslegung im Hinblick auf die numerische Abbildung der Geschäftsprozesse valide ist. Der Buchungsstoff soll vollständig und richtig erfasst und verarbeitet werden. Fehler in der Rechnungslegung sollen grundsätzlich vermieden beziehungsweise wesentliche Fehlbewertungen zeitnah aufgedeckt werden.

Die Ausgestaltung dieses Kontrollsystems umfasst organisatorische und technische Maßnahmen, in die alle Gesellschaften des Konzerns einbezogen sind. Zentral vorgegebene Bilanzierungsrichtlinien regeln die Überleitung der lokalen Abschlüsse und stellen sicher, dass die Bilanzierungsstandards nach EU-IFRS einheitlich und konzernweit angewendet werden. Ein einheitlicher Kontenrahmen ist für alle Konzerngesellschaften verpflichtend. Vielfach wird die Rechnungslegung in „Shared Service Center“ gebündelt, um Abläufe zu zentralisieren und zu standardisieren. Die IFRS-Abschlüsse der einzelnen Konzerngesellschaften werden in einem einheitlichen System, basierend auf einer SAP-Software, erfasst und dann in einer einstufigen Konsolidierung an einem zentralen Standort verarbeitet. Automatische Plausibilitätsprüfungen und systemseitige Validierungen der Buchhaltungsdaten sind ein weiterer Bestandteil unseres Kontrollsystems. Daneben erfolgen regelmäßig manuelle Kontrollen, auf dezentraler Ebene durch die lokalen Verantwortlichen (zum Beispiel CFO) und zentral im Corporate Center durch die Zentralbereiche Konzernrechnungslegung, Steuern und Treasury. Über die genannten Strukturen des IKS und des Risikomanagements hinaus ist die Konzernrevision ein wesentliches Organ im Steuerungs- und Überwachungssystem des Konzerns. Im Rahmen ihrer risikoorientierten Prüfungshandlungen kontrolliert sie regelmäßig die rechnungslegungsrelevanten Prozesse und berichtet dem Vorstand über die Ergebnisse. Unter chronologischen Aspekten werden vor- und nachgelagerte Kontrollen und Analysen der gemeldeten Daten erstellt. Falls erforderlich, wird auf die Expertise externer Gutachter zurückgegriffen, zum Beispiel bei Pensionsrückstellungen. Schließlich garantiert die konzerneinheitlich gesteuerte Durchführung des Abschlussprozesses im Rahmen eines zentral verwalteten Abschlusskalenders einen strukturierten und effizient gestalteten Rechnungslegungsprozess.

## **CHANCEN**

### **Chancen aus der Marktentwicklung und unserer Positionierung**

Wesentliche Chancen des Konzerns bestehen in der weiteren Entwicklung unserer Märkte und in unserer strategischen Positionierung. Wir wollen bevorzugter Anbieter sein. Daher richten wir unser Dienstleistungsangebot noch stärker auf die Bedürfnisse der Kunden aus. Zudem verbessern wir unsere Kostenstrukturen und Abläufe.

Es gibt eine Reihe von zentralen Größen, die unser Geschäft stark beeinflussen und ihm zahlreiche Chancen eröffnen:



An erster Stelle steht die Aussicht auf weiteres Wachstum. Durch die fortschreitende Globalisierung wird die Logistikindustrie auch in Zukunft deutlich stärker wachsen als die Volkswirtschaften insgesamt. Wir rechnen daher in allen Logistikbereichen, in denen wir tätig sind, mit attraktiven Zuwächsen. Dies gilt besonders für Asien, wo die Handelsströme innerhalb des Kontinents und mit anderen Regionen weiter zunehmen werden. Davon werden wir überdurchschnittlich profitieren, weil wir mit den DHL-Unternehmensbereichen im asiatischen Raum besser vertreten sind als der Wettbewerb. Das gilt auch für weitere stark wachsende Regionen wie Südamerika oder den Mittleren Osten.

Weitere Wachstumsperspektiven ergeben sich aus der engeren Zusammenarbeit der DHL-Unternehmensbereiche. Mehr und mehr können wir integrierte Logistik- und Transportlösungen aus einer Hand anbieten – ein großer Wettbewerbsvorteil. Um ihn zu nutzen, haben wir eine Reihe von Initiativen beschlossen. Der Bereich DHL Solutions & Innovations (DSI) bündelt Know-how innerhalb von DHL und entwickelt daraus konzernweit neue Lösungen, zum Beispiel in den Bereichen temperaturgeführter Transport, Retouren-Logistik oder „City Logistics“, logistische Lösungen für Millionenstädte. Unser „Sector Management“ entwickelt gezielt branchenspezifische Lösungen für die Kunden. Zurzeit richten wir unser Augenmerk vor allem auf die Sektoren „Life Sciences & Healthcare“, „Technology“ und „Energy“. Zudem unterstützen wir gezielt Wachstumfelder für ausgewählte Kundengruppen.

Kommunikation und Handel über das Internet schaffen Bedarf für den Transport von Dokumenten und Waren. Im Briefbereich wollen wir mit dem E-Postbrief weiter wachsen, auch im Paketgeschäft entstehen daraus Wachstumsmöglichkeiten.

Schließlich bietet das Umweltbewusstsein der Kunden Chancen, überdurchschnittlich zu wachsen. Sie wollen ihre CO<sub>2</sub>-Emissionen nachhaltig senken, fragen daher vermehrt energieeffiziente Transporte und klimaneutrale Produkte nach. Auf diesem Gebiet sind wir führend in unserer Branche. Das CO<sub>2</sub>-neutrale Angebot umfasst Brief-, Paket- und Expressprodukte sowie Luft- und Seefrachttransporte.

#### **Ideen unserer Mitarbeiter nutzen**

Mit dem Ideenmanagement fördern wir die Innovationsfähigkeit des Unternehmens und erzielen nachhaltig Einsparungen. Unsere Mitarbeiter haben sich in den vergangenen Jahren als besonders ergiebige Quelle für neue Produkte und verbesserte Abläufe erwiesen.

➔ Mitarbeiter, Seite 75

#### **Chancen der Unternehmensbereiche**

Welche Marktchancen wir in den einzelnen Unternehmensbereichen sehen, welche Strategie und Ziele wir dabei verfolgen, schildern wir im Abschnitt Strategische Ausrichtung.

➔ Seite 101 ff.

## RISIKEN

### Risikokategorien und Einzelrisiken

Im Folgenden stellen wir die Risiken dar, die aus heutiger Sicht unsere Ertrags-, Finanz- und Vermögenslage wesentlich negativ beeinflussen könnten. Dies sind nicht notwendigerweise die einzigen Risiken, denen der Konzern ausgesetzt ist. Weitere Einflüsse, die uns derzeit noch nicht bekannt sind oder die wir noch nicht als wesentlich einschätzen, könnten unsere Geschäftstätigkeiten ebenfalls beeinträchtigen.

### Risiken aufgrund politischer und regulatorischer Rahmenbedingungen

Umfeldrisiken entstehen uns vor allem dadurch, dass Konzern und Tochtergesellschaften einen Teil ihrer Dienstleistungen in einem regulierten Markt erbringen. Seit dem 1. Januar 2008 ist die gesetzliche Exklusivlizenz in Deutschland aufgehoben. Allerdings war es Wettbewerbern bereits seit Januar 1998 durch Ausnahmeregelungen des Postgesetzes möglich, auch innerhalb der Gewichts- und Preisgrenzen der Exklusivlizenz tätig zu werden. Die Bundesnetzagentur hat als Regulierungsbehörde bis Ende des Jahres 2010 rund 1.500 Wettbewerbern eine Lizenz erteilt, von denen rund 650 am Markt tätig sind.

Die Rahmenbedingungen, unter denen die genehmigungspflichtigen Briefentgelte in den Jahren 2008 bis Ende 2011 im Price-Cap-Verfahren reguliert werden, hat die Regulierungsbehörde am 7. November 2007 mit der Maßgrößenentscheidung festgelegt. Danach sind für die genehmigungspflichtigen Briefpreise im Wesentlichen die gesamtwirtschaftliche Preissteigerungsrate und die erwartete Produktivitätsfortschrittsrate der Deutsche Post AG maßgeblich. Preissenkungen sind erforderlich, sofern die Inflationsrate im Referenzzeitraum unter der von der Regulierungsbehörde vorgegebenen Produktivitätsfortschrittsrate liegt. Für das Jahr 2011 mussten die Entgelte einzelner entgeltgenehmigungspflichtiger Briefprodukte den Vorgaben entsprechend gesenkt werden. Die Regulierungsbehörde hat einen entsprechenden Antrag der Deutsche Post AG am 27. Oktober 2010 genehmigt. Die Rahmenbedingungen für die Regulierung der genehmigungspflichtigen Briefentgelte ab Januar 2012 wird die Regulierungsbehörde in einem Price-Cap-Verfahren im Laufe des Jahres 2011 festlegen.

Die dritte EU-Postrichtlinie ist am 27. Februar 2008 in Kraft getreten. Sie schreibt der Mehrzahl der EU-Mitgliedstaaten grundsätzlich die Marktöffnung für das Jahr 2011 vor. Neun neue Mitgliedstaaten sowie Griechenland und Luxemburg haben die Möglichkeit, die Marktöffnung bis 2013 zu verschieben. Bis dahin gelten in Europa die bisherigen Grenzen: Der reservierbare Bereich umfasst Briefe bis 50 Gramm beziehungsweise das Zweieinhalbfache des Standardbriefpreises. Seitdem besteht Planungssicherheit darüber, wann in Europa alle nationalen Monopole enden.

Für die Deutsche Post AG ergeben sich aus der Liberalisierung der Postmärkte Risiken durch mehr Wettbewerb in Deutschland, aber auch Chancen auf den anderen europäischen Postmärkten. Der grenzüberschreitende Briefaustausch in Europa wurde 2010 zwischen der Deutsche Post AG und 22 europäischen Postgesellschaften auf der Grundlage der REIMS-Abkommen abgewickelt.

→ Glossar, Seite 232

→ Glossar, Seite 232

→ Glossar, Seite 232

Die Finanzverwaltung hat angekündigt, mehrere bisher von der Mehrwertsteuer befreite Briefprodukte rückwirkend als steuerpflichtig zu behandeln. Es ist davon auszugehen, dass geänderte Steuerbescheide für alle offenen Besteuerungszeiträume erlassen werden. Die Mehrwertsteuerbefreiung von Postdienstleistungen richtet sich nach Europarecht (Postdienste-Richtlinie, Mehrwertsteuersystem-Richtlinie) und nationalen Rechtsnormen (Postgesetz, Post-Universaldienstleistungsverordnung, Umsatzsteuergesetz). In diesem Rahmen hat die Deutsche Post AG ihre Postdienstleistungen entweder als umsatzsteuerfrei oder als umsatzsteuerpflichtig eingeordnet. Dieses Vorgehen hat die Finanzverwaltung über Jahre geprüft und nicht beanstandet. Wir werden gegen entsprechend geänderte Umsatzsteuerbescheide klagen. Auch wenn die Umsatzsteuerbefreiung der Produkte nach unserer Auffassung sowohl geltendem Europarecht als auch den nationalen Rechtsnormen entspricht, lässt sich das Risiko einer Steuernachzahlung nicht ausschließen.

Seit dem 1. Juli 2010 sind infolge einer Neufassung der einschlägigen Steuerbefreiungsvorschrift nur noch bestimmte Universaldienstleistungen in Deutschland von der Mehrwertsteuer befreit, die nicht auf der Grundlage individuell ausgehandelter Vereinbarungen oder zu Sonderkonditionen (Rabatten etc.) erbracht werden. Diese Gesetzesänderung entspricht nach Ansicht der Deutsche Post AG nicht vollständig den zu beachtenden Vorgaben des europäischen Gemeinschaftsrechtes. Aufgrund der mit der neuen gesetzlichen Regelung entstehenden Rechtsunsicherheit bemüht sich die Deutsche Post AG um eine notwendige Klärung einzelner Fachfragen mit den Finanzbehörden. Trotz weitgehender Umsetzung der erforderlichen Maßnahmen durch die Deutsche Post AG wird im Falle unterschiedlicher Rechtsansichten zwischen der Deutsche Post AG einerseits und der Finanzverwaltung andererseits eine gerichtliche Klärung erwogen.

#### **Risiken aus branchenspezifischen Rahmenbedingungen**

Neben den regulatorischen bestimmen markt- und branchenspezifische Rahmenbedingungen wesentlich den Geschäftserfolg unseres Konzerns.

Nach der Wirtschaftskrise, die ihren Höhepunkt im Jahr 2009 erreicht hatte, haben sich die gesamtwirtschaftlichen Bedingungen wieder deutlich verbessert, die Nachfrage nach Logistikleistungen ist gestiegen und damit der Umsatz im Berichtsjahr, was im kommenden Jahr einen positiven Trend erwarten lässt. Angesichts positiver Wachstumsprognosen, besonders für Deutschland und den asiatischen Raum, halten wir es aktuell nicht für wahrscheinlich, dass sich die Konjunktur kurzfristig erneut abkühlen und sich dies wesentlich auf unser geplantes Ergebnis auswirken wird. Die Krise hat einige unserer Kunden wirtschaftlich geschwächt. Mit dem konjunkturellen Aufschwung sinkt die Wahrscheinlichkeit von Kundeninsolvenzen wieder auf ein normales niedriges Niveau, sodass wir keine neuen nennenswerten Verluste durch Zahlungsunfähigkeit von Kunden erwarten.

Wesentliche Erfolgsfaktoren im Brief- und Logistikgeschäft sind Qualität, das Vertrauen des Kunden in den Geschäftspartner sowie wettbewerbsfähige Preise. Dank unserer hohen Qualität und der in den letzten Jahren erzielten Einsparungen sehen wir uns in der Lage, eine potenzielle Gefährdung unseres geplanten Ergebnisses durch Wettbewerb auf eher niedrigem Niveau zu halten. Nicht zuletzt unsere verschiedenen Konzernprogramme sichern unsere starke Wettbewerbsposition.

### Sicherheitsrisiken

Die weltweite Sicherheitslage hat sich Ende des Berichtsjahres zunehmend verschlechtert. Laut Sicherheitsbehörden stellt besonders der Terrorismus ein erhöhtes Risiko für die westliche Welt dar. Konkrete Bedrohungen gegen Personen, Einrichtungen oder Unternehmen lägen derzeit aber nicht vor, so wird versichert.

Wir teilen die Einschätzung der Behörden und nehmen das erhöhte Sicherheitsrisiko ernst. Die weltweite Gefährdungslage wird daher permanent analysiert, unsere Sicherheitskonzepte regelmäßig überprüft und gegebenenfalls angepasst.

Nach dem Versand von Paketbomben aus dem Jemen und Griechenland haben sich betroffene Unternehmen und Behörden weltweit darauf geeinigt, die Sicherheitsmaßnahmen im Luftverkehr zu verstärken. Die Sicherheitskonzepte von Deutsche Post DHL erfüllen bereits die rechtlichen Anforderungen, was zahlreiche behördliche Überprüfungen bestätigt haben. Wir werden auch weiterhin mit allen relevanten Sicherheitsbehörden, zuständigen Luftfahrtbehörden, Regierungsvertretern und Branchenverbänden zusammenarbeiten, damit ein hohes Sicherheitsniveau gewährleistet ist. Allen Sicherheitsrichtlinien und -vorschriften, die weltweit oder von einzelnen Ländern und Behörden erlassen werden, werden wir nicht nur in vollem Umfang nachkommen, sondern sie auch um unseren eigenen hohen Standard ergänzen. Wir wollen zur weiteren Verbesserung von Sicherheitsaspekten und zur Nachhaltigkeit der Sicherheitsmaßnahmen beitragen, vor allem im Sinne unserer Kunden, Geschäftspartner und Mitarbeiter.

### Risiken aus der Unternehmensstrategie

Der Konzern hat in den vergangenen zwei Jahren wichtige strategische Fragen beantwortet. So haben wir die Trennung von der Konzerntochter Deutsche Postbank AG eingeleitet und das Expressgeschäft neu geordnet. Darüber hinaus haben wir ein weitreichendes Programm zur Kostensenkung umgesetzt und so die Grundlage dafür gelegt, dass das Unternehmen gestärkt aus der globalen Krise hervorgehen und nachhaltig profitabel wachsen kann, sofern der wirtschaftliche Abschwung vollständig überwunden ist. Entsprechend konzentrieren wir uns auf unsere Kernkompetenzen im Brief- und im Logistikgeschäft mit den Schwerpunkten Wachstum und Vereinfachung. Da wir im Wesentlichen organisch wachsen wollen, schätzen wir die Risiken aus künftigen Unternehmenskäufen aus Konzernsicht eher gering ein.

Im Unternehmensbereich BRIEF wollen wir profitabel bleiben und reagieren auf die Herausforderungen, die sich durch den Strukturwandel ergeben. Daher erweitern wir unser Leistungsangebot auch in der elektronischen Kommunikation, sichern die Qualitätsführerschaft, stärken unser Engagement im Ausland und flexibilisieren, wo möglich, Preise sowie Kosten der Transport- und Zustelldienste. Unsere Dienstleistungen sollen für Kunden einfach und bequem erreichbar sein. Wir beobachten Marktentwicklungen sehr genau und dank eingeleiteter Maßnahmen sehen wir das Risiko signifikanter Planabweichungen als gering an.

Im Unternehmensbereich EXPRESS wollen wir profitabler werden und in allen Produktbereichen und Regionen organisch wachsen. Derzeit bauen wir unsere Präsenz in Wachstumsmärkten aus und investieren dafür in die Infrastruktur. Der Erfolg ist vor allem abhängig von allgemeinen Faktoren wie Wirtschafts-, Kosten- und Verkehrsmengenentwicklung. In den vergangenen beiden Jahren haben wir unser Geschäft umgebaut und Kosten erheblich gesenkt. Wir sind für den kommenden Wettbewerb gerüstet. Von der Strategie her sehen wir für den Unternehmensbereich keine wesentlichen außergewöhnlichen Risiken.

Da wir im Unternehmensbereich GLOBAL FORWARDING, FREIGHT Transportleistungen nicht selbst erbringen, sondern bei Fluggesellschaften, Reedereien und Frachtführern einkaufen, tragen wir im ungünstigen Fall das Risiko, Preiserhöhungen teilweise nicht an Kunden weitergeben zu können und zulasten unserer eigenen Margen verbuchen zu müssen. Wie hoch das Risiko ist, hängt im Wesentlichen davon ab, wie sich Angebot, Nachfrage und Preise von Transportleistungen entwickeln, sowie von der Dauer unserer Verträge.

Im Unternehmensbereich SUPPLY CHAIN versorgen wir Kunden verschiedener Branchen mit Lösungen entlang der Logistikkette. Unser Erfolg ist stark an die Geschäftsentwicklung der Kunden gekoppelt. Da wir weltweit unseren Kunden ein breit gefächertes Angebot in verschiedenen Branchen bieten, gleichen sich insgesamt die entstehenden Risiken wieder aus. Unser künftiger Erfolg hängt zudem davon ab, inwieweit es uns gelingt, das bestehende Geschäft kontinuierlich zu verbessern und in unseren wichtigsten Marktbereichen und Kundenlösungen zu wachsen.

#### **Risiken aus internen Prozessen**

Die Qualität von logistischen Dienstleistungen zeichnet sich durch Zuverlässigkeit und Pünktlichkeit aus. Um sie zu gewährleisten, stellen wir eine komplexe betriebliche Infrastruktur bereit. Sollte es in einem der Bereiche Einlieferung, Sortierung, Transport, Lagerung oder Zustellung zu Störungen kommen, können diese die Qualität beeinträchtigen. Wir wollen Unterbrechungen oder Störungen unserer betrieblichen Abläufe durch vorbeugende Maßnahmen vermeiden. Sollte es doch zu Störungen kommen, wurden Notfallpläne erstellt, die ihre Folgen minimieren.

So haben wir bereits im Jahr 2005 begonnen, in allen Unternehmensbereichen Notfallpläne für eine Pandemie auszuarbeiten. Ein internationales Krisenteam wurde gebildet. Im Fall einer Pandemie wollen wir das Risiko einer Infektion für unsere Mitarbeiter minimieren und die Geschäftstätigkeit aufrechterhalten.

Da Notfallpläne vorliegen und unsere Leistungen zudem dezentral in mehr als 200 Ländern erbracht werden, schätzen wir die Eintrittswahrscheinlichkeit von für den Konzern signifikanten Betriebsunterbrechungen als gering ein. Bestehende Versicherungen reduzieren mögliche finanzielle Auswirkungen.

Darüber hinaus verbessern wir mit Hilfe der First-Choice-Methodik unsere Abläufe kontinuierlich und richten sie noch stärker an den Anforderungen unserer Kunden aus. Sofern dies mit Investitionen verbunden ist, werden Investitionsentscheidungen über mehr als 25 Mio € vom Gesamtvorstand getroffen. Über Investitionen von mehr als 10 Mio € entscheiden Ausschüsse des Gesamtvorstands, im Bereich Global Business Services und Corporate Center gilt dies bereits ab 5 Mio €. Die Vorstände werden über Investitionen regelmäßig informiert und können so wesentliche Risiken früh erkennen und Gegenmaßnahmen ergreifen.

Als Dienstleistungsunternehmen betreiben wir keine Forschung und Entwicklung im engeren Sinne, sodass in diesem Bereich über keine maßgeblichen Risiken zu berichten ist.

### **Risiken aus der Informationstechnologie**

Mit der Sicherheit unserer Informationssysteme befasst sich konzernweit das „Information Security Committee“. Es hat dafür Standards, Verfahren und Richtlinien entwickelt, die der internationalen Norm ISO 27001 für das Management von Informationssicherheit entsprechen. Außerdem werden IT-Risiken kontinuierlich von Konzernrisikomanagement, IT-Revision, Datenschutz und Konzernsicherheit bewertet und überwacht.

Unsere Abläufe funktionieren nur dann reibungslos, wenn die dafür benötigten IT-Systeme dauerhaft verfügbar sind. Um dies sicherzustellen, werden die Systeme so gestaltet, dass komplette Ausfälle in der Regel vermieden werden. Neben Rechenzentren in Deutschland betreiben wir auch zwei zentrale Rechenzentren in Tschechien und Malaysia und können damit Systeme geografisch trennen und darüber hinaus lokal replizieren.

Der Zugang zu unseren Systemen und Daten ist beschränkt. Zugriffsberechtigt sind diejenigen Mitarbeiter, die Daten für die ihnen übertragenen Aufgaben benötigen. Nur darauf ist ein Zugriff möglich. Die Systeme und Daten werden regelmäßig gesichert, kritische Daten werden zudem in den Rechenzentren repliziert.

Die gesamte Software wird häufig aktualisiert, um Fehler zu beheben, Sicherheitslücken zu schließen und die Funktionalität zu erweitern. Risiken, die aus einer veralteten Software oder aus Software-Upgrades herrühren können, begegnen wir mit „Patch Management“ – einem definierten Prozess zur Aktualisierung von Software.

Wir treffen alle Maßnahmen, um die Eintrittswahrscheinlichkeit eines signifikanten Vorfalls im IT-Bereich zu verringern und jenes Serviceniveau zu gewährleisten, das die Kunden von uns erwarten. Ein Restrisiko mit mittleren bis hohen finanziellen Folgen lässt sich jedoch grundsätzlich nie vollständig ausschließen.

Für das Produkt E-Postbrief ist Sicherheit ein zentrales Leistungsversprechen. Der E-Postbrief setzt dabei auf modernste Verschlüsselungstechnologien und Sicherheitsinfrastrukturen. Bis zum aktuellen Zeitpunkt konnten alle Angriffe auf die E-Postbrief-Plattform problemlos abgewehrt werden. Um dabei zukünftige Risiken auszuschließen, hat die Deutsche Post Sicherheitsexperten und Hacker im Rahmen eines Wettbewerbs dazu eingeladen, neue Angriffsverfahren aufzuspüren. Auch im Rahmen dieses Wettbewerbs ist es nicht gelungen, in die E-Postbrief-Plattform einzudringen. Zudem ist der E-Postbrief vom Bundesamt für Sicherheit in der Informationstechnik im Rahmen des IT-Grundschutzes zertifiziert worden.

### **Risiken aus dem Umweltmanagement**

Das konzernweite Risikomanagement erstreckt sich auch auf umweltpolitische Rahmenbedingungen. So hat die EU beschlossen, im Jahr 2012 ein Emissionshandelsystem für den Luftverkehr einzuführen. Die finanziellen Auswirkungen hängen davon ab, zu welchen Ergebnissen die Emissionserhebungen der EU für die Basiszeiträume 2004 bis 2006 geführt haben. Diese Daten werden bestimmen, welche Menge an Emissionsrechten unseren betroffenen Fluggesellschaften kostenlos zugeteilt wird und in welchem Umfang wir anschließend Emissionsrechte ersteigern müssen, um unseren Bedarf zu decken.



Wir meinen aber, dass der Konzern dank seines „GoGreen“-Programms, mit dem unsere CO<sub>2</sub>-Effizienz bis zum Jahr 2020 gegenüber den Werten von 2007 um 30 % verbessert werden soll, gut gerüstet ist, die finanziellen Risiken zu begrenzen. Zudem haben wir weitere Maßnahmen ergriffen, mit denen Treibstoff eingespart und unser Bedarf an Emissionszertifikaten verringert werden soll: Dazu zählen ein Erneuerungsplan für unsere Flugzeugflotte sowie die kontinuierliche Optimierung von Netzwerk und Ladefaktor. Wir halten die finanziellen Auswirkungen dieser Risiken für eher gering.

→ Unternehmerische Verantwortung,  
Seite 75

### Risiken aus dem Personalbereich

Unser künftiger Erfolg hängt wesentlich von den Mitarbeitern ab. Daher wollen wir bevorzugter Arbeitgeber unserer Branche werden. Der Wettbewerb um qualifizierte Mitarbeiter und Führungskräfte hat wieder zugenommen, nachdem sich die Konjunktur in vielen Ländern und Regionen, in denen wir tätig sind, belebt hat. Durch den demografischen Wandel altert unsere Belegschaft besonders in unserem größten Markt, Deutschland, wo die Zahl potenzieller Nachwuchskräfte sinkt. Deshalb besteht grundsätzlich das Risiko, dass es uns nicht gelingt, geeignete Mitarbeiter für uns zu gewinnen und an uns zu binden.

Um dieses Risiko zu verringern, wollen wir den Mitarbeitern ein motivierendes Arbeitsumfeld schaffen sowie ihnen Möglichkeiten eröffnen, sich weiterzubilden und zu entwickeln. Die Ergebnisse unserer jährlichen Mitarbeiterbefragung belegen, dass wir dabei Fortschritte machen: So erhöhte sich die Zustimmung für „Arbeitsbedingungen“ um sechs Prozentpunkte auf 73 % sowie für „Lernen und Entwicklung“ um fünf Prozentpunkte auf 63 % gegenüber dem Vorjahr.

Im Berichtsjahr haben wir zudem begonnen, Karrierepfade für erfolgskritische Positionen und Jobfamilien einzuführen. Dadurch sichern wir uns den nötigen Nachwuchs und schaffen Transparenz über Angebot und Nachfrage auf dem Personalmarkt.

In Deutschland analysieren wir, wie sich der Personalbedarf durch den demografischen Wandel verändert, und ergreifen entsprechende Maßnahmen. Um einem Fachkräftemangel vorzubeugen, haben wir mehr Auszubildende und Studierende eingestellt als in den Vorjahren. Überdies empfehlen wir uns bei Nachwuchskräften frühzeitig als Arbeitgeber, beispielsweise mit unserem Praktikantenprogramm „JOIN“.

→ Mitarbeiter, Seite 73

Während wir die finanziellen Auswirkungen der genannten Risiken in einem mittleren Ausmaß einschätzen, halten wir die Eintrittswahrscheinlichkeit dank der getroffenen Maßnahmen für gering.

### Finanzwirtschaftliche Risiken

Am 14. Januar 2009 wurde die Transaktion zur Veräußerung der von der Deutsche Post AG gehaltenen Aktien an der Deutsche Postbank AG neu strukturiert. Der geänderte Vertrag sieht eine Veräußerung in drei Tranchen vor.

In der ersten Tranche wurden 50 Millionen Postbank-Aktien veräußert durch ihre Einbringung als Sachkapitalerhöhung unter Verzicht auf Kaufpreisanspruch gegen Ausgabe von 50 Millionen neuer Aktien der Deutsche Bank AG und durch die Erbringung von Zahlungen und geldwerten Leistungen durch die Deutsche Bank AG im Zusammenhang mit Kurssicherungsgeschäften. Die kurzzeitig im Besitz befindlichen Deutsche Bank-Aktien wurden im Zeitraum April bis Juli 2009 veräußert.

Am 31. Dezember 2010 befanden sich noch 86.417.432 Postbank-Aktien im Besitz der Deutsche Post AG. 60 Millionen Postbank-Aktien werden im Rahmen einer von der Deutsche Bank AG gezeichneten Pflichtumtauschleihe übertragen, die in Höhe von 2.568 MIO € gezeichnet wurde und eine Laufzeit von drei Jahren hat (zweite Tranche). Sie ist jährlich mit 4 % (Zinseszins) aufzuzinsen und wird am 25. Februar 2012 fällig.

Die Übertragung der verbleibenden 26.417.432 Postbank-Aktien erfolgt durch die Ausübung einer zwischen der Deutsche Post AG und der Deutsche Bank AG abgeschlossenen Verkaufs- beziehungsweise Kaufoption. Beide Optionen sind zwischen dem dritten und dem vierten Jahr nach Vertragsabschluss (Closing vom 25. Februar 2009) ausübbar.

Die Marktwertänderungen des Forward (zweite Tranche) und der Optionen (dritte Tranche) haben im abgelaufenen Geschäftsjahr zu erheblichen bilanziellen Volatilitäten geführt. In den folgenden Geschäftsjahren werden die Marktwertänderungen der Derivate weiterhin erheblichen Einfluss auf das Finanzergebnis haben. In Teilen werden die Effekte durch die gegenläufigen Marktwertänderungen der verbleibenden Beteiligung an der Postbank ausgeglichen. Das Risiko wird weitergehend im Anhang beschrieben. Dort finden Sie auch Angaben zu weiteren bilanziellen und finanzwirtschaftlichen Risiken.

→ Textziffer 50

#### **Risiken aus anhängigen Rechtsverfahren**

Angaben zu rechtlichen Risiken finden Sie im Anhang.

→ Textziffer 53

#### **Weitere Risiken des Konzerns**

Unsere Finanzierungs- und Versicherungsstrategie, mit der wir im Jahr 2010 fast 97 MIO € eingespart haben, unterteilt die versicherbaren Risiken in zwei Gruppen:

Die erste umfasst Risiken mit hoher Eintrittswahrscheinlichkeit und geringer Schadenssumme je Fall. Sie werden über einen sogenannten Captive versichert. Dabei handelt es sich um eine konzerneigene Versicherungsgesellschaft, die derartige Risiken zu niedrigeren Kosten versichern kann als ein kommerzieller Versicherer. Die Mehrheit unserer Versicherungsaufwendungen fällt in diese Risikogruppe, was neben den geringeren Kosten weitere Vorteile bietet: Die Kosten bleiben stabil, da der Konzern weniger von Änderungen bei Verfügbarkeit und Preis externer Versicherungen betroffen ist. Wir erhalten verlässliche Daten, auf deren Basis wir Risiken mit hoher Eintrittswahrscheinlichkeit und geringer Schadenssumme analysieren und für sie Mindeststandards und Ziele festlegen können.

Die zweite Gruppe umfasst Risiken mit geringer Eintrittswahrscheinlichkeit, aber potenziell hohen Schäden, zum Beispiel Luftverkehrsrisiken. Sie werden über kommerzielle Anbieter versichert.

Im Rahmen der „Unclaimed-Property-Gesetze“ in den Vereinigten Staaten werden zurzeit Betriebsprüfungen bei DHL Express (USA) und Airborne Inc. durchgeführt. Nach diesen Gesetzen müssen herrenlose Vermögensgegenstände entweder an ihre rechtmäßigen Eigentümer zurückgegeben werden oder dem Heimatstaat des letzten Eigentümers oder, falls dieser nicht bekannt ist, dem Staat übertragen werden, in dem das Unternehmen seinen Sitz hat. Die Eintrittswahrscheinlichkeit von wesentlichen finanziellen Auswirkungen für den Konzern ist eher gering.

## GESAMTAUSSAGE ZUR RISIKOSITUATION

Im abgelaufenen Geschäftsjahr hat sich die Risikolage des wirtschaftlichen Umfeldes dank insgesamt positiver Entwicklung erheblich entspannt. Auch wenn es nicht sicher abschätzbar ist, inwieweit sich die weltweit positive Entwicklung auf den Logistikmärkten fortsetzen wird, gehen wir weiterhin von einem positiven Trend aus. Besonders die wirtschaftliche Entwicklung in Deutschland sowie Veränderungen der regulatorischen Rahmenbedingungen auf dem nationalen Briefmarkt können unser zukünftiges Unternehmensergebnis beeinflussen. Insgesamt waren aus dem konzernweiten Früherkennungssystem wie auch nach Einschätzung des Konzernvorstands im abgelaufenen Geschäftsjahr keine Risiken absehbar, die einzeln oder in ihrer Gesamtheit den Fortbestand des Konzerns gefährden. Diese drohen auch nicht in absehbarer Zukunft.

## Strategische Ausrichtung

### KONZERNSTRATEGIE

#### Hervorragend im Wettbewerb aufgestellt

Der Konzern Deutsche Post DHL ist Marktführer im deutschen Briefgeschäft und in fast allen Geschäftsfeldern des Logistikbereichs. Wir sind weltweit vertreten und können unseren Kunden umfassende Leistungen für alle Transportmittel und Stufen der Lieferkette anbieten. Unsere starke Position im Wettbewerb ist beste Voraussetzung für weiteres Wachstum.

#### Ziele der „Strategie 2015“

Im Jahr 2009 haben wir unsere „Strategie 2015“ vorgestellt, mit der wir drei Kernziele verfolgen: Wir wollen bevorzugter Anbieter für Kunden, attraktives Investment für Aktionäre und präferierter Arbeitgeber für Mitarbeiter werden. Diese Ziele stehen in engem Zusammenhang: Zufriedene Mitarbeiter sorgen für zufriedene Kunden, auf deren Treue der wirtschaftliche Erfolg eines Unternehmens beruht. Die Konzernstrategie gilt unverändert und ist inzwischen eng mit den Geschäftsstrategien der Unternehmensbereiche verzahnt. Den Erfolg unserer Strategie messen wir an den Fortschritten, die wir in den drei Kernzielen erreichen. In diesem Zusammenhang messen wir vor allem Fortschritte in Bezug auf die Zufriedenheit unserer Kunden, die Mitarbeiterzufriedenheit sowie das Wachstum beziehungsweise die Profitabilität unserer Geschäftsbereiche.

#### „Die Post für Deutschland“ und „Das Logistikunternehmen für die Welt“

Wir wollen unsere Position als „Die Post für Deutschland“ bewahren. Gleichzeitig möchten wir die globale Stärke unseres Logistikgeschäfts nutzen und „Das Logistikunternehmen für die Welt“ werden.

Die Marke Deutsche Post steht für ein Unternehmen, das weltweit Maßstäbe für Qualität, Technik und Effizienz setzt und sich den Herausforderungen dieses reifen Marktes sehr erfolgreich gestellt hat. Unser Ziel ist es, im Unternehmensbereich BRIEF weiterhin in hohem Maße profitabel zu arbeiten und unser Leistungsangebot um weitere Kommunikationsdienstleistungen zu erweitern.

Die Marke DHL steht für ein breites Angebot und eine globale Präsenz in der Logistik. Mit den Unternehmensbereichen EXPRESS, GLOBAL FORWARDING, FREIGHT und SUPPLY CHAIN sind wir in attraktiven Marktsegmenten tätig. Wir wollen die nach wie vor großen Wachstumschancen in der Logistikindustrie weiter ausschöpfen.

#### **Unser Leitprinzip: Respekt und Resultate**

Die Leistungsstärke eines Unternehmens wird in hohem Maße von seiner Kultur beeinflusst. Unser Leitprinzip „Respekt und Resultate“ steht für die tägliche Herausforderung, erstklassige Ergebnisse mit der Verantwortung für die Bedürfnisse unserer Mitarbeiter und Kunden zu verbinden. Gegenüber unseren Aktionären zeigen wir Respekt, indem wir Herausforderungen offen benennen und deutlich machen, wie wir sie angehen wollen. Wir wissen: Unsere unternehmerischen Aktivitäten haben einen Einfluss auf die Gesellschaft. Darum zeigen wir unseren Respekt auch gegenüber den Menschen, mit denen wir umgehen, und der Umwelt, in der wir leben.

#### **Unser Kundenversprechen**

Ein zentraler Bestandteil unserer Konzernstrategie ist das Kundenversprechen: Wir möchten unseren Kunden in allen Geschäftsbereichen Lösungen anbieten, die ihnen das Leben einfacher machen und die nachhaltig wirken. Konzernweit haben wir dafür ein Programm umgesetzt: „First Choice“ ist darauf ausgerichtet, den Kunden überall in den Mittelpunkt zu stellen, die entsprechenden Abläufe zu verbessern und die Zufriedenheit der Kunden zu steigern. Im Berichtsjahr haben wir rund 4.400 Projekte mit dieser Zielsetzung erfolgreich abgeschlossen. Darüber hinaus befassen wir uns unter dem Stichwort „Simplification“ damit, wie der Austausch mit den Kunden vereinfacht werden kann. Im Mittelpunkt stehen dabei bereichsübergreifende Maßnahmen, die Kunden den Zugang zu unseren Leistungen erleichtern sollen. So wollen wir im Kundenkontakt freundlicher, beweglicher und effizienter werden.

#### **Unternehmerische Verantwortung übernehmen**

Als größtes Unternehmen unserer Branche nehmen wir unsere ökologische und gesellschaftliche Verantwortung ernst. Die Schwerpunkte unserer Nachhaltigkeitsstrategie liegen in drei Bereichen: Mit dem Konzernprogramm „GoGreen“ haben wir einen systematischen Ansatz entwickelt, die CO<sub>2</sub>-Effizienz zu verbessern. Unter dem Themenschwerpunkt „GoHelp“ setzen wir unsere Kompetenz dafür ein, die Lebensbedingungen von Menschen im Katastrophenfall zu verbessern. Dritter Schwerpunkt unseres gesellschaftlichen Engagements ist die Bildung, wo wir uns im Projekt „GoTeach“ engagieren.

### Künftiges Potenzial entfalten

Die „Strategie 2015“ soll uns helfen, unsere Potenziale voll zu entfalten. Das Wachstum unserer operativen Unternehmensbereiche soll das jeweilige jährliche Marktwachstum um ein bis zwei Prozentpunkte übertreffen. Um dieses ehrgeizige Ziel zu erreichen, haben wir im Jahr 2010 mit einem umfassenden Wachstumsprogramm für unser Logistikgeschäft begonnen, das folgende vier Felder umfasst:

- ❶ **Regionen** In ausgewählten Ländern bündeln wir die Ressourcen und Erfahrungen der DHL-Unternehmensbereiche, um dort gezielt zu wachsen.
- ❷ **Sektoren** Mit dem „Sector Management“ entwickeln wir integrierte und innovative Lösungen für Kunden ausgewählter Industriesektoren. Hierzu zählen besonders die Sektoren „Life Sciences & Healthcare“, „Technology“ und „Energy“.
- ❸ **Kunden** Wir sprechen gezielt und frühzeitig Kunden solcher Segmente an, die überdurchschnittlich große Wachstumsmöglichkeiten versprechen.
- ❹ **Produkte** Schließlich bündeln wir im Bereich DS das Know-how innerhalb von DHL und entwickeln konzernweit neue Lösungen.

➔ Chancen, Seite 91

Das bereichsübergreifende Wachstumsprogramm wird durch weitere Initiativen in allen Unternehmensbereichen ergänzt, die wir im folgenden Kapitel schildern.

## STRATEGIE UND ZIELE DER UNTERNEHMENSBEREICHE

### Unternehmensbereich BRIEF

Mit drei strategischen Ansätzen stellen wir uns den heutigen und künftigen Herausforderungen unseres Geschäfts.

- **Die Leistung des Kerngeschäfts sichern** Wir sparen überall dort, wo es möglich und sinnvoll ist, und stärken mit neuen Produkten und intensiven Kundenbeziehungen unser Geschäft. Zugleich bewahren wir die hohe Qualität unserer Leistungen und schonen die Umwelt. Im Idealfall lassen sich mehrere Ziele verbinden: Eine neue Maschinengeneration in unseren Briefzentren steigert nicht nur den Automatisierungsgrad und die Qualität, sondern senkt gleichzeitig die Fertigungskosten und den CO<sub>2</sub>-Ausstoß. Kundennähe ist uns wichtig. Mit rund 20.000 Filialen und Verkaufspunkten betreiben wir das mit Abstand größte stationäre Vertriebsnetz in Deutschland. Wir bauen unsere Kooperation mit dem Handel aus und schaffen über das Internet einen schnellen und einfachen Zugang zu unseren Leistungen. Dazu zählt auch unser Netz aus mehr als 2.500 Packstationen.
- **Netzwerk flexibler gestalten** Damit das Brief- und Paketgeschäft auch in Zukunft einen stabilen Ergebnisbeitrag leistet, müssen wir unsere Netzwerke grundlegend verändern und deren Kosten flexibilisieren. Auch im Jahr 2010 haben wir Maßnahmen erprobt, mit denen wir ohne Qualitätsverlust auf schwankende und sinkende Mengen reagieren können. Dazu haben wir für einen Zeitraum von drei Wochen im Juli und August Sortierschichten von kleineren Briefzentren auf Nachbarbriefzentren verlagert. Außerdem werden wir unser Paketnetz anpassen, um die gestiegenen Paketmengen schneller zu bearbeiten und den Kunden zeitnahe Informationen zum Status ihrer Sendung zu liefern. Mit Hilfe des neuen Produktionssystems können wir Pakete effizienter sortieren und transportieren und damit Kosten einsparen.

- **In digitalen Märkten wachsen** Wir übertragen unsere Kompetenz in der physischen Kommunikation auf die elektronische Welt. Schon heute erleichtert das Internet Kunden den Zugang zu unseren Leistungen: Sie können online und mobil zum Beispiel Porto kalkulieren, frankieren, Filialen und Packstationen suchen. Daneben bieten wir seit Mitte des Jahres mit dem E-Postbrief eine sichere, vertrauliche und verlässliche elektronische Kommunikation an. Nutzer zahlen beim Versand eines E-Postbriefes für die konkrete Leistung, die sie in Anspruch nehmen. So kostet die elektronische oder hybride Standardvariante zum Beispiel 55 Cent. Mit dem E-Postbrief können Unternehmen und Verwaltungen ihren Schriftverkehr signifikant günstiger bearbeiten. Neben den Grundfunktionen werden wir für das Produkt weitere benutzerfreundliche Funktionen entwickeln. Am wachsenden Werbemarkt im Internet werden wir weiter teilhaben. Im August haben wir mit der deutschen nugg.ad AG Europas größte Plattform für Targeting übernommen und damit unsere Kompetenz als Dienstleister im Online-Werbemarkt erweitert. Damit ergänzen wir unsere Plattform für lokale Angebote „allesnebenan.de“ und den „Werbemanager“, mit dem einfach und kalkulierbar in verschiedenen Medien geworben werden kann. Mit „MeinPaket.de“ haben wir im Oktober als erster Paketdienstleister in Deutschland zudem ein eigenes Shopping-Portal im Internet eröffnet.

#### Unternehmensbereich EXPRESS

Im Rahmen unserer „Strategie 2015“ arbeiten wir entlang der vier Bereiche unseres Programms „Focus 2010“:

- **Mitarbeitermotivation** Unsere Mitarbeiter sind ein entscheidender Wettbewerbsvorteil, um Kunden zu halten und neue zu gewinnen. Mit unserem Trainingsprogramm „Certified International Specialist“ (CIS) wollen wir sicherstellen, dass die Mitarbeiter dafür gerüstet sind. Dies ist ein weiterer Schritt, um unsere Position als Marktführer im internationalen Expressmarkt dauerhaft zu stärken. Jeder Mitarbeiter im internationalen Versand – ob als Kurier oder als Angestellter in einem Call-Center – soll sich als DHL-Botschafter sehen und den Kunden in den Mittelpunkt seiner Arbeit stellen.
- **Servicequalität** Um uns von anderen Wettbewerbern zu unterscheiden, setzen wir verstärkt auf Kundenbindung durch Servicequalität. Dazu beobachten wir kontinuierlich die sich ändernden Kundenanforderungen und passen unsere Leistung an. Wir verbessern unsere Abläufe, um erste Wahl zu sein, wenn es um Geschwindigkeit, Zuverlässigkeit und Kosteneffizienz geht. In unseren Qualitätskontrollzentren können wir Sendungen weltweit verfolgen und Abläufe dynamisch anpassen, um auch bei unvorhergesehenen Ereignissen eine schnelle Zustellung zu garantieren. Zuverlässigkeit und Geschwindigkeit sind entscheidend für unsere Position als Experte für den internationalen Versand.



- **Kundenloyalität** Der Kunde steht stets im Mittelpunkt unserer rund 100.000 Mitarbeiter. Mehr als 6.000 Customer-Service-Spezialisten sichern allein die Qualität unseres Kundenservice. Sie werden dafür umfangreich geschult. Im Jahr 2010 haben wir unser Dreijahresprogramm „GALOPP“ (Global Alignment of Product Portfolio) abgeschlossen. Ziel war es, unser Service- und Produktangebot für die Kunden zu vereinfachen. Dies gelingt uns zum Beispiel, indem wir Produkte und Servicenamen straffen und gebräuchliche Begriffe bei der Abrechnung verwenden. Entscheidend ist und bleibt: Wir überprüfen auch mit Hilfe der First-Choice-Methodik ständig Verhalten und Resonanz unserer Kunden und ziehen daraus die notwendigen Schlüsse, und zwar vom Zeitpunkt der ersten Kontaktaufnahme mit dem Call-Center, über das Internet oder mit dem Vertriebsmitarbeiter bis zur Übergabe der Sendung an den Empfänger und letztlich der Rechnungsstellung.
- **Profitabilität** Wir betreiben weiterhin ein striktes Kostenmanagement. Dies ist entscheidend, um wettbewerbsfähige Preise anbieten und weiter wachsen zu können. In den vergangenen Jahren haben wir einschneidende Maßnahmen zum Umbau des Bereichs umgesetzt. Im Berichtsjahr konnten wir die Früchte ernten. Vor dem Hintergrund unserer finanziellen Stärke konzentrieren wir uns zunehmend wieder auf Investitionen in unsere Mitarbeiter und unsere Marke. Nur so werden wir weiter wachsen können. Vorrang hat stets, die Produktivität zu steigern und indirekte Kosten strikt zu kontrollieren. Als Expressdienstleister arbeiten wir innerhalb eines globalen Netzwerks, das mehr als 220 Länder und Territorien umfasst. Jedes Land, jeder Standort hat seinen Beitrag zu leisten, um die Ertragskraft der globalen Organisation nachhaltig zu steigern.

➔ Marken, Seite 85

#### Unternehmensbereich GLOBAL FORWARDING, FREIGHT

Mit unserem globalen Angebot in der Luft- und Seefracht und im Landverkehr sind wir auf unseren Märkten gut aufgestellt. Unser Ziel ist ein kontinuierliches organisches Wachstum über dem Marktdurchschnitt. Dazu verfolgen wir drei Ansätze:

- **Mitarbeiter entwickeln und engagieren** In unserem Geschäft mit geringem Anlagevermögen bringt uns die Qualität der Mitarbeiter den entscheidenden Wettbewerbsvorteil. So fühlen wir uns verpflichtet, ihnen Perspektiven zu eröffnen, sie weiter aus- und fortzubilden. So können talentierte Auszubildende im Rahmen des „CEO Trainee Award“ internationale Erfahrung in einem unserer strategischen Märkte sammeln. Wir stellen den Mitarbeitern ein umfassendes Angebot an Online-Kursen bereit, damit sie zum Beispiel neue Produkte und Dienstleistungen kennenlernen oder Grundlagenwissen vertiefen. Im Berichtsjahr absolvierten 28.000 Mitarbeiter rund 124.000 Kurse. Die „DHL Freight Forwarding Academy“ bietet darüber hinaus personalisierte Entwicklungspläne und motiviert so zu einem kontinuierlichen Lernen. Dass die Mitarbeiter unser Engagement schätzen, zeigt das Ergebnis der letzten Umfrage zur Mitarbeiterzufriedenheit. Das Engagement der Mitarbeiter im Unternehmensbereich hat sich erneut deutlich gegenüber dem Vorjahr verbessert, um drei Prozentpunkte auf jetzt 70 %.

- **Präsenz in Wachstumsmärkten stärken** Wir verfeinern unser Netzwerk dort, wo wir die größten Wachstumschancen sehen, vor allem in Asien, im Mittleren Osten, in Afrika und in Lateinamerika. Im Jahr 2010 haben wir besonders im Mittleren Osten und in Afrika mehr Routen und Verbindungen aufgenommen, erste Niederlassungen in der Ukraine gegründet sowie neue Standorte eröffnet, allein im Großraum China/Nordasien-Pazifik waren es zwölf. Diese neuen, zum Teil volatilen Märkte können wir kostengünstig bedienen, weil wir Frachtkapazitäten zentral managen. So wollen wir im Luftfrachtbereich in diesen Regionen zunehmend unser selbst betriebenes Netzwerk ausweiten. Das über die letzten Jahre eng gewobene Teilladungsnetzwerk (LCL) in der Seefracht wird ebenfalls kontinuierlich erweitert; unter anderem haben wir im September 2010 ein neues Multi-National Gateway im slowenischen Koper eröffnet. Seit Oktober 2010 bietet DHL im Geschäftsfeld Freight den Stückguttransport nach Tunesien an und stellt damit einen direkten Weg von Europa nach Nordafrika her. Erfolgreich haben wir dieses Angebot bereits im Vorjahr und im Berichtsjahr in der Türkei und in Marokko eingeführt. In diese neuen, an Europa grenzenden Märkte vorzudringen und für internationale Unternehmen Güter in und aus diesen Ländern zu transportieren, ist ein Kernstück unserer Strategie zum profitablen Wachstum in neuen Märkten. Seit November 2010 haben wir auch Georgien in das Stückgutnetzwerk aufgenommen, was uns den Zugang zur Kaukasusregion eröffnet.
- **Innovative und branchenspezifische Lösungen schaffen** Wir erweitern unser Serviceangebot kontinuierlich und entwickeln Transportlösungen für spezielle Produkte, Kunden aller Unternehmensgrößen und Branchen. Dabei konzentrieren wir uns vor allem auf die Modebranche, die Öl- und Energiewirtschaft, den Handel mit leicht verderblichen Gütern, die Pharmaindustrie sowie den Technologiesektor. Über alle Transportwege hinweg bieten wir nachhaltige Lösungen an. Der „Carbon Footprint Report“ informiert unsere Kunden über die CO<sub>2</sub>-Emissionen der mit uns oder von Dritten transportierten Güter. Mit dem „Carbon Offsetting“ können sie darüber hinaus diese CO<sub>2</sub>-Emissionen kompensieren und damit CO<sub>2</sub>-neutral versenden. In der Seefracht leisten wir mit „DHL Ocean Secure“ einen Beitrag zu Sicherheit und Verlässlichkeit. Die Kunden erhalten dabei in Echtzeit per Mobilfunk Angaben zu ihren Transporten. Mit mehr Direktverbindungen denn je haben wir außerdem im Seefracht-Teilladungsgeschäft das Volumen gesteigert, die durchschnittliche Transportzeit verkürzt und so Kosten und CO<sub>2</sub>-Emissionen für unsere Kunden verringert. Im Landverkehr stärken wir unser Kernprodukt, den internationalen Stückgutbereich. Wir vereinfachen und standardisieren unser Angebot, um künftig stärker zu wachsen. Neue Produkteigenschaften, wie Track-&-Trace-Lösungen, steigern zudem seine Qualität. Mit besserer Leistung und einer höheren geografischen Abdeckung wollen wir Aufträge von neuen und bestehenden Kunden gewinnen, besonders von kleinen und mittelständischen Firmen. Speziell für die Life-Sciences-Industrie bieten wir das LTL-Produkt „Coldchain“ an. In ganz Europa verfügt DHL über die für empfindliche pharmazeutische Produkte benötigte Infrastruktur. Während des gesamten Transports wird die Temperatur der Pharmazeutika kontinuierlich gemessen und mit GPS übertragen. So können unsere Kunden Status und Temperatur ihrer Sendungen verfolgen.

### Unternehmensbereich SUPPLY CHAIN

Während der Wirtschaftskrise der Jahre 2008 und 2009 hat sich der Unternehmensbereich SUPPLY CHAIN vor allem dank des erfolgreichen, fünf Verbesserungsbereiche umfassenden Geschäftsprogramms „5 to Thrive“ behauptet. In diesem Programm fokussierten wir uns darauf, die Gesamrendite und Profitabilität zu erhöhen.

Seitdem die Konjunktur wieder angezogen hat, ist unser operatives Geschäft wieder stärker auf Wachstum ausgerichtet. Dabei orientieren wir uns an dem Effizienzzuwachs, den wir in den vergangenen beiden Jahren erzielt haben. Unsere neue Strategie namens „Growth Through Excellence“ basiert daher auf zwei Säulen:

- 1 Fortlaufende Verbesserung unseres Bestandsgeschäfts und
- 2 Profitables Wachstum in unseren wichtigsten Sektoren und Lösungen.

Damit unterstützen wir die Konzernziele, bevorzugter Anbieter und Arbeitgeber sowie attraktives Investment zu werden.

**1 Fortlaufende Verbesserung** Wir wollen uns kontinuierlich auf den Gebieten Leistung, Effizienz und Kompetenz verbessern und haben dazu drei Programme aufgelegt: „Operations Excellence“, „Kostenführerschaft“ und „Organisatorische Kompetenzen“. Das Programm „Betriebliche Spitzenleistungen“ soll weltweit eine einheitliche Servicequalität sicherstellen, wobei wir an die Erfolge beim Einkauf, bei der CO<sub>2</sub>-Effizienz und bei der laufenden Messung unserer Qualität anknüpfen. Wir fördern betriebliche und technische Standards, mit denen die Nachhaltigkeit unserer Leistung sichergestellt werden soll. Zudem wenden wir die erprobte First-Choice-Methodik an, um das Erreichte zu sichern und weiterzuentwickeln. Mit dem Programm „Kostenführerschaft“ wollen wir direkte und indirekte Kosten deutlich verringern und wirkungsvoll steuern, um insgesamt profitabler zu werden. Dazu nutzen wir Effizienz im Einkauf, operative Disziplin und erprobte Abläufe. Mit dem Programm „Organisatorische Kompetenzen“ werden Führungsqualitäten und Engagement der Mitarbeiter weiter entwickelt. Wir wollen neue Talente, die unser Geschäftswachstum unterstützen, gewinnen und bereits vorhandene Talente halten und fördern.

**2 Profitables Wachstum** Auch im Hinblick auf weiteres Wachstum haben wir drei Programme aufgelegt: „Sektorfokus“, „Strategische Produktreplikation“ und „Vertriebs-effektivität“. Im Programm „Sektorfokus“ vertiefen wir fortlaufend die Expertise in unseren Schlüsselbranchen „Consumer“, „Retail“, „Technology“, „Life Sciences & Healthcare“, „Automotive“ und „Energy“. Für jeden dieser Sektoren haben wir global ausgerichtete Teams geschaffen, um unsere Vertriebsansätze zu stärken und einen Wissensaustausch zu erfolgreichen Verfahren über Regionen und Geschäftseinheiten hinweg zu gewährleisten. Im Programm „Strategische Produktreplikation“ entwickeln und vervielfältigen wir Logistiklösungen, die die Geschäftsabläufe unserer Kunden vereinfachen. Dazu greifen wir auf beste operative Standards und erprobte Verfahren in aller Welt zurück. Bei unserem Programm „Vertriebs-effektivität“ verbessern wir laufend die Leistung unserer Vertriebsorganisation, indem wir Verkaufsprozesse und Kundenbetreuung stärken. Wir lernen die Geschäftsziele und -strategien der Kunden besser zu verstehen, um ihnen einen echten Mehrwert bieten zu können. Kundenresonanz und -umfragen helfen uns zudem, die Schlagkraft des Vertriebs ständig zu verbessern.

 Strategische Ausrichtung, Seite 100

## Künftige Rahmenbedingungen

### Weltwirtschaft: Der Aufschwung setzt sich fort

Für das Jahr 2011 zeichnet sich ab, dass der globale Aufschwung anhält, aber anfällig für Rückschläge bleibt. Nach wie vor bestehen Unsicherheiten an den Finanzmärkten. Zudem dürften die fiskalischen Impulse besonders in den Industrieländern nachlassen. Das Wachstum wird deshalb wahrscheinlich etwas niedriger ausfallen als im Vorjahr. Der Internationale Währungsfonds (IWF) rechnet damit, dass die globale Wirtschaftsleistung im Jahr 2011 um 4,4 % zunimmt. Auch der Welthandel dürfte weiter wachsen, wenn auch nicht mehr ganz so stark (IWF: 7,1 %, OECD: 8,3 %).

#### A.69 Weltwirtschaft: Wachstumsprognosen

|                                    | 2010 | 2011 |
|------------------------------------|------|------|
| <b>Welthandelsvolumen</b>          | 12,0 | 7,1  |
| <b>Reales Bruttoinlandsprodukt</b> |      |      |
| Welt                               | 5,0  | 4,4  |
| Industrieländer                    | 3,0  | 2,5  |
| Emerging Markets                   | 7,1  | 6,5  |
| Zentral- und Osteuropa             | 4,2  | 3,6  |
| GUS-Staaten                        | 4,2  | 4,7  |
| Emerging Markets in Asien          | 9,3  | 8,4  |
| Mittlerer Osten und Nordafrika     | 3,9  | 4,6  |
| Lateinamerika und Karibik          | 5,9  | 4,3  |
| Afrika südlich der Sahara          | 5,0  | 5,5  |

Quelle: Internationaler Währungsfonds (IWF) World Economic Outlook, Oktober 2010, Aktualisierung Januar 2011

In China ist die Regierung bestrebt, eine konjunkturelle Überhitzung zu vermeiden. Die Wirtschaft sollte daher etwas langsamer wachsen (IWF: 9,6 %).

In Japan dürfte sich der konjunkturelle Aufschwung spürbar abschwächen. Da der Welthandel nicht mehr so dynamisch wachsen wird, werden vom Export weniger Impulse ausgehen, was die binnenwirtschaftliche Nachfrage wohl nicht ausgleichen wird. Das BIP dürfte deshalb nur verhalten wachsen (IWF: 1,6 %, OECD: 1,7 %, Postbank Research: 1,3 %).

In den Vereinigten Staaten wird die Konjunktur gespalten bleiben: Privater Verbrauch und Ausrüstungsinvestitionen werden sich beleben. Von den Bauinvestitionen und vom Außenhandel dürften dagegen kaum Impulse ausgehen. Insgesamt wird das BIP etwa so wachsen wie im Vorjahr (IWF: 3,0 %, OECD: 2,2 %, Postbank Research: 2,9 %).

Die Konjunktur im Euroraum dürfte ihren verhaltenen Aufwärtstrend fortsetzen. Positiv sind die Perspektiven für den privaten Verbrauch und die Ausrüstungsinvestitionen. Wenn die Weltwirtschaft solide wachsen und die Binnennachfrage leicht steigen sollten, könnte die Ausfuhr stärker als die Einfuhr zulegen. Insgesamt dürfte das BIP aber verhalten wachsen (EZB: 1,4 %, Postbank Research: 1,7 %).

Die breite Basis, auf der die deutsche Konjunktur zum Jahreswechsel steht, verspricht einen anhaltenden Aufschwung. Die Ausfuhren sollten weiter zulegen, ebenso wie die Binnennachfrage. Die Bruttoanlageinvestitionen dürften erneut höher ausfallen, wovon der Arbeitsmarkt profitieren wird. Vor diesem Hintergrund sollte auch der private Verbrauch kräftig zulegen. Das BIP dürfte zwar nicht so stark wachsen wie im Jahr 2010, aber immer noch stärker als im Euroraum (Sachverständigenrat: 2,2 %, Postbank Research: 2,4 %).

Rohöl wird sich voraussichtlich im Jahresdurchschnitt weiter verteuern. Sollte der konjunkturelle Aufschwung deutlich stärker ausfallen als erwartet, könnten die Notierungen im Jahresverlauf sogar spürbar anziehen.

Die US-Notenbank dürfte den Leitzins im Jahr 2011 auf seinem extrem niedrigen Niveau halten. Auch die EZB wird ihn wohl für längere Zeit noch bei 1 % belassen und erst im späteren Jahresverlauf leicht anheben, sofern sich die konjunkturelle Erholung fortsetzt und die europäische Staatsschuldenkrise abebbt.

Die Kapitalmarktzinsen dürften leicht steigen. Die Renditeaufschläge sollten sich aber bei weiterhin geringem Inflationsdruck in sehr engen Grenzen halten.

#### **Gedämpftes Wachstum für den Welthandel**

Verglichen mit dem Berichtsjahr werden die Wachstumsaussichten für den weltweiten Handel im Jahr 2011 als gedämpft eingeschätzt, gleichwohl wird Asien als globaler Wachstumsmotor sich erneut überdurchschnittlich entwickeln.

#### **Das Briefgeschäft im Wandel**

Die Briefnachfrage in Deutschland hängt davon ab, wie sich das Kommunikationsverhalten unserer Kunden entwickelt und in welchem Ausmaß elektronische Medien den physischen Brief ersetzen. Wir rechnen damit, dass der Markt für Briefkommunikation weiter schrumpft, der Kommunikationsbedarf aber weiter steigt. Wir haben mit der Einführung des E-Postbriefs den ersten Schritt getan, um unsere Kompetenz in der physischen Kommunikation auf die elektronische zu übertragen und daraus ein neues Geschäft zu entwickeln. Zudem haben wir uns darauf eingestellt, dass die Wettbewerbsintensität hoch bleibt.

Der deutsche Werbemarkt wird nach Prognosen des Zentralverbandes der deutschen Werbewirtschaft im Jahr 2011 leicht wachsen. Er ist ebenfalls konjunkturabhängig und unterliegt derzeit einem Wandel. Der Trend zu zielgruppenorientierter Werbung und zur Kombination mit Internetangeboten dürfte zwar anhalten. Insgesamt aber beobachten wir eine Umverteilung von Werbeausgaben von klassischen hin zu digitalen Medien. Überdies werden Unternehmen verstärkt auf günstigere Werbeformen zurückgreifen. Im liberalisierten Markt für papiergebundene Werbung wollen wir unsere Position sichern, im gesamten Werbemarkt durch Kombination mit Online-Marketing sogar ausbauen.

Der Markt für Pressepost dürfte weiterhin leicht zurückgehen, weil verstärkt neue Medien genutzt werden. Die konjunkturelle Entwicklung wird sich auf Abonnementzahlen und Durchschnittsgewichte auswirken und so unseren künftigen Umsatz bestimmen. In diesem Geschäftsfeld werden wir Ideen für neue digitale Produkte entwickeln.

Auch der internationale Briefmarkt ist vom Kommunikationsverhalten der Geschäftskunden abhängig. Wir wollen hier neue Geschäftsfelder rund um unsere Kernkompetenz Brief erschließen.

Auf dem Paketmarkt werden wir bei den Geschäfts- und Privatkunden vom Internethandel profitieren. Hier wollen wir unsere Position ausbauen.

#### **Internationales Expressgeschäft ausbauen**

Erfahrungsgemäß ist das Wachstum des internationalen Expressmarkts stark abhängig von der allgemeinen konjunkturellen Entwicklung. Angesichts der jüngsten wirtschaftlichen Indikatoren und der Entwicklung unserer Sendungsvolumina sind wir zuversichtlich für das laufende Jahr.

Das gilt auch für unsere Ergebnissituation. Die Einsparungen im Berichtsjahr und ein anhaltendes Kostenbewusstsein werden wesentlich dazu beitragen, das Ergebnis zu verbessern. Unsere Programme, mit denen wir Effizienz und Qualität steigern und das Portfolio bereinigen, werden ebenfalls dazu beitragen. Wir sind zuversichtlich, den Wachstumskurs des Expressgeschäfts halten und unsere Marktführerschaft weiter ausbauen oder verteidigen zu können.

### **Moderates Marktwachstum im Speditionsgeschäft**

Nachdem die Volumina im Speditionsgeschäft in den vergangenen zwei Jahren extremen Schwankungen unterlagen, rechnen wir für das Jahr 2011 mit einer stabilen Entwicklung und moderatem Marktwachstum. Dabei werden eine wirtschaftlich schwache erste und eine zunehmend starke zweite Jahreshälfte erwartet. Da Fluggesellschaften, Reedereien und Frachtführer die Transportkapazitäten der Nachfrage entsprechend steuern, sollten die Frachtraten stabil bleiben.

Aufgrund fundamentaler Wirtschaftsdaten erwarten wir weiterhin Wachstum im innerasiatischen Verkehr sowie auf den Handelsrouten zwischen Asien, dem Mittleren Osten und Afrika sowie zwischen Asien und Lateinamerika. Als Marktführer werden wir dieses Wachstum durch Investitionen in Infrastruktur und Innovationen auch zukünftig begleiten.

Gegenüber dem Berichtsjahr sehen wir für das Jahr 2011 einen weniger positiven Trend im Luftfrachtmarkt; Überkapazitäten sind zu erwarten.

Im Jahr 2011 rechnen wir damit, dass der Seefrachtmarkt weiter wächst. Wir wollen unser Volumen, besonders im Teilladungsgeschäft, erneut erheblich steigern. Aufgrund der Akquisitionshistorie von DHL Global Forwarding existieren in manchen Seefracht-Geschäftsbereichen unterschiedliche Logiken hinsichtlich der Erfassung von Transportvolumina (TEU). Da wir diese Systeme angleichen, wird es notwendig, die Transportvolumina und Marktanteile für DHL Global Forwarding an die einheitliche Berechnungsweise ab dem ersten Quartal 2011 und auch rückwirkend leicht anzupassen.

Im Jahr 2011 dürfte sich die Wachstumsrate am Markt für Straßentransporte konform zur makrowirtschaftlichen Entwicklung abschwächen, aber immer noch auf einem zufriedenstellenden Niveau bleiben.

### **Supply-Chain-Markt erholt sich**

Der Markt für Kontraktlogistik war durch die Wirtschaftskrise stark betroffen, da das Geschäftsvolumen unserer Kunden erheblich zurückgegangen war. Seit Anfang 2010 geht es wieder aufwärts – eine Entwicklung, die sich nach übereinstimmender Meinung der Wirtschaftsforschungsinstitute fortsetzen und in den nächsten Jahren sogar noch beschleunigen dürfte. Es wird daher mit einer Rückkehr auf das Niveau vor der Krise gerechnet.

In unseren Hauptmärkten Europa und Nordamerika erwarten wir ein Wachstum im mittleren bis hohen einstelligen Bereich, während wir für die Märkte im asiatisch-pazifischen Raum von einem Wachstum im niedrigen zweistelligen Bereich ausgehen. Bei Williams Lea wird dank unseres einzigartigen Angebots sowie der zunehmenden Nutzung unserer breiten DHL-Kundenbasis ein zweistelliges Wachstum erwartet.

Um diese Chancen zu nutzen, werden wir die Strategie „Growth Through Excellence“ fortführen, das heißt unser Bestandsgeschäft fortlaufend optimieren und das Neugeschäft profitabel ausbauen.



## Umsatz- und Ergebnisprognose

Die kräftige Erholung der Weltwirtschaft im Jahr 2010 dürfte im Jahr 2011 intakt bleiben. Wir haben für unsere Planungen ein Wachstum von 3 % bis 4 % unterstellt. Das für uns relevante internationale Handelsvolumen dürfte diesen Zuwachs um den Faktor 1,5 bis 2 übertreffen. Der Umsatz besonders der DHL-Unternehmensbereiche dürfte dabei etwa in Höhe der von uns mittelfristig erwarteten Wachstumsraten um 7 % bis 9 % steigen, und zwar in jedem der drei DHL-Unternehmensbereiche.

Vor diesem Hintergrund erwarten wir für das Gesamtjahr 2011 ein Konzern-EBIT in Höhe von 2,2 MRD € bis 2,4 MRD €. Dazu sollte der Unternehmensbereich BRIEF 1,0 MRD € bis 1,1 MRD € beitragen. Für die DHL-Unternehmensbereiche erwarten wir insgesamt eine weitere Ergebnisverbesserung um 10 % bis 17 % gegenüber dem Vorjahr auf 1,6 MRD € bis 1,7 MRD €. Das Ergebnis von Corporate Center/Anderes sollte mit rund –0,4 MRD € etwa auf dem Vorjahresniveau liegen. Die in den vergangenen Jahren beschlossenen und umgesetzten Restrukturierungen sind weitestgehend abgeschlossen und werden zukünftige Ergebnisse nicht mehr belasten. Daher werden wir ab dem Jahr 2011 kein gesondertes EBIT vor Einmaleffekten mehr ausweisen.

Unsere Finanzpolitik werden wir auch im Jahr 2011 beibehalten und das im Vorjahr auf knapp 1,3 MRD € angestiegene Investitionsvolumen auf nicht mehr als 1,6 MRD € aufstocken. Unserer Konzernstrategie entsprechend, setzen wir auf organisches Wachstum und erwarten im Jahr 2011 erneut nur sehr wenige kleine Akquisitionen. Der Cashflow wird im Jahr 2011 in wesentlich geringerem Umfang als im Vorjahr durch die im Jahr 2009 beschlossenen Restrukturierungen belastet sein.

Unter der Voraussetzung, dass die Weltwirtschaft sich weiter erholt, sollte sich die positive Ergebnisentwicklung, die wir für das Jahr 2011 erwarten, auch im Jahr 2012 tendenziell fortsetzen. Dabei sollten im Unternehmensbereich BRIEF die eingeleiteten Kostenmaßnahmen das EBIT stabilisieren, auch wenn die Briefmengen substitutionsbedingt weiter sinken dürften. In den DHL-Unternehmensbereichen erwarten wir, dass sich das EBIT bei einer fortgesetzten Erholung der Handelsvolumen bis zum Jahr 2015 mit einem durchschnittlichen Wachstum von 13 % bis 15 % jährlich weiter verbessert.

Bis Anfang 2012 wird die nach IFRS erforderliche Mark-to-Market-Bewertung einiger Finanzinstrumente im Zusammenhang mit der Postbank-Transaktion analog zur Entwicklung des Marktwertes der Postbank jeweils zum Quartalsende überprüft und gegebenenfalls angepasst. Die Anpassungen sind nicht liquiditätswirksam und werden im Finanzergebnis ausgewiesen. In Teilen werden die Effekte durch die gegenläufigen Marktwertänderungen der verbleibenden Beteiligung an der Postbank ausgeglichen. Das Konzernergebnis vor Effekten aus der Bewertung der Postbank-Instrumente sollte sich im Jahr 2011 analog zum operativen Geschäft weiter verbessern.

## Erwartete Finanzlage

### Kreditwürdigkeit des Konzerns unverändert stabil

Aufgrund der für das Jahr 2011 erwarteten Ergebnisentwicklung und der geplanten Steigerung bei den Investitionen gehen wir davon aus, dass die Steuerungsgröße „FFO to Debt“ in etwa auf dem Vorjahresniveau liegen wird und die Rating-Agenturen unsere Kreditwürdigkeit unverändert als angemessen einstufen werden.

### **Liquidität weiterhin beträchtlich**

Dank unserer beträchtlichen Liquidität sind zurzeit keine wesentlichen Finanzierungsmaßnahmen geplant. Da wir das Rohstoffpreissrisiko weitgehend an unsere Kunden weitergeben, sollten sich mögliche Preisschwankungen beim Rohöl nicht auf die Ertragslage auswirken.

### **Wir werden unsere Investitionen steigern**

Für das Jahr 2011 rechnen wir angesichts der Konjunkturerholung damit, unsere Investitionen auf nicht mehr als 1,6 MRD € hochfahren zu können, das sind 27 % mehr als im Jahr 2010. Der größte Teil wird dabei auf Sachanlagen in den Unternehmensbereichen EXPRESS und BRIEF entfallen.

Die Investitionen für den Unternehmensbereich BRIEF werden über dem Vorjahresniveau liegen und sind vorwiegend für das nationale Briefgeschäft geplant. Wir werden weitere Briefzentren mit neuen Briefsortiermaschinen ausstatten. Im Paketgeschäft wollen wir die Produktionskapazitäten ausbauen, um das höhere Sendungsaufkommen bewältigen zu können, und dabei auch IT erneuern. Das Filialnetz soll weiter umstrukturiert werden, wobei vor allem die in den Filialen verwendete Software zu aktualisieren ist.

Im Unternehmensbereich EXPRESS werden die Investitionen im Jahr 2011 voraussichtlich steigen. Um unser hohes Qualitätsniveau auch bei steigenden Volumina zu halten, werden wir hauptsächlich in die Erhaltung und die Erweiterung unseres globalen Netzwerks investieren. Zudem werden wir selektiv in einzelnen Ländern und Regionen unsere Präsenz noch weiter verstärken, um unsere Strategie für Wachstum und Profitabilität zu stützen.

Im Unternehmensbereich GLOBAL FORWARDING, FREIGHT werden wir im Jahr 2011 etwas mehr als im Berichtsjahr investieren. Im Geschäftsfeld Global Forwarding wollen wir IT-Lösungen verbessern. Regional wird der Schwerpunkt auf den Wachstumsregionen Afrika und Südasiens-Pazifik sowie Nordasiens-Pazifik liegen. Im Geschäftsfeld Freight wollen wir in unser Niederlassungsnetz investieren.

Im Unternehmensbereich SUPPLY CHAIN beabsichtigen wir ebenfalls, die Investitionen zu steigern. Es sind keine Großprojekte geplant. Die Investitionen werden sich auf das Neu- und Bestandsgeschäft konzentrieren. Schwerpunkt der zusätzlichen Investitionen wird es sein, unsere Strategie „Growth Through Excellence“ zu unterstützen, dabei besonders das Wachstum in den Regionen Americas und Asia Pacific.

Die bereichsübergreifenden Investitionen werden im Jahr 2011 gegenüber dem Vorjahr leicht steigen. Wie im Berichtsjahr stehen dabei der Fuhrpark und die IT im Mittelpunkt.

Dieser Geschäftsbericht enthält zukunftsgerichtete Aussagen, die sich auf das Geschäft, die finanzielle Entwicklung und die Erträge der Deutsche Post AG beziehen. Zukunftsgerichtete Aussagen sind keine historischen Fakten und werden mitunter durch Verwendung der Begriffe „glauben“, „erwarten“, „vorhersagen“, „beabsichtigen“, „prognostizieren“, „planen“, „schätzen“, „bestreben“, „voraussehen“, „annehmen“, „das Ziel verfolgen“ und ähnliche Formulierungen kenntlich gemacht. Zukunftsgerichtete Aussagen beruhen auf den gegenwärtigen Plänen, Schätzungen, Prognosen und Erwartungen und unterliegen daher Risiken und Unsicherheitsfaktoren, die dazu führen können, dass die tatsächlich erreichte Entwicklung oder die erzielten Erträge oder Leistungen wesentlich von der Entwicklung, den Erträgen oder den Leistungen abweichen, die in den zukunftsgerichteten Aussagen ausdrücklich oder implizit angenommen werden. Die Leser werden darauf hingewiesen, dass sie kein unangemessenes Vertrauen in diese zukunftsgerichteten Aussagen setzen sollten, die nur zum Zeitpunkt dieser Darstellung Gültigkeit haben. Die Deutsche Post AG beabsichtigt nicht und übernimmt keine Verpflichtung, eine Aktualisierung dieser zukunftsgerichteten Aussagen zu veröffentlichen, um Ereignisse oder Umstände nach dem Datum der Veröffentlichung dieses Geschäftsberichts zu berücksichtigen.

☞ Soweit der Lagebericht auf Inhalte von Internetseiten verweist, sind diese Inhalte nicht Bestandteil des Lageberichts.

Dokumenten-  
versand

Päckchen

Paket

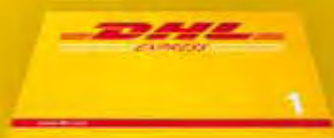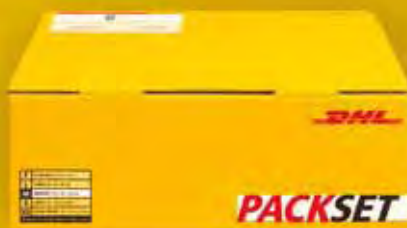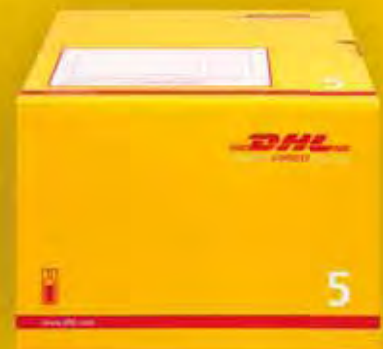

**DHL**

**IHRE WAHL. WEIL FLEXIBILITÄT FREIHEIT GIBT.**

Sowohl für den regelmäßigen Paketversand mit Zielen in Deutschland, Europa und der Welt als auch für zeitkritische Kurier- und Expressdienste zu über 120.000 Zielorten ist DHL Partner für Geschäfts- und Privatkunden. Sie können Pakete und Päckchen komfortabel und flexibel versenden, im Internet frankieren und den Verlauf der Sendung nachverfolgen. Und eilige Dokumente und Pakete bringt DHL von Tür zu Tür: egal, ob die Zustellung noch heute, zu einer bestimmten Uhrzeit oder an einem bestimmten Tag erfolgen soll.

|                           |     |
|---------------------------|-----|
| BERICHT DES AUFSICHTSRATS | 113 |
|---------------------------|-----|

|              |     |
|--------------|-----|
| AUFSICHTSRAT | 117 |
|--------------|-----|

|                                    |     |
|------------------------------------|-----|
| Mitglieder des Aufsichtsrats ..... | 117 |
| Ausschüsse des Aufsichtsrats ..... | 117 |

|          |     |
|----------|-----|
| VORSTAND | 118 |
|----------|-----|

|                       |     |
|-----------------------|-----|
| MANDATE DES VORSTANDS | 122 |
|-----------------------|-----|

|                           |     |
|---------------------------|-----|
| MANDATE DES AUFSICHTSRATS | 123 |
|---------------------------|-----|

|                              |     |
|------------------------------|-----|
| CORPORATE-GOVERNANCE-BERICHT | 124 |
|------------------------------|-----|

|                         |     |
|-------------------------|-----|
| Vergütungsbericht ..... | 128 |
|-------------------------|-----|

# BERICHT DES AUFSICHTSRATS

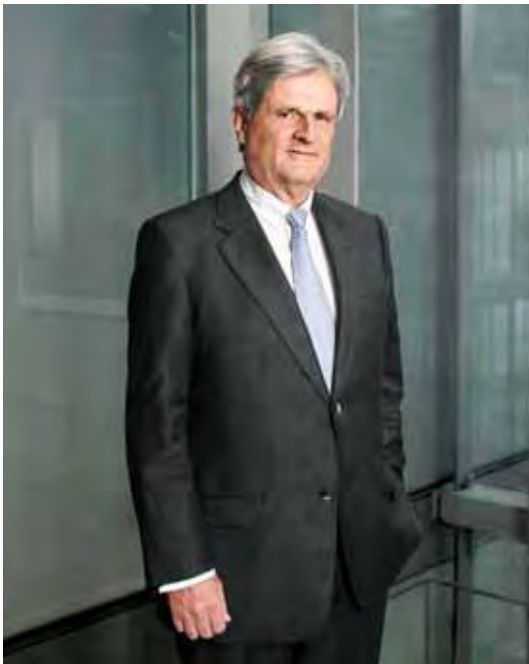

**PROF. DR. WULF VON SCHIMMELMANN**  
Aufsichtsratsvorsitzender

## SEHR GEEHRTE AKTIONÄRE,

der Konzern Deutsche Post DHL hat die Auswirkungen der weltweiten Wirtschaftskrise erfolgreich gemeistert. Mit zweistelligem Umsatzwachstum in den DHL-Unternehmensbereichen und einer zwar leicht rückläufigen, aber insgesamt den Erwartungen entsprechenden Geschäftsentwicklung im Unternehmensbereich BRIEF hat der Konzern das Geschäftsjahr 2010 erfolgreich abgeschlossen.

### **Den Vorstand beraten und überwacht**

Der Aufsichtsrat hat sich im Jahr 2010 auf einer Klausurtagung intensiv mit der Strategie des Konzerns und der Unternehmensbereiche befasst. In jeder Sitzung hat uns der Vorstand ausführlich über die Lage und Ausrichtung der Gesellschaft und des Konzerns, über strategische Maßnahmen und alle wichtigen Fragen der Planung und ihrer Umsetzung sowie über Chancen und Risiken der Geschäftsentwicklung informiert. Dabei haben wir uns kontinuierlich auch mit den Themen Entwicklung des konjunkturellen Umfelds, Umsetzungsfortschritt bei den geplanten Restrukturierungen, Auswirkungen der Übernahme der Karstadt-Warenhäuser durch einen Investor sowie Effekte der geänderten Mehrwertsteuergesetzgebung befasst. Alle bedeutenden Entscheidungen haben wir eingehend mit dem Vorstand erörtert. Er hat uns zeitnah und umfassend über die Geschäftsentwicklung, wichtige Geschäftsvorgänge und -vorhaben in den Unternehmensbereichen, die Compliance-Organisation und das Compliance-Management sowie über Risikolage und -management informiert – den Aufsichtsratsvorsitzenden auch laufend zwischen den Aufsichtsratssitzungen.

Besonders ausführlich beraten wurden Maßnahmen, die der Zustimmung des Aufsichtsrats bedürfen. Diese wurden vorab in den zuständigen Ausschüssen diskutiert. Die Ergebnisse der Diskussionen wurden von den jeweiligen Ausschussvorsitzenden in die Aufsichtsratssitzungen eingebracht.

#### **Vier Sitzungen im Berichtszeitraum**

Im ersten sowie im zweiten Halbjahr haben jeweils zwei Sitzungen stattgefunden. Alle Mitglieder haben an mindestens der Hälfte der Sitzungen teilgenommen.

In der Bilanzsitzung am 8. März 2010 haben wir den Jahres- und den Konzernabschluss 2009 in Anwesenheit der Wirtschaftsprüfer eingehend erörtert und gebilligt. Wir haben die Vorstandsmandate von Bruce Edwards und Hermann Ude für fünf Jahre bis März 2016 verlängert und uns mit Themen der Vorstandsvergütung befasst. Außerdem haben wir die Finanzstrategie des Konzerns erörtert, besonders im Hinblick auf wesentliche finanzielle Steuerungsgrößen, das Kreditrating sowie die Verwendung von Liquidität. Zudem haben wir die Ergebnisse der Effizienzprüfung unserer Aufsichtsrats Tätigkeit diskutiert.

In der Aufsichtsratssitzung am 15. Juni 2010 hat uns der Vorstand informiert, dass der Verkauf des taggenauen Expressgeschäfts in Frankreich kurz vor dem Abschluss stehe. Im Anschluss an die Sitzung haben wir in einer anderthalbtägigen Klausurtagung intensiv über die „Strategie 2015“ des Konzerns sowie die Strategien der Unternehmensbereiche diskutiert. Im Unternehmensbereich BRIEF stand die Einführung des E-Postbriefs im Fokus. Bei den DHL-Unternehmensbereichen haben wir uns mit den Programmen für mehr Effizienz und Wachstum befasst. Wir haben über die Ergebnisse der jährlichen Mitarbeiterbefragung diskutiert sowie die Umsetzung der „Strategie 2015“ im Bereich Finanzen. Wir haben uns auch damit auseinandergesetzt, wie der Konzern extern wahrgenommen wird. Hierzu hatten wir Vertreter einer Investmentbank und einer Unternehmensberatung als renommierte Gastreferenten eingeladen.

In der Sitzung am 16. September 2010 haben wir über die Vorstandsvergütung einschließlich der Altersversorgung beraten. Dabei haben wir den Long-Term-Incentive-Plan im Wesentlichen in der bisherigen Struktur um drei Jahre verlängert. Außerdem wurde dem Rückerwerb der Anteile an der Luftfrachtgesellschaft Astar Air Cargo sowie der Ausgliederung des Flugbetriebs auf eine neue, konzernexterne Gesellschaft zugestimmt. Die Restrukturierung des us-Expressgeschäftes im Jahr 2009 und der damit verbundene Volumenrückgang hatten eine Anpassung des Vertrages mit der Luftfrachtgesellschaft Astar aus Kostengründen notwendig gemacht.

In der letzten Aufsichtsratssitzung des Jahres am 10. Dezember 2010 haben wir den Geschäftsplan 2011 verabschiedet. Außerdem haben wir nochmals die Vorstandsvergütung behandelt einschließlich der Zielvereinbarung für das Jahr 2011 und der Altersversorgung. Ferner haben wir uns mit den Neuerungen des Deutschen Corporate Governance Kodex befasst. Wir haben Ziele für die Zusammensetzung des Aufsichtsrats festgelegt und beschlossen, weiterhin allen Empfehlungen der Regierungskommission Deutscher Corporate Governance Kodex zu entsprechen. Zudem haben wir die Entsprechenserklärung zum Deutschen Corporate Governance Kodex 2010 abgegeben.

#### **Ausschüsse haben intensiv gearbeitet**

Der Präsidialausschuss tagte im Berichtsjahr vier Mal. Tagesordnungspunkte waren vor allem Vorstands- und Aufsichtsratsangelegenheiten wie die Wiederbestellung von Vorstandsmitgliedern sowie die Vergütung und Altersversorgung des Vorstands.

Der Personalausschuss ist ebenfalls zu vier Sitzungen zusammengekommen und hat sich vorwiegend mit den Themen Mitarbeiterbefragung, strategische Projekte zur Weiterentwicklung im Bereich Personal, Vergütungsstruktur der Führungskräfte, Ziele und Struktur des Tochterunternehmens First Mail sowie mit dem Gesundheitsmanagement und dem Bildungsengagement des Konzerns befasst.



Der Finanz- und Prüfungsausschuss trat zu acht Sitzungen zusammen, die von Hero Brahms geleitet wurden. Hero Brahms, der Vorsitzende des Ausschusses, ist Finanzexperte im Sinne der §§ 100 Abs. 5, 107 Abs. 4 AktG. Der Ausschuss prüfte in der Märzsession den Jahres- und Konzernabschluss 2009. Der Wirtschaftsprüfer hat an dieser Sitzung teilgenommen. Im Anschluss an die Hauptversammlung hat der Finanz- und Prüfungsausschuss den Wirtschaftsprüfer mit der Prüfung des Jahres- und Konzernabschlusses 2010 beauftragt und Prüfungsschwerpunkte festgelegt. Ebenso hat er den Prüfer mit der prüferischen Durchsicht der Quartalsfinanzberichte und des Halbjahresfinanzberichts beauftragt. Die Quartalsfinanzberichte und der Halbjahresfinanzbericht wurden im Ausschuss gemeinsam mit dem Vorstand und dem Wirtschaftsprüfer erörtert.

Der Ausschuss hat sich regelmäßig mit der Geschäftsentwicklung des Konzerns und dem internen Kontroll- und Risikomanagementsystem befasst. Es wurden insbesondere das konzernweite Risikocontrolling sowie die Hauptrisikofaktoren für den Konzern diskutiert. Der Ausschuss hat sich mit der Compliance-Organisation und dem Compliance-Management sowie den Prüfungsergebnissen der Internen Revision auseinandergesetzt. Der Prüfungsplan für das Jahr 2011 wurde zustimmend zur Kenntnis genommen. Im Hinblick auf die Rechnungslegung hat der Ausschuss gemeinsam mit dem Wirtschaftsprüfer über die wesentlichen Eigenschaften des Internen Kontrollsystems (IKS) und des Risikomanagementsystems (RMS) diskutiert. Ebenso wurde die Zusammenarbeit mit dem Abschlussprüfer eingehend erörtert.

Der Nominierungsausschuss trat im Jahr 2010 ein Mal zusammen und empfahl dem Aufsichtsrat, der Hauptversammlung die erneute Wahl von Roland Oetker vorzuschlagen.

Über die Erörterungen in den Ausschusssitzungen hat der jeweilige Vorsitzende in der nachfolgenden Plenumsitzung informiert.

Es gab keine Sitzung des gemäß § 27 Abs. 3 MitbestG gebildeten Vermittlungsausschusses.

#### **Besetzung im Aufsichtsrat verändert**

Auf Seiten der Aktionärsvertreter gab es im Jahr 2010 keine personellen Veränderungen. Auf der Arbeitnehmerseite ist Annette Harms zum 6. Oktober 2010 aus dem Aufsichtsrat ausgeschieden. Sabine Schielmann wurde als ihre Nachfolgerin und Vertreterin der Arbeitnehmer am 27. Oktober 2010 gerichtlich zum Mitglied des Aufsichtsrats bestellt.

Im Vorstand der Gesellschaft gab es keine personellen Veränderungen.

#### **Gesellschaft folgt allen Kodex-Empfehlungen**

Vorstand und Aufsichtsrat haben im Dezember 2010 eine uneingeschränkte Entsprechenserklärung nach § 161 AktG abgegeben und diese auf der Internetseite der Gesellschaft veröffentlicht. Hier können auch die Erklärungen der vergangenen Jahre eingesehen werden. Die Deutsche Post AG hat im Geschäftsjahr 2010 allen Empfehlungen der Regierungskommission Deutscher Corporate Governance Kodex in der Fassung vom 18. Juni 2009 entsprochen und beabsichtigt, allen Empfehlungen des Deutschen Corporate Governance Kodex in der Fassung vom 26. Mai 2010 zu entsprechen. Im Corporate-Governance-Bericht (Seite 124 ff.) zeigen wir weitere Informationen zur Corporate Governance des Unternehmens sowie den Vergütungsbericht.

### Jahres- und Konzernabschluss geprüft

Die von der Hauptversammlung zum Abschlussprüfer gewählte PricewaterhouseCoopers Aktiengesellschaft Wirtschaftsprüfungsgesellschaft, Düsseldorf, (PwC) hat den Jahres- und Konzernabschluss einschließlich der jeweiligen Lageberichte für das Geschäftsjahr 2010 geprüft und uneingeschränkte Bestätigungsvermerke erteilt. Die prüferische Durchsicht der Quartalsfinanzberichte sowie des Halbjahresfinanzberichts erfolgte ebenfalls durch PwC.

Nach eingehender Vorprüfung durch den Finanz- und Prüfungsausschuss hat der Aufsichtsrat in der Bilanzsitzung am 9. März 2011 den Jahres- und Konzernabschluss sowie die Lageberichte für das Geschäftsjahr 2010 geprüft. Der Gewinnverwendungsvorschlag des Vorstands wurde in die Prüfung einbezogen. Allen Aufsichtsratsmitgliedern lagen die Prüfberichte vor. Diese wurden eingehend mit dem Vorstand und den anwesenden Wirtschaftsprüfern diskutiert. Der Aufsichtsrat hat sich dem Ergebnis der Prüfung durch den Abschlussprüfer angeschlossen und den Jahres- und Konzernabschluss für das Geschäftsjahr 2010 gebilligt. Nach dem abschließenden Ergebnis der Prüfung des Jahresabschlusses, des Konzernabschlusses, der Lageberichte und des Gewinnverwendungsvorschlags durch den Aufsichtsrat sowie den Finanz- und Prüfungsausschuss sind Einwendungen nicht zu erheben. Dem Vorschlag des Vorstands für die Verwendung des Bilanzgewinns und der Zahlung einer Dividende von 0,65 € je Aktie schließt sich der Aufsichtsrat an.

Wir danken dem Vorstand sowie allen Mitarbeiterinnen und Mitarbeitern des Konzerns für ihre besonderen Leistungen in diesem Jahr. Wir freuen uns, dass sich der Konzern nach dem Krisenjahr 2009 wieder auf Wachstumskurs befindet und erfolgreich die Ziele der „Strategie 2015“ umsetzt.

Bonn, 9. März 2011

Der Aufsichtsrat



Prof. Dr. Wulf von Schimmelmann  
Aufsichtsratsvorsitzender

# AUFSICHTSRAT

## B.01 Mitglieder des Aufsichtsrats

### Aktionärsvertreter

#### Prof. Dr. Wulf von Schimmelmann (Vorsitz)

Ehemaliger Vorsitzender des Vorstands  
der Deutsche Postbank AG

#### Willem G. van Agtmael

Geschäftsführender Gesellschafter  
der E. Breuninger GmbH & Co.

#### Hero Brahms

Unternehmensberater

#### Werner Gatzert

Staatssekretär im Bundesministerium  
der Finanzen

#### Prof. Dr. Henning Kagermann

Ehemaliger Vorstandssprecher der SAP AG

#### Roland Oetker

Geschäftsführender Gesellschafter  
der ROI Verwaltungsgesellschaft mbH

#### Harry Roels

#### Dr. Ulrich Schröder

Vorsitzender des Vorstands  
der KfW Bankengruppe

#### Dr. Stefan Schulte

Vorsitzender des Vorstands der Fraport AG

#### Elmar Toime

Geschäftsführer der E Toime Consulting Ltd.

### Arbeitnehmervertreter

#### Andrea Kocsis (Stv. Vorsitz)

Stv. Vorsitz des ver.di Bundesvorstands und  
Bundesfachbereichsleiterin Postdienste,  
Spedition und Logistik im Bundesvorstand  
ver.di

#### Wolfgang Abel

Landesfachbereichsleiter Postdienste, Spe-  
ditionen und Logistik, ver.di Landesbezirk  
Hamburg

#### Rolf Bauermeister

Bereichsleiter Postdienste, Mitbestimmung  
und Jugend und Bundesfachgruppenleiter  
Postdienste, Bundesverwaltung ver.di

#### Heinrich Josef Busch

Vorsitzender des Konzern- und Unternehmens-  
sprecherausschusses der Deutsche Post AG

#### Thomas Koczelnik

Vorsitzender des Konzernbetriebsrats  
der Deutsche Post AG

#### Anke Kufalt

Mitglied des Betriebsrats  
der DHL Global Forwarding GmbH, Hamburg

#### Andreas Schädler

Vorsitzender des Gesamtbetriebsrats  
der Deutsche Post AG

#### Sabine Schielmann (seit 27. Oktober 2010)

Mitglied der Geschäftsführung des Gesamt-  
betriebsrats der Deutsche Post AG

#### Helga Thiel

Stellvertretende Vorsitzende des Gesamt-  
betriebsrats der Deutsche Post AG

#### Stefanie Weckesser

Stellvertretende Vorsitzende des Betriebsrats  
der Deutsche Post AG, Niederlassung Brief,  
Augsburg (seit 17. Mai 2010)

#### Im Geschäftsjahr 2010 ausgeschieden:

#### Annette Harms (bis 6. Oktober 2010)

Vorsitzende des Betriebsrats  
der Deutsche Postbank AG, Hamburg

## B.02 Ausschüsse des Aufsichtsrats

### Präsidialausschuss

#### Prof. Dr. Wulf von Schimmelmann (Vorsitz)

Andrea Kocsis (Stv. Vorsitz)  
Roland Oetker  
Rolf Bauermeister  
Werner Gatzert  
Stefanie Weckesser

### Finanz- und Prüfungsausschuss

#### Hero Brahms (Vorsitz)

Wolfgang Abel (Stv. Vorsitz)  
Werner Gatzert  
Thomas Koczelnik  
Dr. Stefan Schulte  
Helga Thiel

### Personalausschuss

#### Andrea Kocsis (Vorsitz)

Prof. Dr. Wulf von Schimmelmann  
(Stv. Vorsitz)  
Roland Oetker  
Thomas Koczelnik

### Vermittlungsausschuss

(gemäß § 27 Abs. 3 Mitbestimmungsgesetz)

Prof. Dr. Wulf von Schimmelmann (Vorsitz)  
Andrea Kocsis (Stv. Vorsitz)  
Roland Oetker  
Rolf Bauermeister

### Nominierungsausschuss

#### Prof. Dr. Wulf von Schimmelmann (Vorsitz)

Roland Oetker  
Werner Gatzert

# VORSTAND

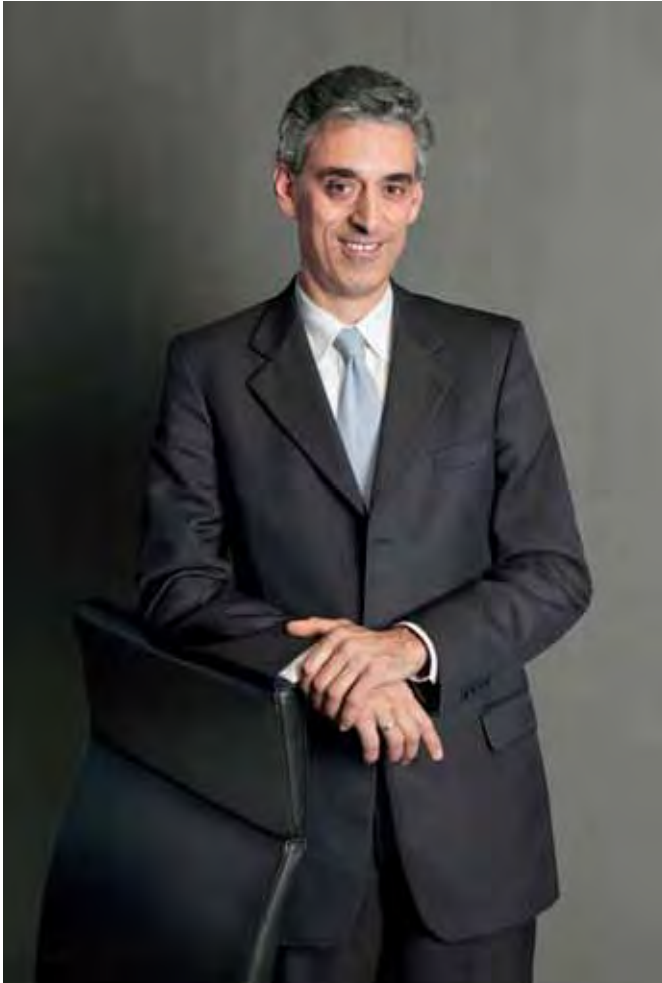

**DR. FRANK APPEL**

**Vorstandsvorsitz**

---

Geboren 1961

Mitglied seit November 2002, Vorstandsvorsitz seit Februar 2008

Bestellt bis Oktober 2012

A handwritten signature of Dr. Frank Appel, enclosed in a simple black rectangular box. The signature is written in black ink and is a stylized, cursive representation of his name.

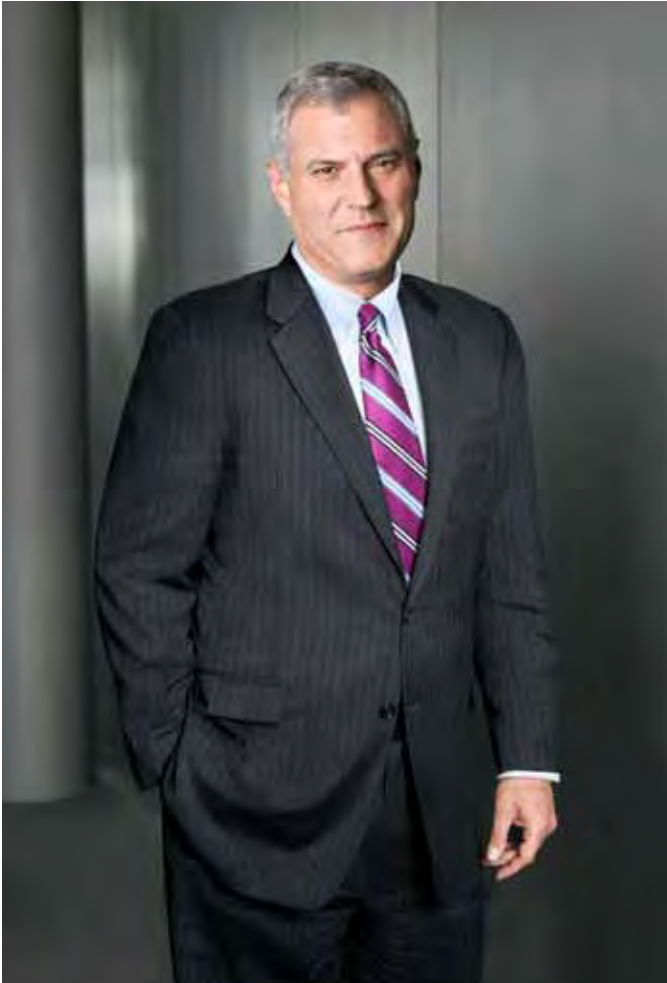

## LAWRENCE ROSEN

Finanzen, Global Business Services

Geboren 1957

Mitglied seit September 2009

Bestellt bis August 2012

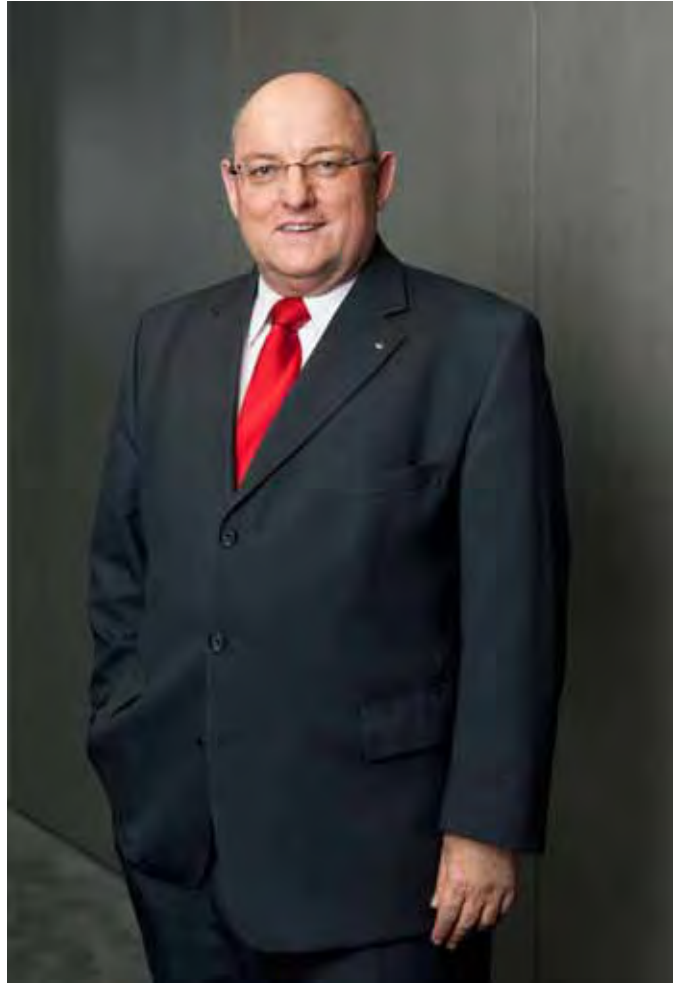

## WALTER SCHEURLE

Personal

Geboren 1952

Mitglied seit April 2000

Bestellt bis März 2013

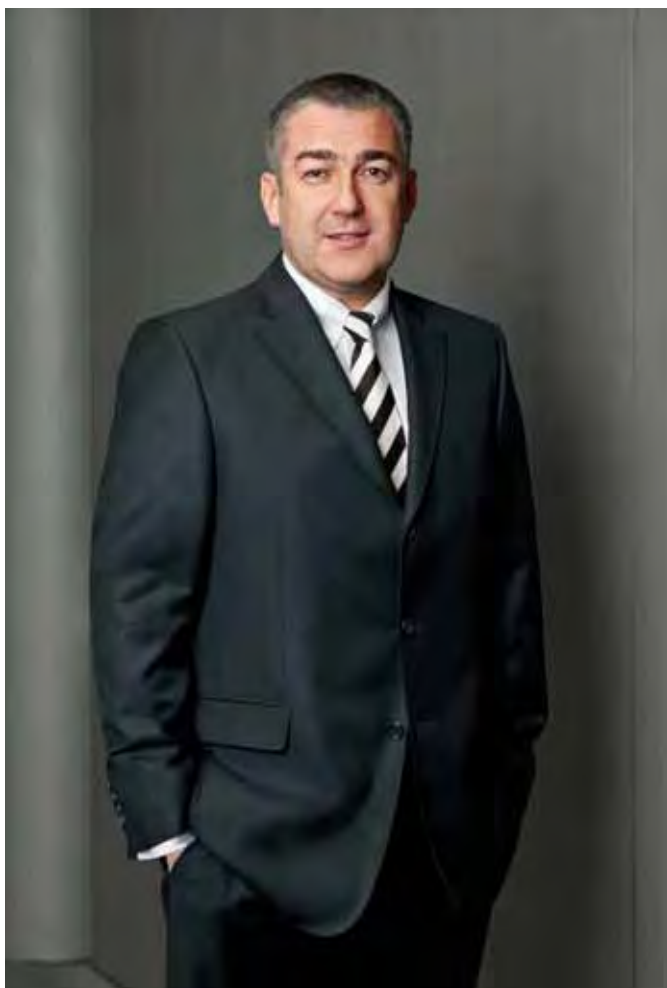

## JÜRGEN GERDES

**BRIEF**

Geboren 1964

Mitglied seit Juli 2007

Bestellt bis Juni 2015

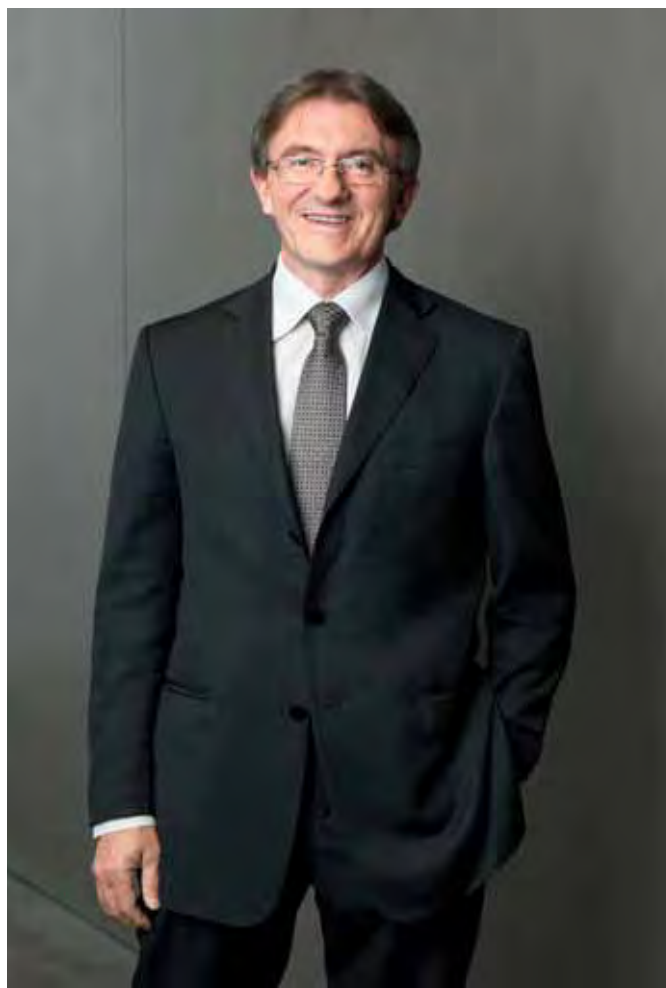

## KEN ALLEN

**EXPRESS**

Geboren 1955

Mitglied seit Februar 2009

Bestellt bis Februar 2012



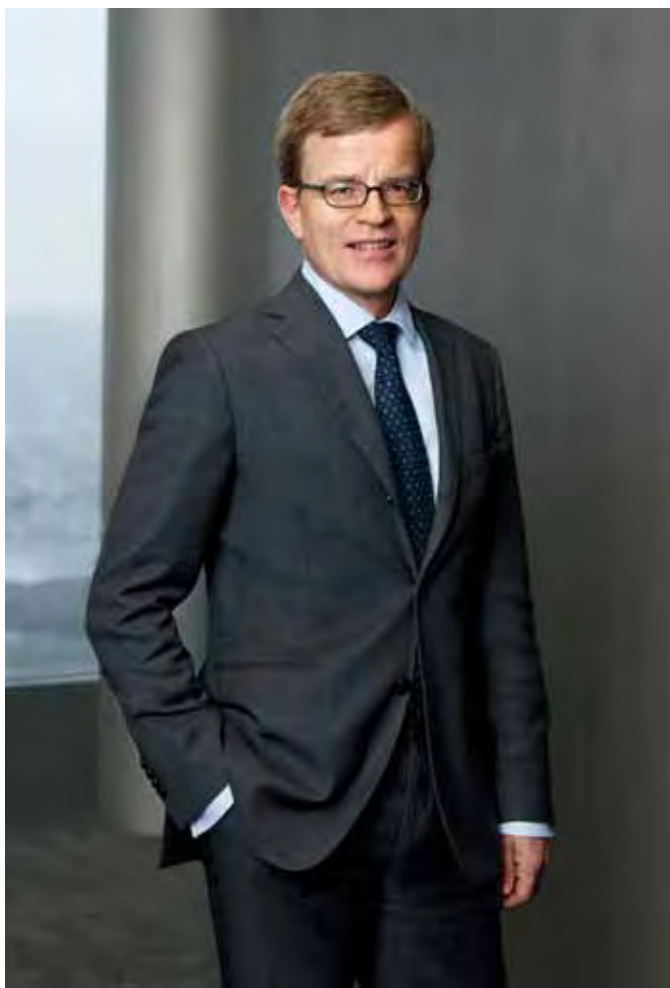

## HERMANN UDE

GLOBAL FORWARDING, FREIGHT

Geboren 1961

Mitglied seit März 2008

Bestellt bis März 2016

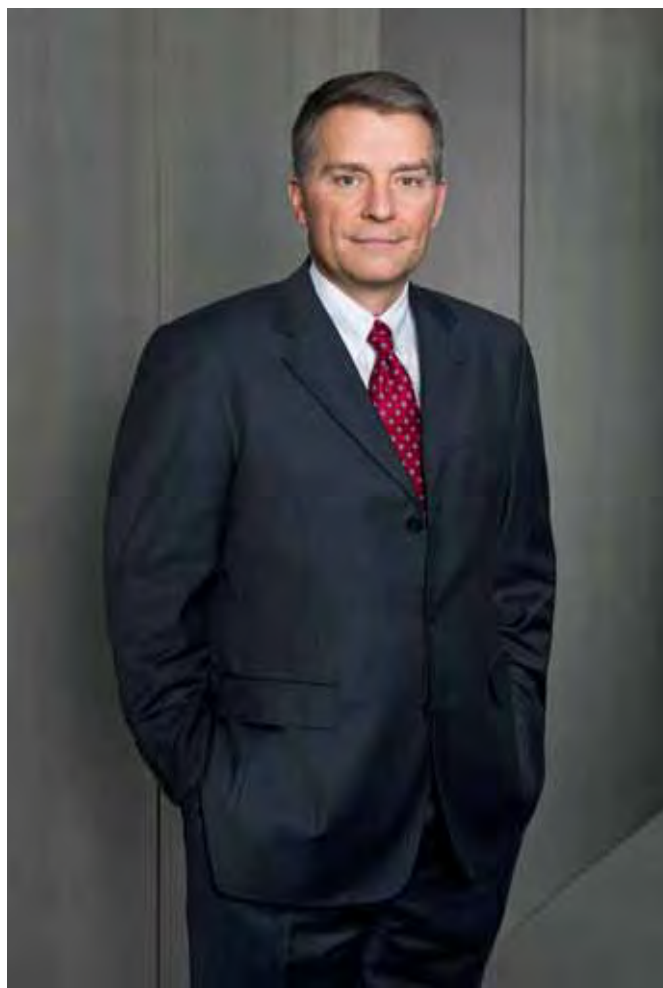

## BRUCE EDWARDS

SUPPLY CHAIN

Geboren 1955

Mitglied seit März 2008

Bestellt bis März 2016

## B.03 MANDATE DES VORSTANDS

### Mandate in gesetzlich zu bildenden

#### Aufsichtsräten

##### Dr. Frank Appel

Deutsche Postbank AG  
(Vorsitz), bis 31. Dezember 2010

##### Lawrence Rosen

Deutsche Postbank AG

#### Vergleichbare Mandate

##### Ken Allen

DHL-Sinotrans International Air Courier Ltd<sup>1)</sup>  
(Board of Directors), seit 18. September 2010

##### Bruce Edwards

Ashtead plc (Board of Directors)  
Exel Automocion, S.A. de C.V.<sup>1)</sup>  
(Board of Directors)  
Exel Investments Limited<sup>1)</sup>  
(Board of Directors)  
Exel Limited<sup>1)</sup> (Board of Directors)  
Exel Logistics, S.A. de C.V.<sup>1)</sup>  
(Board of Directors)  
Exel North American Logistics S.A. de C.V.<sup>1)</sup>  
(Board of Directors)  
Exel Servicios, S.A. de C.V.<sup>1)</sup>  
(Board of Directors)  
Exel Supply Chain Services de México,  
S.A. de C.V.<sup>1)</sup> (Board of Directors)  
Greif, Inc. (Board of Directors)  
Hyperion Inmobiliaria, S.A. de C.V.<sup>1)</sup>  
(Board of Directors)  
Tibbett & Britten Group Limited<sup>1)</sup>  
(Board of Directors)  
Williams Lea Group Limited<sup>1)</sup>  
(Board of Directors)  
Williams Lea Holdings PLC<sup>1)</sup>  
(Board of Directors, Vorsitz)

##### Jürgen Gerdes

Global Mail, Inc.<sup>1)</sup> (Board of Directors)

<sup>1)</sup> Konzernmandat

# B.04 MANDATE DES AUFSICHTSRATS

## Aktionärsvertreter

### Mandate in gesetzlich zu bildenden Aufsichtsräten

#### Prof. Dr. Wulf von Schimmelmann (Vorsitz)

Maxingvest AG

#### Hero Brahms

Georgsmarienhütte Holding GmbH (Stv. Vorsitz)

Wincor Nixdorf AG

Live Holding AG (Vorsitz, seit 31. August 2010)

Telefunken Holding AG (Vorsitz)

#### Werner Gatzert

KfW IPEX-Bank GmbH, bis 31. Januar 2010

g.e.b.b. mbH

Bundesdruckerei GmbH

öPP Deutschland AG

#### Prof. Dr. Henning Kagermann

BMW AG, seit 18. Mai 2010

Deutsche Bank AG

Münchener Rückversicherungs-Gesellschaft AG

#### Roland Oetker

Volkswagen AG, bis 22. April 2010

#### Dr. Ulrich Schröder

Deutsche Telekom AG

KfW IPEX-Bank GmbH

DEG – Deutsche Investitions- und

Entwicklungsgesellschaft mbH

#### Elmar Toime

message AG (Vorsitz)

### Vergleichbare Mandate

#### Prof. Dr. Wulf von Schimmelmann (Vorsitz)

Accenture Corp., USA (Board of Directors)

Western Union Company, USA  
(Board of Directors)

#### Willem G. van Agtmael

Charlottenklinik für Augenheilkunde  
(Stiftungsrat)

#### Hero Brahms

M.M. Warburg & Co. KGaA (Aktionärsausschuss)

Zumtobel AG, Österreich

(Aufsichtsrat, stv. Vorsitz)

#### Prof. Dr. Henning Kagermann

Nokia Corporation, Finnland

(Board of Directors)

Wipro Ltd., Indien (Board of Directors)

#### Roland Oetker

Dr. August Oetker KG

(Beirat, stv. Vorsitz), bis 31. Dezember 2010

#### Harry Roels

Deutsches Stiftungszentrum GmbH

(Verwaltungsrat)

#### Dr. Ulrich Schröder

„Marguerite 2020“: Europäischer Fond  
für Energie, Klimaschutz und Infrastruktur  
(Aufsichtsrat)

#### Elmar Toime

Blackbay Ltd., United Kingdom

(Non-Executive Director)

Postea Inc., USA (Non-Executive Chairman)

## Arbeitnehmervertreter

### Mandate in gesetzlich zu bildenden Aufsichtsräten

#### Rolf Bauermeister

Deutsche Postbank AG

#### Andreas Schädler

PSD Bank Köln eG (Vorsitz)

#### Helga Thiel

PSD Bank Köln eG (Stv. Vorsitz)

### Im Geschäftsjahr 2010 ausgeschieden:

Annette Harms (bis 6. Oktober 2010)

Deutsche Postbank AG

# CORPORATE-GOVERNANCE-BERICHT

## Zugleich Erklärung zur Unternehmensführung gemäß § 289a HGB

@ [dp-dhl.com/de/investoren.html](http://dp-dhl.com/de/investoren.html)

Mit der Erklärung zur Unternehmensführung stellt der Konzern Deutsche Post DHL die wesentlichen Elemente seiner Corporate-Governance-Strukturen dar: die Entsprechenserklärung von Vorstand und Aufsichtsrat, wesentliche über die gesetzlichen Anforderungen hinausgehende Praktiken der Unternehmensführung, die Arbeitsweise von Vorstand und Aufsichtsrat, die Zusammensetzung und Arbeitsweise der Executive Committees und Ausschüsse sowie die Ziele für die Zusammensetzung des Aufsichtsrats.

### Gesellschaft entspricht allen Kodex-Empfehlungen

Vorstand und Aufsichtsrat haben im Dezember 2010 erneut eine uneingeschränkte Entsprechenserklärung gemäß § 161 AktG abgegeben. Sie lautet:

„Vorstand und Aufsichtsrat der Deutsche Post AG erklären, dass den Empfehlungen der Regierungskommission Deutscher Corporate Governance Kodex in der Fassung vom 18. Juni 2009 seit Abgabe der letzten Entsprechenserklärung im Dezember 2009 entsprochen wurde und die Absicht besteht, künftig sämtlichen Empfehlungen des Kodex in der Fassung vom 26. Mai 2010 zu entsprechen. Ziffer 3.8 wurde insoweit entsprochen, als der Selbstbehalt für Aufsichtsratsmitglieder mit der Anpassung der Versicherungsverträge im ersten Halbjahr 2010 in dem geforderten Maße erhöht wurde.“

Die Anregungen setzen wir ebenfalls um – mit einer Ausnahme: Die Hauptversammlung wird nur bis zum Beginn der Generaldebatte im Internet übertragen.

### Eigene Praktiken der Unternehmensführung

„Respekt und Resultate“ ist unser Leitprinzip für die Unternehmensführung. Es steht für die tägliche Herausforderung, erstklassige Ergebnisse mit der Verantwortung für die Bedürfnisse unserer Mitarbeiter und Kunden zu verbinden. Als weltweit tätiges Unternehmen und „Corporate Citizen“ tragen wir eine große Verantwortung für die Umwelt und die Lebensumstände in den Regionen, in denen wir tätig sind. Wir nehmen diese Verantwortung ernst. Unsere Nachhaltigkeitsstrategie basiert auf den Kompetenzen des Unternehmens und den Erfahrungen der Mitarbeiter. Ziel ist es, einen Nutzen für die Gesellschaft zu erbringen und die negativen Auswirkungen unseres Geschäftes auf die Umwelt so gering wie möglich zu halten. Wir wollen Vorreiter bei innovativen und nachhaltigen Logistiklösungen sein. Der Nachhaltigkeitsgedanke treibt Innovationen voran, eröffnet neue Geschäftsmöglichkeiten und verschafft uns damit Wettbewerbsvorteile.

Die Schwerpunkte unserer Nachhaltigkeitsstrategie liegen in drei Bereichen: Mit dem Konzernprogramm „GoGreen“ wollen wir das Klimaschutzziel des Konzerns erreichen. Unter dem Themenschwerpunkt „GoHelp“ setzen wir unsere Kompetenz dafür ein, die Lebensbedingungen von Menschen im Katastrophenfall zu verbessern. Im Jahr 2010 hat unser Disaster Response Team insbesondere in den Katastrophengebieten von Chile, Haiti und Pakistan Unterstützung geleistet. Dritter Schwerpunkt unseres gesellschaftlichen Engagements ist die Unterstützung von Bildungsprogrammen. Dafür wurde das Projekt „GoTeach“ ins Leben gerufen. Deutsche Post DHL ist Gründungspartner und größter Förderer von „Teach First Deutschland“, einer Bildungsinitiative zur Förderung von benachteiligten Schülerinnen und Schülern in Deutschland. Im Jahr 2010

hat Deutsche Post DHL durch die Partnerschaft mit der Dachorganisation „Teach for All“ ihr Engagement für bessere Qualität der Bildung und Bildungssysteme auf globaler Ebene erweitert.

### **Verhaltenskodex und Compliance-Management**

Deutsche Post DHL hat einen Verhaltenskodex entwickelt, der seit Mitte 2006 in allen Regionen und Unternehmensbereichen gilt. Darin sind die Leitlinien für das tägliche Verhalten im Arbeitsalltag der rund 470.000 Mitarbeiter festgeschrieben.

Unsere Grundsätze lauten: Respekt, Toleranz, Ehrlichkeit, Offenheit, Integrität gegenüber Mitarbeitern und Kunden sowie die Bereitschaft zur Übernahme von gesellschaftlicher Verantwortung.

Im Verhaltenskodex ist auch unser Engagement für Chancengleichheit und Gesundheit der Mitarbeiter festgeschrieben. Über die Teilnahme am Pilotprojekt „Anonymisiertes Bewerbungsverfahren“ will Deutsche Post DHL erproben, ob durch ein geändertes Verfahren mehr Chancengleichheit bei der Bewerbung um einen Arbeitsplatz erreicht werden kann. Führungsfunktionen im Konzern werden nach Eignung, Befähigung und fachlicher Leistung besetzt. Der Vorstand achtet dabei auf Vielfalt (Diversity) und strebt eine angemessene Berücksichtigung von Frauen an. Das Gesundheitsmanagement des Konzerns wurde im Geschäftsjahr mit dem „Deutschen Unternehmenspreis Gesundheit“ des Bundesverbandes der Betriebskrankenkassen und der EU-Kommission sowie dem „Corporate Health Award“ unter der Schirmherrschaft des Bundesministeriums für Arbeit und Soziales ausgezeichnet.

Zwei Richtlinien konkretisieren den Verhaltenskodex: Die Antikorruptionsrichtlinie gibt klare Anweisungen, wie mit Geschenken, Zuwendungen und Einladungen umzugehen ist. Eine Wettbewerbsrichtlinie konkretisiert das Verbot von Absprachen mit Wettbewerbern. Der Verhaltenskodex für Lieferanten ist Teil aller neuen Beschaffungsverträge und der bestehenden langfristigen Rahmenverträge. Er verpflichtet diese, ethische und ökologische Standards einzuhalten. Kinder- und Zwangsarbeit sind untersagt. Lohn und Arbeitszeiten müssen den nationalen Regelungen und Gesetzen entsprechen. Unzulässige Zahlungen (Bestechung) sind untersagt.

Das Compliance-Management bei Deutsche Post DHL wird ständig überprüft und weiterentwickelt. Im Jahr 2010 wurde die entsprechende Organisation verstärkt. Der „Chief Compliance Officer“ berichtet direkt an den Finanzvorstand. Das von ihm geführte „Global Compliance Office“ entwickelt konzernweit Standards für das Compliance-Management und unterstützt die entsprechenden Aktivitäten der Unternehmensbereiche. Das „Compliance Committee“, das mit Vertretern aus den Unternehmensbereichen besetzt ist, berät den „Chief Compliance Officer“ bei der laufenden Weiterentwicklung des Compliance-Managements.

### **Arbeitsweise von Vorstand und Aufsichtsrat**

Als deutsche börsennotierte Aktiengesellschaft hat die Deutsche Post ein duales Führungssystem. Der Vorstand leitet das Unternehmen in eigener Verantwortung. Er wird vom Aufsichtsrat bestellt, überwacht und beraten.

Neben den Ressorts des Vorstandsvorsitzenden, des Finanzvorstands und des Personalvorstands gibt es die operativen Ressorts: BRIEF, GLOBAL FORWARDING, FREIGHT, EXPRESS und SUPPLY CHAIN.

Der Vorstand hat sich mit Zustimmung des Aufsichtsrats eine Geschäftsordnung gegeben, die Grundsätze der inneren Ordnung, Geschäftsleitung und Zusammenarbeit innerhalb des Vorstands enthält. In diesem Rahmen leitet jedes Vorstandsmitglied sein Vorstandsressort selbstständig und informiert den Gesamtvorstand regelmäßig über wesentliche Entwicklungen. Über Angelegenheiten, die von besonderer Bedeutung für die Gesellschaft oder den Konzern sind, beschließt der Gesamtvorstand. Hierzu gehören neben den gesetzlich nicht delegierbaren Aufgaben alle Entscheidungen, die dem Aufsichtsrat zur Zustimmung vorzulegen sind. Der Entscheidung des gesamten Vorstands unterliegen ferner Angelegenheiten, die ein Vorstandsmitglied dem Gesamtvorstand zur Entscheidung vorlegt.

Die Mitglieder des Vorstands dürfen bei ihren Entscheidungen weder persönliche Interessen verfolgen noch Geschäftschancen, die dem Unternehmen zustehen, für sich nutzen. Sie sind verpflichtet, Interessenkonflikte dem Aufsichtsrat gegenüber unverzüglich offenzulegen.

Der Aufsichtsrat berät und überwacht den Vorstand. Überdies bestellt er die Mitglieder des Vorstands. Er hat sich eine Geschäftsordnung gegeben, die Grundsätze seiner inneren Ordnung, einen Katalog zustimmungspflichtiger Geschäfte des Vorstands sowie Regelungen zu den Aufsichtsratsausschüssen enthält. Er tritt mindestens zweimal im Kalenderhalbjahr zusammen. Außerordentliche Sitzungen finden statt, wenn bedeutende Ereignisse zu behandeln und zu entscheiden sind. Im Geschäftsjahr 2010 ist der Aufsichtsrat zu vier Plenumssitzungen, 17 Ausschusssitzungen sowie einer Klausurtagung zusammengekommen, wie im Bericht des Aufsichtsrats dargestellt.

Vorstand und Aufsichtsrat stehen in regelmäßigem Austausch über strategische Maßnahmen, Planung, Geschäftsentwicklung, Risikolage und -management sowie die Compliance des Unternehmens. Der Vorstand informiert den Aufsichtsrat zeitnah und umfassend über wichtige Themen.

Entscheidungen des Aufsichtsrats, besonders über zustimmungspflichtige Geschäfte, werden in den zuständigen Ausschüssen intensiv vorbereitet und beraten. Über die Arbeit der Ausschüsse wird der Aufsichtsrat in jeder Plenumssitzung ausführlich informiert.

Die Mitglieder des Aufsichtsrats dürfen bei ihren Entscheidungen weder persönliche Interessen verfolgen noch Geschäftschancen, die dem Unternehmen zustehen, für sich nutzen. Sie sind verpflichtet, Interessenkonflikte dem Aufsichtsrat gegenüber offenzulegen. Wesentliche Interessenkonflikte in der Person eines Aufsichtsratsmitglieds, die nicht nur vorübergehender Natur sind, führen zur Beendigung des Mandats.

#### **Executive Committees und Aufsichtsratsausschüsse**

Sogenannte „Executive Committees“ bereiten die Entscheidungen des Gesamtvorstands vor und entscheiden in den ihnen zugewiesenen Angelegenheiten. Für den Unternehmensbereich BRIEF ist das „MAIL Steering Committee“ zuständig, für die Unternehmensbereiche EXPRESS, GLOBAL FORWARDING, FREIGHT und SUPPLY CHAIN das bereichsübergreifende „Executive Committee DHL“. In den Committees sind der Vorstandsvorsitzende, der Finanzvorstand und die jeweiligen Vorstände der Unternehmensbereiche vertreten. Dem „MAIL Steering Committee“ gehört darüber hinaus der Personalvorstand an. Neben den verantwortlichen Vorstandsmitgliedern sind Führungskräfte der ersten Ebene unterhalb des Vorstands Mitglieder der Executive Committees, teils ständig – zum Beispiel Verantwortliche für das operative Geschäft –,



teils gezielt bei besonderen Themen. So werden die Bereiche Einkauf und Controlling bei Investitionen hinzugezogen und Konzernfinanzen, Konzernentwicklung und Recht bei Akquisitionen. Das „Executive Committee DHL“ und das „MAIL Steering Committee“ tagen jeweils mindestens einmal im Monat.

Darüber hinaus finden vierteljährlich „Business Review Meetings“ statt. Sie sind Teil des strategischen Performance-Dialogs zwischen den Unternehmensbereichen, dem Vorstandsvorsitzenden und dem Finanzvorstand. Hier werden strategische Maßnahmen, operative Themen sowie die Budgetsituation der Unternehmensbereiche erörtert.

Der Aufsichtsrat hat zur effizienten Wahrnehmung seiner Aufgaben fünf Ausschüsse gebildet. Über deren Zusammensetzung und Arbeitsweise informiert der Bericht des Aufsichtsrats. Die Ausschüsse des Aufsichtsrats bereiten die Beschlussfassungen des Aufsichtsratsplenums vor. Entscheidungen zu bestimmten Themen hat der Aufsichtsrat zur abschließenden Entscheidung auf einzelne Ausschüsse delegiert. Der Vorsitzende des Finanz- und Prüfungsausschusses, Hero Brahms, ist Finanzexperte im Sinne der §§ 100 Abs. 5, 107 Abs. 4 AktG.

 Seite 113

#### **Ziele für die Zusammensetzung des Aufsichtsrats**

Der Aufsichtsrat hat in seiner Sitzung vom 10. Dezember 2010 die folgenden konkreten Ziele für seine Zusammensetzung beschlossen:

- ❶ Die Wahlvorschläge des Aufsichtsrats an die Hauptversammlung zur Wahl von Aufsichtsratsmitgliedern sollen sich allein am Wohl des Unternehmens orientieren. In diesem Rahmen strebt der Aufsichtsrat an, den Frauenanteil im gesamten Aufsichtsrat von derzeit 25 % bis zum Jahr 2015 auf 30 % zu erhöhen.
- ❷ Der internationalen Tätigkeit des Unternehmens wird bereits durch die derzeitige Besetzung des Aufsichtsrats angemessen Rechnung getragen. Der Aufsichtsrat strebt an, dies beizubehalten und hierfür auch bei künftigen Wahlvorschlägen an die Hauptversammlung Kandidaten, die aufgrund ihrer Herkunft, Ausbildung oder beruflichen Tätigkeit über besondere internationale Kenntnisse und Erfahrungen verfügen, zu berücksichtigen.
- ❸ Interessenkonflikte bei Aufsichtsratsmitgliedern stehen einer unabhängigen effizienten Beratung und Überwachung des Vorstands entgegen. Der Aufsichtsrat entscheidet in jedem Einzelfall im Rahmen der Gesetze und unter Berücksichtigung des Deutschen Corporate Governance Kodex, wie er mit potenziellen oder auftretenden Interessenkonflikten umgeht.
- ❹ Gemäß der vom Aufsichtsrat beschlossenen und in der Geschäftsordnung des Aufsichtsrats verankerten Altersgrenze wird bei Vorschlägen zur Wahl von Aufsichtsratsmitgliedern berücksichtigt, dass die Amtszeit spätestens mit Ablauf der ordentlichen Hauptversammlung, die auf die Vollendung des 72. Lebensjahres folgt, enden soll.

Die aktuelle Besetzung des Aufsichtsrats entspricht der vorgenannten Zielsetzung.

#### **Aktienoptionsprogramme für Vorstand und Führungskräfte**

Konkrete Angaben über Aktienoptionsprogramme und ähnliche wertpapierorientierte Anreizsysteme der Gesellschaft werden im Vergütungsbericht sowie im Anhang zum Konzernabschluss der Deutsche Post AG erläutert.

 Seite 128 Textziffer 54

## Vergütungsbericht

Der Vergütungsbericht ist gleichzeitig Bestandteil des Konzernlageberichts.

### Struktur der Vergütung des Konzernvorstands im Geschäftsjahr 2010

Der Aufsichtsrat hat im Dezember 2009 auf Vorschlag des Präsidialausschusses über das Vergütungssystem für den Vorstand einschließlich der wesentlichen Vertrags-elemente beraten und es entsprechend den Vorgaben des Gesetzes zur Angemessenheit der Vorstandsvergütung (VorstAG) angepasst. Die ordentliche Hauptversammlung der Deutsche Post AG hat das neue System zur Vergütung der Vorstandsmitglieder am 28. April 2010 mit 98,27 % der abgegebenen Stimmen gebilligt.

Die Vorstandsvergütung orientiert sich an der Größe und der globalen Ausrichtung des Unternehmens, seiner wirtschaftlichen und finanziellen Lage sowie an den Aufgaben und Leistungen des jeweiligen Vorstandsmitglieds. Die Vergütung ist so bemessen, dass sie im internationalen und nationalen Vergleich wettbewerbsfähig ist und damit einen Anreiz für engagierte und erfolgreiche Arbeit bietet.

Die Vergütung des Vorstands im Jahr 2010 ist marktüblich, angemessen und leistungsorientiert; sie setzt sich zusammen aus erfolgsunabhängigen und variablen, das heißt erfolgsbezogenen Komponenten mit kurz-, mittel- und langfristiger Wirkung.

Erfolgsunabhängige Komponenten sind die Jahresfestvergütung (Grundgehalt), Nebenleistungen und Pensionszusagen. Die Jahresfestvergütung wird in zwölf gleichen Monatsraten nachträglich zum Monatsende gezahlt. Nebenleistungen bestehen vor allem aus Firmenwagennutzung, Zuschüssen zu Versicherungen sowie besonderen Pauschalen und Leistungen bei Einsatz außerhalb des Heimatlandes.

Die variablen Vergütungsbestandteile enthalten ein Element, das an den jährlichen geschäftlichen Erfolg gebunden ist (Jahreserfolgsvergütung) – von dem ein Teil in eine Mittelfristkomponente überführt wird-, sowie eine Komponente mit langfristiger Anreizwirkung (Long-Term-Incentive-Plan).

Die Höhe der an den jährlichen geschäftlichen Erfolg gebundenen Komponente, der Jahreserfolgsvergütung, wird durch den Aufsichtsrat auf der Grundlage der Geschäftsentwicklung des Unternehmens nach pflichtgemäßem Ermessen festgelegt. Die individuelle Höhe der Jahreserfolgsvergütung richtet sich nach dem Grad, in dem vorab festgelegte Zielwerte erreicht, unter- oder überschritten werden.

Maßgebend ist dabei für alle Mitglieder des Vorstands die Steuerungsgröße „EBIT after Asset Charge“ (Gewinn nach Kapitalkosten) einschließlich Kapitalkosten auf Goodwill und vor Wertminderung auf Goodwill (nachfolgend: EAC) des Konzerns. Für die Vorstände der Bereiche BRIEF, GLOBAL FORWARDING, FREIGHT, EXPRESS und SUPPLY CHAIN ist zusätzlich das EAC der jeweils verantworteten Division maßgeblich. Zudem werden mit allen Vorstandsmitgliedern ein Mitarbeiterziel, basierend auf der jährlich durchgeführten Mitarbeiterbefragung, sowie weitere Ziele vereinbart.

Sind die für das Geschäftsjahr festgelegten oberen Zielwerte realisiert, wird die maximale Jahreserfolgsvergütung gewährt. Sie ist der Höhe nach auf den Betrag der Jahresfestvergütung begrenzt. Soweit die für das Geschäftsjahr festgelegten Zielwerte nicht vollständig oder gar nicht erreicht werden, wird eine anteilige oder gar keine Jahreserfolgsvergütung gewährt. Darüber hinaus kann der Aufsichtsrat bei außergewöhnlichen Leistungen einen angemessenen Sonderbonus beschließen.

Die Jahreserfolgsvergütung wird, auch wenn die vereinbarten Ziele erreicht worden sind, nicht vollständig auf einmal ausgezahlt. 50 % der Jahreserfolgsvergütung werden in eine Mittelfristkomponente mit dreijährigem Bemessungszeitraum (ein Jahr Leistungsphase, zwei Jahre Nachhaltigkeitsphase) überführt. Eine Auszahlung dieser Mittelfristkomponente erfolgt erst nach Ablauf der Nachhaltigkeitsphase und nur, wenn das Nachhaltigkeitskriterium EAC während der Nachhaltigkeitsphase erreicht wird. Anderenfalls entfällt die Zahlung ersatzlos. Die Regelung wirkt somit im Sinne eines Malussystems, das die Ausrichtung der Vorstandsvergütung auf eine nachhaltige Entwicklung des Unternehmens stärkt und langfristige Anreize setzt.

Die Mittelfristkomponente gilt für alle Anstellungsverträge und Vertragsverlängerungen, die nach dem Inkrafttreten des Gesetzes zur Angemessenheit der Vorstandsvergütung (VorstAG) am 5. August 2009 geschlossen wurden. Darüber hinaus haben alle Vorstandsmitglieder einer Änderung ihrer laufenden Vorstandsverträge mit der Maßgabe zugestimmt, dass ab dem 1. Januar 2010 bis zum Ende der jeweiligen Vertragslaufzeit ein Anteil von 25 % der Jahreserfolgsvergütung in die neue Mittelfristkomponente überführt wird.

Auf Grundlage des vom Aufsichtsrat im Jahr 2006 beschlossenen Long-Term-Incentive-Plans (LTIP 2006) werden Stock Appreciation Rights (SAR) als langfristige Vergütungskomponente gewährt.

Jedes SAR berechtigt zum Barausgleich in Höhe der Differenz zwischen dem Durchschnitt der Schlusskurse der Deutsche-Post-Aktie während der letzten fünf Handelstage vor dem Ausübungstag und dem Ausübungspreis der SAR. Die Mitglieder des Vorstands haben im Jahr 2010 ein Eigeninvestment in Höhe von 10 % ihrer Jahresfestvergütung geleistet. Die Wartezeit für die Ausübung der Rechte beträgt vier Jahre ab Gewährung. Die SAR können nach Ende der Wartezeit innerhalb eines Zeitraums von zwei Jahren ganz oder teilweise ausgeübt werden, wenn am Ende der Wartezeit die absoluten beziehungsweise relativen Erfolgsziele erreicht wurden. Nach Ablauf des Ausübungszeitraums verfallen nicht ausgeübte SAR.

Um zu ermitteln, ob und wie viele der gewährten SAR ausübbar sind, werden der Durchschnittskurs beziehungsweise der Durchschnittsindexwert während Referenz- und Performancezeitraum miteinander verglichen. Beim Referenzzeitraum handelt es sich um die letzten zwanzig aufeinander folgenden Handelstage vor dem Ausgabetag. Der Performancezeitraum betrifft die letzten sechzig Handelstage vor Ablauf der Wartezeit. Der Durchschnittskurs (Endkurs) wird aus dem Durchschnitt der jeweiligen Schlusskurse der Deutsche-Post-Aktie im Xetra-Handel der Deutsche Börse AG ermittelt.

Von je sechs SAR können maximal vier über das absolute Erfolgsziel und maximal zwei über das relative Erfolgsziel „verdient“ werden. Wird zum Ablauf der Wartezeit kein absolutes oder relatives Erfolgsziel erreicht, verfallen die darauf entfallenden SAR der entsprechenden Tranche ersatz- und entschädigungslos.

Jeweils ein SAR wird verdient, wenn der Endkurs der Deutsche-Post-Aktie mindestens 10, 15, 20 oder 25 % über dem Ausgabepreis liegt. Das relative Erfolgsziel ist an die Performance der Aktie im Verhältnis zur Performance des STOXX Europe 600 Index (SXXP; ISIN EU0009658202) gekoppelt. Es ist erreicht, wenn die Wertentwicklung der Aktie während des Performancezeitraums der des Indexes entspricht oder die Outperformance mindestens 10 % beträgt.

Die Vergütung aus den Wertsteigerungsrechten ist auf 300 % der Zielbarvergütung (Jahresfestvergütung zuzüglich Zieljahreserfolgsvergütung) beschränkt. Sie kann darüber hinaus durch den Aufsichtsrat bei außerordentlichen Entwicklungen begrenzt werden.

### **Regelungen zur Begrenzung der Abfindungshöhe gemäß Kodex-Empfehlung, Change-of-Control-Regelungen und nachvertragliches Wettbewerbsverbot**

Die Vorstandsverträge sehen entsprechend der Empfehlung des Deutschen Corporate Governance Kodex (Ziff. 4.2.3 in der Fassung vom 26. Mai 2010) eine Vereinbarung vor, dass im Falle vorzeitiger Beendigung der Vorstandstätigkeit, die nicht durch einen wichtigen Grund veranlasst ist, nicht mehr als der Wert der Ansprüche für die Restlaufzeit des Vertrages vergütet wird. Dabei sind Zahlungen begrenzt auf den Wert von maximal zwei Jahresvergütungen einschließlich Nebenleistungen (Abfindungs-Cap).

Für den Fall eines Kontrollwechsels ist allen Mitgliedern des Vorstands das Recht eingeräumt, innerhalb eines Zeitraums von sechs Monaten nach dem Kontrollwechsel mit einer Frist von drei Monaten zum Monatsende ihr Amt jeweils aus wichtigem Grund niederzulegen und den Vorstandsvertrag zu kündigen (Sonderkündigungsrecht).

Nach der vertraglichen Regelung wird ein Kontrollwechsel unter der Voraussetzung angenommen, dass entweder ein Aktionär durch das Halten von mindestens 30 % der Stimmrechte – einschließlich der ihm nach § 30 Wertpapiererwerbs- und Übernahmegesetz (WpÜG) zuzurechnenden Stimmrechte Dritter – die Kontrolle im Sinne von § 29 Abs. 2 WpÜG erworben hat oder mit der Gesellschaft als abhängigem Unternehmen ein Beherrschungsvertrag nach § 291 Aktiengesetz geschlossen und wirksam geworden ist oder die Gesellschaft gemäß § 2 Umwandlungsgesetz mit einem anderen konzernfremden Rechtsträger verschmolzen wurde, es sei denn, der Wert des anderen Rechtsträgers beträgt ausweislich des vereinbarten Umtauschverhältnisses weniger als 50 % des Werts der Gesellschaft.

Bei Ausübung des Sonderkündigungsrechts oder einvernehmlicher Aufhebung des Vorstandsvertrags innerhalb von neun Monaten seit Kontrollwechsel hat das Mitglied des Vorstands Anspruch auf Abfindung seiner Vergütungsansprüche für die Restlaufzeit des Vorstandsvertrages. Hierbei wird der Empfehlung des Deutschen Corporate Governance Kodex entsprochen und die Höhe der Abfindung auf 150 % des Abfindungs-Caps begrenzt. Der Abfindungsbetrag wird um 25 % gekürzt, wenn das Vorstandsmitglied bei seinem Ausscheiden noch nicht das 60. Lebensjahr vollendet hat. Sofern die Restlaufzeit des Vorstandsvertrages weniger als zwei Jahre beträgt und das Vorstandsmitglied bei seinem Ausscheiden das 62. Lebensjahr noch nicht vollendet hat, entspricht der Abfindungsbetrag dem Abfindungs-Cap. Dasselbe gilt, wenn der Vorstandsvertrag vor Vollendung des 62. Lebensjahres durch Zeitablauf endet, weil er im Zeitpunkt des Kontrollwechsels nur noch eine Laufzeit von weniger als neun Monaten hatte und nicht verlängert wurde.

Geregelt ist darüber hinaus ein nachvertragliches Wettbewerbsverbot. Das bisher bestehende zweijährige nachvertragliche Wettbewerbsverbot wurde ab dem Geschäftsjahr 2010 auf ein Jahr verkürzt. Als Karenzentschädigung werden während der Dauer des Wettbewerbsverbots 100 % (bisher 50 %) der zuletzt vertraglich vereinbarten monatlichen anteiligen Jahresfestvergütung (Grundgehalt) gezahlt, auf die anderweitiges Arbeitseinkommen angerechnet wird. Die Karenzzahlung selbst wird auf etwaige Abfindungszahlungen oder Pensionszahlungen mindernd berücksichtigt. Die Gesellschaft kann vor oder gleichzeitig mit dem Ende des Vorstandsvertrages auf die Einhaltung des Wettbewerbsverbots mit der Wirkung verzichten, dass sie sechs Monate nach Zugang der Erklärung von der Verpflichtung befreit wird, die Karenzentschädigung zu zahlen. Mit Lawrence Rosen wurde ein zweijähriges nachvertragliches Wettbewerbsverbot vereinbart, während dessen er 75 % der zuletzt vertraglich vereinbarten monatlichen

anteiligen Jahresfestvergütung (Grundgehalt) erhält. Auf diese Karenzentschädigung wird grundsätzlich anderweitiges Arbeitseinkommen angerechnet, soweit dies zusammen mit der Karenzzahlung die zuletzt monatlich bezogene Festvergütung übersteigen würde. Eine einseitige Verzichtsmöglichkeit der Gesellschaft auf das Wettbewerbsverbot ist nicht vorgesehen.

Abgesehen von den dargestellten Regelungen sind keinem Vorstandsmitglied weitere Leistungen für den Fall der Beendigung der Tätigkeit zugesagt worden.

#### Höhe der Vergütung der aktiven Mitglieder des Konzernvorstands im Geschäftsjahr 2010

Die Vergütung der aktiven Mitglieder des Vorstands belief sich im Geschäftsjahr 2010 insgesamt auf 11,97 MIO € (Vorjahr: 14,92 MIO €). Davon entfielen 7,07 MIO € auf erfolgsunabhängige Komponenten (Vorjahr: 9,81 MIO €) und 4,90 MIO € auf die ausbezahlte erfolgsbezogene Komponente (Vorjahr: 5,11 MIO €). Weitere 1,79 MIO € der erfolgsbezogenen Komponente wurden in die Mittelfristkomponente überführt und kommen unter der Voraussetzung, dass das maßgebliche Nachhaltigkeitskriterium EAC erfüllt ist, im Jahr 2013 zur Auszahlung.

Die Vorstandsmitglieder erhielten im Geschäftsjahr 2010 insgesamt 1.875.000 Stück SAR im Gesamtwert zum Ausgabezeitpunkt (1. Juli 2010) von 4,99 MIO € (Vorjahr: 7,25 MIO €). Die Gesamtvergütung der aktiven Vorstandsmitglieder ist in folgender Tabelle individualisiert ausgewiesen:

#### B.05 Vergütung des Konzernvorstands 2010: Barkomponenten

| Vorstandsmitglieder           | Erfolgsunabhängig   |                 | Erfolgsbezogen                     |           | In Mittelfristkomponente überführter Anteil der Jahreserfolgsvergütung <sup>2)</sup> |
|-------------------------------|---------------------|-----------------|------------------------------------|-----------|--------------------------------------------------------------------------------------|
|                               | Jahresfestvergütung | Nebenleistungen | Ausgezahlte Jahreserfolgsvergütung | Insgesamt |                                                                                      |
| Dr. Frank Appel, Vorsitzender | 1.661.973           | 48.452          | 1.246.480                          | 2.956.905 | 415.493                                                                              |
| Ken Allen                     | 715.000             | 105.542         | 525.096                            | 1.345.638 | 175.032                                                                              |
| Bruce Edwards                 | 860.000             | 94.898          | 643.646                            | 1.598.544 | 214.549                                                                              |
| Jürgen Gerdes                 | 895.000             | 23.191          | 555.000                            | 1.473.191 | 340.000                                                                              |
| Lawrence Rosen <sup>1)</sup>  | 860.000             | 20.476          | 645.000                            | 1.525.476 | 215.000                                                                              |
| Walter Scheurle               | 912.500             | 17.697          | 670.140                            | 1.600.337 | 223.380                                                                              |
| Hermann Ude                   | 834.664             | 15.036          | 612.977                            | 1.462.677 | 204.326                                                                              |

1) Im Geschäftsjahr wurden ferner 1.869.000 € der im Geschäftsbericht 2009 dargestellten Kompensationszahlung in Höhe von insgesamt 2,55 MIO € für entfallene Rechte infolge des Wechsels zur Deutsche Post AG ausbezahlt

2) Auszahlung erfolgt 2013 und nur bei Erfüllung des Nachhaltigkeitskriteriums

#### B.06 Vergütung des Konzernvorstands 2010: Aktienbasierte Komponente mit langfristiger Anreizwirkung

| Amtierende Vorstandsmitglieder | Anzahl SAR (Stück) | Wert der SAR bei Gewährung am 1. Juli 2010 | Wertentwicklung der 2007 bis 2010 insgesamt gewährten SAR am 31. Dez. 2010 ggü. Wert bei Gewährung |
|--------------------------------|--------------------|--------------------------------------------|----------------------------------------------------------------------------------------------------|
|                                |                    |                                            |                                                                                                    |
| Dr. Frank Appel, Vorsitzender  | 375.000            | 997.500                                    | -2.166.250                                                                                         |
| Ken Allen                      | 250.000            | 665.000                                    | -378.930                                                                                           |
| Bruce Edwards                  | 250.000            | 665.000                                    | -909.182                                                                                           |
| Jürgen Gerdes                  | 250.000            | 665.000                                    | -1.378.519                                                                                         |
| Lawrence Rosen                 | 250.000            | 665.000                                    | -130.300                                                                                           |
| Walter Scheurle                | 250.000            | 665.000                                    | -1.783.700                                                                                         |
| Hermann Ude                    | 250.000            | 665.000                                    | -909.182                                                                                           |

## Höhe der Vergütung des Konzernvorstands im Vorjahr (2009)

### B.07 Vergütung des Konzernvorstands 2009: Barkomponenten

| €                                   | Erfolgsunabhängig   |                 | Erfolgsbezogen         | Insgesamt |
|-------------------------------------|---------------------|-----------------|------------------------|-----------|
|                                     | Jahresfestvergütung | Nebenleistungen | Jahreserfolgsvergütung |           |
| Vorstandsmitglieder                 |                     |                 |                        |           |
| Dr. Frank Appel, Vorsitzender       | 1.582.831           | 27.969          | 1.376.430              | 2.987.230 |
| John Allan (bis 30. Juni 2009)      | 564.375             | 353.658         | 490.781                | 1.408.814 |
| Ken Allen (seit 26. Feb. 2009)      | 602.217             | 84.677          | 562.953                | 1.249.847 |
| Bruce Edwards                       | 860.001             | 141.851         | 373.928                | 1.375.780 |
| Jürgen Gerdes                       | 787.500             | 27.972          | 639.529                | 1.455.001 |
| John Mullen (bis 24. Feb. 2009)     | 161.832             | 160.594         | 218.416                | 540.842   |
| Walter Scheurle                     | 860.000             | 22.656          | 747.856                | 1.630.512 |
| Hermann Ude                         | 715.000             | 15.322          | 455.670                | 1.185.992 |
| Lawrence Rosen (seit 1. Sept. 2009) | 286.667             | 8.001           | 249.285                | 543.953   |

### B.08 Vergütung des Konzernvorstands 2009: Aktienbasierte Komponente mit langfristiger Anreizwirkung

| €                                   | Anzahl SAR (Stück) | Wert der SAR bei Gewährung | Wertentwicklung der 2006 bis 2009                                |
|-------------------------------------|--------------------|----------------------------|------------------------------------------------------------------|
|                                     |                    | am 1. Juli 2009            | insgesamt gewährten SAR am 31. Dez. 2009 ggü. Wert bei Gewährung |
| Vorstandsmitglieder                 |                    |                            |                                                                  |
| Dr. Frank Appel, Vorsitzender       | 360.000            | 1.450.800                  | -1.685.900                                                       |
| Ken Allen (seit 26. Feb. 2009)      | 240.000            | 967.200                    | 145.919                                                          |
| Bruce Edwards                       | 240.000            | 967.200                    | -229.829                                                         |
| Jürgen Gerdes                       | 240.000            | 967.200                    | -656.270                                                         |
| Walter Scheurle                     | 240.000            | 967.200                    | -1.738.900                                                       |
| Hermann Ude                         | 240.000            | 967.200                    | -122.943                                                         |
| Lawrence Rosen (seit 1. Sept. 2009) | 240.000            | 967.200                    | 446.400                                                          |

### Versorgungszusagen nach altem System

Die Mitglieder des Vorstands verfügen über einzelvertragliche unmittelbare Pensionszusagen. Vorgesehen sind Versorgungsleistungen, wenn das Vorstandsmitglied wegen dauernder Arbeitsunfähigkeit, Tod oder altersbedingt aus dem Dienst ausscheidet. Bei Ablauf des Vorstandsvertrages nach mindestens fünf Vorstandsmitgliedsjahren bleiben die erworbenen Anwartschaften in vollem Umfang aufrechterhalten. Voraussetzung für Leistungen wegen dauernder Arbeitsunfähigkeit ist eine erbrachte Dienstzeit von mindestens fünf Jahren. Altersleistungen werden frühestens ab Vollendung des 55. Lebensjahres gewährt, bei Jürgen Gerdes ab dem 62. Lebensjahr. Die Vorstände haben ein Wahlrecht zwischen laufender Ruhegeldleistung und Kapitalzahlung. Die Höhe der Leistungen ist abhängig von den pensionsfähigen Bezügen und dem Versorgungsgrad, der sich aus der Anzahl der Dienstjahre ergibt.

Pensionsfähiges Einkommen ist die Jahresfestvergütung (Grundgehalt), berechnet nach dem Durchschnitt der letzten zwölf Kalendermonate der Beschäftigung. In den Jahren 2002 bis 2007 neu bestellte Vorstände erhalten nach fünf Jahren Dienstzeit als Vorstand einen Versorgungsgrad von 25 %, der maximale Versorgungsgrad (50 %) wird nach einer Dienstzeit von zehn Jahren erreicht. Der höchstmögliche Versorgungsgrad eines noch vor 2002 berufenen aktiven Vorstands beträgt 60 %. Der Versorgungsgrad steigt stufenweise, je nach individueller vertraglicher Regelung entweder entsprechend der Dienstzeit oder den Bestellperioden als Vorstand. Die späteren Rentenleistungen werden entsprechend der Entwicklung des Verbraucherpreisindex für Deutschland erhöht oder ermäßigt.



**B.09 Individualausweis der Versorgungszusagen für den Vorstand nach altem System im Geschäftsjahr 2010**

|                               | Pensionszusagen       |                      |                                                             |                                 |
|-------------------------------|-----------------------|----------------------|-------------------------------------------------------------|---------------------------------|
|                               | Versorgungsgrad       | Maximal-             | Dienstzeitaufwand (Service Cost)                            | Barwert                         |
|                               | am 31. Dez. 2010<br>% | versorgungsgrad<br>% | für die Pensionsverpflichtung im<br>Geschäftsjahr 2010<br>€ | (DBO) zum<br>31. Dez. 2010<br>€ |
| Dr. Frank Appel, Vorsitzender | 25                    | 50                   | 495.558                                                     | 5.898.215                       |
| Jürgen Gerdes <sup>1)</sup>   | 0                     | 50                   | 139.017                                                     | 2.798.820                       |
| Walter Scheurle               | 60                    | 60                   | 615.154                                                     | 7.212.421                       |
| <b>Gesamt</b>                 |                       |                      | <b>1.249.729</b>                                            | <b>15.909.456</b>               |

1) Mindestzeit noch nicht erfüllt. Im Versorgungsfall greifen solange die Bestimmungen der bisherigen Versorgungsregelung

**B.10 Individualausweis der Versorgungszusagen für den Vorstand nach altem System im Vorjahr (2009)**

|                                 | Pensionszusagen       |                      |                                                          |                                 |
|---------------------------------|-----------------------|----------------------|----------------------------------------------------------|---------------------------------|
|                                 | Versorgungsgrad       | Maximal-             | Dienstzeitaufwand (Service Cost)                         | Barwert                         |
|                                 | am 31. Dez. 2009<br>% | versorgungsgrad<br>% | für die Pensionsverpflichtung<br>Geschäftsjahr 2009<br>€ | (DBO) zum<br>31. Dez. 2009<br>€ |
| Dr. Frank Appel, Vorsitzender   | 25                    | 50                   | 415.539                                                  | 4.787.292                       |
| Jürgen Gerdes <sup>1)</sup>     | 0                     | 50                   | 117.912                                                  | 2.200.185                       |
| John Mullen (bis 24. Feb. 2009) | 45                    | 50                   | 674.211 <sup>2)</sup>                                    | 9.648.104 <sup>2)</sup>         |
| Walter Scheurle                 | 30                    | 60                   | 506.408                                                  | 6.085.266                       |
| <b>Gesamt</b>                   |                       |                      | <b>1.714.070</b>                                         | <b>22.540.847</b>               |

1) Mindestzeit noch nicht erfüllt. Im Versorgungsfall greifen solange die Bestimmungen der bisherigen Versorgungsregelung

2) Ganzjahreswert

**Versorgungszusagen nach neuem System**

Im Geschäftsjahr 2008 wurde die Systematik der Versorgungszusagen neu geregelt. Ab dem 4. März 2008 neu berufene Vorstände erhalten statt der bisherigen endgehaltsbezogenen Pensionszusage eine Zusage auf der Basis eines beitragsorientierten Systems.

Im Rahmen der beitragsorientierten Leistungszusage schreibt das Unternehmen für die betreffenden Mitglieder des Vorstands einen jährlichen Beitrag in Höhe von 35 % der Jahresfestvergütung (seit dem 1. Januar 2010, zuvor 25 %) auf ein virtuelles Versorgungskonto gut. Die Dauer der Beitragszahlung ist auf 15 Jahre begrenzt. Das Versorgungskapital wird bis zum Eintritt des Versorgungsfalles oder bis zum Ausscheiden mit dem für die Bildung steuerlicher Pensionsrückstellungen jeweils geltenden Rechnungszins verzinst. Die Versorgungsleistung wird als Kapital in Höhe des angesammelten Wertes des Versorgungskontos ausgezahlt. Der Leistungsfall tritt bei Erreichen der Altersgrenze (Vollendung des 62. Lebensjahres), bei Invalidität oder bei Tod als Aktiver ein. Der Begünstigte hat im Versorgungsfall ein Rentenwahlrecht. Bei Ausübung wird das Kapital in eine Rente nach den jeweiligen maßgeblichen steuerlichen Rechnungsgrundlagen umgerechnet, wobei individuelle Daten der Hinterbliebenen und eine künftige Rentenanpassung von 1 % berücksichtigt werden. Bei vorzeitigem Ausscheiden des Vorstandsmitglieds ohne Eintritt eines Versorgungsfalles wird das Versorgungskonto in Höhe des bis zum Ausscheiden erdienten Kapitals beitragsfrei und zinslos fortgeführt.

In dieses Versorgungssystem sind die Vorstände Ken Allen, Bruce Edwards, Lawrence Rosen und Hermann Ude einbezogen. Die Versorgungszusage von Hermann Ude enthält eine Regelung, die ihm eine Mindestleistung zusichert, deren Höhe den Leistungen bei Fortführung der abgelösten Zusage mit den zum Zeitpunkt seiner Berufung zum Vorstand maßgeblichen Bemessungsgrößen entspricht.

#### B.11 Individualausweis der Versorgungszusagen für den Vorstand nach neuem System im Geschäftsjahr 2010

| €              | Beitragssumme<br>für 2010 | Barwert (DBO)<br>zum 31. Dez. 2010 | Dienstzeitaufwand (Service Cost)<br>für die Pensionsverpflichtung<br>Geschäftsjahr 2010 |
|----------------|---------------------------|------------------------------------|-----------------------------------------------------------------------------------------|
| Ken Allen      | 250.250                   | 458.199                            | 263.643                                                                                 |
| Bruce Edwards  | 301.000                   | 804.427                            | 320.152                                                                                 |
| Lawrence Rosen | 301.000                   | 1.367.910                          | 321.947                                                                                 |
| Hermann Ude    | 250.250                   | 1.140.262                          | 267.532                                                                                 |
| <b>Gesamt</b>  |                           | <b>3.770.798</b>                   | <b>1.173.274</b>                                                                        |

#### B.12 Individualausweis der Versorgungszusagen für den Vorstand nach neuem System im Vorjahr (2009)

| €                            | Beitragssumme<br>für 2009 | Barwert (DBO)<br>zum 31. Dez. 2009 | Dienstzeitaufwand (Service Cost)<br>für die Pensionsverpflichtung<br>Geschäftsjahr 2009 |
|------------------------------|---------------------------|------------------------------------|-----------------------------------------------------------------------------------------|
| Ken Allen <sup>1)</sup>      | 148.958 <sup>3)</sup>     | 164.744                            | 150.597 <sup>5)</sup>                                                                   |
| Bruce Edwards                | 215.000                   | 432.345                            | 221.591                                                                                 |
| Lawrence Rosen <sup>2)</sup> | 871.667 <sup>4)</sup>     | 950.626                            | 70.234 <sup>5)</sup>                                                                    |
| Hermann Ude                  | 178.750                   | 787.389                            | 177.182                                                                                 |
| <b>Gesamt</b>                |                           | <b>2.335.104</b>                   | <b>619.604</b>                                                                          |

1) Mitglied des Vorstands seit 26. Februar 2009 2) Mitglied des Vorstands seit 1. September 2009 3) Anteiliger Beitrag für zehn Monate

4) Anteiliger Beitrag für vier Monate zuzüglich 800.000 € Startbaustein 5) Fiktiv zum 1. Januar 2009 bei 5,75 % Zins ermittelt

#### Bezüge für ehemalige Mitglieder des Vorstands

Die Bezüge für ehemalige Mitglieder des Vorstands beziehungsweise deren Hinterbliebene betrugen im Geschäftsjahr 2010 5,7 MIO € (Vorjahr: 8,1 MIO €). Der nach internationalen Rechnungslegungsgrundsätzen ermittelte Verpflichtungsumfang (DBO) für laufende Pensionen beläuft sich auf 42,9 MIO € (Vorjahr: 26,1 MIO €).

#### Vergütung des Aufsichtsrats

Die Hauptversammlung hat am 28. April 2010 beschlossen, § 17 der Satzung der Deutsche Post AG zur Vergütung des Aufsichtsrats rückwirkend zum 1. Januar 2010 zu ändern. Die vom Erfolg des laufenden Geschäftsjahres abhängige Vergütungskomponente wurde aufgehoben. Die variable Vergütung ist nun vollständig vom langfristigen Erfolg des Unternehmens abhängig und damit stärker auf eine nachhaltige Unternehmensentwicklung ausgerichtet. Die feste, vom Erfolg des Unternehmens unabhängige jährliche Vergütung (Fixum) wurde schrittweise dem Durchschnittswert der DAX-30-Unternehmen angepasst und beträgt für das Jahr 2010 30.000 € (Vorjahr: 20.000 €) und seit dem 1. Januar 2011 40.000 €.

Die variable, auf die nachhaltige Unternehmensentwicklung ausgerichtete Vergütung für das Geschäftsjahr 2010 errechnet sich aus 1.000 € für jeweils 0,02 €, um die der Konzerngewinn je Aktie im Geschäftsjahr 2012 den Konzerngewinn je Aktie des Geschäftsjahres 2009 übersteigt. Dieser variable Vergütungsanteil wird mit Ablauf der ordentlichen Hauptversammlung 2013 fällig. Die variable Vergütung darf 50 % der festen jährlichen Vergütung nicht übersteigen (Cap-Regelung).

Für den Aufsichtsratsvorsitzenden sowie den Vorsitzenden eines Ausschusses erhöht sich die Vergütung um 100 %, für den stellvertretenden Aufsichtsratsvorsitzenden und für das Mitglied eines Ausschusses um 50 %. Dies gilt nicht für den Vermittlungs- und den Nominierungsausschuss. Aufsichtsratsmitglieder, die nur während eines Teils des Geschäftsjahres dem Aufsichtsrat und seinen Ausschüssen angehören beziehungsweise die Funktion eines Vorsitzenden oder stellvertretenden Vorsitzenden haben, erhalten die Vergütung zeitanteilig. Die Mitglieder des Aufsichtsrats haben Anspruch auf Ersatz der ihnen bei der Ausübung ihres Amtes entstehenden baren Auslagen. Umsatzsteuern auf die Aufsichtsratsvergütung und Auslagen werden erstattet. Darüber hinaus erhalten die Mitglieder des Aufsichtsrats ein Sitzungsgeld von 1.000 € (Vorjahr: 500 €) für jede Sitzung des Aufsichtsrats oder eines Ausschusses, an der sie teilnehmen.

Die Vergütung für das Jahr 2010 betrug insgesamt 1.097.000 € (Vorjahr: 756.763 €) und ist in der folgenden Tabelle individuell ausgewiesen:

**B.13 Aufsichtsratsvergütung 2010**

| Aufsichtsratsmitglieder                            | Fixum   | Sitzungsgeld | Gesamt  |
|----------------------------------------------------|---------|--------------|---------|
| Prof. Dr. Wulf von Schimmelpenninck (Vorsitzender) | 105.000 | 16.000       | 121.000 |
| Andrea Kocsis (Stv. Vorsitzende)                   | 90.000  | 12.000       | 102.000 |
| Wolfgang Abel                                      | 45.000  | 12.000       | 57.000  |
| Willem van Agtmael                                 | 30.000  | 4.000        | 34.000  |
| Rolf Bauermeister                                  | 45.000  | 8.000        | 53.000  |
| Hero Brahm                                         | 60.000  | 12.000       | 72.000  |
| Heinrich Josef Busch                               | 30.000  | 4.000        | 34.000  |
| Werner Gatzert                                     | 60.000  | 14.000       | 74.000  |
| Annette Harms (bis 6. Oktober 2010)                | 23.750  | 3.000        | 26.750  |
| Prof. Dr. Henning Kagermann                        | 30.000  | 4.000        | 34.000  |
| Thomas Koczelnik                                   | 60.000  | 16.000       | 76.000  |
| Anke Kufalt                                        | 30.000  | 3.000        | 33.000  |
| Roland Oetker                                      | 60.000  | 13.000       | 73.000  |
| Harry Roels                                        | 30.000  | 4.000        | 34.000  |
| Andreas Schädler                                   | 30.000  | 4.000        | 34.000  |
| Sabine Schielmann (seit 27. Oktober 2010)          | 6.250   | 1.000        | 7.250   |
| Dr. Ulrich Schröder                                | 30.000  | 4.000        | 34.000  |
| Dr. Stefan Schulte                                 | 45.000  | 10.000       | 55.000  |
| Helga Thiel                                        | 45.000  | 12.000       | 57.000  |
| Elmar Toime                                        | 30.000  | 4.000        | 34.000  |
| Stefanie Weckesser                                 | 45.000  | 7.000        | 52.000  |

Für das Geschäftsjahr 2008 sieht das damalige Vergütungssystem eine erfolgsorientierte jährliche Vergütung mit langfristiger Anreizwirkung in Höhe von 300 € für jeweils 3 % vor, um die der Konzerngewinn je Aktie des Geschäftsjahres 2010 den Konzerngewinn je Aktie des Geschäftsjahres 2007 übersteigt. Voraussetzung für eine Erhöhung dieses Vergütungsbestandteils (Vorjahr: keine Auszahlung) ist, dass der Konzernumsatz im Jahr 2010 gegenüber dem Konzernumsatz des Jahres 2007 gesteigert wurde. Da diese Voraussetzung nicht erfüllt wurde, kommt die erfolgsorientierte Vergütung mit langfristiger Anreizwirkung nicht zur Auszahlung.

**B.14 Aufsichtsratsvergütung 2009**

| Aufsichtsratsmitglieder                                                | Fixum  | Sitzungsgeld | Kurzfristige<br>erfolgs-<br>orientierte<br>Vergütung | Gesamt |
|------------------------------------------------------------------------|--------|--------------|------------------------------------------------------|--------|
| Prof. Dr. Wulf von Schimmelmann<br>(Vorsitzender, seit 1. Januar 2009) | 70.000 | 11.000       | 1.050                                                | 82.050 |
| Andrea Kocsis (Stv. Vorsitzende)                                       | 60.000 | 10.000       | 900                                                  | 70.900 |
| Wolfgang Abel                                                          | 30.000 | 8.000        | 450                                                  | 38.450 |
| Willem van Agtmael                                                     | 20.000 | 3.500        | 300                                                  | 23.800 |
| Rolf Bauermeister                                                      | 30.000 | 9.000        | 450                                                  | 39.450 |
| Hero Brahms                                                            | 40.000 | 9.500        | 600                                                  | 50.100 |
| Heinrich Josef Busch                                                   | 20.000 | 3.500        | 300                                                  | 23.800 |
| Werner Gatzert                                                         | 40.000 | 11.000       | 600                                                  | 51.600 |
| Annette Harms                                                          | 20.000 | 4.000        | 300                                                  | 24.300 |
| Prof. Dr. Henning Kagermann (seit 18. Februar 2009)                    | 17.500 | 3.500        | 263                                                  | 21.263 |
| Thomas Koczelnik                                                       | 40.000 | 9.000        | 600                                                  | 49.600 |
| Prof. Dr. Ralf Krüger (bis 21. April 2009)                             | 11.667 | 3.000        | 175                                                  | 14.842 |
| Anke Kufalt                                                            | 20.000 | 4.000        | 300                                                  | 24.300 |
| Roland Oetker                                                          | 37.083 | 7.000        | 556                                                  | 44.640 |
| Harry Roels                                                            | 20.000 | 4.000        | 300                                                  | 24.300 |
| Andreas Schädler                                                       | 20.000 | 4.000        | 300                                                  | 24.300 |
| Dr. Ulrich Schröder                                                    | 20.000 | 3.000        | 300                                                  | 23.300 |
| Dr. Stefan Schulte (seit 21. April 2009)                               | 21.250 | 4.000        | 319                                                  | 25.569 |
| Helga Thiel                                                            | 30.000 | 8.000        | 450                                                  | 38.450 |
| Elmar Toime                                                            | 20.000 | 3.500        | 300                                                  | 23.800 |
| Stefanie Weckesser                                                     | 30.000 | 7.500        | 450                                                  | 37.950 |

Luftfrachtcontainer  
(Unit Load Device)

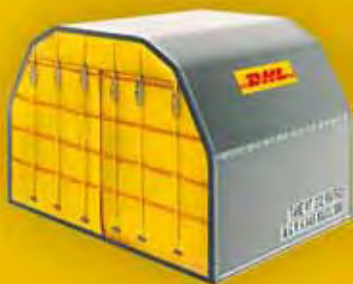

See- und Landfracht-  
container

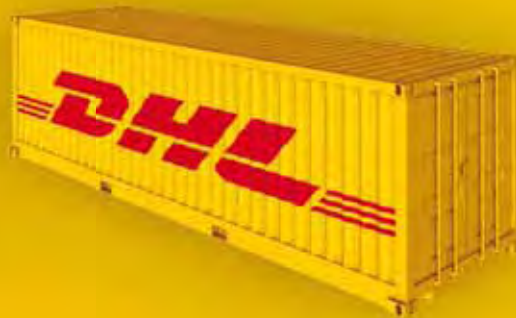

Palette

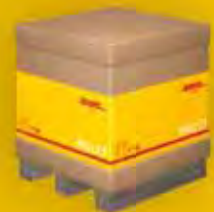

**DHL**

**IHRE WAHL. WEIL GRENZEN ÜBERWINDBAR SIND.**

DHL ist der weltweit führende Anbieter für Luftfracht, die Nummer zwei für Seefracht und einer der führenden Landfrachtpediteure in Europa, dem Nahen und Mittleren Osten und in Nordafrika. Das Unternehmen entwickelt individuelle Transportlösungen, stellt Kapazitäten bereit und koordiniert den Versand von Waren und Informationen in mehr als 150 Ländern.

Als globaler Marktführer in der Kontraktlogistik versorgt DHL Kunden vieler Branchen mit Leistungen entlang der gesamten Lieferkette. Die Kombination aus globalem Netzwerk und lokalem Know-how macht es möglich, Kunden in mehr als 60 Ländern bei komplexen Änderungen ihrer Abläufe zu unterstützen.

|                                    |            |
|------------------------------------|------------|
| <b>GEWINN-UND-VERLUST-RECHNUNG</b> | <b>139</b> |
|------------------------------------|------------|

|                               |            |
|-------------------------------|------------|
| <b>GESAMTERGEBNISRECHNUNG</b> | <b>140</b> |
|-------------------------------|------------|

|               |            |
|---------------|------------|
| <b>BILANZ</b> | <b>141</b> |
|---------------|------------|

|                             |            |
|-----------------------------|------------|
| <b>KAPITALFLUSSRECHNUNG</b> | <b>142</b> |
|-----------------------------|------------|

|                                         |            |
|-----------------------------------------|------------|
| <b>EIGENKAPITALVERÄNDERUNGSRECHNUNG</b> | <b>143</b> |
|-----------------------------------------|------------|

|                                                             |            |
|-------------------------------------------------------------|------------|
| <b>ANHANG ZUM KONZERNABSCHLUSS<br/>DER DEUTSCHE POST AG</b> | <b>144</b> |
|-------------------------------------------------------------|------------|

#### Grundlagen und Methoden

|                                                                                                |     |
|------------------------------------------------------------------------------------------------|-----|
| 1 Grundlagen der Rechnungslegung .....                                                         | 144 |
| 2 Konsolidierungskreis .....                                                                   | 144 |
| 3 Wesentliche Geschäftsvorfälle .....                                                          | 147 |
| 4 Neuerungen in der internationalen Rechnungslegung<br>nach IFRS .....                         | 147 |
| 5 Anpassungen von Vorjahreszahlen .....                                                        | 149 |
| 6 Währungsumrechnung .....                                                                     | 150 |
| 7 Bilanzierungs- und Bewertungsmethoden .....                                                  | 150 |
| 8 Ermessensentscheidungen bei der Anwendung<br>der Bilanzierungs- und Bewertungsmethoden ..... | 156 |
| 9 Konsolidierungsmethoden .....                                                                | 157 |

#### Segmentberichterstattung

|                                   |     |
|-----------------------------------|-----|
| 10 Segmentberichterstattung ..... | 158 |
|-----------------------------------|-----|

#### Erläuterungen zur Gewinn-und-Verlust-Rechnung

|                                                        |     |
|--------------------------------------------------------|-----|
| 11 Umsatzerlöse .....                                  | 161 |
| 12 Sonstige betriebliche Erträge .....                 | 161 |
| 13 Materialaufwand .....                               | 161 |
| 14 Personalaufwand/Mitarbeiter .....                   | 161 |
| 15 Abschreibungen .....                                | 162 |
| 16 Sonstige betriebliche Aufwendungen .....            | 163 |
| 17 Ergebnis aus assoziierten Unternehmen .....         | 163 |
| 18 Sonstiges Finanzergebnis .....                      | 163 |
| 19 Ertragsteuern .....                                 | 164 |
| 20 Ergebnis aus fortgeführten Geschäftsbereichen ..... | 165 |
| 21 Ergebnis aus aufgegebenen Geschäftsbereichen .....  | 165 |
| 22 Konzernjahresergebnis .....                         | 165 |
| 23 Nicht beherrschende Anteile .....                   | 165 |
| 24 Ergebnis je Aktie .....                             | 165 |
| 25 Dividende je Aktie .....                            | 165 |

#### Erläuterungen zur Bilanz

|                                                     |     |
|-----------------------------------------------------|-----|
| 26 Immaterielle Vermögenswerte .....                | 166 |
| 27 Sachanlagen .....                                | 168 |
| 28 Als Finanzinvestition gehaltene Immobilien ..... | 169 |
| 29 Beteiligungen an assoziierten Unternehmen .....  | 169 |
| 30 Langfristige finanzielle Vermögenswerte .....    | 169 |
| 31 Sonstige langfristige Vermögenswerte .....       | 170 |
| 32 Latente Steuern .....                            | 170 |

|                                                                                                                                              |     |
|----------------------------------------------------------------------------------------------------------------------------------------------|-----|
| 33 Vorräte .....                                                                                                                             | 170 |
| 34 Ertragsteueransprüche und Ertragsteuerverpflichtungen .....                                                                               | 170 |
| 35 Forderungen und sonstige kurzfristige Vermögenswerte .....                                                                                | 171 |
| 36 Kurzfristige finanzielle Vermögenswerte .....                                                                                             | 171 |
| 37 Flüssige Mittel und Zahlungsmitteläquivalente .....                                                                                       | 171 |
| 38 Zur Veräußerung gehaltene Vermögenswerte<br>und Verbindlichkeiten im Zusammenhang<br>mit zur Veräußerung gehaltenen Vermögenswerten ..... | 171 |
| 39 Gezeichnetes Kapital .....                                                                                                                | 172 |
| 40 Andere Rücklagen .....                                                                                                                    | 173 |
| 41 Gewinnrücklage .....                                                                                                                      | 174 |
| 42 Aktionären der Deutsche Post AG zuzuordnendes<br>Eigenkapital .....                                                                       | 174 |
| 43 Nicht beherrschende Anteile .....                                                                                                         | 174 |
| 44 Rückstellungen für Pensionen und ähnliche<br>Verpflichtungen .....                                                                        | 174 |
| 45 Sonstige Rückstellungen .....                                                                                                             | 180 |
| 46 Finanzschulden .....                                                                                                                      | 181 |
| 47 Sonstige Verbindlichkeiten .....                                                                                                          | 183 |
| 48 Verbindlichkeiten aus Lieferungen und Leistungen .....                                                                                    | 184 |

#### Erläuterungen zur Kapitalflussrechnung

|                                                 |     |
|-------------------------------------------------|-----|
| 49 Erläuterungen zur Kapitalflussrechnung ..... | 184 |
|-------------------------------------------------|-----|

#### Sonstige Erläuterungen

|                                                                |     |
|----------------------------------------------------------------|-----|
| 50 Risiken und Finanzinstrumente des Konzerns .....            | 186 |
| 51 Eventualverbindlichkeiten .....                             | 199 |
| 52 Sonstige finanzielle Verpflichtungen .....                  | 199 |
| 53 Rechtsverfahren .....                                       | 200 |
| 54 Aktienbasierte Vergütung .....                              | 201 |
| 55 Beziehungen zu nahestehenden Unternehmen und Personen ..... | 202 |
| 56 Honorare des Abschlussprüfers .....                         | 206 |
| 57 Inanspruchnahme von § 264 Abs. 3 HGB .....                  | 206 |
| 58 Entsprechenserklärung zum Corporate Governance Kodex .....  | 206 |
| 59 Wesentliche Ereignisse nach dem Bilanzstichtag .....        | 206 |
| 60 Anteilsbesitzliste .....                                    | 207 |

|                                   |            |
|-----------------------------------|------------|
| <b>VERSICHERUNG DES VORSTANDS</b> | <b>228</b> |
|-----------------------------------|------------|

|                                                     |            |
|-----------------------------------------------------|------------|
| <b>BESTÄTIGUNGSVERMERK<br/>DES ABSCHLUSSPRÜFERS</b> | <b>228</b> |
|-----------------------------------------------------|------------|



## C.01 GEWINN-UND-VERLUST-RECHNUNG

1. Januar bis 31. Dezember

MIO €

|                                                      | Textziffer | 2009    | 2010    |
|------------------------------------------------------|------------|---------|---------|
| <b>Fortgeführte Geschäftsbereiche</b>                |            |         |         |
| Umsatzerlöse                                         | 11         | 46.201  | 51.481  |
| Sonstige betriebliche Erträge                        | 12         | 2.141   | 2.217   |
| Gesamte betriebliche Erträge                         |            | 48.342  | 53.698  |
| Materialaufwand                                      | 13         | -25.774 | -29.473 |
| Personalaufwand                                      | 14         | -17.021 | -16.609 |
| Abschreibungen                                       | 15         | -1.620  | -1.296  |
| Sonstige betriebliche Aufwendungen                   | 16         | -3.696  | -4.485  |
| Gesamte betriebliche Aufwendungen                    |            | -48.111 | -51.863 |
| <b>Ergebnis der betrieblichen Tätigkeit (EBIT)</b>   |            | 231     | 1.835   |
| Ergebnis aus assoziierten Unternehmen                | 17         | 28      | 56      |
| Sonstige Finanzerträge                               |            | 1.885   | 2.251   |
| Sonstige Finanzaufwendungen                          |            | -1.857  | -1.335  |
| Fremdwährungsergebnis                                |            | -11     | 17      |
| Sonstiges Finanzergebnis                             | 18         | 17      | 933     |
| <b>Finanzergebnis</b>                                |            | 45      | 989     |
| Ergebnis vor Ertragsteuern                           |            | 276     | 2.824   |
| Ertragsteuern                                        | 19         | -15     | -194    |
| <b>Ergebnis aus fortgeführten Geschäftsbereichen</b> | 20         | 261     | 2.630   |
| <b>Aufgegebene Geschäftsbereiche</b>                 |            |         |         |
| Ergebnis aus aufgegebenen Geschäftsbereichen         | 21         | 432     | 0       |
| <b>Konzernjahresergebnis</b>                         | 22         | 693     | 2.630   |
| davon entfielen auf Aktionäre der Deutsche Post AG   |            | 644     | 2.541   |
| davon entfielen auf nicht beherrschende Anteile      | 23         | 49      | 89      |
| <b>Unverwässertes Ergebnis je Aktie (€)</b>          | 24         | 0,53    | 2,10    |
| davon fortgeführte Geschäftsbereiche (€)             |            | 0,17    | 2,10    |
| aufgegebene Geschäftsbereiche (€)                    |            | 0,36    | 0,00    |
| <b>Verwässertes Ergebnis je Aktie (€)</b>            | 24         | 0,53    | 2,10    |
| davon fortgeführte Geschäftsbereiche (€)             |            | 0,17    | 2,10    |
| aufgegebene Geschäftsbereiche (€)                    |            | 0,36    | 0,00    |

## C.02 GESAMTERGEBNISRECHNUNG

1. Januar bis 31. Dezember

MIO €

|                                                                      | Textziffer | 2009  | 2010  |
|----------------------------------------------------------------------|------------|-------|-------|
| Konzernjahresergebnis                                                |            | 693   | 2.630 |
| Währungsumrechnungsrücklage                                          |            |       |       |
| Veränderungen aus nicht realisierten Gewinnen und Verlusten          |            | 165   | 522   |
| Veränderungen aus realisierten Gewinnen und Verlusten                |            | 31    | 20    |
| Sonstige Veränderungen in Gewinnrücklagen                            |            |       |       |
| Veränderungen aus nicht realisierten Gewinnen und Verlusten          |            | 0     | 1     |
| Veränderungen aus realisierten Gewinnen und Verlusten                |            | 0     | 0     |
| Hedge-Rücklage gemäß IAS 39                                          |            |       |       |
| Veränderungen aus nicht realisierten Gewinnen und Verlusten          |            | 3     | -67   |
| Veränderungen aus realisierten Gewinnen und Verlusten                |            | -49   | 109   |
| Neubewertungsrücklage gemäß IAS 39                                   |            |       |       |
| Veränderungen aus nicht realisierten Gewinnen und Verlusten          |            | 366   | 6     |
| Veränderungen aus realisierten Gewinnen und Verlusten                |            | -256  | -16   |
| Neubewertungsrücklage gemäß IFRS 3                                   |            |       |       |
| Veränderungen aus nicht realisierten Gewinnen und Verlusten          |            | 0     | -1    |
| Veränderungen aus realisierten Gewinnen und Verlusten                |            | 0     | 0     |
| Ertragsteuern auf sonstiges Ergebnis                                 | 19         | 0     | 1     |
| Anteil assoziierter Unternehmen am sonstigen Ergebnis (nach Steuern) |            | 123   | 93    |
| Sonstiges Ergebnis (nach Steuern)                                    |            | 383   | 668   |
| Gesamtergebnis                                                       |            | 1.076 | 3.298 |
| davon entfielen auf Aktionäre der Deutsche Post AG                   |            | 1.070 | 3.197 |
| davon entfielen auf nicht beherrschende Anteile                      |            | 6     | 101   |

## C.03 BILANZ

MIO €

|                                                                                  | Textziffer | 31. Dez. 2009 | 31. Dez. 2010 |
|----------------------------------------------------------------------------------|------------|---------------|---------------|
| <b>AKTIVA</b>                                                                    |            |               |               |
| Immaterielle Vermögenswerte                                                      | 26         | 11.534        | 11.848        |
| Sachanlagen                                                                      | 27         | 6.220         | 6.130         |
| Als Finanzinvestition gehaltene Immobilien                                       | 28         | 32            | 37            |
| Beteiligungen an assoziierten Unternehmen                                        | 29         | 1.772         | 1.847         |
| Langfristige finanzielle Vermögenswerte                                          | 30         | 1.448         | 3.193         |
| Sonstige langfristige Vermögenswerte                                             | 31         | 348           | 465           |
| Aktive latente Steuern                                                           | 32         | 668           | 973           |
| <b>Langfristige Vermögenswerte</b>                                               |            | <b>22.022</b> | <b>24.493</b> |
| Vorräte                                                                          | 33         | 226           | 223           |
| Ertragsteueransprüche                                                            | 34         | 196           | 223           |
| Forderungen und sonstige kurzfristige Vermögenswerte                             | 35         | 7.157         | 8.641         |
| Kurzfristige finanzielle Vermögenswerte                                          | 36         | 1.894         | 655           |
| Flüssige Mittel und Zahlungsmitteläquivalente                                    | 37         | 3.064         | 3.415         |
| Zur Veräußerung gehaltene Vermögenswerte                                         | 38         | 179           | 113           |
| <b>Kurzfristige Vermögenswerte</b>                                               |            | <b>12.716</b> | <b>13.270</b> |
| <b>Summe AKTIVA</b>                                                              |            | <b>34.738</b> | <b>37.763</b> |
| <b>PASSIVA</b>                                                                   |            |               |               |
| Gezeichnetes Kapital                                                             | 39         | 1.209         | 1.209         |
| Andere Rücklagen                                                                 | 40         | 869           | 1.535         |
| Gewinnrücklagen                                                                  | 41         | 6.098         | 7.767         |
| Aktionären der Deutsche Post AG zuzuordnendes Eigenkapital                       | 42         | 8.176         | 10.511        |
| Nicht beherrschende Anteile                                                      | 43         | 97            | 185           |
| <b>Eigenkapital</b>                                                              |            | <b>8.273</b>  | <b>10.696</b> |
| Rückstellungen für Pensionen und ähnliche Verpflichtungen                        | 44         | 4.574         | 4.513         |
| Passive latente Steuern                                                          | 32         | 182           | 215           |
| Sonstige langfristige Rückstellungen                                             | 45         | 2.275         | 2.440         |
| <b>Langfristige Rückstellungen</b>                                               |            | <b>7.031</b>  | <b>7.168</b>  |
| Langfristige Finanzschulden                                                      | 46         | 6.699         | 6.275         |
| Sonstige langfristige Verbindlichkeiten                                          | 47         | 372           | 401           |
| <b>Langfristige Verbindlichkeiten</b>                                            |            | <b>7.071</b>  | <b>6.676</b>  |
| <b>Langfristige Rückstellungen und Verbindlichkeiten</b>                         |            | <b>14.102</b> | <b>13.844</b> |
| Kurzfristige Rückstellungen                                                      | 45         | 2.646         | 2.259         |
| Kurzfristige Finanzschulden                                                      | 46         | 740           | 747           |
| Verbindlichkeiten aus Lieferungen und Leistungen                                 | 48         | 4.861         | 5.707         |
| Ertragsteuerverpflichtungen                                                      | 34         | 292           | 463           |
| Sonstige kurzfristige Verbindlichkeiten                                          | 47         | 3.674         | 4.047         |
| Verbindlichkeiten im Zusammenhang mit zur Veräußerung gehaltenen Vermögenswerten | 38         | 150           | 0             |
| <b>Kurzfristige Verbindlichkeiten</b>                                            |            | <b>9.717</b>  | <b>10.964</b> |
| <b>Kurzfristige Rückstellungen und Verbindlichkeiten</b>                         |            | <b>12.363</b> | <b>13.223</b> |
| <b>Summe PASSIVA</b>                                                             |            | <b>34.738</b> | <b>37.763</b> |

## C.04 KAPITALFLUSSRECHNUNG

1. Januar bis 31. Dezember

MIO €

|                                                                                                      | Textziffer  | 2009<br>angepasst <sup>1)</sup> | 2010          |
|------------------------------------------------------------------------------------------------------|-------------|---------------------------------|---------------|
| Ergebnis vor Ertragsteuern                                                                           |             | 276                             | 2.824         |
| Sonstiges Finanzergebnis                                                                             |             | -17                             | -933          |
| Ergebnis aus assoziierten Unternehmen                                                                |             | -28                             | -56           |
| Ergebnis der betrieblichen Tätigkeit (EBIT)                                                          |             | 231                             | 1.835         |
| Abschreibungen                                                                                       |             | 1.620                           | 1.296         |
| Ergebnis aus dem Abgang von langfristigen Vermögenswerten                                            |             | 67                              | 279           |
| Zahlungsunwirksame Erträge und Aufwendungen                                                          |             | 128                             | 27            |
| Veränderung Rückstellungen                                                                           |             | -890                            | -953          |
| Veränderung sonstige langfristige Vermögenswerte und Verbindlichkeiten                               |             | -54                             | -74           |
| Ertragsteuerzahlungen                                                                                |             | -339                            | -301          |
| <b>Mittelzufluss aus operativer Geschäftstätigkeit vor Änderung des kurzfristigen Nettovermögens</b> |             | <b>763</b>                      | <b>2.109</b>  |
| Veränderung von Posten der kurzfristigen Vermögenswerte und der Verbindlichkeiten                    |             |                                 |               |
| Vorräte                                                                                              |             | 47                              | 1             |
| Forderungen und sonstige kurzfristige Vermögenswerte                                                 |             | 778                             | -1.258        |
| Verbindlichkeiten und sonstige Posten                                                                |             | -344                            | 1.075         |
| <b>Mittelzufluss aus operativer Geschäftstätigkeit der fortgeführten Geschäftsbereiche</b>           |             | <b>1.244</b>                    | <b>1.927</b>  |
| Mittelabfluss aus operativer Geschäftstätigkeit der aufgegebenen Geschäftsbereiche                   |             | -1.828                          | 0             |
| <b>Mittelabfluss/-zufluss aus operativer Geschäftstätigkeit gesamt</b>                               | <b>49.1</b> | <b>-584</b>                     | <b>1.927</b>  |
| Tochterunternehmen und sonstige Geschäftseinheiten                                                   |             | -8                              | -265          |
| Sachanlagen und immaterielle Vermögenswerte                                                          |             | 217                             | 198           |
| Sonstige langfristige finanzielle Vermögenswerte                                                     |             | 334                             | 55            |
| Einzahlungen aus Abgängen von langfristigen Vermögenswerten                                          |             | 543                             | -12           |
| Tochterunternehmen und sonstige Geschäftseinheiten                                                   |             | -41                             | -74           |
| Sachanlagen und immaterielle Vermögenswerte                                                          |             | -1.174                          | -1.174        |
| Sonstige langfristige finanzielle Vermögenswerte                                                     |             | -229                            | -28           |
| Auszahlungen für Investitionen in langfristige Vermögenswerte                                        |             | -1.444                          | -1.276        |
| Erhaltene Zinsen                                                                                     |             | 103                             | 55            |
| Erhaltene Dividende                                                                                  |             | 0                               | 4             |
| Kurzfristige finanzielle Vermögenswerte                                                              |             | -659                            | 1.237         |
| <b>Mittelabfluss/-zufluss aus Investitionstätigkeit der fortgeführten Geschäftsbereiche</b>          |             | <b>-1.457</b>                   | <b>8</b>      |
| Mittelabfluss aus Investitionstätigkeit der aufgegebenen Geschäftsbereiche                           |             | -1.253                          | 0             |
| <b>Mittelabfluss/-zufluss aus Investitionstätigkeit gesamt</b>                                       | <b>49.2</b> | <b>-2.710</b>                   | <b>8</b>      |
| Aufnahme langfristiger Finanzschulden                                                                |             | 3.981                           | 20            |
| Tilgung langfristiger Finanzschulden                                                                 |             | -587                            | -597          |
| Veränderung kurzfristiger Finanzschulden                                                             |             | -548                            | -64           |
| Sonstige Finanzierungstätigkeit                                                                      |             | -115                            | 54            |
| Einzahlungen aus Transaktionen mit nicht beherrschenden Anteilen                                     |             | 0                               | 0             |
| Auszahlungen für Transaktionen mit nicht beherrschenden Anteilen                                     |             | -12                             | -73           |
| An Aktionäre der Deutsche Post AG gezahlte Dividende                                                 |             | -725                            | -725          |
| An nicht beherrschende Anteilseigner gezahlte Dividende                                              |             | -34                             | -73           |
| Erwerb eigener Anteile                                                                               |             | 0                               | -10           |
| Zinszahlungen                                                                                        |             | -291                            | -183          |
| <b>Mittelzufluss/-abfluss aus Finanzierungstätigkeit der fortgeführten Geschäftsbereiche</b>         |             | <b>1.669</b>                    | <b>-1.651</b> |
| Mittelzufluss aus Finanzierungstätigkeit der aufgegebenen Geschäftsbereiche                          |             | 7                               | 0             |
| <b>Mittelzufluss/-abfluss aus Finanzierungstätigkeit gesamt</b>                                      | <b>49.3</b> | <b>1.676</b>                    | <b>-1.651</b> |
| Zahlungswirksame Veränderung der flüssigen Mittel                                                    |             | -1.618                          | 284           |
| Einfluss von Wechselkursänderungen auf flüssige Mittel                                               |             | 20                              | 67            |
| Zahlungsmittelveränderung im Zusammenhang mit zur Veräußerung gehaltenen Vermögenswerten             |             | 0                               | 0             |
| Konsolidierungskreisbedingte Veränderung des Finanzmittelbestandes                                   |             | 0                               | 0             |
| Flüssige Mittel und Zahlungsmitteläquivalente am Anfang der Berichtsperiode                          |             | 4.662                           | 3.064         |
| <b>Flüssige Mittel und Zahlungsmitteläquivalente am Ende der Berichtsperiode</b>                     | <b>49.4</b> | <b>3.064</b>                    | <b>3.415</b>  |

1) Anhang, Textziffer 5

## C.05 EIGENKAPITALVERÄNDERUNGSRECHNUNG

1. Januar bis 31. Dezember

MIO €

|                                                                                | Gezeichnetes<br>Kapital | Andere Rücklagen      |                      |                                        |                                       | Gewinn-<br>rücklagen | Aktionären<br>der Deutsche<br>Post AG zu-<br>zuordnendes<br>Eigenkapital | Nicht<br>beherrschende<br>Anteile | Eigenkapital<br>gesamt |
|--------------------------------------------------------------------------------|-------------------------|-----------------------|----------------------|----------------------------------------|---------------------------------------|----------------------|--------------------------------------------------------------------------|-----------------------------------|------------------------|
|                                                                                |                         | Kapital-<br>rücklagen | IAS-39-<br>Rücklagen | IFRS-3-Neu-<br>bewertungs-<br>rücklage | Währungs-<br>umrechnungs-<br>rücklage |                      |                                                                          |                                   |                        |
| Textziffer                                                                     | 39                      | 40                    | 40                   | 40                                     | 40                                    | 41                   | 42                                                                       | 43                                |                        |
| Stand 1. Januar 2009                                                           | 1.209                   | 2.142                 | -314                 | 8                                      | -1.397                                | 6.178                | 7.826                                                                    | 2.026                             | 9.852                  |
| Kapitaltransaktionen mit dem Eigner                                            |                         |                       |                      |                                        |                                       |                      |                                                                          |                                   |                        |
| Dividende                                                                      | 0                       | 0                     | 0                    | 0                                      | 0                                     | -725                 | -725                                                                     | -39                               | -764                   |
| Konsolidierungskreisbedingte Verände-<br>rung der nicht beherrschenden Anteile | 0                       | 0                     | 0                    | 0                                      | 0                                     | 0                    | 0                                                                        | -1.896                            | -1.896                 |
| Share Matching Scheme (Ausgabe)                                                | 0                       | 5                     | 0                    | 0                                      | 0                                     | 0                    | 5                                                                        | 0                                 | 5                      |
|                                                                                |                         |                       |                      |                                        |                                       |                      | -720                                                                     | -1.935                            | -2.655                 |
| Gesamtergebnis                                                                 |                         |                       |                      |                                        |                                       |                      |                                                                          |                                   |                        |
| Konzernjahresergebnis                                                          | 0                       | 0                     | 0                    | 0                                      | 0                                     | 644                  | 644                                                                      | 49                                | 693                    |
| Währungsumrechnungsdifferenzen                                                 | 0                       | 0                     | 0                    | 0                                      | 182                                   | 0                    | 182                                                                      | 7                                 | 189                    |
| Übrige Veränderungen                                                           | 0                       | 0                     | 244                  | -1                                     | 0                                     | 1                    | 244                                                                      | -50                               | 194                    |
|                                                                                |                         |                       |                      |                                        |                                       |                      | 1.070                                                                    | 6                                 | 1.076                  |
| Stand 31. Dezember 2009                                                        | 1.209                   | 2.147                 | -70                  | 7                                      | -1.215                                | 6.098                | 8.176                                                                    | 97                                | 8.273                  |
| Stand 1. Januar 2010                                                           | 1.209                   | 2.147                 | -70                  | 7                                      | -1.215                                | 6.098                | 8.176                                                                    | 97                                | 8.273                  |
| Kapitaltransaktionen mit dem Eigner                                            |                         |                       |                      |                                        |                                       |                      |                                                                          |                                   |                        |
| Dividende                                                                      | 0                       | 0                     | 0                    | 0                                      | 0                                     | -725                 | -725                                                                     | -67                               | -792                   |
| Transaktionen mit nicht beherr-<br>schenden Anteilen                           | 0                       | 0                     | 0                    | 0                                      | 0                                     | -147                 | -147                                                                     | 54                                | -93                    |
| Konsolidierungskreisbedingte Verände-<br>rung der nicht beherrschenden Anteile | 0                       | 0                     | 0                    | 0                                      | 0                                     | 0                    | 0                                                                        | 0                                 | 0                      |
| Erwerb eigener Anteile                                                         | -1                      | 0                     | 0                    | 0                                      | 0                                     | -9                   | -10                                                                      | 0                                 | -10                    |
| Share Matching Scheme (Ausgabe)                                                | 0                       | 20                    | 0                    | 0                                      | 0                                     | 0                    | 20                                                                       | 0                                 | 20                     |
| Share Matching Scheme (Ausübung)                                               | 1                       | -9                    | 0                    | 0                                      | 0                                     | 8                    | 0                                                                        | 0                                 | 0                      |
|                                                                                |                         |                       |                      |                                        |                                       |                      | -862                                                                     | -13                               | -875                   |
| Gesamtergebnis                                                                 |                         |                       |                      |                                        |                                       |                      |                                                                          |                                   |                        |
| Konzernjahresergebnis                                                          | 0                       | 0                     | 0                    | 0                                      | 0                                     | 2.541                | 2.541                                                                    | 89                                | 2.630                  |
| Währungsumrechnungsdifferenzen                                                 | 0                       | 0                     | 0                    | 0                                      | 533                                   | 0                    | 533                                                                      | 12                                | 545                    |
| Übrige Veränderungen                                                           | 0                       | 0                     | 123                  | -1                                     | 0                                     | 1                    | 123                                                                      | 0                                 | 123                    |
|                                                                                |                         |                       |                      |                                        |                                       |                      | 3.197                                                                    | 101                               | 3.298                  |
| Stand 31. Dezember 2010                                                        | 1.209                   | 2.158                 | 53                   | 6                                      | -682                                  | 7.767                | 10.511                                                                   | 185                               | 10.696                 |

# ANHANG ZUM KONZERNABSCHLUSS DER DEUTSCHE POST AG

## GRUNDLAGEN UND METHODEN

### 1 Grundlagen der Rechnungslegung

Als börsennotiertes Unternehmen hat die Deutsche Post AG ihren Konzernabschluss nach den International Financial Reporting Standards (IFRS), wie sie in der Europäischen Union (EU) anzuwenden sind, und den ergänzend nach § 315 a Abs. 1 HGB anzuwenden den handelsrechtlichen Vorschriften erstellt. Der Abschluss stellt einen Jahresfinanzbericht im Sinne des Transparenzrichtlinie-Umsetzungsgesetzes (§ 37 v WpHG) vom 5. Januar 2007 dar.

Die Anforderungen der angewandten Standards wurden vollständig erfüllt und vermitteln ein den tatsächlichen Verhältnissen entsprechendes Bild der Vermögens-, Finanz- und Ertragslage des Konzerns.

Der Konzernabschluss umfasst die Gewinn- und Verlust-Rechnung und die Gesamtergebnisrechnung, die Bilanz, die Kapitalflussrechnung, die Eigenkapitalveränderungsrechnung sowie den Anhang (Notes). Um die Klarheit der Darstellung zu verbessern, sind verschiedene Posten der Bilanz sowie der Gewinn- und Verlust-Rechnung zusammengefasst. Diese Posten werden im Anhang gesondert ausgewiesen und erläutert. Die Gewinn- und Verlust-Rechnung ist nach dem Gesamtkostenverfahren gegliedert.

Die Bilanzierung und Bewertung sowie die Erläuterungen und Angaben zum IFRS-Konzernabschluss für das Geschäftsjahr 2010 basieren grundsätzlich auf denselben Bilanzierungs- und Bewertungsmethoden, die auch dem Konzernabschluss 2009 zugrunde lagen. Ausnahmen bilden hier die unter [Textziffer 4](#) aufgeführten Änderungen in der internationalen Rechnungslegung nach IFRS, die vom Konzern seit dem 1. Januar 2010 verpflichtend anzuwenden sind, sowie die unter [Textziffer 5](#) genannten Anpassungen von Vorjahreszahlen. Die Bilanzierungs- und Bewertungsmethoden sind unter [Textziffer 7](#) erläutert.

Das Geschäftsjahr der Deutsche Post AG und ihrer einbezogenen Tochterunternehmen entspricht dem Kalenderjahr. Die in das Handelsregister des Amtsgerichts Bonn eingetragene Deutsche Post AG hat ihren Sitz in Bonn, Deutschland.

Der vorliegende Konzernabschluss wurde mit Beschluss des Vorstands der Deutsche Post AG vom 18. Februar 2011 zur Veröffentlichung freigegeben.

Der Konzernabschluss wird in Euro aufgestellt. Alle Beträge werden, sofern nicht besonders darauf hingewiesen wird, in Millionen Euro (MIO €) angegeben.

### 2 Konsolidierungskreis

In den Konzernabschluss zum 31. Dezember 2010 sind neben der Deutsche Post AG grundsätzlich alle in- und ausländischen Unternehmen einbezogen, bei denen die Deutsche Post AG unmittelbar oder mittelbar über die Mehrheit der Stimmrechte der

Gesellschaft verfügt oder auf andere Weise auf die Tätigkeit beherrschenden Einfluss nehmen kann. Die Unternehmen werden beginnend mit dem Zeitpunkt in den Konzernabschluss einbezogen, ab dem der Konzern die Möglichkeit der Beherrschung erlangt.

Neben der Deutsche Post AG als Mutterunternehmen umfasst der Konsolidierungskreis die in unten stehender Tabelle aufgeführten Unternehmen.

#### Konsolidierungskreis

|                                                                                | 2009 | 2010 |
|--------------------------------------------------------------------------------|------|------|
| <b>Anzahl der vollkonsolidierten Unternehmen (Tochterunternehmen)</b>          |      |      |
| Inländisch                                                                     | 79   | 80   |
| Ausländisch                                                                    | 791  | 747  |
| <b>Anzahl der quotal einbezogenen Gemeinschaftsunternehmen</b>                 |      |      |
| Inländisch                                                                     | 1    | 1    |
| Ausländisch                                                                    | 18   | 16   |
| <b>Anzahl der at-Equity-bilanzierten Unternehmen (assoziierte Unternehmen)</b> |      |      |
| Inländisch                                                                     | 29   | 28   |
| Ausländisch                                                                    | 23   | 31   |

Die vollständige Aufstellung des Anteilsbesitzes des Konzerns gemäß § 313 Abs. 2 Nr. 1 bis 4 und Abs. 3 HGB findet sich unter

[Textziffer 60](#).

#### Kaufpreisallokationen

Wesentliche Unternehmenserwerbe, die gesondert darzustellen sind, haben im Geschäftsjahr 2010 nicht stattgefunden.

Im Geschäftsjahr 2009 wurde die finale Kaufpreisallokation des US-amerikanischen Unternehmens Polar Air Cargo Worldwide, Inc. (Polar Air) durchgeführt.

#### Nettovermögen Polar Air Cargo

| MIO €                           | Beizulegender Zeitwert |
|---------------------------------|------------------------|
| <b>AKTIVA</b>                   |                        |
| Langfristige Vermögenswerte     | 1                      |
| Kurzfristige Vermögenswerte     | 96                     |
| Flüssige Mittel                 | 41                     |
|                                 | <b>138</b>             |
| <b>PASSIVA</b>                  |                        |
| Langfristige Verbindlichkeiten  | 1                      |
| Kurzfristige Verbindlichkeiten  | 103                    |
|                                 | <b>104</b>             |
| <b>Erworbenes Nettovermögen</b> | <b>34</b>              |

Aus der Erstkonsolidierung entstand ein Firmenwert in Höhe von 100 MIO €.



### Unwesentliche Unternehmenserwerbe

In der folgenden Tabelle sind die Akquisitionen von Tochtergesellschaften des Geschäftsjahres 2010 dargestellt, die jede für sich genommen und in Summe sich nicht wesentlich auf die Vermögens-, Finanz- und Ertragslage des Konzerns ausgewirkt haben.

#### Unwesentliche Unternehmenserwerbe 2010

| MIO €                                                |          |           | Beizulegender<br>Zeitwert |
|------------------------------------------------------|----------|-----------|---------------------------|
| 1. Januar bis 31. Dezember                           | Buchwert | Anpassung |                           |
| <b>AKTIVA</b>                                        |          |           |                           |
| Langfristige Vermögenswerte                          | 0        | –         | 0                         |
| Kurzfristige Vermögenswerte                          | 1        | –         | 1                         |
| Flüssige Mittel                                      | 0        | –         | 0                         |
|                                                      | 1        | –         | 1                         |
| <b>PASSIVA</b>                                       |          |           |                           |
| Langfristige Verbindlichkeiten<br>und Rückstellungen | 0        | –         | 0                         |
| Kurzfristige Verbindlichkeiten<br>und Rückstellungen | 0        | –         | 0                         |
|                                                      | 0        | –         | 0                         |
| <b>Nettovermögen</b>                                 |          |           | <b>1</b>                  |

#### Firmenwert 2010

| MIO €                                               | Beizulegender<br>Zeitwert |
|-----------------------------------------------------|---------------------------|
| Anschaffungskosten                                  | 23                        |
| Abzüglich Nettovermögen                             | 1                         |
| Unterschiedsbetrag                                  | 22                        |
| Abzüglich nicht beherrschende Anteile <sup>1)</sup> | 2                         |
| <b>Firmenwert</b>                                   | <b>20</b>                 |

<sup>1)</sup> Die nicht beherrschenden Anteile wurden zum Buchwert angesetzt.

Die Gesellschaften hatten keine wesentlichen Auswirkungen auf den Konzernumsatz sowie auf das Konzern-EBIT. Eine Einbeziehung der Gesellschaften schon zum Januar 2010 hätte keine Änderung ergeben.

Die unwesentlichen Unternehmenserwerbe des Vorjahres zeigt die folgende Tabelle.

#### Unwesentliche Unternehmenserwerbe 2009

| MIO €                                                |          |           | Beizulegender<br>Zeitwert |
|------------------------------------------------------|----------|-----------|---------------------------|
| 1. Januar bis 31. Dezember                           | Buchwert | Anpassung |                           |
| <b>AKTIVA</b>                                        |          |           |                           |
| Langfristige Vermögenswerte                          | 5        | –         | 5                         |
| Kurzfristige Vermögenswerte                          | 9        | –         | 9                         |
| Flüssige Mittel                                      | 5        | –         | 5                         |
|                                                      | 19       | –         | 19                        |
| <b>PASSIVA</b>                                       |          |           |                           |
| Langfristige Verbindlichkeiten<br>und Rückstellungen | 0        | –         | 0                         |
| Kurzfristige Verbindlichkeiten<br>und Rückstellungen | 15       | –         | 15                        |
|                                                      | 15       | –         | 15                        |
| <b>Nettovermögen</b>                                 |          |           | <b>4</b>                  |

#### Firmenwert 2009

| MIO €                                               | Beizulegender<br>Zeitwert |
|-----------------------------------------------------|---------------------------|
| Anschaffungskosten                                  | 50                        |
| Abzüglich Nettovermögen                             | 4                         |
| Unterschiedsbetrag                                  | 46                        |
| Abzüglich nicht beherrschende Anteile <sup>1)</sup> | 19                        |
| <b>Firmenwert</b>                                   | <b>27</b>                 |

<sup>1)</sup> Die nicht beherrschenden Anteile wurden zum Buchwert angesetzt.

Die unwesentlichen Unternehmenserwerbe des Geschäftsjahres 2009 trugen in Summe mit 26 MIO € zum Konzernumsatz bzw. –11 MIO € zum Konzern-EBIT bei. Wären die Gesellschaften alle zum 1. Januar 2009 erworben worden, hätten sich die Beträge nur unwesentlich verändert.

Insgesamt wurden im Geschäftsjahr 2010 für den Erwerb von Tochtergesellschaften 23 MIO € sowie 51 MIO € für bereits in Vorjahren erworbene Tochtergesellschaften (Vorjahr angepasst: 45 MIO €; siehe [Textziffer 5](#)) aufgewandt. Die Kaufpreise der erworbenen Gesellschaften wurden durch die Übertragung von Zahlungsmitteln beglichen. Weitere Angaben zu den Zahlungsströmen finden sich unter [Textziffer 49](#).

### Abgangs- und Entkonsolidierungseffekte

Die folgende Tabelle zeigt die Abgangs- und Entkonsolidierungseffekte von Gesellschaften bzw. Geschäftsbereichen im Geschäftsjahr 2010. DHL Express (UK) Ltd., Großbritannien, hat im März das Geschäft mit den nationalen taggenauen Sendungen verkauft. Dabei wurden bei DHL Express UK, anteilig 12 MIO € Aufwendungen aus der Währungsumrechnungsrücklage realisiert. Im April veräußerte DHL Supply Chain Austria, Österreich, Teile ihrer Kontraktlogistik (Lebensmittel-Kühllogistik). Im Juni wurde der Verkauf des Geschäftsfeldes mit den nationalen taggenauen Sendungen von DHL Express (France) SAS, Frankreich, sowie des Champagner-Geschäfts von DHL Freight France, Frankreich, vollzogen. Die Abgangseffekte der Gesellschaften Fulfilment Plus GmbH, Deutschland, Exel Delamode Logistics SRL, Rumänien, und Innogistics LLC, USA, werden in der Spalte „Sonstiges“ ausgewiesen. Aus den Entkonsolidierungen ergab sich ein Verlust in Höhe von insgesamt 288 MIO €, der unter den sonstigen betrieblichen Aufwendungen ausgewiesen wird.

## Abgangs- und Entkonsolidierungseffekte 2010

MIO €

| 1. Januar bis 31. Dezember                                                                     | DHL Express<br>UK | DHL Express<br>France; DHL<br>Freight France | DHL Supply<br>Chain Austria | Sonstiges | Gesamt      |
|------------------------------------------------------------------------------------------------|-------------------|----------------------------------------------|-----------------------------|-----------|-------------|
| <b>Abgangseffekte</b>                                                                          |                   |                                              |                             |           |             |
| Langfristige Vermögenswerte                                                                    | 0                 | 1                                            | 37                          | 1         | 39          |
| Kurzfristige Vermögenswerte                                                                    | 0                 | 0                                            | 36                          | 0         | 36          |
| Zur Veräußerung gehaltene Vermögenswerte <sup>1)</sup>                                         | 54                | 69                                           | 0                           | 5         | 128         |
| Flüssige Mittel                                                                                | 0                 | 0                                            | 7                           | 0         | 7           |
| Langfristige Verbindlichkeiten und Rückstellungen                                              | 0                 | 0                                            | 19                          | 0         | 19          |
| Kurzfristige Verbindlichkeiten und Rückstellungen                                              | 0                 | 0                                            | 47                          | 0         | 47          |
| Verbindlichkeiten im Zusammenhang mit zur Veräußerung gehaltenen Vermögenswerten <sup>1)</sup> | 39                | 91                                           | 0                           | 2         | 132         |
| <b>Nettovermögen</b>                                                                           | <b>15</b>         | <b>-21</b>                                   | <b>14</b>                   | <b>4</b>  | <b>12</b>   |
| Gesamte erhaltene Gegenleistung                                                                | -26               | -243                                         | 1                           | 4         | -264        |
| <b>Entkonsolidierungsgewinn (+)/-verlust (-)</b>                                               | <b>-53</b>        | <b>-222</b>                                  | <b>-13</b>                  | <b>0</b>  | <b>-288</b> |

<sup>1)</sup> Daten vor Entkonsolidierung

Im Vorjahreszeitraum führte die Veräußerung der Beteiligung an der Deutsche Postbank AG in Höhe von 22,9 % zu einem Entkonsolidierungsgewinn in Höhe von 444 MIO €, der unter dem Ergebnis aus aufgegebenen Geschäftsbereichen ausgewiesen wird. Dabei wurden die im Eigenkapital erfassten Aufwendungen in Höhe von 277 MIO € aus der IAS-39-Neubewertungsrücklage sowie die darauf entfallenden Steuererträge von 87 MIO € und Aufwendungen in Höhe von 31 MIO € aus der Währungsumrechnungsrücklage realisiert. Weiterhin wurden die Gesellschaften DHL Global Mail Services SAS, Frankreich, DHL Container Logistics UK Ltd., Großbritannien, sowie 4C Associates Ltd., Großbritannien, verkauft. Hier ergab sich ein Entkonsolidierungsverlust von insgesamt 22 MIO €.

## Abgangs- und Entkonsolidierungseffekte 2009

MIO €

| 1. Januar bis 31. Dezember                                                                     | Deutsche<br>Postbank<br>Gruppe | Sonstige<br>Gesellschaften | Gesamt       |
|------------------------------------------------------------------------------------------------|--------------------------------|----------------------------|--------------|
| <b>Abgangseffekte</b>                                                                          |                                |                            |              |
| Langfristige Vermögenswerte                                                                    | 0                              | 26                         | 26           |
| Kurzfristige Vermögenswerte                                                                    | 0                              | 48                         | 48           |
| Zur Veräußerung gehaltene Vermögenswerte <sup>1)</sup>                                         | 243.684                        | 0                          | 243.684      |
| Flüssige Mittel                                                                                | 0                              | 7                          | 7            |
| Rückstellungen                                                                                 | 0                              | 4                          | 4            |
| Verbindlichkeiten aus Lieferungen und Leistungen und sonstige Verbindlichkeiten                | 0                              | 43                         | 43           |
| Finanzschulden                                                                                 | 0                              | 9                          | 9            |
| Verbindlichkeiten im Zusammenhang mit zur Veräußerung gehaltenen Vermögenswerten <sup>1)</sup> | 238.734                        | 0                          | 238.734      |
| <b>Nettovermögen</b>                                                                           | <b>4.950</b>                   | <b>25</b>                  | <b>4.975</b> |
| Gesamte erhaltene Gegenleistung                                                                | 1.194                          | 3                          | 1.197        |
| <b>Entkonsolidierungsgewinn (+)/-verlust (-)</b>                                               | <b>444</b>                     | <b>-22</b>                 | <b>422</b>   |

<sup>1)</sup> Daten vor Entkonsolidierung

## BEABSICHTIGTER VERKAUF DEUTSCHE POSTBANK GRUPPE

Am 25. Februar 2009 hatte die Deutsche Bank AG für 50 MIO eigene Aktien aus einer Kapitalerhöhung einen Anteil von 22,9 % an der Deutsche Postbank AG von Deutsche Post DHL erhalten. Bis Anfang Juli 2009 wurde das Aktienpaket an der Deutsche Bank AG am Markt veräußert. 25 MIO Aktien waren mittels einer Forward- und einer Call-Put-Transaktion zu 100 % gesichert. Die aus dieser Transaktion zusätzlich generierten Erlöse stehen der Deutsche Bank AG zu und wurden als Sicherheit bei dieser hinterlegt. Die Abrechnung der Derivate und damit die Freigabe der Sicherheiten erfolgt bei Ausübung der Pflichtumtauschleihe im Jahr 2012, siehe [Textziffer 3](#). Die Veräußerung der Beteiligung an der Deutsche Postbank AG hatte im Geschäftsjahr 2009 zu einem Ergebniseffekt in Höhe von 571 MIO € geführt. Der Betrag von 444 MIO € entfiel auf den Entkonsolidierungserfolg. Die verbliebenen 39,5 % an der Deutsche Postbank AG werden als At-Equity-Beteiligung unter den Beteiligungen an assoziierten Unternehmen ausgewiesen. Die Effekte aus dem beabsichtigten Postbank-Verkauf stellen sich wie folgt dar:

## Effekte aus dem beabsichtigten Postbank-Verkauf

MIO €

|                                              | 2009  | 2010  |
|----------------------------------------------|-------|-------|
| <b>BILANZANSATZ</b>                          |       |       |
| Beteiligungen an assoziierten Unternehmen    | 1.705 | 1.797 |
| Langfristige finanzielle Vermögenswerte      | 789   | 2.509 |
| Finanzschulden                               | 4.012 | 4.164 |
| <b>GEWINN-UND-VERLUST-RECHNUNG</b>           |       |       |
| Ergebnis aus assoziierten Unternehmen        | 19    | 52    |
| Sonstiges Finanzergebnis                     | 632   | 1.517 |
| Ergebnis aus aufgegebenen Geschäftsbereichen | 432   | 0     |

Im Rahmen des beabsichtigten Verkaufs von Deutsche-Postbank-Aktien wird im Februar 2012 ein weiterer Anteil von 27,4 % nach Ablauf von drei Jahren mit Fälligkeit einer Pflichtumtauschleihe auf Postbank-Aktien an die Deutsche Bank AG übertragen (zweite Tranche). Die Pflichtumtauschleihe wurde im Februar 2009 von der Deutsche Post AG ausgegeben und zu 100 % von der Deutsche Bank AG gezeichnet. Erfüllt wird die Anleihe

durch Hingabe von 60 MIO Aktien der Deutsche Postbank AG. Zum 31. Dezember 2010 betrug die langfristige Verbindlichkeit rund 2,6 MRD € zuzüglich angefallener Zinsen. In einer dritten Tranche haben die Deutsche Post AG und die Deutsche Bank AG Optionen zum möglichen Verkauf bzw. Kauf weiterer 12,1 % der Postbank-Aktien vereinbart. Der Ausübungszeitraum der Optionen beginnt mit dem ersten Geschäftstag nach Ausübung der Pflichtumtauschleihe und endet im Februar 2013. Die Optionen werden unter den langfristigen finanziellen Vermögenswerten sowie unter den langfristigen Finanzschulden ausgewiesen. Die Deutsche Bank AG hat auf den Kaufpreis für die verbliebenen 12,1 % der Postbank-Aktien eine Sicherheit in Höhe von rund 1,2 MRD € geleistet, die neben den Zinsen in den langfristigen Finanzschulden ausgewiesen wird.

### Gemeinschaftsunternehmen

Die folgende Tabelle gibt Aufschluss über die Posten der Bilanz und der Gewinn- und Verlust-Rechnung, die den wesentlichen einbezogenen Gemeinschaftsunternehmen zuzurechnen sind:

#### Zum 31. Dezember

| MIO €                                                                        | 2009 <sup>1)</sup> | 2010 <sup>1)</sup> |
|------------------------------------------------------------------------------|--------------------|--------------------|
| <b>BILANZ</b>                                                                |                    |                    |
| Immaterielle Vermögenswerte                                                  | 82                 | 97                 |
| Sachanlagen                                                                  | 24                 | 20                 |
| Forderungen und sonstige Vermögenswerte                                      | 50                 | 64                 |
| Flüssige Mittel und Zahlungsmitteläquivalente                                | 11                 | 16                 |
| Verbindlichkeiten aus Lieferungen und Leistungen, sonstige Verbindlichkeiten | 50                 | 68                 |
| Rückstellungen                                                               | 4                  | 12                 |
| Finanzschulden                                                               | 62                 | 63                 |
| <b>GEWINN-UND-VERLUST-RECHNUNG</b>                                           |                    |                    |
| Umsatzerlöse <sup>2)</sup>                                                   | 211                | 260                |
| Ergebnis der betrieblichen Tätigkeit (EBIT)                                  | 8                  | 13                 |

1) Quotierte Einzelabschlussdaten

2) Umsatzerlöse ohne Konzerninnenumsätze

Bei den einbezogenen Gemeinschaftsunternehmen handelt es sich im Wesentlichen um Express Couriers Ltd., Neuseeland, Express Couriers Australia Pty Ltd., Australien, sowie AeroLogic GmbH, Deutschland, und Bahwan Exel LLC, Oman.

### 3 Wesentliche Geschäftsvorfälle

Mit Wirkung zum 1. Januar 2010 hat der IASB den Anwendungsausschluss des IAS 39.2 (g) hinsichtlich der Fristigkeit zur Abwicklung notwendiger Geschäfte, die mit einem Anteilsverkauf einhergehen, präzisiert. Termingeschäfte fallen nicht mehr unter die Anwendungsausnahme des IAS 39.2 (g), wenn bei Vertragsabschluss ersichtlich ist, dass die Abwicklung derartiger Geschäfte die übliche notwendige Zeit übersteigt. Für die bilanzielle Darstellung des beabsichtigten Postbank-Verkaufs bedeutet dies, dass der in der Pflichtumtauschleihe eingebettete und bisher nicht bilanzierte Terminkontrakt bilanziell zu erfassen ist. Am 1. Januar 2010 wurde der Terminkontrakt mit seinem Marktwert von 1.453 MIO € erfolgswirksam erfasst. Zum 31. Dezember 2010

erhöhte sich der Wert des Forward auf 1.653 MIO €. Marktwertänderungen an den darauffolgenden Bilanzstichtagen können sich weiterhin auf das Finanzergebnis auswirken, [Textziffer 18](#). Weitere Erläuterungen zur bilanziellen Behandlung der Beteiligung an der Deutsche Postbank AG im Geschäftsjahr 2010 finden sich unter [Textziffer 46, 50](#).

### 4 Neuerungen in der internationalen Rechnungslegung nach IFRS

Folgende Standards, Änderungen zu Standards und Interpretationen sind verpflichtend am bzw. nach dem 1. Januar 2010 anzuwenden:

|                                                               | Bedeutung      |
|---------------------------------------------------------------|----------------|
| IFRS 3 „Unternehmenszusammenschlüsse“                         |                |
| und IAS 27 „Konzern- und separate Einzelabschlüsse nach IFRS“ | relevant       |
| „Improvements to IFRS“ (2009)                                 | relevant       |
| IAS 39 „Finanzinstrumente: Ansatz und Bewertung“              | relevant       |
| IFRS 1 „Erstmalige Anwendung der IFRS“ (Amendment)            | nicht relevant |
| IFRS 2 „Anteilsbasierte Vergütung“                            | nicht relevant |
| IFRS für kleine und mittelgroße Unternehmen (IFRS für KMU)    | nicht relevant |
| IFRIC 12 „Dienstleistungskonzessionsvereinbarungen“           | nicht relevant |
| IFRIC 15 „Immobilienfertigungsaufträge“                       | nicht relevant |
| IFRIC 17 „Sachdividenden an Eigentümer“                       | nicht relevant |
| IFRIC 18 „Übertragungen von Vermögenswerten von Kunden“       | nicht relevant |

Die überarbeiteten Fassungen des IFRS 3 „Unternehmenszusammenschlüsse“ und des IAS 27 „Konzern- und separate Einzelabschlüsse nach IFRS“ beinhalten folgende wesentliche Änderungen: Bei der Bilanzierung von Erwerben von weniger als 100 % der Anteile eines Unternehmens wird ein Wahlrecht eingeführt. Danach kann die Bewertung von Minderheitsanteilen entweder zu ihrem beizulegenden Zeitwert (Full-Goodwill-Methode) oder zum beizulegenden Zeitwert des anteiligen identifizierbaren Nettovermögens erfolgen. Anschaffungsnebenkosten werden im Rahmen des Kontrollerwerbs nicht mehr aktiviert, sondern sind stattdessen in voller Höhe als Aufwand zu erfassen. Weiterhin sind Aufstockungen von Mehrheitsbeteiligungen bzw. teilweise Veräußerungen von Anteilen ohne Kontrollverlust als Transaktionen zwischen Anteilseignern erfolgsneutral abzubilden. Auch Transaktionskosten sind in diesem Fall ausschließlich im Eigenkapital zu erfassen. Mit der Überarbeitung des Standards wurde auch die Behandlung bedingter Kaufpreisbestandteile („Contingent Considerations“) dahingehend geändert, dass diese nunmehr unabhängig von ihrer Eintrittswahrscheinlichkeit zum Erstkonsolidierungszeitpunkt zum beizulegenden Zeitwert zu erfassen sind. Die Änderungen sind verpflichtend anzuwenden auf Unternehmenszusammenschlüsse in Geschäftsjahren, die am oder nach dem 1. Juli 2009 beginnen. Unternehmenszusammenschlüsse ab dem Geschäftsjahr 2010 wurden gemäß den Änderungen der beiden Standards behandelt, woraus sich entsprechende Auswirkungen auf den Konzernabschluss ergeben haben. In diesem Zusammenhang wurden auch die entsprechenden Regelungen des IAS 7 „Kapitalflussrechnung“ angepasst, [Textziffer 5](#).

Mit den zum 1. Januar 2010 in Kraft getretenen Änderungen des Sammelstandards „Improvements to IFRS“ hatte insbesondere die Konkretisierung des Anwendungsausschlusses des IAS 39.2 (g) erhebliche Auswirkungen auf den Konzernabschluss von Deutsche Post DHL. Der in die Pflichtumtauschleihe eingebettete Terminkontrakt (beabsichtigte Veräußerung der Postbank-Aktien) wurde mit Wirkung zum 1. Januar 2010 erfolgswirksam angesetzt und wird in den Folgeperioden zu Marktwerten bewertet, da die Fristigkeit zur Abwicklung notwendiger Geschäfte, die mit der Veräußerung der Postbank-Aktien einhergehen, die übliche notwendige Zeit übersteigt,  Textziffer 3.

Am 31. Juli 2008 wurden unter dem Titel „Geeignete Grundgeschäfte“ Änderungen zu IAS 39 „Finanzinstrumente: Ansatz und Bewertung“ veröffentlicht. Mit den Änderungen wird unter anderem klargestellt, wie Optionskontrakte, die als Sicherungsinstrumente eingesetzt werden, zu bilanzieren sind, um im Rahmen der Effektivitätsmessung hoch effektiv zu sein. Die Änderungen sind rückwirkend in der ersten Periode eines am 1. Juli 2009 oder danach beginnenden Geschäftsjahres anzuwenden. Die Auswirkungen auf den Konzernabschluss sind unwesentlich.

#### **Neue Rechnungslegungsvorschriften, die durch die EU anerkannt wurden, deren verpflichtende Anwendung in der Zukunft liegt**

Folgende Standards, Änderungen zu Standards und Interpretationen sind bereits durch die Europäische Union anerkannt worden. Eine verpflichtende Anwendung ist jedoch erst für die Zukunft vorgesehen.

|                                                                                | Anzuwenden für<br>Geschäftsjahre,<br>die am oder nach<br>beginnen | Bedeutung                                              |
|--------------------------------------------------------------------------------|-------------------------------------------------------------------|--------------------------------------------------------|
| IAS 24 „Angaben über Beziehungen zu nahestehenden Unternehmen und Personen“    | 1. Januar 2011                                                    | Erleichterungsvorschrift vorzeitig angewandt; relevant |
| IFRIC 19 „Tilgung finanzieller Verbindlichkeiten mit Eigenkapitalinstrumenten“ | 1. Juli 2010                                                      | relevant                                               |
| IFRIC 14 „Vorauszahlungen im Rahmen von Mindestdotierungsverpflichtungen“      | 1. Januar 2011                                                    | relevant                                               |
| IAS 32 „Finanzinstrumente: Darstellung“                                        | 1. Februar 2010                                                   | nicht relevant                                         |

Am 4. November 2009 veröffentlichte der IASB den überarbeiteten Standard IAS 24 „Angaben über Beziehungen zu nahestehenden Unternehmen und Personen“. Die Änderungen beinhalten im Wesentlichen eine Anpassung der Definition von nahestehenden Unternehmen und Personen (related parties) und die Einführung einer Erleichterungsvorschrift bezüglich der Angabepflichten für Unternehmen, die unter der Beherrschung, der gemeinschaftlichen Führung oder dem maßgeblichen Einfluss der öffentlichen Hand stehen (sogenannte government-related

entities). Weiterhin wird klargestellt, dass auch schwebende Geschäfte (executory contracts) unter die berichtspflichtigen Geschäftsvorfälle fallen. Die überarbeitete Fassung des IAS 24 ist erstmals verpflichtend für Geschäftsjahre anzuwenden, die am oder nach dem 1. Januar 2011 beginnen. Eine frühere Anwendung ist zulässig, wobei die Möglichkeit besteht, allein die neue Befreiungsvorschrift für regierungsverbundene Unternehmen vorzeitig anzuwenden. Die Änderung führt zu erweiterten Angabepflichten. Deutsche Post DHL wendet die Erleichterungsvorschrift vorzeitig zum 31. Dezember 2010 an.

IFRIC 19 „Tilgung finanzieller Verbindlichkeiten durch Eigenkapitalinstrumente“ stellt klar, wie Eigenkapitalinstrumente zu bilanzieren sind, wenn ein Unternehmen die Konditionen einer finanziellen Verbindlichkeit neu aushandelt und zu deren vollständiger oder teilweiser Tilgung Eigenkapitalinstrumente ausgibt. Die Regelung ist für Geschäftsjahre anzuwenden, die am oder nach dem 1. Juli 2010 beginnen. Die Auswirkungen auf den Konzernabschluss sind unwesentlich.

Die Änderungen der Interpretation von IFRIC 14 „Vorauszahlungen im Rahmen von Mindestdotierungsverpflichtungen“ sind von Relevanz, wenn ein Versorgungsplan eine Mindestdotierungsverpflichtung vorsieht und das Unternehmen Beitragsvorauszahlungen auf diese leistet. Im Vergleich zu den bestehenden Vorschriften wird der wirtschaftliche Nutzen aus Beitragsvorauszahlungen des Unternehmens, die künftige Beitragszahlungen aufgrund der Mindestdotierungsverpflichtung vermindern, als Vermögenswert aktiviert. Die Änderungen sind von Beginn der frühesten dargestellten Vergleichsperiode im ersten Abschluss anzuwenden, für den diese Interpretation gilt. Anpassungen, die aus der Anwendung der Änderungen resultieren, sind in der Eröffnungsbilanz dieser Vergleichsperiode in den Gewinnrücklagen zu erfassen. Die Änderungen sind verpflichtend für Geschäftsjahre, die am oder nach dem 1. Januar 2011 beginnen, anzuwenden. Eine vorzeitige freiwillige Anwendung ist zulässig. Die Anwendung der Interpretationsänderung wird keine Auswirkung auf den Konzernabschluss haben.

Der IASB hat am 8. Oktober 2009 Änderungen des IAS 32 „Finanzinstrumente: Darstellung“ bezüglich der Klassifizierung von Bezugsrechten (Classification of Rights Issues) veröffentlicht. IAS 32 wird dahingehend ergänzt, dass Bezugsrechte, Optionen und Optionsscheine auf eine feste Anzahl eigener Anteile gegen einen festen Betrag in einer beliebigen Währung als Eigenkapitalinstrumente auszuweisen sind, solange diese anteilig allen bestehenden Anteilseignern derselben Klasse gewährt werden. Die Änderungen sind verpflichtend anzuwenden für Geschäftsjahre, die am oder nach dem 1. Februar 2010 beginnen. Eine frühere Anwendung ist zulässig. Die Änderungen haben keine Auswirkung auf den Konzernabschluss.

### Neue Rechnungslegungsvorschriften, bei denen die Anerkennung durch die EU noch aussteht (Endorsement-Verfahren)

Der IASB und das IFRIC haben im Geschäftsjahr 2010 sowie in den Vorjahren weitere Standards und Interpretationen verabschiedet, die für das Geschäftsjahr 2010 noch nicht verpflichtend anzuwenden sind. Die Anwendung dieser IFRS setzt voraus, dass die noch ausstehende Anerkennung durch die EU erfolgt.

|                                                     | Veröffentlichungs-<br>zeitpunkt | Anzuwenden für<br>Geschäftsjahre,<br>die am oder nach<br>beginnen | Bedeutung  |
|-----------------------------------------------------|---------------------------------|-------------------------------------------------------------------|------------|
| IFRS 9 „Finanzinstrumente“                          | 12. November 2009               | 1. Januar 2013                                                    | in Prüfung |
| IFRS 7 „Finanzinstrumente:<br>Angaben“ (Amendments) | 7. Oktober 2010                 | 1. Juli 2011                                                      | in Prüfung |
| Improvements to IFRS (2010)                         | 6. Mai 2010                     | 1. Juli 2010                                                      | in Prüfung |

Der IASB hat am 12. November 2009 IFRS 9 „Finanzinstrumente“ zur Klassifizierung und Bewertung von Finanzinstrumenten herausgegeben. Mit IFRS 9 werden neue Vorschriften für die Klassifizierung und Bewertung vorerst für finanzielle Vermögenswerte eingeführt. Die Ansatz-, Klassifizierungs- und Bewertungsvorschriften für die Verbindlichkeiten wurden am 28. November 2010 durch den IASB ergänzt. Diskutiert werden derzeit die Exposure-Drafts zu „Fortgeführte Anschaffungskosten und Impairment“ vom 5. November 2009 und zum „Hedge Accounting“ vom 9. Dezember 2010. Ziel ist es, beide Entwürfe nach abschließender Diskussion in den IFRS 9 zu übernehmen und damit IAS 39 abzulösen. Die Vorschriften sind erstmals für Geschäftsjahre, die am oder nach dem 1. Januar 2013 beginnen, retrospektiv anzuwenden. Eine vorzeitige Anwendung ist zulässig. Die Entscheidung über eine Anerkennung des Standards durch die EU ist derzeit noch offen. Die entsprechenden Auswirkungen auf den Konzern für die bereits verabschiedeten Teile des IFRS 9 werden geprüft.

Der IASB hat am 7. Oktober 2010 Änderungen zu IFRS 7 „Finanzinstrumente: Angaben“ veröffentlicht. Gegenstand der Änderungen sind die Angabepflichten im Zusammenhang mit dem Transfer von finanziellen Vermögenswerten. Mit der Änderung des Standards sind umfassende Angaben zu möglicherweise zurückbehaltenen bzw. im Rahmen der Transaktion übernommenen Rechten und Pflichten erforderlich. Die Änderungen des IFRS 7 sind für Geschäftsjahre, die am oder nach dem 1. Juli 2011 beginnen, verpflichtend anzuwenden. Im ersten Jahr der Anwendung sind Vergleichszahlen nicht erforderlich. Die Auswirkungen auf den Konzern werden derzeit geprüft.

Der IASB hat am 6. Mai 2010 den jährlich erscheinenden Sammelstandard zur Vornahme kleinerer Änderungen an den IFRS, die sogenannten „Improvements to IFRS“ veröffentlicht. Ein Großteil der Änderungen ist erstmals rückwirkend für Geschäftsjahre, die am oder nach dem 1. Januar 2011 beginnen, verpflichtend anzuwenden. Die folgende Änderung an IFRS 3 „Unternehmens-

zusammenschlüsse“ ist allerdings bereits für Geschäftsjahre, die am oder nach dem 1. Juli 2010 beginnen, verpflichtend anzuwenden, wobei eine frühere freiwillige Anwendung zulässig ist. Mit der Überarbeitung des IFRS 3 „Unternehmenszusammenschlüsse“ wurde die Behandlung bedingter Kaufpreisbestandteile („Contingent Considerations“) dahingehend wesentlich geändert, dass diese nunmehr unabhängig von ihrer Eintrittswahrscheinlichkeit zum Erstkonsolidierungszeitpunkt zum beizulegenden Zeitwert zu erfassen sind. Aus diesem Grund werden bedingte Kaufpreisbestandteile auch nicht länger vom Anwendungsbereich des IFRS 7 „Finanzinstrumente: Angaben“, des IAS 32 „Finanzinstrumente: Darstellung“ sowie des IAS 39 „Finanzinstrumente: Ansatz und Bewertung“ ausgenommen. Um klarzustellen, dass diese IFRS aber nicht auf bedingte Kaufpreiszahlungen im Rahmen von Unternehmenszusammenschlüssen anzuwenden sind, deren Erwerbsstichtag vor dem Tag der erstmaligen Anwendung des überarbeiteten IFRS 3 liegt, wurden die zeitlichen Anwendungsbestimmungen der Folgeänderungen aus der Überarbeitung des IFRS 3 entsprechend angepasst. Zudem wurden die Übergangsregelungen des IFRS 3 um die für diese bedingten Kaufpreiszahlungen weiterhin anzuwendenden Bilanzierungsvorschriften des ersetzten IFRS 3 ergänzt. Insgesamt wurde damit klargestellt, dass die Neuregelungen des überarbeiteten IFRS 3 in Bezug auf bedingte Kaufpreisbestandteile nicht rückwirkend auf Altfälle anzuwenden sind. Die Übernahme der Änderungen durch die EU steht noch aus.

## 5 Anpassungen von Vorjahreszahlen

### Kapitalflussrechnung

Im Zusammenhang mit den zum 1. Januar 2010 in Kraft getretenen, prospektiv anzuwendenden Änderungen des IAS 27 und des IFRS 3 wurde auch IAS 7 hinsichtlich der Darstellung der Einzahlungen aus Abgängen von bzw. Auszahlungen für Investitionen in langfristige Vermögenswerte (hier: Tochterunternehmen und sonstige Gesellschaften) in der Kapitalflussrechnung geändert. Die Änderung innerhalb des IAS 7 erfolgt jedoch retrospektiv. Die Vorjahreszahlen wurden entsprechend angepasst.

#### Anpassung in der Kapitalflussrechnung

| MIO €                                                            | 2009 | Anpassung | 2009<br>angepasst |
|------------------------------------------------------------------|------|-----------|-------------------|
| <b>Mittelabfluss aus Investitionstätigkeit</b>                   |      |           |                   |
| Auszahlungen für Investitionen in langfristige Vermögenswerte    |      |           |                   |
| Tochterunternehmen und sonstige Geschäftseinheiten               | -53  | 12        | -41               |
| <b>Mittelzufluss aus Finanzierungstätigkeit</b>                  |      |           |                   |
| Auszahlungen für Transaktionen mit nicht beherrschenden Anteilen | 0    | -12       | -12               |



## 6 Währungsumrechnung

Die in ausländischer Währung aufgestellten Jahresabschlüsse der einbezogenen Gesellschaften werden gemäß IAS 21 nach dem Konzept der funktionalen Währungen in Euro umgerechnet. Die funktionale Währung ausländischer Gesellschaften wird durch das primäre Wirtschaftsumfeld bestimmt, in dem sie hauptsächlich Zahlungsmittel erwirtschaften und verwenden. Innerhalb des Konzerns entspricht die funktionale Währung im Wesentlichen der lokalen Währung. Entsprechend werden im Konzernabschluss die Vermögenswerte und Schulden mit den Stichtagskursen, die periodischen Aufwendungen und Erträge grundsätzlich mit den monatlichen Stichtagskursen umgerechnet. Die hieraus entstehenden Währungsumrechnungsdifferenzen werden erfolgsneutral im Eigenkapital erfasst. Im Geschäftsjahr 2010 wurden 533 MIO € (Vorjahr: 182 MIO €) im sonstigen Ergebnis im Eigenkapital ausgewiesen. Siehe hierzu die Gesamtergebnis- und Eigenkapitalveränderungsrechnung.

Durch Unternehmenszusammenschlüsse nach dem 1. Januar 2005 entstandene Geschäfts- oder Firmenwerte werden als Vermögenswerte des erworbenen Unternehmens behandelt und entsprechend in der funktionalen Währung des erworbenen Unternehmens geführt.

Die Kurse der für den Konzern wesentlichen Währungen stellen sich wie folgt dar:

| Währung | Land           | Stichtagskurse  |                 | Durchschnittskurse |                 |
|---------|----------------|-----------------|-----------------|--------------------|-----------------|
|         |                | 2009<br>1 EUR = | 2010<br>1 EUR = | 2009<br>1 EUR =    | 2010<br>1 EUR = |
| USD     | USA            | 1,44            | 1,34            | 1,40               | 1,32            |
| CHF     | Schweiz        | 1,48            | 1,25            | 1,51               | 1,37            |
| GBP     | Großbritannien | 0,89            | 0,86            | 0,89               | 0,86            |
| SEK     | Schweden       | 10,27           | 8,97            | 10,59              | 9,49            |

Bei konsolidierten Unternehmen, die ihre Geschäfte in hochinflationären Volkswirtschaften betreiben, werden die bilanziellen Wertansätze der nicht monetären Vermögenswerte grundsätzlich gemäß IAS 29 indexiert und spiegeln damit die aktuelle Kaufkraft am Bilanzstichtag wider.

In den in lokaler Währung aufgestellten Abschlüssen der konsolidierten Gesellschaften werden Forderungen und Verbindlichkeiten gemäß IAS 21 zum Bilanzstichtagskurs umgerechnet. Währungsumrechnungsdifferenzen werden erfolgswirksam in den sonstigen betrieblichen Aufwendungen und Erträgen erfasst. Im Geschäftsjahr 2010 ergaben sich in Höhe von 197 MIO € Erträge (Vorjahr: 161 MIO €) und 195 MIO € Aufwendungen (Vorjahr: 163 MIO €) aus Währungsumrechnungsdifferenzen. Abweichend davon werden Währungsumrechnungsdifferenzen, die auf Nettoinvestitionen in einen ausländischen Geschäftsbetrieb beruhen, im sonstigen Ergebnis im Eigenkapital erfasst.

## 7 Bilanzierungs- und Bewertungsmethoden

Die Aufstellung des Konzernabschlusses erfolgt mit Ausnahme bestimmter Finanzinstrumente, die zu beizulegenden Zeitwerten ausgewiesen werden, auf Basis der historischen Kosten.

### Ertrags- und Aufwandsrealisierung

Die gewöhnliche Geschäftstätigkeit von Deutsche Post DHL liegt in der Erbringung von logistischen Dienstleistungen. Alle Erträge, die im Zusammenhang mit der gewöhnlichen Geschäftstätigkeit stehen, werden als Umsatzerlöse in der Gewinn- und Verlust-Rechnung dargestellt. Alle anderen Erträge werden als sonstige betriebliche Erträge gezeigt. Der Ansatz von Umsatzerlösen und sonstigen betrieblichen Erträgen erfolgt grundsätzlich dann, wenn die Leistung erbracht, die Höhe der Erträge zuverlässig ermittelbar ist und der wirtschaftliche Nutzen dem Konzern wahrscheinlich zufließen wird. Betriebliche Aufwendungen werden mit Inanspruchnahme der Leistung bzw. zum Zeitpunkt ihrer Verursachung ergebniswirksam.

### Immaterielle Vermögenswerte

Immaterielle Vermögenswerte werden mit ihren fortgeführten Anschaffungskosten bilanziert. Unter den immateriellen Vermögenswerten werden originäre und erworbene immaterielle Vermögenswerte und erworbene Firmenwerte ausgewiesen.

Selbst erstellte immaterielle Vermögenswerte werden mit ihren Herstellungskosten aktiviert, wenn durch die Herstellung der Zufluss eines wirtschaftlichen Nutzens wahrscheinlich ist und Kosten zuverlässig ermittelt werden können. Im Konzern betrifft dies selbst entwickelte Software. Sind die Aktivierungskriterien nicht erfüllt, werden die Aufwendungen im Jahr der Entstehung sofort ergebniswirksam erfasst. Die Herstellungskosten der selbst entwickelten Software enthalten neben den Einzelkosten angemessene Anteile der zurechenbaren Fertigungsgemeinkosten. Gegebenenfalls anfallende Fremdkapitalkosten sind bei qualifizierten Vermögenswerten Bestandteil der Herstellungskosten. Die im Zusammenhang mit der Anschaffung oder Herstellung von immateriellen Vermögenswerten anfallenden Umsatzsteuern gehen insoweit in die Anschaffungs- und Herstellungskosten ein, wie sie nicht als Vorsteuer in Abzug gebracht werden können. Aktivierte Software wird entsprechend ihrer Nutzungsdauer linear über zwei bis fünf Jahre abgeschrieben.

Die immateriellen Vermögenswerte werden ihrer Nutzungsdauer entsprechend linear abgeschrieben. Lizenzen werden entsprechend ihrer Vertragslaufzeit abgeschrieben. Bilanzierte Kundenbeziehungen werden linear über einen Zeitraum von fünf bis 18 Jahren abgeschrieben. Außerplanmäßige Abschreibungen/Wertminderungen folgen den unter dem Punkt „Wertminderungen“ beschriebenen Grundsätzen.

Immaterielle Vermögenswerte mit einer unbestimmten Nutzungsdauer (z.B. Markennamen) werden nicht planmäßig abgeschrieben, sondern jährlich sowie bei Vorliegen von Anhaltspunkten für eine Wertminderung auf Wertminderungsbedarf geprüft. Der Werthaltigkeitstest unterliegt den Grundsätzen, die unter dem Punkt „Wertminderungen“ beschrieben werden.



## Sachanlagen

Die Bilanzierung von Sachanlagen erfolgt zu Anschaffungs- oder Herstellungskosten, vermindert um die kumulierten Abschreibungen und Wertberichtigungen. Die Herstellungskosten enthalten neben den Einzelkosten angemessene Anteile der zurechenbaren Fertigungsgemeinkosten. Fremdkapitalkosten, die direkt dem Erwerb, Bau oder der Herstellung zugeordnet werden können, werden aktiviert. Die im Zusammenhang mit der Anschaffung oder Herstellung der Sachanlagegegenstände anfallenden Umsatzsteuern gehen insoweit in die Anschaffungs- und Herstellungskosten ein, wie sie nicht als Vorsteuer in Abzug gebracht werden können. Die planmäßige Abschreibung erfolgt grundsätzlich nach der linearen Methode. Dabei werden folgende Nutzungsdauern im Konzern zugrunde gelegt. Liegen Anhaltspunkte für eine Wertminderung vor, siehe Punkt „Wertminderungen“.

### Nutzungsdauern

| Jahre                                       | 2009      | 2010      |
|---------------------------------------------|-----------|-----------|
| Gebäude                                     | 5 bis 50  | 5 bis 50  |
| Technische Anlagen und Maschinen            | 3 bis 10  | 3 bis 10  |
| Personenkraftwagen                          | 4 bis 6   | 4 bis 6   |
| Lastkraftwagen                              | 5 bis 8   | 5 bis 8   |
| Flugzeuge                                   | 15 bis 20 | 15 bis 20 |
| Sonstige Fahrzeuge                          | 3 bis 8   | 3 bis 8   |
| EDV-technische Ausstattung                  | 3 bis 8   | 3 bis 8   |
| Sonstige Betriebs- und Geschäftsausstattung | 3 bis 10  | 3 bis 10  |

## Wertminderungen

Zu jedem Bilanzstichtag werden die Buchwerte der immateriellen Vermögenswerte, Sachanlagen sowie als Finanzinvestition gehaltenen Immobilien daraufhin geprüft, ob Anhaltspunkte für eine Wertminderung vorliegen. Liegen solche Hinweise vor, ist ein Werthaltigkeitstest durchzuführen. Hierbei wird der erzielbare Betrag des betreffenden Vermögenswerts ermittelt und dem entsprechenden Buchwert gegenübergestellt.

Nach IAS 36 entspricht der erzielbare Betrag dem beizulegenden Zeitwert abzüglich Veräußerungskosten oder dem Nutzungswert. Maßgeblich ist der höhere Wert. Der Nutzungswert entspricht dem Barwert der erwarteten Free Cashflows vor Steuern. Als Diskontierungszinssatz wird ein den Marktbedingungen entsprechender Zinssatz vor Steuern verwendet. Sofern kein erzielbarer Betrag für einen einzelnen Vermögenswert ermittelt werden kann, wird der erzielbare Betrag für die Cash Generating Unit (CGU) bestimmt, der der betreffende Vermögenswert zugeordnet werden kann und die unabhängige Cashflows generiert. Ist der erzielbare Betrag eines Vermögenswerts niedriger als der Buchwert, erfolgt eine sofortige ergebniswirksame Wertminderung des Vermögenswerts. Ergibt sich nach einer vorgenommenen Wertminderung zu einem späteren Zeitpunkt ein höherer erzielbarer Betrag des Vermögenswerts oder der CGU, erfolgt eine Wertaufholung bis maximal zur Höhe des erzielbaren Betrags. Die Wertaufholung ist begrenzt auf den fortgeführten Buchwert, der sich ohne die Wertminderung in der Vergangenheit ergeben hätte. Die vorzunehmende Zuschreibung erfolgt ergebniswirksam. Wertaufholungen von vorgenommenen Wertminderungen auf Firmenwerte sind nicht zulässig.

Seit Januar 2005 werden Firmenwerte gemäß IFRS 3 nach dem sogenannten „Impairment-only Approach“ bilanziert. Dieser legt fest, dass ein Firmenwert im Rahmen der Folgebewertung grundsätzlich zu Anschaffungskosten abzüglich ggf. kumulierter Korrekturen aus außerplanmäßigen Wertminderungen zu bewerten ist. Damit darf ein erworbener Firmenwert nicht mehr planmäßig abgeschrieben werden, sondern muss, ebenso wie immaterielle Vermögenswerte mit unbegrenzter Nutzungsdauer, unabhängig vom Vorliegen von Indikatoren für eine mögliche Wertminderung jährlich einer Werthaltigkeitsprüfung nach IAS 36 unterzogen werden. Daneben bleibt die Verpflichtung zu einer Werthaltigkeitsprüfung bei Vorliegen von Anzeichen für eine Wertminderung bestehen. Aus Unternehmenserwerben resultierende Firmenwerte werden den CGU bzw. Gruppen von CGU zugeordnet, die aus den Synergien des Erwerbs Nutzen ziehen sollen. Solche Gruppen stellen die niedrigste Berichtsebene dar, auf der das Management den Firmenwert für interne Steuerungszwecke kontrolliert. Der Buchwert einer CGU, die einen Firmenwert enthält, wird jährlich auf Werthaltigkeit überprüft und zusätzlich, wenn zu anderen Zeitpunkten Hinweise für eine mögliche Wertminderung vorliegen. Im Falle von Wertberichtigungen im Zusammenhang mit CGU, die einen Firmenwert enthalten, werden zunächst bestehende Firmenwerte reduziert. Übersteigt der Wertminderungsbedarf den Buchwert des Firmenwerts, wird die Differenz auf die verbleibenden langfristigen Vermögenswerte der CGU verteilt.

## Finance Lease

Ein Leasingverhältnis ist eine Vereinbarung, in der der Leasinggeber dem Leasingnehmer gegen eine Zahlung oder eine Reihe von Zahlungen das Recht an der Nutzung eines Vermögenswerts für einen bestimmten Zeitraum überträgt. Das wirtschaftliche Eigentum an Leasinggegenständen wird gemäß IAS 17 dann dem Leasingnehmer zugerechnet, wenn dieser die wesentlichen mit dem Eigentum verbundenen Risiken und Chancen aus dem Leasinggegenstand trägt. Sofern das wirtschaftliche Eigentum dem Konzern als Leasingnehmer zuzurechnen ist, erfolgt die Aktivierung zum Zeitpunkt des Nutzungsbeginns entweder zum beizulegenden Zeitwert oder zum Barwert der Mindestleasingzahlungen, sofern dieser den Zeitwert unterschreitet. In gleicher Höhe wird eine Leasingverbindlichkeit unter den langfristigen Verbindlichkeiten passiviert. Die Folgebewertung erfolgt unter Anwendung der Effektivzinsmethode mit den fortgeführten Anschaffungskosten. Die Abschreibungsmethoden und Nutzungsdauern entsprechen denen vergleichbarer erworbener Vermögenswerte.

## Operating Lease

Als Leasinggeber bei einem Operating Lease weist der Konzern das Leasingobjekt als Vermögenswert zu fortgeführten Anschaffungskosten in den Sachanlagen aus. Die in der Periode vereinnahmten Leasingraten werden unter den sonstigen betrieblichen Erträgen gezeigt. Als Leasingnehmer werden die geleisteten Leasingraten als Mietaufwendungen im Materialaufwand ausgewiesen. Die Erfassung der Mietaufwendungen und Mieterträge erfolgt auf linearer Basis.

### Beteiligungen an assoziierten Unternehmen

Die Beteiligungen an assoziierten Unternehmen werden gemäß IAS 28 (Investments in Associates) nach der Equity-Methode bewertet. Ausgehend von den Anschaffungskosten zum Zeitpunkt des Erwerbs der Anteile wird der jeweilige Beteiligungsbuchwert jährlich um die anteiligen Ergebnisse, ausgeschüttete Dividenden und sonstige Veränderungen im Eigenkapital der assoziierten Gesellschaften erhöht bzw. vermindert, soweit diese auf die Anteile der Deutsche Post AG bzw. auf deren einbezogene Tochterunternehmen entfallen. Die Behandlung der in den Beteiligungsbuchwerten enthaltenen Firmenwerte erfolgt gemäß IFRS 3. Nach der Equity-Methode bilanzierte Unternehmen werden außerplanmäßig abgeschrieben, wenn der erzielbare Betrag den Buchwert unterschreitet.

### Finanzinstrumente

Ein Finanzinstrument ist ein Vertrag, der gleichzeitig bei einem Unternehmen zur Entstehung eines finanziellen Vermögenswerts und bei einem anderen Unternehmen zur Entstehung einer finanziellen Verbindlichkeit oder eines Eigenkapitalinstruments führt. Zu den finanziellen Vermögenswerten zählen insbesondere Zahlungsmittel und Zahlungsmitteläquivalente, Forderungen aus Lieferungen und Leistungen, ausgereichte Kredite und Forderungen und zu Handelszwecken gehaltene derivative finanzielle Vermögenswerte. Finanzielle Verbindlichkeiten umfassen eine vertragliche Verpflichtung, Zahlungsmittel oder einen anderen finanziellen Vermögenswert an ein anderes Unternehmen abzugeben. Im Wesentlichen handelt es sich dabei um Verbindlichkeiten aus Lieferungen und Leistungen, Verbindlichkeiten gegenüber Kreditinstituten, Verbindlichkeiten aus Anleihen und Finanzierungsleasing sowie derivative Finanzverbindlichkeiten.

### Wahlrecht der Bewertung zum beizulegenden Zeitwert

Der Konzern hat die Fair Value Option erstmals für das Geschäftsjahr 2006 angewendet. Danach können finanzielle Vermögenswerte bzw. finanzielle Verbindlichkeiten beim erstmaligen Ansatz erfolgswirksam zum beizulegenden Zeitwert bewertet werden, wenn dies Inkongruenzen bei der Bewertung oder beim Ansatz (Accounting Mismatch) beseitigt oder erheblich verringert. Von dem Wahlrecht macht der Konzern zur Vermeidung von Accounting Mismatches Gebrauch.

### Finanzielle Vermögenswerte

Finanzielle Vermögenswerte werden nach den Regelungen des IAS 39 bilanziert, dabei werden vier Kategorien für Finanzinstrumente unterschieden.

#### KATEGORIE „ZUR VERÄUSSERUNG VERFÜGBARE FINANZIELLE VERMÖGENSWERTE“

Diese Finanzinstrumente sind nicht derivative finanzielle Vermögenswerte und werden, soweit verlässlich bestimmbar, mit ihrem Zeitwert angesetzt. Ist ein Zeitwert nicht ermittelbar, erfolgt der Ansatz zu Anschaffungskosten. Wertschwankungen zwischen den Bilanzstichtagen werden grundsätzlich erfolgsneutral in das sonstige Ergebnis (Neubewertungsrücklage) eingestellt. Die Auflösung der Rücklage erfolgt entweder mit der Veräußerung oder bei nachhaltigem Absinken des Zeitwerts unter die Anschaffungs-

kosten erfolgswirksam. Ergibt sich zu einem späteren Bilanzstichtag die Tatsache, dass der beizulegende Wert eines Schuldinstruments infolge von Ereignissen, die nach dem Zeitpunkt der Erfassung der Wertminderung eingetreten sind, objektiv gestiegen ist, sind die Wertminderungen in entsprechender Höhe zurückzunehmen. Wertminderungen von Eigenkapitalinstrumenten dürfen nicht erfolgswirksam rückgängig gemacht werden. Werden die Eigenkapitalinstrumente zum beizulegenden Zeitwert angesetzt, darf eine Wertaufholung nur erfolgsneutral erfolgen. Für Eigenkapitalinstrumente, die zu Anschaffungskosten bilanziert sind, ist eine Wertaufholung ausgeschlossen. „Zur Veräußerung verfügbare finanzielle Vermögenswerte“ sind den langfristigen Vermögenswerten zuzuordnen, sofern nicht die Absicht besteht, sie innerhalb von zwölf Monaten nach Bilanzstichtag zu veräußern. In dieser Kategorie werden insbesondere Anteile an nicht einbezogenen verbundenen Unternehmen, Wertpapiere und sonstige Beteiligungen ausgewiesen.

#### KATEGORIE „BIS ZUR ENDFÄLLIGKEIT ZU HALTENDE VERMÖGENSWERTE“

Finanzinvestitionen sind dieser Kategorie zuzurechnen, wenn die Absicht besteht, das Instrument bis zur Endfälligkeit zu halten, und die wirtschaftlichen Voraussetzungen darauf schließen lassen. Diese Instrumente sind nicht derivative finanzielle Vermögenswerte, die unter Anwendung der Effektivzinsmethode zu fortgeführten Anschaffungskosten bewertet werden.

#### KATEGORIE „AUSLEIHUNGEN UND FORDERUNGEN“

Es handelt sich um nicht derivative finanzielle Vermögenswerte mit fixen bzw. bestimmbareren Zahlungen, die nicht an einem aktiven Markt notiert sind. Sie werden, sofern sie nicht zu Handelszwecken gehalten werden, am Bilanzstichtag zu Anschaffungskosten bzw. zu fortgeführten Anschaffungskosten angesetzt. Die Buchwerte der Geldmarktforderungen entsprechen aufgrund ihrer kurzen Laufzeit annähernd den Zeitwerten. „Ausleihungen und Forderungen“ zählen zu den kurzfristigen Vermögenswerten, soweit deren Fälligkeit nicht zwölf Monate nach dem Bilanzstichtag übersteigt, ansonsten werden sie als langfristige Vermögenswerte ausgewiesen. Bestehen an der Einbringbarkeit von Forderungen Zweifel, werden diese zu fortgeführten Anschaffungskosten abzüglich angemessener Einzelwertberichtigungen oder pauschalierter Einzelwertberichtigung angesetzt. Eine Wertminderung bei Forderungen aus Lieferungen und Leistungen wird dann erfasst, wenn objektive Hinweise vorliegen, dass die fälligen Forderungsbeträge nicht vollständig einbringlich sind. Die Wertminderung wird über ein Wertberichtigungskonto und erfolgswirksam in der Gewinn- und Verlust-Rechnung erfasst.

#### KATEGORIE „ERFOLGSWIRKSAM ZUM BEIZULEGENDEN ZEITWERT BEWERTETE VERMÖGENSWERTE“

Alle zu Handelszwecken gehaltenen Finanzinstrumente sowie Derivate, die nicht im Hedge Accounting stehen, sind dieser Kategorie zuzuordnen. Sie werden grundsätzlich zum Marktwert (Fair Value) bewertet. Sämtliche Marktwertänderungen werden ergebniswirksam erfasst. Die Bilanzierung aller Finanzinstrumente dieser Kategorie erfolgt zum Handelstag. Vermögenswerte dieser Kategorie werden als kurzfristige Vermögenswerte aus-

gewiesen, wenn sie entweder zu Handelszwecken gehalten oder voraussichtlich innerhalb von zwölf Monaten nach dem Bilanzstichtag realisiert werden.

Um Ergebnisschwankungen aus Marktwertänderungen von derivativen Finanzinstrumenten zu vermeiden, wird – soweit möglich und wirtschaftlich sinnvoll – Hedge Accounting angewandt. Gewinne und Verluste aus Grundgeschäft und Derivat werden zeitgleich im Ergebnis erfasst. Nach Art des Grundgeschäfts und des zu sichernden Risikos werden im Konzern Fair Value und Cashflow Hedges designiert.

Zu jedem Abschlussstichtag sowie bei Vorliegen von Anhaltspunkten für eine Wertminderung werden die Buchwerte der finanziellen Vermögenswerte, die nicht erfolgswirksam zum beizulegenden Wert zu bewerten sind, auf ihre Werthaltigkeit untersucht. Ein Wertminderungsaufwand ergibt sich im Vergleich zwischen Buchwert und beizulegendem Zeitwert. Liegt ein objektiver Hinweis auf eine Wertminderung vor, ist ein Wertminderungsaufwand erfolgswirksam im sonstigen betrieblichen Aufwand bzw. im Finanzergebnis zu erfassen. Wertminderungen sind zurückzunehmen, soweit sich nach dem Bilanzstichtag objektive Sachverhalte ergeben, die für eine Wertaufholung sprechen. Die Zuschreibung kann nur bis zur Höhe der fortgeführten Anschaffungskosten, die sich ergeben hätten, wenn die Wertminderung nicht erfasst worden wäre, vorgenommen werden.

Im Konzern werden Wertminderungen vorgenommen, wenn der Schuldner erhebliche finanzielle Schwierigkeiten hat, gegen ihn mit hoher Wahrscheinlichkeit ein Insolvenzverfahren eröffnet wird, wenn sich das technologische, ökonomische, rechtliche Umfeld sowie das Marktumfeld des Emittenten wesentlich verändert oder der Fair Value eines Finanzinstruments andauernd unter die fortgeführten Anschaffungskosten sinkt.

Ein Fair Value Hedge sichert den beizulegenden Zeitwert von bilanzierten Vermögenswerten und Schulden. Die Änderung des Zeitwerts der Derivate sowie die Marktwertänderung des Grundgeschäfts, die auf dem abgesicherten Risiko basiert, werden zeitgleich ergebniswirksam erfasst.

Ein Cashflow Hedge sichert die Schwankungen zukünftiger Zahlungsströme aus bilanzierten Vermögenswerten und Schulden (im Fall von Zinsrisiken), geplante und mit hoher Wahrscheinlichkeit eintretende künftige Transaktionen und festkontrahierte, bilanzunwirksame Verpflichtungen, aus denen ein Währungsrisiko resultiert. Der effektive Teil eines Cashflow Hedges ist in der Hedge-Rücklage im Eigenkapital zu erfassen. Ineffektivitäten aus der Wertänderung des Sicherungsinstruments sind erfolgswirksam zu buchen. Die mit den Sicherungsmaßnahmen verbundenen Gewinne und Verluste bleiben zunächst im Eigenkapital stehen und sind später in der Periode erfolgswirksam zu erfassen, in der der finanzielle Vermögenswert oder die finanzielle Verbindlichkeit das Periodenergebnis beeinflusst. Resultiert eine Absicherung einer festkontrahierten Transaktion später im Ansatz eines nicht finanziellen Vermögenswerts, sind die im Eigenkapital erfassten Gewinne und Verluste dem Vermögenswert bei Zugang zuzurechnen (Basis Adjustment).

Absicherungen von Nettoinvestitionen (Net Investment Hedges) in ausländische Gesellschaften werden wie Cashflow Hedges behandelt. Der Gewinn oder Verlust aus dem effekti-

ven Teil des Sicherungsgeschäftes wird im sonstigen Ergebnis im Eigenkapital erfasst; der Gewinn oder Verlust des ineffektiven Teils ist unmittelbar in der Gewinn- und Verlust-Rechnung zu erfassen. Die erfolgsneutral erfassten Gewinne oder Verluste verbleiben bis zum Abgang oder Teilabgang der Nettoinvestition im Eigenkapital. Ausführliche Angaben zu den Sicherungsgeschäften finden sich unter [Textziffer 50.2](#).

Die Erfassung von finanziellen Vermögenswerten im Rahmen von marktüblichen Käufen und Verkäufen erfolgt zum Erfüllungstag, ausgenommen hiervon sind Held-for-Trading-Instrumente, insbesondere Derivate. Ein finanzieller Vermögenswert wird ausgebucht, wenn die Rechte auf den Erhalt der Cashflows aus dem Vermögenswert ausgelaufen sind. Bei Übertragung eines finanziellen Vermögenswerts wird nach den Abgangsregelungen nach IAS 39 überprüft, ob eine Ausbuchung erfolgt. Mit dem Abgang entsteht ein Veräußerungsgewinn/-verlust. Die in den Vorperioden erfolgsneutral erfassten Wertänderungen sind zum Veräußerungszeitpunkt zwingend aufzulösen. Finanzielle Verbindlichkeiten werden ausgebucht, wenn die Zahlungsverpflichtungen daraus ausgelaufen sind.

#### Als Finanzinvestition gehaltene Immobilien

Als Finanzinvestition gehaltene Immobilien (Investment Properties) sind gemäß IAS 40 solche Immobilien, die zur Erzielung von Mieteinnahmen und/oder zur Wertsteigerung gehalten werden und nicht zur Erbringung von Dienstleistungen oder für Verwaltungszwecke bzw. zum Verkauf im Rahmen der gewöhnlichen Geschäftstätigkeit des Unternehmens genutzt werden. Die Bewertung erfolgt nach dem Anschaffungskostenprinzip. Die abnutzbaren Investment Properties werden über eine Laufzeit von fünf bis 50 Jahren linear abgeschrieben. Der beizulegende Zeitwert wird anhand von Gutachten ermittelt. Die außerplanmäßigen Abschreibungen/Wertminderungen folgen den unter dem Punkt „Wertminderungen“ beschriebenen Grundsätzen.

#### Vorräte

Vorräte sind diejenigen Vermögenswerte, die zum Verkauf im normalen Geschäftsgang gehalten werden, die sich in der Herstellung befinden oder die im Zuge der Herstellung von Produkten bzw. der Erbringung von Dienstleistungen verbraucht werden. Sie sind mit den Anschaffungs- bzw. Herstellungskosten oder zum niedrigeren Nettoveräußerungswert bewertet. Wertberichtigungen werden für veraltete Vorräte sowie Bestände mit geringer Umschlagshäufigkeit vorgenommen.

#### Zuwendungen der öffentlichen Hand

Zuwendungen der öffentlichen Hand werden gemäß IAS 20 zu ihrem beizulegenden Zeitwert nur dann erfasst, wenn eine angemessene Sicherheit dafür besteht, dass die damit verbundenen Bedingungen erfüllt und die Zuwendungen gewährt werden. Die Zuwendungen werden erfolgswirksam behandelt und grundsätzlich in den Perioden verrechnet, in denen die Aufwendungen, die sie kompensieren sollen, anfallen. Erfolgen die Zuwendungen für die Anschaffung oder Herstellung von Vermögenswerten, werden die Zuwendungen passivisch abgegrenzt und über die Nutzungsdauer der Vermögenswerte als Ertrag erfasst.

### **Zur Veräußerung gehaltene Vermögenswerte sowie Verbindlichkeiten im Zusammenhang mit zur Veräußerung gehaltenen Vermögenswerten**

Bei den zur Veräußerung gehaltenen Vermögenswerten handelt es sich um Vermögenswerte, die in ihrem gegenwärtigen Zustand veräußert werden können und deren Veräußerung sehr wahrscheinlich ist. Die Veräußerung muss erwartungsgemäß innerhalb von einem Jahr ab dem Zeitpunkt der Klassifizierung als abgeschlossener Verkauf in Betracht kommen. Dabei kann es sich um einzelne langfristige Vermögenswerte, um Gruppen von Vermögenswerten (Veräußerungsgruppen) oder um Unternehmensbestandteile (aufgegebene Geschäftsbereiche) handeln. Verbindlichkeiten, die zusammen mit Vermögenswerten in einer Transaktion abgegeben werden sollen, sind Bestandteil einer Veräußerungsgruppe oder eines aufgegebenen Geschäftsbereiches und werden als „Verbindlichkeiten im Zusammenhang mit zur Veräußerung gehaltenen Vermögenswerten“ ebenfalls gesondert ausgewiesen. Zur Veräußerung bestimmte Vermögenswerte werden nicht mehr planmäßig abgeschrieben, sondern mit ihrem beizulegenden Zeitwert abzüglich Veräußerungskosten angesetzt, sofern dieser niedriger ist als der Buchwert. Ergebnisse aus der Bewertung einzelner zur Veräußerung stehender Vermögenswerte und Veräußerungsgruppen werden bis zur endgültigen Veräußerung im Ergebnis aus fortgeführten Geschäftsbereichen ausgewiesen. Gewinne und Verluste aus der Bewertung von zur Veräußerung bestimmten Geschäftsbereichen mit dem beizulegenden Zeitwert abzüglich Veräußerungskosten werden als Ergebnis aus aufgegebenen Geschäftsbereichen ausgewiesen. Dies gilt auch für Ergebnisse aus der Geschäftstätigkeit bzw. aus der Veräußerung dieser Unternehmensbereiche.

### **Flüssige Mittel und Zahlungsmitteläquivalente**

Flüssige Mittel und Zahlungsmitteläquivalente umfassen Bargeld, Sichteinlagen, andere kurzfristige liquide finanzielle Vermögenswerte mit einer ursprünglichen Laufzeit von maximal drei Monaten und sind zum Nennwert angesetzt. Ausgenutzte Kontokorrentkredite werden in der Bilanz als Verbindlichkeiten gegenüber Kreditinstituten gezeigt.

### **Aktienbasierte Vergütung**

In die Bewertung des aktienorientierten Vergütungssystem für Führungskräfte (Share Matching Scheme, SMS), das gemäß IFRS 2 grundsätzlich als aktienbasierte Vergütungstransaktion mit Ausgleich durch Eigenkapitalinstrumente zu klassifizieren ist, fließen Annahmen zur Aktienkursentwicklung der Aktie der Deutsche Post AG sowie Annahmen zur Mitarbeiterfluktuation ein. Zudem werden Annahmen bezüglich des Verhaltens der Führungskräfte zur weiteren Wandlung von Anteilen ihres Bonusanspruchs getroffen. Da es sich um ein jährlich aufgelegtes Programm zur aktienorientierten Vergütung handelt, ist der jeweilige Gewährungstag jeder Jahrestranche der 1. Januar des jeweiligen Jahres. Alle Annahmen werden quartalsweise überprüft. Der resultierende Personalaufwand wird entsprechend der im Erdienungszeitraum (Sperrfrist) erbrachten Gegenleistung zeiträtierlich erfolgswirksam erfasst. Verpflichtungen, die ohne Wahlrecht der Führungskraft zukünftig in Aktien der Deutsche Post AG beglichen werden, werden gemäß IFRS 2 im Eigenkapital erfasst.

Die Bewertung der ausgegebenen Stock Appreciation Rights (SAR) für Vorstand und Führungskräfte erfolgt gemäß IFRS 2 auf Basis eines finanzmathematischen Optionspreismodells. Die SAR werden zu jedem Berichtsstichtag und am Erfüllungstag bewertet. Der ermittelte Wert der voraussichtlich ausübbar werdenden SAR wird als Personalaufwand entsprechend der im Erdienungszeitraum (Sperrfrist) erbrachten Gegenleistung zeiträtierlich erfolgswirksam erfasst. In gleichem Umfang werden Rückstellungen gebildet.

### **Pensionsverpflichtungen**

In vielen Ländern unterhält der Konzern leistungsorientierte Altersversorgungssysteme (Defined Benefit Pension Plans) auf der Grundlage der ruhegehaltstfähigen Vergütung der Mitarbeiter und ihrer Dienstzeiten. Diese Versorgungssysteme werden über externe Planvermögen sowie Rückstellungen für Pensionen und ähnliche Verpflichtungen finanziert. Die Bewertung der Pensionsverpflichtungen erfolgt nach der in IAS 19 vorgeschriebenen versicherungsmathematischen Methode der laufenden Einmalprämien (Projected Unit Credit Method) für leistungsorientierte Altersversorgungspläne. Hierbei sind bestimmte versicherungsmathematische Annahmen zu treffen. Versicherungsmathematische Gewinne bzw. Verluste werden gemäß IAS 19.92 nur insoweit erfasst, wie sie 10 % des Maximums von Verpflichtungsumfang und Planvermögen übersteigen (10-%-Korridor). Der übersteigende Betrag wird über die erwartete Restdienstzeit der Aktiven verteilt und ergebniswirksam erfasst. Die in den Pensionsaufwendungen enthaltenen Bestandteile Zinsaufwand und erwartete Erträge aus Planvermögen werden im Finanzergebnis gezeigt, die anderen Bestandteile im Personalaufwand.

Der Konzern unterhält außerdem eine Reihe von beitragsorientierten Altersversorgungssystemen (Defined Contribution Pension Plans). Die Beiträge zu diesen Pensionsplänen werden im Personalaufwand erfasst.

### **ALTERSVERSORGUNGSSYSTEME FÜR BEAMTE IN DEUTSCHLAND**

Die Deutsche Post AG leistet für Beamte aufgrund gesetzlicher Bestimmungen Beiträge an beitragsorientierte Altersversorgungssysteme.

Nach den Vorschriften des Gesetzes zum Personalrecht der Beschäftigten der früheren Deutschen Bundespost (PostPersRG), eingeführt als Art. 4 des Gesetzes zur Neuordnung des Postwesens und der Telekommunikation (PTNeuOG), erbringt die Deutsche Post AG über eine seit Anfang 2001 gemeinsame Postbeamtenversorgungskasse der Postnachfolgeunternehmen, den Bundes-Pensions-Service für Post und Telekommunikation e.V. (BPS-PT), Versorgungs- und Beihilfeleistungen an im Ruhestand befindliche Mitarbeiter und deren Hinterbliebene, denen aus einem Beamtenverhältnis Versorgungsleistungen zustehen. Die Höhe der Zahlungsverpflichtungen der Deutsche Post AG ist in §16 PostPersRG geregelt. Die Deutsche Post AG ist danach verpflichtet, seit dem Jahr 2000 einen jährlichen Beitrag in Höhe von 33 % der Bruttobezüge ihrer aktiven Beamten und der fiktiven Bruttobezüge der ruhegehaltstfähig beurlaubten Beamten an die Postbeamtenversorgungskasse zu zahlen.

Im Berichtsjahr ergaben sich für die Deutsche Post AG durch die Beiträge an den BPS-PT Aufwendungen in Höhe von 541 MIO € (Vorjahr: 559 MIO €).

Nach § 16 PostPersRG gleicht der Bund Unterschiedsbeträge zwischen laufenden Zahlungsverpflichtungen der Postbeamtenversorgungskasse einerseits und laufenden Zuwendungen der Trägerunternehmen oder anderweitigen Vermögenserträgen andererseits auf geeignete Weise aus und gewährleistet, dass die Postbeamtenversorgungskasse jederzeit in der Lage ist, die gegenüber ihren Trägerunternehmen übernommenen Verpflichtungen zu erfüllen. Soweit der Bund danach Zahlungen an die Postbeamtenversorgungskasse erbringt, kann er von der Deutsche Post AG keine Erstattung verlangen.

#### **ALTERSVERSORGUNGSSYSTEME FÜR ARBEITER UND ANGESTELLTE**

Die Verpflichtungen aus leistungsorientierten Altersversorgungssystemen für Arbeiter und Angestellte des Konzerns entfallen überwiegend auf Rentenverpflichtungen in Deutschland sowie signifikante kapitalgedeckte Verpflichtungen in Großbritannien, den Niederlanden, der Schweiz und den USA. Es bestehen verschiedene Zusagen für einzelne Mitarbeitergruppen. Die Zusagen sind in der Regel abhängig von der Dienstzeit sowie endgehaltsabhängig (z.B. Großbritannien), beitragsorientiert (z.B. Schweiz) oder in Form eines Festbetragssystems (z.B. Deutschland).

Der Großteil der leistungsorientierten Altersversorgungsverpflichtungen in Deutschland bezieht sich auf die Deutsche Post AG. Die Deutsche Post AG hat zum 30. Dezember 2009 die Deutsche Post Pensionsfonds AG gegründet. Auf diese wurden Verpflichtungen der Deutsche Post AG zusammen mit Vermögenswerten in Höhe von 650 MIO € übertragen. Durch diese Maßnahme hat sich weder die Höhe der Gesamtverpflichtungen noch der Finanzierungsstand der Deutsche Post AG verändert.

In den USA wurden bestehende leistungsorientierte Altersversorgungssysteme per 31. Dezember 2009 geschlossen und für Dienstzeiten ab 2010 auf beitragsorientierte Altersversorgungssysteme umgestellt.

Im Rahmen der beitragsorientierten Altersversorgungssysteme für Arbeiter und Angestellte des Konzerns wurden im Jahr 2010 Arbeitgeberbeiträge in Höhe von insgesamt 237 MIO € (Vorjahr: 189 MIO €) entrichtet.

#### **Sonstige Rückstellungen**

Sonstige Rückstellungen werden für sämtliche am Bilanzstichtag gegenüber Dritten bestehenden rechtlichen oder faktischen Verpflichtungen gebildet, die auf vergangenen Ereignissen beruhen, die zukünftig wahrscheinlich zu einem Abfluss von Ressourcen führen und deren Höhe verlässlich geschätzt werden kann. Sie stellen ungewisse Verpflichtungen dar, die mit dem nach bestmöglicher Schätzung (Best Estimate) ermittelten Betrag angesetzt werden. Rückstellungen mit einer Restlaufzeit von über einem Jahr werden mit Marktzinssätzen, die dem Risiko, der Region und dem Zeitraum bis zur Erfüllung entsprechen, abgezinst. Die Zinssätze lagen im Geschäftsjahr zwischen 0,5 % und 11,5 % (Vorjahr: 1 % bis 12,75 %).

Rückstellungen für Restrukturierungsmaßnahmen werden unter Berücksichtigung der oben genannten allgemeinen Ansatzkriterien gebildet, wenn ein detaillierter, formaler Restrukturierungsplan erstellt und dieser den betroffenen Parteien mitgeteilt worden ist.

Die versicherungstechnischen Rückstellungen beinhalten im Wesentlichen Rückstellungen für bekannte Schäden sowie Spätschadenrückstellungen. Bei den Rückstellungen für bekannte Schäden handelt es sich um geschätzte Beträge für künftige Verpflichtungen aus bekannten Schadensfällen bzw. bekannten Vorfällen, die voraussichtlich zu Schadensfällen werden. Diese bekannten oder voraussichtlichen Schadensfälle sind dem Unternehmen mitgeteilt, jedoch noch nicht vollständig abgewickelt und zur Zahlung vorgelegt worden. Die Rückstellungen für bekannte Schäden basieren auf individuellen Bewertungen von Schadensfällen, die vom Unternehmen oder von dessen Erstversicherern durchgeführt werden. Die Spätschadenrückstellungen basieren auf geschätzten Beträgen für künftige Verpflichtungen aus Vorfällen, die am oder vor dem Bilanzstichtag eintreten, dem Unternehmen bisher nicht mitgeteilt wurden, jedoch zu Schadensfällen führen werden. Diese Rückstellungen beinhalten auch Rückstellungen für mögliche Fehler bei der Erfüllung von Verpflichtungen aus bekannten Schäden. Das Unternehmen führt die Beurteilung künftiger zahlbarer Verluste anhand versicherungsmathematischer Methoden selbst durch und gibt darüber hinaus jedes Jahr eine unabhängige versicherungsmathematische Prüfung dieser Beurteilung in Auftrag, um die Angemessenheit seiner Schätzungen zu verifizieren.

#### **Finanzschulden**

Finanzschulden werden bei ihrem erstmaligen Ansatz zum beizulegenden Zeitwert, nach Abzug von Transaktionskosten, angesetzt. Als Zeitwert wird der auf einem preiseffizienten und liquiden Markt festgestellte Preis oder ein mittels des im Konzern eingesetzten Treasury-Risk-Management-Systems ermittelter Zeitwert eingesetzt. In den Folgeperioden werden sie zu fortgeführten Anschaffungskosten bewertet. Jede Differenz zwischen Zahlungsbetrag und Rückzahlungsbetrag wird über die Laufzeit der Ausleihung unter Anwendung der Effektivzinismethode in der Gewinn- und Verlust-Rechnung erfasst.

#### **Verbindlichkeiten**

Verbindlichkeiten aus Lieferungen und Leistungen sowie die übrigen Verbindlichkeiten werden zu fortgeführten Anschaffungskosten angesetzt. Der beizulegende Zeitwert der Verbindlichkeiten entspricht näherungsweise dem Buchwert.

### Latente Steuern

Die latenten Steuern werden gemäß IAS 12 für temporäre Bewertungsunterschiede zwischen der IFRS-Bilanz und den Steuerbilanzen der Einzelgesellschaften gebildet. Die aktiven latenten Steuern umfassen auch Steuerminderungsansprüche, die sich aus der erwarteten künftigen Nutzung bestehender steuerlicher Verlustvorträge ergeben und deren Realisierung wahrscheinlich ist. Auf die temporären Differenzen zwischen Wertansätzen in der IFRS- und der Steuerbilanz der Deutsche Post AG wurden unter Beachtung des IAS 12.24 (b) bzw. IAS 12.15 (b) nur insoweit aktive bzw. passive latente Steuern gebildet, wie die Differenzen nach dem 1. Januar 1995 entstanden sind. Auf Wertdifferenzen, die aus der Erstverbuchung in der steuerlichen Eröffnungsbilanz der Deutsche Post AG zum 1. Januar 1995 resultieren, werden keine latenten Steuern gebildet. Weitere Angaben zu den latenten Steuern auf steuerliche Verlustvorträge finden sich unter [Textziffer 19](#).

Die latenten Steuern werden gemäß IAS 12 auf Basis der Steuersätze ermittelt, die in den einzelnen Ländern zum Bilanzstichtag gelten oder für den Zeitpunkt angekündigt sind, in dem die latenten Steueransprüche und -schulden realisiert werden. Der für deutsche Konzernunternehmen angewandte Steuersatz in Höhe von 29,8 % setzt sich aus dem Körperschaftsteuersatz zuzüglich des Solidaritätszuschlags sowie einem Gewerbesteuersatz, der als Durchschnitt aus den unterschiedlichen Gewerbesteuersätzen ermittelt wurde, zusammen. Die ausländischen Konzerngesellschaften verwenden bei der Berechnung der latenten Steuerposten ihren individuellen Ertragsteuersatz. Die angewandten Ertragsteuersätze für ausländische Gesellschaften betragen bis zu 41 %.

### Ertragsteuern

Die Bewertung der Ertragsteueransprüche bzw. -verpflichtungen erfolgt mit dem Betrag, in dessen Höhe eine Erstattung von der bzw. eine Zahlung an die Steuerbehörde erwartet wird.

### Eventualverbindlichkeiten

Eventualverbindlichkeiten stellen zum einen mögliche Verpflichtungen dar, deren tatsächliche Existenz aber erst noch durch das Eintreten eines oder mehrerer ungewisser zukünftiger Ereignisse, die nicht vollständig beeinflusst werden können, bestätigt werden muss. Zum anderen sind darunter bestehende Verpflichtungen zu verstehen, die aber wahrscheinlich zu keinem Vermögensabfluss führen oder deren Vermögensabfluss sich nicht zuverlässig quantifizieren lässt. Die Eventualverbindlichkeiten sind gemäß IAS 37 nicht in der Bilanz zu erfassen, siehe [Textziffer 51](#).

## 8 Ermessensentscheidungen bei der Anwendung der Bilanzierungs- und Bewertungsmethoden

Die Aufstellung eines im Einklang mit den IFRS stehenden Konzernabschlusses erfordert Ermessensentscheidungen. Sämtliche Ermessensentscheidungen werden fortlaufend neu bewertet und basieren auf historischen Erfahrungen und Erwartungen hinsichtlich zukünftiger Ereignisse, die unter den gegebenen

Umständen vernünftig erscheinen. Dies gilt zum Beispiel für Vermögenswerte, die veräußert werden sollen. Hier ist zu bestimmen, ob sie in ihrem gegenwärtigen Zustand veräußert werden können und ihre Veräußerung sehr wahrscheinlich ist. Ist das der Fall, sind die Vermögenswerte und die zugehörigen Schulden als „Zur Veräußerung gehaltene Vermögenswerte“ bzw. „Verbindlichkeiten im Zusammenhang mit zur Veräußerung gehaltenen Vermögenswerten“ auszuweisen und zu bewerten.

### Schätzungen und Beurteilungen des Managements

Die Aufstellung des Konzernabschlusses nach IFRS erfordert, dass Annahmen getroffen und Schätzungen gemacht werden, die sich auf den Wertansatz der bilanzierten Vermögenswerte und Schulden, der Erträge und Aufwendungen sowie die Angaben der Eventualverbindlichkeiten auswirken.

Diese Annahmen beziehen sich unter anderem auf die Bilanzierung und Bewertung von Rückstellungen. Bei der Ermittlung der Rückstellungen für Pensionen und ähnliche Verpflichtungen ist der Abzinsungsfaktor eine wichtige Schätzgröße. Eine Erhöhung oder Verminderung des Abzinsungsfaktors um einen Prozentpunkt würde die Pensionsverpflichtung der Pläne im Inland um rund 930 Mio € reduzieren bzw. erhöhen. Bei den Konzerngesellschaften in Großbritannien hätte eine solche Veränderung des Abzinsungsfaktors eine Verminderung bzw. Erhöhung der Pensionsverpflichtung um rund 490 Mio € zur Folge. Da versicherungsmathematische Gewinne und Verluste nur dann erfasst werden, wenn sie 10 % des höheren Betrags aus dem Verpflichtungsumfang und dem Zeitwert des Planvermögens übersteigen, haben Änderungen des Abzinsungsfaktors bei den im Konzern vorhandenen Versorgungssystemen in der Regel keine oder nur geringe Auswirkungen auf den Aufwand bzw. den Buchwert der Rückstellungen im nächsten Geschäftsjahr.

Der Konzern ist weltweit tätig und unterliegt den örtlichen Steuergesetzen. Das Management hat zur Berechnung tatsächlicher und latenter Steuern in den jeweiligen Ländern einen Beurteilungsspielraum. Obwohl das Management davon ausgeht, eine vernünftige Einschätzung steuerlicher Unwägbarkeiten getroffen zu haben, kann nicht zugesichert werden, dass sich der tatsächliche Ausgang solcher steuerlicher Unwägbarkeiten mit der ursprünglichen Einschätzung deckt. Eine Abweichung der tatsächlichen Ergebnisse von dieser Einschätzung könnte in der jeweiligen Periode, in der die Angelegenheit endgültig entschieden wird, Auswirkungen auf die Steuerverbindlichkeiten und die latenten Steuern haben. Die angesetzten aktiven latenten Steuern könnten sich verringern, falls die Einschätzungen der geplanten steuerlichen Einkommen oder der durch Steuerstrategien zur Verfügung stehenden erzielbaren Steuervorteile gesenkt werden oder falls Änderungen der aktuellen Steuergesetzgebung den Umfang der Realisierbarkeit künftiger Steuervorteile beschränken.



Als Folge von Unternehmenszusammenschlüssen entstehen regelmäßig Firmenwerte in der Bilanz des Konzerns. Bei der Erstkonsolidierung eines Erwerbs sind alle identifizierbaren Vermögenswerte, Verbindlichkeiten und Eventualverbindlichkeiten zu beizulegenden Zeitwerten zum Erwerbsstichtag anzusetzen. Eine der wesentlichsten Schätzungen bezieht sich dabei auf die Bestimmung der zum Erwerbsstichtag beizulegenden Zeitwerte dieser Vermögenswerte und Verbindlichkeiten. Grundstücke, Gebäude und Geschäftsausstattung werden in der Regel durch unabhängige Gutachter bewertet, während marktgängige Wertpapiere zum Börsenpreis angesetzt werden. Falls immaterielle Vermögenswerte identifiziert werden, kann in Abhängigkeit von der Art des immateriellen Vermögenswerts und der Komplexität der Bestimmung des beizulegenden Zeitwerts auf das Gutachten eines unabhängigen externen Bewertungsgutachters zurückgegriffen werden, der den beizulegenden Zeitwert unter Verwendung einer angemessenen Bewertungsmethodik ermittelt, deren Basis üblicherweise die künftig erwarteten Cashflows sind. Diese Bewertungen sind neben den Annahmen über die Entwicklung künftiger Cashflows auch wesentlich beeinflusst von den verwendeten Diskontierungszinssätzen.

Der Werthaltigkeitstest für Firmenwerte basiert auf zukunftsbezogenen Annahmen. Der Konzern führt diese Tests jährlich durch und zusätzlich bei Anlässen, bei denen ein Anhaltspunkt dafür vorliegt, dass eine Wertminderung der Firmenwerte eingetreten ist. Dann ist der erzielbare Betrag der CGU zu ermitteln. Dieser entspricht dem höheren Wert von beizulegendem Zeitwert abzüglich Veräußerungskosten und Nutzungswert. Die Bestimmung des Nutzungswerts beinhaltet die Vornahme von Anpassungen und Schätzungen bezüglich der Prognose und Diskontierung der künftigen Cashflows. Obwohl das Management davon ausgeht, dass die zur Berechnung des erzielbaren Betrags verwendeten Annahmen angemessen sind, könnten etwaige unvorhersehbare Veränderungen dieser Annahmen – z.B. Verringerung der EBIT-Marge, Anstieg der Kapitalkosten oder Rückgang der langfristigen Wachstumsrate – zu einem Wertminderungsaufwand führen, der die Vermögens-, Finanz- und Ertragslage nachteilig beeinflussen könnte.

Unter [Textziffer 53](#) werden die anhängigen Rechtsverfahren des Konzerns ausgewiesen. Der Ausgang dieser Fälle könnte einen wesentlichen Effekt auf die Vermögens-, Finanz- und Ertragslage des Konzerns haben. Das Management analysiert regelmäßig die aktuellen Informationen zu diesen Fällen und bildet Rückstellungen für wahrscheinliche Verpflichtungen einschließlich der geschätzten Rechtskosten. Für die Beurteilung werden interne und externe Rechtsanwälte hinzugezogen. Im Rahmen der Entscheidung über die Notwendigkeit einer Rückstellung berücksichtigt das Management die Wahrscheinlichkeit eines ungünstigen Ausgangs und die Möglichkeit, die Höhe der Verpflichtung ausreichend verlässlich zu schätzen. Die Erhebung einer Klage oder die formale Geltendmachung eines Anspruchs gegen den Konzern oder die Angabe eines Rechtsstreits im Anhang bedeuten nicht automatisch, dass eine Rückstellung für das betreffende Risiko gebildet wurde.

Sämtliche Annahmen und Schätzungen basieren auf den Verhältnissen und Beurteilungen am Bilanzstichtag. Bei der Einschätzung der künftigen Geschäftsentwicklung wurde außerdem das zu diesem Zeitpunkt als realistisch unterstellte künftige wirtschaftliche Umfeld in den Branchen und Regionen, in denen der Konzern tätig ist, berücksichtigt. Durch die Entwicklungen dieser Rahmenbedingungen, die von den Annahmen abweichen, können sich die tatsächlichen Beträge von den Schätzwerten unterscheiden. In solchen Fällen werden die Annahmen und, falls erforderlich, die Buchwerte der betroffenen Vermögenswerte und Schulden entsprechend angepasst.

Zum Zeitpunkt der Erstellung des Konzernabschlusses ist nicht von einer wesentlichen Änderung der zugrunde gelegten Annahmen und Schätzungen auszugehen, sodass aus gegenwärtiger Sicht keine wesentliche Anpassung der angesetzten Vermögenswerte und Schulden im Geschäftsjahr 2011 zu erwarten ist.

## 9 Konsolidierungsmethoden

Grundlage für den Konzernabschluss sind die nach einheitlichen Regeln zum 31. Dezember 2010 erstellten und von unabhängigen Abschlussprüfern geprüften IFRS-Abschlüsse der Deutsche Post AG und ihrer einbezogenen Tochterunternehmen, Gemeinschaftsunternehmen sowie assoziierten Unternehmen.

Für in den Konzernabschluss einbezogene Tochterunternehmen wird die Kapitalkonsolidierung nach der Erwerbsmethode durchgeführt. Die Anschaffungskosten des Erwerbs entsprechen dem beizulegenden Zeitwert der hingegebenen Vermögenswerte, der ausgegebenen Eigenkapitalinstrumente und der entstandenen bzw. übernommenen Schulden zum Transaktionszeitpunkt. Anschaffungsnebenkosten werden aufwandswirksam erfasst. Bedingte Kaufpreisbestandteile („Contingent Considerations“) werden zum Erstkonsolidierungszeitpunkt zum beizulegenden Zeitwert erfasst.

Gemeinschaftsunternehmen werden gemäß IAS 31 auf quotaler Basis einbezogen. Die Vermögenswerte und Schulden sowie Erträge und Aufwendungen der gemeinschaftlich geführten Unternehmen gehen entsprechend der Anteilsquote an diesen Unternehmen in den Konzernabschluss ein. Die quotale Kapitalkonsolidierung und die Behandlung von Firmenwerten erfolgen analog der Vorgehensweise bei der Einbeziehung von Tochterunternehmen.

Unternehmen, auf die ein maßgeblicher Einfluss ausgeübt werden kann (asoziierte Unternehmen), werden nach der Equity-Methode in Form der Buchwertmethode bewertet. Vorhandene Firmenwerte werden unter den Beteiligungen an assoziierten Unternehmen ausgewiesen.

Die Umsätze, die sonstigen betrieblichen Erträge und die Aufwendungen sowie Forderungen und Verbindlichkeiten bzw. Rückstellungen zwischen den konsolidierten Unternehmen werden eliminiert. Zwischenergebnisse aus konzerninternen Lieferungen und Leistungen, die nicht durch Veräußerung an Dritte realisiert sind, werden herausgerechnet.

## SEGMENTBERICHTERSTATTUNG

### 10 Segmentberichterstattung

#### Segmente nach Unternehmensbereichen

|                                              | BRIEF              |         | EXPRESS            |        | GLOBAL FORWARDING, FREIGHT |        | SUPPLY CHAIN       |         | Corporate Center/Andere |        | Konsolidierung     |        | Fortgeführte Geschäftsbereiche |         | Aufgegebene Geschäftsbereiche |      |
|----------------------------------------------|--------------------|---------|--------------------|--------|----------------------------|--------|--------------------|---------|-------------------------|--------|--------------------|--------|--------------------------------|---------|-------------------------------|------|
|                                              | 2009 <sup>1)</sup> | 2010    | 2009 <sup>1)</sup> | 2010   | 2009 <sup>1)</sup>         | 2010   | 2009 <sup>1)</sup> | 2010    | 2009                    | 2010   | 2009 <sup>1)</sup> | 2010   | 2009                           | 2010    | 2009                          | 2010 |
| 1. Jan. bis 31. Dez.                         | 2009 <sup>1)</sup> | 2010    | 2009 <sup>1)</sup> | 2010   | 2009 <sup>1)</sup>         | 2010   | 2009 <sup>1)</sup> | 2010    | 2009                    | 2010   | 2009 <sup>1)</sup> | 2010   | 2009                           | 2010    | 2009                          | 2010 |
| Außenumsatz                                  | 13.777             | 13.700  | 9.635              | 10.788 | 10.630                     | 13.738 | 12.087             | 13.184  | 72                      | 71     | 0                  | 0      | 46.201                         | 51.481  | 1.634                         | 0    |
| Innenumsatz                                  | 135                | 121     | 282                | 323    | 613                        | 603    | 96                 | 117     | 1.455                   | 1.231  | -2.581             | -2.395 | 0                              | 0       | 0                             | 0    |
| Umsatz gesamt                                | 13.912             | 13.821  | 9.917              | 11.111 | 11.243                     | 14.341 | 12.183             | 13.301  | 1.527                   | 1.302  | -2.581             | -2.395 | 46.201                         | 51.481  | 1.634                         | 0    |
| Ergebnis der betrieblichen Tätigkeit (EBIT)  | 1.391              | 1.118   | -790               | 497    | 174                        | 383    | -216               | 233     | -328                    | -395   | 0                  | -1     | 231                            | 1.835   | -24                           | 0    |
| Ergebnis aus assoziierten Unternehmen        | 2                  | 0       | -1                 | 0      | 8                          | 4      | 0                  | 0       | 19                      | 52     | 0                  | 0      | 28                             | 56      | 0                             | 0    |
| Segmentvermögen                              | 3.665              | 3.891   | 8.295              | 8.323  | 6.665                      | 7.727  | 5.706              | 6.030   | 1.271                   | 1.191  | -257               | -132   | 25.345                         | 27.030  | 0                             | 0    |
| Anteile an assoziierten Unternehmen          | 24                 | 8       | 31                 | 28     | 12                         | 15     | 0                  | 0       | 1.705                   | 1.796  | 0                  | 0      | 1.772                          | 1.847   | 0                             | 0    |
| Segmentverbindlichkeiten <sup>2)</sup>       | 2.334              | 2.436   | 2.795              | 2.525  | 2.288                      | 2.777  | 2.743              | 2.942   | 1.123                   | 1.177  | -330               | -187   | 10.953                         | 11.670  | 0                             | 0    |
| Capex                                        | 338                | 445     | 370                | 286    | 92                         | 102    | 195                | 215     | 176                     | 214    | 0                  | 0      | 1.171                          | 1.262   | 7                             | 0    |
| Planmäßige Abschreibungen                    | 332                | 306     | 367                | 349    | 114                        | 98     | 301                | 294     | 242                     | 191    | 0                  | 0      | 1.356                          | 1.238   | 0                             | 0    |
| Wertminderungen                              | 0                  | 17      | 116                | 24     | 0                          | 0      | 91                 | 4       | 57                      | 13     | 0                  | 0      | 264                            | 58      | 0                             | 0    |
| Abschreibungen gesamt                        | 332                | 323     | 483                | 373    | 114                        | 98     | 392                | 298     | 299                     | 204    | 0                  | 0      | 1.620                          | 1.296   | 0                             | 0    |
| Sonstige nicht zahlungswirksame Aufwendungen | 433                | 365     | 1.089              | 792    | 142                        | 73     | 342                | 152     | 126                     | 58     | 0                  | 0      | 2.132                          | 1.440   | 114                           | 0    |
| Mitarbeiter <sup>3)</sup>                    | 147.897            | 146.365 | 97.985             | 88.384 | 41.763                     | 41.729 | 134.259            | 131.032 | 14.747                  | 13.764 | 0                  | 0      | 436.651                        | 421.274 | 0                             | 0    |

#### Informationen über geografische Regionen

|                             | Deutschland        |        | Europa ohne Deutschland |        | Amerikas           |       | Asien/Pazifik      |       | Übrige Regionen    |       | Fortgeführte Geschäftsbereiche |        | Aufgegebene Geschäftsbereiche |      |
|-----------------------------|--------------------|--------|-------------------------|--------|--------------------|-------|--------------------|-------|--------------------|-------|--------------------------------|--------|-------------------------------|------|
|                             | 2009 <sup>1)</sup> | 2010   | 2009 <sup>1)</sup>      | 2010   | 2009 <sup>1)</sup> | 2010  | 2009 <sup>1)</sup> | 2010  | 2009 <sup>1)</sup> | 2010  | 2009                           | 2010   | 2009                          | 2010 |
| 1. Jan. bis 31. Dez.        | 2009 <sup>1)</sup> | 2010   | 2009 <sup>1)</sup>      | 2010   | 2009 <sup>1)</sup> | 2010  | 2009 <sup>1)</sup> | 2010  | 2009 <sup>1)</sup> | 2010  | 2009                           | 2010   | 2009                          | 2010 |
| Außenumsatz <sup>1)</sup>   | 16.269             | 16.527 | 15.968                  | 16.951 | 7.099              | 8.888 | 5.272              | 7.147 | 1.593              | 1.968 | 46.201                         | 51.481 | 1.634                         | 0    |
| Langfristige Vermögenswerte | 3.837              | 4.085  | 7.672                   | 7.198  | 3.105              | 3.261 | 2.932              | 3.231 | 299                | 329   | 17.845                         | 18.104 | 0                             | 0    |
| Capex                       | 635                | 733    | 300                     | 174    | 123                | 210   | 78                 | 94    | 35                 | 51    | 1.171                          | 1.262  | 7                             | 0    |

1) Angepasste Vorjahreszahlen

2) Inklusive unverzinslicher Rückstellungen

3) Im Durchschnitt (Teilzeitkräfte auf Vollzeitkräfte umgerechnet)

#### 10.1 Erläuterungen zur Segmentberichterstattung

Deutsche Post DHL berichtet über vier operative Segmente, die entsprechend der Art der angebotenen Produkte und Dienstleistungen, Marken, Vertriebswege und Kundenprofile eigenständig von segmentverantwortlichen Gremien geführt werden. Die Bestimmung von Unternehmensbestandteilen als Geschäftssegment basiert auf der Existenz von ergebnisverantwortlichen Segmentmanagern, die direkt an das oberste Führungsgremium von Deutsche Post DHL berichten.

Der Außenumsatz repräsentiert den Umsatz der Unternehmensbereiche mit Konzernexternen. Der Innenumsatz zeigt die Umsätze mit anderen Unternehmensbereichen. Existieren für intern angebotene Dienstleistungen oder Produkte vergleich-

bare externe Marktpreise, werden diese Marktpreise oder marktorientierte Preise als interner Verrechnungspreis herangezogen (At-Arm's-Length-Prinzip). Den Verrechnungspreisen für nicht marktfähige Leistungen liegen grundsätzlich inkrementelle Kosten zugrunde.

Die Aufwendungen für die in den IT-Service-Centern erbrachten IT-Dienstleistungen werden verursachungsgemäß den Unternehmensbereichen belastet. Zusätzliche Aufwendungen, die aus der Universaldienstleistungsverpflichtung für Postdienstleistungen der Deutsche Post AG (flächendeckendes Filialnetz, werktägliche Zustellung) und der Übernahme der Vergütungsstruktur als Rechtsnachfolgerin der Deutschen Bundespost resultieren, werden im Unternehmensbereich BRIEF berücksichtigt.

In Übereinstimmung mit der internen Berichterstattung wird die Capital Expenditure (Capex) ausgewiesen. Hierbei werden die Zugänge in immaterielle Vermögenswerte ohne Firmenwerte und Sachanlagen ausgewiesen. Die Abschreibungen betreffen das den einzelnen Unternehmensbereichen zugeordnete Segmentvermögen. Zu den sonstigen nicht zahlungswirksamen Aufwendungen zählen im Wesentlichen die Aufwendungen aus der Bildung von Rückstellungen.

Der dominierenden Organisationsstruktur des Konzerns entsprechend, orientiert sich die primäre Berichterstattung an den Unternehmensbereichen. Folgende Unternehmensbereiche werden im Konzern unterschieden:

## 10.2 Segmente nach Unternehmensbereichen

### BRIEF

Neben dem Transport und der Zustellung schriftlicher Kommunikation versteht sich der Unternehmensbereich BRIEF als umfassender Dienstleister für das Management schriftlicher Mitteilungen. Er ist in folgende Geschäftsfelder aufgeteilt: Brief Kommunikation, Dialog Marketing, Presse Services, Mehrwertleistungen, Paket Deutschland, Filialen, Global Mail und Renten-Service. Zum 1. Juli 2010 wurden wesentliche Teile von Williams Lea Deutschland aus dem Unternehmensbereich SUPPLY CHAIN in den Unternehmensbereich BRIEF verlagert. Hierzu wird im neu geschaffenen Geschäftsfeld Mehrwertleistungen berichtet. Die Vorjahreszahlen wurden entsprechend angepasst.

### EXPRESS

Der Unternehmensbereich EXPRESS bietet Geschäfts- und Privatkunden internationale und nationale Kurier- und Expressdienstleistungen an. Er ist in die Geschäftsfelder Express Europe, Express Americas, Express Asia Pacific und Express EEMEA eingeteilt. Um den unterschiedlichen Anforderungen der Express- und Freight-Kunden besser gerecht zu werden, wurde zum 1. Januar 2010 das nationale Frachtgeschäft von DHL Express Schweden in DHL Freight Schweden überführt. Die Vorjahreszahlen wurden entsprechend angepasst.

### GLOBAL FORWARDING, FREIGHT

Der Unternehmensbereich GLOBAL FORWARDING, FREIGHT beinhaltet den Schienen-, Straßen-, Luft- und Seetransport von Gütern. Die Geschäftsfelder heißen Global Forwarding und Freight. Um den unterschiedlichen Anforderungen der Express- und Freight-Kunden besser gerecht zu werden, wurde zum 1. Januar 2010 das nationale Frachtgeschäft von DHL Express Schweden in DHL Freight Schweden überführt. Die Vorjahreszahlen wurden entsprechend angepasst.

### SUPPLY CHAIN

Der Unternehmensbereich ist spezialisiert auf Kontraktlogistik und bietet Lager- und Transportdienstleistungen sowie Mehrwertleistungen entlang der gesamten Lieferkette verschiedener Sektoren. Weiterhin werden Gesamtlösungen für das Informations- und Kommunikationsmanagement in Unternehmen angeboten. Die Geschäftsfelder umfassen Supply Chain sowie Williams Lea. Zum 1. Juli 2010 wurden wesentliche Teile von Williams Lea Deutschland aus dem Unternehmensbereich SUPPLY CHAIN in den Unternehmensbereich BRIEF verlagert. Die Vorjahreszahlen wurden entsprechend angepasst.

Zusätzlich zu den oben genannten berichtspflichtigen Segmenten werden in der Segmentberichterstattung noch folgende Kategorien dargestellt:

### Corporate Center/Anderes

Das Sammelsegment umfasst die Global Business Services (GBS), das Corporate Center, Tätigkeiten aus dem nicht-operativen Bereich sowie andere Geschäftstätigkeiten. Das Ergebnis von GBS wird auf die operativen Segmente verteilt, Vermögen und Verbindlichkeiten verbleiben bei GBS (asymmetrische Verteilung).

### Konsolidierung

Die Daten zu den Unternehmensbereichen werden nach Konsolidierung der Beziehungen innerhalb der Unternehmensbereiche dargestellt. Die Beziehungen zwischen den Unternehmensbereichen werden in der Spalte Konsolidierung eliminiert.

### Aufgegebene Geschäftsbereiche

Die Deutsche Postbank Gruppe wird für die Monate Januar und Februar 2009 als aufgebener Geschäftsbereich ausgewiesen. Seit März 2009 werden die verbliebenen Anteile, die unter „Beteiligungen an assoziierten Unternehmen“ ausgewiesen werden, und das Ergebnis aus assoziierten Unternehmen in der Spalte „Corporate Center/Anderes“ berichtet.

## 10.3 Informationen über geografische Bereiche

Die wesentlichen geografischen Regionen, in denen der Konzern tätig ist, sind Deutschland, Europa, Amerikas, Asien/Pazifik und übrige Regionen. Für diese Regionen werden Außenumsätze, langfristige Vermögenswerte sowie die Capex dargestellt. Zur Erhöhung der Transparenz wurden in den Außenumsatzerlösen bisher enthaltene Managementallokationen aus den Regionen herausgerechnet. Weiterhin wurde die Zuordnung der langfristigen Vermögenswerte nach geografischen Regionen berichtigt. Die Anpassungen hatten keine Auswirkung auf die Konzernwerte. Die Vorjahreszahlen wurden entsprechend angepasst. Die Zuordnung der Umsätze, der Vermögenswerte sowie der Capex zu den einzelnen Regionen erfolgt nach dem Sitz der berichtenden Gesellschaft. Die langfristigen Vermögenswerte umfassen im Wesentlichen die immateriellen Vermögenswerte, Sachanlagen sowie sonstige langfristige Vermögenswerte.

## 10.4 Überleitung der Segmentzahlen

### Überleitung der Segment- auf Konzernzahlen

#### Überleitung

| MIO €                                        | Summe der berichts-<br>pflichtigen Segmente |         | Corporate Center/Anderes |        | Überleitung zum Konzern/<br>Konsolidierung |        | Konzernwert |         |
|----------------------------------------------|---------------------------------------------|---------|--------------------------|--------|--------------------------------------------|--------|-------------|---------|
|                                              | 2009 <sup>1)</sup>                          | 2010    | 2009                     | 2010   | 2009 <sup>1)</sup>                         | 2010   | 2009        | 2010    |
| Außenumsätze                                 | 46.129                                      | 51.410  | 72                       | 71     | 0                                          | 0      | 46.201      | 51.481  |
| Konzerninnenumsätze                          | 1.126                                       | 1.164   | 1.455                    | 1.231  | -2.581                                     | -2.395 | 0           | 0       |
| Umsatzerlöse                                 | 47.255                                      | 52.574  | 1.527                    | 1.302  | -2.581                                     | -2.395 | 46.201      | 51.481  |
| Sonstige betriebliche Erträge                | 1.766                                       | 1.859   | 1.528                    | 1.509  | -1.153                                     | -1.151 | 2.141       | 2.217   |
| Materialaufwand                              | -26.815                                     | -30.464 | -1.459                   | -1.408 | 2.500                                      | 2.399  | -25.774     | -29.473 |
| Personalaufwand                              | -16.099                                     | -15.726 | -940                     | -902   | 18                                         | 19     | -17.021     | -16.609 |
| Sonstiger betrieblicher Aufwand              | -4.227                                      | -4.920  | -685                     | -692   | 1.216                                      | 1.127  | -3.696      | -4.485  |
| Abschreibungen                               | -1.321                                      | -1.092  | -299                     | -204   | 0                                          | 0      | -1.620      | -1.296  |
| Ergebnis der betrieblichen Tätigkeit (EBIT)  | 559                                         | 2.231   | -328                     | -395   | 0                                          | -1     | 231         | 1.835   |
| Ergebnis aus assoziierten Unternehmen        | 9                                           | 4       | 19                       | 52     | 0                                          | 0      | 28          | 56      |
| Sonstiges Finanzergebnis                     | -                                           | -       | -                        | -      | -                                          | -      | 17          | 933     |
| Ertragsteuern                                | -                                           | -       | -                        | -      | -                                          | -      | -15         | -194    |
| Ergebnis aus aufgegebenen Geschäftsbereichen | -                                           | -       | -                        | -      | -                                          | -      | 432         | 0       |
| Konzernjahresergebnis                        | -                                           | -       | -                        | -      | -                                          | -      | 693         | 2.630   |
| davon entfielen auf                          |                                             |         |                          |        |                                            |        |             |         |
| Aktionäre der Deutsche Post AG               | -                                           | -       | -                        | -      | -                                          | -      | 644         | 2.541   |
| Nicht beherrschende Anteile                  | -                                           | -       | -                        | -      | -                                          | -      | 49          | 89      |

1) Anpassung von Vorjahreszahlen

Die folgende Tabelle zeigt die Überleitung des Gesamtvermögens von Deutsche Post DHL auf das Segmentvermögen. Dabei werden die finanziellen Vermögenswerte, die Ertragsteueransprüche, die latenten Steuern, die flüssigen Mittel und Zahlungsmitteläquivalente sowie weitere verzinsliche Bestandteile der Vermögenswerte in Abzug gebracht.

#### Überleitung Segmentvermögen

| MIO €                                                                                   | 2009 <sup>1)</sup> | 2010          |
|-----------------------------------------------------------------------------------------|--------------------|---------------|
| Bilanzsumme                                                                             | 34.738             | 37.763        |
| Als Finanzinvestition gehaltene Immobilien                                              | -32                | -37           |
| Langfristige finanzielle Vermögenswerte inkl. Beteiligungen an assoziierten Unternehmen | -3.220             | -5.040        |
| Sonstige langfristige Vermögenswerte                                                    | -323               | -387          |
| Aktive latente Steuern                                                                  | -668               | -973          |
| Ertragsteueransprüche                                                                   | -196               | -223          |
| Forderungen und sonstige Vermögenswerte                                                 | -29                | -35           |
| Kurzfristige finanzielle Vermögenswerte                                                 | -1.861             | -623          |
| Flüssige Mittel und Zahlungsmitteläquivalente                                           | -3.064             | -3.415        |
| <b>Segmentvermögen</b>                                                                  | <b>25.345</b>      | <b>27.030</b> |
| davon Corporate Center/Anderes                                                          | 1.271              | 1.191         |
| Summe der berichtspflichtigen Segmente                                                  | 24.331             | 25.971        |
| Konsolidierung                                                                          | -257               | -132          |

1) Anpassung von Vorjahreszahlen

Die folgende Tabelle zeigt die Überleitung der Gesamtverbindlichkeiten von Deutsche Post DHL auf die Segmentverbindlichkeiten. Dabei werden die verzinslichen Bestandteile der Rückstellungen und Verbindlichkeiten sowie die Ertragsteuerpflichtungen und latenten Steuern in Abzug gebracht.

#### Überleitung Segmentverbindlichkeiten

| MIO €                                  | 2009 <sup>1)</sup> | 2010          |
|----------------------------------------|--------------------|---------------|
| Bilanzsumme                            | 34.738             | 37.763        |
| Eigenkapital                           | -8.273             | -10.696       |
| <b>Konzernschulden</b>                 | <b>26.465</b>      | <b>27.067</b> |
| Langfristige Rückstellungen            | -7.031             | -7.168        |
| Langfristige Verbindlichkeiten         | -7.071             | -6.676        |
| Kurzfristige Rückstellungen            | -344               | -298          |
| Kurzfristige Verbindlichkeiten         | -1.066             | -1.255        |
| <b>Segmentverbindlichkeiten</b>        | <b>10.953</b>      | <b>11.670</b> |
| davon Corporate Center/Anderes         | 1.123              | 1.177         |
| Summe der berichtspflichtigen Segmente | 10.160             | 10.680        |
| Konsolidierung                         | -330               | -187          |

1) Anpassung von Vorjahreszahlen

## ERLÄUTERUNGEN ZUR GEWINN-UND- VERLUST-RECHNUNG

### 11 Umsatzerlöse

| MIO €        | 2009   | 2010   |
|--------------|--------|--------|
| Umsatzerlöse | 46.201 | 51.481 |

Im Geschäftsjahr 2010, wie auch im Vorjahr, entstanden keine Umsatzerlöse, denen ein Tauschgeschäft zugrunde lag. Die Umsatzerlöse lagen in fast allen Bereichen über dem Vorjahresniveau.

Die weitere Aufteilung der Umsatzerlöse nach Unternehmensbereichen sowie die Zuordnung der Umsatzerlöse zu geografischen Regionen ist der Segmentberichterstattung zu entnehmen.

### 12 Sonstige betriebliche Erträge

| MIO €                                                        | 2009         | 2010         |
|--------------------------------------------------------------|--------------|--------------|
| Erträge aus der Auflösung von Rückstellungen                 | 562          | 509          |
| Erträge aus Währungsumrechnungsdifferenzen                   | 161          | 197          |
| Erlöse aus Leasing, Verpachtung und Vermietung               | 172          | 173          |
| Versicherungserträge                                         | 171          | 169          |
| Erträge aus Vergütungen und Erstattungen                     | 124          | 142          |
| Erträge aus aktivierten Eigenleistungen                      | 138          | 124          |
| Erträge aus der Neubewertung von Verbindlichkeiten           | 77           | 111          |
| Provisionserträge                                            | 69           | 93           |
| Werterhöhungen Forderungen und sonstige Vermögenswerte       | 81           | 81           |
| Abgangserträge aus dem Anlagevermögen                        | 40           | 55           |
| Erträge aus periodenfremden Abrechnungen                     | 34           | 49           |
| Erträge aus der Ausbuchung von Verbindlichkeiten             | 38           | 42           |
| Erträge aus Schadenersatz                                    | 22           | 21           |
| Erträge aus Derivaten                                        | 90           | 16           |
| Erträge aus Zahlungseingängen auf abgeschriebene Forderungen | 11           | 11           |
| Zuschüsse                                                    | 7            | 10           |
| Erträge aus handelsbezogenen Versicherungsrabatten           | 7            | 4            |
| Übrige Erträge                                               | 337          | 410          |
| <b>Sonstige betriebliche Erträge</b>                         | <b>2.141</b> | <b>2.217</b> |

Die sonstigen betrieblichen Erträge lagen leicht über dem Niveau des Vorjahres. Die Erträge aus der Auflösung von Rückstellungen betreffen wie im Vorjahr im Wesentlichen die Restrukturierung des us-Expressgeschäfts.

In den übrigen Erträgen ist eine Vielzahl von kleineren Einzel-sachverhalten enthalten.

### 13 Materialaufwand

| MIO €                                                                          | 2009          | 2010          |
|--------------------------------------------------------------------------------|---------------|---------------|
| <b>Aufwendungen für Roh-, Hilfs- und Betriebsstoffe und für bezogene Waren</b> |               |               |
| Heiz- und Kraftstoffe                                                          | 736           | 744           |
| Treibstoff Flugzeuge                                                           | 454           | 690           |
| Packmaterial                                                                   | 317           | 308           |
| Bezogene Handelswaren                                                          | 1.311         | 1.512         |
| Büromaterialien                                                                | 68            | 72            |
| Ersatzteile und Reparaturmaterialien                                           | 83            | 93            |
| Sonstige Aufwendungen                                                          | 83            | 91            |
|                                                                                | 3.052         | 3.510         |
| <b>Aufwendungen für bezogene Leistungen</b>                                    |               |               |
| Transportkosten                                                                | 14.791        | 17.823        |
| Leistungen für Fremdarbeitskräfte                                              | 1.852         | 1.871         |
| Aufwendungen aus unkündbaren Mietverträgen                                     | 1.820         | 1.693         |
| Aufwendungen aus kündbaren Mietverträgen                                       | 405           | 453           |
| Andere Aufwendungen aus Mietverträgen (Nebenkosten)                            | 145           | 184           |
| Aufwendungen für Instandhaltungen                                              | 957           | 969           |
| IT-Leistungen                                                                  | 667           | 652           |
| Aufwendungen für Provisionen                                                   | 341           | 411           |
| Aufwendungen aus Nutzung der Postbank-Filialen                                 | 519           | 484           |
| Sonstige Aufwendungen für bezogene Leistungen                                  | 1.225         | 1.423         |
|                                                                                | 22.722        | 25.963        |
| <b>Materialaufwand</b>                                                         | <b>25.774</b> | <b>29.473</b> |

Die Erhöhung des Materialaufwands beruht zum einen auf den gestiegenen Flugzeugtreibstoffkosten, zum anderen auf gestiegenen Transportkosten infolge der Ausweitung der Geschäftsaktivitäten.

In den sonstigen Aufwendungen ist eine Vielzahl von Einzel-sachverhalten enthalten.

### 14 Personalaufwand/Mitarbeiter

| MIO €                                                | 2009          | 2010          |
|------------------------------------------------------|---------------|---------------|
| Entgelte                                             | 13.160        | 13.271        |
| davon Aufwendungen aus Share Matching Scheme         | 5             | 20            |
| davon Aufwendungen aus SAR-Plan 2006/LTIP            | 11            | 21            |
| Soziale Abgaben                                      | 2.040         | 1.973         |
| Aufwendungen für Altersversorgung                    | 911           | 947           |
| Aufwendungen für sonstige Leistungen an Arbeitnehmer | 312           | 275           |
| Aufwendungen für Abfindungen                         | 598           | 143           |
| <b>Personalaufwand</b>                               | <b>17.021</b> | <b>16.609</b> |

Die Verringerung des Personalaufwands resultiert im Wesentlichen aus den geringeren Aufwendungen für Abfindungszahlungen. Das Vorjahr war hier wesentlich beeinflusst durch die Restrukturierungsrückstellungen in den USA und durch die Arcandor-Insolvenz.

Den überwiegenden Teil der Aufwendungen für Personal stellen die Entgelte dar, die die Löhne, Gehälter, Bezüge und alle sonstigen Vergütungen für im Geschäftsjahr geleistete Arbeiten der Mitarbeiter des Konzerns umfassen. Unter den sozialen Abgaben werden die vom Unternehmen zu tragenden gesetzlichen Pflichtabgaben, insbesondere die Beiträge zur Sozialversicherung, ausgewiesen.

Die Aufwendungen für Altersversorgung umfassen Zuführungen zu den Rückstellungen für Pensionen und ähnliche Verpflichtungen sowie Beiträge zur beitragsorientierten Altersversorgungssystemen. Nähere Angaben finden sich unter [Textziffer 7 und 44](#).

Im Berichtsjahr waren im Konzern nach Personengruppen differenziert durchschnittlich beschäftigt:

#### Mitarbeiter

|                    | 2009           | 2010           |
|--------------------|----------------|----------------|
| Arbeitnehmer       | 435.072        | 413.830        |
| Beamte             | 49.691         | 46.866         |
| Auszubildende      | 3.755          | 3.775          |
| <b>Mitarbeiter</b> | <b>488.518</b> | <b>464.471</b> |

Für Gesellschaften, die während des Geschäftsjahres hinzugekommen oder abgegangen sind, wurde das Personal zeitanteilig einbezogen. Auf Vollzeitkräfte umgerechnet betrug die Zahl der Beschäftigten zum 31. Dezember 2010 418.946 Personen (31. Dezember 2009: 424.686 Personen). Die Mitarbeiterzahl der einbezogenen Gemeinschaftsunternehmen betrug quotiert 1.622 (Vorjahr: 1.589).

## 15 Abschreibungen

MIO €

|                                                                                 | 2009         | 2010         |
|---------------------------------------------------------------------------------|--------------|--------------|
| Abschreibungen auf immaterielle Vermögenswerte ohne Wertminderungen Firmenwerte | 421          | 288          |
| Abschreibungen auf Sachanlagen                                                  |              |              |
| Grundstücke und Bauten                                                          | 282          | 190          |
| Technische Anlagen und Maschinen                                                | 287          | 228          |
| Andere Anlagen, Betriebs- und Geschäftsausstattung, Fuhrpark                    | 478          | 432          |
| Flugzeuge                                                                       | 151          | 158          |
| Geleistete Anzahlungen                                                          | 1            | 0            |
|                                                                                 | 1.199        | 1.008        |
|                                                                                 | 1.620        | 1.296        |
| Wertminderungen Firmenwerte                                                     | 0            | 0            |
| <b>Abschreibungen</b>                                                           | <b>1.620</b> | <b>1.296</b> |

Die Abschreibungen sind gegenüber dem Vorjahr um 324 MIO € auf 1.296 MIO € gesunken. Die Verringerung steht unter anderem im Zusammenhang mit der Restrukturierung des US-Expressgeschäfts im Vorjahr, die einen Teil der Abschreibungen vorweggenommen hat.

In den Abschreibungen sind 58 MIO € (Vorjahr: 264 MIO €) Wertminderungen enthalten. Auf Segmentebene stellen sich die Wertminderungen der langfristigen Vermögenswerte (ohne Wertminderungen Firmenwerte) wie folgt dar:

#### Wertminderungen des langfristigen Vermögens

|                                        | 2009       | 2010      |
|----------------------------------------|------------|-----------|
| <b>BRIEF</b>                           | <b>0</b>   | <b>17</b> |
| Immaterielle Vermögenswerte            | 0          | 4         |
| Sachanlagen                            | 0          | 13        |
| davon technische Anlagen und Maschinen | 0          | 10        |
| <b>EXPRESS</b>                         | <b>116</b> | <b>24</b> |
| Immaterielle Vermögenswerte            | 6          | 1         |
| Sachanlagen                            | 110        | 23        |
| davon Grundstücke und Bauten           | 36         | 1         |
| davon Flugzeuge                        | 24         | 21        |
| <b>SUPPLY CHAIN</b>                    | <b>91</b>  | <b>4</b>  |
| Immaterielle Vermögenswerte            | 75         | 1         |
| Sachanlagen                            | 16         | 3         |
| davon Grundstücke und Bauten           | 6          | 2         |
| <b>Corporate Center/Anderes</b>        | <b>57</b>  | <b>13</b> |
| Sachanlagen                            | 57         | 13        |
| davon Grundstücke und Bauten           | 57         | 13        |
| <b>Wertminderungen</b>                 | <b>264</b> | <b>58</b> |

Im Vorjahr waren die Wertminderungen mit 92 MIO € durch die Arcandor-Insolvenz bedingt. Weitere 23 MIO € betrafen Wertminderungen auf Sachanlagen im US-Expressgeschäft sowie 24 MIO € Wertminderungen auf Flugzeuge.



## 16 Sonstige betriebliche Aufwendungen

| MIO €                                                           | 2009         | 2010         |
|-----------------------------------------------------------------|--------------|--------------|
| Aufwendungen aus Abgängen von Vermögenswerten                   | 236          | 421          |
| Sonstige betriebliche Steuern                                   | 273          | 376          |
| Reise- und Bildungskosten                                       | 308          | 323          |
| Fremdleistungen für Reinigung, Transport, Überwachung           | 280          | 287          |
| Aufwendungen für Telekommunikation                              | 236          | 249          |
| Garantie-, Ersatzleistungen und Entschädigungen                 | 290          | 228          |
| Wertberichtigungen kurzfristiges Vermögen                       | 328          | 217          |
| Rechtskosten                                                    | 97           | 207          |
| Aufwendungen aus Währungsumrechnungsdifferenzen                 | 163          | 195          |
| Beratungskosten                                                 | 184          | 192          |
| Büromaterial                                                    | 177          | 183          |
| Aufwendungen für Werbung                                        | 82           | 164          |
| Freiwillige soziale Leistungen                                  | 142          | 140          |
| Repräsentations- und Bewirtungskosten                           | 110          | 132          |
| Aufwendungen aus Versicherungen                                 | 112          | 124          |
| Aufwendungen für sonstige Öffentlichkeitsarbeit                 | 101          | 117          |
| Zuführung zu Rückstellungen                                     | 51           | 116          |
| Abrechnung mit der Bundesanstalt für Post und Telekommunikation | 81           | 78           |
| Aufwendungen aus Derivaten                                      | 34           | 71           |
| Aufwendungen für Provisionsleistungen                           | 70           | 65           |
| Aufwendungen für Public Relations und Kundenbetreuung           | 56           | 65           |
| Beiträge und Gebühren                                           | 49           | 41           |
| Prüfungskosten                                                  | 31           | 30           |
| Kosten des Geldverkehrs                                         | 24           | 30           |
| Spenden                                                         | 2            | 19           |
| Periodenfremde sonstige betriebliche Aufwendungen               | 32           | 17           |
| Übrige Aufwendungen                                             | 147          | 398          |
| <b>Sonstige betriebliche Aufwendungen</b>                       | <b>3.696</b> | <b>4.485</b> |

Der Anstieg der Aufwendungen aus Abgängen von Vermögenswerten ist im Wesentlichen durch die Entkonsolidierungsverluste der Geschäftsverkäufe in Frankreich, England und Österreich bedingt, [Textziffer 2](#).

In den übrigen Aufwendungen ist eine Vielzahl von kleineren Einzelsachverhalten enthalten.

Andere Steuern als die von Einkommen und Ertrag werden entweder unter den zugehörigen Aufwandsposten oder, soweit eine individuelle Zuordnung nicht möglich ist, unter den sonstigen betrieblichen Aufwendungen ausgewiesen.

## 17 Ergebnis aus assoziierten Unternehmen

| MIO €                                 | 2009 | 2010 |
|---------------------------------------|------|------|
| Ergebnis aus assoziierten Unternehmen | 28   | 56   |

Aus den Beteiligungen an Unternehmen, auf die ein maßgeblicher Einfluss ausgeübt werden kann und die nach der Equity-Methode zu konsolidieren sind, resultiert ein Beitrag zum Finanzergebnis in Höhe von 56 MIO € (Vorjahr: 28 MIO €). Davon entfallen 52 MIO € (Vorjahr: 19 MIO €) auf die Deutsche Postbank AG, die seit März 2009 als assoziiertes Unternehmen berücksichtigt wird.

## 18 Sonstiges Finanzergebnis

| MIO €                                                                | 2009      | 2010       |
|----------------------------------------------------------------------|-----------|------------|
| <b>Sonstige Finanzerträge</b>                                        |           |            |
| Zinserträge                                                          | 106       | 52         |
| Erträge aus sonstigen Beteiligungen und finanziellen Vermögenswerten | 2         | 7          |
| Sonstige Finanzerträge                                               | 1.777     | 2.192      |
|                                                                      | 1.885     | 2.251      |
| <b>Sonstige Finanzaufwendungen</b>                                   |           |            |
| Zinsaufwendungen                                                     | -820      | -712       |
| davon aus der Aufzinsung von Pensions- und sonstigen Rückstellungen  | -439      | -362       |
| Abschreibungen auf finanzielle Vermögenswerte                        | -33       | -102       |
| Sonstige Finanzaufwendungen                                          | -1.004    | -521       |
|                                                                      | -1.857    | -1.335     |
| Fremdwährungsergebnis                                                | -11       | 17         |
| <b>Sonstiges Finanzergebnis</b>                                      | <b>17</b> | <b>933</b> |

Das sonstige Finanzergebnis wird im Wesentlichen beeinflusst durch die Effekte des beabsichtigten Postbank-Verkaufs und enthält die Aufwendungen aus der Verzinsung der Umtauschanleihe in Höhe von 125 MIO € (Vorjahr: 103 MIO €) und der Barsicherheit mit 48 MIO € (Vorjahr: 39 MIO €), das Ergebnis aus der Erfassung des Forward aus der Veräußerung des Postbank-Anteils in Höhe von 1.653 MIO € sowie das Ergebnis der Bewertungsmaßnahmen der Optionen der dritten Tranche in Höhe von 89 MIO € (Vorjahr: 647 MIO €), [Textziffer 3](#).

Weiterhin sind in den Abschreibungen auf finanzielle Vermögenswerte 52 MIO € Wertminderungen im Bereich Corporate Center/Anderes auf den Beteiligungsansatz der Deutsche Postbank AG aufgrund des gesunkenen Aktienkurses enthalten sowie weitere 16 MIO € Wertminderung im Segment BRIEF auf die at-Equity bilanzierte Unipost Servicios Generales S.L., Spanien.

Im Finanzergebnis sind Zinserträge in Höhe von 52 MIO € (Vorjahr: 106 MIO €) sowie Zinsaufwendungen in Höhe von 712 MIO € (Vorjahr: 820 MIO €) enthalten. Sie resultieren aus finanziellen Vermögenswerten und Verbindlichkeiten, die nicht erfolgswirksam zum beizulegenden Zeitwert bewertet wurden.

## 19 Ertragsteuern

| MIO €                                                                         | 2009       | 2010        |
|-------------------------------------------------------------------------------|------------|-------------|
| Laufende Ertragsteueraufwendungen                                             | -324       | -467        |
| Laufende Ertragsteuererstattungen                                             | 40         | 5           |
|                                                                               | -284       | -462        |
| Latenter Steueraufwand (Vorjahr: Steuerertrag) aus temporären Wertdifferenzen | 157        | -94         |
| Latenter Steuerertrag aus steuerlichen Verlustvorträgen                       | 112        | 362         |
|                                                                               | 269        | 268         |
| <b>Ertragsteuern</b>                                                          | <b>-15</b> | <b>-194</b> |

Ausgehend vom Konzernjahresergebnis vor Ertragsteuern und der rechnerischen Ertragsteuer gestaltet sich die Überleitung auf den tatsächlichen Ertragsteueraufwand wie folgt:

### Überleitungsrechnung

| MIO €                                                                                                                                | 2009       | 2010        |
|--------------------------------------------------------------------------------------------------------------------------------------|------------|-------------|
| Ergebnis aus fortgeführten Geschäftsbereichen vor Ertragsteuern                                                                      | 276        | 2.824       |
| Rechnerische Ertragsteuer                                                                                                            | -82        | -842        |
| Auf Initial Differences nicht gebildete aktive latente Steuern                                                                       | 304        | 27          |
| Auf steuerliche Verlustvorträge und temporäre Differenzen nicht gebildete aktive latente Steuern inländischer Konzerngesellschaften  | -280       | 430         |
| Auf steuerliche Verlustvorträge und temporäre Differenzen nicht gebildete aktive latente Steuern ausländischer Konzerngesellschaften | -130       | -77         |
| Effekt für laufende Steuern aus Vorjahren                                                                                            | 5          | -75         |
| Steuerfreie Erträge und nicht abziehbare Ausgaben                                                                                    | 143        | 311         |
| Steuersatzdifferenzen ausländischer Unternehmen                                                                                      | 27         | 32          |
| Sonstiges                                                                                                                            | -2         | 0           |
| <b>Tatsächliche Ertragsteuer aus fortgeführten Geschäftsbereichen</b>                                                                | <b>-15</b> | <b>-194</b> |

Der Unterschied zwischen dem rechnerischen Steueraufwand und dem tatsächlichen Steueraufwand gründet auf temporären Differenzen zwischen der IFRS- und der Steuerbilanz der Deutsche Post AG, die aus abweichenden Wertansätzen in der steuerlichen Eröffnungsbilanz zum 1. Januar 1995 resultieren (Initial Differences). Gemäß IAS 12.15 (b) und IAS 12.24 (b) hat der Konzern keine aktiven latenten Steuern auf diese temporären Differenzen, die im Wesentlichen das Sachanlagevermögen, die Pensionsrückstellungen und ähnliche Verpflichtungen betreffen,

gebildet. Die verbleibenden temporären Differenzen zwischen den IFRS-Bilanzansätzen und den Wertansätzen basierend auf der steuerlichen Eröffnungsbilanz belaufen sich zum 31. Dezember 2010 noch auf 0,9 MRD € (Vorjahr: 1,0 MRD €).

Die Effekte aus auf steuerliche Verlustvorträge und temporäre Differenzen nicht gebildeten aktiven latenten Steuern inländischer Konzerngesellschaften betreffen im Wesentlichen die Deutsche Post AG und deren Organgesellschaften. Effekte aus auf steuerliche Verlustvorträge und temporäre Differenzen nicht gebildeten aktiven latenten Steuern ausländischer Gesellschaften resultieren überwiegend aus der Region Amerikas. Effekte aus der Hingabe von konzerninternen Darlehen wurden in den in- und ausländischen Effekten aus auf steuerliche Verlustvorträge und temporäre Differenzen nicht gebildeten aktiven latenten Steuern in Höhe von 733 MIO € saldiert.

Die Effekte aus auf steuerliche Verlustvorträge und temporäre Differenzen nicht gebildete aktive latente Steuern beinhalten in Höhe von 714 MIO € (Vorjahr: 128 MIO €) die Minderung des tatsächlichen Ertragsteueraufwands aufgrund der Nutzung von bisher nicht mit aktiven latenten Steuern belegten steuerlichen Verlustvorträgen und temporären Differenzen. Des Weiteren minderte sich der latente Steueraufwand aufgrund des Ansatzes bisher nicht aktivierter latenter Steuern auf steuerliche Verlustvorträge und abzugsfähiger temporärer Differenz einer früheren Periode um 399 MIO € (Vorjahr: 164 MIO €). Effekte aus nicht gebildeten aktiven latenten Steuern entfallen in Höhe von 634 MIO € (Vorjahr: 648 MIO € Abwertung) auf die Wertberichtigung eines latenten Steueranspruchs. Die übrigen Effekte aus nicht gebildeten aktiven latenten Steuern betreffen im Wesentlichen Verlustvorträge, auf die keine latenten Steuern angesetzt wurden.

Für Gesellschaften, die im Vorjahr ein negatives Ergebnis gezeigt haben, wurde ein latenter Steueranspruch in Höhe von 759 MIO € (Vorjahr: 472 MIO €) aktiviert, da die Realisierung des Steueranspruchs aufgrund der steuerlichen Ergebnisplanung insoweit wahrscheinlich ist.

Die steuerfreien Erträge und nicht abziehbaren Aufwendungen beinhalten im Wesentlichen den Effekt durch den beabsichtigten Postbank-Verkauf.

Im Geschäftsjahr 2010 ergab sich wie im Vorjahr bei inländischen Konzerngesellschaften kein Effekt aus einer Steuersatzänderung. Die Steuersatzänderung in einigen ausländischen Steuerjurisdiktionen führte nicht zu wesentlichen Effekten.

Im tatsächlichen Steueraufwand sind periodenfremde Steueraufwendungen von in- und ausländischen Unternehmen in Höhe von 75 MIO € (Vorjahr: Ertrag 5 MIO €) enthalten.

Die folgende Tabelle stellt die steuerlichen Effekte auf die Bestandteile des sonstigen Ergebnisses (Other Comprehensive Income) dar:

#### Sonstiges Ergebnis

| MIO €                                     | Vor Steuern | Ertragsteuern | Nach Steuern |
|-------------------------------------------|-------------|---------------|--------------|
| <b>2010</b>                               |             |               |              |
| Währungsumrechnungsrücklage               | 542         | 0             | 542          |
| Sonstige Veränderungen in Gewinnrücklagen | 1           | 0             | 1            |
| Hedge-Rücklage gemäß IAS 39               | 42          | 2             | 44           |
| Neubewertungsrücklage gemäß IAS 39        | -10         | -1            | -11          |
| Neubewertungsrücklage gemäß IFRS 3        | -1          | 0             | -1           |
| Anteile assoziierter Unternehmen          | 93          | 0             | 93           |
| <b>Sonstiges Ergebnis</b>                 | <b>667</b>  | <b>1</b>      | <b>668</b>   |
| <b>2009</b>                               |             |               |              |
| Währungsumrechnungsrücklage               | 196         | 0             | 196          |
| Hedge-Rücklage gemäß IAS 39               | -46         | 29            | -17          |
| Neubewertungsrücklage gemäß IAS 39        | 110         | -29           | 81           |
| Anteile assoziierter Unternehmen          | 123         | 0             | 123          |
| <b>Sonstiges Ergebnis</b>                 | <b>383</b>  | <b>0</b>      | <b>383</b>   |

#### 20 Ergebnis aus fortgeführten Geschäftsbereichen

Das Ergebnis aus fortgeführten Geschäftsbereichen betrug im Geschäftsjahr 2010 2.630 MIO € (Vorjahr: 261 MIO €).

#### 21 Ergebnis aus aufgegebenen Geschäftsbereichen

Bis Februar 2009 wurde das Ergebnis der Deutschen Postbank Gruppe gemäß IFRS 5 in der Gewinn- und -Verlust-Rechnung unter „Ergebnis aus aufgegebenen Geschäftsbereichen“ dargestellt. Seit März 2009 wird das Ergebnis der verbliebenen Anteile an der Deutschen Postbank Gruppe unter „Ergebnis aus assoziierten Unternehmen“ ausgewiesen.

| MIO €                                                            | 2009       | 2010     |
|------------------------------------------------------------------|------------|----------|
| Gesamte betriebliche Erträge                                     | 1.607      | 0        |
| Gesamte betriebliche Aufwendungen                                | -1.631     | 0        |
| <b>Ergebnis der betrieblichen Tätigkeit (EBIT)</b>               | <b>-24</b> | <b>0</b> |
| Finanzergebnis                                                   | -13        | 0        |
| <b>Ergebnis vor Steuern aus aufgegebenen Geschäftsbereichen</b>  | <b>-37</b> | <b>0</b> |
| Zurechenbarer Steuerertrag                                       | 25         | 0        |
| <b>Ergebnis nach Steuern aus aufgegebenen Geschäftsbereichen</b> | <b>-12</b> | <b>0</b> |
| Effekte aus Entkonsolidierung                                    | 444        | 0        |
| <b>Ergebnis aus aufgegebenen Geschäftsbereichen</b>              | <b>432</b> | <b>0</b> |

#### 22 Konzernjahresergebnis

Im Geschäftsjahr 2010 erwirtschaftete der Konzern ein Konzernjahresergebnis in Höhe von 2.630 MIO € (Vorjahr: 693 MIO €). Davon entfielen auf die Aktionäre der Deutsche Post AG 2.541 MIO € (Vorjahr: 644 MIO €).

#### 23 Nicht beherrschende Anteile

Das den nicht beherrschenden Anteilseignern zustehende Ergebnis hat sich um 40 MIO € auf 89 MIO € erhöht.

#### 24 Ergebnis je Aktie

Das unverwässerte Ergebnis je Aktie (Basic Earnings per Share) wird nach IAS 33 (Earnings per Share) mittels Division des Konzerngewinns durch die durchschnittliche Anzahl der Aktien ermittelt. Das unverwässerte Ergebnis je Aktie liegt für das Geschäftsjahr 2010 bei 2,10 € (Vorjahr: 0,53 €).

##### Unverwässertes Ergebnis je Aktie

|                                                                       |          | 2009          | 2010          |
|-----------------------------------------------------------------------|----------|---------------|---------------|
| Auf Aktionäre der Deutsche Post AG entfallendes Konzernjahresergebnis | MIO €    | 644           | 2.541         |
| Durchschnittliche gewichtete Anzahl der ausgegebenen Aktien           | Stück    | 1.209.015.874 | 1.208.951.725 |
| <b>Unverwässertes Ergebnis je Aktie</b>                               | <b>€</b> | <b>0,53</b>   | <b>2,10</b>   |
| davon aus fortgeführten Geschäftsbereichen                            | €        | 0,17          | 2,10          |
| davon aus aufgegebenen Geschäftsbereichen                             | €        | 0,36          | 0,00          |

Für die Berechnung des verwässerten Ergebnisses je Aktie wird die durchschnittliche Anzahl der ausgegebenen Aktien um die Anzahl aller potenziell verwässernden Aktien berichtigt. Für Führungskräfte bestanden zum Stichtag 2.636.387 Rechte an Aktien.

##### Verwässertes Ergebnis je Aktie

|                                                                             |          | 2009          | 2010          |
|-----------------------------------------------------------------------------|----------|---------------|---------------|
| Auf Aktionäre der Deutsche Post AG entfallendes Konzernjahresergebnis       | MIO €    | 644           | 2.541         |
| Durchschnittlich gewichtete Anzahl der ausgegebenen Aktien                  | Stück    | 1.209.015.874 | 1.208.951.725 |
| Potenziell verwässernde Aktien                                              | Stück    | 0             | 492.990       |
| Durchschnittliche gewichtete Anzahl von Aktien für das verwässerte Ergebnis | Stück    | 1.209.015.874 | 1.209.444.715 |
| <b>Verwässertes Ergebnis je Aktie</b>                                       | <b>€</b> | <b>0,53</b>   | <b>2,10</b>   |
| davon aus fortgeführten Geschäftsbereichen                                  | €        | 0,17          | 2,10          |
| davon aus aufgegebenen Geschäftsbereichen                                   | €        | 0,36          | 0,00          |

#### 25 Dividende je Aktie

Für das Geschäftsjahr 2010 wird eine Dividende je Aktie von 0,65 € vorgeschlagen. Dies entspricht bei einer im Handelsregister eingetragenen Aktienzahl von 1.209.015.874 (Stand 31. Dezember 2010) einer Ausschüttung von 786 MIO €. Im Vorjahr betrug die Dividende je Aktie 0,60 €. Weitere Erläuterungen zur Ausschüttung finden sich unter [Textziffer 42](#).

## ERLÄUTERUNGEN ZUR BILANZ

### 26 Immaterielle Vermögenswerte

#### 26.1 Übersicht

MIO €

|                                                     | Selbst<br>erstellte<br>immaterielle<br>Vermögens-<br>werte | Erworbene<br>Markennamen | Erworbene<br>Kunden-<br>stämme | Sonstige<br>erworbene<br>immaterielle<br>Vermögens-<br>werte | Firmenwerte   | Geleistete<br>Anzahlungen<br>und immate-<br>rielle Vermö-<br>genswerte in<br>Entwicklung | Gesamt        |
|-----------------------------------------------------|------------------------------------------------------------|--------------------------|--------------------------------|--------------------------------------------------------------|---------------|------------------------------------------------------------------------------------------|---------------|
| <b>Anschaffungs- oder Herstellungskosten</b>        |                                                            |                          |                                |                                                              |               |                                                                                          |               |
| <b>Stand 1. Januar 2009</b>                         | <b>1.010</b>                                               | <b>410</b>               | <b>791</b>                     | <b>1.402</b>                                                 | <b>11.189</b> | <b>108</b>                                                                               | <b>14.910</b> |
| Zugänge Konsolidierungskreis                        | 0                                                          | 0                        | 0                              | 0                                                            | 26            | 1                                                                                        | 27            |
| Zugänge                                             | 88                                                         | 0                        | 0                              | 94                                                           | 30            | 59                                                                                       | 271           |
| Umbuchungen                                         | 16                                                         | 0                        | -6                             | 64                                                           | 0             | -54                                                                                      | 20            |
| Abgänge                                             | -80                                                        | 0                        | 0                              | -155                                                         | -47           | -19                                                                                      | -301          |
| Währungsumrechnungsdifferenzen                      | -1                                                         | 36                       | 20                             | 12                                                           | 93            | 1                                                                                        | 161           |
| <b>Stand 31. Dezember 2009/Stand 1. Januar 2010</b> | <b>1.033</b>                                               | <b>446</b>               | <b>805</b>                     | <b>1.417</b>                                                 | <b>11.291</b> | <b>96</b>                                                                                | <b>15.088</b> |
| Zugänge Konsolidierungskreis                        | 0                                                          | 0                        | 0                              | 0                                                            | 20            | 0                                                                                        | 20            |
| Zugänge                                             | 103                                                        | 0                        | 0                              | 62                                                           | 4             | 40                                                                                       | 209           |
| Umbuchungen                                         | -20                                                        | 0                        | 0                              | 37                                                           | 0             | -26                                                                                      | -9            |
| Abgänge                                             | -41                                                        | 0                        | 0                              | -170                                                         | -11           | -20                                                                                      | -242          |
| Währungsumrechnungsdifferenzen                      | 12                                                         | 16                       | 54                             | 37                                                           | 455           | 2                                                                                        | 576           |
| <b>Stand 31. Dezember 2010</b>                      | <b>1.087</b>                                               | <b>462</b>               | <b>859</b>                     | <b>1.383</b>                                                 | <b>11.759</b> | <b>92</b>                                                                                | <b>15.642</b> |
| <b>Abschreibungen</b>                               |                                                            |                          |                                |                                                              |               |                                                                                          |               |
| <b>Stand 1. Januar 2009</b>                         | <b>681</b>                                                 | <b>382</b>               | <b>218</b>                     | <b>926</b>                                                   | <b>1.041</b>  | <b>35</b>                                                                                | <b>3.283</b>  |
| Zugänge Konsolidierungskreis                        | 0                                                          | 0                        | 0                              | 0                                                            | 0             | 0                                                                                        | 0             |
| Abschreibungen                                      | 93                                                         | 0                        | 83                             | 164                                                          | 0             | 0                                                                                        | 340           |
| Wertminderungen                                     | 2                                                          | 0                        | 0                              | 77                                                           | 0             | 2                                                                                        | 81            |
| Umbuchungen                                         | 2                                                          | 0                        | 0                              | 3                                                            | 0             | -1                                                                                       | 4             |
| Zuschreibungen                                      | 0                                                          | 0                        | 0                              | 0                                                            | 0             | 0                                                                                        | 0             |
| Abgänge                                             | -65                                                        | 0                        | 0                              | -133                                                         | -33           | -4                                                                                       | -235          |
| Währungsumrechnungsdifferenzen                      | -2                                                         | 34                       | 4                              | 5                                                            | 40            | 0                                                                                        | 81            |
| <b>Stand 31. Dezember 2009/Stand 1. Januar 2010</b> | <b>711</b>                                                 | <b>416</b>               | <b>305</b>                     | <b>1.042</b>                                                 | <b>1.048</b>  | <b>32</b>                                                                                | <b>3.554</b>  |
| Zugänge Konsolidierungskreis                        | 0                                                          | 0                        | 0                              | 0                                                            | 0             | 0                                                                                        | 0             |
| Abschreibungen                                      | 92                                                         | 1                        | 70                             | 119                                                          | 0             | 0                                                                                        | 282           |
| Wertminderungen                                     | 0                                                          | 0                        | 0                              | 6                                                            | 0             | 0                                                                                        | 6             |
| Umbuchungen                                         | -4                                                         | 0                        | 0                              | -5                                                           | 0             | -1                                                                                       | -10           |
| Zuschreibungen                                      | 0                                                          | 0                        | 0                              | 0                                                            | 0             | 0                                                                                        | 0             |
| Abgänge                                             | -35                                                        | 0                        | 0                              | -122                                                         | 0             | 0                                                                                        | -157          |
| Währungsumrechnungsdifferenzen                      | 11                                                         | 15                       | 21                             | 25                                                           | 45            | 2                                                                                        | 119           |
| <b>Stand 31. Dezember 2010</b>                      | <b>775</b>                                                 | <b>432</b>               | <b>396</b>                     | <b>1.065</b>                                                 | <b>1.093</b>  | <b>33</b>                                                                                | <b>3.794</b>  |
| <b>Bilanzwert 31. Dezember 2010</b>                 | <b>312</b>                                                 | <b>30</b>                | <b>463</b>                     | <b>318</b>                                                   | <b>10.666</b> | <b>59</b>                                                                                | <b>11.848</b> |
| <b>Bilanzwert 31. Dezember 2009</b>                 | <b>322</b>                                                 | <b>30</b>                | <b>500</b>                     | <b>375</b>                                                   | <b>10.243</b> | <b>64</b>                                                                                | <b>11.534</b> |

Innerhalb der geleisteten Anzahlungen und immateriellen Vermögenswerte in Entwicklung wurden die Abgänge der Anschaffungskosten und Abschreibungen im Vorjahr um jeweils 90 MIO € berichtet. Dies hatte keine Auswirkung auf die Bilanzwerte.

Unter den erworbenen immateriellen Vermögenswerten werden erworbene Software, Konzessionen, gewerbliche Schutzrechte, Lizenzen und ähnliche Rechte und Werte ausgewiesen. Die selbst erstellten immateriellen Vermögenswerte betreffen Entwicklungskosten für selbst erstellte Software.

## 26.2 Firmenwert-Allokation auf Cash Generating Units (CGU)

| MIO €                                | 2009          | 2010          |
|--------------------------------------|---------------|---------------|
| <b>Gesamtfirmenwert<sup>1)</sup></b> | <b>10.243</b> | <b>10.666</b> |
| <b>BRIEF</b>                         |               |               |
| BRIEF National                       | 75            | 94            |
| BRIEF International                  | 552           | 568           |
| <b>EXPRESS</b>                       | <b>4.130</b>  | <b>4.158</b>  |
| <b>GLOBAL FORWARDING, FREIGHT</b>    |               |               |
| DHL Global Forwarding                | 3.451         | 3.723         |
| DHL Freight                          | 265           | 268           |
| <b>SUPPLY CHAIN</b>                  |               |               |
| DHL Supply Chain                     | 1.581         | 1.647         |
| Williams Lea                         | 303           | 322           |

<sup>1)</sup> Firmenwert aus Überleitung beträgt –114 MIO € (Vorjahr: –114 MIO €)

Die Struktur der CGU wurde gegenüber dem Vorjahr nicht geändert. Aufgrund konzerninterner Reorganisationen wurden die Vorjahreswerte jedoch angepasst. Für Zwecke des jährlich durchzuführenden Werthaltigkeitstests nach IAS 36 ermittelt der Konzern den erzielbaren Betrag einer CGU auf Basis eines Nutzungswerts. Diese Berechnungen beruhen auf Prognosen von Free

Cashflows, die zunächst mit einem Kapitalkostensatz nach Steuern diskontiert werden. Im Anschluss werden Diskontierungssätze vor Steuern auf Basis eines iterativen Prozesses ermittelt.

Die Cashflow-Prognosen basieren auf vom Management verabschiedeten Detailplanungen für das EBIT und Investitionen und berücksichtigen unternehmensinterne Erfahrungswerte sowie externe ökonomische Rahmendaten. Methodisch umfasst die Detailplanungsphase einen dreijährigen Planungszeitraum von 2011 bis 2013. Für den Wertbeitrag ab 2014 wird sie ergänzt durch die ewige Rente. Diese wird über eine langfristige Wachstumsrate ermittelt, die für jede CGU einzeln festgelegt wird und deren Höhe der unten stehenden Abbildung entnommen werden kann. Die angewandte Wachstumsrate spiegelt unter anderem die Erwartungen hinsichtlich des Branchenwachstums der CGU wider. Den Cashflow-Prognosen liegen sowohl Vergangenheitswerte als auch die zukünftig erwartete generelle Marktentwicklung zugrunde. Außerdem werden für die Prognosen das Wachstum der jeweiligen nationalen Geschäftstätigkeiten und des internationalen Handels sowie die zunehmende Auslagerung der Logistikaktivitäten berücksichtigt. Die Kosteneinschätzungen für das Transportnetzwerk und Dienstleistungen haben ebenfalls einen Einfluss auf den Nutzungswert.

Der Kapitalkostensatz vor Steuern basiert auf dem Konzept der durchschnittlichen gewichteten Kapitalkosten (Weighted Average Cost of Capital). Den Diskontierungssatz (vor Steuern) für die einzelnen CGU sowie die für die ewige Rente unterstellten jeweiligen Wachstumsraten zeigt folgende Tabelle:

| %                                 | Diskontierungssatz |             | Wachstumsrate |            |
|-----------------------------------|--------------------|-------------|---------------|------------|
|                                   | 2009               | 2010        | 2009          | 2010       |
| <b>SUPPLY CHAIN</b>               |                    |             |               |            |
| DHL Supply Chain                  | 10,7               | 9,5         | 2,5           | 2,5        |
| Williams Lea                      | 11,6               | 9,7         | 2,0           | 2,0        |
| <b>GLOBAL FORWARDING, FREIGHT</b> |                    |             |               |            |
| DHL Freight                       | 10,8               | 9,6         | 2,0           | 2,0        |
| DHL Global Forwarding             | 10,7               | 9,5         | 2,5           | 2,5        |
| <b>BRIEF</b>                      |                    |             |               |            |
| BRIEF National                    | 11,2               | 9,2         | 0,0           | 0,0        |
| BRIEF International               | 10,7               | 8,8         | 1,0           | 1,0        |
| <b>EXPRESS</b>                    | <b>10,7</b>        | <b>10,6</b> | <b>2,0</b>    | <b>2,0</b> |

Auf Basis dieser Annahmen und der durchgeführten Werthaltigkeitstests für die einzelnen CGU, denen ein Firmenwert zugeordnet wurde, wurde festgestellt, dass die erzielbaren Beträge bei sämtlichen CGU die entsprechenden Buchwerte der jeweiligen CGU übersteigen. Ein Wertminderungsbedarf für Firmenwerte wurde zum 31. Dezember 2010 für keine CGU festgestellt.

## 27 Sachanlagen

### 27.1 Übersicht

MIO €

|                                              | Grundstücke<br>und Bauten | Technische<br>Anlagen und<br>Maschinen | Andere<br>Anlagen,<br>Betriebs- und<br>Geschäfts-<br>ausstattung | Flugzeuge | Fuhrpark,<br>Transportaus-<br>stattung | Geleistete<br>Anzahlungen,<br>Anlagen<br>im Bau | Gesamt |
|----------------------------------------------|---------------------------|----------------------------------------|------------------------------------------------------------------|-----------|----------------------------------------|-------------------------------------------------|--------|
| <b>Anschaffungs- oder Herstellungskosten</b> |                           |                                        |                                                                  |           |                                        |                                                 |        |
| Stand 1. Januar 2009                         | 4.849                     | 4.181                                  | 2.398                                                            | 1.436     | 1.949                                  | 296                                             | 15.109 |
| Zugänge Konsolidierungskreis                 | 1                         | 1                                      | 4                                                                | 0         | 7                                      | 0                                               | 13     |
| Zugänge                                      | 74                        | 182                                    | 230                                                              | 110       | 127                                    | 207                                             | 930    |
| Umbuchungen                                  | 32                        | 68                                     | 26                                                               | 160       | 25                                     | -332                                            | -21    |
| Abgänge                                      | -316                      | -275                                   | -292                                                             | -95       | -211                                   | -44                                             | -1.233 |
| Währungsumrechnungsdifferenzen               | 37                        | 40                                     | 23                                                               | 1         | 24                                     | 3                                               | 128    |
| Stand 31. Dezember 2009/Stand 1. Januar 2010 | 4.677                     | 4.197                                  | 2.389                                                            | 1.612     | 1.921                                  | 130                                             | 14.926 |
| Zugänge Konsolidierungskreis                 | 0                         | 0                                      | 0                                                                | 0         | 0                                      | 0                                               | 0      |
| Zugänge                                      | 76                        | 266                                    | 157                                                              | 68        | 212                                    | 279                                             | 1.058  |
| Umbuchungen                                  | 9                         | 61                                     | 26                                                               | 59        | 7                                      | -164                                            | -2     |
| Abgänge                                      | -281                      | -222                                   | -188                                                             | -316      | -207                                   | -15                                             | -1.229 |
| Währungsumrechnungsdifferenzen               | 132                       | 114                                    | 97                                                               | 10        | 36                                     | 4                                               | 393    |
| Stand 31. Dezember 2010                      | 4.613                     | 4.416                                  | 2.481                                                            | 1.433     | 1.969                                  | 234                                             | 15.146 |
| <b>Abschreibungen</b>                        |                           |                                        |                                                                  |           |                                        |                                                 |        |
| Stand 1. Januar 2009                         | 1.933                     | 3.157                                  | 1.739                                                            | 623       | 989                                    | -8                                              | 8.433  |
| Zugänge Konsolidierungskreis                 | 1                         | 1                                      | 3                                                                | 0         | 3                                      | 0                                               | 8      |
| Abschreibungen                               | 184                       | 247                                    | 250                                                              | 127       | 208                                    | 0                                               | 1.016  |
| Wertminderungen                              | 98                        | 40                                     | 10                                                               | 24        | 10                                     | 1                                               | 183    |
| Umbuchungen                                  | 4                         | -2                                     | 6                                                                | -5        | 3                                      | -9                                              | -3     |
| Zuschreibungen                               | 0                         | 0                                      | 0                                                                | 0         | 0                                      | 0                                               | 0      |
| Abgänge                                      | -240                      | -236                                   | -270                                                             | -77       | -165                                   | -1                                              | -989   |
| Währungsumrechnungsdifferenzen               | 12                        | 20                                     | 16                                                               | -3        | 13                                     | 0                                               | 58     |
| Stand 31. Dezember 2009/Stand 1. Januar 2010 | 1.992                     | 3.227                                  | 1.754                                                            | 689       | 1.061                                  | -17                                             | 8.706  |
| Zugänge Konsolidierungskreis                 | 0                         | 0                                      | 0                                                                | 0         | 0                                      | 0                                               | 0      |
| Abschreibungen                               | 173                       | 216                                    | 225                                                              | 137       | 204                                    | 0                                               | 955    |
| Wertminderungen                              | 17                        | 12                                     | 2                                                                | 21        | 1                                      | 0                                               | 53     |
| Umbuchungen                                  | -10                       | 7                                      | 1                                                                | 0         | 0                                      | 11                                              | 9      |
| Zuschreibungen                               | -3                        | 0                                      | -1                                                               | -3        | 0                                      | 0                                               | -7     |
| Abgänge                                      | -156                      | -189                                   | -162                                                             | -276      | -178                                   | 11                                              | -950   |
| Währungsumrechnungsdifferenzen               | 73                        | 76                                     | 76                                                               | 4         | 21                                     | 0                                               | 250    |
| Stand 31. Dezember 2010                      | 2.086                     | 3.349                                  | 1.895                                                            | 572       | 1.109                                  | 5                                               | 9.016  |
| Bilanzwert 31. Dezember 2010                 | 2.527                     | 1.067                                  | 586                                                              | 861       | 860                                    | 229                                             | 6.130  |
| Bilanzwert 31. Dezember 2009                 | 2.685                     | 970                                    | 635                                                              | 923       | 860                                    | 147                                             | 6.220  |

Innerhalb der Fuhrpark- und Transportausstattungen wurden aus einer konzerninternen Übertragung von Vermögenswerten aus dem Jahre 2005 die kumulierten Anschaffungskosten und Abschreibungen um jeweils 553 MIO € berichtigt. Dies hatte keine Auswirkung auf die Bilanzwerte und auf die Gewinn- und Verlust-Rechnung. Die Vorjahreszahlen wurden entsprechend angepasst.

Unter den geleisteten Anzahlungen werden nur Anzahlungen für Sachanlagen ausgewiesen, wenn im Rahmen eines schwebenden Geschäfts Vorleistungen seitens des Konzerns erbracht wurden. Als Anlagen im Bau sind Sachanlagen aktiviert, für deren Herstellung bereits Kosten aus Eigen- oder Fremdleistung angefallen sind, die bis zum Bilanzstichtag aber noch nicht fertig gestellt wurden. Die als Sicherheiten verpfändeten Sachanlagen liegen wie im Vorjahr unter 1 MIO €.



## 27.2 Finance Lease

Folgende Vermögenswerte sind im Rahmen eines Finance Lease im Anlagevermögen bilanziert:

| MIO €                                              | 2009       | 2010       |
|----------------------------------------------------|------------|------------|
| Grundstücke und Bauten                             | 57         | 57         |
| Technische Anlagen und Maschinen                   | 24         | 8          |
| Andere Anlagen, Betriebs- und Geschäftsausstattung | 30         | 25         |
| Flugzeuge                                          | 407        | 281        |
| Fuhrpark, Transportausstattung                     | 3          | 3          |
| <b>Finance Lease</b>                               | <b>521</b> | <b>374</b> |

Die korrespondierenden Verbindlichkeiten aus dem Finance Lease werden unter den Finanzschulden, [Textziffer 46](#), dargestellt.

## 28 Als Finanzinvestition gehaltene Immobilien

| MIO €                                        | 2009      | 2010      |
|----------------------------------------------|-----------|-----------|
| <b>Anschaffungs- oder Herstellungskosten</b> |           |           |
| Stand 1. Januar                              | 45        | 45        |
| Umbuchungen                                  | 0         | 10        |
| Abgänge                                      | 0         | -3        |
| Währungsumrechnungsdifferenzen               | 0         | 1         |
| Stand 31. Dezember                           | 45        | 53        |
| <b>Abschreibungen</b>                        |           |           |
| Stand 1. Januar                              | 13        | 13        |
| Umbuchungen                                  | 0         | 3         |
| Stand 31. Dezember                           | 13        | 16        |
| <b>Bilanzwert 31. Dezember</b>               | <b>32</b> | <b>37</b> |

Die auf diese Immobilien entfallenden Mieteinnahmen betragen 1 MIO €, die Aufwendungen 2 MIO € (Vorjahr: jeweils 1 MIO €). Der beizulegende Zeitwert beträgt wie im Vorjahr 77 MIO €.

## 29 Beteiligungen an assoziierten Unternehmen

Die Beteiligungen an assoziierten Unternehmen haben sich wie folgt entwickelt:

| MIO €                                          | 2009         | 2010         |
|------------------------------------------------|--------------|--------------|
| Stand 1. Januar                                | 61           | 1.772        |
| Zugänge                                        | 1.561        | 0            |
| <b>Änderungen des anteiligen Eigenkapitals</b> |              |              |
| Erfolgswirksame Änderungen                     | 28           | 56           |
| Gewinnausschüttungen                           | -1           | -4           |
| Erfolgsneutrale Änderungen                     | 123          | 93           |
| Wertminderungen                                | 0            | -69          |
| Zwischenergebniseliminierung                   | 0            | -1           |
| <b>Bilanzwert 31. Dezember</b>                 | <b>1.772</b> | <b>1.847</b> |

Seit März 2009 werden die Anteile an der Deutschen Postbank Gruppe in Höhe von 39,5 % als At-Equity-Beteiligung ausgewiesen. Da sie auch gleichzeitig den größten Bestand innerhalb dieser Bilanzposition ausmacht, werden in der folgenden Tabelle ausschließlich die Vermögenswerte, Schulden, Erträge aus Bankgeschäften und das Ergebnis der Deutsche Postbank AG zu 100 % angegeben.

### Deutsche Postbank AG<sup>1)</sup>

| MIO €                                    | 31. Dez. 2009 | 30. Sept. 2010 |
|------------------------------------------|---------------|----------------|
| Vermögenswerte                           | 226.609       | 231.457        |
| Schulden                                 | 221.358       | 225.739        |
| Erträge aus Bankgeschäften <sup>2)</sup> | 9.103         | 6.235          |
| <b>Konzerngewinn</b>                     | <b>76</b>     | <b>218</b>     |

1) Die Werte der Deutsche Postbank AG basieren auf dem letzten veröffentlichten Zwischenabschluss zum 30. September 2010 und dem letzten veröffentlichten Konzernabschluss zum 31. Dezember 2009, da zum Zeitpunkt der Aufstellung des Konzernabschlusses der Deutsche Post AG noch kein testierter Konzernabschluss der Deutsche Postbank AG zum 31. Dezember 2010 vorlag

2) Die Erträge aus Bankgeschäften umfassen Zinserträge, Provisionserträge und das Handelsergebnis

Die der Deutsche Post AG zuzurechnende Beteiligung an der Deutsche Postbank AG hatte am 31. Dezember 2010, bewertet zum Kurs von 20,80 € pro Aktie (Vorjahr: 22,88 €), einen Börsenkurswert von 1.797 MIO € (Vorjahr: 1.977 MIO €). Aufgrund des gesunkenen Aktienkurses wurde der Beteiligungsansatz der Deutsche Postbank AG um 52 MIO € abgewertet, siehe [Textziffer 18](#).

Am 31. Dezember 2010 befanden sich noch 86.417.432 Deutsche-Postbank-Aktien im Besitz der Deutsche Post AG. Im Zusammenhang mit der zweiten und dritten Tranche des beabsichtigten Verkaufs der Postbank-Anteile sind die gesamten Postbank-Aktien als Sicherheit begeben worden, siehe [Textziffern 2, 3 und 50](#).

## 30 Langfristige finanzielle Vermögenswerte

| MIO €                                                              | 2009         | 2010         |
|--------------------------------------------------------------------|--------------|--------------|
| Zur Veräußerung verfügbare finanzielle Vermögenswerte              | 150          | 142          |
| Ausleihungen und Forderungen                                       | 414          | 468          |
| Erfolgswirksam zum beizulegenden Zeitwert bewertete Vermögenswerte | 805          | 2.531        |
| Bis zur Endfälligkeit zu haltende Vermögenswerte                   | 27           | 5            |
| Leasingforderungen                                                 | 52           | 47           |
| <b>Langfristige finanzielle Vermögenswerte</b>                     | <b>1.448</b> | <b>3.193</b> |

Der Anstieg der langfristigen finanziellen Vermögenswerte resultierte im Wesentlichen aus der im Januar 2010 erstmals vorgenommenen Bilanzierung des Terminkontrakts, siehe [Textziffer 3](#).

Die erfolgswirksam zum beizulegenden Zeitwert bewerteten Vermögenswerte enthalten im Wesentlichen eine Put-Option, die im Zusammenhang mit dem beabsichtigten Verkauf der Deutsche Postbank-Anteile an die Deutsche Bank AG steht, siehe Textziffer 50. Weiterhin sind auch Derivate zur Sicherung von Fremdwährungsrisiken in dieser Position enthalten.

In der Gewinn-und-Verlust-Rechnung sind 13 MIO € (Vorjahr: 33 MIO €) Abschreibungen auf langfristige finanzielle Vermögenswerte enthalten, da sie nicht mehr in voller Höhe werthaltig waren. Sie entfielen mit 10 MIO € (Vorjahr: 6 MIO €) auf erfolgswirksam zum beizulegenden Zeitwert bewertete Vermögenswerte sowie mit 3 MIO € (Vorjahr: 1 MIO €) auf zur Veräußerung verfügbare finanzielle Vermögenswerte.

Die Ausleihungen für Wohnungsbauförderungen sind gegenüber dem am 31. Dezember 2010 geltenden Marktzins für vergleichbare langfristige finanzielle Vermögenswerte mehrheitlich unterverzinslich oder unverzinslich. In der Bilanz werden sie mit einem Barwert von 16 MIO € (Vorjahr: 21 MIO €) erfasst. Der Nominalwert dieser Ausleihungen beträgt 22 MIO € (Vorjahr: 23 MIO €).

Angaben zur Einschränkung der Veräußerbarkeit finden sich unter Textziffer 50.2 (Sicherheiten).

### 31 Sonstige langfristige Vermögenswerte

| MIO €                                       | 2009       | 2010       |
|---------------------------------------------|------------|------------|
| Pensionsvermögen                            | 288        | 375        |
| Sonstiges                                   | 60         | 90         |
| <b>Sonstige langfristige Vermögenswerte</b> | <b>348</b> | <b>465</b> |

Weitere Informationen zum Pensionsvermögen finden sich unter Textziffer 44.

### 32 Latente Steuern

| MIO €                                   | 2009         |            | 2010         |            |
|-----------------------------------------|--------------|------------|--------------|------------|
|                                         | Aktivisch    | Passivisch | Aktivisch    | Passivisch |
| Immaterielle Vermögenswerte             | 57           | 295        | 39           | 210        |
| Sachanlagen                             | 90           | 32         | 85           | 43         |
| Langfristige finanzielle Vermögenswerte | 3            | 0          | 13           | 71         |
| Sonstiges langfristiges Vermögen        | 33           | 36         | 4            | 50         |
| Übriges kurzfristiges Vermögen          | 33           | 41         | 33           | 18         |
| Rückstellungen                          | 211          | 14         | 196          | 12         |
| Finanzschulden                          | 412          | 97         | 332          | 61         |
| Übrige Verbindlichkeiten                | 67           | 47         | 54           | 32         |
| Steuerliche Verlustvorträge             | 142          | –          | 499          | –          |
| <b>Bruttobetrag</b>                     | <b>1.048</b> | <b>562</b> | <b>1.255</b> | <b>497</b> |
| Saldierung                              | –380         | –380       | –282         | –282       |
| <b>Bilanzansatz</b>                     | <b>668</b>   | <b>182</b> | <b>973</b>   | <b>215</b> |

Die latenten Steuern auf steuerliche Verlustvorträge entfallen mit 387 MIO € (Vorjahr: 85 MIO €) auf inländische sowie mit 112 MIO € (Vorjahr: 57 MIO €) auf ausländische Verlustvorträge.

Auf steuerliche Verlustvorträge in Höhe von rund 13,3 MRD € (Vorjahr: 16,6 MRD €) und auf temporäre Wertdifferenzen von rund 2.724 MIO € (Vorjahr: 3.208 MIO €) wurden keine aktiven latenten Steuern gebildet, da davon auszugehen ist, dass die steuerlichen Verlustvorträge und temporären Differenzen im Rahmen der steuerlichen Ergebnisplanung wahrscheinlich nicht genutzt werden können. Der überwiegende Teil der Verlustvorträge entfällt auf die Deutsche Post AG. Diese Verlustvorträge sind zeitlich unbefristet nutzbar. Bei ausländischen Gesellschaften verfallen die wesentlichen Verlustvorträge nicht vor dem Jahr 2026.

Für aufgelaufene Ergebnisse in- und ausländischer Tochtergesellschaften wurden in Höhe von 375 MIO € (Vorjahr: 464 MIO €) keine latenten Steuern gebildet, da es wahrscheinlich ist, dass sich die temporären Differenzen in absehbarer Zeit nicht umkehren werden.

#### Fälligkeitsstruktur

| MIO €                   | Kurzfristig | Langfristig | Gesamt |
|-------------------------|-------------|-------------|--------|
| <b>2010</b>             |             |             |        |
| Aktive latente Steuern  | 133         | 840         | 973    |
| Passive latente Steuern | 42          | 173         | 215    |
| <b>2009</b>             |             |             |        |
| Aktive latente Steuern  | 120         | 548         | 668    |
| Passive latente Steuern | 30          | 152         | 182    |

### 33 Vorräte

Festwerte für Postwertzeichen und Ersatzteile in Frachtzentren bestanden in Höhe von 13 MIO € (Vorjahr: 13 MIO €). Wesentliche Wertberichtigungen auf die Vorratsbestände waren nicht erforderlich.

| MIO €                                          | 2009       | 2010       |
|------------------------------------------------|------------|------------|
| Roh-, Hilfs- und Betriebsstoffe                | 156        | 161        |
| Fertige Erzeugnisse und Waren                  | 47         | 44         |
| Unfertige Erzeugnisse und unfertige Leistungen | 15         | 13         |
| Ersatzteile Flugzeuge                          | 7          | 5          |
| Geleistete Anzahlungen                         | 1          | 0          |
| <b>Vorräte</b>                                 | <b>226</b> | <b>223</b> |

### 34 Ertragsteueransprüche und Ertragsteuerverpflichtungen

| MIO €                       | 2009 | 2010 |
|-----------------------------|------|------|
| Ertragsteueransprüche       | 196  | 223  |
| Ertragsteuerverpflichtungen | 292  | 463  |

Sämtliche Ertragsteueransprüche und -verpflichtungen sind kurzfristig und haben Fälligkeiten von unter einem Jahr.

### 35 Forderungen und sonstige kurzfristige Vermögenswerte

| MIO €                                                                      | 2009         | 2010         |
|----------------------------------------------------------------------------|--------------|--------------|
| Forderungen aus Lieferungen und Leistungen                                 | 4.881        | 6.011        |
| Rechnungsabgrenzungsposten                                                 | 620          | 683          |
| Abgegrenzte Umsätze                                                        | 472          | 508          |
| Steuerforderungen                                                          | 386          | 490          |
| Erträge aus Kostenübernahmen                                               | 65           | 83           |
| Debitorische Kreditoren                                                    | 52           | 37           |
| Forderungen gegenüber Konzernunternehmen                                   | 28           | 35           |
| Forderungen an Mitarbeiter                                                 | 26           | 31           |
| Forderungen aus Versicherungsgeschäften                                    | 15           | 20           |
| Forderungen aus Schadenersatz (Regressansprüche)                           | 19           | 19           |
| Forderungen aus Anlagenverkäufen                                           | 44           | 17           |
| Forderungen an Bundes-Pensions-Service für Post und Telekommunikation e.V. | 0            | 14           |
| Forderungen aus Nachnahmen                                                 | 18           | 13           |
| Forderungen gegenüber privaten Postagenturen                               | 9            | 8            |
| Andere Vermögenswerte                                                      | 522          | 672          |
| <b>Forderungen und sonstige kurzfristige Vermögenswerte</b>                | <b>7.157</b> | <b>8.641</b> |

Die Steuerforderungen betreffen mit 388 MIO € (Vorjahr: 307 MIO €) Umsatzsteuer, mit 66 MIO € (Vorjahr: 34 MIO €) Zölle und Abgaben sowie mit 36 MIO € (Vorjahr: 45 MIO €) sonstige Steuerforderungen. In den anderen Vermögenswerten ist eine Vielzahl von Einzelsachverhalten enthalten.

### 38 Zur Veräußerung gehaltene Vermögenswerte und Verbindlichkeiten im Zusammenhang mit zur Veräußerung gehaltenen Vermögenswerten

Die unter diesen Positionen ausgewiesenen Beträge betreffen im Wesentlichen folgende Sachverhalte:

| MIO €                                                                                                              | Vermögenswerte |            | Verbindlichkeiten |          |
|--------------------------------------------------------------------------------------------------------------------|----------------|------------|-------------------|----------|
|                                                                                                                    | 2009           | 2010       | 2009              | 2010     |
| Deutsche Post AG – Immobilien                                                                                      | 18             | 71         | 0                 | 0        |
| Deutsche Post Immobilienentwicklung Grundstücksgesellschaft mbH & Co. Logistikzentren KG, Deutschland – Immobilien | 0              | 25         | 0                 | 0        |
| us-Express-Aviation, USA – Flugzeuge                                                                               | 17             | 12         | 0                 | 0        |
| DHL Exel Supply Chain Euskal-Log S.L.U., Spanien – Gebäude                                                         | 16             | 0          | 0                 | 0        |
| DHL Express (France) SAS, Frankreich                                                                               | 70             | 0          | 98                | 0        |
| DHL Express (UK) Ltd., Großbritannien                                                                              | 51             | 0          | 51                | 0        |
| Sonstiges                                                                                                          | 7              | 5          | 1                 | 0        |
| <b>Zur Veräußerung gehaltene Vermögenswerte und Verbindlichkeiten</b>                                              | <b>179</b>     | <b>113</b> | <b>150</b>        | <b>0</b> |

Die Deutsche Post Immobilienentwicklung Grundstücksgesellschaft, Deutschland, beabsichtigt, vier Immobilien zu veräußern. Daher wurden diese Sachanlagen in die zur Veräußerung gehaltenen Vermögenswerte umgegliedert. Die letztmalige Bewertung vor Umgliederung führte zu einer Wertminderung in Höhe von 13 MIO €.

### 36 Kurzfristige finanzielle Vermögenswerte

| MIO €                                                                          | 2009         | 2010       |
|--------------------------------------------------------------------------------|--------------|------------|
| Zur Veräußerung verfügbare finanzielle Vermögenswerte                          | 1.618        | 420        |
| Ausleihungen und Forderungen                                                   | 196          | 150        |
| Bis zur Endfälligkeit zu haltende Vermögenswerte                               | 1            | 0          |
| Erfolgswirksam zum beizulegenden Zeitwert bewertete finanzielle Vermögenswerte | 31           | 38         |
| Leasingforderungen                                                             | 48           | 47         |
| <b>Kurzfristige finanzielle Vermögenswerte</b>                                 | <b>1.894</b> | <b>655</b> |

Von den zur Veräußerung verfügbaren finanziellen Vermögenswerten wurden 407 MIO € (Vorjahr: 1.605 MIO €) zum beizulegenden Zeitwert bewertet. Angaben zur Einschränkung der Veräußerbarkeit finden sich unter [Textziffer 50.2 \(Sicherheiten\)](#).

### 37 Flüssige Mittel und Zahlungsmitteläquivalente

| MIO €                                                | 2009         | 2010         |
|------------------------------------------------------|--------------|--------------|
| Zahlungsmitteläquivalente                            | 1.982        | 2.056        |
| Bankguthaben                                         | 612          | 837          |
| Unterwegs befindliche Gelder                         | 313          | 350          |
| Kassenbestand                                        | 19           | 28           |
| Sonstige flüssige Mittel                             | 138          | 144          |
| <b>Flüssige Mittel und Zahlungsmitteläquivalente</b> | <b>3.064</b> | <b>3.415</b> |

Weiterhin wurden im Rahmen der Restrukturierung des us-Express-Aviation-Geschäfts nicht mehr benötigte Überkapazitäten an Flugzeugen gemäß IFRS 5 klassifiziert.

Der Verkauf des Gebäudes in Spanien wurde nicht vollzogen. Das Gebäude wurde wieder in das langfristige Vermögen umgegliedert.

Im Vorjahr wurden die beabsichtigten Verkäufe der Geschäfte mit nationalen taggenauen Sendungen von DHL Express (UK) Ltd., Großbritannien, und DHL Express (France) SAS, Frankreich, gemäß IFRS 5 klassifiziert. Die letztmalige Bewertung der langfristigen Vermögenswerte vor Umgliederung in das kurzfristige Vermögen gemäß IFRS 5 hatte bei beiden Unternehmen zu einer Wertminderung von jeweils 32 Mio € geführt. Bei DHL Express UK wurden nach der Umgliederung weitere Anpassungen auf den beizulegenden Zeitwert abzüglich Veräußerungskosten in Höhe von 16 Mio € vorgenommen.

### 31. Dezember 2009

| MIO €                                                | DHL Express UK | DHL Express France |
|------------------------------------------------------|----------------|--------------------|
| <b>AKTIVA</b>                                        |                |                    |
| Langfristige Vermögenswerte                          | 0              | 2                  |
| Vorräte                                              | 1              | 0                  |
| Forderungen und sonstige kurzfristige Vermögenswerte | 50             | 62                 |
| Flüssige Mittel                                      | 0              | 6                  |
| <b>Summe AKTIVA</b>                                  | <b>51</b>      | <b>70</b>          |
| <b>PASSIVA</b>                                       |                |                    |
| Langfristige Rückstellungen                          | 6              | 8                  |
| Kurzfristige Rückstellungen                          | 11             | 14                 |
| Kurzfristige Finanzschulden                          | 0              | 6                  |
| Kurzfristige Verbindlichkeiten                       | 34             | 70                 |
| <b>Summe PASSIVA</b>                                 | <b>51</b>      | <b>98</b>          |

Die auf DHL Express UK im Eigenkapital entfallenden Aufwendungen zeigt die folgende Tabelle:

### Im Eigenkapital kumulativ erfasste Erträge und Aufwendungen

| MIO €                       | Aktionären der Deutsche Post AG zuzuordnendes Eigenkapital | Nicht beherrschende Anteile | Eigenkapital gesamt |
|-----------------------------|------------------------------------------------------------|-----------------------------|---------------------|
| <b>2009</b>                 |                                                            |                             |                     |
| Währungsumrechnungsrücklage | -14                                                        | 0                           | -14                 |

Im Geschäftsjahr 2010 wurden die Verkäufe der Geschäftsfelder beider Gesellschaften vollzogen, siehe [Textziffer 2.](#)

## 39 Gezeichnetes Kapital

### 39.1 Anteilsverhältnisse

Die KfW Bankengruppe (KfW), siehe [Textziffer 55.1](#), hält 30,5 % am Grundkapital der Deutsche Post AG. Der Anteil der im Streubesitz befindlichen Aktien beträgt 69,5 %.

### Anteilsbesitz zum 31. Dezember

| Stück                                       | 2009                 | 2010                 |
|---------------------------------------------|----------------------|----------------------|
| KfW                                         | 368.277.358          | 368.277.358          |
| Streubesitz                                 | 840.738.516          | 840.738.516          |
| <b>Anteilsverhältnisse zum 31. Dezember</b> | <b>1.209.015.874</b> | <b>1.209.015.874</b> |

### 39.2 Gezeichnetes Kapital und Erwerb eigener Anteile

Das gezeichnete Kapital beträgt 1.209 Mio €. Es besteht aus 1.209.015.874 auf den Namen lautenden Stückaktien (Stammaktien) mit einem auf die einzelne Aktie entfallenden anteiligen Betrag des Grundkapitals von 1 € und ist voll eingezahlt.

### Entwicklung gezeichnetes Kapital

| €                         | 2009                 | 2010                 |
|---------------------------|----------------------|----------------------|
| Stand 1. Januar           | 1.209.015.874        | 1.209.015.874        |
| Erwerb eigene Anteile     | 0                    | -769.794             |
| Ausgabe eigene Anteile    | 0                    | 769.794              |
| <b>Stand 31. Dezember</b> | <b>1.209.015.874</b> | <b>1.209.015.874</b> |

Im ersten Quartal 2010 hatte die Deutsche Post AG im Rahmen der erteilten Ermächtigung vom 21. April 2009 769.794 Aktien für die Bedienung des im Geschäftsjahr 2009 eingeführten neuen Bonusprogramms für Führungskräfte (Share Matching Scheme) zu einem Gesamtpreis von 10 Mio € einschließlich Anschaffungsnebenkosten erworben. Dementsprechend reduzierte sich das gezeichnete Kapital um den Nennwert der erworbenen Aktien. Der Kaufpreis je Aktie betrug durchschnittlich 12,96 €. Der Nennbetrag der eigenen Anteile wird mit dem gezeichneten Kapital und der Unterschiedsbetrag zwischen Nennwert und ausgewiesenem Wert der eigenen Anteile wird mit der Gewinnrücklage verrechnet. Mit Ausgabe von 769.794 Aktien an die Führungskräfte im April 2010 erhöhte sich das gezeichnete Kapital wieder um 769.794 €. Die Entwicklung der eigenen Anteile ist in der Eigenkapitalveränderungsrechnung enthalten.

### Genehmigtes/bedingtes Kapital zum 31. Dezember 2010

|                          | Betrag (Mio €) | Zweck                                                             |
|--------------------------|----------------|-------------------------------------------------------------------|
| Genehmigtes Kapital 2009 | 240            | Erhöhung Grundkapital gegen Bar-/Sacheinlage (bis 20. April 2014) |
| Bedingtes Kapital III    | 56             | Ausgabe von Options-/Wandlungsrechten (7. Mai 2012)               |

### 39.3 Ermächtigung zum Erwerb eigener Aktien

Die Gesellschaft ist durch Beschluss der Hauptversammlung vom 28. April 2010 ermächtigt, bis zum 27. April 2015 eigene Aktien bis zu 10 % des bei Beschlussfassung bestehenden Grundkapitals zu erwerben. Die Ermächtigung sieht vor, dass der Vorstand sie zu jedem gesetzlich zulässigen Zweck ausüben kann, insbesondere zur Verfolgung der im Beschluss der Hauptversammlung genannten Ziele. Weiterhin wurde der Vorstand ermächtigt eigene Aktien auch unter Einsatz von Derivaten zu erwerben. Am 31. Dezember 2010 hielt die Deutsche Post AG wie zum Vorjahresstichtag keine eigenen Aktien.

### 39.4 Angaben zum unternehmerischen Kapital

Im Geschäftsjahr 2010 lag die Eigenkapitalquote bei 28,3 % (Vorjahr: 23,8 %). Die Kontrolle des unternehmerischen Kapitals erfolgt über die Net Gearing Ratio, die definiert ist als Nettofinanzverschuldung dividiert durch das Gesamtkapital, wobei dies der Summe aus Eigenkapital und Nettofinanzverschuldung entspricht. Für 2010 betrug die Ratio -14,8 % (Vorjahr: -25,7 %).

| MIO €                                                                                                    | 2009          | 2010          |
|----------------------------------------------------------------------------------------------------------|---------------|---------------|
| Gesamte Finanzschulden                                                                                   | 7.439         | 7.022         |
| Abzüglich flüssige Mittel und Zahlungsmitteläquivalente                                                  | -3.064        | -3.415        |
| Abzüglich kurzfristige finanzielle Vermögenswerte                                                        | -1.894        | -655          |
| Abzüglich Long-term Deposits                                                                             | -120          | -120          |
| Abzüglich langfristige derivative Finanzinstrumente                                                      | -805          | -2.531        |
| Abzüglich Finanzschulden gegenüber nicht beherrschenden Anteilseignern von Williams Lea                  | -23           | -28           |
| Abzüglich Pflichtumtauschleihe                                                                           | -2.670        | -2.796        |
| Abzüglich Barsicherung                                                                                   | -1.200        | -1.248        |
| Zuzüglich Nettoeffekt aus der Bewertung der Derivate im Zusammenhang mit beabsichtigtem Postbank-Verkauf | 647           | 2.389         |
| <b>Nettofinanzverschuldung (+)/-liquidität (-)</b>                                                       | <b>-1.690</b> | <b>-1.382</b> |
| Zuzüglich gesamtes Eigenkapital                                                                          | 8.273         | 10.696        |
| <b>Gesamtkapital</b>                                                                                     | <b>6.583</b>  | <b>9.314</b>  |
| Net Gearing Ratio (%)                                                                                    | -25,7         | -14,8         |

## 40 Andere Rücklagen

| MIO €                              | 2009       | 2010         |
|------------------------------------|------------|--------------|
| Kapitalrücklagen                   | 2.147      | 2.158        |
| Neubewertungsrücklage gemäß IAS 39 | 7          | 86           |
| Hedge-Rücklage gemäß IAS 39        | -77        | -33          |
| Neubewertungsrücklage gemäß IFRS 3 | 7          | 6            |
| Währungsumrechnungsrücklage        | -1.215     | -682         |
| <b>Andere Rücklagen</b>            | <b>869</b> | <b>1.535</b> |

### 40.1 Kapitalrücklagen

| MIO €                                             | 2009         | 2010         |
|---------------------------------------------------|--------------|--------------|
| Kapitalrücklagen zum 1. Januar                    | 2.142        | 2.147        |
| Zuführung                                         |              |              |
| Ausgabe der Rechte am Share Matching Scheme 2009  | 5            | 6            |
| Ausgabe der Rechte am Share Matching Scheme 2010  | 0            | 14           |
| Ausübung der Rechte am Share Matching Scheme 2009 | 0            | -9           |
| <b>Kapitalrücklagen zum 31. Dezember</b>          | <b>2.147</b> | <b>2.158</b> |

Im Vorjahr wurde für einen Teil der Konzernführungskräfte ein neues System zur Gewährung variabler Gehaltsbestandteile eingeführt. Für die Tranchen 2009 und 2010 des Share Matching Scheme wurde bis zum 31. Dezember 2010 ein Betrag in Höhe von 20 MIO € (31. Dezember 2009: 5 MIO €) der Kapitalrücklage zu-

geführt. Mit Ausübung der Rechte an Aktien im April 2010 verringerte sich die Kapitalrücklage durch die entsprechende Ausgabe eigener Anteile an die Führungskräfte um 9 MIO €.

### 40.2 Neubewertungsrücklage gemäß IAS 39

Die Neubewertungsrücklage enthält die erfolgsneutral berücksichtigten Auf- und Abwertungen aus Zeitwertänderungen von Finanzinstrumenten der Kategorie „Zur Veräußerung verfügbare finanzielle Vermögenswerte“. Die erfolgswirksame Auflösung der Rücklage erfolgt entweder mit der Veräußerung oder bei dauerhaftem Absinken des Marktwertes unter die Anschaffungskosten.

| MIO €                                                      | 2009     | 2010      |
|------------------------------------------------------------|----------|-----------|
| Stand 1. Januar                                            | -222     | 7         |
| Währungsumrechnungsdifferenzen                             | -5       | 1         |
| Nicht realisierte Gewinne/Verluste                         | 455      | 5         |
| Anteil assoziierter Unternehmen                            | 130      | 90        |
| Realisierte Gewinne/Verluste                               | -351     | -16       |
| <b>Neubewertungsrücklage zum 31. Dezember vor Steuern</b>  | <b>7</b> | <b>87</b> |
| Latente Steuern                                            | 0        | -1        |
| <b>Neubewertungsrücklage zum 31. Dezember nach Steuern</b> | <b>7</b> | <b>86</b> |

### 40.3 Hedge-Rücklage gemäß IAS 39

Die Hedge-Rücklage wird um den effektiven Teil des Sicherungsgeschäftes eines Cashflow Hedges angepasst. Bei Abwicklung des Grundgeschäftes wird die Hedge-Rücklage erfolgswirksam aufgelöst.

| MIO €                                               | 2009       | 2010       |
|-----------------------------------------------------|------------|------------|
| Stand 1. Januar                                     | -32        | -78        |
| Zugänge                                             | -1         | -67        |
| Abgänge in Bilanz (Basis Adjustment)                | 4          | 0          |
| Abgänge in Gewinn- und Verlust-Rechnung             | -49        | 109        |
| <b>Hedge-Rücklage zum 31. Dezember vor Steuern</b>  | <b>-78</b> | <b>-36</b> |
| Latente Steuern                                     | 1          | 3          |
| <b>Hedge-Rücklage zum 31. Dezember nach Steuern</b> | <b>-77</b> | <b>-33</b> |

Die Veränderung der Hedge-Rücklage ergibt sich im Wesentlichen aus der Vereinnahmung bisher unrealisierter Gewinne und Verluste aus der Absicherung künftiger operativer Fremdwährungstransaktionen. Im Geschäftsjahr wurden insgesamt 12 MIO € unrealisierte Verluste aus der Hedge-Rücklage ergebniswirksam im operativen Ergebnis im sonstigen betrieblichen Aufwand (Vorjahr: -54 MIO € unrealisierte Gewinne im sonstigen betrieblichen Ertrag) und 97 MIO € (Vorjahr: 5 MIO €) unrealisierte Verluste im Finanzergebnis erfasst. Im abgelaufenen Geschäftsjahr erfolgten keine Anpassungsbuchungen aus Sicherungstransaktionen, die im Zusammenhang stehen mit der Anschaffung langfristiger nicht-finanzieller Vermögenswerte (Vorjahr: 4 MIO €). Auf die Hedge-Rücklage sind latente Steuern gebildet worden.

#### 40.4 Neubewertungsrücklage gemäß IFRS 3

| MIO €                                                      | 2009     | 2010     |
|------------------------------------------------------------|----------|----------|
| Stand 1. Januar                                            | 8        | 7        |
| Erfolgsneutrale Veränderungen                              | -1       | -1       |
| <b>Neubewertungsrücklage gemäß IFRS 3 zum 31. Dezember</b> | <b>7</b> | <b>6</b> |

Die Neubewertungsrücklage gemäß IFRS 3 enthält die aus der Kaufpreisallokation entstandenen stillen Reserven der DHL Logistics Co. Ltd., China (ehemals Exel-Sinotrans Freight Forwarding Co. Ltd.). Sie beziehen sich auf die in dem zuvor gehaltenen 50-%-Anteil enthaltenen Kundenbeziehungen sowie Anpassungen auf latente Steuern.

#### 40.5 Währungsumrechnungsrücklage

Die Währungsumrechnungsrücklage enthält das im Rahmen der Kapitalkonsolidierung entstandene Umrechnungsergebnis aus der Konsolidierung der in Fremdwährung bilanzierenden Tochterunternehmen.

| MIO €                                               | 2009          | 2010        |
|-----------------------------------------------------|---------------|-------------|
| Stand 1. Januar                                     | -1.397        | -1.215      |
| Erfolgswirksame Veränderungen                       | 31            | 20          |
| Erfolgsneutrale Veränderungen                       | 151           | 513         |
| <b>Währungsumrechnungsrücklage zum 31. Dezember</b> | <b>-1.215</b> | <b>-682</b> |

#### 41 Gewinnrücklage

Die Gewinnrücklage enthält die in der Vergangenheit erzielten Konzernergebnisse, soweit sie nicht ausgeschüttet wurden. Zur Entwicklung der Rücklagen im Geschäftsjahr siehe auch die Eigenkapitalveränderungsrechnung.

| MIO €                                           | 2009         | 2010         |
|-------------------------------------------------|--------------|--------------|
| Stand 1. Januar                                 | 6.178        | 6.098        |
| Dividendenzahlung                               | -725         | -725         |
| Konzernjahresergebnis                           | 644          | 2.541        |
| Transaktionen mit nicht beherrschenden Anteilen | 0            | -147         |
| Übrige Veränderung                              | 1            | 0            |
| <b>Gewinnrücklage zum 31. Dezember</b>          | <b>6.098</b> | <b>7.767</b> |

Als Folge der Einstellung des Domestic-Business bei Express USA wurden im November 2010 die von anderen Anteilseignern gehaltenen Anteile der vorher bereits als Special Purpose Entity vollkonsolidierten ASTAR Air Cargo Holdings, LLC erworben. Als Gegenleistung für den Erhalt der Anteile wurden 72 MIO € Zahlungsmittel sowie weitere Vermögenswerte, im Wesentlichen Flugzeuge, hingegeben. Dazu kamen weitere Anschaffungsnebenkosten in Höhe von 1 MIO €. Diese Transaktion wurde als Transaktion zwischen Eigenkapitalgebern nach IAS 27 bilanziert. In der Gewinnrücklage ist die Rücklage für eigene Anteile enthalten. Sie entwickelte sich wie folgt:

#### Rücklage für eigene Anteile

| MIO €                  | 2009     | 2010      |
|------------------------|----------|-----------|
| 1. Januar              | 0        | 0         |
| Erwerb eigene Anteile  | 0        | -9        |
| Ausgabe eigene Anteile | 0        | 8         |
| <b>31. Dezember</b>    | <b>0</b> | <b>-1</b> |

Die Entwicklung der eigenen Anteile ist in der Eigenkapitalveränderungsrechnung enthalten.

#### 42 Aktionären der Deutsche Post AG zuzuordnendes Eigenkapital

Das den Aktionären der Deutsche Post AG zuzuordnende Eigenkapital im Geschäftsjahr 2010 beträgt 10.511 MIO € (Vorjahr: 8.176 MIO €).

##### Ausschüttungen

Für Ausschüttungen an die Aktionäre der Deutsche Post AG ist der Bilanzgewinn der Deutsche Post AG in Höhe von 1.502 MIO € nach deutschem Handelsrecht maßgeblich. Der nach Abzug der geplanten Dividendensumme von 786 MIO € (entspricht 0,65 € pro Aktie) verbleibende Betrag von 716 MIO € soll vorgetragen werden.

Im Geschäftsjahr 2010 wurde für das Jahr 2009 eine Dividende von 725 MIO € ausgeschüttet. Im Vorjahr betrug die Dividendenzahlung für das Jahr 2008 ebenfalls 725 MIO €. Dies entsprach in beiden Jahren einer Dividende je Aktie von 0,60 €. Die Dividende unterliegt bei den in Deutschland ansässigen Aktionären nicht der Besteuerung. Von der Ausschüttung wird keine Kapitalertragsteuer einbehalten.

#### 43 Nicht beherrschende Anteile

Dieser Bilanzposten beinhaltet Ausgleichsposten für Anteile fremder Gesellschafter am konsolidierungspflichtigen Kapital aus der Kapitalkonsolidierung sowie die ihnen zustehenden Gewinne und Verluste. Die Anteile entfallen im Wesentlichen auf folgende Unternehmen:

| MIO €                                               | 2009      | 2010       |
|-----------------------------------------------------|-----------|------------|
| DHL Sinotrans International Air Courier Ltd., China | 53        | 84         |
| Lemuir Logistics Private Limited, Indien            | 15        | 18         |
| Blue Dart Express Limited, Indien                   | 14        | 18         |
| Tradeteam Limited, Großbritannien                   | 16        | 18         |
| Andere Unternehmen                                  | -1        | 47         |
| <b>Nicht beherrschende Anteile</b>                  | <b>97</b> | <b>185</b> |

#### 44 Rückstellungen für Pensionen und ähnliche Verpflichtungen

Die nachstehenden Angaben über die Pensionsverpflichtungen gliedern sich nach den Bereichen Deutschland, Großbritannien sowie Sonstige.



#### 44.1 Rückstellungen für Pensionen und ähnliche Verpflichtungen nach Bereichen

| MIO €                                                     | Deutschland  | Groß-<br>britannien | Sonstige  | Gesamt       |
|-----------------------------------------------------------|--------------|---------------------|-----------|--------------|
| <b>31. Dezember 2010</b>                                  |              |                     |           |              |
| Rückstellungen für Pensionen und ähnliche Verpflichtungen | 4.150        | 157                 | 206       | 4.513        |
| Pensionsvermögen                                          | 0            | 196                 | 179       | 375          |
| <b>Nettopensionsrückstellungen</b>                        | <b>4.150</b> | <b>-39</b>          | <b>27</b> | <b>4.138</b> |
| <b>31. Dezember 2009</b>                                  |              |                     |           |              |
| Rückstellungen für Pensionen und ähnliche Verpflichtungen | 4.204        | 187                 | 183       | 4.574        |
| Pensionsvermögen                                          | 0            | 128                 | 160       | 288          |
| <b>Nettopensionsrückstellungen</b>                        | <b>4.204</b> | <b>59</b>           | <b>23</b> | <b>4.286</b> |

#### 44.2 Versicherungsmathematische Parameter

Der Großteil der leistungsorientierten Pensionsverpflichtungen des Konzerns bezieht sich auf Versorgungssysteme in Deutschland und Großbritannien. Darüber hinaus werden signi-

fikante Versorgungssysteme in Ländern des restlichen Euroraums, der Schweiz und den USA angeboten. Die versicherungsmathematische Bewertung wesentlicher Pensionspläne erfolgte auf Basis der folgenden Parameter:

| %                                      | Deutschland | Groß-<br>britannien | Restlicher<br>Euroraum | Schweiz | USA  |
|----------------------------------------|-------------|---------------------|------------------------|---------|------|
| <b>31. Dezember 2010</b>               |             |                     |                        |         |      |
| Rechnungszinsfuß                       | 5,00        | 5,50                | 5,00                   | 2,75    | 5,50 |
| Erwartete Lohn- und Gehaltsentwicklung | 2,50        | 3,44                | 2,57                   | 3,00    | –    |
| Erwartete Inflationsrate               | 2,00        | 3,00                | 2,00                   | 1,50    | –    |
| <b>31. Dezember 2009</b>               |             |                     |                        |         |      |
| Rechnungszinsfuß                       | 5,25        | 5,75                | 5,25                   | 3,00    | 5,75 |
| Erwartete Lohn- und Gehaltsentwicklung | 2,50        | 3,84                | 2,63                   | 3,00    | –    |
| Erwartete Inflationsrate               | 2,00        | 2,75                | 2,00                   | 1,50    | –    |

Die Berechnung der Lebenserwartung bei den deutschen Konzernunternehmen basiert auf den Richttafeln 2005 G, herausgegeben von Klaus Heubeck. Für die britischen Pensionspläne wurden die Sterblichkeitsraten angesetzt, die für die letzte sogenannte Funding Valuation verwendet wurden. Diese beruhen auf

planspezifischen Analysen der Sterblichkeit und beinhalten einen Zuschlag für eine erwartete Zunahme der Lebenserwartung in der Zukunft. In den anderen Ländern wurden landesspezifische Sterbetafeln verwendet.

#### 44.3 Ermittlung des Periodenaufwands

Zur Ermittlung des Periodenaufwands wurde folgender durchschnittlich erwarteter Ertrag aus Planvermögen verwendet:

| %                                                   | Deutschland | Groß-<br>britannien | Restlicher<br>Euroraum | Schweiz | USA  |
|-----------------------------------------------------|-------------|---------------------|------------------------|---------|------|
| <b>31. Dezember 2010</b>                            |             |                     |                        |         |      |
| Durchschnittlich erwarteter Ertrag aus Planvermögen | 4,15        | 6,25                | 5,69                   | 4,25    | 7,00 |
| <b>31. Dezember 2009</b>                            |             |                     |                        |         |      |
| Durchschnittlich erwarteter Ertrag aus Planvermögen | 4,22        | 6,74                | 6,20                   | 4,25    | 7,50 |

Der durchschnittlich erwartete Ertrag aus Planvermögen wurde auf Basis langfristiger Erträge aus Anleihen (Staat und Industrie) bestimmt. Dabei wurden geeignete Risikozuschläge

auf Basis historischer Kapitalmarktrenditen und gegenwärtiger Kapitalmarkterwartungen unter Beachtung der Struktur des Planvermögens einbezogen.

#### 44.4 Abstimmung von Barwert der Verpflichtung, Zeitwert des Planvermögens und der Pensionsrückstellung

MIO €

|                                                                                                      | Deutschland  | Groß-<br>britannien | Sonstige   | Gesamt       |
|------------------------------------------------------------------------------------------------------|--------------|---------------------|------------|--------------|
| <b>2010</b>                                                                                          |              |                     |            |              |
| Barwert der Verpflichtung am 31. Dezember der vollständig oder teilweise kapitalgedeckten Leistungen | 4.003        | 3.294               | 1.589      | 8.886        |
| Barwert der Verpflichtung am 31. Dezember der nicht kapitalgedeckten Leistungen                      | 3.272        | 8                   | 183        | 3.463        |
| Barwert der Gesamtverpflichtung am 31. Dezember                                                      | 7.275        | 3.302               | 1.772      | 12.349       |
| Zeitwert des Planvermögens am 31. Dezember                                                           | -2.122       | -3.378              | -1.519     | -7.019       |
| Nicht realisierte Gewinne (+)/Verluste (-)                                                           | -1.003       | 36                  | -232       | -1.199       |
| Nicht realisierter, nachzuverrechnender Dienstzeitaufwand                                            | 0            | 0                   | 0          | 0            |
| Vermögensanpassung aufgrund Vermögensobergrenze                                                      | 0            | 1                   | 6          | 7            |
| <b>Nettopensionsrückstellungen am 31. Dezember</b>                                                   | <b>4.150</b> | <b>-39</b>          | <b>27</b>  | <b>4.138</b> |
| Pensionsvermögen am 31. Dezember                                                                     | 0            | 196                 | 179        | 375          |
| <b>Rückstellungen für Pensionen und ähnliche Verpflichtungen am 31. Dezember</b>                     | <b>4.150</b> | <b>157</b>          | <b>206</b> | <b>4.513</b> |
| <b>2009</b>                                                                                          |              |                     |            |              |
| Barwert der Verpflichtung am 31. Dezember der vollständig oder teilweise kapitalgedeckten Leistungen | 3.879        | 2.996               | 1.368      | 8.243        |
| Barwert der Verpflichtung am 31. Dezember der nicht kapitalgedeckten Leistungen                      | 3.251        | 8                   | 162        | 3.421        |
| Barwert der Gesamtverpflichtung am 31. Dezember                                                      | 7.130        | 3.004               | 1.530      | 11.664       |
| Zeitwert des Planvermögens am 31. Dezember                                                           | -2.073       | -3.060              | -1.339     | -6.472       |
| Nicht realisierte Gewinne (+)/Verluste (-)                                                           | -852         | 114                 | -184       | -922         |
| Nicht realisierter, nachzuverrechnender Dienstzeitaufwand                                            | -1           | 0                   | 0          | -1           |
| Vermögensanpassung aufgrund Vermögensobergrenze                                                      | 0            | 1                   | 16         | 17           |
| <b>Nettopensionsrückstellungen am 31. Dezember</b>                                                   | <b>4.204</b> | <b>59</b>           | <b>23</b>  | <b>4.286</b> |
| Pensionsvermögen am 31. Dezember                                                                     | 0            | 128                 | 160        | 288          |
| <b>Rückstellungen für Pensionen und ähnliche Verpflichtungen am 31. Dezember</b>                     | <b>4.204</b> | <b>187</b>          | <b>183</b> | <b>4.574</b> |

#### 44.5 Entwicklung des Barwerts der Gesamtverpflichtung

MIO €

|                                                        | Deutschland  | Groß-<br>britannien | Sonstige     | Gesamt        |
|--------------------------------------------------------|--------------|---------------------|--------------|---------------|
| <b>2010</b>                                            |              |                     |              |               |
| Barwert der Gesamtverpflichtung am 1. Januar           | 7.130        | 3.004               | 1.530        | 11.664        |
| Laufender Dienstzeitaufwand, ohne Arbeitnehmerbeiträge | 76           | 31                  | 35           | 142           |
| Arbeitnehmerbeiträge                                   | 8            | 17                  | 15           | 40            |
| Zinsaufwand                                            | 366          | 178                 | 73           | 617           |
| Rentenzahlungen                                        | -487         | -166                | -90          | -743          |
| Nachzuverrechnender Dienstzeitaufwand                  | 13           | 1                   | -3           | 11            |
| Plankürzungen                                          | 0            | -5                  | -2           | -7            |
| Planabgeltungen                                        | 0            | 0                   | -1           | -1            |
| Transfers/Vermögensüberträge                           | 4            | 3                   | 0            | 7             |
| Akquisitionen/Desinvestitionen                         | 3            | 0                   | -2           | 1             |
| Versicherungsmathematische Gewinne (-)/Verluste (+)    | 162          | 137                 | 106          | 405           |
| Währungseffekte                                        | 0            | 102                 | 111          | 213           |
| <b>Barwert der Gesamtverpflichtung am 31. Dezember</b> | <b>7.275</b> | <b>3.302</b>        | <b>1.772</b> | <b>12.349</b> |
| <b>2009</b>                                            |              |                     |              |               |
| Barwert der Gesamtverpflichtung am 1. Januar           | 6.681        | 2.684               | 1.488        | 10.853        |
| Laufender Dienstzeitaufwand, ohne Arbeitnehmerbeiträge | 69           | 40                  | 48           | 157           |
| Arbeitnehmerbeiträge                                   | 8            | 18                  | 13           | 39            |
| Zinsaufwand                                            | 373          | 188                 | 72           | 633           |
| Rentenzahlungen                                        | -487         | -161                | -104         | -752          |
| Nachzuverrechnender Dienstzeitaufwand                  | 16           | 0                   | 1            | 17            |
| Plankürzungen                                          | 0            | 0                   | -23          | -23           |
| Planabgeltungen                                        | 0            | 0                   | 0            | 0             |
| Transfers/Vermögensüberträge                           | -1           | 5                   | -6           | -2            |
| Akquisitionen/Desinvestitionen                         | 0            | 0                   | -2           | -2            |
| Versicherungsmathematische Gewinne (-)/Verluste (+)    | 471          | -7                  | 36           | 500           |
| Währungseffekte                                        | 0            | 237                 | 7            | 244           |
| <b>Barwert der Gesamtverpflichtung am 31. Dezember</b> | <b>7.130</b> | <b>3.004</b>        | <b>1.530</b> | <b>11.664</b> |

#### 44.6 Entwicklung des Planvermögens

| MIO €                                             | Deutschland  | Groß-<br>britannien | Sonstige     | Gesamt       |
|---------------------------------------------------|--------------|---------------------|--------------|--------------|
| <b>2010</b>                                       |              |                     |              |              |
| Zeitwert des Planvermögens am 1. Januar           | 2.073        | 3.060               | 1.339        | 6.472        |
| Arbeitgeberbeiträge                               | 169          | 106                 | 31           | 306          |
| Arbeitnehmerbeiträge                              | 0            | 4                   | 15           | 19           |
| Erwartete Erträge aus Planvermögen                | 88           | 207                 | 79           | 374          |
| Gewinne (+)/Verluste (-) aus Planvermögen         | 1            | 59                  | 41           | 101          |
| Rentenzahlungen                                   | -209         | -165                | -77          | -451         |
| Transfers                                         | -1           | 3                   | 0            | 2            |
| Akquisitionen                                     | 1            | 0                   | 0            | 1            |
| Planabgeltungen                                   | 0            | 0                   | -1           | -1           |
| Währungseffekte                                   | 0            | 104                 | 92           | 196          |
| <b>Zeitwert des Planvermögens am 31. Dezember</b> | <b>2.122</b> | <b>3.378</b>        | <b>1.519</b> | <b>7.019</b> |
| <b>2009</b>                                       |              |                     |              |              |
| Zeitwert des Planvermögens am 1. Januar           | 1.992        | 2.594               | 1.257        | 5.843        |
| Arbeitgeberbeiträge                               | 203          | 62                  | 57           | 322          |
| Arbeitnehmerbeiträge                              | 0            | 4                   | 13           | 17           |
| Erwartete Erträge aus Planvermögen                | 76           | 188                 | 71           | 335          |
| Gewinne (+)/Verluste (-) aus Planvermögen         | 9            | 138                 | 27           | 174          |
| Rentenzahlungen                                   | -207         | -160                | -90          | -457         |
| Transfers                                         | 0            | 5                   | 1            | 6            |
| Akquisitionen                                     | 0            | 0                   | 0            | 0            |
| Planabgeltungen                                   | 0            | 0                   | 0            | 0            |
| Währungseffekte                                   | 0            | 229                 | 3            | 232          |
| <b>Zeitwert des Planvermögens am 31. Dezember</b> | <b>2.073</b> | <b>3.060</b>        | <b>1.339</b> | <b>6.472</b> |

Das Planvermögen besteht aus festverzinslichen Wertpapieren (42 %; Vorjahr: 37 %), Aktien und Investmentfonds (30 %; Vorjahr: 29 %), Immobilien (19 %; Vorjahr: 20 %), liquiden Mitteln (4 %; Vorjahr: 11 %), Versicherungsverträgen (4 %; Vorjahr: 1 %) und anderen Vermögenswerten (1 %; Vorjahr: 2 %).

Von den Immobilien werden 79 % (Vorjahr: 83 %) mit einem Zeitwert von 1.043 MIO € (Vorjahr: 1.050 MIO €) durch die Deutsche Post AG selbst genutzt.

#### 44.7 Finanzierungsstand

| MIO €                                       | 2006<br>Gesamt | 2007<br>Gesamt | 2008<br>Gesamt | 2009<br>Gesamt | 2010<br>Gesamt |
|---------------------------------------------|----------------|----------------|----------------|----------------|----------------|
| Barwert der Verpflichtungen am 31. Dezember | 15.205         | 13.529         | 12.246         | 11.664         | 12.349         |
| Zeitwert des Planvermögens am 31. Dezember  | -7.784         | -7.772         | -6.235         | -6.472         | -7.019         |
| <b>Finanzierungsstand<sup>1)</sup></b>      | <b>7.421</b>   | <b>5.757</b>   | <b>6.011</b>   | <b>5.192</b>   | <b>5.330</b>   |

<sup>1)</sup> Der Finanzierungsstand wird bis zum Geschäftsjahr 2008 inklusive der Werte der Deutschen Postbank Gruppe ausgewiesen

#### 44.8 Gewinne und Verluste

| MIO €                                                                            | 2006      | 2007      | 2008          | 2009       | 2010       |
|----------------------------------------------------------------------------------|-----------|-----------|---------------|------------|------------|
|                                                                                  | Gesamt    | Gesamt    | Gesamt        | Gesamt     | Gesamt     |
| Tatsächlicher Ertrag aus Planvermögen                                            | 448       | 473       | - 632         | 509        | 475        |
| Erwarteter Ertrag aus Planvermögen                                               | 391       | 439       | 415           | 335        | 374        |
| <b>Erfahrungsbedingte Gewinne (+)/Verluste (-) aus Planvermögen<sup>1)</sup></b> | <b>57</b> | <b>34</b> | <b>-1.047</b> | <b>174</b> | <b>101</b> |

<sup>1)</sup> Die erfahrungsbedingten Gewinne und Verluste werden bis zum Geschäftsjahr 2008 inklusive der Werte der Deutschen Postbank Gruppe ausgewiesen

| MIO €                                                                                                | 2006       | 2007         | 2008       | 2009        | 2010        |
|------------------------------------------------------------------------------------------------------|------------|--------------|------------|-------------|-------------|
|                                                                                                      | Gesamt     | Gesamt       | Gesamt     | Gesamt      | Gesamt      |
| Erfahrungsbedingte Gewinne (+)/Verluste (-) aus Verpflichtungen                                      | -226       | 116          | 11         | 61          | 50          |
| Annahmenänderungsbedingte Gewinne (+)/Verluste (-) aus Verpflichtungen                               | 488        | 1.298        | 635        | -561        | -455        |
| <b>Gesamte versicherungs-mathematische Gewinne (+)/Verluste (-) aus Verpflichtungen<sup>1)</sup></b> | <b>262</b> | <b>1.414</b> | <b>646</b> | <b>-500</b> | <b>-405</b> |

<sup>1)</sup> Die gesamten versicherungsmathematischen Gewinne und Verluste aus Verpflichtungen werden bis zum Geschäftsjahr 2008 inklusive der Werte der Deutschen Postbank Gruppe ausgewiesen

#### 44.9 Entwicklung der Nettopensionsrückstellungen

| MIO €                                              | Deutschland  | Groß-britannien | Sonstige  | Gesamt       |
|----------------------------------------------------|--------------|-----------------|-----------|--------------|
| <b>2010</b>                                        |              |                 |           |              |
| Nettopensionsrückstellungen am 1. Januar           | 4.204        | 59              | 23        | 4.286        |
| Pensionsaufwand                                    | 378          | -7              | 41        | 412          |
| Rentenzahlungen                                    | -278         | -1              | -13       | -292         |
| Arbeitgeberbeiträge                                | -169         | -106            | -31       | -306         |
| Arbeitnehmerbeiträge                               | 8            | 13              | 0         | 21           |
| Akquisitionen/Desinvestitionen                     | 2            | 0               | -2        | 0            |
| Transfers                                          | 5            | 0               | -2        | 3            |
| Währungseffekte                                    | 0            | 3               | 11        | 14           |
| <b>Nettopensionsrückstellungen am 31. Dezember</b> | <b>4.150</b> | <b>-39</b>      | <b>27</b> | <b>4.138</b> |
| <b>2009</b>                                        |              |                 |           |              |
| Nettopensionsrückstellungen am 1. Januar           | 4.299        | 63              | 61        | 4.423        |
| Pensionsaufwand                                    | 381          | 40              | 40        | 461          |
| Rentenzahlungen                                    | -280         | -1              | -14       | -295         |
| Arbeitgeberbeiträge                                | -203         | -62             | -57       | -322         |
| Arbeitnehmerbeiträge                               | 8            | 14              | 0         | 22           |
| Akquisitionen/Desinvestitionen                     | 0            | 0               | -2        | -2           |
| Transfers                                          | -1           | 0               | -7        | -8           |
| Währungseffekte                                    | 0            | 5               | 2         | 7            |
| <b>Nettopensionsrückstellungen am 31. Dezember</b> | <b>4.204</b> | <b>59</b>       | <b>23</b> | <b>4.286</b> |

In Bezug auf die Nettopensionsrückstellungen werden im Jahr 2011 Zahlungen in Höhe von 608 MIO € erwartet. Hiervon entfallen 284 MIO € auf direkte erwartete Rentenzahlungen des Unternehmens und 324 MIO € auf erwartete Arbeitgeberbeiträge an Pensionsfonds.

#### 44.10 Pensionsaufwand

| MIO €                                                         | Deutschland | Groß-britannien | Sonstige  | Gesamt     |
|---------------------------------------------------------------|-------------|-----------------|-----------|------------|
| <b>2010</b>                                                   |             |                 |           |            |
| Laufender Dienstzeitaufwand, ohne Arbeitnehmerbeiträge        | 76          | 31              | 35        | 142        |
| Zinsaufwand                                                   | 366         | 178             | 73        | 617        |
| Erwartete Erträge aus Planvermögen                            | -88         | -207            | -79       | -374       |
| Realisierter nachzuverrechnender Dienstzeitaufwand            | 14          | 1               | -3        | 12         |
| Amortisation noch nicht realisierter Gewinne (-)/Verluste (+) | 10          | -4              | 26        | 32         |
| Auswirkungen von Plankürzungen                                | 0           | -6              | -2        | -8         |
| Auswirkungen von Planabgeltungen                              | 0           | 0               | 0         | 0          |
| Auswirkungen der Vermögensobergrenze                          | 0           | 0               | -9        | -9         |
| <b>Pensionsaufwand</b>                                        | <b>378</b>  | <b>-7</b>       | <b>41</b> | <b>412</b> |
| <b>2009</b>                                                   |             |                 |           |            |
| Laufender Dienstzeitaufwand, ohne Arbeitnehmerbeiträge        | 69          | 40              | 48        | 157        |
| Zinsaufwand                                                   | 373         | 188             | 72        | 633        |
| Erwartete Erträge aus Planvermögen                            | -76         | -188            | -71       | -335       |
| Realisierter nachzuverrechnender Dienstzeitaufwand            | 17          | 0               | 1         | 18         |
| Amortisation noch nicht realisierter Gewinne (-)/Verluste (+) | -2          | 0               | -3        | -5         |
| Auswirkungen von Plankürzungen                                | 0           | 0               | -20       | -20        |
| Auswirkungen von Planabgeltungen                              | 0           | 0               | 0         | 0          |
| Auswirkungen der Vermögensobergrenze                          | 0           | 0               | 13        | 13         |
| <b>Pensionsaufwand</b>                                        | <b>381</b>  | <b>40</b>       | <b>40</b> | <b>461</b> |

Vom gesamten Pensionsaufwand sind im Jahr 2010 im Personalaufwand 169 MIO € (Vorjahr: 163 MIO €) und im sonstigen Finanzergebnis 243 MIO € (Vorjahr: 298 MIO €) enthalten.

#### 45 Sonstige Rückstellungen

| MIO €                                  | Langfristig  |              | Kurzfristig  |              | Gesamt       |              |
|----------------------------------------|--------------|--------------|--------------|--------------|--------------|--------------|
|                                        | 2009         | 2010         | 2009         | 2010         | 2009         | 2010         |
| Sonstige Personalleistungen            | 815          | 924          | 307          | 259          | 1.122        | 1.183        |
| Restrukturierungsrückstellungen        | 743          | 696          | 840          | 452          | 1.583        | 1.148        |
| Versicherungstechnische Rückstellungen | 330          | 374          | 198          | 179          | 528          | 553          |
| Postwertzeichen                        | 0            | 0            | 500          | 450          | 500          | 450          |
| Übrige Rückstellungen                  | 387          | 446          | 801          | 919          | 1.188        | 1.365        |
|                                        | <b>2.275</b> | <b>2.440</b> | <b>2.646</b> | <b>2.259</b> | <b>4.921</b> | <b>4.699</b> |

##### 45.1 Entwicklung sonstige Rückstellungen

| MIO €                          | Sonstige Personal-leistungen | Restrukturierungs-Rück-stellungen | Versiche-rungstech-nische Rück-stellungen | Postwert-zeichen | Übrige Rück-stellungen | Gesamt       |
|--------------------------------|------------------------------|-----------------------------------|-------------------------------------------|------------------|------------------------|--------------|
| Stand 1. Januar 2010           | 1.122                        | 1.583                             | 528                                       | 500              | 1.188                  | 4.921        |
| Änderung Konsolidierungskreis  | 0                            | 0                                 | 0                                         | 0                | -4                     | -4           |
| Verbrauch                      | -677                         | -628                              | -96                                       | -500             | -786                   | -2.687       |
| Währungsumrechnungsdifferenz   | 0                            | 82                                | 10                                        | 0                | 22                     | 114          |
| Auflösung                      | -49                          | -308                              | -31                                       | 0                | -130                   | -518         |
| Aufzinsung                     | 46                           | 48                                | 13                                        | 0                | 21                     | 128          |
| Umgliederung                   | -1                           | 4                                 | 0                                         | 0                | 2                      | 5            |
| Zuführung                      | 742                          | 367                               | 129                                       | 450              | 1.052                  | 2.740        |
| <b>Stand 31. Dezember 2010</b> | <b>1.183</b>                 | <b>1.148</b>                      | <b>553</b>                                | <b>450</b>       | <b>1.365</b>           | <b>4.699</b> |



In der Rückstellung „Sonstige Personalleistungen“ sind im Wesentlichen Aufwendungen für die Personalreduzierung (Abfindungen, Überbrückungsgelder, Altersteilzeit etc.) passiviert.

Die Restrukturierungsrückstellungen umfassen sämtliche Aufwendungen, die aus den Restrukturierungsmaßnahmen innerhalb des us-Expressbereichs sowie auch aus dem übrigen Konzern resultieren. Diese betreffen Maßnahmen, die im Wesentlichen auf Leistungsverpflichtungen gegenüber Arbeitnehmern anlässlich der Beendigung des Arbeitsverhältnisses (Altersteilzeitprogramme, Überbrückungsgelder) sowie Aufwendungen für die Schließung von z.B. Terminals beruhen.

Die versicherungstechnischen Rückstellungen enthalten überwiegend Rückstellungen für bekannte Schäden sowie Spätschadenrückstellungen, nähere Angaben finden sich unter [Textziffer 7](#).

Die Rückstellung für Postwertzeichen beinhaltet offene Leistungsverpflichtungen gegenüber den Kunden für Brief- und Paketzustellungen aus verkauften, aber vom Kunden noch vorgehaltenen Postwertzeichen und basiert auf Untersuchungen von Marktforschungsunternehmen. Sie werden zum Nominalwert der ausgebenen Wertzeichen bewertet.

#### 45.3 Fälligkeitsstruktur

Die Fälligkeitsstruktur zu den im Geschäftsjahr 2010 bilanzierten Rückstellungen zeigt sich wie folgt:

| MIO €                                  | Bis 1 Jahr   | Über 1 Jahr<br>bis 2 Jahre | Über 2 Jahre<br>bis 3 Jahre | Über 3 Jahre<br>bis 4 Jahre | Über 4 Jahre<br>bis 5 Jahre | Über 5 Jahre | Gesamt       |
|----------------------------------------|--------------|----------------------------|-----------------------------|-----------------------------|-----------------------------|--------------|--------------|
| <b>2010</b>                            |              |                            |                             |                             |                             |              |              |
| Sonstige Personalleistungen            | 259          | 299                        | 183                         | 122                         | 89                          | 231          | 1.183        |
| Restrukturierungsrückstellungen        | 452          | 131                        | 33                          | 30                          | 14                          | 488          | 1.148        |
| Versicherungstechnische Rückstellungen | 179          | 162                        | 78                          | 57                          | 29                          | 48           | 553          |
| Postwertzeichen                        | 450          | 0                          | 0                           | 0                           | 0                           | 0            | 450          |
| Übrige Rückstellungen                  | 919          | 231                        | 66                          | 47                          | 27                          | 75           | 1.365        |
|                                        | <b>2.259</b> | <b>823</b>                 | <b>360</b>                  | <b>256</b>                  | <b>159</b>                  | <b>842</b>   | <b>4.699</b> |

## 46 Finanzschulden

| MIO €                                                                 | Langfristig  |              | Kurzfristig |            | Gesamt       |              |
|-----------------------------------------------------------------------|--------------|--------------|-------------|------------|--------------|--------------|
|                                                                       | 2009         | 2010         | 2009        | 2010       | 2009         | 2010         |
| Anleihen                                                              | 1.870        | 1.682        | 0           | 0          | 1.870        | 1.682        |
| Verbindlichkeiten gegenüber Kreditinstituten                          | 197          | 44           | 380         | 315        | 577          | 359          |
| Verbindlichkeiten aus Finance Lease                                   | 241          | 183          | 28          | 27         | 269          | 210          |
| Verbindlichkeiten gegenüber Konzernunternehmen                        | 98           | 27           | 28          | 110        | 126          | 137          |
| Erfolgswirksam zum beizulegenden Zeitwert bewertete Verbindlichkeiten | 84           | 15           | 57          | 100        | 141          | 115          |
| Sonstige Finanzschulden                                               | 4.209        | 4.324        | 247         | 195        | 4.456        | 4.519        |
| <b>Finanzschulden</b>                                                 | <b>6.699</b> | <b>6.275</b> | <b>740</b>  | <b>747</b> | <b>7.439</b> | <b>7.022</b> |

#### 45.2 Übrige Rückstellungen

| MIO €                              | 2009         | 2010         |
|------------------------------------|--------------|--------------|
| Steuerrückstellungen               | 315          | 404          |
| Prozesskosten                      | 136          | 121          |
| Risiken aus der Geschäftstätigkeit | 147          | 135          |
| Postbeamtenkrankenkasse            | 22           | 12           |
| Beihilfeleistungen für Beamte      | 22           | 20           |
| Personalrückstellungen             | 22           | 21           |
| Sonstige übrige Rückstellungen     | 524          | 652          |
| <b>Übrige Rückstellungen</b>       | <b>1.188</b> | <b>1.365</b> |

Die Steuerrückstellungen enthalten mit 273 MIO € (Vorjahr: 218 MIO €) Umsatzsteuer, mit 17 MIO € (Vorjahr: 9 MIO €) Zölle und Abgaben sowie mit 114 MIO € (Vorjahr: 88 MIO €) sonstige Steuerrückstellungen.

Die Risiken aus der Geschäftstätigkeit umfassen Verpflichtungen wie Drohverlust- und Gewährleistungsverpflichtungen. In den sonstigen Rückstellungen ist eine Vielzahl von Einzelsachverhalten enthalten.

#### 46.1 Anleihen

Weitere Angaben zu den wesentlichen Anleihen enthält die folgende Tabelle. Die Anleihen der Deutsche Post Finance B. V. sind in voller Höhe durch die Deutsche Post AG garantiert.

##### Wesentliche Anleihen

|                   | Nominalzins | Nominalvolumen | Emittent                    | 2009              |                   | 2010              |                   |
|-------------------|-------------|----------------|-----------------------------|-------------------|-------------------|-------------------|-------------------|
|                   |             |                |                             | Buchwert<br>MIO € | Zeitwert<br>MIO € | Buchwert<br>MIO € | Zeitwert<br>MIO € |
| Anleihe 2002/2012 | 5,125 %     | 679 MIO €      | Deutsche Post Finance B. V. | 721               | 723               | 713               | 718               |
| Anleihe 2003/2014 | 4,875 %     | 926 MIO €      | Deutsche Post Finance B. V. | 957               | 981               | 954               | 992               |

#### 46.2 Verbindlichkeiten gegenüber Kreditinstituten

Die folgende Tabelle enthält die Laufzeiten und Konditionen einzelner wesentlicher Kontrakte, die unter den Verbindlichkeiten gegenüber Kreditinstituten ausgewiesen werden. Die genannten Verbindlichkeiten gegenüber Kreditinstituten sind in voller Höhe durch die Deutsche Post AG garantiert.

##### Laufzeiten und Konditionen

|                                                | Kreditinstitut                         | Zinssatz       | Laufzeitende | Buchwert 2009 | Buchwert 2010 |
|------------------------------------------------|----------------------------------------|----------------|--------------|---------------|---------------|
|                                                |                                        |                |              | MIO €         | MIO €         |
| Deutsche Post International B. V., Niederlande | Europäische Investitionsbank Luxemburg | 4,923 %        | 12.2011      | 114           | 123           |
| Deutsche Post International B. V., Niederlande | Europäische Investitionsbank Luxemburg | 3-Mon.-Floater | 06.2011      | 24            | 8             |
| Deutsche Post International B. V., Niederlande | Europäische Investitionsbank Luxemburg | 5,81 %         | 02.2011      | 14            | 7             |
| Deutsche Post AG, Deutschland                  | DZ BANK                                | 4,565 %        | 12.2010      | 201           | 0             |
| Sonstige                                       |                                        |                |              | 224           | 221           |
|                                                |                                        |                |              | <b>577</b>    | <b>359</b>    |

#### 46.3 Verbindlichkeiten aus Finance Lease

Die Verbindlichkeiten aus Finance Lease betreffen im Wesentlichen folgende Sachverhalte:

| MIO €                                      |                                              |          |              |                               |      |      |
|--------------------------------------------|----------------------------------------------|----------|--------------|-------------------------------|------|------|
|                                            | Leasingpartner                               | Zinssatz | Laufzeitende | Objekt                        | 2009 | 2010 |
| Deutsche Post Immobilien GmbH, Deutschland | Lorac Investment Management Sarl             | 6 %      | 2016         | Immobilien                    | 15   | 11   |
| DHL Express (US) Inc., USA                 | Wachovia Financial Services;<br>Wells Fargo  | 6,74 %   | 2019/2022    | Sortier System<br>Software    | 35   | 36   |
| scm Supply Chain Management Inc., Kanada   | Bank of Nova Scotia                          | variabel | 2012/2013    | Warehouse,<br>Büroausstattung | 41   | 34   |
| Deutsche Post AG, Deutschland              | r-Systems International GmbH,<br>Deutschland | 5 %      | 2011         | IT-Ausstattung                | 19   | 15   |

Die Leasinggegenstände sind mit Buchwerten in Höhe von 374 MIO € (Vorjahr: 521 MIO €) in den Sachanlagen ausgewiesen. Die Abweichung zwischen den Buchwerten der Vermögenswerte und Verbindlichkeiten resultiert aus der längeren wirtschaftlichen Nutzungsdauer der Vermögenswerte gegenüber dem kürzeren Rückzahlungszeitraum der Leasingraten sowie Sondertilgungen von Leasingverpflichtungen. Der Nominalwert der Mindestleasingzahlungen beträgt 234 MIO € (Vorjahr: 319 MIO €).

#### Fälligkeitsstruktur

| MIO €                   | Barwert (Verbindlichkeiten aus Finance Lease) |            | Mindestleasingzahlungen Nominalwert |            |
|-------------------------|-----------------------------------------------|------------|-------------------------------------|------------|
|                         | 2009                                          | 2010       | 2009                                | 2010       |
| Bis 1 Jahr              | 28                                            | 27         | 40                                  | 33         |
| Über 1 Jahr bis 5 Jahre | 155                                           | 108        | 187                                 | 120        |
| Über 5 Jahre            | 86                                            | 75         | 92                                  | 81         |
| <b>Gesamt</b>           | <b>269</b>                                    | <b>210</b> | <b>319</b>                          | <b>234</b> |

#### 46.4 Erfolgswirksam zum beizulegenden Zeitwert bewertete finanzielle Verbindlichkeiten

Die unter dieser Position ausgewiesenen Beträge betreffen die negativen Marktwerte derivativer Finanzinstrumente.

| MIO €                                                                             | 2009 | 2010 |
|-----------------------------------------------------------------------------------|------|------|
| Erfolgswirksam zum beizulegenden Zeitwert bewertete finanzielle Verbindlichkeiten | 141  | 115  |

Ausführliche Erläuterungen zu den Veränderungen finden sich unter [Textziffer 50](#).

## 47 Sonstige Verbindlichkeiten

| MIO €                      | Langfristig |      | Kurzfristig |       | Gesamt |       |
|----------------------------|-------------|------|-------------|-------|--------|-------|
|                            | 2009        | 2010 | 2009        | 2010  | 2009   | 2010  |
| Sonstige Verbindlichkeiten | 372         | 401  | 3.674       | 4.047 | 4.046  | 4.448 |

## 46.5 Sonstige Finanzschulden

| MIO €                                                                                          |                                | 2009         | 2010         |
|------------------------------------------------------------------------------------------------|--------------------------------|--------------|--------------|
| Pflichtumtauschleihe (aufgezinst)                                                              | Deutsche Post AG               | 2.670        | 2.796        |
| Sonstige Verbindlichkeiten im Zusammenhang mit beabsichtigtem Verkauf Deutsche-Postbank-Aktien | Deutsche Post AG               | 1.320        | 1.368        |
| Schuldscheindarlehen (Loan Notes) gegenüber Exel-Altaktionären                                 | Deutsche Post AG               | 61           | 40           |
| Übrige Finanzschulden                                                                          | Sonstige Konzerngesellschaften | 405          | 315          |
| <b>Sonstige Finanzschulden</b>                                                                 |                                | <b>4.456</b> | <b>4.519</b> |

Die sonstigen Finanzschulden bilden im Wesentlichen die Transaktionen im Zusammenhang mit dem beabsichtigten Verkauf von Deutsche-Postbank-Aktien ab. Die Finanzverbindlichkeiten bestehen aus einer Pflichtumtauschleihe auf 60 Millionen Postbank-Aktien, einer Sicherheitsleistung für den Erwerb weiterer 26 Millionen Postbank-Aktien (Cash Collateral) sowie aus Ausgleichszahlungen auf abgewickelte Sicherungsgeschäfte, die zur Sicherung der Deutsche-Bank-Aktien abgeschlossen worden sind, siehe [Textziffer 2](#).

#### 47.1 Gliederung der sonstigen Verbindlichkeiten

| MIO €                                                                                                 | 2009         | 2010         |
|-------------------------------------------------------------------------------------------------------|--------------|--------------|
| Steuerverbindlichkeiten                                                                               | 661          | 884          |
| Leistungszulagen                                                                                      | 477          | 609          |
| Urlaubsansprüche                                                                                      | 410          | 385          |
| Rechnungsabgrenzungsposten, davon langfristig:<br>73 (Vorjahr: 41)                                    | 266          | 323          |
| Löhne, Gehälter, Abfindungen                                                                          | 229          | 288          |
| Verbindlichkeiten aus dem Verkauf von Wohnungs-<br>baudarlehen, davon langfristig: 273 (Vorjahr: 281) | 287          | 278          |
| Verbindlichkeiten im Rahmen der sozialen Sicherheit                                                   | 159          | 181          |
| Verbindlichkeiten gegenüber Mitarbeitern und<br>Organmitgliedern                                      | 288          | 165          |
| Kreditorische Debitoren                                                                               | 105          | 116          |
| Überzeitarbeitsansprüche                                                                              | 88           | 100          |
| Sonstige Freizeitanprüche                                                                             | 71           | 70           |
| Verbindlichkeiten aus Nachnahme                                                                       | 47           | 58           |
| Abgegrenzte Mietzahlungen                                                                             | 19           | 23           |
| Verbindlichkeiten Ausgangsschecks                                                                     | 19           | 20           |
| Verbindlichkeiten aus Schadenersatz                                                                   | 15           | 19           |
| Abgegrenzte Versicherungsbeiträge für Schadenersatz<br>und Ähnliches                                  | 15           | 15           |
| Verbindlichkeiten gegenüber Versicherungen                                                            | 25           | 13           |
| Übrige sonstige Verbindlichkeiten, davon langfristig:<br>55 (Vorjahr: 50)                             | 865          | 901          |
|                                                                                                       | <b>4.046</b> | <b>4.448</b> |

Die Steuerverbindlichkeiten betreffen mit 504 MIO € (Vorjahr: 318 MIO €) Umsatzsteuer, mit 252 MIO € (Vorjahr: 214 MIO €) Zölle und Abgaben sowie mit 128 MIO € (Vorjahr: 129 MIO €) sonstige Steuerverbindlichkeiten.

Die Verbindlichkeiten aus dem Verkauf von Wohnungsbaudarlehen betreffen Verpflichtungen der Deutsche Post AG zur Zahlung von Zinssubventionen an Darlehensnehmer zum Ausgleich von Konditionsnachteilen im Zusammenhang mit den in Vorjahren erfolgten Forderungsabtretungen sowie Verpflichtungen aus weiterzuleitenden Tilgungen und Zinsen für verkaufte Wohnungsbaudarlehen.

In den sonstigen Verbindlichkeiten ist eine Vielzahl von Einzelsachverhalten enthalten.

#### 47.2 Fälligkeitsstruktur

| MIO €                                                 | 2009         | 2010         |
|-------------------------------------------------------|--------------|--------------|
| Bis 1 Jahr                                            | 3.674        | 4.047        |
| Über 1 Jahr bis 2 Jahre                               | 36           | 43           |
| Über 2 Jahre bis 3 Jahre                              | 13           | 15           |
| Über 3 Jahre bis 4 Jahre                              | 7            | 13           |
| Über 4 Jahre bis 5 Jahre                              | 34           | 30           |
| Über 5 Jahre                                          | 282          | 300          |
| <b>Fälligkeitsstruktur sonstige Verbindlichkeiten</b> | <b>4.046</b> | <b>4.448</b> |

Für die sonstigen Verbindlichkeiten ergeben sich aufgrund kurzer Laufzeiten bzw. einer marktnahen Verzinsung keine signifikanten Unterschiede zwischen den bilanziellen Buch- und Zeitwerten. Es besteht kein signifikantes Zinsrisiko, da sie größtenteils marktnah variabel verzinslich sind.

#### 48 Verbindlichkeiten aus Lieferungen und Leistungen

Die Verbindlichkeiten aus Lieferungen und Leistungen beinhalten auch die Verbindlichkeiten gegenüber Konzernunternehmen.

| MIO €                                            | 2009  | 2010  |
|--------------------------------------------------|-------|-------|
| Verbindlichkeiten aus Lieferungen und Leistungen | 4.861 | 5.707 |

Die Verbindlichkeiten aus Lieferungen und Leistungen entfallen mit 844 MIO € (Vorjahr: 862 MIO €) auf die Deutsche Post AG. Die Verbindlichkeiten aus Lieferungen und Leistungen haben im Wesentlichen eine Fälligkeit von unter einem Jahr. Der ausgewiesene Buchwert entspricht dem Marktwert.

## ERLÄUTERUNGEN ZUR KAPITALFLUSS-RECHNUNG

#### 49 Erläuterungen zur Kapitalflussrechnung

Die Kapitalflussrechnung der fortgeführten Geschäftsbereiche wird gemäß IAS 7 (Cashflow-Statement) erstellt. Sie legt die Zahlungsströme offen, um Herkunft und Verwendung der flüssigen Mittel aufzuzeigen. Sie unterscheidet dabei zwischen Mittelveränderungen aus laufender Geschäftstätigkeit, Investitions- und Finanzierungstätigkeit. Die flüssigen Mittel beinhalten Kassenbestand, Schecks sowie Guthaben bei Kreditinstituten mit einer Restlaufzeit von nicht mehr als drei Monaten und entsprechen den flüssigen Mitteln laut Bilanz. Effekte der Währungsumrechnung sowie Änderungen des Konsolidierungskreises werden bei der Berechnung bereinigt.

Ende Februar 2009 wurden die Postbank-Aktien aus der ersten Tranche wie geplant veräußert und die Gesellschaft entkonsolidiert. Die aufgegebenen Geschäftsbereiche beinhalten für das Vorjahr somit noch die Zahlungsströme der ersten beiden Monate des Jahres 2009.

#### 49.1 Mittelzufluss aus operativer Geschäftstätigkeit

Der Cashflow aus operativer Geschäftstätigkeit wird ermittelt, indem zunächst das Ergebnis vor Steuern um das Finanzergebnis sowie nicht zahlungswirksame Größen bereinigt wird, ergänzt um die Steuerzahlungen, die Veränderungen der Rückstellungen sowie die Veränderungen der sonstigen langfristigen Vermögenswerte und Verbindlichkeiten (Mittelzufluss aus operativer Geschäftstätigkeit vor Änderung des kurzfristigen Nettovermögens). Nach Berücksichtigung der Veränderungen der kurzfristigen Vermögenswerte und Verbindlichkeiten (ohne Finanzschulden) ergibt sich ein Mittelzufluss/-abfluss aus operativer Geschäftstätigkeit.

Der Mittelzufluss aus operativer Geschäftstätigkeit der fortgeführten Geschäftsbereiche vor Änderung des kurzfristigen Vermögens konnte im Vergleich zum Vorjahr um 1.346 MIO € auf 2.109 MIO € deutlich gesteigert werden. Dies liegt zu einem großen Teil an dem gestiegenen EBIT, das sich um 1.604 MIO € verbessert hat. Die im EBIT enthaltenen Abschreibungen sind nicht zahlungswirksam und werden daher wieder korrigiert. Sie sind um 324 MIO € geringer als im Vorjahr. Weiterhin sind die im EBIT enthaltenen Verluste aus dem Abgang von Vermögenswerten in Höhe von 279 MIO € nicht der operativen Geschäftstätigkeit zuzuordnen. Sie werden daher in der Zeile „Ergebnis aus dem Abgang von langfristigen Vermögenswerten“ wieder korrigiert und stattdessen in den Mittelveränderungen aus der Investitionstätigkeit gezeigt. Der Anstieg beim Working Capital hat zu einem Mittelabfluss von 182 MIO € geführt. Insbesondere der Aufbau der Forderungen und sonstigen Vermögenswerte hat hierzu maßgeblich beigetragen. Im Vorjahr hat der Rückgang des Working Capital noch zu einem Mittelzufluss von 481 MIO € geführt. Insgesamt hat sich der Mittelzufluss aus operativer Geschäftstätigkeit der fortgeführten Geschäftsbereiche um 683 MIO € auf 1.927 MIO € erhöht.

#### Zahlungsunwirksame Erträge und Aufwendungen

| MIO €                                              | 2009       | 2010      |
|----------------------------------------------------|------------|-----------|
| Aufwendungen aus Neubewertung Vermögenswerte       | 234        | 103       |
| Erträge aus Neubewertung Verbindlichkeiten         | -107       | -145      |
| Aufwendungen aus Abgang Vermögenswerte             | 2          | 51        |
| Personalaufwand aus Share Matching Scheme          | 5          | 20        |
| Sonstiges                                          | -6         | -2        |
| <b>Zahlungsunwirksame Erträge und Aufwendungen</b> | <b>128</b> | <b>27</b> |

#### 49.2 Mittelzufluss aus Investitionstätigkeit

Der Cashflow aus der Investitionstätigkeit ergibt sich im Wesentlichen aus dem Mittelzufluss aus den Abgängen langfristiger Vermögenswerte (Desinvestitionen) und dem Mittelabfluss für Investitionen in langfristige Vermögenswerte. Daneben werden in diesem Tätigkeitsbereich erhaltene Zinsen und Dividenden sowie die Mittelzu- bzw. -abflüsse aus der Veränderung der kurzfristigen finanziellen Vermögenswerte berücksichtigt.

Im Berichtsjahr ergab sich aus der Investitionstätigkeit ein Mittelzufluss von 8 MIO € gegenüber einem Mittelabfluss von 1.457 MIO € im Vorjahr. Verantwortlich hierfür war in erster Linie der Verkauf von Geldmarktfonds, der zu einem Zufluss liquider Mittel aus kurzfristigen finanziellen Vermögenswerten geführt hat. Im Vorjahr haben die Veränderungen der kurzfristigen finanziellen Vermögenswerte per Saldo noch zu einem Mittelabfluss von 659 MIO € geführt: Aus dem Verkauf der Deutsche-Bank-Aktien waren liquide Mittel zugeflossen, die wiederum in Kapitalmarktanlagen investiert wurden.

Die Verkäufe des Expressgeschäfts mit nationalen taggenauen Sendungen in Frankreich und Großbritannien führten zu einem Mittelabfluss und haben die Einzahlungen aus den Abgängen von langfristigen Vermögenswerten entsprechend gemindert. Für den Erwerb von Tochterunternehmen und sonstige Geschäftseinheiten sind 74 MIO € aufgewendet worden. Sie sind vor allem für nachträgliche Kaufpreiszahlungen für Flying Cargo und für den Kauf der nugg.ad AG angefallen. Die Auszahlungen für Investitionen in Sachanlagen und immaterielle Vermögenswerte liegen mit 1.174 MIO € auf dem Vorjahresniveau und sind vorrangig für Ersatzinvestitionen angefallen.

Bei den Akquisitionen von Unternehmen wurden folgende Vermögenswerte und Schulden übernommen, siehe auch [Textziffer 2:](#)

| MIO €                                              | 2009 | 2010 |
|----------------------------------------------------|------|------|
| Langfristige Vermögenswerte                        | 5    | 0    |
| Kurzfristige Vermögenswerte (ohne flüssige Mittel) | 9    | 1    |
| Rückstellungen                                     | 0    | 0    |
| Sonstige Verbindlichkeiten                         | -16  | 0    |

Die Zusammenfassung des Mittelzuflusses aus operativer Tätigkeit und des Mittelabflusses aus Investitionstätigkeit bildet den Free Cashflow. Der Free Cashflow wird als Indikator dafür angesehen, wie viele Zahlungsmittel dem Unternehmen für Dividendenzahlungen oder für die Rückführung der Verschuldung zur Verfügung stehen. Da einerseits der Mittelzufluss aus operativer Geschäftstätigkeit deutlich gesteigert und andererseits aus der Investitionstätigkeit ebenfalls ein Mittelzufluss erzielt wurde, hat sich der Free Cashflow überaus positiv entwickelt: Er konnte von -213 MIO € im Vorjahr auf 1.935 MIO € im Berichtsjahr gesteigert werden.

#### 49.3 Mittelabfluss aus Finanzierungstätigkeit

Aus der Finanzierungstätigkeit sind im Berichtsjahr Mittel in Höhe von 1.651 MIO € abgeflossen gegenüber einem Mittelzufluss im Vorjahr von 1.669 MIO €. Größte Auszahlung in diesem Tätigkeitsbereich war mit 725 MIO € erneut die Zahlung der Dividende an die Aktionäre. Für die Reduzierung der Finanzverschuldung sind liquide Mittel in Höhe von netto 641 MIO € verwendet worden. Der Mittelzufluss des Vorjahres war vor allem geprägt durch die Zeichnung der Pflichtumtauschleihe durch die Deutsche Bank AG im Rahmen des beabsichtigten Postbank-Verkaufs sowie die Zahlung der Besicherung der Verkaufsoption für die verbliebenen Postbank-Anteile. Dieser Mittelzufluss wurde zum Teil zur Tilgung von Finanzschulden eingesetzt. Deshalb reduzierten sich die Zinszahlungen um 108 MIO € gegenüber dem Vorjahr.

#### 49.4 Flüssige Mittel

Die dargestellten Mittelzu- und -abflüsse der einzelnen Tätigkeitsbereiche haben zu einem Bestand an flüssigen Mitteln und Zahlungsmitteläquivalenten der fortgeführten Geschäftsbereiche von 3.415 MIO € geführt, siehe [Textziffer 37](#). Im Vergleich zum Vorjahr hat sich der Bestand um 351 MIO € erhöht. Dazu haben Währungsumrechnungsdifferenzen mit 67 MIO € beigetragen.

## SONSTIGE ERLÄUTERUNGEN

### 50 Risiken und Finanzinstrumente des Konzerns

#### 50.1 Risikomanagement

Aufgrund seiner operativen Geschäftstätigkeit sieht sich der Konzern mit Finanzrisiken konfrontiert, die aus der Änderung von Wechselkursen, Rohstoffpreisen und Zinssätzen entstehen können. Zur Steuerung dieser Finanzrisiken werden neben originären Finanzinstrumenten auch Derivate eingesetzt. Die Nutzung von Derivaten erfolgt ausschließlich zur Begrenzung originärer Finanzrisiken, der Einsatz von Derivaten zu spekulativen Zwecken ist daher in den internen Konzernrichtlinien nicht vorgesehen.

Änderungen von Wechselkursen, Zinssätzen oder Rohstoffpreisen können zu signifikanten Schwankungen der Marktwerte der eingesetzten Derivate führen. Diese Marktwertschwankungen sollten nicht isoliert von den gesicherten Grundgeschäften betrachtet werden, da Derivate und Grundgeschäfte hinsichtlich ihrer gegenläufigen Wertentwicklung eine Einheit bilden.

Die für den Einsatz von Derivaten erforderlichen Handlungsrahmen, Verantwortlichkeiten und Kontrollen sind in den internen Richtlinien des Konzerns eindeutig geregelt. Für die Erfassung, Bewertung und Abwicklung der Finanztransaktionen kommt eine geeignete Risikomanagement-Software zum Einsatz, mit der auch die Wirksamkeit der Sicherungsbeziehungen regelmäßig kontrolliert wird. Zur Begrenzung des Kontrahentenrisikos, das aus dem Abschluss von Finanztransaktionen entstehen kann, sind als Geschäftspartner nur Banken erstklassiger Bonität zugelassen. Jedem Kontrahenten wird ein individuelles Kontrahentenlimit zugeordnet, dessen Ausschöpfung regelmäßig überprüft wird. Der Konzernvorstand wird intern in regelmäßigen Abständen über die existierenden Finanzrisiken und die zur Risikosteuerung eingesetzten Sicherungsgeschäfte informiert. Die externe Bilanzierung der genutzten Finanzinstrumente erfolgt gemäß IAS 39.

#### Liquiditätsmanagement

Ziel des Liquiditätsmanagements ist es, den Konzern Deutsche Post DHL und die Konzerngesellschaften in die Lage zu versetzen, Zahlungsverpflichtungen zeitgerecht zu erfüllen. Zu diesem Zweck wird die Liquidität im Konzern über Cash Pools weitestgehend zentralisiert und im Corporate Center gesteuert.

Steuerungsgrößen sind die zentral verfügbaren Liquiditätsreserven (Funding Availability), die sich aus den zentralen kurzfristigen Geldanlagen und den fest zugesagten Kreditlinien zusammensetzen. Ziel des Konzerns ist die Verfügbarkeit von mindestens 2 MRD € zentralen Kreditlinien.

Zum 31. Dezember 2010 verfügte der Konzern über zentrale Liquiditätsreserven von 4,6 MRD € (Vorjahr: 6,2 MRD €). Die Reserve setzte sich im Vorjahr aus einer zentralen Geldanlage in Höhe von 3,5 MRD € und weiteren Kreditlinien mit diversen Banken in Höhe von insgesamt 2,7 MRD € zusammen. Zum Bilanzstichtag bestehen Reserven aus zentralen Geldanlagen in Höhe von 2,6 MRD €, hinzu kommt eine syndizierte Kreditlinie in Höhe von 2,0 MRD €, die im Dezember 2010 ausgehandelt worden ist.



Die Fälligkeitsstruktur der originären finanziellen Verbindlichkeiten im Anwendungsbereich des IFRS 7 basierend auf Cashflows stellt sich wie folgt dar:

**Fälligkeitsanalyse: Restlaufzeiten**

| MIO €                                            | Bis 1 Jahr   | Über 1 Jahr<br>bis 2 Jahre | Über 2 Jahre<br>bis 3 Jahre | Über 3 Jahre<br>bis 4 Jahre | Über 4 Jahre<br>bis 5 Jahre | Über 5 Jahre |
|--------------------------------------------------|--------------|----------------------------|-----------------------------|-----------------------------|-----------------------------|--------------|
| <b>Zum 31. Dezember 2010</b>                     |              |                            |                             |                             |                             |              |
| Langfristige Finanzschulden                      | 80           | 5.285                      | 130                         | 1.000                       | 29                          | 115          |
| Sonstige Verbindlichkeiten                       | 0            | 6                          | 5                           | 5                           | 4                           | 256          |
| <b>Langfristige Verbindlichkeiten</b>            | <b>80</b>    | <b>5.291</b>               | <b>135</b>                  | <b>1.005</b>                | <b>33</b>                   | <b>371</b>   |
| Kurzfristige Finanzschulden                      | 747          | 0                          | 0                           | 0                           | 0                           | 0            |
| Verbindlichkeiten aus Lieferungen und Leistungen | 5.707        | 0                          | 0                           | 0                           | 0                           | 0            |
| Sonstige Verbindlichkeiten                       | 266          | 0                          | 0                           | 0                           | 0                           | 0            |
| <b>Kurzfristige Verbindlichkeiten</b>            | <b>6.720</b> | <b>0</b>                   | <b>0</b>                    | <b>0</b>                    | <b>0</b>                    | <b>0</b>     |
| <b>Zum 31. Dezember 2009</b>                     |              |                            |                             |                             |                             |              |
| Langfristige Finanzschulden                      | 87           | 522                        | 5.223                       | 118                         | 1.010                       | 481          |
| Sonstige Verbindlichkeiten                       | 0            | 46                         | 44                          | 42                          | 41                          | 283          |
| <b>Langfristige Verbindlichkeiten</b>            | <b>87</b>    | <b>568</b>                 | <b>5.267</b>                | <b>160</b>                  | <b>1.051</b>                | <b>764</b>   |
| Kurzfristige Finanzschulden                      | 683          | 0                          | 0                           | 0                           | 0                           | 0            |
| Verbindlichkeiten aus Lieferungen und Leistungen | 4.861        | 0                          | 0                           | 0                           | 0                           | 0            |
| Sonstige Verbindlichkeiten                       | 236          | 0                          | 0                           | 0                           | 0                           | 0            |
| <b>Kurzfristige Verbindlichkeiten</b>            | <b>5.780</b> | <b>0</b>                   | <b>0</b>                    | <b>0</b>                    | <b>0</b>                    | <b>0</b>     |

Unter den langfristigen Verbindlichkeiten „Über 1 Jahr bis 2 Jahre“ wird eine Pflichtumtauschleihe (Zerobond) in Höhe von 2.568 MIO € zzgl. Zinsen ausgewiesen, die im Februar 2009 begeben worden ist und zu 100 % von der Deutschen Bank gezeichnet wurde, siehe [Textziffer 2](#). Die Erfüllung der Verbindlichkeit im Februar 2012 führt zu keinem Cashflow. Die Deutsche Post AG ist verpflichtet, zur Erfüllung 60 MIO Aktien der Deutsche Postbank AG an die Deutsche Bank AG zu übertragen. Weiterhin wird unter den langfristigen Verbindlichkeiten zum einem ein Cash Colla-

teral in Höhe von 1.161 MIO € zzgl. Zinsen ausgewiesen, der von der Deutsche Bank AG im Februar 2009 als Anzahlung auf die geschriebene Put-Option auf 26.417.432 Postbank-Aktien ausgegeben worden ist. Zum anderen wurde eine Verbindlichkeit gegenüber der Deutsche Bank AG in Höhe von 120 MIO € bilanziert, die die Ausgleichszahlungen aus abgewickelten Geschäften zur Sicherung der Deutsche-Bank-Aktien betreffen, siehe [Textziffer 2](#). In gleicher Höhe wurden Sicherheiten hinterlegt.

Die Fälligkeitsstruktur der derivativen Finanzinstrumente basierend auf Cashflows stellt sich wie folgt dar:

#### Fälligkeitsanalyse: Restlaufzeiten

| MIO €                                                      | Bis 1 Jahr | Über 1 Jahr<br>bis 2 Jahre | Über 2 Jahre<br>bis 3 Jahre | Über 3 Jahre<br>bis 4 Jahre | Über 4 Jahre<br>bis 5 Jahre | Über 5 Jahre |
|------------------------------------------------------------|------------|----------------------------|-----------------------------|-----------------------------|-----------------------------|--------------|
| <b>Zum 31. Dezember 2010</b>                               |            |                            |                             |                             |                             |              |
| <b>Forderungen aus Derivaten mit Bruttoausgleich</b>       |            |                            |                             |                             |                             |              |
| Cash Outflow                                               | -1.303     | -119                       | -11                         | -6                          | 0                           | 0            |
| Cash Inflow                                                | 1.361      | 151                        | 16                          | 14                          | 0                           | 0            |
| <b>Mit Nettoausgleich</b>                                  |            |                            |                             |                             |                             |              |
| Cash Inflow                                                | 9          | 0                          | 0                           | 0                           | 0                           | 0            |
| <b>Verbindlichkeiten aus Derivaten mit Bruttoausgleich</b> |            |                            |                             |                             |                             |              |
| Cash Outflow                                               | -2.930     | -46                        | -12                         | -154                        | 0                           | 0            |
| Cash Inflow                                                | 2.822      | 34                         | 8                           | 165                         | 0                           | 0            |
| <b>Mit Nettoausgleich</b>                                  |            |                            |                             |                             |                             |              |
| Cash Outflow                                               | -6         | 0                          | 0                           | 0                           | 0                           | 0            |
| <b>Zum 31. Dezember 2009</b>                               |            |                            |                             |                             |                             |              |
| <b>Forderungen aus Derivaten mit Bruttoausgleich</b>       |            |                            |                             |                             |                             |              |
| Cash Outflow                                               | -2.421     | -44                        | -54                         | -20                         | -149                        | 0            |
| Cash Inflow                                                | 2.474      | 63                         | 66                          | 20                          | 180                         | 0            |
| <b>Mit Nettoausgleich</b>                                  |            |                            |                             |                             |                             |              |
| Cash Inflow                                                | 6          | 0                          | 0                           | 0                           | 0                           | 0            |
| <b>Verbindlichkeiten aus Derivaten mit Bruttoausgleich</b> |            |                            |                             |                             |                             |              |
| Cash Outflow                                               | -1.733     | -129                       | -72                         | -12                         | -8                          | -172         |
| Cash Inflow                                                | 1.670      | 104                        | 58                          | 9                           | 6                           | 158          |
| <b>Mit Nettoausgleich</b>                                  |            |                            |                             |                             |                             |              |
| Cash Outflow                                               | -10        | 0                          | 0                           | 0                           | 0                           | 0            |

Aus derivativen Finanzinstrumenten resultieren sowohl Ansprüche als auch Verpflichtungen. Die vertragliche Gestaltung legt fest, ob diese Ansprüche und Verpflichtungen miteinander verrechnet werden und damit zu einem Nettoausgleich führen oder ob beide Vertragsparteien ihre Verpflichtungen vollständig zu erfüllen haben (Bruttoausgleich). In den Laufzeitbändern „Über 4 bis 5 Jahre“ und „Über 5 Jahre“ sind am 31. Dezember 2010 keine Cashflows auszuweisen, da unter anderem ein langfristiges Derivat, das zum 31. Dezember 2009 mit seinem negativen Marktwert bilanziert wurde und zu entsprechenden Cashflows geführt hätte, in 2010 glattgestellt worden ist, siehe [Textziffer 50.3](#) „Cash-flow Hedges“.

Die mit der Deutsche Bank AG abgeschlossenen Derivate auf Aktien der Deutsche Postbank AG sind in der Übersicht nicht enthalten, da sie zu keinem Cashflow führen.

#### WÄHRUNGSRISIKO UND WÄHRUNGSMANAGEMENT

Durch seine globalen operativen Geschäftsaktivitäten entstehen für den Konzern Währungsrisiken, die zum Zweck des Risikomanagements in bilanzielle Risiken und Risiken aus geplanten Transaktionen unterschieden werden:

Bilanzielle Währungsrisiken entstehen aus der Bewertung und der Erfüllung von bereits gebuchten Fremdwährungspositionen, wenn der Kurs am Bewertungsstichtag oder Erfüllungstag vom Einbuchungskurs abweicht. Die daraus resultierenden Fremdwährungsdifferenzen wirken sich unmittelbar auf das Ergebnis aus. Um diese Effekte weitestgehend zu reduzieren, werden alle wesentlichen bilanziellen Fremdwährungsrisiken im Konzern im Rahmen der Inhousebank-Funktion bei der Deutschen Post AG zentralisiert. Die zentralisierten Risiken werden vom Corporate Treasury zu einer Nettoposition je Währung zusammengefasst und auf Basis von Value-at-Risk-Limiten extern abgesichert. Der währungsbezogene Value at Risk (95 %/1 Monat Haltedauer) für das betreffende Portfolio betrug zum Jahresende insgesamt 3 MIO € bei einem Limit von maximal 5 MIO €.

Der Nominalwert der zur Steuerung bilanzieller Währungsrisiken eingesetzten Devisentermingeschäfte und -Swaps betrug zum Stichtag 3.383 MIO € (Vorjahr: 3.596 MIO €) bei einem Marktwert von -45 MIO € (Vorjahr: -12 MIO €). Auf die Anwendung von Fair Value Hedge Accounting für die Bilanzierung der eingesetzten Derivate wurde aus Vereinfachungsgründen verzichtet, die Derivate werden als Trading-Derivate ausgewiesen.

Geplante Währungsrisiken entstehen aus der Abwicklung zukünftiger Fremdwährungstransaktionen zu Kursen, die von den ursprünglichen Planungs- oder Kalkulationskursen abweichen. Auch diese Währungsrisiken werden im Corporate Treasury zentral erfasst und gesteuert. Ziel ist es, 50 % bis 80 % der Nettorisiken je Fremdwährung zu hedgen und damit die ursprünglichen Plan-kurse zu sichern. Zum Bilanzstichtag betrug die Sicherungsquote für das laufende Geschäft 2011 rund 50 %. Die betreffenden Absicherungsgeschäfte werden im Rahmen von Cashflow Hedge Accounting abgebildet, siehe [Textziffer 50.3](#) „Cashflow Hedges“.

Insgesamt waren zum Stichtag Devisentermingeschäfte und -Swaps mit einem Nominalwert von 4.603 Mio € (Vorjahr: 4.502 Mio €), die zur Risikosteuerung eingesetzt werden, abzu-bilden. Der entsprechende Marktwert belief sich auf –65 Mio € (Vorjahr: –44 Mio €). Devisenoptionen bestanden zum Jahres-ende 2010 nicht (Vorjahr: Marktwert 1 Mio €). Zur Absicherung langfristiger Fremdwährungsfinanzierungen bestanden außerdem Cross-Currency Swaps mit einem Nominalwert von 211 Mio € (Vorjahr: 240 Mio €) und einem Marktwert von –14 Mio € (Vor-jahr: –11 Mio €).

Fremdwährungsrisiken, die aus der Umrechnung von Vermö-genswerten und Schulden ausländischer Unternehmenseinheiten in die Konzernwährung resultieren (Translationsrisiken), waren zum 31. Dezember 2010 nicht gesichert.

Von den zum 31. Dezember 2010 nach IAS 39 im Eigenkapi-tal erfassten unrealisierten Ergebnissen aus währungsbezogenen Derivaten werden voraussichtlich –19 Mio € (Vorjahr: –15 Mio €) im Verlauf des Jahres 2011 ergebniswirksam.

IFRS 7 fordert eine quantitative Risikoindikation, die die Aus-wirkungen von Wechselkursänderungen am Bilanzstichtag auf die Gewinn-und-Verlust-Rechnung und das Eigenkapital analysiert. Dazu werden die im Bestand befindlichen Finanzinstrumente in fremder Währung im Rahmen einer Value-at-Risk-Berechnung (95 % Konfidenz/1 Monat Haltedauer) auf die Auswirkungen dieser Wechselkursänderungen untersucht. Es wird unterstellt, dass der Bestand am Bilanzstichtag repräsentativ für das Gesamtjahr ist.

Die Auswirkungen hypothetischer Wechselkursänderungen auf das Translationsrisiko fallen nicht in den Anwendungsbereich von IFRS 7. Folgende Annahmen werden der Sensitivitätsanalyse zugrunde gelegt:

Originäre Finanzinstrumente von Konzerngesellschaften in fremder Währung werden über die Inhousebank der Deutsche Post AG gesichert, indem die Deutsche Post AG monat-liche Währungskurse fixiert und garantiert. Änderungen der Währungskurse haben daher keinen Einfluss auf die Gewinn-und-Verlust-Rechnung und das Eigenkapital der Konzerngesell-schaften. Da vereinzelt Konzerngesellschaften aus rechtlichen

Gründen nicht am Inhouse Banking teilnehmen können, werden deren Währungsrisiken aus originären Finanzinstrumenten durch den Einsatz von Derivaten zu 100 % lokal gesichert. Sie haben somit keine Auswirkung auf die Risikoposition des Konzerns.

Hypothetische Wechselkursänderungen haben einen er-folgswirksamen Einfluss auf die Marktwerte der externen Deri-vate der Deutsche Post AG und auf die Fremdwährungsergebnisse aus der Stichtagsbewertung der Inhousebank-Salden, Salden von externen Bankkonten und internen und externen Darlehen der Deutsche Post AG. Der währungsbezogene Value at Risk der betreffenden Fremdwährungspositionen betrug zum Stichtag 3 Mio € (Vorjahr: 2 Mio €). Weiterhin haben hypothetische Wech-selkursänderungen Auswirkungen auf das Eigenkapital und auf die Marktwerte der Derivate, die zur Sicherung von bilanzunwirk-samen festen Verpflichtungen und mit hoher Wahrscheinlichkeit eintretenden künftigen Fremdwährungstransaktionen – Cashflow Hedges – abgeschlossen worden sind. Der währungsbezogene Value at Risk dieser Risikoposition lag zum 31. Dezember 2010 bei 25 Mio € (Vorjahr: 10 Mio €). Der gesamte währungsbezo-gene Value at Risk betrug zum Bilanzstichtag 24 Mio € (Vorjahr: 9 Mio €). Aufgrund gegenseitiger Abhängigkeiten ist der Gesamt-wert geringer als die Summe der oben genannten Einzelwerte.

#### ZINSRISIKO UND ZINSMANAGEMENT

Einen Überblick über die bestehenden Finanzschulden ent-hält die [Textziffer 46](#). Mit Hilfe von Zinsderivaten stellt der Kon-zern ein angemessenes Verhältnis von variabel und festverzins-lichen Finanzierungsinstrumenten sicher.

Die Marktwerte der Zinssicherungsgeschäfte wurden auf Basis abgezinster, zukünftig erwarteter Cashflows ermittelt, dafür wird das im Corporate Treasury eingesetzte Risikomanagement-system verwendet.

Zum 31. Dezember 2010 bestanden Zins-Swaps mit einem Nominalvolumen von 1.005 Mio € (Vorjahr: 1.182 Mio €). Der Marktwert dieser Zins-Swap-Position betrug 71 Mio € (Vorjahr: 51 Mio €). Wie im Vorjahr existierten zum Stichtag keine Zins-optionsgeschäfte.

Durch die Tilgung festverzinslicher Finanzschulden hat der Konzern den Anteil von Instrumenten mit kurzfristiger Zins-bindung im Verlauf des Jahres 2010 leicht angehoben. Der An-teil der Finanzschulden mit kurzfristiger Zinsbindung an den gesamten Finanzschulden beträgt nun rund 60 %. Der Einfluss einer Zinsveränderung auf die Finanzlage des Konzerns ist aber nach wie vor unmaßgeblich. In dieser Betrachtung nicht enthalten sind festverzinsliche Finanzschulden im Zusammenhang mit der beabsichtigten Veräußerung der Postbank, da diese Schulden mit Postbank-Aktien getilgt werden und daher kein Zinsrisiko besteht.

Die von IFRS 7 geforderte Darstellung der quantitativen Risikoindikation bezogen auf das Zinsänderungsrisiko erfolgt mittels einer Sensitivitätsanalyse. Mit dieser Methode werden die Effekte aus hypothetischen Marktzinsänderungen auf die Zinserträge und Zinsaufwendungen und auf das Eigenkapital zum Stichtag ermittelt. Folgende Annahmen liegen der Sensitivitätsanalyse zugrunde:

Originäre variabel verzinsliche Finanzinstrumente unterliegen einem Zinsänderungsrisiko und sind deshalb in die Sensitivitätsanalyse einzubeziehen. Originäre variabel verzinsliche Finanzinstrumente, die mittels Cashflow Hedging in festverzinsliche Finanzinstrumente transformiert wurden, werden nicht einbezogen. Marktzinsänderungen wirken sich bei derivativen Finanzinstrumenten, die zur Sicherung von zinsbedingten Zahlungsschwankungen abgeschlossen wurden (Cashflow Hedging), durch Marktwertänderungen auf das Eigenkapital aus und sind deshalb im Rahmen der Sensitivitätsanalyse zu berücksichtigen. Alle festverzinslichen und zu fortgeführten Anschaffungskosten bewerteten Finanzinstrumente unterliegen keinem Zinsänderungsrisiko.

Designierte Fair Value Hedges zur Absicherung von Zinsänderungsrisiken werden in die Analyse nicht einbezogen, da sich die zinsbedingten Wertänderungen des Grundgeschäfts und des Sicherungsgeschäfts nahezu vollständig für die Periode in der Gewinn-und-Verlust-Rechnung ausgleichen. Lediglich der variable Teil des Sicherungsinstruments hat Auswirkungen auf das Finanzergebnis und ist in die Sensitivitätsanalyse einzubeziehen.

Wenn das Marktzinsniveau zum 31. Dezember 2010 um 100 Basispunkte höher gewesen wäre, hätte sich das Finanzergebnis um 4 Mio € verschlechtert (Vorjahr: um 6 Mio € verbessert). Eine Absenkung des Marktzinsniveaus um 100 Basispunkte hätte den gegenläufigen Effekt zur Folge gehabt. Eine Veränderung des Marktzinsniveaus um 100 Basispunkte hätte Auswirkungen auf die im Eigenkapital bilanzierten Marktwerte der Zinsderivate. Eine Zinserhöhung in diesem Geschäftsjahr hätte zu keiner Erhöhung des Eigenkapitals (Vorjahr: 24 Mio €) geführt und eine Absenkung hätte keine Verringerung des Eigenkapitals (Vorjahr: 30 Mio €) zur Folge gehabt. Der deutliche Rückgang der Sensitivität ist auf die vorzeitige Auflösung eines im Vorjahr noch als Cashflow Hedge bilanzierten Zins-Swaps zurückzuführen.

#### MARKTPREISRISIKO

Risiken aus Rohstoffpreisschwankungen wurden wie im Vorjahr weitgehend über operative Maßnahmen an die Kunden weitergegeben, insbesondere für Preisschwankungen von Kerosin und Schiffsdiesel. Darüber hinaus wurden in geringem Umfang aber auch Rohstoffpreis-Swaps für Diesel zur Steuerung der verbliebenen Risiken genutzt. Der Nominalwert dieser Commodity-Swaps betrug 42 Mio € (Vorjahr: 16 Mio €) bei einem Marktwert von 5 Mio € (Vorjahr: 1 Mio €).

IFRS 7 fordert eine Sensitivitätsanalyse, die die Effekte hypothetischer Rohstoffpreisänderungen auf Gewinn-und-Verlust-Rechnung und Eigenkapital darstellt. Rohstoffpreisänderungen hätten Auswirkungen auf den Marktwert der zur Absicherung zukünftiger hochwahrscheinlicher Rohstoffeinkäufe abgeschlossener Derivate (Cashflow Hedges) und die Hedge-Reserve im Eigenkapital. Da alle Rohstoffpreisderivate als Cashflow Hedges bilanziert werden, würde sich eine Rohstoffpreisänderung auf das Eigenkapital aber nicht auf die Gewinn-und-Verlust-Rechnung auswirken.

Wären die den Derivaten zugrunde liegenden Rohstoffpreise zum Bilanzstichtag 10 % höher gewesen, hätte dies zu einer Erhöhung der Marktwerte und damit des Eigenkapitals um 5 Mio € (Vorjahr: 1 Mio €) geführt. Ein entsprechender Rückgang der Rohstoffpreise hätte eine gegenläufige Entwicklung zur Folge gehabt.

Bilanzielle Risiken aus der Änderung von Aktienkursen entstehen für den Konzern aus den im Rahmen des „Amendment Agreement Regarding the Acquisition of Shares in Deutsche Postbank AG“ abgeschlossenen derivativen Finanzinstrumenten auf von der Deutsche Post AG gehaltenen Aktien an der Deutsche Postbank AG. Neben einem Forward über 60 Mio Deutsche Postbank-Aktien, wurden eine Put- und eine Call-Option über je 26.417.432 Aktien vereinbart. Vertragspartner ist jeweils die Deutsche Bank AG.

Zum 31. Dezember 2010 wurde der Marktwert des Forwards mit 1.653 Mio € (Vorjahr: 0 Mio €) bilanziert. Der Forward wurde aufgrund der Ausschlussregelung des IAS 39.2 (g) zum 31. Dezember 2009 nicht aktiviert. Der Nettomarktwert der Optionen beträgt zum 31. Dezember 2010 736 Mio € (Vorjahr: 647 Mio €). Marktwertänderungen des Forwards und der Optionen werden bis zur Ausübung oder zum Verfall der Instrumente im Finanzergebnis gezeigt. Wäre der Marktwert der Postbank-Aktie am 31. Dezember 2010 10 % niedriger gewesen, hätte sich der Marktwert der aktienpreisbezogenen Derivate netto um 180 Mio € erhöht und hätte zu einem zusätzlichen Ertrag in Höhe von 180 Mio € (Vorjahr: 60 Mio € nur aus den Postbank-Aktienoptionen) im Finanzergebnis geführt. Ein Anstieg der Postbank-Aktie hätte den gegenläufigen Effekt gehabt und zu einem Aufwand im Finanzergebnis geführt.

Sofern der Marktwert auf Basis des Börsenkurses der Deutsche-Postbank-Aktien unter den Wert des Beteiligungsansatzes fällt, wird eine Abwertung vorgenommen. Bei einem Anstieg des Aktienkurses wird bis zu den nach der Equity-Methode fortgeführten Anschaffungskosten zugeschrieben.

## KREDITRISIKO

Ein Kreditrisiko besteht für den Konzern aufgrund der Tatsache, dass Vertragspartner ihren Verpflichtungen aus operativer Geschäftstätigkeit und aus Finanztransaktionen nicht nachkommen. Um das Kreditrisiko aus Finanztransaktionen zu minimieren, werden nur Geschäfte mit Vertragspartnern erstklassiger Bonität abgeschlossen. Aufgrund der heterogenen Kundenstruktur besteht keine Risikokonzentration. Jedem Vertragspartner wird ein individuelles Limit zugewiesen, dessen Ausschöpfung regelmäßig überwacht wird. An den Bilanzstichtagen wird geprüft, ob aufgrund der

Bonität der einzelnen Kontrahenten eine Wertminderung auf die positiven Marktwerte notwendig ist. Zum 31. Dezember 2010 war dies bei keinem Kontrahenten der Fall.

Im operativen Geschäft werden die Ausfallrisiken fortlaufend überwacht. Der Gesamtbetrag der Buchwerte der finanziellen Vermögenswerte stellt das maximale Ausfallrisiko dar. Die Forderungen aus Lieferungen und Leistungen in Höhe von 6.011 MIO € (Vorjahr: 4.881 MIO €) sind innerhalb eines Jahres fällig. Die folgende Tabelle gibt einen Überblick über die Überfälligkeiten bei Forderungen:

| MIO €                                      | Buchwert<br>vor Wert-<br>minderung | Zum Abschlussstag weder<br>wertgemindert noch<br>fällig | Zum Abschlussstichtag überfällig und nicht wertgemindert |            |            |                |                 |                 |            |
|--------------------------------------------|------------------------------------|---------------------------------------------------------|----------------------------------------------------------|------------|------------|----------------|-----------------|-----------------|------------|
|                                            |                                    |                                                         | Weniger als<br>30 Tage                                   | 31–60 Tage | 61–90 Tage | 91–120<br>Tage | 121–150<br>Tage | 151–180<br>Tage | > 180 Tage |
|                                            |                                    |                                                         |                                                          |            |            |                |                 |                 |            |
| <b>Zum 31. Dezember 2010</b>               |                                    |                                                         |                                                          |            |            |                |                 |                 |            |
| Forderungen aus Lieferungen und Leistungen | 6.242                              | 4.133                                                   | 900                                                      | 514        | 197        | 97             | 51              | 19              | 34         |
| <b>Zum 31. Dezember 2009</b>               |                                    |                                                         |                                                          |            |            |                |                 |                 |            |
| Forderungen aus Lieferungen und Leistungen | 5.135                              | 3.304                                                   | 727                                                      | 534        | 166        | 86             | 29              | 20              | 15         |

Die Forderungen aus Lieferungen und Leistungen haben sich wie folgt entwickelt:

| MIO €                          | 2009         | 2010         |
|--------------------------------|--------------|--------------|
| <b>Bruttoforderungen</b>       |              |              |
| Anfangsstand 1. Januar         | 5.788        | 5.135        |
| Veränderungen                  | – 653        | 1.107        |
| Endstand 31. Dezember          | 5.135        | 6.242        |
| <b>Wertberichtigungen</b>      |              |              |
| Anfangsstand 1. Januar         | – 197        | – 254        |
| Veränderungen                  | – 57         | 23           |
| Endstand 31. Dezember          | – 254        | – 231        |
| <b>Bilanzwert 31. Dezember</b> | <b>4.881</b> | <b>6.011</b> |

Alle übrigen Finanzinstrumente sind weder überfällig noch wertgemindert. Die heterogene Struktur der Vertragspartner schließt eine Risikokonzentration aus. Es wird von einer jederzeitigen Einbringlichkeit der übrigen Vermögenswerte ausgegangen.

## 50.2 Sicherheiten

Unter den langfristigen finanziellen Vermögenswerten werden zum Bilanzstichtag 301 MIO € (Vorjahr: 289 MIO €) gestellte Sicherheiten ausgewiesen, die unter anderem im Zusammenhang mit der beabsichtigten Veräußerung der Postbank-Aktien stehen. Die Deutsche Post AG ist verpflichtet, Zahlungen aus bereits abgewickelten Sicherungstransaktionen im Rahmen der Veräußerung der Deutsche-Bank-Aktien als Sicherheit bei der Deutsche Bank AG zu hinterlegen. Die Freigabe der hinterlegten Sicherheiten erfolgt mit Ausübung der Pflichtumtauschleihe im Februar 2012. Weitere Sicherheiten betreffen die Abwicklung der Wohnungsbaukreditlinien und bestehende Mietverhältnisse.

Unter den kurzfristigen finanziellen Vermögenswerten werden 39 MIO € (Vorjahr: 40 MIO €) gestellte Sicherheiten ausgewiesen. Der wesentliche Teil betrifft Sicherheiten im Rahmen der QTE Leases.

Daneben hat die Deutsche Post AG 86.417.432 Aktien der Deutsche Postbank AG an die Deutsche Bank AG verpfändet. Die Freigabe der Sicherheiten erfolgt für 60 MIO Aktien bei Ausübung der Pflichtumtauschleihe und für die verbleibenden 26.417.432 Aktien bei Ausübung einer der Optionen (siehe Marktpreisrisiko).

### 50.3 Derivative Finanzinstrumente

Die folgende Tabelle gibt einen Überblick über die im Konzern eingesetzten bilanzierten derivativen Finanzinstrumente und ihre Marktwerte. Derivate mit amortisierenden Nominalvolumen werden mit voller Höhe bei Endfälligkeit gezeigt.

#### Derivative Finanzinstrumente

| MIO €                           |             | Marktwerte 2010 nach Fälligkeit |             |                    |                    |                  |    |            |             |             |             |             |           |            |             |             |             |             |           |   |  |
|---------------------------------|-------------|---------------------------------|-------------|--------------------|--------------------|------------------|----|------------|-------------|-------------|-------------|-------------|-----------|------------|-------------|-------------|-------------|-------------|-----------|---|--|
|                                 |             | 2009                            |             | 2010               |                    |                  |    | Vermögen   |             |             |             |             |           |            | Schulden    |             |             |             |           |   |  |
|                                 |             |                                 |             |                    |                    |                  |    | Bis 1 Jahr | Bis 2 Jahre | Bis 3 Jahre | Bis 4 Jahre | Bis 5 Jahre | > 5 Jahre | Bis 1 Jahr | Bis 2 Jahre | Bis 3 Jahre | Bis 4 Jahre | Bis 5 Jahre | > 5 Jahre |   |  |
|                                 | Nominalwert | Marktwert                       | Nominalwert | Marktwert Vermögen | Marktwert Schulden | Marktwert gesamt |    |            |             |             |             |             |           |            |             |             |             |             |           |   |  |
| Zinsbezogene Produkte           |             |                                 |             |                    |                    |                  |    |            |             |             |             |             |           |            |             |             |             |             |           |   |  |
| Zins-Swaps                      | 1.182       | 51                              | 1.005       | 71                 | 0                  | 71               | 0  | 43         | 0           | 28          | 0           | 0           | 0         | 0          | 0           | 0           | 0           | 0           | 0         | 0 |  |
| davon Cashflow Hedges           | 340         | -6                              | 163         | 18                 | 0                  | 18               | 0  | 0          | 0           | 18          | 0           | 0           | 0         | 0          | 0           | 0           | 0           | 0           | 0         | 0 |  |
| davon Fair Value Hedges         | 842         | 57                              | 842         | 53                 | 0                  | 53               | 0  | 43         | 0           | 10          | 0           | 0           | 0         | 0          | 0           | 0           | 0           | 0           | 0         | 0 |  |
| davon zu Handelszwecken         | 0           | 0                               | 0           | 0                  | 0                  | 0                | 0  | 0          | 0           | 0           | 0           | 0           | 0         | 0          | 0           | 0           | 0           | 0           | 0         | 0 |  |
| Sonstige                        | 0           | 0                               | 0           | 0                  | 0                  | 0                | 0  | 0          | 0           | 0           | 0           | 0           | 0         | 0          | 0           | 0           | 0           | 0           | 0         | 0 |  |
|                                 | 1.182       | 51                              | 1.005       | 71                 | 0                  | 71               | 0  | 43         | 0           | 28          | 0           | 0           | 0         | 0          | 0           | 0           | 0           | 0           | 0         | 0 |  |
| Währungsbezogene Geschäfte      |             |                                 |             |                    |                    |                  |    |            |             |             |             |             |           |            |             |             |             |             |           |   |  |
| Devisentermingeschäfte          | 2.423       | -40                             | 2.280       | 19                 | -52                | -33              | 17 | 2          | 0           | 0           | 0           | 0           | -48       | -3         | -1          | 0           | 0           | 0           | 0         | 0 |  |
| davon Cashflow Hedges           | 737         | -28                             | 1.052       | 13                 | -33                | -20              | 11 | 2          | 0           | 0           | 0           | 0           | -29       | -3         | -1          | 0           | 0           | 0           | 0         | 0 |  |
| davon Net Invest. Hedges        | 0           | 0                               | 0           | 0                  | 0                  | 0                | 0  | 0          | 0           | 0           | 0           | 0           | 0         | 0          | 0           | 0           | 0           | 0           | 0         | 0 |  |
| davon zu Handelszwecken         | 1.686       | -12                             | 1.228       | 6                  | -19                | -13              | 6  | 0          | 0           | 0           | 0           | 0           | -19       | 0          | 0           | 0           | 0           | 0           | 0         | 0 |  |
| Devisenoptionen                 | 275         | 1                               | 0           | 0                  | 0                  | 0                | 0  | 0          | 0           | 0           | 0           | 0           | 0         | 0          | 0           | 0           | 0           | 0           | 0         | 0 |  |
| davon Cashflow Hedges           | 275         | 1                               | 0           | 0                  | 0                  | 0                | 0  | 0          | 0           | 0           | 0           | 0           | 0         | 0          | 0           | 0           | 0           | 0           | 0         | 0 |  |
| Devisen-Swaps                   | 2.079       | -4                              | 2.323       | 17                 | -49                | -32              | 15 | 2          | 0           | 0           | 0           | 0           | -49       | 0          | 0           | 0           | 0           | 0           | 0         | 0 |  |
| davon Cashflow Hedges           | 169         | -4                              | 168         | 3                  | -3                 | 0                | 1  | 2          | 0           | 0           | 0           | 0           | -3        | 0          | 0           | 0           | 0           | 0           | 0         | 0 |  |
| davon zu Handelszwecken         | 1.910       | 0                               | 2.155       | 14                 | -46                | -32              | 14 | 0          | 0           | 0           | 0           | 0           | -46       | 0          | 0           | 0           | 0           | 0           | 0         | 0 |  |
| Cross-Currency Swaps            | 240         | -11                             | 211         | 0                  | -14                | -14              | 0  | 0          | 0           | 0           | 0           | 0           | -3        | -8         | 0           | -3          | 0           | 0           | 0         | 0 |  |
| davon Cashflow Hedges           | 183         | 3                               | 173         | 0                  | -6                 | -6               | 0  | 0          | 0           | 0           | 0           | 0           | -3        | 0          | 0           | -3          | 0           | 0           | 0         | 0 |  |
| davon Fair Value Hedges         | 57          | -14                             | 38          | 0                  | -8                 | -8               | 0  | 0          | 0           | 0           | 0           | 0           | 0         | -8         | 0           | 0           | 0           | 0           | 0         | 0 |  |
| davon zu Handelszwecken         | 0           | 0                               | 0           | 0                  | 0                  | 0                | 0  | 0          | 0           | 0           | 0           | 0           | 0         | 0          | 0           | 0           | 0           | 0           | 0         | 0 |  |
|                                 | 5.017       | -54                             | 4.814       | 36                 | -115               | -79              | 32 | 4          | 0           | 0           | 0           | 0           | -100      | -11        | -1          | -3          | 0           | 0           | 0         | 0 |  |
| Rohstoffpreisbezogene Geschäfte |             |                                 |             |                    |                    |                  |    |            |             |             |             |             |           |            |             |             |             |             |           |   |  |
| Rohstoffpreis-Swaps             | 16          | 1                               | 42          | 5                  | 0                  | 5                | 5  | 0          | 0           | 0           | 0           | 0           | 0         | 0          | 0           | 0           | 0           | 0           | 0         | 0 |  |
| davon Cashflow Hedges           | 16          | 1                               | 42          | 5                  | 0                  | 5                | 5  | 0          | 0           | 0           | 0           | 0           | 0         | 0          | 0           | 0           | 0           | 0           | 0         | 0 |  |
| Aktienpreisbezogene Geschäfte   |             |                                 |             |                    |                    |                  |    |            |             |             |             |             |           |            |             |             |             |             |           |   |  |
| Aktientermingeschäfte           | -           | -                               | 2.946       | 1.653              | 0                  | 1.653            | 0  | 1.653      | 0           | 0           | 0           | 0           | 0         | 0          | 0           | 0           | 0           | 0           | 0         | 0 |  |
| davon zu Handelszwecken         | -           | -                               | 2.946       | 1.653              | 0                  | 1.653            | 0  | 1.653      | 0           | 0           | 0           | 0           | 0         | 0          | 0           | 0           | 0           | 0           | 0         | 0 |  |
| Aktienoptionen                  | 2.596       | 647                             | 2.596       | 736                | 0                  | 736              | 0  | 736        | 0           | 0           | 0           | 0           | 0         | 0          | 0           | 0           | 0           | 0           | 0         | 0 |  |
| davon zu Handelszwecken         | 2.596       | 647                             | 2.596       | 736                | 0                  | 736              | 0  | 736        | 0           | 0           | 0           | 0           | 0         | 0          | 0           | 0           | 0           | 0           | 0         | 0 |  |
|                                 | 2.596       | 647                             | 5.542       | 2.389              | 0                  | 2.389            | 0  | 2.389      | 0           | 0           | 0           | 0           | 0         | 0          | 0           | 0           | 0           | 0           | 0         | 0 |  |

Unter der Position „Aktienbezogene Geschäfte“ werden der Forward und die Put- und Call-Optionen auf Aktien der Deutsche Postbank AG ausgewiesen.



#### FAIR VALUE HEDGES

Zur Absicherung des Fair-Value-Risikos von festverzinslichen Euro-Verbindlichkeiten wurden Zins-Swaps als Fair Value Hedges eingesetzt. Die beizulegenden Zeitwerte dieser Zins-Swaps betrugen 53 MIO € (Vorjahr: 57 MIO €). Zum 31. Dezember 2010 bestand außerdem eine Buchwertanpassung auf das Grundgeschäft aus einem in der Vergangenheit aufgelösten Zins-Swap von 19 MIO € (Vorjahr: 24 MIO €). Die Buchwertanpassung wird über die Restlaufzeit der Verbindlichkeit anhand der Effektivzinsmethode erfolgswirksam aufgelöst und reduziert den künftigen Zinsaufwand.

Außerdem wurden zur Absicherung von Fremdwährungsverbindlichkeiten gegen negative Marktveränderungen Zins-Währungs-Swaps eingesetzt, durch die die Verbindlichkeit in eine variabel verzinsliche Euro-Verbindlichkeit transformiert worden ist. Damit wurde im Ergebnis das Fair-Value-Risiko aus der Zins- und Währungskomponente gesichert. Der Marktwert dieser Zins-Währungs-Swaps zum 31. Dezember 2010 betrug –8 MIO € (Vorjahr: –14 MIO €).

Eine Übersicht über die aus den gesicherten Grundgeschäften und den entsprechenden Sicherungsgeschäften entstandenen Gewinne und Verluste gibt die folgende Tabelle:

#### Ineffektivitäten Fair Value Hedges

| MIO €                                            | 2009     | 2010     |
|--------------------------------------------------|----------|----------|
| Verluste (–) aus den gesicherten Grundgeschäften | –16      | –1       |
| Gewinne (+) aus den Sicherungsgeschäften         | 17       | 3        |
| <b>Saldo (Ineffektivitäten)</b>                  | <b>1</b> | <b>2</b> |

#### CASHFLOW HEDGES

Cashflow-Risiken aus zukünftigen operativen Fremdwährungsumsätzen und -aufwendungen werden im Konzern mit Devisentermingeschäften und -Swaps abgesichert. Die Zeitwerte der Devisentermingeschäfte und -Swaps lagen zum Stichtag bei –15 MIO € (Vorjahr: –7 MIO €). Die gesicherten Grundgeschäfte werden überwiegend 2011 erfolgswirksam.

Zur Absicherung von Währungsrisiken aus zukünftigen Leasingzahlungen und Annuitäten in fremder Währung wur-

den Devisentermingeschäfte abgeschlossen, deren Zeitwert zum Bilanzstichtag –10 MIO € (Vorjahr: –21 MIO €) betrug. Die Zahlungen aus den gesicherten Grundgeschäften erfolgen ratierlich, letztmals im Jahr 2013.

Aus fest kontrahierten Flugzeugkäufen resultieren für den Konzern Cashflow-Risiken im Zusammenhang mit zukünftig zu leistenden Zahlungen in US-Dollar. Diese Risiken wurden mit Termingeschäften abgesichert. Der Zeitwert dieser Cashflow Hedges zum 31. Dezember 2010 betrug 5 MIO € (Vorjahr: –3 MIO €). Die Flugzeuge gehen im Jahr 2012 zu. Das Sicherungsergebnis wird mit den Anschaffungskosten verrechnet und mit Amortisation des Vermögenswerts erfolgswirksam erfasst.

Risiken aus festverzinslichen Fremdwährungsanlagen wurden mit synthetischen Zins-Währungs-Swaps gesichert und in festverzinsliche Euroanlagen transformiert. Diese synthetischen Zins-Währungs-Swaps mit einem Zeitwert zum Stichtag von 15 MIO € (Vorjahr: 28 MIO €) sichern das Währungsrisiko. Bei den Anlagen handelt es sich um interne Konzerndarlehen, die 2014 fällig werden.

Aus einer variabel verzinslichen Verbindlichkeit bestanden für den Konzern Cashflow-Risiken. Die Risiken wurden mittels eines Zins-Swaps gesichert. Am 27. September 2010 wurde die Verbindlichkeit, die in 2037 fällig werden sollte, durch Zahlung ausgeglichen. Zeitgleich wurde das Sicherungsinstrument mit seinem Marktwert in Höhe von –50 MIO € aus dem Hedge-Portfolio in das Trading-Portfolio umgegliedert. Die Bewertung erfolgte mit Umgliederung erfolgswirksam zu Marktwerten. Am 9. November 2010 wurde das Derivat durch Zahlung glattgestellt. Der Zins-Swap hatte bei Auflösung einen Marktwert von –36 MIO €.

Weiterhin wurde eine festverzinsliche Fremdwährungsverbindlichkeit mittels eines Zins-Währungs-Swaps in eine festverzinsliche Euro-Verbindlichkeit transformiert. Der Marktwert des Derivates betrug zum Bilanzstichtag –3 MIO € (Vorjahr: –7 MIO €). Derivat und Grundgeschäft werden in 2011 fällig.

Risiken aus dem Einkauf von Diesel und Schiffsdiesel, die nicht an Kunden weitergereicht werden können, wurden mit Rohstoffpreis-Swaps abgesichert. Der Zeitwert dieser Cashflow Hedges betrug zum Jahresende 5 MIO € (Vorjahr: 1 MIO €). Es sind unwesentliche Ineffektivitäten angefallen.

#### 50.4 Zusätzliche Angaben zu den im Konzern eingesetzten

##### Finanzinstrumenten

Im Konzern werden Finanzinstrumente analog zu den jeweiligen Bilanzposten klassifiziert. Die folgende Übersicht zeigt eine Überleitung der Klassen auf die Kategorien des IAS 39 und die jeweiligen Marktwerte:

##### Überleitung der Bilanzwerte zum 31. Dezember 2010

MIO €

|                                                      | Buchwert       | Wertansatz nach Bewertungskategorie gemäß IAS 39                                                 |                   |                                                       |
|------------------------------------------------------|----------------|--------------------------------------------------------------------------------------------------|-------------------|-------------------------------------------------------|
|                                                      |                | Erfolgswirksam zum beizulegenden Zeitwert bewertete finanzielle Vermögenswerte/Verbindlichkeiten |                   | Zur Veräußerung verfügbare finanzielle Vermögenswerte |
|                                                      |                | Trading                                                                                          | Fair Value Option |                                                       |
| <b>AKTIVA</b>                                        |                |                                                                                                  |                   |                                                       |
| Langfristige finanzielle Vermögenswerte              | 3.193          |                                                                                                  |                   |                                                       |
| at cost                                              | 588            | 0                                                                                                | 0                 | 68                                                    |
| at Fair Value                                        | 2.605          | 2.390                                                                                            | 66                | 74                                                    |
| Sonstige langfristige Vermögenswerte                 | 465            |                                                                                                  |                   |                                                       |
| nicht IFRS 7                                         | 465            | 0                                                                                                | 0                 | 0                                                     |
| Forderungen und sonstige kurzfristige Vermögenswerte | 8.641          |                                                                                                  |                   |                                                       |
| at cost                                              | 7.305          | 0                                                                                                | 0                 | 0                                                     |
| nicht IFRS 7                                         | 1.336          | 0                                                                                                | 0                 | 0                                                     |
| Kurzfristige finanzielle Vermögenswerte              | 655            |                                                                                                  |                   |                                                       |
| at cost                                              | 210            | 0                                                                                                | 0                 | 13                                                    |
| at Fair Value                                        | 445            | 21                                                                                               | 0                 | 407                                                   |
| nicht IFRS 7                                         | 0              | 0                                                                                                | 0                 | 0                                                     |
| Flüssige Mittel und Zahlungsmitteläquivalente        | 3.415          | 0                                                                                                | 0                 | 0                                                     |
| <b>Summe AKTIVA</b>                                  | <b>16.369</b>  | <b>2.411</b>                                                                                     | <b>66</b>         | <b>562</b>                                            |
| <b>PASSIVA</b>                                       |                |                                                                                                  |                   |                                                       |
| Langfristige Finanzschulden <sup>1)</sup>            | -6.275         |                                                                                                  |                   |                                                       |
| at cost                                              | -6.260         | 0                                                                                                | 0                 | 0                                                     |
| at Fair Value                                        | -15            | -1                                                                                               | 0                 | 0                                                     |
| nicht IFRS 7                                         | 0              | 0                                                                                                | 0                 | 0                                                     |
| Langfristige sonstige Verbindlichkeiten              | -401           |                                                                                                  |                   |                                                       |
| at cost                                              | -273           | 0                                                                                                | 0                 | 0                                                     |
| nicht IFRS 7                                         | -128           | 0                                                                                                | 0                 | 0                                                     |
| Kurzfristige Finanzschulden                          | -747           |                                                                                                  |                   |                                                       |
| at cost                                              | -610           | 0                                                                                                | 0                 | 0                                                     |
| at Fair Value                                        | -137           | -137                                                                                             | 0                 | 0                                                     |
| Verbindlichkeiten aus Lieferungen und Leistungen     | -5.707         | 0                                                                                                | 0                 | 0                                                     |
| Kurzfristige sonstige Verbindlichkeiten              | -4.047         |                                                                                                  |                   |                                                       |
| at cost                                              | -245           | 0                                                                                                | 0                 | 0                                                     |
| nicht IFRS 7                                         | -3.802         | 0                                                                                                | 0                 | 0                                                     |
| <b>Summe PASSIVA</b>                                 | <b>-17.177</b> | <b>-138</b>                                                                                      | <b>0</b>          | <b>0</b>                                              |

<sup>1)</sup> Die in den Finanzschulden enthaltenen Anleihen wurden teilweise als Grundgeschäft zum Fair Value Hedge designiert und unterliegen damit einem Basis Adjustment. Die Bilanzierung erfolgt deshalb weder vollständig zum Fair Value noch zu fortgeführten Anschaffungskosten.

|                                                                       |                                                     |                                                   |                                                                    | Sonstige Finanzinstrumente<br>außerhalb von IAS 39 | Beizulegender Zeitwert<br>der Finanzinstrumente<br>innerhalb von IFRS 7 |
|-----------------------------------------------------------------------|-----------------------------------------------------|---------------------------------------------------|--------------------------------------------------------------------|----------------------------------------------------|-------------------------------------------------------------------------|
| Ausleihungen und Forderungen/<br>übrige finanzielle Verbindlichkeiten | Bis zur Endfälligkeit<br>zu haltende Vermögenswerte | Als Sicherungsinstrumente<br>designierte Derivate | Forderungen aus Leasing/<br>Verbindlichkeiten<br>aus Finance Lease |                                                    |                                                                         |
|                                                                       |                                                     |                                                   |                                                                    |                                                    |                                                                         |
|                                                                       |                                                     |                                                   |                                                                    |                                                    |                                                                         |
| 468                                                                   | 5                                                   | 0                                                 | 47                                                                 | 588                                                |                                                                         |
| 0                                                                     | 0                                                   | 75                                                | 0                                                                  | 2.605                                              |                                                                         |
| 0                                                                     | 0                                                   | 0                                                 | 0                                                                  | 0                                                  |                                                                         |
|                                                                       |                                                     |                                                   |                                                                    |                                                    |                                                                         |
| 7.305                                                                 | 0                                                   | 0                                                 | 0                                                                  | 7.305                                              |                                                                         |
| 0                                                                     | 0                                                   | 0                                                 | 0                                                                  | 0                                                  |                                                                         |
|                                                                       |                                                     |                                                   |                                                                    |                                                    |                                                                         |
| 150                                                                   | 0                                                   | 0                                                 | 47                                                                 | 210                                                |                                                                         |
| 0                                                                     | 0                                                   | 17                                                | 0                                                                  | 445                                                |                                                                         |
| 0                                                                     | 0                                                   | 0                                                 | 0                                                                  | 0                                                  |                                                                         |
| 3.415                                                                 | 0                                                   | 0                                                 | 0                                                                  | 3.415                                              |                                                                         |
| 11.338                                                                | 5                                                   | 92                                                | 94                                                                 | –                                                  |                                                                         |
|                                                                       |                                                     |                                                   |                                                                    |                                                    |                                                                         |
|                                                                       |                                                     |                                                   |                                                                    |                                                    |                                                                         |
| –6.077                                                                | 0                                                   | 0                                                 | –183                                                               | –6.510                                             |                                                                         |
| 0                                                                     | 0                                                   | –14                                               | 0                                                                  | –15                                                |                                                                         |
| 0                                                                     | 0                                                   | 0                                                 | 0                                                                  | 0                                                  |                                                                         |
|                                                                       |                                                     |                                                   |                                                                    |                                                    |                                                                         |
| –273                                                                  | 0                                                   | 0                                                 | 0                                                                  | –277                                               |                                                                         |
| 0                                                                     | 0                                                   | 0                                                 | 0                                                                  | 0                                                  |                                                                         |
|                                                                       |                                                     |                                                   |                                                                    |                                                    |                                                                         |
| –583                                                                  | 0                                                   | 0                                                 | –27                                                                | –610                                               |                                                                         |
| 0                                                                     | 0                                                   | 0                                                 | 0                                                                  | –137                                               |                                                                         |
| –5.707                                                                | 0                                                   | 0                                                 | 0                                                                  | –5.707                                             |                                                                         |
|                                                                       |                                                     |                                                   |                                                                    |                                                    |                                                                         |
| –245                                                                  | 0                                                   | 0                                                 | 0                                                                  | –245                                               |                                                                         |
| 0                                                                     | 0                                                   | 0                                                 | 0                                                                  | 0                                                  |                                                                         |
| –12.885                                                               | 0                                                   | –14                                               | –210                                                               | –                                                  |                                                                         |

## Überleitung der Bilanzwerte zum 31. Dezember 2009

MIO €

|                                                         | Buchwert       | Wertansatz nach Bewertungskategorie gemäß IAS 39                                                    |                   |                                                          |
|---------------------------------------------------------|----------------|-----------------------------------------------------------------------------------------------------|-------------------|----------------------------------------------------------|
|                                                         |                | Erfolgswirksam zum beizulegenden Zeitwert bewertete<br>finanzielle Vermögenswerte/Verbindlichkeiten |                   | Zur Veräußerung verfügbare<br>finanzielle Vermögenswerte |
|                                                         |                | Trading                                                                                             | Fair Value Option |                                                          |
| <b>AKTIVA</b>                                           |                |                                                                                                     |                   |                                                          |
| Langfristige finanzielle Vermögenswerte                 | 1.448          |                                                                                                     |                   |                                                          |
| at cost                                                 | 576            | 0                                                                                                   | 0                 | 83                                                       |
| at Fair Value                                           | 872            | 669                                                                                                 | 51                | 67                                                       |
| Sonstige langfristige Vermögenswerte                    | 348            |                                                                                                     |                   |                                                          |
| nicht IFRS 7                                            | 348            | 0                                                                                                   | 0                 | 0                                                        |
| Forderungen und sonstige kurzfristige<br>Vermögenswerte | 7.157          |                                                                                                     |                   |                                                          |
| at cost                                                 | 6.012          | 0                                                                                                   | 0                 | 0                                                        |
| nicht IFRS 7                                            | 1.145          | 0                                                                                                   | 0                 | 0                                                        |
| Kurzfristige finanzielle Vermögenswerte                 | 1.894          |                                                                                                     |                   |                                                          |
| at cost                                                 | 258            | 0                                                                                                   | 0                 | 13                                                       |
| at Fair Value                                           | 1.636          | 23                                                                                                  | 0                 | 1.605                                                    |
| nicht IFRS 7                                            | 0              | 0                                                                                                   | 0                 | 0                                                        |
| Flüssige Mittel und Zahlungsmitteläquivalente           | 3.064          | 0                                                                                                   | 0                 | 0                                                        |
| <b>Summe AKTIVA</b>                                     | <b>13.911</b>  | <b>692</b>                                                                                          | <b>51</b>         | <b>1.768</b>                                             |
| <b>PASSIVA</b>                                          |                |                                                                                                     |                   |                                                          |
| Langfristige Finanzschulden <sup>1)</sup>               | -6.699         |                                                                                                     |                   |                                                          |
| at cost                                                 | -6.615         | 0                                                                                                   | 0                 | 0                                                        |
| at Fair Value                                           | -84            | -22                                                                                                 | 0                 | 0                                                        |
| nicht IFRS 7                                            | 0              | 0                                                                                                   | 0                 | 0                                                        |
| Langfristige sonstige Verbindlichkeiten                 | -372           |                                                                                                     |                   |                                                          |
| at cost                                                 | -281           | 0                                                                                                   | 0                 | 0                                                        |
| nicht IFRS 7                                            | -91            | 0                                                                                                   | 0                 | 0                                                        |
| Kurzfristige Finanzschulden                             | -740           |                                                                                                     |                   |                                                          |
| at cost                                                 | -683           | 0                                                                                                   | 0                 | 0                                                        |
| at Fair Value                                           | -57            | -35                                                                                                 | 0                 | 0                                                        |
| Verbindlichkeiten aus Lieferungen und Leistungen        | -4.861         | 0                                                                                                   | 0                 | 0                                                        |
| Kurzfristige sonstige Verbindlichkeiten                 | -3.674         |                                                                                                     |                   |                                                          |
| at cost                                                 | -236           | 0                                                                                                   | 0                 | 0                                                        |
| nicht IFRS 7                                            | -3.438         | 0                                                                                                   | 0                 | 0                                                        |
| <b>Summe PASSIVA</b>                                    | <b>-16.346</b> | <b>-57</b>                                                                                          | <b>0</b>          | <b>0</b>                                                 |

<sup>1)</sup> Die in den Finanzschulden enthaltenen Anleihen wurden teilweise als Grundgeschäft zum Fair Value Hedge designiert und unterliegen damit einem Basis Adjustment. Die Bilanzierung erfolgt deshalb weder vollständig zum Fair Value noch zu fortgeführten Anschaffungskosten.

|                                                                       |         |                                                     |                                                   | Sonstige Finanzinstrumente<br>außerhalb von IAS 39                 | Beizulegender Zeitwert der<br>Finanzinstrumente innerhalb<br>von IFRS 7 |
|-----------------------------------------------------------------------|---------|-----------------------------------------------------|---------------------------------------------------|--------------------------------------------------------------------|-------------------------------------------------------------------------|
| Ausleihungen und Forderungen/<br>übrige finanzielle Verbindlichkeiten |         | Bis zur Endfälligkeit<br>zu haltende Vermögenswerte | Als Sicherungsinstrumente<br>designierte Derivate | Forderungen aus Leasing/<br>Verbindlichkeiten<br>aus Finance Lease |                                                                         |
|                                                                       |         |                                                     |                                                   |                                                                    |                                                                         |
|                                                                       |         |                                                     |                                                   |                                                                    |                                                                         |
|                                                                       | 414     | 27                                                  | 0                                                 | 52                                                                 | 576                                                                     |
|                                                                       | 0       | 0                                                   | 85                                                | 0                                                                  | 872                                                                     |
|                                                                       |         |                                                     |                                                   |                                                                    |                                                                         |
|                                                                       | 0       | 0                                                   | 0                                                 | 0                                                                  | 0                                                                       |
|                                                                       |         |                                                     |                                                   |                                                                    |                                                                         |
|                                                                       | 6.012   | 0                                                   | 0                                                 | 0                                                                  | 6.012                                                                   |
|                                                                       | 0       | 0                                                   | 0                                                 | 0                                                                  | 0                                                                       |
|                                                                       |         |                                                     |                                                   |                                                                    |                                                                         |
|                                                                       | 196     | 1                                                   | 0                                                 | 48                                                                 | 258                                                                     |
|                                                                       | 0       | 0                                                   | 8                                                 | 0                                                                  | 1.636                                                                   |
|                                                                       | 0       | 0                                                   | 0                                                 | 0                                                                  | 0                                                                       |
|                                                                       | 3.064   | 0                                                   | 0                                                 | 0                                                                  | 3.064                                                                   |
|                                                                       | 9.686   | 28                                                  | 93                                                | 100                                                                | –                                                                       |
|                                                                       |         |                                                     |                                                   |                                                                    |                                                                         |
|                                                                       |         |                                                     |                                                   |                                                                    |                                                                         |
|                                                                       | –6.374  | 0                                                   | 0                                                 | –241                                                               | –6.841                                                                  |
|                                                                       | 0       | 0                                                   | –62                                               | 0                                                                  | –84                                                                     |
|                                                                       | 0       | 0                                                   | 0                                                 | 0                                                                  | 0                                                                       |
|                                                                       |         |                                                     |                                                   |                                                                    |                                                                         |
|                                                                       | –281    | 0                                                   | 0                                                 | 0                                                                  | –281                                                                    |
|                                                                       | 0       | 0                                                   | 0                                                 | 0                                                                  | 0                                                                       |
|                                                                       |         |                                                     |                                                   |                                                                    |                                                                         |
|                                                                       | –655    | 0                                                   | 0                                                 | –28                                                                | –683                                                                    |
|                                                                       | 0       | 0                                                   | –22                                               | 0                                                                  | –57                                                                     |
|                                                                       | –4.861  | 0                                                   | 0                                                 | 0                                                                  | –4.861                                                                  |
|                                                                       |         |                                                     |                                                   |                                                                    |                                                                         |
|                                                                       | –236    | 0                                                   | 0                                                 | 0                                                                  | –236                                                                    |
|                                                                       | 0       | 0                                                   | 0                                                 | 0                                                                  | 0                                                                       |
|                                                                       | –12.407 | 0                                                   | –84                                               | –269                                                               |                                                                         |

Existiert für ein Finanzinstrument ein liquider Markt (z.B. Wertpapierbörse), wird der Fair Value durch den Markt- bzw. Börsenpreis am Bilanzstichtag bestimmt. Soweit sich kein Fair Value am aktiven Markt ablesen lässt, werden zur Bewertung notierte Marktpreise am aktiven Markt für ähnliche Instrumente oder anerkannte Bewertungsmodelle zur Ermittlung der Marktwerte verwendet. Die Modelle berücksichtigen die wesentlichen wertbestimmenden Faktoren der Finanzinstrumente. Die verwendeten Bewertungsparameter werden aus den Marktkonditionen zum Bilanzstichtag abgeleitet. Das Kontrahentenrisiko wird auf Basis der aktuellen Credit Default Swaps der Vertragspartner analysiert. Die beizulegenden Zeitwerte von sonstigen langfristigen Forderungen sowie von bis zur Endfälligkeit gehaltenen Finanzinvestitionen mit Restlaufzeiten von über einem Jahr entsprechen den Barwerten der mit den Vermögenswerten verbundenen Zahlungen unter Berücksichtigung der jeweils aktuellen Zinsparameter.

Zahlungsmittel und Zahlungsmitteläquivalente, Forderungen aus Lieferungen und Leistungen sowie sonstige Forderungen haben überwiegend kurze Restlaufzeiten. Daher entsprechen deren Buchwerte zum Abschlussstichtag näherungsweise dem beizulegenden Zeitwert. Verbindlichkeiten aus Lieferungen und Leistungen sowie sonstige Verbindlichkeiten haben regelmäßig kurze Restlaufzeiten; die bilanzierten Werte stellen näherungsweise die beizulegenden Zeitwerte dar.

In den als zur Veräußerung verfügbare finanzielle Vermögenswerte klassifizierten Finanzanlagen sind in Höhe von 81 Mio € (Vorjahr: 96 Mio €) Anteile an Personen- und Kapitalgesellschaften enthalten. Für diese Instrumente besteht kein aktiver Markt. Da die zukünftigen Cashflows nicht zuverlässig ermittelt werden können, kann kein Marktwert mit Bewertungsmodellen ermittelt werden. Die Anteile dieser Gesellschaften werden zu Anschaffungskosten ausgewiesen. Es ist nicht geplant, von den zum 31. Dezember 2010 ausgewiesenen zur Veräußerung verfügbaren finanziellen Vermögenswerten wesentliche Anteile in naher Zukunft zu veräußern oder auszubuchen. Im Geschäftsjahr wie auch im Vorjahr wurden keine wesentlichen zu Anschaffungskosten bewerteten Anteile veräußert. Die zur Veräußerung verfügbaren finanziellen Vermögenswerte, die zum Fair Value bewertet werden, betreffen Eigenkapital- und Schuldinstrumente.

Unter den erfolgswirksam zum beizulegenden Zeitwert bewerteten finanziellen Vermögenswerten werden Wertpapiere ausgewiesen, für die Fair Value Option in Anspruch genommen worden ist, um bilanzielle Inkongruenzen zu vermeiden. Für die Vermögenswerte existiert ein aktiver Markt. Die Bilanzierung erfolgt zu Marktwerten.

In der folgenden Tabelle sind die angewandten Methoden der Marktwertermittlung je Klasse dokumentiert:

#### Finanzielle Vermögenswerte und Verbindlichkeiten: 2010

| MIO €                                                 |                          |                                                                                       |                                                                                             |
|-------------------------------------------------------|--------------------------|---------------------------------------------------------------------------------------|---------------------------------------------------------------------------------------------|
| Level                                                 | 1                        | 2                                                                                     | 3                                                                                           |
|                                                       |                          | Bewertung anhand wesentlicher Inputfaktoren, die auf beobachtbaren Marktdaten beruhen | Bewertung anhand wesentlicher Inputfaktoren, die nicht auf beobachtbaren Marktdaten beruhen |
| Klasse                                                | Notierte Preise am Markt | Marktdaten beruhen                                                                    | Marktdaten beruhen                                                                          |
| Langfristige finanzielle Vermögenswerte at Fair Value | 140                      | 2.465                                                                                 | 0                                                                                           |
| Kurzfristige finanzielle Vermögenswerte at Fair Value | 407                      | 38                                                                                    | 0                                                                                           |
| Langfristige Finanzschulden at Fair Value             | 0                        | -15                                                                                   | 0                                                                                           |
| Kurzfristige Finanzschulden at Fair Value             | 0                        | -137                                                                                  | 0                                                                                           |

#### Finanzielle Vermögenswerte und Verbindlichkeiten: 2009

| MIO €                                                 |                          |                                                                                       |                                                                                             |
|-------------------------------------------------------|--------------------------|---------------------------------------------------------------------------------------|---------------------------------------------------------------------------------------------|
| Level                                                 | 1                        | 2                                                                                     | 3                                                                                           |
|                                                       |                          | Bewertung anhand wesentlicher Inputfaktoren, die auf beobachtbaren Marktdaten beruhen | Bewertung anhand wesentlicher Inputfaktoren, die nicht auf beobachtbaren Marktdaten beruhen |
| Klasse                                                | Notierte Preise am Markt | Marktdaten beruhen                                                                    | Marktdaten beruhen                                                                          |
| Langfristige finanzielle Vermögenswerte at Fair Value | 118                      | 754                                                                                   | 0                                                                                           |
| Kurzfristige finanzielle Vermögenswerte at Fair Value | 1.605                    | 31                                                                                    | 0                                                                                           |
| Langfristige Finanzschulden at Fair Value             | 0                        | -84                                                                                   | 0                                                                                           |
| Kurzfristige Finanzschulden at Fair Value             | 0                        | -57                                                                                   | 0                                                                                           |

Die Bestimmung der Marktwerte für Devisentermingeschäfte erfolgte auf Basis abgezinster, zukünftig erwarteter Cashflows unter Berücksichtigung von Terminkursen auf dem Devisenmarkt. Die Devisenoptionen wurden mittels des Optionspreismodells von Black-Scholes bewertet.

Unter Level 2 fallen die Rohstoff-, Zins- und Fremdwährungsderivate, der Forward und die Optionen, die im Rahmen der beabsichtigten Veräußerung der Aktien der Deutsche Postbank AG eingegangen worden sind.



In den Geschäftsjahren 2010 und 2009 wurden keine Vermögenswerte reklassifiziert.

Die Nettoergebnisse aus Finanzinstrumenten, gegliedert nach den einzelnen Bewertungskategorien des IAS 39, stellen sich wie folgt dar:

#### Nettoergebnisse der Bewertungskategorien

| MIO €                                                                                                | 2009 | 2010  |
|------------------------------------------------------------------------------------------------------|------|-------|
| Ausleihungen und Forderungen                                                                         | -184 | -75   |
| Bis zur Endfälligkeit zu haltende finanzielle Vermögenswerte                                         | 0    | 0     |
| Erfolgswirksam zum beizulegenden Zeitwert bewertete finanzielle Vermögenswerte und Verbindlichkeiten |      |       |
| Trading                                                                                              | 146  | 1.757 |
| Fair Value Option                                                                                    | 10   | 7     |
| Übrige finanzielle Verbindlichkeiten                                                                 | -46  | -84   |

Die Nettoergebnisse berücksichtigen im Wesentlichen Effekte aus der Fair-Value-Bewertung, der Wertberichtigung und aus der Veräußerung (Veräußerungsgewinne/-verluste). Der Anstieg der Nettoergebnisse der Bewertungskategorie „Erfolgswirksam zum beizulegenden Zeitwert bewertete finanzielle Vermögenswerte und Verbindlichkeiten“ lässt sich mit der erstmaligen Erfassung des Forwards, der im Rahmen der beabsichtigten Veräußerung der Aktien der Deutsche Postbank AG eingegangen worden ist, erklären. Bei den erfolgswirksam zum Fair Value bilanzierten Finanzinstrumenten wurden keine Dividenden und Zinsen berücksichtigt. Angaben zum Nettoergebnis der zur Veräußerung verfügbaren finanziellen Vermögenswerte erfolgen unter [Textziffer 40](#). Erträge und Aufwendungen aus Zinsen und Provisionsvereinbarungen der nicht erfolgswirksam zum Marktwert bewerteten Finanzinstrumente werden in den Erläuterungen zur Gewinn-und-Verlust-Rechnung dargestellt.

#### 51 Eventualverbindlichkeiten

Die Eventualverbindlichkeiten des Konzerns belaufen sich auf insgesamt 2.469 MIO € (Vorjahr: 2.310 MIO €). Von den Eventualverbindlichkeiten betreffen 12 MIO € Bürgschaftsverpflichtungen (Vorjahr: 63 MIO €), 133 MIO € Gewährleistungsverpflichtungen (Vorjahr: 246 MIO €) sowie 153 MIO € Verpflichtungen aus Prozessrisiken (Vorjahr: 114 MIO €). Die sonstigen Eventualverbindlichkeiten in Höhe von 2.171 MIO € (Vorjahr: 1.887 MIO €) berücksichtigen im Wesentlichen die Verpflichtungen aus einem formalen Beihilfeverfahren, siehe [Textziffer 53](#), sowie steuerliche Sachverhalte.

#### 52 Sonstige finanzielle Verpflichtungen

Neben den Rückstellungen, Verbindlichkeiten und Eventualverbindlichkeiten bestehen sonstige finanzielle Verpflichtungen in Höhe von 7.091 MIO € (Vorjahr: 6.193 MIO €) aus unkündbaren operativen Leasingverhältnissen gemäß IAS 17.

Die künftigen unkündbaren Leasingverpflichtungen des Konzerns entfallen auf folgende Anlageklassen:

#### Leasingverpflichtungen

| MIO €                                              | 2009         | 2010         |
|----------------------------------------------------|--------------|--------------|
| Grundstücke und Bauten                             | 5.359        | 5.554        |
| Flugzeuge                                          | 312          | 951          |
| Transportmittel                                    | 376          | 439          |
| Technische Anlagen und Maschinen                   | 106          | 115          |
| Andere Anlagen, Betriebs- und Geschäftsausstattung | 25           | 20           |
| IT-Ausstattung                                     | 15           | 12           |
| <b>Leasingverpflichtungen</b>                      | <b>6.193</b> | <b>7.091</b> |

Die Veränderung ist im Wesentlichen durch Flugzeug-leasingverträge bedingt.

#### Fälligkeitsstruktur der Mindestleasingzahlungen

| MIO €                                                  | 2009         | 2010         |
|--------------------------------------------------------|--------------|--------------|
| Bis 1 Jahr                                             | 1.357        | 1.433        |
| Über 1 Jahr bis 2 Jahre                                | 1.023        | 1.199        |
| Über 2 Jahre bis 3 Jahre                               | 800          | 914          |
| Über 3 Jahre bis 4 Jahre                               | 600          | 731          |
| Über 4 Jahre bis 5 Jahre                               | 478          | 557          |
| Über 5 Jahre                                           | 1.935        | 2.257        |
| <b>Fälligkeitsstruktur der Mindestleasingzahlungen</b> | <b>6.193</b> | <b>7.091</b> |

Der Barwert der abgezinsten Mindestleasingzahlungen beläuft sich auf 5.311 MIO € (Vorjahr: 4.773 MIO €). Dabei wurde ein Abzinsungsfaktor von 6,50 % (Vorjahr: 6,00 %) zugrunde gelegt. Insgesamt sind Miet- und Leasingzahlungen in Höhe von 2.330 MIO € (Vorjahr: 2.370 MIO €) entstanden, davon entfallen 1.693 MIO € (Vorjahr: 1.820 MIO €) auf unkündbare Miet- und Leasingverträge. Die künftigen Leasingverpflichtungen aus unkündbaren Verträgen entfallen im Wesentlichen auf die Deutsche Post Immobilien GmbH mit 2.745 MIO € (Vorjahr: 2.747 MIO €).

Das Bestellobligo für Investitionen in langfristige Vermögenswerte betrug 194 MIO € (Vorjahr: 234 MIO €).

### 53 Rechtsverfahren

Als Marktführer unterliegen viele Dienstleistungen der Deutsche Post AG der sektorspezifischen Regulierung nach dem Postgesetz. Die Regulierungsbehörde genehmigt bzw. überprüft insbesondere Entgelte, gestaltet Bedingungen des Zugangs zu Teilleistungen und übt die allgemeine Missbrauchskontrolle aus. Aus den daraus resultierenden Verfahren können sich Umsatz- und Ergebniseinbußen ergeben.

Rechtliche Risiken resultieren unter anderem aus den Klagen eines Verbandes sowie eines Wettbewerbers gegen die Preisgenehmigungsentscheidungen im Rahmen des Price-Cap-Verfahrens für die Jahre 2003, 2004 und 2005 sowie des Verbandes gegen die Preisgenehmigungsentscheidung im Rahmen des Price-Cap-Verfahrens für das Jahr 2008. Die Klagen des Verbandes gegen die Preisgenehmigungen für die Jahre 2003 bis 2005 sind zwar rechtskräftig vom OVG Münster zurückgewiesen worden, allerdings hat der Verband gegen diese Entscheidung Verfassungsbeschwerde zum Bundesverfassungsgericht erhoben. Sollte der Verfassungsbeschwerde stattgegeben werden, wären die Klagen beim OVG Münster fortzuführen.

Rechtliche Risiken resultieren ebenso aus Klagen der Deutschen Post gegen weitere Entgeltgenehmigungsentscheidungen der Regulierungsbehörde.

Aufgrund einer Beschwerde des Deutschen Verbands für Post und Telekommunikation wegen des Vorwurfs überhöhter Briefentgelte ist ein Wettbewerbsverfahren vor der Europäischen Kommission anhängig. Im Rahmen dieses Verfahrens hat die Deutsche Post AG detailliert ihre Auffassung dargelegt, dass die Porti in ihrer Höhe angemessen sind.

Die Deutsche Post AG hat zum 1. Juli 2010 die Teilleistungsrabatte erhöht. Gegen diese Rabatterhöhungen haben Wettbewerber der Deutsche Post AG und deren Verbände Beschwerden bei der Bundesnetzagentur erhoben. Nach Ansicht der Beschwerdeführer widersprechen die Rabatterhöhungen insbesondere den regulatorischen Vorgaben. Die Bundesnetzagentur hat jedoch in ihrem Überprüfungsverfahren keinen Verstoß gegen die einschlägigen Vorgaben festgestellt und das Verfahren durch Mitteilung vom 15. September 2010 eingestellt. Ob die Beschwerdeführer versuchen, ihre Vorwürfe durch weitere rechtliche Mittel zu verfolgen, ist derzeit nicht absehbar. Nach Ansicht der Deutsche Post AG entsprechen die Teilleistungsentgelte und die Rabatterhöhungen den regulatorischen und den sonstigen rechtlichen Vorgaben. Dennoch kann nicht ausgeschlossen werden, dass Behörden oder Gerichte zu einer anderen Einschätzung kommen und hieraus negative Wirkungen auf Umsatz und Ergebnis der Deutsche Post AG entstehen.

Ein von der Monopolkommission erhobener Vorwurf ist Gegenstand von Auskunftersuchen, die die EU-Kommission auf Beschwerde eines Dritten an die Bundesregierung richtete. Der Vorwurf lautet, dass die Deutsche Post AG der Deutsche Postbank AG ermögliche, Postfilialen zu nicht marktgerechter Vergütung zu nutzen, und dadurch gegen das Beihilfeverbot des EG-Vertrags verstoße. Deutsche Post AG und Deutsche Postbank AG sind der Auffassung, dass dieser Vorwurf nicht zutreffend ist und dass das von der Deutsche Postbank AG entrichtete Entgelt den wettbewerbs-

und beihilferechtlichen Vorgaben des EU-Rechts entspricht. Die EU-Kommission bat die Bundesrepublik Deutschland auch um eine Stellungnahme zu dem 1999 erfolgten Verkauf aller Anteile der Deutsche Postbank AG an die Deutsche Post AG. Allerdings hatte die EU-Kommission den Erwerb der Deutsche Postbank AG bereits im Rahmen eines Beihilfeverfahrens untersucht, das mit Entscheidung vom 19. Juni 2002 abgeschlossen wurde. Damals war sie ausdrücklich zu dem Ergebnis gelangt, dass der Erwerb der Postbank „ohne jede staatliche Beihilfe“ erfolgte.

Die Bundesregierung hat gegenüber der EU-Kommission dargelegt, dass die Vorwürfe ihrer Auffassung nach unbegründet sind. Dennoch lässt sich für beide im Zusammenhang mit dem Auskunftersuchen stehenden Vorwürfe nicht gänzlich ausschließen, dass die EU-Kommission einen Beihilfetatbestand bejahen wird.

Am 12. September 2007 hat die EU-Kommission ein förmliches Beihilfeprüfverfahren gegen die Bundesrepublik Deutschland eröffnet. Darin wird untersucht, ob die Bundesrepublik Deutschland die Kosten der von der Deutsche Post AG bzw. ihrer Rechtsvorgängerin Deutsche Bundespost POSTDIENST in den Jahren 1989 bis 2007 erbrachten Universaldienstleistungen durch staatliche Mittel überkompensiert habe und ob dem Unternehmen dadurch eine europarechtswidrige Beihilfe gewährt worden sei. Gemäß der Eröffnungsentscheidung will die Kommission alle in diesem Zeitraum erfolgten staatlichen Vermögenstransfers prüfen, ebenso die vom Staat übernommenen Bürgschaften, die gesetzlich eingeräumten Exklusivrechte, die Preisregulierung der Briefdienste und die staatliche Finanzierung von Beamtenpensionen. Untersucht werden soll zudem die Kostenzuordnung zwischen reguliertem Briefdienst, Universaldienst und Wettbewerbsdiensten innerhalb der Deutsche Post AG und ihrer Vorgängerin. Dies betrifft auch die Kooperationsvereinbarungen zwischen Deutsche Post AG und Deutsche Postbank AG sowie zwischen Deutsche Post AG und dem durch die DHL Vertriebs GmbH vermarkteten Geschäftskunden-Paketdienst.

Die Deutsche Post AG ist ebenso wie die Deutsche Postbank AG der Ansicht, dass die neue Untersuchung ohne jede Grundlage ist. Alle im Zuge der Privatisierung der Deutschen Bundespost erfolgten Vermögensübertragungen, die staatlichen Bürgschaften sowie die Finanzierung der Pensionsverpflichtungen waren schon Gegenstand des Beihilfeprüfverfahrens, das durch Entscheidung vom 19. Juni 2002 beendet wurde. Darin wurden diese Maßnahmen nicht als rechtswidrige staatliche Beihilfen gewertet. Die Deutsche Post AG und die Deutsche Postbank AG sind weiter der Ansicht, dass die Exklusivrechte, die gesetzlich gewährt wurden, und die Briefpreise, die der Regulierung unterliegen, schon tatbestandlich nicht als staatliche Beihilfen eingeordnet werden können. Die Deutsche Post AG ist ferner der Auffassung, dass die internen Kostenverrechnungen mit ihren Tochtergesellschaften im Einklang mit den EU-Beihilferegeln sowie der Rechtsprechung des Europäischen Gerichtshofs stehen. Dennoch kann nicht ausgeschlossen werden, dass die EU-Kommission in dem Verfahren das Vorliegen einer rechtswidrigen Beihilfe bejaht.

Am 2. September 2010 hat der Europäische Gerichtshof das Rechtsmittel der EU-Kommission gegen das Urteil des Europäischen Gerichts erster Instanz (EuG) vom 1. Juli 2008 zurückgewiesen. Damit wurde die Entscheidung der EU-Kommission vom 19. Juni 2002 über angebliche Beihilfen zugunsten der Deutsche Post AG endgültig für nichtig erklärt. Damals hatte die EU-Kommission mit ihrer Entscheidung die Deutsche Post AG verpflichtet, angeblich erhaltene Beihilfen zuzüglich Zinsen in Höhe von insgesamt 907 Mio. € zurückzuzahlen. Schon das EuG hatte der Klage der Deutsche Post AG stattgegeben, woraufhin die Deutsche Post AG diesen gezahlten Betrag bereits am 1. August 2008 zurückerhalten hat.

Im Zusammenhang mit einer offiziellen Untersuchung der Festlegung von Zuschlägen und Entgelten in der internationalen Speditionsbranche gingen bei DHL Global Forwarding, wie auch bei allen anderen großen Unternehmen im Speditionsgewerbe, im Oktober 2007 ein Auskunftersuchen der Wettbewerbsdirektion der Europäischen Kommission, eine Vorladung der Kartellabteilung des US-Justizministeriums sowie Auskunftersuchen von Wettbewerbsbehörden anderer Jurisdiktionen ein. Im Januar 2008 wurde im Namen von Käufern von Speditionsleistungen eine Kartellsammelklage gegen die Deutsche Post AG und DHL am Bezirksgericht von New York (New York District Court) angestrengt. Dieser Zivilprozess scheint sich darauf zu gründen, dass Kartelluntersuchungen im Gange sind, jedoch nicht auf ein bekanntes Ergebnis oder einen bezifferten Verlust. Der Konzern Deutsche Post DHL kann das Ergebnis der Untersuchungen oder die Chancen der Sammelklage nicht vorhersagen oder kommentieren, ist jedoch der Auffassung, dass das damit verbundene finanzielle Risiko begrenzt ist.

## 54 Aktienbasierte Vergütung

### Aktienorientiertes Vergütungssystem für Führungskräfte (Share Matching Scheme)

Das im Jahr 2009 für einen Teil der Konzernführungskräfte eingeführte neue System zur Gewährung variabler Gehaltsbestandteile, das als anteilsbasierte Vergütung mit Ausgleich durch Eigenkapitalinstrumente gemäß IFRS 2 bilanziert wird, wurde im Jahr 2010 auf weitere Gruppen der Konzernführungskräfte ausgeweitet. Dieses Vergütungssystem sieht vor, dass bestimmte Konzernführungskräfte einen Teil ihres variablen Gehalts für das Geschäftsjahr im Folgejahr in Aktien der Deutsche Post AG erhalten; alle Konzernführungskräfte können individuell einen erhöhten Aktienanteil durch Umwandlung eines weiteren Teils des variablen Gehaltes für das Geschäftsjahr bestimmen. Bei Erfüllung bestimmter Bedingungen erhält die Führungskraft vier Jahre später nochmals die gleiche Anzahl an Aktien der Deutsche Post AG (sogenannte Matching Shares). Für die Tranche des Geschäftsjahres 2009 läuft somit das Programm nach vierjähriger Sperrfrist in 2014 aus; für die Tranche des Geschäftsjahres 2010 läuft das Programm 2015 aus.

Für das Geschäftsjahr 2010 wird für die an diesem aktienbasierten Vergütungssystem teilnehmenden Konzernführungskräfte ein Bonusanteil von rund 8,5 Mio. € in Aktien ausgeschüttet werden. Auf dieser Basis berechnet sich einschließlich der nach Ablauf von vier Jahren zu gewährenden Matching Shares eine Mindestaktienzahl von rund 1.260.000 Stück. Zusätzlich wird

mit einer weiteren Aktienwandlung aufgrund der individuellen Wahlmöglichkeiten der betroffenen Konzernführungskräfte in Höhe von 614.000 Stück gerechnet. Auf die Tranche 2009 entfallen rund 762.000 erwartete Matching Shares. Der Fair Value der Matching Shares der Tranche 2009 entspricht dem Aktienkurs der Deutsche Post AG zum Gewährungstag der Tranche 2009 (11,48 €). Der Fair Value der Matching Shares der Tranche 2010 am Gewährungstag dieser Tranche beträgt 13,98 €.

Im Konzernabschluss zum 31. Dezember 2010 ist aus diesem neuen System zur Gewährung variabler Gehaltsbestandteile insgesamt ein Betrag in Höhe von 20 Mio. € im Eigenkapital erfasst. Davon entfallen rund 8,8 Mio. € auf den erwarteten Anteil des Bonus für das Geschäftsjahr 2010, der in Aktien der Deutsche Post AG ausgezahlt werden wird; der Rest entfällt auf die Matching Shares, die im April 2014 (Tranche 2009) und im April 2015 (Tranche 2010) voraussichtlich ausgegeben werden.

### SAR (Stock Appreciation Rights)-Plan 2006 für Führungskräfte

Seit dem 3. Juli 2006 erhalten ausgewählte Führungskräfte in jährlichen Tranchen SAR aus dem in 2006 neu aufgelegten Long-Term-Incentive-Plan. Danach haben die Führungskräfte die Möglichkeit, nach Erfüllung von anspruchsvollen Erfolgszielen innerhalb eines festgelegten Zeitraumes eine Barzahlung in Höhe der Differenz zwischen dem jeweiligen Kurs der Deutsche-Post-Aktie und dem jeweils festgelegten Ausgabepreis zu erhalten. Nach Ablauf der jeweiligen Wartezeit sind alle im Rahmen der Tranchen 2006 und 2007 gewährten SAR verfallen, da die daran geknüpften Erfolgsziele ausnahmslos nicht erreicht wurden.

### Long-Term-Incentive-Plan (LTIP 2006) für Vorstandsmitglieder

Seit dem 1. Juli 2006 erhielten die Mitglieder des Vorstands Stock Appreciation Rights (SAR) aus dem neu aufgelegten Long-Term-Incentive-Plan 2006. Jedes SAR aus dem LTIP 2006 berechtigt zum Barausgleich in Höhe der Differenz zwischen dem Durchschnitt der Schlusskurse der Deutsche-Post-Aktie während der letzten fünf Handelstage vor dem Ausübungstag und dem Ausgabepreis des SAR.

Die Mitglieder des Vorstands haben im Jahr 2010 ein Eigeninvestment in Höhe von 10 % ihres Jahresfestgehalts geleistet. Die Anzahl der an die Vorstandsmitglieder auszugebenden SAR wird vom Aufsichtsrat festgelegt. Die gewährten SAR können frühestens nach Ablauf einer vierjährigen Wartezeit (bei bis einschließlich 2008 gewährten SAR: nach Ablauf einer dreijährigen Wartezeit) nach dem Ausgabebetrag innerhalb eines Zeitraums von zwei Jahren ganz oder teilweise ausgeübt werden, wenn am Ende der Wartezeit ein absolutes bzw. ein relatives Erfolgsziel erreicht wird. Nach Ablauf des Ausübungszeitraums verfallen nicht ausgeübte SAR. Um zu ermitteln, ob und wie viele der gewährten SAR ausübbar sind, werden der Durchschnittskurs bzw. der Durchschnittsindex während des Referenz- und Performancezeitraums miteinander verglichen. Beim Referenzzeitraum handelt es sich um die letzten 20 aufeinanderfolgenden Handelstage vor dem Ausgabebetrag. Der Performancezeitraum betrifft die letzten 60 Handelstage vor Ablauf der Wartezeit. Der Durchschnittskurs (Endkurs) wird aus dem Durchschnitt der Schlusskurse der Deutsche-Post-Aktie im Xetra-Handel der Deutsche Börse AG ermittelt.

Das absolute Erfolgsziel ist erreicht, wenn der Endkurs der Deutsche-Post-Aktie mindestens 10, 15, 20 oder 25 % über dem Ausgabepreis liegt. Das relative Erfolgsziel ist an die Performance der Aktie im Verhältnis zur Performance des STOXX Europe 600 Index (SXXP; ISIN EU0009658202) gekoppelt. Es ist erreicht, wenn die Wertentwicklung der Aktie während des Performancezeitraums der des Indexes entspricht oder die Outperformance mindestens 10 % beträgt.

#### LTIP 2006

| SAR                  | Tranche 2006  | Tranche 2007  | Tranche 2008  | Tranche 2009  | Tranche 2010  |
|----------------------|---------------|---------------|---------------|---------------|---------------|
| Ausgabetag           | 1. Juli 2006  | 1. Juli 2007  | 1. Juli 2008  | 1. Juli 2009  | 1. Juli 2010  |
| Ausgabepreis         | 20,70 €       | 24,02 €       | 18,40 €       | 9,52 €        | 12,27 €       |
| Ablauf der Wartezeit | 30. Juni 2009 | 30. Juni 2010 | 30. Juni 2011 | 30. Juni 2013 | 30. Juni 2014 |

Für die SAR aus dem SAR-Plan 2006 und dem Long-Term-Incentive-Plan für Vorstände (LTIP 2006) wurde mit einem stochastischen Simulationsmodell ein Zeitwert ermittelt. Daraus ergab sich, dass für das Geschäftsjahr 2010 ein Aufwand in Höhe von 21 MIO € gebucht wurde (Vorjahr: 11 MIO €).

Weitere Angaben zu der aktienbasierten Vergütung der Vorstandsmitglieder finden sich unter [Textziffer 55.2](#). Für den LTIP 2006 und SAR-Plan 2006 (Vorstände und Führungskräfte) ergab sich zum Bilanzstichtag eine Rückstellung in Höhe von 37 MIO € (Vorjahr: 16 MIO €).

## 55 Beziehungen zu nahestehenden Unternehmen und Personen

Deutsche Post DHL wendet die Erleichterungsvorschrift des überarbeiteten IAS 24 bezüglich der Angabepflichten für Unternehmen, die unter der Beherrschung, der gemeinschaftlichen Führung oder dem maßgeblichen Einfluss der öffentlichen Hand (sogenannte government-related entities) stehen, vorzeitig zum 31. Dezember 2010 an.

### 55.1 Beziehungen zu nahestehenden Unternehmen und der Bundesrepublik Deutschland

Sämtliche nahestehenden Unternehmen, die von dem Konzern beherrscht werden oder auf die vom Konzern ein maßgeblicher Einfluss ausgeübt werden kann, sind in der Anteilsbesitzliste, [Textziffer 60](#), mit Angaben zum Beteiligungsanteil, zum Eigenkapital und zum Jahresergebnis – geordnet nach geografischen Bereichen – verzeichnet.

Die Deutsche Post AG unterhält vielfältige Beziehungen zur Bundesrepublik Deutschland und anderen von der Bundesrepublik Deutschland kontrollierten Unternehmen.

Von je sechs SAR können maximal vier über das absolute Erfolgsziel und maximal zwei über das relative Erfolgsziel „verdient“ werden. Wird zum Ablauf der Wartezeit kein absolutes oder relatives Erfolgsziel erreicht, verfallen die darauf entfallenden SAR der entsprechenden Tranche ersatz- und entschädigungslos. Weitere Details zu den Tranchen des LTIP 2006 zeigt die folgende Tabelle:

Der Bund ist Kunde der Deutsche Post AG und nimmt als solcher Dienste des Unternehmens in Anspruch. Die Geschäftsbeziehungen der Deutsche Post AG bestehen jeweils unmittelbar zu den einzelnen Behörden und sonstigen staatlichen Stellen als voneinander unabhängigen Einzelkunden; die diesen gegenüber erbrachten Leistungen sind jeweils nicht erheblich für die Gesamteinnahmen der Deutsche Post AG.

#### BEZIEHUNGEN ZUR KfW BANKENGRUPPE

Die KfW Bankengruppe (KfW) unterstützt den Bund bei der Fortsetzung der Privatisierung von Unternehmen wie Deutsche Post AG oder Deutsche Telekom AG. Im Jahre 1997 entwickelte die KfW zusammen mit dem Bund das sogenannte Platzhaltermodell als Instrumentarium für Privatisierungen des Bundes. Nach diesem Modell verkauft der Bund ganz oder teilweise seine Beteiligungen an die KfW mit dem Ziel der vollständigen Privatisierung dieser staatlichen Unternehmen. Seit 1997 hat die KfW auf dieser Grundlage in mehreren Schritten Aktien der Deutsche Post AG vom Bund gekauft und verschiedene Kapitalmarkttransaktionen mit diesen Aktien durchgeführt. Der Anteil der KfW am Grundkapital der Deutsche Post AG beträgt aktuell 30,5 %.

#### BEZIEHUNGEN ZUR BUNDESANSTALT FÜR POST UND TELEKOMMUNIKATION (BANSTPT)

Die Bundesanstalt für Post und Telekommunikation e.V. (BANSTPT) ist eine Anstalt des öffentlichen Rechts und steht unter Fach- und Rechtsaufsicht des Bundesministeriums der Finanzen. Durch das zum 1. Dezember 2005 in Kraft getretene Bundesanstalt-Reorganisationsgesetz nimmt der Bund durch das Bundesministerium der Finanzen die Aufgaben bezüglich der Anteile an den Postnachfolgeunternehmen unmittelbar wahr. Die Wahrnehmung der „Eigentümergebüden“ bei der BANSTPT ist damit entfallen. Die Bundesanstalt führt die Sozialeinrichtungen

wie die Postbeamtenkrankenkasse, das Erholungswerk, die Versorgungsanstalt der Deutschen Bundespost (VAP) und das Betreuungswerk für Deutsche Post AG, Deutsche Postbank AG, Deutsche Telekom AG sowie die Erstellung von Grundsätzen der Wohnungsfürsorge weiter. Die Aufgaben werden auf der Grundlage von Geschäftsbesorgungsverträgen wahrgenommen. Im Jahr 2010 wurden der Deutsche Post AG für Leistungen der Bundesanstalt Abschlagszahlungen in Höhe von 72 Mio € (Vorjahr: 68 Mio €) in Rechnung gestellt.

#### **BEZIEHUNGEN ZUM BUNDESMINISTERIUM DER FINANZEN**

Zwischen dem Bundesministerium der Finanzen (BMF) und der Deutsche Post AG wurde im Geschäftsjahr 2001 eine Vereinbarung getroffen, die die Modalitäten der Abführung der Einnahmen der Deutsche Post AG aus der Erhebung der Ausgleichszahlung nach den Gesetzen über den Abbau der Fehlsubventionierung im Wohnungswesen der Postwohnungsfürsorge regelt. Im Geschäftsjahr 2010 hat die Deutsche Post AG 0,1 Mio € für die Endabrechnung des Geschäftsjahres 2009 sowie 0,6 Mio € für das Geschäftsjahr 2010 an den Bund abgeführt. Die Endabrechnung für das Geschäftsjahr 2010 erfolgt vereinbarungsgemäß bis zum 1. Juli 2011.

Mit Vertrag vom 30. Januar 2004 hat die Deutsche Post AG mit dem BMF eine Vereinbarung bezüglich der Überleitung von Beamten zu Bundesbehörden getroffen. Danach werden Beamte mit dem Ziel der Versetzung für sechs Monate abgeordnet und bei Bewährung anschließend versetzt. Die Deutsche Post AG beteiligt sich nach vollzogener Versetzung durch Zahlung eines Pauschalbetrages an der Kostenbelastung des Bundes. Für das Jahr 2010 ergaben sich hieraus 21 Versetzungen (Vorjahr: acht) und neun Abordnungen mit dem Ziel der Versetzung im Jahr 2011 (Vorjahr: 18).

#### **BEZIEHUNGEN ZUR BUNDESAGENTUR FÜR ARBEIT**

Mit Vertrag vom 12. Oktober 2009 hat die Deutsche Post AG mit der Bundesagentur für Arbeit einen Vertrag über die Versetzung von Beamtinnen und Beamten der Deutsche Post AG zur Bundesagentur für Arbeit geschlossen. Für das Jahr 2010 ergaben sich hieraus 365 Versetzungen.

#### **BEZIEHUNGEN ZUR DEUTSCHE TELEKOM AG UND DEREN VERBUNDENEN UNTERNEHMEN**

Der Bund ist direkt und indirekt (über die KfW Bankengruppe) mit rund 32 % an der Deutsche Telekom AG beteiligt. Da der Bund trotz seiner Minderheitsbeteiligung aufgrund der durchschnittlichen Hauptversammlungspräsenz eine sichere Hauptversammlungsmehrheit besitzt, ist ein Abhängigkeitsverhältnis der Deutschen Telekom vom Bund begründet. Daher gilt die Deutsche Telekom als nahestehendes Unternehmen der Deutsche Post AG. Im Geschäftsjahr 2010 hat Deutsche Post DHL für die Deutsche Telekom AG Waren und Dienstleistungen im Wert von 0,3 MRD €

(Vorjahr: 0,3 MRD €) erbracht. Es handelt sich hierbei im Wesentlichen um Beförderungsleistungen für Briefe und Paketsendungen. Im gleichen Zeitraum hat der Konzern für 0,3 MRD € (Vorjahr: 0,4 MRD €) Waren und Dienstleistungen (darunter IT-Produkte und Dienstleistungen) von der Deutschen Telekom erworben.

#### **BEZIEHUNGEN ZUR DEUTSCHE BAHN AG UND DEREN VERBUNDENEN UNTERNEHMEN**

Die Deutsche Bahn AG ist ein 100 %iges Tochterunternehmen des Bundes. Durch dieses Abhängigkeitsverhältnis gilt die Deutsche Bahn AG als nahestehendes Unternehmen der Deutsche Post AG. Deutsche Post DHL unterhält mit dem Deutsche-Bahn-Konzern verschiedene Geschäftsbeziehungen, im Wesentlichen handelt es sich dabei um Transportleistungsverträge.

#### **BEZIEHUNGEN ZUR COMMERZBANK AG**

Die Commerzbank AG ist aufgrund der Aktienbeteiligung des Bundes in Höhe von 25 % plus einer Aktie ein nahestehendes Unternehmen. Seit dem 21. Dezember 2010 ist die Commerzbank AG eine von den Banken des Konsortiums das die mit der Deutsche Post AG vereinbarte „Syndizierte Kreditfazilität“ unterzeichnet hat. Zeitgleich wurde die bilaterale Kreditlinie zwischen der Deutsche Post AG und der Commerzbank AG über 200 Mio € aufgehoben.

#### **BUNDES-PENSIONS-SERVICE FÜR POST UND TELEKOMMUNIKATION E.V.**

Angaben zum Bundes-Pensions-Service für Post und Telekommunikation e.V. (BPS-PT) finden sich unter [Textziffer 7](#).

#### **BEZIEHUNGEN ZU PENSIONS-FONDS**

Die Immobilien im rechtlichen oder wirtschaftlichen Eigentum des Deutsche Post Betriebsrenten-Service e.V. (DPRS) bzw. der Deutsche Post Pensions-Treuhand GmbH & Co. KG, der Deutsche Post Betriebsrenten-Service e.V. & Co. Objekt Gronau KG sowie Deutsche Post Grundstücks-Vermietungsgesellschaft beta mbH Objekt Leipzig KG mit einem Zeitwert von 1.043 Mio € (Vorjahr: 1.050 Mio €) werden ausschließlich an die Deutsche Post Immobilien GmbH vermietet. Der Mietaufwand der Deutsche Post Immobilien GmbH beträgt 63 Mio € für das Jahr 2010 (Vorjahr: 66 Mio €). Die Mieten wurden termingerecht bezahlt. Die Deutsche Post Pensions-Treuhand GmbH & Co. KG ist zu 100 % Eigentümerin der Ende 2009 gegründeten Deutsche Post Pensionsfonds AG. Zum 31. Dezember 2010 bestanden keine Forderungen bzw. Verbindlichkeiten. Im Jahr 2010 gab es keine Verkaufsbeziehungen zwischen den externen Trägern und einem Konzernunternehmen der Deutsche Post AG.

## BEZIEHUNGEN ZU NICHT EINBEZOGENEN UNTERNEHMEN UND ASSOZIIERTEN UNTERNEHMEN

Neben den in den Konzernabschluss einbezogenen Tochterunternehmen steht der Konzern unmittelbar oder mittelbar in Ausübung der normalen Geschäftstätigkeit mit einer Vielzahl von nicht einbezogenen Unternehmen und assoziierten Gesellschaften, die als nahestehende Unternehmen des Konzerns gelten, in Beziehung. Im Rahmen der gewöhnlichen Geschäftstätigkeit wurden sämtliche Liefer- und Leistungsbeziehungen, die mit den nicht in den Konsolidierungskreis einbezogenen Unternehmen stattfanden, zu marktüblichen Bedingungen und Konditionen durchgeführt, wie sie auch mit konzernfremden Dritten üblich sind. Im Geschäftsjahr 2010 wurden mit wesentlichen nahestehenden Unternehmen Geschäfte getätigt, die zu folgenden Posten im Konzernabschluss geführt haben:

| MIO €                                     | 2009 | 2010 |
|-------------------------------------------|------|------|
| Forderungen                               | 25   | 30   |
| Ausleihungen                              | 15   | 13   |
| Forderungen aus dem Inhouse Banking       | 3    | 0    |
| Finanzschulden                            | -46  | -47  |
| Verbindlichkeiten                         | -10  | -20  |
| Verbindlichkeiten aus dem Inhouse Banking | -3   | -4   |

### 55.2 Beziehungen zu nahestehenden Personen

Gemäß IAS 24 berichtet der Konzern auch über Geschäftsvorfälle zwischen ihm und seinen nahestehenden Personen bzw. deren Familienangehörigen. Als nahestehende Personen wurden Vorstand, Aufsichtsrat, Führungskräfte der Ebene 2 und deren Familienangehörige definiert.

Berichtspflichtige Geschäftsvorfälle zwischen Vorstand sowie dessen Familienangehörigen und dem Konzern lagen im Geschäftsjahr 2010 nicht vor. In einem Fall war ein Aufsichtsratsmitglied in Rechtsgeschäften mit der Deutsche Post AG involviert. Dieses betraf im Wesentlichen Dienstleistungserbringungen in einem Umfang von 1 MIO €. Rechtsgeschäfte zwischen Führungskräften der Ebene 2 bzw. ihren Familienangehörigen und Deutsche Post DHL haben nicht stattgefunden.

Die gemäß IAS 24 angabepflichtige Vergütung des Managements in Schlüsselpositionen des Konzerns umfasst die Vergütung des aktiven Vorstands und Aufsichtsrats. Die aktiven Mitglieder des Vorstands und Aufsichtsrats wurden wie folgt vergütet:

| MIO €                                                           | 2009      | 2010      |
|-----------------------------------------------------------------|-----------|-----------|
| Kurzfristige fällige Leistungen (ohne aktienbasierte Vergütung) | 16        | 13        |
| Leistungen nach Beendigung des Arbeitsverhältnisses             | 2         | 2         |
| Leistungen aus Anlass der Beendigung des Arbeitsverhältnisses   | 4         | 0         |
| Aktienbasierte Vergütungen                                      | 2         | 2         |
| <b>Gesamt</b>                                                   | <b>24</b> | <b>17</b> |

Als Leistungen nach Beendigung des Arbeitsverhältnisses wird der aus den Pensionsrückstellungen für die aktiven Vorstandsmitglieder resultierende Dienstzeitaufwand (Service Cost) ausgewiesen.

Die Angabe der aktienbasierten Vergütung bezieht sich auf den für die Geschäftsjahre 2009 und 2010 erfassten Aufwand für die aktienbasierte Vergütung. Er wird in der folgenden Tabelle individualisiert dargestellt:

#### Aktienbasierte Vergütung

| T €                                     | 2009         | 2010         |
|-----------------------------------------|--------------|--------------|
|                                         | SAR          | SAR          |
| Dr. Frank Appel, Vorstandsvorsitzender  | 421          | 443          |
| Ken Allen (seit 26. Februar 2009)       | 177          | 295          |
| Bruce Edwards                           | 276          | 295          |
| Jürgen Gerdes                           | 280          | 295          |
| Lawrence Rosen (seit 1. September 2009) | 177          | 295          |
| Walter Scheurle                         | 284          | 295          |
| Hermann Ude                             | 276          | 295          |
| John Allan (bis 30. Juni 2009)          | 101          | –            |
| <b>Aktienbasierte Vergütung</b>         | <b>1.992</b> | <b>2.213</b> |

Weitere Angaben zu den aktienbasierten Vergütungen der Vorstände für die Geschäftsjahre 2009 und 2010 sind den folgenden Tabellen zu entnehmen:

#### Aktienbasierte Vergütung der Vorstände 2010

| Stück                                                      | Dr. Frank Appel  | Ken Allen      | Bruce Edwards  | Jürgen Gerdes  | Lawrence Rosen | Walter Scheurle | Hermann Ude    |
|------------------------------------------------------------|------------------|----------------|----------------|----------------|----------------|-----------------|----------------|
| <b>SAR</b>                                                 |                  |                |                |                |                |                 |                |
| Ausstehende Rechte zum 1. Januar 2010                      | 925.000          | 370.896        | 523.562        | 618.706        | 240.000        | 690.000         | 523.562        |
| Gewährte SAR                                               | 375.000          | 250.000        | 250.000        | 250.000        | 250.000        | 250.000         | 250.000        |
| Verfallene SAR                                             | 220.000          | 43.938         | 53.562         | 148.706        | 0              | 220.000         | 53.562         |
| Ausgeübte SAR                                              | 0                | 0              | 0              | 0              | 0              | 0               | 0              |
| <b>Ausstehende SAR zum 31. Dezember 2010</b>               | <b>1.080.000</b> | <b>576.958</b> | <b>720.000</b> | <b>720.000</b> | <b>490.000</b> | <b>720.000</b>  | <b>720.000</b> |
| <b>Ausübbarer SAR zum 31. Dezember 2010</b>                | <b>0</b>         | <b>0</b>       | <b>0</b>       | <b>0</b>       | <b>0</b>       | <b>0</b>        | <b>0</b>       |
| Durchschnittlich gewichteter Abrechnungskurs in €          |                  |                |                | Keine Ausübung |                |                 |                |
| Durchschnittlich gewichteter Ausübungspreis in €           |                  |                |                | Keine Ausübung |                |                 |                |
| Gewichteter Durchschnitt der restlichen Laufzeit in Jahren | 2,21             | 2,63           | 2,21           | 2,21           | 3,01           | 2,21            | 2,21           |

#### Aktienbasierte Vergütung der Vorstände 2009

| Stück                                                      | Dr. Frank Appel | Ken Allen      | Bruce Edwards  | Jürgen Gerdes  | Lawrence Rosen | Walter Scheurle | Hermann Ude    | John Mullen <sup>1)</sup> | John Allan <sup>2)</sup> |
|------------------------------------------------------------|-----------------|----------------|----------------|----------------|----------------|-----------------|----------------|---------------------------|--------------------------|
| <b>AOP</b>                                                 |                 |                |                |                |                |                 |                |                           |                          |
| Ausstehende Optionen zum 1. Januar 2009                    | 65.988          | 0              | 0              | 17.272         | 0              | 25.988          | 16.316         | 17.272                    | 0                        |
| Gewährte Optionen                                          | 0               | 0              | 0              | 0              | 0              | 0               | 0              | 0                         | 0                        |
| Verfallene Optionen                                        | 65.988          | 0              | 0              | 17.272         | 0              | 25.988          | 16.316         | 17.272                    | 0                        |
| Ausgeübte Optionen                                         | 0               | 0              | 0              | 0              | 0              | 0               | 0              | 0                         | 0                        |
| <b>Ausstehende Optionen zum 31. Dezember 2009</b>          | <b>0</b>        | <b>0</b>       | <b>0</b>       | <b>0</b>       | <b>0</b>       | <b>0</b>        | <b>0</b>       | <b>0</b>                  | <b>0</b>                 |
| <b>Ausübbare Optionen zum 31. Dezember 2009</b>            | <b>0</b>        | <b>0</b>       | <b>0</b>       | <b>0</b>       | <b>0</b>       | <b>0</b>        | <b>0</b>       | <b>0</b>                  | <b>0</b>                 |
| Durchschnittlich gewichteter Abrechnungskurs in €          | Keine Ausübung  |                |                |                |                |                 |                |                           |                          |
| Durchschnittlich gewichteter Ausübungspreis in €           | Keine Ausübung  |                |                |                |                |                 |                |                           |                          |
| Gewichteter Durchschnitt der restlichen Laufzeit in Jahren | 0               | 0              | 0              | 0              | 0              | 0               | 0              | 0                         | 0                        |
| <b>SAR</b>                                                 |                 |                |                |                |                |                 |                |                           |                          |
| Ausstehende Rechte zum 1. Januar 2009                      | 775.000         | 176.244        | 400.508        | 474.172        | 0              | 660.000         | 337.262        | 660.000                   | 285.000                  |
| Gewährte SAR                                               | 360.000         | 240.000        | 240.000        | 240.000        | 240.000        | 240.000         | 240.000        | 0                         | 0                        |
| Verfallene SAR                                             | 210.000         | 45.348         | 116.946        | 95.466         | 0              | 210.000         | 53.700         | 660.000                   | 0                        |
| Ausgeübte SAR                                              | 0               | 0              | 0              | 0              | 0              | 0               | 0              | 0                         | 0                        |
| <b>Ausstehende SAR zum 31. Dezember 2009</b>               | <b>925.000</b>  | <b>370.896</b> | <b>523.562</b> | <b>618.706</b> | <b>240.000</b> | <b>690.000</b>  | <b>523.562</b> | <b>0</b>                  | <b>285.000</b>           |
| <b>Ausübbare SAR zum 31. Dezember 2009</b>                 | <b>0</b>        | <b>0</b>       | <b>0</b>       | <b>0</b>       | <b>0</b>       | <b>0</b>        | <b>0</b>       | <b>0</b>                  | <b>0</b>                 |
| Durchschnittlich gewichteter Abrechnungskurs in €          | Keine Ausübung  |                |                |                |                |                 |                |                           |                          |
| Durchschnittlich gewichteter Ausübungspreis in €           | Keine Ausübung  |                |                |                |                |                 |                |                           |                          |
| Gewichteter Durchschnitt der restlichen Laufzeit in Jahren | 2,04            | 2,67           | 2,31           | 2,03           | 3,50           | 1,87            | 2,31           | 0                         | 1,30                     |

1) Bis 24. Februar 2010

2) Bis 30. Juni 2010

#### VERGÜTUNG DES VORSTANDS

Die Gesamtvergütung der aktiven Mitglieder des Vorstands inklusive der Komponenten mit langfristiger Anreizwirkung belief sich im Geschäftsjahr 2010 insgesamt auf 17,0 MIO € (Vorjahr: 22,2 MIO €). Davon entfielen 7,1 MIO € (Vorjahr: 9,8 MIO €) auf erfolgsunabhängige Komponenten (Fixum und Nebenleistung), 4,9 MIO € (Vorjahr: 5,1 MIO €) auf erfolgsbezogene Komponenten (Variable) sowie 5,0 MIO € (Vorjahr: 7,3 MIO €) auf Komponenten mit langfristiger Anreizwirkung (SAR). Die Anzahl der SAR betrug 1.875.000 Stück (Vorjahr: 1.800.000 Stück).

#### EHEMALIGE MITGLIEDER DES VORSTANDES

Die Bezüge für ehemalige Mitglieder des Vorstands bzw. deren Hinterbliebene betrugen 5,7 MIO € (Vorjahr: 8,1 MIO €). Der nach internationalen Rechnungslegungsgrundsätzen ermittelte Verpflichtungsumfang (DBO) für laufende Pensionen beläuft sich auf 42,9 MIO € (Vorjahr: 26,1 MIO €).

#### VERGÜTUNG DES AUFSICHTSRATS

Im Geschäftsjahr 2010 betrug die Gesamtvergütung des Aufsichtsrats rund 1,1 MIO € (Vorjahr: 0,7 MIO €), davon entfielen 0,9 MIO € auf das Fixum (Vorjahr: 0,6 MIO €), 0 MIO € auf erfolgsabhängige Vergütung (Vorjahr: 0 MIO €) sowie 0,2 MIO € auf Sitzungsgelder (Vorjahr: 0,1 MIO €).

Weitere Angaben zur individualisierten Vergütung des Vorstands und des Aufsichtsrats finden sich im Corporate-Governance-Bericht, dessen Vergütungsbericht gleichzeitig Bestandteil des Konzernlageberichts ist.

#### AKTIENBESITZ DES VORSTANDS UND DES AUFSICHTSRATS

Vorstand und Aufsichtsrat der Deutsche Post AG halten am 31. Dezember 2010 Aktien der Gesellschaft im Umfang von weniger als 1 % des Grundkapitals der Gesellschaft.



### MELDEPFLICHTIGE TRANSAKTIONEN

Die der Deutsche Post AG gem. § 15 a Wertpapierhandels-gesetz gemeldeten Transaktionen von Vorstands- und Aufsichts-ratsmitgliedern mit Wertpapieren der Gesellschaft sind auf der Website der Gesellschaft unter [www.dp-dhl.com](http://www.dp-dhl.com) einsehbar.

### 56 Honorare des Abschlussprüfers

Für die im Geschäftsjahr 2010 und im Vorjahr erbrachten Dienstleistungen des Abschlussprüfers des Konzernabschlusses, PricewaterhouseCoopers Aktiengesellschaft Wirtschaftsprüfungsgesellschaft, sind folgende Honorare als Aufwand erfasst worden:

| MIO €                                            | 2009     | 2010     |
|--------------------------------------------------|----------|----------|
| Abschlussprüfungen                               | 6        | 5        |
| Sonstige Bestätigungs- oder Bewertungsleistungen | 1        | 2        |
| Steuerberatungsleistungen                        | 0        | 0        |
| Sonstige Leistungen                              | 1        | 1        |
| <b>Honorare des Abschlussprüfers</b>             | <b>8</b> | <b>8</b> |

### 57 Inanspruchnahme von § 264 Abs. 3 HGB

Die Deutsche Post AG nimmt für das Geschäftsjahr 2010 die Erleichterungen des § 264 Abs. 3 HGB für folgende Gesellschaften in Anspruch:

1. Agheera GmbH
2. Danzas Deutschland Holding GmbH
3. Deutsche Post Adress Beteiligungsgesellschaft mbH
4. Deutsche Post Beteiligungen Holding GmbH
5. Deutsche Post Beteiligungen Holding Bankbeteiligungs-gesellschaft mbH
6. Deutsche Post Com GmbH
7. Deutsche Post Consult GmbH
8. Deutsche Post Customer Service Center GmbH
9. Deutsche Post DHL Corporate Real Estate Management GmbH (vorm.: Deutsche Post Immobilienentwicklung Grundstücksgesellschaft mbH)
10. Deutsche Post DHL Inhouse Consulting GmbH
11. Deutsche Post DHL Market Research and Innovation GmbH
12. Deutsche Post Direkt GmbH
13. Deutsche Post Fleet GmbH
14. Deutsche Post Immobilien GmbH
15. Deutsche Post IT Brief GmbH
16. Deutsche Post IT Services GmbH
17. Deutsche Post Real Estate Germany GmbH
18. Deutsche Post Shop Essen GmbH
19. Deutsche Post Shop Hannover GmbH

20. Deutsche Post Shop München GmbH
21. Deutsche Post Technischer Service GmbH
22. DHL Airways GmbH
23. DHL Automotive GmbH
24. DHL Automotive Offenau GmbH
25. DHL BwLog GmbH
26. DHL Express Germany GmbH
27. DHL Global Forwarding GmbH
28. DHL Global Forwarding Management GmbH
29. DHL Global Management GmbH
30. DHL Home Delivery GmbH
31. DHL Hub Leipzig GmbH
32. DHL International GmbH
33. DHL Logistics GmbH
34. DHL Solutions Fashion GmbH
35. DHL Solutions GmbH
36. DHL Solutions Großgut GmbH
37. DHL Solutions Retail GmbH
38. DHL Supply Chain Management GmbH
39. DHL Trade Fairs & Events GmbH
40. DHL Verwaltungs GmbH
41. European Air Transport Leipzig GmbH
42. FIRST MAIL Düsseldorf GmbH
43. interServ Gesellschaft für Personal- und Berater-dienstleistungen mbH
44. ITG GmbH Internationale Spedition und Logistik
45. Werbeagentur Janssen GmbH
46. Williams Lea Deutschland GmbH
47. Williams Lea Direct Marketing Solutions GmbH
48. Williams Lea Document Solutions GmbH
49. Williams Lea GmbH
50. Williams Lea Inhouse Solutions GmbH
51. Williams Lea Print Solutions GmbH

### 58 Entsprechenserklärung zum Corporate Governance Kodex

Der Vorstand und der Aufsichtsrat der Deutsche Post AG haben gemeinsam im Dezember 2010 die nach § 161 des Aktien-gesetzes vorgeschriebene Entsprechenserklärung zum Deutschen Corporate Governance Kodex für das Geschäftsjahr 2010 abgegeben. Die Entsprechenserklärung ist im Internet unter [www.corporate-governance-code.de](http://www.corporate-governance-code.de) und auf der Homepage [www.dp-dhl.com](http://www.dp-dhl.com) im Wortlaut abrufbar.

### 59 Wesentliche Ereignisse nach dem Bilanzstichtag

Berichtspflichtige Ereignisse lagen nicht vor.

## 60 Anteilsbesitzliste

### Verbundene Unternehmen, die in den Konzernabschluss einbezogen werden

| Name                                                                 | Sitz                            | Konzern-Anteile<br>am Kapital % | Währung | Eigenkapital<br>Tausend | Jahresergebnis<br>Tausend |
|----------------------------------------------------------------------|---------------------------------|---------------------------------|---------|-------------------------|---------------------------|
| <b>Europa</b>                                                        |                                 |                                 |         |                         |                           |
| ABIS GmbH                                                            | Deutschland, Frankfurt am Main  | 70,00                           | EUR     | 477                     | 868                       |
| Aerocar B.V.                                                         | Niederlande, Amsterdam          | 100,00                          | EUR     | 5.659                   | 2.478                     |
| Agheera GmbH                                                         | Deutschland, Bonn               | 100,00                          | EUR     | 25                      | -1.444                    |
| Albert Scheid GmbH                                                   | Deutschland, Köln               | 100,00                          | EUR     | 1.032                   | 416                       |
| Applied Distribution Group Limited <sup>5)</sup>                     | Großbritannien, Bracknell       | 100,00                          | EUR     | 5.764                   | 0                         |
| Axial SA                                                             | Belgien, Seneffe                | 100,00                          | EUR     | 2.360                   | -405                      |
| Blue Funnel Bulkships Limited <sup>5)</sup>                          | Großbritannien, Bracknell       | 100,00                          | EUR     | -2.561                  | 0                         |
| BürgTrans GmbH                                                       | Deutschland, Düsseldorf         | 100,00                          | EUR     | 244                     | 4                         |
| Cargus Express Curier S.R.L.                                         | Rumänien, Bukarest              | 100,00                          | EUR     | -8.360                  | -3.103                    |
| Cargus International S.R.L.                                          | Rumänien, Bukarest              | 100,00                          | EUR     | -398                    | 159                       |
| Container Services Amsterdam B.V. <sup>5)</sup>                      | Niederlande, Amsterdam          | 100,00                          | EUR     | 245                     | 0                         |
| Cormar Limited                                                       | Großbritannien, Bracknell       | 100,00                          | EUR     | 1.764                   | 739                       |
| CPJ Travel Limited                                                   | Großbritannien, Hounslow        | 100,00                          | EUR     | 0                       | 0                         |
| DANMAR Lines AG                                                      | Schweiz, Basel                  | 100,00                          | EUR     | 24.459                  | 4.646                     |
| Danzas (UK) Limited <sup>5)</sup>                                    | Großbritannien, Staines         | 100,00                          | EUR     | 1.158                   | 0                         |
| DANZAS AEI (UK) LTD <sup>5)</sup>                                    | Großbritannien, Staines         | 100,00                          | EUR     | 8.753                   | 0                         |
| Danzas AEI GmbH                                                      | Deutschland, Kelsterbach        | 100,00                          | EUR     | 7.810                   | 5                         |
| Danzas Chemicals GmbH <sup>8)</sup>                                  | Deutschland, Düsseldorf         | 100,00                          | EUR     | -1.267                  | 0                         |
| Danzas Deutschland Holding GmbH                                      | Deutschland, Frankfurt am Main  | 100,00                          | EUR     | 5.485                   | 25.213                    |
| DANZAS Fashion B.V.                                                  | Niederlande, Venlo              | 100,00                          | EUR     | -26.171                 | -399                      |
| Danzas Fashion NV                                                    | Belgien, Grimbergen             | 100,00                          | EUR     | 14                      | -17                       |
| Danzas Fashion Service Centers B.V.                                  | Niederlande, Waalwijk           | 100,00                          | EUR     | 645                     | -87                       |
| Danzas Grundstücksverwaltung Düsseldorf GmbH                         | Deutschland, Düsseldorf         | 100,00                          | EUR     | 14.404                  | 2.352                     |
| Danzas Grundstücksverwaltung Frankfurt GmbH                          | Deutschland, Frankfurt am Main  | 100,00                          | EUR     | 27.005                  | -2.839                    |
| Danzas Grundstücksverwaltung Groß-Gerau GmbH                         | Deutschland, Hamburg            | 100,00                          | EUR     | 28                      | -35                       |
| Danzas Holding AG                                                    | Schweiz, Basel                  | 100,00                          | EUR     | 127.294                 | 21.066                    |
| Danzas Kiev Ltd. <sup>1)</sup>                                       | Ukraine, Kiew                   | 100,00                          | EUR     | -1.845                  | -237                      |
| Danzas Odessa Ltd. <sup>1)</sup>                                     | Ukraine, Odessa                 | 100,00                          | EUR     | -                       | -                         |
| Danzas Verwaltungs GmbH                                              | Deutschland, Frankfurt am Main  | 100,00                          | EUR     | 22.427                  | 1.539                     |
| Danzas, S.L. <sup>1)</sup>                                           | Spanien, San Sebastián          | 100,00                          | EUR     | 205.423                 | 2.145                     |
| Union Aduanera Española S.A. <sup>1)</sup>                           | Spanien, Barcelona              | 100,00                          | EUR     | -                       | -                         |
| Darshaan Properties Ltd.                                             | Irland, Dublin                  | 100,00                          | EUR     | 5.651                   | 571                       |
| Deutsche Post Adress Beteiligungsgesellschaft mbH                    | Deutschland, Bonn               | 100,00                          | EUR     | 416                     | 8.569                     |
| Deutsche Post Adress Geschäftsführungs GmbH                          | Deutschland, Bonn               | 51,00                           | EUR     | 17                      | -10                       |
| Deutsche Post Adress GmbH & Co. KG                                   | Deutschland, Bonn               | 51,00                           | EUR     | 9.741                   | 16.763                    |
| Deutsche Post Assekuranz Vermittlungs GmbH                           | Deutschland, Bonn               | 55,00                           | EUR     | 51                      | -8                        |
| Deutsche Post Beteiligungen Holding Bankbeteiligungsgesellschaft mbH | Deutschland, Bonn               | 100,00                          | EUR     | 3.575.225               | 3.554                     |
| Deutsche Post Beteiligungen Holding GmbH                             | Deutschland, Bonn               | 100,00                          | EUR     | 6.793.358               | -1.132.898                |
| Deutsche Post Com GmbH                                               | Deutschland, Bonn               | 100,00                          | EUR     | 1.150                   | 155                       |
| Deutsche Post Consult GmbH                                           | Deutschland, Bonn               | 100,00                          | EUR     | 3.847                   | 556                       |
| Deutsche Post Customer Service Center GmbH                           | Deutschland, Monheim            | 100,00                          | EUR     | 178                     | -27.492                   |
| Deutsche Post DHL Corporate Real Estate Management GmbH              | Deutschland, Bonn               | 100,00                          | EUR     | 51                      | 132                       |
| Deutsche Post DHL Inhouse Consulting GmbH                            | Deutschland, Bonn               | 100,00                          | EUR     | 16                      | 6.860                     |
| Deutsche Post DHL Market Research and Innovation GmbH                | Deutschland, Bonn               | 100,00                          | EUR     | 8.021                   | 195                       |
| Deutsche Post Direkt GmbH                                            | Deutschland, Bonn               | 100,00                          | EUR     | 60                      | 7.072                     |
| Deutsche Post Finance B.V.                                           | Niederlande, Amersfoort         | 100,00                          | EUR     | 10.794                  | 711                       |
| Deutsche Post Fleet GmbH                                             | Deutschland, Bonn               | 100,00                          | EUR     | 511.694                 | 13.558                    |
| Deutsche Post Global Mail (Belgium) NV                               | Belgien, Brüssel                | 100,00                          | EUR     | 1.099                   | 29                        |
| Deutsche Post Global Mail (France) SAS                               | Frankreich, Issy-les-Moulineaux | 100,00                          | EUR     | 2.172                   | -308                      |

IFRS-Werte gemäß Einzelabschluss vor Gewinnabführung

1) Nur Teilkonzern vorhanden 2) Angaben aus 2009 3) Angaben aus 2008 4) Nicht verfügbar 5) Ruhend 6) Einbezug nach SIC 12 7a) Einbezug IAS 27.13 (a) 7b) Einbezug IAS 27.13 (b-d)

8) In Liquidation 9) Angaben nach lokalen Rechnungslegungsvorschriften 10) Stimmrechte 11) Gesellschaft ist im Konzernabschluss der Deutsche Postbank AG enthalten 12) Neugründung 2010

## Verbundene Unternehmen, die in den Konzernabschluss einbezogen werden

| Name                                                                                          | Sitz                           | Konzern-Anteile<br>am Kapital % | Währung | Eigenkapital<br>Tausend | Jahresergebnis<br>Tausend |
|-----------------------------------------------------------------------------------------------|--------------------------------|---------------------------------|---------|-------------------------|---------------------------|
| Deutsche Post Global Mail (Netherlands) B.V.                                                  | Niederlande, Utrecht           | 100,00                          | EUR     | 3.987                   | 1.143                     |
| Deutsche Post Global Mail (Switzerland) AG                                                    | Schweiz, Basel                 | 100,00                          | EUR     | 375                     | 160                       |
| Deutsche Post Global Mail (UK) Limited <sup>5)</sup>                                          | Großbritannien, Croydon        | 100,00                          | EUR     | 7.992                   | 0                         |
| Deutsche Post Immobilien GmbH                                                                 | Deutschland, Bonn              | 100,00                          | EUR     | 3.377                   | -3.373                    |
| Deutsche Post Immobilienentwicklung Grundstücks-<br>gesellschaft mbH & Co. Logistikzentren KG | Deutschland, Bonn              | 100,00                          | EUR     | -40.254                 | 1.564                     |
| Deutsche Post Insurance Limited                                                               | Irland, Dublin                 | 100,00                          | EUR     | 11.014                  | 3.466                     |
| Deutsche Post International B.V. <sup>1)</sup>                                                | Niederlande, Maastricht        | 100,00                          | EUR     | 2.486.066               | 504.394                   |
| The Netherlands 622009 B.V. <sup>1)</sup>                                                     | Niederlande, Apeldoorn         | 100,00                          | EUR     | -                       | -                         |
| Deutsche Post Investments GmbH                                                                | Deutschland, Bonn              | 100,00                          | EUR     | 657.563                 | 2                         |
| Deutsche Post IT BRIEF GmbH                                                                   | Deutschland, Bonn              | 100,00                          | EUR     | 13.563                  | 146                       |
| Deutsche Post IT Services GmbH                                                                | Deutschland, Bonn              | 100,00                          | EUR     | 49.575                  | 12.199                    |
| Deutsche Post Mail Distribution (Netherlands) B.V.                                            | Niederlande, Apeldoorn         | 100,00                          | EUR     | -8.092                  | 53                        |
| Deutsche Post Real Estate Germany GmbH                                                        | Deutschland, Bonn              | 100,00                          | EUR     | -1.591                  | -16.855                   |
| Deutsche Post Reinsurance S.A.                                                                | Luxemburg, Luxemburg           | 100,00                          | EUR     | 2.240                   | 0                         |
| Deutsche Post Selekt Mail Nederland C.V. <sup>1)</sup>                                        | Niederlande, Utrecht           | 100,00                          | EUR     | -62.178                 | -24.344                   |
| sw Post Beheer B.V. <sup>1)</sup>                                                             | Niederlande, Utrecht           | 100,00                          | EUR     | -                       | -                         |
| Deutsche Post Shop Essen GmbH                                                                 | Deutschland, Essen             | 100,00                          | EUR     | 25                      | 17                        |
| Deutsche Post Shop Hannover GmbH                                                              | Deutschland, Hannover          | 100,00                          | EUR     | 25                      | 9                         |
| Deutsche Post Shop München GmbH                                                               | Deutschland, München           | 100,00                          | EUR     | 25                      | 50                        |
| Deutsche Post Technischer Service GmbH                                                        | Deutschland, Bonn              | 100,00                          | EUR     | 2.189                   | 2.224                     |
| Deutsche Post Zahlungsdienste GmbH                                                            | Deutschland, Bonn              | 100,00                          | EUR     | 1.000                   | -804                      |
| DHL Supply Chain (Finland) Oy                                                                 | Finnland, Vantaa               | 100,00                          | EUR     | 4.356                   | 89                        |
| DHL (Cyprus) Ltd.                                                                             | Zypern, Nikosia                | 100,00                          | EUR     | 3.148                   | 341                       |
| DHL Air Limited                                                                               | Großbritannien, Hounslow       | 100,00                          | EUR     | 22.541                  | 3.315                     |
| DHL AirWays GmbH                                                                              | Deutschland, Köln              | 100,00                          | EUR     | -3.288                  | 60                        |
| DHL Automotive GmbH                                                                           | Deutschland, Hamburg           | 100,00                          | EUR     | 4.614                   | -651                      |
| DHL Automotive Offenau GmbH                                                                   | Deutschland, Bonn              | 100,00                          | EUR     | 61                      | -896                      |
| DHL Automotive s.r.o.                                                                         | Tschechische Republik, Prag    | 100,00                          | EUR     | 8.843                   | 296                       |
| DHL Aviation (France) SAS                                                                     | Frankreich, Roissy-en-France   | 100,00                          | EUR     | 1.424                   | -468                      |
| DHL Aviation (Italy) S.r.l.                                                                   | Italien, Mailand               | 100,00                          | EUR     | 3.889                   | 266                       |
| DHL Aviation (Netherlands) B.V.                                                               | Niederlande, Amersfoort        | 100,00                          | EUR     | 4.065                   | 151                       |
| DHL Aviation (UK) Limited                                                                     | Großbritannien, Hounslow       | 100,00                          | EUR     | 18.079                  | 623                       |
| DHL Aviation NV/SA                                                                            | Belgien, Zaventem              | 99,99                           | EUR     | 44.012                  | 706                       |
| DHL Bwlog GmbH                                                                                | Deutschland, Bonn              | 100,00                          | EUR     | 21.076                  | 13                        |
| DHL Distribution Holdings (UK) Limited                                                        | Großbritannien, Hounslow       | 100,00                          | EUR     | 51.524                  | -48.705                   |
| DHL Ekspres (Slovenija), d.o.o.                                                               | Slowenien, Trzin               | 100,00                          | EUR     | 153                     | 179                       |
| DHL Energy Performance & Management Limited                                                   | Großbritannien, Bracknell      | 100,00                          | EUR     | -6.008                  | -1.737                    |
| DHL Estonia AS                                                                                | Estland, Tallinn               | 100,00                          | EUR     | 6.290                   | 693                       |
| DHL Exel Central Services EURL                                                                | Frankreich, Roissy-en-France   | 100,00                          | EUR     | -359                    | -2.191                    |
| DHL Exel Slovakia, s.r.o.                                                                     | Slowakei, Bratislava           | 100,00                          | EUR     | -604                    | -2.287                    |
| DHL Exel Supply Chain (Denmark) A/S                                                           | Dänemark, Kastrup              | 100,00                          | EUR     | -19.797                 | 1.247                     |
| DHL Exel Supply Chain (Poland) Sp. z o.o.                                                     | Polen, Warschau                | 100,00                          | EUR     | -2.495                  | -1.012                    |
| DHL Exel Supply Chain (Sweden) AB                                                             | Schweden, Stockholm            | 100,00                          | EUR     | 10.460                  | -3.342                    |
| DHL Exel Supply Chain Euskal-Log, S.L.U.                                                      | Spanien, Barcelona             | 100,00                          | EUR     | 6.807                   | 875                       |
| DHL Exel Supply Chain Hungary Limited                                                         | Ungarn, Ullo                   | 100,00                          | EUR     | 573                     | -121                      |
| DHL Exel Supply Chain Portugal Lda.                                                           | Portugal, Alverca              | 100,00                          | EUR     | 7.980                   | -139                      |
| DHL Exel Supply Chain Spain, S.L.U.                                                           | Spanien, Madrid                | 100,00                          | EUR     | 19.763                  | -6.458                    |
| DHL Exel Supply Chain Trade (Poland) Sp. z o.o.                                               | Polen, Warschau                | 100,00                          | EUR     | 585                     | 117                       |
| DHL Exel Supply Chain Trollhättan AB                                                          | Schweden, Stockholm            | 100,00                          | EUR     | 4.617                   | 1.777                     |
| DHL Express (Austria) GmbH                                                                    | Österreich, Guntramsdorf       | 100,00                          | EUR     | -1.109                  | -5.204                    |
| DHL Express (Belgium) NV                                                                      | Belgien, Ternat                | 100,00                          | EUR     | 11.824                  | 3.448                     |
| DHL Express (Czech Republic) s.r.o.                                                           | Tschechische Republik, Ostrava | 100,00                          | EUR     | 6.491                   | -1.274                    |
| DHL Express (Denmark) A/S                                                                     | Dänemark, Broendby             | 100,00                          | EUR     | 79.179                  | 4.388                     |
| DHL Express (France) SAS                                                                      | Frankreich, Roissy-en-France   | 100,00                          | EUR     | -40.118                 | -312.629                  |
| DHL Express (Hellas) S.A.                                                                     | Griechenland, Athen            | 100,00                          | EUR     | -698                    | -1.164                    |
| DHL Express (Iceland) EHF                                                                     | Island, Reykjavik              | 100,00                          | EUR     | 95                      | 43                        |

Verbundene Unternehmen, die in den Konzernabschluss einbezogen werden

| Name                                                | Sitz                              | Konzern-Anteile<br>am Kapital % | Währung | Eigenkapital<br>Tausend | Jahresergebnis<br>Tausend |
|-----------------------------------------------------|-----------------------------------|---------------------------------|---------|-------------------------|---------------------------|
| DHL Express (Ireland) Ltd.                          | Irland, Dublin                    | 100,00                          | EUR     | – 609                   | – 67                      |
| DHL Express (Italy) S.r.l.                          | Italien, Mailand                  | 100,00                          | EUR     | 49.782                  | 141                       |
| DHL Express (Luxembourg) s. a.                      | Luxemburg, Contern                | 100,00                          | EUR     | 4.238                   | –396                      |
| DHL Express (Netherlands) B.V.                      | Niederlande, Amersfoort           | 100,00                          | EUR     | –15.282                 | 3.476                     |
| DHL Express (Norway) AS                             | Norwegen, Oslo                    | 100,00                          | EUR     | 11.840                  | 264                       |
| DHL Express (Poland) Sp. z o.o.                     | Polen, Warschau                   | 100,00                          | EUR     | 59.076                  | 25.119                    |
| DHL Express (Schweiz) AG                            | Schweiz, Basel                    | 100,00                          | EUR     | 15.299                  | 2.412                     |
| DHL Express (Slovakia), spol. s r. o.               | Slowakei, Bratislava              | 100,00                          | EUR     | 6.279                   | 520                       |
| DHL Express (UK) Ltd.                               | Großbritannien, Hounslow          | 100,00                          | EUR     | –28.958                 | 826                       |
| DHL Express Bulgaria EOOD                           | Bulgarien, Sofia                  | 100,00                          | EUR     | 2.853                   | 1.026                     |
| DHL Express Germany GmbH                            | Deutschland, Bonn                 | 100,00                          | EUR     | 1.209                   | 42.447                    |
| DHL Express Hungary Forwarding and Services LLC     | Ungarn, Budapest                  | 100,00                          | EUR     | 12.377                  | 330                       |
| DHL Express Iberia S.L. <sup>1)</sup>               | Spanien, San Sebastián            | 100,00                          | EUR     | 182.570                 | 30.494                    |
| Denalur SPE, S.L. <sup>1)</sup>                     | Spanien, San Sebastián            | 100,00                          | EUR     | –                       | –                         |
| DHL Express A Coruña Spain, S.L. <sup>1)</sup>      | Spanien, San Sebastián            | 100,00                          | EUR     | –                       | –                         |
| DHL Express Alacant Spain S.L. <sup>1)</sup>        | Spanien, San Sebastián            | 100,00                          | EUR     | –                       | –                         |
| DHL Express Araba Spain S.L. <sup>1)</sup>          | Spanien, San Sebastián            | 100,00                          | EUR     | –                       | –                         |
| DHL Express Barcelona Spain S.L. <sup>1)</sup>      | Spanien, San Sebastián            | 100,00                          | EUR     | –                       | –                         |
| DHL Express Bizkaia Spain S.L. <sup>1)</sup>        | Spanien, San Sebastián            | 100,00                          | EUR     | –                       | –                         |
| DHL Express Cantabria Spain S.L. <sup>1)</sup>      | Spanien, San Sebastián            | 100,00                          | EUR     | –                       | –                         |
| DHL Express Castello Spain S.L. <sup>1)</sup>       | Spanien, San Sebastián            | 100,00                          | EUR     | –                       | –                         |
| DHL Express Ciudad Real Spain, S.L. <sup>1)</sup>   | Spanien, Ciudad Real              | 100,00                          | EUR     | –                       | –                         |
| DHL Express Gipuzkoa Spain S.L. <sup>1)</sup>       | Spanien, San Sebastián            | 100,00                          | EUR     | –                       | –                         |
| DHL Express Girona Spain S.L. <sup>1)</sup>         | Spanien, San Sebastián            | 100,00                          | EUR     | –                       | –                         |
| DHL Express Huelva Spain S.L. <sup>1)</sup>         | Spanien, San Sebastián            | 100,00                          | EUR     | –                       | –                         |
| DHL Express Illes Balears Spain, S.L. <sup>1)</sup> | Spanien, Barcelona                | 100,00                          | EUR     | –                       | –                         |
| DHL Express Jaén Spain S.L. <sup>1)</sup>           | Spanien, Ciudad Real              | 100,00                          | EUR     | –                       | –                         |
| DHL Express Lugo Spain S.L. <sup>1)</sup>           | Spanien, San Sebastián            | 100,00                          | EUR     | –                       | –                         |
| DHL Express Madrid Spain S.L. <sup>1)</sup>         | Spanien, San Sebastián            | 100,00                          | EUR     | –                       | –                         |
| DHL Express Malaga Spain S.L. <sup>1)</sup>         | Spanien, Malaga                   | 100,00                          | EUR     | –                       | –                         |
| DHL Express Navarra Spain, S.L. <sup>1)</sup>       | Spanien, Navarra                  | 100,00                          | EUR     | –                       | –                         |
| DHL Express Pontevedra Spain S.L. <sup>1)</sup>     | Spanien, Vigo                     | 100,00                          | EUR     | –                       | –                         |
| DHL Express Servicios S.L. <sup>1)</sup>            | Spanien, San Sebastián            | 100,00                          | EUR     | –                       | –                         |
| DHL Express Sevilla Spain S.L. <sup>1)</sup>        | Spanien, Sevilla                  | 100,00                          | EUR     | –                       | –                         |
| DHL Express Tarragona Spain S.L. <sup>1)</sup>      | Spanien, San Sebastián            | 100,00                          | EUR     | –                       | –                         |
| DHL Express Valencia Spain S.L. <sup>1)</sup>       | Spanien, San Sebastián            | 100,00                          | EUR     | –                       | –                         |
| DHL Express Valladolid Spain S.L. <sup>1)</sup>     | Spanien, San Sebastián            | 100,00                          | EUR     | –                       | –                         |
| DHL Express Zaragoza Spain, S.L. <sup>1)</sup>      | Spanien, Saragossa                | 100,00                          | EUR     | –                       | –                         |
| DHL Pony Express Limited <sup>1), 5)</sup>          | Großbritannien, Hounslow          | 100,00                          | EUR     | 6.138                   | 0                         |
| DHL@home Limited <sup>1), 5)</sup>                  | Großbritannien, Hounslow          | 100,00                          | EUR     | –                       | –                         |
| Rosier Distribution Limited <sup>1), 5)</sup>       | Großbritannien, Hounslow          | 100,00                          | EUR     | –                       | –                         |
| Russel Davies Properties Limited <sup>1), 5)</sup>  | Großbritannien, Hounslow          | 100,00                          | EUR     | –                       | –                         |
| Russell Davies Limited <sup>1), 5)</sup>            | Großbritannien, Hounslow          | 100,00                          | EUR     | –                       | –                         |
| DHL Express Macedonia d.o.o.e.l.                    | Mazedonien, Skopje                | 100,00                          | EUR     | 982                     | 89                        |
| DHL Express Portugal, Lda.                          | Portugal, Moreira da Maia         | 100,00                          | EUR     | 18.155                  | 3.413                     |
| DHL Express Services (France) SAS                   | Frankreich, Roissy-en-France      | 100,00                          | EUR     | –8.308                  | –7.591                    |
| DHL Fashion (France) S.A.S.                         | Frankreich, La Plaine-Saint-Denis | 100,00                          | EUR     | –1.396                  | –6.973                    |
| DHL Finance Services B.V.                           | Niederlande, Maastricht           | 100,00                          | EUR     | 24.197                  | 2.644                     |
| DHL FoodServices GmbH                               | Deutschland, Frankfurt am Main    | 100,00                          | EUR     | 184                     | –1.442                    |
| DHL Freight (Belgium) NV                            | Belgien, Grimbergen               | 100,00                          | EUR     | 5.158                   | 918                       |
| DHL Freight (France) SAS                            | Frankreich, Marne-la-Valle        | 100,00                          | EUR     | 2.509                   | –7.738                    |
| DHL Freight (Netherlands) B.V.                      | Niederlande, Amersfoort           | 100,00                          | EUR     | –5.535                  | –1.805                    |
| DHL Freight (Sweden) AB                             | Schweden, Stockholm               | 100,00                          | EUR     | 28.830                  | 1.963                     |
| DHL Freight and Contract Logistics (UK) Limited     | Großbritannien, Milton Keynes     | 100,00                          | EUR     | –4.817                  | –4.510                    |

IFRS-Werte gemäß Einzelabschluss vor Gewinnabführung

1) Nur Teilkonzern vorhanden 2) Angaben aus 2009 3) Angaben aus 2008 4) Nicht verfügbar 5) Ruhend 6) Einbezug nach SIC 12 7a) Einbezug IAS 27.13 (a) 7b) Einbezug IAS 27.13 (b–d)

8) In Liquidation 9) Angaben nach lokalen Rechnungslegungsvorschriften 10) Stimmrechte 11) Gesellschaft ist im Konzernabschluss der Deutsche Postbank AG enthalten 12) Neugründung 2010

## Verbundene Unternehmen, die in den Konzernabschluss einbezogen werden

| Name                                                                            | Sitz                              | Konzern-Anteile<br>am Kapital % | Währung | Eigenkapital<br>Tausend | Jahresergebnis<br>Tausend |
|---------------------------------------------------------------------------------|-----------------------------------|---------------------------------|---------|-------------------------|---------------------------|
| DHL Freight Finland Oy                                                          | Finnland, Vantaa                  | 100,00                          | EUR     | 13.458                  | -849                      |
| DHL Freight Germany Holding GmbH                                                | Deutschland, Düsseldorf           | 100,00                          | EUR     | -54.226                 | -15.041                   |
| DHL Freight GmbH                                                                | Deutschland, Düsseldorf           | 100,00                          | EUR     | 7.805                   | -9.942                    |
| DHL Freight Hungary Forwarding and Logistics Ltd.                               | Ungarn, Budapest                  | 100,00                          | EUR     | -1.700                  | -1.747                    |
| DHL Freight Services (Netherlands) B.V.                                         | Niederlande, Tiel                 | 100,00                          | EUR     | 2.623                   | 4.703                     |
| DHL Freight Spain, S.L.                                                         | Spanien, San Sebastián            | 100,00                          | EUR     | 6.549                   | 1.496                     |
| DHL GBS (UK) Limited                                                            | Großbritannien, Bracknell         | 100,00                          | EUR     | 7.361                   | 550                       |
| DHL Global Forwarding (Austria) GmbH                                            | Österreich, Wien                  | 100,00                          | EUR     | 20.373                  | 4.689                     |
| DHL Global Forwarding (Belgium) NV                                              | Belgien, Zaventem                 | 100,00                          | EUR     | 22.187                  | 4.231                     |
| DHL Global Forwarding (CZ) s.r.o.                                               | Tschechische Republik, Prag       | 100,00                          | EUR     | 24.061                  | 4.020                     |
| DHL Global Forwarding (Denmark) A/S                                             | Dänemark, Kastrup                 | 100,00                          | EUR     | 11.671                  | -574                      |
| DHL Global Forwarding (Finland) Oy                                              | Finnland, Vantaa                  | 100,00                          | EUR     | 4.422                   | 2.104                     |
| DHL Global Forwarding (France) SAS                                              | Frankreich, La Plaine-Saint-Denis | 100,00                          | EUR     | 48.878                  | 7.329                     |
| DHL Global Forwarding (Ireland) Limited                                         | Irland, Dublin                    | 100,00                          | EUR     | 6.754                   | 2.113                     |
| DHL Global Forwarding (Italy) S.p.A.                                            | Italien, Mailand                  | 100,00                          | EUR     | 47.910                  | 17.734                    |
| DHL Global Forwarding (Luxembourg) S.A.                                         | Luxemburg, Luxemburg              | 90,00                           | EUR     | 1.362                   | 601                       |
| DHL Global Forwarding (Netherlands) B.V.                                        | Niederlande, Hoofddorp            | 100,00                          | EUR     | 24.934                  | 10.208                    |
| DHL Global Forwarding (Norway) AS                                               | Norwegen, Gardemoen               | 100,00                          | EUR     | 1.760                   | -498                      |
| DHL Global Forwarding (SWEDEN) AB                                               | Schweden, Kista                   | 100,00                          | EUR     | 14.183                  | 3.547                     |
| DHL Global Forwarding (UK) Limited                                              | Großbritannien, Staines           | 100,00                          | EUR     | 141.437                 | 30.153                    |
| DHL Global Forwarding GmbH                                                      | Deutschland, Frankfurt am Main    | 100,00                          | EUR     | 1.775                   | 29.193                    |
| DHL Global Forwarding Hellas S.A. of International Transportation and Logistics | Griechenland, Piräus              | 100,00                          | EUR     | 5.548                   | -1.115                    |
| DHL Global Forwarding Hungary Kft.                                              | Ungarn, Vecses                    | 100,00                          | EUR     | 20.450                  | 1.998                     |
| DHL Global Forwarding Management GmbH                                           | Deutschland, Bonn                 | 100,00                          | EUR     | -2.435                  | -6.238                    |
| DHL Global Forwarding Portugal, Lda.                                            | Portugal, Moreira da Maia         | 100,00                          | EUR     | 3.402                   | 1.101                     |
| DHL Global Forwarding Sp. z o.o.                                                | Polen, Lodz                       | 100,00                          | EUR     | 12.044                  | 4.517                     |
| DHL Global Forwarding Spain, S.L.U.                                             | Spanien, Madrid                   | 100,00                          | EUR     | 18.083                  | 5.454                     |
| DHL Global Mail (UK) Limited                                                    | Großbritannien, Bracknell         | 100,00                          | EUR     | -15.317                 | -2.045                    |
| DHL Global Mail Nordic AB                                                       | Schweden, Stockholm               | 100,00                          | EUR     | 657                     | 455                       |
| DHL Global Mail ooo                                                             | Russland, Moskau                  | 100,00                          | EUR     | 27                      | -447                      |
| DHL Global Management GmbH                                                      | Deutschland, Bonn                 | 100,00                          | EUR     | 1.351.975               | -1.336                    |
| DHL Group Services NV/SA                                                        | Belgien, Zaventem                 | 99,96                           | EUR     | 1.367                   | 0                         |
| DHL Holding (France) SAS                                                        | Frankreich, Roissy-en-France      | 100,00                          | EUR     | 368.532                 | 12.065                    |
| DHL Holding (Italy) S.r.l.                                                      | Italien, Mailand                  | 100,00                          | EUR     | 240.577                 | 15.318                    |
| DHL Holdings (Ireland) Ltd.                                                     | Irland, Dublin                    | 100,00                          | EUR     | 93                      | 0                         |
| DHL Home Delivery GmbH                                                          | Deutschland, Hamburg              | 100,00                          | EUR     | 5.094                   | -16.330                   |
| DHL Hub Leipzig GmbH                                                            | Deutschland, Schkeuditz           | 100,00                          | EUR     | -110                    | 766                       |
| DHL Information Services (Europe) s.r.o.                                        | Tschechische Republik, Prag       | 100,00                          | EUR     | 89.641                  | 3.840                     |
| DHL Inter Limited <sup>9)</sup>                                                 | Großbritannien, Moss End          | 100,00                          | EUR     | 0                       | 0                         |
| DHL International (Albania) Ltd.                                                | Albanien, Tirana                  | 100,00                          | EUR     | 589                     | 208                       |
| DHL International (Ireland) Ltd.                                                | Irland, Dublin                    | 100,00                          | EUR     | 1.049                   | 1                         |
| DHL International (Romania) S.R.L.                                              | Rumänien, Bukarest                | 100,00                          | EUR     | 2.539                   | -473                      |
| DHL International (UK) Limited                                                  | Großbritannien, Hounslow          | 100,00                          | EUR     | 47.045                  | 2.919                     |
| DHL International (Ukraine) JSC                                                 | Ukraine, Kiew                     | 99,99                           | EUR     | 2.184                   | 413                       |
| DHL International d.o.o.                                                        | Kroatien, Zagreb                  | 100,00                          | EUR     | 2.421                   | 312                       |
| DHL International AB <sup>9)</sup>                                              | Schweden, Stockholm               | 100,00                          | EUR     | 4.082                   | 0                         |
| DHL International B.V. <sup>9)</sup>                                            | Niederlande, Amersfoort           | 100,00                          | EUR     | 26.664                  | 0                         |
| DHL International Express (France) SAS                                          | Frankreich, Roissy-en-France      | 100,00                          | EUR     | 37.969                  | 20.737                    |
| DHL International GmbH                                                          | Deutschland, Bonn                 | 100,00                          | EUR     | 1.950.949               | -7.378                    |
| DHL International Ltd.                                                          | Malta, Luqa                       | 100,00                          | EUR     | 436                     | 134                       |
| DHL International NV/SA                                                         | Belgien, Diegem                   | 100,00                          | EUR     | 9.010                   | 1.386                     |
| DHL International ZAO, Russia                                                   | Russland, Moskau                  | 100,00                          | EUR     | 25.862                  | 33.691                    |
| DHL International-Sarajevo d.o.o.                                               | Bosnien und Herzegowina, Sarajevo | 100,00                          | EUR     | 359                     | 201                       |
| DHL Investments Limited                                                         | Großbritannien, St. Helier        | 100,00                          | EUR     | -29.716                 | -3.294                    |
| DHL Latvia SIA                                                                  | Lettland, Riga                    | 100,00                          | EUR     | -347                    | 215                       |
| DHL Logistica d.o.o.                                                            | Slowenien, Brnik                  | 100,00                          | EUR     | 895                     | 202                       |

Verbundene Unternehmen, die in den Konzernabschluss einbezogen werden

| Name                                       | Sitz                              | Konzern-Anteile<br>am Kapital % | Währung | Eigenkapital<br>Tausend | Jahresergebnis<br>Tausend |
|--------------------------------------------|-----------------------------------|---------------------------------|---------|-------------------------|---------------------------|
| DHL Logistics (Schweiz) AG                 | Schweiz, Basel                    | 100,00                          | EUR     | 33.817                  | 9.661                     |
| DHL Logistics (Slovakia), spol. s r.o.     | Slowakei, Senec                   | 100,00                          | EUR     | 3.519                   | 2.239                     |
| DHL Logistics (Ukraine) Ltd. <sup>1)</sup> | Ukraine, Kiew                     | 100,00                          | EUR     | 144                     | 0                         |
| ooo ASG Rad Transport Russia <sup>1)</sup> | Russland, Sankt Petersburg        | 100,00                          | EUR     | –                       | –                         |
| DHL Logistics GmbH                         | Deutschland, Hamburg              | 100,00                          | EUR     | 453                     | –13.124                   |
| DHL Logistics ooo                          | Russland, Chimki                  | 100,00                          | EUR     | 135                     | 1.216                     |
| DHL Logistics S.R.L.                       | Rumänien, Bukarest                | 100,00                          | EUR     | 882                     | 151                       |
| DHL Logistik Service GmbH                  | Österreich, Wien                  | 100,00                          | EUR     | –3.083                  | –4.462                    |
| DHL Management (Schweiz) AG                | Schweiz, Basel                    | 100,00                          | EUR     | 22.488                  | –3.455                    |
| DHL Management Services Limited            | Großbritannien, Hounslow          | 100,00                          | EUR     | 195                     | 31                        |
| DHL Medjunarodni Vazdusni Ekspres d.o.o.   | Serbien, Belgrad                  | 100,00                          | EUR     | 2.992                   | 618                       |
| DHL Nordic AB                              | Schweden, Stockholm               | 100,00                          | EUR     | 65.875                  | 1.179                     |
| DHL Packaging s.r.o.                       | Tschechische Republik, Pohrlitz   | 70,00                           | EUR     | –230                    | 330                       |
| DHL Pipelife Logistik GmbH                 | Österreich, Wien                  | 100,00                          | EUR     | 196                     | –1.958                    |
| DHL Quality Cargo AS                       | Norwegen, Oslo                    | 100,00                          | EUR     | 1.355                   | –396                      |
| DHL Rail AB                                | Schweden, Trelleborg              | 100,00                          | EUR     | 164                     | –914                      |
| DHL Services Limited                       | Großbritannien, Milton Keynes     | 100,00                          | EUR     | 91.895                  | 93.205                    |
| DHL Shoe Logistics s.r.o.                  | Tschechische Republik, Pohrlitz   | 100,00                          | EUR     | 1.143                   | 187                       |
| DHL Solutions (Belgium) nv                 | Belgien, Mechelen                 | 100,00                          | EUR     | 28.403                  | 1.080                     |
| DHL Solutions (France) SAS                 | Frankreich, La Plaine-Saint-Denis | 100,00                          | EUR     | 2.489                   | 521                       |
| DHL Solutions Fashion GmbH                 | Deutschland, Essen                | 100,00                          | EUR     | 64                      | 81                        |
| DHL Solutions GmbH                         | Deutschland, Hamburg              | 100,00                          | EUR     | 41.582                  | –14.195                   |
| DHL Solutions Großgut GmbH                 | Deutschland, Frankfurt am Main    | 100,00                          | EUR     | 937                     | 3.475                     |
| DHL Solutions Retail GmbH                  | Deutschland, Unna                 | 100,00                          | EUR     | 4.128                   | 7.858                     |
| DHL Solutions s.r.o.                       | Tschechische Republik, Ostrava    | 100,00                          | EUR     | 6.271                   | 313                       |
| DHL Stenvreten Kommanditbolag              | Schweden, Stockholm               | 100,00                          | EUR     | –1.704                  | 0                         |
| DHL Stock Express SAS                      | Frankreich, La Plaine-Saint-Denis | 100,00                          | EUR     | –21.177                 | –6.994                    |
| DHL Supply Chain (Belgium) nv              | Belgien, Mechelen                 | 100,00                          | EUR     | 8.041                   | –2.695                    |
| DHL Supply Chain (Ireland) Limited         | Irland, Dublin                    | 100,00                          | EUR     | 12.656                  | –2.148                    |
| DHL Supply Chain (Italy) S.p.A.            | Italien, Mailand                  | 100,00                          | EUR     | 37.731                  | 2.648                     |
| DHL Supply Chain (Netherlands) B.V.        | Niederlande, Amersfoort           | 100,00                          | EUR     | 97.693                  | 5.489                     |
| DHL Supply Chain (Norway) AS               | Norwegen, Oslo                    | 100,00                          | EUR     | 2.481                   | 1.273                     |
| DHL Supply Chain Management (Benelux) B.V. | Niederlande, Amersfoort           | 100,00                          | EUR     | –28.799                 | 1.708                     |
| DHL Supply Chain Management GmbH           | Deutschland, Bonn                 | 100,00                          | EUR     | 25                      | –23.474                   |
| DHL Supply Chain, s.r.o.                   | Tschechische Republik, Pohrlitz   | 100,00                          | EUR     | 6.627                   | –975                      |
| DHL Technical Distribution B.V.            | Niederlande, Veghel               | 100,00                          | EUR     | –2.091                  | –32                       |
| DHL Trade Fairs & Events GmbH              | Deutschland, Frankfurt am Main    | 100,00                          | EUR     | 515                     | –3.437                    |
| DHL Trade Fairs and Events (UK) Limited    | Großbritannien, Staines           | 85,00                           | EUR     | 218                     | 84                        |
| DHL Vehicle Services (UK) Limited          | Großbritannien, Hounslow          | 100,00                          | EUR     | –1.842                  | –106                      |
| DHL Vertriebs GmbH & Co. oHG               | Deutschland, Bonn                 | 100,00                          | EUR     | 79.472                  | 46.200                    |
| DHL Verwaltungs GmbH                       | Deutschland, Bonn                 | 100,00                          | EUR     | –39                     | 370                       |
| DHL Voigt International GmbH               | Deutschland, Neumünster           | 51,00                           | EUR     | 1.328                   | 1.032                     |
| DHL Wahl International GmbH                | Deutschland, Bielefeld            | 51,00                           | EUR     | 1.006                   | 366                       |
| DHL Worldwide Express Logistics NV/SA      | Belgien, Diegem                   | 100,00                          | EUR     | 17.795                  | 1.181                     |
| DHL Worlwide Network NV/SA                 | Belgien, Diegem                   | 100,00                          | EUR     | 19.536                  | 1.111                     |
| DZ Specialties B.V.                        | Niederlande, Amersfoort           | 100,00                          | EUR     | 79.994                  | 10.410                    |
| European Air Transport Leipzig GmbH        | Deutschland, Schkeuditz           | 100,00                          | EUR     | –2.222                  | 4.352                     |
| Exel (Africa) Limited                      | Großbritannien, Bracknell         | 100,00                          | EUR     | –1.861                  | –255                      |
| Exel (European Services Centre) Ltd.       | Irland, Dublin                    | 100,00                          | EUR     | 0                       | –27                       |
| Exel (Meinerzhagen) GmbH                   | Deutschland, Unna                 | 100,00                          | EUR     | 200                     | 1                         |
| Exel (Wommelgem) nv                        | Belgien, Wommelgem                | 100,00                          | EUR     | –3.417                  | –66                       |
| Exel Beziens SARL                          | Frankreich, Paris                 | 100,00                          | EUR     | –320                    | –94                       |
| Exel Chenas SARL                           | Frankreich, Roissy-en-France      | 100,00                          | EUR     | 53                      | –13                       |
| Exel Czech Republic s.r.o. <sup>9)</sup>   | Tschechische Republik, Prag       | 100,00                          | EUR     | 393                     | 0                         |

IFRS-Werte gemäß Einzelabschluss vor Gewinnabführung

1) Nur Teilkonzern vorhanden 2) Angaben aus 2009 3) Angaben aus 2008 4) Nicht verfügbar 5) Ruhend 6) Einbezug nach SIC 12 7a) Einbezug IAS 27.13 (a) 7b) Einbezug IAS 27.13 (b–d)

8) In Liquidation 9) Angaben nach lokalen Rechnungslegungsvorschriften 10) Stimmrechte 11) Gesellschaft ist im Konzernabschluss der Deutsche Postbank AG enthalten 12) Neugründung 2010



## Verbundene Unternehmen, die in den Konzernabschluss einbezogen werden

| Name                                                | Sitz                                 | Konzern-Anteile<br>am Kapital % | Währung | Eigenkapital<br>Tausend | Jahresergebnis<br>Tausend |
|-----------------------------------------------------|--------------------------------------|---------------------------------|---------|-------------------------|---------------------------|
| Exel de Portugal Transítarios Lda.                  | Portugal, Lissabon                   | 100,00                          | EUR     | 90                      | -3                        |
| Exel Eiendom AS                                     | Norwegen, Oslo                       | 100,00                          | EUR     | 12.136                  | 324                       |
| Exel Environmental Developments Limited             | Großbritannien, Bracknell            | 100,00                          | EUR     | 2                       | 1                         |
| Exel Europe Limited                                 | Großbritannien, Milton Keynes        | 100,00                          | EUR     | 346.624                 | 47.872                    |
| Exel Finance (1986) Limited <sup>5)</sup>           | Großbritannien, Bedford              | 100,00                          | EUR     | 0                       | 0                         |
| Exel Finance Limited                                | Großbritannien, Bedford              | 100,00                          | EUR     | 358                     | 61                        |
| Exel France SA                                      | Frankreich, Roissy-en-France         | 100,00                          | EUR     | 143.338                 | 2.844                     |
| Exel Freight Management (UK) Limited <sup>5)</sup>  | Großbritannien, Bracknell            | 100,00                          | EUR     | 7.252                   | 0                         |
| Exel Freight SAS                                    | Frankreich, Roissy-en-France         | 100,00                          | EUR     | 33.061                  | -62                       |
| Exel Gallieni SARL                                  | Frankreich, Roissy-en-France         | 100,00                          | EUR     | -1.596                  | -604                      |
| Exel Gironde SA                                     | Frankreich, Arles                    | 99,96                           | EUR     | 3.243                   | -1.314                    |
| Exel Group Holdings (Nederland) B. v.               | Niederlande, Veghel                  | 100,00                          | EUR     | 50.697                  | -8.859                    |
| Exel Head Office Services Limited                   | Großbritannien, Bedford              | 100,00                          | EUR     | 0                       | 0                         |
| Exel Healthcare (Belgium) NV                        | Belgien, Mechelen                    | 100,00                          | EUR     | 56.629                  | -258                      |
| Exel Holdings Limited                               | Großbritannien, Bedford              | 100,00                          | EUR     | 713.754                 | 33.988                    |
| Exel Insurance Limited                              | Großbritannien, St. Peter Port       | 100,00                          | EUR     | 7.765                   | 155                       |
| Exel International Holdings (Belgium) NV            | Belgien, Mechelen                    | 100,00                          | EUR     | 87.131                  | -407                      |
| Exel International Holdings (Netherlands 1) B. v.   | Niederlande, Veghel                  | 100,00                          | EUR     | 695.660                 | -202                      |
| Exel International Holdings (Netherlands 2) B. v.   | Niederlande, Veghel                  | 100,00                          | EUR     | 1.063.458               | -78.012                   |
| Exel International Holdings (Netherlands 5) B. v.   | Niederlande, Veghel                  | 100,00                          | EUR     | 27.260                  | -193                      |
| Exel Investments Limited                            | Großbritannien, Bracknell            | 100,00                          | EUR     | 200.896                 | 32.977                    |
| Exel Investments Netherlands B. v.                  | Niederlande, Veghel                  | 100,00                          | EUR     | 225                     | 0                         |
| Exel Lille SARL                                     | Frankreich, Roissy-en-France         | 100,00                          | EUR     | -1.217                  | -826                      |
| Exel Limited                                        | Großbritannien, Bracknell            | 100,00                          | EUR     | 909.386                 | 62.901                    |
| Exel Logistics (Northern Ireland) Limited           | Großbritannien, Mallusk              | 100,00                          | EUR     | 5.173                   | 167                       |
| Exel Logistics Limited                              | Großbritannien, Milton Keynes        | 100,00                          | EUR     | 28.625                  | 1.467                     |
| Exel Logistics Property Limited                     | Großbritannien, Bedford              | 100,00                          | EUR     | 57.593                  | 3.496                     |
| Exel Loire SARL                                     | Frankreich, Roissy-en-France         | 100,00                          | EUR     | 2.167                   | -493                      |
| Exel Management Services No 2 Limited <sup>5)</sup> | Großbritannien, Bracknell            | 100,00                          | EUR     | 0                       | 0                         |
| Exel Overseas Limited                               | Großbritannien, Bracknell            | 100,00                          | EUR     | 157.169                 | 6.086                     |
| Exel SARL                                           | Frankreich, Erstein                  | 100,00                          | EUR     | 221                     | 55                        |
| Exel Scotland Limited                               | Großbritannien, Glasgow              | 94,17                           | EUR     | 2.497                   | 28                        |
| Exel Services Logistiques SAS                       | Frankreich, Vitry-sur-Seine          | 100,00                          | EUR     | 8.207                   | -1.845                    |
| Exel Supply Chain Solutions Ltd.                    | Irland, Dublin                       | 100,00                          | EUR     | -320                    | 1.474                     |
| Exel Sweden AB                                      | Schweden, Stockholm                  | 100,00                          | EUR     | 106                     | -172                      |
| Exel Transport France SASU                          | Frankreich, Vitry-sur-Seine          | 100,00                          | EUR     | 1.460                   | -241                      |
| Exel UK Limited                                     | Großbritannien, Bracknell            | 100,00                          | EUR     | 48.055                  | 5.817                     |
| F. x. Coughlin B. v.                                | Niederlande, Veghel                  | 100,00                          | EUR     | 2.349                   | 731                       |
| F. x. Coughlin (U. K.) Limited                      | Großbritannien, Bracknell            | 100,00                          | EUR     | 2.440                   | -429                      |
| FACT Denmark A/S                                    | Dänemark, Kastrup                    | 100,00                          | EUR     | 633                     | 86                        |
| Fashion Logistics Limited                           | Großbritannien, Bracknell            | 100,00                          | EUR     | 1.023                   | 635                       |
| First Mail Düsseldorf GmbH                          | Deutschland, Düsseldorf              | 100,00                          | EUR     | -2.077                  | -2.509                    |
| Formation E-Document Solutions Limited              | Großbritannien, London               | 100,00                          | EUR     | 911                     | 490                       |
| Freight Indemnity and Guarantee Company Limited     | Großbritannien, Bedford              | 100,00                          | EUR     | 19                      | 0                         |
| Gerlach & Co Internationale Expeditores B. v.       | Niederlande, Venlo                   | 100,00                          | EUR     | 3.400                   | 293                       |
| Gerlach & Co. NV                                    | Belgien, Antwerpen                   | 100,00                          | EUR     | 5.171                   | 1                         |
| Gerlach AG                                          | Schweiz, Basel                       | 100,00                          | EUR     | 6.820                   | 5.089                     |
| Gerlach Customs Services EOOD                       | Bulgarien, Sofia                     | 100,00                          | EUR     | -28                     | -30                       |
| Gerlach European Customs Services, spol. s r. o.    | Slowakei, Senec                      | 100,00                          | EUR     | 156                     | 7                         |
| Gerlach Sp. z o. o.                                 | Polen, Gluchowo/Komorniki            | 100,00                          | EUR     | 793                     | 165                       |
| Gerlach Spol s. r. o.                               | Tschechische Republik, Rudna u Prahy | 100,00                          | EUR     | 2.607                   | 1.715                     |
| Gerlach Zolldienste GmbH                            | Deutschland, Frankfurt am Main       | 100,00                          | EUR     | 159                     | 548                       |
| Giorgio Gori S. r. l.                               | Italien, Collesalveti (Livorno)      | 60,00                           | EUR     | 19.030                  | 7.460                     |
| Giorgio Gori (France) SAS                           | Frankreich, Châtenoy-le-Royal        | 100,00                          | EUR     | 1.169                   | 200                       |
| Global Mail (Austria) Ges. m. b. H.                 | Österreich, Wien                     | 100,00                          | EUR     | 1.652                   | -181                      |
| Gori Iberia S. L.                                   | Spanien, Barcelona                   | 100,00                          | EUR     | 1.506                   | 750                       |
| Gori Iberia Transítarios, Limitada                  | Portugal, Matosinhos                 | 60,00                           | EUR     | 846                     | 494                       |



Verbundene Unternehmen, die in den Konzernabschluss einbezogen werden

| Name                                                                      | Sitz                           | Konzern-Anteile<br>am Kapital % | Währung | Eigenkapital<br>Tausend | Jahresergebnis<br>Tausend |
|---------------------------------------------------------------------------|--------------------------------|---------------------------------|---------|-------------------------|---------------------------|
| Güll GmbH                                                                 | Deutschland, Lindau (Bodensee) | 51,00                           | EUR     | 3.121                   | 441                       |
| Henderson Line Limited <sup>9)</sup>                                      | Großbritannien, Glasgow        | 100,00                          | EUR     | 366                     | 0                         |
| Higgs International Limited                                               | Großbritannien, Bracknell      | 100,00                          | EUR     | 12.740                  | 320                       |
| Historia Sp. z o.o. <sup>8)</sup>                                         | Polen, Warschau                | 100,00                          | EUR     | -162                    | 0                         |
| Hull, Blyth (Angola) Limited                                              | Großbritannien, Bracknell      | 100,00                          | EUR     | -4.964                  | -1.224                    |
| Hyperion Properties Limited <sup>9)</sup>                                 | Großbritannien, Bedford        | 100,00                          | EUR     | -5.191                  | 0                         |
| Inside Track Automotive Limited <sup>9)</sup>                             | Großbritannien, Bracknell      | 100,00                          | EUR     | 3.012                   | 0                         |
| Integrated Logistics Management Belgium B.V.                              | Niederlande, Veghel            | 100,00                          | EUR     | 1.570                   | -5                        |
| Interlanden B.V. <sup>1)</sup>                                            | Niederlande, Apeldoorn         | 100,00                          | EUR     | -28.504                 | -28.321                   |
| Wegener Transport B.V. <sup>1)</sup>                                      | Niederlande, Apeldoorn         | 70,00                           | EUR     | -                       | -                         |
| interServ Gesellschaft für Personal- und Berater-<br>dienstleistungen mbH | Deutschland, Bonn              | 100,00                          | EUR     | 13.372                  | -58.473                   |
| INTEXO Holding (Deutschland) GmbH                                         | Deutschland, Hünxe             | 100,00                          | EUR     | 3.572                   | 4                         |
| ITG Global Logistics B.V.                                                 | Niederlande, Schiphol          | 100,00                          | EUR     | 619                     | -335                      |
| ITG GmbH Internationale Spedition und Logistik                            | Deutschland, Schwaig/Oberding  | 100,00                          | EUR     | 875                     | -2.772                    |
| ITG Internationale Spedition GmbH                                         | Österreich, Wien               | 100,00                          | EUR     | 51                      | 26                        |
| Joint Retail Logistics Limited <sup>9)</sup>                              | Großbritannien, Bracknell      | 100,00                          | EUR     | 875                     | 0                         |
| Kampton                                                                   | Großbritannien, Bedford        | 100,00                          | EUR     | -74                     | -17                       |
| Karukera Transit sas                                                      | Frankreich, Pointe-à-Pitre     | 100,00                          | EUR     | 1.353                   | -54                       |
| Kelpo Kuljetus Fi Oy                                                      | Finnland, Vantaa               | 100,00                          | EUR     | -1.676                  | -44                       |
| Laible AG Speditionen                                                     | Schweiz, Schaffhausen          | 100,00                          | EUR     | 1.244                   | 1.119                     |
| Langtexo Logistik Verwaltungs GmbH                                        | Deutschland, Duisburg          | 100,00                          | EUR     | 948                     | -62                       |
| LLC Williams Lea                                                          | Russland, Moskau               | 100,00                          | EUR     | -19                     | -104                      |
| MailMerge Nederland B.V. <sup>5)</sup>                                    | Niederlande, Wormerveer        | 100,00                          | EUR     | 157                     | 0                         |
| McGregor Cory Limited                                                     | Großbritannien, Bracknell      | 100,00                          | EUR     | 16.449                  | -709                      |
| McGregor Gow & Holland (1996) Limited                                     | Großbritannien, Bracknell      | 100,00                          | EUR     | 272                     | 0                         |
| McGregor Sea & Air Services Limited                                       | Großbritannien, Bracknell      | 100,00                          | EUR     | 347                     | 0                         |
| Mercury Airspeed International B.V.                                       | Niederlande, Nieuw Vennepe     | 100,00                          | EUR     | -834                    | -12                       |
| Mercury Holdings Limited <sup>9)</sup>                                    | Großbritannien, Bracknell      | 100,00                          | EUR     | 11.026                  | 0                         |
| MSAS Limited                                                              | Großbritannien, Bracknell      | 100,00                          | EUR     | -3.577                  | 0                         |
| Multimar Seefrachtenkontor Gesellschaft m.B.H.                            | Österreich, Wien               | 100,00                          | EUR     | 278                     | 0                         |
| National Carriers Limited                                                 | Großbritannien, Bedford        | 100,00                          | EUR     | 5.963                   | 82                        |
| NFC International Holdings (Ireland)                                      | Irland, Dublin                 | 100,00                          | EUR     | 38.584                  | 10.000                    |
| nugg.ad AG predictive behavioral targeting                                | Deutschland, Berlin            | 95,99                           | EUR     | 274                     | -28                       |
| Ocean Group Investments Limited                                           | Großbritannien, Bracknell      | 100,00                          | EUR     | 23.612                  | -2.643                    |
| Ocean Overseas (Luxembourg) Sarl                                          | Luxemburg, Luxemburg           | 100,00                          | EUR     | 36.461                  | 16.494                    |
| Ocean Overseas Holdings Limited                                           | Großbritannien, Bracknell      | 100,00                          | EUR     | 417.227                 | 11.628                    |
| Orbital Secretaries Limited <sup>9)</sup>                                 | Großbritannien, Hounslow       | 100,00                          | EUR     | 0                       | 0                         |
| Outrack Credit (UK) Limited <sup>9)</sup>                                 | Großbritannien, Hounslow       | 100,00                          | EUR     | 1                       | 0                         |
| Packaging Datastore Limited <sup>9)</sup>                                 | Großbritannien, Bracknell      | 100,00                          | EUR     | 0                       | 0                         |
| Packaging Management Group Limited <sup>9)</sup>                          | Großbritannien, Bracknell      | 100,00                          | EUR     | 0                       | 0                         |
| Pharma Logistics B.V.                                                     | Niederlande, Rotterdam         | 100,00                          | EUR     | 343                     | 1                         |
| Pharma Logistics nv                                                       | Belgien, Mechelen              | 100,00                          | EUR     | 35.075                  | 2.580                     |
| Power Europe (Cannock) Limited                                            | Großbritannien, Bracknell      | 100,00                          | EUR     | 368                     | 205                       |
| Power Europe (Doncaster) Limited                                          | Großbritannien, Bracknell      | 100,00                          | EUR     | 483                     | 363                       |
| Power Europe Development Limited <sup>9)</sup>                            | Großbritannien, Bracknell      | 100,00                          | EUR     | 0                       | 0                         |
| Power Europe Development No. 3 Limited                                    | Großbritannien, Bracknell      | 100,00                          | EUR     | -50                     | -32                       |
| Power Europe Limited                                                      | Großbritannien, Bracknell      | 100,00                          | EUR     | -1.287                  | 2.085                     |
| Power Europe Operating Limited                                            | Großbritannien, Bracknell      | 100,00                          | EUR     | 8.858                   | 2.219                     |
| PPL CZ s.r.o.                                                             | Tschechische Republik, Prag    | 100,00                          | EUR     | 83.808                  | 7.795                     |
| Presse-Service Güll GmbH                                                  | Schweiz, St. Gallen            | 51,00                           | EUR     | 856                     | 317                       |
| RDC Properties Limited                                                    | Großbritannien, Bracknell      | 100,00                          | EUR     | 6.604                   | 89                        |
| Realcause Limited                                                         | Großbritannien, Bedford        | 100,00                          | EUR     | 461.896                 | -3.275                    |
| Rosier Tankers Limited <sup>9)</sup>                                      | Großbritannien, Hounslow       | 100,00                          | EUR     | -3.109                  | 0                         |
| Ross House (AL) Limited                                                   | Großbritannien, Bracknell      | 100,00                          | EUR     | 348                     | 0                         |

IFRS-Werte gemäß Einzelabschluss vor Gewinnabführung

1) Nur Teilkonzern vorhanden 2) Angaben aus 2009 3) Angaben aus 2008 4) Nicht verfügbar 5) Ruhend 6) Einbezug nach SIC 12 7a) Einbezug IAS 27.13 (a) 7b) Einbezug IAS 27.13 (b-d)

8) In Liquidation 9) Angaben nach lokalen Rechnungslegungsvorschriften 10) Stimmrechte 11) Gesellschaft ist im Konzernabschluss der Deutsche Postbank AG enthalten 12) Neugründung 2010

## Verbundene Unternehmen, die in den Konzernabschluss einbezogen werden

| Name                                                               | Sitz                            | Konzern-Anteile<br>am Kapital % | Währung | Eigenkapital<br>Tausend | Jahresergebnis<br>Tausend |
|--------------------------------------------------------------------|---------------------------------|---------------------------------|---------|-------------------------|---------------------------|
| Scherbauer Spedition GmbH <sup>7b)</sup>                           | Deutschland, Neutraubling       | 50,00                           | EUR     | 3.687                   | 1.196                     |
| Selektivracht B. V.                                                | Niederlande, Utrecht            | 100,00                          | EUR     | 12.167                  | 4.133                     |
| SERMAT Services Maritimes Aériens et Transit SA                    | Frankreich, La Garenne Colombes | 100,00                          | EUR     | 1.736                   | -189                      |
| sgb Speditionsgesellschaft mbH                                     | Deutschland, München            | 100,00                          | EUR     | 590                     | 274                       |
| Speedmail International Limited <sup>9)</sup>                      | Großbritannien, London          | 100,00                          | EUR     | 10.124                  | 0                         |
| StarBroker AG                                                      | Schweiz, Basel                  | 100,00                          | EUR     | 26.262                  | 11.400                    |
| Sydney Cooper (Distribution) Ltd.                                  | Irland, Dublin                  | 100,00                          | EUR     | 883                     | -623                      |
| T&B Whitwood Holdings Limited                                      | Großbritannien, Bracknell       | 100,00                          | EUR     | 4                       | 195                       |
| Tankfreight (Ireland) Ltd.                                         | Irland, Dublin                  | 100,00                          | EUR     | 52                      | -621                      |
| TBMM Holdings Limited                                              | Großbritannien, Bracknell       | 100,00                          | EUR     | 40                      | 0                         |
| The Stationery Office Group Limited                                | Großbritannien, London          | 100,00                          | EUR     | 19.330                  | 0                         |
| The Stationery Office Holdings Limited                             | Großbritannien, London          | 100,00                          | EUR     | 84.190                  | 194.339                   |
| The Stationery Office Limited                                      | Großbritannien, London          | 100,00                          | EUR     | 144.427                 | 15.021                    |
| Tibbett & Britten Group (Ireland) Limited                          | Irland, Dublin                  | 100,00                          | EUR     | 4.954                   | -37                       |
| Tibbett & Britten Group Limited                                    | Großbritannien, Bracknell       | 100,00                          | EUR     | 26.596                  | 69                        |
| Tibbett & Britten International Holdings Limited <sup>9), 8)</sup> | Großbritannien, Bracknell       | 100,00                          | EUR     | 0                       | 0                         |
| Tibbett & Britten International Limited                            | Großbritannien, Bracknell       | 100,00                          | EUR     | 2.625                   | 212                       |
| Tradeteam Limited                                                  | Großbritannien, Bedford         | 50,10                           | EUR     | 35.082                  | 11.437                    |
| Traditrade Holding S. A.                                           | Luxemburg, Luxemburg            | 100,00                          | EUR     | 22                      | 0                         |
| Transflash McGregor (Ireland) Ltd.                                 | Irland, Dublin                  | 100,00                          | EUR     | -21.615                 | -453                      |
| Transportbedrijf H. de Haan Vianen B. V. <sup>5)</sup>             | Niederlande, Utrecht            | 100,00                          | EUR     | 4.674                   | 0                         |
| The Stationery Office Enterprises Limited                          | Großbritannien, London          | 100,00                          | EUR     | -44.773                 | -1.181                    |
| Tso Holdings A Limited                                             | Großbritannien, London          | 100,00                          | EUR     | 19.248                  | 208.994                   |
| Tso Holdings B Limited                                             | Großbritannien, London          | 100,00                          | EUR     | 35.001                  | 224.651                   |
| Tso Property Limited                                               | Großbritannien, London          | 100,00                          | EUR     | 11.567                  | 577                       |
| UAB DHL Lietuva                                                    | Litauen, Vilnius                | 100,00                          | EUR     | 2.416                   | 448                       |
| Véron Grauer AG                                                    | Schweiz, Basel                  | 100,00                          | EUR     | 1.630                   | 1.258                     |
| Vetsch AG, Internationale Transporte <sup>1)</sup>                 | Schweiz, Buchs                  | 100,00                          | EUR     | 1.286                   | 585                       |
| Vetsch Internationale Transporte GmbH <sup>1)</sup>                | Österreich, Wolfurt             | 100,00                          | EUR     | -                       | -                         |
| Werbeagentur Janssen GmbH                                          | Deutschland, Düsseldorf         | 100,00                          | EUR     | 511                     | 855                       |
| Williams Lea Belgium BVBA                                          | Belgien, Ternat                 | 100,00                          | EUR     | -281                    | -24                       |
| Williams Lea Deutschland GmbH                                      | Deutschland, Bonn               | 100,00                          | EUR     | 1.851                   | -9.186                    |
| Williams Lea Direct Marketing Solutions GmbH                       | Deutschland, Bonn               | 100,00                          | EUR     | 34                      | 528                       |
| Williams Lea Document Solutions GmbH                               | Deutschland, Mannheim           | 100,00                          | EUR     | 25                      | -6.463                    |
| Williams Lea Finland Oy                                            | Finnland, Vantaa                | 100,00                          | EUR     | 163                     | 134                       |
| Williams Lea France SAS                                            | Frankreich, Paris               | 100,00                          | EUR     | 757                     | 647                       |
| Williams Lea GmbH                                                  | Deutschland, München            | 100,00                          | EUR     | 25                      | 1.042                     |
| Williams Lea Group Limited <sup>1)</sup>                           | Großbritannien, London          | 100,00                          | EUR     | 85.503                  | 10.825                    |
| Williams Lea (No. 1) Ltd. <sup>1)</sup>                            | Großbritannien, London          | 100,00                          | EUR     | -                       | -                         |
| Williams Lea Group Management Services Limited                     | Großbritannien, London          | 100,00                          | EUR     | 20                      | -346                      |
| Williams Lea Holdings PLC                                          | Großbritannien, London          | 96,06                           | EUR     | 478.719                 | 348                       |
| Williams Lea Hungary Kft.                                          | Ungarn, Budapest                | 100,00                          | EUR     | -28                     | -6                        |
| Williams Lea Inhouse Solutions GmbH                                | Deutschland, Bonn               | 100,00                          | EUR     | 1.816                   | 12.279                    |
| Williams Lea Ireland Limited                                       | Irland, Dublin                  | 100,00                          | EUR     | 2.121                   | 379                       |
| Williams Lea Italia S. r. l.                                       | Italien, Rom                    | 100,00                          | EUR     | 30                      | 52                        |
| Williams Lea Limited                                               | Großbritannien, London          | 100,00                          | EUR     | 51.756                  | 9.255                     |
| Williams Lea Netherlands B. V.                                     | Niederlande, Amsterdam          | 100,00                          | EUR     | -609                    | -135                      |
| Williams Lea Print Solutions GmbH                                  | Deutschland, Bonn               | 100,00                          | EUR     | 581                     | -11.552                   |
| Williams Lea S. L.                                                 | Spanien, Barcelona              | 100,00                          | EUR     | 9                       | 285                       |
| Williams Lea Sweden AB                                             | Schweden, Nyköping              | 100,00                          | EUR     | 881                     | -181                      |
| Williams Lea UK Limited                                            | Großbritannien, London          | 100,00                          | EUR     | 15.639                  | -3.212                    |
| Williams Lea Ukraine                                               | Ukraine, Kiew                   | 100,00                          | EUR     | 84                      | 14                        |
| Williams Lea, s. r. o.                                             | Tschechische Republik, Brunn    | 100,00                          | EUR     | 1.882                   | 1.087                     |
| <b>Amerikas</b>                                                    |                                 |                                 |         |                         |                           |
| Advance Logistics Inc.                                             | USA, Westerville                | 100,00                          | EUR     | -86                     | -154                      |
| AEI Drawback Services Inc.                                         | USA, Miami                      | 100,00                          | EUR     | 9.819                   | 1.089                     |
| Aero Express del Ecuador (TransAm) cia Ltda.                       | Ecuador, Guayaquil              | 100,00                          | EUR     | 6.156                   | 823                       |

Verbundene Unternehmen, die in den Konzernabschluss einbezogen werden

| Name                                                                | Sitz                                   | Konzern-Anteile<br>am Kapital % | Währung | Eigenkapital<br>Tausend | Jahresergebnis<br>Tausend |
|---------------------------------------------------------------------|----------------------------------------|---------------------------------|---------|-------------------------|---------------------------|
| Aero Express del Ecuador TransAm Cia Ltd.<br>(Colombian Branch)     | Kolumbien, Bogotá                      | 100,00                          | EUR     | 401                     | 427                       |
| Aerotrans S.A.                                                      | Panama, Panama-Stadt                   | 100,00                          | EUR     | 0                       | 27                        |
| Agencia de Aduanas DHL Express Colombia Ltda.                       | Kolumbien, Bogotá                      | 100,00                          | EUR     | 2.047                   | 29                        |
| Agencia de Aduanas DHL Global Forwarding<br>(Colombia) S.A. Nivel 1 | Kolumbien, Bogotá                      | 99,00                           | EUR     | 2.973                   | 383                       |
| Air Express International USA, Inc.                                 | USA, Miami                             | 100,00                          | EUR     | -13.354                 | -31.297                   |
| ASTAR Air Cargo, Inc.                                               | USA, Miami                             | 100,00                          | EUR     | -182.072                | -18.233                   |
| Circuit Logistics Inc.                                              | Kanada, Toronto                        | 100,00                          | EUR     | 588                     | 450                       |
| Connect Logistics Services Inc.                                     | Kanada, Toronto                        | 100,00                          | EUR     | 29.683                  | 5.176                     |
| Danzas Corporation                                                  | USA, Miami                             | 100,00                          | EUR     | -31.231                 | -1.113                    |
| DHL (Bahamas) Limited                                               | Bahamas, Nassau                        | 100,00                          | EUR     | 1.015                   | -66                       |
| DHL (Barbados) Ltd.                                                 | Barbados, Christ Church                | 100,00                          | EUR     | 1.632                   | 12                        |
| DHL (Bolivia) SRL                                                   | Bolivien, Santa Cruz de la Sierra      | 100,00                          | EUR     | 5.959                   | 1.322                     |
| DHL (BVI) Ltd.                                                      | Britische Jungferninseln, Tortola      | 100,00                          | EUR     | 1.595                   | -64                       |
| DHL (Costa Rica) S.A.                                               | Costa Rica, Cormar                     | 100,00                          | EUR     | 3.746                   | -4.471                    |
| DHL (Honduras) S.A. de C.V.                                         | Honduras, San Pedro Sula               | 100,00                          | EUR     | 6.387                   | 1.084                     |
| DHL (Jamaica) Ltd.                                                  | Jamaika, Kingston                      | 100,00                          | EUR     | 1.178                   | 193                       |
| DHL (Paraguay) S.R.L.                                               | Paraguay, Asunción                     | 100,00                          | EUR     | 4.492                   | 1.061                     |
| DHL (Trinidad and Tobago) Limited                                   | Trinidad und Tobago, Port of Spain     | 100,00                          | EUR     | -153                    | -195                      |
| DHL (Uruguay) S.R.L.                                                | Uruguay, Montevideo                    | 100,00                          | EUR     | 9.115                   | 2.768                     |
| DHL Aero Expresso S.A.                                              | Panama, Panama-Stadt                   | 51,75                           | EUR     | 21.279                  | 1.307                     |
| DHL Arwest (Panama) S.A. <sup>1)</sup>                              | Panama, Panama-Stadt                   | 100,00                          | EUR     | -3.407                  | -1.176                    |
| Corporación Arwest de Mexico S.A. de C.V. <sup>1)</sup>             | Mexiko, Mexiko-Stadt                   | 100,00                          | EUR     | -                       | -                         |
| DHL Arwest (Guatemala) S.A. <sup>1)</sup>                           | Guatemala, Guatemala-Stadt             | 100,00                          | EUR     | -                       | -                         |
| DHL Arwest de Mexico S.A. de C.V. <sup>1)</sup>                     | Mexiko, Mexiko-Stadt                   | 100,00                          | EUR     | -                       | -                         |
| DHL Aviation (Costa Rica) S.A.                                      | Costa Rica, San José                   | 100,00                          | EUR     | 1.749                   | -270                      |
| DHL Aviation Americas, Inc.                                         | USA, Plantation                        | 100,00                          | EUR     | 1.515                   | 124                       |
| DHL Co Manufacturing Packing SC México                              | Mexiko, Mexiko-Stadt                   | 100,00                          | EUR     | -308                    | -6                        |
| DHL Corporate Services SC México                                    | Mexiko, Tepetzotlán                    | 100,00                          | EUR     | 7.105                   | 293                       |
| DHL Customer Support (Costa Rica) S.A.                              | Costa Rica, Heredia                    | 100,00                          | EUR     | -297                    | 219                       |
| DHL Customs (Costa Rica) S.A.                                       | Costa Rica, Heredia                    | 100,00                          | EUR     | 370                     | -1.769                    |
| DHL Customs Brokerage Ltd.                                          | Kanada, Mississauga                    | 100,00                          | EUR     | -407                    | -455                      |
| DHL de Guatemala S.A. <sup>7a)</sup>                                | Guatemala, Guatemala-Stadt             | 49,00                           | EUR     | 11.640                  | 348                       |
| DHL Dominicana SA                                                   | Dominikanische Republik, Santo Domingo | 99,96                           | EUR     | 2.290                   | 1.979                     |
| DHL Exel Supply Chain (Argentina) S.A.                              | Argentinien, Buenos Aires              | 100,00                          | EUR     | 558                     | -602                      |
| DHL Express (Argentina) S.A.                                        | Argentinien, Buenos Aires              | 100,00                          | EUR     | 13.190                  | 4.457                     |
| DHL Express (Brazil) Ltda.                                          | Brasilien, São Paulo                   | 100,00                          | EUR     | 16.467                  | 9.208                     |
| DHL Express (Canada) Ltd.                                           | Kanada, Mississauga                    | 100,00                          | EUR     | -190.410                | -13.204                   |
| DHL Express (Chile) Ltda.                                           | Chile, Santiago                        | 99,00                           | EUR     | 29.381                  | 16.593                    |
| DHL Express (Ecuador) S.A.                                          | Ecuador, Quito                         | 100,00                          | EUR     | 3.166                   | 1.608                     |
| DHL Express (El Salvador) S.A. de C.V. <sup>1)</sup>                | El Salvador, San Salvador              | 100,00                          | EUR     | 4.095                   | 1.652                     |
| DHL Logistics de El Salvador S.A. de C.V. <sup>1)</sup>             | El Salvador, San Salvador              | 100,00                          | EUR     | -                       | -                         |
| DHL Express (USA), Inc.                                             | USA, Plantation                        | 100,00                          | EUR     | 16.766                  | 760.036                   |
| DHL Express Aduanas Peru S.A.C.                                     | Peru, Callao                           | 100,00                          | EUR     | 1.677                   | 211                       |
| DHL Express Aduanas Venezuela C.A.                                  | Venezuela, Caracas                     | 100,00                          | EUR     | 641                     | -211                      |
| DHL Express Colombia Ltda.                                          | Kolumbien, Bogotá                      | 100,00                          | EUR     | 4.346                   | 1.794                     |
| DHL Express México, S.A. de C.V.                                    | Mexiko, Mexiko-Stadt                   | 100,00                          | EUR     | 25.807                  | 26.354                    |
| DHL Express Peru S.A.C.                                             | Peru, Callao                           | 100,00                          | EUR     | 15.370                  | -61                       |
| DHL Fletes Aereos, C.A.                                             | Venezuela, Caracas                     | 100,00                          | EUR     | 9.377                   | 4.544                     |
| DHL Global Customer Solutions (USA) Inc.                            | USA, Plantation                        | 100,00                          | EUR     | 1.698                   | 944                       |
| DHL Global Forwarding (Argentina) S.A.                              | Argentinien, Buenos Aires              | 99,97                           | EUR     | 6.917                   | 2.083                     |
| DHL Global Forwarding (Canada) Inc.                                 | Kanada, Mississauga                    | 100,00                          | EUR     | 56.991                  | 4.238                     |
| DHL Global Forwarding (Chile) S.A.                                  | Chile, Santiago de Chile               | 100,00                          | EUR     | 15.316                  | 2.094                     |
| DHL Global Forwarding (Colombia) Ltda.                              | Kolumbien, Bogotá                      | 100,00                          | EUR     | 296                     | -2.073                    |

IFRS-Werte gemäß Einzelabschluss vor Gewinnabführung

1) Nur Teilkonzern vorhanden 2) Angaben aus 2009 3) Angaben aus 2008 4) Nicht verfügbar 5) Ruhend 6) Einbezug nach SIC 12 7a) Einbezug IAS 27.13 (a) 7b) Einbezug IAS 27.13 (b-d)  
8) In Liquidation 9) Angaben nach lokalen Rechnungslegungsvorschriften 10) Stimmrechte 11) Gesellschaft ist im Konzernabschluss der Deutsche Postbank AG enthalten 12) Neugründung 2010

## Verbundene Unternehmen, die in den Konzernabschluss einbezogen werden

| Name                                                                      | Sitz                                  | Konzern-Anteile<br>am Kapital % | Währung | Eigenkapital<br>Tausend | Jahresergebnis<br>Tausend |
|---------------------------------------------------------------------------|---------------------------------------|---------------------------------|---------|-------------------------|---------------------------|
| DHL Global Forwarding (Ecuador) S.A.                                      | Ecuador, Quito                        | 100,00                          | EUR     | -36                     | -71                       |
| DHL Global Forwarding (El Salvador) S.A. <sup>1)</sup>                    | El Salvador, San Salvador             | 100,00                          | EUR     | 226                     | -117                      |
| DHL Zona Franca El Salvador S.A. <sup>1)</sup>                            | El Salvador, Antiguo Cuscatlan        | 100,00                          | EUR     | -                       | -                         |
| DHL Global Forwarding (Guatemala) S.A. <sup>1)</sup>                      | Guatemala, Guatemala-Stadt            | 100,00                          | EUR     | 3.203                   | 1.218                     |
| Carga Aerea Internacional S.A. (CARINTER) <sup>1)</sup>                   | Guatemala, Guatemala-Stadt            | 100,00                          | EUR     | -                       | -                         |
| DHL Zona Franca (Guatemala) S.A. <sup>1)</sup>                            | Guatemala, Guatemala-Stadt            | 100,00                          | EUR     | -                       | -                         |
| Transportes Expresos Internacionales<br>(Interexpreso) S.A. <sup>1)</sup> | Guatemala, Guatemala-Stadt            | 100,00                          | EUR     | -                       | -                         |
| DHL Global Forwarding (Mexico) S.A. de c.v.                               | Mexiko, Mexiko-Stadt                  | 100,00                          | EUR     | 21.387                  | 5.499                     |
| DHL Global Forwarding (Nicaragua) S.A.                                    | Nicaragua, Managua                    | 100,00                          | EUR     | -55                     | 13                        |
| DHL Global Forwarding (Panama) S.A. <sup>1)</sup>                         | Panama, Panama-Stadt                  | 100,00                          | EUR     | 3.451                   | 395                       |
| DHL Holding Panama Inc. <sup>1)</sup>                                     | Panama, Panama-Stadt                  | 100,00                          | EUR     | -                       | -                         |
| DHL Global Forwarding Deposito Aduanero<br>(Colombia) S.A.                | Kolumbien, Bogotá                     | 100,00                          | EUR     | 2.158                   | 88                        |
| DHL Global Forwarding Management<br>Latin America Inc.                    | USA, Coral Gables                     | 100,00                          | EUR     | 610                     | -2.560                    |
| DHL Global Forwarding Peru S.A. <sup>1)</sup>                             | Peru, Lima                            | 100,00                          | EUR     | 3.384                   | 110                       |
| DHL Global Forwarding Aduanas Peru S.A. <sup>1)</sup>                     | Peru, Callao                          | 100,00                          | EUR     | -                       | -                         |
| DHL Global Forwarding Venezuela, C.A.                                     | Venezuela, Caracas                    | 100,00                          | EUR     | 3.005                   | -1.008                    |
| DHL Global Forwarding Zona Franca (Colombia) S.A.                         | Kolumbien, Bogotá                     | 100,00                          | EUR     | 2.412                   | -919                      |
| DHL Holding Central America Inc. <sup>1)</sup>                            | Panama, Panama-Stadt                  | 100,00                          | EUR     | 38.831                  | 1.460                     |
| Lagents & Co. SRL <sup>1),7b)</sup>                                       | Costa Rica, San José                  | 50,00                           | EUR     | -                       | -                         |
| DHL Information Services (Americas), Inc.                                 | USA, Plantation                       | 100,00                          | EUR     | 1.376                   | 511                       |
| DHL International Antilles SARL                                           | Martinique, Lamentin                  | 100,00                          | EUR     | -612                    | -612                      |
| DHL International Express Ltd.                                            | Kanada, Mississauga                   | 100,00                          | EUR     | 79.908                  | 132                       |
| DHL International Haiti SA                                                | Haiti, Port-au-Prince                 | 99,00                           | EUR     | 394                     | -253                      |
| DHL Logistics (Brazil) Ltda.                                              | Brasilien, São Paulo                  | 100,00                          | EUR     | 21.953                  | 17.933                    |
| DHL Management Cenam S.A.                                                 | Costa Rica, Heredia                   | 100,00                          | EUR     | 3.341                   | 638                       |
| DHL Metropolitan Logistics sc México                                      | Mexiko, Tepotzotlán                   | 100,00                          | EUR     | -646                    | 1.937                     |
| DHL Network Operations (USA), Inc.                                        | USA, Plantation                       | 100,00                          | EUR     | -168.020                | 365.073                   |
| DHL Nicaragua, S.A.                                                       | Nicaragua, Managua                    | 100,00                          | EUR     | 716                     | -24                       |
| DHL of Curacao NV                                                         | Niederländische Antillen, Curaçao     | 100,00                          | EUR     | 960                     | -303                      |
| DHL Panama S.A.                                                           | Panama, Panama-Stadt                  | 100,00                          | EUR     | 2.402                   | -91                       |
| DHL Regional Services, Inc.                                               | USA, Plantation                       | 100,00                          | EUR     | 613                     | -772                      |
| DHL S.A.                                                                  | Guatemala, Guatemala-Stadt            | 100,00                          | EUR     | 2.455                   | -10                       |
| DHL Sint Maarten N.V.                                                     | Niederländische Antillen, Philipsburg | 100,00                          | EUR     | 2.219                   | 16                        |
| DHL Solutions (USA), Inc.                                                 | USA, Westerville                      | 100,00                          | EUR     | -16.769                 | -2.188                    |
| DHL Worldwide Express (Aruba) NV <sup>5)</sup>                            | Aruba, Oranjestad                     | 100,00                          | EUR     | 4                       | 0                         |
| Dimalsa Logistics Inc.                                                    | Puerto Rico, San Juan (Tacano)        | 100,00                          | EUR     | 711                     | 231                       |
| DPWN Financing (USA) 1, LLC                                               | USA, Plantation                       | 100,00                          | EUR     | 0                       | 0                         |
| DPWN Financing (USA) 2, LLC                                               | USA, Plantation                       | 100,00                          | EUR     | 0                       | 0                         |
| DPWN Financing (USA), LP                                                  | USA, Plantation                       | 100,00                          | EUR     | 902                     | 834                       |
| DPWN Holdings (USA), Inc.                                                 | USA, Plantation                       | 100,00                          | EUR     | 6.594.147               | 1.671.363                 |
| Exel Automocion S.A. de c.v.                                              | Mexiko, Mexiko-Stadt                  | 100,00                          | EUR     | 8.306                   | 2.011                     |
| Exel Canada Ltd.                                                          | Kanada, Toronto                       | 100,00                          | EUR     | -3.639                  | 5.982                     |
| DHL Supply Chain (Chile) S.A.                                             | Chile, Santiago                       | 100,00                          | EUR     | 1.960                   | 558                       |
| Exel Direct Inc.                                                          | USA, Westerville                      | 100,00                          | EUR     | 33.682                  | 1.370                     |
| Exel Global Logistics do Brasil S.A.                                      | Brasilien, São Paulo                  | 100,00                          | EUR     | 4.436                   | -175                      |
| Exel Global Logistics Inc.                                                | USA, Palm City                        | 100,00                          | EUR     | -755                    | -736                      |
| Exel Inc.                                                                 | USA, Westerville                      | 100,00                          | EUR     | 127.159                 | 36.741                    |
| Exel Investments Inc.                                                     | USA, Wilmington                       | 100,00                          | EUR     | 594.316                 | 30.437                    |
| Exel Logistics Argentina S.A.                                             | Argentinien, Buenos Aires             | 100,00                          | EUR     | 556                     | -62                       |
| Exel Logistics do Nordeste Ltda.                                          | Brasilien, Camacari                   | 100,00                          | EUR     | 815                     | -463                      |
| Exel Logistics S.A. de c.v.                                               | Mexiko, Mexiko-Stadt                  | 100,00                          | EUR     | 12.483                  | 4.194                     |
| Exel Supply Chain Services de Mexico, S.A. de c.v.                        | Mexiko, Tepotzotlán                   | 100,00                          | EUR     | -362                    | -716                      |
| Exel Transportation Services Inc. (Canadian Branch)                       | Kanada, Mississauga                   | 100,00                          | EUR     | 669                     | 237                       |
| Exel Transportation Services Inc.                                         | USA, Memphis                          | 100,00                          | EUR     | 3.277                   | -6.117                    |
| Exel Trucking Inc.                                                        | USA, Memphis                          | 100,00                          | EUR     | -1.290                  | 77                        |

Verbundene Unternehmen, die in den Konzernabschluss einbezogen werden

| Name                                                            | Sitz                       | Konzern-Anteile<br>am Kapital % | Währung | Eigenkapital<br>Tausend | Jahresergebnis<br>Tausend |
|-----------------------------------------------------------------|----------------------------|---------------------------------|---------|-------------------------|---------------------------|
| F.X. Coughlin do Brasil Ltda.                                   | Brasilien, São Paulo       | 100,00                          | EUR     | – 6.156                 | 0                         |
| Freshlink Canada Ltd.                                           | Kanada, Toronto            | 100,00                          | EUR     | 910                     | 163                       |
| Genesis Logistics Inc.                                          | USA, Westerville           | 100,00                          | EUR     | 11.492                  | 3.487                     |
| Giorgio Gori USA, Inc.                                          | USA, Baltimore             | 100,00                          | EUR     | 5.483                   | 2.415                     |
| Global Mail, Inc.                                               | USA, Weston                | 100,00                          | EUR     | 107.509                 | –6.023                    |
| Global Mail Terminal Operations (USA) LLC <sup>8)</sup>         | USA, Weston                | 100,00                          | EUR     | 0                       | 0                         |
| Gori Argentina S.A.                                             | Argentinien, Mendoza       | 95,00                           | EUR     | 852                     | 598                       |
| GORI CHILE S.A.                                                 | Chile, Santiago            | 99,00                           | EUR     | 5.003                   | 330                       |
| Harmony Logistics Canada Inc.                                   | Kanada, Toronto            | 100,00                          | EUR     | 9.373                   | 1.171                     |
| Heartland Logistics Inc.                                        | USA, Westerville           | 100,00                          | EUR     | 366                     | 480                       |
| Hyperion Inmobiliaria S.A. de C.V.                              | Mexiko, Tepotzotlán        | 100,00                          | EUR     | 2.943                   | 164                       |
| Ibryl Inc.                                                      | Kaimaninseln, George Town  | 100,00                          | EUR     | –25.988                 | –14.850                   |
| Integracion Aduanera S.A.                                       | Costa Rica, Barrio Tournon | 51,00                           | EUR     | 540                     | –6                        |
| ITG International Transports, Inc.                              | USA, Boston                | 100,00                          | EUR     | 489                     | 61                        |
| Llano Logistics Inc.                                            | USA, Westerville           | 100,00                          | EUR     | 3.377                   | 584                       |
| Marias Falls Insurance Co., Ltd.                                | Bermuda, Hamilton          | 100,00                          | EUR     | 31.885                  | 487                       |
| Matrix Logistics Services Ltd.                                  | Kanada, Toronto            | 100,00                          | EUR     | 245                     | 650                       |
| Mercury Airfreight International Inc.                           | USA, Avenel                | 100,00                          | EUR     | 694                     | 65                        |
| Mercury Holdings Inc.                                           | USA, Avenel                | 100,00                          | EUR     | 227                     | 0                         |
| Polar Air Cargo Worldwide, Inc. <sup>7b)</sup>                  | USA, Purchase              | 49,00                           | EUR     | 9.821                   | 263                       |
| Relay Logistics Inc.                                            | Kanada, Toronto            | 100,00                          | EUR     | 13                      | –1                        |
| Saturn Integrated Logistics Inc.                                | Kanada, Toronto            | 100,00                          | EUR     | 645                     | 433                       |
| scm Supply Chain Management Inc.                                | Kanada, Toronto            | 100,00                          | EUR     | 4.313                   | 4.617                     |
| Sky Courier, Inc.                                               | USA, Sterling              | 100,00                          | EUR     | 9.086                   | 3.900                     |
| South Bay Terminals LLC                                         | USA, Westerville           | 100,00                          | EUR     | –7.181                  | –2.283                    |
| Summit Logistics Inc.                                           | Kanada, Toronto            | 100,00                          | EUR     | 13.704                  | 1.182                     |
| Tafinor S.A.                                                    | Uruguay, Montevideo        | 100,00                          | EUR     | 6                       | 38                        |
| Tibbett & Britten Group Canada Inc.                             | Kanada, Toronto            | 100,00                          | EUR     | 12.743                  | –217                      |
| Tibbett & Britten Group North America, LLC <sup>1)</sup>        | USA, Westerville           | 100,00                          | EUR     | –16.177                 | 7.857                     |
| Compass Logistics Inc. <sup>1)</sup>                            | USA, Westerville           | 100,00                          | EUR     | –                       | –                         |
| Galaxy Logistics Inc. <sup>1)</sup>                             | USA, Westerville           | 100,00                          | EUR     | –                       | –                         |
| Harvest Logistics Inc. <sup>1)</sup>                            | USA, Westerville           | 100,00                          | EUR     | –                       | –                         |
| Matrix Logistics Inc. <sup>1)</sup>                             | USA, Westerville           | 100,00                          | EUR     | –                       | –                         |
| Northstar Logistics Inc. <sup>1)</sup>                          | USA, Westerville           | 100,00                          | EUR     | –                       | –                         |
| Pinnacle Logistics Inc. <sup>1)</sup>                           | USA, Westerville           | 100,00                          | EUR     | –                       | –                         |
| Tomair, LLC                                                     | USA, Plantation            | 100,00                          | EUR     | 5.123                   | –74                       |
| Tracker Logistics Inc.                                          | Kanada, Toronto            | 100,00                          | EUR     | 1.977                   | 416                       |
| Transcare Supply Chain Management Inc.                          | Kanada, Toronto            | 100,00                          | EUR     | 498                     | 96                        |
| Unidock's Assessoria e Logística de Materiais Ltda.             | Brasilien, Barueri         | 100,00                          | EUR     | 14.481                  | 6.865                     |
| Vensecar Internacional, C.A. <sup>7a)</sup>                     | Venezuela, Maiquítia       | 48,56                           | EUR     | 17.818                  | 578                       |
| Venture Logistics S.A. de C.V.                                  | Mexiko, Mexiko-Stadt       | 100,00                          | EUR     | 3.305                   | 1.185                     |
| Western Distribution Centers Alberta Inc.                       | Kanada, Toronto            | 100,00                          | EUR     | 974                     | 0                         |
| Williams Lea (Brazil) Assessoria Em Solucoes Empresariais Ltda. | Brasilien, Rio de Janeiro  | 100,00                          | EUR     | 511                     | 193                       |
| Williams Lea (Canada), Inc.                                     | Kanada, Montréal           | 100,00                          | EUR     | 874                     | 264                       |
| Williams Lea Argentina S.A.                                     | Argentinien, Buenos Aires  | 100,00                          | EUR     | –239                    | –3                        |
| Williams Lea Holdings, Inc.                                     | USA, Chicago               | 100,00                          | EUR     | 56.412                  | 0                         |
| Williams Lea Inc.                                               | USA, Chicago               | 100,00                          | EUR     | 83.641                  | 6.683                     |
| Williams Lea México, S. de R.L. de C.V.                         | Mexiko, Mexiko-Stadt       | 100,00                          | EUR     | –249                    | 30                        |
| Wilmington Air Park, LLC                                        | USA, Plantation            | 100,00                          | EUR     | –285.401                | –62.476                   |
| Zenith Logistics Inc.                                           | Kanada, Toronto            | 100,00                          | EUR     | 2.260                   | 319                       |
| <b>Asien/Pazifik</b>                                            |                            |                                 |         |                         |                           |
| Air Express International (Malaysia) Sdn. Bhd. <sup>7a)</sup>   | Malaysia, Puchong          | 49,00                           | EUR     | 2.335                   | 79                        |
| Asia Overnight (Thailand) Ltd. <sup>7a)</sup>                   | Thailand, Bangkok          | 48,71                           | EUR     | 699                     | 101                       |

IFRS-Werte gemäß Einzelabschluss vor Gewinnabführung

1) Nur Teilkonzern vorhanden 2) Angaben aus 2009 3) Angaben aus 2008 4) Nicht verfügbar 5) Ruhend 6) Einbezug nach SIC 12 7a) Einbezug IAS 27.13 (a) 7b) Einbezug IAS 27.13 (b–d)

8) In Liquidation 9) Angaben nach lokalen Rechnungslegungsvorschriften 10) Stimmrechte 11) Gesellschaft ist im Konzernabschluss der Deutsche Postbank AG enthalten 12) Neugründung 2010

## Verbundene Unternehmen, die in den Konzernabschluss einbezogen werden

| Name                                                           | Sitz                          | Konzern-Anteile<br>am Kapital % | Währung | Eigenkapital<br>Tausend | Jahresergebnis<br>Tausend |
|----------------------------------------------------------------|-------------------------------|---------------------------------|---------|-------------------------|---------------------------|
| Asia-Pacific Information Services Sdn. Bhd.                    | Malaysia, Puchong             | 100,00                          | EUR     | 20.388                  | 800                       |
| Beijing Sinotrans Express Co., Ltd.                            | China, Peking                 | 100,00                          | EUR     | - 6.913                 | - 5.006                   |
| Blue Dart Aviation Ltd. <sup>6)</sup>                          | Indien, Mumbai                | 49,00                           | EUR     | 5.047                   | 18                        |
| Blue Dart Express Limited                                      | Indien, Mumbai                | 81,03                           | EUR     | 100.120                 | 15.026                    |
| Danzas (China) Ltd.                                            | China, Hongkong               | 100,00                          | EUR     | - 6.451                 | - 7.286                   |
| Danzas AEI (HK) Limited                                        | China, Hongkong               | 100,00                          | EUR     | 52                      | - 16                      |
| Danzas AEI Logistics (Shanghai) Co. Ltd.                       | China, Shanghai               | 100,00                          | EUR     | 2.800                   | 469                       |
| Danzas Freight (India) Pvt. Ltd. <sup>7a), 8)</sup>            | Indien, Mumbai                | 40,00                           | EUR     | 75                      | 0                         |
| Danzas Intercontinental, Inc. (Philippines) <sup>7a), 8)</sup> | Philippinen, Manila           | 40,00                           | EUR     | - 1.317                 | 0                         |
| Danzas Pty. Limited <sup>9)</sup>                              | Australien, Melbourne         | 100,00                          | EUR     | 3.894                   | 0                         |
| DANZASMAL Domestic Logistics Services Sdn. Bhd. <sup>7a)</sup> | Malaysia, Kuala Lumpur        | 49,00                           | EUR     | 1.171                   | 648                       |
| Deutsche Post Global Mail (Australia) Pty Ltd.                 | Australien, Mascot            | 100,00                          | EUR     | - 6.438                 | 1.419                     |
| DHL (Chengdu) Service Ltd.                                     | China, Chengdu                | 100,00                          | EUR     | 399                     | - 232                     |
| DHL Air Freight Forwarder Sdn. Bhd. <sup>7a)</sup>             | Malaysia, Kuala Lumpur        | 49,00                           | EUR     | 2.280                   | 87                        |
| DHL Asia Pacific Shared Services Sdn. Bhd.                     | Malaysia, Kuala Lumpur        | 100,00                          | EUR     | - 2.885                 | 813                       |
| DHL Aviation (Hong Kong) Ltd.                                  | China, Hongkong               | 99,36                           | EUR     | 8.828                   | 206                       |
| DHL Aviation (Philippines), Inc. <sup>8)</sup>                 | Philippinen, Makati Stadt     | 100,00                          | EUR     | 0                       | 0                         |
| DHL Aviation Services (Shanghai) Co., Ltd.                     | China, Shanghai               | 99,36                           | EUR     | 12.807                  | - 2.676                   |
| DHL Danzas Air & Ocean (Cambodia) Ltd. <sup>5)</sup>           | Kambodscha, Phnom Penh        | 100,00                          | EUR     | 26                      | 0                         |
| DHL Exel Logistics (Malaysia) Sdn. Bhd. <sup>7a)</sup>         | Malaysia, Petaling Jaya       | 49,00                           | EUR     | 2.562                   | 261                       |
| DHL Exel Supply Chain Management Phils., Inc.                  | Philippinen, Manila           | 100,00                          | EUR     | 1.455                   | 241                       |
| DHL Exel Supply Chain Phils., Inc.                             | Philippinen, Manila           | 100,00                          | EUR     | 1.326                   | - 294                     |
| DHL Express (Australia) Pty Ltd.                               | Australien, Sydney            | 100,00                          | EUR     | 16.740                  | 2.818                     |
| DHL Express (Brunei) Sdn. Bhd.                                 | Brunei Darussalam, Brunei Dar | 90,00                           | EUR     | 502                     | - 45                      |
| DHL Express (Cambodia) Ltd.                                    | Kambodscha, Phnom Penh        | 100,00                          | EUR     | 236                     | 33                        |
| DHL Express (Fiji) Ltd.                                        | Fidschi, Suva                 | 100,00                          | EUR     | 555                     | 21                        |
| DHL Express (Hong Kong) Limited                                | China, Hongkong               | 100,00                          | EUR     | 16.439                  | 4.020                     |
| DHL Express (India) Pvt. Ltd.                                  | Indien, Mumbai                | 100,00                          | EUR     | 27.370                  | 5.333                     |
| DHL Express (Macau) Ltd.                                       | Macau, Macau                  | 100,00                          | EUR     | 387                     | 61                        |
| DHL Express (Malaysia) Sdn. Bhd.                               | Malaysia, Kuala Lumpur        | 70,00                           | EUR     | 9.803                   | - 749                     |
| DHL Express (New Zealand) Limited                              | Neuseeland, Auckland          | 100,00                          | EUR     | 5.630                   | 1.004                     |
| DHL Express (Papua New Guinea) Ltd                             | Papua-Neuguinea, Port Moresby | 100,00                          | EUR     | 460                     | 81                        |
| DHL Express (Philippines) Corp.                                | Philippinen, Makati Stadt     | 100,00                          | EUR     | 5.546                   | - 1.218                   |
| DHL Express (Singapore) Pte. Ltd.                              | Singapur, Singapur            | 100,00                          | EUR     | 129.129                 | 12.924                    |
| DHL Express (Taiwan) Corp.                                     | Taiwan, Taipeh                | 100,00                          | EUR     | 9.976                   | 4.576                     |
| DHL Express (Thailand) Limited <sup>7a)</sup>                  | Thailand, Bangkok             | 49,00                           | EUR     | 5.237                   | 161                       |
| DHL Express International (Thailand) Ltd.                      | Thailand, Bangkok             | 100,00                          | EUR     | 5.555                   | 310                       |
| DHL Express Lda.                                               | Osttimor, Dili                | 100,00                          | EUR     | 375                     | 4                         |
| DHL Express Nepal Pvt. Ltd.                                    | Nepal, Kathmandu              | 100,00                          | EUR     | 667                     | 425                       |
| DHL Global Forwarding (Australia) Pty Ltd.                     | Australien, Tullamarine       | 100,00                          | EUR     | 70.055                  | 16.459                    |
| DHL Global Forwarding (Bangladesh) Limited                     | Bangladesch, Dhaka            | 99,90                           | EUR     | 52                      | 24                        |
| DHL Global Forwarding (China) Co., Ltd.                        | China, Shanghai               | 100,00                          | EUR     | 79.291                  | 10.483                    |
| DHL Global Forwarding (Fiji) Limited <sup>9)</sup>             | Fidschi, Lautoka              | 100,00                          | EUR     | 339                     | 0                         |
| DHL Global Forwarding (Hong Kong) Limited                      | China, Hongkong               | 100,00                          | EUR     | - 73.847                | 1.477                     |
| DHL Global Forwarding (Korea) Ltd.                             | Südkorea, Seoul               | 100,00                          | EUR     | 12.485                  | 3.947                     |
| DHL Global Forwarding (Malaysia) Sdn. Bhd.                     | Malaysia, Kuala Lumpur        | 100,00                          | EUR     | 13.594                  | 4.765                     |
| DHL Global Forwarding (New Zealand) Limited                    | Neuseeland, Auckland          | 100,00                          | EUR     | 14.966                  | 1.623                     |
| DHL Global Forwarding (Philippines) Inc.                       | Philippinen, Manila           | 100,00                          | EUR     | 2.033                   | 436                       |
| DHL Global Forwarding (PNG) Limited <sup>9)</sup>              | Papua-Neuguinea, Port Moresby | 74,00                           | EUR     | - 100                   | 0                         |
| DHL Global Forwarding (Singapore) Pte. Ltd.                    | Singapur, Singapur            | 100,00                          | EUR     | 77.477                  | 9.838                     |
| DHL Global Forwarding (Singapore) Pte. Ltd., Taiwan Branch     | Taiwan, Taipeh                | 100,00                          | EUR     | 5.629                   | 5.152                     |
| DHL Global Forwarding (Thailand) Limited                       | Thailand, Bangkok             | 100,00                          | EUR     | 26.626                  | 2.478                     |
| DHL Global Forwarding (Vietnam) Corporation <sup>7a)</sup>     | Vietnam, Ho-Chi-Minh-Stadt    | 49,00                           | EUR     | 3.666                   | 2.244                     |
| DHL Global Forwarding Caledonie                                | Neukaledonien, Noumea         | 100,00                          | EUR     | 1.654                   | - 1.270                   |
| DHL Global Forwarding Japan K.K.                               | Japan, Tokio                  | 100,00                          | EUR     | 20.835                  | 3.528                     |
| DHL Global Forwarding Lanka (Private) Limited                  | Sri Lanka, Colombo            | 70,00                           | EUR     | - 160                   | - 522                     |



Verbundene Unternehmen, die in den Konzernabschluss einbezogen werden

| Name                                                        | Sitz                          | Konzern-Anteile<br>am Kapital % | Währung | Eigenkapital<br>Tausend | Jahresergebnis<br>Tausend |
|-------------------------------------------------------------|-------------------------------|---------------------------------|---------|-------------------------|---------------------------|
| DHL Global Forwarding Management (Asia Pacific) Pte. Ltd.   | Singapur, Singapur            | 100,00                          | EUR     | 192.213                 | 35.878                    |
| DHL Global Forwarding Pakistan (Private) Limited            | Pakistan, Karatschi           | 100,00                          | EUR     | 2.302                   | 1.167                     |
| DHL Global Forwarding Polynesie S.A.R.L.                    | Französisch-Polynesien, Faaa  | 100,00                          | EUR     | 3.889                   | 378                       |
| DHL Global Mail (Japan) K.K.                                | Japan, Tokio                  | 100,00                          | EUR     | 288                     | 11                        |
| DHL Global Mail (Singapore) Pte. Ltd.                       | Singapur, Singapur            | 100,00                          | EUR     | 1.049                   | 585                       |
| DHL Holdings (New Zealand) Limited                          | Neuseeland, Auckland          | 100,00                          | EUR     | 8.489                   | 2.167                     |
| DHL Incheon Hub Limited (Korea)                             | Südkorea, Incheon             | 100,00                          | EUR     | 6.357                   | 495                       |
| DHL International Guinea Ecuatorial SRL                     | Guam, Malabo                  | 100,00                          | EUR     | 3                       | 218                       |
| DHL International Kazakhstan, too                           | Kasachstan, Almaty            | 100,00                          | EUR     | 2.354                   | 1.244                     |
| DHL ISC (Hong Kong) Limited                                 | China, Hongkong               | 100,00                          | EUR     | 6.112                   | 1.670                     |
| DHL Japan Inc.                                              | Japan, Tokio                  | 100,00                          | EUR     | 66.937                  | 8.507                     |
| DHL Keells (Private) Limited <sup>7a)</sup>                 | Sri Lanka, Colombo            | 50,00                           | EUR     | 3.419                   | 562                       |
| DHL Korea Limited                                           | Südkorea, Seoul               | 95,00                           | EUR     | 28.312                  | 2.890                     |
| DHL Lao Limited                                             | Laos, Skihottabong            | 100,00                          | EUR     | 474                     | 242                       |
| DHL Lemuir Logistics Private Limited                        | Indien, Mumbai                | 76,00                           | EUR     | 65.541                  | 10.213                    |
| DHL Logistics (Beijing) Co., Ltd.                           | China, Peking                 | 100,00                          | EUR     | -16.334                 | -4.191                    |
| DHL Logistics (Cambodia) Ltd.                               | Kambodscha, Phnom Penh        | 100,00                          | EUR     | 1.640                   | 420                       |
| DHL Logistics (China) Co., Ltd.                             | China, Peking                 | 100,00                          | EUR     | 35.417                  | 25.302                    |
| DHL Logistics (Kazakhstan) too                              | Kasachstan, Aksai             | 100,00                          | EUR     | 1.935                   | 683                       |
| DHL Logistics (Shenzhen) Co., Ltd.                          | China, Shenzhen               | 100,00                          | EUR     | 2.460                   | 1.280                     |
| DHL Pakistan (Private) Limited                              | Pakistan, Karatschi           | 99,95                           | EUR     | 3.837                   | 1.378                     |
| DHL Project & Chartering (China) Limited                    | China, Hongkong               | 100,00                          | EUR     | 1.202                   | 1.223                     |
| DHL Properties (Malaysia) Sdn. Bhd.                         | Malaysia, Shah Alam           | 69,98                           | EUR     | 5.963                   | 669                       |
| DHL SCM K.K.                                                | Japan, Saitama                | 100,00                          | EUR     | -354                    | 366                       |
| DHL Sinotrans Bonded Warehouse (Beijing) Co., Ltd.          | China, Peking                 | 100,00                          | EUR     | 1.404                   | 598                       |
| DHL Sinotrans International Air Courier Ltd. <sup>7a)</sup> | China, Peking                 | 50,00                           | EUR     | 227.187                 | 126.787                   |
| DHL Supply Chain (Australia) Pty Limited                    | Australien, Mascot            | 100,00                          | EUR     | 16.614                  | 8.168                     |
| DHL Supply Chain (Hong Kong) Limited                        | China, Hongkong               | 100,00                          | EUR     | 51.070                  | -618                      |
| DHL Supply Chain (Korea) Ltd.                               | Südkorea, Seoul               | 100,00                          | EUR     | 2.181                   | 600                       |
| DHL Supply Chain (Malaysia) Sdn. Bhd.                       | Malaysia, Petaling Jaya       | 100,00                          | EUR     | 7.327                   | 332                       |
| DHL Supply Chain (New Zealand) Limited                      | Neuseeland, Auckland          | 100,00                          | EUR     | 28.659                  | 2.511                     |
| DHL Supply Chain (Taiwan) Co. Ltd.                          | Taiwan, Taipeh                | 100,00                          | EUR     | 303                     | -386                      |
| DHL Supply Chain (Vietnam) Limited                          | Vietnam, Ho-Chi-Minh-Stadt    | 100,00                          | EUR     | -90                     | -260                      |
| DHL Supply Chain K.K.                                       | Japan, Tokio                  | 100,00                          | EUR     | -23.360                 | 1.724                     |
| DHL Supply Chain Service K.K.                               | Japan, Tokio                  | 100,00                          | EUR     | 1.001                   | 133                       |
| DHL Supply Chain Singapore Pte. Ltd.                        | Singapur, Singapur            | 100,00                          | EUR     | 35.981                  | 5.910                     |
| DHL Worldwide Express (Bangladesh) Private Limited          | Bangladesch, Dhaka            | 90,00                           | EUR     | 1.289                   | 846                       |
| DHL-VNPT Express Ltd.                                       | Vietnam, Ho-Chi-Minh-Stadt    | 51,00                           | EUR     | 2.128                   | 82                        |
| Dongguan DHL Supply Chain Co., Ltd.                         | China, Dongguan               | 100,00                          | EUR     | 460                     | 116                       |
| Exel (Australia) Pty Ltd.                                   | Australien, Victoria          | 100,00                          | EUR     | 5.544                   | -29                       |
| Exel Consolidation Services Limited                         | China, Hongkong               | 100,00                          | EUR     | 9.457                   | 9                         |
| Exel Distribution (Thailand) Ltd.                           | Thailand, Nonthaburi          | 100,00                          | EUR     | 20.502                  | 978                       |
| Exel Japan (Finance) Ltd.                                   | Japan, Shinagawa              | 100,00                          | EUR     | 12.452                  | 243                       |
| Exel Logistics (China) Co. Ltd.                             | China, Shanghai               | 100,00                          | EUR     | -6.140                  | -4.389                    |
| Exel Logistics (Far East) Ltd.                              | Thailand, Bangkok             | 87,05                           | EUR     | 5.309                   | 1.608                     |
| Exel Logistics Services Lanka (Private) Ltd.                | Sri Lanka, Colombo            | 99,00                           | EUR     | 239                     | -273                      |
| Exel Thailand Ltd. <sup>9)</sup>                            | Thailand, Bangkok             | 100,00                          | EUR     | 864                     | 0                         |
| Gori Australia Pty Ltd.                                     | Australien, Brighton-Le-Sands | 100,00                          | EUR     | 4.434                   | 2.647                     |
| Jingle Express Limited                                      | China, Peking                 | 100,00                          | EUR     | 60                      | -30                       |
| MSAS Global Logistics (Far East) Limited                    | China, Hongkong               | 100,00                          | EUR     | 1.146                   | -6                        |
| PT Danzas Sarana Perkasa                                    | Indonesien, Jakarta           | 100,00                          | EUR     | 10                      | 262                       |
| PT Birotika Semesta <sup>9)</sup>                           | Indonesien, Jakarta           | 0,00                            | EUR     | 1.861                   | 740                       |
| PT Cargotama Multi Servisindo <sup>9)</sup>                 | Indonesien, Jakarta           | 100,00                          | EUR     | 29                      | 0                         |
| PT DHL Exel Supply Chain Indonesia                          | Indonesien, Jakarta           | 90,34                           | EUR     | 1.301                   | -1.170                    |

IFRS-Werte gemäß Einzelabschluss vor Gewinnabführung

1) Nur Teilkonzern vorhanden 2) Angaben aus 2009 3) Angaben aus 2008 4) Nicht verfügbar 5) Ruhend 6) Einbezug nach SIC 12 7a) Einbezug IAS 27.13 (a) 7b) Einbezug IAS 27.13 (b-d)

8) In Liquidation 9) Angaben nach lokalen Rechnungslegungsvorschriften 10) Stimmrechte 11) Gesellschaft ist im Konzernabschluss der Deutsche Postbank AG enthalten 12) Neugründung 2010



## Verbundene Unternehmen, die in den Konzernabschluss einbezogen werden

| Name                                                               | Sitz                                    | Konzern-Anteile<br>am Kapital % | Währung | Eigenkapital<br>Tausend | Jahresergebnis<br>Tausend |
|--------------------------------------------------------------------|-----------------------------------------|---------------------------------|---------|-------------------------|---------------------------|
| PT DHL Global Forwarding Indonesia                                 | Indonesien, Jakarta                     | 100,00                          | EUR     | 7.069                   | 2.680                     |
| Shanghai Danzas Freight Agency Co. Ltd.                            | China, Shanghai                         | 100,00                          | EUR     | 863                     | 39                        |
| Shanghai Quan Yi Express Limited Company (APEX 3)                  | China, Shanghai                         | 100,00                          | EUR     | - 4.317                 | - 6.499                   |
| Shanghai Quan Yi Express Limited Company (APEX 2)                  | China, Shanghai                         | 100,00                          | EUR     | 1.863                   | 0                         |
| Singha Sarn Co. Ltd                                                | Thailand, Bangkok                       | 98,90                           | EUR     | - 51                    | - 11                      |
| StarBroker (Hong Kong) Limited                                     | China, Hongkong                         | 100,00                          | EUR     | 43                      | - 1                       |
| Tibbett & Britten Asia Pte. Ltd.                                   | Singapur, Singapur                      | 100,00                          | EUR     | - 1.424                 | - 327                     |
| Trade Clippers Cargo Limited                                       | Bangladesch, Dhaka                      | 85,00                           | EUR     | 268                     | 178                       |
| Williams Lea Asia Limited <sup>1)</sup>                            | China, Hongkong                         | 100,00                          | EUR     | 3.704                   | 1.350                     |
| MDF Australia Pty Limited t/a CREATIS <sup>1)</sup>                | Australien, Sydney                      | 100,00                          | EUR     | -                       | -                         |
| Williams Lea (Beijing) Limited <sup>1)</sup>                       | China, Peking                           | 100,00                          | EUR     | -                       | -                         |
| Williams Lea (Hong Kong) Limited <sup>1)</sup>                     | China, Hongkong                         | 100,00                          | EUR     | -                       | -                         |
| Williams Lea Japan Limited <sup>1)</sup>                           | Japan, Tokio                            | 100,00                          | EUR     | -                       | -                         |
| Williams Lea Private Limited <sup>1)</sup>                         | Singapur, Singapur                      | 100,00                          | EUR     | -                       | -                         |
| Williams Lea Pty Limited <sup>1)</sup>                             | Australien, Sydney                      | 100,00                          | EUR     | -                       | -                         |
| Williams Lea India Private Limited                                 | Indien, Neu Delhi                       | 100,00                          | EUR     | 2.558                   | 611                       |
| <b>Übrige Regionen</b>                                             |                                         |                                 |         |                         |                           |
| Buddingtrade 33 (Proprietary) Limited                              | Südafrika, Benoni                       | 100,00                          | EUR     | 2.782                   | - 722                     |
| Danzas Abu Dhabi LLC <sup>7b)</sup>                                | Vereinigte Arabische Emirate, Abu Dhabi | 49,00                           | EUR     | 4.362                   | 697                       |
| Danzas Bahrain WLL <sup>7b)</sup>                                  | Bahrain, Manama                         | 40,00                           | EUR     | 1.839                   | 1.510                     |
| DHL (Ghana) Limited                                                | Ghana, Accra                            | 100,00                          | EUR     | 2.298                   | 656                       |
| DHL (Israel) Ltd.                                                  | Israel, Tel Aviv                        | 100,00                          | EUR     | 6.861                   | 188                       |
| DHL (Mauritius) Ltd.                                               | Mauritius, Port Louis                   | 100,00                          | EUR     | 862                     | 266                       |
| DHL (Namibia) (Pty) Ltd.                                           | Namibia, Windhuk                        | 100,00                          | EUR     | 908                     | - 16                      |
| DHL (Tanzania) Ltd.                                                | Tansania, Daressalam                    | 100,00                          | EUR     | 1.156                   | 349                       |
| DHL Aviation (Maroc) SA                                            | Marokko, Casablanca                     | 100,00                          | EUR     | 1.527                   | - 167                     |
| DHL Aviation (Nigeria) Ltd.                                        | Nigeria, Lagos                          | 100,00                          | EUR     | 159                     | 8                         |
| DHL Aviation (Pty) Limited                                         | Südafrika, Johannesburg                 | 100,00                          | EUR     | 5.734                   | 733                       |
| DHL Aviation EEMEA B.S.C.(c)                                       | Bahrain, Manama                         | 100,00                          | EUR     | 811                     | 37                        |
| DHL Aviation Kenya Ltd.                                            | Kenia, Nairobi                          | 99,90                           | EUR     | 16                      | 0                         |
| DHL Egypt WLL                                                      | Ägypten, Kairo                          | 100,00                          | EUR     | 451                     | 248                       |
| DHL Exel Supply Chain Kenya Limited                                | Kenia, Nairobi                          | 100,00                          | EUR     | 4.150                   | - 468                     |
| DHL Express Maroc S.A.                                             | Marokko, Casablanca                     | 99,99                           | EUR     | 406                     | 571                       |
| DHL Global Forwarding & Co. LLC <sup>7b)</sup>                     | Oman, Muscat                            | 40,00                           | EUR     | 4.818                   | 2.288                     |
| DHL Global Forwarding (Angola) – Comércio e Transitários, Limitada | Angola, Luanda                          | 99,99                           | EUR     | - 4.236                 | - 1.623                   |
| DHL Global Forwarding (Cameroon) PLC                               | Kamerun, Douala                         | 62,00                           | EUR     | - 416                   | - 585                     |
| DHL Global Forwarding (Kenya) Limited                              | Kenia, Nairobi                          | 100,00                          | EUR     | 1.203                   | - 884                     |
| DHL Global Forwarding (Kuwait ) Company WLL <sup>7b)</sup>         | Kuwait, Safat                           | 49,00                           | EUR     | 8.534                   | 6.338                     |
| DHL Global Forwarding (Senegal) S.A.                               | Senegal, Dakar                          | 100,00                          | EUR     | - 323                   | - 416                     |
| DHL Global Forwarding (Uganda) Limited                             | Uganda, Kampala                         | 100,00                          | EUR     | 367                     | 126                       |
| DHL Global Forwarding (Congo) SA                                   | Republik Kongo, Pointe-Noire            | 100,00                          | EUR     | 146                     | 131                       |
| DHL Global Forwarding Cote D'Ivoire SA                             | Elfenbeinküste, Abidjan                 | 100,00                          | EUR     | - 105                   | - 128                     |
| DHL Global Forwarding (Gabon) SA                                   | Gabun, Libreville                       | 99,00                           | EUR     | - 510                   | - 262                     |
| DHL Global Forwarding Lebanon S.A.L. <sup>7b)</sup>                | Libanon, Beirut                         | 50,00                           | EUR     | 1.733                   | 766                       |
| DHL Global Forwarding Nigeria Limited                              | Nigeria, Lagos                          | 100,00                          | EUR     | 707                     | - 183                     |
| DHL Global Forwarding Qatar LLC <sup>7b)</sup>                     | Katar, Doha                             | 49,00                           | EUR     | 952                     | 683                       |
| DHL Global Forwarding Egypt S.A.E.                                 | Ägypten, Kairo                          | 100,00                          | EUR     | 7.061                   | 2.828                     |
| DHL Global Forwarding SA (Pty) Limited                             | Südafrika, Boksburg                     | 74,99                           | EUR     | 15.927                  | - 5.946                   |
| DHL Global Forwarding Tasimacilik A.S.                             | Türkei, Istanbul                        | 100,00                          | EUR     | 8.891                   | - 210                     |
| DHL International (Algeria) SARL                                   | Algerien, Algiers                       | 100,00                          | EUR     | 2.397                   | 774                       |
| DHL International (Bahrain) WLL <sup>7b)</sup>                     | Bahrain, Manama                         | 49,00                           | EUR     | 50                      | 0                         |
| DHL International (Congo) SPRL                                     | Demokratische Republik Kongo, Kinshasa  | 100,00                          | EUR     | 1.982                   | 291                       |
| DHL International (Gambia) Ltd.                                    | Gambia, Kanifing                        | 100,00                          | EUR     | 110                     | - 19                      |
| DHL International (Liberia) Ltd.                                   | Liberia, Monrovia                       | 100,00                          | EUR     | - 390                   | 79                        |
| DHL International (Pty) Ltd.                                       | Südafrika, Isando                       | 74,90                           | EUR     | 18.158                  | 3.359                     |
| DHL International (Pvt) Ltd.                                       | Simbabwe, Harare                        | 100,00                          | EUR     | 1.240                   | 48                        |

Verbundene Unternehmen, die in den Konzernabschluss einbezogen werden

| Name                                                         | Sitz                                    | Konzern-Anteile<br>am Kapital % | Währung | Eigenkapital<br>Tausend | Jahresergebnis<br>Tausend |
|--------------------------------------------------------------|-----------------------------------------|---------------------------------|---------|-------------------------|---------------------------|
| DHL International (SL) Ltd.                                  | Sierra Leone, Freetown                  | 100,00                          | EUR     | 612                     | -53                       |
| DHL International (Uganda) Ltd.                              | Uganda, Kampala                         | 100,00                          | EUR     | 441                     | 89                        |
| DHL International B. S. C (C)                                | Bahrain, Manama                         | 100,00                          | EUR     | 479                     | -73                       |
| DHL International Benin SARL                                 | Benin, Cotonou                          | 100,00                          | EUR     | 771                     | 405                       |
| DHL International Botswana (Pty) Ltd.                        | Botswana, Gaborone                      | 99,99                           | EUR     | -66                     | -6                        |
| DHL International Burkina Faso SARL                          | Burkina Faso, Ouagadougou               | 100,00                          | EUR     | 690                     | 260                       |
| DHL International Cameroon SARL                              | Kamerun, Douala                         | 100,00                          | EUR     | 2.005                   | 868                       |
| DHL International Centrafrique SARL                          | Zentralafrikanische Republik, Bangui    | 100,00                          | EUR     | 311                     | 64                        |
| DHL International Chad SARL                                  | Tschad, Ndjamena                        | 99,50                           | EUR     | 97                      | 160                       |
| DHL International Congo SARL                                 | Republik Kongo, Brazzaville             | 100,00                          | EUR     | 5.167                   | 1.754                     |
| DHL International Cote D'Ivoire SARL                         | Elfenbeinküste, Abidjan                 | 100,00                          | EUR     | 2.305                   | 1.280                     |
| DHL International Gabon SARL                                 | Gabun, Libreville                       | 100,00                          | EUR     | -729                    | 563                       |
| DHL International Guinee SARL                                | Guinea, Conakry                         | 100,00                          | EUR     | 404                     | 142                       |
| DHL International Iran PJSC                                  | Iran, Teheran                           | 100,00                          | EUR     | 4.435                   | 1.725                     |
| DHL International Madagascar SA                              | Madagaskar, Antananarivo                | 100,00                          | EUR     | 851                     | -38                       |
| DHL International Malawi Ltd.                                | Malawi, Blantyre                        | 100,00                          | EUR     | 294                     | -108                      |
| DHL International Mali SARL                                  | Mali, Bamako                            | 100,00                          | EUR     | 649                     | 173                       |
| DHL International Mauritanie SARL                            | Mauretanien, Teveragh-Zeina Nouakchot   | 100,00                          | EUR     | 29                      | -190                      |
| DHL International Niger SARL                                 | Niger, Niamey                           | 100,00                          | EUR     | 610                     | 171                       |
| DHL International Nigeria Ltd.                               | Nigeria, Lagos                          | 100,00                          | EUR     | 4.940                   | 2.473                     |
| DHL International Reunion SARL                               | Réunion, Sainte Marie                   | 99,00                           | EUR     | -195                    | 9                         |
| DHL International Togo SARL                                  | Togo, Lomé                              | 100,00                          | EUR     | 434                     | 245                       |
| DHL International Transportation Co WLL <sup>6)</sup>        | Kuwait, Safat                           | 0,00                            | EUR     | 155                     | 0                         |
| DHL International Zambia Limited                             | Sambia, Lusaka                          | 100,00                          | EUR     | -1.081                  | -355                      |
| DHL Lesotho (Proprietary) Ltd.                               | Lesotho, Maseru                         | 100,00                          | EUR     | 391                     | -56                       |
| DHL Logistics Ghana Ltd.                                     | Ghana, Tema                             | 100,00                          | EUR     | 1.112                   | 748                       |
| DHL Logistics Kenya Limited                                  | Kenia, Nairobi                          | 50,25                           | EUR     | -56                     | 275                       |
| DHL Logistics Morocco S.A.                                   | Marokko, Casablanca                     | 99,99                           | EUR     | 70                      | 31                        |
| DHL Logistics Tanzania Limited                               | Tansania, Daressalam                    | 100,00                          | EUR     | -142                    | -28                       |
| DHL Lojistik Hizmetleri A.S.                                 | Türkei, Istanbul                        | 100,00                          | EUR     | 12.432                  | 2.707                     |
| DHL Mocambique Lda.                                          | Mosambik, Maputo                        | 100,00                          | EUR     | 204                     | -662                      |
| DHL Operations BV Jordan Services<br>with Limited Liability  | Jordanien, Amman                        | 100,00                          | EUR     | 359                     | 100                       |
| DHL Qatar Limited <sup>7b)</sup>                             | Katar, Doha                             | 49,00                           | EUR     | -648                    | -4                        |
| DHL Regional Services (Indian Ocean) Ltd.                    | Mauritius, Port Louis                   | 100,00                          | EUR     | 1                       | 0                         |
| DHL Regional Services Limited <sup>9)</sup>                  | Nigeria, Lagos                          | 100,00                          | EUR     | 113                     | 0                         |
| DHL Senegal SARL                                             | Senegal, Dakar                          | 100,00                          | EUR     | 1.902                   | 443                       |
| DHL Supply Chain (South Africa) (Pty) Ltd.                   | Südafrika, Germiston                    | 100,00                          | EUR     | -62.237                 | -10.097                   |
| DHL Swaziland (Proprietary) Ltd.                             | Swasiland, Mbabane                      | 100,00                          | EUR     | 289                     | -35                       |
| DHL Worldwide Express & Company LLC                          | Oman, Ruwi                              | 70,00                           | EUR     | 3                       | -347                      |
| DHL Worldwide Express (Abu Dhabi) LLC <sup>7b)</sup>         | Vereinigte Arabische Emirate, Abu Dhabi | 49,00                           | EUR     | 61                      | 0                         |
| DHL Worldwide Express (Dubai) LLC <sup>7b)</sup>             | Vereinigte Arabische Emirate, Dubai     | 49,00                           | EUR     | 0                       | 0                         |
| DHL Worldwide Express (Sharjah) LLC <sup>7b)</sup>           | Vereinigte Arabische Emirate, Sharjah   | 49,00                           | EUR     | 102                     | 0                         |
| DHL Worldwide Express Cargo LLC <sup>7b)</sup>               | Vereinigte Arabische Emirate, Dubai     | 49,00                           | EUR     | 61                      | 0                         |
| DHL Worldwide Express Ethiopia Private Limited<br>Company    | Äthiopien, Addis Abeba                  | 73,00                           | EUR     | -134                    | -215                      |
| DHL Worldwide Express Kenya Limited                          | Kenia, Nairobi                          | 51,00                           | EUR     | 3.675                   | 395                       |
| DHL Worldwide Express Tasimacilik ve Ticaret A.S.            | Türkei, Istanbul                        | 99,98                           | EUR     | 25.628                  | 4.706                     |
| Document Handling (East Africa) Ltd.                         | Kenia, Nairobi                          | 51,00                           | EUR     | 55                      | 451                       |
| Exel (Nigeria) Ltd. <sup>5)</sup>                            | Nigeria, Lagos                          | 100,00                          | EUR     | -183                    | 0                         |
| Exel Contract Logistics (Kenya) Limited<br>(Tanzania Branch) | Tansania, Daressalam                    | 100,00                          | EUR     | 762                     | 611                       |
| Exel Contract Logistics Nigeria Ltd.                         | Nigeria, Ikeja                          | 100,00                          | EUR     | 1.487                   | 644                       |
| Exel Middle East (Fze)                                       | Vereinigte Arabische Emirate, Dubai     | 100,00                          | EUR     | 290                     | 147                       |
| Exel Supply Chain Services (South Africa) (Pty) Ltd.         | Südafrika, Johannesburg                 | 100,00                          | EUR     | 18.709                  | -64                       |

IFRS-Werte gemäß Einzelabschluss vor Gewinnabführung

1) Nur Teilkonzern vorhanden 2) Angaben aus 2009 3) Angaben aus 2008 4) Nicht verfügbar 5) Ruhend 6) Einbezug nach SIC 12 7a) Einbezug IAS 27.13 (a) 7b) Einbezug IAS 27.13 (b-d)

8) In Liquidation 9) Angaben nach lokalen Rechnungslegungsvorschriften 10) Stimmrechte 11) Gesellschaft ist im Konzernabschluss der Deutsche Postbank AG enthalten 12) Neugründung 2010

## Verbundene Unternehmen, die in den Konzernabschluss einbezogen werden

| Name                                                           | Sitz                                    | Konzern-Anteile<br>am Kapital % | Währung | Eigenkapital<br>Tausend | Jahresergebnis<br>Tausend |
|----------------------------------------------------------------|-----------------------------------------|---------------------------------|---------|-------------------------|---------------------------|
| F.c. (Flying Cargo) International Transportation Ltd.          | Israel, Lod                             | 100,00                          | EUR     | 21.404                  | 7.399                     |
| Ghanem Clearing & Forwarding Establishment <sup>6)</sup>       | Vereinigte Arabische Emirate, Abu Dhabi | 0,00                            | EUR     | 0                       | 0                         |
| Giorgio Gori International Freight Forwards (Pty) Ltd.         | Südafrika, Ferndale                     | 100,00                          | EUR     | 230                     | -63                       |
| Hull, Blyth (Angola) Ltd. (Angolan branch) <sup>1)</sup>       | Angola, Luanda                          | 100,00                          | EUR     | 7.006                   | -1.699                    |
| Hull Blyth Angola Viagens e Turismo Lda. <sup>1)</sup>         | Angola, Luanda                          | 99,99                           | EUR     | -                       | -                         |
| Kinesis Logistics (Pty) Ltd. <sup>3)</sup>                     | Südafrika, Germiston                    | 100,00                          | EUR     | -377                    | 0                         |
| Misr Freight SARL                                              | Ägypten, Kairo                          | 100,00                          | EUR     | 348                     | 8                         |
| Sherkate Hami-oNaghl Sarie DHL Kish                            | Iran, Teheran                           | 100,00                          | EUR     | -1                      | 0                         |
| SNAS Lebanon SARL <sup>7b)</sup>                               | Libanon, Beirut                         | 45,00                           | EUR     | 703                     | 255                       |
| SNAS Trading and Contracting <sup>6)</sup>                     | Saudi-Arabien, Riad                     | 0,00                            | EUR     | 0                       | 0                         |
| SSA Regional Services (Pty) Ltd.                               | Südafrika, Johannesburg                 | 100,00                          | EUR     | 1.252                   | 52                        |
| Trans Care Fashion SARL (Morocco) <sup>5)</sup>                | Marokko, Casablanca                     | 100,00                          | EUR     | -535                    | 0                         |
| Ukhozi Logistics (Pty) Ltd.                                    | Südafrika, Boksburg                     | 100,00                          | EUR     | 116                     | 0                         |
| Uniauto-Organizacoes Técnicas e Industriais SARL <sup>5)</sup> | Angola, Luanda                          | 98,93                           | EUR     | 15                      | 0                         |

IFRS-Werte gemäß Einzelabschluss vor Gewinnabführung

1) Nur Teilkonzern vorhanden 2) Angaben aus 2009 3) Angaben aus 2008 4) Nicht verfügbar 5) Ruhend 6) Einbezug nach SIC 12 7a) Einbezug IAS 27.13 (a) 7b) Einbezug IAS 27.13 (b-d)  
8) In Liquidation 9) Angaben nach lokalen Rechnungslegungsvorschriften 10) Stimmrechte 11) Gesellschaft ist im Konzernabschluss der Deutsche Postbank AG enthalten 12) Neugründung 2010

## Verbundene Unternehmen, die nicht in den Konzernabschluss einbezogen werden

| Name                                                                                                      | Sitz                               | Konzern-Anteile<br>am Kapital % | Währung | Eigenkapital<br>Tausend | Jahresergebnis<br>Tausend |
|-----------------------------------------------------------------------------------------------------------|------------------------------------|---------------------------------|---------|-------------------------|---------------------------|
| <b>Europa</b>                                                                                             |                                    |                                 |         |                         |                           |
| Adamscott Limited <sup>3), 8)</sup>                                                                       | Großbritannien, Southampton        | 100,00                          | EUR     | 68.225                  | 5.339                     |
| Alistair McIntosh Trustee Company Limited <sup>5), 9)</sup>                                               | Großbritannien, London             | 100,00                          | GBP     | 0                       | -                         |
| Arbuckle, Smith & Company Limited <sup>9)</sup>                                                           | Großbritannien, Glasgow            | 100,00                          | GBP     | 5.298                   | 0                         |
| Arbuckle, Smith Investments Limited <sup>5), 9)</sup>                                                     | Großbritannien, Glasgow            | 100,00                          | GBP     | 651                     | -                         |
| ASG Leasing HB <sup>9)</sup>                                                                              | Schweden, Stockholm                | 100,00                          | SEK     | 5                       | 0                         |
| Bernard Brook Transport (Elland) Limited <sup>2), 9)</sup>                                                | Großbritannien, Bracknell          | 100,00                          | GBP     | 887                     | 0                         |
| Beteiligungsgesellschaft Privatstraße gvz Eifeltor GBR <sup>4)</sup>                                      | Deutschland, Grafschaft-Holzweiler | 53,54                           | EUR     | -                       | -                         |
| Calayan Cargo International (BVI) Ltd. <sup>4), 5)</sup>                                                  | Großbritannien, Tortola            | 100,00                          | GBP     | -                       | -                         |
| Cassin Partners Ltd. <sup>4), 5)</sup>                                                                    | Irland, Dublin                     | 100,00                          | EUR     | -                       | -                         |
| Danzas Logistics Limited <sup>4), 5)</sup>                                                                | Großbritannien, Staines            | 100,00                          | GBP     | -                       | -                         |
| DEGEMOLTO Grundstücksverwaltungsgesellschaft mbH & Co. Immobilien-Vermietungs KG <sup>2), 9)</sup>        | Deutschland, Meinerzhagen          | 100,00                          | EUR     | 16                      | 32                        |
| Deutsche Post Grundstücks-Vermietungsgesellschaft beta mbH <sup>2), 9)</sup>                              | Deutschland, Bonn                  | 100,00                          | EUR     | 17                      | 0                         |
| Deutsche Post Immobilienentwicklung Grundstücks-gesellschaft mbH & Co. Objekt Weißenhorn KG <sup>4)</sup> | Deutschland, Bonn                  | 100,00                          | EUR     | -                       | -                         |
| Deutsche Post Pensionsfonds AG <sup>2), 9)</sup>                                                          | Deutschland, Bonn                  | 99,98                           | EUR     | 3.420                   | 0                         |
| Deutsche Post Pensions-Treuhand GmbH & Co. KG <sup>2), 9)</sup>                                           | Deutschland, Bonn                  | 99,98                           | EUR     | 10                      | 0                         |
| DHL Employee Benefit Fund ASBL/vZW <sup>2), 9)</sup>                                                      | Belgien, Diegem                    | 100,00                          | EUR     | -240                    | 0                         |
| DHL Exel Supply Chain Limited <sup>4), 5)</sup>                                                           | Großbritannien, Bracknell          | 100,00                          | GBP     | -                       | -                         |
| DHL Pensions Investment Fund Limited <sup>4), 5)</sup>                                                    | Großbritannien, Bedford            | 100,00                          | GBP     | -                       | -                         |
| DHL Systems Limited <sup>3), 9)</sup>                                                                     | Großbritannien, Bracknell          | 100,00                          | GBP     | 0                       | 0                         |
| DHL Trustees Limited <sup>4), 5)</sup>                                                                    | Großbritannien, Bedford            | 74,00                           | GBP     | -                       | -                         |
| DHL UK Pension Trustees Limited <sup>5), 9)</sup>                                                         | Großbritannien, Hounslow           | 100,00                          | GBP     | 0                       | -                         |
| DMW-Expo <sup>3), 9)</sup>                                                                                | Russland, Moskau                   | 66,00                           | RUB     | 1.800                   | 430                       |
| Elan International (Ireland) Ltd. <sup>4), 5)</sup>                                                       | Irland, Dublin                     | 100,00                          | EUR     | -                       | -                         |
| Excel Logistics Limited <sup>5), 9)</sup>                                                                 | Großbritannien, Bracknell          | 100,00                          | GBP     | 0                       | -                         |
| Exel (Northern Ireland) Limited <sup>5), 9)</sup>                                                         | Großbritannien, Mallusk            | 100,00                          | GBP     | 511                     | -                         |
| Exel Express Limited <sup>5), 9)</sup>                                                                    | Großbritannien, Bracknell          | 100,00                          | GBP     | 0                       | -                         |
| Exel Holdings (Russia) Limited <sup>5), 9)</sup>                                                          | Großbritannien, Bracknell          | 100,00                          | GBP     | -3                      | -                         |
| Exel International Holdings Limited <sup>2), 8)</sup>                                                     | Großbritannien, Bedford            | 100,00                          | GBP     | 258.564                 | 1.600                     |
| Exel Logistics (Ireland) Limited <sup>9)</sup>                                                            | Irland, Dublin                     | 100,00                          | GBP     | -                       | -                         |
| Exel Nominee No 2 Limited <sup>5), 9)</sup>                                                               | Großbritannien, Bracknell          | 100,00                          | GBP     | 0                       | -                         |

Verbundene Unternehmen, die nicht in den Konzernabschluss einbezogen werden

| Name                                                                                                | Sitz                        | Konzern-Anteile<br>am Kapital % | Währung | Eigenkapital<br>Tausend | Jahresergebnis<br>Tausend |
|-----------------------------------------------------------------------------------------------------|-----------------------------|---------------------------------|---------|-------------------------|---------------------------|
| Exel Overseas Finance <sup>2), 8)</sup>                                                             | Großbritannien, Bedford     | 100,00                          | EUR     | 343.765                 | 15.666                    |
| Exel Sand and Ballast Company Limited <sup>5), 9)</sup>                                             | Großbritannien, Bracknell   | 100,00                          | GBP     | 189                     | –                         |
| Exel Secretarial Services Limited <sup>4), 5)</sup>                                                 | Großbritannien, Bracknell   | 100,00                          | GBP     | –                       | –                         |
| Exel Share Scheme Trustees Limited <sup>5), 9)</sup>                                                | Großbritannien, Bracknell   | 100,00                          | GBP     | 0                       | –                         |
| Exel Taskforce Limited <sup>5), 9)</sup>                                                            | Großbritannien, Bracknell   | 100,00                          | GBP     | –48                     | –                         |
| Fashionflow Limited <sup>5), 9)</sup>                                                               | Großbritannien, Bracknell   | 100,00                          | GBP     | 0                       | –                         |
| forum gelb GmbH <sup>9)</sup>                                                                       | Deutschland, Bonn           | 100,00                          | EUR     | 25                      | 2                         |
| Higgs Air España S.A. <sup>8)</sup>                                                                 | Spanien, Barcelona          | 100,00                          | EUR     | –                       | –                         |
| Hi-Tech Logistics Limited <sup>5), 9)</sup>                                                         | Großbritannien, Bracknell   | 100,00                          | GBP     | 639                     | –                         |
| Industrial & Marine Engineering Co of Nigeria Limited <sup>4)</sup>                                 | Großbritannien, London      | 100,00                          | GBP     | –                       | –                         |
| it4logistics AG <sup>2), 9)</sup>                                                                   | Deutschland, Potsdam        | 75,10                           | EUR     | 366                     | 121                       |
| KXC (EXEL) GP INVESTMENT LIMITED <sup>5), 9)</sup>                                                  | Großbritannien, Bracknell   | 100,00                          | GBP     | 15                      | –                         |
| Mail Service GmbH Hannover <sup>9)</sup>                                                            | Deutschland, Hannover       | 100,00                          | EUR     | 25                      | –9                        |
| Mail Service GmbH Köln <sup>9)</sup>                                                                | Deutschland, Köln           | 100,00                          | EUR     | 25                      | –10                       |
| McGregor Air Charter Limited <sup>3), 8)</sup>                                                      | Großbritannien, Southampton | 100,00                          | EUR     | 61.816                  | 4.222                     |
| Mercury Airfreight Holdings Limited <sup>5), 9)</sup>                                               | Großbritannien, Bracknell   | 100,00                          | GBP     | 500                     | –                         |
| Mexicoblade Limited <sup>5), 9)</sup>                                                               | Großbritannien, London      | 100,00                          | GBP     | –2                      | –                         |
| Millsdale <sup>3), 8)</sup>                                                                         | Großbritannien, Southampton | 100,00                          | EUR     | 4.219                   | 250                       |
| MSAS Global Logistics Limited <sup>2), 8)</sup>                                                     | Großbritannien, Bracknell   | 100,00                          | EUR     | 63.790                  | 4.290                     |
| MSAS Project Services <sup>3), 8)</sup>                                                             | Großbritannien, Bracknell   | 100,00                          | EUR     | 15.560                  | 1.109                     |
| Neptune Logistics Ltd. <sup>8)</sup>                                                                | Irland, Dublin              | 100,00                          | EUR     | –                       | –                         |
| Newsround International Airfreight Limited <sup>5), 9)</sup>                                        | Großbritannien, Bracknell   | 100,00                          | GBP     | 526                     | –                         |
| NFC International Limited <sup>3), 8)</sup>                                                         | Großbritannien, Bracknell   | 100,00                          | EUR     | 257.122                 | 0                         |
| NFC Investments Limited <sup>9)</sup>                                                               | Großbritannien, Bracknell   | 100,00                          | GBP     | 1                       | 0                         |
| Ocean (BFL) Limited <sup>3), 8)</sup>                                                               | Großbritannien, Bracknell   | 100,00                          | EUR     | 1                       | 0                         |
| Ocean (Shetland) Limited <sup>2), 8)</sup>                                                          | Großbritannien, Glasgow     | 100,00                          | EUR     | 195                     | 0                         |
| Ocean Group (Ireland) Ltd. <sup>2), 8)</sup>                                                        | Irland, Dublin              | 100,00                          | EUR     | 3.321                   | 0                         |
| Ocean Group Share Scheme Trustee Limited <sup>5), 9)</sup>                                          | Großbritannien, Bracknell   | 100,00                          | GBP     | 0                       | –                         |
| Ocean Transport & Trading Limited <sup>2), 8)</sup>                                                 | Großbritannien, Bracknell   | 100,00                          | EUR     | 601.233                 | 20.275                    |
| Oceanair International Limited <sup>3), 8)</sup>                                                    | Großbritannien, Bracknell   | 100,00                          | EUR     | 57.819                  | 4.569                     |
| Outrack Credit Ireland Ltd. <sup>4), 5)</sup>                                                       | Irland, Dublin              | 100,00                          | EUR     | –                       | –                         |
| Power Europe Development No. 2 Limited <sup>5), 9)</sup>                                            | Großbritannien, Bracknell   | 100,00                          | GBP     | 0                       | –                         |
| Print to Post Limited <sup>5), 9)</sup>                                                             | Großbritannien, London      | 100,00                          | GBP     | 11                      | –                         |
| Siegfried Vögele Institut (svi) – Internationale Gesellschaft für Dialogmarketing mbH <sup>9)</sup> | Deutschland, Königstein     | 100,00                          | EUR     | 50                      | 20                        |
| Tankclean (Ireland) Ltd. <sup>8)</sup>                                                              | Irland, Dublin              | 100,00                          | EUR     | –                       | –                         |
| Tankfreight Limited <sup>5), 9)</sup>                                                               | Großbritannien, Bracknell   | 100,00                          | GBP     | 2                       | –                         |
| The Stationery Office Pension Trustees Limited <sup>5), 9)</sup>                                    | Großbritannien, London      | 100,00                          | GBP     | 0                       | –                         |
| The Stationery Office Trustees Limited <sup>5), 9)</sup>                                            | Großbritannien, London      | 100,00                          | GBP     | 0                       | –                         |
| Tibbett & Britten (N.I.) Limited <sup>5), 9)</sup>                                                  | Großbritannien, Ballyclare  | 99,00                           | GBP     | –5                      | –                         |
| Tibbett & Britten (USA) Limited <sup>2), 8)</sup>                                                   | Großbritannien, Bracknell   | 100,00                          | EUR     | 0                       | 0                         |
| Tibbett & Britten Applied Limited <sup>9)</sup>                                                     | Großbritannien, Bracknell   | 100,00                          | GBP     | 1                       | –72                       |
| Tibbett & Britten Automotive Assets Limited <sup>9)</sup>                                           | Großbritannien, Bracknell   | 100,00                          | GBP     | 0                       | 0                         |
| Tibbett & Britten Consumer Group Limited <sup>5), 9)</sup>                                          | Großbritannien, Bracknell   | 100,00                          | GBP     | 0                       | –                         |
| Tibbett & Britten Consumer Limited <sup>9)</sup>                                                    | Großbritannien, Bracknell   | 100,00                          | GBP     | 10                      | 0                         |
| Tibbett & Britten Dairy Logistics Sp. z o.o. <sup>9)</sup>                                          | Polen, Warschau             | 100,00                          | PLN     | 50                      | 0                         |
| Tibbett & Britten Finance (UK) Limited <sup>3), 8)</sup>                                            | Großbritannien, Bracknell   | 100,00                          | EUR     | 10.955                  | 0                         |
| Tibbett & Britten Group Iberia Limited <sup>8)</sup>                                                | Großbritannien, Bracknell   | 100,00                          | GBP     | –                       | –                         |
| Tibbett & Britten Limited <sup>5), 9)</sup>                                                         | Großbritannien, Bracknell   | 100,00                          | GBP     | 0                       | –                         |
| Tibbett & Britten Pension Trust Limited <sup>9)</sup>                                               | Großbritannien, Bracknell   | 100,00                          | GBP     | 0                       | 0                         |
| Tibbett & Britten Quest Trustees Limited <sup>9)</sup>                                              | Großbritannien, Bracknell   | 100,00                          | GBP     | 0                       | 0                         |
| Track One Logistics Limited <sup>5), 9)</sup>                                                       | Großbritannien, Bracknell   | 100,00                          | GBP     | 92                      | –                         |
| Transcare Gulf Logistics International Limited <sup>4), 5)</sup>                                    | Großbritannien, Bedford     | 50,00                           | GBP     | –                       | –                         |
| Trucks and Child Safety Limited <sup>5), 9)</sup>                                                   | Großbritannien, Bedford     | 100,00                          | GBP     | 100                     | –                         |

IFRS-Werte gemäß Einzelabschluss vor Gewinnabführung

1) Nur Teilkonzern vorhanden 2) Angaben aus 2009 3) Angaben aus 2008 4) Nicht verfügbar 5) Ruhend 6) Einbezug nach SIC 12 7a) Einbezug IAS 27.13 (a) 7b) Einbezug IAS 27.13 (b–d)

8) In Liquidation 9) Angaben nach lokalen Rechnungslegungsvorschriften 10) Stimmrechte 11) Gesellschaft ist im Konzernabschluss der Deutsche Postbank AG enthalten 12) Neugründung 2010

## Verbundene Unternehmen, die nicht in den Konzernabschluss einbezogen werden

| Name                                                                        | Sitz                                 | Konzern-Anteile<br>am Kapital % | Währung | Eigenkapital<br>Tausend | Jahresergebnis<br>Tausend |
|-----------------------------------------------------------------------------|--------------------------------------|---------------------------------|---------|-------------------------|---------------------------|
| UNITRANS Deutschland Gesellschaft für Termin-<br>verkehre mbH <sup>4)</sup> | Deutschland, Düsseldorf              | 65,38                           | EUR     | –                       | –                         |
| Van Gend & Loos – Euro Express NV <sup>9)</sup>                             | Belgien, Ternat                      | 100,00                          | EUR     | –206                    | 1                         |
| Williams Lea (us Acquisitions) Limited <sup>3), 9)</sup>                    | Großbritannien, London               | 100,00                          | GBP     | 1                       | 0                         |
| Williams Lea Group Quest Trustees Limited <sup>5), 9)</sup>                 | Großbritannien, London               | 100,00                          | GBP     | 0                       | –                         |
| Williams Lea International Limited <sup>5), 9)</sup>                        | Großbritannien, London               | 100,00                          | GBP     | 0                       | –                         |
| <b>Amerikas</b>                                                             |                                      |                                 |         |                         |                           |
| Axis Logistics Inc. <sup>9)</sup>                                           | Kanada, Toronto                      | 100,00                          | CAD     | 3                       | 0                         |
| Deutsche Post World Net USA Inc. <sup>4)</sup>                              | USA, Washington                      | 100,00                          | USD     | –                       | –                         |
| DHL Consumer Services SC México <sup>2), 9)</sup>                           | Mexiko, Tepotzotlán                  | 100,00                          | MXP     | – 5.186                 | 6.704                     |
| DHL Express (Belize) Limited <sup>2), 9)</sup>                              | Belize, Belize City                  | 100,00                          | USD     | 20                      | 0                         |
| DHL Global Forwarding (Brazil) Logistics Ltda. <sup>4)</sup>                | Brasilien, São Paulo                 | 100,00                          | BRL     | –                       | –                         |
| DHL Holdings N. V. <sup>8)</sup>                                            | Niederländische Antillen, Willemstad | 100,00                          | ANG     | –                       | –                         |
| DHL International (Antigua) Ltd. <sup>4), 5)</sup>                          | Antigua und Barbuda, St. Johns       | 100,00                          | USD     | –                       | –                         |
| DHL Servicios, S.A. de C.V. <sup>2), 9)</sup>                               | Mexiko, Mexiko-Stadt                 | 100,00                          | MXP     | –251                    | 39                        |
| DHL St. Lucia Ltd. <sup>4), 5)</sup>                                        | St. Lucia, Castries                  | 100,00                          | XCD     | –                       | –                         |
| Exel Dedicated Inc. <sup>12)</sup>                                          | Kanada, Mississauga                  | 100,00                          | CAD     | –                       | –                         |
| Hyperion Properties Inc. <sup>4)</sup>                                      | USA, Westerville                     | 100,00                          | USD     | –                       | –                         |
| Inversiones 3340, C.A. <sup>4)</sup>                                        | Venezuela, Caracas                   | 49,00                           | VEF     | –                       | –                         |
| Power Packaging (Geneva), LLC <sup>4)</sup>                                 | USA, Westerville                     | 100,00                          | USD     | –                       | –                         |
| Power Packaging, Inc. <sup>4)</sup>                                         | USA, Westerville                     | 100,00                          | USD     | –                       | –                         |
| Radix Group International, Inc. <sup>4)</sup>                               | USA, Miami                           | 100,00                          | USD     | –                       | –                         |
| Safe Way Argentina S.A. <sup>9)</sup>                                       | Argentinien, Buenos Aires            | 99,97                           | EUR     | 34                      | 0                         |
| Skyhawk Transport Ltd. <sup>9)</sup>                                        | Kanada, Mississauga                  | 100,00                          | CAD     | 35.000                  | 0                         |
| usc Distribution Services LLC <sup>4)</sup>                                 | USA, Westerville                     | 100,00                          | USD     | –                       | –                         |
| <b>Asien/Pazifik</b>                                                        |                                      |                                 |         |                         |                           |
| Concorde Air Logistics Ltd. <sup>2), 9)</sup>                               | Indien, Mumbai                       | 99,54                           | INR     | 43.610                  | 3.096                     |
| DHL China Limited <sup>8)</sup>                                             | China, Kowloon Bay                   | 100,00                          | USD     | 0                       | 0                         |
| DHL Customs Brokerage Corp. <sup>2), 9)</sup>                               | Philippinen, Pasay Stadt             | 100,00                          | PHP     | 1.167                   | 35                        |
| Exel Logistics Delbros Philippines Inc. <sup>5), 8)</sup>                   | Philippinen, Manila                  | 60,00                           | PHP     | –                       | –                         |
| Exel Logistics Services (M) Sdn. Bhd. <sup>5), 8)</sup>                     | Malaysia, Shah Alam                  | 100,00                          | PHP     | –                       | –                         |
| Skyline Air Logistics Ltd. <sup>2), 9)</sup>                                | Indien, Mumbai                       | 99,99                           | INR     | 36.797                  | 12.498                    |
| Tibbett & Britten Kontena Nasional Sdn. Bhd. <sup>5), 8)</sup>              | Malaysia, Darul Ehsan                | 60,00                           | MYR     | –                       | –                         |
| Watthanonthai Company Ltd. <sup>9)</sup>                                    | Thailand, Bangkok                    | 49,00                           | THB     | 1.325                   | –21                       |
| Yamato Dialog & Media Co. Ltd. <sup>2), 9)</sup>                            | Japan, Tokio                         | 49,00                           | JPY     | 629.076                 | 3.477                     |
| <b>Übrige Regionen</b>                                                      |                                      |                                 |         |                         |                           |
| Blue Funnel Angola Ltda. <sup>5), 9)</sup>                                  | Angola, Luanda                       | 99,99                           | USD     | –61                     | –                         |
| Danzas AEI (private) Ltd. <sup>4), 5)</sup>                                 | Kenia, Nairobi                       | 100,00                          | KES     | –                       | –                         |
| Danzas AEI (Private) Ltd. <sup>4), 5)</sup>                                 | Simbabwe, Harare                     | 100,00                          | EUR     | –                       | –                         |
| Danzas AEI Intercontinental LTD <sup>8)</sup>                               | Malawi, Blantyre                     | 100,00                          | MWK     | –                       | –                         |
| Danzas Intercontinental Pte. Ltd. <sup>2), 9)</sup>                         | Mauritius, Port Louis                | 40,00                           | USD     | –56                     | –8                        |
| DHL Air Freight Forwarder (Egypt) WLL <sup>8)</sup>                         | Ägypten, Kairo                       | 99,90                           | EGP     | –                       | –                         |
| DHL Danzas Air & Ocean (Kenya) Ltd. <sup>8)</sup>                           | Kenia, Nairobi                       | 100,00                          | KES     | –                       | –                         |
| Elder Dempster Ltda. <sup>5), 9)</sup>                                      | Angola, Luanda                       | 99,99                           | USD     | –61                     | –                         |
| Exel Domestic Distribution (Pty) Ltd. <sup>8)</sup>                         | Südafrika, Boksburg                  | 100,00                          | ZAR     | –                       | –                         |
| Exel Contract Logistics (SA) (Pty) Ltd. <sup>8)</sup>                       | Südafrika, Elandsfontein             | 100,00                          | ZAR     | –                       | –                         |
| Fashion Logistics (Pty) Ltd. <sup>8)</sup>                                  | Südafrika, Germiston                 | 100,00                          | ZAR     | –                       | –                         |
| Palmer Womersley Distributors (Pty) Ltd. <sup>8)</sup>                      | Südafrika, Germiston                 | 100,00                          | ZAR     | –                       | –                         |
| Storecare (Pty) Ltd. <sup>8)</sup>                                          | Südafrika, Germiston                 | 100,00                          | ZAR     | –                       | –                         |
| Synergistic Alliance Investments (Pty) Ltd. <sup>5), 9)</sup>               | Südafrika, Germiston                 | 100,00                          | ZAR     | –3.341                  | –                         |
| Tibbett & Britten Egypt Ltd. <sup>8)</sup>                                  | Ägypten, Kairo                       | 50,00                           | EGP     | –                       | –                         |

IFRS-Werte gemäß Einzelabschluss vor Gewinnabführung

1) Nur Teilkonzern vorhanden 2) Angaben aus 2009 3) Angaben aus 2008 4) Nicht verfügbar 5) Ruhend 6) Einbezug nach SIC 12 7a) Einbezug IAS 27.13 (a) 7b) Einbezug IAS 27.13 (b–d)

8) In Liquidation 9) Angaben nach lokalen Rechnungslegungsvorschriften 10) Stimmrechte 11) Gesellschaft ist im Konzernabschluss der Deutsche Postbank AG enthalten 12) Neugründung 2010

Gemeinschaftsunternehmen (Quotenkonsolidierung)

| Name                                                         | Sitz                        | Konzern-Anteile<br>am Kapital % | Währung | Eigenkapital<br>Tausend | Jahresergebnis<br>Tausend |
|--------------------------------------------------------------|-----------------------------|---------------------------------|---------|-------------------------|---------------------------|
| <b>Europa</b>                                                |                             |                                 |         |                         |                           |
| AeroLogic GmbH                                               | Deutschland, Leipzig        | 50,00                           | EUR     | 18.494                  | 7.814                     |
| Danzas DV LLC                                                | Russland, Yuzhno-Sakhalinsk | 50,00                           | EUR     | 310                     | – 4                       |
| <b>Amerikas</b>                                              |                             |                                 |         |                         |                           |
| EC Logistica S.A.                                            | Argentinien, Buenos Aires   | 51,00                           | EUR     | 217                     | 146                       |
| EV Logistics                                                 | Kanada, Vancouver           | 50,00                           | EUR     | 1.083                   | 1.877                     |
| LifeConEx LLC                                                | USA, Plantation             | 50,00                           | EUR     | – 1.389                 | – 180                     |
| <b>Asien/Pazifik</b>                                         |                             |                                 |         |                         |                           |
| Express Couriers Limited <sup>1)</sup>                       | Neuseeland, Wellington      | 50,00                           | EUR     | 86.252                  | 9.002                     |
| Roadstar Transport Limited <sup>1)</sup>                     | Neuseeland, Wellington      | 50,00                           | EUR     | –                       | –                         |
| Parcel Direct Group Pty. Limited <sup>1)</sup>               | Australien, Mascot          | 50,00                           | EUR     | – 568                   | – 23.198                  |
| Couriers Please Pty. Ltd. <sup>1)</sup>                      | Australien, Pymble          | 50,00                           | EUR     | –                       | –                         |
| Express Couriers Australia (SUB1) Pty. Limited <sup>1)</sup> | Australien, Mascot          | 50,00                           | EUR     | –                       | –                         |
| Hills Parcel Direct Pty. Limited <sup>1)</sup>               | Australien, Pymble          | 50,00                           | EUR     | –                       | –                         |
| Northern Kope Parcel Express (SA) Pty. Limited <sup>1)</sup> | Australien, Pymble          | 50,00                           | EUR     | –                       | –                         |
| Northern Kope Parcel Express Pty. Ltd. <sup>1)</sup>         | Australien, Pymble          | 50,00                           | EUR     | –                       | –                         |
| Parcel Direct Australia Pty. Limited <sup>1)</sup>           | Australien, Pymble          | 50,00                           | EUR     | –                       | –                         |
| Parcel Overnight Direct Pty. Ltd. <sup>1)</sup>              | Australien, Pymble          | 50,00                           | EUR     | –                       | –                         |
| <b>Übrige Regionen</b>                                       |                             |                                 |         |                         |                           |
| Bahwan Exel LLC                                              | Oman, Muscat                | 49,00                           | EUR     | 666                     | 6.010                     |
| Exel Saudia LLC                                              | Saudi-Arabien, Al Khobar    | 50,00                           | EUR     | 6.213                   | 2.910                     |

IFRS-Werte gemäß Einzelabschluss vor Gewinnabführung

1) Nur Teilkonzern vorhanden 2) Angaben aus 2009 3) Angaben aus 2008 4) Nicht verfügbar 5) Ruhend 6) Einbezug nach SIC 12 7a) Einbezug IAS 27.13 (a) 7b) Einbezug IAS 27.13 (b–d)  
8) In Liquidation 9) Angaben nach lokalen Rechnungslegungsvorschriften 10) Stimmrechte 11) Gesellschaft ist im Konzernabschluss der Deutsche Postbank AG enthalten 12) Neugründung 2010

Assoziierte Unternehmen (Bewertung im Konzernabschluss nach der Equity-Methode)

| Name                                                                                          | Sitz                           | Konzern-Anteile<br>am Kapital % | Währung | Eigenkapital<br>Tausend | Jahresergebnis<br>Tausend |
|-----------------------------------------------------------------------------------------------|--------------------------------|---------------------------------|---------|-------------------------|---------------------------|
| <b>Europa</b>                                                                                 |                                |                                 |         |                         |                           |
| Betriebs-Center für Banken AG <sup>1)</sup>                                                   | Deutschland, Frankfurt am Main | 39,50                           | EUR     | 322.502                 | 40.273                    |
| Betriebs-Center für Banken Processing GmbH <sup>1)</sup>                                      | Deutschland, Frankfurt am Main | 39,50                           | EUR     | 4.521                   | 1.289                     |
| BHW – Gesellschaft für Wohnungswirtschaft mbH <sup>1)</sup>                                   | Deutschland, Hameln            | 39,50                           | EUR     | 967.039                 | – 5.895                   |
| BHW – Gesellschaft für Wohnungswirtschaft<br>mbH & Co. Immobilienverwaltungs KG <sup>1)</sup> | Deutschland, Hameln            | 39,50                           | EUR     | 92.878                  | 4.380                     |
| BHW Bausparkasse AG <sup>1)</sup>                                                             | Deutschland, Hameln            | 39,50                           | EUR     | 1.445.806               | 8.041                     |
| BHW Gesellschaft für Vorsorge mbH <sup>1)</sup>                                               | Deutschland, Hameln            | 39,50                           | EUR     | 237.982                 | 1.278                     |
| BHW Holding Aktiengesellschaft <sup>1)</sup>                                                  | Deutschland, Berlin            | 39,50                           | EUR     | 815.642                 | 9.744                     |
| BHW Immobilien GmbH <sup>1)</sup>                                                             | Deutschland, Hameln            | 39,50                           | EUR     | 3.196                   | 721                       |
| Cargo Center Sweden AB <sup>9)</sup>                                                          | Schweden, Stockholm            | 50,00                           | SEK     | 17.830                  | 147.097                   |
| Deutsche Postbank AG <sup>2), 9)</sup>                                                        | Deutschland, Bonn              | 39,50                           | EUR     | 1.650.646               | – 491.630                 |
| Deutsche Postbank Finance Center Objekt SARL <sup>1)</sup>                                    | Luxemburg, Munsbach            | 39,50                           | EUR     | 2.226                   | – 55                      |
| Deutsche Postbank Financial Services GmbH <sup>1)</sup>                                       | Deutschland, Frankfurt am Main | 39,50                           | EUR     | 5.385                   | 580                       |
| Deutsche Postbank International S.A. <sup>1)</sup>                                            | Luxemburg, Munsbach            | 39,50                           | EUR     | 970.171                 | 99.036                    |
| Deutsche Postbank Vermögens-Management S.A. <sup>1)</sup>                                     | Luxemburg, Munsbach            | 39,50                           | EUR     | 31.745                  | 11.325                    |
| DPBI Immobilien KGaA <sup>1)</sup>                                                            | Luxemburg, Munsbach            | 39,50                           | EUR     | 348                     | 120                       |
| DSL Portfolio GmbH & Co. KG <sup>1)</sup>                                                     | Deutschland, Bonn              | 39,50                           | EUR     | 14.045                  | 462                       |
| DSL Holding Aktiengesellschaft <sup>1)</sup>                                                  | Deutschland, Bonn              | 39,50                           | EUR     | 57.437                  | 395                       |
| DSL Portfolio Verwaltungs GmbH <sup>1)</sup>                                                  | Deutschland, Bonn              | 39,50                           | EUR     | 27                      | 0                         |
| Merkur I SICAV - FIS <sup>1)</sup>                                                            | Luxemburg, Luxemburg           | 39,50                           | EUR     | 2.647.287               | 180.118                   |

IFRS-Werte gemäß Einzelabschluss vor Gewinnabführung

1) Nur Teilkonzern vorhanden 2) Angaben aus 2009 3) Angaben aus 2008 4) Nicht verfügbar 5) Ruhend 6) Einbezug nach SIC 12 7a) Einbezug IAS 27.13 (a) 7b) Einbezug IAS 27.13 (b–d)  
8) In Liquidation 9) Angaben nach lokalen Rechnungslegungsvorschriften 10) Stimmrechte 11) Gesellschaft ist im Konzernabschluss der Deutsche Postbank AG enthalten 12) Neugründung 2010

## Assoziierte Unternehmen (Bewertung im Konzernabschluss nach der Equity-Methode)

| Name                                                                                   | Sitz                                | Konzern-Anteile<br>am Kapital % | Währung | Eigenkapital<br>Tausend | Jahresergebnis<br>Tausend |
|----------------------------------------------------------------------------------------|-------------------------------------|---------------------------------|---------|-------------------------|---------------------------|
| Merkur II SICAV - FIS <sup>1)</sup>                                                    | Luxemburg, Luxemburg                | 39,50                           | EUR     | 100.848                 | -10                       |
| PB Factoring GmbH <sup>1)</sup>                                                        | Deutschland, Bonn                   | 39,50                           | EUR     | 17.440                  | 879                       |
| PB Firmenkunden AG <sup>1)</sup>                                                       | Deutschland, Bonn                   | 39,50                           | EUR     | 2.084                   | 61                        |
| PB Spezial-Investmentaktiengesellschaft<br>mit Teilgesellschaftsvermögen <sup>1)</sup> | Deutschland, Frankfurt am Main      | 38,35                           | EUR     | 5.370.264               | 299.646                   |
| Postbank Beteiligungen GmbH <sup>1)</sup>                                              | Deutschland, Bonn                   | 39,50                           | EUR     | 310.325                 | 0                         |
| Postbank Direkt GmbH <sup>1)</sup>                                                     | Deutschland, Bonn                   | 39,50                           | EUR     | 22.079                  | 1.019                     |
| Postbank Filial GmbH <sup>1)</sup>                                                     | Deutschland, Bonn                   | 39,50                           | EUR     | 22                      | -3                        |
| Postbank Filialvertrieb AG <sup>1)</sup>                                               | Deutschland, Bonn                   | 39,50                           | EUR     | -6.681                  | -5.835                    |
| Postbank Finanzberatung AG <sup>1)</sup>                                               | Deutschland, Hameln                 | 39,50                           | EUR     | 83.324                  | -12.280                   |
| Postbank Immobilien und Baumanagement GmbH <sup>1)</sup>                               | Deutschland, Bonn                   | 39,50                           | EUR     | 18.874                  | 0                         |
| Postbank Immobilien und Baumanagement<br>GmbH & Co. Objekt Leipzig KG <sup>1)</sup>    | Deutschland, Bonn                   | 35,55                           | EUR     | 321                     | 3.915                     |
| Postbank Leasing GmbH <sup>1)</sup>                                                    | Deutschland, Bonn                   | 39,50                           | EUR     | 5.264                   | 153                       |
| Postbank Support GmbH <sup>1)</sup>                                                    | Deutschland, Köln                   | 39,50                           | EUR     | 840                     | 90                        |
| Postbank Systems AG <sup>1)</sup>                                                      | Deutschland, Bonn                   | 39,50                           | EUR     | 174.845                 | 12.798                    |
| Postbank Versicherungsvermittlung GmbH <sup>1)</sup>                                   | Deutschland, Bonn                   | 39,50                           | EUR     | 25                      | 0                         |
| Unipost Servicios Generales S.L. <sup>1)</sup>                                         | Spanien, Barcelona                  | 37,69                           | EUR     | 18.549                  | 390                       |
| Unipost S.A. <sup>1)</sup>                                                             | Spanien, Barcelona                  | 37,69                           | EUR     | -                       | -                         |
| Suresa Cit., S.L. <sup>1)</sup>                                                        | Spanien, L'Hospitalet de Llobregat  | 37,69                           | EUR     | -                       | -                         |
| vöb-zvd Bank für Zahlungsverkehrsdienstleistungen<br>GmbH <sup>1)</sup>                | Deutschland, Bonn                   | 29,62                           | EUR     | 12.962                  | 4.039                     |
| <b>Amerikas</b>                                                                        |                                     |                                 |         |                         |                           |
| Deutsche Postbank Funding LLC I <sup>1)</sup>                                          | USA, Wilmington                     | 39,50                           | EUR     | 25                      | 0                         |
| Deutsche Postbank Funding LLC II <sup>1)</sup>                                         | USA, Wilmington                     | 39,50                           | EUR     | 4                       | -4                        |
| Deutsche Postbank Funding LLC III <sup>1)</sup>                                        | USA, Wilmington                     | 39,50                           | EUR     | 36                      | 7                         |
| Deutsche Postbank Funding LLC IV <sup>1)</sup>                                         | USA, Wilmington                     | 39,50                           | EUR     | 87                      | 20                        |
| Deutsche Postbank Funding Trust I <sup>1)</sup>                                        | USA, Wilmington                     | 39,50                           | EUR     | 1                       | 0                         |
| Deutsche Postbank Funding Trust II <sup>1)</sup>                                       | USA, Wilmington                     | 39,50                           | EUR     | 1                       | 0                         |
| Deutsche Postbank Funding Trust III <sup>1)</sup>                                      | USA, Wilmington                     | 39,50                           | EUR     | 1                       | 0                         |
| Deutsche Postbank Funding Trust IV <sup>1)</sup>                                       | USA, Wilmington                     | 39,50                           | EUR     | 60                      | 3                         |
| PB (USA) Holdings, Inc. <sup>1), 1)</sup>                                              | USA, Wilmington                     | 39,50                           | EUR     | 850.727                 | 87.131                    |
| Miami MEI, LLC <sup>1), 1)</sup>                                                       | USA, Dover                          | 39,50                           | EUR     | -                       | -                         |
| PB Capital Corporation <sup>1), 1)</sup>                                               | USA, Wilmington                     | 39,50                           | EUR     | -                       | -                         |
| PB Finance (Delaware), Inc. <sup>1), 1)</sup>                                          | USA, Wilmington                     | 39,50                           | EUR     | -                       | -                         |
| PB Hollywood I Hollywood Station, LLC <sup>1), 1)</sup>                                | USA, Dover                          | 39,50                           | EUR     | -                       | -                         |
| PB Hollywood II Lofts LLC <sup>1), 1)</sup>                                            | USA, Dover                          | 39,50                           | EUR     | -                       | -                         |
| PBC Carnegie LLC <sup>1), 1)</sup>                                                     | USA, Wilmington                     | 39,50                           | EUR     | -                       | -                         |
| PB Realty Corporation <sup>1), 1)</sup>                                                | USA, New York                       | 39,50                           | EUR     | -                       | -                         |
| PMG Collins, LLC <sup>1), 1)</sup>                                                     | USA, Tallahassee                    | 39,50                           | EUR     | -                       | -                         |
| <b>Asien/Pazifik</b>                                                                   |                                     |                                 |         |                         |                           |
| Air Hong Kong Ltd. <sup>9)</sup>                                                       | China, Hongkong                     | 40,00                           | HKD     | 350.580                 | 433.237                   |
| Deutsche Postbank Home Finance Ltd. <sup>1)</sup>                                      | Indien, Neu Delhi                   | 39,50                           | EUR     | 95.182                  | 13.076                    |
| Tasman Cargo Airlines Pty. Limited <sup>2), 9)</sup>                                   | Australien, Mascot                  | 48,98                           | AUD     | 5.822                   | 217                       |
| <b>Übrige Regionen</b>                                                                 |                                     |                                 |         |                         |                           |
| Danzas AEI Emirates LCC                                                                | Vereinigte Arabische Emirate, Dubai | 42,50                           | AED     | 208.644                 | 41.018                    |

IFRS-Werte gemäß Einzelabschluss vor Gewinnabführung

1) Nur Teilkonzern vorhanden 2) Angaben aus 2009 3) Angaben aus 2008 4) Nicht verfügbar 5) Ruhend 6) Einbezug nach SIC 12 7a) Einbezug IAS 27.13 (a) 7b) Einbezug IAS 27.13 (b-d)

8) In Liquidation 9) Angaben nach lokalen Rechnungslegungsvorschriften 10) Stimmrechte 11) Gesellschaft ist im Konzernabschluss der Deutsche Postbank AG enthalten 12) Neugründung 2010



#### Nicht einbezogene Gemeinschaftsunternehmen

| Name                                                                         | Sitz                           | Konzern-Anteile<br>am Kapital % | Währung | Eigenkapital<br>Tausend | Jahresergebnis<br>Tausend |
|------------------------------------------------------------------------------|--------------------------------|---------------------------------|---------|-------------------------|---------------------------|
| <b>Europa</b>                                                                |                                |                                 |         |                         |                           |
| Aerologic Management GmbH <sup>3), 8)</sup>                                  | Deutschland, Frankfurt am Main | 50,00                           | EUR     | 182                     | -11                       |
| MALTO Grundstücks-Verwaltungsgesellschaft<br>mbH & Co. KG <sup>4), 10)</sup> | Deutschland, Grünwald          | 50,00                           | EUR     | -                       | -                         |

IFRS-Werte gemäß Einzelabschluss vor Gewinnabführung

1) Nur Teilkonzern vorhanden 2) Angaben aus 2009 3) Angaben aus 2008 4) Nicht verfügbar 5) Ruhend 6) Einbezug nach SIC 12 7a) Einbezug IAS 27.13 (a) 7b) Einbezug IAS 27.13 (b-d)  
8) In Liquidation 9) Angaben nach lokalen Rechnungslegungsvorschriften 10) Stimmrechte 11) Gesellschaft ist im Konzernabschluss der Deutsche Postbank AG enthalten 12) Neugründung 2010

#### Nicht einbezogene assoziierte Unternehmen

| Name                                                                                     | Sitz                           | Konzern-Anteile<br>am Kapital % | Währung | Eigenkapital<br>Tausend | Jahresergebnis<br>Tausend |
|------------------------------------------------------------------------------------------|--------------------------------|---------------------------------|---------|-------------------------|---------------------------|
| <b>Europa</b>                                                                            |                                |                                 |         |                         |                           |
| Airmail Center Frankfurt GmbH <sup>2), 9)</sup>                                          | Deutschland, Frankfurt am Main | 20,00                           | EUR     | 2.051                   | -192                      |
| Automotive Logistics (UK) Limited <sup>8)</sup>                                          | Großbritannien, Ipswich        | 50,00                           | GBP     | -                       | -                         |
| Balsa Grundstücksverwaltungs SARL & Co.<br>Vermietungs KG <sup>4)</sup>                  | Deutschland, Mainz             | 24,01                           | EUR     | -                       | -                         |
| Bike-Logistik GmbH Gesellschaft für Zweirad-<br>transporte <sup>2), 9)</sup>             | Deutschland, Nürnberg          | 25,00                           | EUR     | 53                      | 3                         |
| DCM GmbH & Co Vermögensaufbau Fonds 2 KG <sup>4)</sup>                                   | Deutschland, München           | 23,81                           | EUR     | -                       | -                         |
| Deutsche Fonds Management GmbH & Co. DCM<br>Renditefonds 18 KG <sup>4)</sup>             | Deutschland, München           | 24,94                           | EUR     | -                       | -                         |
| Diorit Grundstücksverwaltungsgesellschaft<br>mbH & Co. Vermietungs KG <sup>4), 10)</sup> | Deutschland, Mainz             | 24,01                           | EUR     | -                       | -                         |
| European EPC Competence Center GmbH <sup>9)</sup>                                        | Deutschland, Köln              | 30,00                           | EUR     | 206                     | 33                        |
| EXPO Logistik OOD <sup>3), 9)</sup>                                                      | Bulgarien, Sofia               | 50,00                           | BGN     | 5                       | 40                        |
| Expo-Dan <sup>2), 9)</sup>                                                               | Ukraine, Kiew                  | 50,00                           | UAH     | 680                     | -493                      |
| Expo Sped Sp. z o.o. <sup>2), 9)</sup>                                                   | Polen, Warschau                | 50,00                           | PLN     | 276                     | 54                        |
| Gardermoen Perishable Center AS <sup>2), 9)</sup>                                        | Norwegen, Gardermoen           | 33,33                           | NOK     | 7.884                   | 4.584                     |
| Jurte Grundstücksverwaltungsgesellschaft<br>mbH & Co. Vermietungs KG <sup>4), 10)</sup>  | Deutschland, Mainz             | 24,00                           | EUR     | -                       | -                         |
| Maxser Holding B.V. <sup>4)</sup>                                                        | Niederlande, Maastricht        | 30,00                           | EUR     | -                       | -                         |
| profresh Systemlogistik GmbH <sup>4)</sup>                                               | Deutschland, Hamburg           | 33,33                           | EUR     | -                       | -                         |
| <b>Amerikas</b>                                                                          |                                |                                 |         |                         |                           |
| BITS Limited <sup>4), 9)</sup>                                                           | Bermuda, Hamilton              | 40,00                           | BMD     | -984                    | -                         |
| Consimex S.A. <sup>4)</sup>                                                              | Kolumbien, Medellin            | 29,24                           | COP     | -                       | -                         |
| DHL International (Cayman) Ltd. <sup>4), 9)</sup>                                        | Kaimaninseln, George Town      | 40,00                           | KYD     | -960                    | -                         |
| Wilmington Commerce Park Partnership <sup>9)</sup>                                       | USA, Westerville               | 50,00                           | USD     | 506                     | -5.332                    |
| <b>Übrige Regionen</b>                                                                   |                                |                                 |         |                         |                           |
| Danzas AEI Intercontinental (Mauritius) Ltd. <sup>8)</sup>                               | Mauritius, Port Louis          | 35,00                           | MUR     | -                       | -                         |
| DHL Yemen Company Limited (Express Courier) <sup>2), 9)</sup>                            | Jemen, Sanaa                   | 49,00                           | EUR     | 409                     | -27                       |
| Drakensberg Logistics (Pty) Ltd. <sup>3), 9)</sup>                                       | Südafrika, Germiston           | 50,00                           | TAR     | 7.399                   | 3.300                     |

IFRS-Werte gemäß Einzelabschluss vor Gewinnabführung

1) Nur Teilkonzern vorhanden 2) Angaben aus 2009 3) Angaben aus 2008 4) Nicht verfügbar 5) Ruhend 6) Einbezug nach SIC 12 7a) Einbezug IAS 27.13 (a) 7b) Einbezug IAS 27.13 (b-d)  
8) In Liquidation 9) Angaben nach lokalen Rechnungslegungsvorschriften 10) Stimmrechte 11) Gesellschaft ist im Konzernabschluss der Deutsche Postbank AG enthalten 12) Neugründung 2010

#### Andere Beteiligungen an großen Kapitalgesellschaften

| Name                             | Sitz          | Konzern-Anteile<br>am Kapital % | Währung | Eigenkapital<br>Tausend | Jahresergebnis<br>Tausend |
|----------------------------------|---------------|---------------------------------|---------|-------------------------|---------------------------|
| <b>Asien/Pazifik</b>             |               |                                 |         |                         |                           |
| Sinotrans Ltd. <sup>1), 2)</sup> | China, Peking | 5,59                            | RMB     | 10.704.331              | 554.149                   |

IFRS-Werte gemäß Einzelabschluss vor Gewinnabführung

1) Nur Teilkonzern vorhanden 2) Angaben aus 2009

## VERSICHERUNG DES VORSTANDS

Wir versichern nach bestem Wissen, dass gemäß den anzuwendenden Rechnungslegungsgrundsätzen der Konzernabschluss ein den tatsächlichen Verhältnissen entsprechendes Bild der Vermögens-, Finanz- und Ertragslage des Konzerns vermittelt und im Konzernlagebericht der Geschäftsverlauf einschließlich des Geschäftsergebnisses und die Lage des Konzerns so dargestellt sind, dass ein den tatsächlichen Verhältnissen entsprechendes Bild vermittelt wird sowie die wesentlichen Chancen und Risiken der voraussichtlichen Entwicklung des Konzerns beschrieben sind.

Bonn, den 18. Februar 2011

Deutsche Post AG

Der Vorstand



Dr. Frank Appel



Ken Allen



Jürgen Gerdes



Walter Scheurle



Bruce Edwards

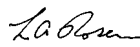

Lawrence Rosen



Hermann Ude

## BESTÄTIGUNGSVERMERK DES ABSCHLUSSPRÜFERS

Wir haben den von der Deutsche Post AG, Bonn, aufgestellten Konzernabschluss – bestehend aus Gewinn- und -Verlust-Rechnung und Gesamtergebnisrechnung, Bilanz, Kapitalflussrechnung, Eigenkapitalveränderungsrechnung und Anhang – sowie den Konzernlagebericht für das Geschäftsjahr vom 1. Januar bis 31. Dezember 2010 geprüft. Die Aufstellung von Konzernabschluss und Konzernlagebericht nach den IFRS, wie sie in der EU anzuwenden sind, und den ergänzend nach § 315 a Abs. 1 HGB anzuwendenden handelsrechtlichen Vorschriften liegt in der Verantwortung des Vorstands der Gesellschaft. Unsere Aufgabe ist es, auf der Grundlage der von uns durchgeführten Prüfung eine Beurteilung über den Konzernabschluss und den Konzernlagebericht abzugeben.

Wir haben unsere Konzernabschlussprüfung nach § 317 HGB unter Beachtung der vom Institut der Wirtschaftsprüfer (IDW) festgestellten deutschen Grundsätze ordnungsmäßiger Abschlussprüfung unter ergänzender Beachtung der International Standards on Auditing (ISA) vorgenommen. Danach ist die Prüfung so zu planen und durchzuführen, dass Unrichtigkeiten und Verstöße, die sich auf die Darstellung des durch den Konzernabschluss unter Beachtung der anzuwendenden Rechnungslegungsvorschriften und durch den Konzernlagebericht vermittelten Bildes der Vermögens-, Finanz- und Ertragslage wesentlich auswirken, mit hinreichender Sicherheit erkannt werden. Bei der Festlegung der Prüfungshandlungen werden die Kenntnisse über die Geschäftstätigkeit und über das wirtschaftliche und rechtliche Umfeld des Konzerns sowie die Erwartungen über mögliche Fehler berücksichtigt. Im Rahmen der Prüfung werden die Wirksamkeit des rechnungslegungsbezogenen internen Kontrollsystems sowie Nachweise für die Angaben im Konzernabschluss und Konzernlagebericht überwiegend auf der Basis von Stichproben beurteilt. Die Prüfung umfasst die Beurteilung der Jahresabschlüsse der in den Konzernabschluss einbezogenen Unternehmen, der Abgrenzung des Konsolidierungskreises, der angewandten Bilanzierungs- und Konsolidierungsgrundsätze und der wesentlichen Einschätzungen des Vorstands sowie die Würdigung der Gesamtdarstellung des Konzernabschlusses und des Konzernlageberichts. Wir sind der Auffassung, dass unsere Prüfung eine hinreichend sichere Grundlage für unsere Beurteilung bildet.

Unsere Prüfung hat zu keinen Einwendungen geführt.

Nach unserer Beurteilung aufgrund der bei der Prüfung gewonnenen Erkenntnisse entspricht der Konzernabschluss den IFRS, wie sie in der EU anzuwenden sind, und den ergänzend nach § 315 a Abs. 1 HGB anzuwendenden handelsrechtlichen Vorschriften und vermittelt unter Beachtung dieser Vorschriften ein den tatsächlichen Verhältnissen entsprechendes Bild der Vermögens-, Finanz- und Ertragslage des Konzerns. Der Konzernlagebericht steht in Einklang mit dem Konzernabschluss, vermittelt insgesamt ein zutreffendes Bild von der Lage des Konzerns und stellt die Chancen und Risiken der zukünftigen Entwicklung zutreffend dar.

Düsseldorf, den 18. Februar 2011

PricewaterhouseCoopers

Aktiengesellschaft

Wirtschaftsprüfungsgesellschaft

Klaus-Dieter Ruske

Wirtschaftsprüfer

Dietmar Prümm

Wirtschaftsprüfer

WEITERE INFORMATIONEN

D

## GOGREEN-Brief

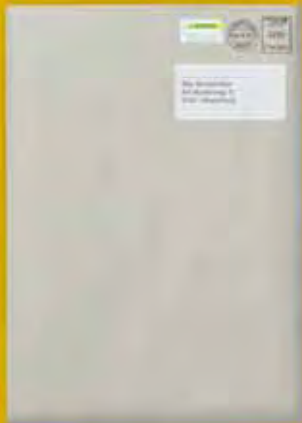

## GOGREEN-Paket

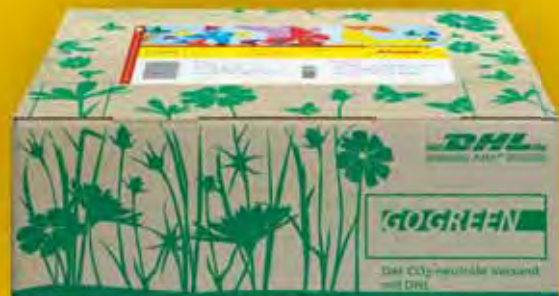

### **GOGREEN**

**IHRE WAHL. WEIL NACHHALTIGKEIT VORDENKER BRAUCHT.**

Deutsche Post DHL hat mit **GOGREEN** als erstes Logistikunternehmen einen CO<sub>2</sub>-neutralen Versand für Privat- und Geschäftskunden eingeführt. Die beim Transport von Briefen, Paketen, Express- und Frachtsendungen erzeugten Emissionen werden gemessen und mit CO<sub>2</sub>-Zertifikaten aus Klimaschutzprojekten ausgeglichen. Dieser Versandservice ist bereits in mehr als 30 Ländern verfügbar und umfasst neben Brief-, Paket- und Expressprodukten auch das Speditionsgeschäft. Der Konzern Deutsche Post DHL will seine CO<sub>2</sub>-Effizienz bis zum Jahr 2020 gegenüber 2007 um 30 Prozent verbessern und so die Auswirkungen seines Geschäfts auf die Umwelt verringern.

|                      |     |
|----------------------|-----|
| STICHWORTVERZEICHNIS | 231 |
|----------------------|-----|

|         |     |
|---------|-----|
| GLOSSAR | 232 |
|---------|-----|

|                                 |     |
|---------------------------------|-----|
| GRAFIK- UND TABELLENVERZEICHNIS | 233 |
|---------------------------------|-----|

|          |     |
|----------|-----|
| KONTAKTE | 234 |
|----------|-----|

|                     |    |
|---------------------|----|
| MEHRJAHRESÜBERSICHT | IV |
|---------------------|----|

|         |    |
|---------|----|
| TERMINE | VI |
|---------|----|

# STICHWORTVERZEICHNIS

|                                                                          |                                                                                   |                                                                                                   |
|--------------------------------------------------------------------------|-----------------------------------------------------------------------------------|---------------------------------------------------------------------------------------------------|
| <b>A</b>                                                                 | <b>G</b>                                                                          | <b>O</b>                                                                                          |
| Aktienkurs 35                                                            | Genehmigtes Kapital 24, 172                                                       | Ölpreis 28, 38, 107                                                                               |
| Aktionärsstruktur 36                                                     | Gewinn-und-Verlust-Rechnung 139, 161 ff.                                          | Operativer Cashflow 40 f., 47, 50, 56, 61, 65, 69                                                 |
| Anleihen 42, 44, 181 f.                                                  | Global Business Services 21 f., 95, 159                                           |                                                                                                   |
| Aufgegebene Geschäftsbereiche 39, 146, 154, 158 f., 165                  | Global Forwarding 15, 40, 50, 61 ff., 94, 96, 145, 189                            | <b>P</b>                                                                                          |
| Aufsichtsrat 23 ff., 113 ff., 117, 123, 134 ff., 204 ff.                 | GLOBAL FORWARDING, FREIGHT 21 f., 46, 50, 62 ff., 70 f., 85, 95, 103 f., 110, 159 | Paket Deutschland 22, 50, 53, 55, 85, 101, 107, 159                                               |
| Aus- und Weiterbildung 72 f.                                             | Global Mail 22, 50, 53, 56, 85, 159                                               | Patronatserklärungen 40, 43                                                                       |
| Ausblick 88 ff.                                                          | GoGreen 57, 75 ff., 83, 97, 100, 124                                              | Personalaufwand 38, 70, 139, 154, 161, 180, 185                                                   |
| Ausschüsse des Aufsichtsrats 114 f., 117, 127                            | GoHelp 77 f., 100, 124                                                            | Presse Services 22, 50, 52, 55, 85, 107, 159                                                      |
| Ausschüttung 34, 39, 165, 174                                            | GoTeach 78, 100, 124                                                              |                                                                                                   |
|                                                                          | Grundkapital 23 ff., 172, 202, 205                                                | <b>Q</b>                                                                                          |
| <b>B</b>                                                                 |                                                                                   | Qualität 57, 82 ff., 93, 101 ff.                                                                  |
| Bedingtes Kapital 24 f., 172                                             | <b>H</b>                                                                          |                                                                                                   |
| Bestätigungsvermerk 116, 228                                             | Handelsvolumina 29 f.                                                             | <b>R</b>                                                                                          |
| Beteiligungen 144 f., 152, 157, 163, 196 ff.                             | Hauptversammlung 23 ff., 39, 115 ff., 124, 127 f., 134 f., 172                    | Rating 32, 40 f., 43, 79, 109                                                                     |
| Bilanz 48, 141, 156 f., 166 ff.                                          |                                                                                   | Regulierung 31, 92 f., 200 f.                                                                     |
| BRIEF 21 f., 38, 45, 50, 51 ff., 70 f., 101 f., 109 f., 158 f.           | <b>I</b>                                                                          | Renten-Service 22, 50, 51, 85, 159                                                                |
| Brief Kommunikation 22, 50, 51, 54, 85, 159                              | Investitionen 40, 44, 45 ff., 95, 109, 110, 127, 185                              | Risikomanagement 88 ff., 115, 186, 188 f.                                                         |
| Bürgschaften 40                                                          |                                                                                   |                                                                                                   |
| <b>C</b>                                                                 | <b>K</b>                                                                          | <b>S</b>                                                                                          |
| Capital Expenditure 40, 45 ff., 110, 159                                 | Kapitalflussrechnung 47, 142, 149, 184 ff.                                        | Satzung 23 ff., 134                                                                               |
| Cashflow 40 f., 47 f., 50, 109, 142, 184 ff., 187 ff., 192 f.            | Kapitalkostensatz 32, 167                                                         | Seefracht 21, 30, 62 ff., 103 f., 108                                                             |
| Chancen 88 ff., 113                                                      | Kontraktlogistik 21, 30, 38, 66 ff., 108, 145, 159                                | Segmentberichterstattung 37 f., 54, 68, 158 ff.                                                   |
| Corporate Governance 22, 26, 111 ff., 124 ff., 206                       | Kontrollwechsel 26, 130 f.                                                        | Speditionsgeschäft 63, 65, 84, 108                                                                |
|                                                                          | Konzernjahresergebnis 37, 39, 139, 140, 143, 165                                  | Straßentransport 30, 63, 65, 108                                                                  |
| <b>D</b>                                                                 | Konzernumsatz 38, 145                                                             | Strategie 2015 31, 70, 75, 86, 99 ff., 114, 116                                                   |
| Dialog Marketing 22, 50, 52, 54 f., 85, 159                              | Krankenstand 72                                                                   | Streubesitz 36, 172                                                                               |
| Dividende 34, 37, 39, 116, 165, 174                                      | Kreditlinien 42, 186                                                              | SUPPLY CHAIN 21 f., 38, 46 f., 50, 66 ff., 84 f., 95, 105, 108, 110, 159                          |
|                                                                          | Kredit-Rating 32, 40 f., 43, 109                                                  |                                                                                                   |
| <b>E</b>                                                                 | <b>L</b>                                                                          | <b>U</b>                                                                                          |
| EBIT after Asset Charge 32 f., 128                                       | Liquiditätsmanagement 42, 186                                                     | Umsatz 37, 38, 50, 54 ff., 60 f., 63 ff., 68, 109, 139, 145, 158                                  |
| Eigenkapitalquote 49, 173                                                | Living Responsibility 75                                                          | Umsatzrendite 37, 50, 56                                                                          |
| Einmaleffekte 33, 39, 56, 61, 65, 69, 109                                | Luftfracht 21, 30, 62 ff., 103 f., 108                                            |                                                                                                   |
| Entsprechenserklärung 114 f., 124, 206                                   |                                                                                   | <b>V</b>                                                                                          |
| E-Postbrief 21 f., 31, 38, 45, 51 f., 86, 91, 96, 102, 107, 114          | <b>M</b>                                                                          | Vergütung des Aufsichtsrats 134 ff., 205                                                          |
| Ergebnis je Aktie 34, 37, 39, 139, 165                                   | Mandate 114, 122 f.                                                               | Vergütung des Vorstands 114, 128 ff., 205                                                         |
| EXPRESS 21 f., 38, 45 f., 50, 57 ff., 65, 70 f., 94, 102 f., 110, 158 f. | Marken 22, 85 ff., 103, 150, 158, 166                                             | Versicherung des Vorstands 228                                                                    |
|                                                                          | Marktanteile 51 ff., 58 f., 62 f., 67, 108                                        | Vorstand 16 f., 22 ff., 37, 39, 88, 99, 113 ff., 118 ff., 122, 124 ff., 128 f., 154, 201 ff., 228 |
| <b>F</b>                                                                 | Marktvolumina 30                                                                  |                                                                                                   |
| Filialen 22, 46, 50, 53, 55, 83, 101, 110, 159                           | <b>N</b>                                                                          | <b>W</b>                                                                                          |
| Finanzstrategie 36, 40 ff., 114                                          | Net Gearing 49, 173                                                               | WACC 32, 41                                                                                       |
| First Choice 74, 83 f., 95, 100, 103, 105                                | Net Interest Cover 49                                                             | Weltwirtschaft 27 f., 56, 60, 88, 106, 109                                                        |
| Fortgeführte Geschäftsbereiche 37 ff., 139, 158, 165                     | Nettovermögensbasis 32 f.                                                         | Werbesendungen 54 f.                                                                              |
| Free Float 36, 172                                                       | Nettofinanzverschuldung 49, 173                                                   | Williams Lea 22, 38, 46 f., 50, 52, 54, 66 ff., 85, 108, 159, 206                                 |
| Freight 22, 46, 50, 63, 65, 85, 104, 110, 159                            |                                                                                   | Working Capital 32, 47, 56, 65, 69, 80, 185                                                       |

# GLOSSAR

## Aftermarket-Logistik

Logistikleistungen für Umtausch, Rückgabe und Reparatur bei Fertigungsunternehmen

## Bundesnetzagentur

Deutsche Regulierungsbehörde für Elektrizität, Gas, Telekommunikation, Post und Eisenbahnen

## Business Process Outsourcing (BPO)

Auslagerung von Geschäftsprozessen

## B2B

Austausch von Waren, Dienstleistungen und Informationen zwischen Unternehmen

## Clinical Trial

Transport von zeitkritischen Proben (Gewebe, Blut) während der klinischen Versuchsphase eines neuen Medikaments

## Container

Abschließbarer, genormter Großbehälter mit einem Volumen von mehr als drei Kubikmetern und einem Fassungsvermögen von mehr als fünf Tonnen, der zum Transport unterschiedlicher Ladungen dient

## Customs Brokerage

Zollmaklertätigkeit, die die Güterabfertigung für Importeure und Exporteure ermöglicht. Umfasst das Erstellen und die Vorlage von (elektronischen) Dokumenten sowie die Berechnung von Zöllen und Abgaben für den Kunden

## Day Definite

Tagesgenaue Zustellung von Sendungen

## DHL Solutions & Innovations (DSI)

Konzerneinheit, die die vorhandenen Innovationsbereiche bündelt, innovative Lösungen entwickelt und die bereichsübergreifende Zusammenarbeit vorantreibt

## Dialogmarketing

Marktgerichtete Aktivitäten, die sich der direkten Kommunikation bedienen, um Zielgruppen in persönlicher Einzelsprache gezielt zu erreichen

## E-Postbrief

Kommunikationsmedium für sichere und vertrauliche Onlinekommunikation, das sowohl elektronisch als auch in Papierform zugestellt werden kann

## EU-Postrichtlinie

Rechtsrahmen für die Postmärkte in den Mitgliedstaaten der Europäischen Union

## Exklusivlizenz

Das Postgesetz hat der Deutsche Post AG bis Ende 2007 das ausschließliche Recht zur gewerbsmäßigen Beförderung von bestimmten Sendungen eingeräumt. Die Exklusivlizenz ist zum 1. Januar 2008 entfallen

## First Choice

Konzernweites Programm zur Verbesserung von Servicequalität und Kundenorientierung

## Full Container Load (FCL)

Der Container wird komplett von einem Versender beladen und an den Frachtführer übergeben

## Gateway

Sammelpunkt für Waren für den Export sowie Ort der Weiterverteilung nach dem Import von Waren; Ort der Verzollung

## Global Customer Solutions (GCS)

Organisation zur Kundenpflege für die größten und wichtigsten globalen Kunden des Konzerns

## Hauptumschlagbasis (Hub)

Sammelpunkt für Umschlag, Zusammenfassung und Weiterverteilung von Warenströmen

## Inbound-Logistik

Versorgung von Fertigungs- und Montagestandorten

## Inbound-to-Manufacturing

Beschaffung von Gütern und deren Transport vom Herkunfts-/Herstellungsort zur Fertigungsanlage

## Intermodaler Verkehr

Transportkette, die verschiedene Verkehrsträger kombiniert, häufig im Straßen-/Schienenverkehr

## Internationaler Briefverkehr (outbound)

Umfasst den Export aller internationalen Briefsendungsmengen

## Komplettladung

Transport von kompletten Ladeeinheiten vom Absender zum Empfänger

## Kontraktlogistik

Übernahme von komplexen logistischen und logistiknahen Aufgaben entlang der Wertschöpfungskette durch einen Dienstleister. Die industrie- und kundenspezifischen Lösungen basieren in der Regel auf mehrjährigen Verträgen

## Lead Logistics Provider

Logistikdienstleister, der für seine Kunden die Organisation aller oder der wesentlichen logistischen Prozesse übernimmt

## Less than Container Load (LCL)

Ladungen, die keinen Container füllen und für den Transport per Seefracht konsolidiert werden

## Lieferkette

Reihe miteinander verknüpfter Ressourcen und Prozesse, die mit der Beschaffung von Rohstoffen beginnt und mit der Lieferung von Handelsware an den Endkunden endet

## Packstation

Paketautomat, an dem Pakete und Päckchen rund um die Uhr eingeliefert und abgeholt werden können

## Paketbox

Briefkasten für frankierte Pakete und Päckchen (maximale Größe 50 x 40 x 30 cm)

## Partnerfiliale

Postfilialen, die von Kaufleuten, zumeist aus dem Einzelhandel, betrieben werden. Sie bieten Postdienstleistungen ergänzend zu ihrem Kerngeschäft an

## Postgesetz

Wurde zum 1. Januar 1998 mit dem Zweck erlassen, durch Regulierung den Wettbewerb im Postwesen zu fördern und flächendeckend angemessene und ausreichende Dienstleistungen zu gewährleisten. Es regelt unter anderem Lizenzen, Entgelte und den Universaldienst

## Postvertriebsstück

Presseerzeugnis mit mehr als 30 % presseüblicher Berichterstattung

## Pressesendung

Presseerzeugnis mit bis zu 30 % presseüblicher Berichterstattung

## Price-Cap-Verfahren

Verfahren, in dem von der Bundesnetzagentur die Entgelte für bestimmte Briefprodukte genehmigt werden. Sie genehmigt die Entgelte auf Basis der von ihr zuvor vorgegebenen Maßgrößen, die die durchschnittlichen Änderungsraten der Entgelte in von ihr zusammengestellten Körben von Dienstleistungen festlegen

## Repair and Return

Waren werden bei Endbenutzern an verschiedenen Adressen abgeholt, zu einem bestimmten Reparaturunternehmen transportiert, dort nach der Reparatur abgeholt und wieder an den Endbenutzer ausgeliefert

## Same Day

Zustellung von Waren und Sendungen innerhalb von 24 Stunden ab Bestellung

## Standardbrief

Brief mit den maximalen Maßen 235 x 125 x 5 mm und einem Gewicht bis 20 g

## Stückgut

Sendung mit einem Gewicht von etwa drei Tonnen, die kleiner als eine Ladeeinheit ist und für den Transport mit denen anderer Absender und/oder Empfänger zu einer Ladung konsolidiert wird

## Targeting

Verfahren zur gezielten Steuerung von Werbung auf Internetseiten mit dem Ziel, eine möglichst hohe Werbewirkung zu erreichen

## Teilladung

Sendung, die eine Ladeeinheit nicht ganz füllt, jedoch ohne Umschlag vom Abgangsort zum Ankunftsort befördert wird

## Time Definite

Zustellung von zeitkritischen Waren und Sendungen, bei der Tag oder Uhrzeit der Auslieferung spezifiziert oder garantiert sind

## Transported Asset Protection Association (TAPA)

Zusammenschluss von Herstellern, Logistikdienstleistern, Frachtunternehmen, Strafverfolgungsbehörden und anderen Beteiligten mit dem Ziel, Verluste in der internationalen Lieferkette zu reduzieren

## Twenty-foot Equivalent Unit (TEU)

Standardisierte Containereinheit mit einer Länge von 20 Fuß (6 Meter) und einer Breite von 8 Fuß (2,40 Meter)

# GRAFIK- UND TABELLENVERZEICHNIS

|                                                                                      |     |                                                                                                              |     |
|--------------------------------------------------------------------------------------|-----|--------------------------------------------------------------------------------------------------------------|-----|
| <b>Umschlag</b>                                                                      |     |                                                                                                              |     |
| 01.1 Ausgewählte Kennzahlen<br>(fortgeführte Geschäftsbereiche)                      | I   | A.27 Capex und Abschreibungen, Gesamtjahr                                                                    | 45  |
| 02 Konzernstruktur                                                                   | II  | A.28 Capex und Abschreibungen, 4. Quartal                                                                    | 45  |
| 03 Soll-Ist-Vergleich                                                                | III | A.29 Operativer Cashflow nach Unternehmens-<br>bereichen 2010                                                | 47  |
| 04 Mehrjahresübersicht                                                               | IV  | A.30 Ausgewählte Kennzahlen zur Finanzlage<br>(fortgeführte Geschäftsbereiche)                               | 47  |
| 05 Termine                                                                           | VI  | A.31 Ausgewählte Kennzahlen zur Vermögenslage<br>(fortgeführte Geschäftsbereiche)                            | 49  |
| <b>A Konzernlagebericht</b>                                                          |     | A.32 Nettoliquidität (-)/Nettofinanz-<br>verschuldung (+)                                                    | 49  |
| <b>Geschäft und Umfeld</b>                                                           |     | <b>Unternehmensbereiche</b>                                                                                  |     |
| A.01 Organisationsstruktur Deutsche Post DHL                                         | 22  | A.33 Kennzahlen der operativen<br>Unternehmensbereiche                                                       | 50  |
| A.02 Konzernstruktur aus verschiedenen<br>Perspektiven                               | 22  | A.34 Nationaler Markt<br>für Briefkommunikation 2010                                                         | 51  |
| A.03 Weltwirtschaft: Wachstumsindikatoren 2010                                       | 27  | A.35 Nationaler Markt für Dialogmarketing 2010                                                               | 52  |
| A.04 Brentöl-Spotpreis und Wechselkurs<br>Euro/us-Dollar 2010                        | 28  | A.36 Nationaler Markt für Pressepost 2010                                                                    | 52  |
| A.05 Handelsvolumina: Durchschnittliche<br>annualisierte Wachstumsrate 2009 bis 2010 | 29  | A.37 Nationaler Paketmarkt 2010                                                                              | 53  |
| A.06 Wesentliche Handelsströme: Volumina 2010                                        | 30  | A.38 Internationaler Briefmarkt (outbound) 2010                                                              | 53  |
| A.07 Marktvolumina                                                                   | 30  | A.39 Brief Kommunikation: Volumina                                                                           | 54  |
| A.08 Berechnung des EAC                                                              | 32  | A.40 Dialog Marketing: Volumina                                                                              | 55  |
| A.09 Berechnung der Nettovermögensbasis                                              | 32  | A.41 Paket Deutschland: Volumina                                                                             | 55  |
| A.10 EBIT after Asset Charge<br>(EAC, Gewinn nach Kapitalkosten)                     | 33  | A.42 Brief International: Volumina                                                                           | 56  |
| A.11 Nettovermögensbasis (unkonsolidiert)                                            | 33  | A.43 Europäischer internationaler<br>Expressmarkt 2009: Top 4                                                | 58  |
| <b>Deutsche-Post-Aktie</b>                                                           |     | A.44 Amerikanischer internationaler<br>Expressmarkt 2009: Top 4                                              | 59  |
| A.12 Mehrjahresübersicht Deutsche-Post-Aktie                                         | 34  | A.45 Asiatisch-pazifischer internationaler<br>Expressmarkt 2009: Top 4                                       | 59  |
| A.13 Peergroup-Vergleich: Schlusskurse<br>am 30. Dezember                            | 34  | A.46 Internationaler Expressmarkt<br>der Region EEMEA 2009: Top 4                                            | 59  |
| A.14 Kursverlauf                                                                     | 35  | A.47 EXPRESS: Umsatz nach Produkten                                                                          | 60  |
| A.15 Kerzengrafik/Gleitender Durchschnitt<br>30 Tage                                 | 35  | A.48 EXPRESS: Volumina nach Produkten                                                                        | 60  |
| A.16 Aktionärsstruktur                                                               | 36  | A.49 Luftfrachtmarkt 2009: Top 4                                                                             | 62  |
| <b>Wirtschaftliche Lage</b>                                                          |     | A.50 Seefrachtmarkt 2009: Top 4                                                                              | 63  |
| A.17 Ausgewählte Kennzahlen zur Ertragslage<br>(fortgeführte Geschäftsbereiche)      | 37  | A.51 Europäischer Markt für Straßentransport<br>2009: Top 5                                                  | 63  |
| A.18 Konzernumsatz der fortgeführten<br>Geschäftsbereiche                            | 38  | A.52 Global Forwarding: Umsatz                                                                               | 64  |
| A.19 Konzern-EBIT der fortgeführten<br>Geschäftsbereiche                             | 39  | A.53 Global Forwarding: Volumina                                                                             | 64  |
| A.20 Ausschüttungssumme und Dividende<br>je Stückaktie                               | 39  | A.54 Kontraktlogistikmarkt 2009: Top 7                                                                       | 67  |
| A.21 Finanzstrategie                                                                 | 41  | A.55 SUPPLY CHAIN: Umsatz nach Sektoren 2010                                                                 | 68  |
| A.22 FFO to Debt                                                                     | 41  | A.56 SUPPLY CHAIN: Umsatz nach Regionen 2010                                                                 | 68  |
| A.23 Bewertung der Rating-Agenturen                                                  | 43  | <b>Nichtfinanzielle Leistungsindikatoren</b>                                                                 |     |
| A.24 Finanzverbindlichkeiten                                                         | 44  | A.57 Anzahl der Mitarbeiter<br>(fortgeführte Geschäftsbereiche)                                              | 70  |
| A.25 Operative Leasingverpflichtungen<br>nach Anlageklassen                          | 44  | A.58 Mitarbeiter nach Regionen 2010                                                                          | 71  |
| A.26 Capex nach Regionen                                                             | 45  | A.59 Krankenstand                                                                                            | 72  |
|                                                                                      |     | A.60 Arbeitsschutz                                                                                           | 72  |
|                                                                                      |     | A.61 Ausbildungsberufe Konzern<br>Deutsche Post DHL weltweit                                                 | 72  |
|                                                                                      |     | A.62 Geschlechterverteilung<br>im Top-Management 2010                                                        | 74  |
|                                                                                      |     | A.63 Work-Life-Balance                                                                                       | 74  |
|                                                                                      |     | A.64 Ideenmanagement                                                                                         | 75  |
|                                                                                      |     | A.65 CO <sub>2</sub> -Emissionen 2010                                                                        | 75  |
|                                                                                      |     | A.66 Beschaffungsausgaben 2010                                                                               | 79  |
|                                                                                      |     | A.67 Marken und Geschäftsfelder                                                                              | 85  |
|                                                                                      |     | <b>Prognose</b>                                                                                              |     |
|                                                                                      |     | A.68 Chancen- und Risikomanagementprozess<br>im Ablauf                                                       | 88  |
|                                                                                      |     | A.69 Weltwirtschaft: Wachstumsprognosen                                                                      | 106 |
|                                                                                      |     | <b>B Corporate Governance</b>                                                                                |     |
|                                                                                      |     | B.01 Mitglieder des Aufsichtsrats                                                                            | 117 |
|                                                                                      |     | B.02 Ausschüsse des Aufsichtsrats                                                                            | 117 |
|                                                                                      |     | B.03 Mandate des Vorstands                                                                                   | 122 |
|                                                                                      |     | B.04 Mandate des Aufsichtsrats                                                                               | 123 |
|                                                                                      |     | <b>Corporate-Governance-Bericht</b>                                                                          |     |
|                                                                                      |     | B.05 Vergütung des Konzernvorstands 2010:<br>Barkomponenten                                                  | 131 |
|                                                                                      |     | B.06 Vergütung des Konzernvorstands 2010:<br>Aktienbasierte Komponente<br>mit langfristiger Anreizwirkung    | 131 |
|                                                                                      |     | B.07 Vergütung des Konzernvorstands 2009:<br>Barkomponenten                                                  | 132 |
|                                                                                      |     | B.08 Vergütung des Konzernvorstands 2009:<br>Aktienbasierte Komponente<br>mit langfristiger Anreizwirkung    | 132 |
|                                                                                      |     | B.09 Individualausweis der Versorgungszusagen<br>für den Vorstand nach altem System<br>im Geschäftsjahr 2010 | 133 |
|                                                                                      |     | B.10 Individualausweis der Versorgungszusagen<br>für den Vorstand nach altem System<br>im Vorjahr (2009)     | 133 |
|                                                                                      |     | B.11 Individualausweis der Versorgungszusagen<br>für den Vorstand nach neuem System<br>im Geschäftsjahr 2010 | 134 |
|                                                                                      |     | B.12 Individualausweis der Versorgungszusagen<br>für den Vorstand nach neuem System<br>im Vorjahr (2009)     | 134 |
|                                                                                      |     | B.13 Aufsichtsratsvergütung 2010                                                                             | 135 |
|                                                                                      |     | B.14 Aufsichtsratsvergütung 2009                                                                             | 136 |
|                                                                                      |     | <b>C Konzernabschluss</b>                                                                                    |     |
|                                                                                      |     | C.01 Gewinn-und-Verlust-Rechnung                                                                             | 139 |
|                                                                                      |     | C.02 Gesamtergebnisrechnung                                                                                  | 140 |
|                                                                                      |     | C.03 Bilanz                                                                                                  | 141 |
|                                                                                      |     | C.04 Kapitalflussrechnung                                                                                    | 142 |
|                                                                                      |     | C.05 Eigenkapitalveränderungsrechnung                                                                        | 143 |



## KONTAKTE

**Ansprechpartner****Investor Relations**

Telefon: 0228 182-6 36 36  
 Telefax: 0228 182-6 31 99  
 E-Mail: [ir@deutschepost.de](mailto:ir@deutschepost.de)

**Pressestelle**

Telefon: 0228 182-99 44  
 Telefax: 0228 182-98 80  
 E-Mail: [pressestelle@deutschepost.de](mailto:pressestelle@deutschepost.de)

**Bestellung des Geschäftsberichts****Extern**

E-Mail: [ir@deutschepost.de](mailto:ir@deutschepost.de)  
 Internet: [dp-dhl.com/de/investoren.html](http://dp-dhl.com/de/investoren.html)

**Intern**

Bestellmodul GeT und DHL Webshop  
 Mat.-Nr. 675-601-529

**Veröffentlichung**

Dieser Bericht wurde am 10. März 2011 veröffentlicht.

**Übersetzung**

Dieser Bericht liegt auch in Englisch vor.

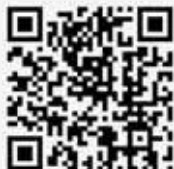

Wenn Ihr Mobiltelefon über eine QR-Code-Erkennungssoftware verfügt, gelangen Sie nach dem Abfotografieren dieses Codes direkt auf das Investoren-Portal unserer Website.

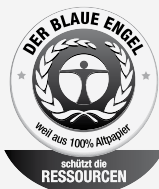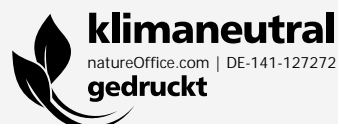

## 05 TERMINE

Mehrjahresübersicht  
→

Finanzkalender<sup>1)</sup>

Zwischenbericht  
zum 31. März 2011

10

MAI 2011

Hauptversammlung 2011  
(Frankfurt am Main)

25

MAI 2011

Dividendenzahlung

26

MAI 2011

Zwischenbericht  
zum 30. Juni 2011

02

AUGUST 2011

Zwischenbericht  
zum 30. September 2011

09

NOVEMBER 2011

Geschäftsbericht 2011

13

MÄRZ 2012

Zwischenbericht  
zum 31. März 2012

08

MAI 2012

Hauptversammlung 2012  
(Frankfurt am Main)

09

MAI 2012

Dividendenzahlung

10

MAI 2012

Zwischenbericht  
zum 30. Juni 2012

02

AUGUST 2012

Zwischenbericht  
zum 30. September 2012

08

NOVEMBER 2012

Investorenveranstaltungen<sup>1)</sup>

|                        |                                                                          |
|------------------------|--------------------------------------------------------------------------|
| 23. März 2011          | J. P. Morgan Aviation, Transportation & Defense Conference (New York)    |
| 30. März 2011          | Citi's Airline & Transport Symposium (Mailand)                           |
| 18. Mai 2011           | Cheuvreux Pan-Europe London Forum (London)                               |
| 19.–20. Mai 2011       | Deutsche Bank German & Austrian Corporate Conference (Frankfurt am Main) |
| 14.–16. Juni 2011      | Deutsche Bank Global Industrials Conference (Chicago)                    |
| 20.–21. Juni 2011      | Goldman Sachs Business Services Conference (London)                      |
| 12.–13. September 2011 | UBS Transport Conference (London)                                        |
| 14.–15. September 2011 | UBS Best of Germany Conference (New York)                                |
| 20.–21. September 2011 | Sanford C. Bernstein's Strategic Decisions Conference (London)           |
| 29. September 2011     | UniCredit German Investment Conference (München)                         |

<sup>1)</sup> Weitere Termine, Terminaktualisierungen und Hinweise zu Live-Übertragungen @ [dp-dhl.com/de/investoren.html](http://dp-dhl.com/de/investoren.html)

## 04 MEHRJAHRESÜBERSICHT

## Kennzahlen 2003 bis 2010

| MIO €                                                                                                                                                  | 2003<br>angepasst | 2004<br>angepasst | 2005<br>angepasst | 2006<br>angepasst | 2007<br>angepasst | 2008<br>angepasst | 2009<br>angepasst | 2010          |
|--------------------------------------------------------------------------------------------------------------------------------------------------------|-------------------|-------------------|-------------------|-------------------|-------------------|-------------------|-------------------|---------------|
| <b>Umsatz</b>                                                                                                                                          |                   |                   |                   |                   |                   |                   |                   |               |
| BRIEF                                                                                                                                                  | 12.495            | 12.747            | 12.878            | 15.290            | 14.569            | 14.393            | 13.912            | 13.821        |
| EXPRESS                                                                                                                                                | 15.293            | 17.557            | 16.831            | 13.463            | 13.874            | 13.637            | 9.917             | 11.111        |
| LOGISTIK                                                                                                                                               | 5.878             | 6.786             | 9.933             | 24.405            | –                 | –                 | –                 | –             |
| GLOBAL FORWARDING, FREIGHT                                                                                                                             | –                 | –                 | –                 | –                 | 12.959            | 14.179            | 11.243            | 14.341        |
| SUPPLY CHAIN                                                                                                                                           | –                 | –                 | –                 | –                 | 14.317            | 13.718            | 12.183            | 13.301        |
| FINANZ DIENSTLEISTUNGEN                                                                                                                                | 7.661             | 7.349             | 7.089             | 9.593             | –                 | –                 | –                 | –             |
| SERVICES                                                                                                                                               | –                 | –                 | 3.874             | 2.201             | –                 | –                 | –                 | –             |
| Unternehmensbereiche gesamt                                                                                                                            | 41.327            | 44.439            | 50.605            | 64.952            | 55.719            | 55.927            | 47.255            | 52.574        |
| Corporate Center/Anderes<br>(bis 2004: Sonstiges/Konsolidierung; bis 2006<br>Konsolidierung; bis 2007: Corporate Center/Anderes<br>und Konsolidierung) | –1.310            | –1.271            | –6.011            | –4.407            | –1.676            | 1.782             | 1.527             | 1.302         |
| Konsolidierung                                                                                                                                         | –                 | –                 | –                 | –                 | –                 | –3.235            | –2.581            | –2.395        |
| Fortgeführte Geschäftsbereiche                                                                                                                         | –                 | –                 | –                 | –                 | 54.043            | 54.474            | 46.201            | 51.481        |
| Aufgegebene Geschäftsbereiche                                                                                                                          | –                 | –                 | –                 | –                 | 10.335            | 11.226            | 1.634             | 0             |
| <b>Gesamt</b>                                                                                                                                          | <b>40.017</b>     | <b>43.168</b>     | <b>44.594</b>     | <b>60.545</b>     | <b>–</b>          | <b>–</b>          | <b>–</b>          | <b>–</b>      |
| <b>Ergebnis der betrieblichen Tätigkeit (EBIT)</b>                                                                                                     |                   |                   |                   |                   |                   |                   |                   |               |
| BRIEF                                                                                                                                                  | 2.067             | 2.072             | 2.030             | 2.094             | 1.976             | 2.179             | 1.391             | 1.118         |
| EXPRESS                                                                                                                                                | 152               | 117               | –23               | 288               | –272              | –2.194            | –790              | 497           |
| LOGISTIK                                                                                                                                               | 116               | 182               | 346               | 751               | –                 | –                 | –                 | –             |
| GLOBAL FORWARDING, FREIGHT                                                                                                                             | –                 | –                 | –                 | –                 | 409               | 362               | 174               | 383           |
| SUPPLY CHAIN                                                                                                                                           | –                 | –                 | –                 | –                 | 577               | –920              | –216              | 233           |
| FINANZ DIENSTLEISTUNGEN                                                                                                                                | 567               | 714               | 863               | 1.004             | –                 | –                 | –                 | –             |
| SERVICES                                                                                                                                               | –                 | –                 | 679               | –229              | –                 | –                 | –                 | –             |
| Unternehmensbereiche gesamt                                                                                                                            | 2.902             | 3.085             | 3.895             | 3.908             | 2.690             | –573              | 559               | 2.231         |
| Corporate Center/Anderes<br>(bis 2004: Sonstiges/Konsolidierung; bis 2006<br>Konsolidierung; bis 2007: Corporate Center/Anderes<br>und Konsolidierung) | –246              | –84               | –131              | –36               | –557              | –393              | –328              | –395          |
| Konsolidierung                                                                                                                                         | –                 | –                 | –                 | –                 | –                 | 0                 | 0                 | –1            |
| Fortgeführte Geschäftsbereiche                                                                                                                         | –                 | –                 | –                 | –                 | 2.133             | –966              | 231               | 1.835         |
| Aufgegebene Geschäftsbereiche                                                                                                                          | –                 | –                 | –                 | –                 | 1.060             | –871              | –24               | 0             |
| <b>Gesamt</b>                                                                                                                                          | <b>2.656</b>      | <b>3.001</b>      | <b>3.764</b>      | <b>3.872</b>      | <b>–</b>          | <b>–</b>          | <b>–</b>          | <b>–</b>      |
| <b>Konzernjahresergebnis</b>                                                                                                                           | <b>1.342</b>      | <b>1.740</b>      | <b>2.448</b>      | <b>2.282</b>      | <b>1.873</b>      | <b>–1.979</b>     | <b>693</b>        | <b>2.630</b>  |
| <b>Cashflow/Investitionen/Abschreibungen</b>                                                                                                           |                   |                   |                   |                   |                   |                   |                   |               |
| Cashflow aus operativer Geschäftstätigkeit gesamt                                                                                                      | 3.006             | 2.336             | 3.624             | 3.922             | 5.151             | 1.939             | –584              | 1.927         |
| Cashflow aus Investitionstätigkeit gesamt                                                                                                              | –2.133            | –385              | –5.052            | –2.697            | –1.053            | –441              | –2.710            | 8             |
| Cashflow aus Finanzierungstätigkeit gesamt                                                                                                             | –304              | –493              | –1.288            | –865              | –1.787            | –1.468            | 1.676             | –1.651        |
| Investitionen                                                                                                                                          | 2.846             | 2.536             | 6.176             | 4.066             | 2.343             | 3.169             | 1.444             | 1.276         |
| Abschreibungen                                                                                                                                         | 1.693             | 1.821             | 1.961             | 1.771             | 2.196             | 2.662             | 1.620             | 1.296         |
| <b>Vermögens- und Kapitalstruktur</b>                                                                                                                  |                   |                   |                   |                   |                   |                   |                   |               |
| Langfristige Vermögenswerte<br>(bis 2003: Anlagevermögen) <sup>1)</sup>                                                                                | 15.957            | 17.027            | 25.223            | 26.074            | 25.764            | 20.517            | 22.022            | 24.493        |
| Kurzfristige Vermögenswerte<br>(bis 2003: Umlaufvermögen inklusive aktiver<br>latenter Steuern) <sup>1)</sup>                                          | 138.976           | 136.369           | 147.417           | 191.624           | 209.656           | 242.447           | 12.716            | 13.270        |
| Eigenkapital (ohne nicht beherrschende Anteile)                                                                                                        | 6.106             | 7.242             | 10.624            | 11.220            | 11.035            | 7.826             | 8.176             | 10.511        |
| Nicht beherrschende Anteile                                                                                                                            | 59                | 1.623             | 1.791             | 2.732             | 2.778             | 2.026             | 97                | 185           |
| Lang- und kurzfristige Rückstellungen                                                                                                                  | 12.673            | 12.441            | 12.161            | 14.233            | 12.276            | 10.836            | 9.677             | 9.427         |
| Lang- und kurzfristige Verbindlichkeiten <sup>2)</sup>                                                                                                 | 12.778            | 15.064            | 19.371            | 20.850            | 21.544            | 242.276           | 16.788            | 17.640        |
| <b>Bilanzsumme</b>                                                                                                                                     | <b>154.933</b>    | <b>153.396</b>    | <b>172.640</b>    | <b>217.698</b>    | <b>235.420</b>    | <b>262.964</b>    | <b>34.738</b>     | <b>37.763</b> |

## Kennzahlen 2003 bis 2010

|                                                                                    |                          | 2003<br>angepasst | 2004<br>angepasst | 2005<br>angepasst | 2006<br>angepasst | 2007<br>angepasst | 2008<br>angepasst | 2009    | 2010                |
|------------------------------------------------------------------------------------|--------------------------|-------------------|-------------------|-------------------|-------------------|-------------------|-------------------|---------|---------------------|
| <b>Mitarbeiter/Personalaufwand<br/>(ab 2007: Fortgeführte Geschäftsbereiche)</b>   |                          |                   |                   |                   |                   |                   |                   |         |                     |
| Zahl der Mitarbeiter<br>(Kopfzahl inklusive Auszubildender)                        | zum Stichtag<br>31. Dez. | 383.173           | 379.828           | 502.545           | 520.112           | 512.147           | 512.536           | 477.280 | 467.088             |
| Mitarbeiter auf Vollzeitkräfte umgerechnet<br>(ohne Auszubildende) <sup>3)</sup>   | zum Stichtag<br>31. Dez. | 348.781           | 340.667           | 455.115           | 463.350           | 453.626           | 451.515           | 424.686 | 418.946             |
| Durchschnittliche Zahl der Mitarbeiter<br>(Kopfzahl)                               |                          | 375.096           | 381.492           | 393.463           | 507.641           | 500.252           | 511.292           | 488.518 | 464.471             |
| Personalaufwand                                                                    | MIO €                    | 13.329            | 13.840            | 14.337            | 18.616            | 17.169            | 18.389            | 17.021  | 16.609              |
| Personalaufwandsquote <sup>4)</sup>                                                | %                        | 33,3              | 32,1              | 32,2              | 30,7              | 31,8              | 33,8              | 36,8    | 32,3                |
| <b>Kennzahlen Umsatz/Ertrag/Vermögens-<br/>und Kapitalstruktur</b>                 |                          |                   |                   |                   |                   |                   |                   |         |                     |
| Umsatzrendite <sup>5)</sup>                                                        | %                        | 7,4               | 7,0               | 8,4               | 6,4               | 3,9               | -1,8              | 0,5     | 3,6                 |
| Eigenkapitalrendite vor Steuern <sup>6)</sup>                                      | %                        | 34,2              | 29,2              | 28,7              | 21,6              | 8,6               | -9,0              | 3,0     | 29,8                |
| Gesamtkapitalrendite <sup>7)</sup>                                                 | %                        | 1,7               | 1,9               | 2,3               | 2,0               | 0,9               | -0,4              | 0,2     | 5,1                 |
| Steuerquote <sup>8)</sup>                                                          | %                        | 29,9              | 20,2              | 19,8              | 19,7              | 14,0              | -                 | 5,4     | 6,9                 |
| Eigenkapitalquote <sup>9)</sup>                                                    | %                        | 3,9               | 5,8               | 7,2               | 6,4               | 5,9               | 3,7               | 23,8    | 28,3                |
| Nettofinanzverschuldung (+)/-liquidität (-)<br>(Postbank at Equity) <sup>10)</sup> | MIO €                    | 2.044             | -32               | 4.193             | 3.083             | 2.858             | 2.466             | -1.690  | -1.382              |
| Net Gearing (Postbank at Equity) <sup>11)</sup>                                    | %                        | 25,1              | -0,4              | 28,1              | 21,4              | 20,4              | 23,7              | -25,7   | -14,8               |
| Dynamischer Verschuldungsgrad<br>(Postbank at Equity) <sup>12)</sup>               | Jahre                    | 0,8               | 0,0               | 2,4               | 1,4               | 1,0               | 0,7               | -1,4    | -0,7                |
| <b>Kennzahlen zur Aktie</b>                                                        |                          |                   |                   |                   |                   |                   |                   |         |                     |
| (Verwässertes) Ergebnis je Aktie <sup>13)</sup>                                    | €                        | 1,18              | 1,44              | 1,99              | 1,60              | 1,15              | -1,40             | 0,53    | 2,10                |
| Cashflow je Aktie <sup>13), 14)</sup>                                              | €                        | 2,70              | 2,10              | 3,23              | 3,28              | 4,27              | 1,60              | -0,48   | 1,59                |
| Dividendenausschüttung                                                             | MIO €                    | 490               | 556               | 836               | 903               | 1.087             | 725               | 725     | 786 <sup>15)</sup>  |
| Ausschüttungsquote<br>(bezogen auf Konzerngewinn)                                  | %                        | 37,4              | 34,8              | 37,4              | 47,1              | 78,6              | -                 | 112,6   | 30,9                |
| Dividende je Aktie                                                                 | €                        | 0,44              | 0,50              | 0,70              | 0,75              | 0,90              | 0,60              | 0,60    | 0,65 <sup>15)</sup> |
| Dividendenrendite (bezogen auf Jahres-<br>schlusskurs)                             | %                        | 2,7               | 3,0               | 3,4               | 3,3               | 3,8               | 5,0               | 4,4     | 5,1                 |
| (Verwässertes) Kurs-Gewinn-Verhältnis <sup>16)</sup>                               |                          | 13,9              | 11,7              | 10,3              | 14,3              | 20,4              | -8,5              | 25,5    | 6,0                 |
| Dividendenberechtigte Aktien                                                       | MIO Stück                | 1.112,8           | 1.112,8           | 1.193,9           | 1.204,0           | 1.208,2           | 1.209,0           | 1.209,0 | 1.209,0             |
| Jahresschlusskurs                                                                  | €                        | 16,35             | 16,90             | 20,48             | 22,84             | 23,51             | 11,91             | 13,49   | 12,70               |

1) Ab 2004 Darstellung entsprechend Bilanzausweis gem. neuem IAS 1 wie im Anhang 2005 unter Textziffer 5 erläutert 2) Ohne Verbindlichkeiten aus Finanzdienstleistungen

3) Bis 2004 inklusive Auszubildende 4) Personalaufwand/Umsatz 5) EBITA/Umsatz; Ab 2004: EBIT/Umsatz (ab 2007: Fortgeführte Geschäftsbereiche) 6) Ergebnis vor Ertragsteuern (ab 2007 Fortgeführte Geschäftsbereiche)/durchschnittlicher Eigenkapitalbestand (ab 2004 inkl. nicht beherrschende Anteile) 7) EBIT (ab 2007: Fortgeführte Geschäftsbereiche)/durchschnittlicher Gesamtkapitalbestand 8) Ertragsteuern/Ergebnis vor Ertragsteuern 9) Eigenkapital (ab 2004 inkl. nicht beherrschende Anteile)/Gesamtkapital 10) Finanzschulden abzüglich flüssiger Mittel und Zahlungsmitteläquivalente, kurzfristiger Finanzinstrumente und Long-Term-Deposits. Ab 2006 abzüglich Finanzschulden gegenüber Minderheitsaktionären von Williams Lea. Ab 2008: siehe Lagebericht, S. 49 11) Nettofinanzverschuldung/Nettofinanzverschuldung und Eigenkapital (ab 2004 inkl. nicht beherrschende Anteile)

12) Nettofinanzverschuldung/Cashflow aus operativer Geschäftstätigkeit 13) Zur Berechnung wird die gewichtete durchschnittliche Aktienzahl der Periode herangezogen

14) Cashflow aus operativer Geschäftstätigkeit 15) Vorschlag 16) Jahresschlusskurs/Ergebnis je Aktie

Deutsche Post AG  
Zentrale  
Investor Relations  
53250 Bonn  
[www.dp-dhl.com](http://www.dp-dhl.com)

**Deutsche Post DHL**
