# Supplementary material
Source: publisher site journal article supplement (https://www.degruyterbrill.com/publication/isbn/9783110432879/downloadAsset/9783110432879_Elektronischer_Anhang_2.zip)
Supplement: Supplementary file 40 [file Deutsche Post Werte und Kultur.pdf › Korpustexte/Korpustexte pdf/Deutsche Post/Deutsche Post Werte und Kultur.pdf]

# Werte & Kultur

Vielfalt, Respekt und Kreativität

Als Mitarbeiter von Deutsche Post DHL teilen wir gemeinsame Werte. Wir alle respektieren die individuellen Fähigkeiten unserer Kollegen und stehen aktiv ein für Toleranz und Vielfalt. Mit unserer Kreativität und unserem Engagement tragen wir täglich dazu bei, eine Unternehmenskultur zu etablieren, die von Offenheit, Vertrauen und gegenseitigem Respekt geprägt ist. Auch unserer sozialen und ökologischen Verantwortung kommen wir dabei nach.

## Diversity

### Die Vielfalt unserer Mitarbeiter ist unsere Stärke

Bei Deutsche Post DHL arbeiten Frauen und Männer mit den unterschiedlichsten nationalen, ethnischen religiösen und persönlichen Hintergründen, Menschen mit Behinderung und unterschiedlicher sexueller Orientierung. Diese Vielfalt ist es, die unseren Konzern einzigartig und erfolgreich macht. Und genau deshalb treten wir von Deutsche Post DHL aktiv ein für gleiche Rechte und Chancen unserer Mitarbeiter.

Wir pflegen eine von Respekt, Wertschätzung und gegenseitiger Akzeptanz geprägte Unternehmenskultur und engagieren uns aktiv für Chancengleichheit, damit alle unsere Mitarbeiter ihre Fähigkeiten und Talente einsetzen und ihre Potenziale verwirklichen können. Auf diese Weise bieten wir unseren Beschäftigten große Gestaltungs- und Entwicklungsmöglichkeiten – und schaffen so Raum für kreative Lösungen, mit denen sich die Herausforderungen des Wirtschafts- und Arbeitslebens erfolgreich meistern lassen.

### Chancengleichheit in Führungspositionen

Ausgezeichnet mit dem TOTAL E-QUALITY Prädikat 2009: Deutsche Post DHL.

Der Bedarf an gut ausgebildeten Fachkräften steigt. Dennoch stoßen viele qualifizierte und motivierte Frauen und Mütter bei der Vereinbarung von Familie und Beruf auf erhebliche Widerstände. Deutsche Post DHL beschreitet deshalb neue zeitgemäße Wege der Chancengleichheit. Um die Anzahl von Frauen in Führungspositionen zu erhöhen, entwickeln und unterstützen wir talentierte Mitarbeiterinnen, beispielsweise im Rahmen unseres Internationalen Mentoring-Programms.

Darüber hinaus sorgen wir dafür, dass Familie und Beruf für Mitarbeiterinnen und Mitarbeiter von Deutsche Post DHL bestmöglich zu vereinbaren sind. Dazu tragen eine verbesserte Kinderbetreuung, flexible Arbeitszeiten und sinnvolle Ideen in der Gestaltung der Elternzeit bei.

### Generationen

Mit gezielten Maßnahmen zu Personal-Recruiting, Personalbindung und -entwicklung will Deutsche Post DHL dazu beitragen, das Potenzial der Beschäftigten vor dem Hintergrund sinkender Bevölkerungszahlen und steigendem Altersdurchschnitt zu nutzen.

Immer mehr ältere Menschen wollen weiter aktiv am Berufsleben teilhaben. Wir wissen, dass es sich auszahlt, unsere Personalpolitik nicht nur auf jüngere Mitarbeiter zu konzentrieren. Denn ältere Mitarbeiter haben große Stärken. Zu diesen gehört insbesondere ein hohes Maß an beruflicher Erfahrung und betrieblichem Know-how.

Gerade "altersgemischte" Belegschaften, die in einer gesunden Mischung Kompetenzen der Älteren mit dem aktuellen Wissen der Jüngeren kombinieren, sind in hohem Maße produktiv. Fördern und Fordern ist unsere Auffassung vom lebenslangen Lernen. Und für uns ist es selbstverständlich, älteren Bewerbern auf freie Stellen die gleichen Chancen einzuräumen wie jungen.

### **Gleich und Gleich**

Das Netzwerk für lesbische, schwule, bi- und transsexuelle Beschäftigte bei Deutsche Post DHL, setzt sich aktiv dafür ein, Vorurteile gegenüber Lesben, Schwulen, Bi- und Transsexuellen abzubauen und die gegenseitige Toleranz auf allen Ebenen zu fördern.

Weltweit bekennen sich immer mehr homo- und bisexuelle Frauen und Männer offen zu ihrer sexuellen Orientierung und Identifikation, auch bei Deutsche Post DHL. Wir setzen uns dafür ein, dass unsere Beschäftigten ungeachtet ihrer sexuellen Orientierung und Identifikation ihrer Arbeit nachgehen und ihre beruflichen Ziele verfolgen können.

Mit unserer Devise "Vielfalt leben. Wir tolerieren keine Diskriminierung." fördern und fordern wir einen offenen, wertschätzenden und respektvollen Umgang, der auf Akzeptanz und Toleranz basiert. Diese Werte sind in unserer Unternehmenskultur ebenso fest verankert wie in unserem Verhaltenskodex „Code of Conduct“.

### **Disability**

Im Bewusstsein sozialer Verantwortung möchten wir von Deutsche Post DHL einen Beitrag dazu leisten, dass schwerbehinderte Menschen gleichberechtigt am Arbeitsleben teilhaben. Dazu gehört neben der Schaffung und Sicherung einer beruflichen Existenzgrundlage für schwerbehinderte Menschen insbesondere die Förderung ihres beruflichen Fortkommens.

Die Deutsche Post AG hat sich deshalb beispielsweise in einer freiwilligen Vereinbarung dazu verpflichtet, die deutsche gesetzliche Mindestbeschäftigungsquote schwerbehinderter Menschen mehr als gefordert zu erfüllen. Um dies zu erreichen, kann jeder Arbeitsplatz grundsätzlich auch von einem behinderten Menschen besetzt werden. Entscheidend für die Aufgabenerfüllung sind in erster Linie Eignung, Qualifikation und Motivation.

### **Total Global**

Deutsche Post DHL ist ein globaler Konzern: Wir sind in 220 Ländern und Territorien tätig und beschäftigen Menschen aus der ganzen Welt. Die kulturelle Vielfalt, die sich daraus ergibt, ist einer unserer Erfolgsfaktoren.

Umso wichtiger ist es deshalb für uns, bei unseren Mitarbeitern das Verständnis für andere Kulturen und Lebenssituationen zu fördern und die Integration von Mitarbeitern aus anderen Ländern und Kulturen durch spezielle Maßnahmen und gelebte Wertschätzung voranzutreiben. Denn je früher wir integrieren, umso erfolgreicher sind wir. Als Konzern. Gemeinsam. Weltweit.

## **Code of Conduct**

### **Das Wie, das unser Handeln bestimmt**

Auf Basis der sieben Konzernwerte hat Deutsche Post DHL einen Verhaltenskodex erarbeitet, der seit Mitte 2006 in allen Regionen und Unternehmensbereichen gültig ist. Als "ethischer Kompass" sind in diesem "Code of Conduct" die Leitlinien für das tägliche Verhalten im Arbeitsalltag der etwa 470.000 Mitarbeiter festgeschrieben.

Respekt, Toleranz, Ehrlichkeit und Offenheit sowie Integrität gegenüber Mitarbeitern und Kunden sowie die Bereitschaft zur Übernahme von gesellschaftlicher Verantwortung sind die Grundpfeiler des Verhaltenskodex. Die Leitlinien gelten unabhängig von Hierarchiestufen für alle Beschäftigten und alle Unternehmensbereiche. Der "Code of Conduct" orientiert sich an internationalen Übereinkünften und Leitlinien wie der Allgemeinen Erklärung der Menschenrechte, den Konventionen der Internationalen Arbeitsorganisation (ILO) und dem "Global Compact" der Vereinten Nationen.

Als wesentliche Elemente sind die Einhaltung von Menschenrechten, Chancengleichheit, Transparenz sowie eindeutige Positionen im Kampf gegen Diskriminierung, Bestechlichkeit und Korruption festgelegt.

## **Step In – Induction**

### **Wir heißen Sie willkommen bei Deutsche Post DHL**

Die ersten Tage und Wochen in einem Job können besonders schwierig sein. Neue Aufgaben, neue Kollegen, neue Regeln – vielleicht sogar noch verbunden mit privaten Veränderungen, zum Beispiel dem Umzug in eine fremde Stadt.

Wir von Deutsche Post DHL helfen neuen Mitarbeitern von Beginn an, sich in unserem Unternehmen wohl zu fühlen.

Wir von Deutsche Post DHL sorgen dafür, dass Sie sich möglichst schnell bei uns zurechtfinden und unmittelbar Anschluss finden.

## **Mitgestaltung**

### **Ihre Idee zählt**

Das größte Kapital unseres Konzerns sind die Kreativität und das Ideenpotenzial unserer Mitarbeiter. Jeder von ihnen ist ein Spezialist auf seinem Gebiet: Er verfügt über ein spezifisches Know-how, kennt die Arbeitsabläufe an seinem Arbeitsplatz und kann die Anforderungen unserer Kunden bestens beurteilen.

Wir von Deutsche Post DHL möchten dieses Potenzial nutzen, um Arbeitsprozesse kontinuierlich zu optimieren, kundenzentrierte Lösungen zu entwickeln und so langfristig den Erfolg unseres Konzerns zu sichern. Aus diesem Grund geben wir unseren Mitarbeitern und Nachwuchskräften den größtmöglichen Freiraum bei der Gestaltung ihrer Arbeitsumgebung und der Erfüllung ihrer Aufgaben. Darüber hinaus ermuntern wir unsere Mitarbeiter gezielt dazu, konventionelle Ansätze zu hinterfragen und neue Wege zu beschreiten. Mehr noch: Mit

dem Ideenmanagement haben wir ein System geschaffen, mit dem kreative Köpfe auch finanziell vom Erfolg ihrer Ideen profitieren.

### **Mehr als 200.000 Ideen!**

2009 haben unsere Mitarbeiter rund 227.000 Vorschläge eingereicht, um Arbeitsprozesse effektiver zu gestalten, Reparatur- und Energiekosten zu senken und den Umweltschutz zu verbessern. Viele dieser Ideen haben wir umgesetzt. Der daraus erzielte Nutzen für unseren Konzern bezifferte sich auf 262 Mio. €.

### **Anreize schaffen, Motivation sichern**

Für jede umgesetzte Idee erhält der Einreicher neben einem konsolidierten Feedback und der Wertschätzung von Vorgesetzten und Kollegen auch eine Prämie. Das können bis zu 100.000 € sein. Aber auch Vorschläge ohne messbare Resultate werden honoriert, denn jede Idee zählt. Wer gleich mehrere erfolgreiche Ideen einreicht, wird für ein Jahr in den „Club der Denker“ aufgenommen und hat Gelegenheit, Kontakte zu knüpfen sowie an Vorträgen und Diskussionen teilzunehmen.

<http://www.dp-dhl.com/de/karriere/managementexperten/warumdpdhl/wertekultur.html>
