# Supplementary material
Source: publisher site journal article supplement (https://www.degruyterbrill.com/publication/isbn/9783110432879/downloadAsset/9783110432879_Elektronischer_Anhang_2.zip)
Supplement: Supplementary file 41 [file Deutsche Telekom Die Unternehmenswerte der Telekom.pdf › Korpustexte/Korpustexte pdf/Deutsche Telekom/Deutsche Telekom Die Unternehmenswerte der Telekom.pdf]

# Die Unternehmenswerte der Telekom

**Die Informations- und Wissensgesellschaft entwickelt sich dynamisch. Um Veränderungen im Kundenverhalten und Entwicklungen der digitalen Technologien innovativ zu begleiten, stellt sich die Deutsche Telekom kontinuierlich auf den Prüfstand und entwickelt ihre Vision und ihren Anspruch weiter.**

In diesem Entwicklungsprozess ist die Unternehmenskultur ein Schlüsselfaktor und die Leitlinien fungieren als Eckpfeiler, die diese Kultur formen. Daher wurden auch die Unternehmenswerte zu den aktuellen Leitlinien weiterentwickelt. Sie sind wichtige Instrumente, die vorgeben, wie wir uns verhalten wollen und sie repräsentieren unsere Werte und woran wir glauben.

Die Leitlinien sind jedoch nicht nur für den internen Gebrauch gedacht, sondern für den Umgang mit dem externen Umfeld der Deutschen Telekom. Damit unterstreichen Sie auch das gesellschaftliche Engagement des Konzerns.

## Die fünf Leitlinien der Deutschen Telekom

### ■ **Kunden begeistern und Dinge einfacher machen**

Hier geht es um das wichtigste Gut des Konzerns, den Kunden. Es geht um die Gedanken, Emotionen, Bedürfnisse und Erfahrungen der Kunden. Sie sind der Antrieb für den Erfolg der Telekom.

### ■ **Integrität und Wertschätzung leben**

In der zweiten Leitlinie geht es nicht nur um den Respekt unter Kolleginnen und Kollegen. Dazu gehört auch die Wertschätzung von Kunden, Partnern, Lieferanten, Anteilseignern und auch für die Gesellschaft und die Umwelt.

### ■ **Offen zur Entscheidung – geschlossen umsetzen**

Das dritte Prinzip betrifft die Kultur der Zusammenarbeit. Im Team müssen Themen offen diskutiert werden. Für unterschiedliche Meinungen und harte Diskussionen muss Platz sein. Aber wenn eine Entscheidung getroffen ist, wird diese konsequent und geschlossen umgesetzt.

### ■ **An die Spitze! Leistung anerkennen – Chancen bieten**

Wenn die Deutsche Telekom zum bestangesehenen Serviceunternehmen der Branche werden will, braucht sie motivierte und gute Mitarbeiter. Daher ist diese Leitlinie eine Verpflichtung für alle Führungskräfte, individuellen Einsatz und Erfolg anzuerkennen und ein positives Umfeld zu bieten mit Fortbildungsmöglichkeiten und Perspektiven.

### ■ **Ich bin die Telekom – auf mich ist Verlass**

Die fünfte Leitlinie ist das persönliche Bekenntnis jedes einzelnen Mitarbeiters. Das heißt beispielsweise, dass sich jede Kollegin und jeder Kollege bei einem Problem eines Kunden persönlich für die Lösung einsetzt. Der Kunde kann in diesem Fall ein Endverbraucher sein, aber auch ein Kollege, Geschäftspartner oder ein anderer Partner des Unternehmens.

Die Leitlinien stellen die Basis für die Zusammenarbeit für unsere Kunden, Anteilseigner und die Öffentlichkeit dar. Das Top Management der Deutschen Telekom hat sich verpflichtet, diese Werte zu leben und sie in den Konzern zu integrieren. Das Ziel aller Mitarbeiter ist es, die Vision und Werte mit Leben zu füllen.

Darauf aufbauend ist der Code of Conduct unser Verhaltenskodex, der unsere Leitlinien noch stärker greifbar macht. Er definiert die Regeln für unser tägliches Arbeiten intern wie extern. Damit schlägt er die Brücke zwischen den Leitlinien und den vielen verschiedenen Richtlinien und rechtlichen Regelungen im Konzern.

---
