# Supplementary material
Source: publisher site journal article supplement (https://www.degruyterbrill.com/publication/isbn/9783110432879/downloadAsset/9783110432879_Elektronischer_Anhang_2.zip)
Supplement: Supplementary file 42 [file Deutsche Telekom GB 2010.pdf › Korpustexte/Korpustexte pdf/Deutsche Telekom/Deutsche Telekom GB 2010.pdf]

Das Geschäftsjahr 2010.

2015 wird ein Mobilfunk-  
Kunde jeden Monat  
rund 14 Gigabyte an  
Datenvolumen verbrauchen.

2005 waren es noch  
wenige Megabyte.

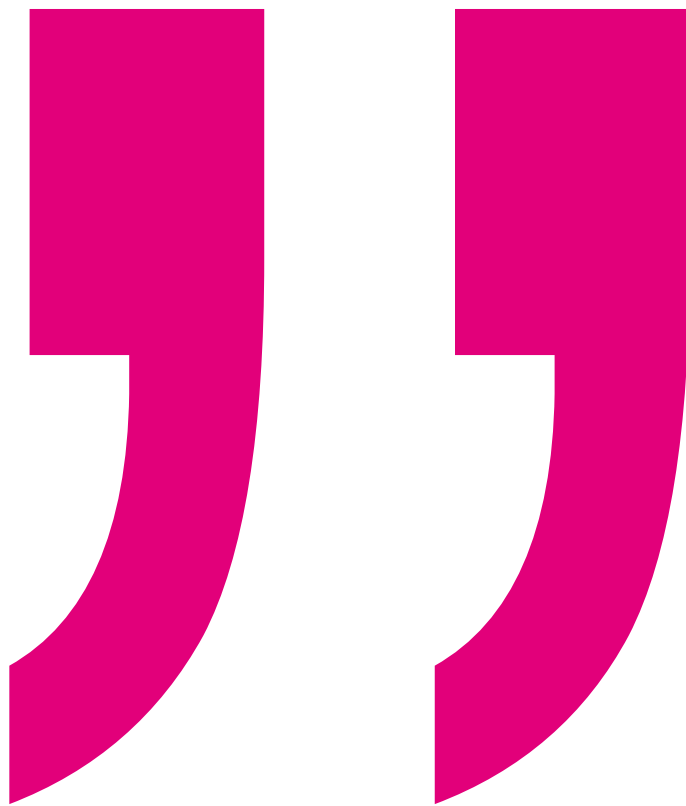

Erleben, was verbindet.

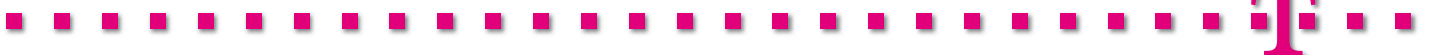

# Die Finanzdaten des Konzerns auf einen Blick.

Seit dem 1. April 2010 ohne Vollkonsolidierung der T-Mobile UK.

|                                                                                                |            | Veränderung<br>zum Vorjahr<br>% <sup>a</sup> | 2010<br>Mrd. € | 2009<br>Mrd. € | 2008<br>Mrd. € | 2007<br>Mrd. € | 2006<br>Mrd. € |
|------------------------------------------------------------------------------------------------|------------|----------------------------------------------|----------------|----------------|----------------|----------------|----------------|
| <b>Umsatz und Ergebnis</b>                                                                     |            |                                              |                |                |                |                |                |
| Umsatzerlöse                                                                                   |            | (3,4)                                        | 62,4           | 64,6           | 61,7           | 62,5           | 61,3           |
| davon: Inlandsanteil <sup>a</sup>                                                              | %          | 0,3                                          | 43,7           | 43,4           | 46,8           | 49,1           | 52,9           |
| davon: Auslandsanteil <sup>a</sup>                                                             | %          | (0,3)                                        | 56,3           | 56,6           | 53,2           | 50,9           | 47,1           |
| Betriebsergebnis (EBIT)                                                                        |            | (8,4)                                        | 5,5            | 6,0            | 7,0            | 5,3            | 5,3            |
| Konzernüberschuss/(-fehlbetrag)                                                                |            | 380,2                                        | 1,7            | 0,4            | 1,5            | 0,6            | 3,2            |
| Konzernüberschuss/(-fehlbetrag) (bereinigt um Sondereinflüsse)                                 |            | 0,8                                          | 3,4            | 3,4            | 3,4            | 3,0            | 3,9            |
| EBITDA <sup>a, b, c</sup>                                                                      |            | (13,0)                                       | 17,3           | 19,9           | 18,0           | 16,9           | 16,3           |
| EBITDA (bereinigt um Sondereinflüsse) <sup>a, b, c</sup>                                       |            | (5,8)                                        | 19,5           | 20,7           | 19,5           | 19,3           | 19,4           |
| EBITDA-Marge (bereinigt um Sondereinflüsse) <sup>a</sup>                                       | %          | (0,8)                                        | 31,2           | 32,0           | 31,6           | 30,9           | 31,7           |
| <b>Bilanz</b>                                                                                  |            |                                              |                |                |                |                |                |
| Bilanzsumme                                                                                    |            | 0,0                                          | 127,8          | 127,8          | 123,1          | 120,7          | 130,2          |
| Eigenkapital                                                                                   |            | 2,6                                          | 43,0           | 41,9           | 43,1           | 45,2           | 49,7           |
| Eigenkapitalquote <sup>a</sup>                                                                 | %          | n. a.                                        | 33,7           | 32,8           | 35,0           | 37,5           | 38,2           |
| Netto-Finanzverbindlichkeiten <sup>a, c</sup>                                                  |            | 3,3                                          | 42,3           | 40,9           | 38,2           | 37,2           | 39,6           |
| Relative Verschuldung<br>(Netto-Finanzverbindlichkeiten/EBITDA (bereinigt um Sondereinflüsse)) |            | n. a.                                        | 2,2            | 2,0            | 2,0            | 1,9            | 2,0            |
| Gearing (Netto-Finanzverbindlichkeiten/Eigenkapital)                                           |            | 0,0                                          | 1,0            | 1,0            | 0,9            | 0,8            | 0,8            |
| Cash Capex                                                                                     |            | (7,1)                                        | (9,9)          | (9,2)          | (8,7)          | (8,0)          | (11,8)         |
| <b>Cashflow</b>                                                                                |            |                                              |                |                |                |                |                |
| Cashflow aus Geschäftstätigkeit <sup>d</sup>                                                   |            | (6,7)                                        | 14,7           | 15,8           | 15,4           | 13,7           | 14,2           |
| Free Cashflow (vor Ausschüttung) <sup>a, c, e, f</sup>                                         |            | (6,1)                                        | 6,5            | 7,0            | 7,0            | 6,6            | 3,0            |
| Cashflow aus Investitionstätigkeit <sup>d</sup>                                                |            | 23,8                                         | (10,7)         | (8,6)          | (11,4)         | (8,1)          | (14,3)         |
| Cashflow aus Finanzierungstätigkeit                                                            |            | 24,3                                         | (6,4)          | (5,1)          | (3,1)          | (6,1)          | (2,1)          |
| <b>Mitarbeiter</b>                                                                             |            |                                              |                |                |                |                |                |
| Anzahl der Beschäftigten im Jahresdurchschnitt<br>(Vollzeitkräfte ohne Auszubildende)          | Tsd.       | (2,0)                                        | 252            | 258            | 235            | 244            | 248            |
| Umsatz je Mitarbeiter <sup>a</sup>                                                             | Tsd. €     | (1,4)                                        | 247,2          | 250,8          | 262,5          | 256,5          | 246,9          |
| <b>Kennzahlen zur T-Aktie</b>                                                                  |            |                                              |                |                |                |                |                |
| Ergebnis je Aktie (unverwässert und verwässert) nach IFRS <sup>g</sup>                         | €          | 387,5                                        | 0,39           | 0,08           | 0,34           | 0,13           | 0,74           |
| Dividende je Aktie                                                                             | €          | (10,3)                                       | 0,70           | 0,78           | 0,78           | 0,78           | 0,72           |
| Ausschüttungssumme <sup>h</sup>                                                                | Mrd. €     | (11,1)                                       | 3,0            | 3,4            | 3,4            | 3,4            | 3,1            |
| Aktienrückkauf <sup>i</sup>                                                                    | Mrd. €     | n. a.                                        | 0,4            | -              | -              | -              | -              |
| Gesamtanzahl der Stammaktien zum Stichtag <sup>j</sup>                                         | Mio. Stück | (0,9)                                        | 4 321          | 4 361          | 4 361          | 4 361          | 4 361          |

<sup>a</sup> Berechnet auf Basis der genaueren Millionenwerte. Veränderungen von Prozentwerten sind in Prozentpunkten dargestellt.

<sup>b</sup> Die Deutsche Telekom definiert das EBITDA als Betriebsergebnis vor Abschreibungen auf immaterielle Vermögenswerte und Sachanlagen.

<sup>c</sup> EBITDA, EBITDA bereinigt um Sondereinflüsse, Netto-Finanzverbindlichkeiten und Free Cashflow sind sog. Pro-forma-Kennzahlen, die nicht Bestandteil der internationalen Rechnungslegungsvorschriften nach den International Financial Reporting Standards (IFRS) sind. Sie sollten nicht isoliert als Alternative zum Betriebsergebnis, Konzernüberschuss, Cashflow aus Geschäftstätigkeit sowie den in der Konzern-Bilanz ausgewiesenen Schulden oder sonstigen nach IFRS ausgewiesenen Kenngrößen der Deutschen Telekom betrachtet werden. Zur detaillierten Erläuterung und Herleitung verweisen wir auf die Ausführungen des in diesem Geschäftsbericht enthaltenen Konzernlageberichts, Abschnitt „Geschäftsentwicklung des Konzerns“.

<sup>d</sup> Die kurzfristigen Forderungen Finance Lease wurden bislang im Cashflow aus Geschäftstätigkeit ausgewiesen. Seit dem Geschäftsjahr 2007 erfolgt der Ausweis innerhalb des Cashflow aus Investitionstätigkeit. Die Vorjahreswerte wurden entsprechend angepasst.

<sup>e</sup> Vor Auszahlungen für Investitionen für im Rahmen eines Asset-Deals übernommene Unternehmensteile der Centrica PLC durch T-Systems UK in Höhe von 0,1 Mrd. € in 2007. In 2006 sind Auszahlungen für den Erwerb von Lizenzen in Höhe von 3,3 Mrd. € enthalten.

<sup>f</sup> Die Deutsche Telekom definiert den Free Cashflow als den operativen Cashflow abzüglich gezahlter Zinsen und Nettoszahlen für Investitionen in immaterielle Vermögenswerte (ohne Goodwill) und Sachanlagen.

<sup>g</sup> Die Ermittlung des unverwässerten und verwässerten Ergebnisses je Aktie nach IFRS erfolgt nach den Vorschriften des IAS 33 „Earnings per share“.

<sup>h</sup> Vorbehaltlich der Zustimmung der Hauptversammlung im Jahr 2011 für die Ausschüttung des Geschäftsjahres 2010. Nähere Ausführungen entnehmen Sie bitte dem Kapitel „Konzern-Anhang“ unter der Angabe 28 „Dividende je Aktie“.

<sup>i</sup> Bezogen auf die im Jahr 2010 beschlossene Ausschüttungspolitik für die Geschäftsjahre 2010 bis 2012.

<sup>j</sup> Einschließlich der von der Deutschen Telekom AG gehaltenen eigenen Aktien.

## Der Konzern Deutsche Telekom und die operativen Segmente.

Die Deutsche Telekom gehört mit rund 129 Millionen Mobilfunk-Kunden, 36 Millionen Festnetz- und mehr als 16 Millionen Breitbandanschlüssen zu den führenden integrierten Telekommunikationsunternehmen weltweit. Wir bieten Produkte und Dienstleistungen aus den Bereichen Festnetz/Breitband, Mobilfunk, Internet und Internet-TV für Privatkunden sowie Lösungen der Informations- und Kommunikationstechnik für Groß- und Geschäftskunden. Die Deutsche Telekom ist in rund 50 Ländern vertreten. Im Geschäftsjahr 2010 haben wir mit weltweit rund 247 000 Mitarbeitern einen Umsatz in Höhe von 62,4 Milliarden Euro erwirtschaftet – mehr als die Hälfte davon außerhalb Deutschlands.

## Deutschland.

In unserem Deutschlandgeschäft haben wir den Rückgang des Gesamtumsatzes gegenüber dem Vorjahr weiter verringert. Während der Umsatz im Festnetz-Geschäft rückläufig war, haben wir im Mobilfunk-Geschäft unseren Umsatz um 3 % gesteigert. Großen Anteil an diesem Erfolg hatten vor allem die Datenumsätze mit einem starken Wachstum von 35 %. Im letzten Jahr haben wir knapp 5 Mrd. € in den Breitbandstandort Deutschland investiert. Das sind rund 50 % mehr als im Jahr davor.

Seite 77 – 80

## Europa.

Das operative Segment Europa umfasst unsere Festnetz- und Mobilfunk-Tochtergesellschaften in Griechenland, Rumänien, Bulgarien, Albanien, Ungarn, EJR Mazedonien, Montenegro, Kroatien, der Slowakei, Polen, Tschechien, den Niederlanden und Österreich. Die schwierige wirtschaftliche Situation vor allem in den südosteuropäischen Ländern belastete den Gesamtumsatz erheblich. Die großen Wachstumspotenziale der Zukunft liegen im Breitbandgeschäft sowie im Bereich Internet-TV, wie die Teilnehmerzahlen klar zeigen. Wachstumsmotor im Mobilfunk war das wert-haltige Vertragskundengeschäft.

Seite 81 – 87

## USA.

In den USA haben wir unser Hochleistungsnetz weiter ausgebaut und betreiben es mit 4G-Geschwindigkeiten. Darüber hinaus werden wir eine Reihe von attraktiven Smartphones und Tablet-PCs in unser Portfolio aufnehmen. Bereits im Geschäftsjahr 2010 haben wir die Zahl der Nutzer von Smartphones der dritten und vierten Generation mehr als verdoppelt. T-Mobile USA wurde für seinen exzellenten Kundenservice mehrfach von unabhängigen Verbraucherorganisationen ausgezeichnet.

Seite 88 – 89

## Systemgeschäft.

T-Systems bietet individuelle Lösungen der Informations- und Kommunikationstechnik (ITK) für Großkunden. Dafür betreibt das Unternehmen weltweit Netze und Rechenzentren. Obwohl die Preisentwicklung im ITK-Geschäft rückläufig ist, steigerte T-Systems den Gesamtumsatz durch neue, strategisch wichtige Vertragsabschlüsse. Hier spiegelt sich auch die große Nachfrage nach den sog. Cloud Services wider. Kunden erhalten für ihre Geschäftsprozesse Bandbreite, Rechnerkapazität und Speicherleistung je nach Bedarf und zahlen je nach Verbrauch.

Seite 90 – 92

## Konzernzentrale & Shared Services.

Dieser Bereich übernimmt für den Konzern strategische und segmentübergreifende Steuerungsaufgaben sowie operative Aufgaben, die nicht zum unmittelbaren Kerngeschäft gehören. Zu den Shared Services zählen z. B. das Immobilienmanagement, die DeTeFleetServices GmbH sowie Vivento. Aufgabe von Vivento ist es, im Rahmen des Personalumbaus Mitarbeitern neue Beschäftigungsmöglichkeiten zu vermitteln.

Seite 93 – 94

|                                                                                 | Veränderung<br>% | 2010<br>Mrd. € | 2009<br>Mrd. € |
|---------------------------------------------------------------------------------|------------------|----------------|----------------|
| <b>Gesamtumsatz</b>                                                             | <b>(1,1)</b>     | <b>25,1</b>    | <b>25,4</b>    |
| EBIT (Betriebsergebnis)                                                         | (2,9)            | 4,9            | 5,1            |
| EBITDA (bereinigt um Sondereinflüsse)                                           | 0,1              | 9,6            | 9,6            |
| Anzahl der Beschäftigten im Durchschnitt<br>(Vollzeitkräfte ohne Auszubildende) | (6,2)            | 79 364         | 84 584         |

|                                                                                 | Veränderung<br>% | 2010<br>Mrd. € | 2009<br>Mrd. € |
|---------------------------------------------------------------------------------|------------------|----------------|----------------|
| <b>Gesamtumsatz</b>                                                             | <b>(14,1)</b>    | <b>16,8</b>    | <b>19,6</b>    |
| EBIT (Betriebsergebnis)                                                         | n. a.            | 1,0            | 0,1            |
| EBITDA (bereinigt um Sondereinflüsse)                                           | (10,0)           | 5,7            | 6,4            |
| Anzahl der Beschäftigten im Durchschnitt<br>(Vollzeitkräfte ohne Auszubildende) | (5,5)            | 65 435         | 69 277         |

|                                                                                 | Veränderung<br>% | 2010<br>Mrd. € | 2009<br>Mrd. € |
|---------------------------------------------------------------------------------|------------------|----------------|----------------|
| <b>Gesamtumsatz</b>                                                             | <b>4,0</b>       | <b>16,1</b>    | <b>15,5</b>    |
| EBIT (Betriebsergebnis)                                                         | (6,3)            | 2,1            | 2,2            |
| EBITDA (bereinigt um Sondereinflüsse)                                           | (2,5)            | 4,2            | 4,3            |
| Anzahl der Beschäftigten im Durchschnitt<br>(Vollzeitkräfte ohne Auszubildende) | (1,1)            | 37 795         | 38 231         |

|                                                                                 | Veränderung<br>% | 2010<br>Mrd. € | 2009<br>Mrd. € |
|---------------------------------------------------------------------------------|------------------|----------------|----------------|
| <b>Gesamtumsatz</b>                                                             | <b>2,9</b>       | <b>9,1</b>     | <b>8,8</b>     |
| EBIT (Betriebsergebnis)                                                         | n. a.            | 0,04           | (0,01)         |
| EBITDA (bereinigt um Sondereinflüsse)                                           | 2,7              | 0,9            | 0,9            |
| Anzahl der Beschäftigten im Durchschnitt<br>(Vollzeitkräfte ohne Auszubildende) | 5,0              | 47 588         | 45 328         |

|                                                                                 | Veränderung<br>% | 2010<br>Mrd. € | 2009<br>Mrd. € |
|---------------------------------------------------------------------------------|------------------|----------------|----------------|
| <b>Gesamtumsatz</b>                                                             | <b>(10,1)</b>    | <b>2,2</b>     | <b>2,4</b>     |
| EBIT (Betriebsergebnis)                                                         | (98,5)           | (2,5)          | (1,2)          |
| EBITDA (bereinigt um Sondereinflüsse)                                           | n. a.            | (0,9)          | (0,3)          |
| Anzahl der Beschäftigten im Durchschnitt<br>(Vollzeitkräfte ohne Auszubildende) | (7,3)            | 22 312         | 20 181         |

Fit für die Gigabit-  
Gesellschaft.

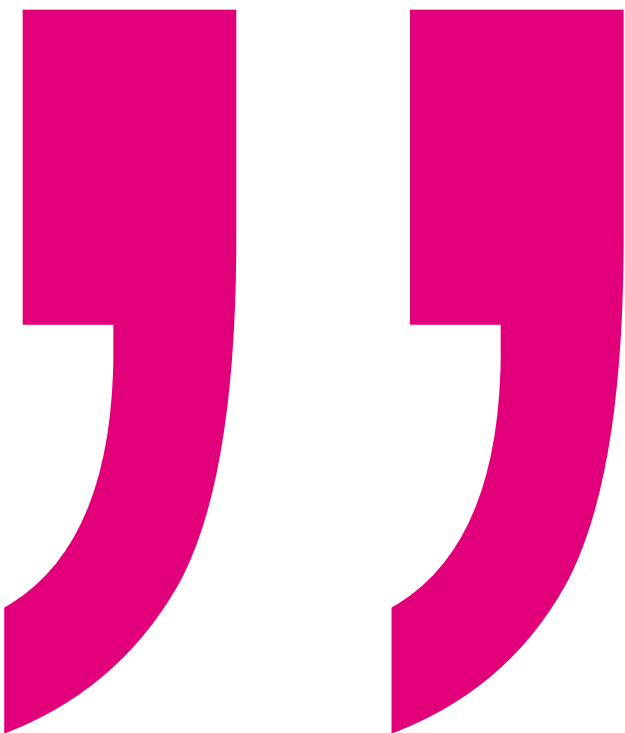

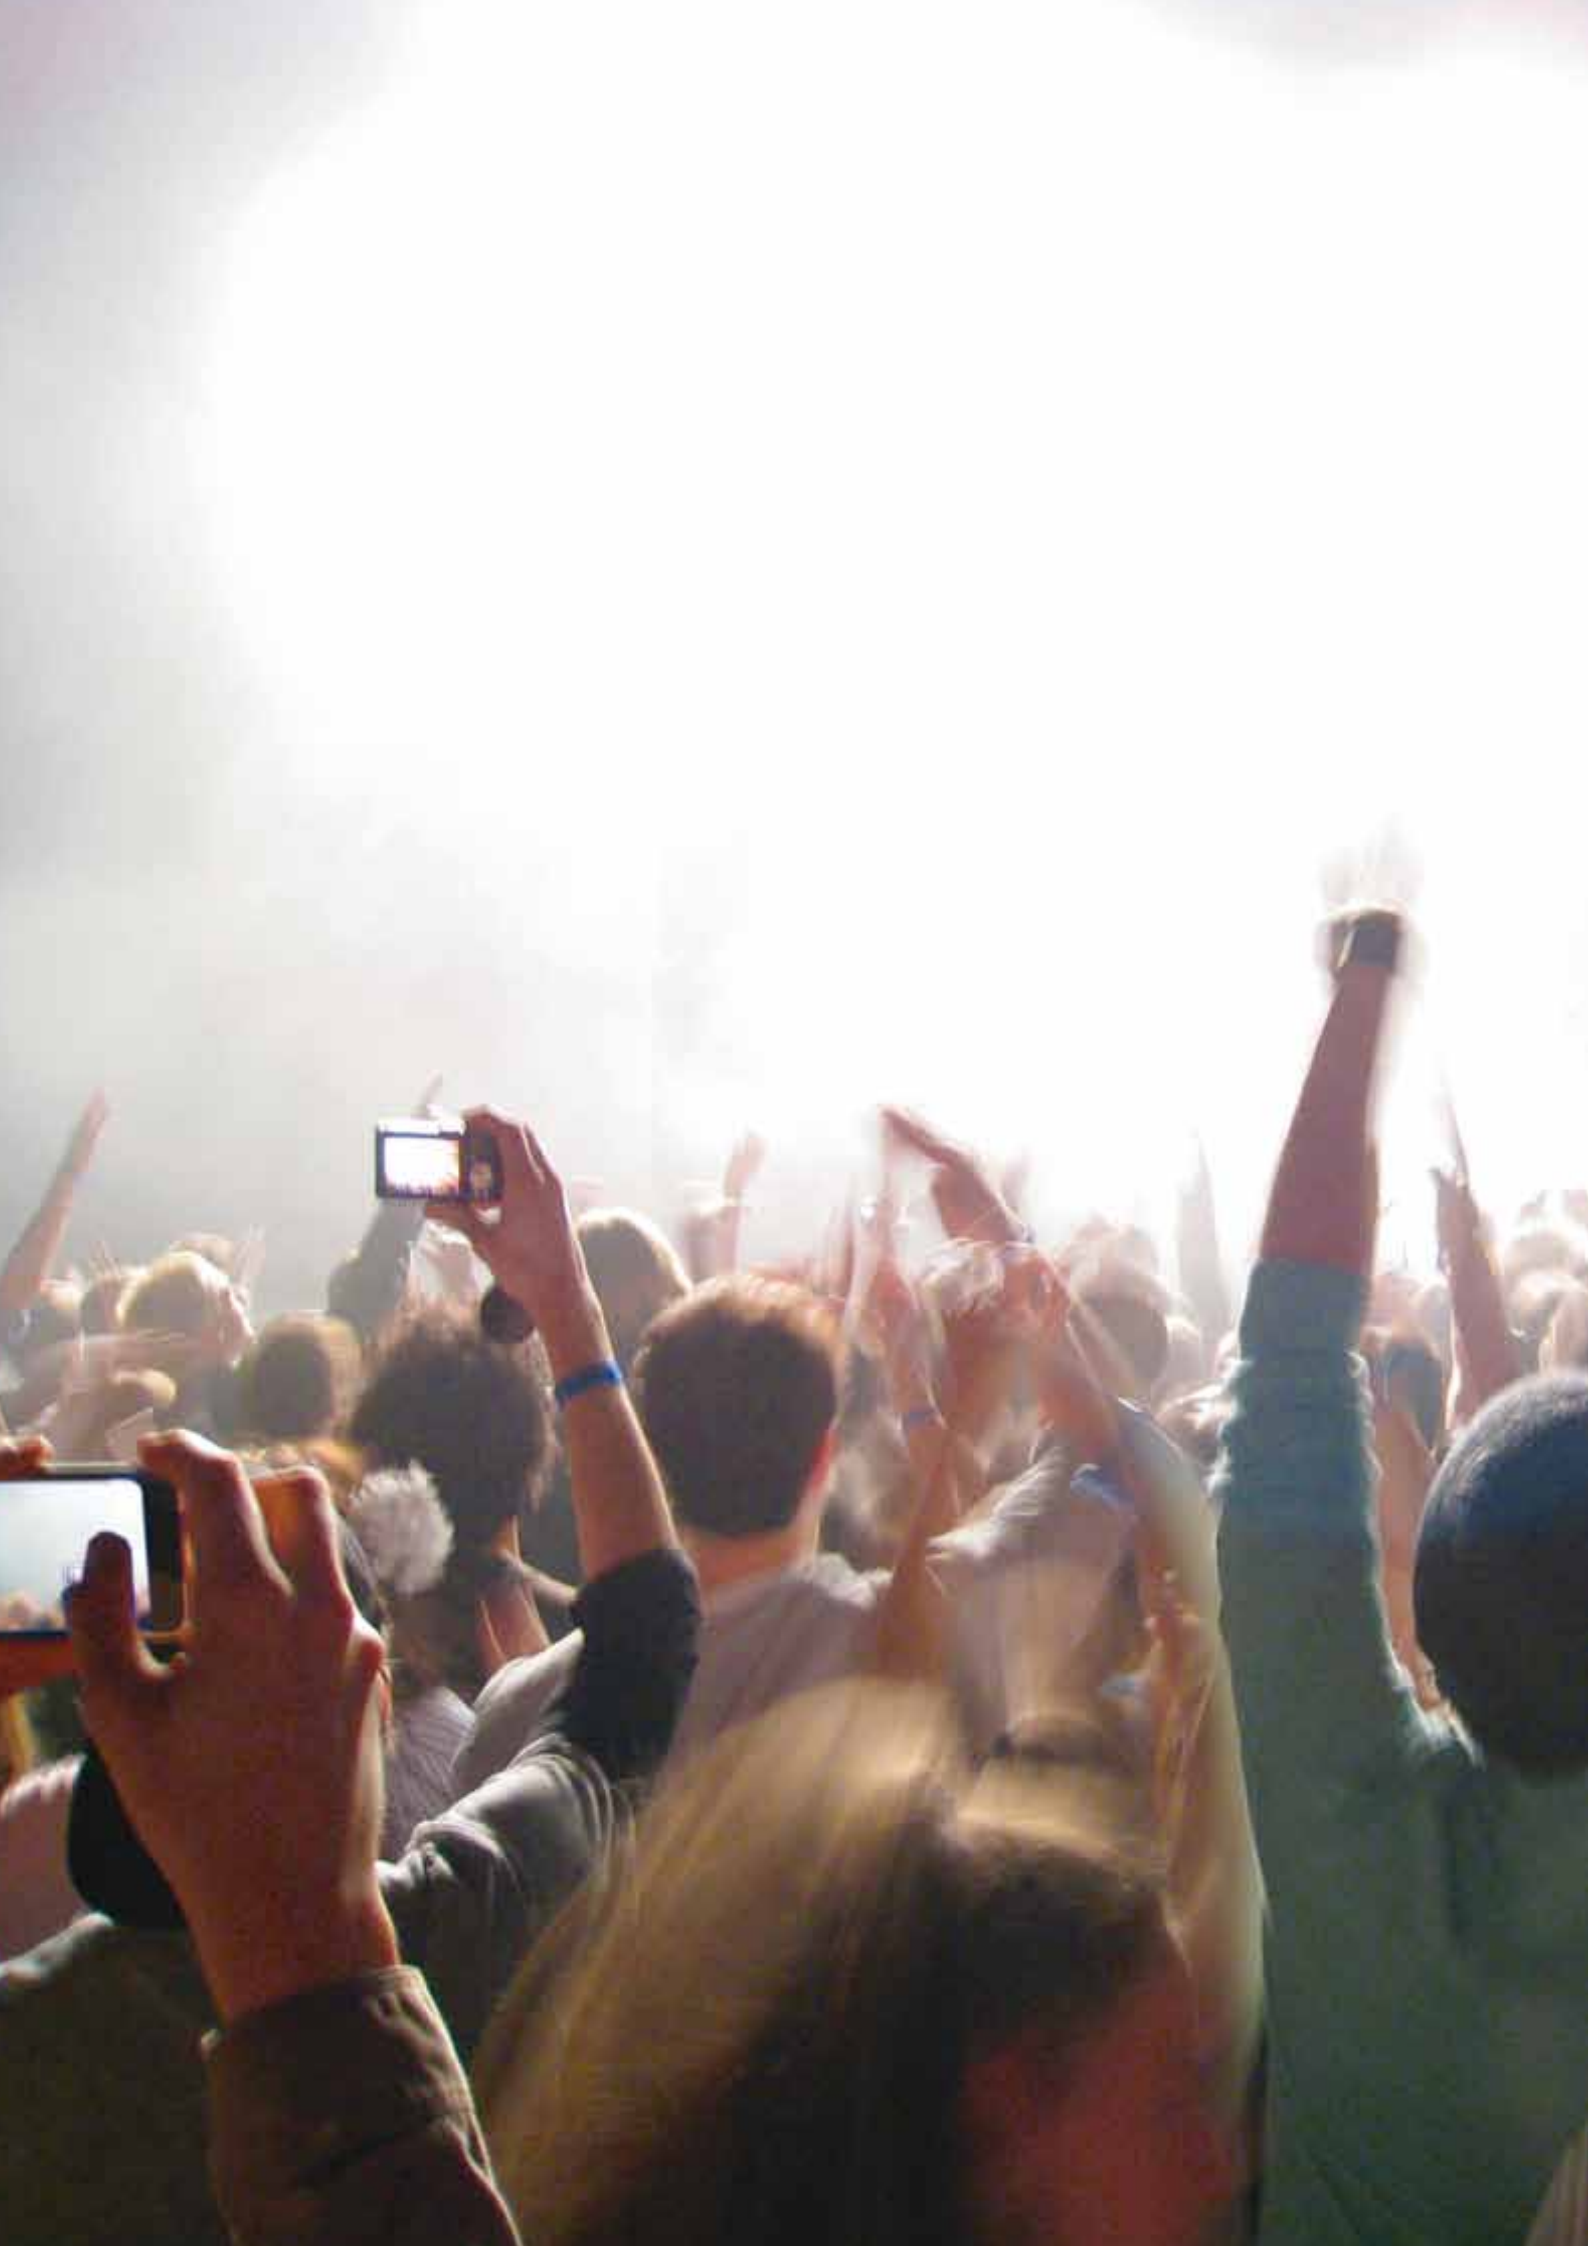

# Wir haben alles, was diese Entwick- lung fordert und fördert.

Das digitale Zeitalter verändert unsere Kommunikation. Internetanwendungen sind inzwischen unverzichtbarer Bestandteil des Lebens. Was vor Jahren noch Utopie war, ist nun sekunden-schnelle Realität: Filme aus dem Internet herunterladen, Fußball-spiele live auf dem Handy anschauen, Fotos oder Videoaufnahmen mit dem Smartphone verschicken und sie über die sozialen Netz-werke mit Freunden teilen. Technisch gesehen heißt das: Immer größere Datenmengen – Gigabytes – müssen in immer höherer Geschwindigkeit – Gigabits pro Sekunde – übertragen werden. Dies ist eines der wesentlichen Merkmale der Gigabit-Gesellschaft. Mit unseren leistungsstarken Netzen schaffen wir eine der wich-tigsten Voraussetzungen dafür.

Wir haben unsere Strategie und unser Geschäftsmodell exakt auf diese neuen Anforderungen ausgerichtet. Mit Investitionen in intelligente Netze sowie in eigene Internetangebote und Mehrwertdienste werden wir unser Geschäft weiterentwickeln und mehr Umsatz aus den neuen Wachstumsfeldern erzielen.

Wir sind auf dem Weg in die Gigabit-Gesellschaft.  
Die Deutsche Telekom gestaltet sie aktiv mit.

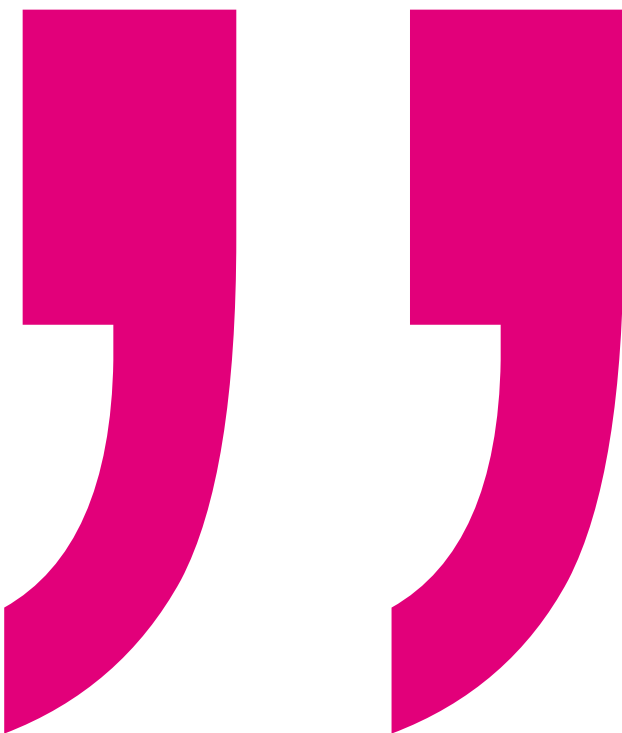

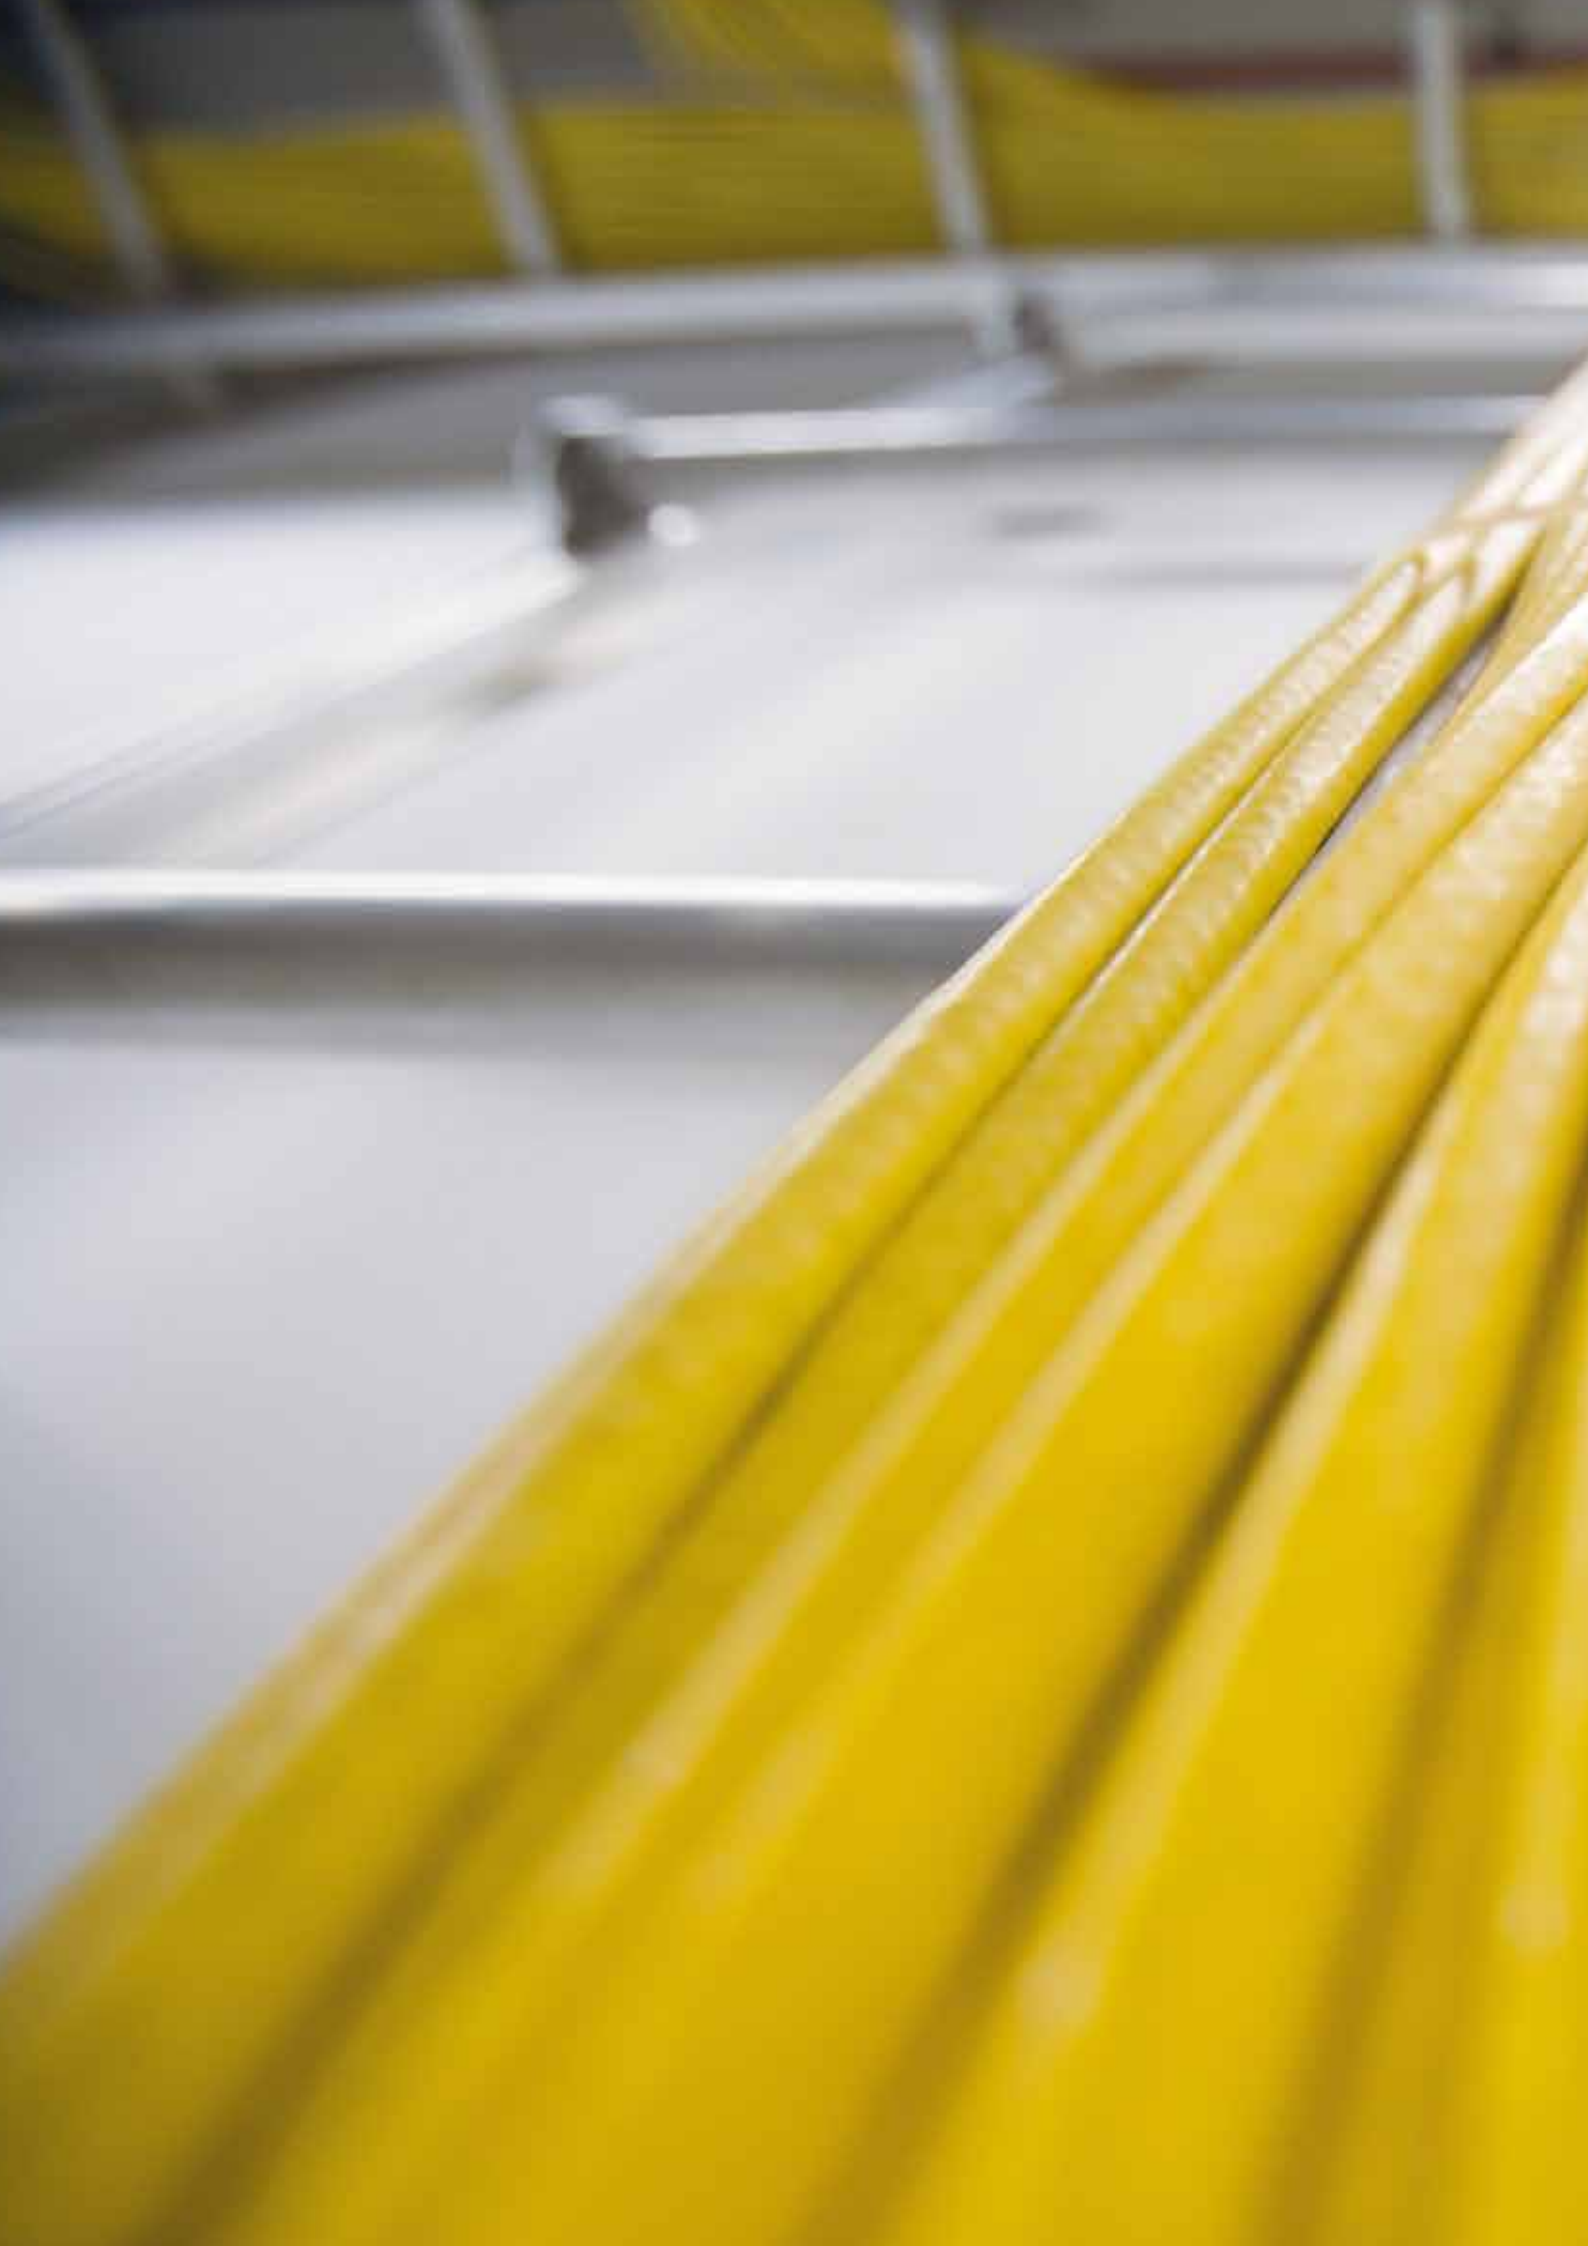



A close-up photograph of several bundles of yellow fiber optic cables. The cables are bundled together and run parallel to each other, creating a sense of depth and direction. The background is blurred, showing more of the same cables and some industrial-looking structures.

# Schnelle Netze!

Mit unseren leistungs-  
fähigen Netzen treiben wir  
die Entwicklung der  
Gigabit-Gesellschaft voran.

Ohne moderne Netze geht heute und in Zukunft nichts. Überall auf der Welt, rund um die Uhr verschicken Menschen Nachrichten, laden Musik oder Videos aus dem Internet. Voraussetzung für die immer vielfältigeren und komplexeren Multimedia-Anwendungen ist eine flächendeckende, leistungsstarke Breitband-Infrastruktur, die diese großen Datenmengen in der entsprechend hohen Geschwindigkeit transportieren kann. Sie bildet die Basis unseres Geschäfts. Deshalb investieren wir bis 2012 allein in den Breitband-Standort Deutschland rund zehn Milliarden Euro.



„Ich gehöre zu den Teams, die das schnelle Internet über Mobilfunk in die ländlichen Regionen bringen. Wenn wir die Station in Betrieb nehmen und die ersten Funksignale über die Antenne gehen – das ist für mich immer der schönste Moment.“

Uwe Pobel, Telekom Deutschland

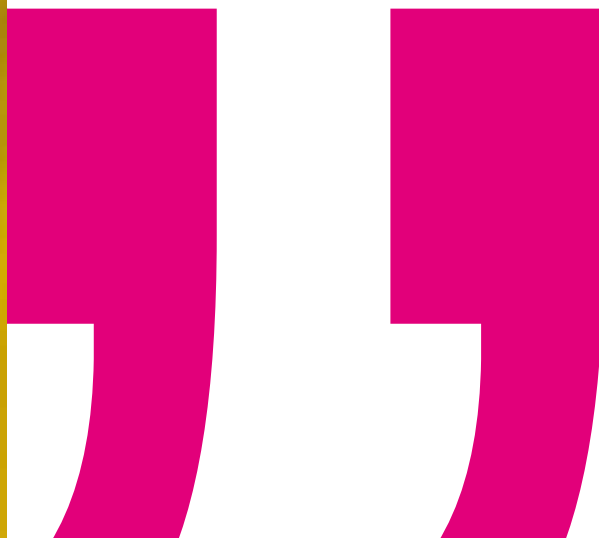

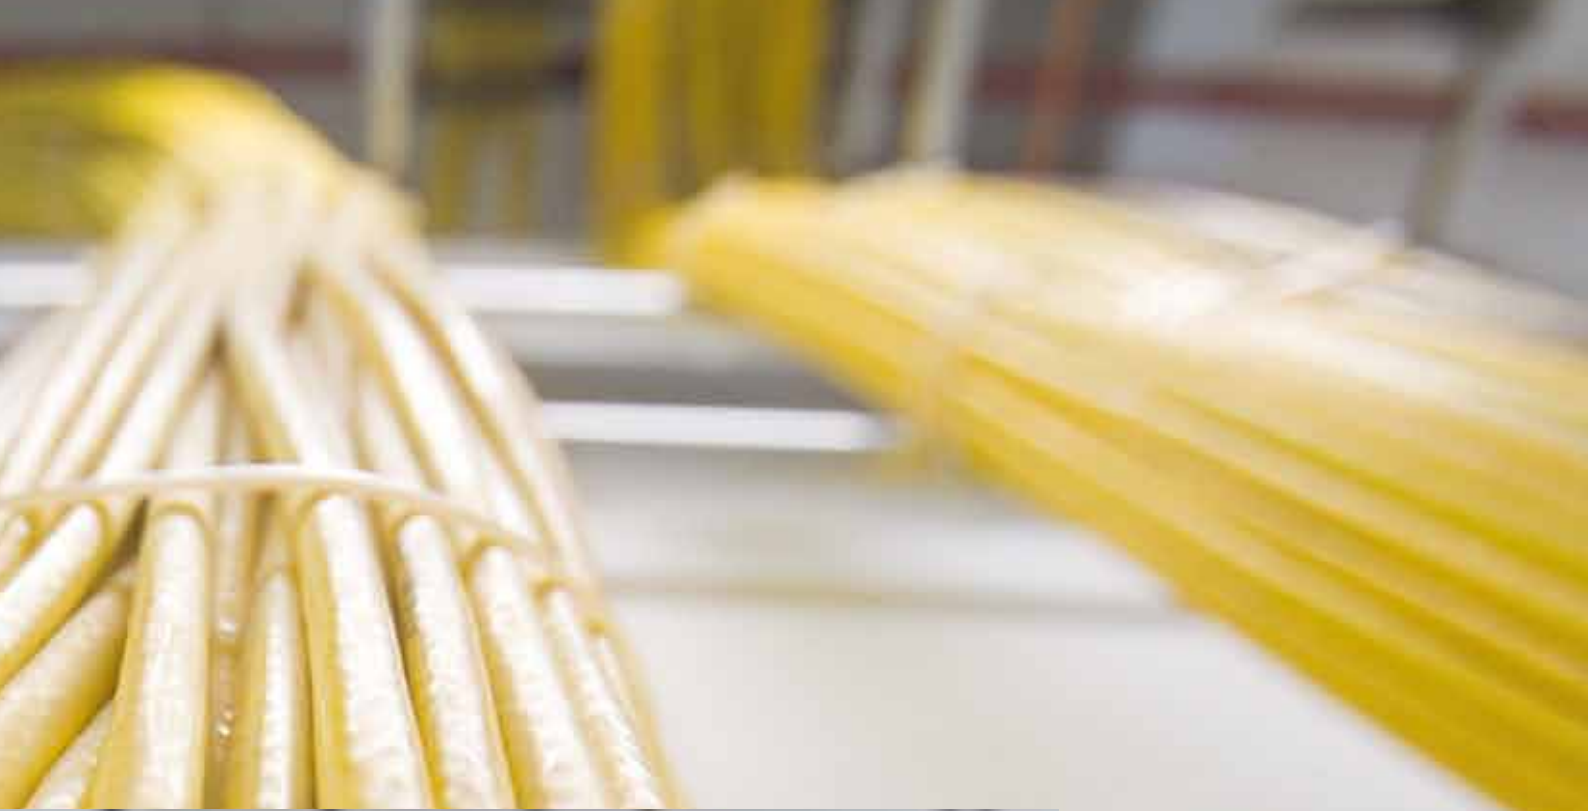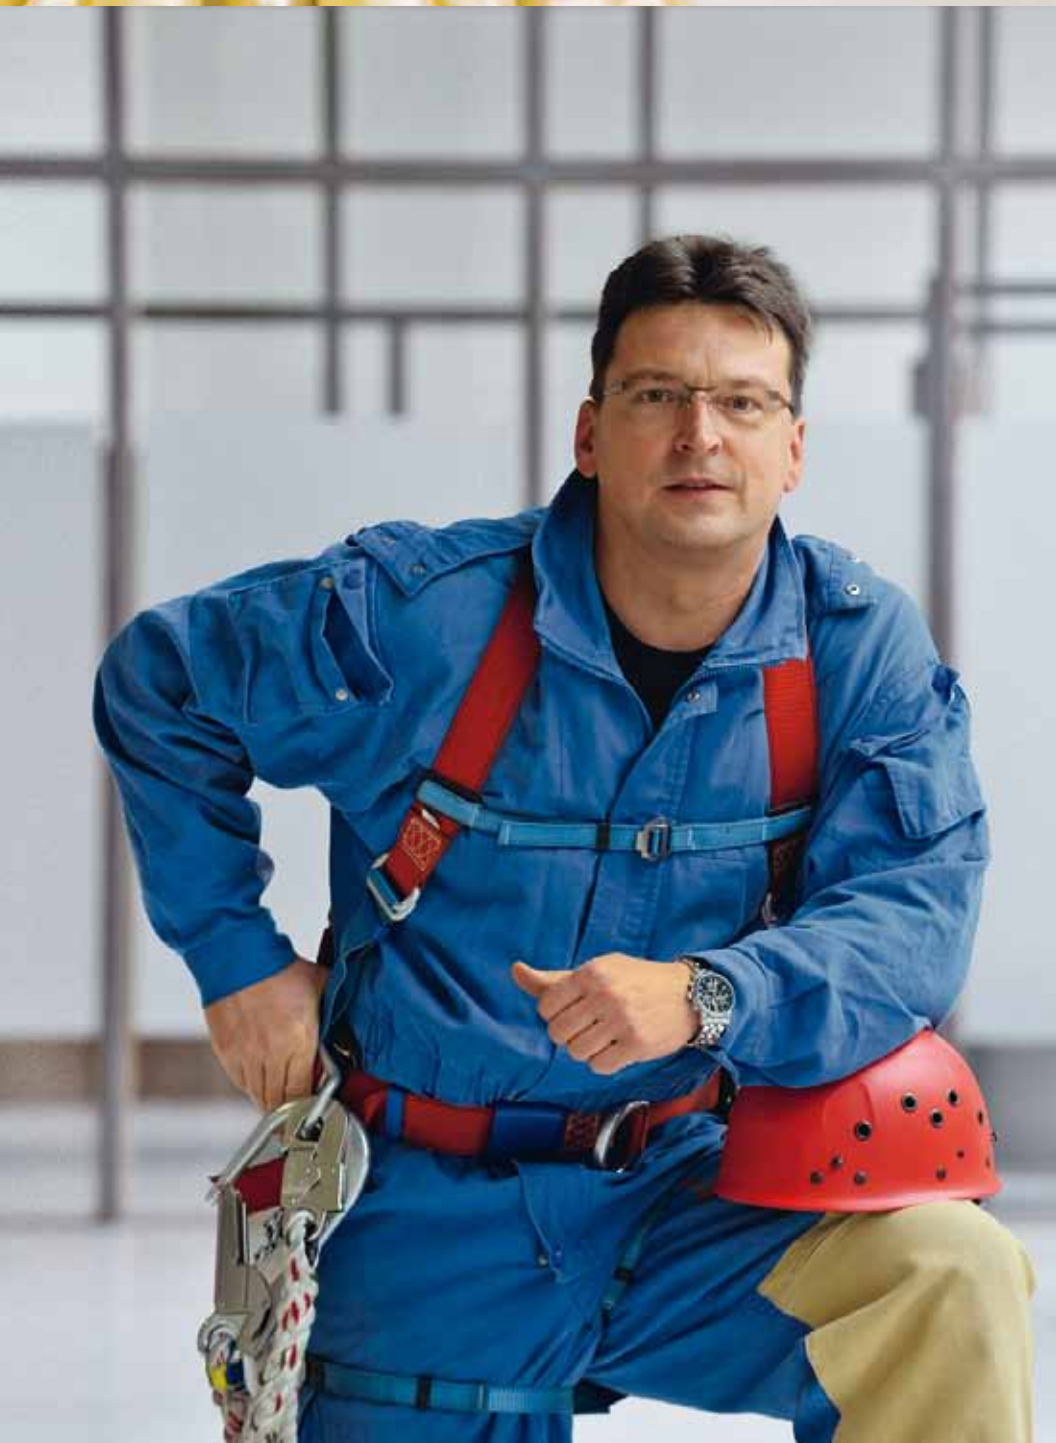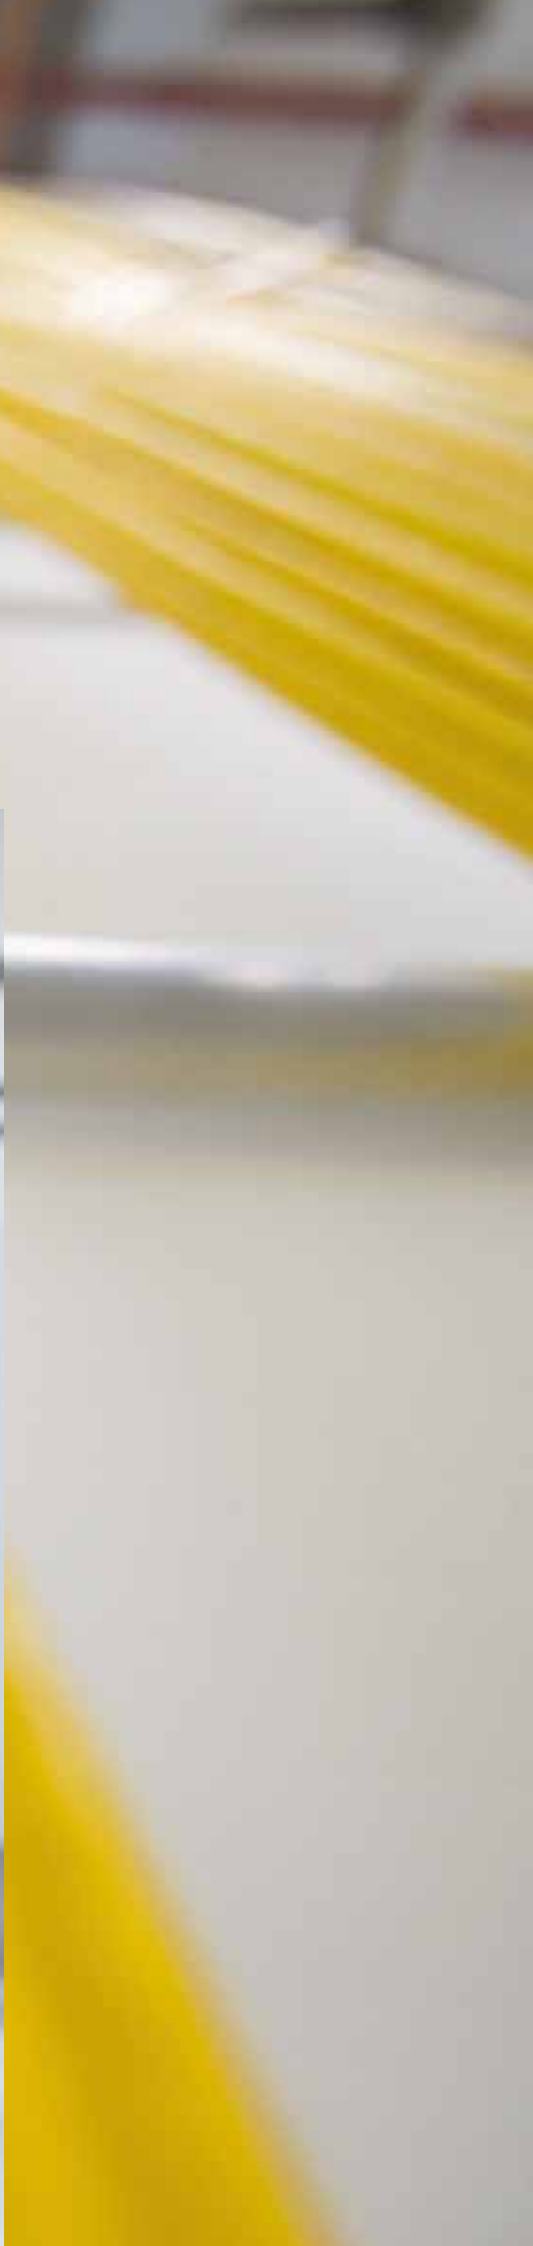

## Netzausbau für eine breitbandige Zukunft.

Sie ist dünner als eine Gitarrensaite – und doch steckt in jeder einzelnen Glasfaser die geballte Kraft für Übertragungsraten von bis zu 200 Megabits pro Sekunde im Festnetz. Reichen diese Glasfaserleitungen ohne Unterbrechung bis in die Wohnung der Kunden, so haben sie den bestmöglichen Zugang zum Internet. Sie können z. B. 3D-Fernsehen in allen Facetten genießen sowie mit „Entertain“, unserem Angebot für internetbasiertes Fernsehen, mehrere Filme gleichzeitig aufnehmen und abspielen. Dieses Verfahren des Netzausbaus mit dem Kürzel FTTH („Fiber to the Home“-Glasfaser bis ins Haus) haben wir 2010 in Pilotprojekten bereits erfolgreich angewendet. Jetzt treiben wir den Netzausbau weiter voran.

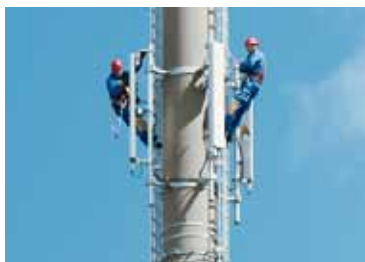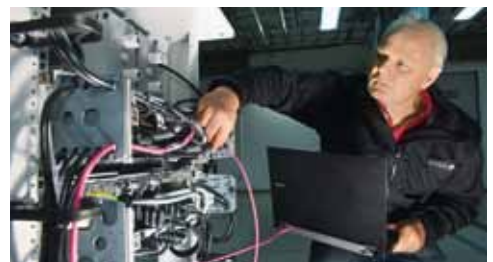

Im Mobilfunk-Bereich arbeiten wir mit Hochdruck am Ausbau des LTE-Netzes (Long Term Evolution). Dieser Mobilfunk-Standard der vierten Generation ermöglicht dank großer Reichweiten, vor allem ländliche Orte mit schnellen Internetzugängen zu versorgen, die bisher nicht zu erreichen waren. So erfüllen wir auch unsere gesellschaftliche Aufgabe, die „weißen Flecken“ auf der Breitband-Landkarte Schritt für Schritt zu beseitigen.

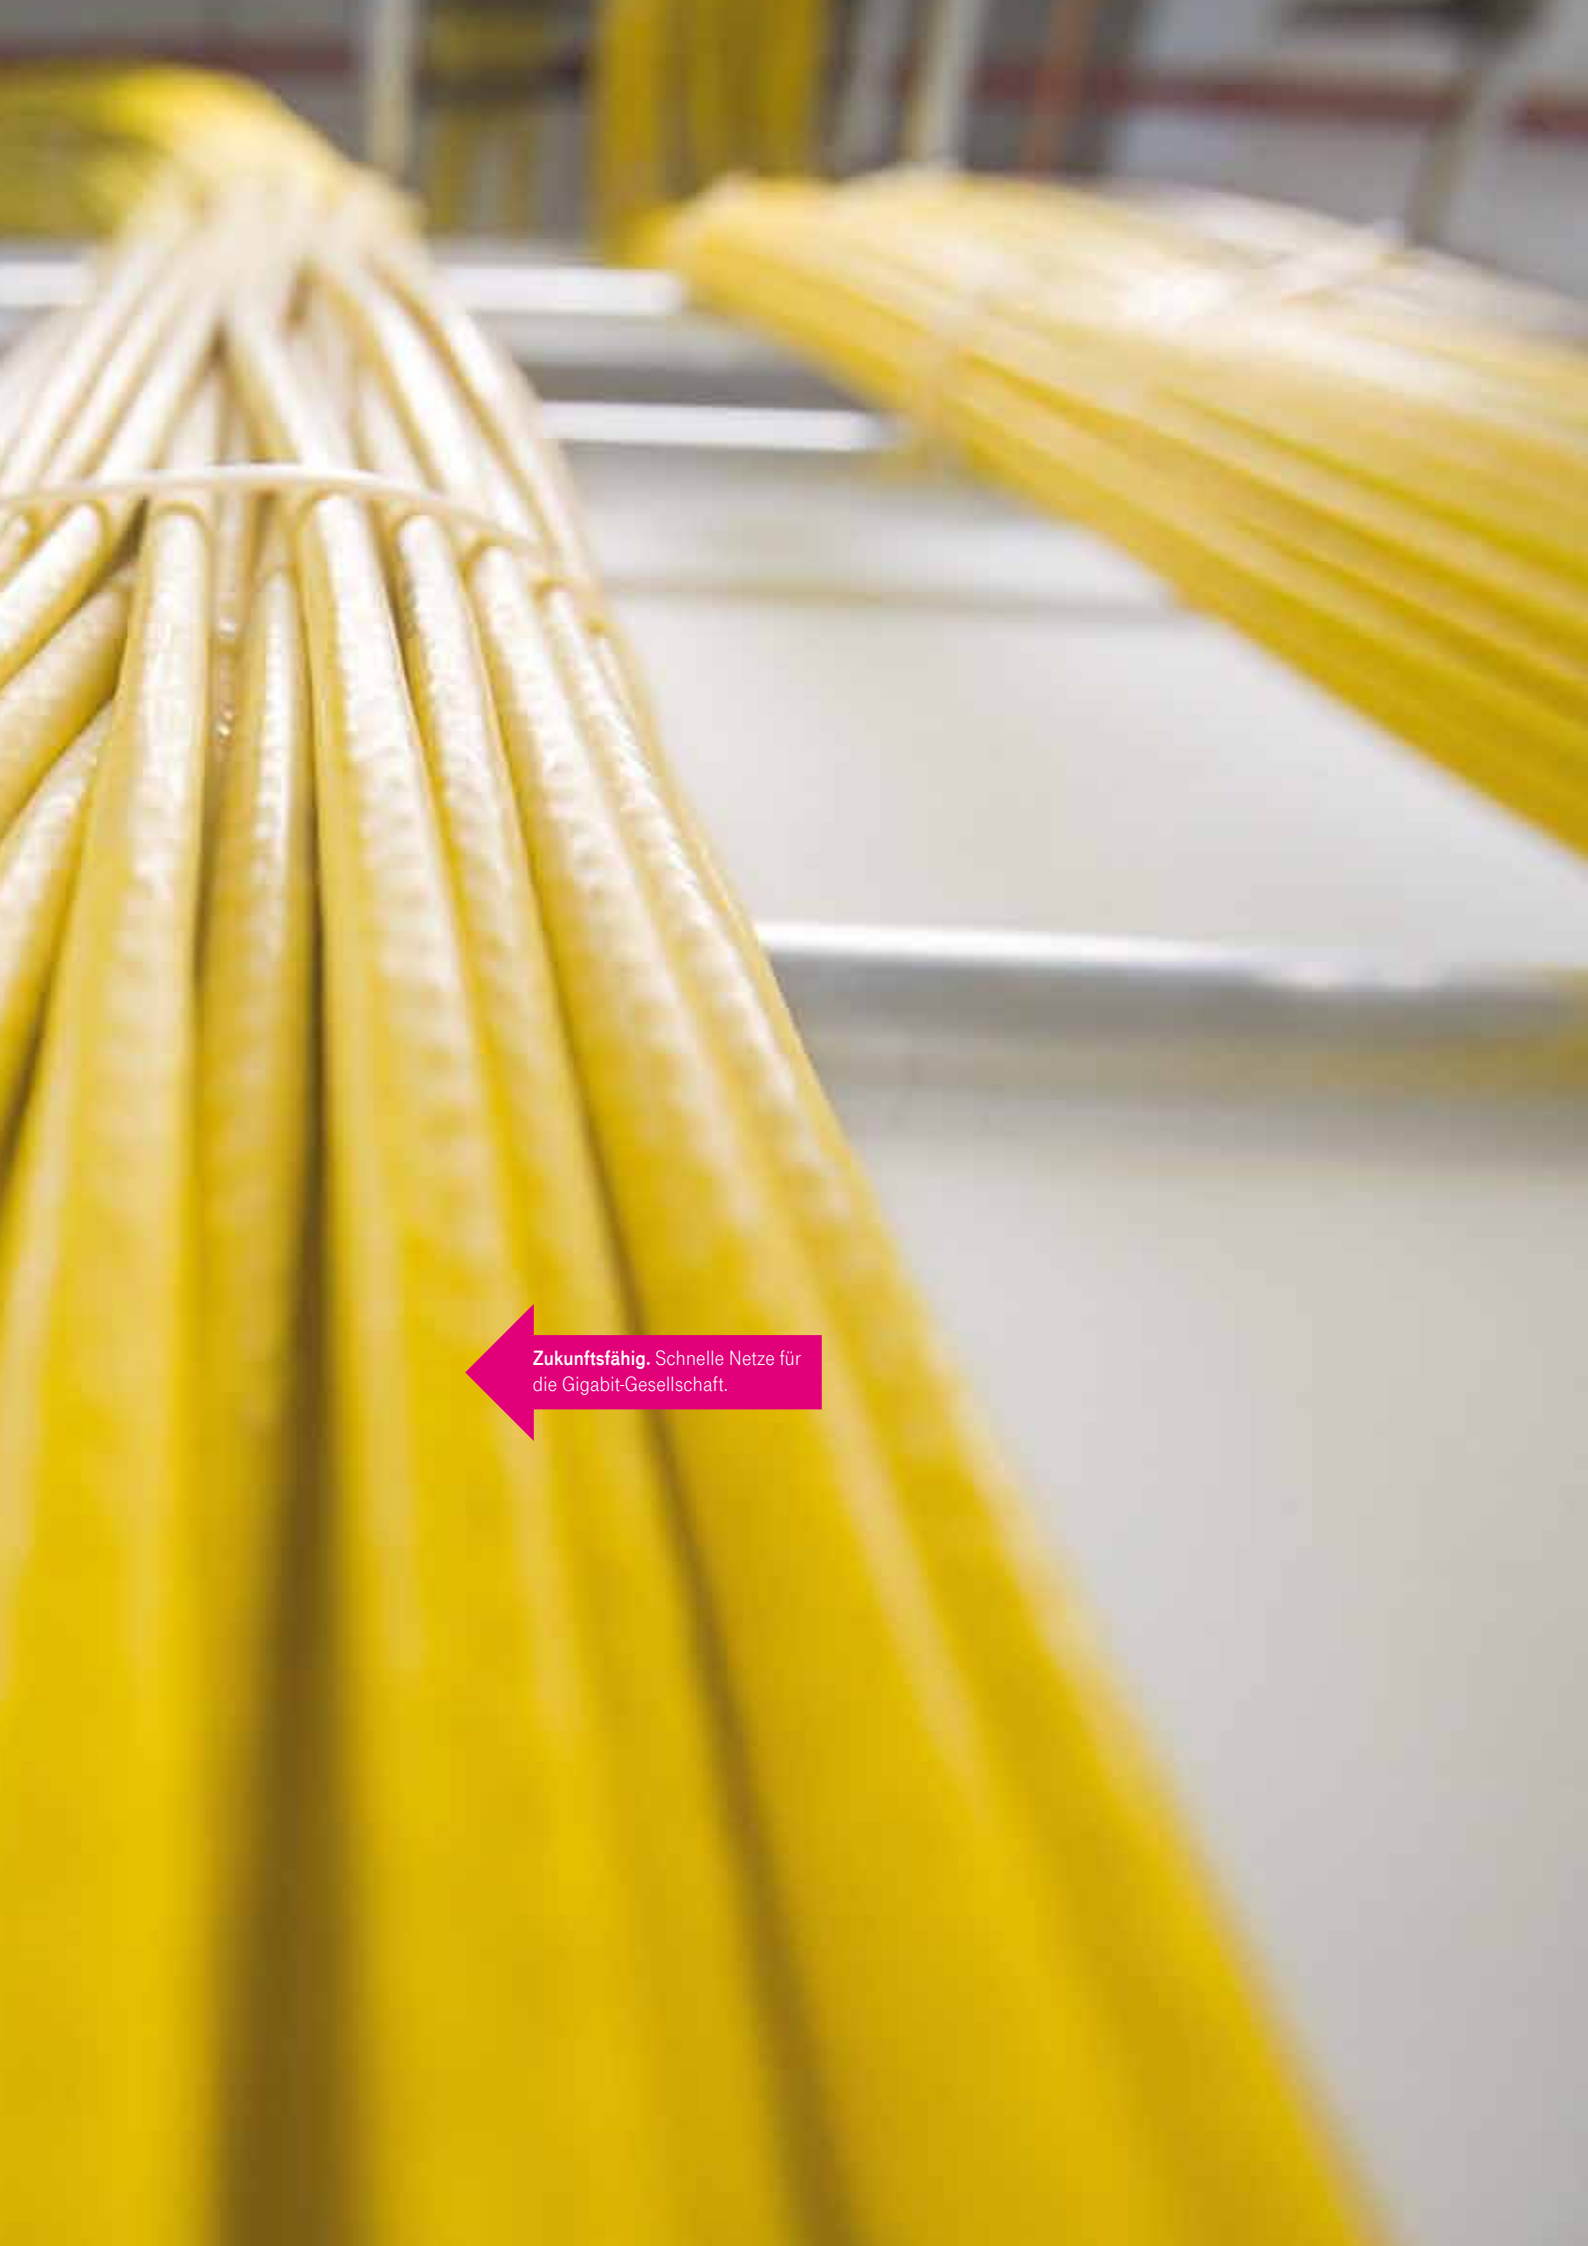

**Zukunftsfähig.** Schnelle Netze für die Gigabit-Gesellschaft.

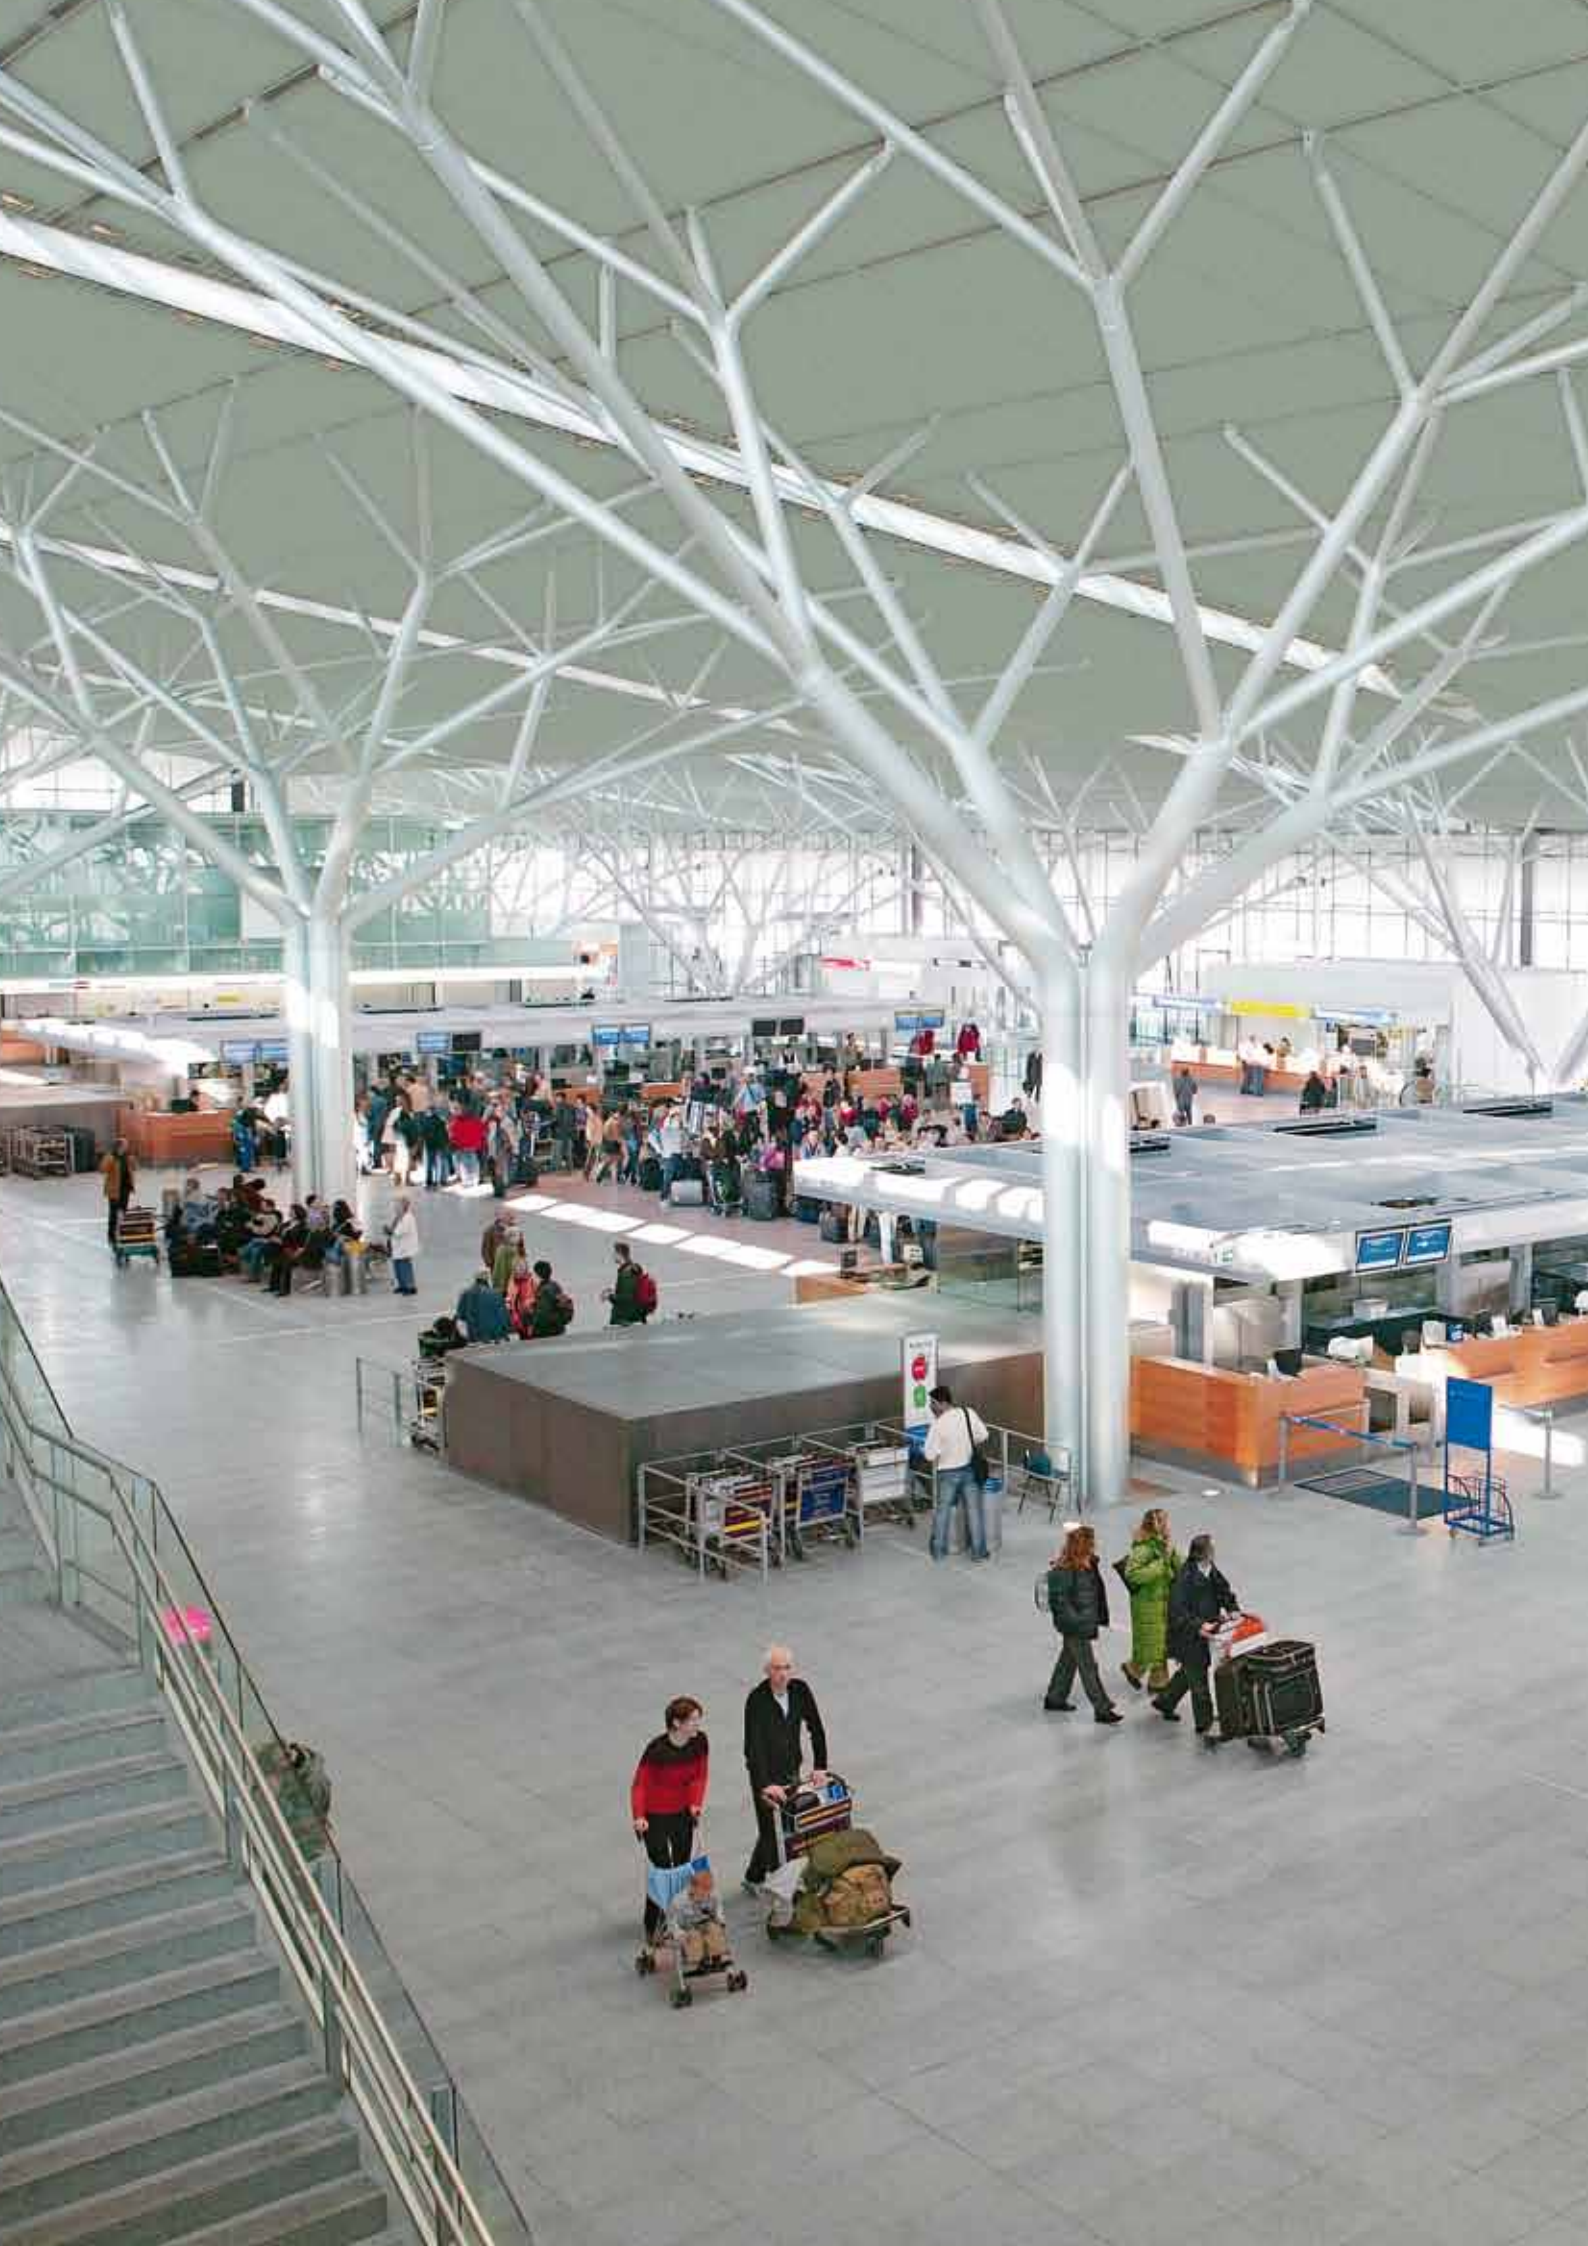



# Vernetztes Leben!

Universeller und  
komfortabler Zugang zu  
Information, Kommunikation  
und Unterhaltung.

Jederzeit und von überall auf Fotos, Videos und Lieblingsongs zugreifen oder eigene Motive auf dem Fernschirmschirm anschauen. Unterwegs über das mobile Internet mit dem Smartphone oder dem Laptop Fotos und Videos direkt bei Facebook oder Flickr veröffentlichen und sie mit Freunden teilen – ohne Datenaustausch per E-Mail oder USB-Stick. Im ICE und im Flugzeug über einen Breitband-Internetzugang surfen. Wir entwickeln Anwendungen und Vernetzungslösungen für Handy, Fernseher und PC, die verschiedenste Lebensbereiche miteinander verbinden.

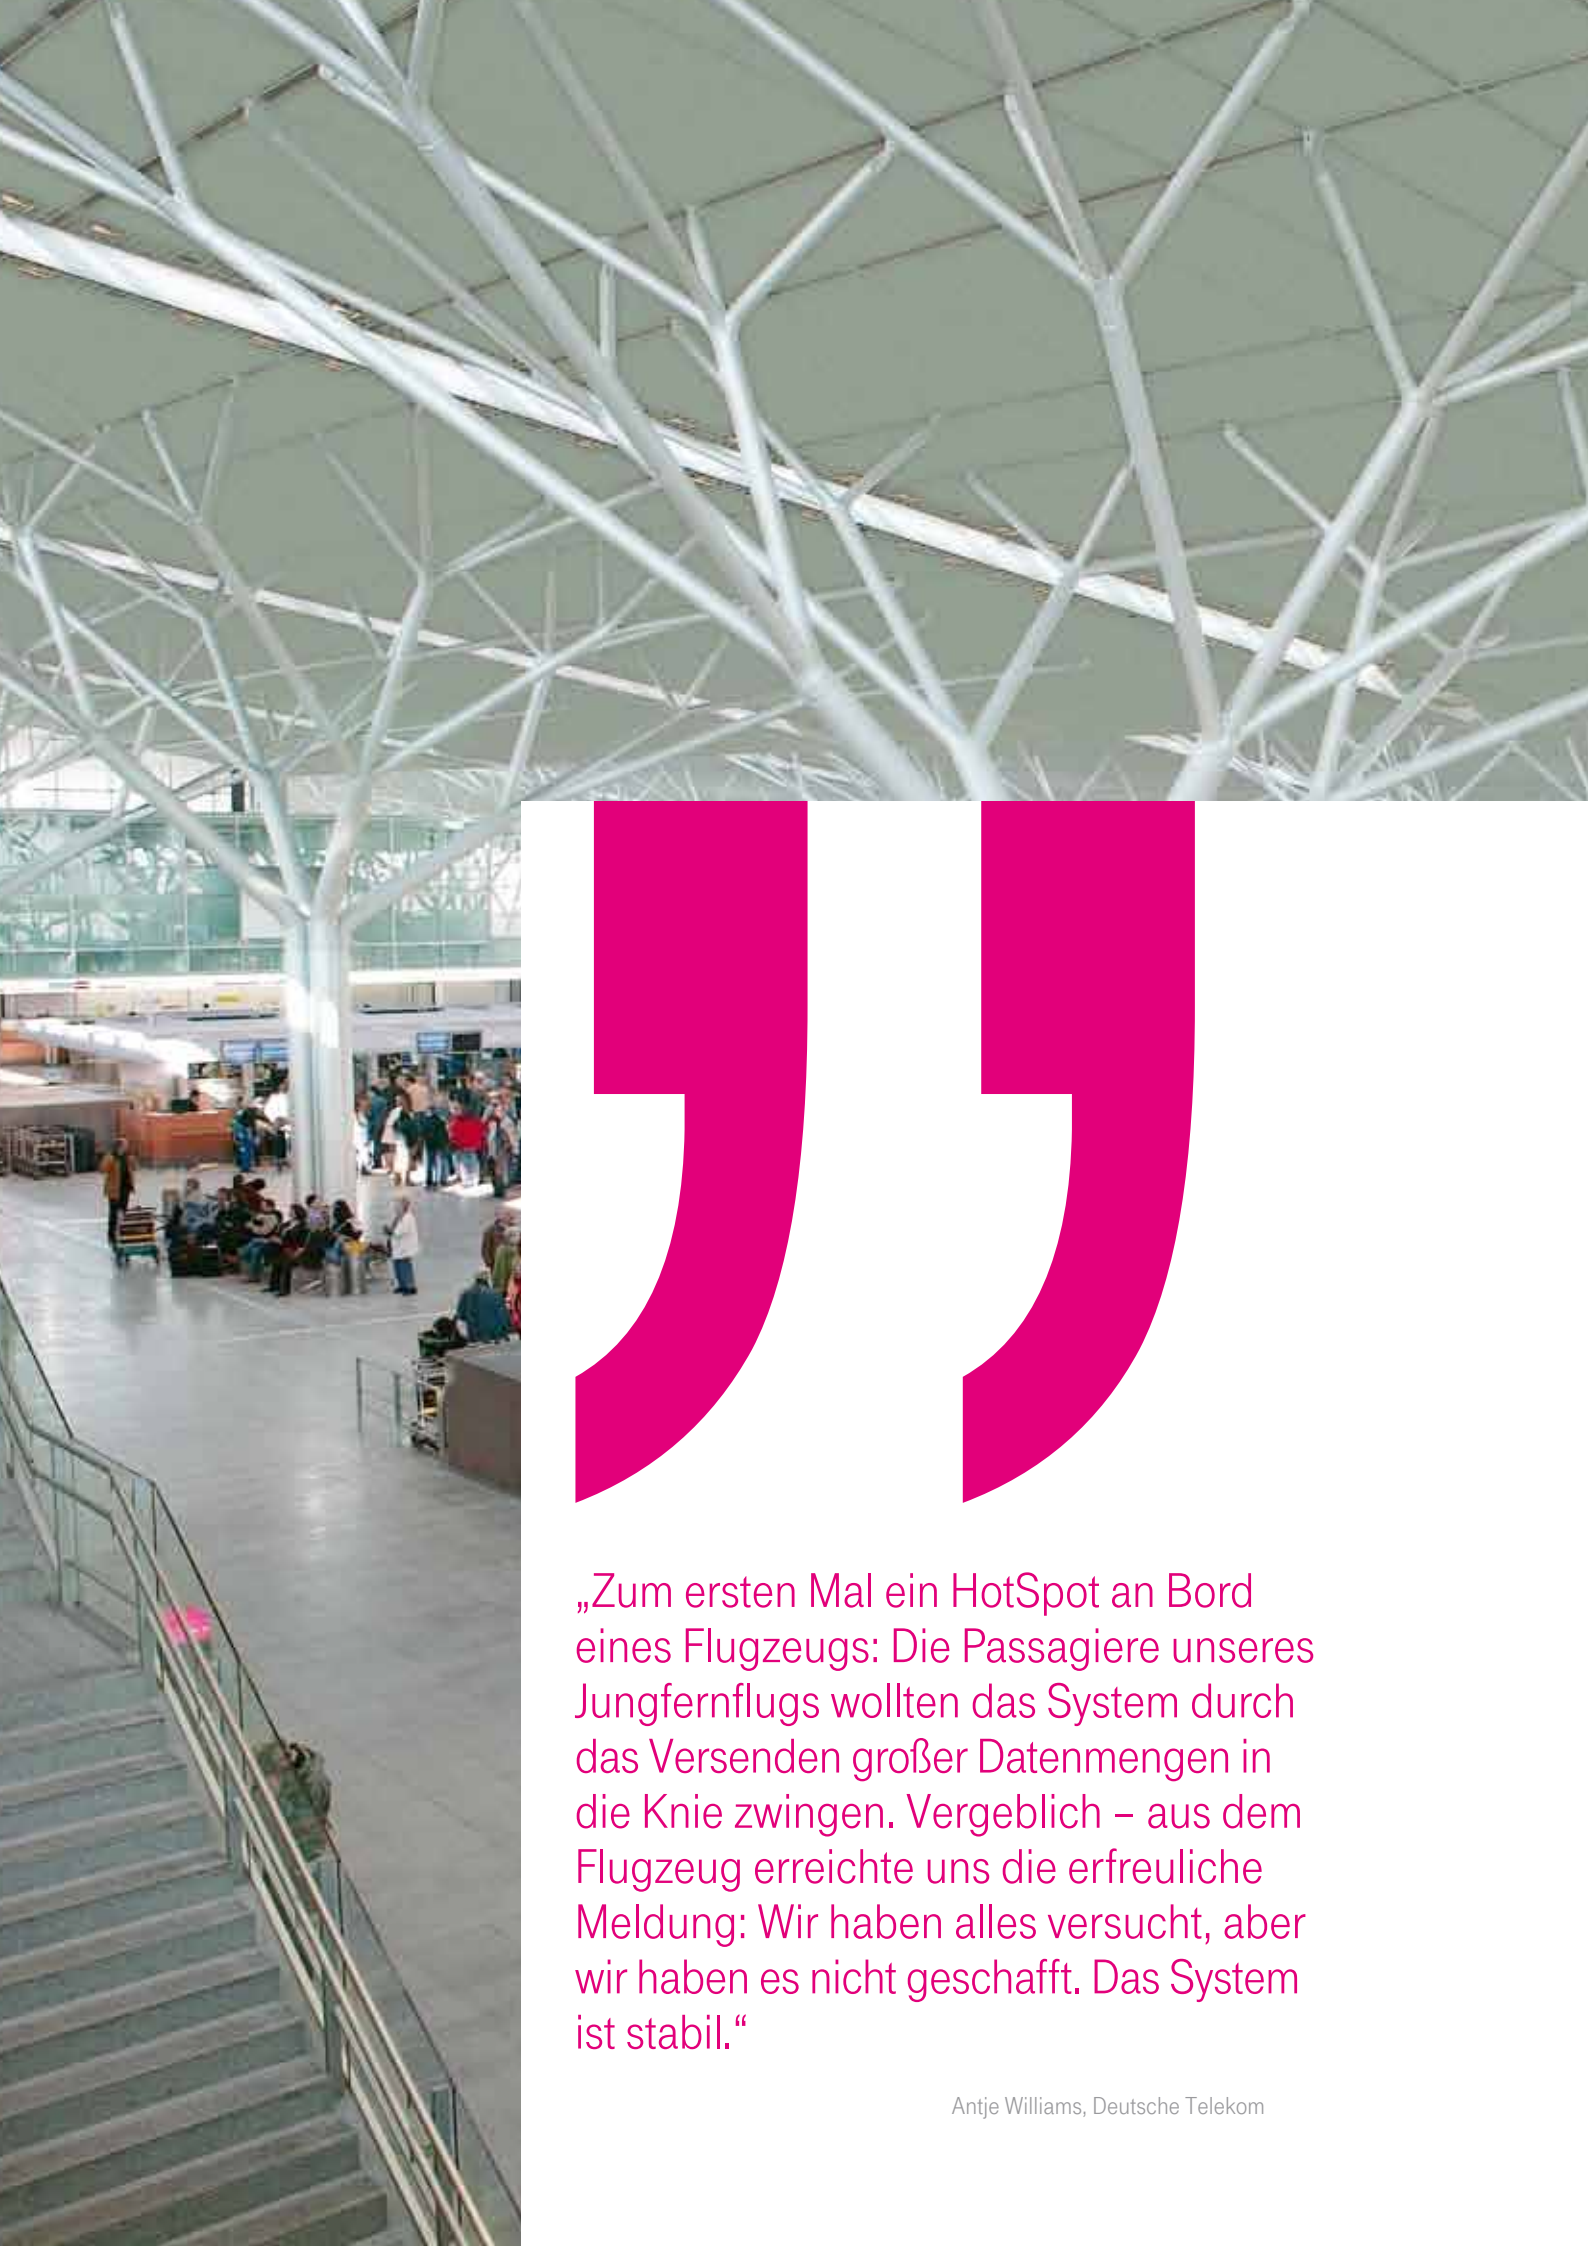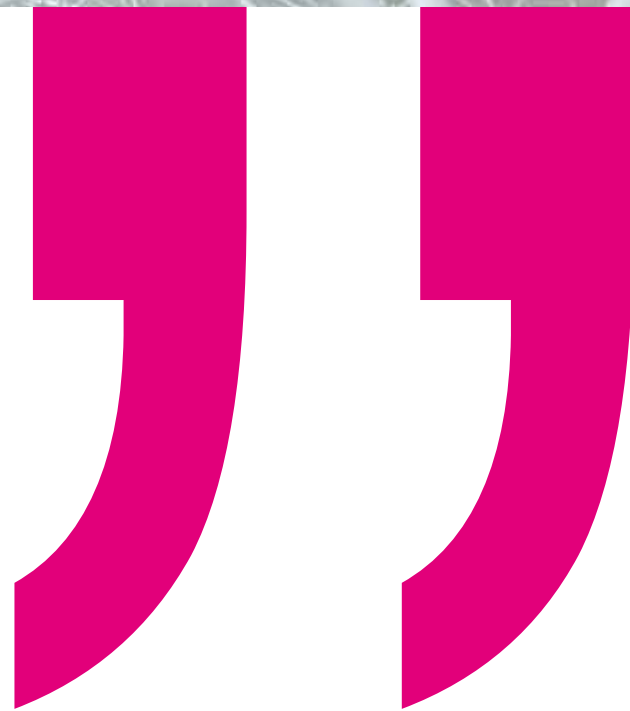

„Zum ersten Mal ein HotSpot an Bord eines Flugzeugs: Die Passagiere unseres Jungfernflugs wollten das System durch das Versenden großer Datenmengen in die Knie zwingen. Vergeblich – aus dem Flugzeug erreichte uns die erfreuliche Meldung: Wir haben alles versucht, aber wir haben es nicht geschafft. Das System ist stabil.“

Antje Williams, Deutsche Telekom



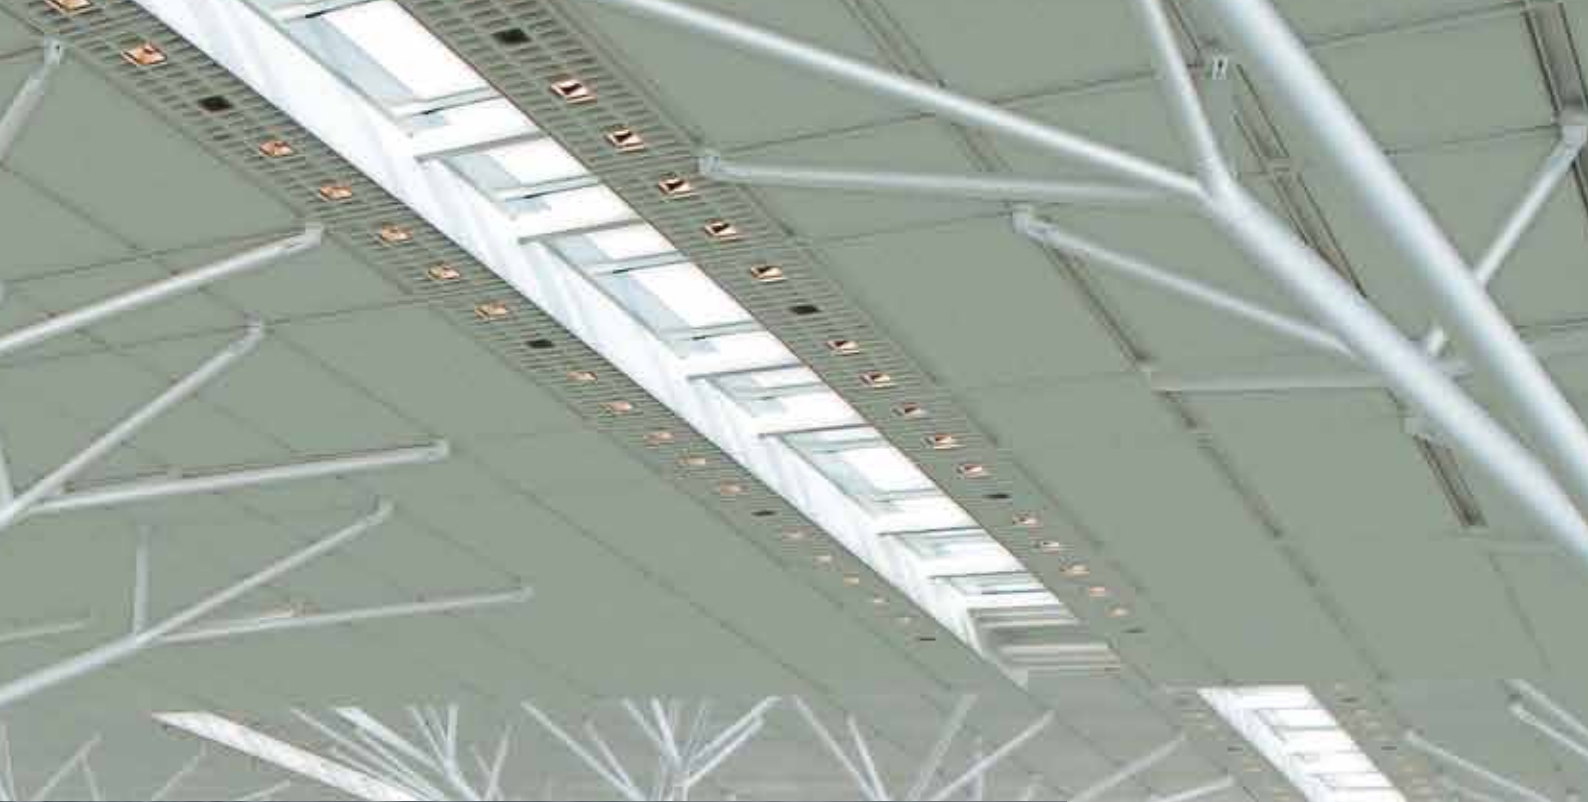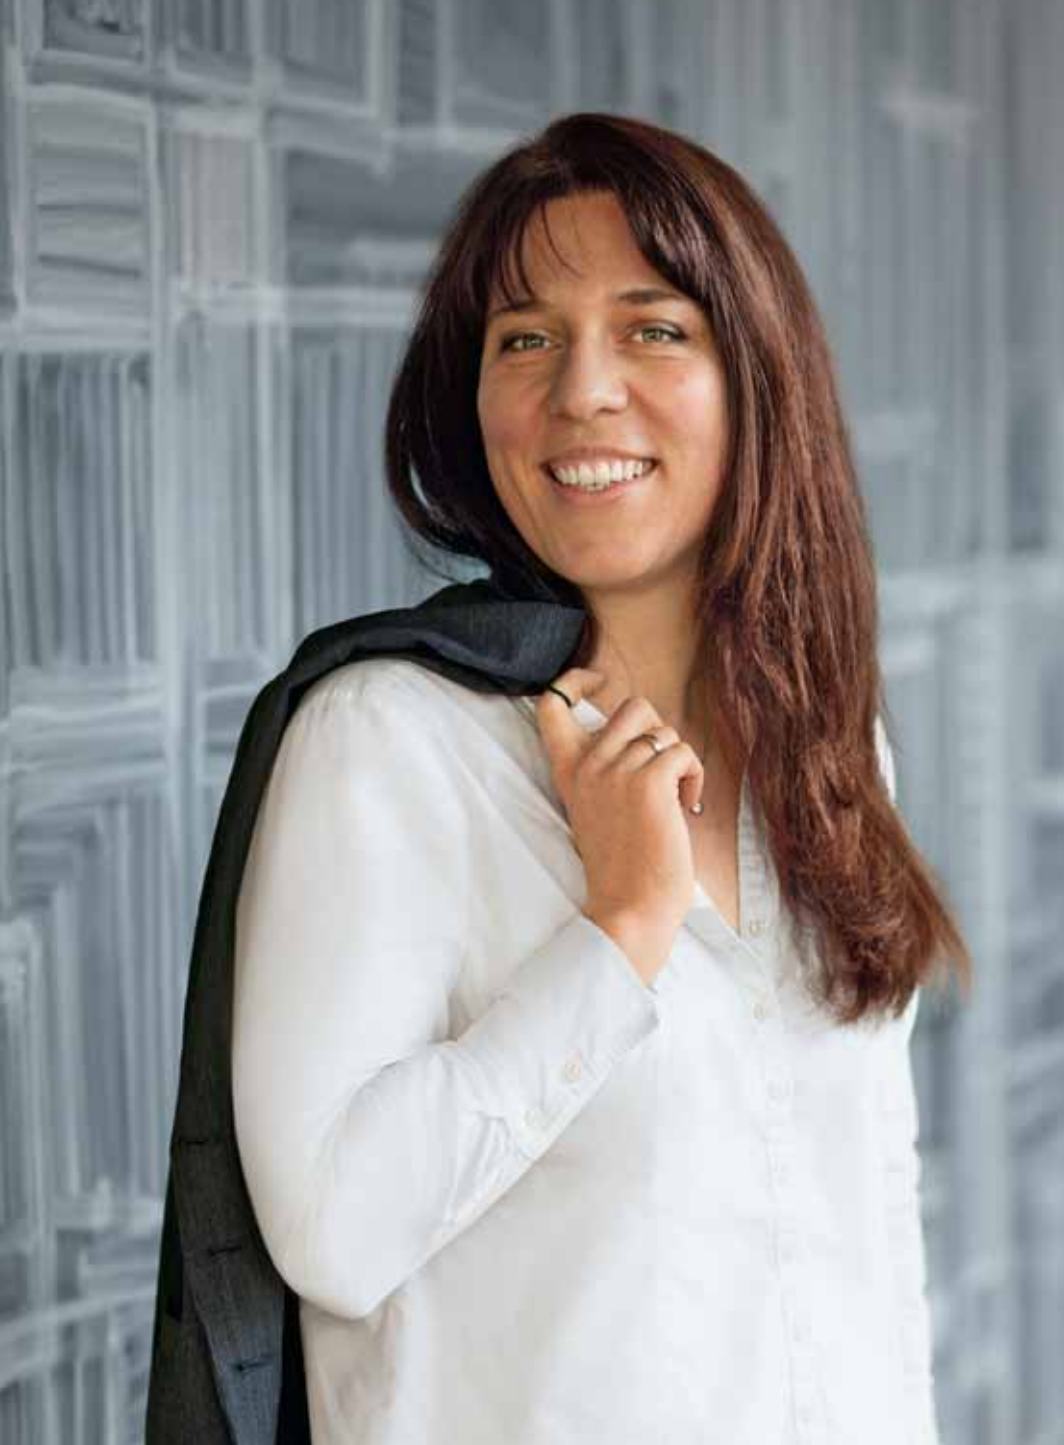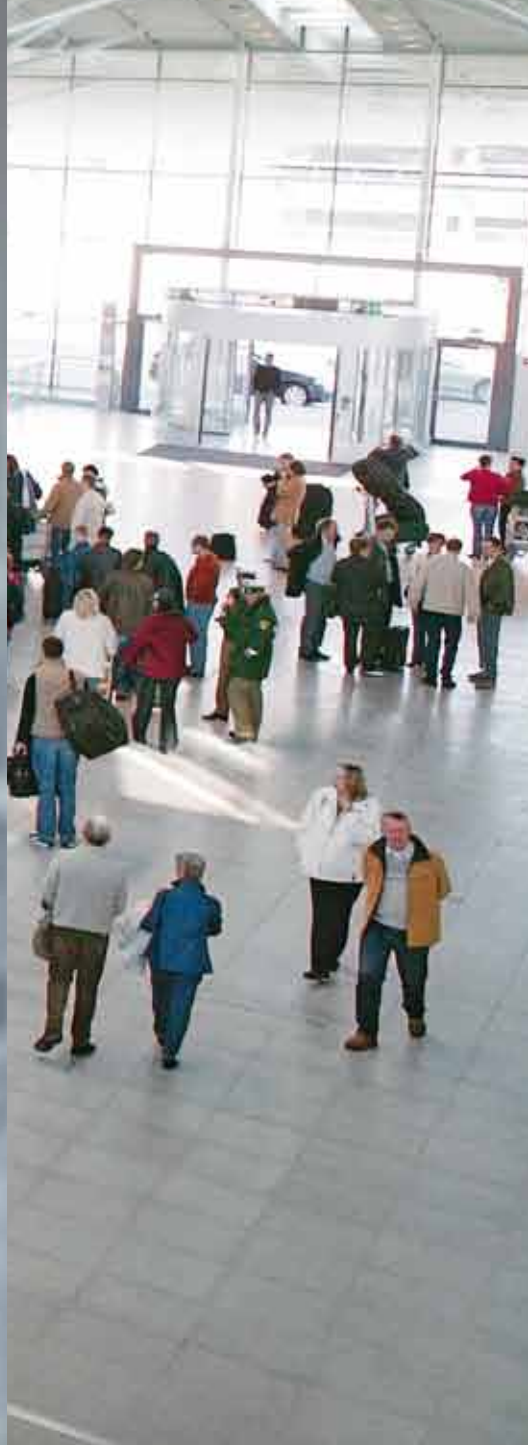

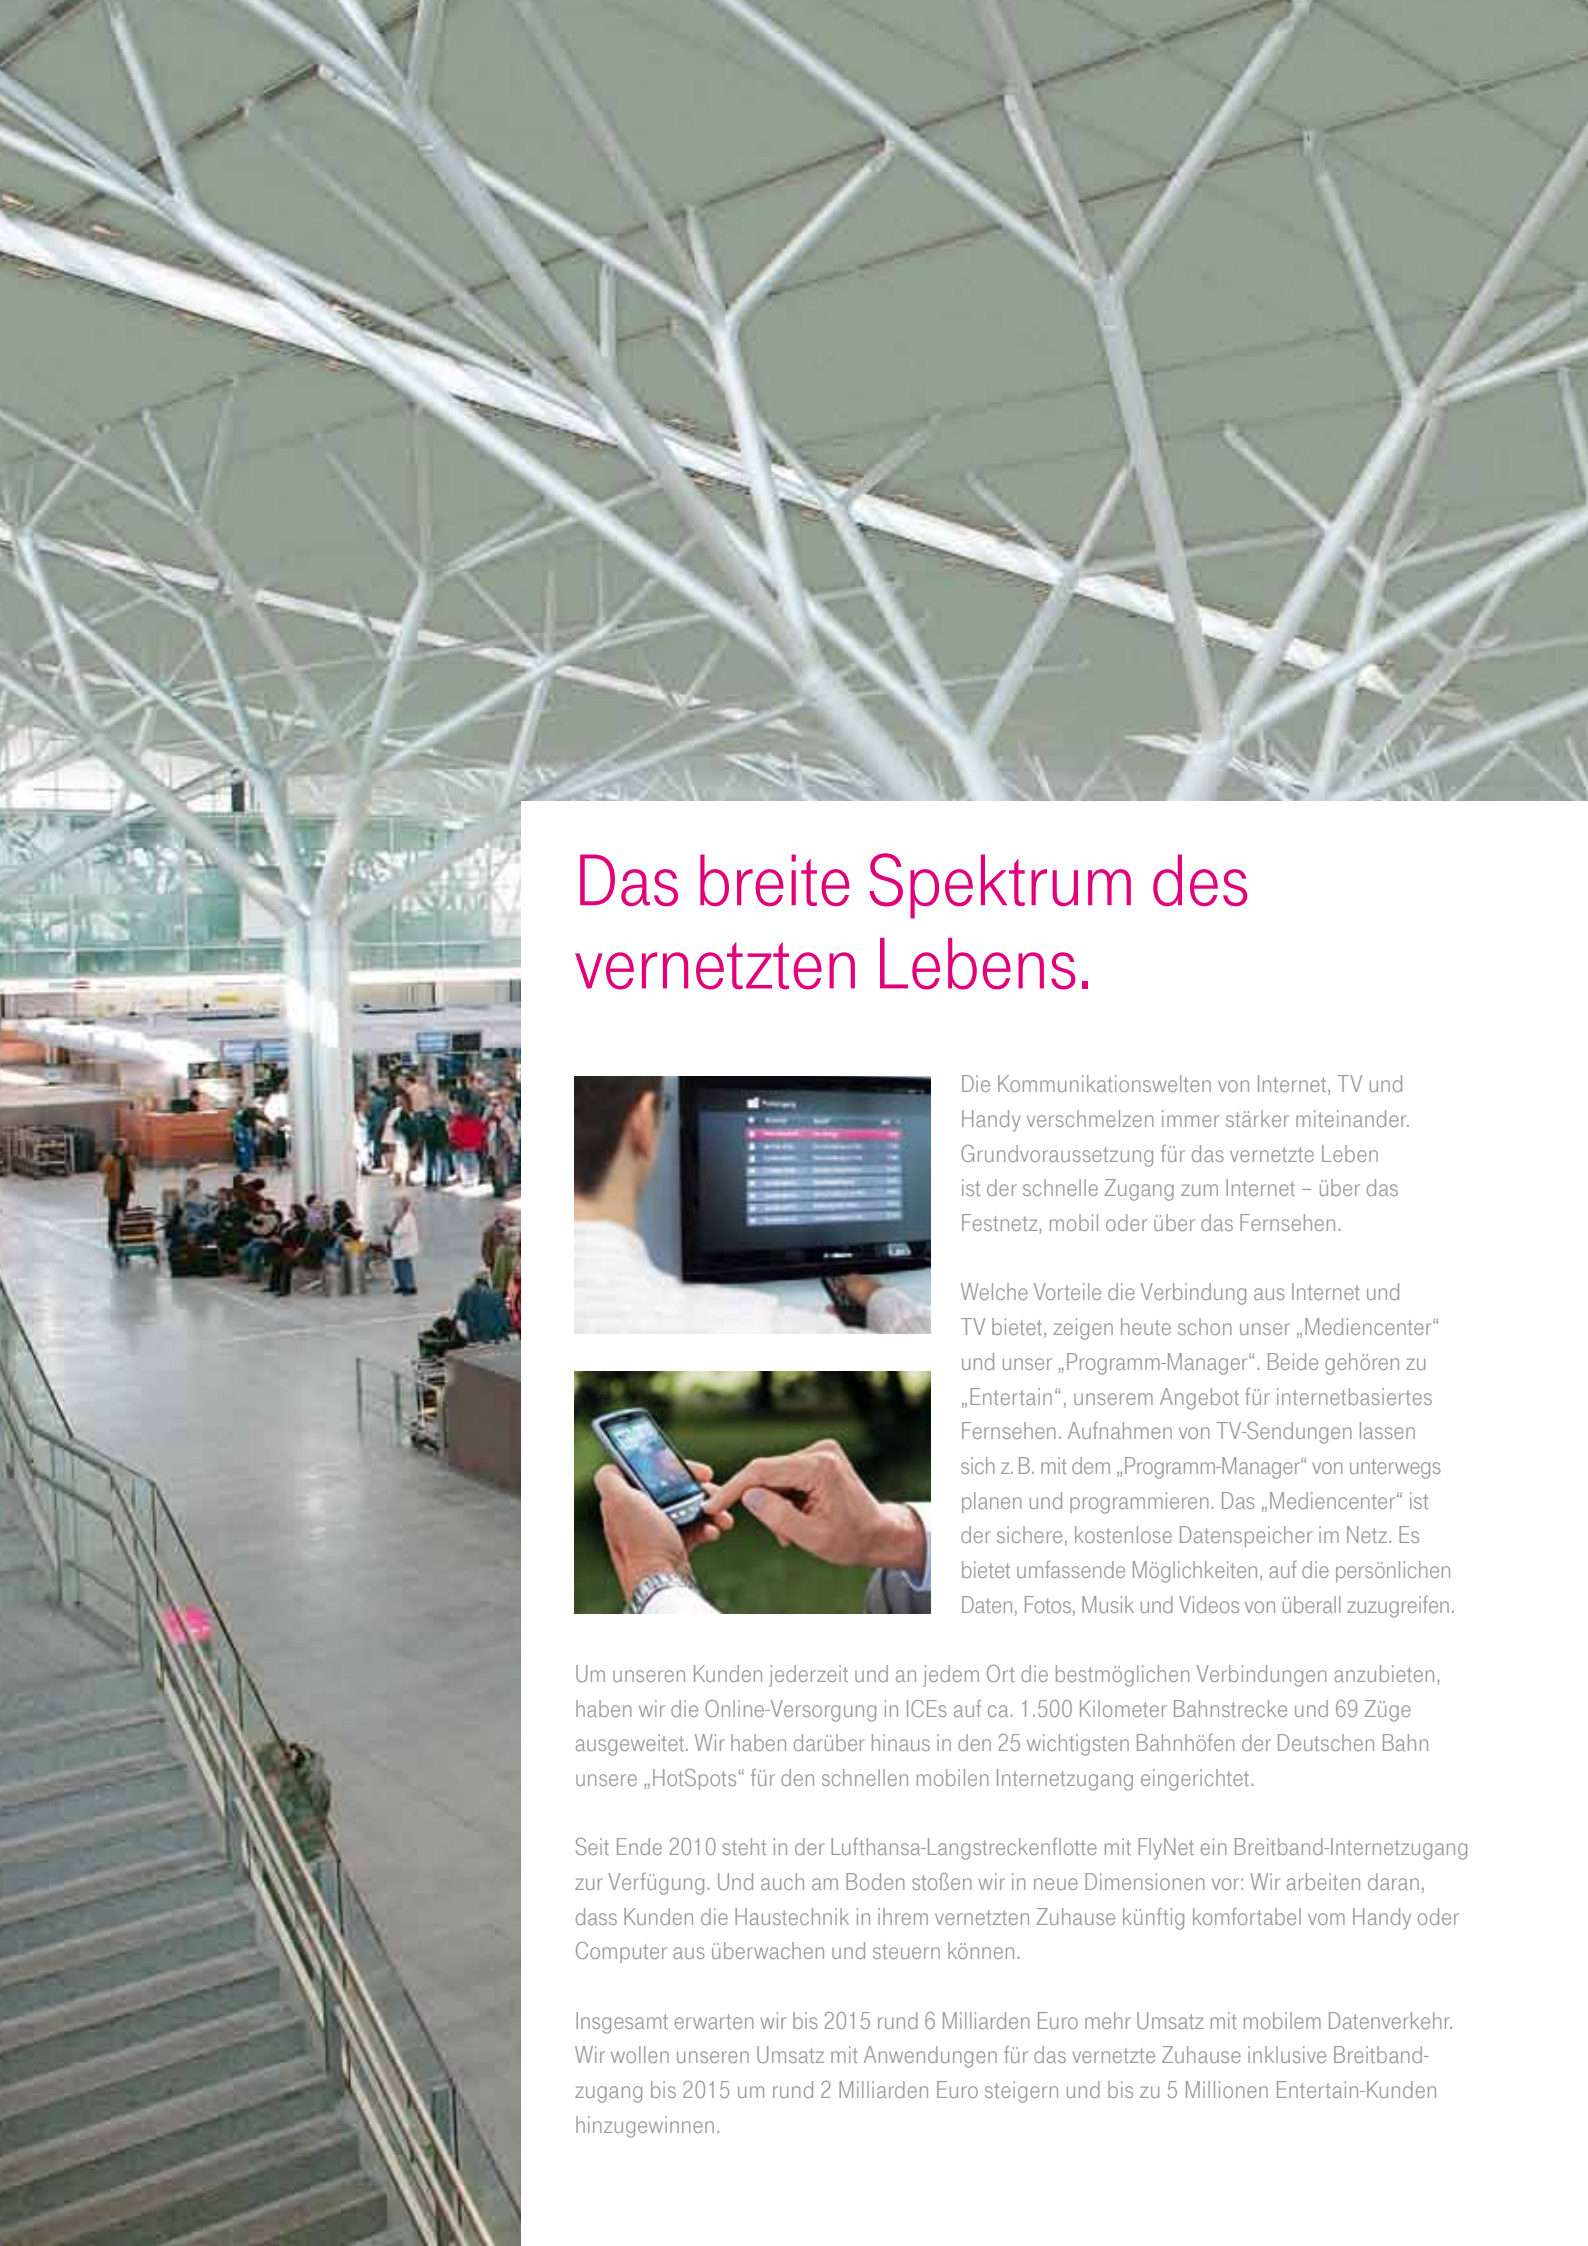

## Das breite Spektrum des vernetzten Lebens.

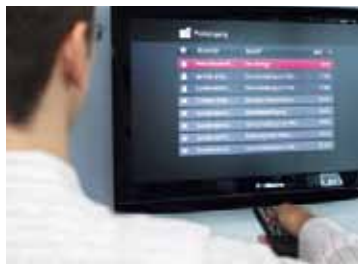

Die Kommunikationswelten von Internet, TV und Handy verschmelzen immer stärker miteinander. Grundvoraussetzung für das vernetzte Leben ist der schnelle Zugang zum Internet – über das Festnetz, mobil oder über das Fernsehen.

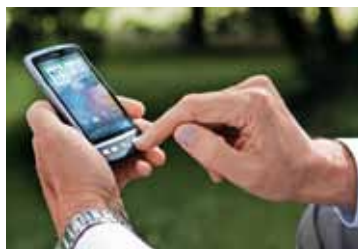

Welche Vorteile die Verbindung aus Internet und TV bietet, zeigen heute schon unser „Mediencenter“ und unser „Programm-Manager“. Beide gehören zu „Entertain“, unserem Angebot für internetbasiertes Fernsehen. Aufnahmen von TV-Sendungen lassen sich z. B. mit dem „Programm-Manager“ von unterwegs planen und programmieren. Das „Mediencenter“ ist der sichere, kostenlose Datenspeicher im Netz. Es bietet umfassende Möglichkeiten, auf die persönlichen Daten, Fotos, Musik und Videos von überall zuzugreifen.

Um unseren Kunden jederzeit und an jedem Ort die bestmöglichen Verbindungen anzubieten, haben wir die Online-Versorgung in ICEs auf ca. 1.500 Kilometer Bahnstrecke und 69 Züge ausgeweitet. Wir haben darüber hinaus in den 25 wichtigsten Bahnhöfen der Deutschen Bahn unsere „HotSpots“ für den schnellen mobilen Internetzugang eingerichtet.

Seit Ende 2010 steht in der Lufthansa-Langstreckenflotte mit FlyNet ein Breitband-Internetzugang zur Verfügung. Und auch am Boden stoßen wir in neue Dimensionen vor: Wir arbeiten daran, dass Kunden die Haustechnik in ihrem vernetzten Zuhause künftig komfortabel vom Handy oder Computer aus überwachen und steuern können.

Insgesamt erwarten wir bis 2015 rund 6 Milliarden Euro mehr Umsatz mit mobilem Datenverkehr. Wir wollen unseren Umsatz mit Anwendungen für das vernetzte Zuhause inklusive Breitbandzugang bis 2015 um rund 2 Milliarden Euro steigern und bis zu 5 Millionen Entertain-Kunden hinzugewinnen.

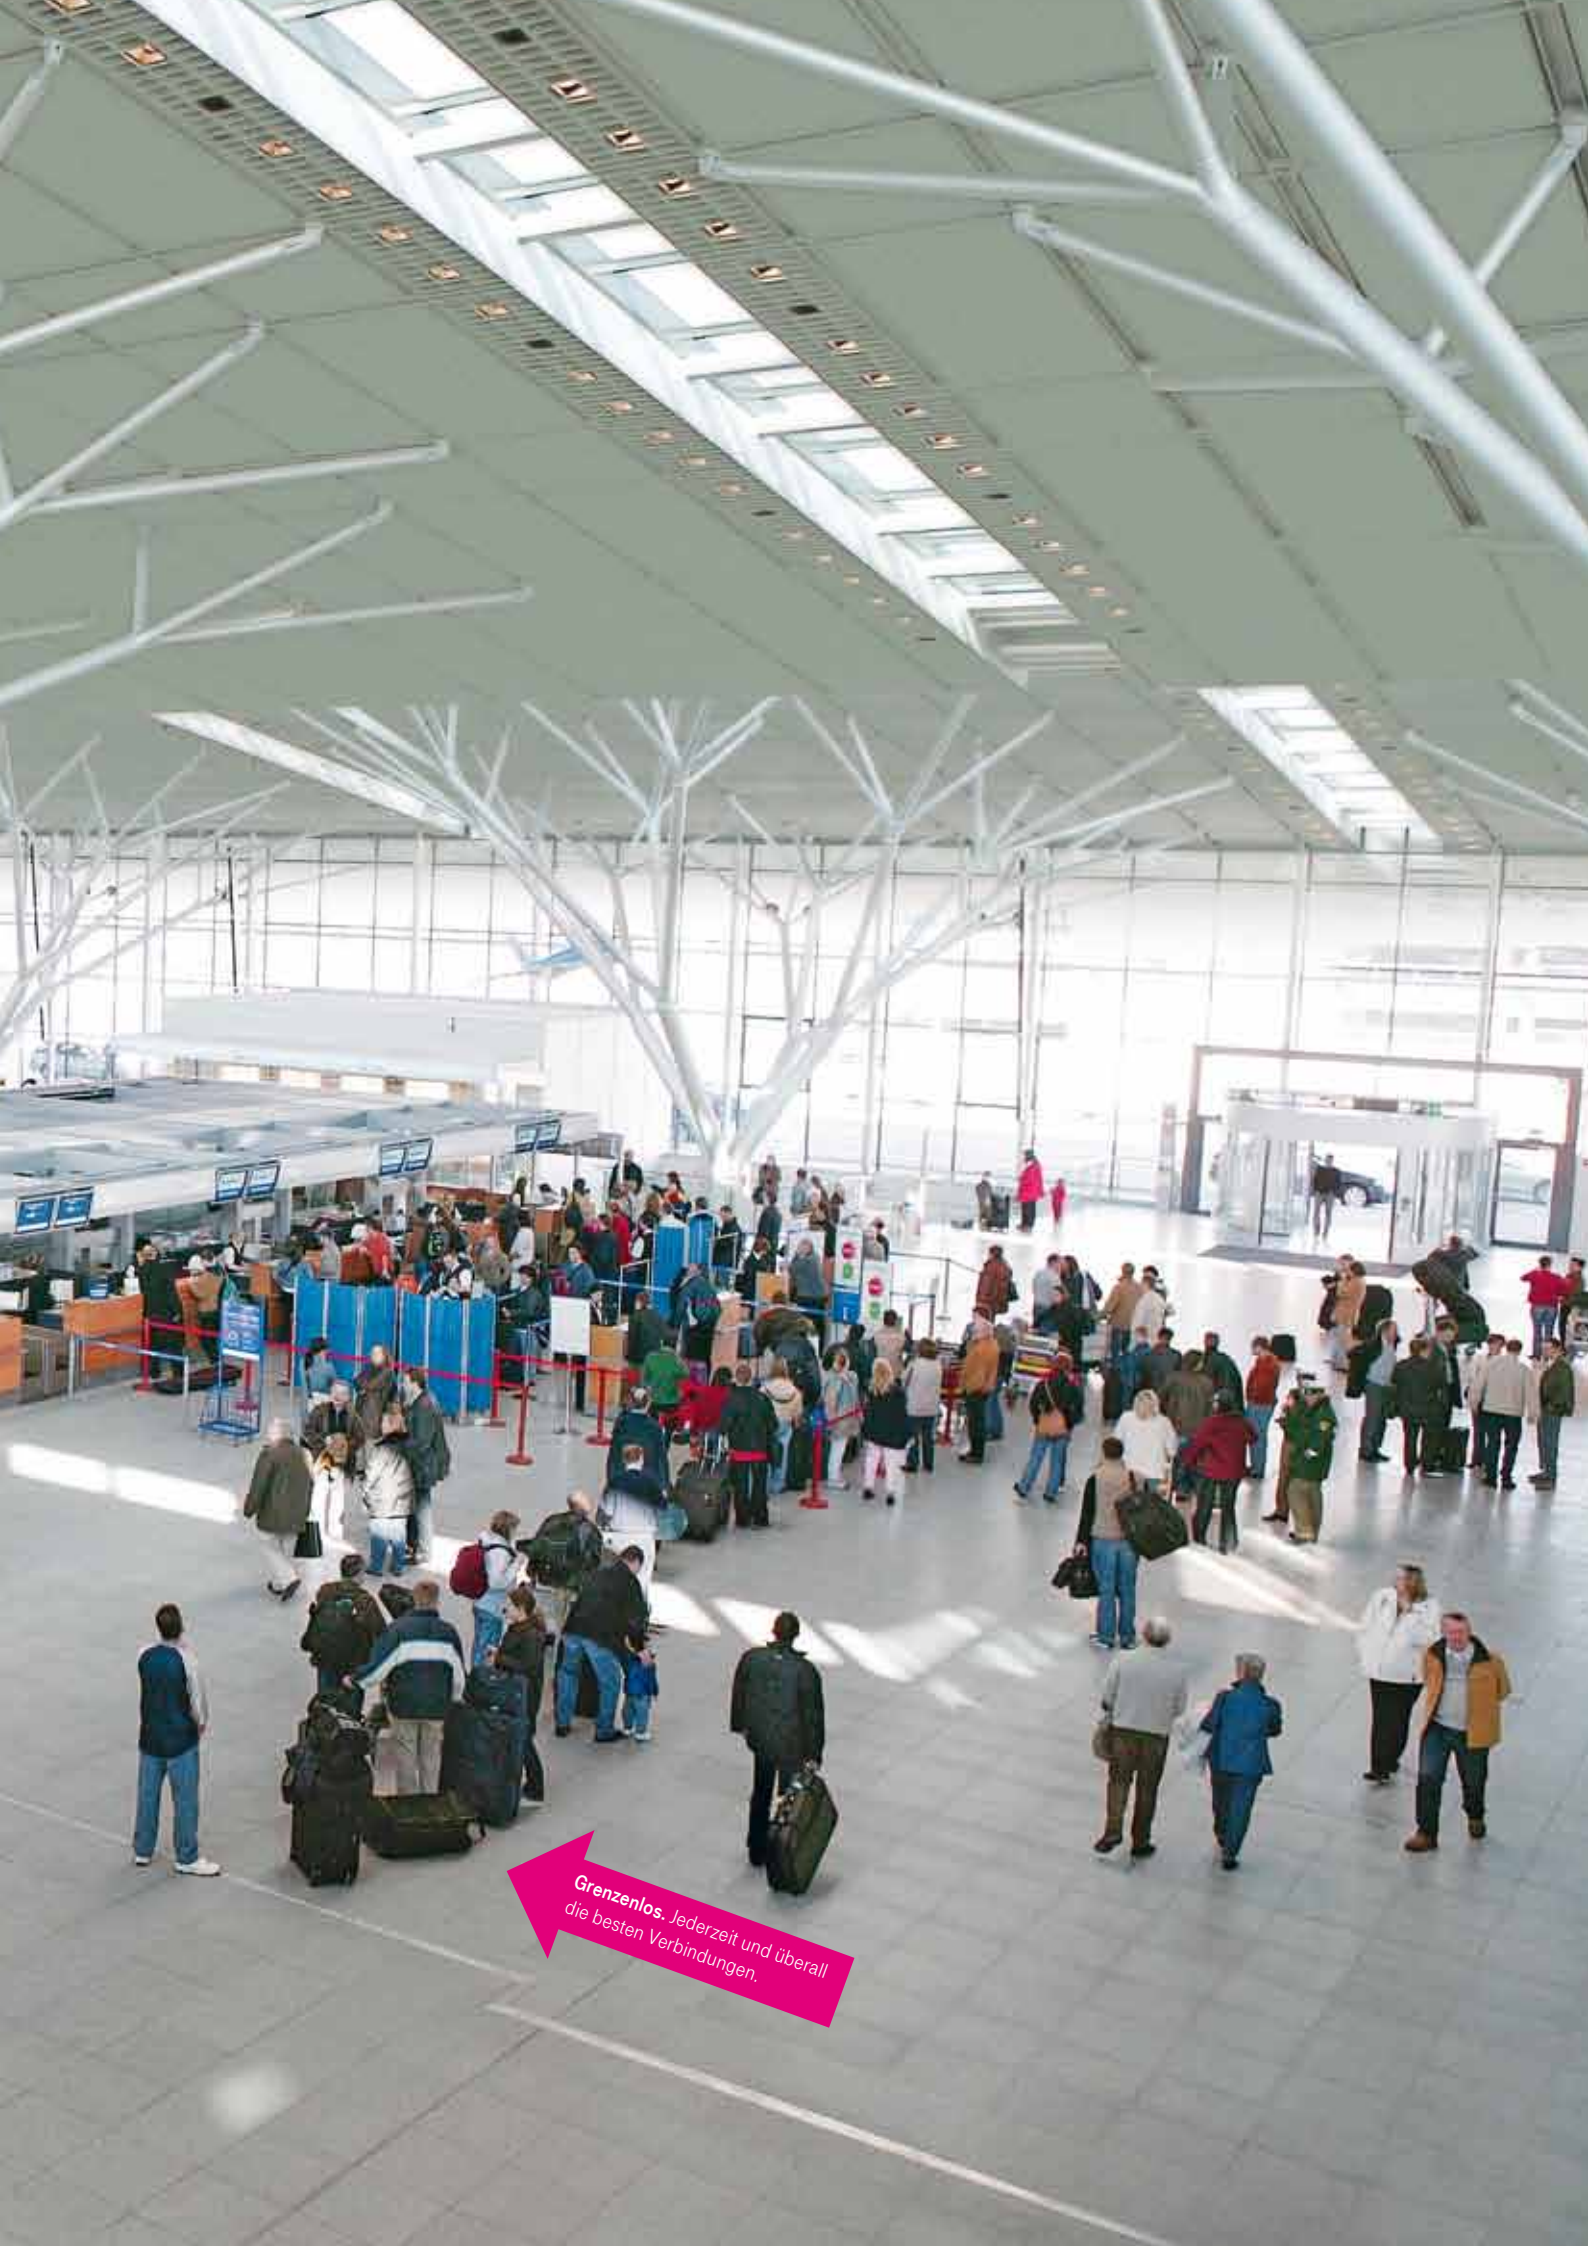

**Grenzenlos.** Jederzeit und überall  
die besten Verbindungen.

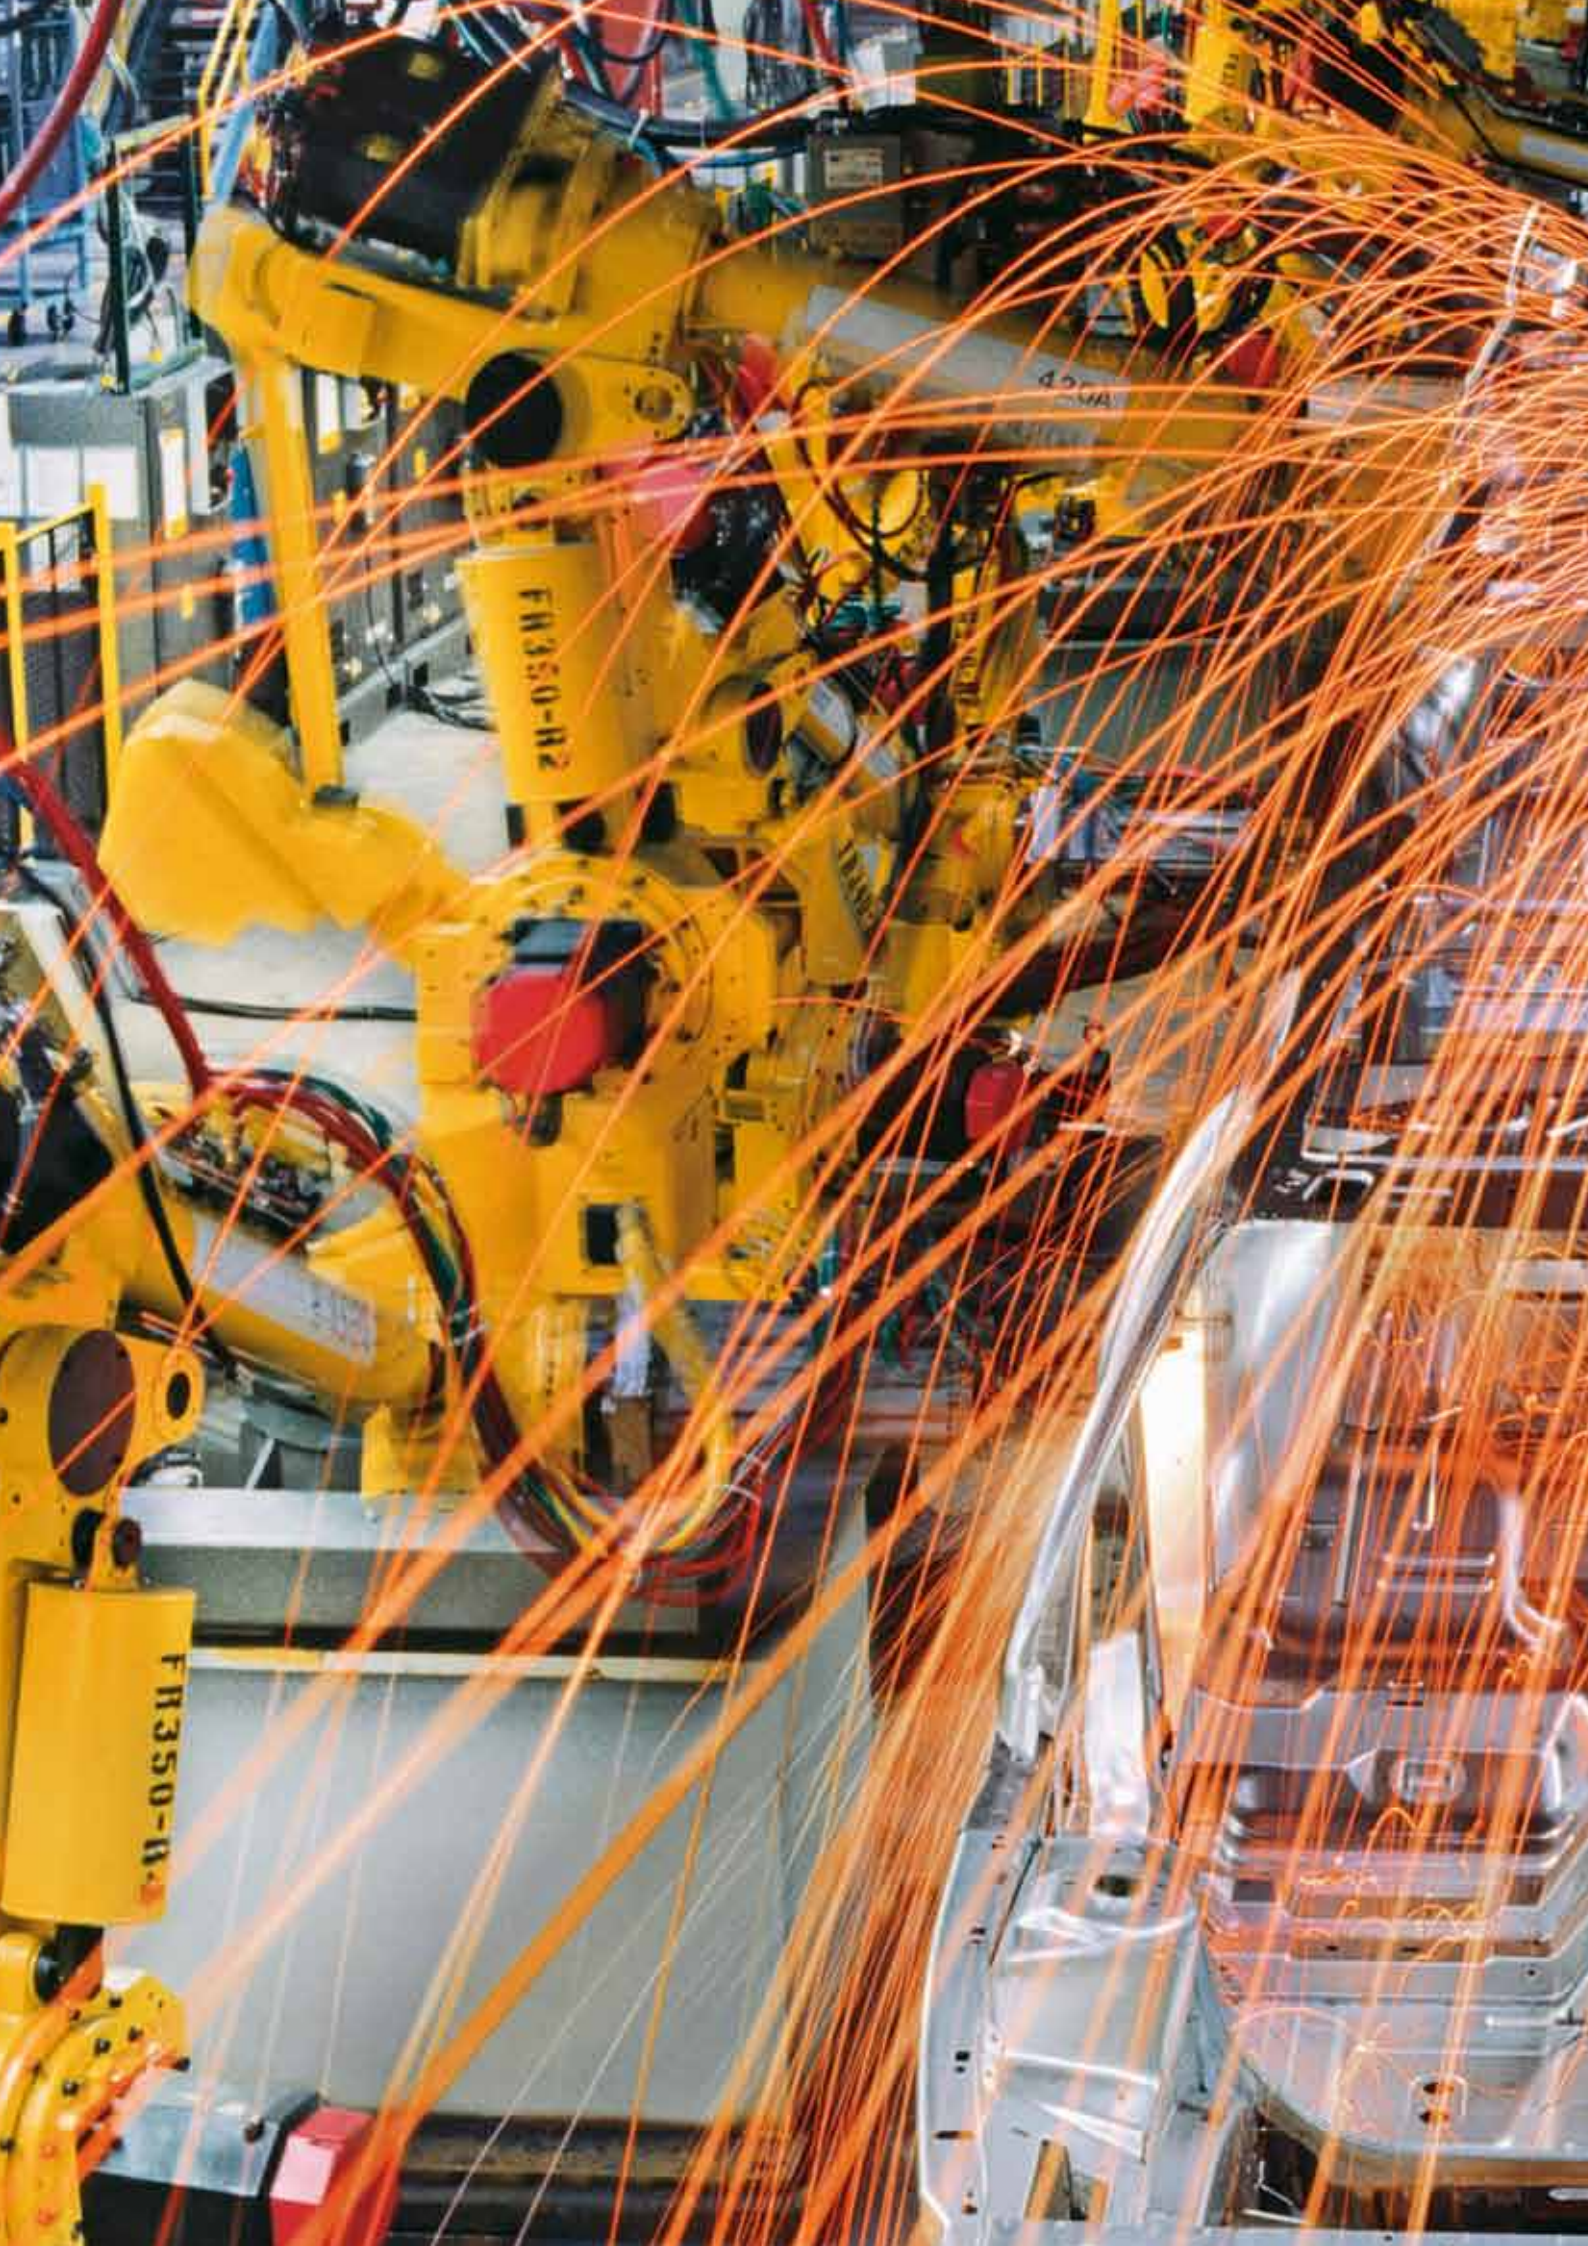

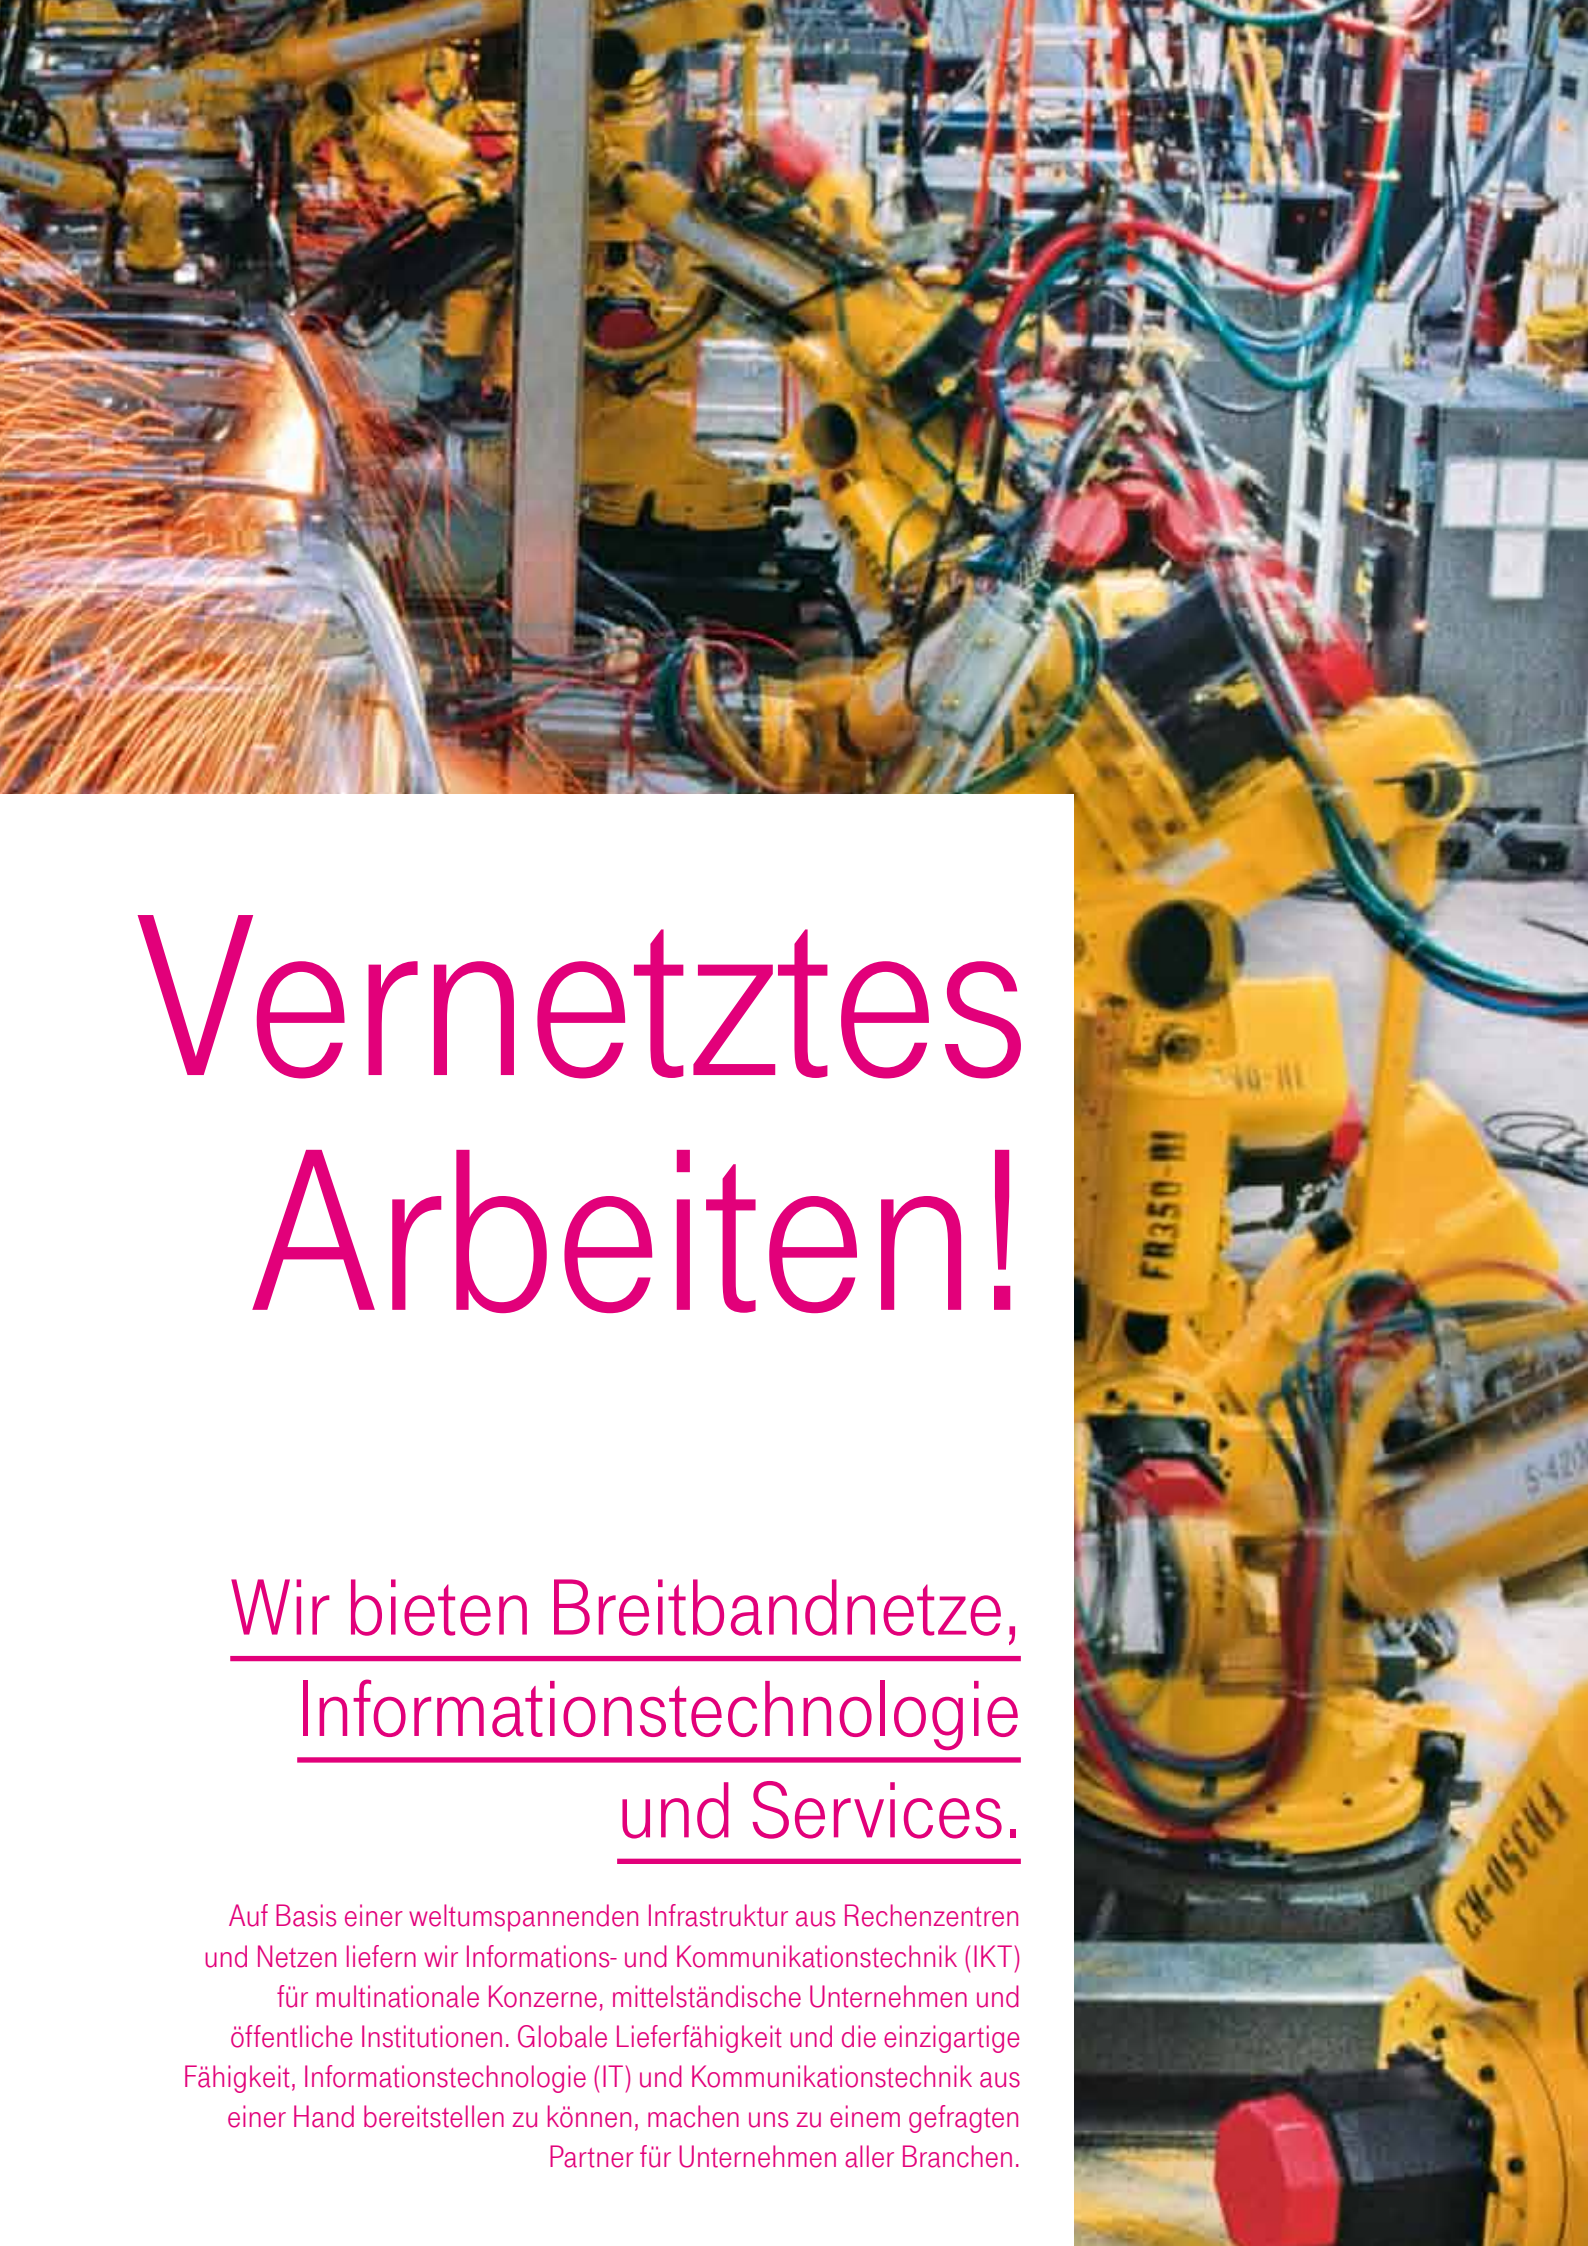

# Vernetztes Arbeiten!

Wir bieten Breitbandnetze,  
Informationstechnologie  
und Services.

Auf Basis einer weltumspannenden Infrastruktur aus Rechenzentren und Netzen liefern wir Informations- und Kommunikationstechnik (IKT) für multinationale Konzerne, mittelständische Unternehmen und öffentliche Institutionen. Globale Lieferfähigkeit und die einzigartige Fähigkeit, Informationstechnologie (IT) und Kommunikationstechnik aus einer Hand bereitstellen zu können, machen uns zu einem gefragten Partner für Unternehmen aller Branchen.

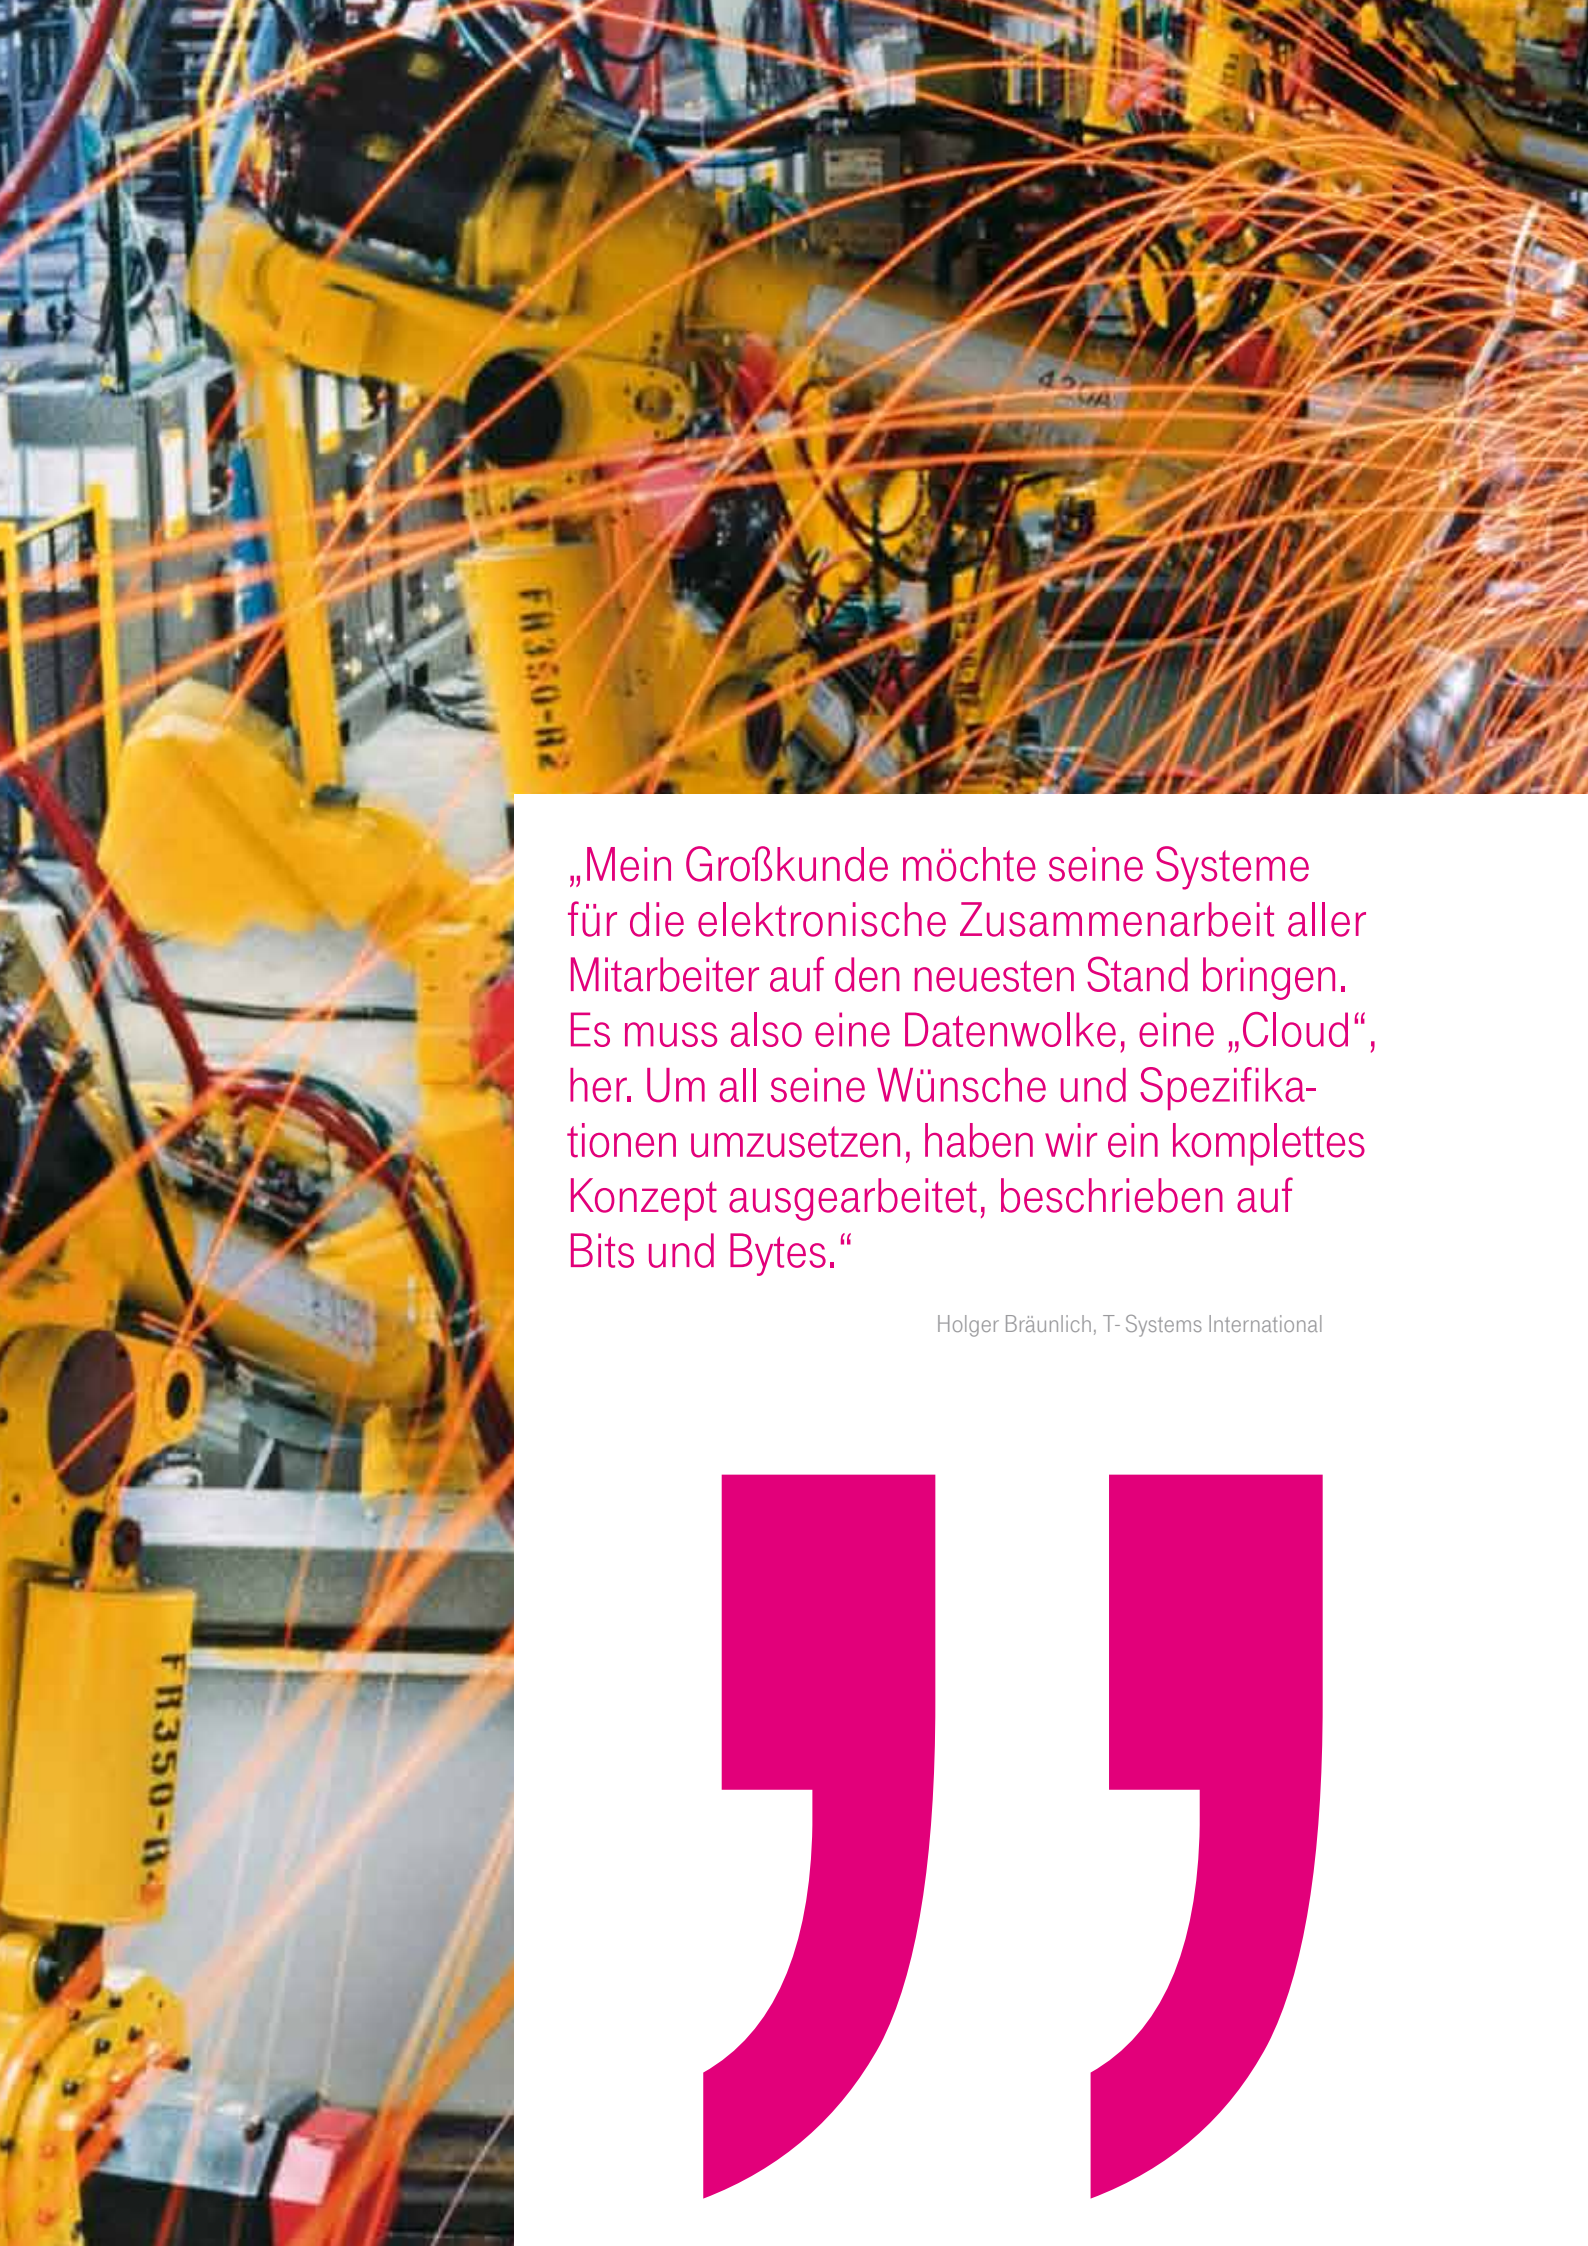

„Mein Großkunde möchte seine Systeme für die elektronische Zusammenarbeit aller Mitarbeiter auf den neuesten Stand bringen. Es muss also eine Datenwolke, eine „Cloud“, her. Um all seine Wünsche und Spezifikationen umzusetzen, haben wir ein komplettes Konzept ausgearbeitet, beschrieben auf Bits und Bytes.“

Holger Bräunlich, T-Systems International

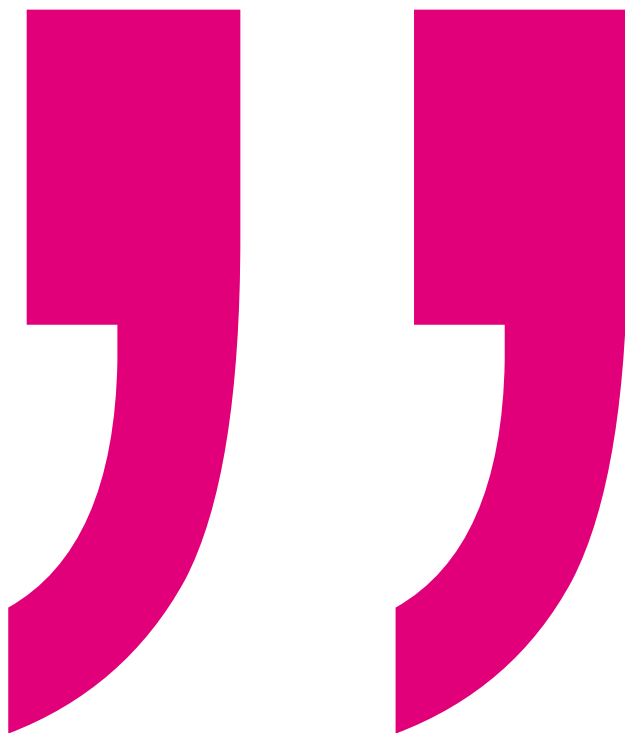

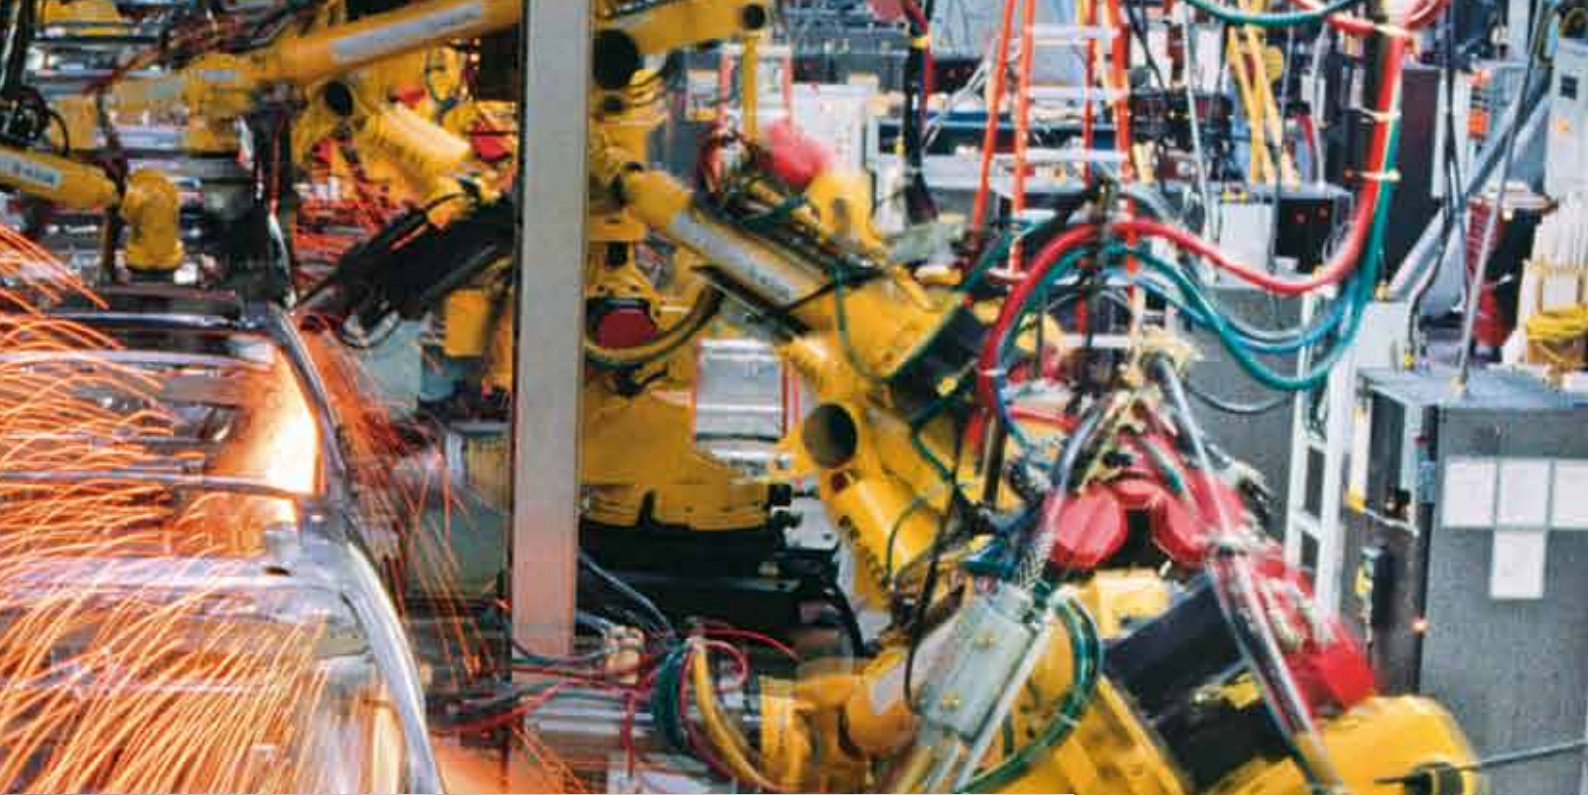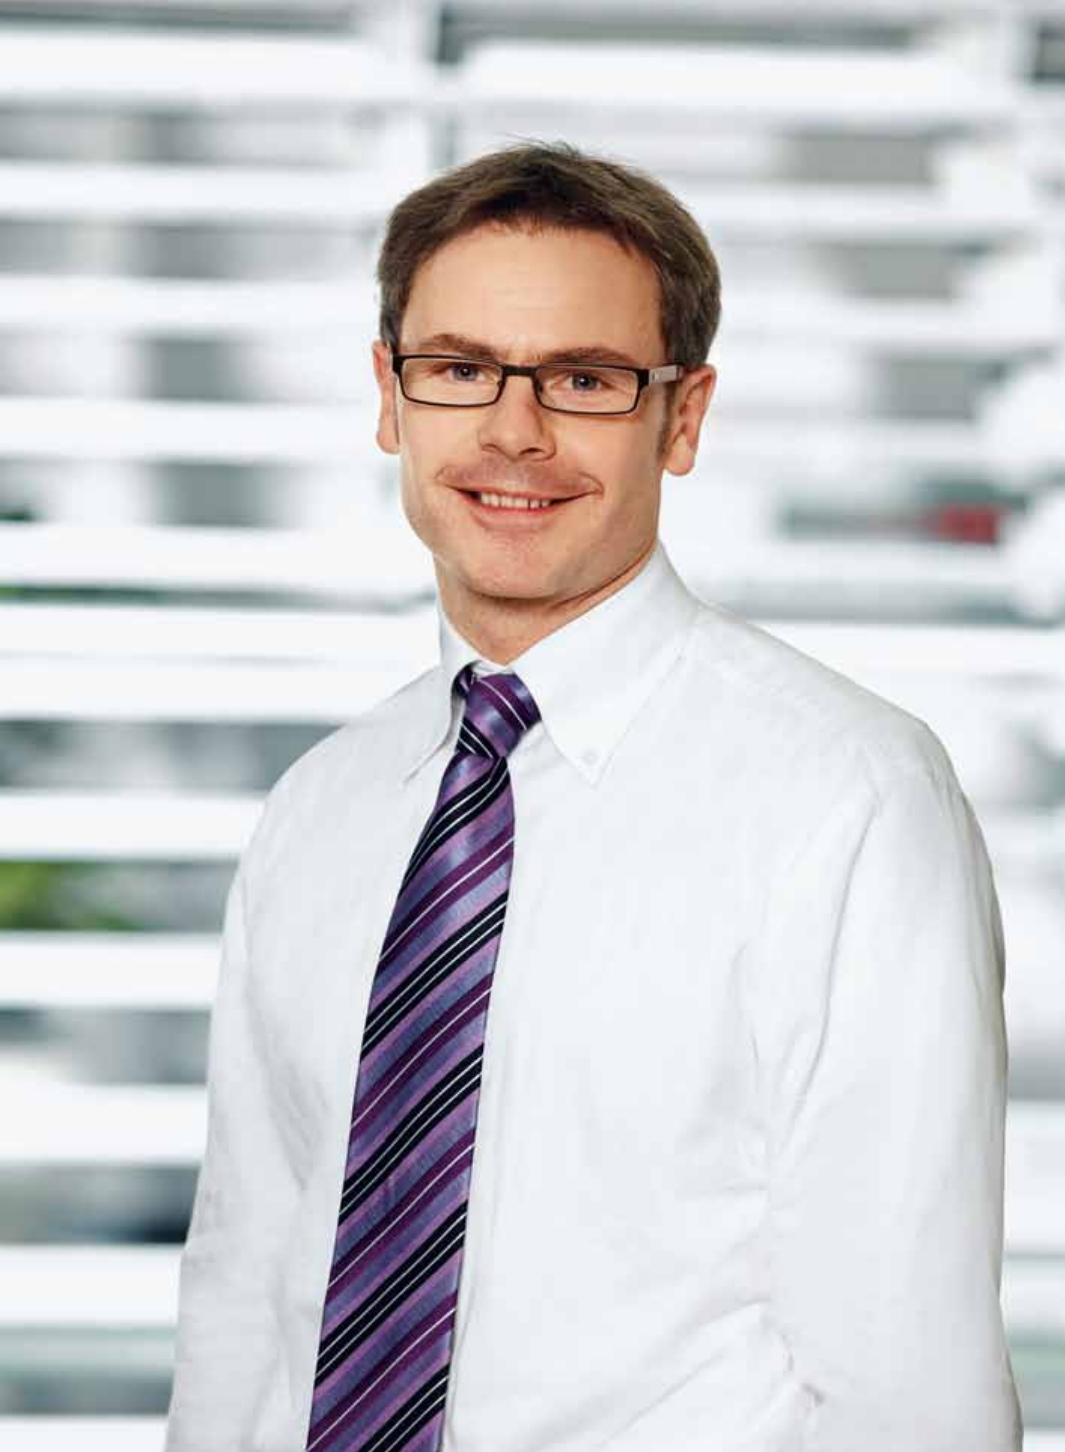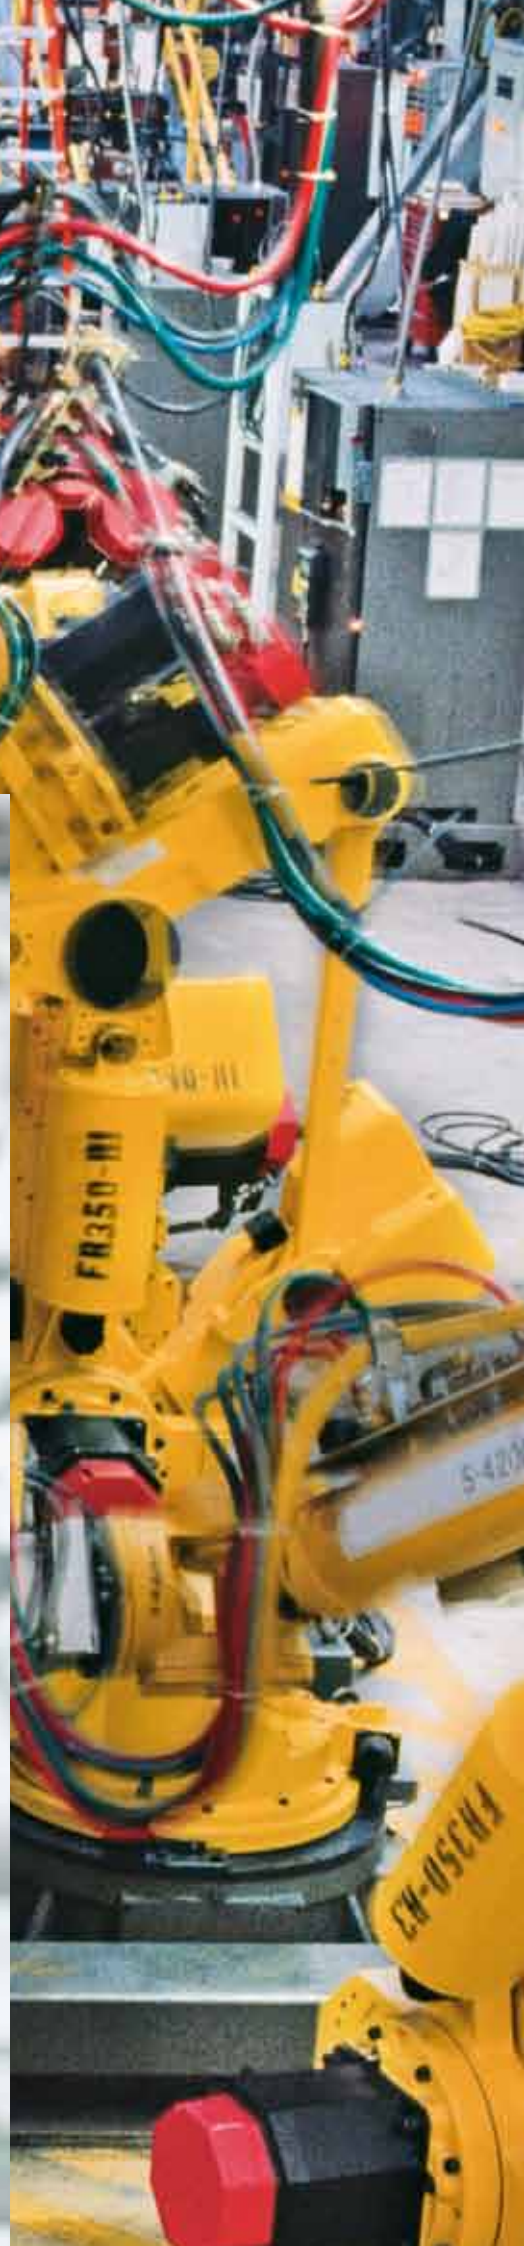

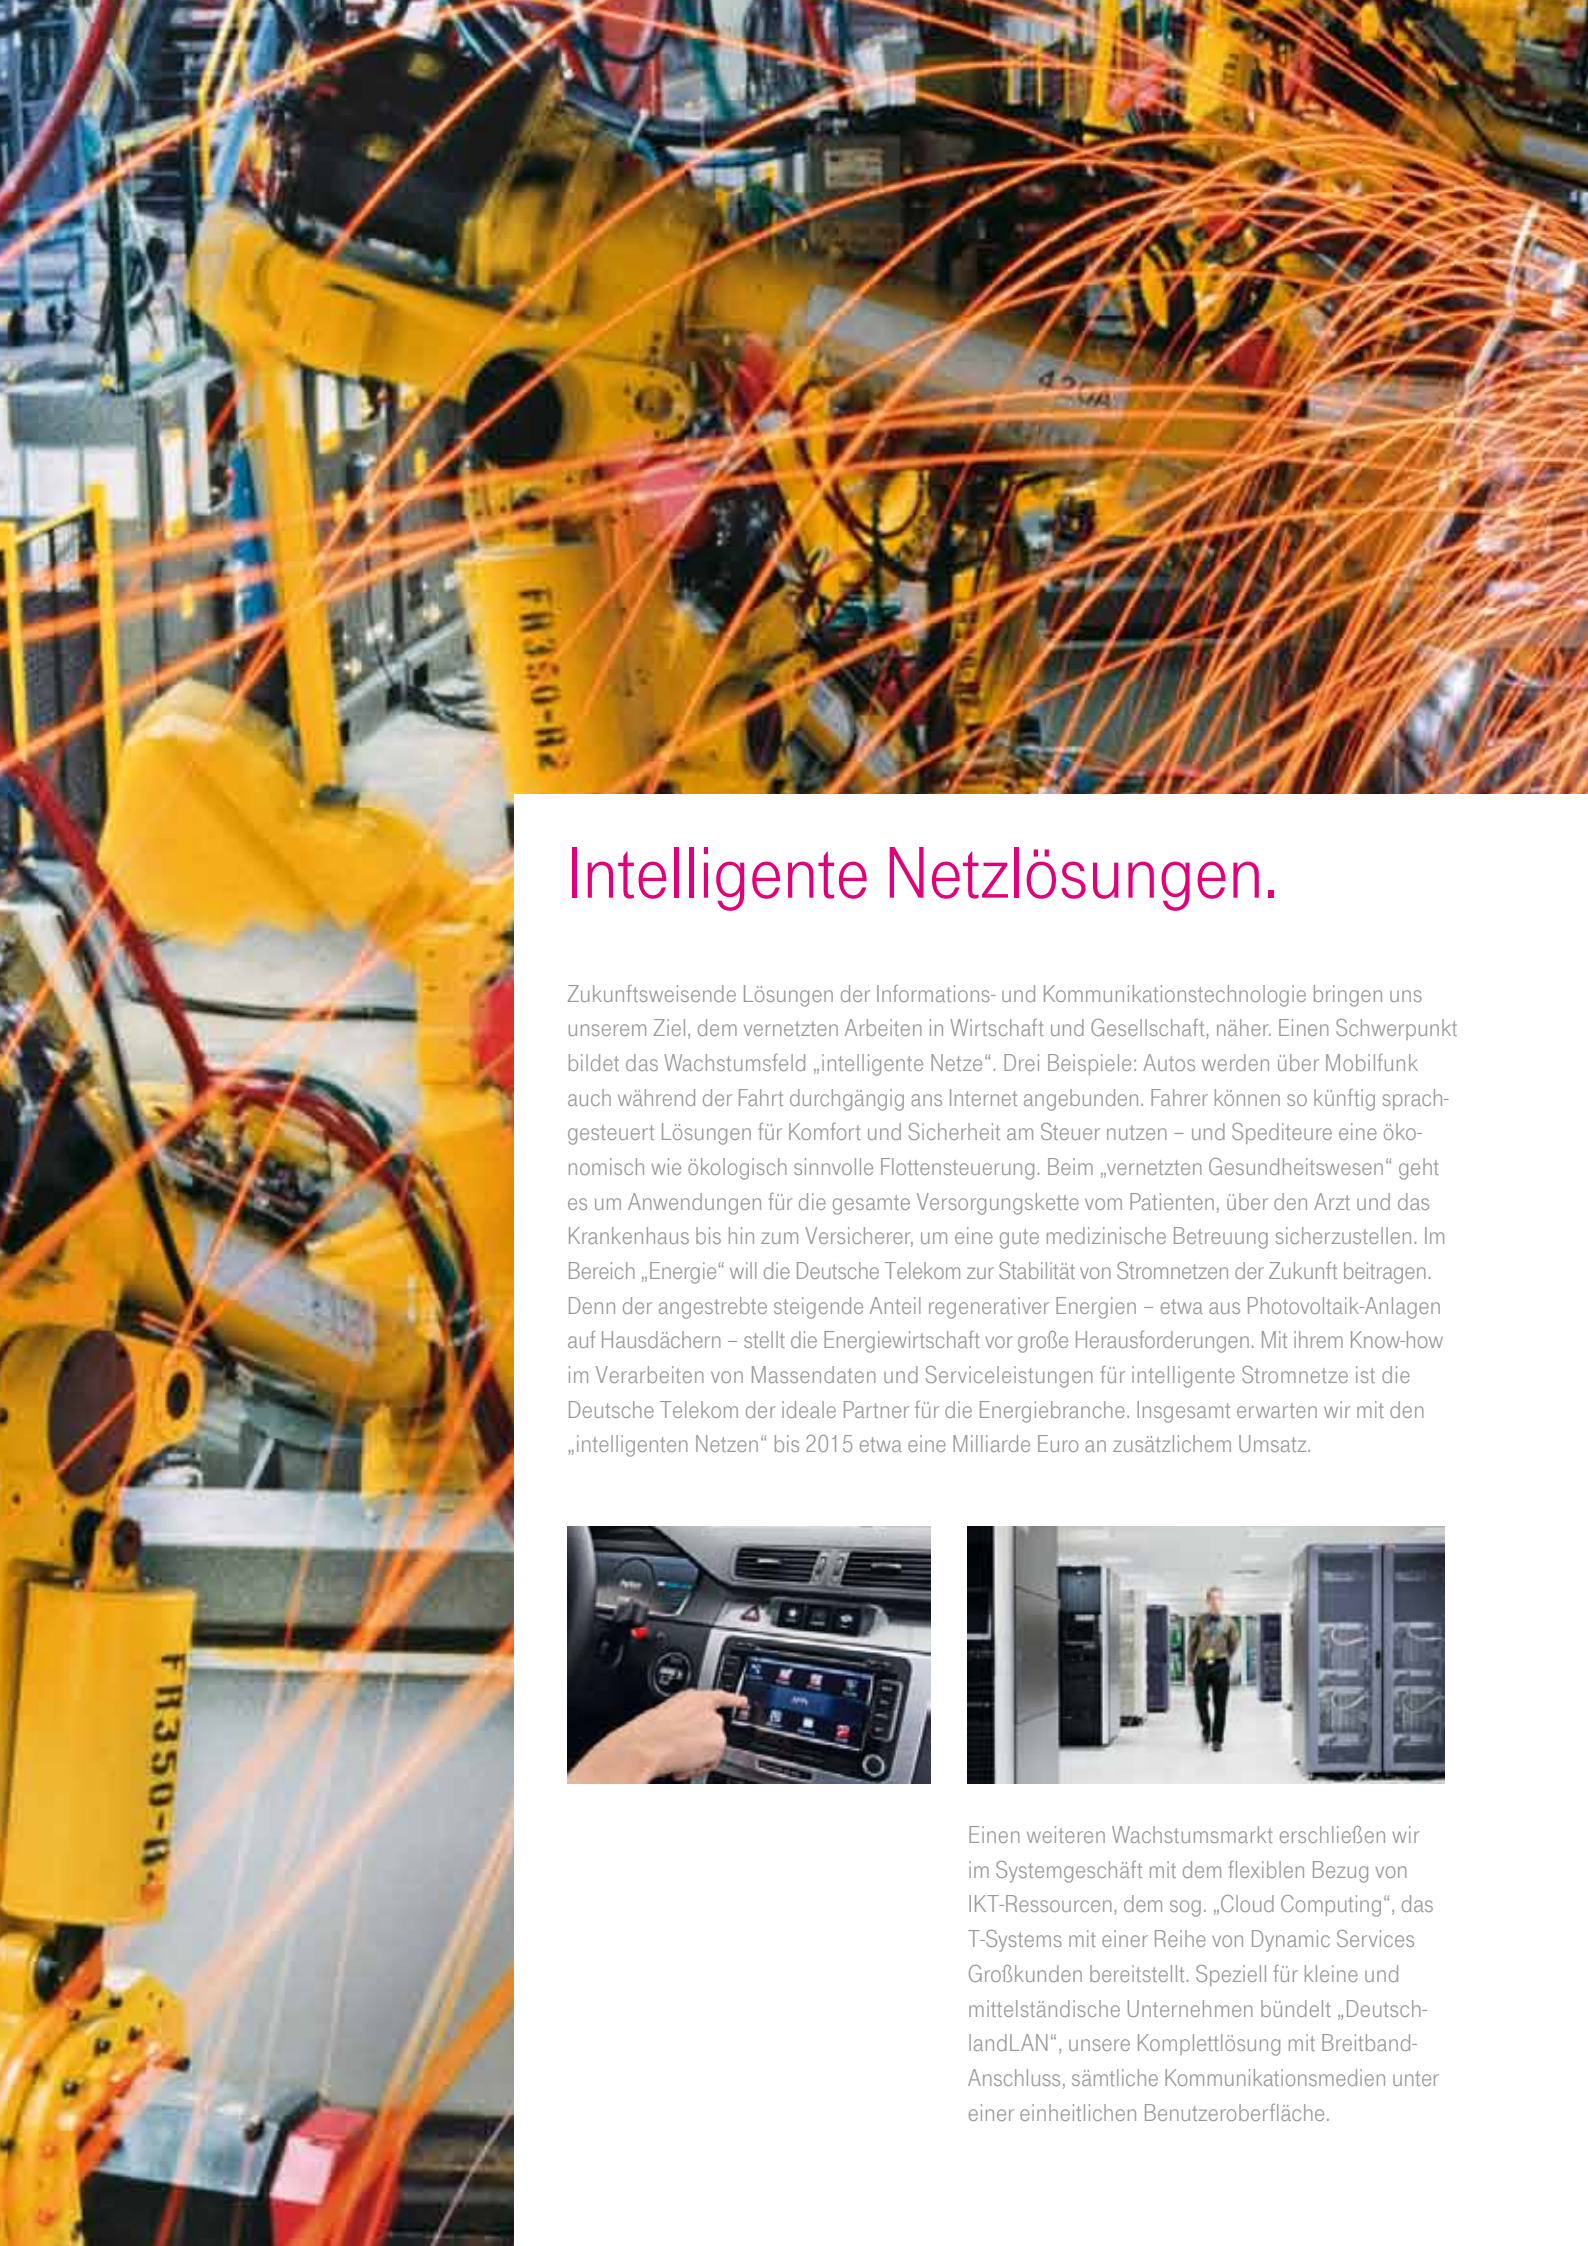

## Intelligente Netzlösungen.

Zukunftsweisende Lösungen der Informations- und Kommunikationstechnologie bringen uns unserem Ziel, dem vernetzten Arbeiten in Wirtschaft und Gesellschaft, näher. Einen Schwerpunkt bildet das Wachstumsfeld „intelligente Netze“. Drei Beispiele: Autos werden über Mobilfunk auch während der Fahrt durchgängig ans Internet angebunden. Fahrer können so künftig sprachgesteuert Lösungen für Komfort und Sicherheit am Steuer nutzen – und Spediteure eine ökonomisch wie ökologisch sinnvolle Flottensteuerung. Beim „vernetzten Gesundheitswesen“ geht es um Anwendungen für die gesamte Versorgungskette vom Patienten, über den Arzt und das Krankenhaus bis hin zum Versicherer, um eine gute medizinische Betreuung sicherzustellen. Im Bereich „Energie“ will die Deutsche Telekom zur Stabilität von Stromnetzen der Zukunft beitragen. Denn der angestrebte steigende Anteil regenerativer Energien – etwa aus Photovoltaik-Anlagen auf Hausdächern – stellt die Energiewirtschaft vor große Herausforderungen. Mit ihrem Know-how im Verarbeiten von Massendaten und Serviceleistungen für intelligente Stromnetze ist die Deutsche Telekom der ideale Partner für die Energiebranche. Insgesamt erwarten wir mit den „intelligenten Netzen“ bis 2015 etwa eine Milliarde Euro an zusätzlichem Umsatz.

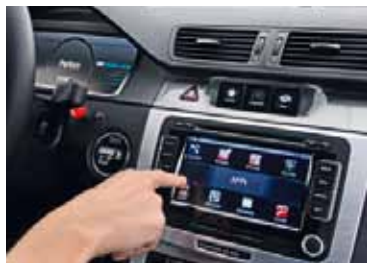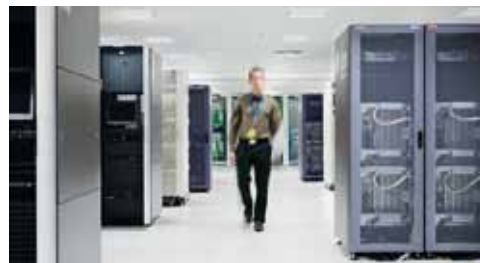

Einen weiteren Wachstumsmarkt erschließen wir im Systemgeschäft mit dem flexiblen Bezug von IKT-Ressourcen, dem sog. „Cloud Computing“, das T-Systems mit einer Reihe von Dynamic Services Großkunden bereitstellt. Speziell für kleine und mittelständische Unternehmen bündelt „DeutschlandLAN“, unsere Komplettlösung mit Breitband-Anschluss, sämtliche Kommunikationsmedien unter einer einheitlichen Benutzeroberfläche.



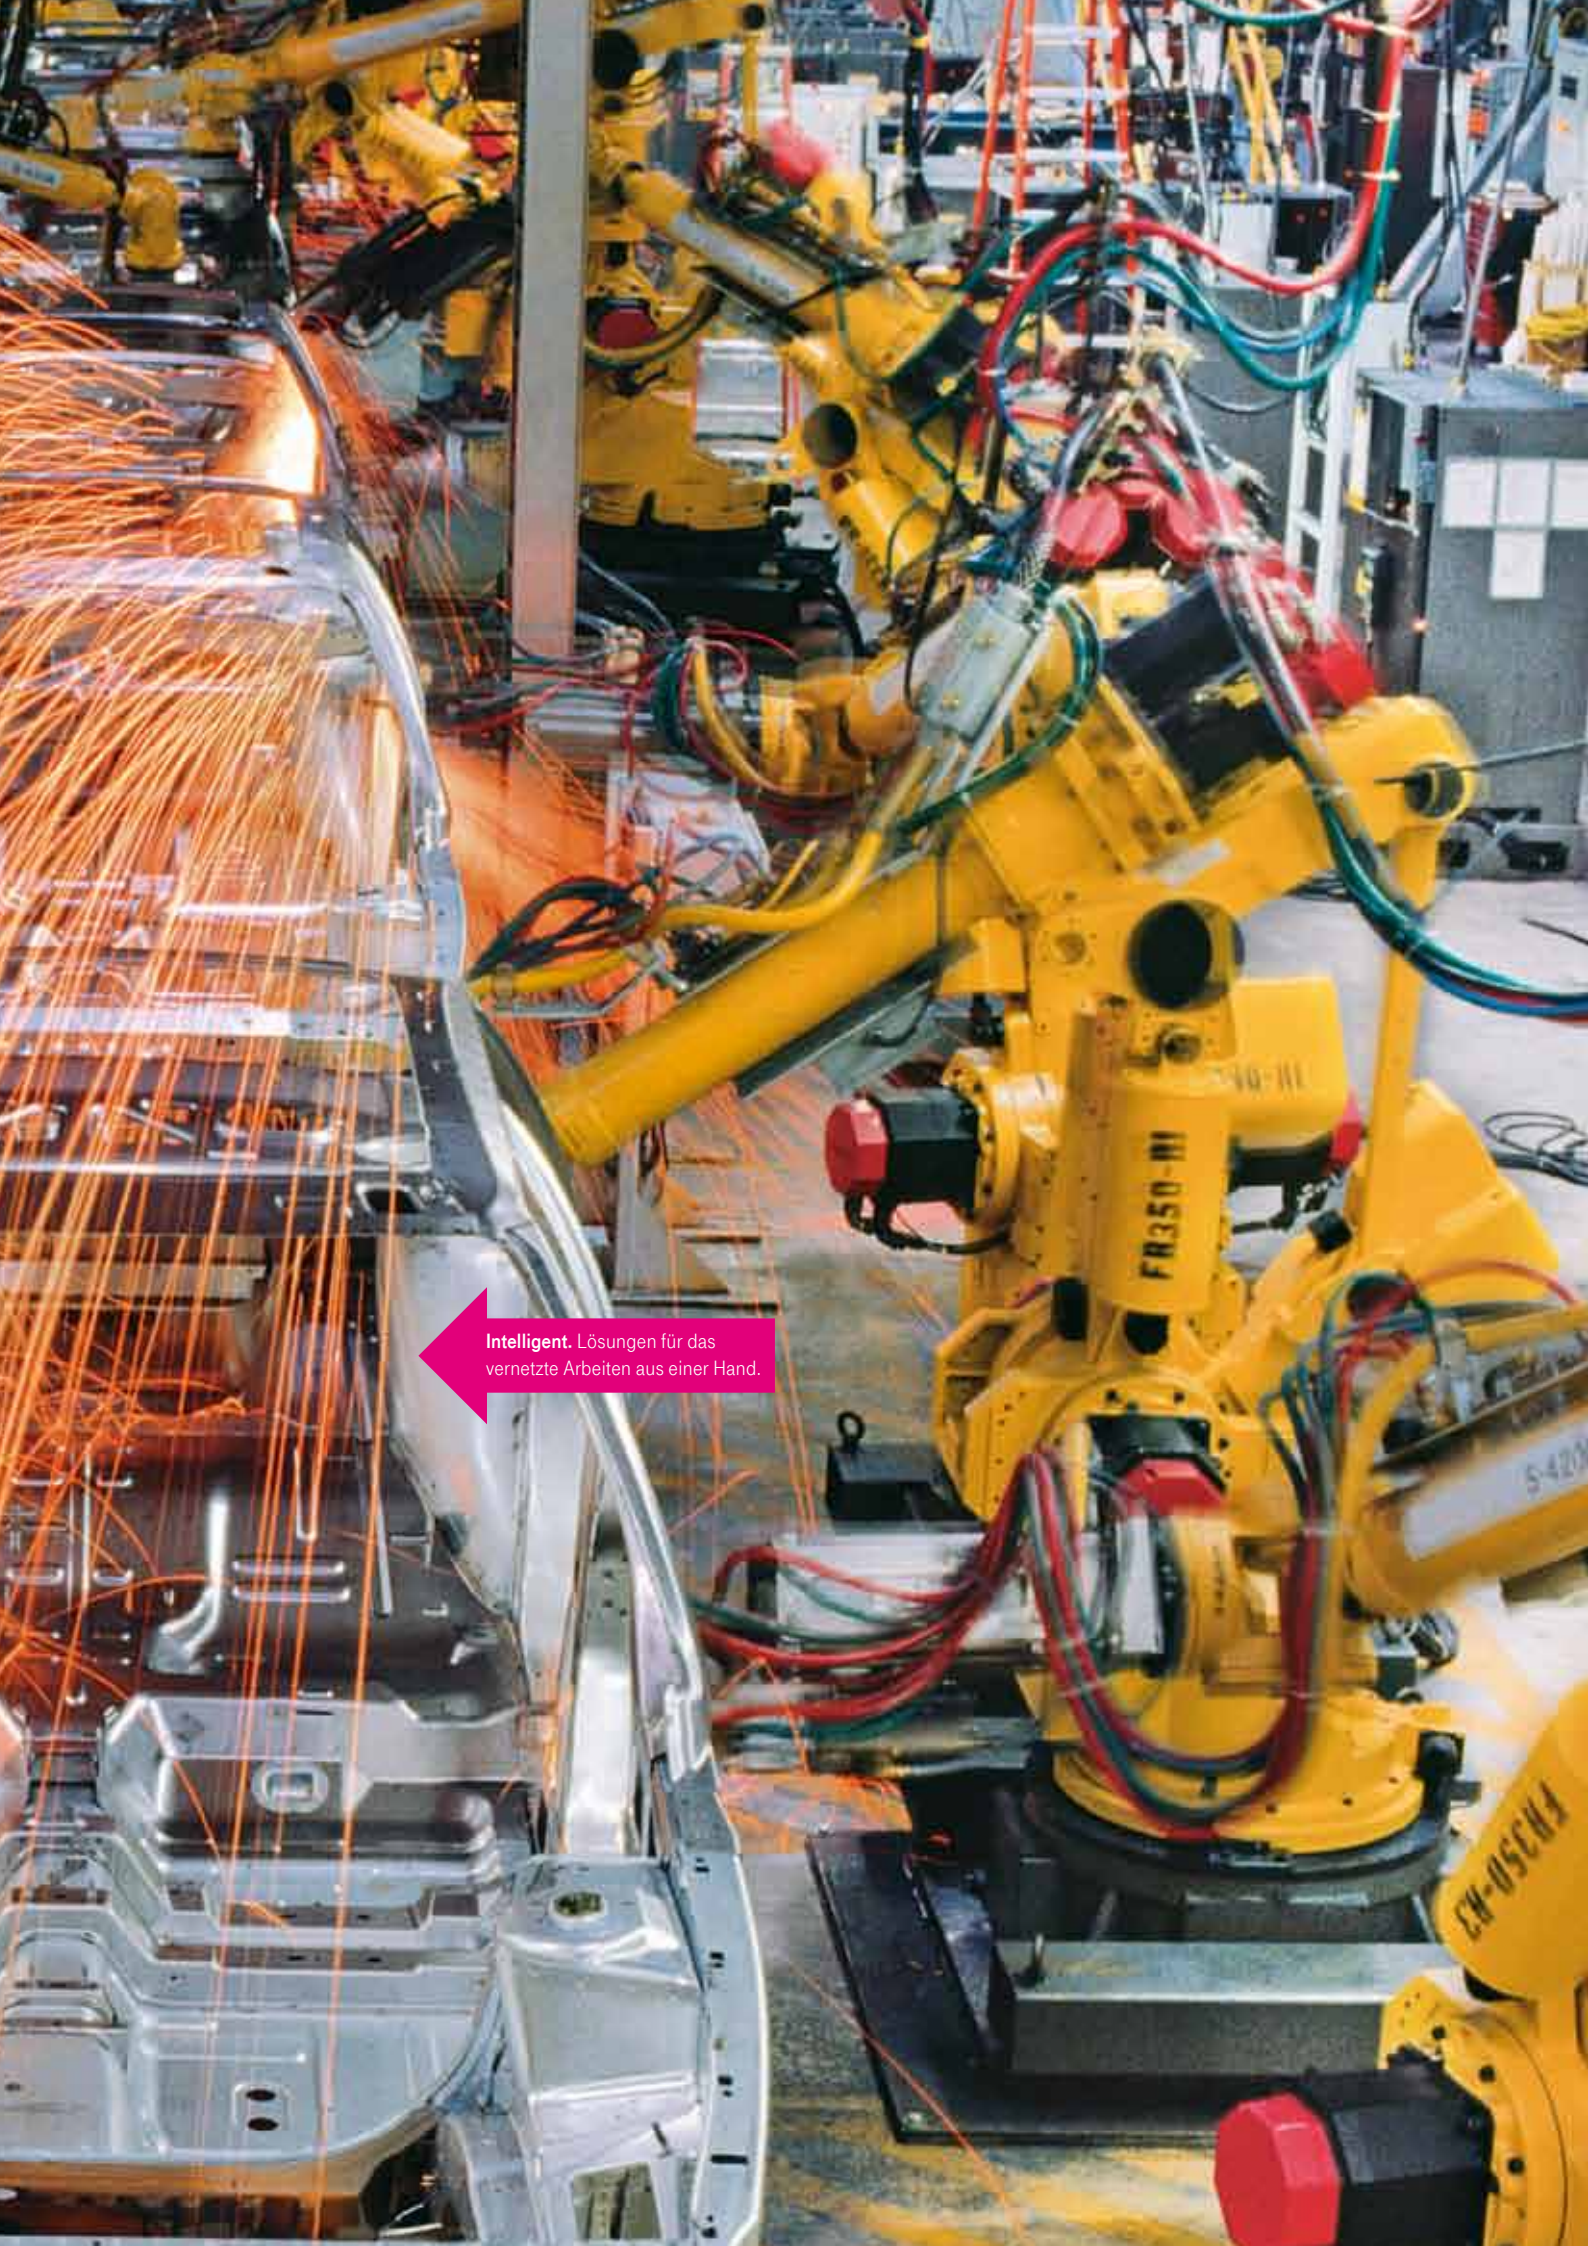

Intelligent. Lösungen für das vernetzte Arbeiten aus einer Hand.

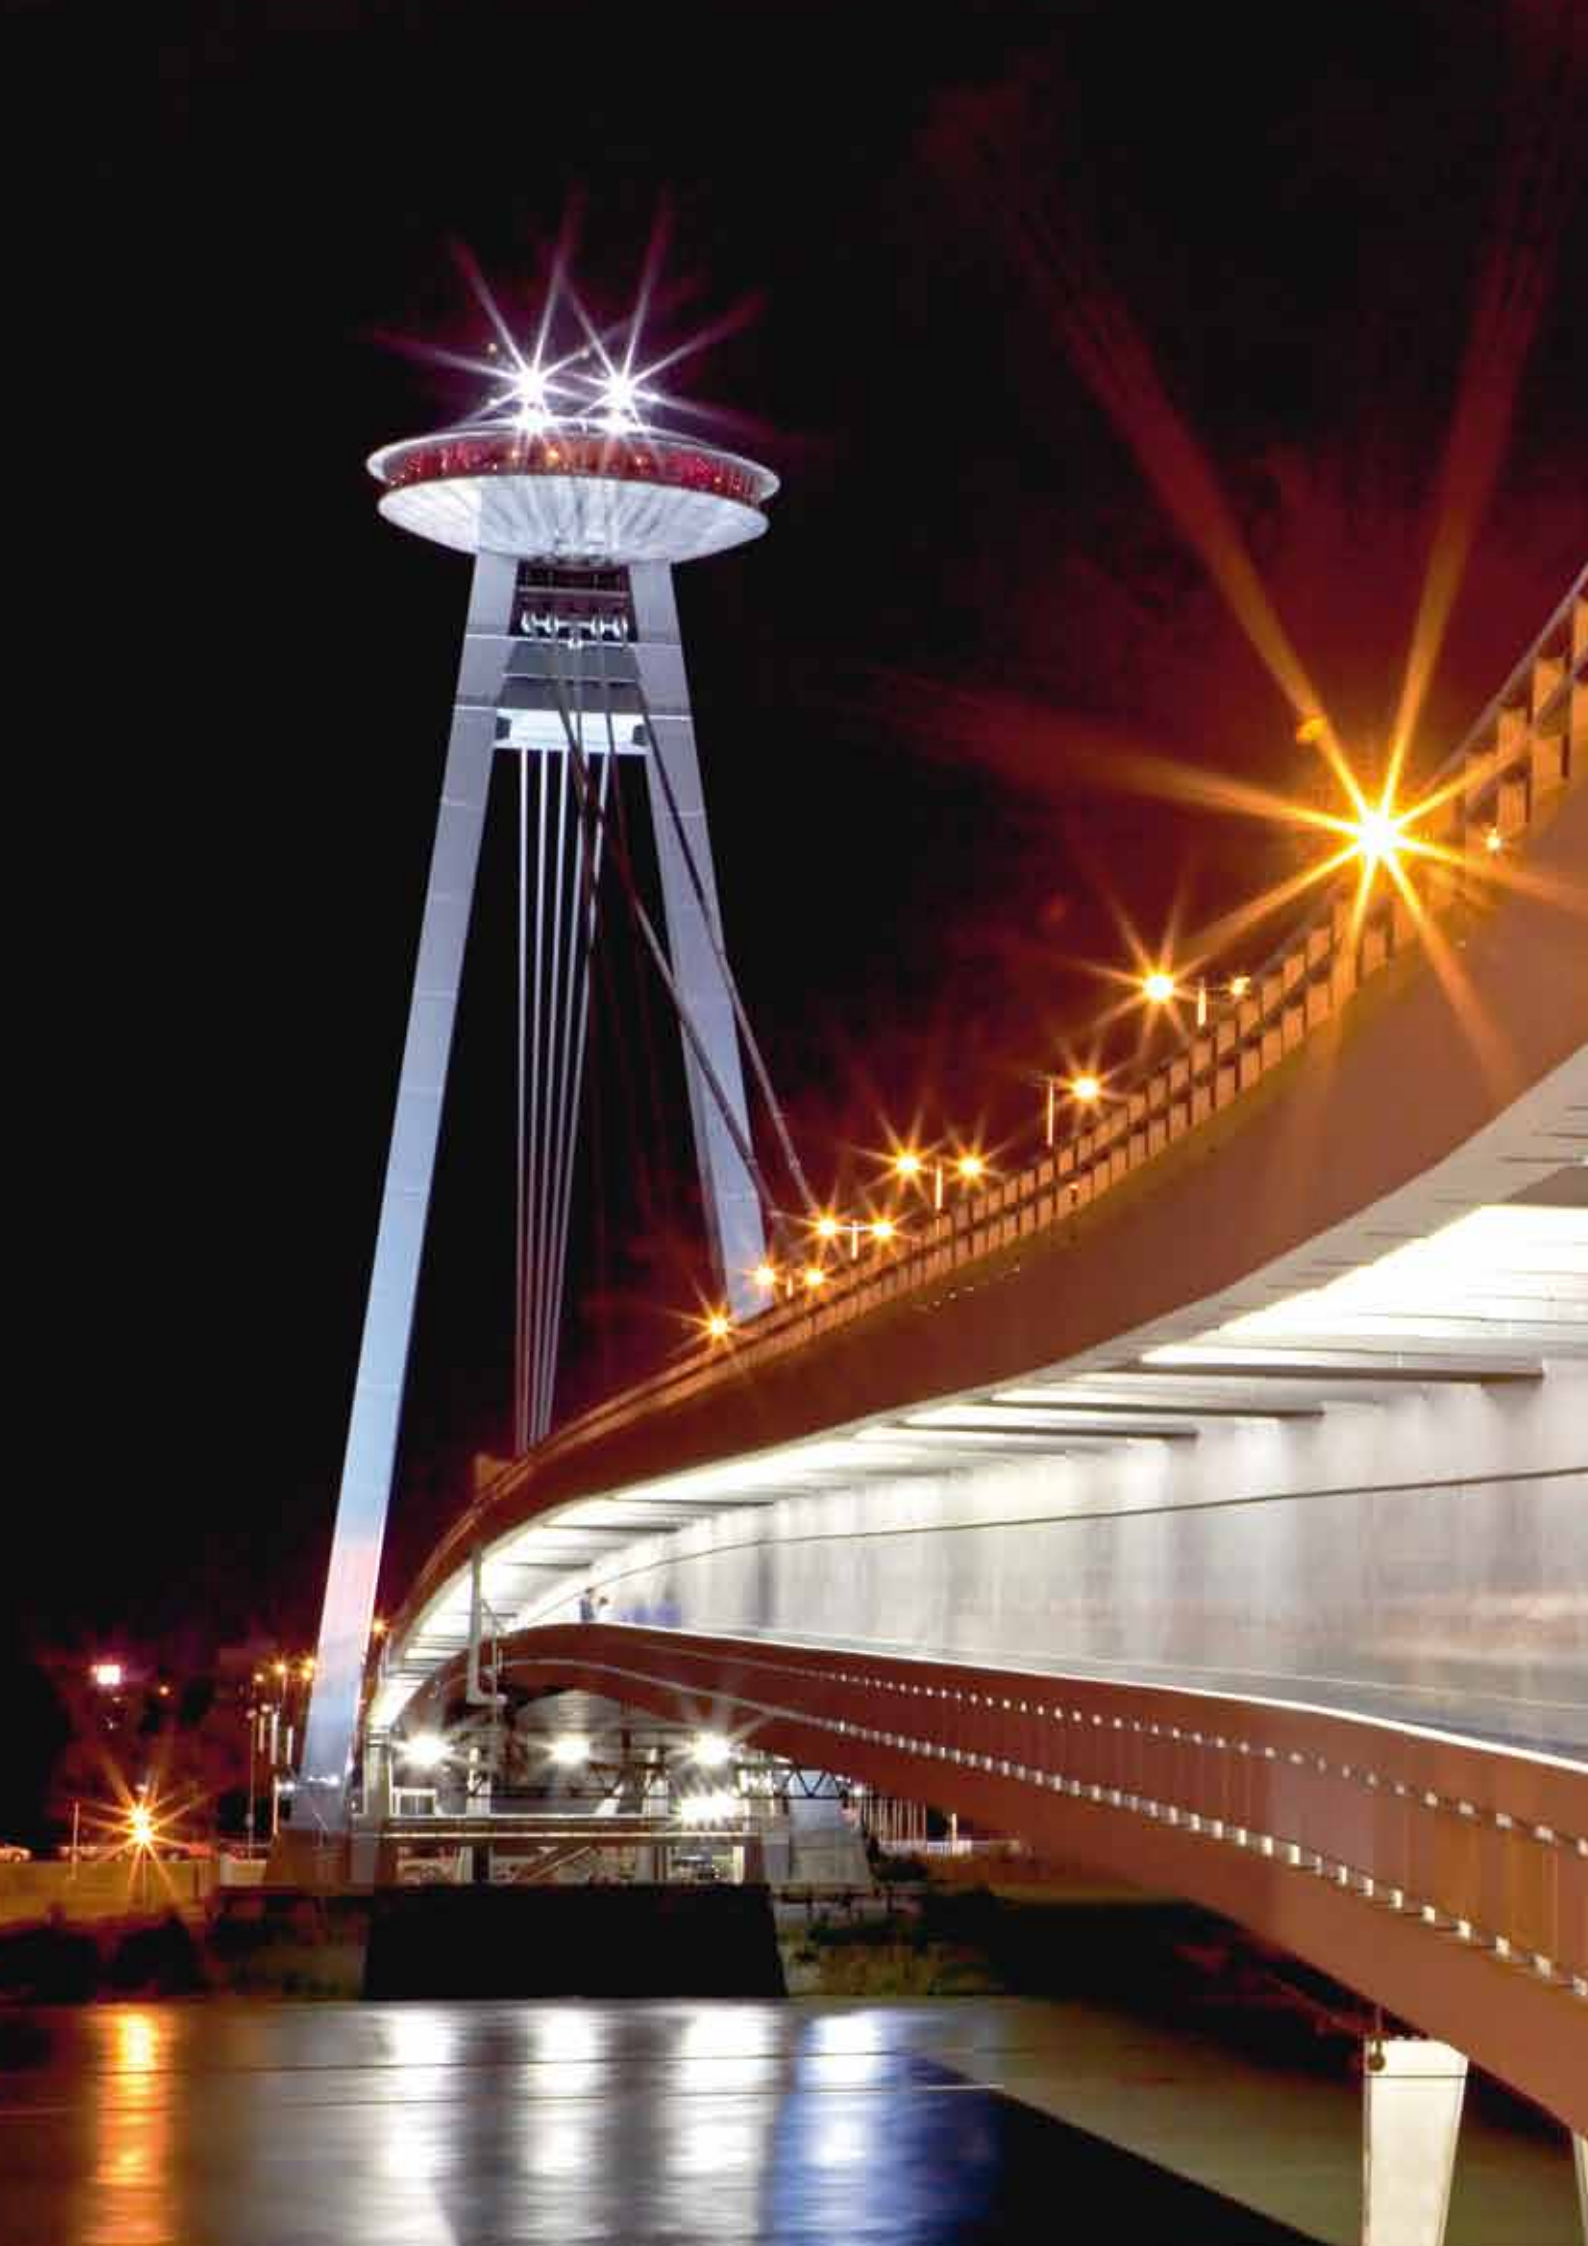

A photograph of a modern office interior. On the left, a staircase with a wooden railing and glass balustrade is visible. The ceiling features recessed lighting fixtures. The overall color palette is warm, with wood tones and soft lighting.

# Mehr Integration!

## Festnetz und Mobilfunk in einem Unternehmen.

Im Rahmen unserer Strategie haben wir in Deutschland und in weiteren europäischen Beteiligungen die bislang getrennten Bereiche Festnetz und Mobilfunk zusammengelegt. Eine wichtige Entscheidung, um integrierte Produkte und Dienstleistungen auf den Markt bringen zu können. Sie eröffnet uns wertvolle Synergien, z. B. im Marketing, im Vertrieb sowie im Einkauf, und ermöglicht mehr Effizienz, Innovationskraft und Servicequalität. Damit trägt die integrierte Unternehmensstruktur dazu bei, uns Vorteile im Wettbewerb zu verschaffen.

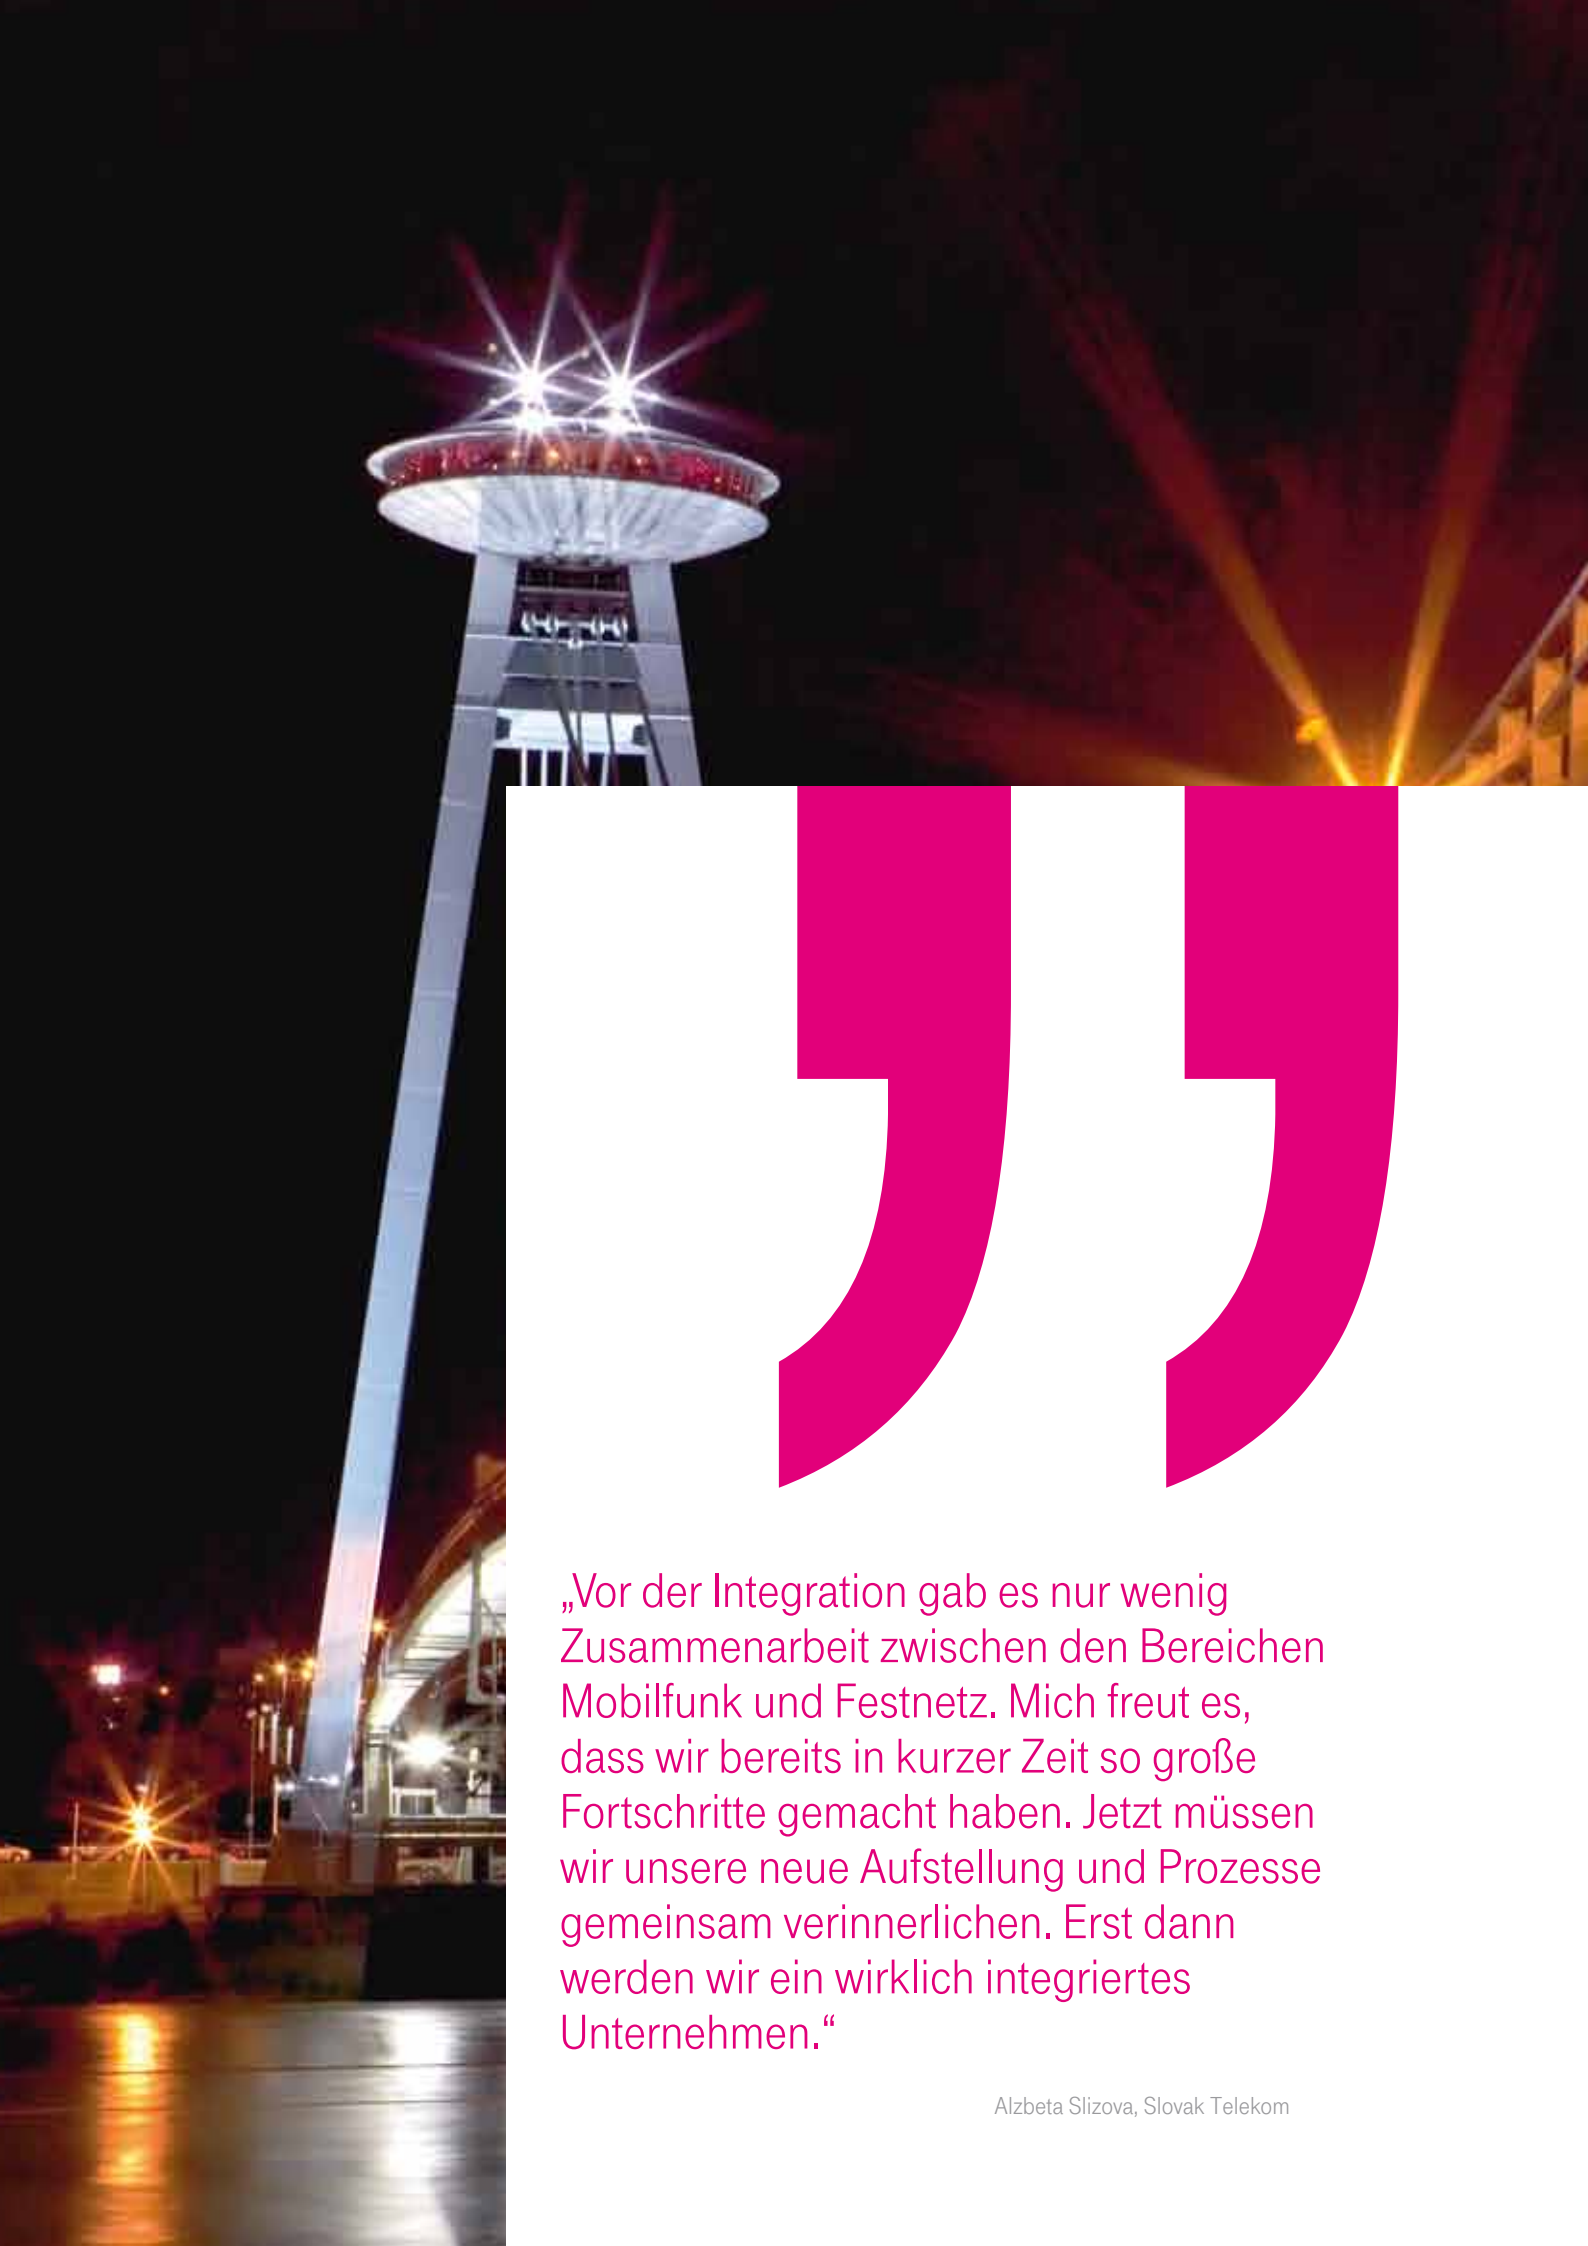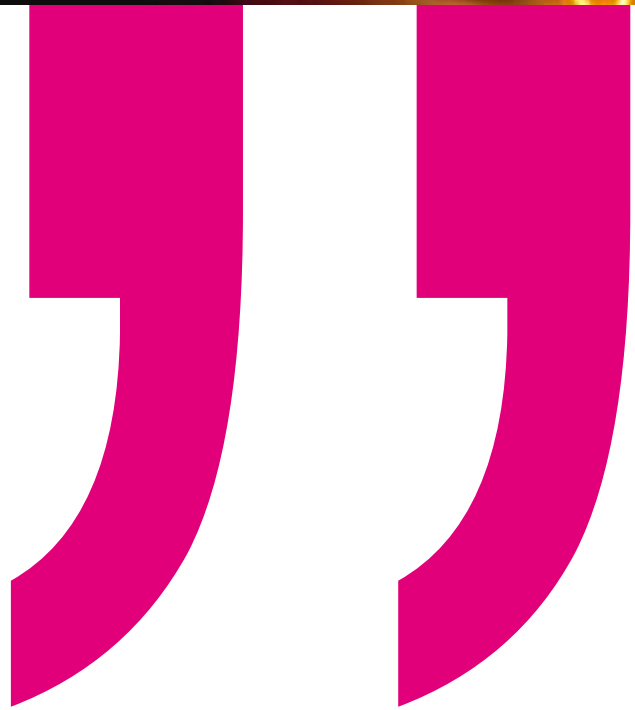

„Vor der Integration gab es nur wenig Zusammenarbeit zwischen den Bereichen Mobilfunk und Festnetz. Mich freut es, dass wir bereits in kurzer Zeit so große Fortschritte gemacht haben. Jetzt müssen wir unsere neue Aufstellung und Prozesse gemeinsam verinnerlichen. Erst dann werden wir ein wirklich integriertes Unternehmen.“

Alzbeta Slizova, Slovak Telekom

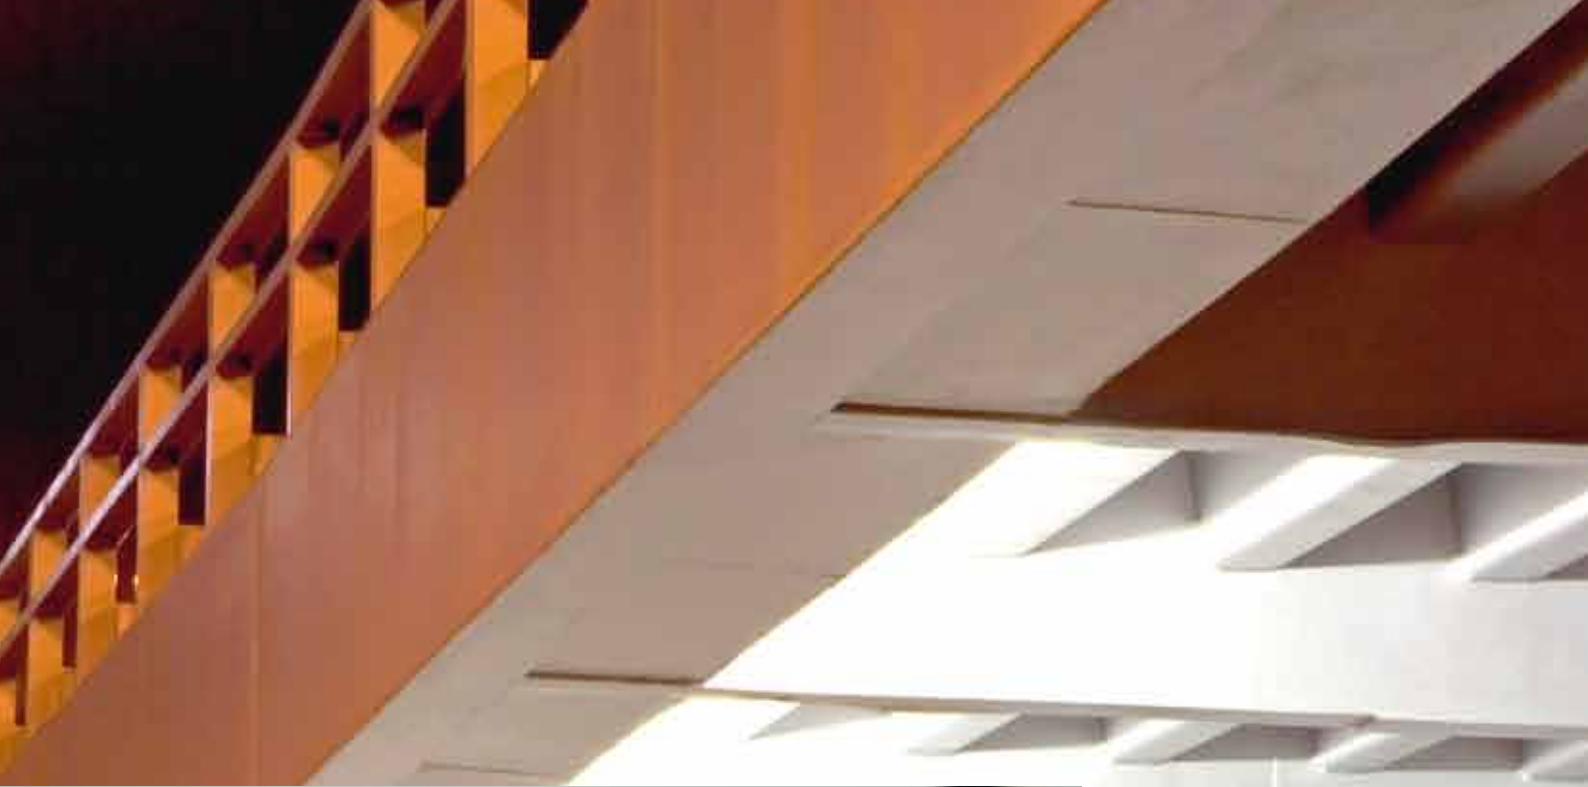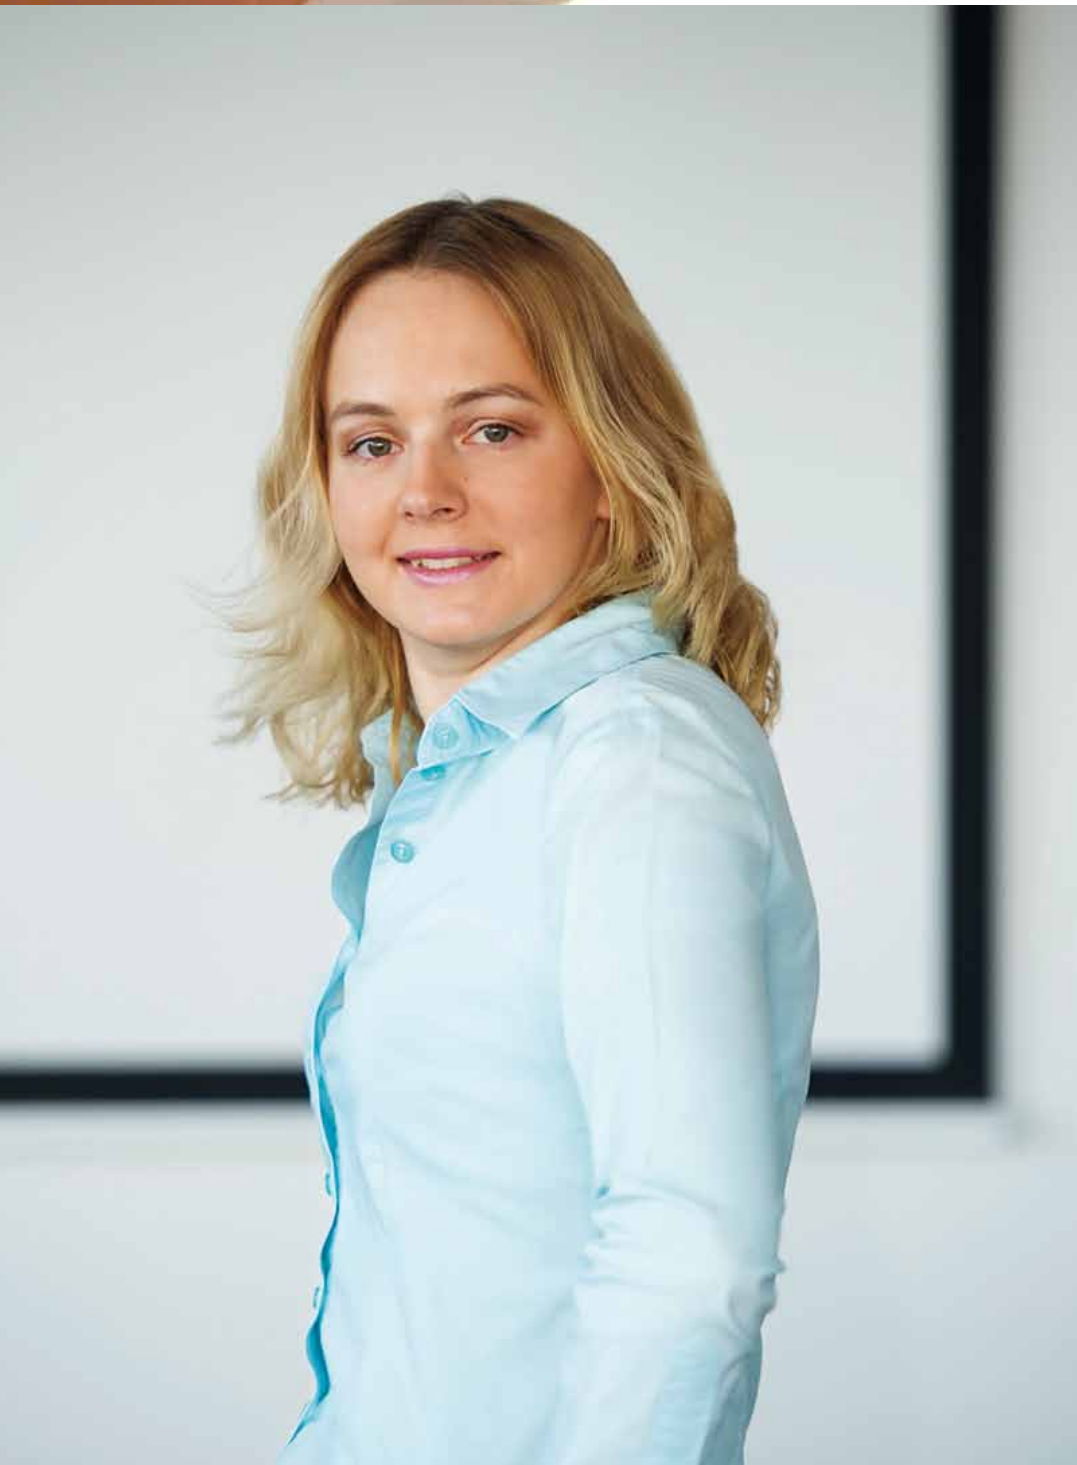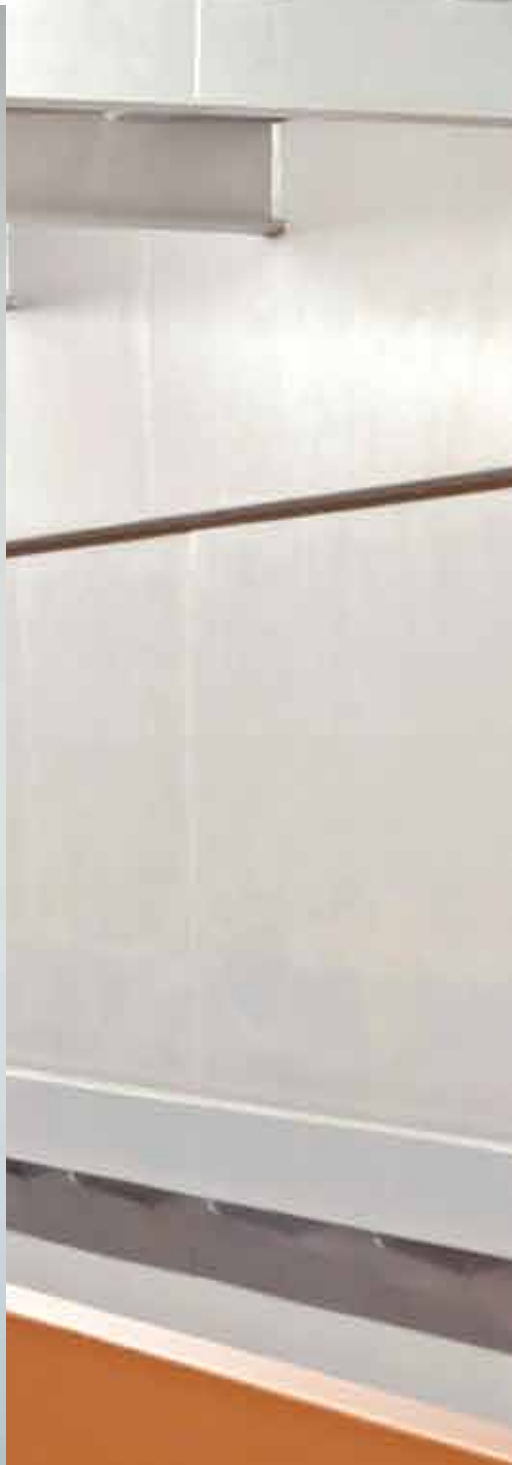



## Gemeinsam stärker!

Im Jahr 2010 haben wir schon vieles erreicht: In Deutschland fiel der Startschuss für die neue Telekom Deutschland GmbH, die nun die beiden Unternehmensbereiche Festnetz und Mobilfunk unter einem Dach vereint. Auch in Ungarn und Kroatien haben wir diese Zusammenlegung erfolgreich vollzogen. Jüngstes Beispiel war im Sommer 2010 die Zusammenführung von Slovak Telekom und T-Mobile Slovakia. So sind wir auch auf europäischer Ebene sehr gut aufgestellt, um den mobilen Datenverkehr und Dienstleistungen für das vernetzte Leben und Arbeiten voranzutreiben. Hier erwarten wir bis 2015 rund 2 Milliarden Euro an zusätzlichem Umsatz.

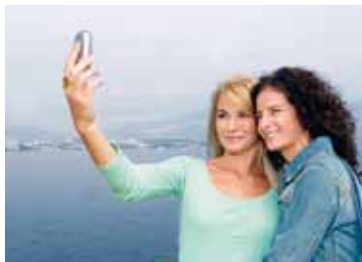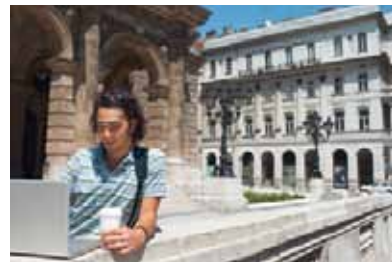

Um dieses Ziel zu erreichen, werden wir unsere Programme und Prozesse zur Kundenbindung verbessern und weiterentwickeln. Dies ist besonders wichtig für die integrierten Unternehmen und eine unverzichtbare Voraussetzung, um entsprechende Angebote von Festnetz- und Mobilfunk-Dienstleistungen auf den Markt zu bringen. Eingeflossen in dieses neue Konzept sind die gesamten Erfahrungen unserer Beteiligungen in Europa.

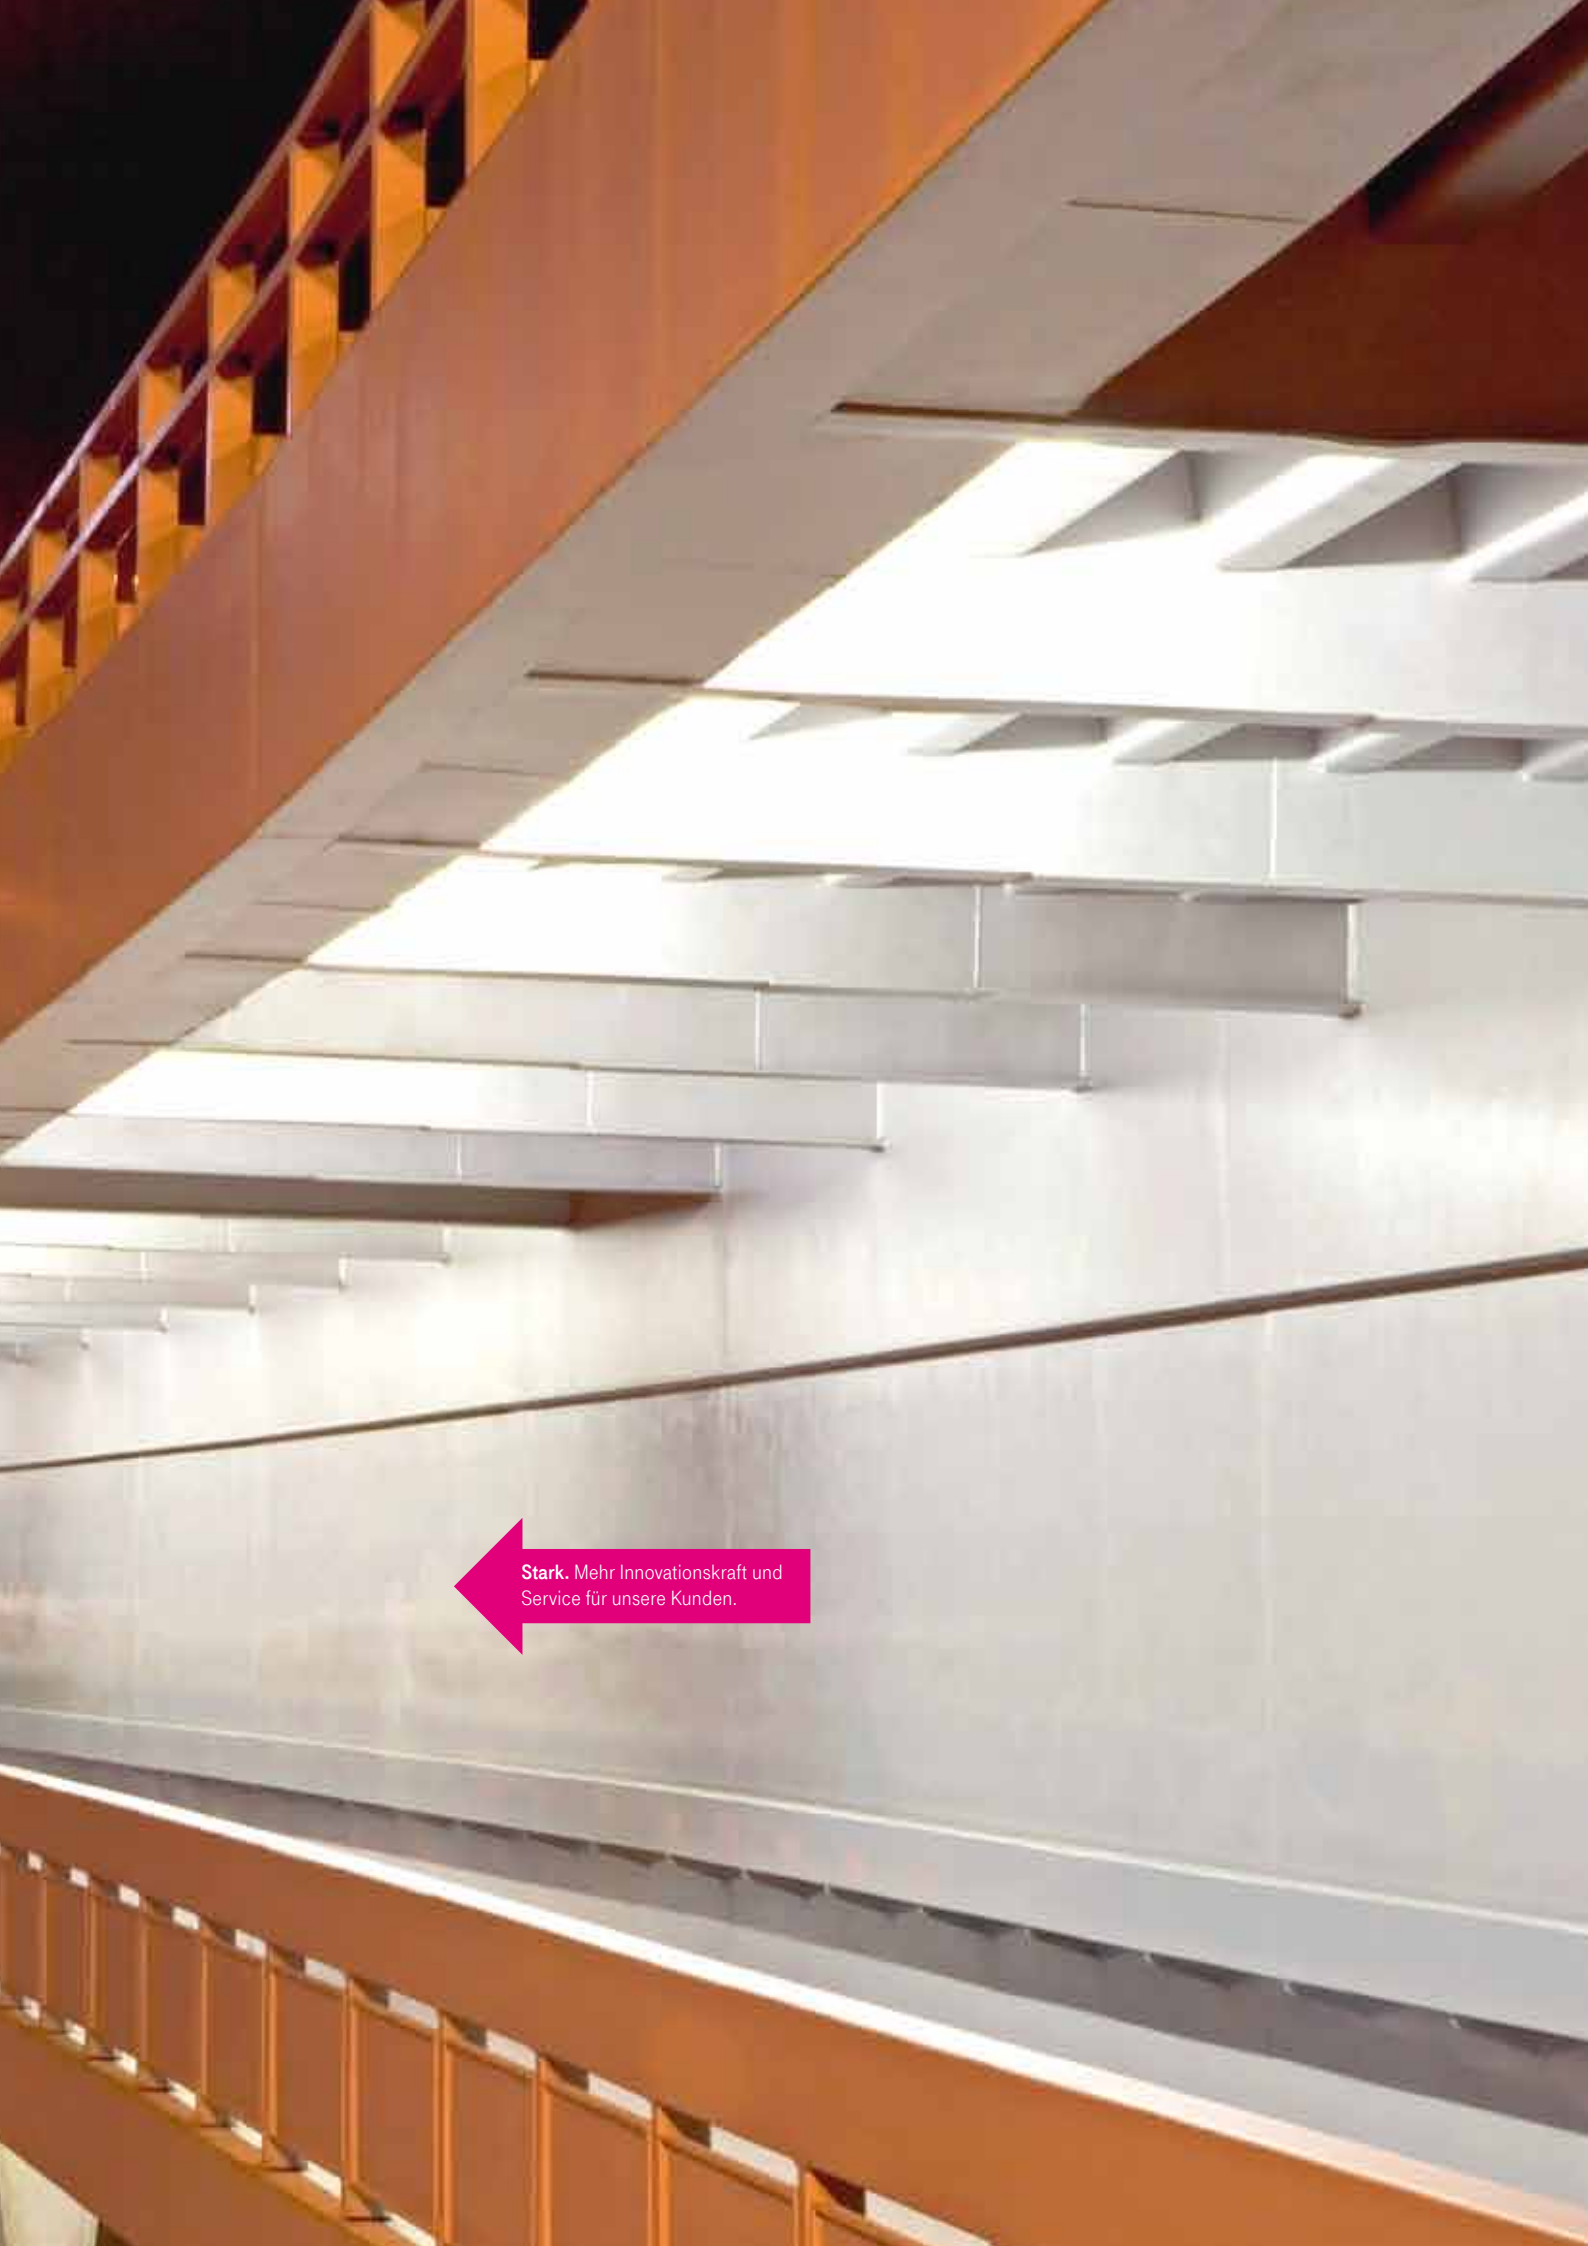

**Stark.** Mehr Innovationskraft und  
Service für unsere Kunden.

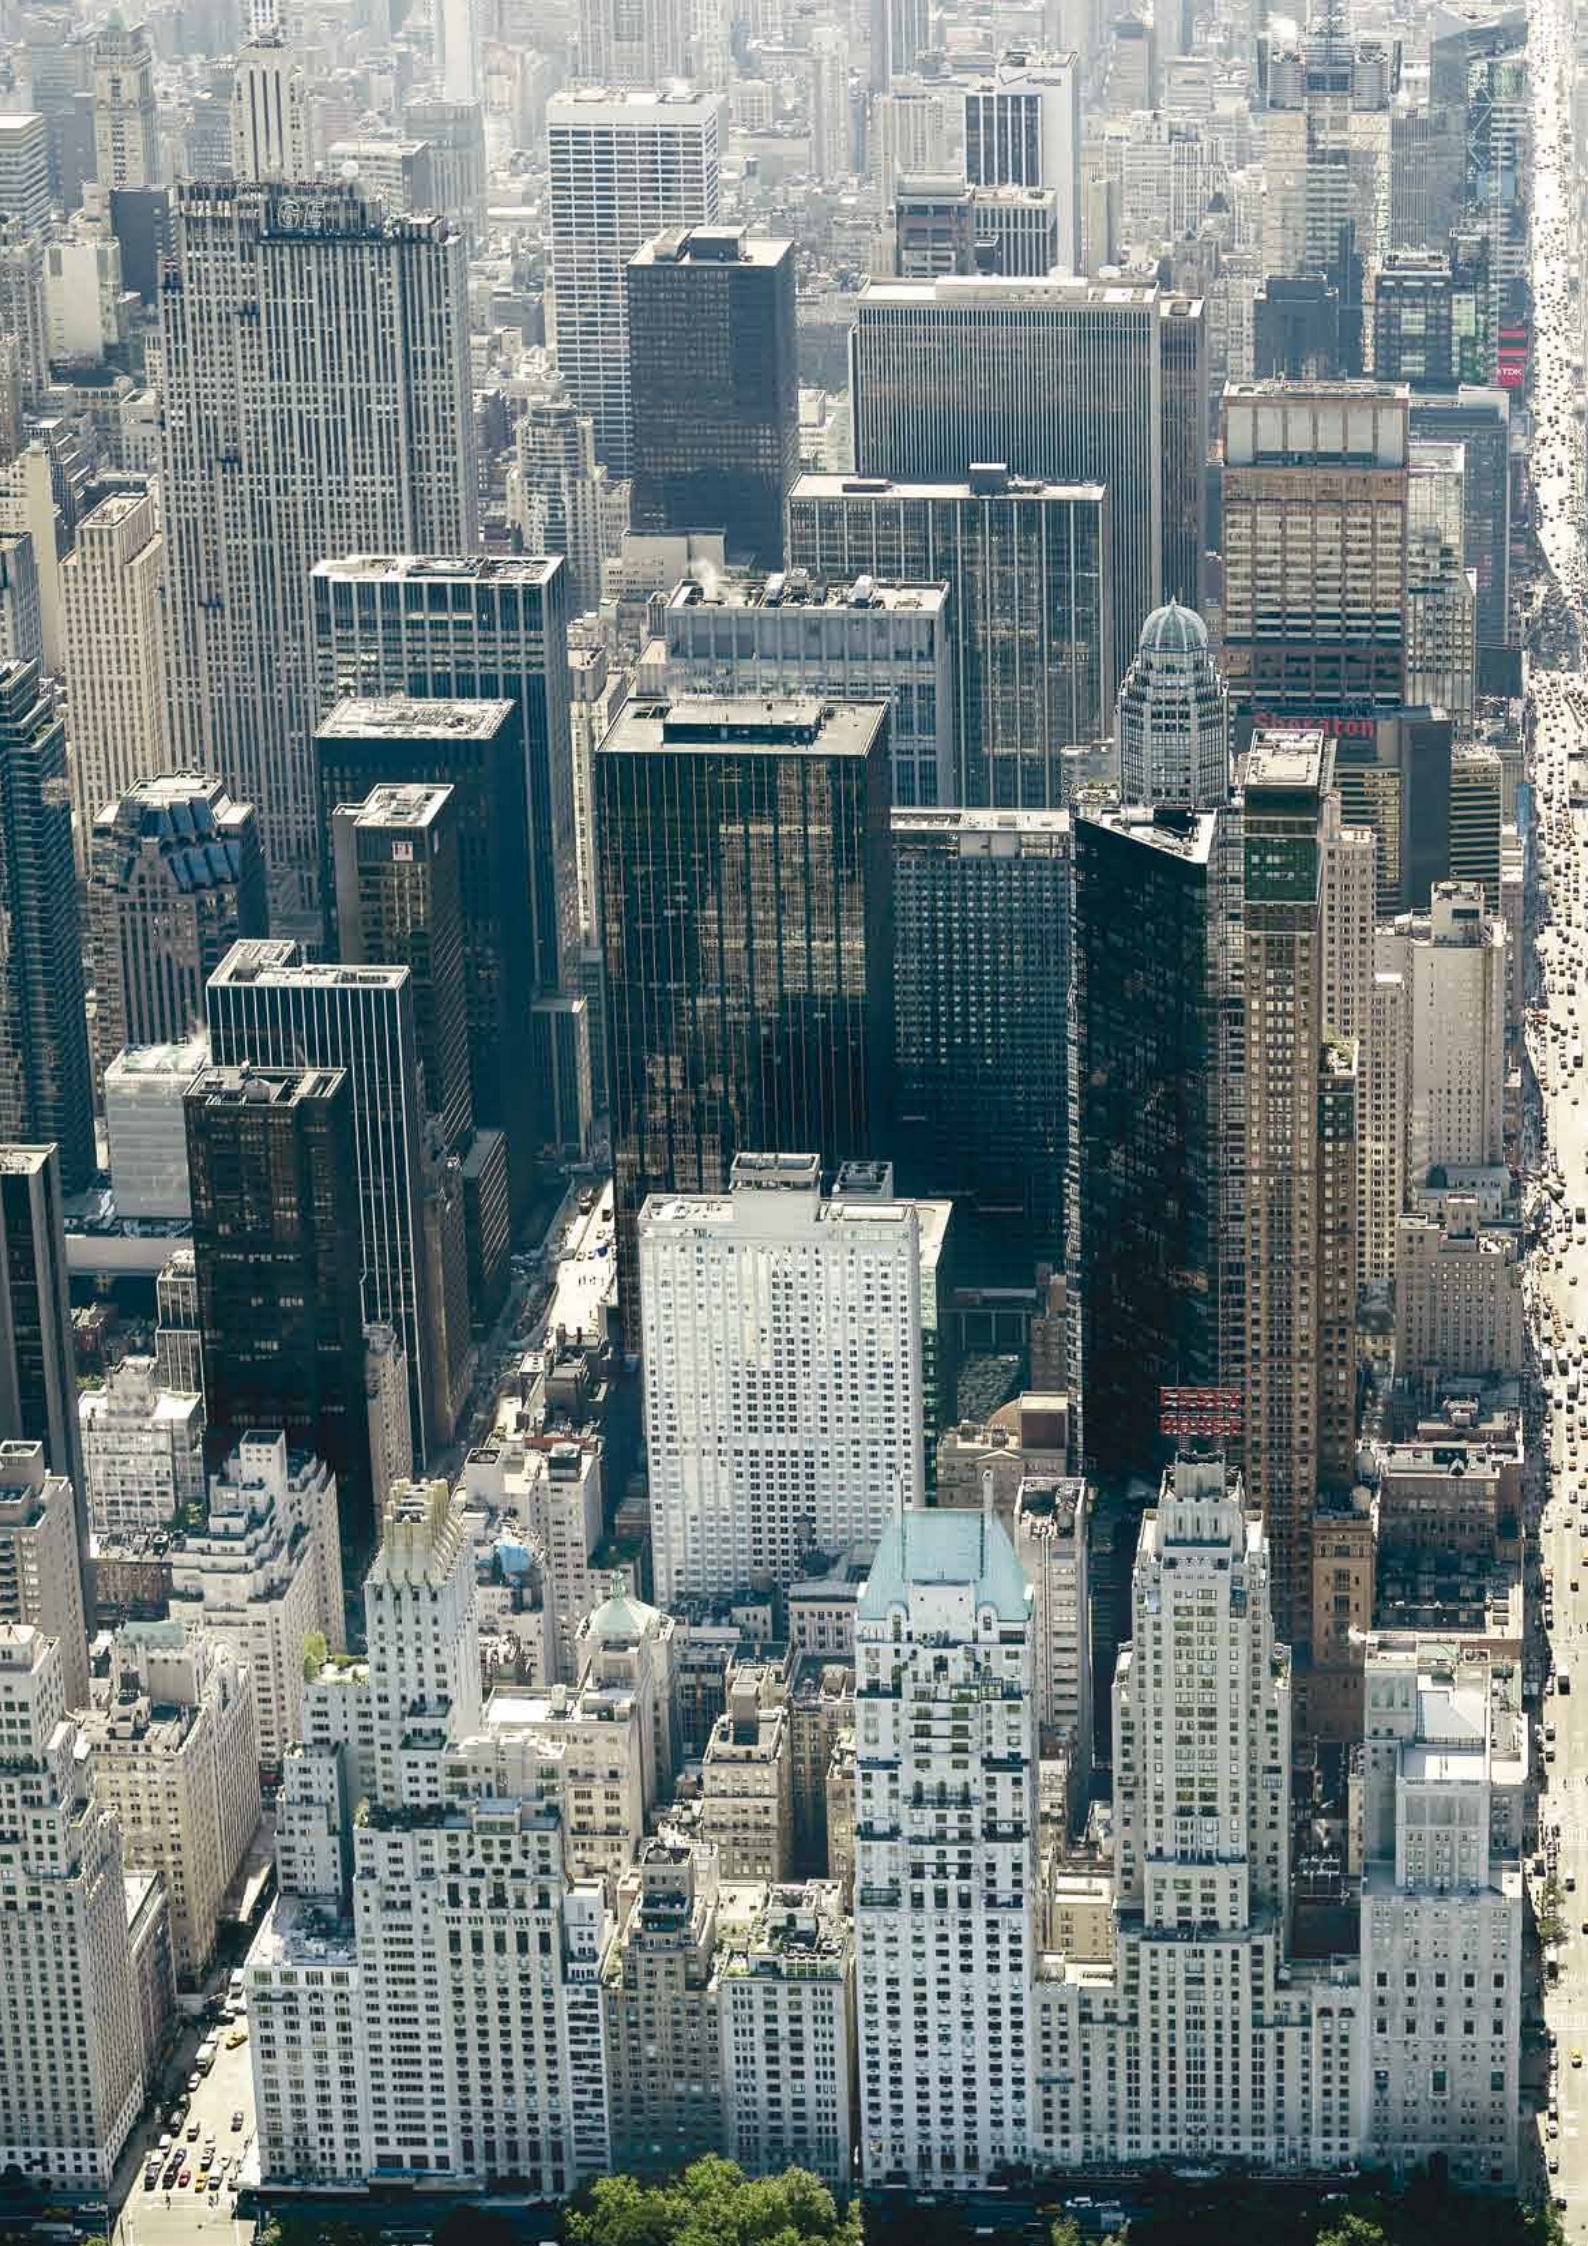



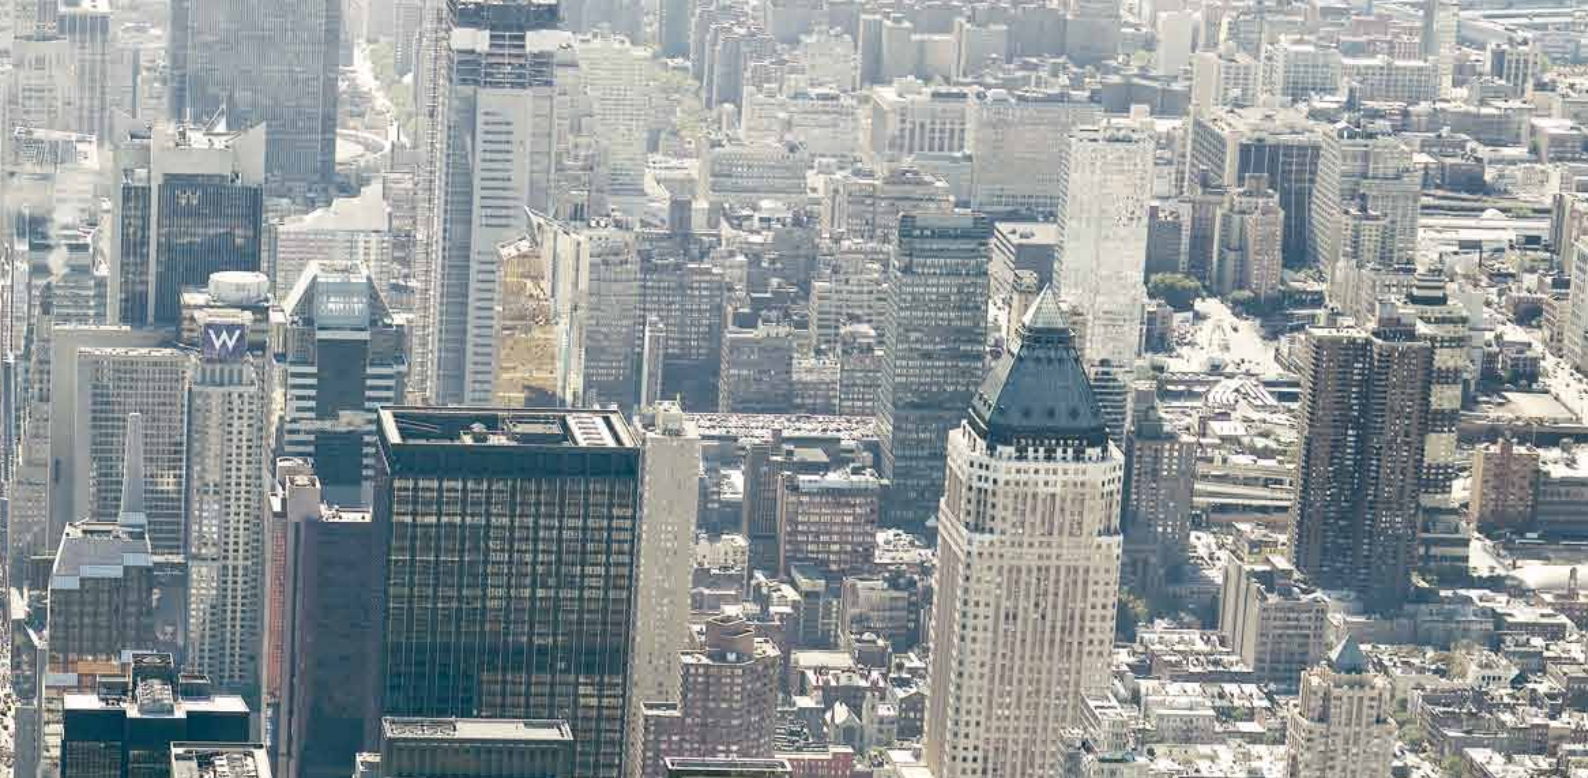

# Höchst- leistungen!

Wir bauen das Geschäft  
mit mobilen Daten  
in Nordamerika aus.

In den USA wird sich dieser Markt bis 2014 mehr als verdreifachen. Um unsere Chancen dort optimal zu nutzen, folgt unsere Wachstumsstrategie dem Ziel, Marktanteile zu gewinnen und den Umsatz bis 2014 um 3 Milliarden US-Dollar zu steigern. Dazu bauen wir das Netz aus und betreiben das derzeit schnellste landesweite Mobilfunknetz. So werden wir unseren Kunden zukünftig auch mobil die Geschwindigkeiten bieten, die mit denen des Festnetz-Breitbands vergleichbar sind: bis zu 42 Megabits pro Sekunde. Schon jetzt ist das 4G-Netz in 100 Großstadtgebieten der USA verfügbar, wir können so über 200 Millionen Nutzer erreichen.

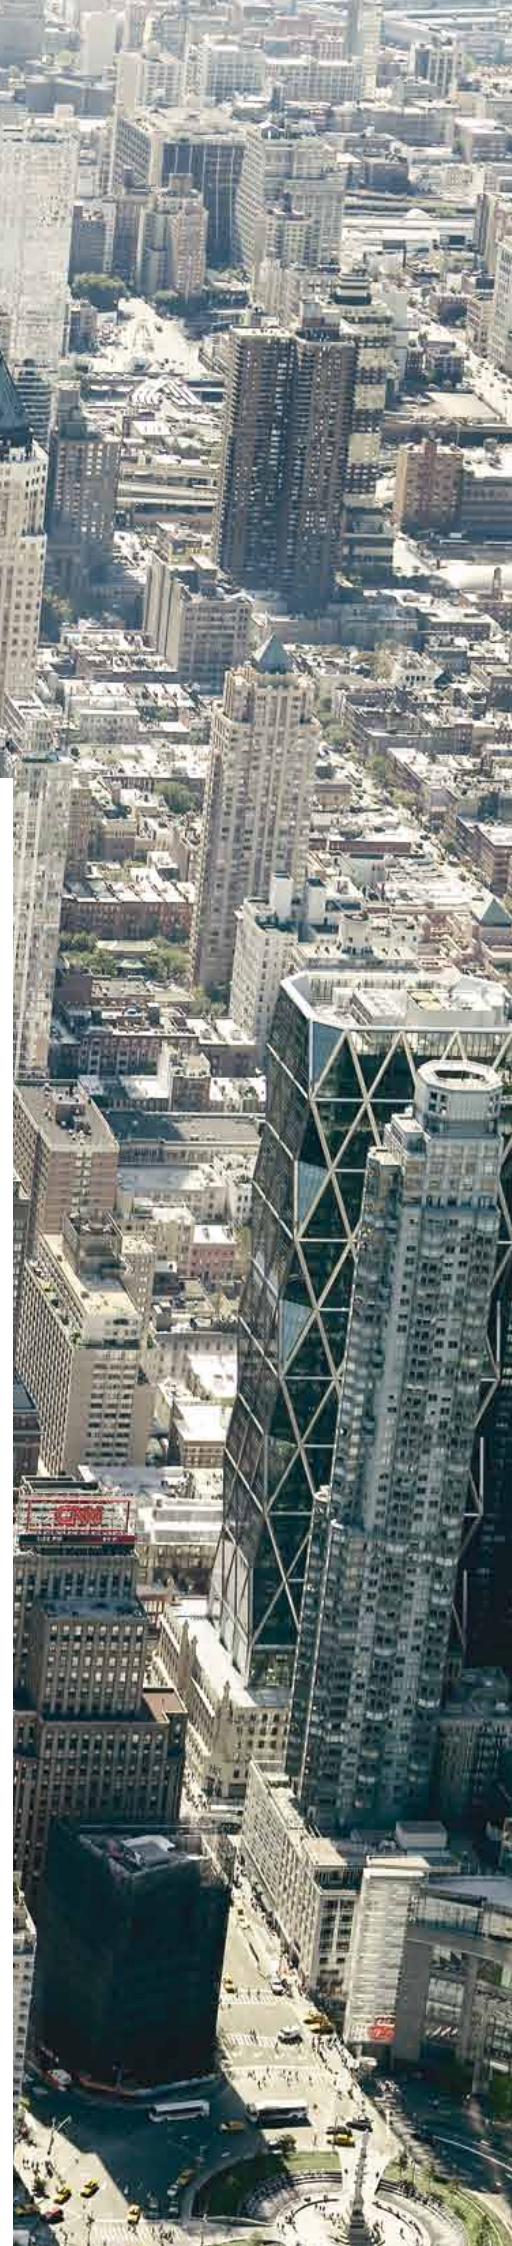

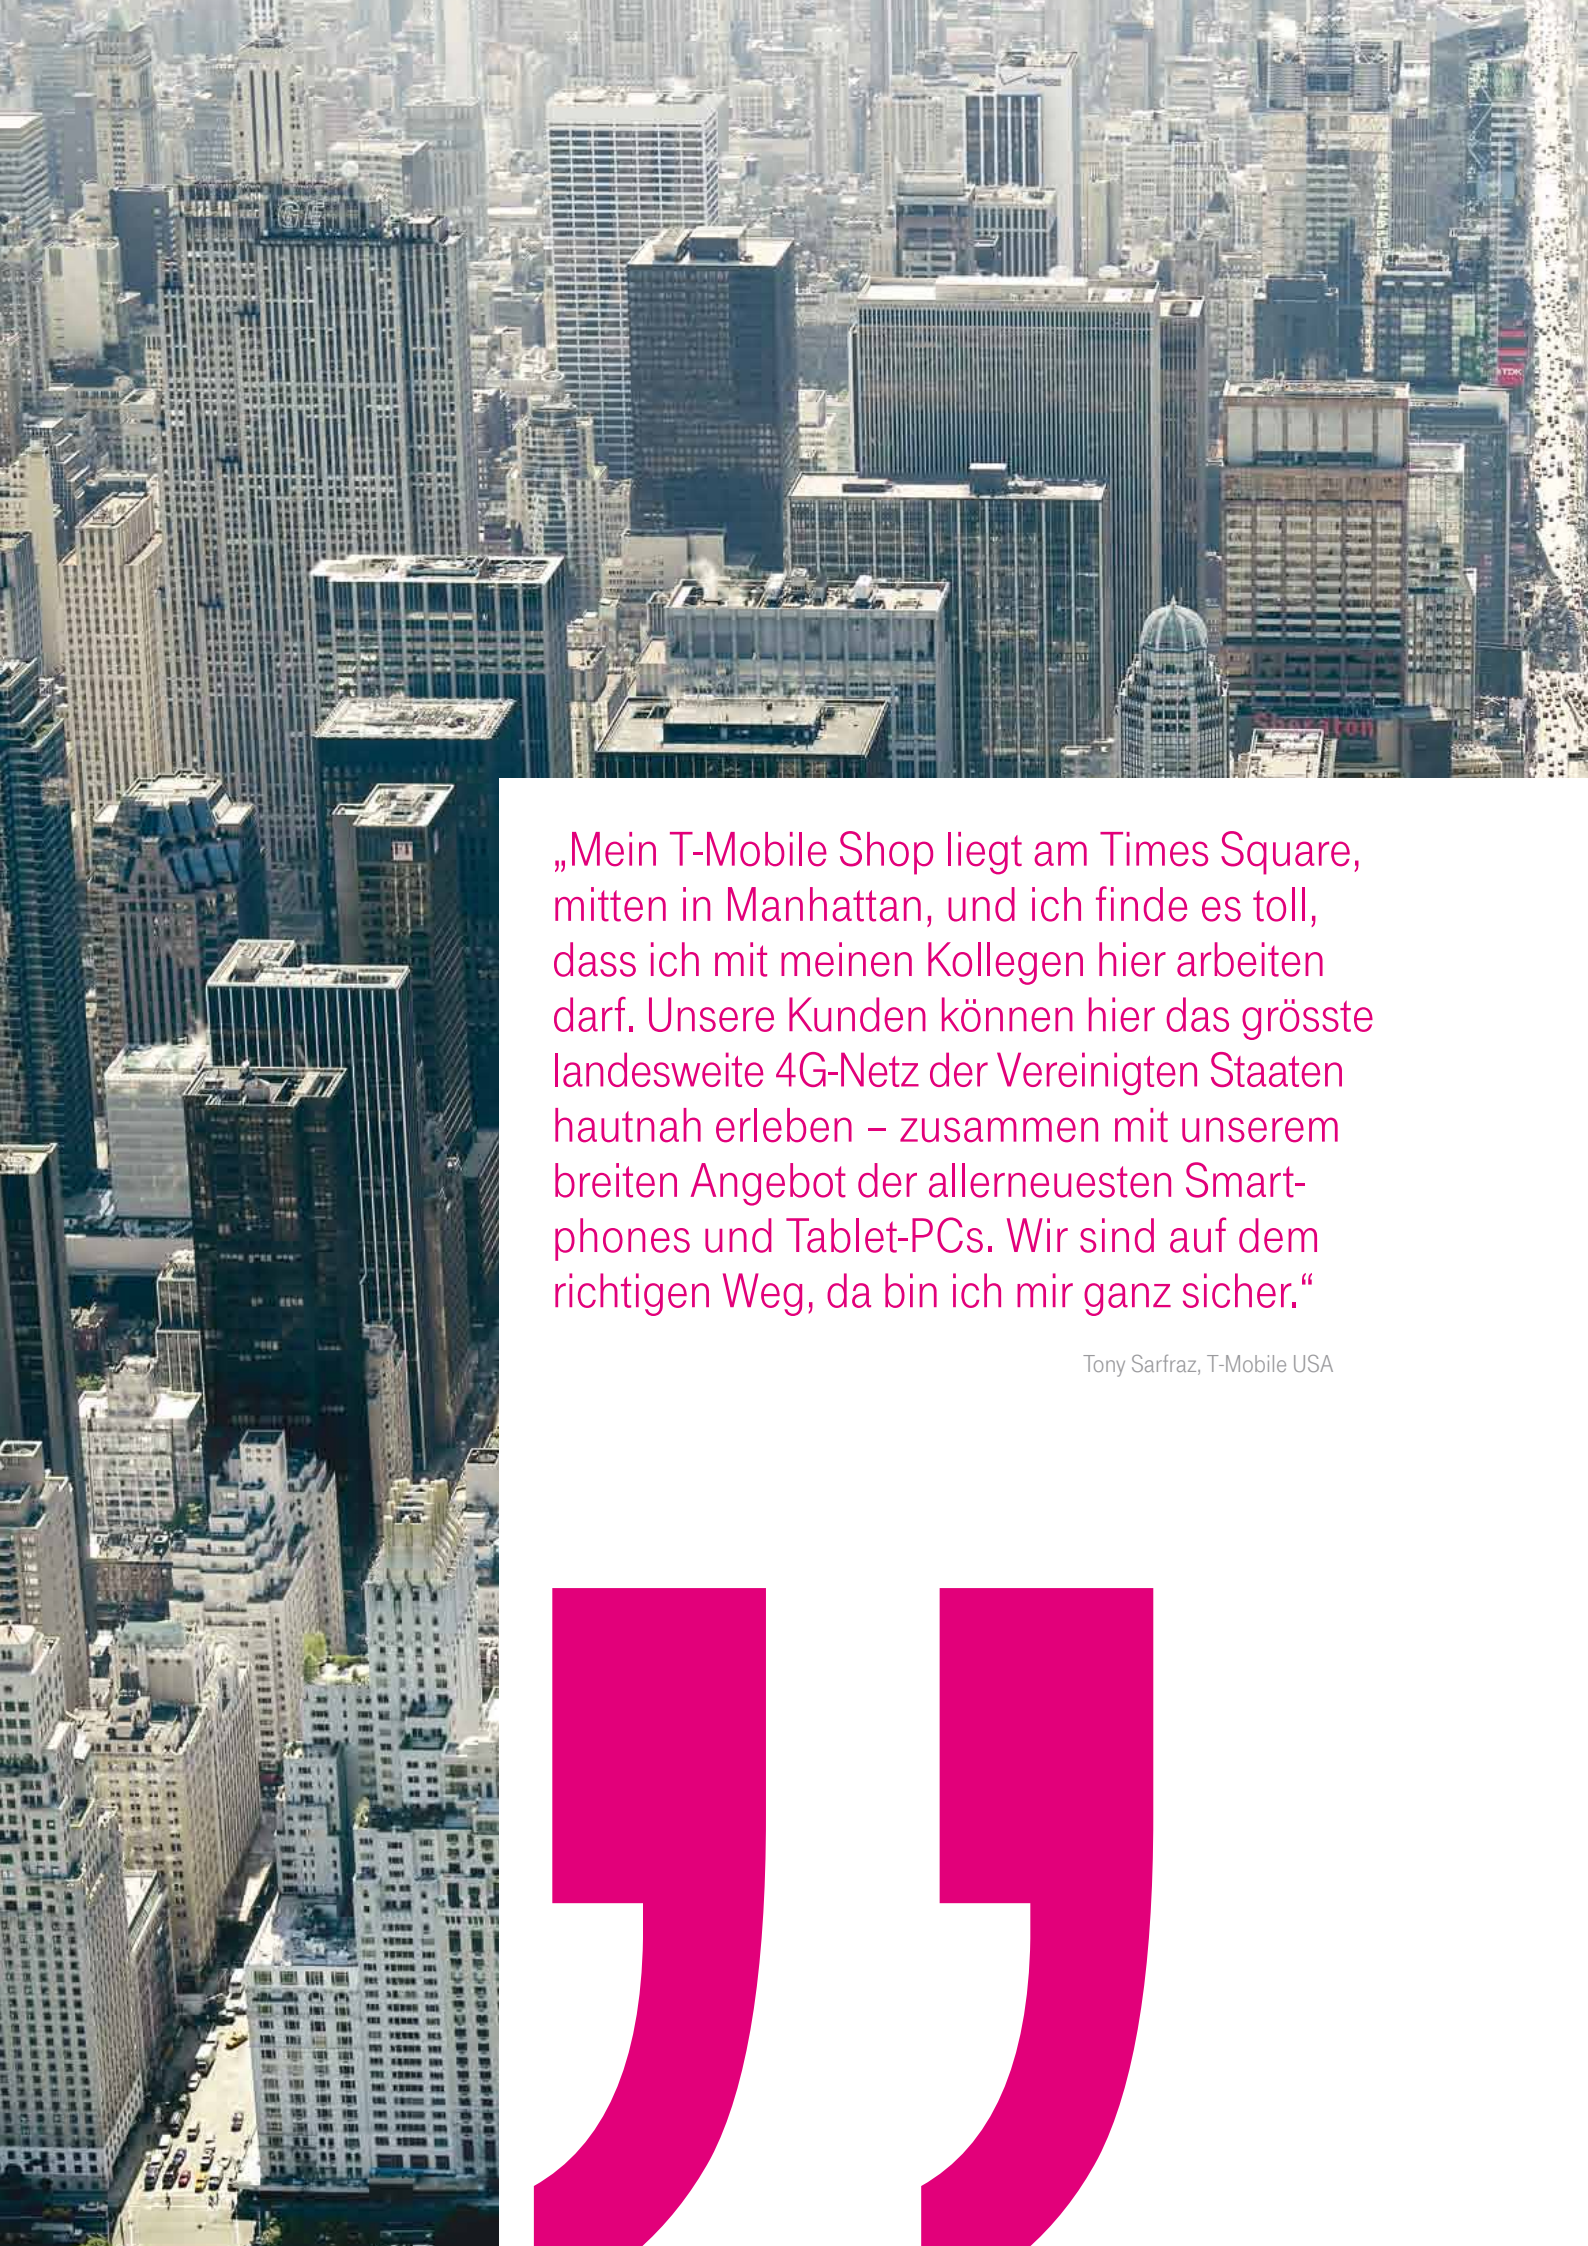

„Mein T-Mobile Shop liegt am Times Square, mitten in Manhattan, und ich finde es toll, dass ich mit meinen Kollegen hier arbeiten darf. Unsere Kunden können hier das grösste landesweite 4G-Netz der Vereinigten Staaten hautnah erleben – zusammen mit unserem breiten Angebot der allerneuesten Smartphones und Tablet-PCs. Wir sind auf dem richtigen Weg, da bin ich mir ganz sicher.“

Tony Sarfraz, T-Mobile USA

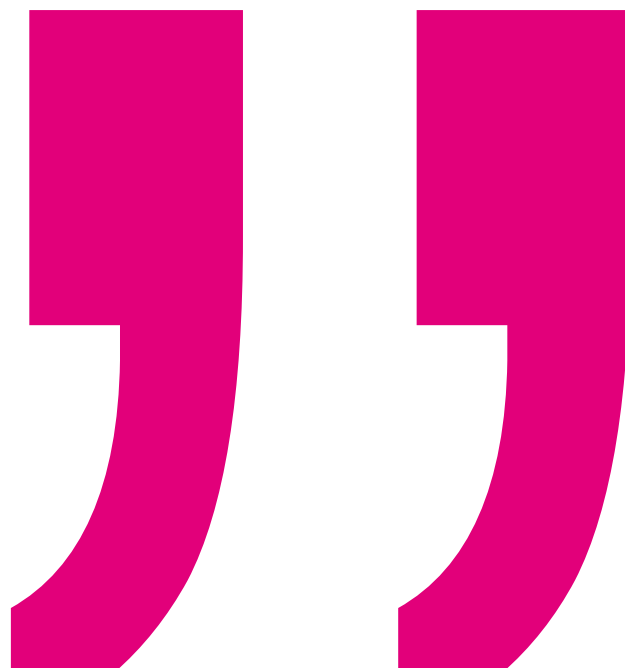

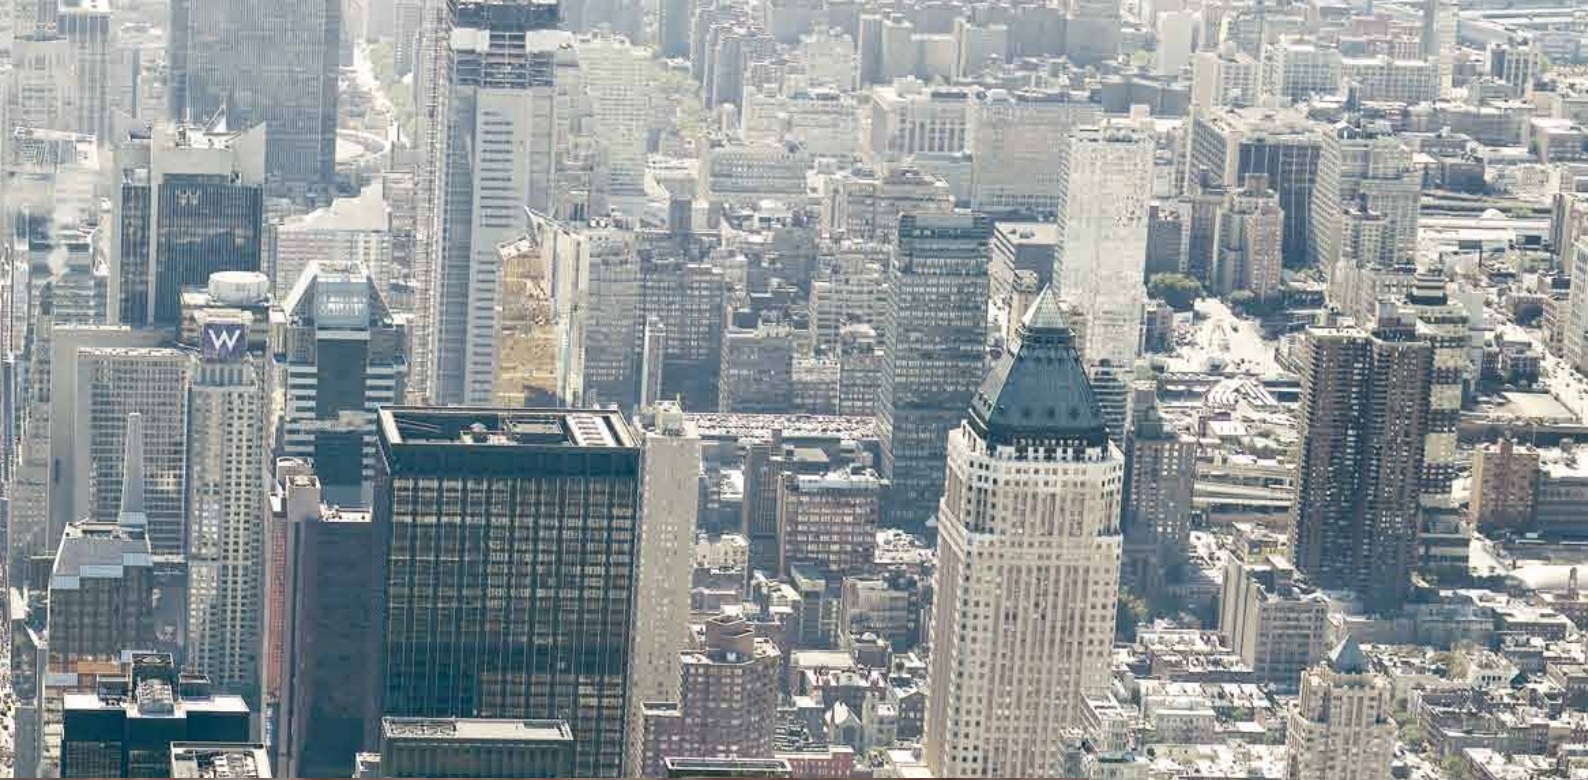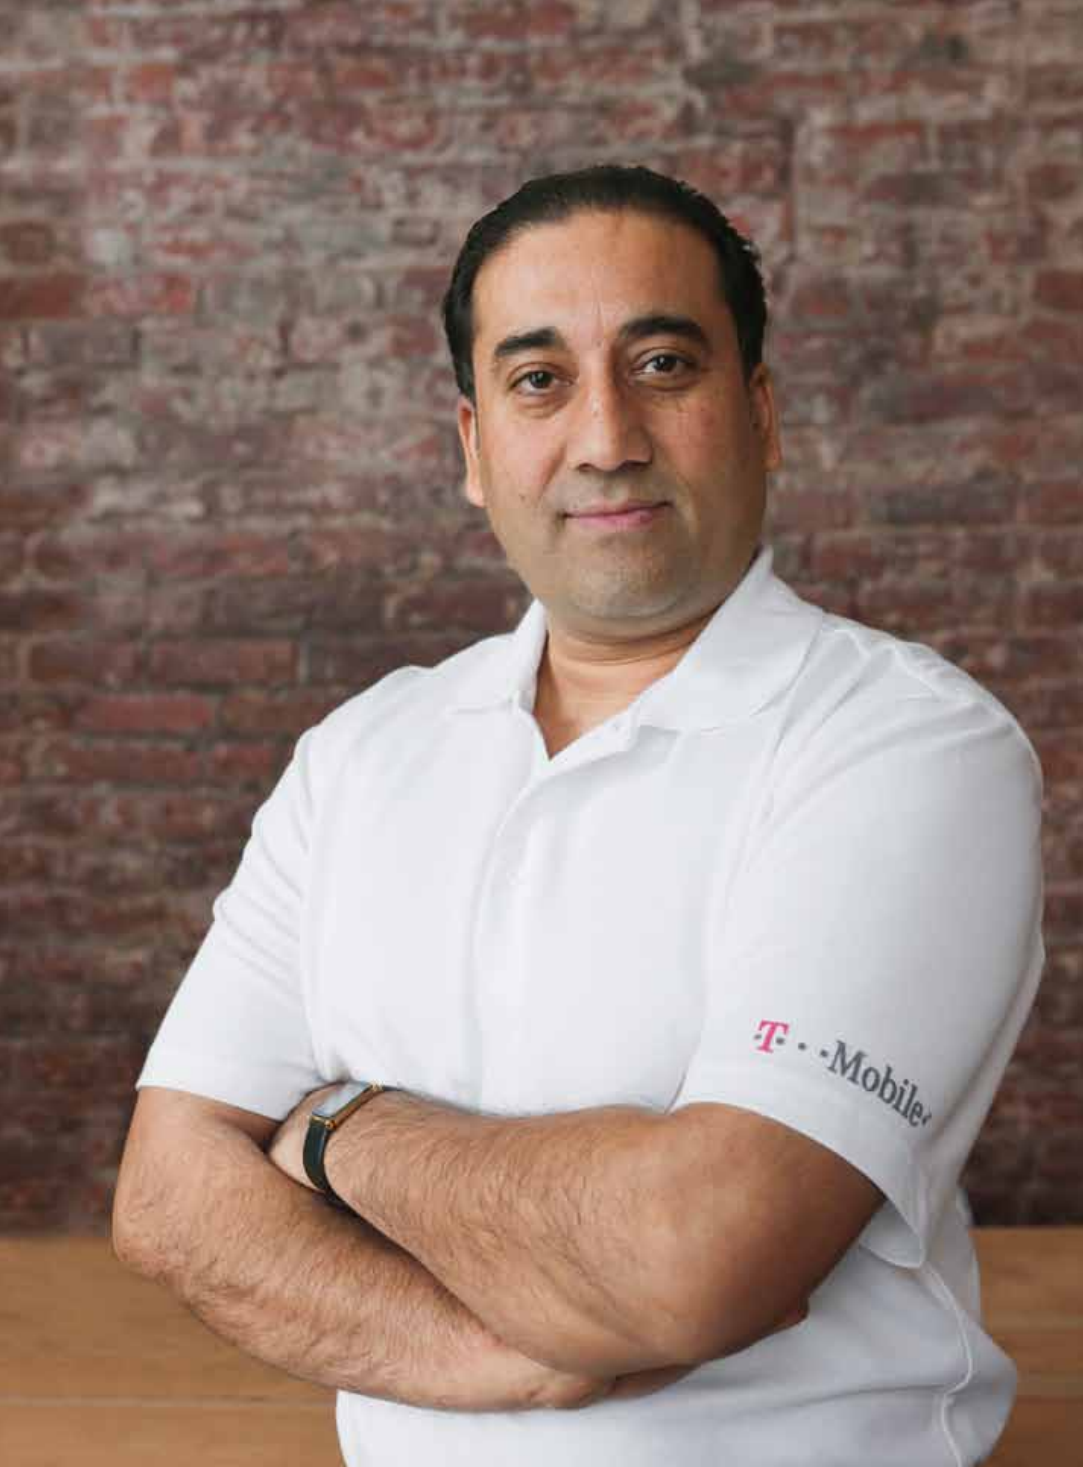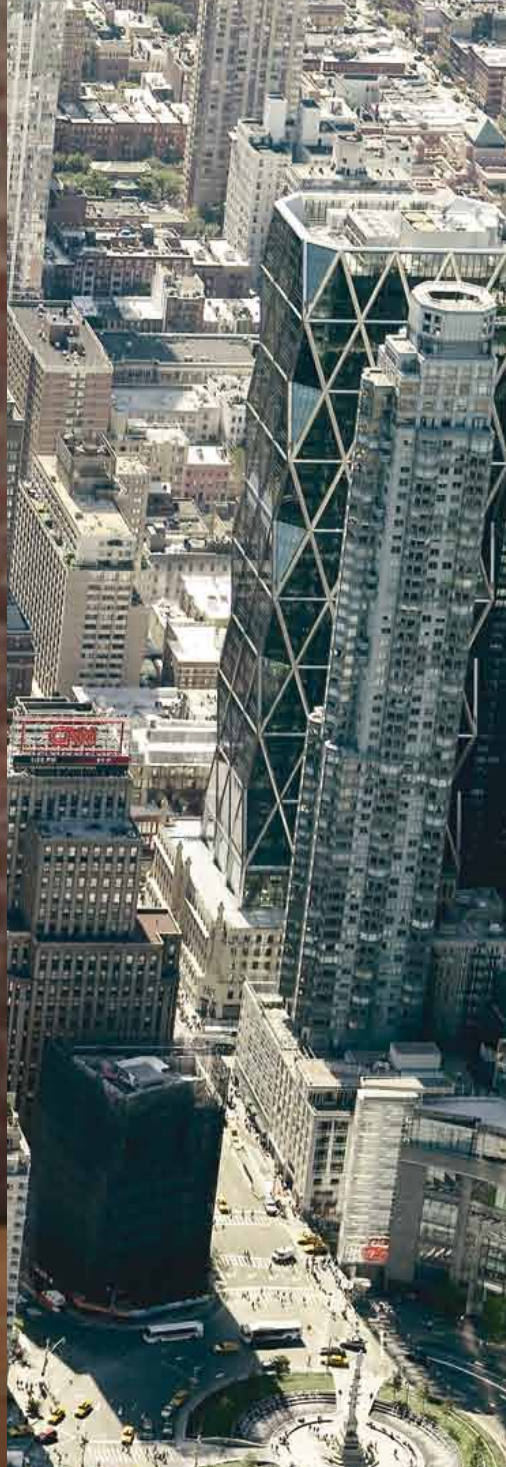

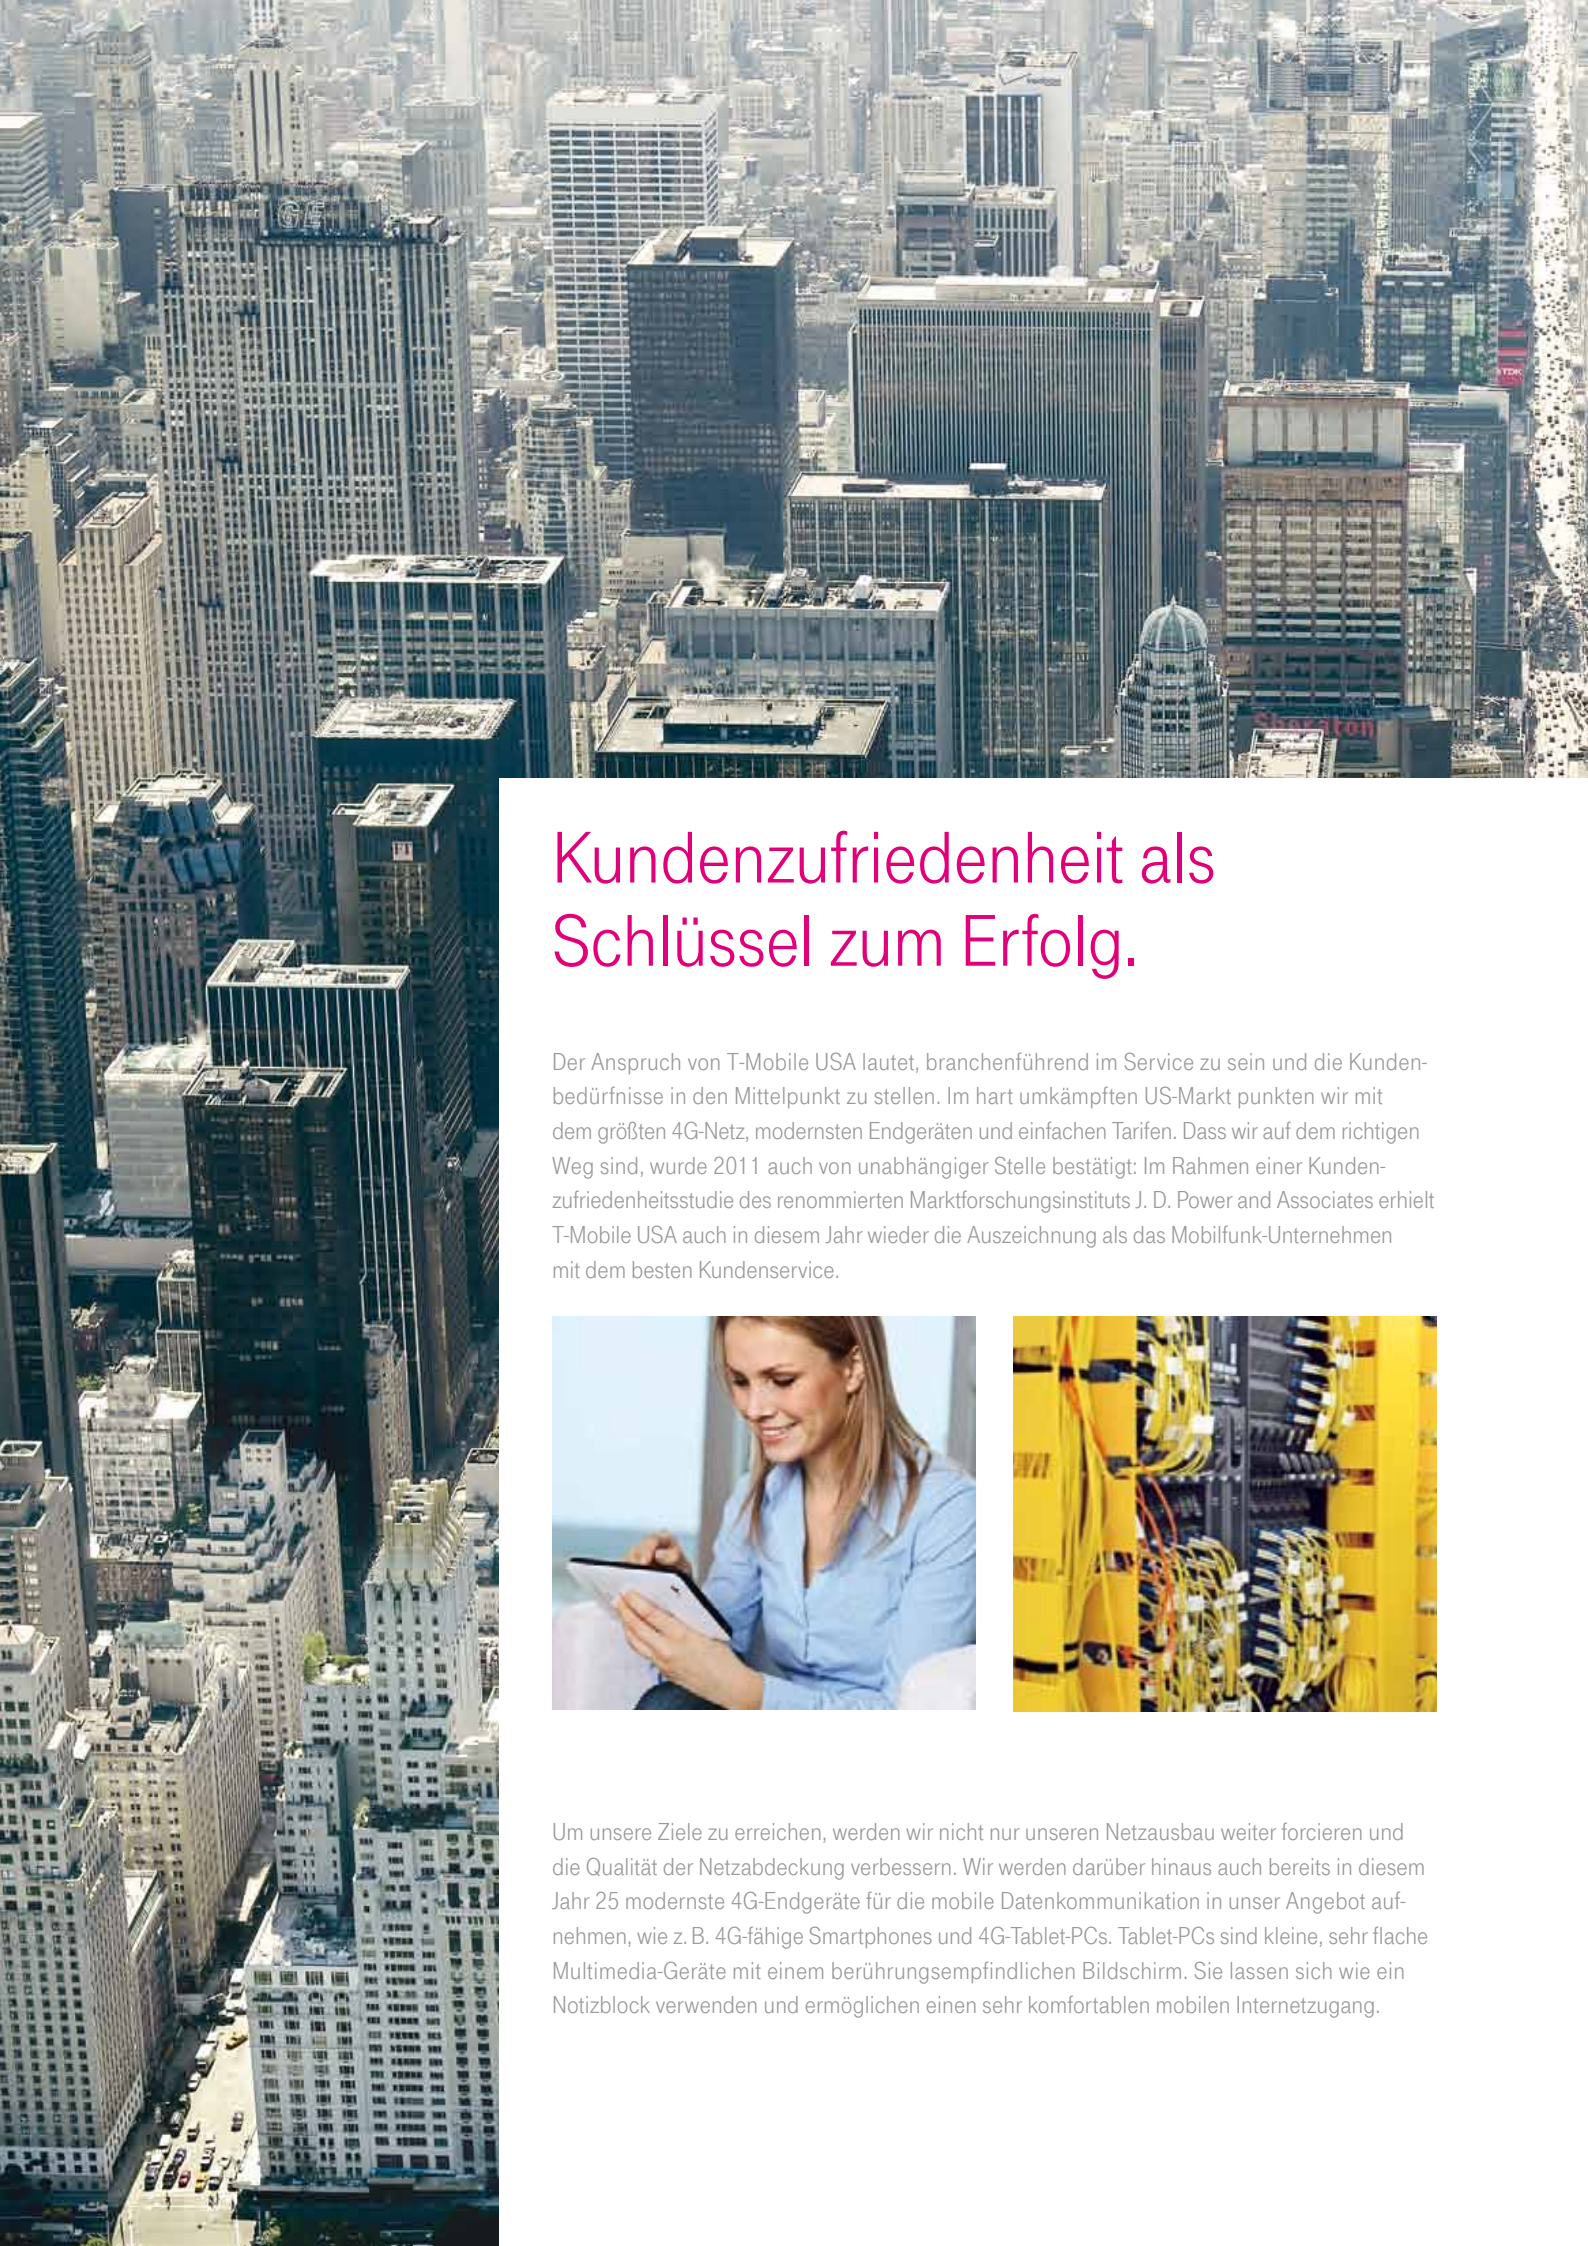

## Kundenzufriedenheit als Schlüssel zum Erfolg.

Der Anspruch von T-Mobile USA lautet, branchenführend im Service zu sein und die Kundenbedürfnisse in den Mittelpunkt zu stellen. Im hart umkämpften US-Markt punkten wir mit dem größten 4G-Netz, modernsten Endgeräten und einfachen Tarifen. Dass wir auf dem richtigen Weg sind, wurde 2011 auch von unabhängiger Stelle bestätigt: Im Rahmen einer Kundenzufriedenheitsstudie des renommierten Marktforschungsinstituts J. D. Power and Associates erhielt T-Mobile USA auch in diesem Jahr wieder die Auszeichnung als das Mobilfunk-Unternehmen mit dem besten Kundenservice.

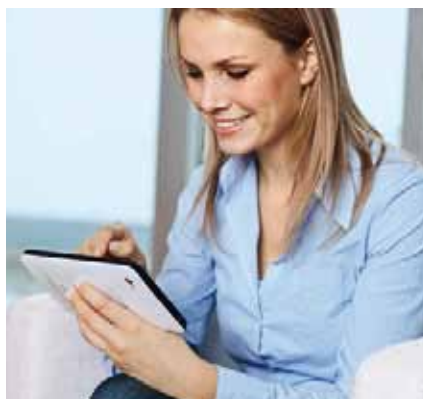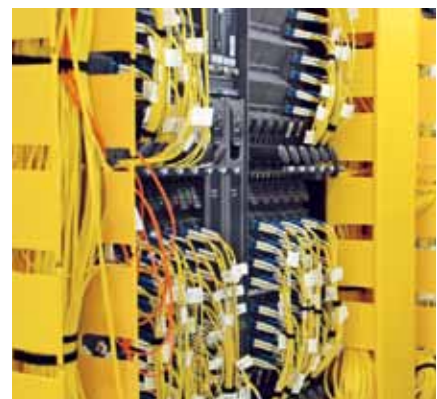

Um unsere Ziele zu erreichen, werden wir nicht nur unseren Netzausbau weiter forcieren und die Qualität der Netzabdeckung verbessern. Wir werden darüber hinaus auch bereits in diesem Jahr 25 modernste 4G-Endgeräte für die mobile Datenkommunikation in unser Angebot aufnehmen, wie z. B. 4G-fähige Smartphones und 4G-Tablet-PCs. Tablet-PCs sind kleine, sehr flache Multimedia-Geräte mit einem berührungsempfindlichen Bildschirm. Sie lassen sich wie ein Notizblock verwenden und ermöglichen einen sehr komfortablen mobilen Internetzugang.

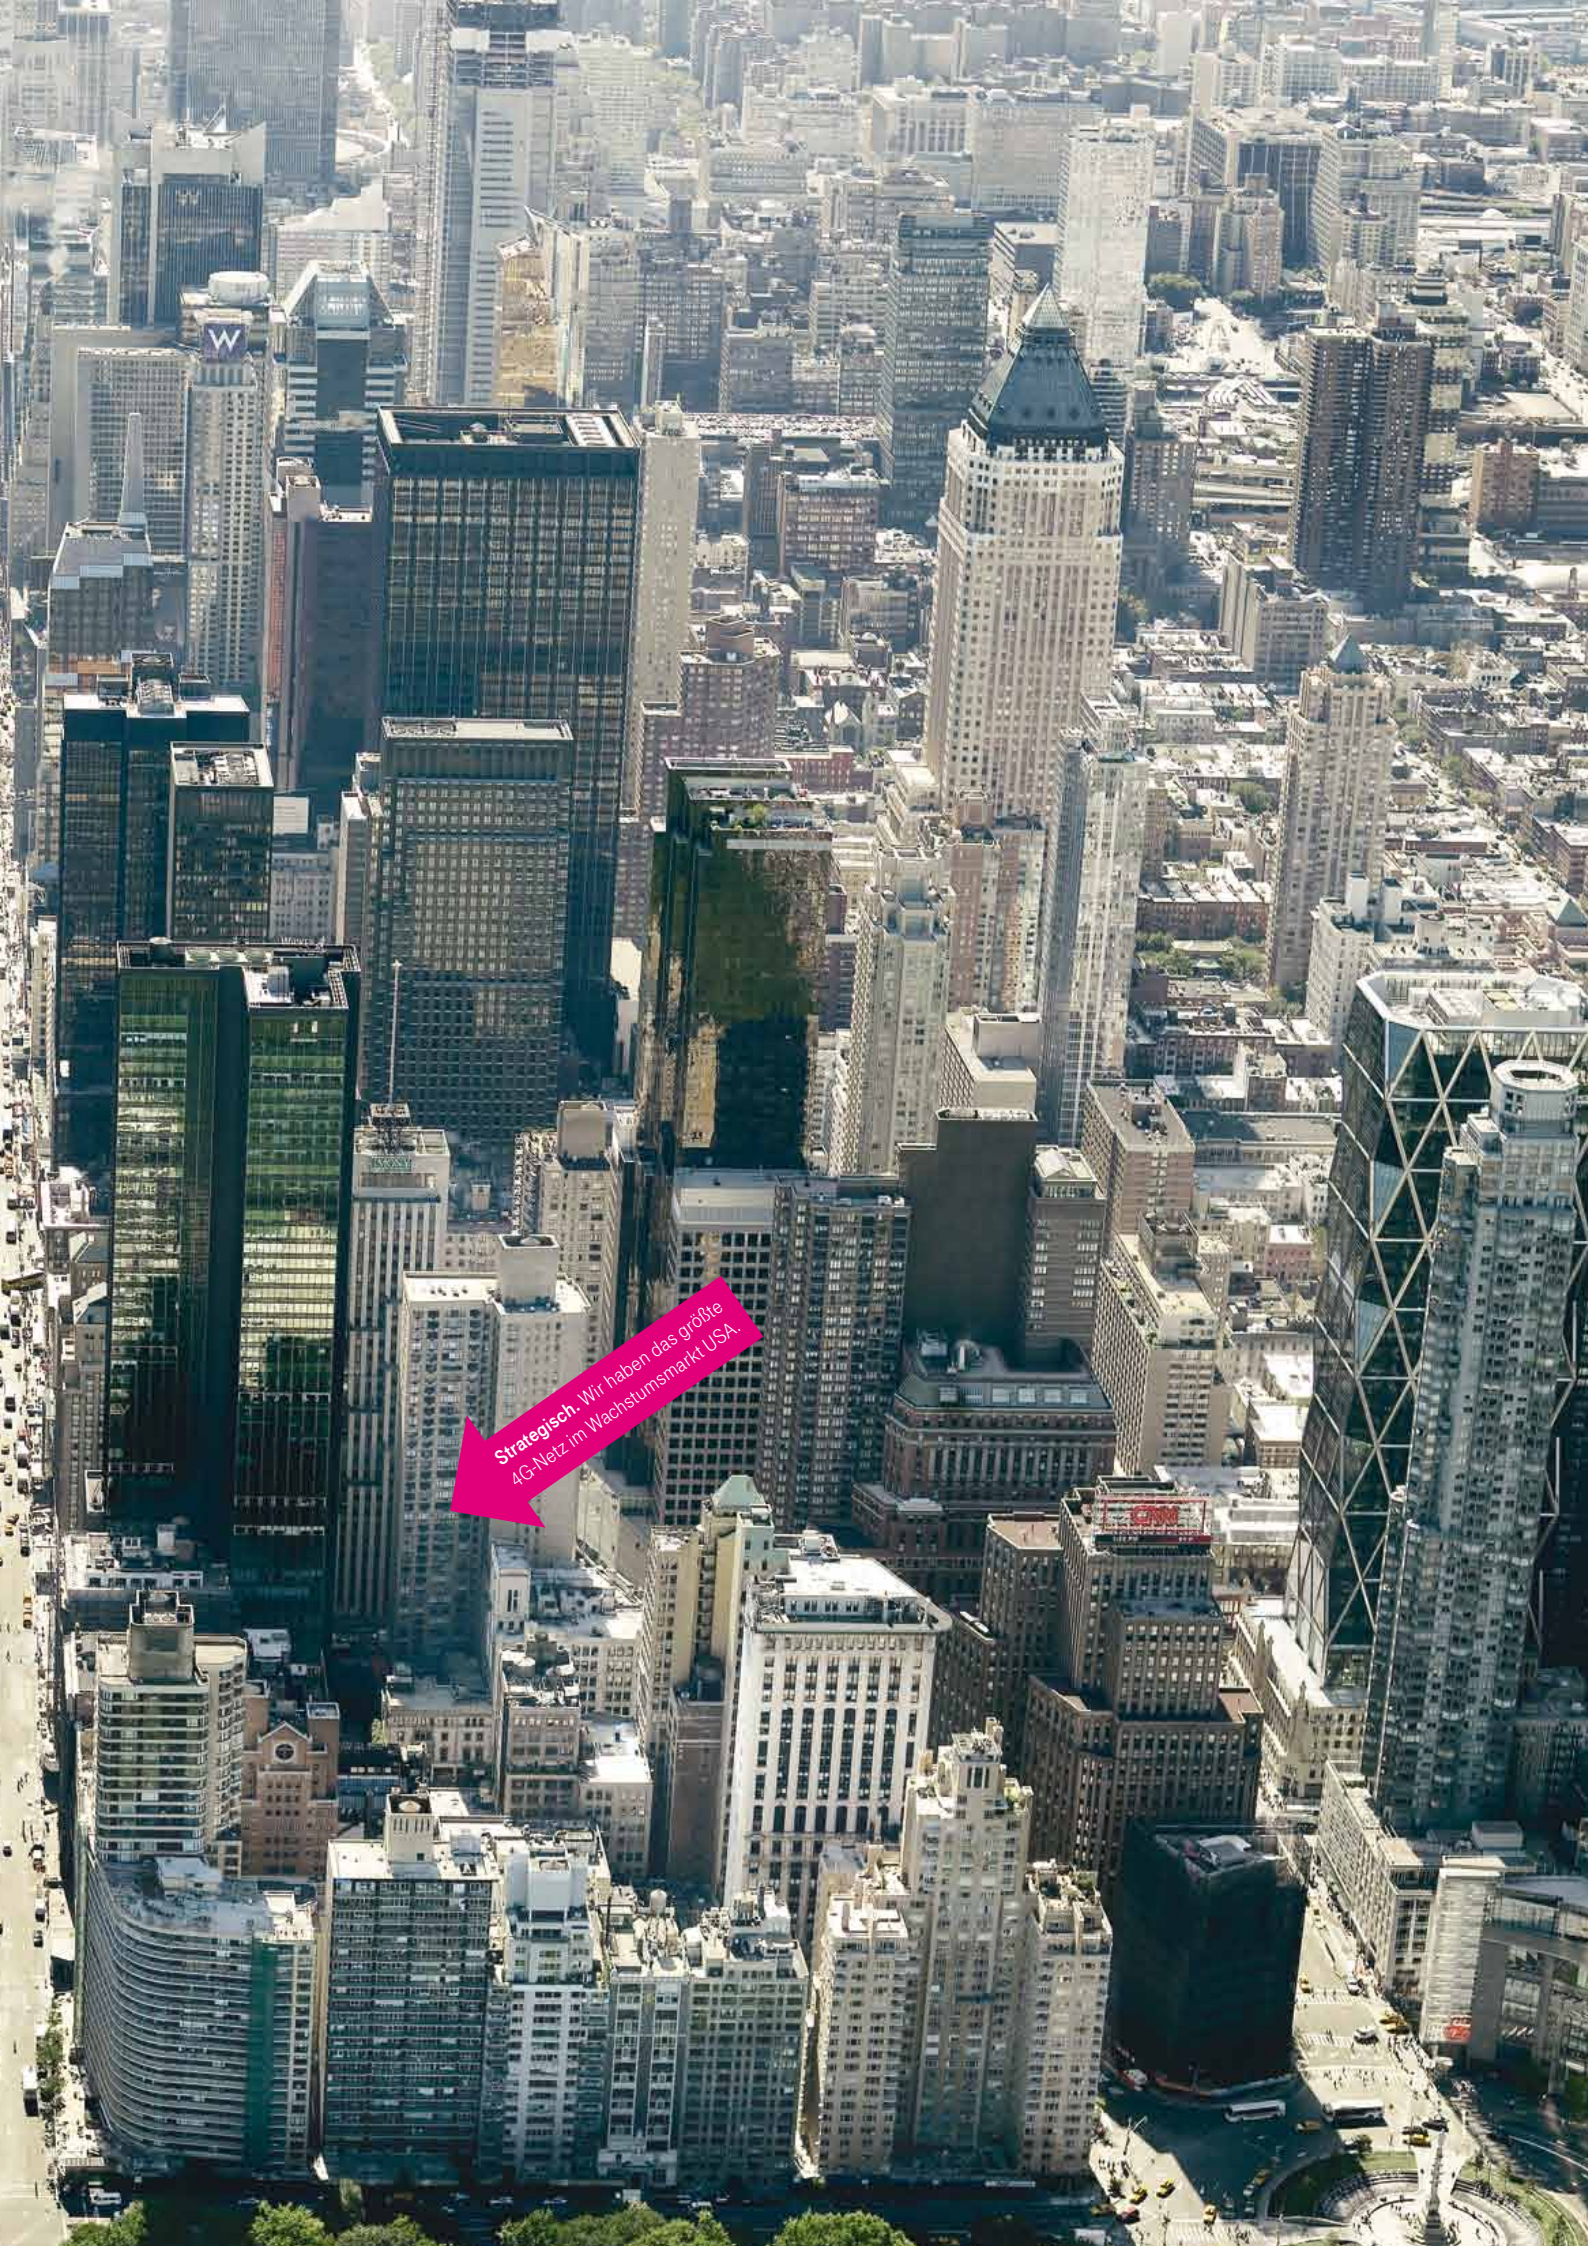

Strategisch. Wir haben das größte  
4G-Netz im Wachstumsmarkt USA.



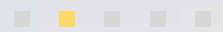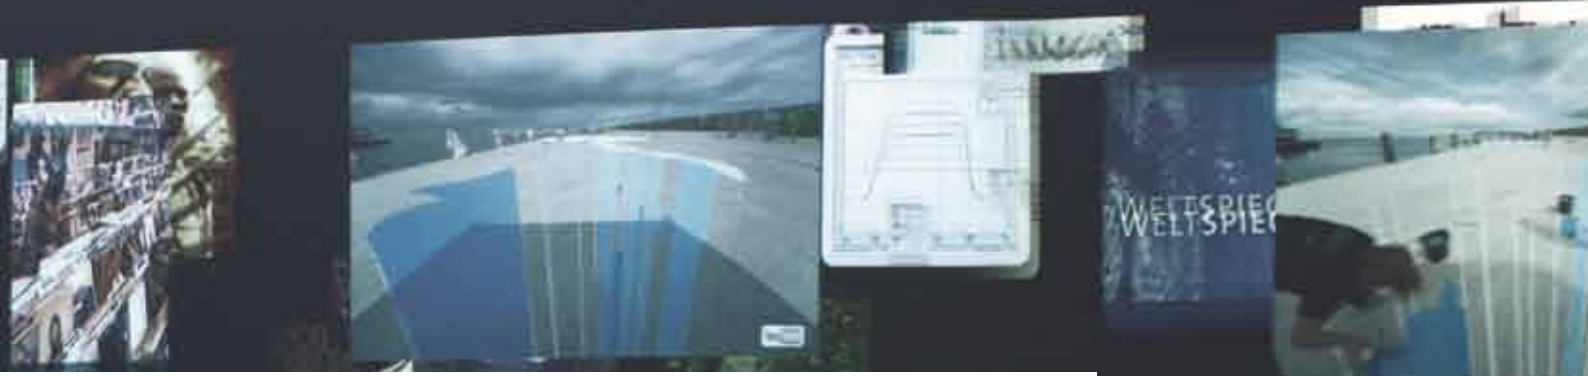

# Perspektive!

## 2015 im Blick: Die Telekom Strategie hat langfristige Ziele.

Wer in fünf Jahren erfolgreich sein will, der muss heute die richtigen Weichen stellen. Die Deutsche Telekom wandelt sich von einer klassischen „Telco“ zur „Telco plus“ und ergänzt ihr Stammgeschäft um neue, internetbasierte Produkte. Die Strategie „Verbessern – Verändern – Erneuern“ gibt dafür die Richtung vor: mit klar definierten Maßnahmen und messbaren Zielen bis 2015. Das hilft auch unseren Aktionären, die auf lange Sicht wissen wollen, wofür ihr Kapital eingesetzt wird.

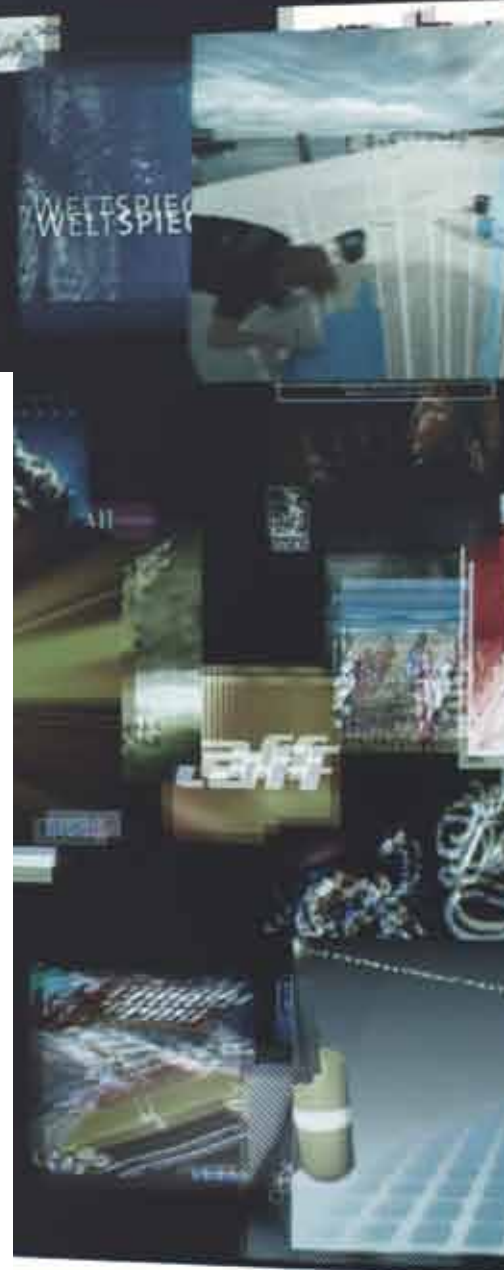

An unsere Aktionäre.

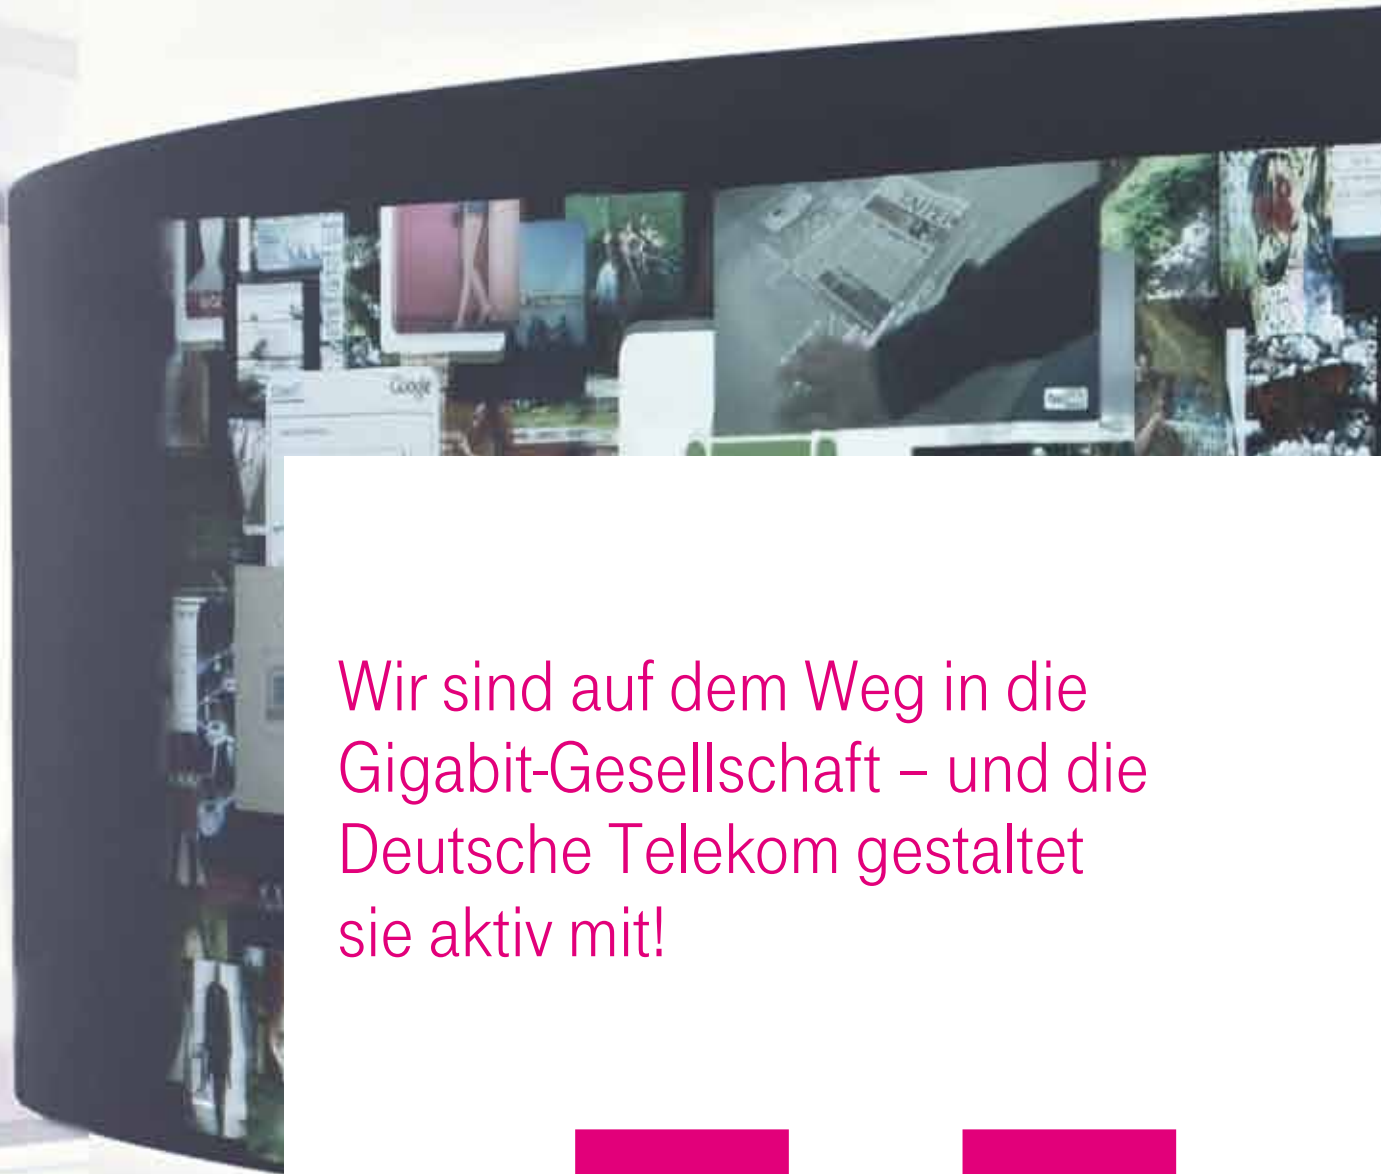

Wir sind auf dem Weg in die Gigabit-Gesellschaft – und die Deutsche Telekom gestaltet sie aktiv mit!

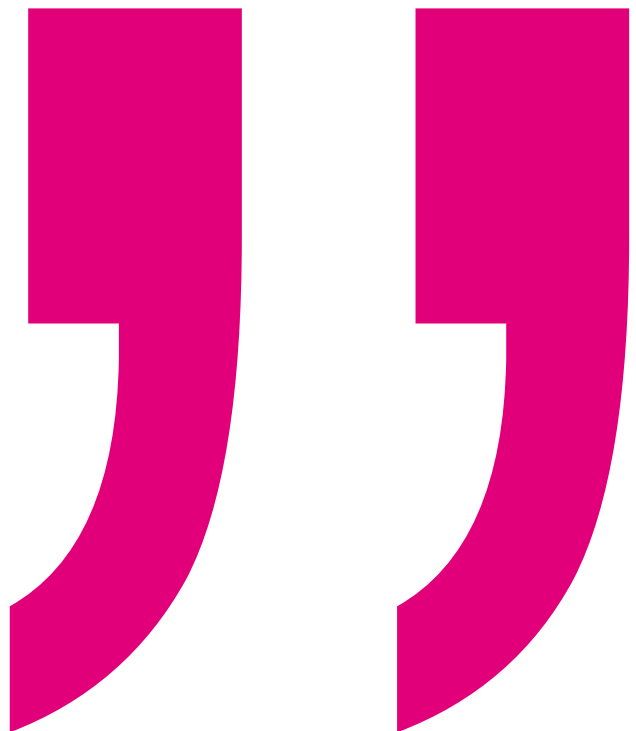



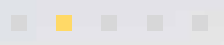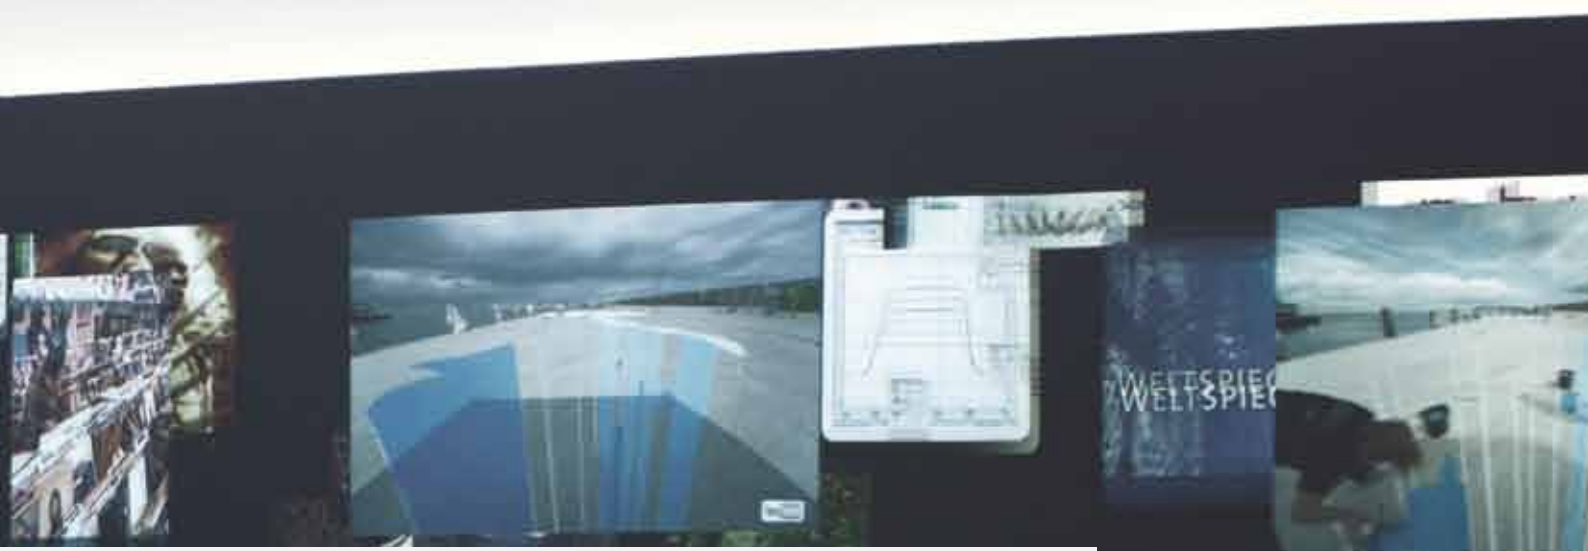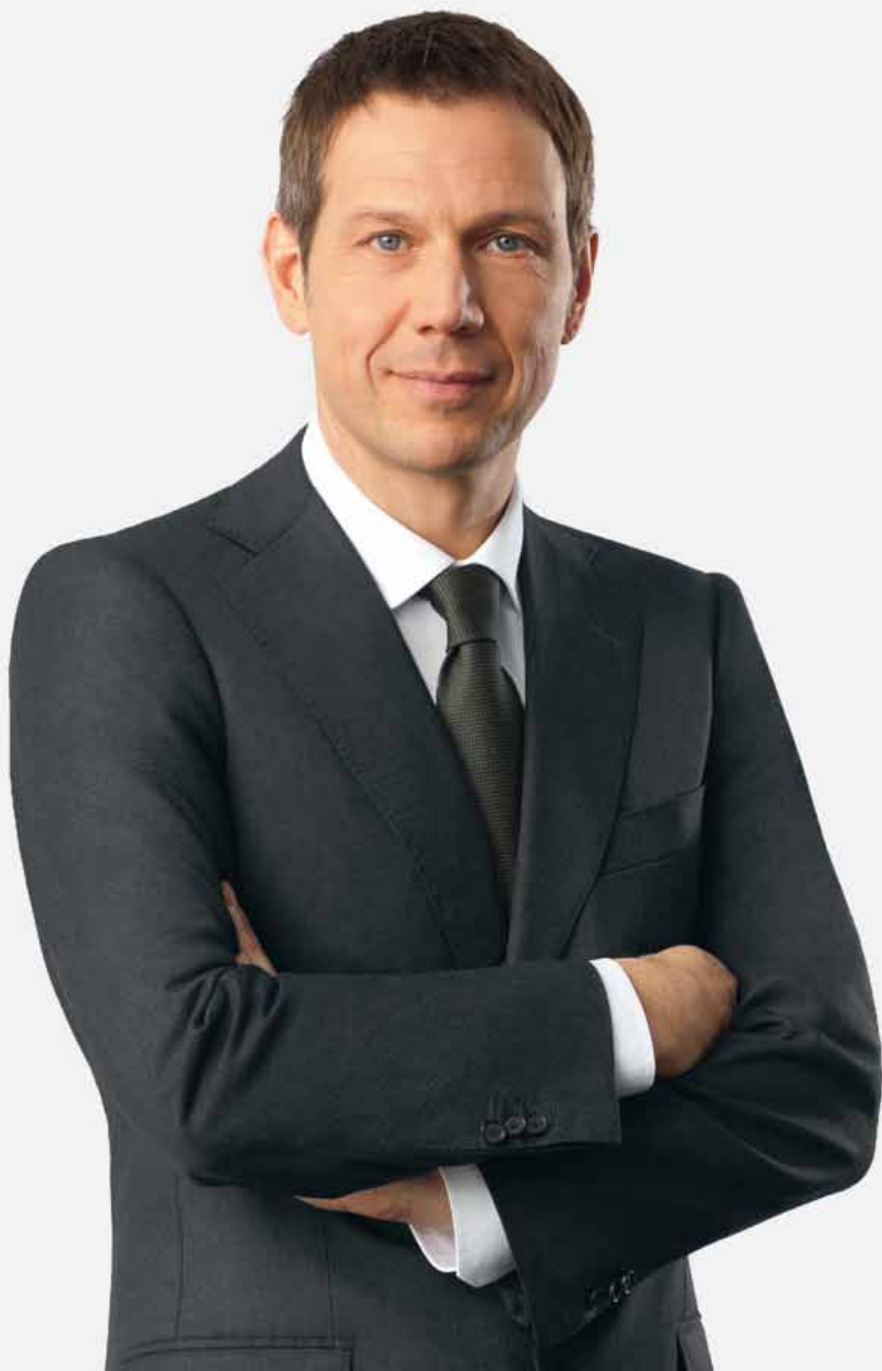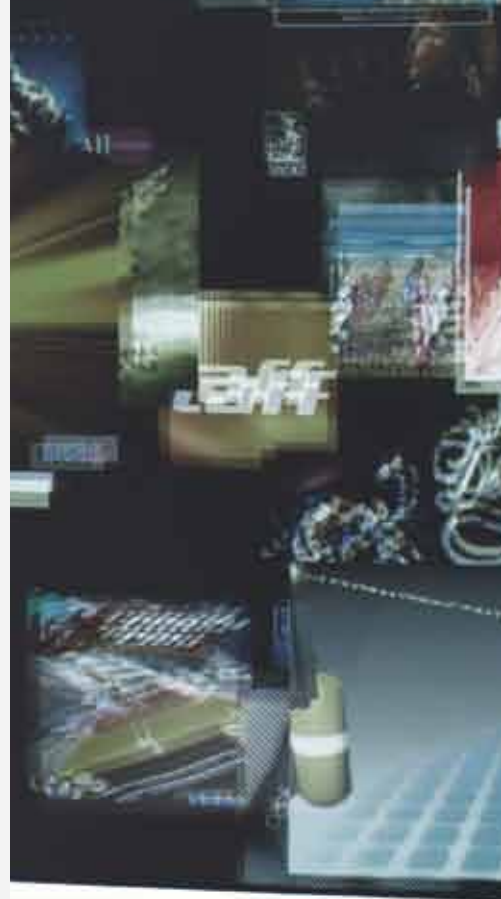

## An unsere Aktionäre.

### Sehr geehrte Aktionärinnen und Aktionäre,

die Deutsche Telekom steht für Stabilität und Verlässlichkeit in unruhigen Zeiten. Während viele Unternehmen und Industrien infolge der Finanz- und Wirtschaftskrise zum Teil erheblichen Schwankungen ausgesetzt waren, konnten und können unsere Aktionäre auf planbare und solide Geschäftsergebnisse zählen. Wir haben 2010 den Umsatz leicht auf 62,4 Milliarden Euro gesteigert – bereinigt um T-Mobile UK, unser Geschäft in Großbritannien, das wir im April 2010 in ein Joint Venture „Everything Everywhere“ eingebracht haben. Der Free Cashflow lag mit 6,5 Milliarden Euro über den von uns prognostizierten 6,2 Milliarden Euro. Beim bereinigten EBITDA haben wir mit 19,5 Milliarden Euro unser Jahresziel erreicht.

Und das, obwohl die Rahmenbedingungen nicht immer optimal waren: Unser Geschäft ist weiter von hohem Wettbewerbs- und Preisdruck geprägt. In vielen Kernländern der Telekom sorgen zudem Regulierungsentscheidungen für sinkende Erlöse. Schließlich belasten unvorhergesehene Sondersteuern in einigen Ländern Osteuropas das Ergebnis. Mit solchen Einflüssen werden wir auch in Zukunft leben müssen. Ein diszipliniertes Kostenmanagement bleibt somit für uns ohne Alternative. Wir führen darum unser erfolgreiches Effizienzprogramm „Save for Service“ fort.

Um auch künftig erfolgreich zu sein, müssen wir nicht nur die Kostenseite im Griff behalten, sondern auch Wachstumsinitiativen und Innovationen erfolgreich entwickeln. „Verbessern – Verändern – Erneuern“ heißt unsere Strategie für die nächsten Jahre. Sie ist unsere Antwort auf die entscheidenden Trends der Branche: Daten fließen in immer größeren Mengen und Geschwindigkeiten durch die Netze. Das Internet wird zunehmend mobil.

Für uns heißt das zweierlei: Der Betrieb von Netzen und IT bleibt die Basis unseres Geschäfts. Gleichzeitig setzen wir auf neue Wachstumsfelder: auf das mobile Internet und auf das vernetzte Zuhause, auf ICT-Lösungen für Großkunden, eigene Internet-Angebote und intelligente Netzlösungen für andere Branchen wie den Gesundheitssektor. Den Umsatz aus all diesen Wachstumsfeldern wollen wir bis 2015 auf ca. 29 Milliarden Euro steigern. Langfristig soll der Konzern wieder auf dem Niveau des allgemeinen Wirtschaftswachstums liegen. Angesichts des starken Rückgangs im ehemaligen Monopolgeschäft ist das keine leichte Aufgabe. Es erfordert also eine große Transformation unseres Unternehmens. Wir konzentrieren uns dazu auf fünf strategische Handlungsfelder:

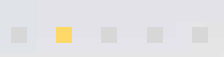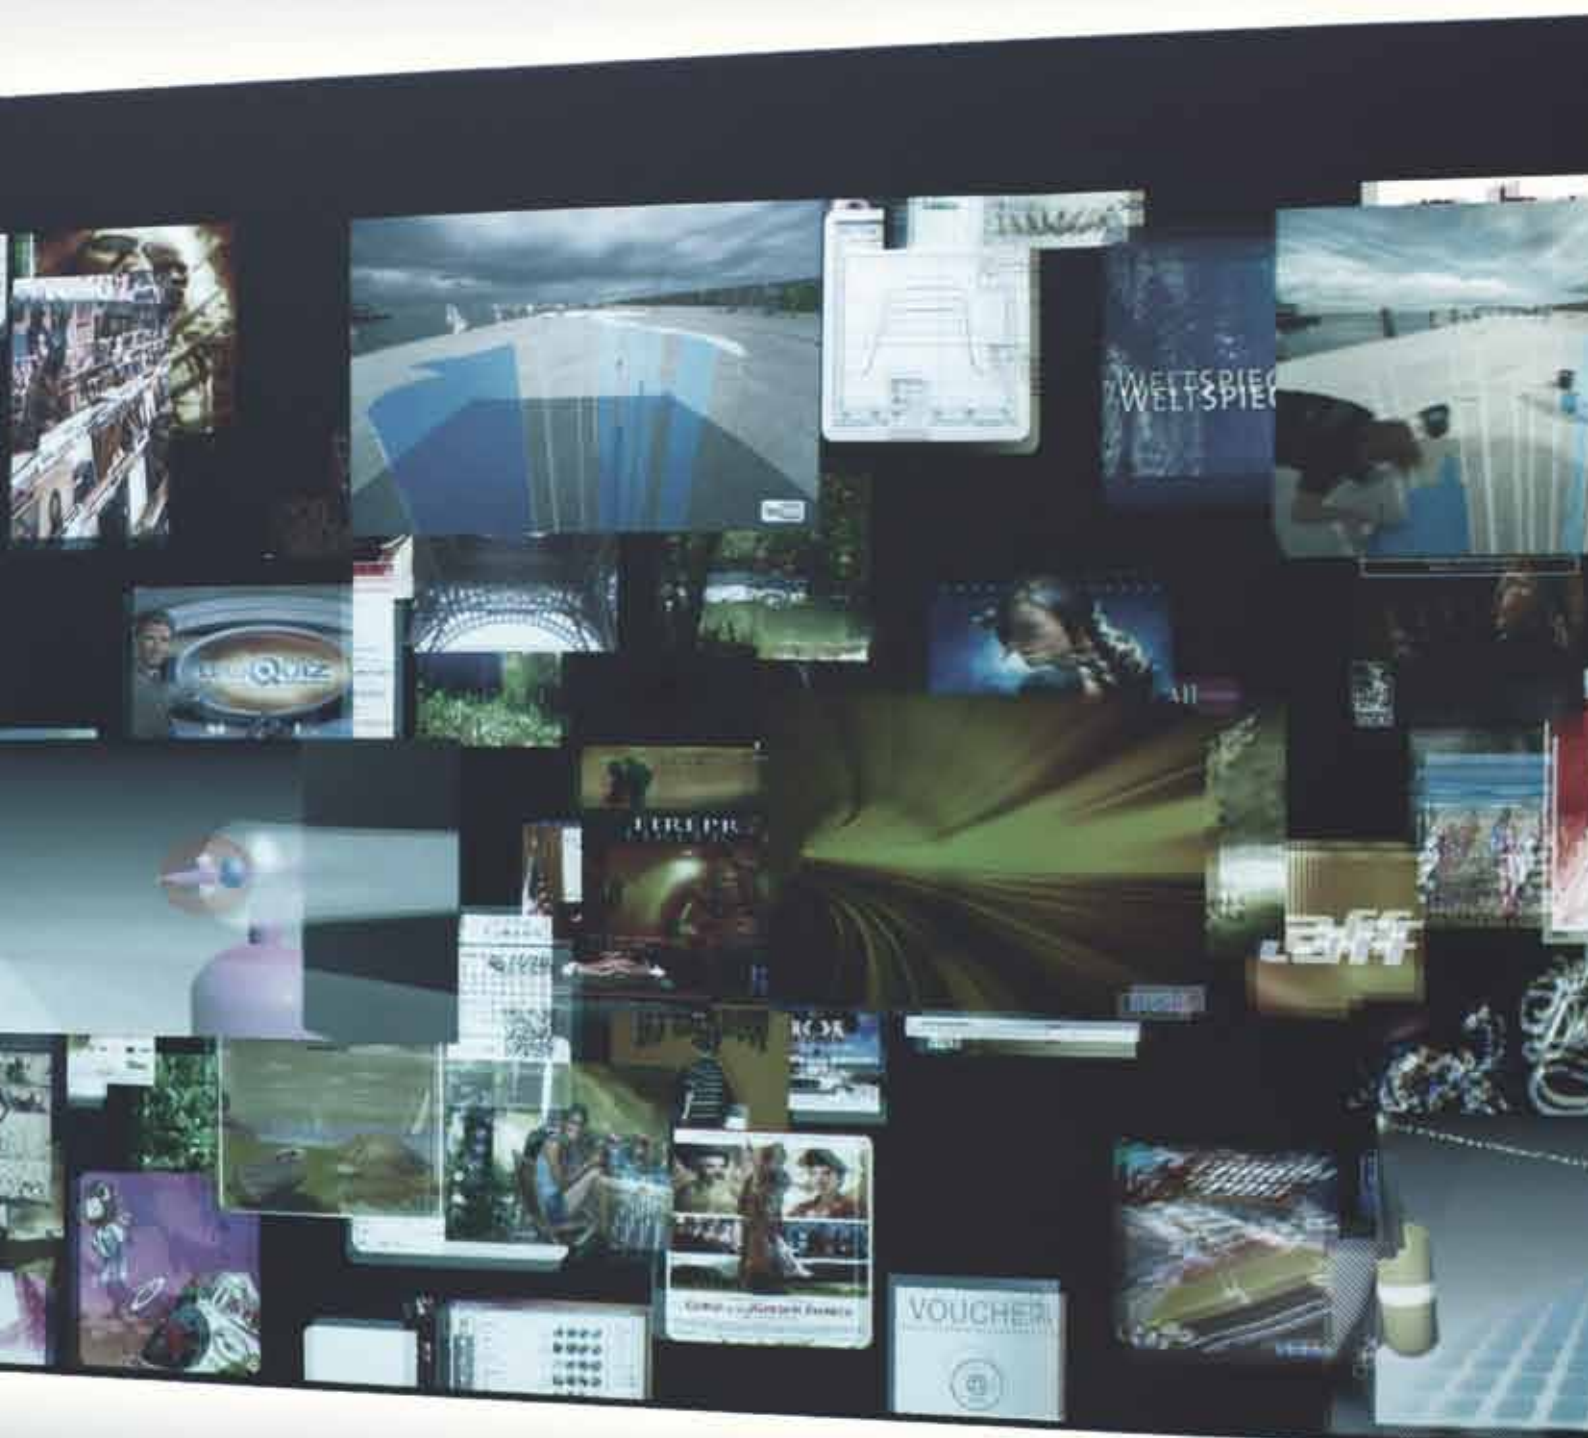

## Wir bauen die Netze und Prozesse für die Gigabit-Gesellschaft.

Netze betreiben kann unter den richtigen Rahmenbedingungen ein attraktives Geschäft bleiben. Darum planen wir, weiter in den Breitbandausbau in Festnetz und Mobilfunk zu investieren, benötigen dafür aber eine moderne Regulierung und ein investitionsfreundliches Umfeld. Bereits im vergangenen Jahr haben wir in Deutschland bei ersten Pilotkunden Glasfaserverbindungen bis in die Wohnung verlegt – mit Geschwindigkeiten von bis zu einem Gigabit pro Sekunde. 2011 startet der landesweite Ausbau. Gleichzeitig haben wir 2010 zusätzliche Mobilfunk-Frequenzen erworben, etwa in Deutschland, Österreich und in den Niederlanden. In Deutschland haben wir als erster Netzbetreiber eine LTE-Mobilfunk-Station in Betrieb genommen. Damit verbessern wir die Breitbandversorgung in ländlichen Gebieten. In den USA bieten wir unseren Kunden mit dem Standard HSPA+ das größte und derzeit schnellste Mobilfunknetz.

## Wir vernetzen das Leben unserer Kunden vom Handy bis zum Fernseher.

Die größten Wachstumschancen sehen wir beim mobilen Internet. Hier erwarten wir im Jahr 2015 rund zehn Milliarden Euro Umsatz. Treiber dieser Entwicklung sind attraktive internetfähige Mobilfunk-Geräte und dazu passende Anwendungen. In den USA nutzen bereits mehr als acht Millionen unserer Kunden diese so genannten Smartphones. Entsprechend stiegen im vergangenen Jahr auch unsere weltweiten Umsätze mit dem mobilen Internet um fast 30 Prozent auf 4,4 Milliarden Euro. Ein weiterer wichtiger Baustein unserer Strategie ist das europäische Fernsehgeschäft: In Deutschland haben sich bis Ende 2010 mehr als 1,5 Millionen Kunden für Entertain entschieden, in Süd- und Osteuropa nutzen insgesamt bereits 2,3 Millionen Kunden unsere TV-Angebote.

## Wir sorgen mit führenden ICT-Lösungen für die Vernetzung der Arbeitswelt.

T-Systems konnte 2010 den Umsatz mit Kunden außerhalb des Konzerns erneut steigern und hat eine Reihe von Großaufträgen gewonnen, etwa mit der Deutschen Post oder E.ON. Immer wichtiger werden dabei so genannte Cloud Services, also die Miete von Infrastruktur, Software und Bandbreiten zu definierten Service-Konditionen. Gleichzeitig positioniert sich T-Systems mit intelligenten Netzlösungen für die Branchen Energie, Gesundheit, Automobil und Mediendistribution. Mit Continental haben wir zur CeBIT 2010 ein Infotainment-System für das vernetzte Auto vorgestellt. Und T-Systems kooperiert unter anderem mit ABB bei der Entwicklung von intelligenten Stromnetzen.

## Wir nutzen unseren Vorsprung auf integrierten Märkten.

Mit dem Eintrag der Telekom Deutschland GmbH in das Handelsregister Ende März 2010 ist die Zusammenführung des deutschen Mobilfunk- und Festnetz-Geschäfts rechtlich vollzogen. Wir können nun unsere Mobilfunk- und Festnetzkunden aus einer Hand bedienen und so zusätzliche Umsätze erzielen, den Service weiter verbessern und Synergien heben. Die Integration von Festnetz und Mobilfunk ist für uns auch Vorbild für andere Märkte. So sind nach Ungarn im vergangenen Jahr auch Kroatien und die Slowakei diesen Weg gegangen – weitere könnten folgen.

## Wir verbessern die Performance im Mobilfunk.

Nach dem erfolgreichen Start des Joint Venture „Everything Everywhere“ in Großbritannien liegt unser Augenmerk in diesem Handlungsfeld vor allem auf dem US-amerikanischen Markt. Ende Januar 2011 haben wir die neue Strategie für T-Mobile USA vorgestellt: Bis 2014 wollen wir beim Umsatz um drei Milliarden US-Dollar zulegen. Dabei helfen uns ein hochleistungsfähiges Mobilfunknetz und eine attraktive Endgeräte-Auswahl von Smartphones und Tablet-Computern. Wir haben strategisch die Weichen gestellt, um wieder zu wachsen. Schließlich konnten wir in Polen einen jahrelangen Rechtsstreit gütlich beenden. Die Einigung sichert uns das vollständige Eigentumsrecht an PTC, damit besitzen wir eine starke Mobilfunk-Tochter im wichtigen polnischen Markt.

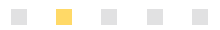

Sehr geehrte Aktionärinnen und Aktionäre, mit der Strategie „Verbessern – Verändern – Erneuern“ schaffen wir die Voraussetzungen für wirtschaftlichen Erfolg in der so genannten Gigabit-Gesellschaft. Ganz bewusst haben wir uns dabei für eine langfristige Perspektive entschieden. Und es ist uns wichtig, unsere ausgeglichene Stakeholderpolitik weiter fortzusetzen und Verlässlichkeit für alle internen und externen Interessengruppen des Konzerns zu bieten. Das gilt zunächst für unsere Mitarbeiterinnen und Mitarbeiter, ohne die wir die Transformation des Konzerns nicht umsetzen können. Wir werden den notwendigen Personalumbau auch in Zukunft ausgewogen und sozialverträglich gestalten. Unser Ziel ist es, so vielen Menschen wie möglich eine Beschäftigungsperspektive im Unternehmen zu bieten. Darüber hinaus stellen wir aber auch neue Mitarbeiter ein: Rund 4.000 waren es im Jahr 2010, davon die Hälfte eigene Nachwuchskräfte.

Die hohen ökologischen, sozialen und ethischen Standards, nach denen wir unser wirtschaftliches Handeln ausrichten, finden immer mehr Anerkennung am Kapitalmarkt. Bereits neun Prozent aller T-Aktien werden von nachhaltig orientierten Investoren gehalten. Wir wissen außerdem, dass viele unserer Aktionäre wertorientierte Anleger sind, die eher auf langfristige Stabilität und nachhaltige Dividendenzahlungen als auf kurzfristiges Wachstum setzen. Um genau diese Anlegergruppe gezielt anzusprechen, haben wir vor einem Jahr eine mittelfristige Ausschüttungspolitik beschlossen – mit einem geplanten festen Volumen von jeweils 3,4 Milliarden Euro für die Geschäftsjahre 2010 bis 2012. Im abgelaufenen Geschäftsjahr haben wir eigene Aktien im Wert von 400 Millionen Euro zurückgekauft. Für das Geschäftsjahr 2010 schlagen Vorstand und Aufsichtsrat der Hauptversammlung am 12. Mai 2011 daher die Zahlung einer Dividende in Höhe von 70 Cent je Aktie vor. Zusammen mit den Aktienrückkäufen ergibt sich daraus die angekündigte Ausschüttungssumme.

Ich danke Ihnen für das Vertrauen, das Sie mir und meinem Vorstandsteam in den vergangenen Jahren geschenkt haben. Und ich hoffe, unsere Strategie überzeugt Sie darin, die Deutsche Telekom auch weiterhin zu unterstützen.

Bonn, im Februar 2011

Ihr

René Obermann  
Vorstandsvorsitzender Deutsche Telekom AG

# Inhaltsverzeichnis.

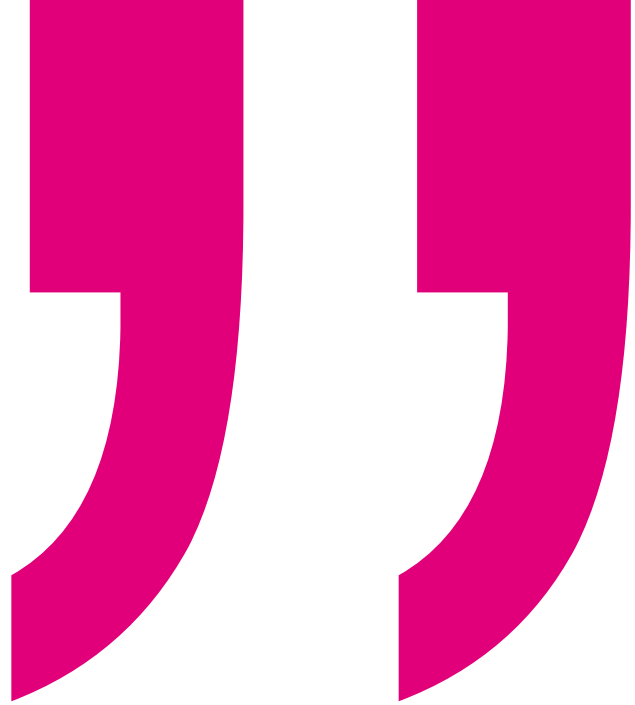

## ■ 14 An unsere Aktionäre

- U2** Die Finanzdaten des Konzerns auf einen Blick
- U3** Der Konzern Deutsche Telekom und die operativen Segmente
- 14** Brief an unsere Aktionäre
- 20** Der Vorstand
- 24** Bericht des Aufsichtsrats
- 32** Corporate Governance-Bericht
- 38** Die T-Aktie

## ■ 43 Zusammengefasster Lagebericht

- 44** Das Geschäftsjahr 2010 im Überblick
- 47** Wichtige Ereignisse im Geschäftsjahr 2010
- 51** Konzernstruktur
- 57** Konzernstrategie und Konzernsteuerung
- 61** Wirtschaftliches Umfeld
- 65** Geschäftsentwicklung des Konzerns
- 76** Geschäftsentwicklung der operativen Segmente
- 95** Geschäftsentwicklung der Deutschen Telekom AG
- 99** Corporate Responsibility
- 102** Innovation und Produktentwicklung
- 106** Mitarbeiter
- 112** Risiko- und Chancenmanagement
- 123** Rechnungslegungsbezogenes internes Kontrollsystem
- 124** Besondere Ereignisse nach Schluss des Geschäftsjahres
- 125** Sonstige Angaben
- 126** Prognosen zur Umsatz und Ergebnisentwicklung

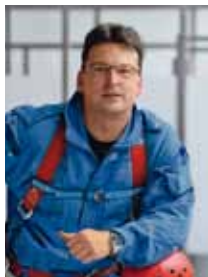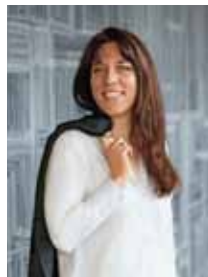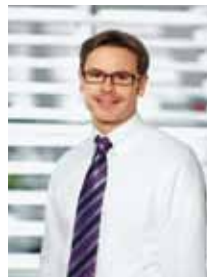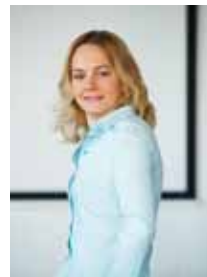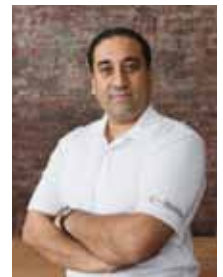

## ■ 131 Der Konzernabschluss

- 132 Konzern-Bilanz
- 134 Konzern-Gewinn- und Verlustrechnung
- 135 Konzern-Gesamtergebnisrechnung
- 136 Konzern-Eigenkapitalveränderungsrechnung
- 138 Konzern-Kapitalflussrechnung
- 139 Konzern-Anhang
  
- 222 Versicherung der gesetzlichen Vertreter
- 223 Bestätigungsvermerk des Abschlussprüfers

## ■ 225 Mandate und weitere Informationen

- 226 Der Aufsichtsrat  
einschließlich weiterer Mandate
- 228 Mandate der Vorstandsmitglieder  
in Aufsichtsräten
- 230 Glossar
- 234 Stichwortverzeichnis
- 235 Impressum/Finanzkalender
- 236 Haftungsausschluss
- U5 Deutsche Telekom weltweit
- U6 Inhaltsverzeichnis
- U7 Daten aus dem Konzern

# Der Vorstand der Deutschen Telekom AG 2010/2011.

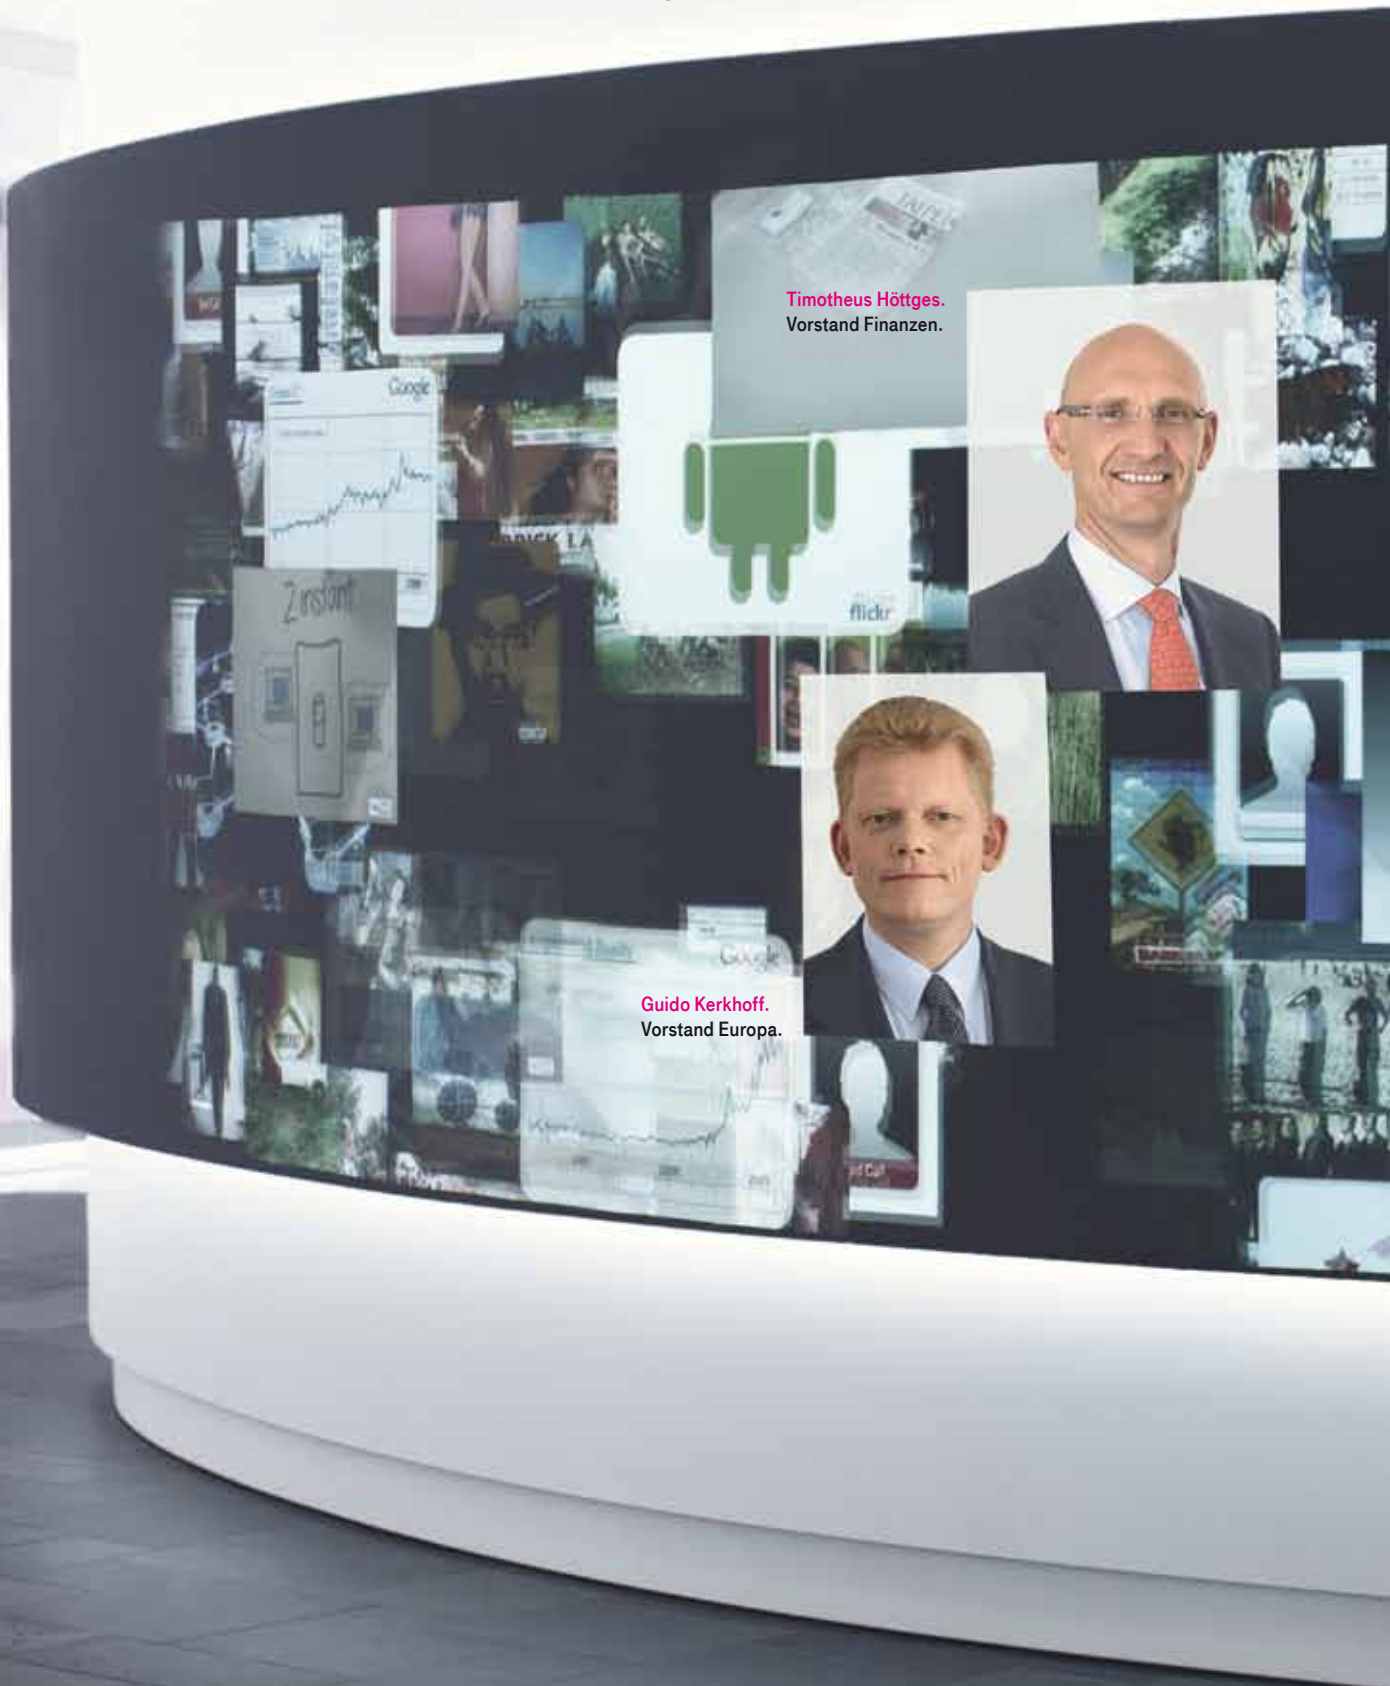

**Timotheus Höttges.**  
Vorstand Finanzen.

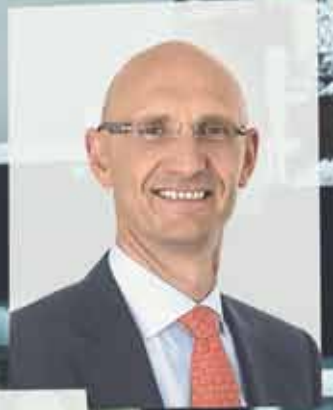

**Guido Kerkhoff.**  
Vorstand Europa.

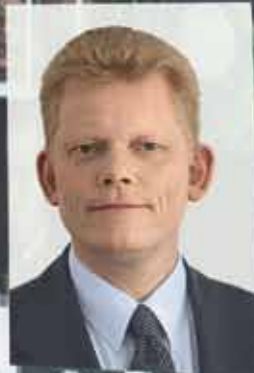



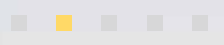

**Thomas Sattelberger.**  
Vorstand Personal.



**Edward R. Kozel.**  
Vorstand Technologie  
und Innovation.



**Niek Jan van Damme.**  
Vorstand Deutschland.



**René Obermann.**  
Vorstandsvorsitzender.



**Dr. Manfred Balz.**  
Vorstand Datenschutz,  
Recht und Compliance.



**Reinhard Clemens.**  
Vorstand T-Systems.

# Der Vorstand der Deutschen Telekom AG 2010/2011.

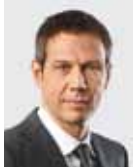

„Wir investieren bis 2012 rund zehn Milliarden Euro in den Breitbandstandort Deutschland.“

## **René Obermann.**

### **Vorstandsvorsitzender.**

Jahrgang 1963. Nach einer Ausbildung zum Industriekaufmann bei der BMW AG in München gründete René Obermann 1986 das Handelsunternehmen ABC Telekom. Er leitete die daraus entstandene Hutchison Mobilfunk GmbH als Geschäftsführender Gesellschafter und war von 1994 bis 1998 Vorsitzender der Geschäftsführung. Obermann kam 1998 als Geschäftsführer Vertrieb der T-Mobile Deutschland zur Deutschen Telekom. Im April 2000 wurde er Vorsitzender der Geschäftsführung und übernahm ein Jahr später bei der T-Mobile International den Vorstand für European Operations and Group Synergies. Im November 2002 trat er als Vorstand für den Bereich Mobilfunk in den Vorstand der Deutschen Telekom ein, gleichzeitig führte er die T-Mobile International als Vorstandsvorsitzender. Seit dem 13. November 2006 ist René Obermann Vorstandsvorsitzender der Deutschen Telekom AG.

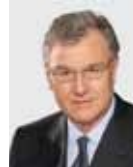

„Datenschutz und Datensicherheit fangen für uns schon bei der Produktentwicklung an.“

## **Dr. Manfred Balz.**

### **Vorstand Datenschutz, Recht und Compliance.**

Jahrgang 1944. Nach dem Jurastudium in Tübingen, München, St. Petersburg und an der Harvard University in Boston begann Balz seine berufliche Laufbahn 1974 beim Bundesjustizministerium. Es folgten die Position des Chefsyndikus der Treuhandanstalt Berlin sowie eine Partnerschaft bei der internationalen Anwaltssozietät Wilmer, Cutler & Pickering. Der promovierte Jurist war von 1997 bis zu seiner Bestellung in den Vorstand der Deutschen Telekom AG Chefjustiziar des Konzerns. Manfred Balz ist seit dem 22. Oktober 2008 Vorstand für Datenschutz, Recht und Compliance bei der Deutschen Telekom AG.

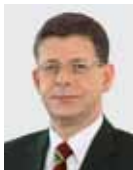

„Informations- und Kommunikationstechnik ist Lebensader unserer Wirtschaft geworden – wie Strom oder Wasser.“

## **Reinhard Clemens.**

### **Vorstand T-Systems.**

Jahrgang 1960. Nach dem Studium der Elektrotechnik in Aachen begann Reinhard Clemens seine berufliche Laufbahn 1990 als Geschäftsführer der Gesellschaft für Industrieautomaten. Von 1994 bis 2001 war er in verschiedenen Positionen für den IBM Konzern tätig, danach wechselte Clemens in den Vorstand der Systematics AG, wo er zuletzt den Bereich Vertrieb leitete. Anschließend war er Vorsitzender der Geschäftsführung von EDS in Deutschland. Seit Dezember 2007 ist Reinhard Clemens im Vorstand der Deutschen Telekom. Er leitet den Vorstandsbereich T-Systems und ist Chief Executive Officer (CEO) von T-Systems.

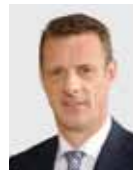

„Beim Vernetzten Leben und Arbeiten geht es darum, das Leben zu vereinfachen.“

## **Niek Jan van Damme.**

### **Vorstand Deutschland.**

Jahrgang 1961. Van Damme studierte Wirtschaftswissenschaften an der Vrije Universiteit Amsterdam und begann seine berufliche Laufbahn 1986 bei Procter & Gamble. Ab 1997 war er Managing Partner bei Floor Heijn Retail, bis er 1999 als Director for Marketing Communications zu Ben Nederland wechselte, der späteren T-Mobile Niederlande. Hier übernahm er von 2004 bis 2009 die Geschäftsführung. Niek Jan van Damme ist seit März 2009 Mitglied des Vorstands der Deutschen Telekom. Seit Juli 2009 ist er Vorstandsmitglied mit der Zuständigkeit Deutschland und verantwortet Vertrieb, Marketing und Service von Festnetz- und Mobilfunk-Standardprodukten für Privat- und Geschäftskunden in Deutschland. Er ist zudem seit April 2010 Sprecher der Geschäftsführung der Telekom Deutschland GmbH.

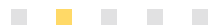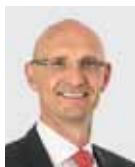

„Solide Finanzen sind die Grundlage nachhaltigen Wirtschaftens.“

**Timotheus Höttges.**

**Vorstand Finanzen.**

Jahrgang 1962. Nach seinem Studium der Betriebswirtschaft in Köln begann Höttges seine berufliche Laufbahn bei der Mummert + Partner Unternehmensberatung in Hamburg und wechselte 1992 zum VIAG Konzern. Höttges ist seit September 2000 bei der Deutschen Telekom, u. a. war er Vorsitzender der Geschäftsführung der T-Mobile Deutschland, anschließend wurde er Vorstand „Sales and Service Operations Europe“ der T-Mobile International. Danach leitete er im Konzernvorstand den Bereich T-Home, Sales & Services. Timotheus Höttges ist seit dem 1. März 2009 Vorstand Finanzen der Deutschen Telekom AG.

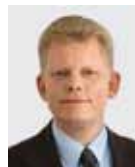

„Wir werden die Datennutzung im Mobil- und Festnetzbereich in unseren Präsenzmärkten weiter steigern.“

**Guido Kerkhoff.**

**Vorstand Europa.**

Jahrgang 1967. Nach Abschluss des Studiums der Betriebswirtschaft begann er seine berufliche Laufbahn bei der VEW AG und bei der Bertelsmann AG. Seit April 2002 hatte Kerkhoff verschiedene Führungspositionen im Finanzbereich der Deutschen Telekom inne. Von März 2009 bis April 2010 war er als Vorstand Süd- und Osteuropa verantwortlich für die Beteiligungen, die in dieser Region sowohl Festnetz- als auch Mobilfunk-Dienstleistungen anbieten, z. B. die OTE-Gruppe, die Magyar Telekom-Gruppe, die kroatische Hrvatski Telekom sowie Slovak Telekom. Seit April 2010 verantwortet er als Vorstand Europa darüber hinaus auch die Mobilfunk-Beteiligungen in den Niederlanden, Österreich, Polen, Tschechien sowie das Joint Venture in Großbritannien.

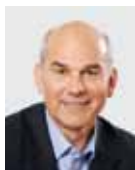

„Um ein hochmodernes, internetbasiertes Unternehmen zu werden, stärken wir unsere Innovationskultur.“

**Edward R. Kozel.**

**Vorstand Technologie und Innovation.**

Jahrgang 1955. Edward R. Kozel absolvierte ein Studium der Elektrotechnik an der University of California, Davis. Er hatte führende Positionen in der Telekommunikationsindustrie inne. So war er Vorstandsmitglied bei Cisco, hielt Aufsichtsratsmandate bei Yahoo und Reuters und war Vorsitzender des Aufsichtsrats bei Telepo. Darüber hinaus arbeitet er für weitere führende Unternehmen der Technologiebranche, darunter Red Hat, Symbol Technology und TIBCO Software. Seit dem 3. Mai 2010 ist Edward R. Kozel Vorstand Technologie und Innovation der Deutschen Telekom.

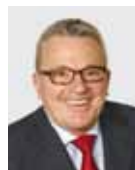

„Talent ist überall: Wir brauchen ein unternehmerisches ‚Biotop‘ mit Hunger auf Kulturwandel.“

**Thomas Sattelberger.**

**Vorstand Personal.**

Jahrgang 1949. Nach dem Studium der Betriebswirtschaft an der Berufsakademie Baden-Württemberg begann Thomas Sattelberger 1975 seine 19-jährige Laufbahn im damaligen Daimler-Benz-Konzern in Stuttgart, mit weiteren Stationen in dem Tochterkonzern MTU-Gruppe, im Vertriebsressort von Mercedes-Benz sowie der heutigen EADS. Von 1994 bis 2003 war er für die Deutsche Lufthansa AG tätig, wo er zuletzt Mitglied des Bereichsvorstands (Executive Vice President Product & Service) der Lufthansa Passage Airline war. Von 2003 bis 2007 war er Personalvorstand der Continental AG in Hannover. Seit dem 3. Mai 2007 ist Thomas Sattelberger Personalvorstand und Arbeitsdirektor der Deutschen Telekom AG.

# Bericht des Aufsichtsrats an die Hauptversammlung 2011.

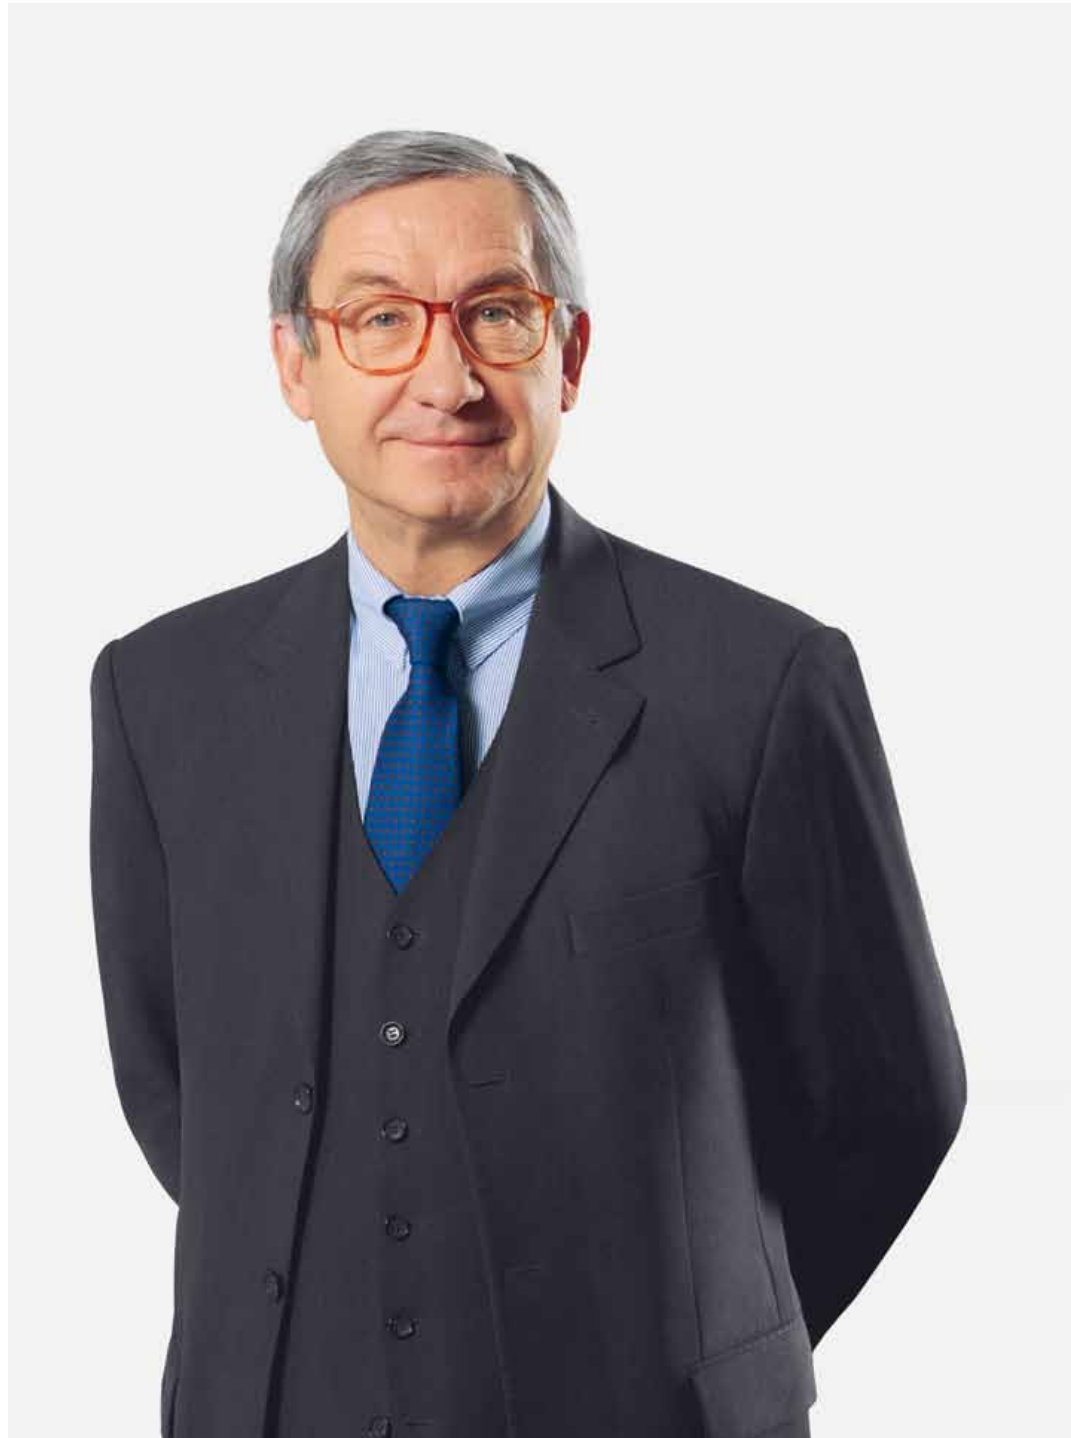

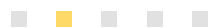

Das Geschäftsjahr 2010 war für die Deutsche Telekom insbesondere gekennzeichnet von der Umsetzung der Zusammenführung von Festnetz- und Mobilfunk-Geschäft in Deutschland, der Entwicklung der T-Mobile US und strategischen Planung des Geschäfts in den USA sowie dem weiterhin schwierigen Wettbewerbs- und Regulierungsumfeld. Trotz der in Süd- und Osteuropa schwierigen makroökonomischen Bedingungen hat der Konzern im Geschäftsjahr 2010 gute Ergebnisse erzielt und die Erwartungen erfüllt. Der Aufsichtsrat hat die Führung der Geschäfte durch den Vorstand in Erfüllung seiner gesetzlichen Beratungs- und Überwachungsfunktion intensiv begleitet.

## Aufsichtsratstätigkeit im Geschäftsjahr 2010.

Der Aufsichtsrat hat die Geschäftsführung des Vorstands und die Konzernleitung durch den Vorstand kontinuierlich überwacht. Maßstab für diese Überwachung waren namentlich die Rechtmäßigkeit, Ordnungsmäßigkeit, Zweckmäßigkeit und Wirtschaftlichkeit der Geschäftsführung und Konzernleitung. Wesentliche Grundlage für die Erfüllung der gesetzlichen Überwachungsaufgabe waren die schriftlichen und mündlichen Berichte des Vorstands. Dem Aufsichtsrat ist vom Vorstand insbesondere regelmäßig über die Unternehmensplanung, die Geschäftsentwicklung sowie wichtige Geschäftsvorfälle der Gesellschaft und wesentlicher Beteiligungsgesellschaften berichtet worden. Die aktuelle Situation des Unternehmens ist vom Aufsichtsrat regelmäßig in den Sitzungen des Aufsichtsrats und seiner Ausschüsse auf Basis der schriftlichen und mündlichen Berichterstattung des Vorstands überprüft worden. Eine Erörterung insbesondere der Geschäftsentwicklung wurde in jeder Sitzung des Aufsichtsrats vorgenommen. Dabei wurden auch die Abweichungen vom ursprünglich geplanten Geschäftsverlauf erörtert. Der Vorstand ist seinen Informationspflichten gegenüber dem Aufsichtsrat zeitnah und vollständig nachgekommen. Die Berichte des Vorstands wurden sowohl hinsichtlich ihrer Gegenstände als auch hinsichtlich ihres Umfangs den vom Gesetz, guter Corporate Governance und vom Aufsichtsrat an sie gestellten Anforderungen gerecht. Zusätzlich zu den Berichten ließ sich der Aufsichtsrat vom Vorstand ergänzende Informationen und Auskünfte erteilen. Die vom Vorstand erteilten Berichte und sonstigen Informationen hat der Aufsichtsrat auf ihre Plausibilität hin überprüft sowie kritisch gewürdigt und hinterfragt.

Ein vom Aufsichtsrat erstellter, in den Geschäftsordnungen von Vorstand und Aufsichtsrat verankerter und vom Aufsichtsrat regelmäßig auf erforderliche Anpassungen hin überprüfter Katalog listet die Arten von Geschäften und Maßnahmen auf, die von grundlegender Bedeutung sind und zu deren Vornahme der Vorstand deshalb der Zustimmung des Aufsichtsrats bedarf. Die danach vom Vorstand dem Aufsichtsrat zur Zustimmung vorzulegenden Geschäfte und Maßnahmen hat der Aufsichtsrat mit dem Vorstand erörtert und eingehend geprüft. Dabei haben regelmäßig der Nutzen und die Auswirkungen des jeweiligen Geschäfts im Mittelpunkt gestanden. Der Aufsichtsrat hat allen ihm zur Zustimmung vorgelegten Geschäften und Maßnahmen zugestimmt. Der Prüfungsausschuss hat sich darüber hinaus u. a. regelmäßig mit den Quartalsberichten befasst und diese mit den Abschlussprüfern besprochen sowie der Quartalsberichterstattung zugestimmt.

Zwischen den Sitzungsterminen hat der Aufsichtsratsvorsitzende im kontinuierlichen Austausch mit dem Vorstand und hier insbesondere mit dem Vorstandsvorsitzenden die Strategie, die Geschäftsentwicklung und das Risikomanagement des Unternehmens erörtert und sich über den Gang der Geschäfte sowie wichtige Ereignisse informiert.

Neben der gesetzlichen Regelberichterstattung sind insbesondere folgende Themen intensiv beraten und geprüft worden:

- Die Befassung mit der Umsetzung der Zusammenführung von Festnetz- und Mobilfunk-Geschäft in Deutschland.
- Die Entwicklung des Regulierungs- und Wettbewerbsumfelds und die daraus resultierenden Maßnahmen in Strategie und Planung des Konzerns.
- Die Implementierung der Konzernstrategie im Rahmen einer Klausurtagung von Vorstand und Aufsichtsrat.
- Die Entwicklung der T-Mobile US und die strategische Planung für diese Gesellschaft.
- Die Gründung des Joint Venture zwischen der T-Mobile UK und Orange UK in Großbritannien.
- Die Entwicklung der griechischen OTE vor dem besonderen Hintergrund der makroökonomischen Entwicklungen in Griechenland.
- Die Begleitung der rechtlichen Auseinandersetzungen in Bezug auf die PTC in Polen.

- Die Beteiligung an Frequenzauktionen für die vierte Mobilfunk-Generation in Deutschland und in weiteren europäischen Ländern.
- Die Budget- und Mittelfristplanung sowie die Ausschüttungspolitik des Konzerns.
- Die Begleitung der Personalbedarfs- und -bestandsentwicklung sowie die qualitative Personalplanung.
- Die Erörterung der Risikosituation des Konzerns und der Compliance im Konzern.
- Die Beratung der Ergebnisse der nach den Regeln der International Financial Reporting Standards (IFRS) regelmäßig durchzuführenden Impairment-Tests sowie die Prüfung der Bilanzansätze der immateriellen Vermögensgegenstände nach deutschem Handelsrecht.
- Die Umsetzung der durch das Gesetz zur Angemessenheit der Vorstandsvergütung (VorstAG) geänderten Rechtslage in den vertraglichen Regelungen für die Mitglieder des Vorstands.
- Die kontinuierliche Begleitung der Aufarbeitung der Datenmissbrauchsaffäre und der Schutz der Betroffenen.
- Die Corporate Governance unter besonderer Berücksichtigung der Empfehlungen und Anregungen des Deutschen Corporate Governance Kodex.
- Die Erörterung der Entwicklung des Beteiligungsportfolios des Konzerns.
- Die Deregistrierung der Aktie der Deutschen Telekom AG von der New Yorker Börse sowie der Börse in Tokio.
- Die Vorbereitung des Vorschlags des Aufsichtsrats an die Hauptversammlung 2011 zur Bestellung des Abschlussprüfers für das Geschäftsjahr 2011.

Der Aufsichtsrat und sein Prüfungsausschuss haben insbesondere überwacht, dass der Vorstand rechtmäßig gehandelt und u. a. durch eine konzernweit eingerichtete Compliance-Organisation für die Einhaltung der gesetzlichen Bestimmungen und der unternehmensinternen Regelungen und Richtlinien gesorgt hat. Der Aufsichtsrat und der Prüfungsausschuss unterstützen den weiteren Ausbau dieser Organisation durch den Vorstand. Der Aufsichtsrat hat sich zudem regelmäßig vom Vorstand über das vom Vorstand eingerichtete konzernweite Risikomanagement und konzernweite Risikocontrolling berichten lassen. Der Aufsichtsrat ist aufgrund seiner Prüfungen, die Erörterungen mit den Abschlussprüfern einschlossen, zu der Einschätzung gelangt, dass das interne Kontroll- und Risikomanagementsystem sowie das konzernweite Risikocontrolling wirksam und funktionsfähig sind.

## Organisation der Aufsichtsratsarbeit.

Der Aufsichtsrat hat zur Steigerung der Effizienz seiner Arbeit und unter Berücksichtigung der spezifischen Anforderungen an den Aufsichtsrat der Deutschen Telekom AG folgende Ausschüsse gebildet, die jeweils paritätisch besetzt sind.

Der **Präsidialausschuss** ist für die Vorbereitungen der Sitzungen und wesentliche Entscheidungen des Aufsichtsrats sowie für die Vorbereitung der Vorstandspersonalia zuständig. Mitglieder: Prof. Dr. Ulrich Lehner (Vorsitzender), Jörg Asmussen, Waltraud Litzenberger, Lothar Schröder.

Der **Finanzausschuss** behandelt komplexe finanzwirtschaftliche und betriebswirtschaftliche Unternehmensvorgänge, die ihm vom Aufsichtsratsvorsitzenden oder vom Aufsichtsrat zur Prüfung und Beratung zugewiesen werden. Mitglieder: Prof. h. c. (CHN) Dr.-Ing. E. h. Dr. Ulrich Middemann (Vorsitzender seit 5. Juli 2010), Hermann Josef Becker, Dr. Wulf H. Bernotat (seit 5. Juli 2010), Monika Brandl (seit 5. Juli 2010), Hans Martin Bury (bis 5. Juli 2010), Lawrence H. Guffey (bis 5. Juli 2010), Lothar Holzwarth, Waltraud Litzenberger (bis 5. Juli 2010), Dr. Ulrich Schröder (seit 5. Juli 2010) und Dr. h. c. Bernhard Walter (Vorsitzender bis 5. Juli 2010).

Der **Prüfungsausschuss** behandelt u. a. die Themen, für welche das deutsche Recht und der Deutsche Corporate Governance Kodex Zuständigkeiten für den Prüfungsausschuss vorsehen. Hierzu gehören insbesondere die Überwachung der Rechnungslegung sowie die Überwachung der Wirksamkeit des internen Kontrollsystems, des Risikomanagementsystems und des internen Revisionssystems. Darüber hinaus befasst sich der Prüfungsausschuss mit der Abschlussprüfung, hier insbesondere mit der Unabhängigkeit des Abschlussprüfers und der vom Abschlussprüfer zusätzlich erbrachten Leistungen, der Compliance und dem Datenschutz. Der Prüfungsausschuss behandelte ferner bis zum Wirksamwerden der Deregistrierung von der New Yorker Börse alle Aufgaben, die einem Audit Committee nach geltendem US-Recht für börsennotierte Unternehmen mit Sitz außerhalb der USA zugewiesen sind.

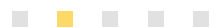

Herr Dr. h. c. Bernhard Walter, der Vorsitzende des Prüfungsausschusses, verfügt als unabhängiges Mitglied über Sachverstand auf den Gebieten Rechnungslegung und Abschlussprüfung (§ 100 Abs. 5 AktG) und hat besondere Kenntnisse und Erfahrungen in der Anwendung von Rechnungslegungsgrundsätzen und internen Kontrollverfahren. Weitere Mitglieder: Hermann Josef Becker, Hans Martin Bury, Lawrence H. Guffey, Lothar Holzwarth (bis 5. Juli 2010), Hans-Jürgen Kallmeier (seit 5. Juli 2010), Waltraud Litzenberger.

Der Prüfungsausschuss hat im Geschäftsjahr 2010 erstmals eine Sondersitzung zu grundsätzlichen Themen durchgeführt, die künftig jährlich stattfinden soll. Auf der Sondersitzung in 2010 standen die Themen Risikomanagement, Versicherungsschutz, Abschlussprüfung, Anforderungen an den Prüfungsausschuss und neue Rechts- und Bilanzentwicklungen im Vordergrund. Ferner wurde die Arbeit des Prüfungsausschusses mit sehr guten Ergebnissen einer externen Effizienzprüfung unterzogen.

Der **Personalausschuss** befasst sich mit Fragen des Personals der Deutschen Telekom, insbesondere mit der Personalstruktur und -entwicklung sowie der Personalplanung des Unternehmens. Dabei hat sich der Personalausschuss in Vorbereitung der Beschlussfassung des Aufsichtsrats zu Budget und Mittelfristplanung insbesondere mit der Personalbestands- und -bedarfsplanung befasst. Mitglieder: Lothar Schröder (Vorsitzender), Dr. Hubertus von Grünberg, Prof. Dr. Ulrich Lehner, Frau Waltraud Litzenberger.

Der **Nominierungsausschuss** hat die Aufgabe, dem Aufsichtsrat für dessen Wahlvorschläge an die Hauptversammlung geeignete Kandidaten vorzuschlagen. Entsprechend der Empfehlung des Deutschen Corporate Governance Kodex besteht er ausschließlich aus Vertretern der Anteilseigner. Mitglieder: Prof. Dr. Ulrich Lehner, Jörg Asmussen. Im Jahr 2010 wurden auf Seiten der Anteilseignervertreter keine Aufsichtsratsmandate vakant.

Der gemäß § 27 Absatz 3 Mitbestimmungsgesetz zu bildende **Vermittlungsausschuss** erfüllt die ihm gesetzlich obliegenden Aufgaben. Er hat im Geschäftsjahr 2010 nicht getagt. Mitglieder: Prof. Dr. Ulrich Lehner (Vorsitzender), Dr. Hubertus von Grünberg, Waltraud Litzenberger, Lothar Schröder.

Vom 1. Januar 2010 bis zum 20. Mai 2010 wurde ein **Sonderausschuss** eingerichtet, der die Beteiligung des Unternehmens an der Versteigerung von Frequenzen der vierten Mobilfunk-Generation in Deutschland begleitete. Mitglieder: Prof. Dr. Ulrich Lehner (Vorsitzender), Waltraud Litzenberger, Lothar Schröder, Dr. h. c. Bernhard Walter.

Über den Inhalt und die Ergebnisse der Sitzungen der Ausschüsse wurde der Aufsichtsrat in seinen Sitzungen durch die jeweiligen Ausschussvorsitzenden regelmäßig informiert.

## Sitzungen und Teilnahme.

Der Aufsichtsrat tagte im Geschäftsjahr 2010 in vier regulären und einer außerordentlichen Sitzung. Darüber hinaus ist der Aufsichtsrat zu einer Klausurtagung zusammengekommen, um mit dem Vorstand die strategische Ausrichtung des Konzerns zu erörtern. Der Präsidialausschuss des Aufsichtsrats hat im vergangenen Jahr mit acht Sitzungen (davon eine zusammen mit dem Finanzausschuss) die Arbeit des Aufsichtsrats unterstützt. Der Prüfungsausschuss kam im Geschäftsjahr 2010 zu sechs Sitzungen zusammen, der Finanzausschuss tagte dreimal (davon einmal zusammen mit dem Präsidialausschuss). Der Personalausschuss des Aufsichtsrats traf sich zu zwei Sitzungen. Der Sonderausschuss für Frequenzerwerb in Deutschland traf sich insgesamt zu drei Sitzungen. Nach den Empfehlungen des Deutschen Corporate Governance Kodex berichtspflichtige Vorgänge in Bezug auf die Häufigkeit der Sitzungsteilnahme von Mitgliedern des Aufsichtsrats lagen im Geschäftsjahr 2010 nicht vor.

## Interessenkonflikte.

Herr Ulrich Hocker ist Mitglied des Aufsichtsrats der Deutschen Telekom AG und zugleich Hauptgeschäftsführer der Deutschen Schutzvereinigung für Wertpapierbesitz e.V. (DSW). Die DSW vertritt bzw. unterstützt auch in diversen Angelegenheiten Anlegerinteressen gegenüber der Deutschen Telekom AG. Um von vornherein auszuschließen, dass es hier zu einem Interessenkonflikt kommen könnte, erklärte Herr Hocker gegenüber dem Aufsichtsrat, dass er als Mitglied des Aufsichtsrats darauf verzichte, Berichte oder Informationen zu erhalten, an Beschlüssen mitzuwirken und an Aufsichtsrats- und Ausschusssitzungen teilzunehmen, sobald Sachverhalte betroffen seien, bei denen die DSW Interessen gegen die Deutsche Telekom AG vertrete oder unterstütze. Ferner erklärte Herr Hocker, dass er sich bei Bedarf im Einzelfall mit dem Aufsichtsratsvorsitzenden über den Umgang mit einem etwaigen Interessenkonflikt abstimmen werde.

## Corporate Governance.

Aufsichtsrat und Vorstand handeln in dem Bewusstsein, dass eine gute Corporate Governance im Interesse unserer Aktionäre und der Kapitalmärkte eine wichtige Basis für den Erfolg des Unternehmens ist. Dabei ist der Deutsche Corporate Governance Kodex in den Statuten der Gesellschaft reflektiert. Vorstand und Aufsichtsrat haben zuletzt im Dezember 2010 die Entsprechenserklärung zum Corporate Governance Kodex abgegeben. ■ Die Corporate Governance des Unternehmens wird über diesen Bericht hinaus gesondert im Geschäftsbericht dargestellt (Seiten 32–37).

## Personalia Vorstand.

Der Aufsichtsrat hat mit Beschluss vom 17. Dezember 2009 mit Wirkung zum 15. Februar 2010 der Bitte von Herrn Akhavan entsprochen, ihn von seinen Aufgaben zu entbinden, um eine andere berufliche Herausforderung annehmen zu können.

Der Aufsichtsrat hat beschlossen, dass ab dem 15. Februar 2010 die Verantwortung für die Mobilfunk-Beteiligungen in den Niederlanden, Großbritannien, Österreich, Polen und der Tschechischen Republik kommissarisch von Herrn Kerkhoff, Vorstand Süd- und Osteuropa, wahrgenommen wird. Diese Mobilfunk-Beteiligungen wurden mit Wirkung zum 1. April 2010 in die Verantwortung von Herrn Kerkhoff überführt und das Vorstandsressort „Süd- und Osteuropa“ in „Europa“ umbenannt.

Die weiteren Aufgaben des bisher von Herrn Akhavan geführten Ressorts wurden ab dem 15. Februar 2010 kommissarisch von Herrn Clemens, Vorstand T-Systems, wahrgenommen. Mit Beschluss vom 2. Mai 2010 hat der Aufsichtsrat Herrn Edward R. Kozel mit Wirkung zum 3. Mai 2010 zum Vorstand bestellt und ihm die Verantwortung für Technik, IT, Einkauf sowie Produkte und Innovation für das Standardgeschäft Privat- und Geschäftskunden im Rahmen des Vorstandsressorts „Technologie und Innovation“ zugewiesen.

## Personalia Aufsichtsrat.

**Anteilseignervertreter:** Auf der Hauptversammlung am 3. Mai 2010 wurden die zuvor mit Wirkung zum 1. Januar 2010 gerichtlich bestellten Herren Dr. Wulf Bernotat und Prof. h. c. (CHN) Dr.-Ing. E. h. Dr. Ulrich Middelmann bis zur Beendigung der Hauptversammlung, die über die Entlastung des Aufsichtsrats für das Geschäftsjahr 2014 beschließt, in den Aufsichtsrat gewählt.

**Arbeitnehmervertreter:** Herr Josef Falbisoner hat mit Ablauf der Hauptversammlung 2010 wegen Eintritts in den Ruhestand sein Mandat niedergelegt. Für ihn wurde vom zuständigen Amtsgericht Bonn mit Wirkung zum 4. Mai 2010 Frau Sibylle Spoo in den Aufsichtsrat bestellt.

Der Aufsichtsrat dankt den ausgeschiedenen Mitgliedern der Gremien für ihre engagierte Tätigkeit im Interesse des Unternehmens.



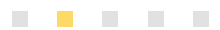

## Jahres- und Konzernabschlussprüfung 2010.

Der Vorstand hat dem Aufsichtsrat den Jahresabschluss und den Lagebericht, der mit dem Konzernlagebericht zusammengefasst ist, den Konzernabschluss und den mit dem Lagebericht zusammengefassten Konzernlagebericht der Deutschen Telekom AG sowie seinen Gewinnverwendungsvorschlag fristgerecht vorgelegt.

Die von der Hauptversammlung für das Geschäftsjahr 2010 auf Empfehlung des Prüfungsausschusses und Wahlvorschlag des gesamten Aufsichtsrats gemeinsam zum Abschlussprüfer und Konzernabschlussprüfer (Abschlussprüfer) Bestellten – die PricewaterhouseCoopers Aktiengesellschaft Wirtschaftsprüfungsgesellschaft, Frankfurt am Main, und die Ernst & Young GmbH Wirtschaftsprüfungsgesellschaft, Stuttgart – haben den nach den Regeln des Handelsgesetzbuchs (HGB) aufgestellten Jahresabschluss zum 31. Dezember 2010 und den mit dem Konzernlagebericht zusammengefassten Lagebericht sowie den nach den IFRS, wie sie in der EU anzuwenden sind, und den ergänzend nach § 315a Abs. 1 HGB anzuwendenden handelsrechtlichen Vorschriften aufgestellten Konzernabschluss zum 31. Dezember 2010 und den mit dem Lagebericht zusammengefassten Konzernlagebericht geprüft und jeweils einen uneingeschränkten Bestätigungsvermerk erteilt. Die Prüfung des Konzernabschlusses umfasste ergänzend den Auftrag, dessen Übereinstimmung mit den IFRS insgesamt zu beurteilen.

Die Abschlussprüfer haben vor der Beschlussfassung zur Empfehlung des Prüfungsausschusses an den Aufsichtsrat betreffend den Wahlvorschlag an die Hauptversammlung erklärt, dass keine geschäftlichen, finanziellen, persönlichen oder sonstigen Beziehungen zwischen den Prüfern und ihren Organen und Prüfungsleitern einerseits und dem Unternehmen und seinen Organmitgliedern andererseits bestehen, die Zweifel an ihrer Unabhängigkeit begründen können. Im Rahmen dieser Erklärung wurde auch angegeben, in welchem Umfang im vorausgegangenen Geschäftsjahr andere Leistungen für das Unternehmen, insbesondere auf dem Beratungssektor, erbracht wurden bzw. für das folgende Jahr vertraglich vereinbart waren. In diesem Rahmen wurde vom Prüfungsausschuss geprüft und bestätigt, dass die erforderliche Unabhängigkeit gegeben ist. Über das Ergebnis der Prüfung ist der Aufsichtsrat vor seiner Beschlussfassung zum Wahlvorschlag an die Hauptversammlung informiert worden.

Die Abschlussprüfer haben ihre Berichte über Art und Umfang sowie über das Ergebnis ihrer Prüfungen (Prüfungsberichte) dem Aufsichtsrat vorgelegt. Die genannten Abschlussunterlagen, die Prüfungsberichte der Abschlussprüfer und der Vorschlag des Vorstands für die Verwendung des Bilanzgewinns wurden allen Aufsichtsratsmitgliedern rechtzeitig übermittelt.

Der Aufsichtsrat hat die Vorlagen des Vorstands und die Prüfungsberichte der Abschlussprüfer seinerseits geprüft.

Zur Vorbereitung der Prüfung und Beschlussfassung durch den Aufsichtsrat hat sich zunächst der Prüfungsausschuss eingehend mit den vorgenannten Unterlagen befasst. In seiner Sitzung am 22. Februar 2011 ließ sich der Prüfungsausschuss den Jahresabschluss, den Konzernabschluss und den zusammengefassten Lage- und Konzernlagebericht sowie den Vorschlag des Vorstands zur Verwendung des Bilanzgewinns eingehend erläutern. Ferner wurden Fragen der Ausschussmitglieder beantwortet. Die an der Sitzung ebenfalls teilnehmenden Abschlussprüfer haben darüber hinaus über ihre Prüfungen, insbesondere ihre im Einvernehmen mit dem Prüfungsausschuss und dem Aufsichtsrat festgelegten Prüfungsschwerpunkte und die wesentlichen Ergebnisse ihrer Prüfungen, berichtet sowie ihre Prüfungsberichte erläutert. Wesentliche Schwächen des internen Kontrollsystems, des Risikomanagementsystems sowie des Rechnungslegungsprozesses sind von den Abschlussprüfern nicht festgestellt worden. Die Mitglieder des Prüfungsausschusses haben die Prüfungsberichte und die Bestätigungsvermerke zur Kenntnis genommen, kritisch gewürdigt und sie ebenso wie die Prüfungen selbst mit den Abschlussprüfern diskutiert, was die Befragung zu Art und Umfang der Prüfungen sowie zu den Prüfungsergebnissen einschloss. Dabei konnte sich der Prüfungsausschuss von der Ordnungsmäßigkeit der Prüfungen und der Prüfungsberichte überzeugen. Er gelangte insbesondere zu der Überzeugung, dass die Prüfungsberichte – wie auch die von den Abschlussprüfern durchgeführten Prüfungen selbst – den gesetzlichen Anforderungen entsprechen. Der Prüfungsausschuss teilt die Einschätzung der Abschlussprüfer, dass das interne Kontroll- und das Risikomanagementsystem, insbesondere auch bezogen auf den Rechnungslegungsprozess, keine wesentlichen Schwächen aufweist. Der Prüfungsausschuss hat dem Aufsichtsrat empfohlen, dem Ergebnis der Prüfungen durch die Abschlussprüfer zuzustimmen und, da nach seiner Beurteilung keine Einwendungen gegen die Vorlagen des Vorstands zu erheben sind, den Jahresabschluss und den Konzernabschluss sowie den zusammengefassten Lage- und Konzernlagebericht zu billigen und sich dem Vorschlag des Vorstands zur Verwendung des Bilanzgewinns anzuschließen.

Die abschließende Prüfung von Jahresabschluss, Konzernabschluss und zusammengefasstem Lage- und Konzernlagebericht sowie des Vorschlags des Vorstands zur Verwendung des Bilanzgewinns durch den Aufsichtsrat erfolgte in der Aufsichtsratssitzung am 23. Februar 2010 unter Berücksichtigung des Berichts und der Empfehlungen des Prüfungsausschusses sowie der Prüfungsberichte der Abschlussprüfer. Die Vorstandsmitglieder nahmen an dieser Sitzung teil, erläuterten ihre Vorlagen und beantworteten die Fragen der Aufsichtsratsmitglieder. Die Abschlussprüfer nahmen an dieser Sitzung ebenfalls teil, berichteten über ihre Prüfungen und ihre wesentlichen Prüfungsergebnisse, erläuterten ihre Prüfungsberichte und beantworteten Fragen der Aufsichtsratsmitglieder zu Art und Umfang der Prüfungen und zu den Prüfungsergebnissen. Hierdurch und auf der Grundlage des vom Prüfungsausschuss erstatteten Berichts konnte sich der Aufsichtsrat von der Ordnungsmäßigkeit der Prüfungen und der Prüfungsberichte überzeugen. Der Empfehlung des Prüfungsausschusses folgend hat der Aufsichtsrat dem Ergebnis der Prüfungen durch die Abschlussprüfer zugestimmt.

Nach dem abschließenden Ergebnis der vom Aufsichtsrat durchgeführten eigenen Prüfung von Jahresabschluss, Konzernabschluss und zusammengefasstem Lage- und Konzernlagebericht sowie des Vorschlags des Vorstands zur Verwendung des Bilanzgewinns sind keine Einwendungen zu erheben; das betrifft auch die Erklärung zur Unternehmensführung und zwar auch, soweit sie nicht vom Abschlussprüfer zu prüfen ist. Der Empfehlung des Prüfungsausschusses folgend hat der Aufsichtsrat den Jahresabschluss und den Konzernabschluss gebilligt. Der Aufsichtsrat hat dabei insbesondere gebilligt, dass vom Jahresüberschuss des Einzelabschlusses der Deutschen Telekom AG gemäß § 58 Abs. 2 AktG in Verbindung mit § 19 Abs. 3 der Satzung ein Betrag in Höhe von 0,0 € in die anderen Gewinnrücklagen eingestellt wird. Mit der Billigung des Jahresabschlusses durch den Aufsichtsrat ist dieser festgestellt. Der Aufsichtsrat stimmt in seiner Einschätzung der Lage von Gesellschaft und Konzern mit der des Vorstands in dessen zusammengefasstem Lage- und Konzernlagebericht überein und hat diese Berichte, der Empfehlung des Prüfungsausschusses folgend, ebenfalls gebilligt.

Bereits im Zuge der Verabschiedung der mittelfristigen Finanzplanung des Unternehmens für die kommenden drei Jahre durch Vorstand und Aufsichtsrat am 16. Dezember 2010 hat sich der Aufsichtsrat intensiv mit der mittelfristigen Finanz- und Investitionsplanung und insbesondere mit der Entwicklung der operativen Erträge, des Free Cashflows und der Bilanzrelationen beschäftigt. Als Ergebnis der in der Sitzung des Prüfungsausschusses am 22. Februar 2011 und in der Aufsichtsratssitzung am 23. Februar 2011 durchgeführten Prüfung des Vorschlags des Vorstands zur Verwendung des Bilanzgewinns, die eine Erörterung mit den Abschlussprüfern in beiden Gremien einschloss, hat der Aufsichtsrat – der Empfehlung des Prüfungsausschusses folgend – diesem Vorschlag des Vorstands zur Verwendung des Bilanzgewinns zugestimmt und sich ihm angeschlossen. Der Vorschlag beinhaltet eine Ausschüttungssumme in Höhe von rund 3,0 Mrd. € und einen Vortrag auf neue Rechnung in Höhe von rund 3,0 Mrd. €.

## Prüfung des Berichts des Vorstands über Beziehungen zu verbundenen Unternehmen.

Der Vorstand hat den von ihm aufgestellten Bericht über Beziehungen zu verbundenen Unternehmen im Geschäftsjahr 2010 (Abhängigkeitsbericht) dem Aufsichtsrat fristgerecht vorgelegt.

Die Abschlussprüfer haben den Abhängigkeitsbericht geprüft und folgenden Bestätigungsvermerk erteilt:

„Nach unserer pflichtmäßigen Prüfung und Beurteilung bestätigen wir, dass

1. die tatsächlichen Angaben des Berichts richtig sind,
2. bei den im Bericht aufgeführten Rechtsgeschäften die Leistung der Gesellschaft nicht unangemessen hoch war.“

Den Prüfungsbericht haben die Abschlussprüfer dem Aufsichtsrat vorgelegt. Der Abhängigkeitsbericht und der Prüfungsbericht hierzu wurden allen Aufsichtsratsmitgliedern rechtzeitig übermittelt.

Der Aufsichtsrat hat den Abhängigkeitsbericht des Vorstands und den Prüfungsbericht der Abschlussprüfer seinerseits geprüft.

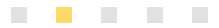

Zur Vorbereitung der Prüfung und Beschlussfassung durch den Aufsichtsrat hat sich zunächst der Prüfungsausschuss eingehend mit den vorgenannten Unterlagen befasst. In seiner Sitzung am 22. Februar 2011 ließ sich der Prüfungsausschuss den Abhängigkeitsbericht eingehend von den Mitgliedern des Vorstands erläutern. Ferner wurden Fragen der Ausschussmitglieder beantwortet. Die an der Sitzung ebenfalls teilnehmenden Abschlussprüfer haben darüber hinaus über ihre Prüfung, insbesondere ihre Prüfungsschwerpunkte und die wesentlichen Ergebnisse ihrer Prüfung, berichtet sowie ihren Prüfungsbericht erläutert. Die Mitglieder des Prüfungsausschusses haben den Prüfungsbericht und den Bestätigungsvermerk zur Kenntnis genommen, kritisch gewürdigt und sie ebenso wie die Prüfungen selbst mit den Abschlussprüfern diskutiert, was die Befragung zu Art und Umfang der Prüfung sowie zu den Prüfungsergebnissen einschloss. Dabei konnte sich der Prüfungsausschuss von der Ordnungsmäßigkeit der Prüfung und des Prüfungsberichts überzeugen. Er gelangte insbesondere zu der Überzeugung, dass der Prüfungsbericht – wie auch die von den Abschlussprüfern durchgeführte Prüfung selbst – den gesetzlichen Anforderungen entsprechen. Der Prüfungsausschuss hat dem Aufsichtsrat empfohlen, dem Ergebnis der Prüfung durch die Abschlussprüfer zuzustimmen, da nach seiner Beurteilung keine Einwendungen gegen die Erklärung des Vorstands zum Abhängigkeitsbericht zu erheben sind.

Die abschließende Prüfung durch den Aufsichtsrat erfolgte in der Aufsichtsratsitzung am 23. Februar 2011 unter Berücksichtigung des Prüfungsberichts der Abschlussprüfer. Die Vorstandsmitglieder nahmen auch an dieser Sitzung teil, erläuterten den Abhängigkeitsbericht und beantworteten die Fragen der Aufsichtsratsmitglieder. Die Abschlussprüfer nahmen an dieser Sitzung ebenfalls teil, berichteten über ihre Prüfung des Abhängigkeitsberichts und ihre wesentlichen Prüfungsergebnisse, erläuterten ihren Prüfungsbericht und beantworteten Fragen der Aufsichtsratsmitglieder zu Art und Umfang der Prüfung des Abhängigkeitsberichts und zu den Prüfungsergebnissen. Hierdurch und auf der Grundlage des vom Prüfungsausschuss erstatteten Berichts konnte sich der Aufsichtsrat von der Ordnungsmäßigkeit der Prüfung des Abhängigkeitsberichts und des Prüfungsberichts überzeugen. Er gelangte insbesondere zu der Überzeugung, dass der Prüfungsbericht – wie auch die von den Abschlussprüfern durchgeführte Prüfung selbst – den gesetzlichen Anforderungen entsprechen. Der Aufsichtsrat hat den Abhängigkeitsbericht insbesondere auf Vollständigkeit und Richtigkeit geprüft und hat sich dabei auch davon vergewissert, dass der Kreis der verbundenen Unternehmen mit der gebotenen Sorgfalt festgestellt und notwendige Vorkehrungen zur Erfassung der berichtspflichtigen Rechtsgeschäfte und Maßnahmen getroffen wurden. Anhaltspunkte für Beanstandungen des Abhängigkeitsberichts sind bei dieser Prüfung nicht ersichtlich geworden. Der Empfehlung des Prüfungsausschusses folgend hat der Aufsichtsrat dem Ergebnis der Prüfung des Abhängigkeitsberichts durch die Abschlussprüfer zugestimmt. Nach dem abschließenden Ergebnis der vom Aufsichtsrat durchgeführten eigenen Prüfung des Abhängigkeitsberichts sind keine Einwendungen gegen die Erklärung des Vorstands zum Abhängigkeitsbericht zu erheben.

Der Aufsichtsrat dankt den Mitgliedern des Vorstands und allen Mitarbeiterinnen und Mitarbeitern für ihr großes Engagement im Geschäftsjahr 2010.

Bonn, den 23. Februar 2011  
Der Aufsichtsrat

Prof. Dr. Ulrich Lehner  
Vorsitzender

# Corporate Governance-Bericht.

Für die Deutsche Telekom als international ausgerichtetem Konzern mit einer Vielzahl von Beteiligungen ist eine gute und nachhaltige Unternehmensführung (Corporate Governance) von besonderer Bedeutung. Dabei werden vom Unternehmen sowohl nationale Regelungen wie die Empfehlungen der „Regierungskommission Deutscher Corporate Governance Kodex“ als auch internationale Standards eingehalten. Vorstand und Aufsichtsrat sind der Überzeugung, dass eine gute Corporate Governance, welche die unternehmens- und branchenspezifischen Gesichtspunkte berücksichtigt, eine wichtige Grundlage für den Erfolg der Deutschen Telekom ist. Die Umsetzung und Beachtung dieser Grundsätze wird als zentrale Führungsaufgabe verstanden.

Vorstand und Aufsichtsrat haben sich auch im Geschäftsjahr 2010 intensiv mit der Corporate Governance der Deutschen Telekom AG und des Konzerns sowie mit den Inhalten des Corporate Governance Kodex befasst. Die Deutsche Telekom AG hat in diesem Berichtszeitraum erneut sämtlichen Empfehlungen des Corporate Governance Kodex entsprochen. Aufsichtsrat und Vorstand der Deutschen Telekom AG konnten daher am 30. Dezember 2010 eine uneingeschränkte Entsprechenserklärung zum Corporate Governance Kodex abgeben:

## Entsprechenserklärung gemäß § 161 Aktiengesetz

- I. Aufsichtsrat und Vorstand der Deutschen Telekom AG erklären, dass seit Abgabe der letzten Erklärung nach § 161 Aktiengesetz am 5. Januar 2010 den vom Bundesministerium der Justiz am 5. August 2009 im amtlichen Teil des elektronischen Bundesanzeigers bekannt gemachten Empfehlungen der „Regierungskommission Deutscher Corporate Governance Kodex“ ohne Ausnahme entsprochen wurde.
- II. Aufsichtsrat und Vorstand der Deutschen Telekom AG erklären weiter, dass den vom Bundesministerium der Justiz am 2. Juli 2010 im amtlichen Teil des elektronischen Bundesanzeigers bekannt gemachten Empfehlungen der „Regierungskommission Deutscher Corporate Governance Kodex“ ohne Ausnahme entsprochen wird.

ⓘ Diese Entsprechenserklärung kann auch über die Internetseite der Deutschen Telekom ([www.telekom.com](http://www.telekom.com)) unter dem Pfad: Investor Relations/Corporate Governance/Entsprechenserklärung, eingesehen werden. Auf dieser Internetseite sind auch die nicht mehr aktuellen Entsprechenserklärungen der vergangenen Jahre zugänglich.

**Zusammenarbeit von Vorstand und Aufsichtsrat.** Vorstand und Aufsichtsrat arbeiten zum Wohle des Unternehmens eng zusammen und stehen in regelmäßigem Kontakt. Bei der Deutschen Telekom AG finden jährlich regelmäßig vier ordentliche Aufsichtsratssitzungen statt. Im Geschäftsjahr 2010 fand zusätzlich eine außerordentliche Aufsichtsratssitzung sowie eine Klausur zur strategischen Ausrichtung des Unternehmens statt. Der Vorstand informiert den Aufsichtsrat regelmäßig, zeitnah und umfassend über die Geschäftsentwicklung, die Planung, die Risikosituation, das Risikomanagement, die Compliance und über etwaige Abweichungen der Geschäftsentwicklung von der ursprünglichen Planung. Berichte des Vorstands werden regelmäßig schriftlich erstattet. Die Berichtspflichten des Vorstands sind durch den Aufsichtsrat über die gesetzlichen Verpflichtungen hinausgehend konkretisiert worden. Die Arbeit der Organe Vorstand und Aufsichtsrat ist jeweils in einer Geschäftsordnung geregelt. Die Geschäftsordnung des Vorstands regelt insbesondere die Geschäftsverteilung des Vorstands sowie die erforderlichen Beschlussmehrheiten. Der Vorstandsvorsitzende hat regelmäßigen Informationsaustausch mit dem Aufsichtsratsvorsitzenden. ⓘ Einzelheiten zur Arbeitsweise von Vorstand und Aufsichtsrat können den Seiten 24–31 des Geschäftsberichts entnommen werden.

**Zusammensetzung des Vorstands.** Die Geschäftsverteilung des Vorstands sieht acht Vorstandsbereiche vor: Den Vorstandsvorsitzenden, den Vorstand Finanzen, den Vorstand Personal, den Vorstand Datenschutz, Recht und Compliance, den Vorstand T-Systems, den Vorstand Deutschland, den Vorstand Technologie und Innovation und den Vorstand Europa. Jedes Vorstandsmitglied ist im Rahmen des ihm zugewiesenen Aufgabenbereichs allein geschäftsführungsbefugt. Bestimmte Angelegenheiten entscheidet der Vorstand in seiner Gesamtheit. Außerdem kann jedes Vorstandsmitglied dem Gesamtvorstand Angelegenheiten zur Beschlussfassung vorlegen. Für die Mitglieder des Vorstands gilt grundsätzlich eine Altersgrenze von 62 Jahren.

**Zusammensetzung des Aufsichtsrats.** Der Aufsichtsrat der Deutschen Telekom AG setzt sich aus zwanzig Mitgliedern zusammen, je zehn Aufsichtsratsmitglieder der Anteilseigner und der Arbeitnehmer. Die Aufsichtsratsmitglieder der Anteilseigner werden von der Hauptversammlung mit

einfacher Mehrheit gewählt. Wie bereits in den vergangenen Jahren wurden auch auf der letzten Hauptversammlung am 3. Mai 2010 Wahlen zum Aufsichtsrat als Einzelwahl durchgeführt. Die Amtsperioden der einzelnen Anteilseignervertreter im Aufsichtsrat enden zu unterschiedlichen Terminen. Hierdurch kann bei der Besetzung des Aufsichtsrats Kontinuität gewahrt werden. Die Aufsichtsratsmitglieder der Arbeitnehmer wurden von den Arbeitnehmern zuletzt auf der Delegiertenversammlung am 4. Dezember 2008 nach den Vorschriften des Mitbestimmungsgesetzes neu gewählt.  Einzelheiten zum Wechsel von Aufsichtsratsmitgliedern im Berichtszeitraum können dem Bericht des Aufsichtsrats an die Hauptversammlung auf den Seiten 24–31 des Geschäftsberichts entnommen werden. Der Aufsichtsrat ist zu der Überzeugung gelangt, dass dem Gremium – wie vom Deutschen Corporate Governance Kodex empfohlen – eine ausreichende Zahl unabhängiger Mitglieder angehören, um eine unabhängige Beratung und Überwachung des Vorstands durch den Aufsichtsrat zu ermöglichen.

Der Aufsichtsrat hat für seine Besetzung folgende Ziele benannt:

- Der Aufsichtsrat setzt sich unter Beachtung der unternehmensspezifischen Situation zum Ziel, bei künftigen Aufsichtsratsbesetzungen neben der erforderlichen fachlichen Qualifikation bei den Vorschlägen an die zuständigen Wahlgremien auf Vielfalt (Diversity) zu achten.
- Der Aufsichtsrat ist so zusammenzusetzen, dass seine Mitglieder insgesamt über die zur ordnungsgemäßen Wahrnehmung der Aufgaben erforderlichen Kenntnisse, Fähigkeiten und fachlichen Erfahrungen verfügen.
- Der Aufsichtsrat unterstützt eine angemessene Beteiligung von Frauen im Aufsichtsrat. Er strebt an, den Frauenanteil im Aufsichtsrat bis zum Ende des Jahres 2015 auf den im Unternehmen angestrebten Anteil von Frauen in Führungspositionen von 30 % zu erhöhen. Derzeit liegt der Frauenanteil im Aufsichtsrat bei 20 %.
- Mit Blick auf die internationale Ausrichtung des Unternehmens sollen bei der Besetzung des Aufsichtsrats auch Mitglieder mit internationalem Hintergrund ausreichend berücksichtigt werden.
- Bei der Besetzung des Aufsichtsrats sollen Interessenkonflikte vermieden werden.
- Zum Zeitpunkt der Bestellung sollen Aufsichtsratsmitglieder grundsätzlich nicht älter als 67 Jahre sein.

**Arbeit des Aufsichtsrats.** Der Aufsichtsrat berät den Vorstand bei der Leitung des Unternehmens und überwacht und prüft ihn in seiner Tätigkeit. Er wird in Entscheidungen von grundlegender Bedeutung für das Unternehmen eingebunden. Die Arbeit des Aufsichtsrats ist in einer Geschäftsordnung geregelt. Zur Konkretisierung der Vorlagepflichten des Vorstands hat der Aufsichtsrat einen Katalog zustimmungspflichtiger Geschäfte definiert, der Bestandteil der Geschäftsordnungen des Aufsichtsrats und des Vorstands ist. Der Aufsichtsrat führt regelmäßig eine Effizienzprüfung durch, zuletzt im Geschäftsjahr 2009. Die Selbstbeurteilung des Aufsichtsrats erfolgte auf Grundlage eines umfangreichen Fragebogens sowie individueller Gespräche mit dem Aufsichtsratsvorsitzenden. Die Arbeit des Prüfungsausschusses wurde in 2010 mit sehr guten Ergebnissen einer externen Effizienzprüfung unterzogen.

Der Aufsichtsrat hat zur optimalen Wahrnehmung seiner Aufgaben derzeit sechs ständige Ausschüsse gebildet: Der Präsidialausschuss bereitet Vorstandspersonalia und insgesamt die Sitzungen des Aufsichtsrats vor. Der Personalausschuss berät den Vorstand bei Personalthemen – mit Ausnahme der Vorstandspersonalia. Der Finanzausschuss behandelt komplexe finanzwirtschaftliche Themen und die Planungen des Unternehmens. Der Prüfungsausschuss nimmt die Aufgaben eines Prüfungsausschusses nach dem Gesetz und dem Deutschen Corporate Governance Kodex wahr. Hierzu gehören insbesondere die Vorbefassung mit dem Jahresabschluss, die Überwachung der Rechnungslegung sowie die Überwachung der Wirksamkeit des internen Kontrollsystems, des Risikomanagementsystems und des internen Revisionssystems. Bis zur Deregistrierung von der US-amerikanischen Börse erfüllte der Prüfungsausschuss die Aufgaben eines Audit Committees nach US-Recht. Der Aufsichtsrat hat ferner einen Nominierungsausschuss gebildet, der ausschließlich mit Vertretern der Anteilseigner besetzt ist. Der Nominierungsausschuss hat die Aufgabe, dem Aufsichtsrat für dessen Wahlvorschläge an die Hauptversammlung geeignete Kandidaten vorzuschlagen. Schließlich gibt es einen Vermittlungsausschuss gemäß § 27 Abs. 3 des Mitbestimmungsgesetzes. Vom 1. Januar bis 20. Mai 2010 wurde ein Sonderausschuss eingerichtet, der die Beteiligung des Unternehmens an der Versteigerung von Frequenzen der vierten Mobilfunk-Generation in Deutschland begleitet hat.  Nähere Angaben zur Zusammensetzung und Arbeitsweise der Ausschüsse können dem Bericht des Aufsichtsrats an die Hauptversammlung auf den Seiten 24–31 des Geschäftsberichts entnommen werden.

Die jeweiligen Ausschussvorsitzenden berichten regelmäßig an den Aufsichtsrat über die Arbeit der Ausschüsse. Der Vorsitzende des Prüfungsausschusses, Herr Dr. h. c. Bernhard Walter, verfügt über besondere Kenntnisse und Erfahrungen in der Anwendung von Rechnungslegungsgrundsätzen und internen Kontrollverfahren. Dr. Walter ist kein ehemaliges Vorstandsmitglied der Gesellschaft.

In die Aufsichtsratsarbeit werden im Rahmen der bestehenden gesetzlichen Möglichkeiten moderne Kommunikationsmedien einbezogen, um im Interesse des Unternehmens eine zügige Befassung und ggf. Beschlussfassung des Aufsichtsratsgremiums zu gewährleisten.

Der Aufsichtsratsvorsitzende koordiniert die Arbeit im Aufsichtsrat und leitet dessen Sitzungen. Er steht über die organisatorischen Aufgaben im Aufsichtsrat hinaus mit dem Vorstandsvorsitzenden und dem Vorstand insgesamt in regelmäßigem Kontakt, um sich über die Strategie, die Geschäftsentwicklung, das Risikomanagement des Unternehmens und die Maßnahmen des Managements zu informieren und sich mit dem Vorstand auszutauschen. In diesem Rahmen wird der Aufsichtsratsvorsitzende vom Vorstandsvorsitzenden über alle Ereignisse informiert, die für die Lage, die Entwicklung sowie die Leitung des Unternehmens von wesentlicher Bedeutung sind.  Weitere Angaben zu den Aufsichtsratsmitgliedern einschließlich ihrer Aufsichtsratsmandate bei anderen Gesellschaften sind auf den Seiten 226–227 des Geschäftsberichts zu finden.

**Vermeidung von Interessenkonflikten.** Interessenkonflikte von Vorstands- bzw. Aufsichtsratsmitgliedern werden dem Aufsichtsrat unverzüglich offengelegt. Die Übernahme von Tätigkeiten von Vorstandsmitgliedern, die nicht zur Wahrnehmung des Vorstandsmandats gehören, unterliegt der Zustimmung des Präsidialausschusses des Aufsichtsrats.

**Risiko- und Chancenmanagement.** Der Umgang mit Chancen und Risiken, die im Zusammenhang mit der Geschäftstätigkeit des Unternehmens entstehen, ist für Vorstand und Aufsichtsrat von grundsätzlicher Bedeutung für eine professionelle Unternehmensführung. Der Vorstand wird von dem im Konzern eingerichteten Risikomanagement regelmäßig über die Risiken sowie deren Entwicklung informiert. Er berichtet seinerseits über die Risikolage und das Risikomanagement-System an den Aufsichtsrat. Das Risikomanagement-System der Deutschen Telekom wird von den Abschlussprüfern und der internen Revision geprüft und von der Gesellschaft kontinuierlich weiterentwickelt. Der Prüfungsausschuss befasst sich mit dem Risikomanagement inklusive der Überwachung der Wirksamkeit des internen Risikomanagementsystems. Das Risikomanagement umfasst neben finanziellen Risiken u. a. auch Reputationsrisiken.

 Weitere Ausführungen finden sich im Konzernlagebericht unter dem Kapitel „Risiko- und Chancenmanagement“ auf den Seiten 112–122 des Geschäftsberichts.

**Compliance.** Die Deutsche Telekom verfügt über eine konzernweite Compliance-Organisation, die kontinuierlich ausgebaut wird ( veröffentlicht auch im Corporate Responsibility-Bericht 2010 unter [www.cr-bericht.telekom.de](http://www.cr-bericht.telekom.de)). Dabei wurde zunächst ein Compliance Committee eingerichtet, das den Vorstand dabei unterstützt, die notwendigen Strukturen für ein funktionsfähiges Compliance Management einzurichten und weiterzuentwickeln. Mitglieder des Compliance Committees sind erfahrene Führungskräfte der Bereiche Compliance, Recht, Datenschutz, Konzernrevision, Konzernsicherheit und Personal. Der vom Vorstand ernannte Chief Compliance Officer hat den Vorsitz im Compliance Committee. Er berichtet an den Konzernvorstand sowie direkt an den Prüfungsausschuss und den Aufsichtsrat. In den strategischen Geschäftsfeldern wurde jeweils ein Compliance Officer benannt. Je nach Größe und Risikosituation existieren Compliance-Beauftragte/-Ansprechpartner in den Geschäftseinheiten. Durch die Bündelung der Compliance-Aktivitäten im Vorstandsbereich Datenschutz, Recht und Compliance wird die Bedeutung der Compliance-Thematik weiterhin hervorgehoben.

Als Teil des Compliance-Programms gibt es den Code of Conduct sowie den Ethikkodex. Der Code of Conduct ist ein Verhaltenskodex, in dem verbindlich festgelegt ist, wie ein an Werten orientiertes und rechtskonformes Verhalten im Geschäftsalltag von den Mitarbeitern und dem Management gelebt werden soll. Der Ethikkodex gilt für die Mitglieder des Konzernvorstands und Personen, die eine besondere Verantwortung für die Finanzberichterstattung tragen. Er verpflichtet zu Redlichkeit, Integrität, Transparenz und ethischem Verhalten und wird von den betroffenen Personen einmal im Jahr durch Unterzeichnung explizit anerkannt.  Der Code of Conduct sowie der Ethikkodex sind auf der Internetseite der Deutschen Telekom ([www.telekom.com](http://www.telekom.com)) veröffentlicht.

 Weitere Einzelheiten zum Compliance-Programm sind auf der Internetseite der Deutschen Telekom ([www.telekom.com/compliance](http://www.telekom.com/compliance)) veröffentlicht.

**Internes Kontrollsystem der Finanzberichterstattung.** Die Deutsche Telekom hat einen Prozess zur systematischen Bewertung der Effektivität des Internen Kontrollsystems der Finanzberichterstattung implementiert. Die konzernweite Funktionsfähigkeit wurde für das Geschäftsjahr 2010 erneut nachgewiesen. Der Prüfungsausschuss nimmt für den Aufsichtsrat die Aufgabe der Überwachung der Rechnungslegungs- und Finanzberichterstattungsprozesse wahr. Das Interne Kontrollsystem der Finanzberichterstattung wird kontinuierlich weiterentwickelt und von der Internen Revision und von den Abschlussprüfern unabhängig voneinander geprüft.

Der Prüfungsausschuss befasst sich auch mit der Überwachung der Wirksamkeit des Internen Kontrollsystems, das über die Finanzberichterstattung hinausgeht, und erfüllt damit die seit Mai 2009 in Kraft getretenen Anforderungen des Bilanzrechtsmodernisierungsgesetzes (BilMoG).  Eine Beschreibung der wesentlichen Merkmale des rechnungslegungsbezogenen Internen Kontrollsystems findet sich im Abschnitt „Konzernstruktur“ des Konzernlageberichts auf den Seiten 51–56 des Geschäftsberichts.

**Rechnungslegung und Abschlussprüfung.** Mit den Abschlussprüfern der Deutschen Telekom ist vereinbart, dass der Vorsitzende des Aufsichtsrats bzw. des Prüfungsausschusses über während der Prüfung auftretende mögliche Ausschluss- oder Befangenheitsgründe unverzüglich unterrichtet wird, soweit diese nicht unverzüglich beseitigt werden. Ferner ist vereinbart, dass die Abschlussprüfer über alle für die Aufgaben des Aufsichtsrats wesentlichen Feststellungen und Vorkommnisse unverzüglich berichten, die sich bei der Durchführung der Abschlussprüfung ergeben. Vereinbarungsgemäß haben die Abschlussprüfer den Aufsichtsrat zu informieren bzw. im Prüfungsbericht zu vermerken, wenn sie bei Durchführung der Abschlussprüfung Tatsachen feststellen, die eine Unrichtigkeit der von Vorstand und Aufsichtsrat abgegebenen Erklärungen zum Deutschen Corporate Governance Kodex ergeben. Der Prüfungsausschuss untersucht die Unabhängigkeit der Abschlussprüfer.

## Bericht über die Vergütung des Vorstands.

 Die Vergütung der Vorstandsmitglieder ist im Konzern-Anhang des Konzernabschlusses entsprechend den gesetzlichen Vorgaben, aufgeteilt nach erfolgsunabhängigen und erfolgsbezogenen Komponenten sowie Komponenten mit langfristiger Anreizwirkung, individualisiert ausgewiesen und zwar auf den Seiten 213–220 des Geschäftsberichts unter der Überschrift „Vergütung von Vorstand und Aufsichtsrat“. Diese im Konzern-Anhang gemachten Angaben sind zugleich integraler Bestandteil dieses Corporate Governance-Berichts. Darüber hinaus wird im Folgenden ein Überblick zur Struktur und den Grundzügen der Vorstandsvergütung gegeben:

Die Hauptversammlung der Deutschen Telekom AG hat am 3. Mai 2010 ein neues System der Vorstandsvergütung gebilligt, welches den Vorgaben des Gesetzes zur Angemessenheit der Vorstandsvergütung (VorstAG) entspricht. Im Anschluss an das Votum der Hauptversammlung hat der Aufsichtsrat begonnen, die bereits bestehenden Vorstandsverträge in das neue System der Vorstandsvergütung zu überführen. Zum 31. Dezember 2010 waren sechs Vorstandsmitglieder in das neue System der Vorstandsvergütung überführt, zwei Vorstandsmitglieder machten von der zulässigen Möglichkeit Gebrauch, mit ihrem Bestandsvertrag im alten System der Vorstandsvergütung zu verbleiben.

Das Vergütungssystem für den Vorstand einschließlich der wesentlichen Vertragselemente wird vom Aufsichtsrat festgelegt und regelmäßig überprüft. Seit Einführung des Gesetzes zur Angemessenheit der Vorstandsvergütung (VorstAG) und der Aktualisierung des Deutschen Corporate Governance Kodex in 2009 beschließt der Aufsichtsrat im Plenum die individualvertraglichen Regelungen der Verträge mit Vorständen. Dem Präsidialausschuss des Aufsichtsrats kommt seitdem eine vorbereitende Funktion für die Beschlussfassung im Aufsichtsrat zu. Die Vergütung des Vorstands besteht sowohl im Altsystem als auch im Neusystem aus mehreren Bestandteilen. Sie umfasst fixe und kurz- und langfristig ausgelegte variable Bestandteile, diverse – im Einzelnen in den Anhangangaben auch individualisiert angegebene – Nebenleistungen, die grundsätzlich als Sachleistungen, in Form von Beiträgen zum Versicherungsschutz und als geldwert zu versteuernde Vorteile ausgestaltet sind, sowie Zusagen auf Anwartschaften auf eine Vorstandsversorgung.

Sowohl im Altsystem als auch im Neusystem enthalten die variablen Vergütungsbestandteile einerseits Komponenten, die an den jährlichen geschäftlichen Erfolg gebunden sind, andererseits auch Komponenten mit langfristiger Anreizwirkung und Risikocharakter.

Die **jährliche variable Vergütung** (im Neusystem als Variable I bezeichnet) bestimmt sich nach dem Grad der Erreichung der vom Aufsichtsrat vor Beginn des Geschäftsjahres jedem Mitglied des Vorstands erteilten Zielvorgaben. Bei voller Zielerreichung der variablen Gehaltsbestandteile sind im Altsystem der Vorstandsvergütung etwa zwei Drittel der Vergütung variabel und ein Drittel fix ausgestaltet. Im Neusystem beträgt der Anteil der jährlichen festen Zielvergütung ca. 40 % und die variablen Zielvergütungsbestandteile (Variable I und Variable II) betragen ca. 60 % der Gesamtzielvergütung eines Vorstandsmitglieds.

Im Neusystem besteht die Verpflichtung, ein Drittel der vom Aufsichtsrat jährlich festgesetzten Variable I in Aktien der Deutschen Telekom AG zu investieren und diese über einen Zeitraum von mindestens vier Jahren zu halten. Die Deutsche Telekom AG überträgt nach Ablauf von vier Jahren und gleichzeitigem Verbleib im Unternehmen für jede im Rahmen dieses Eigeninvestments erworbene Aktie eine weitere Aktie ohne Zuzahlung durch das Vorstandsmitglied (Matching Shares). Somit wird sichergestellt, dass frühestens nach Ablauf von vier Jahren eine Veräußerung der von Unternehmensseite gewährten Aktien möglich ist und der Verbleib im Unternehmen honoriert wird.

Als **Vergütungskomponente mit langfristiger Anreizwirkung und Risikocharakter** sind im Altsystem Leistungen auf der Grundlage des sog. „Mid-Term Incentive Plans“ ausgelobt. Darüber hinaus bestehen auch Ansprüche aus Aktienoptionsplänen (☐ siehe unten zum Aktienoptionsplan 2001). Bei dem **Mid-Term Incentive Plan** der Deutschen Telekom AG (MTIP) handelt es sich um ein konzernweites Vergütungsinstrument mit langfristigem Charakter für obere Führungskräfte. Die Mitglieder des Vorstands nehmen seit dem Geschäftsjahr 2004 daran teil. Der Plan hat eine dreijährige Laufzeit und wird jährlich revolvierend aufgelegt. Er sieht zwei aktienbasierte, additive und gleichgewichtete Erfolgsparameter vor. Für das Geschäftsjahr 2010 wurden – wie auch für die vorherigen Geschäftsjahre – eine absolute und eine relative Planhürde festgelegt. Die absolute Planhürde bezieht sich auf die Steigerung des Werts der Aktie der Deutschen Telekom AG. Die relative Planhürde verlangt eine bessere Entwicklung des Total Return der Aktie der Deutschen Telekom AG gegenüber dem Dow Jones Euro STOXX® Total Return Index. Die Tranche des MTIP 2008 hat das relative Kursentwicklungsziel erreicht, während das absolute Kursentwicklungsziel verfehlt wurde. Somit kann für die Tranche 2008 ein Anteil von 50 % des Auslobungsvolumens ausbezahlt werden. ☐ Weitere Einzelheiten sind im Konzern-Anhang auf den Seiten 200–201 des Geschäftsberichts zu finden.

Im Neusystem der Vorstandsvergütung stellt die sog. Variable II die Vergütungskomponente mit langfristiger Anreizwirkung dar. Die Variable II wird jährlich revolvierend aufgelegt und hat eine vierjährige Laufzeit. Zielparameter der Variable II sind die vier gleichgewichteten Kennzahlen (bereinigter operativer Return On Capital Employed (ROCE), bereinigte Earnings Per Share (EPS), Kundenzufriedenheit und Mitarbeiterzufriedenheit). Eine Übererfüllung der Zielvorgaben wird linear abgebildet und ist auf 150 % des Auslobungsbetrags begrenzt. Die Messung erfolgt über die durchschnittliche Zielerreichung der vier zum Zeitpunkt der Auslobung geplanten Jahre. Der Auslobungsbetrag wird entkoppelt von anderen Vergütungsbestandteilen und individuell pro Vorstandsmitglied festgelegt, wobei dieser Vergütungsbestandteil ca. 30 % der Gesamtzielvergütung ausmachen soll.

Der **Aktienoptionsplan 2001** wurde bereits im Jahr 2004 für den Vorstand geschlossen. Aus Tranchen des Aktienoptionsplans 2001 an aktuelle und im Berichtsjahr ausgeschiedene Vorstandsmitglieder gewährte Optionen sind grundsätzlich weiterhin ausübbar, sofern die hierfür festgelegten Voraussetzungen erfüllt sind. ☐ Weitere Einzelheiten sind im Konzern-Anhang auf den Seiten 202–203 des Geschäftsberichts zu finden. Diese im Konzern-Anhang gemachten Angaben sind zugleich integraler Bestandteil dieses Corporate Governance-Berichts.

Im Neusystem der Vorstandsvergütung ist ein **Matching Share Plan** als weiterer mit langfristiger Anreizwirkung und Risikocharakter angelegter variabler Vergütungsbestandteil verankert. Für jede Aktie, die das berechnete Vorstandsmitglied im Rahmen des verpflichtenden Eigeninvestments aus der vom Aufsichtsrat festgesetzten Variable I nachweist, gewährt die Deutsche Telekom AG eine weitere Aktie, die dem Vorstandsmitglied nach Ablauf von vier Jahren zugeteilt wird.

Die Laufzeiten der Verträge der Mitglieder des Vorstands sind an die Laufzeit der Bestellung zum Mitglied des Vorstands gekoppelt. Für den Fall, dass die Gesellschaft berechtigt ist, die Berufung zu beenden, ohne dass dies zugleich auch ein zivilrechtlich relevanter „wichtiger Grund“ für die Beendigung des Dienstvertrags wäre, sehen die Vorstandsverträge aller Vorstandsmitglieder der Deutschen Telekom AG eine Klausel zur Höchstbetragsbegrenzung für die im Falle eines diesbezüglichen Ausscheidens an das Vorstandsmitglied zu zahlende Abfindung vor.

Die Verträge der Mitglieder des Vorstands sehen grundsätzlich ein nachvertragliches Wettbewerbsverbot vor.

Beim Abschluss von Vorstandsverträgen wird für den Fall der vorzeitigen Beendigung ohne wichtigen Grund eine Ausgleichszahlung vorgesehen, deren Höhe entsprechend den Regelungen des Corporate Governance Kodex auf maximal zwei Jahresvergütungen begrenzt ist (Abfindungs-Cap) und die nicht höher als die Vergütung für die Restlaufzeit des Anstellungsvertrags sein darf.

Die Mitglieder des Vorstands haben grundsätzlich eine Zusage auf eine **betriebliche Altersversorgung**. Diese ist für Vorstandsmitglieder, die vor 2009 erstmalig zum Vorstandsmitglied bestellt worden sind, in Abhängigkeit vom Endgehalt ausgestaltet. Das bedeutet, dass die Vorstände im Versorgungsfall pro abgeleistetem Dienstjahr einen festgelegten Prozentsatz (zwischen 5 % und 6 %) des letzten festen Jahresgehalts vor Eintritt des Versorgungsfalls als betriebliche Altersversorgung erhalten. Maximal kann nach zehn Jahren Vorstandszugehörigkeit ein Versorgungssatz i. H. v. 50 % (bzw. 60 %) des letzten festen Jahresgehalts erreicht werden. Die Anwartschaften sind grundsätzlich nach den gesetzlichen Vorgaben unverfallbar (bzw. in Einzelfällen sofortig vertraglich unverfallbar). Die Versorgung wird in Form von lebenslangem Ruhegeld, vorgezogenem Ruhegeld, Invalidenversorgung sowie Witwen- und Waisenversorgung gezahlt. ☐ Alle darüber hinaus anzugebenden Details hierzu finden sich im Anhang zum Konzernabschluss und zwar auf den Seiten 213–220 des Geschäftsberichts unter der Überschrift „Vergütung von Vorstand und Aufsichtsrat“. Diese im Konzern-Anhang gemachten Angaben sind zugleich integraler Bestandteil dieses Corporate Governance-Berichts.



Seit 2009 erstmalig bestellte Vorstandsmitglieder erhalten eine beitragsorientierte Versorgungszusage in Form eines Einmalkapitals im Versorgungsfall. Für jedes abgeleistete Dienstjahr wird dem Vorstandsmitglied ein Beitrag auf einem Versorgungskonto gutgeschrieben, welches mit einer marktüblichen Verzinsung hinterlegt ist. Die Zuführung des jährlichen Beitrags erfolgt nicht liquiditätswirksam. Der Liquiditätsabfluss entsteht erst mit Eintritt des Versorgungsfalls. Der Versorgungsfall tritt grundsätzlich mit dem vollendeten 62. Lebensjahr ein. Die Höhe des jährlich bereitzustellenden Beitrags wird individualisiert und entkoppelt von anderen Vergütungsbestandteilen vorgenommen. Bei der exakten Festlegung des Beitrags erfolgt eine Orientierung an Unternehmen gleicher Größenordnung, die einen angemessenen Vergleichsmaßstab darstellen und die ebenfalls eine beitragsorientierte Versorgungszusage anbieten.

Leistungen Dritter für die Vorstandstätigkeit werden nicht gezahlt.

■ Darüber hinaus sind die Grundzüge des Vergütungssystems sowie die konkrete Ausgestaltung der Vergütungsbestandteile mit langfristiger Anreizwirkung und Risikocharakter im Anhang zum Konzernabschluss und zwar auf den Seiten 213–220 des Geschäftsberichts unter der Überschrift „Vergütung von Vorstand und Aufsichtsrat“ sowie im Internet ( [www.telekom.com](http://www.telekom.com)) unter dem Pfad: Investor Relations/Corporate Governance/Incentive-Pläne, dargestellt. Diese im Konzern-Anhang gemachten Angaben sind integraler Bestandteil dieses Corporate Governance-Berichts.

## Bericht über die Vergütung des Aufsichtsrats.

Die Vergütung des Aufsichtsrats ist in § 13 der Satzung festgelegt. Sie wurde auf der Hauptversammlung am 3. Mai 2010 neu geregelt. Die Vergütung soll der Verantwortung und dem Tätigkeitsumfang der Aufsichtsratsmitglieder sowie der wirtschaftlichen Lage und dem Erfolg des Unternehmens Rechnung tragen. Die Mitglieder des Aufsichtsrats erhalten neben einer festen eine erfolgsorientierte Vergütung mit langfristiger Anreizwirkung, die sich an der Entwicklung des Konzernüberschusses je Aktie orientiert. Der Vorsitz und der stellvertretende Vorsitz im Aufsichtsrat sowie der Vorsitz und die Mitgliedschaft in den Ausschüssen werden bei der Aufsichtsratsvergütung berücksichtigt.

■ Die Vergütung der Aufsichtsratsmitglieder ist im Anhang des Konzernabschlusses entsprechend den gesetzlichen Vorgaben aufgeteilt nach Bestandteilen individualisiert ausgewiesen und zwar auf den Seiten 213–220 des Geschäftsberichts unter der Überschrift „Vergütung von Vorstand und Aufsichtsrat“. Diese im Konzern-Anhang gemachten Angaben sind zugleich integraler Bestandteil dieses Corporate Governance-Berichts.

Darüber hinaus wurden vom Unternehmen an die Mitglieder des Aufsichtsrats keine Vergütungen gezahlt oder Vorteile für persönliche erbrachte Leistungen, insbesondere Beratungs- und Vermittlungsleistungen, gewährt. Für seine Tätigkeit als Vorsitzender des Datenschutzbeirats hat Herr Lothar Schröder Sitzungsgeld erhalten.

## Aktienbesitz von Mitgliedern des Vorstands und des Aufsichtsrats.

Der direkte oder indirekte Besitz von Aktien der Gesellschaft oder sich darauf beziehender Finanzinstrumente von Vorstands- und Aufsichtsratsmitgliedern übersteigt insgesamt nicht 1 % der von der Gesellschaft ausgegebenen Aktien.

## Wertpapierorientierte Anreizsysteme.

■ Konkrete Angaben zu den wertpapierorientierten Anreizsystemen der Gesellschaft finden sich im Anhang zum Konzernabschluss und zwar auf den Seiten 200–203 des Geschäftsberichts unter der Überschrift „Mid-Term Incentive Pläne (MTIP)/„Phantom-Share“ Plan/Aktienorientierte Vergütungssysteme“ sowie auf den Seiten 213–220 des Geschäftsberichts unter der Überschrift „Vergütung von Vorstand und Aufsichtsrat“. Diese im Konzern-Anhang gemachten Angaben sind zugleich integraler Bestandteil dieses Corporate Governance-Berichts.

Bonn, den 23. Februar 2011  
Aufsichtsrat und Vorstand

# Die T-Aktie.

Konjunkturelle Erholung und Euro-Krise bestimmen Börsenjahr // Deutsche Telekom überzeugt mit langfristiger Ausschüttungspolitik

## Daten zur T-Aktie.

|                                                                                 |                                   | 2010     | 2009     |
|---------------------------------------------------------------------------------|-----------------------------------|----------|----------|
| <b>Xetra-Schlusskurse</b>                                                       |                                   |          |          |
|                                                                                 | €                                 |          |          |
| Börsenkurs am letzten Handelstag                                                |                                   | 9,66     | 10,29    |
| Höchster Kurs                                                                   |                                   | 10,60    | 11,39    |
| Niedrigster Kurs                                                                |                                   | 8,55     | 7,93     |
| <b>Handelsvolumen</b>                                                           |                                   |          |          |
| Deutsche Börsen                                                                 | Mrd. Stück                        | 4,7      | 5,3      |
| New York Stock Exchange (ADR) *                                                 | Mio. Stück                        | 184      | 356      |
| Tokyo Stock Exchange *                                                          | Mio. Stück                        | 1,4      | 0,3      |
| <b>Marktkapitalisierung am letzten Handelstag</b>                               |                                   |          |          |
|                                                                                 | Mrd. €                            | 41,7     | 44,9     |
| <b>Gewichtung der T-Aktie in wichtigen Aktienindizes zum letzten Handelstag</b> |                                   |          |          |
| DAX 30                                                                          | %                                 | 4,7      | 5,8      |
| Dow Jones Euro STOXX 50®                                                        | %                                 | 1,1      | 1,2      |
| <b>Kennzahlen zur T-Aktie</b>                                                   |                                   |          |          |
| Ergebnis je Aktie (unverwässert und verwässert)                                 | €                                 | 0,39     | 0,08     |
| Dividendenvorschlag                                                             | €                                 | 0,70     | 0,78     |
| Ausgegebene Aktien                                                              | Mio. Stück, jeweils am Jahresende | 4 321,32 | 4 361,32 |

\* Im Geschäftsjahr 2010 beendete die Deutsche Telekom ihre Börsennotierungen in New York und Tokio. Der 18. Juni 2010 war der letzte Handelstag an der New Yorker Börse (NYSE), der 15. Juli 2010 war der letzte Handelstag an der Tokyo Stock Exchange.

## Kapitalmarktumfeld.

Nachdem die Weltwirtschaft 2009 die schwerste Rezession seit 1945 erlebt hatte, stand 2010 im Zeichen der konjunkturellen Erholung auf der einen Seite und der Schuldenkrise in mehreren europäischen Staaten auf der anderen Seite.

Rund um den Globus belebte sich die wirtschaftliche Aktivität – oft gestützt durch massive fiskal- und geldpolitische Maßnahmen. Die Angst vor einer Staatspleite Griechenlands, Irlands und anderer europäischer Staaten brachte jedoch den Euro massiv unter Druck, die EU und der IWF mussten mit Milliarden-Hilfskrediten einspringen.

Weltweit gefragt waren an den Börsen zyklische Titel, also Aktien mit hoher Abhängigkeit vom Wirtschaftswachstum, die jedoch auch zu den Hauptverlierern des Krisenjahres 2009 gehörten. Entsprechend blieben

2010 defensive Werte wie Gesundheits- und Telekommunikationsaktien, die auch im Vorfeld nicht diesen drastischen Einbruch erlebt hatten, zumeist etwas hinter den steigenden Märkten zurück.

## Entwicklung der internationalen Indizes.

Je nach Betroffenheit von der Euro-Krise, Bedeutung des Finanzsektors sowie der jeweiligen heimischen Wirtschaftsstärke fiel die Kursentwicklung an den europäischen Börsen höchst unterschiedlich aus. So legte der DAX als einer der besten europäischen Indizes insgesamt 16,1 % zu. Der Index überwand im Dezember an mehreren Tagen erstmals seit Juni 2008 wieder die Marke von 7 000 Punkten und schloss bei 6 914 Punkten. Derweil musste der spanische IBEX 30 Kursrückgänge um 17,4 % verkraften. In Griechenland betrug der Verlust sogar 35,6 %.

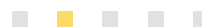

Der europäische Leitindex Euro STOXX 50® verlor auf Total Return-Basis 2,8% (Aktienkursperformance plus Dividende). Hier bremste deutlich die Schuldenkrise mehrerer Euroländer, die vor allem die Kursentwicklung bei Banken nachhaltig belastete. Bankaktien sind im europäischen Leitindex verhältnismäßig stark vertreten.

Die wichtigsten US-amerikanischen Indizes beendeten das Jahr 2010 mit guten Zugewinnen, wenngleich die Befürchtungen vor einem erneuten Abrutschen der US-Konjunktur, dem sog. Double-Dip, sowie die anhaltend hohen Arbeitslosenzahlen im Jahresverlauf immer wieder für Rücksetzer sorgten. Der Dow Jones Industrial Index gewann insgesamt 11 %, der S&P-500 stieg um 12,8 %, die NASDAQ legte 16,9 % zu.

Der japanische Nikkei musste auf Jahressicht ein Minus von 3 % verbuchen. Hier belastete die Stärke der Landeswährung Yen, durch die insbesondere exportorientierte Unternehmen, die die Wirtschaft des asiatischen Landes dominieren, unter Druck gerieten.

## Entwicklung der T-Aktie.

Die T-Aktie verzeichnete auf Jahressicht einen stabilen Aktienkurs. Das Jahreshoch wurde direkt zu Jahresbeginn bei 10,60 € verbucht, das Tief wurde im Mai bei 8,55 € aufgrund der Dividendenausschüttung verzeichnet. Auf Total Shareholder Return-Basis (Aktienkursperformance plus Dividende) gewann die Aktie im Jahresverlauf 2 % und ging bei einem Kurs von 9,66 € aus dem Handel.

Zu überzeugen vermochte die Deutsche Telekom innerhalb des Telekommunikationssektors mit ihrer neuen Ausschüttungspolitik: Demnach wird das Unternehmen in den drei Jahren bis 2012 über 10 Mrd. € an ihre Aktionäre ausschütten, davon jährlich mindestens 3 Mrd. € als Dividende. Als erster DAX-Konzern kommuniziert die Deutsche Telekom damit eine Mindestdividende für drei Jahre in Kombination mit einem Aktienrückkauf in Höhe von bis zu 1,2 Mrd. €. Die Realisierung dieser Strategie steht unter dem Vorbehalt, dass für das jeweilige Geschäftsjahr ein entsprechender Bilanzgewinn im handelsrechtlichen Einzelabschluss der Deutschen Telekom AG ausgewiesen werden kann und die für den Aktienrückkauf erforderliche Fähigkeit zur Rücklagenbildung besteht. Voraussetzung ist darüber hinaus, dass die zuständigen Organe unter Berücksichtigung der jeweils aktuellen Situation der Gesellschaft entsprechende Beschlüsse fassen.

Am 3. Dezember 2010 wurde der vom Vorstand am 27. Juli 2010 beschlossene Aktienrückkauf abgeschlossen. Der Aktienrückkauf fand im Rahmen der oben erwähnten neuen Ausschüttungspolitik der Deutschen Telekom statt. Insgesamt wurden rund 40 Mio. Aktien mit einem auf sie entfallenden

anteiligen Betrag des Grundkapitals von rund 102,40 Mio. € über die Börse zurückgekauft. Dies entspricht ca. 0,9 % des Grundkapitals. Der Rückkauf erfolgte zu einem durchschnittlichen Preis von 9,9998 €. Der Gesamtrückkaufswert beträgt rund 400 Mio. €.

Die vorgelegten Quartalszahlen konnten die Erwartungen erfüllen, insbesondere in Bezug auf das Deutschlandgeschäft.

## Delisting der American Depositary Shares von der New Yorker Börse.

Am 21. Juni 2010 trat nach Handelsschluss das Delisting der American Depositary Shares (ADS) der Deutschen Telekom von der New Yorker Börse (NYSE) in Kraft. Des Weiteren beendete die Deutsche Telekom ihre Berichtspflicht gegenüber der amerikanischen Securities and Exchange Commission (SEC). Der Konzernvorstand fasste den Beschluss auf seiner Sitzung am 20. April 2010.

US-Anleger im Besitz von Stammaktien der Deutschen Telekom waren von dem Delisting nicht betroffen. ADS des Level III unserer ADS-Inhaber in den USA wurden mithilfe unserer Depotbank Deutsche Bank in ein gefördertes „Level I“-ADS-Programm überführt, was einen Aktienhandel „over the counter“ ermöglicht.

Das wesentliche Ziel des Delisting und der Deregistrierung war, die Prozesse der Finanzberichterstattung innerhalb des Unternehmens zu vereinfachen und Kosten einzusparen. Die Deutsche Telekom verpflichtet sich jedoch weiterhin zu höchster Transparenz und Einhaltung der Corporate Governance-Standards bei der Finanzberichterstattung. Das Unternehmen wird auch künftig den offenen und direkten Dialog mit seinen US-Investoren intensiv pflegen.

## Aktienbesitz von Mitgliedern des Vorstands und des Aufsichtsrats.

Insgesamt wurden im Jahr 2010 knapp 160 000 Aktien der Deutschen Telekom von Mitgliedern des Vorstands und Aufsichtsrats gekauft. Der direkte oder indirekte Besitz von Aktien der Gesellschaft oder sich darauf beziehender Finanzinstrumente von Vorstands- und Aufsichtsratsmitgliedern übersteigt insgesamt nicht 1 % der von der Gesellschaft ausgegebenen Aktien.

## Dividende.

Vorstand und Aufsichtsrat der Deutschen Telekom AG schlagen der diesjährigen Hauptversammlung am 12. Mai 2011 die Ausschüttung einer Dividende von 0,70 € je dividendenberechtigter Aktie vor.

### T-Aktie gegen DAX, Dow Jones STOXX 50® und Dow Jones STOXX® Telecommunications.

1. Januar bis 31. Dezember 2010

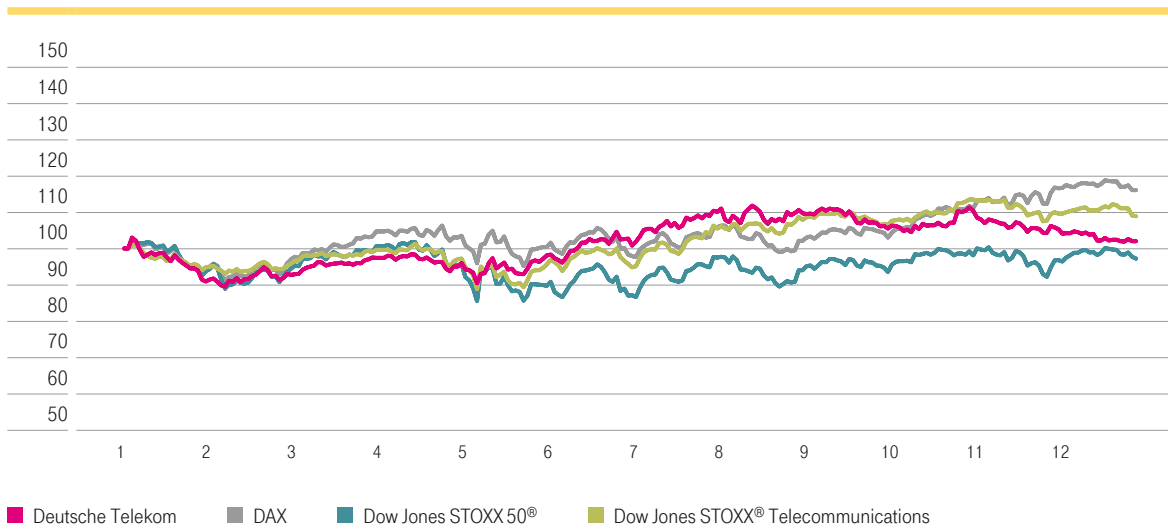

### T-Aktie gegen andere europäische Telekommunikationsunternehmen.

1. Januar bis 31. Dezember 2010

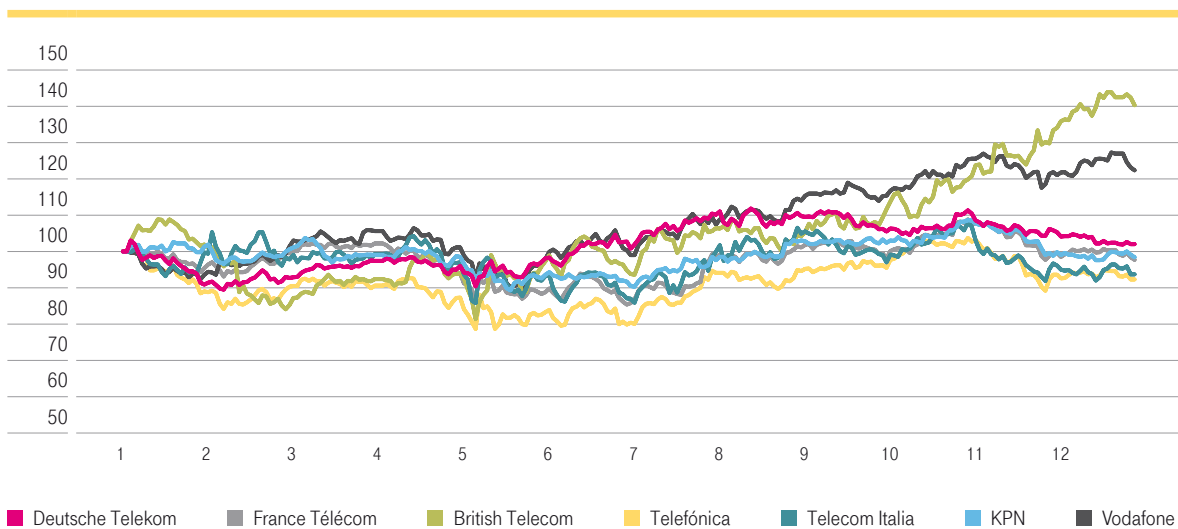

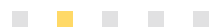

## Aktionärsstruktur.

Am 31. Dezember 2010

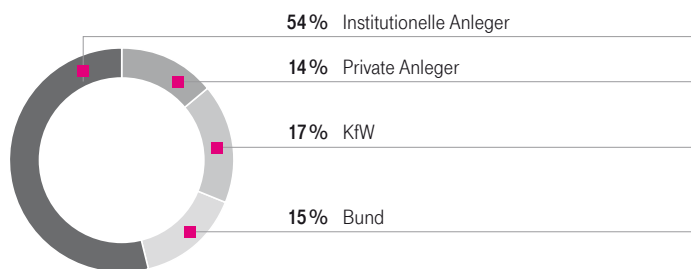

## Geografische Verteilung des Aktienstreubesitzes (Freefloat).

Am 31. Dezember 2010

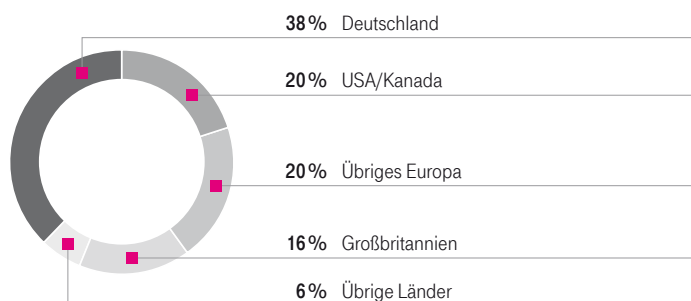

## Aktionärsstruktur.

Durch den Aktienrückkauf und die daraufhin durchgeführte Kapitalherabsetzung zum 17. Dezember 2010 hat sich die Aktionärsstruktur leicht verändert. Der Anteil des Bundes, inklusive des Anteils der KfW, Kreditanstalt für Wiederaufbau, liegt nun bei 32 %. Der Anteil im Streubesitz sank dadurch auf 68 %. Der Anteil der institutionellen Investoren ist auf 54 % gesunken und der Anteil der privaten Anleger auf rund 14 % des Grundkapitals gestiegen.

## Investor Relations.

Im Geschäftsjahr 2010 hat die Deutsche Telekom, wie in den Jahren zuvor, in Einzel- und Gruppengesprächen im Rahmen von Roadshows in Europa und Nordamerika, in denen das Top-Management die Konzernstrategie, die wirtschaftliche Situation des Unternehmens sowie die Quartals- und Jahresergebnisse persönlich vorgestellt hat, den intensiven Kontakt mit den institutionellen Investoren, Privatanlegern und Finanzanalysten gepflegt.

Des Weiteren gab es einen direkten Austausch mit dem Kapitalmarkt im Rahmen einer Analystenkonferenz in Bonn sowie in London und bei internationalen Investorenkonferenzen u. a. in Frankfurt, Barcelona, London, Paris und New York.

Darüber hinaus stand auch im Geschäftsjahr 2010 den Aktionären der umfangreiche Internet-Service der Deutschen Telekom AG zur Verfügung. Auch in Zukunft können Aktionäre auf Wunsch z. B. per E-Mail die Hauptversammlungsunterlagen erhalten. Der Internet-Dialog ermöglicht zudem den kontinuierlichen Ausbau der elektronischen Kommunikation mit den Aktionären. Über ihr selbst eingerichtetes Profil können sie Eintrittskarten für sich oder eine Vertretung zur Teilnahme an der Hauptversammlung bestellen. Falls sie nicht persönlich teilnehmen möchten, können sie an den Stimmrechtsvertreter erteilte Weisungen bis kurz vor Eintritt in die Abstimmung ändern. Bereits zum zweiten Mal konnte die Hauptversammlung klimaneutral gestellt werden.

Zusätzlich informiert der Newsletter „direkt“ über die letzten Quartalszahlen und den Jahresabschluss des Konzerns sowie bedeutende Entwicklungen und Ereignisse, die Konzernstrategie und besondere Serviceangebote. Der Newsletter ist auf der IR-Website als Download verfügbar, als Druckversion im kostenlosen Abonnement oder via E-Mail. Im vergangenen Jahr haben Aktionäre und Aktieninteressierte der Deutschen Telekom AG intensiv das Angebot für Privatanleger genutzt. Unser Team bearbeitete im Geschäftsjahr 2010 mehr als 20 000 Anfragen.

Unseren Privatanlegern steht mit dem IR-Team ein direkter Ansprechpartner unter der Telefonnummer 0228 181 88333 (Fax 0228 181 88339) sowie per E-Mail unter [forum-taktie@telekom.de](mailto:forum-taktie@telekom.de) für Fragen über das Unternehmen zur Verfügung.

Wir haben das Know-how,  
die finanzielle Kraft  
und die richtigen Leute.

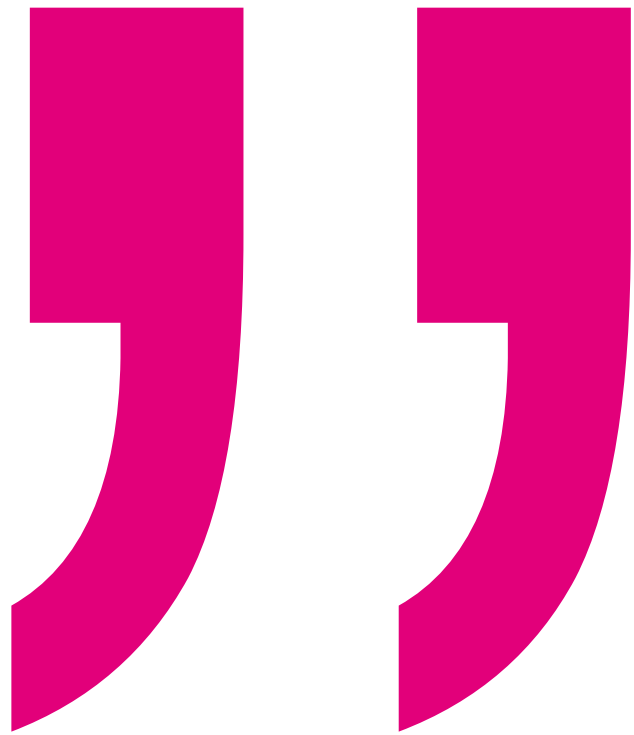

## ■ 43 Zusammengefasster Lagebericht

- 44 Das Geschäftsjahr 2010 im Überblick
- 47 Wichtige Ereignisse im Geschäftsjahr 2010
- 51 Konzernstruktur
- 57 Konzernstrategie und Konzernsteuerung
- 61 Wirtschaftliches Umfeld
- 65 Geschäftsentwicklung des Konzerns
- 76 Geschäftsentwicklung der operativen Segmente
- 95 Geschäftsentwicklung der Deutschen Telekom AG
- 99 Corporate Responsibility
- 102 Innovation und Produktentwicklung
- 106 Mitarbeiter
- 112 Risiko- und Chancenmanagement
- 123 Rechnungslegungsbezogenes internes Kontrollsystem
- 124 Besondere Ereignisse nach Schluss des Geschäftsjahres
- 125 Sonstige Angaben
- 126 Prognosen zur Umsatz- und Ergebnisentwicklung

# Das Geschäftsjahr 2010 im Überblick.

## Konzernumsatz. (Mrd. €)

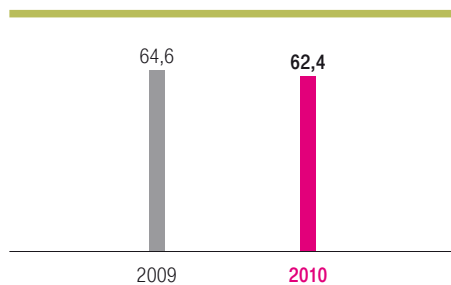

- Der Konzernumsatz sank um 3,4% gegenüber dem Vorjahr. Ohne Berücksichtigung von T-Mobile UK stieg der Konzernumsatz gegenüber dem Vorjahr leicht um 0,3 Mrd. €.
- Konsolidierungskreiseffekte (OTE, T-Mobile UK) wirkten sich saldiert mit 1,9 Mrd. € negativ aus, und Wechselkurseffekte von insgesamt 1,2 Mrd. € beeinflussten den Konzernumsatz positiv.
- Positive Auswirkungen auf das operative Geschäft: die Entwicklung der Datenumsätze im Mobilfunk und der Umsatzanstieg im Systemgeschäft aufgrund neu gewonnener Verträge.
- Negative Auswirkungen auf das operative Geschäft: wettbewerbsbedingte Anschlussverluste im Festnetz und regulierungsbedingte Preisänderungen.

## Anteil Ausland am Konzernumsatz. (%)

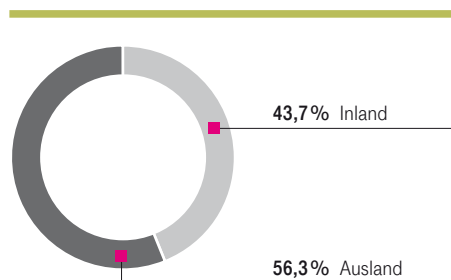

- Die Auslandsquote sank bei 56,3% (2009: 56,6%) leicht.
- Der Inlandsumsatz lag mit 27,3 Mrd. € um 0,8 Mrd. € unter dem des Vorjahres. Der Auslandsumsatz sank im Vergleich zum Vorjahr um 3,9% oder 1,4 Mrd. €.
- Wesentliche Ursache für den gesunkenen Auslandsumsatz war die Gründung des neuen Joint Venture Everything Everywhere in Großbritannien. T-Mobile UK wurde seit dem 1. April 2010 nicht mehr vollkonsolidiert.

## EBITDA bereinigt. (Mrd. €)

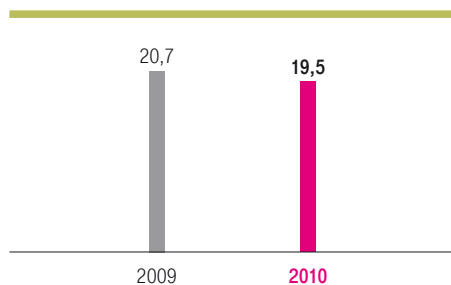

- Mit einem bereinigten EBITDA von 19,5 Mrd. € haben wir unser kommuniziertes Unternehmensziel von ursprünglich rund 20 Mrd. € abzüglich 0,4 bis 0,5 Mrd. € aufgrund der Entkonsolidierung T-Mobile UK erreicht.
- Wettbewerbsbedingte Anschlussverluste im Festnetz, regulierungsbedingte Preisänderungen sowie neu eingeführte bzw. erhöhte Sondersteuern auf Telekommunikationsleistungen belasteten das bereinigte EBITDA.
- Das Kostenmanagement und das „Save for Service“-Programm konnten diese Effekte nur teilweise auffangen.

## Free Cashflow (vor Ausschüttung und vor Investitionen im Spektrum). (Mrd. €)

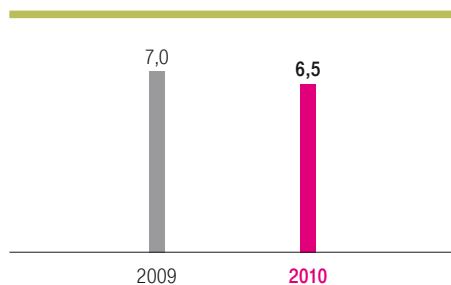

- Mit einem Free Cashflow von 6,5 Mrd. € wurde das Unternehmensziel für 2010 um 0,3 Mrd. € übererfüllt, obwohl die Einzahlungen aus Forderungsverkäufen (Factoring) um 0,6 Mrd. € geringer waren als im Vorjahr.



### Netto-Finanzverbindlichkeiten. (Mrd. €)

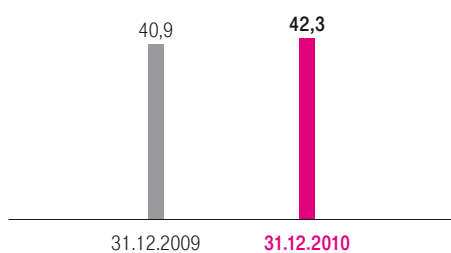

- Die Netto-Finanzverbindlichkeiten stiegen gegenüber dem Jahresende 2009 um 3,3% auf 42,3 Mrd. €.
- Erhöhend wirkten: Dividendenausschüttungen von 4,0 Mrd. € (inkl. Ausschüttungen an Minderheiten), Zahlungen für Spektrum von 1,3 Mrd. €, Währungseffekte von 0,8 Mrd. €, Effekte aus Unternehmenstransaktionen von 0,8 Mrd. € – im Wesentlichen T-Mobile UK und STRATO – und der vorgezogene Aktienrückkauf in Höhe von 0,4 Mrd. €.
- Der Free Cashflow von 6,5 Mrd. € reduzierte die Netto-Finanzverbindlichkeiten.

### Konzernüberschuss. (Mrd. €)

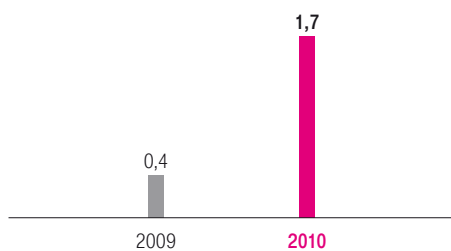

- Anstieg des Konzernüberschusses um 1,3 Mrd. € auf 1,7 Mrd. €.
- Die negative Entwicklung des EBITDA konnte überkompensiert werden.
- Abschreibungen (inkl. Wertminderungen auf Goodwill und Sachanlagen) sanken um 2,1 Mrd. €; Finanzergebnis verbesserte sich um 0,5 Mrd. €.
- 0,8 Mrd. € geringerer Ertragsteueraufwand; reduzierte Anteile anderer Gesellschafter am Überschuss.

### Eigenkapital. (Mrd. €)

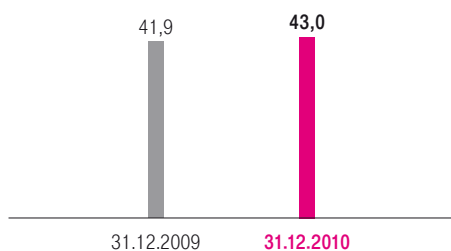

- Das Eigenkapital hat sich im Vergleich zum Jahresende 2009 um 1,1 Mrd. € erhöht.
- Erhöhend wirkten: Währungsumrechnung (3,7 Mrd. €) und Konzernüberschuss (1,7 Mrd. €).
- Vermindernd wirkten: Dividendenausschüttungen (4,0 Mrd. €) und Kapitalherabsetzung (0,4 Mrd. €).

### Eigenkapitalquote. (%)

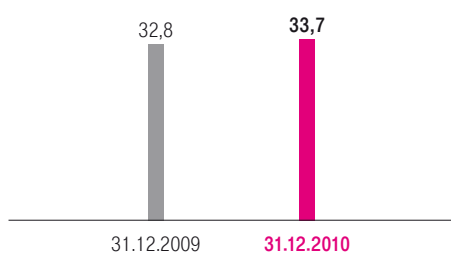

- Die Bilanzsumme blieb im Vergleich zum Jahresende 2009 nahezu unverändert (127,8 Mrd. €).
- Anstieg des Eigenkapitals um 2,6%.
- Die genannte Entwicklung führte zu einer Verbesserung der Eigenkapitalquote.

## Soll-Ist-Vergleich der Konzernerwartungen.

Die ursprünglichen im Geschäftsbericht 2009 veröffentlichten Einschätzungen für das Jahr 2010 basierten auf einer planerischen Annahme einer Vollkonsolidierung der britischen Tochtergesellschaft T-Mobile UK. Das aus der Zusammenlegung der T-Mobile UK und der Orange UK am 1. April 2010 neu gegründete Joint Venture Everything Everywhere wird als Beteiligung

an at equity bilanzierten Unternehmen in der Konzern-Bilanz ausgewiesen. Das (anteilige) Ergebnis des Joint Venture wird im Finanzergebnis in der Konzern-Gewinn- und Verlustrechnung erfasst. Entsprechend haben wir daher die ursprünglichen Einschätzungen um diesen Sachverhalt angepasst.

| Bereinigtes EBITDA  |                    |
|------------------------------------------------------------------------------------------------------|--------------------|
| <b>Erwartung 2010</b>                                                                                | <b>Ist 2010</b>    |
| – mit T-Mobile UK rund <b>20 Mrd. €</b>                                                              |                    |
| – ohne T-Mobile UK Verringerung um <b>0,4 bis 0,5 Mrd. €</b>                                         | <b>19,5 Mrd. €</b> |

| Free Cashflow  |                   |
|---------------------------------------------------------------------------------------------------|-------------------|
| <b>Erwartung 2010</b>                                                                             | <b>Ist 2010</b>   |
| – mit T-Mobile UK rund 6,2 Mrd. €                                                                 |                   |
| – ohne T-Mobile UK rund <b>6,2 Mrd. €</b>                                                         | <b>6,5 Mrd. €</b> |

Das **Investitionsniveau (vor Spektrum)** lag 2010 bei 8,5 Mrd. €. Der Schwerpunkt der Investitionen war in allen Ländern der weitere Breitbandausbau sowie die Kapazitätserweiterung der bestehenden Netze. Im Mobilfunk-Bereich haben wir insbesondere die Netzabdeckung 3G erhöht, während im Festnetz-Bereich die Themen DSL, VDSL und IPTV im Vordergrund standen. Weitergeführt haben wir auch die Umrüstung des bestehenden Telefonnetzes auf ein Netz der nächsten Generation, wie z. B. das IP-basierte Sprachnetz. Bei T-Systems wurden Investitionen vor allem im Zusammenhang mit Kundenaufträgen und zum Ausbau übergreifender neuer Plattformen (z. B. für Cloud Service) getätigt.

## Soll-Ist-Vergleich der Stakeholder-Erwartungen.

Die folgenden Maßnahmen und Zielerreichungen dienen dazu, die unterschiedlichen Erwartungen und Interessen der Stakeholder (Aktionäre, Fremdkapitalgeber, Mitarbeiter und die sog. „Unternehmer

im Unternehmen“) an den Konzern sicherzustellen.  Für weitere Erläuterungen verweisen wir auf das Kapitel „Konzernstrategie und Konzernsteuerung“.

| Aktionäre  |                                                                                                                                                                                                                                                                                                                                                                                                                                                |
|-----------------------------------------------------------------------------------------------|------------------------------------------------------------------------------------------------------------------------------------------------------------------------------------------------------------------------------------------------------------------------------------------------------------------------------------------------------------------------------------------------------------------------------------------------|
| <b>Ausschüttungsstrategie<sup>a</sup></b>                                                     | <p><b>Erwartung 2010</b></p> <ul style="list-style-type: none"> <li>– jährliches Gesamtausschüttungsvolumen von rund <b>3,4 Mrd. €</b></li> <li>– davon jährliche Mindestdividende in Höhe von <b>0,70 €/Aktie</b></li> </ul> <p><b>Ist 2010</b></p> <ul style="list-style-type: none"> <li>– Aktienrückkauf in Höhe von <b>0,4 Mrd. €</b> und</li> <li>– Dividendenvorschlag für 2010 in Höhe von <b>0,70 €/Aktie</b> (3,0 Mrd. €)</li> </ul> |

| Fremdkapitalgeber  |                                           |
|---------------------------------------------------------------------------------------------------------|-------------------------------------------|
| <b>Rating</b>                                                                                           | <b>Erwartung 2010</b> A-/BBB+             |
| <b>Relative Verschuldung</b>                                                                            | 2 bis 2,5 x                               |
| <b>Eigenkapitalquote</b>                                                                                | 25 bis 35 %                               |
| <b>Gearing</b>                                                                                          | 0,8 bis 1,2                               |
| <b>Liquiditätsreserve</b>                                                                               | deckt Fälligkeiten der nächsten 24 Monate |
|                                                                                                         | <b>Ist 2010</b> BBB+                      |
|                                                                                                         | 2,2 x                                     |
|                                                                                                         | 33,7 %                                    |
|                                                                                                         | 1,0                                       |
|                                                                                                         | deckt Fälligkeiten > 24 Monate            |

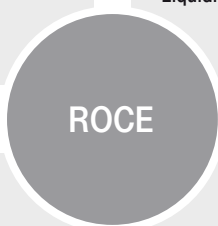

**Erwartung bis 2012**  
Verbesserung um rund 150 Basispunkte

**ROCE Stand<sup>b</sup>**  
2010: 3,5 % (2009: 3,9 %)

|                                 |                                                                                                  |
|---------------------------------|--------------------------------------------------------------------------------------------------|
| <b>Personalumbau und -abbau</b> | Aufwendungen aus Personalrestrukturierungen 2010: 1,0 Mrd. €<br>ROCE Auswirkung: ≈ -0,6 %-Punkte |
|---------------------------------|--------------------------------------------------------------------------------------------------|

|                           |                                                                                                                   |
|---------------------------|-------------------------------------------------------------------------------------------------------------------|
| <b>Transaktionen 2010</b> | – Gründung Joint Venture Everything Everywhere<br>– PTC-Transaktion<br>ROCE Auswirkung insgesamt: ≈ -0,4 %-Punkte |
|---------------------------|-------------------------------------------------------------------------------------------------------------------|

**Mitarbeiter**

**„Unternehmer im Unternehmen“**

<sup>a</sup>  Siehe Fußnote 2 auf Seite 129.

<sup>b</sup> ROCE 2010: 3,9 % (ohne Aufwendungen aus PTC-Transaktion und ohne Entkonsolidierungseffekt T-Mobile UK).

# Wichtige Ereignisse im Geschäftsjahr 2010.

## Weiterentwicklung der Konzernstrategie.

**Der Vorstand hat die Konzernstrategie weiterentwickelt.** Im Rahmen der weiterentwickelten Strategie „Verbessern – Verändern – Erneuern“ wollen wir mit Investitionen in intelligente Netze und mit IT-Services sowie Internet- und Netzwerkdiensten unser Geschäft umbauen. Unser Ziel dabei: deutlich mehr Umsatz in den Wachstumsfeldern erzielen.

■ Mehr über unsere weiterentwickelte Strategie finden Sie im Kapitel „Konzernstrategie und Konzernsteuerung“.

## Personalia.

**René Obermann erhält neuen 5-Jahres-Vertrag.** Der Aufsichtsrat der Deutschen Telekom AG hat in seiner Sitzung am 16. Dezember 2010 beschlossen, den Vertrag von René Obermann als Vorstandsvorsitzender unseres Unternehmens vorzeitig um weitere fünf Jahre zu verlängern. Sein aktueller Vertrag läuft am 31. Oktober 2011 aus; der neue gilt bis Ende Oktober 2016.

### Edward R. Koziel ist neues Vorstandsmitglied der Deutschen Telekom AG.

In der Aufsichtsratssitzung am 2. Mai 2010 hat der Aufsichtsrat Edward R. Koziel mit Wirkung zum 3. Mai 2010 zum neuen Vorstandsmitglied der Deutschen Telekom AG bestellt. Als Vorstand Technologie und Innovation/Chief Technology and Innovation Officer (CTIO) verantwortet er Technik, IT, Einkauf sowie Produkte & Innovation für das Standardgeschäft (Privat- und Geschäftskunden).

**Führungswechsel bei T-Mobile USA und OTE.** Philipp Humm hat mit Wirkung zum 1. November 2010 den vorherigen CEO von T-Mobile USA, Robert Dotson, abgelöst und damit die Unternehmensführung übernommen. Robert Dotson steht dem Unternehmen weiterhin als Vice Chairman zur Verfügung. Michael Tsamaz wurde mit Wirkung vom 3. November 2010 zum Nachfolger von Panagis Vourloumis ernannt und ist damit Chairman and Chief Executive Officer (CEO) der OTE. Panagis Vourloumis hat das Unternehmen zum 3. November 2010 verlassen. Michael Tsamaz wird auch weiterhin seine Aufgaben als CEO der Cosmote Mobile Communications wahrnehmen.

## Investoren/Ausschüttungspolitik.

### Ausschüttungspolitik\* für die Geschäftsjahre 2010 bis 2012

**beschlossen.** Vorstand und Aufsichtsrat haben eine Ausschüttungsstrategie beschlossen, die für die Geschäftsjahre 2010 bis 2012 eine Ausschüttung einer jährlichen Dividende in Höhe von mindestens 0,70 € pro Aktie umfasst. Vorgesehen ist darüber hinaus der Rückkauf eigener Aktien in Höhe der Restsumme bis zu einer Gesamtausschüttungssumme von rund 3,4 Mrd. €. Die Realisierung dieser Strategie steht unter dem Vorbehalt, dass für das jeweilige Geschäftsjahr ein entsprechender Bilanzgewinn im handelsrechtlichen Jahresabschluss der Deutschen Telekom AG zur Verfügung steht. Zudem muss die für den Aktienrückkauf erforderliche Fähigkeit zur Rücklagenbildung bestehen. Voraussetzung ist darüber hinaus, dass die zuständigen Organe unter Berücksichtigung der jeweils aktuellen Situation der Gesellschaft entsprechende Beschlüsse fassen.

**Aktienrückkauf und Kapitalherabsetzung in 2010 durchgeführt.** Die Deutsche Telekom AG hat im Jahr 2010 Aktien zu einem Kaufpreis von 400 Mio. € (ohne Nebenkosten) erworben. Anschließend wurden die so erworbenen rund 40 Mio. Stück Aktien eingezogen und das Grundkapital der Deutschen Telekom AG entsprechend um 102 Mio. € herabgesetzt. ■ Für weitere Informationen verweisen wir auf die Erläuterungen im Konzernabschluss.

### Deutsche Telekom abermals im Dow Jones Sustainability Index (DJSI)

**gelistet.** Auch 2010 qualifizierten wir uns wieder für die renommiertesten Nachhaltigkeitsindizes „Dow Jones Sustainability Index World“ und „Dow Jones Sustainability Index Europe“.

## Unternehmenstransaktionen/Änderungen der Segmentstruktur.

**Joint Venture Everything Everywhere in Großbritannien erfolgreich gegründet.** Zusammen mit der France Télécom S.A. haben wir am 1. April 2010 T-Mobile UK und Orange UK in ein Joint Venture mit dem Namen Everything Everywhere eingebracht, an dem beide Gesellschafter jeweils einen 50-prozentigen Anteil halten. Als Folge dieser Gründung wurden die Vermögenswerte und Schulden der T-Mobile UK ab dem 1. April 2010 nicht mehr in der Konzern-Bilanz ausgewiesen. Ab dem 1. April 2010 ist auch die Gewinn- und Verlustrechnung der T-Mobile UK nicht mehr in der Konzern-Gewinn- und Verlustrechnung enthalten. In der Konzern-Bilanz wird das Joint Venture stattdessen als Beteiligung an at equity bilanzierten Unternehmen erfasst. Das (anteilige) Ergebnis des Joint Venture wird demnach in der Konzern-Gewinn- und Verlustrechnung im Finanzergebnis ausgewiesen.

\* ■ Siehe Fußnote 2 auf Seite 129.

**Zusammenlegung der operativen Segmente Europa und Süd- und Osteuropa.** Der Aufsichtsrat hat am 24. Februar 2010 beschlossen, die Führungsstruktur der beiden bisherigen operativen Segmente Süd- und Osteuropa und Europa neu auszurichten: Diese beiden operativen Segmente wurden am 1. April 2010 zum neuen operativen Segment Europa zusammengefasst. Es umfasst die Festnetz- und Mobilfunk-Aktivitäten der Landesgesellschaften in Griechenland, Rumänien, Ungarn, Polen, der Tschechischen Republik, Kroatien, den Niederlanden, der Slowakei, Österreich, Bulgarien, Albanien, EJR Mazedonien und Montenegro sowie des Joint Venture in Großbritannien. Ebenso dazu gehört der Bereich International Carrier Sales and Services, der im Wesentlichen Telekommunikationsvorleistungen für andere operative Segmente im Konzern erbringt. Seit dem 1. April 2010 berichten wir also in vier operativen Segmenten Deutschland, Europa, USA, Systemgeschäft sowie der Konzernzentrale & Shared Services.

**Erwerb von STRATO und ClickandBuy.** Zum 1. Januar 2010 haben wir die STRATO AG und die STRATO Rechenzentrum AG (STRATO) vollkonsolidiert. Das macht uns zu einem führenden Anbieter von Webhosting-Produkten, vor allem für Privat- und kleine Geschäftskunden in Deutschland. Außerdem haben wir mit Wirkung zum 1. April 2010 die ausstehenden Anteile an dem Internetzahlungsanbieter Firstgate erworben. Bereits seit 2006 waren wir an der durch die Marke ClickandBuy bekannten Firstgate beteiligt, über unser Venture Capital Unternehmen T-Venture.

## Beendigung von Rechtsstreitigkeiten.

**Spruchverfahren T-Online.** Das Oberlandesgericht Frankfurt am Main hat am 3. September 2010 entschieden, dass die Deutsche Telekom im Verfahren zur Überprüfung der Angemessenheit des Umtauschverhältnisses bei der Verschmelzung der T-Online auf die Deutsche Telekom eine bare Zuzahlung in Höhe von 1,15 € zuzüglich Zinsen je Aktie an ehemalige T-Online Aktionäre leisten muss. Der Beschluss betrifft nur diejenigen Aktionäre, deren T-Online Aktien im Rahmen der Verschmelzung in Aktien der Deutschen Telekom umgetauscht wurden. Bei ca. 120 Mio. betroffenen Aktien ergibt sich daraus einbarer Zuzahlungsbetrag von ca. 138 Mio. € zuzüglich Zinsen.

**Polska Telefonia Cyfrowa Sp.z o.o. (PTC).** Im Dezember 2010 haben wir eine Vereinbarung mit der französischen Vivendi und der polnischen Elektrim sowie den Gläubigern von Elektrim abschließen können. Diese Vereinbarung sichert uns das vollständige und unumstrittene Eigentum an der PTC. Entsprechend der Vereinbarung haben die Deutsche Telekom AG und ihre Beteiligungsgesellschaften insgesamt ca. 1,4 Mrd. € im Januar 2011 an Elektrim und Vivendi gezahlt. Daneben wurde die Beilegung aller juristischen Auseinandersetzungen der Parteien vereinbart.  Für weitere Informationen verweisen wir auf die Erläuterungen im Konzernabschluss.

## One Company.

**Offizieller Start für die Telekom Deutschland GmbH.** Mit Eintrag ins Handelsregister am 30. März 2010 ist die Ausgliederung des Geschäftsbereichs „T-Home“ auf die T-Mobile Deutschland GmbH wirksam geworden – dadurch wurde das deutsche Festnetz- und Mobilfunk-Geschäft in einer Gesellschaft zusammengeführt. Zugleich ist die T-Mobile Deutschland GmbH – ebenfalls mit Eintragung in das Handelsregister am 30. März 2010 – in Telekom Deutschland GmbH umbenannt worden.

**Zusammenschluss von Festnetz und Mobilfunk nun auch in der Slowakei.** Nachdem in Ungarn, Montenegro und zum Jahresbeginn 2010 in Kroatien bereits Mobilfunk- und Festnetz-Geschäft zusammengeführt wurden, haben sich auch Slovak Telekom und T-Mobile Slovakia zusammengeschlossen. Somit gehen nun auch die Landesgesellschaften in der Slowakei als „One Company“ den gleichen Weg, den wir bereits in Deutschland erfolgreich eingeschlagen haben.

## Delisting.

**Die Deutsche Telekom hat ihre Börsennotierung an der New Yorker Börse (NYSE) und der Börse in Tokio beendet.** Seit dem 21. Juni 2010 werden die Aktien der Deutschen Telekom AG am US-amerikanischen Freihandelsmarkt (Over-the-Counter, OTC) gehandelt. Zudem hat sich die Deutsche Telekom AG bei der U.S. Securities and Exchange Commission (SEC) deregistriert. Von der Börse in Tokio sind die Aktien der Deutschen Telekom seit dem 15. Juli 2010 delistet.

**OTE und Magyar Telekom ziehen sich von der New Yorker Börse zurück.** OTE ist seit dem 17. September 2010 und Magyar Telekom seit dem 12. November 2010 mit ihren American Depositary Shares (ADS) nicht mehr an der New Yorker Börse (NYSE) notiert. Beide Unternehmen wollen zudem ihre Berichtspflichten gegenüber der U.S. Securities and Exchange Commission (SEC) beenden (Deregistrierung).

## Mitarbeiter.

**Deutsche Telekom führt als erstes DAX-30-Unternehmen Frauenquote für Führungspositionen ein.** Als erstes Dax-30-Unternehmen haben wir im März 2010 eine Frauenquote für mittlere und obere Führungspositionen eingeführt: Bis 2015 sollen konzernweit 30 % der oberen und mittleren Führungspositionen mit Frauen besetzt sein.

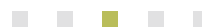

## Investitionen in Netze und neue Spektren.

**Telekom Deutschland GmbH hat erfolgreich an der LTE-Frequenz-versteigerung teilgenommen.** Im Mai 2010 ersteigerte die Telekom Deutschland GmbH für rund 1,3 Mrd. € Spektren in den Frequenzbereichen 0,8 GHz, 1,8 GHz und 2,6 GHz. Damit können wir ländliche Regionen mit Breitbandanschlüssen versorgen und kurzfristig die ersten „Weißen Flecken“ schließen. Im August 2010 haben wir als erster Netzbetreiber eine 4G-Basisstation im brandenburgischen Kyritz in den Live-Betrieb genommen. Im Dezember 2010 startete der Pilotbetrieb mit ausgewählten Kunden in Baden-Württemberg und Brandenburg.

**Glasfaserausbau in Deutschland/Fiber-to-the-home.** Unsere Rolle als Innovationsführer behaupteten wir im vergangenen Jahr auch, was den Breitbandausbau betrifft. Neben einem weiteren Ausbau der Glasfaserverbindungen unserer Netzinfrastruktur im Verbindungsnetz haben wir 2010 in Deutschland begonnen, Glasfasern bis in die Wohnungen unserer Kunden zu verlegen (Fiber-to-the-home, FTTH). Erste Pilotstädte für diesen Ausbau waren hierbei Hennigsdorf und Braunschweig.

**T-Mobile USA bietet das schnellste Netz in den USA an.** T-Mobile USA bietet Mobilfunk-Nutzern durch die HSPA+-Technik nun ein 4G-Erlebnis an – einschließlich der Geschwindigkeiten vergleichbar mit anderen 4G-Netzen, die derzeit den Mobilfunk-Nutzern in den USA angeboten werden. So erreicht T-Mobile USA bis zum Jahresende nun 200 Mio. Menschen mit dieser Technologie.

**3G-/UMTS-Netzausbau in Europa vorangetrieben.** In Österreich, der Tschechischen Republik, Rumänien und Griechenland haben wir den 3G-/UMTS-Netzausbau entscheidend vorangetrieben. So hat beispielsweise T-Mobile Austria das komplette 3G-Netzwerk gemeinsam mit dem Netzwerkausrüster Nokia Siemens Networks ausgetauscht und es auf den neuesten technischen Stand gebracht. In der Tschechischen Republik versorgt T-Mobile nun 39 Städte mit UMTS und testet derzeit die HSPA+-Technologie mit Geschwindigkeiten von bis zu 21 Mbit/s. In Rumänien haben wir bereits in mehreren größeren Städten ein 3G-Netzwerk mit bis zu 21,6 Mbit/s in Betrieb genommen. Die Mobilfunk-Tochter Cosmote in Griechenland kann als erster Anbieter in Griechenland Download-Geschwindigkeiten im mobilen Breitbandmarkt von bis zu 42,2 Mbit/s erzielen.

**T-Mobile Niederlande und T-Mobile Austria erwerben jeweils Lizenzen im 2,6 GHz-Bereich.** T-Mobile Niederlande hat im Rahmen der Versteigerung von Mobilfunk-Frequenzen im 2,6 GHz-Bereich zweiteilige 10 MHz-Bandbreiten für 109 000 € erworben. Die T-Mobile Austria sicherte sich insgesamt 2 x 20 MHz im Rahmen des 2,6 GHz-Bereichs für einen Betrag von 11 Mio. €. Die erworbenen Frequenzen ermöglichen es, die volle Leistungsbandbreite der neuen 4G-Technologie zu nutzen. Mitte Oktober 2010 schaltete T-Mobile Austria 4G live und vernetzte Innsbruck als erste Stadt Österreichs.

**Cosmote Bulgarien (GLOBUL) erwarb zusätzliches Spektrum für das UMTS-Netz.** In Bulgarien haben wir über Cosmote Bulgarien – Teil der OTE-Gruppe – Spektrum zum Ausbau des UMTS-Netzes erworben. Damit bauen wir das 3G-Netz von GLOBUL, der Mobilfunk-Marke von Cosmote Bulgarien, weiter aus. Für den Erwerb des von der bulgarischen Kommunikationsaufsichtsbehörde (CRC) vergebenen Spektrums zahlte GLOBUL ein einmaliges Entgelt in Höhe von 17 Mio. BGN sowie ein zusätzliches Jahresentgelt in Höhe von 1 Mio. BGN – umgerechnet ca. 9 Mio. €.

## Neue Produkte/Vernetztes Leben und Arbeiten.

**DeutschlandLAN.** Für das vernetzte Arbeiten bieten wir ein innovatives Komplettpaket an: eine Lösung mit Breitbandanbindung und netzbasierten Anwendungen für die Sprach- und Datenkommunikation via Festnetz und Mobilfunk. Eine übergreifende Kommunikationszentrale macht das vernetzte Arbeiten im Büro und unterwegs einfach und komfortabel.

**T-Systems zeigt neue Lösungen für die vernetzte Arbeitswelt.** Auf der CeBIT 2010 stellten T-Systems und Continental ein offenes, flexibles und zukunftssicheres Infotainment-Konzept auf Basis des Kommunikationsnetzwerks AutoLinQ vor. Damit können Fahrzeuge über eine Mobilfunk-Verbindung überall und jederzeit im Stil der „Apps“ moderner Handys vernetzt werden.

**HomeNetwork 2.0 in der T-City.** Im Juli 2010 startete das Pilotprojekt HomeNetwork 2.0. Damit können Haushalte unterschiedliche Elektrogeräte vernetzen sowie standortunabhängig und zentral im Blick behalten und steuern.

**LIGA total! Interaktiv.** Zur Fußballbundesliga-Saison 2010/2011 präsentierten wir die persönliche Live-Konferenz. Abonnenten von LIGA total! haben die Wahl zwischen der Standardkonferenz aus allen parallel laufenden Spielen und einer selbst zusammengestellten, persönlichen Konferenz.

**Innovative Endgeräte.** Im Jahr 2010 haben wir mit dem Verkauf des iPhone 4 in Deutschland und in allen Ländern unseres operativen Segments Europa begonnen. Dabei haben wir bei den jeweiligen Tarifen das individuelle Nutzerverhalten und die unterschiedlichen technischen Möglichkeiten des jeweiligen Landes berücksichtigt. Ebenso konnten wir als strategischer Partner von Microsoft seit dem vierten Quartal 2010 zwei exklusive und hochwertige Endgeräte mit dem neuen, innovativen Betriebssystem Windows Phone 7 vertreiben, das HTC 7 Mozart und das Samsung Omnia 7. In den USA bieten wir das neue T-Mobile G2 mit Google-Technik an. Dieses bietet Download-Geschwindigkeiten und Websurfen in 4G-Qualität sowie integrierte Google-Dienste. Mit dem G2 betreten wir Neuland: Es ist das erste Smartphone, das speziell für das HSPA+-Netz von T-Mobile USA entwickelt wurde. Ebenfalls brachte T-Mobile USA seinen ersten mobilen Tablet-PC auf Android-Basis heraus: den Samsung Galaxy Tab.

## Verbindungen der Zukunft/Drahtlose Internetanbindungen.

**Entertain-Neuheiten.** Auf der Internationalen Funkausstellung im September 2010 in Berlin präsentierten wir erstmals 3D-Inhalte, die jeder Entertain-Kunde mit einem passenden Fernseher und entsprechender 3D-Brille jederzeit aus der Online-Videothek abrufen kann. Im Jahr 2010 konnten wir zahlreiche HD-Sender wie z. B. Das Erste HD, ZDF HD, TNT Film HD, SyFy, Sport1+ HD anbieten. Auch das Angebot der Online-Videothek haben wir auf 15 000 Titel und 1 500 HD-Inhalte erweitert.

**De-Mail.** Seit dem 22. Oktober 2010 können zukünftige De-Mail-Nutzer bei uns ihre persönliche Wunschadresse für die sichere und rechtsverbindliche Online-Kommunikation registrieren.

**Breitband-Internetzugänge in Flugzeugen.** Seit dem 30. November 2010 bieten wir neben mehr als 8 000 Zugangspunkten (HotSpots) in ganz Deutschland auch Breitband-Internetzugänge in Flugzeugen der Deutschen Lufthansa an. Unsere Kunden haben nun dank der Kooperation mit der Deutschen Lufthansa auf Interkontinentalflügen unbegrenzten Internetzugang.

## Der Ausbau der Cloud Services und zukunftsweisende Projekte für Großkunden stärken T-Systems.

Immer mehr Energieversorger fragen nicht nur klassische ICT-Dienstleistungen nach, sondern auch Services für das intelligente Stromnetz. Im Jahr 2010 haben wir in diesem Sektor einige neue Verträge über das Auslesen, Übertragen und Aufbereiten von Energiedaten geschlossen.

Dass wir uns auf das Systemgeschäft von Großkunden ausgerichtet haben, hat sich 2010 im In- und Ausland in erfolgreichen Großaufträgen niedergeschlagen. So beziehen **Deutsche Post DHL** und die **DekaBank** von T-Systems für jeweils mindestens fünf Jahre wichtige ICT-Services. Auch der Energieversorger **E.ON** lagert einen Teil der bisher im eigenen Unternehmen erbrachten IT-Services aus. Partner dafür sind T-Systems und Hewlett-Packard. Die Vertragslaufzeit erstreckt sich über maximal sieben, mindestens jedoch fünf Jahre. Das Gesamtvolumen des Auftrags beträgt bis zu 1 Mrd. €.

Erfolgreich war T-Systems auch beim länderübergreifenden Geschäft; das zeigen z. B. Großaufträge im Ausland. So wird T-Systems ein europaweites Telekommunikationsnetz für die Unternehmensstandorte des Touristikkonzerns **TUI Travel** aufbauen. Auch die **Schweizerischen Bundesbahnen (SBB)** setzen – mittlerweile seit mehr als zehn Jahren – weiterhin auf die strategische Partnerschaft mit T-Systems und verlängerten ihre bestehenden Verträge bis 2015.

# Konzernstruktur.

## Zusammenlegung der operativen Segmente Europa und Süd- und Osteuropa

### Geschäftstätigkeit und Organisation.

#### Geschäftstätigkeit.

Wir sind weltweit eines der führenden Dienstleistungsunternehmen in der Telekommunikations- und Informationstechnologiebranche. Unseren Millionen Kunden bieten wir Produkte und Services rund um das vernetzte Leben und Arbeiten an.

Wir richten uns international aus und sind in rund 50 Ländern vertreten. Mehr als die Hälfte des Konzernumsatzes in Höhe von 35,1 Mrd. € erwirtschafteten wir im Geschäftsjahr 2010 außerhalb unseres Heimatmarkts Deutschlands. Insgesamt beschäftigen wir 246 777 Menschen (Dezember 2010).

Wir orientieren uns an den wesentlichen technischen und gesellschaftlichen Trends und prägen diese entscheidend mit: So hält die Digitaltechnik verstärkt Einzug in viele Lebensbereiche. Produkte und Dienste werden immer individueller und personalisierter, die Menschen immer mobiler, und auch die Globalisierung schreitet voran. Die verschiedenen Technologien wachsen immer mehr zusammen. Im Fachjargon heißt das zunehmende Konvergenz. Darum setzen wir auf ein integriertes Produktportfolio,

mit dem Kunden auf persönliche Daten wie Musik, Videos oder auch Adressen von allen Endgeräten aus zugreifen können. Über Festnetz und Mobilfunk bieten wir Netzzugänge, Kommunikations- und Mehrwertdienste mit immer höherer Bandbreite an. So fördern wir mit innovativen Produkten und Dienstleistungen die persönliche und soziale Vernetzung der Menschen. Neben dem Stammgeschäft – dem klassischen Anschlussgeschäft im Festnetz und im Mobilfunk – erschließen wir mit Investitionen in intelligente Netze, mit IT-Services sowie mit Internet- und Netzwerkdiensten gezielt neue Wachstumsfelder.

Von uns erhalten Kunden in Deutschland aus einer Hand für sie maßgeschneiderte Produkte und Services und die beste Netzqualität. Dafür haben wir die bislang eigenständigen Geschäftseinheiten für Festnetz (T-Home) und Mobilfunk (T-Mobile) nun auch rechtlich zusammengelegt. Das „T“ ist konzernweit unsere Unternehmensmarke; sie wird in Zukunft auch für die ausländischen Beteiligungen fester Bestandteil des Markenauftritts sein.

T-Systems, unsere Großkundensparte, konzentriert sich auf das Geschäft mit netzzentrierten ICT-Lösungen – also mit kombinierten Angeboten aus IT- und TK-Diensten. T-Systems bietet global aufgestellten Unternehmen Komplettlösungen an. In den Fokus rücken darüber hinaus Services wie Cloud Computing und IT-Lösungen für Branchen, die sich im Umbruch befinden, wie z. B. Energie, Gesundheit, Mediendistribution und Automobil.

#### Organisation.

#### Organisationsstruktur.

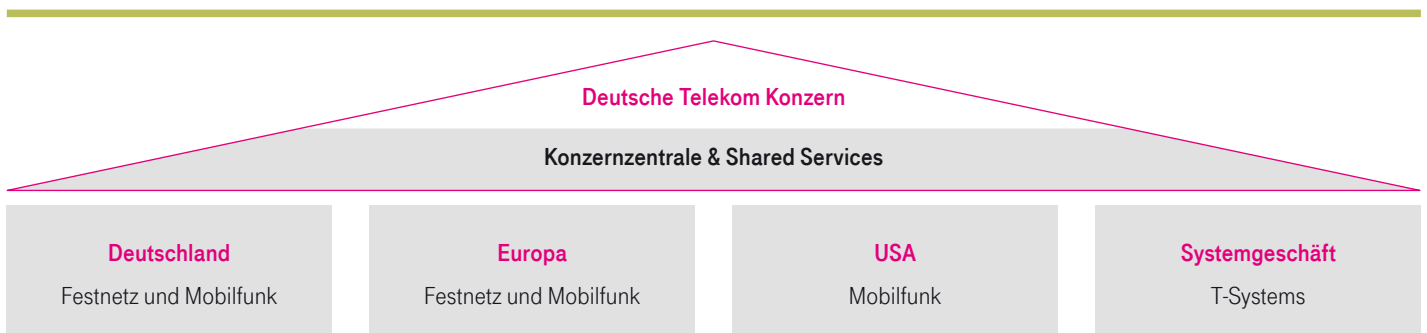

Der Aufsichtsrat hat am 24. Februar 2010 beschlossen, die Führungsstruktur der beiden bisherigen operativen Segmente Süd- und Osteuropa und Europa neu auszurichten: Am 1. April 2010 wurden die beiden operativen Segmente zum neuen operativen Segment Europa zusammengelegt. Somit berichten wir seit dem 1. April 2010 die vier folgenden operativen Segmente:

- Deutschland,
- Europa,
- USA,
- Systemgeschäft.

Das Festnetz-Geschäft umfasst alles rund um die Sprach- und Datenkommunikation durch Festnetz- bzw. Breitbandtechnik. Dazu gehören sowohl der Vertrieb von Endgeräten und sonstiger Hardware als auch der Vertrieb der Dienste an Wiederverkäufer.

Das Mobilfunk-Geschäft bietet Privat- und Geschäftskunden mobile Sprach- und Datendienste an. In Verbindung mit diesen Diensten verkaufen wir Mobilfunk-Geräte und andere Hardware. Darüber hinaus vertreiben wir T-Mobile Dienste auch an Wiederverkäufer sowie an Gesellschaften, die Netzleistungen einkaufen und selbstständig an Dritte vermarkten (Mobile Virtual Network Operator, MVNO).

Bei den vier operativen Segmenten wird die Geschäftstätigkeit wie folgt aufgeteilt: bei drei Segmenten nach Regionen, bei einem Segment nach Kunden und Produkten.

Das operative Segment **Deutschland** umfasst sämtliche Aktivitäten des Festnetz- und Mobilfunk-Geschäfts in Deutschland. Darüber hinaus erbringt das operative Segment Deutschland Telekommunikationsvorleistungen für andere operative Segmente im Konzern.

Das operative Segment **Europa** umfasst sämtliche Aktivitäten aus Festnetz- und Mobilfunk-Geschäft der Landesgesellschaften in Griechenland, Rumänien, Ungarn, Polen, der Tschechischen Republik, Kroatien, den Niederlanden, der Slowakei, Österreich, Bulgarien, Albanien, EJR Mazedonien und Montenegro sowie des Joint Venture in Großbritannien. Ebenso dazu gehört der Bereich International Carrier Sales and Services, der hauptsächlich Telekommunikationsvorleistungen für andere operative Segmente im Konzern erbringt.

Das operative Segment **USA** umfasst sämtliche Mobilfunk-Aktivitäten auf dem US-amerikanischen Markt.

Das operative Segment **Systemgeschäft** bündelt unter der Marke T-Systems das Geschäft für ICT-Produkte und -Lösungen für große multinationale Unternehmen. Das operative Segment bietet seinen Kunden Informations- und Kommunikationstechnik aus einer Hand. Für multinationale Konzerne und öffentliche Institutionen entwickelt und betreibt das operative Segment Infrastruktur- und Branchenlösungen. Das Angebot reicht von Standardprodukten über IP-basierte Hochleistungsnetze bis zur Realisierung kompletter ICT-Lösungen.

Die **Konzernzentrale & Shared Services** umfassen alle Konzerneinheiten, die nicht direkt einem der operativen Segmente zugeordnet sind. Die Konzernzentrale übernimmt die strategischen und segmentübergreifenden Steuerungsaufgaben. Die sog. Shared Services sind für alle sonstigen operativen Aufgaben zuständig, die nicht unmittelbar das Kerngeschäft der operativen Segmente betreffen. Zu den Shared Services zählen unter anderen neben Vivento, die dafür verantwortlich ist, im Rahmen des Personalumbaus Mitarbeitern neue Beschäftigungsmöglichkeiten zu vermitteln, der Bereich „Grundstücke und Gebäude“ und die DeTeFleetServices GmbH als Komplettanbieter von Fuhrparkmanagement und Mobilitätsleistungen. Des Weiteren umfassen die Konzernzentrale & Shared Services auch das Vorstandsressort Technologie und Innovation. Die Shared Services erbringen ihre Leistungen schwerpunktmäßig in Deutschland.

## Rechtliche Konzernstruktur.

Die Deutsche Telekom AG, Bonn, ist das Mutterunternehmen des Deutschen Telekom Konzerns. Ihre Aktien werden neben Frankfurt am Main auch an anderen deutschen Börsen gehandelt.

☞ Hinsichtlich der Angaben des Grundkapitals gemäß § 289 Abs. 4 Nr. 1 HGB wird auf die Anmerkung 15 im Anhang verwiesen.

### Eigenkapital.

**Jede Aktie gewährt eine Stimme.** Eingeschränkt sind diese Stimmrechte jedoch bei den eigenen Anteilen (per 31. Dezember 2010: rund 2 Mio. Stück) und den sog. Trust (Treuhand)-Aktien (per 31. Dezember 2010: rund 19 Mio. Stück). Die Trust-Aktien stehen im Zusammenhang mit dem Erwerb von VoiceStream und Powertel im Jahr 2001. Im Rahmen dieser Akquisition gab die Deutsche Telekom neue Aktien aus genehmigtem Kapital an Treuhänder aus, u. a. zugunsten von Inhabern von Optionsscheinen, Optionen und Umtauschrechten. Was die an Trusts ausgegebenen Aktien betrifft, verzichtet der jeweilige Treuhänder – solange der Trust besteht – auf Stimmrechte und Bezugsrechte sowie grundsätzlich auf Dividendenrechte. Die an die Trusts ausgegebenen Aktien können auf Weisung der Deutschen Telekom über die Börse verkauft werden, wenn die Berechtigten ihre Options-, Umtausch- bzw. Wandlungsrechte nicht ausüben oder diese erlöschen. Der Veräußerungserlös fließt der Deutschen Telekom zu.



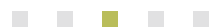

**Rückkauf eigener Aktien.** Mit Beschluss der Hauptversammlung vom 3. Mai 2010 wurde der Vorstand ermächtigt, bis zum 2. November 2011 Aktien der Gesellschaft mit einem auf diese entfallenden Betrag am Grundkapital von insgesamt bis zu 1 116 497 918,20 € mit folgender Maßgabe zu erwerben: Auf die aufgrund dieser Ermächtigung erworbenen Aktien zusammen mit anderen Aktien der Gesellschaft, welche die Gesellschaft bereits erworben hat und noch besitzt oder die ihr gemäß §§ 71 d und 71 e AktG zuzurechnen sind, entfallen zu keinem Zeitpunkt mehr als 10 % des Grundkapitals der Gesellschaft. Ferner sind die Voraussetzungen des § 71 Abs. 2 Sätze 2 und 3 AktG zu beachten. Der Erwerb darf nicht zum Zweck des Handels in eigenen Aktien erfolgen. Die Ermächtigung kann ganz oder in Teilen ausgeübt werden. Der Erwerb kann innerhalb des Ermächtigungszeitraums bis zur Erreichung des maximalen Erwerbsvolumens in Teiltranchen, verteilt auf verschiedene Erwerbszeitpunkte, erfolgen. Der Erwerb kann auch durch von der Deutschen Telekom AG im Sinn von § 17 AktG abhängige Konzernunternehmen oder durch Dritte für Rechnung der Deutschen Telekom AG oder für Rechnung von nach § 17 AktG abhängigen Konzernunternehmen der Deutschen Telekom AG durchgeführt werden. Der Erwerb erfolgt unter Wahrung des Gleichbehandlungsgrundsatzes (§ 53a AktG) über die Börse. Er kann stattdessen auch mittels eines an alle Aktionäre gerichteten öffentlichen Kauf- oder Aktientauschangebots erfolgen, bei dem, vorbehaltlich eines zugelassenen Ausschlusses des Andienungsrechts, der Gleichbehandlungsgrundsatz ebenfalls zu wahren ist.

Der Hauptversammlungsbeschluss vom 3. Mai 2010 hat den Vorstand u. a. auch dazu ermächtigt, Aktien der Deutschen Telekom AG, die aufgrund der vorstehenden Ermächtigung erworben werden, einzuziehen, ohne dass die Einziehung oder ihre Durchführung eines weiteren Hauptversammlungsbeschlusses bedarf. Auf Grundlage dieser Ermächtigung hat der Vorstand am 27. Juli 2010 die Durchführung eines Aktienrückkaufprogramms beschlossen.

Das Rückkaufprogramm wurde am 3. Dezember 2010 abgeschlossen. Insgesamt wurden 40 001 Tsd. Stück Aktien mit einem Gesamterwerbsvolumen von insgesamt 400 Mio. € (ohne Nebenkosten) erworben (durchschnittlicher Kaufpreis pro Aktie: 9,99 €). Am 14. Dezember 2010 hat der Vorstand beschlossen, das Grundkapital der Deutschen Telekom AG entsprechend herabzusetzen und die erworbenen Aktien einzuziehen. Als Folge daraus verringerte sich zum 31. Dezember 2010 das gezeichnete Kapital um 102 Mio. € (rechnerischer Wert pro Aktie: 2,56 €) und die Gewinnrücklagen des Konzerns um 400 Mio. €. Der Kapitalrücklage wurden 102 Mio. € gemäß § 237 Abs. 5 AktG zugeführt.

**Genehmigtes Kapital und bedingtes Kapital.** Der Vorstand ist durch Beschluss der Hauptversammlung vom 30. April 2009 ermächtigt, das Grundkapital in der Zeit bis zum 29. April 2014 mit Zustimmung des Aufsichtsrats um bis zu 2 176 000 000 € durch Ausgabe von bis zu 850 000 000 auf den Namen lautende Stückaktien gegen Sacheinlagen zu erhöhen. Diese Ermächtigung kann vollständig oder ein- oder mehrmals in Teilbeträgen ausgenutzt werden. Der Vorstand ist ermächtigt, mit Zustimmung des Aufsichtsrats das Bezugsrecht der Aktionäre auszu-schließen, um neue Aktien auszugeben im Rahmen von Unternehmenszusammenschlüssen oder im Rahmen des Erwerbs von Unternehmen, Unternehmensteilen oder Beteiligungen an Unternehmen, einschließlich der Erhöhung bestehenden Anteilsbesitzes, oder von anderen mit einem solchen Akquisitionsvorhaben im Zusammenhang stehenden einlagefähigen Wirtschaftsgütern, einschließlich Forderungen gegen die Gesellschaft. Der Vorstand ist darüber hinaus ermächtigt, mit Zustimmung des Aufsichtsrats den weiteren Inhalt der Aktienrechte und die Bedingungen der Aktienaussgabe festzulegen (**Genehmigtes Kapital 2009/I**).

Der Vorstand ist durch Beschluss der Hauptversammlung vom 30. April 2009 darüber hinaus ermächtigt, das Grundkapital in der Zeit bis zum 29. April 2014 mit Zustimmung des Aufsichtsrats um bis zu 38 400 000 € durch Ausgabe von bis zu 15 000 000 auf den Namen lautende Stückaktien gegen Bar- und/oder Sacheinlagen zu erhöhen. Die Ermächtigung kann vollständig oder ein- oder mehrmals in Teilbeträgen ausgenutzt werden. Das Bezugsrecht der Aktionäre ist ausgeschlossen. Die neuen Aktien dürfen nur zur Gewährung von Aktien an Mitarbeiter der Deutschen Telekom AG und der nachgeordneten verbundenen Unternehmen ausgegeben werden (Belegschaftsaktien). Die neuen Aktien können dabei auch an ein Kreditinstitut oder ein anderes die Voraussetzungen des § 186 Abs. 5 Satz 1 AktG erfüllendes Unternehmen ausgegeben werden, das die Aktien mit der Verpflichtung übernimmt, sie ausschließlich zur Gewährung von Belegschaftsaktien zu verwenden. Soweit gesetzlich zulässig, können die Belegschaftsaktien auch in der Weise ausgegeben werden, dass die auf sie zu leistende Einlage aus dem Teil des Jahresüberschusses gedeckt wird, den Vorstand und Aufsichtsrat nach § 58 Abs. 2 AktG in andere Gewinnrücklagen einstellen können. Die als Belegschaftsaktien auszugebenden Aktien können auch im Wege von Wertpapierdarlehen von einem Kreditinstitut oder einem anderen die Voraussetzungen des § 186 Abs. 5 Satz 1 AktG erfüllenden Unternehmen beschafft und die neuen Aktien zur Rückführung dieser Wertpapierdarlehen verwendet werden. Der Vorstand ist ermächtigt, mit Zustimmung des Aufsichtsrats den weiteren Inhalt der Aktienrechte und die Bedingungen der Aktienaussgabe festzulegen (**Genehmigtes Kapital 2009/II**).

Das Grundkapital ist zum 31. Dezember 2010 um bis zu 31 813 089,28 € bedingt erhöht – eingeteilt in bis zu 12 426 988 neue auf den Namen lautende Stückaktien (**Bedingtes Kapital II**). Die bedingte Kapitalerhöhung dient ausschließlich der Erfüllung von Bezugsrechten auf Aktien aus Aktienoptionen, die aufgrund des Ermächtigungsbeschlusses für einen Aktienoptionsplan 2001 der Hauptversammlung vom 29. Mai 2001 in der Zeit bis zum 31. Dezember 2003 an Mitglieder des Vorstands der Gesellschaft, an Führungskräfte der Ebenen unterhalb des Vorstands der Gesellschaft sowie an weitere Führungskräfte, Leiter und Spezialisten der Gesellschaft und an Vorstände, Mitglieder der Geschäftsführung und weitere Führungskräfte, Leiter und Spezialisten von nachgeordneten Konzernunternehmen im In- und Ausland begeben wurden. Sie wird nur insoweit durchgeführt, wie die Inhaber der Bezugsrechte von ihren Bezugsrechten Gebrauch machen.

Das Grundkapital ist zum 31. Dezember 2010 um 1 100 000 000 € bedingt erhöht – eingeteilt in bis zu 429 687 500 auf den Namen lautende Stückaktien (**Bedingtes Kapital 2010**). Die bedingte Kapitalerhöhung wird nur insoweit durchgeführt, wie

- a) die Inhaber bzw. Gläubiger von Optionsschuldverschreibungen, Wandelschuldverschreibungen, Genussrechten und/oder Gewinnschuldverschreibungen (bzw. Kombinationen dieser Instrumente) mit Options- oder Wandlungsrechten, die von der Deutschen Telekom AG oder deren unmittelbaren oder mittelbaren Mehrheitsbeteiligungsgesellschaften aufgrund des Ermächtigungsbeschlusses der ordentlichen Hauptversammlung vom 3. Mai 2010 bis zum 2. Mai 2015 ausgegeben bzw. garantiert werden, von ihren Options- bzw. Wandlungsrechten Gebrauch machen oder
- b) die aus von der Deutschen Telekom AG oder deren unmittelbaren oder mittelbaren Mehrheitsbeteiligungsgesellschaften aufgrund des Ermächtigungsbeschlusses der ordentlichen Hauptversammlung vom 3. Mai 2010 bis zum 2. Mai 2015 ausgegebenen oder garantierten Optionsschuldverschreibungen, Wandelschuldverschreibungen, Genussrechten und/oder Gewinnschuldverschreibungen (bzw. Kombinationen dieser Instrumente) Verpflichteten ihre Options- bzw. Wandlungspflicht erfüllen

und nicht andere Erfüllungsformen eingesetzt werden. Die neuen Aktien nehmen vom Beginn des Geschäftsjahres an, in dem sie durch Ausübung von Options- oder Wandlungsrechten oder durch Erfüllung von Options- bzw. Wandlungspflichten entstehen, am Gewinn teil. Der Aufsichtsrat ist ermächtigt, § 5 Abs. 5 der Satzung entsprechend der jeweiligen Inanspruchnahme des bedingten Kapitals und nach Ablauf sämtlicher Options- bzw. Wandlungsfristen zu ändern.

#### **Wesentliche Vereinbarungen unter der Bedingung eines Kontrollwechsels (Change of Control).**

Die wesentlichen Vereinbarungen der Deutschen Telekom AG, die eine **Klausel für den Fall einer Übernahme (Change of Control)** der Deutschen Telekom AG enthalten, betreffen hauptsächlich bilaterale Kreditfazilitäten sowie mehrere Darlehensverträge. Im Übernahmefall haben die jeweiligen Kreditgeber das Recht, die Fazilität zu kündigen und ggf. fällig zu stellen bzw. die Rückzahlung der Darlehen zu verlangen. Dabei wird eine Übernahme angenommen, wenn ein Dritter die Kontrolle über die Deutsche Telekom AG erlangt; dies kann auch eine gemeinschaftlich handelnde Gruppe sein.

Ferner haben die anderen Konsortialpartner von Toll Collect (Daimler Financial Services AG und Cofiroute SA) eine Call Option für den Fall, dass ein Wechsel in der Eigentümerstruktur der Deutschen Telekom AG dadurch eintritt, dass mehr als 50 % des Aktienkapitals oder der Stimmrechte von einem neuen Gesellschafter gehalten werden, die er zuvor nicht besaß, und die anderen Konsortialpartner diesem Wechsel nicht zugestimmt haben. Bei der Zurechnung von Stimmrechten gilt § 22 Abs. 1 WpHG analog.

Sollte die Deutsche Telekom AG von einem Unternehmen übernommen werden, das kein Telekommunikationsunternehmen aus der Europäischen Union oder den USA mit ähnlicher Größe und vergleichbarem Standing wie die Deutsche Telekom AG ist, kann der griechische Staat alle Anteile der Deutschen Telekom AG an der griechischen Hellenic Telecommunications Organization S.A., Athen, Griechenland (OTE) von der Deutschen Telekom AG erwerben. Eine Übernahme in diesem Sinne liegt vor, wenn eine oder mehrere Personen – mit Ausnahme der Bundesrepublik Deutschland – direkt oder indirekt 35 % der Stimmrechte an der Deutschen Telekom AG erwerben.

Im Rahmen der Gründung des Joint Venture Everything Everywhere in Großbritannien haben die Deutsche Telekom AG und France Télécom S.A. im Joint Venture Agreement vereinbart, dass die France Télécom für den Fall, dass die Deutsche Telekom unter den beherrschenden Einfluss eines Dritten gelangt, für die Dauer eines Jahres von sämtlichen den Gesellschaftern im Hinblick auf eine Übertragung ihrer Anteile auferlegten Restriktionen befreit ist. Eine Übertragung von Anteilen an Wettbewerber ist aber auch in diesem Fall untersagt.



## Konsolidierungskreisveränderungen.

Die wesentlichen Tochterunternehmen der Deutschen Telekom AG werden im Konzern-Anhang im Abschnitt „Grundlagen und Methoden“ unter „**Wesentliche Tochterunternehmen**“ aufgeführt. Im Konzernabschluss der Deutschen Telekom werden neben der Deutschen Telekom AG 64 inländische und 177 ausländische Tochterunternehmen vollkonsolidiert (31. Dezember 2009: 62 und 182). Zusätzlich werden 13 assoziierte Unternehmen (31. Dezember 2009: 12) und 5 Gemeinschaftsunternehmen (31. Dezember 2009: 5) nach der Equity-Methode einbezogen.

Im Folgenden werden Unternehmenszusammenschlüsse und sonstige Unternehmenstransaktionen im Geschäftsjahr 2010 erläutert:

**Erwerb der STRATO.** Die Deutsche Telekom unterzeichnete am 19. November 2009 einen Vertrag mit der Freenet AG zur Übernahme von 100 % der Anteile an dem Webhosting-Anbieter STRATO AG und der STRATO Rechenzentrum AG (im Folgenden: STRATO). Am 1. Januar 2010 hat die Deutsche Telekom die Beherrschung über die STRATO erlangt. In Deutschland und Europa ist die STRATO-Gruppe der zweitgrößte Webhosting-Anbieter. Neben dem Hauptmarkt Deutschland ist sie auch in den Ländern Spanien, Niederlande, Frankreich, Großbritannien und Italien tätig.

**Anteilserwerb Firstgate (ClickandBuy).** Die Deutsche Telekom hat am 23. März 2010 einen Vertrag mit den ehemaligen Anteilseignern zum Erwerb der ausstehenden Anteile an dem Internetzahlungsanbieter Firstgate unterzeichnet. Das Datum des Kontrollübergangs und damit der Zeitpunkt der erstmaligen Vollkonsolidierung war der 1. April 2010. Bereits seit 2006 war die Deutsche Telekom über ihr Venture Capital Unternehmen T-Venture an der durch die Marke ClickandBuy bekannten Firstgate mit 20,2 % beteiligt.

**Joint Venture Everything Everywhere in Großbritannien.** Die Deutsche Telekom AG und France Télécom S.A. haben mit Wirkung zum 1. April 2010 die Gesellschaften T-Mobile UK und Orange UK in ein Joint Venture mit dem Namen Everything Everywhere zusammengelegt. Beide Gesellschaften halten einen 50-prozentigen Anteil an der neuen Gesellschaft. Die Deutsche Telekom hat die T-Mobile UK in das neue Joint Venture eingebracht. Als Folge daraus wird das Joint Venture nun als Beteiligung an at equity bilanzierten Unternehmen in den Konzernabschluss einbezogen.

## Leitung und Kontrolle.

Die Führungs- und Kontrollstrukturen sowie das Vergütungssystem für Vorstand und Aufsichtsrat orientieren sich am langfristigen Erfolg des Konzerns und folgen insbesondere den Empfehlungen des Deutschen Corporate Governance Kodex.

Die Geschäftsverteilung des Vorstands sieht acht Vorstandsbereiche vor. Fünf davon sind die zentralen Führungsbereiche:

- Vorstandsvorsitzender

und die Vorstandsressorts

- Finanzen,
- Personal,
- Datenschutz, Recht und Compliance,
- Technologie und Innovation.

Zudem gibt es drei weitere segmentbezogene Vorstandsbereiche:

- Deutschland,
- Europa,
- T-Systems.

**Veränderungen im Vorstand.** Am 17. Dezember 2009 hat der Aufsichtsrat dem Wunsch von Hamid Akhavan entsprochen, sein Vorstandsmandat mit Wirkung zum 15. Februar 2010 niederzulegen. Der Aufsichtsrat der Deutschen Telekom hat am 29. Januar 2010 dem Vorschlag des Vorstands zugestimmt, die Zuständigkeiten für die bisherigen Aufgabenbereiche von Hamid Akhavan zunächst kommissarisch zu regeln. Dazu haben die Vorstandsmitglieder Guido Kerkhoff und Reinhard Clemens kommissarisch die Aufgaben von Hamid Akhavan übernommen. Guido Kerkhoff war seit dem 15. Februar 2010 kommissarisch für das operative Segment Europa (Großbritannien, die Niederlande, Österreich, Polen und Tschechische Republik) sowie International Sales und Service zuständig. Reinhard Clemens übernahm ab diesem Zeitpunkt konzernübergreifend die Führung der restlichen Bereiche des Chief Operating Office (COO) wie Produkte & Innovation, Technik, IT und Einkauf – dies ebenfalls kommissarisch.

Der Aufsichtsrat der Deutschen Telekom hat am 24. Februar 2010 dem Vorschlag des Vorstands zugestimmt, den Zuständigkeitsbereich von Guido Kerkhoff dauerhaft zu erweitern. Guido Kerkhoff verantwortet seit dem 1. April 2010 neben dem operativen Segment Süd- und Osteuropa das operative Segment Europa. Das bisherige Vorstandsressort Chief Operating Office (COO) wurde entsprechend verändert. Seit dem 1. April 2010 sind diese beiden operativen Segmente zusammengeführt und werden unter dem Namen operatives Segment Europa fortgeführt.

In der Aufsichtsratssitzung am 2. Mai 2010 hat der Aufsichtsrat Edward R. Kozel mit Wirkung zum 3. Mai 2010 zum neuen Vorstand der Deutschen Telekom bestellt. Edward R. Kozel übernimmt als Vorstand Technologie und Innovation/Chief Technology and Innovation Officer (CTIO) und verantwortet damit die Bereiche Technik, IT, Einkauf sowie Produkte & Innovation für das Standardgeschäft (Privat- und Geschäftskunden).

Der Aufsichtsrat der Deutschen Telekom überwacht die Geschäftsführung des Vorstands und berät ihn. Er setzt sich aus 20 Mitgliedern zusammen, von denen 10 die Aktionäre und 10 die Arbeitnehmer vertreten.

Die Bestellung und Abberufung von Mitgliedern des Vorstands erfolgt auf Grundlage der §§ 84, 85 AktG, § 31 MitbestG. Änderungen der Satzung richten sich nach den §§ 179, 133 AktG und § 18 der Satzung. Dabei ist der Aufsichtsrat gemäß § 21 der Satzung ermächtigt, die Satzung ohne Beschluss der Hauptversammlung an neue gesetzliche Vorschriften anzupassen, die für die Gesellschaft verbindlich werden, und Änderungen der Satzung zu beschließen, die nur die Fassung betreffen.

#### Zusammensetzung des Vorstands zum 31. Dezember 2010.

| Mitglieder des Vorstands | Ressort                           |
|--------------------------|-----------------------------------|
| René Obermann            | Vorstandsvorsitzender (CEO)/USA   |
| Dr. Manfred Balz         | Datenschutz, Recht und Compliance |
| Reinhard Clemens         | T-Systems                         |
| Niek Jan van Damme       | Deutschland                       |
| Timotheus Höttges        | Finanzen (CFO)                    |
| Guido Kerkhoff           | Europa                            |
| Edward R. Kozel          | Technologie und Innovation        |
| Thomas Sattelberger      | Personal                          |

**Grundlagen der Vorstandsvergütung.** Der Aufsichtsrat hat am 24. Februar 2010 ein neues System zur Vergütung der Vorstandsmitglieder beschlossen. Umgesetzt wurden dabei die seit dem 5. August 2009 geltenden Regelungen des Gesetzes zur Angemessenheit der Vorstandsvergütung (VorstAG). Die Hauptversammlung der Deutschen Telekom AG vom 3. Mai 2010 billigte dieses neue System. Dienstverträge der Vorstände, die bereits vor Inkrafttreten des VorstAG bestanden haben, unterliegen gemäß den Gesetzesbegründungsmaterialien (Drucksache 16/13433) einem Bestandsschutz. Dennoch besteht für diese Vorstandsmitglieder die Möglichkeit, freiwillig in das neue Vergütungssystem zu wechseln. ■ Für weitere Details zur Vorstandsvergütung und den Angaben nach § 314 Handelsgesetzbuch, dem Deutschen Rechnungslegungsstandard Nr. 17 (DRS 17) sowie die Angaben nach dem Deutschen Corporate Governance Kodex verweisen wir auf die Angabe 39 im Konzern-Anhang.

Die Vergütung der Vorstandsmitglieder setzt sich aus verschiedenen Bestandteilen zusammen. Die Mitglieder des Vorstands haben auf Basis der mit ihnen geschlossenen Dienstverträge einen Anspruch auf: eine jährliche feste Vergütung, eine jährliche variable Erfolgsvergütung, eine langfristig ausgelegte variable Vergütungskomponente sowie Anspruch auf Nebenleistungen und auf Anwartschaften aus einer betrieblichen Pensionszusage. Der Aufsichtsrat legt die Struktur des Vergütungssystems für den Vorstand fest. Diese Struktur und die Angemessenheit der Vergütung überprüft er regelmäßig.

Die feste Vergütung ist bei allen Vorstandsmitgliedern gemäß den aktienrechtlichen Anforderungen unter Beachtung der marktüblichen Vergütungen festgelegt. Es ist sichergestellt, dass die Vorstandsvergütung auf eine nachhaltige Unternehmensentwicklung ausgerichtet ist und im Neusystem die variablen Vergütungsbestandteile eine Bemessungsgrundlage über mehrere Jahre haben.

Der Aufsichtsrat kann zudem nach seinem pflichtgemäßen Ermessen außerordentliche Leistungen einzelner oder aller Vorstandsmitglieder in Form einer besonderen Erfolgstantieme vergüten.

In markt- und konzernüblicher Weise gewährt die Gesellschaft allen Mitgliedern des Vorstands aus ihren Vorstandsverträgen weitere Leistungen, die zum Teil als geldwerte Vorteile angesehen und entsprechend versteuert werden; so vor allem die Überlassung eines Geschäftsfahrzeugs sowie die Gewährung von Unfallversicherungs- und Haftpflichtschutz und Leistungen im Rahmen einer doppelten Haushaltsführung.

Nebentätigkeiten sind grundsätzlich genehmigungspflichtig. Die Übernahme von Management- und Aufsichtsratsfunktionen in Konzerngesellschaften erfolgt grundsätzlich unentgeltlich.

# Konzernstrategie und Konzernsteuerung.

Neue Konzernstrategie // Fünf Wachstumsfelder // 3-jährige Finanzstrategie bis 2012

## Konzernstrategie.

**Verbessern – Verändern – Erneuern. Seit März 2010 setzen wir unsere neue Strategie erfolgreich um.** Ständiger, dynamischer Wandel und globale Trends prägen das Bild der Telekommunikationsbranche. Das betrifft alle relevanten Bereiche: das Festnetz, den Mobilfunk und das Internet.

Auch in Zukunft bleibt die Infrastruktur die Basis unseres Geschäfts. Wir gehen davon aus, dass die Gigabit-Gesellschaft nach immer schnelleren Netzen verlangt. Zwei Punkte sind hier entscheidend, um effizient und erfolgreich zu sein: die Netze der nächsten Generation und standardisierte IT. Daneben wird es für Telekommunikationsanbieter künftig auch verstärkt darum gehen, Wachstumspotenziale zu realisieren. Erhebliche Wachstumschancen sehen wir z. B. beim mobilen Internet und bei Internetangeboten. Was erwarten die Kunden? Einen sicheren und universellen Zugang zu allen Diensten – und das mit allen Endgeräten. Bei den Geschäftskunden bieten unserer Meinung nach Cloud Computing und Dynamic Computing großes Wachstumspotenzial. Zudem werden in Zukunft Intelligente Netze die anstehenden Veränderungen in Branchen wie Energie, Gesundheit, Medien und Verkehr/Automobil unterstützen. Grundsätzlich sind wir nach wie vor davon überzeugt, dass eine starke nationale Wettbewerbsposition wichtig für ein profitables Geschäft ist.

Nachdem wir unsere bisherige Strategie „Konzentrieren und gezielt wachsen“ in den Jahren 2007 bis 2009 erfolgreich umgesetzt haben, entwickelten wir mit der im März 2010 vorgestellten neuen Strategie „Verbessern – Verändern – Erneuern“ unsere strategische Ausrichtung weiter. Wir richten uns gezielt auf die Herausforderungen und Chancen im Markt aus und sichern so langfristig unsere erfolgreiche Position. Unsere Vision ist es weiterhin, ein internationaler Marktführer für vernetztes Leben und Arbeiten zu werden. Darum bauen wir in den kommenden Jahren unser Geschäftsmodell konsequent um – mit Investitionen in Intelligente Netze, mit IT-Services sowie Internet- und Netzwerkdiensten. Mit dieser Strategie positionieren wir uns entlang der gesamten Wertschöpfungskette und treten als ein offener Partner sowohl für Privat- und Geschäftskunden als auch für die Internetbranche auf.

Wir haben fünf neue strategische Handlungsfelder definiert:

- Verbessern der Performance im Mobilfunk.
- Vorsprung auf integrierten Märkten.
- Netze und Prozesse für die Gigabit-Gesellschaft.
- Vernetztes Leben vom Handy bis zum Fernseher.
- Vernetztes Arbeiten mit führenden ICT-Lösungen.

In diesen Handlungsfeldern setzen wir die neue Strategie konsequent um und konnten bereits in allen Feldern erste Erfolge erzielen.

### Verbessern der Performance im Mobilfunk.

In allen Ländern, in denen wir überwiegend Mobilfunk-Dienste anbieten, wollen wir noch leistungsfähiger werden und gezielt in Technologien der nächsten Generation investieren, innovative Dienste entwickeln und unser Portfolio an Mobilfunk-Geräten erweitern.

So ist in Großbritannien das neu gegründete Joint Venture Everything Everywhere erfolgreich als Marktführer gestartet und zwar gemessen an der gemeinsamen Kundenbasis. In den USA haben wir eine neue strategische Ausrichtung festgelegt, um unsere Wettbewerbsposition weiter zu verbessern. Im Jahr 2010 steigerten wir dort dank unseres 3G-/4G-Netzes den durchschnittlichen Datenumsatz je Kunde in einer Größenordnung von mehr als 20 %. Darüber hinaus erreichten wir auch in den anderen auf Mobilfunk fokussierten Märkten eine bessere Position, so z. B. in den Niederlanden und Polen, wo wir unsere Datenumsätze ebenfalls deutlich erhöhten.

### Vorsprung auf integrierten Märkten.

Den Weg der Integration von Festnetz und Mobilfunk, den wir im Rahmen des Projekts „One Company“ eingeschlagen haben, setzen wir auch mit der neuen Strategie planmäßig fort. Durch die in diesem Jahr erfolgreich abgeschlossene Integration in Deutschland und in einigen europäischen Märkten (z. B. in Kroatien und der Slowakei) können wir zusätzliche Umsätze erzielen, den Service weiter verbessern und Synergien erzeugen. Zudem haben wir unsere Europaaktivitäten organisatorisch neu aufgestellt. Mit gutem Ergebnis: Die EBITDA-Margen liegen in den integrierten Märkten weiterhin auf hohem Niveau – und das, obwohl die gesamtwirtschaftliche Situation in einigen Ländern schwierig war.

Mit neuen, innovativen Diensten und Tarifen können wir uns besser gegenüber den Wettbewerbern differenzieren. Beispielsweise haben unsere Kunden bereits heute über das Mediacenter jederzeit Zugriff auf ihre Musik, ihre Bilder und andere Medieninhalte – egal, ob am PC, am Fernseher oder dem Smartphone. LIGA total!, das Fußballangebot der Deutschen Telekom in Deutschland, ist ebenfalls auf verschiedenen Bildschirmen zuhause und unterwegs zu empfangen.

#### Netze und Prozesse für die Gigabit-Gesellschaft.

Beim globalen Datenverkehr erwarten wir in den nächsten Jahren einen rasanten Anstieg. Unser Ziel ist es deshalb, das operative Geschäft weiter zu transformieren, indem wir einerseits effizienter werden und andererseits für die nachgefragte, größere Bandbreite sorgen. Daher richten wir unseren Fokus darauf:

- die Glasfasernetze auszubauen und die Mobilfunknetze mit HSPA+ und LTE weiterzuentwickeln,
- das All-IP-Konzept konsequent umzusetzen,
- die IT-Fabrik schneller und flexibler zu machen,
- führende Enabling-Kompetenzen kontinuierlich auszubauen.

Um diese Ziele zu erreichen, haben wir bereits erste Schritte unternommen. Wir haben zusätzliche Mobilfunk-Frequenzen u. a. in Deutschland, den Niederlanden und Österreich erworben. Beim Netzausbau konnten wir weitere Fortschritte erzielen und haben in Deutschland im Jahr 2010 mehr als 3 000 zusätzliche UMTS-Standorte in Betrieb genommen. Außerdem haben wir damit begonnen, das LTE-Netz in mehreren Ländern auszubauen. In den USA bieten wir mit dem schnellen Übertragungsstandard HSPA+ jetzt das größte 4G-Netz in Amerika, das aktuell in 100 Großstädten verfügbar ist und mit dem wir eine Abdeckung von 200 Mio. Einwohnern erreichen.

Auf der Festnetz-Seite bauen wir unsere Netze ebenfalls weiter aus. Unsere Milliardeninvestitionen sorgen für eine immer größere Abdeckung der Haushalte mit schnellen Breitbandanschlüssen. In Zahlen ausgedrückt: Als Marktführer in Deutschland haben wir rund 12 Mio. Breitbandanschlüsse im Bestand, daneben haben sich 342 Tsd. Kunden für einen VDSL-Anschluss der Deutschen Telekom entschieden.

#### Vernetztes Leben vom Handy bis zum Fernseher.

Ein strategisches Ziel ist es, innovative, geräteübergreifende und konvergente Dienste bereitzustellen. Die größten Wachstumschancen sehen wir bei der Mobilisierung von Datendiensten, insbesondere bei dem mobilen Internet. Im Bereich Vernetztes Leben entwickeln und vermarkten wir eigenständig zentrale Angebote, so z. B. innovative Kommunikationslösungen rund um das persönliche netzbasierte Adressbuch, welches wir bereits in fünf Ländern erfolgreich auf den Markt gebracht haben (z. B. unser Produkt myPhonebook in Deutschland). Natürlich legen wir auch viel Wert darauf, unsere Kunden mit attraktiven Endgeräten auszustatten. Mit dem Vertrieb von Smartphones haben wir in Deutschland und den USA erste Erfolge erzielt: In Deutschland sind in etwa 50 % aller verkauften Endgeräte Smartphones; in den USA besitzen nun mehr als 8 Mio. unserer Kunden ein Smartphone für das dortige 3G-/4G-Netz – mehr als eine Verdopplung gegenüber dem Vorjahr.

Darüber hinaus positioniert sich die Deutsche Telekom als Wegweiser für digitale Inhalte, indem wir Medieninhalte gezielt und personalisiert verknüpfen und verteilen. Mit gezielten Zukäufen (z. B. ClickandBuy und STRATO) haben wir unser Portfolio im wachstumsstarken Internetgeschäft ergänzt. Weiterer Baustein unseres Erfolgs ist unsere starke Position im europäischen TV-Geschäft. In Deutschland haben wir seit Markteinführung bereits 1,6 Mio. Entertain-Pakete vermarktet und unsere TV-Kundenzahl in den süd- und osteuropäischen Märkten auf 2,3 Mio. gesteigert (+ 23 % gegenüber 2009).

#### Vernetztes Arbeiten mit führenden ICT-Lösungen.

Die Deutsche Telekom bietet Geschäftskunden maßgeschneiderte Lösungen im Bereich Informations- und Kommunikationstechnologie und nutzt T-Systems bei der fortschreitenden Standardisierung interner IT-Lösungen. Dazu wird T-Systems weiter umgebaut und ihre Profitabilität auf Branchenniveau gehoben. T-Systems konnte den externen Umsatz mit IT-Services im Jahr 2010 erfolgreich steigern und dabei verstärkt auf internationalen Märkten hinzugewinnen.

Wir haben intelligente und innovative Angebote rund um sichere Cloud Dienste geschaffen, die unsere Geschäftskunden gerne in Anspruch nehmen. T-Systems positionieren wir als offenen Partner, eben auch für andere Branchen; so möchten wir Wachstumsmöglichkeiten bei ICT-Lösungen in Branchen nutzen, die sich im Umbruch befinden. Innerhalb dieser Initiative haben wir vier neue Geschäftsfelder geschaffen, um Intelligente Netzlösungen zu entwickeln: Energie, Gesundheit, Mediendistribution und Vernetztes Automobil. Auch hier konnten wir schon erste Erfolge verbuchen. So wurde z. B. auf der CeBIT 2010 mit Continental vereinbart, gemeinsam ein offenes, flexibles und zukunftssicheres Infotainment-Konzept für vernetzte Fahrzeuge zu entwickeln. Ein weiterer Erfolg ist die Kooperation mit ABB zur Entwicklung intelligenter Stromnetze der Zukunft.



## Wachstumsfelder der Deutschen Telekom.

Die erzielten Erfolge in den strategischen Handlungsfeldern wirken direkt und positiv auf die wesentlichen Wachstumsfelder der Deutschen Telekom.

Unser größtes Wachstumsfeld ist das **Mobile Internet**. Hierunter fallen alle Umsätze, die wir mit mobilen Datendiensten erzielen. Unser Ziel: in diesem Bereich bis zum Jahr 2015 einen Umsatz von rund 10 Mrd. € zu erreichen. Dazu haben wir in unseren Ländergesellschaften entsprechende Initiativen gestartet.

Ein weiteres für uns sehr wichtiges Wachstumsfeld ist das **Vernetzte Zuhause**. Hier bündeln wir alle Umsätze, die wir mit unseren bereits bestehenden Double- und Triple-Play-Angeboten – also unseren Festnetz-basierten Sprach-, Daten- und TV-Diensten – erzielen. Auch unsere künftigen innovativen Produkte für das Vernetzte Zuhause, wie z. B. der Home Gateway oder auch die Personal Communication Suite, zählen zu diesem Bereich. Unser Ziel hier: bis 2015 rund 7 Mrd. € Umsatz.

Unser gesamtes **Internetangebot** fassen wir ebenfalls in einem Wachstumsfeld zusammen, das hauptsächlich aus drei Blöcken besteht: Online-Werbung (z. B. auf den Internetseiten der Scout Gruppe, auf den Mobiltelefonen, auf unseren Fernsehangeboten), den digitalen Inhalten unserer Load Familie (Musik, Video, Spiele und Software) sowie den sog. „Near Access Services“ – hierzu gehören z. B. das Bereitstellen von Webseiten und der Verkauf von Sicherheitssoftware. Unser Ziel ist es, den Umsatz mit den Internetangeboten bis 2015 auf 2 bis 3 Mrd. € zu steigern.

In einem weiteren Wachstumsfeld messen wir alle **extern erzielten Umsätze der T-Systems**; hierzu gehören entsprechend der neuen Strategie insbesondere auch Geschäfte mit innovativen Cloud Services. Für 2015 haben wir uns das Ziel gesteckt, insgesamt rund 8 Mrd. € Umsatz durch die T-Systems mit externen Kunden zu erwirtschaften.

Das Wachstumsfeld **Intelligente Netzlösungen** umfasst das neue Geschäft in Branchen, die sich im Umbruch befinden, wie Energie, Gesundheit, Medien und Verkehr/Automobil. Hier haben wir uns bis 2015 etwa 1 Mrd. € Umsatz als Ziel gesetzt. Um dies zu schaffen, haben wir in diesem Jahr vier neue Geschäftsbereiche gegründet, die innovative Lösungen entwickeln und vermarkten.

## Wachstumsfelder der Deutschen Telekom.

|                                                                                           | Ambitionsniveau 2015<br>Umsatz in Mrd. € |
|-------------------------------------------------------------------------------------------|------------------------------------------|
| Mobile Internet                                                                           | ≈ 10                                     |
| Vernetztes Zuhause                                                                        | ≈ 7                                      |
| Internetangebot                                                                           | 2 bis 3                                  |
| T-Systems (externer Umsatz)                                                               | ≈ 8                                      |
| Intelligente Netzlösungen (Energie, Gesundheit, Mediendistribution, Vernetztes Automobil) | ≈ 1                                      |

Insgesamt wollen wir die Umsätze in den Wachstumsfeldern bis zum Jahr 2015 nahezu verdoppeln – von 15 Mrd. € im Jahr 2009 auf dann etwa 29 Mrd. €. Dazu werden wir auch im Jahr 2011 alle fünf Handlungsfelder der Strategie konsequent umsetzen.

## Konzernsteuerung.

Eine nachhaltige Konzernsteuerung erfordert die Berücksichtigung der Erwartungen der **vier Stakeholdergruppen** der Deutschen Telekom (Aktionäre, Fremdkapitalgeber, Mitarbeiter und die sog. „Unternehmer im Unternehmen“) an den Konzern:

- Die **Aktionäre** erwarten eine angemessene und verlässliche Verzinsung auf das eingesetzte Kapital.
- Die **Fremdkapitalgeber** und Banken erwarten eine angemessene Verzinsung und die Fähigkeit der Schuldenrückzahlung.
- Die **Mitarbeiter** erwarten nachhaltige und sichere Arbeitsplätze mit Perspektiven sowie eine sozialverträgliche Gestaltung des notwendigen Personalumbaus.
- Die **„Unternehmer im Unternehmen“** erwarten ausreichend Investitionsmittel, um das zukünftige Geschäft zu gestalten und Produkte, Innovationen und Services für die Kunden zu entwickeln.

Die Konzernsteuerung zielt darauf ab, einen Ausgleich der unterschiedlichen Erwartungen und Interessen dieser Stakeholder sicherzustellen, damit ausreichend Mittel für Investitionen, einen sozialverträglichen Personalumbau, den Schuldenabbau und eine attraktive Dividendenpolitik zur Verfügung stehen.

Die **Kapitalrendite (ROCE)** ist für uns der wesentliche Maßstab für die Ausrichtung aller operativen Maßnahmen auf die Steigerung des Konzernwerts. Unseres Erachtens spiegelt die Kapitalrendite die Erwartungen der oben beschriebenen Stakeholdergruppen am besten wider. Sie gibt an, welches Ergebnis ein Unternehmen im Verhältnis zum dafür eingesetzten Vermögen erwirtschaftet. Um die Kapitalrendite zu ermitteln, wird das operative Ergebnis nach Abschreibungen und kalkulatorischer Steuern (entspricht dem Net Operating Profit After Taxes; NOPAT) ins Verhältnis zum dafür notwendigen durchschnittlich im Jahresverlauf gebundenen Vermögen (dies entspricht den Net Operating Assets; NOA) gesetzt. Unser Ziel ist es, die aus dem Kapitalmarkt abgeleiteten Renditevorgaben der Fremd- und Eigenkapitalgeber zu verdienen bzw. zu übertreffen und damit Wert zu schaffen. Maßstab für den Verzinsungsanspruch ist der Kapitalkostensatz. Diesen ermitteln wir als gewichteten Durchschnittskostensatz aus Eigen- und Fremdkapitalkosten (Weighted Average Cost of Capital; WACC).

Zur operativen Steuerung nutzen wir daneben die im Folgenden beschriebenen Kennzahlen.

Die Entwicklung des **Umsatzes** ist eine wesentliche Größe, um den Unternehmenserfolg zu messen. So stellen Top Line Programme zur Umsatzsteigerung eine wesentliche Säule für die zukünftige Entwicklung dar.

Das **EBITDA** entspricht dem **EBIT** (Betriebsergebnis) vor Abschreibungen auf immaterielle Vermögenswerte und Sachanlagen. EBIT und EBITDA zeigen die kurzfristige operative Leistungskraft und den Erfolg der einzelnen Geschäftsbereiche. Neben diesen beiden Größen verwendet der Konzern die EBIT- und EBITDA-Margen, um die Kennzahlen im Verhältnis zum Umsatz darzustellen. Diese relative Größe lässt einen Vergleich der Ertragskraft von ergebnisorientierten Bereichen unterschiedlicher Größen zu.

Den **Free Cashflow** definieren wir als Cashflow aus Geschäftstätigkeit abzüglich Nettozahlungen für Investitionen in immaterielle Vermögenswerte (ohne Goodwill) und Sachanlagen. Diese Kennzahl ist die zentrale Maßgröße für die Fremd- und Eigenkapitalgeber als Stakeholder der Deutschen Telekom. Der Free Cashflow ist Gradmesser für das Potenzial zur Weiterentwicklung des Unternehmens, wie zur Schaffung von organischem und anorganischem Wachstum und für die Dividendenfähigkeit sowie für die Fähigkeit, Verbindlichkeiten zurückzuzahlen.

Im Vorjahr wurde eine zentrale Free Cashflow Management-Organisation aufgebaut, die verantwortlich für Transparenz, Steuerung, Forecast und Performancemessung ist. Der Schwerpunkt in 2010 lag darin, das Working Capital weiter zu optimieren, kurz- und mittelfristige Planungsinstrumente zu verbessern und die Steuerungsprozesse zu verfeinern. Zur Verbesserung des Working Capital wurde das konzernweite Programm CORE (Cash Optimization for ROCE Enhancement) aufgesetzt. Im Vordergrund stand 2010 dabei die Entwicklung einer konzernweiten Zahlungsrichtlinie, um das Verbindlichkeitsmanagement zu optimieren. Daneben gab es konzernweit Workshops, in denen die Potenziale aus dem Forderungsmanagement in den einzelnen Gesellschaften ausgearbeitet und evaluiert sowie Maßnahmen definiert wurden. Die Umsetzung dieser Maßnahmen sollte in den Jahren 2011 bis 2013 folgen und zu einer nachhaltigen Verbesserung des Working Capital führen.

Um die Anforderungen der Fremdkapitalgeber zu erfüllen und die finanzielle Stabilität zu sichern, sind neben einem stabilen Rating im Wesentlichen die Kennzahlen „Gearing“ und „Relative Verschuldung“ relevant. Die Kennzahl „Relative Verschuldung“ setzt die Netto-Finanzverbindlichkeiten ins Verhältnis zum bereinigten EBITDA. Die Kennzahl „Gearing“ setzt die Netto-Finanzverbindlichkeiten ins Verhältnis zum Eigenkapital.

## Finanzstrategie.

### Unsere 3-jährige Finanzstrategie der Jahre 2010 bis 2012.

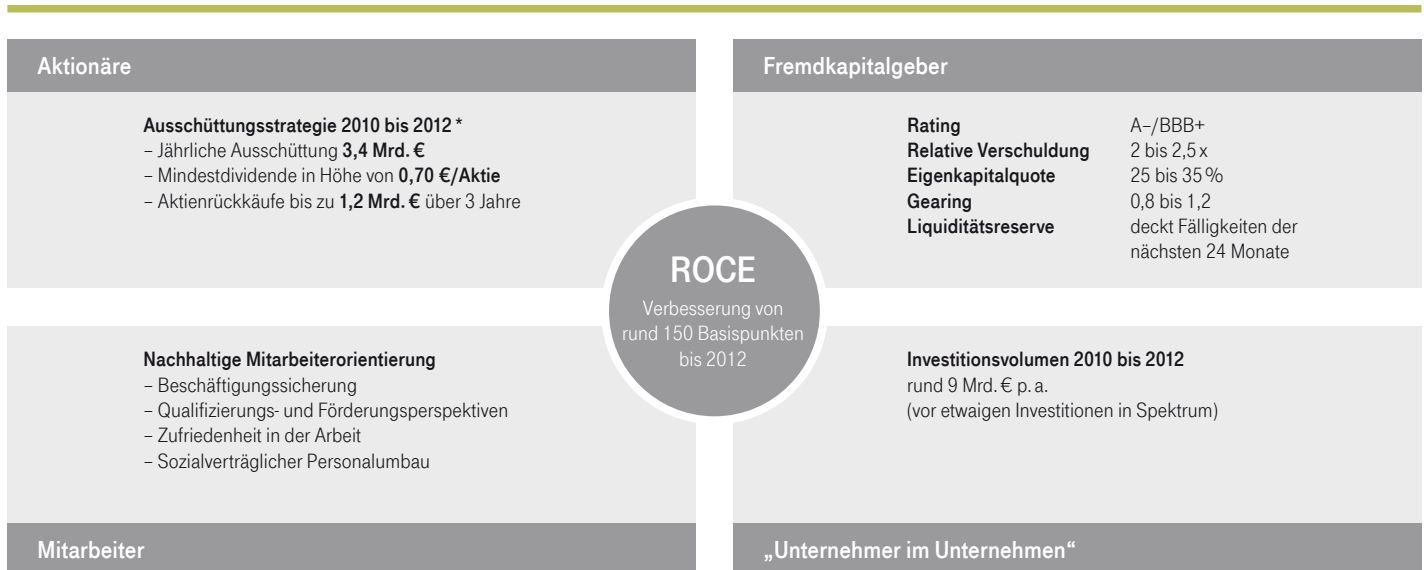

\* Siehe Fußnote 2 auf Seite 129.



# Wirtschaftliches Umfeld.

Positive Entwicklung 2010 // Leicht nachlassende Dynamik 2011

## Entwicklung der Weltwirtschaft.

Im Jahr 2010 erholte sich die Weltwirtschaft weiter – dank des anziehenden Welthandels und der expansiven Geld- und Fiskalpolitik der führenden Wirtschaftsnationen. Während sie 2009 noch um 1 % schrumpfte, ist sie laut OECD-Prognose im Jahr 2010 voraussichtlich um 4,5 % gewachsen. Vor allem im ersten Halbjahr 2010 ist die Weltwirtschaftsleistung deutlich kräftiger gestiegen als noch vor einem Jahr prognostiziert. Allerdings ließ das Tempo dieser Erholung gegen Ende des Jahres 2010 leicht nach. Gründe dafür sind u. a., dass die Konjunkturmaßnahmen in den Industrieländern teilweise ausliefen und so die davon ausgehenden Anschubeffekte nachließen; diese konnten noch nicht vollständig durch eine selbsttragende Wachstumsdynamik abgelöst werden.

Wachstumslokomotive 2010 waren mit rund 70 % Anteil am globalen Wachstum die Schwellenländer. In den meisten Industrieländern verlief nach den Prognosen der OECD und ersten Schätzungen der wirtschaftliche Aufschwung spürbar moderater und zunehmend unterschiedlich: Deutschland, Konjunkturmotor der Europäischen Union, wuchs im Berichtsjahr um 3,6 %, deutlich mehr als die 1,7 % Wachstumsrate der Länder des Euroraums. Nach einem guten Start konnte die US-Wirtschaft verhalten zulegen. Mit 2,8 % lag das Wachstum historisch gesehen auf einem relativ moderaten Niveau. Auch die Kernländer unseres operativen Segments Europa gaben kein einheitliches Bild ab: Polen, die Slowakei und die Tschechische Republik zeigen recht gute Wachstumsraten von 2,5 bis 4,5 %, während die Volkswirtschaften in Griechenland, Rumänien und Kroatien um 2 bis 4 % gegenüber dem Vorjahr schrumpften. Die Niederlande, Österreich und Ungarn wuchsen moderat um 1 bis 2 %.

Auch die Bedingungen an den Arbeitsmärkten entwickelten sich im Laufe des Jahres 2010 zunehmend ungleich. Sehr positiv entwickelte sich der Arbeitsmarkt in Deutschland. Das lag vor allem an der flexiblen Arbeitsmarktpolitik in Form von Kurzarbeit sowie dem abermals starken Export. Die Arbeitslosenquote sank bis zum Jahresende auf 7,2 %. In vielen anderen westlichen Industrienationen und Kernländern der Deutschen Telekom liegt sie aber immer noch nahe ihrer Höchststände des Krisenjahres 2009. In den USA blieb die Arbeitslosenquote auf einem hohen Niveau von 9,4 %. Zudem ist speziell in den Ländern mit hoher Staatsverschuldung und damit verbundenen Sparprogrammen und fiskalpolitischen Maßnahmen eine größere Beeinträchtigung der Volkswirtschaft und somit auch eine höhere Arbeitslosigkeit festzustellen.

## Telekommunikationsmarkt.

Unser Geschäft war im Berichtsjahr geprägt von intensivem Wettbewerb, sich weiter verschärfenden regulatorischen Eingriffen und damit einhergehendem weiteren Preisverfall.

In unseren meisten Kernmärkten konnten die anziehende Weltkonjunktur und die leicht steigende Konsumneigung das Geschäftsumfeld nur leicht stützen, ohne jedoch große Impulse zu setzen. In Ländern mit nach wie vor sinkender Kaufkraft war ein negativer bzw. weiterhin bremsender Effekt sichtbar. Aufgrund des in einzelnen Ländern hohen Drucks zur Konsolidierung der Staatsfinanzen kam es in 2010 vereinzelt zu Steuererhöhungen bzw. neuen Steuern für Telekommunikationsunternehmen. Diese belasteten sowohl den Konsum als auch die Telekommunikationsunternehmen. Im Bereich der Telekommunikation werden die süd- und osteuropäischen Märkte auch 2011 von der Wirtschaftskrise geprägt sein. In einigen Ländern werden die Regierungen versuchen, durch fiskalpolitische Eingriffe ihre Finanzsituation zu verbessern.

### Deutschland.

Der Gesamtumsatz aus Telekommunikationsdiensten sank 2010 in Deutschland um mehr als 1 % auf ca. 61 Mrd. €. Die Umsätze im Festnetz-Markt gingen in diesem Zeitraum im Vergleich zum Vorjahr um 3,5 % zurück. Der Mobilfunk-Markt konnte diesen Rückgang mit einem leichten Gesamtumsatzplus von 0,8 % teilweise kompensieren.

Für Telekommunikationsdienstleistungen insgesamt (Festnetz und Mobilfunk) sanken im Berichtsjahr die Preise um 2,0 % gegenüber dem Vorjahr. Für Dienstleistungen im Festnetz und Internet sanken die Preise um 1,8 %, für mobile Sprach- und Datenverbindungen um 2,8 %.

Auch 2010 veränderte sich der Festnetz-Markt in Deutschland weiter stark. So gingen mehr als 90 % der generierten Sprachminuten auf das Konto von Komplettangeboten, während die Anteile an Sprachminuten über Call-by-Call- und Preselection-Angeboten weiter zurückgingen. Die Zahl der rein Festnetz-basierten Anschlüsse blieb in etwa gleich, die Zahl der Breitbandanschlüsse in Deutschland legte um rund 1,3 Mio. auf knapp 26 Mio. zu. Davon profitieren derzeit vor allem die Kabelnetzbetreiber, die hohe Bandbreiten von zum Teil bis zu 128 Mbit/s und integrierte Produkte (Telefonie, Internet und TV) anbieten: Sie verbuchten 2010 bei den Nutzerzahlen Zuwächse von ca. 26 %.

Immer wichtiger in Deutschland wird der Ausbau des Glasfasernetzes. Wir unterstützen diesen Ausbau beispielsweise in Dresden, Hennigsdorf und Braunschweig. Dort haben wir begonnen, Glasfasern bis in die Wohnungen unserer Kunden zu verlegen.

Der deutsche Mobilfunk-Markt war 2010 gekennzeichnet durch ein leichtes Wachstum, das jedoch hart umkämpft und von einem starken Verdrängungswettbewerb geprägt war. Eine immer größere Rolle bei der Marktentwicklung spielen regulatorische Entscheidungen, wie z. B. die Absenkung der Terminierungsentgelte. Daher legen Mobilfunk-Anbieter verstärkt Wert auf eine hohe Kundenbindung und werthaltiges Wachstum bei den Vertragskunden. Die Serviceumsätze im Gesamtmarkt entwickelten sich 2010 im Vergleich zum Vorjahr positiv. Dies ist vor allem auf die wachsende mobile Datennutzung durch die immer beliebter werdenden Smartphones zurückzuführen. Um den steigenden Ansprüchen an das Mobilfunknetz gerecht zu werden, gibt es schon jetzt in Deutschland insgesamt 69 258 Mobilfunk-Standorte (Quelle: BNetzA), davon allein ca. 25 000 von der Deutschen Telekom.

Im Mai 2010 wurden die neuen Long-Term-Evolution-Frequenzen (LTE) versteigert. Seitdem haben Telekommunikationsanbieter in ganz Deutschland damit begonnen, den neuen Mobilfunk-Standard auszubauen. Wir starteten im Juni 2010 mit dem LTE-Ausbau in Brandenburg, Niedersachsen, Baden-Württemberg und Bayern.

Telekommunikationsunternehmen fächern das Spektrum an Produkten und Dienstleistungen, das sie ihren Kunden anbieten, weiter auf. Auch wir erschließen neue Geschäftsfelder. Dazu zählen der automatisierte Datenaustausch zwischen Maschinen, intelligente Netzstrukturen und neue Serviceangebote zur elektronischen Datenübermittlung wie z. B. De-Mail.

## Europa.

Auch der Telekommunikationsmarkt in den Ländern unseres operativen Segments Europa war gekennzeichnet durch intensiven Wettbewerb und, als Folge davon, weiter sinkende Endkundenpreise. Darüber hinaus minderten die von den Regulierungsbehörden reduzierten Terminierungsentgelte die Umsätze. In den meisten süd- und osteuropäischen Ländern des operativen Segments Europa waren die Telekommunikationsanbieter starken staatlichen und regulatorischen Einflüssen unterworfen.

Die Märkte unseres operativen Segments Europa sind im Mobilfunk weitgehend gesättigt. Dennoch erhöhte sich bei fast allen Ländern die Marktpenetration. Nur Griechenland und die Niederlande hatten eine geringere Marktdurchdringung. Grund hierfür war in Griechenland die umzusetzende staatliche Vorschrift, Prepaid-Kunden ab sofort zu registrieren. In den Niederlanden verzeichneten wir eine geringere Marktdurchdringung aufgrund der Ausbuchung inaktiver Prepaid-Kunden bei T-Mobile Netherlands.

Das klassische Festnetz-Geschäft verliert mehr und mehr an Bedeutung: 2010 gab es in allen Ländern des operativen Segments Europa weitere Anschlussverluste, wenn auch leicht geringere als im Vorjahr. Das Breitbandgeschäft dagegen wächst nach wie vor, 2010 jedoch weniger dynamisch. Die Breitbandabdeckung ist in den einzelnen Ländern unterschiedlich hoch. Der Bedarf nach größeren Bandbreiten wächst kontinuierlich weiter, beispielsweise aufgrund des IPTV-Geschäfts.

## USA.

In den USA setzt sich das Wachstum des Mobilfunk-Markts insgesamt fort, nachdem rückläufige Sprachumsätze durch steigende Datenumsätze überkompensiert werden konnten. Vier nationale Carrier (AT&T Wireless, Verizon Wireless, Sprint und T-Mobile USA) und verschiedene regionale Netzbetreiber teilen den Markt unter sich auf. Zudem gibt es eine Reihe von sog. virtuellen Mobilfunknetzbetreibern (MVNO), die ihren Verkehr über die Netze eines oder mehrerer nationaler Netzbetreiber abwickeln. Die beiden größten nationalen Netzbetreiber AT&T Wireless und Verizon Wireless verzeichneten im Geschäftsjahr 2010 ein besonders starkes Umsatzwachstum und solide Margen. Dies war auf einen deutlichen Zuwachs bei den Smartphones und steigende durchschnittliche Umsätze je Kunde im Vertragskundensegment zurückzuführen. Aufgrund von Größenvorteilen und der Möglichkeit, Mobilfunk- und Festnetz-Angebote zu bündeln, wären AT&T Wireless und Verizon Wireless in der Lage, ihre Dienstleistungen kostengünstiger anzubieten und so ihren Kundenbestand überproportional zu steigern. Dies hätte negative Auswirkungen auf die Wettbewerbsposition von T-Mobile USA.



AT&T konnte in den vergangenen drei Jahren durch den Exklusivvertrieb des Apple iPhone einen Wettbewerbsvorteil erzielen. Dieser Exklusivvertrieb läuft allerdings 2011 aus. Verizon kommt als weiterer Vertriebspartner hinzu und erlangt dadurch ebenfalls einen Wettbewerbsvorteil. Wann T-Mobile USA das iPhone anbieten kann, ist derzeit unklar. Insbesondere Verizon und AT&T konnten 2010 einen überproportional höheren Nettokundenzuwachs verzeichnen, was in Verbindung mit dem Wettbewerbsdruck seitens der regionalen Billig-Komplett-Anbieter 2010 zu einem leicht rückläufigen Marktanteil von T-Mobile USA führte.

Ein Hauptthema der Branche ist der Ausbau der 4G-Netze. So hat Verizon Wireless mit der Umstellung auf die LTE-Netztechnologie begonnen, die bis Ende des Jahres bereits für 110 Mio. Menschen verfügbar sein soll. Bislang kann Verizon Wireless zwar nur LTE-Dongles anbieten, aber im Laufe des Jahres 2011 sollen auch LTE-Smartphones verfügbar sein. AT&T und T-Mobile USA haben HSPA+-Netze aufgebaut. An das HSPA+-Netz der T-Mobile USA konnten bis Ende 2010 bereits 200 Mio. Menschen angeschlossen werden. AT&T liegt vermutlich bei der HSPA+-Netzabdeckung hinter T-Mobile USA, da die Backhaul-Anbindungen noch nicht so umfassend auf Glasfaser umgestellt sind. AT&T will 2011 mit dem LTE-Ausbau beginnen. Sprint hat kein eigenes 4G-Netz, sondern setzt auf das Unternehmen Clearwire, an dem es eine Minderheitenbeteiligung hält. Ende 2010 erreichte das auf WiMAX basierende Netz von Clearwire rund 110 Mio. Menschen. Von Sprint sind inzwischen die ersten WiMAX-fähigen Smartphones auf dem Markt.

#### Systemgeschäft.

Während die Jahre 2008 und 2009 von der Weltwirtschaftskrise geprägt waren, zeigte 2010 deutliche Zeichen der Erholung. Trotz der allgemeinen Erholung der Märkte lastete der Kostendruck weiterhin auf den Unternehmen. Die erforderliche Modernisierung und Anpassung der IT kam in vielen Unternehmen nur zögerlich in Gang. Das Projekt- und das Infrastrukturgeschäft erholten sich langsam. In den einzelnen Marktsegmenten zeigt sich diese Entwicklung sehr unterschiedlich.

Auf die Telekommunikation hatte die wirtschaftliche Erholung einen relativ geringen Einfluss. Dieser Markt war wie schon in den vergangenen Jahren geprägt von intensivem Wettbewerb und Preisverfall.

Der Markt für IT-Dienstleistungen verzeichnete nach den Krisenjahren wieder ein leichtes Wachstum. Die Erholung im Outsourcing-Geschäft im Bereich Computing und Desktop Services (CDS) ist spürbar. Das liegt nicht nur am traditionellen Outsourcing-Geschäft, sondern auch am Erfolg im Cloud Service, dem Bereitstellen von IT-Dienstleistungen über das Internet.

Auch das IT-Projektgeschäft verzeichnete nach einem starken Rückgang 2009 ebenfalls ein leichtes Wachstum im Jahr 2010. Das industrie-spezifische Systemintegrationsgeschäft, getrieben durch IT-Projekte in den Branchen Gesundheit, Energie und öffentliche Hand, hat sich hierbei deutlich schneller erholt als das Standardprojektgeschäft im Umfeld ERP (Enterprise Resource Planning), CRM (Customer Relationship Management) und SCM (Supply Chain Management).

Die Gesamtnachfrage wandelt sich immer mehr: Während die Kunden bisher Telekommunikationsprodukte und IT-Services als separate Leistungen nachfragten, wollen sie heute zunehmend ICT-Lösungen aus einer Hand, um ihre Unternehmensprozesse zu verbessern und den Unternehmenswert zu steigern. Vor allem die Themen Cloud Service, Embedded Systems und intelligente Netze verändern den Markt zunehmend.

### Regulatorischer Einfluss auf das Geschäft.

Unsere Geschäftstätigkeit unterliegt in hohem Maße der nationalen und europäischen Regulierung; damit verbunden sind umfassende Eingriffsbefugnisse in unsere Produkt- und Preisgestaltung.

Auch 2010 wurde unser **Festnetz-Geschäft** umfassend reguliert. Wesentliche Eingriffe waren:

Die Bundesnetzagentur (BNetzA) hat im Berichtszeitraum zwei Regulierungsverfügungen erlassen: Am 17. September 2010 hat die Behörde festgelegt, dass VDSL- und FTTH-Anschlüsse auch grundsätzlich dem regulierten Vorleistungsregime von DSL unterworfen werden sollen. Aufgenommen wurde auch ein Ethernet-basierter Bitstream-Access. Um die Verfügung umzusetzen, muss ein angepasstes Standardangebot vorgelegt werden. Die Entgelte unterliegen einer ex-post Kontrolle durch die BNetzA.

Im September 2010 hat die BNetzA den Konsultationsentwurf zur Regulierungsverordnung Teilnehmeranschlussleitung (TAL) veröffentlicht. Dieser bestätigt grundsätzlich den bisherigen Verpflichtungsumfang zum entbündelten Zugang zur TAL. Zudem beabsichtigt die BNetzA, in Zukunft auch den Zugang zur TAL auf reiner Glasfaser unter den Anwendungsbereich des vorliegenden Regulierungsregimes auf Basis einer ex-post Verpflichtung fallen zu lassen. Das Bundesverwaltungsgericht hat mit seinem Revisionsurteil 2010 erneut die Zugangsverpflichtung zur unbeschalteten Glasfaser (Dark Fibre, DF) auferlegt. Die endgültige Regulierungsverordnung wird nach Konsultation mit der EU-Kommission verabschiedet.

Darüber hinaus prüfte die BNetzA die Entgelte für die Weitergabe von Teilnehmerdaten an Datenabnehmer (Telefonbücher, Auskunftsbetreiber) in einem ex-post Verfahren auf Missbräuchlichkeit. Im Beschluss vom 19. Juli 2010 hat sie die Entgelte für missbräuchlich erklärt, soweit sie für die Datenabgabe 1,6 Mio. € p. a. überschreiten. Gegen diesen Beschluss haben wir Klage eingereicht. Bis zur Entscheidung über diese Klage ist der Beschluss der BNetzA bindend.

Am 20. September 2010 veröffentlichte die EU-Kommission die Empfehlung zur Regulierung von Zugangsnetzen der nächsten Generation (Next Generation Access (NGA)-Recommendation). Die Empfehlung enthält Leitlinien für nationale Regulierungsbehörden, die diese bei der Auf-erlegung von Zugangsverpflichtungen für Next Generation Access-Netze marktmächtiger Unternehmen weitestgehend berücksichtigen sollen. Ziel ist es, Regularisierungsaufgaben in Europa einheitlich zu gestalten. Die Empfehlung sieht grundsätzlich regulierten Zugang zur physischen Netzinfrastruktur auf der Vorleistungsebene sowie im Markt für Breitbandzugang vor. Insgesamt erwartet die EU-Kommission eine Fortführung der bisherigen, für das bestehende Kupfernetz entwickelten Preis- und Zugangsregulierung auch für neue Glasfasernetze.

In Bezug auf die Mobilfunk-Terminierung wurde der **Mobilfunk-Markt** auch 2010 trotz intensiven Wettbewerbs nach wie vor ex-ante reguliert und unterlag damit weiterhin der Preiskontrolle durch die BNetzA und die EU.

Zum 1. Juli 2010 wurde die nächste Stufe der EU-Roaming-Verordnung umgesetzt. Abgehende Gespräche in der EU kosten seitdem 39 ct zuzüglich MwSt., ankommende Gespräche 15 ct zuzüglich MwSt. Der zwischen den Betreibern abgerechnete Vorleistungspreis (IOT) sank auf 22 ct zuzüglich MwSt. Die Preise für gesendete bzw. empfangene SMS blieben unverändert bei 11 ct bzw. 4 ct jeweils zuzüglich MwSt. Bezüglich Daten-Roaming wurde der IOT von 1 € auf 0,80 € abgesenkt. Ebenfalls ab dem 1. Juli 2010 wurde für alle Kunden, die sich nicht auf Wunsch davon haben ausnehmen lassen, ein sog. Spending Cap eingeführt: Es unterbricht die Daten-Roaming-Verbindung nach einem Rechnungsbetrag von 50 € netto automatisch – bis der Kunde einer weiteren Nutzung und weiteren Kosten aktiv zustimmt. Aktuell diskutiert man in Brüssel die Zukunft der Roaming-Regulierung nach dem Ende der aktuellen Verordnung ab Juli 2012. Die Kommission hat in ihrer „Digitalen Agenda für Europa“ das politische Ziel ausgegeben, bis 2015 die Unterschiede zwischen nationalen Tarifen und Roaming-Tarifen abzuschaffen.

Die Bundesnetzagentur hat am 30. November 2010 die ab 1. Dezember 2010 gültigen neuen Entgelte für die Zustellung von Sprachverbindungen in die nationalen Mobilfunknetze vorläufig genehmigt. Die bisherigen asymmetrischen Entgelte für Vodafone und Telekom Deutschland GmbH wurden dabei um rund 50 % auf de facto symmetrische Entgelte abgesenkt. Die Entgeltentscheidung der BNetzA ist EU-weit zu konsultieren und wird voraussichtlich gegen Ende des ersten Quartals 2011 in Kraft treten. Diese Entgelte sind bis zum 30. November 2012 befristet.

**Regularisierungsaufgaben zum LTE-Ausbau.** Die Telekom Deutschland GmbH ersteigerte im Mai 2010 Frequenzen in den Bereichen 800 MHz, 1,8 GHz und 2,6 GHz. Ende Oktober 2010 lagen die Zuteilungsbescheide der BNetzA für alle erworbenen Frequenzen vor. Die Versorgungsaufgabe sieht für den Bereich 800 MHz vor, dass die Netzbetreiber LTE zunächst in den Städten und Gemeinden ausbauen müssen, die keine oder nur geringe Breitbandversorgung haben (sog. „Weiße Flecken“). Bis Anfang 2016 soll die Breitbandabdeckung auf jeweils 90 % der Bevölkerung in den „Weißen Flecken“ angehoben sein. Hierbei ist ein stufenweiser Ausbau bezogen auf die Einwohnerzahl vorgegeben, beginnend in Orten mit 0 bis 5 000 Einwohnern. Bei der Auflagenerfüllung werden auch andere, eigene und sonstige Breitbandabdeckungen (z. B. durch DSL oder UMTS) angerechnet, die eine Mindestübertragungsbandbreite von 1 Mbit/s haben. Unabhängig davon soll aber jeder Netzbetreiber bis Anfang 2016 jeweils 50 % der Bevölkerung mit 800 MHz-Breitbanddiensten versorgen.

Auch für die neuen Frequenzen in den Bereichen 1,8 GHz und 2,6 GHz gelten Ausbauforderungen: 25 % Bevölkerungsversorgung bis Anfang 2014, 50 % bis Anfang 2016. Da hier die erreichten Abdeckungen mit GSM und UMTS anerkannt werden, erfüllt die Telekom Deutschland GmbH diese Auflagen bereits.

# Geschäftsentwicklung des Konzerns.

Unternehmensziele erreicht // Bereinigtes EBITDA in Höhe von 19,5 Mrd. €  
// Free Cashflow mit 6,5 Mrd. € übererfüllt

## Gesamtaussage zur Geschäftsentwicklung im Jahr 2010.

Wir haben unsere kommunizierten Unternehmensziele – das bereinigte EBITDA und den Free Cashflow (vor Ausschüttung und vor Investitionen in Spektrum) – erreicht bzw. übererfüllt. Ebenso konnten wir die für die Geschäftsjahre 2010 bis 2012 kommunizierte Ausschüttungspolitik durch einen Dividendenvorschlag von 0,70 € je dividendenberechtigter Stückaktie und den durchgeführten Aktienrückkauf mit einem Volumen von 0,4 Mrd. € im Jahr 2010 voll erfüllen. Mit den durchgeführten Investitionen (vor Spektrum) in Höhe von 8,5 Mrd. € haben wir den Breitbandausbau vorangetrieben, in Kapazitätserweiterungen der bestehenden Netze sowie in schnellere Mobilfunknetze investiert. Darüber hinaus haben wir Spektren in Höhe von 1,3 Mrd. € erworben, die unseren Breitbandausbau vorantreiben werden. Vor dem Hintergrund eines weiter steigenden Wettbewerbsdrucks im Telekommunikationsmarkt, sich weiter verschärfender regulatorischer Eingriffe und des damit einhergehenden weiteren Preisverfalls haben wir ein erfolgreiches Geschäftsjahr 2010 abschließen können. Dem lag die zu Beginn des Jahres 2010 kommunizierte und seitdem angewandte Konzernstrategie „Verbessern – Verändern – Erneuern“ zugrunde.

## Konsolidierungskreiseffekte.

Konsolidierungskreiseffekte haben die Geschäftsentwicklung im Jahr 2010 wesentlich beeinflusst. Diese Effekte gehen hauptsächlich auf folgende Sachverhalte zurück:

**OTE-Gruppe.** Die Hellenic Telecommunications Organization S.A. (OTE/OTE-Gruppe) wird seit Februar 2009 vollständig in den Konzernabschluss einbezogen. Daher war sie im Geschäftsjahr 2009 nicht über den gesamten Zeitraum in der Konzern-Gewinn- und Verlustrechnung enthalten. Ausgewiesen wird die OTE-Gruppe in unserem operativen Segment Europa.

**Joint Venture Everything Everywhere.** Die Deutsche Telekom AG und France Télécom S.A. haben am 1. April 2010 T-Mobile UK und Orange UK in ein Joint Venture mit dem Namen Everything Everywhere eingebracht, an dem beide Gesellschaften jeweils einen 50-prozentigen Anteil halten. Infolge dieser Gründung werden die Vermögenswerte und Schulden der T-Mobile UK ab dem 1. April 2010 nicht mehr in der Konzern-Bilanz ausgewiesen. Ebenso ist die Gewinn- und Verlustrechnung der T-Mobile UK ab dem 1. April 2010 nicht mehr in der Konzern-Gewinn- und Verlustrechnung enthalten. In der Konzern-Bilanz wird das Joint Venture stattdessen als Beteiligung an at equity bilanzierten Unternehmen erfasst. Das (anteilige) Ergebnis des Joint Venture wird im Finanzergebnis in der Konzern-Gewinn- und Verlustrechnung aufgeführt. Ausgewiesen wird das neue Joint Venture in unserem operativen Segment Europa.

In der folgenden Tabelle zeigen wir, welche Auswirkungen der Konsolidierungskreiseffekt des Joint Venture Everything Everywhere auf unsere wesentlichen Kennzahlen hat. Dazu eliminierten wir aus 2010 bzw. den jeweiligen Vergleichsperioden (1. April bis 31. Dezember) die der Deutschen Telekom zuzurechnenden anteiligen Ergebnisse des Joint Venture bzw. der T-Mobile UK.

|                                                                       | ohne T-Mobile UK |                |                | mit T-Mobile UK |                |                |
|-----------------------------------------------------------------------|------------------|----------------|----------------|-----------------|----------------|----------------|
|                                                                       | 2010<br>Mio. €   | 2009<br>Mio. € | 2008<br>Mio. € | 2010<br>Mio. €  | 2009<br>Mio. € | 2008<br>Mio. € |
| Umsatz                                                                | 62 421           | 62 152         | 58 815         | 62 421          | 64 602         | 61 666         |
| EBITDA (bereinigt um Sondereinflüsse)                                 | 19 473           | 20 168         | 18 811         | 19 473          | 20 668         | 19 459         |
| Konzernüberschuss/(-fehlbetrag)                                       | 1 744            | 232            | 1 374          | 1 695           | 353            | 1 483          |
| Konzernüberschuss/(-fehlbetrag)<br>(bereinigt um Sondereinflüsse)     | 3 413            | 3 259          | 3 322          | 3 364           | 3 390          | 3 426          |
| Free Cashflow (vor Ausschüttung und<br>vor Investitionen in Spektrum) | 6 163            | 6 688          | 6 646          | 6 543           | 6 969          | 7 033          |
| Cash Capex                                                            | 9 851            | 9 054          | 8 408          | 9 851           | 9 202          | 8 707          |

Details zu diesen Konsolidierungskreiseffekten geben wir im Konzern-Anhang im Abschnitt „Unternehmenszusammenschlüsse und sonstige Unternehmenstransaktionen“ im Kapitel „Grundlagen und Methoden“.

## Ertragslage des Konzerns.

### Umsatz.

Im Geschäftsjahr 2010 erzielten wir einen Konzernumsatz von 62,4 Mrd. €, das sind 2,2 Mrd. € weniger als im Vorjahr. Die zuvor beschriebenen Konsolidierungskreiseffekte von 1,9 Mrd. € wirkten sich dabei negativ aus, Wechselkurseffekte von 1,2 Mrd. € dagegen positiv. Diese Wechselkurseffekte entstanden hauptsächlich durch die Umrechnung von US-Dollar, Polnischen Zloty und Tschechischen Kronen in Euro. Ohne diese Effekte sank der Umsatz im Vergleich zum Vorjahr um 1,5 Mrd. € oder 2,4 %.

Unsere operativen Segmente Systemgeschäft und USA konnten ihren Umsatz steigern. Alle anderen operativen Segmente mussten Umsatzrückgänge hinnehmen. Im Einzelnen entwickelte sich der Umsatz unserer operativen Segmente wie folgt:

Unser operatives Segment **Deutschland** verzeichnete im Berichtsjahr einen Umsatzrückgang von 1,1 % im Vergleich zu 2009. Der Umsatzanstieg im Mobilfunk-Geschäft von 0,2 Mrd. € konnte den Umsatzrückgang im Festnetz-Geschäft von 0,6 Mrd. € nur zum Teil ausgleichen.

Unser operatives Segment **Europa** verbuchte im Vergleich zum Vorjahr einen Umsatzrückgang von 2,8 Mrd. € bzw. 14,1 %. Dieser Rückgang ergibt sich vor allem durch die oben genannten negativen Konsolidierungskreiseffekte. Bereinigt um diese Effekte von 2,1 Mrd. € und die positiven Wechselkurseffekte von 0,2 Mrd. € sank der Umsatz gegenüber 2009 um 1,0 Mrd. € oder 5,6 %. Dieser operative Umsatzrückgang lag hauptsächlich an Preisminderungen, die in den meisten Ländern des Segments durch regulierungsbedingt geringere Mobilfunk-Terminierungsentgelte und den scharfen Wettbewerb verursacht waren. Auch zum Teil neu erlassene oder gestiegene Sondersteuern und Mobilfunk-Abgaben minderten den Gesamtumsatz.

Unser operatives Segment **USA** erhöhte den Umsatz auf Euro-Basis um 4,0 % im Vergleich zum Vorjahr. Berücksichtigt man die Wechselkurseffekte von 0,8 Mrd. €, ging der Umsatz allerdings um 1,0 % leicht zurück.

Unser operatives Segment **Systemgeschäft** erzielte 2010 einen Umsatzanstieg von 2,9 % verglichen mit 2009. Diese positive Entwicklung ist das Ergebnis der vielen Verträge, die sowohl im letzten als auch in diesem Jahr abgeschlossen wurden. Diese neuen Verträge kompensierten die generell rückläufige Preisentwicklung im IT- und Kommunikationsgeschäft.

### Beitrag der operativen Segmente zum Konzernumsatz.

|                                   | 2010<br>Mio. € | 2009<br>Mio. € | Veränderung<br>Mio. € | Veränderung<br>% | 2008<br>Mio. € |
|-----------------------------------|----------------|----------------|-----------------------|------------------|----------------|
| <b>Konzernumsatz</b>              | <b>62 421</b>  | <b>64 602</b>  | <b>(2 181)</b>        | <b>(3,4)</b>     | <b>61 666</b>  |
| Deutschland                       | 25 145         | 25 423         | (278)                 | (1,1)            | 26 400         |
| Europa                            | 16 840         | 19 607         | (2 767)               | (14,1)           | 15 932         |
| USA                               | 16 087         | 15 471         | 616                   | 4,0              | 14 957         |
| Systemgeschäft                    | 9 057          | 8 798          | 259                   | 2,9              | 9 343          |
| Konzernzentrale & Shared Services | 2 166          | 2 410          | (244)                 | (10,1)           | 2 781          |
| Intersegmentumsatz                | (6 874)        | (7 107)        | 233                   | 3,3              | (7 747)        |

### Regionale Umsatzverteilung.

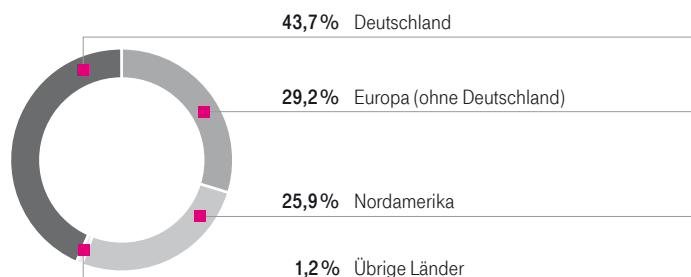

### Beitrag der operativen Segmente zum Konzernumsatz.

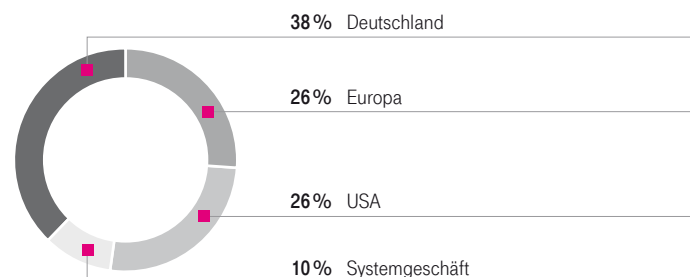

Mit einem Anteil von 38 % leistete unser operatives Segment **Deutschland** im Geschäftsjahr 2010 den größten Beitrag zum Konzernumsatz. Der Anteil unseres operativen Segments **Europa** sank infolge der Konsolidierungskreiseffekte gegenüber dem Vorjahr um 3,5 Prozentpunkte. Bei unserem operativen Segment **USA** stieg der Anteil am Konzernumsatz insbesondere aufgrund von Wechselkurseffekten um 1,9 Prozentpunkte. Nahezu gleich blieb der Anteil unseres operativen Segments **Systemgeschäft** am Konzernumsatz.

Die Auslandsquote des Konzernumsatzes blieb im Vergleich zum Vorjahr nahezu konstant. Sowohl der Konzernumsatz in Deutschland als auch im Ausland reduzierte sich. Während sich in Europa (ohne Deutschland) im Wesentlichen die Konsolidierungskreisveränderungen negativ auswirkten, stieg der Umsatz in Nordamerika hauptsächlich aufgrund von Wechselkurseffekten.

### EBITDA.

Wir haben im Geschäftsjahr 2010 ein EBITDA von 17,3 Mrd. € erzielt, das ist ein Rückgang von 13,0 % gegenüber dem Vorjahr. Neben einem operativen Rückgang des EBITDA wirkten sich folgende Effekte negativ auf das EBITDA aus: der Konsolidierungskreiseffekt aus der Entkonsolidierung der T-Mobile UK und damit der Wegfall des Beitrags der Gesellschaft zum EBITDA von 0,5 Mrd. € sowie im Vergleich zum Vorjahr um 1,4 Mrd. € gestiegene Sondereinflüsse. Hierbei handelte es sich im Wesentlichen um Aufwendungen im Zusammenhang mit Personalmaßnahmen und sachbezogenen Restrukturierungen (1,3 Mrd. €), Aufwendungen aus der PTC-Transaktion (0,4 Mrd. €) sowie Aufwendungen im Zusammenhang mit der Entkonsolidierung der T-Mobile UK (0,4 Mrd. €). Dem entgegen standen positive Wechselkurseffekte (0,3 Mrd. €).

## Konzern-Gewinn- und Verlustrechnung und Auswirkungen von Sondereinflüssen.

|                                                            | EBITDA 2010<br>Mio. € | EBIT 2010<br>Mio. € | EBITDA 2009<br>Mio. € | EBIT 2009<br>Mio. € | EBITDA 2008<br>Mio. € | EBIT 2008<br>Mio. € |
|------------------------------------------------------------|-----------------------|---------------------|-----------------------|---------------------|-----------------------|---------------------|
| <b>EBITDA/EBIT</b>                                         | <b>17 313</b>         | <b>5 505</b>        | <b>19 906</b>         | <b>6 012</b>        | <b>18 015</b>         | <b>7 040</b>        |
| <b>Deutschland</b>                                         | <b>(509)</b>          | <b>(509)</b>        | <b>(349)</b>          | <b>(356)</b>        | <b>(960)</b>          | <b>(973)</b>        |
| Personalrestrukturierung                                   | (401)                 | (401)               | (300)                 | (300)               | (772)                 | (772)               |
| Sachbezogene Restrukturierungen                            | (11)                  | (11)                | (31)                  | (31)                | (23)                  | (23)                |
| Ergebniseffekte aus Entkonsolidierungen, Ver- und Zukäufen | 0                     | 0                   | 10                    | 10                  | 0                     | 0                   |
| Sonstiges                                                  | (97)                  | (97)                | (28)                  | (35)                | (165)                 | (178)               |
| <b>Europa</b>                                              | <b>(606)</b>          | <b>(1 297)</b>      | <b>(93)</b>           | <b>(2 443)</b>      | <b>(151)</b>          | <b>(440)</b>        |
| Personalrestrukturierung                                   | (209)                 | (209)               | (36)                  | (36)                | (50)                  | (50)                |
| Sachbezogene Restrukturierungen                            | (5)                   | (5)                 | (26)                  | (26)                | (65)                  | (65)                |
| Ergebniseffekte aus Entkonsolidierungen, Ver- und Zukäufen | (355)                 | (355)               | 0                     | 0                   | 0                     | 0                   |
| Wertminderungen                                            | -                     | (680)               | -                     | (2 345)             | -                     | (249)               |
| Sonstiges                                                  | (37)                  | (48)                | (31)                  | (36)                | (36)                  | (76)                |
| <b>USA</b>                                                 | <b>0</b>              | <b>0</b>            | <b>0</b>              | <b>0</b>            | <b>(57)</b>           | <b>(57)</b>         |
| Personalrestrukturierung                                   | 0                     | 0                   | 0                     | 0                   | (11)                  | (11)                |
| Sachbezogene Restrukturierungen                            | 0                     | 0                   | 0                     | 0                   | (46)                  | (46)                |
| <b>Systemgeschäft</b>                                      | <b>(281)</b>          | <b>(289)</b>        | <b>(213)</b>          | <b>(240)</b>        | <b>36</b>             | <b>12</b>           |
| Personalrestrukturierung                                   | (113)                 | (113)               | (68)                  | (68)                | (320)                 | (320)               |
| Sachbezogene Restrukturierungen                            | (170)                 | (178)               | (152)                 | (179)               | (167)                 | (191)               |
| Ergebniseffekte aus Entkonsolidierungen, Ver- und Zukäufen | 0                     | 0                   | 7                     | 7                   | 518                   | 518                 |
| Sonstiges                                                  | 2                     | 2                   | 0                     | 0                   | 5                     | 5                   |
| <b>Konzernzentrale &amp; Shared Services</b>               | <b>(769)</b>          | <b>(769)</b>        | <b>(101)</b>          | <b>(101)</b>        | <b>(312)</b>          | <b>(322)</b>        |
| Personalrestrukturierung                                   | (281)                 | (281)               | (109)                 | (109)               | 84                    | 84                  |
| Sachbezogene Restrukturierungen                            | (100)                 | (100)               | 0                     | 0                   | 0                     | 0                   |
| Ergebniseffekte aus Entkonsolidierungen, Ver- und Zukäufen | (385)                 | (385)               | 24                    | 24                  | (346)                 | (356)               |
| Sonstiges                                                  | (3)                   | (3)                 | (16)                  | (16)                | (50)                  | (50)                |
| <b>Konzernüberleitung</b>                                  | <b>5</b>              | <b>5</b>            | <b>(6)</b>            | <b>(6)</b>          | <b>0</b>              | <b>0</b>            |
| Personalrestrukturierung                                   | 0                     | 0                   | (16)                  | (16)                | 15                    | 15                  |
| Sachbezogene Restrukturierungen                            | 1                     | 1                   | 10                    | 10                  | 0                     | 0                   |
| Ergebniseffekte aus Entkonsolidierungen, Ver- und Zukäufen | 4                     | 4                   | 0                     | 0                   | (25)                  | (25)                |
| Sonstiges                                                  | 0                     | 0                   | 0                     | 0                   | 10                    | 10                  |
| <b>Summe Sondereinflüsse</b>                               | <b>(2 160)</b>        | <b>(2 859)</b>      | <b>(762)</b>          | <b>(3 146)</b>      | <b>(1 444)</b>        | <b>(1 780)</b>      |
| <b>EBITDA/EBIT (bereinigt um Sondereinflüsse)</b>          | <b>19 473</b>         | <b>8 364</b>        | <b>20 668</b>         | <b>9 158</b>        | <b>19 459</b>         | <b>8 820</b>        |
| Finanzergebnis (bereinigt um Sondereinflüsse)              |                       | (2 724)             |                       | (3 125)             |                       | (2 936)             |
| Steuern (bereinigt um Sondereinflüsse)                     |                       | (1 898)             |                       | (2 102)             |                       | (1 889)             |
| Minderheiten (bereinigt um Sondereinflüsse)                |                       | 378                 |                       | 541                 |                       | 569                 |
| <b>Konzernüberschuss (bereinigt um Sondereinflüsse)</b>    |                       | <b>3 364</b>        |                       | <b>3 390</b>        |                       | <b>3 426</b>        |



**Bereinigtes EBITDA.**

Unser um Sondereinflüsse bereinigtes EBITDA betrug 19,5 Mrd. € gegenüber 20,7 Mrd. € im Vorjahr. Wechselkurseffekte wirkten in Höhe von 0,3 Mrd. € positiv, dem gegenüber standen negative Konsolidierungskreiseffekte – vor allem aus der Entkonsolidierung der T-Mobile UK – in Höhe von 0,3 Mrd. €. Ohne diese Effekte sank das bereinigte EBITDA im Vergleich zum Vorjahr um 1,2 Mrd. € oder 6,0 %.

In unserem operativen Segment **Deutschland** erhöhte sich das bereinigte EBITDA im Berichtszeitraum leicht um 0,1 %. Die positive Entwicklung im Mobilfunk-Geschäft konnte den Rückgang im klassischen Festnetz-Geschäft auffangen. Einen wichtigen Beitrag dazu leistete ein effektives Kostenmanagement im Rahmen unseres „Save for Service“-Programms. Die bereinigte EBITDA-Marge stieg um 0,6 Prozentpunkte.

Unser operatives Segment **Europa** erzielte im Geschäftsjahr 2010 ein bereinigtes EBITDA von 5,7 Mrd. €. Zum einen verringerte sich das bereinigte EBITDA des Segments durch die Entkonsolidierung der T-Mobile UK zum 1. April 2010; zum anderen erhöhte sich das bereinigte EBITDA als Folge des Konsolidierungskreiseffekts der OTE-Gruppe. Zudem wirkten sich positive Wechselkurseffekte bei dem Polnischen Zloty, der Tschechischen Krone, dem Ungarischen Forint, der Kroatischen Kuna und dem Britischen Pfund aus. Ohne diese Effekte sank das bereinigte EBITDA um 7,0 %. Hier wirkten sich neben den oben beschriebenen Entwicklungen des operativen Geschäfts insbesondere die neu erlassene Sondersteuer in Ungarn – rückwirkend für das gesamte Berichtsjahr 2010 – aus.

In unserem operativen Segment **USA** ging das bereinigte EBITDA im Vergleich zum Vorjahr zurück. Hauptgründe dafür sind neben einem leicht geringeren Umsatz (auf US-Dollar Basis) steigende Kosten (auf US-Dollar Basis); diese entstanden aus verstärkten Kundenanreizprogrammen und aus der Tatsache, dass Kunden eher zu kostenintensiveren 3G-Geräten wechselten. Wechselkurseffekte in Höhe von 0,2 Mrd. € dämpften den Rückgang des bereinigten EBITDA in Euro.

In unserem operativen Segment **Systemgeschäft** stieg das bereinigte EBITDA im Vergleich zu 2009 um 2,7 %. Das lag vor allem an Einsparungen, die mit dem umfassenden Restrukturierungs- und Effizienzprogramm „Save for Service“ erzielt wurden.

Neben den beschriebenen Entwicklungen innerhalb unserer operativen Segmente erreichten die **Konzernzentrale & Shared Services** ein um 0,6 Mrd. € geringeres bereinigtes EBITDA als im Vorjahr. Ausschlaggebend dafür waren im Vorjahr höhere Erträge aus Rückstellungsaufösungen und höhere Erträge aus der Umklassifizierung von Immobilien aus zur Veräußerung gehalten in die langfristigen Vermögenswerte. Einen ebenfalls negativen Einfluss auf das bereinigte EBITDA hatten der gestiegene Personalaufwand (u. a. bei Vivento) und höhere zentral anfallende Marketing- und Technikkosten. Zudem waren in diesem Jahr die Erlöse aus Immobilienverkäufen geringer als 2009.

**Beitrag der operativen Segmente zum Konzern-EBITDA bereinigt.**

|                                                             | 2010          | Anteil am                   | 2009          | Anteil am                   | Veränderung    | Veränderung  | 2008          |
|-------------------------------------------------------------|---------------|-----------------------------|---------------|-----------------------------|----------------|--------------|---------------|
|                                                             | Mio. €        | Konzern-EBITDA<br>bereinigt |               | Konzern-EBITDA<br>bereinigt |                |              |               |
|                                                             |               | %                           | Mio. €        | %                           | Mio. €         | %            | Mio. €        |
| <b>EBITDA (bereinigt um Sondereinflüsse)<br/>im Konzern</b> | <b>19 473</b> | <b>100,0</b>                | <b>20 668</b> | <b>100,0</b>                | <b>(1 195)</b> | <b>(5,8)</b> | <b>19 459</b> |
| Deutschland                                                 | 9 618         | 49,4                        | 9 607         | 46,5                        | 11             | 0,1          | 9 764         |
| Europa                                                      | 5 748         | 29,5                        | 6 390         | 30,9                        | (642)          | (10,0)       | 4 954         |
| USA                                                         | 4 156         | 21,3                        | 4 261         | 20,6                        | (105)          | (2,5)        | 4 240         |
| Systemgeschäft                                              | 948           | 4,9                         | 923           | 4,5                         | 25             | 2,7          | 826           |
| Konzernzentrale & Shared Services                           | (870)         | (4,5)                       | (315)         | (1,5)                       | (555)          | n. a.        | (181)         |
| Überleitung                                                 | (127)         | (0,6)                       | (198)         | (1,0)                       | 71             | 35,9         | (144)         |

## EBIT.

Das EBIT des Konzerns sank gegenüber dem Vorjahr um 0,5 Mrd. € auf 5,5 Mrd. €. Neben den bereits oben beschriebenen Effekten, die sich insgesamt negativ auf das EBIT auswirkten, konnten gegenüber dem Vorjahr um 0,4 Mrd. € geringere Abschreibungen diese Effekte zum Teil ausgleichen. Die planmäßigen Abschreibungen auf Sachanlagevermögen (Technische Anlagen und Maschinen) sanken hauptsächlich dadurch, dass Abschreibungen auf die Vermögenswerte der T-Mobile UK in diesem Jahr wegfielen bzw. ausgesetzt wurden. Daneben wurden im Vorjahr Wertminderungen auf Goodwill in Höhe von 2,3 Mrd. € notwendig, während wir in 2010 zum Jahresende Wertminderungen auf Goodwill und Sachanlagevermögen von insgesamt 0,7 Mrd. € als Ergebnis aus unseren jährlichen Werthaltigkeitstests erfasst haben.

## Ergebnis vor Ertragsteuern.

Das Ergebnis vor Ertragsteuern blieb gegenüber dem Vorjahr konstant bei 2,7 Mrd. €. Neben den bereits oben beschriebenen Effekten war das um 0,5 Mrd. € verbesserte Finanzergebnis des Konzerns der Grund für diesen Anstieg. Neben Effekten aus der Veränderung des Ergebnisses aus Finanzinstrumenten lässt sich die deutliche Verbesserung des sonstigen Finanzergebnisses in Höhe von 0,6 Mrd. € hauptsächlich auf geringere Aufwendungen aus der Aufzinsung von Rückstellungen und Verbindlichkeiten (Zinsanteil) zurückführen.

## Konzernüberschuss.

Wir steigerten im Geschäftsjahr 2010 den Konzernüberschuss gegenüber dem Vorjahr um 1,3 Mrd. € auf 1,7 Mrd. €. Wesentliche Ursache war neben den bereits oben beschriebenen Effekten der um 0,8 Mrd. € gegenüber 2009 gesunkene Ertragsteueraufwand. Das ist die Folge von den zum Teil gegenläufigen Effekten: Im Jahr 2010 wurden latente Steuern in Höhe von 0,5 Mrd. € auf temporäre Differenzen und steuerliche Verlustvorträge im operativen Segment Europa aktiviert, da eine zukünftige Nutzung dieser temporären Differenzen und Verlustvorträge wahrscheinlich geworden ist. Gegenläufig wirkte eine griechische Sonderabgabe, die den Steueraufwand des Konzerns im Berichtszeitraum ansteigen ließ. Zusätzlich erhöhte sich der Konzernüberschuss durch eine geringere Zurechnung des Überschusses an die Anteile anderer Gesellschafter in Höhe von 0,4 Mrd. €. Die Anteile anderer Gesellschaften beinhalten u. a. in Höhe von 0,2 Mrd. € die oben erwähnten Wertminderungen am Jahresende.

## „Save for Service“-Programm.

Das Programm „Save for Service“ hat in der ersten Phase von 2007 bis 2009 insgesamt 5,9 Mrd. € Kosteneinsparungen realisiert.

Nach diesem Erfolg haben wir uns auch für die Jahre 2010 bis 2012 mit konzernweiten Einsparungen in Höhe von weiteren 4,2 Mrd. € ambitionierte Ziele gesetzt, um die Rentabilität zu steigern und unsere Servicequalität noch weiter zu verbessern.

Wie bereits in den letzten Jahren haben wir auch in 2010 das Kostensenkungsziel von 2 Mrd. € wieder deutlich übererfüllt. Die so freigeordneten Mittel konnten wir zum Teil zur Steigerung der Servicequalität einsetzen. Wesentliche Einsparhebel waren u. a.:

- Steigerung der Produktions- und Prozesseffizienz,
- Reduktion von Kundenbeschwerden,
- Verbesserte Einkaufskonditionen,
- Standardisierung des Produktportfolios,
- Shared Services im Bereich Finance.

## Vermögens- und Finanzlage des Konzerns.

## Konzern-Bilanzstruktur.

|                                                                                                                        | 31.12.2010<br>Mio. € | 31.12.2010<br>% | 31.12.2009<br>Mio. € | 31.12.2009<br>% | Veränderung<br>Mio. € | 31.12.2008<br>Mio. € | 31.12.2008<br>% |
|------------------------------------------------------------------------------------------------------------------------|----------------------|-----------------|----------------------|-----------------|-----------------------|----------------------|-----------------|
| <b>Aktiva</b>                                                                                                          |                      |                 |                      |                 |                       |                      |                 |
| <b>Kurzfristige Vermögenswerte</b>                                                                                     | <b>15 243</b>        | <b>11,9</b>     | <b>23 012</b>        | <b>18,0</b>     | <b>(7 769)</b>        | <b>15 431</b>        | <b>12,5</b>     |
| Zahlungsmittel und Zahlungsmitteläquivalente                                                                           | 2 808                | 2,2             | 5 022                | 3,9             | (2 214)               | 3 026                | 2,4             |
| Forderungen aus Lieferungen und Leistungen und sonstige Forderungen                                                    | 6 889                | 5,4             | 6 757                | 5,3             | 132                   | 7 393                | 6,0             |
| Zur Veräußerung gehaltene langfristige Vermögenswerte und Veräußerungsgruppen                                          | 51                   | 0,0             | 6 527                | 5,1             | (6 476)               | 434                  | 0,4             |
| Übrige kurzfristige Vermögenswerte                                                                                     | 5 495                | 4,3             | 4 706                | 3,7             | 789                   | 4 578                | 3,7             |
| <b>Langfristige Vermögenswerte</b>                                                                                     | <b>112 569</b>       | <b>88,1</b>     | <b>104 762</b>       | <b>82,0</b>     | <b>7 807</b>          | <b>107 709</b>       | <b>87,5</b>     |
| Immaterielle Vermögenswerte                                                                                            | 53 807               | 42,1            | 51 705               | 40,5            | 2 102                 | 53 927               | 43,8            |
| Sachanlagen                                                                                                            | 44 298               | 34,7            | 45 468               | 35,6            | (1 170)               | 41 559               | 33,7            |
| Beteiligungen an at equity bilanzierten Unternehmen                                                                    | 7 242                | 5,7             | 147                  | 0,1             | 7 095                 | 3 557                | 2,9             |
| Übrige langfristige Vermögenswerte                                                                                     | 7 222                | 5,6             | 7 442                | 5,8             | (220)                 | 8 666                | 7,1             |
| <b>Bilanzsumme</b>                                                                                                     | <b>127 812</b>       | <b>100,0</b>    | <b>127 774</b>       | <b>100,0</b>    | <b>38</b>             | <b>123 140</b>       | <b>100,0</b>    |
| <b>Passiva</b>                                                                                                         |                      |                 |                      |                 |                       |                      |                 |
| <b>Kurzfristige Schulden</b>                                                                                           | <b>26 452</b>        | <b>20,7</b>     | <b>24 794</b>        | <b>19,4</b>     | <b>1 658</b>          | <b>24 242</b>        | <b>19,7</b>     |
| Finanzielle Verbindlichkeiten                                                                                          | 11 689               | 9,1             | 9 391                | 7,4             | 2 298                 | 9 584                | 7,8             |
| Verbindlichkeiten aus Lieferungen und Leistungen und sonstige Verbindlichkeiten                                        | 6 750                | 5,3             | 6 304                | 4,9             | 446                   | 7 073                | 5,7             |
| Kurzfristige Rückstellungen                                                                                            | 3 193                | 2,5             | 3 369                | 2,6             | (176)                 | 3 437                | 2,8             |
| Schulden in direktem Zusammenhang mit zur Veräußerung gehaltenen langfristigen Vermögenswerten und Veräußerungsgruppen | -                    | 0,0             | 1 423                | 1,1             | (1 423)               | 95                   | 0,1             |
| Übrige kurzfristige Schulden                                                                                           | 4 820                | 3,8             | 4 307                | 3,4             | 513                   | 4 053                | 3,3             |
| <b>Langfristige Schulden</b>                                                                                           | <b>58 332</b>        | <b>45,6</b>     | <b>61 043</b>        | <b>47,8</b>     | <b>(2 711)</b>        | <b>55 786</b>        | <b>45,3</b>     |
| Finanzielle Verbindlichkeiten                                                                                          | 38 857               | 30,4            | 41 800               | 32,7            | (2 943)               | 37 010               | 30,0            |
| Langfristige Rückstellungen                                                                                            | 8 001                | 6,2             | 8 340                | 6,5             | (339)                 | 8 461                | 6,9             |
| Übrige langfristige Schulden                                                                                           | 11 474               | 9,0             | 10 903               | 8,6             | 571                   | 10 315               | 8,4             |
| <b>Eigenkapital</b>                                                                                                    | <b>43 028</b>        | <b>33,7</b>     | <b>41 937</b>        | <b>32,8</b>     | <b>1 091</b>          | <b>43 112</b>        | <b>35,0</b>     |
| <b>Bilanzsumme</b>                                                                                                     | <b>127 812</b>       | <b>100,0</b>    | <b>127 774</b>       | <b>100,0</b>    | <b>38</b>             | <b>123 140</b>       | <b>100,0</b>    |

Unsere **Bilanzsumme** blieb im Vergleich zum Jahresende 2009 nahezu unverändert. Während die kurzfristigen Vermögenswerte um 7,8 Mrd. € sanken, stiegen die langfristigen Vermögenswerte um diesen Betrag an. Auf der Passivseite stiegen die kurzfristigen Schulden um 1,7 Mrd. €, während die langfristigen Schulden um 2,7 Mrd. € sanken.

Im Folgenden werden die wesentlichen Veränderungen der Bilanz im Vergleich zum 31. Dezember 2009 näher erläutert:

Der Bestand an **Zahlungsmitteln und Zahlungsmitteläquivalenten** sank gegenüber dem 31. Dezember 2009 um 2,2 Mrd. €.  Detailinformationen zu dieser Veränderung sind der Konzern-Kapitalflussrechnung und den ausgewählten Erläuterungen zur Konzern-Kapitalflussrechnung im Konzern-Anhang zu entnehmen.

Die Buchwerte der zur **Veräußerung gehaltenen langfristigen Vermögenswerte und Veräußerungsgruppen** sowie der **Schulden im direktem Zusammenhang mit zur Veräußerung gehaltenen langfristigen Vermögenswerten und Veräußerungsgruppen** sanken saldiert um 5,1 Mrd. €. Die Einbringung der T-Mobile UK in ein Joint Venture mit dem Namen Everything Everywhere seit dem 1. April 2010 hatte zur Folge, dass die Vermögenswerte und Schulden der T-Mobile UK, die zum 31. Dezember 2009 als zur Veräußerung gehalten ausgewiesen waren, entkonsolidiert wurden und stattdessen die 50-prozentige Beteiligung der Deutschen Telekom an dem Joint Venture als **Beteiligungen an at equity bilanzierten Unternehmen** ausgewiesen wurde.  Weitere Erläuterungen hierzu sind dem Konzern-Anhang zu entnehmen.

Die übrigen **kurzfristigen Vermögenswerte** haben sich um 0,8 Mrd. € erhöht. Während die Vorräte, die Ertragsteuerforderungen und die übrigen Vermögenswerte insgesamt um 0,4 Mrd. € stiegen, erhöhten sich die sonstigen finanziellen Vermögenswerte im Vergleich zum 31. Dezember 2009 um 0,4 Mrd. €. In diesem Geschäftsjahr haben wir gemeinsam mit der France Télécom S.A. dem Joint Venture Everything Everywhere eine Finanzierung bereitgestellt. Diese wurde in Form einer Anleihe, die zu gleichen Teilen von beiden Gesellschaftern (jeweils 0,8 Mrd. €) erworben wurde, vorgenommen. Die Bewertung der kurzfristigen derivativen finanziellen Vermögenswerte führte dem entgegen zu einer Reduzierung um 0,2 Mrd. €.

Der Anstieg der **immateriellen Vermögenswerte und Sachanlagen** von 0,9 Mrd. € war im Wesentlichen auf Zugänge von 10,8 Mrd. € (davon Technische Anlagen und Maschinen: 2,6 Mrd. €, Erwerb Spektrum: 1,3 Mrd. € und geleistete Anzahlungen: 4,0 Mrd. €), Wechselkurseffekte von 2,4 Mrd. € und den Zugang des Goodwills aus dem Erwerb der STRATO von 0,2 Mrd. € zurückzuführen. Abschreibungen von 11,8 Mrd. € (davon erworbene immaterielle Vermögenswerte: 2,8 Mrd. €, Technische Anlagen und Maschinen: 6,1 Mrd. €) und Abgänge von 0,7 Mrd. € standen dem entgegen.

Die kurzfristigen und langfristigen **finanziellen Verbindlichkeiten** haben sich im Vergleich zum Jahresende um 0,6 Mrd. € verringert. Während die kurzfristigen finanziellen Verbindlichkeiten um 2,3 Mrd. € anstiegen, sanken die langfristigen finanziellen Verbindlichkeiten um 2,9 Mrd. €.  Weitere Erläuterungen hierzu sind den nachfolgenden Tabellen und den zugehörigen Erläuterungen zu entnehmen.

Die **übrigen Schulden** (kurzfristig und langfristig) stiegen um 1,1 Mrd. € vor allem aufgrund von gestiegenen Verbindlichkeiten im Rahmen des Vorruhestands der Beamten (0,4 Mrd. €) und um 0,5 Mrd. € höhere passive latente Steuern (im Wesentlichen aus Wechselkurseffekten).

Die **Rückstellungen** (kurzfristig und langfristig) sanken um 0,5 Mrd. €. Während die Pensionsrückstellungen und ähnliche Verpflichtungen um 0,2 Mrd. € anstiegen, reduzierten sich die Rückstellungen aus Restrukturierung um 0,9 Mrd. € im Vergleich zum 31. Dezember 2009.

Das **Eigenkapital** hat sich um 1,1 Mrd. € auf 43,0 Mrd. € erhöht. Die positive Entwicklung des sonstigen Ergebnisses mit 3,7 Mrd. € (im Wesentlichen aus Währungsumrechnungen ausländischer Geschäftsbetriebe) und der Überschuss in Höhe von 1,8 Mrd. € wirkten sich hierbei steigernd aus. Dagegen wirkten sich die Dividendenausschüttungen des Konzerns in Höhe von 4,0 Mrd. € und die Kapitalherabsetzung der Deutschen Telekom AG von 0,4 Mrd. € reduzierend aus.

## Finanzielle Verbindlichkeiten.

|                                                                                | 31.12.2010    |                            |                                         |                              |
|--------------------------------------------------------------------------------|---------------|----------------------------|-----------------------------------------|------------------------------|
|                                                                                | Summe         | Restlaufzeit<br>bis 1 Jahr | Restlaufzeit<br>über 1 Jahr bis 5 Jahre | Restlaufzeit<br>über 5 Jahre |
|                                                                                | Mio. €        | Mio. €                     | Mio. €                                  | Mio. €                       |
| Anleihen und sonstige verbriefte Verbindlichkeiten                             |               |                            |                                         |                              |
| Nicht konvertible Anleihen                                                     | 23 078        | 3 894                      | 9 317                                   | 9 867                        |
| Commercial Papers, Medium Term Notes und ähnliche Verbindlichkeiten            | 15 112        | 2 843                      | 6 195                                   | 6 074                        |
| Verbindlichkeiten gegenüber Kreditinstituten                                   | 4 190         | 472                        | 3 284                                   | 434                          |
|                                                                                | <b>42 380</b> | <b>7 209</b>               | <b>18 796</b>                           | <b>16 375</b>                |
| Verbindlichkeiten aus Leasingverhältnissen                                     | 1 934         | 142                        | 426                                     | 1 366                        |
| Verbindlichkeiten gegenüber Nicht-Kreditinstituten<br>aus Schuldscheindarlehen | 1 164         | –                          | 192                                     | 972                          |
| Sonstige verzinsliche Verbindlichkeiten                                        | 1 304         | 1 056                      | 139                                     | 109                          |
| Sonstige unverzinsliche Verbindlichkeiten                                      | 3 193         | 3 176                      | 15                                      | 2                            |
| Derivative finanzielle Verbindlichkeiten                                       | 571           | 106                        | 457                                     | 8                            |
|                                                                                | <b>8 166</b>  | <b>4 480</b>               | <b>1 229</b>                            | <b>2 457</b>                 |
| <b>Finanzielle Verbindlichkeiten</b>                                           | <b>50 546</b> | <b>11 689</b>              | <b>20 025</b>                           | <b>18 832</b>                |

## Herleitung Brutto-Finanzverbindlichkeiten.

|                                               | 31.12.2010<br>Mio. € | 31.12.2009<br>Mio. € | Veränderung<br>Mio. € | Veränderung<br>% | 31.12.2008<br>Mio. € |
|-----------------------------------------------|----------------------|----------------------|-----------------------|------------------|----------------------|
| Finanzielle Verbindlichkeiten (kurzfristig)   | 11 689               | 9 391                | 2 298                 | 24,5             | 9 584                |
| Finanzielle Verbindlichkeiten (langfristig)   | 38 857               | 41 800               | (2 943)               | (7,0)            | 37 010               |
| <b>Finanzielle Verbindlichkeiten</b>          | <b>50 546</b>        | <b>51 191</b>        | <b>(645)</b>          | <b>(1,3)</b>     | <b>46 594</b>        |
| Zinsabgrenzungen                              | (1 195)              | (1 175)              | (20)                  | (1,7)            | (988)                |
| Verpflichtungen aus Unternehmenstransaktionen | (1 566)              | (1 455)              | (111)                 | (7,6)            | (1 641)              |
| Sonstige                                      | (467)                | (444)                | (23)                  | (5,2)            | (518)                |
| <b>Brutto-Finanzverbindlichkeiten</b>         | <b>47 318</b>        | <b>48 117</b>        | <b>(799)</b>          | <b>(1,7)</b>     | <b>43 447</b>        |

## Netto-Finanzverbindlichkeiten.

|                                                                             | 31.12.2010<br>Mio. € | 31.12.2009<br>Mio. € | 31.12.2008<br>Mio. € |
|-----------------------------------------------------------------------------|----------------------|----------------------|----------------------|
| Anleihen                                                                    | 38 190               | 38 508               | 34 302               |
| Verbindlichkeiten gegenüber Kreditinstituten                                | 4 190                | 4 718                | 4 222                |
| Verbindlichkeiten gegenüber Nicht-Kreditinstituten aus Schuldscheindarlehen | 1 164                | 1 057                | 887                  |
| Derivative finanzielle Verbindlichkeiten                                    | 561                  | 924                  | 1 053                |
| Verbindlichkeiten aus Leasingverhältnissen                                  | 1 934                | 1 909                | 2 009                |
| Andere finanzielle Verbindlichkeiten                                        | 1 279                | 1 001                | 974                  |
| <b>Brutto-Finanzverbindlichkeiten</b>                                       | <b>47 318</b>        | <b>48 117</b>        | <b>43 447</b>        |
| Zahlungsmittel und Zahlungsmitteläquivalente                                | 2 808                | 5 022                | 3 026                |
| Finanzielle Vermögenswerte Available-for-Sale/Held for Trading              | 75                   | 162                  | 101                  |
| Derivative finanzielle Vermögenswerte                                       | 835                  | 1 048                | 1 598                |
| Andere finanzielle Vermögenswerte                                           | 1 331                | 974                  | 564                  |
| <b>Netto-Finanzverbindlichkeiten</b>                                        | <b>42 269</b>        | <b>40 911</b>        | <b>38 158</b>        |

Wir haben unsere Netto-Finanzverbindlichkeiten im Vergleich zum Vorjahr um 1,4 Mrd. € auf 42,3 Mrd. € erhöht. Erhöhend wirkten sich Dividendenausschüttungen von 4,0 Mrd. €, der Erwerb von Spektrum (1,3 Mrd. €), Effekte aus Unternehmenstransaktionen von insgesamt 0,8 Mrd. €, Wechselkurseffekte von 0,8 Mrd. € sowie der Aktienrückkauf in Höhe von 0,4 Mrd. € aus. Der Free Cashflow von 6,5 Mrd. € wirkte sich verringend auf die Netto-Finanzverbindlichkeiten aus.

Das **Finanzmanagement** der Deutschen Telekom stellt die permanente Zahlungsfähigkeit und damit die Erhaltung des finanziellen Gleichgewichts im Konzern sicher. Die Grundzüge der Finanzpolitik legt der Vorstand jährlich fest, der Aufsichtsrat überwacht sie. Die Umsetzung der Finanzpolitik sowie das laufende Risikomanagement verantwortet die Konzern-Treasury.

## Rating der Deutschen Telekom AG.

|                         | Standard & Poor's | Moody's       | Fitch         |
|-------------------------|-------------------|---------------|---------------|
| <b>Langfrist-Rating</b> |                   |               |               |
| 31.12.2008              | BBB+              | Baa1          | A-            |
| 31.12.2009              | BBB+              | Baa1          | BBB+          |
| <b>31.12.2010</b>       | <b>BBB+</b>       | <b>Baa1</b>   | <b>BBB+</b>   |
| <b>Kurzfrist-Rating</b> | <b>A-2</b>        | <b>P-2</b>    | <b>F2</b>     |
| <b>Ausblick</b>         | <b>stabil</b>     | <b>stabil</b> | <b>stabil</b> |

## Finanzielle Flexibilität.

|                                                                                             | 31.12.2010 | 31.12.2009 | 31.12.2008 |
|---------------------------------------------------------------------------------------------|------------|------------|------------|
| <b>Relative Verschuldung</b>                                                                |            |            |            |
| $\frac{\text{Netto-Finanzverbindlichkeiten}}{\text{EBITDA (bereinigt um Sondereinflüsse)}}$ | 2,2        | 2,0        | 2,0        |
| <b>Eigenkapitalquote</b>                                                                    | 33,7       | 32,8       | 35,0       |
| <b>Gearing</b>                                                                              |            |            |            |
| $\frac{\text{Netto-Finanzverbindlichkeiten}}{\text{Eigenkapital}}$                          | 1,0        | 1,0        | 0,9        |

Zur Sicherstellung der finanziellen Flexibilität setzen wir im Wesentlichen zwei Kennzahlen ein: das Gearing und die Relative Verschuldung. Ein Bestandteil der Kennzahlen sind die Netto-Finanzverbindlichkeiten, die der Konzern als eine wichtige Kenngröße gegenüber Investoren, Analysten und Ratingagenturen verwendet.

**Kapitalflussrechnung (Kurzfassung).**

|                                                                                                                                                       | 2010<br>Mio. €  | 2009<br>Mio. € | 2008<br>Mio. €  |
|-------------------------------------------------------------------------------------------------------------------------------------------------------|-----------------|----------------|-----------------|
| <b>Cashflow aus Geschäftstätigkeit</b>                                                                                                                | <b>14 731</b>   | <b>15 795</b>  | <b>15 368</b>   |
| Auszahlungen für Investitionen in immaterielle Vermögenswerte (ohne Goodwill und vor Investitionen in Spektrum) und Sachanlagen ( <b>Cash Capex</b> ) | (8 532)         | (9 202)        | (8 707)         |
| Einzahlungen aus Abgängen von immateriellen Vermögenswerten (ohne Goodwill) und Sachanlagen                                                           | 344             | 376            | 372             |
| <b>Free Cashflow (vor Ausschüttung und vor Investitionen in Spektrum)</b>                                                                             | <b>6 543</b>    | <b>6 969</b>   | <b>7 033</b>    |
| <b>Cashflow aus Investitionstätigkeit</b>                                                                                                             | <b>(10 711)</b> | <b>(8 649)</b> | <b>(11 384)</b> |
| <b>Cashflow aus Finanzierungstätigkeit</b>                                                                                                            | <b>(6 369)</b>  | <b>(5 123)</b> | <b>(3 097)</b>  |
| Auswirkung von Kursveränderungen auf die Zahlungsmittel (Laufzeit bis 3 Monate)                                                                       | 50              | 58             | (61)            |
| Zahlungsmittelveränderung im Zusammenhang mit zur Veräußerung gehaltenen langfristigen Vermögenswerten und Veräußerungsgruppen                        | 85              | (85)           | -               |
| Veränderung der kurzfristigen Zahlungsmittel                                                                                                          | (2 214)         | 1 996          | 826             |
| <b>Zahlungsmittel und Zahlungsmitteläquivalente</b>                                                                                                   | <b>2 808</b>    | <b>5 022</b>   | <b>3 026</b>    |

**Free Cashflow.** Der Free Cashflow des Konzerns lag mit 6,5 Mrd. € um 0,4 Mrd. € unter dem des Vorjahres.

Im Geschäftsjahr 2010 verringerte sich der Cashflow aus Geschäftstätigkeit gegenüber dem Vorjahreszeitraum um 1,1 Mrd. € auf 14,7 Mrd. €. Neben den Effekten aus der operativen Geschäftsentwicklung waren im Wesentlichen die folgenden Effekte für diesen Rückgang verantwortlich: gegenüber dem Vorjahr geringere Einzahlungen im Rahmen von Forderungsverkäufen (Factoring) in Höhe von 0,6 Mrd. € sowie netto höhere Auszahlungen aus dem Aufbau von Vorräten in Höhe von 0,4 Mrd. €. Dem stehen höhere Einzahlungen aus erhaltenen Dividenden in Höhe von 0,4 Mrd. € – im Wesentlichen aus einer unterjährigen Ausschüttung des Joint Venture Everything Everywhere – gegenüber. Die weiteren Veränderungen des Cashflows aus Geschäftstätigkeit umfassen eine Vielzahl von zum Teil gegenläufigen Effekten.

Die Auszahlungen für Investitionen in immaterielle Vermögenswerte (ohne Goodwill und vor Investitionen in Spektrum) und Sachanlagen sanken im Vergleich zum Vorjahr um 0,7 Mrd. €, während die Einzahlungen auf dem Niveau des Vorjahres blieben.

**Cashflow aus Investitionstätigkeit.** Die Mittelabflüsse aus Investitionstätigkeit beliefen sich auf 10,7 Mrd. € gegenüber 8,6 Mrd. € im Vorjahr. Zu dieser Veränderung trug u. a. der Zugang der Zahlungsmittel der OTE-Gruppe in Höhe von 1,6 Mrd. € im Vorjahr bei, dem in diesem Jahr ein Gesamteffekt aus dem Abgang der T-Mobile UK in Höhe von 0,4 Mrd. € gegenüberstand. Darüber hinaus erwarb die Deutsche Telekom im Geschäftsjahr 2010 Anteile in Höhe von 0,8 Mrd. € an einer vom Joint Venture Everything Everywhere begebenen Anleihe und verzeichnete höhere Auszahlungen für immaterielle Vermögenswerte in Höhe von 1,4 Mrd. €, was hauptsächlich auf die Auszahlungen für den Erwerb von Mobilfunk-Lizenzen (Spektrum) in Deutschland in Höhe von 1,3 Mrd. € zurückzuführen war.

Gegenläufig entwickelten sich die Auszahlungen für Sachanlagen (0,7 Mrd. €) und Auszahlungen für Unternehmenserwerbe (0,6 Mrd. €), die sich jeweils verringerten. Gegenläufig entwickelten sich die Nettoszahungen aus der Veränderung kurzfristiger finanzieller Vermögenswerte, die sich um 0,8 Mrd. € erhöhten.

**Cashflow aus Finanzierungstätigkeit.** Die Mittelabflüsse aus Finanzierungstätigkeit betrugen 6,4 Mrd. € im Vergleich zu 5,1 Mrd. € im Vorjahr. Neben einer netto Aufnahme von mittel- und langfristigen Finanzverbindlichkeiten in Höhe von 3,1 Mrd. € (2009: 5,3 Mrd. €) ist diese Entwicklung auch auf Auszahlungen für den Rückkauf von Aktien in Höhe von 0,4 Mrd. € zurückzuführen. Demgegenüber verringerte sich netto die Rückzahlung von kurzfristigen Finanzverbindlichkeiten um 1,3 Mrd. €, während sich die Ausschüttungen der OTE um 0,2 Mrd. € sowie der Slovak Telekom um 0,1 Mrd. € gegenüber dem Vorjahr verringerten.

☞ Weitergehende Erläuterungen zur Konzern-Kapitalflussrechnung finden sich im Konzern-Anhang.

# Geschäftsentwicklung der operativen Segmente.

## Anteil der operativen Segmente am Konzernumsatz.

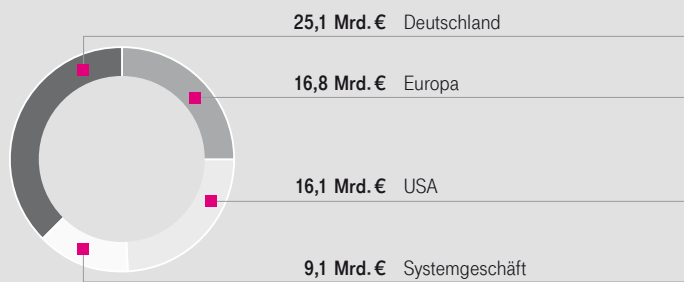

Anteile der Konzernzentrale & Shared Services 2,2 Mrd. € sowie Überleitung –6,9 Mrd. €.

## Anteil der operativen Segmente am EBITDA bereinigt.

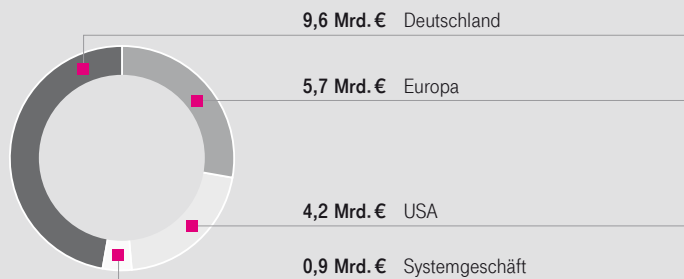

Anteile der Konzernzentrale & Shared Services –0,9 Mrd. € sowie Überleitung –0,1 Mrd. €.

## Anteil der operativen Segmente am EBIT.

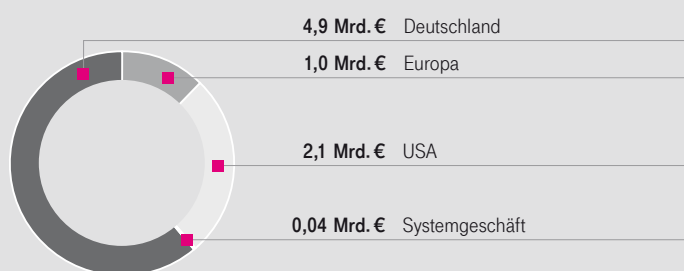

Anteile der Konzernzentrale & Shared Services –2,5 Mrd. € sowie Überleitung –0,1 Mrd. €.



# Deutschland.

## Kundenentwicklung.

**Festnetz-Anschlüsse.** (Tsd.)

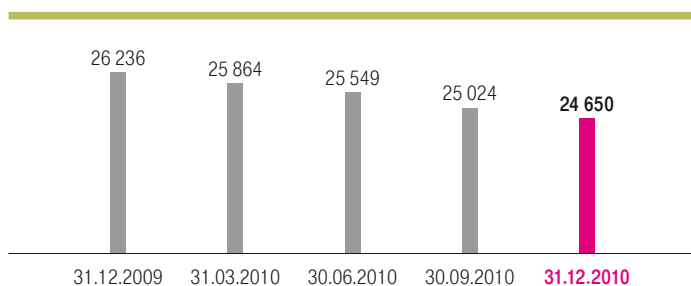

**IPTV.\*** (Tsd.)

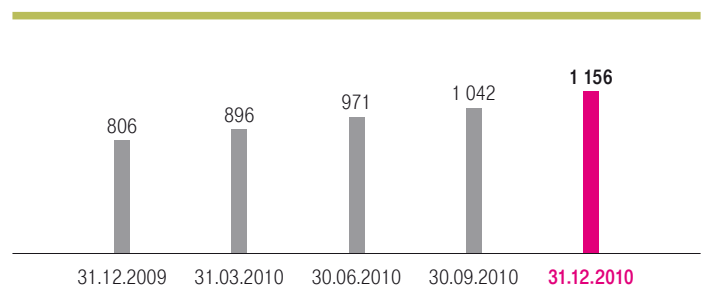

\* Angeschlossene Kunden.

**Breitbandanschlüsse Retail.** (Tsd.)

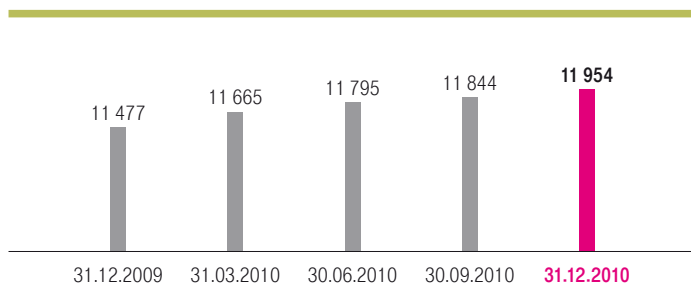

**Mobilfunk-Kunden.\*** (Tsd.)

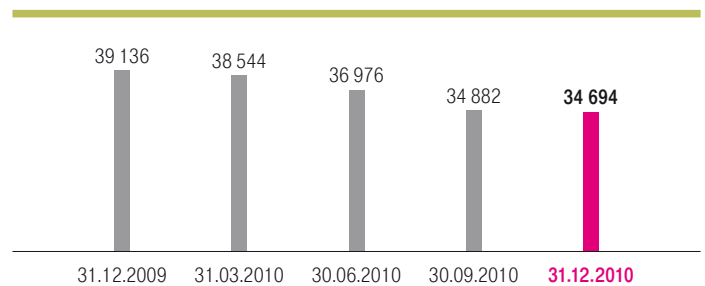

\* Ausbuchung von inaktiven Prepaid-Kundenkarten: Gesamtjahr 2009 (4,4 Mio.); im ersten Quartal 2010 (1,5 Mio.); im zweiten Quartal 2010 (2,5 Mio.); im dritten Quartal 2010 (3,1 Mio.); im vierten Quartal 2010 (1,2 Mio.). Ab dem 1. April 2010 erfolgt automatisch eine Kündigung durch die Telekom Deutschland GmbH, wenn eine Prepaid-Karte zwei Jahre nicht aufgeladen wurde und drei Monate nicht aktiv war.

|                                  | 31.12.2010<br>Mio. | 31.12.2009<br>Mio. | Veränderung<br>Mio. | Veränderung<br>% | 31.12.2008<br>Mio. |
|----------------------------------|--------------------|--------------------|---------------------|------------------|--------------------|
| <b>Festnetz</b>                  |                    |                    |                     |                  |                    |
| Festnetz-Anschlüsse              | 24,7               | 26,2               | (1,5)               | (5,7)            | 28,3               |
| Breitbandanschlüsse Retail       | 12,0               | 11,5               | 0,5                 | 4,3              | 10,6               |
| Wholesale gebündelte Anschlüsse  | 1,0                | 1,6                | (0,6)               | (37,5)           | 2,5                |
| Teilnehmeranschlussleitung (TAL) | 9,5                | 9,1                | 0,4                 | 4,4              | 8,3                |
| Wholesale entbündelte Anschlüsse | 1,0                | 0,6                | 0,4                 | 66,7             | 0,2                |
| <b>Mobilfunk</b>                 |                    |                    |                     |                  |                    |
| Mobilfunk-Kunden *               | 34,7               | 39,1               | (4,4)               | (11,3)           | 39,1               |

\* Ab dem 1. April 2010 erfolgt automatisch eine Kündigung durch die Telekom Deutschland GmbH, wenn eine Prepaid-Karte zwei Jahre nicht aufgeladen wurde und drei Monate nicht aktiv war.

## Gesamt.

Im operativen Segment Deutschland bündeln wir die Servicedienstleistungen rund um Mobilfunk, Breitband und Festnetz-Telefonie. In den vergangenen Jahren begegneten wir immer neuen Herausforderungen: Regulatorische Entscheidungen, zunehmend gesättigte Märkte und gut aufgestellte Mitbewerber haben den Wettbewerb verschärft. Doch unser Deutschlandgeschäft hat sich in allen Märkten gut behauptet.

## Festnetz.

### Alles, was verbindet: Telefon, Internet und Fernsehen.

Unser Anteil am hiesigen Breitbandmarkt liegt auch am Ende des Jahres 2010 stabil bei 46 %. Bei den Retail-Anschlüssen konnten wir rund 0,5 Mio. Neukunden gewinnen. Somit steigt die Gesamtzahl der Anschlüsse auf 12,0 Mio. Auch im Berichtsjahr haben sich für unser TV-Angebot Entertain wieder mehr als eine halbe Million Menschen entschieden: Bis zum 31. Dezember 2010 wurden insgesamt 1,6 Mio. Entertain-Pakete vermarktet. Die Anzahl der Bestandskunden steigerten wir im Berichtsjahr um 0,4 Mio. auf rund 1,2 Mio.

Bis zum 31. Dezember 2010 nutzten rund 24,7 Mio. Menschen einen Festnetz-Anschluss der Deutschen Telekom. Also haben wir im Jahr 2010 zwar rund 5,7 % bzw. mehr als 1,5 Mio. Anschlüsse verloren, jedoch 0,5 Mio. weniger Anschlussverluste als im Jahr zuvor. Zum Vergleich: Ende des Jahres 2009 waren es 2,1 Mio. und Ende 2008 noch 2,5 Mio. verlorene Anschlüsse. Bei den Anschlussverlusten handelt es sich größtenteils um Kunden, die zu Kabelnetzbetreibern, Netzinfrastruktur-anbietern und Mobilfunk-Betreibern wechselten.

Dagegen stiegen die Zahlen verschiedener Vorleistungsprodukte unseres Unternehmens für die Mitbewerber, wie der Teilnehmeranschlussleitung (TAL) und des entbündelten Bitstromzugangs (IP-BSA). Die Anzahl

der TAL erhöhte sich gegenüber dem Vorjahr um 4,4 % auf nun 9,5 Mio. Anschlüsse. Die Anzahl unserer gebündelten Wholesale-Anschlüsse sank im Jahr 2010 um rund 0,6 Mio. auf 1,0 Mio. Wir gehen davon aus, dass dieser Trend auch in den kommenden Jahren anhält. Grund dafür ist vor allem, dass unsere Mitbewerber, um ihr Angebot zu optimieren, von gebündelten zu entbündelten Wholesale-Angeboten wechseln. So verbuchen wir bei den entbündelten Angeboten einen Zuwachs von rund 0,4 Mio.

## Mobilfunk.

### Überall mitten im Leben: Mobile Telefonie und Datenanwendungen.

Auch 2010 haben wir weiterhin das im Vergleich zum Gesamtmarkt umsatzstärkste Mobilfunk-Geschäft in Deutschland. Wir konnten somit unseren Marktanteil steigern. Unsere Strategie, den Fokus unseres Mobilfunk-Geschäfts auf werthaltige Vertragskunden auszurichten, ist also erfolgreich. Die Zahl unserer Mobilfunk-Kunden sank zwar um 11,3 % auf 34,7 Mio., doch ist die Ursache hierfür die Bereinigung unserer Kundendatenbank: Auch im vergangenen Geschäftsjahr haben wir sie konsequent bereinigt und insgesamt rund 8,3 Mio. inaktive Prepaid-Kundenkarten deaktiviert. So senken wir unseren Verwaltungsaufwand. Da diese SIM-Karten bereits seit langer Zeit inaktiv waren, steuerten sie auch nichts zu unserem Umsatz bei. Die Anzahl unserer Vertragskunden bleibt stabil bei 17,2 Mio. Für diese positive Entwicklung sehen wir zwei Gründe:

- Unsere Kunden nutzen unser umfassendes Angebot an attraktiven und innovativen Smartphones, wie das neue Windows Phone 7, zahlreiche Android-Geräte und nach wie vor das Apple iPhone.
- Seit November 2010 bieten wir unseren Kunden verbesserte integrierte Tarife für Telefonie und Datennutzung. Damit setzen wir bei den Vertragskunden auch weiterhin auf nachhaltiges und vor allem werthaltiges Wachstum.

## Operative Entwicklung.

|                                               | 2010<br>Mio. € | 2009<br>Mio. € | Veränderung<br>Mio. € | Veränderung<br>% | 2008<br>Mio. € |
|-----------------------------------------------|----------------|----------------|-----------------------|------------------|----------------|
| <b>Gesamtumsatz</b>                           | 25 145         | 25 423         | (278)                 | (1,1)            | 26 400         |
| Festnetz                                      | 18 177         | 18 736         | (559)                 | (3,0)            | 19 782         |
| Mobilfunk                                     | 8 349          | 8 109          | 240                   | 3,0              | 8 069          |
| Betriebsergebnis (EBIT)                       | 4 916          | 5 062          | (146)                 | (2,9)            | 4 624          |
| EBIT-Marge %                                  | 19,6           | 19,9           |                       |                  | 17,5           |
| Abschreibungen                                | (4 193)        | (4 196)        | 3                     | 0,1              | (4 180)        |
| EBITDA                                        | 9 109          | 9 258          | (149)                 | (1,6)            | 8 804          |
| EBITDA-wirksame Sondereinflüsse               | (509)          | (349)          | (160)                 | (45,8)           | (960)          |
| <b>EBITDA (bereinigt um Sondereinflüsse)</b>  | 9 618          | 9 607          | 11                    | 0,1              | 9 764          |
| Festnetz                                      | 6 061          | 6 247          | (186)                 | (3,0)            | 6 400          |
| Mobilfunk                                     | 3 559          | 3 373          | 186                   | 5,5              | 3 364          |
| EBITDA-Marge (bereinigt um Sondereinflüsse) % | 38,3           | 37,7           |                       |                  | 37,0           |
| Festnetz %                                    | 33,3           | 33,3           |                       |                  | 32,4           |
| Mobilfunk %                                   | 42,6           | 41,6           |                       |                  | 41,7           |
| <b>Cash Capex</b>                             | (4 765)        | (3 158)        | (1 607)               | (50,9)           | (3 038)        |
| <b>Anzahl Mitarbeiter (im Durchschnitt)</b>   | 79 364         | 84 584         | (5 220)               | (6,2)            | 89 961         |
| Festnetz                                      | 73 614         | 78 507         | (4 893)               | (6,2)            | 83 932         |
| Mobilfunk                                     | 5 750          | 6 077          | (327)                 | (5,4)            | 6 029          |

Die Beiträge der Bereiche Festnetz und Mobilfunk entsprechen grundsätzlich den jeweiligen Einzelsichten ohne Berücksichtigung von Konsolidierungseffekten auf der Ebene des operativen Segments.

**Gesamtumsatz.**

Der Gesamtumsatz unseres operativen Segments Deutschland liegt 2010 bei 25,1 Mrd. €. Der Rückgang um 1,1 % im Vergleich zum Vorjahr kommt vor allem durch die Verluste in unserer Festnetz-Sparte, die der Umsatz unseres Mobilfunk-Geschäfts teilweise kompensieren konnte. Trotz regulatorischer Entscheidungen und des starken Wettbewerbs – sowohl im Mobilfunk als auch im Festnetz – konnten wir den Rückgang des Gesamtumsatzes damit im Vergleich zum Vorjahr (Umsatzrückgang 2009: 3,7 %) erneut verringern.

Der Umsatz im **Festnetz-Geschäft** sank um 3,0 % auf 18,2 Mrd. €. Neben den bereits erwähnten regulatorischen Eingriffen liegen die Ursachen hierfür in den anhaltenden Anschlussverlusten. Die Umsatzrückgänge konnten in diesem Jahr teilweise kompensiert werden durch die positiven Effekte unserer Erstkonsolidierungen von STRATO und Firstgate (ClickandBuy), das Mengenwachstum der TAL und der entbündelten Anschlüsse sowie durch die Zuwächse im Bereich unserer Breitband-Retail-Anschlüsse.

Im **Mobilfunk-Geschäft** steigerten wir unseren Gesamtumsatz im Berichtsjahr um 3,0 % auf 8,3 Mrd. €. Bereits 2009 stieg der Umsatz um 0,5 %, und mit dem erneuten Umsatzplus in 2010 bestätigen wir die positiven Anzeichen aus den vorangegangenen Jahren.

Einen großen Anteil an diesem Erfolg haben erneut die gestiegenen Service- und Datenumsätze. So wuchsen die Serviceumsätze im vergangenen Geschäftsjahr um 4,4 % auf 7,3 Mrd. €, während die Datenumsätze sogar um 35,7 % zulegten. Dieser positive Trend ist vor allem Folge der wachsenden Beliebtheit von innovativen Smartphones. Nach wie vor sind wir im gesamten deutschen Mobilfunk-Markt das umsatzstärkste Unternehmen.

Die Absenkung der Terminierungsentgelte im Mobilfunk um 49 % am 30. November 2010 hatte zwar im Dezember negative Auswirkungen auf unseren Umsatz und unser EBITDA, jedoch noch nicht in berichtenswerter Höhe. In 2011 rechnen wir mit deutlich stärkeren negativen Effekten.

### EBITDA, bereinigtes EBITDA.

Im Jahr 2010 beträgt unser – um Sondereffekte bereinigtes – EBITDA 9,6 Mrd. € und bleibt somit im Vergleich zum Vorjahr trotz Umsatzrückgang stabil. Das Verhältnis unseres bereinigten EBITDA zum Gesamtumsatz – die bereinigte EBITDA-Marge – stieg um 0,6 Prozentpunkte auf 38,3 %.

Ungeachtet des bereits dargestellten Umsatzrückgangs im Festnetz-Geschäft bleibt das bereinigte EBITDA stabil bei 6,1 Mrd. €. Im Mobilfunk steigerten wir das bereinigte EBITDA sogar um 5,5 % auf 3,6 Mrd. €. Wesentlichen Beitrag dazu leisteten unsere umfassenden Projekte für besseren Service und effektives Kostenmanagement wie z. B. „Save for Service“. Beispiele dafür sind die Optimierung unseres Kundenservice oder der Versand von Rechnungen per E-Mail. Außerdem erhöhten wir die Effizienz unserer Werbe- und Kommunikationsmaßnahmen und optimierten unsere Büro- und Lagerflächennutzung. Trotz Investitionen in Wachstumsgeschäfte (wie z. B. STRATO) oder in die stark gestiegene Vermarktung von Smartphones konnten wir im Jahr 2010 durch verschiedene Maßnahmen in Geschäftsfeldern wie Produktion, Vertrieb, Service, Marketing und IT unsere operativen Kosten um ca. 0,5 Mrd. € senken.

### EBIT.

Das Betriebsergebnis beläuft sich 2010 auf 4,9 Mrd. €. Somit liegt unser Betriebsergebnis 2,9 % unter dem Vorjahreswert von 5,1 Mrd. €. Dieser Rückgang ist im Wesentlichen auf die Sondereffekte in Höhe von 0,5 Mrd. € zurückzuführen, die im Vergleich zum Vorjahr um 0,2 Mrd. € höher waren und sich größtenteils unseren personalbezogenen Ausgaben zuordnen lassen.

### Cash Capex.

Wir investieren seit Jahren konsequent in den Breitbandstandort Deutschland. Entsprechend stiegen unsere Investitionsausgaben im Vergleich zum Vorjahr um 50,9 % auf 4,8 Mrd. €. Diese Steigerung ergibt sich insbesondere durch die von uns im Mai 2010 ersteigerten Mobilfunk-Frequenzen im Bereich der Long Term Evolution (LTE). Damit sichern wir schon jetzt den Ausbau des mobilen Internets, gerade in ländlichen Regionen. Darüber hinaus steigerten wir unsere Investitionen in den marktgerechten Mobilfunknetzausbau durch hochbitratige Anbindung der Basisstationen unseres UMTS-Mobilfunknetzes, verstärkten Ausbau hochwertiger Übertragungswege sowie Sicherstellung des Netzbetriebs und den All-IP-Ausbau.

### Mitarbeiter.

Im Jahr 2010 beschäftigten wir durchschnittlich 79 364 Mitarbeiter. Das macht uns zu einem der größten Arbeitgeber in Deutschland. Trotz der Neueinstellungen durch die Erstkonsolidierungen der STRATO und ClickandBuy verringerte sich die Zahl unserer Mitarbeiter um 6,2 %. Zurückführen lässt sich das hauptsächlich auf unsere sozialverträglichen Maßnahmen im Personalum- und -abbau.

# Europa.

## Kundenentwicklung.

**Festnetz-Anschlüsse.** (Tsd.)

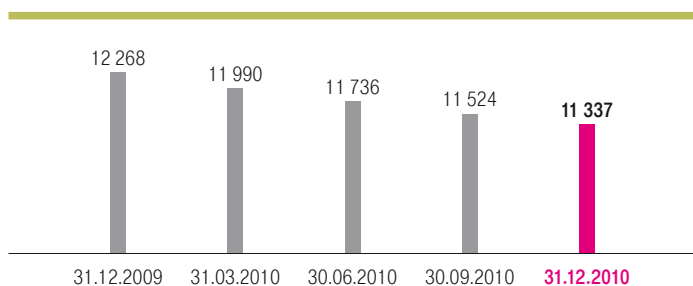

**IPTV.** (Tsd.)

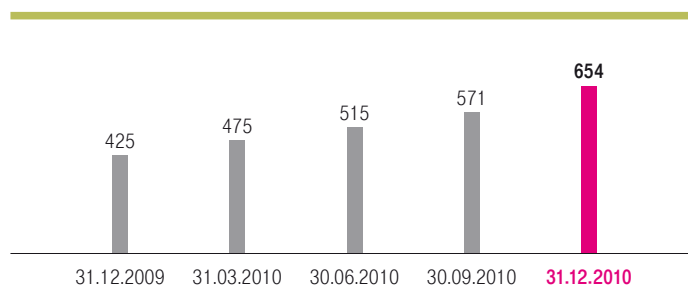

**Breitbandanschlüsse Retail.** (Tsd.)

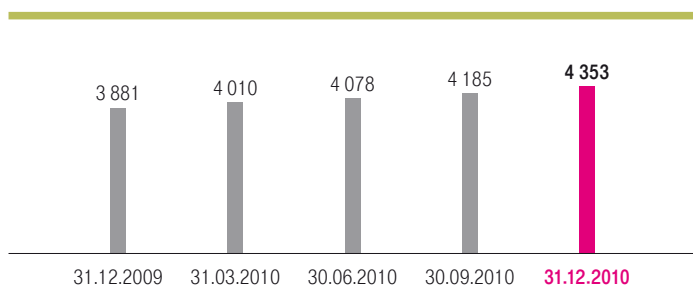

**Mobilfunk-Kunden.** (Tsd.)

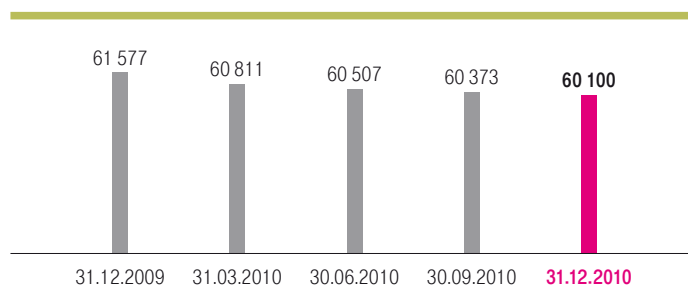

|                                      |                                  | 31.12.2010<br>Mio. | 31.12.2009<br>Mio. | Veränderung<br>Mio. | Veränderung<br>% | 31.12.2008<br>Mio. |
|--------------------------------------|----------------------------------|--------------------|--------------------|---------------------|------------------|--------------------|
| <b>Europa, gesamt</b> <sup>a,b</sup> | Festnetz-Anschlüsse              | 11,3               | 12,3               | (1,0)               | (8,1)            | 13,2               |
|                                      | Breitbandanschlüsse Retail       | 4,4                | 3,9                | 0,5                 | 12,8             | 3,3                |
|                                      | Wholesale gebündelte Anschlüsse  | 0,2                | 0,2                | -                   | -                | 0,3                |
|                                      | Teilnehmeranschlussleitung (TAL) | 1,5                | 1,1                | 0,4                 | 36,4             | 0,7                |
|                                      | Mobilfunk-Kunden                 | 60,1               | 61,6               | (1,5)               | (2,4)            | 59,0               |
| <b>Griechenland</b> <sup>b</sup>     | Festnetz-Anschlüsse              | 3,7                | 4,2                | (0,5)               | (11,9)           | 4,6                |
|                                      | Breitbandanschlüsse              | 1,1                | 1,1                | -                   | -                | 1,0                |
|                                      | Mobilfunk-Kunden                 | 8,0                | 9,2                | (1,2)               | (13,0)           | 7,9                |
| <b>Rumänien</b> <sup>b,c</sup>       | Festnetz-Anschlüsse              | 2,6                | 2,8                | (0,2)               | (7,1)            | 3,0                |
|                                      | Breitbandanschlüsse              | 1,0                | 0,8                | 0,2                 | 25,0             | 0,7                |
|                                      | Mobilfunk-Kunden                 | 6,8                | 7,3                | (0,5)               | (6,8)            | 5,9                |
| <b>Ungarn</b>                        | Festnetz-Anschlüsse              | 1,7                | 1,8                | (0,1)               | (5,6)            | 2,0                |
|                                      | Breitbandanschlüsse              | 0,8                | 0,8                | -                   | -                | 0,8                |
|                                      | Mobilfunk-Kunden                 | 5,2                | 5,1                | 0,1                 | 2,0              | 5,4                |
| <b>Polen</b>                         | Mobilfunk-Kunden                 | 13,3               | 13,5               | (0,2)               | (1,5)            | 13,3               |
| <b>Tschechische Republik</b>         | Festnetz-Anschlüsse              | 0,1                | 0,0                | 0,1                 | n. a.            | -                  |
|                                      | Breitbandanschlüsse              | 0,1                | 0,0                | 0,1                 | n. a.            | -                  |
|                                      | Mobilfunk-Kunden                 | 5,5                | 5,5                | -                   | -                | 5,4                |
| <b>Kroatien</b>                      | Festnetz-Anschlüsse              | 1,4                | 1,5                | (0,1)               | (6,7)            | 1,6                |
|                                      | Breitbandanschlüsse              | 0,6                | 0,6                | -                   | -                | 0,5                |
|                                      | Mobilfunk-Kunden                 | 2,9                | 2,9                | -                   | -                | 2,7                |
| <b>Niederlande</b>                   | Festnetz-Anschlüsse              | 0,3                | 0,3                | -                   | -                | 0,3                |
|                                      | Breitbandanschlüsse              | 0,3                | 0,3                | -                   | -                | 0,3                |
|                                      | Mobilfunk-Kunden                 | 4,5                | 4,6                | (0,1)               | (2,2)            | 5,3                |
| <b>Slowakei</b>                      | Festnetz-Anschlüsse              | 1,1                | 1,1                | -                   | -                | 1,1                |
|                                      | Breitbandanschlüsse              | 0,4                | 0,4                | -                   | -                | 0,3                |
|                                      | Mobilfunk-Kunden                 | 2,4                | 2,4                | -                   | -                | 2,3                |
| <b>Österreich</b>                    | Mobilfunk-Kunden                 | 3,8                | 3,4                | 0,4                 | 11,8             | 3,4                |
| <b>Übrige</b> <sup>b,d</sup>         | Festnetz-Anschlüsse              | 0,5                | 0,5                | -                   | -                | 0,6                |
|                                      | Breitbandanschlüsse              | 0,2                | 0,2                | -                   | -                | 0,1                |
|                                      | Mobilfunk-Kunden                 | 7,7                | 7,7                | -                   | -                | 7,4                |

<sup>a</sup> Die Kunden der T-Mobile UK, die seit dem 1. April 2010 durch die Zusammenlegung der T-Mobile UK und der Orange UK in das Joint Venture Everything Everywhere übergegangen sind, wurden zur besseren Vergleichbarkeit aus allen historischen Kundenzahlen herausgerechnet.

<sup>b</sup> Die ÖTE-Gruppe ist seit 1. Februar 2009 vollkonsolidiert. Vorjahreszahlen wurden pro-forma entsprechend angepasst.

<sup>c</sup> Inkl. der rumänischen Zapp seit dem 1. November 2009.

<sup>d</sup> Übrige enthält die Landesgesellschaften der Länder Bulgarien, Albanien, EJR Mazedonien und Montenegro.

## Gesamt.

Im Geschäftsjahr 2010 beeinträchtigten die angespannte gesamtwirtschaftliche Situation, vor allem in Griechenland und Rumänien, sowie der hohe Wettbewerbsdruck in allen Ländern die Kundenentwicklung unseres operativen Segments Europa. Im klassischen Festnetz sank die Zahl der Anschlüsse gegenüber 2009. Das konnten wir durch Zuwächse bei den Breitbandanschlüssen Retail sowie beim innovativen IPTV-Geschäft teilweise auffangen. Der Gesamtkundenbestand im Mobilfunk-Geschäft ging im gleichen Zeitraum leicht zurück.

## Festnetz.

### Alles, was verbindet: Telefon, Internet und Fernsehen.

Im klassischen Festnetz hatten wir Ende 2010 einen Bestand von 11,3 Mio. Anschlüssen; ein Rückgang um 8,1 % gegenüber 2009. Doch die Anschlussverluste haben sich von Quartal zu Quartal innerhalb des Jahres 2010 deutlich verlangsamt – mit dem bisher niedrigsten Verlust im vierten Quartal. Zurückzuführen sind diese Anschlussverluste auf den Wechsel der Kunden zu anderen Netzbetreibern, Kabelnetzbetreibern und Mobilfunk-Anbietern. Die großen Wachstumspotenziale der Zukunft liegen jedoch im Breitbandgeschäft, wie die Entwicklung unserer Breitbandanschlüsse zeigt: Zum 31. Dezember 2010 wuchsen die Retail-Anschlüsse sowie die ge- und entbündelten Wholesale-Anschlüsse insgesamt auf 4,6 Mio. Anschlüsse gegenüber 2009. Dabei trugen alle Länder unseres operativen Segments Europa zu diesem Ergebnis bei. Am höchsten waren diese Zuwächse in Rumänien und Ungarn. Außerdem setzte sich das kräftige Wachstum des IPTV-Geschäfts fort. Dank der erfolgreichen Vermarktung erzielten wir eine Wachstumsrate von 54 % gegenüber 2009. Die größten Beiträge leisteten hierbei Kroatien und Ungarn. Diese Entwicklung bestätigt unsere Strategie: Die Entscheidung, in einigen europäischen Ländern das Breitband- und TV-Geschäft mit Angeboten innovativer Produkte beispielsweise von Quad Play-Paketen in den Vordergrund der Vermarktung zu stellen, ist der richtige Weg zum Erfolg.

## Mobilfunk.

### Überall mitten im Leben: Mobile Telefonie und Datenanwendungen.

Der Gesamtkundenbestand des operativen Segments Europa fiel um 2,4 % auf 60,1 Mio. Mobilfunk-Kunden. Den größten Anteil an diesen sinkenden Kundenbeständen trugen Griechenland, Rumänien, Polen und die Niederlande. Wachsende Gesamtkundenzahlen erzielten Österreich und Ungarn und wirkten so dem Kundenrückgang entgegen. Alle übrigen Länder unseres operativen Segments Europa behaupteten sich in ihren hart umkämpften Märkten und stabilisierten ihren Kundenbestand. Hauptgrund für die niedrigeren Gesamtkundenzahlen gegenüber dem Vorjahr ist die Entwicklung im Prepaid-Segment: Dieses Segment umfasst 56 % des Gesamtkundenbestands. In Griechenland, Rumänien, Polen und den Niederlanden sank die Zahl der Prepaid-Kunden um rund 2 Mio. In Polen und den Niederlanden verringerte sich der Prepaid-Bestand aufgrund einer stärkeren Ausrichtung hin zum werthaltigen Vertragskundengeschäft. Zusätzlich verminderte sich in den Niederlanden und Rumänien der Prepaid-Kundenbestand, weil inaktive Prepaid-Kunden ausgebucht wurden. In Griechenland führten die im November 2009 neu eingeführten Registrierungsvorschriften zu einem Rückgang im Prepaid-Bestand.

Wachstumsmotor unseres operativen Segments Europa war auch im Berichtsjahr das werthaltige Vertragskundengeschäft. Bei fast allen europäischen Gesellschaften, mit Ausnahme von Rumänien und Mazedonien, konnten wir die Anzahl der Vertragskunden gegenüber dem Vorjahr weiter steigern. Von den insgesamt 1,1 Mio. neuen Vertragskunden stammte mit rund 0,6 Mio. Kunden der Großteil aus den Niederlanden, Ungarn und Bulgarien. Dieser positive Trend spiegelte sich auch im Anteil der Vertragskunden am gesamten Kundenbestand des operativen Segments Europa wider: Seit Jahresende 2009 erreichten wir einen Anstieg um 2,8 Prozentpunkte auf jetzt knapp 44 %. Dieses positive Ergebnis erzielten wir, weil wir uns strategisch darauf ausgerichtet haben, werthaltige Kunden zu gewinnen und an uns zu binden, wie beispielsweise durch die Vermarktung von attraktiven Tarifen mit Inklusivminuten, Flatrate-Tarifen und neuen Hardware-Angeboten in Verbindung mit einem Laufzeitvertrag. Im Rahmen von vernetztem Leben und Arbeiten erreichten wir gezielt neue Kundengruppen, indem wir innovative Daten- und Content-Dienste für das mobile Internet sowie innovative Mobilfunk-Endgeräte anboten. Hierbei kam den Smartphones eine besondere Bedeutung zu; beispielsweise trug die erfolgreiche Vermarktung des in allen europäischen Märkten eingeführten Apple iPhone 4 deutlich zu einem steigenden Vertragskundenbestand bei.

## Operative Entwicklung.

|                                               | 2010<br>Mio. € | 2009<br>Mio. € | Veränderung<br>Mio. € | Veränderung<br>% | 2008<br>Mio. € |
|-----------------------------------------------|----------------|----------------|-----------------------|------------------|----------------|
| <b>Gesamtumsatz</b>                           | 16 840         | 19 607         | (2 767)               | (14,1)           | 15 932         |
| davon: Griechenland                           | 3 876          | 3 899          | (23)                  | (0,6)            | -              |
| davon: Rumänien                               | 1 165          | 1 104          | 61                    | 5,5              | -              |
| davon: Ungarn                                 | 1 517          | 1 682          | (165)                 | (9,8)            | 2 006          |
| davon: Polen                                  | 1 839          | 1 757          | 82                    | 4,7              | 2 260          |
| davon: Tschechische Republik                  | 1 157          | 1 191          | (34)                  | (2,9)            | 1 329          |
| davon: Kroatien                               | 1 148          | 1 161          | (13)                  | (1,1)            | 1 223          |
| davon: Niederlande                            | 1 767          | 1 807          | (40)                  | (2,2)            | 1 806          |
| davon: Slowakei                               | 934            | 974            | (40)                  | (4,1)            | 994            |
| davon: Österreich                             | 983            | 1 038          | (55)                  | (5,3)            | 1 085          |
| davon: Großbritannien                         | 783            | 3 390          | (2 607)               | (76,9)           | 4 051          |
| davon: Übrige *                               | 1 937          | 1 885          | 52                    | 2,8              | 1 331          |
| <b>Betriebsergebnis (EBIT)</b>                | 985            | 140            | 845                   | n. a.            | 1 412          |
| EBIT-Marge %                                  | 5,8            | 0,7            |                       |                  | 8,9            |
| Abschreibungen                                | (4 157)        | (6 157)        | 2 000                 | 32,5             | (3 391)        |
| EBITDA                                        | 5 142          | 6 297          | (1 155)               | (18,3)           | 4 803          |
| EBITDA-wirksame Sondereinflüsse               | (606)          | (93)           | (513)                 | n. a.            | (151)          |
| <b>EBITDA (bereinigt um Sondereinflüsse)</b>  | 5 748          | 6 390          | (642)                 | (10,0)           | 4 954          |
| davon: Griechenland                           | 1 433          | 1 447          | (14)                  | (1,0)            | -              |
| davon: Rumänien                               | 281            | 293            | (12)                  | (4,1)            | -              |
| davon: Ungarn                                 | 567            | 675            | (108)                 | (16,0)           | 820            |
| davon: Polen                                  | 691            | 616            | 75                    | 12,2             | 785            |
| davon: Tschechische Republik                  | 551            | 614            | (63)                  | (10,3)           | 634            |
| davon: Kroatien                               | 507            | 525            | (18)                  | (3,4)            | 557            |
| davon: Niederlande                            | 461            | 430            | 31                    | 7,2              | 352            |
| davon: Slowakei                               | 403            | 439            | (36)                  | (8,2)            | 427            |
| davon: Österreich                             | 283            | 283            | -                     | -                | 285            |
| davon: Großbritannien                         | 167            | 611            | (444)                 | (72,7)           | 888            |
| davon: Übrige *                               | 426            | 446            | (20)                  | (4,5)            | 199            |
| EBITDA-Marge (bereinigt um Sondereinflüsse) % | 34,1           | 32,6           |                       |                  | 31,1           |
| <b>Cash Capex</b>                             | (2 012)        | (2 489)        | 477                   | 19,2             | (2 018)        |
| <b>Anzahl Mitarbeiter (im Durchschnitt)</b>   | 65 435         | 69 277         | (3 842)               | (5,5)            | 39 174         |

Die Beiträge der Landesgesellschaften entsprechen den jeweiligen Einzelabschlüssen der Gesellschaften ohne Berücksichtigung von Konsolidierungseffekten auf der Ebene des operativen Segments.

\* Übrige enthält die Landesgesellschaften der Länder Bulgarien, Albanien, EJR Mazedonien und Montenegro sowie ICSS (International Carrier Sales and Services), Europa Headquarter und bis einschließlich Mai 2010 T-Mobile International UK.





## Gesamtumsatz.

Im Geschäftsjahr 2010 erzielte unser operatives Segment Europa einen Gesamtumsatz von 16,8 Mrd. €, das sind 14,1 % oder 2,8 Mrd. € weniger als im Vorjahr. Dieser Nettorückgang ist vor allem die Folge von zwei gegenläufigen Effekten: Zum einen verringerte sich der Segmentumsatz durch die Entkonsolidierung der T-Mobile UK zum 1. April 2010; zum anderen wirkte sich der Konsolidierungskreiseffekt der OTE-Gruppe, die seit Februar 2009 vollständig einbezogen wurde, positiv auf die Umsatzentwicklung aus. Die positive Entwicklung der Wechselkurse gegenüber dem Euro verbesserte den Umsatz des Segments. Dazu trugen insbesondere der Polnische Zloty, die Tschechische Krone, der Ungarische Forint, das Britische Pfund und die Kroatianische Kuna bei. Bereinigt um diese Effekte reduzierte sich der Gesamtumsatz nur um 5,6 %. Dieser operative Umsatzrückgang lag hauptsächlich an Preisminderungen, die in den meisten Ländern des Segments durch regulierungsbedingt geringere Mobilfunk-Terminierungsentgelte und den scharfen Wettbewerb verursacht waren. Auch die von der ungarischen Regierung im Oktober 2010 erlassene Sondersteuer minderte mit einem Betrag von rund 0,1 Mrd. € rückwirkend für das gesamte Jahr 2010 den Gesamtumsatz. Zusätzlich belasteten die Mobilfunk-Abgabe in Kroatien sowie die schwierige gesamtwirtschaftliche Situation vor allem in den süd- und osteuropäischen Ländern den Gesamtumsatz erheblich. Besonders stark davon betroffen waren Griechenland, Rumänien und Ungarn: Auf sie entfallen über 64 % des operativen Umsatzrückgangs. Dem entgegen wirkten starke Umsatzzuwächse im Festnetz in den Bereichen Wholesale, Breitband und TV.

**Griechenland.** In Griechenland erreichten wir 2010 mit insgesamt 3,9 Mrd. € einen stabilen Umsatz gegenüber dem Vorjahr. Bereinigt um den griechischen Konsolidierungskreiseffekt der OTE-Gruppe sank der Umsatz um 9,7 %. Festnetz und Mobilfunk waren hierbei annähernd zu gleichen Teilen betroffen. Das Festnetz konnte die Verluste aus dem klassischen Geschäft durch eine positive Entwicklung der Wholesale- und Breitband-Umsätze nahezu auffangen. Im Mobilfunk wirkten sich die abgesenkten Terminierungsentgelte und der scharfe Preiswettbewerb negativ auf die Serviceumsätze aus. Zusätzlich führten die Prepaid-Registrierungsvorschriften erneut zu Kundenverlusten im Prepaid-Segment – und somit zu niedrigeren Umsätzen. Die leicht höheren Verkäufe bei den Endgeräten im Jahresvergleich wirkten dem Umsatzrückgang entgegen.

**Rumänien.** In Rumänien stieg im Berichtsjahr der Umsatz gegenüber dem Vorjahr um 5,5 %, vor allem durch den positiven rumänischen Konsolidierungskreiseffekt der OTE-Gruppe. Operativ sank der Umsatz im Festnetz aufgrund der angespannten gesamtwirtschaftlichen Lage und des sehr intensiven Preiskampfs auf dem rumänischen Telekommunikationsmarkt. Das enorme Kundenwachstum im Breitband führte zu höheren Umsätzen bei Breitband und TV. Diese Zuwächse konnten jedoch die negativen Effekte aus den Rückgängen im klassischen Festnetz-Geschäft nur zum Teil ausgleichen. Im Gegensatz dazu wuchs der operative Mobilfunk-Umsatz um einen knapp zweistelligen Prozentsatz hauptsächlich dank höherer Service- und Endgeräteumsätze. Einen weiteren positiven Umsatzbeitrag leistete ein leicht höherer Anteil von Vertragskunden am Gesamtkundenbestand, auch bedingt durch die Erstkonsolidierung des Mobilfunk-Anbieters Zapp zum 1. November 2009.

**Ungarn.** In Ungarn sank der Umsatz um 9,8 % auf 1,5 Mrd. € gegenüber 2009. Die im Oktober 2010 von der ungarischen Regierung neu eingeführte Sondersteuer reduzierte den Umsatz um rund 0,1 Mrd. €. Ohne diese Steuer wären die Umsätze nur um 4,4 % zurückgegangen. Wir profitierten dagegen von einer positiven Wechselkursentwicklung des Ungarischen Forint gegenüber dem Euro. Der um diese beiden Effekte bereinigte operative Umsatzrückgang geht primär auf die allgemeine gesamtwirtschaftliche Lage zurück. Davon war das Festnetz-Geschäft stärker betroffen als der Mobilfunk, trotz eines höheren Bestands an Breitband-TV-Anschlüssen und des dort gestiegenen Umsatzes. Die Serviceumsätze im Mobilfunk-Geschäft fielen vor allem infolge gesunkener Mobilfunk-Terminierungsentgelte. Zum Teil konnten steigende Non Voice-Umsätze diesen Rückgang ausgleichen.

**Polen.** Bei PTC ließen positive Wechselkurseffekte des Polnischen Zloty gegenüber dem Euro den Umsatz um 4,7 % steigen. Diese konnten die sinkenden operativen Umsätze – hauptsächlich verursacht durch die Serviceumsätze – ausgleichen. Höhere Non Voice-Umsätze kompensierten nur teilweise die Umsatzverluste bei der Sprachtelefonie. Diese Umsatzverluste wurden vor allem durch den Verfall der durchschnittlichen Minutenpreise ausgelöst.

**Tschechische Republik.** Im Vergleich zum Vorjahr reduzierte sich der Umsatz bei T-Mobile CZ um 2,9 % auf insgesamt 1,2 Mrd. €. Positive Wechselkurseffekte der Tschechischen Krone gegenüber dem Euro fingen teilweise den Rückgang des operativen Umsatzes auf. Der geringere operative Umsatz lag hauptsächlich an den Serviceumsätzen, die im Vorjahresvergleich vor allem wegen eines positiven Einmaleffekts im zweiten Quartal 2009 sanken. Zudem belastete die regulierungsbedingte Absenkung der Terminierungsentgelte die Umsätze. Die Festnetz-Umsätze infolge des Erwerbs des Retail-Geschäfts der Česká Radiokomunikace im Dezember 2009 konnten diese Effekte teilweise kompensieren.

**Kroatien.** In Kroatien ging der Umsatz gegenüber dem Vorjahr nur leicht zurück. Positive Wechselkurseffekte der Kroatischen Kuna gegenüber dem Euro milderten den Umsatzrückgang in lokaler Währung ab. Hauptgrund für den sinkenden operativen Umsatz war die gesamtwirtschaftliche Lage; das Mobilfunk-Geschäft war hiervon viel stärker betroffen als das Festnetz. Im Mobilfunk sanken die Serviceumsätze. Obwohl die Anzahl der Mobilfunk-Kunden leicht stieg, ließen sich die Umsatzrückgänge bei der mobilen Sprachtelefonie und im Non Voice-Bereich nicht ausgleichen. Zusätzlich belastete die im August 2009 eingeführte Mobilfunk-Abgabe die Umsätze wegen des Ganzjahreseffekts 2010 stärker als 2009. Dagegen entwickelte sich das Festnetz-Geschäft erfreulich konstant. Die positiven Beiträge aus den Umsätzen von Breitband und TV sowie den Konsolidierungskreiseffekten konnten die Verluste aus dem klassischen Festnetz fast komplett ausgleichen.

**Niederlande.** Im abgelaufenen Geschäftsjahr wies T-Mobile Netherlands ein leichtes Umsatzminus aus, hauptsächlich wegen geringerer MVNO- und Online-Umsätze. Dem standen positive Serviceumsätze gegenüber. Der gestiegene Anteil von Vertragskunden am Gesamtkundenbestand ließ den Umsatz aus ausgehenden Gesprächen wachsen. Zusammen mit den höheren Non Voice-Umsätzen konnten sie die durch die Regulierung verursachten negativen Effekte ausgleichen.

**Slowakei.** In der Slowakei reduzierten sich die Umsätze gegenüber 2009 vor allem wegen der Entwicklung im Mobilfunk-Geschäft. Abgesenkte Terminierungsentgelte und Preisreduzierungen infolge der hohen Wettbewerbsintensität verringerten die Serviceumsätze deutlich. Höhere MVNO-Umsätze wirkten dem entgegen. Im Gegensatz zum Mobilfunk konnten wir im Festnetz-Geschäft den Umsatz steigern. Grund waren die Entwicklung der Anschlüsse im Breitband und die erfolgreiche Vermarktung der TV-Produkte IPTV und Satelliten-TV. Zusätzlich wirkten sich Konsolidierungskreiseffekte positiv auf den Umsatz aus.

**Österreich.** T-Mobile Austria wies im Berichtsjahr geringere Umsätze aus, die großteils das Ergebnis niedrigerer Serviceumsätze waren. Die Umsätze aus der Sprachtelefonie sanken aufgrund der wettbewerbsbedingten Senkung des Minutenpreises sowie regulierungsbedingt geringerer Terminierungsentgelte. Teilweise kompensierten Zuwächse bei den Non Voice-Umsätzen und bei den Endgeräteverkäufen diese negativen Effekte.

#### **EBITDA, bereinigtes EBITDA.**

Unser operatives Segment Europa erzielte im Geschäftsjahr 2010 ein bereinigtes EBITDA von 5,7 Mrd. €. Diese Minderung um 10,0 % im Vergleich zum Vorjahr ist hauptsächlich auf zwei gegenläufige Effekte zurückzuführen: Zum einen verringerte sich das EBITDA des Segments durch die Entkonsolidierung der T-Mobile UK zum 1. April 2010; zum anderen erhöhte sich das EBITDA als Folge des Konsolidierungskreiseffekts der OTE-Gruppe. Aufgrund der neu erlassenen Sondersteuer in Ungarn – rückwirkend für das gesamte Berichtsjahr 2010 – sank das bereinigte EBITDA gegenüber dem Vorjahr. Zudem wirkten sich positive Wechselkurseffekte bei dem Polnischen Zloty, der Tschechischen Krone, dem Ungarischen Forint, der Kroatischen Kuna und dem Britischen Pfund aus. Ohne diese Effekte sank das bereinigte EBITDA um 5,5 %.

**Griechenland.** Wir erzielten 2010 im griechischen Mobilfunk- und Festnetz-Geschäft mit insgesamt 1,4 Mrd. € ein nahezu stabiles bereinigtes EBITDA, vor allem infolge des positiven Konsolidierungskreiseffekts. Ohne dessen Berücksichtigung sank das bereinigte EBITDA wegen der negativen Umsatzentwicklung. Höhere Kundenakquisitionskosten als Reaktion auf den intensiven Mobilfunk-Wettbewerb verstärkten diesen Rückgang. Einsparungen bei den Gemeinkosten konnten diese Effekte nicht ausgleichen.

**Rumänien.** In Rumänien sank das bereinigte EBITDA im Berichtsjahr gegenüber 2009 hauptsächlich durch die geringeren Umsätze im Festnetz-Geschäft. Ferner konnten die Einsparungen bei anderen Kostenpositionen die gestiegenen Kosten für TV-Rechte nicht vollständig kompensieren. Dagegen erzielten wir im Mobilfunk im Jahresvergleich ein höheres bereinigtes EBITDA infolge des gestiegenen Umsatzes sowie geringerer Kundenakquisitionskosten.

**Ungarn.** Das bereinigte EBITDA verringerte sich im abgelaufenen Geschäftsjahr gegenüber dem Vorjahr um 0,1 Mrd. € auf 0,6 Mrd. €. Die neu erlassene Sondersteuer beeinflusste die EBITDA-Entwicklung deutlich negativ. Die positiven Wechselkurseffekte des Ungarischen Forint gegenüber dem Euro milderten diesen Rückgang ab. Bereinigt um die zuvor genannten Effekte wies das Mobilfunk-Geschäft ein leicht höheres bereinigtes EBITDA aus. Effizienzsteigernde Maßnahmen konnten den operativen Umsatzrückgang des Festnetz-Geschäfts nur teilweise auffangen.

**Polen.** In Polen wuchs das bereinigte EBITDA 2010 auf 0,7 Mrd. €. Bereinigt um die positiven Wechselkurseffekte erhöhte sich das bereinigte EBITDA somit leicht. Geringere Kundenbindungskosten sowie Einsparungen bei den Gemeinkosten, insbesondere in den Bereichen Technik und Marketing, halfen die negativen Effekte aus den Umsatzrückgängen auszugleichen. Zusätzlich wirkte sich ein positiver Einmaleffekt im vierten Quartal 2010 ergebnisverbessernd aus.

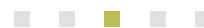

**Tschechische Republik.** T-Mobile CZ wies 2010 ein geringeres bereinigtes EBITDA aus. Positive Wechselkurseffekte der Tschechischen Krone gegenüber dem Euro kompensierten nur zum Teil die Rückgänge in lokaler Währung. Die Ursache dafür waren vor allem positive Einmaleffekte im zweiten Quartal 2009, die im Berichtsjahr nicht in vergleichbarer Weise anfielen. Des Weiteren wirkten sich prozessoptimierende Maßnahmen positiv auf das bereinigte EBITDA aus. Geringeren Kundenakquisitions- und Kundenbindungskosten standen höhere Gemeinkosten aus dem Erwerb des Retail-Geschäfts der Česká Radiokomunikace und wegen des deutlichen Ausbaus des 3G-Netzes im Vergleich zum Vorjahr gegenüber.

**Kroatien.** In Kroatien erzielten wir im abgelaufenen Geschäftsjahr ein bereinigtes EBITDA von 0,5 Mrd. €; dies entspricht einer Minderung von 3,4%. Der größte Anteil davon entfiel auf das Mobilfunk-Geschäft. Geringere Kundenakquisitions- und Kundenbindungskosten sowie Einsparungen bei den Gemeinkosten konnten die negativen Effekte aus den rückläufigen Mobilfunk-Umsätzen nicht auffangen. Dagegen verzeichnete das Festnetz-Geschäft ein höheres bereinigtes EBITDA durch Einsparungen bei den allgemeinen Verwaltungskosten und durch die erfolgreiche Umsetzung von Initiativen zur Effizienzsteigerung.

**Niederlande.** T-Mobile Netherlands steigerte 2010 das bereinigte EBITDA deutlich. Niedrigere Kundenakquisitionskosten sowie ein Einmaleffekt im zweiten Quartal 2010 verbesserten das Ergebnis. Da die Integration von Orange mittlerweile abgeschlossen ist, führten deutliche Einsparungen bei den Gemeinkosten zu einem höheren bereinigten EBITDA.

**Slowakei.** Im Berichtsjahr reduzierte sich das bereinigte EBITDA insbesondere aufgrund der negativen Effekte aus den Umsätzen des Mobilfunk-Geschäfts. Nur teilweise konnten geringere Kundenakquisitions- und Kundenbindungskosten sowie Einsparungen bei den Gemeinkosten diese ausgleichen. Auch das bereinigte EBITDA des Festnetz-Geschäfts ging zurück.

**Österreich.** Gegenüber 2009 erzielten wir in Österreich eine stabile Entwicklung des bereinigten EBITDA. Die Einsparungen bei den Gemeinkosten sowie ein Einmaleffekt im vierten Quartal 2010 konnten die negativen Effekte aus den Umsatzrückgängen sowie höhere Kosten für Kundengewinnung und Kundenbindung ausgleichen.

## EBIT.

In unserem operativen Segment Europa wuchs das EBIT zum Ende des Geschäftsjahres 2010 auf 1,0 Mrd. €, vor allem bedingt durch die im Vorjahr enthaltenen Wertminderungen auf Goodwill in Höhe von 2,3 Mrd. €. Davon entfielen 1,8 Mrd. € auf die zahlungsmittelgenerierende Einheit T-Mobile UK. Dem entgegen standen die zum Jahresende 2010 notwendig gewordenen Wertminderungen auf Goodwill und Sachanlagevermögen in Höhe von insgesamt 0,7 Mrd. € im Festnetz von Griechenland und Rumänien und im Mobilfunk von Rumänien und Albanien. Zu der Verbesserung des EBIT führte zusätzlich die Tatsache, dass im Zeitraum September 2009 bis März 2010 die T-Mobile UK als „zur Veräußerung gehalten“ ausgewiesen wurde und damit die planmäßigen Abschreibungen aussetzten. Diese Effekte konnten den EBITDA-Rückgang mehr als kompensieren.

## Cash Capex.

Zum 31. Dezember 2010 wiesen wir im operativen Segment Europa einen Cash Capex von insgesamt 2,0 Mrd. € aus. Dies ist ein Rückgang gegenüber dem Vorjahr um 19,2% oder 0,5 Mrd. € – trotz des Konsolidierungskreiseffekts der OTE-Gruppe. Außerdem trug die Entkonsolidierung der T-Mobile UK zu einem niedrigeren Cash Capex bei. Darüber hinaus führten die schwierige Marktlage sowie die Sondersteuer in Ungarn und die Mobilfunk-Abgabe in Kroatien zu einem zurückhaltenden Investitionsverhalten der Länder.

## Mitarbeiter.

Die durchschnittliche Anzahl der Mitarbeiter sank 2010 in unserem operativen Segment Europa um 5,5% auf insgesamt 65 435. Die erstmalige Vollkonsolidierung der OTE-Gruppe Anfang Februar 2009 erhöhte die Mitarbeiterzahl; dem wirkte die Entkonsolidierung der T-Mobile UK zum 1. April 2010 entgegen. Auch führten Abbauprogramme infolge von Effizienzsteigerungsmaßnahmen in mehreren Ländern zu einem geringeren durchschnittlichen Mitarbeiterbestand. Dem standen gestiegene Mitarbeiterzahlen durch einige kleinere Akquisitionen gegenüber.

## Kundenentwicklung.

Vertragskunden. (Tsd.)

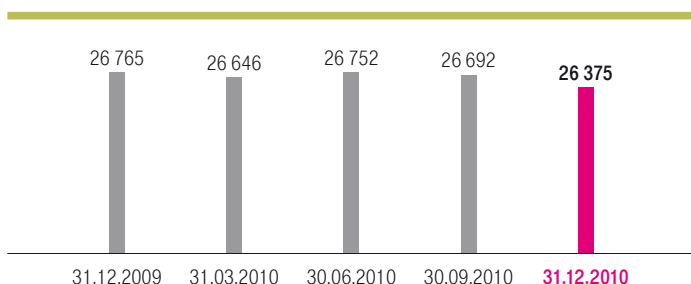

Prepaid-Kunden. (Tsd.)

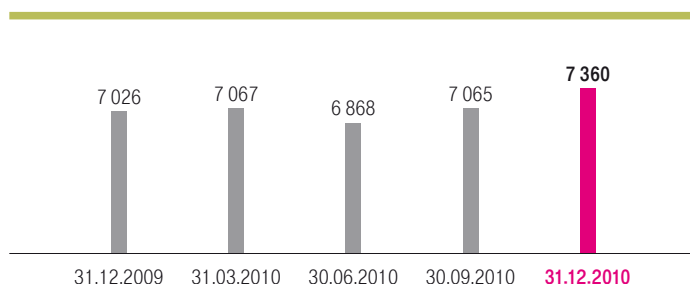

|                  | 31.12.2010<br>Mio. | 31.12.2009<br>Mio. | Veränderung<br>Mio. | Veränderung<br>% | 31.12.2008<br>Mio. |
|------------------|--------------------|--------------------|---------------------|------------------|--------------------|
| <b>USA</b>       |                    |                    |                     |                  |                    |
| Mobilfunk-Kunden | 33,7               | 33,8               | (0,1)               | (0,3)            | 32,8               |

Zum Ende des Geschäftsjahres 2010 betreute das operative Segment USA (T-Mobile USA) 33,7 Mio. Endkunden. Dies entspricht einem Rückgang im Gesamtjahr 2010 um netto 56 000 Kunden im Vergleich zu 1,0 Mio. Nettoneuzugängen 2009. Der Nettokundenbestand war im Vergleich zum Vorjahr insgesamt rückläufig, wobei die Zuwächse im Wholesale-Bereich (MVNOs und vernetzte Geräte) die Verluste bei Endkunden (Gesamtkundenanzahl ohne MVNOs) nicht ausgleichen konnten. Bei den Vertragskunden verzeichnete T-Mobile USA 2010 einen Nettorückgang von 390 000 gegenüber 42 000 im Jahr 2009. Diese Entwicklung ist in erster Linie auf rückläufige Bruttozugänge bei FlexPay-Vertragskunden zurückzuführen, die durch die kräftigen Zuwächse bei vernetzten Geräten nur teilweise ausgeglichen werden konnten. Zum Stichtag 31. Dezember 2010 betrug die Anzahl der Kunden mit vernetzten Geräten 1,9 Mio. Der Bestand der Prepaid-Kunden erhöhte sich im Gesamtjahr 2010 um netto 334 000, während es 2009 netto 1,1 Mio. waren. Diese Veränderung in

der Bestandsentwicklung bei Prepaid-Kunden im Jahr 2010 ist vor allem auf die vermehrte Ausbuchung von MVNO-Kunden und klassischen Prepaid-Kunden zurückzuführen. Zum 31. Dezember 2010 verzeichnete T-Mobile USA einen MVNO-Kundenbestand von 2,8 Mio.

Die Kundenfluktuation im Gesamtkundenbestand von T-Mobile USA erhöhte sich 2010 im Vergleich zum Vorjahr von 3,2 % pro Monat auf 3,4 % pro Monat. Insgesamt war im Jahresverlauf 2010 ein Anstieg der Fluktuation im Gesamtkundenbestand zu beobachten. Hauptgrund hierfür war eine verstärkte Abwanderung von MVNO-Kunden im Prepaid-Bereich. Die Fluktuation bei Vertragskunden blieb aufgrund der anhaltenden Wettbewerbsintensität auf hohem Niveau.

## Operative Entwicklung.

|                                              | 2010<br>Mio. € | 2009<br>Mio. € | Veränderung<br>Mio. € | Veränderung<br>% | 2008<br>Mio. € |
|----------------------------------------------|----------------|----------------|-----------------------|------------------|----------------|
| <b>Gesamtumsatz</b>                          | 16 087         | 15 471         | 616                   | 4,0              | 14 957         |
| Betriebsergebnis (EBIT)                      | 2 092          | 2 233          | (141)                 | (6,3)            | 2 299          |
| EBIT-Marge                                   | 13,0           | 14,4           |                       |                  | 15,4           |
| Abschreibungen                               | (2 064)        | (2 028)        | (36)                  | (1,8)            | (1 884)        |
| EBITDA                                       | 4 156          | 4 261          | (105)                 | (2,5)            | 4 183          |
| EBITDA-wirksame Sondereinflüsse              | -              | -              | -                     | -                | (57)           |
| <b>EBITDA (bereinigt um Sondereinflüsse)</b> | 4 156          | 4 261          | (105)                 | (2,5)            | 4 240          |
| EBITDA-Marge (bereinigt um Sondereinflüsse)  | 25,8           | 27,5           |                       |                  | 28,3           |
| <b>Cash Capex</b>                            | (2 121)        | (2 666)        | 545                   | 20,4             | (2 540)        |
| <b>Anzahl Mitarbeiter (im Durchschnitt)</b>  | 37 795         | 38 231         | (436)                 | (1,1)            | 36 076         |

**Gesamtumsatz.**

Der Gesamtumsatz des operativen Segments USA (T-Mobile USA) erhöhte sich aufgrund von Währungsschwankungen gegenüber dem Vorjahr um 4 % von 15,5 Mrd. € auf 16,1 Mrd. €. Auf US-Dollar Basis verzeichnete T-Mobile USA einen leichten Umsatzrückgang um 1,0 % gegenüber dem Vorjahr. Hauptgrund hierfür waren rückläufige Sprachumsätze aufgrund rückläufiger Bestandszahlen bei Endkunden (Gesamtkundenanzahl ohne MVNOs und vernetzte Geräte). Darüber hinaus war bei den variablen Sprachumsätzen wegen des höheren Anteils an Kunden mit einer Flatrate und niedrigerer Roaming-Umsätze im Vergleich zum Vorjahr ein Rückgang zu verzeichnen. Diesem Rückgang stand ein deutlicher Zuwachs beim Datenumsatz mit Kunden gegenüber, die ein Smartphone besitzen und einen Datentarif für die mobile Breitbandnutzung gewählt haben. Die Zahl der Nutzer von Smartphones der dritten und vierten Generation, die den UMTS-, HSPA- oder HSPA+-Standard unterstützen, hat sich seit dem Ende des Vorjahres von 3,9 Mio. auf 8,2 Mio. zum Ende des Jahres 2010 mehr als verdoppelt. Auch profitierte der Gesamtumsatz des operativen Segments gegen Ende des Jahres 2010 vom erstmaligen Angebot einer eigenen Handy-Versicherung von T-Mobile USA.

**EBITDA, bereinigtes EBITDA.**

Das EBITDA sank im Geschäftsjahr 2010 auf 4,2 Mrd. €; dies entspricht einem Rückgang um 2,5 % im Vergleich zum Vorjahr. Auf US-Dollar Basis sank das EBITDA aufgrund des bereits erläuterten leichten Rückgangs der Umsatzerlöse und gestiegener betrieblicher Aufwendungen. Die betrieblichen Aufwendungen stiegen im Vorjahresvergleich, vor allem aufgrund höherer Kosten für den Endgeräteverkauf, da T-Mobile USA zahlreiche Kaufanreize im Endgerätebereich setzte, die das Interesse für Smartphones und mobile Breitbanddatentarife wecken sollten. Außerdem entstanden

durch den Betrieb des HSPA+-Netzes im Festnetz-Bereich höhere Kosten, die nur teilweise durch niedrigere Aufwendungen für Roaming und Outsourcing ausgeglichen werden konnten. Teilweise konnten die im Jahr 2010 gestiegenen betrieblichen Aufwendungen auch durch niedrigere Provisionskosten ausgeglichen werden, die wiederum aus geringeren Bruttozuwächsen bei Endkunden von T-Mobile USA resultierten.

**EBIT.**

Das EBIT reduzierte sich im Geschäftsjahr 2010 gegenüber dem Vorjahr um 141 Mio. € oder 6,3 % auf 2,1 Mrd. € aufgrund der bereits dargestellten Effekte.

**Cash Capex.**

Im Vorjahresvergleich sank der Cash Capex von 2,7 Mrd. € auf 2,1 Mrd. € im Jahr 2010. Dieser Rückgang der Investitionen im Berichtsjahr ist vor allem das Ergebnis des Ausbaus des landesweiten UMTS/HSDPA (3G)-Netzes im Jahr 2009. Die netzbezogenen Aufwendungen konzentrierten sich im Jahr 2010 auf weitere Netzinvestitionen, u. a. auf den Ausbau der Netzabdeckung und die Umstellung auf HSPA+. Damit bietet T-Mobile USA seinen Kunden in 100 Ballungsgebieten nunmehr das landesweit größte 4G-Netz mit HSPA+-Technologie, an das 200 Mio. Menschen zwischen Ost- und Westküste angeschlossen werden können.

**Mitarbeiter.**

Die durchschnittliche Anzahl der Mitarbeiter war 2010 im Vergleich zum Vorjahr leicht rückläufig. Grund hierfür war ein Rückgang bei der Anzahl von Mitarbeitern im Kundenservice wegen des geringeren Aufkommens von Kundenanrufen, der allerdings durch eine höhere Anzahl von Mitarbeitern im Endkundenvertrieb teilweise wieder ausgeglichen wurde.

# Systemgeschäft.

## Wesentliche KPIs.

**Auftragseingang.** (Mio. €)

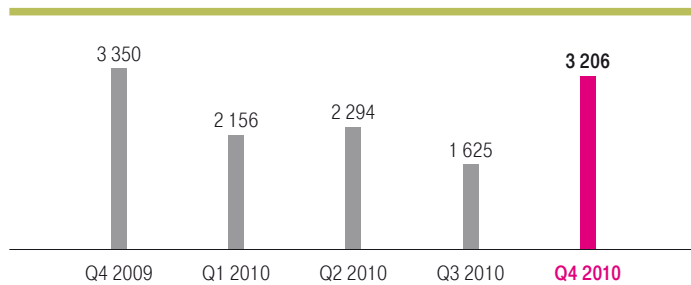

**Umsatz.** (Mio. €)

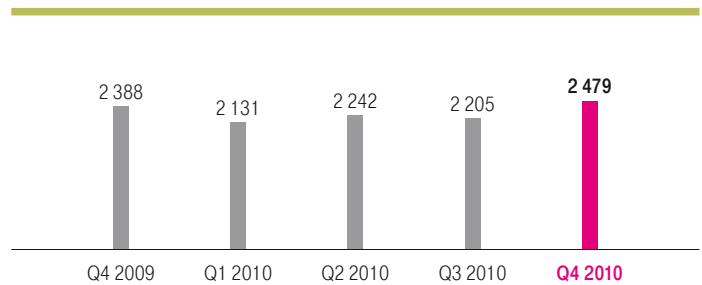

**EBIT bereinigt.** (Mio. €)

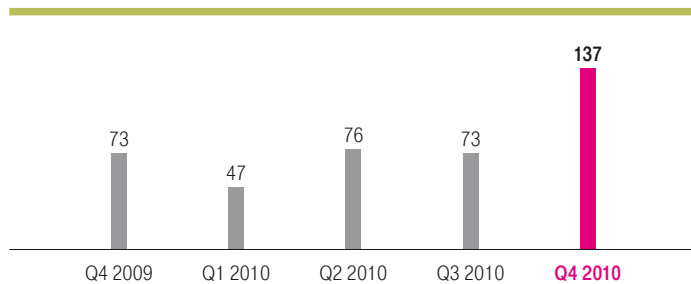

|                                          |               | 31.12.2010 | 31.12.2009 | Veränderung | Veränderung % | 31.12.2008 |
|------------------------------------------|---------------|------------|------------|-------------|---------------|------------|
| <b>Auftragseingang</b>                   | <b>Mio. €</b> | 9 281      | 9 364      | (83)        | (0,9)         | 10 235     |
| <b>Computing &amp; Desktop Services</b>  |               |            |            |             |               |            |
| Anzahl der betreuten Server              | Stück         | 58 073     | 47 092     | 10 981      | 23,3          | 56 734     |
| Anzahl der betreuten Arbeitsplatzsysteme | Mio. Stück    | 1,95       | 1,86       | 0,09        | 4,8           | 1,51       |
| <b>Systems Integration</b>               |               |            |            |             |               |            |
| Fakturierte Stunden                      | Mio.          | 9,2        | 9,6        | (0,4)       | (4,2)         | 10,7       |
| Utilization Rate                         | %             | 84,0       | 81,3       |             | 2,7p          | 80,9       |

## Geschäftsentwicklung.

Unserem operativen Segment Systemgeschäft (T-Systems) gelangen im Geschäftsjahr 2010 neue, strategisch wichtige Vertragsabschlüsse im Großkundenmarkt für ICT. Insbesondere im neuen Wachstumsfeld Dynamic Computing spüren wir eine große Nachfrage. Beim Dynamic Computing erhalten die Kunden Bandbreite, Rechenkapazität und Speicherleistung nach Bedarf, zahlen nach Verbrauch und teilen sich die Infrastruktur. Aus den sog. Cloud Services nutzen Unternehmen zunehmend Software, um ihre Geschäftsprozesse zu steuern (Private Cloud). Innerhalb von acht Monaten verdoppelte T-Systems diese dynamischen Ressourcen aus dem Netz.

Die Anzahl der betreuten Server wuchs im Berichtszeitraum um 23,3 % im Vergleich zum Vorjahr. Grund dafür war hauptsächlich die steigende Nachfrage nach Dynamic Computing Services. Die Zahl der betreuten Arbeitsplatzsysteme stieg ebenfalls deutlich. Zurückzuführen ist das vor allem auf neu gewonnene Kundenaufträge. Auch der Bereich Systems Integration entwickelte sich positiv, auch wenn der wettbewerbsbedingte Kostendruck weiterhin zu spüren war. Es gab zwar weniger fakturierte Stunden, doch eine höhere Auslastung (Utilization Rate) konnte dies ausgleichen. Ebenfalls erfreulich ist, dass immer mehr Energieversorger neben klassischen ICT-Dienstleistungen auch Dienstleistungen für das intelligente Stromnetz nachfragen: 2010 konnten wir neue Verträge schließen – zuletzt mit den Stadtwerken Emden über das Auslesen, Übertragen und Aufbereiten von Energiedaten.

## Operative Entwicklung.

|                                               | 2010<br>Mio. € | 2009<br>Mio. € | Veränderung<br>Mio. € | Veränderung<br>% | 2008<br>Mio. € |
|-----------------------------------------------|----------------|----------------|-----------------------|------------------|----------------|
| <b>Gesamtumsatz</b>                           | 9 057          | 8 798          | 259                   | 2,9              | 9 343          |
| Betriebsergebnis (EBIT)                       | 44             | (11)           | 55                    | n. a.            | 81             |
| EBIT-wirksame Sondereinflüsse                 | (289)          | (240)          | (49)                  | (20,4)           | 12             |
| EBIT (bereinigt um Sondereinflüsse)           | 333            | 229            | 104                   | 45,4             | 69             |
| EBIT-Marge (bereinigt um Sondereinflüsse) %   | 3,7            | 2,6            |                       |                  | 0,7            |
| Abschreibungen                                | (623)          | (721)          | 98                    | 13,6             | (781)          |
| EBITDA                                        | 667            | 710            | (43)                  | (6,1)            | 862            |
| EBITDA-wirksame Sondereinflüsse               | (281)          | (213)          | (68)                  | (31,9)           | 36             |
| <b>EBITDA (bereinigt um Sondereinflüsse)</b>  | 948            | 923            | 25                    | 2,7              | 826            |
| EBITDA-Marge (bereinigt um Sondereinflüsse) % | 10,5           | 10,5           |                       |                  | 8,8            |
| <b>Cash Capex</b>                             | (725)          | (681)          | (44)                  | (6,5)            | (823)          |
| <b>Anzahl Mitarbeiter (im Durchschnitt)</b>   | 47 588         | 45 328         | 2 260                 | 5,0              | 46 095         |

## Gesamtumsatz.

Der Gesamtumsatz unseres operativen Segments Systemgeschäft betrug im Berichtsjahr 9,1 Mrd. € und lag damit 2,9 % über dem Vorjahreswert. Diese positive Entwicklung ist das Ergebnis der vielen Verträge, die sowohl im letzten als auch in diesem Jahr abgeschlossen wurden. Diese neuen Verträge kompensierten die generell rückläufige Preisentwicklung im IT- und Kommunikationsgeschäft. Der Umsatz mit anderen operativen Segmenten der Deutschen Telekom betrug im Berichtszeitraum 2,6 Mrd. €, ein Rückgang um 2,5 %. Als Dienstleister für unseren Konzern trägt T-Systems wesentlich zur Optimierung der IT-Kosten bei. Hier standardisierte und verbesserte T-Systems die IT-Landschaft für den Konzern und leistete einen wichtigen Beitrag für das „Save for Service“-Programm.

## Außenumsatz.

Das Geschäft mit Kunden außerhalb der Deutschen Telekom konnte T-Systems deutlich ausweiten. Das zeigt den Erfolg des neu eingeschlagenen Wachstumskurses von T-Systems. Mit einem Außenumsatz von 6,4 Mrd. € erwirtschaftete das operative Segment 5,4 % mehr als im Vorjahr. Diese erfreuliche Entwicklung fußt zum einen auf Computing & Desktop Services. Viele Kunden greifen bereits auf sog. Cloud Services zurück. Derzeit bedienen wir hieraus bereits zwei Drittel der SAP-Leistungen für unsere Kunden. Zum anderen wird diese Entwicklung ergänzt durch ein Wachstum im Systemintegrationsgeschäft um 1,3 %, insbesondere durch Application Management & Development. Außerdem setzten die Vertragsabschlüsse mit TUI Travel und E.ON positive Akzente im preisbedingt rückläufigen Telekommunikationsgeschäft.

### EBITDA, bereinigtes EBITDA.

Im Berichtsjahr erzielte unser operatives Segment Systemgeschäft ein EBITDA von 0,7 Mrd. €. Der Rückgang von 6,1 % gegenüber 2009 liegt vor allem an erhöhtem Materialaufwand aufgrund von Anfangsaufwendungen im Zusammenhang mit gewonnenen Verträgen. Die steigenden Kosten wurden teilweise durch die Einsparungen ausgeglichen, die mit dem umfassenden Restrukturierungs- und Effizienzprogramm „Save for Service“ erzielt wurden. Das EBITDA wurde durch Sondereffekte in Höhe von 0,3 Mrd. € im Wesentlichen aus Restrukturierungsmaßnahmen belastet. Das bereinigte EBITDA lag in 2010 bei 0,9 Mrd. €, ein Anstieg von 2,7 %.

### EBIT, bereinigtes EBIT.

Das bereinigte EBIT wuchs gegenüber dem Vorjahr um 45,4 %. Positiv wirkte das umfassende Restrukturierungs- und Effizienzprogramm „Save for Service“. Für einen weiteren positiven Effekt sorgten geringere Abschreibungen aufgrund wirtschaftlich begründeter Verlängerungen der Nutzungsdauern einiger Anlagegüter, wie z. B. leistungsstärkere Server. Die bereinigte EBIT-Marge stieg von 2,6 % in 2009 auf 3,7 % im Berichtszeitraum.

### Cash Capex.

Der Cash Capex lag mit 0,7 Mrd. € im Berichtszeitraum über dem Vorjahreswert. 2010 investierte T-Systems in neue Verträge und Kundenbeziehungen, zudem in den Ausbau der Plattform für Dynamic Computing. Positive Auswirkungen der Effizienzmaßnahmen, wie z. B. die zunehmende Standardisierung der ICT-Plattformen, wurden durch die Übernahme von Vermögensgütern im Rahmen der Vertragsabschlüsse teilweise wieder kompensiert.

### Mitarbeiter.

Die durchschnittliche Anzahl der Mitarbeiter stieg 2010 um 2 260 auf 47 588 Mitarbeiter. Das sind 5,0 % mehr als im Vorjahr. Während im Inland die durchschnittliche Mitarbeiterzahl im Berichtszeitraum um 452 bzw. 1,8 % auf 25 095 Mitarbeiter sank, stieg sie im Ausland um 2 712 oder 13,7 %. Hier spiegeln sich die eingeleiteten Maßnahmen zur Personalrestrukturierung wider, insbesondere im Bereich Systems Integration in Deutschland sowie die Offshore-Verlagerung bei Computing & Desktop Services. Daneben sind für den Anstieg die Übernahme von Mitarbeitern im Rahmen von gewonnenen Großaufträgen und der verstärkte Einsatz eigener Mitarbeiter aus Near- und Offshore-Ländern ursächlich.



# Konzernzentrale & Shared Services.

Unser Personaldienstleister Vivento unterstützte uns auch 2010 konsequent beim Personalumbau im Konzern. Dabei stand im Fokus, Beamte und Angestellte in externe Beschäftigungsperspektiven, insbesondere in den öffentlichen Dienst, zu vermitteln. Vivento legte ein besonderes Augenmerk auf die Versetzung von Mitarbeitern, speziell zur Bundesagentur für Arbeit. Zudem bietet Vivento Konzernmitarbeitern Beschäftigungsmöglichkeiten in der Vivento Customer Services GmbH an.

Vivento beschäftigte zum 31. Dezember 2010 rund 8 900 Mitarbeiter. Dazu zählten rund 3 600 Mitarbeiter in externen Beschäftigungen, vor allem im öffentlichen Sektor wie z. B. der Bundesagentur für Arbeit. Weitere rund 3 300 Mitarbeiter waren in der konzerninternen Beschäftigung, insbesondere im Service-Center-Bereich, tätig. Rund 2 000 Mitarbeiter waren in operativen und strategischen Einheiten von Vivento eingesetzt oder wurden

von Vivento betreut. 2010 übernahm Vivento insgesamt rund 2 200 Mitarbeiter aus unserem Konzern. In demselben Zeitraum verließen im Berichtszeitraum rund 2 800 Mitarbeiter Vivento mit einer neuen Beschäftigungsperspektive. Davon vermittelte Vivento rund 800 Mitarbeitern unbefristete Stellen im öffentlichen Dienst, rund 700 davon bei der Bundesagentur für Arbeit.

Das Immobilienmanagement arbeitete auch 2010 weiterhin daran, das Immobilienportfolio zu bereinigen und zu optimieren. Insgesamt schloss die Deutsche Telekom im Berichtsjahr 196 Immobilienverkäufe über eine Gesamtmietfläche von 149 Tsd. Quadratmeter und 1,5 Mio. Quadratmeter Grundstücksfläche ab. Die Einzahlungen aus Immobilienverkäufen erreichten 0,1 Mrd. €. Durch die fortgesetzte Flächen- und Standortoptimierung konnten wir die Anmietflächen um weitere 106 Tsd. Quadratmeter reduzieren. Insgesamt lagen die Flächen- und Bewirtschaftungskosten 2010 auf Vorjahresniveau.

## Operative Entwicklung.

|                                              | 2010<br>Mio. € | 2009<br>Mio. € | Veränderung<br>Mio. € | Veränderung<br>% | 2008<br>Mio. € |
|----------------------------------------------|----------------|----------------|-----------------------|------------------|----------------|
| <b>Gesamtumsatz</b>                          | 2 166          | 2 410          | (244)                 | (10,1)           | 2 781          |
| <b>Betriebsergebnis (EBIT)</b>               | (2 479)        | (1 249)        | (1 230)               | (98,5)           | (1 266)        |
| Abschreibungen                               | (840)          | (833)          | (7)                   | (0,8)            | (773)          |
| EBITDA                                       | (1 639)        | (416)          | (1 223)               | n. a.            | (493)          |
| EBITDA-wirksame Sondereinflüsse              | (769)          | (101)          | (668)                 | n. a.            | (312)          |
| <b>EBITDA (bereinigt um Sondereinflüsse)</b> | (870)          | (315)          | (555)                 | n. a.            | (181)          |
| <b>Cash Capex</b>                            | (406)          | (449)          | 43                    | 9,6              | (426)          |
| <b>Anzahl Mitarbeiter (im Durchschnitt)</b>  | 22 312         | 20 181         | 2 131                 | 10,6             | 23 581         |
| davon: Vivento *                             | 8 900          | 9 600          | (700)                 | (7,3)            | 8 200          |

\* Mitarbeiter zum Stichtag, einschließlich Stammkräfte und Management; Werte gerundet.

### Gesamtumsatz.

Der Gesamtumsatz der Konzernzentrale & Shared Services reduzierte sich im Geschäftsjahr 2010 gegenüber dem Vorjahr um 10,1 %. Eine wesentliche Ursache dafür war der Umsatzrückgang im Bereich Grundstücke und Gebäude im Zusammenhang mit den Flächenoptimierungen der operativen Segmente, insbesondere für Technikflächen. Einen negativen Einfluss auf die Umsatzentwicklung hatten darüber hinaus die Reduzierungen der Verrechnungen von Technikfunktionen im Konzern sowie die mengenbedingt gesunkenen Umsätze für Service-Center-Leistungen bei Vivento. Hinzu kamen geringere Umsätze der DeTeFleetServices GmbH, die hauptsächlich aus gesunkenen Erlösen aus Fahrzeugverkäufen und einem niedrigeren Durchschnittsbestand an Flottenfahrzeugen resultierten.

### EBITDA, bereinigtes EBITDA.

In der Berichtsperiode verschlechterte sich das bereinigte EBITDA der Konzernzentrale & Shared Services um 0,6 Mrd. € im Vergleich zum Vorjahr. Grund dafür waren vor allem die im Vorjahr höheren Erträge aus Rückstellungsaufösungen sowie aus der Umklassifizierung von Immobilien aus zur Veräußerung gehaltenen Vermögenswerten in die langfristigen Vermögenswerte. Einen ebenfalls negativen Einfluss auf das bereinigte EBITDA hatten der gestiegene Personalaufwand (u. a. bei Vivento) und höhere zentral anfallende Marketing- und Technikkosten. Hinzu kamen der Umsatzrückgang bei Vivento und die in der Berichtsperiode geringeren Ergebnisbeiträge aus Immobilienverkäufen. Insgesamt wurde das EBITDA 2010 mit negativen Sondereinflüssen von 0,8 Mrd. € belastet. Im Wesentlichen handelte es sich dabei um Aufwendungen im Zusammenhang mit der Beilegung der Rechtsstreitigkeiten zwischen der Deutschen Telekom AG, Vivendi und Elektrim bezüglich des Eigentums an dem polnischen Mobilfunk-Unternehmen Polska Telefonia Cyfrowa (PTC) sowie um Aufwendungen für Personalmaßnahmen. Zum Vergleich: 2009 wirkten sich Sondereinflüsse von 0,1 Mrd. € negativ auf das EBITDA aus – im Wesentlichen Aufwendungen für Personalmaßnahmen.

### EBIT.

Das EBIT sank gegenüber dem Vorjahr um 1,2 Mrd. € wegen des Anstiegs der negativen Sondereinflüsse und der Entwicklung des bereinigten EBITDA.

### Mitarbeiter.

Die durchschnittliche Anzahl der Mitarbeiter lag im Berichtsjahr bei 22 312. Der Anstieg um 2 131 Mitarbeiter im Vergleich zu 2009 resultierte vor allem aus dem höheren Personalbestand bei Vivento sowie den Personalzugängen aus den im Rahmen der konzernweiten Neuausrichtung der Führungsstruktur bei der Konzernzentrale & Shared Services integrierten Einheiten.

# Geschäftsentwicklung der Deutschen Telekom AG.

Die Deutsche Telekom AG, die über diverse Zweigniederlassungen in der Bundesrepublik Deutschland verfügt, stellt ihren Jahresabschluss nach den Grundsätzen des Handelsgesetzbuches (HGB) und des Aktiengesetzes (AktG) auf.

Als Konzernzentrale übernehmen wir strategische und segmentübergreifende Steuerungsaufgaben und erbringen Dienstleistungen für andere Konzerngesellschaften. Die Ergebnisse unserer Tochtergesellschaften und die Maßnahmen der Konzernfinanzierung prägen entscheidend unsere Vermögens-, Finanz- und Ertragslage. Das Geschäftsjahr 2010 war für die Deutsche Telekom AG weiterhin durch einen hohen Wettbewerbs- und Preisdruck in der Telekommunikationsbranche beeinflusst, der sich in den Ergebnissen der Tochtergesellschaften widerspiegelt.

Die Deutsche Telekom AG weist für das Geschäftsjahr 2010 einen Jahresüberschuss in Höhe von 3,0 Mrd. € aus. Die Geschäftsentwicklung wurde im Berichtsjahr von einer Vielzahl unterschiedlichster Effekte geprägt, die sich sowohl originär aus dem operativen Geschäft der Gesellschaft als auch aus dem Beteiligungsergebnis und den im Geschäftsjahr 2010 durchgeführten Umstrukturierungen ergeben.

So erfolgte mit wirtschaftlicher Wirkung zum 1. Januar 2010 die Ausgliederung des von uns betriebenen Festnetz-Geschäfts (im Folgenden: Geschäftsbereich T-Home) auf die Telekom Deutschland GmbH. Das ausgegliederte Festnetz-Geschäft umfasst Aktivitäten der Sprach- und Datenkommunikation durch Festnetz- und Breitbandtechnik. Aufgrund der Ausgliederung des Geschäftsbereichs T-Home ist die Vergleichbarkeit der Vorjahresbeträge nicht gegeben.

Zum ersten Mal wurde im Berichtsjahr das Bilanzrechtsmodernisierungsgesetz vollumfänglich angewendet. Die Vorjahreszahlen wurden entsprechend § 265 Abs. 2 Satz 3 HGB sowie Artikel 67 Abs. 8 Satz 2 EGHGB nicht angepasst.

Die HGB-Ausgliederungsbilanz des Geschäftsbereichs T-Home wird im Folgenden verkürzt dargestellt:

|                            | Mio. €        |
|----------------------------|---------------|
| <b>Aktiva</b>              |               |
| Anlagevermögen             | 13 254        |
| Umlaufvermögen             | 1 205         |
| Rechnungsabgrenzungsposten | 56            |
| <b>Bilanzsumme</b>         | <b>14 515</b> |
| <b>Passiva</b>             |               |
| Eigenkapital               | 2 232         |
| Rückstellungen             | 1 015         |
| Verbindlichkeiten          | 11 232        |
| Rechnungsabgrenzungsposten | 36            |
| <b>Bilanzsumme</b>         | <b>14 515</b> |

In Höhe des ausgegliederten Reinvermögens (2,2 Mrd. €) hat sich der Beteiligungsbuchwert an der Telekom Deutschland GmbH bei der Deutschen Telekom AG erhöht.

## Ertragslage der Deutschen Telekom AG.

### HGB-Gewinn- und Verlustrechnung Deutsche Telekom AG (Gesamtkostenverfahren).

|                                                                | 2010<br>Mio. € | 2009<br>Mio. € | Veränderung<br>Mio. € | Veränderung<br>% | 2008<br>Mio. € |
|----------------------------------------------------------------|----------------|----------------|-----------------------|------------------|----------------|
| <b>Umsatzerlöse</b>                                            | <b>4 269</b>   | <b>18 220</b>  | <b>(13 951)</b>       | <b>(76,6)</b>    | <b>18 201</b>  |
| Bestandsveränderungen und<br>andere aktivierte Eigenleistungen | 7              | 37             | (30)                  | (81,1)           | 56             |
| <b>Gesamtleistung</b>                                          | <b>4 276</b>   | <b>18 257</b>  | <b>(13 981)</b>       | <b>(76,6)</b>    | <b>18 257</b>  |
| Sonstige betriebliche Erträge                                  | 5 146          | 7 160          | (2 014)               | (28,1)           | 5 284          |
| Materialaufwand                                                | (1 596)        | (6 935)        | 5 339                 | 77,0             | (6 411)        |
| Personalaufwand                                                | (3 394)        | (3 979)        | 585                   | 14,7             | (3 871)        |
| Abschreibungen                                                 | (525)          | (3 526)        | 3 001                 | 85,1             | (3 565)        |
| Sonstige betriebliche Aufwendungen                             | (6 081)        | (9 160)        | 3 079                 | 33,6             | (8 682)        |
| <b>Betriebsergebnis</b>                                        | <b>(2 174)</b> | <b>1 817</b>   | <b>(3 991)</b>        | <b>n. a.</b>     | <b>1 012</b>   |
| Finanzergebnis                                                 | 4 738          | 3 183          | 1 555                 | 48,9             | 1 064          |
| <b>Ergebnis der gewöhnlichen Geschäftstätigkeit</b>            | <b>2 564</b>   | <b>5 000</b>   | <b>(2 436)</b>        | <b>(48,7)</b>    | <b>2 076</b>   |
| Außerordentliches Ergebnis                                     | (24)           | (329)          | 305                   | 92,7             | -              |
| Steuern                                                        | 443            | (161)          | 604                   | n. a.            | (72)           |
| <b>Jahresüberschuss</b>                                        | <b>2 983</b>   | <b>4 510</b>   | <b>(1 527)</b>        | <b>(33,9)</b>    | <b>2 004</b>   |

Das Betriebsergebnis ist aufgrund der Ausgliederung des Geschäftsbereichs T-Home mit dem Vorjahr nicht mehr vergleichbar.

Im Rahmen dieser Ausgliederung ergibt sich für unsere Ertragslage deshalb eine Verschiebung zwischen dem Betriebs- und dem Finanzergebnis, da wesentliche Teile des Geschäfts der Deutschen Telekom AG in die Telekom Deutschland GmbH übertragen wurden und der Ergebnisbeitrag aus diesem Geschäft über die Ergebnisabführung jetzt erstmalig im Finanzergebnis ausgewiesen wird.

Das Betriebsergebnis verringerte sich somit im Vergleich zum Vorjahr um 4,0 Mrd. €. Wesentliche Gründe dafür sind, infolge der Ausgliederung des Geschäftsbereichs T-Home, sinkende Umsatzerlöse, denen jedoch niedrigere Materialaufwendungen, Abschreibungen und sonstige betriebliche Aufwendungen gegenüberstehen. Weiterhin war das Betriebsergebnis durch Sondereinflüsse von ca. 0,5 Mrd. € belastet. Im Gegensatz zum Vorjahr sind in den Umsatzerlösen insbesondere Erträge aus der Personalüberlassung, Vermietung und Verpachtung sowie Weiterbildung enthalten.

Das Finanzergebnis verbesserte sich gegenüber dem Vorjahr um 1,6 Mrd. € auf 4,7 Mrd. €. Wesentlichen Anteil daran hatte die Entwicklung des darin enthaltenen Beteiligungsergebnisses von 6,9 Mrd. € (2009: 5,5 Mrd. €), das, wie im Vorjahr, u. a. auch durch Sondereinflüsse – insbesondere durch die Ergebnisabführung der T-Mobile Global Zwischenholding GmbH in Höhe von 1,8 Mrd. € (2009: 3,5 Mrd. €) – beeinflusst war. Das Beteiligungsergebnis erhöhte sich insbesondere durch die Ergebnisabführung der Telekom Deutschland GmbH in Höhe von 5,3 Mrd. € (2009: 2,2 Mrd. €). Gegenläufig wirkten sich Abschreibungen auf Finanzanlagen von ca. 1,0 Mrd. € auf das Finanzergebnis in 2010 aus.

Das Ergebnis der gewöhnlichen Geschäftstätigkeit verringerte sich gegenüber dem Vorjahr, neben den Sondereinflüssen im Betriebsergebnis, insbesondere noch aufgrund von niedrigeren positiven Sondereffekten im Finanzergebnis.

Unter Einbeziehung des außerordentlichen Aufwands in Höhe von 24 Mio. € und des Steuerertrags von 443 Mio. € ergibt sich so unter Einbezug der oben beschriebenen Einflüsse im Geschäftsjahr ein Jahresüberschuss von 3,0 Mrd. €.

## Vermögens- und Finanzlage der Deutschen Telekom AG.

## HGB-Bilanz Deutsche Telekom AG.

|                                                           | 31.12.2010<br>Mio. € | 31.12.2010<br>% | 31.12.2009<br>Mio. € | Veränderung<br>Mio. € | 31.12.2008<br>Mio. € |
|-----------------------------------------------------------|----------------------|-----------------|----------------------|-----------------------|----------------------|
| <b>Aktiva</b>                                             |                      |                 |                      |                       |                      |
| Immaterielle Vermögensgegenstände                         | 206                  | 0,2             | 1 275                | (1 069)               | 1 030                |
| Sachanlagen                                               | 5 034                | 5,0             | 17 282               | (12 248)              | 18 815               |
| Finanzanlagen                                             | 80 876               | 80,8            | 75 759               | 5 117                 | 83 277               |
| <b>Anlagevermögen</b>                                     | <b>86 116</b>        | <b>86,0</b>     | <b>94 316</b>        | <b>(8 200)</b>        | <b>103 122</b>       |
| Vorräte                                                   | 10                   | 0,0             | 84                   | (74)                  | 88                   |
| Forderungen                                               | 11 571               | 11,6            | 9 356                | 2 215                 | 3 344                |
| Sonstige Vermögensgegenstände                             | 869                  | 0,9             | 1 112                | (243)                 | 803                  |
| Wertpapiere                                               | 14                   | 0,0             | 226                  | (212)                 | 206                  |
| Flüssige Mittel                                           | 754                  | 0,8             | 2 732                | (1 978)               | 960                  |
| <b>Umlaufvermögen</b>                                     | <b>13 218</b>        | <b>13,3</b>     | <b>13 510</b>        | <b>(292)</b>          | <b>5 401</b>         |
| Rechnungsabgrenzungsposten                                | 738                  | 0,7             | 516                  | 222                   | 536                  |
| Aktiver Unterschiedsbetrag aus der Vermögensverrechnung   | 12                   | 0,0             | -                    | 12                    | -                    |
| <b>Bilanzsumme</b>                                        | <b>100 084</b>       | <b>100,0</b>    | <b>108 342</b>       | <b>(8 258)</b>        | <b>109 059</b>       |
| <b>Passiva</b>                                            |                      |                 |                      |                       |                      |
| Gezeichnetes Kapital und Rücklagen                        | 53 310               | 53,3            | 53 715               | (405)                 | 53 713               |
| Bilanzgewinn                                              | 6 018                | 6,0             | 6 421                | (403)                 | 5 297                |
| <b>Eigenkapital</b>                                       | <b>59 328</b>        | <b>59,3</b>     | <b>60 136</b>        | <b>(808)</b>          | <b>59 010</b>        |
| Rückstellungen für Pensionen und ähnliche Verpflichtungen | 2 662                | 2,7             | 2 769                | (107)                 | 2 630                |
| Steuerrückstellungen                                      | 124                  | 0,1             | 547                  | (423)                 | 179                  |
| Sonstige Rückstellungen                                   | 2 903                | 2,9             | 4 598                | (1 695)               | 5 049                |
| <b>Rückstellungen</b>                                     | <b>5 689</b>         | <b>5,7</b>      | <b>7 914</b>         | <b>(2 225)</b>        | <b>7 858</b>         |
| Finanzverbindlichkeiten                                   | 6 711                | 6,7             | 6 195                | 516                   | 6 308                |
| Übrige Verbindlichkeiten                                  | 28 031               | 28,0            | 33 891               | (5 860)               | 35 833               |
| <b>Verbindlichkeiten</b>                                  | <b>34 742</b>        | <b>34,7</b>     | <b>40 086</b>        | <b>(5 344)</b>        | <b>42 141</b>        |
| Rechnungsabgrenzungsposten                                | 325                  | 0,3             | 206                  | 119                   | 50                   |
| <b>Bilanzsumme</b>                                        | <b>100 084</b>       | <b>100,0</b>    | <b>108 342</b>       | <b>(8 258)</b>        | <b>109 059</b>       |

Unsere Vermögenslage ist insbesondere neben dem Eigenkapital durch die Finanzanlagen, die Forderungen und Verbindlichkeiten gegenüber Konzerngesellschaften sowie durch die Finanzverbindlichkeiten bestimmt.

Die Verringerung der Bilanzsumme gegenüber dem Vorjahr resultierte im Wesentlichen aus der Ausgliederung des Geschäftsbereichs T-Home.

So verringerte sich unser Anlagevermögen gegenüber dem Vorjahr im Saldo um 8,2 Mrd. €.

Ursache hierfür ist primär der Rückgang des Sachanlagevermögens um 12,2 Mrd. €, dem ein Anstieg der Finanzanlagen um 5,1 Mrd. € gegenübersteht. Die Sachanlagen haben am Gesamtvermögen einen Anteil von 5,0 % (31. Dezember 2009: 16,0 %); sie verringerten sich gegenüber 2009 vor allem durch die Ausgliederung des Geschäftsbereichs T-Home. Die Finanzanlagen machen 80,8 % des Gesamtvermögens aus (31. Dezember 2009: 69,9 %); sie enthalten überwiegend Anteile an verbundenen Unternehmen in Höhe von 74,5 Mrd. € sowie Ausleihungen an verbundene Unternehmen in Höhe von 6,3 Mrd. €.

Die Finanzanlagen stiegen im Vergleich zum Vorjahr um 5,1 Mrd. € hauptsächlich aufgrund von Zugängen bei den Ausleihungen an verbundene Unternehmen, die sich aus der Übertragung von Finanzkontrakten im Rahmen der Ausgliederung des Geschäftsbereichs T-Home auf die Telekom Deutschland GmbH ergaben.

Die Forderungen und Verbindlichkeiten gegenüber verbundenen Unternehmen betragen 10,6 Mrd. € (31. Dezember 2009: 8,6 Mrd. €) bzw. 22,2 Mrd. € (31. Dezember 2009: 28,5 Mrd. €). Der Rückgang der Verbindlichkeiten resultierte überwiegend aus der Ausgliederung des Geschäftsbereichs T-Home.

Das Eigenkapital reduzierte sich gegenüber dem Vorjahr um 0,8 Mrd. €, insbesondere durch den Jahresüberschuss von 3,0 Mrd. €, die Gewinnausschüttung für das Vorjahr von 3,4 Mrd. € und den Rückkauf eigener Anteile von 0,4 Mrd. €. Die Eigenkapitalquote stieg um 3,8 Prozentpunkte auf 59,3 % (31. Dezember 2009: 55,5 %).

#### Kapitalflussrechnung.

|                                                        | 2010<br>Mio. € | 2009<br>Mio. € | Veränderung<br>Mio. € |
|--------------------------------------------------------|----------------|----------------|-----------------------|
| Jahresüberschuss                                       | 2 983          | 4 510          | (1 527)               |
| Cashflow aus Geschäftstätigkeit                        | 751            | 5 442          | (4 691)               |
| Cashflow aus Investitionstätigkeit                     | (329)          | (2 903)        | 2 574                 |
| Cashflow aus Finanzierungstätigkeit                    | (2 400)        | (767)          | (1 633)               |
| <b>Nettoveränderung der flüssigen Mittel</b>           | <b>(1 978)</b> | <b>1 772</b>   | <b>(3 750)</b>        |
| Bestand der flüssigen Mittel am Anfang des Jahres      | 2 732          | 960            | 1 772                 |
| <b>Bestand der flüssigen Mittel am Ende des Jahres</b> | <b>754</b>     | <b>2 732</b>   | <b>(1 978)</b>        |

Die Reduzierung des Cashflows aus der Geschäftstätigkeit resultiert wesentlich aus dem Rückgang des Jahresüberschusses sowie der Ausgliederung des Geschäftsbereichs T-Home. Die Veränderung des Cashflows aus der Investitionstätigkeit ist primär auf die Ausgliederung des Geschäftsbereichs T-Home zurückzuführen.

Der Mittelabfluss aus der Finanzierungstätigkeit ist neben der Auszahlung der Dividende in Höhe von 3,4 Mrd. € und dem Rückkauf eigener Anteile mit einem Volumen von 0,4 Mrd. € auch durch Mittelzuflüsse aus dem Aufbau konzerninterner Finanzverbindlichkeiten bedingt. Zusammen führte dies im Berichtsjahr zu einem reduzierten Bestand an liquiden Mitteln in Höhe von 0,8 Mrd. €.

#### Risikomanagement bei der Bilanzierung von Sicherungsgeschäften.

Wir setzen derivative Finanzinstrumente ein, um Zinsänderungs- und Währungsrisiken zu begrenzen; also nur zu Sicherungszwecken und nicht aus spekulativen Gründen. Dabei überprüfen wir laufend die Wirksamkeit des Sicherungszusammenhangs.

# Corporate Responsibility.

Verantwortungsvolle Unternehmensführung // Klimaschutzaktivitäten // Nachhaltigkeitsratings und Auszeichnungen

## Verantwortungsvolle Unternehmensführung.

Wir wollen bis 2015 weltweit Vorreiter im Bereich Corporate Responsibility (CR) werden; bereits heute sind wir in vielen Bereichen führend. Unser Handlungsrahmen dafür ist seit 2008 unsere konzernweit gültige CR-Strategie mit ihren drei zentralen Handlungsfeldern: „Vernetzung von Leben und Arbeit“, „Anschluss an die Informations- und Wissensgesellschaft“ und „Wege zu einer klimaschonenden Gesellschaft“. Die Meilensteine für unser ehrgeiziges CR-Ziel haben wir mit einem neuen internen Projekt bestimmt: Zunächst betrachteten wir mithilfe externer Benchmarks und interner SWOT-Analysen den Status quo, was die Integration von CR in die Konzernprozesse betrifft, sowie die konkrete inhaltliche Leistung des Unternehmens gegenüber Dritten. Unser CR-Bereich entwickelte daraus nicht nur die Erfolgskriterien, sondern auch schon konkrete Handlungsempfehlungen. 2010 haben wir bereits erste Maßnahmen umgesetzt. Bis 2015 unterziehen wir empfohlene Einzelmaßnahmen einem Monitoring und Controlling. Genauso überprüfen wir bis 2015 bereits existierende Key Performance Indikatoren (KPI) auf Basis der Ergebnisse des internen Projekts.

### Klimaschutzaktivitäten und neue Klimaschutzziele.

**Klimaschutzaktivitäten.** Ein besonderer Schwerpunkt unserer CR-Aktivitäten lag im Berichtsjahr 2010 auf dem Klimaschutz. Und das nicht nur, was die Reduktion von schädlichen Treibhausgasen bei unserer eigenen Geschäftstätigkeit betrifft, sondern auch die Einsparungen bei unseren Kunden durch den Einsatz unserer Produkte und Lösungen. Bei unserer eigenen Geschäftstätigkeit setzten wir u. a. auf nachhaltige Mobilität. So soll nach der neuen „Green Car Policy“ die CO<sub>2</sub>-Emission neuer PKW der gesamten Fahrzeugflotte bis 2015 bei durchschnittlich 110 Gramm pro Kilometer liegen. Das entspricht einem Durchschnittsverbrauch von 4,2 Liter Diesel pro 100 Kilometer. Dieser Wert liegt sogar unter den angestrebten Klimaschutzzielen der Europäischen Union, die bis 2015 einen Wert von 120 Gramm pro Kilometer erreichen will.

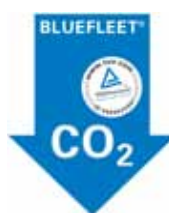

Mit über 33 000 in Deutschland zugelassenen PKW und Servicefahrzeugen ist unsere Firmenflotte eine der größten Europas. Unser Fuhrpark wurde 2010 vom TÜV Rheinland genau analysiert und mit dem „Bluefleet“-Siegel für einen CO<sub>2</sub>-kontrollierten Fuhrpark ausgezeichnet. Dieses Zertifikat wird alle zwölf Monate neu überprüft.

Darüber hinaus fahren die Telekom-Mitarbeiter bei Dienstreisen mit der Bahn CO<sub>2</sub>-frei. Rund 128 Mio. Kilometer fahren unsere Mitarbeiter jedes Jahr mit der Bahn. Die dafür benötigte Menge Strom speist die Deutsche Bahn aus erneuerbaren Energien direkt in ihr Netz ein. Alleine durch dieses Abkommen mit der Bahn tragen wir dazu bei, jährlich rund 5 700 Tonnen CO<sub>2</sub> zu vermeiden.

Unsere Kunden können durch unsere Dienste ebenfalls einen großen Beitrag zum Klimaschutz und zum nachhaltigen Umgang mit Ressourcen leisten. So z. B. durch „Smart Metering“, einer intelligenten Technologie, die hilft, den Stromverbrauch transparenter zu machen und so Energie zu sparen, in Unternehmen und in privaten Haushalten.

„Smart Grids“ (intelligente Stromnetze) sind die Voraussetzung dafür, um dezentrale Energieerzeugung effizient zu vernetzen. Energieversorger können damit beispielsweise genau so viel Strom in ihr Netz einspeisen, wie gerade benötigt wird. Oder bedarfsgerecht fehlende Mengen hinzukaufen. Mit dem Einsatz von „Smart Grids“ könnten bis 2020 allein in Deutschland 23,6 Megatonnen CO<sub>2</sub>-Emissionen eingespart werden (Quelle: Studie Smart 2020 Addendum Deutschland).

**Neue Klimaschutzziele.** Schon seit 1995 haben wir uns dem Klimaschutz verpflichtet. Der Klimawandel schreitet heute schneller voran, als man damals noch dachte. Gleichzeitig hat aber die Informations- und Kommunikationstechnologie in den letzten Jahren enorme Fortschritte in Sachen Leistungsfähigkeit und Energieeffizienz gemacht. Unsere Klimaschutzstrategie aus dem Jahr 2005 sah für unseren Konzern in Deutschland eine Reduktion der CO<sub>2</sub>-Emissionen um 20 % vor, im Zeitraum 1995 bis 2020. Dieses Ziel ist aus unserer Sicht nicht mehr ambitioniert genug. Im vergangenen Jahr haben wir daher mit der Überarbeitung der Klimaschutzstrategie auf Basis der in 2008 erhobenen Daten begonnen und streben nun eine Reduktion der CO<sub>2</sub>-Emissionen von 30 % bis 2020 für diesen Zeitraum für die Telekom in Deutschland an. Das entspricht hochgerechnet auf das Jahr 1995 einer Reduktion von insgesamt 40 %.

Die Reduktionen in den nächsten Jahren resultieren vor allem aus der Umstellung des Netzes auf das energieeffizientere Internet-Protokoll (AlHP), aus der neuen „Green Car Policy“ und aus Einsparungen im Bereich Gebäude und Mobilität (z. B. CO<sub>2</sub>-freie Dienstreisen mit der Bahn). Als nächsten Meilenstein wollen wir unsere Klimaschutzstrategie internationalisieren und für die verschiedenen Länder spezifische Ziele erarbeiten.

## Die gesamte Lieferkette im Blick.

Wir stellen uns unserer unternehmerischen Verantwortung – entlang der gesamten Wertschöpfungskette. Als internationaler ICT-Dienstleister sind wir in mehr als 50 Ländern vertreten; mit entsprechenden Lieferantenbeziehungen. Wir kaufen also direkt und indirekt auch in Entwicklungs- und Schwellenländern Waren und Dienstleistungen ein. Oft entsprechen die Produktionsbedingungen in diesen Ländern noch nicht unseren Umwelt- und Sozialanforderungen. Ein Grund dafür, warum wir uns für die Förderung und Sicherung entsprechender Standards einsetzen. Genauso engagieren wir uns für die Einhaltung der Menschenrechte bei unseren Lieferanten.

Zusätzlich setzen wir uns in Brancheninitiativen dafür ein, Lieferantenbeziehungen nachhaltig zu gestalten. Mitte 2010 haben wir im Rahmen eines Abkommens mit France Télécom und Telecom Italia eine sog. Joint Audit Cooperation ins Leben gerufen, um gemeinsame Prüfungsverfahren bei Lieferanten – Social Audits – weltweit durchzuführen. Diese gemeinsamen Audits werden mit externen Auditierungsfirmen durchgeführt. Sie laufen nach genau festgelegten einheitlichen Kriterien ab, um ethische, soziale und umweltrelevante Standards bei unseren Lieferanten zu etablieren und zu gewährleisten. Im Berichtsjahr führten wir bereits 26 Audits bei unseren Lieferanten durch (2009: 4); bis 2012 sollen es dann insgesamt 200 werden.

## Neue Wege in der Stakeholderkommunikation.

**Utopia-Kooperation.** utopia.de ist eine der wichtigsten Online-Plattformen für nachhaltigen Konsum im deutschsprachigen Raum.  Bereits seit Oktober 2009 sind wir dort mit einem eigenen Unternehmensprofil samt Blog präsent. Im Frühjahr 2010 bauten wir die Partnerschaft mit Utopia zu einer strategischen Kooperation aus. Ziel ist es, gemeinsam den Bewusstseinswandel für nachhaltigen Konsum durch gesellschaftlichen Dialog voranzutreiben. Grundlage dieser Partnerschaft ist das „Changemaker Manifest“ der Utopia-Stiftung: eine Selbstverpflichtung zur Nachhaltigkeit in zehn Punkten; diese unterzeichnete René Obermann im April 2010 als erster Vorstandsvorsitzender eines DAX-Unternehmens. Direkt danach stellte er sich auch gleich dem ersten gesellschaftlichen Dialog – einem Livechat im Internet mit der Utopia-Nutzergruppe.

**Nachhaltigkeitsoffensive.** Was nachhaltiges Handeln angeht, wollen wir ganz gezielt auch unsere Kunden einbinden. Den ersten Schritt dazu machten wir bereits 2009, als wir die auf mehrere Jahre angelegte Nachhaltigkeitsoffensive „Große Veränderungen fangen klein an“ starteten. Ein Schwerpunkt dieser Offensive 2010: alte Handys zurückzunehmen. In Deutschland gibt es rund 60 Mio. alte, unbenutzte Mobiltelefone, die neben Wertstoffen auch Schadstoffe enthalten. Wir haben mit verschiedenen Aktionen dazu aufgerufen, Althandys abzugeben, wie z. B. mit einem großen Gewinnspiel oder über eine Facebook-Aktion mit dem Popstar Katy Perry. All dies hat geholfen, im Berichtsjahr fast 250 000 Althandys einzusammeln.

**Twittmob.** Ein weiteres Beispiel für die neuen Wege in der Stakeholderkommunikation ist die von Telekom-Mitarbeitern freiwillig in ihrer Freizeit organisierte Online-Demonstration „MachMitMob“. Unter dem Motto „140 Zeichen für Nachhaltigkeit“ wurde vor und während des 16. Juli 2010 auf der Online-Plattform Twitter dazu aufgerufen, Nachrichten zum Thema Nachhaltigkeit abzusetzen, z. B. Tipps, Infos, Aufrufe und Aktionen. Der Erfolg übertraf alle Erwartungen: Nachhaltigkeit war an diesem Tag das mit Abstand am meisten „getwitterte“ Thema in Deutschland.





Weiterführende Informationen zur CR-Strategie und den wichtigsten CR-Themen enthält der CR-Printbericht 2010 bzw. der CR-Onlinebericht unter [www.cr-bericht.telekom.de](http://www.cr-bericht.telekom.de).\*

## Weitere Erfolge: Nachhaltigkeitsratings und Auszeichnungen.

### Listing der T-Aktie in Nachhaltigkeitsindizes bzw. Prädikate.

| Ratingagentur                         | Indizes/Prädikate/Ranking                           | Erfolge Index-Listing |       |       |       |
|---------------------------------------|-----------------------------------------------------|-----------------------|-------|-------|-------|
|                                       |                                                     | 2010                  | 2009  | 2008  | 2007  |
| SAM                                   | DJSI World                                          | ✓                     | ✓     | ✓     | ✓     |
|                                       | DJSI Europe (bis 2009 STOXX®)                       | ✓                     | ✓     | ✓     | ✓     |
| Oekom                                 | „Prime“                                             | (✓)                   | ✓     | (✓)   | ✓     |
| VIGEO                                 | ASPI                                                | ✓                     | ✓     | ✓     | ✓     |
|                                       | ESI                                                 | ✓                     | ✓     | ✓     | ✓     |
| imug/EIRIS                            | FTSE4Good                                           | ✓                     | ✓     | ✓     | ✓     |
| Sarasin                               | DAX Global Sarasin Sustainability                   | (✓)                   | (✓)   | ✓     | ✓     |
| CDP                                   | Carbon Disclosure Leadership Index                  | X                     | X     | X     | ✓     |
|                                       | Carbon Performance Leadership Index (neu seit 2010) | ✓                     | n. a. | n. a. | n. a. |
| RiskMetrics                           | FTSE KLD Global Climate 100                         | ✓                     | ✓     | ✓     | ✓     |
|                                       | FTSE KLD Global Sustainability                      | X                     | X     | X     | ✓     |
| Newsweek<br>Green Rankings Global 100 | Rank Germany #1, Global #7,<br>Technology #3        | ✓                     | n. a. | n. a. | n. a. |

- ✓ = Erfolgreich gelistet.
- ( ) = Mehrjähriger Rhythmus.
- X = Nicht gelistet.

Erneut konnten wir im abgelaufenen Jahr in Sachen Nachhaltigkeit punkten – wie im renommierten „SAM“ (Sustainable Asset Management)-Rating. Wir qualifizierten uns von neuem für ein Listing in den relevanten „Dow Jones Sustainability“-Indizes. Im Branchenvergleich der Mobilfunk-Unternehmen belegten wir im Gegensatz zum Vorjahr – in dem wir als Sector Leader ausgezeichnet wurden – im Berichtsjahr einen erfolgreichen zweiten Platz. Auch das kontinuierliche Listing in den auf den Analysen von VIGEO und imug/EIRIS beruhenden Indizes bestätigt unsere Leistung gegenüber den Interessen von SRI-orientierten Investoren (Socially Responsible Investment). Zum Jahresbeginn 2010 erreichten wir in dem bekannten Ranking von Oekom und der „Wirtschaftswoche“ den zweiten Platz innerhalb der DAX-Konzerne – ebenfalls ein sehr gutes Ergebnis.

Neu hinzugekommen ist die Auszeichnung des US-Nachrichtenmagazins „Newsweek“. Dabei haben wir in einer nach Umweltfreundlichkeit erstellten Rangliste der 100 größten Unternehmen weltweit den siebten Platz erreicht – und sind bestes deutsches Unternehmen! In der Kategorie der Technologie-Firmen rangieren wir hinter IBM, HP und Sony.

**Neu: Stark gestiegenes Interesse an nachhaltigen Investments.** Das Volumen der 354 zum Publikumsvertrieb zugelassenen nachhaltigen Fonds in Deutschland, Österreich und der Schweiz umfasste zum Jahresende 2010 nach Recherchen des Sustainable Business Institute (SBI) ca. 34 Mrd. €. Damit hat sich das Wachstum der nachhaltigen Publikumsfonds auch im vierten Quartal 2010 fortgesetzt. Ende 2009 registrierte das SBI noch 313 Fonds. Dabei sind alle Fonds miteinbezogen, die angeben, in besonderer Weise soziale, ökologische oder auch ethische Kriterien (ESG-Kriterien) zu berücksichtigen.

Auch das Interesse dieser Fonds an Aktien der Deutschen Telekom ist weiterhin hoch. 9% aller Aktien der Deutschen Telekom wurden im Jahr 2009 von Investoren gehalten, die zumindest teilweise SRI/ESG-Kriterien bei Investmententscheidungen berücksichtigen. 2% der T-Aktien werden von Investoren gehalten, die ihre Fonds vorrangig unter SRI/ESG-Gesichtspunkten managen (Quelle: Ipreo).

\* Soweit der Lagebericht auf Inhalte von Internetseiten verweist, sind diese Inhalte nicht Bestandteil des Lageberichts.

# Innovation und Produktentwicklung.

## Vernetztes Leben treibt Innovation

### Innovation treibt die Vernetzung der Produkte voran.

Die Vision vom vernetzten Leben und Arbeiten ist der rote Faden für unseren Innovationsprozess. Schließlich sind unsere Produkte miteinander vernetzt. Wir betrachten und entwickeln sie aus Kundensicht. Weil wir finden, dass jeder Kunde seinen ganz persönlichen digitalen Lebensstil gestalten können sollte. Dabei wollen wir ihn unterstützen. Um die Vernetzung geht es aber nicht nur bei unseren Produkten, sondern sie spielt auch eine wichtige Rolle bei Innovation und Produktentwicklung. Hier sind unsere Experten, externe Partner und auch Kunden miteinander verbunden.

Unser Unternehmensbereich Produkte & Innovationen (Products & Innovation) verantwortet unsere Innovationen und Produktentwicklungen von der konzernweiten Forschung & Entwicklung über das Innovationsmanagement und -marketing sowie Produktentwicklung und -management bis hin zur Steuerung unseres Produktportfolios. Mit dem Ziel, innovative und wettbewerbsfähige Produkte, Dienste und Geschäftsmodelle zu entwickeln. Mit einem breiten Verständnis von Markt und Kunden sowie Innovations- und Technologiekompetenz begeben wir uns auf die gemeinsame Mission „Superior User Experience & Simplicity“; Kundenorientierung, Einfachheit, ein exzellentes Nutzungserlebnis, ein werthaltiges Produktportfolio und nachhaltige Wirtschaftlichkeit sind uns hier besonders wichtig.

### Am Anfang steht die Idee.

Was Innovationen betrifft, handeln wir nach den Prinzipien „Open Innovation“ und „User Driven Innovation“. Innovationen entwickeln wir zusammen mit Kunden und Partnern – die Bedürfnisse unserer Kunden dabei immer fest im Blick. Ein Instrument ist z. B. das Creation Center, das Produktideen und -konzepte für alle Konzernbereiche erarbeitet. Hier schauen wir zusammen mit Forschern buchstäblich in die Wohnzimmer der Kunden und erarbeiten gemeinsam mit den Produktmanagern stimmige Konzepte für Endverbraucher.

Die Forschungs- und Entwicklungsaktivitäten unseres Konzerns sind in den Deutsche Telekom Laboratories (T-Labs) gebündelt – einem „An-Institut“ der Technischen Universität Berlin, als privatrechtlich organisierte wissenschaftliche Einrichtung. In Berlin, Darmstadt, Beer Sheva (Israel) und Los Altos (Kalifornien, USA) entwickeln etwa 180 Wissenschaftler und 180 Telekom-Experten Prototypen für innovative Produkte und Dienste. Die T-Labs arbeiten schwerpunktmäßig an Projekten und neuen Technologien, von denen man erwartet, dass sie in eineinhalb bis fünf Jahren marktreif oder am Markt eingeführt sind.

Wir engagieren uns in nationalen und internationalen Foren und Gremien, um zukünftige Produkte und Leistungen mitzugestalten. Hier bringen wir unsere Interessen und die Wünsche unserer Kunden ein. Unsere T-Labs sind vernetzt mit internationalen Industriepartnern und anerkannten Forschungseinrichtungen.

Um die Wünsche der Kunden herauszufinden, haben die T-Labs das „Innovationsforum“ aufgebaut: Über 900 Berliner Haushalte helfen bei Produkttests, Befragungen und Vor-Ort-Recherchen. T-Labs veranstalten auch Workshops, um Bedürfnisse besser und schneller zu erkennen. Unter anderen mit Zielgruppen wie Senioren und Seniorinnen oder jungen Frauen. Die Verantwortlichen für Produktentwicklung und -design nutzen diese Erkenntnisse und setzen sie um.

Geschäftsideen aus den T-Labs, die wir nicht in unser Produktportfolio überführen, denen aber ein überzeugender Kundennutzen bescheinigt und Markterfolg prognostiziert wird, werden aus unserem Konzern als eigenständige Unternehmen ausgegründet. Diese erhalten von Venture-Capital-Gebern, wie z. B. T-Venture, nicht nur das erforderliche Eigenkapital, sondern auch wichtiges Know-how und agieren schließlich eigenständig am Markt. Bisher gab es vier Spin-offs aus den T-Labs, zuletzt YOOCHOOSE und wahwah.fm. Um die Zahl der Spin-offs zu erhöhen, gibt es das „Inkubations-Management“, das gute Ideen systematischer und schneller zur Marktreife bringt. In den T-Labs wurde das Entrepreneurs-Programm entwickelt, das interne und externe Start-up-Teams u. a. mit finanziellen Starthilfen in der Gründungsphase eines Unternehmens (sog. Seed-Finanzierungen) unterstützt, um so die Potenziale aus disruptiven Technologien auszuschöpfen.

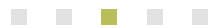

### Immer kürzere Innovationszyklen.

Die Innovationszyklen verkürzen sich. Das bedeutet für uns in der Telekommunikationsbranche, dass wir neue Produkte in immer kürzeren Zeitabständen hervorbringen müssen. Das erfordert neue Konzepte und daher halten wir uns an die Prinzipien der offenen Innovation. Indem alle, die an der Lösung eines Problems interessiert sind, offen und intensiv zusammenarbeiten, werden marktfähige Produkte wesentlich schneller entwickelt. Eines unserer Beispiele dafür ist das Projekt „Android“ zur Weiterentwicklung einer offenen Plattform für Mobiltelefone. Innovationen für unsere Kunden sind aber auch Ergebnis offener Wettbewerbe, wie z. B. des IPTV-Wettbewerbs zur Weiterentwicklung unseres Entertain-Produkts. Mit unserem Portal Developer Garden sprechen wir die Software-Entwickler-Szene an; hier können Entwickler mit unseren Toolboxes neue Software-Lösungen für Internetanwendungen zur Marktreife bringen. Mit der T-City Friedrichshafen entsteht bis zum Jahr 2012 eine Stadt, die beispielhaft für die Lebens- und Standortqualität in der Zukunft ist. Auf Basis einer modernsten Infrastruktur im Festnetz und Mobilfunk werden zahlreiche Innovationen – von der Betreuung herzkranker Menschen bis hin zur Stromzählerfernablesung über das Netz – erprobt.

### Patente und Preise.

**Patente.** Im Markt der Mobilfunk- und Festnetz-Telefonie sind Schutzrechte – national wie international – außerordentlich bedeutend. Darum widmen wir uns intensiv den Feldern Eigenentwicklung und Erwerb von Rechten. Die Zahl der Patentanmeldungen in 2010 stieg gegenüber dem Vorjahr um 28,1 % auf 913. Der Bestand an Gesamtschutzrechten (Erfindungen, Patentanmeldungen, Patente, Gebrauchsmuster und Geschmacksmuster) betrug 7 434 zum Jahresende 2010. Der Bestand wird regelmäßig überprüft und um nicht mehr relevante Schutzrechte bereinigt. Gezielt berücksichtigen wir beim Management dieser Schutzrechte Kosten-Nutzen-Aspekte.

**Auszeichnungen.** Der Erfolg der Innovationsarbeit spiegelt sich auch in zahlreichen Auszeichnungen für das Unternehmen, die Produkte und Mitarbeiter wider. So erhielten die T-Labs im Jahr 2010 den „Open Innovation“-Preis in der Kategorie Forschung und Entwicklung. Seit ihrer Eröffnung erhielten die T-Labs bereits über 50 Preise und Auszeichnungen, z. B. den Berliner Wissenschaftspreis 2008, den Johann-Philipp-Reis-Preis 2009, den Convergator of the Year 2009 und zuletzt den Leibniz-Preis 2011, den höchstdotierten deutschen Wissenschaftspreis. Bereits mehrere Jahre in Folge erhielten unsere Entwicklungen den Voice Award für die besten Sprachdialogsysteme, also Telefondienste, die per Sprache gesteuert werden.

**Innovationspreis Public Private Partnership.** Das Deutsche Zentrum für Luft- und Raumfahrt und T-Systems erhalten für ihre zehnjährige Outsourcing-Partnerschaft für ICT-Dienstleistungen den Innovationspreis Public Private Partnership. Die Jury bewertete neben dem Faktor Innovation auch die Wirtschaftlichkeit, Effizienz und angemessene Risikoverteilung zwischen den Partnern.

**Preis für innovatives Lösungsangebot.** Laut Cisco und IDG Global Solutions hat T-Systems mit Application Performance Management als erster Anbieter einen Service geschaffen, der Anwendungen in globalen Unternehmensnetzen optimiert. Daher hat T-Systems den Preis in der Kategorie „Most Innovative Service Offering“ erhalten. Damit können international tätige Unternehmen die Leistung ihres weltweiten Firmennetzes und der standortübergreifenden Applikationen steigern – um das bis zu 50-Fache.

**New Product Innovation Award für T-Systems.** Die internationale Unternehmensberatung Frost & Sullivan zeichnet mit dem „New Product Innovation Award“ jährlich Unternehmen mit innovativen Produkten und Spitzentechnologien aus. T-Systems erhielt die Auszeichnung für eine neue Lösung im Bereich „Elektronische Mauterhebung“.

### Ergebnisse aus Forschung und Entwicklung.

Wichtig für uns ist der Transfer der Arbeitsergebnisse in unsere Konzernbereiche, die daraus für unsere Kunden neue Produkte und Dienste auf den Markt bringen.

Ein Beispiel für einen solchen Transfer ist das Empfehlungssystem des Kölner Start-up-Unternehmens YOOCHOOSE. Deren Recommender Engine für Internetangebote basiert auf Technologien und Patenten, die aus unseren T-Labs stammen. Verglichen mit anderen Empfehlungssystemen ist das Besondere an dieser Lösung die außergewöhnlich präzise Auswahl relevanter Inhalte; die Produkthinweise sind genau auf den jeweiligen Nutzer zugeschnitten. Dabei ist die Lösung so konstruiert, dass sie schnell angepasst werden kann an unterschiedliche Einsatzgebiete, z. B. bei Musicload, Gamesload und anderen Portalen. Wir werden die Recommender Engine auf weiteren Portalen, wie z. B. Videoload, installieren und den Empfehlungsservice portalübergreifend anbieten. Damit erhalten Kunden, wenn sie unsere Portale nutzen, automatisch zusätzliche Empfehlungen für andere, passende Produkte der Deutschen Telekom.

Ein weiteres Beispiel ist das Projekt SEE ICT (Solutions for Energy Efficient Information Communication Technology), in dem Lösungen entwickelt werden, mit denen der Energiebedarf der Netzplattformen der Deutschen Telekom reduziert werden kann. Schließlich benötigen diese für ihren Betrieb die Leistung von mehr als einem Großkraftwerk. Auf der Basis der Projektergebnisse zählt die Energieaufnahme von technischen Elementen der Netzinfrastruktur inzwischen zu den Einkaufskriterien. Mit dem Tochterunternehmen Power and Air Solutions werden mithilfe von Modellrechnungen abgestufte Konzepte etwa für die Stromversorgung in Betriebsstellen erarbeitet, in die auch Faktoren wie die Alterung bestimmter Geräte einbezogen werden. Im Mobilfunk-Bereich, der durch den gleichzeitigen Betrieb von drei unterschiedlichen Übertragungstechnologien besonders anspruchsvoll ist, konnten Beiträge für kurzfristige Einsparungen bei dem Energieverbrauch der Basisstationen geleistet werden.

Viele mobile Endgeräte weisen Bewegungssensoren und Navigationsfähigkeit auf, die auch für mobile Multiplayer-Spiele genutzt werden können. Dank intelligenter Software können die Spiele sich zudem an spezifische Situationen anpassen. Im Projekt Adaptive Mobile Gaming wird ein Software-Development-Kit (SDK) erarbeitet, das Entwickler bei der Realisierung mobiler Multiplayer-Spiele unterstützt. Als Demonstrator wurde eine mit mobilen Geräten spielbare Variante des Brettspielklassikers „Scotland Yard“ geschaffen. Das Spiel „Mister X Mobile“, das in Zusammenarbeit mit der Uni Bonn entwickelt wurde, hatte im Berichtsjahr eine sehr positive Medienresonanz und wird über Gamesload und als App im iTunes-Store angeboten. Die im Projekt gewonnenen Erkenntnisse dienen als Grundlage für die Weiterentwicklung des Software-Development-Kit (SDK).

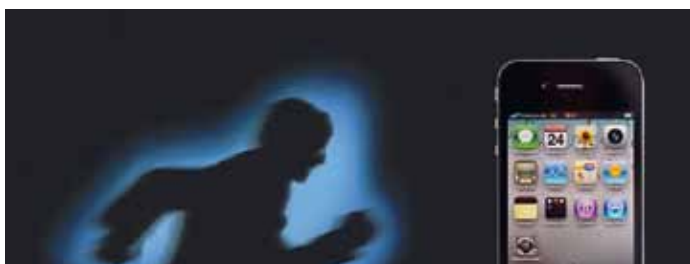

## Innovative Produkte, schnelle Netze und Weiterentwicklungen.

Im abgelaufenen Geschäftsjahr haben wir einige neue Produkte und Weiterentwicklungen zur Marktreife gebracht. Dazu zählen unteren anderen:

**Ausbau 3G-Netzwerke auf HSPA+.** In den Ländern Deutschland, Österreich, der Tschechischen Republik, den Niederlanden, Polen und Griechenland haben wir unsere Netze auf ein 3G-Netzwerk auf HSPA+ ausgebaut. T-Mobile USA bietet durch HSPA+ Geschwindigkeiten vergleichbar mit der eines 4G-Netzwerks an – und das in größerer Flächenabdeckung als alle Wettbewerber. Auch haben wir das Daten-Roaming deutlich vereinfacht; in Großbritannien können Kunden bereits „Roaming passes“ per SMS oder im Internet buchen und wissen genau und von Anfang an, was die Services kosten.

**DeutschlandLAN.** DeutschlandLAN ist die netzbasierte Lösung für die gesamte Business-Kommunikation im Büro und unterwegs. Eine einheitliche Benutzeroberfläche integriert als Kommunikationszentrale für das vernetzte Arbeiten sämtliche Kommunikationskanäle wie Telefonie, E-Mail, SMS und Instant Messaging.

**Cloud Services.** T-Systems ist weltweit Vorreiter, was Standards für neue Dienste wie Cloud Computing betrifft – das ist die Nutzung von Daten und Software aus dem Netz. Die im weltweiten Vergleich strengen deutschen Datenschutzvorgaben, die T-Systems einhält, sind für uns ein deutlicher Wettbewerbsvorteil gegenüber internationalen Anbietern. Unter dem Namen Dynamic Services bietet T-Systems schon seit Jahren Cloud Computing weltweit erfolgreich an. Hier können Unternehmen kurzfristig und kostengünstig IT-Ressourcen an allen Standorten beziehen, hinzubuchen und abbestellen. So können sie schnell und ohne eigenes Investitionsrisiko IT-Projekte voranbringen oder neue Geschäftsmodelle etablieren. Sie nutzen und bezahlen nur das, was sie tatsächlich benötigen. Die Dynamic Services lassen sich nahtlos in jede bestehende ICT-Landschaft integrieren. Das bringt ein hohes Maß an Investitionssicherheit mit sich. Über das „traditionelle“ Cloud Computing hinaus integriert T-Systems auch Netzdienste, Applikationen und Desktops.

**Zukunftsmärkte mit „intelligenten Netzen“ erschließen.** Schwerpunkte im Bereich „intelligente Netze“ sind für T-Systems das vernetzte Auto, das Gesundheitswesen und effizientes Energiemanagement. Darunter verstehen wir u. a. Internetnutzung im PKW oder satellitengestützte Mautsysteme, automatischen Notruf oder sprachgesteuerte E-Mails. Im Gesundheitswesen vernetzt T-Systems die verschiedenen Akteure sicher und komfortabel. Dabei unterstützt T-Systems auch die sog. integrierte Versorgung, bei der

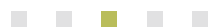

Patienten von einer fachübergreifenden Betreuung und Behandlung profitieren – etwa durch Klinikärzte, Hausärzte, spezialisierte Therapeuten und Reha-Einrichtungen. Für die effiziente Nutzung von Energie, das minuten-genaue Ablesen des Stromverbrauchs im Privathaushalt, steht mit Smart Metering bereits eine Lösung bereit, die die notwendige Transparenz schafft. Derzeit arbeitet T-Systems an einer Lösung für die Stromnetze der Zukunft, den sog. Smart Grids. Sie bringen die schwankende Produktion (Wind, Sonne) und den Verbrauch in Einklang. Dabei greift T-Systems zurück auf ihr Know-how beim Betrieb komplexer Netze sowie auf ihre Branchenexpertise im Energiesektor.

**Mobile Enterprise.** Unternehmen werden immer mobiler. T-Systems unterstützt sie dabei und hat im Geschäftsjahr das Mobile Enterprise Service Portfolio beachtlich weiterentwickelt: Hierin gebündelt sind alle Services rund um mobile Endgeräte im Unternehmenseinsatz – seien es klassische Mobiltelefone oder neuartige Tablets. Diese Angebote umfassen sowohl Verbindungsthemen als auch das Management der Geräte mit passenden Sicherheitsservices – jeweils als voll gemanagten Service oder alternativ als Service aus der Cloud.

**LIGA total! Interaktiv.** Das Feature „Persönliche Konferenz“. Unseren Kunden steht eine individuelle Auswahl der parallelen Spielbegegnungen eines Fußballbundesliga-Spieltags mit weiteren Features zur Verfügung. Mit der LIGA total! Spieltagskarte kann man Fußball an einem beliebigen Spieltag genießen, also ein Schnupperangebot für Entertain-Kunden, um LIGA total! ohne Vertragsbindung zu testen.

**MyPhonebook.** Mit MyPhonebook wird der Massenmarkt erreicht, und es bietet allen Kunden ein sicheres, auch über mehrere Endgeräte und Screens einfach nutzbares netzwerkbasierendes Adressbuch. Neben Telefonie, SMS, E-Mail und Mobilbox werden künftig vermehrt weitere Dienste wie Mediacenter oder neue Kommunikationsdienste darauf aufbauen. Visual Voice Mail (VVM) und Mobilbox Pro bieten bereits heute dem Kunden den nutzerfreundlichen Dienst einer Mobilbox.

**DT One Music Platform.** Im November 2010 wurde eine einheitliche Plattform für Musik-Downloaddservices im Konzern erfolgreich ausgerollt. Dadurch konnten Synergien beim technischen Betrieb der Services und ein einheitlicher Auftritt für Festnetz- und Mobilfunk-Kunden erzielt werden. Auf der DT One Music Plattform werden sowohl Musicload als auch Musik-Downloadshops von Telekom Landesgesellschaften betrieben.

**Neues PayTV-Portfolio, Einführung eines HD-Pakets.** In 2010 wurde das gesamte Entertain PayTV-Portfolio umstrukturiert. Unsere Entertain-Kunden haben seitdem die Auswahl zwischen sechs PayTV-Paketen aus verschiedenen Genres. Außerdem wurde die Anzahl der HD-Sender (High-Definition) in 2010 stark ausgebaut.

**Machine-to-Machine Competence Center.** Wir haben im Februar 2010 ein Machine-to-Machine Competence Center (M2M CC) gegründet und erschließen damit ein weiteres zukunftsweisendes Geschäftsfeld. Mithilfe strategischer Allianzen realisiert das M2M CC die Integration intelligenter Dienste in Endkunden-Produkte. So bietet BMW's „Connected Drive“-Service durch die Anbindung an das Mobilfunknetz der neuesten Generation nun zusätzliche Vorteile für den Fahrer, wie z. B. eCall Notruf-Funktion, Verkehrsinformationen und persönliche Kommunikation per E-Mails. Durch den Aufbau technischer und kommerzieller Strukturen durch das M2M CC konnten segmentspezifische Kundenlösungen weltweit vermarktet werden. Weiterhin wurde speziell die M2M-Servicequalität erforscht, um bei kritischen Applikationen, wie z. B. im Gesundheitsbereich, die Konsequenzen durch Störungen über neue Standards zu minimieren.

**Innovation Center München.** Zukunft zum Anfassen – T-Systems hat in der bayerischen Hauptstadt ihr erstes Innovation Center eröffnet, um Innovationen erlebbar zu machen. Im Münchner Euroindustriepark können Unternehmen künftig auf rund 450 Quadratmetern neue Informations- und Telekommunikationslösungen in einem realistischen Arbeitsumfeld testen. Kunden können eigene Ideen einbringen, um eine Lösung weiterzuentwickeln und sie auf ihre Anforderungen zuzuschneiden. Wissenschaftlicher Partner des Innovation Center Münchens ist die Münchner Ludwig-Maximilians-Universität.

## Aufwand und Investitionen in Forschung und Entwicklung.

Zu unseren Forschungs- und Entwicklungsaufwendungen im engeren Sinne zählen produktvorbereitende Forschung und Entwicklung, wie z. B. die Suche nach alternativen Produkten, Verfahren, Systemen oder Dienstleistungen. Dagegen erfassen wir die Aufwendungen zur Entwicklung von System- und Anwendersoftware mit dem Ziel der Produktivitätssteigerung nicht als Forschungs- und Entwicklungsaufwendungen. Im Geschäftsjahr 2010 lag der Forschungs- und Entwicklungsaufwand für den Konzern mit 0,1 Mrd. € unter dem Niveau der Vorjahre. Die Deutsche Telekom AG trägt als Konzernmutter die wesentlichen Forschungs- und Entwicklungsaufwendungen im Konzern. Auch hier ist der Aufwand niedriger als im Vorjahr.

Die Investitionen des Konzerns in zu aktivierende selbst erstellte immaterielle Vermögenswerte beliefen sich auf 0,2 Mrd. € (2009: 0,2 Mrd. €). Diese Investitionen betreffen hauptsächlich selbst erstellte Software, wobei der überwiegende Anteil auf das operative Segment Deutschland entfällt. Für alle Projekte und Aktivitäten, die zu neuen Produkten und deren effizienterem Angebot an Kunden führen, arbeiteten im Berichtsjahr über 2 200 Mitarbeiter.

# Mitarbeiter.

Wettbewerbsfähige Belegschaft // Servicekultur // Talent Agenda // HR@2012

## „Verbessern – Verändern – Erneuern“.

„HR Big 4“ unterstützen Strategie und Wachstumsfelder. Für ein weltweit herausragendes Service- und Produktportfolio in unserem heutigen Kerngeschäft und in unseren Wachstumsfeldern brauchen wir effektive, effiziente und integrierte Unternehmens- und Personalstrukturen. Diese gilt es weiter zu optimieren. Unser HR-Bereich unterstützt uns dabei als „Partner für das Geschäft“ mit seinen vier Strategie-Stoßrichtungen „HR Big 4“: wettbewerbsfähige Belegschaft, Servicekultur, Talent Agenda und dem HR-spezifischen Qualitäts- und Effizienzprogramm HR@2012. Unser Ziel ist es, eine Unternehmenskultur zu fördern, die auf unternehmerischer

Mitverantwortung basiert und die Balance zwischen hocheffizientem Serviceunternehmen und kreativem Innovationstreiber schafft. Stetig verbessern wir zudem nach außen wie nach innen unser Arbeitgeberimage und unser Talentmanagement. Wir stellen sicher, dass der Konzern immer kompetente und engagierte Mitarbeiter hat: Mit unserer Diversity-Strategie sind wir Vorreiter einer zukunftsgerichteten Personal- und Talentpolitik, die eine große Vielfalt an Persönlichkeiten, Talenten und Stilen in einer werteorientierten Unternehmenskultur vereint und diese Potenziale gewinnbringend erschließt.

## Personalbestandsentwicklung.

| Mitarbeiter im Konzern                       | 31.12. 2010    | 31.12. 2009    | 31.12. 2008    |
|----------------------------------------------|----------------|----------------|----------------|
| <b>Gesamt</b>                                | <b>246 777</b> | <b>259 920</b> | <b>227 747</b> |
| davon: Deutsche Telekom AG <sup>a</sup>      | 35 855         | 49 122         | 44 645         |
| Operatives Segment Deutschland               | 76 478         | 81 336         | 85 637         |
| Operatives Segment Europa                    | 63 338         | 71 163         | 39 140         |
| Operatives Segment USA                       | 37 760         | 40 697         | 38 031         |
| Operatives Segment Systemgeschäft            | 47 707         | 46 021         | 45 862         |
| Konzernzentrale & Shared Services            | 21 494         | 20 703         | 19 077         |
| <b>Geografische Verteilung</b>               |                |                |                |
| Deutschland                                  | 123 174        | 127 487        | 131 713        |
| International                                | 123 603        | 132 433        | 96 034         |
| davon: Übrige EU                             | 68 941         | 76 196         | 45 115         |
| davon: Europa außerhalb EU                   | 9 991          | 10 061         | 7 908          |
| davon: Nordamerika                           | 38 467         | 41 235         | 38 621         |
| davon: Übrige Welt                           | 6 204          | 4 941          | 4 390          |
| <b>Produktivitätsentwicklung<sup>b</sup></b> |                |                |                |
| Konzernumsatz je Mitarbeiter                 | Tsd. € 247     | 251            | 263            |

<sup>a</sup> Aufgrund der Ausgliederung des Festnetz-Geschäfts ist die Vergleichbarkeit der Vorjahresbeträge nicht gegeben.

<sup>b</sup> Mitarbeiter im Durchschnitt.



## Personalaufwand.

|                                                          | 2010<br>Mrd. € | 2009<br>Mrd. € | 2008<br>Mrd. € |
|----------------------------------------------------------|----------------|----------------|----------------|
| Personalaufwand im Konzern                               | 15,1           | 14,3           | 14,1           |
| Sondereinflüsse                                          | 1,0            | 0,5            | 1,1            |
| Personalaufwand im Konzern bereinigt um Sondereinflüsse  | 14,1           | 13,8           | 13,0           |
| Konzernumsatz                                            | 62,4           | 64,6           | 61,7           |
| <b>Bereinigte Personalaufwandsquote</b>                  | <b>22,5</b>    | <b>21,4</b>    | <b>21,1</b>    |
|                                                          | %              |                |                |
| <b>Personalaufwand der Deutschen Telekom AG nach HGB</b> | <b>3,4</b>     | <b>4,0</b>     | <b>3,9</b>     |

Sondereinflüsse: Aufwendungen für Personalmaßnahmen (Details hierzu geben wir im Kapitel „Geschäftsentwicklung des Konzerns“).

## HR Big I: Wettbewerbsfähige Belegschaft.

### Total Workforce Management: Personaleinsatz weltweit optimieren.

Nicht nur als Vorreiter der Branche, sondern auch richtungsweisend in der Liga der großen Konzerne haben wir 2008/2009 zunächst in Deutschland damit begonnen, das auf unserer Geschäftsstrategie aufbauende sog. Total Workforce Management (TWM) einzuführen: TWM lässt uns erstmals weltweit qualitativ und quantitativ den eigenen Personalbestand sowie die notwendigen Fremdleister ermitteln, planen und systematisch optimieren. 2010 haben wir TWM sowohl in Polen als auch in Ungarn ausgerollt sowie in den anderen Landesgesellschaften die Einführungsvoraussetzungen geschaffen. Damit werden wir ab 2011 weltweit strategiebasiert Fähigkeiten, Wertschöpfung, Menge und Kosten der eigenen Belegschaft sowie der Fremdleister optimal planen und steuern können. Wie schon zuvor in Deutschland werden wir dadurch beispielsweise Kosten sowie Know-how unserer internen und externen Workforce analysieren und durch maßgeschneiderte Personalstrukturen im operativen Geschäft noch effizienter arbeiten können. Beispielsweise gab es in Ungarn 2010 dank des durchgängigen Skill- und Kostenabgleichs im Rahmen des TWM einen deutlichen Effizienzsprung durch die Optimierung externer Ressourcen, interner Umqualifizierungen und die Optimierung der Organisationsstruktur. Seit Sommer 2010 läuft unser Konzernprojekt „Global Labor Cost Management“, um bis 2012 die organisatorischen und technischen Grundlagen zu schaffen, unsere Personalkosten auch unterjährig länderübergreifend zu planen, zu steuern und zu kontrollieren. Total Workforce Management bildet auch das Fundament für längerfristige Personalaufbauplanung und Talentmanagement.

### Neueinstellungen, Nachwuchskräfte-Übernahmen und Ausbildung.

Wir brauchen vielfältige und neue Kompetenzen, um unsere Chancen in unseren Kerngeschäften wie auch in Innovations- und Wachstumsfeldern zu ergreifen. Darum planen wir, neben der Weiterentwicklung des vorhandenen Personals, bis 2012 in Deutschland ca. 10 400 und europaweit ca. 18 000 (ohne exklusive Einstellungen im Operativen Systemgeschäft (OS) außerhalb Deutschlands) neue, entsprechend qualifizierte Mitarbeiter einzustellen. Exzellente Experten von außen gewinnen und unsere eigenen Talente fördern: Dieser Mix ist der Schlüssel dazu, unser Unternehmen fit für die Zukunft zu machen. Deshalb ist es nur konsequent, dass z. B. in Deutschland mehr als die Hälfte der Einstellungen aus den Reihen unserer intern ausgebildeten Nachwuchskräfte stammt. 2010 haben wir über 2 000 Nachwuchskräfte aus der eigenen Ausbildung übernommen, davon 91 Studierende aus dualen Studiengängen. Wieder einmal konnten wir das zweifelsohne hohe Übernahmeniveau der Vorjahre steigern. Insgesamt haben wir in Deutschland im Berichtsjahr 3 998 Menschen neu eingestellt, davon rund 1 990 externe Hochschulabsolventen sowie Experten mit Berufserfahrung. Auf dem externen Arbeitsmarkt rekrutieren wir vor allem Software-Entwickler, IT-Architekten, Betriebswirte, Produktmanager und Business-Analysten. Wir haben in Deutschland erneut rund 3 300 jungen Menschen die Chance geboten, eine qualitativ hochwertige Berufsausbildung im Konzern zu beginnen. Mit 9 952 Auszubildenden und Studierenden in dualen Studiengängen sind wir einer der größten Ausbildungsbetriebe in Deutschland.

**Personalumbau: erfolgreiche Bilanz.** Neben dem Aufbau wissens- und zukunftsstarker Arbeitsplätze haben wir 2010 in Teilbereichen unsere Anstrengungen für einen sozialverträglichen Personalumbau fortgesetzt, um die Telekom in wirtschaftlich fordernden Zeiten erfolgreich auf Kurs zu halten. Der weiterhin intensive Wettbewerb und die technologische Entwicklung erfordern, dass in einigen Bereichen unseres Unternehmens künftig weniger Mitarbeiter mit zum Teil anderer Qualifikation arbeiten werden. Um unserer Verantwortung gegenüber unseren Mitarbeitern und dem Unternehmen selbst gerecht zu werden, haben wir neben umfangreichen Re-Qualifikationsprogrammen insbesondere Instrumente zum freiwilligen Ausscheiden aus dem Unternehmen eingesetzt. Dazu zählen die Vorruhestandsprogramme für Beamte und Arbeitnehmer („55er-Programm“), die noch laufende Altersteilzeit sowie für Teilbereiche speziell aufgelegte Sonder-Abfindungsprogramme.

Vivento hat dabei seine Position als spezialisierter Dienstleister für den Personalumbau in Deutschland weiter gestärkt. 2010 lag der Fokus darauf, in Kooperation mit der Bundesagentur für Arbeit (BA) dauerhafte Beschäftigungsalternativen im öffentlichen Dienst zu eröffnen. Mit Erfolg: Zum ersten Mal standen 2010 dort auch in größerer Zahl unbefristete Stellen zur Verfügung; rund 700 Stellen konnten mit Mitarbeitern aus der Deutschen Telekom dauerhaft besetzt werden. Zudem waren rund 2 600 Telekom-Mitarbeiter Ende des Geschäftsjahres 2010 in Projekten bei der BA im Einsatz. Vivento realisierte darüber hinaus rund 100 weitere Versetzungen in den öffentlichen Dienst.

**Health & Safety.** Ein Gesundheitsmanagement als reinen „Reparaturbetrieb“ akzeptieren wir nicht. In einer sich ständig verändernden Branche wollen wir Vorreiter einer proaktiven Gesundheitskultur sein. Und wir sind auf einem guten Weg: Für unsere Bemühungen um die psychische Gesundheit unserer Belegschaft sind wir im Berichtsjahr mit dem Corporate Health Award, der unter der Schirmherrschaft des Bundesministeriums für Arbeit und Soziales steht, ausgezeichnet worden. Erstmals haben wir bei der alle zwei Jahre stattfindenden Mitarbeiterbefragung im vierten Quartal 2010 auch rund 50 Fragen zur psychischen Arbeitsbelastung und Gesundheit gestellt. Fördern wollen wir damit, dass sich die Mitarbeiter wie auch die Führungskräfte mit den Themen Arbeitsgestaltung, Stressbelastung und Bewältigen von Veränderungsprozessen auseinandersetzen. Außerdem sollen Risiken rechtzeitig erkannt werden. Unabhängig von der Mitarbeiterbefragung fördern wir mit unserem Gesundheitsmanagement und seinen Präventivangeboten die Gesundheitskompetenz und das Gesundheitsbewusstsein aller Mitarbeiter, z. B. auch durch das gut genutzte Angebot persönlicher und telefonischer Führungskräfte- und Mitarbeiterberatung.

Mit einem international einheitlichen Health & Safety-Managementsystem unterstützen wir konzernweit diese strategische Ausrichtung. In bereits elf internationalen Tochterunternehmen haben wir damit begonnen, dieses System in Betrieb zu nehmen. Damit haben wir den Grundstein für künftig weltweit einheitliche Standards im Arbeits- und Gesundheitsschutz gelegt. Dem System liegen die internationalen Standards OHSAS 18001, ISO 14001 und ISO 9001 für Gesundheits-, Arbeits- und Umweltschutz sowie Qualität zugrunde. Durch Mindeststandards und entsprechende Kennzahlen schaffen wir international nicht nur mehr Transparenz und bessere Vergleichbarkeit, sondern auch weitere Optimierungspotenziale. Außerdem sind einheitliche Standards und Kennzahlen Teil und Grundlage unserer langfristigen Pandemie-Vorsorgeplanung. Mit ihr wollen wir auf der einen Seite unsere Mitarbeiter gezielt und bestmöglich schützen; auf der anderen Seite versetzen wir unser Unternehmen dadurch in die Lage, auch im Krisenfall die weltweite Telekommunikationsinfrastruktur aufrechtzuerhalten. Auf Grundlage der Erfahrungen, die wir bisher gesammelt haben, werden wir das Health & Safety-Managementsystem 2011 und 2012 in jeweils zehn weiteren Konzerneinheiten umsetzen.

## HR Big II: Servicekultur.

**One Company für eine gemeinsame Servicekultur.** Ob Deutschland, Kroatien, die Slowakei oder Ungarn: Die kundenorientierte Integration unserer Festnetz- und Mobilfunk-Aktivitäten schreitet rasch und gezielt voran. Jetzt geht es darum, den Wandel zu „One Company“ in einer gemeinsamen, am Kunden ausgerichteten Unternehmenskultur mit Leben zu füllen – und zwar auf allen Hierarchieebenen und in allen Bereichen unseres Unternehmens.

Ein professionelles und konzernweit hochwertiges Change-Management, das auch die Emotionalität und subjektive Betroffenheit einbezieht, unterstützt die Umsetzung von „One Company“. Nur so können wir die Mitarbeiter bei umwälzenden, teils schwierigen Veränderungen zur „Neuen Telekom“ mitnehmen und die neuen Strukturen und die neue Kultur im Arbeitsalltag verankern. 2009 und 2010 richtete unser Personalbereich sein Augenmerk darauf, die „One Company“-Integration aktiv zu begleiten.

Wir haben unsere Change-Tools und -Initiativen unter dem Begriff „Change-Haus“ gebündelt. Seit 2010 haben wir damit ein effizientes, konzernweit standardisiertes Change-Management etabliert, das zugleich auch Rücksicht nimmt auf spezifische regionale und lokale Gegebenheiten.

**Umsetzung der Guiding Principles.** Am „Tag der Guiding Principles“, unseren Unternehmenswerten, haben vielfältige, kreative Mitarbeiteraktionen gezeigt, dass unser Leitbild im Konzern weltweit angekommen ist. In 19 Sprachen, 34 Ländern und 50 Geschäftseinheiten ist es uns gelungen, den nächsten Schritt der Implementierung – nämlich die aktive Anwendung der Leitlinien – sichtbar zu machen. Damit haben wir ein klares Zeichen gesetzt, dass diese auf Dauer eine wichtige Rolle für die





Entwicklung unseres Unternehmens spielen. Zur weiteren Verankerung im gesamten Konzern bedarf es nun vor allem der Nachhaltigkeit und damit dem Vorleben der Leitlinien, insbesondere von unseren Führungskräften. Dazu haben wir auch unseren geltenden Code of Conduct (CoC) aktualisiert. Mit dem internationalen Roll-out unseres neuen CoC – in Deutschland im Januar 2011 gestartet – veranschaulichen wir, was die Guiding Principles für Mitarbeiter wie Führungskräfte im Arbeitsalltag bedeuten, und etablieren einen operationalisierten Verhaltenskodex für den gesamten Konzern. Damit stellen wir sicher, dass wir weltweit nach den gleichen Leitlinien agieren und leben.

Unsere Führungskräfte fordern wir dazu auf, das Verhalten vorzuleben, das wir von unseren Mitarbeitern erwarten. Für die Wahrnehmung ihrer Rolle als Multiplikatoren von Konzernstrategie, Leitlinien und Kodex stärken wir unseren Führungskräften gezielt den Rücken. Beispiel Telekom Deutschland GmbH: Bereits die Hälfte aller deutschen Führungskräfte hatte bis September 2010 an den Workshops des mehrstufigen Programms „Initiative 2010 Deutschland. Strategie und Integration – Leitlinien und Leadership“ teilgenommen.

**Top-Exzellenz im Kundenservice.** Wir wollen im Kundenservice herausragend werden! Daran arbeiten wir zielstrebig weiter. Ein Beispiel für internationale Service-Initiativen ist das dreiphasige Servicekultur-Programm der kroatischen Hrvatski Telekom. Sie schult im Zeitraum 2009 bis 2011 ihr technisches Personal rund um die Servicekultur. Ihr Ziel: „Kunden begeistern“. Auch in Deutschland arbeiten wir weiterhin an einer intensiven Servicequalifizierung. Allein in unseren drei Servicegesellschaften haben die Mitarbeiter im Berichtsjahr über 100 000 Servicequalifizierungstage absolviert. Darüber hinaus haben alle Mitarbeiter im operativen Segment Deutschland an rund 360 000 Qualifizierungstagen und mehr als 14 500 Tagen IT-/IP-Trainings teilgenommen. Das entspricht rund 4,5 Qualifizierungstagen pro Jahr, die wir je Mitarbeiter für die Weiterbildung zur Verfügung gestellt haben – und einem Investitionsvolumen in das Know-how unserer Mitarbeiter von über 72 Mio. €.

2009/2010 setzten wir auch unsere Personalentwicklungsmaßnahme „Servicekarriere“ erfolgreich um – einen neuen, auf alle drei Servicegesellschaften jeweils genau zugeschnittenen Karriereweg. Er bietet besonders leistungsstarken Mitarbeitern eine weitere hochkarätige Möglichkeit, sich beruflich weiterzuentwickeln, und zwar über Top-Leistung im Service. 1 100 Mitarbeiter haben ihre Qualifikation für ihre Zusatz-tätigkeit bzw. ihre neue Funktion oder Tätigkeit im Rahmen der Servicekarriere aufgenommen. Die Qualifizierungsphase dauert maximal zehn Monate und führt zu unterschiedlichen Zieltätigkeiten, beim Vertrieb und Service Deutschland z. B. als Kundenberater, Teamleiter, Top Agent oder Workforce Manager. Damit wollen wir sowohl die persönlichen Entwicklungsperspektiven als auch die Lösungs- und Servicekompetenz unserer Mitarbeiter gegenüber den Kunden verbessern.

Um das Service-Verständnis unserer Führungskräfte weiter zu vertiefen, haben wir darüber hinaus die erfolgreiche deutsche Service Akademie fortgesetzt. 1 913 Führungskräfte haben in 2010 die Angebote der Service Akademie genutzt.

**Ideenmanagement.** Lebendige Identifikation mit dem Unternehmen und kreativer, innovativer Austausch heißt aktive Einbindung der Mitarbeiter. Indem sie – möglichst hierarchiefrei – Ideen und Vorschläge einbringen können für Verbesserungen im Kundenservice, bei internen Prozessen bis hin zu Produktinnovationen. Im Ideenmanagement haben 2010 zwei weitere zentrale Schlüsselaktivitäten begonnen. Zum einen haben wir das deutschlandweit einheitliche IT-Tool „genial@telekom“ gestartet und ausgebaut. Ideen einzubringen ist nun deutlich komfortabler und einfacher – und auch transparenter über den gesamten Prozess bis hin zur Bewertung. Dies zeigt auch die Teilnahmequote: Im Jahr 2010 haben 4 992 Mitarbeiter ihre Ideen eingereicht. Somit konnte mit 10 498 eingebrachten Ideen eine Steigerung in Höhe von 88 % zum Vorjahr festgestellt werden. Zum anderen haben wir die konzernweite Nachhaltigkeitsaktion „Große Veränderungen fangen klein an“ unterstützt. Unser Ideenmanagement ist damit schon heute ein wichtiges Element der Mitarbeiter-Teilhabe an der Unternehmensgestaltung. Zugleich zeigt es mit seinen interaktiven Tools den Weg zu einer noch weiteren Öffnung der Deutschen Telekom nach innen und nach außen.

**Enterprise 2.0.** Wir wollen das Wissen unserer Mitarbeiter vernetzen, Wissenszugang demokratisieren und potenzieren, ganz im Sinne einer verzahnten Enterprise 2.0-Strategie. Dabei setzen wir in Zukunft auch auf übergreifenden, zeitlich und räumlich unbegrenzten Dialog und Kontakt, z. B. mit dem in 2011 startenden „Ideengarten“: Innerhalb dieses virtuellen Kommunikationsraums können noch unausgereifte Einfälle und Ansätze in einer Community kommuniziert und weiterentwickelt werden.

**Business Excellence.** Bezogen auf Kundenzufriedenheit sowie auf Qualität und Effizienz der Prozesse, setzen wir seit 2006 erfolgreich auch auf die Methoden „Six Sigma“ und „Lean Management/Office Lean“. Die Six Sigma-Arbeitsgruppe arbeitet dazu sehr eng mit der Change Management Community zusammen. Um unsere Mitarbeiter entsprechend zu qualifizieren, wurden konzernweit mehrere hundert Mitarbeiter zu Six Sigma-Projektleitern ausgebildet und über 750 Prozessmanager in den Six Sigma-Werkzeugen geschult. Alle Business Excellence-Ausbildungen enthalten ein Zertifizierungskonzept, das im Berichtsjahr konzernweit einheitlich geregelt wurde. Plan ist es, das Zertifizierungskonzept im kommenden Jahr in die Expertenkarriere sowie in die Leistungsbeurteilung aufzunehmen.

## HR Big III: Talent Agenda.

**Arbeitgeberimage.** Wir sind auf dem Weg in die Top 10 der Arbeitgeber bzw. Talentunternehmen in jeder unserer internationalen Landesgesellschaften. Das bestätigen auch zahlreiche aktuelle Auszeichnungen als hervorragende Arbeitgeber, die unsere weltweiten Gesellschaften und Beteiligungen 2010 erhalten haben. Einige Gesellschaften gehören sowohl aufgrund ihrer Kultur als auch ihres innovativen und bedarfsorientierten HR Managements schon seit Jahren sogar zu den Top 3 Arbeitgebern ihres Landes. Hier galt es für den restlichen Konzern einen Best-Practice-Austausch voranzutreiben, um von den Besten zu lernen. In Deutschland sind wir begehrtester Arbeitgeber der Telekommunikationsbranche und konnten auch insgesamt in den relevanten Arbeitgeber-Rankings deutlich bessere Plätze belegen als in den Vorjahren. Damit sind wir auf gutem Weg zurück in die Top 30 der attraktivsten Arbeitgeber in Deutschland. Mit ein Grund dafür ist unser innovatives Talent Recruiting. So gilt die Deutsche Telekom, was den Einsatz von Social Media Tools zur Talentgewinnung betrifft, inzwischen als Vorreiter unter den DAX 30-Unternehmen. Maßstäbe setzen hier die vielfältigen und innovativen Maßnahmen unseres zentralen Recruiting & Talent Services (RTS). Zu dem wachsenden Ansehen als Arbeitgeber tragen auch unsere herausragende interne Ausbildung und unser langjähriges Engagement als Befürworter des Bologna-Prozesses bei. Unter dem Leitmotiv „The Great Experience“ erarbeiten wir derzeit Alleinstellungsmerkmale, die unsere Arbeitgebermarke unverwechselbar machen.

**Top-Ausbildungsunternehmen.** Wir sind einer der größten Ausbildungsbetriebe in Deutschland. Im Ausbildungsjahr 2010/2011 liegt die Zahl der Auszubildenden und Studierenden in dualen Studiengängen bei über 10 000, davon rund 1 000 Studenten in dualen Studiengängen. Hinzu kommen über 200 Direktstudenten an unserer unternehmenseigenen Hochschule für Telekommunikation in Leipzig (HfTL). Ein Programm für benachteiligte Jugendliche trägt dazu bei, unentdeckte Talente zu fördern. Jugendliche, vor allem aus bildungsfernen Schichten, erhalten über das Programm „Einstiegsqualifizierung“ (EQ) konkrete Perspektiven für den Berufseinstieg. Von 61 beteiligten Jugendlichen haben es 50 geschafft, einen Ausbildungsplatz zu erhalten. Darüber hinaus fördern wir im Rahmen unseres Konzernprogramms Bologna@Telekom beispielhaft das lebenslange Lernen unserer Mitarbeiter und bieten ihnen akademische Entwicklungsperspektiven. Seit dem Wintersemester 2010/2011 können jedes Jahr rund 200 Mitarbeiter berufsbegleitend und mit Unterstützung des Konzerns einen Bachelor- oder Masterstudiengang an einer unserer Kooperationshochschulen belegen.

**Diversity Management.** Für uns bedeutet Diversity produktive Vielfalt: Wir setzen auf die große Palette der Persönlichkeiten, Talente und Stile als Quelle von Geschäftserfolg, Kreativität und Innovation. Diversity ist ein maßgeblicher Treiber des Wandels unserer Unternehmenskultur – von der Monokultur zum offenen Unternehmen. Damit bieten wir Talenten in ihren verschiedenen Lebensphasen vielfältige Möglichkeiten, sich beruflich und individuell zu entfalten. Wir schaffen attraktive Arbeitsumfelder und flexible Arbeitsbedingungen, für Frauen wie für Männer. Wir verankern Diversity mit praktischen Maßnahmen weltweit im Unternehmen und entwickeln sie als unternehmerischen Erfolgsfaktor weiter. 2009 definierten wir hierfür in einem ersten Schritt die Business Cases für Diversity. Im Berichtsjahr haben wir dann Diversity durch zahlreiche praktische Maßnahmen noch fester im Unternehmen verankert. Aus den vielen Initiativen ragen zwei besonders heraus: der Start des neuen konzernweiten Programms zur Umsetzung der Frauenquote und unser bereits etabliertes Programm „work-life@telekom“, das wir mit weiteren Maßnahmen und Angeboten ausgebaut haben.

**Fair Share.** Wir haben uns das mutige Ziel gesteckt, bis Ende 2015 im gesamten Konzern unser mittleres und oberes Management zu 30 % mit Frauen zu besetzen. Um das zu schaffen, steuern wir unser Programm zur Umsetzung der Frauenquote systematisch durch Zielwerte entlang der gesamten Talentpipeline. Ein Jahr nach Einführung der Frauenquote stellen wir bereits erste Erfolge fest, so konnten wir zahlreiche Frauen gewinnen, gerade auch für Top-Führungspositionen und wichtige Personalentwicklungsprogramme:

- Die Frauenquote im mittleren und oberen Management ist weltweit von 19 % auf 22,6 % gestiegen.
- In unserem 67-köpfigen Management-Team unterhalb des Konzernvorstands, dem Business Leader Team, sind seit März 2010 statt zwei nun insgesamt sechs Managerinnen vertreten.
- Wir haben zehn weibliche Aufsichtsräte in unseren deutschen Tochter- und Enkelunternehmen bestellt. Damit nehmen jetzt 14 Frauen Mandate in Aufsichtsräten der Deutschen Telekom wahr.
- Bei Einstellungen von Top-Nachwuchskräften hat sich der Frauenanteil von 33 % Anfang 2010 bis Jahresende auf 52 % erhöht.
- Der Anteil von Frauen in Managemententwicklungsprogrammen ist von 2009 auf 2010 von 18 % auf mittlerweile 31 % gestiegen.

## Frauen im mittleren und oberen Management. (%)

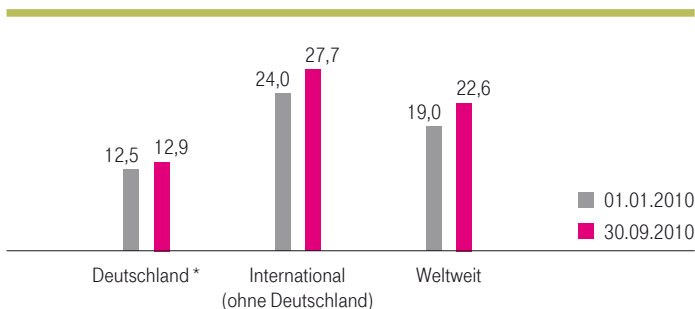

\* Nur oberes Management.

**Harmonisierte Personalentwicklung.** Der Performance & Potential Review (PPR) trägt wesentlich dazu bei, die individuellen Personalentwicklungsprozesse konzernweit gehaltvoller, transparenter und einheitlicher zu gestalten. 2010 haben wir ihn nicht nur erfolgreich zur Führungskräfteentwicklung unserer Executives in Deutschland eingesetzt, sondern auch bei über 2 700 außertariflichen Führungskräften und Fachleitern in Deutschland sowie bei über 2 000 weiteren Führungskräften im Ausland. Insgesamt sind unsere Führungskräfte mit dem PPR als Drehscheibe der individuellen Führungskräfteentwicklung sehr zufrieden. Sie sowie die HR Business Partner bestätigen mit einem überdurchschnittlichen Votum in Befragungen, dass der PPR die Führungskräfte effektiv bei der Leistungs- und Potenzialbewertung unterstützt. Die Rückmeldung der Befragten hat u. a. dazu geführt, dass wir das 2009 erstmals eingesetzte IT-Tool erneut verbessern konnten. Und wir bleiben am Ball: Anfang 2011 werden wir eine weitere Befragung durchführen, um herauszufinden, wie zufrieden die Teilnehmer mit der Durchführung des PPR sind.

### Expertenlaufbahn in der gesamten Deutschen Telekom Gruppe.

Als Alternative zu einer klassischen Managementkarriere haben wir im Unternehmen einen Rahmen zur Expertenentwicklung (Go Ahead!) eingeführt. Aktuell nutzen ca. 33 000 Mitarbeiter Go Ahead! besonders bei der T-Systems in Deutschland und in den Ländergesellschaften sowie bei den europäischen Festnetz- und Mobilfunk-Töchtern, in wettbewerbskritischen Bereichen wie Technologie und Informations- und Kommunikationstechnologie sowie Projektmanagement. Parallel dazu haben 2010 über 20 000 Experten von T-Systems die strategischen Qualifizierungsprogramme CAMPUS im Rahmen der Expertenentwicklung durchlaufen. Bei T-Mobile Austria ist das Fachkräfte-Entwicklungsprogramm bereits vollständig umgesetzt, für insgesamt rund 1 700 Experten. Außerdem ist die Expertenkarriere bei der kroatischen Hrvatski Telekom, in den Niederlanden und Tschechien in ausgewählten Expertengruppen eingeführt. Erste Vorbereitungen laufen bei Magyar Telekom (Ungarn) und der polnischen PTC. Nach und nach setzen wir den internationalen Roll-out in Tschechien, der Slowakei, den Niederlanden und in Griechenland fort. In verschiedenen Förderprogrammen vernetzen sich die Experten untereinander und mit dem Top-Management.

## HR Big IV: HR@2012.

**Qualität und Effizienz für besten HR-Service und exzellente HR-Produkte.** Die elementaren Bausteine für ein Top-Kundenerlebnis sind auch Eckpfeiler unserer internen Organisationsstruktur und unserer HR-Kultur. Wir stärken die Dienstleistungskultur im Personalbereich und seine Position als „Partner fürs Geschäft“ der Deutschen Telekom.

Im Rahmen von „HR@2009“ haben wir eine neue, dreigliedrige Organisation aus Business Partnern, Competence Centern und Shared Services implementiert. Diese Struktur schärfen wir derzeit mit dem neu aufgelegten Programm HR@2012. Darüber hinaus steigern wir die Qualität der HR Dienstleistung, indem wir Prozesse anwenderorientiert automatisiert und weiter vereinfacht haben. Auf diese Weise konnten wir auch die Effizienz der HR-Organisation weiter erhöhen.

Qualität und Effizienz der HR-Arbeit gehen einher mit einer funktionalen, nutzerorientierten Prozess- und IT-Landschaft. Die Beschäftigten der Deutschen Telekom erwarten als Kunden des HR-Bereichs, dass angemessene HR-Services und -Leistungsangebote sie im Arbeitsalltag optimal unterstützen. Diese Unterstützung ist letztlich ausschlaggebend für die Zufriedenheit der HR-Kunden. Ziel ist deshalb der Aufbau einer „Global HR Service Architecture“ (GHSA). Sie soll die Qualität der HR-Services verbessern. Durch sie kann der HR-Bereich außerdem auch sehr flexibel auf organisatorische Veränderungen im Konzern reagieren und gleichzeitig Prozesse und Systeme auf nationaler und internationaler Ebene vereinheitlichen.

### Mit den besten Mitarbeitern zum herausragenden HR-Kundenerlebnis.

Der Anspruch, den die Telekom an die Personalarbeit stellt und der sich an der HR-Mission „Partner fürs Geschäft“ festmacht, ist hoch. Neben einer optimierten Organisationsstruktur sind ausgeprägte Kompetenz und professionelles Serviceverständnis unserer Personalrinnen und Personalr gefordert, um einerseits die Erwartungen unserer internen Kunden zu erfüllen und andererseits die Wettbewerbsfähigkeit unseres Unternehmens insgesamt zu fördern. Als eines der HR Top-Projekte zielt „Best HR People“ deshalb darauf ab, die Personalfunktion in ihrer eigenen Personalentwicklung weiterzuentwickeln. Das Projekt fokussierte sich 2010 auf die Schärfung der Business Partner-Rolle in Deutschland, insbesondere auch über Qualifizierung zum Thema Total Workforce Management (TWM). Weitere Schwerpunkte in diesem Projekt sind Talentmanagement und die Nachwuchssicherung im HR-Bereich sowie eine breite Qualifizierung von Personalern über „HR CAMPUS“.

# Risiko- und Chancenmanagement.

Risikofrüherkennungssystem ausgebaut und optimiert // Schieds- und Gerichtsverfahren PTC beigelegt

## Risikomanagementsystem.

Unser Umfeld ist geprägt von hohem technologischen Fortschritt, sich weiter verschärfendem Wettbewerb und einschneidenden regulatorischen Entscheidungen in den Bereichen Mobilfunk und Festnetz. Diesen Herausforderungen begegnen wir, indem wir Risiken und Chancen systematisch managen – innerhalb eines ganzheitlichen Systems zur Risikofrüherkennung.

Unser konzernweites Risikomanagementsystem enthält alle strategischen und organisatorischen Kontroll- und Überwachungsmaßnahmen, um Risiken zu steuern. Dabei konzentrieren wir uns darauf, Risiken und Chancen

frühzeitig zu erkennen und zu bewerten. Denn nur so können wir zeitnah Maßnahmen zur Risikoprävention bzw. -handhabung einleiten.

Regelmäßig analysieren wir Risiken und Chancen, sowohl in unseren operativen Segmenten als auch in unseren zentralen Konzerneinheiten. Die Systeme, die wir zur Risikofrüherkennung einsetzen, beruhen auf konzernweit vorgegebenen Methoden und sind auf die jeweils individuellen Bedürfnisse genau zugeschnitten. Dabei werden Risiken, u. a. in Form von Szenarien, identifiziert und nach Ausmaß und Eintrittswahrscheinlichkeit bewertet. Bezugsgrößen für das Ausmaß sind unsere Zielgrößen (u. a. EBITDA).

## Das Risikomanagementsystem (RMS).

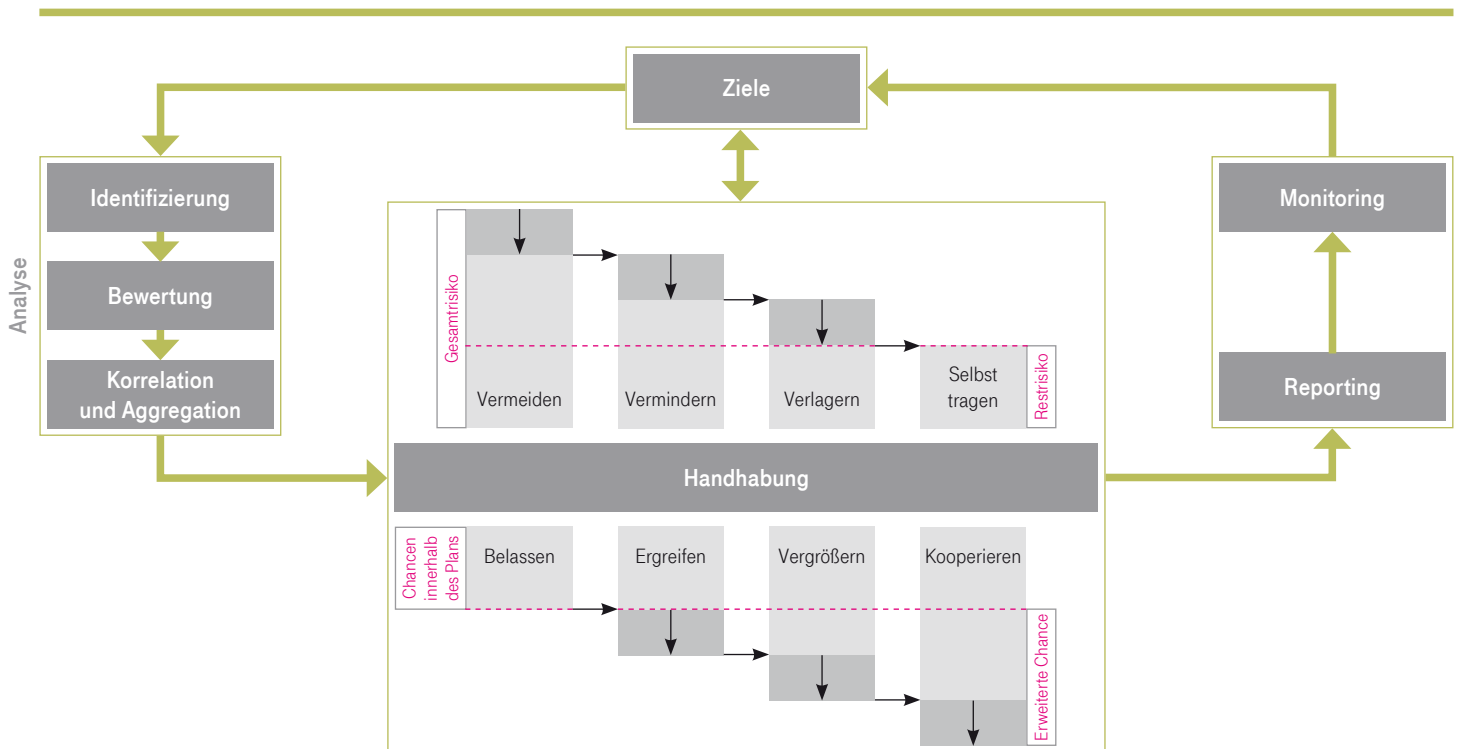

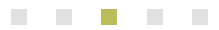

Unser Risikomanagement aggregiert wesentliche EBITDA-bewertete Einzelrisiken. Dabei werden Eintrittswahrscheinlichkeiten und Korrelationen mittels Kombinations- und Simulationsverfahren berücksichtigt. Außerdem analysiert es Themen, die für unsere Reputation und unser Image bedeutend werden könnten. Diese Komponenten fließen in die Bewertung eines Gesamtrisikos ein.

Unser Risikomanagement berichtet über Risiken, und wie diese sich entwickeln, regelmäßig an den Vorstand. Dieser wiederum informiert den Aufsichtsrat. Der Prüfungsausschuss des Aufsichtsrats befasst sich regelmäßig in seinen Sitzungen mit dem vierteljährlichen Risikobericht. Das Reporting der wesentlichen Chancen und Risiken erfolgt turnusmäßig je Quartal; bei Risiken, die unerwartet auftreten, auch unmittelbar („ad hoc“). Für jede Berichtsebene gibt es definierte Wesentlichkeitsgrenzen für Risiken. Ergänzend dazu wird auf Konzernebene regelmäßig ein Risiko-Cockpit für den Vorstand erstellt. In diesem werden die für die Telekommunikationsbranche relevanten Indikatoren aus konzerninternen und -externen Quellen zusammengestellt und ausgewertet. Das Instrument befindet sich kontinuierlich in der Weiterentwicklung und soll in erster Linie im Rahmen einer ergänzenden operativen Frühwarnfunktion die Möglichkeit bieten, den Fokus auf ausgewählte, für den Konzern kritische Risikofelder zu legen.

Der Bereich „Group Risk Management/Insurance“ hat die zentrale Methoden- und Systemverantwortung für dieses konzernweit standardisierte, eigenständige Berichtswesen. Dieser Bereich stellt auch sicher, dass das Risikofrüherkennungssystem effizient funktioniert.

Besonderen Wert legen wir auf das Management von Risiken, die sich aus den einzelnen Finanzpositionen ergeben können. Für alle Finanztransaktionen – insbesondere für den Einsatz derivativer Instrumente – gilt der Grundsatz der Risikominimierung. Darum führen wir alle Finanztransaktionen und Risikopositionen in einem zentralen System. Die Konzernführung wird regelmäßig über diese Positionen informiert. Wir setzen derivative Finanzinstrumente ein, um Risiken aus Zinsveränderungen sowie zahlungswirksame Währungsrisiken und sonstige Preisrisiken zu begrenzen.

Abhängig von Art und Höhe einer Finanztransaktion muss der Vorstand diese vorher genehmigen. Zudem erhält er regelmäßig Informationen über den Umfang und den Betrag des aktuellen Risiko-Exposures. Um die Auswirkungen unterschiedlicher Marktgegebenheiten einschätzen zu können, nehmen wir Simulationsrechnungen vor. Dabei verwenden wir verschiedene Markt- und Worst-Case-Szenarien. Zur Sicherung von Marktrisiken setzen wir ausgewählte derivative und nicht-derivative Sicherungsinstrumente ein. Grundsätzlich werden jedoch nur Risiken besichert, die sich auf den Cashflow auswirken. Für uns gilt: Derivative Finanzinstrumente nutzen wir nur als Sicherungsinstrumente; wir setzen sie nicht zu Handelszwecken oder für andere spekulative Zwecke ein.

Bezogen auf die Risiken der Rechnungslegung greift das Risikomanagementsystem auf das interne Kontrollsystem zurück. Damit stellen wir sicher, dass wir alle rechnungslegungsbezogenen Risiken im Rahmen des Risikomanagementsystems erfassen. Das interne Kontrollsystem und eindeutige konzerninterne Regelungen und Leitlinien stellen die Konformität des Konzernabschlusses sicher. Risiken, die dem Ziel der Regelungskonformität entgegenstehen könnten, sollen frühzeitig erkannt, bewertet, zeitnah kommuniziert und begrenzt werden. Genau dies gewährleistet das Risikomanagement.

Unsere interne Revision prüft in regelmäßigen Abständen, ob die Risikomanagementprozesse effizient funktionieren. Der Abschlussprüfer prüft im Rahmen des gesetzlichen Prüfungsauftrags für die Jahresabschlussprüfung, ob das Risikofrüherkennungssystem geeignet ist, unternehmensgefährdende Risiken und Entwicklungen frühzeitig zu erkennen. Die Funktionsfähigkeit und Wirksamkeit des Systems sind sichergestellt.

Wir gewährleisten durch unser Risikomanagementsystem, dass sich unternehmerische Chancen und Risiken frühzeitig erkennen lassen. Dieses System entspricht den gesetzlichen Anforderungen an ein Risikofrüherkennungssystem und steht im Einklang mit dem Deutschen Corporate Governance Kodex.

## Die Risiken.

Aus allen für den Konzern identifizierten Risiken erläutern wir nachfolgend die Risikofelder bzw. Einzelrisiken, die aus heutiger Sicht die Vermögens-, Finanz- und Ertragslage der Deutschen Telekom und über die Ergebnisse der Tochtergesellschaften die Vermögens-, Finanz- und Ertragslage der Deutschen Telekom AG wesentlich beeinflussen könnten.

### Konjunktur.

Die Weltwirtschaft hat sich 2010 weiter erholt. Allerdings verlor das Wachstum in der zweiten Jahreshälfte – nach einem kräftigen Aufschwung im ersten Halbjahr 2010 – leicht an Schwung. Risiken für die Konjunktorentwicklung ergeben sich durch die weiterhin volatilen Finanz- und Devisenmärkte, die Belastungen für den Privatkonsum infolge hoher Arbeitslosigkeit in einzelnen Ländern und die Gefahren durch die hohen Staatsverschuldungen in vielen Nationen. In einigen Ländern unseres operativen Segments Europa können sich durch die angespannte gesamtwirtschaftliche Lage, den anhaltend harten Wettbewerb sowie die in einigen dieser Länder neu erhobenen bzw. angehobenen Mobilfunk-Steuern weitere Risikopotenziale für unsere Geschäftsentwicklung ergeben. Mit besonderen Unsicherheiten verbunden ist die Konjunktorentwicklung in Griechenland, Rumänien und Kroatien. Ferner resultieren ggf. Risiken aus den stark schwankenden Wechselkursen, insbesondere dem US-Dollar und den süd- und osteuropäischen Währungen.

### **Branche und Wettbewerb.**

Im Festnetz und im Mobilfunk ging das Preisniveau bei Sprach- und Datendiensten auch 2010 weiter zurück. Grund dafür waren der beständig starke Wettbewerb und der technologische Fortschritt. Generell besteht das Risiko, dass sich Preisreduzierungen nicht durch entsprechendes Mengenwachstum ausgleichen lassen.

Der Wettbewerbsdruck – vor allem im Festnetz-Bereich – könnte sich noch weiter erhöhen, z. B. indem sich die Marktabdeckung von (regionalen) Teilnehmernetzbetreibern deutlich ausweitet und sich der Trend zu Bündelangeboten fortsetzt. Außerdem verschärft sich die Konkurrenzsituation durch technologische Innovationen sowie dadurch, dass der Mobilfunk die Festnetz-Kommunikation immer mehr ersetzt. Hinzu kommt, dass bisher reine Mobilfunk-Anbieter in Deutschland zunehmend auch mit Festnetz- bzw. DSL-Angeboten an den Markt gehen. Darüber hinaus verkaufen DSL-Wettbewerber Bündelangebote, die Breitband und VoIP integrieren, ohne dass es hierfür einen separaten Telefonanschluss braucht.

Kabelnetzbetreiber intensivieren den Wettbewerb zusätzlich: Sie sind in der Lage, flächendeckend Haushalten und kleineren Unternehmen Telekommunikationsprodukte anzubieten, für die weder ein eigener Netzausbau noch eine Teilnehmeranschlussleitung der Deutschen Telekom benötigt wird. Die Kabelnetzbetreiber selbst bauen ihr Angebotportfolio weiter aus, z. B. durch Triple-Play-Angebote und Angebote mit hohen Datenübertragungsraten. Alternativ verlängern Wettbewerber in bestimmten Regionen ihr eigenes Glasfasernetz bis an die Haushalte, um sich auch dort von unserem Netz unabhängig zu machen. Ein weiteres Wettbewerbsrisiko liegt darin, dass wir verstärkt auch Konkurrenten gegenüberstehen, die nicht im engeren Sinne zur Telekommunikationsbranche zählen. Zu diesen neuen Wettbewerbern gehören große Unternehmen aus dem Bereich Consumer Electronics und der Internetbranche. Für uns besteht daher über die bisherigen Marktanteilsverluste hinaus das Risiko, dass Marktanteile und Margen weiter sinken.

Der zu erwartende weitere Preisrückgang sowohl in der mobilen Sprachtelefonie als auch bei mobilen Datendiensten könnte sich auf unsere Mobilfunk-Umsätze negativ auswirken. Gründe für den Preisrückgang sind u. a. Billiganbieter, die in Deutschland und auf weiteren europäischen Märkten expandieren.

In den USA stehen wir vor der Herausforderung, der kleinste der vier nationalen Anbieter zu sein. Weiterhin muss T-Mobile USA auch durch Produkt- und Servicequalität sowie durch die Preisgestaltung überzeugen.

Auch der ICT-Markt in unserem operativen Segment Systemgeschäft ist gekennzeichnet durch intensiven Wettbewerb, Preisrückgang sowie die verhaltene Vergabe von Projekten und lange Verkaufszyklen. Das führt zu einem potenziellen Risiko von Umsatzrückgängen und Margenverfall für die T-Systems. Einerseits hat sich die Situation grundsätzlich wegen des konjunkturellen Aufschwungs verbessert – vor allem in Deutschland. Andererseits wurde der Markt für Großaufträge, sog. „Big Deals“, noch schwieriger, was sich negativ auf das ICT-Geschäft der T-Systems auswirken kann.

### **Produkte, Dienste und Innovationen.**

Durch den schnellen technologischen Fortschritt und die andauernde technologische Konvergenz ist es möglich, dass sich Technologien bzw. Produkte teilweise gegenseitig ersetzen. Dies kann sowohl im Sprach- als auch im Datenverkehr zu geringeren Preisen und Umsätzen führen. Doch besteht durch die Weiterentwicklung von Smartphones und Datendiensten auch die Chance, neue Einnahmequellen im mobilen Internet zu erschließen.

In Bezug auf die Nachfrage nach Breitbandanschlüssen muss man bei Breitbandanschlüssen in Deutschland wegen der hohen Marktdurchdringung mit Tendenzen hin zur Marktsättigung rechnen. Dies zeigt sich durch geringeres Marktwachstum im Jahr 2010. Die erfolgreiche Vermarktung von IPTV-Angeboten, wie z. B. Entertain, kann dadurch negativ beeinflusst werden. Wir verbessern die Marktchancen des mobilen Internets, indem wir unser leistungsfähiges Mobilfunknetz kontinuierlich ausbauen. Sollten sich jedoch die Anwendungen der mobilen Datenkommunikation nicht wie erwartet entwickeln, besteht das Risiko, Umsatzziele zu verfehlen. Zudem könnten sich die Investitionen in Netzaufbau und -ausbau sowie in bestehende und künftige Mobilfunk-Lizenzen erst später als ursprünglich erwartet amortisieren.

### **Regulierung.**

Die Deutsche Telekom unterliegt der sektorspezifischen Marktregulierung, wenn die zuständige nationale Regulierungsbehörde für sie auf dem relevanten Telekommunikationsmarkt eine beträchtliche Marktmacht feststellt. In Deutschland bedeutet das für uns, dass wir im Markt für Festnetz-Telefonanschlüsse und zugehöriger Paketangebote noch einer ex-post Missbrauchsaufsicht ausgesetzt sind. Darüber hinaus müssen wir unseren Wettbewerbern kostenorientierte Vorleistungen anbieten, z. B. in den Vorleistungsmärkten für den Zugang zum Teilnehmeranschluss, dem Bitstream-Access sowie der Festnetz- und Mobilfunk-Terminierung. Auch unsere anderen europäischen Tochtergesellschaften sind im Festnetz- und Mobilfunk-Bereich entsprechenden Rahmenbedingungen ausgesetzt.



Mit der Regulierung verbunden sind umfassende Eingriffsbefugnisse in unsere Produkt- und Preisgestaltung. Das hat erhebliche Auswirkungen auf unser operatives Geschäft. Diese Eingriffe sind für uns nur bedingt vorzusehen und können den bestehenden Preis- und Wettbewerbsdruck weiter verschärfen. Es ist zu befürchten, dass die regulatorischen Einflüsse in Deutschland und in den anderen europäischen Ländern die Umsatzentwicklung im Festnetz-Kernmarkt und im Mobilfunk-Markt mittel- bis langfristig beeinflussen.

Investitionen in den Kundenzugang der nächsten Netzgeneration (Next Generation Access, NGA) erfordern einen modifizierten investitionsfördernden Regulierungsrahmen, der u. a. eine faire Risikoverteilung zwischen Investor und Zugangsuchenden vorsieht und die nötige Preisflexibilität ermöglicht. Andernfalls besteht das Risiko, dass die Wirtschaftlichkeit für diese Investitionen nicht wie geplant erreicht werden kann.

Novellierte EU-Richtlinien bestimmen, dass das Telekommunikationsgesetz (TKG), das den wesentlichen Rechtsrahmen für die Regulierung bildet, bis Ende Mai 2011 überarbeitet werden muss. Wesentliches Ziel dieser TKG-Novelle ist die Umsetzung der Richtlinienvorschriften. Diese sollen Anreize für Investitionen in den Aufbau neuer Hochgeschwindigkeitsnetze setzen. Zudem sind Änderungen durch zusätzliche Vorgaben für den Kundenschutz zu erwarten.

Am 20. Januar 2011 haben wir die Entgelte für die Teilnehmeranschlussleitung (TAL) neu beantragt. Mit einer Entscheidung dazu rechnen wir im März 2011. Für die wichtigste Leitung, den Zugang zu TAL, wurden 12,90 € beantragt. Die Höhe des TAL-Entgelts ist entscheidend für die Rentabilität einer flächendeckenden Infrastruktur. Zudem setzt sie Anreize für den weiteren Breitbandausbau, insbesondere für den Ausbau neuer Glasfasernetze.

Die Beschlüsse über die TAL-Überlassungsentgelte aus dem Jahr 1999 und über die TAL-Einmalentgelte aus den Jahren 2001 und 2002 wurden rechtskräftig aufgehoben. Die Bundesnetzagentur (BNetzA) muss nun erneut über diese Entgelte entscheiden. Eine formal durch die BNetzA zu beachtende Vorfestlegung zur Entgelthöhe durch das Gericht gibt es nicht. Daher ist prinzipiell offen, ob und in welcher Höhe Entgelte verändert werden. Mit Beschluss vom 20. Januar 2011 genehmigte die BNetzA die TAL-Einmalentgelte 2002 für den Zeitraum April 2002 bis Juni 2003 neu. Im Vergleich zur Entscheidung aus dem Jahr 2002 wurden die Entgelte gesenkt: für die wichtigsten Bereitstellungs-/Übernahmevarianten um 3 % bis 8 % und für Kündigungsvarianten um 11 % bis 15 %. Die Entgeltentscheidung wurde nur für die im Gerichtsverfahren erfolgreichen Klägerinnen ausgesprochen; Grund dafür ist der in 2002 nach damaligem Telekommunikationsgesetz anzuwendende sog. Einzelvertragsbezug.

**Netzneutralität.** Bis heute gibt es für diesen Begriff noch keine allgemein gültige und zugleich funktional-technisch geeignete Definition. Das Thema Netzneutralität wird verstärkt öffentlich diskutiert. Teilweise wird sogar gefordert, dass alle Datenpakete technisch und wirtschaftlich vollkommen gleich zu behandeln sind. Insbesondere Content- und Applikationsanbieter setzen auch für die Zukunft voraus, dass die Netzbetreiber ihre Transportkapazität stetig erweitern und die Infrastruktur ausbauen.

Mit der Umsetzung der neuen europäischen Richtlinienvorgaben in nationales Recht erhalten die nationalen Regulierungsbehörden die Möglichkeit, Mindestanforderungen an die Dienstqualität aufzuerlegen. In Deutschland sind derzeit keine über die Richtlinienumsetzungen hinausgehenden regulatorischen Eingriffe bekannt. Das Bundeswirtschaftsministerium geht davon aus, dass der funktionierende Wettbewerb und die vorgesehenen Transparenzverpflichtungen ausreichen, um entsprechenden Veränderungen entgegenzuwirken.

#### **Personal.**

Auch 2010 konnten wir den personellen Umbau in unserem Konzern in Deutschland sozialverträglich gestalten und umsetzen; im Wesentlichen über Abfindungen, Altersteilzeit, Vorruhestand und die von Vivento angebotenen Beschäftigungsperspektiven für Beamte und Angestellte, insbesondere im öffentlichen Sektor. Auch künftig setzen wir den Personalumbau im erforderlichen Umfang fort. Falls sich die entsprechenden Maßnahmen nicht oder nicht im geplanten Ausmaß realisieren lassen, kann sich dies negativ auf unsere Finanzziele und unsere Rentabilität auswirken.

Werden Konzerneinheiten, in denen Beamte beschäftigt sind, veräußert, besteht grundsätzlich die Möglichkeit, dass diese weiterhin bei der veräußerten Konzerneinheit arbeiten. Dazu muss der Beamte selbst zustimmen bzw. den Antrag stellen. Allerdings besteht das Risiko, dass Beamte, z. B. nach dem Ende der Beurlaubung, von einer veräußerten Einheit zur Deutschen Telekom zurückkehren. Ein solches Rückkehrrecht besteht derzeit für etwa 3 000 Beamte. Dieses Risiko lässt sich etwa durch Kompensationszahlungen reduzieren, aber nicht vollständig vermeiden.

**Sonderzahlung Beamte.** Im November 2004 hat die Bundesrepublik Deutschland das Erste Gesetz zur Änderung des Postpersonalrechtsgesetzes (PostPersRG) verabschiedet, das die Notwendigkeit für die Deutsche Telekom und für die anderen Postnachfolgeunternehmen beseitigt hat, den beschäftigten Beamten eine jährliche Sonderzahlung nach dem Bundessonderzahlungsgesetz zu zahlen. Dieses Gesetz wurde in verschiedenen gerichtlichen Instanzen geprüft. Im Dezember 2008 hat das Bundesverwaltungsgericht entschieden, den Fall dem Bundesverfassungsgericht zur Normenkontrolle gemäß Artikel 100 Grundgesetz vorzulegen. Eine Entscheidung des Bundesverfassungsgerichts wird für Anfang 2011 erwartet. Sollte entschieden werden, dass die Streichung der Sonderzahlung verfassungswidrig war, könnte das für die Jahre 2004 bis Juni 2009 zu einem Nachzahlungsaufwand führen.

**Abgesenkte Besoldungstabellen.** Mit Inkrafttreten des Dienstrechtsneuordnungsgesetzes am 11. Februar 2009 hat der Gesetzgeber die Beträge, die bisher die jährliche Sonderzahlung nach dem Bundessonderzahlungsgesetz darstellten, für alle Bundesbeamtinnen und Bundesbeamten in das monatliche Grundgehalt integriert. Dies gilt nach § 78 Bundesbesoldungsgesetz nicht für die bei den Postnachfolgeunternehmen beschäftigten Beamtinnen und Beamten. Gegen die um den Anteil der Sonderzahlung abgesenkten Besoldungstabellen legten einige Beamte ebenfalls Rechtsmittel ein. In zwei Klageverfahren wurde diese gesetzliche Regelung vom Verwaltungsgericht Stuttgart dem Bundesverfassungsgericht zur Prüfung auf Verfassungsmäßigkeit vorgelegt. Daraus könnte ab Juli 2009 Nachzahlungsaufwand entstehen.

### IT-/NT-Infrastrukturen.

Unter Informations-/Netztechnik (IT/NT)-Infrastruktur verstehen wir alle Gebäude (Netzknotten), Kommunikationsdienste (Netzwerk), Hardware und Software, die zur Informationsverarbeitung bereitstehen. Unsere IT-/NT-Ressourcen und -Strukturen sind also eine organisatorische und technische Plattform, die die Geschäftstätigkeit unseres Konzerns unterstützt. IT/NT ist sowohl das zentrale Fundament für die „Gigabit-Gesellschaft“ als auch Grundlage für innovative neue TK-Produkte und -Dienste.

Wir wollen die aus dem Betrieb und der Architektur der IT-/NT-Infrastruktur resultierenden Risiken minimieren. Daher betrachten wir die Aspekte Kosten/Nutzen, Qualität und Sicherheit und schöpfen diese optimal aus.

Auch im Geschäftsjahr 2010 führten wir umfangreiche Programme durch, um die IT-Systeme und die IT-Infrastruktur an die sich ändernden Kundenbedürfnisse und die neuen organisatorischen Anforderungen im Rahmen von „One Company“ anzupassen. 2011 setzen wir diese konzernweiten Programme fort. Bei unzureichender Planung und Steuerung dieser Programme könnte es zu Störungen der Geschäftsprozesse und somit Umsatzausfall oder Kostensteigerungen kommen.

Sechs konzernweite „Next Generation IT“ (NG IT) Programme sind der Rahmen für alle IT-relevanten Anteile in den Transformationsprogrammen des Konzerns. Mit „Next Generation IT“ wollen wir die IT-Strategie umsetzen und die zukünftige IT-Zielarchitektur des Konzerns implementieren. Schwerpunkt ist dabei, die Applikationen und Infrastruktur zu harmonisieren, zu standardisieren und zu konsolidieren. In konzernübergreifenden Projekten werden Lösungen erarbeitet, z. B. für ein übergreifendes Kundenbeziehungsmanagement der Zukunft, für die Fakturierung konvergenter Produkte oder die zukünftige IT-Unterstützung der Funktionen Finanzen, Personal, Logistik und Einkauf. Alle aufgesetzten IT-Programme vereinfachen die IT-Architektur und verbessern u. a. auch die Netzstabilität bzw. reduzieren das Ausfallrisiko, da das Netz effizienter werden wird.

Wir ersetzen die vielen verschiedenen heterogenen Architekturen, Zugangsarten und Dienste durch eine einheitliche Architektur – mit gemeinsamen Aggregations-, Transport- und Zugangsebenen. Hier bestehen Risiken, die alle IT-/NT-Systeme und -Produkte mit Internetanbindung betreffen können. Die IT-/NT-Landschaft ist sehr komplex. Daher würden Störungen, beispielsweise zwischen neu entwickelten und bereits bestehenden IT-/NT-Systemen, zu Unterbrechungen von Geschäftsprozessen und Produkten, z. B. bei der Mobiltelefonie, führen.

Risiken durch Hackerangriffe, Spammails/Calls, Viren/Trojanersoftware und Netzausfall treten wir mit vielen Maßnahmen entgegen, z. B. Firewalls, Virenskans, technische Frühwarnsysteme (z. B. Entwicklung von Datenmengen) und Dopplung von Systemen und Rechenzentren. Außerdem setzen wir organisatorische und technische Notfallmaßnahmen ein, um Schäden zu mindern. Darüber hinaus sind versicherbare Risiken durch ein konzernübergreifendes Versicherungsprogramm abgedeckt.

### Datenschutz und Datensicherheit.

Die Sicherheit und der Schutz von Kundendaten haben für uns höchste Priorität. Schließlich sind sie die Basis jeder vertrauensvollen Kundenbeziehung. Wie wichtig diese Themen für uns sind, zeigt sich darin, dass wir 2008 ein eigenes Vorstandsressort für Datenschutz, Recht und Compliance geschaffen haben sowie ein umfangreiches Maßnahmenpaket für einen verbesserten Datenschutz, eine erhöhte Datensicherheit und mehr Transparenz. Dieser Bereich stellt sicher, dass wir die notwendigen Maßnahmen zu Datenschutz und Datensicherheit sowie Compliance bereichsübergreifend abstimmen und konzernweit einheitlich umsetzen. Zudem haben wir einen externen Datenschutzbeirat eingerichtet, der sich aus führenden Datenschutzexperten und Persönlichkeiten aus Politik, Wissenschaft, Wirtschaft und unabhängigen Organisationen zusammensetzt. 2010 gab es insgesamt fünf Sitzungen dieses Datenschutzbeirats; für 2011 sind weitere Treffen geplant.





 Informationen über die aktuelle Lage des Datenschutzes der Deutschen Telekom finden Sie unter [www.telekom.com/datenschutz](http://www.telekom.com/datenschutz).

Um konzernweit die höchsten Standards beim operativen Datenschutz zu gewährleisten, haben wir umfangreiche Maßnahmen eingeleitet und laufende Projekte weitergeführt. Für noch mehr Datensicherheit haben wir 2010 z. B. ein sog. „Listenprüf-Tool“ eingeführt. Dies stellt sicher, dass personenbezogene Daten nur so lange wie unbedingt erforderlich verwendet werden dürfen – und auch nur von einem definierten Personenkreis. Außerdem haben wir für ein Vertriebspartnerportal personalisierte Einmalpasswörter eingeführt. Das verbessert die Authentifizierung der Vertriebspartner wesentlich, erschwert die Nutzung des Systemzugangs durch unbefugte Dritte deutlich und reduziert das Missbrauchsrisiko. Für 2011 haben wir weitere Maßnahmen geplant, um den Zugriffsschutz auf sensible Daten weiter zu verbessern; dazu gehört z. B. das Pilotprojekt für eine mobile Transaktionsnummer (mTAN), die den Zugriff auf Vertragsdaten der Festnetz-Kunden absichert. Ein Vertriebspartner erhält erst dann Zugriff auf Kundendaten, wenn der Kunde ihn dazu über eine auf sein Mobiltelefon übermittelte mTAN autorisiert hat.

Bezogen auf unternehmensinterne Systementwicklungsprozesse, haben wir mit Erfolg die Sicherheit und den Schutz personenbezogener Daten verbessert. Das sog. Privacy&Security Assessment gewährleistet, dass Anforderungen bezüglich Sicherheit und Datenschutz bei den neu entwickelten Systemen und Anwendungen berücksichtigt werden, und zwar so früh wie möglich. Wir haben eine einheitliche Schnittstelle zu den Systementwicklungsprozessen eingerichtet; so können wir systemimmanente Risiken optimal bewerten und diese auch wirksam mithilfe angemessener Datenschutz- und Sicherheitsmaßnahmen bzw. -aktivitäten bewältigen. Sicherheit und Datenschutz sind damit zu einem Designkriterium für neue Systeme geworden.

Wir wollen die Sensibilität unserer Beschäftigten, insbesondere auch unserer Führungskräfte, für das Thema Datenschutz und Datensicherheit weiter erhöhen. Darum haben wir die bereits bestehenden Schulungen und jährlichen Daten-Audits weiter vertieft.

Unser Ziel: Wir wollen die Transparenz im Bereich Datenschutz nachhaltig erhöhen. Regelmäßig und freiwillig veröffentlichen wir einen Bericht zum Stand des Datenschutzes/der Datensicherheit. Diesen legen wir unserem Aufsichtsrat, dem Bundesbeauftragten für Datenschutz sowie der Öffentlichkeit vor. Die ersten Datenschutzberichte sind im April 2009 und Mai 2010 erschienen.  Im Oktober 2008 starteten wir die Internetseite [www.telekom.com/datenschutz](http://www.telekom.com/datenschutz); sie informiert über die derzeitige Lage des Datenschutzes der Deutschen Telekom in Deutschland und gibt Auskunft über aktuelle und kritische Datenschutzvorgänge. Damit gehen wir über die Anforderungen zur Informationspflicht hinaus, die der Gesetzgeber am 1. September 2009 mit der Novellierung des Bundesdatenschutzgesetzes § 42a vorgegeben hat.

Wir minimieren den Eintritt weiterer negativer Ereignisse im Rahmen von Datensicherheit und Datenschutz durch das optimale Zusammenspiel präventiver und reaktiver Maßnahmen.

## Gesundheit und Umwelt.

Elektromagnetische Felder (EMF) werden mit möglichen Umwelt- und Gesundheitsbeeinträchtigungen in Zusammenhang gebracht. Zu diesem Thema gibt es eine intensive öffentliche Diskussion. Akzeptanzprobleme in der Öffentlichkeit gibt es dabei sowohl, was die Netzwerke angeht, als auch beim Einsatz von Endgeräten. Diese Probleme wirken sich z. B. im Mobilfunk-Bereich insbesondere auf den Ausbau der Mobilfunknetze aus. Im Festnetz-Bereich betreffen sie den Absatz von schnurlosen DECT-Geräten sowie Endgeräten mit WLAN-Technologie. Neben rechtlichen Risiken sind regulatorische Maßnahmen möglich, wie etwa die Umsetzung von Vorsorgemaßnahmen beim Mobilfunk. Die Weltgesundheitsorganisation (WHO) hat erklärt, dass – auf Basis des momentanen wissenschaftlichen Kenntnisstands – keine bekannten nachteiligen Gesundheitseffekte unterhalb der internationalen Grenzwerte bestehen. Auch für die Zukunft erwartet die WHO keine ernsthaften Gefahren. Sie empfiehlt aber weitergehende Forschung wegen bestehender wissenschaftlicher Unsicherheiten.

Unser Ziel ist es, die Unsicherheit in der Bevölkerung abzubauen – durch eine sachliche, wissenschaftlich fundierte und transparente Informationspolitik. So engagieren wir uns in einer Brancheninitiative der Mobilfunk-Unternehmen: im „Informationszentrum Mobilfunk“, ein umfassendes Informations- und Dialogangebot für die Öffentlichkeit. Unser Bestreben, modernste Technologien anzubieten, beinhaltet auch die Förderung wissenschaftlicher Forschung, um mögliche Risiken frühzeitig zu erkennen. Für uns bedeutet das neben dem langjährigen Engagement in der Forschungsgemeinschaft Funk (FGF) insbesondere die finanzielle Förderung der Forschungsaktivitäten der Bundesregierung im Rahmen des Deutschen Mobilfunk-Forschungsprogramms und des Umweltforschungsplans. Aktuell ist dazu noch die Gründung des Wissenschaftsforums EMF hinzugekommen – einer wichtigen Forschungsplattform, die die Lücke, die nach der Auflösung der FGF entstanden ist, schließt. Wir haben diese Neugründung angestoßen und unterstützen dieses Wissenschaftsforum finanziell. Zudem hat T-Mobile mit der 2004 beschlossenen EMF-Policy für alle Landesgesellschaften bestimmte Maßnahmen zur Transparenz, Information, Beteiligung und Forschungsförderung festgeschrieben. Sie sollen mögliche rechtliche und regulatorische sowie Akzeptanzprobleme in der Bevölkerung minimieren.

\* Soweit der Lagebericht auf Inhalte von Internetseiten verweist, sind diese Inhalte nicht Bestandteil des Lageberichts.

## Einkauf.

Als Dienstleister sowie Betreiber und Anbieter von IT-/TK-Produkten arbeiten wir mit unterschiedlichen Lieferanten für technische Komponenten zusammen; zu diesen Komponenten zählen z. B. Soft- und Hardware, Übertragungstechnik, Vermittlungs- und Linientechnik sowie Endgeräte.

Lieferrisiken lassen sich grundsätzlich nicht ausschließen. So können Lieferengpässe, Preiserhöhungen, veränderte wirtschaftliche Rahmenbedingungen oder Produktstrategien der Lieferanten negative Folgen für unsere Geschäftsprozesse und unser Ergebnis haben. Risiken können sich aus Abhängigkeiten von einzelnen Zulieferern bzw. dem Ausfall von einzelnen Lieferanten als direkte Folge der Wirtschaftskrise ergeben. Diesen Risiken begegnen wir mit einer Vielzahl von organisatorischen, vertraglichen und einkaufsstrategischen Vorsorgemaßnahmen. Wir haben u. a. ein kennzahlengestütztes Lieferantenbewertungssystem eingeführt. Es beinhaltet auch Kennzahlen mit einer gewissen Prognosegüte. So können wir Lieferantenrisiken möglichst frühzeitig erkennen und rechtzeitig Risikomanagementmaßnahmen einleiten.

## OTE.

Die Deutsche Telekom hält 30 % plus eine Aktie an der OTE und übt durch ein entsprechendes Shareholder Agreement Beherrschung aus. Die Regierungspartei der sozialistischen Bewegung in Griechenland PASOK hatte sich vor ihrem Wahlerfolg am 4. Oktober 2009 kritisch zum Teilverkauf der OTE an uns geäußert. Allerdings ist das Risiko von „Nachverhandlungen zu Inhalten des Shareholder Agreements“ durch die neue Regierung gering, da grundsätzlich Änderungen des Shareholder Agreements nur einvernehmlich beschlossen werden können.

## Rechtsrisiken.

**Rechtsstreitigkeiten.** Die Deutsche Telekom ist Partei in mehreren gerichtlichen und außergerichtlichen Verfahren mit Behörden, Wettbewerbern sowie anderen Beteiligten. Von besonderer Bedeutung sind aus Sicht der Deutschen Telekom die nachfolgend aufgeführten Verfahren.

- **Prospekthaftungsverfahren.** Es handelt sich um ca. 2 600 laufende Klagen von ca. 16 000 angeblichen Käufern von T-Aktien, die auf der Grundlage der Prospekte vom 28. Mai 1999 und vom 26. Mai 2000 verkauft wurden. Der Streitwert beläuft sich auf insgesamt ca. 80 Mio. €. Die Klagen richten sich zum Teil auch gegen die Kreditanstalt für Wiederaufbau (KfW) und/oder die Bundesrepublik Deutschland sowie teilweise auch gegen emissionsbegleitende Banken.

Das Landgericht Frankfurt am Main hat jeweils Vorlagebeschlüsse nach dem Kapitalanleger-Musterverfahrensgesetz (KapMuG) zum Oberlandesgericht (OLG) Frankfurt am Main in Bezug auf den zweiten und dritten Börsengang (DT2 und DT3) erlassen und die Ausgangsverfahren ausgesetzt. Die letzte mündliche Verhandlung im Musterverfahren DT3 hat am 15. Dezember 2010 stattgefunden. Die Parteien haben die Möglichkeit, sich nochmals schriftlich zu äußern. Das Gericht hat eine Entscheidung für das zweite Quartal 2011 angekündigt. Das Vorlageverfahren zu DT2 ruht derzeit faktisch.

Ca. 12 000 weitere angebliche Käufer von T-Aktien hatten Güteverfahren bei der „Öffentlichen Rechtsauskunfts- und Antragsstelle der Freien und Hansestadt Hamburg (ÖRA)“ beantragt. Davon wurden ca. 8 000 Verfahren abgeschlossen und die verbleibenden ca. 4 000 bislang noch nicht vollständig abgeschlossenen Verfahren aufgrund eines Beschlusses des Hanseatischen OLG vom 10. Februar 2010 von der ÖRA mit Schreiben vom 4. März 2010 gegenüber der Deutschen Telekom AG für beendet erklärt.

- **Toll Collect.** In dem Schiedsverfahren zwischen den Hauptgesellschaftern des Konsortiums Toll Collect, der Daimler Financial Services AG und der Deutschen Telekom sowie der Konsortialgesellschaft Toll Collect GbR einerseits und der Bundesrepublik Deutschland andererseits über Streitigkeiten, die mit dem Mauterhebungssystem zusammenhängen, erhielt die Deutsche Telekom die Klageschrift des Bundes am 2. August 2005. Darin machte der Bund einen Anspruch auf entgangene Mautentnahmen in Höhe von ca. 3,51 Mrd. € nebst Zinsen wegen Verspätung der Aufnahme des Wirkbetriebs zum 1. September 2003 geltend. Die Summe der geltend gemachten Vertragsstrafen wurde in Höhe von 1,65 Mrd. € nebst Zinsen gefordert. Die Vertragsstrafen beruhen auf angeblichen Verletzungen des Betreibervertrags (fehlender Zustimmung zu Unteraufnahmeverträgen, verspäteter Bereitstellung von „On-Board-Units“ und Kontrolleinrichtungen). Der Bund hat mit Schriftsatz vom 16. Mai 2008 seine Klageforderung in Bezug auf den Mautausfallschaden neu berechnet und geringfügig um 169 Mio. € nach unten korrigiert. Die neue Klageforderung beträgt nunmehr ca. 3,3 Mrd. € zuzüglich Zinsen. Die Summe aller Hauptforderungen des Bundes (einschließlich Vertragsstrafenansprüchen) beträgt nunmehr ca. 4,99 Mrd. €.



Die Beklagten haben am 30. Juni 2006 die Klageerwidmung eingereicht. Die Klägerin hat dazu mit Schriftsatz vom 14. Februar 2007 Stellung genommen. Nach weiteren Schriftsatzwechseln zwischen den Verfahrensbeteiligten fand im Juni 2008 eine erste mündliche Verhandlung statt, in der das Schiedsgericht rechtliche Fragen mit den Schiedsparteien erörterte, ohne dass hieraus bereits Schlüsse auf den Ausgang des Verfahrens gezogen werden könnten. Die Parteien reichten seitdem weitere Schriftsätze ein. In einer weiteren mündlichen Verhandlung im Dezember 2010 wurden verschiedene Zeugen und Sachverständige angehört. Es wurde eine weitere Schriftsatzfrist für die Parteien bis zum 20. Mai 2011 festgelegt.

– **Schieds- und Gerichtsverfahren in Sachen PTC – Anteilserwerb (Polska Telefonia Cyfrowa Sp.z o.o.; PTC).**

In den diversen Rechtsstreitigkeiten um die Anteile an der polnischen PTC hat die Deutsche Telekom AG im Dezember 2010 eine Vereinbarung mit der französischen Vivendi und der polnischen Elektrim sowie den Gläubigern von Elektrim abgeschlossen. Die Vereinbarung sichert das vollständige und unumstrittene Eigentum an der PTC. Entsprechend der Vereinbarung haben die Deutsche Telekom AG und ihre Beteiligungsgesellschaften insgesamt ca. 1,4 Mrd. € im Januar 2011 an Elektrim und Vivendi gezahlt. Daneben wurde die Beilegung aller juristischen Auseinandersetzungen der Parteien vereinbart. Neben einer Vielzahl von Klagen und Schiedsverfahren betrifft diese Beilegung u. a. die Schiedsklage von Vivendi SA in Genf/Schweiz. Schadensersatzansprüche von Vivendi SA in Paris/Frankreich und von Vivendi SA in Seattle/USA wurden bereits im Jahr 2010 rechtskräftig abgewiesen.

- **telegate AG/Harisch.** Am 19. Oktober 2005 wurde der Deutschen Telekom AG nach vorangegangenem Mahnverfahren eine Schadensersatzklage der telegate AG in Höhe von ca. 86 Mio. € nebst Zinsen zugestellt. Die telegate begründet ihre Klage mit angeblich überhöhten Preisen der Deutschen Telekom AG für die Überlassung der Teilnehmerdaten zwischen 1997 und 1999. Damit hätten der telegate AG nicht ausreichende Mittel für Marketingmaßnahmen zur Verfügung gestanden, sodass der geplante Marktanteil nicht erreicht werden konnte. Ebenfalls am 19. Oktober 2005 wurde der Deutschen Telekom AG wiederum nach vorangegangenem Mahnverfahren eine Schadensersatzklage des Herrn Dr. Harisch in Höhe von ca. 329 Mio. € nebst Zinsen zugestellt. Herr Dr. Harisch begründet seine Klage damit, dass wegen der angeblich überhöhten Preise für die Überlassung der Teilnehmerdaten zwischen 1997 und 1999 mehrfach der Eigenkapitalanteil der telegate AG signifikant abgesunken sei, sodass Kapitalerhöhungsmaßnahmen erforderlich gewesen seien. Hierzu hätten Herr Dr. Harisch und ein weiterer Gesellschafter Anteile aus ihrem Aktienbestand abgeben müssen, ihr verbliebener Aktienbestand sei dadurch verwässert worden. Der Kläger macht nunmehr einen um ca. 283 Mio. € erhöhten Schaden geltend. Der Streitwert hat sich dadurch auf ca. 612 Mio. € erhöht. Das Verfahren ist noch in erster Instanz vor dem Landgericht Köln anhängig.

- **Schadensersatzklagen – Preis-Kosten-Schere.** Wettbewerbsunternehmen haben Schadensersatzansprüche wegen einer Preis-Kosten-Schere zwischen Vorleistungspreisen und Endkundenpreisen im Ortsnetz geltend gemacht, die von der EU-Kommission im Rahmen einer Bußgeldentscheidung im Jahr 2003 festgestellt worden ist. Vodafone (vormals Arcor) hat aktuell Schadensersatz in Höhe von 223 Mio. € nebst Zinsen gerichtlich geltend gemacht. Der bisher anhängige Rechtsstreit war bis zu einer rechtskräftigen Entscheidung der europäischen Gerichte über die Bußgeldentscheidung der EU-Kommission ausgesetzt. Das Europäische Gericht Erster Instanz (EuG) hatte am 10. April 2008 die Nichtigkeitsklage der Deutschen Telekom AG gegen die Bußgeldentscheidung abgewiesen. Das hiergegen gerichtete Rechtsmittel der Deutschen Telekom AG wurde vom Europäischen Gerichtshof (EuGH) am 14. Oktober 2010 zurückgewiesen. Die Bußgeldentscheidung der EU-Kommission in Höhe von 12,6 Mio. € zuzüglich Zinsen ist damit bestandskräftig geworden. Im Rahmen des fortzusetzenden Schadensersatzprozesses darf das nationale Gericht keine Entscheidung erlassen, die der Entscheidung des EuGH zuwiderlaufen würde. Die Höhe des Schadens von Wettbewerbern war nicht Gegenstand des Verfahrens vor dem EuGH. In 2011 haben Versatel und EWE Tel gegen die Telekom Deutschland GmbH eine Schadensersatzklage über ca. 70 Mio. € bzw. ca. 82 Mio. € und NetCologne in Höhe von ca. 73 Mio. € jeweils nebst Zinsen bei Gericht eingereicht. HanseNet hat eine Klage auf Feststellung erhoben, dass die Deutsche Telekom AG und die Telekom Deutschland GmbH verpflichtet sind, HanseNet sämtliche Schäden zu ersetzen, die aufgrund der von der EU-Kommission festgestellten Preis-Kosten-Schere entstanden sind. Daneben hat ein weiterer Wettbewerber einen Schadensersatzanspruch über ca. 27 Mio. € nebst Zinsen geltend gemacht.
- **Entgelte zu den Teilnehmeranschlussleitungen.** Im November 2008 hob das Verwaltungsgericht Köln die Entgeltgenehmigung für die Teilnehmeranschlussleitung (TAL) aus dem Jahr 1999 hinsichtlich der Überlassungsentgelte auf. Sowohl die Deutsche Telekom AG als auch die BNetzA erhoben gegen die Urteile die Nichtzulassungsbeschwerden. Mit Beschluss vom 5. Oktober 2009 wies das BVerwG diese Beschwerden zurück, da es sich bei den aufgeworfenen Rechtsfragen um solche zur alten Rechtslage handelt. Die aufhebenden Urteile des Verwaltungsgerichts Köln wurden dadurch rechtskräftig und das Entgeltverfahren aus 1999 lebt wieder auf, d. h. die BNetzA muss über die TAL-Überlassungsentgelte für den Zeitraum Februar 1999 bis März 2001 neu entscheiden.

Hinsichtlich der TAL-Entgeltgenehmigung 2001 hat das Bundesverwaltungsgericht mit Beschluss vom 23. Juni 2010 auf die Nichtzulassungsbeschwerden der Deutschen Telekom AG und der Bundesnetzagentur (BNetzA) gegen das Urteil des Verwaltungsgerichts Köln vom 27. August 2009 die Revision bezüglich der TAL-Überlassungsentgelte zugelassen. Bezüglich der TAL-Einmalentgelte für den Zeitraum April 2001 bis März 2002 wies das Gericht die Nichtzulassungsbeschwerden zurück. Demnach wurde das aufhebende Urteil des Verwaltungsgerichts insoweit rechtskräftig und die BNetzA muss erneut über die TAL-Einmalentgelte entscheiden.

In Hinsicht auf die TAL-Einmalentgeltenehmigung 2002 für den Zeitraum April 2002 bis Juni 2003 hat das Bundesverwaltungsgericht am 30. Juni 2010 die Nichtzulassungsbeschwerden der Deutschen Telekom AG und der BNetzA gegen das Urteil des Verwaltungsgerichts Köln vom 19. November 2009 zurückgewiesen. Mit Beschluss vom 19. Januar 2011 genehmigte die BNetzA gegenüber den Klägerinnen neue Entgelte für den genannten Zeitraum.

Auch alle übrigen Entscheidungen der BNetzA zu TAL-Entgelten seit 1999 wurden von den Wettbewerbern angefochten und sind bis auf die TAL-Einmalentgelte 1999 daher nicht bestandskräftig.

- **Untersuchung von Verträgen in EJR Mazedonien und Montenegro.** Im Rahmen der Abschlussprüfung der Magyar Telekom für das Geschäftsjahr 2005 wurden Verträge identifiziert, deren angemessener wirtschaftlicher Hintergrund seinerzeit nicht vollständig festgestellt werden konnte. Der Prüfungsausschuss der Magyar Telekom beauftragte eine unabhängige Rechtsanwaltskanzlei, betreffende Verträge auf ihre Rechtmäßigkeit zu untersuchen. Magyar Telekom informierte die US-Behörden (Department of Justice und Securities and Exchange Commission (SEC)), die dann ein Ermittlungsverfahren wegen möglicher Verstöße gegen den Foreign Corrupt Practices Act (FCPA) einleiteten. Magyar Telekom und die als Konzernobergesellschaft betroffene Deutsche Telekom haben diese Ermittlungen umfangreich unterstützt sowie ihr eigenes Compliance-Programm überprüft und weiter verbessert. Die anwaltlichen Vertreter der Magyar Telekom und der Deutschen Telekom besprechen gegenwärtig mit den US-Behörden den Ermittlungsstand und die Möglichkeiten einer Verfahrensbeendigung. Das Ergebnis dieser Gespräche kann nicht vorhergesehen

werden. Kommt eine einvernehmliche Verfahrensbeendigung nicht zustande, kann derzeit nicht abgeschätzt werden, ob und ggf. welche weiteren Maßnahmen die US-Behörden ergreifen werden. In Zusammenhang mit einem Rechtshilfeersuchen der US-Behörden hat die Staatsanwaltschaft Bonn ein eigenes Ermittlungsverfahren eingeleitet.

- **IPR-Risiken.** Die Deutsche Telekom sieht sich – wie viele andere große Telekommunikations-/Internetanbieter auch – einer tendenziell wachsenden Zahl von IPR-Streitfällen (IPR Intellectual Property Rights) ausgesetzt. Für die Deutsche Telekom besteht das Risiko der Zahlung von Lizenzgebühren und/oder Schadensersatz. In einigen Fällen droht auch die Verurteilung zur Unterlassung.
- **IPR-Klagen gegen ADSL-Technik.** Die Deutsche Telekom AG wurde in vier Klageverfahren wegen Patentverletzungen verklagt, die sich auf DSL-Datenübertragungsverfahren beziehen. Insbesondere richten sich die in den vier Klagen geltend gemachten Patente auf besondere Verfahren, die zur Prüfung der DSL-Kanalqualität, zum Kodieren von Daten und zum Einstellen von Übertragungsraten sowie zur Korrektur von Übertragungsfehlern verwendet werden. Für zwei Patente wurde vor dem Bundespatentgericht erstinstanzlich eine Nichtigkeitsklage erstritten. Gegen ein weiteres läuft eine Nichtigkeitsklage, eine vierte Nichtigkeitsklage ist in Ausarbeitung, wurde aber noch nicht erhoben. Vor dem Verletzungsgericht sind zwei Klagen ausgesetzt, die anderen zwei Klagen terminlos gestellt, sodass zurzeit keine Verhandlungstermine bezüglich der Verletzung existieren.
- **OTE Lannet Case.** Lannet Communications SA hat im Mai 2009 Klage eingereicht und fordert Schadensersatz in Höhe von 176 Mio. € aufgrund der angeblich rechtswidrigen Kündigung von Leistungen (hauptsächlich Zusammenschaltungsleistungen, Entbündelung von TAL und Vermietung von Standleitungen) seitens der OTE. Eine Anhörung vor dem zuständigen Gericht soll am 17. Februar 2011 stattfinden.

Die Deutsche Telekom beabsichtigt im Übrigen, sich in jedem dieser Gerichts-, Güte- und Schiedsverfahren entschieden zu verteidigen bzw. ihre Ansprüche zu verfolgen.

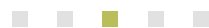

### Kartellrechtliche Verfahren.

- **Verfahren der Anti-Monopol Kommission in Polen.** Die polnische Anti-Monopol Kommission (UOKiK) hat im Jahr 2010 mehrere Verfahren gegen verschiedene polnische Telekommunikationsunternehmen eröffnet, u. a. auch gegen die PTC. Die UOKiK ist zum einen der Auffassung, dass zwischen den Anbietern kollusives Zusammenwirken stattgefunden hat. Zum anderen wirft die UOKiK der PTC vor, verschiedene Verstöße gegen Kundeninteressen begangen zu haben. In beiden Fällen ist die maximale Strafsumme in Polen gesetzlich festgeschrieben und bemisst sich auf 10% der Erlöse aus Telekommunikationsleistungen oder auf 10% der steuerlich geltend zu machenden Erlöse.
- **Verfahren der Europäischen Kommission gegen Slovak Telekom.** Die Europäische Kommission hat im April 2009 ein Verfahren eröffnet, um zu untersuchen, ob Slovak Telekom sich missbräuchlich auf dem slowakischen Breitbandmarkt verhalten hat. Nach Angaben der Europäischen Kommission könnte ein solcher Missbrauch u. a. bestehen in Zugangsverweigerungen zur Teilnehmeranschlussleitung sowie anderen Vorleistungen für Breitbandinfrastruktur, Preis-Kosten-Scheren in diesen Bereichen und anderen diskriminierenden Verhaltensweisen wie Bündelungen. Im Dezember 2010 wurde das Verfahren förmlich auf die Deutsche Telekom als Konzern ausgeweitet. Auf dieser Grundlage kann die Deutsche Telekom in die Haftung für eventuelle Verstöße einbezogen werden. Sollte die Europäische Kommission letztlich einen Verstoß gegen europäisches Kartellrecht feststellen, könnte sie Bußgelder gegen Slovak Telekom und auch gegen die Deutsche Telekom festsetzen.

### Finanzwirtschaftliche Risiken.

Unsere finanzwirtschaftlichen Risiken resultieren im Wesentlichen aus Liquiditätsrisiken, Ausfallrisiken sowie Währungs- und Zinsrisiken. Aufgrund von operativen Erfordernissen und Transferbeschränkungen existieren risikobehaftete Geldanlagen von Tochtergesellschaften, insbesondere in Süd- und Osteuropa. Diese Risiken überwachen und steuern wir durch regelmäßige Analysen und Bewertungen der Anlagerisiken.

Damit wir die Zahlungsfähigkeit sowie die finanzielle Flexibilität des Konzerns und der Deutschen Telekom AG jederzeit sicherstellen können, halten wir eine Liquiditätsreserve in Form von Kreditlinien und Barmitteln vor. Hauptsächlich genutzte Instrumente der mittel- bis langfristigen Finanzierung sind Anleihen und Medium Term Notes (MTN), jeweils in unterschiedlichen Währungen und Rechtsrahmen. Diese werden in der Regel über die Deutsche Telekom International Finance B.V. emittiert und als interne Kredite im Konzern weitergereicht.

Zum 31. Dezember 2010 stellten uns 21 Banken Kreditlinien mit einem Gesamtvolumen von 12,6 Mrd. € zur Verfügung. Die Situation an den internationalen Finanzmärkten hat sich während der Jahre 2009 und 2010 zuletzt deutlich entspannt. Der Zugang zu den internationalen Fremdkapitalmärkten ist aus heutiger Sicht nicht gefährdet. Das Jahr 2010 war von hohen Neuemissionsvolumina geprägt. 2010 konnten wir in verschiedenen Märkten 3,1 Mrd. € Fremdmittel aufnehmen.

Während in 2008 diverse Banken die Kreditlinien nicht prolongiert haben, teils aufgrund der Kapittallimitierungen im Zusammenhang mit der Bankenkrise, teils aufgrund der mit der Krise einhergehenden Konsolidierung in der Bankenbranche, konnten die bilateralen Linien nach Januar 2009 – mit Ausnahme einer Kreditlinie – sämtlich verlängert werden. In 2010 wurde zudem eine neue Kreditlinie vereinbart und eine zuvor in 2008 gekündigte Linie erneut verlängert.

Zum 31. Dezember 2010 bewertet die Ratingagentur Moody's die Deutsche Telekom mit Baa1, Fitch und Standard & Poor's mit BBB+. Der Ausblick ist bei allen drei Agenturen stabil. Ein verschlechtertes Rating unter definierte Schwellenwerte hätte höhere Zinsen bei einem Teil der emittierten Anleihen und MTNs zur Folge.

### Werthaltigkeit des Vermögens der Deutschen Telekom.

Der Wert des Vermögens der Deutschen Telekom und deren Tochterunternehmen wird regelmäßig überprüft. Flankierend zu den regelmäßigen jährlichen Bewertungen sind in bestimmten Fällen zusätzliche Werthaltigkeitstests durchzuführen. Zum Beispiel dann, wenn infolge von Änderungen im Wirtschafts-, Regulierungs-, Geschäfts- oder Politikumfeld zu vermuten ist, dass sich der Wert von Goodwill, immateriellen Vermögenswerten oder Gegenständen des Sachanlagevermögens vermindert haben könnte. Ergebnis solcher Werthaltigkeitstests können entsprechende Wertminderungen sein, die aber nicht zu Auszahlungen führen. Unser Ergebnis kann hierdurch in erheblichem Umfang gemindert werden; dies könnte den Kurs der T-Aktie belasten.

### Aktienverkäufe des Bundes bzw. der KfW.

Zum 31. Dezember 2010 hielt der Bund zusammen mit der KfW rund 32,0%, die Blackstone Group 4,4% der Anteile an der Deutschen Telekom AG. Am 24. April 2006 erwarb die Blackstone Group von der KfW Anteile am Grundkapital der Deutschen Telekom AG.

Es ist nicht auszuschließen, dass der Bund seine Privatisierungspolitik fortführt und sich von weiteren Beteiligungen kapitalmarktgerecht und unter Einbeziehung der KfW trennt – u. a. auch von Anteilen an der Deutschen Telekom AG. Die KfW hat am 16. Mai 2008 eine fünfjährige Umtauschanleihe auf Aktien der Deutschen Telekom AG begeben. Umtauschanleihen sind Schuldtitel, die der Gläubiger während einer vorher festgelegten Periode zu einem vorher festgelegten Wandlungspreis in Aktien einer anderen Gesellschaft umtauschen kann; im Fall der beschriebenen KfW-Umtauschanleihe in Namensaktien der Deutschen Telekom AG. Bei Überschreitung des Wandlungspreises darf und bei Ausübung des Wandlungsrechts durch die Anleihegläubiger muss die KfW die ihr angedienten Anleihen in Aktien der Deutschen Telekom AG umtauschen. Bei Fälligkeit der Anleihen hat die KfW das Recht, die Anleihen mit Aktien der Deutschen Telekom zurückzuzahlen. Das Volumen der Anleihe beläuft sich auf 3,3 Mrd. €, der Wandlungspreis beträgt 14,9341 €. Für uns besteht das Risiko, dass die Veräußerung von Anteilen der Deutschen Telekom durch den Bund oder die KfW in größerem Umfang bzw. durch entsprechende Spekulationen am Markt den Kurs der T-Aktie kurzfristig negativ beeinflussen.

### Gesamtrisikosituation.

Die Einschätzung der Gesamtrisikosituation ist das Ergebnis der konsolidierten Betrachtung aller wesentlichen Risikofelder bzw. Einzelrisiken. Die Gesamtrisikosituation hat sich 2010 gegenüber dem Vorjahr nicht grundlegend verändert – trotz des hohen Wettbewerbs- und Preisdrucks, der regulatorischen Rahmenbedingungen, der konjunkturellen Bedingungen sowie der großen Herausforderungen beim Personalumbau und der Servicequalität. Aus heutiger Sicht ist der Bestand unseres Unternehmens nicht gefährdet.

### Die Chancen.

Unsere neue Strategie „Verbessern – Verändern – Erneuern“ haben wir im März 2010 vorgestellt. Mit der neuen Strategie streben wir einen breiteren Umsatzmix an, der neben dem klassischen Anschlussgeschäft im Festnetz und im Mobilfunk auch neue Wachstumsbereiche umfasst. Mit unseren fünf strategischen Handlungsfeldern (☐ siehe Kapitel „Konzernstrategie und Konzernsteuerung“) wollen wir gezielt die Herausforderungen und Chancen im Markt angehen und unsere erfolgreiche Positionierung langfristig sichern. Die Vermögens-, Finanz- und Ertragslage der Deutschen Telekom AG ist über die Ergebnisse der Tochtergesellschaften dadurch ebenfalls beeinflusst.

In den Ländern, in denen wir Mobilfunk-Dienste anbieten, werden wir unsere Leistungsfähigkeit weiter verbessern und gezielt in Technologien der nächsten Generation investieren. Darüber hinaus werden wir innovative Dienste entwickeln und unser Portfolio an hochwertigen Mobilfunk-Geräten erweitern. Auch setzen wir konsequent die weitere Integration von Festnetz und Mobilfunk fort. Diese Zusammenführung erlaubt uns, den Service weiter zu verbessern, Synergien durch die Integration in Marketing, Vertrieb und Service auszunutzen und durch Cross-Selling zusätzliche Umsatzpotenziale zu erschließen. Mit neuen, innovativen Diensten und Tarifen können wir uns besser gegenüber den Wettbewerbern differenzieren.

Wir sehen die Mobilisierung von Datendiensten und hier insbesondere den mobilen Internetzugriff als größte Wachstumschance in unserer Branche. Eine weitere strategische Chance ist es, innovative, geräteübergreifende und konvergente Dienste anzubieten. Neben eigenen Diensten und Services gehen wir auch gezielt Kooperationen ein und positionieren uns langfristig als strategischer Partner für die Top-Akteure anderer Branchen, z. B. als exklusiver Online-Inhalte-Partner oder bei der Vermarktung innovativer Endgeräte wie dem Windows Phone 7, dem T-Mobile G2 in den USA oder dem iPhone und iPad von Apple.

In den nächsten Jahren erwarten wir beim globalen Datenverkehr einen rasanten Anstieg. Unser Ziel ist es deshalb, das operative Geschäft weiter zu transformieren, indem wir einerseits effizienter werden und andererseits für die nachgefragte, größere Bandbreite sorgen. Bei T-Systems führen wir den Umbau fort und steigern ihre Profitabilität auf Branchenniveau. Mit ihrer globalen Infrastruktur aus Rechenzentren und Netzen bietet T-Systems ein einzigartiges Know-how und Produktportfolio.

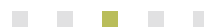

# Rechnungslegungsbezogenes internes Kontrollsystem.

Das interne Kontrollsystem (IKS) der Deutschen Telekom AG ist in Anlehnung an das international anerkannte Rahmenwerk „COSO (The Committee of Sponsoring Organizations of the Treadway Commission) Internal Control – Integrated Framework“ aufgebaut. Der Prüfungsausschuss der Deutschen Telekom überwacht die Wirksamkeit des IKS – wie gemäß Bilanzrechtsmodernisierungsgesetz in § 107 Abs. 3 Satz 2 AktG gefordert. Der Umfang und die Ausgestaltung des IKS liegen dabei im Ermessen und in der Verantwortung des Vorstands.

Die interne Revision ist verantwortlich dafür, die Funktionsfähigkeit und Wirksamkeit des IKS im Konzern und bei der Deutschen Telekom AG unabhängig zu prüfen. Um dies tun zu können, hat die interne Revision umfassende Informations-, Prüf- und Eintrittsrechte. Grundsätzlich gilt für jedes IKS, dass es, unabhängig davon, wie es konkret ausgestaltet ist, keine absolute Sicherheit gibt, ob es seine Ziele erreicht. Bezogen auf das rechnungslegungsbezogene IKS kann es somit nur eine relative, aber keine absolute Sicherheit geben, dass wesentliche Fehlaussagen in der Rechnungslegung vermieden oder aufgedeckt werden.

Das rechnungslegungsbezogene IKS beinhaltet die Grundsätze, Verfahren und Maßnahmen, um die Ordnungsmäßigkeit der Rechnungslegung sicherzustellen, und wird kontinuierlich weiterentwickelt.

Das rechnungslegungsbezogene IKS zielt darauf ab, dass der Konzernabschluss der Deutschen Telekom nach den International Financial Reporting Standards (IFRS), wie sie in der Europäischen Union (EU) anzuwenden sind, und den nach § 315a Abs. 1 HGB ergänzend zu beachtenden handelsrechtlichen Vorschriften aufgestellt wird. Zudem verfolgt das rechnungslegungsbezogene IKS auch das Ziel, dass der Jahresabschluss der Deutschen Telekom AG nach den handelsrechtlichen Vorschriften aufgestellt wird.

Bei uns steuert der Bereich Group Accounting die Prozesse zur Konzernrechnungslegung und Lageberichtserstellung. Gesetze, Rechnungslegungsstandards und andere Verlautbarungen werden kontinuierlich analysiert, ob und wie weit sie relevant sind und wie sie sich auf die Rechnungslegung auswirken. Relevante Anforderungen werden z. B. in der Konzern-Bilanzierungsrichtlinie festgehalten, kommuniziert und sind zusammen mit dem konzernweit gültigen Abschlusskalender die Basis für den Abschlusserstellungsprozess. Darüber hinaus unterstützen ergänzende Verfahrensanweisungen, standardisierte Meldeformate, IT-Systeme sowie IT-unterstützte Reporting- und Konsolidierungsprozesse den Prozess der einheitlichen und ordnungsgemäßen Konzernrechnungslegung. Wenn nötig, setzen wir auch externe Dienstleister ein, z. B. für die Bewertung von Pensionsverpflichtungen. Der Bereich Group Accounting stellt über entsprechende Prozesse sicher, dass diese Anforderungen konzernweit und einheitlich eingehalten werden. Die in den Rechnungslegungsprozess einbezogenen Mitarbeiter werden regelmäßig geschult. Die Deutsche Telekom AG und die Konzerngesellschaften sind dafür verantwortlich, dass sie die konzernweit gültigen Richtlinien und Verfahren einhalten. Weiterhin stellen sie den ordnungsgemäßen und zeitgerechten Ablauf ihrer rechnungslegungsbezogenen Prozesse und Systeme sicher. Dabei unterstützt und überwacht sie der Bereich Group Accounting.

Eingebettet in den Rechnungslegungsprozess sind unter Risikoaspekten definierte, interne Kontrollen. Das rechnungslegungsbezogene IKS umfasst sowohl präventive als auch aufdeckende Kontrollen; dazu gehören: IT-gestützte und manuelle Abstimmungen, die Funktionstrennung, das Vier-Augen-Prinzip, allgemeine IT-Kontrollen wie z. B. Zugriffsregelungen in IT-Systemen und ein Veränderungsmanagement sowie deren Überwachung.

Seit dem Geschäftsjahr 2006 verfügen wir über ein konzernweit standardisiertes Verfahren, um die Wirksamkeit des rechnungslegungsbezogenen IKS zu überwachen. Dieses Verfahren ist konsequent an den Risiken einer möglichen Fehlberichterstattung im Konzernabschluss ausgerichtet. Dazu werden zunächst bestimmte Teile unter Risikoaspekten ausgewählt, für die nacheinander Selbstbeurteilungen angefertigt werden – begonnen wird dabei bei den Prozessbeteiligten über die wesentlichen Verantwortungsträger im Rechnungslegungsprozess bis hin zum Vorstand. Die interne Revision ist über alle Stufen des Verfahrens hinweg eng einbezogen, um die hohe Qualität dieses rechnungslegungsbezogenen IKS zu sichern, und nimmt dafür auch eine unabhängige, stichprobenhafte Prüfung der Selbstbeurteilungen vor.

# Besondere Ereignisse nach Schluss des Geschäftsjahres.

## Ministerialbeschluss zum Sozialversicherungsfonds IKA-ETAM.

Das griechische Arbeits- und Sozialministerium hat einen Ministerialbeschluss erlassen und die OTE darauf hingewiesen, dass eventuell nach Erstellung eines Gutachtens zusätzliche Zahlungen zur Deckung eines Defizits in den Fonds zu leisten sind. Die OTE hat Widerspruch gegen den Ministerialbeschluss eingelegt. Im Januar 2011 hat das griechische Arbeits- und Sozialministerium eine Zahlungsaufforderung in Höhe von 130 Mio. € an die OTE gestellt. Die OTE wird erneut Widerspruch vor weiteren juristischen Schritten einlegen. Im Konzernabschluss wurde dieser Sachverhalt entsprechend berücksichtigt. Nach Meinung der OTE bestehen gute Gründe dafür, einen Prozess durch das Einreichen einer Klage gegen den Sachverhalt gewinnen zu können.

## Einigung mit der französischen Vivendi, der polnischen Elektrim sowie den Gläubigern von Elektrim vollzogen.

Am 14. Januar 2011 wurde die Einigung über das Eigentum am polnischen Mobilfunk-Anbieter PTC abgeschlossen. Die Deutsche Telekom hat 1,4 Mrd. € im Januar 2011 gezahlt und sich nun das unumstrittene Eigentum an der PTC gesichert. Die Deutsche Telekom ist im Besitz aller Anteile an der PTC.





# Sonstige Angaben.

## Erklärung zur Unternehmensführung gemäß § 289a HGB.

Die Erklärung zur Unternehmensführung nach § 289a HGB ist Bestandteil des zusammengefassten Lageberichts.  Diese ist auf der Internetseite der Deutschen Telekom ([www.telekom.com](http://www.telekom.com)) öffentlich zugänglich.

## Schlussklärung des Vorstands zum Bericht über Beziehungen zu verbundenen Unternehmen.

Da die Bundesrepublik Deutschland als Anteilseigner der Deutschen Telekom AG mit ihrer Minderheitsbeteiligung aufgrund der durchschnittlichen Hauptversammlungspräsenz eine sichere Hauptversammlungsmehrheit repräsentiert, ist ein Abhängigkeitsverhältnis der Deutschen Telekom gegenüber der Bundesrepublik Deutschland nach § 17 Abs. 1 AktG begründet.

Ein Beherrschungs- oder Gewinnabführungsvertrag der Deutschen Telekom mit der Bundesrepublik Deutschland besteht nicht. Der Vorstand der Deutschen Telekom hat daher gemäß § 312 AktG einen Abhängigkeitsbericht über Beziehungen zu verbundenen Unternehmen erstellt. Der Vorstand hat am Ende des Berichts folgende Erklärung abgegeben: „Der Vorstand erklärt, dass die Gesellschaft nach den Umständen, die dem Vorstand zu dem Zeitpunkt bekannt waren, zu dem die Rechtsgeschäfte vorgenommen wurden, bei jedem Rechtsgeschäft eine angemessene Gegenleistung erhalten hat. Maßnahmen im Interesse oder auf Veranlassung des herrschenden Unternehmens oder der mit ihm verbundenen Unternehmen sind nicht getroffen und auch nicht unterlassen worden.“

# Prognosen zur Umsatz- und Ergebnisentwicklung.<sup>1</sup>

## Konjunkturerwartungen.

Für das Jahr 2011 wird eine Fortsetzung der positiven weltwirtschaftlichen Entwicklung erwartet, wenn auch die Dynamik leicht abnehmen sollte. Frühindikatoren, wie z. B. die Composite Leading Indicators der OECD oder die internationalen Einkaufsmanagerindizes, deuten auf einen weiterhin intakten und nachhaltigen Aufwärtstrend. Hierbei sind es weiterhin die Schwellenländer, welche überdurchschnittlich stark wachsen werden, flankiert von einer weiterhin robusten Entwicklung in Deutschland sowie einem sich langsam, aber stetig verbessernden Wachstum in den USA.

Für unsere Kernmärkte fällt der konjunkturelle Ausblick unterschiedlich aus: In Deutschland – so die derzeitige Annahme – wird sich die Konjunktur im Vergleich zu anderen europäischen Volkswirtschaften weiterhin als robust erweisen und sich auch in 2011 positiv entwickeln. Während der Aufschwung in 2010 maßgeblich vom Export gestützt wurde, wird für 2011 eine zunehmende Stützung durch die Binnennachfrage erwartet. Die „Projektgruppe Gemeinschaftsdiagnose“ prognostizierte in ihrem Herbstgutachten 2010 für Deutschland, dass das reale Bruttoinlandsprodukt im Jahr 2011 um 2,0% zunehmen wird. In der aktuellen Prognose des Bundeswirtschaftsministeriums wird für 2011 ein Wachstum von 2,3% erwartet.

Für die USA wird in aktuellen Schätzungen für das Jahr 2011 von einer Wachstumsrate um die 3% bis 3,5% ausgegangen. Die jüngste Verbesserung des Ausblicks ist dabei speziell auf die zum Ende 2010 beschlossenen Steuererleichterungen zurückzuführen, mit entsprechend positiven Auswirkungen auf den Privatkonsum. Dennoch bleibt die wirtschaftliche Entwicklung in den USA mit einem erhöhten Maß an Unsicherheit verbunden, insbesondere im Hinblick auf die relativ hohe Arbeitslosigkeit und Staatsverschuldung.

Eine moderate und sich in Teilen auch zunehmend verbessernde wirtschaftliche Entwicklung in 2011 wird aktuell für unsere Kernmärkte: Polen, Österreich, Tschechien, Ungarn, Niederlande und Slowakei erwartet. Die jährlichen Wachstumsraten werden hierbei um die 2% bis 4% erwartet. Eine unverändert schwierige wirtschaftliche Entwicklung für 2011 wird für die Kernmärkte Griechenland, Rumänien und Kroatien erwartet, wobei Kroatien Ende 2010 erstmalig seit der Krise wieder zu marginal positiven Wachstumsraten kam. Für Rumänien wird eine Rückkehr zu positivem Wachstum im Laufe von 2011 erwartet. Für Griechenland prognostiziert die Gemeinschaftsdiagnose ein Minus von 2,1%.

Aufgrund des in einzelnen Ländern weiterhin hohen Drucks zur Konsolidierung der Staatsfinanzen ist nicht auszuschließen, dass es in 2011 vereinzelt zu weiteren Sparprogrammen und/oder Steuererhöhungen kommen kann, mit entsprechend negativen Effekten auf den Konsum und einzelne Unternehmen.

## Markterwartungen.

Der deutsche Mobilfunk-Markt kehrte in 2010, getrieben durch eine steigende Penetration von Smartphones und starkes Wachstum im mobilen Datenverkehr, zu einem gesunden Wachstum zurück. Dieser positive Trend der verstärkten mobilen Daten- und Internetnutzung wird sich auch in 2011 fortsetzen! Allerdings wird sich der massive regulatorische Eingriff in Form der Absenkung der Terminierungsentgelte um nahezu 50% für die gesamte Industrie negativ auf dieses positive unterliegende Wachstum auswirken. Im Festnetz-Bereich schätzen wir, dass die Zahl der Breitbandanschlüsse nur noch leicht zunimmt. Die klassischen Sprachumsätze gehen nach wie vor zurück. Die Nachfrage der kleinen und mittleren Geschäftskunden nach Telekommunikationsprodukten steigt voraussichtlich weiter, insbesondere in den Bereichen der mobilen Datenübertragung und des automatisierten Datenaustauschs zwischen Maschinen.

In den europäischen Märkten ohne Deutschland, in denen wir vertreten sind, wird der Preisverfall in der Sprachtelefonie – bedingt durch Regulierung und Wettbewerb – insgesamt zu stagnierenden Marktumsätzen führen. Der Umsatzzuwachs aus mobiler Datennutzung und aus Angeboten neuer Produkte in der Telekommunikation wird den Umsatzrückgang in der Sprachtelefonie nur zum Teil ausgleichen. Die süd- und osteuropäischen Märkte, in denen wir agieren, werden auch 2011 von der Wirtschaftskrise gekennzeichnet sein. In einigen Ländern werden die Regierungen versuchen, durch fiskalpolitische Eingriffe ihre Finanzsituation zu verbessern. Diese Maßnahmen können den privaten Konsum und damit das Marktvolumen negativ beeinflussen. Für Griechenland gehen wir von einer nach wie vor angespannten gesamtwirtschaftlichen Lage aus.

Der Mobilfunk-Markt in den USA wird voraussichtlich in den nächsten beiden Jahren bei verbessertem Konsumklima und relativ hoher Arbeitslosigkeit immer noch wachsen und gleichzeitig von einem intensiven Wettbewerb zwischen den großen Mobilfunk-Anbietern geprägt sein. Das Wachstum wird voraussichtlich vor allem auf dem immer erfolgreicherem Vertrieb von Datendiensten basieren. Dieser zusätzliche Umsatz dürfte den sinkenden Umsatz in den Bereichen Telefonie und Kurznachrichten ausgleichen. Flatrate-Produkte sorgen für weiteren Preisdruck. Prepaid wird voraussichtlich weiterhin an Stärke gewinnen. Postpaid sollte das moderate Wachstum durch mobile Breitbandverbindungen aufrechterhalten können.

Die konjunkturelle Erholung sollte sich in den relevanten in- und ausländischen Märkten positiv auf das Geschäft mit Groß- und Geschäftskunden in der Telekommunikation und Informationstechnologie auswirken. Was das Großkundengeschäft angeht, erwarten wir durch die kontinuierliche wirtschaftliche Erholung und durch die stark steigende Nachfrage nach Cloud Computing in den nächsten Jahren ein nachhaltiges Wachstum.



## Konzernerwartungen.

Wir streben ein organisches Umsatzwachstum bei einem breiteren Umsatzmix an. So sollen in den nächsten Jahren die Umsätze der neuen Wachstumsbereiche stark wachsen; diese Bereiche sind „Mobile Internet“, „Vernetztes Zuhause“, „Internetangebot“, „T-Systems (externer Umsatz)“ und „Intelligente Netzlösungen“. Um diese Ziele zu erreichen, werden wir weiter in Technologien der nächsten Generation investieren. So wollen wir 2011 und 2012 – neben dem Ausbau des schnellen Breitbandnetzes in Deutschland – leistungsfähige Mobilfunk-Frequenzen in anderen Ländern in Europa erwerben. Daneben haben wir uns ehrgeizige Ziele gesetzt, die sich positiv auf die Rentabilität auswirken sollen: Bis zum Jahr 2012 sollen – ausgehend vom Jahr 2009 – im Rahmen der zweiten Phase des „Save for Service“-Programms weitere 4,2 Mrd. € an Kosten eingespart werden. Die Kapitalrendite (ROCE) des Gesamtkonzerns soll – ebenfalls bis 2012 – um rund 150 Basispunkte gesteigert werden.

Wir erwarten, dass unser gesamtes Investitionsvolumen 2011 rund 9 Mrd. € (vor etwaigen Investitionen in Spektrum) betragen wird. Ausgehend von den 2010 Zahlen (bereinigt um das erste Quartal der T-Mobile UK) erwarten wir für 2011 ein bereinigtes EBITDA von rund 19,1 Mrd. €. Wir erwarten ebenso für 2011 einen gegenüber dem Niveau von 2010 stabilen bis leicht steigenden Free Cashflow von rund 6,5 Mrd. € (ohne die Auswirkung der PTC-Transaktion in Höhe von 0,4 Mrd. €, die im Januar 2011 abgeschlossen wurde).

Für 2012 erwarten wir ein nachhaltig starkes bereinigtes EBITDA und einen nachhaltig starken Free Cashflow.

Trotz hoher Investitionen in unsere Zukunftsfähigkeit wollen wir auch in den Jahren 2011 und 2012 – vorbehaltlich der Erzielung eines entsprechenden Bilanzgewinns – unsere Aktionäre angemessen vergüten. So soll den Anteilseignern der Deutschen Telekom AG eine Mindestdividende in Höhe von 0,70 € je Aktie ausgeschüttet werden, die sich mit den bis 2012 angestrebten Aktienrückkäufen zu einer Gesamtausschüttung von jährlich 3,4 Mrd. € summiert.<sup>2</sup> Durch die Aufteilung auf Dividende und Aktienrückkauf sollen sowohl der Bar-Zufluss unserer Aktionäre gesichert als auch unser Aktienkurs unterstützt werden.

Auch in Zukunft wollen wir durch angemessene Akquisitionen in Präsenzmärkten internationale Größenvorteile und Synergien nutzen. Nicht geplant sind allerdings größere Akquisitionen und die Expansion in Emerging Markets.

Die Lage an den internationalen Finanzmärkten stand im Jahr 2010 vor allem im Zeichen der Schuldenkrise. In deren Folge hatten einige Länder Schwierigkeiten, ihre fälligen Schulden an den internationalen Kapitalmärkten zu refinanzieren. 2011 wird die Entwicklung der Finanzmärkte voraussichtlich maßgeblich von der Implementierung geeigneter Maßnahmen abhängig sein, um die Schuldenkrise zu bewältigen.

Wir konnten 2010 Anleihen, Medium Term Notes und Schuldscheindarlehen im Gegenwert von insgesamt 3,1 Mrd. € an den internationalen Kapitalmärkten platzieren. Für 2011 erwarten wir für unsere Finanzierungsmaßnahmen grundsätzlich offene Finanzmärkte.

Per Jahresende 2010 hatten wir eine komfortable Liquiditätsreserve in Höhe von rund 18 Mrd. €. Auch für 2011 planen wir eine Liquiditätsreserve, die so bemessen sein soll, dass wir hieraus die Fälligkeiten der nächsten 24 Monate bedienen können.

Ende 2010 stuften uns die Ratingagenturen Fitch, Moody's und Standard & Poor's mit BBB+/Baa1/BBB+ als solides Investment-Grade-Unternehmen ein. Der Ausblick der Agenturen war jeweils stabil. Um auch zukünftig einen sicheren Zugang zu den internationalen Finanzmärkten zu haben, ist für 2011 gleichermaßen ein solides Investment-Grade-Rating ein Teil unserer Finanzstrategie.

Für 2011 und 2012 strebt die Deutsche Telekom AG als Konzernmuttergesellschaft weiterhin einen Jahresüberschuss an.

## Erwartungen operative Segmente.

### Deutschland.

Unsere Strategie werden wir in den kommenden Jahren an Themenfeldern ausrichten, die das Fundament für unser erfolgreiches Deutschlandgeschäft bilden:

- Erstklassige Produkt- und Servicequalität für unsere Kunden.
- LTE- und Glasfaserausbau – Investition in den Breitbandstandort Deutschland.
- Entertain – innovative TV- und Unterhaltungsplattform der Zukunft.
- „Save for Service“ – Wir machen unser Unternehmen fit für die Zukunft.

Insbesondere durch regulatorische Eingriffe rechnen wir auch für das Jahr 2011 mit einem sinkenden Umsatz im operativen Segment Deutschland. Diesem Rückgang wollen wir in den nächsten Jahren mit folgenden Aktivitäten entgegenwirken: Fortführung des Breitbandausbaus, Weiterentwicklung des mobilen Datengeschäfts, Investitionen in intelligente und innovative Netzstrukturen, Weiterentwicklung unseres Produktportfolios sowie anhaltende Verbesserung unserer Serviceleistungen. Diese Aktivitäten sollen auf die angestrebte Umsatzstabilisierung ab 2012 einzahlen. Wir erwarten, dass das bereinigte EBITDA sich 2011 und 2012 – im Vergleich zum jeweiligen Vorjahr – weiter stabilisieren bis leicht steigen wird; bei der EBITDA-Marge erwarten wir eine positive Entwicklung.

Wir werden unsere Marktführerschaft im Festnetz- und Breitbandgeschäft auch im nächsten Jahr behaupten können. Allerdings ist dieser Markt nahezu gesättigt und wird durch Anschlussverluste geprägt sein. Der Wettbewerb im Festnetz- und Breitbandgeschäft wird auch in den kommenden Jahren immer stärker werden. Unser TV-Angebot Entertain wollen wir weiter im Massenmarkt etablieren. Dieses Ziel wollen wir mit einem ausgebauten 3D- und HD-Angebot, neuen Funktionen sowie neuen Verbreitungswegen – beispielsweise über Satellit – erreichen.

Auf den intensiven Wettbewerb im deutschen Mobilfunk-Markt sind wir schon jetzt gut vorbereitet: Unsere neue Tarifstruktur orientiert sich noch stärker als in der Vergangenheit an den Bedürfnissen unserer Kunden. Unser Angebot an Endgeräten umfasst attraktive Smartphones aus der Windows Phone- und Android-Reihe sowie weiterhin das Apple iPhone mit exklusiven Applikationen für unsere Kunden. Der Wachstumstreiber mobiles Internet profitiert von den steigenden Smartphone-Absätzen. Die Bundesnetzagentur hat entschieden, die Preise für Anrufzustellung im Mobilfunk um fast 50 % auf 3,36 ct pro Minute zu senken. Das wird sich voraussichtlich im nächsten Jahr negativ auf unsere Serviceumsätze im Mobilfunk auswirken. Insgesamt sollten sich unsere Serviceumsätze im Mobilfunk dennoch weiterhin positiv entwickeln und unsere Datenumsätze weiterhin stark wachsen.

Für den Zeitraum von 2010 bis 2012 beträgt das geplante Investitionsvolumen des operativen Segments Deutschland mehr als 10 Mrd. €. Damit werden wir hauptsächlich in unsere strategischen Wachstums- und Innovationsfelder investieren, beispielsweise in unsere Netzstrukturen im Festnetz und Mobilfunk. So bauen wir seit Juni 2010 in ländlichen Gebieten unsere LTE-Standorte aus und wollen ab April 2011 mit der offiziellen Vermarktung unseres LTE-Angebots beginnen. Unsere Angebotsstruktur werden wir entsprechend mit neuen Angeboten, wie z. B. Call & Surf Comfort via Funk, erweitern. Auch der Glasfaserausbau (FTTx) wird nach einigen erfolgreichen Pilotprojekten – u. a. in Brandenburg – in den kommenden Jahren eine größere Rolle spielen.

Im Rahmen von „One Company“ möchten wir unsere Geschäftsstruktur noch enger an den Bedürfnissen der Kunden ausrichten. Daher werden wir ab dem ersten Quartal 2011 unseren Kundenstamm erstmals nach privater und geschäftlicher Nutzung zusammenfassen – und nicht mehr nach Mobilfunk- und Festnetz. Diese Neuausrichtung wird sich auch in der Berichterstattung der Geschäftszahlen widerspiegeln.

## Europa.

Im operativen Segment Europa wollen wir unsere starke Marktposition weiterhin verteidigen bzw. unsere Marktanteile in einigen Ländern ausbauen. Im Sinne unserer Strategie von vernetztem Leben streben wir an, unsere Privat- und Geschäftskunden mit neuen intelligenten Endgeräten und attraktiven Tarifen zu überzeugen. Außerdem wollen wir unser Angebot an innovativen Daten- und Content-Diensten für Smartphones und Laptops erweitern. In den Ländern, in denen wir die Integration von Festnetz- und Mobilfunk-Geschäft bereits erfolgreich vollzogen haben, werden wir unser Produktportfolio verstärkt mit innovativen Bündelangeboten bewerben. Wichtiger werden hier insbesondere IPTV sowie TV über Satellit. Im Zuge der Strategie von vernetztem Arbeiten werden intelligente ICT-Lösungen auch im operativen Segment Europa bedeutender.

Um unsere Wettbewerbsfähigkeit zu stärken, werden wir schwerpunktmäßig darin investieren, die Netzinfrastruktur weiterzuentwickeln. Beim Mobilfunk werden wir unser Engagement darauf konzentrieren, die LTE-Technologie als vierte Mobilfunk-Generation einzuführen. Neben der Markteinführung von LTE bei T-Mobile Austria wurden erste vielversprechende Live-Tests in Griechenland und Kroatien durchgeführt. Parallel dazu sind weitere Investitionen vorgesehen, um die UMTS-Netze auszubauen, HSPA+ einzuführen sowie die GSM-Netze zu verbessern. Im Festnetz soll weiter investiert werden, um die Breitbandabdeckung zu erhöhen, wie beispielsweise in den Ausbau der Glasfaserinfrastruktur. Weitere Investitionen sind für einen besseren Kundenservice und effizientere Prozesse geplant.

Nach wie vor ist die gesamtwirtschaftliche Lage im operativen Segment Europa angespannt. Insbesondere in Griechenland und Rumänien schätzen wir die gesamtwirtschaftliche Situation auch im kommenden Jahr kritisch ein. Darüber hinaus werden wir uns gegen einen anhaltend harten Wettbewerb und den damit verbundenen weiteren Preisverfall behaupten müssen. Hier sollen strategische Initiativen sowie Kostensenkungsmaßnahmen, die auch Aktivitäten im Rahmen des „Save for Service“-Programms beinhalten, weiterhin ihre Wirkung entfalten und mögliche negative Effekte teilweise ausgleichen. Ein Beispiel für diese strategischen Initiativen ist unsere im Dezember 2010 mit PTK Centertel unterzeichnete Absichtserklärung zur gemeinsamen Nutzung der Netzinfrastruktur und der Funkfrequenzen in Polen. Regulatorische Maßnahmen sowie Änderungen in der Gesetzgebung (z. B. im Zuge von staatlichen Sparprogrammen) können sich nachteilig auf die Umsätze und Ergebnisse auswirken. So wird sich beispielsweise in Ungarn die im Oktober 2010 beschlossene Sondersteuer für Großunternehmen im Handel-, Energie- und Telekommunikationssektor umsatz- und ergebnisbelastend auswirken und das Investitionspotenzial im Land begrenzen. Gleiches gilt in Kroatien für die seit August 2009 erhobene Mobilfunk-Abgabe. Darüber hinaus können Wechselkursänderungen zu einer Belastung der Ergebnisse auf Euro-Basis führen.



Auf Basis dieser vorgenannten Rahmenparameter erwarten wir im operativen Segment Europa – bereinigt um den Effekt aus der Gründung des Joint Venture Everything Everywhere in Großbritannien –, dass die Umsätze und das bereinigte EBITDA 2011 gegenüber dem Vorjahr sinken werden. Für 2012 gehen wir davon aus, dass sich der Umsatzrückgang gegenüber 2011 verlangsamt und sich das bereinigte EBITDA stabilisiert.

### USA.

Im Geschäftsjahr 2011 wollen wir in den USA das Angebot an mobilen Breitband- und anderen Datendiensten ausbauen, neue Kunden gewinnen und bestehende Kunden besser an uns binden. Positive Auswirkungen auf die Ergebnisse erwarten wir ferner durch steigende Datenumsätze, die Weiterentwicklung des Handy-Versicherungsangebots und durch betriebliche Effizienzsteigerungen.

Regulatorische Veränderungen und Wettbewerbsdruck können den Umsatz und das bereinigte EBITDA in lokaler Währung negativ beeinflussen. Darüber hinaus können sich die Wechselkurse in den Jahren 2011 und 2012 deutlich auf Umsatz und bereinigtes EBITDA auf Euro-Basis auswirken. Im gleichen Zeitraum erwartet T-Mobile USA eine positive Entwicklung von Umsatz und bereinigtem EBITDA in lokaler Währung.

T-Mobile USA wird sich nach wie vor darauf konzentrieren, die Netzqualität und -abdeckung zu verbessern, und insbesondere das mobile Breitbandnetz weiter auf- und ausbauen.

### Systemgeschäft.

T-Systems konzentriert sich auf den Wachstumsmarkt der ICT-Services mit Lösungen für Großkunden. Hier steigt die Nachfrage nach internationalen ICT-Lösungen – nicht zuletzt durch die zunehmende Globalisierung der Unternehmen. Mit einer weltumspannenden Infrastruktur aus Rechenzentren und Netzen betreibt T-Systems die Informations- und Kommunikationstechnik für rund 400 Großkunden: multinationale Konzerne sowie Institutionen der öffentlichen Hand und des Gesundheitswesens. Unsere Großkundensparte bietet auf dieser Basis integrierte Lösungen für die vernetzte Zukunft von Wirtschaft und Gesellschaft. Wir konnten den Grundstein legen für die Umsatzentwicklung der kommenden Jahre, insbesondere durch neue Großaufträge von namhaften Branchengrößen wie Deutsche Post, TUI, SBB und E.ON. Dennoch bleibt abzuwarten, wie sich die Geschäfte bei den Kunden von T-Systems im aktuellen wirtschaftlichen Umfeld entwickeln werden.

Den Weg, den wir eingeschlagen haben, unsere Kosten zu senken, werden wir weiter beschreiten. Schließlich zeigten die Kostensenkungsmaßnahmen im abgelaufenen Geschäftsjahr erfreuliche Auswirkungen und werden fortgeführt. Für das operative Segment erwarten wir in 2011 einen leichten Umsatzanstieg und ein stabiles bereinigtes EBITDA und für 2012 eine leicht positive Entwicklung bei Umsatz und bereinigtem EBITDA.

### Konzernzentrale & Shared Services.

In den Jahren 2011 und 2012 erwarten wir für die Konzernzentrale & Shared Services ein bereinigtes EBITDA, das etwa auf dem Niveau des jeweiligen Vorjahres liegt. Das bereinigte EBITDA wird im Wesentlichen durch die Aufwendungen der Konzernzentrale und die Aktivitäten zum Personalumbau über Vivento zunehmend negativ beeinflusst. Dem gegenüber stehen positive Ergebnisbeiträge aus den Shared Services.

### „Save for Service“-Programm.

Wir haben uns ehrgeizige Ziele gesetzt, die sich positiv auf die Rentabilität auswirken: Bis zum Jahr 2012 sollen – ausgehend vom Jahr 2009 – im Rahmen der zweiten Phase des „Save for Service“-Programms weitere 4,2 Mrd. € an Kosten eingespart werden.

<sup>1</sup> Die Prognosen zur Umsatz- und Ergebnisentwicklung enthalten vorausschauende Aussagen über künftige Entwicklungen, die auf aktuellen Einschätzungen des Managements beruhen. Wörter wie „antizipieren“, „annehmen“, „glauben“, „einschätzen“, „erwarten“, „beabsichtigen“, „können/könnten“, „planen“, „anstreben“, „sollten“, „werden“, „wollen“ und ähnliche Begriffe kennzeichnen vorausschauende Aussagen. Diese vorausschauenden Aussagen enthalten Aussagen zur erwarteten Entwicklung in Bezug auf Umsatzerlöse, bereinigtes EBITDA, Investitionen und Free Cashflow bis 2012. Solche Aussagen sind Risiken und Unsicherheiten unterworfen. Beispiele hierfür sind ein konjunktureller Abschwung in Europa oder Nordamerika, Veränderungen der Wechselkurse und Zinssätze, der Ausgang von Streitigkeiten, an denen die Deutsche Telekom beteiligt ist, sowie wettbewerbs- und ordnungspolitische Entwicklungen.  Einige Unsicherheitsfaktoren oder andere Unwägbarkeiten, die die Fähigkeit, die Ziele zu erreichen, beeinflussen können, werden im Kapitel „Risiko- und Chancenmanagement“ im zusammengefassten Lagebericht und im „Haftungsausschluss“ am Ende des Geschäftsberichts beschrieben. Sollten diese oder andere Unsicherheitsfaktoren und Unwägbarkeiten eintreten oder sich die den Aussagen zugrunde liegenden Annahmen als unrichtig erweisen, könnten die tatsächlichen Ergebnisse wesentlich von den in diesen Aussagen genannten oder implizit zum Ausdruck gebrachten Ergebnissen abweichen. Wir garantieren nicht, dass sich unsere vorausschauenden Aussagen als richtig erweisen. Die hier enthaltenen vorausschauenden Aussagen basieren auf der aktuellen Konzernstruktur, wobei unter Umständen noch zu beschließende Akquisitionen, Veräußerungen, Unternehmenszusammenschlüsse oder Joint Ventures unberücksichtigt bleiben. Diese Aussagen werden im Hinblick auf die Gegebenheiten am Tag der Veröffentlichung dieses Dokuments getroffen. Wir haben – unbeschadet bestehender kapitalmarktrechtlicher Verpflichtungen – weder die Absicht noch übernehmen wir eine Verpflichtung, vorausschauende Aussagen laufend zu aktualisieren.

<sup>2</sup> Die Realisierung dieser Strategie steht unter dem Vorbehalt, dass für das jeweilige Geschäftsjahr ein entsprechender Bilanzgewinn im handelsrechtlichen Einzelabschluss der Deutschen Telekom AG ausgewiesen werden kann und die für den Aktienrückkauf erforderliche Fähigkeit zur Rücklagenbildung besteht. Voraussetzung ist darüber hinaus, dass die zuständigen Organe unter Berücksichtigung der jeweils aktuellen Situation der Gesellschaft entsprechende Beschlüsse fassen.

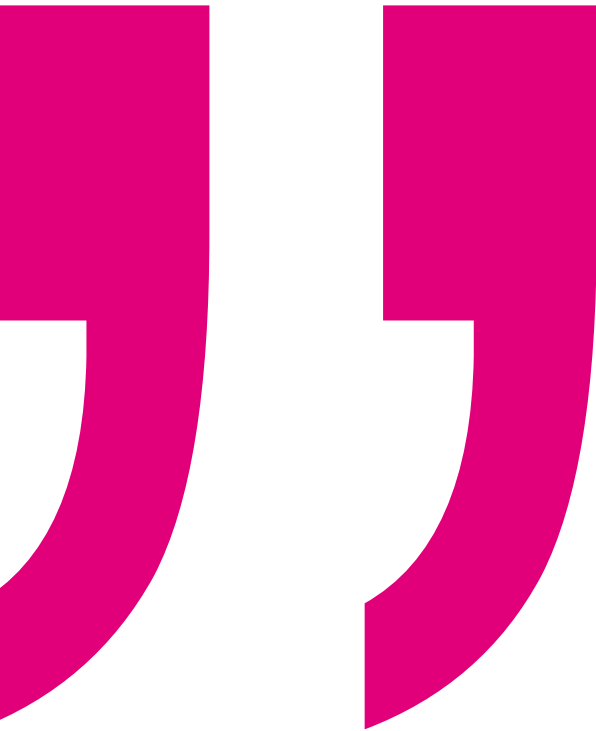

Internettechnologie, schnelle und intelligente Netze, Erweiterung des Portfolios um Internetprodukte: Wir legen die Basis für neues Wachstum.

## ■ 131 Der Konzernabschluss

- 132** Konzern-Bilanz
- 134** Konzern-Gewinn- und Verlustrechnung
- 135** Konzern-Gesamtergebnisrechnung
- 136** Konzern-Eigenkapitalveränderungsrechnung
- 138** Konzern-Kapitalflussrechnung
- 139** Konzern-Anhang

### **139** Grundlagen und Methoden

- 139 Allgemeine Angaben
- 139 Grundlagen der Bilanzierung
- 140 Erstmals im Geschäftsjahr anzuwendende Standards, Interpretationen und Änderungen von Standards und Interpretationen
- 141 Veröffentlichte, aber noch nicht angewendete Standards, Interpretationen und Änderungen
- 143 Änderungen der Bilanzierungs- und Bewertungsmethoden und Änderungen der Berichtsstruktur
- 143 Ansatz und Bewertung
- 152 Ermessensentscheidungen und Schätzungsunsicherheiten
- 155 Konsolidierungskreis
- 156 Unternehmenszusammenschlüsse und sonstige Unternehmenstransaktionen
- 158 Pro-forma-Angaben
- 158 Wesentliche Tochterunternehmen
- 159 Konsolidierungsgrundsätze
- 159 Währungsumrechnung

### **160** Erläuterungen zur Konzern-Bilanz

- 160 **1** Zahlungsmittel und Zahlungsmitteläquivalente
- 160 **2** Forderungen aus Lieferungen und Leistungen und sonstige Forderungen
- 161 **3** Vorräte
- 161 **4** Zur Veräußerung gehaltene langfristige Vermögenswerte und Veräußerungsgruppen
- 162 **5** Immaterielle Vermögenswerte
- 166 **6** Sachanlagen
- 167 **7** Beteiligungen an at equity bilanzierten Unternehmen
- 168 **8** Sonstige finanzielle Vermögenswerte
- 168 **9** Übrige Vermögenswerte
- 169 **10** Finanzielle Verbindlichkeiten
- 173 **11** Verbindlichkeiten aus Lieferungen und Leistungen und sonstige Verbindlichkeiten
- 173 **12** Pensionsrückstellungen und ähnliche Verpflichtungen
- 177 **13** Sonstige Rückstellungen
- 178 **14** Übrige Schulden
- 178 **15** Eigenkapital

### **180** Erläuterungen zur Konzern-Gewinn- und Verlustrechnung

- 180 **16** Umsatzerlöse
- 180 **17** Umsatzkosten
- 180 **18** Vertriebskosten
- 180 **19** Allgemeine Verwaltungskosten
- 180 **20** Sonstige betriebliche Erträge
- 180 **21** Sonstige betriebliche Aufwendungen
- 181 **22** Zinsergebnis
- 181 **23** Ergebnis aus at equity bilanzierten Unternehmen
- 182 **24** Sonstiges Finanzergebnis
- 182 **25** Ertragsteuern
- 187 **26** Zurechnung des Überschusses/(Fehlbetrags) an die Anteile anderer Gesellschafter
- 187 **27** Ergebnis je Aktie
- 188 **28** Dividende je Aktie
- 188 **29** Anzahl der Mitarbeiter und Personalaufwand
- 189 **30** Abschreibungen

### **190** Sonstige Angaben

- 190 **31** Erläuterungen zur Konzern-Kapitalflussrechnung
- 191 **32** Segmentberichterstattung
- 195 **33** Eventualverbindlichkeiten und -forderungen
- 198 **34** Angaben zu Leasingverhältnissen
- 200 **35** Mid-Term Incentive Pläne (MTIP)/ „Phantom-Share“ Plan/ Aktienorientierte Vergütungssysteme
- 204 **36** Angaben zu Finanzinstrumenten
- 208 **37** Risikomanagement, Finanzderivate und weitere Angaben zum Kapitalmanagement
- 213 **38** Angaben zu den Beziehungen zu nahe stehenden Unternehmen und Personen
- 213 **39** Vergütung von Vorstand und Aufsichtsrat
- 221 **40** Erklärung gemäß § 161 AktG zum Deutschen Corporate Governance Kodex
- 221 **41** Ereignisse nach der Berichtsperiode
- 221 **42** Honorare und Dienstleistungen der Abschlussprüfer gemäß § 314 HGB

## ■ 222 Versicherung der gesetzlichen Vertreter

## ■ 223 Bestätigungsvermerk des Abschlussprüfers

## Konzern-Bilanz.

|                                                                               | Angabe | 31.12.2010<br>Mio. € | 31.12.2009<br>Mio. € |
|-------------------------------------------------------------------------------|--------|----------------------|----------------------|
| <b>Aktiva</b>                                                                 |        |                      |                      |
| <b>Kurzfristige Vermögenswerte</b>                                            |        | <b>15 243</b>        | <b>23 012</b>        |
| Zahlungsmittel und Zahlungsmitteläquivalente                                  | 1      | 2 808                | 5 022                |
| Forderungen aus Lieferungen und Leistungen und sonstige Forderungen           | 2      | 6 889                | 6 757                |
| Ertragsteuerforderungen                                                       | 25     | 224                  | 144                  |
| Sonstige finanzielle Vermögenswerte                                           | 8      | 2 372                | 2 001                |
| Vorräte                                                                       | 3      | 1 310                | 1 174                |
| Zur Veräußerung gehaltene langfristige Vermögenswerte und Veräußerungsgruppen | 4      | 51                   | 6 527                |
| Übrige Vermögenswerte                                                         | 9      | 1 589                | 1 387                |
| <b>Langfristige Vermögenswerte</b>                                            |        | <b>112 569</b>       | <b>104 762</b>       |
| Immaterielle Vermögenswerte                                                   | 5      | 53 807               | 51 705               |
| Sachanlagen                                                                   | 6      | 44 298               | 45 468               |
| Beteiligungen an at equity bilanzierten Unternehmen                           | 7      | 7 242                | 147                  |
| Sonstige finanzielle Vermögenswerte                                           | 8      | 1 695                | 1 739                |
| Aktive latente Steuern                                                        | 25     | 5 129                | 5 162                |
| Übrige Vermögenswerte                                                         | 9      | 398                  | 541                  |
| <b>Bilanzsumme</b>                                                            |        | <b>127 812</b>       | <b>127 774</b>       |



|                                                                                                                                                     | Angabe    | 31.12.2010<br>Mio. € | 31.12.2009<br>Mio. € |
|-----------------------------------------------------------------------------------------------------------------------------------------------------|-----------|----------------------|----------------------|
| <b>Passiva</b>                                                                                                                                      |           |                      |                      |
| <b>Kurzfristige Schulden</b>                                                                                                                        |           | <b>26 452</b>        | <b>24 794</b>        |
| Finanzielle Verbindlichkeiten                                                                                                                       | 10        | 11 689               | 9 391                |
| Verbindlichkeiten aus Lieferungen und Leistungen und sonstige Verbindlichkeiten                                                                     | 11        | 6 750                | 6 304                |
| Ertragsteuerverbindlichkeiten                                                                                                                       | 25        | 545                  | 511                  |
| Sonstige Rückstellungen                                                                                                                             | 13        | 3 193                | 3 369                |
| Schulden in direktem Zusammenhang mit zur Veräußerung gehaltenen langfristigen Vermögenswerten und Veräußerungsgruppen                              | 4         | –                    | 1 423                |
| Übrige Schulden                                                                                                                                     | 14        | 4 275                | 3 796                |
| <b>Langfristige Schulden</b>                                                                                                                        |           | <b>58 332</b>        | <b>61 043</b>        |
| Finanzielle Verbindlichkeiten                                                                                                                       | 10        | 38 857               | 41 800               |
| Pensionsrückstellungen und ähnliche Verpflichtungen                                                                                                 | 12        | 6 373                | 6 179                |
| Sonstige Rückstellungen                                                                                                                             | 13        | 1 628                | 2 161                |
| Passive latente Steuern                                                                                                                             | 25        | 7 635                | 7 153                |
| Übrige Schulden                                                                                                                                     | 14        | 3 839                | 3 750                |
| <b>Schulden</b>                                                                                                                                     |           | <b>84 784</b>        | <b>85 837</b>        |
| <b>Eigenkapital</b>                                                                                                                                 | <b>15</b> | <b>43 028</b>        | <b>41 937</b>        |
| Gezeichnetes Kapital                                                                                                                                |           | 11 063               | 11 165               |
| Eigene Anteile                                                                                                                                      |           | (5)                  | (5)                  |
|                                                                                                                                                     |           | <b>11 058</b>        | <b>11 160</b>        |
| Kapitalrücklage                                                                                                                                     |           | 51 635               | 51 530               |
| Gewinnrücklagen einschließlich Ergebnisvortrag                                                                                                      |           | (24 355)             | (20 951)             |
| Kumuliertes sonstiges Konzernergebnis                                                                                                               |           | (2 017)              | (3 576)              |
| Kumuliertes sonstiges Konzernergebnis in direktem Zusammenhang mit zur Veräußerung gehaltenen langfristigen Vermögenswerten und Veräußerungsgruppen |           | –                    | (2 162)              |
| Konzernüberschuss/(-fehlbetrag)                                                                                                                     |           | 1 695                | 353                  |
| <b>Anteile der Eigentümer des Mutterunternehmens</b>                                                                                                |           | <b>38 016</b>        | <b>36 354</b>        |
| Anteile anderer Gesellschafter                                                                                                                      |           | 5 012                | 5 583                |
| <b>Bilanzsumme</b>                                                                                                                                  |           | <b>127 812</b>       | <b>127 774</b>       |

# Konzern-Gewinn- und Verlustrechnung.

|                                                                     | Angabe    | 2010<br>Mio. € | 2009<br>Mio. € | 2008<br>Mio. € |
|---------------------------------------------------------------------|-----------|----------------|----------------|----------------|
| <b>Umsatzerlöse</b>                                                 | <b>16</b> | <b>62 421</b>  | <b>64 602</b>  | <b>61 666</b>  |
| Umsatzkosten                                                        | 17        | (35 725)       | (36 259)       | (34 592)       |
| <b>Bruttoergebnis vom Umsatz</b>                                    |           | <b>26 696</b>  | <b>28 343</b>  | <b>27 074</b>  |
| Vertriebskosten                                                     | 18        | (14 620)       | (15 863)       | (15 952)       |
| Allgemeine Verwaltungskosten                                        | 19        | (5 252)        | (4 653)        | (4 821)        |
| Sonstige betriebliche Erträge                                       | 20        | 1 498          | 1 504          | 1 971          |
| Sonstige betriebliche Aufwendungen                                  | 21        | (2 817)        | (3 319)        | (1 232)        |
| <b>Betriebsergebnis</b>                                             |           | <b>5 505</b>   | <b>6 012</b>   | <b>7 040</b>   |
| Zinsergebnis                                                        | 22        | (2 500)        | (2 555)        | (2 487)        |
| Zinserträge                                                         |           | 349            | 341            | 408            |
| Zinsaufwendungen                                                    |           | (2 849)        | (2 896)        | (2 895)        |
| Ergebnis aus at equity bilanzierten Unternehmen                     | 23        | (57)           | 24             | (388)          |
| Sonstiges Finanzergebnis                                            | 24        | (253)          | (826)          | (713)          |
| <b>Finanzergebnis</b>                                               |           | <b>(2 810)</b> | <b>(3 357)</b> | <b>(3 588)</b> |
| <b>Ergebnis vor Ertragsteuern</b>                                   |           | <b>2 695</b>   | <b>2 655</b>   | <b>3 452</b>   |
| Ertragsteuern                                                       | 25        | (935)          | (1 782)        | (1 428)        |
| <b>Überschuss/(Fehlbetrag)</b>                                      |           | <b>1 760</b>   | <b>873</b>     | <b>2 024</b>   |
| <b>Zurechnung des Überschusses/(Fehlbetrags) an die</b>             |           | <b>1 760</b>   | <b>873</b>     | <b>2 024</b>   |
| Eigentümer des Mutterunternehmens (Konzernüberschuss/(-fehlbetrag)) |           | 1 695          | 353            | 1 483          |
| Anteile anderer Gesellschafter                                      | 26        | 65             | 520            | 541            |
| <b>Ergebnis je Aktie</b>                                            | <b>27</b> |                |                |                |
| Unverwässert                                                        |           | € 0,39         | 0,08           | 0,34           |
| Verwässert                                                          |           | € 0,39         | 0,08           | 0,34           |

# Konzern-Gesamtergebnisrechnung.

|                                                                                                           | 2010<br>Mio. € | 2009<br>Mio. € | 2008<br>Mio. € |
|-----------------------------------------------------------------------------------------------------------|----------------|----------------|----------------|
| <b>Überschuss/(Fehlbetrag)</b>                                                                            | <b>1 760</b>   | <b>873</b>     | <b>2 024</b>   |
| Versicherungsmathematische Gewinne und Verluste aus leistungsorientierten Plänen                          | (32)           | (461)          | 227            |
| Neubewertung im Rahmen von Unternehmenserwerben                                                           | (2)            | (38)           | 0              |
| Gewinne und Verluste aus der Umrechnung der Abschlüsse ausländischer Tochterunternehmen                   |                |                |                |
| Erfolgswirksame Änderung                                                                                  | 2 151          | -              | -              |
| Erfolgsneutrale Änderung                                                                                  | 1 547          | (211)          | (352)          |
| Gewinne und Verluste aus der Neubewertung von<br>zur Veräußerung verfügbaren finanziellen Vermögenswerten |                |                |                |
| Erfolgswirksame Änderung                                                                                  | 0              | 0              | 0              |
| Erfolgsneutrale Änderung                                                                                  | (3)            | (4)            | 1              |
| Gewinne und Verluste aus Sicherungsinstrumenten bei einer Absicherung von Zahlungsströmen                 |                |                |                |
| Erfolgswirksame Änderung                                                                                  | 0              | 8              | (101)          |
| Erfolgsneutrale Änderung                                                                                  | 58             | (56)           | 60             |
| Anteil am sonstigen Ergebnis von Beteiligungen an at equity bilanzierten Unternehmen                      | 28             | -              | -              |
| Sonstige direkt im Eigenkapital erfasste Erträge und Aufwendungen                                         | 0              | 11             | (8)            |
| Steuern auf direkt mit dem Eigenkapital verrechnete Wertänderungen                                        | (5)            | 138            | (53)           |
| <b>Sonstiges Ergebnis</b>                                                                                 | <b>3 742</b>   | <b>(613)</b>   | <b>(226)</b>   |
| <b>Gesamtergebnis</b>                                                                                     | <b>5 502</b>   | <b>260</b>     | <b>1 798</b>   |
| <b>Zurechnung des Gesamtergebnisses an die</b>                                                            | <b>5 502</b>   | <b>260</b>     | <b>1 798</b>   |
| Eigentümer des Mutterunternehmens                                                                         | 5 443          | (261)          | 1 251          |
| Anteile anderer Gesellschafter                                                                            | 59             | 521            | 547            |

# Konzern-Eigenkapitalveränderungsrechnung.

## Eigenkapital der Eigentümer des Mutterunternehmens

|                                    | Anzahl<br>der Aktien | Bezahltes Eigenkapital  |                   |                      | Erwirtschaftetes<br>Konzern-Eigenkapital                       |                                          |
|------------------------------------|----------------------|-------------------------|-------------------|----------------------|----------------------------------------------------------------|------------------------------------------|
|                                    |                      | Gezeichnetes<br>Kapital | Eigene<br>Anteile | Kapital-<br>rücklage | Gewinn-<br>rücklagen<br>einschließlich<br>Ergebnis-<br>vortrag | Konzern-<br>überschuss/<br>(-fehlbetrag) |
|                                    |                      | Mio. €                  | Mio. €            | Mio. €               | Mio. €                                                         | Mio. €                                   |
|                                    | Tsd.                 |                         |                   |                      |                                                                |                                          |
| <b>Stand zum 1. Januar 2008</b>    | <b>4 361 298</b>     | <b>11 165</b>           | <b>(5)</b>        | <b>51 524</b>        | <b>(16 218)</b>                                                | <b>571</b>                               |
| Veränderung Konsolidierungskreis   |                      |                         |                   |                      |                                                                |                                          |
| Gewinnvortrag                      |                      |                         |                   |                      | 571                                                            | (571)                                    |
| Dividendenausschüttungen           |                      |                         |                   |                      | (3 386)                                                        |                                          |
| Kapitalerhöhung aus Aktienoptionen | 22                   |                         |                   | 2                    |                                                                |                                          |
| Überschuss/(Fehlbetrag)            |                      |                         |                   |                      |                                                                | 1 483                                    |
| Sonstiges Ergebnis                 |                      |                         |                   |                      | 166                                                            |                                          |
| Transfer in Gewinnrücklagen        |                      |                         |                   |                      | 106                                                            |                                          |
| <b>Stand zum 31. Dezember 2008</b> | <b>4 361 320</b>     | <b>11 165</b>           | <b>(5)</b>        | <b>51 526</b>        | <b>(18 761)</b>                                                | <b>1 483</b>                             |
| <b>Stand zum 1. Januar 2009</b>    | <b>4 361 320</b>     | <b>11 165</b>           | <b>(5)</b>        | <b>51 526</b>        | <b>(18 761)</b>                                                | <b>1 483</b>                             |
| Veränderung Konsolidierungskreis   |                      |                         |                   |                      |                                                                |                                          |
| Gewinnvortrag                      |                      |                         |                   |                      | 1 483                                                          | (1 483)                                  |
| Dividendenausschüttungen           |                      |                         |                   |                      | (3 386)                                                        |                                          |
| Kapitalerhöhung aus Aktienoptionen |                      |                         |                   | 4                    |                                                                |                                          |
| Überschuss/(Fehlbetrag)            |                      |                         |                   |                      |                                                                | 353                                      |
| Sonstiges Ergebnis                 |                      |                         |                   |                      | (333)                                                          |                                          |
| Transfer in Gewinnrücklagen        |                      |                         |                   |                      | 46                                                             |                                          |
| <b>Stand zum 31. Dezember 2009</b> | <b>4 361 320</b>     | <b>11 165</b>           | <b>(5)</b>        | <b>51 530</b>        | <b>(20 951)</b>                                                | <b>353</b>                               |
| <b>Stand zum 1. Januar 2010</b>    | <b>4 361 320</b>     | <b>11 165</b>           | <b>(5)</b>        | <b>51 530</b>        | <b>(20 951)</b>                                                | <b>353</b>                               |
| Veränderung Konsolidierungskreis   |                      |                         |                   |                      |                                                                |                                          |
| Gewinnvortrag                      |                      |                         |                   |                      | 353                                                            | (353)                                    |
| Dividendenausschüttungen           |                      |                         |                   |                      | (3 386)                                                        |                                          |
| Kapitalerhöhung aus Aktienoptionen |                      |                         |                   | 3                    | 2                                                              |                                          |
| Kapitalherabsetzung                | (40 001)             | (102)                   |                   | 102                  | (400)                                                          |                                          |
| Überschuss/(Fehlbetrag)            |                      |                         |                   |                      |                                                                | 1 695                                    |
| Sonstiges Ergebnis                 |                      |                         |                   |                      | (52)                                                           |                                          |
| Transfer in Gewinnrücklagen        |                      |                         |                   |                      | 79                                                             |                                          |
| <b>Stand zum 31. Dezember 2010</b> | <b>4 321 319</b>     | <b>11 063</b>           | <b>(5)</b>        | <b>51 635</b>        | <b>(24 355)</b>                                                | <b>1 695</b>                             |

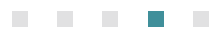

**Eigenkapital der Eigentümer des Mutterunternehmens**

Kumuliertes sonstiges Konzernergebnis

**Summe**

**Anteile  
anderer  
Gesell-  
schafter**

**Gesamt  
Konzern-  
Eigenkapital**

| Währungs-<br>umrechnung<br>ausländischer<br>Tochter-<br>unternehmen | Neu-<br>bewertungs-<br>rücklage | Zur Ver-<br>äußerung<br>verfügbare<br>finanzielle<br>Vermögens-<br>werte | Sicherungs-<br>instrumente<br>aus der<br>Absicherung<br>von Zahlungs-<br>strömen | Übriges<br>sonstiges<br>Ergebnis | Steuern      |               |              |               |
|---------------------------------------------------------------------|---------------------------------|--------------------------------------------------------------------------|----------------------------------------------------------------------------------|----------------------------------|--------------|---------------|--------------|---------------|
| Mio. €                                                              | Mio. €                          | Mio. €                                                                   | Mio. €                                                                           | Mio. €                           | Mio. €       | Mio. €        | Mio. €       | Mio. €        |
| <b>(5 999)</b>                                                      | <b>308</b>                      | <b>2</b>                                                                 | <b>1 126</b>                                                                     | <b>0</b>                         | <b>(344)</b> | <b>42 130</b> | <b>3 115</b> | <b>45 245</b> |
|                                                                     |                                 |                                                                          |                                                                                  |                                  |              | 0             | (2)          | (2)           |
|                                                                     |                                 |                                                                          |                                                                                  |                                  |              | 0             |              | 0             |
|                                                                     |                                 |                                                                          |                                                                                  |                                  |              | (3 386)       | (545)        | (3 931)       |
|                                                                     |                                 |                                                                          |                                                                                  |                                  |              | 2             |              | 2             |
|                                                                     |                                 |                                                                          |                                                                                  |                                  |              | 1 483         | 541          | 2 024         |
| (357)                                                               |                                 | 1                                                                        | (41)                                                                             | (11)                             | 10           | (232)         | 6            | (226)         |
|                                                                     | (106)                           |                                                                          |                                                                                  |                                  |              | 0             |              | 0             |
| <b>(6 356)</b>                                                      | <b>202</b>                      | <b>3</b>                                                                 | <b>1 085</b>                                                                     | <b>(11)</b>                      | <b>(334)</b> | <b>39 997</b> | <b>3 115</b> | <b>43 112</b> |
| <b>(6 356)</b>                                                      | <b>202</b>                      | <b>3</b>                                                                 | <b>1 085</b>                                                                     | <b>(11)</b>                      | <b>(334)</b> | <b>39 997</b> | <b>3 115</b> | <b>43 112</b> |
|                                                                     |                                 |                                                                          |                                                                                  |                                  |              | 0             | 2 783        | 2 783         |
|                                                                     |                                 |                                                                          |                                                                                  |                                  |              | 0             |              | 0             |
|                                                                     |                                 |                                                                          |                                                                                  |                                  |              | (3 386)       | (840)        | (4 226)       |
|                                                                     |                                 |                                                                          |                                                                                  |                                  |              | 4             | 4            | 8             |
|                                                                     |                                 |                                                                          |                                                                                  |                                  |              | 353           | 520          | 873           |
| (221)                                                               | (38)                            | (6)                                                                      | (48)                                                                             | 11                               | 21           | (614)         | 1            | (613)         |
|                                                                     | (46)                            |                                                                          |                                                                                  |                                  |              | 0             |              | 0             |
| <b>(6 577)</b>                                                      | <b>118</b>                      | <b>(3)</b>                                                               | <b>1 037</b>                                                                     | <b>0</b>                         | <b>(313)</b> | <b>36 354</b> | <b>5 583</b> | <b>41 937</b> |
| <b>(6 577)</b>                                                      | <b>118</b>                      | <b>(3)</b>                                                               | <b>1 037</b>                                                                     | <b>0</b>                         | <b>(313)</b> | <b>36 354</b> | <b>5 583</b> | <b>41 937</b> |
|                                                                     |                                 |                                                                          |                                                                                  |                                  |              | 0             | (23)         | (23)          |
|                                                                     |                                 |                                                                          |                                                                                  |                                  |              | 0             |              | 0             |
|                                                                     |                                 |                                                                          |                                                                                  |                                  |              | (3 386)       | (612)        | (3 998)       |
|                                                                     |                                 |                                                                          |                                                                                  |                                  |              | 5             | 5            | 10            |
|                                                                     |                                 |                                                                          |                                                                                  |                                  |              | (400)         |              | (400)         |
|                                                                     |                                 |                                                                          |                                                                                  |                                  |              | 1 695         | 65           | 1 760         |
| 3 734                                                               | (2)                             | (1)                                                                      | 85                                                                               |                                  | (16)         | 3 748         | (6)          | 3 742         |
|                                                                     | (79)                            |                                                                          |                                                                                  |                                  |              | 0             |              | 0             |
| <b>(2 843)</b>                                                      | <b>37</b>                       | <b>(4)</b>                                                               | <b>1 122</b>                                                                     | <b>0</b>                         | <b>(329)</b> | <b>38 016</b> | <b>5 012</b> | <b>43 028</b> |

# Konzern-Kapitalflussrechnung.

| Angabe                                                                                                                            | 2010<br>Mio. €  | 2009<br>Mio. € | 2008<br>Mio. €  |
|-----------------------------------------------------------------------------------------------------------------------------------|-----------------|----------------|-----------------|
| <b>31</b>                                                                                                                         |                 |                |                 |
| <b>Überschuss/(Fehlbetrag)</b>                                                                                                    | <b>1 760</b>    | <b>873</b>     | <b>2 024</b>    |
| Abschreibungen auf immaterielle Vermögenswerte und Sachanlagen                                                                    | 11 808          | 13 894         | 10 975          |
| Ertragsteueraufwand/-ertrag                                                                                                       | 935             | 1 782          | 1 428           |
| Zinserträge und -aufwendungen                                                                                                     | 2 500           | 2 555          | 2 487           |
| Sonstiges Finanzergebnis                                                                                                          | 253             | 826            | 713             |
| Ergebnis aus at equity bilanzierten Unternehmen                                                                                   | 57              | (24)           | 388             |
| Ergebnis aus dem Abgang vollkonsolidierter Gesellschaften                                                                         | 349             | (26)           | (455)           |
| Sonstige zahlungsunwirksame Vorgänge                                                                                              | (21)            | (230)          | (147)           |
| Ergebnis aus dem Abgang immaterieller Vermögenswerte und Sachanlagen                                                              | 90              | 51             | 70              |
| Veränderung aktives Working Capital                                                                                               | (243)           | 1 936          | 286             |
| Veränderung der Rückstellungen                                                                                                    | (68)            | (891)          | 493             |
| Veränderung übriges passives Working Capital                                                                                      | (209)           | (1 818)        | (130)           |
| Erhaltene/(Gezahlte) Ertragsteuern                                                                                                | (819)           | (928)          | (520)           |
| Erhaltene Dividenden                                                                                                              | 412             | 29             | 13              |
| Nettozahlungen aus dem Abschluss und der Auflösung von Zinsswaps                                                                  | 265             | 242            | -               |
| <b>Operativer Cashflow</b>                                                                                                        | <b>17 069</b>   | <b>18 271</b>  | <b>17 625</b>   |
| Gezahlte Zinsen                                                                                                                   | (3 223)         | (3 456)        | (3 431)         |
| Erhaltene Zinsen                                                                                                                  | 885             | 980            | 1 174           |
| <b>Cashflow aus Geschäftstätigkeit</b>                                                                                            | <b>14 731</b>   | <b>15 795</b>  | <b>15 368</b>   |
| Auszahlungen für Investitionen in                                                                                                 |                 |                |                 |
| Immaterielle Vermögenswerte                                                                                                       | (2 978)         | (1 598)        | (1 799)         |
| Sachanlagen                                                                                                                       | (6 873)         | (7 604)        | (6 908)         |
| Langfristige finanzielle Vermögenswerte                                                                                           | (997)           | (176)          | (3 261)         |
| Anteile vollkonsolidierter Gesellschaften und Geschäftseinheiten                                                                  | (448)           | (1 007)        | (1 030)         |
| Einzahlungen aus Abgängen von                                                                                                     |                 |                |                 |
| Immateriellen Vermögenswerten                                                                                                     | 26              | 7              | 34              |
| Sachanlagen                                                                                                                       | 318             | 369            | 338             |
| Langfristigen finanziellen Vermögenswerten                                                                                        | 162             | 99             | 102             |
| Anteilen vollkonsolidierter Gesellschaften und Geschäftseinheiten                                                                 | 4               | 116            | 778             |
| Veränderung der Zahlungsmittel (Laufzeit mehr als 3 Monate), Wertpapiere und Forderungen des kurzfristigen finanziellen Vermögens | 491             | (320)          | 611             |
| Veränderung der Zahlungsmittel aufgrund der erstmaligen vollständigen Einbeziehung der OTE                                        | -               | 1 558          | -               |
| Sonstiges                                                                                                                         | (416)           | (93)           | (249)           |
| <b>Cashflow aus Investitionstätigkeit</b>                                                                                         | <b>(10 711)</b> | <b>(8 649)</b> | <b>(11 384)</b> |
| Aufnahme kurzfristiger Finanzverbindlichkeiten                                                                                    | 30 046          | 3 318          | 39 281          |
| Rückzahlung kurzfristiger Finanzverbindlichkeiten                                                                                 | (34 762)        | (9 314)        | (44 657)        |
| Aufnahme mittel- und langfristiger Finanzverbindlichkeiten                                                                        | 3 219           | 5 379          | 6 477           |
| Rückzahlung mittel- und langfristiger Finanzverbindlichkeiten                                                                     | (149)           | (93)           | (96)            |
| Dividendenausschüttungen                                                                                                          | (4 003)         | (4 287)        | (3 963)         |
| Kapitalerhöhung aus Aktienoptionen                                                                                                | -               | 2              | 3               |
| Aktienrückkauf                                                                                                                    | (400)           | -              | -               |
| Tilgung von Leasingverbindlichkeiten                                                                                              | (139)           | (128)          | (142)           |
| Sonstiges                                                                                                                         | (181)           | -              | -               |
| <b>Cashflow aus Finanzierungstätigkeit</b>                                                                                        | <b>(6 369)</b>  | <b>(5 123)</b> | <b>(3 097)</b>  |
| Auswirkung von Kursveränderungen auf die Zahlungsmittel (Laufzeit bis 3 Monate)                                                   | 50              | 58             | (61)            |
| Zahlungsmittelveränderung im Zusammenhang mit zur Veräußerung gehaltenen langfristigen Vermögenswerten und Veräußerungsgruppen    | 85              | (85)           | -               |
| <b>Nettoveränderung der Zahlungsmittel (Laufzeit bis 3 Monate)</b>                                                                | <b>(2 214)</b>  | <b>1 996</b>   | <b>826</b>      |
| <b>Bestand am Anfang des Jahres</b>                                                                                               | <b>5 022</b>    | <b>3 026</b>   | <b>2 200</b>    |
| <b>Bestand am Ende des Jahres</b>                                                                                                 | <b>2 808</b>    | <b>5 022</b>   | <b>3 026</b>    |

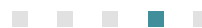

# Konzern-Anhang.

## Grundlagen und Methoden.

### Allgemeine Angaben.

Der Deutsche Telekom Konzern (im Nachfolgenden „Deutsche Telekom“ oder „Konzern“ genannt) ist eines der weltweit führenden Dienstleistungsunternehmen der Telekommunikations- und Informationstechnologiebranche. Die Deutsche Telekom bietet Kunden Produkte und Services rund um das vernetzte Leben und Arbeiten an. Dabei berichtet der Konzern die vier operativen Segmente Deutschland, Europa, USA, Systemgeschäft sowie die Konzernzentrale & Shared Services.

Die Gesellschaft wurde am 2. Januar 1995 unter der Firma Deutsche Telekom AG in das Handelsregister beim Amtsgericht Bonn (HRB 6794) eingetragen.

Sitz der Gesellschaft ist Bonn, Deutschland. Die Anschrift lautet: Deutsche Telekom AG, Friedrich-Ebert-Allee 140, 53113 Bonn.

Die nach § 161 des Aktiengesetzes vorgeschriebene Erklärung zum Deutschen Corporate Governance Kodex wurde abgegeben und den Aktionären zugänglich gemacht. Diese Entsprechenserklärung kann auch über die Internetseite der Deutschen Telekom ([www.telekom.com](http://www.telekom.com)) unter dem Pfad: Investor Relations/Corporate Governance/Entsprechenserklärung eingesehen werden.

Die Aktien der Deutschen Telekom AG werden neben Frankfurt am Main auch an anderen deutschen Börsen gehandelt.

Der von der Ernst & Young GmbH Wirtschaftsprüfungsgesellschaft, Stuttgart, und der PricewaterhouseCoopers Aktiengesellschaft Wirtschaftsprüfungsgesellschaft, Frankfurt am Main, mit dem uneingeschränkten Bestätigungsvermerk versehene Jahresabschluss der Deutschen Telekom AG sowie der Konzernabschluss der Deutschen Telekom AG werden im elektronischen Bundesanzeiger veröffentlicht. Der Geschäftsbericht kann bei der Deutschen Telekom AG, Bonn, Investor Relations, angefordert bzw. auf der Internetseite der Deutschen Telekom ([www.telekom.com](http://www.telekom.com)) eingesehen werden.

Der Konzernabschluss der Deutschen Telekom für das Geschäftsjahr 2010 wurde am 18. Februar 2011 durch den Vorstand zur Veröffentlichung freigegeben.

### Grundlagen der Bilanzierung.

Der Konzernabschluss der Deutschen Telekom wurde nach den International Financial Reporting Standards (IFRS), wie sie in der Europäischen Union (EU) anzuwenden sind, und den nach § 315a Abs. 1 HGB ergänzend zu beachtenden handelsrechtlichen Vorschriften aufgestellt. Alle vom International Accounting Standards Board (IASB) herausgegebenen und zum Zeitpunkt der Aufstellung des vorliegenden Konzernabschlusses geltenden und von der Deutschen Telekom angewendeten IFRS wurden von der Europäischen Kommission für die Anwendung in der EU übernommen. Der Konzernabschluss der Deutschen Telekom entspricht damit auch den durch das IASB veröffentlichten IFRS. Im Folgenden wird daher einheitlich der Begriff IFRS verwendet.

Das Geschäftsjahr entspricht dem Kalenderjahr. In der Konzern-Bilanz werden Vergleichszahlen für einen Abschlussstichtag angegeben. In der Konzern-Gewinn- und Verlustrechnung, der Konzern-Gesamtergebnisrechnung, der Konzern-Eigenkapitalveränderungsrechnung sowie der Konzern-Kapitalflussrechnung werden Vergleichszahlen für zwei Vorjahre angegeben.

Beim Bilanzausweis wird zwischen lang- und kurzfristigen Vermögenswerten und Schulden unterschieden, die im Anhang grundsätzlich detailliert nach ihrer Fristigkeit ausgewiesen werden. Die Konzern-Gewinn- und Verlustrechnung ist nach dem Umsatzkostenverfahren gegliedert. Dabei werden den Umsatzerlösen die zu ihrer Erzielung angefallenen Aufwendungen gegenübergestellt, die den Funktionsbereichen Herstellung, Vertrieb und allgemeine Verwaltung zugeordnet werden. Der Konzernabschluss wird in Euro aufgestellt.

Die Abschlüsse der Deutschen Telekom AG und deren Tochterunternehmen werden unter Beachtung der einheitlich für den Konzern geltenden Ansatz- und Bewertungsmethoden in den Konzernabschluss einbezogen.

## Erstmals im Geschäftsjahr anzuwendende Standards, Interpretationen und Änderungen von Standards und Interpretationen.

Die Deutsche Telekom hat folgende Verlautbarungen bzw. Änderungen von Verlautbarungen des IASB im Geschäftsjahr erstmals angewandt:

| Verlautbarung               | Datum der Veröffentlichung durch das IASB | Titel                                                                |
|-----------------------------|-------------------------------------------|----------------------------------------------------------------------|
| IFRS 3/IAS 27               | 10. Januar 2008                           | Business Combinations/Consolidated and Separate Financial Statements |
| IAS 39                      | 31. Juli 2008                             | Financial Instruments: Recognition and Measurement                   |
| IFRIC 17                    | 27. November 2008                         | Distribution of Non-Cash Assets to Owners                            |
| IAS 24                      | 4. November 2009                          | Related Party Disclosures                                            |
| Annual Improvements Project | 16. April 2009                            | Improvements to IFRSs                                                |
| IFRS 2                      | 18. Juni 2009                             | Share-based Payment                                                  |

**IFRS 3 „Business Combinations“ und IAS 27 „Consolidated and Separate Financial Statements“.** Die Standards sind das Ergebnis der zweiten Phase des gemeinsam mit dem Financial Accounting Standards Board (FASB) durchgeführten Projekts zur Reformierung der Bilanzierung von Unternehmenszusammenschlüssen. Die überarbeiteten Fassungen von IFRS 3 und IAS 27 wurden im Juni 2009 von der Europäischen Union in europäisches Recht übernommen. Die Deutsche Telekom wendet die überarbeiteten Standards seit dem 1. Januar 2010 für Transaktionen und Unternehmenszusammenschlüsse prospektiv an. Die Vergleichsperioden wurden nicht angepasst.

Die wesentlichen Änderungen gegenüber der bisherigen Fassung des **IFRS 3** lassen sich wie folgt zusammenfassen:

- Für die bilanzielle Behandlung von Anteilen anderer Gesellschafter sieht die neue Fassung des IFRS 3 ein Wahlrecht zur Bewertung zum beizulegenden Zeitwert oder dem anteiligen identifizierbaren Nettovermögen vor. Dieses Wahlrecht kann für jeden Unternehmenszusammenschluss einzeln ausgeübt werden.
- Für sukzessive Unternehmenserwerbe erfolgt im Zeitpunkt der Erlangung der Beherrschung eine erfolgswirksame Neubewertung bereits bestehender Anteile an dem erworbenen Unternehmen. Der Goodwill ermittelt sich als Differenz zwischen dem neu bewerteten Beteiligungsbuchwert zuzüglich Kaufpreiszahlungen für den Erwerb der neuen Anteile abzüglich des erworbenen Nettovermögens.

- Bedingte Kaufpreiszahlungen oder sonstige bedingte Gegenleistungen (contingent considerations) werden im Erwerbszeitpunkt zum beizulegenden Zeitwert bewertet und im Erwerbszeitpunkt entweder als Eigenkapital oder als Vermögenswert bzw. Verbindlichkeit klassifiziert. Die Folgebilanzierung für vereinbarte contingent considerations erfolgt gemäß der im Erwerbszeitpunkt gewählten Klassifizierung.
- Anschaffungsnebenkosten im Zusammenhang mit Unternehmenserwerben sind als Aufwand zu erfassen.
- Für mögliche Anpassungen der Anschaffungskosten in Abhängigkeit von künftigen Ereignissen (contingent considerations), die im Erwerbszeitpunkt zu erfassen sind, ist in der Folgebewertung keine Anpassung des Goodwills mehr möglich.
- Effekte aus der Abwicklung von Geschäftsbeziehungen, die bereits vor dem Unternehmenszusammenschluss bestanden, sind nach der neuen Fassung des IFRS 3 nicht in die Ermittlung der Gegenleistung für den Zusammenschluss einzubeziehen.
- Gegenüber der bisherigen Fassung regelt IFRS 3 in der überarbeiteten Fassung den Ansatz und die Bewertung von Rechten, die vor dem Unternehmenszusammenschluss einem anderen Unternehmen gewährt wurden und nun im Rahmen des Zusammenschlusses wirtschaftlich zurückerlangt werden (zurückerworbene Rechte).

Die wesentlichen Änderungen gegenüber der bisherigen Fassung des **IAS 27** lassen sich wie folgt zusammenfassen:

- Änderungen in der Beteiligungsquote ohne Verlust der Beherrschung sind ausschließlich als Eigenkapitaltransaktion zu erfassen.
- Bei Verlust der Beherrschung eines Tochterunternehmens sind die konsolidierten Vermögenswerte und Schulden auszubuchen. Neu geregelt ist, dass eine verbleibende Beteiligung an dem vormaligen Tochterunternehmen beim erstmaligen Ansatz zum beizulegenden Zeitwert zu bewerten ist und dass sich hierbei ergebende Differenzen ergebniswirksam zu erfassen sind.
- Übersteigen die auf die Anteile anderer Gesellschafter entfallenden Verluste den Anteil anderer Gesellschafter am Eigenkapital des Tochterunternehmens, sind diese in voller Höhe den Minderheiten zuzurechnen.

**IAS 39 „Financial Instruments: Recognition and Measurement“.** Die Änderung von IAS 39 wurde im September 2009 von der Europäischen Union in europäisches Recht übernommen. Durch die Änderung „Eligible Hedged Items“ wird konkretisiert, dass auch allein Cashflow- oder Fair-Value-Änderungen eines Grundgeschäfts über- oder unterhalb eines bestimmten Preises bzw. einer anderen Variablen als Hedge designiert werden können. Die Deutsche Telekom beachtet die Änderungen des IAS 39 seit dem 1. Januar 2010. Die Vorschriften sind retrospektiv anzuwenden. Aus der Änderung haben sich keine wesentlichen Auswirkungen auf die Darstellung der Vermögens-, Finanz- und Ertragslage bzw. der Cashflows der Deutschen Telekom ergeben.



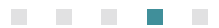

**IFRIC 17 „Distribution of Non-Cash Assets to Owners“.** IFRIC 17 wurde im November 2009 von der Europäischen Union in europäisches Recht übernommen. Die Interpretation betrifft den Ansatz und die Bewertung von Verbindlichkeiten aus Ausschüttungen in Form von Sachdividenden (z. B. Sachanlagen) und klärt die Frage, wie ein etwaiger Unterschiedsbetrag zwischen dem Buchwert der ausgeschütteten Vermögenswerte und dem Zeitwert der gezahlten Dividende zu bilanzieren ist. Die Deutsche Telekom wendet IFRIC 17 seit dem 1. Januar 2010 an. Aus der Anwendung von IFRIC 17 haben sich keine wesentlichen Auswirkungen auf die Darstellung der Vermögens-, Finanz- und Ertragslage bzw. der Cashflows der Deutschen Telekom ergeben.

**IAS 24 „Related Party Disclosures“.** Das IASB hat im November 2009 Änderungen zu IAS 24 veröffentlicht. Bisher mussten Unternehmen, die staatlich kontrolliert oder bedeutend beeinflusst sind, Informationen zu allen Geschäftsvorfällen mit Unternehmen, die vom gleichen Staat kontrolliert oder bedeutend beeinflusst werden, offenlegen. Nach dem geänderten Standard sind weiterhin Angaben erforderlich, die für Adressaten von Abschlüssen wichtig sind. Jedoch sind von nun an Informationen ausgenommen, die nur mit hohem Kostenaufwand zur Verfügung gestellt werden können oder von wenig Wert für die Adressaten sind. Dies wird dadurch erreicht, dass nur Angaben zu solchen Geschäftsvorfällen gefordert sind, die einzeln oder zusammen genommen von Bedeutung sind. Weiterhin wurde die Definition für ein nahe stehendes Unternehmen oder eine nahe stehende Person vereinfacht und Unstimmigkeiten beseitigt. Diese Änderungen wurden im Juli 2010 von der Europäischen Union in europäisches Recht übernommen. Der überarbeitete Standard ist retrospektiv für Berichtsperioden anzuwenden, die am oder nach dem 1. Januar 2011 beginnen. Eine frühere Anwendung ist erlaubt. Die Deutsche Telekom wendet die Änderungen des IAS 24 vorzeitig seit dem 1. Januar 2010 an. Aus diesen Änderungen haben sich keine wesentlichen Auswirkungen auf die Darstellung der Vermögens-, Finanz- und Ertragslage bzw. der Cashflows der Deutschen Telekom ergeben.

**„Improvements to IFRSs“.** Es handelt sich hierbei um das zweite Annual Improvements Project, das Änderungen an zwölf bestehenden Standards und Interpretationen vorsieht. Die Änderungen wurden im März 2010 von der Europäischen Union in europäisches Recht übernommen. Die Deutsche Telekom wendet die Änderungen seit dem 1. Januar 2010 an. Die Änderungen haben keine wesentlichen Auswirkungen auf die Darstellung der Vermögens-, Finanz- und Ertragslage bzw. der Cashflows der Deutschen Telekom.

**IFRS 2 „Share-based Payment“.** Die Änderungen betreffen die Bilanzierung von „group-settled share-based payment“-Transaktionen, bei denen ein Tochterunternehmen Güter oder Dienstleistungen von Arbeitnehmern oder Lieferanten erhält, die vom Mutterunternehmen oder einem anderen Konzernunternehmen bezahlt werden. Diese wurden im März 2010 von der Europäischen Union in europäisches Recht übernommen. Ein Unternehmen, das Güter oder Dienstleistungen im Rahmen einer anteilsbasierten Vergütungsvereinbarung erhält, muss diese bilanzieren, unabhängig davon,

welches Unternehmen im Konzern die zugehörige Verpflichtung erfüllt, und unabhängig davon, ob die Verpflichtung in Anteilen oder in bar erfüllt wird. Das Board hat weiterhin klargestellt, dass der Begriff „group“ in IFRS 2 die gleiche Bedeutung hat wie in IAS 27 „Consolidated and Separate Financial Statements“. Mit den Änderungen von IFRS 2 werden auch Regelungen in den Standard aufgenommen, die vormalig in IFRIC 8 „Scope of IFRS 2“ und IFRIC 11 „IFRS 2 – Group and Treasury Share Transactions“ enthalten waren. Daher hat das IASB IFRIC 8 und IFRIC 11 zurückgezogen. Die Deutsche Telekom wendet die Änderungen zu IFRS 2 seit dem 1. Januar 2010 an. Die Änderungen haben keine wesentlichen Auswirkungen auf die Darstellung der Vermögens-, Finanz- und Ertragslage bzw. der Cashflows der Deutschen Telekom.

## Veröffentlichte, aber noch nicht angewendete Standards, Interpretationen und Änderungen.

Das IASB hat im Oktober 2009 eine Ergänzung des Standards **IAS 32 „Financial Instruments: Presentation“** veröffentlicht. Diese Ergänzung wurde im Dezember 2009 von der Europäischen Union in europäisches Recht übernommen. Diese betrifft die Klarstellung der Klassifizierung von Bezugsrechten als Eigen- oder Fremdkapital, wenn die Bezugsrechte auf eine andere Währung als die funktionale Währung des Emittenten lauten. Bislang wurden solche Rechte als derivative Verbindlichkeiten bilanziert. Die Ergänzung sieht vor, dass solche Bezugsrechte, die zu einem festgelegten Währungsbetrag anteilig an die Anteilseigner eines Unternehmens ausgegeben werden, als Eigenkapital zu klassifizieren sind. Die Währung des Ausübungspreises ist dabei nicht von Belang. Die Änderungen treten für Geschäftsjahre in Kraft, die am oder nach dem 1. Februar 2010 beginnen. Die Ergänzung wird voraussichtlich keine wesentlichen Auswirkungen auf die Darstellung der Vermögens-, Finanz- und Ertragslage bzw. der Cashflows der Deutschen Telekom haben.

Das IASB hat im November 2009 **IFRS 9 „Financial Instruments“** veröffentlicht. Die Änderungen wurden bisher noch nicht von der Europäischen Union in europäisches Recht übernommen. Der Standard ist das Ergebnis der ersten von drei Phasen des Projekts zum Ersatz des IAS 39 „Financial Instruments: Recognition and Measurement“ durch IFRS 9. IFRS 9 regelt die Klassifizierung und Bewertung von finanziellen Vermögenswerten. Die Regelungen zu Wertminderungen von Finanzinstrumenten und Hedge Accounting werden derzeit vom IASB überarbeitet. IFRS 9 schreibt vor, dass finanzielle Vermögenswerte einer der folgenden zwei Bewertungskategorien zuzuordnen sind: „Zu fortgeführten Anschaffungskosten“ oder „Zum Fair Value“. Zudem gewährt IFRS 9 ein Wahlrecht der Bewertung zum Fair Value, indem er gestattet, finanzielle Vermögenswerte, die normalerweise der Kategorie „at amortized cost“ zuzuordnen wären, der Kategorie „at fair value“ zuzuordnen, wenn dies Inkongruenzen bei der Bewertung oder beim Ansatz beseitigt oder erheblich verringert. Eigenkapitalinstrumente sind zwingend der Kategorie „at fair value“ zuzuordnen.

Der Standard gestattet jedoch beim erstmaligen Ansatz von Eigenkapitalinstrumenten, die nicht zu Handelszwecken erworben wurden, das unwiderrechtliche Wahlrecht auszuüben, diese erfolgsneutral direkt im Eigenkapital „Zum Fair Value“ zu designieren. Hieraus erhaltene Dividenden werden erfolgswirksam in der Gewinn- und Verlustrechnung ausgewiesen. IFRS 9 ist für Geschäftsjahre anzuwenden, die am oder nach dem 1. Januar 2013 beginnen. Die Vorschriften sind retrospektiv abzubilden. Die Deutsche Telekom prüft die hieraus resultierenden Effekte auf die Darstellung der Vermögens-, Finanz- und Ertragslage bzw. der Cashflows.

Das IASB hat im November 2009 eine Änderung der Vorschriften zur Bilanzierung von Pensionsplänen herausgegeben. Die Änderung wurde im Juli 2010 von der Europäischen Union in europäisches Recht übernommen. Sie betrifft die Interpretation **IFRIC 14 „Prepayments of a Minimum Funding Requirement“**, die ihrerseits eine Auslegung von IAS 19 „Employee Benefits“ darstellt. Die Änderung gilt unter den begrenzten Umständen, unter denen ein Unternehmen Mindestfinanzierungsvorschriften unterliegt und eine Vorauszahlung der Beiträge leistet, die diesen Anforderungen genügen. Sie erlaubt es Unternehmen, den Nutzen aus einer solchen Vorauszahlung als Vermögenswert anzusetzen. Die Änderung tritt verpflichtend zum 1. Januar 2011 in Kraft. Eine retrospektive Anwendung ist vorgeschrieben. Die Deutsche Telekom prüft die hieraus resultierenden Effekte auf die Darstellung der Vermögens-, Finanz- und Ertragslage bzw. der Cashflows.

Das IASB hat im November 2009 die Interpretation **IFRIC 19 „Extinguishing Financial Liabilities with Equity Instruments“** veröffentlicht. IFRIC 19 wurde im Juli 2010 von der Europäischen Union in europäisches Recht übernommen. Die Interpretation bietet Hilfestellung bei der Auslegung von IFRS für Kreditnehmer, die im Rahmen von Neuverhandlungen mit einem Kreditgeber erreichen, dass dieser Eigenkapitalinstrumente zur vollständigen oder partiellen Tilgung der finanziellen Verbindlichkeiten akzeptiert. IFRIC 19 stellt klar, dass die Eigenkapitalinstrumente, die an den Kreditgeber ausgegeben werden, als „gezahltes Entgelt“ anzusehen sind, um die finanzielle Verbindlichkeit vollständig oder partiell auszubuchen. Des Weiteren sind diese Eigenkapitalinstrumente zum beizulegenden Zeitwert zu bewerten. Ist dieser nicht verlässlich ermittelbar, werden die Eigenkapitalinstrumente mit dem beizulegenden Zeitwert der getilgten finanziellen Verbindlichkeit bewertet. Eine etwaige Differenz zwischen dem Buchwert der finanziellen Verbindlichkeit und dem erstmaligen Bewertungsbetrag der ausgegebenen Eigenkapitalinstrumente wird in der Gewinn- und Verlustrechnung erfasst. Die Interpretation tritt für Geschäftsjahre in Kraft, die am oder nach dem 1. Juli 2010 beginnen. Aus der Anwendung des IFRIC 19 werden sich voraussichtlich keine wesentlichen Auswirkungen auf die Darstellung der Vermögens-, Finanz- und Ertragslage bzw. der Cashflows der Deutschen Telekom ergeben.

Das IASB hat im Mai 2010 im Rahmen des dritten „**Annual Improvements Project**“ Verlautbarungen veröffentlicht, die Änderungen an sechs Standards und an einer Interpretation enthalten. Die Änderungen wurden noch nicht von der Europäischen Union in europäisches Recht übernommen. Die Änderungen haben keine wesentlichen Auswirkungen auf die Darstellung der Vermögens-, Finanz- und Ertragslage bzw. der Cashflows der Deutschen Telekom und sind für Geschäftsjahre anzuwenden, die am oder nach dem 1. Januar 2011 beginnen.

Im Oktober 2010 hat das IASB die Verlautbarung „Disclosures – Transfers of Financial Assets“ als Ergänzung zu **IFRS 7 „Financial Instruments: Disclosures“** veröffentlicht. Die Änderung schreibt quantitative und qualitative Angaben zu solchen Übertragungen von finanziellen Vermögenswerten vor, bei denen die übertragenen Vermögenswerte nicht vollständig ausgebucht werden oder beim übertragenden Unternehmen ein anhaltendes Engagement (continuing involvement) verbleibt. Dadurch soll den Anwendern ein besserer Einblick in solche Transaktionen (z. B. Verbriefungen) ermöglicht und die potenziellen Auswirkungen zurückbehaltener Risiken auf das übertragende Unternehmen dargestellt werden. Die Änderung verlangt außerdem zusätzliche Angaben, falls ein unangemessen hoher Anteil solcher Transaktionen in zeitlicher Nähe zum Periodenstichtag vorgenommen wird. Die Änderungen sind anwendbar für Geschäftsjahre, die am oder nach dem 1. Juli 2011 beginnen. Diese Verlautbarung wurde bislang noch nicht von der Europäischen Union in europäisches Recht übernommen. Die Deutsche Telekom prüft die hieraus resultierenden Effekte auf die Darstellung der Vermögens-, Finanz- und Ertragslage bzw. der Cashflows.

Ebenfalls im Oktober 2010 hat das IASB die Vorschriften zur Bilanzierung von finanziellen Verbindlichkeiten veröffentlicht. Diese werden in **IFRS 9 „Financial Instruments“** integriert und ersetzen die hierzu existierenden Vorschriften in IAS 39 „Financial Instruments: Recognition and Measurement“. Die neue Verlautbarung übernimmt die Vorschriften zur Einbuchung und Ausbuchung sowie die meisten Vorschriften zu Klassifizierung und Bewertung unverändert aus IAS 39. Vorschriften zur Fair Value Option für finanzielle Verbindlichkeiten, um die Problematik des eigenen Kreditrisikos zu regeln, werden hingegen im neuen IFRS 9 modifiziert und das Verbot der Bewertung solcher derivativer Verbindlichkeiten zum beizulegenden Zeitwert, die mit einem nicht notierten Eigenkapitalinstrument verbunden sind und nur durch Lieferung solcher erfüllt werden können, wird eliminiert. Die Verlautbarung ist für Geschäftsjahre anzuwenden, die am oder nach dem 1. Januar 2013 beginnen. Diese Verlautbarung wurde bislang noch nicht von der Europäischen Union in europäisches Recht übernommen. Die Deutsche Telekom prüft die hieraus resultierenden Effekte auf die Darstellung der Vermögens-, Finanz- und Ertragslage bzw. der Cashflows.

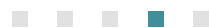

Das IASB hat im Dezember 2010 die Verlautbarungen „**Deferred Tax: Recovery of Underlying Assets – Amendments to IAS 12**“ veröffentlicht. Die neue Verlautbarung bestimmt, welche Art der Realisierung für bestimmte Vermögenswerte zu unterstellen ist. Dies ist wichtig in Fällen, in denen sich je nach Art der Realisierung unterschiedliche Steuerkonsequenzen ergeben. Die Verlautbarung setzt die widerlegbare Vermutung, dass der Buchwert einer als Finanzinvestition gehaltenen Immobilie, die nach dem Neubewertungsmodell des IAS 40 „Investment Property“ zum beizulegenden Zeitwert bewertet wird, durch Verkauf realisiert wird. Des Weiteren gilt in jedem Fall die unwiderlegbare Vermutung, dass der Buchwert eines nicht abnutzbaren Vermögenswerts, der nach dem Neubewertungsmodell des IAS 16 „Property, Plant and Equipment“ zum Neubewertungsbetrag bewertet wird, durch Verkauf realisiert wird. Durch die neue Verlautbarung wird die Interpretation SIC 21 „Income Taxes – Recovery of Revalued Non-Depreciable Assets“ außer Kraft gesetzt. Sie ist anzuwenden für Geschäftsjahre, die am oder nach dem 1. Januar 2012 beginnen und wurde bislang noch nicht von der Europäischen Union in europäisches Recht übernommen. Die Deutsche Telekom prüft die hieraus resultierenden Effekte auf die Darstellung der Vermögens-, Finanz- und Ertragslage bzw. der Cashflows.

## Änderungen der Bilanzierungs- und Bewertungsmethoden und Änderungen der Berichtsstruktur.

Die Deutsche Telekom hat im Geschäftsjahr 2010 keine wesentlichen Änderungen der Bilanzierungs- und Bewertungsmethoden vorgenommen. Als Folge der neu ausgerichteten Führungsstruktur der beiden operativen Segmente Süd- und Osteuropa und Europa wurde folgende Änderung an der Struktur der operativen Segmente vorgenommen:

Seit dem 1. April 2010 wurden die operativen Segmente Süd- und Osteuropa und Europa zum neuen operativen Segment Europa zusammengefasst. Das operative Segment Europa umfasst sämtliche Aktivitäten der Festnetz- und Mobilfunk-Gesellschaften der Landesgesellschaften in Griechenland, Rumänien, Ungarn, Polen, der Tschechischen Republik, Kroatien, den Niederlanden, der Slowakei, Österreich, Albanien, EJR Mazedonien, Montenegro, Bulgarien sowie des Joint Venture in Großbritannien und den Bereich International Carrier Sales and Services, welcher im Wesentlichen Telekommunikationsvorleistungen für andere operative Segmente im Konzern erbringt. Sämtliche Darstellungen im Konzern-Anhang sowie im zusammengefassten Lagebericht wurden entsprechend retrospektiv angepasst.

Die Deutsche Telekom berichtet demzufolge seit dem 1. April 2010 die vier operativen Segmente Deutschland, Europa, USA, Systemgeschäft sowie die Konzernzentrale & Shared Services.

## Ansatz und Bewertung.

Die nachstehend dargestellten wesentlichen Regelungen zum Ansatz und zur Bewertung sind einheitlich für alle in diesem Konzernabschluss dargestellten Rechnungslegungsperioden angewendet worden.

**Immaterielle Vermögenswerte** (ohne Goodwill) mit bestimmbarer Nutzungsdauer, einschließlich der UMTS-Lizenzen, werden mit ihren Anschaffungskosten bewertet und planmäßig über die jeweilige Nutzungsdauer linear abgeschrieben. Derartige Vermögenswerte sind im Wert gemindert, wenn der erzielbare Betrag – der höhere Wert aus beizulegendem Zeitwert abzüglich Verkaufskosten und Nutzungswert des Vermögenswerts – niedriger ist als der Buchwert. Immaterielle Vermögenswerte mit unbegrenzter Nutzungsdauer (Mobilfunk-Lizenzen der Federal Communications Commission in den USA (FCC-Lizenzen)) werden zu Anschaffungskosten bewertet. Obwohl die FCC-Lizenzen grundsätzlich für eine vertraglich definierte Zeit vergeben werden, werden sie regelmäßig zu vernachlässigbaren Kosten erneuert. Daneben liegen keine sonstigen rechtlichen, regulatorischen, vertraglichen, wettbewerbsbedingten, wirtschaftlichen oder anderen Faktoren vor, die die Nutzungsdauer der Lizenzen beschränken. Sie werden nicht planmäßig abgeschrieben, sondern jährlich und zusätzlich immer dann, wenn Anzeichen für eine Wertminderung vorliegen, auf ihre Werthaltigkeit untersucht und, sofern notwendig, auf den erzielbaren Betrag abgeschrieben. Soweit die Gründe für zuvor erfasste Wertminderungen entfallen sind, werden diese Vermögenswerte bis auf den Wert zugeschrieben, der sich ergeben hätte, wenn in den früheren Perioden keine Wertminderungen erfasst worden wären.

Die Nutzungsdauern und die Abschreibungsmethode der immateriellen Vermögenswerte werden mindestens an jedem Jahresabschlussstichtag überprüft; wenn die Erwartungen von den bisherigen Schätzungen abweichen, werden die entsprechenden Änderungen gemäß IAS 8 als Änderungen von Schätzungen erfasst.

Die planmäßige Abschreibung von Mobilfunk-Lizenzen beginnt, sobald das zugehörige Netz betriebsbereit ist. Die Nutzungsdauern von Mobilfunk-Lizenzen werden auf der Grundlage verschiedener Faktoren festgelegt, u. a. der Laufzeit der von der jeweiligen nationalen Regulierungsbehörde gewährten Lizenzen, der Verfügbarkeit und der erwarteten Kosten für die Erneuerung der Lizenzen sowie der Entwicklung künftiger Technologien.

Die Restnutzungsdauern wesentlicher Mobilfunk-Lizenzen des Unternehmens sind wie folgt:

| Mobilfunk-Lizenzen | Jahre      |
|--------------------|------------|
| FCC-Lizenzen       | unbegrenzt |
| UMTS-Lizenzen      | 4 bis 14   |
| GSM-Lizenzen       | 1 bis 14   |

**Ausgaben für Entwicklung** werden aktiviert, sofern die entsprechenden Voraussetzungen erfüllt sind, und planmäßig über ihre Nutzungsdauer abgeschrieben. **Forschungsausgaben** werden nicht aktiviert, sondern werden im Entstehungszeitpunkt verursachungsgemäß als Aufwand erfasst.

Der **Goodwill** wird nicht planmäßig abgeschrieben, sondern auf der Basis des erzielbaren Betrags der zahlungsmittelgenerierenden Einheit, der der Goodwill zugeordnet ist, auf eine Wertminderung untersucht (Impairment Only-Ansatz). Im Rahmen der Überprüfung auf Wertminderung wird der bei einem Unternehmenszusammenschluss erworbene Goodwill jeder einzelnen zahlungsmittelgenerierenden Einheit zugeordnet, die voraussichtlich von den Synergien aus dem Zusammenschluss profitiert. Der Werthaltigkeitstest ist jährlich durchzuführen und zusätzlich immer dann, wenn Anzeichen dafür vorliegen, dass die zahlungsmittelgenerierende Einheit in ihrem Wert gemindert ist. Übersteigt der Buchwert der zahlungsmittelgenerierenden Einheit, welcher der Goodwill zugewiesen wurde, deren erzielbaren Betrag, ist der dieser zahlungsmittelgenerierenden Einheit zugeordnete Goodwill in Höhe des Differenzbetrags wertzumindern. Wertminderungen des Goodwills dürfen nicht rückgängig gemacht werden. Übersteigt die Wertminderung der zahlungsmittelgenerierenden Einheit den Buchwert des ihr zugeordneten Goodwills, ist die darüber hinausgehende Wertminderung durch anteilige Minderung von Buchwerten der der zahlungsmittelgenerierenden Einheit zugeordneten Vermögenswerte zu erfassen. Der erzielbare Betrag einer zahlungsmittelgenerierenden Einheit wird anhand ihres beizulegenden Zeitwerts abzüglich Veräußerungskosten ermittelt, sofern nicht ein höherer Nutzungswert bestimmt werden kann. Der beizulegende Zeitwert abzüglich Veräußerungskosten errechnet sich in der Regel unter Anwendung des Discounted-Cash Flow-(DCF)-Verfahrens. Diesen DCF-Berechnungen liegen Prognosen zugrunde, die auf den vom Management genehmigten Finanzplänen für zehn Jahre beruhen und auch für interne Zwecke verwendet werden. Der gewählte Planungshorizont spiegelt die Annahmen für kurz- bis mittelfristige Marktentwicklungen wider. Cashflows, die über den 10-Jahres-Zeitraum hinausgehen, werden anhand geeigneter Wachstumsraten berechnet. Zu den wesentlichen Annahmen, auf denen die Ermittlung des beizulegenden Zeitwerts abzüglich Veräußerungskosten durch das Management beruht, gehören Annahmen bezüglich Umsatzentwicklung, Kundengewinnung und Kosten für die Kundenbindung, Kündigungsrate, Investitionen, Marktanteil, Wachstumsraten sowie Diskontierungszinssatz. Die Cashflow-Berechnungen werden durch externe Informationsquellen abgesichert.

**Sachanlagen** werden zu Anschaffungs- oder Herstellungskosten, vermindert um planmäßige lineare Abschreibungen und ggf. Wertminderungen, bewertet. Die Abschreibungsdauer richtet sich nach der voraussichtlichen wirtschaftlichen Nutzungsdauer. Im Zugangsjahr werden Vermögenswerte des Sachanlagevermögens zeitanteilig abgeschrieben. Die Restbuchwerte, die Nutzungsdauern und die Abschreibungsmethode der Vermögenswerte werden mindestens an jedem Jahresabschlussstichtag überprüft; wenn die Erwartungen von den bisherigen Schätzungen abweichen, werden die entsprechenden Änderungen gemäß IAS 8 als Änderungen von Schätzungen bilanziert. Die Herstellungskosten der selbst erstellten Anlagen umfassen neben den direkt zurechenbaren Kosten auch anteilige Material- und Fertigungsgemeinkosten sowie produktions- bzw. leistungserstellungsbezogene Verwaltungskosten. Zu den Anschaffungs- oder Herstellungskosten zählen neben dem Kaufpreis und den direkt zurechenbaren Kosten, um den Vermögenswert zu dem Standort und in den erforderlichen, vom Management beabsichtigten, betriebsbereiten Zustand zu bringen, auch die geschätzten Kosten für den Abbruch und das Abräumen des Gegenstands und die Wiederherstellung des Standorts, an dem er sich befindet. Besteht ein Vermögenswert des Sachanlagevermögens aus mehreren Bestandteilen mit unterschiedlichen Nutzungsdauern, werden die einzelnen wesentlichen Bestandteile über ihre individuellen Nutzungsdauern abgeschrieben. Wartungs- und Reparaturkosten werden im Entstehungszeitpunkt als Aufwand erfasst. Vereinnahmte Investitionszuschüsse mindern die Anschaffungs- oder Herstellungskosten derjenigen Vermögenswerte, für die der Zuschuss gewährt wurde.

Bei Abgang eines Gegenstands des Sachanlagevermögens oder wenn kein weiterer wirtschaftlicher Nutzen aus seiner Nutzung oder seinem Abgang zu erwarten ist, wird der Buchwert des Gegenstands ausgebucht. Der Gewinn oder Verlust aus dem Abgang einer Sachanlage ist die Differenz zwischen dem Nettoveräußerungserlös und dem Buchwert des Gegenstands und wird im Zeitpunkt der Ausbuchung in den sonstigen betrieblichen Erträgen oder sonstigen betrieblichen Aufwendungen erfasst. Die Nutzungsdauern der wesentlichen Anlagenklassen sind in der folgenden Tabelle dargestellt:

|                                                                                                                                                                                    | Jahre     |
|------------------------------------------------------------------------------------------------------------------------------------------------------------------------------------|-----------|
| Gebäude                                                                                                                                                                            | 25 bis 50 |
| Einrichtungen der Fernsprechdienste und Endeinrichtungen                                                                                                                           | 3 bis 10  |
| Datenübermittlungseinrichtungen, Telefonnetz- und ISDN-Vermittlungseinrichtungen, Übertragungseinrichtungen, Funkeinrichtungen, technische Einrichtungen für Breitbandverteilnetze | 2 bis 12  |
| Breitbandverteilnetze, Liniennetze, Kabelkanallinien                                                                                                                               | 8 bis 35  |
| Andere Anlagen und Betriebs- und Geschäftsausstattung                                                                                                                              | 2 bis 23  |

Mietereinbauten werden entweder über ihre jeweilige Nutzungsdauer oder über die kürzere Laufzeit eines etwaigen Leasingverhältnisses abgeschrieben.



**Fremdkapitalkosten**, die direkt dem Erwerb, dem Bau oder der Herstellung eines qualifizierten Vermögenswerts zugeordnet werden können, werden als Teil der Anschaffungs- oder Herstellungskosten aktiviert. Die Deutsche Telekom definiert qualifizierte Vermögenswerte als Bauprojekte oder andere Vermögenswerte, für die notwendigerweise mindestens zwölf Monate erforderlich sind, um sie in ihren beabsichtigten gebrauchsfähigen Zustand zu versetzen. Fremdkapitalkosten für Vermögenswerte, die zum beizulegenden Zeitwert bewertet werden, und für Vorräte, die regelmäßig in großen Mengen hergestellt oder produziert werden, auch wenn der Zeitraum bis zum verkaufsfähigen Zustand wesentlich ist, werden nicht aktiviert.

**Wertminderungen von immateriellen Vermögenswerten und von Vermögenswerten des Sachanlagevermögens** werden durch den Vergleich des Buchwerts mit dem erzielbaren Betrag ermittelt. Können den einzelnen Vermögenswerten keine eigenen, von anderen Vermögenswerten unabhängig generierten künftigen Finanzmittelzuflüsse zugeordnet werden, ist die Werthaltigkeit auf Basis der übergeordneten zahlungsmittelgenerierenden Einheit von Vermögenswerten zu testen. An jedem Abschlussstichtag wird überprüft, ob Anhaltspunkte dafür vorliegen, dass ein Vermögenswert möglicherweise wertgemindert ist. Wenn ein solcher Anhaltspunkt vorliegt, ist der erzielbare Betrag des Vermögenswerts oder der zahlungsmittelgenerierenden Einheit zu bestimmen. Bei immateriellen Vermögenswerten mit unbegrenzter Nutzungsdauer (FCC-Lizenzen) wird darüber hinaus ein jährlicher Werthaltigkeitstest durchgeführt. Immaterielle Vermögenswerte mit unbegrenzter Nutzungsdauer werden nicht planmäßig abgeschrieben, sondern auf der Basis des erzielbaren Betrags einer zahlungsmittelgenerierenden Einheit auf eine mögliche Wertminderung untersucht. Soweit die Gründe für zuvor erfasste Wertminderungen entfallen sind, werden diese Vermögenswerte bis auf den Wert zugeschrieben, der sich ergeben hätte, wenn in den früheren Perioden keine Wertminderung erfasst worden wäre.

Der erzielbare Betrag der zahlungsmittelgenerierenden Einheiten wird in der Regel mithilfe eines Discounted-Cash Flow-(DCF)-Verfahrens ermittelt. Dabei werden Prognosen hinsichtlich der Cashflows angestellt, die über die geschätzte Nutzungsdauer des Vermögenswerts oder der zahlungsmittelgenerierenden Einheit erzielt werden. Der verwendete Abzinsungssatz berücksichtigt die mit dem Vermögenswert oder der zahlungsmittelgenerierenden Einheit verbundenen Risiken. Die ermittelten Cashflows spiegeln Annahmen des Managements wider und werden durch externe Informationsquellen abgesichert.

Das wirtschaftliche Eigentum an **Leasinggegenständen** wird demjenigen Vertragspartner in einem Leasingverhältnis zugerechnet, der die wesentlichen Chancen und Risiken trägt, die mit dem Leasinggegenstand verbunden sind. Trägt der Leasinggeber die wesentlichen Chancen und Risiken (Operating Lease), wird der Leasinggegenstand vom Leasinggeber in der Bilanz angesetzt. Die Bewertung des Leasinggegenstands richtet sich nach den für den Leasinggegenstand einschlägigen Bilanzierungsvorschriften.

Die Leasingraten werden erfolgswirksam erfasst. Der Leasingnehmer in einem Operating Lease erfasst während des Zeitraums des Leasingverhältnisses gezahlte Leasingraten erfolgswirksam. Vertraglich festgelegte zukünftige Veränderungen der Leasingraten während der Laufzeit werden über die gesamte nur einmal zum Datum des Vertragsabschlusses festgelegte Vertragslaufzeit gleichmäßig im Aufwand erfasst (Straight line lease). Im Fall von Verlängerungsoptionen wird zum Zeitpunkt des Abschlusses des Leasingverhältnisses zunächst die hinreichend sichere Inanspruchnahme von Verlängerungsoptionen berücksichtigt. Während des Leasingverhältnisses wird bei Bekanntwerden von Umständen, die zu einer Änderung der ursprünglichen Einschätzung der Inanspruchnahme von Verlängerungsoptionen führen könnten, eine entsprechende Schätzungsänderung für die Ermittlung der künftigen Verpflichtungen aus Operating-Leasinggeschäften vorgenommen.

Trägt der Leasingnehmer die wesentlichen Chancen und Risiken, die mit dem Eigentum am Leasinggegenstand verbunden sind (Finance Lease), so hat der Leasingnehmer den Leasinggegenstand in der Bilanz anzusetzen. Der Leasinggegenstand wird im Zugangszeitpunkt mit seinem beizulegenden Zeitwert oder dem niedrigeren Barwert der künftigen Mindestleasingzahlungen bewertet und über die geschätzte Nutzungsdauer oder die kürzere Vertragslaufzeit abgeschrieben. Die Abschreibung wird erfolgswirksam erfasst. Der Leasingnehmer setzt im Zugangszeitpunkt zugleich eine Leasingverbindlichkeit an, die in ihrer Höhe dem Buchwert des Leasinggegenstands entspricht. Die Leasingverbindlichkeit wird in den Folgeperioden nach der Effektivzinsmethode getilgt und fortgeschrieben. Der Leasinggeber in einem Finance Lease setzt eine Forderung in Höhe des Nettoinvestitionswerts aus dem Leasingverhältnis an. Die Leasingerträge werden in Tilgungen der Leasingforderung und Finanzerträge aufgeteilt. Die Forderung aus dem Leasingverhältnis wird nach der Effektivzinsmethode getilgt und fortgeschrieben.

Wenn eine Sale-and-Leaseback-Transaktion zu einem Finance Lease führt, wird ein Überschuss der Verkaufserlöse über den Buchwert abgegrenzt und über die Laufzeit des Leasingverhältnisses erfolgswirksam erfasst.

**Sonstige langfristige Forderungen** werden unter Anwendung der Effektivzinsmethode mit den fortgeführten Anschaffungskosten bewertet.

Zur **Veräußerung gehaltene langfristige Vermögenswerte und Veräußerungsgruppen** werden als solche klassifiziert, wenn der zugehörige Buchwert überwiegend durch ein Veräußerungsgeschäft und nicht durch fortgesetzte Nutzung realisiert wird. Diese Vermögenswerte werden mit dem niedrigeren Wert aus Buchwert oder beizulegendem Zeitwert abzüglich Veräußerungskosten bewertet und werden als „zur Veräußerung gehaltene langfristige Vermögenswerte und Veräußerungsgruppen“ klassifiziert.

Diese Vermögenswerte werden nicht mehr planmäßig abgeschrieben. Wertminderungen werden für diese Vermögenswerte grundsätzlich nur dann erfasst, wenn der beizulegende Zeitwert abzüglich Veräußerungskosten unterhalb des Buchwerts liegt. Im Fall einer späteren Erhöhung des beizulegenden Zeitwerts abzüglich Veräußerungskosten ist die zuvor erfasste Wertminderung rückgängig zu machen. Die Zuschreibung ist auf die zuvor für die betreffenden Vermögenswerte erfassten Wertminderungen begrenzt. Sind die Voraussetzungen zur Klassifizierung von Vermögenswerten als „zur Veräußerung gehalten“ nicht mehr erfüllt, sind die Vermögenswerte nicht mehr als zur Veräußerung gehalten auszuweisen. Die Vermögenswerte sind zu bewerten mit dem niedrigeren Wert aus dem Buchwert, der sich ergeben hätte, wenn der Vermögenswert nicht als zur Veräußerung gehalten klassifiziert worden wäre, und dem erzielbaren Betrag zum Zeitpunkt, zu dem die Voraussetzungen zur Klassifizierung als „zur Veräußerung gehalten“ nicht mehr erfüllt sind.

**Vorräte** werden zum niedrigeren Wert aus Nettoveräußerungswert und Anschaffungs- oder Herstellungskosten bewertet. Zu den Anschaffungs- oder Herstellungskosten zählen alle Kosten des Erwerbs und der Herstellung sowie sonstige Kosten, die angefallen sind, um die Vorräte an ihren derzeitigen Ort und in ihren derzeitigen Zustand zu versetzen. Anschaffungs- oder Herstellungskosten werden nach der Durchschnittskostenmethode ermittelt. Der Nettoveräußerungswert ist der geschätzte, im normalen Geschäftsgang erzielbare Verkaufserlös abzüglich der geschätzten Kosten bis zur Fertigstellung und der geschätzten notwendigen Vertriebskosten. Die Deutsche Telekom verkauft Endgeräte separat sowie in Verbindung mit Dienstleistungsverträgen. Als Teil der Strategie zur Gewinnung neuer Kunden verkauft das Unternehmen gelegentlich Endgeräte in Verbindung mit einem Dienstleistungsvertrag zu einem Preis, der unter den Anschaffungskosten liegt. Da die Endgerätesubvention Teil der Unternehmensstrategie zur Gewinnung neuer Kunden ist, wird dieser Verlust aus dem Endgeräteverkauf zum Zeitpunkt des Verkaufs erfasst und grundsätzlich unter den Umsatzkosten ausgewiesen.

**Finanzielle Vermögenswerte** werden bei ihrem erstmaligen Ansatz mit dem beizulegenden Zeitwert bewertet. Dabei sind bei allen finanziellen Vermögenswerten, die in der Folge nicht erfolgswirksam zum beizulegenden Zeitwert bewertet werden, die dem Erwerb direkt zurechenbaren Transaktionskosten zu berücksichtigen. Die in der Bilanz angesetzten beizulegenden Zeitwerte entsprechen in der Regel den Marktpreisen der finanziellen Vermögenswerte. Sofern diese nicht unmittelbar verfügbar sind, werden sie unter Anwendung anerkannter Bewertungsmodelle und unter Rückgriff auf aktuelle Marktparameter berechnet. Dazu werden die bereits fixierten oder unter Anwendung der aktuellen Zinsstrukturkurve über Forward-Rates ermittelten Cashflows mit den aus der am Stichtag gültigen Zinsstrukturkurve bestimmten Diskontfaktoren auf den Bewertungsstichtag diskontiert. Zur Anwendung kommen die Mittelkurse.

**Forderungen aus Lieferungen und Leistungen sowie andere kurzfristige Forderungen** werden – ggf. unter Anwendung der Effektivzinsmethode – mit dem Buchwert im Zeitpunkt des Zugangs abzüglich Wertminderungen bewertet. Die Wertminderungen, welche in Form von Einzelwertberichtigungen vorgenommen werden, tragen den erwarteten Ausfallrisiken hinreichend Rechnung; konkrete Ausfälle führen zur Ausbuchung der betreffenden Forderungen. Im Rahmen von Einzelwertberichtigungen werden finanzielle Vermögenswerte, für welche ein potenzieller Abwertungsbedarf besteht, anhand gleichartiger Ausfallrisikoeigenschaften gruppiert und gemeinsam auf Wertminderungen untersucht sowie ggf. wertberichtigt. Bei der dazu notwendigen Ermittlung der erwarteten künftigen Cashflows der Portfolios werden neben den vertraglich vorgesehenen Zahlungsströmen auch historische Ausfallerfahrungen berücksichtigt. Die Cashflows werden auf Basis des gewichteten Durchschnitts der ursprünglichen Effektivzinssätze der im jeweiligen Portfolio enthaltenen finanziellen Vermögenswerte abgezinst.

**Wertminderungen von Forderungen aus Lieferungen und Leistungen** werden teilweise unter Verwendung von Wertberichtigungskonten vorgenommen. Die Entscheidung, ob ein Ausfallrisiko mittels eines Wertberichtigungskontos oder über eine direkte Minderung der Forderung berücksichtigt wird, hängt vom Grad der Verlässlichkeit der Beurteilung der Risikosituation ab. Aufgrund unterschiedlicher operativer Segmente sowie unterschiedlicher regionaler Rahmenbedingungen obliegt diese Beurteilung den einzelnen Portfolioverantwortlichen.

**Zahlungsmittel und Zahlungsmitteläquivalente**, welche Geldkonten und kurzfristige Geldanlagen bei Kreditinstituten einschließen, haben beim Zugang eine Restlaufzeit von bis zu drei Monaten und werden mit den fortgeführten Anschaffungskosten bewertet.

Der Konzern unterhält in verschiedenen Ländern **leistungsorientierte Altersversorgungssysteme** (Defined Benefit Pension Plans) auf der Grundlage der ruhegehaltsfähigen Vergütung der Mitarbeiter und ihrer Dienstzeiten. Diese Versorgungssysteme werden teilweise über externe Pensionsfonds finanziert. Die Bewertung der **Pensionsrückstellungen** erfolgt nach den vorgeschriebenen versicherungsmathematischen Anwartschaftsbarwertverfahren (Projected Unit Credit Method) für leistungsorientierte Altersversorgungspläne. Dabei werden sowohl die am Abschlussstichtag bekannten Renten und erworbenen Anwartschaften als auch die künftig zu erwartenden Steigerungen der Gehälter und Renten berücksichtigt. Der Zinssatz zur Ermittlung des Barwerts der Verpflichtungen wird auf der Grundlage der Renditen für erstrangige festverzinsliche Unternehmensanleihen des jeweiligen Währungsraums ermittelt. In Ländern ohne liquiden Markt für solche Anleihen werden stattdessen Schätzungen auf der Basis von Renditen für Staatsanleihen verwendet. Versicherungsmathematische Gewinne und Verluste aus Anpassungen und Änderungen von versicherungsmathematischen Annahmen werden in der Periode, in der sie entstehen, erfolgsneutral im Eigenkapital erfasst (Gewinnrücklagen).

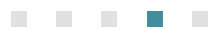

Die Erträge aus dem Planvermögen und Aufwendungen aus der Aufzinsung der Verpflichtungen werden im Zinsergebnis ausgewiesen. Der Dienstzeitaufwand wird als betrieblicher Aufwand klassifiziert. Der nachzuverrechnende Dienstzeitaufwand wird erfasst, sofern die Anwartschaften unverfallbar sind; anderenfalls werden sie linear über den durchschnittlich verbleibenden Erdienungszeitraum vereinnahmt.

Leistungsorientierte Versorgungszusagen des Konzerns beziehen sich im Wesentlichen auf Versorgungssysteme in Deutschland. Darüber hinaus existieren Versorgungspläne in der Schweiz, in Griechenland und in einigen anderen Ländern der Europäischen Union.

Die Versorgungsverpflichtungen des Konzerns in Deutschland gegenüber nicht beamteten Arbeitnehmern beruhen auf unmittelbaren und auf mittelbaren Versorgungszusagen; darüber hinaus bestehen Verpflichtungen gemäß Artikel 131 des Grundgesetzes (GG). Seit 1996 beruhen die Versorgungszusagen in Deutschland auf direkten Pensionszusagen in Form von Gutschriften auf arbeitnehmerbezogenen Kapitalkonten. Im Rahmen einer Neuordnung der betrieblichen Altersversorgung im Jahr 1997 wurden Altzusagen unter Wahrung einer vereinbarten Besitzstandsregelung in diese Kapitalkonten überführt. Die Ansprüche von Rentnern und rentennahen Jahrgängen wurden unverändert fortgeführt.

Einzelne Konzerngesellschaften gewähren ihren Mitarbeitern **beitragsorientierte Zusagen** (Defined Contribution Plans). Bei beitragsorientierten Versorgungsplänen geht der Arbeitgeber über die Entrichtung von Beitragszahlungen an einen externen Versorgungsträger hinaus keine weiteren Verpflichtungen ein. Die Höhe der zukünftigen Pensionsleistungen richtet sich ausschließlich nach der Höhe der Beiträge, die der Arbeitgeber (und ggf. auch dessen Arbeitnehmer) an den externen Versorgungsträger gezahlt hat, einschließlich der Erträge aus der Anlage dieser Beiträge. Die zu zahlenden Beträge werden aufwandswirksam erfasst, wenn die Verpflichtung zur Zahlung der Beträge entsteht, und als Bestandteil der betrieblichen Aufwendungen ausgewiesen.

**Pensionsregelungen für Beamte der Deutschen Telekom.** Nach den Vorschriften des Postneuordnungsgesetzes (PTNeuOG) erbringt der BPS-PT (Bundes-Pensions-Service für Post und Telekommunikation e.V. für aktive und früher beamtete Mitarbeiter) Versorgungs- und Beihilfeleistungen an im Ruhestand befindliche Mitarbeiter und deren Hinterbliebene, denen aus einem Beamtenverhältnis Versorgungsleistungen zustehen. Die Höhe der Zahlungsverpflichtungen der Deutschen Telekom AG an ihre Unterstützungskasse ist in § 16 Postpersonalrechtsgesetz geregelt. Die Deutsche Telekom AG ist gesetzlich verpflichtet, seit dem Jahr 2000 einen jährlichen Beitrag in Höhe von 33 % der Bruttobezüge der aktiven und der fiktiven Bruttobezüge der ruhegehaltstfähigen beurlaubten Beamten an die Unterstützungskasse zu leisten.

**Altersteilzeitvereinbarungen** basieren überwiegend auf dem sog. Blockmodell. In diesem Zusammenhang entstehen zwei Arten von Verpflichtungen, die jeweils in Übereinstimmung mit versicherungsmathematischen Grundsätzen mit ihrem Barwert bewertet werden und getrennt voneinander bilanziert werden: Die erste Verpflichtungsart bezieht sich auf den kumulierten ausstehenden Erfüllungsbetrag, der anteilig über die Laufzeit der Aktiv-/Arbeitsphase erfasst wird. Der kumulierte ausstehende Erfüllungsbetrag basiert auf der Differenz zwischen der Vergütung des Arbeitnehmers vor Beginn der Altersteilzeitvereinbarung (einschließlich des Arbeitgeberanteils an den Sozialversicherungsbeiträgen) und der Vergütung für die Teilzeitbeschäftigung (einschließlich des Arbeitgeberanteils an den Sozialversicherungsbeiträgen, jedoch ohne Berücksichtigung der Aufstockungsbeträge). Die zweite Verpflichtungsart bezieht sich auf die Verpflichtung des Arbeitgebers zur Leistung von Aufstockungsbeträgen zuzüglich eines weiteren Beitrags zur gesetzlichen Rentenversicherung und wird unmittelbar bei Entstehen der Verpflichtung in voller Höhe erfasst.

**Rückstellungen für Abfindungen für Angestellte und Rückstellungen im Zusammenhang mit der Regelung zum vorzeitigen Ruhestand für Beamte** werden angesetzt, wenn die Deutsche Telekom nachweislich zur Erbringung dieser Leistungen verpflichtet ist. Dies ist der Fall, wenn die Deutsche Telekom einen detaillierten formalen Plan für die Beendigung des Beschäftigungsverhältnisses besitzt und keine realistische Möglichkeit hat, sich dem zu entziehen. Die Leistungen aus Anlass der Beendigung von Beschäftigungsverhältnissen werden auf der Basis der Anzahl von Beschäftigten, die voraussichtlich betroffen sein werden, bewertet. Sind die Leistungen mehr als zwölf Monate nach dem Abschlussstichtag fällig, ist der erwartete Erfüllungsbetrag auf den Abschlussstichtag abzuzinsen.

**Sonstige Rückstellungen** werden angesetzt, soweit rechtliche oder faktische Verpflichtungen gegenüber Dritten bestehen, die auf zurückliegenden Geschäftsvorfällen oder Ereignissen beruhen und wahrscheinlich zu Vermögensabflüssen führen, die zuverlässig ermittelbar sind. Diese Rückstellungen werden unter Berücksichtigung aller erkennbaren Risiken zum voraussichtlichen Erfüllungsbetrag bewertet und dürfen nicht mit Erstattungen verrechnet werden. Der Erfüllungsbetrag wird auf der Basis einer bestmöglichen Schätzung berechnet. Rückstellungen werden abgezinst, wenn der Effekt hieraus wesentlich ist. Änderungen der Schätzungen der Höhe oder des zeitlichen Anfalls von Auszahlungen oder Änderungen des Zinssatzes zur Bewertung von Rückstellungen für Entsorgungs-, Wiederherstellungs- und ähnlichen Verpflichtungen werden entsprechend der Veränderung des Buchwerts des korrespondierenden Vermögenswerts erfasst. Für den Fall, dass eine Minderung der Rückstellung den Buchwert des korrespondierenden Vermögenswerts überschreitet, ist der überschüssige Betrag unmittelbar erfolgswirksam als Ertrag zu erfassen. Für externe Rechtsberatungsgebühren im Zusammenhang mit Prozessrisiken werden Rückstellungen gebildet.

**Erfolgsunsicherheiten (Eventualschulden und -forderungen)** sind mögliche Verpflichtungen oder Vermögenswerte, die aus Ereignissen der Vergangenheit resultieren und deren Existenz durch das Eintreten oder Nichteintreten eines oder mehrerer unsicherer künftiger Ereignisse bedingt ist, die nicht vollständig unter Kontrolle der Deutschen Telekom stehen. Eventualschulden sind zudem gegenwärtige Verpflichtungen, die aus Ereignissen der Vergangenheit resultieren, bei denen der Abfluss von Ressourcen, die wirtschaftlichen Nutzen verkörpern, unwahrscheinlich ist oder bei denen der Umfang der Verpflichtung nicht verlässlich geschätzt werden kann. Eventualschulden werden zu ihrem beizulegenden Zeitwert angesetzt, wenn sie im Rahmen eines Unternehmenserwerbs übernommen wurden. Nicht im Rahmen eines Unternehmenserwerbs übernommene Eventualschulden werden nicht angesetzt. Eventualforderungen werden nicht angesetzt. Ist die Realisation von Erträgen jedoch so gut wie sicher, ist der betreffende Vermögenswert nicht mehr als Eventualforderung anzusehen und wird als Vermögenswert angesetzt. Sofern ein Abfluss von Ressourcen mit wirtschaftlichem Nutzen nicht unwahrscheinlich ist, werden im Konzern-Anhang Angaben zu Eventualschulden gemacht. Gleiches gilt für Eventualforderungen, sofern der Zufluss wirtschaftlichen Nutzens wahrscheinlich ist.

Ein **Finanzinstrument** ist ein Vertrag, der gleichzeitig bei einem Unternehmen zur Entstehung eines finanziellen Vermögenswerts und bei einem anderen Unternehmen zur Entstehung einer finanziellen Verbindlichkeit oder eines Eigenkapitalinstruments führt. Finanzielle Vermögenswerte umfassen insbesondere Zahlungsmittel und Zahlungsmitteläquivalente, Forderungen aus Lieferungen und Leistungen sowie sonstige ausgereichte Kredite und Forderungen, bis zur Endfälligkeit gehaltene Finanzinvestitionen und zu Handelszwecken gehaltene originäre und derivative finanzielle Vermögenswerte. Finanzielle Verbindlichkeiten begründen regelmäßig einen Rückgabeanspruch in Zahlungsmitteln oder einem anderen finanziellen Vermögenswert. Darunter fallen insbesondere Anleihen und sonstige verbrieftete Verbindlichkeiten, Verbindlichkeiten aus Lieferungen und Leistungen, Verbindlichkeiten gegenüber Kreditinstituten, Verbindlichkeiten aus Finanzierungsleasingverhältnissen, Verbindlichkeiten gegenüber Nicht-Kreditinstituten aus Schuldscheindarlehen und derivative Finanzverbindlichkeiten. Finanzinstrumente werden angesetzt, sobald die Deutsche Telekom Vertragspartei der Regelungen des Finanzinstruments wird. Bei marktüblichen Käufen oder Verkäufen (Käufe oder Verkäufe im Rahmen eines Vertrags, dessen Bedingungen die Lieferung des Vermögenswerts innerhalb eines Zeitraums vorsehen, der üblicherweise durch Vorschriften oder Konventionen des jeweiligen Markts festgelegt wird) ist für die erstmalige bilanzielle Erfassung sowie den bilanziellen Abgang allerdings der Erfüllungstag relevant, d. h. der Tag, an dem der Vermögenswert an oder durch die Deutsche Telekom geliefert wird. Finanzielle Vermögenswerte und finanzielle Verbindlichkeiten werden in der Regel

unsaldiert ausgewiesen; sie werden nur dann saldiert, wenn bezüglich der Beträge zum gegenwärtigen Zeitpunkt ein Aufrechnungsrecht besteht und beabsichtigt wird, den Ausgleich auf Nettobasis herbeizuführen. Sofern Verträge zum Kauf oder Verkauf nicht finanzieller Vermögenswerte in den Anwendungsbereich von IAS 39 fallen, werden sie gemäß den Regelungen dieses Standards bilanziert.

**Zu Handelszwecken gehaltene finanzielle Vermögenswerte** werden mit dem beizulegenden Zeitwert bewertet. Darunter fallen primär derivative Finanzinstrumente, die nicht in eine wirksame Sicherungsbeziehung gemäß IAS 39 eingebunden sind und damit zwingend als „zu Handelszwecken gehalten“ klassifiziert werden müssen. Ein aus der Folgebewertung resultierender Gewinn oder Verlust wird erfolgswirksam in der Gewinn- und Verlustrechnung erfasst.

Bei bestimmten Finanzinvestitionen ist sowohl beabsichtigt als auch wirtschaftlich mit hinreichender Verlässlichkeit zu erwarten, dass diese **bis zur Endfälligkeit** gehalten werden. Diese finanziellen Vermögenswerte werden unter Anwendung der Effektivzinsmethode mit den fortgeführten Anschaffungskosten bewertet.

Die anderen originären finanziellen Vermögenswerte sind als „**zur Veräußerung verfügbar**“ kategorisiert und werden grundsätzlich mit dem beizulegenden Zeitwert bewertet. Die aus der Bewertung mit dem beizulegenden Zeitwert in der Folge resultierenden Gewinne und Verluste werden erfolgsneutral im Eigenkapital erfasst. Dies gilt nicht, wenn es sich um dauerhafte oder wesentliche Wertminderungen sowie um währungsbedingte Wertänderungen von Fremdkapitalinstrumenten handelt, die erfolgswirksam erfasst werden. Erst mit dem Abgang der finanziellen Vermögenswerte werden die im Eigenkapital erfassten kumulierten Gewinne und Verluste aus der Bewertung zum beizulegenden Zeitwert erfolgswirksam in der Gewinn- und Verlustrechnung erfasst. Lässt sich für nicht börsennotierte Eigenkapitalinstrumente der Zeitwert nicht hinreichend verlässlich bestimmen, werden die Anteile mit den Anschaffungskosten (ggf. abzüglich Wertminderungen) bewertet.

Von der Möglichkeit, finanzielle Vermögenswerte bei ihrem erstmaligen Ansatz als erfolgswirksam zum beizulegenden Zeitwert zu bewertende finanzielle Vermögenswerte (**Financial Assets at Fair Value Through Profit or Loss**) zu designieren, hat die Deutsche Telekom bislang keinen Gebrauch gemacht.



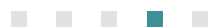

Zu jedem Abschlussstichtag werden die Buchwerte der finanziellen Vermögenswerte, die nicht erfolgswirksam mit dem beizulegenden Zeitwert zu bewerten sind, daraufhin untersucht, ob objektive substanzielle Hinweise (wie etwa erhebliche finanzielle Schwierigkeiten des Schuldners, die hohe Wahrscheinlichkeit eines Insolvenzverfahrens gegen den Schuldner, der Wegfall eines aktiven Markts für den finanziellen Vermögenswert, eine bedeutende Veränderung des technologischen, ökonomischen, rechtlichen Umfelds sowie des Marktumfelds des Emittenten, ein andauernder Rückgang des beizulegenden Zeitwerts des finanziellen Vermögenswerts unter die fortgeführten Anschaffungskosten) auf eine **Wertminderung** hindeuten. Ein etwaiger Wertminderungsaufwand, welcher sich durch einen im Vergleich zum Buchwert geringeren beizulegenden Zeitwert begründet, wird erfolgswirksam erfasst. Wurden Wertminderungen der beizulegenden Zeitwerte von zur Veräußerung verfügbaren finanziellen Vermögenswerten bisher erfolgsneutral im Eigenkapital erfasst, so sind diese bis zur Höhe der ermittelten Wertminderung aus dem Eigenkapital zu eliminieren und erfolgswirksam in der Gewinn- und Verlustrechnung zu erfassen. Ergibt sich zu späteren Bewertungszeitpunkten, dass der beizulegende Zeitwert infolge von Ereignissen, die nach dem Zeitpunkt der Erfassung der Wertminderung eingetreten sind, objektiv gestiegen ist, werden die Wertminderungen in entsprechender Höhe zurückgenommen. Bei Schuldinstrumenten wird diese Wertaufholung erfolgswirksam erfasst. Wertminderungen, die als zur Veräußerung verfügbare und mit den Anschaffungskosten bilanzierte nicht börsennotierte Eigenkapitalinstrumente betreffen, dürfen nicht rückgängig gemacht werden. Der im Rahmen der Prüfung auf etwaige Wertminderungen zu bestimmende beizulegende Zeitwert von Wertpapieren, die bis zur Endfälligkeit zu halten sind, sowie der beizulegende Zeitwert der mit den fortgeführten Anschaffungskosten bewerteten Kredite und Forderungen entsprechen dem Barwert der geschätzten und mit dem ursprünglichen Effektivzinssatz diskontierten künftigen Cashflows. Der beizulegende Zeitwert von mit den Anschaffungskosten bewerteten nicht börsennotierten Eigenkapitalinstrumenten ergibt sich als Barwert der erwarteten künftigen Cashflows, diskontiert mit dem aktuellen Zinssatz, welcher der speziellen Risikolage der Investition entspricht.

**Finanzielle Verbindlichkeiten** werden bei ihrem erstmaligen Ansatz mit dem beizulegenden Zeitwert bewertet. Die dem Erwerb direkt zurechenbaren Transaktionskosten werden bei allen finanziellen Verbindlichkeiten, die in der Folge nicht als erfolgswirksam zum beizulegenden Zeitwert bewertet werden, ebenfalls angesetzt.

**Verbindlichkeiten aus Lieferungen und Leistungen sowie sonstige originäre finanzielle Verbindlichkeiten** werden grundsätzlich unter Anwendung der Effektivzinsmethode mit den fortgeführten Anschaffungskosten bewertet.

Bei den finanziellen Verbindlichkeiten hat der Konzern von der Anwendung des Wahlrechts, diese bei ihrer erstmaligen bilanziellen Erfassung als erfolgswirksam zum beizulegenden Zeitwert zu bewertende finanzielle Verbindlichkeiten (**Financial Liabilities at Fair Value Through Profit or Loss**) zu designieren, bisher keinen Gebrauch gemacht.

Nicht in eine wirksame Sicherungsbeziehung gemäß IAS 39 eingebundene derivative Finanzinstrumente sind zwingend als „zu Handelszwecken gehalten“ einzustufen und damit erfolgswirksam mit den beizulegenden Zeitwerten zu bewerten. Sind die beizulegenden Zeitwerte negativ, führt dies zum Ansatz unter den finanziellen Verbindlichkeiten.

Die Deutsche Telekom setzt **derivative Finanzinstrumente** zur Absicherung der aus operativen Tätigkeiten, Finanztransaktionen und Investitionen resultierenden Zins- und Währungsrisiken ein.

Zu Spekulationszwecken werden derivative Finanzinstrumente weder gehalten noch begeben.

Die derivativen Finanzinstrumente werden bei ihrer erstmaligen Erfassung mit dem beizulegenden Zeitwert angesetzt. Die Zeitwerte sind auch für die Folgebewertungen relevant. Der beizulegende Zeitwert gehandelter derivativer Finanzinstrumente entspricht dem Marktwert. Dieser Wert kann positiv oder negativ sein. Liegen keine Marktwerte vor, müssen die Zeitwerte mittels anerkannter finanzmathematischer Modelle berechnet werden.

Für derivative Finanzinstrumente entspricht der beizulegende Zeitwert dem Betrag, den die Deutsche Telekom bei Beendigung des Finanzinstruments zum Abschlussstichtag entweder erhalten würde oder zahlen müsste. Dieser wird unter Anwendung der zum Abschlussstichtag relevanten Wechselkurse und Zinssätze der Vertragspartner berechnet. Für die Berechnungen werden Mittelkurse verwendet. Bei zinstragenden derivativen Finanzinstrumenten wird zwischen dem „Clean Price“ und dem „Dirty Price“ unterschieden. Im Unterschied zum „Clean Price“ umfasst der „Dirty Price“ auch die abgegrenzten Stückzinsen. Die angesetzten beizulegenden Zeitwerte entsprechen dem „Full Fair Value“ bzw. dem „Dirty Price“.

Für die Erfassung der Veränderungen der beizulegenden Zeitwerte – erfolgswirksame Erfassung in der Gewinn- und Verlustrechnung oder erfolgsneutrale Erfassung im Eigenkapital – ist entscheidend, ob das derivative Finanzinstrument in eine wirksame Sicherungsbeziehung gemäß IAS 39 eingebunden ist. Liegen keine **Sicherungsgeschäfte** (Hedge Accounting) gemäß IAS 39 vor, sind die Veränderungen der beizulegenden Zeitwerte der derivativen Finanzinstrumente sofort erfolgswirksam zu erfassen. Besteht hingegen eine wirksame Sicherungsbeziehung gemäß IAS 39, wird der Besicherungszusammenhang als solcher bilanziert.

Die Deutsche Telekom wendet Vorschriften zu Hedge Accounting zur Sicherung von Bilanzposten und künftigen Zahlungsströmen an. Dies mindert Volatilitäten in der Gewinn- und Verlustrechnung. Nach Art des abgesicherten Grundgeschäfts ist zwischen „Fair Value Hedge“, „Cash Flow Hedge“ und „Hedge of a Net Investment in a Foreign Operation“ zu unterscheiden.

Ein **Fair Value Hedge** dient der Besicherung der beizulegenden Zeitwerte von in der Bilanz angesetzten Vermögenswerten, in der Bilanz angesetzten Verbindlichkeiten oder noch nicht in der Bilanz angesetzten festen Verpflichtungen. Jede Veränderung des beizulegenden Zeitwerts des als Sicherungsinstrument eingesetzten Derivats ist erfolgswirksam in der Gewinn- und Verlustrechnung zu erfassen; der Buchwert des Grundgeschäfts ist um den auf das besicherte Risiko entfallenden Gewinn oder Verlust erfolgswirksam anzupassen (Basis Adjustment). Die Anpassungen des Buchwerts werden erst ab Auflösung der Hedge-Beziehung amortisiert.

Mittels eines **Cash Flow Hedge** werden künftige Zahlungsströme aus in der Bilanz angesetzten Vermögenswerten und Verbindlichkeiten, aus festen Verpflichtungen (im Fall von Währungsrisiken) oder aus mit hoher Wahrscheinlichkeit eintretenden geplanten Transaktionen gegen Schwankungen abgesichert. Zur Absicherung des Währungsrisikos einer bilanzunwirksamen festen Verpflichtung nutzt die Deutsche Telekom das Wahlrecht und bilanziert diese nicht als Fair Value Hedge, sondern als Cash Flow Hedge. Liegt ein Cash Flow Hedge vor, wird der effektive Teil der Wertänderung des Sicherungsinstruments bis zur Erfassung des Ergebnisses aus dem gesicherten Grundgeschäft erfolgsneutral im Eigenkapital (Sicherungsrücklage) erfasst; der ineffektive Teil der Wertänderung des Sicherungsinstruments ist erfolgswirksam zu erfassen. Führt die Absicherung einer erwarteten Transaktion später zur Erfassung von finanziellen oder nicht finanziellen Vermögenswerten bzw. Verbindlichkeiten, so verbleiben die mit der Sicherungsmaßnahme verbundenen kumulierten Gewinne und Verluste zunächst im Eigenkapital und sind später in denselben Perioden erfolgswirksam zu erfassen, in denen der erworbene finanzielle Vermögenswert bzw. die übernommene finanzielle Verbindlichkeit das Periodenergebnis beeinflusst. Die Deutsche Telekom hat sich somit bei der Absicherung von geplanten Transaktionen mit Entstehung von nicht finanziellen Bilanzposten gegen das Wahlrecht zur Anpassung des Erstbuchwerts (Basis Adjustment) entschieden.

Wird eine Nettoinvestition in eine ausländische Einheit durch einen **Hedge of a Net Investment in a Foreign Operation** besichert, werden alle Wertänderungen des effektiven Teils des eingesetzten Sicherungsinstruments gemeinsam mit dem Ergebnis aus der Fremdwährungsumrechnung der besicherten Investition erfolgsneutral im Eigenkapital erfasst; auf den ineffektiven Teil entfallende Gewinne und Verluste werden sofort erfolgswirksam erfasst. Erst mit dem Abgang des Investments werden die zuvor kumuliert im Eigenkapital erfassten Bewertungsänderungen des Sicherungsinstruments und die Umrechnungsergebnisse des Grundgeschäfts erfolgswirksam in der Gewinn- und Verlustrechnung erfasst.

IAS 39 stellt strenge Anforderungen an die Anwendung des Hedge Accounting. Diese werden von der Deutschen Telekom wie folgt erfüllt: Bei Beginn einer Sicherungsmaßnahme werden sowohl die Beziehung zwischen dem als Sicherungsinstrument eingesetzten Finanzinstrument und dem Grundgeschäft als auch Ziel sowie Strategie der Absicherung dokumentiert. Dazu zählen sowohl die konkrete Zuordnung der Absicherungsinstrumente zu den entsprechenden Vermögenswerten bzw. Verbindlichkeiten oder (fest vereinbarten/erwarteten) künftigen Transaktionen als auch die Einschätzung des Grads der Wirksamkeit der eingesetzten Absicherungsinstrumente. Bestehende Sicherungsmaßnahmen werden fortlaufend auf ihre Effektivität hin überwacht; wird ein Hedge ineffektiv, wird er umgehend aufgelöst.

Die Deutsche Telekom führt auch Sicherungsmaßnahmen durch, die nicht die strengen Anforderungen des IAS 39 an die Anwendung des Hedge Accounting erfüllen, jedoch gemäß den Grundsätzen des Risikomanagements effektiv zur Sicherung des finanziellen Risikos beitragen. Zur Absicherung von Fremdwährungsrisiken bilanzierter monetärer Vermögenswerte und Verbindlichkeiten wendet die Deutsche Telekom ebenfalls kein Hedge Accounting gemäß IAS 39 an, da die aus der Währungsumrechnung gemäß IAS 21 erfolgswirksam zu realisierenden Gewinne und Verluste der Grundgeschäfte in der Erfolgsrechnung gleichzeitig mit den Gewinnen und Verlusten aus den als Sicherungsinstrumente eingesetzten Derivaten gezeigt werden.

**Aktioptionen** (aktienbasierte Vergütungstransaktionen mit Ausgleich durch Eigenkapitalinstrumente) werden im Zeitpunkt der Gewährung mit dem beizulegenden Zeitwert bewertet. Der beizulegende Zeitwert der Verpflichtung wird über den Erdienungszeitraum als Personalaufwand erfasst. Ausübungsbedingungen, die nicht an Marktverhältnisse gebunden sind, werden in den Annahmen zur Anzahl von Optionen berücksichtigt, für die eine Ausübung erwartet wird. Die Verpflichtungen aus aktienbasierten Vergütungstransaktionen mit Barausgleich werden als Verbindlichkeit angesetzt und am Abschlussstichtag zum beizulegenden Zeitwert bewertet. Die Aufwendungen werden über den Erdienungszeitraum erfasst. Der beizulegende Zeitwert wird sowohl bei aktienbasierten Vergütungstransaktionen mit Ausgleich durch Eigenkapitalinstrumente als auch bei aktienbasierten Vergütungstransaktionen mit Barausgleich mit international anerkannten Bewertungsverfahren ermittelt, z. B. dem Black-Scholes-Modell oder dem Monte-Carlo-Modell.

Die **Umsatzerlöse** enthalten alle Erlöse, die aus der typischen Geschäftstätigkeit der Deutschen Telekom resultieren. Die Umsatzerlöse werden ohne Umsatzsteuer und sonstige bei den Kunden erhobene und an die Steuerbehörden abgeführte Steuern ausgewiesen. Sie werden zeitraumbezogen nach dem Realisationsprinzip erfasst. Bereitstellungsentgelte werden über die geschätzte durchschnittliche Kundenbindungsdauer abgegrenzt, es sei denn, sie sind Teil eines Mehrkomponentenvertrags;



in diesem Fall sind sie Bestandteil des vom Kunden zu entrichtenden Entgelts für das Mehrkomponentengeschäft. Kosten der Bereitstellung und mit der Gewinnung von Kunden verbundene Kosten werden bis zu dem Betrag der abgegrenzten Bereitstellungsentgelte abgegrenzt und über die durchschnittliche Kundenbindungsdauer erfasst.

Bei **Mehrkomponentenverträgen** ist die Umsatzerfassung für jede der identifizierten Bewertungseinheiten (Komponenten) gesondert zu bestimmen. Hierbei wird der Umsatz auf Basis der beizulegenden Zeitwerte der einzelnen Komponenten realisiert. Vereinbarungen, die die Lieferung von gebündelten Produkten bzw. die Erbringung von gebündelten Dienstleistungen enthalten, sind in einzelne Komponenten zu trennen, wobei für jede Komponente ein gesonderter Erlösbeitrag zu bestimmen ist. Der Preis für das gesamte Mehrkomponentengeschäft wird auf der Grundlage der anteiligen beizulegenden Zeitwerte auf die verschiedenen Komponenten aufgeteilt (d. h., der beizulegende Zeitwert jeder einzelnen Komponente wird ins Verhältnis zum gesamten beizulegenden Zeitwert der gebündelten Leistungen gesetzt). Der anteilige beizulegende Zeitwert einer einzelnen Komponente und damit der realisierte Umsatz für diese Bewertungseinheit wird jedoch durch den Teil der vom Kunden zu erbringenden Gegenleistung für das gesamte Mehrkomponentengeschäft begrenzt, dessen Zahlung nicht von der Erbringung weiterer Leistungen abhängig ist. Wenn der beizulegende Zeitwert der erbrachten Einzelleistungen nicht verlässlich bestimmt werden kann, aber der beizulegende Zeitwert der nicht erbrachten Einzelleistungen verlässlich bestimmt werden kann, wird zur Aufteilung des Gesamtpreises für das Mehrkomponentengeschäft der beizulegende Zeitwert der erbrachten Leistungen als Differenz zwischen der vom Kunden zu erbringenden Gegenleistung für das gesamte Mehrkomponentengeschäft und den verlässlich bestimmbar beizulegenden Zeitwerten der nicht erbrachten Einzelleistungen bestimmt.

Zahlungen an Kunden einschließlich Zahlungen an Händler und Vermittler (Rabatte, Provisionen) werden grundsätzlich als Erlösminderung erfasst. Hat die Gegenleistung einen eigenständigen Nutzen und ist zuverlässig bewertbar, werden die Zahlungen als Aufwendungen erfasst.

Im Einzelnen gestaltet sich die **Umsatzrealisierung** in der Deutschen Telekom wie folgt:

Im **Mobilfunk-Geschäft** der operativen Segmente Deutschland, Europa und USA werden Umsätze durch das Angebot von Mobilfunk-Diensten, einmalige Bereitstellungsentgelte sowie den Verkauf mobiler Endgeräte und Zubehör generiert. Umsätze aus Mobilfunk-Diensten enthalten monatliche Leistungsentgelte, Entgelte für Sondermerkmale sowie Verbindungs- und

Roaming-Entgelte, die sowohl T-Mobile Kunden als auch anderen Mobilfunk-Betreibern in Rechnung gestellt werden. Umsätze aus Mobilfunk-Diensten werden auf Basis in Anspruch genommener Nutzungsminuten oder anderer vereinbarter Tarifmodelle realisiert abzüglich Gutschriften und Anpassungen aufgrund von Preisnachlässen. Der aus dem Verkauf mobiler Telefone, mobiler Datengeräte und Zubehör generierte Umsatz und die damit verbundenen Aufwendungen werden realisiert, sobald die Produkte geliefert und vom Kunden abgenommen wurden.

Das **Festnetz-Geschäft** in den operativen Segmenten Deutschland und Europa umfasst schmal- und breitbandige Zugänge zum Festnetz sowie Internet. Der aus diesen Zugängen erzielte Umsatz aus der Nutzung für Sprach-/Datenkommunikation wird mit Erbringung der vereinbarten Dienstleistung realisiert. Die erbrachten Dienstleistungen beziehen sich dabei entweder auf die Nutzung durch den Kunden (z. B. Telefonminuten), den Zeitablauf (z. B. monatliche Servicegebühren) oder andere vereinbarte Tarifmodelle. Darüber hinaus werden Telekommunikationseinrichtungen verkauft, vermietet und gewartet. Der Umsatz und die mit dem Verkauf von Telekommunikationseinrichtungen und Zubehör verbundenen Aufwendungen werden erfasst, sobald die Produkte geliefert werden und soweit keine unerfüllten Verpflichtungen seitens des Unternehmens bestehen, die sich auf die endgültige Abnahme des Kunden auswirken. Umsätze aus Vermietungen sowie Mieten und Leasingraten für nicht aktivierte Gegenstände werden monatlich mit Entstehung des Anspruchs auf die Entgelte realisiert. Umsätze aus Bereitstellungsentgelten werden über die durchschnittliche Kundenbindungsdauer abgegrenzt. Weitere Umsatzerlöse resultieren aus Entgelten für Werbung und E-Commerce. Werbeumsätze werden in der Periode erfasst, in der die Werbung gezeigt wird. Transaktionsumsätze werden realisiert, sobald der Kunde mitteilt, dass eine entsprechende Transaktion stattgefunden hat und eine Einziehung der entsprechenden Forderung weitgehend gesichert ist.

Im operativen Segment **Systemgeschäft** werden Umsatzerlöse erfasst, wenn substantielle Hinweise für eine Kaufvereinbarung vorliegen, die Produkte geliefert oder Dienstleistungen erbracht werden, der Verkaufspreis oder die Entgelte fest oder bestimmbar sind und die Einbringlichkeit angemessen gesichert ist.

Umsatzerlöse aus Computing & Desktop Services werden mit Bereitstellung der Leistung unter Anwendung eines sog. „Proportional Performance“-Modells erfasst. Bei Verträgen auf Basis von Festpreisen werden Umsatzerlöse anteilig über die Laufzeit des Dienstleistungsvertrags erfasst und bei allen anderen Dienstleistungsverträgen auf Basis der erbrachten Dienstleistung oder auf Nutzungsbasis. Umsatzerlöse aus Verträgen für nach Zeit- und Materialaufwand abgerechneten Leistungen werden mit dem Erbringen von Arbeitsstunden und dem Anfallen direkter Kosten zum vertraglich festgelegten Stundensatz erfasst.

Umsatzerlöse aus dem Verkauf von Hardware bzw. verkaufsartigen Miet- und Leasinggeschäften werden realisiert, sobald das Produkt an den Kunden versandt wurde und soweit es keine unerfüllten Verpflichtungen seitens des Unternehmens gibt, die sich auf die endgültige Abnahme des Kunden auswirken. Sämtliche Kosten aus diesen Verpflichtungen werden bei der Realisierung des entsprechenden Umsatzerlöses erfasst.

„Telecommunications (TK) Services“ umfassen „Network Services“ sowie „Hosting & ASP Services“. Verträge für „Network Services“, die aus der Errichtung und dem Betrieb von Kommunikationsnetzen für Kunden bestehen, haben eine durchschnittliche Laufzeit von ca. drei Jahren. Bereitstellungsentgelte und die zugehörigen Kosten werden über die geschätzte durchschnittliche Kundenbindungsdauer abgegrenzt. Umsatzerlöse aus Sprachdiensten und Datendiensten werden im Rahmen solcher Verträge realisiert, sobald sie vom Kunden in Anspruch genommen werden. Wenn eine Vereinbarung ein Leasingverhältnis enthält, wird dieses Leasingverhältnis gemäß IFRIC 4 und IAS 17 getrennt bilanziert. Umsatzerlöse aus „Hosting & ASP Services“ werden mit Bereitstellung der Leistungen erfasst.

Umsatzerlöse aus Vermietungen sowie Mieten und Leasingraten werden linear über den Mietzeitraum erfasst.

Die **Ertragsteuern** umfassen sowohl die tatsächlichen Steuern vom Einkommen und vom Ertrag als auch die latenten Steuern. Die Steuerverbindlichkeiten/-forderungen enthalten im Wesentlichen Verpflichtungen/Ansprüche für in- und ausländische Ertragsteuern. Diese umfassen sowohl das laufende Jahr als auch etwaige Verpflichtungen/Ansprüche aus Vorjahren. Die Verbindlichkeiten/Forderungen werden auf Basis der steuerlichen Vorschriften in den Ländern unserer Geschäftstätigkeit berechnet und berücksichtigen alle uns bekannten Sachverhalte.

Aktive und passive latente Steuern werden für temporäre Differenzen zwischen den Wertansätzen in der Konzern-Bilanz und der Steuerbilanz sowie für steuerliche Verlustvorträge angesetzt. Aktive latente Steuern werden angesetzt, sofern es wahrscheinlich ist, dass ein zu versteuerndes Ergebnis verfügbar sein wird, gegen das die abzugsfähige temporäre Differenz verwendet werden kann. Passive latente Steuern werden gebildet bei temporären Differenzen aus Anteilen an Tochterunternehmen und assoziierten Unternehmen, außer wenn der Konzern in der Lage ist, den zeitlichen Verlauf der Umkehrung der temporären Differenz zu steuern, und es wahrscheinlich ist, dass sich die temporäre Differenz in absehbarer Zeit nicht umkehren wird. Außerdem werden keine latenten Steuern angesetzt, wenn diese aus dem erstmaligen Ansatz eines Vermögenswerts oder einer Schuld im Rahmen eines Geschäftsvorfalles resultieren, bei dem es sich nicht um einen Unternehmenszusammenschluss handelt, und wenn dadurch weder das IFRS-Ergebnis (vor Ertragsteuern) noch das steuerrechtliche Ergebnis beeinflusst wird. Für die Bewertung der latenten Steuern werden die zum Abschlussstichtag gültigen bzw. verabschiedeten steuerlichen Vorschriften herangezogen.

## Ermessensentscheidungen und Schätzungsunsicherheiten.

Die Darstellung der Vermögens-, Finanz- und Ertragslage im Konzernabschluss ist von Ansatz- und Bewertungsmethoden sowie von Annahmen und Schätzungen abhängig. Die sich tatsächlich ergebenden Beträge können von den Schätzungen abweichen. Die nachstehend aufgeführten wesentlichen Schätzungen und zugehörigen Annahmen sowie die mit den gewählten Bilanzierungs- und Bewertungsmethoden verbundenen Unsicherheiten sind entscheidend für das Verständnis der zugrunde liegenden Risiken der Finanzberichterstattung sowie der Auswirkungen, die diese Schätzungen, Annahmen und Unsicherheiten auf den Konzernabschluss haben könnten.

Die Bewertung von **Vermögenswerten des Sachanlagevermögens und immateriellen Vermögenswerten** ist mit Schätzungen zur Ermittlung des beizulegenden Zeitwerts zum Erwerbszeitpunkt verbunden, wenn diese im Rahmen eines Unternehmenszusammenschlusses erworben wurden. Ferner ist die erwartete Nutzungsdauer der Vermögenswerte zu schätzen. Die Ermittlung der beizulegenden Zeitwerte von Vermögenswerten und Schulden sowie der Nutzungsdauern der Vermögenswerte basiert auf Beurteilungen des Managements.

Im Rahmen der Ermittlung der **Wertminderung von Vermögenswerten des Sachanlagevermögens und von immateriellen Vermögenswerten** werden auch Schätzungen vorgenommen, die sich u. a. auf Ursache, Zeitpunkt und Höhe der Wertminderung beziehen. Eine Wertminderung beruht auf einer Vielzahl von Faktoren. Grundsätzlich werden Änderungen der gegenwärtigen Wettbewerbsbedingungen, Erwartungen bezüglich des Wachstums der Telekommunikationsbranche, Erhöhungen der Kapitalkosten, Änderungen der künftigen Verfügbarkeit von Finanzierungsmitteln, technologische Veralterung, die Einstellung von Dienstleistungen, aktuelle Wiederbeschaffungskosten, in vergleichbaren Transaktionen gezahlte Kaufpreise und sonstige das Umfeld betreffende Änderungen, die auf eine Wertminderung hindeuten, berücksichtigt. Der erzielbare Betrag und die beizulegenden Zeitwerte werden in der Regel unter Anwendung der „Discounted Cash Flow“-Methode ermittelt, in die angemessene Annahmen von Marktteilnehmern einfließen. Die Identifizierung von Anhaltspunkten, die auf eine Wertminderung hindeuten, die Schätzung von künftigen Cashflows sowie die Ermittlung der beizulegenden Zeitwerte von Vermögenswerten (oder von Gruppen von Vermögenswerten) sind mit wesentlichen

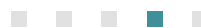

Einschätzungen verbunden, die das Management hinsichtlich der Identifizierung und Überprüfung von Anzeichen für eine Wertminderung, der erwarteten Cashflows, der zutreffenden Abzinsungssätze, der jeweiligen Nutzungsdauern sowie der Restwerte zu treffen hat. Insbesondere geht die Schätzung der den beizulegenden Zeitwerten zugrunde liegenden Cashflows aus dem Mobilfunk-Geschäft von anhaltenden Investitionen in unsere Netzinfrastruktur aus, die notwendig sind, um durch das Angebot neuer Datenprodukte und -dienste ein Erlöswachstum zu generieren. Hierzu liegen nur in begrenztem Umfang historische Informationen über die Kundennachfrage vor. Wenn die Nachfrage nach diesen Produkten und Diensten sich nicht so entwickelt wie erwartet, würde dies die Erlöse und Cashflows reduzieren und möglicherweise zu Wertminderungsaufwendungen in Verbindung mit der Abschreibung dieser Investitionen auf ihre beizulegenden Zeitwerte führen. Dies könnte sich negativ auf die künftige Ertragslage auswirken.

Die Ermittlung des **erzielbaren Betrags einer zahlungsmittelgenerierenden Einheit** ist mit Schätzungen durch das Management verbunden. Zu den verwendeten Methoden zur Ermittlung des beizulegenden Zeitwerts abzüglich Veräußerungskosten zählen Methoden auf der Grundlage von Discounted Cash Flows und Methoden, die als Basis notierte Marktpreise verwenden. Zu den wesentlichen Annahmen, auf denen die Ermittlung des beizulegenden Zeitwerts abzüglich Veräußerungskosten durch das Management beruht, gehören Annahmen bezüglich Umsatzentwicklung, Kundengewinnung und Kosten für die Kundenbindung, Kündigungsrate, Investitionen und Marktanteil. Diese Schätzungen, einschließlich der verwendeten Methoden, können auf die Ermittlung des beizulegenden Zeitwerts sowie letztlich auf die Höhe der Abschreibungen auf den Geschäftswert wesentliche Auswirkungen haben.

Die Bewertung von **Beteiligungen an at equity bilanzierten Unternehmen** ist im Fall des 50-prozentigen Anteils am Joint Venture Everything Everywhere im Rahmen der Anwendung der „Discounted Cash Flow“-Methode mit Schätzungen zur Ermittlung des beizulegenden Zeitwerts zum Zeitpunkt der erstmaligen at equity Bilanzierung verbunden.

Das Management bildet **Wertberichtigungen auf zweifelhafte Forderungen**, um erwarteten Verlusten Rechnung zu tragen, die aus der Zahlungsunfähigkeit von Kunden resultieren. Die vom Management verwendeten Grundlagen für die Beurteilung der Angemessenheit der Wertberichtigungen auf zweifelhafte Forderungen sind die Fälligkeitsstruktur der Forderungsbalden und Erfahrungen in Bezug auf Ausbuchungen von Forderungen in der Vergangenheit, die Bonität der Kunden sowie Veränderungen der Zahlungsbedingungen. Bei einer Verschlechterung der Finanzlage der Kunden kann der Umfang der tatsächlich vorzunehmenden Ausbuchungen den Umfang der erwarteten Ausbuchungen übersteigen.

**Ertragsteuern** sind für jede Steuerjurisdiktion zu schätzen, in der der Konzern tätig ist. Dabei ist für jedes Besteuerungssubjekt die erwartete tatsächliche Ertragsteuer zu berechnen und die temporären Differenzen aus der unterschiedlichen Behandlung bestimmter Bilanzposten zwischen dem IFRS-Konzernabschluss und dem steuerrechtlichen Abschluss sind zu beurteilen. Soweit temporäre Differenzen vorliegen, führen diese Differenzen grundsätzlich zum Ansatz von aktiven und passiven latenten Steuern im Konzernabschluss. Das Management muss bei der Berechnung tatsächlicher und latenter Steuern Beurteilungen treffen. Aktive latente Steuern werden in dem Maße angesetzt, in dem es wahrscheinlich ist, dass sie genutzt werden können. Die Nutzung aktiver latenter Steuern hängt von der Möglichkeit ab, im Rahmen der jeweiligen Steuerart und Steuerjurisdiktion ausreichendes zu versteuerndes Einkommen zu erzielen, wobei ggf. gesetzliche Beschränkungen hinsichtlich der maximalen Verlustvortragsperiode zu berücksichtigen sind. Zur Beurteilung der Wahrscheinlichkeit der künftigen Nutzbarkeit von aktiven latenten Steuern sind verschiedene Faktoren heranzuziehen, wie z. B. Ertragslage der Vergangenheit, operative Planungen, Verlustvortragsperioden und Steuerplanungsstrategien. Weichen die tatsächlichen Ergebnisse von diesen Schätzungen ab oder sind diese Schätzungen in künftigen Perioden anzupassen, könnte dies nachteilige Auswirkungen auf die Vermögens-, Finanz- und Ertragslage haben. Kommt es zu einer Änderung der Werthaltigkeitsbeurteilung bei aktiven latenten Steuern, sind die angesetzten aktiven latenten Steuern – entsprechend der ursprünglichen Bildung – erfolgswirksam oder erfolgsneutral abzuwerten bzw. wertberichtigte aktive latente Steuern erfolgswirksam oder erfolgsneutral zu aktivieren.

Die **Pensionsverpflichtungen für Leistungen an nicht beamtete Arbeitnehmer** sind grundsätzlich durch leistungsorientierte Pläne gedeckt. Die Aufwendungen für Altersversorgung für nicht beamtete Arbeitnehmer werden in Übereinstimmung mit versicherungsmathematischen Verfahren ermittelt, die auf Annahmen hinsichtlich des Zinssatzes, der Lebenserwartung und ggf. der erwarteten Erträge aus Planvermögen beruhen. Unsere Annahmen in Bezug auf die erwarteten Erträge aus Planvermögen werden unter Berücksichtigung langfristiger historischer Renditen in der Vergangenheit, der Anlagestrategie sowie von Schätzungen langfristiger Anlageerträge auf einheitlicher Basis getroffen. Falls Änderungen der Annahmen in Bezug auf Zinssätze oder die erwarteten Erträge aus Planvermögen erforderlich sind, könnte dies wesentliche Auswirkungen auf die künftige Höhe der Aufwendungen für Altersversorgung haben.

Gemäß dem Gesetz zur Reorganisation der Bundesanstalt für Post und Telekommunikation Deutsche Bundespost ist die Deutsche Telekom verpflichtet, ihren Anteil an der Deckungslücke zwischen den Einnahmen der **Postbeamtenkrankenkasse** (PBeaKK) und ihren Leistungen auszugleichen. Die PBeaKK erbringt für ihre Mitglieder (aktive oder frühere Beamte der Deutschen Telekom AG, der Deutschen Post AG und der Deutschen Postbank AG) und deren Angehörige Leistungen in Krankheits-, Geburts- und Todesfällen. Die PBeaKK wurde mit Inkrafttreten der Postreform II in ihrem Bestand geschlossen. Die von der PBeaKK vereinnahmten Versicherungsbeiträge dürfen die von alternativen Anbietern privater Krankenversicherung berechneten Versicherungsbeiträge für vergleichbare Leistungen nicht überschreiten. Daher wird die sich ändernde Altersstruktur der Mitglieder in der PBeaKK nicht in den Versicherungsbeiträgen berücksichtigt. In Höhe des nach versicherungsmathematischen Grundsätzen berechneten Barwerts des Anteils der Deutschen Telekom an den künftigen Deckungslücken werden Rückstellungen gebildet. Dabei werden Abzinsungssätze verwendet sowie Annahmen bezüglich der Lebenserwartungen und Prognosen hinsichtlich der Beiträge und der künftigen Steigerungen der Gesundheitskosten in Deutschland vorgenommen. Da die Berechnung dieser Rückstellung mit langfristigen Prognosen über einen Zeitraum von mehr als 50 Jahren verbunden ist, kann sich der Barwert der Verbindlichkeit schon bei geringfügigen Schwankungen der der Berechnung zugrunde liegenden Annahmen erheblich ändern.

Ansatz und Bewertung der **Rückstellungen** und der Höhe der **Eventualschulden** im Zusammenhang mit anhängigen Rechtsstreitigkeiten oder anderen ausstehenden Ansprüchen aus Vergleichs-, Vermittlungs-, Schiedsgerichts- oder staatlichen Verfahren bzw. sonstiger Eventualschulden sind in erheblichem Umfang mit Einschätzungen durch die Deutsche Telekom verbunden. So beruht die Beurteilung der Wahrscheinlichkeit, dass ein anhängiges Verfahren Erfolg hat oder eine Verbindlichkeit entsteht, bzw. die Quantifizierung der möglichen Höhe der Zahlungsverpflichtung auf der Einschätzung der jeweiligen Situation. Für Verbindlichkeiten werden Rückstellungen gebildet, wenn Verluste aus schwebenden Geschäften drohen, ein Verlust wahrscheinlich ist und dieser Verlust verlässlich geschätzt werden kann. Wegen der mit dieser Beurteilung verbundenen Unsicherheiten können die tatsächlichen Verluste ggf. von den ursprünglichen Schätzungen und damit von dem Rückstellungsbetrag abweichen. Zudem ist die Ermittlung von Rückstellungen für Steuern, Umweltverbindlichkeiten und Rechtsrisiken mit erheblichen Schätzungen verbunden. Diese Schätzungen können sich aufgrund neuer Informationen ändern. Bei der Einholung neuer Informationen nutzt die Deutsche Telekom hauptsächlich die Dienste interner Experten sowie die Dienste externer Berater wie beispielsweise Versicherungsmathematiker oder Rechtsberater. Änderungen der Schätzungen dieser drohenden Verluste aus schwebenden Geschäften können sich erheblich auf die künftige Ertragslage auswirken.

#### **Umsatzrealisierung.**

**Einmalige Bereitstellungsentgelte.** Die operativen Segmente Deutschland, Europa und USA erhalten von Neukunden Entgelte für die erstmalige Bereitstellung und die Freischaltung ihres Anschlusses. Diese Entgelte (sowie die zugehörigen direkt zurechenbaren Kosten) werden abgegrenzt und über die erwartete Dauer der Kundenbeziehung verteilt. Die Schätzung der erwarteten durchschnittlichen Dauer der Kundenbeziehung basiert auf der historischen Kunden-Fluktuationsrate. Bei einer Änderung der Schätzungen durch das Management können sich wesentliche Unterschiede in Betrag und Zeitpunkt der Umsätze für nachfolgende Perioden ergeben.

**Mehrkomponentenverträge.** Die Bestimmung der beizulegenden Zeitwerte von einzelnen Bewertungseinheiten von gebündelten Produkten bzw. Dienstleistungen ist komplex, da bestimmte Komponenten preissensibel sind und daher in einem von Wettbewerb geprägten Marktumfeld Schwankungen unterliegen. Änderungen der Schätzungen dieser anteiligen beizulegenden Zeitwerte können die Aufteilung des Preises für das gesamte Mehrkomponentengeschäft auf die einzelnen Bewertungseinheiten erheblich beeinflussen und sich daher auf die künftige Ertragslage auswirken.

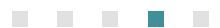

## Konsolidierungskreis.

In den Konzernabschluss werden sämtliche Tochterunternehmen, Gemeinschaftsunternehmen und assoziierte Unternehmen einbezogen. Tochterunternehmen sind Gesellschaften, die direkt oder indirekt von der Deutschen Telekom beherrscht und vollkonsolidiert werden. Die Existenz und Auswirkung von potenziellen Stimmrechten, die gegenwärtig ausgeübt oder umgewandelt werden können, einschließlich von anderen Unternehmen gehaltener potenzieller Stimmrechte, werden bei der Beurteilung, ob ein Unternehmen beherrscht wird, berücksichtigt. Gemeinschaftsunternehmen sind Gesellschaften, über die mit anderen Unternehmen die gemeinschaftliche Führung ausgeübt wird. Assoziierte Unternehmen sind Gesellschaften, auf die die Deutsche Telekom maßgeblichen Einfluss ausübt und die weder Tochterunternehmen noch Gemeinschaftsunternehmen sind. Assoziierte Unternehmen werden ebenso wie die Gemeinschaftsunternehmen nach der Equity-Methode in den Konzernabschluss einbezogen.

Tochterunternehmen werden nicht in den Konzernabschluss einbezogen, wenn sie aus Sicht eines operativen Segments oder des Konzerns nach folgender Beurteilung unwesentlich sind: Die Summe aller nicht in den Konzernabschluss einbezogenen Tochterunternehmen darf nicht mehr als 1 % des Gesamtkonzernwerts bei Bilanzsumme, Umsatz, Jahresergebnis und Eventualforderungen, -verbindlichkeiten sowie sonstigen finanziellen Verpflichtungen ausmachen. Sollte die Grenze von 1 % überschritten werden, wird unter Berücksichtigung von Nachhaltigkeits- und Konsolidierungseffekten geprüft, welches Unternehmen in den Konzernabschluss einzubeziehen ist. Die Wesentlichkeitsbeurteilung für assoziierte und gemeinschaftlich geführte Unternehmen beschränkt sich lediglich auf die Kriterien Jahresergebnis und Eventualforderungen, -verbindlichkeiten sowie sonstige finanzielle Verpflichtungen. Neben den quantitativen Kriterien werden auch qualitative Kriterien zur Beurteilung der Wesentlichkeit eines Unternehmens für den Konsolidierungskreis herangezogen. So dürfen sich durch eine unterlassene Einbeziehung weder wesentliche Veränderungen des Segment- oder des Konzernjahresergebnisses ergeben noch weitere wesentliche Trends verschleiert werden.

Der Konsolidierungskreis veränderte sich im Geschäftsjahr 2010 wie folgt:

|                                                                     | Inland    | Ausland    | Gesamt     |
|---------------------------------------------------------------------|-----------|------------|------------|
| <b>Vollkonsolidierte Tochterunternehmen</b>                         |           |            |            |
| 1. Januar 2010                                                      | 62        | 182        | 244        |
| Zugänge                                                             | 4         | 10         | 14         |
| Abgänge (einschließlich Verschmelzungen)                            | (2)       | (15)       | (17)       |
| <b>31. Dezember 2010</b>                                            | <b>64</b> | <b>177</b> | <b>241</b> |
| <b>Nach der Equity-Methode einbezogene assoziierte Unternehmen</b>  |           |            |            |
| 1. Januar 2010                                                      | 5         | 7          | 12         |
| Zugänge                                                             | 0         | 2          | 2          |
| Abgänge                                                             | 0         | (1)        | (1)        |
| <b>31. Dezember 2010</b>                                            | <b>5</b>  | <b>8</b>   | <b>13</b>  |
| <b>Nach der Equity-Methode einbezogene Gemeinschaftsunternehmen</b> |           |            |            |
| 1. Januar 2010                                                      | 2         | 3          | 5          |
| Zugänge                                                             | 0         | 1          | 1          |
| Abgänge                                                             | 0         | (1)        | (1)        |
| <b>31. Dezember 2010</b>                                            | <b>2</b>  | <b>3</b>   | <b>5</b>   |
| <b>Insgesamt</b>                                                    |           |            |            |
| 1. Januar 2010                                                      | 69        | 192        | 261        |
| Zugänge                                                             | 4         | 13         | 17         |
| Abgänge (einschließlich Verschmelzungen)                            | (2)       | (17)       | (19)       |
| <b>31. Dezember 2010</b>                                            | <b>71</b> | <b>188</b> | <b>259</b> |

Die Deutsche Telekom hält zum Bilanzstichtag nicht mehr als die Hälfte der Anteile an der OTE-Gruppe. Aufgrund von Gesellschaftervereinbarungen zwischen der Deutschen Telekom und der Hellenischen Republik besitzt die Deutsche Telekom die Kontrolle über 50 % plus zwei stimmberechtigter Aktien und übt damit die Beherrschung der Finanz- und Geschäftspolitik über die OTE-Gruppe aus. Die Gesellschaften der OTE-Gruppe sind somit vollkonsolidierte Tochterunternehmen.

## Unternehmenszusammenschlüsse und sonstige Unternehmenstransaktionen.

Im Folgenden werden die wesentlichen Unternehmenszusammenschlüsse und sonstige Unternehmenstransaktionen im Geschäftsjahr 2010 erläutert.

**Erwerb der STRATO.** Die Deutsche Telekom unterzeichnete am 19. November 2009 einen Vertrag mit der Freenet AG zur Übernahme von 100 % der Anteile an dem Webhosting-Anbieter STRATO AG und der STRATO Rechenzentrum AG (im Folgenden STRATO). Am 1. Januar 2010 hat die Deutsche Telekom die Beherrschung über die STRATO erlangt.

Die STRATO-Gruppe ist der zweitgrößte Webhosting-Anbieter in Deutschland und Europa und verfügt in diesem Markt über hohes Know-how sowie technologische Kompetenz. Neben dem Hauptmarkt Deutschland ist die STRATO-Gruppe auch in Spanien, den Niederlanden, Frankreich, Großbritannien und Italien tätig.

Auf Basis der endgültigen Kaufpreisallokation ergibt sich aus dem Unternehmenszusammenschluss mit der STRATO ein Goodwill in Höhe von 184 Mio. €. Dieser ermittelt sich wie folgt:

|                                                        | Mio. €     |
|--------------------------------------------------------|------------|
| Gezahlter Kaufpreis für 100 % der Anteile              | 291        |
| Beizulegende Zeitwerte der Vermögenswerte und Schulden | (152)      |
| Passive latente Steuern                                | 45         |
| <b>Goodwill</b>                                        | <b>184</b> |

Der Goodwill wird im Wesentlichen durch Synergien bestimmt, die durch den Zusammenschluss der Gesellschaften erwartet werden, und ist seit dem Erwerbszeitpunkt im Geschäftsjahr unverändert.

Die zum Erwerbszeitpunkt angesetzten beizulegenden Zeitwerte der erworbenen Vermögenswerte und Schulden der STRATO sind in der nachfolgenden Tabelle dargestellt:

|                                                                                    | Beizulegende<br>Zeitwerte zum<br>Erwerbszeitpunkt<br>Mio. € |
|------------------------------------------------------------------------------------|-------------------------------------------------------------|
| <b>Vermögenswerte</b>                                                              | <b>397</b>                                                  |
| <b>Kurzfristige Vermögenswerte</b>                                                 | <b>54</b>                                                   |
| Zahlungsmittel und Zahlungsmitteläquivalente                                       | 25                                                          |
| Forderungen aus Lieferungen und Leistungen<br>und sonstige Forderungen             | 3                                                           |
| Übrige Vermögenswerte                                                              | 26                                                          |
| <b>Langfristige Vermögenswerte</b>                                                 | <b>343</b>                                                  |
| Immaterielle Vermögenswerte                                                        | 324                                                         |
| davon: Goodwill                                                                    | 184                                                         |
| Sachanlagen                                                                        | 14                                                          |
| Übrige Vermögenswerte                                                              | 5                                                           |
| <b>Schulden</b>                                                                    | <b>106</b>                                                  |
| <b>Kurzfristige Schulden</b>                                                       | <b>60</b>                                                   |
| Verbindlichkeiten aus Lieferungen und Leistungen<br>und sonstige Verbindlichkeiten | 37                                                          |
| Übrige Schulden                                                                    | 23                                                          |
| <b>Langfristige Schulden</b>                                                       | <b>46</b>                                                   |
| Passive latente Steuern                                                            | 45                                                          |
| Übrige Schulden                                                                    | 1                                                           |

Die beizulegenden Zeitwerte der Vermögenswerte und Schulden wurden anhand beobachtbarer Marktpreise bestimmt. Konnten keine Marktpreise festgestellt werden, kamen einkommensorientierte Ansätze oder kostenorientierte Verfahren für die Bewertung der erworbenen Vermögenswerte und übernommenen Schulden zur Anwendung.

Der Konzernumsatz erhöhte sich aufgrund des Erwerbs der STRATO um 91 Mio. €. Im Überschuss der aktuellen Periode ist ein Gewinn der STRATO in Höhe von 10 Mio. € enthalten.





**Anteilserwerb Firstgate (ClickandBuy).** Die Deutsche Telekom hat am 23. März 2010 einen Vertrag mit den ehemaligen Anteilseignern zum Erwerb der ausstehenden Anteile an dem Internetzahlungsanbieter Firstgate unterzeichnet. Das Datum des Übergangs der Beherrschung und damit der Zeitpunkt der erstmaligen Vollkonsolidierung war der 1. April 2010. Seit 2006 war die Deutsche Telekom über ihr Venture-Capital-Unternehmen T-Venture an der durch die Marke ClickandBuy bekannten Firstgate bereits mit 20,2 % beteiligt. Der Kaufpreis der ausstehenden 79,8 % der Anteile an der Firstgate wird voraussichtlich 78 Mio. € betragen. Die endgültige Höhe des Kaufpreises ist weiterhin von vertraglichen Bedingungen abhängig.

**Joint Venture Everything Everywhere in Großbritannien.** Die Deutsche Telekom AG und France Télécom S.A. haben mit Wirkung zum 1. April 2010 die Gesellschaften T-Mobile UK und Orange UK in ein Joint Venture mit dem Namen Everything Everywhere eingebracht. Beide Gesellschaften halten einen 50-prozentigen Anteil an der neuen Gesellschaft. Die Deutsche Telekom hat aufgrund dieser Zusammenlegung die Beherrschung über die T-Mobile UK verloren. Stattdessen wurde das Joint Venture als Beteiligung an at equity bilanzierten Unternehmen in der Konzern-Bilanz bilanziert.

Die Buchwerte der Hauptgruppen der Vermögenswerte und Schulden der T-Mobile UK zum 1. April 2010 stellten sich wie folgt dar:

|                                                                                                                               | Mio. €       |
|-------------------------------------------------------------------------------------------------------------------------------|--------------|
| <b>Kurzfristige Vermögenswerte</b>                                                                                            | <b>667</b>   |
| Forderungen aus Lieferungen und Leistungen und sonstige Forderungen                                                           | 280          |
| Übrige kurzfristige Vermögenswerte                                                                                            | 387          |
| <b>Langfristige Vermögenswerte</b>                                                                                            | <b>6 022</b> |
| Immaterielle Vermögenswerte                                                                                                   | 3 833        |
| Sachanlagen                                                                                                                   | 1 664        |
| Übrige langfristige Vermögenswerte                                                                                            | 525          |
| <b>Zur Veräußerung gehaltene langfristige Vermögenswerte und Veräußerungsgruppen</b>                                          | <b>6 689</b> |
| <b>Kurzfristige Schulden</b>                                                                                                  | <b>761</b>   |
| Verbindlichkeiten aus Lieferungen und Leistungen und sonstige Verbindlichkeiten                                               | 501          |
| Übrige kurzfristige Schulden                                                                                                  | 260          |
| <b>Langfristige Schulden</b>                                                                                                  | <b>695</b>   |
| <b>Schulden in direktem Zusammenhang mit zur Veräußerung gehaltenen langfristigen Vermögenswerten und Veräußerungsgruppen</b> | <b>1 456</b> |

In den übrigen kurzfristigen Vermögenswerten sind 0,2 Mrd. € Zahlungsmittel und Zahlungsmitteläquivalente enthalten. Der beizulegende Zeitwert des 50-prozentigen Anteils an dem Joint Venture zum Zeitpunkt der erstmaligen at equity Bilanzierung am 1. April 2010 betrug 7,3 Mrd. €. Dem standen die oben dargestellten Buchwerte der abgehenden Vermögenswerte und Schulden gegenüber. Unter der Berücksichtigung von konzern-internen Finanzierungsbeziehungen ergab sich ein Buchwert der abgehenden Vermögenswerte und Schulden der T-Mobile UK von 5,5 Mrd. €. Daraus resultierte ein Entkonsolidierungsergebnis von 1,8 Mrd. €. Die seit dem Erwerb der T-Mobile UK entstandenen kumulierten Effekte aus der Währungsumrechnung der Vermögenswerte und Schulden von - 2,2 Mrd. € wurden bis zum Zeitpunkt der Entkonsolidierung erfolgsneutral im kumulierten sonstigen Konzernergebnis ausgewiesen. Zum Zeitpunkt der Entkonsolidierung wurde dieser Betrag aufwandswirksam vereinnahmt. Diese beiden erfolgswirksamen Effekte von saldiert 0,4 Mrd. € wurden unter den sonstigen betrieblichen Aufwendungen ausgewiesen.

## Pro-forma-Angaben.

Die nebenstehende Pro-forma-Rechnung stellt Finanzdaten der Deutschen Telekom einschließlich der wesentlichen in den Geschäftsjahren 2008 bis 2010 erworbenen vollkonsolidierten Konzernunternehmen unter der Annahme dar, dass diese bereits zu Beginn des jeweiligen Geschäftsjahres in den Konzernabschluss einbezogen worden wären.

|                          | 2010<br>Mio. € | 2009<br>Mio. € | 2008<br>Mio. € |
|--------------------------|----------------|----------------|----------------|
| <b>Umsatzerlöse</b>      |                |                |                |
| Ausgewiesen              | 62 421         | 64 602         | 61 666         |
| Pro-forma                | 62 421         | 65 101         | 61 750         |
| <b>Konzernüberschuss</b> |                |                |                |
| Ausgewiesen              | 1 695          | 353            | 1 483          |
| Pro-forma                | 1 695          | 377            | 1 477          |
| <b>Ergebnis je Aktie</b> |                |                |                |
| Ausgewiesen              | € 0,39         | 0,08           | 0,34           |
| Pro-forma                | € 0,39         | 0,09           | 0,34           |

## Wesentliche Tochterunternehmen.

Die wesentlichen Tochterunternehmen des Konzerns sind in der folgenden Tabelle dargestellt:

| Name und Sitz der Gesellschaft                                                        | Kapitalanteil der<br>Deutschen Telekom | Umsatz         | Anzahl Mitarbeiter<br>(im Durchschnitt) |
|---------------------------------------------------------------------------------------|----------------------------------------|----------------|-----------------------------------------|
|                                                                                       | %<br>31.12.2010                        | Mio. €<br>2010 | 2010                                    |
| Telekom Deutschland GmbH, Bonn                                                        | 100,00                                 | 23 862         | 4 781                                   |
| T-Mobile USA, Inc., Bellevue, Washington, USA <sup>a, b</sup>                         | 100,00                                 | 16 087         | 37 795                                  |
| T-Systems International GmbH, Frankfurt a. M.                                         | 100,00                                 | 6 253          | 18 747                                  |
| Hellenic Telecommunications Organization S.A. (OTE), Athen, Griechenland <sup>a</sup> | 30,00                                  | 5 483          | 31 589                                  |
| Magyar Telekom Nyrt., Budapest, Ungarn <sup>a, b</sup>                                | 59,30                                  | 1 943          | 10 355                                  |
| PTC, Polska Telefonia Cyfrowa Sp.z o.o., Warschau, Polen <sup>b</sup>                 | 97,00                                  | 1 839          | 5 364                                   |
| T-Mobile Netherlands Holding B.V., Den Haag, Niederlande <sup>a, b</sup>              | 100,00                                 | 1 767          | 2 125                                   |
| T-Mobile Czech Republic a.s., Prag, Tschechische Republik <sup>b</sup>                | 60,77                                  | 1 157          | 2 904                                   |
| Hrvatski Telekom d.d., Zagreb, Kroatien <sup>a</sup>                                  | 51,00                                  | 1 148          | 6 177                                   |
| T-Mobile Austria Holding GmbH, Wien, Österreich <sup>a, b</sup>                       | 100,00                                 | 983            | 1 391                                   |
| Slovak Telekom a.s., Bratislava, Slowakei <sup>a</sup>                                | 51,00                                  | 934            | 5 066                                   |

<sup>a</sup> Vorkonsolidierter Teilkonzernabschluss bzw. Konzernabschluss.

<sup>b</sup> Indirekte Beteiligung der Deutschen Telekom AG.

Die vollständige Aufstellung des Anteilsbesitzes gemäß § 313 HGB, die Bestandteil des Konzern-Anhangs ist, wird mit dem Konzernabschluss im elektronischen Bundesanzeiger offengelegt. Sie kann bei der Deutschen Telekom AG, Bonn, Investor Relations, angefordert werden. Des Weiteren enthält die Aufstellung des Anteilsbesitzes auch eine abschließende Aufzählung aller Tochterunternehmen, die von Erleichterungen gemäß § 264 Abs. 3 HGB bzw. von der Offenlegungserleichterung gemäß § 264b HGB Gebrauch machen.

## Konsolidierungsgrundsätze.

Nach IFRS sind sämtliche Unternehmenszusammenschlüsse nach der Erwerbsmethode abzubilden. Der Kaufpreis des erworbenen Tochterunternehmens wird auf die erworbenen Vermögenswerte, Schulden und Eventualschulden verteilt. Maßgeblich sind dabei die Wertverhältnisse zu dem Zeitpunkt, an dem die Beherrschung über das Tochterunternehmen erlangt wurde. Die ansatzfähigen Vermögenswerte und die übernommenen Schulden und Eventualschulden werden – unabhängig von der Beteiligungshöhe – in voller Höhe mit ihren beizulegenden Zeitwerten bewertet. Zur Veräußerung gehaltene langfristige Vermögenswerte werden zum beizulegenden Zeitwert abzüglich Veräußerungskosten bewertet. Ein verbleibender aktiver Unterschiedsbetrag wird als Goodwill angesetzt. Ein verbleibender passiver Unterschiedsbetrag wird erfolgswirksam erfasst.

Erträge und Aufwendungen eines Tochterunternehmens werden ab dem Erwerbszeitpunkt in den Konzernabschluss einbezogen. Erträge und Aufwendungen eines Tochterunternehmens bleiben bis zu dem Zeitpunkt in den Konzernabschluss einbezogen, an dem die Beherrschung durch das Mutterunternehmen endet. Der Unterschiedsbetrag zwischen dem Erlös aus der Veräußerung des Tochterunternehmens und seinem Buchwert, einschließlich der kumulierten Umrechnungsdifferenzen, die im Eigenkapital erfasst wurden, wird zum Zeitpunkt der Veräußerung in der konsolidierten Gewinn- und Verlustrechnung als Gewinn oder Verlust aus dem Abgang des Tochterunternehmens erfasst. Aufwendungen und Erträge, Forderungen und Verbindlichkeiten sowie Ergebnisse zwischen den in den Konzernabschluss einbezogenen Unternehmen werden eliminiert.

Die Beteiligungen an Gemeinschaftsunternehmen und assoziierten Unternehmen, die nach der Equity-Methode in den Konzernabschluss einbezogen werden, werden beim Erwerb mit ihren anteiligen neu bewerteten Vermögenswerten (zuzüglich etwaigem Goodwill), Schulden und Eventualschulden bilanziert. Der Goodwill aus der Anwendung der Equity-Methode wird nicht planmäßig abgeschrieben. Unrealisierte Gewinne und Verluste aus Geschäftsvorfällen mit diesen Unternehmen werden anteilig eliminiert. Die Werthaltigkeit des aus der Anwendung der Equity-Methode resultierenden Buchwerts der Beteiligung wird untersucht, wenn Anzeichen für eine Wertminderung vorliegen. Sofern der Buchwert der Beteiligung ihren erzielbaren Betrag übersteigt, ist in Höhe der Differenz ein Wertminderungsaufwand zu erfassen. Der erzielbare Betrag wird durch den höheren Wert aus beizulegendem Zeitwert abzüglich Veräußerungskosten und Nutzungswert der Beteiligung bestimmt.

## Währungsumrechnung.

Transaktionen in fremder Währung werden mit dem Kurs am Tag der Transaktion in die funktionale Währung umgerechnet. Am Abschlussstichtag werden monetäre Posten zum Stichtagskurs umgerechnet, nicht monetäre Posten werden mit dem Kurs am Tag der Transaktion umgerechnet. Umrechnungsdifferenzen werden erfolgswirksam erfasst.

Die Vermögenswerte und Schulden der Konzernunternehmen, deren funktionale Währung nicht der Euro ist, werden von der jeweiligen Landeswährung in Euro mit den Mittelkursen am Abschlussstichtag umgerechnet. Die Mittelkurse entsprechen den durchschnittlichen Geld- und Briefkursen zum Ende der jeweiligen Stichtage. Die Gewinn- und Verlustrechnungen der ausländischen Konzernunternehmen, deren funktionale Währung nicht der Euro ist, werden wie die entsprechenden Jahresergebnisse zu Durchschnittskursen des Berichtszeitraums umgerechnet. Die Umrechnungsdifferenzen werden erfolgsneutral erfasst.

Die Wechselkurse wichtiger Währungen entwickelten sich wie folgt:

|                               | Durchschnittskurse |           |           | Stichtagskurse  |                 |
|-------------------------------|--------------------|-----------|-----------|-----------------|-----------------|
|                               | 2010<br>€          | 2009<br>€ | 2008<br>€ | 31.12.2010<br>€ | 31.12.2009<br>€ |
| 100 Tschechische Kronen (CZK) | 3,95536            | 3,78123   | 4,00894   | 3,98728         | 3,77646         |
| 1 Britisches Pfund (GBP)      | 1,16553            | 1,12218   | 1,25601   | 1,15979         | 1,12387         |
| 100 Kroatische Kuna (HRK)     | 13,72000           | 13,62190  | 13,84420  | 13,54730        | 13,70710        |
| 1 000 Ungarische Forint (HUF) | 3,63022            | 3,56631   | 3,97687   | 3,59999         | 3,69609         |
| 100 Mazedonische Denar (MKD)  | 1,62536            | 1,62428   | 1,62523   | 1,59628         | 1,63024         |
| 100 Polnische Zloty (PLN)     | 25,03330           | 23,09760  | 28,47930  | 25,25810        | 24,35900        |
| 1 US-Dollar (US-\$)           | 0,75398            | 0,71692   | 0,67976   | 0,74698         | 0,69393         |

# Erläuterungen zur Konzern-Bilanz.

## 1 Zahlungsmittel und Zahlungsmitteläquivalente.

Die Zahlungsmittel und Zahlungsmitteläquivalente haben eine ursprüngliche Laufzeit von bis zu drei Monaten und enthalten überwiegend Festgeldanlagen bei Kreditinstituten. Daneben sind hier in geringem Umfang Kassenbestände sowie Schecks enthalten. Zur Sicherung etwaiger Ausfallrisiken aus derivativen Transaktionen hat die Deutsche Telekom auf Basis von Collateralverträgen Barsicherheiten in Höhe von 625 Mio. € (31. Dezember 2009: 578 Mio. €) erhalten.

Die Zahlungsmittel und Zahlungsmitteläquivalente verringerten sich in der Berichtsperiode um 2,2 Mrd. € auf 2,8 Mrd. €. Wesentliche Gründe für diesen Rückgang waren die Dividendenausschüttungen von 4,0 Mrd. €,

eine Nettorückzahlung von Finanzierungen in Höhe von 1,6 Mrd. €, der Erwerb von Spektrum in Höhe von 1,3 Mrd. €, der Erwerb einer Anleihe in Höhe von 0,8 Mrd. € sowie der Aktienrückkauf in Höhe von 0,4 Mrd. €. Der Free Cashflow (vor Ausschüttungen und vor Investitionen in Spektrum) von 6,5 Mrd. € wirkte sich gegenläufig aus.  Weitere Informationen sind der Konzern-Kapitalflussrechnung zu entnehmen.

Zum 31. Dezember 2010 hat der Konzern 0,5 Mrd. € (31. Dezember 2009: 0,6 Mrd. €) als Zahlungsmittel und Zahlungsmitteläquivalente ausgewiesen, die von Tochterunternehmen in den Ländern Kroatien, EJR Mazedonien und Montenegro gehalten werden. Diese unterliegen Devisenverkehrskontrollen und anderen gesetzlichen Einschränkungen. Die Verfügbarkeit über diese Bestände durch das Mutterunternehmen und andere Konzernunternehmen ist daher eingeschränkt.

## 2 Forderungen aus Lieferungen und Leistungen und sonstige Forderungen.

|                                            | 31.12.2010<br>Mio. € | 31.12.2009<br>Mio. € |
|--------------------------------------------|----------------------|----------------------|
| Forderungen aus Lieferungen und Leistungen | 6 766                | 6 643                |
| Sonstige Forderungen                       | 123                  | 114                  |
|                                            | <b>6 889</b>         | <b>6 757</b>         |

Vom Gesamtbetrag der Forderungen aus Lieferungen und Leistungen und sonstigen Forderungen sind 6 849 Mio. € (31. Dezember 2009: 6 715 Mio. €) innerhalb eines Jahres fällig.

Die nachfolgende Tabelle zeigt die Fälligkeitsstruktur der Forderungen aus Lieferungen und Leistungen an, die zum Stichtag nicht wertgemindert sind:

|                                                   | davon: Zum Abschlussstichtag weder wertgemindert noch überfällig<br>Mio. € | davon: Zum Abschlussstichtag nicht wertgemindert und in den folgenden Zeitbändern überfällig |                                    |                                    |                                     |                                      |                             |
|---------------------------------------------------|----------------------------------------------------------------------------|----------------------------------------------------------------------------------------------|------------------------------------|------------------------------------|-------------------------------------|--------------------------------------|-----------------------------|
|                                                   |                                                                            | Weniger als 30 Tage<br>Mio. €                                                                | Zwischen 30 und 60 Tagen<br>Mio. € | Zwischen 61 und 90 Tagen<br>Mio. € | Zwischen 91 und 180 Tagen<br>Mio. € | Zwischen 181 und 360 Tagen<br>Mio. € | Mehr als 360 Tage<br>Mio. € |
| <b>Forderungen aus Lieferungen und Leistungen</b> |                                                                            |                                                                                              |                                    |                                    |                                     |                                      |                             |
| <b>zum 31.12.2010</b>                             | 3 295                                                                      | 483                                                                                          | 93                                 | 59                                 | 96                                  | 97                                   | 32                          |
| <b>zum 31.12.2009</b>                             | 3 245                                                                      | 814                                                                                          | 115                                | 77                                 | 179                                 | 205                                  | 38                          |

Hinsichtlich des weder wertgeminderten noch in Zahlungsverzug befindlichen Bestands der Forderungen aus Lieferungen und Leistungen deuten zum Abschlussstichtag keine Anzeichen darauf hin, dass die Schuldner ihren Zahlungsverpflichtungen nicht nachkommen werden.

Die Wertberichtigungen auf Forderungen aus Lieferungen und Leistungen haben sich wie folgt entwickelt:

|                                                   | 2010<br>Mio. € | 2009<br>Mio. € |
|---------------------------------------------------|----------------|----------------|
| <b>Stand Wertberichtigungen am 1. Januar</b>      | <b>1 178</b>   | <b>1 023</b>   |
| Kursdifferenzen                                   | 15             | (11)           |
| Zuführungen (Aufwendungen für Wertberichtigungen) | 822            | 676            |
| Verbrauch                                         | (529)          | (447)          |
| Auflösungen                                       | (163)          | (63)           |
| <b>Stand Wertberichtigungen am 31. Dezember</b>   | <b>1 323</b>   | <b>1 178</b>   |

In der folgenden Tabelle sind die Aufwendungen für die vollständige Ausbuchung von Forderungen aus Lieferungen und Leistungen sowie die Erträge aus dem Eingang von ausgebuchten Forderungen aus Lieferungen und Leistungen dargestellt:

|                                                              | 2010<br>Mio. € | 2009<br>Mio. € | 2008<br>Mio. € |
|--------------------------------------------------------------|----------------|----------------|----------------|
| Aufwendungen für die vollständige Ausbuchung von Forderungen | 138            | 327            | 424            |
| Erträge aus dem Eingang von ausgebuchten Forderungen         | 7              | 39             | 55             |

Alle Aufwendungen und Erträge aus Wertberichtigungen und Ausbuchungen von Forderungen aus Lieferungen und Leistungen werden unter den Vertriebskosten ausgewiesen.

### 3 Vorräte.

|                                             | 31.12.2010<br>Mio. € | 31.12.2009<br>Mio. € |
|---------------------------------------------|----------------------|----------------------|
| Roh-, Hilfs- und Betriebsstoffe             | 167                  | 193                  |
| Unfertige Erzeugnisse, unfertige Leistungen | 108                  | 48                   |
| Fertige Erzeugnisse und Handelswaren        | 1 033                | 929                  |
| Geleistete Anzahlungen                      | 2                    | 4                    |
|                                             | <b>1 310</b>         | <b>1 174</b>         |

Von den am 31. Dezember 2010 angesetzten Vorräten wurden Wertminderungen auf den Nettoveräußerungswert in Höhe von 50 Mio. € (2009: 33 Mio. €; 2008: 53 Mio. €) vorgenommen. Die Wertminderungen wurden erfolgswirksam erfasst.

Der Buchwert der Vorräte, der während der Periode als Aufwand erfasst wurde, beträgt 5 774 Mio. € (2009: 6 311 Mio. €; 2008: 6 188 Mio. €).

### 4 Zur Veräußerung gehaltene langfristige Vermögenswerte und Veräußerungsgruppen.

Zum 31. Dezember 2010 sind in den kurzfristigen Vermögenswerten der Konzern-Bilanz 51 Mio. € als zur Veräußerung gehaltene Vermögenswerte und Veräußerungsgruppen ausgewiesen. Diese betreffen hauptsächlich Immobilien der Deutschen Telekom AG (Konzernzentrale & Shared Services) im Rahmen der Flächenoptimierungen, insbesondere für Technikflächen. Die als zur Veräußerung gehaltenen langfristigen Vermögenswerte und Veräußerungsgruppen sind in den weiteren Angaben im Anhang nicht enthalten oder als Überleitung dargestellt.

Wesentlicher Grund für den Rückgang gegenüber dem 31. Dezember 2009 in Höhe von 6,5 Mrd. € war die Einbringung der T-Mobile UK (operatives Segment Europa) und der Orange UK in ein Joint Venture Everything Everywhere seit dem 1. April 2010.  Weitergehende Erläuterungen hierzu sind unter Angabe 7 und im Kapitel „Unternehmenszusammenschlüsse und sonstige Unternehmenstransaktionen“ dargestellt.

## 5 Immaterielle Vermögenswerte.

|                                                                                                 | Selbst erstellte immaterielle Vermögenswerte |                  |                                                                                          |
|-------------------------------------------------------------------------------------------------|----------------------------------------------|------------------|------------------------------------------------------------------------------------------|
|                                                                                                 | Mio. €                                       | Gesamt<br>Mio. € | Erworbene Konzessionen, gewerbliche Schutzrechte und ähnliche Rechte und Werte<br>Mio. € |
| <b>Anschaffungs- bzw. Herstellungskosten</b>                                                    |                                              |                  |                                                                                          |
| <b>Stand 31. Dezember 2008</b>                                                                  | <b>2 220</b>                                 | <b>42 940</b>    | <b>1 180</b>                                                                             |
| Währungsumrechnung                                                                              | (12)                                         | (98)             | 3                                                                                        |
| Veränderung Konsolidierungskreis                                                                | 0                                            | 2 953            | 425                                                                                      |
| Zugänge                                                                                         | 232                                          | 713              | 26                                                                                       |
| Abgänge                                                                                         | 278                                          | 1 352            | 88                                                                                       |
| Veränderung aus zur Veräußerung gehaltener langfristiger Vermögenswerte und Veräußerungsgruppen | (219)                                        | (5 413)          | 0                                                                                        |
| Umbuchungen                                                                                     | 572                                          | 462              | (16)                                                                                     |
| <b>Stand 31. Dezember 2009</b>                                                                  | <b>2 515</b>                                 | <b>40 205</b>    | <b>1 530</b>                                                                             |
| Währungsumrechnung                                                                              | 59                                           | 1 521            | 12                                                                                       |
| Veränderung Konsolidierungskreis                                                                | 1                                            | 232              | 35                                                                                       |
| Sonstige Veränderung                                                                            | 0                                            | 0                | 0                                                                                        |
| Zugänge                                                                                         | 162                                          | 2 064            | 6                                                                                        |
| Abgänge                                                                                         | 334                                          | 1 067            | 1                                                                                        |
| Veränderung aus zur Veräußerung gehaltener langfristiger Vermögenswerte und Veräußerungsgruppen | 0                                            | (4)              | 0                                                                                        |
| Umbuchungen                                                                                     | 513                                          | 1 001            | 9                                                                                        |
| <b>Stand 31. Dezember 2010</b>                                                                  | <b>2 916</b>                                 | <b>43 952</b>    | <b>1 591</b>                                                                             |
| <b>Kumulierte Abschreibungen</b>                                                                |                                              |                  |                                                                                          |
| <b>Stand 31. Dezember 2008</b>                                                                  | <b>1 310</b>                                 | <b>11 421</b>    | <b>646</b>                                                                               |
| Währungsumrechnung                                                                              | (8)                                          | 163              | 2                                                                                        |
| Veränderung Konsolidierungskreis                                                                | 0                                            | (33)             | 0                                                                                        |
| Zugänge (planmäßige Abschreibungen)                                                             | 561                                          | 2 742            | 175                                                                                      |
| Zugänge (Wertminderungen)                                                                       | 0                                            | 7                | 7                                                                                        |
| Abgänge                                                                                         | 278                                          | 1 344            | 81                                                                                       |
| Veränderung aus zur Veräußerung gehaltener langfristiger Vermögenswerte und Veräußerungsgruppen | (132)                                        | (1 969)          | 0                                                                                        |
| Umbuchungen                                                                                     | 2                                            | 15               | (14)                                                                                     |
| <b>Stand 31. Dezember 2009</b>                                                                  | <b>1 455</b>                                 | <b>11 002</b>    | <b>735</b>                                                                               |
| Währungsumrechnung                                                                              | 39                                           | 150              | 11                                                                                       |
| Veränderung Konsolidierungskreis                                                                | 0                                            | 11               | 0                                                                                        |
| Zugänge (planmäßige Abschreibungen)                                                             | 577                                          | 2 767            | 158                                                                                      |
| Zugänge (Wertminderungen)                                                                       | 0                                            | 3                | 0                                                                                        |
| Abgänge                                                                                         | 332                                          | 1 061            | 6                                                                                        |
| Veränderung aus zur Veräußerung gehaltener langfristiger Vermögenswerte und Veräußerungsgruppen | 0                                            | 0                | 0                                                                                        |
| Umbuchungen                                                                                     | (14)                                         | 44               | (3)                                                                                      |
| <b>Stand 31. Dezember 2010</b>                                                                  | <b>1 725</b>                                 | <b>12 916</b>    | <b>895</b>                                                                               |
| <b>Buchwerte</b>                                                                                |                                              |                  |                                                                                          |
| Stand 31. Dezember 2009                                                                         | 1 060                                        | 29 203           | 795                                                                                      |
| <b>Stand 31. Dezember 2010</b>                                                                  | <b>1 191</b>                                 | <b>31 036</b>    | <b>696</b>                                                                               |



| Erworbene immaterielle Vermögenswerte |              |                             |                                              | Goodwill      | Geleistete Anzahlungen | Gesamt        |
|---------------------------------------|--------------|-----------------------------|----------------------------------------------|---------------|------------------------|---------------|
| UMTS-Lizenzen                         | GSM-Lizenzen | FCC-Lizenzen (T-Mobile USA) | Übrige erworbene immaterielle Vermögenswerte |               |                        |               |
| Mio. €                                | Mio. €       | Mio. €                      | Mio. €                                       | Mio. €        | Mio. €                 | Mio. €        |
| <b>13 870</b>                         | <b>1 280</b> | <b>17 666</b>               | <b>8 944</b>                                 | <b>29 788</b> | <b>872</b>             | <b>75 820</b> |
| 410                                   | 2            | (547)                       | 34                                           | 246           | 2                      | 138           |
| 327                                   | 198          | 0                           | 2 003                                        | 0             | 0                      | 2 953         |
| 0                                     | 11           | 31                          | 645                                          | 2 470         | 676                    | 4 091         |
| 0                                     | 0            | 0                           | 1 264                                        | 18            | 11                     | 1 659         |
| (4 593)                               | 0            | (35)                        | (785)                                        | (5 933)       | 0                      | (11 565)      |
| 8                                     | 0            | 0                           | 470                                          | 0             | (430)                  | 604           |
| <b>10 022</b>                         | <b>1 491</b> | <b>17 115</b>               | <b>10 047</b>                                | <b>26 553</b> | <b>1 109</b>           | <b>70 382</b> |
| 12                                    | 13           | 1 308                       | 176                                          | 702           | 1                      | 2 283         |
| 4                                     | 0            | 8                           | 185                                          | 4             | 0                      | 237           |
| 0                                     | 0            | 0                           | 0                                            | (260)         | 0                      | (260)         |
| 8                                     | 0            | 14                          | 2 036                                        | 465           | 829                    | 3 520         |
| 0                                     | 0            | 0                           | 1 066                                        | 19            | 19                     | 1 439         |
| 0                                     | 0            | (4)                         | 0                                            | 0             | 0                      | (4)           |
| 0                                     | 71           | 1                           | 920                                          | 2             | (861)                  | 655           |
| <b>10 046</b>                         | <b>1 575</b> | <b>18 442</b>               | <b>12 298</b>                                | <b>27 447</b> | <b>1 059</b>           | <b>75 374</b> |
| <b>3 865</b>                          | <b>669</b>   | <b>0</b>                    | <b>6 241</b>                                 | <b>9 162</b>  | <b>0</b>               | <b>21 893</b> |
| 109                                   | 2            | 0                           | 50                                           | 250           | 1                      | 406           |
| 0                                     | 0            | 0                           | (33)                                         | 0             | 0                      | (33)          |
| 767                                   | 138          | 0                           | 1 662                                        | 0             | 0                      | 3 303         |
| 0                                     | 0            | 0                           | 0                                            | 2 345         | 0                      | 2 352         |
| 0                                     | 0            | 0                           | 1 263                                        | 0             | 0                      | 1 622         |
| (1 356)                               | 0            | 0                           | (613)                                        | (5 538)       | 0                      | (7 639)       |
| 0                                     | 0            | 0                           | 29                                           | 0             | 0                      | 17            |
| <b>3 385</b>                          | <b>809</b>   | <b>0</b>                    | <b>6 073</b>                                 | <b>6 219</b>  | <b>1</b>               | <b>18 677</b> |
| 1                                     | 7            | 0                           | 131                                          | 312           | (1)                    | 500           |
| 0                                     | 0            | 0                           | 11                                           | 0             | 0                      | 11            |
| 605                                   | 138          | 0                           | 1 866                                        | 0             | 0                      | 3 344         |
| 0                                     | 0            | 0                           | 3                                            | 395           | 1                      | 399           |
| 0                                     | 0            | 0                           | 1 055                                        | 0             | 1                      | 1 394         |
| 0                                     | 0            | 0                           | 0                                            | 0             | 0                      | 0             |
| 0                                     | 0            | 0                           | 47                                           | 0             | 0                      | 30            |
| <b>3 991</b>                          | <b>954</b>   | <b>0</b>                    | <b>7 076</b>                                 | <b>6 926</b>  | <b>0</b>               | <b>21 567</b> |
| 6 637                                 | 682          | 17 115                      | 3 974                                        | 20 334        | 1 108                  | 51 705        |
| <b>6 055</b>                          | <b>621</b>   | <b>18 442</b>               | <b>5 222</b>                                 | <b>20 521</b> | <b>1 059</b>           | <b>53 807</b> |

Der Nettobuchwert der UMTS-Lizenzen in Höhe von 6,1 Mrd. € entfällt im Wesentlichen auf das operative Segment Deutschland.

Zum Abschlussstichtag hat sich die Deutsche Telekom in Höhe von 0,3 Mrd. € (31. Dezember 2009: 0,3 Mrd. €) vertraglich zum Erwerb von immateriellen Vermögenswerten verpflichtet. Diese stehen vor allem im Zusammenhang mit dem Netzausbau bei den operativen Segmenten USA und Deutschland.

Die **Buchwerte des Goodwills** sind den operativen Segmenten und zahlungsmittelgenerierenden Einheiten wie folgt zugeordnet:

|                          | 31.12.2010<br>Mio. € | 31.12.2009<br>Mio. € |
|--------------------------|----------------------|----------------------|
| <b>Deutschland</b>       | <b>4 016</b>         | <b>3 587</b>         |
| <b>Europa</b>            | <b>8 683</b>         | <b>9 282</b>         |
| davon:                   |                      |                      |
| PTC                      | 1 650                | 1 607                |
| T-Mobile Netherlands     | 1 317                | 1 317                |
| T-Mobile Austria Gruppe  | 1 202                | 1 202                |
| Ungarn – Mobilfunk       | 933                  | 958                  |
| Griechenland – Mobilfunk | 838                  | 964                  |
| T-Mobile Tschechien      | 666                  | 631                  |
| Ungarn – Festnetz        | 366                  | 373                  |
| Kroatien – Festnetz      | 305                  | 297                  |
| Bulgarien – Mobilfunk    | 262                  | 293                  |
| Slowakei – Festnetz      | 231                  | 225                  |
| Kroatien – Mobilfunk     | 194                  | 196                  |
| Slowakei – Mobilfunk     | 168                  | 168                  |
| Rumänien – Mobilfunk     | 145                  | 251                  |
| Griechenland – Festnetz  | 124                  | 476                  |
| Übrige                   | 282                  | 324                  |
| <b>USA</b>               | <b>4 827</b>         | <b>4 471</b>         |
| <b>Systemgeschäft</b>    | <b>2 995</b>         | <b>2 994</b>         |
|                          | <b>20 521</b>        | <b>20 334</b>        |

Im Geschäftsjahr haben sich folgende wesentliche Entwicklungen der Buchwerte des Goodwills zahlungsmittelgenerierender Einheiten ergeben:

**Deutschland.** Der Buchwert der zahlungsmittelgenerierenden Einheit Deutschland stieg im Vergleich zum 31. Dezember 2009 um 0,4 Mrd. €. Aus dem Unternehmenszusammenschluss mit der STRATO ergab sich ein Goodwill in Höhe von 0,2 Mrd. €. Daneben erhöhte sich der Buchwert auch aufgrund der Entscheidung des Oberlandesgerichts Frankfurt am Main zur baren Zuzahlung an T-Online Aktionäre (Unternehmenstransaktion aus dem Jahr 2006) um 0,2 Mrd. €.

**Europa.** Bei den zahlungsmittelgenerierenden Einheiten **Griechenland – Mobilfunk** und **Griechenland – Festnetz** wirkte sich zum einen die Buchwertanpassung der Verkaufsoption II der Hellenischen Republik (☐ Weitere Erläuterungen hierzu finden sich in Angabe 10) in Höhe von 0,3 Mrd. € vermindern aus. Zum anderen wirkten sich bei den zahlungsmittelgenerierenden Einheiten **Griechenland – Festnetz**, **Rumänien – Mobilfunk** und **Albanien** zum Jahresende notwendig gewordene Wertminderungen von insgesamt 0,4 Mrd. € aus.

Alle übrigen Veränderungen des Goodwills resultierten im Wesentlichen aus Wechselkurseffekten.



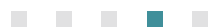

**Angaben zu Werthaltigkeitstests.** Die Deutsche Telekom führte zum 31. Dezember 2010 ihre jährlichen Werthaltigkeitstests für den den zahlungsmittelgenerierenden Einheiten zugrunde gelegten Goodwill durch. Die nachfolgende Tabelle enthält eine Übersicht der vom Konzern angewandten Perioden für die Cashflow-Prognosen, die zur Extrapolation der Cashflow-Prognosen genutzten Wachstumsraten und die auf die Cashflow-Prognosen angewandten Diskontierungszinssätze, gegliedert nach operativen Segmenten:

|                | Angewandte<br>Perioden<br>Jahre | Wachstums-<br>raten<br>% | Diskontierungs-<br>zinssätze<br>% |
|----------------|---------------------------------|--------------------------|-----------------------------------|
| Deutschland    | 10                              | 1,0                      | 5,88                              |
| Europa         | 10                              | 1,5 – 2,0                | 6,68 – 10,21                      |
| USA            | 10                              | 2,5                      | 7,14                              |
| Systemgeschäft | 10                              | 1,5                      | 6,95                              |

Den Bewertungen der zahlungsmittelgenerierenden Einheiten liegen Prognosen zugrunde, die auf den vom Management genehmigten Finanzplänen beruhen und auch für interne Zwecke verwendet werden. Der gewählte Planungshorizont spiegelt die Annahmen für kurz- bis mittelfristige Marktentwicklungen wider. Cashflows, die über den Planungshorizont hinausgehen, werden anhand geeigneter Wachstumsraten berechnet. Zu den wesentlichen Annahmen, auf denen die Ermittlung des beizulegenden Zeitwerts abzüglich Veräußerungskosten durch das Management beruht, gehören folgende im Wesentlichen intern ermittelte Annahmen, die hauptsächlich vergangene Erfahrungen widerspiegeln bzw. mit externen Marktwerten verglichen werden: Umsatzentwicklung, Kundengewinnungs- und Kundenbindungskosten, Kündigungsraten, Investitionen, Marktanteile sowie Wachstumsraten. Diskontierungszinssätze werden auf Basis externer vom Markt abgeleiteter Größen bestimmt. Sollten sich künftig wesentliche Veränderungen in den oben aufgeführten Annahmen ergeben, so würde dies Einfluss auf die beizulegenden Zeitwerte der zahlungsmittelgenerierenden Einheiten haben. In den Ländern des operativen Segments Europa könnten sich mögliche Veränderungen dieser Annahmen durch zukünftige Entwicklungen der makroökonomischen Lage, des anhaltend harten Wettbewerbs, die in einigen dieser Länder neu erhobenen bzw. angehobenen Mobilfunk-Steuern sowie weitere mögliche Änderungen in der Gesetzgebung (z. B. im Zuge von staatlichen Sparprogrammen) stärker und ggf. negativ auswirken.

Auf Basis der zum Abschlussstichtag vorliegenden Erkenntnisse und Erwartungen des Markt- und Wettbewerbsumfelds ergaben die Werthaltigkeitstests zum Jahresende für folgende zahlungsmittelgenerierende Einheiten Wertminderungsbedarf:

|                                                                                             | Wertminderungen auf<br>Goodwill<br>Mio. € | Wertminderungen auf<br>Sachanlagevermögen<br>Mio. € | Segment-<br>zugehörigkeit |
|---------------------------------------------------------------------------------------------|-------------------------------------------|-----------------------------------------------------|---------------------------|
| Griechenland – Festnetz                                                                     | 287                                       |                                                     | Europa                    |
| Rumänien – Mobilfunk                                                                        | 80                                        |                                                     | Europa                    |
| Rumänien – Festnetz                                                                         | 2                                         | 285                                                 | Europa                    |
| Übrige                                                                                      | 26                                        |                                                     | Europa                    |
| <b>Wertminderungen<br/>(Sonstige betriebliche<br/>Aufwendungen)</b>                         | <b>395</b>                                | <b>285</b>                                          |                           |
| Latente Steuern                                                                             |                                           | (46)                                                |                           |
| <b>Ergebniseffekt</b>                                                                       | <b>395</b>                                | <b>239</b>                                          |                           |
| davon: Anteile anderer<br>Gesellschafter                                                    |                                           | (189)                                               |                           |
| <b>davon: Anteile des<br/>Mutterunternehmens<br/>(Konzernüberschuss/<br/>(-fehlbetrag))</b> | <b>395</b>                                | <b>50</b>                                           |                           |

Die aus den durchgeführten Werthaltigkeitstests resultierende Wertminderung auf Sachanlagevermögen der zahlungsmittelgenerierenden Einheit Rumänien – Festnetz bezieht sich auf Grundstücke, grundstücksgleiche Rechte, Bauten und Bauten auf fremden Grundstücken sowie Technische Anlagen und Maschinen.

Die Wertminderungen resultierten im Wesentlichen aus den, bislang in dieser Ausprägung unerwarteten, der Finanzmarktkrise folgenden ökonomischen Unsicherheiten über die zukünftigen Wachstumsaussichten für die Bruttoinlandsprodukte. Daneben haben sich im Laufe der zweiten Jahreshälfte 2010 die Entwicklung der verfügbaren Einkommen sowie der Wettbewerb in den Ländern dieser zahlungsmittelgenerierenden Einheiten verschlechtert bzw. verschärft.

Wären bei den Werthaltigkeitstests des Goodwills der zahlungsmittelgenerierenden Einheiten, bei denen am Jahresende Wertminderungen in Höhe von insgesamt 0,7 Mrd. € erfasst wurden, die zugrunde gelegten Diskontierungszinssätze um 0,5 Prozentpunkte höher gewesen, hätten sich um 0,2 Mrd. € höhere Wertminderungen ergeben. Wären die Diskontierungszinssätze hingegen um 0,5 Prozentpunkte niedriger gewesen, hätten sich um 0,2 Mrd. € niedrigere Wertminderungen ergeben. Wären die bei diesen Werthaltigkeitstests zugrunde gelegten Wachstumsraten um 0,5 Prozentpunkte niedriger gewesen, hätte dies eine um 0,1 Mrd. € höhere Wertminderung und bei 0,5 Prozentpunkten höheren Wachstumsraten eine um 0,1 Mrd. € niedrigere Wertminderung zur Folge gehabt.

## 6 Sachanlagen.

|                                                                                                    | Grundstücke,<br>grundstücksgleiche<br>Rechte, Bauten und<br>Bauten auf fremden<br>Grundstücken<br>Mio. € | Technische Anlagen<br>und Maschinen<br>Mio. € | Andere Anlagen,<br>Betriebs- und<br>Geschäftsausstattung<br>Mio. € | Geleistete<br>Anzahlungen und<br>Anlagen im Bau<br>Mio. € | <b>Gesamt</b><br><br>Mio. € |
|----------------------------------------------------------------------------------------------------|----------------------------------------------------------------------------------------------------------|-----------------------------------------------|--------------------------------------------------------------------|-----------------------------------------------------------|-----------------------------|
| <b>Anschaffungs- bzw. Herstellungskosten</b>                                                       |                                                                                                          |                                               |                                                                    |                                                           |                             |
| <b>Stand 31. Dezember 2008</b>                                                                     | <b>16 178</b>                                                                                            | <b>94 344</b>                                 | <b>6 701</b>                                                       | <b>3 192</b>                                              | <b>120 415</b>              |
| Währungsumrechnung                                                                                 | (41)                                                                                                     | (40)                                          | (6)                                                                | (21)                                                      | (108)                       |
| Veränderung Konsolidierungskreis                                                                   | 1 779                                                                                                    | 4 492                                         | 87                                                                 | 695                                                       | 7 053                       |
| Zugänge                                                                                            | 140                                                                                                      | 2 522                                         | 436                                                                | 4 278                                                     | 7 376                       |
| Abgänge                                                                                            | 55                                                                                                       | 3 397                                         | 438                                                                | 47                                                        | 3 937                       |
| Veränderung aus zur Veräußerung gehaltener<br>langfristiger Vermögenswerte und Veräußerungsgruppen | 437                                                                                                      | (3 588)                                       | (211)                                                              | (326)                                                     | (3 688)                     |
| Umbuchungen                                                                                        | 454                                                                                                      | 3 382                                         | 537                                                                | (4 977)                                                   | (604)                       |
| <b>Stand 31. Dezember 2009</b>                                                                     | <b>18 892</b>                                                                                            | <b>97 715</b>                                 | <b>7 106</b>                                                       | <b>2 794</b>                                              | <b>126 507</b>              |
| Währungsumrechnung                                                                                 | 121                                                                                                      | 830                                           | 117                                                                | 67                                                        | 1 135                       |
| Veränderung Konsolidierungskreis                                                                   | 4                                                                                                        | 11                                            | 94                                                                 | (13)                                                      | 96                          |
| Zugänge                                                                                            | 151                                                                                                      | 2 596                                         | 455                                                                | 4 038                                                     | 7 240                       |
| Abgänge                                                                                            | 93                                                                                                       | 3 638                                         | 543                                                                | 113                                                       | 4 387                       |
| Veränderung aus zur Veräußerung gehaltener<br>langfristiger Vermögenswerte und Veräußerungsgruppen | (146)                                                                                                    | (6)                                           | (31)                                                               | (4)                                                       | (187)                       |
| Umbuchungen                                                                                        | 491                                                                                                      | 2 315                                         | 285                                                                | (3 746)                                                   | (655)                       |
| <b>Stand 31. Dezember 2010</b>                                                                     | <b>19 420</b>                                                                                            | <b>99 823</b>                                 | <b>7 483</b>                                                       | <b>3 023</b>                                              | <b>129 749</b>              |
| <b>Kumulierte Abschreibungen</b>                                                                   |                                                                                                          |                                               |                                                                    |                                                           |                             |
| <b>Stand 31. Dezember 2008</b>                                                                     | <b>7 193</b>                                                                                             | <b>67 161</b>                                 | <b>4 497</b>                                                       | <b>5</b>                                                  | <b>78 856</b>               |
| Währungsumrechnung                                                                                 | (18)                                                                                                     | 30                                            | (9)                                                                | 0                                                         | 3                           |
| Veränderung Konsolidierungskreis                                                                   | 2                                                                                                        | 6                                             | 0                                                                  | 0                                                         | 8                           |
| Zugänge (planmäßige Abschreibungen)                                                                | 762                                                                                                      | 6 498                                         | 760                                                                | 0                                                         | 8 020                       |
| Zugänge (Wertminderungen)                                                                          | 179                                                                                                      | 10                                            | 3                                                                  | 11                                                        | 203                         |
| Abgänge                                                                                            | 46                                                                                                       | 3 240                                         | 341                                                                | 0                                                         | 3 627                       |
| Veränderung aus zur Veräußerung gehaltener<br>langfristiger Vermögenswerte und Veräußerungsgruppen | 251                                                                                                      | (2 427)                                       | (100)                                                              | 0                                                         | (2 276)                     |
| Umbuchungen                                                                                        | (3)                                                                                                      | (14)                                          | 0                                                                  | 0                                                         | (17)                        |
| Zuschreibungen                                                                                     | (131)                                                                                                    | 0                                             | 0                                                                  | 0                                                         | (131)                       |
| <b>Stand 31. Dezember 2009</b>                                                                     | <b>8 189</b>                                                                                             | <b>68 024</b>                                 | <b>4 810</b>                                                       | <b>16</b>                                                 | <b>81 039</b>               |
| Währungsumrechnung                                                                                 | 57                                                                                                       | 375                                           | 69                                                                 | (1)                                                       | 500                         |
| Veränderung Konsolidierungskreis                                                                   | 1                                                                                                        | 1                                             | 65                                                                 | 0                                                         | 67                          |
| Zugänge (planmäßige Abschreibungen)                                                                | 814                                                                                                      | 6 098                                         | 701                                                                | 2                                                         | 7 615                       |
| Zugänge (Wertminderungen)                                                                          | 158                                                                                                      | 271                                           | 1                                                                  | 19                                                        | 449                         |
| Abgänge                                                                                            | 75                                                                                                       | 3 491                                         | 457                                                                | 1                                                         | 4 024                       |
| Veränderung aus zur Veräußerung gehaltener<br>langfristiger Vermögenswerte und Veräußerungsgruppen | (109)                                                                                                    | (6)                                           | 0                                                                  | (7)                                                       | (122)                       |
| Umbuchungen                                                                                        | 39                                                                                                       | (82)                                          | 10                                                                 | 3                                                         | (30)                        |
| Zuschreibungen                                                                                     | (43)                                                                                                     | 0                                             | 0                                                                  | 0                                                         | (43)                        |
| <b>Stand 31. Dezember 2010</b>                                                                     | <b>9 031</b>                                                                                             | <b>71 190</b>                                 | <b>5 199</b>                                                       | <b>31</b>                                                 | <b>85 451</b>               |
| <b>Buchwerte</b>                                                                                   |                                                                                                          |                                               |                                                                    |                                                           |                             |
| Stand 31. Dezember 2009                                                                            | 10 703                                                                                                   | 29 691                                        | 2 296                                                              | 2 778                                                     | 45 468                      |
| <b>Stand 31. Dezember 2010</b>                                                                     | <b>10 389</b>                                                                                            | <b>28 633</b>                                 | <b>2 284</b>                                                       | <b>2 992</b>                                              | <b>44 298</b>               |

■ Weitere Erläuterungen zu den planmäßigen Abschreibungen finden sich unter Angabe 30. Weitere Erläuterungen zu den Wertminderungen finden sich unter Angabe 5.

Zum 31. Dezember 2010 wurden Rückbauverpflichtungen in Höhe von 0,2 Mrd. € (31. Dezember 2009: 0,2 Mrd. €) aktiviert. Die Deutsche Telekom hat sich zum Abschlussstichtag in Höhe von 0,6 Mrd. € (31. Dezember 2009: 0,9 Mrd. €) vertraglich zum Erwerb von Sachanlagen verpflichtet.

Die Deutsche Telekom hat in den operativen Segmenten USA und Systemgeschäft teilweise Nutzungsdauern von Sachanlagevermögen geändert. Aus dieser Schätzungsänderung resultierten saldiert höhere Abschreibungen im Geschäftsjahr 2010 von 0,1 Mrd. €.

## 7 Beteiligungen an at equity bilanzierten Unternehmen.

Die wesentlichen Beteiligungen an at equity bilanzierten Unternehmen stellen sich wie folgt dar:

| Name                               | 31.12.2010      |                  | 31.12.2009      |                  |
|------------------------------------|-----------------|------------------|-----------------|------------------|
|                                    | Kapitalanteil % | Buchwerte Mio. € | Kapitalanteil % | Buchwerte Mio. € |
| Everything Everywhere <sup>a</sup> | 50,00           | 7 095            | -               | -                |
| HT Mostar <sup>b</sup>             | 39,10           | 47               | 39,10           | 51               |
| Toll Collect <sup>a</sup>          | 45,00           | 40               | 45,00           | 46               |
| Sonstige                           |                 | 60               |                 | 50               |
|                                    |                 | <b>7 242</b>     |                 | <b>147</b>       |

<sup>a</sup> Gemeinschaftsunternehmen.

<sup>b</sup> Indirekte Beteiligung über Hrvatski Telekom d.d., Kroatien (Anteil Deutsche Telekom AG: 51,00 %).

Die folgende Übersicht zeigt aggregierte Eckdaten zu den nach der Equity-Methode in den Konzernabschluss einbezogenen assoziierten Unternehmen. Die Werte beziehen sich nicht auf die auf den Konzern Deutsche Telekom entfallenden Anteile, sondern stellen die Werte auf Basis eines fiktiven Anteilsbesitzes von 100 % dar.

### Aggregierte Eckdaten at equity bilanzierter assoziierter Unternehmen.

|                | 31.12.2010<br>Mrd. € | 31.12.2009<br>Mrd. € |
|----------------|----------------------|----------------------|
| Gesamtvermögen | 0,2                  | 0,2                  |
| Gesamtschulden | 0,1                  | 0,1                  |

|              | 2010<br>Mrd. € | 2009<br>Mrd. € |
|--------------|----------------|----------------|
| Umsatzerlöse | 0,2            | 0,2            |
| Ergebnis     | 0,0            | 0,0            |

Eine zusammenfassende Darstellung aggregierter Eckdaten der nach der Equity-Methode in den Konzernabschluss einbezogenen Gemeinschaftsunternehmen der Deutschen Telekom auf Basis der jeweiligen Beteiligungsquote ist der folgenden Tabelle zu entnehmen:

### Aggregierte Eckdaten at equity bilanzierter Gemeinschaftsunternehmen.

|                       | Everything Everywhere<br>Mrd. € | Sonstige<br>Mrd. € | Gesamt<br>31.12.2010<br>Mrd. € | Gesamt<br>31.12.2009<br>Mrd. € |
|-----------------------|---------------------------------|--------------------|--------------------------------|--------------------------------|
| <b>Gesamtvermögen</b> | <b>9,5</b>                      | <b>0,4</b>         | <b>9,9</b>                     | <b>0,5</b>                     |
| Kurzfristig           | 1,2                             | 0,3                | 1,5                            | 0,3                            |
| Langfristig           | 8,3                             | 0,1                | 8,4                            | 0,2                            |
| <b>Gesamtschulden</b> | <b>2,4</b>                      | <b>0,3</b>         | <b>2,7</b>                     | <b>0,4</b>                     |
| Kurzfristig           | 2,0                             | 0,3                | 2,3                            | 0,3                            |
| Langfristig           | 0,4                             | 0,0                | 0,4                            | 0,1                            |

|              | Everything Everywhere<br>Mrd. € | Sonstige<br>Mrd. € | Gesamt<br>2010<br>Mrd. € | Gesamt<br>2009<br>Mrd. € |
|--------------|---------------------------------|--------------------|--------------------------|--------------------------|
| Umsatzerlöse | 3,1                             | 0,2                | 3,3                      | 0,2                      |
| Ergebnis     | 0,0                             | (0,1)              | (0,1)                    | 0,0                      |

## 8 Sonstige finanzielle Vermögenswerte.

|                                                                | 31.12.2010       |                                 | 31.12.2009       |                                 |
|----------------------------------------------------------------|------------------|---------------------------------|------------------|---------------------------------|
|                                                                | Gesamt<br>Mio. € | davon:<br>Kurzfristig<br>Mio. € | Gesamt<br>Mio. € | davon:<br>Kurzfristig<br>Mio. € |
| Ausgereichte Darlehen und Forderungen                          | 2 628            | 2 124                           | 2 003            | 1 509                           |
| Zur Veräußerung verfügbare Vermögenswerte (Available-for-Sale) | 513              | 79                              | 609              | 74                              |
| Derivative finanzielle Vermögenswerte                          | 835              | 126                             | 1 048            | 348                             |
| Übrige Vermögenswerte                                          | 91               | 43                              | 80               | 70                              |
|                                                                | <b>4 067</b>     | <b>2 372</b>                    | <b>3 740</b>     | <b>2 001</b>                    |

| Ausgereichte Darlehen<br>und Forderungen | davon: Zum<br>Abschluss-<br>stichtag weder<br>wertgemindert<br>noch überfällig<br>Mio. € | davon: Zum Abschlussstichtag nicht wertgemindert und in den folgenden Zeitbändern überfällig |                                          |                                          |                                           |                                            |                                   |
|------------------------------------------|------------------------------------------------------------------------------------------|----------------------------------------------------------------------------------------------|------------------------------------------|------------------------------------------|-------------------------------------------|--------------------------------------------|-----------------------------------|
|                                          |                                                                                          | Weniger<br>als<br>30 Tage<br>Mio. €                                                          | Zwischen<br>30 und<br>60 Tagen<br>Mio. € | Zwischen<br>61 und<br>90 Tagen<br>Mio. € | Zwischen<br>91 und<br>180 Tagen<br>Mio. € | Zwischen<br>181 und<br>360 Tagen<br>Mio. € | Mehr<br>als<br>360 Tage<br>Mio. € |
| <b>zum 31.12.2010</b>                    |                                                                                          |                                                                                              |                                          |                                          |                                           |                                            |                                   |
| Restlaufzeit bis 1 Jahr                  | 1 960                                                                                    | 76                                                                                           | 11                                       | 4                                        | 21                                        | 11                                         | 12                                |
| Restlaufzeit über 1 Jahr                 | 491                                                                                      | -                                                                                            | -                                        | -                                        | -                                         | -                                          | 2                                 |
| <b>zum 31.12.2009</b>                    |                                                                                          |                                                                                              |                                          |                                          |                                           |                                            |                                   |
| Restlaufzeit bis 1 Jahr                  | 1 413                                                                                    | 26                                                                                           | 8                                        | 3                                        | 19                                        | 18                                         | 1                                 |
| Restlaufzeit über 1 Jahr                 | 482                                                                                      | 9                                                                                            | -                                        | -                                        | -                                         | -                                          | 3                                 |

Hinsichtlich des weder wertgeminderten noch in Zahlungsverzug befindlichen Bestands der ausgereichten Darlehen und Forderungen deuten zum Abschlussstichtag keine Anzeichen darauf hin, dass die Schuldner ihren Zahlungsverpflichtungen nicht nachkommen werden.

Forderungen in Höhe von 223 Mio. € (31. Dezember 2009: 337 Mio. €) wurden im Rahmen von Collateralverträgen zur Sicherung etwaiger Ausfallrisiken aus derivativen Transaktionen eingesetzt.

Der Anstieg bei den kurzfristigen ausgereichten Darlehen und Forderungen steht im Wesentlichen in Zusammenhang mit dem Erwerb einer Anleihe in Höhe von 0,8 Mrd. € des neu gegründeten Joint Venture Everything Everywhere.

Die zur Veräußerung verfügbaren finanziellen Vermögenswerte (AfS) enthalten nicht börsennotierte Eigenkapitalinstrumente, deren beizulegende Zeitwerte nicht zuverlässig bestimmbar waren und die daher am 31. Dezember 2010 in Höhe von 335 Mio. € (31. Dezember 2009: 411 Mio. €) zu Anschaffungskosten bewertet worden sind.

Im Geschäftsjahr 2010 wurden zur Veräußerung verfügbare finanzielle Vermögenswerte um 101 Mio. € (2009: 8 Mio. €) erfolgswirksam im Wert gemindert, da die Wertminderungen dauerhaft oder wesentlich waren.

## 9 Übrige Vermögenswerte.

Die übrigen Vermögenswerte beinhalten im Wesentlichen aktivische Rechnungsabgrenzungen in Höhe von 1,4 Mrd. € (31. Dezember 2009: 1,2 Mrd. €).

## 10 Finanzielle Verbindlichkeiten.

|                                                                                | 31.12.2010    |                            |                                            |                              | 31.12.2009    |                            |                                            |                              |
|--------------------------------------------------------------------------------|---------------|----------------------------|--------------------------------------------|------------------------------|---------------|----------------------------|--------------------------------------------|------------------------------|
|                                                                                | Summe         | Restlaufzeit<br>bis 1 Jahr | Restlaufzeit<br>über 1 Jahr<br>bis 5 Jahre | Restlaufzeit<br>über 5 Jahre | Summe         | Restlaufzeit<br>bis 1 Jahr | Restlaufzeit<br>über 1 Jahr<br>bis 5 Jahre | Restlaufzeit<br>über 5 Jahre |
|                                                                                | Mio. €        | Mio. €                     | Mio. €                                     | Mio. €                       | Mio. €        | Mio. €                     | Mio. €                                     | Mio. €                       |
| Anleihen und sonstige verbriefte Verbindlichkeiten                             |               |                            |                                            |                              |               |                            |                                            |                              |
| Nicht konvertible Anleihen                                                     | 23 078        | 3 894                      | 9 317                                      | 9 867                        | 25 055        | 4 121                      | 9 686                                      | 11 248                       |
| Commercial Papers, Medium Term Notes<br>und ähnliche Verbindlichkeiten         | 15 112        | 2 843                      | 6 195                                      | 6 074                        | 13 453        | 285                        | 8 318                                      | 4 850                        |
| Verbindlichkeiten gegenüber Kreditinstituten                                   | 4 190         | 472                        | 3 284                                      | 434                          | 4 718         | 974                        | 2 764                                      | 980                          |
|                                                                                | <b>42 380</b> | <b>7 209</b>               | <b>18 796</b>                              | <b>16 375</b>                | <b>43 226</b> | <b>5 380</b>               | <b>20 768</b>                              | <b>17 078</b>                |
| Verbindlichkeiten aus Leasingverhältnissen                                     | 1 934         | 142                        | 426                                        | 1 366                        | 1 909         | 131                        | 446                                        | 1 332                        |
| Verbindlichkeiten gegenüber<br>Nicht-Kreditinstituten aus Schuldscheindarlehen | 1 164         | –                          | 192                                        | 972                          | 1 057         | –                          | 177                                        | 880                          |
| Sonstige verzinsliche Verbindlichkeiten                                        | 1 304         | 1 056                      | 139                                        | 109                          | 1 025         | 675                        | 229                                        | 121                          |
| Sonstige unverzinsliche Verbindlichkeiten                                      | 3 193         | 3 176                      | 15                                         | 2                            | 2 995         | 2 908                      | 85                                         | 2                            |
| Derivative finanzielle Verbindlichkeiten                                       | 571           | 106                        | 457                                        | 8                            | 979           | 297                        | 463                                        | 219                          |
|                                                                                | <b>8 166</b>  | <b>4 480</b>               | <b>1 229</b>                               | <b>2 457</b>                 | <b>7 965</b>  | <b>4 011</b>               | <b>1 400</b>                               | <b>2 554</b>                 |
| <b>Finanzielle Verbindlichkeiten</b>                                           | <b>50 546</b> | <b>11 689</b>              | <b>20 025</b>                              | <b>18 832</b>                | <b>51 191</b> | <b>9 391</b>               | <b>22 168</b>                              | <b>19 632</b>                |

In den diversen Rechtsstreitigkeiten um die Anteile an der polnischen PTC hat die Deutsche Telekom im Dezember 2010 eine Vereinbarung mit der französischen Vivendi und der polnischen Elektrim sowie den Gläubigern von Elektrim abgeschlossen. Die Vereinbarung sichert das vollständige und unumstrittene Eigentum an der PTC. Die Vereinbarung sieht vor, dass die Deutsche Telekom insgesamt 1,4 Mrd. € an Elektrim und Vivendi bei Vollzug zahlen wird. Daneben wurde die Beilegung aller juristischen Auseinandersetzungen der Parteien vereinbart. Sämtliche Rechtsstreitigkeiten zwischen den Parteien wurden bis zum 14. Januar 2011 unwiderruflich beigelegt. Neben den bereits im Vorjahr ausgewiesenen und im Rahmen der Erstkonsolidierung erfolgsneutral berücksichtigten 0,8 Mrd. € wurden zum Bilanzstichtag weitere 0,4 Mrd. € erfolgswirksam in den sonstigen unverzinslichen Verbindlichkeiten erfasst. Weitere 0,2 Mrd. € werden bei Vollzug der Vereinbarung für den Erwerb der Minderheitsanteile erfolgsneutral erfasst.

Im Rahmen des Anteilskaufvertrags der OTE-Gruppe in 2009 räumte die Deutsche Telekom der Hellenischen Republik für weitere 10 % der Anteile eine Verkaufsoption (Verkaufsoption II) ein. Diese kann ab dem 10. November 2009 für zwölf Monate zum jeweils gültigen Marktpreis mit einem Aufschlag von zunächst 20 % und danach bis zum 31. Dezember 2011 mit einem Aufschlag von 15 % ausgeübt werden. Der Buchwert der Verkaufsoption II wird im Fall von Marktpreisänderungen zu jedem Bilanzstichtag erfolgsneutral angepasst und verändert den Goodwill. Diese Verkaufsoption wird unter den sonstigen unverzinslichen Verbindlichkeiten ausgewiesen.

Am 31. Dezember 2010 standen der Deutschen Telekom standardisierte bilaterale Kreditlinien mit 21 Banken mit einem aggregierten Gesamtvolumen von 12,6 Mrd. € zur Verfügung. Zum 31. Dezember 2010 wurden 0,2 Mrd. € dieser Banklinien in Anspruch genommen. Die Konditionen sind gemäß den Kreditverträgen abhängig vom Rating der Deutschen Telekom. Die bilateralen Kreditverträge haben eine ursprüngliche Laufzeit von 36 Monaten und können jeweils nach 12 Monaten um weitere 12 Monate auf wiederum 36 Monate prolongiert werden. Die Situation an den internationalen Finanzmärkten hat sich während der Jahre 2009 und 2010 zuletzt deutlich entspannt. Der Zugang zu den internationalen Fremdkapitalmärkten ist aus heutiger Sicht nicht gefährdet. Das Jahr 2010 war von hohen Neuemissionsvolumina geprägt. 2010 konnten wir in verschiedenen Märkten 3,1 Mrd. € Fremdmittel aufnehmen.

Aus den folgenden Tabellen sind die vertraglich vereinbarten (undiskontierten) Zins- und Tilgungszahlungen der originären finanziellen Verbindlichkeiten sowie der derivativen Finanzinstrumente mit positivem und negativem beizulegenden Zeitwert der Deutschen Telekom ersichtlich:

|                                                                                                                                                                                                              | Buchwert<br>31.12.2010<br><br>Mio. € | Cashflows 2011        |                            |                   |
|--------------------------------------------------------------------------------------------------------------------------------------------------------------------------------------------------------------|--------------------------------------|-----------------------|----------------------------|-------------------|
|                                                                                                                                                                                                              |                                      | Zins<br>fix<br>Mio. € | Zins<br>variabel<br>Mio. € | Tilgung<br>Mio. € |
| <b>Originäre finanzielle Verbindlichkeiten:</b>                                                                                                                                                              |                                      |                       |                            |                   |
| Anleihen, sonstige verbriefte Verbindlichkeiten, Verbindlichkeiten gegenüber Kreditinstituten und Verbindlichkeiten gegenüber Nicht-Kreditinstituten aus Schuldscheindarlehen und ähnliche Verbindlichkeiten | (43 544)                             | (2 334)               | (63)                       | (7 897)           |
| Verbindlichkeiten aus Finanzierungsleasing                                                                                                                                                                   | (1 400)                              | (105)                 |                            | (168)             |
| Sonstige verzinsliche Verbindlichkeiten                                                                                                                                                                      | (1 838)                              | (55)                  | (5)                        | (1 055)           |
| Sonstige unverzinsliche Verbindlichkeiten                                                                                                                                                                    | (3 193)                              |                       |                            | (3 176)           |
| <b>Derivative finanzielle Verbindlichkeiten und Vermögenswerte:</b>                                                                                                                                          |                                      |                       |                            |                   |
| Derivative finanzielle Verbindlichkeiten:                                                                                                                                                                    |                                      |                       |                            |                   |
| - Devisenderivate ohne Hedge-Beziehung                                                                                                                                                                       | (43)                                 |                       |                            | (44)              |
| - Devisenderivate in Verbindung mit Cash Flow Hedges                                                                                                                                                         | (56)                                 |                       |                            | (50)              |
| - Zinsderivate ohne Hedge-Beziehung                                                                                                                                                                          | (196)                                | 49                    | (60)                       | (3)               |
| - Zinsderivate in Verbindung mit Fair Value Hedges                                                                                                                                                           | -                                    |                       |                            |                   |
| - Zinsderivate in Verbindung mit Cash Flow Hedges                                                                                                                                                            | (266)                                | (71)                  | 36                         |                   |
| Derivative finanzielle Vermögenswerte:                                                                                                                                                                       |                                      |                       |                            |                   |
| - Devisenderivate ohne Hedge-Beziehung                                                                                                                                                                       | 53                                   |                       |                            | 56                |
| - Devisenderivate in Verbindung mit Cash Flow Hedges                                                                                                                                                         | 13                                   |                       |                            | 8                 |
| - Zinsderivate ohne Hedge-Beziehung                                                                                                                                                                          | 507                                  | 46                    | (27)                       | 48                |
| - Zinsderivate in Verbindung mit Fair Value Hedges                                                                                                                                                           | 144                                  | 163                   | (57)                       |                   |
| - Zinsderivate in Verbindung mit Cash Flow Hedges                                                                                                                                                            | 118                                  | 8                     |                            |                   |

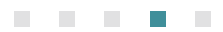

| Cashflows 2012        |                            |                   | Cashflows 2013 – 2015 |                            |                   | Cashflows 2016 – 2020 |                            |                   | Cashflows 2021 ff.    |                            |                   |
|-----------------------|----------------------------|-------------------|-----------------------|----------------------------|-------------------|-----------------------|----------------------------|-------------------|-----------------------|----------------------------|-------------------|
| Zins<br>fix<br>Mio. € | Zins<br>variabel<br>Mio. € | Tilgung<br>Mio. € | Zins<br>fix<br>Mio. € | Zins<br>variabel<br>Mio. € | Tilgung<br>Mio. € | Zins<br>fix<br>Mio. € | Zins<br>variabel<br>Mio. € | Tilgung<br>Mio. € | Zins<br>fix<br>Mio. € | Zins<br>variabel<br>Mio. € | Tilgung<br>Mio. € |
| (1 822)               | (47)                       | (4 618)           | (4 188)               | (42)                       | (14 255)          | (3 821)               |                            | (9 962)           | (4 207)               |                            | (8 096)           |
| (91)                  |                            | (104)             | (241)                 |                            | (295)             | (247)                 |                            | (441)             | (201)                 |                            | (392)             |
| (52)                  |                            | (41)              | (159)                 |                            | (94)              | (177)                 |                            | (624)             | (43)                  |                            | (25)              |
|                       |                            | (8)               |                       |                            | (7)               |                       |                            | (1)               |                       |                            | (1)               |
|                       |                            | (4)               |                       |                            |                   |                       |                            |                   |                       |                            |                   |
| 12                    | (17)                       | (106)             | (26)                  | (8)                        | (75)              | (2)                   | (2)                        | (1)               | (1)                   | (4)                        | (3)               |
| (141)                 | 54                         |                   | (474)                 | 131                        |                   |                       |                            |                   |                       |                            |                   |
|                       |                            | 1                 |                       |                            |                   |                       |                            |                   |                       |                            |                   |
|                       |                            | 2                 |                       |                            | 3                 |                       |                            |                   |                       |                            |                   |
| 21                    | (9)                        | 34                | 21                    | (24)                       | 359               | 29                    | (48)                       |                   | 108                   | (115)                      | 107               |
| 163                   | (55)                       |                   | 301                   | (99)                       |                   | 36                    | (9)                        |                   | 57                    | (14)                       |                   |
| 8                     |                            | 15                | 17                    |                            |                   | 36                    |                            | 44                | 23                    |                            | 65                |

|                                                                                                                                                                                                             | Buchwert   | Cashflows |         |           |           |          |
|-------------------------------------------------------------------------------------------------------------------------------------------------------------------------------------------------------------|------------|-----------|---------|-----------|-----------|----------|
|                                                                                                                                                                                                             | 31.12.2009 | 2010      | 2011    | 2012-2014 | 2015-2019 | 2020 ff. |
|                                                                                                                                                                                                             | Mio. €     | Mio. €    | Mio. €  | Mio. €    | Mio. €    | Mio. €   |
| <b>Originäre finanzielle Verbindlichkeiten:</b>                                                                                                                                                             |            |           |         |           |           |          |
| Anleihen, sonstige verbrieft Verbindlichkeiten, Verbindlichkeiten gegenüber Kreditinstituten und Verbindlichkeiten gegenüber Nicht-Kreditinstituten aus Schuldscheindarlehen und ähnliche Verbindlichkeiten | (44 283)   | (8 015)   | (8 982) | (18 506)  | (16 516)  | (10 052) |
| Verbindlichkeiten aus Finanzierungsleasing                                                                                                                                                                  | (1 423)    | (234)     | (202)   | (537)     | (771)     | (644)    |
| Sonstige verzinsliche Verbindlichkeiten                                                                                                                                                                     | (1 511)    | (828)     | (110)   | (215)     | (669)     | (98)     |
| Sonstige unverzinsliche Verbindlichkeiten                                                                                                                                                                   | (2 995)    | (2 908)   | (85)    |           | (1)       | (1)      |
| <b>Derivative finanzielle Verbindlichkeiten und Vermögenswerte:</b>                                                                                                                                         |            |           |         |           |           |          |
| Derivative finanzielle Verbindlichkeiten:                                                                                                                                                                   |            |           |         |           |           |          |
| - Devisenderivate ohne Hedge-Beziehung                                                                                                                                                                      | (46)       | (45)      | (2)     |           |           |          |
| - Devisenderivate in Verbindung mit Cash Flow Hedges                                                                                                                                                        | (17)       | (15)      |         |           |           |          |
| - Zinsderivate ohne Hedge-Beziehung                                                                                                                                                                         | (635)      | (205)     | (47)    | (264)     | (92)      | (95)     |
| - Zinsderivate in Verbindung mit Fair Value Hedges                                                                                                                                                          | (52)       | 87        | 87      | 262       | 27        | 50       |
| - Zinsderivate in Verbindung mit Cash Flow Hedges                                                                                                                                                           | (174)      | (32)      | (43)    | (280)     | 3         | 19       |
| Derivative finanzielle Vermögenswerte:                                                                                                                                                                      |            |           |         |           |           |          |
| - Devisenderivate ohne Hedge-Beziehung                                                                                                                                                                      | 91         | 102       | 1       | 2         |           |          |
| - Devisenderivate in Verbindung mit Cash Flow Hedges                                                                                                                                                        | 15         | 11        | 1       | 1         |           |          |
| - Zinsderivate ohne Hedge-Beziehung                                                                                                                                                                         | 562        | 90        | 12      | 276       | 175       |          |
| - Zinsderivate in Verbindung mit Fair Value Hedges                                                                                                                                                          | 225        | 112       | 129     | 250       | 197       | 340      |
| - Zinsderivate in Verbindung mit Cash Flow Hedges                                                                                                                                                           | 155        | 103       | (24)    |           |           |          |

In den Tabellen der vertraglichen (undiskontierten) Zins- und Tilgungszahlungen ist die der Everything Everywhere gewährte Finanzierungszusage (vgl. Angabe 37) nicht berücksichtigt.

Einbezogen wurden alle Instrumente, die am 31. Dezember 2010 im Bestand waren und für die bereits Zahlungen vertraglich vereinbart waren. Planzahlen für zukünftige neue Verbindlichkeiten wurden nicht einbezogen. Fremdwährungsbeträge wurden jeweils mit dem Stichtagskassakurs umgerechnet. Die variablen Zinszahlungen aus den Finanzinstrumenten wurden unter Zugrundelegung der zuletzt vor dem 31. Dezember 2010 gefixten Zinssätze ermittelt. Jederzeit rückzahlbare finanzielle Verbindlichkeiten sind immer dem frühesten Zeitraster zugeordnet. Gemäß § 2 Abs. 4 PostUmwG trägt der Bund die Gewährleistung für die Erfüllung der Verbindlichkeiten, die am 1. Januar 1995 bereits bestanden. Diese beliefen sich zum 31. Dezember 2010 auf nominal 2,0 Mrd. € (31. Dezember 2009: 1,9 Mrd. €).



## 11 Verbindlichkeiten aus Lieferungen und Leistungen und sonstige Verbindlichkeiten.

|                                                  | 31.12.2010<br>Mio. € | 31.12.2009<br>Mio. € |
|--------------------------------------------------|----------------------|----------------------|
| Verbindlichkeiten aus Lieferungen und Leistungen | 6 737                | 6 294                |
| Sonstige Verbindlichkeiten                       | 13                   | 10                   |
|                                                  | <b>6 750</b>         | <b>6 304</b>         |

Vom Gesamtbetrag der Verbindlichkeiten aus Lieferungen und Leistungen und sonstigen Verbindlichkeiten sind 6 745 Mio. € (31. Dezember 2009: 6 300 Mio. €) innerhalb eines Jahres fällig.

## 12 Pensionsrückstellungen und ähnliche Verpflichtungen.

### Leistungsorientierte Versorgungszusagen.

Die Versorgungsverpflichtungen setzen sich wie folgt zusammen:

|                                                                   | 31.12.2010<br>Mio. € | 31.12.2009<br>Mio. € |
|-------------------------------------------------------------------|----------------------|----------------------|
| <b>Pensionsrückstellungen (Defined Benefit Liability)</b>         | <b>6 373</b>         | <b>6 179</b>         |
| Vermögenswert aus Pensionsverpflichtungen (Defined Benefit Asset) | (28)                 | (14)                 |
| <b>Pensionsrückstellungen (netto)</b>                             | <b>6 345</b>         | <b>6 165</b>         |
| Versorgungsverpflichtungen                                        |                      |                      |
| - Unmittelbare                                                    | 5 996                | 5 804                |
| - Mittelbare                                                      | 346                  | 358                  |
| Verpflichtungen gemäß Artikel 131 GG                              | 3                    | 3                    |

Das Defined Benefit Asset ist in der Konzern-Bilanz unter den übrigen langfristigen Vermögenswerten erfasst.

### Herleitung der Pensionsrückstellungen (Defined Benefit Liability/Defined Benefit Asset):

|                                                                                                         | 31.12.2010<br>Mio. € | 31.12.2009<br>Mio. € |
|---------------------------------------------------------------------------------------------------------|----------------------|----------------------|
| Barwert der über einen Fonds finanzierten Verpflichtungen                                               | 977                  | 979                  |
| Ausgegliederte Vermögenswerte (Plan Assets)                                                             | (629)                | (618)                |
| <b>Das Vermögen übersteigende Leistungsverpflichtungen</b>                                              | <b>348</b>           | <b>361</b>           |
| Barwert der nicht über einen Fonds finanzierten Verpflichtungen                                         | 6 040                | 5 854                |
| Unrealisierter nachzuerrechnender Dienstzeitaufwand (Unrecognized Past Service Cost)                    | (43)                 | (50)                 |
| <b>Pensionsrückstellungen gemäß IAS 19.54 (Defined Benefit Liability (+)/Defined Benefit Asset (-))</b> | <b>6 345</b>         | <b>6 165</b>         |

### Annahmen für die Bewertung der Verpflichtungen (Defined Benefit Obligation) zum 31. Dezember des Jahres:

|                |                                     | 2010<br>%               | 2009<br>% |
|----------------|-------------------------------------|-------------------------|-----------|
| Rechnungszins  | Inland                              | 5,16                    | 5,25      |
|                | Schweiz (T-Systems)                 | 3,05                    | 3,15      |
|                | Griechenland (OTE S.A.)             | 4,56/3,71               | 4,56/3,89 |
|                | Großbritannien                      | 5,40                    | 5,70      |
| Gehaltstrend   | Inland (Tariflich Angestellte)      | 3,25                    | 3,25      |
|                | Inland (Außertariflich Angestellte) | 3,50                    | 3,50      |
|                | Schweiz (T-Systems)                 | 1,50                    | 1,50      |
|                | Griechenland (OTE S.A.)             | 2,20/3,20/<br>2,40/2,50 | 4,50/5,50 |
| Rententrend    | Großbritannien                      | 4,40                    | 4,60      |
|                | Inland (allgemein)                  | 1,50                    | 1,50      |
|                | Inland (satzungsgemäß)              | 1,00                    | 1,00      |
|                | Schweiz (T-Systems)                 | 0,30                    | 0,30      |
|                | Griechenland (OTE S.A.)             | n.a.                    | n.a.      |
| Großbritannien | 3,20                                | 3,40                    |           |

Für die deutschen Konzernunternehmen erfolgt die Bewertung der Pensionsverpflichtungen unter Verwendung der biometrischen Rechnungsgrundlagen Heubeck Richttabelle 2005G. In den anderen Ländern wurden landesspezifische Richttabellen verwendet.

**Annahmen für die Ermittlung der Pensionsaufwendungen  
(Pension Expense) für Jahre, die am 31. Dezember geendet haben:**

|                                        |                                     | 2010      | 2009      | 2008  |
|----------------------------------------|-------------------------------------|-----------|-----------|-------|
|                                        |                                     | %         | %         | %     |
| Rechnungszins                          | Inland                              | 5,25      | 5,80      | 5,50  |
|                                        | Schweiz (T-Systems)                 | 3,15      | 3,00      | 3,25  |
|                                        | Griechenland (OTE S.A.)             | 4,56/3,89 | 5,50/5,00 | n. a. |
|                                        | Großbritannien                      | 5,70      | 5,80      | 5,40  |
| Gehaltstrend                           | Inland (Tariflich Angestellte)      | 3,25      | 3,50      | 2,50  |
|                                        | Inland (Außertariflich Angestellte) | 3,50      | 4,25      | 3,25  |
|                                        | Schweiz (T-Systems)                 | 1,50      | 1,50      | 1,50  |
|                                        | Griechenland (OTE S.A.)             | 4,50/5,50 | 6,50/4,50 | n. a. |
| Erwarteter Zinsertrag vom Planvermögen | Großbritannien                      | 4,60      | 4,20      | 4,20  |
|                                        | Inland                              | 3,90      | 3,50      | 4,30  |
|                                        | Schweiz (T-Systems)                 | 4,50      | 4,50      | 4,50  |
| Rententrend                            | Großbritannien                      | 7,00      | 6,90      | 7,00  |
|                                        | Inland (allgemein)                  | 1,50      | 2,00      | 1,70  |
|                                        | Inland (satzungsgemäß)              | 1,00      | 1,00      | 1,00  |
| Erwarteter Zinsertrag vom Planvermögen | Schweiz (T-Systems)                 | 0,30      | 0,30      | 0,60  |
|                                        | Griechenland (OTE S.A.)             | n. a.     | n. a.     | n. a. |
|                                        | Großbritannien                      | 3,40      | 3,20      | 3,20  |
|                                        | Großbritannien                      | 7,00      | 6,90      | 7,00  |

**Entwicklung der Pensionsverpflichtungen im Berichtsjahr  
(Defined Benefit Obligation):**

|                                                                                                 | 2010         | 2009         |
|-------------------------------------------------------------------------------------------------|--------------|--------------|
|                                                                                                 | Mio. €       | Mio. €       |
| <b>Barwert der Pensionsverpflichtungen (Defined Benefit Obligation) zum 1. Januar</b>           | <b>6 833</b> | <b>6 101</b> |
| Umgliederung gemäß IFRS 5                                                                       | -            | (454)        |
| Veränderung durch Unternehmenszusammenschlüsse/<br>Betriebsübergänge/Zu- und Verkäufe           | (10)         | 609          |
| Aufwand für die im Geschäftsjahr hinzuerworbenen<br>Versorgungsansprüche (Current Service Cost) | 193          | 204          |
| Zinsaufwand der bereits erworbenen Ansprüche<br>(Interest Cost)                                 | 344          | 371          |
| Beiträge von Planteilnehmern                                                                    | 5            | 3            |
| Versicherungsmathematische Verluste (+)/Gewinne (-)                                             | 39           | 373          |
| Versorgungszahlungen im Geschäftsjahr                                                           | (401)        | (393)        |
| Plankürzungen (Curtailments)                                                                    | (2)          | -            |
| Planabgeltungen (Settlements)                                                                   | (15)         | -            |
| Planänderungen (Plan Amendments)                                                                | 2            | (12)         |
| Wechselkursänderungen bei Plänen in fremder Währung                                             | 29           | 31           |
| <b>Barwert der Pensionsverpflichtungen (Defined Benefit Obligation) zum 31. Dezember</b>        | <b>7 017</b> | <b>6 833</b> |

Unter Berücksichtigung ausgegliederter Vermögenswerte (Plan Assets) sind die Versorgungsverpflichtungen vollständig ausgewiesen.

**Entwicklung der ausgegliederter Vermögenswerte im Berichtsjahr  
(Plan Assets):**

|                                                                                       | 2010       | 2009       |
|---------------------------------------------------------------------------------------|------------|------------|
|                                                                                       | Mio. €     | Mio. €     |
| <b>Ausgegliederte Vermögenswerte (Plan Assets) zum 1. Januar</b>                      | <b>618</b> | <b>952</b> |
| Umgliederung gemäß IFRS 5                                                             | -          | (307)      |
| Veränderung durch Unternehmenszusammenschlüsse/<br>Betriebsübergänge/Zu- und Verkäufe | 15         | 0          |
| Erwarteter Vermögensertrag                                                            | 27         | 50         |
| Versicherungsmathematische Verluste (-)/Gewinne (+)                                   | 7          | (91)       |
| Arbeitgeberbeiträge an externe Versorgungsträger                                      | 2          | 45         |
| Beiträge von Planteilnehmern                                                          | 5          | 3          |
| Versorgungszahlungen externer Versorgungsträger<br>im Geschäftsjahr                   | (56)       | (61)       |
| Planabgeltungen (Settlements)                                                         | (12)       | 0          |
| Wechselkursänderungen bei Plänen in fremder Währung                                   | 23         | 27         |
| <b>Ausgegliederte Vermögenswerte (Plan Assets) zum 31. Dezember</b>                   | <b>629</b> | <b>618</b> |

**Zusammensetzung ausgegliederter Vermögenswerte  
nach Anlagekategorien:**

|                     | 31.12.2010 | 31.12.2009 |
|---------------------|------------|------------|
|                     | %          | %          |
| Eigenkapitalpapiere | 19         | 19         |
| Schuld-papiere      | 65         | 64         |
| Immobilien          | 6          | 6          |
| Sonstiges           | 10         | 11         |

Die Anlagenstruktur wird mithilfe von Asset-Liability-Studien definiert, gesteuert und regelmäßig überprüft. Die sich ergebenden Zielallokationen für die Planvermögen der jeweiligen Pensionspläne berücksichtigen daher u. a. die Duration (Fälligkeitsstruktur) der Verpflichtungen, den Verpflichtungsumfang, die Mindestanforderungen an das Deckungskapital und ggf. weitere Faktoren.

Die ausgegliederter Vermögenswerte enthalten zum Abschlussstichtag 0,8 Mio. € in Aktien (31. Dezember 2009: 1,0 Mio. € in Aktien), die von der Deutschen Telekom AG ausgegeben worden sind. Weitere eigene Finanzinstrumente sind in den dargestellten Jahren nicht enthalten.



### Bestimmung der erwarteten Renditen der wesentlichen ausgegliederten Vermögenswerte:

Den erwarteten Renditen liegen Konsensus-Prognosen der jeweiligen Asset-Klassen sowie Bankengespräche zugrunde. Die Prognosen basieren auf Erfahrungswerten, Wirtschaftsdaten, Zinsprognosen und Erwartungen am Aktienmarkt.

### Die Pensionsaufwendungen (Pension Expense) für die jeweilige Periode setzen sich wie folgt zusammen und sind in den jeweils angegebenen Posten der Gewinn- und Verlustrechnung (GuV) ausgewiesen:

|                                                                                              | GuV-Ausweis              | 2010<br>Mio. € | 2009<br>Mio. € | 2008<br>Mio. € |
|----------------------------------------------------------------------------------------------|--------------------------|----------------|----------------|----------------|
| Aufwand für die im Geschäftsjahr hinzuerworbenen Versorgungsansprüche (Current Service Cost) | Funktionskosten *        | 193            | 204            | 204            |
| Zinsaufwand der bereits erworbenen Ansprüche (Interest Cost)                                 | Sonstiges Finanzergebnis | 344            | 371            | 331            |
| Erwarteter Vermögensertrag (Expected Return on Plan Assets)                                  | Sonstiges Finanzergebnis | (27)           | (50)           | (52)           |
| Verteilungsaufwendungen für nachzuerrechnenden Dienstzeitaufwand (Past Service Cost)         | Funktionskosten *        | 9              | -              | -              |
| <b>Pensionsaufwendungen vor Plankürzungen/-abgeltungen</b>                                   |                          | <b>519</b>     | <b>525</b>     | <b>483</b>     |
| Plankürzungen (Curtailments)                                                                 | Funktionskosten *        | (2)            | -              | -              |
| Planabgeltungen (Settlements)                                                                | Funktionskosten *        | (3)            | -              | -              |
| <b>Pensionsaufwendungen der Periode (Pension Expense)</b>                                    |                          | <b>514</b>     | <b>525</b>     | <b>483</b>     |
| Tatsächlicher Vermögensertrag (Actual Return on Plan Assets)                                 |                          | 34             | (41)           | 50             |

\* Einschließlich sonstigem betrieblichem Aufwand.

### Die Konzern-Gesamtergebnisrechnung beinhaltet folgende Beträge:

|                                                                                                                | 2010<br>Mio. € | 2009<br>Mio. € | 2008<br>Mio. € |
|----------------------------------------------------------------------------------------------------------------|----------------|----------------|----------------|
| <b>Kumulierte im Eigenkapital erfasste Gewinne (-)/Verluste (+) zum 1. Januar</b>                              | <b>576</b>     | <b>115</b>     | <b>342</b>     |
| Versicherungsmathematische Gewinne (-)/Verluste (+) gemäß Darstellung in der Konzern-Gesamtergebnisrechnung    | 32             | 461            | (227)          |
| davon: Erfassung der versicherungsmathematischen Gewinne (-)/Verluste (+) des Berichtsjahres im Eigenkapital   | 32             | 464            | (230)          |
| davon: Veränderung der Zusatzrückstellung aufgrund einer Mindestdotierungsanforderung                          | -              | (3)            | 3              |
| <b>Kumulierte im Eigenkapital erfasste Gewinne (-)/Verluste (+) zum 31. Dezember</b>                           | <b>608</b>     | <b>576</b>     | <b>115</b>     |
| Versicherungsmathematische Gewinne (-)/Verluste (+) aus ehemals zum Konzern gehörenden Pensionsverpflichtungen | (55)           | 13             | 3              |
|                                                                                                                | <b>553</b>     | <b>589</b>     | <b>118</b>     |

**Erwartete Arbeitgeberbeiträge an externe Versorgungsträger für das Folgejahr werden wie folgt geschätzt:**

|                                                            | 2011<br>Mio. € |
|------------------------------------------------------------|----------------|
| Erwartete Arbeitgeberbeiträge an externe Versorgungsträger | 17             |

**Beträge für das laufende Jahr und die vier Vorjahre der Pensionsverpflichtungen, der ausgegliederten Vermögenswerte, das Vermögen übersteigende Leistungsverpflichtungen und erfahrungsbedingte Anpassungen:**

|                                                                            | 2010<br>Mio. € | 2009<br>Mio. € | 2008<br>Mio. € | 2007<br>Mio. € | 2006<br>Mio. € |
|----------------------------------------------------------------------------|----------------|----------------|----------------|----------------|----------------|
| Pensionsverpflichtungen (Defined Benefit Obligation)                       | 7 017          | 6 833          | 6 101          | 6 327          | 7 134          |
| Ausgegliederte Vermögenswerte (Plan Assets)                                | (629)          | (618)          | (952)          | (986)          | (966)          |
| <b>Das Vermögen übersteigende Leistungsverpflichtungen (Funded Status)</b> | <b>6 388</b>   | <b>6 215</b>   | <b>5 149</b>   | <b>5 341</b>   | <b>6 168</b>   |

|                                                                                        | 2010<br>% | 2009<br>% | 2008<br>% | 2007<br>% | 2006<br>% |
|----------------------------------------------------------------------------------------|-----------|-----------|-----------|-----------|-----------|
| Anpassungen                                                                            |           |           |           |           |           |
| Erfahrungsbedingte Erhöhung (+)/<br>Reduzierung (-) der Pensionsverpflichtung          | 0,1       | (0,7)     | (0,1)     | (0,8)     | (0,4)     |
| Erfahrungsbedingte Erhöhung (+)/<br>Reduzierung (-) der ausgegliederten Vermögenswerte | 1,1       | (9,9)     | (0,2)     | (2,5)     | 1,1       |

**Beitragsorientierte Versorgungszusagen.**

Im Geschäftsjahr 2010 betragen die laufenden Beitragszahlungen für beitragsorientierte Versorgungszusagen, die als Aufwand des jeweiligen Jahres in der Konzern-Gewinn- und Verlustrechnung ausgewiesen werden, 114 Mio. € (2009: 73 Mio. €; 2008: 160 Mio. €).

**Pensionsregelungen für Beamte der Deutschen Telekom.**

Im Geschäftsjahr 2010 wurden 676 Mio. € (2009: 684 Mio. €; 2008: 762 Mio. €) als Aufwand für den jährlichen Beitrag in Höhe von 33 % der Bruttobezüge der aktiven und der fiktiven Bruttobezüge der ruhegehaltsfähig beurlaubten Beamten an die Unterstützungskasse BPS-PT erfasst. Der Barwert der Gesamtverpflichtung aus Zahlungsverpflichtungen an diese Unterstützungskasse beträgt zum Abschlussstichtag 5,9 Mrd. € (31. Dezember 2009: 6,6 Mrd. €).

## 13 Sonstige Rückstellungen.

|                                       | Rückstellungen für<br>Restrukturierung | Übrige Personal-<br>rückstellungen | Rückstellungen für Rückbau-<br>verpflichtungen | Rückstellungen für<br>Prozessrisiken | Rückstellungen für Vertriebs-<br>und Einkaufs-<br>unterstützungen | Übrige sonstige<br>Rückstellungen | Gesamt       |
|---------------------------------------|----------------------------------------|------------------------------------|------------------------------------------------|--------------------------------------|-------------------------------------------------------------------|-----------------------------------|--------------|
|                                       | Mio. €                                 | Mio. €                             | Mio. €                                         | Mio. €                               | Mio. €                                                            | Mio. €                            | Mio. €       |
| <b>Stand am 31. Dezember 2008</b>     | <b>2 251</b>                           | <b>1 875</b>                       | <b>700</b>                                     | <b>472</b>                           | <b>487</b>                                                        | <b>956</b>                        | <b>6 741</b> |
| davon: Kurzfristig                    | 695                                    | 1 466                              | 26                                             | 170                                  | 474                                                               | 606                               | 3 437        |
| Änderungen des Konsolidierungskreises | 1                                      | 83                                 | 7                                              | 48                                   | 0                                                                 | 12                                | 151          |
| Währungsdifferenzen                   | 7                                      | 4                                  | 6                                              | 1                                    | (1)                                                               | 3                                 | 20           |
| Zuführung                             | 460                                    | 1 382                              | 156                                            | 105                                  | 456                                                               | 397                               | 2 956        |
| Verbrauch                             | (1 341)                                | (1 477)                            | (38)                                           | (68)                                 | (481)                                                             | (288)                             | (3 693)      |
| Auflösung                             | (116)                                  | (296)                              | (24)                                           | (104)                                | (23)                                                              | (194)                             | (757)        |
| Zinseffekt                            | 131                                    | 17                                 | 67                                             | 0                                    | 0                                                                 | 17                                | 232          |
| Sonstige Veränderungen                | (54)                                   | 13                                 | (76)                                           | (4)                                  | (31)                                                              | 32                                | (120)        |
| <b>Stand am 31. Dezember 2009</b>     | <b>1 339</b>                           | <b>1 601</b>                       | <b>798</b>                                     | <b>450</b>                           | <b>407</b>                                                        | <b>935</b>                        | <b>5 530</b> |
| davon: Kurzfristig                    | 536                                    | 1 349                              | 39                                             | 424                                  | 407                                                               | 614                               | 3 369        |
| Änderungen des Konsolidierungskreises | 1                                      | 16                                 | 1                                              | 0                                    | 0                                                                 | 6                                 | 24           |
| Währungsdifferenzen                   | (2)                                    | 19                                 | 7                                              | 0                                    | 5                                                                 | 11                                | 40           |
| Zuführung                             | 191                                    | 1 510                              | 88                                             | 126                                  | 508                                                               | 430                               | 2 853        |
| Verbrauch                             | (1 031)                                | (1 433)                            | (36)                                           | (104)                                | (443)                                                             | (318)                             | (3 365)      |
| Auflösung                             | (72)                                   | (110)                              | (30)                                           | (19)                                 | (22)                                                              | (146)                             | (399)        |
| Zinseffekt                            | (9)                                    | 25                                 | 46                                             | 2                                    | 0                                                                 | 6                                 | 70           |
| Sonstige Veränderungen                | 41                                     | 11                                 | 0                                              | 2                                    | (1)                                                               | 15                                | 68           |
| <b>Stand am 31. Dezember 2010</b>     | <b>458</b>                             | <b>1 639</b>                       | <b>874</b>                                     | <b>457</b>                           | <b>454</b>                                                        | <b>939</b>                        | <b>4 821</b> |
| davon: Kurzfristig                    | 281                                    | 1 360                              | 32                                             | 427                                  | 454                                                               | 639                               | 3 193        |

Die Rückstellungen für Restrukturierungen beinhalten im Wesentlichen Rückstellungen für den Personalumbau. Im Geschäftsjahr haben sich die Rückstellungen für Restrukturierungen wie folgt entwickelt:

|                       | 01.01.2010   | Zuführung  | Verbrauch      | Auflösung   | Sonstige<br>Veränderungen | 31.12.2010 |
|-----------------------|--------------|------------|----------------|-------------|---------------------------|------------|
|                       | Mio. €       | Mio. €     | Mio. €         | Mio. €      | Mio. €                    | Mio. €     |
| Vorzeitiger Ruhestand | 622          | 18         | (702)          | (8)         | 82                        | 12         |
| Abfindungsmodelle     | 366          | 58         | (191)          | (55)        | 23                        | 201        |
| Altersteilzeit        | 292          | 113        | (98)           | (3)         | (80)                      | 224        |
| Sonstige              | 59           | 2          | (40)           | (6)         | 6                         | 21         |
|                       | <b>1 339</b> | <b>191</b> | <b>(1 031)</b> | <b>(72)</b> | <b>31</b>                 | <b>458</b> |
| davon: Kurzfristig    | 536          |            |                |             |                           | 281        |

Die hier dargestellten Personalumbauinstrumente sind zum Teil gesetzlich verankert, so z. B. das Gesetz für den vorzeitigen Ruhestand für Beamte. Für die bei der Deutschen Telekom beschäftigten Beamten bietet das Gesetz die Möglichkeit, unter bestimmten Voraussetzungen ab dem vollendeten 55. Lebensjahr in den vorzeitigen Ruhestand zu treten. Mit Inkrafttreten des Dienstrechtsneuordnungsgesetzes wurde die Vorruhestandsregelung für Beamte bis zum 31. Dezember 2012 verlängert. Eine Inanspruchnahme in den Jahren 2011 und 2012 bedarf allerdings eines Vorstandsbeschlusses.

Die übrigen Personalrückstellungen umfassen eine Vielzahl von Einzelthemen wie Rückstellungen für Entgeltabgrenzungen, Beihilfen und Jubiläumszuwendungen. Die Aufwendungen werden verursachungsgerecht den Funktionskosten bzw. den sonstigen betrieblichen Aufwendungen zugeordnet.

Die Rückstellungen für Rückbauverpflichtungen enthalten die geschätzten Kosten für den Abbruch und das Abräumen eines Vermögenswerts und die Wiederherstellung des Standorts, an dem er sich befindet. Die geschätzten Kosten sind Bestandteil der Anschaffungs- und Herstellungskosten des betreffenden Vermögenswerts.

Die Rückstellungen für Prozessrisiken beinhalten im Wesentlichen mögliche Inanspruchnahmen aus anhängigen Klagen.

Die Rückstellungen für Vertriebs- und Einkaufsunterstützungen beinhalten Händlerprovisionen, Werbekostenzuschüsse und Rückvergütungen.

Die übrigen sonstigen Rückstellungen beinhalten neben Rückstellungen im Zusammenhang mit Unternehmensverkäufen und Standortschließungen, Rückstellungen für Altlasten und Umweltrisiken sowie Rückstellungen für Gewährleistungen eine Vielzahl weiterer Sachverhalte mit Wertansätzen von im Einzelfall nur untergeordneter Bedeutung.

## 14 Übrige Schulden.

|                                             | 31.12.2010<br>Mio. € | 31.12.2009<br>Mio. € |
|---------------------------------------------|----------------------|----------------------|
| Abgegrenzte Umsatzerlöse                    | 1 980                | 2 095                |
| Vorzeitiger Ruhestand                       | 2 325                | 1 819                |
| Verbindlichkeiten aus sonstigen Steuern     | 1 221                | 1 178                |
| Verbindlichkeiten aus „Straight line lease“ | 1 080                | 845                  |
| Sonstige abgegrenzte Erlöse                 | 601                  | 527                  |
| Übrige sonstige Schulden                    | 907                  | 1 082                |
|                                             | <b>8 114</b>         | <b>7 546</b>         |

## 15 Eigenkapital.

### Gezeichnetes Kapital.

Zum 31. Dezember 2010 beträgt das Grundkapital der Deutschen Telekom 11 063 Mio. €. Das Grundkapital ist in 4 321 319 206 nennwertlose, auf den Namen lautende Stückaktien eingeteilt.

|                         | 2010             |              |
|-------------------------|------------------|--------------|
|                         | Tsd. Stück       | %            |
| Bund                    | 646 575          | 15,0         |
| KfW Bankengruppe        | 735 662          | 17,0         |
| Streubesitz             | 2 939 082        | 68,0         |
| davon: Blackstone Group | 191 700          | 4,4          |
| davon: BlackRock        | 145 762          | 3,4          |
|                         | <b>4 321 319</b> | <b>100,0</b> |

**Kapitalherabsetzung.** Mit Beschluss der Hauptversammlung vom 3. Mai 2010 wurde der Vorstand ermächtigt, bis zum 2. November 2011 Aktien der Gesellschaft mit einem auf diese entfallenden Betrag am Grundkapital von insgesamt bis zu 1 116 497 918,20 € mit folgender Maßgabe zu erwerben: Auf die aufgrund dieser Ermächtigung erworbenen Aktien zusammen mit anderen Aktien der Gesellschaft, welche die Gesellschaft bereits erworben hat und noch besitzt oder die ihr gemäß §§ 71d und 71e AktG zuzurechnen sind, entfallen zu keinem Zeitpunkt mehr als 10 % des Grundkapitals der Gesellschaft. Ferner sind die Voraussetzungen des § 71 Abs. 2 Sätze 2 und 3 AktG zu beachten. Der Erwerb darf nicht zum Zweck des Handels in eigenen Aktien erfolgen. Die Ermächtigung kann ganz oder in Teilen ausgeübt werden. Der Erwerb kann innerhalb des Ermächtigungszeitraums bis zur Erreichung des maximalen Erwerbsummens in Teiltranchen, verteilt auf verschiedene Erwerbszeitpunkte, erfolgen. Der Erwerb kann auch durch von der Deutschen Telekom AG im Sinn von § 17 AktG abhängige Konzernunternehmen oder durch Dritte für Rechnung der Deutschen Telekom AG oder für Rechnung von nach § 17 AktG abhängigen Konzernunternehmen der Deutschen Telekom AG durchgeführt werden. Der Erwerb erfolgt unter Wahrung des Gleichbehandlungsgrundsatzes (§ 53a AktG) über die Börse. Er kann stattdessen auch mittels eines an alle Aktionäre gerichteten öffentlichen Kauf- oder Aktienangebots erfolgen, bei dem, vorbehaltlich eines zugelassenen Ausschlusses des Andienungsrechts, der Gleichbehandlungsgrundsatz ebenfalls zu wahren ist.

Der Hauptversammlungsbeschluss vom 3. Mai 2010 hat den Vorstand u. a. auch dazu ermächtigt, Aktien der Deutschen Telekom AG, die aufgrund der vorstehenden Ermächtigung erworben werden, einzuziehen, ohne dass die Einziehung oder ihre Durchführung eines weiteren Hauptversammlungsbeschlusses bedarf. Auf Grundlage dieser Ermächtigung hat der Vorstand am 27. Juli 2010 die Durchführung eines Aktienrückkaufprogramms beschlossen.



Das Rückkaufprogramm wurde am 3. Dezember 2010 abgeschlossen. Insgesamt wurden 40 001 Tsd. Stück Aktien mit einem Gesamterwerbsumfang von insgesamt 400 Mio. € (ohne Nebenkosten) erworben (durchschnittlicher Kaufpreis pro Aktie: 9,99 €). Am 14. Dezember 2010 hat der Vorstand beschlossen, das Grundkapital der Deutschen Telekom AG entsprechend herabzusetzen und die erworbenen Aktien einzuziehen. Als Folge daraus verringerte sich das gezeichnete Kapital um 102 Mio. € (rechnerischer Wert pro Aktie: 2,56 €) und die Gewinnrücklagen des Konzerns um 400 Mio. €. Der Kapitalrücklage wurden 102 Mio. € gemäß § 237 Abs. 5 AktG zugeführt.

**Stimmrechte.** Jede Aktie gewährt eine Stimme. Die Stimmrechte sind jedoch bei den eigenen Anteilen (per 31. Dezember 2010: rund 2 Mio. Stück) und den sog. Trust (Treuhänder)-Aktien (per 31. Dezember 2010: rund 19 Mio. Stück) eingeschränkt. Die Trust-Aktien stehen im Zusammenhang mit den Akquisitionen von VoiceStream und Powertel (jetzt T-Mobile USA) im Jahr 2001. Im Rahmen dieser Akquisitionen gab die Deutsche Telekom AG neue Aktien aus genehmigtem Kapital an Treuhänder aus, u. a. zugunsten von Inhabern von Optionsscheinen, Optionen und Umtauschrechten. Hinsichtlich der an Trusts ausgegebenen Aktien hat der jeweilige Treuhänder für die Zeit des Bestehens des Trusts auf Stimmrechte und Bezugsrechte sowie grundsätzlich auf Dividendenrechte verzichtet. Die an die Trusts ausgegebenen Aktien können auf Weisung der Deutschen Telekom AG über die Börse verkauft werden, wenn die Berechtigten ihre Options-, Umtausch- bzw. Wandlungsrechte nicht ausüben oder diese erlöschen. Der Veräußerungserlös fließt der Deutschen Telekom AG zu. Am 31. Dezember 2010 betrug die Anzahl der hinterlegten T-Aktien für die noch ausstehenden Bezugsrechte 3 042 055 Stück.

**Genehmigtes Kapital und bedingtes Kapital.** Das genehmigte Kapital und das bedingte Kapital zum 31. Dezember 2010 setzen sich aus den folgenden Bestandteilen zusammen:

|                               | Betrag<br>Mio. € | Stückaktien<br>Tsd. Stück | Zweck                                                                                                          |
|-------------------------------|------------------|---------------------------|----------------------------------------------------------------------------------------------------------------|
| Genehmigtes Kapital 2009/I *  | 2 176            | 850 000                   | Erhöhung Grundkapital (bis 29. April 2014)                                                                     |
| Genehmigtes Kapital 2009/II * | 38               | 15 000                    | Belegschaftsaktien (bis 29. April 2014)                                                                        |
| Bedingtes Kapital II          | 32               | 12 427                    | Erfüllung von Bezugsrechten auf Aktien aus Aktienoptionen für den Aktienoptionsplan 2001                       |
| Bedingtes Kapital IV          | 1 100            | 429 688                   | Bedienung von bis zum 25. April 2010 ausgegebenen garantierten Wandelschuld- oder Optionsschuldverschreibungen |

\* Die Zustimmung des Aufsichtsrats ist erforderlich.

### Kapitalrücklage.

Die Kapitalrücklage des Konzerns umfasst insbesondere die Kapitalrücklage der Deutschen Telekom AG. Unterschiede zu der Kapitalrücklage der Deutschen Telekom AG resultieren aus dem im Konzernabschluss zulässigen Ansatz der im Rahmen des Erwerbs von T-Mobile USA Inc., Bellevue (USA)/Powertel Inc., Bellevue (USA) neu ausgegebenen Aktien der Deutschen Telekom AG zu deren Marktwert an Stelle des Nennwerts sowie aus der damit im Zusammenhang stehenden Behandlung der Emissionskosten, die von der Kapitalrücklage abgezogen wurden.

# Erläuterungen zur Konzern-Gewinn- und Verlustrechnung.

## 16 Umsatzerlöse.

Die Umsätze gliedern sich in die folgenden Erlösarten:

|                                                              | 2010<br>Mio. € | 2009<br>Mio. € | 2008<br>Mio. € |
|--------------------------------------------------------------|----------------|----------------|----------------|
| Umsatzerlöse aus der Erbringung von Dienstleistungen         | 58 159         | 61 017         | 58 449         |
| Umsatzerlöse aus dem Verkauf von Gütern und Handelswaren     | 4 067          | 3 442          | 3 036          |
| Umsatzerlöse aus der Nutzungsüberlassung von Vermögenswerten | 195            | 143            | 181            |
|                                                              | <b>62 421</b>  | <b>64 602</b>  | <b>61 666</b>  |

■ Ausführliche Erläuterungen zur Entwicklung der Umsatzerlöse sind dem Kapitel „Geschäftsentwicklung des Konzerns“ im zusammengefassten Lagebericht zu entnehmen.

## 17 Umsatzkosten.

Konsolidierungskreiseffekte aus der Entkonsolidierung der T-Mobile UK in Höhe von 1,5 Mrd. €, die durch Währungseffekte von insgesamt 0,7 Mrd. € teilweise kompensiert wurden, begründeten im Wesentlichen den Rückgang der Umsatzkosten um 0,5 Mrd. €.

## 18 Vertriebskosten.

Der Rückgang der Vertriebskosten um 1,2 Mrd. € resultiert im Wesentlichen aus Konsolidierungskreiseffekten in Höhe von 0,6 Mrd. € und geringeren Kundenakquisitions- und Kundenbindungskosten im operativen Segment Deutschland. Dem standen Währungskurseffekte hauptsächlich aus der US-Dollar-Umrechnung in Höhe von insgesamt 0,3 Mrd. € entgegen.

## 19 Allgemeine Verwaltungskosten.

Der Anstieg der allgemeinen Verwaltungskosten um 0,6 Mrd. € stand im Wesentlichen im Zusammenhang mit höheren Aufwendungen für den vorzeitigen Ruhestand in Höhe von 0,2 Mrd. €. Zudem war hier im Vorjahr die Auflösung einer Rückstellung für die Postbeamtenkrankenkasse in Höhe von 0,2 Mrd. € enthalten.

## 20 Sonstige betriebliche Erträge.

|                                                                        | 2010<br>Mio. € | 2009<br>Mio. € | 2008<br>Mio. € |
|------------------------------------------------------------------------|----------------|----------------|----------------|
| Erträge aus Kostenerstattungen                                         | 381            | 344            | 272            |
| Erträge aus der Zuschreibung langfristiger Vermögenswerte gemäß IFRS 5 | 47             | 131            | 134            |
| Erträge aus dem Abgang von langfristigen Vermögenswerten               | 70             | 104            | 100            |
| Erträge aus Versicherungsentschädigungen                               | 42             | 49             | 50             |
| Erträge aus Entkonsolidierungen                                        | 3              | 20             | 505            |
| Übrige sonstige betriebliche Erträge                                   | 955            | 856            | 910            |
|                                                                        | <b>1 498</b>   | <b>1 504</b>   | <b>1 971</b>   |

Die sonstigen betrieblichen Erträge haben sich im Vergleich zum Vorjahr nicht wesentlich verändert.

## 21 Sonstige betriebliche Aufwendungen.

|                                                                                                                         | 2010<br>Mio. € | 2009<br>Mio. € | 2008<br>Mio. € |
|-------------------------------------------------------------------------------------------------------------------------|----------------|----------------|----------------|
| Wertminderungen aus dem Werthaltigkeitstest zum Jahresende                                                              |                |                |                |
| davon: Auf Goodwill                                                                                                     | 395            | 2 345          | 289            |
| davon: Auf Sachanlagevermögen                                                                                           | 285            | -              | -              |
| Aufwand im Zusammenhang mit der Einigung mit der französischen Vivendi und der polnischen Elektrim über die PTC-Anteile | 400            | -              | -              |
| Verluste aus Entkonsolidierungen                                                                                        | 350            | 1              | 62             |
| Verluste aus dem Abgang von langfristigen Vermögenswerten                                                               | 159            | 154            | 170            |
| Übrige sonstige betriebliche Aufwendungen                                                                               | 1 228          | 819            | 711            |
|                                                                                                                         | <b>2 817</b>   | <b>3 319</b>   | <b>1 232</b>   |





Die sonstigen betrieblichen Aufwendungen verringerten sich im Vergleich zum Vorjahr um 0,5 Mrd. €. Die Verringerung ist u. a. durch geringere Abschreibungen, die im Zusammenhang mit den zum Jahresende durchgeführten Werthaltigkeitstests gebucht wurden, entstanden. Unter anderem war im Vorjahr eine Wertminderung des Goodwills in Höhe von 1,8 Mrd. € der zahlungsmittelgenerierenden Einheit T-Mobile UK enthalten.  Weitere Erläuterungen sind der Angabe 5 zu entnehmen. Der Aufwand im Zusammenhang mit der Einigung über die PTC-Anteile in Höhe von 0,4 Mrd. € und der Aufwand aus der Entkonsolidierung der T-Mobile UK im zweiten Quartal 2010 aufgrund der Gründung des Joint Venture Everything Everywhere in Höhe von 0,4 Mrd. € standen dem teilweise entgegen.

## 22 Zinsergebnis.

|                                                                                     | 2010<br>Mio. € | 2009<br>Mio. € | 2008<br>Mio. € |
|-------------------------------------------------------------------------------------|----------------|----------------|----------------|
| Zinserträge                                                                         | 349            | 341            | 408            |
| Zinsaufwendungen                                                                    | (2 849)        | (2 896)        | (2 895)        |
|                                                                                     | <b>(2 500)</b> | <b>(2 555)</b> | <b>(2 487)</b> |
| davon: Aus Finanzinstrumenten der<br>Bewertungskategorien gemäß IAS 39:             |                |                |                |
| Darlehen und Forderungen                                                            | 77             | 132            | 162            |
| Held-to-Maturity-Investitionen                                                      | 2              | 3              | 23             |
| Finanzielle Vermögenswerte<br>Available-for-Sale                                    | 15             | 42             | 32             |
| Finanzielle Verbindlichkeiten<br>bewertet mit fortgeführten<br>Anschaffungskosten * | (2 490)        | (2 637)        | (2 668)        |

\* Nach der Effektivzinsmethode ermittelte Zinsaufwendungen korrigiert um Zinsabgrenzungen aus derivativen Finanzinstrumenten, die in der Berichtsperiode im Rahmen des Hedge Accounting gemäß IAS 39 als Sicherungsinstrumente gegen zinsbedingte Veränderungen der beizulegenden Zeitwerte von zu fortgeführten Anschaffungskosten bilanzierten finanziellen Verbindlichkeiten eingesetzt wurden (2010: Zinserträge 155 Mio. €, 2009: Zinserträge 107 Mio. €, 2008: Zinserträge 68 Mio. € und Zinsaufwendungen 11 Mio. €).

Im Geschäftsjahr wurden 69 Mio. € (2009: 27 Mio. €) als Teil der Anschaffungs- oder Herstellungskosten aktiviert. Der Berechnung lag ein konzernweit anzuwendender durchschnittlicher Zinssatz von 5,4 % (2009: 5,9 %) zugrunde.

Im Geschäftsjahr wurden 3,3 Mrd. € (2009: 3,5 Mrd. €, 2008: 3,4 Mrd. €) an Zinszahlungen geleistet.

Abgegrenzte Zinszahlungen aus derivativen Finanzinstrumenten (Zinsswaps), die als Sicherungsinstrumente in einem Fair Value Hedge gemäß IAS 39 designiert wurden, werden pro Swapkontrakt saldiert und entsprechend dem Nettobetrag entweder als Zinsertrag oder -aufwand erfasst. Das Zinsergebnis wird den Bewertungskategorien anhand des Grundgeschäfts zugeordnet; im Berichtszeitraum wurden ausschließlich finanzielle Verbindlichkeiten gesichert.

## 23 Ergebnis aus at equity bilanzierten Unternehmen.

|                                          | 2010<br>Mio. € | 2009<br>Mio. € | 2008<br>Mio. € |
|------------------------------------------|----------------|----------------|----------------|
| Ergebnis aus<br>Gemeinschaftsunternehmen | (59)           | 9              | 31             |
| Ergebnis aus<br>assoziierten Unternehmen | 2              | 15             | (419)          |
|                                          | <b>(57)</b>    | <b>24</b>      | <b>(388)</b>   |

Seit dem 1. April 2010 wird das Joint Venture Everything Everywhere als Beteiligung an at equity bilanzierten Unternehmen ausgewiesen. Der Ergebnisanteil aus diesem Joint Venture (2010: - 49 Mio. €), der auf die Deutsche Telekom entfällt, wird seitdem im Ergebnis aus Gemeinschaftsunternehmen ausgewiesen.

## 24 Sonstiges Finanzergebnis.

|                                                                             | 2010<br>Mio. € | 2009<br>Mio. € | 2008<br>Mio. € |
|-----------------------------------------------------------------------------|----------------|----------------|----------------|
| Beteiligungsergebnis (ohne Ergebnis aus at equity bilanzierten Unternehmen) | 30             | 22             | 44             |
| Ergebnis aus Finanzinstrumenten                                             | 133            | (171)          | (254)          |
| Zinsanteil aus der Bewertung von Rückstellungen und Verbindlichkeiten       | (416)          | (677)          | (503)          |
|                                                                             | <b>(253)</b>   | <b>(826)</b>   | <b>(713)</b>   |

Im sonstigen Finanzergebnis werden sämtliche Ergebniskomponenten, einschließlich der Zinserträge und -aufwendungen von Finanzinstrumenten, die nach IAS 39 als „zu Handelszwecken gehalten“ eingestuft sind, ausgewiesen.

Im Ergebnis aus Finanzinstrumenten sind Ergebniseffekte aus Währungsumrechnungen in Höhe von – 424 Mio. € (2009: – 22 Mio. €; 2008: – 587 Mio. €) enthalten. Dem stehen 557 Mio. € (2009: – 149 Mio. €; 2008: 333 Mio. €) Ergebniseffekte aus Finanzinstrumenten gegenüber, die im Wesentlichen zur Sicherung von Währungseffekten eingegangen wurden.

Die deutliche Verbesserung des sonstigen Finanzergebnisses in Höhe von 0,6 Mrd. € im Vergleich zum Vorjahr ist neben den Effekten aus der Veränderung des Ergebnisses aus Finanzinstrumenten im Wesentlichen auf geringere Belastungen aus Zinseffekten in den Rückstellungen und Verbindlichkeiten zurückzuführen.

## 25 Ertragsteuern.

### Ertragsteuern in der Konzern-Gewinn- und Verlustrechnung.

Als Ertragsteuern sind die in den einzelnen Ländern gezahlten bzw. geschuldeten tatsächlichen Steuern sowie die latenten Steuern ausgewiesen.

Die Ertragsteuern teilen sich auf das In- und Ausland wie folgt auf:

|                             | 2010<br>Mio. € | 2009<br>Mio. € | 2008<br>Mio. € |
|-----------------------------|----------------|----------------|----------------|
| <b>Tatsächliche Steuern</b> | <b>768</b>     | <b>873</b>     | <b>644</b>     |
| Deutschland                 | 87             | 163            | 88             |
| Ausland                     | 681            | 710            | 556            |
| <b>Latente Steuern</b>      | <b>167</b>     | <b>909</b>     | <b>784</b>     |
| Deutschland                 | 197            | 353            | 515            |
| Ausland                     | (30)           | 556            | 269            |
|                             | <b>935</b>     | <b>1 782</b>   | <b>1 428</b>   |

Der zusammengefasste Ertragsteuersatz für das Jahr 2010 beträgt bei der Deutschen Telekom 30,5%. Er setzt sich aus der Körperschaftsteuer mit einem Steuersatz von 15% und dem Solidaritätszuschlag, der in Höhe von 5,5% auf die Körperschaftsteuer erhoben wird, sowie der Gewerbesteuer mit einem Durchschnittshebesatz von 419% zusammen. Für 2009 belief sich der zusammengefasste Ertragsteuersatz auf 30,5% und 2008 ebenfalls auf 30,5%.

**Ableitung Effektivsteuersatz.** Die Ertragsteuern im Berichtsjahr in Höhe von 935 Mio. € (2009: 1 782 Mio. €; 2008: 1 428 Mio. €) leiten sich wie folgt von einem „erwarteten“ Ertragsteueraufwand ab, der sich bei Anwendung des gesetzlichen Ertragsteuersatzes des Mutterunternehmens (zusammengefasster Ertragsteuersatz) auf das Ergebnis vor Ertragsteuern ergeben hätte:

|                                                                                                                             | 2010<br>Mio. € | 2009<br>Mio. € | 2008<br>Mio. € |
|-----------------------------------------------------------------------------------------------------------------------------|----------------|----------------|----------------|
| <b>Ergebnis vor Ertragsteuern</b>                                                                                           | <b>2 695</b>   | <b>2 655</b>   | <b>3 452</b>   |
| Erwarteter Ertragsteueraufwand (Nominaler Ertragsteuersatz der Deutschen Telekom AG: 2010: 30,5%; 2009: 30,5%; 2008: 30,5%) | 822            | 810            | 1 053          |
| <b>Anpassungen des erwarteten Steueraufwands</b>                                                                            |                |                |                |
| Auswirkungen von Steuersatzänderungen                                                                                       | (113)          | 26             | 3              |
| Steuereffekte aus Vorjahren                                                                                                 | 112            | (26)           | 29             |
| Steuereffekte aus anderen Ertragsteuern                                                                                     | 68             | 161            | 115            |
| Steuerfreie Erträge                                                                                                         | (85)           | (106)          | (86)           |
| Steuereffekte aus „Equity Investments“                                                                                      | 16             | (9)            | 124            |
| Nicht abziehbare Aufwendungen                                                                                               | 130            | 136            | 110            |
| Permanente Differenzen                                                                                                      | 123            | 64             | (47)           |
| Außerplanmäßige Wertminderungen auf Goodwill                                                                                | 106            | 702            | 71             |
| Steuereffekte aus Verlustvorträgen                                                                                          | (385)          | 51             | (34)           |
| Steuereffekte aus Hinzurechnungen und Kürzungen für lokale Steuern                                                          | 91             | 71             | 86             |
| Anpassungen des Steuerbetrags an den abweichenden nationalen Steuersatz                                                     | 52             | (102)          | 3              |
| Sonstige Steuereffekte                                                                                                      | (2)            | 4              | 1              |
| <b>Ertragsteueraufwand gemäß Konzern-Gewinn- und Verlustrechnung</b>                                                        | <b>935</b>     | <b>1 782</b>   | <b>1 428</b>   |
| Effektiver Steuersatz                                                                                                       | %              | 35             | 67             |
|                                                                                                                             |                |                | 41             |

**Tatsächliche Ertragsteuern in der Konzern-Gewinn- und Verlustrechnung.**

Die tatsächlichen Ertragsteuern setzen sich wie folgt zusammen:

|                                         | 2010<br>Mio. € | 2009<br>Mio. € | 2008<br>Mio. € |
|-----------------------------------------|----------------|----------------|----------------|
| <b>Tatsächliche Ertragsteuern</b>       | <b>768</b>     | <b>873</b>     | <b>644</b>     |
| davon:                                  |                |                |                |
| Steueraufwand der laufenden Periode     | 560            | 744            | 596            |
| Steueraufwand/(-ertrag) aus Vorperioden | 208            | 129            | 48             |

**Latente Steuern in der Konzern-Gewinn- und Verlustrechnung.** Die latenten Steuern haben sich wie folgt entwickelt:

|                                         | 2010<br>Mio. € | 2009<br>Mio. € | 2008<br>Mio. € |
|-----------------------------------------|----------------|----------------|----------------|
| <b>Latenter Steueraufwand/(-ertrag)</b> | <b>167</b>     | <b>909</b>     | <b>784</b>     |
| davon:                                  |                |                |                |
| Aus temporären Differenzen              | 21             | 692            | 409            |
| Aus Verlustvorträgen                    | 165            | 232            | 419            |
| Aus Steuergutschriften                  | (19)           | (15)           | (44)           |

Der Ertragsteueraufwand ist im Vergleich zum Vorjahreszeitraum gesunken, obwohl das Vorsteuerergebnis höher ausfällt. Ursächlich hierfür ist zum einen, dass im Jahr 2009 im Vergleich zum Berichtsjahr hohe Wertminderungen auf Goodwill im Vorsteuerergebnis erfasst wurden, die steuerlich nicht zu berücksichtigen waren und damit die Steuerquote in 2009 erhöhten. Zum anderen sind im Segment Europa in der laufenden Periode latente Steuern in Höhe von 466 Mio. € auf temporäre Differenzen und steuerliche Verlustvorträge aktiviert worden, da eine zukünftige Nutzung dieser temporären Differenzen und Verlustvorträge wahrscheinlich geworden ist. Gegenläufig wirkte die griechische Special Contribution Tax II, die den Steueraufwand und die Steuerquote des Konzerns im Berichtszeitraum ansteigen lässt. Der T-Mobile UK Entkonsolidierungseffekt, der steuerlich keine Berücksichtigung findet, wirkte sich ebenfalls erhöhend auf die Steuerquote aus.

**Ertragsteuern in der Konzern-Bilanz.****Tatsächliche Ertragsteuern in der Konzern-Bilanz:**

|                         | 31.12.2010<br>Mio. € | 31.12.2009<br>Mio. € |
|-------------------------|----------------------|----------------------|
| Steuerforderungen       | 224                  | 144                  |
| Steuerverbindlichkeiten | (545)                | (511)                |

**Latente Steuern in der Konzern-Bilanz:**

|                                                               | 31.12.2010<br>Mio. € | 31.12.2009<br>Mio. € |
|---------------------------------------------------------------|----------------------|----------------------|
| Aktive latente Steuern                                        | 5 129                | 5 162                |
| Passive latente Steuern                                       | (7 635)              | (7 153)              |
|                                                               | <b>(2 506)</b>       | <b>(1 991)</b>       |
| davon: Aus Verrechnung mit dem Eigenkapital                   |                      |                      |
| Versicherungsmathematische Gewinne und Verluste               | 175                  | 151                  |
| Neubewertungsrücklage                                         | 3                    | 3                    |
| Sicherungsinstrumente aus der Absicherung von Zahlungsströmen | (338)                | (319)                |
| Zur Veräußerung verfügbare finanzielle Vermögenswerte         | 3                    | 3                    |
|                                                               | <b>(157)</b>         | <b>(162)</b>         |

**Entwicklung der latenten Steuern:**

|                                   | 31.12.2010<br>Mio. € | 31.12.2009<br>Mio. € |
|-----------------------------------|----------------------|----------------------|
| Bilanzansatz latente Steuern      | (2 506)              | (1 991)              |
| Unterschied gegenüber dem Vorjahr | (515)                | (1 117)              |
| davon:                            |                      |                      |
| Erfolgswirksam                    | (167)                | (909)                |
| Verrechnung mit dem Eigenkapital  | 5                    | 138                  |
| Akquisitionen/Veräußerungen       | (63)                 | (482)                |
| Währungsdifferenzen               | (290)                | 136                  |

Die latenten Steuern entfallen auf folgende wesentliche Bilanzposten, Verlustvorträge und Steuergutschriften:

|                                                                                 | 31.12.2010                          |                                      | 31.12.2009                          |                                      |
|---------------------------------------------------------------------------------|-------------------------------------|--------------------------------------|-------------------------------------|--------------------------------------|
|                                                                                 | Aktive<br>latente Steuern<br>Mio. € | Passive<br>latente Steuern<br>Mio. € | Aktive<br>latente Steuern<br>Mio. € | Passive<br>latente Steuern<br>Mio. € |
| <b>Kurzfristige Vermögenswerte</b>                                              | <b>895</b>                          | <b>(415)</b>                         | <b>788</b>                          | <b>(368)</b>                         |
| Forderungen aus Lieferungen und Leistungen und sonstige Forderungen             | 699                                 | (344)                                | 339                                 | (52)                                 |
| Sonstige finanzielle Vermögenswerte                                             | 0                                   | 0                                    | 317                                 | (251)                                |
| Vorräte                                                                         | 86                                  | (25)                                 | 13                                  | (17)                                 |
| Übrige Vermögenswerte                                                           | 110                                 | (46)                                 | 119                                 | (48)                                 |
| <b>Langfristige Vermögenswerte</b>                                              | <b>2 448</b>                        | <b>(11 315)</b>                      | <b>1 279</b>                        | <b>(9 739)</b>                       |
| Immaterielle Vermögenswerte                                                     | 996                                 | (7 216)                              | 493                                 | (6 802)                              |
| Sachanlagen                                                                     | 579                                 | (2 844)                              | 459                                 | (2 588)                              |
| Beteiligungen an at equity bilanzierten Unternehmen                             | 0                                   | 0                                    | 0                                   | 0                                    |
| Sonstige finanzielle Vermögenswerte                                             | 873                                 | (1 255)                              | 327                                 | (349)                                |
| <b>Kurzfristige Schulden</b>                                                    | <b>784</b>                          | <b>(741)</b>                         | <b>641</b>                          | <b>(405)</b>                         |
| Finanzielle Verbindlichkeiten                                                   | 326                                 | (415)                                | 267                                 | (229)                                |
| Verbindlichkeiten aus Lieferungen und Leistungen und sonstige Verbindlichkeiten | 146                                 | (81)                                 | 29                                  | (58)                                 |
| Sonstige Rückstellungen                                                         | 119                                 | (21)                                 | 176                                 | (46)                                 |
| Übrige Schulden                                                                 | 193                                 | (224)                                | 169                                 | (72)                                 |
| <b>Langfristige Schulden</b>                                                    | <b>2 942</b>                        | <b>(630)</b>                         | <b>3 209</b>                        | <b>(998)</b>                         |
| Finanzielle Verbindlichkeiten                                                   | 1 464                               | (352)                                | 1 572                               | (734)                                |
| Pensionsrückstellungen und ähnliche Verpflichtungen                             | 491                                 | (165)                                | 542                                 | (162)                                |
| Sonstige Rückstellungen                                                         | 287                                 | (74)                                 | 393                                 | (75)                                 |
| Übrige Schulden                                                                 | 700                                 | (39)                                 | 702                                 | (27)                                 |
| <b>Steuergutschriften</b>                                                       | <b>224</b>                          | <b>-</b>                             | <b>196</b>                          | <b>-</b>                             |
| <b>Verlustvorträge</b>                                                          | <b>3 973</b>                        | <b>-</b>                             | <b>4 458</b>                        | <b>-</b>                             |
| <b>Gesamt</b>                                                                   | <b>11 266</b>                       | <b>(13 101)</b>                      | <b>10 571</b>                       | <b>(11 510)</b>                      |
| davon: Langfristig                                                              | 9 587                               | (11 946)                             | 8 865                               | (10 737)                             |
| Wertberichtigung                                                                | (671)                               | -                                    | (1 052)                             | -                                    |
| Saldierung                                                                      | (5 466)                             | 5 466                                | (4 357)                             | 4 357                                |
| <b>Bilanzansatz</b>                                                             | <b>5 129</b>                        | <b>(7 635)</b>                       | <b>5 162</b>                        | <b>(7 153)</b>                       |

Die Wertberichtigungen beziehen sich im Wesentlichen auf die Verlustvorträge.



#### Die Verlustvorträge betragen:

|                                           | 31.12.2010<br>Mio. € | 31.12.2009<br>Mio. € |
|-------------------------------------------|----------------------|----------------------|
| <b>Verlustvorträge Körperschaftsteuer</b> | <b>11 972</b>        | <b>13 516</b>        |
| Verfallsdatum innerhalb von               |                      |                      |
| 1 Jahr                                    | 88                   | 38                   |
| 2 Jahren                                  | 119                  | 1 403                |
| 3 Jahren                                  | 76                   | 165                  |
| 4 Jahren                                  | 29                   | 128                  |
| 5 Jahren                                  | 32                   | 157                  |
| Nach 5 Jahren                             | 3 873                | 5 051                |
| Unbegrenzt vortragsfähig                  | 7 755                | 6 574                |

#### Die Verlustvorträge und temporären Differenzen, auf die keine latenten Steuern gebildet wurden, betragen:

|                                                 | 31.12.2010<br>Mio. € | 31.12.2009<br>Mio. € |
|-------------------------------------------------|----------------------|----------------------|
| <b>Verlustvorträge Körperschaftsteuer</b>       | <b>1 669</b>         | <b>3 295</b>         |
| Verfallsdatum innerhalb von                     |                      |                      |
| 1 Jahr                                          | 7                    | 18                   |
| 2 Jahren                                        | 67                   | 1 127                |
| 3 Jahren                                        | 57                   | 46                   |
| 4 Jahren                                        | 10                   | 43                   |
| 5 Jahren                                        | 15                   | 81                   |
| Nach 5 Jahren                                   | 300                  | 202                  |
| Unbegrenzt vortragsfähig                        | 1 213                | 1 778                |
| <b>Temporäre Differenzen Körperschaftsteuer</b> | <b>348</b>           | <b>477</b>           |

Daneben werden keine latenten Steuern für gewerbsteuerliche Verlustvorträge in Höhe von 88 Mio. € (31. Dezember 2009: 124 Mio. €) und gewerbsteuerliche Ansprüche aus temporären Differenzen in Höhe von 1 Mio. € (31. Dezember 2009: 40 Mio. €) angesetzt. Weiterhin wurden – getrennt von den körperschaftsteuerlichen Verlustvorträgen – keine latenten Steuern in Höhe eines Betrags von 160 Mio. € (31. Dezember 2009: 118 Mio. €) für sonstige ausländische ertragsteuerliche Verlustvorträge angesetzt.

Auf die oben genannten steuerlichen Verlustvorträge und temporären Differenzen wurden keine aktiven latenten Steuern gebildet, da von einer Realisierung der Steueransprüche in absehbarer Zeit nicht auszugehen ist.

Aus der Nutzung von steuerlichen Verlustvorträgen, auf die bislang keine aktiven latenten Steuern gebildet wurden, entsteht im Berichtsjahr ein positiver Effekt in Höhe von 301 Mio. € (2009: 12 Mio. €; 2008: 12 Mio. €).

Auf temporäre Unterschiede im Zusammenhang mit Anteilen an Tochtergesellschaften wurden in Höhe von 1 130 Mio. € (31. Dezember 2009: 1 590 Mio. €) keine latenten Steuerschulden angesetzt, da es nicht wahrscheinlich ist, dass sich diese temporären Differenzen in absehbarer Zeit umkehren werden.

Aufgrund von Unterschieden zwischen Ausschüttungs- und Thesaurierungsbelastung können sich zukünftig im Konzern Steuerbelastungen von bis zu 160 Mio. € ergeben.

## Angaben zu steuerlichen Auswirkungen auf das „Sonstige Ergebnis“.

|                                                                                      | 2010                          |                        |                                | 2009                          |                        |                                | 2008                          |                        |                                |
|--------------------------------------------------------------------------------------|-------------------------------|------------------------|--------------------------------|-------------------------------|------------------------|--------------------------------|-------------------------------|------------------------|--------------------------------|
|                                                                                      | Vor<br>Steuereffekt<br>Mio. € | Steuereffekt<br>Mio. € | Nach<br>Steuereffekt<br>Mio. € | Vor<br>Steuereffekt<br>Mio. € | Steuereffekt<br>Mio. € | Nach<br>Steuereffekt<br>Mio. € | Vor<br>Steuereffekt<br>Mio. € | Steuereffekt<br>Mio. € | Nach<br>Steuereffekt<br>Mio. € |
| Versicherungsmathematische Gewinne und Verluste aus leistungsorientierten Plänen     | (32)                          | 12                     | (20)                           | (461)                         | 116                    | (345)                          | 227                           | (64)                   | 163                            |
| Neubewertung im Rahmen von Unternehmenserwerben                                      | (2)                           | 0                      | (2)                            | (38)                          | 3                      | (35)                           | 0                             | 0                      | 0                              |
| Ausgleichsposten aus der Währungsumrechnung ausländischer Tochterunternehmen         | 3 698                         | 0                      | 3 698                          | (211)                         | 0                      | (211)                          | (352)                         | 0                      | (352)                          |
| davon: Erfolgswirksam                                                                | 2 151                         | 0                      | 2 151                          | 0                             | 0                      | 0                              | 0                             | 0                      | 0                              |
| Marktbewertung Available-for-Sale Securities                                         | (3)                           | 1                      | (2)                            | (4)                           | 0                      | (4)                            | 1                             | 0                      | 1                              |
| davon: Erfolgswirksam                                                                | 0                             | 0                      | 0                              | 0                             | 0                      | 0                              | 0                             | 0                      | 0                              |
| Marktbewertung Sicherungsinstrumente                                                 | 58                            | (18)                   | 40                             | (48)                          | 19                     | (29)                           | (41)                          | 8                      | (33)                           |
| davon: Erfolgswirksam                                                                | 0                             | 0                      | 0                              | 8                             | (1)                    | 7                              | (101)                         | 5                      | (96)                           |
| Anteil am sonstigen Ergebnis von Beteiligungen an at equity bilanzierten Unternehmen | 28                            | 0                      | 28                             | 0                             | 0                      | 0                              | 0                             | 0                      | 0                              |
| Sonstige direkt im Eigenkapital verrechnete Wertänderungen                           | 0                             | 0                      | 0                              | 11                            | 0                      | 11                             | (8)                           | 3                      | (5)                            |
| <b>Sonstiges Ergebnis</b>                                                            | <b>3 747</b>                  | <b>(5)</b>             | <b>3 742</b>                   | <b>(751)</b>                  | <b>138</b>             | <b>(613)</b>                   | <b>(173)</b>                  | <b>(53)</b>            | <b>(226)</b>                   |
| Überschuss/(Fehlbetrag)                                                              |                               |                        | 1 760                          |                               |                        | 873                            |                               |                        | 2 024                          |
| <b>Gesamtergebnis</b>                                                                |                               |                        | <b>5 502</b>                   |                               |                        | <b>260</b>                     |                               |                        | <b>1 798</b>                   |



## 26 Zurechnung des Überschusses/(Fehlbetrags) an die Anteile anderer Gesellschafter.

Von dem den Anteilen anderer Gesellschafter zugerechneten Überschuss von 65 Mio. € (2009: 520 Mio. €; 2008: 541 Mio. €) entfallen 484 Mio. € (2009: 527 Mio. €; 2008: 859 Mio. €) auf Gewinnanteile und 419 Mio. € (2009: 7 Mio. €; 2008: 318 Mio. €) auf Verlustanteile.

Die den Anteilen anderer Gesellschafter zugerechneten Gewinnanteile in 2010 setzen sich im Wesentlichen aus den Gesellschaften T-Mobile CZ, Hrvatski Telekom, Magyar Telekom, Slovak Telekom und T-Mobile Macedonia zusammen.

Die den Anteilen anderer Gesellschafter zugerechneten Verlustanteile in 2010 setzen sich im Wesentlichen aus Gesellschaften der OTE-Gruppe zusammen.

## 27 Ergebnis je Aktie.

Das unverwässerte und verwässerte Ergebnis je Aktie berechnen sich gemäß IAS 33 wie folgt:

### Unverwässertes Ergebnis je Aktie.

|                                                                                                   |                   | 2010         | 2009         | 2008         |
|---------------------------------------------------------------------------------------------------|-------------------|--------------|--------------|--------------|
| Den Eigentümern des Mutterunternehmens zugerechneter Überschuss (Konzernüberschuss)               | Mio. €            | 1 695        | 353          | 1 483        |
| Anpassung                                                                                         | Mio. €            | -            | -            | -            |
| <b>Angepasster Konzernüberschuss (unverwässert)</b>                                               | <b>Mio. €</b>     | <b>1 695</b> | <b>353</b>   | <b>1 483</b> |
| Anzahl der ausgegebenen Stammaktien                                                               | Mio. Stück        | 4 358        | 4 361        | 4 361        |
| Eigene Aktien                                                                                     | Mio. Stück        | (5)          | (2)          | (2)          |
| Hinterlegte Aktien für noch ausstehende Optionsrechte (T-Mobile USA/Powertel)                     | Mio. Stück        | (19)         | (19)         | (19)         |
| <b>Angepasste gewichtete durchschnittliche Anzahl der ausstehenden Stammaktien (unverwässert)</b> | <b>Mio. Stück</b> | <b>4 334</b> | <b>4 340</b> | <b>4 340</b> |
| <b>Unverwässertes Ergebnis je Aktie</b>                                                           | <b>€</b>          | <b>0,39</b>  | <b>0,08</b>  | <b>0,34</b>  |

Für die Berechnung des unverwässerten Ergebnisses je Aktie liegt die zeitlich gewichtete Summe aller ausstehenden Stammaktien zugrunde. Zudem wird die gewichtete durchschnittliche Anzahl der ausstehenden Stammaktien unter Abzug der von der Deutschen Telekom AG gehaltenen eigenen Aktien sowie der Aktien, die im Rahmen der Ausgabe neuer Aktien im Zuge der Akquisition von T-Mobile USA/Powertel treuhänderisch für eine spätere Ausgabe und die Aufnahme des Handels als Namensaktien gehalten werden, jeweils multipliziert mit dem entsprechenden zeitlichen Gewichtungsfaktor, berechnet.

**Verwässertes Ergebnis je Aktie.**

|                                                                                                                |                   | 2010         | 2009         | 2008         |
|----------------------------------------------------------------------------------------------------------------|-------------------|--------------|--------------|--------------|
| Angepasster den Eigentümern des Mutterunternehmens zugerechneter Überschuss (Konzernüberschuss) (unverwässert) | Mio. €            | 1 695        | 353          | 1 483        |
| Verwässernde Ergebniseffekte aus Aktienoptionen (nach Steuern)                                                 | Mio. €            | 0            | 0            | 0            |
| <b>Konzernüberschuss (verwässert)</b>                                                                          | <b>Mio. €</b>     | <b>1 695</b> | <b>353</b>   | <b>1 483</b> |
| Angepasste gewichtete durchschnittliche Anzahl der ausstehenden Stammaktien (unverwässert)                     | Mio. Stück        | 4 334        | 4 340        | 4 340        |
| Verwässernde potenzielle Stammaktien aus Aktienoptionen und Warrants                                           | Mio. Stück        | 0            | 0            | 0            |
| <b>Gewichtete durchschnittliche Anzahl der ausstehenden Stammaktien (verwässert)</b>                           | <b>Mio. Stück</b> | <b>4 334</b> | <b>4 340</b> | <b>4 340</b> |
| <b>Verwässertes Ergebnis je Aktie</b>                                                                          | <b>€</b>          | <b>0,39</b>  | <b>0,08</b>  | <b>0,34</b>  |

Die Berechnung des verwässerten Ergebnisses je Aktie entspricht grundsätzlich der Berechnungsweise des unverwässerten Ergebnisses je Aktie. Die in die Berechnung eingehenden Größen sind jedoch zusätzlich um alle Kapitalverwässerungseffekte, die sich aus potenziellen Stammaktien ergeben, zu bereinigen. Eigenkapitalinstrumente können das unverwässerte Ergebnis je Aktie in Zukunft verwässern und wurden – sofern im jeweiligen Betrachtungszeitraum bereits eine potenzielle Verwässerung vorlag – in die Berechnung des verwässerten Ergebnisses je Aktie einbezogen. Weitere Einzelheiten zu den derzeit gültigen Eigenkapitalinstrumenten sind der Angabe 15 und der Angabe 35 zu entnehmen.

**28 Dividende je Aktie.**

Für das Geschäftsjahr 2010 schlägt der Vorstand eine Dividende in Höhe von 0,70 € je dividendenberechtigter Stückaktie vor. Unter Zugrundelegung dieses Ausschüttungsvolumens entfällt auf die am 18. Februar 2011 dividendenberechtigten Stückaktien eine Dividendensumme von 3 011 Mio. € (2009: 3 386 Mio. €).

Die endgültige Dividendensumme hängt von der Anzahl der dividendenberechtigten Stückaktien zum Zeitpunkt der Beschlussfassung über die Verwendung des Bilanzgewinns am Tag der Hauptversammlung ab.

**29 Anzahl der Mitarbeiter und Personalaufwand.****Anzahl der Mitarbeiter (im Durchschnitt).**

|                            |               | 2010           | 2009           | 2008           |
|----------------------------|---------------|----------------|----------------|----------------|
| <b>Gesamtkonzern</b>       |               | <b>252 494</b> | <b>257 601</b> | <b>234 887</b> |
| Inland                     |               | 126 952        | 130 477        | 141 123        |
| Ausland                    |               | 125 542        | 127 124        | 93 764         |
| Arbeitnehmer               |               | 224 428        | 226 460        | 201 036        |
| Beamte (Inland)            |               | 28 066         | 31 141         | 33 851         |
| Auszubildende/Praktikanten |               | 9 217          | 9 805          | 10 424         |
| <b>Personalaufwand</b>     | <b>Mio. €</b> | <b>15 071</b>  | <b>14 333</b>  | <b>14 078</b>  |

Die Anzahl der Mitarbeiter sank im Geschäftsjahr um 2,0 %. Diese Entwicklung wurde durch folgende Effekte verursacht: Im Inland war die Verringerung im Wesentlichen durch den Personalabbau im Festnetz-Bereich des operativen Segments Deutschland begründet, dem aber ein höherer Personalbestand bei Vivento und aus den im Rahmen der konzernweiten Neuausrichtung der Führungsstruktur in der Konzernzentrale & Shared Services integrierten Einheiten teilweise entgegenstand.



Im Ausland sank die Anzahl der Mitarbeiter im Wesentlichen durch Maßnahmen zur Personalrestrukturierung im operativen Segment Europa und aus dem Abgang der T-Mobile UK. Dem standen höhere durchschnittliche Mitarbeiterzahlen im operativen Segment Systemgeschäft durch Offshore-Aktivitäten und durch die Übernahme von Mitarbeitern im Rahmen von gewonnenen Großaufträgen teilweise entgegen.

Der Personalaufwand stieg im Vergleich zum Vorjahr um 5,1 %. Wesentliche Treiber waren höhere Aufwendungen für den Vorruhestand der Beamten im Inland sowie höhere Personalkosten im operativen Segment Deutschland und in der Konzernzentrale & Shared Services, die durch die tarifliche Anhebung der Gehälter entstanden sind. Höhere Personalkosten im operativen Segment USA, die im Wesentlichen aufgrund des Wachstums im Einzelvertrieb und Wechselkurseffekten begründet sind, sowie die Erhöhung des ausländischen Personalbestands im operativen Segment Systemgeschäft trugen ebenfalls zu dieser Entwicklung bei.

### 30 Abschreibungen.

Die in den Funktionskosten und sonstigen betrieblichen Aufwendungen enthaltenen Abschreibungen setzen sich wie folgt zusammen:

|                                                                                              | 2010<br>Mio. € | 2009<br>Mio. € | 2008<br>Mio. € |
|----------------------------------------------------------------------------------------------|----------------|----------------|----------------|
| <b>Abschreibungen auf immaterielle Vermögenswerte</b>                                        | <b>3 743</b>   | <b>5 657</b>   | <b>3 397</b>   |
| davon:                                                                                       |                |                |                |
| Wertminderungen auf Goodwill aus dem Werthaltigkeitstest zum Jahresende                      | 395            | 2 345          | 289            |
| Abschreibungen auf Mobilfunk-Lizenzen                                                        | 743            | 905            | 1 013          |
| <b>Abschreibungen auf Sachanlagen</b>                                                        | <b>8 065</b>   | <b>8 237</b>   | <b>7 578</b>   |
| davon: Aus Wertminderungen auf Sachanlagevermögen aus dem Werthaltigkeitstest zum Jahresende | 285            | -              | -              |
|                                                                                              | <b>11 808</b>  | <b>13 894</b>  | <b>10 975</b>  |

Folgende Tabelle zeigt die im Gesamtbetrag der Abschreibungen enthaltenen Wertminderungen:

|                                                         | 2010<br>Mio. € | 2009<br>Mio. € | 2008<br>Mio. € |
|---------------------------------------------------------|----------------|----------------|----------------|
| <b>Immaterielle Vermögenswerte</b>                      | <b>399</b>     | <b>2 354</b>   | <b>340</b>     |
| davon:                                                  |                |                |                |
| Auf Goodwill aus dem Werthaltigkeitstest zum Jahresende | 395            | 2 345          | 289            |
| US-Mobilfunk-Lizenzen                                   | -              | -              | 21             |
| <b>Sachanlagen</b>                                      | <b>450</b>     | <b>217</b>     | <b>140</b>     |
| Grundstücke und Gebäude                                 | 159            | 193            | 123            |
| davon: Aus dem Werthaltigkeitstest zum Jahresende       | 27             | -              | -              |
| Technische Anlagen und Maschinen                        | 271            | 10             | 5              |
| davon: Aus dem Werthaltigkeitstest zum Jahresende       | 258            | -              | -              |
| Andere Anlagen, Betriebs- und Geschäftsausstattung      | 1              | 3              | 8              |
| Geleistete Anzahlungen und Anlagen im Bau               | 19             | 11             | 4              |
|                                                         | <b>849</b>     | <b>2 571</b>   | <b>480</b>     |

Die Abschreibungen sanken gegenüber dem Vorjahr um 2,1 Mrd. €. Die Wertminderungen sanken dabei um 1,7 Mrd. €. Der Rückgang der planmäßigen Abschreibungen resultiert im Wesentlichen aus geringeren Abschreibungen auf Sachanlagen (Technische Anlagen und Maschinen). Diese Verringerung ist hauptsächlich Folge des Wegfalls bzw. des Aussetzens der Abschreibungen auf die Vermögenswerte der T-Mobile UK in diesem Jahr.

Aus den Werthaltigkeitstests der zahlungsmittelgenerierenden Einheiten zum Jahresende resultierten neben Wertminderungen auf Goodwill in Höhe von 0,4 Mrd. € auch Wertminderungen auf Sachanlagevermögen in Höhe von 0,3 Mrd. €. Im Vorjahr waren zum Jahresende Wertminderungen auf Goodwill in Höhe von 2,3 Mrd. € notwendig geworden.  Weitere Erläuterungen zu den Werthaltigkeitstests der zahlungsmittelgenerierenden Einheiten zum Jahresende sind der Angabe 5 zu entnehmen.

# Sonstige Angaben.

## 31 Erläuterungen zur Konzern-Kapitalflussrechnung.

**Cashflow aus Geschäftstätigkeit.** Im Geschäftsjahr 2010 verringerte sich der Cashflow aus Geschäftstätigkeit gegenüber dem Vorjahreszeitraum um 1,1 Mrd. € auf 14,7 Mrd. €. Neben den Effekten aus der operativen Geschäftsentwicklung waren im Wesentlichen die folgenden Effekte für diesen Rückgang verantwortlich: gegenüber dem Vorjahr geringere Einzahlungen im Rahmen von Forderungsverkäufen (Factoring) in Höhe von 0,6 Mrd. € sowie netto höhere Auszahlungen aus dem Aufbau von Vorräten in Höhe von 0,4 Mrd. €. Dem stehen höhere Einzahlungen aus erhaltenen Dividenden in Höhe von 0,4 Mrd. € – im Wesentlichen aus einer unterjährigen Ausschüttung des Joint Venture Everything Everywhere – gegenüber. Die weiteren Veränderungen des Cashflows aus Geschäftstätigkeit umfassen eine Vielzahl von zum Teil gegenläufigen Effekten.

**Cashflow aus Investitionstätigkeit.** Die Mittelabflüsse aus Investitionstätigkeit beliefen sich auf 10,7 Mrd. € gegenüber 8,6 Mrd. € im Vorjahr. Zu dieser Veränderung trug u. a. der Zugang der Zahlungsmittel der OTE-Gruppe in Höhe von 1,6 Mrd. € im Vorjahr bei, dem in diesem Jahr ein Gesamteffekt aus dem Abgang der T-Mobile UK in Höhe von 0,4 Mrd. € gegenüberstand. Darüber hinaus erwarb die Deutsche Telekom im Geschäftsjahr 2010 Anteile in Höhe von 0,8 Mrd. € an einer vom Joint Venture Everything Everywhere begebenen Anleihe und verzeichnete höhere Auszahlungen für immaterielle Vermögenswerte in Höhe von 1,4 Mrd. €, was hauptsächlich auf die Auszahlungen für den Erwerb von Mobilfunk-Lizenzen (Spektrum) in Deutschland in Höhe von 1,3 Mrd. € zurückzuführen war.

Gegenläufig entwickelten sich die Auszahlungen für Sachanlagen, die sich um 0,7 Mrd. € verringerten, sowie die Nettozahlungen aus der Veränderung kurzfristiger finanzieller Vermögenswerte, die sich um 0,8 Mrd. € verbesserten. Hierzu trugen im abgelaufenen Geschäftsjahr vor allem Einzahlungen aus dem Rückfluss aus im Vorjahr hinterlegten Barsicherheiten für den Erwerb der STRATO in Höhe von 0,3 Mrd. € sowie Rückflüsse aus hinterlegten Sicherheitsleistungen und Sicherungsgeschäften in Höhe von netto 0,3 Mrd. € bei. Darüber hinaus verringerten sich die Auszahlungen für Unternehmenserwerbe um 0,6 Mrd. €. Den Auszahlungen im Geschäftsjahr 2009 in Höhe von 1,0 Mrd. € vor allem für den Erwerb weiterer Anteile an der OTE und den Erwerb der Zapp standen im Geschäftsjahr 2010 Auszahlungen für den Erwerb der STRATO von 0,3 Mrd. € sowie ClickandBuy von 0,1 Mrd. € gegenüber.

**Cashflow aus Finanzierungstätigkeit.** Die Mittelabflüsse aus Finanzierungstätigkeit betragen 6,4 Mrd. € im Vergleich zu 5,1 Mrd. € im Vorjahr.

Neben einer netto Aufnahme von mittel- und langfristigen Finanzverbindlichkeiten in Höhe von 3,1 Mrd. € (2009: 5,3 Mrd. €) ist diese Entwicklung auch auf Auszahlungen für den Rückkauf von Aktien in Höhe von 0,4 Mrd. € zurückzuführen. Demgegenüber verringerte sich netto die Rückzahlung von kurzfristigen Finanzverbindlichkeiten um 1,3 Mrd. €, während sich die Ausschüttungen der OTE um 0,2 Mrd. € sowie der Slovak Telekom um 0,1 Mrd. € verringerten.

Die Aufnahme von Finanzverbindlichkeiten betraf im Geschäftsjahr 2010 vor allem die Begebung von Medium Term Notes in Höhe von 1,8 Mrd. €, die Begebung eines Eurobonds in Höhe von 1,2 Mrd. €, die Aufnahme von Geldern vom Joint Venture UK in Höhe von netto 0,3 Mrd. €, die Inanspruchnahme eines Kredits bei der Europäischen Investitionsbank in Höhe von 0,1 Mrd. € sowie die Begebung von Schuldscheindarlehen in Höhe von 0,1 Mrd. €. Im gleichen Zeitraum wurde ein USD-Bond in Höhe von 2,4 Mrd. €, Eurobonds in Höhe von 2,0 Mrd. €, Kredite bei der Europäischen Investitionsbank in Höhe von 0,6 Mrd. €, Medium Term Notes in Höhe von 0,3 Mrd. € und ein Kredit der KfW Bankengruppe in Höhe von 0,2 Mrd. € zurückgezahlt. Darüber hinaus konnten Rückflüsse aus Sicherungsgeschäften in Höhe von netto 0,5 Mrd. € verzeichnet werden.



## 32 Segmentberichterstattung.

Der Aufsichtsrat hat am 24. Februar 2010 beschlossen, die Führungsstruktur der beiden bisherigen operativen Segmente Süd- und Osteuropa und Europa neu auszurichten. Am 1. April 2010 wurden die beiden operativen Segmente zum neuen operativen Segment Europa zusammengelegt und umfassen sämtliche Aktivitäten der Festnetz- und Mobilfunk-Gesellschaften der Landesgesellschaften in Griechenland, Rumänien, Ungarn, Polen, der Tschechischen Republik, Kroatien, den Niederlanden, der Slowakei, Österreich, Bulgarien, Albanien, EJR Mazedonien und Montenegro sowie des Joint Venture in Großbritannien. Ebenso dazu gehört der Bereich International Carrier Sales and Services, der hauptsächlich Telekommunikationsvorleistungen für andere operative Segmente im Konzern erbringt. Die Deutsche Telekom berichtet demzufolge seit dem 1. April 2010 die vier operativen Segmente Deutschland, Europa, USA, Systemgeschäft sowie die Konzernzentrale & Shared Services.

Diese Änderungen wurden in den nachfolgenden Tabellen berücksichtigt und Vorjahres- und Vergleichswerte entsprechend angepasst.

Von den vier operativen Segmenten erfolgt bei drei Segmenten eine regionale Aufteilung der Geschäftstätigkeiten, während bei einem Segment eine Kunden- und Produktzuordnung zugrunde liegt.

Das operative Segment **Deutschland** umfasst sämtliche Aktivitäten des Festnetz- und Mobilfunk-Geschäfts in Deutschland. Darüber hinaus erbringt das operative Segment Deutschland Telekommunikationsvorleistungen für andere operative Segmente im Konzern. Das operative Segment **Europa** umfasst sämtliche Aktivitäten aus Festnetz- und Mobilfunk-Geschäft der Landesgesellschaften in Griechenland, Rumänien, Ungarn, Polen, der Tschechischen Republik, Kroatien, den Niederlanden, der Slowakei, Österreich, Bulgarien, Albanien, EJR Mazedonien und Montenegro sowie das Joint Venture in Großbritannien. Ebenso dazu gehört der Bereich International Carrier Sales and Services, der hauptsächlich Telekommunikationsvorleistungen für andere operative Segmente im Konzern erbringt. Das operative Segment **USA** umfasst sämtliche Mobilfunk-Aktivitäten auf dem US-amerikanischen Markt.

Das Festnetz-Geschäft umfasst sämtliche Aktivitäten der Sprach- und Datenkommunikation durch Festnetz- bzw. Breitbandtechnik. Dazu gehören sowohl der Vertrieb von Endgeräten und sonstiger Hardware als auch der Vertrieb der Dienste an Wiederverkäufer.

Das Mobilfunk-Geschäft bietet Privat- und Geschäftskunden mobile Sprach- und Datendienste an. In Verbindung mit den angebotenen Diensten werden zudem Mobilfunk-Endgeräte und andere Hardware vertrieben. Darüber hinaus erfolgt der Vertrieb der T-Mobile Dienste auch an Wiederverkäufer sowie an Gesellschaften, die Netzleistungen einkaufen und selbstständig an Dritte vermarkten (MVNO).

Das operative Segment **Systemgeschäft** bündelt unter der Marke T-Systems das Geschäft für ICT-Produkte und -Lösungen für große multinationale Unternehmen. Das operative Segment bietet seinen Kunden Informations- und Kommunikationstechnik aus einer Hand. Für multinationale Konzerne und öffentliche Institutionen entwickelt und betreibt das operative Segment Infrastruktur- und Branchenlösungen. Das Angebot reicht von Standardprodukten über IP-basierte Hochleistungsnetze bis zur Realisierung kompletter ICT-Lösungen.

Die **Konzernzentrale & Shared Services** besteht aus der „Service Zentrale“ und den Beteiligungen der Deutschen Telekom AG, die nicht den operativen Segmenten zugeordnet sind.

In der Überleitung werden die Eliminierungen konzerninterner Verflechtungen zwischen den Segmenten zusammengefasst.

Den Bewertungsgrundsätzen für die Segmentberichterstattung der Deutschen Telekom liegen die im Konzernabschluss verwendeten IFRS zugrunde. Die Deutsche Telekom beurteilt die Leistung der Segmente u. a. anhand des Umsatzes und des Betriebsergebnisses (EBIT). Die Umsätze und Vorleistungen zwischen den Segmenten werden auf Basis von Marktpreisen verrechnet. Segmentvermögen und -schulden umfassen sämtliche Vermögenswerte und Schulden, die auf der Basis der durch die operativen Segmente erstellten und in den Konzernabschluss einbezogenen Abschlüsse bilanziert werden. Die Segmentinvestitionen beinhalten die Zugänge zu immateriellen Vermögenswerten und Sachanlagen. Soweit nach der Equity-Methode in den Konzernabschluss einbezogene Unternehmen einem Segment direkt zurechenbar sind, werden deren Anteil am Periodenergebnis und deren Buchwert dort angegeben. Im Folgenden werden die von der Deutschen Telekom zur Beurteilung der Leistung der operativen Segmente herangezogenen Steuerungsgrößen und darüber hinausgehende segmentbezogene Größen dargestellt:

|                                      |             | Außen-<br>umsatz | Intersegment-<br>umsatz | Gesamt-<br>umsatz | Betriebs-<br>ergebnis<br>(EBIT) | Zinserträge  | Zinsauf-<br>wendungen | Ergebnis aus<br>at equity<br>bilanzierten<br>Unternehmen | Ertrag-<br>steuern |
|--------------------------------------|-------------|------------------|-------------------------|-------------------|---------------------------------|--------------|-----------------------|----------------------------------------------------------|--------------------|
|                                      |             | Mio. €           | Mio. €                  | Mio. €            | Mio. €                          | Mio. €       | Mio. €                | Mio. €                                                   | Mio. €             |
| Deutschland                          | 2010        | 23 523           | 1 622                   | 25 145            | 4 916                           | 24           | (600)                 | -                                                        | 8                  |
|                                      | 2009        | 23 813           | 1 610                   | 25 423            | 5 062                           | 172          | (107)                 | 2                                                        | (13)               |
|                                      | 2008        | 24 754           | 1 646                   | 26 400            | 4 624                           | 654          | (425)                 | (1)                                                      | 16                 |
| Europa                               | 2010        | 16 183           | 657                     | 16 840            | 985                             | 147          | (840)                 | (52)                                                     | (319)              |
|                                      | 2009        | 18 996           | 611                     | 19 607            | 140                             | 218          | (666)                 | 7                                                        | (582)              |
|                                      | 2008        | 15 295           | 637                     | 15 932            | 1 412                           | 289          | (420)                 | 7                                                        | (282)              |
| USA                                  | 2010        | 16 075           | 12                      | 16 087            | 2 092                           | 24           | (514)                 | (1)                                                      | (595)              |
|                                      | 2009        | 15 457           | 14                      | 15 471            | 2 233                           | 16           | (543)                 | 6                                                        | (643)              |
|                                      | 2008        | 14 942           | 15                      | 14 957            | 2 299                           | 81           | (577)                 | 6                                                        | (694)              |
| Systemgeschäft                       | 2010        | 6 411            | 2 646                   | 9 057             | 44                              | 23           | (31)                  | (4)                                                      | (12)               |
|                                      | 2009        | 6 083            | 2 715                   | 8 798             | (11)                            | 39           | (46)                  | 10                                                       | (12)               |
|                                      | 2008        | 6 368            | 2 975                   | 9 343             | 81                              | 82           | (59)                  | 41                                                       | (10)               |
| Konzernzentrale &<br>Shared Services | 2010        | 229              | 1 937                   | 2 166             | (2 479)                         | 1 892        | (3 089)               | -                                                        | 117                |
|                                      | 2009        | 253              | 2 157                   | 2 410             | (1 249)                         | 1 156        | (2 768)               | -                                                        | (570)              |
|                                      | 2008        | 307              | 2 474                   | 2 781             | (1 266)                         | 1 559        | (3 627)               | (441)                                                    | (476)              |
| <b>Summe</b>                         | <b>2010</b> | <b>62 421</b>    | <b>6 874</b>            | <b>69 295</b>     | <b>5 558</b>                    | <b>2 110</b> | <b>(5 074)</b>        | <b>(57)</b>                                              | <b>(801)</b>       |
|                                      | <b>2009</b> | <b>64 602</b>    | <b>7 107</b>            | <b>71 709</b>     | <b>6 175</b>                    | <b>1 601</b> | <b>(4 130)</b>        | <b>25</b>                                                | <b>(1 820)</b>     |
|                                      | <b>2008</b> | <b>61 666</b>    | <b>7 747</b>            | <b>69 413</b>     | <b>7 150</b>                    | <b>2 665</b> | <b>(5 108)</b>        | <b>(388)</b>                                             | <b>(1 446)</b>     |
| Überleitung                          | 2010        | -                | (6 874)                 | (6 874)           | (53)                            | (1 761)      | 2 225                 | -                                                        | (134)              |
|                                      | 2009        | -                | (7 107)                 | (7 107)           | (163)                           | (1 260)      | 1 234                 | (1)                                                      | 38                 |
|                                      | 2008        | -                | (7 747)                 | (7 747)           | (110)                           | (2 257)      | 2 213                 | -                                                        | 18                 |
| Konzern                              | 2010        | 62 421           | -                       | 62 421            | 5 505                           | 349          | (2 849)               | (57)                                                     | (935)              |
|                                      | 2009        | 64 602           | -                       | 64 602            | 6 012                           | 341          | (2 896)               | 24                                                       | (1 782)            |
|                                      | 2008        | 61 666           | -                       | 61 666            | 7 040                           | 408          | (2 895)               | (388)                                                    | (1 428)            |

|                                      |             | Segment-<br>vermögen | Segment-<br>schulden | Segment-<br>investitionen | Beteiligungen<br>an at equity<br>bilanzierten<br>Unternehmen | Planmäßige<br>Abschreibungen | Wert-<br>minderungen | Anzahl<br>Mitarbeiter<br>(im Durchschnitt) |
|--------------------------------------|-------------|----------------------|----------------------|---------------------------|--------------------------------------------------------------|------------------------------|----------------------|--------------------------------------------|
|                                      |             | Mio. €               | Mio. €               | Mio. €                    | Mio. €                                                       | Mio. €                       | Mio. €               |                                            |
| Deutschland                          | 2010        | 35 334               | 26 111               | 4 902                     | 26                                                           | (4 178)                      | (15)                 | 79 364                                     |
|                                      | 2009        | 52 002               | 16 244               | 3 221                     | 23                                                           | (4 189)                      | (7)                  | 84 584                                     |
|                                      | 2008        | 49 797               | 14 693               | 3 412                     | 18                                                           | (4 164)                      | (16)                 | 89 961                                     |
| Europa                               | 2010        | 46 040               | 20 334               | 2 127                     | 7 143                                                        | (3 453)                      | (704)                | 65 435                                     |
|                                      | 2009        | 46 759               | 22 063               | 4 813                     | 52                                                           | (3 772)                      | (2 385)              | 69 277                                     |
|                                      | 2008        | 34 327               | 10 646               | 1 940                     | 68                                                           | (3 090)                      | (301)                | 39 174                                     |
| USA                                  | 2010        | 38 316               | 23 056               | 2 118                     | 24                                                           | (2 063)                      | (1)                  | 37 795                                     |
|                                      | 2009        | 36 087               | 19 326               | 2 494                     | 18                                                           | (2 025)                      | (3)                  | 38 231                                     |
|                                      | 2008        | 37 213               | 20 998               | 3 615                     | 14                                                           | (1 863)                      | (21)                 | 36 076                                     |
| Systemgeschäft                       | 2010        | 8 855                | 5 783                | 819                       | 49                                                           | (619)                        | (4)                  | 47 588                                     |
|                                      | 2009        | 8 872                | 5 932                | 837                       | 54                                                           | (718)                        | (3)                  | 45 328                                     |
|                                      | 2008        | 9 280                | 6 342                | 846                       | 46                                                           | (765)                        | (16)                 | 46 095                                     |
| Konzernzentrale &<br>Shared Services | 2010        | 107 357              | 60 806               | 675                       | 0                                                            | (714)                        | (126)                | 22 312                                     |
|                                      | 2009        | 120 162              | 78 379               | 747                       | 0                                                            | (660)                        | (173)                | 20 181                                     |
|                                      | 2008        | 116 948              | 75 764               | 545                       | 3 411                                                        | (646)                        | (127)                | 23 581                                     |
| <b>Summe</b>                         | <b>2010</b> | <b>235 902</b>       | <b>136 090</b>       | <b>10 641</b>             | <b>7 242</b>                                                 | <b>(11 027)</b>              | <b>(850)</b>         | <b>252 494</b>                             |
|                                      | <b>2009</b> | <b>263 882</b>       | <b>141 944</b>       | <b>12 112</b>             | <b>147</b>                                                   | <b>(11 364)</b>              | <b>(2 571)</b>       | <b>257 601</b>                             |
|                                      | <b>2008</b> | <b>247 565</b>       | <b>128 443</b>       | <b>10 358</b>             | <b>3 557</b>                                                 | <b>(10 528)</b>              | <b>(481)</b>         | <b>234 887</b>                             |
| Überleitung                          | 2010        | (108 090)            | (51 306)             | (302)                     | -                                                            | 68                           | 1                    | -                                          |
|                                      | 2009        | (136 108)            | (56 107)             | (645)                     | -                                                            | 41                           | -                    | -                                          |
|                                      | 2008        | (124 425)            | (48 415)             | (241)                     | -                                                            | 33                           | 1                    | -                                          |
| Konzern                              | 2010        | 127 812              | 84 784               | 10 339                    | 7 242                                                        | (10 959)                     | (849)                | 252 494                                    |
|                                      | 2009        | 127 774              | 85 837               | 11 467                    | 147                                                          | (11 323)                     | (2 571)              | 257 601                                    |
|                                      | 2008        | 123 140              | 80 028               | 10 117                    | 3 557                                                        | (10 495)                     | (480)                | 234 887                                    |

|                                      |             | Cashflow aus<br>Geschäftstätigkeit<br>Mio. € | Cashflow aus<br>Investitionstätigkeit<br>Mio. € | davon:<br>Cash Capex*<br>Mio. € | Cashflow aus<br>Finanzierungstätigkeit<br>Mio. € |
|--------------------------------------|-------------|----------------------------------------------|-------------------------------------------------|---------------------------------|--------------------------------------------------|
| Deutschland                          | 2010        | 9 167                                        | (4 977)                                         | (4 765)                         | (10 023)                                         |
|                                      | 2009        | 9 777                                        | (2 801)                                         | (3 158)                         | (3 689)                                          |
|                                      | 2008        | 9 941                                        | (2 791)                                         | (3 038)                         | (7 224)                                          |
| Europa                               | 2010        | 4 481                                        | (3 045)                                         | (2 012)                         | (2 839)                                          |
|                                      | 2009        | 5 034                                        | (1 510)                                         | (2 489)                         | (6 071)                                          |
|                                      | 2008        | 4 296                                        | (2 048)                                         | (2 018)                         | (1 900)                                          |
| USA                                  | 2010        | 3 691                                        | (1 870)                                         | (2 121)                         | (1 920)                                          |
|                                      | 2009        | 3 929                                        | (3 014)                                         | (2 666)                         | (1 004)                                          |
|                                      | 2008        | 3 740                                        | (2 892)                                         | (2 540)                         | (852)                                            |
| Systemgeschäft                       | 2010        | 517                                          | (726)                                           | (725)                           | (373)                                            |
|                                      | 2009        | 325                                          | (643)                                           | (681)                           | 88                                               |
|                                      | 2008        | 766                                          | 9                                               | (823)                           | (838)                                            |
| Konzernzentrale &<br>Shared Services | 2010        | 7 486                                        | 3 424                                           | (406)                           | (5 554)                                          |
|                                      | 2009        | 6 801                                        | (2 995)                                         | (449)                           | (2 147)                                          |
|                                      | 2008        | 3 366                                        | (1 021)                                         | (426)                           | (1 028)                                          |
| <b>Summe</b>                         | <b>2010</b> | <b>25 342</b>                                | <b>(7 194)</b>                                  | <b>(10 029)</b>                 | <b>(20 709)</b>                                  |
|                                      | <b>2009</b> | <b>25 866</b>                                | <b>(10 963)</b>                                 | <b>(9 443)</b>                  | <b>(12 823)</b>                                  |
|                                      | <b>2008</b> | <b>22 109</b>                                | <b>(8 743)</b>                                  | <b>(8 845)</b>                  | <b>(11 842)</b>                                  |
| Überleitung                          | 2010        | (10 611)                                     | (3 517)                                         | 178                             | 14 340                                           |
|                                      | 2009        | (10 071)                                     | 2 314                                           | 241                             | 7 700                                            |
|                                      | 2008        | (6 741)                                      | (2 641)                                         | 138                             | 8 745                                            |
| Konzern                              | 2010        | 14 731                                       | (10 711)                                        | (9 851)                         | (6 369)                                          |
|                                      | 2009        | 15 795                                       | (8 649)                                         | (9 202)                         | (5 123)                                          |
|                                      | 2008        | 15 368                                       | (11 384)                                        | (8 707)                         | (3 097)                                          |

\* Auszahlungen für Investitionen in immaterielle Vermögenswerte (ohne Goodwill) und Sachanlagen laut Kapitalflussrechnung.

**Informationen über geografische Gebiete.** Langfristige Vermögenswerte und die Außenumsätze des Konzerns werden nach Regionen aufgeteilt dargestellt. Hierbei handelt es sich um Regionen, in denen die Deutsche Telekom tätig ist: Inland, Europa (ohne Deutschland), Nordamerika und übrige Länder. Die Region „Europa (ohne Deutschland)“ umfasst das gesamte Gebiet der Europäischen Union (ohne Deutschland) sowie die sonstigen Staaten Europas. Die Region „Nordamerika“ setzt sich aus den USA und Kanada zusammen. In der Region „Übrige Länder“ sind alle Staaten erfasst, die weder Deutschland, Europa (ohne Deutschland) noch Nordamerika zugehörig sind. Die Zuordnung der langfristigen Vermögenswerte zu den Regionen wird nach dem Standort des betreffenden Vermögens vorgenommen. Die langfristigen Vermögenswerte umfassen immaterielle Vermögenswerte, Sachanlagen, Beteiligungen an at equity bilanzierten Unternehmen sowie übrige langfristige Vermögenswerte. Die Zuordnung der Außenumsätze orientiert sich nach dem Standort der jeweiligen Kunden.

**Informationen über Produkte und Dienstleistungen.** Die Umsatzerlöse mit externen Kunden für die Gruppen vergleichbarer Produkte und Dienstleistungen entwickelten sich wie folgt:

|                   | Außenumsatz    |                |                |
|-------------------|----------------|----------------|----------------|
|                   | 2010<br>Mio. € | 2009<br>Mio. € | 2008<br>Mio. € |
| Telekommunikation | 55 781         | 58 266         | 54 991         |
| Systemgeschäft    | 6 411          | 6 083          | 6 368          |
| Sonstige          | 229            | 253            | 307            |
|                   | <b>62 421</b>  | <b>64 602</b>  | <b>61 666</b>  |

|                           | Langfristige Vermögenswerte |                      |                      | Außenumsatz    |                |                |
|---------------------------|-----------------------------|----------------------|----------------------|----------------|----------------|----------------|
|                           | 31.12.2010<br>Mio. €        | 31.12.2009<br>Mio. € | 31.12.2008<br>Mio. € | 2010<br>Mio. € | 2009<br>Mio. € | 2008<br>Mio. € |
| Inland                    | 41 138                      | 40 499               | 44 385               | 27 268         | 28 033         | 28 885         |
| Ausland                   | 64 607                      | 57 362               | 55 227               | 35 153         | 36 569         | 32 781         |
| davon:                    |                             |                      |                      |                |                |                |
| Europa (ohne Deutschland) | 31 385                      | 26 575               | 23 854               | 18 217         | 20 573         | 17 324         |
| Nordamerika               | 33 104                      | 30 717               | 31 298               | 16 192         | 15 527         | 14 931         |
| Übrige Länder             | 118                         | 70                   | 75                   | 744            | 469            | 526            |
| <b>Konzern</b>            | <b>105 745</b>              | <b>97 861</b>        | <b>99 612</b>        | <b>62 421</b>  | <b>64 602</b>  | <b>61 666</b>  |

### 33 Eventualverbindlichkeiten und -forderungen.

Zum Abschlussstichtag bestehen im Konzern Eventualverbindlichkeiten in Höhe von 771 Mio. € (31. Dezember 2009: 724 Mio. €), die auf Grundlage der vorliegenden Erkenntnisse und Einschätzungen die Voraussetzungen zum Ansatz in der Bilanz nicht erfüllen. Die Deutsche Telekom ist im Rahmen ihrer allgemeinen Geschäftstätigkeit an verschiedenen Gerichts- und Schiedsverfahren beteiligt. Die Rechtsberatungskosten und die voraussichtlichen Kosten aufgrund negativer Verfahrensergebnisse wurden als Rückstellungen für Prozessrisiken berücksichtigt. Die Deutsche Telekom geht nicht davon aus, dass weitere potenzielle Kosten aus Rechtsberatung und aufgrund von Verfahrensergebnissen wesentliche negative Auswirkungen auf die Vermögens-, Finanz- und Ertragslage des Konzerns haben werden.

In der oben aufgeführten Summe der Eventualverbindlichkeiten sind neben Einzelfällen, die alleine betrachtet keine wesentlichen Auswirkungen haben, folgende Sachverhalte enthalten:

**Sonderzahlung Beamte.** Im November 2004 hat die Bundesrepublik Deutschland das Erste Gesetz zur Änderung des Postpersonalrechtsgesetzes (PostPersRG) verabschiedet, das die Notwendigkeit für die Deutsche Telekom und für die anderen Postnachfolgeunternehmen beseitigt hat, den beschäftigten Beamten eine jährliche Sonderzahlung nach dem Bundessonderzahlungsgesetz zu zahlen. Dieses Gesetz wurde in verschiedenen gerichtlichen Instanzen geprüft. Im Dezember 2008 hat das Bundesverwaltungsgericht entschieden, den Fall dem Bundesverfassungsgericht zur Normenkontrolle gemäß Art. 100 Grundgesetz vorzulegen. Eine Entscheidung des Bundesverfassungsgerichts wird für Anfang 2011 erwartet. Sollte entschieden werden, dass die Streichung der Sonderzahlung verfassungswidrig war, könnte das für die Jahre 2004 bis Juni 2009 zu einem Nachzahlungsaufwand von bis zu 0,2 Mrd. € führen.

**Verfahren der Europäischen Kommission gegen Slovak Telekom.** Die Europäische Kommission hat im April 2009 ein Verfahren eröffnet, um zu untersuchen, ob Slovak Telekom sich missbräuchlich auf dem slowakischen Breitbandmarkt verhalten hat. Nach Angaben der Europäischen Kommission könnte ein solcher Missbrauch u. a. bestehen in Zugangsverweigerungen zur Teilnehmeranschlussleitung sowie anderen Vorleistungen für Breitbandinfrastruktur, Preis-Kosten-Scheren in diesen Bereichen und anderen diskriminierenden Verhaltensweisen wie Bündelungen. Im Dezember 2010 wurde das Verfahren förmlich auf die Deutsche Telekom als Konzern ausgeweitet. Auf dieser Grundlage kann die Deutsche Telekom in die Haftung für eventuelle Verstöße einbezogen werden. Sollte die Europäische Kommission letztlich einen Verstoß gegen europäisches Kartellrecht feststellen, könnte sie Bußgelder gegen Slovak Telekom von 0,1 Mrd. € und auch gegen die Deutsche Telekom festsetzen.

**IPR-Klagen gegen ADSL-Technik.** Die Deutsche Telekom wurde in vier Klageverfahren wegen Patentverletzungen verklagt, die sich auf DSL-Datenübertragungsverfahren beziehen. Insbesondere richten sich die in den vier Klagen geltend gemachten Patente auf besondere Verfahren, die zur Prüfung der DSL-Kanalqualität, zum Kodieren von Daten und zum Einstellen von Übertragungsraten sowie zur Korrektur von Übertragungsfehlern verwendet werden. Für zwei Patente wurde vor dem Bundespatentgericht erstinstanzlich eine Nichtigkeitsklage erstritten. Gegen ein weiteres läuft eine Nichtigkeitsklage, eine vierte Nichtigkeitsklage ist in Ausarbeitung, wurde aber noch nicht erhoben. Vor dem Verletzungsgericht sind zwei Klagen ausgesetzt, die anderen zwei Klagen terminlos gestellt, sodass zurzeit keine Verhandlungstermine bezüglich der Verletzung existieren. Die Deutsche Telekom ist auf insgesamt 0,1 Mrd. € Streitwert verklagt worden.

Die folgenden Sachverhalte erfüllen ebenfalls auf Grundlage der vorliegenden Erkenntnisse und Einschätzungen nicht die Voraussetzungen zum Ansatz in der Bilanz. Da der Konzern aufgrund der bestehenden und im Folgenden beschriebenen Unsicherheiten die Höhe der jeweiligen Eventualverbindlichkeit nicht schätzen kann, sind diese in der zuvor genannten Summe der Eventualverbindlichkeiten allerdings nicht enthalten.

**Toll Collect.** In dem Schiedsverfahren zwischen den Hauptgesellschaftern des Konsortiums Toll Collect, der Daimler Financial Services AG und der Deutschen Telekom sowie der Konsortialgesellschaft Toll Collect GbR einerseits und der Bundesrepublik Deutschland andererseits über Streitigkeiten, die mit dem Mauterhebungssystem zusammenhängen, erhielt die Deutsche Telekom die Klageschrift des Bundes am 2. August 2005. Darin machte der Bund einen Anspruch auf entgangene Mauteinnahmen in Höhe von ca. 3,51 Mrd. € nebst Zinsen wegen Verspätung der Aufnahme des Wirkbetriebs zum 1. September 2003 geltend. Die Summe der geltend gemachten Vertragsstrafen wurde in Höhe von 1,65 Mrd. € nebst Zinsen gefordert. Die Vertragsstrafen beruhen auf angeblichen Verletzungen des

Betreibervertrags (fehlender Zustimmung zu Unterauftragnehmerverträgen, verspäteter Bereitstellung von On-Board-Units und Kontrolleinrichtungen). Der Bund hat mit Schriftsatz vom 16. Mai 2008 seine Klageforderung in Bezug auf den Mautausfallschaden neu berechnet und geringfügig um 169 Mio. € nach unten korrigiert. Die neue Klageforderung beträgt nunmehr ca. 3,3 Mrd. € zuzüglich Zinsen. Die Summe aller Hauptforderungen des Bundes (einschließlich Vertragsstrafenansprüchen) beträgt nunmehr ca. 4,99 Mrd. €.

Die Beklagten haben am 30. Juni 2006 die Klageerwidderung eingereicht. Die Klägerin hat dazu mit Schriftsatz vom 14. Februar 2007 Stellung genommen. Nach weiteren Schriftsatzwechselln zwischen den Verfahrensbeteiligten fand im Juni 2008 eine erste mündliche Verhandlung statt, in der das Schiedsgericht rechtliche Fragen mit den Schiedsparteien erörterte, ohne dass hieraus bereits Schlüsse auf den Ausgang des Verfahrens gezogen werden könnten. Die Parteien reichten seitdem weitere Schriftsätze ein. In einer weiteren mündlichen Verhandlung im Dezember 2010 wurden verschiedene Zeugen und Sachverständige angehört. Es wurde eine weitere Schriftsatzfrist für die Parteien bis zum 20. Mai 2011 festgelegt.

- **Garantie von Bankkrediten.** Die Deutsche Telekom AG garantiert gegenüber Dritten bis zu einem Höchstbetrag von 115 Mio. € Bankkredite, die der Toll Collect GmbH gewährt werden. Diese Garantien für Bankkredite haben eine Laufzeit bis zum 31. Mai 2012.
- **Kapitalintakthalteerklärung.** Die Konsortialpartner haben die Verpflichtung, gesamt- und einzelschuldnerisch, weiteres Eigenkapital der Toll Collect GmbH bereitzustellen, um eine Eigenkapitalquote von mindestens 15 % (des nach den Vorschriften des deutschen Handelsrechts aufgestellten Einzelabschlusses) zu gewährleisten (sog. „Kapitalintakthalteerklärung“). Diese Verpflichtung endet mit Ablauf des Betreibervertrags am 31. August 2015 oder früher, falls der Betreibervertrag vorzeitig gekündigt werden sollte.

Im Juni 2006 begann die Bundesrepublik Deutschland damit, die monatlichen Vorauszahlungen der Betreibervergütung an die Toll Collect GmbH partiell in Höhe von 8 Mio. € mit Vertragsstrafenforderungen aufzurechnen, die bereits Gegenstand des vorstehend beschriebenen Schiedsverfahrens sind. Als Folge der Aufrechnung könnte es für die Konsortialmitglieder im weiteren Verlauf erforderlich sein, der Toll Collect GmbH weitere Liquidität zuzuführen.

Die Risiken und Verpflichtungen von Cofiroute, die zu 10 % Anteilseigner an der Toll Collect ist, sind auf den Betrag von 70 Mio. € beschränkt. Die Deutsche Telekom AG und Daimler Financial Services AG sind gesamtschuldnerisch verpflichtet, Cofiroute von weiteren Ansprüchen freizustellen.





Die Deutsche Telekom hält die Ansprüche der Bundesrepublik Deutschland für unbegründet. Darüber hinaus kann die Höhe einer möglichen Inanspruchnahme aus der Kapitalintakthalteerklärung oder aus der beschriebenen Schiedsklage, welche wesentlich sein könnten, aufgrund der oben beschriebenen Unsicherheiten nicht eingeschätzt werden.

**Entgelte zu den Teilnehmeranschlussleitungen.** Im November 2008 hob das Verwaltungsgericht Köln die Entgeltgenehmigung für die Teilnehmeranschlussleitung (TAL) aus dem Jahr 1999 hinsichtlich der Überlassungsentgelte auf. Sowohl die Deutsche Telekom AG als auch die BNetzA erhoben gegen die Urteile die Nichtzulassungsbeschwerde. Mit Beschluss vom 5. Oktober 2009 wies das BVerwG diese Beschwerden zurück, da es sich bei den aufgeworfenen Rechtsfragen um solche zur alten Rechtslage handelt. Die aufhebenden Urteile des Verwaltungsgerichts Köln wurden dadurch rechtskräftig und das Entgeltverfahren aus 1999 lebt wieder auf, d. h. die BNetzA muss über die TAL-Überlassungsentgelte für den Zeitraum Februar 1999 bis März 2001 neu entscheiden.

Hinsichtlich der TAL-Entgeltgenehmigung 2001 hat das Bundesverwaltungsgericht mit Beschluss vom 23. Juni 2010 auf die Nichtzulassungsbeschwerden der Deutschen Telekom AG und der Bundesnetzagentur (BNetzA) gegen das Urteil des Verwaltungsgerichts Köln vom 27. August 2009 die Revision bezüglich der TAL-Überlassungsentgelte zugelassen. Bezüglich der TAL-Einmalentgelte für den Zeitraum April 2001 bis März 2002 wies das Gericht die Nichtzulassungsbeschwerden zurück. Demnach wurde das aufhebende Urteil des Verwaltungsgerichts insoweit rechtskräftig und die BNetzA muss erneut über die TAL-Einmalentgelte entscheiden.

In Hinsicht auf die TAL-Einmalentgeltgenehmigung 2002 für den Zeitraum April 2002 bis Juni 2003 hat das Bundesverwaltungsgericht am 30. Juni 2010 die Nichtzulassungsbeschwerden der Deutschen Telekom AG und der BNetzA gegen das Urteil des Verwaltungsgerichts Köln vom 19. November 2009 zurückgewiesen. Mit Beschluss vom 19. Januar 2011 genehmigte die BNetzA gegenüber den Klägerinnen neue Entgelte für den genannten Zeitraum.

Auch alle übrigen Entscheidungen der BNetzA zu TAL-Entgelten seit 1999 wurden von den Wettbewerbern angefochten und sind bis auf die TAL-Einmalentgelte 1999 daher nicht bestandskräftig.

**Untersuchung von Verträgen in EJR Mazedonien und Montenegro.** Im Rahmen der Abschlussprüfung der Magyar Telekom für das Geschäftsjahr 2005 wurden Verträge identifiziert, deren angemessener wirtschaftlicher Hintergrund seinerzeit nicht vollständig festgestellt werden konnte. Der Prüfungsausschuss der Magyar Telekom beauftragte eine unabhängige Rechtsanwaltskanzlei, betreffende Verträge auf ihre Rechtmäßigkeit zu untersuchen. Magyar Telekom informierte die US-Behörden (Department of Justice und Securities and Exchange Commission (SEC)), die dann ein Ermittlungsverfahren wegen möglicher Verstöße gegen den Foreign Corrupt Practices Act (FCPA) einleiteten. Magyar Telekom und die als Konzernobergesellschaft betroffene Deutsche Telekom haben diese Ermittlungen umfangreich unterstützt sowie ihr eigenes Compliance-Programm überprüft und weiter verbessert. Die anwaltlichen Vertreter der Magyar Telekom und der Deutschen Telekom besprechen gegenwärtig mit den US-Behörden den Ermittlungsstand und die Möglichkeiten einer Verfahrensbeendigung. Das Ergebnis dieser Gespräche kann nicht vorhergesehen werden. Kommt eine einvernehmliche Verfahrensbeendigung nicht zustande, kann derzeit nicht abgeschätzt werden, ob und ggf. welche weiteren Maßnahmen die US-Behörden ergreifen werden. In Zusammenhang mit einem Rechtshilfeersuchen der US-Behörden hat die Staatsanwaltschaft Bonn ein eigenes Ermittlungsverfahren eingeleitet.

**Verfahren der Anti-Monopol Kommission in Polen.** Die polnische Anti-Monopol Kommission (UOKiK) hat im Jahr 2010 mehrere Verfahren gegen verschiedene polnische Telekommunikationsunternehmen eröffnet, u. a. auch gegen die PTC. Die UOKiK ist zum einen der Auffassung, dass zwischen den Anbietern kollusives Zusammenwirken stattgefunden hat. Zum anderen wirft die UOKiK der PTC vor, verschiedene Verstöße gegen Kundeninteressen begangen zu haben. In beiden Fällen ist die maximale Strafsumme in Polen gesetzlich festgeschrieben und bemisst sich auf 10 % der Erlöse aus Telekommunikationsleistungen oder auf 10 % der steuerlich geltend zu machenden Erlöse.

**OTE Lannet Case.** Lannet Communications SA hat im Mai 2009 Klage eingereicht und fordert Schadensersatz in Höhe von 176 Mio. € aufgrund der angeblich rechtswidrigen Kündigung von Leistungen (hauptsächlich Zusammenschaltungsleistungen, Entbündelung von TAL und Vermietung von Standleitungen) seitens der OTE. Eine Anhörung vor dem zuständigen Gericht soll am 17. Februar 2011 stattfinden.

**IPR-Risiken.** Die Deutsche Telekom sieht sich – wie viele andere große Telekommunikations-/Internetanbieter auch – einer tendenziell wachsenden Zahl von IPR-Streitfällen (IPR Intellectual Property Rights) ausgesetzt. Für die Deutsche Telekom besteht das Risiko der Zahlung von Lizenzgebühren und/oder Schadensersatz. In einigen Fällen droht auch die Verurteilung zur Unterlassung.

**Eventualforderung.** Die Deutsche Telekom hat eine Eventualforderung in Höhe von 0,1 Mrd. € gegenüber dem deutschen Hauptzollamt.

## 34 Angaben zu Leasingverhältnissen.

### Die Deutsche Telekom als Leasingnehmer.

**Finanzierungs-Leasingverhältnisse.** Sofern die Deutsche Telekom als Leasingnehmer die wesentlichen Chancen und Risiken aus einem Leasingverhältnis trägt, setzt sie die Leasinggegenstände in der Bilanz im Zugangszeitpunkt mit dem beizulegenden Zeitwert oder dem niedrigeren Barwert der künftigen Mindestleasingzahlungen an. Die im Rahmen von Finanzierungs-Leasingverhältnissen in der Bilanz angesetzten Leasinggegenstände betreffen überwiegend langfristige Miet-/Pachtverträge für Bürogebäude. Die Vertragslaufzeit umfasst dabei üblicherweise bis zu 25 Jahre. Die Verträge enthalten Verlängerungs- und Kaufoptionen. Die zum Abschlussstichtag bestehenden Nettobuchwerte der im Rahmen eines Finanzierungsleasings aktivierten Leasinggegenstände können der nebenstehenden Darstellung entnommen werden:

|                                                         | 31.12.2010   | davon:<br>Sale and<br>Leaseback | 31.12.2009   | davon:<br>Sale and<br>Leaseback |
|---------------------------------------------------------|--------------|---------------------------------|--------------|---------------------------------|
|                                                         | Mio. €       | Mio. €                          | Mio. €       | Mio. €                          |
| Grundstücke und Gebäude                                 | 954          | 539                             | 1 035        | 591                             |
| Technische Anlagen und Maschinen                        | 91           | 3                               | 35           | 9                               |
| Sonstiges                                               | 15           | 1                               | 21           | 0                               |
| <b>Nettobuchwert der aktivierten Leasinggegenstände</b> | <b>1 060</b> | <b>543</b>                      | <b>1 091</b> | <b>600</b>                      |

Die Deutsche Telekom setzt im Zugangszeitpunkt des Leasinggegenstands zugleich eine Leasingverbindlichkeit an, die in ihrer Höhe dem Buchwert des Leasinggegenstands entspricht. In den Folgeperioden mindern – unter Anwendung der Effektivzinsmethode – die an die jeweiligen Leasinggeber zu zahlenden Leasingraten in Höhe des Tilgungsanteils die Leasingverbindlichkeit. Der Zinsanteil der Zahlungen wird ergebniswirksam in der Gewinn- und Verlustrechnung erfasst.

Im Einzelnen ergeben sich folgende Werte:

|                   | Mindestleasingzahlungen |                                        | Enthaltener Zinsanteil |                                        | Barwerte         |                                        |
|-------------------|-------------------------|----------------------------------------|------------------------|----------------------------------------|------------------|----------------------------------------|
|                   | Gesamt<br>Mio. €        | davon:<br>Sale and Leaseback<br>Mio. € | Gesamt<br>Mio. €       | davon:<br>Sale and Leaseback<br>Mio. € | Gesamt<br>Mio. € | davon:<br>Sale and Leaseback<br>Mio. € |
| <b>31.12.2010</b> |                         |                                        |                        |                                        |                  |                                        |
| <b>Fälligkeit</b> |                         |                                        |                        |                                        |                  |                                        |
| Bis 1 Jahr        | 235                     | 106                                    | 93                     | 63                                     | 142              | 43                                     |
| 1 bis 3 Jahre     | 405                     | 213                                    | 185                    | 114                                    | 220              | 99                                     |
| 3 bis 5 Jahre     | 360                     | 211                                    | 154                    | 96                                     | 206              | 115                                    |
| Über 5 Jahre      | 1 279                   | 758                                    | 447                    | 290                                    | 832              | 468                                    |
|                   | <b>2 279</b>            | <b>1 288</b>                           | <b>879</b>             | <b>563</b>                             | <b>1 400</b>     | <b>725</b>                             |
| <b>31.12.2009</b> |                         |                                        |                        |                                        |                  |                                        |
| <b>Fälligkeit</b> |                         |                                        |                        |                                        |                  |                                        |
| Bis 1 Jahr        | 231                     | 114                                    | 110                    | 66                                     | 121              | 48                                     |
| 1 bis 3 Jahre     | 387                     | 211                                    | 202                    | 120                                    | 185              | 91                                     |
| 3 bis 5 Jahre     | 358                     | 213                                    | 154                    | 104                                    | 204              | 109                                    |
| Über 5 Jahre      | 1 415                   | 860                                    | 502                    | 334                                    | 913              | 526                                    |
|                   | <b>2 391</b>            | <b>1 398</b>                           | <b>968</b>             | <b>624</b>                             | <b>1 423</b>     | <b>774</b>                             |

**Operating-Leasingverhältnisse.** Das wirtschaftliche Eigentum an Leasinggeschäften verbleibt beim Leasinggeber, wenn dieser die mit dem Leasinggegenstand verbundenen wesentlichen Chancen und Risiken trägt. Der Leasinggeber setzt den Leasinggegenstand in seiner Bilanz an. Die Deutsche Telekom erfasst während des Zeitraums des Operating-Leasingverhältnisses gezahlte Leasingraten erfolgswirksam. Die Verpflichtungen der Deutschen Telekom aus Operating-Leasingverhältnissen betreffen überwiegend langfristige Miet-/Pachtverträge für Netzinfrastruktur, Funktürme und Immobilien.

Einige Verträge beinhalten Verlängerungsoptionen und Staffelmieten. Diese betreffen im Wesentlichen Leasingverhältnisse für Funktürme in den USA. Im Geschäftsjahr 2010 (zum 30. Juni 2010) hat die Deutsche Telekom eine Änderung der Einschätzung zur Laufzeit der bestehenden Operating-Leasingverhältnisse in den USA bezüglich der Ausübung von Verlängerungsoptionen vorgenommen. Aufgrund einer geänderten Marktsituation und neuer technischer Rahmenbedingungen ist eine Ausübung von Verlängerungsoptionen entgegen der ursprünglichen Einschätzung lediglich bis zu einer Gesamtlaufzeit von 15 Jahren als hinreichend sicher anzusehen. Das entspricht einer Reduzierung zur ursprünglichen Einschätzung, bei der eine Gesamtlaufzeit zwischen 20 und 25 Jahren erwartet wurde. Als Resultat dieser Schätzungsänderung verringerten sich die erwarteten künftigen Mindestleasingzahlungen aus Operating-Leasingverhältnissen im operativen Segment USA um 11,4 Mrd. USD (31. Dezember 2010: 8,5 Mrd. €; 31. Dezember 2009: 7,9 Mrd. €).

Die erfolgswirksam erfassten Aufwendungen aus Operating-Leasingverhältnissen betragen zum Jahresende 2,2 Mrd. € (2009: 2,1 Mrd. €; 2008: 2,0 Mrd. €). Im Einzelnen ergeben sich folgende Werte für künftige Verpflichtungen aus Operating-Leasinggeschäften:

|                   | 31.12.2010<br>Mio. € | 31.12.2009<br>Mio. € |
|-------------------|----------------------|----------------------|
| <b>Fälligkeit</b> |                      |                      |
| Bis 1 Jahr        | 2 627                | 2 553                |
| 1 bis 3 Jahre     | 4 502                | 4 195                |
| 3 bis 5 Jahre     | 3 767                | 3 325                |
| Über 5 Jahre      | 6 767                | 14 475               |
|                   | <b>17 663</b>        | <b>24 548</b>        |

In den Verpflichtungen aus Operating-Leasingverträgen zum 31. Dezember 2009 sind die Verpflichtungen der T-Mobile UK, die als „zur Veräußerung gehalten“ ausgewiesen war, nicht enthalten.

### Die Deutsche Telekom als Leasinggeber.

**Finanzierungs-Leasingverhältnisse.** Die Deutsche Telekom tritt als Leasinggeber im Rahmen von Finanzierungs-Leasingverhältnissen auf. Im Wesentlichen handelt es sich dabei um die Vermietung von Routern, die den Kunden der Deutschen Telekom für Daten- und Telefonnetzwerk-lösungen bereitgestellt werden. Die Deutsche Telekom setzt eine Forderung in Höhe des Nettoinvestitionswerts aus dem Leasingverhältnis an. Die von den jeweiligen Leasingnehmern gezahlten Leasingraten werden unter Anwendung der Effektivzinsmethode in einen Zins- und Tilgungsanteil aufgeteilt. Die Forderung aus dem Leasingverhältnis wird vermindert um die erhaltenen Tilgungsanteile fortgeschrieben. Der Zinsanteil der Zahlungen wird als Finanzertrag in der Gewinn- und Verlustrechnung erfasst. Die Ableitung des Nettoinvestitionswerts aus Finanzierungs-Leasingverhältnissen kann der folgenden Übersicht entnommen werden:

|                                                                   | 31.12.2010<br>Mio. € | 31.12.2009<br>Mio. € |
|-------------------------------------------------------------------|----------------------|----------------------|
| Mindestleasingzahlungen                                           | 328                  | 307                  |
| Nicht garantierter Restwert                                       | -                    | -                    |
| Bruttoinvestition                                                 | 328                  | 307                  |
| Noch nicht realisierter Finanzertrag                              | (39)                 | (43)                 |
| <b>Nettoinvestition<br/>(Barwert der Mindestleasingzahlungen)</b> | <b>289</b>           | <b>264</b>           |

Die Bruttoinvestition und der Barwert der ausstehenden Mindestleasingzahlungen sind in folgender Übersicht dargestellt:

|                   | 31.12.2010                       |                                                            | 31.12.2009                       |                                                            |
|-------------------|----------------------------------|------------------------------------------------------------|----------------------------------|------------------------------------------------------------|
|                   | Brutto-<br>investition<br>Mio. € | Barwert der<br>Mindest-<br>leasing-<br>zahlungen<br>Mio. € | Brutto-<br>investition<br>Mio. € | Barwert der<br>Mindest-<br>leasing-<br>zahlungen<br>Mio. € |
| <b>Fälligkeit</b> |                                  |                                                            |                                  |                                                            |
| Bis 1 Jahr        | 126                              | 110                                                        | 98                               | 83                                                         |
| 1 bis 3 Jahre     | 142                              | 124                                                        | 131                              | 112                                                        |
| 3 bis 5 Jahre     | 55                               | 50                                                         | 57                               | 49                                                         |
| Über 5 Jahre      | 5                                | 5                                                          | 21                               | 20                                                         |
|                   | <b>328</b>                       | <b>289</b>                                                 | <b>307</b>                       | <b>264</b>                                                 |

**Operating-Leasingverhältnisse.** Die Deutsche Telekom tritt als Leasinggeber im Rahmen von Operating-Leasingverhältnissen auf und setzt die überlassenen Vermögenswerte weiterhin in ihrer Bilanz an. Die erhaltenen Leasingraten werden erfolgswirksam erfasst. Im Wesentlichen handelt es sich dabei um die Vermietung von Gebäudeflächen oder Funktürmen. Die Verträge haben eine Vertragslaufzeit von durchschnittlich zehn Jahren. Die zukünftigen Mindestleasingzahlungen aus unkündbaren Operating-Leasingverhältnissen können der folgenden Tabelle entnommen werden:

|                   | 31.12.2010<br>Mio. € | 31.12.2009<br>Mio. € |
|-------------------|----------------------|----------------------|
| <b>Fälligkeit</b> |                      |                      |
| Bis 1 Jahr        | 359                  | 338                  |
| 1 bis 3 Jahre     | 456                  | 406                  |
| 3 bis 5 Jahre     | 346                  | 318                  |
| Über 5 Jahre      | 756                  | 624                  |
|                   | <b>1 917</b>         | <b>1 686</b>         |

**Vereinbarungen, die nach ihrem wirtschaftlichen Gehalt kein Leasingverhältnis darstellen.** Die Telekom Deutschland GmbH (firmierte damals als T-Mobile Deutschland GmbH) hat 2002 für wesentliche Teile ihres GSM-Mobilfunk-Netzwerks sog. Lease-in-lease-out-Verträge (QTE-Mietverträge) geschlossen (Volumen 0,8 Mrd. USD). Vertragspartner waren vier, nach einer vorzeitigen, einvernehmlichen Vertragsauflösung in 2009 noch drei US-Trusts, hinter denen jeweils US-Investoren stehen. Die Telekom Deutschland GmbH ist im Rahmen von Haupt-Mietverträgen verpflichtet, dem jeweiligen US-Trust für die Dauer von 30 Jahren die ungestörte Nutzungsmöglichkeit an den Mietgegenständen einzuräumen. Nach Ablauf der Haupt-Mietverträge haben die US-Trusts das Recht, die Netzteile für einen Kaufpreis von jeweils 1,00 USD zu erwerben. Im Gegenzug hat die Telekom Deutschland GmbH im Rahmen von Unter-Mietverträgen die jeweiligen Netzteile für 16 Jahre zurückgemietet. Nach rund 13 Jahren hat sie die Option, die Rechte des jeweiligen US-Trusts aus den Haupt-Mietverträgen zu erwerben (Kaufoption). Bei Ausübung der Kaufoption gehen alle Rechte des jeweiligen US-Trusts an den Mietgegenständen auf die Telekom Deutschland GmbH über. In diesem Fall stünde die Telekom Deutschland GmbH auf beiden Seiten des jeweiligen Haupt-Mietvertrags, sodass dieser dann jeweils durch Konfusion erlöschen würde.

## 35 Mid-Term Incentive Pläne (MTIP)/ „Phantom-Share“ Plan/ Aktienorientierte Vergütungssysteme.

Innerhalb des Konzerns gibt es verschiedene Aktienoptionspläne, Mid-Term Incentive Pläne und „Phantom-Share“ Pläne, die insgesamt keine wesentlichen Auswirkungen auf die Darstellung der Vermögens-, Finanz- und Ertragslage bzw. der Cashflows des Konzerns haben. Der Aufwand aus aktienbasierten Vergütungssystemen im Berichtsjahr betrug 47 Mio. € (2009: 31 Mio. €; 2008: 96 Mio. €). Die Rückstellungen belaufen sich zum Abschlussstichtag auf 68 Mio. € (31. Dezember 2009: 78 Mio. €).

### Mid-Term Incentive Pläne (MTIP)/ „Phantom-Share“ Plan.

Innerhalb des Konzerns existieren für Vorstandsmitglieder und Senior Executives sowie weitere Berechtigte Mid-Term Incentive Pläne (MTIP) und ein „Phantom-Share“ Plan (PSP).

**Mid-Term Incentive Pläne.** Der MTIP der Deutschen Telekom AG ist ein cash-basierter Plan, der an zwei gleich gewichtete aktienbezogene Erfolgsparameter – einen absoluten und einen relativen – gebunden ist. Werden beide Erfolgsziele erfüllt, so wird den Planteilnehmern der gesamte durch das jeweilige Arbeitgeberunternehmen ausgelobte Betrag ausgezahlt; wird ein Erfolgsziel erreicht, werden 50 % des ausgelobten Betrags ausgezahlt; wird keines der beiden Erfolgsziele erreicht, erfolgt keine Auszahlung.

Das absolute Erfolgsziel ist erfüllt, wenn am Ende der einzelnen Pläne der Aktienkurs der T-Aktie um mindestens 30 % im Vergleich zum Kurs der T-Aktie bei Planbeginn gestiegen ist. Maßstab für die Betrachtung sind die nicht gewichteten Durchschnitte der T-Aktie (auf Basis der Schlusskurse der T-Aktie im Xetra-Handel) der Deutschen Börse AG während der letzten 20 Börsenhandelstage vor Planbeginn bzw. vor Planende.

Das relative Erfolgsziel ist erfüllt, wenn sich der Total Return der T-Aktie während der jeweiligen Planlaufzeit prozentual besser entwickelt hat als der Dow Jones EURO STOXX® Total Return Index im gleichen Zeitraum. Maßstab sind die nicht gewichteten Durchschnitte der T-Aktie (auf Basis der Schlusskurse der T-Aktie im Xetra-Handel) zuzüglich des in die T-Aktie reinvestierten Werts der Dividendenzahlungen, der Bonusaktien etc. sowie die nicht gewichteten Durchschnitte des Dow Jones EURO STOXX® Total Return Index, jeweils während der letzten 20 Börsenhandelstage vor Planbeginn bzw. vor Planende.

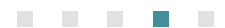

Nach Ablauf der Laufzeit der einzelnen Pläne stellt der Aufsichtsrat der Deutschen Telekom AG die Zielerreichung des absoluten sowie des relativen Erfolgsziels für den Vorstand fest. Auf dieser Grundlage stellt der Vorstand die Zielerreichung einheitlich für die Deutsche Telekom und alle teilnehmenden Unternehmen fest und kommuniziert diese. Im Anschluss an die Feststellung der Zielerreichung erfolgt bei Erreichung eines oder beider Ziele unabhängig voneinander die Auszahlung an die Planteilnehmer.

Der Präsidialausschuss des Aufsichtsrats hat in seiner Sitzung am 3. Februar 2010 und der Aufsichtsrat in seiner Sitzung am 24. Februar 2010 festgestellt, dass in der Tranche 2007 des MTIP die relative Planhürde erreicht worden ist. Somit wurden 50 % des Auslobungsvolumens der Tranche 2007 im Jahr 2010 ausgezahlt.

| MTIP-<br>Planjahr | Maximales<br>Budget | Planlaufzeit | Aktienkurs<br>zu<br>Planbeginn | Absolutes<br>Erfolgsziel | Ausgangs-<br>wert<br>des Index |
|-------------------|---------------------|--------------|--------------------------------|--------------------------|--------------------------------|
|                   | Mio. €              | Jahre        | €                              | €                        |                                |
| 2008              | 83                  | 3            | 15,11                          | 19,64                    | 601,59                         |
| 2009              | 55                  | 3            | 11,01                          | 14,31                    | 328,55                         |
| <b>2010</b>       | <b>57</b>           | <b>3</b>     | <b>10,29</b>                   | <b>13,38</b>             | <b>417,62</b>                  |

Der anteilig als Aufwand zu erfassende Betrag wird nach dem Monte-Carlo-Modell berechnet.

Der MTIP von **Magyar Telekom** basiert grundsätzlich auf dem gleichen Modell, das für den MTIP der Deutschen Telekom AG gilt, allerdings mit der Ausnahme, dass der Erfolg an die Kursentwicklung der Magyar Telekom Aktien und an den Dow Jones EURO STOXX® Total Return Index gebunden ist. Darüber hinaus ist das absolute Erfolgsziel dann erfüllt, wenn am Ende der einzelnen Pläne der Aktienkurs der Magyar Telekom Aktie um mindestens 35 % im Vergleich zum Kurs der Magyar Telekom Aktie bei Planbeginn gestiegen ist. Derzeit sind die Pläne 2008 bis 2010 offen.

Der MTIP von **Hrvatski Telekom** basiert grundsätzlich auf dem gleichen Modell, das für den MTIP der Deutschen Telekom AG gilt. Allerdings ist das absolute Erfolgsziel für den MTIP 2008 das EBITDA und das relative Erfolgsziel ein kombinierter Index aus einem Korb von Telekommunikationsaktien. Für den MTIP 2010 ist das absolute Erfolgsziel der 30-prozentige Anstieg der HT-Aktie.

**PTC** hat ein Performance Cash Plan Program in Form von Long-Term Incentive Plänen (LTIP) aufgelegt. Hierbei handelt es sich um eine zusätzliche Zahlung zur Vergütung in Form einer Deferred Compensation, die sich nach den Bestimmungen des LTIP richtet und für Mitarbeiter bestimmt ist, deren Arbeit eine besondere Bedeutung für den Unternehmenswert darstellt. Teilnahmeberechtigt am LTIP sind grundsätzlich Leistungsträger bestimmter Führungsebenen. Ihre individuelle Teilnahme am jeweiligen Plan wird von der Geschäftsführung der PTC bestimmt. Der jeweilige Plan umfasst einen Zeitraum von drei aufeinander folgenden Zyklen, welche jeweils vom 1. Januar bis einschließlich 31. Dezember laufen. Die Auszahlung des Plans erfolgt nach drei Jahren und richtet sich nach der Erreichung des jeweiligen EBITDA-Ziels (EBITDA-Hürde). Zudem gibt es für jeden Zyklus einen Bonus. Die Höhe des Bonus richtet sich nach der Zielerreichung und wird für jeden Zyklus gesondert ermittelt. Derzeit sind die Pläne 2008 bis 2010 offen.

**„Phantom-Share“ Plan (PSP).** T-Mobile USA hat einen Phantom-Share Plan (PSP) als Long-Term Incentive Plan (LTIP) auf revolvierender Basis für die Jahre 2005 bis 2010 aufgelegt, der das Topmanagement begünstigt. Im Rahmen dieses PSPs gewährt T-Mobile USA leistungsorientierte Cash Bonus Awards. Die vollständige oder teilweise Vergabe dieser Awards orientiert sich am Kundenwachstum; dabei wird eine gleitende Skala von 60 % bis 150 % hinsichtlich der ursprünglichen Anzahl der gewährten virtuellen Aktien (Phantom-Shares) zugrunde gelegt. Der Wert einer Phantom-Share erhöht oder vermindert sich ausgehend von ihrem Nennwert in Höhe von 10 USD je Aktie im Verhältnis zur Veränderung des geschätzten Enterprise Value der T-Mobile USA in der Performance-Periode. Der Wert eines Awards ergibt sich aus der Multiplikation der Anzahl der realisierten Phantom-Shares mit dem Schätzwert einer Phantom-Share. Die Awards werden anteilmäßig über eine Performance-Periode von zwei oder drei Jahren realisiert und ausgezahlt.

### Aktionsoptionspläne.

Die folgende Aufstellung gibt einen Überblick über alle bestehenden Aktienoptionspläne im Konzern:

| Gesellschaft                                       | Plan                       | Ausgabe-jahr      | Zugesagte Aktienoptionen<br>Tsd. Stück | Sperrfrist<br>Jahre | Vertragliche Laufzeit<br>Jahre | Gewichteter Ausübungspreis | Aktienpreis bei Zusage | Maximalpreis bei SAR | Klassifizierung/<br>Bilanzierung |
|----------------------------------------------------|----------------------------|-------------------|----------------------------------------|---------------------|--------------------------------|----------------------------|------------------------|----------------------|----------------------------------|
| Deutsche Telekom AG                                | AOP 2001                   | 2001              | 8 221                                  | 2 - 3               | 10                             | 30,00 €                    | 19,10 €                |                      | equity settled                   |
|                                                    |                            | 2002              | 3 928                                  | 2 - 3               | 10                             | 12,36 €                    | 10,30 €                |                      | equity settled                   |
|                                                    | SAR                        | 2001              | 165                                    | 2 - 3               | 10                             | 30,00 €                    | 19,10 €                | 50,00 €              | cash settled                     |
|                                                    |                            | 2002              | 3                                      | 2 - 3               | 10                             | 12,36 €                    | 10,30 €                | 20,60 €              | cash settled                     |
| Deutsche Telekom AG<br>(T-Online International AG) | AOP 2001                   | 2001              | 2 369                                  | 2 - 3               | 10                             | 10,35 €                    | 8,28 €                 |                      | cash settled                     |
|                                                    |                            | 2002              | 2 067                                  | 2 - 6               | 10                             | 10,26 €                    | 8,21 €                 |                      | cash settled                     |
| T-Mobile USA                                       | AOP                        | 2001              | 24 278                                 | bis zu 4            | maximal 10                     | 15,36 US-\$                |                        |                      | cash settled                     |
|                                                    |                            | 2002              | 5 964                                  | bis zu 4            | maximal 10                     | 13,35 US-\$                |                        |                      | cash settled                     |
|                                                    |                            | 2003              | 1 715                                  | bis zu 4            | maximal 10                     | 12,86 US-\$                |                        |                      | cash settled                     |
|                                                    | Powerotel                  | 2001              | 5 323                                  | bis zu 4            | maximal 10                     | 20,04 US-\$                |                        |                      | cash settled                     |
|                                                    | T-Mobile USA/<br>Powerotel | 2004              | 230                                    | bis zu 4            | maximal 10                     | 19,64 US-\$                |                        |                      | cash settled                     |
| OTE-Gruppe                                         | Cosmote-Gruppe             | 2005 -<br>2007    | 3 440                                  | bis zu 3            | 6                              | 14,90 €                    | 15,48 €                |                      | equity settled                   |
|                                                    |                            | OTE originär 2008 | 2008                                   | 3 142               | bis zu 3                       | maximal 6                  | 15,70 €                | 21,38 €              |                                  |
|                                                    | OTE-Gruppe 2008            | 2009              | 3 226                                  | bis zu 3            | maximal 6                      | 16,20 €                    | 10,40 €                |                      | equity settled                   |
|                                                    |                            | 2010              | 4 671                                  | bis zu 3            | maximal 6                      | 9,32 €                     | 11,26 €                |                      | equity settled                   |

**Deutsche Telekom AG.** Der Aktienoptionsplan 2001 (AOP 2001) führte zur Ausgabe von Aktienoptionen im August 2001 und im Juli 2002. Des Weiteren wurden Mitarbeitern in den Ländern, in denen es rechtlich nicht möglich war, Aktienoptionen auszugeben, Rechte auf einen Barausgleich an Stelle von Aktien gewährt (Stock Appreciation Rights; „SAR“).

**Deutsche Telekom AG (vormals T-Online International AG (vor Verschmelzung)).** Mit dem Eintrag in das Handelsregister am 6. Juni 2006 wurde die Verschmelzung der T-Online International AG auf die Deutsche Telekom AG wirksam. Die Deutsche Telekom AG war gemäß Umwandlungsgesetz verpflichtet, den Inhabern der Aktienoptionen „gleichwertige Rechte“ zu gewähren. Dementsprechend ist im Verschmelzungsvertrag vereinbart worden, dass jedes Optionsrecht gemäß dem vertraglich bestimmten Umtauschverhältnis zum Bezug von 0,52 Stückaktien der Deutschen Telekom AG zu dem in den Optionsbedingungen jeweils genannten Ausübungspreis berechtigt. Der Vorstand hat am 2. August 2005 auf der Grundlage des Verschmelzungsvertrags beschlossen, dass zur Gewährung gleichwertiger Rechte zukünftig ein Barausgleich vorgenommen wird. Das Oberlandesgericht Frankfurt am Main hat im Verfahren zur Überprüfung der Angemessenheit des Umtauschverhältnisses bei der Verschmelzung der T-Online International AG auf die Deutsche Telekom AG mit Beschluss vom 3. September 2010 entschieden, dass die Deutsche Telekom eine

bare Zuzahlung in Höhe von 1,15 € je Aktie an ehemalige T-Online Aktionäre leisten muss. Entsprechend den Regelungen des Verschmelzungsvertrags mindert diese bare Zuzahlung den – jeweils in den Optionsbedingungen genannten – Ausübungspreis. Der um die bare Zuzahlung geminderte Ausübungspreis für die Tranche 2001 beträgt 9,20 €; für die Tranche 2002 beträgt der geminderte Ausübungspreis 9,11 €.

**T-Mobile USA.** Vor der Akquisition von T-Mobile USA (vormals VoiceStream und Powerotel) am 31. Mai 2001 hatten die Unternehmen Aktienoptionen an ihre Mitarbeiter im Rahmen des „Management Incentive Stock Option Plan“ („MISOP“) von 1999 ausgegeben. Die Pläne wurden zum 1. Januar 2004 zu einem T-Mobile Plan zusammengeführt. Das Umtauschverhältnis für die VoiceStream Aktien betrug 3,7647 und für die Powerotel Aktie 2,6353 je Aktie. Der Plan ist zwischenzeitlich ausgelaufen, und es können keine neuen Optionen mehr ausgegeben werden. Mit Vorstandsbeschluss vom 15. Juni 2010 macht der Vorstand der Deutschen Telekom AG künftig bei diesen Aktienoptionen von der Möglichkeit eines Barausgleichs Gebrauch.

Aus den einzelnen Aktienoptionsplänen resultiert im Geschäftsjahr 2010 folgende Entwicklung der Optionsrechte:

|                                                                                                  | Equity settled               |                              |                     | Cash settled                                    |                              |
|--------------------------------------------------------------------------------------------------|------------------------------|------------------------------|---------------------|-------------------------------------------------|------------------------------|
|                                                                                                  | Deutsche Telekom AG          | OTE-Gruppe                   | Deutsche Telekom AG | Deutsche Telekom AG (T-Online International AG) | T-Mobile USA                 |
|                                                                                                  | Aktienoptionen<br>Tsd. Stück | Aktienoptionen<br>Tsd. Stück | SAR<br>Tsd. Stück   | Aktienoptionen<br>Tsd. Stück                    | Aktienoptionen<br>Tsd. Stück |
| <b>Ausstehende/Ausübbarer Aktienoptionen 1. Januar 2010</b>                                      | <b>8 057</b>                 | <b>8 675</b>                 | <b>134</b>          | <b>2 346</b>                                    | <b>5 403</b>                 |
| Gewährt                                                                                          | -                            | 4 671                        | -                   | -                                               | -                            |
| Ausgeübt                                                                                         | -                            | -                            | -                   | -                                               | 209                          |
| Verfallen                                                                                        | 1 357                        | 666                          | 2                   | 325                                             | 2 152                        |
| <b>Ausstehende Aktienoptionen 31. Dezember 2010</b>                                              | <b>6 700</b>                 | <b>12 680</b>                | <b>132</b>          | <b>2 021</b>                                    | <b>3 042</b>                 |
| <b>Ausübbarer Aktienoptionen 31. Dezember 2010</b>                                               | <b>6 700</b>                 | <b>6 713</b>                 | <b>132</b>          | <b>2 021</b>                                    | <b>3 042</b>                 |
| Gewichteter durchschnittlicher Ausübungspreis zum 31. Dezember 2010 (ausstehende Aktienoptionen) | 23,44 €                      | 13,44 €                      | 29,93 €             | 9,15 €                                          | 20,22 US-\$                  |
| Gewichteter durchschnittlicher Ausübungspreis zum 31. Dezember 2010 (ausübbarer Aktienoptionen)  | 23,44 €                      | 15,00 €                      | 29,93 €             | 9,15 €                                          | 20,22 US-\$                  |

Zum 31. Dezember 2010 weisen die Optionen folgende Merkmale auf:

| Spanne der Ausübungspreise<br>€ | Deutsche Telekom AG  |                                     | Deutsche Telekom AG (T-Online International AG) |                                     | OTE-Gruppe           |                                     |
|---------------------------------|----------------------|-------------------------------------|-------------------------------------------------|-------------------------------------|----------------------|-------------------------------------|
|                                 | Anzahl<br>Tsd. Stück | Vertragliche Restlaufzeit<br>Jahre* | Anzahl<br>Tsd. Stück                            | Vertragliche Restlaufzeit<br>Jahre* | Anzahl<br>Tsd. Stück | Vertragliche Restlaufzeit<br>Jahre* |
| 8 - 20                          | 2 493                | 1,5                                 | 2 021                                           | 1,1                                 | 12 680               | 3,5                                 |
| 21 - 40                         | 4 207                | 0,6                                 | -                                               | -                                   | -                    | -                                   |
|                                 | <b>6 700</b>         | <b>1,0</b>                          | <b>2 021</b>                                    | <b>1,1</b>                          | <b>12 680</b>        | <b>3,5</b>                          |

\* Gewichteter Durchschnitt.

| Spanne der Ausübungspreise<br>US-\$ | T-Mobile USA         |                                     |
|-------------------------------------|----------------------|-------------------------------------|
|                                     | Anzahl<br>Tsd. Stück | Vertragliche Restlaufzeit<br>Jahre* |
| 0,02 - 15,19                        | 948                  | 1,3                                 |
| 15,20 - 30,39                       | 2 083                | 0,2                                 |
| 30,40 - 34,19                       | 11                   | 0,1                                 |
| 34,20 - 38,00                       | -                    | -                                   |
|                                     | <b>3 042</b>         | <b>0,5</b>                          |

\* Gewichteter Durchschnitt.

## 36 Angaben zu Finanzinstrumenten.

## Buchwerte, Wertansätze und beizulegende Zeitwerte nach Bewertungskategorien.

|                                                                                | Bewertungs-<br>kategorie<br>nach IAS 39 | Buchwert<br>31.12.2010<br><br>Mio. € | Wertansatz Bilanz nach IAS 39                     |                                   |                                                       |                                                       |
|--------------------------------------------------------------------------------|-----------------------------------------|--------------------------------------|---------------------------------------------------|-----------------------------------|-------------------------------------------------------|-------------------------------------------------------|
|                                                                                |                                         |                                      | Fortgeführte<br>Anschaffungs-<br>kosten<br>Mio. € | Anschaffungs-<br>kosten<br>Mio. € | Beizulegender<br>Zeitwert<br>erfolgsneutral<br>Mio. € | Beizulegender<br>Zeitwert<br>erfolgswirksam<br>Mio. € |
| <b>Aktiva</b>                                                                  |                                         |                                      |                                                   |                                   |                                                       |                                                       |
| Zahlungsmittel und Zahlungsmitteläquivalente                                   | LaR                                     | 2 808                                | 2 808                                             |                                   |                                                       |                                                       |
| Forderungen aus Lieferungen und Leistungen                                     | LaR                                     | 6 766                                | 6 766                                             |                                   |                                                       |                                                       |
| Sonstige Forderungen                                                           | LaR/n. a.                               | 2 628                                | 2 340                                             |                                   |                                                       |                                                       |
| Sonstige originäre finanzielle Vermögenswerte                                  |                                         |                                      |                                                   |                                   |                                                       |                                                       |
| Held-to-Maturity Investments                                                   | HtM                                     | 91                                   | 91                                                |                                   |                                                       |                                                       |
| Available-for-Sale Financial Assets                                            | AfS                                     | 513                                  |                                                   | 335                               | 178                                                   |                                                       |
| Derivative finanzielle Vermögenswerte                                          |                                         |                                      |                                                   |                                   |                                                       |                                                       |
| Derivate ohne Hedge-Beziehung                                                  | FAHFT                                   | 560                                  |                                                   |                                   |                                                       | 560                                                   |
| Derivate mit Hedge-Beziehung                                                   | n. a.                                   | 275                                  |                                                   |                                   | 131                                                   | 144                                                   |
| <b>Passiva</b>                                                                 |                                         |                                      |                                                   |                                   |                                                       |                                                       |
| Verbindlichkeiten aus Lieferungen und Leistungen                               | FLAC                                    | 6 737                                | 6 737                                             |                                   |                                                       |                                                       |
| Anleihen und sonstige verbriefte Verbindlichkeiten                             | FLAC                                    | 38 190                               | 38 190                                            |                                   |                                                       |                                                       |
| Verbindlichkeiten gegenüber Kreditinstituten                                   | FLAC                                    | 4 190                                | 4 190                                             |                                   |                                                       |                                                       |
| Verbindlichkeiten gegenüber Nicht-Kreditinstituten<br>aus Schuldscheindarlehen | FLAC                                    | 1 164                                | 1 164                                             |                                   |                                                       |                                                       |
| Sonstige verzinsliche Verbindlichkeiten                                        | FLAC                                    | 1 838                                | 1 838                                             |                                   |                                                       |                                                       |
| Sonstige unverzinsliche Verbindlichkeiten                                      | FLAC                                    | 3 193                                | 3 193                                             |                                   |                                                       |                                                       |
| Verbindlichkeiten aus Finanzierungsleasing                                     | n. a.                                   | 1 400                                |                                                   |                                   |                                                       |                                                       |
| Derivative finanzielle Verbindlichkeiten                                       |                                         |                                      |                                                   |                                   |                                                       |                                                       |
| Derivate ohne Hedge-Beziehung (Held for Trading)                               | FLHFT                                   | 249                                  |                                                   |                                   |                                                       | 249                                                   |
| Derivate mit Hedge-Beziehung (Hedge Accounting)                                | n. a.                                   | 322                                  |                                                   |                                   | 322                                                   |                                                       |
| Davon aggregiert nach Bewertungskategorien gemäß IAS 39:                       |                                         |                                      |                                                   |                                   |                                                       |                                                       |
| Loans and Receivables (LaR)                                                    |                                         | 11 914                               | 11 914                                            |                                   |                                                       |                                                       |
| Held-to-Maturity Investments (HtM)                                             |                                         | 91                                   | 91                                                |                                   |                                                       |                                                       |
| Available-for-Sale Financial Assets (AfS)                                      |                                         | 513                                  |                                                   | 335                               | 178                                                   |                                                       |
| Financial Assets Held for Trading (FAHFT)                                      |                                         | 560                                  |                                                   |                                   |                                                       | 560                                                   |
| Financial Liabilities Measured at Amortized Cost (FLAC)                        |                                         | 55 312                               | 55 312                                            |                                   |                                                       |                                                       |
| Financial Liabilities Held for Trading (FLHFT)                                 |                                         | 249                                  |                                                   |                                   |                                                       | 249                                                   |

\*  Siehe dazu ausführlich Angabe 8.



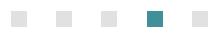

| Wertansatz Bilanz nach IAS 17 | Beizulegender Zeitwert 31.12.2010 | Bewertungskategorie nach IAS 39 | Buchwert 31.12.2009 | Wertansatz Bilanz nach IAS 39   |                    |                                       |                                       | Wertansatz Bilanz nach IAS 17 | Beizulegender Zeitwert 31.12.2009 |
|-------------------------------|-----------------------------------|---------------------------------|---------------------|---------------------------------|--------------------|---------------------------------------|---------------------------------------|-------------------------------|-----------------------------------|
|                               |                                   |                                 |                     | Fortgeführte Anschaffungskosten | Anschaffungskosten | Beizulegender Zeitwert erfolgsneutral | Beizulegender Zeitwert erfolgswirksam |                               |                                   |
| Mio. €                        | Mio. €                            |                                 | Mio. €              | Mio. €                          | Mio. €             | Mio. €                                | Mio. €                                | Mio. €                        |                                   |
|                               | 2 808                             | LaR                             | 5 022               | 5 022                           |                    |                                       |                                       | 5 022                         |                                   |
|                               | 6 766                             | LaR                             | 6 643               | 6 643                           |                    |                                       |                                       | 6 643                         |                                   |
| 288                           | 2 628                             | LaR/n. a.                       | 2 003               | 1 739                           |                    |                                       | 264                                   | 2 003                         |                                   |
|                               | 91                                | HtM                             | 80                  | 80                              |                    |                                       |                                       | 80                            |                                   |
|                               | 178*                              | AfS                             | 609                 |                                 | 411                | 198                                   |                                       | 198*                          |                                   |
|                               | 560                               | FAHfT                           | 653                 |                                 |                    |                                       | 653                                   | 653                           |                                   |
|                               | 275                               | n. a.                           | 395                 |                                 |                    | 170                                   | 225                                   | 395                           |                                   |
|                               | 6 737                             | FLAC                            | 6 294               | 6 294                           |                    |                                       |                                       | 6 294                         |                                   |
|                               | 41 806                            | FLAC                            | 38 508              | 38 508                          |                    |                                       |                                       | 41 813                        |                                   |
|                               | 4 346                             | FLAC                            | 4 718               | 4 718                           |                    |                                       |                                       | 4 864                         |                                   |
|                               | 1 326                             | FLAC                            | 1 057               | 1 057                           |                    |                                       |                                       | 1 205                         |                                   |
|                               | 1 838                             | FLAC                            | 1 511               | 1 511                           |                    |                                       |                                       | 1 562                         |                                   |
|                               | 3 193                             | FLAC                            | 2 995               | 2 995                           |                    |                                       |                                       | 2 995                         |                                   |
| 1 400                         | 1 671                             | n. a.                           | 1 423               |                                 |                    |                                       | 1 423                                 | 1 703                         |                                   |
|                               | 249                               | FLHfT                           | 730                 |                                 |                    |                                       | 730                                   | 730                           |                                   |
|                               | 322                               | n. a.                           | 249                 |                                 |                    | 197                                   | 52                                    | 249                           |                                   |
|                               | 11 914                            |                                 | 13 404              | 13 404                          |                    |                                       |                                       | 13 404                        |                                   |
|                               | 91                                |                                 | 80                  | 80                              |                    |                                       |                                       | 80                            |                                   |
|                               | 178*                              |                                 | 609                 |                                 | 411                | 198                                   |                                       | 198*                          |                                   |
|                               | 560                               |                                 | 653                 |                                 |                    |                                       | 653                                   | 653                           |                                   |
|                               | 59 246                            |                                 | 55 083              | 55 083                          |                    |                                       |                                       | 58 733                        |                                   |
|                               | 249                               |                                 | 730                 |                                 |                    |                                       | 730                                   | 730                           |                                   |

## Bewertungsklassen nach IFRS 7.27.

|                                                              | 31.12.2010        |                   |                   |                 | 31.12.2009        |                   |                   |                 |
|--------------------------------------------------------------|-------------------|-------------------|-------------------|-----------------|-------------------|-------------------|-------------------|-----------------|
|                                                              | Level 1<br>Mio. € | Level 2<br>Mio. € | Level 3<br>Mio. € | Summe<br>Mio. € | Level 1<br>Mio. € | Level 2<br>Mio. € | Level 3<br>Mio. € | Summe<br>Mio. € |
| <b>Aktiva</b>                                                |                   |                   |                   |                 |                   |                   |                   |                 |
| Available-for-Sale Financial Assets (AFS)                    |                   | 178               |                   | 178             |                   | 198               |                   | 198             |
| Financial Assets Held for Trading (FAHFT)                    |                   | 560               |                   | 560             |                   | 653               |                   | 653             |
| Derivative finanzielle Vermögenswerte mit Hedge-Beziehung    |                   | 275               |                   | 275             |                   | 395               |                   | 395             |
| <b>Passiva</b>                                               |                   |                   |                   |                 |                   |                   |                   |                 |
| Financial Liabilities Held for Trading (FLHFT)               |                   | 249               |                   | 249             |                   | 730               |                   | 730             |
| Derivative finanzielle Verbindlichkeiten mit Hedge-Beziehung |                   | 322               |                   | 322             |                   | 249               |                   | 249             |

☐ Weitere Erläuterungen zu den Bewertungsklassen sind dem Abschnitt „Änderungen der Bilanzierungs- und Bewertungsmethoden und Änderungen der Berichtsstruktur“ des Kapitels „Grundlagen und Methoden“ zu entnehmen.

Zahlungsmittel und Zahlungsmitteläquivalente, Forderungen aus Lieferungen und Leistungen sowie sonstige Forderungen haben überwiegend kurze Restlaufzeiten. Daher entsprechen deren Buchwerte zum Abschlussstichtag näherungsweise dem beizulegenden Zeitwert.

Die beizulegenden Zeitwerte von sonstigen langfristigen Forderungen sowie von bis zur Endfälligkeit gehaltenen Finanzinvestitionen mit Restlaufzeiten über einem Jahr entsprechen den Barwerten der mit den Vermögenswerten verbundenen Zahlungen unter Berücksichtigung der jeweils aktuellen Zinsparameter, welche markt- und partnerbezogene Veränderungen der Konditionen und Erwartungen reflektieren.

Verbindlichkeiten aus Lieferungen und Leistungen sowie sonstige Verbindlichkeiten haben regelmäßig kurze Restlaufzeiten; die bilanzierten Werte stellen näherungsweise die beizulegenden Zeitwerte dar.

Die beizulegenden Zeitwerte der börsennotierten Anleihen und sonstigen verbrieften Verbindlichkeiten entsprechen den Nominalwerten multipliziert mit den Kursnotierungen zum Abschlussstichtag.

Die beizulegenden Zeitwerte von nicht börsennotierten Anleihen, Verbindlichkeiten gegenüber Kreditinstituten, Verbindlichkeiten gegenüber Nicht-Kreditinstituten aus Schuldscheindarlehen und sonstigen finanziellen Verbindlichkeiten werden als Barwerte der mit den Schulden verbundenen Zahlungen unter Zugrundelegung der jeweils gültigen Zinsstrukturkurve sowie der währungsdifferenziert bestimmten Credit-Spread-Kurve der Deutschen Telekom ermittelt.



### Nettoergebnisse nach Bewertungskategorien.

|                                                             | aus Zinsen,<br>Dividenden | aus der Folgebewertung                     |                                   |                                 | aus Abgang | Nettoergebnis  |                |
|-------------------------------------------------------------|---------------------------|--------------------------------------------|-----------------------------------|---------------------------------|------------|----------------|----------------|
|                                                             | Mio. €                    | zum<br>beizulegenden<br>Zeitwert<br>Mio. € | Währungs-<br>umrechnung<br>Mio. € | Wert-<br>berichtigung<br>Mio. € | Mio. €     | 2010<br>Mio. € | 2009<br>Mio. € |
| Loans and Receivables (LaR)                                 | 77                        |                                            | 1 301                             | (749)                           |            | 629            | (779)          |
| Held-to-Maturity Investments (HTM)                          | 2                         |                                            |                                   |                                 |            | 2              | 7              |
| Available-for-Sale Financial Assets (AFS)                   | 45                        |                                            |                                   | (101)                           | 14         | (42)           | 45             |
| Financial Instruments Held for Trading<br>(FAHfT und FLHfT) | n. a.                     | 654                                        |                                   |                                 |            | 654            | (79)           |
| Financial Liabilities Measured<br>at Amortized Cost (FLAC)  | (2 646)                   |                                            | (1 716)                           |                                 |            | (4 362)        | (2 574)        |
|                                                             | <b>(2 522)</b>            | <b>654</b>                                 | <b>(415)</b>                      | <b>(850)</b>                    | <b>14</b>  | <b>(3 119)</b> | <b>(3 380)</b> |

Die Zinsen aus Finanzinstrumenten werden im Zinsergebnis, die Dividenden im sonstigen Finanzergebnis (Beteiligungsergebnis) ausgewiesen (vgl. Angabe 22 und 24). Die übrigen Komponenten des Nettoergebnisses erfasst die Deutsche Telekom im sonstigen Finanzergebnis. Davon ausgenommen sind die der Bewertungskategorie Loans and Receivables zuzuordnenden Wertberichtigungen auf Forderungen aus Lieferungen und Leistungen (vgl. Angabe 2), die unter den Vertriebskosten ausgewiesen werden. In das Ergebnis aus der Folgebewertung der Finanzinstrumente, die der Bewertungskategorie Held for Trading zugeordnet sind (Gewinne in Höhe von netto 654 Mio. €), gehen sowohl Zins- als auch Währungseffekte ein. Die Gewinne aus der Währungsumrechnung von den der Bewertungskategorie Loans and Receivables zugeordneten finanziellen Vermögenswerten in Höhe von netto 1 301 Mio. € resultieren überwiegend aus der konzerninternen Weiterleitung von Darlehen, welche die Finanzierungsgesellschaft der Deutschen Telekom, die Deutsche Telekom International Finance B.V., in Fremdwährung am Kapitalmarkt aufnimmt. Diesen stehen entsprechende Währungskursverluste aus den Kapitalmarktverbindlichkeiten gegenüber (1 716 Mio. €). Das Zinsergebnis aus finanziellen Verbindlichkeiten der Bewertungskategorie Financial Liabilities Measured at Amortized Cost (Aufwendungen in Höhe von netto 2 646 Mio. €) schließt im Wesentlichen Zinsaufwendungen aus Anleihen und aus sonstigen (verbrieften) Finanzverbindlichkeiten ein. Ferner werden darunter auch Zinsaufwendungen aus der Aufzinsung und Zinserträge aus der Abzinsung von Verbindlichkeiten aus Lieferungen und Leistungen subsumiert. Nicht enthalten sind jedoch die Zinsaufwendungen und Zinserträge aus Zinsderivaten, welche die Deutsche Telekom in der Berichtsperiode im Rahmen von Fair Value Hedges als Sicherungsinstrumente zur Absicherung des Zeitwertrisikos finanzieller Verbindlichkeiten eingesetzt hat (vgl. Angabe 22).

## 37 Risikomanagement, Finanzderivate und weitere Angaben zum Kapitalmanagement.

**Grundsätze des Risikomanagements.** Die Deutsche Telekom unterliegt hinsichtlich ihrer Vermögenswerte, Verbindlichkeiten und geplanten Transaktionen insbesondere Risiken aus der Veränderung der Wechselkurse, der Zinssätze und der Börsenkurse. Ziel des finanziellen Risikomanagements ist es, diese Marktrisiken durch die laufenden operativen und finanzorientierten Aktivitäten zu begrenzen. Hierzu werden je nach Einschätzung des Risikos ausgewählte derivative und nicht derivative Sicherungsinstrumente eingesetzt. Grundsätzlich werden jedoch nur die Risiken besichert, die Auswirkungen auf den Cashflow des Konzerns haben. Derivative Finanzinstrumente werden ausschließlich als Sicherungsinstrumente genutzt, d. h. für Handels- oder andere spekulative Zwecke kommen sie nicht zum Einsatz. Zur Minderung des Ausfallrisikos werden die Sicherungsgeschäfte grundsätzlich nur mit führenden Finanzinstituten mit einem Kreditrating von mindestens BBB+/Baa1 abgeschlossen. Zudem wird über eine Limitverwaltung, die abhängig vom Rating, der Aktienkursentwicklung und Credit Default Swap-Level des Kontrahenten individuell bestimmte relative und absolute Größen des Risikoausmaßes festlegt, das Ausfallrisiko bei Finanzinstrumenten mit positivem Marktwert minimiert.

Die Grundzüge der Finanzpolitik werden vom Vorstand festgelegt und vom Aufsichtsrat überwacht. Die Umsetzung der Finanzpolitik sowie das laufende Risikomanagement obliegen der Konzern-Treasury. Bestimmte Transaktionen bedürfen der vorherigen Genehmigung durch den Vorstand, der darüber hinaus regelmäßig über den Umfang und den Betrag des aktuellen Risikoausmaßes informiert wird.

Die Treasury betrachtet das effektive Management des Marktrisikos als eine ihrer Hauptaufgaben. Um die Auswirkungen unterschiedlicher Gegebenheiten am Markt einschätzen zu können, werden Simulationsrechnungen unter Verwendung verschiedener Worst-Case- und Markt-Szenarien vorgenommen.

**Währungsrisiken.** Die Währungskursrisiken der Deutschen Telekom resultieren aus Investitionen, Finanzierungsmaßnahmen und operativen Tätigkeiten. Risiken aus Fremdwährungen werden gesichert, soweit sie die Cashflows des Konzerns beeinflussen. Fremdwährungsrisiken, die die Cashflows des Konzerns nicht beeinflussen (d. h. die Risiken, die aus der Umrechnung des Abschlusses der Vermögenswerte und Verbindlichkeiten ausländischer Unternehmenseinheiten in die Konzern-Berichterstattungswährung resultieren), bleiben hingegen grundsätzlich ungesichert. Unter Umständen kann die Deutsche Telekom jedoch auch dieses Fremdwährungsrisiko besichern.

Fremdwährungsrisiken im Investitionsbereich resultieren u. a. aus dem Erwerb und der Veräußerung von Beteiligungen an ausländischen Unternehmen. Die Deutsche Telekom sichert diese Risiken. Falls die Risikoposition 100 Mio. € übersteigt, obliegt die Sicherungsstrategie einer speziellen Entscheidung des Vorstands. Liegt die Risikoposition unter 100 Mio. €, führt die Konzern-Treasury die Währungssicherung selbstständig durch. Zum Abschlussstichtag unterlag die Deutsche Telekom keinen wesentlichen Risiken aus auf Fremdwährung lautenden Transaktionen im Investitionsbereich.

Fremdwährungsrisiken im Finanzierungsbereich resultieren aus finanziellen Verbindlichkeiten in Fremdwährung und aus Darlehen in Fremdwährung, die zur Finanzierung an Konzerngesellschaften ausgereicht werden. Die Treasury sichert diese Risiken vollständig. Zur Umwandlung von auf fremde Währung lautenden finanziellen Verpflichtungen und konzerninternen Darlehen in die funktionalen Währungen der Konzernunternehmen werden Zins-/Währungsswaps und Devisenderivate eingesetzt.

Zum Abschlussstichtag bestehen die auf ausländische Währungen lautenden Verbindlichkeiten, für die Währungsrisiken gesichert sind, in erster Linie aus Anleihen und Medium Term Notes in Schweizer Franken, Tschechischen Koruna, Japanischen Yen, Britischen Pfund und US-Dollar. Die Deutsche Telekom war aufgrund dieser Sicherungsaktivitäten zum Abschlussstichtag keinen wesentlichen Währungskursrisiken im Finanzierungsbereich ausgesetzt.

Im operativen Bereich wickeln die Konzernunternehmen ihre Aktivitäten überwiegend in ihrer jeweiligen funktionalen Währung ab. Auszahlungen, die außerhalb der jeweiligen funktionalen Währung erfolgen, führen zu Fremdwährungsrisiken im Konzern. Diese betreffen im Wesentlichen Zahlungen für die Beschaffung von Netztechnik und Mobilfunk-Geräten sowie Zahlungen an internationale Telekommunikationsgesellschaften für die Bereitstellung von Anschlussleistungen. Zur Sicherung setzt die Deutsche Telekom Devisenderivate oder vereinzelt Devisenoptionen ein. Die Deutsche Telekom war aufgrund dieser Sicherungsaktivitäten zum Abschlussstichtag keinen wesentlichen Währungskursrisiken im operativen Bereich ausgesetzt.

Zur Darstellung von Marktrisiken verlangt IFRS 7 Sensitivitätsanalysen, welche Auswirkungen hypothetischer Änderungen von relevanten Risikovariablen auf Ergebnis und Eigenkapital zeigen. Neben Währungsrisiken unterliegt die Deutsche Telekom Zinsänderungsrisiken und Preisrisiken von Beteiligungen. Die periodischen Auswirkungen werden bestimmt, indem die hypothetischen Änderungen der Risikovariablen auf den Bestand der Finanzinstrumente zum Abschlussstichtag bezogen werden. Dabei wird unterstellt, dass der Bestand zum Abschlussstichtag repräsentativ für das Gesamtjahr ist.



Währungsrisiken im Sinne von IFRS 7 entstehen durch Finanzinstrumente, welche in einer von der funktionalen Währung abweichenden Währung denominiert und monetärer Art sind; wechsellkursbedingte Differenzen aus der Umrechnung von Abschlüssen in die Konzernwährung bleiben unberücksichtigt. Als relevante Risikovariablen gelten grundsätzlich alle nicht funktionalen Währungen, in denen die Deutsche Telekom Finanzinstrumente kontrahiert hat.

Den Währungssensitivitätsanalysen liegen die folgenden Annahmen zugrunde:

Wesentliche originäre monetäre Finanzinstrumente (Flüssige Mittel, Forderungen, verzinsliche Wertpapiere bzw. gehaltene Fremdkapitalinstrumente, verzinsliche Schulden, Verbindlichkeiten aus Finanzierungs-Leasingverhältnissen, unverzinsliche Verbindlichkeiten) sind entweder unmittelbar in funktionaler Währung denominiert oder werden durch den Einsatz von Derivaten in die funktionale Währung transferiert. Währungskursänderungen haben daher keine Auswirkungen auf Ergebnis oder Eigenkapital.

Im Bestand befindliche unverzinsliche Wertpapiere bzw. gehaltene Eigenkapitalinstrumente sind nicht monetär und demnach mit keinem Währungsrisiko im Sinne des IFRS 7 verbunden.

Zinserträge und -aufwendungen aus Finanzinstrumenten werden ebenfalls entweder direkt in funktionaler Währung erfasst oder mittels Derivateinsatz in die funktionale Währung überführt. Daher können auch diesbezüglich keine Auswirkungen auf die betrachteten Größen entstehen.

Bei zur Absicherung von Währungsrisiken designierten Fair Value Hedges gleichen sich die wechsellkursbedingten Wertänderungen von Grund- und Sicherungsgeschäft nahezu vollständig in derselben Periode in der Gewinn- und Verlustrechnung aus. Demzufolge sind auch diese Finanzinstrumente nicht mit Währungsrisiken in Bezug auf Ergebnis- oder Eigenkapitalwirkung verbunden.

Zins-/Währungsswaps sind stets originären Grundgeschäften zugeordnet, sodass auch aus diesen Instrumenten keine Währungswirkungen entstehen.

Die Deutsche Telekom ist demnach nur Währungsrisiken aus bestimmten Devisenderivaten ausgesetzt. Dabei handelt es sich zum einen um Devisenderivate, die in eine wirksame Cash Flow Hedge Beziehung zur Absicherung wechsellkursbedingter Zahlungsschwankungen nach IAS 39 eingebunden sind. Kursänderungen der diesen Geschäften zugrunde liegenden Währungen haben Auswirkungen auf die Sicherungsrücklage im Eigenkapital und auf den beizulegenden Zeitwert dieser Sicherungsgeschäfte. Zum anderen handelt es sich um die Devisenderivate, welche weder in eine Sicherungsbeziehung nach IAS 39 noch in eine Sicherungsbeziehung mit bilanzwirksamen Grundgeschäften (Natural Hedge) eingebunden sind.

Diese Derivate dienen der Sicherung von Planpositionen. Kursänderungen der solchen Finanzinstrumenten zugrunde liegenden Währungen wirken sich auf das sonstige Finanzergebnis (Bewertungsergebnis aus der Anpassung der finanziellen Vermögenswerte und Verbindlichkeiten an den beizulegenden Zeitwert) aus.

Wenn der Euro gegenüber dem US-Dollar, dem Britischen Pfund, der indonesischen Rupiah und dem malaysischen Ringgit zum 31. Dezember 2010 um 10 % aufgewertet (abgewertet) gewesen wäre, wären die Sicherungsrücklage im Eigenkapital und die beizulegenden Zeitwerte der Sicherungsgeschäfte vor Steuern um 38 Mio. € niedriger (höher) (31. Dezember 2009: 70 Mio. € niedriger (höher)) gewesen. Die hypothetische Ergebnisauswirkung von – 38 Mio. € ergibt sich im Wesentlichen aus den Währungssensitivitäten EUR/USD: – 22 Mio. €; EUR/GBP: – 15 Mio. €.

Wenn der Euro gegenüber sämtlichen Währungen zum 31. Dezember 2010 um 10 % aufgewertet (abgewertet) gewesen wäre, wären das sonstige Finanzergebnis und die beizulegenden Zeitwerte der Sicherungsgeschäfte vor Steuern um 17 Mio. € höher (niedriger) (31. Dezember 2009: 11 Mio. € niedriger (höher)) gewesen. Die hypothetische Ergebnisauswirkung von 17 Mio. € ergibt sich im Wesentlichen aus den Währungssensitivitäten EUR/USD: – 48 Mio. €; EUR/PLN: 46 Mio. €; EUR/HUF: 10 Mio. € und EUR/CZK: 9 Mio. €.

**Zinsrisiken.** Die Deutsche Telekom unterliegt Zinsrisiken hauptsächlich in der Eurozone und in den Vereinigten Staaten von Amerika. Um die Auswirkungen von Zinsschwankungen in diesen Regionen zu minimieren, managt die Deutsche Telekom das Zinsrisiko für die auf Euro und den US-Dollar lautenden Netto-Finanzverbindlichkeiten getrennt. Einmal im Jahr legt der Vorstand für einen Zeitraum von drei Jahren die gewünschte Mischung aus fest und variabel verzinslichen Netto-Finanzverbindlichkeiten fest. Unter Berücksichtigung der gegebenen und der geplanten Schuldenstruktur setzt die Treasury Zinsderivate ein, um so die Zinsausstattung für die Netto-Finanzverbindlichkeiten der vom Vorstand vorgegebenen Zusammensetzung anzupassen.

Aufgrund der derivativen Sicherungsgeschäfte waren in 2010 durchschnittlich 65 % (2009: 72 %) der auf Euro lautenden und 61 % (2009: 73 %) der auf US-Dollar lautenden Netto-Finanzverbindlichkeiten festverzinslich. Der durchschnittliche Wert ist repräsentativ für das Gesamtjahr.

Zinsänderungsrisiken werden gemäß IFRS 7 mittels Sensitivitätsanalysen dargestellt. Diese stellen die Effekte von Änderungen der Marktzinssätze auf Zinszahlungen, Zinserträge und -aufwendungen, andere Ergebnisteile sowie ggf. auf das Eigenkapital dar. Den Zinsensitivitätsanalysen liegen die folgenden Annahmen zugrunde:

Marktzinssatzänderungen von originären Finanzinstrumenten mit fester Verzinsung wirken sich nur dann auf das Ergebnis aus, wenn diese zum beizulegenden Zeitwert bewertet sind. Demnach unterliegen alle zu fortgeführten Anschaffungskosten bewerteten Finanzinstrumente mit fester Verzinsung keinen Zinsänderungsrisiken im Sinne von IFRS 7.

Bei zur Absicherung von Zinsänderungsrisiken designierten Fair Value Hedges gleichen sich die zinsbedingten Wertänderungen von Grund- und Sicherungsgeschäft nahezu vollständig in derselben Periode in der Gewinn- und Verlustrechnung aus. Demzufolge sind zinsbedingte Marktbewertungsänderungen von Grund- und Sicherungsgeschäft weitestgehend ergebnisneutral und unterliegen deshalb keinen Zinsänderungsrisiken.

Marktzinssatzänderungen betreffen bei Zinsderivaten in Fair Value Hedges jedoch die Höhe der Zinszahlungen und wirken sich damit auf das Zinsergebnis aus und gehen demzufolge in die Berechnung der ergebnisbezogenen Sensitivitäten ein.

Marktzinssatzänderungen von Finanzinstrumenten, die als Sicherungsinstrumente im Rahmen eines Cash Flow Hedges zur Absicherung zinsbedingter Zahlungsschwankungen designiert wurden, haben Auswirkungen auf die Sicherungsrücklage im Eigenkapital und werden daher bei den eigenkapitalbezogenen Sensitivitätsberechnungen berücksichtigt.

Marktzinssatzänderungen wirken sich auf das Zinsergebnis von originären variabel verzinslichen Finanzinstrumenten, deren Zinszahlungen nicht als Grundgeschäfte im Rahmen von Cash Flow Hedges gegen Zinsänderungsrisiken designiert sind, aus und gehen demzufolge in die Berechnung der ergebnisbezogenen Sensitivitäten mit ein.

Marktzinssatzänderungen von Zinsderivaten (Zinsswaps, Zins-/Währungsswaps), die nicht in eine Sicherungsbeziehung nach IAS 39 eingebunden sind, haben Auswirkungen auf das sonstige Finanzergebnis und werden daher bei den ergebnisbezogenen Sensitivitätsberechnungen berücksichtigt. Währungsderivate unterliegen keinen Zinsänderungsrisiken und haben daher keinen Einfluss auf die Zinssensitivitäten.

Wenn das Marktzinsniveau zum 31. Dezember 2010 um 100 Basispunkte höher (niedriger) gewesen wäre, wäre das Ergebnis vor Steuern um 249 Mio. € (31. Dezember 2009: 194 Mio. €) geringer (höher) gewesen. Die hypothetische Ergebnisauswirkung von – 249 Mio. € ergibt sich aus den potenziellen Effekten aus Zinsderivaten von – 228 Mio. € und originären variabel verzinslichen Finanzschulden von – 21 Mio. €. Die potenziellen Effekte aus Zinsderivaten werden teilweise kompensiert durch gegenläufige Wertentwicklungen bei nicht derivativen Finanzinstrumenten, die jedoch aufgrund der Rechnungslegungsvorschriften nicht abgebildet werden. Wenn das Marktzinsniveau zum 31. Dezember 2010 um 100 Basispunkte höher (niedriger) gewesen wäre, wäre das kumulierte sonstige Konzernergebnis vor Steuern um 164 Mio. € (31. Dezember 2009: 104 Mio. €) höher (geringer) gewesen.

**Sonstige Preisrisiken.** IFRS 7 verlangt im Rahmen der Darstellung zu Marktrisiken auch Angaben darüber, wie sich hypothetische Änderungen von Risikovariablen auf Preise von Finanzinstrumenten auswirken. Als Risikovariablen kommen insbesondere Börsenkurse oder Indizes in Frage.

Zum 31. Dezember 2010 hatte die Deutsche Telekom keine wesentliche als zur Veräußerung verfügbar kategorisierte Beteiligung im Bestand.

**Ausfallrisiken.** Die Deutsche Telekom ist aus ihrem operativen Geschäft und aus bestimmten Finanzierungsaktivitäten einem Ausfallrisiko ausgesetzt. Im Finanzierungsbereich werden Geschäfte nur mit Kontrahenten mit einem Kreditrating von mindestens BBB+/Baa1 abgeschlossen, verbunden mit einem laufenden Bonitätsmanagement-System. Im operativen Geschäft werden die Außenstände bereichsbezogen, also dezentral, fortlaufend überwacht. Ausfallrisiken wird mittels Einzelwertberichtigungen und pauschalierten Einzelwertberichtigungen Rechnung getragen.

Das Geschäft mit Großkunden, insbesondere internationalen Carriern, unterliegt einer gesonderten Bonitätsüberwachung. Gemessen an dem gesamten Risikoausmaß aus dem Ausfallrisiko sind die Forderungen gegenüber diesen Kontrahenten jedoch nicht so groß, als dass sie außerordentliche Risikokonzentrationen begründen würden.

Das maximale Ausfallrisiko wird zum einen durch die Buchwerte der in der Bilanz angesetzten finanziellen Vermögenswerte (einschließlich derivativer Finanzinstrumente mit positivem Marktwert) wiedergegeben. Mit Ausnahme der in Angabe 1 und Angabe 8 genannten Collateralverträge liegen zum Abschlussstichtag keine wesentlichen, das maximale Ausfallrisiko mindern den Vereinbarungen (wie z. B. Aufrechnungsvereinbarungen) vor. Zum anderen ist die Deutsche Telekom auch durch die Gewährung finanzieller Garantien einem Ausfallrisiko ausgesetzt. Zum Abschlussstichtag waren Garantiebeträge im Nominalvolumen von insgesamt 115 Mio. € (31. Dezember 2009: 41 Mio. €) zugesagt.

**Risiken aus Finanzierungszusage.** Die Deutsche Telekom hat eine von der Everything Everywhere emittierte Anleihe mit einem Nominalbetrag von 625 Mio. GBP erworben. Die Deutsche Telekom ist der Everything Everywhere gegenüber verpflichtet, diese am 30. November 2011 fällige Finanzierung bis Ende März 2012 in derselben Höhe weiterhin zur Verfügung zu stellen, wobei die Anschlussfinanzierung zu dann marktüblichen Konditionen zu gewähren ist und auch in Form einer Garantie- oder Bürgschaftsübernahme erfolgen kann. Der Nominalbetrag von 625 Mio. GBP stellt das maximale Ausfallrisiko aus dieser Finanzierungszusage dar.

**Liquiditätsrisiken.**  Vgl. dazu Angabe 10.



## Sicherungsmaßnahmen.

**Fair Value Hedges.** Zur Sicherung des Zeitwertrisikos festverzinslicher Verbindlichkeiten hat die Deutsche Telekom im Wesentlichen Zinsswaps und Forward-Zinsswaps („Zahle variabel – Empfänge fix“) in CHF, EUR, GBP, JPY und USD eingesetzt. Als Grundgeschäfte wurden festverzinsliche CHF-, EUR-, GBP-, JPY- und USD-Anleihen/MTNs designed. Die Wertänderungen der Grundgeschäfte, die sich aus den Veränderungen der CHFLibor-, Euribor-, GBPLibor-, JPYLibor- bzw. USDLibor Swap-Rate ergeben, werden durch die Wertänderungen der Zinsswaps ausgeglichen. Mit den Sicherungsmaßnahmen wird das Ziel verfolgt, die festverzinslichen Anleihen in variabel verzinsliche Finanzschulden zu transformieren und damit den beizulegenden Zeitwert der finanziellen Verbindlichkeiten zu sichern. Bonitätsrisiken sind nicht Teil der Sicherung.

Die Wirksamkeit der Sicherungsbeziehung wird prospektiv und retrospektiv zu jedem Abschlussstichtag mit einem Effektivitätstest mit statistischen Methoden in Form einer Regressionsrechnung überprüft. Alle Sicherungsbeziehungen, deren Wirksamkeit mit statistischen Methoden überprüft wird, waren zum Abschlussstichtag effektiv.

Wie der Auflistung zu den beizulegenden Zeitwerten von derivativen Finanzinstrumenten zu entnehmen ist (siehe Tabelle Abschnitt Derivative Finanzinstrumente), waren bei der Deutschen Telekom zum 31. Dezember 2010 Zinsderivate in Höhe von saldiert +0,1 Mrd. € (2009: +0,2 Mrd. €) als Sicherungsinstrumente im Rahmen von Fair Value Hedges designed. Aus der Buchwertanpassung der Grundgeschäfte resultieren im Geschäftsjahr 2010 im sonstigen Finanzergebnis erfasste Verluste von 0,3 Mrd. € (2009: Gewinne von 0,3 Mrd. €), aus den Veränderungen der beizulegenden Zeitwerte der Sicherungsgeschäfte wurden Gewinne von 0,3 Mrd. € (2009: Verluste von 0,3 Mrd. €) im sonstigen Finanzergebnis erfasst.

**Cash Flow Hedges – Zinsänderungsrisiken.** Zur Sicherung des Zahlungsstromrisikos variabel verzinslicher Verbindlichkeiten hat die Deutsche Telekom Payer-Zinsswaps und Forward Payer-Zinsswaps („Zahle fix – Empfänge variabel“) abgeschlossen. Die Zahlungsstromänderungen der Grundgeschäfte, die sich aus den Veränderungen der Euribor- bzw. Libor-Rate ergeben, werden durch die Zahlungsstromänderungen der Zinsswaps ausgeglichen. Mit den Sicherungsmaßnahmen wird das Ziel verfolgt, die variabel verzinslichen Anleihen in festverzinsliche Finanzschulden zu transformieren und damit den Zahlungsstrom aus den finanziellen Verbindlichkeiten zu sichern. Bonitätsrisiken sind nicht Teil der Sicherung.

In 2010 hat die Deutsche Telekom Forward Payer-Zinsswaps für erwartete Transaktionen in 2012 in Höhe von 3,0 Mrd. € abgeschlossen. Die folgende Tabelle zeigt die in 2010 neu in eine Hedge-Beziehung genommenen vertraglichen Fälligkeiten der Zahlungen der o. a. Forward Payer-Zinsswaps.

| Start           | Ende            | Nominalvolumen | Referenzzins     |
|-----------------|-----------------|----------------|------------------|
| 16. Januar 2012 | 16. Januar 2015 | 3 000 Mio. €   | 6-Monats Euribor |

Die Wirksamkeit der Sicherungsbeziehung wird prospektiv und retrospektiv mit einem Effektivitätstest mit statistischen Methoden in Form einer Regressionsrechnung überprüft. In der Berichtsperiode wurde eine Ineffektivität aus Cash Flow Hedges in Höhe von – 16 Mio. € erfolgswirksam erfasst (2009: 0 Mio. €). Alle Sicherungsbeziehungen dieser Art waren zum Abschlussstichtag hinreichend effektiv.

Wie der Auflistung zu den beizulegenden Zeitwerten von derivativen Finanzinstrumenten zu entnehmen ist (siehe Tabelle Abschnitt Derivative Finanzinstrumente), waren bei der Deutschen Telekom zum 31. Dezember 2010 Zinsderivate mit einem beizulegenden Zeitwert von – 0,3 Mrd. € (2009: – 0,1 Mrd. €) und einem Nominalvolumen von 6,7 Mrd. € (2009: 3,7 Mrd. €) als Sicherungsinstrumente im Rahmen von Cash Flow Hedges designed. Die Laufzeiten der Sicherungsbeziehungen enden in den Jahren 2012 bis 2015. Aus der erfolgsneutralen Realisierung der Wertveränderung der Sicherungsgeschäfte resultieren im Geschäftsjahr 2010 in der Neubewertungsrücklage erfasste Verluste von 0,1 Mrd. € (2009: Verluste von 0,1 Mrd. €). Im Geschäftsjahr 2010 wurden im Eigenkapital erfasste Verluste in Höhe von 56 Mio. € (2009: Verluste in Höhe von 41 Mio. €) in das sonstige Finanzergebnis transferiert.

**Cash Flow Hedges – Währungsrisiken.** Zur Sicherung nicht in funktionaler Währung denominierter Zahlungsströme hat die Deutsche Telekom Devisenderivate und Zins-/Währungsswaps abgeschlossen. In 2010 wurden Zins-/Währungsswaps in CHF/EUR – im Gesamtvolumen von 0,4 Mrd. CHF und einem EUR-Gegenwert von 0,3 Mrd. € sowie Zins-/Währungsswaps in EUR/GBP – im Gesamtvolumen von 0,9 Mrd. GBP und einem EUR-Gegenwert von 1,0 Mrd. € abgeschlossen. Die Laufzeit der in 2010 abgeschlossenen CHF/EUR-Fremdwährungsderivate endet in 2016, während die in 2010 abgeschlossenen EUR/GBP-Fremdwährungsderivate unterschiedliche Fälligkeiten zwischen 2012 und 2030 aufweisen. Die Wirksamkeit der Sicherungsbeziehung wird prospektiv und retrospektiv mit einem Effektivitätstest mit statistischen Methoden in Form einer Regressionsrechnung überprüft. Die Sicherungsbeziehung war zum Abschlussstichtag effektiv.

Im Geschäftsjahr 2010 wurden aus der Veränderung der beizulegenden Zeitwerte von Devisenderivaten resultierende Gewinne von insgesamt 238 Mio. € (2009: Gewinne von 26 Mio. €) im Eigenkapital (Sicherungsrücklage) erfasst. Diese Wertänderungen stellen den effektiven Teil der Sicherungsbeziehung dar. Im Geschäftsjahr 2010 wurden im Eigenkapital erfasste Gewinne in Höhe von 98 Mio. € (2009: Gewinne von 32 Mio. €) in das sonstige Finanzergebnis transferiert. Die Sicherungsmaßnahmen waren bis zum Abschlussstichtag mit keinen wesentlichen Ineffektivitäten verbunden.

Wie der Auflistung zu den beizulegenden Zeitwerten von derivativen Finanzinstrumenten zu entnehmen ist (siehe Tabelle Abschnitt Derivative Finanzinstrumente), waren bei der Deutschen Telekom zum 31. Dezember 2010 Devisentermingeschäfte mit einem beizulegenden Zeitwert von saldiert – 43 Mio. € (2009: – 2 Mio. €) und einem Gesamtvolumen von 0,3 Mrd. € (2009: 0,7 Mrd. €) sowie Zins-/Währungsswaps mit einem beizulegenden Zeitwert von saldiert + 0,1 Mrd. € (2009: + 0,1 Mrd. €) und einem Gesamtvolumen von 2,1 Mrd. € (2009: 1,9 Mrd. €) als Sicherungsinstrumente im Rahmen von Cash Flow Hedges designiert. Die Laufzeiten der Sicherungsbeziehungen enden in den Jahren 2011 bis 2030.

**Derivative Finanzinstrumente.** In der folgenden Tabelle sind die bilanzierten beizulegenden Zeitwerte der verschiedenen derivativen Finanzinstrumente dargestellt. Dabei wird unterschieden, ob diese in eine wirksame Sicherungsbeziehung gemäß IAS 39 (Fair Value Hedge, Cash Flow Hedge) eingebunden sind oder nicht. Sonstige Derivate können zudem eingebettet (d. h. Bestandteil eines zusammengesetzten Instruments, welches einen nicht derivativen Basisvertrag enthält) sein.

|                                                      | Buchwerte<br>31.12.2010<br>Mio. € | Buchwerte<br>31.12.2009<br>Mio. € |
|------------------------------------------------------|-----------------------------------|-----------------------------------|
| <b>Aktiva</b>                                        |                                   |                                   |
| Zinsswaps                                            |                                   |                                   |
| – Ohne Hedge-Beziehung                               | 43                                | 94                                |
| – In Verbindung mit Fair Value Hedges                | 144                               | 225                               |
| – In Verbindung mit Cash Flow Hedges                 | 0                                 | 0                                 |
| Devisentermingeschäfte/Devisenswaps                  |                                   |                                   |
| – Ohne Hedge-Beziehung                               | 53                                | 91                                |
| – In Verbindung mit Cash Flow Hedges                 | 13                                | 15                                |
| Zins-/Währungsswaps                                  |                                   |                                   |
| – Ohne Hedge-Beziehung                               | 464                               | 468                               |
| – In Verbindung mit Cash Flow Hedges                 | 118                               | 155                               |
| Sonstige Derivate in Verbindung mit Cash Flow Hedges | 0                                 | 0                                 |
| <b>Passiva</b>                                       |                                   |                                   |
| Zinsswaps                                            |                                   |                                   |
| – Ohne Hedge-Beziehung                               | 12                                | 80                                |
| – In Verbindung mit Fair Value Hedges                | –                                 | 52                                |
| – In Verbindung mit Cash Flow Hedges                 | 266                               | 142                               |
| Devisentermingeschäfte/Devisenswaps                  |                                   |                                   |
| – Ohne Hedge-Beziehung                               | 43                                | 46                                |
| – In Verbindung mit Cash Flow Hedges                 | 56                                | 17                                |
| Zins-/Währungsswaps                                  |                                   |                                   |
| – Ohne Hedge-Beziehung                               | 184                               | 555                               |
| – In Verbindung mit Cash Flow Hedges                 | –                                 | 32                                |
| Sonstige Derivate in Verbindung mit Cash Flow Hedges | –                                 | 6                                 |
| Eingebettete Derivate                                | 10                                | 49                                |

**Angaben zum Kapitalmanagement.** Vorrangiges Ziel des Kapitalmanagements des Konzerns ist es, sicherzustellen, dass auch in Zukunft die Schuldentilgungsfähigkeit und die finanzielle Substanz des Konzerns erhalten bleiben.

Eine wichtige Kennzahl des Kapitalmanagements ist das Gearing, das die Netto-Finanzverbindlichkeiten ins Verhältnis zum Eigenkapital gemäß Konzern-Bilanz setzt. Die Netto-Finanzverbindlichkeiten werden von der Deutschen Telekom als eine wichtige Kenngröße gegenüber Investoren, Analysten und Ratingagenturen verwendet. Diese Kenngröße ist nicht Bestandteil der Rechnungslegungsvorschriften nach den International Financial Reporting Standards und kann in der Definition und Berechnung dieser Größe bei anderen Unternehmen abweichend sein. Das Gearing blieb zum 31. Dezember 2010 im Vergleich zum Vorjahr unverändert bei 1,0. Der Zielkorridor für diese Größe liegt zwischen 0,8 und 1,2.

#### Herleitung der Netto-Finanzverbindlichkeiten; Eigenkapital.

|                                                                             | 31.12.2010<br>Mio. € | 31.12.2009<br>Mio. € |
|-----------------------------------------------------------------------------|----------------------|----------------------|
| Anleihen                                                                    | 38 190               | 38 508               |
| Verbindlichkeiten gegenüber Kreditinstituten                                | 4 190                | 4 718                |
| Verbindlichkeiten gegenüber Nicht-Kreditinstituten aus Schuldscheindarlehen | 1 164                | 1 057                |
| Derivative finanzielle Verbindlichkeiten                                    | 561                  | 924                  |
| Verbindlichkeiten aus Leasingverhältnissen                                  | 1 934                | 1 909                |
| Andere finanzielle Verbindlichkeiten                                        | 1 279                | 1 001                |
| <b>Brutto-Finanzverbindlichkeiten</b>                                       | <b>47 318</b>        | <b>48 117</b>        |
| Zahlungsmittel und Zahlungsmitteläquivalente                                | 2 808                | 5 022                |
| Finanzielle Vermögenswerte                                                  |                      |                      |
| Available-for-Sale/Held for Trading                                         | 75                   | 162                  |
| Derivative finanzielle Vermögenswerte                                       | 835                  | 1 048                |
| Andere finanzielle Vermögenswerte                                           | 1 331                | 974                  |
| <b>Netto-Finanzverbindlichkeiten</b>                                        | <b>42 269</b>        | <b>40 911</b>        |
| <b>Eigenkapital gemäß Konzern-Bilanz</b>                                    | <b>43 028</b>        | <b>41 937</b>        |





## 38 Angaben zu den Beziehungen zu nahe stehenden Unternehmen und Personen.

### Bundesrepublik Deutschland und andere nahe stehende Unternehmen.

Die Bundesrepublik Deutschland (Bund) ist direkt und indirekt (über die KfW Bankengruppe) mit insgesamt rund 32,0% (31. Dezember 2009: 31,7%) an der Deutschen Telekom AG beteiligt. Da der Bund trotz seiner Minderheitsbeteiligung aufgrund der durchschnittlichen Hauptversammlungspräsenz eine sichere Hauptversammlungsmehrheit besitzt, ist ein Abhängigkeitsverhältnis der Deutschen Telekom gegenüber dem Bund begründet. Daher gelten der Bund und die von ihm beherrschten Unternehmen bzw. Unternehmen, bei denen der Bund wesentlichen Einfluss ausüben kann, als nahe stehende Personen/Unternehmen der Deutschen Telekom, dazu zählen auch der Konzern Deutsche Post DHL und der Commerzbank-Konzern.

Der Bundesanstalt für Post und Telekommunikation (Bundesanstalt) sind per Gesetz bestimmte Aufgaben übertragen worden, die unternehmensübergreifende Angelegenheiten der Deutschen Telekom AG sowie der Deutschen Post AG und der Deutschen Postbank AG betreffen. Die Bundesanstalt führt u. a. die Postbeamtenkrankenkasse, das Erholungswerk, die Versorgungsanstalt der Deutschen Bundespost (VAP) und das Betreuungswerk für die Deutsche Telekom AG, die Deutsche Post AG und die Deutsche Postbank AG. Die Koordinations- und Verwaltungsaufgaben werden auf der Grundlage von Geschäftsbesorgungsverträgen wahrgenommen. Für das Geschäftsjahr 2010 wurden von der Deutschen Telekom Zahlungen in Höhe von 59 Mio. € (2009: 56 Mio. €; 2008: 55 Mio. €) geleistet. Zahlungen erfolgen zudem nach den Vorschriften des Postneuordnungsgesetzes an die Unterstützungskasse (☐ Angabe 12).

Der Bund und die von ihm beherrschten Unternehmen bzw. Unternehmen, bei denen der Bund wesentlichen Einfluss ausüben kann, sind Kunden der Deutschen Telekom und nehmen als solche Dienste des Unternehmens in Anspruch. Die Geschäftsbeziehungen der Deutschen Telekom bestehen jeweils unmittelbar zu den einzelnen Unternehmen, Behörden und sonstigen staatlichen Stellen als voneinander unabhängigen Einzelkunden. Die Deutsche Telekom hat im Rahmen ihrer normalen Geschäftstätigkeit Telekommunikationsdienste und ähnliche Services erbracht, während die vom Bund beherrschten Unternehmen bzw. Unternehmen, bei denen der Bund wesentlichen Einfluss ausüben kann, ebenfalls im Rahmen ihrer normalen Geschäftstätigkeit Dienstleistungen, insbesondere Beförderungsleistungen und Finanzdienstleistungen, an Unternehmen der Deutschen Telekom erbracht haben.

Im Geschäftsjahr 2010 hatte die Deutsche Telekom keine für sich einzeln betrachtet wesentlichen Transaktionen im Rahmen der normalen Geschäftstätigkeit zu den vom Bund beherrschten Unternehmen bzw. Unternehmen, bei denen der Bund wesentlichen Einfluss ausüben kann.

**Gemeinschaftsunternehmen und assoziierte Unternehmen.** Die Deutsche Telekom steht mit zahlreichen assoziierten Unternehmen und Gemeinschaftsunternehmen in Geschäftsbeziehungen.

Gegenüber dem am 1. April 2010 gegründeten Gemeinschaftsunternehmen Everything Everywhere erzielte die Deutsche Telekom im Geschäftsjahr 2010 Umsatzerlöse in Höhe von 0,1 Mrd. €. Daneben hat die Deutsche Telekom eine von der Everything Everywhere emittierte Anleihe mit einem Nominalbetrag von 625 Mio. GBP erworben. Die Deutsche Telekom ist der Everything Everywhere gegenüber verpflichtet, diese am 30. November 2011 fällige Finanzierung bis Ende März 2012 in derselben Höhe weiterhin zur Verfügung zu stellen.

Gegenüber dem Gemeinschaftsunternehmen Toll Collect erzielte die Deutsche Telekom im Geschäftsjahr 2010 Umsatzerlöse in Höhe von 0,1 Mrd. € (2009: 0,1 Mrd. €; 2008: 0,1 Mrd. €). ☐ Weitere Erläuterungen finden sich in Angabe 33.

**Natürliche nahe stehende Personen.** ☐ Zu Angaben zur Vergütung von Vorstand und Aufsichtsrat wird auf die Angabe 39 verwiesen. Daneben haben keine wesentlichen Transaktionen mit natürlichen nahe stehenden Personen stattgefunden.

## 39 Vergütung von Vorstand und Aufsichtsrat.

### Vergütung des Vorstands.

Bei den nachfolgenden Angaben zur Vorstandsvergütung handelt es sich um die Anhangangaben nach § 314 Handelsgesetzbuch (HGB), dem Deutschen Rechnungslegungsstandard Nr. 17 (DRS 17), IAS 24 sowie um die Angaben aufgrund der Vorgaben des Deutschen Corporate Governance Kodex.

**Veränderungen im Vorstand und Vertragsverlängerungen.** Am 17. Dezember 2009 hat der Aufsichtsrat dem Wunsch von Hamid Akhavan entsprochen, sein Vorstandsmandat mit Wirkung zum 15. Februar 2010 niederzulegen. Der Aufsichtsrat der Deutschen Telekom hat am 29. Januar 2010 dem Vorschlag des Vorstands zugestimmt, die Zuständigkeiten für die bisherigen Aufgabenbereiche von Hamid Akhavan zunächst kommissarisch zu regeln. Dazu haben die Vorstandsmitglieder Guido Kerkhoff und Reinhard Clemens kommissarisch die Aufgaben von Hamid Akhavan übernommen. Guido Kerkhoff war seit dem 15. Februar 2010 kommissarisch für das operative Segment Europa (Großbritannien, die Niederlande, Österreich, Polen und die Tschechische Republik) sowie International Sales und Service zuständig. Reinhard Clemens übernahm ab diesem Zeitpunkt konzernübergreifend die Führung der restlichen Bereiche des Chief Operating Office (COO) wie Produkte & Innovation, Technik, IT und Einkauf – dies ebenfalls kommissarisch.

Der Aufsichtsrat der Deutschen Telekom hat am 24. Februar 2010 dem Vorschlag des Vorstands zugestimmt, den Zuständigkeitsbereich von Guido Kerkhoff dauerhaft zu erweitern. Guido Kerkhoff verantwortet seit dem 1. April 2010 neben dem operativen Segment Süd- und Osteuropa das operative Segment Europa. Das bisherige Vorstandsressort Chief Operating Office (COO) wurde entsprechend verändert. Seit dem 1. April 2010 sind diese beiden operativen Segmente zusammengeführt und werden unter dem Namen operatives Segment Europa fortgeführt.

In der Aufsichtsratsitzung am 2. Mai 2010 hat der Aufsichtsrat Edward R. Kozel mit Wirkung zum 3. Mai 2010 zum neuen Vorstand der Deutschen Telekom bestellt. Edward R. Kozel übernimmt als Vorstand Technologie und Innovation/Chief Technology and Innovation Officer (CTIO) und verantwortet damit die Bereiche Technik, IT, Einkauf sowie Produkte & Innovation für das Standardgeschäft (Privat- und Geschäftskunden).

Das am 21. Oktober 2010 endende Mandat von Dr. Manfred Balz wurde mit Beschluss des Aufsichtsrats vom 17. Dezember 2009 um zwei weitere Jahre verlängert.

Der Aufsichtsrat hat mit Beschluss vom 16. Dezember 2010 den am 31. Oktober 2011 endenden Vorstandsvertrag von René Obermann um weitere fünf Jahre verlängert.

**Änderung der Vorstandsvergütung.** Der Aufsichtsrat hat am 24. Februar 2010 ein neues System zur Vergütung der Vorstandsmitglieder beschlossen. Umgesetzt wurden dabei die seit dem 5. August 2009 geltenden Regelungen des Gesetzes zur Angemessenheit der Vorstandsvergütung (VorstAG). Die Hauptversammlung der Deutschen Telekom AG vom 3. Mai 2010 billigte dieses neue System. Dienstverträge der Vorstände, die bereits vor Inkrafttreten des VorstAG bestanden haben, unterliegen gemäß den Gesetzesbegründungsmaterialien (Drucksache 16/13433) einem Bestandsschutz. Dennoch besteht für diese Vorstandsmitglieder die Möglichkeit, freiwillig in das neue Vergütungssystem zu wechseln. Zum 31. Dezember 2010 befinden sich die Vorstandsmitglieder René Obermann, Reinhard Clemens, Niek Jan van Damme, Timotheus Höttges, Guido Kerkhoff und Edward R. Kozel in der neuen Systematik der Vorstandsvergütung, während für die übrigen Vorstandsmitglieder die Regelungen des Altsystems Gültigkeit behalten, welches bereits weitestgehend den Anforderungen des VorstAG entspricht. Im Folgenden wird sowohl die neue als auch die alte Systematik erläutert.

**Grundlagen der Vorstandsvergütung.** Die Vergütung der Vorstandsmitglieder setzt sich aus verschiedenen Bestandteilen zusammen. Die Mitglieder des Vorstands haben auf Basis der mit ihnen geschlossenen Dienstverträge einen Anspruch auf: eine jährliche feste Vergütung, eine jährliche variable Erfolgsvergütung, eine langfristig ausgelegte variable Vergütungskomponente sowie Anspruch auf Nebenleistungen und auf Anwartschaften aus einer betrieblichen Pensionszusage. Der Aufsichtsrat legt die Struktur des Vergütungssystems für den Vorstand fest. Diese Struktur und die Angemessenheit der Vergütung überprüft er regelmäßig.

Die feste Vergütung ist bei allen Vorstandsmitgliedern gemäß den aktienrechtlichen Anforderungen unter Beachtung der marktüblichen Vergütungen festgelegt. Es ist sichergestellt, dass die Vorstandsvergütung auf eine nachhaltige Unternehmensentwicklung ausgerichtet ist und im Neusystem die variablen Vergütungsbestandteile eine mehrjährige Bemessungsgrundlage haben.

Der Aufsichtsrat kann zudem nach seinem pflichtgemäßen Ermessen außerordentliche Leistungen einzelner oder aller Vorstandsmitglieder in Form einer besonderen Erfolgstantieme vergüten.

In markt- und konzernüblicher Weise gewährt die Gesellschaft allen Mitgliedern des Vorstands aus ihren Vorstandsverträgen weitere Leistungen, die zum Teil als geldwerte Vorteile angesehen und entsprechend versteuert werden; so vor allem die Überlassung eines Geschäftsfahrzeugs sowie die Gewährung von Unfallversicherungs- und Haftpflichtschutz und Leistungen im Rahmen einer doppelten Haushaltsführung.

Nebentätigkeiten sind grundsätzlich genehmigungspflichtig. Die Übernahme von Management- und Aufsichtsratsfunktionen in Konzerngesellschaften erfolgt grundsätzlich unentgeltlich.

Bei einer vorübergehenden Arbeitsunfähigkeit, die durch Krankheit, Unfall oder aus einem anderen nicht durch das jeweilige Vorstandsmitglied zu vertretenden Grund eintritt, wird die feste Grundvergütung weitergewährt; maximal jedoch für einen Zeitraum von bis zu drei Monaten nach dem Ende des Monats, in dem eine dauernde Arbeitsunfähigkeit des Vorstandsmitglieds festgestellt worden ist.

#### **Variable Erfolgsvergütung (altes System).**

Die jährliche kurzfristige variable Erfolgsvergütung der Vorstandsmitglieder bestimmt sich nach dem Grad der Erreichung der vom Aufsichtsrat der Deutschen Telekom AG vor Beginn des Geschäftsjahres jedem Mitglied des Vorstands erteilten Zielvorgabe. Die Zielvorgabe setzt sich aus Konzernzielen und Individualzielen der einzelnen Vorstandsmitglieder zusammen, für die die Parameter Umsatz, EBITDA ohne Sondereinflüsse und Free Cashflow verwendet werden. Die Zielerreichung wird vom Aufsichtsrat für das jeweilige Geschäftsjahr festgelegt.

Daneben nehmen die Mitglieder des Vorstands an dem im Geschäftsjahr 2004 eingeführten Mid-Term Incentive Plan der Deutschen Telekom AG (MTIP) teil (siehe hierzu die vorstehenden Ausführungen zum MTIP unter Angabe 35).

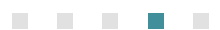

|                                              | MTIP 2010<br>Auslobungsbetrag | MTIP 2010<br>Beizulegender<br>Zeitwert<br>zum Zeitpunkt<br>der Gewährung<br>€* | Gesamtaufwand<br>aktienbasierte<br>Vergütung aus<br>MTIP in 2010<br>€* | MTIP 2009<br>Auslobungsbetrag<br>€* | Gesamtaufwand<br>aktienbasierte<br>Vergütung aus<br>MTIP in 2009<br>€* |
|----------------------------------------------|-------------------------------|--------------------------------------------------------------------------------|------------------------------------------------------------------------|-------------------------------------|------------------------------------------------------------------------|
| René Obermann                                | 0                             | 0                                                                              | 181 341                                                                | 750 000                             | 257 518                                                                |
| Hamid Akhavan (bis 15. Februar 2010)         | 0                             | 0                                                                              | (123 942)                                                              | 480 000                             | 164 812                                                                |
| Dr. Manfred Balz                             | 330 000                       | 22 489                                                                         | 61 375                                                                 | 330 000                             | 62 004                                                                 |
| Reinhard Clemens                             | 0                             | 0                                                                              | 101 551                                                                | 420 000                             | 63 869                                                                 |
| Dr. Karl-Gerhard Eick (bis 28. Februar 2009) | 0                             | 0                                                                              | 0                                                                      | 0                                   | (250 939)                                                              |
| Niek Jan van Damme                           | 0                             | 0                                                                              | 22 737                                                                 | 295 000                             | 41 502                                                                 |
| Timotheus Höttges                            | 0                             | 0                                                                              | 108 805                                                                | 450 000                             | 154 511                                                                |
| Guido Kerkhoff                               | 0                             | 0                                                                              | 46 776                                                                 | 360 000                             | 70 366                                                                 |
| Thomas Sattelberger                          | 515 000                       | 35 097                                                                         | 163 652                                                                | 515 000                             | 173 887                                                                |
|                                              | <b>845 000</b>                | <b>57 586</b>                                                                  | <b>562 295</b>                                                         | <b>3 600 000</b>                    | <b>737 530</b>                                                         |

\* Beizulegender Zeitwert ermittelt nach dem sog. Monte-Carlo-Modell.

### Variable Erfolgsvergütung (neues System).

Die variable Vergütung der Mitglieder des Vorstands unterteilt sich in die Variablen I und II. Die Variable I enthält sowohl kurzfristige als auch langfristig angelegte Komponenten, die in der Realisierung des Budgets in konkreten Zielgrößen sowie der Umsetzung der Strategie und dem Handeln im Einklang mit dem Konzernleitbild bestehen. Die Variable II ist ausschließlich langfristig orientiert. So ist sichergestellt, dass im Rahmen der variablen Vergütung eine Ausrichtung auf eine nachhaltige Unternehmensentwicklung erfolgt und eine überwiegend langfristige Anreizwirkung besteht.

**Variable I.** Die jährliche variable Vergütung der Vorstandsmitglieder bestimmt sich nach dem Grad der Erreichung der vom Aufsichtsrat der Deutschen Telekom AG zu Beginn des Geschäftsjahres jedem Mitglied des Vorstands erteilten Zielvorgabe. Die Zielvorgabe setzt sich dabei aus Konzernzielen (50 %) für Umsatz, EBITDA ohne Sondereinflüsse und dem Free Cashflow sowie Individualzielen der einzelnen Vorstandsmitglieder zusammen. Die Individualziele bestehen aus den auf den nachhaltigen Unternehmenserfolg ausgerichteten Zielen zur Umsetzung der Strategie (30 %) sowie dem Handeln im Einklang mit dem Konzernleitbild (Value Adherence) in Höhe von 20 %. Die Zielvereinbarung und Zielerreichung für das jeweilige Geschäftsjahr werden vom Aufsichtsratsplenum festgelegt. Eine Übererfüllung der Zielvorgaben wird linear abgebildet und ist auf 150 % des Auslobungsbetrags begrenzt. Darüber hinausgehende Zielerreichungsgrade bleiben unberücksichtigt. Zur darüber hinausgehenden Sicherstellung der langfristigen Anreizwirkung und der Ausrichtung

auf eine nachhaltige Unternehmensentwicklung ist in einem vorgegebenen Zeitfenster ein Betrag von einem Drittel der jährlich durch das Aufsichtsratsplenum festgesetzten jährlichen Variablen in Aktien der Deutschen Telekom AG zu investieren; diese sind über einen Zeitraum von mindestens vier Jahren vom jeweiligen Vorstandsmitglied zu halten. Die Deutsche Telekom AG wird für jede im Rahmen des oben beschriebenen Eigeninvestments des Vorstands erworbene Aktie eine zusätzliche Aktie erwerben (Matching Share Plan).

**Variable II.** Die ausschließlich langfristig angelegte Variable II wird an der Erfüllung von vier gleich gewichteten Erfolgsparametern (bereinigter operativer Return On Capital Employed (ROCE), bereinigte Earnings Per Share (EPS), Kundenzufriedenheit und Mitarbeiterzufriedenheit) gemessen. Jeder Parameter beeinflusst ein Viertel des Auslobungsbetrags. Eine Übererfüllung der Zielvorgaben wird linear abgebildet und ist auf 150 % des Auslobungsbetrags begrenzt. Der Bemessungszeitraum beträgt vier Jahre. Die Messung erfolgt über die durchschnittliche Zielerreichung der vier zum Zeitpunkt der Auslobung geplanten Jahre. Der Auslobungsbetrag wird entkoppelt von anderen Vergütungsbestandteilen und individuell pro Vorstandsmitglied festgelegt.

**Überleitung vom Altsystem der Vorstandsvergütung in das neue Vorstandsvergütungssystem.** Zur Überleitung vom Altsystem in das Neusystem hat der Aufsichtsrat beschlossen, den zum Zeitpunkt des Systemwechsels bereits bestellten Vorständen das Angebot zu unterbreiten, auf das Anrecht aus der bestehenden Tranche des MTIP 2009 zu verzichten und für die Restlaufzeit dieser Tranche (bis zum 31. Dezember 2011) eine Auslobung der Variable II nach oben beschriebener Ausgestaltung zu erhalten. Das ursprünglich ausgelobte Volumen wurde dabei nicht verändert (siehe hierzu Tabelle zu MTIP-Auslobungen). Darüber hinaus hat der Aufsichtsrat beschlossen, dass alle in das Neusystem gewechselten Vorstandsmitglieder keine Auslobung einer MTIP-Tranche 2010 erhalten sollen, sondern stattdessen eine Auslobung in Höhe der vertraglich vereinbarten Variable II erfolgt, die eine dreijährige Laufzeit aufweist. Die noch bis zum 31. Dezember 2010 laufende Tranche des MTIP 2008 bleibt wegen der kurzen Restlaufzeit in unveränderter Form bestehen. Durch diese Gestaltung ermöglicht der Aufsichtsrat dem Vorstand, auch in der Zukunft in jedem Jahr eine Auszahlung des mehrjährigen variablen Vergütungsanspruchs zu erhalten, wenn die vorgegebenen Ziele erfüllt werden. Ohne diese Übergangslösung wäre durch den Wechsel von einer dreijährigen auf eine vierjährige Laufzeit bei den langfristigen Vergütungsinstrumenten systembedingt im Jahr 2013 keine Auszahlung möglich gewesen. Vorstandsmitglieder, die in das neue System der Vorstandsvergütung wechseln, können optional mit im Jahr 2010 erworbenen Aktien bereits am Matching Share Plan partizipieren. Die maximale Höhe der Teilnahme am Matching Share Plan ist dabei für das Jahr 2010 auf ein Drittel der vertraglich vereinbarten neuen Variable I begrenzt.

**Angaben zu Matching Shares.** Im Geschäftsjahr 2010 haben sich die Vorstandsmitglieder, für die das neue Vorstandsvergütungssystem gilt wie oben beschrieben, vertraglich dazu verpflichtet, ein Drittel der Variablen I in Aktien der Deutschen Telekom AG zu investieren. Die Deutsche Telekom AG wird für jede im Rahmen des oben beschriebenen Eigeninvestments des Vorstands erworbene Aktie eine zusätzliche Aktie gewähren (Matching Share Plan), die nach Ablauf der vierjährigen Haltefrist dem Planberechtigten zugeteilt wird. So wird sichergestellt, dass frühestens nach Ablauf von vier Jahren eine Veräußerung der von Unternehmensseite gewährten Aktien möglich ist und nur der Verbleib im Unternehmen durch diesen Vergütungsbestandteil honoriert wird.

In Anwendung der Vorschriften DRS 17 und IFRS 2 ist der Gesamtaufwand aus aktienbasierter Vergütung aus Matching Shares 2010 und der beizulegende Zeitwert der Matching Shares zum Zeitpunkt der Gewährung anzugeben. Die folgende Tabelle basiert dabei auf einer erwarteten Zielerreichung für das Geschäftsjahr 2010 und damit einer erwarteten Höhe des vom jeweiligen Vorstand zu leistenden Eigeninvestments.

|                    | Gesamtaufwand<br>aktienbasierte<br>Vergütung aus<br>Matching Shares<br>2010<br>€ | Beizulegende<br>Zeitwerte der<br>Matching Shares<br>zum Zeitpunkt<br>der Gewährung<br>€ |
|--------------------|----------------------------------------------------------------------------------|-----------------------------------------------------------------------------------------|
| René Obermann      | 78 372                                                                           | 628 943                                                                                 |
| Reinhard Clemens   | 40 937                                                                           | 328 255                                                                                 |
| Niek Jan van Damme | 34 461                                                                           | 276 523                                                                                 |
| Timotheus Höttges  | 47 023                                                                           | 377 363                                                                                 |
| Guido Kerkhoff     | 23 958                                                                           | 138 949                                                                                 |
| Edward R. Kozel    | 32 143                                                                           | 225 115                                                                                 |

Bis zum 31. Dezember 2010 hat die Deutsche Telekom keine Aktien für Zwecke zur Ausgabe von Matching Shares erworben.

Daneben ist auch die Anzahl der zu gewährenden Matching Shares für die einzelnen Vorstandsmitglieder anzugeben. Diese sind in Abhängigkeit von der voraussichtlichen Zielerreichung der Variablen I sowie dem Aktienkurs zum Zeitpunkt der Gewährung zu ermitteln. Für das Geschäftsjahr 2010 werden René Obermann 85 804 Stück Matching Shares, Reinhard Clemens 44 002 Stück, Niek Jan van Damme 37 828 Stück, Timotheus Höttges 51 482 Stück, Guido Kerkhoff 18 601 Stück und Edward R. Kozel 22 693 Stück Matching Shares gewährt.

Durch die erstmalige Gewährung von Matching Shares im Geschäftsjahr 2010 bestehen für den Vorjahreszeitraum keine anzugebenden Vergleichswerte.

**Regelungen für den Fall der Beendigung der Vorstandstätigkeit.** In Vorstandsverträgen, die seit dem Geschäftsjahr 2009 abgeschlossen worden sind bzw. durch Wechsel in das neue Vergütungssystem geändert wurden, ist für den Fall der vorzeitigen Beendigung ohne wichtigen Grund eine Ausgleichszahlung vorgesehen, deren Höhe entsprechend den Regelungen des Deutschen Corporate Governance Kodex auf maximal zwei Jahresvergütungen begrenzt ist (Abfindungs-Cap) und die nicht höher als die Vergütung für die Restlaufzeit des Anstellungsvertrags sein darf.

Die Vorstandsverträge der Deutschen Telekom AG enthalten keine Zusagen für Leistungen aus Anlass der Beendigung der Vorstandstätigkeit infolge eines Kontrollwechsels.

Die Verträge der Vorstandsmitglieder sehen grundsätzlich ein nachvertragliches Wettbewerbsverbot vor. Den Mitgliedern des Vorstands ist es danach vertraglich untersagt, während der Dauer von einem Jahr nach Ausscheiden Leistungen an oder für einen Wettbewerber zu erbringen. Hierfür erhalten sie als Karenzentschädigung eine Zahlung in Höhe der zuletzt bezogenen jährlichen Grundvergütung.

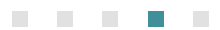

### Betriebliche Altersversorgung.

**Betriebliche Altersversorgung (Altzusage).** Die Mitglieder des Vorstands haben eine Zusage auf eine betriebliche Altersversorgung. Die betriebliche Altersversorgung steht in einem direkten Verhältnis zum individuellen Jahresgehalt. Die Vorstandsmitglieder erhalten im Versorgungsfall pro abgeleistetem Dienstjahr einen festgelegten Prozentsatz des letzten festen Jahresgehalts vor Eintritt des Versorgungsfalls als betriebliche Altersversorgung. Die Zusageform besteht in einem lebenslangen Ruhegeld ab Vollendung des 62. Lebensjahres bzw. einem vorgezogenen Ruhegeld mit Vollendung des 60. Lebensjahres. Für den Fall des vorgezogenen Ruhegelds werden jedoch entsprechende versicherungsmathematische Abschläge durchgeführt. Die Höhe des betrieblichen Ruhegelds berechnet sich durch Multiplikation eines Basisprozentsatzes von 5 % (6 % für René Obermann) mit der Anzahl der in Jahren abgeleisteten Vorstandsdienstzeiten. Nach zehn Jahren Dienstzeit wäre somit das maximale Versorgungsniveau von 50 % (60 % für René Obermann) der letzten fixen Jahresvergütung erreicht.

Die zu leistenden Versorgungszahlungen werden jährlich dynamisiert. Dabei beträgt der verwendete Steigerungsprozentsatz 1 %, bei René Obermann 3 %. Darüber hinaus enthalten die Versorgungsvereinbarungen Regelungen zur Hinterbliebenenversorgung in Form von Witwen- und Waisenrentenansprüchen. Dabei kann der Anspruch auf Witwenrenten in speziell geregelten Sonderfällen ausgeschlossen sein. Anrechnungstatbestände sind in den Versorgungszusagen marktüblich geregelt. Im Fall einer dauernden Arbeitsunfähigkeit (Invalidität) wird jeweils die Dienstzeit bis zum Ende der laufenden Bestellperiode für die Berechnung der Versorgung zugrunde gelegt.

Die Gesellschaft übernimmt für ein Vorstandsmitglied noch die Beiträge inklusive deren Besteuerung für eine Risikolebensversicherung mit marktüblicher Deckung (1,3 Mio. €). Die hieraus entstandenen Kosten werden im Rahmen der geldwerten Vorteile mit ausgewiesen.

**Betriebliche Altersversorgung (Neuzusage).** Für alle Vorstandsmitglieder mit einer Neuzusage auf betriebliche Altersversorgung wird eine beitragsorientierte Zusage in Form eines Einmalkapitals im Versorgungsfall erteilt. Für jedes abgeleistete Dienstjahr wird dem Vorstandsmitglied ein Beitrag auf einem Versorgungskonto gutgeschrieben, welches mit einer marktüblichen Verzinsung hinterlegt ist. Die Zuführung des jährlichen Beitrags erfolgt nicht liquiditätswirksam. Der Liquiditätsabfluss entsteht erst mit Eintritt des Versorgungsfalls. Der Versorgungsfall tritt grundsätzlich mit dem vollendeten 62. Lebensjahr ein. Es besteht jedoch die Möglichkeit, ein vorgezogenes Ruhegeld ab dem vollendeten 60. Lebensjahr gegen entsprechende versicherungsmathematische Abschläge zu beziehen. Die Höhe des jährlich bereitzustellenden Beitrags wird individualisiert und entkoppelt von anderen Vergütungsbestandteilen vorgenommen. Bei der exakten Festlegung des Beitrags erfolgt eine Orientierung an Unternehmen gleicher Größenordnung, die einen angemessenen Vergleichsmaßstab darstellen und die ebenfalls eine beitragsorientierte Versorgungszusage anbieten.

Darüber hinaus enthalten die Versorgungsvereinbarungen Regelungen zur Hinterbliebenenversorgung in Form von Witwen- und Waisenrentenansprüchen. Ein Anspruch auf Witwenrente ist in speziell geregelten Sonderfällen ausgeschlossen. Schlussendlich sind in den Versorgungszusagen Anrechnungstatbestände marktüblich geregelt. Im Fall einer dauernden Arbeitsunfähigkeit (Invalidität) wird jeweils die Dienstzeit bis zum Ende der laufenden Bestellperiode für die Berechnung der Versorgung zugrunde gelegt.

In der folgenden Tabelle sind der Dienstzeitaufwand und die Defined Benefit Obligation für jedes Vorstandsmitglied dargestellt:

|                     | Dienstzeitaufwand<br>(Service Costs)<br>2010<br>€ | Defined Benefit<br>Obligation (DBO)<br>31.12.2010<br>€ |
|---------------------|---------------------------------------------------|--------------------------------------------------------|
| René Obermann       | 575 170                                           | 5 358 169                                              |
| Dr. Manfred Balz    | 282 982                                           | 613 412                                                |
| Reinhard Clemens    | 367 252                                           | 1 232 442                                              |
| Niek Jan van Damme  | 275 534                                           | 465 141                                                |
| Timotheus Höttges   | 260 901                                           | 1 307 754                                              |
| Guido Kerkhoff      | 273 876                                           | 431 504                                                |
| Edward R. Kozel     | 146 567                                           | 146 567                                                |
| Thomas Sattelberger | 875 447                                           | 4 751 293                                              |

Im Rahmen der Regelungen der neuen betrieblichen Altersversorgung wurden Guido Kerkhoff und Niek Jan van Damme 290 000 € als jährlicher Beitrag dem Versorgungskonto gutgeschrieben, während die Beiträge für Dr. Manfred Balz 270 000 € und für Edward R. Kozel 250 000 € betragen.

Der aus der betrieblichen Altersversorgung resultierende Pensionsaufwand wird durch die Angabe der Service Costs dargestellt. Die in 2010 vorgenommenen Zuführungen zu den Pensionsrückstellungen betragen 3,6 Mio. € (2009: 4,1 Mio. €). In diesem Betrag sind Dienstzeitaufwendungen (Service Costs) in Höhe von 3,1 Mio. € (2009: 3,6 Mio. €) und Zinsaufwendungen (Interest Costs) in Höhe von 0,5 Mio. € (2009: 0,5 Mio. €) enthalten.

**Aktienoptionsplan.** Bei der Deutschen Telekom werden keine Aktienoptionspläne mehr ausgegeben. Einzelne Vorstandsmitglieder halten jedoch noch Aktienoptionen aus dem Aktienoptionsplan 2001 mit den beiden Tranchen 2001 und 2002.

Timotheus Höttges und René Obermann nehmen noch aus ihrer vorherigen Tätigkeit für T-Mobile an der Tranche 2002 des Aktienoptionsplans 2001 teil. Dr. Manfred Balz und Guido Kerkhoff partizipieren noch aus ihrem Angestelltenverhältnis vor der Berufung zum Vorstandsmitglied am Aktienoptionsplan.

Die gewährten Aktienoptionen sind im Rahmen der Vorgaben ausübbar; bislang erfolgte jedoch noch keine Ausübung. Der Bestand an Aktienoptionen ist in Bezug auf die zum 31. Dezember 2010 aktiven Vorstandsmitglieder unverändert zum Vorjahr.

Die Anzahl der Aktienoptionen ergibt sich im Einzelnen aus der unten stehenden Tabelle.

Die Bandbreite der Ausübungspreise der Optionen von René Obermann und Dr. Manfred Balz variiert zwischen 12,36 € und 30,00 €.

Aufgrund der Teilnahme der verbleibenden Vorstandsmitglieder an nur jeweils einer Tranche des Aktienoptionsplans sind keine Bandbreiten anzugeben.

Aus den am 31. Dezember 2010 ausstehenden Optionen für Vorstandsmitglieder ergibt sich ein gewichteter Durchschnitt der restlichen Vertragslaufzeit von 1,0 Jahren.

☞ Siehe im Übrigen die Ausführungen zum AOP vorstehend unter Angabe 35.

**Vorstandsvergütung für das Geschäftsjahr 2010.** Unter Zugrundelegung der rechtlichen und sonstigen Vorgaben werden im Folgenden Bezüge der Mitglieder des Vorstands für das Geschäftsjahr 2010 mit insgesamt 14,4 Mio. € (2009: 13,7 Mio. €) ausgewiesen.

Diese beinhalten für Vorstandsmitglieder, für die das neue Vorstandsvergütungssystem gilt, die feste Jahresvergütung sowie sonstige Leistungen, geldwerte Vorteile und Sachbezüge, die variable Vergütung (Variable I) und den beizulegenden Zeitwert der Matching Shares. Dieser wurde auf Basis der zum Zeitpunkt der Gewährung geschätzten Höhe der Variablen I und einer daraus resultierenden Anzahl an Matching Shares berechnet.

Für Vorstandsmitglieder, für die das alte Vergütungssystem gilt, beinhaltet die Vorstandsvergütung die feste Jahresvergütung sowie sonstige Leistungen, geldwerte Vorteile und Sachbezüge, die variable Vergütung für das Geschäftsjahr 2010 und die beizulegenden Zeitwerte des MTIP 2010 zum Zeitpunkt der Gewährung.

Die sonstigen Bezüge sind vollständig erfolgsunabhängig.

|                                         |      | Optionen AOP 2001 Tranche 2001 |                                         | Optionen AOP 2001 Tranche 2002 |                                         | Gewichteter Durchschnitt der Ausübungspreise der Aktienoptionen € |
|-----------------------------------------|------|--------------------------------|-----------------------------------------|--------------------------------|-----------------------------------------|-------------------------------------------------------------------|
|                                         |      | Anzahl                         | Wert der Optionen bei Begebung (2001) € | Anzahl                         | Wert der Optionen bei Begebung (2002) € |                                                                   |
| René Obermann                           | 2010 | 48 195                         | 4,87                                    | 28 830                         | 3,79                                    | 23,40                                                             |
|                                         | 2009 | 48 195                         |                                         | 28 830                         |                                         |                                                                   |
| Hamid Akhavan<br>(bis 15. Februar 2010) | 2010 | 0                              | 0                                       | 0                              | 0                                       | 0                                                                 |
|                                         | 2009 | 0                              |                                         | 19 840                         | 3,79                                    | 12,36                                                             |
| Dr. Manfred Balz                        | 2010 | 32 130                         | 4,87                                    | 17 360                         | 3,79                                    | 23,81                                                             |
|                                         | 2009 | 32 130                         |                                         | 17 360                         |                                         |                                                                   |
| Timotheus Höttges                       | 2010 | 0                              |                                         | 17 050                         | 3,79                                    | 12,36                                                             |
|                                         | 2009 | 0                              |                                         | 17 050                         |                                         |                                                                   |
| Guido Kerkhoff                          | 2010 | 0                              |                                         | 4 650                          | 3,79                                    | 12,36                                                             |
|                                         | 2009 | 0                              |                                         | 4 650                          |                                         |                                                                   |
|                                         | 2010 | 80 325                         |                                         | 67 890                         |                                         |                                                                   |
|                                         | 2009 | 80 325                         |                                         | 87 730                         |                                         |                                                                   |

**Gesamtbezüge.** Die Vergütung des Vorstands ergibt sich im Einzelnen aus der nachfolgenden Tabelle:

|                                                 |      | Festes<br>Jahresgehalt | Sonstige<br>Bezüge   | Kurzfristige<br>variable Vergütung | Langfristige<br>variable Vergütung<br>(beizulegender<br>Zeitwert) <sup>a</sup> | Summe      |
|-------------------------------------------------|------|------------------------|----------------------|------------------------------------|--------------------------------------------------------------------------------|------------|
|                                                 |      | €                      | €                    | €                                  | €                                                                              | €          |
| René Obermann                                   | 2010 | 1 350 000              | 35 790               | 1 346 250                          | 628 943                                                                        | 3 360 983  |
|                                                 | 2009 | 1 250 000              | 37 233               | 1 365 000                          | 76 613                                                                         | 2 728 846  |
| Hamid Akhavan<br>(bis 15. Februar 2010)         | 2010 | 100 000                | 50 001 <sup>b</sup>  | 119 244                            | –                                                                              | 269 245    |
|                                                 | 2009 | 800 000                | 611 878 <sup>b</sup> | 789 600                            | 49 032                                                                         | 2 250 510  |
| Dr. Manfred Balz                                | 2010 | 687 097                | 18 292               | 391 716                            | 22 489                                                                         | 1 119 594  |
|                                                 | 2009 | 660 000                | 19 204               | 468 600                            | 33 710                                                                         | 1 181 514  |
| Reinhard Clemens                                | 2010 | 795 000                | 25 064               | 665 000                            | 328 255                                                                        | 1 813 319  |
|                                                 | 2009 | 658 333                | 31 531               | 825 750                            | 42 903                                                                         | 1 558 517  |
| Dr. Karl-Gerhard Eick<br>(bis 28. Februar 2009) | 2010 | –                      | –                    | –                                  | –                                                                              | –          |
|                                                 | 2009 | 183 750                | 17 371               | 183 750                            | –                                                                              | 384 871    |
| Niek Jan van Damme                              | 2010 | 570 000                | 24 502               | 542 080                            | 276 523                                                                        | 1 413 105  |
|                                                 | 2009 | 366 667                | 31 538               | 549 450                            | 30 134                                                                         | 977 789    |
| Timotheus Höttges                               | 2010 | 825 000                | 22 265               | 775 500                            | 377 363                                                                        | 2 000 128  |
|                                                 | 2009 | 750 000                | 21 583               | 803 250                            | 45 968                                                                         | 1 620 801  |
| Guido Kerkhoff                                  | 2010 | 610 000                | 20 322               | 606 480                            | 138 949                                                                        | 1 375 751  |
|                                                 | 2009 | 433 333                | 11 874               | 692 250                            | 36 774                                                                         | 1 174 231  |
| Edward R. Kozel<br>(seit 3. Mai 2010)           | 2010 | 595 161                | 43 960               | 420 623                            | 225 115                                                                        | 1 284 859  |
|                                                 | 2009 | –                      | –                    | –                                  | –                                                                              | –          |
| Thomas Sattelberger                             | 2010 | 800 000                | 4 582                | 908 417                            | 35 097                                                                         | 1 748 096  |
|                                                 | 2009 | 800 000                | 5 687                | 976 250                            | 52 607                                                                         | 1 834 544  |
|                                                 | 2010 | 6 332 258              | 244 778              | 5 775 310                          | 2 032 734                                                                      | 14 385 080 |
|                                                 | 2009 | 5 902 083              | 787 899              | 6 653 900                          | 367 741                                                                        | 13 711 623 |

<sup>a</sup> In dieser Spalte ist sowohl der beizulegende Zeitwert für Matching Shares als auch für die Teilnahme am MTIP 2010 ausgewiesen.

<sup>b</sup> Hamid Akhavan erhält wegen seiner US-Staatsbürgerschaft neben der „pension substitute“ einen pauschalen monatlichen Steuerausgleich aufgrund unterschiedlicher Besteuerungsregeln in Deutschland und den USA.

Der Gesamtaufwand für die im Geschäftsjahr 2010 gewährten Auslobungen der Variablen II beträgt 3,3 Mio. € (2009: 0,0 Mio. €).

Im Rahmen der mit Hamid Akhavan mit Wirkung zum 15. Februar 2010 geschlossenen Aufhebungsvereinbarung wurden sämtliche bestehenden Anrechte auf Aktienoptionen und die noch ausstehenden Tranchen des MTIP 2008 und 2009 entschädigungslos aufgehoben. Für den Zeitraum bis zum 15. Februar 2010 wurden die anteilige feste Grundvergütung und die anteiligen sonstigen Bezüge gezahlt. Für den gleichen Zeitraum wurde der anteilige Anspruch auf kurzfristige variable Vergütung auf Grundlage der durchschnittlichen Zielerreichung der vergangenen drei Geschäftsjahre festgelegt. Die mit Hamid Akhavan vereinbarte jährliche Zahlung einer Pension Substitute wurde letztmalig im Geschäftsjahr 2009 geleistet. Mit Beginn des 15. Februar 2010 erhält Hamid Akhavan die im Rahmen des Wettbewerbsverbots vereinbarte Karenzentschädigung in Höhe eines festen Jahresgehalts in monatlichen Zahlungen.

Kein Mitglied des Vorstands hat im abgelaufenen Geschäftsjahr Leistungen oder entsprechende Zusagen von einem Dritten im Hinblick auf seine Tätigkeit als Vorstandsmitglied erhalten.

**Frühere und ausgeschiedene Mitglieder des Vorstands.** Für Leistungen und Ansprüche früherer und ausgeschiedener Mitglieder des Vorstands und deren Hinterbliebene sind 5,4 Mio. € (2009: 4,2 Mio. €) als Gesamtbezüge ausgewiesen.

Für laufende Pensionen und Anwartschaften auf Pensionen wurden für diesen Personenkreis sowie deren Hinterbliebene 99,3 Mio. € (2009: 96,3 Mio. €) als Rückstellungen (Bewertung nach IAS 19) passiviert.

**Sonstiges.** Die Gesellschaft hat keine Vorschüsse und Kredite an Vorstandsmitglieder bzw. ehemalige Vorstandsmitglieder gewährt. Ebenso wurden keine Haftungsverhältnisse zugunsten dieses Personenkreises eingegangen.

### Vergütung des Aufsichtsrats.

Die Vergütung der Mitglieder des Aufsichtsrats wird in § 13 der Satzung der Deutschen Telekom AG geregelt. Mitglieder des Aufsichtsrats erhalten eine feste jährliche Vergütung, die für das Geschäftsjahr 2010 30 000,00 € und für die Folgejahre 40 000,00 € beträgt. Die Mitglieder des Aufsichtsrats können bei entsprechender Entwicklung des Konzernüberschusses je Stückaktie eine variable erfolgsorientierte Vergütung erhalten.

Diese erfolgsorientierte jährliche Vergütung mit langfristiger Anreizwirkung beträgt 1 000,00 € für jeweils 0,02 €, um die der Konzernüberschuss pro Stückaktie des zweiten dem jeweiligen Geschäftsjahr nachfolgenden Geschäftsjahres (Referenzjahr) den Konzernüberschuss pro Stückaktie des dem jeweiligen Geschäftsjahr vorangegangenen Geschäftsjahres übersteigt. Die erfolgsorientierte jährliche Vergütung mit langfristiger Anreizwirkung beträgt jedoch höchstens 40 000,00 €.

Der Vorsitzende des Aufsichtsrats erhält das Doppelte, der stellvertretende Vorsitzende das Eineinhalbfache der Vergütung eines einfachen Aufsichtsratsmitglieds. Die gesamte Vergütung erhöht sich außerdem für jede Mitgliedschaft in einem Aufsichtsratsausschuss (außer Vermittlungsausschuss sowie Nominierungsausschuss) jeweils um das 0,5-Fache, im Fall des Prüfungsausschusses um das 1,0-Fache, und für jeden Vorsitz in einem Aufsichtsratsausschuss zusätzlich jeweils um das 0,5-Fache. Aufsichtsratsmitglieder, die nicht während des ganzen Geschäftsjahres im Amt waren, erhalten für jeden angefangenen Monat ihrer Tätigkeit ein Zwölftel der Vergütung. Dies gilt sowohl für die feste jährliche Vergütung als auch für die jährliche Vergütung mit langfristiger Anreizwirkung.

Die Mitglieder des Aufsichtsrats erhalten für jede Sitzung des Aufsichtsrats und seiner Ausschüsse, an der sie teilgenommen haben, ein Sitzungsgeld von 1 000,00 €. Die auf die Vergütung und Auslagen zu zahlende Umsatzsteuer wird von der Gesellschaft erstattet.

Die Gesamtvergütung der Mitglieder des Aufsichtsrats für 2010 beträgt 1 942 791,66 € (zzgl. Umsatzsteuer).

Kredite wurden den Mitgliedern des Aufsichtsrats nicht gewährt.

Die **Aufsichtsratsvergütung 2010** verteilt sich auf die einzelnen Mitglieder wie folgt:

| Aufsichtsratsmitglied                                | Fixumvergütung<br>inkl. Sitzungsgeld<br>€ | Bewertung des<br>langfristigen<br>Vergütungs-<br>anspruchs <sup>a</sup><br>€ |
|------------------------------------------------------|-------------------------------------------|------------------------------------------------------------------------------|
| Asmussen, Jörg                                       | 54 000,00                                 | 23 250,00                                                                    |
| Becker, Hermann Josef                                | 90 000,00                                 | 38 750,00                                                                    |
| Dr. Bernotat, Wulf                                   | 47 000,00                                 | 20 150,00                                                                    |
| Brandl, Monika                                       | 47 000,00                                 | 20 150,00                                                                    |
| Bury, Hans Martin                                    | 81 000,00                                 | 35 650,00                                                                    |
| Falbisoner, Josef (bis 3. Mai 2010)                  | 14 500,00                                 | 6 458,33                                                                     |
| Dr. von Grünberg, Hubertus                           | 51 000,00                                 | 23 250,00                                                                    |
| Guffey, Lawrence H.                                  | 78 000,00                                 | 35 650,00                                                                    |
| Hocker, Ulrich                                       | 36 000,00                                 | 15 500,00                                                                    |
| Holzwarth, Lothar <sup>b</sup>                       | 76 000,00                                 | 32 550,00                                                                    |
| Kallmeier, Hans-Jürgen <sup>c</sup>                  | 52 000,00                                 | 23 250,00                                                                    |
| Kühnast, Sylvia                                      | 36 000,00                                 | 15 500,00                                                                    |
| Prof. Dr. Lehner, Ulrich (Vorsitzender)              | 136 000,00                                | 60 450,00                                                                    |
| Litzenberger, Waltraud                               | 131 000,00                                | 54 250,00                                                                    |
| Löffler, Michael                                     | 36 000,00                                 | 15 500,00                                                                    |
| Prof. Dr. Middelmann, Ulrich                         | 53 000,00                                 | 23 250,00                                                                    |
| Schröder, Lothar (stellv. Vorsitzender) <sup>d</sup> | 115 000,00                                | 49 600,00                                                                    |
| Dr. Schröder, Ulrich                                 | 47 000,00                                 | 20 150,00                                                                    |
| Sommer, Michael                                      | 35 000,00                                 | 15 500,00                                                                    |
| Spoo, Sibylle (seit 4. Mai 2010)                     | 22 000,00                                 | 10 333,33                                                                    |
| Dr. h.c. Walter, Bernhard                            | 115 000,00                                | 51 150,00                                                                    |
|                                                      | <b>1 352 500,00</b>                       | <b>590 291,66</b>                                                            |

<sup>a</sup> Zum Zweck der Ermittlung eines Rückstellungsbetrags wurde hypothetisch zugrunde gelegt, dass der Konzernüberschuss pro Stückaktie in 2012 dem Konzernüberschuss pro Stückaktie in 2010 entsprechen wird. Ausgehend von dieser Prämisse ergibt sich für den Vergleichszeitraum 2009 bis 2012 ein Anspruch von 15 500,00 €, bezogen auf das Gesamtjahr. Nach Anwendung der Multiplikatoren ergibt sich ein Rückstellungsbetrag von 590 291,66 €.

<sup>b</sup> Für ein Aufsichtsratsmandat bei der Telekom Deutschland GmbH (vormals T-Mobile Deutschland GmbH), Bonn, einer 100 %-Tochtergesellschaft der Deutschen Telekom AG, hat Lothar Holzwarth von dieser Gesellschaft für das Geschäftsjahr 2010 eine Aufsichtsratsvergütung in Höhe von 11 333,33 € erhalten.

<sup>c</sup> Für ein Aufsichtsratsmandat bei der T-Systems International GmbH, Frankfurt am Main, einer 100 %-Tochtergesellschaft der Deutschen Telekom AG, hat Hans-Jürgen Kallmeier von dieser Gesellschaft für das Geschäftsjahr 2010 eine Aufsichtsratsvergütung in Höhe von 833,33 € erhalten.

<sup>d</sup> Für ein Aufsichtsratsmandat bei der Telekom Deutschland GmbH (vormals T-Mobile Deutschland GmbH), Bonn, einer 100 %-Tochtergesellschaft der Deutschen Telekom AG, hat Lothar Schröder von dieser Gesellschaft für das Geschäftsjahr 2010 eine Aufsichtsratsvergütung in Höhe von 18 800,00 € erhalten.





## 40 Erklärung gemäß § 161 AktG zum Deutschen Corporate Governance Kodex.

Vorstand und Aufsichtsrat der Deutschen Telekom AG haben die nach § 161 des AktG vorgeschriebene Erklärung abgegeben und den Aktionären auf der Internetseite der Deutschen Telekom AG zugänglich gemacht. Der vollständige Wortlaut der Entsprechenserklärung ist über die Internetseite der Deutschen Telekom ([www.telekom.com](http://www.telekom.com)) im Bereich „Investor Relations“ unter der Rubrik „Corporate Governance“ zugänglich.

## 41 Ereignisse nach der Berichtsperiode.

**Ministerialbeschluss zum Sozialversicherungsfonds IKA-ETAM.** Das griechische Arbeits- und Sozialministerium hat einen Ministerialbeschluss erlassen und die OTE darauf hingewiesen, dass eventuell nach Erstellung eines Gutachtens zusätzliche Zahlungen zur Deckung eines Defizits in den Fonds zu leisten sind. Die OTE hat Widerspruch gegen den Ministerialbeschluss eingelegt. Im Januar 2011 hat das griechische Arbeits- und Sozialministerium eine Zahlungsaufforderung in Höhe von 130 Mio. € an die OTE gestellt. Die OTE wird erneut Widerspruch vor weiteren juristischen Schritten einlegen. Im Konzernabschluss wurde dieser Sachverhalt entsprechend berücksichtigt. Nach Meinung der OTE bestehen gute Gründe dafür, einen Prozess durch das Einreichen einer Klage gegen den Sachverhalt gewinnen zu können.

**Einigung mit der französischen Vivendi, der polnischen Elektrim sowie den Gläubigern von Elektrim vollzogen.** Am 14. Januar 2011 wurde die Einigung über das Eigentum am polnischen Mobilfunk-Anbieter PTC abgeschlossen. Die Deutsche Telekom hat 1,4 Mrd. € im Januar 2011 gezahlt und sich nun das unumstrittene Eigentum an der PTC gesichert. Die Deutsche Telekom ist im Besitz aller Anteile an der PTC.

## 42 Honorare und Dienstleistungen der Abschlussprüfer gemäß § 314 HGB.

Das für die Abschlussprüfer des Konzernabschlusses im Geschäftsjahr als Aufwand erfasste Honorar gliedert sich wie folgt:

### PricewaterhouseCoopers Aktiengesellschaft.

|                               | 2010<br>Mio. € |
|-------------------------------|----------------|
| Abschlussprüfungsleistungen   | 5              |
| Andere Bestätigungsleistungen | 6              |
| Steuerberatungsleistungen     | 1              |
| Sonstige Leistungen           | 8              |
|                               | <b>20</b>      |

### Ernst & Young GmbH.

|                               | 2010<br>Mio. € |
|-------------------------------|----------------|
| Abschlussprüfungsleistungen   | 7              |
| Andere Bestätigungsleistungen | 6              |
| Steuerberatungsleistungen     | 1              |
| Sonstige Leistungen           | 1              |
|                               | <b>15</b>      |

Unter den Honoraren für Abschlussprüfungsleistungen werden insbesondere Honorare für die gesetzliche Prüfung des Jahres- und Konzernabschlusses ausgewiesen sowie Honorare für weitere Prüfungsleistungen.

Bei den Honoraren für andere Bestätigungsleistungen handelt es sich vor allem um Entgelte für die prüferische Durchsicht der Zwischenabschlüsse sowie die prüferische Begleitung im Rahmen der Dokumentation des internen Kontrollsystems für die Finanzberichterstattung.

Honorare für Steuerberatungsleistungen beinhalten im Wesentlichen erbrachte Steuerberatungsleistungen im Zusammenhang mit laufenden und geplanten Transaktionen.

Die sonstigen Leistungen umfassen überwiegend Beratungsleistungen und Unterstützung im Zusammenhang mit der Erfüllung von Anforderungen, die von der Bundesnetzagentur und anderen Behörden an die Gesellschaft gestellt werden.

# Versicherung der gesetzlichen Vertreter.

Wir versichern nach bestem Wissen, dass gemäß den anzuwendenden Rechnungslegungsgrundsätzen der Konzernabschluss ein den tatsächlichen Verhältnissen entsprechendes Bild der Vermögens-, Finanz- und Ertragslage des Konzerns vermittelt und im Konzernlagebericht, der mit dem Lagebericht der Deutschen Telekom AG zusammengefasst ist, der Geschäftsverlauf einschließlich des Geschäftsergebnisses und die Lage des Konzerns so dargestellt sind, dass ein den tatsächlichen Verhältnissen entsprechendes Bild vermittelt wird, sowie die wesentlichen Chancen und Risiken der voraussichtlichen Entwicklung des Konzerns beschrieben sind.

Bonn, den 18. Februar 2011

Deutsche Telekom AG  
Der Vorstand

René Obermann

Dr. Manfred Balz

Reinhard Clemens

Niek Jan van Damme

Timotheus Höttges

Guido Kerkhoff

Edward R. Kozel

Thomas Sattelberger

# Bestätigungsvermerk des Abschlussprüfers.

Wir haben den von der Deutschen Telekom AG, Bonn, aufgestellten Konzernabschluss – bestehend aus Bilanz, Gewinn- und Verlustrechnung und Gesamtergebnisrechnung, Eigenkapitalveränderungsrechnung, Kapitalflussrechnung und Anhang – sowie den Konzernlagebericht, der mit dem Lagebericht der Deutschen Telekom AG zusammengefasst ist, für das Geschäftsjahr vom 1. Januar bis 31. Dezember 2010 geprüft. Die Aufstellung von Konzernabschluss und zusammengefasstem Lagebericht nach den IFRS, wie sie in der EU anzuwenden sind, und den ergänzend nach § 315a Abs. 1 HGB anzuwendenden handelsrechtlichen Vorschriften liegt in der Verantwortung des Vorstands der Gesellschaft. Unsere Aufgabe ist es, auf der Grundlage der von uns durchgeführten Prüfung eine Beurteilung über den Konzernabschluss und den zusammengefassten Lagebericht abzugeben. Ergänzend wurden wir beauftragt zu beurteilen, ob der Konzernabschluss auch den IFRS insgesamt entspricht.

Wir haben unsere Konzernabschlussprüfung nach § 317 HGB unter Beachtung der vom Institut der Wirtschaftsprüfer (IDW) festgestellten deutschen Grundsätze ordnungsmäßiger Abschlussprüfung unter ergänzender Beachtung der International Standards on Auditing (ISA) vorgenommen. Danach ist die Prüfung so zu planen und durchzuführen, dass Unrichtigkeiten und Verstöße, die sich auf die Darstellung des durch den Konzernabschluss unter Beachtung der anzuwendenden Rechnungslegungsvorschriften und durch den zusammengefassten Lagebericht vermittelten Bildes der Vermögens-, Finanz- und Ertragslage wesentlich auswirken, mit hinreichender Sicherheit erkannt werden. Bei der Festlegung der Prüfungshandlungen werden die Kenntnisse über die Geschäftstätigkeit und über das wirtschaftliche und rechtliche Umfeld des Konzerns sowie die Erwartungen über mögliche Fehler berücksichtigt. Im Rahmen der Prüfung werden die Wirksamkeit des rechnungslegungsbezogenen internen Kontrollsystems sowie Nachweise für die Angaben im Konzernabschluss und zusammengefassten Lagebericht überwiegend auf der Basis von Stichproben beurteilt. Die Prüfung umfasst die Beurteilung der Jahresabschlüsse der in den Konzernabschluss einbezogenen Unternehmen, der Abgrenzung des Konsolidierungskreises, der angewandten Bilanzierungs- und Konsolidierungsgrundsätze und der wesentlichen Einschätzungen des Vorstands sowie die Würdigung der Gesamtdarstellung des Konzernabschlusses und des zusammengefassten Lageberichts. Wir sind der Auffassung, dass unsere Prüfung eine hinreichend sichere Grundlage für unsere Beurteilung bildet.

Unsere Prüfung hat zu keinen Einwendungen geführt.

Nach unserer Beurteilung aufgrund der bei der Prüfung gewonnenen Erkenntnisse entspricht der Konzernabschluss den IFRS, wie sie in der EU anzuwenden sind, und den ergänzend nach § 315a Abs. 1 HGB anzuwendenden handelsrechtlichen Vorschriften sowie den IFRS insgesamt und vermittelt unter Beachtung dieser Vorschriften ein den tatsächlichen Verhältnissen entsprechendes Bild der Vermögens-, Finanz- und Ertragslage des Konzerns. Der zusammengefasste Lagebericht steht in Einklang mit dem Konzernabschluss, vermittelt insgesamt ein zutreffendes Bild von der Lage des Konzerns und stellt die Chancen und Risiken der zukünftigen Entwicklung zutreffend dar.

Stuttgart/Frankfurt am Main, den 8. Februar 2011 / 18. Februar 2011

Ernst & Young GmbH  
Wirtschaftsprüfungsgesellschaft

(Prof. Dr. Wollmert)  
Wirtschaftsprüfer

(Forst)  
Wirtschaftsprüfer

PricewaterhouseCoopers  
Aktiengesellschaft  
Wirtschaftsprüfungsgesellschaft

(Kayser)  
Wirtschaftsprüfer

(Tandetzki)  
Wirtschaftsprüfer

Mit der Strategie „Verbessern –  
Verändern – Erneuern“ schaffen  
wir die Voraussetzungen für  
unseren wirtschaftlichen Erfolg  
in der Gigabit-Gesellschaft.

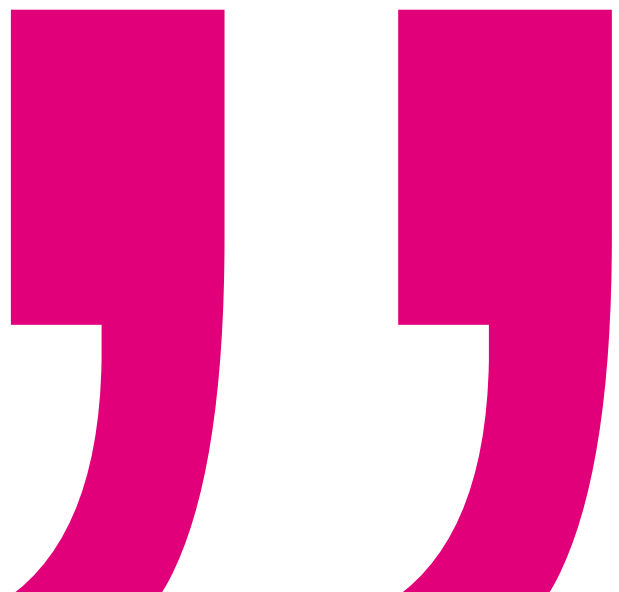

**■ 225 Mandate und weitere Informationen**

- 226** Der Aufsichtsrat einschließlich weiterer Mandate
- 228** Mandate der Vorstandsmitglieder in Aufsichtsräten
- 230** Glossar
- 234** Stichwortverzeichnis
- 235** Impressum/Finanzkalender
- 236** Haftungsausschluss
- U5** Deutsche Telekom weltweit
- U6** Inhaltsverzeichnis
- U7** Daten aus dem Konzern

# Der Aufsichtsrat der Deutschen Telekom AG 2010

einschließlich der Aufsichtsratsmandate bei anderen Gesellschaften.

## Prof. Dr. Ulrich Lehner.

Mitglied des Aufsichtsrats seit 17. April 2008  
 Vorsitzender des Aufsichtsrats seit 25. April 2008  
 Mitglied des Gesellschafterausschusses der Henkel AG & Co. KGaA, Düsseldorf  
 – Porsche Automobil Holding SE, Stuttgart (seit 11/2007)  
 – Dr. Ing. h.c. F. Porsche AG, Stuttgart (1/2007 bis 11/2009)  
 – E.ON AG, Düsseldorf (seit 4/2003)  
 – Henkel Management AG, Düsseldorf (seit 2/2008)  
 – HSBC Trinkaus & Burkhardt AG, Düsseldorf (seit 6/2004)  
 – ThyssenKrupp AG, Düsseldorf (seit 1/2008)

## Mitgliedschaften in vergleichbaren in- und ausländischen

### Kontrollgremien in Wirtschaftsunternehmen:

– Dr. August Oetker KG, Bielefeld, Beirat (seit 3/2000)  
 – Novartis AG, Basel, Schweiz,  
 Mitglied des Verwaltungsrats (seit 3/2002)

## Lothar Schröder.

Mitglied des Aufsichtsrats seit 22. Juni 2006  
 Stellvertretender Vorsitzender des Aufsichtsrats seit 29. Juni 2006  
 Mitglied des Bundesvorstands ver.di, Berlin  
 – Telekom Deutschland GmbH  
 (vormals T-Mobile Deutschland GmbH), Bonn (seit 8/2003),  
 Stellvertretender Vorsitzender des Aufsichtsrats (seit 9/2003)

## Jörg Asmussen.

Mitglied des Aufsichtsrats seit 1. Juli 2008  
 Staatssekretär im Bundesministerium der Finanzen, Berlin  
 – Deutsche Gesellschaft für Internationale Zusammenarbeit GmbH (GIZ)  
 (vormals Deutsche Gesellschaft für Technische Zusammenarbeit  
 GmbH (GTZ)), Frankfurt am Main (seit 9/2008)

## Hermann Josef Becker.

Mitglied des Aufsichtsrats seit 1. Januar 2008  
 Mitglied der Geschäftsleitung Deutsche Telekom Direktvertrieb und  
 Beratung sowie Vorsitzender des Konzernsprecherausschusses und  
 des Unternehmenssprecherausschusses Deutsche Telekom AG, Bonn  
 – keine weiteren Mandate –

## Dr. Wulf H. Bernotat.

Mitglied des Aufsichtsrats seit 1. Januar 2010  
 Ehemaliger Vorsitzender des Vorstands der E.ON AG, Düsseldorf  
 – Allianz SE, München (seit 4/2003)  
 – Bertelsmann AG, Gütersloh (seit 5/2006)  
 – Metro AG, Düsseldorf (seit 5/2003)  
 – E.ON Energie AG<sup>1</sup>, München,  
 Vorsitzender des Aufsichtsrats (5/2003 bis 4/2010)  
 – E.ON Ruhrgas AG<sup>1</sup>, Essen,  
 Vorsitzender des Aufsichtsrats (5/2003 bis 7/2010)

## Mitgliedschaften in vergleichbaren in- und ausländischen

### Kontrollgremien in Wirtschaftsunternehmen:

– E.ON Sverige AB<sup>1</sup>, Malmö, Schweden,  
 Vorsitzender des Aufsichtsrats (4/2004 bis 9/2010)  
 – E.ON US Investments Corp.<sup>1</sup>, Delaware, USA,  
 Vorsitzender des Aufsichtsrats (1/2004 bis 04/2010)

## Monika Brandl.

Mitglied des Aufsichtsrats seit 6. November 2002  
 Vorsitzende des Gesamtbetriebsrats der Deutschen Telekom AG, Bonn  
 – keine weiteren Mandate –

## Hans Martin Bury.

Mitglied des Aufsichtsrats seit 15. Mai 2008  
 Managing Partner, HERING SCHUPPENER Consulting  
 Corporate Affairs & Public Strategies GmbH, Düsseldorf  
 (vormals Hering Schuppener Strategieberatung  
 für Kommunikation GmbH)  
 – keine weiteren Mandate –

## Dr. Hubertus von Grünberg.

Mitglied des Aufsichtsrats seit 25. Mai 2000  
 Präsident des Verwaltungsrats der ABB Ltd., Zürich, Schweiz  
 – Allianz Versicherungs-AG, München (seit 5/1998)

## Mitgliedschaften in vergleichbaren in- und ausländischen

### Kontrollgremien in Wirtschaftsunternehmen:

– ABB Ltd., Zürich, Schweiz, Präsident des Verwaltungsrats (seit 5/2007)  
 – Schindler Holding AG, Hergiswil, Schweiz, Verwaltungsrat (seit 5/1999)

## Lawrence H. Guffey.

Mitglied des Aufsichtsrats seit 1. Juni 2006  
 Senior Managing Director, The Blackstone Group International  
 Partners Ltd., London, Großbritannien

## Mitgliedschaften in vergleichbaren in- und ausländischen

### Kontrollgremien in Wirtschaftsunternehmen:

– Axtel Ote Corp., San Pedro Gaza Garcia, Nuevo Leon, Mexiko  
 (seit 4/2000)  
 – Cineworld Corp., London, Großbritannien (10/2004 bis 11/2009)  
 – Paris Review, New York, USA (seit 7/2006)  
 – TDC AS Corp., Kopenhagen, Dänemark (seit 2/2006)

## Ulrich Hocker.

Mitglied des Aufsichtsrats seit 14. Oktober 2006  
 Hauptgeschäftsführer Deutsche Schutzvereinigung  
 für Wertpapierbesitz e.V. (DSW), Düsseldorf  
 – E.ON AG, Düsseldorf (seit 6/2000)  
 – Feri Finance AG, Bad Homburg (seit 12/2001),  
 Stellvertretender Vorsitzender des Aufsichtsrats (seit 12/2005)  
 – Gildemeister AG, Bielefeld (seit 5/2010)

## Mitgliedschaften in vergleichbaren in- und ausländischen

### Kontrollgremien in Wirtschaftsunternehmen:

– Gartmore SICAV, Luxemburg, Luxemburg (seit 5/2005)  
 – Phoenix Mecano AG, Stein am Rhein, Schweiz (seit 8/1988),  
 Präsident des Verwaltungsrats (seit 7/2003)

<sup>1</sup> Konzernmandate (E.ON AG) im Sinne von § 100 Abs. 2 Satz 2 AktG.

**Lothar Holzwarth.**

Mitglied des Aufsichtsrats seit 6. November 2002  
Vorsitzender des Gesamtbetriebsrats der Telekom Deutschland GmbH,  
Bonn (seit 6/2010)  
– PSD Bank RheinNeckarSaar eG (seit 1/1996),  
Stellvertretender Vorsitzender des Aufsichtsrats (seit 6/2008)  
– Telekom Deutschland GmbH (vormals T-Mobile Deutschland GmbH),  
Bonn (seit 3/2010)

**Hans-Jürgen Kallmeier.**

Mitglied des Aufsichtsrats seit 15. Oktober 2008  
Vorsitzender des Gesamtbetriebsrats der T-Systems International GmbH,  
Frankfurt am Main  
– T-Systems International GmbH, Frankfurt am Main (seit 12/2010)

**Sylvia Kühnast.**

Mitglied des Aufsichtsrats seit 3. Mai 2007  
Mitglied im Gesamtbetriebsratsausschuss des Gesamtbetriebsrats  
der Telekom Deutschland GmbH, Hannover  
– Telekom Deutschland GmbH (vormals T-Mobile Deutschland GmbH),  
Bonn (seit 1/2011)

**Waltraud Litzenberger.**

Mitglied des Aufsichtsrats seit 1. Juni 1999  
Vorsitzende des Konzernbetriebsrats und des Europäischen  
Betriebsrats der Deutschen Telekom AG, Bonn  
– keine weiteren Mandate –

**Michael Löffler.**

Mitglied des Aufsichtsrats seit 1. Januar 1995  
Mitglied des Betriebsrats der Deutschen Telekom Netzproduktion GmbH,  
Bonn, TI NL MO  
– keine weiteren Mandate –

**Prof. h.c. (CHN) Dr.-Ing. E. h. Dr. Ulrich Middelman.**

Mitglied des Aufsichtsrats seit 1. Januar 2010  
Ehemaliger stellvertretender Vorsitzender des Vorstands der  
ThyssenKrupp AG, Duisburg und Essen  
– Commerzbank AG, Frankfurt am Main (seit 4/2006)  
– E.ON Ruhrgas AG, Essen (9/2005 bis 6/2010)  
– LANXESS AG, Leverkusen (seit 3/2005)  
– LANXESS Deutschland GmbH, Leverkusen (seit 3/2005)  
– ThyssenKrupp Elevator AG<sup>1</sup>, Düsseldorf (10/2006 bis 4/2010)  
– ThyssenKrupp Marine Systems AG<sup>1</sup>, Hamburg (10/2009 bis 2/2010)  
– ThyssenKrupp Materials International GmbH<sup>1</sup>, Düsseldorf (seit 10/2009)  
– ThyssenKrupp Nirosta GmbH<sup>1</sup>, Krefeld (9/1997 bis 4/2010)  
– ThyssenKrupp Steel Europe AG<sup>1</sup>, Duisburg (seit 9/1997)

**Mitgliedschaften in vergleichbaren in- und ausländischen  
Kontrollgremien in Wirtschaftsunternehmen:**

– Hoberg & Driesch GmbH, Düsseldorf (seit 2/2001),  
Vorsitzender des Beirats (seit 5/2004)  
– ThyssenKrupp Acciai Speciali Terni S.p.A.<sup>1</sup>, Terni, Italien  
(1/1997 bis 4/2010)  
– ThyssenKrupp (China) Ltd.<sup>1</sup>, Peking, VR China (7/2005 bis 4/2010)

**Dr. Ulrich Schröder.**

Mitglied des Aufsichtsrats seit 1. Oktober 2008  
Vorsitzender des Vorstands der KfW, Frankfurt am Main  
– DEG – Deutsche Investitions- und Entwicklungsgesellschaft mbH<sup>2</sup>,  
Köln (seit 10/2009)  
– Deutsche Post AG, Bonn (seit 9/2008)  
– KfW IPEX-Bank GmbH<sup>2</sup>, Frankfurt am Main (seit 10/2009)  
– 2020 European Fund for Energy, Climate Change and Infrastructure  
(„Fonds Marguerite“), Luxemburg, Luxemburg (seit 11/2009)

**Michael Sommer.**

Mitglied des Aufsichtsrats seit 15. April 2000  
Vorsitzender des Deutschen Gewerkschaftsbundes, Berlin  
– Deutsche Postbank AG, Bonn,  
Stellvertretender Vorsitzender des Aufsichtsrats  
(11/1997 bis 6/2010)

**Mitgliedschaften in vergleichbaren in- und ausländischen  
Kontrollgremien in Wirtschaftsunternehmen:**

– KfW, Frankfurt am Main, Verwaltungsrat (seit 1/2003)

**Sibylle Spoo.**

Mitglied des Aufsichtsrats seit 4. Mai 2010  
Rechtsanwältin, Gewerkschaftssekretärin bei der ver.di-Bundesverwaltung,  
Berlin  
– keine weiteren Mandate –

**Dr. h.c. Bernhard Walter.**

Mitglied des Aufsichtsrats seit 27. Mai 1999  
Ehemaliger Sprecher des Vorstands der Dresdner Bank AG,  
Frankfurt am Main  
– Bilfinger Berger SE, Mannheim (seit 7/1998),  
Vorsitzender des Aufsichtsrats (seit 5/2006)  
– Daimler AG, Stuttgart (seit 5/1998)  
– Henkel AG & Co. KGaA, Düsseldorf (seit 5/1998)

**In 2010 ausgeschiedene Aufsichtsratsmitglieder:****Josef Falbisoner.**

Mitglied des Aufsichtsrats vom 2. Oktober 1997 bis 3. Mai 2010  
Landesbezirksleiter ver.di Bayern, München (bis 16. April 2010)  
– PSD Bank eG, München, Sitz Augsburg (seit 6/1994)

<sup>1</sup> Konzernmandate (ThyssenKrupp AG) im Sinne von § 100 Abs. 2 Satz 2 AktG.

<sup>2</sup> Konzernmandate im Sinne von § 100 Abs. 2 Satz 2 AktG.

# Der Vorstand der Deutschen Telekom AG 2010

einschließlich der Aufsichtsratsmandate bei anderen Gesellschaften.

## René Obermann.

Vorsitzender des Vorstands seit 13. November 2006

### Aufsichtsratsmandate in Tochtergesellschaften und Beteiligungen:

- T-Mobile USA Inc., Bellevue, USA (seit 1/2003),  
Vorsitzender des Board of Directors (seit 12/2006)
- T-Systems International GmbH, Frankfurt am Main,  
Vorsitzender des Aufsichtsrats (seit 12/2006)

## Dr. Manfred Balz.

Vorstand Datenschutz, Recht und Compliance seit 22. Oktober 2008

### Mitgliedschaften in vergleichbaren in- und ausländischen Kontrollgremien in Wirtschaftsunternehmen:

- Arcandor AG (in Insolvenz), Essen (seit 4/2009)

## Reinhard Clemens.

Vorstand T-Systems seit 1. Dezember 2007

- keine weiteren Mandate -

## Niek Jan van Damme.

Vorstand Deutschland seit 1. Juli 2009

### Aufsichtsratsmandate in Tochtergesellschaften und Beteiligungen:

- Deutsche Telekom Kundenservice GmbH, Bonn (seit 8/2009)
- Deutsche Telekom Technischer Service GmbH, Bonn (seit 9/2009),  
Vorsitzender des Aufsichtsrats (seit 12/2009)
- Telekom Shop Vertriebsgesellschaft mbH, Bonn (seit 8/2009),  
Vorsitzender des Aufsichtsrats (seit 9/2009)

## Timotheus Höttges.

Vorstand Finanzen seit 1. März 2009

### Aufsichtsratsmandate in Tochtergesellschaften und Beteiligungen:

- Telekom Deutschland GmbH (vormals T-Mobile Deutschland GmbH),  
Bonn (seit 4/2005),  
Vorsitzender des Aufsichtsrats (seit 7/2009)
- Everything Everywhere Limited, Hertfordshire, Großbritannien,  
Chairman of the Board of Directors (seit 4/2010)

### Mitgliedschaften in vergleichbaren in- und ausländischen Kontrollgremien in Wirtschaftsunternehmen:

- FC Bayern München AG, München (seit 2/2010)

## Guido Kerkhoff.

Vorstand Europa seit 1. April 2010

Vorstand Süd- und Osteuropa vom 1. März 2009 bis 31. März 2010

### Aufsichtsratsmandate in Tochtergesellschaften und Beteiligungen:

- Deutsche Telekom Venture Funds GmbH, Bonn (11/2008 bis 10/2010)
- HELLENIC TELECOMMUNICATIONS ORGANIZATION S.A. (OTE S.A.),  
Maroussi, Athen, Griechenland (seit 3/2009)
- HT-Hrvatski telekomunikacije d.d., Zagreb, Kroatien  
Vorsitzender des Aufsichtsrats (seit 4/2009)
- Magyar Telekom Nyrt., Budapest, Ungarn,  
Board of Directors (seit 4/2009)
- Polska Telefonia Cyfrowa, Spółka z ograniczoną odpowiedzialnością,  
Warschau, Polen (seit 7/2010)
- T-Mobile Austria GmbH, Wien, Österreich,  
Vorsitzender des Aufsichtsrats (seit 4/2010)
- T-Mobile Austria Holding GmbH, Wien, Österreich,  
Vorsitzender des Aufsichtsrats (seit 4/2010)
- Everything Everywhere Limited, Hertfordshire, Großbritannien,  
Board of Directors (seit 7/2010)
- T-Venture Holding GmbH, Bonn (5/2006 bis 10/2010)



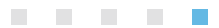

**Edward R. Koziel.**

Vorstand Technologie und Innovation seit 3. Mai 2010

**Aufsichtsratsmandate in Tochtergesellschaften und Beteiligungen:**

- Deutsche Telekom Venture Funds GmbH, Bonn (seit 6/2010),  
Vorsitzender des Aufsichtsrats (seit 9/2010)
- T-Venture Holding GmbH, Bonn (seit 6/2010),  
Vorsitzender des Aufsichtsrats (seit 9/2010)

**Thomas Sattelberger.**

Vorstand Personal seit 3. Mai 2007

**Aufsichtsratsmandate in Tochtergesellschaften und Beteiligungen:**

- Telekom Deutschland GmbH (vormals T-Mobile Deutschland GmbH),  
Bonn (seit 7/2009)
- T-Systems International GmbH, Frankfurt am Main (seit 6/2007)

**In 2010 ausgeschiedene Vorstandsmitglieder:**

**Hamid Akhavan.**

Vorstand Chief Operating Officer (COO) vom 1. Juli 2009 bis 14. Februar 2010

**Aufsichtsratsmandate in Tochtergesellschaften und Beteiligungen:**

- Deutsche Telekom Venture Funds GmbH, Bonn,  
Vorsitzender des Aufsichtsrats (11/2008 bis 2/2010)
- HELLENIC TELECOMMUNICATIONS ORGANIZATION S.A. (OTE S.A.),  
Maroussi, Athen, Griechenland (6/2008 bis 2/2010)
- T-Mobile USA Inc., Bellevue, USA,  
Board of Directors (7/2007 bis 2/2010)
- T-Venture Holding GmbH, Bonn (1/2007 bis 2/2010),  
Vorsitzender des Aufsichtsrats (3/2007 bis 2/2010)

# Glossar.

**3G.** Unter 3G versteht man den Mobilfunk-Standard der dritten Generation, der für höhere Übertragungsraten steht. In Deutschland ist dies der Standard Universal Mobile Telecommunications System (UMTS).

**4G.** Mit 4G wird in der Industrie die vierte Mobilfunk-Generation bezeichnet (siehe LTE).

**Access.** Zugang zum Internet.

**ADSL, ADSL2+.** Siehe DSL.

**All-IP.** Ein All-IP-Netz stellt alle Dienste wie VoIP, IPTV (Fernsehen basierend auf dem Internet-Protokoll), Datentransfer usw. jedem Benutzer zu jeder Zeit an jedem Ort zu Verfügung. Die Daten werden hierbei über das Internet-Protokoll (IP) paketvermittelt übertragen.

**Android Market.** Android Market ist eine Plattform für Mobilfunk-Geräte, die zu einem großen Teil auf Linux und Java basiert. Sie wird von der Open Handset Alliance entwickelt, die von Google initiiert wurde und bei der auch T-Mobile Mitglied ist. Im Oktober 2008 brachte T-Mobile in den USA das erste Handy, das diese Plattform nutzt, auf den Markt – das T-Mobile G1 (November 2008 in Großbritannien, Februar 2009 in Deutschland).

**App.** Abkürzung für engl. Application = Anwendung. Anwendungsprogramme, insbesondere Anwendungen für moderne Smartphones, die über einen meist in das Betriebssystem integrierten Onlineshop bezogen und direkt auf dem Smartphone installiert werden können.

**Application Performance Management.** Gemanagter Service zur Optimierung von Unternehmensnetzen. Das APM Lösungsportfolio von T-Systems sorgt mit drei Modulen dafür, dass der Kunde seine gesamte ICT-Infrastruktur vom Server bis zum Anwender im Blick hat und optimiert. Consulting-Leistungen bieten eine umfassende Leistungsanalyse hinsichtlich Applikationen und ICT-Infrastruktur des Unternehmens. Über das Monitoring können Fehler und Engpässe im System frühzeitig erkannt und durch gezielte Investitionen in die Infrastruktur beseitigt werden. Durch die Optimierung wird die Laufzeit der Anwendungen verbessert, beispielsweise durch die Vermeidung von Doppelübertragung von Daten. Auf diese Weise lässt sich die Datenübertragung im Netz bis auf das 50-Fache beschleunigen. Darüber hinaus trägt die frühzeitige Fehlerdiagnose auch zur Reduzierung der Betriebskosten bei.

**ASP – Application Service Providing.** Angebot eines Providers an Unternehmen, IT-Anwendungen (Applications) zu mieten. Vorteil: Der Kunde verfügt über die jeweils aktuellste Version, die der Provider zentral vorhält (z. B. in einem Rechenzentrum), und muss sich nicht selbst um die Beschaffung und Pflege von Softwareanwendungen (Lizenzen, Updates) kümmern.

**Backhaul-Anbindung** (engl. für Rücktransport). Bezeichnet die Anbindung eines vorgelagerten, meist hierarchisch untergeordneten Netzknotens an einen zentralen Netzknoten.

**Bandbreite.** Die Bandbreite beschreibt den Umfang eines Frequenzbands bei der Datenübertragung. Je mehr Bandbreite, desto schneller die Verbindung.

**Bitstream Access** (engl. für Bitstromzugang). Der Bitstromzugang ist ein Vorleistungsprodukt, mit dem alternative Telefongesellschaften Breitbandanschlüsse realisieren können.

**Change Management** (engl. für Veränderungsmanagement). Bezeichnet die Aufgaben und Maßnahmen, die umfassende Veränderungen in einer Organisation bewirken sollen.

**Cloud Computing.** Das dynamische Bereitstellen von Infrastruktur-, Software- oder Plattformleistungen als Service aus dem Netz. Basis für die bereitgestellten Leistungen sind eine hohe Automation und Virtualisierung sowie Multi-Mandantenfähigkeit und Standardisierung der Hard- und Software. Kunden beziehen diese Dienste nach Bedarf und bezahlen nach Verbrauch. Als Kommunikationsinfrastruktur dient das Internet (Public Cloud), ein Unternehmensnetz (Private Cloud) oder eine Mischform davon (Hybrid Cloud). Dynamic Services ist ein Angebot von T-Systems zum variablen Bezug von ICT-Ressourcen sowie -Leistungen.

**Connected Life and Work – Vernetztes Leben und Arbeiten.** Die einfache Handhabung aller persönlicher Daten und Internetdienste auf jedem Bildschirm, sei es PC, Mobiltelefon oder Fernsehgerät. Basis hierfür ist die sichere Speicherung aller Daten im Netz, auf die dann alle Endgeräte über Breitbandnetze zugreifen können.

**Delisting.** Beendigung einer Börsennotierung.

**Desktop Services.** Global Desktop Services umfassen Serviceleistungen bis zum Outsourcing der IT-Infrastruktur. Die Deutsche Telekom tritt hierbei als Komplettanbieter auf und stellt von der Server-Infrastruktur, über die einzelnen Arbeitsplatz-PCs bis hin zu Applikationsmanagement und Callcenter-Diensten für Anwendersupport ein integriertes Portfolio rund um die Unternehmens-IT zur Verfügung.

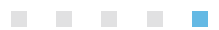

**Double-Play.** Bezeichnet kombinierte Dienstleistungsangebote aus Internet und Sprachkommunikation (Telefonie).

**Download.** Englischer Begriff für das Herunterladen von Dateien von einem entfernten Server über Netzwerke wie das Internet oder Mobilfunk-Verbindungen auf den lokalen Rechner oder einen anderen Client wie das Handy.

**DSL.** Im Portfolio der Deutschen Telekom als: ADSL (Asymmetrical Digital Subscriber Line) für private Endkundenanschlüsse: Technik zur Übertragung von hohen Datenraten (Upstream 16 kbit/s bis 640 kbit/s; Downstream bis 8 Mbit/s) auf der üblichen Kupferdoppelader im Anschlussbereich bis etwa drei Kilometer.

ADSL2+: Weiterentwicklung von ADSL, erhöht die Datenrate auf einen maximalen Downstream von 16 Mbit/s und den Upstream auf 1 Mbit/s.

VDSL (Very high bit rate Digital Subscriber Line): Neue Technik zur Übertragung von sehr hohen Datenraten (Upstream 10 Mbit/s, Downstream 50 Mbit/s) im Glasfasernetz.

**Embedded Systems** (engl. für eingebettete Systeme). Bezeichnet einen elektronischen Rechner oder auch Computer, der in einen technischen Kontext eingebettet ist. Dabei hat der Rechner entweder die Aufgabe, das System, in das er eingebettet ist, zu steuern, zu regeln oder zu überwachen. Oder der Rechner ist für eine Form der Daten- bzw. Signalverarbeitung zuständig, beispielsweise beim Ver- bzw. Entschlüsseln, Codieren bzw. Decodieren oder Filtern.

Eingebettete Systeme verrichten – weitestgehend unsichtbar für den Benutzer – den Dienst in einer Vielzahl von Anwendungsbereichen und Geräten, beispielsweise in Geräten der Medizintechnik, Waschmaschinen, Flugzeugen, Kraftfahrzeugen, Kühlschränken, Fernsehern, DVD-Playern, SetTopBoxen, Mobiltelefonen oder allgemein in Geräten der Unterhaltungselektronik. Im Fall von komplexen Gesamtsystemen handelt es sich dabei meist um eine Vernetzung einer Vielzahl von ansonsten autonomen, eingebetteten Systemen (z. B. im Fahrzeug oder Flugzeug).

**Enabling** (engl. für befähigen). Enabling-Dienste sind ein wichtiger Bestandteil unseres Geschäftsmodells. Wir ermöglichen anderen Unternehmen oder Softwareentwicklern, unsere Fähigkeiten aus Netz und IT über standardisierte Schnittstellen in ihre eigenen Dienste zu integrieren. Dafür bündeln wir unsere Produkte in einem Baukasten aus Standardleistungen. So fördern wir das Wachstum unserer Partner und partizipieren gleichzeitig daran.

**Entertain.** Angebot der Deutschen Telekom für internetbasiertes Fernsehen (siehe auch IPTV). TV-Signale werden hierbei über die DSL-Leitung transportiert. Diese Übertragungstechnik ermöglicht interaktive Funktionen wie z. B. zeitversetztes Fernsehen oder den Zugang zu einer Online-Videothek.

**Flatrate.** Pauschaltarif für die Zugangsmöglichkeit zu einem Netzwerk unabhängig von Zeit und Datenmenge.

**FTTH** (Fiber to the Home. Wörtlich: Glasfaser bis ins Haus). Glasfaseranschlusstechnik, bei der die Glasfaser bis ins Haus des Kunden geführt wird. Bandbreiten bis über ein Gbit/s.

**Gigabit.** 1 Milliarde bits. Maßeinheit für die Geschwindigkeit der Datenübertragung.

**Gigabyte.** 1 Milliarde bytes. Maßeinheit für die Speicherkapazität von Datenträgern.

**Glasfaser.** Transportweg für optische Datenübertragung.

**GSM – Global System for Mobile Communications.** Globaler Standard für digitalen Mobilfunk.

**Home Gateway.** Zentrale Steuerung, über die Elektronikgeräte im Haushalt von jedem Ort aus bedient werden können.

**Hosting.** Bereitstellen von Speicherplatz über das Internet. Die wichtigsten Leistungen eines Internet-Service-Providers aus dem Bereich Hosting sind Registrierung und Betrieb von Domains, Vermietung von Web-Servern (komplett oder teilweise) und Vermietung von Platz in einem Rechenzentrum inklusive Internetanbindung, Strom- und Notstromversorgung etc.

**HotSpot.** HotSpot bezeichnet einen Bereich, in dem Kunden ein öffentlicher drahtloser Internetzugang über WLAN (Wireless Local Area Network) zur Verfügung steht.

**HSDPA – High Speed Downlink Packet Access.** Protokollzusatz, der die Datenraten in UMTS-Netzen verbessert und eine Verbindungsgeschwindigkeit im Megabit-Bereich ermöglicht.

**HSPA+.** Weiterentwicklung von HSPA mit höheren Übertragungsraten/Bandbreiten. HSPA+ verkürzt die Datenlaufzeiten weiter und ist damit ideal für alle datenintensiven mobilen Anwendungen.

**HSUPA – High Speed Uplink Packet Access.** Die Technik beschleunigt den Daten-Upstream vom Mobilfunk-Gerät zum Netz und verkürzt außerdem die Datenlaufzeiten („Ping-Zeit“) erheblich. Damit ergänzt HSUPA optimal die HSDPA-Technik im T-Mobile Netz. Zusammen sorgen HSDPA und HSUPA dafür, dass Nutzer unterwegs ähnlich komfortabel im Internet surfen oder im Intranet arbeiten können wie über Festnetz-DSL.

**ICT – Information and Communication Technology.** Informations- und Kommunikationstechnologie.

**Infotainment.** Wortzusammensetzung aus Information und Entertainment (= Unterhaltung).

**Internet/Intranet.** Weltweites Netzwerk von Computern auf Basis des Internet-Protokolls (IP) ohne zentrales Netzmanagement. Intranets sind dagegen gemanagte IP-Netze, die nur bestimmten Nutzergruppen zugänglich sind.

**Internet-Service-Provider** (engl. für Internetdiensteanbieter). Im deutschsprachigen Raum auch oft nur Provider genannt, bietet in der Regel gegen Entgelt verschiedene technische Leistungen an, die für die Nutzung oder den Betrieb von Internetdiensten erforderlich sind.

**IP – Internet-Protokoll.** Herstellerneutrales Transport-Protokoll der Schicht 3 des OSI-Referenzmodells für die netzüberschreitende Kommunikation.

**IPTV – Internet Protocol Television.** Fernsehen basierend auf dem Internet-Protokoll. Mit IPTV wird die digitale Übertragung von Fernsehprogrammen und Filmen über ein digitales Datennetz bezeichnet. Hierzu wird das dem Internet zugrunde liegende Internet-Protokoll (IP) verwendet.

**ISDN – Integrated Services Digital Network.** Dienstintegrierendes digitales Telekommunikationsnetz. ISDN integriert Telekommunikationsdienste wie Telefon, Fax oder Datenkommunikation in einem Netz. Die Digitalisierung verbessert die Übertragungsqualität und erhöht die Übertragungsgeschwindigkeit gegenüber der herkömmlichen analogen Übertragung und ermöglicht darüber hinaus auch paketvermittelnde Datenübertragung.

**IT.** Informationstechnologie.

**Joint Venture.** Gemeinschaftsunternehmen. Zur Kooperation mehrerer Unternehmen wird eine Gesellschaft gegründet, an der sich die kooperierenden Unternehmen beteiligen.

**LAN – Local Area Network** (engl. für lokales Netz). Ist ein Rechnernetz, das auf ein Firmen- oder Campusgelände begrenzt ist.

**LTE – Long Term Evolution** (engl. für langfristige Entwicklung). Die neue Generation der Mobilfunk-Technik 4G nutzt Mobilfunk-Frequenzen, die durch die Digitalisierung des Fernsehens frei geworden sind. Mit den reichweitenstarken Fernsehfrequenzen lassen sich große Flächen mit deutlich weniger Sendemasten als bisher erschließen. LTE ermöglicht Geschwindigkeiten von mehr als 100 Mbit/s im Download und 50 Mbit/s im Upload und ermöglicht neue Serviceangebote für Handy, Smartphones und Tablet-PCs.

**LTE-Dongle.** USB-Sticks der vierten Generation.

**M2M.** Maschinenkommunikation, bei der Maschinen und Automaten automatisch Informationen an den Empfänger versenden. Z. B. verschicken Alarmanlagen im Notfall von selbst ein Signal an den Sicherheitsdienst bzw. an die Polizei.

**Mbit/s – Megabit pro Sekunde.** Einheit der Datenübertragungsgeschwindigkeit.

**MVNO – Mobile Virtual Network Operator.** Dienstleister, die vergleichsweise günstige Gesprächsminuten ohne Gerätesubventionen anbieten und dabei über kein eigenes Mobilfunknetz verfügen, sondern als Service Provider auf die Netzinfrastruktur der großen Mobilfunk-Anbieter zurückgreifen.

**Nearshore- und Offshore-Länder.** Bezeichnet das nahe gelegene und das weit entfernte Ausland.

**One Company** (engl. für „ein Unternehmen“). Damit bezeichnen wir im Konzern Deutsche Telekom die Zusammenführung des vormals getrennten Mobilfunk- und Festnetzgeschäfts in ein Unternehmen.

**Prepaid.** Im Gegensatz zu Postpaid-Verträgen vorausbezahlte Kommunikationsleistungen in Form von Guthaben ohne vertragliche Bindung.

**PSTN – Public Switched Telephone Network.** Das weltweit verfügbare öffentliche Telefonnetz. Zu seinen Bestandteilen gehören Telefone, Telefonanschlusskabel (paarweise verdreht) und die Vermittlungsstellen. Das öffentliche Telefonnetz wird manchmal auch als POTS (Plain Old Telephone Service) bezeichnet.

**Quad-Play** (engl. für vierfaches Spiel). Wenn zu einem gebündelten Angebot von drei Diensten – Fernsehen, Telefonie und Internet – dem sog. Triple-Play ein Mobilfunk-Angebot hinzukommt, spricht man von Quad-Play.



**Rating.** Beurteilung der Bonität von Wertpapieren oder Schuldnern durch Ratingagenturen.

**Retail.** Klein-/Einzelhandel. Im Gegensatz hierzu bezeichnet man das Großhandelsgeschäft auch als Wholesale-Geschäft.

**Roaming.** Leistungsmerkmal zellularer Funknetze, das die Erreichbarkeit aktivierter Mobilstationen standortunabhängig in allen Funkzellen des gesamten Versorgungsbereichs eines Netzes sicherstellt. Darüber hinaus kann sich das Roaming auch über gleichartige Netze verschiedener Netzbetreiber, wie z. B. beim internationalen Roaming im paneuropäischen GSM-System, erstrecken.

**SIM-Karte.** Chipkarte, die in das Mobiltelefon eingesetzt wird. Diese enthält sämtliche Daten des Mobilfunk-Teilnehmers.

**Smart Metering.** Der Service umfasst das Auslesen, Verarbeiten, Darstellen sowie Fakturieren des Verbrauchs von Strom, Wasser und anderen Zählern in Industrie und Haushalt. Smart Metering senkt erheblich Kosten und erlaubt den Zugriff auf einen massenmarktfähigen Service. Es eröffnet vor allem Energieversorgern, Messstellenbetreibern und der Wohnungswirtschaft die Möglichkeit, innovative Produkte und Dienstleistungen anzubieten, da es Verbrauchsdaten in nahezu Echtzeit liefert.

**Smartphones.** Endgeräte, die gleichzeitig Mobiltelefon, Webbrowser- und E-Mail-Programmfunktionen ausführen können.

**SMS und MMS.** Der Short Message Service (SMS) ist ein Telekommunikationsdienst zur Übertragung von Textnachrichten, der zuerst für den GSM-Mobilfunk entwickelt wurde und nun auch im Festnetz verfügbar ist. Die Weiterentwicklung des SMS ist der Multimedia Messaging Service (MMS), mit dem unterschiedliche Medien wie Texte, Bilder, Animationen, Video- und Audiosequenzen als eine Nachricht verschickt werden können. Mit SMS und MMS werden neben dem Dienst auch die verschickten Nachrichten selbst bezeichnet.

**Stakeholder** (engl. für Inhaber eines Anspruchs). Der Stakeholder-Ansatz ist die Erweiterung des in der Betriebswirtschaft verbreiteten Shareholder-Value-Ansatzes. Im Gegensatz zum Shareholder-Value-Prinzip, das die Bedürfnisse und Erwartungen der Anteilseigner eines Unternehmens in den Mittelpunkt des Interesses stellt, versucht der Stakeholder-Ansatz, das Unternehmen in seinem gesamten sozialen Kontext zu erfassen und die Bedürfnisse der unterschiedlichen Anspruchsgruppen in Einklang zu bringen. Als Stakeholder gelten dabei neben den Shareholdern die Mitarbeiter, die Kunden, die Lieferanten sowie der Staat und die Öffentlichkeit.

**Tablet-PC.** Ein flacher, tragbarer Computer mit einem berührungsempfindlichen Bildschirm, der sich mit einem Stift oder per Fingerstreich bedienen lässt. Die kompakten Multimedia-Geräte ermöglichen den Nutzern, unterwegs oder zuhause komfortabel im Internet zu surfen, ihre Mails zu bearbeiten, Fotos und Videos zu betrachten, Musik zu hören, zu telefonieren oder elektronische Bücher zu lesen.

**Triple-Play** (engl. für dreifaches Spiel). Triple-Play bezeichnet Angebote aus festnetzbasierter Sprach-, Daten- und TV-Diensten. Auf der Basis von Breitbandnetzen können die Kunden solche IP-basierten Dienstleistungen über eine Leitung nutzen.

**UMTS – Universal Mobile Telecommunications System.** Internationaler Mobilfunk-Standard der dritten Generation, der mobile Multimedia- und Telematikdienste unter dem Frequenzspektrum von 2 GHz vereinigt.

**USB Stick** (engl. für Universal Serial Bus). Speichersticks, die über USB kommunizieren und einen eingebauten Datenspeicher besitzen oder für Wechseldatenträger benutzt werden.

**VDSL.** Siehe DSL.

**VoIP – Voice over Internet Protocol.** Technik, mit der via Internet Telefonverbindungen hergestellt werden. Hierbei gibt es drei Methoden: PC zu PC, PC zum Festnetz, Telefonate über IP-basierte interne Netzwerke.

**Webhosting.** Bereitstellen von Speicherplatz über das Internet.

**Wholesale.** Wholesale steht als Begriff für jenes Geschäft, bei dem Leistungen an Dritte abgegeben werden, die diese ihren Endkunden direkt oder verarbeitet zur Verfügung stellen.

**WiMAX – Worldwide Interoperability for Microwave Access.** Technik, die mittels ortsfester, lokaler Funkzellen Highspeed-Internet über die Luftschnittstelle zur Verfügung stellt.

**WLAN – Wireless Local Area Network.** Kabellose Funknetze für den mobilen Internetzugang. Es können auch mehrere Rechner ohne Kabel untereinander und mit einem zentralen Informationssystem, einem Drucker oder einem Scanner verbunden werden.

# Stichwortverzeichnis.

| Stichwort                                                          | Seite                                                                               |
|--------------------------------------------------------------------|-------------------------------------------------------------------------------------|
| <b>A</b>                                                           |                                                                                     |
| ADSL/ADSL2+                                                        | 120, 196, 230, 231                                                                  |
| Aktioptionen                                                       | 54, 136, 138, 150, 179, 188, 202, 203, 218, 219                                     |
| All-IP                                                             | 58, 80, 100, 230, U7                                                                |
| Android                                                            | 50, 78, 103, 128, 230                                                               |
| Ausbildung                                                         | 107, 110                                                                            |
| <b>B</b>                                                           |                                                                                     |
| Breitband                                                          | U3, 50, 78, 79, 83, 85, 86, 114, 129                                                |
| <b>C</b>                                                           |                                                                                     |
| Cloud Computing, Cloud Services                                    | U4, 8, 16, 46, 50, 51, 57, 59, 63, 91, 104, 126, 230                                |
| Connected Life and Work<br>(s. auch Vernetztes Leben und Arbeiten) | 230                                                                                 |
| <b>D</b>                                                           |                                                                                     |
| Datenumsatz                                                        | 57, 89                                                                              |
| Dividende                                                          | U2, 17, 38, 39, 47, 65, 98, 127, 141, 188                                           |
| DSL                                                                | 46, 63, 64, 114, 120, 196, 230, 231, 233, U7                                        |
| <b>E</b>                                                           |                                                                                     |
| Entertain                                                          | 4, 6, 16, 50, 58, 78, 103, 105, 114, 127, 128, 231                                  |
| <b>F</b>                                                           |                                                                                     |
| Forschung und Entwicklung                                          | 103, 105                                                                            |
| Freefloat                                                          | 41                                                                                  |
| FTTH                                                               | 4, 49, 63, 231                                                                      |
| <b>G</b>                                                           |                                                                                     |
| Gearing                                                            | U2, 46, 60, 74, 212                                                                 |
| GSM                                                                | 64, 128, 144, 163, 200, 231, 233                                                    |
| <b>H</b>                                                           |                                                                                     |
| HSDPA                                                              | 89, 231                                                                             |
| HSPA+                                                              | 16, 49, 50, 58, 63, 89, 104, 128, 231                                               |
| HSUPA                                                              | 231                                                                                 |
| <b>I</b>                                                           |                                                                                     |
| ICT (Information and Communication Technology)                     | 14, 16, 50, 51, 52, 57, 58, 63, 91, 92, 100, 103, 104, 114, 128, 129, 191, 230, 232 |
| Investor Relations                                                 | 41, 139, 158, 235                                                                   |
| IP                                                                 | 46, 52, 58, 78, 80, 100, 109, 191, 230, 232, 233, U7                                |
| IPTV/Fernsehen auf Basis des Internet-Protokolls                   | 46, 62, 77, 81, 83, 86, 103, 114, 128, 230, 231, 232                                |
| <b>K</b>                                                           |                                                                                     |
| Konsolidierungskreis                                               | 136, 155, 162, 166                                                                  |

| Stichwort                                                          | Seite                                                       |
|--------------------------------------------------------------------|-------------------------------------------------------------|
| <b>L</b>                                                           |                                                             |
| LTE                                                                | 4, 16, 49, 58, 62, 63, 64, 80, 127, 128, 232                |
| <b>M</b>                                                           |                                                             |
| Mid-Term Incentive Plan                                            | 36, 37, 200, 214                                            |
| <b>N</b>                                                           |                                                             |
| Nachhaltigkeit                                                     | 100, 101, 109                                               |
| <b>O</b>                                                           |                                                             |
| One Company                                                        | 48, 57, 108, 116, 128, 232                                  |
| Organisationsstruktur                                              | 51, 107, 111                                                |
| <b>P</b>                                                           |                                                             |
| Patentanmeldungen                                                  | 103                                                         |
| Personalaufwand                                                    | 69, 94, 96, 107, 150, 188, 189                              |
| Personalbestandsentwicklung                                        | 106                                                         |
| <b>Q</b>                                                           |                                                             |
| Quad-Play                                                          | 83, 232                                                     |
| <b>R</b>                                                           |                                                             |
| Regulierung                                                        | 63, 64, 86, 114, 115, 126                                   |
| Risikomanagement                                                   | 25, 26, 27, 29, 32, 33, 34, 74, 98, 112, 113, 118, 150, 208 |
| ROCE                                                               | 36, 46, 59, 60, 127, 215                                    |
| <b>T</b>                                                           |                                                             |
| T-Aktie                                                            | U2, 17, 38, 39, 40, 41, 101, 121, 122, 179, 200             |
| Triple-Play                                                        | 59, 114, 232, 233                                           |
| <b>U</b>                                                           |                                                             |
| UMTS                                                               | 49, 58, 64, 80, 89, 128, 143, 144, 163, 164, 230, 231, 233  |
| <b>V</b>                                                           |                                                             |
| VDSL                                                               | 46, 58, 63, 231, 233                                        |
| Vergütung des Aufsichtsrats                                        | 37, 220                                                     |
| Vergütung des Vorstands                                            | 35, 213, 219                                                |
| Vernetztes Leben und Arbeiten<br>(s. auch Connected Life and Work) | 7, 9, 49, 57, 58, 102, 230                                  |
| Vivento                                                            | U4, 52, 69, 93, 94, 108, 115, 129, 188                      |
| VoIP                                                               | 114, 230, 233                                               |
| <b>W</b>                                                           |                                                             |
| Währungsumrechnung                                                 | 45, 72, 137, 150, 157, 159, 162, 166, 182, 186, 207         |
| Wechselkurseffekte                                                 | 44, 66, 67, 69, 72, 74, 85, 86, 87, 164, 189                |
| Weiterbildung                                                      | 96, 109                                                     |
| Wireless LAN/WLAN                                                  | 117, 213, 233                                               |



# Impressum/Finanzkalender.

Deutsche Telekom AG  
Unternehmenskommunikation  
Postfach 2000, D-53105 Bonn  
Telefon 0228 181 4949  
Telefax 0228 181 94004

[www.telekom.com](http://www.telekom.com)

Investor Relations:  
Telefon 0228 181 88880  
Telefax 0228 181 88899  
E-Mail: [investor.relations@telekom.de](mailto:investor.relations@telekom.de)

Unseren Geschäftsbericht finden Sie im Internet unter:  
[www.telekom.com/geschaeftsbericht2010](http://www.telekom.com/geschaeftsbericht2010)  
[www.telekom.com/annualreport2010](http://www.telekom.com/annualreport2010)

Für Fragen und Anregungen unserer Privatanleger:

Telefon 0228 181 88333  
Telefax 0228 181 88339  
E-Mail: [forum-taktie@telekom.de](mailto:forum-taktie@telekom.de)

Der Geschäftsbericht liegt auch in Englisch vor.  
Im Zweifelsfall ist die deutsche Version maßgeblich.

Konzept:  
Deutsche Telekom AG und  
HGB Hamburger Geschäftsberichte GmbH & Co. KG, Hamburg

Gestaltung und Produktion:  
HGB Hamburger Geschäftsberichte GmbH & Co. KG, Hamburg

Fotos:  
Michael Ebner, Mareen Fischinger,  
gettyimages, imagesource, Norbert Ittermann,  
Andreas Pohlmann, Wolfram Scheible,  
strandperle, Marc Trautmann@schierke.com

Reproduktion:  
PX2@Medien GmbH & Co. KG, Hamburg

Druck:  
Broermann Druck + Medien GmbH, Troisdorf-Spich

KNr. 642 200 200 (deutsch)  
KNr. 642 200 201 (englisch)

---

## Finanzkalender 2011

|                                      |                    |
|--------------------------------------|--------------------|
| Bericht zum ersten Quartal 2011      | 6. Mai 2011*       |
| Hauptversammlung Deutsche Telekom AG | 12. Mai 2011*      |
| Bericht zum ersten Halbjahr 2011     | 4. August 2011*    |
| Bericht zum dritten Quartal 2011     | 10. November 2011* |

\* Voraussichtliche Termine.

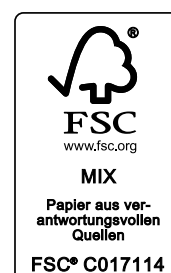

Gedruckt auf elementar  
chlorfrei gebleichtem Papier.

# Haftungsausschluss.

Dieser Bericht (vor allem das Kapitel „Prognosen zur Umsatz- und Ergebnisentwicklung“) enthält zukunftsbezogene Aussagen, welche die gegenwärtigen Ansichten des Managements der Deutschen Telekom hinsichtlich zukünftiger Ereignisse widerspiegeln. Sie sind im Allgemeinen durch die Wörter „erwarten“, „davon ausgehen“, „annehmen“, „beabsichtigen“, „einschätzen“, „anstreben“, „zum Ziel setzen“, „planen“, „werden“, „erstreben“, „Ausblick“ und vergleichbare Ausdrücke gekennzeichnet und beinhalten im Allgemeinen Informationen, die sich auf Erwartungen oder Ziele für Umsatzerlöse, bereinigtes EBITDA oder andere Maßstäbe für die Performance beziehen. Zukunftsbezogene Aussagen basieren auf derzeit gültigen Plänen, Einschätzungen und Erwartungen. Daher sollten Sie sie mit Vorsicht betrachten. Solche Aussagen unterliegen Risiken und Unsicherheitsfaktoren, von denen die meisten schwierig einzuschätzen sind und die im Allgemeinen außerhalb der Kontrolle der Deutschen Telekom liegen. Dazu gehören u. a. auch der Fortschritt, den die Deutsche Telekom mit den personalbezogenen Restrukturierungsmaßnahmen erzielt, und die Auswirkungen anderer bedeutender strategischer und operativer Initiativen, einschließlich des Erwerbs oder der Veräußerung von Gesellschaften sowie von Unternehmenszusammenschlüssen. Weitere mögliche Faktoren, die die Kosten- und Erlösentwicklung wesentlich beeinträchtigen, sind regulatorische Vorgaben, ein Wettbewerb, der schärfer ist als erwartet, Veränderungen bei den Technologien, Rechtsstreitigkeiten und aufsichtsrechtliche Entwicklungen. Sollten diese oder andere Risiken und Unsicherheitsfaktoren eintreten, oder sollten sich die den Aussagen zugrunde liegenden Annahmen als unrichtig herausstellen, so können die tatsächlichen Ergebnisse der Deutschen Telekom wesentlich von denjenigen abweichen, die in diesen Aussagen ausgedrückt oder impliziert werden. Die Deutsche Telekom kann keine Garantie dafür geben, dass die Erwartungen oder Ziele erreicht werden.

Die Deutsche Telekom lehnt – unbeschadet bestehender kapitalmarktrechtlicher Verpflichtungen – jede Verantwortung für eine Aktualisierung der zukunftsbezogenen Aussagen durch Berücksichtigung neuer Informationen oder zukünftiger Ereignisse oder anderer Dinge ab. Zusätzlich zu den nach IFRS erstellten Kennzahlen legt die Deutsche Telekom Proforma-Kennzahlen vor, z. B. EBITDA, EBITDA-Marge, bereinigtes EBITDA, bereinigte EBITDA-Marge, bereinigtes EBIT, bereinigter Konzernüberschuss, Free Cashflow sowie Brutto- und Netto-Finanzverbindlichkeiten, die nicht Bestandteil der Rechnungslegungsvorschriften sind. Diese Kennzahlen sind als Ergänzung, jedoch nicht als Ersatz für die nach IFRS erstellten Angaben zu sehen. Pro-forma-Kennzahlen unterliegen weder den IFRS noch anderen allgemein geltenden Rechnungslegungsvorschriften. Andere Unternehmen legen diesen Begriffen unter Umständen andere Definitionen zugrunde.  Weitere Informationen zu Pro-forma Kennzahlen finden sich im Kapitel „Geschäftsentwicklung des Konzerns“ in diesem Bericht sowie auf der Website der Deutschen Telekom ( [www.telekom.com](http://www.telekom.com)) unter „Investor Relations“.



# Deutsche Telekom weltweit.

 Unsere Präsenz finden Sie unter [www.telekom.com/weltweit](http://www.telekom.com/weltweit).

## Zentrale des Konzerns

Bonn

## Ausgewählte internationale Tochterunternehmen und Beteiligungen

|                     |                                                                          | Anteil (direkt/indirekt) Deutsche Telekom          |
|---------------------|--------------------------------------------------------------------------|----------------------------------------------------|
| <b>Europa</b>       |                                                                          |                                                    |
| Albanien            | AMC (Albanian Mobile Communications Sh.A.)                               | 97,21 % der Anteile liegen bei Cosmote             |
| Belgien             | T-Systems Belgium NV                                                     | 100,00 %                                           |
| Bosnien             | T-Systems d.o.o.                                                         | 100,00 %                                           |
| Bulgarien           | Global (Cosmo Bulgaria Mobile EAD)                                       | 100,00 % der Anteile liegen bei Cosmote            |
|                     | Novatel EOOD                                                             | 100,00 % der Anteile liegen bei Magyar Telekom     |
|                     | T-Systems Bulgaria EOOD (03.01.11)                                       | 100,00 %                                           |
| Dänemark            | T-Systems Nordic A/S                                                     | 100,00 %                                           |
| EJR Mazedonien      | Makedonski Telekom AD                                                    | 51,00 % der Anteile liegen bei Magyar Telekom      |
|                     | T-Mobile Macedonia AD                                                    | 100,00 % der Anteile liegen bei Makedonski Telekom |
| Frankreich          | T-Systems France SAS                                                     | 100,00 %                                           |
| Griechenland        | OTE (Hellenic Telecommunications Organization S.A.)                      | 30,00 % plus eine Aktie                            |
|                     | Cosmote (Cosmote Mobile Telecommunications S.A.)                         | 100,00 % der Anteile liegen bei OTE                |
|                     | T-Systems Information and Communication Technology E.P.E.                | 100,00 %                                           |
| Großbritannien      | Everything Everywhere Limited                                            | 50,00 %                                            |
|                     | T-Systems Limited                                                        | 100,00 %                                           |
| Italien             | T-Systems Italia S.p.A.                                                  | 100,00 %                                           |
| Kroatien            | Hrvatski Telekom d.d. *                                                  | 51,00 %                                            |
| Luxemburg           | T-Systems Luxembourg S.A.                                                | 100,00 %                                           |
| Montenegro          | Crnogorski Telekom A.D. *                                                | 76,53 % der Anteile liegen bei Magyar Telekom      |
| Niederlande         | T-Mobile Netherlands B.V.                                                | 100,00 %                                           |
|                     | T-Systems Nederland B.V.                                                 | 100,00 %                                           |
| Österreich          | Software Daten Service Gesellschaft m.b.H.                               | 100,00 %                                           |
|                     | T-Mobile Austria GmbH                                                    | 100,00 %                                           |
|                     | Deutsche Telekom Value Added Services Austria GmbH                       | 100,00 %                                           |
|                     | T-Systems Austria GmbH                                                   | 100,00 %                                           |
| Polen               | PTC (Polska Telefonia Cyfrowa Sp.z o.o.)                                 | 100,00 %                                           |
|                     | T-Systems Polska Sp.z o.o.                                               | 100,00 %                                           |
| Rumänien            | Combridge S.R.L.                                                         | 100,00 % der Anteile liegen bei Magyar Telekom     |
|                     | Cosmote Romanian Mobile Telecommunications S.A.                          | 70,00 % der Anteile liegen bei Cosmote             |
|                     | Romtelecom S.A.                                                          | 54,01 % der Anteile liegen bei OTE                 |
|                     | T-Systems ICT Romania S.R.L. (10.01.11)                                  | 100,00 %                                           |
| Russland            | T-Systems CIS                                                            | 100,00 %                                           |
| Schweiz             | T-Systems Schweiz AG                                                     | 100,00 %                                           |
| Serbien             | Telekom Srbija a.d.                                                      | 20,00 % der Anteile liegen bei OTE                 |
| Slowakei            | Slovak Telekom, a.s. *                                                   | 51,00 %                                            |
|                     | T-Systems Slovakia s.r.o.                                                | 100,00 %                                           |
| Slowenien           | T-Systems, informacijski sistemi, d.o.o.                                 | 100,00 %                                           |
| Spanien             | T-Systems ITC Iberia, S.A.                                               | 100,00 %                                           |
| Tschechien          | T-Mobile Czech Republic a.s.                                             | 60,77 %                                            |
|                     | T-Systems Czech Republic a.s.                                            | 100,00 %                                           |
| Türkei              | T SYSTEMS TELEKOMÜNİKASYON LIMITED SİRKETİ                               | 100,00 %                                           |
| Ukraine             | Novatel Ukraine LLC.                                                     | 100,00 % der Anteile liegen bei Magyar Telekom     |
|                     | TOB T-Systems Ukraine                                                    | 100,00 %                                           |
| Ungarn              | Magyar Telekom Nyrt. *                                                   | 59,30 %                                            |
|                     | IT Services Hungary Szolgáltató Kft.                                     | 100,00 %                                           |
|                     | IQSYS Zrt.                                                               | 100,00 % der Anteile liegen bei Magyar Telekom     |
| <b>Nordamerika</b>  |                                                                          |                                                    |
| Kanada              | T-Systems Canada, Inc.                                                   | 100,00 %                                           |
| Mexiko              | T-Systems Mexico S.A. de C.V.                                            | 100,00 %                                           |
| USA                 | T-Mobile USA, Inc.                                                       | 100,00 %                                           |
|                     | T-Systems North America, Inc.                                            | 100,00 %                                           |
| <b>Südamerika</b>   |                                                                          |                                                    |
| Argentinien         | T-Systems Argentina S.A.                                                 | 100,00 %                                           |
| Brasilien           | T-Systems do Brasil Ltda.                                                | 100,00 %                                           |
| <b>Asien</b>        |                                                                          |                                                    |
| Hongkong            | T-Systems China Limited                                                  | 100,00 %                                           |
| Indien              | T-Systems Information and Communication Technology India Private Limited | 100,00 %                                           |
| Japan               | T-Systems Japan K.K.                                                     | 100,00 %                                           |
| Malaysia            | T-Systems Malaysia Sdn. Bhd.                                             | 100,00 %                                           |
| Singapur            | T-Systems Singapore Pte. Ltd.                                            | 100,00 %                                           |
| Volksrepublik China | T-Systems P.R. China Ltd.                                                | 100,00 %                                           |
| <b>Afrika</b>       |                                                                          |                                                    |
| Südafrika           | T-Systems South Africa (Pty) Limited                                     | 70,00 %                                            |

\* Mobilfunk-Dienste werden unter der Marke T-Mobile angeboten.

## Inhaltsverzeichnis

### 14 An unsere Aktionäre

- |           |                                                          |           |                              |
|-----------|----------------------------------------------------------|-----------|------------------------------|
| <b>U2</b> | Die Finanzdaten des Konzerns auf einen Blick             | <b>14</b> | Brief an unsere Aktionäre    |
| <b>U3</b> | Der Konzern Deutsche Telekom und die operativen Segmente | <b>20</b> | Der Vorstand                 |
|           |                                                          | <b>24</b> | Bericht des Aufsichtsrats    |
|           |                                                          | <b>32</b> | Corporate Governance-Bericht |
|           |                                                          | <b>38</b> | Die T-Aktie                  |

### 43 Zusammengefasster Lagebericht

- |           |                                               |            |                                                       |
|-----------|-----------------------------------------------|------------|-------------------------------------------------------|
| <b>44</b> | Das Geschäftsjahr 2010 im Überblick           | <b>102</b> | Innovation und Produktentwicklung                     |
| <b>47</b> | Wichtige Ereignisse im Geschäftsjahr 2010     | <b>106</b> | Mitarbeiter                                           |
| <b>51</b> | Konzernstruktur                               | <b>112</b> | Risiko- und Chancenmanagement                         |
| <b>57</b> | Konzernstrategie und Konzernsteuerung         | <b>123</b> | Rechnungslegungsbezogenes internes Kontrollsystem     |
| <b>61</b> | Wirtschaftliches Umfeld                       | <b>124</b> | Besondere Ereignisse nach Schluss des Geschäftsjahres |
| <b>65</b> | Geschäftsentwicklung des Konzerns             | <b>125</b> | Sonstige Angaben                                      |
| <b>76</b> | Geschäftsentwicklung der operativen Segmente  | <b>126</b> | Prognosen zur Umsatz- und Ergebnisentwicklung         |
| <b>95</b> | Geschäftsentwicklung der Deutschen Telekom AG |            |                                                       |
| <b>99</b> | Corporate Responsibility                      |            |                                                       |

### 131 Der Konzernabschluss

- |            |                                          |            |                                          |
|------------|------------------------------------------|------------|------------------------------------------|
| <b>132</b> | Konzern-Bilanz                           | <b>139</b> | Konzern-Anhang                           |
| <b>134</b> | Konzern-Gewinn- und Verlustrechnung      | <b>222</b> | Versicherung der gesetzlichen Vertreter  |
| <b>135</b> | Konzern-Gesamtergebnisrechnung           | <b>223</b> | Bestätigungsvermerk des Abschlussprüfers |
| <b>136</b> | Konzern-Eigenkapitalveränderungsrechnung |            |                                          |
| <b>138</b> | Konzern-Kapitalflussrechnung             |            |                                          |

### 225 Mandate und weitere Informationen

- |            |                                                   |            |                           |
|------------|---------------------------------------------------|------------|---------------------------|
| <b>226</b> | Der Aufsichtsrat einschließlich weiterer Mandate  | <b>230</b> | Glossar                   |
| <b>228</b> | Mandate der Vorstandsmitglieder in Aufsichtsräten | <b>234</b> | Stichwortverzeichnis      |
|            |                                                   | <b>235</b> | Impressum/Finanzkalender  |
|            |                                                   | <b>236</b> | Haftungsausschluss        |
|            |                                                   | <b>U5</b>  | Deutsche Telekom weltweit |
|            |                                                   | <b>U6</b>  | Inhaltsverzeichnis        |
|            |                                                   | <b>U7</b>  | Daten aus dem Konzern     |

# Daten aus dem Konzern.

|                                               |             | 2010   | 2009   | 2008   | 2007   |
|-----------------------------------------------|-------------|--------|--------|--------|--------|
| <b>Daten aus dem Konzern</b>                  | <b>Mio.</b> |        |        |        |        |
| Festnetz-Anschlüsse <sup>a</sup>              |             | 36,0   | 38,5   | 41,5   | 44,7   |
| Breitbandanschlüsse Retail <sup>b</sup>       |             | 16,4   | 15,4   | 13,9   | 11,4   |
| Mobilfunk-Kunden                              |             | 128,5  | 134,5  | 130,9  | 118,4  |
| <b>Deutschland</b>                            | <b>Mio.</b> |        |        |        |        |
| <b>Festnetz</b>                               |             |        |        |        |        |
| Festnetz-Anschlüsse <sup>a</sup>              |             | 24,7   | 26,2   | 28,3   | 30,8   |
| Breitbandanschlüsse Retail <sup>a</sup>       |             | 12,0   | 11,5   | 10,6   | 9,0    |
| Wholesale gebündelte Anschlüsse <sup>b</sup>  |             | 1,0    | 1,6    | 2,5    | 3,5    |
| Teilnehmeranschlussleitung (TAL) <sup>c</sup> |             | 9,5    | 9,1    | 8,3    | 6,4    |
| Wholesale entbündelte Anschlüsse <sup>d</sup> |             | 1,0    | 0,6    | 0,2    | -      |
| <b>Mobilfunk</b>                              |             |        |        |        |        |
| Mobilfunk-Kunden <sup>e</sup>                 |             | 34,7   | 39,1   | 39,1   | 36,0   |
| <b>Europa</b>                                 | <b>Mio.</b> |        |        |        |        |
| <b>Festnetz</b>                               |             |        |        |        |        |
| Festnetz-Anschlüsse <sup>a</sup>              |             | 11,3   | 12,3   | 13,2   | 13,9   |
| Breitbandanschlüsse Retail <sup>b</sup>       |             | 4,4    | 3,9    | 3,3    | 2,4    |
| Wholesale gebündelte Anschlüsse <sup>b</sup>  |             | 0,2    | 0,2    | 0,3    | 0,4    |
| Teilnehmeranschlussleitung (TAL) <sup>c</sup> |             | 1,5    | 1,1    | 0,7    | 0,3    |
| <b>Mobilfunk</b>                              |             |        |        |        |        |
| Mobilfunk-Kunden                              |             | 60,1   | 61,6   | 59,0   | 52,6   |
| <b>USA</b>                                    | <b>Mio.</b> |        |        |        |        |
| Mobilfunk-Kunden                              |             | 33,7   | 33,8   | 32,8   | 29,8   |
| <b>Systemgeschäft</b>                         |             |        |        |        |        |
| <b>Computing &amp; Desktop Services</b>       |             |        |        |        |        |
| Anzahl der betreuten Server                   | Stück       | 58 073 | 47 092 | 56 734 | 39 419 |
| Anzahl der betreuten Arbeitsplatzsysteme      | Mio. Stück  | 1,95   | 1,86   | 1,51   | 1,46   |
| <b>Systems Integration<sup>a</sup></b>        |             |        |        |        |        |
| Fakturierte Stunden <sup>b</sup>              | Mio.        | 9,2    | 9,6    | 10,7   | 11,4   |
| Utilization Rate <sup>c</sup>                 | %           | 84,0   | 81,3   | 80,9   | 80,2   |

Vorjahreswerte wurden pro-forma angepasst. Die Summen wurden auf genauen Zahlen berechnet und auf Millionen gerundet.

In dieser Darstellung entspricht jede Mobilfunk-Karte einem Kunden.

## Konzern

<sup>a</sup> Anschlüsse in Betrieb. Telefonanschlüsse einschließlich IP-basierter Anschlüsse ohne Eigenverbrauch und öffentliche Telekommunikationseinrichtungen inkl. Vorleistungen und Geschäftskunden.

<sup>b</sup> Breitbandanschlüsse in Betrieb.

## Deutschland

<sup>a</sup> Anschlüsse in Betrieb ohne Eigenverbrauch und ohne öffentliche Telekommunikationseinrichtungen, einschließlich IP-basierter Anschlüsse und congstar.

<sup>b</sup> Wholesale gebündelte Anschlüsse: Verkauf von Breitbandanschlüssen auf Basis der DSL-Technologie an alternative Anbieter außerhalb der Deutschen Telekom, einschließlich IP-BSA gebündelt. Bei IP-Bitstream Access (IP-BSA) überlässt die Deutsche Telekom dem Wettbewerber DSL-Anschlüsse und transportiert den darüber geführten Datenstrom.

<sup>c</sup> Teilnehmeranschlussleitung: Ein Vorleistungsprodukt der Deutschen Telekom, das alternative Teilnehmernetzbetreiber ohne vorgeschaltete Technik anmieten können, um auf dieser Basis den eigenen Kunden einen Telefon- oder DSL-Anschluss anzubieten.

<sup>d</sup> Wholesale entbündelte Anschlüsse: Vorleistungsprodukt ohne Kopplung an einen PSTN-Anschluss. Ermöglicht Wettbewerbern ein All-IP-Angebot.

<sup>e</sup> Ab dem 1. April 2010 erfolgt automatisch eine Kündigung durch die Telekom Deutschland GmbH, wenn eine Prepaid-Karte zwei Jahre nicht aufgeladen wurde und drei Monate nicht aktiv war.

## Europa

Das operative Segment Europa enthält die Festnetz- und Mobilfunk-Tochtergesellschaften OTE Griechenland, Cosmote Griechenland, Romtelecom, Cosmote Rumänien, Zapp (Rumänien), Globul (Bulgarien), AMC (Albanien), Magyar Telekom, Makedonski Telekom, Crnogorski Telekom, PTC, T-Mobile Czech Republic, T-Hrvatski Telekom, T-Mobile Netherlands, Slovak Telekom und T-Mobile Austria.

Die Kunden der T-Mobile UK, die seit dem 1. April 2010 durch die Zusammenlegung der T-Mobile UK und der Orange UK in das Joint Venture Everything Everywhere übergegangen sind, wurden zur besseren Vergleichbarkeit aus allen historischen Kundenzahlen herausgerechnet.

Die OTE-Gruppe ist seit 1. Februar 2009 vollkonsolidiert. Die Kennzahlen der Vorjahre wurden pro-forma entsprechend angepasst.

Die rumänische Zapp ist seit dem 1. November 2009 konsolidiert. Die Kennzahlen der Vorjahre wurden nicht angepasst.

Die Festnetz- und Breitbandanschlüsse in den Niederlanden sind in allen Jahren enthalten.

<sup>a</sup> Anschlüsse in Betrieb ohne Eigenverbrauch und ohne öffentliche Telekommunikationseinrichtungen, einschließlich IP-basierter Anschlüsse.

<sup>b</sup> Wholesale gebündelte Anschlüsse: Verkauf von Breitbandanschlüssen auf Basis der DSL-Technologie an alternative Anbieter außerhalb der Deutschen Telekom, einschließlich IP-BSA gebündelt. Bei IP-Bitstream Access (IP-BSA) überlässt die Deutsche Telekom dem Wettbewerber DSL-Anschlüsse und transportiert den darüber geführten Datenstrom.

<sup>c</sup> Teilnehmeranschlussleitung: Ein Vorleistungsprodukt der Deutschen Telekom, das alternative Teilnehmernetzbetreiber ohne vorgeschaltete Technik anmieten können, um auf dieser Basis den eigenen Kunden einen Telefon- oder DSL-Anschluss anzubieten.

## Systemgeschäft

<sup>a</sup> National: ohne Konsolidierungskreisveränderungen.

<sup>b</sup> Kumulierte Werte zum Stichtag.

<sup>c</sup> Quotient aus durchschnittlicher Anzahl fakturierter Stunden und fakturierbarer Stunden pro Periode.

Deutsche Telekom AG  
Friedrich-Ebert-Allee 140  
D-53113 Bonn

[www.telekom.com](http://www.telekom.com)
