# Supplementary material
Source: publisher site journal article supplement (https://www.degruyterbrill.com/publication/isbn/9783110432879/downloadAsset/9783110432879_Elektronischer_Anhang_2.zip)
Supplement: Supplementary file 43 [file Deutsche Telekom T Spirit - Das Leitbild der Deutschen Telekom.pdf › Korpustexte/Korpustexte pdf/Deutsche Telekom/Deutsche Telekom T Spirit - Das Leitbild der Deutschen Telekom.pdf]

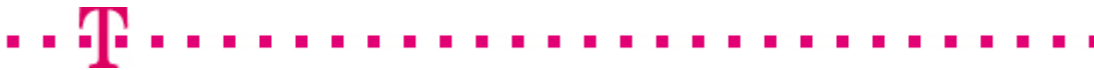

## T-Spirit - Das Leitbild der Deutschen Telekom

Neue Technologien - wie Breitband-Internet und Mobilfunk - haben die Kommunikation in den vergangenen Jahren weltweit revolutioniert. Im Zuge dieses Wandels hin zu einer weltweit vernetzten Kommunikations-Gesellschaft hat auch die Deutsche Telekom ihr Gesicht stark verändert. Das Konzernleitbild "T-Spirit" trägt diesen Veränderungen Rechnung. T-Spirit verbindet die gemeinsame Vision der Deutschen Telekom mit sechs zentralen Werten, die konzernweit gelten.

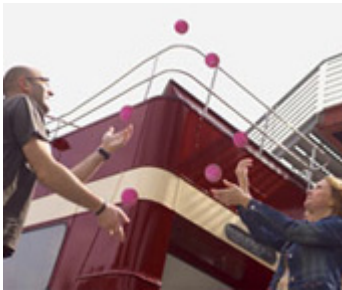

Sechs Werte führen zu T-Spirit

Nach innen gibt das neue Leitbild damit allen Mitarbeitern im Konzern Orientierung für ihr Denken und Handeln im Sinne des Kunden und bildet ein starkes Band für die konzernweite Zusammenarbeit und Identifikation unter dem "T". T-Spirit wirkt aber nicht nur intern - sondern auch nach außen: Vision und Werte verdeutlichen die verantwortungsbewusste Rolle der Deutschen Telekom in Wirtschaft und Gesellschaft.

### Qualität, Innovation, Effizienz: Im Mittelpunkt steht der Kunde

Im Zentrum allen Handelns steht der Kunde. Das "T" steht konzernweit als Gütesiegel. Qualität, Innovation und Effizienz sind die Eckpunkte der Vision des Konzernleitbildes und damit das verbindende Element im gesamten Konzern. Es ist das gemeinsame Leistungsversprechen an die Kunden.

### Die sechs Corporate Values

Hinter T-Spirit verbirgt sich aber nicht nur der neue Geist, der im Konzern Einzug hält, sondern auch sechs ganz konkrete zentrale Unternehmenswerte, die sich systematisch aus den einzelnen Buchstaben S P I R I T ableiten lassen:

**S** - Steigerung des Konzernwertes: "Wir steigern den Wert der Deutschen Telekom nachhaltig."

**P** - Partner für den Kunden: "Wir begeistern unsere Kunden durch exzellente Produkte und Services".

**I** - Innovation: "Wir schaffen ein Klima für Innovationen und Spaß an Leistung."

**R** - Respekt: "Wir nutzen unsere kulturelle Vielfalt, respektieren und unterstützen uns."

**I** - Integrität: "Wir kommunizieren offen und ehrlich und halten, was wir versprechen."

**T** - Top Exzellenz: "Wir denken und handeln entschlossen, wollen mit den richtigen Menschen am richtigen Platz ständig effizienter werden, belohnen Leistung und sanktionieren Fehlverhalten konsequent."

### T-Spirit leben

Die sechs Werte machen deutlich, dass T-Spirit nicht nur ein philosophischer Überbau ist. T-Spirit ist das Leitbild, an dem das gesamte Handeln aller Mitarbeiter im Konzern ausgerichtet werden soll. Das Top-Management der Telekom hat sich dazu bekannt, die Unternehmenswerte konsequent vorzuleben und zu verankern. Ziel ist es, dass das Leitbild von allen Mitarbeitern im Konzern gelebt wird.
