# Supplementary material
Source: publisher site journal article supplement (https://www.degruyterbrill.com/publication/isbn/9783110432879/downloadAsset/9783110432879_Elektronischer_Anhang_2.zip)
Supplement: Supplementary file 44 [file E.ON Cleaner and better energy.pdf › Korpustexte/Korpustexte pdf/E.ON/E.ON Cleaner and better energy.pdf]

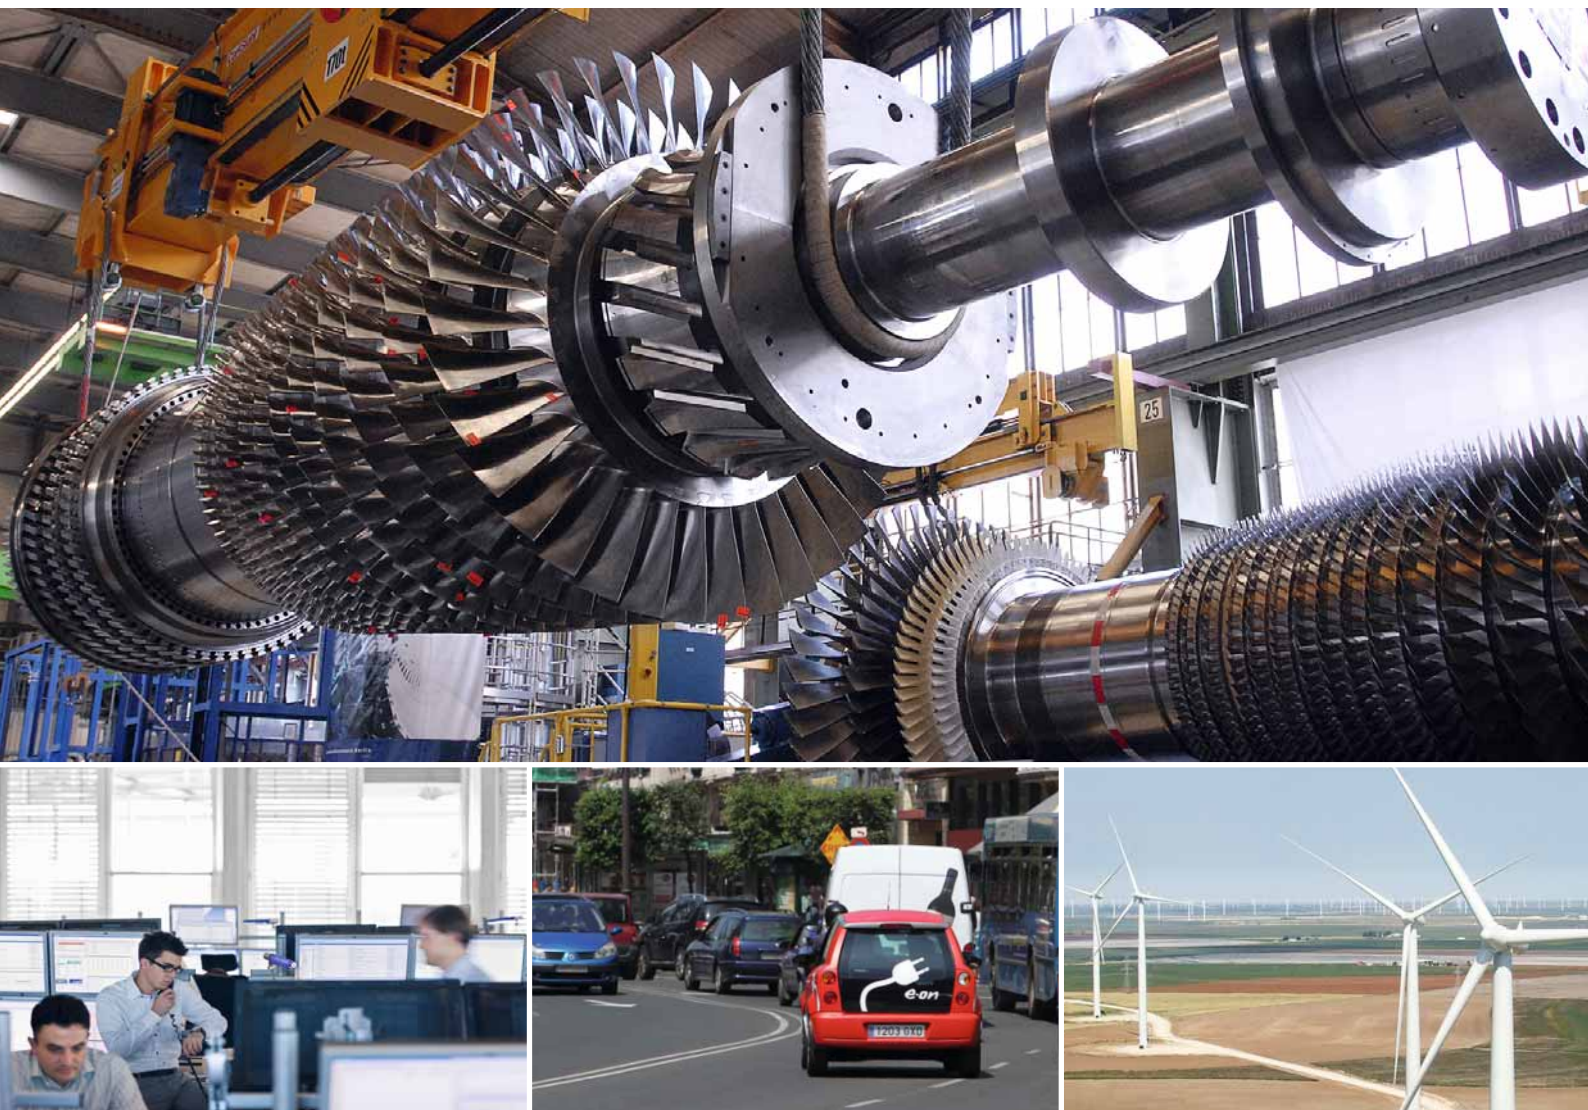

# Cleaner & better energy

Unternehmensbericht

**e-on**

Wir haben Antworten auf die Herausforderungen, denen wir gegenüberstehen. Unser Ziel ist, Energie immer sauberer und immer besser zu machen. Das haben wir jetzt ebenso klar in unserem neuen strategischen Anspruch formuliert: **cleaner & better energy**. Wir wollen die Welt der Energie substanziell verbessern. Im Hinblick auf Wirtschaftlichkeit, Versorgungssicherheit und Klimaschutz. Dieser Anspruch ist die Maßgabe für unser Handeln und damit für unsere neuen strategischen Schwerpunkte:

- Wir stellen uns in Europa noch fokussierter auf.
- Wir erschließen gezielt Wachstumsmöglichkeiten außerhalb Europas.
- Wir steigern unsere Effizienz und optimieren unser operatives Geschäft.
- Wir optimieren unseren Kapitaleinsatz.

Die zahlreichen in diesem Bericht vorgestellten Aktivitäten zeigen, wie wir schon heute für saubere und bessere Energie sorgen.

Für **cleaner & better energy**.

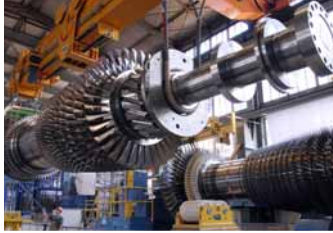

#### Seite 6

Irsching 4: Das effizienteste Gas- und Dampfkraftwerk der Welt

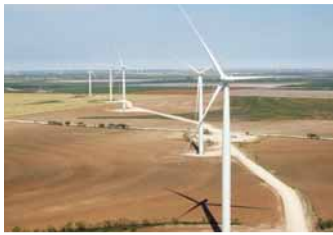

#### Seite 18

Windenergie in Texas: Beste Bedingungen für Effizienz und Wirtschaftlichkeit

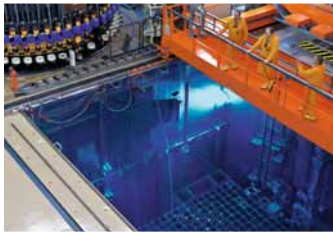

#### Seite 28

Kernenergie: Klimafreundliche Säule in unserem Energiemix

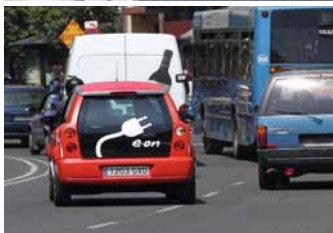

#### Seite 36

Elektromobilität: Wichtiger Baustein für intelligente Energiekonzepte

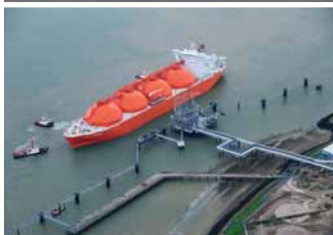

#### Seite 42

Grain LNG in Großbritannien: Sichere Gasversorgung, weniger CO<sub>2</sub>

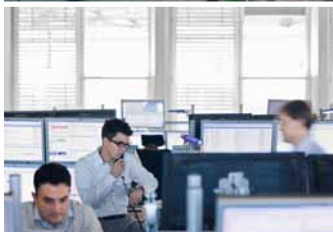

#### Seite 62

Handel: Integrierter Energiemarkt schafft Effizienz beim Kraftwerkseinsatz

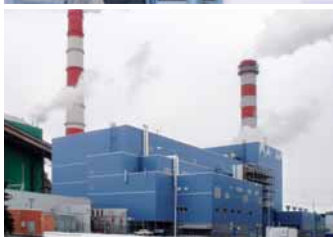

#### Seite 74

Neues Kraftwerk in Shatura: Für effiziente und klimafreundliche Energie in Russland

2 Brief des Vorstandsvorsitzenden

### 8 Unser Unternehmen

8 Kurzprofil  
10 Verantwortung  
12 Neue Technologien  
16 Das Jahr 2010

### 20 Unser Team

20 Vorstand  
22 Aufsichtsrat  
23 Mitarbeiter  
26 Zusammenarbeit

### 30 Unsere Investoren

30 Überblick  
31 Finanzstrategie  
32 E.ON-Aktie  
35 E.ON-Anleihen

### 38 Unsere Strategie

39 Strategische Schwerpunkte  
39 Europa  
40 Außerhalb Europas  
41 Performance  
41 Investitionen

### 44 Unsere Struktur

44 Überblick  
46 Globale Einheiten  
46 Konventionelle Erzeugung  
50 Erneuerbare Erzeugung  
54 Global Gas  
58 Handel  
64 Regionale Einheiten  
64 Deutschland  
66 Weitere EU-Länder  
66 Großbritannien  
67 Schweden  
68 Italien  
68 Spanien  
69 Frankreich  
69 Niederlande  
70 Ungarn  
70 Tschechien  
71 Slowakei  
71 Rumänien  
71 Bulgarien  
72 Russland

76 Impressum  
Finanzkalender

Die vorliegende Publikation stellt E.ON in der neuen Struktur seit 1. Januar 2011 dar. Zahlen, Daten, Fakten zum Geschäftsjahr 2010 sind im Geschäftsbericht 2010 zu finden. Dieser orientiert sich an der bis zum 31. Dezember 2010 gültigen Struktur des Konzerns.

Zum Herunterladen oder Bestellen finden Sie die Berichte unter [www.eon.com/broschueren](http://www.eon.com/broschueren)



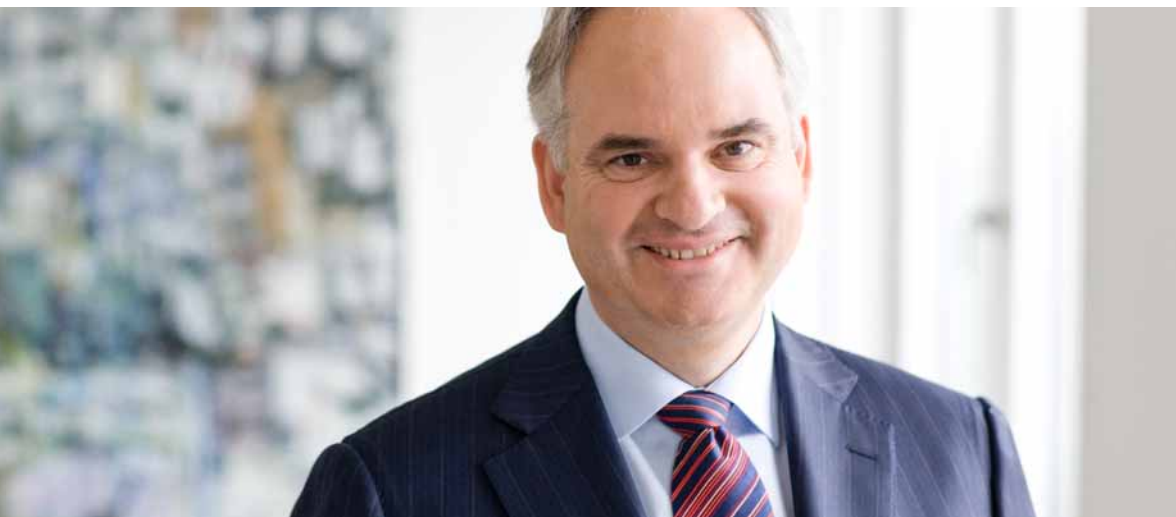

*liebe Leserinnen und Leser,*

im abgelaufenen Geschäftsjahr 2010 haben wir, wie viele andere Energieunternehmen, mit den Folgen der Wirtschaftskrise kämpfen müssen. Während sich die Konjunktur in Deutschland und vielen Ländern Nordeuropas dank der vorausschauenden und besonnenen Politik in der Krise schnell und ohne nachhaltige Verwerfungen erholt hat, kommt die Wirtschaft in vielen anderen europäischen Ländern nur schleppend in Fahrt. Der Energieverbrauch und die Energieproduktion Europas liegen noch spürbar unter dem Vorkrisenniveau. Noch sind die notwendigen Anpassungsprozesse in der Energiewirtschaft an das veränderte Wettbewerbsumfeld nicht abgeschlossen. E.ON hat aber schon früh auf die Herausforderungen reagiert, die Leistungskraft erhöht, Kosten gesenkt und die Verschuldung mithilfe eines starken operativen Cashflows und substanzieller Mittelzuflüsse aus Veränderungen im Portfolio zurückgeführt. Deswegen haben wir wie zugesagt auch in diesem schwierigen Umfeld Kurs gehalten. Das Adjusted EBIT des Geschäftsjahres 2010 lag mit 9,5 Mrd € leicht über dem hohen Vorjahresniveau, der bereinigte Konzernüberschuss lag mit 4,9 Mrd € leicht unter dem hohen Vorjahresergebnis. Daher können wir der Hauptversammlung erneut die Ausschüttung einer im Vergleich zum Vorjahr stabilen Bardividende in Höhe von 1,50 € je Aktie vorschlagen. Die Auszahlungsquote vom bereinigten Konzernüberschuss liegt damit bei 59 Prozent; wir halten also auch bei unserer Dividendenpolitik unseren bisherigen Kurs bei, 50 bis 60 Prozent des bereinigten Konzernüberschusses auszuschütten. E.ON zählt damit auch 2010 zu den dividendenstärksten Aktien im DAX. Des weiteren planen wir für die Geschäftsjahre 2011 und 2012 eine Dividende pro Aktie von mindestens 1,30 €.

So sehr mich dieses gute Ergebnis freut und stolz macht auf die Leistung unserer Mitarbeiter, weisen eine Reihe von Indikatoren darauf hin, dass wir dieses hohe Niveau in den nächsten zwei Jahren nicht halten werden. Wir gehen jedoch davon aus, dass 2013 unsere heutigen Geschäfte insgesamt das bisherige Niveau wieder erreichen. Vorerst befinden wir uns in einem angespannten Umfeld; in den meisten unserer Märkte gestaltet sich das Geschäft mit Strom und Gas schwierig. In weiten Teilen Europas dämpft die Wirtschaftslage noch immer die Nachfrage nach Energie, und die Entwicklung der Strom- und Rohstoffpreise führt in der Folge zu teilweise deutlich geringeren Margen und Auslastungen unserer Kraftwerke. Insbesondere in Südeuropa haben die negativen Auswirkungen der Finanz- und Wirtschaftskrise in Form von Überkapazitäten, niedrigen Strompreisen und stark verringerten Margen in der Erzeugung angehalten. Hier mussten wir 2010 auf diese Geschäfte Wertberichtigungen in Höhe von insgesamt rund 2,6 Mrd € vornehmen. Auch in unserem deutschen Heimatmarkt prägen harte Konkurrenz im Vertrieb, geringere Erlöse im regulierten Netzbetrieb und schmalere Margen in der Erzeugung unser Geschäft.

Daher hatte ich bereits bei Übernahme meiner Aufgabe als Vorstandsvorsitzender im Frühjahr 2010 angekündigt, die Lage und Positionierung des Unternehmens zügig und eingehend zu analysieren, um die Weichen dafür zu stellen, dass E.ON auch in einem schwieriger werdenden wirtschaftlichen Umfeld erfolgreich bleibt. Im November haben wir die große Linie dazu vorgelegt. Mit unserem Anspruch cleaner & better energy setzen wir neue strategische Schwerpunkte. Unser Ziel ist es, gerade in wirtschaftlich schwierigen Zeiten die Vereinbarkeit von Wirtschaftlichkeit, Versorgungssicherheit und Klimaschutz in einer unternehmerischen Strategie voranzutreiben. Wir wollen Energie klimaschonender bereitstellen, als Partner unserer Kunden noch attraktiver werden und zugleich den Wert des Unternehmens steigern. Cleaner & better ist kein Slogan, sondern die Beschreibung eines Programms: „Cleaner“ sind Produkte und Dienstleistungen, die beim Anwender die Energiequalität im Sinne von Klima- und Umweltschutz spürbar verbessern. „Better“ ist unsere Energie, wenn wir Leistungen erbringen und Technologien einsetzen, die wir deutlich überlegener als der Wettbewerb beherrschen, und hieraus bessere Produkte und Dienstleistungen für unsere Kunden machen.

Dabei bleibt Europa der Schwerpunkt unserer Geschäftsaktivitäten, mit Deutschland als zentralem Heimatmarkt. Wir werden unsere Geschäfte in Europa allerdings stärker fokussieren und uns auf die Aktivitäten und Märkte konzentrieren, die nach Regeln des Wettbewerbs funktionieren. Hier werden wir unsere Stärken in der Stromerzeugung, im Energiehandel, im internationalen Gasgeschäft sowie bei innovativen Energielösungen für unsere Kunden nutzen. Insofern bleibt Stromerzeugung – darüber darf die krisen-geprägte aktuelle Lage nicht hinwegtäuschen – ein langfristiger Wachstumsmarkt. Ich bin überzeugt, dass sich nicht nur die Nachfrage verbessern wird; Strom wird auch weitere Anwendungen erschließen, zum Beispiel im Bereich Mobilität – wenn wir ihn klimafreundlich herstellen. Dazu werden wir bei E.ON die Erneuerbaren Energien in einem System mit intelligenten Speichern und Netzen weiter ausbauen. Schon jetzt zählen wir zu den weltweit größten Anbietern von Strom aus Erneuerbaren Energien. 2010 haben wir vier große On- und Offshore-Windparks in Betrieb genommen und haben damit jetzt Kapazitäten von 3,6 GW aus Wind, Sonne und Biomasse am Netz. Mit unseren Fotovoltaik- und solarthermischen Kraftwerken in Südeuropa bringen wir jetzt auch Solarstrom auf das technologische und kommerzielle Niveau der Windkraft. Zugleich aber sorgen wir mit dem Bau neuer hocheffizienter Kohle-, Gas-, Pumpspeicher- und Laufwasserkraftwerke für Stabilität und Versorgungssicherheit. Dadurch werden wir die

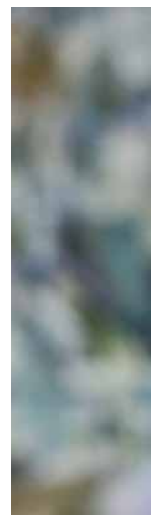

spezifischen CO<sub>2</sub>-Emissionen unserer Stromerzeugung in Europa bereits 2020, also zehn Jahre früher als bislang geplant, gegenüber 1990 halbieren und leisten damit einerseits einen entscheidenden Beitrag zur Umsetzung der klimapolitischen Ziele der EU und Deutschlands. Andererseits minimieren wir so noch stärker die Kosten, die sich aus dem Erwerb von CO<sub>2</sub>-Zertifikaten ergeben.

Beim Erdgas haben der weltweite Handel von verflüssigtem Erdgas und die Erschließung völlig neuer Gasquellen unser Geschäft unter erheblichen Anpassungsdruck gebracht, dem wir aber mit der Neuverhandlung und Anpassung unserer Lieferverträge begegnen wollen. Denn langfristig wird Erdgas mit seinen guten Umwelteigenschaften einen weiter wachsenden Anteil an der Energieversorgung Europas haben. Die Innovationen der letzten Jahre in der Erdgasproduktion haben zu einer völlig neuen Einschätzung der langfristigen Potenziale dieses klimaschonenden Energieträgers geführt. Erdgas ist nach aktuellen Erkenntnissen auf Jahrhunderte sicher und umweltverträglich zugänglich. Die Versorgungsquellen und -wege werden sich weiter diversifizieren. Und dank der Anpassung der Preispositionierung, die derzeit in den Märkten vorgenommen wird, bieten sich gänzlich neue Wachstumspotenziale für Erdgas. E.ON arbeitet in allen Segmenten an Erdgasthemen führend mit.

E.ON wird in den nächsten Jahren verstärkt auch außerhalb Europas aktiv sein und vom weltweiten Bedarf an zusätzlicher Erzeugungskapazität profitieren. E.ON verfügt über Spitzen-Know-how beim Bau und Betrieb von sowohl konventionellen, d.h. fossilen und nuklearen, als auch erneuerbaren Erzeugungsanlagen. Diese Erfahrung zusammen mit der tiefen Kenntnis über die Entwicklung von Energiesystemen wollen wir weiterhin in Russland und Nordamerika und darüber hinaus in zunächst zwei zusätzlichen Regionen einsetzen. Es geht dabei nicht um Markteintritte durch Akquisitionen, sondern um Projekte, die zu einer Verbesserung der dortigen Energieversorgung beitragen. Wir wollen so den Anteil unseres außerhalb Europas erwirtschafteten Ergebnisses auf 25 Prozent bis zum Jahr 2015 steigern.

Dass wir unser Ergebnis trotz Wettbewerbsdrucks und lahmender Konjunktur 2010 leicht steigern konnten, verdanken wir nicht zuletzt den Kostensenkungen und operativen Verbesserungen unseres Programms „PerformtoWin“ und unserer Investitionsdisziplin. Wenn wir aber in wirtschaftlich schwierigen Zeiten weiter wachsen wollen, müssen wir Effizienz zum festen Bestandteil der Leistungskultur des Unternehmens

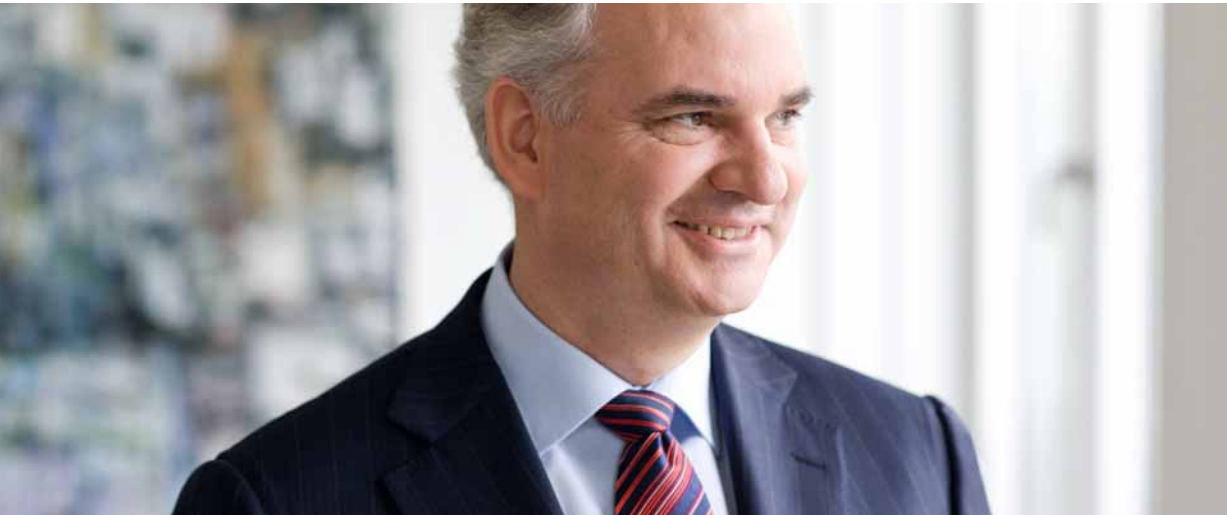

machen. Bei bestehenden und neuen Geschäften stellen wir also die Rentabilität künftig noch stärker in den Vordergrund als bisher. Unser Ziel ist, ab Ende 2013 zusätzliche Ergebnispotenziale von jährlich 600 Mio € zu heben. Um unseren Spielraum für Investitionen zu verbessern und unsere Finanzschulden weiter zu reduzieren, untersuchen wir zudem unsere einzelnen Geschäfte im Hinblick auf ihren Wertbeitrag zum Gesamtkonzern. 2010 haben wir mit der Abgabe von US-Midwest, der transpower, der BKW sowie weiteren kleineren Transaktionen erfolgreich unser Portfolio optimiert und damit das 2009 angekündigte Desinvestitionsziel von 10 Mrd € übererfüllt. Diesen Kurs werden wir weiterverfolgen und so bis Ende 2013 rund 15 Mrd € durch Desinvestitionen erzielen. Mehr als 50 Prozent dieser Erlöse setzen wir zum Schuldenabbau ein, den übrigen Betrag investieren wir in Wachstumsgeschäfte, vor allem außerhalb Europas. Ende 2010 haben wir bereits unseren Gazprom-Anteil von 3,5 Prozent veräußert und damit insgesamt einen Verkaufserlös von 3,4 Mrd € erzielt. Auch den Verkauf unseres italienischen Gasnetzes sowie unseres britischen Stromnetzes haben wir bereits erfolgreich eingeleitet.

Die beiden vor uns liegenden Jahre dienen also vorrangig der finanziellen Konsolidierung. Gleichzeitig werden wir mit einer gezielten Investitionsstrategie das angestrebte Wachstum innerhalb und außerhalb Europas einleiten. Mit dieser klaren Strategie, einer deutlich schlankeren Konzernstruktur und unserer neuen Leistungskultur werden wir auch unter schwereren Rahmenbedingungen die Erfolgsgeschichte von E.ON fortschreiben.

Mit freundlichen Grüßen

A handwritten signature in black ink, consisting of a stylized 'J' followed by a series of loops and a final 'n'.

Dr. Johannes Teyssen



## Irsching 4: Das effizienteste Gas- und Dampfkraftwerk der Welt

Irsching 4 wird im Spätsommer 2011 als effizientestes Gas- und Dampfkraftwerk der Welt seinen Betrieb aufnehmen. Mit einem weltweit bisher unerreichten Wirkungsgrad von über 60 Prozent setzt die Anlage in puncto Energieeffizienz und Klimaschutz neue Maßstäbe. Die im Kraftwerk eingesetzte Gasturbine ist als leistungsstärkste ihrer Art sogar im Guinnessbuch der Rekorde zu finden. Rechnerisch vereint sie die Kraft von 14 Jumbojet-Triebwerken in sich. Irsching 4 ist ebenso wie das 2010 in Betrieb gegangene Gas- und Dampfkraftwerk Irsching 5 besonders flexibel einsetzbar und trägt so erheblich zum Ausgleich der immer stärker schwankenden Einspeisung aus Erneuerbaren Energien ins Netz bei. Die beiden Kraftwerke in Irsching sind so ein wesentlicher Meilenstein auf dem Weg zu einem immer mehr auf regenerative Energieträger ausgerichteten Energiesystem. Dank des Brennstoffs Erdgas und der hohen Effizienz leisten die beiden neuen Blöcke schon heute einen wichtigen Beitrag zum Klimaschutz: Ihre CO<sub>2</sub>-Emissionen liegen weit unter dem Durchschnitt bestehender Kraftwerke.

Auch das bedeutet für uns **cleaner & better energy**.

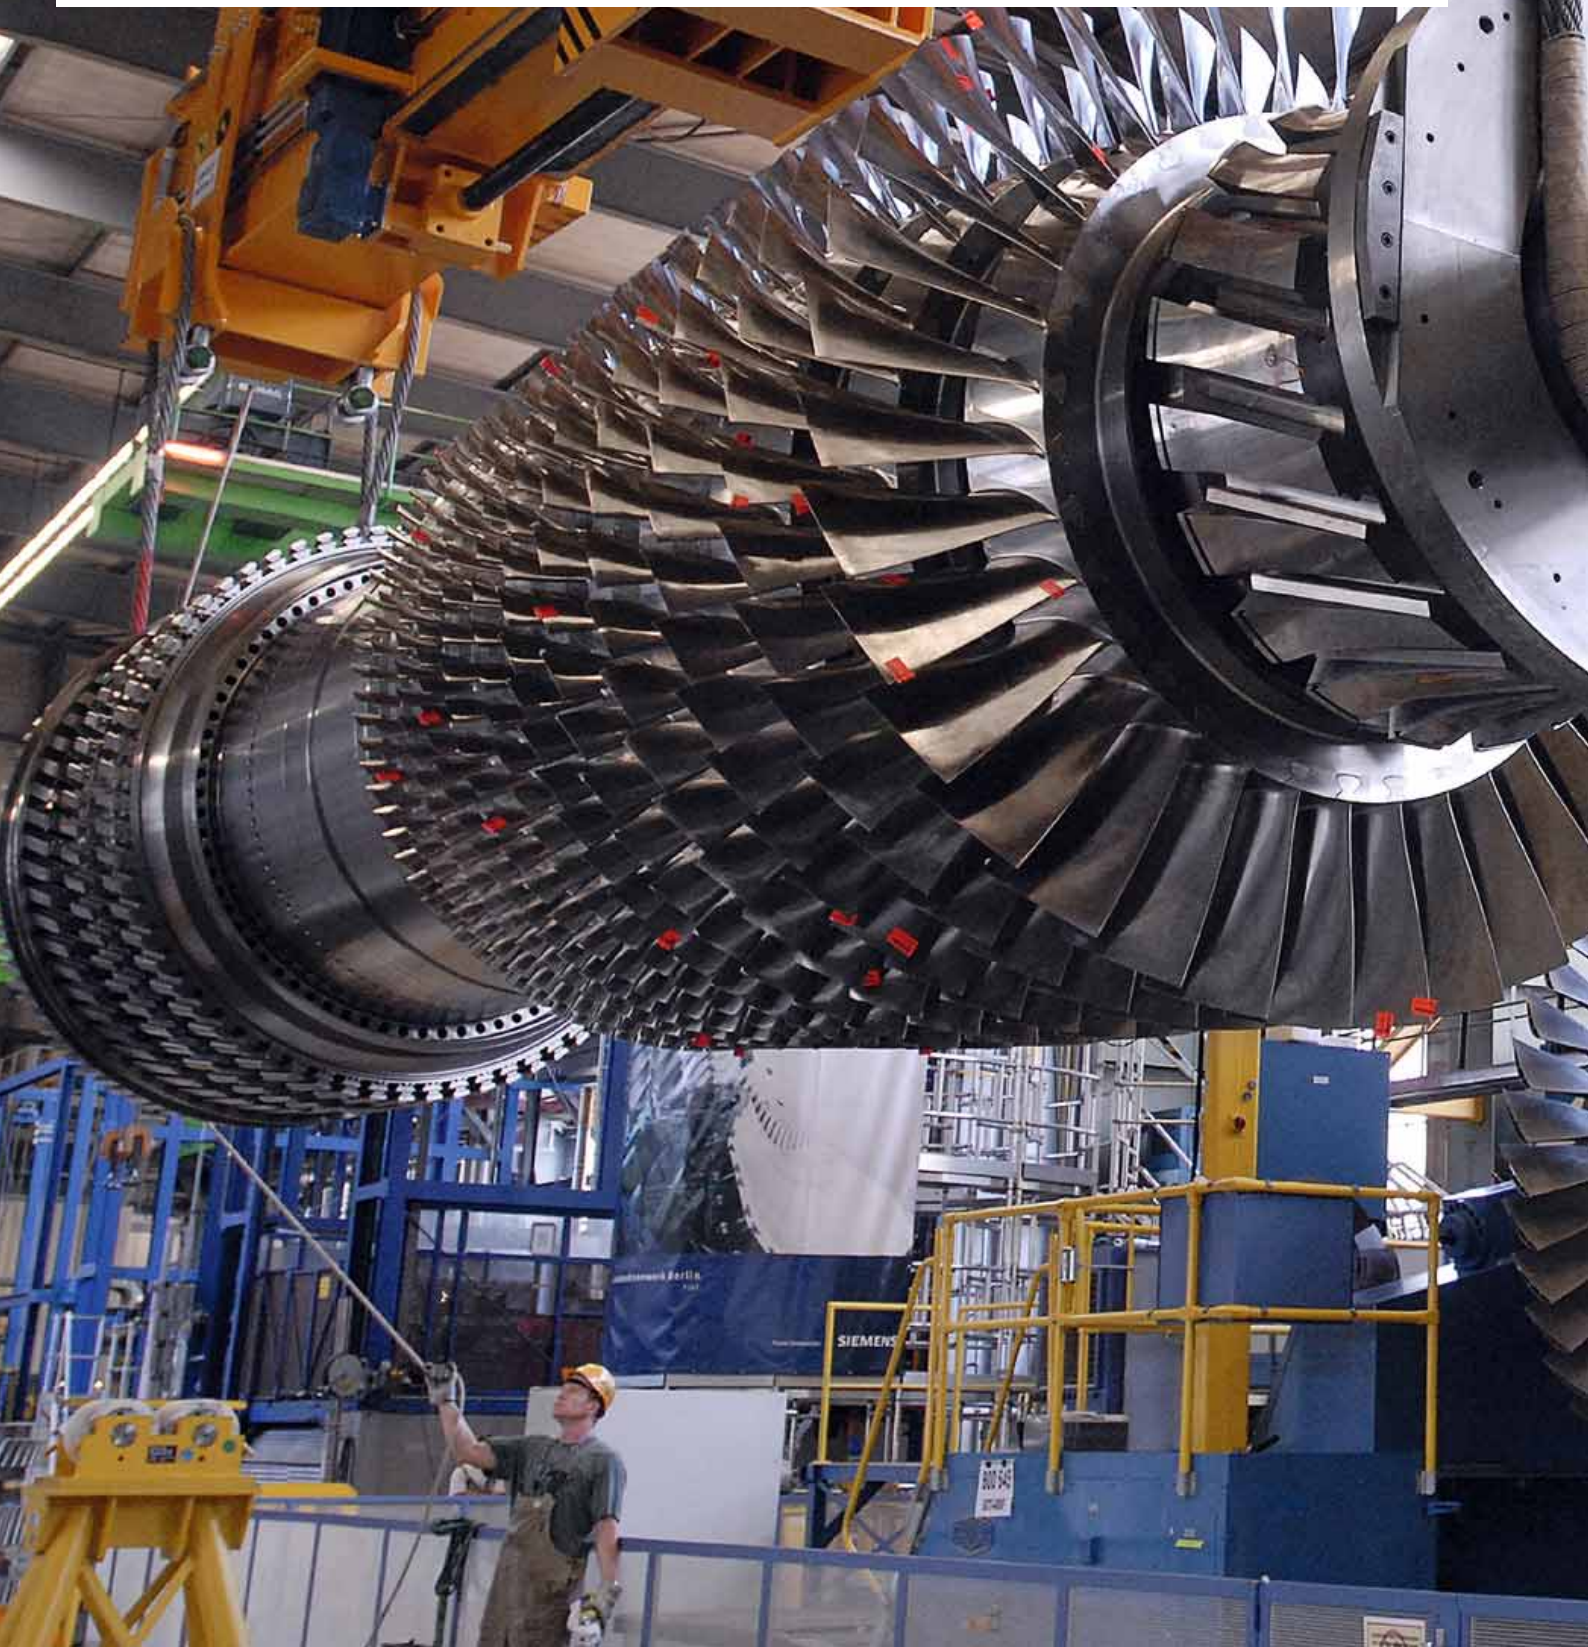



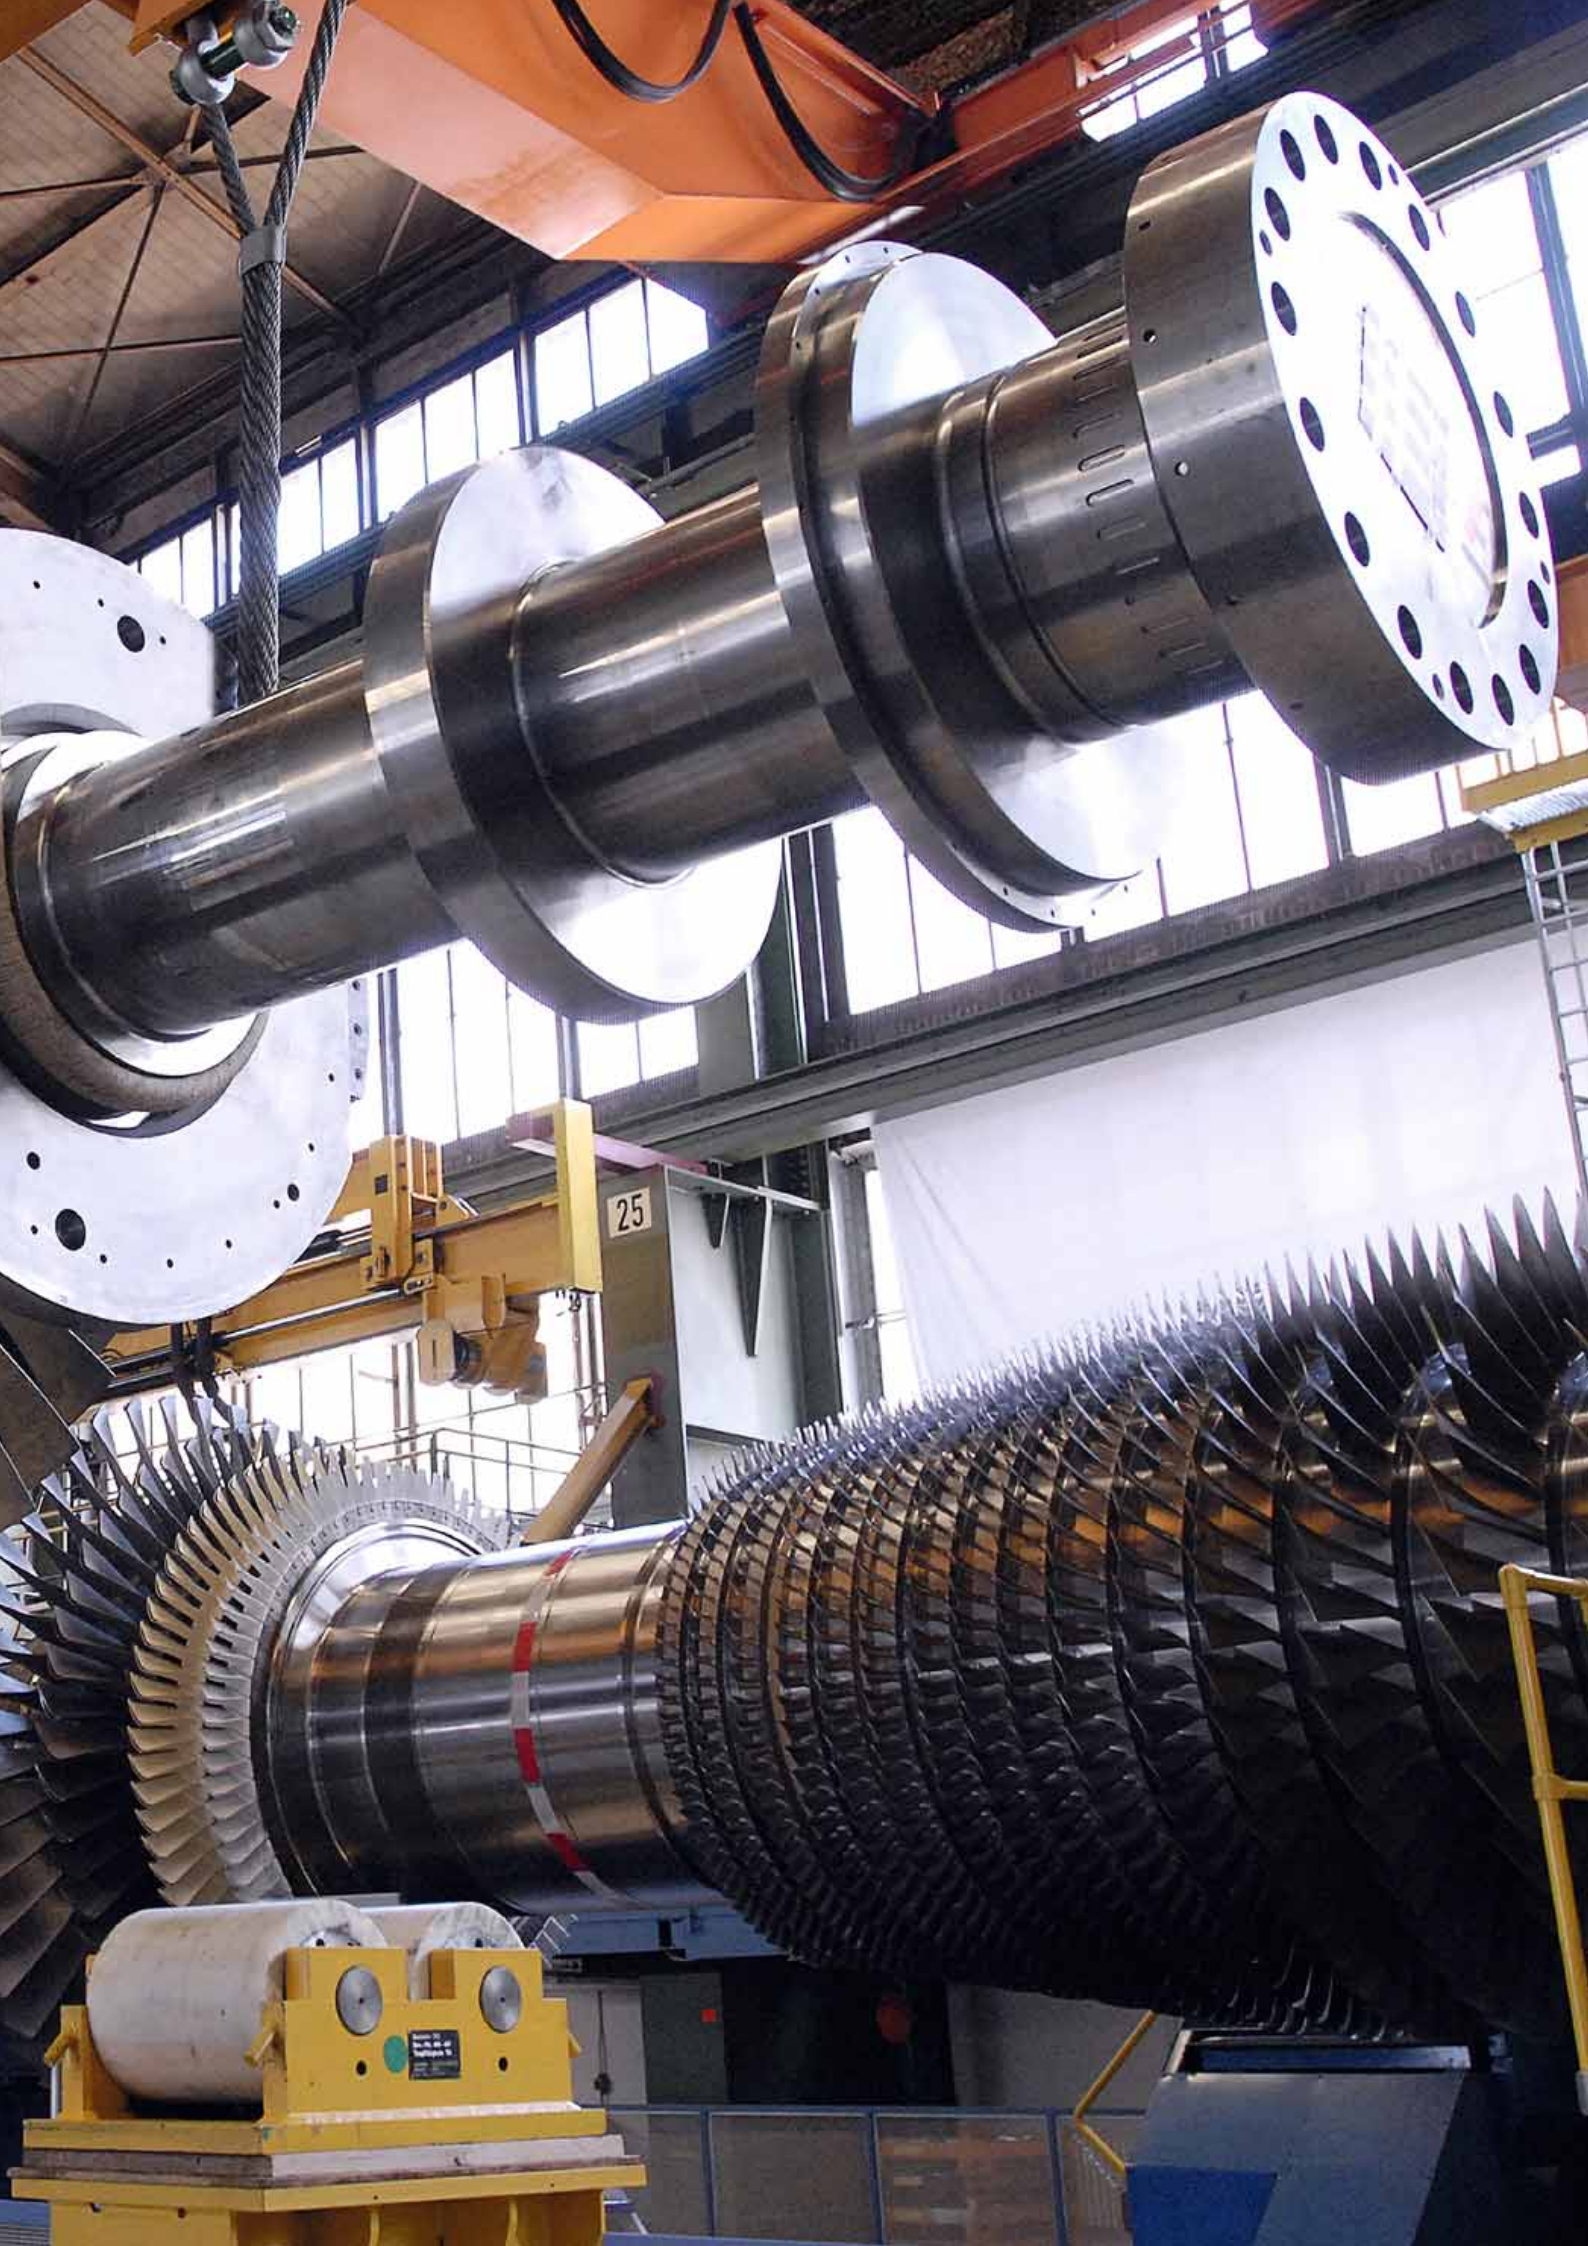

# Unser Unternehmen

Kurzprofil

## Dafür stehen wir: cleaner & better energy

An unseren Standorten in Europa, Russland und Nordamerika erwirtschaften unsere über 85.000 Mitarbeiter einen Umsatz von knapp 93 Mrd €. Überall dort, wo wir aktiv sind, ist unser Anspruch, dass die Welt der Energie besser und sauberer wird. In Zukunft wollen wir noch globaler agieren und haben mit unserer neuen strategischen Ausrichtung cleaner & better energy den Transformationsprozess zu einem globalen, spezialisierten Anbieter von Energielösungen eingeleitet. Davon werden unsere Mitarbeiter, Kunden und Investoren gleichermaßen profitieren.



## E.ON-Konzern in Zahlen (in Mio €)

|                               | 2010    | 2009 <sup>1)</sup> | +/- % |
|-------------------------------|---------|--------------------|-------|
| Stromabsatz (in Mrd kWh)      | 1.030,4 | 785,5              | +31   |
| Gasabsatz (in Mrd kWh)        | 1.342,4 | 1.206,5            | +11   |
| Umsatz                        | 92.863  | 79.974             | +16   |
| Adjusted EBITDA               | 13.346  | 12.975             | +3    |
| Adjusted EBIT                 | 9.454   | 9.291              | +2    |
| Bereinigter Konzernüberschuss | 4.882   | 5.097              | -4    |
| Investitionen                 | 8.286   | 8.655              | -4    |
| Mitarbeiter (31. Dezember)    | 85.105  | 85.108             | -     |

1) bereinigt um nicht fortgeführte Aktivitäten

### Unser Vorteil

Überall, wo wir arbeiten, wollen wir die Welt der Energie ein Stück weit verbessern. Unsere Produkte und Dienstleistungen sorgen dafür, dass sich die Energiequalität zum Nutzen unserer Kunden und im Sinne von Umweltschutz und Wettbewerbsfähigkeit nachhaltig verbessert. Unsere Energie ist klimaschonend, attraktiv für unsere Kunden und steigert zugleich den Wert unseres Unternehmens. Das schaffen wir durch den Einsatz neuester Technologien, die wir besser beherrschen als andere. Und aus denen wir bessere Produkte und Dienstleistungen für unsere Kunden machen.

### Unser Fokus

Wir konzentrieren uns auf das, was wir am besten können und wo wir den höchsten Wert schaffen können. Im Wettbewerbsumfeld der internationalen Energiemärkte sind das die Stromerzeugung aus Erneuerbaren Energien und konventionellen Energiequellen, der Energiehandel, das internationale Gasgeschäft sowie der Vertrieb von innovativen Energielösungen für unsere Kunden.

### Unsere Verantwortung

Klimaschutz steht dabei ganz oben auf unserer Agenda. Daher arbeiten wir konsequent daran, in der Stromerzeugung die spezifischen CO<sub>2</sub>-Emissionen weiter zu verringern. Strom wird nur dann neue Anwendungen wie den Bereich der Mobilität erschließen können, wenn wir ihn klimafreundlich herstellen. Deshalb haben wir ein klares Ziel vor Augen: Wir wollen bereits bis 2020, und damit zehn Jahre früher als ursprünglich geplant, unsere spezifischen CO<sub>2</sub>-Emissionen gegenüber 1990 in der europäischen Stromerzeugung halbieren.

### Unsere Struktur

Der von der Konzernleitung in Düsseldorf geführte E.ON-Konzern gliedert sich in globale Funktions- und regionale Ländereinheiten. Fünf globale Einheiten sind für das Management der Erzeugungsflotte, für Erneuerbare Energien, den Energiehandel, Neubau und Technologie und das globale Gasgeschäft verantwortlich. Zwölf regionale Einheiten in Europa verantworten das kundennahe Vertriebsgeschäft, die regionale Infrastruktur sowie die dezentrale Erzeugung. Hinzu kommt die Schwerpunktregion Russland mit Stromproduktion und -großhandel. Mit unserer neuen Einheit E.ON International Energy werden wir unsere hohe Kompetenz bei allen Werttreibern der konventionellen

und erneuerbaren Erzeugung künftig auch in starken Wachstumsregionen außerhalb Europas einsetzen. Unterstützende Aufgaben wie IT oder Einkauf werden konzernweit funktional organisiert.

### Unsere Zukunft

Innerhalb weniger Jahre haben wir unser Geschäft mit Erneuerbaren Energien weltweit erfolgreich aufgebaut. In nur knapp drei Jahren haben wir die installierte Leistung unserer Windparks, Solaranlagen und Biomassekraftwerke von 400 MW auf 3,6 GW zum Jahresende 2010 ausgebaut und seit 2007 rund 6 Mrd € investiert. Ein eindrucksvoller Beleg unserer Kompetenz, mit neuen Technologien schnell zu einem bedeutenden internationalen Player zu werden – auch in Ländern, in denen wir zuvor nicht präsent waren. In einem nächsten Schritt wollen wir unser Engagement außerhalb Europas weiter verstärken und ausbauen – nicht nur mit Blick auf den Ausbau Erneuerbarer Energien, sondern indem wir unsere gesamten Stärken bei der Energieerzeugung nutzen.



# Integration von Verantwortung und Nachhaltigkeit – global und lokal

Die Wahrnehmung gesellschaftlicher Verantwortung hat für E.ON einen hohen Stellenwert. Nicht zuletzt tragen wir durch die Integration von nachhaltigen Aspekten in unsere operativen Geschäftsprozesse auch zu unserem langfristigen unternehmerischen Erfolg bei. Um dies zu unterstreichen, berichten wir regelmäßig über unsere unternehmerischen, gesellschaftlichen und ökologischen Leistungen sowie die Fortschritte, die wir dabei erzielen.

Saubere Energie und die Reduzierung unserer spezifischen CO<sub>2</sub>-Emissionen sind dabei besonders wichtige Themen für den nachhaltigen Erfolg unseres Geschäfts. Notwendige Grundlage hierfür sind internationale Klimaabkommen, die die globalen Rahmenbedingungen für langfristige Investitionen unserer Industrie in eine CO<sub>2</sub>-arme und nachhaltige Produktion definieren. Angesichts politischer Hindernisse und unzureichender Verbindlichkeit der bei den UN-Klimaverhandlungen vereinbarten Ziele für die Staatengemeinschaft sind nationale und regionale Klimaschutzmaßnahmen in jüngster Zeit wieder verstärkt in den Vordergrund getreten. Diese Maßnahmen können internationale Abkommen zwar nicht ersetzen, sind jedoch umso wichtiger, damit notwendige Schritte ohne Verzögerungen eingeleitet werden können.

Den Energieunternehmen kommt hierbei eine besondere Verantwortung zu. Im Rahmen unserer neuen Strategie verpflichten wir uns, die spezifischen CO<sub>2</sub>-Emissionen unserer Kraftwerke in Europa bis 2020 um 50 Prozent gegenüber 1990 zu reduzieren. Das wollen wir mit hohen Investitionen in Erneuerbare Energien und dem Neubau von effizienten Anlagen für die Energieversorgung erreichen. Auch in Märkten außerhalb Europas liegt unser Schwerpunkt auf Investitionen in hocheffiziente Kraftwerke und Erneuerbare Energien, um der steigenden Energienachfrage nachzukommen.

Wir stellen uns in vielen Bereichen den Herausforderungen an ein verantwortungsvolles und nachhaltiges Wirtschaften – sei es auf internationaler oder regionaler Ebene. Diesen Anspruch unterstreichen wir unter anderem durch folgende Aktivitäten:

- Wir sorgen durch verschiedene Maßnahmen für eine verantwortliche Beschaffung unserer wichtigsten Güter und Rohstoffe. Beispielsweise durch Richtlinien für den Einkauf von Biomasse oder durch Audits, die wir in Kohleminen durchführen.

## Energie- und Umweltbildung für Kinder

Wir engagieren uns dafür, Kinder für den bewussten Umgang mit natürlichen Ressourcen und Energie zu sensibilisieren. Das tun wir gemeinsam mit der eigens gegründeten gemeinnützigen Gesellschaft „Leuchtpol“ und führen an insgesamt 4.000 Kindergärten in Deutschland Seminare und Erlebnistage durch. Das von der UNESCO und dem Rat für Nachhaltigkeit bei der Bundesregierung ausgezeichnete Bildungsprojekt wird vollumfänglich von E.ON finanziert.

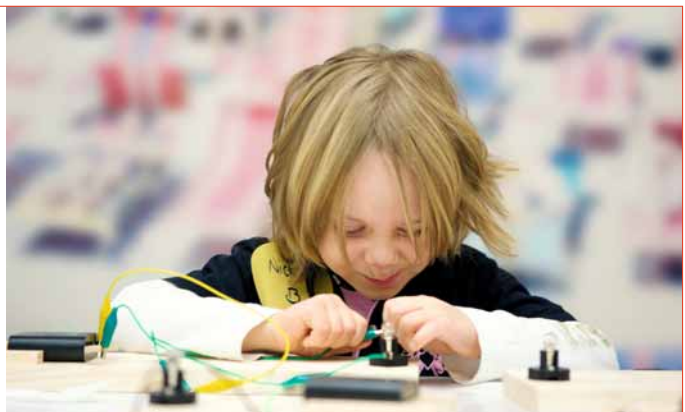

- Wir realisieren Technologien zur Energieerzeugung aus Erneuerbaren Energien im industriellen Maßstab wie Offshore-Windenergie, Sonnenenergie und Biomasse.
- Wir erhöhen kontinuierlich die Wirkungsgrade neuer fossiler Kraftwerke. Zusätzlich erkunden wir industrielle Verfahren zur Abtrennung und Speicherung von CO<sub>2</sub> („Carbon Capture and Storage“, CCS).
- Sämtliche Aktivitäten im Bereich Forschung und Entwicklung müssen sich an ihrem Beitrag zu einer umwelt- und klimaverträglichen Energieversorgung messen lassen.
- Mit unseren Stakeholdern pflegen wir einen offenen und auch selbstkritischen Dialog. Zudem suchen wir die sachliche Diskussion unter anderem zu den Themen Klimaschutz, verantwortliche Beschaffung von Rohstoffen, Arbeitssicherheit und Transparenz. Hierzu verstärken wir auch unsere Zusammenarbeit mit Nichtregierungsorganisationen (NGOs).
- Wir nehmen die Schwierigkeiten bedürftiger Kunden ernst. Dafür haben wir konzernweit regional verschiedene Programme aufgesetzt. Hier unterstützen wir bedürftige Kunden beispielsweise mit individuellen Zahlungsplänen aber natürlich auch beim Energiesparen. In einigen Regionen gibt es eine enge Zusammenarbeit mit den Kommunen, um bedürftige Kunden zu unterstützen.
- Wir haben die Berechnungsgrundlage zur Ermittlung des „Carbon Footprint“ entsprechend der globalen Reporting Standards erweitert. Dabei ermitteln wir indirekte Emissionen, die im Zusammenhang mit unseren Aktivitäten entstehen. Hierzu gehören beispielsweise die Ermittlung der CO<sub>2</sub>-Belastung innerhalb einer Beschaffungskette oder bei den an unsere Endkunden verkauften und durch diese genutzten Strom- und Gasmengen.
- Als eines der ersten Unternehmen im Energiesektor haben wir uns verpflichtet, Nachhaltigkeitsprüfungen für alle bedeutenden Infrastruktur-Investitionen vorzunehmen.

Auf diese vielfältige Weise kommen wir unserer Verpflichtung zur gesellschaftlichen Verantwortung nach und leisten zugleich einen wichtigen Beitrag zu unserem Anspruch cleaner & better energy.

Unser Engagement für Nachhaltigkeit wurde auch 2010 belohnt. So haben wir uns erneut für einen der weltweit wichtigsten Indizes für nachhaltige Unternehmen, den Dow Jones Sustainability Index (DJSI), qualifiziert. Darüber hinaus wurden wir 2010 in den Carbon Performance Leadership Index (CPLI) aufgenommen – nur 48 der 500 weltweit größten Unternehmen sind in diesem Index gelistet.

### Dienstwagenregelung schafft Anreiz für CO<sub>2</sub>-ärmere Autos

Für unsere Führungskräfte und Vorstände in Deutschland gilt seit Januar 2011 eine neue CO<sub>2</sub>-Regelung für Dienstwagen. Der CO<sub>2</sub>-Grenzwert für alle Fahrzeugtypen liegt bei 150 g/km. Bei Überschreitung wird für den Nutzer ein Zusatzbeitrag fällig, der ausgewählten Umweltprojekten zugutekommt. Die Unterschreitung der Grenze wird belohnt; der Nutzer erhält einen Bonus. Weitere Unterstützung wird für Erdgasfahrzeuge, die einen erheblich geringeren CO<sub>2</sub>-Ausstoß haben, gewährt. Auch außerhalb Deutschlands, beispielsweise bei E.ON UK, gibt es bereits Anreizsysteme für CO<sub>2</sub>-ärmere Dienstwagen.

# Technologien für cleaner & better energy

Neuartige Technologien, insbesondere bei Erneuerbaren Energien, haben das Gesicht von E.ON in den vergangenen Jahren deutlich verändert. Diese Entwicklung wird sich noch beschleunigen. Denn neben neuen Technologien bei der Stromerzeugung steht auch im Bereich unserer Leitungsnetze ein Entwicklungssprung an. Intelligente Stromzähler werden die Möglichkeiten der E.ON-Vertriebsgesellschaften erweitern, unseren Kunden neue Produkte und Dienstleistungen anzubieten. So können wir die Möglichkeiten zum effizienteren Umgang mit Energie und zur dezentralen Stromerzeugung besser ausschöpfen. Mittelfristig werden auch elektrisch angetriebene Fahrzeuge die Energiewirtschaft stark verändern.

All diese Faktoren der technischen Weiterentwicklung stellen uns vor Herausforderungen, aber sie bieten auch neue Chancen. Wir wollen so beispielsweise die Auswirkungen auf unsere Umwelt signifikant verringern und gleichzeitig bessere Leistungen für unsere Kunden bieten. Als Energieunternehmen sehen wir uns in der Verantwortung, zum endgültigen Durchbruch der Erneuerbaren Energien beizutragen und sie technologisch und wirtschaftlich im industriellen Maßstab verfügbar und nutzbar zu machen. Wir sind bereits heute in der Spitzengruppe im Bereich regenerativer Energien. Wir investieren international mehrere Milliarden Euro in eine Reihe von vielversprechenden Technologien; vor allem in Windkraft und Solarenergie, aber beispielsweise auch in Biomasse. Neben der raschen Erweiterung unserer Kapazitäten bei den Erneuerbaren Energien treiben wir mit beträchtlichen Forschungsausgaben vor allem Energieeffizienz, Energiespeicherung, Elektromobilität und intelligente Netze voran.

Um unserem Anspruch cleaner & better energy in allen unseren Geschäften gerecht zu werden, setzen wir die Schwerpunkte unserer Forschungs- und Entwicklungsaktivitäten in einem breiten Spektrum, das von der Erzeugung bis zur Energieanwendung beim Kunden reicht:

- Hocheffiziente Kohlekraftwerke
- CO<sub>2</sub>-Abtrennung und -Speicherung (Carbon Capture and Storage, CCS)
- Kernenergie der neuesten Generation
- Offshore-Windparks
- Hochmoderne und flexible Gaskraftwerke
- Bio-Erdgas
- Thermische Solarkraftwerke (Concentrated Solar Power, CSP)
- Intelligente Netze
- Mikrokraftwerke mit Kraft-Wärme-Kopplung
- Gaswärmepumpen
- Elektromobilität
- Energiespeicher

## Wir fördern aktiv die Energieforschung

Neben unseren eigenen Aktivitäten im Bereich Forschung und Entwicklung unterstützen wir mehr als zehn Universitäten direkt mit finanziellen Mitteln. Bestes Beispiel unserer Hochschulförderung ist das E.ON Forschungszentrum für Energie an der RWTH Aachen. Im Rahmen dieser sogenannten Public-Private-Partnership mit der renommierten Hochschule fördern wir vor allem die Forschung über die sichere Integration eines hohen Anteils Erneuerbarer Energien in die Stromversorgung. Dazu stellen wir über einen Zeitraum von zehn Jahren eine Summe von 40 Mio € zur Verfügung. Das Forschungszentrum blickt dabei über den Tellerrand. Statt Einzellösungen für isolierte technische Probleme zu suchen, entwirft es umfassende, Forschungsdisziplinen übergreifende Konzepte, die alle Aspekte komplexer Energiefragen mit einbeziehen. Die bereits existierenden und international angesehenen Aktivitäten zur Energieforschung der RWTH Aachen werden durch folgende von E.ON geförderte Forschungsschwerpunkte ergänzt: elektrische Energieerzeugung und Speichersysteme, angewandte Geophysik und Geothermie, Automatisierung von Versorgungsnetzen, Energieeffizienz in Gebäuden und Innenraum-Klimatisierung sowie Bedürfnisse und zukünftiges Verhalten der Energieverbraucher.



### Unsere Kunden: vom Konsumenten zum Produzenten

Von jeher floss Strom nur in eine Richtung: von zentralen Kraftwerken zum Verbraucher. Neuerdings fließt er immer mehr auch in die andere Richtung. Denn kleine, privat betriebene Kraft-Wärme-Kopplungsanlagen (KWK-Anlagen) werden immer wirtschaftlicher und Fotovoltaikanlagen immer zahlreicher. Die über den Eigenbedarf hinausgehende Energie speisen diese Anlagen in das Stromnetz ein. Das macht Tausende unserer Kunden zu Energieproduzenten. In Deutschland unterstützen wir das Projekt Callux, einen Praxistest von Brennstoffzellen-Heizgeräten für Einfamilienhäuser. Um diese Tests auszubauen, haben wir in Deutschland die „Mikro-KWK-Usergroup“ gegründet. Und in Großbritannien testen wir Stirling-Motoren und Brennstoffzellen für die dezentrale Strom- und Wärmeerzeugung. Wie bei den Erneuerbaren Energien erfordert auch die Einbindung solcher dezentraler Erzeugungseinheiten neue Steuerungsmöglichkeiten für Netzbetreiber. Wir entwickeln und testen schon heute in Kooperation mit führenden Herstellern die dazu notwendigen Sensoren, Datenverbindungen, Rechner und automatisierten Überwachungsanlagen.

### Genaue Informationen erleichtern das Energiesparen

Eine Stromrechnung sagt lediglich etwas über den Energieverbrauch in der Vergangenheit aus. Ein intelligenter Stromzähler (Smart Meter) zeigt hingegen den Echtzeitverbrauch an. Zudem

können unsere Kunden mit einem Smart Meter ihren Stromverbrauch exakt der Tageszeit zuordnen und so versteckte Energiefresser aufspüren. Studien zufolge kann diese unmittelbare Rückmeldung Menschen dazu bewegen, ihren Energieverbrauch um fünf bis zehn Prozent zu senken. So ließen sich beachtliche Mengen an Energie und CO<sub>2</sub>-Emissionen einsparen. Wir haben bereits über eine Million Smart Meter, vornehmlich in Schweden und Spanien, installiert und führen weitere Feldversuche in Deutschland und Großbritannien durch. In Deutschland haben wir Ende 2010 in den ersten Regionen ein Smart-Meter-Angebot gestartet. Dort installieren wir nicht nur einen neuartigen digitalen Stromzähler, sondern bieten auch flexible, zeitabhängige Tarife an.

### Smart Meter machen Stromnetze intelligent

E.ON will Smart Meter nicht nur zum Stromsparen nutzen. Sie sollen zum Herzstück der intelligenten Netze werden. Mit neuartiger Netztechnik werden wir den Stromverbrauch entlang des Angebots steuern und mit den Bedürfnissen unserer Kunden in Einklang bringen. So könnten flexible Tarife Anreize bieten, einzelne, wenig zeitkritische Verbraucher wie eine Waschmaschine gezielt in Zeiten einer geringen Stromnachfrage zu nutzen und so Verbrauchsspitzen zu vermeiden.

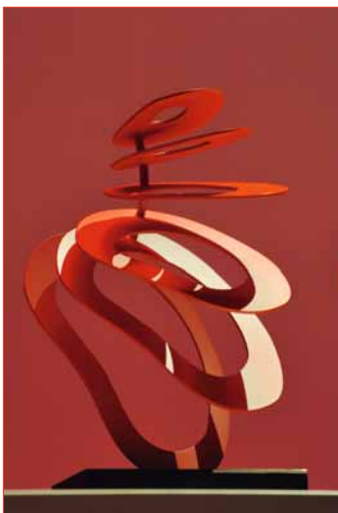

### E.ON-Forschungspreis – Auszeichnung für Wissenschaftler mit neuen Ideen

Im Jahr 2010 wurde der E.ON-Forschungspreis bereits zum dritten Mal an internationale Forschungsprojekte und Universitätsinstitute verliehen. Er ist die höchstdotierte Auszeichnung der Branche in Deutschland. Um die Wissenschaft zu unterstützen, stellt E.ON seit 2007 für die einzelnen Forschungsschwerpunkte jeweils rund 5 Mio € bereit – fast 60 Mio € in einem Zeitraum von mehreren Jahren. Das Besondere am E.ON-Forschungspreis: Alle Siegerprojekte werden nicht nur einmalig ausgezeichnet, sondern bleiben über mehrere Jahre im Fokus und werden so weiter unterstützt und begleitet.

Die Gewinner des E.ON Research Award 2010 waren fünf Forschungsteams aus Europa und den USA, die Projektvorschläge zum Thema „Wärmespeicherung für konzentrierte Sonnenenergie (CSP, Concentrated Solar Power)“ eingereicht hatten. CSP nutzt gebündelte Sonnenstrahlen, um Dampf zu erzeugen. Dieser vollständig CO<sub>2</sub>-frei erzeugte Dampf kann dann zur Stromerzeugung genutzt werden. Das Wüstenstromprojekt Desertec, an dem E.ON beteiligt ist, verfolgt einen solchen Ansatz. Und in Südsanien bauen wir bereits unsere ersten beiden solarthermischen Kraftwerke mit je 50 MW Kapazität.

## Wir bringen umweltfreundlichen Strom auf die Straße.

E.ON treibt Elektromobilität in mehreren europäischen Märkten voran. Aus unseren Demonstrationsprojekten haben wir gelernt, dass Nutzer ihr Fahrzeug überwiegend zu Hause laden wollen. Deshalb steht für uns der Ausbau einer öffentlichen Ladeinfrastruktur nicht im Fokus. Vielmehr haben wir Ladelösungen für verschiedene Anwendungsbereiche entwickelt und vermarktet diese auch bereits. Neben einer öffentlichen Stromtankstelle mit Abrechnungsfunktion bieten wir sogenannte „Wallboxen“ für die Garage und Parkhäuser an. So können Elektroautos einfach und sicher geladen werden. Passend dazu bieten wir ein Produkt aus Erneuerbaren Energien an – so fahren Elektrofahrzeuge vollkommen emissionsfrei.

### Elektroautos als Stromspeicher

Die Batterien von Elektroautos können künftig helfen, den Anteil Erneuerbarer Energien weiter zu erhöhen. Mit Smart Metern können wir das Aufladen der Fahrzeugbatterien so steuern, dass gezielt Zeiten genutzt werden, in denen insgesamt wenig Strom verbraucht wird. So würden die Batterien der Elektroautos beispielsweise Windstrom speichern. Sogar ein Rückspeisen einer gewissen Strommenge aus dem Akku eines geparkten Fahrzeugs in das Netz ist technisch möglich.

### MINI E in München

Eines der ersten großen Pilotprojekte mit Elektroautos in Deutschland ist nach einem Jahr abgeschlossen. Rund 100 Fahrer aus München und dem Umland legten mehr als 150.000 km zurück – emissionsfrei mit umweltfreundlichem E.ON-Strom aus bayerischer Wasserkraft. E.ON gewann dabei wichtige Erkenntnisse zum Ladeverhalten der Nutzer: Diese schlossen ihren MINI E zumeist in ihrer heimischen Garage an das Stromnetz an. Die Erfahrungen aus Projekten wie diesem fließen in die Weiterentwicklung unserer Ladelösungen, wie beispielsweise für private Garagen, Parkhäuser oder auch die Betriebshöfe von Flottenbetreibern, ein und sind so auf die Bedürfnisse unserer Kunden abgestimmt.

### Modellregion München wird eflott

Im Rahmen des vom Bundesministerium für Verkehr unterstützten Projekts eflott wird E.ON rund 100 Ladepunkte vor allem im Umland der bayerischen Landeshauptstadt einrichten. Gemeinsam mit den Projektpartnern Audi, Stadtwerke München und Technische Universität München werden wir Erfahrungen im praktischen Einsatz von Elektroautos sammeln. Im Fokus steht dabei die Weiterentwicklung der Datenübertragung zwischen Fahrer, Auto und Stromtankstelle bis hin zum Stromnetz. Dabei wird beispielsweise der Einsatz von Smartphones als zentrale Schnittstelle für den Fahrer getestet. Die eingesetzten Fahrzeuge vom Typ Audi A1 e-tron verfügen über einen Lithium-Ionen-Akku, der platzsparend vor der Hinterachse in der Bodengruppe liegt. Damit kann das Fahrzeug im Stadtverkehr mehr als 50 km rein elektrisch zurücklegen.

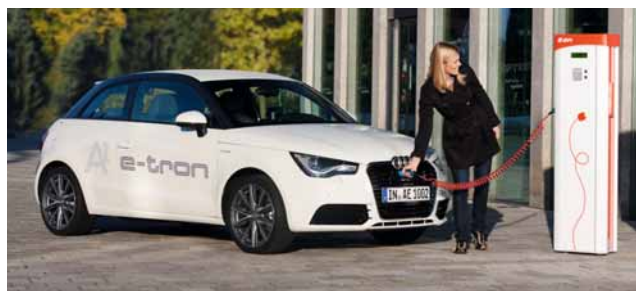

### Öko-Technologie CABLED in den englischen Midlands

In den Midlands, der Geburtsstätte der britischen Automobilproduktion, findet im Rahmen unserer E-Mobilitäts-Initiative Großbritanniens erster Großversuch mit Elektrofahrzeugen statt: der „Coventry and Birmingham Low-Emission Vehicle Demonstrator“ (CABLED). In dem einjährigen Versuch, der Mitte 2010 begann, testen Autofahrer insgesamt 110 Fahrzeuge unterschiedlicher Typen (elektrische Autos, elektrische Lieferwagen, Plug-In-Hybride). Das Projekt wird Daten darüber sammeln, wie die Fahrzeuge genutzt werden, wann sie aufgeladen werden müssen und wie die Fahrer die verschiedenen Fahrzeugtechnologien nutzen. Das Ziel besteht darin, die breite Einführung von Fahrzeugen mit geringem CO<sub>2</sub>-Ausstoß voranzutreiben. E.ON stellt für das Projekt die komplette Ladeinfrastruktur zur Verfügung, die aus 90 hausinternen, 36 öffentlichen und 18 an Arbeitsplätzen befindlichen Ladestationen besteht.

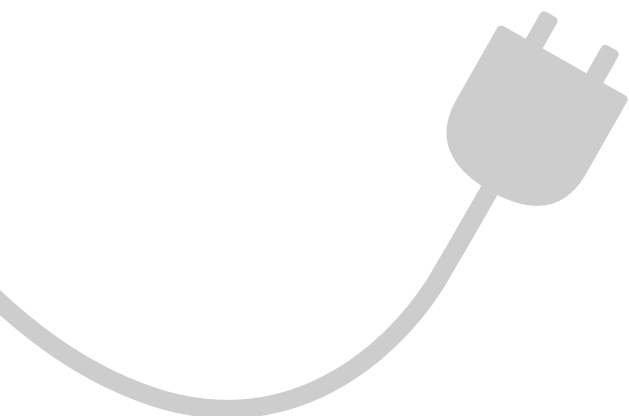

## Cleaner & better energy in Europa: Smart Home

**Haushalte sind für etwa ein Viertel der CO<sub>2</sub>-Emissionen in Europa verantwortlich. Damit Europa seine Klimaschutzziele erreichen kann, will E.ON das Zuhause umweltverträglicher und intelligenter machen. Umweltverträglicher bedeutet dabei, Energie effizienter zu verwenden und Ressourcen zu schonen. Intelligenter bedeutet, hausinterne Erzeugungstechnologien, Elektrofahrzeuge und aktives Energiemanagement zu integrieren und zu einem Bestandteil eines funktionierenden intelligenten Netzes zu machen.**

In Schweden, Großbritannien und Deutschland haben wir ein länderübergreifendes Projekt gestartet, um Haushalte auf das Effizienzniveau von morgen zu bringen. Dazu wollen wir mehr über intelligente und effiziente Technologien im Haushalt lernen, die Öffentlichkeit auf ihre energiesparenden und klimaschützenden Vorteile aufmerksam machen und nicht zuletzt die Einführung und Verbreitung fördern.

Im schwedischen Malmö errichten wir gemeinsam mit anderen Unternehmen einen Häuserblock mit hochmoderner Energietechnik und schließen das Bauwerk mit intelligenten Stromzählern an Malmö's existierendes Stromnetz an. In Großbritannien, wo 80 Prozent des für 2050 prognostizierten Wohnungsbestandes schon errichtet worden sind, konzentrieren wir uns auf das Identifizieren von Technologien, die CO<sub>2</sub>-Emissionen der bestehenden Haushalte ohne Komforteinbußen reduzieren. In Deutschland untersuchen wir sowohl neue wie auch alte Häuser und beteiligen uns an Projekten, um Betriebsgebäude intelligenter zu machen. Mit den in diesen drei Ländern gewonnenen Erkenntnissen werden wir unseren Kunden in allen Märkten helfen, ihre CO<sub>2</sub>-Emissionen zu reduzieren.

Weitere Informationen zu unseren innovativen Projekten finden Sie ab Seite 46 in den Kapiteln zu unseren globalen Einheiten Konventionelle Erzeugung, Erneuerbare Erzeugung und Global Gas sowie unter [www.eon.com/innovation](http://www.eon.com/innovation).

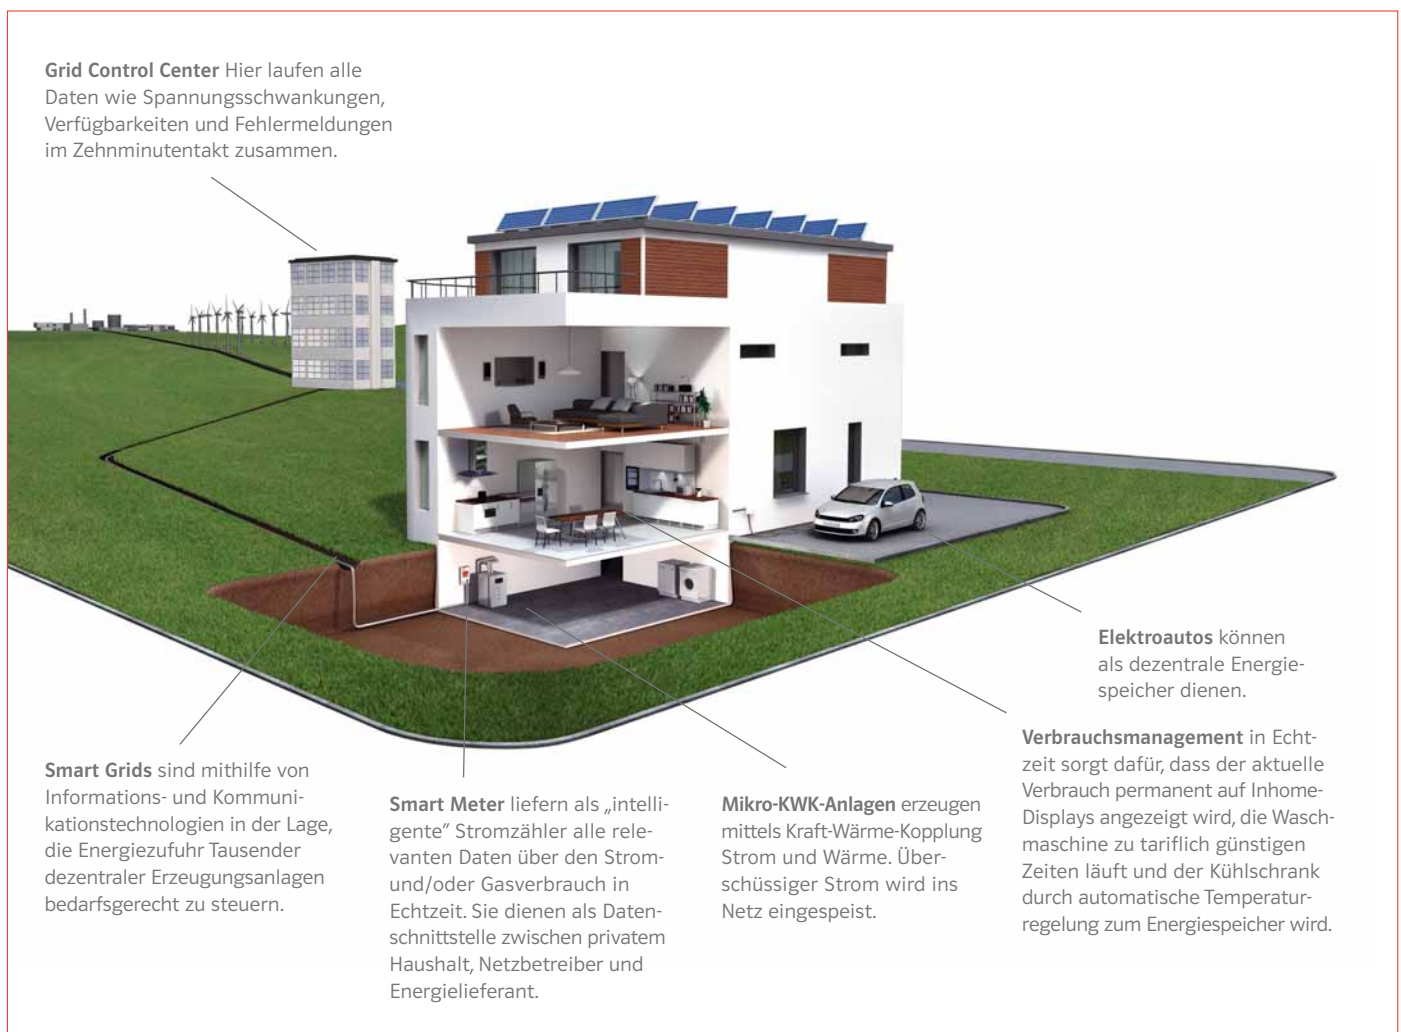



# 2010

## Januar

Nach Zustimmung durch die zuständigen Kartellbehörden tauscht E.ON mit EdF und EnBW Erzeugungskapazitäten. Die Transaktion ist Teil der wettbewerbsfördernden Maßnahmen für den deutschen Energiemarkt, zu denen sich E.ON gegenüber der EU-Kommission 2008 verpflichten musste. Insgesamt hatte E.ON 2008 die Abgabe von 4.800 MW Kraftwerkskapazität sowie des Höchstspannungsnetzes in Deutschland zugesagt. E.ON hat in diesem Zusammenhang bereits Vereinbarungen zur Abgabe von Kraftwerkskapazitäten in Deutschland abgeschlossen, unter anderem mit der norwegischen Statkraft, der belgischen Electrabel und dem österreichischen Verbund.

E.ON und Masdar, die Initiative des Emirats Abu Dhabi zur Entwicklung Erneuerbarer Energien, gründen ein Joint Venture für Klimaschutzprojekte. Das gemeinsame Unternehmen EMIC (E.ON Masdar Integrated Carbon) wird Projekte im Mittleren Osten, Afrika und Asien entwickeln. Ziel ist es, den Ausstoß von CO<sub>2</sub> bei Kraftwerken und Industrieanlagen deutlich zu reduzieren. Für die Durchführung der Klimaschutzprojekte erhalten E.ON und Masdar CO<sub>2</sub>-Zertifikate, welche zum Beispiel in das europäische CO<sub>2</sub>-Handelssystem eingebracht werden können.

## Februar

E.ON und die TenneT Holding schließen den Verkauf des E.ON-Höchstspannungsnetzes in Deutschland endgültig ab. TenneT übernimmt mit Wirkung zum 31. Dezember 2009 alle Anteile der E.ON-Tochtergesellschaft transpower stromübertragungs GmbH (transpower). Mit dem Verkauf seines Höchstspannungsnetzes hat E.ON seine Verpflichtungszusage gegenüber der EU-Kommission nahezu erfüllt.

## März

E.ON und Bionersis, ein weltweit führendes Unternehmen bei der Entwicklung von CDM-(Clean-Development-Mechanism-) Deponiegasprojekten, investieren 6,6 Mio € zur Verminderung des Treibhausgasausstoßes aus der Mülldeponie Nam Son bei Hanoi in Vietnam. Das bislang größte Klimaschutzprojekt in Südostasien wird in den nächsten 20 Jahren zu einer Emissionsverringerung führen, die 4,5 Mio Tonnen CO<sub>2</sub> entspricht. Das Projekt wurde bereits bei der UNFCCC (United Nations Framework Convention on Climate Change) eingetragen.

## April

E.ON veräußert das Strom- und Gasgeschäft von E.ON U.S. LLC an die PPL Corporation, Allentown, Pennsylvania. Der vereinbarte Kaufpreis liegt bei 7,6 Mrd US-\$. Die Transaktion wird am 1. November erfolgreich abgeschlossen.

## Mai

Johannes Teyssen tritt zum 1. Mai sein neues Amt als Vorstandsvorsitzender von E.ON an.

E.ON setzt die Verpflichtungszusage gegenüber der EU-Kommission mit einer letzten Transaktion vollständig um: Die Morgan Stanley Capital Group erhält Strombezugsrechte aus dem Kohlekraftwerk Veltheim entsprechend einer Kapazität von 265 MW.

Der E.ON-Aufsichtsrat stimmt einem organisatorischen und personellen Umbau des Vorstands zu und bestellt mit sofortiger Wirkung drei neue Vorstandsmitglieder: Regine Stachelhaus, Jørgen Kildahl sowie den bisherigen Vorstandsvorsitzenden von E.ON Energie, Klaus-Dieter Maubach. Christoph Dänzer-Vanotti und Lutz Feldmann scheiden aus dem Vorstand aus. Der bisherige Vorstandsvorsitzende von E.ON Ruhrgas, Bernhard Reutersberg, komplettiert ab August das Gremium.

E.ON nimmt im Süden von Portugal einen weiteren großen Onshore-Windpark in Betrieb. Der Windpark „Barão São João“ hat eine installierte Leistung von 50 MW.

Im oberbayrischen Irsching nehmen E.ON und beteiligte Partnerunternehmen mit dem 860-MW-Block Irsching 5 eines der effizientesten und leistungsstärksten Gas- und Dampfkraftwerke der Welt in Betrieb. Mit einem Wirkungsgrad von 59,7 Prozent setzt die Anlage in puncto Energieeffizienz und Klimaschutz neue Maßstäbe.

## Juni

E.ON und CEA (Commissariat à l'Énergie Atomique et aux Énergies Alternatives, Frankreich) treffen eine Rahmenvereinbarung zur Zusammenarbeit bei der Kernenergie-Forschung und -Entwicklung. Diese Vereinbarung schafft die Grundlage für neue Forschungsprojekte zur künftigen Nutzung der Kernenergie.

## Juli

E.ON leitet die Abgabe seiner Beteiligung in Höhe von rund 21 Prozent an der BKW FMB Energie AG, Bern, ein. Die Veräußerung der Minderheitsbeteiligung an der BKW ist Teil des laufenden Prozesses zur Überprüfung des Geschäftsportfolios. Noch im gleichen Monat wird in einem ersten Schritt die Veräußerung von rund 14 Prozent vollzogen.

## September

E.ON begrüßt das von der Bundesregierung vorgestellte Energiekonzept als wichtige Weichenstellung für Deutschlands Energiezukunft. Vor allem mit der Modernisierung konventioneller Energieanlagen, dem Ausbau Erneuerbarer Energien und mit Forschung und Entwicklung rund um das Thema Energieeffizienz will E.ON wesentliche Beiträge zur Umsetzung des Konzeptes leisten. In diesem Zusammenhang hat die Bundesregierung auch eine Verlängerung der Laufzeiten für die deutschen Kernkraftwerke beschlossen. Der größere Teil der daraus entstehenden zusätzlichen Gewinne wird vom Staat über die zur Konsolidierung des Bundeshaushalts eingeführte Kernbrennstoffsteuer und im Rahmen eines Energie- und Klimafonds

abgeschöpft. Die Laufzeitverlängerung macht deutlich, dass die Kernenergie auf dem Weg in die Energieversorgung von morgen noch längere Zeit gebraucht wird.

## Oktober

In Polen weiht E.ON in der Nähe von Posen einen großen Windpark ein: Wielkopolska ist mit 52,5 MW einer der größten und technisch modernsten Windparks des Landes.

Zwischen der deutschen Insel Fehmarn und der dänischen Insel Lolland eröffnet E.ON den Offshore-Windpark Rødsand II. Er ist derzeit der größte der sechs Offshore-Windparks des E.ON-Konzerns. Mit einer Kapazität von 207 MW liefert er saubere Energie für die Versorgung von 200.000 Haushalten. Das Projekt konnte drei Monate früher als geplant abgeschlossen werden.

E.ON erhält von der UN die erste Zustimmung für ein russisches Joint-Implementation-Projekt. Das Unternehmen errichtet am Kraftwerksstandort Shaturskaya bei Moskau ein hocheffizientes Gas- und Dampfkraftwerk mit einer Leistung von circa 400 MW. Damit kann bis Ende 2012 der CO<sub>2</sub>-Ausstoß um über 1 Mio Tonnen verringert werden. Das Kraftwerk wird im Dezember in Betrieb genommen.

E.ON schließt eine neue Kreditlinie über 6 Mrd € ab. Dabei erhält E.ON die besten Konditionen für eine fünfjährige Kreditlinie, die ein Single-A-geratetes Unternehmen seit Beginn der Finanzkrise erzielen konnte. Die neue Kreditlinie dient als allgemeine Liquiditätsreserve im Rahmen des Liquiditätsmanagements des Konzerns.

## November

E.ON setzt unter dem Anspruch cleaner & better energy neue strategische Schwerpunkte, begegnet so dem sich verändernden Marktumfeld mit einer klaren Strategie und leitet damit den Transformationsprozess zu einem globalen, spezialisierten Anbieter von Energielösungen ein.

## Dezember

E.ON verkauft den von der Konzerntochter E.ON Ruhrgas gehaltenen Gazprom-Anteil von 3,5 Prozent. Dabei übernimmt die staatliche russische Investitionsbank Vnesheconombank (VEB) 2,7 Prozent an Gazprom; 0,8 Prozent waren bereits über den Markt vorverkauft.

E.ON stimmt der Veräußerung von E.ON Rete, die das Gasverteilnetz in Italien führt, an ein Konsortium aus dem italienischen Infrastrukturfonds F2i SGR S.p.A. und AXA Private Equity, zu. Der Verkauf wird voraussichtlich zum Ende des ersten Quartals 2011 abgeschlossen.

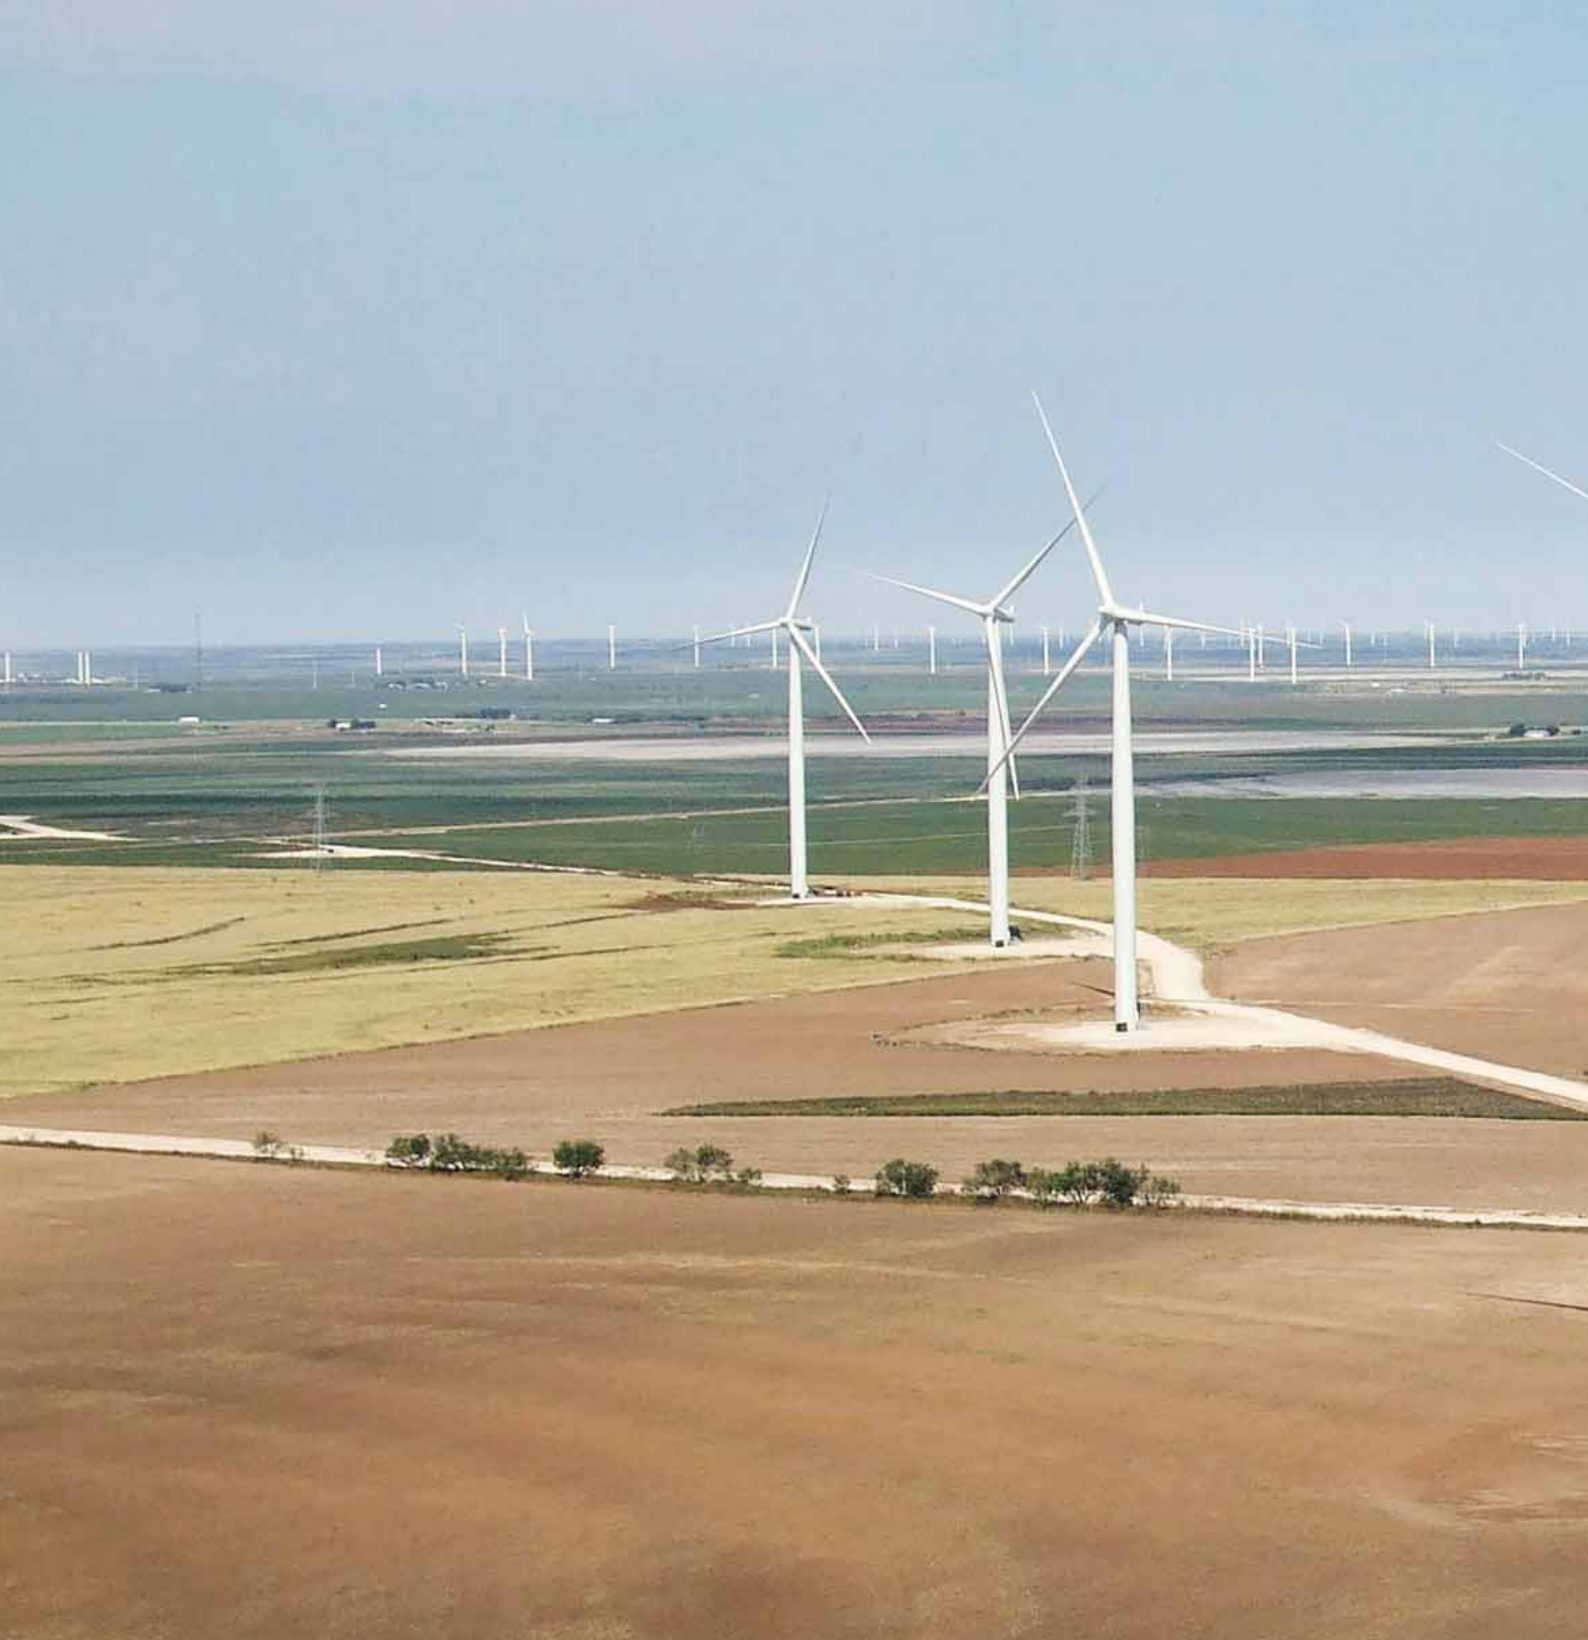

## Windenergie in Texas: Beste Bedingungen für Effizienz und Wirtschaftlichkeit

Windkraftanlagen an Land sind aktuell die am häufigsten eingesetzte Technologie zur Nutzung Erneuerbarer Energien. Mit mehr als 70 Onshore-Windparks zählen wir zu den zehn größten Windkraftbetreibern der Welt. Und das an Standorten, an denen wir ökologisch und wirtschaftlich zugleich den größtmöglichen Nutzen erzielen. Deshalb planen und bauen wir große Windparks unter anderem in den USA – denn dort bieten gleichmäßig hohe Windstärken, große Freiflächen und auch günstige regulatorische Bedingungen ein ausgezeichnetes Umfeld. So war die Fertigstellung des weltweit größten Windparks im texanischen Roscoe ein wichtiger Meilenstein für den rapiden Ausbau unseres Geschäfts mit Erneuerbaren Energien. 627 Windräder mit einer installierten Leistung von rund 780 MW erzeugen dort Strom für mehr als 230.000 Haushalte. Der Windpark erstreckt sich über eine Fläche von rund 400 km<sup>2</sup>. Mit Projekten wie Roscoe tragen wir aktiv zum ökonomischen und technologischen Durchbruch der Erneuerbaren Energien bei.

Auch das bedeutet für uns **cleaner & better energy**.



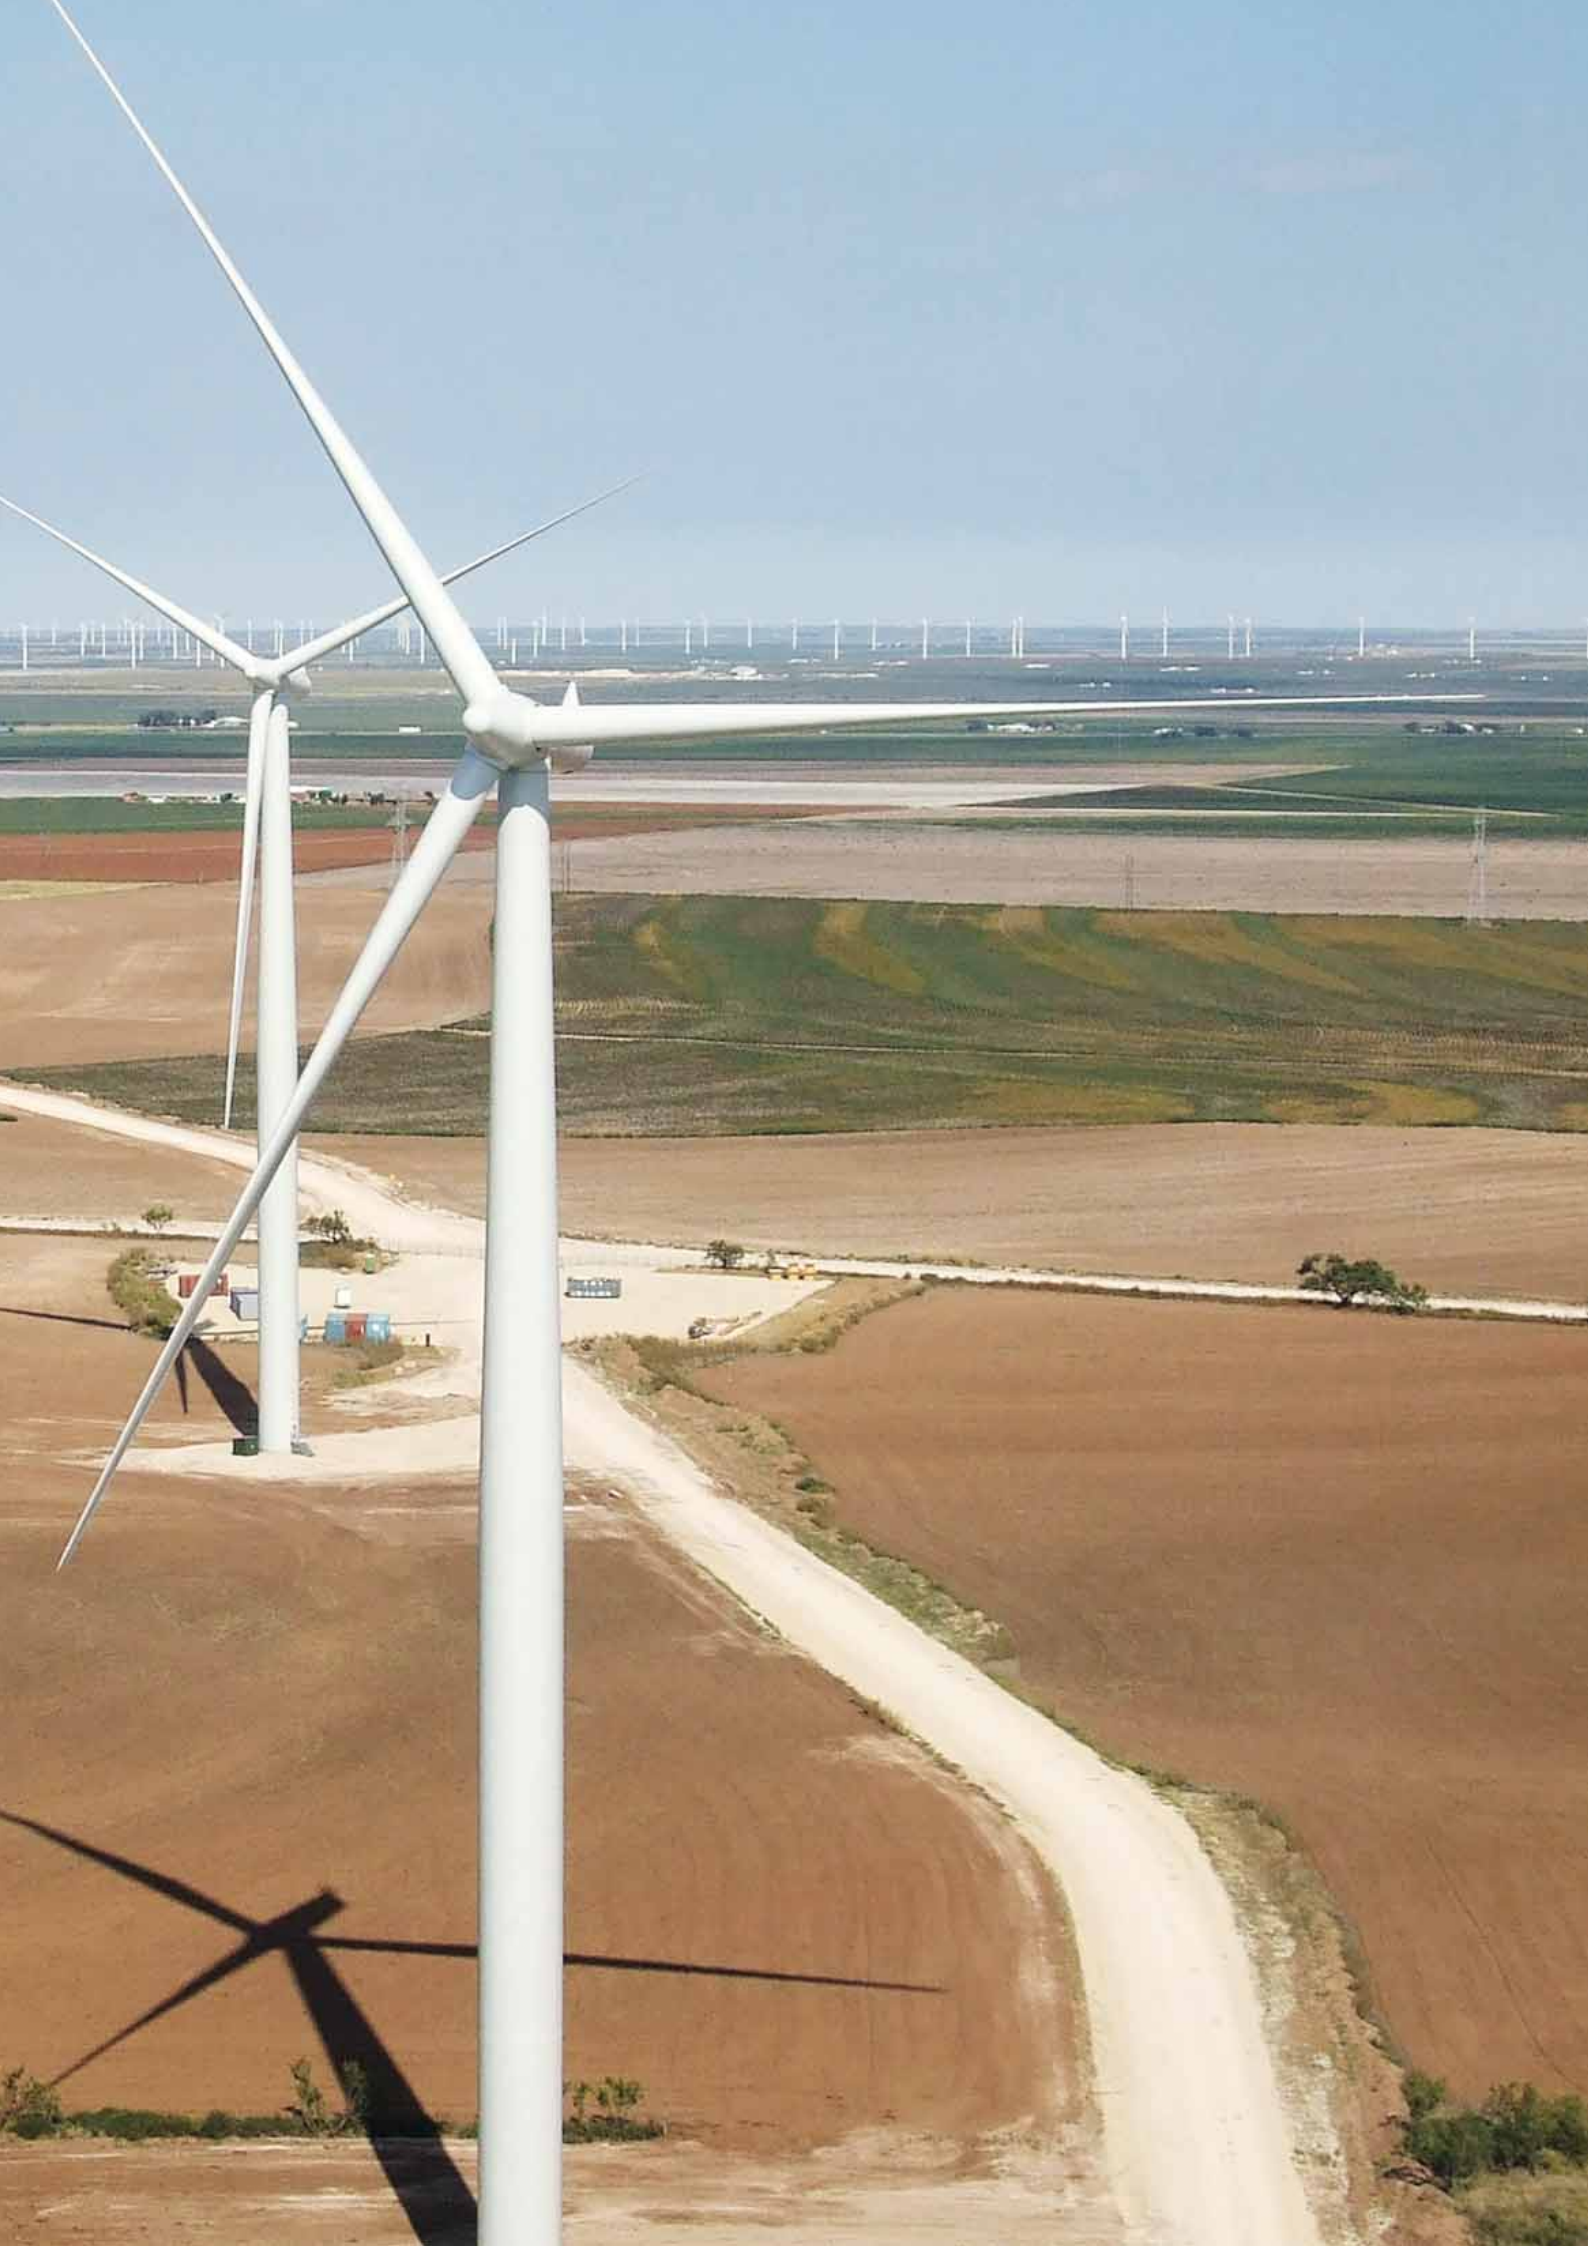



# Unser Team

## Vorstand

Johannes Teyssen, Jørgen Kildahl, Klaus-Dieter Maubach, Bernhard Reutersberg, Marcus Schenck und Regine Stachelhaus - sechs Vorstandsmitglieder mit ganz unterschiedlicher Ausrichtung und Herkunft bestimmen die strategische Ausrichtung des Konzerns und steuern unser Geschäft. Gemeinsam stellen sie sich den Herausforderungen der Energiewelt und gestalten so den Weg in die Zukunft des Konzerns. Bei allen relevanten Themen und Entscheidungen bezieht der Vorstand den Aufsichtsrat mit ein.

### Dr. Johannes Teyssen

trägt als Vorstandsvorsitzender und Konzernchef die Gesamtverantwortung für E.ON. Er ist zudem zuständig für Führungskräfte, Strategie und Unternehmensentwicklung, Investor Relations, Revision sowie Politik und Kommunikation.

### Jørgen Kildahl

steuert die konventionelle und erneuerbare Stromerzeugung, das Gasgeschäft, den weltweiten Handel sowie die energiewirtschaftliche Optimierung des Konzerns über alle Regionen und Produkte hinweg zentral aus einem Vorstandsressort.

### Prof. Dr. Klaus-Dieter Maubach

leitet das Vorstandsressort für Technologie. Er steuert damit alle Forschungs- und Entwicklungsaktivitäten und -themen und ist für E.ON New Build & Technology und damit für die Steuerung aller Großinvestitionen des Konzerns verantwortlich.

### Dr. Bernhard Reutersberg

ist für die Führung der Landesgesellschaften zuständig. Er steuert die Verteilungs- und Vertriebsgeschäfte des Konzerns sowie die politischen und regulatorischen Prozesse. Zudem koordiniert er die energiewirtschaftlichen Aktivitäten im russischen Markt.

### Dr. Marcus Schenck

ist für die Finanzen des Konzerns zuständig. Darüber hinaus trägt er die Verantwortung für das Rechnungswesen, das Controlling, die Steuern, alle konzernweiten M&A-Aktivitäten sowie für E.ON International Energy.

### Regine Stachelhaus

verantwortet in ihrem Ressort alle das Kerngeschäft unterstützenden Funktionen, insbesondere Personal, IT, Einkauf sowie Recht und Compliance. Frau Stachelhaus ist die Arbeitsdirektorin des E.ON-Konzerns.

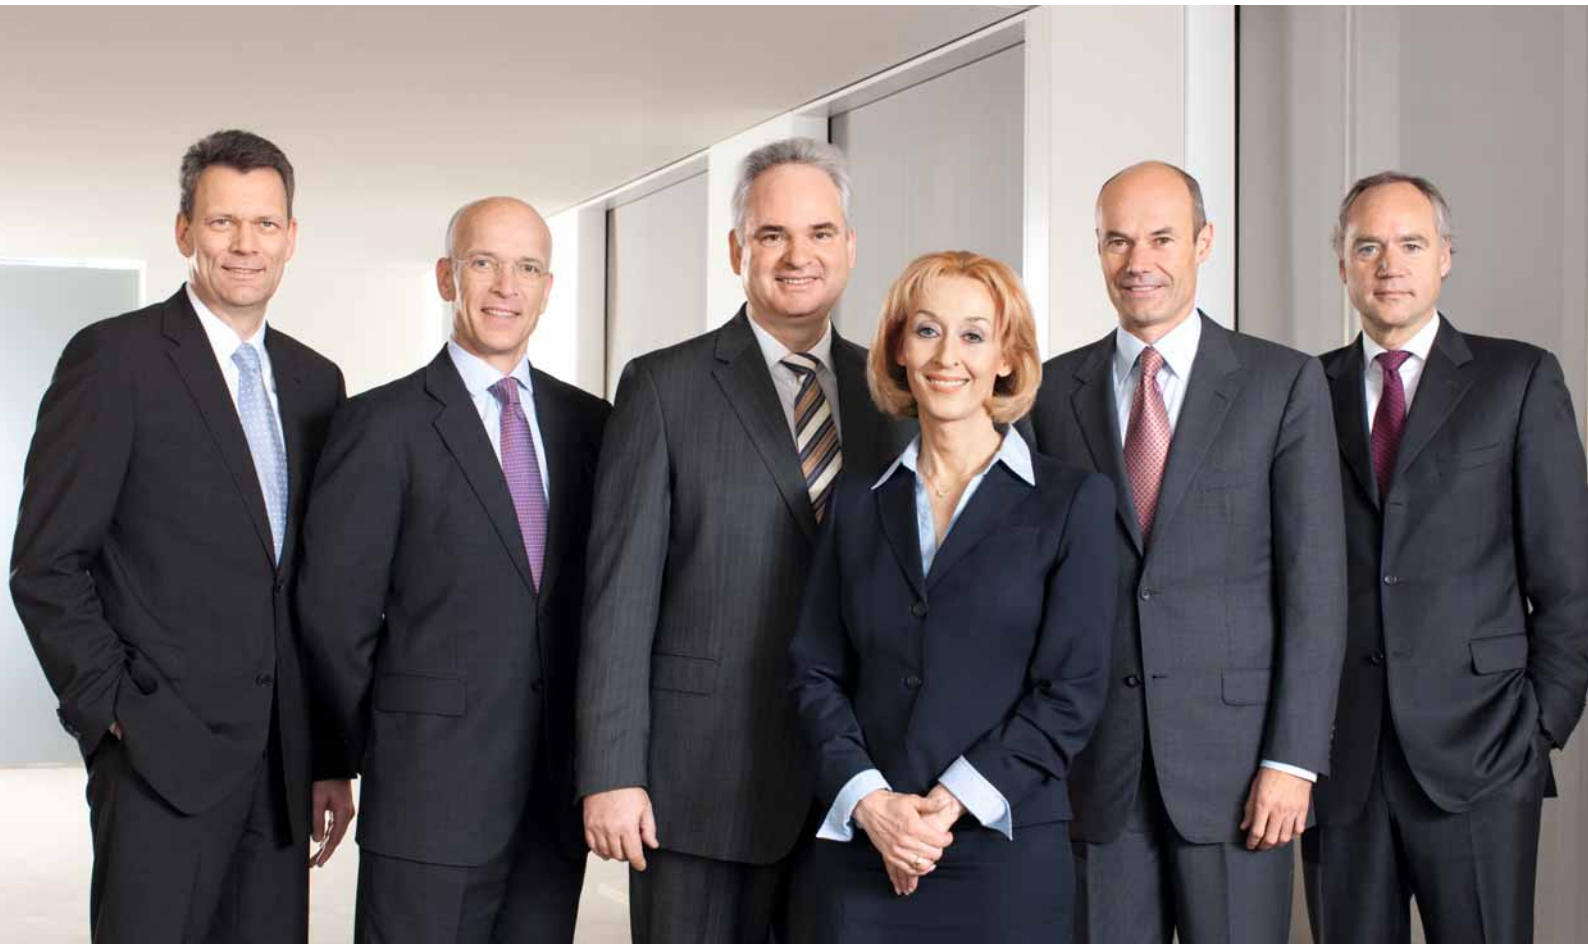

Prof. Dr. Klaus-Dieter Maubach

Jørgen Kildahl

Dr. Johannes Teyssen

Regine Stachelhaus

Dr. Marcus Schenck

Dr. Bernhard Reutersberg

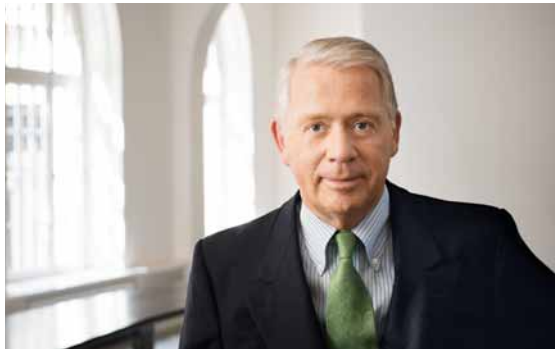

Ulrich Hartmann

Die Mitglieder des Aufsichtsrats stehen für eine Vielfalt von Wissen, Erfahrungen und Perspektiven aus vielen Bereichen der Wirtschaft. Je zehn Vertreterinnen und Vertreter der Anteilseigner und der Arbeitnehmer mit unterschiedlichster Ausrichtung – darunter Manager, Gewerkschaftsvertreter, Betriebsräte und Angestellte – stehen dem Vorstand beratend und kontrollierend zur Seite.

Um der internationalen Ausrichtung des Konzerns zu entsprechen, gehören dem Aufsichtsrat auch mehrere Mitglieder mit internationaler Erfahrung an. Das Gremium hat sich außerdem zum Ziel gesetzt, die Anzahl von Frauen im Aufsichtsrat kontinuierlich zu erhöhen. Denn die Vielfalt des Gremiums ist von hohem Wert für alle wichtigen Entscheidungen, in die der Aufsichtsrat direkt eingebunden ist. Und damit für die Zukunft von E.ON.

**Prof. Dr. Günter Vogelsang**

Ehrenvorsitzender des Aufsichtsrats der E.ON AG

**Ulrich Hartmann**

Vorsitzender des Aufsichtsrats der E.ON AG

**Erhard Ott**

Stellvertretender Vorsitzender des Aufsichtsrats der E.ON AG

**Werner Bartoschek**

Vorsitzender des Konzernbetriebsrats der E.ON Ruhrgas AG

**Sven Bergelin**

ver.di Bundesfachgruppenleiter Energiewirtschaft

**Gabriele Gratz**

Vorsitzende des Betriebsrats der E.ON Ruhrgas AG

**Jens P. Heyerdahl d.y.**

Jurist (bis 30. Juni 2010)

**Wolf-Rüdiger Hinrichsen**

Vorsitzender des Betriebsrats der E.ON AG

**Ulrich Hocker**

Hauptgeschäftsführer der Deutsche Schutzvereinigung für Wertpapierbesitz e.V.

**Prof. Dr. Ulrich Lehner**

Mitglied des Gesellschafterausschusses der Henkel AG &amp; Co. KGaA

**Bård Mikkelsen**

Kaufmann (seit 19. Juli 2010)

**Hans Prüfer**

Vorsitzender des Konzernbetriebsrats der E.ON AG

**Klaus Dieter Raschke**

Vorsitzender des Konzernbetriebsrats der E.ON Energie AG

**Dr. Walter Reitler**

Bereichsleiter HSE/CR-Steuerung der E.ON Energie AG

**Dr. Henning Schulte-Noelle**

Vorsitzender des Aufsichtsrats der Allianz SE

**Hubertus Schmoldt**

Volkswirt

**Dr. Karen de Segundo**

Juristin

**Dr. Theo Siegert**

Geschäftsführender Gesellschafter de Haen-Carstanjen &amp; Söhne

**Prof. Dr. Wilhelm Simson**

Diplom-Chemiker

**Dr. Georg Frhr. von Waldenfels**

Rechtsanwalt

**Werner Wenning**

Ehemaliger Vorsitzender des Vorstands der Bayer AG

**Hans Wollitzer**

Vorsitzender des Gesamtbetriebsrats der E.ON Energie AG

# Strategische Schwerpunkte unseres Personalmanagements

**E.ON steht für einen klaren und eindeutigen Anspruch: cleaner & better energy. Um diesem Anspruch gerecht zu werden, setzen wir auf das Engagement unserer Mitarbeiter. Die Personalarbeit ist darauf ausgerichtet, nachhaltig zur Umsetzung der Strategie beizutragen. Schwerpunkte bilden neben der kontinuierlichen Weiterentwicklung der operativen HR-Arbeit die Fokusthemen „Geschäft führen“, „Ressourcen managen“ und „Talente entwickeln“. Dabei hat die soziale Verantwortung für unsere Mitarbeiter sowie die offene, konstruktive Zusammenarbeit mit den Arbeitnehmervertretern bei allen Aktivitäten einen hohen Stellenwert.**

## Das Geschäft führen

Führung ist ein Schlüssel für die Umsetzung unserer ambitionierten Ziele. Daher wurden die Führungs- und Steuerungsinstrumente für die sogenannten Executives neu ausgerichtet. Sie wurden in die drei Führungskreise „Strategic Leader“ (E1 Executives), „Performance Leader“ (E2 Executives) und „Operational Leader“ (E3 Executives) überführt. Damit wird einerseits eine klarere Führungsstruktur geschaffen, andererseits mehr Flexibilität ermöglicht und Funktionswechsel erleichtert. Mit der Erweiterung des Kreises der konzernweiten Executive-Betreuung wird insbesondere der Austausch hoch qualifizierter Führungskräfte über die Konzerngesellschaften hinweg verbessert.

Die Anreizsysteme, vor allem das „Short-Term Incentive“, wurden der neuen Konzernsteuerung angepasst. Dabei wurde auch die Bewertung der individuellen Leistung, vor allem im Hinblick auf die konkret mit der jeweiligen Funktion verbundenen Aufgaben, gestärkt. Gleichzeitig wird die Bemessung des Unternehmenserfolges zukünftig durch die zentrale Steuerungsgröße des Konzerns, das EBITDA, und das Verhältnis von Konzernüberschuss und Kapitalkosten erfolgen.

Im Zusammenhang mit der Neuausrichtung der Führungskreise wurde auch die Führungskräftekommunikation ausgebaut. Die Strategic Leader des E.ON-Konzerns stehen regelmäßig mit dem E.ON-Vorstand im Austausch über wichtige, aktuelle Entwicklungen im Unternehmen. Im Rahmen eines intensiven Dialogs werden sie in strategische Überlegungen einbezogen und sorgen, in einem kaskadierenden Kommunikationsprozess, für eine Weiterführung des konstruktiven Dialogs.

Ein weiteres Element der veränderten Führungskräftekommunikation ist die Einbeziehung der Performance Leader in den Kommunikationsprozess. Im November 2010 haben sich die E1 und E2 Executives zur ersten Group Executive Conference getroffen, um sich eingehend mit der neuen strategischen Ausrichtung des Konzerns auseinanderzusetzen: Vermittlung der Bausteine, Inhalte der Strategie sowie Führungs- und Steuerungsmodell wurden diskutiert. So wurden die Executives auf ihre Vermittlungsrolle gegenüber den nachgeordneten Führungskräften und Mitarbeitern intensiv vorbereitet.

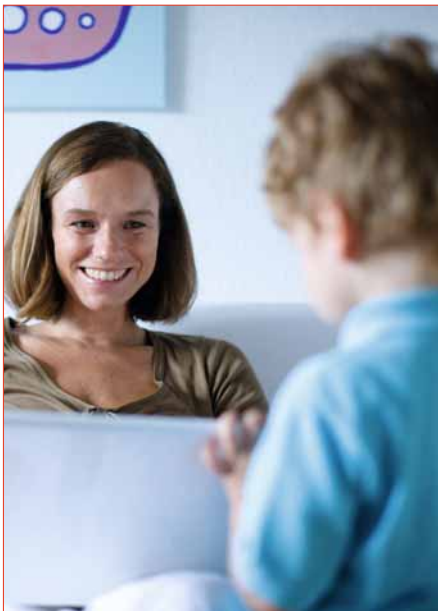

## Beruf und Familie

Bei E.ON hat die Vereinbarkeit von Beruf und Familie bereits seit vielen Jahren einen hohen Stellenwert. So setzt sich E.ON konsequent und kontinuierlich für den Ausbau und die Weiterentwicklung von gezielten Unterstützungsangeboten ein:

In Deutschland sind beispielsweise professionelle Serviceleistungen im Bereich der Kinderbetreuung sowie der Betreuung von pflegebedürftigen Angehörigen (Homecare/Eldercare) und ein Beratungs- und Unterstützungsangebot für Mitarbeiter in beruflichen und familiären Problemsituationen von zentraler Bedeutung. Die Mehrzahl der E.ON-Gesellschaften bietet unterstützende Serviceleistungen in diesen Bereichen an, jedoch derzeit noch mit unterschiedlichem Leistungsumfang. Ziel ist die Etablierung eines Standards, mit welchem wir deutschlandweit qualitativ hochwertige Serviceleistungen gewährleisten wollen. In Schweden gehören flexible Arbeitszeiten für die meisten E.ON-Mitarbeiter zum Alltag. Viele nutzen auch die Möglichkeit, von zu Hause aus zu arbeiten. Dies gelingt durch eine Unternehmenskultur, die sich stärker an Leistung als an Anwesenheitszeiten orientiert. Die Balance zwischen Arbeit und Familie wird außerdem durch die Bezuschussung und Verlängerung des staatlichen Elterngeldes verbessert. Ergänzt werden diese Maßnahmen durch Plusvalet, ein Programm bei dem Mitarbeiter aus verschiedenen Angeboten, wie zum Beispiel Unterstützung bei der Haus- und Gartenarbeit, Reinigungsservices und professionellen Babysittern, wählen können.



## Ressourcen managen

Der demografische Wandel stellt heute eine der größten gesellschaftspolitischen Herausforderungen dar. Unser Ziel ist es, mithilfe einer quantitativen und qualitativen Personalplanung anstehende demografische Herausforderungen frühzeitig zu erkennen, aktiv darauf zu reagieren und so langfristig den Fach- und Führungskräftebedarf adäquat zu decken. Wir werden beispielsweise zielgerichtete Maßnahmen zur Bewältigung des demographisch bedingten Fachkräftemangels entwickeln und unser Talentmanagement intensiv am spezifischen Bedarf ausrichten. Die geplante Einführung konzernweit einheitlicher Job-Familien wird eine wesentliche Grundlage dafür bilden. Beginnen werden wir in besonders relevanten Unternehmensbereichen mit Pilotprojekten.

## Talente entwickeln

Jeder unserer Mitarbeiter besitzt persönliche Stärken und Fähigkeiten, welche umso besser eingebracht und genutzt werden können, je konsequenter wir diese managen. Gleichzeitig stellt diese Vielfalt an Kenntnissen, Erfahrungen und Perspektiven eine enorme Ressource dar, die wir gewinnbringend für unser Unternehmen ausbauen werden.

Mit der Neuausrichtung unseres „Talent Managements“ werden wir einen wichtigen Beitrag leisten, um unsere Potenzialträger zu identifizieren, zielgerichtet zu entwickeln und durch ein intelligentes Netzwerken

im Konzern sichtbar zu machen. Die Basis hierfür bilden die jährlichen Mitarbeitergespräche sowie der konzernweite Management-Review-Prozess für Führungs- und Führungsnachwuchskräfte. Im Rahmen dieses Prozesses wird die Leistung des Einzelnen bewertet, Entwicklungsbedarf ermittelt und Potenzialträger für den Konzern frühzeitig identifiziert. Konzernweite Talentkonferenzen mit den Top-Führungskräften aller Gesellschaften, ein systematisches Nachfolgemanagement sowie ein konzernweit zentral gesteuerter Besetzungsprozess stellen sicher, dass unsere Talente zielgerichtet entwickelt und richtig eingesetzt werden. Individuelle Entwicklungsmaßnahmen unterstützen dabei, die für eine neue Rolle erforderlichen Kompetenzen auszubauen und Wechsel erfolgreich zu gestalten.

Durch unser „Diversity Management“ werden wir bewusst die Vielfalt unserer Mitarbeiter ausbauen. Hierzu wird E.ON sich auf die drei Schwerpunkte Geschlecht („Gender“), Internationalität und Arbeitsmarktfähigkeit („Employability“) fokussieren:

Bei E.ON ist – wie bei vielen anderen Unternehmen – der Anteil von Frauen in Führungspositionen noch gering. So hat E.ON sich das Ziel gesetzt, den Anteil von Frauen in Führungspositionen in den kommenden fünf Jahren signifikant zu erhöhen. Hierzu wird ein Handlungspaket geschnürt, das an den wesentlichen unternehmensspezifischen Stellhebeln

ansetzt. Neben der regelmäßigen Überprüfung der Entwicklung des Anteils von Frauen in Führungspositionen, in jeder unserer Units, werden wir verstärkt daran arbeiten, für Frauen mit Familie ein Umfeld zu schaffen, das es für sie attraktiv macht, ihre Karriere bei E.ON voranzutreiben. Eine systematische Nachfolgeplanung, die einen besonderen Fokus auf weibliche Talente legt, konsequente Besetzungsverfahren für Führungspositionen sowie gezielte Unterstützung durch unsere Top-Führungskräfte sind weitere Maßnahmen, die einen wesentlichen Beitrag leisten, den Anteil von Frauen in Führungspositionen stetig zu erhöhen.

Mit unserer neuen strategischen Ausrichtung wollen wir insbesondere auch außerhalb Europas unsere Kompetenzen einsetzen. In diesem Zusammenhang ist es wichtig, die Märkte und die dortigen Akteure richtig zu verstehen. Dies gelingt nur mit einer Belegschaft, die über exzellente Kompetenzen verfügt und diese auch in einem internationalen Umfeld effektiv einsetzen kann. Im Laufe des Jahres 2011 werden wir daher Maßnahmen verabschieden, die hierzu einen Beitrag leisten. Dazu werden auch die Förderung von internationalen Einsätzen, interkulturelle Trainings sowie die Nutzung von Technologie, die grenzüberschreitendes Arbeiten unterstützt, gehören.

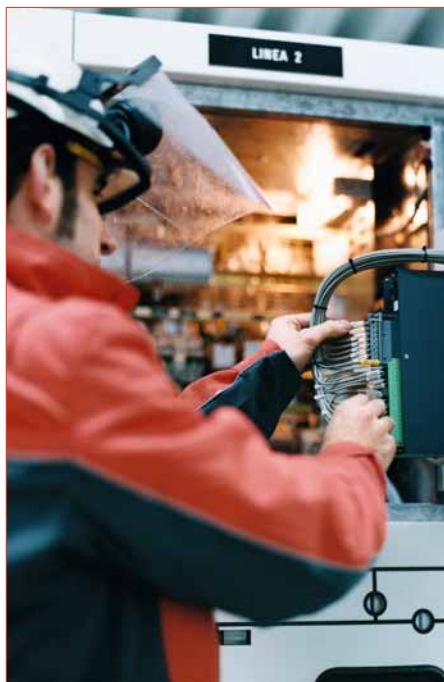

## Arbeitssicherheit ist für uns oberste Priorität – Safety F1RST

Die Sicherheit aller, die für uns arbeiten, hat für uns Priorität. Darüber hinaus sind wir davon überzeugt, dass eine gute Arbeitssicherheitsleistung die Qualität bei unseren Infrastrukturmaßnahmen, wie zum Beispiel Wartung und Instandhaltung oder Neubauprojekte, und die Kundenzufriedenheit positiv beeinflusst. In 2010 konnten wir unsere gute Arbeitssicherheitsleistung weiter festigen. 2010 hatten wir, unter unseren betriebszugehörigen Mitarbeitern, 2,2 arbeitsbedingte Unfälle mit Ausfallzeiten pro eine Million Arbeitsstunden (LTIF). Damit gehört E.ON zu den Unternehmen mit den höchsten Sicherheitsstandards der Branche. Um unser ehrgeiziges Arbeitssicherheitsziel zu realisieren, 2015 zu den sichersten Unternehmen weltweit zu gehören, werden wir weiter verstärkt präventive, pro-aktive Maßnahmen implementieren und deren Bewertung zudem in der variablen Vergütung berücksichtigen. Nachdem wir uns in den letzten Jahren auf die Themen Sicherheitsbewusstsein und -kompetenz fokussiert haben, werden zukünftig Maßnahmen in den Vordergrund gestellt, die einen kontinuierlichen Verbesserungsprozess unterstützen. Dazu dienen jährliche Arbeitssicherheitsprogramme unserer Gesellschaften, die Bestandteil von Zielvereinbarungen sind, sowie harmonisierte Arbeitssicherheitsmanagement-Systeme. Aber auch Maßnahmen, die eine positive Arbeitssicherheitskultur und das verantwortliche Verhalten jedes Einzelnen fördern, sind unser Ziel. Weiter werden wir zukünftig, zur Optimierung unserer Unfallstatistik, zusätzlich zu den Unfällen, die zu Ausfallzeiten führen, auch weniger schwere Vorfälle, wie zum Beispiel medizinische Behandlungen und Schonarbeitsplätze (sogenannte Total Recordable Injuries), berücksichtigen. Diese Maßnahme dient dem besseren Verständnis von Unfällen und gefährlichen Situationen, um so Unfälle von vornherein zu vermeiden.

Außerdem wollen wir unseren Mitarbeitern ein Arbeitsumfeld bieten, das ihre Gesundheit und Arbeitsfähigkeit erhält und in dem sie unabhängig von ihrem Alter ihre persönlichen und fachlichen Kompetenzen einbringen können. Voraussetzungen hierfür sind die Förderung von lebenslangem Lernen und Maßnahmen zur persönlichen Gesunderhaltung des Einzelnen. Daher bieten wir unseren Mitarbeitern ein großes Angebot an individuellen Qualifizierungsmaßnahmen und ermöglichen beispielsweise die Teilnahme an Vorsorgeuntersuchungen.

### Soziale Verantwortung leben

Auch in wirtschaftlich schwierigen Zeiten handelt E.ON bei Veränderungen mit sozialer Verantwortung, indem Folgen für Mitarbeiter fair und sozial verträglich ausgestaltet werden. Dies wurde beispielsweise auch im Rahmen des konzernweiten Effizienzsteigerungs-Programms Perform-to-Win mit dem Abschluss zahlreicher Vereinbarungen mit den Arbeitnehmervertretungen zur sozialen Absicherung unserer Mitarbeiter erneut unter Beweis gestellt. Aktuell gilt dieser Grundsatz auch für die Umsetzung der Auslagerung von Teilen der IT-Infrastruktur. So bestand ein wesentliches Auswahlkriterium für die

Outsourcing-Partner in einem auch künftig verantwortungsvollen Umgang mit den Mitarbeitern. Daher wurde unter anderem besonders Wert darauf gelegt, dass in enger Zusammenarbeit mit den Mitbestimmungsgremien Vereinbarungen zur Absicherung der übergehenden Mitarbeiter getroffen wurden.

### Mitarbeiter nach Regionen 2010<sup>1)</sup>

|                              |               |                 |
|------------------------------|---------------|-----------------|
| Deutschland                  | 35.116        | 41,26 %         |
| Großbritannien               | 16.343        | 19,20 %         |
| Rumänien                     | 6.535         | 7,68 %          |
| Ungarn                       | 5.431         | 6,38 %          |
| Schweden                     | 5.064         | 5,95 %          |
| Russland                     | 4.828         | 5,67 %          |
| Tschechische Republik        | 3.454         | 4,06 %          |
| Bulgarien                    | 2.038         | 2,39 %          |
| Italien                      | 1.516         | 1,78 %          |
| Spanien                      | 1.310         | 1,54 %          |
| Weitere Länder <sup>2)</sup> | 3.470         | 4,08 %          |
| <b>Summe</b>                 | <b>85.105</b> | <b>100,00 %</b> |

1) ohne Vorstände/Geschäftsführer, Auszubildende und inaktive Mitarbeiter

2) je weniger als 1.000 Mitarbeiter; unter anderem Frankreich, Niederlande, Slowakei und Polen

### Psychische Gesundheit fördern

Wir sind überzeugt, dass die Gesundheit der Mitarbeiter ein wesentlicher Faktor für den wirtschaftlichen Erfolg eines Unternehmens ist. Wachsende Bedeutung kommt dabei der psychischen Gesundheit zu, da solche Erkrankungen fast immer Langfristerkrankungen und statistisch für fast zehn Prozent der Ausfallzeiten verantwortlich sind. Deshalb sensibilisieren wir Führungskräfte und Mitarbeiter durch Beiträge im Intranet und Broschüren über Ursachen, Symptome und Umgang mit Krankheiten wie Depression oder Burn-out. Zusätzlich bietet die E.ON Academy verschiedene Programme zur Vermittlung eines besseren Umgangs mit An- oder auch Überforderungen an. An einigen Standorten haben sich Betroffene zusammengetan, um sich beispielsweise bei der Wiedereingliederung nach längerer Abwesenheit gegenseitig zu unterstützen. Gefördert werden diese und andere Aktivitäten von den Gesundheitsmanagern unserer Einheiten und dem Vorstand der E.ON AG. Wir wollen uns dem Thema psychischer Erkrankungen nicht verschließen, denn unabhängig von der ökonomischen Tragweite solcher Erkrankungen haben wir für unsere Mitarbeiter auch eine klare Fürsorgepflicht, der wir gerecht werden müssen.

# Neue Wege gehen

Heftige Schneefälle, starker Wind und umstürzende Bäume haben am 24. Dezember 2010 in der Mitte und im Osten Deutschlands zahlreiche Stromleitungen erheblich beschädigt, auch bei unseren Verteilnetzbetreibern E.ON Avacon und E.ON edis. Bei mehr als 100.000 Netzkunden fiel dadurch ausgerechnet an Heiligabend der Strom aus. Viele unserer Monteure und Techniker unterbrachen ihren Weihnachtsurlaub und verstärkten die Bereitschaftsdienste an diesem eigentlich arbeitsfreien Tag. So konnten die meisten Kunden innerhalb von 24 Stunden wieder versorgt werden. Schnelle und engagierte Hilfe in solchen Situationen ist bei uns schon lange Standard.

Dieses Beispiel zeigt: Wir sind immer nah am Kunden, wir handeln verantwortungsvoll, wir legen großen Wert auf gute Zusammenarbeit und packen gemeinsam an. Dass wir uns miteinander für unsere Kunden engagieren, ist für uns gelebte Gemeinschaft.

## Zusammenarbeit über Grenzen hinweg

Gerade in schwierigen Situationen beweisen wir so eine Unternehmenskultur, von der letztlich unsere Mitarbeiter, Kunden, Aktionäre und Geschäftspartner gleichermaßen profitieren. Die vor einigen Jahren unter dem Leitbild „OneE.ON“ vereinbarten Werte und Verhaltensweisen haben maßgeblich dazu beigetragen, dass Führungskräfte und Mitarbeiter des Konzerns offen und ehrlich miteinander umgehen, sich vertrauen und sich gegenseitig respektieren. Sie sind aber auch die Basis dafür, dass wir über Team- und Ländergrenzen hinweg erfolgreich zusammenarbeiten – und dies nicht nur auf der Ebene von Führungskräften: Einige junge deutsche Mitarbeiter arbeiten noch heute bei E.ON UK und haben so in Großbritannien eine feste Anstellung gefunden. Sie haben vor wenigen Jahren besondere Flexibilität und Veränderungsbereitschaft bewiesen. Seinerzeit fehlten in Großbritannien gut ausgebildete Fachkräfte, während unsere deutschen Gesellschaften viele junge Mitarbeiter trotz fachlicher Eignung nach ihrer Ausbildung nicht unbefristet übernehmen konnten. Eine Reihe von ihnen haben wir unbürokratisch zu E.ON UK vermittelt und damit eine für alle Beteiligten vorteilhafte Lösung umgesetzt. Dies ist nur ein Beispiel für viele, die zeigen, dass jeder einzelne Mitarbeiter wirkungsvoll zum Erfolg des Unternehmens beitragen kann.

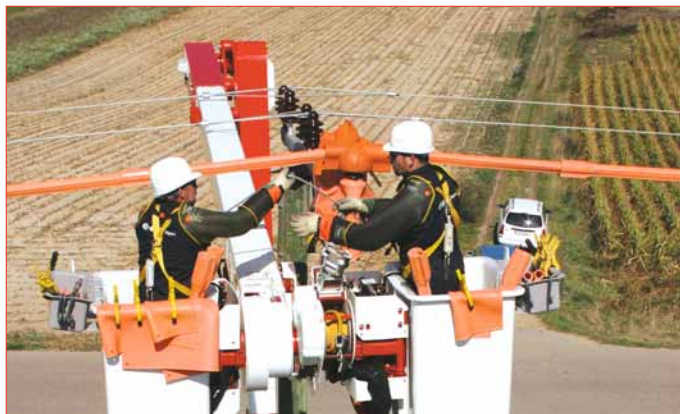

## Gutes Beispiel für gelebte Arbeitskultur

Mitarbeiter von E.ON Bayern schulen ein Team von E.ON Czech im „Arbeiten unter Spannung“. Wartungsarbeiten im 22-kV-Netz können damit ohne Unterbrechung des Stromflusses durchgeführt werden.



### Herausforderungen gemeinsam meistern

Darauf aufbauend werden wir uns den großen, vor allem wirtschaftlichen Herausforderungen stellen, die in den nächsten Jahren vor uns liegen. Auf unseren Märkten herrscht intensiver Wettbewerb, die Politik nimmt immer stärkeren Einfluss und das Energieversorgungssystem befindet sich am Anfang eines durchgreifenden Umbauprozesses. Gleichzeitig liegen die Auswirkungen der Weltwirtschaftskrise noch nicht hinter uns.

Antworten auf diese Herausforderungen geben wir mit unserer neuen Strategie und der angepassten Konzernstruktur, die Entscheidungsprozesse beschleunigt und klare Verantwortlichkeiten festlegt. Jetzt kommt es mehr denn je darauf an, dass das E.ON-Team – vom Konzernvorstand bis zum Mitarbeiter vor Ort – gemeinsam und entschlossen handelt. Bereitschaft und Mut für Veränderungen sind jetzt wichtiger denn je. Dabei verfolgen alle die gleichen Ziele im Interesse unseres Unternehmens. Denn eines steht fest: Die Probleme und Herausforderungen der kommenden Jahre werden sich nicht von alleine lösen. Ob und wie all diese Veränderungen von unseren Mitarbeitern angenommen wurden, werden wir in einer konzernweiten Mitarbeiterbefragung, die wir im Juni 2011 durchführen, ermitteln. Auch kritisches Feedback ist Teil unserer Unternehmenskultur; denn es zeigt uns Verbesserungspotenziale auf und hilft uns, Veränderungen erfolgreich umzusetzen.

### Leistung fordern und fördern

Grundlage für unsere Zusammenarbeit ist ein richtiger Mix von unvermeidlichen, klaren Regeln und Freiräumen für unternehmerisches Denken und Handeln. Bei Themen wie Compliance und Arbeitssicherheit kann es beispielsweise keine Kompromisse geben. Hohe Ansprüche stellen wir auch an Leistungsbereitschaft und Leistungserbringung unserer Führungskräfte und Mitarbeiter. Gerade in besonders herausfordernden Zeiten ist eine nachhaltige Leistungskultur die Basis dafür, dass wir auch weiterhin auf Erfolgskurs bleiben. Jedem Einzelnen muss klar sein, dass er einen wichtigen und unverzichtbaren Beitrag leistet und welche Verantwortung er ganz konkret hat. Regeln und Instrumente, mit denen wir Leistung einfacher messen und so Erfolg besser sichtbar

machen wollen, unterstützen diesen Prozess. Dazu gehören erreichbare, transparente Ziele, klare Messgrößen und ein regelmäßiges Leistungsfeedback. Damit fördern wir eine positive Leistungskultur, denn neue Ansprüche an uns schaffen auch Chancen für alle.

Derartige Instrumente können aber alleine noch keine Leistungskultur begründen. Führungskräfte und Mitarbeiter müssen auch noch stärker als bisher Einstellungen, Wertvorstellungen und Verhaltensweisen täglich leben, die diesem Anspruch gerecht werden. Unverzichtbar sind dafür insbesondere eine von wechselseitigem Respekt und Wertschätzung getragene Offenheit im alltäglichen Umgang miteinander und eine hohe Bereitschaft zur Veränderung und zur Steigerung der eigenen Effizienz. Eine von diesen Elementen geprägte Unternehmenskultur erlaubt es, Konflikte im Sinne einer positiven Streitkultur auszutragen, mutig und entscheidungsfreudig zu handeln und gemeinsam neue Wege zu gehen.

Mit cleaner & better energy haben wir einen hohen Anspruch und gleichzeitig ambitionierte Zusagen für unsere Kunden formuliert. Der damit eingeleitete Strategiewandel in Verbindung mit einer ausgeprägten Leistungsbereitschaft jedes einzelnen Mitarbeiters ist der Grundstein dafür, dass wir die großen Herausforderungen, vor denen wir stehen, meistern und weiterhin erfolgreich bleiben.

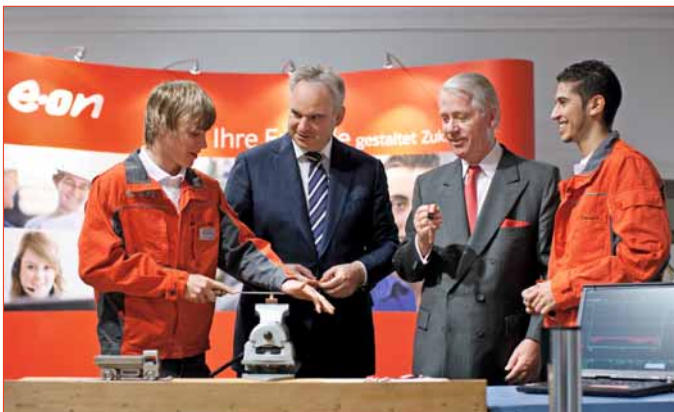

### Wertschätzung hautnah erlebt

Auszubildende präsentieren sich und ihre Arbeit auf der Hauptversammlung 2010.



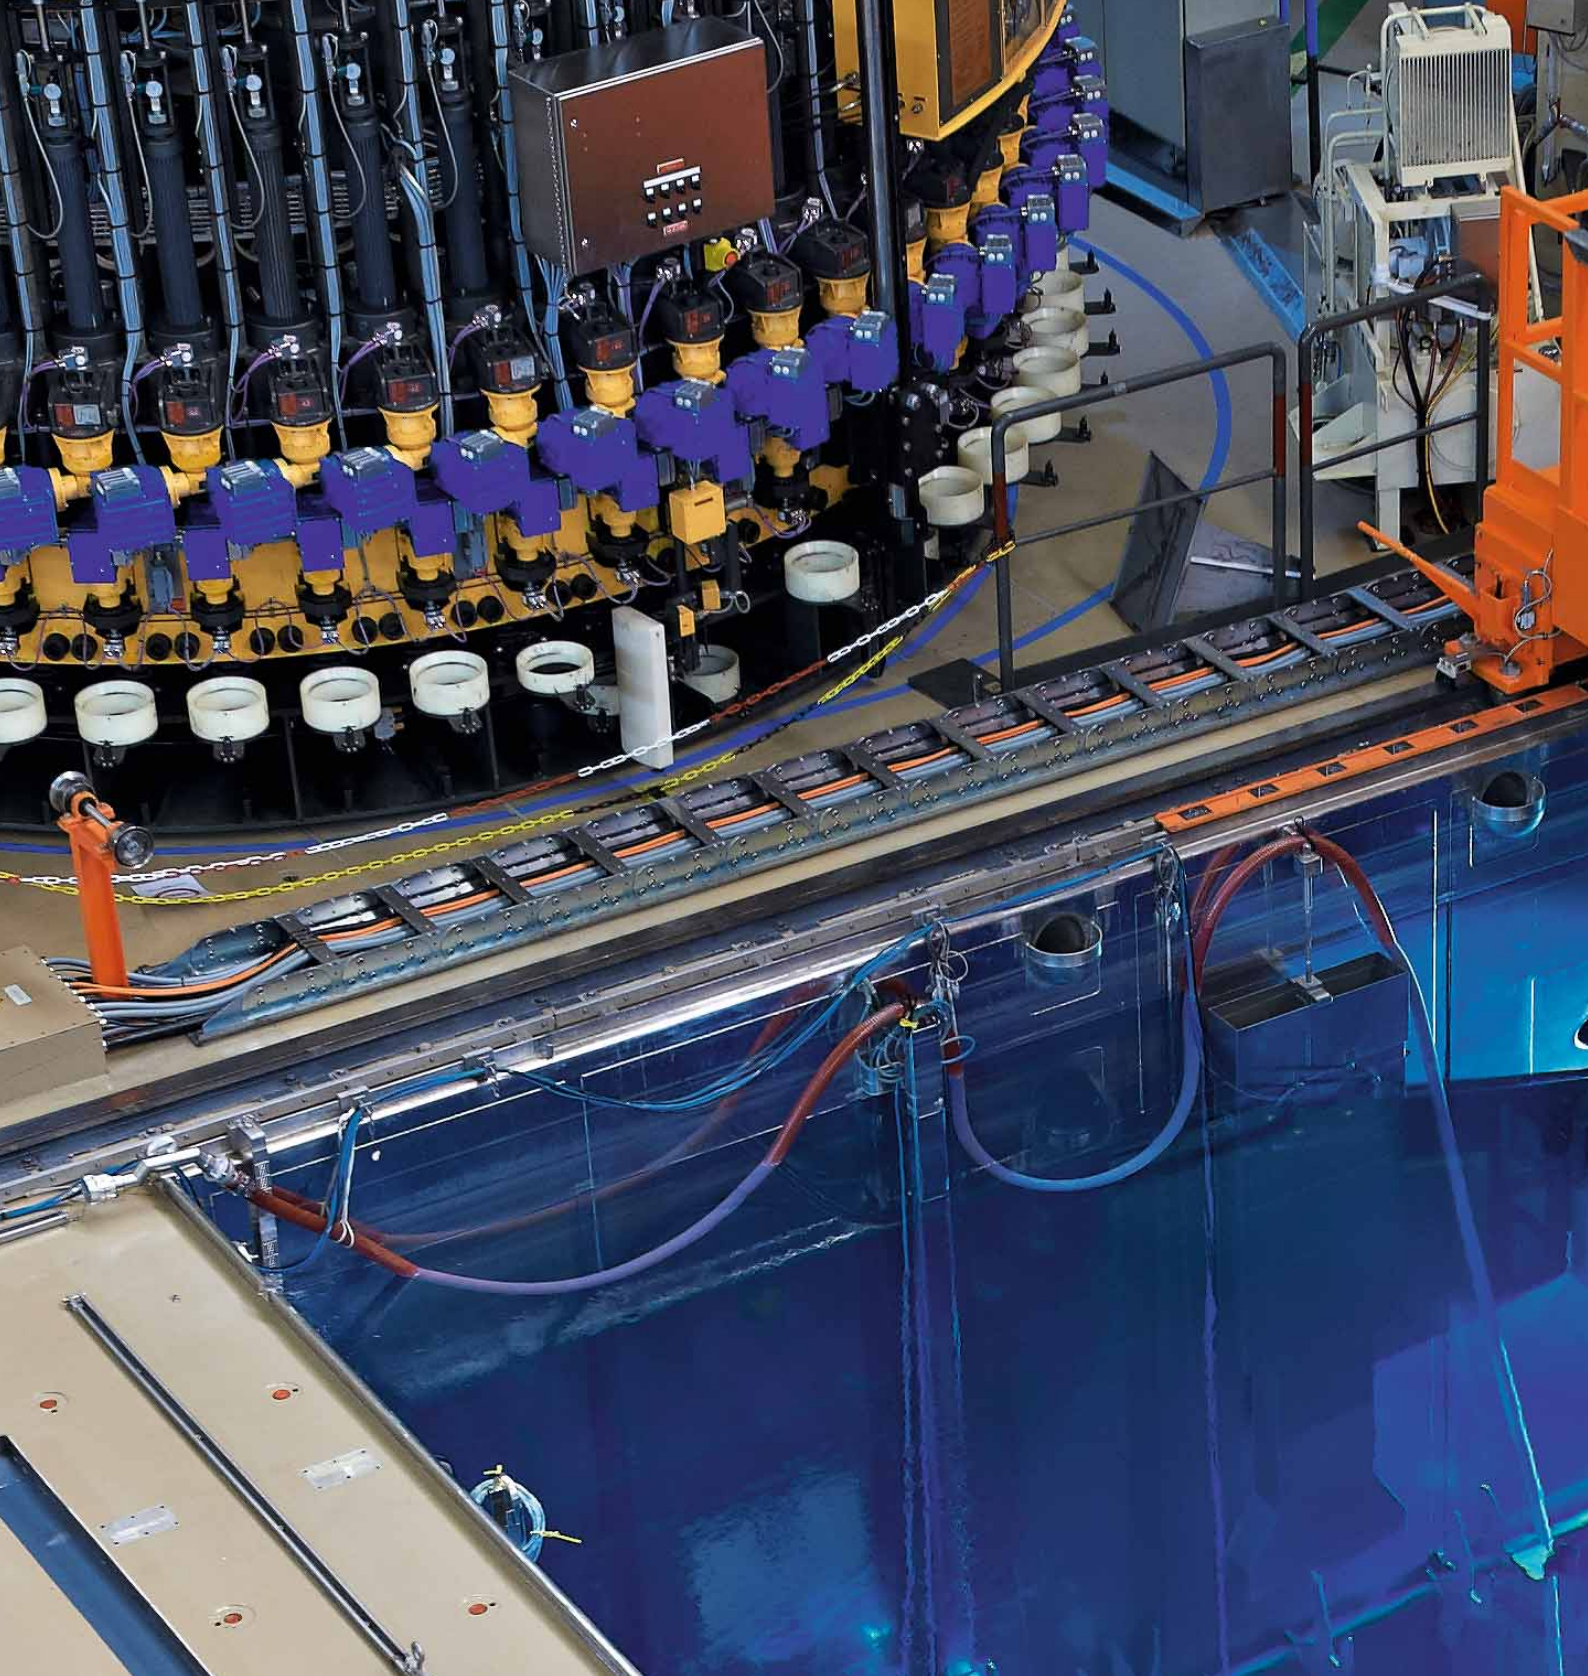

## Kernenergie: Klimafreundliche Säule in unserem Energiemix

Kernenergie ist für uns ein unverzichtbarer Baustein einer sicheren und umweltverträglichen Stromversorgung. Weltweit haben sich viele Länder politisch für eine langfristige Weiternutzung oder den Neubau von Kernkraftwerken entschieden. Wir verfügen auf diesem Gebiet über herausragendes Know-how, das aus jahrzehntelanger Erfahrung mit dem Betrieb von Kernkraftwerken resultiert. Unsere Anlagen zeichnen sich im internationalen Vergleich durch höchste Sicherheit und Zuverlässigkeit aus. So erzeugte unser Kernkraftwerk Isar 2 im Jahr 2010 brutto insgesamt 12 Mrd kWh Strom. Diese Stromproduktion deckt den Bedarf von rund 3,5 Millionen Haushalten und führt im Vergleich zu fossil befeuerten Kraftwerken zu einer Einsparung von 11,4 Mio Tonnen CO<sub>2</sub>. Dabei sind unsere Kernkraftwerke im Erzeugungsmix ein wichtiger Partner der Erneuerbaren Energien: Sie tragen immer mehr zum Ausgleich der schwankenden Einspeisung bei und sorgen somit für stabile Netze.

Auch das bedeutet für uns **cleaner & better energy**.



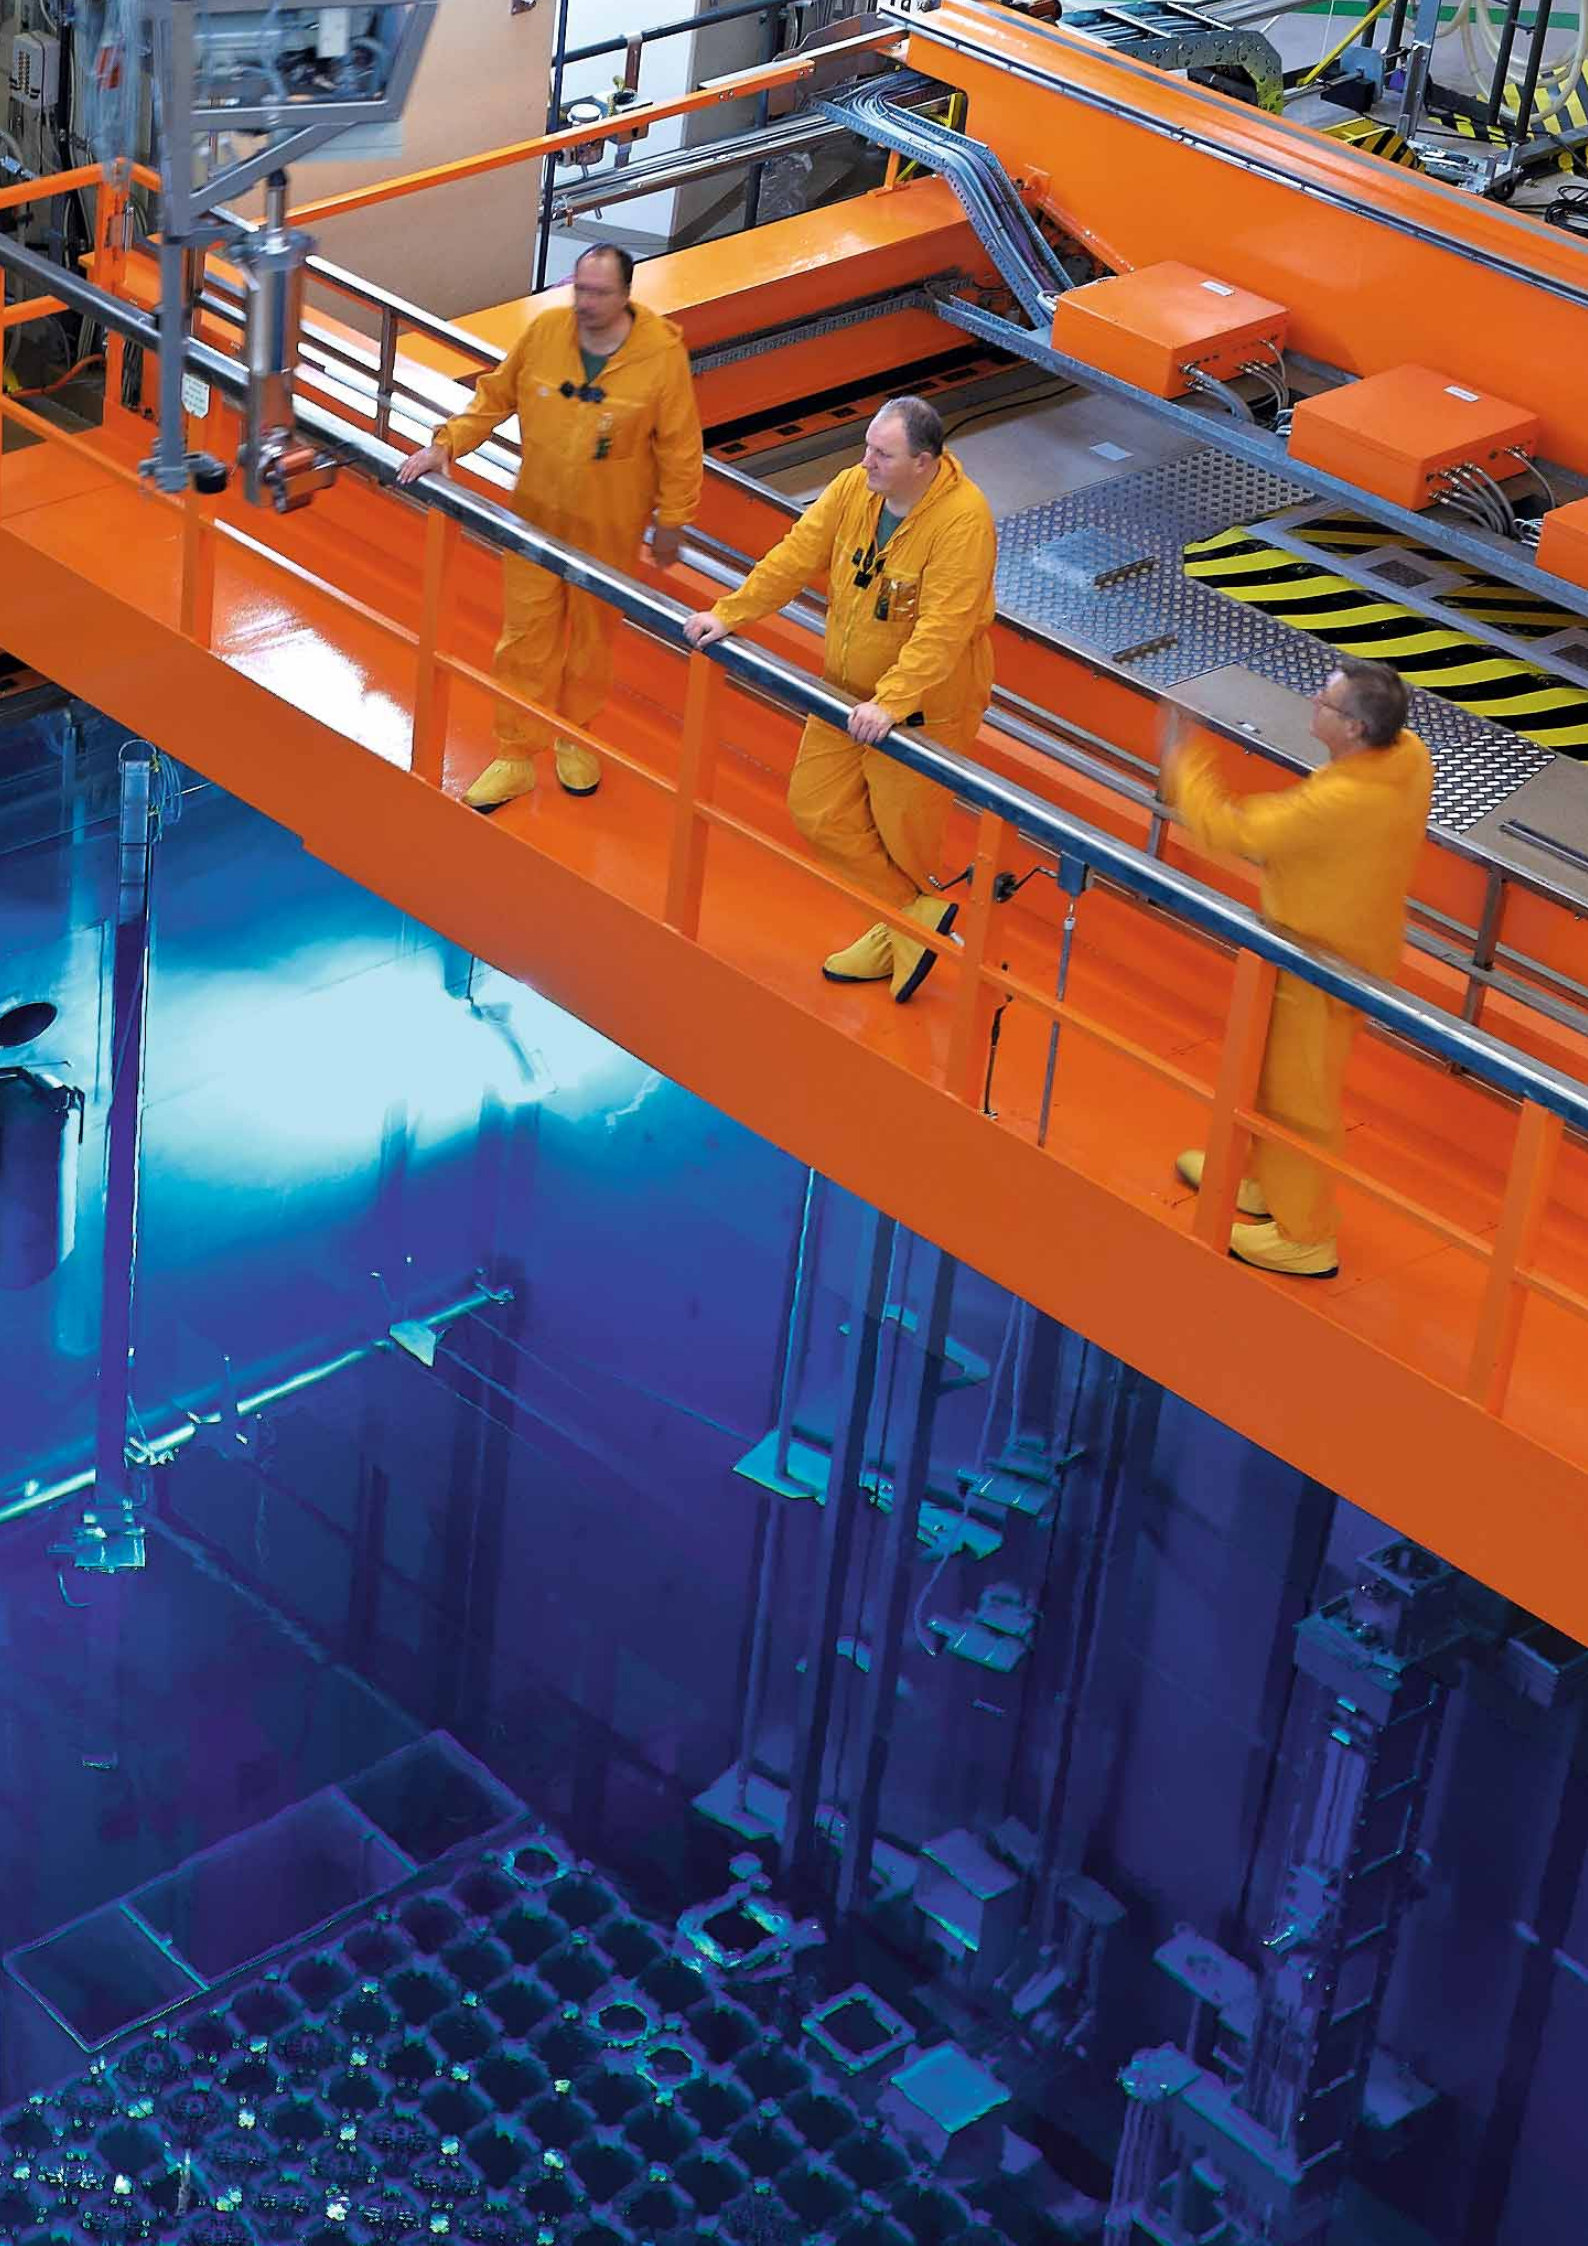



# Unsere Investoren

Überblick

## Dank des Vertrauens unserer Investoren halten wir den Kurs.

Sie kommen aus Beijing oder aus unserer Nachbarschaft. Sie können eine Kapitalanlagegesellschaft in New York sein oder eine vierköpfige Familie in Florenz, eine große Bank in Basel oder unsere eigenen Mitarbeiter in München. Aber sie haben eines gemeinsam: Sie vertrauen uns ihr Geld an – mit dem Kauf unserer Aktien oder unserer Anleihen. Und selbstverständlich ist es unser Bestreben, dieses Vertrauen zu rechtfertigen – indem wir eine Strategie entwickeln und umsetzen, die unseren Investoren eine langfristig attraktive Rendite bietet. Die Menschen und Institutionen, die in E.ON investieren, kommen aus der ganzen Welt. Dementsprechend sind die wesentlichen Finanzmärkte in Europa und Nordamerika gut vertreten. Der deutsche Anteil wird darüber hinaus durch unsere Privataktionäre ergänzt.

### Aktionärsstruktur

Im Rahmen unserer Aktionärsstrukturhebung entfallen rund 80 Prozent unseres Aktienkapitals auf institutionelle Investoren und 20 Prozent auf private Anleger. Rund 36 Prozent der Anteile an E.ON befinden sich im Inlandsbesitz und rund 64 Prozent im Auslandsbesitz.<sup>1),2)</sup>

Mit unseren Aktionären und Anleihe-Investoren aus der ganzen Welt erreichen wir eine breit gestreute Investorenstruktur.

### Aktionäre: Geografische Verteilung <sup>1), 2)</sup>

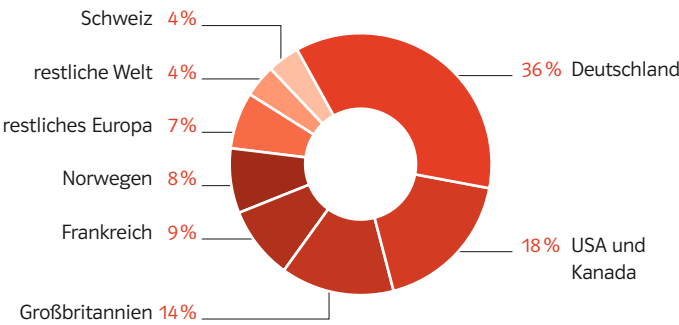

### Aktionäre: Institutionelle Investoren vs. Privatanleger <sup>1), 2)</sup>

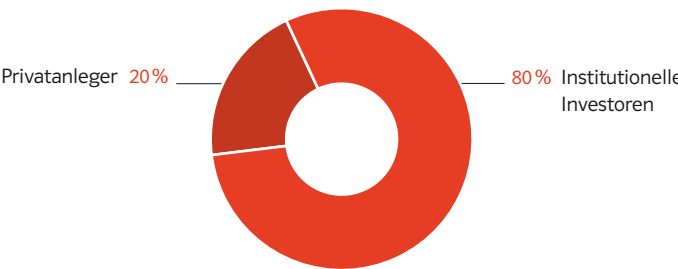

1) Prozentwerte auf Basis der gesamten identifizierten Aktionäre  
2) Prozentangaben gerundet  
Quellen: Aktienregister (Stand 31. Januar 2011), Thomson Reuters (Stand 31. Dezember 2010)

## Unsere Finanzstrategie ist langfristig orientiert und lässt gleichzeitig Raum für sinnvolle Weiterentwicklungen.

Die Ziele unserer Finanzstrategie sind, eine kostenoptimale Kapitalstruktur zu schaffen und jederzeit einen unbeschränkten Zugang zu den Kapitalmärkten zu gewährleisten. Für E.ON ist die erfolgreiche Umsetzung dieser Finanzstrategie weiterhin von großer Wichtigkeit, insbesondere unter der Berücksichtigung der vergleichsweise hohen Kapitalanforderungen, die mit unserem Geschäft einhergehen. Ob Wind- oder Solarparks, Kraftwerke, Strom- und Gasverteilnetze, Gastransportleitungen oder Untertage-Erdgasspeicher – unsere Anlagen werden über Jahre hinweg gebaut und binden Kapital teils über mehrere Jahrzehnte.

Auf E.ONs Capital Market Day am 10. November 2010 haben wir bestimmte Anpassungen in unserer Finanzstrategie präsentiert. Diese Anpassungen wurden insbesondere nötig, da wir in Zukunft mit erhöhten Herausforderungen im regulatorischen Umfeld (Stichwort: Brennelementesteuer) sowie auf den europäischen Strom- und Gasmärkten umgehen müssen. So formulieren wir unser Ratingziel nun mit „Solid single A“ nach zuvor „A flat/A2“ (Standard & Poor's/Moody's). Mit dem neuen Rating-Ziel schaffen wir eine Flexibilität, die sicherstellt, dass E.ON nicht zwecks Einhaltung eines engen Ratingziels zu übereilten Handlungen gezwungen wird. Beispielsweise ist der Erfolg von Desinvestitionen mit dem Ziel der Schuldenreduktion unter anderem auch von der Existenz eines aufnahmebereiten Käufermarktes abhängig, zeitlich gesehen ist dies jedoch nicht immer der Fall. Wir sind daher der festen Überzeugung, mit dem adaptierten Ratingziel bei Bedarf eine nachhaltige Umsetzung geeigneter Maßnahmen zur Verbesserung unserer Verschuldungskennzahlen zu gewährleisten.

Als Mess- und Steuerungsgröße für unsere Kapitalstruktur haben wir den Debt Factor definiert. Dieser „Verschuldungsfaktor“ entspricht unserer wirtschaftlichen Netto-Verschuldung geteilt durch unser Adjusted EBITDA. In vergangenen Jahren lag das Ziel für den Debt Factor innerhalb einer Bandbreite von 2,8 bis 3,3, die in Einklang stand mit dem Zielrating von „A flat/A2“. Nun ist unser mittelfristiges Ziel für den Debt Factor ein Wert von kleiner oder gleich 3. Um diesen Zielwert sowie gleichzeitig die Einhaltung unseres Ratingziels sicherzustellen, hat E.ON auf dem

Capital Market Day im November 2010 ein weiteres strategisches Programm zum Management der Portfolio- und Bilanzstruktur angekündigt, welches Desinvestitionen bis Ende 2013 von etwa 15 Mrd € zum Ziel hat. Mehr als 50 Prozent dieser Erlöse werden zur Schuldenreduktion verwendet. Den verbleibenden Betrag werden wir für Wachstumsinvestitionen verwenden. Bereits in 2009 und 2010 haben wir ein strategisches Programm zur Portfolio-Optimierung erfolgreich durchgeführt. Mit Verkaufserlösen von insgesamt rund 13 Mrd € haben wir dabei das ursprüngliche Ziel von insgesamt 10 Mrd € deutlich übertroffen.

Darüber hinaus ist es uns sehr wichtig, unseren Anteilseignern eine attraktive Rendite zu sichern. Ein entscheidender Faktor in diesem Zusammenhang ist unsere über die letzten Jahre stabile und kontinuierliche Dividendenpolitik, die wir weiter fortführen werden. Der Zielwert für unsere Ausschüttungsquote – und damit für die Dividende – liegt unverändert bei einer Bandbreite zwischen 50 und 60 Prozent des bereinigten Konzernüberschusses. Darüber hinaus haben wir angekündigt, für das Geschäftsjahr 2010 eine Zieldividende von 1,50 € pro Aktie vorzuschlagen. Des Weiteren planen wir für die Geschäftsjahre 2011 und 2012 eine Mindestdividende pro Aktie von 1,30 €. Wir sind der festen Ansicht, unseren Aktionären mit dieser Dividendenrendite die Möglichkeit zu einer langfristigen und werthaltigen Investition auch in schwierigen Zeiten zu bieten.

# Entwicklung der E.ON-Aktie 2010

Am Ende des Jahres 2010 lag der Kurs der E.ON-Aktie um 17 Prozent (einschließlich wiederangelegter Dividende) unter dem Kurs zum Jahresende 2009 und entwickelte sich damit deutlich schlechter als der Branchenindex STOXX Utilities (-4 Prozent im selben Zeitraum).

Im Jahr 2010 betrug der Börsenumsatz der E.ON-Aktien 59,8 Mrd € und lag damit 7 Prozent höher als im vergleichbaren Vorjahreszeitraum.

äquivalenten Wertentwicklung des Branchenindex STOXX Utilities (+4 Prozent), des DAX (+0,7 Prozent) und des EURO STOXX (-2,7 Prozent).

Mehr dazu?  
[www.eon.com/aktie](http://www.eon.com/aktie)

## Zehn-Jahres-Entwicklung der E.ON-Aktie

Ein Anleger, der Ende 2000 E.ON-Aktien im Wert von 5.000 € gekauft hatte, erreichte am Jahresende 2010 inklusive wiederangelegter Dividenden (einschließlich Sonderdividende 2006) einen Depotwert von 8.053 €. Dies entspricht einer durchschnittlichen Jahresrendite von 4,9 Prozent und liegt damit über der

## Entwicklung 2000–2010

|                 |       |
|-----------------|-------|
| E.ON            | +61 % |
| STOXX Utilities | +48 % |
| DAX             | +7 %  |
| EURO STOXX      | -24 % |

## Zehn-Jahres-Entwicklung der E.ON-Aktie

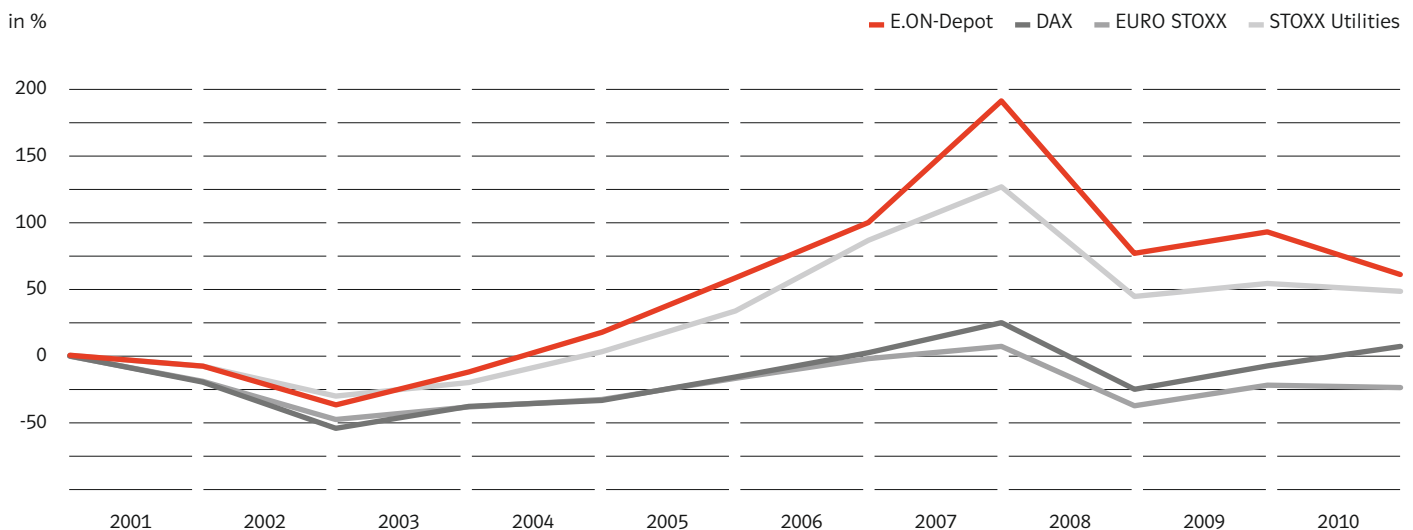

## Gewichtung der E.ON-Aktie in wichtigen Indizes (Stand 30. Dezember 2010)

|                 |        |
|-----------------|--------|
| DAX             | 7,2 %  |
| EURO STOXX      | 2,9 %  |
| STOXX Utilities | 21,2 % |

## Kennzahlen zur E.ON-Aktie<sup>1)</sup>

| in € je Aktie                                    | 2006    | 2007    | 2008    | 2009    | 2010    |
|--------------------------------------------------|---------|---------|---------|---------|---------|
| Ergebnis (Anteil der Gesellschafter der E.ON AG) | 2,82    | 3,69    | 0,68    | 4,42    | 3,07    |
| Ergebnis aus bereinigtem Konzernüberschuss       | 2,22    | 2,62    | 3,01    | 2,68    | 2,56    |
| Dividende                                        | 1,12    | 1,37    | 1,50    | 1,50    | 1,50    |
| Dividendensumme (in Mio €)                       | 2.210   | 2.560   | 2.857   | 2.858   | 2.858   |
| Höchstkurs <sup>2)</sup>                         | 34,80   | 48,69   | 50,93   | 30,47   | 29,36   |
| Tiefstkurs <sup>2)</sup>                         | 27,37   | 32,02   | 23,50   | 18,19   | 21,13   |
| Jahresendkurs am 30. Dezember <sup>2)</sup>      | 34,28   | 48,53   | 28,44   | 29,23   | 22,94   |
| Anzahl ausstehender Aktien (in Mio)              | 1.979   | 1.895   | 1.905   | 1.905   | 1.905   |
| Marktkapitalisierung <sup>3)</sup> (in Mrd €)    | 67,6    | 92,0    | 54,2    | 55,7    | 43,7    |
| Umsatz E.ON-Aktien <sup>4)</sup> (in Mrd €)      | 92,5    | 136,2   | 119,2   | 55,9    | 59,8    |
| Umsatz deutsche Aktien <sup>5)</sup> (in Mrd €)  | 1.539,3 | 2.350,9 | 2.029,6 | 1.009,1 | 1.072,1 |
| Anteil E.ON (in %)                               | 6,0     | 5,8     | 5,9     | 5,5     | 5,6     |

1) bereinigt um nicht fortgeführte Aktivitäten und unter Berücksichtigung des Aktiensplits

2) Xetra

3) auf Basis ausstehender Aktien

4) an allen deutschen Börsen inklusive Xetra

5) Quelle: Deutsche Börse AG

## Dividende

Für das Geschäftsjahr 2010 wird der Hauptversammlung die Ausschüttung einer im Vergleich zum Vorjahr stabilen Bardividende in Höhe von 1,50 € je Aktie vorgeschlagen. Die Ausschüttungsquote vom bereinigten Konzernüberschuss liegt damit bei 59 Prozent, nach 54 Prozent im Vorjahr. Bezogen auf den Jahresendkurs 2010 beträgt die Dividendenrendite 6,5 Prozent – E.ON gehört damit wieder zu den leistungsstärksten Dividendenzahlern im DAX. Darüber hinaus wird die Attraktivität der E.ON-Aktie für Investoren unterstrichen durch die Ankündigung, dass E.ON für die Geschäftsjahre 2011 und 2012 eine Dividende pro Aktie von mindestens 1,30 € plant.

## Dividendenentwicklung

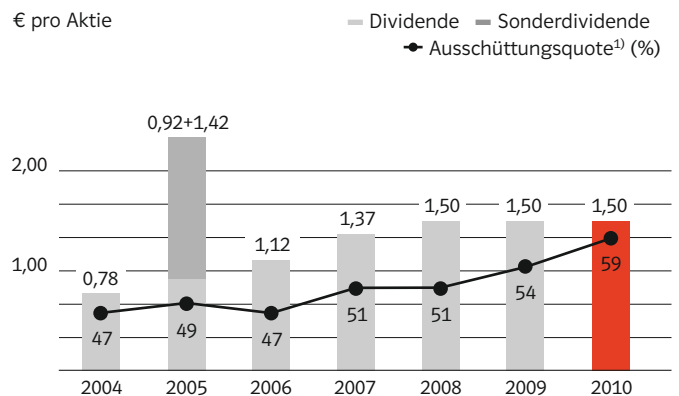

1) Ausschüttungsquote nicht um nicht fortgeführte Aktivitäten angepasst

## Basisdaten zur E.ON-Aktie

### Aktienart

nennwertlose  
Stückaktien/  
Namensaktien

### Wertpapierkennnummer

Deutschland USA  
WKN ENAG99 Cusip-No. 268 780 103  
ISIN DE000ENAG999

### E.ON-Kurszeichen

Reuters Bloomberg  
FSE EONGn.F FSE EOAN GF  
Xetra EONGn.DE Xetra EOAN GY  
ADR EONGY.PK ADR EONGY US



# Intensiver Dialog stärkt die Beziehung.

Unsere Investor-Relations-Arbeit basiert auf vier Prinzipien: Offenheit, Kontinuität, Glaubwürdigkeit und Gleichbehandlung aller unserer Investoren. In diesen Bereichen wollen wir uns jedes Jahr aufs Neue weiterentwickeln. Wir sehen es als unseren Auftrag, unsere Investoren auf regelmäßig stattfindenden Konferenzen und Roadshows, im Internet und im persönlichen Gespräch schnell und transparent zu informieren. Auch im Jahr 2010, welches geprägt war von Herausforderungen im regulatorischen Umfeld und auf den europäischen Strom- und Gasmärkten, haben wir den intensiven, persönlichen Dialog mit unseren Analysten und Anlegern gesucht. Schließlich sind regelmäßige Kommunikation und Beziehungspflege unerlässlich für eine gute Investor-Relations-Arbeit.

Einmal im Jahr lädt E.ON Analysten und institutionelle Investoren zum sogenannten Capital Market Day ein. Während in der Vergangenheit unsere Market Units und operativen Einheiten im Fokus waren, stand der Capital Market Day am 10. November 2010 ganz im Zeichen der neuen Strategie und finanziellen Ausrichtung des Konzerns. Ein Highlight der Konferenz war die Kommunikation des Finanzausblicks für die Planungsperiode 2010-2013. So wurden

neben einer großen Anzahl an Schlüsselindikatoren zur Ergebnismessung auch konkrete Annahmen mit Blick auf die zukünftige Entwicklung unserer Zielmärkte und Rohstoffe, die unser Geschäft beeinflussen, präsentiert. Insgesamt nahmen mehr als 100 Investoren und Analysten an dieser Veranstaltung in London teil; die Teilnehmerquote der Live-Übertragung im Internet war noch um ein Vielfaches höher.

Mehr dazu?

[www.eon.com/investorrelations](http://www.eon.com/investorrelations)

Treten Sie mit uns in den Dialog:

[investorrelations@eon.com](mailto:investorrelations@eon.com)

T 02 11 - 45 79 - 5 49

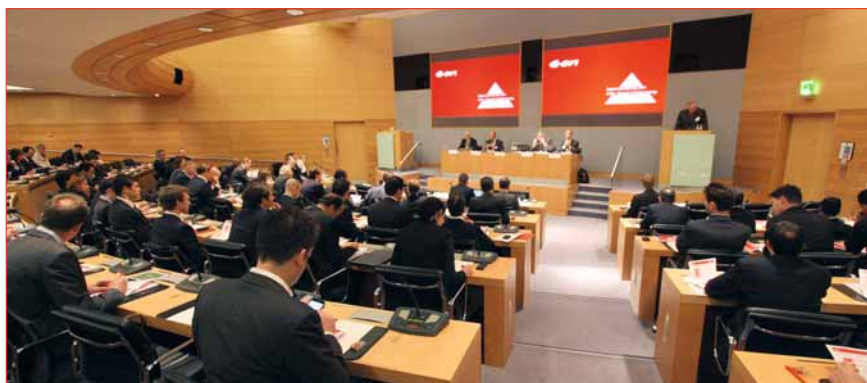

Der Capital Market Day 2010 in London stand ganz im Zeichen unserer neuen Strategie und finanziellen Ausrichtung.

# Reduziertes Finanzierungsvolumen in 2010

Zum 31. Dezember 2010 betrug der Gegenwart ausstehender Anleihen des E.ON-Konzerns insgesamt 27,5 Mrd €. Hinzu kamen Schuldscheindarlehen im Gesamtvolumen von 1,4 Mrd €.

Im Jahr 2010 haben die E.ON AG beziehungsweise die E.ON International Finance B.V. keine neuen Anleihen emittiert. Die in 2010 benötigten Mittel konnten über den operativen Cashflow und Desinvestitionserlöse vollständig gedeckt werden.

E.ON gab im November 2010 bekannt, Erlöse aus Unternehmensverkäufen teilweise zur Schuldenreduzierung einzusetzen. Im Zuge dessen wurden in 2010 diverse Finanzverbindlichkeiten im Gesamtvolumen von rund 1,1 Mrd € vorzeitig zurückgeführt. Insgesamt konnten die Finanzverbindlichkeiten des E.ON-Konzerns zum 31. Dezember 2010 um 5,3 Mrd € im Vergleich zum Vorjahr reduziert werden. In 2011 erfolgte weiterhin die vorzeitige Rückführung beziehungsweise Kündigung von rund 0,5 Mrd € an Schuldscheindarlehen. Zudem hat E.ON am 24. Januar 2011 Anleihegläubigern ein zweistufiges Angebot zum vorzeitigen Rückkauf mehrerer Anleihen im Nennwert von circa 7 Mrd € unterbreitet. Insgesamt wurden Anleihen im Nennwert von 1,81 Mrd € zurückgekauft. All diese Maßnahmen führen zu einer weiteren Verringerung der Bruttoverschuldung des E.ON-Konzerns.

Auf Ebene der Units haben unsere Tochtergesellschaften Central Networks East und West im Dezember 2010 zwei Anleihen über insgesamt 500 Mio £ Sterling begeben. Diese Transaktion diente einer Erweiterung unserer strategischen Flexibilität in Bezug auf dieses Verteilnetzgeschäft in England.

Neben der Emission von Anleihen hat E.ON auch die Möglichkeit zur Nutzung von Commercial-Paper-Programmen. Diese kurzfristigen Schuldverschreibungen sind insbesondere zur Deckung kurzfristiger Finanzierungsspitzen geeignet. Während des letzten Jahres allerdings haben wir auf dieses Instrument immer weniger zurückgegriffen, sodass nach 1,5 Mrd € zu Beginn des Jahres keine Commercial Paper Ende 2010 ausstehend waren.

## Anleihen und Schuldscheindarlehen der E.ON AG und von E.ON International Finance B.V. – Fälligkeitsstruktur

in Mrd €

Stand: 31. Dezember 2010

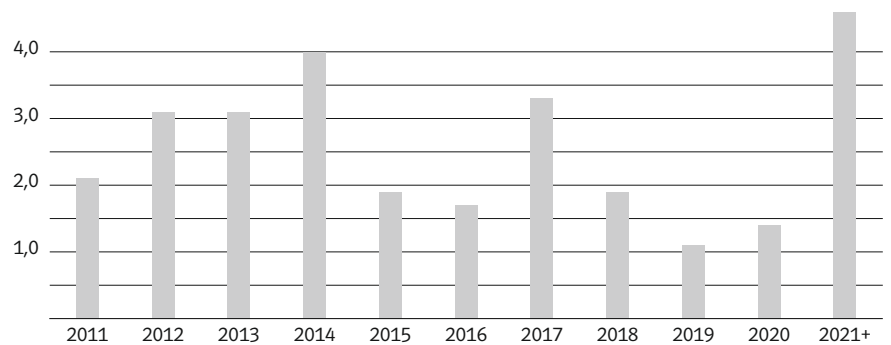

Im Herbst 2010 haben wir eine neue syndizierte Kreditlinie mit einem Volumen von 6 Mrd € und einer Laufzeit von fünf Jahren abgeschlossen. Diese Kreditlinie ist nicht gezogen, sondern dient vielmehr als verlässliche und nachhaltige Liquiditätsreserve des Konzerns. Die neue syndizierte Kreditlinie ersetzt die zuvor bestehende Kreditlinie, deren beide Tranchen über Fälligkeiten im November 2010 beziehungsweise Dezember 2011 verfügten.

### Das Gewicht unserer Anleihen

Ebenso wie E.ON-Aktien spielen auch E.ON-Anleihen eine große Rolle in wichtigen europäischen Indizes. Zum 31. Dezember 2010 lag die Gewichtung von E.ON bei 9,6 Prozent im iBoxx EUR Utilities Index und 2,4 Prozent im iBoxx EUR Non-Financials Index. Diese starken Gewichtungen zeigen sowohl die Bedeutung von E.ON im Kapitalmarkt als auch das robuste Handelsvolumen unserer Anleihen im Sekundärmarkt.

### Mit Verlässlichkeit und Transparenz das Vertrauen unserer Investoren rechtfertigen

Unsere Aktivitäten im Rahmen von Creditor Relations zielen darauf ab, dem Vertrauen unserer Investoren mit einer klaren Strategie und einer transparenten Kommunikation jederzeit Rechnung zu tragen. Den regelmäßigen Kontakt zu Investoren zu erhalten und bei Bedarf auszubauen ist für uns daher eine essenzielle Aufgabe. Vor diesem Hintergrund haben wir verschiedene

Kommunikationsinstrumente etabliert, so zum Beispiel Non-Deal Roadshows in großen Finanzzentren Europas, regelmäßige Telefonkonferenzen für Analysten und Investoren, Informationsveranstaltungen für unsere Kernbankengruppe und das Angebot detaillierter Informationen für die Fremdkapitalseite auf unserer Website. Darüber hinaus sind wir selbstverständlich telefonisch oder per E-Mail erreichbar, wenn unsere Investoren Antworten auf spezielle Fragen wünschen. Mit all diesen Maßnahmen für Fremdkapitalgeber verleihen wir unserer Überzeugung Ausdruck, dass es bei Finanzierungen nicht nur um Zahlen, sondern vor allem auch um gegenseitiges Vertrauen geht.

Creditor Relations beinhaltet bei uns auch die intensive Zusammenarbeit mit Rating-Agenturen. Die Bonitätsbeurteilung von E.ON ist eine wichtige Kenngröße in Bezug auf unsere finanzielle Stabilität und unsere Fähigkeit, Kredite fristgerecht zurückzuzahlen. E.ON wird durch die beiden internationalen Rating-Agenturen Moody's und Standard & Poor's bewertet.

Mehr dazu?

[www.eon.com/creditorrelations](http://www.eon.com/creditorrelations)

[creditorrelations@eon.com](mailto:creditorrelations@eon.com)

T 02 11 - 45 79 - 5 63

## Elektromobilität: Wichtiger Baustein für intelligente Energiekonzepte

Wir wollen den Verkehr durch die Nutzung von Strom sauberer und unabhängiger von fossilen Energieträgern machen. Nach einer Reihe von Projekten und Feldversuchen treiben wir jetzt mit auf unterschiedlichste Kundenbedürfnisse ausgerichteten Produkten im Bereich Ladeinfrastruktur die Markteinführung der Elektromobilität voran. Das Spektrum reicht dabei von benutzerfreundlichen Ladelösungen für die heimische Garage bis zur komplexen Ladeinfrastruktur für Flottenbetreiber. Im nordspanischen Santander besteht bereits die gesamte Flotte unserer Servicefahrzeuge aus Elektroautos. Die Fahrzeuge werden an einer Reihe von Ladestationen, die über die gesamte Stadt verteilt sind, geladen. Darüber hinaus untersuchen wir die Chancen, Elektroautos in zukünftigen intelligenten Stromnetzen als Zwischenspeicher für Strom aus Erneuerbaren Energien zu nutzen. Das bringt uns wichtige Erkenntnisse über die Energiewelt von morgen.

Auch das bedeutet für uns **cleaner & better energy**.

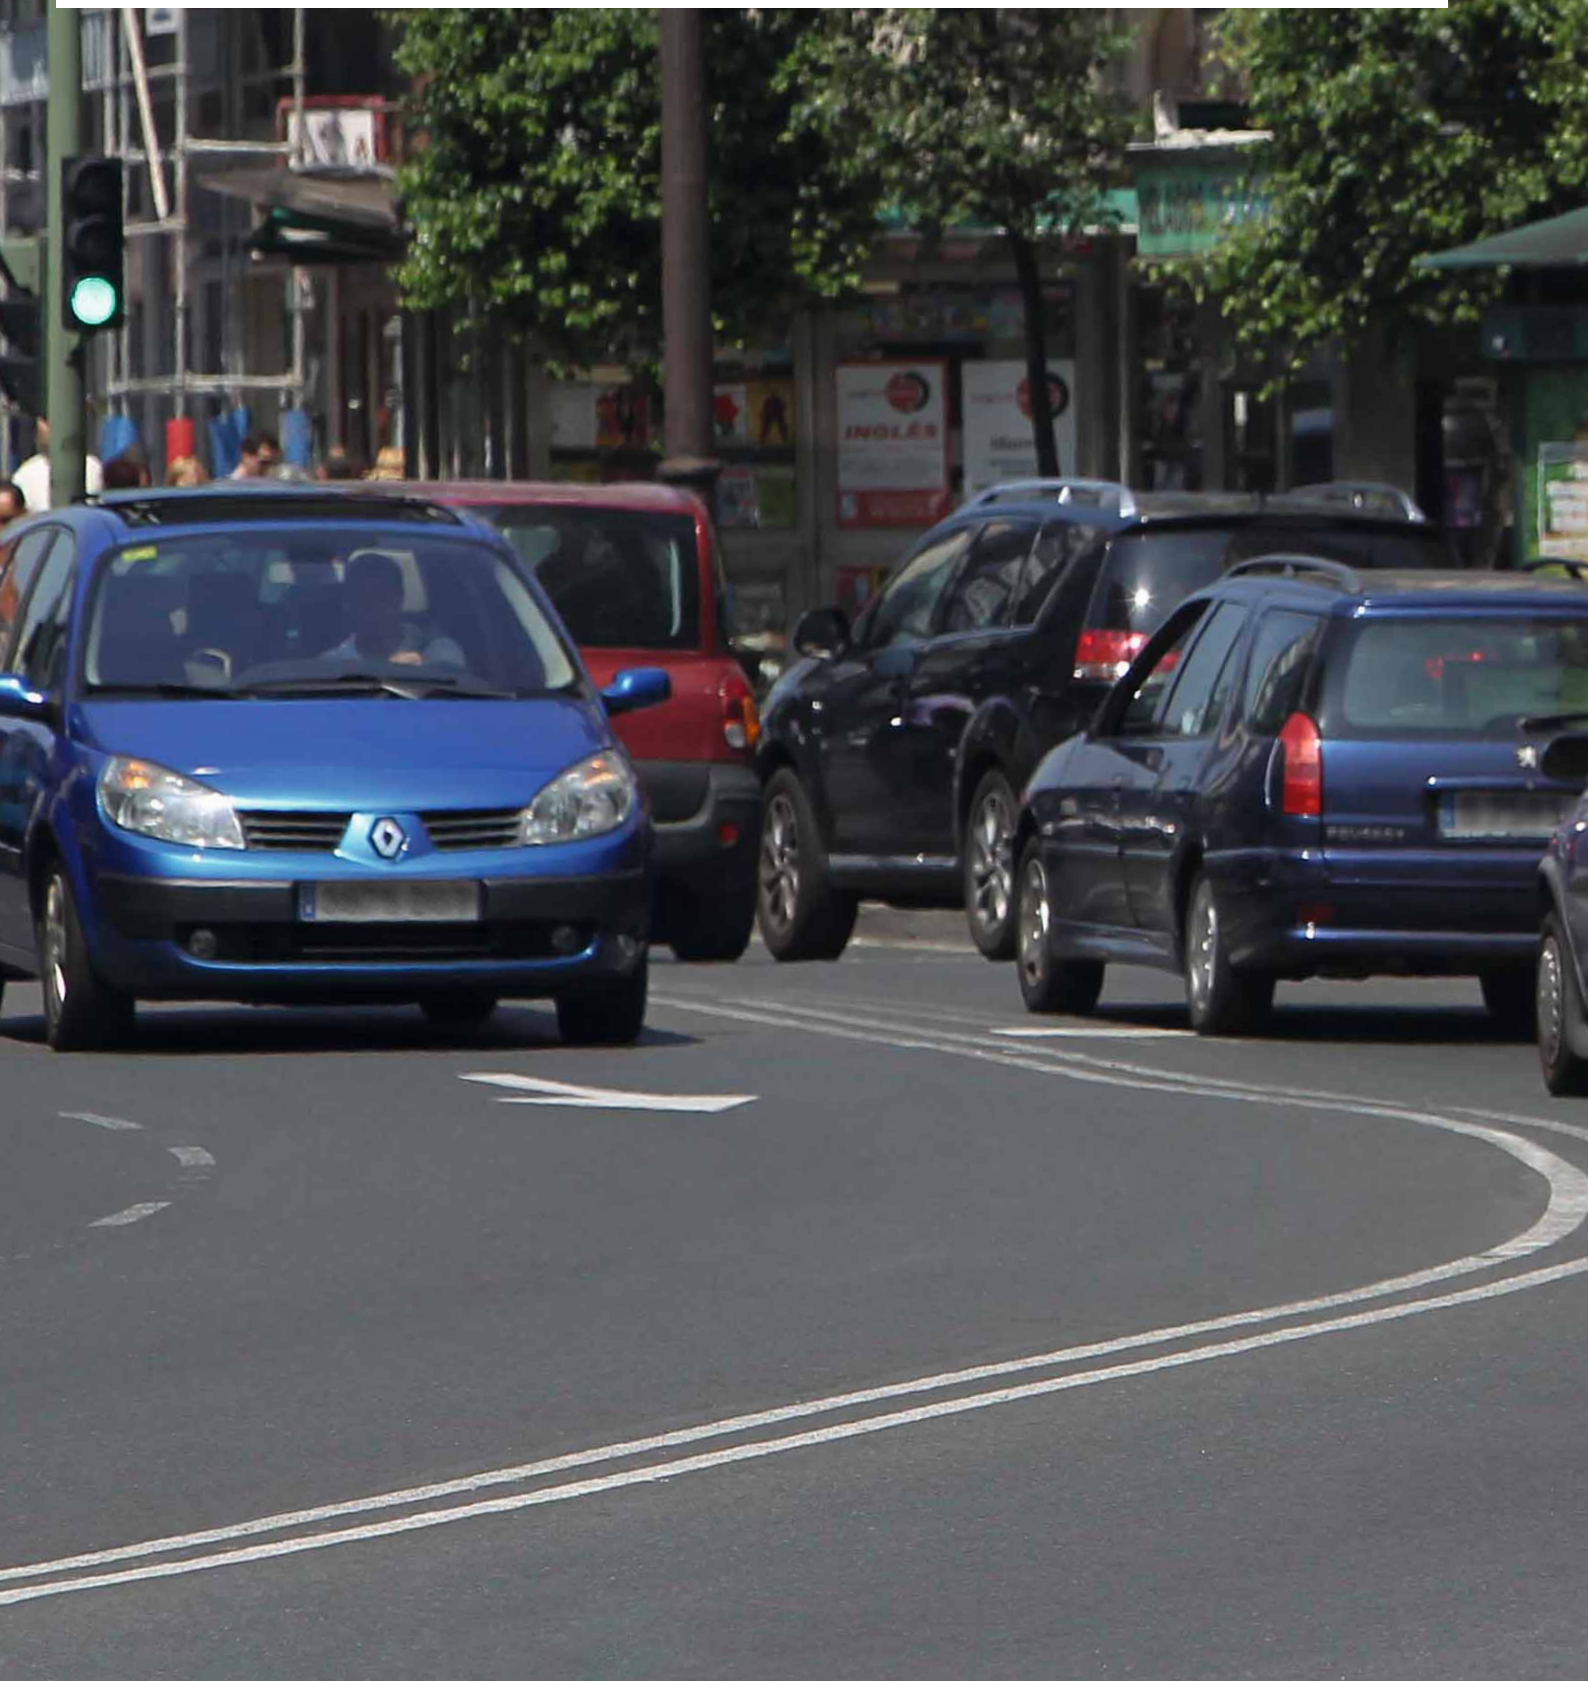



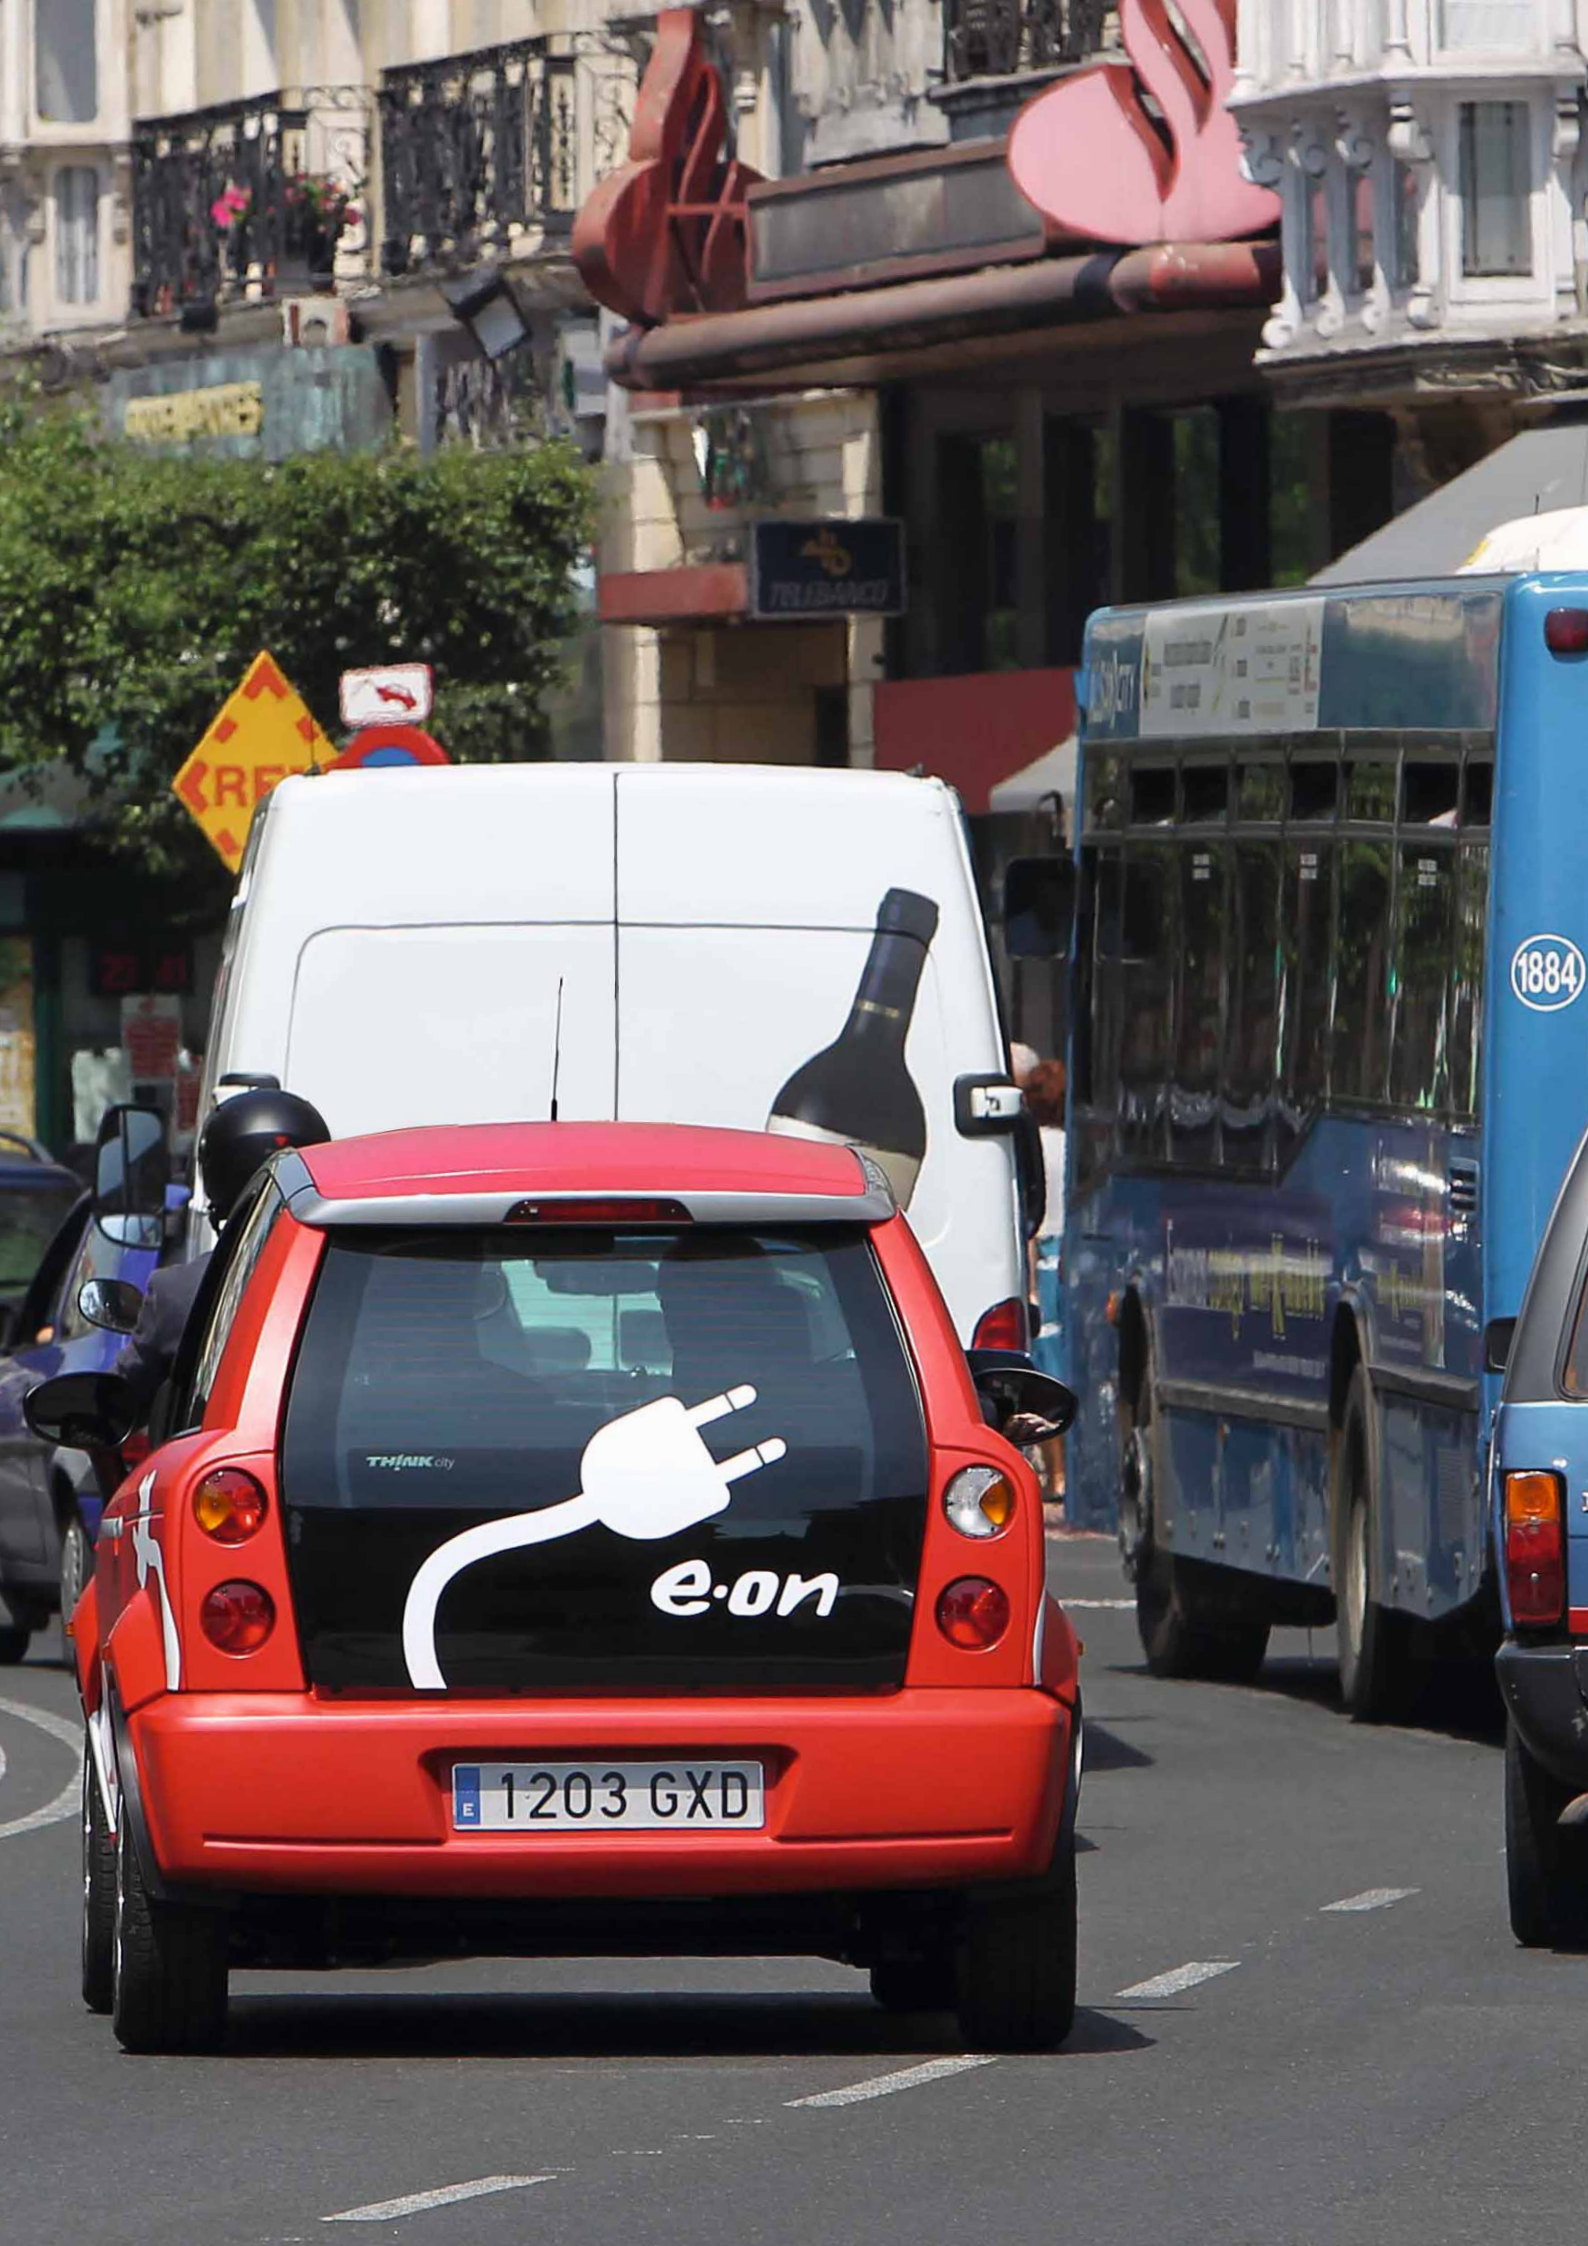



# Unsere Strategie

## Neuer Fokus. Neue

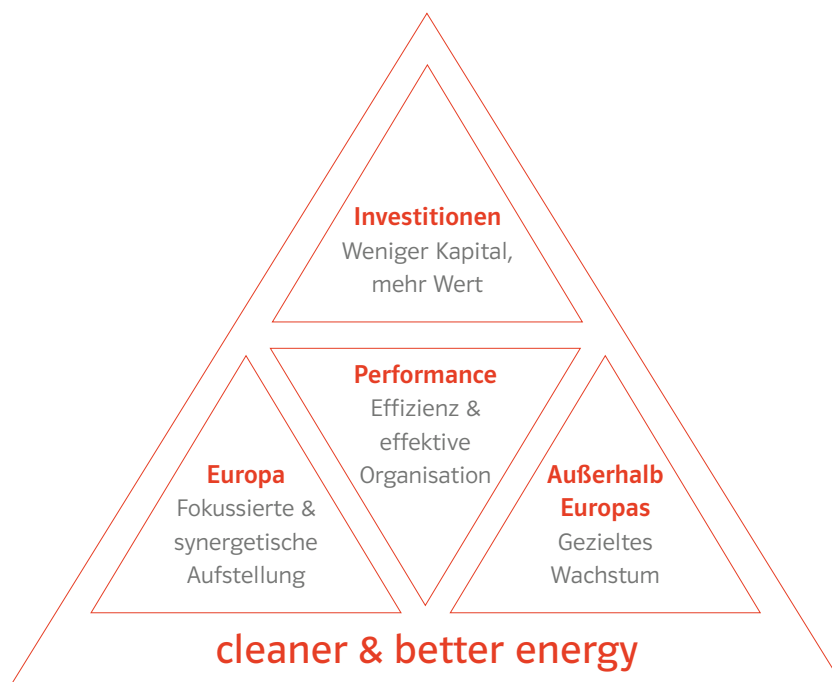

Mit unserer neuen strategischen Ausrichtung haben wir einen klaren Anspruch an uns formuliert und geben Antworten auf die Frage, warum aktuelle und zukünftige Herausforderungen einen neuen strategischen Fokus unabdingbar machen.

In einem sich verändernden Marktumfeld müssen wir unsere Wettbewerbsvorteile effektiver nutzen, um für unsere Kunden, für unsere Investoren und natürlich auch für unser Unternehmen Mehrwert zu schaffen.

Nur so werden wir für unsere Führungskräfte und Mitarbeiter auch weiterhin ein attraktiver Arbeitgeber sein. E.ON bekennt sich dabei klar zu einer starken Position im europäischen Markt und profitiert zusätzlich von neuem, internationalem Wachstum. So entstehen interessante Perspektiven für die persönliche Weiterentwicklung innerhalb und außerhalb Europas.

Unseren Kunden werden wir bessere Produkte und Dienstleistungen, eine wettbewerbsfähige und zuverlässige Energieversorgung und eine sauberere Energiewelt bieten.

Unseren Investoren bieten wir wertsteigernde Wachstumsperspektiven mit einem attraktiven Risiko-Ertrags-Verhältnis und attraktiven Dividenden.

Die neue Strategie bedeutet für E.ON die Transformation von einem primär europäischen Energieversorger zu einem globalen, spezialisierten Anbieter von Energielösungen – davon werden unsere Mitarbeiter, Kunden und Investoren gleichermaßen profitieren.

# Perspektiven.

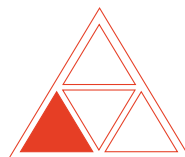

## Strategische Schwerpunkte

Überall, wo wir aktiv sind, haben wir ein Ziel: Wir wollen, dass Energie sauberer und besser wird. Selbst in wirtschaftlich schwierigen Zeiten sind wir davon überzeugt, dass Wirtschaftlichkeit, Versorgungssicherheit und Klimaschutz in einer unternehmerisch erfolgreichen Strategie miteinander vereinbar sind. Unsere weiterentwickelte E.ON-Strategie kommt in unserem Anspruch *cleaner & better energy* zum Ausdruck. Wir haben bewusst von „clean“ und nicht von „green“ gesprochen. Und wir haben bewusst den Komparativ gewählt, da es nicht um absolute Werte oder Einheitsziele in allen Teilen der Welt gehen kann, sondern vielmehr um stetige Verbesserungsprozesse.

E.ON formuliert damit keine eigenen oder politischen Zielgrößen, sondern stellt an sich den Anspruch, die Welt der Energie überall zu verbessern. In diesem Sinne sind „cleaner“ alle Produkte und Dienstleistungen, die dort, wo wir arbeiten, substantiell die Energiequalität bezogen auf Umweltschutz und Wettbewerbsfähigkeit verbessern. „Better“ ist unsere Energie, wenn wir Leistungen erbringen und Technologien einsetzen, bei denen wir deutlich besser sind als der Wettbewerb und entsprechend überlegene Produkte und Dienstleistungen für unsere Kunden entwickeln.

Wie werden wir dies erreichen? Die vier Schlüsselemente unserer Strategie in Kürze:

## Europa

Europa ist und bleibt unser Heimatmarkt und der Schwerpunkt unserer Geschäftsaktivitäten. Aber wir werden unsere Geschäfte in Europa stärker fokussieren und uns auf die Geschäfte und Märkte konzentrieren, in denen wir in einem wettbewerblichen, das heißt in der Regel nicht regulierten Umfeld unsere Stärken nutzen können. In diesem Wettbewerbsumfeld lassen sich Größenvorteile und Synergien zwischen den Geschäften unserer Meinung nach erheblich besser nutzen. Darüber hinaus sind wir davon überzeugt, dass sich mittelfristig bei allen EU-Staaten der Gedanke durchsetzen wird, dass zusammenwachsende Energiemärkte für Bürger und Unternehmen Vorteile haben. Dieses Zusammenwachsen der Märkte ermöglicht weitere Synergien zwischen unseren Aktivitäten, die wir verstärkt nutzen möchten. Wir wollen uns auf das konzentrieren, was wir am besten können und wo wir die größten Chancen für profitables Wachstum sehen.

Strom hat so viele klare Vorteile, dass die Elektrifizierung unseres Alltags, vom Haushalt über Industrie und Gewerbe bis zum Verkehr, noch lange nicht beendet ist. Insofern ist Stromerzeugung ein langfristiger Wachstumsmarkt, obwohl große Teile Europas die Auswirkungen der Weltwirtschaftskrise noch deutlich spüren. Spätestens Mitte des Jahrzehnts werden in den meisten europäischen Ländern die Strommärkte wieder etwas enger, weil ein großer Anteil der heute installierten kohle- und ölgefeuerten Kraftwerke in Europa durch eine Vollauktionierung von CO<sub>2</sub>-Zertifikaten und durch die von der EU beschlossenen Beschränkungen der Emissionen von Großfeuerungsanlagen aus dem Markt gehen wird. Es kommt also alles darauf an, zum richtigen Zeitpunkt mit den richtigen Kapazitäten am Markt zu sein.

### Leinen los!

Den Startschuss für die Umsetzung der neuen E.ON-Strategie hat der Vorstand Ende 2010 gegeben: Rund 600 Führungskräfte aus dem ganzen Konzern haben sich intensiv mit der neuen strategischen Ausrichtung auseinandergesetzt. Danach galt es, alle E.ON-Mitarbeiter umfassend zu informieren und mit den Strategieinhalten vertraut zu machen. Denn: „Ein Kapitän und sein Schiff sind nur so gut wie seine Offiziere und alle Mitglieder seiner Mannschaft“, betonte Johannes Teyssen zum Abschluss der Konferenz.

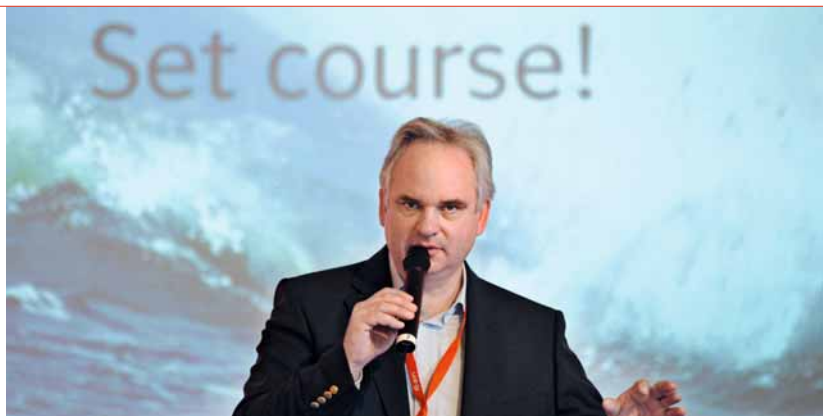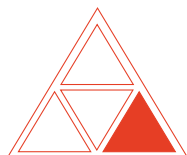

Bei den Erneuerbaren Energien werden wir vor allem in Projekte im industriellen Maßstab und kosteneffiziente Lösungen investieren. Hier wird unser Wachstumsschwerpunkt für die nächsten Jahre liegen. Bei der konventionellen Erzeugung werden wir in Europa die bestehenden Investitionsprojekte abschließen und in ausgewählten Fällen in flexible, CO<sub>2</sub>-arme Erzeugungsverfahren investieren. Insgesamt beabsichtigen wir, in Europa unsere spezifischen CO<sub>2</sub>-Emissionen im Vergleich zu 1990 bereits bis 2020 um 50 Prozent zu reduzieren.

Wir werden unser Geschäftsmodell für Gaseinkauf und -verkauf an das veränderte Marktumfeld anpassen. Außerdem wollen wir noch stärker Synergiepotenziale durch eine übergreifende Optimierung des europäischen Gasgeschäfts ausschöpfen.

Im Vertrieb werden wir unsere Wettbewerbsfähigkeit durch effiziente operative Strukturen, wettbewerbsfähige Vertriebsprodukte für Strom, Gas und Wärme und innovative Kundenlösungen stärken. Dazu zählen auch energienahe Dienstleistungen wie Energieeffizienz-Beratung und dezentrale Energieerzeugung.

### Außerhalb Europas

Während es in Europa vorrangig um eine Transformation des Energiesystems in Richtung noch mehr Effizienz und Klimaschutz geht, haben andere Regionen der Welt ein starkes Nachfragewachstum und damit verbunden einen enormen Nachholbedarf beim Ausbau von modernen Erzeugungskapazitäten. Wir verfügen über Spitzen-Know-how beim Bau von konventionellen Kraftwerken und Erneuerbaren Energien. Diese Erfahrung und unser ausgezeichnetes Können wollen wir künftig noch stärker auch außerhalb Europas einsetzen.

Bislang ist E.ON in zwei Regionen außerhalb Europas aktiv: mit der Stromerzeugung aus Erneuerbaren Energien in Nordamerika sowie mit konventioneller Stromerzeugung und Gasförderung in Russland. In Nordamerika werden wir die Erneuerbaren Energien im Einklang mit den politischen Rahmenbedingungen weiterentwickeln. In Russland werden wir unser Neubauprogramm im Bereich der konventionellen Stromerzeugung umsetzen, das schon kurzfristig eine positive Kapitalrendite verspricht. Darüber hinaus wird E.ON zunächst zwei zusätzliche Wachstumsregionen für die konventionelle und erneuerbare Energieerzeugung erschließen. Dabei werden wir ausschließlich Lösungen anbieten, die zu deutlichen Verbesserungen der dortigen Energieversorgung beitragen.

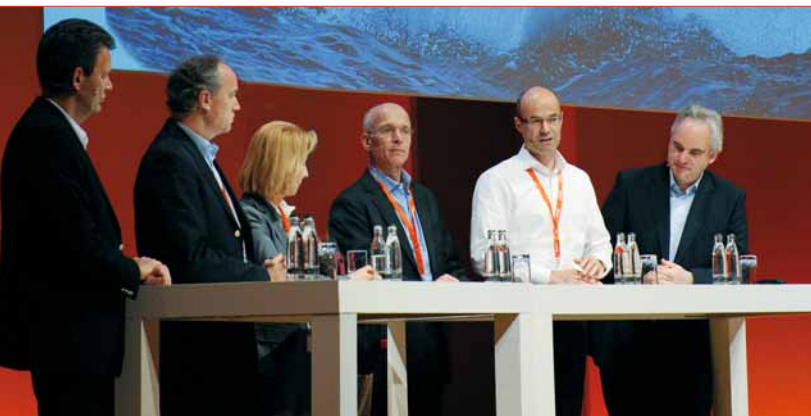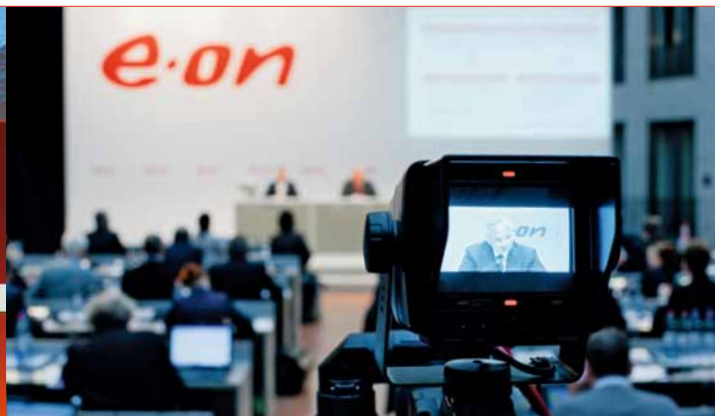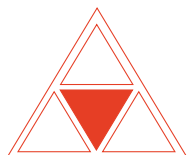

### Performance

Mit unserem Effizienzprogramm „PerformtoWin“ haben wir bereits Kostensenkungen und operative Verbesserungen in Höhe von jährlich 1,5 Mrd € ab 2011 definiert und zu einem großen Teil bereits realisiert. Wir werden darauf aufbauen. Effizienzsteigerungen sollen aber nicht mehr Ergebnis gesonderter Programme oder Projekte sein, sondern fester Bestandteil einer neuen, umfassenden Leistungskultur unseres Unternehmens. Bei bestehenden und neuen Geschäften steht die Rentabilität künftig noch stärker im Vordergrund als bisher. Ab Ende 2013 werden wir so jährlich 600 Mio € zusätzliche Ergebnispotenziale heben. Topleistung zu erbringen und eine Leistungskultur aktiv zu leben, das sind unabdingbare Voraussetzungen für unseren Erfolg in einem zunehmend wettbewerbsintensiven und anspruchsvollen Umfeld. Dabei ist es unser Anspruch, in allen Geschäften, in denen wir aktiv sind, zum Top-Quartil der Branche zu gehören.

Diese neue Leistungskultur und unsere strategische Neuausrichtung insgesamt wird durch eine veränderte, schlagkräftigere Konzernstruktur umgesetzt. Dabei wird der von der Konzernleitung in Düsseldorf geführte Konzern in globale Funktions- und regionale Ländereinheiten gegliedert. Die fünf globalen Einheiten sind für das Management der Erzeugungsflotte, für Erneuerbare Energien, den Energiehandel, Neubau und Technologie und das globale Gasgeschäft verantwortlich.

Die zwölf regionalen Einheiten in Europa verantworten das Vertriebsgeschäft für Strom, Gas und Wärme, die regionale Infrastruktur sowie die dezentrale Erzeugung und kundennahe Dienstleistungen. Russland wird als separate Einheit geführt. Unterstützende Aufgaben wie IT oder Einkauf werden funktional organisiert. Diese neue Struktur macht uns schlagkräftiger, effizienter und stellt sicher, dass unsere Strategie klarer und schneller in unseren Märkten umgesetzt wird.

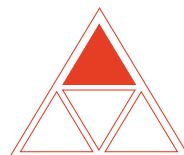

### Investitionen

Wir sehen klare Wachstumschancen in den Energiemärkten, vor allem außerhalb Europas und dabei insbesondere in der Stromerzeugung. Wir müssen aber auch berücksichtigen, dass E.ON in den nächsten Jahren vor immensen wirtschaftlichen Belastungen steht. Diese sind Folge politischer Entscheidungen und eines deutlich veränderten Marktumfelds in unseren heutigen Märkten.

Wenn wir unsere Marktchancen optimal nutzen wollen, müssen wir neue Wege finden, um zukünftig Wachstum bei geringerer Kapitalbindung zu schaffen. Wir müssen auf Basis unserer Kompetenzen wachsen und weniger durch immer steigenden Kapitaleinsatz.

Um aus weniger Kapital mehr Wertwachstum zu generieren, werden wir verschiedene Modelle nutzen: Im Bereich Erneuerbare Energien werden wir beispielsweise – in Europa und in Nordamerika – nicht mehr zwingend Betreiber und alleiniger Eigentümer von Windparks sein. Dort, wo wir interessierte Partner als Miteigentümer finden, wollen wir vor allem durch Design, Planung und Betrieb unser Geld verdienen.

In neuen Märkten muss dies umso mehr gelten. Kapital ist dort vorhanden. Unser wirklicher Beitrag ist unsere Expertise. Wir werden mit kapitalstarken Partnern mit lokalen Beziehungen arbeiten und unser Know-how im Bau und Betrieb in den verschiedenen Technologien und auch im Verständnis der Großhandelsmärkte einbringen. Die Logik hinter dieser neuen Strategie: Wir werden uns noch stärker auf die Leistungen und Prozessschritte konzentrieren, bei denen wir Weltspitze sind und die eine hohe Wertschöpfung erlauben.

Im Zeitraum 2011 bis 2013 planen wir, auf Basis unserer bestehenden Geschäfte insgesamt bis zu 20 Mrd € zu investieren. Unsere Erwartung an diese Investitionen ist hoch. Alle neuen Wachstumsprojekte, wie zum Beispiel unsere neuen Offshore-Windparks oder neue Gaskraftwerke, müssen mindestens 1,5 Prozentpunkte mehr als die Kapitalkosten erzielen.



## Grain LNG in Großbritannien: Sichere Gasversorgung, weniger CO<sub>2</sub>

Der umweltschonende Brennstoff Erdgas ist als wichtiger Bestandteil einer nachhaltigen Energieversorgung nicht mehr wegzudenken. Sein Bedarf wird in den kommenden Jahren weiter zunehmen. Wir sichern die langfristige Erdgasversorgung für Europa mit einem breit diversifizierten Bezugsportfolio, zu dem auch der Import von verflüssigtem Erdgas (Liquefied Natural Gas, LNG) gehört. Dazu haben wir uns bei der dritten Ausbaustufe des britischen LNG-Terminals Isle of Grain langfristige Kapazitäten gesichert. Das ist für uns attraktiver als der Bau eines eigenen Terminals, der in nennenswertem Umfang Investitionsmittel binden würde. Damit haben wir neben unseren LNG-Importkapazitäten in Spanien nicht nur unsere erste langfristige LNG-Importkapazität in Nordwest-Europa in Betrieb genommen, wir setzen auch neue Akzente beim Klimaschutz. Ein Teil der Wärme, die für das LNG-Terminal benötigt wird, kommt aus unserem Blockheizkraftwerk auf dem Festland. Es erzeugt gleichzeitig Strom für rund eine Million Haushalte. Dadurch reduzieren wir die CO<sub>2</sub>-Emissionen allein an diesem Standort um jährlich bis zu 350.000 Tonnen.

Auch das bedeutet für uns **cleaner & better energy**.

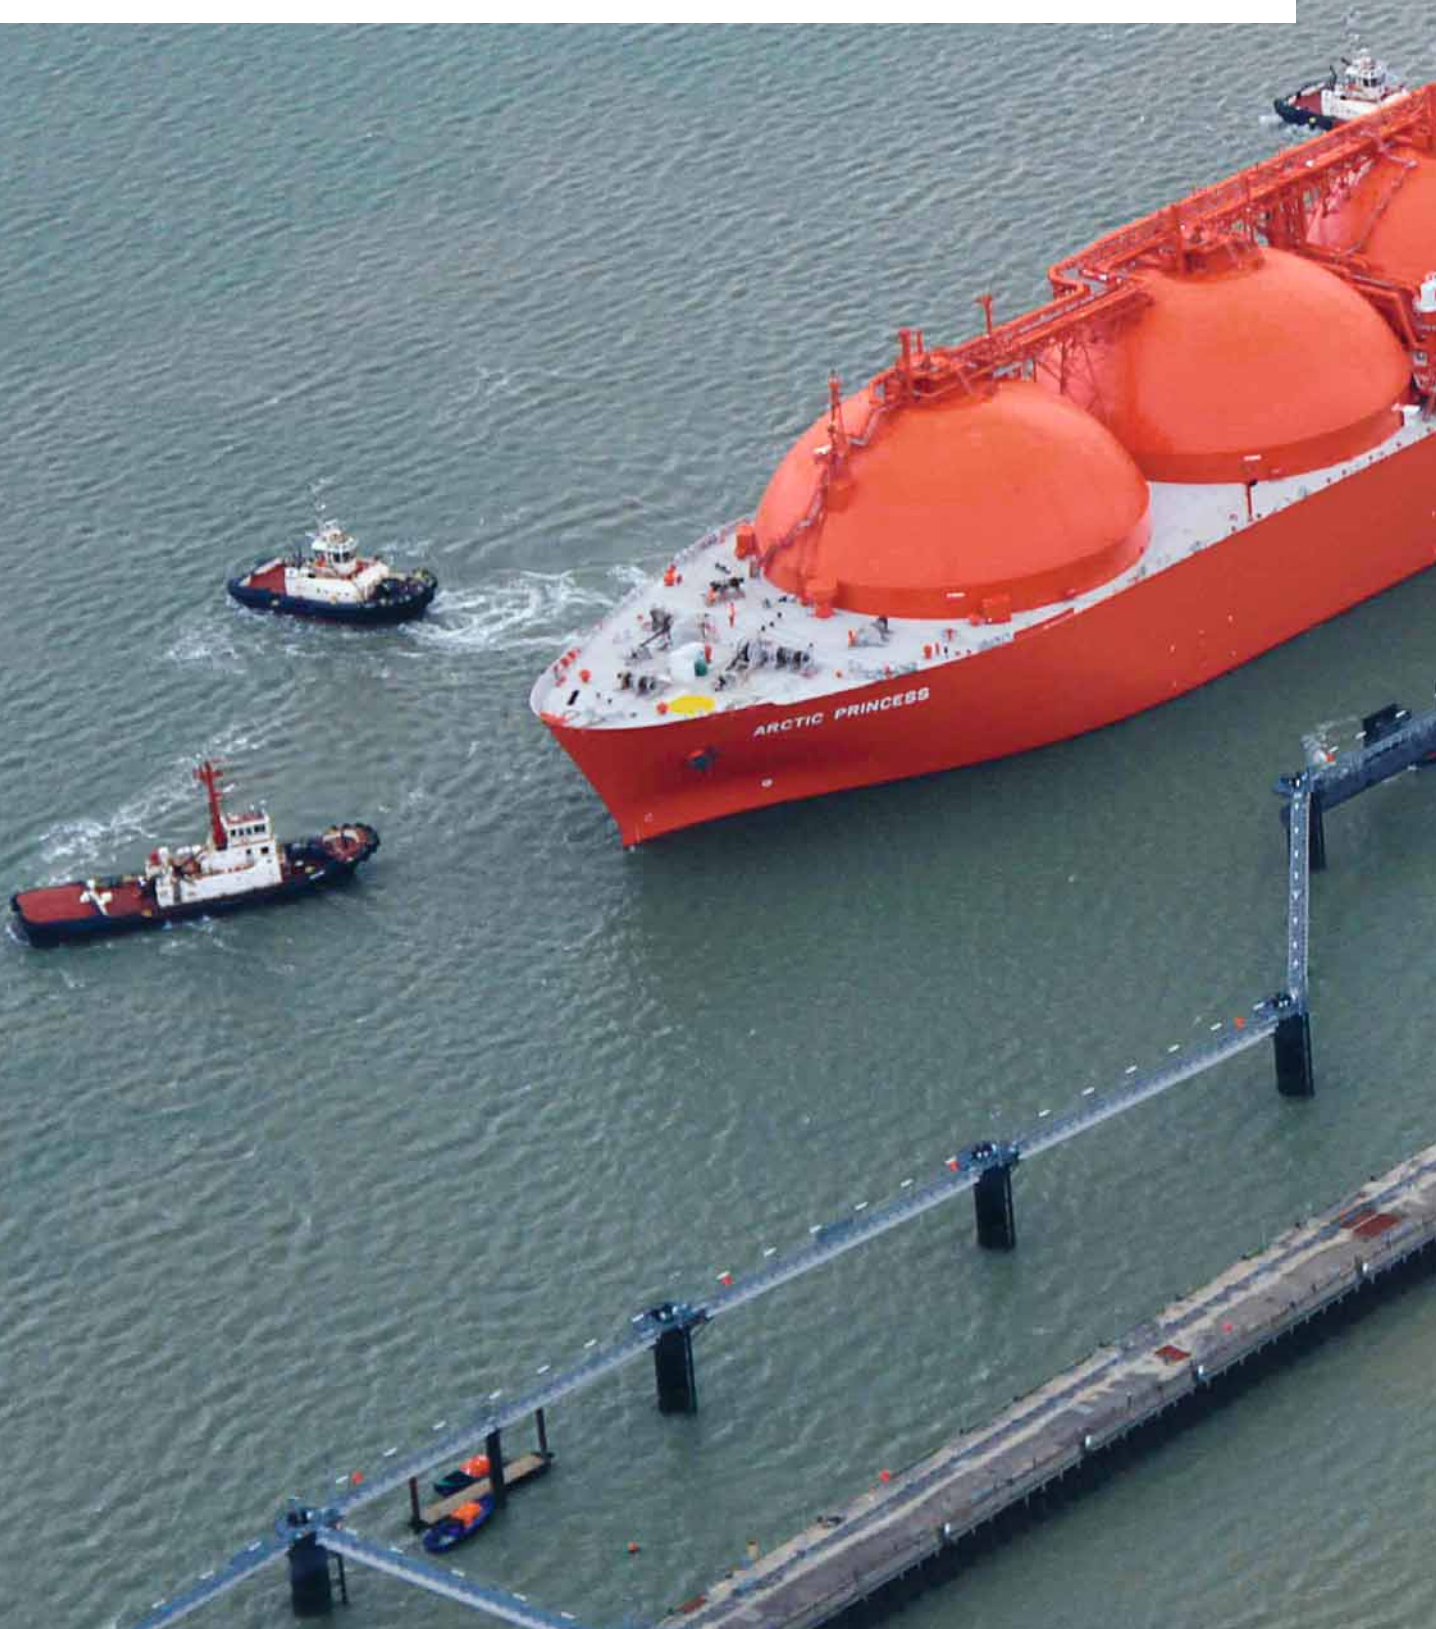



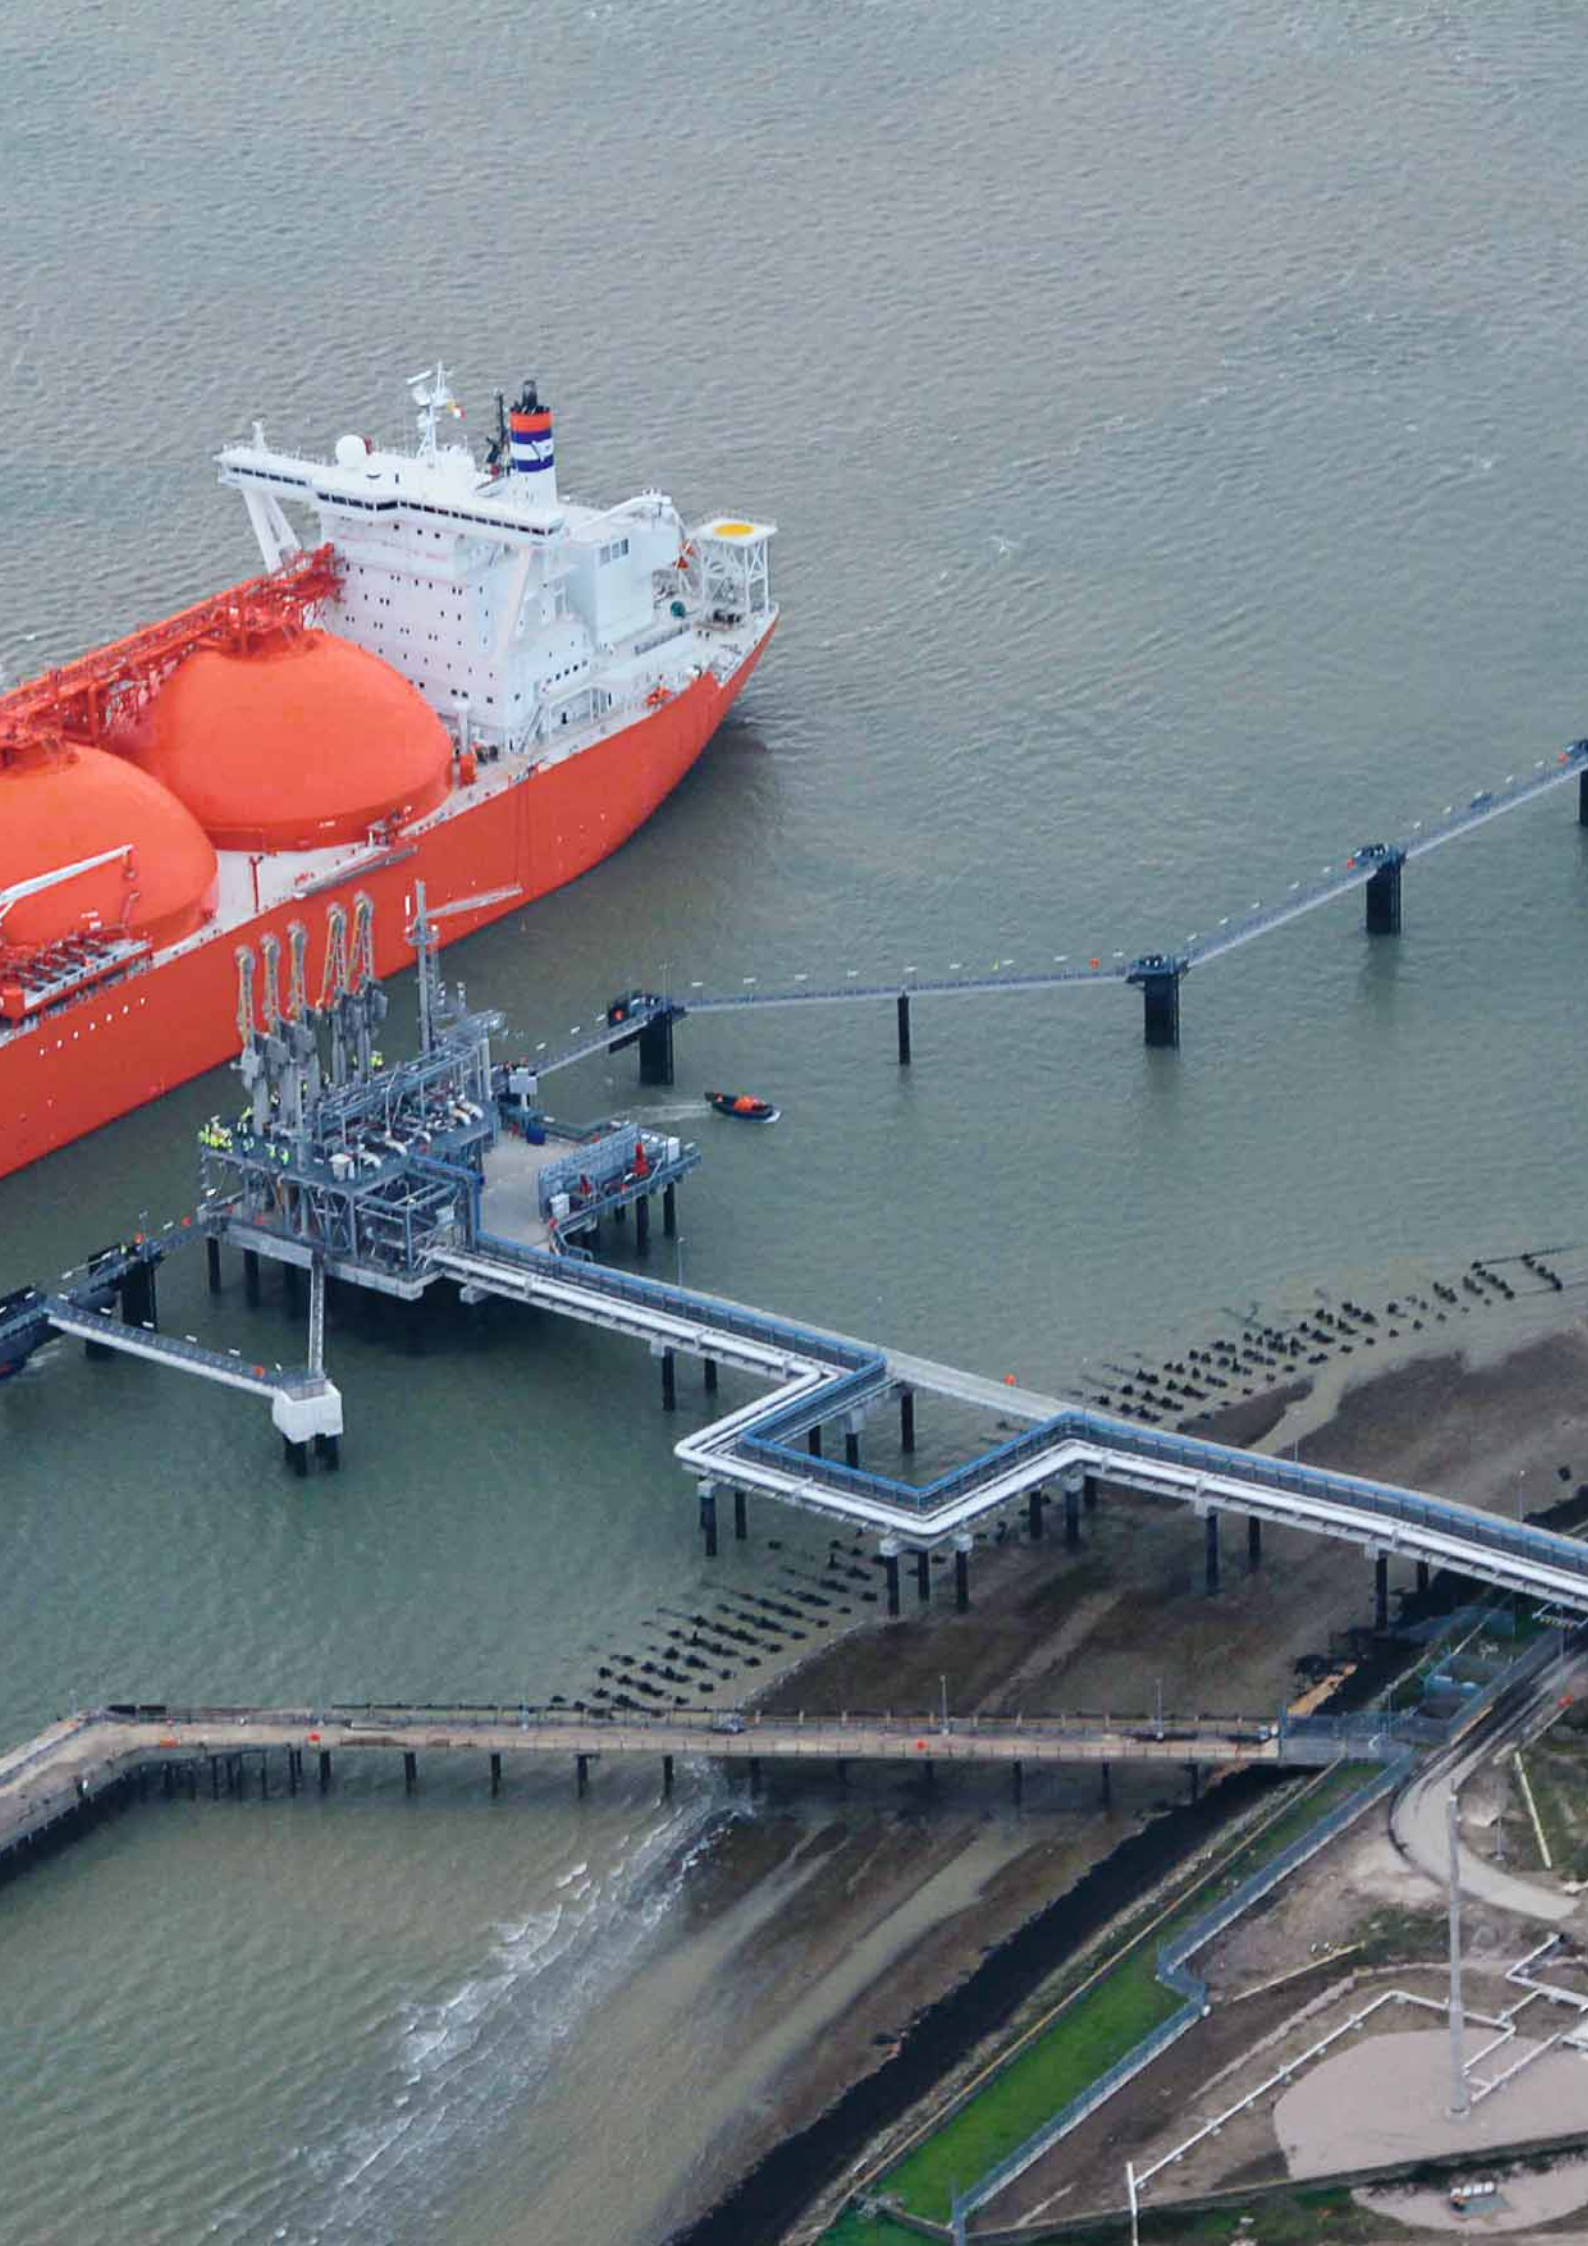

# Unsere Struktur

Überblick

## Neue Struktur. Neue Möglichkeiten.

Wir sehen klare Wachstumschancen in den Energiemärkten, in Europa, aber vor allem auch außerhalb Europas. Um dieses Wachstumspotenzial effizient zu nutzen, haben wir unsere Konzernstruktur neu aufgesetzt und verschlankt. Dabei wird der von der Konzernleitung in Düsseldorf geführte Konzern in globale Funktions- und regionale Ländereinheiten gegliedert. Fünf globale Einheiten sind für das Management der Erzeugungsflotte, Neubau und Technologie, Erneuerbare Energien, das globale Gasgeschäft und den Energiehandel verantwortlich.

Zwölf regionale Einheiten in Europa verantworten das kundennahe Vertriebsgeschäft, die regionale Infrastruktur sowie die dezentrale Erzeugung. Auch unser Erzeugungsgeschäft in Russland wird als eigenständige Einheit geführt.

Unterstützende Aufgaben wie IT oder Einkauf werden funktional organisiert. Diese neue Struktur macht uns schlanker, effizienter und stellt sicher, dass unsere Strategie klarer und schneller in unseren Märkten umgesetzt wird.

Im Rahmen unserer neuen Strategie werden wir mit unserer neuen Einheit E.ON International Energy unsere hohe Kompetenz bei allen Werttreibern der konventionellen und erneuerbaren Erzeugung künftig auch in starken Wachstums-Regionen außerhalb Europas einsetzen. Ziel ist, zunächst zwei zusätzliche Schwerpunktregionen außerhalb Europas zu definieren und zu erschließen.

### Konzernleitung

Hauptaufgabe der Konzernleitung in Düsseldorf ist die Koordination des operativen Geschäfts und damit die Führung des Gesamtkonzerns. Dazu zählt die strategische Weiterentwicklung, Finanzierungs- politik und -maßnahmen, die marktübergreifende Steuerung des Gesamtgeschäfts, das Risikomanagement und die laufende Optimierung unseres Portfolios.

### Die globalen Einheiten

Fünf globale Einheiten sind für konventionelle Erzeugung, Neubau und Technologie, erneuerbare Erzeugung, das globale Gasgeschäft und den Energiehandel verantwortlich.

### Konventionelle Erzeugung

In der globalen Einheit Konventionelle Erzeugung sind alle konventionellen, d.h. alle fossilen und nuklearen Erzeugungskapazitäten innerhalb Europas gebündelt. Sie werden länderübergreifend gesteuert und optimiert.



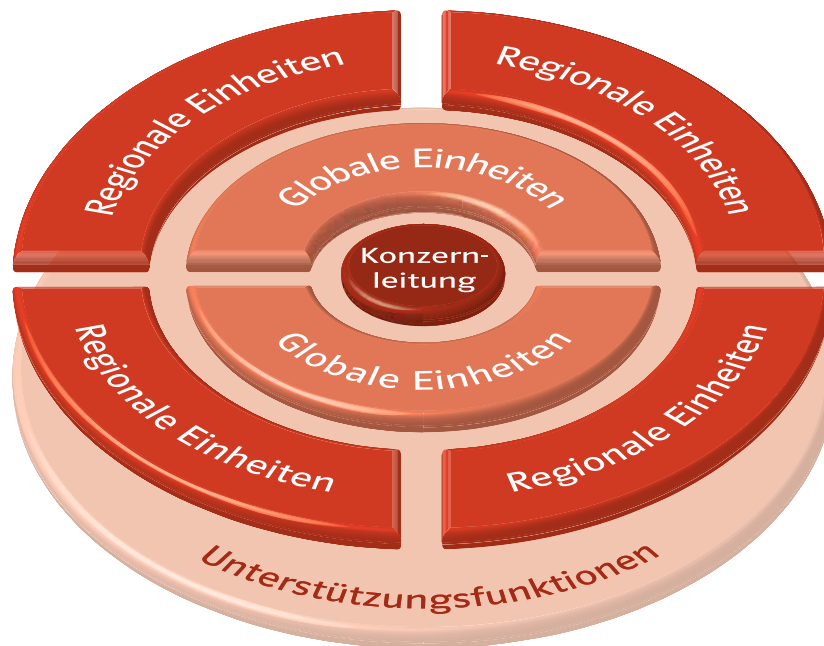

### Neubau & Technologie<sup>1)</sup>

Auch das Neubau- und Technologiegeschäft von E.ON haben wir neu strukturiert und die Projektmanagement- und Engineering-Kompetenzen des Konzerns gebündelt, um den Neubau sowie den Betrieb bestehender Anlagen überall dort zu unterstützen, wo E.ON aktiv ist. Darüber hinaus verantwortet diese Einheit die konzernweiten Forschungs- und Entwicklungsaktivitäten.

### Erneuerbare Erzeugung

Auch unsere weltweiten Aktivitäten in den Bereichen Klimaschutz und Erneuerbare Energien steuern wir global. Unser Fokus ist der weitere Ausbau unserer heute schon führenden Position in diesem Wachstumsmarkt.

### Global Gas

Die Einheit Global Gas ist im E.ON-Konzern verantwortlich für die Gasbeschaffung einschließlich der eigenen Gasförderung sowie für die Projekt- und Produktentwicklung in den Bereichen Speicherung, Transport, LNG und technische Anlagenbetreuung.

### Handel

Die funktionale Einheit Handel verantwortet unsere Handelsaktivitäten für Strom, Gas, Kohle, Öl und CO<sub>2</sub>-Zertifikate und ist an allen großen europäischen Energiebörsen aktiv.

### Die regionalen Einheiten

Das Verteilungs- und Vertriebsgeschäft von E.ON in Europa wird von insgesamt zwölf regionalen Einheiten operativ gesteuert. Dazu zählen neben dem deutschen Markt Großbritannien, Schweden, Italien, Spanien, Frankreich, die Niederlande, Ungarn, Tschechien, Slowakei, Rumänien und Bulgarien. Darüber hinaus wird unser Stromerzeugungsgeschäft in Russland als Fokusregion geführt.

### Unterstützungsfunktionen

Alle Funktionen, die wertvolle Unterstützung für unser Kerngeschäft leisten und nicht ortsgebunden sind, organisieren wir funktional: IT, Einkauf, Versicherung, Beratung sowie kaufmännische Steuerungssysteme. So erzielen wir Synergieeffekte und profitieren vom Fachwissen, das länderspezifisch in unserem Konzern vorhanden ist.

Mehr dazu?

[www.eon.com/struktur](http://www.eon.com/struktur)

Kennzahlen zum 31. Dezember 2010 für den E.ON-Konzern sind im Geschäftsbericht 2010 zu finden.

<sup>1)</sup> kein Berichtssegment

## Globale Einheit

# Konventionelle Erzeugung

- Effizientere Steuerung der Kraftwerke im gesamten Konzern
- Neue, hochmoderne Kraftwerke in Europa ans Netz gegangen und im Bau
- Kompetenzen bei Neubau- und Technologiethematen gebündelt

## Zentrale Steuerung für mehr Effizienz

Als Ergebnis der neuen E.ON-Konzernstruktur werden alle fossilen und nuklearen Erzeugungskapazitäten innerhalb Europas seit dem 1. Januar 2011 in der neuen globalen Einheit Konventionelle Erzeugung geführt. Aufgebaut ist der E.ON-Kraftwerkspark dabei funktional und länderübergreifend nach Kraftwerksflotten, die sich strukturell an Technologiearten orientieren und vom Fleet-Management (Generation Center) mit Sitz in Hannover geführt werden. Die dampfbetriebenen Kraftwerke, die im Wesentlichen mit Kohle befeuert werden, sind dabei in der Steam Fleet zusammengefasst. Die Kernkraftwerke im E.ON-Konzern sind in der Nuclear Fleet gebündelt. Die gasgefeuerten Kraftwerke laufen in der Gas-CCGT Fleet. Die einzelnen Flotten sind für den effizienten Betrieb der zugehörigen Kraftwerke verantwortlich, während das Generation Center die flottenübergreifende Steuerung und Koordination verantwortet sowie zentrale Standards und Services zur Verfügung stellt.

Ziel der Neuorganisation ist eine stringenter und effizientere länderübergreifende Steuerung und Optimierung der Erzeugung im E.ON-Konzern. Durch die Etablierung einer internationalen Organisationsstruktur, den konzernweiten Wissens- und Erfahrungsaustausch sowie die Nutzung von Größenvorteilen sollen Synergien und wirtschaftliche Potenziale im Betrieb der Anlagen systematisch gehoben werden. Anspruch ist es, fachlichen Austausch und Zusammenarbeit konzernweit innerhalb der jeweiligen Kraftwerksflotte zu leben und dafür zu sorgen, dass neue technologische Standards und verbesserte Prozesse allen zugutekommen. Damit wollen wir unseren in den letzten Jahren stark gewachsenen Kraftwerkspark auch in Zukunft effizient und wettbewerbsfähig führen.

## Hohe Flexibilität

Die Leistung der Anlagen unseres Kraftwerksparks kann jederzeit flexibel an die aktuellen energiewirtschaftlichen Gegebenheiten angepasst werden. Unser Kraftwerkspark trägt so zum Ausgleich der schwankenden Einspeisung aus Wind- und Solarkraftwerken bei. Zugleich wird auf diese Weise auch der gesetzlich vorgeschriebene Vorrang für die Einspeisung Erneuerbarer Energien sichergestellt.

## Zukunft der Kernenergie

Das beherrschende Thema für die Nuclear Fleet war im Jahr 2010 die politische Einigung der Regierungskoalition in Deutschland auf ein umfassendes Energiekonzept, das auch eine Laufzeitverlängerung der deutschen Kernkraftwerke enthält. Diese Entscheidung schafft stabile Rahmenbedingungen für den Betrieb von Kernkraftwerken in Deutschland und stellt deutlich klar, dass die Kernenergie für eine sichere, preisgünstige und klimaschonende Stromversorgung noch für einen längeren Zeitraum benötigt wird.

E.ON und Vattenfall haben mit Blick auf die geänderten gesetzlichen Rahmenbedingungen für die Kernenergie vereinbart, gemeinsam alle Möglichkeiten zur baldigen Wiederinbetriebnahme und zur weiteren betrieblichen Optimierung der Kernkraftwerke Krümmel und Brunsbüttel zu prüfen.

## Unser Erzeugungsportfolio aus fossilen und nuklearen Kapazitäten in Europa<sup>1)</sup>

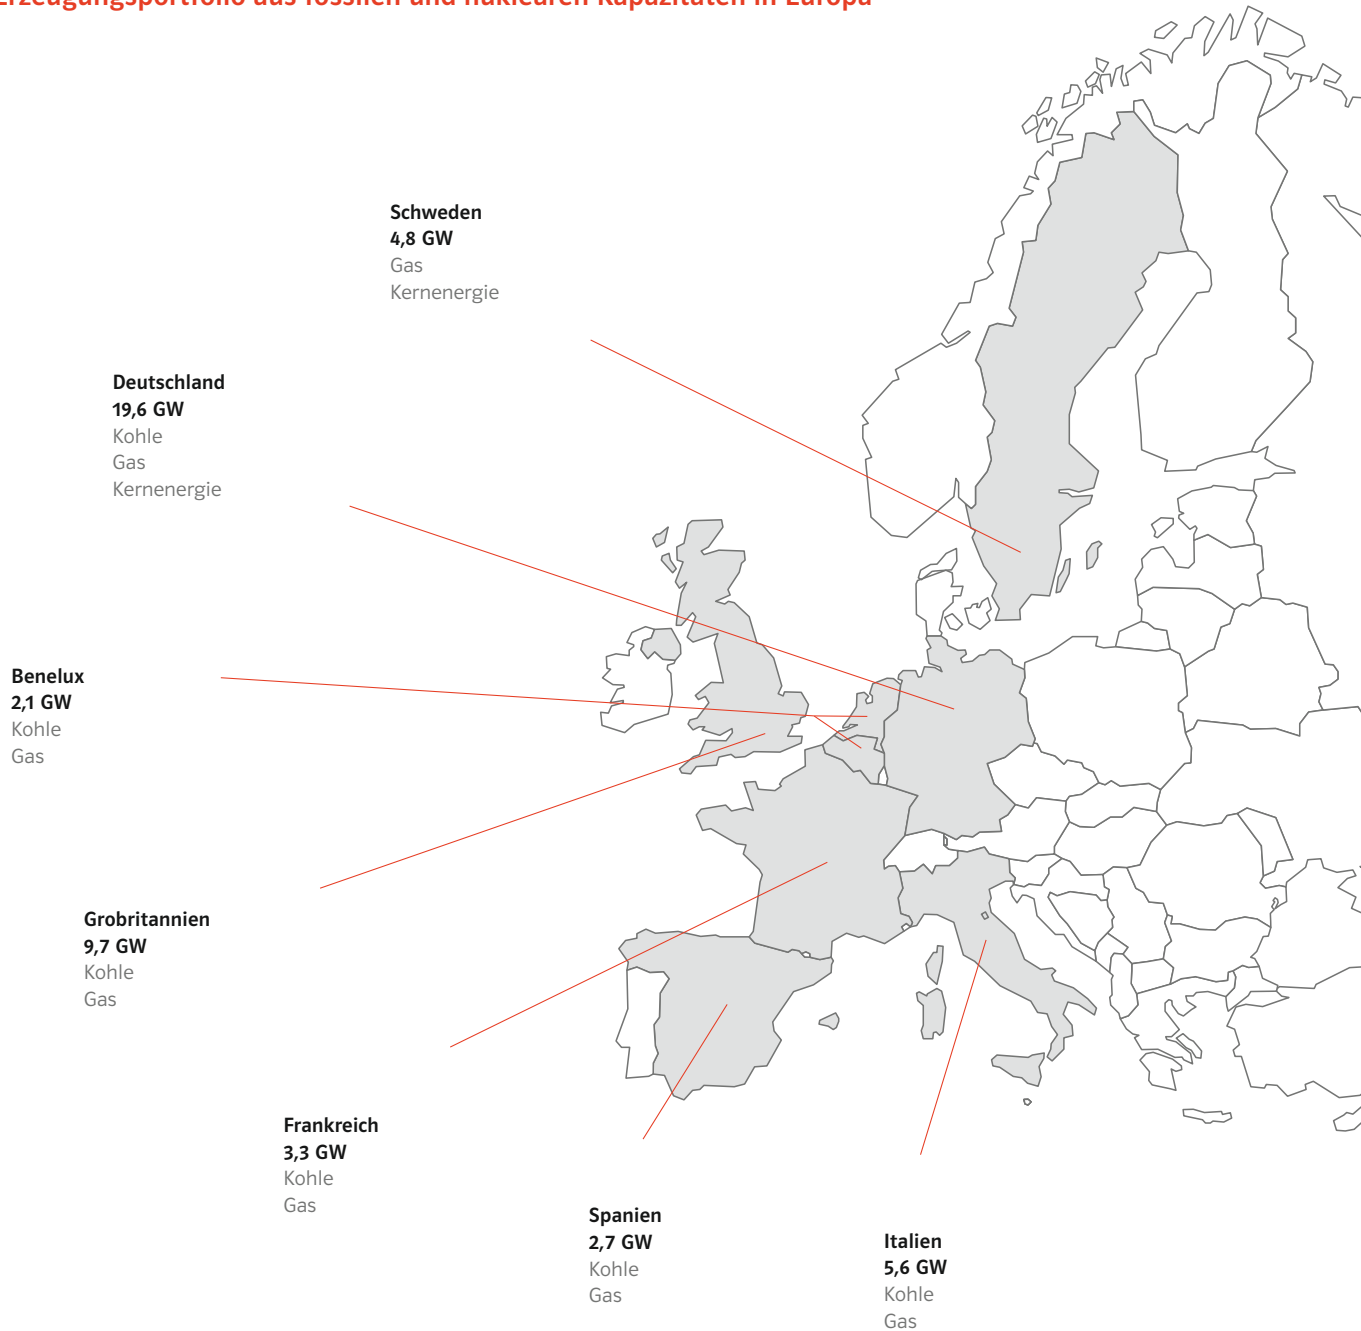

1) Stand 31.12.2010; vorläufige Daten in neuer Struktur  
 Darüber hinaus verfügen wir über Kapazitäten aus dezentraler Erzeugung in Höhe von 3,7 GW in Deutschland, Benelux, Tschechien, Ungarn, Großbritannien und Schweden.  
 Unsere Kapazitäten in Russland in Höhe von 8,7 GW sind ab Seite 72 ausgewiesen.

### Strategische Forschung auf der Agenda – Kernkraftwerke der nächsten Generation

Die „Sustainable Nuclear Energy Technology Platform“, kurz SNETP, eine europaweite Organisation, der auch E.ON angehört, will sicherstellen, dass Kernenergie weiter fester Bestandteil im CO<sub>2</sub>-neutralen Energiemix der Zukunft ist. Die strategische Forschungsagenda der SNETP und ihr entsprechender Plan zur Implementierung umfassen unter anderem die Entwicklung der nächsten Kernkraftwerksgeneration, aber auch neue Kernkraft-Anwendungsbereiche wie die Erzeugung von Wärme und Wasserstoff.

### Neue Kraftwerke fast überall in Europa

2010 war die Erzeugung erheblichen Veränderungen unterworfen. Einerseits wurde die Abgabe von insgesamt rund 5.000 MW Erzeugungskapazität in Deutschland entsprechend einer gegenüber der EU-Kommission abgegebenen Verpflichtungszusage abgeschlossen. Andererseits gingen europaweit zahlreiche neue Kraftwerke in Betrieb und wurden damit auch in die Flottenorganisation eingebunden. Dabei handelte es sich durchweg um hocheffiziente und flexibel einsetzbare Gaskraftwerke. Sie sind besonders geeignet, Lastschwankungen im Netz, die durch die



wachsende und eher unregelmäßige Einspeisung von Wind und Sonnenenergie entstehen, schnell und flexibel auszugleichen. Damit leisten diese Anlagen auch einen wirkungsvollen Beitrag zum Ausbau der Erneuerbaren Energien.

So wurde am 17. Mai 2010 nach knapp zweijähriger Bauzeit im oberbayrischen Irsching eines der effizientesten und leistungstärksten Gas- und Dampfkraftwerke der Welt in Betrieb genommen, der Gasblock Irsching 5. Mit einem Wirkungsgrad von 59,7 Prozent setzt die Anlage in puncto Energieeffizienz und Klimaschutz neue Maßstäbe. Mit der für 2011 geplanten Inbetriebnahme des hocheffizienten Gasblocks Irsching 4 wird E.ON erstmals für diesen Anlagentyp einen Gesamtnutzungsgrad von über 60 Prozent erreichen.

Weiterhin konnten mit dem operativen Start der Gas- und Dampfkraftwerke Émile Huchet (Frankreich) sowie Scandale (Italien) auch außerhalb Deutschlands erfolgreiche Neuzugänge verzeichnet werden. Die im Frühjahr 2010 in Betrieb gegangenen Blöcke Émile Huchet 7 und 8 haben dabei eine Gesamtleistung von 860 MW und bilden gemeinsam mit den bestehenden Kohleblöcken 4 bis 6 die größte Kraftwerksanlage von E.ON in Frankreich. Scandale in Süditalien, an dem E.ON mit 50 Prozent beteiligt ist, ist nach Livorno-Ferraris der zweite Neubau, den E.ON in Italien in Betrieb genommen hat. Die Anlage, die im November 2010 den Betrieb aufgenommen hat, gehört mit einem Wirkungsgrad von rund 56 Prozent zu den modernsten in Italien.

Im ersten Quartal 2011 haben auch drei neue Gas- und Dampfkraftwerksblöcke in Grain (Großbritannien) ihren Betrieb aufgenommen. Die Blöcke 6 bis 8 gehören hierbei mit 1.275 MW zu den großen Kraftwerksblöcken in Großbritannien und können rund eine Million Haushalte mit Strom versorgen. Zusätzlich werden 340 MW Wärmeenergie durch Kraft-Wärme-Kopplung bereitgestellt, was in einem Gesamtwirkungsgrad des Kraftwerks von rund 72 Prozent resultiert. Das macht die Anlage nicht nur zu einer der effizientesten Anlagen in Großbritannien, sondern auch zu einer der größten KWK-Anlagen weltweit.

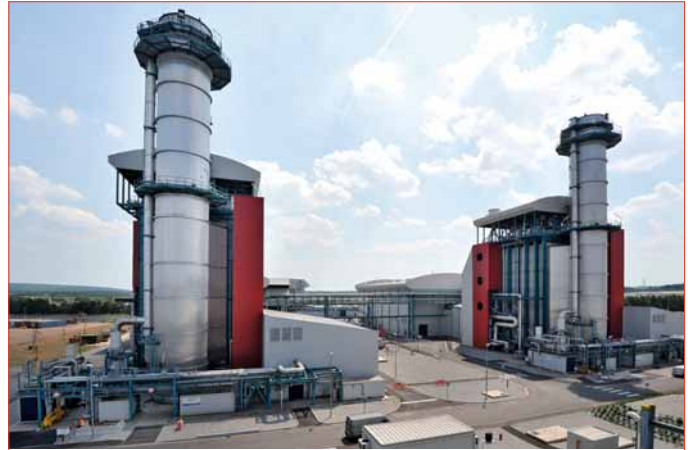

#### Émile Huchet: Größter GuD-Neubau in Frankreich

Im französischen St. Avold (Lorraine), an unserem Kraftwerksstandort Émile Huchet, ist im Frühjahr 2010 das gegenwärtig größte kombinierte Gas- und Dampfkraftwerk (GuD) in Frankreich ans Netz gegangen. Die zwei Blöcke des neuen Kraftwerks haben eine Leistung von zusammen 860 MW und zeichnen sich durch einen hohen Wirkungsgrad von knapp 57 Prozent aus.

Ein weiteres Gas- und Dampfkraftwerk steht im südspanischen Algeciras vor der Fertigstellung. Diese Anlage wird in zwei Gasturbinen und einer Dampfturbine mit einer Gesamtleistung von rund 820 MW und einem Wirkungsgrad von 57,4 Prozent Strom erzeugen.

In der Slowakei ist das Gas- und Dampfkraftwerk Malženice im Januar 2011 ans Netz gegangen. Dieses Kraftwerk verfügt über eine Leistung von 430 MW. Mit einem Wirkungsgrad von 58 Prozent gehört es zu den umweltfreundlichsten und energieeffizientesten Anlagen in der Slowakei. Ein vergleichbares Kraftwerk wird in diesem Jahr im ungarischen Gönyü den Betrieb aufnehmen.

Mehr zur Erzeugung?  
[www.eon.com/erzeugung](http://www.eon.com/erzeugung)

## Globale Einheit

# Neubau & Technologie<sup>1)</sup>

## Bündelung von Know-how bei Neubau- und Technologiethemen

Analog zur funktionalen Behandlung der bestehenden Kraftwerke wurde 2010 auch das Neubau- und Technologiegeschäft von E.ON neu strukturiert: So bündelt seit dem 1. Juli 2010 die globale Einheit Neubau & Technologie die Mitarbeiter und Kompetenzen von E.ON Engineering, der New Build Unit von E.ON Kraftwerke und des Teams Neue Technologien von E.ON Energie. Zusätzlich wird auch das Center of Nuclear Competence von E.ON Kernkraft von der neuen Einheit funktional gesteuert.

In unserer globalen Einheit Neubau & Technologie haben wir unsere Kompetenzen im Projektmanagement, in der Projektabwicklung und im Engineering vereint. Überall dort, wo wir aktiv sind, unterstützen wir auf diese Weise den Betrieb bestehender sowie den Bau neuer Anlagen. Dies umfasst sowohl den fossilen und nuklearen, als auch den erneuerbaren Erzeugungsbereich. Die neue Einheit kann in einem Umfeld, das gleichzeitig durch hohe Qualitätsanforderungen im Projektgeschäft und einen hohen technologischen Entwicklungsdruck geprägt ist, auf unterschiedlichste Marktanforderungen schnell und flexibel reagieren. Darüber hinaus bündelt die Einheit die konzernweiten Forschungs- und Entwicklungsaktivitäten.<sup>2)</sup>

Wesentliche Neubauprojekte im fossilen Bereich sind aktuell zwei hochmoderne Steinkohleblöcke, die im nordrhein-westfälischen Datteln und im niederländischen Maasvlakte im Bau sind.

## CO<sub>2</sub>-Abtrennung und -Speicherung: Emissionen nahe null

E.ON sieht die Technologie zur Abscheidung, zum Transport und zur Speicherung von CO<sub>2</sub> (Carbon Capture and Storage, CCS) als wichtigen Schritt auf dem Weg zu einem CO<sub>2</sub>-armen Erzeugungsmix. Bis zum großtechnischen Einsatz von CCS sind allerdings noch technologische und wirtschaftliche Hürden zu überwinden. E.ON trägt deshalb zur Erforschung und Entwicklung der CCS-Technologie bei, zum Beispiel im Rahmen von Hochschulkooperationen und mit CCS-Pilotanlagen an mehreren Kraftwerksstandorten.

1) Eigenständige globale Einheit, die aber kein gesondertes Berichtssegment ist. Die entsprechenden Zahlen werden im Segment Konzernleitung/Konsolidierung dargestellt.

2) Weitere Informationen zu neuen Technologien sowie Forschung und Entwicklung finden Sie ab Seite 12.

## Maasvlakte 3 und Datteln 4 – Hocheffiziente Kohleverstromung

Die im Bau befindlichen hocheffizienten Steinkohleblöcke im niederländischen Maasvlakte und im nordrhein-westfälischen Datteln (siehe Bild) werden in Sachen Effizienz neue Maßstäbe setzen und durch die Optimierung der Anlagentechnik einen Wirkungsgrad von über 45 Prozent erreichen. Beide Anlagen sind so konzipiert, dass über die Auskopplung umweltfreundlicher Fernwärme Wohngebiete in der Umgebung versorgt werden können. Datteln 4 soll beispielsweise rund 100.000 Haushalte im mittleren Ruhrgebiet mit Fernwärme versorgen. Pro erzeugter Kilowattstunde Strom benötigen die neuen Blöcke zudem deutlich weniger Kohle als alte Anlagen. Beim Kraftwerksprojekt Datteln 4 arbeitet E.ON auf allen Ebenen an der Wiederherstellung der planungsrechtlichen Grundlagen. E.ON ist von der Genehmigungsfähigkeit und den ökonomischen und ökologischen Vorteilen von Datteln 4 fest überzeugt und strebt eine schnellstmögliche Fertigstellung und Inbetriebnahme an.

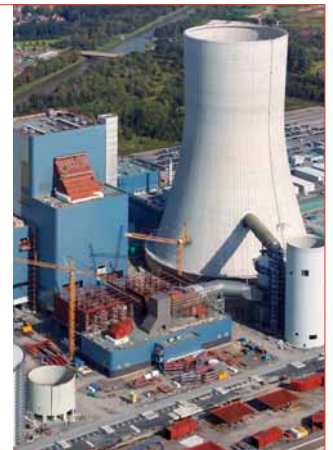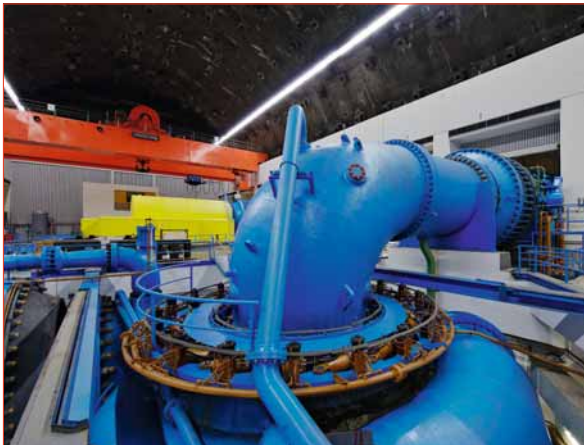

## Neue Turbinen steigern Leistung in Pumpspeicherkraftwerk

Die beiden Maschinensätze unseres größten Pumpspeicherkraftwerks Waldeck 2 wurden umfassenden Maßnahmen zur Leistungssteigerung unterzogen. Dabei konnte die Leistung der Anlage von 2 x 220 MW auf 2 x 240 MW gesteigert werden. Beteiligt waren dabei erstmals auch die Experten unserer Einheit Neubau & Technologie. Mehrere Kollegen waren vor Ort im Bereich der Projektleitung und Koordinierung tätig. Waldeck 2 konnte im Jahr 2010 wieder mit voller Leistung ans Netz genommen werden. Pumpspeicherkraftwerke speichern Energie sehr effizient und stehen bei Bedarf schnell zur CO<sub>2</sub>-freien und umweltfreundlichen Stromproduktion bereit. Der Ausbau stützt damit die weitere Integration der Erneuerbaren Energien.

## Globale Einheit

# Erneuerbare Erzeugung

- Erzeugungskapazität aus Wind und Sonne im Jahr 2010 um 20 Prozent gesteigert
- Neue Offshore-Windparks in Großbritannien, Deutschland und Dänemark ans Netz gegangen
- E.ON unter den Top drei bei Offshore-Windkraft
- Mehr als 90 MW Solarkapazität im Bau
- 110 MW Pumpspeicherkapazität in Betrieb genommen

## Unsere Erzeugungskapazitäten aus Erneuerbaren Energien weltweit<sup>1)</sup>

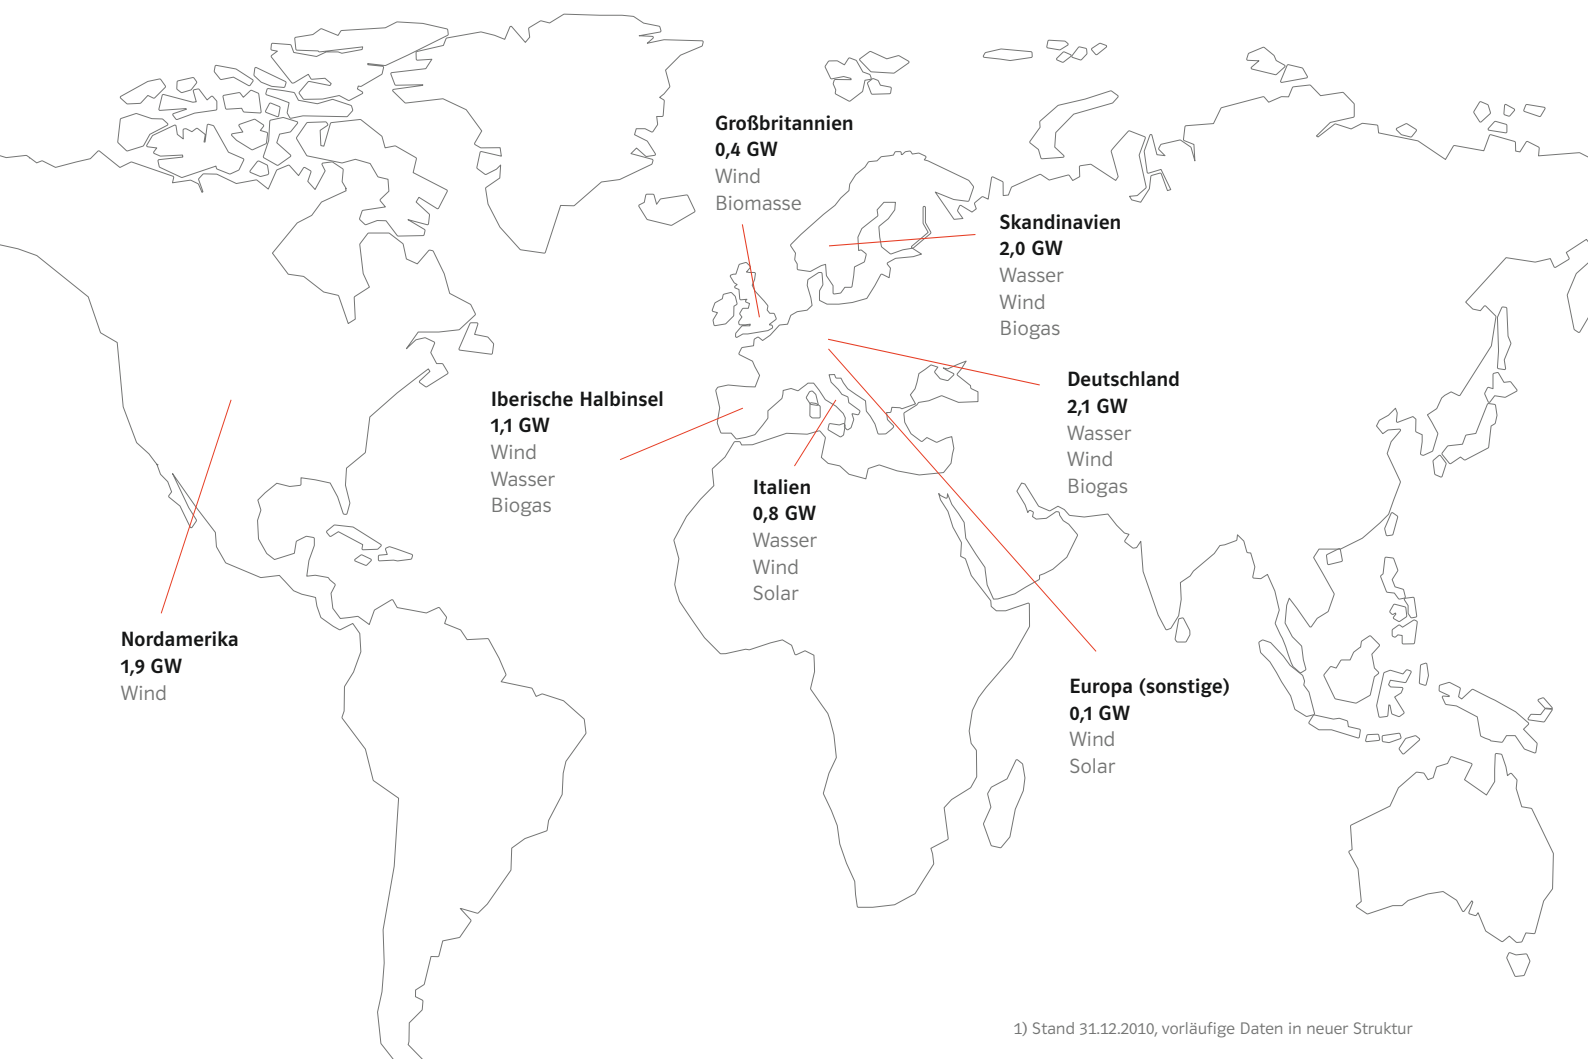

1) Stand 31.12.2010, vorläufige Daten in neuer Struktur

Die globale Einheit Erneuerbare Erzeugung ist für die Entwicklung und Steuerung unseres globalen Geschäfts im Bereich Erneuerbare Energien und Klimaschutzprojekte verantwortlich. Ihr sind auch unsere gesamten Wasserkraft-Kapazitäten in vier europäischen Ländern zugeordnet. Unser Erzeugungsportfolio aus Erneuerbaren Energien umfasst somit ein breites Spektrum an Technologien. Wir verfügen über 4,8 GW Wasserkraft-Kapazitäten aus Laufwasser- und Pumpspeicherkraftwerken, etwa 3,1 GW aus Onshore- und 0,5 GW aus Offshore-Windkraft. Darüber hinaus vergrößern wir unser Engagement im Bereich Solarenergie als weiteres Standbein unseres Portfolios. Zusätzlich sind wir in der regenerativen Energieerzeugung aus Biomasse, Bio-Erdgas sowie bei der Gewinnung von Strom aus dem Meer aktiv.

Heute sind Erneuerbare Energien wie Wind oder Solarstrom noch nicht grundlastfähig. Daher müssen sie in ein System mit Speichern und Netzen eingebunden werden, damit sauber erzeugter Strom auch dann zur Verfügung gestellt werden kann, wenn der Wind nicht weht und Wolken die Sonne verdecken. Pumpspeicherkraftwerke bilden aufgrund ihrer Flexibilität eine ideale Ergänzung für die Erneuerbaren Energien. Die Anlagen können überschüssigen Strom zu Zeiten starker Einspeisung der Erneuerbaren im großen Maße speichern. Wenn dann bei hohem Strombedarf mehr Energie benötigt wird, können Pumpspeicherkraftwerke in sehr kurzer Zeit ans Netz gehen und Strom liefern.

### Ausbau im industriellen Maßstab

Für das Jahr 2011 sind Investitionen in Höhe von rund 1,1 Mrd € in Erneuerbare Energien vorgesehen. Wir konzentrieren uns dabei auf die erfolgversprechendsten Märkte und Technologien. Der Schwerpunkt der letzten Jahre war dabei die Windkraft. Zum Jahresende 2010 verfügten wir über eine Erzeugungskapazität von 3,6 GW – fast zehnmal mehr als vor drei Jahren – und zählen damit weltweit zu den führenden und am schnellsten wachsenden Akteuren in dieser jungen, dynamischen Industrie. Wir sind darüber hinaus das einzige Unternehmen aus dieser Spitzengruppe mit einer starken Position bei der Offshore-Windkraft. Aufgrund des weiterhin starken Wachstums in unseren Kernmärkten Nordamerika und Europa werden wir unsere installierte Kapazität aus Windkraft und zunehmend auch aus Solarenergie weiter ausbauen.

Um dies zu erreichen, werden wir unseren Geschäftszweig Erneuerbare Energien entlang der gesamten Wertschöpfungskette im industriellen Maßstab ausbauen: von der Entwicklung über die Beschaffung bis hin zu Betrieb und Wartung. Von 2007 bis 2010 ist es uns bereits gelungen, die durchschnittliche Größe unserer Windparks von 15 MW auf 100 MW und die durchschnittliche Leistung unserer Windturbinen von 1,4 auf 2,3 MW zu erhöhen. Größere Anlagen und Turbinen bedeuten auch größere Wirtschaftlichkeit. Aber die größten Wertschöpfungspotenziale liegen bei Erneuerbaren Energien zum einen im Bau und zum anderen in Betrieb und Wartung von Anlagen. Auch hier streben wir einen Ausbau im industriellen Maßstab an. Großaufträge verringern die Kosten und bringen Skaleneffekte mit sich. Nachdem wir die Windkraft erfolgreich auf ein industrielles Niveau gehoben haben, gehen wir nun die Solarenergie an und erwarten ebenfalls enorme Kostendegressionseffekte.

### Forschungskooperation mit Umweltorganisation

Offshore-Technologien wie Windenergieanlagen, Wellen- oder Gezeitenkraftwerken kommt wachsende Bedeutung für unser Portfolio im Bereich Erneuerbare Energien zu. Um unsere Aktivitäten auf See so umweltverträglich wie möglich zu gestalten, haben wir im Dezember 2008 eine Forschungskooperation mit der International Union for Conservation of Nature and Natural Resources (IUCN) abgeschlossen. Die IUCN ist das weltweit älteste und größte Netzwerk für Naturschutz, das mehr als 1.000 Regierungsbehörden und Nichtregierungsorganisationen sowie

annähernd 11.000 ehrenamtliche Wissenschaftler unter seinem Dach vereint. Unser Projekt mit der IUCN unter dem Namen „Greening blue energy“ ist darauf ausgerichtet, ein Instrumentarium für ausgewogene, wissenschaftlich fundierte Diskussionen und begründete Entscheidungen zur umweltfreundlichen Offshore-Energienutzung zu schaffen. Diese Kooperation ist Teil unseres Bekenntnisses, eng mit Umweltorganisationen und -schützern zusammenzuarbeiten, um nachhaltige Lösungen für die Nutzung Erneuerbarer Energien zu entwickeln.



### Onshore-Windkraft

Neben der Wasserkraft ist Onshore-Wind zurzeit die am weitesten ausgereifte und am wirtschaftlichsten einsetzbare Technologie zur Nutzung Erneuerbarer Energien. Wir engagieren uns hier vor allem in den USA, Spanien und Italien. Der amerikanische Markt bietet durch konstante Windstärken, große Freiflächen und allgemein günstige regulatorische Bedingungen ein ausgezeichnetes Wachstumspotenzial. 2010 haben wir über 350 MW Onshore-Windkraft in Betrieb genommen, einschließlich Papalotte Creek 2 in den USA mit 200 MW und Wielkopolska in Polen mit 52,5 MW. Beide Projekte konnten früher und günstiger fertiggestellt werden als geplant.

### Offshore-Windkraft

Mit einer Kapazität von 467 MW in Großbritannien, Dänemark und Deutschland sowie mehr als 3 GW, die zurzeit entwickelt und errichtet werden, haben wir eine führende Position im Bereich der Offshore-Windkraft. Robin Rigg, ein 180-MW-Offshore-Windpark vor der Nordwestküste Großbritanniens, wurde im März 2010 fertiggestellt. Auch der erste Hochseewindpark alpha ventus in der deutschen Nordsee mit einer Leistung von 60 MW wurde im März 2010 vollendet. Darüber hinaus errichten wir derzeit den weltweit größten Offshore-Windpark in der Themsemündung rund 20 km vor der Südostküste Englands: London Array. Nach der Fertigstellung des ersten Bauabschnitts 2012 werden wir hier eine Kapazität von 630 MW erreichen. Wenn London Array komplett installiert sein wird, werden wir dort über eine Gesamtkapazität von 1 GW verfügen. Beide Projekte setzen wir jeweils gemeinsam mit Partnern um.

### Solarenergie

Solarenergie besitzt enormes Potenzial. Das Sonnenlicht, das auf einer Wüstenfläche von 1.000 km<sup>2</sup> auftrifft, würde ausreichen, um damit den Primärenergiebedarf der gesamten Menschheit zu decken. Ausgehend von der momentanen Entwicklungsgeschwindigkeit wird die Solarenergie etwa in fünf bis zehn Jahren mit der Windkraft gleichziehen. Langfristig wollen wir Solarenergie neben Windenergie und Wasserkraft zum weiteren Standbein unseres Geschäfts im Bereich Erneuerbare Energien machen. 2010 haben wir einige bedeutende Meilensteine im Solargeschäft erreicht: So haben wir vier Fotovoltaikanlagen in Italien fertiggestellt. Darüber hinaus haben wir sehr gute Fortschritte bei der Errichtung zweier solarthermischer 50-MW-Kraftwerke gemacht, die wir in einem Joint Venture mit Abengoa, dem spanischen Marktführer für solarthermische Kraftwerke (Concentrated Solar Power, CSP), in Andalusien bauen. 2011, also schon in diesem Jahr, sollen sie ihren Betrieb aufnehmen.

Aber wir denken noch weiter. Im Juni 2009 gehörten wir zu den Gründungsmitgliedern des Desertec-Konsortiums. Dieses Projekt verfolgt das Ziel, mit Solar- und Windparks in den Wüsten Nordafrikas Strom zu erzeugen und nach Europa zu leiten. Wenn alles planmäßig verläuft, könnte dieses ambitionierte 400-Mrd-€-Projekt bis 2050 rund 15 Prozent des europäischen Strombedarfs decken.

#### In Rekordzeit am Netz

Rödsand II, ein Offshore-Windpark in der Ostsee mit einer Kapazität von 207 MW, wurde im September in Betrieb genommen, drei Monate vor der ursprünglich geplanten Inbetriebnahme.

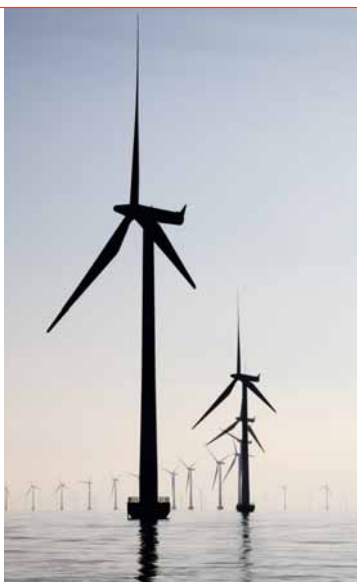

#### Energie für Europa aus Afrika

Es mag utopisch klingen, aber wir halten es für machbar: Die sengende Sonne in den Wüsten Nordafrikas soll Strom für Europa liefern. Einen ersten Schritt zur Realisierung dieser Vision haben E.ON und elf weitere Großunternehmen im Juli 2009 mit der Unterzeichnung des „Memorandum of Understanding“ zur Gründung der industriellen Initiative DII getan. Ziel dieser Initiative ist die Analyse und Entwicklung von technischen, ökonomischen, politischen, gesellschaftlichen und ökologischen Rahmenbedingungen zur groß angelegten Stromerzeugung aus Sonnen- und Windkraft in Nordafrika. Mit dem ambitionierten 400-Mrd-€-Projekt wird angestrebt, bis 2050 rund 15 Prozent des Strombedarfs von Europa zu decken. Darüber hinaus soll ein erheblicher Teil der Stromerzeugung für die Versorgung in den nordafrikanischen Erzeugerländern genutzt werden.

## Wasserkraft

Auch im Bereich der Wasserkraft war E.ON im Jahr 2010 sehr aktiv. So hat E.ON im nordhessischen Waldeck im Frühsommer 2010 ein neues hochmodernes Pumpspeicherkraftwerk mit einer Leistung von 70 MW ans Netz genommen. Parallel zu diesem Neubau konnte auch die Modernisierung des zweiten Pumpspeicherkraftwerks in Waldeck erfolgreich abgeschlossen werden. Dabei wurde die Kapazität der Anlage von bisher 440 MW auf 480 MW erhöht (mehr dazu siehe Seite 49). Ende 2010 konnten schließlich noch die Genehmigungsanträge für den Bau einer weiteren 300 MW starken Pumpspeichieranlage am Standort Waldeck bei den Behörden eingereicht werden. Darüber hinaus ist E.ON an einem Pumpspeicherprojekt im Südosten Bayerns beteiligt. Die geplante Anlage soll im Jahr 2018 mit einer Leistung von 300 MW ans Netz gehen. Auch die Modernisierungs- und Ertüchtigungsarbeiten der italienischen Kraftwerksgruppe Terni laufen derzeit auf Hochtouren. Parallel treibt E.ON auch den Ausbau seiner Laufwasserkapazitäten weiter voran. In Bayern laufen momentan die Genehmigungsverfahren für drei neue Anlagen.

## Biomasse

Biomasse gehört ebenfalls zu unserem Erzeugungsportfolio. Wir betreiben das 44-MW-Holzkraftwerk Steven's Croft im schottischen Lockerbie. Die Anlage, eines der größten reinen Biomassekraftwerke Großbritanniens, erzeugt genügend Strom für 70.000 Haushalte und ermöglicht damit die Einsparung von 140.000 Tonnen CO<sub>2</sub> jährlich. Weitere Projekte mit insgesamt 400 MW Kapazität befinden sich in verschiedenen Entwicklungsstadien.

## Klimaschutzprojekte

E.ON engagiert sich auch weltweit im Bereich Klimaschutz. Die Aktivitäten umfassen sowohl den in Artikel 12 des Kyoto-Protokolls festgelegten „Mechanismus für umweltverträgliche Entwicklung“ (Clean Development Mechanism, CDM) als auch das in Artikel 6 festgelegte Instrument der Joint Implementation (JI). Bei CDM-Projekten werden Emissionsguthaben für Klimaschutzprojekte in Entwicklungsländern, bei JI-Projekten für solche Projekte in Industrieländern erteilt. E.ON setzt ihre große Erfahrung mit Klimaschutzprojekten derzeit schwerpunktmäßig für JI- und CDM-Projekte in Südostasien, im Mittleren Osten, Nordafrika sowie in Russland ein. Außerdem haben wir mit Bionersis 2009 eine Partnerschaft ins Leben gerufen, um in einem CDM-Projekt in Südostasien klimaschädliches Methangas aus Deponien aufzufangen und für die Stromerzeugung zu nutzen.

Mehr zu Erneuerbaren Energien?

[www.eon.com/erneuerbare](http://www.eon.com/erneuerbare)

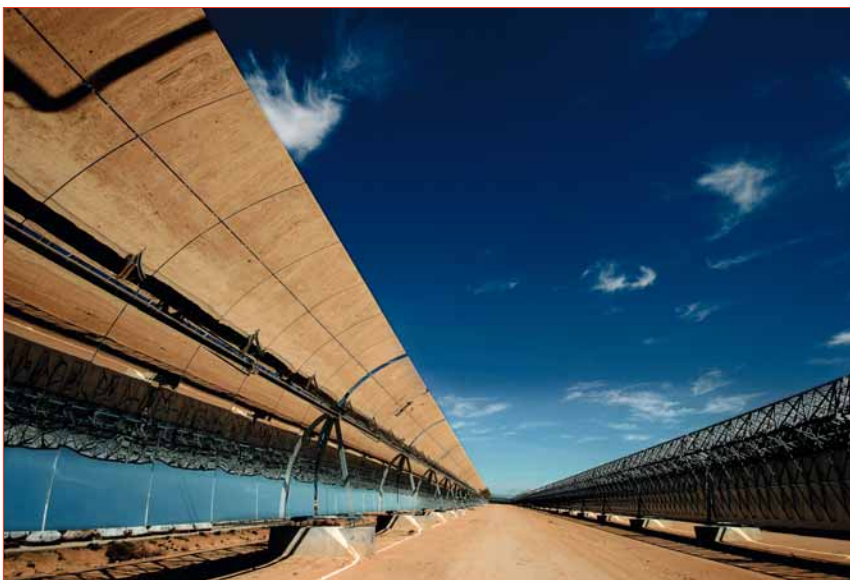

## Sonne im Aufwind

Gemeinsam mit einem Partner bauen wir in Andalusien zwei Solarkraftwerke (Helioenergy 1 und 2) mit einer Leistung von je 50 MW. Die Anlagen entstehen im südspanischen Écija in der Nähe von Sevilla, eines der Gebiete in Europa mit der höchsten Sonneneinstrahlung. Auf einer Fläche von rund 210 Hektar kommt die sogenannte Parabolic-Trough-Technologie zum Einsatz. Bei dieser Variante solarthermischer Kraftwerke (Concentrated Solar Power, CSP) bündeln Parabolrinnen das Sonnenlicht und erzeugen damit Dampf, der über eine Dampfturbine Strom erzeugt. Unser Einstieg in die CSP-Technologie ergänzt unsere Aktivitäten bei der Fotovoltaik und bringt uns einen wichtigen Schritt weiter, auch im Bereich der Solarenergie unser Portfolio kontinuierlich auszubauen und auf industrielles Niveau zu heben.

## Globale Einheit

## Global Gas

- Gespräche zur Anpassung der langfristigen Bezugsverträge
- Erheblicher Produktionszuwachs bei der Erdgasförderung
- Transportgeschäft seit 1. September 2010 unabhängig geführt
- Investitionen in Speicher- und Leitungsprojekte sichern auch künftig die Gasversorgung

Zu unserem globalen Gasgeschäft zählen insbesondere die Gasbeschaffung, die eigene Gasförderung, die Projekt- und Produktentwicklung in den Bereichen Speicherung, Transport und Liquefied Natural Gas (LNG) sowie die technische Anlagenbetreuung. Durch ein integriertes Portfoliomanagement wird ein abgestimmtes Zusammenwirken einzelner Geschäftsbereiche sichergestellt.

**Erdgasförderung (Exploration & Production, E&P)**

Global Gas ist verantwortlich für die Explorations- und Förderaktivitäten von Gas und Öl im E.ON-Konzern und ist mittlerweile fest als Erdgasproduzent und Betriebsführer etabliert. Unsere Erdgasproduktion stieg im Jahr 2010 auf rund 7,5 Mrd m<sup>3</sup> Gas – das sind rund 75 Prozent mehr als im Vorjahr. Dazu trug insbesondere der 2009 abgeschlossene Erwerb eines 25-prozentigen Anteils am Gasfeld Yushno Russkoje mit Gasreserven von circa 600 Mrd m<sup>3</sup> und einer anteiligen Jahresproduktion von über 6 Mrd m<sup>3</sup> bei. Inhaber der Förderlizenz und Betriebsführer ist die russische OAO Severneftegazprom (SNGP), an deren stimmberechtigtem Kapital die Gazprom 50 Prozent plus sechs Aktien und E.ON sowie Wintershall jeweils 25 Prozent minus je drei Aktien halten. Weitere Steigerungen der Förderleistung ergeben sich in den nächsten Jahren unter anderem durch die Erschließung der Erdgasfelder Babbage und Huntington in der britischen Nordsee sowie des

**LTC: Energie für Jahrzehnte**

Langfristige Gaseinkaufsverträge (Long term contracts, LTC) sind ein zentraler Bestandteil unseres Beschaffungsportfolios. Die aktuelle Marktsituation macht jedoch umfangreiche Anpassungen der Verträge erforderlich. Im Geschäftsjahr 2010 haben wir deshalb mit allen wesentlichen Lieferanten Gespräche aufgenommen, um die langfristigen Verträge auf die veränderte Marktsituation anzupassen. Die Auswirkungen der Wirtschaftskrise sowie strukturelle Veränderungen des Gasmarktes

machen Anpassungen zentraler Elemente der Verträge notwendig. Aufgrund der langjährigen und vertrauensvollen Beziehungen zu unseren Lieferanten sind wir davon überzeugt, dass wir diese Herausforderung im konstruktiven Dialog mit unseren Partnern bewältigen werden, um eine nachhaltige Basis für die Rolle von Erdgas im Energiesystem des 21. Jahrhunderts zu schaffen.



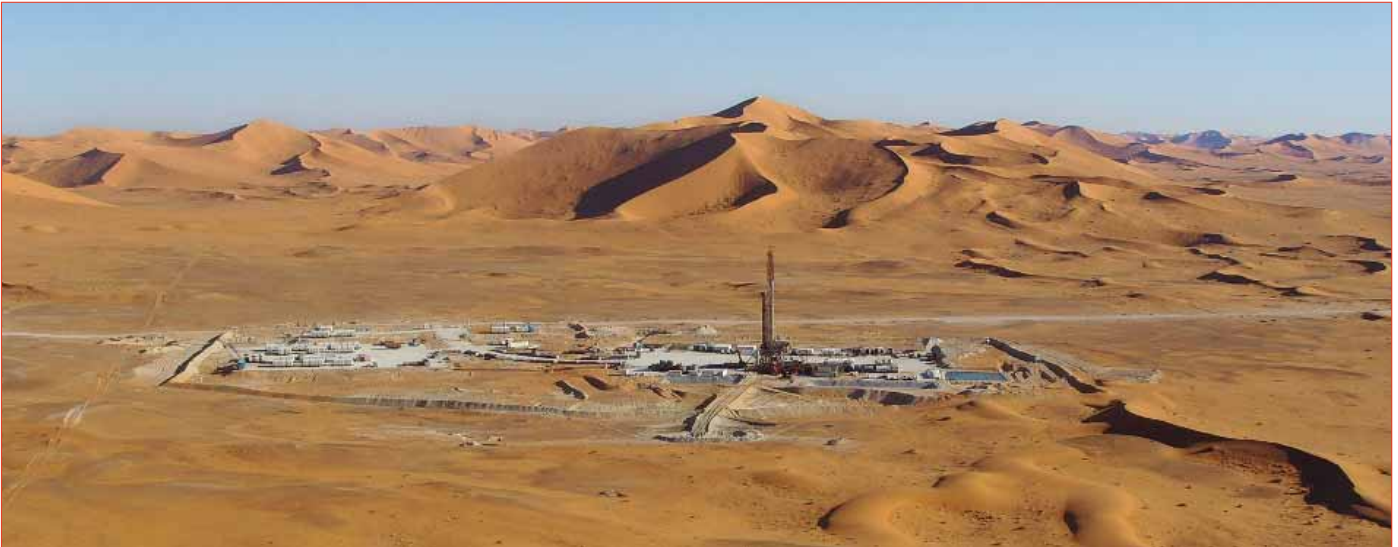

### Explorationserfolg: Gasfund in Rhourde Yacoub, Algerien

E.ON und Sonatrach haben im Rhourde-Yacoub-Block im Oktober 2010 Gas gefunden. In Kooperation mit Sonatrach, dem staatlichen algerischen Öl- und Gaskonzern, haben wir als Betriebsführer der Explorationslizenz Rhourde Yacoub die Erkundungsbohrung Zemlet Cherguia-1extension erfolgreich getestet. Das Feld befindet sich in der östlichen algerischen Sahara, circa 250 km südöstlich der Stadt Hassi Messaoud im gas- und ölhöffigen Berkine-Becken, in dem in den 1990er-Jahren die ersten

Erkundungsbohrungen abgeteuft wurden. In der zweiten Hälfte des Jahres 2008 hat sich E.ON an der ersten Lizenzvergeberunde Algeriens nach Inkrafttreten des neuen Öl- und Gasgesetzes von 2005 beteiligt. Im Dezember 2008 haben wir den Zuschlag für die Rhourde-Yacoub-Lizenz, die ein Gebiet von 1.091 km<sup>2</sup> umfasst, bekommen. Am Rhourde-Yacoub-Block hält E.ON einen Anteil von 49 Prozent.

Gas- und Ölfeldes Skarv in der norwegischen See. Ein umfangreiches Portfolio von Explorationslizenzen in Großbritannien, Norwegen und Nordafrika eröffnet uns weitere Möglichkeiten zum Ausbau der Eigenförderung.

### Langfristige Erdgasbeschaffung (Long-Term Contracts, LTC)

Wir sind einer der führenden Erdgasimporteure in Europa und verfügen über ein diversifiziertes Portfolio von langfristigen Gasbezugsverträgen. Über diese langfristigen Verträge sichern wir Erdgaslieferungen aus den größten Produktionsländern für den europäischen Markt. Sie haben eine Gesamtlauzeit von mehr als 30 Jahren und garantieren den Bezug großer Mengen von Erdgas zu marktgerechten Konditionen. Durch langfristige Einkaufsverträge hat sich E.ON eine strategische Bezugsbasis im zunehmend globalen Nachfragewettbewerb um Erdgas geschaffen und stärkt somit die Versorgungssicherheit Europas.

### Verflüssigtes Erdgas (Liquefied Natural Gas, LNG)

Der Markt für verflüssigtes Erdgas ist ein weiterer wichtiger Pfeiler der zukünftigen Gasversorgung von Europa. Mit LNG erschließen wir sowohl langfristige Wachstumsmöglichkeiten im Gasgeschäft als auch neue Möglichkeiten zur Belieferung unserer Märkte. Wir bauen ein gut diversifiziertes Portfolio an Wiederverdampfungskapazitäten in Europa auf, um LNG-Bezüge in unsere Zielmärkte bringen zu können. So hat E.ON im Jahr 2010 mit der Kapazitätsbuchung bei der dritten Ausbaustufe des LNG-Importterminals auf der britischen Isle of Grain neben Terminals in

Spanien eine weitere langfristige LNG-Importkapazität in Europa in Betrieb genommen. Weitere wichtige Terminalprojekte sind Gate in Rotterdam (NL) und OLT in Livorno (I). OLT ist das weltweit erste schwimmende Wiederverdampfungsterminal. Darin wird das verflüssigte Erdgas vor der italienischen Küste auf dem Wasser wieder in den gasförmigen Zustand überführt und von dort in das italienische Erdgasnetz eingespeist.

### Gasvertrieb

Um den spezifischen Kundenanforderungen und -bedürfnissen zukünftig noch besser zu entsprechen, hat E.ON das Vertriebsgeschäft in Deutschland zusammengeführt. Kunden erhalten zukünftig Strom und Erdgas aus einer Hand. Dies schafft mehr Effizienz und eine deutlich größere Attraktivität im Markt. Die Lage auf den Energiemärkten hat sich im Jahr 2010 noch einmal deutlich verändert. Auf den Gasmärkten haben sich Transparenz, Liquidität und Dynamik spürbar erhöht. Für unsere Kunden geben die Preise an den Börsen die relevanten Signale und sind Benchmark im Wettbewerb. In diesem sich wandelnden Umfeld setzt E.ON auf innovative, kundennahe Produkte und baut die Erdgaslieferungen ins europäische Ausland weiter aus. Die Liberalisierung des europäischen Gasmarktes eröffnet hierbei neue Chancen. Wir verfügen über ein breites Angebot von verschiedenen Lieferkonzepten, Mengen-, Struktur- und Flexibilitätsvarianten sowie Preismodellen. Mit ergänzenden Energiedienstleistungen trägt E.ON zur Steigerung der Energieeffizienz ihrer Kunden bei.

## Infrastrukturbeteiligungen

Neben der Gasförderung und -beschaffung tragen auch unsere Infrastrukturbeteiligungen zu einem hohen Niveau der Versorgungssicherheit in Europa bei. Gemeinsam mit internationalen Partnern investieren wir daher in moderne und effiziente Leitungssysteme für eine länderübergreifende Anbindung bestehender und neuer Erdgasvorkommen an die Verbrauchsmärkte in Europa. Dazu zählen insbesondere die 15,5-Prozent-Beteiligung an der Ostsee-Pipeline Nord Stream, die über die sich anschließende Ostsee-Pipeline-Anbindungsleitung (OPAL) und die Nordeuropäische Erdgasleitung (NEL) die erste direkte Verbindung zwischen den russischen Gasvorkommen und dem europäischen Binnenmarkt schafft. Zusammen mit drei anderen europäischen Energieunternehmen und der Gazprom ist E.ON am Bau der 1.224 km langen Gasleitung durch die Ostsee beteiligt. 2010 war ein bedeutendes Jahr für das Leitungsprojekt zwischen dem russischen Portovaya bei Wyborg und dem norddeutschen Greifswald: Im Februar erlangte Nord Stream die letzte Baugenehmigung, sodass die Nord Stream-Gesellschaft im April mit dem Bau des ersten Leitungsstranges beginnen konnte. Zum Ende des Jahres wurden bereits über 60 Prozent der Leitung fertig gestellt. Ab Ende

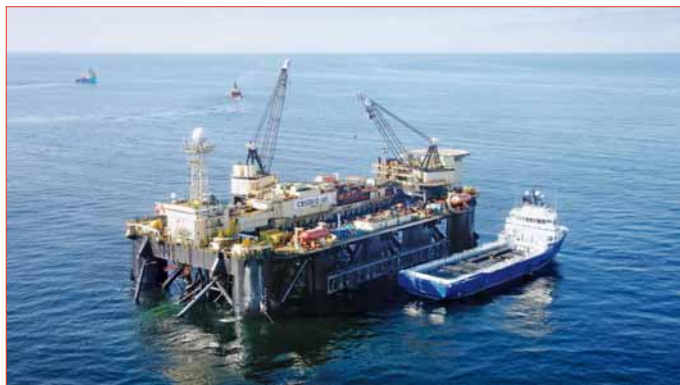

### Nord Stream: Russisches Erdgas für Europa

Die Verlegearbeiten für die Ostsee-Pipeline Nord Stream haben am 9. April 2010 vor der schwedischen Küste begonnen. Die ersten Gaslieferungen sind für Ende 2011 geplant. Anfang dieses Jahres wurden bereits über 80 Prozent des ersten Leitungsstranges fertig gestellt.

### Pipelineprojekt für Gas aus der kaspischen Region

Das Trans Adriatic Pipeline-Konsortium, an dem wir mit einem Anteil von 15 Prozent beteiligt sind, plant eine rund 520 km lange Erdgas-pipeline von Griechenland über Albanien durch die Adria nach Süditalien. Weitere Shareholder sind die schweizerische EGL und die norwegische Statoil mit je 42,5 Prozent. Ziel des Konsortiums ist es, Gas aus der kaspischen Region über die Türkei nach Europa zu bringen. Die Leitung könnte voraussichtlich Ende 2016 mit einer Kapazität von rund 10 Mrd m<sup>3</sup> pro Jahr in Betrieb gehen und später auf 20 Mrd m<sup>3</sup> erweitert werden.

2011 werden über die neue Transleitung jährlich zunächst rund 27,5 Mrd m<sup>3</sup> Erdgas pro Jahr fließen. Nach Fertigstellung des zweiten Leitungsstrangs stehen dann insgesamt rund 55 Mrd m<sup>3</sup> Transportkapazität zur Verfügung.

## Gasspeicherung

Aufgrund des Rückgangs der verbrauchsnahe Gasproduktion in Europa sowie der zunehmenden Handelsaktivitäten steigt der europäische Bedarf an Flexibilitätsdienstleistungen weiter an. Dabei kommt Gasspeichern eine zentrale Bedeutung für die Strukturierung zu. Auf diesem Gebiet verfügen wir über ausgeprägtes Know-how für die Entwicklung, den Bau, Betrieb und die Vermarktung von Untertage-Erdgasspeichern sowie im Bereich innovativer Speicherlösungen, mit denen die Erdgasspeicherung optimiert wird. Als führender europäischer Speicherbetreiber ist E.ON an zahlreichen Neu- und Ausbauprojekten beteiligt. Allein mit den Vorhaben „Etzel ESE“ in Norddeutschland und „7Fields“ in Ober-

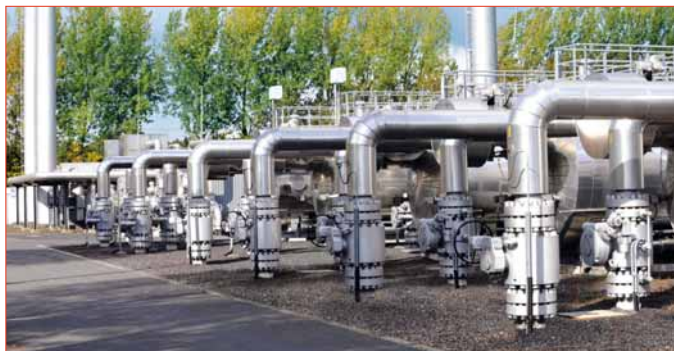

### Speicherlösungen für Europa

Unseren Kunden stellen wir mit innovativen Dienstleistungen und Produkten bedarfsgerechte und transparente Speicherlösungen zur Verfügung.

### Erdgasspeicher Etzel ESE

Gemeinsam mit unseren Partnern OMV und VNG errichten wir den ESE – Erdgasspeicher Etzel mit einem projektierten Arbeitsgasvolumen von rund 2 Mrd m<sup>3</sup>. Geplant ist, dass die in einem unterirdischen Salzstock entstehenden Kavernen stufenweise von 2012 bis 2014 in Betrieb gehen. Der neue Erdgasspeicher wird dann im Auftrag des Konsortiums durch uns betrieben.

### Vermarktung von Speicherkapazität

E.ON bietet ein breites Portfolio von innovativen Speicherprodukten fair, transparent und diskriminierungsfrei an. Im September 2010 ist das neue Day Ahead Portal für die Kurzfristvermarktung von Speicherkapazitäten in Deutschland erfolgreich online gegangen. Durch diese Handelsplattform können Kunden kurzfristig ihre gebuchten Speicherkapazitäten individuell und flexibel den eigenen Bedürfnissen anpassen, um Opportunitäten im Gashandelsmarkt noch besser zu nutzen.

österreich schaffen wir neue Speicherkapazitäten für den Erdgasmarkt im Umfang von mehr als 3 Mrd m<sup>3</sup>.

### Gastransport: Open Grid Europe

Seit 1. September 2010 wird unser Gastransportgeschäft im Sinne des dritten EU-Energiebinnenmarktpakets vom unabhängigen Fernleitungsnetzbetreiber Open Grid Europe geführt. Mit der Umsetzung des ITO-Modells (ITO = Independent Transmission Operator) im Gastransportnetz erfüllt E.ON die Vorgabe der Europäischen Kommission, Transport und Netzbetrieb unabhängig vom Handelsgeschäft zu führen. Die neue Gesellschaft verantwortet mit rund 1.800 Mitarbeitern alle Prozesse, die für das rund 12.000 km lange Ferngasleitungsnetz erforderlich sind. Sie hat jahrzehntelange Erfahrung in der Planung, im Bau und im Betrieb von Ferngasleitungen und investiert kontinuierlich in den bedarfsgerechten Ausbau der Netzkapazitäten. Deutschlands führender Ferngasleitungsnetzbetreiber stellt transparent und kundenfreundlich Dienstleistungen rund um den Transport von Erdgas zur Verfügung. Kunden können so gebuchte Kapazitäten effektiv nutzen. Open Grid Europe unterstützt die Liberalisierung, indem sie den Netzzugang für Transportkunden kontinuierlich vereinfacht.

### Bio-Erdgas

Erdgas ist ein vergleichsweise CO<sub>2</sub>-armer Brennstoff. Der Einsatz von Bio-Erdgas steigert die Umweltfreundlichkeit von Erdgas weiter. Die Bundesregierung hat erklärt, bis 2020 den Bio-Erdgasanteil auf über 60 Mrd kWh ausbauen zu wollen. Deshalb gehören wir mit einer Netzeinspeiseleistung von rund 400 Mio kWh in 2010 zu den Schrittmachern der Bio-Erdgasnutzung in Deutschland. Seit 2008 speisen unsere Anlagen in Schwandorf/Oberpfalz und in Aiterhofen und Einbeck das auf Erdgasqualität aufbereitete Bio-Erdgas in das flächendeckende Gasnetz ein. Zwei weitere Anlagen sind im Saarland und in der bayerischen Hallertau im Bau. In der Hallertau wird erstmalig das aus dem Hopfenanbau verbleibende, heute ungenutzte Hopfenlaub als Rohstoff verwendet. Neben unserer Eigenerzeugung kaufen wir Bio-Erdgas von anderen Erzeugern vorwiegend aus der Landwirtschaft oder dem landwirtschaftsnahen Bereich. Bis 2012 werden wir unser Portfolio auf 1 Mrd kWh pro Jahr erhöhen. Das entspricht dem Verbrauch von 100.000 Haushalten.

### Kompetenzcenter Gastechnik & Energiesysteme

Unser Kompetenzcenter Gastechnik & Energiesysteme bündelt jahrzehntelange Erfahrung und technisches Know-how im Erdgasbereich. Forschungs- und Entwicklungsaktivitäten treiben die effiziente Nutzung von Erdgas voran. Als Forschungs- und Informationsplattform leistet das Kompetenzcenter Gastechnik & Energiesysteme mit seinen Prüfständen und Laboratorien einen Beitrag zur effizienten und klimaschonenden Anwendung von Erdgas. Im Bereich Anwendungsentwicklung werden innovative Technologien und Versorgungskonzepte vorangetrieben; darunter zum Beispiel Gaswärmepumpen, Mikro-KWKs auf Basis von Stirling- und Gasmotoren, Brennstoffzellen sowie Projekte zur Einspeisung von Biogas ins öffentliche Netz. Der Bereich Netztechnik schafft die Grundlagen für den zuverlässigen Einsatz und Transport von Erdgas und flankiert damit unsere Handelsaktivitäten. Durch die Expertise auf den Gebieten Leitungstechnik, Messtechnik, Gasqualität und Thermodynamik können beispielsweise Auswirkungen neuer Erdgasqualitäten auf Gasanlagen und -geräte schnell und zuverlässig abgeschätzt werden. Zusammen mit der Ruhr-Universität Bochum wurde im Jahr 2010 im Rahmen der GERG (European Gas Research Group) die Entwicklung eines neuen Dichtemessverfahrens für verflüssigtes Erdgas (LNG) aufgenommen. Dies soll dazu beitragen, bei der Entladung von LNG-Tankschiffen die Energiemenge genauer bestimmen zu können. Das Projekt wurde mit dem „Excellence Research Grant“ ausgezeichnet und wird damit zur Hälfte aus EU-Mitteln gefördert. Im Rahmen der Mikro-KWK-Usergroup unterstützt E.ON ihre Stadtwerkekunden bei der Erprobung dieser Technik. Dazu werden die Stirling- und Gasmotoren der jeweils neusten Entwicklungsstufe im Labor in Altenessen getestet und entsprechende Modelle danach in Feldobjekte der Stadtwerkekunden eingebaut.

Mehr zu Global Gas?

[www.eon-ruhrgas.com](http://www.eon-ruhrgas.com)



## Globale Einheit

# Handel

- Erfolgreicher Handel in zusammenwachsenden EU-Märkten
- Erneut steigende Handelsmengen und positiver Ergebnisbeitrag
- Zunehmende Globalisierung im Energiehandel eröffnet weltweite Chancen

### Konzentration der Kräfte und Marktexpertise

Im dritten Jahr nach der Zusammenführung aller europäischen Handelsaktivitäten des E.ON-Konzerns hat die globale Einheit Handel erneut einen starken Ergebnisbeitrag geleistet und die Risikoposition des Konzerns deutlich verbessert. Unsere Handelseinheit mit Sitz in Düsseldorf mit ihren rund 1.000 Mitarbeitern aus fast 50 Ländern ist heute eines der erfolgreichsten und umsatzstärksten Energiehandelshäuser Europas und wurde zuletzt von dem Fachmagazin „Energy Risk“ zum Gashandelshaus des Jahres 2010 gekürt. Die gute Gesamt-Performance der letzten drei Jahre vor dem Hintergrund der Weltfinanzkrise und allgemeiner Verunsicherung auch in den Rohstoffmärkten ist nicht zuletzt als Folge einer erfolgreichen Integration des Handels in eine einzige Einheit zu sehen. Durch die Konzentration der Kräfte und die gebündelte Marktexpertise hat die Handelseinheit eine gute Basis für die nächsten Jahre in einem schnell zusammenwachsenden europäischen und globalen Energiemarkt gelegt.

Allerdings bleiben die Folgen der Finanz- und Wirtschaftskrise in den kommenden Jahren deutlich spürbar. Besonders der Preisverfall bei Strom und Gas macht sich längerfristig bemerkbar und sorgt für ein schwieriges Marktumfeld. Hinzu kommt die Ungewissheit, ob und in welcher Form die EU-Kommission den europäischen Energiehandel in die Finanzmarktregulierung einbeziehen wird.

Als Bindeglied zwischen E.ON und den weltweiten Großhandelsmärkten für Energie kauft und verkauft die Einheit Strom, Gas, Öl, Kohle, Frachtkontingente, Biomasse und CO<sub>2</sub>-Zertifikate. Die Händler und Risikomanager sorgen für den bestmöglichen Einsatz der europäischen E.ON-Kraftwerke, handeln und beschaffen weltweit Rohstoffe und CO<sub>2</sub>-Zertifikate zum Betrieb dieser Kraftwerke und sichern künftige Strommengen schon heute im Voraus preislich ab. Dadurch werden die Risiken für E.ON aus den verschiedenen Rohstoffmärkten gebündelt und in Summe verringert.

Das Portfolio des E.ON-Konzerns aus regenerativer und effizienter konventioneller Stromerzeugung ist geografisch und technisch so vielfältig wie kein anderes in Europa. Dadurch bieten sich erhebliche Optimierungsmöglichkeiten über nationale und regionale Grenzen hinweg, die wir für unseren Konzern und unsere Kunden nutzen können. Die früher national geführten Kraftwerksparks bilden heute ein umfassendes europäisches Portfolio, das zentral gesteuert wird und auf Marktpreisentwicklungen schnell und effizient reagieren kann. Dies setzt eine marktübergreifende Expertise und Prognosefähigkeit voraus, die gleichermaßen nationale, europäische und globale Preistrends auf verschiedenen Rohstoffmärkten berücksichtigt. E.ON hat die vielfältigen Marktperspektiven aus den früheren Einzelgesellschaften Schritt für Schritt zu einer ganzheitlichen europäischen und globalen Sicht auf die Märkte verdichtet und setzt damit Maßstäbe im europäischen Wettbewerb.

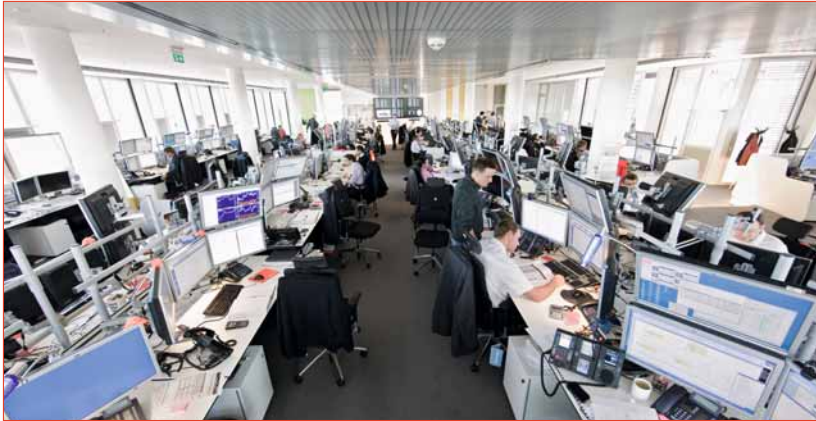

### Handelsvolumen nach Gütern

|                                      |                    |
|--------------------------------------|--------------------|
| 1.472 Mrd kWh<br>Strom               | 72 Mio t<br>Öl     |
| 2.005 Mrd kWh<br>Erdgas              | 289 Mio t<br>Kohle |
| 650 Mio t<br>CO <sub>2</sub> -Rechte |                    |

### Integration der europäischen Märkte

Seit vielen Jahren unterstützt E.ON Initiativen zur Zusammenführung der nationalen Märkte in Europa. Dies geschieht nicht ohne Grund: Kein Unternehmen hat ein größeres Interesse daran, ein einheitliches Marktgebiet für Strom und Gas in Europa anzustreben. Das breite E.ON-Portfolio von Energie-Assets in fast allen Teilen des Kontinents kann nur dann optimal gesteuert und genutzt werden, wenn der Austausch über die Marktgrenzen hinweg problemlos und ungehindert möglich ist. Außerdem bietet ein größeres Marktgebiet mit zentralen Handelsplätzen und einheitlichen Regeln greifbare Vorteile für alle Seiten:

**Für Industrie und Privatkunden:** Denn im europäischen Wettbewerb werden alle Erzeugungsanlagen optimal eingesetzt. Der Druck durch den Wettbewerb in einem Europa ohne Lieferbarrieren sorgt dafür, dass keine Megawattstunde zu viel produziert wird. Die Effizienzgewinne spiegeln sich in marktgerechten Großhandelspreisen. Davon profitieren alle Kunden, denn die Großhandelspreise sind ein wesentlicher Bestandteil des Kundenpreises – neben Netzkosten und staatlichen Abgaben und Umlagen.

**Für Investoren:** Denn ein großes europäisches Marktgebiet mit fairen und gleichen Regeln für alle Teilnehmer bietet eine gute Grundlage für Investitionen in zukunftsweisende Technologien und Anlagen. Je höher die Liquidität des Marktes, je größer die Zahl der handelnden Unternehmen, desto verlässlicher die im täglichen Handelsgeschäft an den Börsen entstehenden Preissignale. Nur auf der Grundlage klarer Preissignale werden Investoren bereit sein, die erwarteten hohen Kosten für den Umbau der Energiesysteme durch neue Projekte mitzutragen, denn diese Projekte erfordern eine langfristige Sicherheit für die Kapitalanlage.

**Für die Umwelt:** Denn in einem europäischen Marktgebiet gilt der europäische Kraftwerksmix: Wasserkraft aus Skandinavien und den Alpenländern, klimafreundliche Kernenergie aus Frankreich oder Deutschland, Offshore-Windkraft aus der Nordsee oder der Irischen See, klimaschonende und effiziente Gas- und Kohlekraftwerke etc. Ein europäisches Marktgebiet sorgt für mehr Wettbewerb auf der Erzeugungsebene und verschafft allen Bürgern Zugang zu den Ressourcen des Kontinents. In einem solchen breiten Mix ist die Integration der Erneuerbaren Energien besser möglich als in national beschränkten Märkten. Flexible und effiziente Kraftwerke übernehmen die Versorgung, wenn bei Windflaute oder zu wenig Sonne die Anlagen aus Erneuerbaren Energien nicht liefern können. Der europäische CO<sub>2</sub>-Handel und EU-weit einheitliche Bedingungen bei der Förderung der Erneuerbaren Energien würden einen klaren Rahmen für Investitionen in umweltfreundliche Anlagen liefern.

Am 9. November 2010 wurden die Marktgebiete Deutschlands, der Beneluxstaaten und Frankreichs für Strom „gekoppelt“. Damit ist ein Meilenstein auf dem Weg zu einem europäischen Strombinnenmarkt erreicht. Die Staaten und die Marktteilnehmer der betroffenen Länder hatten Jahre daran gearbeitet, durch handels-technische Vereinfachungen in diesem regionalen Rahmen ein einheitliches Marktgebiet zu schaffen – E.ON hat die Initiativen maßgeblich vorangetrieben und unterstützt. Seither entwickeln sich die Strompreise im Kurzfristhandel dieser Länder nicht nur parallel, sondern nahezu identisch. Schon bald sollen die skandinavischen Länder an das neue Strommarktgebiet angegliedert werden. Deutschland und Skandinavien sind ihrerseits bereits seit Ende 2009 „gekoppelt“. Die Vision eines einheitlichen EU-Marktgebietes für Strom bis 2015 nimmt konkrete Gestalt an und die Bundesregierung weist zu Recht darauf hin, dass ein solcher Markt mehr Wettbewerb und Vorteile für die Bürger bringen wird.

Eine ähnlich erfreuliche Entwicklung zeigt sich im Gashandel. Die Volumina sind 2010 erneut deutlich angestiegen. Dazu haben zahlreiche Initiativen der Marktteilnehmer – darunter E.ON – beigetragen, die Liquidität in den Spotmärkten zu vergrößern. Diese europaweit positive Entwicklung an den Gas-Hubs ist umso bemerkenswerter, als die allgemeine Nachfrage nach Gas infolge der Finanz- und Wirtschaftskrise nachgegeben hat und sich erst allmählich erholt.

Großbritannien ist nach wie vor der mit Abstand liquideste und umsatzstärkste Gasmarkt, aber die niederländischen und deutschen Handelsplätze zeigten 2010 das kräftigste Wachstum. Der Gas-Hub mit den größten Handelsmengen in Kontinentaleuropa ist der niederländische Title Transfer Facility Point (TTF), während die deutsche NetConnect Germany (NCG) das stärkste Wachstum aufweist. Auch die Zahl der aktiven Handelsteilnehmer an der NCG ist in den letzten Jahren deutlich gestiegen.

Ähnlich wie im Strombereich erkennt man im Gashandel deutliche Zeichen des Zusammenwachsens und der Integration der europäischen Märkte: Nicht zuletzt die höhere Verfügbarkeit von verflüssigtem Erdgas (LNG), das an europäischen Terminals angelandet wird, hat zu einem hohen Grad an Preiskorrelation auf den Spotmärkten des Kontinents beigetragen.

E.ON ist seit Jahren an den wichtigsten Handelsplätzen für Gas in Westeuropa aktiv und sorgt als sogenannter Market Maker an der NCG in Deutschland aktiv für Liquidität und verlässliche Preisstellung. Wir unterstützen aber ebenfalls die Entwicklung der Hubs in Frankreich, Italien und Österreich sowie die in den aufstrebenden Märkten Mittel- und Osteuropas wie Ungarn, Tschechien, Slowakei und Rumänien.

## Globalisierung der Rohstoffmärkte

Während die Märkte in Europa sich verbinden und integrieren, wirken globale Einflüsse immer stärker von außen auf Europa ein. Ein Beispiel: Der Gashandel hat sich in den letzten Jahren von einem leitungsgebundenen europäischen zu einem globalen Geschäft entwickelt. Ursache hierfür sind unter anderem Gasvorkommen in den USA, deren Erschließung bisher als unökonomisch galt (sog. unconventional gas) und die nunmehr zusätzliche Gasmengen zu wettbewerbsfähigen Preisen auf den nordamerikanischen Markt bringen. Dadurch werden LNG-Lieferungen für Europa und Asien frei, die ursprünglich für die USA eingeplant waren. LNG wiederum ist ein weltweit gehandeltes, kurzfristig verfügbares Produkt, das als preisliche Brücke zwischen den Märkten dient und die Korrelation zwischen diesen verstärkt. Erdgas ist damit bereits jetzt eine Welthandelsware – ähnlich wie Steinkohle oder Erdöl, die schon immer im globalen Maßstab gehandelt wurden.

Getrieben wird diese Entwicklung auch vom Rohstoffhunger der aufstrebenden Märkte, vor allem Chinas. Es entstehen neue globale Wettbewerbsmärkte, die nun auch Absicherungsgeschäfte von Kontinent zu Kontinent möglich und nötig machen. So sind wir im Mai 2010 mit einem ersten finanziellen Geschäft in den US-Gashandel eingestiegen. Dieser soll in Zukunft weiter ausgebaut werden, damit auf beiden Seiten des Atlantiks Chancen im Handel genutzt werden können. Ebenso haben wir im Oktober 2010 mit der ersten Transaktion an der New Yorker CO<sub>2</sub>-Börse Green Exchange Neuland im Emissionshandel betreten. Hier wurden Zertifikate für das europäische CO<sub>2</sub>-Handelssystem (EUAs) für Dezember 2010 erworben. E.ON nimmt schon jetzt die Chancen wahr, die sich in einer zusammenwachsenden Welt des globalen Energiehandels bieten.

Mehr zum Handel?

[www.eon-energy-trading.com](http://www.eon-energy-trading.com)



Die globale Einheit Handel ist in mehr als 40 Ländern aktiv und an allen wichtigen Energiebörsen und Gas-Hubs Europas präsent. Außerdem handelt sie in den USA mit finanziellen Stromprodukten, CO<sub>2</sub>- und Gasprodukten sowie weltweit mit Steinkohle und Frachten.<sup>1)</sup>

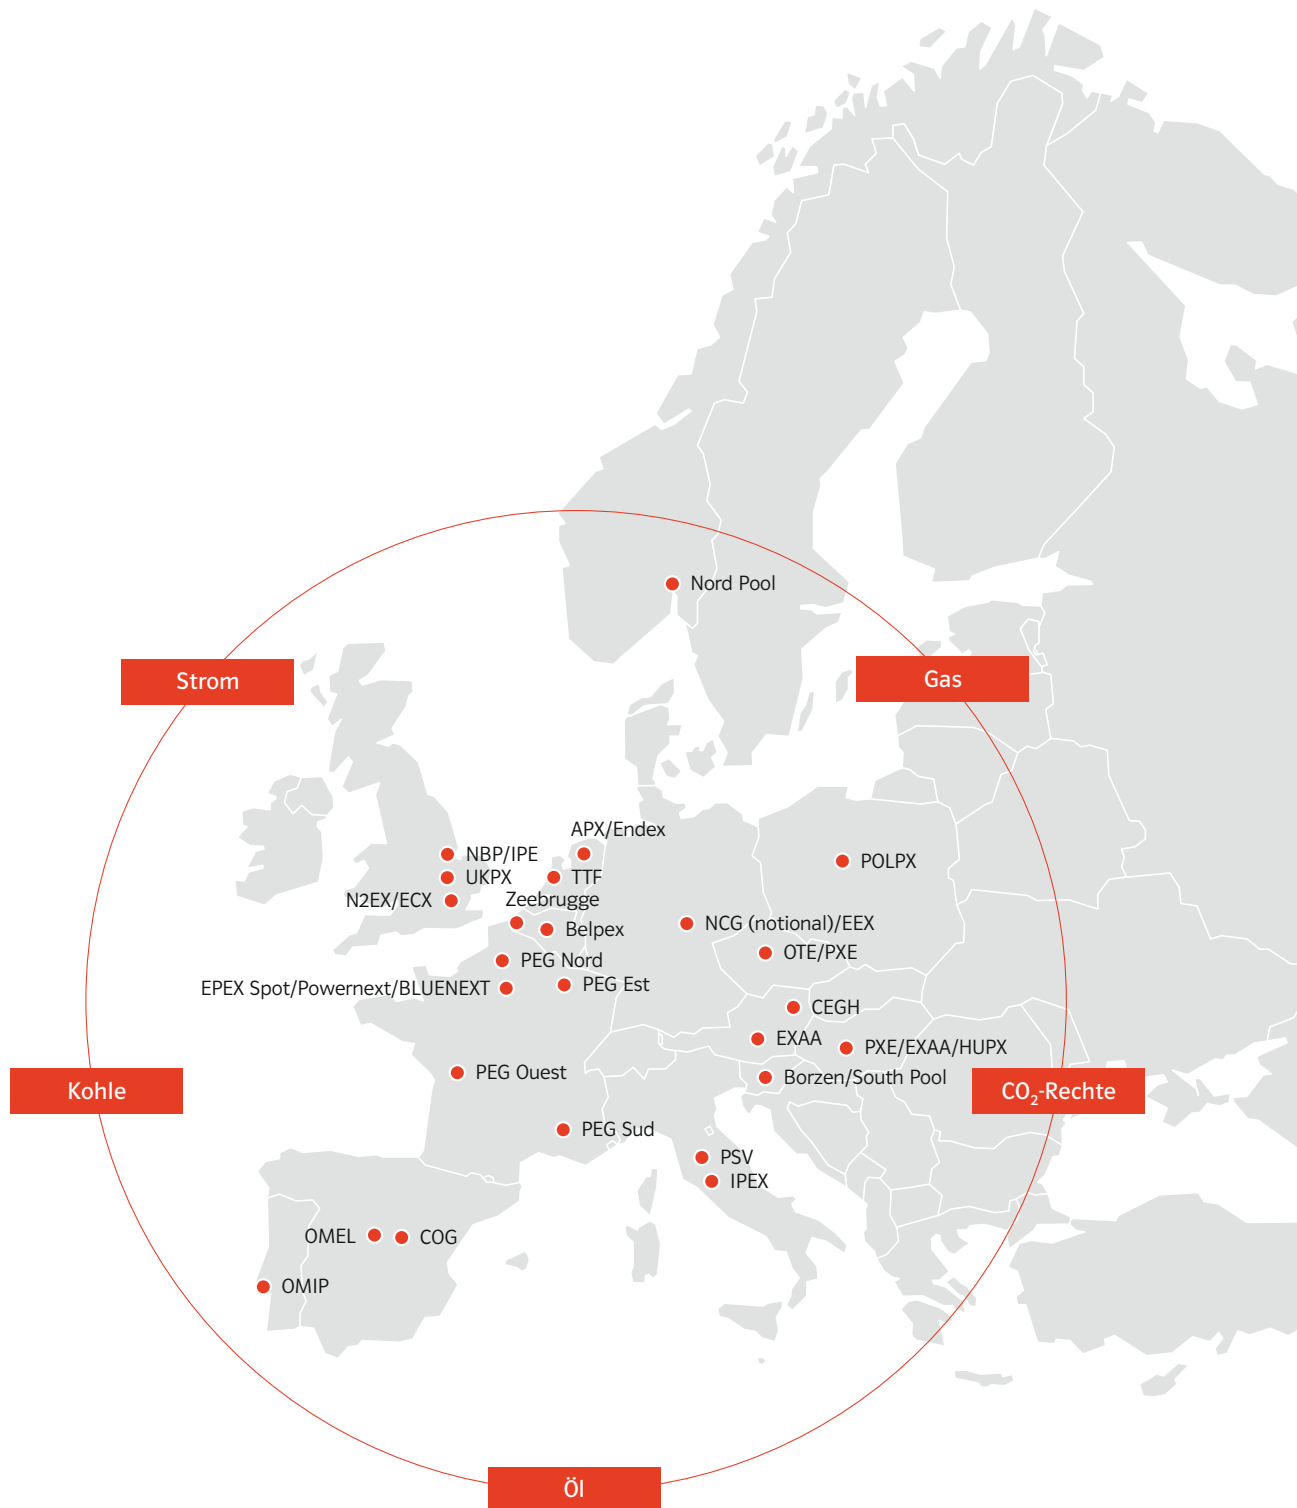

1) an einigen Standorten kann es mehrere Handelspunkte für verschiedene Commodities geben.

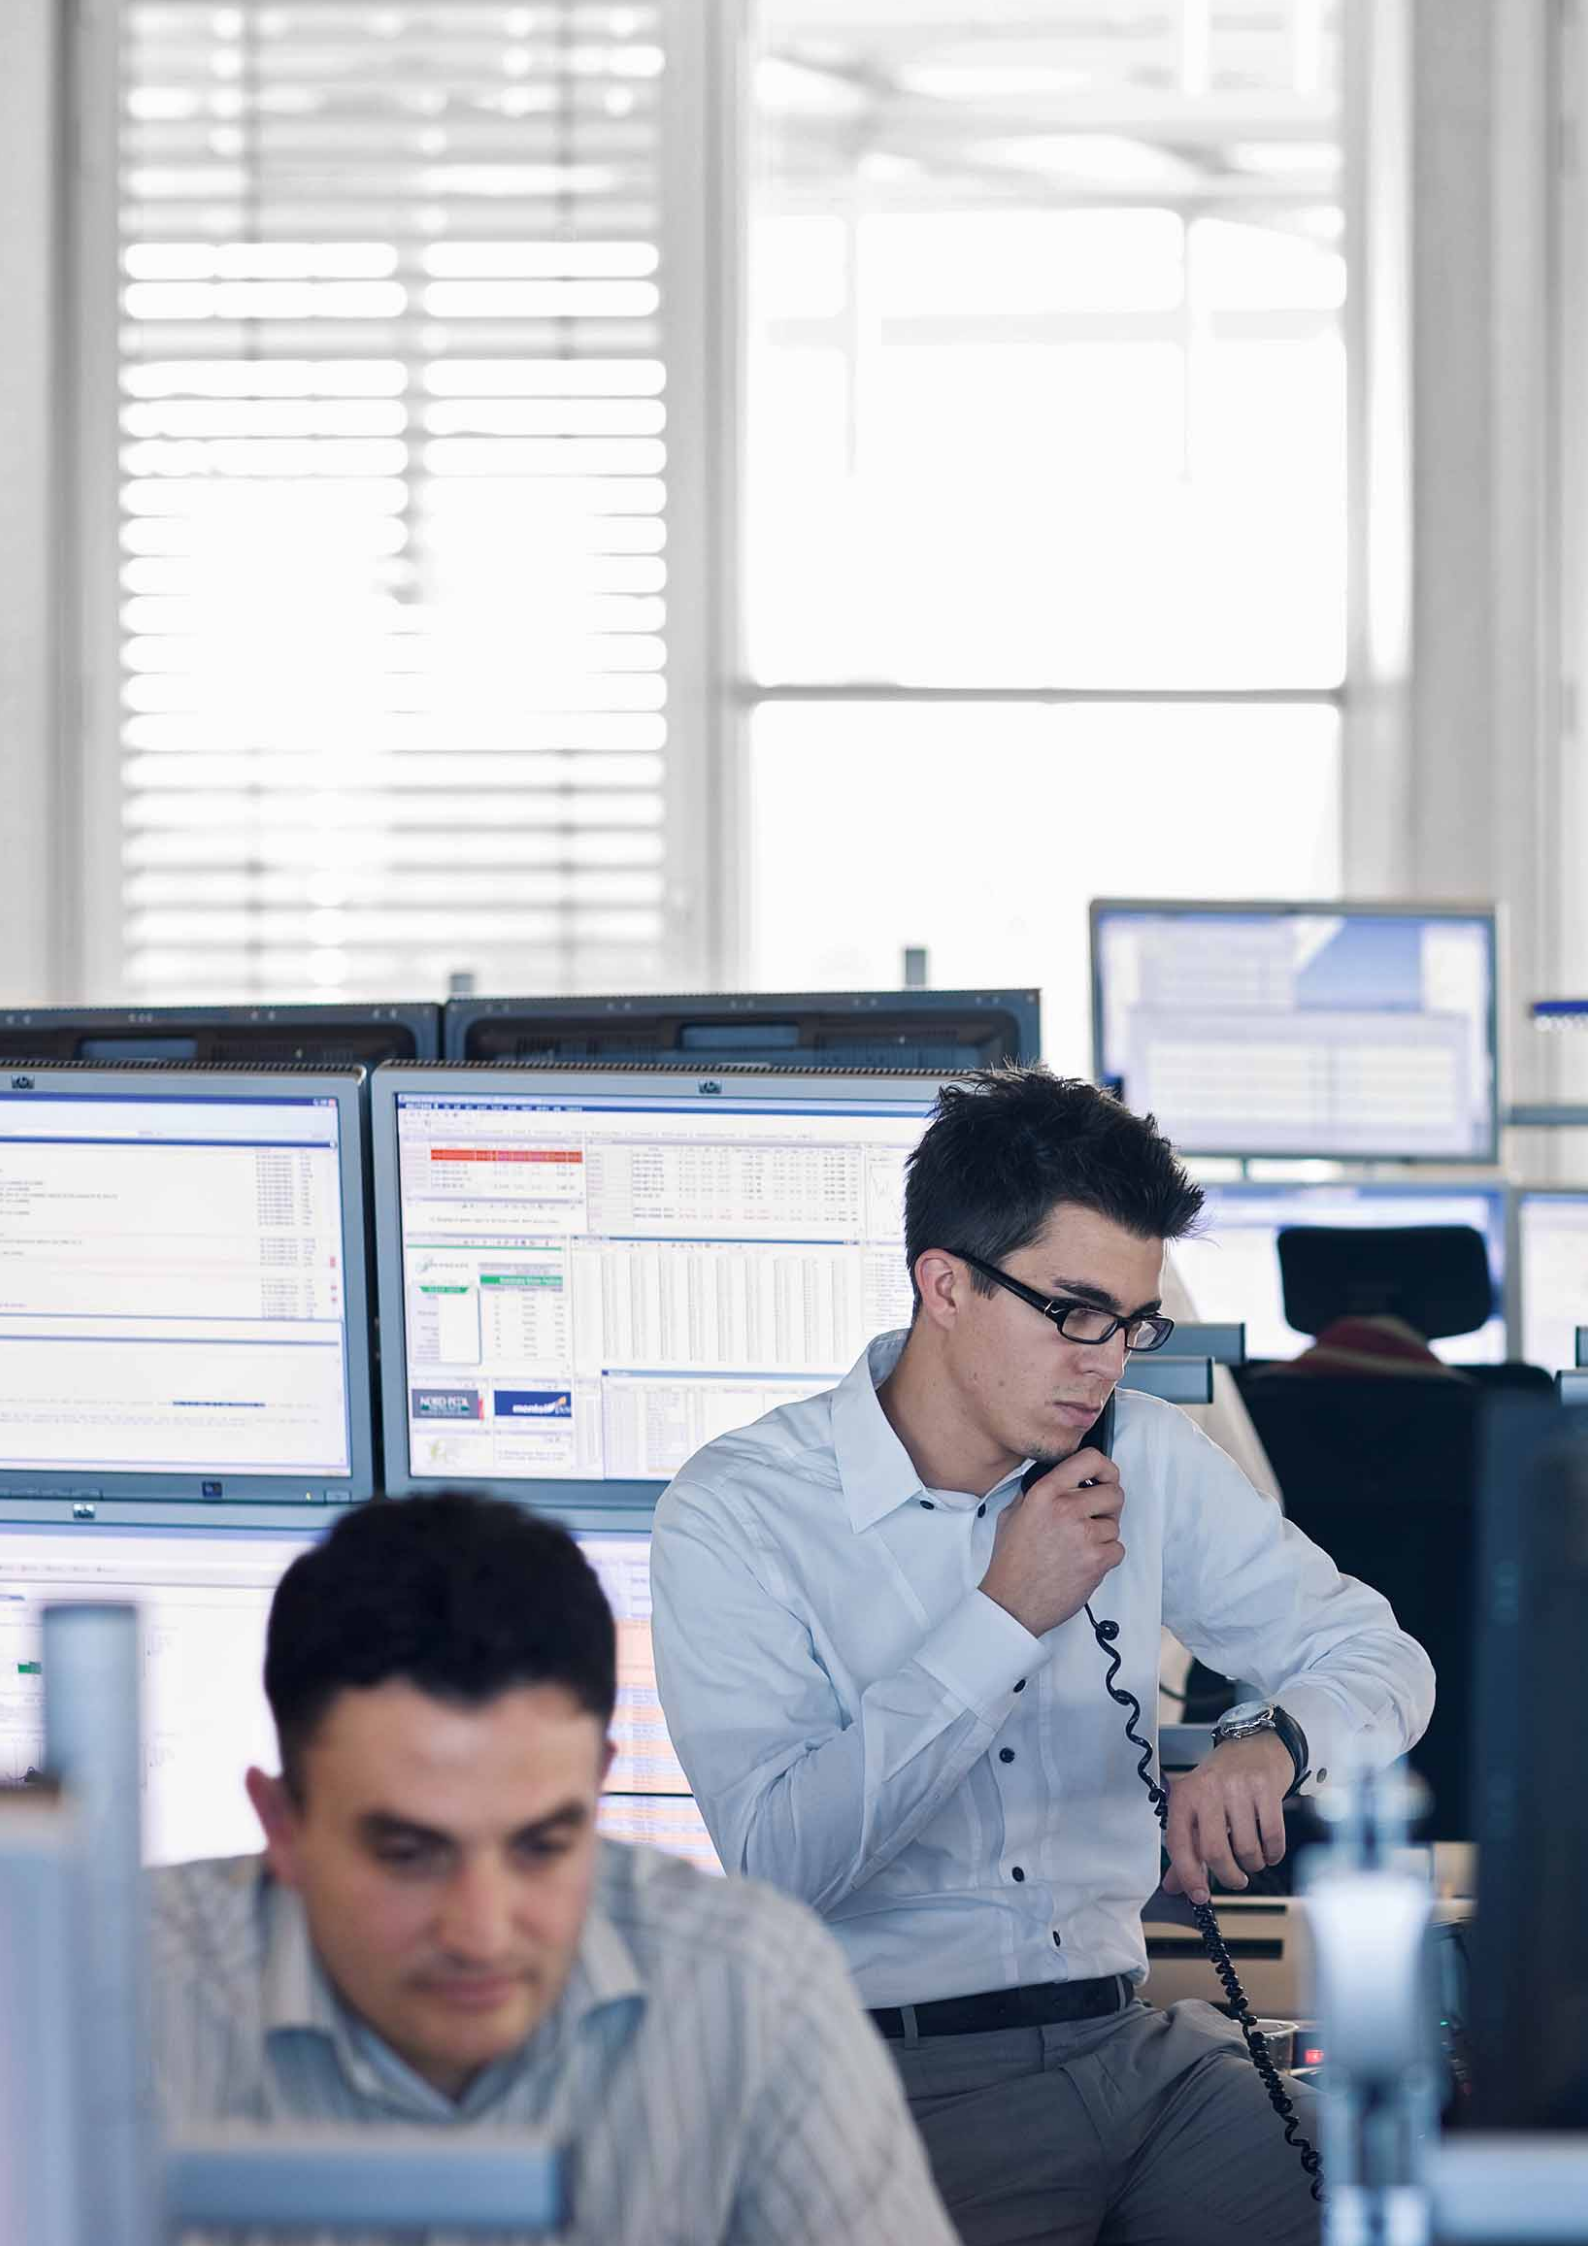

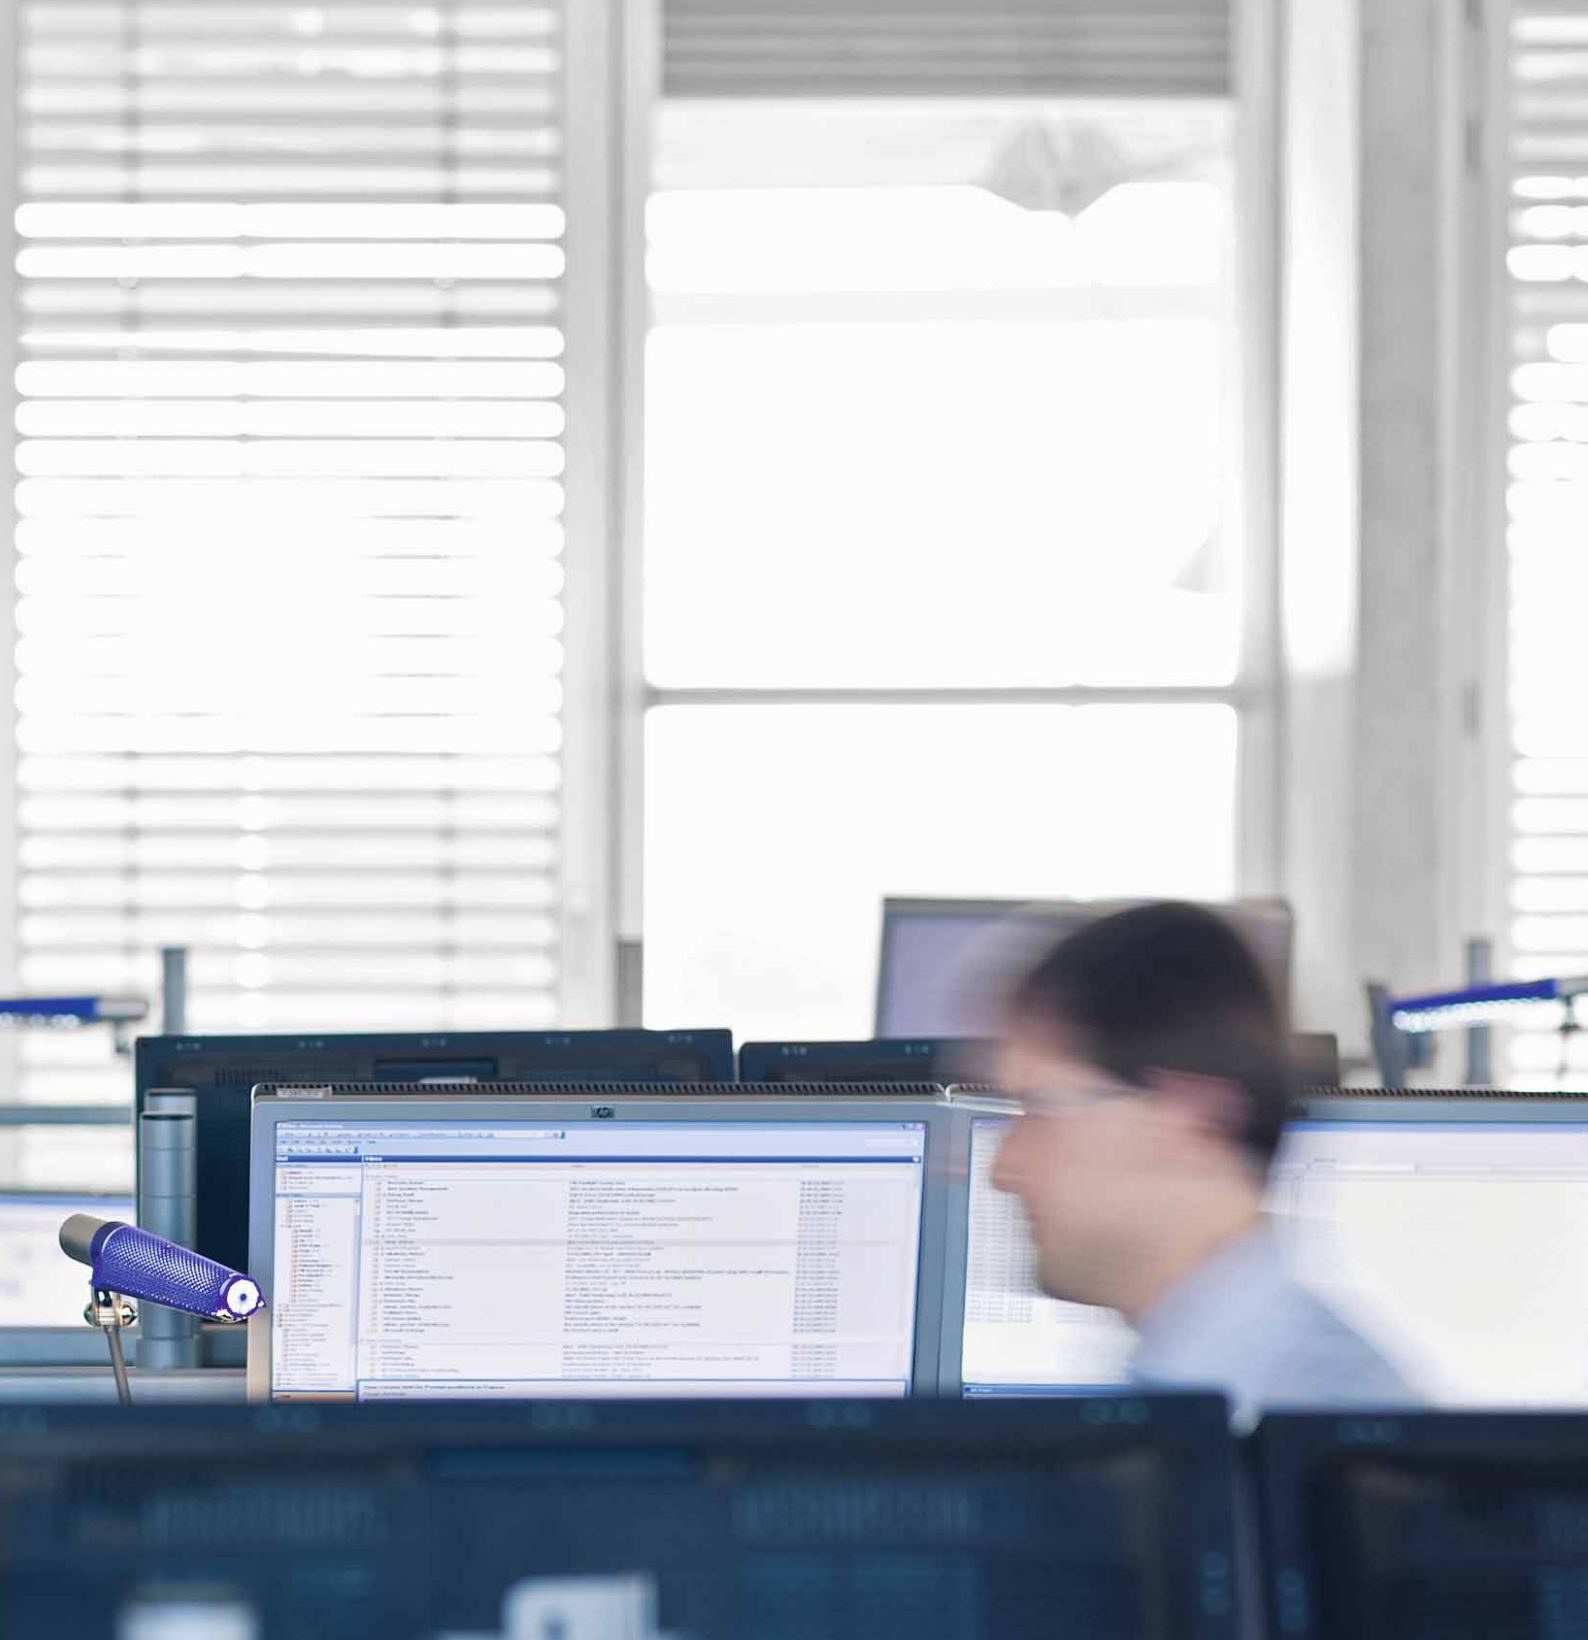

## Handel: Integrierter Energiemarkt schafft Effizienz beim Kraftwerkseinsatz

Unsere Handelsaktivitäten haben wir systematisch unter einem Dach zusammengeführt. Damit verfügen wir über eine hervorragende Basis für die optimale Steuerung aller Beschaffungs-, Handels- und Verkaufsaktivitäten und können so die Chancen des zusammenwachsenden Energiemarkts in Europa ebenso nutzen wie die der globalen Rohstoffmärkte. So steuern wir auch den Einsatz unserer Stromerzeugungsanlagen, unter anderem in Deutschland, Großbritannien, den Beneluxländern, Skandinavien und Frankreich, zentral. Weil die Leitungsverbindungen zwischen diesen Märkten relativ gut sind, können wir unsere Anlagen über die Ländergrenzen hinweg effizient einsetzen. Dieser Wettbewerb zwischen den Kraftwerken in Verbindung mit dem europaweiten Emissionshandel sorgt dafür, dass die Stromnachfrage einer Region mit den effizientesten Technologien und möglichst niedrigen Kosten bedient wird. Das erspart der Umwelt unnötige CO<sub>2</sub>-Emissionen und schont die Ressourcen.

Auch das bedeutet für uns **cleaner & better energy**.



## Regionale Einheiten

Unsere regionalen Einheiten in Europa verantworten das Vertriebsgeschäft, die regionale Infrastruktur sowie die dezentrale Erzeugung. Damit sind sie der zentrale Ansprechpartner für unsere Kunden. Gleichzeitig sind sie in ihren jeweiligen Ländern Ansprechpartner für alle relevanten Interessengruppen, zum Beispiel in der Politik, bei Behörden, Verbänden und Medien. Zusätzlich sind sie aber auch wichtige Partner unserer globalen Einheiten. Für diese nehmen sie ein breites Spektrum an Unterstützungsaufgaben wahr. Darüber hinaus stellen sie dem Konzern ihre Kenntnisse des jeweiligen Marktes mit seinem politischen und regulatorischen Umfeld zur Verfügung. So sind unsere regionalen Einheiten beispielsweise für die Entwicklung von Erzeugungsprojekten von der Voranalyse bis zur Investitionsentscheidung verantwortlich.

# Deutschland

Die Kernaufgaben der regionalen Einheit Deutschland sind die Verteilung und der Vertrieb von Strom und Erdgas sowie die dezentrale Erzeugung. Die Führungsgesellschaft dieser Einheit ist E.ON Energie mit Sitz in München.

### Unsere Vertriebsaktivitäten

Auf dem deutschen Markt steht E.ON im Wettbewerb mit insgesamt knapp 1.300 Energieunternehmen<sup>1)</sup>. Diesem Wettbewerb

stellen wir uns aktiv mit vielfältigen Angeboten zu fairen Preisen für eine verlässliche Belieferung mit Strom, Erdgas und Wärme sowie mit auf verschiedenste Bedürfnisse zugeschnittenen Serviceangeboten. Unser Strom- und Gasvertrieb wird seit dem vergangenen Jahr für alle Kundengruppen – vom industriellen Großkunden bis zum Privathaushalt – von der in München ansässigen Gesellschaft E.ON Vertrieb Deutschland gesteuert. Ihr Kerngeschäft

liegt in der Beschaffung von Energie sowie im Produktmanagement und Marketing. Schwerpunkte bilden hier die Themen Energieeffizienz und Verbrauchsoptimierung. Für den direkten Kontakt zu unseren Kunden sorgen regionale Vertriebsgesellschaften und der bundesweit tätige Anbieter E wie Einfach. Unser Produktspektrum reicht von Festpreisangeboten, mit denen sich unsere Kunden gegen steigende Energiekosten absichern können, bis hin zu

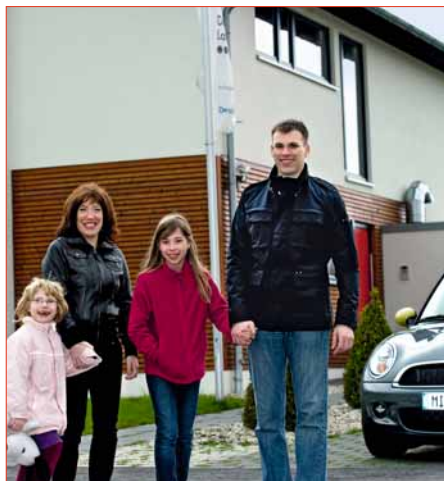

### Smart Homes

In einem Pilotprojekt im Norden Niedersachsens werden Haushalte durch den Einsatz zukunftsweisender Haustechnik zu sogenannten Smart Homes. Hier kommen Fotovoltaikanlagen, modernste Klimatechnik, hocheffiziente Beleuchtungsanlagen und intelligente Stromzähler (Smart Meter) zum Einsatz. Darüber hinaus stellt E.ON den Hausbesitzern auch Elektroautos zur Verfügung. Dabei wird untersucht, wie man die Fahrzeugbatterien als Stromspeicher nutzen kann. Denn mit Smart Metern können die Fahrzeuge flexibel geladen werden, um schwankende

Einspeisung aus Erneuerbaren Energien auszugleichen. So kann in Zukunft sogar aus einem parkenden Elektroauto Strom zurück ins Netz fließen – wenn der entsprechende Bedarf da ist. Mit diesem Projekt wollen wir nicht nur neue Erkenntnisse über die Bedürfnisse und das Verbrauchsverhalten unserer Kunden gewinnen. Es geht auch darum, schon heute zu zeigen, wie unsere Kunden zukünftig vom Einsatz innovativer Technologien profitieren können.

1) Quelle: BDEW (Stand November 2010)

innovativen Lösungen, die Transparenz über den Energieverbrauch schaffen und energiesparendes Verhalten belohnen. Dazu gehört seit Ende 2010 unser neues Produkt „EnergieNavi“, bei dem intelligente Zähler das Energiesparen zu Hause unterstützen. Individuelle Verbrauchsdaten können online abgerufen werden und bilden die Grundlage dafür, nach Einsparmöglichkeiten zu suchen und mit einem günstigen Zeitzonentarif Geld zu sparen.

### Unsere Netze – auf dem Weg zum „smart grid“

Unsere acht Netzunternehmen betreiben Stromnetze mit einer Gesamtlänge von 455.000 km und 65.000 km Gasnetze. Damit transportieren sie Energie direkt und zuverlässig zu rund neun Millionen Netzkunden in großen Teilen Deutschlands. Die E.ON Netz stellt mit ihrem fast 22.000 km langen Hochspannungsnetz die Verbindung zwischen dem europäischen Stromtransportnetz und den Netzen regionaler Energieversorger her. Für die weitere Verteilung in den Regionen sind unsere sieben Verteilnetzbetreiber verantwortlich, die als Partner vieler Städte und Gemeinden über den Netzbetrieb und -service hinaus verschiedene Dienstleistungen anbieten.

Verteilnetze liefern aber heute nicht mehr nur Strom zu den Verbrauchern, sie nehmen ihn auch auf. Dezentrale Fotovoltaik-, Windkraft- und andere Erzeugungsanlagen speisen ihren Strom ein. Je mehr solcher Anlagen am Netz sind, umso größer werden die Schwankungen bei der Stromeinspeisung. Der massive Ausbau der Erneuerbaren Energien hat schon heute dazu geführt, dass in unseren regionalen Netzen zeitweise ausschließlich regenerativ erzeugter Strom fließt. Deshalb bauen die E.ON-Netzbetreiber die Kapazität ihrer Netze weiter bedarfsgerecht aus. Gleichzeitig arbeiten sie an der Entwicklung intelligenter Netze, sogenannter smart grids. Dabei unterstützt ein paralleles Datennetz die Steuerung der Verteilung, Speicherung und Erzeugung von Energie. Im Hochspannungsnetz sind bei E.ON schon heute viele solcher „intelligenten“ Lösungen im Einsatz.

Aber auch in der Mittel- und Niederspannung testet E.ON intelligente Lösungen. So sind in Niedersachsen die deutschlandweit ersten selbstregelnden Trafostationen im Einsatz, die trotz starker Schwankungen durch die Erzeugung aus Erneuerbarer Energie für eine konstante Spannung im Netz sorgen. Intelligente Netze werden die Voraussetzungen für den Ausbau und die Integration dezentraler Erzeugung künftig deutlich verbessern.

### Dezentrale Erzeugung

Bei der dezentralen Erzeugung bietet E.ON über verschiedene Tochtergesellschaften in Deutschland ein breites Spektrum von Kraft-Wärme-Kopplungsanlagen an: Es reicht von kleinen Anlagen wie Mini-Blockheizkraftwerken im Keller von Wohnhäusern über Biomasse-Heizkraftwerke für Gewerbebetriebe bis hin zu dezentralen Anlagen für den industriellen Bedarf. In Plattling versorgt beispielsweise unser 2010 in Betrieb genommenes Gas- und Dampfkraftwerk zwei große Papierfabriken mit Strom und Wärme. Die Anlagen decken 100 Prozent des Wärmebedarfs und rund 70 Prozent des Strombedarfs. Die Anlage zählt zu den größten und modernsten ihrer Art in Deutschland. Im Vergleich zur getrennten Strom- und Wärmeerzeugung werden pro Jahr rund 260.000 Tonnen CO<sub>2</sub> eingespart. Für den im Bau befindlichen neuen Großflughafen Berlin-Brandenburg International hat E.ON hocheffiziente Energiezentralen für die Strom-, Wärme- und Kälteversorgung des Flughafens geplant und gebaut. Zentraler Baustein sind vier gasbetriebene Blockheizkraftwerke (BHKW) mit einer Gesamtleistung von rund 8 MW, die den eingesetzten Brennstoff zu rund 90 Prozent ausnutzen und damit neue Maßstäbe bei der Energieeffizienz setzen.

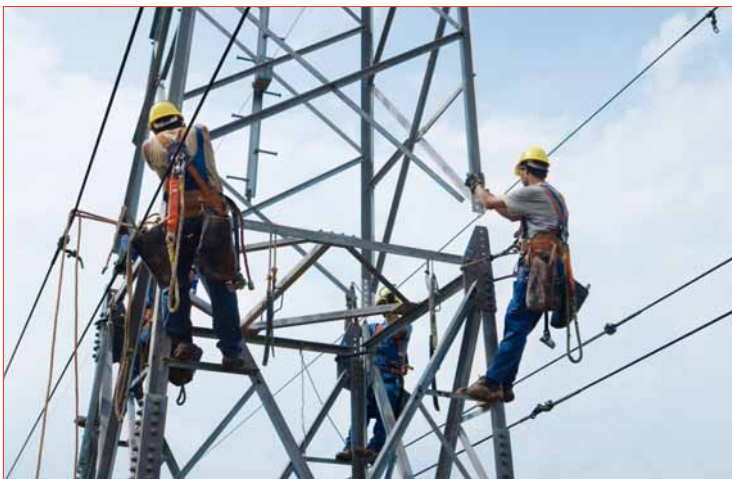

### Netzausbau für Erneuerbare Energien

Der Anteil der Erneuerbaren Energien am Erzeugungsmix wächst stetig. Unsere Netze nehmen diese Energie auf und bringen sie dahin, wo sie gebraucht wird – eine Aufgabe, die immer anspruchsvoller wird. Denn die Einspeisung aus Erneuerbaren Energien schwankt naturgemäß und wird zur Herausforderung, wenn es um die konstante und zuverlässige Versorgung der Kunden geht. Deshalb muss der Ausbau der Erneuerbaren Energien mit dem Ausbau der Netze einhergehen. Die E.ON-Netzbetreiber investieren dafür in den nächsten Jahren deutlich über eine Milliarde allein in den Netzausbau zur Einspeisung regenerativer Energien.

# Weitere EU-Länder

## Großbritannien

Die Führungsgesellschaft unserer regionalen Einheit ist E.ON UK mit Hauptsitz in Coventry. In Großbritannien ist E.ON mit etwa 8 Millionen Strom- und Gaskunden, darunter Haushalts-, Mittelstands- und Industriekunden, eines der landesweit führenden Energieunternehmen. E.ON bietet darüber hinaus Instandhaltung und Beratung rund um die Themen Energieeffizienz und Wärme an. Zusätzlich sind wir der zweitgrößte Netzbetreiber des Landes. An der Entwicklung von bis zu 6 GW neuer Kapazität aus Kernenergie arbeiten wir gemeinsam mit Horizon Nuclear Power, an der wir 50 Prozent der Anteile halten. Mit diesen neuen Kapazitäten kann genug Strom produziert werden, um eine Region vergleichbar mit dem Großraum London zuverlässig mit Strom zu versorgen.

### Energieeffizienz für unsere Kunden

In Großbritannien sind wir der Schrittmacher für mehr Energieeffizienz. So haben wir die Initiative Energy Fit ins Leben gerufen: Auf einer speziellen Internetseite ([www.eonenergyfit.com](http://www.eonenergyfit.com)) können Verbraucher die Energie-Fitness ihres Zuhauses ermitteln und Verbesserungsvorschläge ausarbeiten lassen. Zusätzlich haben wir mehr als eine Viertelmillion Energy Fit Starterpakete an unsere Endkunden verteilt. Jedes Paket enthält ein Gerät zur Überwachung des Energieverbrauchs, spezielle Software zur Energieverwaltung und viele nützliche Energiespartipps. Diese Aktion kam gut bei unseren Kunden an – und bei den Medien, die ausgiebig und sehr positiv berichteten.

Damit die Menschen auch in direkten Kontakt mit unseren Energieexperten treten können, haben wir die Energy Fit Experience gestartet, eine Roadshow, die in zahlreichen Städten des Landes haltmacht. So haben die Kunden die Möglichkeit, persönlich unseren Energieexperten ihre Fragen zu stellen und kostenlose Anregungen zur Verbesserung ihrer Energie-Fitness zu bekommen. Davon profitieren nicht nur die Menschen vor Ort, sondern auch wir, indem wir unseren Kunden zuhören und so eine noch engere Bindung zu ihnen aufbauen. Initiativen wie diese helfen aber auch dabei, die Verbrauchsgewohnheiten im ganzen Land zu verbessern.

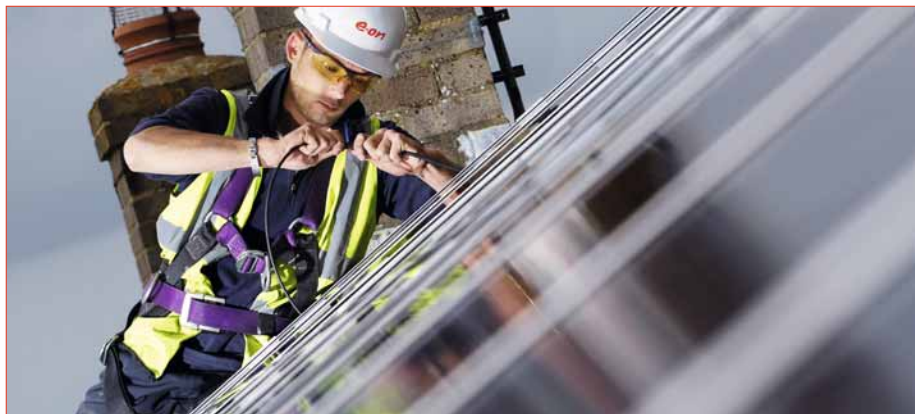

### Unterstützung für die Regionen

Mit unseren Städtepartnerschaften helfen wir Kommunen, nachhaltig mit Energie zu wirtschaften. So arbeiten wir im mittelwest-englischen Stoke on Trent an der möglichen Installation von fast 5.000 Solarpaneelen. Dadurch unterstützen wir nicht nur den Ausbau Erneuerbarer Energie, sondern schaffen auch neue Arbeitsplätze und wertvolles Know-how in der Region.

## Schweden

E.ON betreibt in Schweden regulierte Verteilernetze für Strom, Gas und Wärme mit etwa einer Million Kunden, vorwiegend im Süden und der östlichen Mitte des Landes. Strom, Gas und Wärme vertreiben wir landesweit. Dabei legen wir besonderen Wert auf CO<sub>2</sub>-arme Energielösungen und unterstützen Kunden sowie Kommunen beim nachhaltigen Umgang mit Energie.

### Nachhaltigkeit mit Biotreibstoffen

Im Segment der Biotreibstoffe sind wir weiterhin der Schrittmacher und haben 2010 unsere Bio-Erdgasproduktion auf 15 Mio m<sup>3</sup> jährlich ausgeweitet. Lokal produzierte, klimaneutrale Biotreibstoffe können nicht nur die CO<sub>2</sub>-Emissionen reduzieren, sondern auch die Abhängigkeit von importierter fossiler Energie. Ein gutes Beispiel ist der Einsatz von Bio-Erdgas in erdgasbetriebenen Fahrzeugen. Wir versorgen inzwischen 52 Tankstellen in ganz Schweden mit Bio-Erdgas und haben jüngst einen Vertrag mit Ikea über die Errichtung einer Bio-Erdgastankstelle an einem Möbelhaus abgeschlossen. Auch mit anderen Unternehmen und öffentlichen Stellen arbeiten wir zusammen, um unser Bio-Erdgasgeschäft weiter auszubauen und die Mobilität in Schweden noch nachhaltiger zu machen.

Beim nachhaltigen Umgang ganzer Kommunen mit Energie sind wir eine treibende Kraft. So waren wir maßgeblich an der Umgestaltung von Västra Hamnen (Westhafen) in Malmö beteiligt. Das ehemalige Industriegebiet wurde in ein modernes Wohngebiet umgewandelt, das zu 100 Prozent mit lokal erzeugter Erneuerbarer Energie versorgt wird. Von den Erfahrungen, die wir in Schweden gesammelt haben, profitiert E.ON insgesamt. Wir bringen sie in ein europaweites Projekt zur Förderung von Häusern mit intelligenter

Energienutzung ein, in dessen Rahmen wir acht Eigenheime in einem Stadtteil in Malmö bauen. Dort werden die neuesten Technologien der Energieeffizienz und die Entwicklung nachhaltigen Wohnens vorgestellt.

### Verlässliche Versorgung und intelligente Produkte für unsere Kunden

Beim Aufbau eines intelligenteren und nachhaltigeren Energiesystems spielt die Einbindung der Kunden eine zentrale Rolle. In Schweden verfolgen wir deswegen einen kundenorientierten Ansatz. Wir bieten unseren Kunden eine Reihe von Programmen und Dienstleistungen zur Reduzierung des Energieverbrauchs an, zeigen ihnen Möglichkeiten auf, wie sie mit Kleinstanlagen ihren eigenen Strom produzieren können, und hören ihnen einfach zu. Ein eigener, aktiver Ombudsmann für Kunden garantiert, dass Kundenbelange im Unternehmen immer eine gewichtige Stimme haben. Und das zahlt sich aus: In einer aktuellen Untersuchung gaben uns unsere Kunden in Schweden Höchstnoten für Servicequalität und den generellen Umgang mit ihnen.

Der wichtigste Faktor für zufriedene Kunden ist aber eine verlässliche Energieversorgung – im harten schwedischen Winter keine leichte Aufgabe. Wir haben diese Herausforderung angenommen und 17.000 km Stromkabel winterfest gemacht, indem wir Überlandleitungen in die Erde verlegt haben. Dieses Projekt hat mehrere Jahre gedauert und insgesamt 2 Mrd € gekostet, aber 2010 konnten wir es erfolgreich abschließen und die Versorgungssicherheit für 266.000 Kunden signifikant erhöhen.

### Modernes Wohnen

In Malmö waren wir maßgeblich am Umbau eines ehemaligen Industriegebiets beteiligt, das heute ausschließlich mit lokal erzeugter Erneuerbarer Energie versorgt wird.

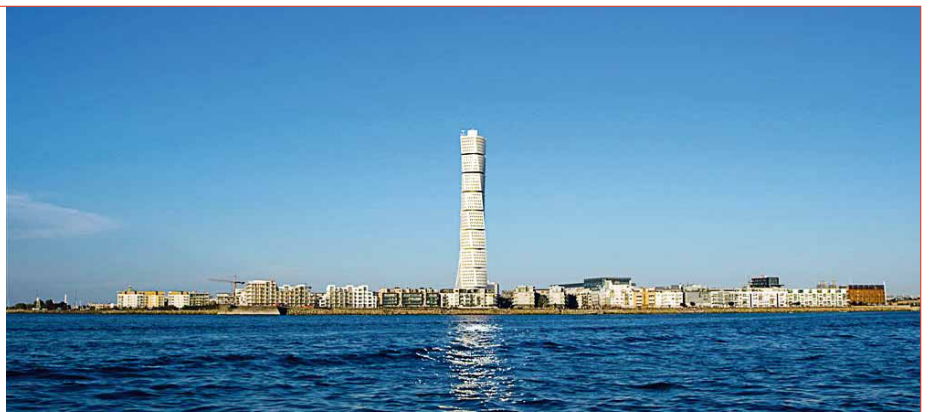



## Italien

E.ON Italia mit Sitz in Mailand ist die Führungsgesellschaft unserer regionalen Einheit in Italien. 2010 konnte unsere Vertriebsgesellschaft ihren Kundenstamm auf fast 900.000 Kunden erweitern und zählt nun, gemessen am Umsatz, zu den vier größten Versorgern des Landes. Innovative Produkte rund um Erneuerbare Energien haben genauso dazu beigetragen wie die konsequente Fortsetzung des erfolgreichen Kundenbindungsprogramms, das Energieeffizienz und Einsparungen unterstützt. Im Dezember haben wir der Veräußerung unseres regulierten Gasverteilnetzes zugestimmt, da wir nur wenig Potenzial für Synergien mit unseren weiteren Geschäften in der Region sehen. Wir erwarten, dass die Transaktion Ende März 2011 abgeschlossen sein wird.

Darüber hinaus wollen wir zusammen mit GdF Suez die Möglichkeiten zur Errichtung neuer Kernenergie-Kapazitäten in Italien ausloten. Die italienische Regierung strebt bis 2020 einen Energiemix an, der zu 25 Prozent aus Kernkraft, 25 Prozent aus Erneuerbaren Energien und 50 Prozent Erdgas besteht.

Auch sozial engagieren wir uns sehr stark: So haben wir zusammen mit anderen Organisationen ein neues Gemeindezentrum in Onna gebaut. Der Ort wurde während des Erdbebens 2009 stark zerstört. Das Gebäude wurde im Oktober 2010 eröffnet und erfüllt höchste Standards der Erdbebensicherheit und Energieeffizienz. Zusätzlich spendete E.ON Italia 150 Computer für Schulen im Erdbebengebiet.

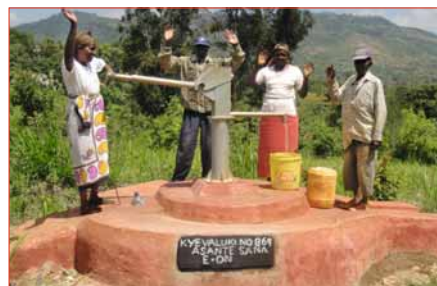

### Sauberer Strom für Italien, sauberes Wasser für Afrika

Um das Bewusstsein für die wichtigste Erneuerbare Energie Italiens – die Wasserkraft – zu stärken, hat E.ON Italia im September 2010 eine spezielle Internetseite zum Thema Wasser gestartet. Die Seite ist auch mit einem gemeinnützigen Projekt von E.ON und AMREF, einer humanitären Hilfsorganisation für Afrika, verlinkt. Das Projekt baut vier Brunnen in Kenia.

## Spanien

Unsere Geschäfte in Spanien führt E.ON España mit Sitz in Madrid. Schwerpunkte sind dabei der Vertrieb und die Verteilung von Strom.

E.ON Energía, unsere Vertriebsgesellschaft, konnte 2010 ihren Kundenstamm auf 100.000 Privat-, Industrie- und Geschäftskunden weiter ausbauen. Eine weitere Tochtergesellschaft liefert Strom an 500.000 Kunden (hauptsächlich Privatkunden) auf dem regulierten Markt. Die fortschreitende Deregulierung im spanischen Strommarkt führt dazu, dass immer mehr Kunden ihren Anbieter frei wählen können. Wir nutzen diese Entwicklung, um durch hochwertige Produkte und attraktive Dienstleistungen im Vertriebsgeschäft weiter zu wachsen.

Auch in Spanien engagieren wir uns für eine Energie, die sauberer und besser ist. Als wichtigen Schritt hin zu einem intelligenten Stromnetz hat E.ON España bereits 160.000 intelligente Stromzähler installiert. Darüber hinaus unterstützen

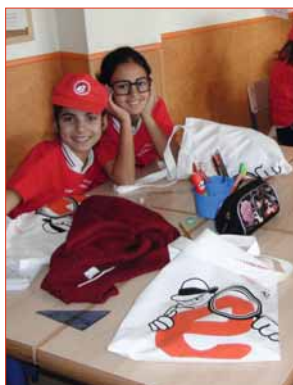

### Energieeffizienz auch im Klassenzimmer

Nicht nur bei unseren operativen Geschäften ist Effizienz wichtig – wir fördern auch das Wissen um Energieeffizienz. Ein Beispiel dafür ist das Projekt Environmental Champions, das wir in den Gemeinden durchführen, in denen wir aktiv sind. 15 freiwillige E.ON-Mitarbeiter unterrichten mehr als 350 Schüler im Alter von 7 bis 14 Jahren und bringen ihnen bei, wie Energie effizient genutzt werden kann.

wir die Verbreitung von Elektrofahrzeugen. Dazu arbeiten wir beispielsweise mit der Stadtverwaltung von Santander zusammen: Dort versorgt ein stadtweites Netz von Ladestationen unsere Unternehmensflotte, die ausschließlich aus Elektrofahrzeugen besteht.

## Frankreich

Unsere Geschäfte in Frankreich, dem zweitgrößten Energiemarkt Zentraleuropas, werden von E.ON France mit Sitz in Paris geführt. Das Unternehmen ist über seine Tochtergesellschaft E.ON Énergie auch im Vertrieb von Strom und Gas tätig. Die Vertriebsgesellschaft verfügt über eine solide Kundenbasis im Industrie- und Großkundengeschäft. Dabei vermarktet sie teilweise auch Strommengen, die in den französischen E.ON-Kraftwerken erzeugt werden. Zu diesen Anlagen gehören auch die beiden Anfang 2010 in Betrieb genommenen Gas- und Dampfturbinenblöcke am Standort Émile Huchet, mit denen E.ON einen wichtigen Schritt zu einem noch ausgeglicheneren, CO<sub>2</sub>-reduzierten Erzeugungsmix in Frankreich gemacht hat.

Energiepolitisch stand das Jahr 2010 in Frankreich ganz im Zeichen der kürzlich verabschiedeten Gesetze für mehr Wettbewerb auf dem Energiemarkt. E.ON France hat sich aktiv an den vorangehenden politischen und öffentlichen Diskussionen beteiligt und sich nachdrücklich für eine weitere Öffnung des französischen Energiemarktes eingesetzt.

Gleichzeitig hat die französische Regierung neue Richtlinien zur Förderung der Erneuerbaren Energien in Kraft gesetzt. Damit sind die Voraussetzungen für einen Ausbau der Stromerzeugung aus Erneuerbaren Energien festgelegt. Wir sind überzeugt, dass unser Geschäft in Frankreich von einem stärker auf Wettbewerb und Erneuerbare Energien ausgerichteten Markt

profitieren wird. Konkrete Chancen für eine Verstärkung des Engagements bei den Erneuerbaren Energien sieht E.ON France derzeit insbesondere im Zusammenhang mit der Ausschreibung von Wasserkraftkonzessionen. Die französische Regierung plant, Konzessionen für bestehende Wasserkraftwerke mit einer Gesamtleistung von mehr als 5,2 GW neu zu vergeben. E.ON France wird sich an diesem Prozess beteiligen und dabei auf die jahrzehntelange Erfahrung und das herausragende technische Know-how des E.ON-Konzerns beim Betrieb von Wasserkraftanlagen bauen.

## Niederlande

E.ON Benelux mit Sitz in Rotterdam führt unsere Aktivitäten in den Niederlanden. Im Mittelpunkt stehen die Vermarktung und der Vertrieb von Strom. Darüber hinaus ist die Gesellschaft verantwortlich für unsere Aktivitäten in Belgien und Luxemburg.

Der Strommarkt in den Niederlanden und Belgien ist komplex und hart umkämpft. Aggressive Preissenkungen sind weit verbreitet. Politische Entscheidungsträger und die öffentliche Meinung haben traditionell einen starken Einfluss auf den Markt. Da wir in dieser Region einen Großteil unseres Stroms mit konventionellen Kohlekraftwerken erzeugen, sind offene Dialoge und gute Beziehungen zu den verschiedenen Interessengruppen von

fundamentaler Bedeutung für unseren Erfolg. Wir bedienen uns einer ganzen Reihe verschiedener Foren und pflegen so den offenen Dialog. Dies gilt insbesondere für das neue Kohlekraftwerk, das wir in Rotterdam bauen, die geplante CCS-Pilotanlage am gleichen Standort sowie für verantwortliche Beschaffungsstrategien unserer Brennstoffe und den Übergang in den Strommarkt der Zukunft. In dieser Nachhaltigkeitsdebatte arbeiten wir teilweise auch mit anderen Marktteilnehmern zusammen, denn sie betrifft unsere gesamte Branche.

2010 war das Vertriebsgeschäft durch verstärkte Kundenakquise und die erfolgreiche Marketingkampagne „30 million

customers in Europe can't be wrong“ geprägt. Mit diesen Maßnahmen konnten wir unseren Kundenstamm um 20 Prozent signifikant vergrößern und haben auch im Segment der Mittelstandskunden unseren Marktanteil ausgebaut.

## Ungarn

In Ungarn ist E.ON eines der führenden Energieunternehmen. E.ON Hungária, mit Sitz in Budapest, versorgt 2,5 Millionen Kunden mit Strom und mehr als eine halbe Million Haushalte mit Erdgas. Im Großhandel decken wir zwei Drittel des landesweiten Erdgasbedarfs. Darüber hinaus verfügen wir über Strom- und Gasverteilnetze mit einer Gesamtlänge von rund 70.000 km. Auch im Wärmegeschäft sind wir in Ungarn aktiv: an verschiedenen Standorten verfügen wir über kleinere Kraft-Wärme-Kopplungsanlagen.

Wir haben uns auf die Sicherung der nationalen Gasversorgung, mehr Kundenorientierung und besseren Arbeitsschutz konzentriert. Deshalb haben wir für unsere Kunden zwei sehr erfolgreiche Programme

gestartet: Eines, um sozial benachteiligte Verbraucher zu unterstützen und eines, um treue Kunden zu belohnen. Auch im Bereich Arbeitsschutz haben wir Fortschritte auf dem Weg zu einem der führenden Unternehmen des Landes gemacht. Darüber hinaus sind wir im Bereich Corporate Citizenship schon heute führend und haben – neben anderen Preisträgern – den Preis für das Ehrenamt 2010 gewonnen.

2010 war für Ungarn ein herausforderndes Jahr mit einer Reihe von umfeldbedingten Änderungen. So hat die ungarische Regierung eine neue Steuer erlassen. Die sogenannte Krisensteuer hat das Ziel, Ungarns Haushaltsdefizit zu reduzieren. Sie orientiert sich am Umsatz, nicht jedoch am erzielten Gewinn des besteuerten

Unternehmens. Sie trifft vor allem Branchen, die aufgrund ihrer an die Regionen gebundenen Infrastrukturen nur begrenzt reagieren können. Dies sind unter anderem Telekommunikation, Einzelhandel und Energieunternehmen. E.ON arbeitet an Lösungen, die finanziellen Auswirkungen der Steuer auszugleichen.

Die ungarische Regierung arbeitet darüber hinaus an einer neuen Richtlinie zur Belebung der nationalen Wirtschaft. Gegenstand ist u.a. die Förderung der Erneuerbaren Energien, die Nutzung von Erdwärme sowie die Steigerung der Energieeffizienz.

## Tschechien

Mit rund 1,3 Millionen Stromkunden und 105.000 Gaskunden ist die E.ON Czech-Gruppe der größte integrierte Strom- und Gasanbieter in der Tschechischen Republik. Im Netzbereich stehen Prozessoptimierungen sowie Ausbau und Optimierung der Infrastruktur im Vordergrund und werden

unter Berücksichtigung der regulatorischen Rahmenbedingungen umgesetzt. Durch die Gründung einer eigenständigen Gesellschaft für netznahe Dienstleistungen soll die Performance der Gruppe an der Effizienz externer Dienstleistungen ausgerichtet werden mit dem Ziel, Kunden

diese Dienstleistungen unter Wettbewerbsbedingungen anzubieten. Vertriebliche Schwerpunkte sind Maßnahmen zur Erhöhung der Energieeffizienz sowie erdgas- und strombasierte Mobilitätslösungen.

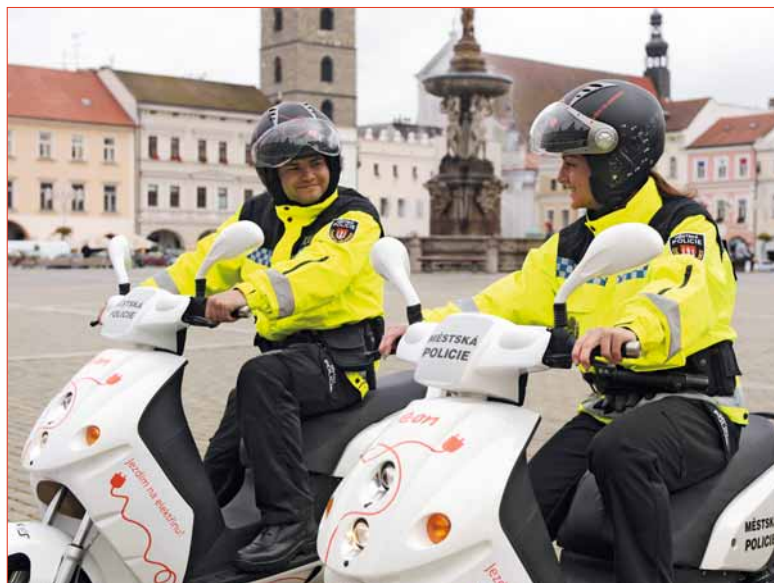

### Tschechische Polizei testet Elektro-Roller

Im Rahmen des Projektes Smart Mobility hat E.ON Anfang November 2010 die Stadtpolizei in Český Krumlov und České Budějovice mit Elektroscootern ausgerüstet. Ziel ist, den Einsatz der Roller im Alltagsbetrieb zu testen.

## Slowakei

Von Bratislava aus führt E.ON Slovensko unsere Geschäfte in der Slowakei. Das Unternehmen verfügt über eine 40-Prozent-Beteiligung sowie die Führungskontrolle an der ZSE-Gruppe, einem führenden Energieunternehmen mit einem Marktanteil von 34 Prozent am slowakischen Strommarkt. Die ZSE-Gruppe versorgt über ein Stromnetz von 36.000 km Länge in der westlichen Slowakei Industrie- und Großhandelskunden sowie private und gewerbliche Endkunden mit jährlich 8 Mrd kWh Strom. Weiterhin hat E.ON Slovensko im Land vier Biogasanlagen mit je 1 MW installierter Leistung entwickelt.

Das Marktumfeld in der Slowakei ist von wachsendem Wettbewerb im Energiesektor geprägt. Dem begegnet die Vertriebs Tochter ZSE Energia mit Kundenbin-

dungsprogrammen und einer Preispolitik, die besonders treue Kunden mit günstigen Tarifen belohnt. Daneben verfolgen wir verschiedene innovative Ansätze, um noch erfolgreicher am Markt zu agieren. So bietet das Unternehmen einen zertifizierten Tarif für grünen Strom an. Darüber hinaus wirkt die ZSE-Gruppe an VIBRATE mit, einem von der EU geförderten Programm zum Aufbau der notwendigen Infrastruktur für Elektrofahrzeuge zwischen Wien und Bratislava.

Auch im Bereich der unternehmerischen Verantwortung nimmt ZSE eine führende Rolle ein. 2010 wurde das Unternehmen mit dem European Volunteering Award für sein erfolgreiches Mitarbeiterprogramm zur Förderung des Ehrenamtes ausgezeichnet.

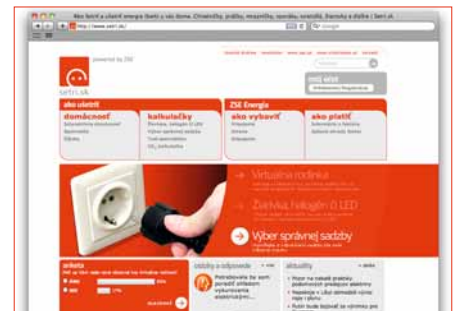

### Energiesparen leicht gemacht

Kundenbindung und die Förderung der Energieeffizienz gehen bei uns Hand in Hand: in der Slowakei unterstützen wir unsere Kunden über unser interaktives Online-Portal [www.setri.sk](http://www.setri.sk) mit Energiespartipps und praktischen Beispielen für den ressourcenschonenden Umgang mit Energie.

## Rumänien

E.ON ist seit fünf Jahren in Rumänien aktiv und eines der führenden Energieunternehmen des Landes. Geschäftsführende Gesellschaft ist E.ON România, mit Sitz in Bukarest, mit vier mehrheitlich geführten Tochtergesellschaften. Im Norden Rumäniens sind wir das führende Gasunternehmen (Gasverteilung und -versorgung) und im Nordosten das wichtigste Unternehmen in der Stromverteilung und im -vertrieb. Wir versorgen insgesamt 2,9 Millionen Kunden mit Energie (1,5 Millionen mit Gas und 1,4 Millionen mit Strom) und verfügen über

Strom- und Gasverteilnetze mit einer Gesamtlänge von rund 100.000 km. Seit Anfang 2011 sind unsere Strom- und Gasaktivitäten, die in der Vergangenheit weitgehend getrennt waren, in einer einzigen Gesellschaft gebündelt. Das macht uns zum ersten, integrierten Anbieter von Strom und Gas in Rumänien.

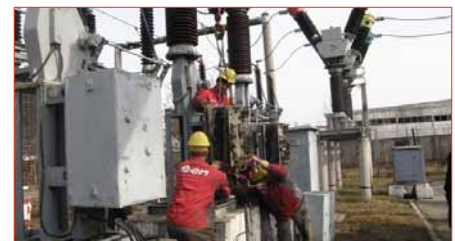

### Für Versorgungssicherheit

Im Fokus unserer Aktivitäten stehen die Erneuerung, Modernisierung und der Ausbau unseres Verteilnetzes.

## Bulgarien

In Bulgarien versorgt E.ON 1,1 Millionen Kunden im Nordosten des Landes mit Strom. E.ON Bulgaria führt unsere Geschäfte von Varna aus und verfügt über ein eigenes Netz von 41.800 Kilometern Länge.

E.ON Bulgaria konnte die Auflagen zur Unternehmensentflechtung erfolgreich umsetzen und so den Weg für straffere Strukturen und Prozesse ebnen. Darüber hinaus haben wir ein Call Center eröffnet, das rund um die Uhr unseren Kunden zur Verfügung steht. Eine weitere wesentliche Verbesserung ist auch die sogenannte Hot-Line Wartung, die wir als eines der ersten

Unternehmen des Landes eingeführt haben. Damit ist es möglich, Stromleitungen bei laufendem Betrieb zu warten, ohne diese abschalten zu müssen. Das erhöht die

Kundenzufriedenheit durch weniger wartungsbedingte Unterbrechungen der Stromversorgung.

### Wir investieren in Gesundheit und Sicherheit

E.ON Bulgaria fühlt sich einer dauerhaften Sicherheitskultur verpflichtet. Deswegen haben wir ein hochmodernes Zentrum für Sicherheitstrainings aufgebaut. 2010 haben über 1.000 Mitarbeiter und etwa 200 Mitarbeiter von Fremdfirmen die Trainingsprogramme des Zentrums erfolgreich absolviert. Darüber hinaus gab es zahlreiche Sicherheitsdemonstrationen für Studenten verschiedener Technischer Hochschulen und Universitäten.



# Russland

- Liberalisierung des Energiemarktes gut im Plan
- Erfolgreicher Auftakt für Neubauprogramm

Russland ist seit über 40 Jahren ein wichtiger und geschätzter Geschäftspartner für E.ON. Seit der Übernahme des russischen Stromerzeugers OGK-4 in 2007 ist E.ON nicht nur einer der größten Abnehmer für russisches Gas, sondern auch der größte ausländische Investor im russischen Energiemarkt. Dazu zählen mehrere neue Kraftwerke sowie unsere Investitionen in die Gasförderung und den Gastransport. Mit diesen langfristig ausgerichteten Aktivitäten unterstreichen wir nicht nur die Bedeutung Russlands für E.ON, sondern tragen erheblich zur Verbesserung der Versorgungssicherheit in unserem Heimatmarkt Europa bei. Auch in Zukunft bleibt Russland als Fokusregion ein strategisch wichtiger Markt für unseren Konzern.

## Stromgeschäft

Unser Stromgeschäft in Russland besteht aus Erzeugung und Lieferung an große Industriekunden sowie Großhandel. Mit einem Anteil von 78,3 Prozent am Stromerzeuger OGK-4 verfügt E.ON Russia derzeit über eine Erzeugungskapazität von 8,7 GW - damit haben wir in Russland unseren drittgrößten Kraftwerkspark nach Deutschland und Großbritannien. Unsere Kraftwerke befinden sich in wichtigen Industrieregionen wie Zentralrussland, Ural und Sibirien. OGK-4 hat einen Anteil von 5,5 Prozent an der Gesamtkapazität des Landes in der Stromproduktion und 9 Prozent an der thermischen Stromproduktion. Mit einer durchschnittlichen Auslastung von etwa 73 Prozent ist OGK-4 der leistungsfähigste Stromproduzent Russlands.

Als führender Stromerzeuger gehört OGK-4 zu den größten Akteuren im russischen Großhandelsmarkt für Strom und deckt mit dem verkauften Strom über 5 Prozent des landesweiten Bedarfs.

## Energiemarkt Russland

Die Ausgestaltung des russischen Strommarktes ist geprägt von dem Ziel der russischen Regierung, die Liberalisierung voranzubringen und ein günstiges und sicheres Umfeld für weitere Investitionen zu schaffen. Vor dem Hintergrund der Auswirkungen der globalen Wirtschafts- und Finanzkrise soll gleichzeitig verhindert werden, dass die Endverbraucherpreise übermäßig ansteigen. Beide Aspekte spiegeln sich in der Weiterentwicklung des Markt- und Regulierungssystems wider. Im aktuellen Rechtsrahmen sind zwei Märkte zu unterscheiden: der Markt für Absatzmengen (Strommarkt) und der Markt für Erzeugungskapazitäten (Kapazitätsmarkt). Mittels des Strommarkts sollen die variablen Kosten (im Wesentlichen die Brennstoffkosten) vergütet werden. Die Kosten für die bereitgestellte Leistung (Fixkosten) werden über den Kapazitätsmarkt gedeckt.

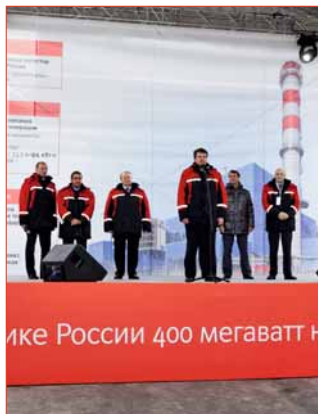

### Erster hochmoderner Kraftwerksblock in Shatura in Betrieb genommen

Die Inbetriebnahme einer neuen GuD-Anlage mit einer Kapazität von 400 MW in Shatura Ende 2010 ist das erste Projekt, das wir im Rahmen unserer Milliardeninvestitionen in Russland verwirklichen. Dieses Projekt zeigt deutlich, was E.ON mit seiner neuen strategischen Ausrichtung „cleaner & better energy“ konkret meint. In Shatura wurde das nach dem heutigen Stand effizienteste und modernste Kraftwerk in Russland errichtet. Mit einem Wirkungsgrad von 56 Prozent setzt E.ON hier neue Maßstäbe in puncto Effizienz und Klimaverträglichkeit bei der Stromproduktion.

Das neue Kraftwerk hat einen wesentlich geringeren CO<sub>2</sub>-Ausstoß als die älteren und weniger effektiven Anlagen mit vergleichbarer Leistung. Bis Ende 2012 kann allein mit diesem Kraftwerk der CO<sub>2</sub>-Ausstoß um über 1 Mio Tonnen verringert werden. Das Shatura-Neubauprojekt wurde von den UN als erstes russisches Joint-Implementation Projekt im Rahmen des Kyoto-Mechanismus anerkannt.

## Unser Erzeugungsportfolio und geplante Kapazitätserweiterungen in Russland

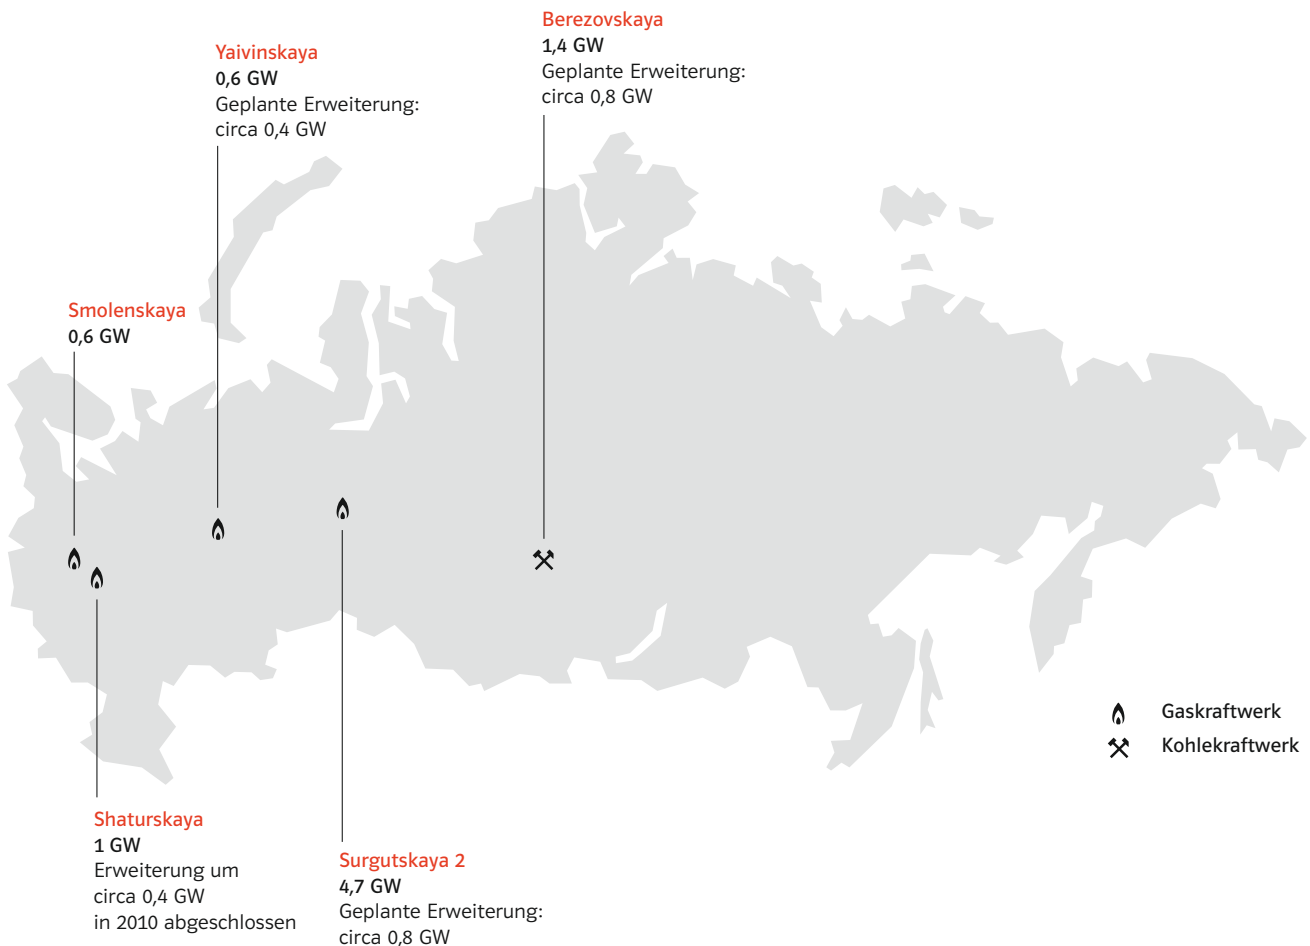

Im Rahmen der Liberalisierung wurde die Öffnung des Großhandelsstrommarktes zum 01. Januar 2011 abgeschlossen und damit planmäßig umgesetzt. Der Anteil an Strom, der auf dem freien Markt an Geschäfts- und Industriekunden verkauft wird, betrug Ende 2010 80 Prozent.

Im Hinblick auf den Kapazitätsmarkt wird zwischen Alt- und Neuanlagen unterschieden. Neuanlagen, die im Rahmen einer vertraglichen Investitionsverpflichtung entstehen, erhalten für bis zu zehn Jahre eine gesicherte Kapazitätsvergütung. Altanlagen werden im Rahmen von Auktionen vermarktet. Die erste Auktion nach den neuen Kapazitätsmarktregeln wurde im

Herbst 2010 durchgeführt. Die nächste Auktion ist für Frühjahr 2011 geplant. Parallel gilt ein Mechanismus hinsichtlich der Deckung des Stromverbrauchs der Haushaltskunden und der den Haushaltskunden zugeordneten Kunden, wonach ein Teil der Absatzmengen und Erzeugungskapazitäten nach Tarif vergütet werden können.

Im Jahr 2010 lag der Energieverbrauch mit knapp einer Mrd kWh Strom um 4,4 Prozent über dem Vorjahr. Auch in Zukunft geht das russische Energieministerium von steigendem Verbrauch aus und prognostiziert einen Anstieg von 2 bis 2,5 Prozent jährlich.

### Neubauprojekte

An zwei bestehenden russischen Standorten errichten wir neue, hocheffiziente Gas- und Dampfturbinen (GuD) und an einem vierten Standort ein effizientes Braunkohlekraftwerk. Insgesamt wird E.ON in Russland seine Kraftwerkskapazitäten um 2,4 GW erweitern und so dazu beitragen, die steigende Energienachfrage in Russland zu decken. Mit den drei noch im Bau befindlichen gasgefeuerten GuD-Blöcken – zwei in Surgut und eines in Yaiva – wird sich das Unternehmen ebenfalls um die Anerkennung als Joint-Implementation-Projekte bewerben.

## Neues Kraftwerk in Shatura: Für effiziente und klimafreundliche Energie in Russland

Im 150 km östlich von Moskau gelegenen Shatura haben wir im November 2010 ein neues Gas- und Dampfkraftwerk mit einer Kapazität von 400 MW in Betrieb genommen. Damit haben wir das heute effizienteste und modernste Kraftwerk in Russland errichtet. Mit einem Wirkungsgrad von gut 56 Prozent setzt es neue Maßstäbe in Effizienz und Klimaverträglichkeit bei der Stromerzeugung. Im Vergleich zu den älteren und deutlich weniger effizienten Anlagen in Russland verringert das neue Kraftwerk allein bis Ende 2012 den CO<sub>2</sub>-Ausstoß um über 1 Mio Tonnen. Dank seiner hohen Umweltverträglichkeit wurde das Neubauprojekt von den UN als erstes russisches Joint-Implementation-Projekt im Rahmen des Kyoto-Mechanismus anerkannt. Neben dem Kraftwerk in Shatura setzen wir in Russland an drei weiteren Standorten moderne und effiziente Neubauprojekte um – und tragen so dazu bei, Russlands Stromwirtschaft zu modernisieren und die steigende Energienachfrage in Russland sicher, effizient und klimaschonend zu decken.

Auch das bedeutet für uns **cleaner & better energy**.

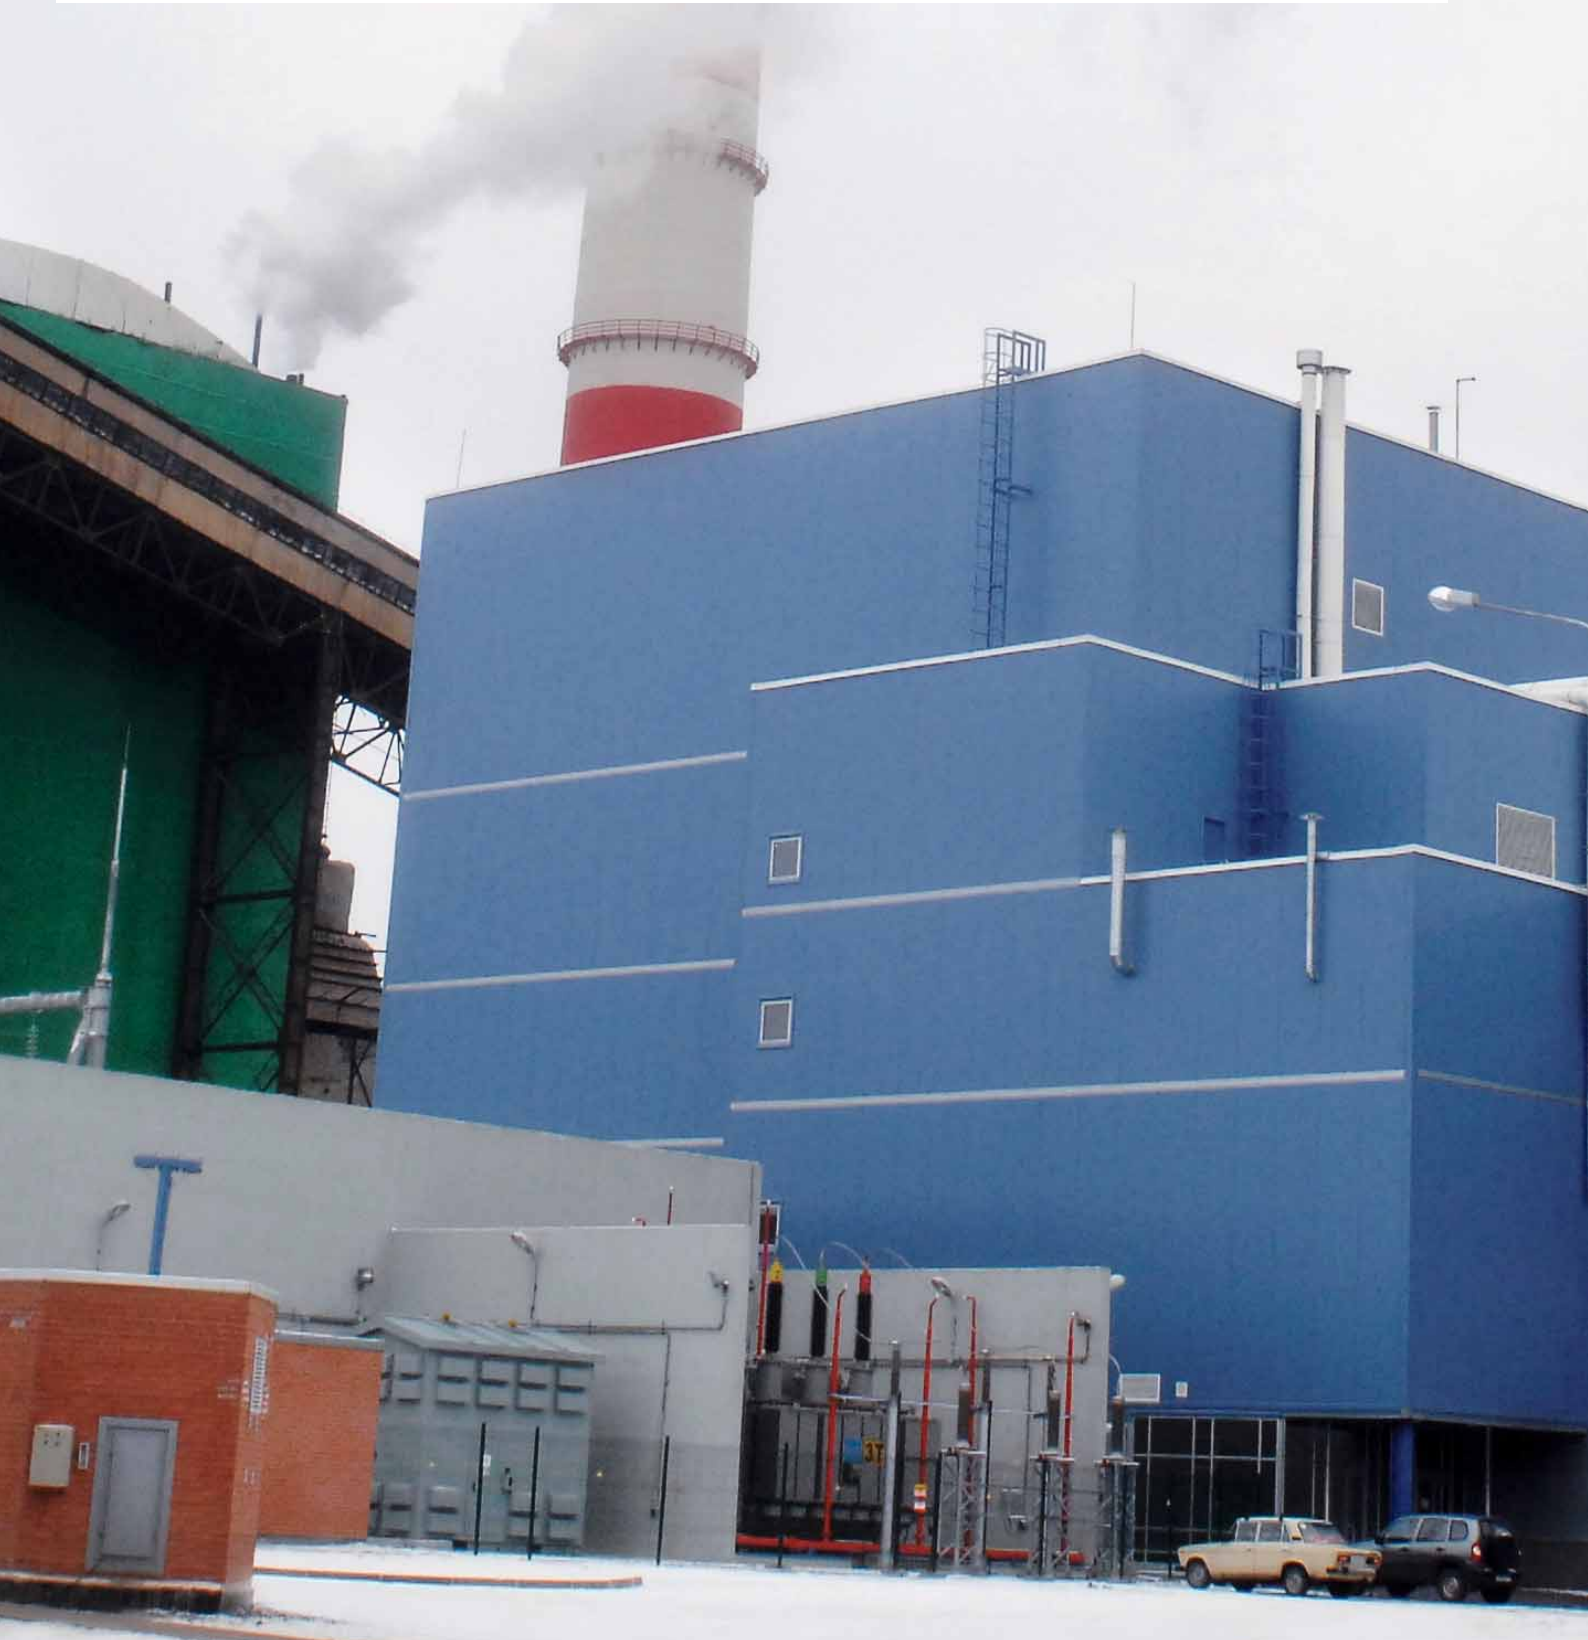

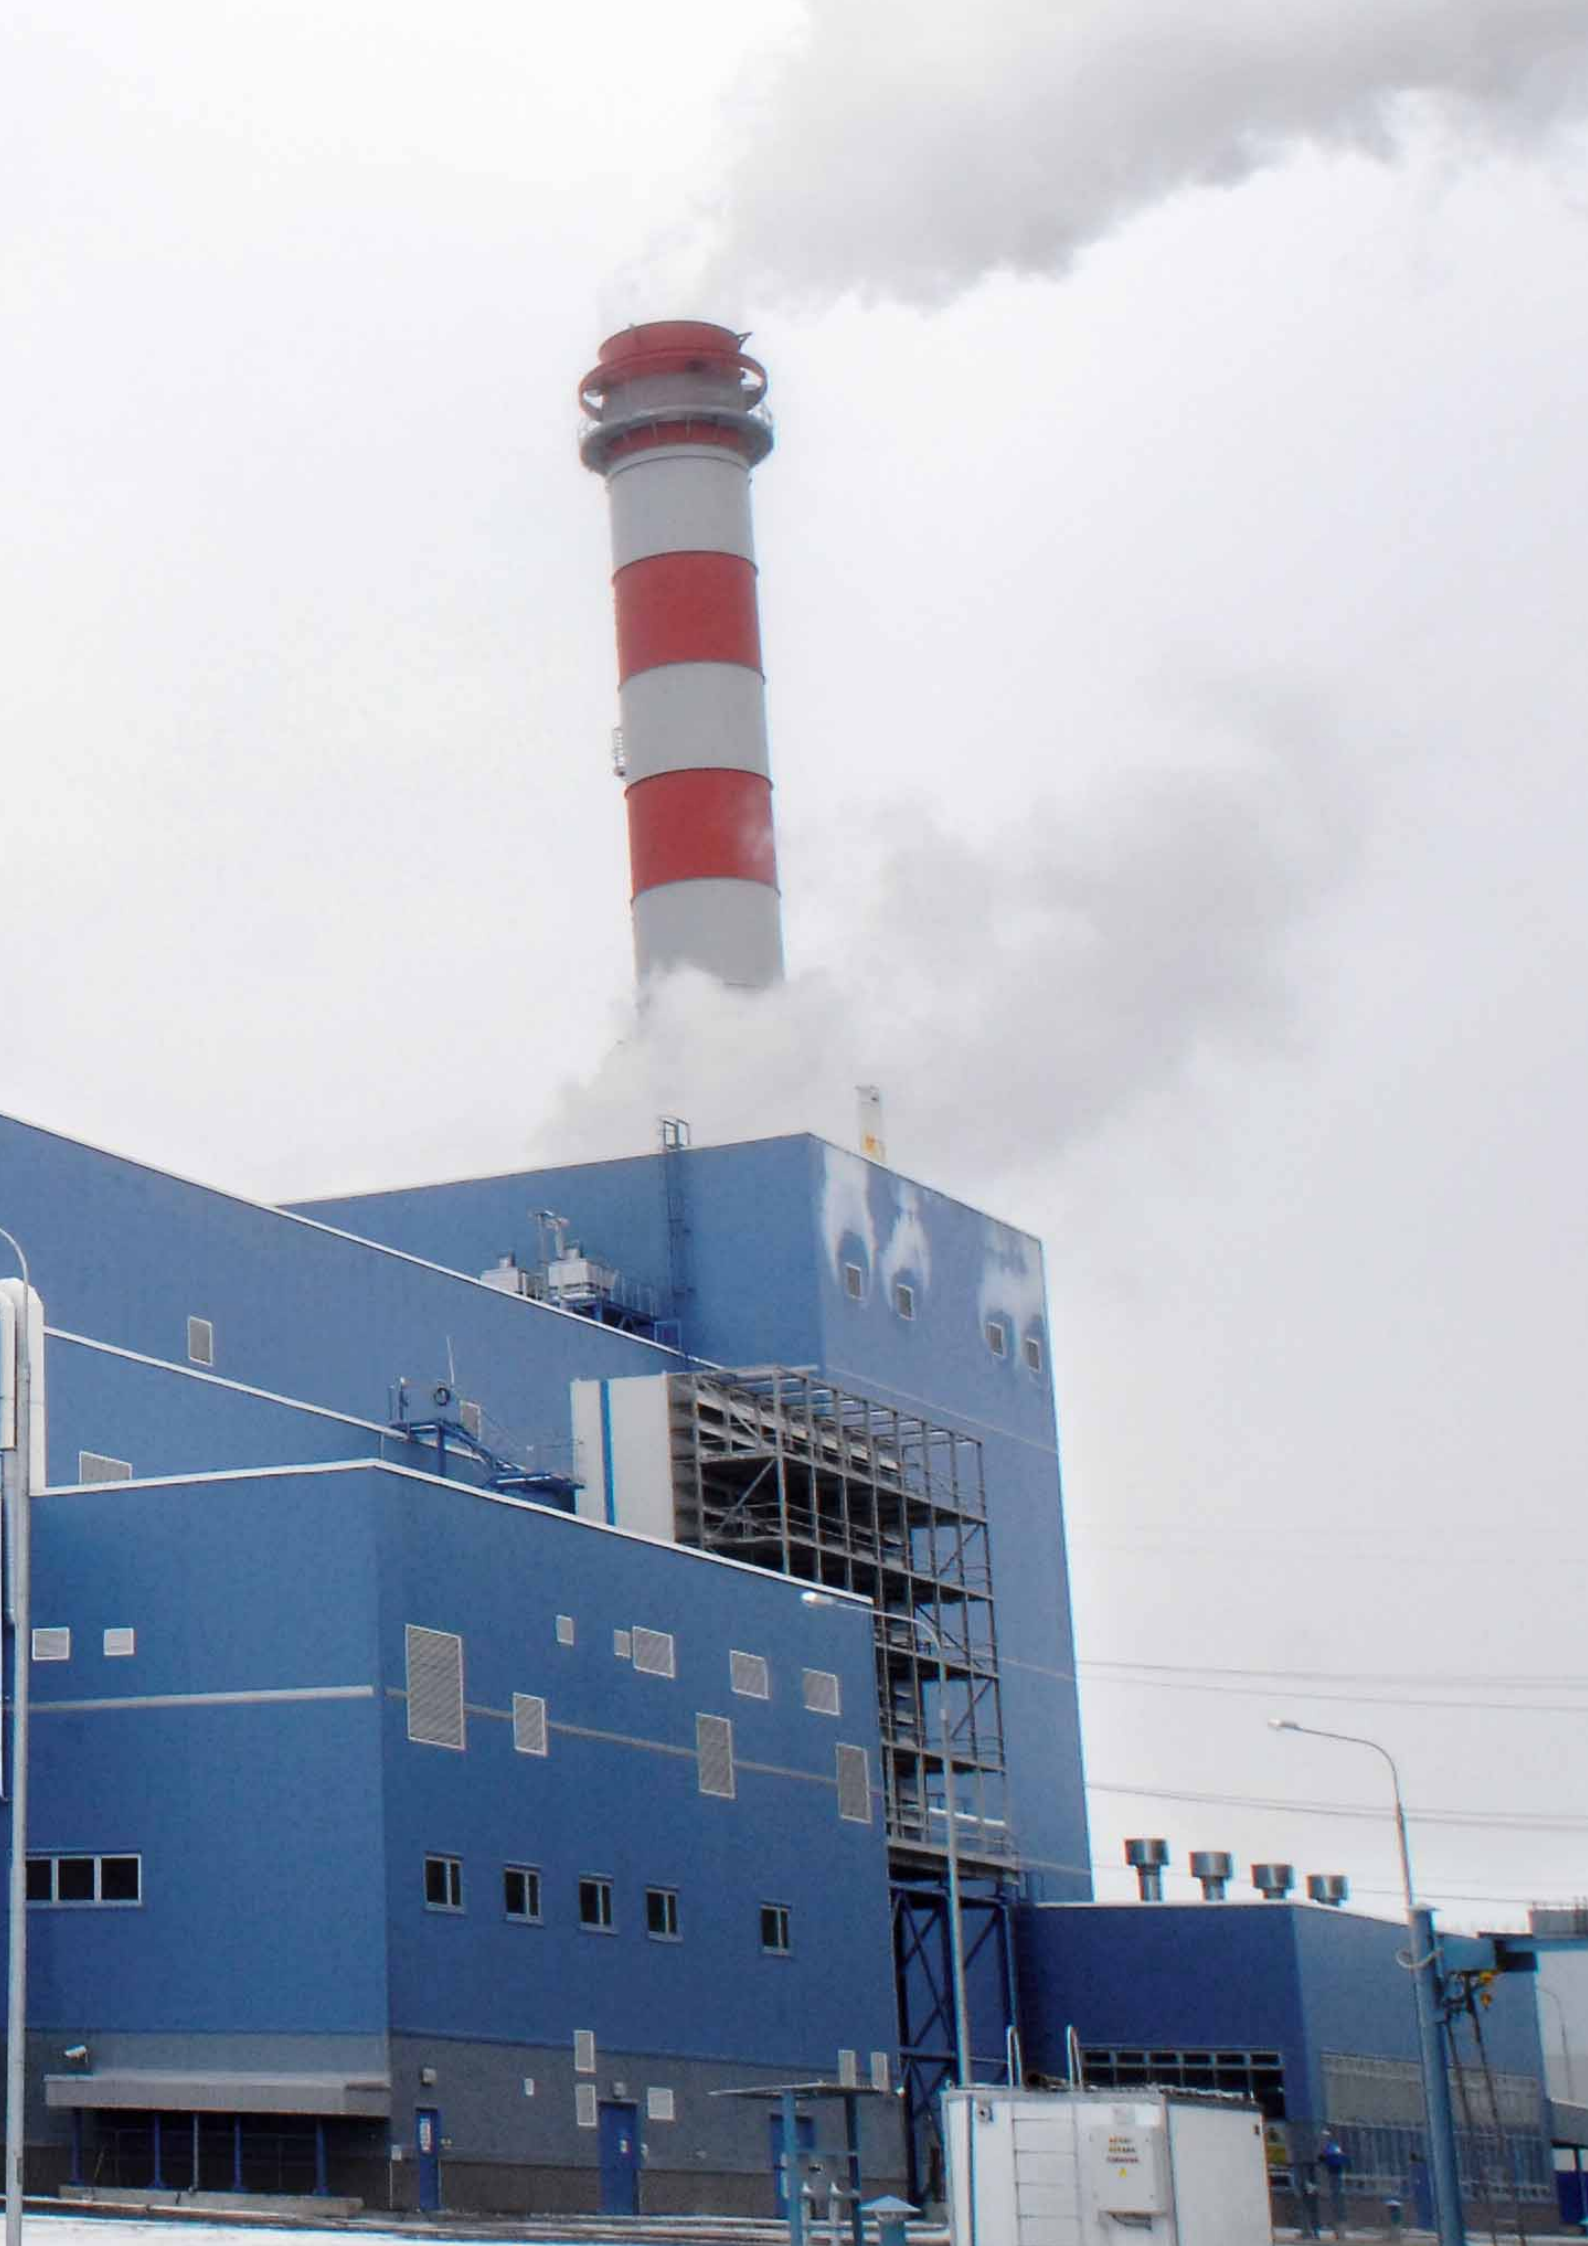



## Treten Sie mit uns in den Dialog

### E.ON AG

E.ON-Platz 1  
40479 Düsseldorf

T 02 11-45 79-0  
F 02 11-45 79-5 01  
info@eon.com  
www.eon.com

### Journalisten

T 02 11-45 79-4 53  
presse@eon.com

### Analysten und Aktionäre

T 02 11-45 79-5 49  
investorrelations@eon.com

### Anleihe-Investoren

T 02 11-45 79-5 63  
creditorrelations@eon.com

Weitere Publikationen zum Herunterladen oder Bestellen finden Sie unter:  
[www.eon.com/broschueren](http://www.eon.com/broschueren)

### Konzept & Gestaltung Produktion Satz & Lithografie Druck

Lesmo, Düsseldorf  
Jung Produktion, Düsseldorf  
Addon Technical Solutions, Düsseldorf  
Druckpartner, Essen

### Fotos

Abengoa (Seite 53), Amref (Seite 68), Audi AG (Seite 14), Faust Avart (Seite 48), Basset, Mark/Bildschön (Seite 34), E.ON (Seiten U1, 1, 10, 18/19, 26, 36/37, 49, 52, 64, 65, 66, 68, 70, 71, 72, 74/75), E.ON Ruhrgas (Seiten 1, 42/43, 55, 56), Rainer Jensen (Seiten 13, 40, 41), Berne Lundqvist (Seite 67), Rüdiger Nehmzow (Seiten 22, 24), Nord Stream (Seite 56), Andreas Pohlmann (Seite 21), Christian Schlüter (Seiten U1, 1, 2, 5, 23, 27, 41, 59, 62/63), Siemens AG (Seiten U1, 1, 6/7), Rolf Sturm (Seiten 1, 28/29, 49)

Print  kompensiert  
Ident-Nr. 118390

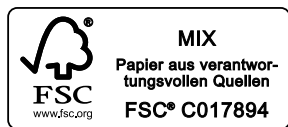

Das für diesen Unternehmensbericht verwendete Papier wurde aus Zellstoffen hergestellt, die aus verantwortungsvoll bewirtschafteten und gemäß den Bestimmungen des Forest Stewardship Council zertifizierten Forstbetrieben stammen.

Dieser Unternehmensbericht enthält möglicherweise bestimmte in die Zukunft gerichtete Aussagen, die auf den gegenwärtigen Annahmen und Prognosen der Unternehmensleitung des E.ON-Konzerns und anderen derzeit verfügbaren Informationen beruhen. Verschiedene bekannte wie auch unbekannte Risiken und Ungewissheiten sowie sonstige Faktoren können dazu führen, dass die tatsächlichen Ergebnisse, die Finanzlage, die Entwicklung oder die Leistung der Gesellschaft wesentlich von den hier abgegebenen Einschätzungen abweichen. Die E.ON AG beabsichtigt nicht und übernimmt keinerlei Verpflichtung, derartige zukunftsgerichtete Aussagen zu aktualisieren und an zukünftige Ereignisse oder Entwicklungen anzupassen.

## **Finanzkalender**

|                          |                                             |
|--------------------------|---------------------------------------------|
| <b>5. Mai 2011</b>       | Hauptversammlung 2011                       |
| <b>6. Mai 2011</b>       | Dividendenzahlung                           |
| <b>11. Mai 2011</b>      | Zwischenbericht Januar – März 2011          |
| <b>10. August 2011</b>   | Zwischenbericht Januar – Juni 2011          |
| <b>9. November 2011</b>  | Zwischenbericht Januar – September 2011     |
|                          |                                             |
| <b>14. März 2012</b>     | Veröffentlichung des Geschäftsberichts 2011 |
| <b>3. Mai 2012</b>       | Hauptversammlung 2012                       |
| <b>4. Mai 2012</b>       | Dividendenzahlung                           |
| <b>9. Mai 2012</b>       | Zwischenbericht Januar – März 2012          |
| <b>13. August 2012</b>   | Zwischenbericht Januar – Juni 2012          |
| <b>13. November 2012</b> | Zwischenbericht Januar – September 2012     |
