# Supplementary material
Source: publisher site journal article supplement (https://www.degruyterbrill.com/publication/isbn/9783110432879/downloadAsset/9783110432879_Elektronischer_Anhang_2.zip)
Supplement: Supplementary file 45 [file E.ON Energie wird intelligent.pdf › Korpustexte/Korpustexte pdf/E.ON/E.ON Energie wird intelligent.pdf]

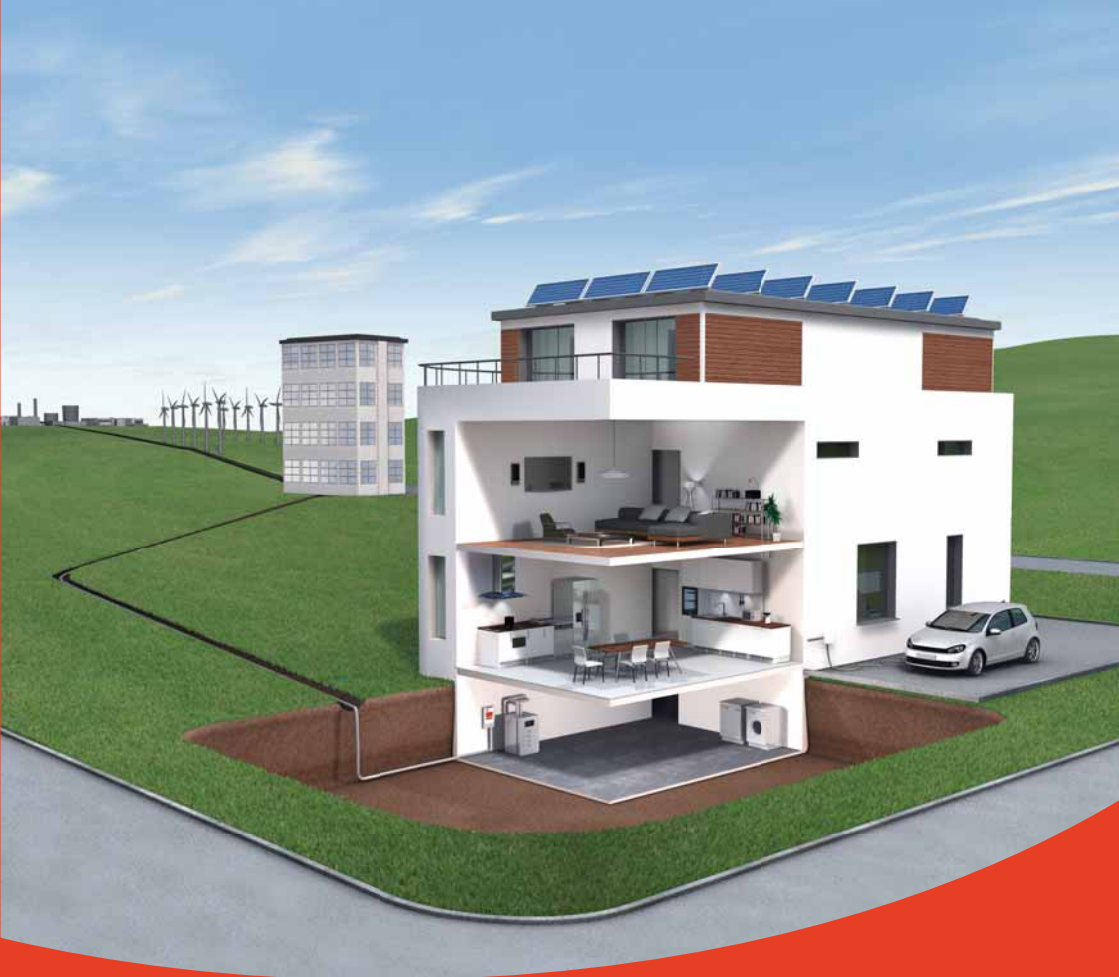

Energie wird intelligent.

**e-on**

- 1 Vorwort
- 2 Übersicht
- 6 **Energieeffizienz-Projekte**
  - 6 Mit intelligenten Haushalten umweltverträgliches Wohnen fördern
  - 7 Wärmepumpen für ein warmes Zuhause
  - 8 Mehr Eigenerzeugung mit Mikro-KWK
  - 9 Mit aktivem Nachfragemanagement den Verbrauch an das Angebot anpassen
  - 10 Moderne LED-Lampen leuchten den Weg in die Zukunft
- 11 **Elektromobilität-Projekte**
  - 11 Elektromobilität in München
  - 12 Vernetzt: Flottenversuch in Wolfsburg und Potsdam
  - 13 Stromtanken in den englischen Midlands
  - 14 Kabelloses Laden
- 15 **Projekte mit intelligenten Netzen**
  - 15 Intelligentere Haushalte für ganz Europa
  - 16 Mit Netzkapazitätserweiterung mehr Windkraft nutzen
  - 17 Den Ansprüchen einer dezentralisierten Stromerzeugung in Bayern gerecht werden
  - 18 Energieprojekt 2020 und die intelligente Ortsnetzstation
- 19 **Malmö: eine nachhaltige Stadt**

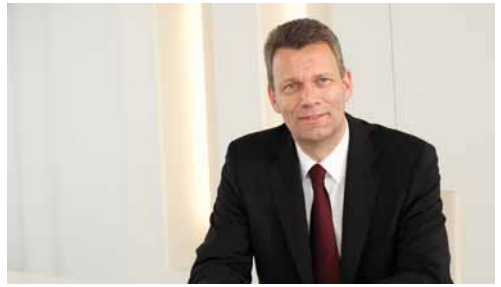

Prof. Dr. Klaus-Dieter Maubach  
Vorstandsmitglied der E.ON AG

Sehr geehrte Leserinnen,  
sehr geehrte Leser,

der weltweite Energiebedarf wächst stetig. Gleichzeitig besteht ein dringender Bedarf, den Klimaveränderungen entgegenzuwirken und weniger Energie aus fossilen Brennstoffen zu gewinnen. Außerdem müssen wir dafür sorgen, dass Energie erschwinglich bleibt und wir über einen ausgewogenen Energiemix verfügen. Um diese Herausforderungen erfolgreich zu bewältigen, benötigen wir ein intelligenteres Energiesystem. Kraftwerke müssen Energie auf umweltfreundlichere Weise produzieren. Netzbetreiber müssen Energie auf intelligentere Weise verteilen. Verbraucher müssen Energie effizienter nutzen. Und Regierungen müssen ein regulatorisches Umfeld schaffen, das diese Bemühungen fördert.

Bei E.ON ist intelligente Energie mehr als nur eine Zukunftsvision. Wir machen sie zur Realität, indem wir die Technologien, Produkte und Dienstleistungen entwickeln und einsetzen, die sehr positive Auswirkungen haben werden. Neben der raschen Erweiterung unserer Kapazitäten im Bereich Erneuerbarer Energien investieren wir beträchtliche Ressourcen in drei Hauptbereiche: Energieeffizienz, Elektromobilität und intelligente Netze.

Intelligente Lösungen für Haushalte und Unternehmen werden Verbraucher in der Zukunft befähigen, Energie effizienter zu nutzen und ihren Verbrauch aktiv zu beeinflussen. Auch die Mobilität wird intelligenter. Im Laufe des nächsten Jahrzehnts werden einige Millionen Elektrofahrzeuge in Europa den Personenverkehr weniger CO<sub>2</sub>-intensiv und die Städte sauberer und leiser machen. Darüber hinaus werden die Batterien dieser Fahrzeuge ein großes, verteiltes Speichersystem darstellen, das es uns ermöglichen wird, die schwankende Einspeisung aus Erneuerbaren Energien besser zu nutzen.

Schließlich führt die Dezentralisierung der Energieversorgung zu komplexen Energieflüssen. Um diese zu beherrschen, müssen die Netzbetreiber die Strom- und Gasnetze mit Sensoren und neuen Informations- und Kommunikationstechnologien ausrüsten. Dieses intelligente Netz wird eine wichtige Rolle beim Übergang in eine CO<sub>2</sub>-arme Zukunft spielen.

Diese Broschüre beschreibt einige der Herausforderungen, die sich uns als Energieversorger stellen, sowie die Lösungen, die wir zu ihrer Bewältigung entwickeln. Wir hoffen, dass Sie Freude daran haben, sie zu lesen, und dass Sie uns auf unserem Weg in eine intelligente Energiezukunft begleiten und unterstützen werden.

Mit freundlichen Grüßen

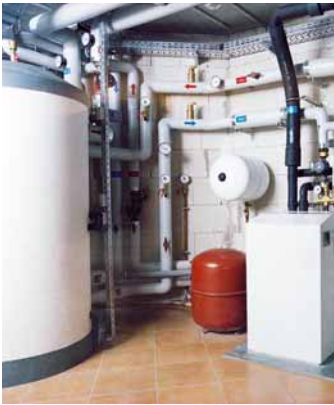

Wärmepumpe im Hausgebrauch

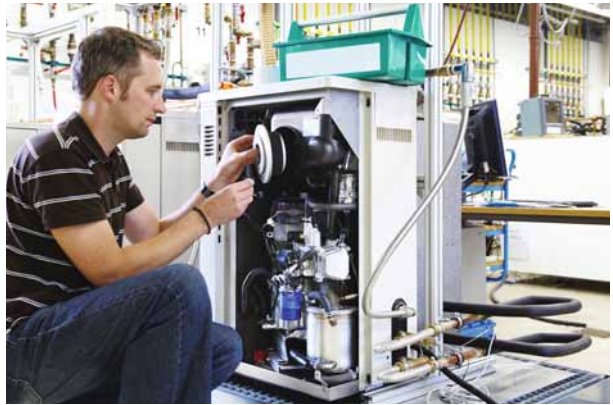

Testbetrieb einer Mikro-KWK-Anlage

## Energieeffizienz durch effizientes Wohnen und effiziente Gebäude

Drei Probleme dominieren unsere Energiedebatte: Kosten, Versorgungssicherheit und Umweltauswirkungen. Diese Probleme – und ihre potenziellen Lösungen – sind häufig komplex. Die einfachste Lösung – die Energieeffizienz – steht jedoch bereits zur Verfügung und muss in Zukunft eine noch wichtigere Rolle spielen. Intelligente Stromzähler und Automatisierungsgeräte ermöglichen es, den Energieverbrauch in Haushalten und Betriebsgebäuden effektiver zu steuern. Moderne Isolierung und energiearme Beleuchtung reduzieren den Gesamtverbrauch. Wärmepumpen verbrauchen weniger Energie als herkömmliche Gas- oder Elektroheizgeräte, und Millionen von kleinen hausinternen Kraft-Wärme-Kopplungsanlagen werden dazu beitragen, dass weniger neue Großkraftwerke gebaut werden müssen.

Bei E.ON fördern wir Energieeffizienz aktiv als Teil unserer Bemühungen, die Energie von morgen für unsere Kunden billiger und umweltverträglicher zu machen und die Abhängigkeit von importierten fossilen Brennstoffen zu reduzieren.

### Was wir tun, um dies zu realisieren

- Wir entwickeln Konzepte für intelligente Haushalte in Deutschland, Großbritannien und Schweden, um die zukünftige Haustechnologie, ihre Auswirkungen auf Kunden und ihre vielen Vorteile im täglichen Lebensablauf besser zu verstehen (Seite 6).
- Wir finanzieren Feldversuche mit Wärmepumpen, um zu lernen, wie sich menschliche Gewohnheiten und umweltbezogene Faktoren auf deren Leistungsfähigkeit auswirken (Seite 7).
- Wir wollen wegweisend sein bei der Reduzierung von CO<sub>2</sub>-Emissionen in Privathaushalten durch Mikro-KWK-Anlagen (Seite 8).
- Wir arbeiten mit führenden Unternehmen und Universitäten zusammen, um die Auswirkungen und die Vorteile einer flexiblen und bedarfsgerechten Steuerung der Heizung und Kühlung von Betriebsgebäuden besser zu verstehen (Seite 9).
- Wir schließen Partnerschaften zur Entwicklung und Installation von energiearmen LED-Straßenlampen, um die CO<sub>2</sub>-Emissionen und die Stromrechnungen von Städten zu reduzieren (Seite 10).

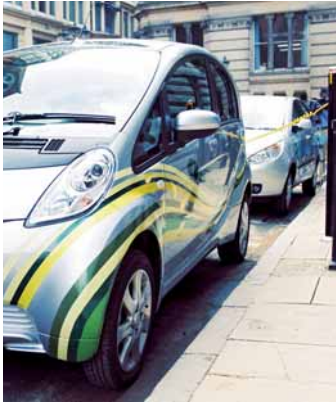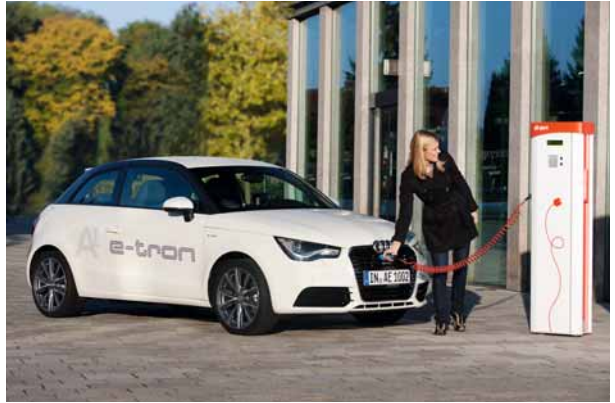

Feldversuche mit Elektroautos werden u.a. in Großbritannien und Deutschland durchgeführt

## Neu auf der Straße: Elektromobilität

Der Transportsektor ist für 20 Prozent der in Europa verursachten CO<sub>2</sub>-Emissionen verantwortlich. Um den Klimawandel in den Griff zu bekommen, müssen wir die von uns verursachte Kohlenstoffbelastung verringern. Die Elektromobilität wird hierbei eine wichtige Rolle spielen. Elektrofahrzeuge sind sauberer und leiser als konventionelle Autos und Lastwagen. Sie werden die Mobilität umweltfreundlicher machen und könnten eines Tages als riesiges verteiltes Energiespeichersystem dienen.

Viele Länder wollen hiervon profitieren. Bis zum Jahr 2020 sollen in Europa acht Millionen Elektrofahrzeuge in Betrieb sein. E.ON unterstützt die Entwicklung dieser vielversprechenden Technologie aktiv mit einer unternehmensweiten Initiative zur Elektromobilität.

### Was wir tun, um dies zu realisieren

- Wir führen Feldversuche mit Fahrzeugen und Ladestationen in Deutschland (Seite 11-12), Großbritannien (Seite 13), Schweden und Spanien durch, um mehr über das Fahrverhalten herauszufinden, technische Probleme zu lösen und das Bewusstsein der Öffentlichkeit zu schärfen.
- Wir arbeiten mit Universitäten in Aachen, Berlin, Coventry, Karlsruhe und München sowie mit nationalen Forschungsinstituten zusammen, um die Forschung und Entwicklung von Elektrofahrzeugen voranzutreiben.
- Wir testen Technologien, um das Laden leicht und effizient zu machen (Seite 14).
- Wir analysieren, wie Elektrofahrzeuge als intelligentes, verteiltes Energiespeichersystem dienen könnten (Seite 12).
- Wir erforschen Möglichkeiten zur Bereitstellung von Elektrizität zum Laden von Elektrofahrzeugen aus ausschließlich erneuerbaren Energiequellen.

## Mehr Watt durch Bytes: intelligente Netze

Ein umweltverträgliches Energiesystem verlangt mehr als nur CO<sub>2</sub>-arme Technologien zur Erzeugung von Energie. Es benötigt auch die richtige Infrastruktur: große Energiespeichersysteme und intelligente Netze, damit wir den sporadischen Energiefluss von Wind- und Solaranlagen voll nutzen und Tausende von kleineren, verteilten Energieerzeugungsgeräten integrieren können. Das heutige Netz, das errichtet wurde, als Elektrizität von einer relativ kleinen Anzahl großer Kraftwerke erzeugt wurde, ist hierfür überhaupt nicht geeignet. Es benötigt Sensoren, Datenverbindungen, Rechenleistung und automatisierte Steuerelemente. Kurz gesagt, es benötigt intelligente Technologie. Wenn neben der Energie auch Informationen fließen, werden wir die Möglichkeit haben, CO<sub>2</sub>-arme Technologien aktiv und effizient zu integrieren sowie auch immer komplexere Verbrauchs- und Erzeugungsmuster zu steuern. Dies ist die Energieinfrastruktur, die wir brauchen, um eine CO<sub>2</sub>-arme Zukunft zur Realität werden zu lassen.

### Was wir tun, um dies zu realisieren

- Wir installieren intelligente Stromzähler in Millionen Haushalten und Unternehmen in ganz Europa, um Kunden die Informationen zu geben, die sie für eine effizientere Energienutzung benötigen (Seite 15).
- Wir installieren Technologien, um die Kapazität unserer Stromnetze zu erweitern und sie aktiver und dynamischer zu machen, damit wir in der Lage sind, die Strommenge zu maximieren, die wir aus Erneuerbaren Energien gewinnen und verteilen können (Seite 16).
- Wir wollen mehr über Lastsituationen in unseren Verteilnetzen lernen, vor allem hinsichtlich der Einspeisung aus der Photovoltaik in das Niederspannungsnetz (Seite 17).
- Wir simulieren die Auswirkungen des zukünftigen Verbraucherverhaltens auf das Netz (Seite 18).
- Wir entwickeln Prototyplösungen für die umweltverträgliche Stadt der Zukunft, in der das gesamte Energie- und Verkehrssystem optimiert wird (Seite 19–20).



**Intelligente Netze** werden Sensoren und Datenkommunikation einsetzen, um die Verteilungskapazität zu erhöhen, die Effizienz zu verbessern und die Strom-einspeisung aus Tausenden weit verteilten Quellen sowie die zeitliche Koordinierung des Strombedarfs zu steuern.



**Verteilte Stromerzeugung**, die große, zentral gelegene Kraftwerke durch zahlreiche kleinere Kraftwerke und Anlagen zur Erzeugung Erneuerbarer Energien im ganzen Netz ergänzt.

**Lastwarte**: das Nervenzentrum des intelligenten Stromnetzes, in dem die Daten von Tausenden von Sensoren verarbeitet werden, um die Spannung aufrechtzuerhalten und das Angebot genau auf die Nachfrage abzustimmen.

**E-Autos** werden die Mobilität umweltfreundlicher machen und könnten eines Tages als verteiltes Energiespeichersystem dienen.

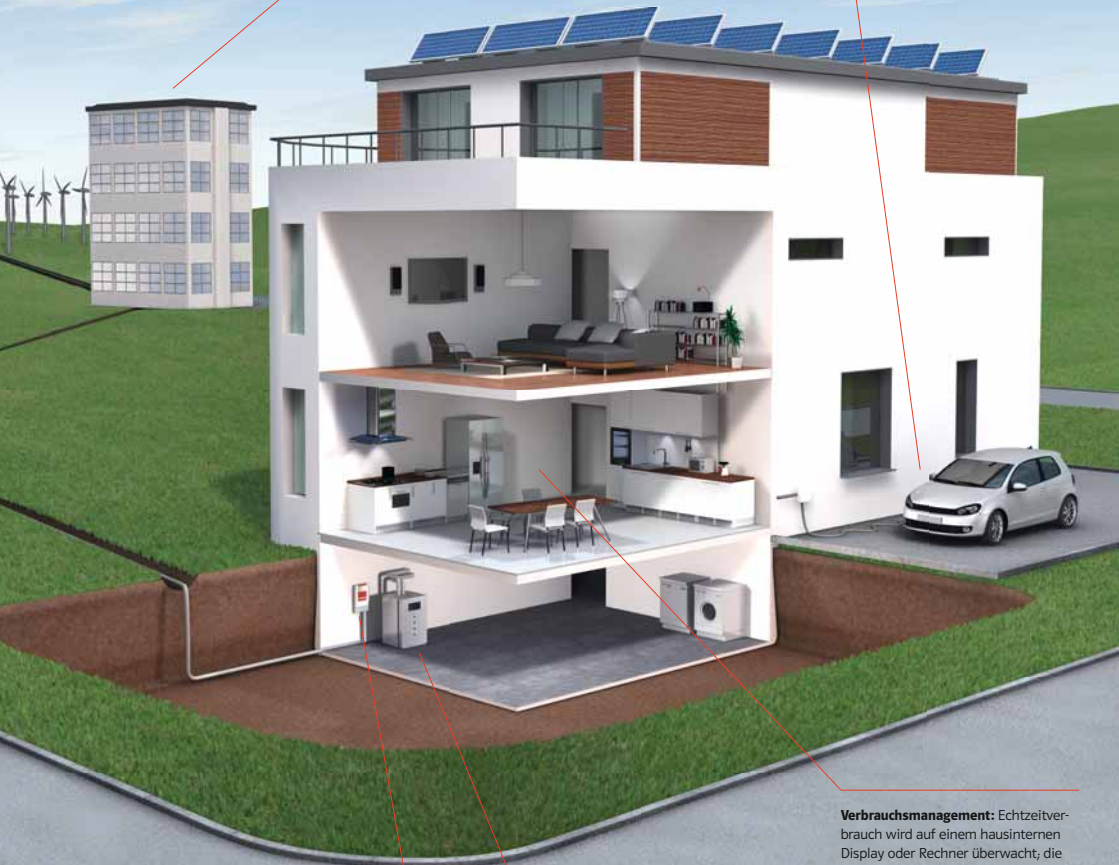

**Intelligente Stromzähler** liefern Echtzeitdaten über den Verbrauch von Strom und/oder Gas und stellen eine wechselseitige Datenschnittstelle zwischen Verbraucher und Netzbetreiber bereit.

**Mikro-KWK-Anlagen** in Haushalten und Unternehmen stellen klimafreundliche Strom- und Wärmequellen bereit, deren überschüssiger Strom ins Netz eingespeist wird.

**Verbrauchsmanagement**: Echtzeitverbrauch wird auf einem hausinternen Display oder Rechner überwacht, die programmierbare Waschmaschine läuft außerhalb der Hauptverbrauchszeiten, und der hochmoderne Kühl- oder Gefrierschrank dient als Energiespeichergerät.

## Mit intelligenten Haushalten umweltverträgliches Wohnen fördern

Haushalte sind für etwa ein Viertel der CO<sub>2</sub>-Emissionen in Europa verantwortlich. Damit Europa seine Klimaschutzziele erreichen kann, müssen Haushalte umweltverträglicher und intelligenter werden. Umweltverträglicher bedeutet, Energie effizienter zu verwenden und Ressourcen zu schonen. Intelligenter bedeutet, in der Lage zu sein, hausinterne Erzeugungstechnologien, Elektrofahrzeuge und aktives Energiemanagement zu integrieren und zu einem Bestandteil eines funktionierenden intelligenten Netzes zu machen.

### Die Haushalte von morgen

Wir haben ein Projekt in die Wege geleitet, um die Haushalte von morgen in drei Ländern zu präsentieren: in Deutschland, Großbritannien und Schweden. Zweck des Projekts ist es, mehr über intelligente und effiziente Technologien im Haushalt zu lernen, die Öffentlichkeit auf die energiesparenden und klimaschützenden Vorteile dieser Technologien aufmerksam zu machen und ihre Einführung und Verbreitung zu fördern. In der schwedischen Stadt Malmö haben wir uns mit anderen Unternehmen zusammengeschlossen, um einen Häuserblock zu errichten, der hochmodernste Technologien mit Bautechniken verbindet; in Verbindung mit Malmös existierendem Netz aus intelligenten Stromzählern wird mit diesem Projekt eines der intelligentesten Häuserblocks Europas geschaffen werden. In Großbritannien, wo 80 Prozent des für 2050 projizierten Wohnungsbestands schon errichtet worden sind, konzentrieren wir uns auf die Identifikation von Technologien und Techniken, die die CO<sub>2</sub>-Emissionen der bestehenden Haushalte reduzieren, aber weiterhin für Kundenkomfort und -kontrolle sorgen. In Deutschland untersuchen wir sowohl neue wie auch alte Häuser und beteiligen uns an Projekten, um Betriebsgebäude intelligenter zu machen. Wir wollen die in den drei Ländern gewonnenen Erkenntnisse nutzen und sie in allen Märkten einsetzen, in denen E.ON aktiv ist, damit wir unseren Kunden helfen können, ihre CO<sub>2</sub>-Emissionen zu reduzieren.

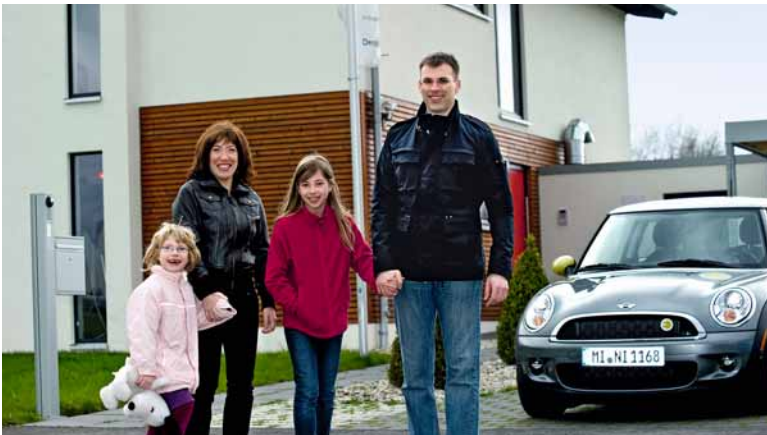

Wir alle müssen lernen, noch effizienter mit Energie umzugehen



## Wärmepumpen für ein warmes Zuhause

Mit Ausnahme des sonnigen Südens, wo die Heizsaison kürzer ist, trägt in Europa die Raum- und Wasserheizung einen großen Teil – üblicherweise mehr als 75 Prozent – zum Energieverbrauch eines Haushalts bei. Die Verbesserung der Effizienz in diesem Bereich allein wird einen beträchtlichen Beitrag zum Klimaschutz leisten. Wärmepumpen sind eine besonders vielversprechende Option. Wärmepumpen entnehmen einer im Freien liegenden Quelle (Luft, Erde oder Grundwasser) Wärme und verwenden sie zum Heizen des Hauses. Dies macht sie wesentlich energieeffizienter als typische Hausheizgeräte. So kann eine durchschnittliche Luftquellen-Wärmepumpe aus einer Kilowattstunde eingesetzter Energie mehr als das Dreifache an Wärmeenergie produzieren. Damit kann die Wärmepumpe problemlos mit den effizientesten Erdgasheizungen mithalten. Auch wirtschaftlich kann die Wärmepumpe konkurrieren, denn sie kostet über die Lebensdauer betrachtet in etwa das Gleiche wie andere Heizungssysteme, die sie ersetzt.

### Starke Nachfrage nach Wärmepumpen

Die britische Regierung schätzt, dass bis zum Jahr 2050 20 Millionen neue Wärmepumpen im Land installiert werden könnten. Außerdem besteht Potenzial, den europäischen Markt für Wärmepumpen zu erweitern. Um Kunden zu helfen, dieses Potenzial zu nutzen, finanzieren wir Feldversuche mit Wärmepumpen in Großbritannien und Deutschland. Wir wollen dabei untersuchen, welche Faktoren – wie etwa Installationstechniken, Verwendungsgewohnheiten oder das örtliche Klima – Einfluss auf die Effizienz der Wärmepumpen haben. Unser Ziel ist es dabei, aus diesen Erfahrungen zu lernen und die Wärmepumpentechnologie weiter zu optimieren, sodass unsere Kunden – und das Klima der Erde – den größten Nutzen aus dieser CO<sub>2</sub>-armen Technologie ziehen können.

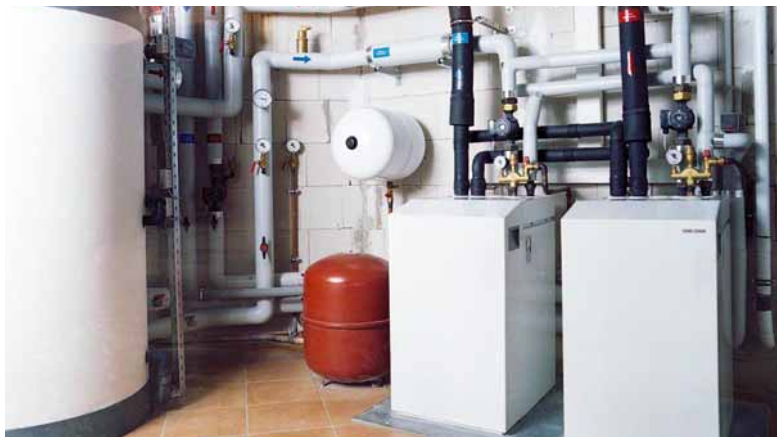

Wärmepumpen sind energieeffizienter als typische Hausheizgeräte

## Mehr Eigenerzeugung mit Mikro-KWK

Viele Regierungen hätten es sicherlich gerne, wenn ihr Land mehr Energie auf heimischem Boden produzieren und weniger aus dem Ausland importieren würde. In nicht allzu ferner Zukunft werden Millionen von Haushalten genau dies tun: selbst Energie produzieren und weniger aus dem Netz importieren. Ein einzelnes Hausgerät, das etwa die Größe einer Waschmaschine oder eines Kühlschranks hat, hält die Bewohner warm, versorgt sie mit warmem Wasser und deckt den größten Teil ihres Strombedarfs ab. Diese Technologie nennt sich Mikro-KWK (Kraft-Wärme-Kopplung, die kombinierte Erzeugung von Strom und Wärme). Da sie zwei Dinge gleichzeitig tut, nämlich neben der Stromerzeugung auch die dabei anfallende Wärme direkt für den Hausgebrauch nutzt, ist Mikro-KWK äußerst effizient und daher sehr klimafreundlich.

### Bereit für den Massenmarkt

Weil der Wohnheizungsmarkt so groß ist, verfügt Mikro-KWK über ein enormes Klimaschutzpotenzial. In Deutschland zum Beispiel wechseln jährlich etwa 700.000 Haushalte ihren Gasboiler aus. In Großbritannien und Nordirland werden sogar jedes Jahr eineinhalb Millionen Heizsysteme ausgetauscht. Europaweit könnten die Einsparungen enorm sein. Diese Heizungen durch Mikro-KWK-Geräte zu ersetzen würde zu einer zusätzlichen Einsparung an jährlichen CO<sub>2</sub>-Emissionen in Höhe von etwa einer Million Tonnen führen.

Wir bei E.ON arbeiten mit den weltweit führenden Mikro-KWK-Herstellern (Whisper Tech, Energetix Group, Ceramic Fuel Cells Ltd) zusammen, um diese Technologie für den Massenmarkt vorzubereiten. Ein wesentliches Forschungsgebiet bezieht sich dabei auf Feldstudien in Kundenhaushalten mit WhisperGen, einem gasbetriebenen Mikro-KWK-Gerät. Außerdem sind wir an dem Projekt Callux beteiligt, Deutschlands größtem Feldversuch mit Brennstoff-Mikro-KWK, bei dem bis 2012 in mehr als 800 Haushalten Anlagen installiert werden sollen.

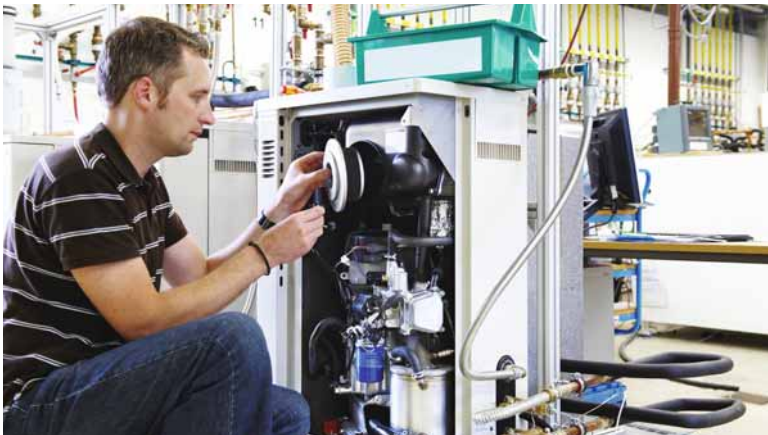

Weitere Informationen unter [www.eon.com/kwk](http://www.eon.com/kwk)

## Mit aktivem Nachfragemanagement den Verbrauch an das Angebot anpassen

Da sich Elektrizität nicht leicht in großen Mengen speichern lässt, muss die Erzeugung immer genau dem Verbrauch entsprechen, und das rund um die Uhr. Dies erfordert genaue Bedarfs- voraussagen, eine sorgfältige Überwachung von Echtzeitdaten und vor allem Reservekapazität: Kraftwerke laufen nicht mit voller Kraft, um die Erzeugung schnell hochfahren zu können.

Aktives Nachfragemanagement nutzt den gegenteiligen Ansatz: Es reduziert Spitzen, indem es den Bedarf verschiebt – um ein paar Minuten oder Stunden –, um die Versorgung sicherzustellen. Dies bietet mehrere Vorteile: Ältere Stromverteilungsnetze werden weniger stark belastet. Es hilft, die Verwendung von Wind- und Solarenergie zu maximieren, indem der Bedarf auf windige oder sonnige Tage verschoben wird. Es kann die jährlichen CO<sub>2</sub>-Emissionen um 300 bis 700 Tonnen reduzieren, und zwar für jedes Megawatt an fossilbefeuerteter Reservekapazität, das nicht im Leerlauf fahren muss. Und es kann Kunden Geld sparen helfen, indem es den Verbrauch in solche Zeiten lenkt, in denen Elektrizität weniger kostet.

### Nachfrageflexibilität demonstrieren

Ende 2010 hat ein von E.ON angeführtes Konsortium ein zweijähriges Großprojekt abgeschlossen. In diesem Projekt haben wir an mehreren Standorten in Großbritannien unterschiedliche Steuerungstechnologien für betriebliche Heiz-, Lüftungs- und Klimaanlage untersucht und sind der Frage nachgegangen, welche Kommunikations- und Zählrüstung diese Techniken erfordern. Mitglieder des Konsortiums waren neben weiteren Energieversorgern auch führende Forscher und Institute. Es wurde von der britischen Regierung über das „Technology Strategy Board“ finanziert. Die im Projekt generierten Daten ermöglichen es uns, das Potenzial eines aktiven Nachfragemanagements in Großbritannien und in anderen europäischen Länder zu ermitteln. Das Projekt stellt somit einen Baustein für aktiven Klimaschutz dar.

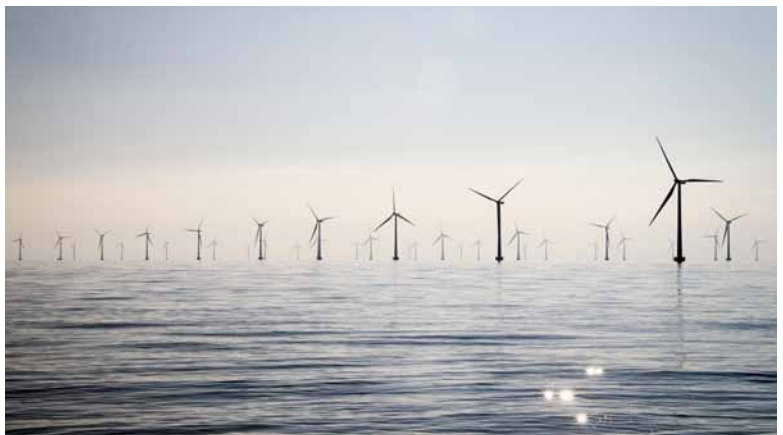

Aktives Nachfragemanagement: Bedarf auf windige Tage verschieben

## Moderne LED-Lampen leuchten den Weg in die Zukunft

In Europa gibt es über 90 Millionen Straßenlampen. Sie helfen bei der Unfallverhütung und Verbrechensvermeidung. Aber sie verbrauchen auch eine Menge Elektrizität, die wiederum den Steuerzahler viel Geld kostet. Hinzu kommt, dass Straßenlampen auch zur sogenannten Lichtverschmutzung beitragen. Man schätzt, dass Europas Straßenlampen jährlich etwa 70 Terawattstunden Elektrizität verbrauchen. Das entspricht etwa 2,5 Prozent des gesamten EU-Verbrauchs oder dem dreifachen Stromverbrauch aller schwedischen Privathaushalte. Wir sind zuversichtlich, dass die moderne LED-Technologie die Straßenbeleuchtung schon bald umweltverträglicher machen wird, weil sie den Stromverbrauch deutlich reduziert.

### Mehr Licht – weniger CO<sub>2</sub>

E.ON hat bei der Entwicklung der Straßenbeleuchtung eine Vorreiterrolle übernommen und in Partnerschaft mit der in Coventry ansässigen Advanced LEDs Ltd die Marlin-LED-Straßenlampe entwickelt. Im Vergleich zu einer herkömmlichen Natriumlampe verfügt die Marlin-Lampe über ähnliche Lichtwerte, hält aber bis zu zehn Mal länger. Sie verbraucht 70 Prozent weniger Strom bei einem Drittel der Lebenszykluskosten. Erfolgreiche Versuche an E.ON-Standorten in Großbritannien zeigten, dass die Marlin-Lampe die hohen britischen Standards für Straßenbeleuchtung erfüllt und dass ihr weißeres Licht die Sichtverhältnisse verbessert. Hinzu kommt, dass sie die Auflösung von Überwachungskamerabildern steigert, was der öffentlichen Sicherheit zuträglich ist. LED-Lampen wie die Marlin-Lampe, die jetzt schon das Rückgrat unseres öffentlichen Beleuchtungsgeschäfts bilden, könnten die jährlichen CO<sub>2</sub>-Emissionen Europas um 19 Millionen Tonnen reduzieren. Unser Ziel besteht deshalb darin, so vielen Gemeinden wie möglich dabei zu helfen, ihre Energiekosten und CO<sub>2</sub>-Emissionen zu reduzieren, indem sie ihre Straßen mit LEDs beleuchten.

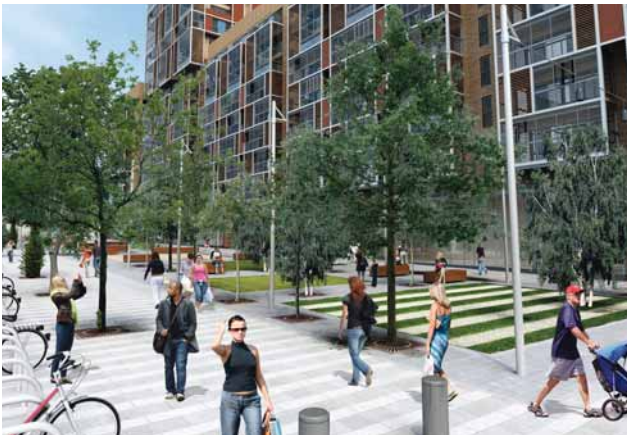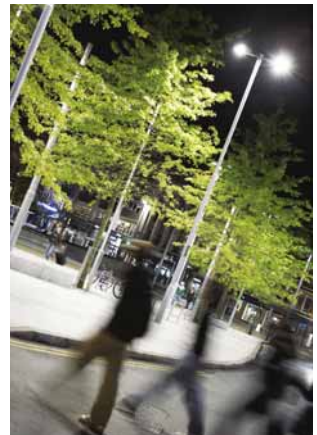

LED-Lampen helfen Energie zu sparen und CO<sub>2</sub>-Emissionen zu reduzieren

## Elektromobilität in München

Im Juli 2010 wurde der einjährige Feldtest mit 15 batteriebetriebenen BMW Minis in der Modellregion München abgeschlossen. Für das Projekt hatte E.ON ein Netz von Heimladestationen aufgebaut. Der Strom für die Ladepunkte wurde von E.ON-Wasserkraftwerken bereitgestellt, so waren die Fahrzeuge besonders klimafreundlich unterwegs. Während der Projektlaufzeit legten die 15 Minis im Durchschnitt je 10.000 km zurück. Der Versuch gab uns wertvolle Einblicke in die Bedürfnisse der Fahrer. Die Minis wurden bevorzugt am heimischen Ladeplatz aufgeladen. Die Mehrheit der Fahrer würde jedoch eine kabellose Ladetechnologie bevorzugen (weitere Informationen darüber, was wir im Hinblick auf die Entwicklung einer derartigen Technologie tun, finden Sie auf Seite 14). Daten aus Versuchen wie diesen helfen uns bei der Prognose, welche Auswirkungen eine große Anzahl von Elektrofahrzeugen auf das Stromsystem haben wird.

Seit September 2010 ist München außerdem der Projektort für eFlott, einem einjährigen Versuch mit 20 Audi A1 Plug-In-Hybridfahrzeugen. Ab Mitte 2011 werden die Audis auf den Straßen zu sehen sein. Die Fahrzeuge verfügen über einen Elektromotor (für kurze Fahrten in der Stadt) und einen Verbrennungsmotor (für größere Distanzen). Das Ziel besteht darin, den Wechsel zu sauberen, effizienten und batteriebetriebenen Autos so einfach wie möglich zu machen.

[www.eon.com/emobility](http://www.eon.com/emobility)

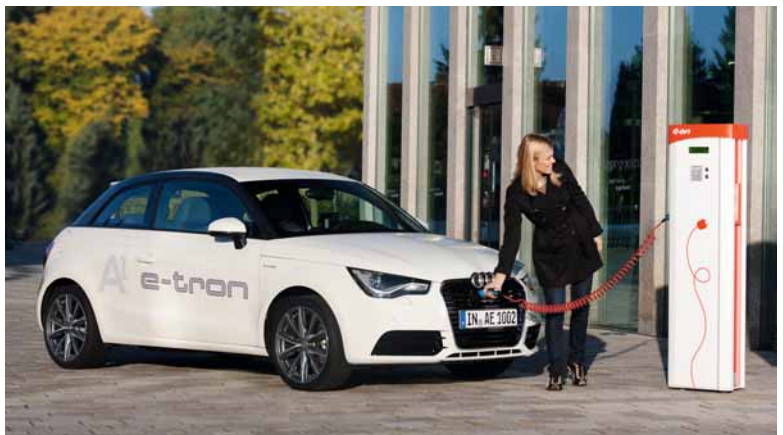

Ab Mitte 2011 auf Münchens Straßen unterwegs: der A1 e-tron



## Vernetzt: Flottenversuch in Wolfsburg und Potsdam

Seit Juni 2008 beteiligt sich E.ON gemeinsam mit Volkswagen und anderen Partnern am „Flottenversuch Elektromobilität“. Ab 2011 sind 20 Golf Twin Drive unterwegs, um die Hybridtechnik im Alltag zu testen. Ein Ziel ist es, durch intelligente Beladung der Elektroautos die Integration Erneuerbarer Energien ins Netz so effizient wie möglich zu gestalten und so emissionsfreies Fahren zu kostengünstigen Preisen zu ermöglichen. Mit dem Twin Drive wird erstmals in Deutschland die zeitvariable Ladesteuerung mit Rückspeisung ins Stromnetz praktisch erforscht (Vehicle-to-Grid). Die Steuerung erfolgt dabei durch einen intelligenten Stromzähler (Smart Meter).

So kommen im Rahmen des Projekts variable Strompreise zum Einsatz und spiegeln die Situation in einem zukünftigen Energiemix mit hohem Anteil Erneuerbarer wider. Die Preise werden stundenweise aktualisiert und einen Tag im Voraus an den intelligenten Stromzähler überspielt. In einem geschlossenen Bereich im Internet oder auf seinem Smartphone kann der Nutzer jederzeit die gültigen Preise und die Ladeintervalle abrufen und sich so über sein Ladeverhalten informieren. Monatlich erhalten die Versuchsteilnehmer eine Aufstellung, wie viel sie durch diesen Handel verdient haben. Die Ersparnisse werden dem Kunden ausgezahlt und somit reale Anreize geschaffen, sich effizient zu verhalten. E.ON entwickelt im Rahmen des Flottenversuchs die Technologie zum Laden von Elektrofahrzeugen weiter und wird erstmals eine Schnellladeeinrichtung mit Gleichstrom präsentieren. Damit lässt sich der Akku des Twin Golfs nach sehr kurzer Zeit wieder aufladen. Die Auswirkungen dieser Technik auf die Batterie sind bisher noch wenig erforscht und der Versuch wird dazu wichtige Erkenntnisse liefern. Auch die Bundesregierung sieht das Potenzial dieses Konzepts und unterstützt den „Flottenversuch Elektromobilität“.

[www.eon.com/emobility](http://www.eon.com/emobility)

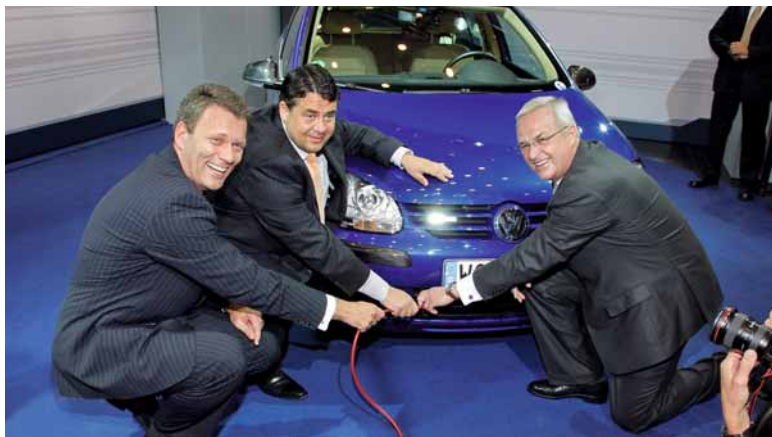

E.ON ist einer der Projektpartner beim „Flottenversuch Elektromobilität“



## Stromtanken in den englischen Midlands

In den Midlands, der Geburtsstätte der britischen Automobilproduktion, findet Großbritanniens erster Großversuch mit Elektrofahrzeugen statt: der „Coventry and Birmingham Low-Emission Vehicle Demonstrator“ (CABLED). CABLED setzt sich aus 13 Partnern zusammen (E.ON, die beiden Städte, drei örtliche Universitäten, ein technisches Beratungsbüro und sechs Automobilhersteller) und ist das größte von acht Konsortien, die gemeinsam an einem landesweiten Demonstrationsprogramm für CO<sub>2</sub>-arme Mobilität teilnehmen. Die britische Regierung unterstützt dieses Projekt mit insgesamt ca. 25 Millionen GBP.

Im Dezember 2009 begann der Versuch. Autofahrer testen insgesamt 110 Fahrzeuge unterschiedlicher Typen (elektrisch angetriebene Pkws und Lieferwagen, Plug-In-Hybride). In dem Projekt werden Daten gesammelt, wie die Fahrzeuge eingesetzt werden, wann sie aufgeladen werden und wie die Fahrer die verschiedenen Fahrzeugtechnologien nutzen. Das Ziel besteht letztendlich darin, Hemmnisse für eine breite Einführung von Elektromobilität abzubauen. Dadurch wird ein wesentlicher Beitrag erreicht, CO<sub>2</sub>-Emissionen in Großbritannien bis 2050 um 80 Prozent zu reduzieren.

### Anschlussmöglichkeiten für CABLED

Als exklusiver Energiepartner stellt E.ON die Ladeinfrastruktur für das Projekt, die aus 90 hausinternen, 36 öffentlichen und 18 an Arbeitsplätzen befindlichen Ladestationen besteht, bereit. Durch die Auswertung der Nutzungsfrequenz der einzelnen Ladestationen gewinnen wir wertvolle Erkenntnisse darüber, wie viele Stationen erforderlich sind und wo sie sich befinden sollten. So sind wir auf den Tag vorbereitet, an dem Millionen von elektrischen Fahrzeugen auf den britischen Straßen unterwegs sein werden.

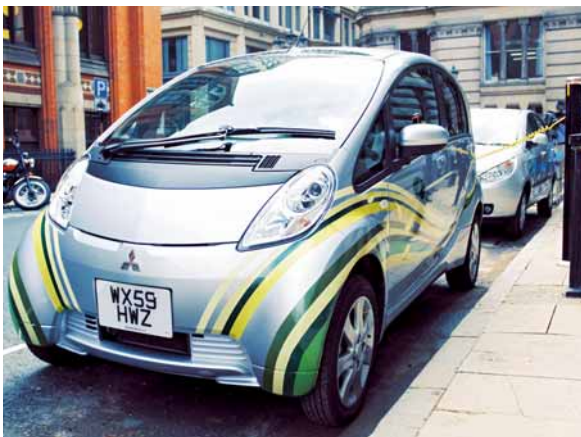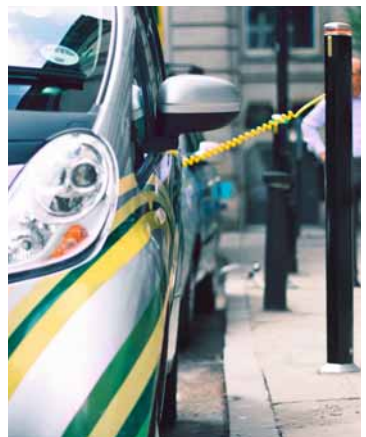

Das Elektroauto Mitsubishi i-MiEV hat eine Reichweite von bis zu 140 Kilometern

## Kabelloses Laden

Wenn sich Elektrofahrzeuge von etwas Neuartigem in etwas Alltägliches verwandeln sollen, brauchen sie eine sichere und leicht bedienbare Ladeinfrastruktur. Fahrer werden sich nicht damit zufriedengeben, ihre Elektrofahrzeuge nur zu Hause aufladen zu können. Sie werden in der Lage sein wollen, ihre Batterie problemlos an geeigneten Orten nachladen zu können – in der eigenen Garage, am Arbeitsplatz oder während Sie Einkäufe erledigen – Laden heißt Parken. Wichtig ist außerdem, dass der Ladevorgang einfach und sicher ist.

Induktives, also kabelloses Laden, wird bereits millionenfach beim Aufladen von elektrischen Zahnbürsten und Rasierapparaten eingesetzt und ist auch für die Elektromobilität ein relevantes Thema. Dabei wird die Energie mittels elektromagnetischer Felder, ohne eine direkte Kabelverbindung, übertragen. In der Zukunft werden Sie Ihr Elektrofahrzeug einfach auf einem Parkplatz mit Induktivtechnologie abstellen und so Ihr Auto ganz einfach aufladen können.

### Technologien testen, Standards setzen

E.ON ist aktiv an der Entwicklung und Prüfung von effizienten kabellosen Ladelösungen beteiligt. Dazu haben wir auch eine Partnerschaft mit dem TÜV Süd geschlossen. Ziel dieser Partnerschaft ist es, strenge Mindestsicherheitsstandards für induktive Ladesysteme zu etablieren sowie sicherzustellen, dass das Wiederaufladen von Fahrzeugen in der Energiewelt von morgen kabel- und problemlos erfolgen kann.

[www.eon.com/induktivesladen](http://www.eon.com/induktivesladen)

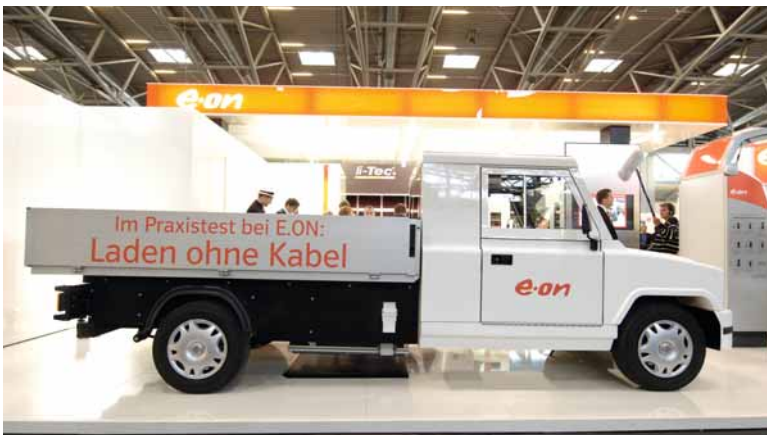

Ecocarier beim induktiven Laden

## Intelligenter Haushalte für ganz Europa

Die Energierechnung zeigt Kunden bisher lediglich an, wie viel Energie sie in der Vergangenheit verbraucht haben. Intelligente Stromzähler dagegen geben ihnen direkt Rückmeldung. Dadurch bekommen sie ganz neue Möglichkeiten, die Auswirkungen ihres Verhaltens auf ihren Energieverbrauch zu verstehen und Maßnahmen zur Energieeinsparung zu treffen. Unabhängige Studien und unsere eigene Erfahrung lassen darauf schließen, dass intelligente Stromzähler Haushaltskunden dabei helfen können, ihren Energieverbrauch um 3 bis 10 Prozent zu reduzieren. Europaweit gesehen würde dies zu enormen Einsparungen an Energie und CO<sub>2</sub>-Emissionen führen. Intelligente Stromzähler können zudem die Verbrauchsdaten von Kunden speichern, also Informationen, die uns helfen werden, neue Produkte und Dienstleistungen zu entwickeln, die besser auf die Bedürfnisse, Alltagsroutinen und Lebensstile unserer Kunden ausgerichtet sind. Außerdem lassen sich intelligente Stromzähler aus der Ferne ablesen, was die Abrechnung akkurater, informativer und pünktlicher macht. Die Technologie der intelligenten Stromzähler dient aber nicht nur der Energieeinsparung; sie ermöglicht es E.ON auch, mit unseren Kunden auf dem Weg in die Zukunft neue Partnerschaften zu schließen.

### Bald wird es mehrere Millionen von intelligenten Stromzählern geben

Was die Technologie der intelligenten Stromzähler betrifft, so geben wir in Europa das Tempo vor. In Schweden haben wir zum Beispiel schon über eine Million intelligente Stromzähler installiert. In Spanien in etwa 130.000, weitere 620.000 sollen bis 2018 installiert werden. Während intelligente Stromzähler auch in unseren anderen Märkten eingeführt werden, werden wir diese Erfahrung nutzen, um unseren Kunden dabei zu helfen, das Potenzial dieser Technologie zur Energieeinsparung vollständig zu realisieren. Darüber hinaus bereiten wir gerade in Großbritannien die Versorgung unserer fünf Millionen Kunden mit intelligenten Gas- und Stromzählern vor.

[www.eon.com/smartmeter](http://www.eon.com/smartmeter)

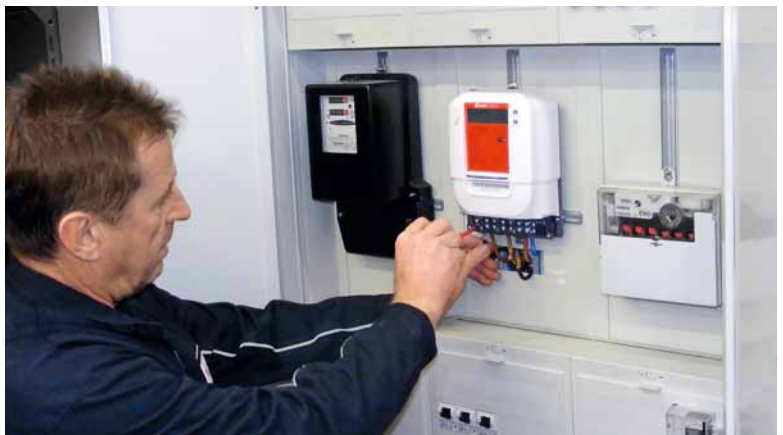

Installation eines intelligenten Stromzählers

## Mit Netzkapazitätserweiterung mehr Windkraft nutzen

Wir betreiben Stromnetze im windigen Norden Deutschlands. Dort gibt es mittlerweile so viele Windräder, dass sie an stürmischen Tagen manchmal ihre Erzeugung reduzieren müssen, weil anderenfalls die Kapazität des Netzes überschritten würde. Unsere Herausforderung besteht darin, innovative Wege zu finden, so viel Erneuerbare Energie wie möglich über unsere existierenden Leitungen zu transportieren. Einer dieser Wege heißt „Freileitungsmonitoring“. Je mehr Strom durch eine Leitung fließt, desto heißer wird sie; sie dehnt sich aus und hängt schließlich durch. Wenn eine Leitung zu sehr durchhängt, ist sie nicht mehr sicher, weil sie zu nahe an Bäume, Gegenstände oder Lebewesen heranreichen könnte. Stromleitungen werden von Luft und Wind gekühlt, d.h., ihre Kapazität ist an kühlen, windigen Tagen höher. Doch um Netzzuverlässigkeit sicherzustellen, beruht die einer Leitung zugeordnete Kapazität (bekannt als „statische Tragzahl“) auf einem Worst-Case-Szenario: einem ungewöhnlich heißen, windstillen Tag.

### Freileitungsmonitoring

Beim Freileitungsmonitoring werden bestehende Stromleitungen mit intelligenten Technologien ausgestattet, damit ihre Kapazität nicht mehr auf dem Worst-Case-Szenario beruht, sondern auf der tatsächlich gemessenen Lufttemperatur und Windgeschwindigkeit. Sensoren entlang der Leitungen übertragen Wetterdaten an einen Rechner in der Steuerzentrale, der auf dieser Basis die genaue Tragfähigkeit jeder Leitung berechnet. Diese Daten dienen dann dazu, die Leistung der Windparks aus der Ferne zu steuern, damit unser Netz nahe seiner maximalen sicheren Kapazität betrieben werden kann. Das Freileitungsmonitoring hat die Kapazität unserer Leitungen in Deutschland auf einer Länge von 1.000 km um bis zu 70 Prozent erhöht. Im Laufe der nächsten fünf Jahre rüsten wir weitere 10.000 km mit dieser Technologie auf. Künftig wollen wir das Freileitungsmonitoring auch zunehmend in Großbritannien, Schweden und Spanien einsetzen. Mehr Wind bedeutet mehr umweltfreundlichen Strom und, dank der intelligenten Technologie, mehr Kapazität, um ihn zum Kunden zu bringen. Eine echte Win-Win-Lösung.

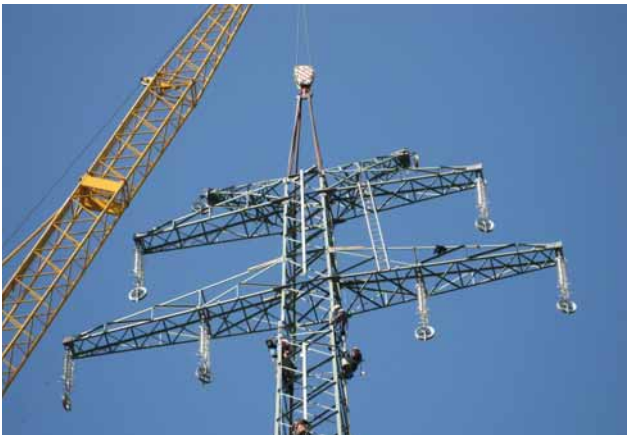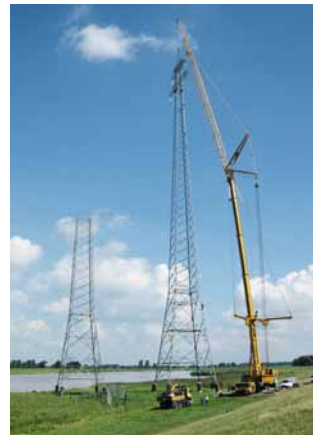

## Den Ansprüchen einer dezentralisierten Stromerzeugung in Bayern gerecht werden

Im Durchschnitt gibt es in Bayern mehr sonnige Stunden pro Tag als in irgendeiner anderen Region Deutschlands. Dank des häufig wolkenlosen Himmels und der günstigen Zuschüsse für Erneuerbare Energien wächst die Photovoltaik (PV)-Kapazität rapide. An sonnigen Tagen werden 3,5 GW an PV-Strom in das bayrische Netz eingespeist. Das entspricht ungefähr der Ausgangsleistung von drei Kernkraftwerken, und es kommt ständig mehr hinzu. Der Unterschied für uns ist, dass 3,5 GW an Solarstrom nicht zentral in einigen Großkraftwerken generiert werden, sondern dezentral an über 100.000 verschiedenen Orten. Diese umfassen kleine PV-Felder auf Dächern sowie große Solarparks (Straßkirchen, Bayerns größter Solarpark, erzeugt 54 MW) und stellen damit große Herausforderungen für Netzbetreiber wie unsere Tochtergesellschaft E.ON Bayern dar.

### Heute die Stromnetze von morgen entwickeln

E.ON hat es sich zur Aufgabe gemacht, einen umweltverträglichen Energiemix zu unterstützen und die notwendige Netzinfrastruktur für den Anschluss der dezentralisierten Erzeugung Erneuerbarer Energien bereitzustellen. 2010 hat E.ON Bayern dazu ein zweijähriges Projekt namens „Das Stromnetz von morgen“ gestartet. In der Region Seebach in Niederbayern werden dazu intelligente Stromzähler bei Kunden installiert, die eine PV-Anlage auf dem Dach haben. Diese Stromzähler erfassen Daten über die sich verändernde Dynamik im Netz. Außerdem werden etwa 100 Ortsnetzstationen ebenfalls mit Messeinrichtungen sowie mit moderner Informations- und Kommunikationstechnologie ausgerüstet. Die Daten werden uns helfen, die Auswirkungen einer erhöhten dezentralisierten Stromerzeugung auf unser Netz zu erforschen und zu identifizieren, wo und wann unsere Netze mit neuen Technologien aufgerüstet werden müssen. So handeln wir heute, um die intelligente Infrastruktur der CO<sub>2</sub>-armen Energiewelt von morgen zu entwickeln.

[www.eon-bayern.com/netz](http://www.eon-bayern.com/netz)

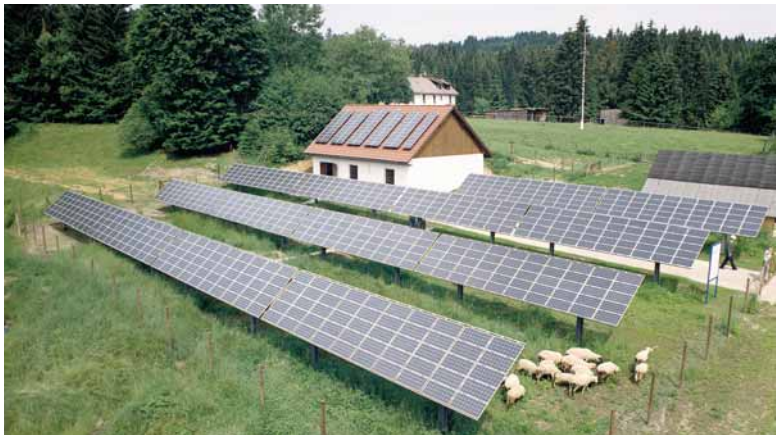

Eine PV-Anlage in einer ländlichen Region Bayerns



## Energieprojekt 2020 und die intelligente Ortsnetzstation

Photovoltaik und Klimaanlage, intelligente Messung (Smart Meter) und Elektroautos - das Verbrauchsverhalten eines Haushalts wird sich aufgrund neuer technischer Entwicklungen in den nächsten Jahren ändern. Wann und wie viel Energie nimmt so ein Haus dann noch aus dem Netz? Wann und wie viel speist es ein? Um diesen Fragen auf den Grund zu gehen, stattet E.ON Avacon rund 30 Haushalte mit moderner Technik aus. Sie sollen simulieren, wie ein typischer Haushalt im Jahr 2020 funktioniert, wenn viele dieser Techniken zum Standard geworden sind.

Untersucht werden außerdem die Auswirkungen des veränderten Einspeise- und Verbraucher- verhaltens auf das Niederspannungsnetz. Dieses erhält daher ebenfalls innovative Komponenten wie selbstregelnde Trafostationen, die starke Spannungsschwankungen automatisch ausgleichen und so das Netz stabil halten. Diese Technik ist in der Mittelspannung bereits erprobt, in den Niederspannungsnetzen setzt E.ON in Niedersachsen einen Prototypen ein.

### Intelligenz für das Ortsnetz

Wenn viele Photovoltaik-Anlagen gleichzeitig einspeisen, kommt es schnell zu unerwünschten Spannungsschwankungen. E.ON Westfalen Weser stattet daher rund 100 herkömmliche Ortsnetzstationen mit intelligenter, fernsteuerbarer Technik aus. Hier erproben wir, was später Standard werden soll: der weitgehende automatisierte Betrieb der Stationen, um Spannungsschwankungen zu minimieren.

[www.ehomeprojekt.de](http://www.ehomeprojekt.de)

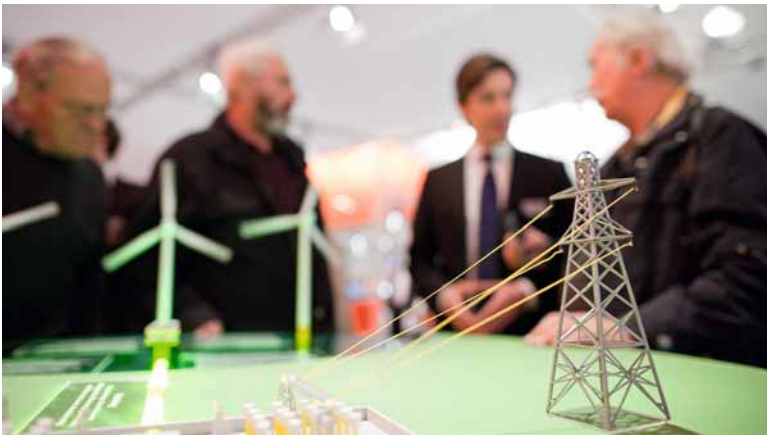

Intelligentes-Netz-Modell auf der E.ON-Hauptversammlung 2010 in Essen



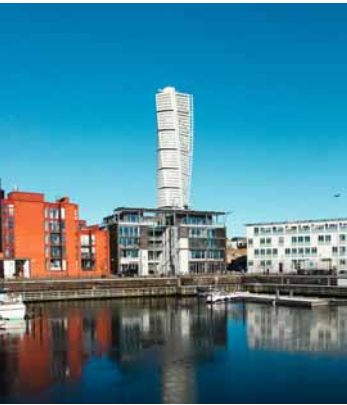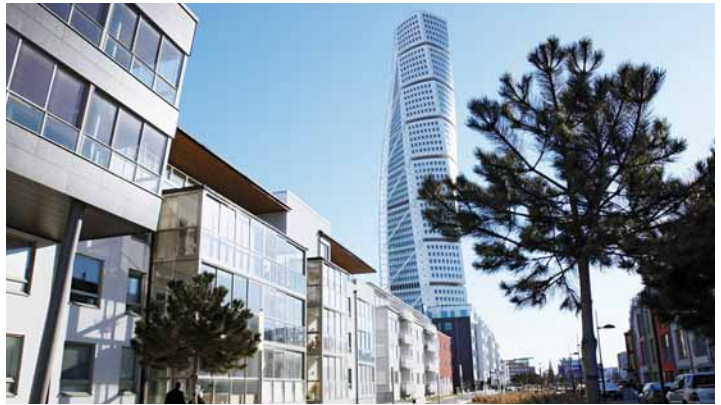

Västra Hamnen in Malmö ist ein gelungenes Beispiel für nachhaltige Stadtentwicklung

## Malmö: eine nachhaltige Stadt

Die Hälfte der Weltbevölkerung lebt in Städten. Dieser Anteil wird in den kommenden Jahren weiter zunehmen. Eine Folge dieser Urbanisierung ist die hohe Konzentration des Energieverbrauchs und der Abfallproduktion in einem begrenzten Gebiet. Für Städte macht dies den Übergang zur Nachhaltigkeit zu einer besonderen Herausforderung. Wir bei E.ON nutzen unsere Sachkenntnisse im Bereich Energie, um Städten bei der Bewältigung dieser Herausforderung zu helfen, indem wir mit ihnen zusammen klimafreundliche Infrastrukturlösungen entwerfen und implementieren. Unsere erste Partnerschaft schlossen wir mit Malmö, der drittgrößten und am schnellsten wachsenden Stadt Schwedens. Diese Partnerschaft zeigt, dass Städte sowohl einen hohen Lebensstandard als auch wahre Umweltverträglichkeit erzielen können, wenn man das gesamte Know-how in einem Gesamtkonzept zusammenfließen lässt – innovative Technologien, Energieeffizienz und Elektromobilität.

### Västra Hamnen

Noch vor einem Jahrzehnt war der Bezirk Västra Hamnen (Westhafen) in Malmö ein industrielles Ödland, bestehend aus maroden Docks, leeren Lagerhäusern und einer verlassenen Schiffswerft. Heute ist er ein moderner, lebhafter Teil der Stadt, der fast 3.000 Einwohner, Dutzende von Unternehmen und ein Kongresszentrum beherbergt, ebenso wie ein Stück zeitgenössischer Architektur, das schon jetzt Ikonenstatus erreicht hat: ein Hochhaus namens „Turning Torso“. Västra Hamnen ist ein hervorragendes Beispiel für innovative, umweltverträgliche Stadtentwicklung. Seine Gebäude vereinen hochmoderne Materialien, Technologien und Designs, die die Energieeffizienz maximieren. Der ganze Bezirk wird zu 100 Prozent mittels örtlich produzierten Erneuerbaren Energien mit Strom versorgt, geheizt und gekühlt: mit Wind-, Solar- und Biomassenenergie sowie einer großen Grundwasser-Wärmepumpe. Selbst der Abfall wird genutzt: Die Stadtbusse werden mit Biogas betrieben, das in der örtlichen Mülldeponie produziert wird.

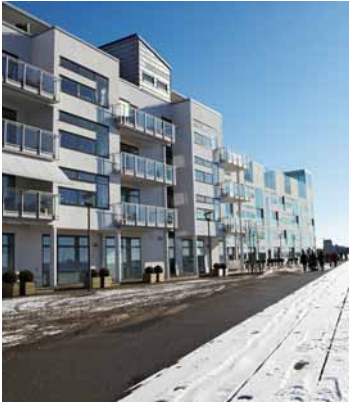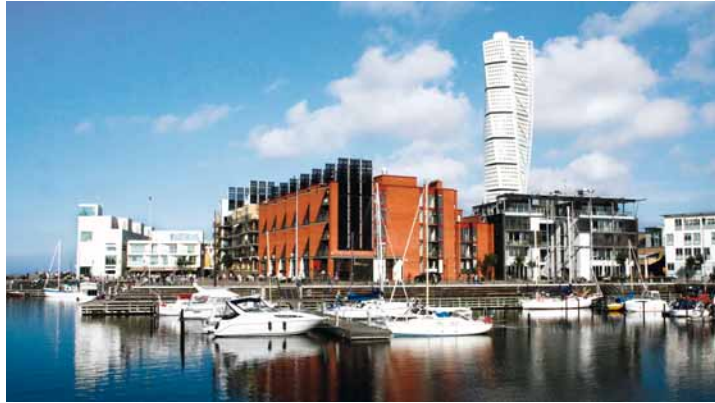

Västra Hamnen wird zu 100 Prozent mit lokal produziertem Strom aus Erneuerbaren versorgt

### **Elektromobilität und Umweltverträglichkeit**

Gegenwärtig arbeiten wir mit Malmö zusammen, um zu zeigen, wie Elektromobilität in das Umweltverträglichkeitsparadigma der Stadt integriert werden kann. Ein mehrjähriger Feldtest, der 2012 beginnen wird, wird sich mit 70 Elektro- und Hybridfahrzeugen von verschiedenen Herstellern und 250 Ladestationen in und um Malmö herum befassen. Die Ladestationen werden an verschiedenen Orten eingerichtet, wie etwa in Privatgaragen sowie auf Parkplätzen von Wohnhäusern, Unternehmen, Einkaufszentren und Freizeiteinrichtungen. Der Test wird auch über eine starke intermodale Komponente verfügen: Ladestationen werden neben Bahnhöfen und Busstationen eingerichtet, sodass die Elektromobilität die öffentlichen Verkehrsmittel ergänzt. Der Feldtest wird uns helfen, mehr über das Anwenderverhalten bezüglich Fahrzeugtechnologien und Auflademöglichkeiten zu lernen, wie auch darüber, welche Elektromobilitäts-Geschäftsmodelle am besten für uns als Energielieferant funktionieren.

### **Was liegt vor uns?**

E.ONs Partnerschaft mit Malmö zeigt, wie Unternehmen und Gemeinden zusammenarbeiten können, um wirtschaftliches Wachstum mit Umwelt- und Klimaschutz zu kombinieren. Gegenwärtig wird geplant, unter Anwendung eines umfassenden Umweltverträglichkeitsansatzes, der auch Smart-Grid-Lösungen mit einbezieht, einen weiteren Bezirk von Malmö (Hyllie) zu entwickeln. Es gibt auch eine wachsende Liste von Städten, die das Malmö-Paradigma mit E.ONs Hilfe implementieren wollen. Dazu zählen Mora und Norrköping (beides in Schweden) wie auch Kopenhagen (Dänemark), dessen Nordhafen in ein umweltverträgliches Wohnviertel für 40.000 Menschen verwandelt wird. In Deutschland erforschen wir Wege, das Malmö-Paradigma auf eine Stadt im Ruhrgebiet zu übertragen.

E.ON AG  
E.ON-Platz 1  
40479 Düsseldorf

T 0211-4579-0  
F 0211-4579-501  
[info@eon.com](mailto:info@eon.com)  
[www.eon.com](http://www.eon.com)
