# Supplementary material
Source: publisher site journal article supplement (https://www.degruyterbrill.com/publication/isbn/9783110432879/downloadAsset/9783110432879_Elektronischer_Anhang_2.zip)
Supplement: Supplementary file 46 [file E.ON GB 2010.pdf › Korpustexte/Korpustexte pdf/E.ON/E.ON GB 2010.pdf]

# Geschäftsbericht 2010

## E.ON-Konzern in Zahlen<sup>1)</sup>

| in Mio €                                         | 2010    | 2009    | +/- %                |
|--------------------------------------------------|---------|---------|----------------------|
| Stromabsatz <sup>2)</sup> (in Mrd kWh)           | 1.030,4 | 785,5   | +31                  |
| Gasabsatz <sup>2)</sup> (in Mrd kWh)             | 1.342,4 | 1.206,5 | +11                  |
| Umsatz                                           | 92.863  | 79.974  | +16                  |
| Adjusted EBITDA                                  | 13.346  | 12.975  | +3                   |
| Adjusted EBIT                                    | 9.454   | 9.291   | +2                   |
| Konzernüberschuss                                | 6.281   | 8.669   | -28                  |
| Konzernüberschuss der Gesellschafter der E.ON AG | 5.853   | 8.420   | -30                  |
| Bereinigter Konzernüberschuss                    | 4.882   | 5.097   | -4                   |
| Investitionen                                    | 8.286   | 8.655   | -4                   |
| Operativer Cashflow <sup>3)</sup>                | 10.614  | 8.590   | +24                  |
| Wirtschaftliche Netto-Verschuldung (31.12.)      | -37.701 | -44.665 | +6.964 <sup>4)</sup> |
| Debt Factor <sup>5)</sup>                        | 2,8     | 3,4     | -0,6 <sup>4)</sup>   |
| Eigenkapital                                     | 45.585  | 43.986  | +4                   |
| Bilanzsumme                                      | 152.881 | 152.614 | -                    |
| ROCE (in %)                                      | 11,9    | 12,2    | -0,3 <sup>6)</sup>   |
| Kapitalkosten vor Steuern (in %)                 | 8,3     | 9,1     | -0,8 <sup>6)</sup>   |
| Kapitalkosten nach Steuern (in %)                | 6,1     | 6,7     | -0,6 <sup>6)</sup>   |
| Value Added                                      | 2.864   | 2.362   | +21                  |
| Mitarbeiter (31.12.)                             | 85.105  | 85.108  | -                    |
| Ergebnis je Aktie <sup>7), 8)</sup> (in €)       | 3,07    | 4,42    | -31                  |
| Eigenkapital je Aktie <sup>7), 8)</sup> (in €)   | 21,86   | 21,19   | +3                   |
| Dividende je Aktie (in €)                        | 1,50    | 1,50    | -                    |
| Dividendensumme                                  | 2.858   | 2.858   | -                    |
| Marktkapitalisierung <sup>8)</sup> (in Mrd €)    | 43,7    | 55,7    | -22                  |

1) bereinigt um nicht fortgeführte Aktivitäten

2) einschließlich Handelsabsatz

3) entspricht dem Cashflow aus der Geschäftstätigkeit fortgeführter Aktivitäten

4) Veränderung in absoluten Werten

5) Verhältnis zwischen wirtschaftlicher Netto-Verschuldung und Adjusted EBITDA

6) Veränderung in Prozentpunkten

7) Anteil der Gesellschafter der E.ON AG

8) auf Basis ausstehender Aktien

## 2 Zusammengefasster Lagebericht

- 2 Geschäft und Rahmenbedingungen
- 18 Ertragslage
- 30 Finanzlage
- 34 Vermögenslage
- 35 Jahresabschluss der E.ON AG
- 36 Corporate Responsibility
- 37 Mitarbeiter
- 39 Forschung und Entwicklung
- 40 Risikobericht
- 47 Wichtige Ereignisse nach Schluss des Geschäftsjahres
- 48 Prognosebericht

## 56 Konzernabschluss

- 56 Bestätigungsvermerk
- 57 Gewinn- und Verlustrechnung
- 57 Aufstellung der im Konzerneigenkapital erfassten Erträge und Aufwendungen
- 58 Bilanz
- 60 Kapitalflussrechnung
- 62 Entwicklung des Konzerneigenkapitals
- 64 Anhang
- 146 Versicherung der gesetzlichen Vertreter
- 147 Anteilsbesitzliste

## 162 Corporate-Governance-Bericht

- 162 Erklärung zur Unternehmensführung<sup>1)</sup>
- 168 Vergütungsbericht<sup>1)</sup>

## 176 Aufsichtsrat und Vorstand

- 176 Bericht des Aufsichtsrats
- 180 Aufsichtsratsmitglieder
- 182 Angaben zu Übernahmehindernissen<sup>1)</sup>
- 184 Internes Kontrollsystem zum Rechnungslegungsprozess<sup>1)</sup>
- 186 Erläuternder Bericht des Vorstands
- 187 Vorstandsmitglieder

## 188 Tabellen und Erläuterungen

- 188 Mehrjahresübersicht
- 189 Finanzglossar
- 193 Finanzkalender

<sup>1)</sup> Bestandteil des zusammengefassten Lageberichts

- Adjusted EBIT gegenüber Vorjahr um 2 Prozent gestiegen
- Operativer Cashflow 24 Prozent über Vorjahresniveau
- Dividende in Höhe von 1,50 € vorgesehen
- Für das Jahr 2011 Adjusted EBITDA zwischen 11,2 und 11,9 Mrd € erwartet

## E.ON-Konzern: Market Units, Führungsgesellschaften, Geschäftsfelder bis Ende 2010

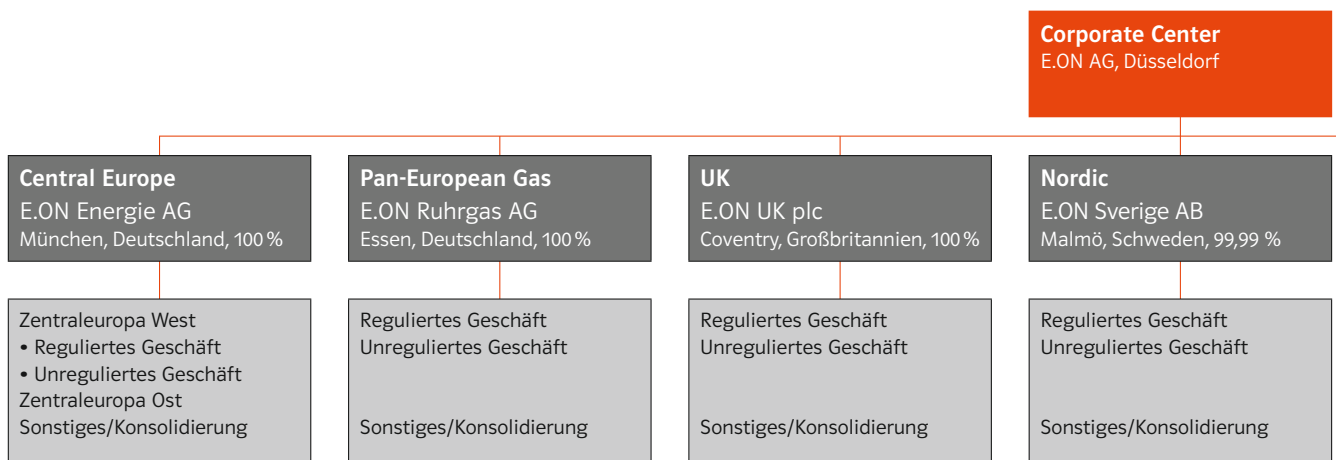

## Geschäft und Rahmenbedingungen

### Beschreibung der Konzernstruktur und Geschäftstätigkeit für das Jahr 2010

E.ON ist ein bedeutendes privates Energieunternehmen. Unser Geschäft war bis zum Jahresende 2010 geografisch oder funktional in Market Units gegliedert. Im Rahmen unserer neuen strategischen Ausrichtung haben wir unser Geschäft ab Anfang 2011 in globalen oder regionalen Aktivitäten gebündelt (siehe Prognosebericht).

Aufgrund der Größenordnung der Kennzahlen haben wir unsere Market Units Climate & Renewables, Russia, Italy und Spain zum Segment Neue Märkte zusammengefasst.

Nach dem erfolgreichen Abschluss der Verkaufsverhandlungen haben wir unsere Market Unit US-Midwest nach dem Rechnungslegungsstandard IFRS 5 seit dem zweiten Quartal 2010 bis zum Abgang als nicht fortgeführte Aktivität ausgewiesen. Für das Jahr 2010 und rückwirkend für das Jahr 2009 wurden deshalb die Zahlen – auch die energiewirtschaftlichen Angaben – entsprechend um die Beiträge von US-Midwest bereinigt und die Market Unit somit nicht mehr kommentiert. Die Transaktion wurde am 1. November 2010 abgeschlossen.

### Central Europe

Central Europe ist in zahlreichen zentraleuropäischen Ländern aktiv – unter anderem in Deutschland, den Beneluxstaaten, Frankreich, Ungarn, der Slowakei, Tschechien, Bulgarien und Rumänien. Die Geschäftsfelder Zentraleuropa West Reguliert und Unreguliert umfassen den Betrieb konventioneller und nuklearer Kraftwerke sowie die Stromerzeugung aus regenerativen Energien und Entsorgung, den Stromtransport über Hochspannungsnetze, die regionale Verteilung von Strom, Gas und Wärme sowie den Strom-, Gas- und Wärmevertrieb. Im Geschäftsfeld Zentraleuropa Ost sind im Wesentlichen die Beteiligungen an den dortigen regionalen Strom- und Gasversorgern zusammengefasst.

Im Geschäftsjahr 2010 versorgte Central Europe – einschließlich wesentlicher Minderheitsbeteiligungen – rund 17 Millionen Kunden im In- und Ausland mit Strom und Gas, etwa je zur Hälfte in Zentraleuropa West und Zentraleuropa Ost.

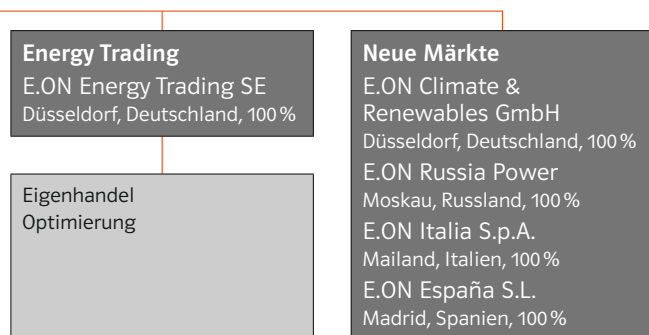

## Pan-European Gas

E.ON Ruhrgas ist eine der führenden Gasgesellschaften in Europa und einer der größten privaten Erdgasimporteure der Welt. Kunden sind regionale und lokale Energieunternehmen sowie Industriebetriebe im In- und Ausland. Das regulierte Geschäft beinhaltet zum einen Energiebeteiligungen im europäischen Ausland (E.ON Ruhrgas International) und zum anderen das regulierte Transportgeschäft. Im Berichtssegment Unreguliert werden das Gashandelsgeschäft, das E&P-Geschäft und das Gasspeichergeschäft zusammengefasst. Das Segment Sonstiges/Konsolidierung umfasst seit dem Verkauf der Thüga-Aktivitäten nur noch Konsolidierungseffekte. Mit Wirkung zum 1. Dezember 2009 wurde die Thüga-Gruppe, die Minderheitsbeteiligungen an kommunalen Gas- und Stromversorgern in Deutschland bündelte, an ein kommunales Erwerberkonsortium verkauft.

Das Gasleitungsnetz von Open Grid Europe GmbH und ihrer deutschen Projektgesellschaften umfasste zum Jahresende rund 12.000 km. Darüber hinaus sind 66 km Kokereigasleitungen im Besitz von E.ON Ruhrgas. Die Arbeitsgaskapazität aus eigenen, im Gemeinschaftseigentum oder im Besitz von Projektgesellschaften befindlichen sowie angemieteten Untertage-Erdgasspeichern von E.ON Gas Storage belief sich auf rund 7 Mrd m<sup>3</sup> (inkl. 650 Mio m<sup>3</sup> vermarktet durch E.ON Hanse/E.ON Avacon/Storengy) mit einer maximalen Ausspeicherleistung von rund 7,3 Mio m<sup>3</sup>/h. Europaweit liegt die Arbeitsgaskapazität einschließlich der Tochtergesellschaften

E.ON Földgáz Storage in Ungarn und E.ON Gas Storage UK in Großbritannien bei über 11 Mrd m<sup>3</sup> mit einer maximalen Ausspeicherleistung von rund 9,6 Mio m<sup>3</sup>/h. Weitere Kapazitäten befinden sich im Aufbau.

## UK

E.ON UK ist für das Energiegeschäft in Großbritannien zuständig. Das regulierte Geschäft beinhaltet die Stromverteilung durch Central Networks. Zum unregulierten Geschäft zählen Stromerzeugung, Endkundengeschäft und der Bereich Energy Services. Das Erzeugungsgeschäft umfasst die Stromerzeugung, den Betrieb und die Wartung von Kraft-Wärme-Kopplungsanlagen sowie die Entwicklung beziehungsweise Betriebsführung von Kraftwerken. Im Endkundengeschäft werden Strom- und Gasdienstleistungen an Haushalts-, Geschäfts- und Industriekunden verkauft. Im Jahr 2010 belieferte E.ON UK etwa 8,0 Millionen Kunden. Davon waren 7,4 Millionen Haushaltskunden und 0,6 Millionen Geschäftskunden.

## Nordic

E.ON Sverige führt das operative Geschäft in Nordeuropa. Das regulierte Geschäft umfasst die Strom- und Gasverteilung. Im unregulierten Geschäft sind im Wesentlichen die Stromerzeugung, die Wärmeerzeugung, das Endkundengeschäft in den Bereichen Strom-, Gas- und Wärmeversorgung sowie Energy Services gebündelt. Ende des Jahres 2010 belieferte E.ON Nordic etwa eine Million Strom-, Gas- und Wärmekunden.

### Energy Trading

Energy Trading vereint unsere Risikomanagement-Aktivitäten beim Handel, insbesondere von Strom, Gas, Kohle, Öl und CO<sub>2</sub>-Zertifikaten, unter einem Dach. Dies beinhaltet die Optimierung und den Eigenhandel. Dabei werden auch Marktpreisveränderungen und Risikopositionen im Rahmen unserer Risikomanagementsysteme und -limite bewusst genutzt.

### Neue Märkte

E.ON Climate & Renewables ist für die Steuerung und den weltweiten Ausbau der Stromerzeugung aus Erneuerbaren Energien – ohne große Wasserkraftaktivitäten – und Klimaschutzprojekte zuständig.

E.ON Russia Power ist für die Stromaktivitäten des E.ON-Konzerns in Russland verantwortlich. Das Geschäft in Russland konzentriert sich auf den Betrieb thermischer Kraftwerke in den grundsätzlich wachstumsstarken Industrieregionen Zentralrussland, Ural und Sibirien.

E.ON Italia führt unser Strom- und Gasgeschäft in Italien. Das operative Geschäft umfasst die Stromerzeugung, den Strom- und Gasvertrieb sowie die Gasverteilung. Am Jahresende 2010 lieferte E.ON Italia Strom und Gas an rund 854.000 Privat- und Geschäftskunden.

E.ON España ist für unser integriertes Energiegeschäft in Spanien verantwortlich. Ende 2010 wurden rund 600.000 Kunden mit Strom versorgt.

### Corporate Center

Der Vorstand der E.ON AG führt den E.ON-Konzern. Dies beinhaltet die strategische Weiterentwicklung, die Steuerung sowie Sicherung der erforderlichen Finanzierungsmittel, die marktübergreifende Steuerung des Gesamtgeschäfts, die Risiko- steuerung und die laufende Optimierung des Portfolios.

Das Segment umfasst die E.ON AG und direkt von der E.ON AG geführte Beteiligungen. Darüber hinaus ordnen wir diesem Segment die Konsolidierungsmaßnahmen im Rahmen des Konzernabschlusses zu.

### Absatzmärkte und jeweilige Wettbewerbspositionen

#### Central Europe

- Nr. 3 in der Stromerzeugung
- Nr. 2 im Strom-/Gasvertrieb
- Wesentliche Aktivitäten in Deutschland, Belgien, Frankreich, den Niederlanden, Ungarn, Tschechien, der Slowakei, Rumänien und Bulgarien

#### Pan-European Gas

- Eine der führenden Gasgesellschaften in Europa
- Paneuropäisches Gasbezugsportfolio mit langfristigen Lieferverträgen mit Russland, Norwegen, Deutschland, den Niederlanden, Dänemark und Großbritannien

#### UK

- Nr. 4 in der Stromerzeugung
- Nr. 2 im Strom-/Gasvertrieb
- Wesentliche Aktivitäten in Großbritannien

#### Nordic

- Nr. 4 in der nordischen Stromerzeugung
- Nr. 3 im nordischen Stromvertrieb
- Wesentliche Aktivitäten in Schweden und Finnland

#### Neue Märkte

- Climate & Renewables  
Mit Aktivitäten in Deutschland, Frankreich, Polen, Schweden, Italien, Spanien, Portugal, Großbritannien und den USA zählt E.ON Climate & Renewables zu den größten Produzenten von Windenergie weltweit.
- Russia  
E.ON zählt zu den führenden thermischen Stromerzeugern in Russland.
- Italy und Spain  
In Italien und Spanien halten wir gute Marktpositionen.

### Strategie

E.ON ist mit seinem Geschäftsportfolio und seiner Expertise eines der führenden Energieunternehmen in Europa. Durch die Wachstumsschritte der vergangenen Jahre ist es uns gelungen, unsere Präsenz in Europa zu stärken, neue Märkte wie zum Beispiel Russland zu erschließen und eine führende Stellung im Bereich Erneuerbare Energien zu erlangen. E.ON besitzt damit eine ausgezeichnete Position, um den neuen Herausforderungen und Chancen im europäischen und außereuropäischen Marktumfeld erfolgreich zu begegnen.

Im Rahmen unseres Capital Market Day im November 2010 haben wir unsere neue strategische Ausrichtung und unsere neue Konzernstruktur – mit globalen oder regionalen Aktivitäten – ab Anfang 2011 bekannt gegeben. Erläuterungen hierzu befinden sich im Prognosebericht.

## Energiepolitisches Umfeld

### International

Vom 29. November bis zum 10. Dezember 2010 fand im mexikanischen Cancún die 16. Klimakonferenz der Vereinten Nationen statt. Dort wurden die Verhandlungen über einen völkerrechtlichen Vertrag in Nachfolge des Kyoto-Protokolls fortgesetzt. Festlegungen für individuelle CO<sub>2</sub>-Reduktionsziele wurden nicht getroffen. Die Diskussion über mögliche individuelle Reduktionsziele für 2050 soll erst auf der nächsten Klimakonferenz Ende 2011 in Durban geführt werden.

### Europa

Die EU-Kommission hat 2010 ihre neue Energiestrategie bis zum Jahr 2020 vorgelegt. Demnach soll der Prozess der „Europäisierung der Energiepolitik“ konsequent fortgeführt werden. Die EU-Kommission erarbeitet weitere Vorschläge zur Energieeffizienz und zum Ausbau der Infrastruktur und der Erneuerbaren Energien, bei denen die EU Vorreiterregion werden will. Am 4. Februar 2011 haben die Staats- und Regierungschefs der EU über diese Themen beraten.

Im November 2010 hat die EU-Kommission das Regelwerk zur Auktion von CO<sub>2</sub>-Zertifikaten verabschiedet, das die Basis für die Versteigerung von CO<sub>2</sub>-Zertifikaten in der dritten Handelsperiode ab 2013 darstellt. Die Europäische Union hatte im Jahr 2009 das „Grüne Paket“ verabschiedet, mit dem die Klimaziele der EU erreicht werden sollen. Dazu zählte, dass die bisher kostenlose Zuteilung von Zertifikaten über das Europäische Emissionshandelssystem (ETS) für Stromerzeuger ab 2013 vollständig durch Auktionen ersetzt wird.

Der Ausbau Erneuerbarer Energien wird weiterhin politisch stark unterstützt. Die im Jahr 2009 in Kraft getretene Erneuerbare-Energien-Richtlinie mit der verbindlichen Zielsetzung, den Anteil Erneuerbarer Energien auf 20 Prozent am Gesamtenergieverbrauch zu steigern, bedeutet für den Strommarkt einen Anteil von rund 34 Prozent. Um diese Ziele zu erreichen, müssen die EU-Mitgliedstaaten ihre nationale Förderpolitik der EU-Kommission im Rahmen von nationalen Aktionsplänen vorlegen. Hierdurch ist bis auf Weiteres von einer Beibehaltung beziehungsweise Verbesserung der Förderpolitik der Mitgliedstaaten auszugehen. Allerdings bieten die sogenannten „flexiblen Mechanismen“ der EU-Richtlinie zu Erneuerbaren

Energien, mit denen Kooperationsprojekte zwischen Mitgliedstaaten und Drittländern möglich werden, einen wichtigen Ansatzpunkt, diese Förderung zu harmonisieren und damit effektiver zu machen.

Insgesamt bleiben Entscheidungen über den Energiemix weiterhin den Mitgliedstaaten überlassen. Angesichts des hohen Beitrags der Kernenergie zur Energieversorgung in der EU betonte der Rat die Notwendigkeit eines breiten Dialogs über die Chancen und Risiken der Kernenergie in der Gemeinschaft.

Ziel der EU-Kommission ist es, den Weg zu einer CO<sub>2</sub>-armen Wirtschaft zu gehen, insbesondere durch eine Verringerung des CO<sub>2</sub>-Ausstoßes in der Stromversorgung und im Verkehrssektor – zum Beispiel durch die Entwicklung von Elektroautos. Hierzu beitragen soll auch die Schaffung eines europäischen Supernetzes für Strom und Gas. Darüber hinaus hat die EU-Kommission angekündigt, eine Energiestrategie für den Zeitraum bis 2050 zu entwickeln. Auch hierbei wird ein Augenmerk auf der Steigerung der Energieeffizienz und dem Ausbau der Erneuerbaren Energien liegen.

Die europäischen Regulierer haben Vorschläge zu Rahmenrichtlinien zur Kapazitätsallokation und zum Engpassmanagement an den Grenzkuppelstellen mit besonderem Bezug auf den innereuropäischen Stromhandel entwickelt. Es wird in diesem Zusammenhang unter anderem vorgeschlagen, nationale Märkte, die strukturelle Engpässe im Netz aufweisen, entlang dieser topologischen Grenzen in mehrere Zonen aufzuteilen. Denn es wird angenommen, dass nationale Netzengpässe dazu führen, dass die Grenzkuppelkapazitäten nicht optimal genutzt werden. Strukturelle Engpässe, die nicht zeitnah durch Netzausbau beseitigt werden können, sollen danach im Day-ahead-Markt durch unterschiedliche Preise in den Zonen gelöst werden. Demgegenüber soll das sogenannte Redispatching, die heute in vielen Ländern übliche Methode, kleinen Engpässen vorbehalten sein. Eine Aufteilung des deutschen Markts, aber auch von anderen europäischen Märkten, kann erhebliche Auswirkungen auf die Wirtschaftlichkeit der Erzeugungsanlagen in der jeweiligen Region haben, da die erzielbaren Strompreise je Zone stark unterschiedlich sein können. Die Einteilung eines nationalen Markts in Preiszonen kann – wie es sich in Schweden abzeichnet – auch negative Einflüsse auf das Vertriebsgeschäft haben.

## Deutschland

Im September 2010 hat die Bundesregierung ihr Energiekonzept verabschiedet. Das Konzept enthält zahlreiche Ziele für den schrittweisen Übergang von der bislang weitgehend auf konventionellen Energieträgern basierenden Energieversorgung hin zu einer überwiegenden Nutzung Erneuerbarer Energien. Bis zum Jahr 2050 sollen die Treibhausgasemissionen gegenüber 1990 um 80 bis 95 Prozent reduziert werden. In diesem Zusammenhang hat die Bundesregierung auch eine Verlängerung der Laufzeiten für Kernkraftwerke unter Beachtung der strengen nationalen und internationalen Sicherheitsstandards von rechnerisch durchschnittlich zwölf Jahren beschlossen. Ältere Anlagen erhalten zusätzliche Reststrommengen, die einer Laufzeitverlängerung von acht Jahren entsprechen, jüngere Anlagen dementsprechend Reststrommengen für 14 zusätzliche Jahre. Der größere Teil der zusätzlichen Gewinne aus der Laufzeitverlängerung wird vom Staat über die Kernbrennstoffsteuer und im Rahmen eines Energie- und Klimafonds abgeschöpft. Die in den Jahren 2011 bis 2016 zu entrichtende Kernbrennstoffsteuer soll Einnahmen von jährlich bis zu 2,3 Mrd € zur Konsolidierung des deutschen Staatshaushalts erbringen. Mit Mitteln aus dem Energie- und Klimafonds sollen insbesondere Maßnahmen zur Steigerung der Energieeffizienz im Rahmen des Energiekonzepts der Bundesregierung finanziert werden.

Ein weiterer Teil des Energiekonzepts ist die Verabschiedung eines Zehn-Punkte-Sofortprogramms, das bis zum Ende des Jahres 2011 umgesetzt werden soll. Dazu zählt die Initiative für eine deutschlandweit abgestimmte Netzausbauplanung, ein Kreditprogramm für Offshore-Windparks, veränderte Netzananschlussregelungen und die Verabschiedung eines Gesetzes zur Abscheidung und Speicherung von CO<sub>2</sub>.

Deutschland soll sich außerdem zu einem „Leitmarkt“ für Elektromobilität entwickeln, mit dem Ziel, bis zum Jahr 2020 eine Million Elektrofahrzeuge in den Markt zu bringen. Hierzu will die Bundesregierung eine breit angelegte und technologieoffene Mobilitäts- und Kraftstoffstrategie entwickeln, die alle alternativen Technologien und Energieträger mit einschließt. Auch auf europäischer Ebene soll die Entwicklung von Elektrofahrzeugen gefördert werden.

## Anreizregulierung

Bereits am 1. Januar 2009 wurden die deutschen Energienetze einem Anreizregulierungssystem unterworfen, durch das die zuvor geltende Kostenregulierung ersetzt wurde. Zum 1. Januar 2010 sollten gemäß der betreffenden Verordnung auch die überregionalen Gastransportnetze in das neue Regulierungsregime überführt werden. Vor der Überführung wird ein Effizienzvergleich zwischen den wenigen Gasfernleitungsnetzbetreibern stattfinden. Der vorläufige individuelle Effizienzfaktor wurde den Unternehmen Ende März 2010 übermittelt. Eine Entscheidung über die endgültigen Effizienzfaktoren wird im ersten Halbjahr 2011 erwartet. Der individuelle

Effizienzfaktor beeinflusst die Höhe der Erlösobergrenze. Die Netzbetreiber haben insgesamt zehn Jahre Zeit, um ihre Kosten auf das Niveau vollständig effizienter Netzbetreiber zu senken. Die Bundesnetzagentur (BNetzA) ermittelte in einem bundesweiten Effizienzvergleich für die darin enthaltenen E.ON-Netzbetreiber bereits heute Effizienzwerte von im Durchschnitt nahezu 100 Prozent. Im Juli 2008 hat die BNetzA für die erste Regulierungsperiode die geltende Eigenkapitalverzinsung für Strom und Gas einheitlich auf 9,29 Prozent für Neuanlagen und 7,56 Prozent für Altanlagen festgelegt. Im Vergleich zum vorher geltenden Niveau sind die Zinssätze im Gasbereich nahezu unverändert, während sie für den Strombereich eine Erhöhung darstellen.

Am 15. Dezember 2010 wurde von der BNetzA ein Eckpunktepapier zur Ausgestaltung des sogenannten Qualitätselements Netzzuverlässigkeit Strom im Rahmen der Anreizregulierung herausgegeben. Das Qualitätselement wird Bestandteil der Formel zur Ermittlung der jährlichen Erlösobergrenzen und beeinflusst dadurch die zulässigen Erlöse im Netzbereich. In dem Eckpunktepapier ist ein Start der Qualitätsregulierung zunächst für den Strombereich zum 1. Januar 2012 vorgesehen. Ein Zeitplan für den Start der Qualitätsregulierung im Bereich Gas wurde bisher noch nicht bekanntgegeben.

## Gasnetzzugang

Der Gasnetzzugang hat sich durch die Einführung des Zweivertragsmodells und die Zusammenlegung von sogenannten Marktgebieten deutlich vereinfacht. Zu Beginn existierten über 20 Marktgebiete in Deutschland. Seit dem 1. Oktober 2009 gibt es in Deutschland nur noch drei Marktgebiete für hochkalorisches Gas (H-Gas) und drei für niederkalorisches Gas (L-Gas). Das größte und liquideste H-Gas-Gebiet „NetConnect Germany“ umfasst dabei neben Open Grid Europe und bayer-nets die neuen Mitglieder ENI/GVS und GRTgaz Deutschland. Dem gegenüber steht das zweite wesentliche H-Gas-Gebiet „Gaspool“. Gemäß der im letzten Jahr novellierten GasNZV soll bis zum 1. April 2011 die Anzahl der Marktgebiete nochmals reduziert werden. Die deutschen Fernleitungsnetzbetreiber arbeiten derzeit in Abstimmung mit der BNetzA daran, dass ab dem 1. April 2011 nur noch zwei qualitätsübergreifende Marktgebiete in Deutschland bestehen sollen.

## Großbritannien

Seit Mai 2010 regiert in Großbritannien eine Koalition aus Konservativen und Liberaldemokraten. Im Juli hat das Energieministerium eine Überprüfung der Strommärkte angekündigt mit dem Ziel, verbesserte Rahmenbedingungen für Investitionen in CO<sub>2</sub>-arme Technologien – inklusive Erneuerbarer und Kernenergie – zu schaffen und die Versorgungssicherheit zu gewährleisten. Die britische Regierung hat hierzu im Dezember 2010 ein umfangreiches Konsultationsverfahren eingeleitet. Darin wird die Einführung zusätzlicher Mechanismen etwa von Kapazitätsmärkten, Einspeisevergütungen oder



Vorgaben für den CO<sub>2</sub>-Ausstoß diskutiert. Die Konsultation wird im Laufe des Jahres 2011 abgeschlossen. Außerdem hat die britische Regierung im Dezember 2010 ein Maßnahmenpaket („Green Deal“) zur Steigerung der Energieeffizienz in Gebäuden und Unternehmen vorgestellt. Dadurch sollen Kunden verbesserten Zugang zu Effizienzmaßnahmen erhalten.

Im Verlauf des Jahres 2010 hat der britische Regulierer Ofgem seine Überprüfung der Netzregulierung abgeschlossen und daraufhin Änderungen im Bereich des Netzausbaus vorgeschlagen.

### Schweden

Im Februar 2009 hat die schwedische Regierung ein Konzept für eine nachhaltige Energie- und Klimapolitik beschlossen. Zentrales Ziel ist, den Weg aus der Abhängigkeit von fossilen Energieträgern vorzubereiten, um den Ausstoß von Klimagasen zu reduzieren und die Versorgungssicherheit zu erhöhen. Im Mittelpunkt stehen die Steigerung des Anteils der Erneuerbaren Energien in allen Bereichen und die Erhöhung der Energieeffizienz mit klaren Zielvorgaben bis 2020 für Erneuerbare Energien und Klimaschutz. Der Anteil Erneuerbarer Energien am Energieverbrauch soll auf 50 Prozent, im Transportsektor auf 10 Prozent erhöht werden. Die Energieeffizienz soll um 20 Prozent gesteigert und die Treibhausgasemissionen um 40 Prozent im Vergleich zu 1990 gesenkt werden.

Bis 2020 soll der Wärmemarkt unabhängig von fossilen Energieträgern werden. Im Verkehrssektor setzt das Programm insbesondere auf Hybridantrieb und Elektromobilität. Hier ist das Ziel, bis 2030 unabhängig von fossilen Energieträgern zu sein. Im Stromsektor will die Regierung aus Klimaschutzgründen an der Kernenergie festhalten, gleichzeitig aber den Strommix diversifizieren, der bislang hauptsächlich auf Kernenergie und Wasserkraft beruht. Damit sollen die Störungsanfälligkeit reduziert und die Versorgungssicherheit erhöht werden. Neben einem signifikanten Ausbau der Windenergie und anderer Erneuerbarer Energien findet auch ein Schwenk in der Kernenergiepolitik statt. Der Ausstiegsbeschluss wurde formal aufgehoben und das seit nahezu 30 Jahren geltende Bauverbot für neue Kernkraftwerke revidiert. Die Möglichkeit, neue Kernkraftwerke zu bauen, soll auf bestehende Kraftwerksstandorte beschränkt bleiben.

Im Mai 2010 entschied der schwedische Übertragungsnetzbetreiber in Abstimmung mit der Europäischen Kommission, den schwedischen Stromgroßhandelsmarkt ab November 2011 in unterschiedliche Preiszonen aufzuteilen.

### USA

Im Jahr 2009 hat die US-Regierung das Stimulierungspaket „New Green Deal“ verabschiedet, mit dem vor allem der Ausbau Erneuerbarer Energien, der Aufbau intelligenter Stromnetze und der Ausbau der Netzinfrastruktur mit insgesamt 17 Mrd US-\$ gefördert werden sollen. Die im gleichen Jahr eingebrachten Klimaschutzgesetzentwürfe sind im Sommer des Jahres 2010 im Kongress gescheitert.

Die Debatte über konkrete Maßnahmen zur Reduzierung der CO<sub>2</sub>-Emissionen in den USA wird derzeit vor allem über die EPA (Environmental Protection Agency), die US-Umweltbehörde sowie in einzelnen Bundesstaaten geführt. Die EPA hat hierzu im Jahr 2010 unterschiedliche Regulierungen zur Reduktion von CO<sub>2</sub> vorgelegt. Es handelt sich hierbei um ordnungsrechtliche Maßnahmen mit der Vorgabe von Grenzwerten für einzelne Anlagen. Da ein bundesweites Handelssystem mit CO<sub>2</sub>-Rechten ähnlich dem europäischen System im Kongress nicht mehrheitsfähig ist, konzentriert sich die Diskussion auf die Festlegung von Emissionsstandards. Eine verbindliche Festlegung auf Klimaschutzziele der USA ist mit dieser Diskussion aber nicht verbunden. Der Wahlausgang bei den Kongresswahlen vom November 2010 wird weitere klimapolitische Initiativen eher erschweren. Daher hat die US-Delegation auf der Klimakonferenz in Cancún Ende November 2010 auch eher zurückhaltend agiert. Die Förderprogramme zur Finanzierung Erneuerbarer Energien laufen unterdessen weiter.

Die nationale Energiepolitik widmete sich 2010 auch angesichts der großen Erdgasfunde bei sogenanntem unkonventionellem Gas sowie der gestiegenen globalen Energienachfrage wieder verstärkt Problemen der Versorgungssicherheit und ordnete Klimaschutz diesem Themenkomplex unter.

### Frankreich

Die in Frankreich eingesetzte sogenannte Champsaur-Kommission zur Neuordnung der Strommarktregulierung hatte im April 2009 ihren Bericht vorgelegt. Nach einer Übergangszeit im Jahr 2010 sollen die regulierten Tarife für mittlere und große Industriekunden abgeschafft werden. Die vollständige Abschaffung regulierter Tarife für große Industriekunden soll jedoch erst bis 2015 erfolgen. Wettbewerbern im französischen Strommarkt soll vorübergehend und begrenzt der Zugang zu Grundlastkapazitäten (insbesondere bei Kernenergie) gewährt werden. Die französische Regierung hat dazu im Jahr 2010 eine Reform des französischen Strommarkts (NOME) gestartet. Dabei sollen die regulierten Tarife für Haushalte und kleine Unternehmen zunächst beibehalten werden.

**Italien**

In Italien wurden 2010 zwei wichtige Verordnungen erlassen: Die Verordnung für den Gasmarkt zielt darauf ab, den Wettbewerb zu fördern, hauptsächlich durch Zugang zu neuen Gasspeichern für Kunden mit hohem Energieverbrauch und die Betreiber thermoelektrischer Kraftwerke. Eine zweite Verordnung initiiert die erste Phase eines virtuellen Gashandelsplatzes, der die Handhabung zunehmender Mengen von Gas durch einen organisierten Markt regelt und der Abwicklungsstelle „GME“ (Gestore dei Mercati Energetici) zugeordnet ist. Im italienischen Markt wurde zudem die Einführung eines marktbasierten Vergütungsschemas vorgeschlagen, wie es der italienische Regulierer vorgestellt hatte, um langfristig Preissignale für die Erzeugungskapazitäten zu generieren.

Das Anreizsystem für Erneuerbare Energien wird überarbeitet. Bis 2015 soll der „Green Certificate“-Mechanismus graduell zurückgefahren werden. Bezogen auf Anlagen für Erneuerbare Energien, die von 2013 an betrieben werden, wird das neue Anreizschema für Anlagen über 5 MW auf einem Ausschreibungsprozess basiert sein. Für andere Anlagen gilt ein Konzept der Einspeisevergütung. Für Anlagen, die vor 2013 gebaut wurden, wird es eine Übergangszeit von den „Green Certificates“ zur Einspeisevergütung für Anlagen Erneuerbarer Energien geben.

**Spanien**

Ähnlich wie in Deutschland ist der Anteil der Erneuerbaren Energien in Spanien signifikant gestiegen, was zu einer Erhöhung des gesamten Fördervolumens geführt hat. Vor diesem Hintergrund sehen es Regierung und Opposition als unumgänglich an, das System anzupassen. Politische Unstimmigkeiten zwischen der Regierung und der größten Oppositionspartei (Partido Popular) haben die Entwicklung eines Energieprogramms beeinflusst, was zum Einfrieren der Entgelte im Juli 2010 geführt hat.

Die energiepolitischen Rahmenbedingungen werden derzeit maßgeblich von der Bevorzugung einheimischer Kohle beeinflusst. Außerdem spielen die weitere Strategie zum Ausbau Erneuerbarer Energien zu vertretbaren Kosten, moderate Preiserhöhungen sowie Zukunftsthemen wie Energieeffizienz und E-Mobility eine Rolle.

**Russland**

Die russische Wirtschaft erholt sich von der Finanzkrise 2008/2009; für die Folgejahre wird ein moderates BIP-Wachstum erwartet. Zusätzlich verstärkt durch extreme Witterungsbedingungen stieg die Stromnachfrage in Russland um 4,4 Prozent gegenüber 2009.

Der Day-ahead-Markt für Stromhandel wurde zum Ende des Jahres 2010 vollständig geöffnet. Ausgenommen bleiben Lieferungen für Haushaltskunden und ihnen zugeordnete Kunden. Die 2010 eingeführten Regeln für den langfristigen Kapazitätsmarkt sehen unterschiedliche Vergütungssysteme für bereits existierende Erzeugungskapazitäten und Kraftwerksneubauten vor. Demnach erfolgt die Preisbildung der Altanlagen über eine Wettbewerbsauswahl unter Berücksichtigung spezifischer Wettbewerbskonstellationen in regionalen Teilmärkten. Neuanlagen, die im Rahmen einer vertraglichen Investitionsverpflichtung entstehen, erhalten eine gesicherte Kapazitätsvergütung. Nach zehn Jahren sollen beide Märkte zu einem einheitlichen Kapazitätsmarkt für Neu- und Altanlagen zusammengeführt werden.

**Gesamtwirtschaftliche Rahmenbedingungen**

Die Weltwirtschaft hat sich nach dem Einbruch im Jahr 2009 überraschend schnell erholt. Ausgehend von der expansiven Geld- und Fiskalpolitik sowie der stabilen Nachfrage in den Schwellenländern ist die weltweite Produktion nach Schätzungen des deutschen Sachverständigenrates zur Begutachtung der gesamtwirtschaftlichen Entwicklung (SVR) im Jahr 2010 vermutlich mit einer Rate von 4,8 Prozent gewachsen. Wie schon in der Rezession sichtbar, verbergen sich hier jedoch unterschiedliche Entwicklungen: Die reale Zuwachsrates des Bruttoinlandsprodukts betrug in den Industrieländern 2,3 Prozent; in den Schwellenländern fiel sie mit 7,6 Prozent wesentlich höher aus. Während die Weltproduktion 2010 insgesamt wieder das Niveau vor der Finanzkrise erreichte, wurde dieses Niveau in den meisten Industrieländern verfehlt. In einigen Volkswirtschaften in Asien war während der Krise hingegen überhaupt kein Einbruch zu verzeichnen.

Während die Schwellenländer als Stütze der weltweiten Erholung fungierten, war in den Industrieländern 2010 ein schleppender konjunktureller Verlauf zu beobachten. Hier belasten die Probleme des Finanz- und Immobiliensektors, der Staatsverschuldung sowie des Arbeitsmarktes eine weitere konjunkturelle Erholung. So nahm die wirtschaftliche Leistung in den USA zwar in der zweiten Jahreshälfte 2010 spürbar zu, der private Verbrauch stieg trotz hoher Arbeitslosigkeit und steigender Sparneigung; insgesamt war die Belebung des inländischen Konsums jedoch nach Ansicht des SVR in den USA eher schwach.

Die wirtschaftliche Entwicklung im Euro-Raum war insgesamt eher verhalten und ähnlich der weltweiten Entwicklung von divergierenden Geschwindigkeiten gekennzeichnet. Länder wie Spanien oder Italien erholen sich eher unterdurchschnittlich. Insbesondere die zu Beginn des Jahres 2010 in Schwierigkeiten geratenen Peripherieländer befinden sich unter Druck der schmerzhaften Anpassungen in den öffentlichen Haushalten. Motor der moderaten Entwicklung in der EU war die Aufhellung der konjunkturellen Lage in Deutschland. Dabei profitierte

Deutschland seit dem Frühjahr 2010 sowohl von der anziehenden globalen Nachfrage als auch von den vermehrten inländischen Impulsen. Ein robusterer Arbeitsmarkt und ein niedriges Zinsniveau stellen nach Auffassung des SVR die Voraussetzungen für zunehmende Wachstumsimpulse aus dem Inland dar. Es darf aber trotz der guten Lage nicht übersehen werden, dass sich die deutsche Wirtschaftsleistung zur Jahresmitte 2010 erst wieder auf dem Niveau der Jahreswende 2006/2007 befunden hat. Insgesamt wurde die konjunkturelle Belebung im Euro-Raum vom Export und privaten Verbrauch getragen.

Während die wirtschaftliche Leistung in Großbritannien im Durchschnitt der EU wuchs, erzielten Schweden und Dänemark ein überdurchschnittliches Wachstum. Die osteuropäischen Länder entwickelten sich ebenso wie die westeuropäischen sehr heterogen, wuchsen im Durchschnitt aber wie die gesamte EU.

Unter den sogenannten BRIC-Ländern (Brasilien, Russland, Indien, China) bildete die wirtschaftliche Leistung Russlands das Schlusslicht. Zwar stabilisierte der gestiegene Ölpreis die Entwicklung, Binnennachfrage und Außenhandel blieben allerdings nach Ansicht des SVR schwach.

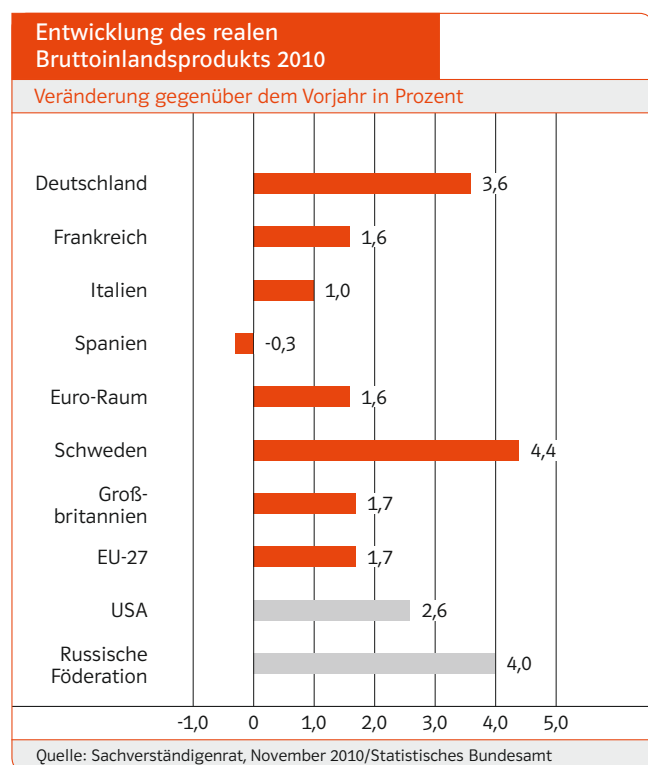

## Branchensituation

Der Energieverbrauch in Deutschland stieg im Jahr 2010 nach Berechnungen der Arbeitsgemeinschaft Energiebilanzen (AG Energiebilanzen) um 4,6 Prozent und lag am Ende des Jahres mit rund 480 Millionen Tonnen Steinkohleneinheiten (Mio t SKE) nahezu auf dem Niveau vor dem konjunkturellen Einbruch des Jahres 2008.

Der gute Konjunkturverlauf und die deutlich niedrigeren Temperaturen prägten die Entwicklung bei den verschiedenen Energieträgern. Der Verbrauch an Mineralöl legte um gut 1 Prozent zu. Der Erdgasverbrauch nahm um 4,2 Prozent zu. Der Verbrauch an Steinkohle erhöhte sich nach dem starken Einbruch im Vorjahr kräftig um mehr als 15 Prozent. Der Verbrauch an Braunkohle lag leicht über dem Niveau des Vorjahres. Die inländischen Kernkraftwerke steigerten ihren Beitrag um rund 4 Prozent. Die Erneuerbaren Energien trugen mit 45 Mio t SKE (+9,9 Prozent) zur Energiebilanz 2010 bei. Die Stromerzeugung aus Wasserkraft (ohne Pumpspeicher) stieg um 3 Prozent, die der Windkraft ging dagegen durch ungünstige Windverhältnisse um 5,5 Prozent zurück. Einen gewaltigen Sprung machte die Fotovoltaik mit einem Zuwachs von mehr als 80 Prozent. Biogas und Biokraftstoffe konnten um 12 Prozent beziehungsweise knapp 4 Prozent zulegen.

| Primärenergieverbrauch 2010 in Deutschland         |              |              |
|----------------------------------------------------|--------------|--------------|
| Anteile in Prozent                                 | 2010         | 2009         |
| Mineralöl                                          | 33,6         | 34,8         |
| Erdgas                                             | 21,8         | 21,9         |
| Steinkohle                                         | 12,1         | 10,9         |
| Braunkohle                                         | 10,7         | 11,2         |
| Kernenergie                                        | 10,9         | 11,0         |
| Erneuerbare Energien                               | 9,4          | 8,9          |
| Sonstige (einschließlich Außenhandels-saldo Strom) | 1,5          | 1,3          |
| <b>Insgesamt</b>                                   | <b>100,0</b> | <b>100,0</b> |

Quelle: AG Energiebilanzen

Die Bruttostromerzeugung erhöhte sich 2010 im Vergleich zum Vorjahr um 4,7 Prozent. Dabei stieg der Einsatz aller Energieträger: Erneuerbare Energieträger (+ 7,8 Prozent), Steinkohle (+ 7,5 Prozent), Erdgas (+ 7,2 Prozent), Kernenergie (+4,2 Prozent) und Braunkohle (+1 Prozent).

Der höhere Energieverbrauch in Deutschland führte zu einem Anstieg (etwa 4 Prozent) des energiebedingten CO<sub>2</sub>-Ausstoßes, da sich nach den Berechnungen der AG Energiebilanzen beim Mix der Energieträger im Jahr 2010 nur geringfügige Veränderungen zugunsten CO<sub>2</sub>-armer Energieträger ergaben und etwa zwei Drittel des gesamten Verbrauchszuwachses auf kohlenstoffhaltige Energieträger entfällt.

In England, Schottland und Wales wurden im Jahr 2010 rund 320 Mrd kWh (Vorjahr: 315 Mrd kWh) Strom verbraucht. Der Gasverbrauch nahm (ohne den Einsatz in Kraftwerken) von 597 Mrd kWh im Jahr 2009 auf 647 Mrd kWh zu. Der Anstieg ist im Wesentlichen auf die niedrigen Temperaturen, insbesondere im ersten und vierten Quartal 2010, zurückzuführen. Die anhaltenden Energiesparmaßnahmen wirkten sich teilweise kompensierend aus.

In den nordeuropäischen Ländern wurden mit 394 Mrd kWh im Jahr 2010 rund 19 Mrd kWh mehr Strom verbraucht als im Vorjahr. Gründe waren die sehr kühle Witterung im ersten und vierten Quartal 2010 (+12 Mrd kWh), die leicht zunehmende Nachfrage in Schweden und Finnland und ein erheblicher Bedarf der energieintensiven Industrie in Norwegen im dritten Quartal. Der Netto-Stromimport aus den umliegenden Ländern stieg um 10,1 Mrd kWh auf rund 18,7 Mrd kWh. Der Netto-Stromimport aus Deutschland lag bei 5,1 Mrd kWh.

In Russland wurden mit 1.025 Mrd kWh 4,4 Prozent mehr Strom erzeugt als im Vorjahr. Die Zunahme resultierte aus der wirtschaftlichen Erholung.

Der Stromverbrauch in Italien nahm 2010 im Vergleich zum Vorjahr um 1,8 Prozent (bereinigt um Temperaturdifferenzen und die Zahl der Arbeitstage um 1,7 Prozent) auf 326,2 Mrd kWh zu. Dadurch stiegen die Erzeugungsmengen um 1,9 Prozent auf 286,5 Mrd kWh. Der Gasverbrauch erhöhte sich um 6,6 Prozent auf 876,2 Mrd kWh. Die Nachfrage legte hauptsächlich im Industrie- und Haushaltskundengeschäft zu.

Der Stromverbrauch auf dem spanischen Festland lag im Jahr 2010 im Wesentlichen aufgrund der gestiegenen industriellen Nachfrage mit 260 Mrd kWh um 3,2 Prozent (bereinigt um Temperaturdifferenzen und die Zahl der Arbeitstage um 2,9 Prozent) über dem Vorjahreswert.

## Energiepreisentwicklung

Im Jahr 2010 wurden die Strom- und Gasmärkte in Europa und Russland von vier wesentlichen Faktoren beeinflusst:

- den internationalen Rohstoffpreisen, insbesondere für Öl, Kohle und CO<sub>2</sub>-Zertifikate,
- der allgemeinen wirtschaftlichen Entwicklung,
- den Wetterbedingungen und
- der verfügbaren Wasserkraft in Skandinavien.

Nach dem ersten Quartal mit niedrigeren Brennstoff- und Strompreisen – mit Ausnahme von Brent-Rohöl – erholten sich die Preise während des zweiten Quartals. Bis November gaben die Forward-Strompreise in Deutschland, Großbritannien und Italien wieder etwas nach, während die Preise für andere Forwardprodukte im nordischen Strommarkt sowie Kohle und Gas stagnierten. Zum Jahresende stiegen die Strompreise in allen Märkten an. Der Brent-Rohölpreis verzeichnete nach einem Zwischenhoch im Mai einen Preisanstieg in der zweiten Jahreshälfte.

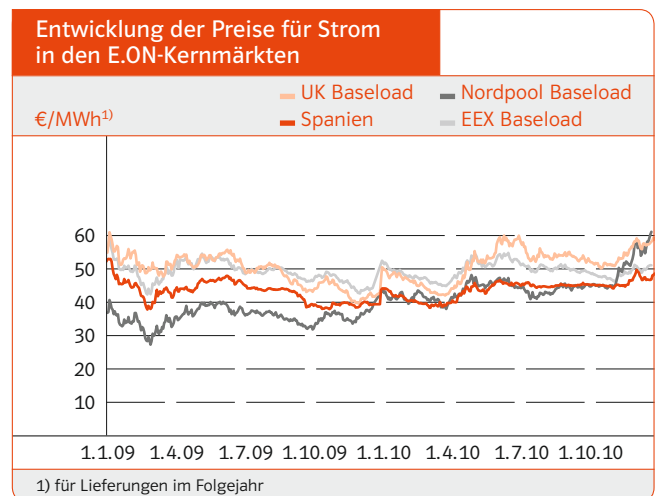

Der Handelspreis von Brent-Rohöl für Lieferungen im nächsten Monat bewegte sich in einer Bandbreite zwischen 70 und 90 US-\$ pro Barrel. Diese Schwankungen waren geprägt einerseits durch positive Erwartungen bezüglich der anziehenden wirtschaftlichen Erholung, durch eine steigende Nachfrage in Asien und durch eine Belebung der Finanz- und Rohstoffmärkte sowie andererseits durch Bedenken hinsichtlich der Staatsverschuldung in der Eurozone und der sich schwach entwickelnden US-Wirtschaft. Anfang Dezember überstiegen die Preise, bedingt durch ein außergewöhnlich starkes Wachstum der globalen Ölnachfrage im dritten Quartal und einen frühen Wintereinbruch, die 90-US-\$-Marke.

Auf dem europäischen Kohlemarkt (API#2) führte Anfang 2010 extrem kaltes Wetter in China und Europa zu Kohlepreisen von rund 100 US-\$ pro Tonne. Im Frühjahr gaben die Preise infolge gut gefüllter Lager und fallender Gaspreise in Europa auf rund 85 US-\$ nach. Daraus resultierten neuartige globale Arbitragegeschäfte (zum Beispiel Kohlelieferungen von Kolumbien nach China). Im zweiten Quartal erholten sich – gleichzeitig mit den Gaspreisen – die Preise für Kohle, die zwischen Mai und November in einer Preisspanne zwischen 95 und 105 US-\$ gehandelt wurde. Ab September stiegen die Preise kontinuierlich und lagen am Jahresende bei rund 120 US-\$. Dieser starke Preisanstieg beruhte auf einer Angebotsverknappung durch Überflutungen in Kolumbien, Südafrika und Australien und gleichzeitig einen frühen und kalten Winter in der nördlichen Hemisphäre. Der Seefrachtmarkt blieb im Laufe des Jahres aufgrund eines Überangebotes an Schiffen überwiegend unter Preisdruck.

Der europäische Gasmarkt setzte, wenn auch mit Schwankungen, im Gesamtjahrestrend die Preiserholung des Vorjahres fort. Im ersten Quartal gaben die Preise durch ein globales Überangebot und eine rezessionsbedingt niedrigere Nachfrage nach. Im zweiten Quartal stiegen die Preise wieder kontinuierlich. Gründe waren im Wesentlichen eine stärkere Gasnachfrage der Stromerzeuger und der Industrie, niedrige Speicherstände nach einem längeren, kalten Winter und erhebliche Lieferengpässe in Norwegen. Zudem blieben allgemein erwartete Lieferungen verflüssigten Erdgases (LNG) wegen Wartungsarbeiten an bestehenden und der Verzögerung beim Bau neuer Verflüssigungsanlagen in Katar aus. Darüber hinaus zog die Nachfrage aus Asien deutlich an. Wegen der unerwartet hohen Gaspreise während des Sommers wurden die Speicher unterdurchschnittlich befüllt. Gestiegene LNG-Importe nach dem Ende der Wartungsarbeiten in Katar

führten im dritten Quartal zu niedrigeren Spotpreisen. Sowohl die Spot- als auch die Forwardpreise erholten sich im vierten Quartal wieder, besonders gestützt durch den einsetzenden kalten Winter und die starke Inanspruchnahme von Speichern. Der US-Gasmarkt steht seit Jahresanfang unter kontinuierlichem Preisdruck und entwickelte sich zunehmend unabhängig vom europäischen Gasmarkt.

Der Handel mit CO<sub>2</sub>-Zertifikaten im europaweiten Handelssystem EU-ETS (EU Allowances (EUA)) verlief im ersten Quartal in einem schmalen Preiskorridor zwischen 13 und 14 € je Tonne für EUA-Lieferungen im Dezember des nächsten Jahres. Nach der Veröffentlichung der EU-Emissionswerte für 2009 überstiegen die Preise bei hohem Handelsvolumen zeitweise 16 €, stabilisierten sich anschließend seit Mitte des Jahres bis Dezember um ein neues Preisband zwischen 15 und 16 €, mit Ausnahme der Urlaubsphase während der Sommermonate. Politische Diskussionen bestimmten das Marktgeschehen. Die EU-Kommission veröffentlichte eine Analyse zur möglichen Verschärfung der europäischen Minderungsziele. Im November folgte ein Kommissionsvorschlag über eine Beschränkung von bescheinigten CO<sub>2</sub>-Gutschriften (CER-Zertifikaten) aus bestimmten Projekten mit klimaschädlichen Gasen ab 2013. Eher unbeeinflusst durch das Verhandlungsergebnis in Cancún gaben die Preise infolge eines verbesserten Angebots an CER-Zertifikaten und zunehmender Verkaufsaktivitäten zum Jahresende nach und lagen am Jahresende bei gut 14 €.

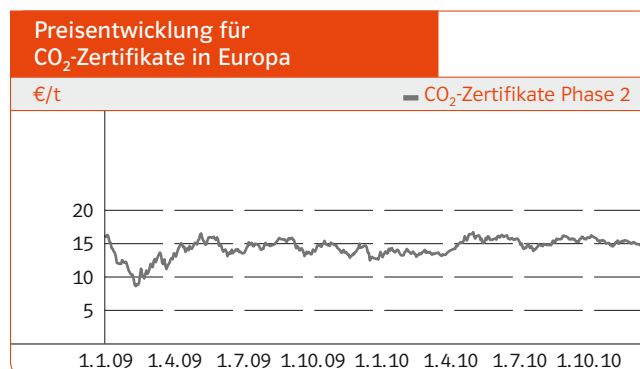

Der deutsche Strommarkt ist geprägt durch die Entwicklung der Wirtschaft und der Brennstoffpreise. Forward-Strompreise für Baseload-Lieferungen im Jahr 2011 fielen während des ersten Quartals auf 45 € pro MWh und erholten sich im zweiten Quartal auf bis zu 55 €. Durch die Inbetriebnahme neuer thermischer und erneuerbarer Kraftwerkskapazitäten sowie die Aussicht auf die Laufzeitverlängerung der Atomkraftwerke gaben die Preise auf rund 51 € nach. Ein hoher Anteil an Solarstrom mit Kapazitäten von rund 15,5 GW im Oktober reduzierte im Spotmarkt den Preisunterschied zwischen Peak- und Off-peak-Preisen. Die Preise in Großbritannien zeigten einen ähnlichen Verlauf, auch wenn der Preisanstieg stärker und der anschließende Preisrückgang bis November durch relativ stabile Gaspreise schwächer ausfielen. Zum Jahresende folgten die Strompreise dem Aufwärtstrend der Gaspreise und notierten bei knapp 60 €. Der nordische Strommarkt wurde beeinflusst durch Probleme bei der Stromerzeugung in Kernkraftwerken in Schweden, die niedrigsten Wasserstände in den Reservoirs seit 1996 sowie einen Verbrauchsanstieg gegenüber dem Vorjahr. Die Preise für Lieferungen im nächsten Jahr lagen zu Jahresanfang bei rund 42 € und nach einem extremen Anstieg seit November am Jahresende bei rund 61 €. Gleichzeitig erreichte der Spotmarkt im Dezember mit durchschnittlich knapp 82 € einen Höchstwert. Der Preisanstieg beruhte auf einem sich weiter verschlechternden Defizit der Wasserbilanz und extrem niedrigen Temperaturen.

Die Forward-Strompreise in Spanien und Italien entwickelten sich im ersten Halbjahr ähnlich wie in den nordwesteuropäischen Märkten. In Spanien bewegten sich die Preise für eine Lieferung im nächsten Jahr nach einer Erholung im zweiten Quartal bis November auf einem relativ konstanten Niveau von rund 45 €, um im Dezember zeitgleich mit der Veröffentlichung neuer regulierter Stromtarife für 2011 auf 50 € zu steigen. Die Preise in Italien folgten ab Mitte des Jahres bis November dem Abwärtstrend im deutschen Markt, erholten sich mit steigenden Brennstoffpreisen bis zum Jahresende aber wieder auf rund 72 €.

Im Jahr 2010 lag der Stromverbrauch in Russland 4,4 Prozent über dem des Vorjahres. Der durchschnittliche Strompreis im liberalisierten Kurzfristhandel stieg wegen angehobener Brennstoffpreise, extrem hoher Temperaturen in der europäischen Preiszone in den Sommermonaten und Produktionseinschränkungen in den Kraftwerken auf 834 Rubel pro MWh in der europäischen Preiszone (ca. 21 €) und 486 Rubel (ca. 12 €) in der sibirischen Preiszone. Zum 1. Januar 2011 wurde die Öffnung des Großhandelsmarktes für Elektrizität abgeschlossen und die erste Auktion im Kapazitätsmarkt durchgeführt.

Entwicklung der Preise für Öl und Gas in den E.ON-Kernmärkten

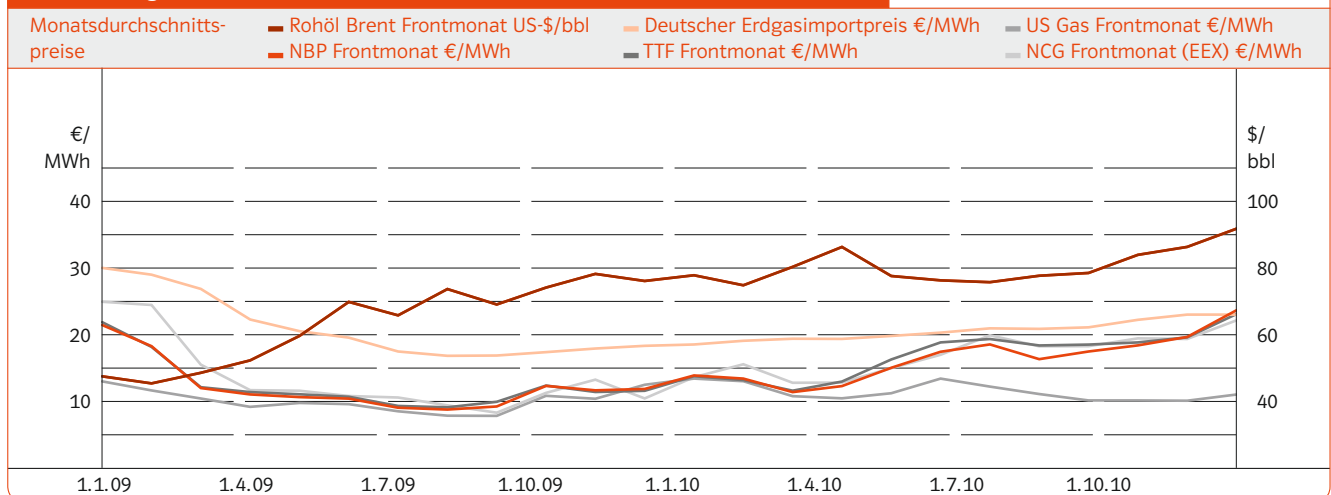



## Zurechenbare Kraftwerksleistung

Die zurechenbare Kraftwerksleistung im E.ON-Konzern nahm mit 68.475 MW im Vergleich zum Jahresende 2009 (65.829 MW) um 4 Prozent zu.

Bei der Market Unit Central Europe stieg die zurechenbare Kraftwerksleistung um 4 Prozent auf 29.626 MW (Vorjahr: 28.407 MW). Dieser Zuwachs begründet sich vor allem durch die Inbetriebnahmen der Kraftwerke Emile Huchet 7 und 8, Irsching 5 sowie Plattling.

Bei UK blieb die zurechenbare Leistung mit 10.330 MW gegenüber dem Vorjahr unverändert.

Die zurechenbare Kraftwerksleistung von Nordic lag nahezu unverändert bei 6.829 MW (Vorjahr: 6.842 MW).

Im Segment Neue Märkte haben wir eine zurechenbare Kraftwerksleistung von 21.690 MW (Vorjahr: 20.250 MW). Auf Climate & Renewables entfallen 3.600 MW (2.957 MW), auf Russia 8.646 MW (8.264 MW), auf Italy 6.091 MW (5.676 MW) und auf Spain 3.353 MW wie im Vorjahr.

Bei Climate & Renewables stieg die zurechenbare Leistung um rund 22 Prozent oder 643 MW, im Wesentlichen durch neue Windparks auf dem Festland in den USA und neue Windparks auf offener See in Europa.

Die zurechenbare Leistung von Russia erhöhte sich im Wesentlichen durch die Inbetriebnahme eines neuen Gaskraftwerksblocks am Standort Shaturskaya um 382 MW.

In der Market Unit Italy nahm die zurechenbare Kraftwerksleistung vor allem durch die Inbetriebnahme eines neuen 407-MW-Gaskraftwerksblocks in Scandale um 415 MW zu.

| Zurechenbare Kraftwerksleistung |                |               |              |               |               |
|---------------------------------|----------------|---------------|--------------|---------------|---------------|
| 31. Dezember 2010 in MW         | Central Europe | UK            | Nordic       | Neue Märkte   | E.ON-Konzern  |
| Kernenergie                     | 8.555          | -             | -            | -             | 8.555         |
| Braunkohle                      | 852            | -             | -            | -             | 852           |
| Steinkohle                      | 6.016          | -             | -            | -             | 6.016         |
| Erdgas                          | 3.786          | -             | -            | -             | 3.786         |
| Öl                              | 1.095          | -             | -            | -             | 1.095         |
| Wasserkraft                     | 2.490          | -             | -            | -             | 2.490         |
| Windkraft                       | 10             | -             | -            | 197           | 207           |
| Sonstige                        | 344            | -             | -            | -             | 344           |
| <b>Inland</b>                   | <b>23.148</b>  | <b>-</b>      | <b>-</b>     | <b>197</b>    | <b>23.345</b> |
| Kernenergie                     | -              | -             | 2.774        | -             | 2.774         |
| Braunkohle                      | 62             | -             | -            | 1.418         | 1.480         |
| Steinkohle                      | 3.988          | 4.910         | -            | 2.032         | 10.930        |
| Erdgas                          | 2.363          | 3.506         | 624          | 13.098        | 19.591        |
| Öl                              | -              | 1.300         | 1.440        | 305           | 3.045         |
| Wasserkraft                     | 31             | -             | 1.765        | 1.262         | 3.058         |
| Windkraft                       | 2              | -             | -            | 3.320         | 3.322         |
| Sonstige                        | 32             | 614           | 226          | 58            | 930           |
| <b>Ausland</b>                  | <b>6.478</b>   | <b>10.330</b> | <b>6.829</b> | <b>21.493</b> | <b>45.130</b> |
| <b>Summe</b>                    | <b>29.626</b>  | <b>10.330</b> | <b>6.829</b> | <b>21.690</b> | <b>68.475</b> |

### Strombeschaffung

Im Jahr 2010 lag die in eigenen Kraftwerken erzeugte Strommenge mit 275,5 Mrd kWh um 2 Prozent über dem Vorjahresniveau von 270,0 Mrd kWh. Der Strombezug stieg demgegenüber um 44 Prozent auf 776,1 Mrd kWh. Etwa 10 Prozent der Eigenerzeugung haben wir aus Erneuerbaren Energien gewonnen.

Die erhöhte Eigenerzeugung bei Central Europe ist auf die Inbetriebnahme von gasbefeuerten Erzeugungseinheiten – vor allem an den Standorten Irsching und Plattling in Deutschland sowie Emile Huchet in Frankreich – zurückzuführen. Durch diese Erzeugungseinheiten wurde die Verringerung von Stromerzeugungskapazitäten im Rahmen der Verpflichtungszusage von E.ON an die Europäische Kommission mehr als ausgeglichen.

| Strombeschaffung                    |                |       |      |      |        |      |                |       |             |       |                |        |              |       |
|-------------------------------------|----------------|-------|------|------|--------|------|----------------|-------|-------------|-------|----------------|--------|--------------|-------|
|                                     | Central Europe |       | UK   |      | Nordic |      | Energy Trading |       | Neue Märkte |       | Konsolidierung |        | E.ON-Konzern |       |
| in Mrd kWh                          | 2010           | 2009  | 2010 | 2009 | 2010   | 2009 | 2010           | 2009  | 2010        | 2009  | 2010           | 2009   | 2010         | 2009  |
| Eigenerzeugung                      | 133,8          | 130,4 | 28,8 | 32,8 | 24,3   | 19,0 | -              | -     | 88,6        | 87,8  | -              | -      | 275,5        | 270,0 |
| Bezug                               | 274,3          | 260,6 | 52,5 | 48,8 | 29,7   | 27,3 | 804,9          | 578,8 | 28,0        | 40,3  | -413,3         | -417,4 | 776,1        | 538,4 |
| <i>Gemeinschafts-</i>               |                |       |      |      |        |      |                |       |             |       |                |        |              |       |
| <i>kraftwerke</i>                   | 3,2            | 5,4   | 0,8  | 1,6  | 9,0    | 8,0  | -              | -     | -           | 0,5   | -              | -      | 13,0         | 15,5  |
| <i>Energy Trading/</i>              |                |       |      |      |        |      |                |       |             |       |                |        |              |       |
| <i>Fremde</i>                       | 271,1          | 255,2 | 51,7 | 47,2 | 20,7   | 19,3 | 804,9          | 578,8 | 28,0        | 39,8  | -413,3         | -417,4 | 763,1        | 522,9 |
| Summe                               | 408,1          | 391,0 | 81,3 | 81,6 | 54,0   | 46,3 | 804,9          | 578,8 | 116,6       | 128,1 | -413,3         | -417,4 | 1.051,6      | 808,4 |
| Eigenverbrauch,<br>Netzverlust etc. | -11,9          | -13,0 | -3,5 | -3,6 | -1,8   | -1,8 | -              | -     | -4,0        | -4,5  | -              | -      | -21,2        | -22,9 |
| Stromabsatz                         | 396,2          | 378,0 | 77,8 | 78,0 | 52,2   | 44,5 | 804,9          | 578,8 | 112,6       | 123,6 | -413,3         | -417,4 | 1.030,4      | 785,5 |

Die Market Unit UK erzeugte mit 28,8 Mrd kWh rund 12 Prozent weniger Strom in eigenen Kraftwerken als im Vorjahr (32,8 Mrd kWh). Der Rückgang ist im Wesentlichen auf geringere Margen zurückzuführen, die den Betrieb einiger Kraftwerke weniger wirtschaftlich machten.

Nordic erzeugte 5,3 Mrd kWh mehr Strom in eigenen Kraftwerken. Die Eigenerzeugung aus Kernkraft stieg um 3,6 Mrd kWh und die der neuen KWK-Anlage in Malmö um 1,5 Mrd kWh.

Im Segment Neue Märkte wurden 88,6 Mrd kWh (Vorjahr: 87,8 Mrd kWh) Strom in eigenen Kraftwerken erzeugt. Hiervon entfielen

- 7,9 Mrd kWh (5,2 Mrd kWh) auf Climate & Renewables,
- 55,8 Mrd kWh (53,9 Mrd kWh) auf Russia,
- 14,9 Mrd kWh (16,5 Mrd kWh) auf Italy und
- 10,0 Mrd kWh (12,2 Mrd kWh) auf Spain.

97 Prozent der Eigenerzeugung von Climate & Renewables stammten aus Windkraftanlagen, die verbleibenden Mengen aus Biomasse und kleinsten Wasserkraftwerken. Die Market Unit steigerte die Eigenerzeugung um 52 Prozent gegenüber dem Vorjahr.

| Anteil der Primärenergieträger an der Eigenerzeugung |                |            |             |            |             |            |             |            |              |            |
|------------------------------------------------------|----------------|------------|-------------|------------|-------------|------------|-------------|------------|--------------|------------|
|                                                      | Central Europe |            | UK          |            | Nordic      |            | Neue Märkte |            | E.ON-Konzern |            |
| in Mrd kWh                                           | 2010           | %          | 2010        | %          | 2010        | %          | 2010        | %          | 2010         | %          |
| Kernenergie                                          | 59,9           | 45         | -           | -          | 12,1        | 50         | -           | -          | 72,0         | 26         |
| Braunkohle                                           | 5,2            | 4          | -           | -          | -           | -          | 9,3         | 10         | 14,5         | 5          |
| Steinkohle                                           | 40,2           | 30         | 13,7        | 48         | -           | -          | 7,9         | 9          | 61,8         | 23         |
| Erdgas/Öl                                            | 17,6           | 13         | 15,1        | 52         | 3,2         | 13         | 60,2        | 68         | 96,1         | 35         |
| Wasserkraft                                          | 5,6            | 4          | -           | -          | 8,0         | 33         | 3,3         | 4          | 16,9         | 6          |
| Windkraft                                            | -              | -          | -           | -          | -           | -          | 7,7         | 9          | 7,7          | 3          |
| Sonstige                                             | 5,3            | 4          | -           | -          | 1,0         | 4          | 0,2         | -          | 6,5          | 2          |
| <b>Summe</b>                                         | <b>133,8</b>   | <b>100</b> | <b>28,8</b> | <b>100</b> | <b>24,3</b> | <b>100</b> | <b>88,6</b> | <b>100</b> | <b>275,5</b> | <b>100</b> |



Russia hat im Berichtszeitraum mit ihren eigenen Kraftwerken rund 91 Prozent des Gesamtbedarfs von 61,1 Mrd kWh gedeckt. 5,3 Mrd kWh Strom wurden von Fremden bezogen.

Italy erzeugte mit 14,9 Mrd kWh 49 Prozent des Strombedarfs von 30,5 Mrd kWh in eigenen Kraftwerken. Der Vorjahreswert beinhaltet 1,8 Mrd kWh aus Kraftwerken, die Ende Juni 2009 an A2A abgegeben wurden. 15,6 Mrd kWh wurden im Markt und 1,6 Mrd kWh vor allem für Vertriebsaktivitäten bei E.ON Energy Trading S.p.A. eingekauft.

Die Market Unit Spain deckte 63 Prozent des gesamten Strombedarfs von 15,8 Mrd kWh mit Mengen aus eigenen Kraftwerken. Der im Vergleich geringere Anteil der Eigenerzeugung (Vorjahr: 70 Prozent) war auf die Optimierung unserer Kraftwerke in einem Marktumfeld mit geringeren Margen zurückzuführen. Der Rückgang der Eigenerzeugung um 2,2 Mrd kWh wurde teilweise durch um 0,6 Mrd kWh höhere Bezugsmengen kompensiert.

## Gasbeschaffung

Im Geschäftsjahr 2010 bezog E.ON Ruhrgas rund 684,5 Mrd kWh Erdgas von in- und ausländischen Produzenten. Dies sind rund 10 Prozent mehr als im Vorjahr. Wichtigste Bezugsquellen waren Russland mit einem Anteil von 27 Prozent, Norwegen mit 25 Prozent, Deutschland mit 23 Prozent und die Niederlande mit 17 Prozent.

Die Gasproduktion von Pan-European Gas aus den Nordseefeldern nahm in 2010 mit 1.513 Mio m<sup>3</sup> gegenüber dem Vorjahr um knapp 7 Prozent zu. Gründe waren im Wesentlichen die sehr gute Förderleistung des Feldes Rita und der Produktionsstart im Feld Babbage in der britischen Nordsee. Die Produktion von Öl und Kondensaten lag mit 5,2 Mio Barrel vor allem durch den natürlichen Produktionsrückgang leicht unter dem Vorjahresniveau. Zusätzlich zu den in der Nordsee produzierten Mengen stehen Pan-European Gas 6 Mrd m<sup>3</sup> Erdgas aus dem Ende 2009 akquirierten und at equity einbezogenen Feld Yushno Russkoje in Sibirien zu. Damit nahmen die Gasförderungsmengen aus eigener Produktion um rund 75 Prozent gegenüber dem Vorjahr zu.

| Upstream-Produktion                          |             |             |           |
|----------------------------------------------|-------------|-------------|-----------|
|                                              | 2010        | 2009        | +/- %     |
| Liquids/Öl (in Mio Barrel)                   | 5,2         | 5,5         | -4        |
| Gas (in Mio Standard-m <sup>3</sup> )        | 1.513       | 1.420       | +7        |
| <b>Summe</b><br>(in Mio Barrel Öläquivalent) | <b>14,8</b> | <b>14,4</b> | <b>+2</b> |

## Handelsvolumen

Im Beschaffungs- und Absatzprozess für den E.ON-Konzern handelte Energy Trading konzernextern die folgenden finanziellen und physischen Mengen:

| Handelsvolumen                       |       |       |
|--------------------------------------|-------|-------|
|                                      | 2010  | 2009  |
| Strom (Mrd kWh)                      | 1.472 | 1.240 |
| Gas (Mrd kWh)                        | 2.005 | 1.498 |
| CO <sub>2</sub> -Zertifikate (Mio t) | 650   | 501   |
| Öl (Mio t)                           | 72    | 69    |
| Kohle (Mio t)                        | 289   | 223   |

## Stromabsatz

Im Berichtszeitraum 2010 stieg der konsolidierte Stromabsatz im E.ON-Konzern von 785,5 Mrd kWh im Vorjahr um 31 Prozent auf 1.030,4 Mrd kWh. An Endkunden und Weiterverteiler wurden mit 332,3 Mrd kWh 6 Prozent mehr Strom geliefert.

Der Anstieg des Stromabsatzes von Central Europe resultierte im Wesentlichen aus erhaltenen Bezugsrechten ausländischer Kraftwerke, die im Rahmen der im Jahr 2008 abgegebenen Verpflichtungszusage von E.ON an die Europäische Kommission getauscht wurden. Darüber hinaus wirkte sich die einsetzende konjunkturelle Erholung positiv auf die industrielle Nachfrage aus.

Bei UK stieg der Stromabsatz an Privat- und kleinere Geschäftskunden um 6 Prozent. Der temperaturbedingte Absatzanstieg wurde durch die gesunkene Kundenzahl und Energiesparmaßnahmen teilweise kompensiert. Der Absatz von Strom an Industrie- und Geschäftskunden erhöhte sich, in erster Linie aufgrund der Erhöhung der Kundenzahl in diesem Bereich, um 18 Prozent.

Nordic konnte den Stromabsatz insbesondere wegen der im Vergleich zum Vorjahr kühleren Witterung und höherer Erzeugungsmengen um 7,7 Mrd kWh steigern. Der Absatz an Endkunden, Vertriebspartner (einschließlich Minderheitsanteile) und Energy Trading erhöhte sich. Die Stromlieferungen an Industrie- und Geschäftskunden lagen auf dem Vorjahresniveau.

Im Segment Neue Märkte wurden 112,6 Mrd kWh (Vorjahr: 123,6 Mrd kWh) Strom abgesetzt. Hiervon entfielen

- 9,2 Mrd kWh (6,4 Mrd kWh) auf Climate & Renewables,
- 59,3 Mrd kWh (57,3 Mrd kWh) auf Russia,
- 29,8 Mrd kWh (44,2 Mrd kWh) auf Italy und
- 14,3 Mrd kWh (15,7 Mrd kWh) auf Spain.

Die Market Unit Climate & Renewables verkaufte Strom ausschließlich in unregulierten Märkten und steigerte den Stromabsatz im Wesentlichen durch den Ausbau der Erzeugungskapazitäten um 44 Prozent.

| Stromabsatz                          |                |              |             |             |             |             |                |              |              |              |                |               |                |              |
|--------------------------------------|----------------|--------------|-------------|-------------|-------------|-------------|----------------|--------------|--------------|--------------|----------------|---------------|----------------|--------------|
|                                      | Central Europe |              | UK          |             | Nordic      |             | Energy Trading |              | Neue Märkte  |              | Konsolidierung |               | E.ON-Konzern   |              |
| in Mrd kWh                           | 2010           | 2009         | 2010        | 2009        | 2010        | 2009        | 2010           | 2009         | 2010         | 2009         | 2010           | 2009          | 2010           | 2009         |
| Privat- und kleinere Geschäftskunden | 45,8           | 46,3         | 28,9        | 27,3        | 8,7         | 7,1         | -              | -            | 7,3          | 6,9          | -              | -             | 90,7           | 87,6         |
| Industrie- und Geschäftskunden       | 81,2           | 75,3         | 19,4        | 16,4        | 10,8        | 10,8        | -              | -            | 10,7         | 10,1         | -              | -             | 122,1          | 112,6        |
| Vertriebspartner                     | 111,2          | 105,9        | -           | -           | 5,5         | 4,2         | -              | -            | 2,8          | 3,5          | -              | -             | 119,5          | 113,6        |
| <b>Kundengruppen</b>                 | <b>238,2</b>   | <b>227,5</b> | <b>48,3</b> | <b>43,7</b> | <b>25,0</b> | <b>22,1</b> | <b>-</b>       | <b>-</b>     | <b>20,8</b>  | <b>20,5</b>  | <b>-</b>       | <b>-</b>      | <b>332,3</b>   | <b>313,8</b> |
| Großhandelsmarkt/<br>Energy Trading  | 158,0          | 150,5        | 29,5        | 34,3        | 27,2        | 22,4        | 804,9          | 578,8        | 91,8         | 103,1        | -413,3         | -417,4        | 698,1          | 471,7        |
| <b>Summe</b>                         | <b>396,2</b>   | <b>378,0</b> | <b>77,8</b> | <b>78,0</b> | <b>52,2</b> | <b>44,5</b> | <b>804,9</b>   | <b>578,8</b> | <b>112,6</b> | <b>123,6</b> | <b>-413,3</b>  | <b>-417,4</b> | <b>1.030,4</b> | <b>785,5</b> |

Russia setzte mit 59,3 Mrd kWh gut 3 Prozent mehr Strom am Großhandelsmarkt ab. Gründe hierfür waren vor allem die extremen Witterungsbedingungen im Jahr 2010 sowie gestiegene Erzeugungsmengen im Kraftwerk Surgutskaya aufgrund der Umterminierung von Wartungsarbeiten.

Der Stromabsatz von Italy ging vor allem durch die gesunkenen Absatzmengen an Energy Trading sowie die Abgabe von Kraftwerken an A2A zurück. Er verteilte sich auf Privatkunden (4,7 Mrd kWh), Industrie- und Geschäftskunden (6,4 Mrd kWh), Vertriebspartner (1,8 Mrd kWh), den Großhandelsmarkt (14,9 Mrd kWh) und E.ON Energy Trading S.p.A. (2,0 Mrd kWh).

Bei der Market Unit Spain nahm der Stromabsatz gegenüber dem Vorjahr im Wesentlichen am Großhandelsmarkt aufgrund der bereits genannten geringeren Margen um 1,4 Mrd kWh ab.

## Gasabsatz

Der konsolidierte Gasabsatz lag im Berichtszeitraum um 135,9 Mrd kWh über dem Vorjahresniveau. Grund war vor allem das deutlich höhere Handelsvolumen.

| Gasabsatz                                    |                |                |            |
|----------------------------------------------|----------------|----------------|------------|
| in Mrd kWh                                   | 2010           | 2009           | +/- %      |
| Ferngasgesellschaften/<br>Ortsgasunternehmen | 434,4          | 386,6          | +12        |
| Industrie                                    | 94,9           | 78,1           | +22        |
| Ausland                                      | 166,1          | 144,4          | +15        |
| <b>Absatz E.ON Ruhrgas AG</b>                | <b>695,4</b>   | <b>609,1</b>   | <b>+14</b> |
| Absatz übrige Beteiligungen                  | 135,5          | 151,7          | -11        |
| Pan-European Gas interner<br>Absatz          | -73,7          | -49,2          | -          |
| <b>Absatz Pan-European Gas</b>               | <b>757,2</b>   | <b>711,6</b>   | <b>+6</b>  |
| davon E.ON-interner Absatz                   | -233,8         | -187,9         | -          |
| Übrige Market Units                          | 819,0          | 682,8          | +20        |
| <b>E.ON-Konzern</b>                          | <b>1.342,4</b> | <b>1.206,5</b> | <b>+11</b> |

Die Zunahme des Gasabsatzes bei Central Europe beruhte im Wesentlichen auf der Erstkonsolidierung von Gesellschaften im Geschäftsfeld Zentraleuropa Ost zum 1. Januar 2010.

Die E.ON Ruhrgas AG setzte im Geschäftsjahr 2010 rund 86 Mrd kWh mehr Gas ab als im Vorjahr. Das Mengenwachstum hatte im Wesentlichen folgende Gründe: Im Segment der Ferngasgesellschaften und Ortsgasunternehmen sorgte insbesondere im ersten und im vierten Quartal die kalte Witterung für einen positiven Absatzeffekt. Ferner wirkte sich die einsetzende konjunkturelle Erholung begünstigend auf die Nachfrage der Industrie aus. Dieser Effekt zeigt sich sowohl bei der indirekt über die Weiterverteiler belieferten Industrie als auch im Segment der direkt von E.ON Ruhrgas belieferten Industrie. Der erhöhte Auslandsabsatz trug rund 22 Mrd kWh zur gesamten Absatzsteigerung der E.ON Ruhrgas AG bei. Im Geschäftsjahr 2010 konnten zusätzliche Mengen vor allem an Kunden in Luxemburg, Österreich und Schweden geliefert werden. Darüber hinaus wurde der Kurzfristhandel mit der Market Unit Energy Trading ausgeweitet. Der Rückgang des Absatzes der übrigen Beteiligungen resultierte in erster Linie aus einem wettbewerbsbedingt geringeren Gasabsatz von E.ON Földgáz Trade in Ungarn sowie aus dem Wegfall des Absatzes der im vierten Quartal 2009 verkauften Thüga-Gruppe.

Der Gasabsatz an Privat- und kleinere Geschäftskunden nahm bei UK um 13 Prozent zu. Ursache hierfür war vor allem die sehr kühle Witterung im ersten und vierten Quartal 2010. Zusätzlich wirkte sich die gestiegene Kundenzahl positiv aus, was durch anhaltende Energiesparmaßnahmen teilweise kompensiert wurde. Der Gasabsatz an Industrie- und Geschäftskunden ging durch Änderungen innerhalb des Kundenbestands deutlich zurück. Die kühlere Witterung wirkte sich leicht positiv aus.

Der Gasabsatz von Nordic ging im Wesentlichen durch den Verlust von zwei größeren Kunden und gesunkener Großhandelsmengen um 0,3 Mrd kWh zurück. Teilweise kompensierend wirkte sich der Absatzzuwachs aufgrund der vergleichsweise niedrigen Temperaturen aus. Der Wärmeabsatz stieg vor allem witterungsbedingt um 11 Prozent auf 8,8 Mrd kWh (Vorjahr: 7,9 Mrd kWh).

Im Segment Neue Märkte setzte Italy 17,8 Mrd kWh (Vorjahr: 25,7 Mrd kWh) Gas ab. Der Absatz verteilte sich auf Privatkunden (11,0 Mrd kWh), Industrie- und Geschäftskunden (3,5 Mrd kWh) und den Großhandelsmarkt (3,3 Mrd kWh). Der Absatzzrückgang ist vor allem auf die gesunkene Kundenzahl im Industriekundensegment und den gegenüber dem Vorjahr fehlenden Absatz an Vertriebspartner zurückzuführen.

| Gasabsatz (ohne Pan-European Gas)    |                |       |      |      |        |      |                |       |             |      |                |        |       |       |
|--------------------------------------|----------------|-------|------|------|--------|------|----------------|-------|-------------|------|----------------|--------|-------|-------|
|                                      | Central Europe |       | UK   |      | Nordic |      | Energy Trading |       | Neue Märkte |      | Konsolidierung |        | Summe |       |
| in Mrd kWh                           | 2010           | 2009  | 2010 | 2009 | 2010   | 2009 | 2010           | 2009  | 2010        | 2009 | 2010           | 2009   | 2010  | 2009  |
| Privat- und kleinere Geschäftskunden | 64,5           | 58,1  | 59,9 | 52,8 | 0,3    | 0,2  | -              | -     | 11,0        | 10,3 | -              | -      | 135,7 | 121,4 |
| Industrie- und Geschäftskunden       | 68,2           | 60,1  | 14,5 | 18,5 | 3,8    | 4,0  | -              | -     | 3,5         | 7,4  | -              | -      | 90,0  | 90,0  |
| Vertriebspartner                     | 20,6           | 22,9  | -    | -    | -      | -    | -              | -     | -           | 2,4  | -              | -      | 20,6  | 25,3  |
| Kundengruppen                        | 153,3          | 141,1 | 74,4 | 71,3 | 4,1    | 4,2  | -              | -     | 14,5        | 20,1 | -              | -      | 246,3 | 236,7 |
| Großhandelsmarkt/<br>Energy Trading  | 5,2            | 5,0   | -    | -    | 0,2    | 0,4  | 836,6          | 753,8 | 3,3         | 5,6  | -272,6         | -318,7 | 572,7 | 446,1 |
| Summe                                | 158,5          | 146,1 | 74,4 | 71,3 | 4,3    | 4,6  | 836,6          | 753,8 | 17,8        | 25,7 | -272,6         | -318,7 | 819,0 | 682,8 |

## Geschäftsentwicklung

Im abgelaufenen Geschäftsjahr 2010 haben wir, wie viele andere Energieunternehmen, mit den Folgen der Wirtschaftskrise kämpfen müssen. Während sich die Konjunktur in Deutschland und vielen Ländern Nordeuropas dank der vorausschauenden und besonnenen Politik in der Krise schnell und ohne nachhaltige Verwerfungen erholt hat, kommt die Wirtschaft in vielen anderen europäischen Ländern nur schleppend in Fahrt. Der Energieverbrauch und die Energieproduktion Europas liegen noch spürbar unter dem Vorkrisenniveau. Noch sind die notwendigen Anpassungsprozesse in der Energiewirtschaft an das veränderte Wettbewerbsumfeld nicht abgeschlossen. E.ON hat aber schon früh auf die Herausforderungen reagiert. Deswegen haben wir auch in diesem schwierigen Umfeld unsere Ergebnisziele erreicht. Das Adjusted EBIT des Geschäftsjahres 2010 lag mit 9,5 Mrd € leicht über dem hohen Vorjahresniveau, der bereinigte Konzernüberschuss lag mit 4,9 Mrd € leicht unter dem hohen Vorjahresergebnis.

Die folgenden wesentlichen Transaktionen haben wir im Jahr 2010 durchgeführt.

### Unternehmenserwerbe, Veräußerungen und nicht fortgeführte Aktivitäten im Jahr 2010

Ausführliche Beschreibungen der Transaktionen befinden sich in Textziffer 4 des Anhangs.

#### Nicht fortgeführte Aktivitäten

Ende April 2010 hat E.ON mit der Pennsylvania Power & Light Corporation Verträge über den Verkauf des in der Market Unit US-Midwest gebündelten Strom- und Gasgeschäfts in den USA geschlossen. Die Transaktion konnte am 1. November 2010 vollzogen werden.

#### Abgangsgruppen und zur Veräußerung gehaltene Vermögenswerte

Mitte Dezember 2010 wurden die vertraglichen Vereinbarungen zum Verkauf der Anteile an der E.ON Rete in Italien, über die die Market Unit Italy das italienische Gasverteilnetz geführt hat, geschlossen. Der Vollzug der Transaktion wird für die erste Jahreshälfte 2011 erwartet.

Infolge des Abgangs der Thüga-Gruppe im Jahr 2009 wurden die in der Market Unit Pan-European Gas bilanzierten Beteiligungen an den Stadtwerken Duisburg und Karlsruhe (Vollzug Anfang 2011) als zur Veräußerung gehaltenen Vermögenswerte ausgewiesen. Für die Beteiligung an den Stadtwerken Duisburg wird eine Veräußerung im ersten Halbjahr 2011 angestrebt.

Nach der Abgabe der Thüga-Gruppe konnte im Laufe des dritten Quartals ein konkreter Verhandlungsstand über die Abgabe der in der Market Unit Pan-European Gas bilanzierten 40-prozentigen Beteiligung an der HEAG Südthüringische Energie AG erreicht werden. Der Vollzug der Transaktion soll im ersten Halbjahr 2011 erfolgen.

Im Zuge von Portfoliobereinigungen wurde eine Veräußerung der 50-prozentigen Beteiligung an der Europgas a.s. in der Tschechischen Republik angestrebt. Der Vollzug erfolgte Ende Juli 2010.

Ebenfalls im Rahmen von Portfoliobereinigungen beschloss E.ON die Abgabe von rund 21 Prozent der Anteile an der BKW FMB Energie in der Schweiz. Im Juli 2010 konnte der erste Teil der Transaktion mit der Abgabe von rund 14 Prozent der Anteile vollzogen werden.

Im vierten Quartal 2010 wurde im Rahmen von Portfoliobereinigungen ein Großteil der gehaltenen Beteiligung an Gazprom an die russische Vnesheconombank (VEB) veräußert.

Im Dezember 2008 wurde die Verpflichtungszusage von E.ON an die Europäische Kommission, diverse Stromkapazitäten sowie das Höchstspannungsnetz in Deutschland abzugeben, wirksam. Die Verpflichtung gegenüber der EU-Kommission konnte im April 2010 vollständig erfüllt werden.

Aus Desinvestitionen wurden im Jahr 2010 insgesamt zahlungswirksame Effekte in Höhe von 9.601 Mio € (Vorjahr: 5.384 Mio €) realisiert.

## Umsatzentwicklung

Im Jahr 2010 lag der Umsatz im Wesentlichen durch einen höheren Außenumsatz der Market Unit Energy Trading infolge verstärkter Optimierungsaktivitäten über dem Vorjahresniveau. Darüber hinaus wirkten sich Währungsumrechnungseffekte und höhere Preise bei Nordic positiv aus.

| Umsatz           |               |               |            |
|------------------|---------------|---------------|------------|
| in Mio €         | 2010          | 2009          | +/- %      |
| Central Europe   | 42.651        | 41.419        | +3         |
| Pan-European Gas | 20.896        | 20.640        | +1         |
| UK               | 10.547        | 10.097        | +4         |
| Nordic           | 4.486         | 3.348         | +34        |
| Energy Trading   | 47.948        | 41.251        | +16        |
| Neue Märkte      | 6.871         | 7.749         | -11        |
| Corporate Center | -40.536       | -44.530       | -          |
| <b>Summe</b>     | <b>92.863</b> | <b>79.974</b> | <b>+16</b> |

## Central Europe

Im Vergleich zum Vorjahr nahm der Umsatz der Market Unit Central Europe um 1,2 Mrd € zu.

| Umsatz                   |               |               |           |
|--------------------------|---------------|---------------|-----------|
| in Mio €                 | 2010          | 2009          | +/- %     |
| Zentraleuropa West       | 38.844        | 39.715        | -2        |
| Reguliert                | 11.185        | 12.288        | -9        |
| Unreguliert              | 27.659        | 27.427        | +1        |
| Zentraleuropa Ost        | 5.721         | 5.323         | +7        |
| Sonstiges/Konsolidierung | -1.914        | -3.619        | -         |
| <b>Central Europe</b>    | <b>42.651</b> | <b>41.419</b> | <b>+3</b> |

Im Geschäftsfeld Zentraleuropa West Reguliert lagen die Umsatzerlöse um 1,1 Mrd € unter dem Vorjahresniveau. Geringere Umsätze aufgrund der Abgabe des Höchstspannungsnetzes Ende Februar 2010 konnten durch im Wesentlichen regulierungsbedingt höhere Netzentgelte im Verteilnetz nicht ausgeglichen werden.

Im Geschäftsfeld Zentraleuropa West Unreguliert nahm der Umsatz um 0,2 Mrd € zu. Dieser Anstieg ist vor allem auf die zusätzliche Vermarktung von Strommengen aus erhaltenen Bezugsrechten ausländischer Kernkraftwerke und auf die Inbetriebnahme neuer Kraftwerke zurückzuführen. Gegenläufig wirkten sich gesenkte Gaspreise und die Abgabe von Stromerzeugungskapazitäten im Rahmen der Verpflichtungszusage gegenüber der Europäischen Kommission aus.

Die Umsatzerlöse des Geschäftsfelds Zentraleuropa Ost erhöhten sich um 0,4 Mrd €. Die positive Entwicklung ist im Wesentlichen auf die erstmalige Einbeziehung von Gasgesellschaften in diesem Segment zurückzuführen.

Im Geschäftsfeld Sonstiges/Konsolidierung waren im Wesentlichen infolge der Abgabe des Höchstspannungsnetzes Ende Februar 2010 weniger interne Umsätze zu eliminieren. Im Vergleich zum Vorjahr führte dies zu einem Anstieg der Umsätze um 1,7 Mrd €.

## Pan-European Gas

Der Umsatz der Market Unit Pan-European Gas stieg um 1 Prozent auf 20,9 Mrd € (Vorjahr: 20,6 Mrd €).

| Umsatz                   |               |               |           |
|--------------------------|---------------|---------------|-----------|
| in Mio €                 | 2010          | 2009          | +/- %     |
| Reguliertes Geschäft     | 4.598         | 4.647         | -1        |
| Unreguliertes Geschäft   | 18.691        | 17.659        | +6        |
| Sonstiges/Konsolidierung | -2.393        | -1.666        | -         |
| <b>Pan-European Gas</b>  | <b>20.896</b> | <b>20.640</b> | <b>+1</b> |

Im regulierten Geschäft ging der Umsatz um 49 Mio € beziehungsweise 1 Prozent zurück. Diese Entwicklung resultiert insbesondere aus einem rückläufigen Absatz von E.ON Földgáz Trade in Ungarn. Der Umsatz des Transportgeschäfts stieg, wobei der negative Einfluss des Ansatzes kostenbasierter Entgelte durch höhere Umsätze aus Regel-/Ausgleichsenergie überkompensiert wurde.

Im unregulierten Geschäft lag der Umsatz um 1 Mrd € oder 6 Prozent über dem Niveau des Vorjahres. Ein deutlicher Anstieg der Umsätze ist im Upstream-Geschäft zu verzeichnen. Dies ist insbesondere auf die erstmals ganzjährige Einbeziehung des Gasfeldes Yushno Russkoje in Sibirien sowie auf die Energiepreisentwicklung in England und Norwegen zurückzuführen. Im Gashandelsgeschäft stieg der Umsatz geringfügig, wobei der deutliche Anstieg des Gasabsatzes durch die Preisentwicklung nahezu vollständig kompensiert wurde.

Im Vorjahr wurden unter Sonstiges/Konsolidierung noch die Umsätze der Ende 2009 veräußerten Thüga ausgewiesen.

## UK

Der Umsatz der Market Unit UK stieg um 450 Mio €. In der Landeswährung erhöhte sich der Umsatz um 52 Mio £.

| Umsatz                   |               |               |           |
|--------------------------|---------------|---------------|-----------|
| in Mio €                 | 2010          | 2009          | +/- %     |
| Reguliertes Geschäft     | 792           | 717           | +10       |
| Unreguliertes Geschäft   | 9.909         | 9.526         | +4        |
| Sonstiges/Konsolidierung | -154          | -146          | -         |
| <b>UK</b>                | <b>10.547</b> | <b>10.097</b> | <b>+4</b> |

  

| in Mio £                 |              |              |           |
|--------------------------|--------------|--------------|-----------|
| Reguliertes Geschäft     | 680          | 639          | +6        |
| Unreguliertes Geschäft   | 8.500        | 8.488        | -         |
| Sonstiges/Konsolidierung | -132         | -131         | -         |
| <b>UK</b>                | <b>9.048</b> | <b>8.996</b> | <b>+1</b> |

Im regulierten Geschäft nahm der Umsatz wegen positiver Währungsumrechnungseffekte sowie gestiegener Tarife und Absatzmengen um 75 Mio € zu.

Im unregulierten Geschäft erhöhte sich der Umsatz um 383 Mio € im Wesentlichen aufgrund von positiven Währungsumrechnungseffekten.

### Nordic

Der Umsatz der Market Unit Nordic stieg im Vergleich zum Vorjahr um 1.138 Mio € beziehungsweise 34 Prozent. In lokaler Währung erhöhte sich der Umsatz um 20 Prozent.

| Umsatz                   |               |               |            |
|--------------------------|---------------|---------------|------------|
| in Mio €                 | 2010          | 2009          | +/- %      |
| Reguliertes Geschäft     | 944           | 728           | +30        |
| Unreguliertes Geschäft   | 3.530         | 2.616         | +35        |
| Sonstiges/Konsolidierung | 12            | 4             | -          |
| <b>Nordic</b>            | <b>4.486</b>  | <b>3.348</b>  | <b>+34</b> |
| in Mio SEK               |               |               |            |
| Reguliertes Geschäft     | 9.002         | 7.731         | +16        |
| Unreguliertes Geschäft   | 33.666        | 27.782        | +21        |
| Sonstiges/Konsolidierung | 118           | 43            | -          |
| <b>Nordic</b>            | <b>42.786</b> | <b>35.556</b> | <b>+20</b> |

Der Umsatz im regulierten Geschäft nahm um 216 Mio € auf 944 Mio € zu. Gründe hierfür waren vor allem witterungsbedingt größere Absatzmengen und höhere Tarife. Die Tarife in der Stromverteilung wurden zum 1. Januar angepasst, um die gestiegenen Kosten anderer Netzbetreiber (hauptsächlich von Svenska Kraftnät) sowie die hohen Investitionen in die Versorgungssicherheit zu decken. Darüber hinaus wirkten sich Währungsumrechnungseffekte positiv aus.

Im unregulierten Geschäft stieg der Umsatz um 914 Mio €, insbesondere wegen gestiegener Preise im Endkundengeschäft und höherer marktbasierter Transferpreise im Erzeugungsgeschäft sowie positiver Währungsumrechnungseffekte.

### Energy Trading

Der Umsatz der Market Unit Energy Trading lag mit 48 Mrd € aufgrund von höheren Marktpreisen insbesondere bei Mengen aus dem nichtfossilen Stromportfolio über dem Vorjahreswert. Die Umsatzerlöse des Eigenhandels werden saldiert mit den zugehörigen Materialaufwendungen in der Gewinn- und Verlustrechnung ausgewiesen. Diese Methode führte zu dem Ausweis eines negativen Umsatzes.

| Umsatz                |               |               |            |
|-----------------------|---------------|---------------|------------|
| in Mio €              | 2010          | 2009          | +/- %      |
| Eigenhandel           | -36           | 190           | -          |
| Optimierung           | 47.984        | 41.061        | +17        |
| <b>Energy Trading</b> | <b>47.948</b> | <b>41.251</b> | <b>+16</b> |

### Neue Märkte

Der Umsatz im Segment Neue Märkte ging um 11 Prozent auf 6,9 Mrd € zurück.

| Umsatz               |              |              |            |
|----------------------|--------------|--------------|------------|
| in Mio €             | 2010         | 2009         | +/- %      |
| Climate & Renewables | 666          | 466          | +43        |
| Russia               | 1.252        | 973          | +29        |
| in Mio RUB           | 50.344       | 42.931       | +17        |
| Italy                | 3.564        | 4.964        | -28        |
| Spain                | 1.389        | 1.346        | +3         |
| <b>Neue Märkte</b>   | <b>6.871</b> | <b>7.749</b> | <b>-11</b> |

Climate & Renewables konnte den Umsatz um 43 Prozent steigern. Wesentliche Gründe waren der erhebliche Zuwachs der Erzeugungskapazitäten – hauptsächlich in den USA – und die im Berichtszeitraum vollständig in Betrieb befindlichen Anlagen in Italien.

Gründe für das Umsatzwachstum um 29 Prozent bei der Market Unit Russia waren die höheren Strompreise auf dem liberalisierten Markt. Diese Entwicklung wurde durch die einsetzende wirtschaftliche Erholung und die extremen Witterungsbedingungen im Jahr 2010 unterstützt. Zusätzlich wirkten sich die höheren Erzeugungsmengen im Kraftwerk Surgutskaya und die Aufwertung des Rubels positiv aus.

Der Umsatzrückgang bei der Market Unit Italy resultierte vor allem aus geringeren Absatzmengen an Energy Trading. Darüber hinaus enthielt der Vorjahreswert einen Beitrag von 137 Mio € aus Erzeugungskapazitäten, die Ende Juni 2009 an A2A verkauft wurden.

Bei der Market Unit Spain erhöhte sich der Umsatz im Vergleich zum Vorjahr wegen der erstmaligen Einbeziehung von Aktivitäten in Argentinien.

### Corporate Center

Der im Segment Corporate Center ausgewiesene Wert spiegelt insbesondere die konzerninterne Eliminierung der Umsätze der europäischen Market Units mit Energy Trading wider.

### Entwicklung weiterer wesentlicher Positionen der Gewinn- und Verlustrechnung

Die anderen aktivierten Eigenleistungen erhöhten sich um 11 Prozent beziehungsweise 56 Mio € auf 588 Mio € (Vorjahr: 532 Mio €). Dies resultierte im Wesentlichen aus Engineering-Leistungen im Netzbereich im Zusammenhang mit Neubauprojekten.



Die sonstigen betrieblichen Erträge sind um 36 Prozent auf 15.961 Mio € (Vorjahr: 24.942 Mio €) gesunken. Gründe waren insbesondere geringere Erträge aus Währungskursdifferenzen von 5.177 Mio € (10.849 Mio €) und aus derivativen Finanzinstrumenten in Höhe von 6.046 Mio € (7.458 Mio €). Wie im Vorjahr ergaben sich wesentliche Auswirkungen bei den derivativen Finanzinstrumenten aus den Commodity-Derivaten. Diese betreffen im Wesentlichen die Kohle-, Öl- und Gaspositionen. Kompensierende Effekte fielen dagegen in den sonstigen betrieblichen Aufwendungen an. Die Erträge aus dem Verkauf von Wertpapieren, Sachanlagen und Beteiligungen – vor allem durch die Veräußerung unserer Anteile an Gazprom sowie die Abgabe von Stromkapazitäten und des Höchstspannungsnetzes (transpower) im Rahmen unserer Verpflichtungszusage an die EU-Kommission – betrugen 3.478 Mio € (5.307 Mio €). In den übrigen sonstigen betrieblichen Erträgen sind vor allem Auflösungen von Wertberichtigungen und Rückstellungen sowie vereinnahmte Schadensersatzleistungen enthalten.

Beim Materialaufwand verzeichneten wir einen Anstieg um 12.552 Mio € auf 73.575 Mio € (Vorjahr: 61.023 Mio €). Ursache hierfür war in erster Linie das im Jahr 2010 im Vergleich zum Vorjahr gestiegene Geschäftsvolumen.

Der Personalaufwand erhöhte sich 2010 um 123 Mio € auf 5.281 Mio €.

Die Abschreibungen lagen mit 6.457 Mio € deutlich über dem Vorjahreswert von 3.806 Mio €. Gründe hierfür waren vor allem außerplanmäßige Wertberichtigungen auf Goodwill von rund 1,1 Mrd € und auf das sonstige Anlagevermögen in Höhe von 1,5 Mrd € bei den von Enel/Acciona und Endesa erworbenen Aktivitäten in Italien, Spanien und Frankreich (siehe Erläuterungen in Textziffer 14 des Anhangs).

Die sonstigen betrieblichen Aufwendungen verringerten sich um 40 Prozent beziehungsweise 8.887 Mio € auf 13.597 Mio € (Vorjahr: 22.484 Mio €). Dies ist im Wesentlichen auf geringere Aufwendungen aus Währungskursdifferenzen von 4.936 Mio € (11.095 Mio €) und geringere Aufwendungen aus derivativen Finanzinstrumenten von 3.559 Mio € (5.701 Mio €) zurückzuführen.

Das Ergebnis aus at equity bewerteten Unternehmen lag bei 663 Mio €, verglichen mit 941 Mio € im Vorjahr. Dies ist vor allem auf das entfallene Ergebnis der Thüga-Beteiligungen zurückzuführen, die im vierten Quartal 2009 verkauft wurden.

## Entwicklung des Adjusted EBIT

Zur internen Steuerung und als Indikator für die nachhaltige Ertragskraft eines Geschäfts diente bei E.ON bis Ende 2010 das Adjusted EBIT, ein um außergewöhnliche Effekte bereinigtes Ergebnis vor Zinsen und Steuern. Zu den Bereinigungen zählen Buchgewinne und -verluste aus Desinvestitionen sowie weitere nicht operative Aufwendungen und Erträge mit einmaligem beziehungsweise seltenem Charakter (siehe auch Erläuterungen in Textziffer 23 des Anhangs).

Im Berichtszeitraum 2010 konnten wir das Adjusted EBIT trotz der Ergebnisbelastungen aus der Abgabe von Stromkapazitäten und dem Verkauf des Höchstspannungsnetzes sowie der Thüga-Beteiligungen um 163 Mio € gegenüber dem Vorjahreswert steigern. Die wesentlichen Gründe waren

- höhere Tarife und Absatzmengen im regulierten Geschäft, niedrige Temperaturen und operative Verbesserungen bei UK,
- gestiegene Absatzmengen und höhere Tarife bei Nordic,
- höhere Margen bei Energy Trading und
- gesteigerte Erzeugungskapazitäten bei Climate & Renewables sowie höhere Margen bei Russia.

| Adjusted EBIT    |              |              |           |
|------------------|--------------|--------------|-----------|
| in Mio €         | 2010         | 2009         | +/- %     |
| Central Europe   | 4.743        | 4.832        | -2        |
| Pan-European Gas | 1.471        | 1.754        | -16       |
| UK               | 890          | 649          | +37       |
| Nordic           | 580          | 549          | +6        |
| Energy Trading   | 1.196        | 949          | +26       |
| Neue Märkte      | 908          | 862          | +5        |
| Corporate Center | -334         | -304         | -         |
| <b>Summe</b>     | <b>9.454</b> | <b>9.291</b> | <b>+2</b> |

## Central Europe

Das Adjusted EBIT der Market Unit Central Europe lag um 89 Mio € unter dem Vorjahreswert.

| Central Europe           |                 |              |               |              |
|--------------------------|-----------------|--------------|---------------|--------------|
| in Mio €                 | Adjusted EBITDA |              | Adjusted EBIT |              |
|                          | 2010            | 2009         | 2010          | 2009         |
| Zentraleuropa West       | 5.499           | 5.786        | 4.239         | 4.583        |
| Reguliert                | 1.923           | 1.688        | 1.289         | 1.061        |
| Unreguliert              | 3.576           | 4.098        | 2.950         | 3.522        |
| Zentraleuropa Ost        | 795             | 641          | 499           | 359          |
| Sonstiges/Konsolidierung | 168             | 39           | 5             | -110         |
| <b>Summe</b>             | <b>6.462</b>    | <b>6.466</b> | <b>4.743</b>  | <b>4.832</b> |

Im Geschäftsfeld Zentraleuropa West Reguliert belastete die Abgabe des Höchstspannungsnetzes Ende Februar 2010 das Ergebnis. Insbesondere durch regulierungsbedingt höhere Entgelte sowohl im Strom- als auch Gasnetz wurde dies mehr als kompensiert. Das Adjusted EBIT stieg um 228 Mio € über den Vorjahreswert.

Im Geschäftsfeld Zentraleuropa West Unreguliert nahm das Ergebnis um 572 Mio € gegenüber dem Vorjahr ab. Entfallene Ergebnisbeiträge, unter anderem aus dem Abgang von Stromerzeugungskapazitäten, und eine rückläufige Marge im Gasgeschäft konnten durch Effizienzsteigerungen und die Inbetriebnahme neuer Kraftwerke nicht ausgeglichen werden.

Das Adjusted EBIT des Geschäftsfelds Zentraleuropa Ost lag um 140 Mio € über dem Vorjahresniveau. Der Anstieg resultierte aus einem positiven energiewirtschaftlichen Ergebnis der Erstkonsolidierung von Gasgesellschaften, niedrigeren konjunkturbedingten Belastungen sowie positiven Währungsumrechnungseffekten.

Der Anstieg des Adjusted EBIT des Geschäftsfelds Sonstiges/Konsolidierung auf 5 Mio € war unter anderem auf Ergebnisbelastungen im Vorjahr durch die Wirtschafts- und Finanzkrise zurückzuführen.

### Pan-European Gas

Das Adjusted EBIT von Pan-European Gas lag mit 1.471 Mio € um 283 Mio € beziehungsweise 16 Prozent unter dem Vorjahreswert.

| Pan-European Gas         |                 |              |               |              |
|--------------------------|-----------------|--------------|---------------|--------------|
| in Mio €                 | Adjusted EBITDA |              | Adjusted EBIT |              |
|                          | 2010            | 2009         | 2010          | 2009         |
| Reguliertes Geschäft     | 690             | 918          | 538           | 761          |
| Unreguliertes Geschäft   | 1.375           | 1.085        | 967           | 751          |
| Sonstiges/Konsolidierung | -34             | 272          | -34           | 242          |
| <b>Summe</b>             | <b>2.031</b>    | <b>2.275</b> | <b>1.471</b>  | <b>1.754</b> |

Im regulierten Geschäft sank das Adjusted EBIT um 223 Mio € beziehungsweise 29 Prozent auf 538 Mio €. Auf das Ergebnis des Transportgeschäftes wirkten sich die seit dem 1. Oktober 2009 angesetzten kostenbasierten Entgelte sowie geringere Beteiligungserträge aus assoziierten Unternehmen belastend aus. Der Ergebnisbeitrag von E.ON Ruhrgas International verzeichnete im Vorjahresvergleich einen Rückgang. Ein verringertes Beteiligungsergebnis aus assoziierten Unternehmen wurde durch höhere Buchgewinne aus dem Verkauf von Beteiligungen zum Teil ausgeglichen. Das Ergebnis von E.ON Földgáz Trade ist durch die 2010 eingeführte und für die Jahre von 2010 bis 2012 gültige umsatzabhängige Krisensteuer belastet.

Das Adjusted EBIT im unregulierten Geschäft legte um 216 Mio € zu. Dazu trug insbesondere das Explorationsgeschäft bei. Das Upstream-Geschäft profitierte von der erstmals ganzjährigen Einbeziehung des Gasfeldes Yushno Russkoje sowie von gestiegenen Ölpreisen. Im Gashandelsgeschäft der E.ON Ruhrgas AG wurde der positive Effekt aus dem Anstieg des Gasabsatzes durch den insbesondere seit Beginn des neuen Gaswirtschaftsjahres am 1. Oktober 2010 verstärkten wettbewerbsbedingten Druck auf die Verkaufspreise zu großen Teilen kompensiert. Die Dividende aus der Gazprom-Beteiligung verzeichnete gegenüber dem Vorjahr einen Anstieg.

Unter Sonstiges/Konsolidierung wurde im Vorjahr noch der Ergebnisbeitrag der Ende 2009 verkauften Thüga ausgewiesen.

### UK

Das Adjusted EBIT von UK nahm um 241 Mio € zu.

| UK                       |                 |              |               |            |
|--------------------------|-----------------|--------------|---------------|------------|
| in Mio €                 | Adjusted EBITDA |              | Adjusted EBIT |            |
|                          | 2010            | 2009         | 2010          | 2009       |
| Reguliertes Geschäft     | 583             | 525          | 456           | 407        |
| Unreguliertes Geschäft   | 843             | 613          | 527           | 308        |
| Sonstiges/Konsolidierung | -84             | -58          | -93           | -66        |
| <b>Summe</b>             | <b>1.342</b>    | <b>1.080</b> | <b>890</b>    | <b>649</b> |
| in Mio £                 |                 |              |               |            |
| Reguliertes Geschäft     | 500             | 468          | 391           | 363        |
| Unreguliertes Geschäft   | 723             | 546          | 452           | 275        |
| Sonstiges/Konsolidierung | -73             | -52          | -80           | -59        |
| <b>Summe</b>             | <b>1.150</b>    | <b>962</b>   | <b>763</b>    | <b>579</b> |

Das Ergebnis im regulierten Geschäft stieg wegen höherer Tarife und Absatzmengen um 49 Mio €.

Für den Ergebnisanstieg von 219 Mio € im unregulierten Geschäft waren insbesondere operative Verbesserungen im Endkundengeschäft und eine Kombination von gesteigerter Nachfrage im Jahresverlauf durch die niedrigen Temperaturen und verminderter Kosten im Großhandel während des ersten Halbjahres verantwortlich.



## Nordic

Bei der Market Unit Nordic stieg das Adjusted EBIT in der Berichtswährung um 31 Mio € beziehungsweise 6 Prozent. In lokaler Währung verminderte sich das Adjusted EBIT gegenüber dem Vorjahr um 5 Prozent.

| Nordic                   |                 |              |               |              |
|--------------------------|-----------------|--------------|---------------|--------------|
| in Mio €                 | Adjusted EBITDA |              | Adjusted EBIT |              |
|                          | 2010            | 2009         | 2010          | 2009         |
| Reguliertes Geschäft     | 448             | 342          | 313           | 226          |
| Unreguliertes Geschäft   | 530             | 514          | 299           | 348          |
| Sonstiges/Konsolidierung | -3              | 9            | -32           | -25          |
| <b>Summe</b>             | <b>975</b>      | <b>865</b>   | <b>580</b>    | <b>549</b>   |
| in Mio SEK               |                 |              |               |              |
| Reguliertes Geschäft     | 4.276           | 3.633        | 2.988         | 2.401        |
| Unreguliertes Geschäft   | 5.054           | 5.458        | 2.856         | 3.698        |
| Sonstiges/Konsolidierung | -28             | 94           | -317          | -269         |
| <b>Summe</b>             | <b>9.302</b>    | <b>9.185</b> | <b>5.527</b>  | <b>5.830</b> |

Im regulierten Geschäft nahm das Adjusted EBIT um 87 Mio € beziehungsweise 38 Prozent zu. Ursachen hierfür waren vor allem witterungsbedingt gestiegene Absatzmengen und höhere Tarife. Zusätzlich wirkten sich Währungsumrechnungseffekte positiv aus.

Das Adjusted EBIT im unregulierten Geschäft verringerte sich im Vergleich zum Vorjahreszeitraum um 49 Mio € beziehungsweise 14 Prozent, insbesondere aufgrund von geänderten Schätzungen für zukünftige Rückbaukosten im Nuklearbereich. Teilweise wurde dies durch höhere marktbasierte Transferpreise und Absatzmengen kompensiert. Währungsumrechnungseffekte waren ein weiterer positiver Faktor.

## Energy Trading

Das Adjusted EBIT der Market Unit Energy Trading lag bei insgesamt 1.196 Mio €. Auf den Optimierungsbereich, der im Wesentlichen der Risikobegrenzung und der Optimierung von Erzeugung und Produktion im E.ON-Konzern dient, entfielen aufgrund höherer Margen im Strom- und Gasbereich 1.303 Mio €. Der Eigenhandel wurde von einem schwierigen Marktumfeld negativ beeinflusst und wies einen Verlust von 107 Mio € aus.

| Energy Trading |                 |            |               |            |
|----------------|-----------------|------------|---------------|------------|
| in Mio €       | Adjusted EBITDA |            | Adjusted EBIT |            |
|                | 2010            | 2009       | 2010          | 2009       |
| Eigenhandel    | -105            | 127        | -107          | 124        |
| Optimierung    | 1.310           | 834        | 1.303         | 825        |
| <b>Summe</b>   | <b>1.205</b>    | <b>961</b> | <b>1.196</b>  | <b>949</b> |

## Neue Märkte

Das Adjusted EBIT im Segment Neue Märkte nahm um 5 Prozent auf 908 Mio € zu.

| Neue Märkte          |                 |              |               |            |
|----------------------|-----------------|--------------|---------------|------------|
| in Mio €             | Adjusted EBITDA |              | Adjusted EBIT |            |
|                      | 2010            | 2009         | 2010          | 2009       |
| Climate & Renewables | 452             | 293          | 240           | 146        |
| Russia               | 377             | 203          | 250           | 73         |
| in Mio RUB           | 15.180          | 8.959        | 10.062        | 3.209      |
| Italy                | 526             | 821          | 297           | 540        |
| Spain                | 231             | 227          | 121           | 103        |
| <b>Summe</b>         | <b>1.586</b>    | <b>1.544</b> | <b>908</b>    | <b>862</b> |

Die Market Unit Climate & Renewables konnte das Adjusted EBIT im Wesentlichen durch den erheblichen Anstieg der Erzeugungskapazitäten deutlich erhöhen.

Bei Russia stieg das Adjusted EBIT im Berichtszeitraum vornehmlich durch eine verbesserte Strommarge um 177 Mio €.

Das Adjusted EBIT von Italy betrug 297 Mio €. Ursache für den Rückgang ist vor allem ein Einmaleffekt aus Vertragsneuverhandlungen im Strombereich, der im Vorjahr enthalten war, und die Abgabe von Kraftwerkskapazitäten an A2A Ende Juni 2009.

Das Adjusted EBIT der Market Unit Spain von insgesamt 121 Mio € entfällt mit 47 Mio € auf den Erzeugungsbereich und mit 77 Mio € auf das Verteilnetzgeschäft. Im Verteilnetzgeschäft waren verbesserte Margen die wesentlichen Einflussfaktoren. Zusätzlich wirkte sich die Einbeziehung von Aktivitäten in Argentinien (vormals Beteiligung von US-Midwest) mit 7 Mio € positiv aus.

## Konzernüberschuss

Der Konzernüberschuss der Gesellschafter der E.ON AG lag mit 5,9 Mrd € um 30 Prozent und das entsprechende Ergebnis je Aktie mit 3,07 € um 31 Prozent unter den Vorjahreswerten von 8,4 Mrd € beziehungsweise 4,42 €.

| Konzernüberschuss                                             |              |               |            |
|---------------------------------------------------------------|--------------|---------------|------------|
| in Mio €                                                      | 2010         | 2009          | +/- %      |
| <b>Adjusted EBIT</b>                                          | <b>9.454</b> | <b>9.291</b>  | <b>+2</b>  |
| Wirtschaftliches Zinsergebnis                                 | -2.257       | -2.201        | -          |
| Netto-Buchgewinne                                             | 2.873        | 4.815         | -          |
| Restrukturierung/<br>Kostenmanagement                         | -621         | -443          | -          |
| Sonstiges nicht operatives<br>Ergebnis                        | -386         | 38            | -          |
| <b>Ergebnis aus fortgeführten<br/>Aktivitäten vor Steuern</b> | <b>9.063</b> | <b>11.500</b> | <b>-21</b> |
| Steuern vom Einkommen und<br>vom Ertrag                       | -1.946       | -2.858        | -          |
| <b>Ergebnis aus fortgeführten<br/>Aktivitäten</b>             | <b>7.117</b> | <b>8.642</b>  | <b>-18</b> |
| Ergebnis aus nicht<br>fortgeführten Aktivitäten               | -836         | 27            | -          |
| <b>Konzernüberschuss</b>                                      | <b>6.281</b> | <b>8.669</b>  | <b>-28</b> |
| <i>Anteil der Gesellschafter<br/>der E.ON AG</i>              | <i>5.853</i> | <i>8.420</i>  | <i>-30</i> |
| <i>Minderheitsanteile</i>                                     | <i>428</i>   | <i>249</i>    | <i>+72</i> |

Das wirtschaftliche Zinsergebnis lag mit -2.257 Mio € auf dem Vorjahresniveau von -2.201 Mio €. Hierbei standen dem höheren Zinsaufwand unter anderem aus der einmaligen Berücksichtigung des Zinsnachteils aus den Vorausleistungen in den Fonds zur Förderung der Erneuerbaren Energien geringere Zinsen aufgrund der im Jahresverlauf niedrigeren Netto-Ver-schuldung gegenüber.

| Wirtschaftliches Zinsergebnis                    |               |               |
|--------------------------------------------------|---------------|---------------|
| in Mio €                                         | 2010          | 2009          |
| Zinsergebnis laut Gewinn- und<br>Verlustrechnung | -2.303        | -2.273        |
| Neutraler Zinsaufwand (+)/Zinsertrag (-)         | 46            | 72            |
| <b>Summe</b>                                     | <b>-2.257</b> | <b>-2.201</b> |

Im Geschäftsjahr 2010 lagen die Netto-Buchgewinne um 1,9 Mrd € unter dem Vorjahresniveau. Dies ist auf die Abgabe von Stromkapazitäten im Rahmen der Verpflichtungszusage gegenüber der EU-Kommission zurückzuführen. Die hieraus resultierenden Buchgewinne waren im Jahr 2009 erheblich höher als im Berichtszeitraum. Im Jahr 2010 wirkten sich die Buchgewinne aus der Veräußerung von Gazprom-Anteilen und der Abgabe des Höchstspannungsnetzes (transpower) positiv aus.

Die Aufwendungen für Restrukturierung/Kostenmanagement sind 2010 im Vergleich zum Vorjahr um rund 178 Mio € gestiegen. Die Aufwendungen entfielen hierbei wie im Vorjahr im Wesentlichen auf Strukturmaßnahmen bei deutschen Regionalversorgern und auf Kosten in Verbindung mit der fortgeführten Umsetzung der im Jahr 2008 beschlossenen Konzernorganisationsstruktur. Im Jahr 2010 fielen darüber hinaus höhere Kosten im Rahmen unseres Projekts PerformtoWin als im Vorjahr an.

Das sonstige nicht operative Ergebnis war vor allem durch die außerplanmäßigen Wertberichtigungen auf Goodwill von rund 1,1 Mrd € und auf das sonstige Anlagevermögen in Höhe von 1,5 Mrd € bei den von Enel/Acciona und Endesa erworbenen Aktivitäten in Italien, Spanien und Frankreich geprägt (siehe Erläuterungen in Textziffer 14 des Anhangs). Dagegen resultierte aus der stichtagsbezogenen Marktbewertung von Derivaten, mit denen das operative Geschäft gegen Preisschwankungen abgesichert wird, zum 31. Dezember 2010 ein positiver Effekt von rund 2,7 Mrd € gegenüber etwa 1,1 Mrd € zum Vorjahresstichtag. Darüber hinaus war das Vorjahresergebnis vor allem durch das Bußgeld wegen angeblicher Marktab-sprachen zwischen E.ON Ruhrgas und GdF Suez in Höhe von 553 Mio € belastet.

Im Jahr 2010 wird für die fortgeführten Aktivitäten ein Steuer-aufwand von 1,9 Mrd € ausgewiesen. Die effektive Steuerquote beträgt 22 Prozent gegenüber 25 Prozent im Vorjahr und ist im Wesentlichen durch höhere steuerfreie Ergebnisse, insbe-sondere aus der Veräußerung von Gazprom-Anteilen zum Jahresende, gesunken.

Das Ergebnis aus nicht fortgeführten Aktivitäten enthält nach dem erfolgreichen Abschluss der Verkaufsverhandlungen im Wesentlichen das Ergebnis der Market Unit US-Midwest, das gemäß IFRS in der Gewinn- und Verlustrechnung gesondert ausgewiesen wird (siehe Erläuterungen in Textziffer 4 des Anhangs). Der hohe negative Wert resultiert aus einer Wert-berichtigung auf den in der Market Unit US-Midwest bilan-zierten Goodwill in Höhe von etwa 0,9 Mrd €, die im Rahmen der Veräußerung des US-Strom- und -Gasgeschäfts vorge-nommen werden musste.

## Bereinigter Konzernüberschuss

Der Konzernüberschuss wird neben der operativen Geschäftsentwicklung durch Sondereinflüsse wie zum Beispiel die Marktbewertung von Derivaten geprägt. Mit dem bereinigten Konzernüberschuss weisen wir eine Ergebnisgröße nach Zinsen, Steuern vom Einkommen und vom Ertrag sowie Minderheitsanteilen aus, die um außergewöhnliche Effekte bereinigt ist. Zu den Bereinigungen zählen neben den Effekten aus der Marktbewertung von Derivaten auch Buchgewinne und -verluste aus Desinvestitionen, Restrukturierungsaufwendungen und sonstige nicht operative Aufwendungen und Erträge mit einmaligem beziehungsweise seltenem Charakter (nach Steuern und Minderheitsanteilen). Darüber hinaus werden die Ergebnisse aus nicht fortgeführten Aktivitäten und aus der Erstanwendung neuer IFRS-Vorschriften nach Steuern und Minderheitsanteilen sowie außergewöhnliche Steuereffekte beim bereinigten Konzernüberschuss nicht berücksichtigt.

| Bereinigter Konzernüberschuss                            |              |              |           |
|----------------------------------------------------------|--------------|--------------|-----------|
| in Mio €                                                 | 2010         | 2009         | +/- %     |
| Konzernüberschuss der Gesellschafter der E.ON AG         | 5.853        | 8.420        | -30       |
| Netto-Buchgewinne                                        | -2.873       | -4.815       | -         |
| Aufwendungen für Restrukturierung/Kostenmanagement       | 621          | 443          | -         |
| Sonstiges nicht operatives Ergebnis                      | 386          | -38          | -         |
| Steuern und Minderheitsanteile auf das neutrale Ergebnis | 171          | 1.130        | -         |
| Außergewöhnliche Steuereffekte                           | -112         | -20          | -         |
| Ergebnis aus nicht fortgeführten Aktivitäten             | 836          | -23          | -         |
| <b>Summe</b>                                             | <b>4.882</b> | <b>5.097</b> | <b>-4</b> |

## Wertmanagement

### Konzernweit einheitliches Wertmanagement

Im Mittelpunkt unserer Unternehmenspolitik steht die nachhaltige Steigerung des Unternehmenswertes. Zur wertorientierten Steuerung des Gesamtunternehmens sowie der einzelnen Geschäftsfelder setzen wir ein konzernweit einheitliches Planungs- und Controllingsystem ein, das die effiziente Verwendung unserer Finanzmittel gewährleistet.

Neben unserer bisher wichtigsten internen Steuerungskennzahl Adjusted EBIT sind ROCE und Value Added weitere Kriterien zur Beurteilung der Wertentwicklung des operativen Geschäfts von E.ON. Für die periodische Erfolgskontrolle unserer Geschäftsfelder wird der ROCE den geschäftsspezifischen Kapitalkosten gegenübergestellt. Bei der Wertanalyse kommt neben dem ROCE als relativem Performance-Maß gleichzeitig der Indikator Value Added für den absoluten Wertbeitrag eines Geschäftsfelds zum Einsatz.

### Kapitalkosten

Wir ermitteln die Kapitalkosten für das eingesetzte Vermögen als gewichteten Durchschnitt der Eigen- und Fremdkapitalkosten. Die Renditeansprüche der Eigen- und Fremdkapitalgeber fließen gewichtet mit den jeweiligen Marktwerten in die Mittelwertbildung ein. Die Eigenkapitalkosten entsprechen der Rendite, die Anleger bei einer Investition in die E.ON-Aktie erwarten. Als Kosten des Fremdkapitals setzen wir die langfristigen Finanzierungskonditionen des E.ON-Konzerns nach Steuern an. Die Prämissen der Kapitalkostenfestlegung werden jährlich überprüft. Eine Anpassung der Kapitalkosten erfolgt bei signifikanten Änderungen.

Aufgrund deutlicher Veränderungen von einzelnen Prämissen haben wir unsere Kapitalkosten im abgelaufenen Geschäftsjahr angepasst.

Die nachfolgende Tabelle zeigt die Herleitung der Kapitalkosten vor und nach Steuern. Die im Vergleich zum Vorjahr gesunkenen Kapitalkosten sind im Wesentlichen auf das niedrigere Marktzinsniveau zurückzuführen. Die angesetzte Kapitalstruktur entspricht für den E.ON-Konzern einem Verhältnis von 65 zu 35 Prozent. Dabei handelt es sich um eine Zielkapitalstruktur, die aus dem Marktwert des Eigenkapitals sowie der mit dem angestrebten Zielrating korrespondierenden Verschuldung abgeleitet wird.

Insgesamt führte die Neufestlegung der Parameter zu einer Veränderung der Kapitalkosten vor Steuern des E.ON-Konzerns für das Jahr 2010 von 9,1 Prozent auf 8,3 Prozent. Die Kapitalkosten nach Steuern sanken von 6,7 Prozent auf 6,1 Prozent. Die Renditeanforderungen für die einzelnen Segmente wurden ebenfalls angepasst. Sie variierten für das abgelaufene Geschäftsjahr zwischen 8,2 Prozent und 10,6 Prozent vor Steuern.

| Kapitalkosten                          |              |              |
|----------------------------------------|--------------|--------------|
|                                        | 2010         | 2009         |
| Risikoloser Zinssatz                   | 4,0 %        | 4,5 %        |
| Marktpremie <sup>1)</sup>              | 4,0 %        | 4,0 %        |
| Beta-Faktor <sup>2)</sup>              | 0,84         | 0,88         |
| <b>Eigenkapitalkosten nach Steuern</b> | <b>7,4 %</b> | <b>8,0 %</b> |
| Steuersatz                             | 27 %         | 27 %         |
| Eigenkapitalkosten vor Steuern         | 10,1 %       | 11,0 %       |
| Fremdkapitalkosten vor Steuern         | 5,0 %        | 5,7 %        |
| Tax Shield (27 %) <sup>3)</sup>        | 1,3 %        | 1,5 %        |
| <b>Fremdkapitalkosten nach Steuern</b> | <b>3,7 %</b> | <b>4,2 %</b> |
| Anteil Eigenkapital                    | 65,0 %       | 65,0 %       |
| Anteil Fremdkapital                    | 35,0 %       | 35,0 %       |
| <b>Kapitalkosten nach Steuern</b>      | <b>6,1 %</b> | <b>6,7 %</b> |
| <b>Kapitalkosten vor Steuern</b>       | <b>8,3 %</b> | <b>9,1 %</b> |

1) Die Marktpremie entspricht der langfristigen Überrendite des Aktienmarkts im Vergleich zu Bundesanleihen.

2) Der Beta-Faktor dient als Maß für das relative Risiko einer einzelnen Aktie im Vergleich zum gesamten Aktienmarkt: Ein Beta größer eins signalisiert ein höheres Risiko, ein Beta kleiner eins dagegen ein niedrigeres Risiko als der Gesamtmarkt.

3) Mit dem sogenannten Tax Shield wird die steuerliche Abzugsfähigkeit der Fremdkapitalzinsen in den Kapitalkosten berücksichtigt.

### Wertanalyse mit ROCE und Value Added

Der ROCE ist eine Kapitalrendite vor Steuern. Er misst den nachhaltig aus dem operativen Geschäft erzielten Erfolg auf das eingesetzte Kapital. Er wird als Quotient aus dem Adjusted EBIT und dem investierten Kapital (Capital Employed) berechnet.

Das Capital Employed spiegelt das im Konzern gebundene und zu verzinsende Kapital wider. Bei der Ermittlung wird das unverzinslich zur Verfügung stehende Kapital vom betrieblich gebundenen Anlage- und Umlaufvermögen der einzelnen Geschäftsfelder abgezogen. Firmenwerte aus Akquisitionen (Goodwill) fließen mit ihren Anschaffungswerten ein, solange sie als werthaltig zu betrachten sind.

Analog zum Vorjahr werden Marktbewertungen der übrigen Beteiligungen nicht im Capital Employed berücksichtigt. Damit soll eine konsistente Ermittlung der Wertentwicklung gewährleistet werden. Während die übrigen Beteiligungen in der Bilanz zu Marktwerten angesetzt werden, sind Veränderungen der Marktwerte nicht im Adjusted EBIT, sondern erfolgsneutral im Eigenkapital erfasst. Dies betrifft insbesondere unsere Anteile an Gazprom.

Der Value Added spiegelt den operativen Erfolg wider, der über die Kosten des eingesetzten Kapitals hinaus erwirtschaftet wird. Die Kennzahl wird wie folgt ermittelt:

$$\text{Value Added} = (\text{ROCE} - \text{Kapitalkosten}) \times \text{Capital Employed}$$

Die nachfolgende Tabelle zeigt die Herleitung von ROCE und Value Added für den E.ON-Konzern.

| Wertentwicklung                                                                                      |               |               |
|------------------------------------------------------------------------------------------------------|---------------|---------------|
| in Mio €                                                                                             | 2010          | 2009          |
| <b>Adjusted EBIT</b>                                                                                 | <b>9.454</b>  | <b>9.291</b>  |
| Goodwill, immaterielle Vermögensgegenstände und Sachanlagen <sup>1)</sup>                            | 83.528        | 79.336        |
| + Beteiligungen                                                                                      | 8.544         | 12.783        |
| + Vorräte                                                                                            | 4.064         | 4.320         |
| + Forderungen aus Lieferungen und Leistungen                                                         | 15.819        | 11.300        |
| + Übrige unverzinsliche Vermögenswerte inkl. aktiver Rechnungsabgrenzungsposten und latenter Steuern | 23.709        | 23.631        |
| - Unverzinsliche Rückstellungen <sup>2)</sup>                                                        | 8.006         | 7.441         |
| - Unverzinsliche Verbindlichkeiten inkl. passiver Rechnungsabgrenzungsposten und latenter Steuern    | 46.224        | 43.959        |
| - Bereinigungen <sup>3)</sup>                                                                        | 1.076         | 2.588         |
| <b>Capital Employed der fortgeführten Aktivitäten zum Stichtag</b>                                   | <b>80.358</b> | <b>77.382</b> |
| <b>Capital Employed der fortgeführten Aktivitäten im Jahresdurchschnitt<sup>4)</sup></b>             | <b>79.553</b> | <b>76.199</b> |
| <b>ROCE</b>                                                                                          | <b>11,9 %</b> | <b>12,2 %</b> |
| <b>Kapitalkosten vor Steuern</b>                                                                     | <b>8,3 %</b>  | <b>9,1 %</b>  |
| <b>Value Added</b>                                                                                   | <b>2.864</b>  | <b>2.362</b>  |

1) Nach Abschluss der Kaufpreisverteilung (siehe Textziffer 4 des Anhangs) sind für den Goodwill die endgültigen Werte angesetzt worden.

2) Zu den unverzinslichen Rückstellungen zählen im Wesentlichen kurzfristige Rückstellungen, darunter beispielsweise aus absatz- und beschaffungsmarktorientierten Verpflichtungen. Insbesondere Pensions- und Entsorgungsrückstellungen werden nicht in Abzug gebracht.

3) Bereinigungen bei der Ermittlung des Capital Employed betreffen die Marktbewertungen von übrigen Beteiligungen (unter Berücksichtigung latenter Steuerwirkungen) sowie betriebliche Verbindlichkeiten, die gemäß IAS 32 für bestimmte Kaufverpflichtungen gegenüber Minderheitsgesellschaftern zu bilden sind. Die Bereinigung der Marktbewertungen bezieht sich insbesondere auf unsere Beteiligung an Gazprom.

4) Um innerjährliche Schwankungen in der Kapitalbindung besser abzubilden, ermitteln wir das durchschnittliche Capital Employed als Mittelwert von Jahresanfangs- und -endbestand sowie der Bestände an den drei Quartalsstichtagen. Das Capital Employed der fortgeführten Aktivitäten betrug zum 31.3.2010 78.783 Mio €, zum 30.6.2010 82.426 Mio € und zum 30.9.2010 78.817 Mio €.

## Renditeentwicklung im Geschäftsjahr 2010

Trotz der Ergebnisbelastungen aus der Abgabe von Stromkapazitäten und des Verkaufs des Höchstspannungsnetzes konnte weiterhin eine positive Wertentwicklung des Konzerns verzeichnet werden. Der stabilen Entwicklung des Adjusted EBIT steht eine im Wesentlichen investitionsbedingt erhöhte Kapitalbasis gegenüber. Mit einem ROCE von 11,9 Prozent lagen wir im Jahr 2010 erneut deutlich über den Kapitalkosten vor Steuern. Der Value Added beläuft sich für das abgelaufene Geschäftsjahr auf 2.864 Mio €.

## Wertentwicklung nach Geschäftsbereichen

| in Mio €                    | Central Europe |        | Pan-European Gas <sup>1)</sup> |        | UK    |       | Nordic |       |
|-----------------------------|----------------|--------|--------------------------------|--------|-------|-------|--------|-------|
|                             | 2010           | 2009   | 2010                           | 2009   | 2010  | 2009  | 2010   | 2009  |
| Adjusted EBIT               | 4.743          | 4.832  | 1.471                          | 1.754  | 890   | 649   | 580    | 549   |
| ÷ Capital Employed          | 23.152         | 22.171 | 18.591                         | 17.638 | 9.341 | 8.947 | 7.343  | 6.098 |
| = ROCE                      | 20,5 %         | 21,8 % | 7,9 %                          | 9,9 %  | 9,5 % | 7,3 % | 7,9 %  | 9,0 % |
| Kapitalkosten <sup>2)</sup> | 8,4 %          | 9,2 %  | 8,2 %                          | 8,8 %  | 9,0 % | 9,8 % | 8,3 %  | 9,3 % |
| Value Added                 | 2.801          | 2.793  | -56                            | 194    | 47    | -224  | -29    | -18   |

1) Im Capital Employed werden Marktbewertungen von übrigen Beteiligungen nicht berücksichtigt. Dies betrifft insbesondere unsere Beteiligung an Gazprom.  
 2) vor Steuern

## Central Europe

Im vergangenen Jahr hat Central Europe mit 20,5 Prozent eine Rendite leicht unter dem Vorjahreswert, jedoch weiterhin deutlich über den Kapitalkosten erzielt. Der Value Added ist leicht gestiegen. Der Anstieg ergibt sich trotz höherer Kapitalbasis, die vor allem aus höheren Investitionen in Sachanlagen resultiert, aufgrund der um 0,8 Prozentpunkte niedrigeren Kapitalkosten.

## Pan-European Gas

Die Rendite der Market Unit Pan European Gas ist im abgelaufenen Geschäftsjahr auf 7,9 Prozent gesunken und liegt damit unterhalb der Kapitalkosten. Der Rückgang ist insbesondere auf die anhaltend schwierige Marktlage im Gasgeschäft und den Wegfall des Ergebnisbeitrags der Thüga zurückzuführen. Ferner stieg die Kapitalbasis trotz Abgang der Thüga-Aktivitäten und Veräußerung der Gazprom-Anteile unter anderem durch den Anteilserwerb am Gasfeld Yushno Russkoje im Oktober 2009 sowie durch Investitionen im Upstream-Bereich und in die gaswirtschaftliche Infrastruktur.

## UK

UK hat im vergangenen Jahr einen Anstieg des ROCE auf 9,5 Prozent zu verzeichnen und liegt damit über den Kapitalkosten. Diese positive Entwicklung ist vor allem auf den deutlichen Ergebnisanstieg im unregulierten Geschäft zurückzuführen. Hierzu haben vor allem Effizienzsteigerungen sowie eine wetterbedingt erhöhte Nachfrage im Vertriebsgeschäft beigetragen. Der Anstieg der Kapitalbasis in Euro ist fast ausschließlich durch die Veränderung der Währungskurse bedingt. In lokaler Währung liegt das Capital Employed nahezu auf Vorjahresniveau.

## Nordic

Bei der Market Unit Nordic kam es zu einer Abschwächung der Rendite gegenüber dem Vorjahr auf 7,9 Prozent. Damit liegt der Wert leicht unter dem Kapitalkostenniveau. Die Entwicklung des ROCE basiert hauptsächlich auf ergebnisseitigen nicht beeinflussbaren externen Effekten wie höheren Kosten für Brennstoffentsorgung und Stilllegung. Darüber hinaus tragen niedrigere Produktionsvolumina aufgrund einer geringeren Verfügbarkeit, basierend auf Erweiterungs- und Modernisierungsprojekten in der Kernenergie, zu einem niedrigeren Ergebnis bei. Die Zunahme des gebundenen Kapitals ist hauptsächlich auf Investitionsprojekte im Bereich Kernkraft und im Stromnetz sowie Währungsumrechnungseffekte zurückzuführen.

| Energy Trading |      | Neue Märkte |        | Corporate Center |       | E.ON-Konzern |        |
|----------------|------|-------------|--------|------------------|-------|--------------|--------|
| 2010           | 2009 | 2010        | 2009   | 2010             | 2009  | 2010         | 2009   |
| 1.196          | 949  | 908         | 862    | -334             | -304  | 9.454        | 9.291  |
| -              | -    | 20.216      | 19.067 | 1.261            | 1.751 | 79.553       | 76.199 |
| -              | -    | 4,5 %       | 4,5 %  | -                | -     | 11,9 %       | 12,2 % |
| -              | -    | 10,6 %      | 10,4 % | -                | -     | 8,3 %        | 9,1 %  |
| -              | -    | -1.233      | -1.125 | -                | -     | 2.864        | 2.362  |

### Energy Trading

Für die Market Unit Energy Trading sind die Kennzahlen ROCE und Value Added aufgrund der strukturellen Besonderheiten des Handelsgeschäfts nur sehr eingeschränkt aussagefähig und werden deshalb an dieser Stelle nicht ausgewiesen.

### Neue Märkte

Erwartungsgemäß werden sich die aus den langfristig ausgerichteten Investitionen resultierenden Ergebnissteigerungen und Wertbeiträge erst in den kommenden Jahren einstellen.

## Entwicklung der Investitionen

Im Geschäftsjahr 2010 haben sich die Investitionen auf 8,3 Mrd € verringert. Auf Sachanlagen und immaterielle Vermögenswerte entfielen rund 7,9 Mrd € (Vorjahr: 7,8 Mrd €). Die Investitionen in Beteiligungen betrugen 382 Mio € gegenüber 824 Mio € im Vorjahr.

| Investitionen                |              |              |           |
|------------------------------|--------------|--------------|-----------|
| in Mio €                     | 2010         | 2009         | +/- %     |
| Central Europe               | 3.192        | 3.256        | -2        |
| Pan-European Gas             | 1.244        | 1.610        | -23       |
| UK                           | 1.029        | 897          | +15       |
| Nordic                       | 730          | 1.104        | -34       |
| Energy Trading               | 16           | 53           | -70       |
| Neue Märkte                  | 1.975        | 1.881        | +5        |
| Corporate Center             | 100          | -146         | -         |
| <b>Summe</b>                 | <b>8.286</b> | <b>8.655</b> | <b>-4</b> |
| Ausland                      | 5.924        | 6.099        | -3        |
| Instandhaltungsinvestitionen | 1.110        | 1.108        | -         |

Im abgelaufenen Geschäftsjahr investierte die Market Unit Central Europe 64 Mio € weniger als im Vorjahreszeitraum. Die Investitionen in Sachanlagen und immaterielle Vermögenswerte erhöhten sich um 64 Mio € auf 3.103 Mio €. Auf die Stromerzeugung entfielen mit 1.755 Mio € um 18 Mio € höhere Ausgaben. Höhere Auszahlungen für die Kraftwerksprojekte Gönyü, Maasvlakte und Irsching 4 wurden dabei durch im Jahresvergleich geringere Investitionen in Kraftwerke, die im Verlauf des Jahres bereits fertiggestellt wurden, weitgehend kompensiert. Im Bereich Netz lagen die Investitionen mit 1.186 Mio € um 83 Mio € über dem Vorjahr. Dies ist auf höhere Investitionen im Verteilnetz, insbesondere auch im Zusammenhang mit dem Gesetz für den Vorrang Erneuerbarer Energien, zurückzuführen. Dadurch wurde der Effekt aus der Abgabe des Höchstspannungsnetzes mehr als ausgeglichen. Im Jahr 2009 waren noch ganzjährig Investitionen in diese Spannungsebene, insbesondere in die Netzanbindung von Offshore-Windparks, enthalten. Die Beteiligungsinvestitionen lagen mit 89 Mio € um 128 Mio € unter dem Vergleichswert.

Die Investitionen in der Market Unit Pan-European Gas betrugen 1.244 Mio €. Hiervon entfielen 1.102 Mio € (Vorjahr: 1.117 Mio €) auf Sachanlagen und immaterielle Vermögenswerte. Dabei handelte es sich im Wesentlichen um Investitionen im Explorationsbereich und in die gaswirtschaftliche Infrastruktur. Die Investitionen in Beteiligungen reduzierten sich auf 142 Mio € (Vorjahr: 493 Mio €). Der hohe Vorjahreswert ist unter anderem auf Auszahlungen im Zusammenhang mit dem Anteilserwerb am Gasfeld Yushno Russkoje zurückzuführen.

Die Market Unit UK investierte im Berichtszeitraum rund 1.006 Mio € (Vorjahr: 864 Mio €) in Sachanlagen und immaterielle Vermögenswerte. Die Ausgaben betrafen im Wesentlichen den Kraftwerkspark, einschließlich des Baus des Gaskraftwerks Grain, und Investitionen in das Netzgeschäft. Die Beteiligungsinvestitionen lagen bei 23 Mio € (33 Mio €).

Nordic investierte insgesamt 374 Mio € weniger als im Vorjahr. In Sachanlagen und immaterielle Vermögenswerte wurden 726 Mio € (Vorjahr: 810 Mio €) zur Instandhaltung und zum Ausbau der Kraftwerke sowie zur Verbesserung und zum Ausbau des Verteilnetzes investiert. Die Beteiligungsinvestitionen betrugen 4 Mio € (294 Mio €). Der hohe Vorjahreswert beinhaltete eine Ausgleichszahlung an Statkraft.

Im Segment Neue Märkte wurden 1.975 Mio € (Vorjahr: 1.881 Mio €) investiert. Bei Climate & Renewables lagen die Investitionen mit 1.163 Mio € über dem Vorjahresniveau von 1.031 Mio €. Der leichte Anstieg war durch Auszahlungen im Zusammenhang mit der Fertigstellung des Offshore-Windparks Rødsand 2 in Dänemark bedingt. Die Market Unit Russia investierte 434 Mio € (403 Mio €), besonders im Rahmen des Neubauprogramms. Die Investitionen bei Italy von 93 Mio € (172 Mio €) entfielen hauptsächlich auf die Sanierung des Wasserkraftwerks Terni und das Verteilnetz. Bei Spain lagen die Investitionen bei 285 Mio € (275 Mio €) und betrafen im Wesentlichen Auszahlungen für das 817-MW-Gaskraftwerk Algeciras.



## Cashflow und Finanzposition

E.ON stellt die Finanzlage des Konzerns unter anderem mit den Kennzahlen operativer Cashflow und wirtschaftliche Netto-Verschuldung dar.

Der operative Cashflow lag mit 10,6 Mrd € um 24 Prozent über dem Vorjahreswert von 8,6 Mrd €. Wesentliche Gründe hierfür sind operative, zahlungswirksame Effekte im Zusammenhang mit der Steigerung des Adjusted EBITDA und die Belastung des operativen Cashflows des Vorjahres durch eine Bußgeldzahlung an die Europäische Kommission. Zudem fielen im Vorjahr zahlungsunwirksame Einmaleffekte im Adjusted EBITDA an, wie beispielsweise die Neuverhandlung der Stromlieferverträge in Italien. Im Berichtszeitraum 2010 wirkten sich Effekte aus der Speicherbeschäftigung im Gasbereich negativ auf den operativen Cashflow aus, während sich die weiteren Working-Capital-Veränderungen im Gesamtkonzern im Wesentlichen saldierten. Deutliche Verbesserungen beruhten dagegen auf geringeren Steuerzahlungen beziehungsweise Steuererstattungen.

Der Cashflow aus der Investitionstätigkeit fortgeführter Aktivitäten lag im Jahr 2010 bei rund 1,1 Mrd € (Vorjahr: -2,4 Mrd €). Dies ist vor allem auf höhere Einzahlungen aus dem Verkauf von Beteiligungen zurückzuführen. Darüber hinaus waren die Auszahlungen für Investitionen geringer als im Vorjahr.

Im Jahr 2010 betrug der Cashflow aus der Finanzierungstätigkeit fortgeführter Aktivitäten -9,9 Mrd € (Vorjahr: -5,2 Mrd €). Dies spiegelt vor allem die Rückzahlung von Finanzverbindlichkeiten sowie die Auszahlung an Minderheitsgesellschafter wider.

Weitere Informationen zur Kapitalflussrechnung befinden sich in Textziffer 29 im Anhang zum Konzernabschluss.

Im Vergleich zum 31. Dezember 2009 (-27.991 Mio €) verbesserte sich unsere Netto-Finanzposition um 7.676 Mio € auf -20.315 Mio €. Wesentliche Gründe sind die Veräußerung unseres US-Geschäfts und der Gazprom-Beteiligung. Darüber hinaus reichte der operative Cashflow nahezu vollständig zur Finanzierung der Sachanlageinvestitionen und für die Dividendenzahlung der E.ON AG aus. Diese Effekte führten ebenfalls zu einer Verbesserung unserer wirtschaftlichen Netto-Verschuldung. Dagegen wirkte sich der Anstieg der Entsorgungs- und Pensionsrückstellungen negativ aus, sodass sich unsere wirtschaftliche Netto-Verschuldung nur um 6.964 Mio € auf -37.701 Mio € (31. Dezember 2009: -44.665 Mio €) verbesserte.

Bei der Herleitung der wirtschaftlichen Netto-Verschuldung berücksichtigen wir die Marktwerte (netto) der Währungsderivate aus Finanztransaktionen (ohne Transaktionen aus dem operativen Geschäft und dem Assetmanagement), um auch die Fremdwährungseffekte aus Finanztransaktionen zu erfassen, die sich aus bilanziellen Gründen nicht direkt in den Komponenten der Netto-Finanzposition auswirken.

| Wirtschaftliche Netto-Verschuldung                                            |                |                |
|-------------------------------------------------------------------------------|----------------|----------------|
| in Mio €                                                                      | 31. Dezember   |                |
|                                                                               | 2010           | 2009           |
| Liquide Mittel                                                                | 8.273          | 6.116          |
| Langfristige Wertpapiere                                                      | 3.903          | 3.670          |
| <b>Liquide Mittel und langfristige Wertpapiere</b>                            | <b>12.176</b>  | <b>9.786</b>   |
| Finanzverbindlichkeiten gegenüber Kreditinstituten und Dritten                | -31.799        | -35.579        |
| Finanzverbindlichkeiten aus Beteiligungsverhältnissen                         | -692           | -2.198         |
| <b>Finanzverbindlichkeiten</b>                                                | <b>-32.491</b> | <b>-37.777</b> |
| <b>Netto-Finanzposition</b>                                                   | <b>-20.315</b> | <b>-27.991</b> |
| Marktwerte (netto) der Währungsderivate aus Finanztransaktionen <sup>1)</sup> | 334            | -6             |
| Pensionsrückstellungen                                                        | -3.250         | -2.884         |
| Rückstellungen für Entsorgungs- und Rückbauverpflichtungen                    | -15.968        | -15.050        |
| Abzüglich Vorausleistungen an den schwedischen Nuklearfonds                   | 1.498          | 1.266          |
| <b>Wirtschaftliche Netto-Verschuldung</b>                                     | <b>-37.701</b> | <b>-44.665</b> |
| Adjusted EBITDA                                                               | 13.346         | 12.975         |
| <b>Debt Factor</b>                                                            | <b>2,8</b>     | <b>3,4</b>     |

1) Hierin nicht enthalten sind Transaktionen aus dem operativen Geschäft und dem Assetmanagement.

Insbesondere aufgrund der Verbesserung unserer wirtschaftlichen Netto-Verschuldung sank der Debt Factor im Jahr 2010 auf 2,8 im Vergleich zu 3,4 am 31. Dezember 2009.

## Finanzstrategie

Sowohl Eigen- als auch Fremdkapital stellen für den E.ON-Konzern wichtige Finanzierungsquellen dar. E.ONs Finanzstrategie hat daher die Interessen der Aktionäre und der Fremdkapitalgeber gleichermaßen im Fokus. Auf dem Capital Market Day am 10. November 2010 präsentierte E.ON nachfolgende Anpassungen in der Finanzstrategie, um in Zukunft auf die erhöhten Herausforderungen im regulatorischen und politischen Umfeld sowie auf den europäischen Strom- und Gasmärkten angemessen reagieren zu können.

Das von E.ON gesetzte Ratingziel liegt nun bei einem „Solid single A“. Mit dem neuen Ratingziel wird eine erhöhte Flexibilität geschaffen, die sicherstellt, dass E.ON nicht zwecks Einhaltung eines engen Ratingziels zu übereilten Handlungen gezwungen wird. Dies sichert zum Beispiel die wertoptimierende Umsetzung von Maßnahmen zur Verbesserung unserer Verschuldungskennzahlen, unter anderem durch Desinvestitionen.

Die Kapitalstruktur ist der Kern unserer Finanzstrategie und wird mittels des Verschuldungsfaktors (Debt Factor) gemessen. Der Debt Factor ergibt sich aus dem Verhältnis zwischen der wirtschaftlichen Netto-Verschuldung und dem Adjusted EBITDA. Die wirtschaftliche Netto-Verschuldung schließt neben den Finanzschulden auch Pensions- und Entsorgungsrückstellungen ein. Außerdem werden die Netto-Marktwerte der Währungsderivate aus Finanztransaktionen (ohne Transaktionen aus dem operativen Geschäft und dem Assetmanagement) einbezogen. In vergangenen Jahren lag das Ziel für den Debt Factor innerhalb einer Bandbreite von 2,8 bis 3,3, die in Einklang stand mit dem parallel gültigen Zielrating von „A flat/A2“. Nun ist unser mittelfristiges Ziel für den Debt Factor ein Wert von kleiner oder gleich 3. Um diesen Zielwert sowie gleichzeitig die Einhaltung unseres neuen Ratingziels von „Solid single A“ sicherzustellen, hat E.ON auf dem Capital Market Day im November 2010 ein zusätzliches Programm zum Management der Portfolio- und Bilanzstruktur angekündigt. Dieses Programm hat Desinvestitionen bis Ende 2013 von rund 15 Mrd € zum Ziel. Mehr als 50 Prozent dieser Erlöse sollen zur Schuldenreduktion verwendet werden. Bereits in den Jahren 2009 und 2010 haben wir ein strategisches Programm zur Portfoliooptimierung erfolgreich abgeschlossen. Mit Verkaufserlösen von insgesamt rund 13 Mrd € haben wir dabei das ursprüngliche Ziel von 10 Mrd € deutlich übertroffen.

Ein weiteres wichtiges Element der Finanzstrategie ist unsere über die letzten Jahre stabile und kontinuierliche Dividendenpolitik, die wir weiter fortführen werden. Der Zielwert für unsere Ausschüttungsquote – und damit für die Dividende – liegt unverändert bei einer Bandbreite zwischen 50 und 60 Prozent des bereinigten Konzernüberschusses. Für das Geschäftsjahr 2010 schlagen wir eine im Vergleich zum Vorjahr unveränderte Dividende von 1,50 € pro Aktie vor.

Darüber hinaus planen wir für die Geschäftsjahre 2011 und 2012 eine Dividende pro Aktie von mindestens 1,30 €. Auf diese Weise sichern wir unseren Aktionären eine langfristige und werthaltige Investition, die sich durch eine stabile Rendite auszeichnet.

## Finanzierungspolitik und -maßnahmen

Grundsätzlich verfolgt E.ON eine Finanzierungspolitik, die jederzeit Zugang zu unterschiedlichen Finanzierungsquellen gewährleistet. Sicherergestellt wird dieses Ziel durch folgende Prinzipien: Erstens wird eine möglichst breite Diversifikation der Investoren durch Nutzung verschiedener Märkte und Instrumente angestrebt. Zweitens werden die Anleihen mit solchen Laufzeiten ausgegeben, die zu einem möglichst ausgeglichenen Fälligkeitenprofil führen. Drittens werden großvolumige Benchmark-Anleihen mit kleineren, opportunistischen Anleihen kombiniert. Im Regelfall werden externe Finanzierungen von der niederländischen Finanzierungsgesellschaft E.ON International Finance B.V. unter Garantie der E.ON AG oder von der E.ON AG selbst durchgeführt und die Mittel innerhalb des Konzerns weitergeleitet.

Im Jahre 2010 haben die E.ON AG bzw. die E.ON International Finance B.V. keine neuen Anleihen emittiert. Die im Jahr 2010 benötigten Mittel zur Finanzierung von Investitionen und Dividendenausschüttung konnten über den operativen Cashflow und Desinvestitionerlöse nahezu vollständig gedeckt werden. Gegen Ende 2010 haben wir zudem liquide Mittel zur vorzeitigen Rückführung von Finanzverbindlichkeiten im Gesamtvolumen von rund 1,1 Mrd € genutzt. Insgesamt konnten die Finanzverbindlichkeiten zum 31. Dezember 2010 um 5,3 Mrd € im Vergleich zum Vorjahr reduziert werden.

Auf Ebene der Market Units haben unsere englischen Tochtergesellschaften Central Networks East und West im Dezember 2010 zwei Anleihen über insgesamt 500 Mio £ begeben. Diese Transaktion diente einer Erweiterung unserer strategischen Flexibilität in Bezug auf dieses Verteilnetzgeschäft in England.

Alle derzeit ausstehenden Anleihen auf Ebene der E.ON AG und der E.ON International Finance B.V. wurden mit Ausnahme der im Jahr 2008 begebenen US-Anleihe unter dem Dokumentationsrahmen des Debt-Issuance-Programms emittiert. Das Programm lief nach einem Jahr Gültigkeit plangemäß im Dezember 2010 aus und wurde aufgrund des fehlenden kurz- bis mittelfristigen Finanzierungsbedarfs nicht umgehend aktualisiert. Zuletzt standen im Dezember 2010 im Rahmen des Debt-Issuance-Programms Schuldverschreibungen in Höhe von umgerechnet rund 24 Mrd € aus (gesamter Programmrahmen: 35 Mrd €). Eine erneute Verlängerung des Programms ist im Laufe des Jahres 2011 vorgesehen.

Die großen E.ON-Anleihen sind in relevanten Anleihen-Indizes enthalten, so zum Beispiel dem iBoxx EUR Non-Financials und dem iBoxx EUR Utilities. Die Auswahl der Anleihen, die für die Indexberechnung verwendet werden, unterliegt Auswahlkriterien wie zum Beispiel Rating, Laufzeit und Mindestvolumen.

Neben dem Debt-Issuance-Programm stehen uns ein europäisches CP-Programm mit einem Volumen von 10 Mrd € und ein US-Dollar-CP-Programm in Höhe von 10 Mrd US-\$ zur Verfügung, unter denen wir jeweils kurzfristige Schuldverschreibungen begeben können. Die Emission von CP dient der Finanzierung kurzfristiger Finanzierungsspitzen beziehungsweise zur weiteren Diversifikation der Investorenbasis. Während des letzten Jahres allerdings haben wir auf dieses Instrument immer weniger zurückgegriffen, sodass nach 1,5 Mrd € Ende 2009 keine Commercial Paper Ende 2010 ausstanden.

| Finanzverbindlichkeiten    |               |               |
|----------------------------|---------------|---------------|
| in Mrd €                   | 31. Dez. 2010 | 31. Dez. 2009 |
| Anleihen <sup>1)</sup>     | 27,5          | 29,0          |
| in EUR                     | 16,6          | 18,3          |
| in GBP                     | 5,5           | 4,8           |
| in USD                     | 2,5           | 2,9           |
| in CHF                     | 1,6           | 1,5           |
| in SEK                     | 0,4           | 0,6           |
| in JPY                     | 0,7           | 0,7           |
| in sonstigen Währungen     | 0,2           | 0,2           |
| Schuldscheindarlehen       | 1,4           | 1,4           |
| Commercial Paper           | -             | 1,5           |
| Sonstige Verbindlichkeiten | 3,6           | 5,9           |
| <b>Summe</b>               | <b>32,5</b>   | <b>37,8</b>   |

1) inklusive Privatplatzierungen

Weitere Erläuterungen zu ausstehenden E.ON-Anleihen und zu Verbindlichkeiten, Haftungsverhältnissen sowie sonstigen Verpflichtungen befinden sich in den Textziffern 26 und 27 des Anhangs zum Konzernabschluss.

Mit Wirkung zum 25. November 2010 haben wir eine neue syndizierte Kreditlinie mit einem Volumen von 6 Mrd € und einer Laufzeit von fünf Jahren abgeschlossen. Diese Kreditlinie ist nicht gezogen, sondern dient vielmehr als verlässliche und nachhaltige Liquiditätsreserve des Konzerns. Die neue syndizierte Kreditlinie ersetzt die zuvor bestehende Kreditlinie, deren beide Tranchen über Fälligkeiten im November 2010 beziehungsweise Dezember 2011 verfügten.

E.ONs Kreditwürdigkeit wird von Standard & Poor's (S&P) und von Moody's mit einem Langfrist-Rating von A beziehungsweise von A2 bewertet. Das Kurzfrist-Rating ist A-1 (S&P) und P-1 (Moody's). Die Bonitätsbeurteilungen beider Ratingagenturen liegen damit innerhalb des von E.ON angestrebten Ratingziels. In Veröffentlichungen im Februar 2011 von S&P und im Dezember 2010 von Moody's wurden das Langfrist- und Kurzfrist-Rating für E.ON von beiden Ratingagenturen mit stabilem Ausblick bestätigt.

| Ratings der E.ON AG |                      |                      |          |
|---------------------|----------------------|----------------------|----------|
|                     | Langfristiges Rating | Kurzfristiges Rating | Ausblick |
| Moody's             | A2                   | P-1                  | stabil   |
| Standard & Poor's   | A                    | A-1                  | stabil   |

## Entwicklung der E.ON-Aktie

Am Ende des Jahres 2010 lag der Kurs der E.ON-Aktie um 17 Prozent (einschließlich wiederangelegter Dividende) unter dem Kurs zum Jahresende 2009 und entwickelte sich damit schlechter als der Branchenindex STOXX Europe 600 Utilities (-4 Prozent im selben Zeitraum).

Aktuelle Informationen zur E.ON-Aktie finden Sie auf unserer Website unter [www.eon.com](http://www.eon.com).

| E.ON-Aktie                                      | 31. Dez. 2010 | 31. Dez. 2009 |
|-------------------------------------------------|---------------|---------------|
| Ergebnis je Aktie <sup>1)</sup> (in €)          | 3,07          | 4,42          |
| Dividende je Aktie in € <sup>2)</sup>           | 1,50          | 1,50          |
| Anzahl ausstehender Aktien in Mio <sup>3)</sup> | 1.905         | 1.905         |
| Jahresendkurs in € <sup>3)</sup>                | 22,94         | 29,23         |
| Marktkapitalisierung in Mrd € <sup>3) 4)</sup>  | 43,7          | 55,7          |

1) Anteil der Gesellschafter der E.ON AG  
2) für das jeweilige Geschäftsjahr; Vorschlag für 2010  
3) zum 30. Dezember  
4) auf Basis ausstehender Aktien

Im Vergleich zum Vorjahresende verminderten sich die langfristigen Vermögenswerte zum 31. Dezember 2010 um 6 Prozent, vor allem durch die Veräußerung der Market Unit US-Midwest. Daneben wirkten sich die außerplanmäßigen Wertberichtigungen insbesondere auf Goodwill und auf das sonstige Anlagevermögen bei den von Enel/Acciona und Endesa erworbenen Aktivitäten in Italien, Spanien und Frankreich mindernd aus. Diese Effekte wurden zum Teil durch Investitionen in Sachanlagen kompensiert.

Die kurzfristigen Vermögenswerte nahmen um 17 Prozent zu. Gründe hierfür waren im Vergleich zum 31. Dezember 2009 vor allen Dingen die saisonbedingte Erhöhung von Forderungen aus Lieferungen und Leistungen sowie die Erhöhung von liquiden Mitteln, insbesondere durch den Zufluss des Kaufpreises aus der Veräußerung von US-Midwest.

Mit 30 Prozent lag die Eigenkapitalquote leicht über dem Stand von Ende Dezember 2009.

Die langfristigen Schulden gingen um 1 Prozent gegenüber dem Vorjahr zurück, vor allem durch die Tilgung von langfristigen Finanzschulden. Gegenläufig wirkte sich der Anstieg von langfristigen Rückstellungen aus. Die kurzfristigen Schulden lagen zum 31. Dezember 2010 auf dem Vorjahresniveau.

Die Verbindlichkeiten aus Lieferungen und Leistungen stiegen zwar, es wurden aber in leicht größerem Umfang kurzfristige Finanzschulden abgebaut.

Die nachfolgenden Finanzkennziffern belegen, dass der E.ON-Konzern über eine gute Vermögens- und Kapitalstruktur verfügt:

- Das langfristig gebundene Vermögen war zu 43 Prozent durch Eigenkapital gedeckt (31. Dezember 2009: 39 Prozent).
- Das langfristig gebundene Vermögen war zu 108 Prozent (31. Dezember 2009: 102 Prozent) durch langfristiges Kapital finanziert.

Weitere Erläuterungen zur Vermögenslage befinden sich in den Textziffern 4 bis 26 des Anhangs zum Konzernabschluss.

### Zusammenfassende Aussage zur Ertrags-, Finanz- und Vermögenslage

Das leicht über dem Vorjahresniveau liegende Adjusted EBIT und der im Vorjahresvergleich etwas geringere bereinigte Konzernüberschuss, die weiterhin positive Wertentwicklung, der starke operative Cashflow und die verbesserten Finanzkennziffern belegen die solide wirtschaftliche Lage des E.ON-Konzerns im Geschäftsjahr 2010.

| Konzernbilanzstruktur       |                |            |                |            |
|-----------------------------|----------------|------------|----------------|------------|
| in Mio €                    | 31. Dez. 2010  | %          | 31. Dez. 2009  | %          |
| Langfristige Vermögenswerte | 106.657        | 70         | 113.046        | 74         |
| Kurzfristige Vermögenswerte | 46.224         | 30         | 39.568         | 26         |
| <b>Aktiva</b>               | <b>152.881</b> | <b>100</b> | <b>152.614</b> | <b>100</b> |
| Eigenkapital                | 45.585         | 30         | 43.986         | 29         |
| Langfristige Schulden       | 69.580         | 45         | 70.775         | 46         |
| Kurzfristige Schulden       | 37.716         | 25         | 37.853         | 25         |
| <b>Passiva</b>              | <b>152.881</b> | <b>100</b> | <b>152.614</b> | <b>100</b> |

## Jahresabschluss der E.ON AG

Der Jahresabschluss der E.ON AG ist nach den Vorschriften des Handelsgesetzbuches in der Fassung des am 29. Mai 2009 in Kraft getretenen Bilanzrechtsmodernisierungsgesetzes (BilMoG) und des Aktiengesetzes aufgestellt. Durch die Erstanwendung des BilMoG zum 1. Januar 2010 wurden sowohl das außerordentliche Ergebnis als auch die Gewinnrücklagen beeinflusst.

| Bilanz der E.ON AG (Kurzfassung)                    |               |               |
|-----------------------------------------------------|---------------|---------------|
| in Mio €                                            | 31. Dezember  |               |
|                                                     | 2010          | 2009          |
| Immaterielle Vermögensgegenstände und Sachanlagen   | 134           | 146           |
| Finanzanlagen                                       | 38.983        | 38.341        |
| <b>Anlagevermögen</b>                               | <b>39.117</b> | <b>38.487</b> |
| Forderungen gegen verbundene Unternehmen            | 19.310        | 23.267        |
| Übrige Forderungen                                  | 5.835         | 4.909         |
| Liquide Mittel                                      | 2.271         | 2.025         |
| <b>Umlaufvermögen</b>                               | <b>27.416</b> | <b>30.201</b> |
| <b>Gesamtvermögen</b>                               | <b>66.533</b> | <b>68.688</b> |
| Eigenkapital                                        | 13.648        | 12.453        |
| Sonderposten mit Rücklageanteil                     | -             | 384           |
| Rückstellungen                                      | 6.043         | 4.954         |
| Verbindlichkeiten gegenüber verbundenen Unternehmen | 44.237        | 46.345        |
| Übrige Verbindlichkeiten                            | 2.605         | 4.552         |
| <b>Gesamtkapital</b>                                | <b>66.533</b> | <b>68.688</b> |

Deshalb wurden im Wesentlichen folgende bilanzielle Anpassungen durchgeführt: Der Sonderposten mit Rücklageanteil in Höhe von 384 Mio € wurde erfolgsneutral zugunsten der Gewinnrücklagen aufgelöst und die Finanzanlagen mit 74 Mio € erfolgsneutral zugunsten der Gewinnrücklagen zugeschrieben. Die zum 1. Januar 2010 auf der Aktivseite der Bilanz ausgewiesenen eigenen Anteile wurden mit 214,3 Mio € beim Eigenkapital abgesetzt. Ferner erhöhten sich die sonstigen langfristigen Rückstellungen aufgrund der erstmaligen Berücksichtigung zukünftiger Kosten- und Preissteigerungen um insgesamt 86 Mio €. Dieser Betrag wurde in der Gewinn- und Verlustrechnung im außerordentlichen Aufwand ausgewiesen.

Der Jahresüberschuss beträgt 3.811 Mio € gegenüber 3.834 Mio € im Vorjahr. Nach Einstellung von 953 Mio € in die anderen Gewinnrücklagen ergibt sich ein Bilanzgewinn von 2.858 Mio €.

## Gewinn- und Verlustrechnung der E.ON AG (Kurzfassung)

| in Mio €                                            | 2010         | 2009         |
|-----------------------------------------------------|--------------|--------------|
| Beteiligungsergebnis                                | 6.742        | 6.689        |
| Zinsergebnis                                        | -1.324       | -1.195       |
| Übrige Aufwendungen und Erträge                     | -883         | -487         |
| <b>Ergebnis der gewöhnlichen Geschäftstätigkeit</b> | <b>4.535</b> | <b>5.007</b> |
| Außerordentlicher Aufwand                           | -86          | -            |
| Steuern                                             | -638         | -1.173       |
| <b>Jahresüberschuss</b>                             | <b>3.811</b> | <b>3.834</b> |
| Einstellung in die Gewinnrücklagen                  | -953         | -976         |
| <b>Bilanzgewinn</b>                                 | <b>2.858</b> | <b>2.858</b> |

Das Beteiligungsergebnis der E.ON AG liegt mit 6.742 Mio € auf dem Niveau des Vorjahres. Die wesentlichen Gewinnabführungen (einschließlich der Konzernsteuerumlagen) im Jahr 2010 betragen von der E.ON Energie AG 2.796 Mio € (Vorjahr: 4.004 Mio €) und von der E.ON Ruhrgas Holding GmbH 3.840 Mio € (Vorjahr: 3.073 Mio €).

Der negative Saldo aus den übrigen Aufwendungen und Erträgen hat sich im Vergleich zum Vorjahr um 396 Mio € auf -883 Mio € verschlechtert. Gründe hierfür sind insbesondere der Anstieg von Abschreibungen auf Finanzanlagen in Höhe von 1.476 Mio €. Gegenläufig wirkten hier mit 893 Mio € Buchgewinne aus dem Abgang von Finanzanlagen und mit 171 Mio € positive Effekte aus Finanzgeschäften.

Die Steuern beinhalten sowohl für das Geschäftsjahr 2010 als auch für das Vorjahr die laufenden Ertragsteuern und aperiodische Steuern für noch offene Betriebsprüfungszeiträume.

Wir schlagen der Hauptversammlung am 5. Mai 2011 vor, aus dem Bilanzgewinn eine Dividende von 1,50 € je dividendenberechtigten Stückaktie auszuschütten. Damit können wir die Dividende auf dem Vorjahresniveau halten. Auf diese Weise bleibt die E.ON-Aktie attraktiv für unsere Aktionäre.

Der vom Abschlussprüfer PricewaterhouseCoopers Aktiengesellschaft, Wirtschaftsprüfungsgesellschaft, Düsseldorf, mit dem uneingeschränkten Bestätigungsvermerk versehene vollständige Jahresabschluss der E.ON AG wird im elektronischen Bundesanzeiger bekannt gemacht. Er kann als Sonderdruck bei der E.ON AG angefordert werden. Im Internet ist er unter [www.eon.com](http://www.eon.com) abrufbar.

## Angaben zu Übernahmehindernissen

Die Angaben nach § 289 Abs. 4 und § 315 Abs. 4 HGB sind Bestandteil des zusammengefassten Lageberichts und befinden sich im Kapitel Angaben zu Übernahmehindernissen auf den Seiten 182 bis 184.

## Corporate Responsibility (CR)

Die Erwartungen der Gesellschaft gegenüber der Energiewirtschaft – insbesondere großen Energieunternehmen – werden zunehmend größer. Es geht für E.ON darum, Antworten auf Fragen rund um den Klimawandel, zur Energieeffizienz oder wie die zukünftige Energieversorgung aussehen soll, zu geben. Die CR-Organisation verfolgt das Ziel, auf die unterschiedlichen Interessen der Gesellschaft einzugehen und im Dialog mit unseren Stakeholdern zu stehen. Nur auf diese Weise bekommen wir weiterhin die Akzeptanz, unser Geschäft zu betreiben (License to operate) und neue Anlagen zur Stromerzeugung zu bauen (License to build). Der langfristige Erfolg unseres Geschäfts ist auch abhängig von der Einbindung von Stakeholder-Interessen und -Erwartungen an die Art und Weise, wie wir unser Geschäft betreiben.

Wir haben klare Ziele im Bereich Corporate Responsibility, Umwelt, Arbeitssicherheit und Gesundheit für die Themen, die unser Geschäft betreffen, definiert. Richtlinien und Standards und deren Implementierung sowie die Integration in wichtige Konzernstrategien haben dabei oberste Priorität. So haben wir unser Profil 2010 besonders in den Bereichen verantwortliche Brennstoffbeschaffung, Transparenz im Performance-Reporting und bei der Arbeitssicherheit für unsere Mitarbeiter und Kontraktoren geschärft.

Die Bewertungen am Kapitalmarkt und die Anforderungen internationaler Organisationen an das nachhaltige Management und dessen Berichterstattung bestätigen unser Vorgehen. Im Jahr 2010 wurden wir beispielsweise erneut im Dow Jones Sustainability Index gelistet und in den Carbon Performance Leadership Index (CPLI) aufgenommen.

| CO <sub>2</sub> -Emissionen aus der Strom- und Wärmeerzeugung und zugeteilte CO <sub>2</sub> -Zertifikate |                |        |        |             |              |
|-----------------------------------------------------------------------------------------------------------|----------------|--------|--------|-------------|--------------|
| in Mio t                                                                                                  | Central Europe | UK     | Nordic | Neue Märkte | E.ON-Konzern |
| CO <sub>2</sub> -Emissionen <sup>1)</sup>                                                                 | 55,251         | 21,061 | 1,876  | 11,725      | 89,913       |
| Zugeteilte CO <sub>2</sub> -Zertifikate <sup>2)</sup>                                                     | 46,747         | 15,097 | 1,291  | 11,516      | 74,651       |

1) Einschließlich der CO<sub>2</sub>-Emissionen der Kraft-Wärme-Kopplungsanlagen von UK, die in der Eigenerzeugung nicht enthalten sind  
 2) Die Market Unit Russia nimmt nicht am europäischen Emissionshandel teil, 31,3 Mio t CO<sub>2</sub>.

E.ON hat im Jahr 2010 insgesamt 116,7 Mio t CO<sub>2</sub> in der Stromproduktion ausgestoßen (einschließlich unserer Kraft-Wärme-Kopplungsanlagen in Großbritannien aufgrund der bestehenden rechtlichen Abgabeverpflichtung). Das sind 1,7 Mio t CO<sub>2</sub> mehr als im Vorjahr. Die CO<sub>2</sub>-Intensität hat sich leicht um 0,5 Prozent auf 0,419 t pro MWh reduziert. In den kommenden Jahren rechnen wir mit einer eher sinkenden CO<sub>2</sub>-Intensität durch neue effizientere fossile Kraftwerke und zunehmende Erzeugung aus Erneuerbaren Energien. Die CO<sub>2</sub>-Emissionen von Pan-European Gas betrugen rund 512.000 t. Es wurden rund 513.000 Zertifikate zugeteilt.

| CO <sub>2</sub> -Intensität <sup>1)</sup> im E.ON-Konzern |              |              |
|-----------------------------------------------------------|--------------|--------------|
| in t CO <sub>2</sub> /MWh                                 | 2010         | 2009         |
| Central Europe                                            | 0,385        | 0,388        |
| UK <sup>2)</sup>                                          | 0,658        | 0,539        |
| Nordic                                                    | 0,045        | 0,031        |
| Neue Märkte                                               | 0,533        | 0,505        |
| <b>E.ON-Konzern</b>                                       | <b>0,419</b> | <b>0,421</b> |
| <b>E.ON-Konzern (nur Europa)</b>                          | <b>0,391</b> | <b>0,386</b> |

1) Spezifische CO<sub>2</sub>-Emissionen: ausgestoßene Tonnen CO<sub>2</sub> pro MWh erzeugten Stroms  
 2) Einschließlich der CO<sub>2</sub>-Emissionen der Kraft-Wärme-Kopplungsanlagen von UK, die in der Eigenerzeugung nicht enthalten sind

Unter [www.eon.com/verantwortung](http://www.eon.com/verantwortung) finden Sie ab Mai 2011 unseren CR-Bericht und weitere Informationen, die nicht als Bestandteil des zusammengefassten Lageberichts anzusehen sind.



## Mitarbeiter

### Entwicklung der Mitarbeiterzahlen

Am 31. Dezember 2010 waren im E.ON-Konzern weltweit 85.105 Mitarbeiter beschäftigt. Die Zahl der Beschäftigten ist damit im Vergleich zum Jahresende 2009 nahezu konstant geblieben. Hinzu kommen 2.501 Auszubildende sowie 301 Vorstände und Geschäftsführer.

| Mitarbeiter <sup>1)</sup>      |               |               |          |
|--------------------------------|---------------|---------------|----------|
|                                | 31. Dezember  |               | +/- %    |
|                                | 2010          | 2009          |          |
| Central Europe                 | 48.525        | 48.126        | +1       |
| Pan-European Gas               | 3.189         | 3.143         | +2       |
| UK                             | 14.831        | 16.098        | -8       |
| Nordic                         | 5.253         | 5.570         | -6       |
| Energy Trading                 | 1.062         | 1.075         | -1       |
| Neue Märkte                    | 8.496         | 7.976         | +7       |
| Corporate Center <sup>2)</sup> | 3.749         | 3.120         | +20      |
| <b>Summe</b>                   | <b>85.105</b> | <b>85.108</b> | <b>-</b> |

1) ohne Vorstände/Geschäftsführer und Auszubildende  
2) einschließlich E.ON IT

In der Market Unit Central Europe führten Erstkonsolidierungen im Geschäftsfeld Zentraleuropa Ost zu einem Anstieg der Mitarbeiterzahl. Demgegenüber verursachten die Abgabe des Höchstspannungsnetzes und die Mitarbeiterübergänge zur E.ON IT einen Personalarückgang im Inland.

In der Market Unit UK verringerte sich die Mitarbeiterzahl im Wesentlichen durch Effizienzsteigerungsmaßnahmen im Endkundengeschäft, Betriebsübergänge auf die E.ON IT und eine Desinvestition im Bereich Energy Services.

Die Personalreduktion bei Nordic ist unter anderem auf Restrukturierungsmaßnahmen und die Übertragung der IT-Aktivitäten auf die E.ON IT zurückzuführen.

Der Anstieg der Beschäftigten im Segment Neue Märkte ist im Wesentlichen durch die Einbeziehung einer Gasgesellschaft in der Market Unit Spain und den Aufbau einer zentralisierten Instandhaltungseinheit in der Market Unit Russia bedingt.

Der Mitarbeiteranstieg im Bereich Corporate Center beruht im Wesentlichen auf der Übertragung der IT-Aktivitäten auf die E.ON IT. Außerdem kam es durch die Gründung der zentralen Führungseinheit des Flottenmanagements zu weiteren Mitarbeiterübergängen an das Corporate Center.

## Geografische Struktur

Der Anteil der im Ausland tätigen Mitarbeiter ist im Vergleich zum Jahresende nahezu unverändert. Zum Ende des vierten Quartals waren insgesamt 49.989 Mitarbeiter (59 Prozent) im Ausland tätig.

| Mitarbeiter nach Regionen <sup>1)</sup> |               |
|-----------------------------------------|---------------|
|                                         | 31. Dez. 2010 |
| Deutschland                             | 35.116        |
| Großbritannien                          | 16.343        |
| Rumänien                                | 6.535         |
| Ungarn                                  | 5.431         |
| Schweden                                | 5.064         |
| Russland                                | 4.828         |
| Tschechische Republik                   | 3.454         |
| Bulgarien                               | 2.038         |
| Italien                                 | 1.516         |
| Weitere Länder <sup>2)</sup>            | 4.780         |

1) ohne Vorstände/Geschäftsführer und Auszubildende  
2) unter anderem Spanien, Frankreich, Niederlande, Polen

### Anteil weiblicher Mitarbeiter, Altersstruktur, Teilzeitbeschäftigung

Der Frauenanteil an der Belegschaft lag zum 31. Dezember 2010 bei insgesamt 27 Prozent. Bei den Senior Managern blieb der Frauenanteil unverändert bei 12 Prozent, bei den Top Executives stieg der Frauenanteil auf 7 Prozent. Zum Jahresende betrug das Durchschnittsalter im E.ON Konzern 42 Jahre und die durchschnittliche Betriebszugehörigkeit rund 15 Jahre. Insgesamt 7.932 Mitarbeiter waren am Jahresende im E.ON-Konzern in Teilzeit beschäftigt, davon 4.337 Frauen (55 Prozent). Die auf freiwilligen Kündigungen basierende Fluktuation lag im Konzerndurchschnitt bei 4,5 Prozent.

## Arbeitgebermarke – Employer Branding

Nur wenn E.ON in einem sich stark verändernden demografischen Umfeld und dem damit verbundenen Kampf um die Fachkräfte als attraktiver Arbeitgeber wahrgenommen wird, werden wir auch die am besten qualifizierten und talentiertesten Mitarbeiter gewinnen und langfristig an uns binden können. So sehen wir in der direkten Ansprache unterschiedlicher Zielgruppen sowie im Dialog mit ihnen einen wichtigen Erfolgsfaktor. Denn auf diesem Wege kommunizieren wir mit den potenziellen Mitarbeitern auf Augenhöhe und berücksichtigen die verschiedenen Bedürfnisse und Interessen. Dabei nutzen wir die verschiedensten Kanäle, wie zum Beispiel Karriereevents oder Social Media.

Zur Stärkung unserer Arbeitgebermarke sind wir außerdem aktiv in den Bereichen Hochschul-, Schüler- und Auszubildendenmarketing. Hierzu zählt auch die gezielte Ansprache von Jugendlichen mit Migrationshintergrund. Darüber hinaus bieten wir ausgezeichnete Einstiegsmöglichkeiten, attraktive Nachwuchsprogramme sowie internationale Karrieremöglichkeiten. Ferner investieren wir in Frauenförderung und diverse relevante Netzwerke. Dass das Employer-Branding-Konzept erfolgreich ist, zeigt sich bei den Arbeitgeber-Rankings – unter anderem „Deutschlands Beste Arbeitgeber“. Hier hat sich E.ON kontinuierlich gesteigert und wurde seit 2008 jährlich ausgezeichnet als einer der „Best Workplaces in Europe“. Besides sind Wettbewerbe des Great Place to Work® Institute.

## E.ON Graduate Program

Seit der Einführung des E.ON Graduate Program im Jahr 2005 wurden konzernweit insgesamt 287 Nachwuchskräfte eingestellt, davon 51 allein im Jahr 2010. 207 Trainees haben das Programm bereits erfolgreich abgeschlossen und konnten in verantwortungsvolle Funktionen übernommen werden.

## Personalentwicklung

Mit der Neuausrichtung unseres Talent Managements werden wir einen wichtigen Beitrag leisten, um unseren Führungsnachwuchs auch langfristig aus eigenen Reihen zu besetzen: Potenzialträger werden identifiziert, zielgerichtet entwickelt und eingesetzt. Die Basis hierfür bilden die jährlichen Mitarbeitergespräche sowie der konzernweite Management-Review-Prozess für Führungs- und Führungsnachwuchskräfte. Die Ergebnisse werden in die konzernweite Nachfolgeplanung sowie in unsere bedarfsorientierte Personalentwicklungsplanung eingebracht.

Die konzernweiten Weiterbildungskosten betrugen im Jahr 2010 rund 73 Mio €. Ein Großteil der Weiterbildung wird dabei über den internen Bildungsanbieter E.ON Academy abgedeckt.

## Executives

Die Führungs- und Steuerungsinstrumente für die sogenannten Executives wurden neu ausgerichtet. Ziele sind eine klarere Führungsstruktur die Erleichterung von Funktionswechseln über die Konzerngesellschaften hinweg. Die Anreizsysteme, vor allem das Short Term Incentive, wurden der neuen Konzernsteuerung angepasst und die Bewertung des individuellen Leistungsbeitrags, vor allem im Hinblick auf die konkret mit der jeweiligen Funktion verbundenen Aufgaben, gestärkt. Gleichzeitig wird die Bemessung des Unternehmenserfolges zukünftig durch die zentralen Steuerungsgrößen des Konzerns – das Adjusted EBITDA und das Verhältnis von Konzernüberschuss zu Kapitalkosten – erfolgen.

## Vergütung, Altersversorgung, Mitarbeiterbeteiligung

Zu einem wettbewerbsfähigen Arbeitsumfeld zählen auch eine attraktive Vergütung sowie ansprechende Nebenleistungen. Leistungen der betrieblichen Altersversorgung sind ein wichtiger Bestandteil der Gesamtvergütung und haben im E.ON-Konzern von jeher einen hohen Stellenwert. Sie sind für die Mitarbeiter eine wichtige Säule der Vorsorge für das Alter und tragen zugleich zu deren Bindung an das Unternehmen bei. Die Leistungen der E.ON-Unternehmen werden dabei durch attraktive betriebliche Angebote zur Eigenvorsorge ergänzt. Ein weiterer Erfolgsfaktor für die Mitarbeiterbindung ist die Beteiligung am Unternehmenserfolg: Dazu gehört die Gewährung von Performance-Rechten mit mehrjähriger Laufzeit im Rahmen des E.ON Share Performance Plans an Führungskräfte. Darüber hinaus wurde die Attraktivität des Mitarbeiteraktienprogramms durch eine Erhöhung des steuerfreien Zuschusses im Jahr 2009 erhalten. Im Jahr 2010 haben insgesamt 20.470 Mitarbeiter 980.897 Aktien gezeichnet. Damit lag die Teilnahmequote mit 55 Prozent etwas unterhalb der Quote des Vorjahres (57 Prozent).



## Grundzüge des Vergütungssystems für Vorstand und Aufsichtsrat

Die Grundzüge der Vergütungssysteme sowie Angaben zu den Konzernbezügen einzelner Vorstands- und Aufsichtsratsmitglieder sind für das Geschäftsjahr 2010 im Vergütungsbericht zusammengefasst. Er berücksichtigt die Regelungen des HGB in der durch das Gesetz zur Angemessenheit der Vorstandsvergütung (VorstAG) geänderten Fassung sowie die Grundsätze des Deutschen Corporate Governance Kodex. Der Vergütungsbericht befindet sich auf den Seiten 168 bis 175 und ist Bestandteil dieses zusammengefassten Lageberichts.

## Ausbildung

Einen traditionell hohen Stellenwert hat bei E.ON die Berufsausbildung junger Menschen. Die Ausbildungsquote in Deutschland blieb gegenüber dem Vorjahr annähernd gleich und liegt bei rund 7 Prozent. Die bereits im Jahr 2003 gestartete E.ON-Ausbildungsinitiative zur Vorbeugung von Jugendarbeitslosigkeit wurde auch im Jahr 2010 fortgeführt. Neben dem Start von 743 Auszubildenden (Vorjahr: 810) erhielten hier im Jahr 2010 über 925 Menschen eine Unterstützung zum Start ins Berufsleben in Form von ausbildungsvorbereitenden Praktika und Schulprojekten.

| Auszubildende in Deutschland   |               |
|--------------------------------|---------------|
|                                | 31. Dez. 2010 |
| Central Europe                 | 2.148         |
| Pan-European Gas               | 212           |
| E.ON AG/Sonstige <sup>1)</sup> | 141           |
| <b>E.ON-Konzern</b>            | <b>2.501</b>  |

1) einschließlich E.ON IT

## Forschung und Entwicklung

Im Jahr 2010 wurde im Vorstand der E.ON AG ein eigenes Vorstandsressort für Technologie eingerichtet. Dies unterstreicht die Bedeutung, die wir dem Thema Innovation im Energiebereich beimessen.

Wir haben 2010 das Engagement im Bereich Forschung und Entwicklung trotz des schwierigen wirtschaftlichen Umfelds beibehalten. Mit unseren vielfältigen Forschungs- und Entwicklungsaktivitäten verfolgen wir schon seit Langem zwei Ziele:

Zum einen optimieren wir bestehende Anlagen und Verfahren, um betrieblichen Herausforderungen mit innovativen Lösungen zu begegnen und unsere Anlagen während ihrer gesamten Lebensdauer effizient und wirtschaftlich zu betreiben.

Zum anderen unterstützen wir durch unsere Technologieinitiative „innovate.on“ aktiv die Entwicklung von Schlüsseltechnologien und beschleunigen so deren Markteintritt. Dies ist der Anspruch, den wir als eines der weltweit führenden Energieunternehmen an uns selbst stellen. Ziele unserer Aktivitäten sind, die operative Umsetzung von Forschungsergebnissen und ihre wirtschaftliche Implementierung aktiv voranzutreiben.

Im Jahr 2010 lag der Forschungs- und Entwicklungsaufwand von E.ON gemäß Rechnungslegungsstandard IAS 38 bei rund 61 Mio € (2009: 62 Mio €). 231 Mitarbeiter arbeiteten 2010 bei E.ON in den Bereichen Forschung und Entwicklung.

Neben den Investitionen in die Optimierung und Weiterentwicklung von Technologien ist E.ON auch auf dem Gebiet der Grundlagenforschung aktiv. E.ON unterstützte durch Spenden und Sponsoring die Energieforschung an Hochschulen im Jahr 2010 mit 6 Mio €.

Die gesamten Ausgaben im Jahr 2010 für neue Technologien in den Bereichen Hochschulförderung, Forschung, Entwicklung und Demonstrationsanlagen lag bei 93 Mio € (2009: 105 Mio €).

## Risikomanagementsystem

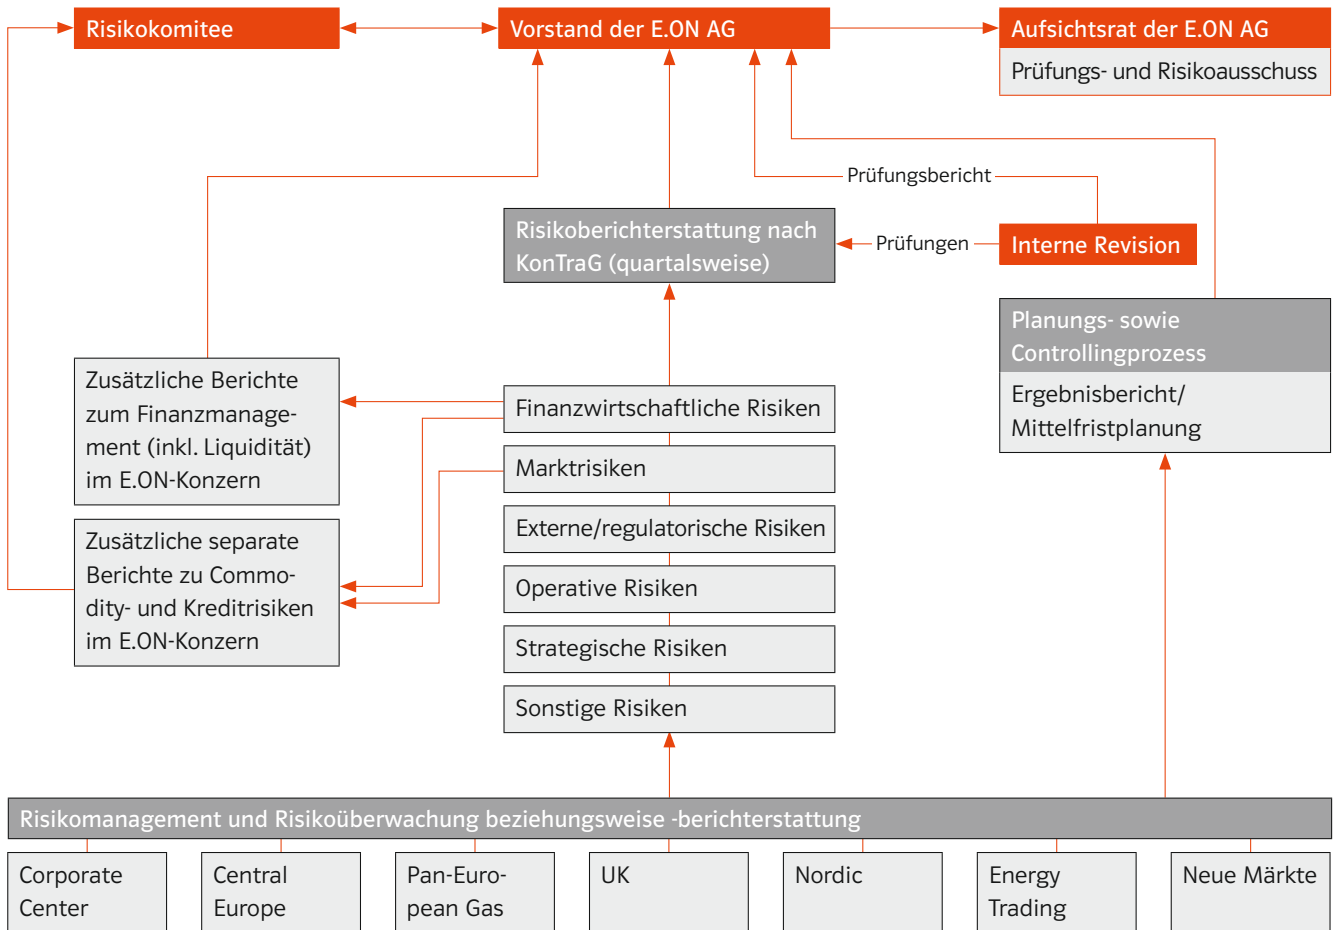

Das Risikomanagementsystem besteht aus einer Vielzahl von Bausteinen, die in die gesamte Aufbau- und Ablauforganisation von E.ON eingebettet sind. Damit ist das Risikomanagementsystem integraler Bestandteil der Geschäftsprozesse und Unternehmensentscheidungen. Zu den Bausteinen des Risikomanagementsystems zählen im Wesentlichen konzernweite Richtlinien und Berichtssysteme, der konzernweit einheitliche Strategie-, Planungs- und Controllingprozess, die Tätigkeit der internen Revision sowie die gesonderte konzernweite Risikoberichterstattung auf Basis des Gesetzes zur Kontrolle und Transparenz im Unternehmensbereich (KonTraG) und die Einrichtung von Risikokomitees. Unser Risikomanagementsystem zielt darauf ab, die Unternehmensleitung in die Lage zu versetzen, frühzeitig Risiken zu erkennen, um rechtzeitig gegensteuern zu können. Die konzernweiten Planungs-, Steuerungs- und Berichtsprozesse werden kontinuierlich auf Effektivität und Effizienz überprüft. Darüber hinaus erfolgt gemäß den gesetzlichen Anforderungen eine regelmäßige Überprüfung der Wirksamkeit unseres Risikofrüherkennungssystems durch unsere interne Revision.

## Risikomanagement und Versicherung

Die E.ON Risk Consulting GmbH ist als 100-prozentige Tochter der E.ON AG für das Versicherungs-Risikomanagement im E.ON-Konzern verantwortlich. Sie entwickelt und optimiert Lösungen für die betrieblichen Risiken des Konzerns durch Versicherungs- und versicherungsähnliche Instrumente und deckt diese in den internationalen Versicherungsmärkten ein. Hierzu stellt E.ON Risk Consulting GmbH unter anderem die Bestandsführung, das Schadenmanagement, die Abrechnung der Versicherungsverträge und -ansprüche sowie das entsprechende Reporting sicher.

## Risikokomitee

Gemäß den Bestimmungen von § 91 Abs. 2 AktG zur Einrichtung eines Überwachungs- und Risikofrüherkennungssystems besteht ein Risikokomitee für den E.ON-Konzern. Das Risikokomitee stellt als Gremium unter Beteiligung von maßgeblich beteiligten Bereichen und Abteilungen der E.ON AG die Umsetzung und Einhaltung der durch den Vorstand beschlossenen Strategie zur Risikopolitik im Commodity- und Kreditrisikobereich sicher und entwickelt diese weiter.

## Risikolage

Im Zuge unserer geschäftlichen Aktivitäten sind wir einer Reihe von Risiken ausgesetzt, die untrennbar mit unserem unternehmerischen Handeln verbunden sind. Für den E.ON-Konzern und somit auch für die E.ON AG bestehen im Wesentlichen folgende Risiken:

### Marktrisiken

Das internationale Marktumfeld, in dem sich unsere Market Units bewegen, ist durch allgemeine Risiken der Konjunktur gekennzeichnet. In Verbindung mit der Wirtschaftskrise ergaben sich für E.ON somit Risiken aus Nachfragerückgängen im Wesentlichen bei industriellen beziehungsweise gewerblichen Kunden, die zunehmend ihre Produktion reduziert haben und unter Umständen weiter kürzen werden. Dadurch könnten möglicherweise schon eingedeckte Mengen nicht abgesetzt werden. Unser in- und ausländisches Stromgeschäft sieht sich zudem, bedingt durch neu in den Markt tretende Anbieter sowie aggressiveres Vorgehen bereits bestehender Marktteilnehmer, einem verstärkten Wettbewerb ausgesetzt, der unsere Margen reduzieren könnte. E.ON Ruhrgas sieht sich im Gasbereich ebenfalls einem zunehmenden und erheblichen Wettbewerbsdruck ausgesetzt. Aus dem zunehmenden Wettbewerb auf dem Gasmarkt und steigenden Handelsvolumina an virtuellen Handelspunkten und der Gasbörse könnten erhebliche Risiken für Mengen aus Langfristverträgen mit Take-or-pay-Verpflichtungen resultieren. Darüber hinaus ergeben sich gravierende Preisrisiken, da die Gasbezugspreise überwiegend an den Ölpreis gekoppelt sind, während die Verkaufspreise sich am Handelsmarkt orientieren. Insgesamt unterliegen die Verträge zwischen Produzenten und Importeuren generell Anpassungen an aktuelle Marktgegebenheiten. E.ON Ruhrgas führt derzeit intensive Verhandlungen mit den Produzenten.

Die Nachfrage nach Strom und Gas ist grundsätzlich saisonal. Im Allgemeinen existiert eine höhere Nachfrage während der kalten Monate Oktober bis März sowie eine geringere Nachfrage während der wärmeren Monate April bis September. Im Ergebnis bedeutet diese saisonale Struktur, dass unsere Umsätze und operativen Ergebnisse im ersten und vierten Quartal höher beziehungsweise im zweiten und dritten Quartal geringer sind. Unsere Umsätze und operativen Ergebnisse können jedoch bei ungewöhnlich warmen Wetterperioden während der Herbst- und Wintermonate negativ beeinflusst werden. Darüber hinaus könnten sich für unsere Market Unit Nordic negative Auswirkungen durch einen zu geringen Niederschlag ergeben, der sich in einer reduzierten Stromerzeugung aus Wasserkraft bemerkbar machen kann. Wir erwarten auch weiterhin saisonale und wetterbedingte Fluktuationen im Hinblick auf unsere Umsätze und operativen Ergebnisse.

Durch ein umfassendes Vertriebscontrolling und ein intensives Kundenmanagement begrenzen wir diese Risiken.

### Marktpreisänderungsrisiken

Der E.ON-Konzern ist bei seiner operativen Geschäftstätigkeit Marktpreisänderungsrisiken im Commodity-Bereich ausgesetzt. Zur Begrenzung dieser Risiken betreiben wir ein systematisches Risikomanagement. Kernelemente dieses Risikomanagements sind – neben den bereits erwähnten konzernweit bindenden Richtlinien und dem unternehmensweiten Berichtssystem – die Verwendung quantitativer Kennziffern sowie die Limitierung von Risiken und die Funktionstrennung von Bereichen. Zur Begrenzung von Marktpreisänderungsrisiken setzen wir im Markt übliche derivative Instrumente ein. Diese Instrumente werden mit Finanzinstituten, Brokern, Strombörsen und Drittkunden kontrahiert, deren Bonität wir laufend überwachen. Die Preisrisiken aus den liquiden europäischen Commodity-Märkten sind bei der E.ON Energy Trading gebündelt und werden dort einheitlich gesteuert.

Im Wesentlichen werden Strom-, Gas-, Kohle-, Emissionsrechte- und Ölpreissicherungsgeschäfte kontrahiert, um Preisänderungsrisiken abzusichern, eine Systemoptimierung und einen Lastenausgleich zu erzielen sowie unsere Margen zu sichern. Der Eigenhandel im Commodity-Bereich findet im Rahmen detailliert festgelegter Richtlinien und innerhalb eng definierter Grenzen statt.

### Finanzwirtschaftliche Risiken

Der E.ON-Konzern ist aufgrund der internationalen Natur seiner Geschäftstätigkeit Risiken aus Wechselkursschwankungen ausgesetzt. Solche Risiken entstehen einerseits aufgrund der Zahlungen in einer anderen Währung als der funktionalen Währung der Gesellschaft (Transaktionsrisiko). Andererseits führen Wechselkursschwankungen zu einem bilanziellen Effekt aufgrund der Umrechnung der Bilanzpositionen sowie der Erträge und Aufwendungen der ausländischen Konzerngesellschaften im Konzernabschluss (Translationsrisiko). Die Sicherung der Wechselkursrisiken erfolgt im Rahmen des Währungsmanagements durch den Einsatz derivativer Finanzinstrumente. Die Wechselkursrisiken stammen im Wesentlichen aus Geschäften in US-Dollar, britischen Pfund, schwedischen Kronen, norwegischen Kronen und ungarischen Forint.

Aus variabel verzinslichen Finanzverbindlichkeiten, Fälligkeiten beziehungsweise kurzfristigen Finanzierungen und Zinsderivaten, die auf variablen Zinsen basieren, können sich für E.ON Ergebnisrisiken ergeben.

Die Steuerung der Zins- und Währungsrisiken erfolgt auf Basis eines systematischen Risikomanagements. Die E.ON AG übernimmt hierbei eine zentrale Funktion, sie bündelt mittels konzerninterner Geschäfte die entstehenden Risikopositionen und sichert diese am externen Markt. Die Risikoposition der E.ON AG ist aufgrund der durchleitenden Funktion somit weitgehend geschlossen. Ausführliche Erläuterungen zum Risikomanagement des Konzerns befinden sich in Textziffer 31 des Anhangs zum Konzernabschluss.

Aus dem operativen Geschäft sowie dem Einsatz von Finanzinstrumenten ergeben sich für E.ON Kreditrisiken. Im Rahmen des konzernweiten Kreditrisikomanagements erfolgt eine systematische Überwachung der Geschäftspartner-Bonität auf Grundlage konzernweiter Mindestvorgaben. Die Steuerung des Kreditrisikos erfolgt durch den Einsatz geeigneter Maßnahmen, unter anderem die Hereinnahme von Sicherheiten und durch Limitierung. Das Risikokomitee des E.ON-Konzerns wird regelmäßig über die wesentlichen Kreditrisiken unterrichtet.

Aus Verpflichtungen zur liquiden Hinterlegung von Sicherheiten bei negativen Marktpreisbewertungen derivativer Finanzinstrumente können sich für E.ON Liquiditätsrisiken ergeben.

Darüber hinaus ergeben sich Kursänderungs- und weitere Verlustrisiken aus kurz- und langfristigen Kapitalanlagen, die bei E.ON zur Deckung langfristiger Verpflichtungen, insbesondere im Pensions- und Entsorgungsbereich, dienen. Grundlage der Risikosteuerung ist dabei eine konservative Anlagepolitik und eine breite Diversifizierung des Portfolios.

Weitere Risiken könnten sich aus den Initiativen der Europäischen Kommission zu geplanten Änderungen der Regulierung von Derivaten sowie aus der Rücknahme der Markets in Financial Instruments Directive (MiFID)-Ausnahme für Energiehandelsunternehmen ergeben. Hinsichtlich der Derivate-Regulierung wird von der Europäischen Kommission geprüft, auch für den Energiehandel ein obligatorisches Clearing der OTC-Geschäfte einzuführen. Dies würde die Sicherheiten erhöhen, die für die Handelsgeschäfte hinterlegt werden müssten, was ein erhöhtes Liquiditätsrisiko bedeutet. Weiterhin kann sich dieses negativ auf die wirtschaftliche Netto-Verschuldung von E.ON auswirken. Die Rücknahme der MiFID-Ausnahme für Energiehandelsunternehmen hätte ähnliche Auswirkungen wie die Regulierung der OTC-Geschäfte. Zusätzlich könnten erhöhte Eigenkapitalanforderungen und Berichterstattungspflichten für die Energiehandelsgesellschaften von E.ON entstehen.

### Strategische Risiken

Unsere Strategie bezieht Akquisitionen und Investitionen in unser Kerngeschäft sowie Desinvestitionen mit ein. Diese Strategie hängt in Teilen von unserer Fähigkeit ab, Unternehmen erfolgreich zu identifizieren, zu erwerben und zu integrieren, die unser Energiegeschäft unter annehmbaren Bedingungen sinnvoll ergänzen. Um die notwendigen Zustimmungen für Akquisitionen zu erhalten, könnten wir aufgefordert werden, andere Teile unseres Geschäfts zu veräußern oder Zugeständnisse zu leisten, die unser Geschäft wesentlich beeinflussen. Zusätzlich können wir nicht garantieren, dass wir die Rendite erzielen, die wir von jeder möglichen Akquisition oder Investition erwarten. Beispielsweise könnte es problematisch werden, wichtige Leistungsträger zu halten, akquirierte Unternehmen erfolgreich in unser vorhandenes Geschäft zu integrieren sowie geplante Kosteneinsparungen beziehungsweise operative Ergebnisbeiträge zu realisieren und zukünftige Marktentwicklungen oder regulatorische Veränderungen richtig zu beurteilen. Zudem ist es möglich, dass wir für eine Akquisition, eine Integration oder den Betrieb eines neuen Geschäfts mehr aufwenden müssen als angenommen. Des Weiteren beinhalten Akquisitionen und Investitionen in neue geografische Gebiete oder Geschäftsbereiche, dass wir uns mit neuen Absatzmärkten und Wettbewerbern vertraut machen und uns mit den entsprechenden wirtschaftlichen Risiken auseinandersetzen.

Möglichen Risiken in Verbindung mit Akquisitionen und Investitionen begegnen wir mit umfangreichen präventiven Maßnahmen. Diese beinhalten soweit möglich – neben den zugrunde liegenden Richtlinien und Handbüchern – unter anderem umfassende Due-Diligence-Prüfungen und die

rechtliche Absicherung im Rahmen von Verträgen sowie ein mehrstufiges Genehmigungsverfahren und ein Beteiligungsbeziehungsweise Projektcontrolling. Nachgelagerte umfangreiche Integrationsprojekte tragen darüber hinaus zu einer erfolgreichen Integration bei.

Bei geplanten Desinvestitionen besteht für E.ON das nicht bewertbare Risiko des Nichteintretens oder der zeitlichen Verzögerung sowie das Risiko, dass E.ON einen geringeren als den erwarteten Beteiligungswert als Veräußerungserlös erhält. Die Eintrittswahrscheinlichkeit dieser Risiken ist bei derartigen Projekten nicht bewertbar. Das Nichteintreten oder eine signifikante zeitliche Verzögerung bei geplanten Desinvestitionen durch E.ON würde die geplante Entwicklung des Debt Factors negativ beeinflussen.

### Operative Risiken und Umweltrisiken

Bei der Erzeugung und Verteilung von Energie werden technologisch komplexe Produktionsanlagen eingesetzt. In bedeutenden Teilen Europas und der USA kam es in den letzten Jahren zu größeren Stromausfällen. Die Gründe für diese Stromausfälle variieren, obwohl sie hauptsächlich auf ein ungenügendes – lokales oder regionales – Gleichgewicht zwischen Energieerzeugung und -verbrauch zurückzuführen sind. Dabei können einzelne Ausfälle aufgrund von Überlastung oder Spannungsproblemen eine kaskadenförmige Abschaltung der Netze und Kraftwerke auslösen. Die Wahrscheinlichkeit dieser Art von Problemen hat sich in den letzten Jahren nach der Liberalisierung der EU-Strommärkte erhöht. Dies ist zum Teil mit einem zunehmenden grenzüberschreitenden Stromhandel zu begründen, der zu einer wesentlich höheren Belastung des internationalen Verbundnetzes führt, das ursprünglich hauptsächlich für Zwecke der gegenseitigen Unterstützung und Betriebsoptimierung konstruiert wurde. Infolgedessen gibt es Engpässe an vielen Stellen in Europa und die hohe Belastung hat zu einem geringeren Grad an Sicherheitsreserven im Netz geführt. In Deutschland ist das Risiko von Stromausfällen geringer, da sich Kraftwerke – im Gegensatz zu vielen anderen Ländern – in der näheren Umgebung von Ballungszentren befinden und somit kürzere Übertragungswege vorhanden sind beziehungsweise eine stärkere Vernetzung gegeben ist. Zusätzlich wird die geringe Wahrscheinlichkeit eines Stromausfalls in Deutschland durch die Organisation des deutschen Stromnetzes in vier Regelzonen unterstützt. Dennoch existiert im Hinblick auf unsere deutschen und internationalen Aktivitäten das Risiko eines Stromausfalls sowie einer Abschaltung

von Kraftwerken infolge unvorhergesehener Betriebsstörungen oder sonstiger Probleme, die unter anderem auch auf extreme Wetterverhältnisse zurückgeführt werden können. Betriebsstörungen oder längere Produktionsausfälle von Anlagen oder Komponenten könnten unsere Ertragslage beeinträchtigen.

Wir könnten darüber hinaus – in Verbindung mit dem Betrieb von Kernkraftwerken oder konventionellen Kraftwerken – durch Umweltschädigungen aus der Umwelthaftpflicht beansprucht werden, was unser Geschäft wesentlich negativ beeinflussen könnte. Zusätzlich können neue oder geänderte Umweltgesetze und -regelungen eine wesentliche Zunahme der Kosten für uns bedeuten.

Ferner ist Klimawandel ein zentraler Risikofaktor geworden. Die operative Geschäftstätigkeit bei E.ON kann beispielsweise durch ausbleibende Niederschläge oder durch überdurchschnittlich hohe Temperaturen, in deren Folge es zu einer reduzierten Effizienz bei der Kühlung oder gar zur Abschaltung von Anlagen kommen kann, negativ beeinflusst werden. Extreme Wetterereignisse oder langfristige klimatische Veränderungen können auch Auswirkungen auf die Windenergieerzeugung haben. Neben den Risiken bei der Energieerzeugung gibt es auch Risiken, die zu einer Störung der Off-site-Aktivitäten (zum Beispiel Verkehr, Kommunikation, Wasser, Abfallentsorgung etc.) führen können. Unsere Investoren und Kunden erwarten bei Umweltthemen wie Klimawandel oder beim verantwortungsvollen Umgang mit der Ressource Wasser zunehmend eine aktive Führungsrolle. Wird diese Erwartungshaltung nicht erfüllt, erhöht sich das Geschäftsrisiko durch reduzierte Investitionen der Kapitaleseite und ein schwindendes Vertrauen in unsere Marke.

Zur Begrenzung dieser Risiken wird E.ON ihr Netzmanagement und den optimalen Einsatz ihrer Kraftwerke weiterhin verbessern. Zugleich führen wir betriebliche und infrastrukturelle Verbesserungen durch, die die Sicherheit unserer Kraftwerke und der Übertragungs- und Verteilungsnetze auch unter außergewöhnlichen Belastungen erhöhen. Zusätzlich haben wir die operativen und finanziellen Auswirkungen von Umweltrisiken auf unser Geschäft in eine Ausfallplanung integriert. Sie sind Teil einer Erfassung von Krisen und Störfallszenarien, die unser Notfall- und Krisenmanagement-Team für den Konzern vorbereitet.

Wir ergreifen unter anderem die folgenden umfassenden Maßnahmen, um diesen Risiken zu begegnen:

- Systematische Schulungs-, Weiterbildungs- und Qualifikationsprogramme für unsere Mitarbeiter
- Weiterentwicklung und Optimierung unserer Produktionsverfahren, -prozesse und -technologien
- Regelmäßige Wartung und Inspektion unserer Anlagen und Netze
- Richtlinien sowie Arbeits- und Verfahrensanweisungen
- Qualitätsmanagement, -kontrollen und -sicherung
- Projekt-, Umwelt- und Alterungsmanagement
- Krisenabwehrorganisation und Notfallplanungen

Gegen dennoch eintretende Schadensfälle sind wir in einem wirtschaftlich sinnvollen Umfang versichert.

Zusätzlich ergeben sich gegenwärtig aus der operativen Geschäftstätigkeit des E.ON-Konzerns einzelne Risiken in Verbindung mit Rechtsstreitigkeiten. Im Wesentlichen handelt es sich dabei um Klagen und Verfahren wegen Preiserhöhungen, angeblicher Marktabsprachen und marktmisbräuchlichen Verhaltens. Die genannten Verfahren wegen Preiserhöhungen schließen Klagen auf Rückforderung von vereinnahmten Erhöhungsbeträgen im Zusammenhang mit der Feststellung der Unwirksamkeit von Preisanpassungsklauseln der vergangenen Jahre im Sonderkundensegment mit ein. Zwischenzeitlich ist im Juli 2010 gegen die EWE AG ein Urteil des BGH über die Wirksamkeit von Gaspreisanpassungen und die Rechtswirkungen vorbehaltloser Zahlung ergangen. Die möglichen Auswirkungen dieses Urteils auf die Gesellschaften des E.ON-Konzerns können derzeit noch nicht abschließend beurteilt werden.

Die Europäische Kommission hat am 8. Juli 2009 gegen E.ON Ruhrgas und E.ON als Gesamtschuldner wegen angeblicher Marktabsprachen mit GdF Suez ein Bußgeld in Höhe von 553 Mio € verhängt. E.ON Ruhrgas und E.ON haben im September 2009 gegen diese Bußgeldentscheidung Nichtigkeitsklage beim Europäischen Gericht Erster Instanz erhoben. Die Klageerhebung hat keine aufschiebende Wirkung. Das Bußgeld wurde fristgemäß im Oktober 2009 gezahlt. Folgeverfahren können nicht ausgeschlossen werden.

E.ON errichtet derzeit in Datteln ein Steinkohlekraftwerk mit einer elektrischen Nettoleistung von ca. 1.055 MW und hat in diesem Zusammenhang bereits rund 1 Mrd € investiert. Mit Urteil vom 3. September 2009 hat das Oberverwaltungsgericht Münster den Bebauungsplan der Stadt Datteln (Nr. 105 E.ON Kraftwerk) für unwirksam erklärt. Das Oberverwaltungsgericht rügt neben Abwägungsfehlern vor allem, dass der Bebauungsplan verbindliche landesplanerische Vorgaben nicht hinreichend berücksichtigt habe. Das Bundesverwaltungsgericht Leipzig hat die Entscheidung des Oberverwaltungsgerichts Münster am 16. März 2010 bestätigt, sodass die

Entscheidung des OVG nun rechtskräftig ist. Gleichwohl verneint das Oberverwaltungsgericht in seinem Urteil nicht den Bau eines Steinkohlekraftwerks auf dem dafür vorgesehenen Standort. Der Rat der Stadt Datteln hat am 17. März 2010 einen Einleitungsbeschluss für ein neues Bebauungsplanverfahren gefasst. Der Regionalverband Ruhr hat am 13. Dezember 2010 einen Erarbeitungsbeschluss für ein Regionalplanänderungsverfahren gefasst, der zunächst über die Vergabe von Rechtsgutachten rechtlich abgesichert werden muss. In dem durchzuführenden neuen Planverfahren müssen die Kritikpunkte des OVG aufgegriffen und behoben werden, um die planerischen Grundlagen für das Kraftwerk in Datteln wiederherzustellen. Aktuell ist vor dem Hintergrund der laufenden Planungsprozesse mit weiteren Verzögerungen gegenüber dem ursprünglich vorgesehenen Inbetriebnahmezeitpunkt zu rechnen. Wir sind weiterhin fest von der erfolgreichen Realisierung der Anlage überzeugt. Derartige Risiken können sich im Grundsatz auch bei anderen Neubauvorhaben im Strom- und Gasbereich ergeben. Durch eine entsprechende Verfahrensbetreuung soll sichergestellt werden, solche Risiken frühzeitig zu erkennen und zu minimieren.

Des Weiteren sind im Zusammenhang mit der Veräußerung von VEBA Electronics im Jahr 2000 Klagen gegen die E.ON AG und US-Tochtergesellschaften anhängig. Gegen Unternehmen des E.ON-Konzerns könnten zudem auch in Zukunft gerichtliche Prozesse, behördliche Untersuchungen und Verfahren sowie andere Ansprüche eingeleitet oder geltend gemacht werden. Durch eine geeignete Verfahrensbetreuung und entsprechende Vertragsgestaltungen im Vorfeld versuchen wir, die Risiken dieser und zukünftiger Rechtsstreitigkeiten zu minimieren.

E.ON Ruhrgas bezieht gegenwärtig – auf Basis langfristiger Bezugsverträge mit Gazprom – rund ein Viertel ihrer gesamten Gaslieferungen aus Russland. Mit zurzeit fünf weiteren Lieferländern ist E.ON Ruhrgas eines der am stärksten diversifizierten Gasversorgungsunternehmen Europas. Verschiedene zurückliegende Ereignisse in einigen Ländern Osteuropas haben in Teilen Westeuropas die Bedenken hinsichtlich der Zuverlässigkeit russischer Gaslieferungen verstärkt, obwohl Russland bisher immer ein sehr zuverlässiger Lieferant war. Wirtschaftliche beziehungsweise politische Instabilität oder andere Konflikte in jedem möglichen Durchleitungsland, durch das russisches Gas geleitet werden muss, bevor es seinen abschließenden Bestimmungsort in Westeuropa erreicht, können nachteilige Auswirkungen auf den Gasbezug aus Russland haben, wobei derartige Vorfälle außerhalb der Einflussmöglichkeiten von E.ON Ruhrgas liegen.



## Externe Risiken

Weitere Risiken ergeben sich aus dem politischen, rechtlichen und regulatorischen Umfeld des E.ON-Konzerns, dessen Änderung zu erheblichen Planungsunsicherheiten führen kann.

Die im Koalitionsvertrag festgeschriebene Laufzeitverlängerung der Kernkraftwerke wurde mit der 11. Atomgesetz-Novelle umgesetzt. Ältere Anlagen (Inbetriebnahme bis einschließlich 1980) haben zusätzliche Reststrommengen erhalten, die einer Laufzeitverlängerung von acht Jahren entsprechen, jüngere Anlagen Reststrommengen für 14 zusätzliche Jahre. Ein wesentlicher Teil der zusätzlichen Gewinne aus der Laufzeitverlängerung wird vom Bund über Förderbeiträge im Rahmen eines „Energie- und Klimafonds“ abgeschöpft. Darüber hinaus wird eine Kernbrennstoffsteuer erhoben. Hinsichtlich der Förderbeiträge regelt der zwischen den Kernkraftwerksbetreibern, deren Konzernobergesellschaften sowie der Bundesrepublik Deutschland abgeschlossene Förderfondsvertrag die Einzelheiten. Sollte es zu einem Regierungswechsel kommen, ist offen, ob eine neue Bundesregierung an der Laufzeitverlängerung unverändert festhält und sich die gesetzlich fixierten zusätzlichen Reststrommengen vollumfänglich realisieren lassen. Zudem ist mit diversen Klagen gegen die Laufzeitverlängerung zu rechnen, deren Erfolgsaussichten allerdings als gering einzuschätzen sind.

In Europa entwickelten die europäischen Regulierer Vorschläge zu rechtsverbindlichen Rahmenrichtlinien zum Kapazitäts- und Engpassmanagement für Gasfernleitungsnetzbetreiber. Die Regeln betreffen die Grenzübergangspunkte zwischen Mitgliedstaaten sowie Grenzübergangspunkte zwischen verschiedenen Gasfernleitungsnetzbetreibern innerhalb eines Mitgliedstaates. Die Vorschläge wurden vom Markt konsultiert und könnten Risiken in Bezug auf bestehende Lieferverträge sowie untätige Flexibilitäten haben. Parallel dazu plant die Bundesnetzagentur (BNetzA) in Deutschland Festlegungen zu Änderungen im Kapazitätsvergabeverfahren für deutsche Gasfernleitungen. Diese Änderungen können Auswirkungen auf bestehende Aktivitäten im Gasbereich haben.

Die Bundesregierung hat, wie im Koalitionsvertrag vereinbart, den Prozess zur Aufhebung des Gorleben-Moratoriums eingeleitet. Die Erkundung soll nun in einem mehrstufigen Verfahren ergebnisoffen fortgesetzt werden. Das Bundesumweltministerium rechnet mit dem Abschluss der Vorbereitungsphase, die mit der Feststellung der Eignung und im positiven Falle mit der Einleitung des atomrechtlichen Verfahrens endet, nicht vor Ende der nächsten Legislaturperiode.

Die BNetzA hat Ende 2009 gegen alle E.ON Energie-Regionalversorgungsunternehmen mit neuer Regionalstruktur sowie E.ON Energie ein förmliches Verfahren wegen vermeintlicher Nichteinhaltung von Entflechtungsvorgaben eingeleitet. Die Behörde plant, das Verfahren gegen die E.ON Bayern AG und die E.ON Energie AG als Musterverfahren weiterzuführen und die Verfahren gegen die anderen Regionalversorgungsunternehmen ruhen zu lassen. E.ON Energie und E.ON Bayern sowie E.ON edis als Regionalversorgungsunternehmen mit kommunaler Beteiligung haben zwischenzeitlich eine ausführliche Stellungnahme zur Einleitung des Verfahrens abgegeben. Ein erster mündlicher Verhandlungstermin findet bei der BNetzA im ersten Halbjahr 2011 statt.

Im Hinblick auf IT-basierte Abrechnungssysteme hat die BNetzA eine Trennung von Kundenstämmen zwischen Vertrieb und Netz in den Abrechnungssystemen festgelegt (Zwei-Mandanten-System). IT-bedingt kam es zu Umsetzungsschwierigkeiten in der Branche, sodass die Umsetzungsfrist durch die BNetzA bis zum 1. Oktober 2010 verlängert wurde. Bei der Umsetzung durch E.ON kam es teilweise zu IT-bedingten Verzögerungen oder migrationsbedingten systemischen Restfehlern. Infolge von Händlerbeschwerden bei der BNetzA wurden gegen E.ON edis zwischenzeitlich zwei Zwangsgelder (650.000 € und 1,3 Mio €) festgesetzt und für einen weiteren Wiederholungsfall wieder ein Zwangsgeld von erneut 1,3 Mio € angedroht. Darüber hinaus haben zwischenzeitlich auch die E.ON Bayern AG Zwangsgelder in Höhe von 2,5 Mio € sowie die Schleswig-Holstein Netz AG in Höhe von 750.000 € angedroht bekommen. E.ON arbeitet derzeit an der Migration aller IT-Systeme seiner Regionalversorger und an der Beseitigung etwaiger Restfehler. Dieser Prozess wird begleitet von Gesprächen mit der BNetzA.



Für das Jahr 2010 war vorgesehen, den überregionalen Transportbereich von Open Grid Europe (vormals E.ON Gastransport) in die Anreizregulierung zu überführen. Vor der Überführung findet ein Effizienzvergleich zwischen den zehn Gastransportnetzbetreibern statt, die unter anderem mit Blick auf ihre transportwirtschaftliche Versorgungsaufgabe, ihre Größe und ihre Netzhistorie untereinander sehr heterogen sind. Der vorläufige individuelle Effizienzfaktor wurde den Unternehmen Ende März übermittelt. Eine Entscheidung über die endgültigen Effizienzfaktoren steht weiterhin noch aus. Die BNetzA hat aus diesem Grund eine vorläufige Erlösobergrenze für die Jahre 2010 und 2011 festgelegt. Diese schreibt lediglich die im Kostenbescheid vom 30. September 2009 beschiedene Höhe der erlaubten Einnahmen unverändert fort und bleibt so lange in Kraft, bis die Behörde eine finale Erlösobergrenze festgelegt hat. Aktuell überlegt die Behörde, die im Effizienzvergleich bislang bekannten drei Parameter noch einmal zu verändern. Der individuelle Effizienzfaktor beeinflusst die Höhe der Erlösobergrenze. Darüber hinausgehende Risiken aus der Entgeltregulierung sind nicht auszuschließen.

Die Europäische Kommission, das Europäische Parlament und die Mitgliedstaaten hatten im August 2009 abschließend das dritte Binnenmarktpaket verabschiedet. Danach ist neben einer vollständigen eigentumsrechtlichen Entflechtung von Übertragungsnetzbetreibern (Strom/Gas) die Einsetzung eines Independent Transmission Operators (ITO) oder eines Independent System Operators (ISO) möglich. Das dritte Binnenmarktpaket nimmt auf alle Wertschöpfungsstufen Einfluss und eröffnet den nationalen und europäischen Regulierungsbehörden weitreichende neue Eingriffsmöglichkeiten. Risiken ergeben sich nicht nur durch diese Eingriffsmöglichkeiten, sondern auch durch nationale Umsetzungsgesetze, die über die Vorgaben der Strom- und Gasrichtlinie hinausgehen. Die Mitgliedstaaten arbeiten derzeit an der Umsetzung der beiden Richtlinien in nationales Recht.

Daneben haben die Europäische Kommission, das Europäische Parlament und der Rat das „Grüne Paket“ verabschiedet, mit dem die Klimaziele der EU erreicht werden sollen: Bis 2020 sollen im Vergleich zu 1990 20 Prozent des Energiekonsums der EU aus Erneuerbaren Energien bereitgestellt und Treibhausgase um 20 Prozent (gegebenenfalls 30 Prozent) gesenkt werden. Die bisher kostenlose Zuteilung von Zertifikaten über das Europäische Emissionshandelssystem (ETS) wird schrittweise durch Auktionen ersetzt. Stromerzeuger sind bereits ab 2013 verpflichtet, ihre Zertifikate vollständig über Auktionen zu erwerben. Die absolute Anzahl von Zertifikaten wird jährlich verringert. Industrien, die nicht unter das ETS fallen, müssen ebenfalls ihre Emissionen entsprechend den nationalen Zielen verringern. Ein Teil der Brennstoffe für private Nutzer (Heizung, Transport) muss aus Erneuerbaren Rohstoffen kommen. Die Technologie von CO<sub>2</sub>-Abscheidung und -Speicherung soll gefördert werden. Das Paket nimmt einen starken Einfluss auf den zukünftigen Erzeugungsmix sowie die Ausgestaltung der Netze und der Marktregeln.

Durch einen intensiven und konstruktiven Dialog mit Behörden und Politik versuchen wir, diesen Risiken zu begegnen.

### IT-Risiken

Die operative und strategische Steuerung unseres Konzerns ist maßgeblich abhängig von einer komplexen Informationstechnologie. Die Optimierung und Aufrechterhaltung der IT-Systeme wird durch den Einsatz qualifizierter interner und externer Experten sowie durch diverse technologische Sicherungsmaßnahmen gewährleistet. Daneben begegnet der E.ON-Konzern den Risiken aus unberechtigtem Datenzugriff, Datenmissbrauch und Datenverlust mit diversen Gegenmaßnahmen technischer und organisatorischer Art.

### Reputationsrisiken

E.ON verfügt in allen wesentlichen Märkten, mit Ausnahme von Deutschland, über akzeptable Markenwerte. Wie bei allen großen Energieversorgern in Deutschland haben sich die Werte durch die Kernkraftdebatte im Allgemeinen und die unterstellten Milliardengewinne im Besonderen erheblich verschlechtert. E.ON ist in Deutschland besonders exponiert und wird bei öffentlichen Diskussionen zu kritischen Themen der Energiepolitik stets genannt. Darüber hinaus hat E.ON seinen Hauptsitz in Deutschland und erhält als großes DAX-Unternehmen ohnehin große öffentliche Aufmerksamkeit.

Vertrauen und Glaubwürdigkeit sind Voraussetzungen, um langfristig erfolgreich zu arbeiten. Grundlage dafür ist, dass sich E.ON mit klaren Botschaften konsistent gegenüber den wichtigen Zielgruppen (Politik, Öffentlichkeit, Kunden) präsentiert. Dazu wird auch die kommunikativ bereits fokussierte neue Strategie „cleaner & better energy“ und der im Jahr 2011 neu aufgesetzte Stakeholder-Management-Prozess beitragen.

Zudem bauen wir verstärkt auf den Dialog mit und auf gute Beziehungen zu wichtigen Interessengruppen. E.ON berücksichtigt mehr als je zuvor Umweltaspekte, soziale Aspekte und Themen der verantwortlichen Governance. Damit unterstützen wir unsere Interaktion mit Interessengruppen (inklusive Investoren), geschäftliche Entscheidungen und auch unsere Außendarstellung. Ziel ist es, Reputationsrisiken zu minimieren und gesellschaftliche Akzeptanz zu erhalten, damit wir unser Geschäft weiterhin erfolgreich führen können.

### Beurteilung der Risikosituation durch die Unternehmensleitung

Im Berichtszeitraum hat sich die Risikolage des E.ON-Konzerns im operativen Geschäft gegenüber dem Jahresende 2009 nachteilig verändert. Nach wie vor könnten insbesondere ein anhaltend niedrigeres Preisniveau in den Commodity-Märkten und ein dauerhaft deutlicher Rückgang der Nachfrage, vorrangig durch Industriekunden, mittelfristig die Ertragslage des E.ON-Konzerns erheblich beeinflussen. Darüber hinaus könnten sich der zunehmende Wettbewerb auf dem Gasmarkt und

die damit einhergehende Entwicklung der Mengen und Preise sowie eventuelle Verzögerungen bei Neubauvorhaben im Strom- oder Gasbereich nachteilig auf die Ertragslage auswirken. Aus heutiger Sicht sind für die Zukunft jedoch keine Risiken erkennbar, die den Fortbestand des Konzerns oder einzelner Segmente gefährden könnten.

### Angaben zum rechnungslegungsbezogenen internen Kontrollsystem

Die Angaben nach § 289 Abs. 5 HGB sind Bestandteil des zusammengefassten Lageberichts und befinden sich auf den Seiten 184 bis 186.

### Wichtige Ereignisse nach Schluss des Geschäftsjahres

Zur Schuldenreduzierung hat E.ON am 24. Januar 2011 Anleihegläubigern ein zweistufiges Angebot zum vorzeitigen Rückkauf mehrerer Anleihen unterbereitet, im Rahmen dessen wurden Anleihen im Nennwert von 1,81 Mrd € zurückgekauft.

Im Rahmen unserer Strategie, Aktivitäten im Wert von über 15 Mrd € bis Ende 2013 zu veräußern, werden wir das britische Stromverteilnetz an die US-amerikanische Pennsylvania Power & Light Corporation verkaufen. Der Vollzug der Transaktion wird für Anfang April 2011 erwartet. Weitere Erläuterungen hierzu befinden sich in Textziffer 35 des Anhangs.

## E.ON-Konzernstruktur (gültig ab 1. Januar 2011)

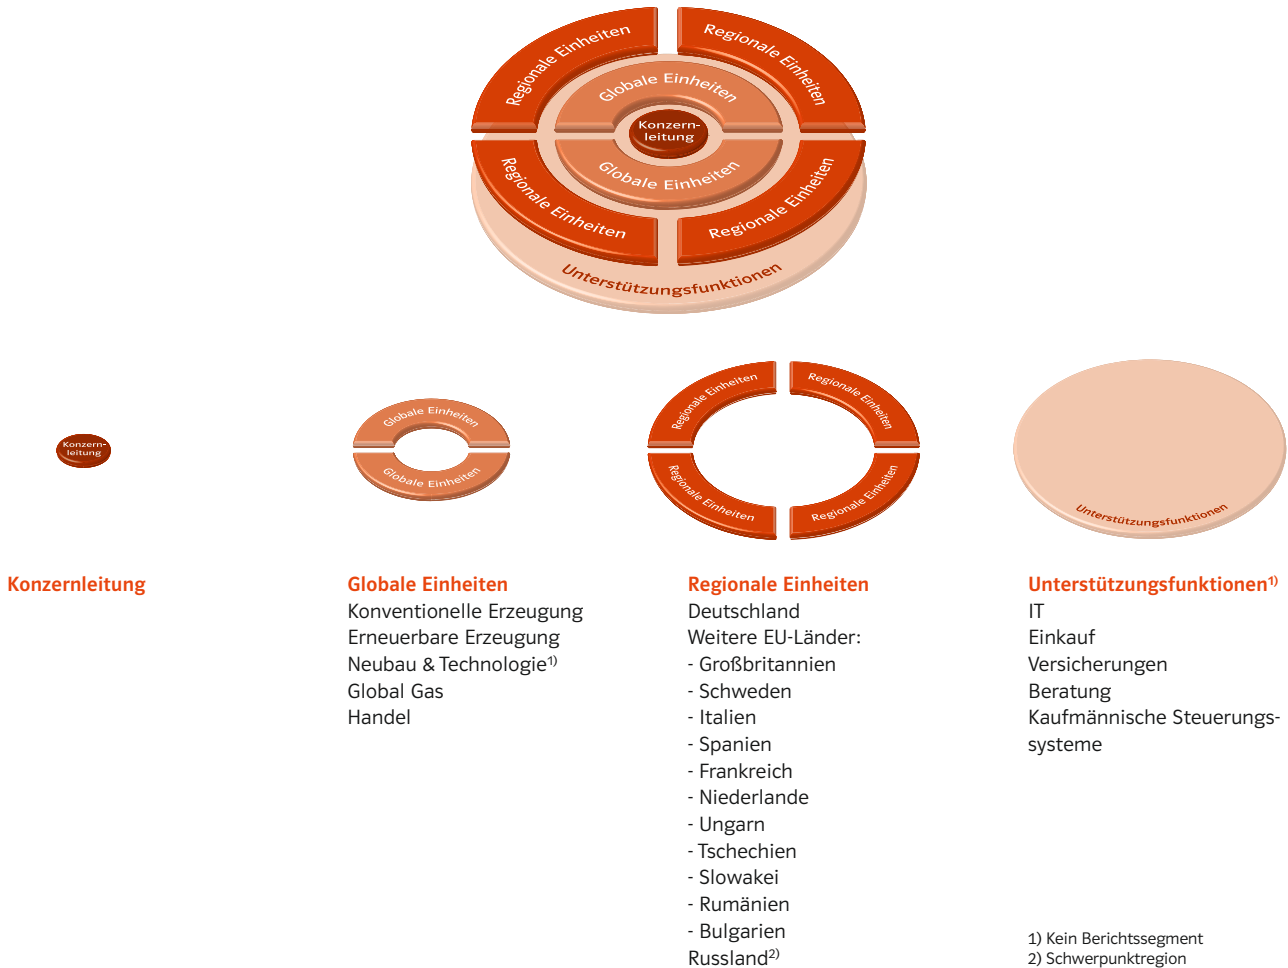

## Ausrichtung des Konzerns in den folgenden Geschäftsjahren

### Geplante Änderungen in der Geschäftspolitik sowie nicht finanzielle Ziele

E.ON hat sich als Ziel gesetzt, Energie sauberer und besser zu machen. Hierfür werden wir uns in Europa künftig auf Wettbewerbsgeschäfte konzentrieren und dabei in zusammenwachsenden Energiemärkten verstärkt Synergien zwischen den Geschäften und Geschäftsfeldern nutzen. In Russland setzt E.ON seine Neubauvorhaben konsequent um, in Nordamerika werden die Erneuerbaren Energien weiter ausgebaut. Zusätzlich will E.ON in zunächst zwei weiteren Regionen außerhalb Europas seine Kompetenzen in der Stromerzeugung und im Bereich der Erneuerbaren Energien nutzen. Mit dieser international breiteren Aufstellung soll der Anteil der Geschäfte außerhalb Europas am Adjusted Konzern-EBITDA bis zum Ende des Jahres 2015 auf ein Viertel steigen. Bei bestehenden und neuen Geschäften steht die Rentabilität künftig noch stärker im Vordergrund als bisher. Mit einer weiterentwickelten und vereinfachten Struktur sowie nochmals verstärkten Anstrengungen zur Effizienz wird E.ON seine Leistungsfähigkeit

weiter steigern. Mit diesen neuen strategischen Schwerpunkten will der Konzern Wachstum bei geringerer Kapitalbindung schaffen. Gleichzeitig begegnet das Unternehmen damit wirtschaftlichen Belastungen, die als Folge politischer Entscheidungen und eines veränderten Marktumfelds für die nächsten Jahre erwartet werden.

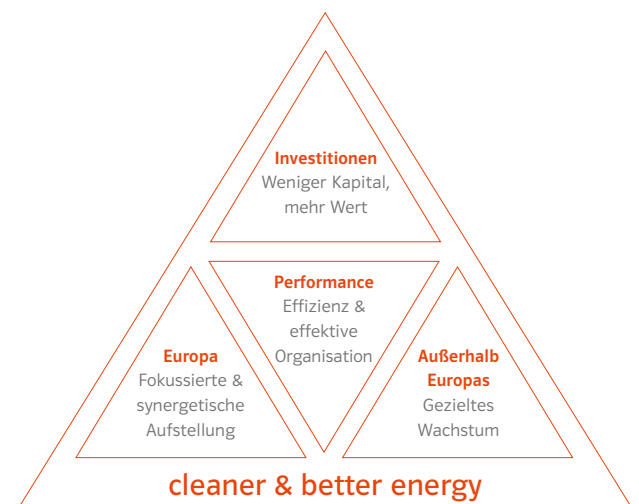

Die strategische Neuausrichtung wird E.ON mit einer neuen, schlankeren Struktur umsetzen. Dabei wird der von der Konzernleitung in Düsseldorf ganzheitlich geführte Konzern in globale Funktions- und regionale Ländereinheiten gegliedert. Die künftig fünf globalen Einheiten sind für konventionelle Stromerzeugung, Neubau und Technologien (kein externes Berichtssegment), Erneuerbare Erzeugung, globales Gasgeschäft und Handel verantwortlich. Die 12 regionalen Einheiten in Europa (Regionen Deutschland und weitere EU-Länder) verantworten das kundennahe Vertriebsgeschäft, die regionale Infrastruktur sowie die dezentrale Erzeugung. Auch unser Stromerzeugungsgeschäft in Russland wird künftig als Fokusregion geführt. Unterstützende Aufgaben wie IT oder Einkauf werden von der Konzernleitung gesteuert.

### Effizienzsteigerungen

Die neue Struktur macht uns schlanker, effizienter und schneller. Deshalb sollen Effizienzsteigerungen nicht mehr durch gesonderte Programme oder Projekte erzielt werden, sondern fester Bestandteil der Leistungskultur im Unternehmen werden. Unser Ziel ist, ab Ende 2013 zusätzliche Ergebnispotenziale von 600 Mio € pro Jahr zu heben. Die im Rahmen des 2008 gestarteten Programms „PerformtoWin“ geplanten Ergebnisverbesserungen von 1,5 Mrd € ab Ende 2011 sind bereits auf sehr gutem Wege.

### Künftige Absatzmärkte

Europa ist und bleibt der deutliche Schwerpunkt unserer geschäftlichen Aktivitäten. Hier wird sich das Unternehmen künftig stärker auf wettbewerbliche Geschäfte fokussieren, bei denen E.ON über Größenvorteile verfügt und die gemeinsam optimiert werden können. Dabei konzentriert sich E.ON vorrangig auf zusammenwachsende Energiemärkte, um länder- und geschäftsübergreifende Synergien bestmöglich zu nutzen.

Außerhalb Europas wollen wir mit unserer neuen Einheit E.ON International Energy an der global wachsenden Energienachfrage partizipieren. Während es in Europa vorrangig um eine noch effizientere und klimaschonendere Energieversorgung geht, haben andere Regionen der Welt noch enormen Nachholbedarf beim Ausbau von Erzeugungskapazitäten. E.ON verfügt über Know-how beim Bau von konventionellen und erneuerbaren Erzeugungsanlagen. Unsere Erfahrung und unser Können wollen wir künftig nicht nur in Russland und Nordamerika, sondern auch in zunächst zwei weiteren Regionen einsetzen und dabei ausschließlich Lösungen anbieten, die zu deutlichen Verbesserungen der dortigen Energieversorgung beitragen.

### Künftige Verwendung neuer Technologien/Prozesse

Beim Klimaschutz erhöhen wir das Tempo: Die spezifischen CO<sub>2</sub>-Emissionen der Stromerzeugung in Europa sollen bereits bis 2020 – und damit zehn Jahre früher als bislang geplant – gegenüber 1990 halbiert werden. Die klimapolitischen Ziele der Europäischen Union und der deutschen Bundesregierung haben wir fest im Blick. E.ON wird insbesondere in der Erzeugung und mit entsprechenden Produkt- und Dienstleistungsangeboten für die Kunden einen ganz erheblichen Beitrag zum klimaschonenden Umbau der Energieversorgung und zur Reduzierung der CO<sub>2</sub>-Emissionen leisten.

### Künftige Produkte und Dienstleistungen

In der europäischen Stromerzeugung werden wir konsequent an einer weiteren Verringerung der CO<sub>2</sub>-Emissionen arbeiten. Der Schwerpunkt liegt dabei auf dem substanziellen Ausbau der Erneuerbaren Energien. Hierfür konzentriert sich E.ON auf moderne und kostengünstige Technologien im industriellen Maßstab, wie beispielsweise große Windparks an Land oder auf See. Darüber hinaus sind selektive Investitionen in flexible und CO<sub>2</sub>-arme konventionelle Erzeugung sowie Pumpspeicher- und Laufwasserkraftwerke vorgesehen.

Das internationale Gasgeschäft wird auch künftig eine wichtige Rolle im E.ON-Portfolio haben. Vorrangiges Ziel ist, die langfristigen Gaseinkaufsverträge an die neuen Marktgegebenheiten anzupassen. Entsprechende Gespräche mit den Gasproduzenten wurden bereits aufgenommen. Daneben wird E.ON Chancen aus einer integrierten Optimierung im europäischen Maßstab noch stärker nutzen.

Das internationale Handelsgeschäft wird E.ON ausbauen und weiter optimieren. Damit nutzt das Unternehmen Chancen, die sich aus der fortschreitenden Globalisierung der Rohstoffmärkte ergeben.

Im europäischen Vertriebsgeschäft will sich E.ON mit intelligenten Produkten für Privatkunden – wie beispielsweise Mikro-KWK-Anlagen in Einfamilienhäusern – und effizienten Energielösungen für Geschäftskunden deutlicher von Wettbewerbern abgrenzen. Damit setzt das Unternehmen auch im Vertrieb auf höhere Energieeffizienz und mehr Nachhaltigkeit.

Bei den regulierten Strom- und Gasnetzen wird E.ON in Abhängigkeit von den jeweiligen regulatorischen Rahmenbedingungen prüfen, wie diese am besten weiterentwickelt werden können.

## Wirtschaftliche Rahmenbedingungen

### Gesamtwirtschaftliche Situation

Die Weltwirtschaft wird nach Auffassung des Sachverständigenrates (SVR) bis Ende 2011 ihre Erholung fortsetzen, aber an Fahrt verlieren. Unsicherheiten bestehen zusätzlich zu den bereits bekannten Risiken in möglichen währungs- und handelspolitischen Kontroversen. Während sich das starke Wachstum in den Schwellenländern fortsetzen dürfte, können die Industrieländer mit einem weiterhin verhaltenen Aufschwung rechnen.

Für die USA wird im Jahr 2011 eine moderate Entwicklung der Konjunktur erwartet. Die Investitionstätigkeit wird zwar durch das niedrige Zinsniveau gestützt, der Schuldenabbau im privaten Sektor belastet aber weiterhin die private Nachfrage. Die aktuell heterogene Entwicklung der Volkswirtschaften in der EU-27 dürfte sich auch 2011 fortsetzen. Die nördlichen Länder werden dabei ein besseres Ergebnis vorlegen als die von realwirtschaftlichen Problemen im Finanz- und Immobilienbereich oder auf dem Arbeitsmarkt belasteten südlichen Länder. Insgesamt werden die noch unterausgelasteten Kapazitäten lediglich zu einer moderaten Erhöhung der Investitionen führen.

Für Russland ist im Jahr 2011 mit einer Fortsetzung der Erholung zu rechnen, auch wenn das Land die schwächsten Zuwachsraten der BRIC-Länder (Brasilien, Russland, Indien, China) aufweisen dürfte.

Eine inflationäre Dynamik ist nach Ansicht des SVR im Prognosezeitraum 2011 weder in den USA noch in der EU sichtbar, sodass sich die Preissteigerungsraten im Rahmen der Werte von 2010 bewegen werden.

Trotz großer Unsicherheit auf finanz- und realwirtschaftlicher Seite sieht IHS Global Insight mittelfristig für das Jahr 2012 und die Folgejahre eine Rückkehr der globalen Volkswirtschaft auf einen Wachstumspfad. China und die USA könnten diesen Wachstumsprozess anführen. Die Eurozone und Osteuropa einschließlich Russland schwenken wieder auf einen verhalten positiven Wachstumspfad ein. Bei möglichen inflationären Tendenzen würden die Zentralbanken gegensteuern.

### Energiemärkte

Auf den Märkten für Elektrizität und Brennstoffe überwiegen positive Signale für die Preisentwicklung in den Jahren 2011 und 2012.

Für die nächsten beiden Jahre ist zu erwarten, dass Brent-Rohöl – unter der Annahme eines stabilen konjunkturellen Umfeldes – über dem Preisniveau der letzten beiden Jahre notieren wird. Zu Beginn des Jahres 2011 notierte Brent-Rohöl für Lieferung im nächsten Monat knapp über 90 US-\$ pro Barrel – also deutlich über dem durchschnittlichen Lieferpreis von 2010 (rund 80 US-\$ pro Barrel). Am Forwardmarkt zeigte sich bei den Jahresdurchschnittspreisen eine Contango-Preisstruktur, das heißt je später der Fälligkeitszeitpunkt, desto höher der Preis, womit Brent-Rohöl für Lieferung 2012 über dem Niveau von 2011 lag. Gestützt wird diese Erwartung unter anderem auch durch eine kontinuierlich wachsende Ölnachfrage, primär in den Schwellenländern, sowie durch zunehmend steigende Produktionskosten (zum Beispiel der „Unconventionals“).

Die Steinkohlepreise für eine Lieferung im nächsten Jahr lagen zu Beginn des Jahres ebenfalls deutlich über dem durchschnittlichen Lieferpreis von 2010 (rund 100 US-\$ pro Tonne; API#2). Seit Beginn des Jahres zeigten die Forwardprodukte für Lieferungen in den Jahren 2011 und 2012 eine sogenannte Backwardation-Preisstruktur, das heißt je später der Fälligkeitszeitpunkt, desto niedriger der Preis. Insofern lagen die Preise für das Forwardprodukt für 2012 unter dem Niveau des Produktes für 2011. Diese Struktur am Forwardmarkt lässt sich durch vorübergehende wetterbedingte Lieferengpässe auf der Angebotsseite erklären – primär verursacht durch Überflutungen in Kolumbien, Südafrika und Australien.

An den europäischen Gashandelsmärkten führten im Jahr 2010 die wieder anziehende Konjunktur, die Witterungsbedingungen sowie infrastrukturelle Verfügbarkeitseinschränkungen zur Erholung der Preise. Für die nächsten beiden Jahre werden – neben der Entwicklung der europäischen Nachfrage – die europäischen Gashandelsmärkte maßgeblich dadurch geprägt sein, wie stark die weiterhin zunehmende LNG-Versorgungskapazität durch eine anwachsende Gasnachfrage in Asien und Lateinamerika ausgelastet werden kann. Es ist zu erwarten, dass der US-Markt aufgrund der kostengünstigeren Nutzbarkeit von Schiefergasvorkommen weiterhin auf niedrigem Preisniveau nahezu autark sein wird. Da sich die Forwardprodukte für Lieferungen in den Jahren 2011 und 2012 an den europäischen Handelspunkten im Laufe des Jahres 2010 parallel zu den Spotnotierungen

entwickelt haben und deutlich an Wert gewinnen konnten, geht der Markt derzeit von einer Fortsetzung des Gaspreisanstiegs aus, jedoch mit abnehmender Intensität. Das Preisniveau von 2008 wird von den derzeitigen Forwardpreisen jedoch noch nicht erreicht.

Die Entwicklung der CO<sub>2</sub>-Märkte wird entscheidend von den politischen Aktivitäten zum Klimaschutz geprägt. Moderate Entwicklungsschritte im internationalen Kontext werden durch EU-Initiativen zur Verschärfung der bestehenden europäischen Minderungsziele flankiert. Darüber hinaus schränken voraussichtlich ab 2013 in Kraft tretende Qualitätsrestriktionen hinsichtlich der aus internationalen Emissionsminderungsprojekten importierbaren CERs das Angebot an Emissionsberechtigungen weiter ein. Hieraus können weitere positive Signale für den Strommarkt erwachsen.

Das Strompreisniveau ist kurz- bis mittelfristig stark durch die Steinkohle- und Gaspreise sowie die Preise für CO<sub>2</sub>-Zertifikate geprägt. Die auf den Brennstoffmärkten zu beobachtenden positiven Erwartungen wirken tendenziell preissteigernd auf die Strommärkte. Für den Strommarkt spielt des Weiteren das Verhältnis zwischen Angebot, also der verfügbaren Kraftwerksleistung, und Stromnachfrage eine Rolle. Der Strombedarf steigt europaweit – wenn auch regional nicht im gleichen Maße – nach dem krisenbedingten Rückgang weiter an. Dies liefert ebenso positive Impulse auf die Strompreise wie zu erwartende Stilllegungen älterer Kraftwerkskapazitäten. Dem gegenüber stehen der für die nächsten Jahre in Aussicht stehende Ausbau der Erneuerbaren Energien sowie – im begrenzten Umfang – die Inbetriebnahme neuer Kraftwerke. An der EEX lagen die Forwards (Grundlastprodukt) für 2012/2013 am 13. Januar 2011 bei rund 53 €/MWh für Lieferung im Jahr 2012 beziehungsweise rund 54 €/MWh für Lieferung im Jahr 2013 und damit über den letzten Quotierungen (Ende 2010) für das Jahr 2011 mit rund 51 €/MWh. Die allgemeine Markterwartung schließt aus den oben beschriebenen Einflüssen somit für die EEX sowie benachbarte Märkte eine positive Strompreisentwicklung mit ansteigender Tendenz für die Jahre 2012/2013.

Unsere Stromproduktion ist für 2011 bereits nahezu vollständig abgesichert. In den Folgejahren nimmt das abgesicherte Portfolio durch planmäßige Absicherungsmaßnahmen über die Zeit ebenfalls zu (siehe exemplarisch folgende Grafik für unsere europäische nicht-fossile Stromproduktion im Wesentlichen mit Kernenergie und Wasserkraft [outright]).

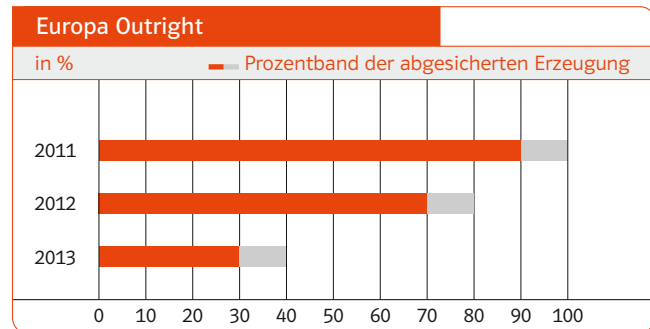

## Mitarbeiter

Die Zahl der Mitarbeiter im E.ON-Konzern wird bis zum Jahresende 2011 (ohne Auszubildende und Vorstände/Geschäftsführer) sinken. Dies ist vor allem auf das Outsourcing der IT-Infrastruktur bei der E.ON IT sowie Maßnahmen zur Integration und Effizienzsteigerung bei Gesellschaften in Osteuropa zurückzuführen.



## Erwartete Ertragslage

### Voraussichtliche Ergebnisentwicklung

Im November 2010 haben wir im Rahmen der Veröffentlichung des Zwischenberichts unsere neue Konzernstruktur und unsere neue Strategie vorgestellt. In diesem Zusammenhang haben wir Zielwerte für das Jahr 2013 für einige Konzernkennzahlen veröffentlicht. Deshalb sind einmalig einzelne Prognosen bis 2013 auch in diesem Prognosebericht enthalten.

Zur internen Steuerung und als Indikator für die nachhaltige Ertragskraft eines Geschäfts verwenden wir seit dem 1. Januar 2011 – anstelle des bisher genutzten Adjusted EBIT – das Adjusted EBITDA, ein um außergewöhnliche Effekte bereinigtes Ergebnis vor Zinsen, Steuern und Abschreibungen. Gründe für die Umstellung sind die Unabhängigkeit dieser Ergebnisgröße von Investitions- und Abschreibungszyklen und die gleichzeitig bessere Indikation des zahlungswirksamen Ergebnisbeitrags.

Trotz bereits erzielter und der zusätzlich geplanten Effizienzsteigerungen stehen wir in den nächsten Jahren vor erheblichen wirtschaftlichen Herausforderungen. Insbesondere die in Deutschland eingeführte Steuer auf Kernbrennstoffe, die Vollauktionierung von CO<sub>2</sub>-Zertifikaten, das veränderte Marktumfeld im Gasgeschäft und niedrigere Großhandelsmargen werden erheblichen Druck auf die Ergebnisentwicklung ausüben. Wir gehen aus heutiger Sicht davon aus, dass das Adjusted EBITDA im Jahr 2011 in einer Bandbreite von 11,2 bis 11,9 Mrd € liegen wird. Im Jahre 2012 steigt das Ergebnisniveau gegenüber 2011 wieder leicht an und erreicht 2013 in etwa das Niveau des Jahres 2010.

Dieser Prognose liegen – ohne Berücksichtigung der angekündigten Portfoliomaßnahmen – folgende Annahmen zugrunde:

- Die Nachfrage nach Strom und Gas steigt im Zuge der weiteren Erholung der Industrie.
- Kohlepreise und Spotpreise für Gas erleben einen Aufwärtstrend.
- Die Preise für CO<sub>2</sub>-Zertifikate steigen nur leicht.
- Die Differenzen zwischen den Kohle- und Gaseinkaufspreisen und den erzielbaren Verkaufspreisen des aus den jeweiligen Brennstoffen erzeugten Stroms befinden sich auf historischen Tiefstständen – ein Fortschreiten dieses Trends wird nicht erwartet.

Für den bereinigten Konzernüberschuss erwarten wir im Jahr 2011 eine Bandbreite von 3,3 bis 4,0 Mrd €. Analog zur Entwicklung des Adjusted EBITDA rechnen wir in den Folgejahren mit einem Anstieg, der durch die Erhöhung des relativen Steueraufwands teilweise kompensiert wird.

Zu den Segmenten im Einzelnen:

| Adjusted EBITDA               |                      |                    |
|-------------------------------|----------------------|--------------------|
| in Mrd €                      | 2011<br>(Prognose)   | 2010 <sup>1)</sup> |
| Konventionelle Erzeugung      | 3,7 bis 4,0          | 3,9                |
| Erneuerbare Erzeugung         | 1,4 bis 1,6          | 1,2                |
| Global Gas                    | 0,7 bis 1,2          | 2,0                |
| Handel                        | -0,3 bis -0,1        | 1,2                |
| Deutschland                   | 2,1 bis 2,3          | 2,5                |
| Weitere EU-Länder             | 2,7 bis 2,9          | 2,6                |
| Russland                      | 0,5 bis 0,7          | 0,4                |
| Konzernleitung/Konsolidierung | –                    | -0,5               |
| <b>Summe</b>                  | <b>11,2 bis 11,9</b> | <b>13,3</b>        |

1) Die Adjusted-EBITDA-Zahlen für das Jahr 2010 wurden als Vergleichszahlen für die neue Steuerungsstruktur auf vorläufiger Basis ermittelt. Sie können im Laufe des Jahres 2011 noch Änderungen unterliegen.

Für die Konventionelle Erzeugung erwarten wir im Jahr 2011 ein Adjusted EBITDA in Höhe von 3,7 bis 4,0 Mrd €. Höhere marktbasierende Transferpreise, die den Erzeugungseinheiten vom Handel bezahlt werden, kompensieren die Belastungen durch die im Jahr 2010 verabschiedete Kernenergiesteuer. Für das Jahr 2012 gehen wir von einem Ergebnis deutlich unter Vorjahresniveau aus, geprägt durch sinkende Transferpreise sowie die Belastungen aus der Kernenergiesteuer.

Im Jahr 2011 rechnen wir für die Erneuerbare Erzeugung mit einem Adjusted EBITDA zwischen 1,4 und 1,6 Mrd €. So wird das Ergebnis von dem deutlichen Zuwachs der Erzeugungskapazitäten, insbesondere im Bereich Windkraft, profitieren. Für das Jahr 2012 wird ein leichter Rückgang des Ergebnisses erwartet. Zusätzliche Ergebnisse durch den Ausbau an Windkapazitäten werden dabei durch sinkende Energiepreise für Wasserkraftwerke überkompensiert.



Für 2011 erwarten wir bei Global Gas ein Adjusted EBITDA von 0,7 bis 1,2 Mrd €. Aufgrund des fortgesetzten scharfen Wettbewerbs und der andauernden Entkopplung zwischen ölgebundenen Einkaufspreisen und Gashandelspreisen ist das Gas-handelsgeschäft weiterhin einem erheblichen Margendruck ausgesetzt. Daraus resultierende Verhandlungen mit Produzenten zur Reduzierung der Bezugskosten bringen in diesem Segment eine hohe Planungsunsicherheit mit sich. Der Upstream-Bereich wird infolge der Inbetriebnahme neuer Felder die Produktion ausweiten und einen steigenden Ergebnisbeitrag liefern. Das Transportgeschäft sowie die Aktivitäten in Ungarn stehen auch 2011 unter regulatorischem Druck. Erwartete Erfolge aus den Verhandlungen mit Produzenten und höhere Produktionsmengen im Upstream-Bereich bringen 2012 eine Verbesserung des Ergebnisses für Global Gas mit sich.

Beim Handel erwarten wir 2011 ein Adjusted EBITDA zwischen -0,3 und -0,1 Mrd €. Dies ist im Wesentlichen auf anhaltend hohe Transferpreise zwischen dem Handel und den Erzeugungseinheiten zurückzuführen. Verstärkt wird dieser Effekt durch sinkende erzielte Preise. Für das Jahr 2012 gehen wir dagegen von einer Verbesserung des Ergebnisses gegenüber 2011 aufgrund einer vorteilhaften Margenentwicklungen aus.

Das Adjusted EBITDA im Segment Deutschland wird 2011 voraussichtlich zwischen 2,1 und 2,3 Mrd € liegen. Das Jahr 2010 war maßgeblich durch positive Effekte im Netzbereich beeinflusst, die 2011 nicht in analoger Höhe eintreten werden. Daran anknüpfend gehen wir für das Jahr 2012 von einer stabilen Entwicklung aus.

Für die weiteren EU-Länder wird im Jahr 2011 ein Adjusted EBITDA zwischen 2,7 und 2,9 Mrd € erwartet. Hierbei wirkt sich insbesondere der Entfall von Belastungen durch Erneuerbare Energien in der Region Tschechien positiv aus. Diese haben das Jahresergebnis 2010 negativ beeinflusst. Für das Jahr 2012 gehen wir auch für die weiteren EU-Länder von einer stabilen Entwicklung aus.

Im Jahr 2011 erwarten wir für Russland ein Adjusted EBITDA von 0,5 bis 0,7 Mrd €. Die Inbetriebnahme der Neubauprojekte sowie höhere Margen bei den Bestandskraftwerken wirken sich hierbei positiv aus. Für das Jahr 2012 wird mit einem weiteren Anstieg des Ergebnisses gerechnet.

## Voraussichtliche Entwicklung der Dividende

Unsere bisherige Dividendenpolitik, nach der die Ausschüttungsquote 50 bis 60 Prozent des bereinigten Konzernüberschusses beträgt, wollen wir unverändert beibehalten. Für das Jahr 2010 wird eine unveränderte Dividende pro Aktie von 1,50 € vorgeschlagen. Für die Jahre 2011 und 2012 planen wir eine Dividende von mindestens 1,30 € pro dividendenberechtigter Aktie. Die Ausschüttungsquote könnte für diese beiden Jahre damit abweichend von unserer Dividendenpolitik über 60 Prozent liegen.

## Erwartete Finanzlage

### Geplante Finanzierungsmaßnahmen

Auf dem Capital Market Day am 10. November 2010 haben wir bestimmte Anpassungen in unserer Finanzstrategie vorgestellt. Ausführliche Details befinden sich im Kapitel Finanzlage im Abschnitt Finanzstrategie. Für das Jahr 2011 erwarten wir keinen Finanzierungsbedarf. Darüber hinaus werden wir mehr als die Hälfte der Erlöse aus den angekündigten Portfoliomaßnahmen zur Schuldenreduktion verwenden. Die für 2011 geplanten Ausgaben für Investitionen sowie die Dividende können laut Plan durch den für dieses Jahr erwarteten operativen Cashflow und die Erlöse aus Desinvestitionen finanziert werden. Bei unterjährigen Spitzen in den Finanzierungserfordernissen des Konzerns ist die kurzfristige Nutzung von Commercial Paper möglich.

### Geplante Investitionen

Im Rahmen unserer Mittelfristplanung haben wir für das Jahr 2011 Investitionen in Höhe von 7,5 Mrd € vorgesehen. Auch hierbei haben wir die angekündigten Portfoliomaßnahmen noch nicht berücksichtigt. Rund ein Fünftel der geplanten Investitionen sind für den Erhalt der bestehenden Anlagen vorgesehen, der übrige Teil für Ausbau beziehungsweise organisches Wachstum. Geografisch betrachtet bleibt Deutschland Schwerpunktland unserer Investitionstätigkeit. Hier investieren wir maßgeblich in den Erhalt und Ausbau unserer konventionellen Stromerzeugung sowie der Strom- und Gasinfrastruktur.

| Investitionen: Planung 2011   |            |              |
|-------------------------------|------------|--------------|
|                               | Mrd €      | Anteile in % |
| Konventionelle Erzeugung      | 2,3        | 31           |
| Erneuerbare Erzeugung         | 1,1        | 15           |
| Global Gas                    | 1,2        | 15           |
| Handel                        | -          | -            |
| Deutschland                   | 0,9        | 12           |
| Weitere EU-Länder             | 1,6        | 21           |
| Russland                      | 0,6        | 8            |
| Konzernleitung/Konsolidierung | -0,2       | -2           |
| <b>Summe</b>                  | <b>7,5</b> | <b>100</b>   |

Im kommenden Jahr werden 2,3 Mrd € in den Ausbau und den Ersatz sowie den Erhalt der Erzeugungsarten Steinkohle, Gas und Kernenergie investiert. Darin enthalten sind unter anderem Kraftwerksneubauprojekte der fossilen Stromerzeugung (zum Beispiel „Maasvlakte 3“ und „Datteln 4“) und lebensdauer verlängernde Maßnahmen (2000-MW-Steinkohlekraftwerk Ratcliffe in UK). Für den Bereich der Kernenergie umfasst die Investitionsplanung die Aktivitäten im Rahmen des Joint Ventures „Horizon Nuclear Power“ mit RWE zur Entwicklung von bis zu zwei Kraftwerksstandorten in Großbritannien. Für die deutschen Kernkraftwerke sind umfangreiche Maßnahmen zur Laufzeitverlängerung geplant. In Schweden ist unter anderem die Laufzeitverlängerung von „Oskarshamn 2“ planerisch unterstellt.

Im Segment Erneuerbare Erzeugung (E.ON Climate & Renewables und Wasserkraftwerke) werden wir im kommenden Jahr rund 1,1 Mrd € investieren. Der Schwerpunkt wird vorwiegend auf Offshore-Windparks wie London Array und Onshore-Windparks in Europa beziehungsweise den USA liegen.

Bei Global Gas entfällt der größte Teil der Investitionen von 1,2 Mrd € auf die Entwicklung von Gas- und Ölfeldern. Darüber hinaus wird in die Infrastruktur des Transport- und Speichergeschäfts investiert.

Die Investitionen in die Region Deutschland (0,9 Mrd €) betreffen insbesondere zahlreiche Einzelinvestitionen für den Ausbau von Mittel- und Niederspannungsleitungen, Schaltanlagen sowie Mess- und Regeltechnik und weitere Investitionen, um eine sichere und störungsfreie Stromübertragung und -verteilung zu gewährleisten.

Die Investitionen in den weiteren EU-Ländern machen rund ein Fünftel der Investitionen aus und bestehen im Wesentlichen aus Erhaltungsinvestitionen für das regionale Netz in Schweden und Großbritannien.

In der Region Russland werden 2011 mit rund 600 Mio € hauptsächlich die bereits laufenden Kraftwerksneubauprojekte fortgesetzt.

Für den E.ON-Konzern sieht die Investitionsplanung im Jahr 2012 insgesamt Investitionen in Höhe von rund 5,8 Mrd € vor. Mit jeweils rund einem Viertel wollen wir in das Geschäft der Segmente Konventionelle Erzeugung und Weitere EU-Länder investieren. Gut ein weiteres Viertel dient dem Ausbau unserer Aktivitäten im Bereich der Erneuerbaren Erzeugung und der Plattform Global Gas. Der verbleibende Teil fließt insbesondere in die Region Deutschland beziehungsweise unsere Erzeugungskapazitäten in Russland.

## Chancen

Die Führungsgesellschaften im In- und Ausland sowie die Fachbereiche der E.ON AG berichten im Rahmen eines Bottom-up-Ansatzes halbjährlich zum Ende des zweiten und vierten Quartals auf Basis einer Konzernrichtlinie ihre Chancen, sofern die zugrunde liegenden Sachverhalte hinreichend konkretisierbar und wesentlich erscheinen. Wesentliche Chancen sind durch Sachverhalte gekennzeichnet, die eine signifikante positive Auswirkung auf die Vermögens-, Finanz- oder Ertragslage der Gesellschaften beziehungsweise Segmente haben können.

Hinsichtlich der Rahmenbedingungen ergeben sich Chancen bei der regulatorischen Entwicklung. Außerdem kann sich die Entwicklung des Markts positiv auf E.ON auswirken. Einflussfaktoren sind unter anderem die Preisentwicklung auf den Großhandelsmärkten und im Einzelhandel sowie die steigende Wechselbereitschaft der Kunden.

Im Rahmen der operativen Geschäftstätigkeit ergeben sich für E.ON Chancen in Verbindung mit einer für uns positiven Entwicklung von Währungskursen und Marktpreisen für die Commodities Strom, Gas, Kohle, Öl und CO<sub>2</sub>. Dazu gehört beispielsweise auch die Chance, durch die Teilnahme am behördlich vorgeschriebenen Gas-Release-Programm der ENI in Italien Gasmengen zu günstigen Konditionen einkaufen zu können.

Chancen ergeben sich weiterhin durch die Etablierung der europäischen Regulierungsbehörde ACER in den nächsten Jahren, die losgelöst von nationalen Erwägungen stärker die europäische Marktintegration fördern wird. Dadurch werden Marktstrukturen angeglichen, sodass der Einstieg beziehungsweise das Wachstum in anderen Märkten erleichtert werden kann.

Durch den seit Anfang 2008 konzernweit gebündelten Handel nutzen wir die Chancen des voranschreitenden Zusammenwachsens des europäischen Strom- und Gasmarkts sowie der bereits heute weltweiten Commodity-Märkte. Zum Beispiel können sich mit Blick auf die Marktentwicklungen in Großbritannien und Kontinentaleuropa durch den Handel an europäischen Gashandelspunkten zusätzliche Absatz- und Einkaufspotenziale ergeben.

Darüber hinaus können Chancen durch eine fortlaufende Optimierung von Transport- und Speicherrechten im Gasbereich sowie der Verfügbarkeit und Ausnutzung unserer Anlagen im Strom- oder Gasbereich – durch beschleunigtes Projektmanagement beziehungsweise verkürzte Stillstandszeiten – realisiert werden.

## **Gesamtaussage zur voraussichtlichen Entwicklung**

In den nächsten Jahren werden wir beim Umbau unseres Unternehmens hin zu einem leistungsstarken Anbieter hervorragender Energielösungen erhebliche wirtschaftliche Belastungen zu tragen haben. Mit unserer weiterentwickelten Strategie, einer deutlich schlankeren Struktur und einer neuen Leistungskultur werden wir aber auch unter diesen schweren Rahmenbedingungen hart daran arbeiten, die Erfolgsgeschichte von E.ON fortzuschreiben. Die Jahre 2011 und 2012 dienen vorrangig der finanziellen Konsolidierung, gleichzeitig wollen wir aber das angestrebte langfristige Wachstum auch außerhalb Europas einleiten.

### Bestätigungsvermerk des Abschlussprüfers

Wir haben den von der E.ON AG, Düsseldorf, aufgestellten Konzernabschluss – bestehend aus Bilanz, Gewinn- und Verlustrechnung, Aufstellung der im Konzerneigenkapital erfassten Erträge und Aufwendungen, Kapitalflussrechnung, Entwicklung des Konzerneigenkapitals und Anhang – sowie den Konzernlagebericht der E.ON AG, Düsseldorf, der mit dem Lagebericht der Gesellschaft zusammengefasst ist, für das Geschäftsjahr vom 1. Januar bis 31. Dezember 2010 geprüft. Die Aufstellung von Konzernabschluss und zusammengefasstem Lagebericht nach den IFRS, wie sie in der EU anzuwenden sind, und den ergänzend nach § 315a Abs. 1 HGB anzuwendenden handelsrechtlichen Vorschriften liegt in der Verantwortung des Vorstands der Gesellschaft. Unsere Aufgabe ist es, auf der Grundlage der von uns durchgeführten Prüfung eine Beurteilung über den Konzernabschluss und den zusammengefassten Lagebericht abzugeben.

Wir haben unsere Konzernabschlussprüfung nach § 317 HGB unter Beachtung der vom Institut der Wirtschaftsprüfer (IDW) festgestellten deutschen Grundsätze ordnungsgemäßer Abschlussprüfung unter ergänzender Beachtung der International Standards on Auditing (ISA) vorgenommen. Danach ist die Prüfung so zu planen und durchzuführen, dass Unrichtigkeiten und Verstöße, die sich auf die Darstellung des durch den Konzernabschluss unter Beachtung der anzuwendenden Rechnungslegungsvorschriften und durch den zusammengefassten Lagebericht vermittelten Bildes der Vermögens-, Finanz- und Ertragslage wesentlich auswirken, mit hinreichender Sicherheit erkannt werden. Bei der Festlegung der Prüfungshandlungen werden die Kenntnisse über die Geschäftstätigkeit und über das wirtschaftliche und rechtliche Umfeld des Konzerns sowie die Erwartungen über mögliche Fehler berücksichtigt. Im Rahmen der Prüfung werden die Wirksamkeit des rechnungslegungsbezogenen internen Kontrollsystems sowie Nachweise für die Angaben im Konzernabschluss und im zusammengefassten Lagebericht überwiegend auf

der Basis von Stichproben beurteilt. Die Prüfung umfasst die Beurteilung der Jahresabschlüsse der in den Konzernabschluss einbezogenen Unternehmen, der Abgrenzung des Konsolidierungskreises, der angewandten Bilanzierungs- und Konsolidierungsgrundsätze und der wesentlichen Einschätzungen des Vorstands sowie die Würdigung der Gesamtdarstellung des Konzernabschlusses und des zusammengefassten Lageberichts. Wir sind der Auffassung, dass unsere Prüfung eine hinreichend sichere Grundlage für unsere Beurteilung bildet.

Unsere Prüfung hat zu keinen Einwendungen geführt.

Nach unserer Beurteilung aufgrund der bei der Prüfung gewonnenen Erkenntnisse entspricht der Konzernabschluss den IFRS, wie sie in der EU anzuwenden sind, und den ergänzend nach § 315a Abs. 1 HGB anzuwendenden handelsrechtlichen Vorschriften und vermittelt unter Beachtung dieser Vorschriften ein den tatsächlichen Verhältnissen entsprechendes Bild der Vermögens-, Finanz- und Ertragslage des Konzerns. Der zusammengefasste Lagebericht steht in Einklang mit dem Konzernabschluss, vermittelt insgesamt ein zutreffendes Bild von der Lage des Konzerns und stellt die Chancen und Risiken der zukünftigen Entwicklung zutreffend dar.

Düsseldorf, den 1. März 2011

PricewaterhouseCoopers  
Aktiengesellschaft  
Wirtschaftsprüfungsgesellschaft

Dr. Norbert Vogelpoth  
Wirtschaftsprüfer

Dr. Norbert Schwieters  
Wirtschaftsprüfer

| Gewinn- und Verlustrechnung des E.ON-Konzerns                                                  |        |               |               |
|------------------------------------------------------------------------------------------------|--------|---------------|---------------|
| in Mio €                                                                                       | Anhang | 2010          | 2009          |
| Umsatzerlöse einschließlich Strom- und Energiesteuern                                          |        | 94.812        | 81.875        |
| Strom- und Energiesteuern                                                                      |        | -1.949        | -1.901        |
| <b>Umsatzerlöse</b>                                                                            | (5)    | <b>92.863</b> | <b>79.974</b> |
| Bestandsveränderungen                                                                          |        | 82            | 43            |
| Andere aktivierte Eigenleistungen                                                              | (6)    | 588           | 532           |
| Sonstige betriebliche Erträge                                                                  | (7)    | 15.961        | 24.942        |
| Materialaufwand                                                                                | (8)    | -73.575       | -61.023       |
| Personalaufwand                                                                                | (11)   | -5.281        | -5.158        |
| Abschreibungen                                                                                 | (14)   | -6.457        | -3.806        |
| Sonstige betriebliche Aufwendungen                                                             | (7)    | -13.597       | -22.484       |
| Ergebnis aus at equity bewerteten Unternehmen                                                  |        | 663           | 941           |
| <b>Ergebnis aus fortgeführten Aktivitäten vor Finanzergebnis und Steuern</b>                   |        | <b>11.247</b> | <b>13.961</b> |
| Finanzergebnis                                                                                 | (9)    | -2.184        | -2.461        |
| <i>Beteiligungsergebnis</i>                                                                    |        | 119           | -188          |
| <i>Erträge aus Wertpapieren, Zinsen und ähnliche Erträge</i>                                   |        | 653           | 600           |
| <i>Zinsen und ähnliche Aufwendungen</i>                                                        |        | -2.956        | -2.873        |
| Steuern vom Einkommen und vom Ertrag                                                           | (10)   | -1.946        | -2.858        |
| <b>Ergebnis aus fortgeführten Aktivitäten</b>                                                  |        | <b>7.117</b>  | <b>8.642</b>  |
| Ergebnis aus nicht fortgeführten Aktivitäten                                                   | (4)    | -836          | 27            |
| <b>Konzernüberschuss</b>                                                                       |        | <b>6.281</b>  | <b>8.669</b>  |
| <i>Anteil der Gesellschafter der E.ON AG</i>                                                   |        | 5.853         | 8.420         |
| <i>Anteile ohne beherrschenden Einfluss</i>                                                    |        | 428           | 249           |
| in €                                                                                           |        |               |               |
| <b>Ergebnis je Aktie (Anteil der Gesellschafter der E.ON AG) – unverwässert und verwässert</b> | (13)   |               |               |
| aus fortgeführten Aktivitäten                                                                  |        | 3,51          | 4,41          |
| aus nicht fortgeführten Aktivitäten                                                            |        | -0,44         | 0,01          |
| <b>aus Konzernüberschuss</b>                                                                   |        | <b>3,07</b>   | <b>4,42</b>   |

| Aufstellung der im Konzerneigenkapital erfassten Erträge und Aufwendungen des E.ON-Konzerns                                  |  |               |              |
|------------------------------------------------------------------------------------------------------------------------------|--|---------------|--------------|
| in Mio €                                                                                                                     |  | 2010          | 2009         |
| <b>Konzernüberschuss</b>                                                                                                     |  | <b>6.281</b>  | <b>8.669</b> |
| Cashflow Hedges                                                                                                              |  | -1            | 207          |
| <i>Unrealisierte Veränderung</i>                                                                                             |  | -204          | 45           |
| <i>Ergebniswirksame Reklassifizierung</i>                                                                                    |  | 203           | 162          |
| Weiterveräußerbare Wertpapiere                                                                                               |  | -1.658        | 772          |
| <i>Unrealisierte Veränderung</i>                                                                                             |  | 419           | 2.617        |
| <i>Ergebniswirksame Reklassifizierung</i>                                                                                    |  | -2.077        | -1.845       |
| Währungsumrechnungsdifferenz                                                                                                 |  | 469           | 129          |
| <i>Unrealisierte Veränderung</i>                                                                                             |  | 662           | 473          |
| <i>Ergebniswirksame Reklassifizierung</i>                                                                                    |  | -193          | -344         |
| Veränderung versicherungsmathematischer Gewinne/Verluste leistungsorientierter Pensionszusagen und ähnlicher Verpflichtungen |  | -722          | -1.500       |
| At equity bewertete Unternehmen                                                                                              |  | -15           | 23           |
| <i>Unrealisierte Veränderung</i>                                                                                             |  | -15           | 23           |
| <i>Ergebniswirksame Reklassifizierung</i>                                                                                    |  | -             | -            |
| Ertragsteuern                                                                                                                |  | 324           | 763          |
| <b>Summe der direkt im Eigenkapital erfassten Erträge und Aufwendungen</b>                                                   |  | <b>-1.603</b> | <b>394</b>   |
| <b>Summe der erfassten Erträge und Aufwendungen (Summe Comprehensive Income)</b>                                             |  | <b>4.678</b>  | <b>9.063</b> |
| <i>Anteil der Gesellschafter der E.ON AG</i>                                                                                 |  | 4.248         | 8.807        |
| <i>Anteile ohne beherrschenden Einfluss</i>                                                                                  |  | 430           | 256          |

| Bilanz des E.ON-Konzerns – Aktiva                                                                 |        |                |                |                |
|---------------------------------------------------------------------------------------------------|--------|----------------|----------------|----------------|
| in Mio €                                                                                          | Anhang | 31. Dezember   |                | 1. Januar      |
|                                                                                                   |        | 2010           | 2009           | 2009           |
| Goodwill                                                                                          | (14a)  | 14.588         | 16.901         | 17.311         |
| Immaterielle Vermögenswerte                                                                       | (14a)  | 8.070          | 8.665          | 7.059          |
| Sachanlagen                                                                                       | (14b)  | 60.870         | 60.327         | 56.004         |
| At equity bewertete Unternehmen                                                                   | (15)   | 6.343          | 7.342          | 8.931          |
| Sonstige Finanzanlagen                                                                            | (15)   | 6.104          | 9.131          | 8.823          |
| <i>Beteiligungen</i>                                                                              |        | 2.201          | 5.461          | 3.806          |
| <i>Langfristige Wertpapiere</i>                                                                   |        | 3.903          | 3.670          | 5.017          |
| Finanzforderungen und sonstige finanzielle Vermögenswerte                                         | (17)   | 3.357          | 2.652          | 2.451          |
| Betriebliche Forderungen und sonstige betriebliche Vermögenswerte                                 | (17)   | 4.022          | 3.388          | 3.789          |
| Ertragsteueransprüche                                                                             | (10)   | 822            | 1.549          | 1.988          |
| Aktive latente Steuern                                                                            | (10)   | 2.481          | 3.091          | 2.266          |
| <b>Langfristige Vermögenswerte</b>                                                                |        | <b>106.657</b> | <b>113.046</b> | <b>108.622</b> |
| Vorräte                                                                                           | (16)   | 4.064          | 4.518          | 4.774          |
| Finanzforderungen und sonstige finanzielle Vermögenswerte                                         | (17)   | 1.674          | 1.729          | 2.101          |
| Forderungen aus Lieferungen und Leistungen und sonstige betriebliche Vermögenswerte               | (17)   | 27.492         | 23.007         | 28.848         |
| Ertragsteueransprüche                                                                             | (10)   | 2.678          | 1.925          | 1.515          |
| Liquide Mittel                                                                                    | (18)   | 8.273          | 6.116          | 6.348          |
| <i>Wertpapiere und Festgeldanlagen</i>                                                            |        | 1.697          | 1.722          | 2.125          |
| <i>Zahlungsmittel und Zahlungsmitteläquivalente, die einer Verfügungsbeschränkung unterliegen</i> |        | 433            | 184            | 552            |
| <i>Zahlungsmittel und Zahlungsmitteläquivalente</i>                                               |        | 6.143          | 4.210          | 3.671          |
| Zur Veräußerung gehaltene Vermögenswerte                                                          | (4)    | 2.043          | 2.273          | 4.521          |
| <b>Kurzfristige Vermögenswerte</b>                                                                |        | <b>46.224</b>  | <b>39.568</b>  | <b>48.107</b>  |
| <b>Summe Aktiva</b>                                                                               |        | <b>152.881</b> | <b>152.614</b> | <b>156.729</b> |

**Bilanz des E.ON-Konzerns – Passiva**

| in Mio €                                                                                     | Anhang | 31. Dezember   |                | 1. Januar      |
|----------------------------------------------------------------------------------------------|--------|----------------|----------------|----------------|
|                                                                                              |        | 2010           | 2009           | 2009           |
| Gezeichnetes Kapital                                                                         | (19)   | 2.001          | 2.001          | 2.001          |
| Kapitalrücklage                                                                              | (20)   | 13.747         | 13.747         | 13.741         |
| Gewinnrücklagen                                                                              | (21)   | 29.026         | 26.609         | 22.188         |
| Kumuliertes Other Comprehensive Income                                                       | (22)   | 410            | 1.552          | 110            |
| Eigene Anteile                                                                               | (19)   | -3.531         | -3.530         | -3.549         |
| <b>Anteil der Gesellschafter der E.ON AG</b>                                                 |        | <b>41.653</b>  | <b>40.379</b>  | <b>34.491</b>  |
| Anteile ohne beherrschenden Einfluss (vor Umgliederung)                                      |        | 4.532          | 4.157          | 4.538          |
| Umgliederung im Zusammenhang mit Put-Optionen                                                |        | -600           | -550           | -578           |
| <b>Anteile ohne beherrschenden Einfluss</b>                                                  | (23)   | <b>3.932</b>   | <b>3.607</b>   | <b>3.960</b>   |
| <b>Eigenkapital</b>                                                                          |        | <b>45.585</b>  | <b>43.986</b>  | <b>38.451</b>  |
| Finanzverbindlichkeiten                                                                      | (26)   | 28.880         | 30.657         | 25.036         |
| Betriebliche Verbindlichkeiten                                                               | (26)   | 6.506          | 7.773          | 9.629          |
| Ertragsteuern                                                                                | (10)   | 3.406          | 3.124          | 2.602          |
| Rückstellungen für Pensionen und ähnliche Verpflichtungen                                    | (24)   | 3.250          | 2.884          | 3.559          |
| Übrige Rückstellungen                                                                        | (25)   | 20.381         | 18.808         | 19.198         |
| Passive latente Steuern                                                                      | (10)   | 7.157          | 7.529          | 6.299          |
| <b>Langfristige Schulden</b>                                                                 |        | <b>69.580</b>  | <b>70.775</b>  | <b>66.323</b>  |
| Finanzverbindlichkeiten                                                                      | (26)   | 3.611          | 7.120          | 16.022         |
| Verbindlichkeiten aus Lieferungen und Leistungen und sonstige betriebliche Verbindlichkeiten | (26)   | 26.357         | 23.099         | 28.370         |
| Ertragsteuern                                                                                | (10)   | 2.578          | 1.643          | 2.153          |
| Übrige Rückstellungen                                                                        | (25)   | 4.950          | 4.715          | 4.260          |
| Mit zur Veräußerung gehaltenen Vermögenswerten verbundene Schulden                           | (4)    | 220            | 1.276          | 1.150          |
| <b>Kurzfristige Schulden</b>                                                                 |        | <b>37.716</b>  | <b>37.853</b>  | <b>51.955</b>  |
| <b>Summe Passiva</b>                                                                         |        | <b>152.881</b> | <b>152.614</b> | <b>156.729</b> |



## Kapitalflussrechnung des E.ON-Konzerns

in Mio €

|                                                                                                               | 2010          | 2009          |
|---------------------------------------------------------------------------------------------------------------|---------------|---------------|
| Konzernüberschuss                                                                                             | 6.281         | 8.669         |
| Ergebnis aus nicht fortgeführten Aktivitäten                                                                  | 836           | -27           |
| Abschreibungen auf immaterielle Vermögenswerte und Sachanlagen                                                | 6.457         | 3.806         |
| Veränderung der Rückstellungen                                                                                | 968           | 145           |
| Veränderung der latenten Steuern                                                                              | 265           | 849           |
| Sonstige zahlungsunwirksame Aufwendungen und Erträge                                                          | 347           | 395           |
| Ergebnis aus dem Abgang von Vermögenswerten                                                                   | -3.246        | -5.093        |
| <i>Immaterielle Vermögenswerte und Sachanlagen</i>                                                            | 104           | -60           |
| <i>Beteiligungen</i>                                                                                          | -3.133        | -4.829        |
| <i>Wertpapiere (&gt;3 Monate)</i>                                                                             | -217          | -204          |
| Veränderungen von Posten der betrieblichen Vermögenswerte, Verbindlichkeiten und Ertragsteuern                | -1.294        | -154          |
| <i>Vorräte</i>                                                                                                | 342           | 720           |
| <i>Forderungen aus Lieferungen und Leistungen</i>                                                             | -3.836        | 1.940         |
| <i>Sonstige betriebliche Forderungen und Ertragsteueransprüche</i>                                            | -686          | 1.904         |
| <i>Verbindlichkeiten aus Lieferungen und Leistungen</i>                                                       | -195          | -858          |
| <i>Sonstige betriebliche Verbindlichkeiten und Ertragsteuern</i>                                              | 3.081         | -3.860        |
| <b>Cashflow aus der Geschäftstätigkeit fortgeführter Aktivitäten (operativer Cashflow)</b>                    | <b>10.614</b> | <b>8.590</b>  |
| <b>Cashflow aus der Geschäftstätigkeit nicht fortgeführter Aktivitäten</b>                                    | <b>471</b>    | <b>464</b>    |
| <b>Cashflow aus der Geschäftstätigkeit</b>                                                                    | <b>11.085</b> | <b>9.054</b>  |
| Einzahlungen aus dem Abgang von Vermögenswerten                                                               | 9.601         | 5.384         |
| <i>Immaterielle Vermögenswerte und Sachanlagen</i>                                                            | 242           | 309           |
| <i>Beteiligungen</i>                                                                                          | 9.359         | 5.075         |
| Auszahlungen für Investitionen                                                                                | -8.286        | -8.655        |
| <i>Immaterielle Vermögenswerte und Sachanlagen</i>                                                            | -7.904        | -7.831        |
| <i>Beteiligungen</i>                                                                                          | -382          | -824          |
| Einzahlungen aus dem Verkauf von Wertpapieren (>3 Monate) sowie Finanzforderungen und Festgeldanlagen         | 6.316         | 6.538         |
| Auszahlungen für den Erwerb von Wertpapieren (>3 Monate) sowie Finanzforderungen und Festgeldanlagen          | -6.247        | -6.014        |
| Veränderung der Zahlungsmittel und Zahlungsmitteläquivalente, die einer Verfügungsbeschränkung unterliegen    | -256          | 342           |
| <b>Cashflow aus der Investitionstätigkeit fortgeführter Aktivitäten</b>                                       | <b>1.128</b>  | <b>-2.405</b> |
| <b>Cashflow aus der Investitionstätigkeit nicht fortgeführter Aktivitäten</b>                                 | <b>-372</b>   | <b>-994</b>   |
| <b>Cashflow aus der Investitionstätigkeit</b>                                                                 | <b>756</b>    | <b>-3.399</b> |
| Ein-/Auszahlungen aus Kapitalveränderungen <sup>1)</sup>                                                      | -332          | -1            |
| Ein-/Auszahlungen für den Verkauf/Erwerb eigener Anteile                                                      | -1            | 25            |
| Gezahlte Dividenden an die Gesellschafter der E.ON AG                                                         | -2.858        | -2.857        |
| Gezahlte Dividenden an Anteile ohne beherrschenden Einfluss                                                   | -243          | -298          |
| Einzahlungen aus dem Zugang von Finanzverbindlichkeiten                                                       | 2.429         | 10.398        |
| Auszahlungen für die Tilgung von Finanzverbindlichkeiten                                                      | -8.929        | -12.436       |
| <b>Cashflow aus der Finanzierungstätigkeit fortgeführter Aktivitäten</b>                                      | <b>-9.934</b> | <b>-5.169</b> |
| <b>Cashflow aus der Finanzierungstätigkeit nicht fortgeführter Aktivitäten</b>                                | <b>10</b>     | <b>-1</b>     |
| <b>Cashflow aus der Finanzierungstätigkeit</b>                                                                | <b>-9.924</b> | <b>-5.170</b> |
| <b>Liquiditätswirksame Veränderung der Zahlungsmittel und Zahlungsmitteläquivalente</b>                       | <b>1.917</b>  | <b>485</b>    |
| Wechselkursbedingte Wertänderung der Zahlungsmittel und Zahlungsmitteläquivalente                             | 16            | 54            |
| Zahlungsmittel und Zahlungsmitteläquivalente zum Jahresanfang                                                 | 4.210         | 3.671         |
| <b>Zahlungsmittel und Zahlungsmitteläquivalente zum Jahresende</b>                                            | <b>6.143</b>  | <b>4.210</b>  |
| <b>Abzüglich: Zahlungsmittel und Zahlungsmitteläquivalente nicht fortgeführter Aktivitäten zum Jahresende</b> | <b>0</b>      | <b>15</b>     |
| <b>Zahlungsmittel und Zahlungsmitteläquivalente fortgeführter Aktivitäten zum Jahresende</b>                  | <b>6.143</b>  | <b>4.195</b>  |

1) In den jeweiligen Jahren sind keine wesentlichen Saldierungen enthalten.

| Ergänzende Informationen zum Cashflow aus der Geschäftstätigkeit |        |        |
|------------------------------------------------------------------|--------|--------|
| in Mio €                                                         | 2010   | 2009   |
| Gezahlte Ertragsteuern (abzüglich Erstattungen)                  | -726   | -1.737 |
| Gezahlte Zinsen                                                  | -1.619 | -1.800 |
| Erhaltene Zinsen                                                 | 534    | 602    |
| Erhaltene Dividenden                                             | 866    | 1.017  |

Weitere Erläuterungen zur Kapitalflussrechnung werden in Textziffer 29 gegeben.

## Entwicklung des Konzerneigenkapitals

| in Mio €                                                                                                                                    | Gezeichnetes<br>Kapital | Kapitalrücklage | Gewinn-<br>rücklagen | Veränderung kumuliertes<br>Other Comprehensive Income |                                        |                    |
|---------------------------------------------------------------------------------------------------------------------------------------------|-------------------------|-----------------|----------------------|-------------------------------------------------------|----------------------------------------|--------------------|
|                                                                                                                                             |                         |                 |                      | Differenz aus<br>der Währungs-<br>umrechnung          | Weiter-<br>veräußerbare<br>Wertpapiere | Cashflow<br>Hedges |
| <b>Stand zum 1. Januar 2009</b>                                                                                                             | <b>2.001</b>            | <b>13.741</b>   | <b>22.188</b>        | <b>-2.547</b>                                         | <b>2.676</b>                           | <b>-19</b>         |
| Veränderung Konsolidierungskreis                                                                                                            |                         |                 |                      |                                                       |                                        |                    |
| Zurückgekauft/verkaufte<br>eigene Anteile                                                                                                   |                         |                 |                      |                                                       |                                        |                    |
| Kapitalerhöhung                                                                                                                             |                         | 6               |                      |                                                       |                                        |                    |
| Kapitalherabsetzung                                                                                                                         |                         |                 |                      |                                                       |                                        |                    |
| Gezahlte Dividenden                                                                                                                         |                         |                 | -2.857               |                                                       |                                        |                    |
| Sonstige Veränderungen                                                                                                                      |                         |                 |                      |                                                       |                                        |                    |
| Anteilserhöhung                                                                                                                             |                         |                 | -87                  |                                                       |                                        |                    |
| Saldo Zu-/Abgänge aus der<br>Umgliederung im Zusammenhang<br>mit Put-Optionen                                                               |                         |                 |                      |                                                       |                                        |                    |
| Comprehensive Income                                                                                                                        |                         |                 | 7.365                | 542                                                   | 835                                    | 65                 |
| Konzernüberschuss                                                                                                                           |                         |                 | 8.420                |                                                       |                                        |                    |
| Other Comprehensive Income                                                                                                                  |                         |                 | -1.055               | 542                                                   | 835                                    | 65                 |
| Veränderung versicherungs-<br>mathematischer Gewinne/<br>Verluste leistungsorientierter<br>Pensionszusagen und<br>ähnlicher Verpflichtungen |                         |                 | -1.055               |                                                       |                                        |                    |
| Veränderung kumuliertes<br>Other Comprehensive Income                                                                                       |                         |                 |                      | 542                                                   | 835                                    | 65                 |
| <b>Stand zum 31. Dezember 2009</b>                                                                                                          | <b>2.001</b>            | <b>13.747</b>   | <b>26.609</b>        | <b>-2.005</b>                                         | <b>3.511</b>                           | <b>46</b>          |
| <b>Stand zum 1. Januar 2010</b>                                                                                                             | <b>2.001</b>            | <b>13.747</b>   | <b>26.609</b>        | <b>-2.005</b>                                         | <b>3.511</b>                           | <b>46</b>          |
| Veränderung Konsolidierungskreis                                                                                                            |                         |                 |                      |                                                       |                                        |                    |
| Zurückgekauft/verkaufte<br>eigene Anteile                                                                                                   |                         |                 |                      |                                                       |                                        |                    |
| Kapitalerhöhung                                                                                                                             |                         |                 |                      |                                                       |                                        |                    |
| Kapitalherabsetzung                                                                                                                         |                         |                 |                      |                                                       |                                        |                    |
| Gezahlte Dividenden                                                                                                                         |                         |                 | -2.858               |                                                       |                                        |                    |
| Sonstige Veränderungen                                                                                                                      |                         |                 |                      |                                                       |                                        |                    |
| Anteilserhöhung                                                                                                                             |                         |                 | -115                 |                                                       |                                        |                    |
| Saldo Zu-/Abgänge aus der<br>Umgliederung im Zusammenhang<br>mit Put-Optionen                                                               |                         |                 |                      |                                                       |                                        |                    |
| Comprehensive Income                                                                                                                        |                         |                 | 5.390                | 435                                                   | -1.588                                 | 11                 |
| Konzernüberschuss                                                                                                                           |                         |                 | 5.853                |                                                       |                                        |                    |
| Other Comprehensive Income                                                                                                                  |                         |                 | -463                 | 435                                                   | -1.588                                 | 11                 |
| Veränderung versicherungs-<br>mathematischer Gewinne/<br>Verluste leistungsorientierter<br>Pensionszusagen und<br>ähnlicher Verpflichtungen |                         |                 | -463                 |                                                       |                                        |                    |
| Veränderung kumuliertes<br>Other Comprehensive Income                                                                                       |                         |                 |                      | 435                                                   | -1.588                                 | 11                 |
| <b>Stand zum 31. Dezember 2010</b>                                                                                                          | <b>2.001</b>            | <b>13.747</b>   | <b>29.026</b>        | <b>-1.570</b>                                         | <b>1.923</b>                           | <b>57</b>          |

|  |    | Eigene<br>Anteile | Anteil der<br>Gesellschafter<br>der E.ON AG | Anteile ohne beherr-<br>schenden Einfluss<br>(vor der Umgliede-<br>rung) | Umgliederung im<br>Zusammenhang<br>mit Put-Optionen | Anteile ohne beherr-<br>schenden Einfluss | Summe  |
|--|----|-------------------|---------------------------------------------|--------------------------------------------------------------------------|-----------------------------------------------------|-------------------------------------------|--------|
|  |    | -3.549            | 34.491                                      | 4.538                                                                    | -578                                                | 3.960                                     | 38.451 |
|  |    |                   |                                             | -52                                                                      |                                                     | -52                                       | -52    |
|  | 19 |                   | 19                                          |                                                                          |                                                     |                                           | 19     |
|  |    |                   | 6                                           | 23                                                                       |                                                     | 23                                        | 29     |
|  |    |                   |                                             | -25                                                                      |                                                     | -25                                       | -25    |
|  |    |                   | -2.857                                      | -270                                                                     |                                                     | -270                                      | -3.127 |
|  |    |                   |                                             | -1                                                                       |                                                     | -1                                        | -1     |
|  |    |                   | -87                                         | -312                                                                     |                                                     | -312                                      | -399   |
|  |    |                   |                                             |                                                                          | 28                                                  | 28                                        | 28     |
|  |    |                   | 8.807                                       | 256                                                                      |                                                     | 256                                       | 9.063  |
|  |    |                   | 8.420                                       | 249                                                                      |                                                     | 249                                       | 8.669  |
|  |    |                   | 387                                         | 7                                                                        |                                                     | 7                                         | 394    |
|  |    |                   | -1.055                                      | -11                                                                      |                                                     | -11                                       | -1.066 |
|  |    |                   | 1.442                                       | 18                                                                       |                                                     | 18                                        | 1.460  |
|  |    | -3.530            | 40.379                                      | 4.157                                                                    | -550                                                | 3.607                                     | 43.986 |
|  |    | -3.530            | 40.379                                      | 4.157                                                                    | -550                                                | 3.607                                     | 43.986 |
|  |    |                   |                                             | 147                                                                      |                                                     | 147                                       | 147    |
|  | -1 |                   | -1                                          |                                                                          |                                                     |                                           | -1     |
|  |    |                   |                                             | 68                                                                       |                                                     | 68                                        | 68     |
|  |    |                   |                                             | -35                                                                      |                                                     | -35                                       | -35    |
|  |    |                   | -2.858                                      | -223                                                                     |                                                     | -223                                      | -3.081 |
|  |    |                   |                                             |                                                                          |                                                     |                                           | 0      |
|  |    |                   | -115                                        | -12                                                                      |                                                     | -12                                       | -127   |
|  |    |                   |                                             |                                                                          | -50                                                 | -50                                       | -50    |
|  |    |                   | 4.248                                       | 430                                                                      |                                                     | 430                                       | 4.678  |
|  |    |                   | 5.853                                       | 428                                                                      |                                                     | 428                                       | 6.281  |
|  |    |                   | -1.605                                      | 2                                                                        |                                                     | 2                                         | -1.603 |
|  |    |                   | -463                                        | -29                                                                      |                                                     | -29                                       | -492   |
|  |    |                   | -1.142                                      | 31                                                                       |                                                     | 31                                        | -1.111 |
|  |    | -3.531            | 41.653                                      | 4.532                                                                    | -600                                                | 3.932                                     | 45.585 |

### (1) Allgemeine Grundsätze

Der E.ON-Konzern (E.ON oder Konzern) ist ein in Deutschland ansässiger, international aufgestellter Energiekonzern mit integrierten Strom- und Gasaktivitäten. Die berichtspflichtigen Segmente im Sinne des International Financial Reporting Standard (IFRS) 8 „Geschäftssegmente“ (IFRS 8) des E.ON-Konzerns sind an der internen Organisations- und Berichtsstruktur ausgerichtet:

- Die Market Unit Central Europe unter Führung der E.ON Energie AG (E.ON Energie), München, fokussiert sich auf das Stromgeschäft und das Downstream-Gasgeschäft in Zentraleuropa.
- Pan-European Gas ist für das Upstream- und Midstream-Gasgeschäft verantwortlich. Daneben hält die Market Unit überwiegend Energiebeteiligungen im europäischen Ausland. Führungsgesellschaft dieser Market Unit ist die E.ON Ruhrgas AG (E.ON Ruhrgas), Essen.
- Die Market Unit UK umfasst das Energiegeschäft in Großbritannien. Geführt wird diese Market Unit durch die E.ON UK plc (E.ON UK), Coventry, Großbritannien.
- Die Market Unit Nordic, geführt von dem integrierten Energieunternehmen E.ON Sverige AB (E.ON Sverige), Malmö, Schweden, konzentriert sich auf das Energiegeschäft in Nordeuropa.

- Die Market Unit Energy Trading, mit der Führungsgesellschaft E.ON Energy Trading SE (E.ON Energy Trading), Düsseldorf, umfasst die europäischen Handelsaktivitäten für Strom, Gas, Kohle, Öl und CO<sub>2</sub>-Zertifikate des Konzerns.
- Alle sonstigen Segmente werden im Einklang mit IFRS 8 zusammengefasst und als Segment Neue Märkte bezeichnet. Dieses beinhaltet die Aktivitäten der neuen Market Units Climate & Renewables, Italy und Russia sowie die Market Unit Spain.

Zudem beinhaltet Corporate Center/Konsolidierung, neben der E.ON AG (E.ON oder Gesellschaft) selbst, die direkt von der E.ON AG geführten Beteiligungen sowie die auf Konzern-ebene durchzuführenden Konsolidierungen. Bezüglich weiterer Informationen zu den Segmenten wird auf Textziffer 33 verwiesen.

Dieser Konzernabschluss wird in Anwendung von § 315a Abs. 1 HGB unter Beachtung der IFRS und Interpretationen des International Financial Reporting Interpretations Committee (IFRIC) aufgestellt, die bis zum Ende der Berichtsperiode von der Europäischen Kommission für die Anwendung in der EU übernommen wurden und zum 31. Dezember 2010 verpflichtend anzuwenden waren.

### (2) Zusammenfassung der wesentlichen Grundsätze der Rechnungslegung

#### Allgemeine Grundlagen

Die Aufstellung des Konzernabschlusses erfolgt grundsätzlich auf Basis der historischen Kosten, eingeschränkt durch die zum beizulegenden Zeitwert (Fair Value) bewerteten zur Veräußerung verfügbaren finanziellen Vermögenswerte (Available-for-Sale) sowie die erfolgswirksam zum Fair Value angesetzten finanziellen Vermögenswerte und finanziellen Verbindlichkeiten (inklusive derivativer Finanzinstrumente).

#### Konsolidierungsgrundsätze

In den Konzernabschluss werden die Abschlüsse der E.ON AG und der von ihr beherrschten Unternehmen (Tochterunternehmen) einbezogen. Beherrschung liegt vor, wenn die Gesellschaft die Möglichkeit zur Bestimmung der Finanz- und Geschäftspolitik eines Unternehmens hat, um daraus wirtschaftlichen Nutzen zu ziehen. Darüber hinaus werden Zweckgesellschaften konsolidiert, wenn die wirtschaftliche Betrachtung des Verhältnisses zwischen E.ON und der Zweckgesellschaft zeigt, dass E.ON dieses Unternehmen beherrscht.

Die Ergebnisse der im Laufe des Jahres erworbenen oder veräußerten Tochterunternehmen werden vom Erwerbszeitpunkt an beziehungsweise bis zu ihrem Abgangszeitpunkt in die Konzern-Gewinn- und Verlustrechnung einbezogen.

Sofern erforderlich, werden die Jahresabschlüsse der Tochterunternehmen angepasst, um ihre Bilanzierungs- und Bewertungsmethoden an die im Konzern angewandten Methoden anzugleichen. Konzerninterne Forderungen, Schulden und Zwischenergebnisse zwischen Konzernunternehmen werden im Rahmen der Konsolidierung eliminiert.

#### Assoziierte Unternehmen

Ein assoziiertes Unternehmen ist ein Unternehmen, auf welches E.ON durch Mitwirkung an dessen finanz- und geschäftspolitischen Entscheidungsprozessen maßgeblichen Einfluss nehmen kann, wobei weder Beherrschung noch gemeinschaftliche Beherrschung vorliegt. Maßgeblicher Einfluss wird grundsätzlich angenommen, wenn E.ON direkt oder indirekt ein Stimmrechtsanteil von mindestens 20, aber weniger als 50 Prozent zusteht.

Anteile an assoziierten Unternehmen werden nach der Equity-Methode bilanziert. Ebenfalls grundsätzlich nach der Equity-Methode werden Unternehmen bilanziert, für die E.ON trotz Mehrheit der Stimmrechte aufgrund von Beschränkungen in Bezug auf das Vermögen oder die Geschäftsführung keine Beherrschungsmöglichkeit besitzt.

Im Rahmen der Anwendung der Equity-Methode werden die Anschaffungskosten der Beteiligung mit dem auf E.ON entfallenden Anteil der Reinvermögensänderung fortentwickelt. Anteilige Verluste, die den Wert des Beteiligungsanteils des Konzerns an einem assoziierten Unternehmen, gegebenenfalls unter Berücksichtigung zuzurechnender langfristiger Ausleihungen, übersteigen, werden nicht erfasst. Ein bilanzierter Goodwill wird im Buchwert des assoziierten Unternehmens ausgewiesen.

Unrealisierte Zwischenergebnisse aus Transaktionen mit assoziierten Unternehmen, die at equity bewertet sind, werden im Rahmen der Konsolidierung anteilig eliminiert, soweit die zugrunde liegenden Sachverhalte wesentlich sind.

Im Rahmen der Werthaltigkeitsprüfung (Impairment-Test) wird der Buchwert eines at equity bewerteten Unternehmens mit dessen erzielbarem Betrag verglichen. Falls der Buchwert den erzielbaren Betrag übersteigt, ist eine Wertminderung (Impairment) in Höhe des Differenzbetrags vorzunehmen. Sofern die Gründe für eine zuvor erfasste Wertminderung entfallen sind, erfolgt eine entsprechende erfolgswirksame Zuschreibung.

Die Abschlüsse der nach der Equity-Methode bilanzierten Beteiligungen werden grundsätzlich nach konzerneinheitlichen Bilanzierungs- und Bewertungsmethoden aufgestellt.

### Joint Ventures

Gemeinschaftlich geführte Unternehmen (Joint Ventures) werden ebenfalls nach der Equity-Methode bilanziert. Unrealisierte Zwischenergebnisse aus Transaktionen mit Joint Ventures werden im Rahmen der Konsolidierung anteilig eliminiert, soweit die zugrunde liegenden Sachverhalte wesentlich sind.

### Unternehmenszusammenschlüsse

Die Bilanzierung von Unternehmenszusammenschlüssen erfolgt nach der Erwerbsmethode, bei der der Kaufpreis dem neu bewerteten anteiligen Netto-Reinvermögen des erworbenen Unternehmens gegenübergestellt wird (Kapitalkonsolidierung). Dabei sind die Wertverhältnisse zum Erwerbszeitpunkt zugrunde zu legen, der dem Zeitpunkt entspricht, zu dem die Beherrschung über das erworbene Unternehmen erlangt wurde. Wertdifferenzen werden in voller Höhe aufgedeckt, das heißt, ansatzfähige Vermögenswerte, Schulden und Eventualschulden des Tochterunternehmens werden unabhängig

von vorliegenden Anteilen ohne beherrschenden Einfluss grundsätzlich mit ihren Fair Values in der Konzernbilanz ausgewiesen. Die Fair-Value-Bestimmung für einzelne Vermögenswerte erfolgt zum Beispiel bei marktgängigen Wertpapieren durch Heranziehung veröffentlichter Börsen- oder Marktpreise zum Erwerbszeitpunkt sowie bei Grundstücken, Gebäuden und größeren technischen Anlagen in der Regel anhand unternehmensextern vorgenommener Bewertungsgutachten. Kann auf Börsen- oder Marktpreise nicht zurückgegriffen werden, werden die Fair Values auf Basis der verlässlichsten verfügbaren Informationen ermittelt, die auf Marktpreisen für vergleichbare Vermögenswerte oder auf geeigneten Bewertungsverfahren beruhen. E.ON bestimmt in diesen Fällen den Fair Value mittels der Discounted-Cashflow-Methode auf Basis der erwarteten künftigen Cashflows und der gewichteten Kapitalkosten. Grundsätzlich folgen zur Bestimmung der Cashflows neben der Berücksichtigung der drei Planjahre der Mittelfristplanung zwei zusätzliche Detailplanungsjahre, die unter Verwendung einer aus Branchen- und Unternehmensdaten abgeleiteten Wachstumsrate über die Nutzungsdauer des Vermögenswertes fortgeschrieben werden. Der Abzinsungssatz berücksichtigt die speziellen Risiken der erworbenen Aktivitäten.

Transaktionen mit Anteilseignern ohne beherrschenden Einfluss werden als Transaktionen mit Eigenkapitalgebern behandelt. Resultiert aus dem Erwerb weiterer Anteile an einem Tochterunternehmen ein Unterschiedsbetrag zwischen den Anschaffungskosten für diese Anteile und den Buchwerten der erworbenen Anteile ohne beherrschenden Einfluss, ist dieser vollständig im Eigenkapital zu erfassen.

Gewinne und Verluste aus Verkäufen von Anteilen ohne beherrschenden Einfluss werden, sofern sie nicht zu einem Verlust des beherrschenden Einflusses führen, ebenfalls im Eigenkapital erfasst.

Immaterielle Vermögenswerte sind separat anzusetzen, wenn sie eindeutig abgrenzbar sind oder ihr Ansatz auf einem vertraglichen oder anderen Recht basiert. Sie sind insoweit nicht im Goodwill enthalten. Rückstellungen für Restrukturierungsmaßnahmen dürfen im Rahmen der Kaufpreisverteilung nicht neu gebildet werden. Ist der gezahlte Kaufpreis höher als das neu bewertete anteilige Netto-Reinvermögen zum Erwerbszeitpunkt, wird der positive Differenzbetrag als Goodwill aktiviert. Ein auf nicht kontrollierte Anteile entfallender positiver Unterschiedsbetrag wird grundsätzlich nicht angesetzt. Ein negativer Differenzbetrag wird sofort ergebniswirksam aufgelöst.

### Währungsumrechnung

Transaktionen der Gesellschaft, die in einer Fremdwährung erfolgen, werden mit dem Wechselkurs zum Zeitpunkt des Zugangs umgerechnet. Monetäre Posten in Fremdwährung werden zu jedem Bilanzstichtag mit dem dann geltenden Wechselkurs umgerechnet; dabei entstehende Umrechnungsdifferenzen werden ebenso wie die Effekte bei Realisierung ergebniswirksam erfasst und in den sonstigen betrieblichen Erträgen beziehungsweise sonstigen betrieblichen Aufwendungen ausgewiesen. Ergebnisse aus der Umrechnung von originären Finanzinstrumenten, die zur Währungsabsicherung der Netto-Aktiva von Fremdwährungsbeteiligungen eingesetzt sind, werden erfolgsneutral innerhalb des Eigenkapitals als Bestandteil des Other Comprehensive Income erfasst. Der ineffektive Anteil der Absicherung wird sofort ergebniswirksam erfasst.

Die funktionale Währung der E.ON AG sowie die Berichtswährung des Konzerns ist der Euro. Die Vermögens- und Schuldposten der ausländischen Tochterunternehmen der Gesellschaft mit einer anderen funktionalen Währung als dem Euro werden zu den am Bilanzstichtag geltenden Mittelkursen umgerechnet, während die entsprechenden Posten der Gewinn- und Verlustrechnung zu Jahresdurchschnittskursen umgerechnet werden. Wesentliche Geschäftsvorfälle ausländischer Konzerngesellschaften werden zum jeweiligen Transaktionskurs umgerechnet. Unterschiedsbeträge aus der Währungsumrechnung der Vermögens- und Schuldposten gegenüber der Umrechnung des Vorjahres sowie Umrechnungsdifferenzen zwischen der Gewinn- und Verlustrechnung und der Bilanz werden ergebnisneutral innerhalb des Eigenkapitals als Bestandteil des Other Comprehensive Income gesondert ausgewiesen.

Umrechnungseffekte, die auf die Anschaffungskosten von als weiterveräußerbare Wertpapiere klassifizierten monetären Finanzinstrumenten entfallen, sind erfolgswirksam zu erfassen. Auf die Fair-Value-Anpassungen monetärer Finanzinstrumente entfallende Umrechnungseffekte sowie Währungsumrechnungseffekte für nicht monetäre, als weiterveräußerbare klassifizierte Finanzinstrumente werden erfolgsneutral innerhalb des Eigenkapitals als Bestandteil des Other Comprehensive Income erfasst.

Der Devisenverkehr aus der Russischen Föderation kann im Einzelfall Beschränkungen unterliegen.

Die Wechselkurse wesentlicher Währungen von Ländern, die nicht an der Europäischen Währungsunion teilnehmen, haben sich wie folgt entwickelt:

| Währungen          |          | 1 €, Mittelkurs zum Stichtag |        | 1 €, Jahresdurchschnittskurs |        |
|--------------------|----------|------------------------------|--------|------------------------------|--------|
|                    | ISO-Code | 2010                         | 2009   | 2010                         | 2009   |
| Britisches Pfund   | GBP      | 0,86                         | 0,89   | 0,86                         | 0,89   |
| Norwegische Krone  | NOK      | 7,80                         | 8,30   | 8,00                         | 8,73   |
| Russischer Rubel   | RUB      | 40,82                        | 43,15  | 40,20                        | 44,14  |
| Schwedische Krone  | SEK      | 8,97                         | 10,25  | 9,54                         | 10,62  |
| Ungarischer Forint | HUF      | 277,95                       | 270,42 | 275,48                       | 280,33 |
| US-Dollar          | USD      | 1,34                         | 1,44   | 1,33                         | 1,39   |

### Ertragsrealisierung

#### a) Umsatzerlöse

Die Realisierung der Umsatzerlöse erfolgt grundsätzlich zum Zeitpunkt der Lieferung an den Kunden beziehungsweise mit Erfüllung der Leistung. Die Lieferung gilt als abgeschlossen, wenn entsprechend den vertraglichen Vereinbarungen die mit dem Eigentum verbundenen Risiken auf den Käufer übergegangen sind, das Entgelt vertraglich festgelegt ist und die Erfüllung der Forderung wahrscheinlich ist. Die Umsatzerlöse für Güter beziehungsweise Dienstleistungen bemessen sich nach dem Fair Value der erhaltenen oder zu erhaltenden Gegenleistung. Sie spiegeln den Wert der gelieferten Einheiten, einschließlich der geschätzten Werte für Einheiten zwischen der letzten Abrechnung und dem Periodenende, wider.

Umsatzerlöse werden ohne Umsatzsteuer, Retouren, Rabatte und Preisnachlässe und nach Eliminierung konzerninterner Verkäufe ausgewiesen.

Die Umsatzerlöse resultieren überwiegend aus den Verkäufen von Strom und Gas an Industriekunden, gewerbliche Abnehmer und Endverbraucher. In diesem Posten werden auch Erlöse aus der Verteilung von Strom und Gas, aus Lieferungen von Dampf, Wärme und Wasser sowie aus dem Eigenhandel ausgewiesen.

#### b) Zinserträge

Zinserträge werden zeitanteilig unter Anwendung der Effektivzinismethode erfasst.

#### c) Dividendenerträge

Dividendenerträge werden zu dem Zeitpunkt erfasst, in dem das Recht auf den Empfang der Zahlung entsteht.

### Strom- und Energiesteuern

Die Stromsteuer entsteht bei Stromlieferungen an Endverbraucher und weist einen pro Kilowattstunde (kWh) fixen, nach Abnehmergruppen differenzierten Tarif auf. Die geleisteten



Strom- und Energiesteuern werden offen von den Umsatzerlösen abgesetzt, sofern die Strom- und Energiesteuer mit der Abnahme der Energie durch den Endverbraucher entsteht.

### Verkäufe von Anteilen an Beteiligungen

Führt die Ausgabe von Anteilen von Tochterunternehmen oder assoziierten Unternehmen an Konzernfremde zu einer Reduzierung des prozentualen Anteilsbesitzes von E.ON an diesen Beteiligungen (Verwässerung) und dadurch zu einem Verlust des beherrschenden beziehungsweise des maßgeblichen Einflusses, so werden Gewinne und Verluste aus diesen Verwässerungstransaktionen erfolgswirksam unter den sonstigen betrieblichen Erträgen beziehungsweise Aufwendungen erfasst.

### Ergebnis je Aktie

Das Basis-Ergebnis (unverwässertes Ergebnis) je Aktie ergibt sich aus der Division des den Gesellschaftern des Mutterunternehmens zustehenden Konzernüberschusses durch die gewogene durchschnittliche Zahl der im Umlauf befindlichen Stammaktien. Die Ermittlung des verwässerten Ergebnisses je Aktie entspricht bei E.ON der Ermittlung des Basis-Ergebnisses je Aktie, da die E.ON AG keine potenziell verwässernden Stammaktien ausgegeben hat.

### Goodwill und immaterielle Vermögenswerte

#### Goodwill

Nach IFRS 3 „Unternehmenszusammenschlüsse“ (IFRS 3) unterliegt der Goodwill keiner planmäßigen Abschreibung, sondern wird mindestens jährlich einer Werthaltigkeitsprüfung auf der Betrachtungsebene zahlungsmittelgenerierender Einheiten (Cash Generating Units) unterzogen. Bei Eintritt besonderer Ereignisse, die dazu führen können, dass der Buchwert einer Cash Generating Unit nicht mehr durch den erzielbaren Betrag gedeckt ist, ist auch unterjährig ein Impairment-Test durchzuführen.

Die Zuordnung von neu entstandenem Goodwill erfolgt jeweils zu den Cash Generating Units, von denen erwartet wird, dass sie aus dem Zusammenschluss Nutzen ziehen. Die Cash Generating Units für Zwecke des Goodwill-Impairment-Tests sind regelmäßig die operativen Geschäftsbereiche unterhalb der Segmente beziehungsweise die Segmente.

Die Werthaltigkeitsprüfung des Goodwills erfolgt, indem der erzielbare Betrag einer Cash Generating Unit mit ihrem Buchwert einschließlich Goodwill verglichen wird. Der erzielbare Betrag ist der höhere der beiden Werte aus Fair Value abzüglich Veräußerungskosten der Cash Generating Unit und deren Nutzungswert. E.ON ermittelt zur Bestimmung des erzielbaren Betrags einer Cash Generating Unit zunächst den Fair Value (abzüglich Veräußerungskosten) mittels allgemein anerkannter Bewertungsverfahren. Die Basis hierfür ist die

Mittelfristplanung der jeweiligen Cash Generating Unit. Die Bewertung erfolgt anhand von Discounted-Cashflow-Berechnungen und wird, sofern verfügbar, mittels geeigneter Multiplikatoren plausibilisiert. Zudem werden – sofern vorhanden – Markttransaktionen oder Bewertungen Dritter für ähnliche Vermögenswerte berücksichtigt. Bei Bedarf wird zudem eine Berechnung des Nutzungswerts durchgeführt. In Abgrenzung zur Ermittlung des Fair Values erfolgt die Berechnung des Nutzungswerts aus der Sichtweise des Managements. In Einklang mit IAS 36 „Wertminderung von Vermögenswerten“ (IAS 36) wird zudem sichergestellt, dass insbesondere Restrukturierungsaufwendungen sowie Erst- und Erweiterungsinvestitionen (sofern diese noch nicht begonnen wurden) nicht in die Bewertung einbezogen werden.

Falls der Buchwert den erzielbaren Betrag übersteigt, so ist auf den dieser Cash Generating Unit zugeordneten Goodwill eine Wertminderung in Höhe des Differenzbetrags zu erfassen.

Übersteigt der identifizierte Abwertungsbedarf den der Cash Generating Unit zugeordneten Goodwill, sind die übrigen Vermögenswerte der Einheit im Verhältnis ihrer Buchwerte abzuschreiben. Eine Abstockung einzelner Vermögenswerte darf lediglich dann vorgenommen werden, wenn hierdurch der jeweilige Buchwert den höheren der folgenden Werte nicht unterschreiten würde:

- den Fair Value abzüglich Veräußerungskosten,
- den Nutzungswert oder
- den Wert null.

Der Betrag des Wertminderungsaufwands, der in diesem Fall dem Vermögenswert darüber hinaus zugeordnet worden wäre, ist anteilig auf die anderen Vermögenswerte der Einheit zu verteilen.

Die jährliche Werthaltigkeitsprüfung des Goodwills auf Ebene der Cash Generating Units erfolgt bei E.ON jeweils im vierten Quartal eines Geschäftsjahres in lokaler Währung.

Abschreibungen, die auf den Goodwill einer Cash Generating Unit vorgenommen werden, dürfen in späteren Perioden nicht rückgängig gemacht werden.

### Immaterielle Vermögenswerte

Gemäß IAS 38 „Immaterielle Vermögenswerte“ (IAS 38) werden immaterielle Vermögenswerte über ihre voraussichtliche Nutzungsdauer abgeschrieben, es sei denn, ihre Nutzungsdauer wird als unbestimmbar klassifiziert.

Erworbene immaterielle Vermögenswerte mit bestimmbarer Nutzungsdauer werden in die Kategorien marketingbezogen, kundenbezogen, vertraglich bedingt und technologiebezogen eingeteilt. Die selbsterstellten immateriellen Vermögenswerte mit bestimmbarer Nutzungsdauer stehen im Zusammenhang mit Software. Immaterielle Vermögenswerte mit

bestimmbarer Nutzungsdauer werden zu Anschaffungs- oder Herstellungskosten bewertet und planmäßig linear über ihre jeweilige Nutzungsdauer abgeschrieben. Diese beträgt bei den Kategorien marketingbezogene, kundenbezogene und vertraglich bedingte immaterielle Vermögenswerte grundsätzlich 5 bis 25 Jahre. Technologiebezogene immaterielle Vermögenswerte werden grundsätzlich über eine Nutzungsdauer von 3 bis 5 Jahren abgeschrieben. Zu dieser Kategorie zählt insbesondere Software. Vertraglich bedingte immaterielle Vermögenswerte werden im Einklang mit den in den Verträgen fixierten Regelungen planmäßig abgeschrieben. Die Nutzungsdauern und Abschreibungsmethoden unterliegen einer jährlichen Überprüfung. Immaterielle Vermögenswerte mit bestimmbarer Nutzungsdauer werden auf Wertminderungen überprüft, wenn Ereignisse oder veränderte Umstände vermuten lassen, dass eine Wertminderung eingetreten sein könnte.

Immaterielle Vermögenswerte mit einer unbestimmbaren Nutzungsdauer werden zu Anschaffungs- oder Herstellungskosten bewertet und jährlich – beziehungsweise im Falle von Ereignissen, die auf eine Wertminderung hindeuten können, auch unterjährig – auf ihre Werthaltigkeit überprüft. Zudem erfolgt eine jährliche Überprüfung, ob die Einschätzung einer unbestimmbaren Nutzungsdauer aufrechtzuerhalten ist.

In Übereinstimmung mit IAS 36 wird der Buchwert eines immateriellen Vermögenswertes mit bestimmbarer wie unbestimmbarer Nutzungsdauer mit dessen erzielbarem Betrag, der dem höheren Betrag aus dem Nutzungswert des Vermögenswertes und dem Fair Value abzüglich Veräußerungskosten entspricht, verglichen. Überschreitet der Buchwert den korrespondierenden erzielbaren Betrag, so wird eine Wertminderung in Höhe des Unterschiedsbetrags zwischen Buchwert und erzielbarem Betrag vorgenommen.

Sofern die Gründe für eine zuvor erfasste Wertminderung entfallen sind, werden immaterielle Vermögenswerte erfolgswirksam zugeschrieben. Der im Rahmen einer Wertaufholung zu erhöhende Buchwert eines immateriellen Vermögenswertes mit bestimmbarer Nutzungsdauer darf den Buchwert, der sich durch planmäßige Abschreibung ohne die Berücksichtigung von zuvor erfassten Wertminderungen in der Periode ergeben hätte, nicht übersteigen.

Sofern kein erzielbarer Betrag für einen einzelnen immateriellen Vermögenswert ermittelt werden kann, wird der erzielbare Betrag für die kleinste identifizierbare Gruppe von Vermögenswerten (Cash Generating Unit) bestimmt, der dieser immaterielle Vermögenswert zugeordnet werden kann. Bezüglich weiterer Informationen zu Goodwill und immateriellen Vermögenswerten wird auf Textziffer 14 a verwiesen.

**Aufwendungen für Forschung und Entwicklung**

Aufwendungen für Forschung und Entwicklung müssen nach IFRS in Forschungs- und Entwicklungsphase aufgeteilt werden. Während Forschungsaufwendungen sofort erfolgswirksam erfasst werden, sind Entwicklungsaufwendungen bei Vorliegen der in IAS 38 genannten allgemeinen Ansatzkriterien für einen immateriellen Vermögenswert sowie weiterer spezieller Voraussetzungen zu aktivieren. In den Geschäftsjahren 2010 und 2009 waren diese Kriterien – mit Ausnahme von selbst- erstellter Software – nicht erfüllt.

**Emissionsrechte**

Nach IFRS werden Emissionsrechte, die im Rahmen von nationalen und internationalen Emissionsrechtssystemen zur Erfüllung der Abgabeverpflichtungen gehalten werden, als immaterielle Vermögenswerte ausgewiesen. Da Emissionsrechte keiner planmäßigen Abnutzung im Rahmen des Produktionsprozesses unterliegen, erfolgt der Ausweis unter den immateriellen Vermögenswerten mit unbestimmbarer Nutzungsdauer. Die Emissionsrechte werden mit den Anschaffungskosten bei Ausgabe für die jeweilige Abrechnungsperiode als (Teil-)Erfüllung des Zuteilungsbescheids der zuständigen nationalen Behörde oder bei Erwerb aktiviert.

Getätigte Emissionen werden durch Bildung einer Rückstellung zum Buchwert der gehaltenen Emissionsrechte beziehungsweise bei Unterdeckung zum aktuellen Fair Value der Emissionsrechte berücksichtigt. Die Aufwendungen für die Bildung der Rückstellung werden im Materialaufwand ausgewiesen.

Im Rahmen der operativen Geschäftstätigkeit werden Emissionsrechte auch zu Eigenhandelszwecken gehalten. Emissionsrechte des Eigenhandelsbestands werden unter den sonstigen betrieblichen Vermögenswerten mit den Anschaffungskosten oder dem niedrigeren Fair Value angesetzt.

**Sachanlagen**

Sachanlagen sind mit ihren Anschaffungs- oder Herstellungskosten einschließlich aktivierungspflichtiger Stilllegungskosten bewertet und werden entsprechend der voraussichtlichen Nutzungsdauer der Komponenten grundsätzlich linear abgeschrieben, sofern nicht in Ausnahmefällen ein anderer Abschreibungsverlauf dem Nutzungsverlauf besser gerecht wird. Die Nutzungsdauern der wesentlichen Komponenten werden nachfolgend dargestellt:

| Nutzungsdauern der Sachanlagen                     |                 |
|----------------------------------------------------|-----------------|
| Gebäude                                            | 10 bis 50 Jahre |
| Technische Anlagen und Maschinen                   | 10 bis 65 Jahre |
| Andere Anlagen, Betriebs- und Geschäftsausstattung | 3 bis 25 Jahre  |

Sachanlagen werden auf Wertminderungen überprüft, wenn Ereignisse oder veränderte Umstände vermuten lassen, dass eine Wertminderung eingetreten sein könnte. In einem solchen Fall erfolgt die Werthaltigkeitsprüfung nach IAS 36 entsprechend den für immaterielle Vermögenswerte erläuterten Grundsätzen. Sofern eine Wertminderung vorzunehmen ist, wird die Restnutzungsdauer gegebenenfalls entsprechend angepasst. Sind die Gründe für eine zuvor erfasste Wertminderung entfallen, werden diese Vermögenswerte erfolgswirksam zugeschrieben, wobei diese Wertaufholung nicht den Buchwert übersteigen darf, der sich ergeben hätte, wenn in den früheren Perioden keine Wertminderung erfasst worden wäre.

Investitionszulagen oder -zuschüsse mindern nicht die Anschaffungs- oder Herstellungskosten der entsprechenden Vermögenswerte, sondern werden grundsätzlich passivisch abgegrenzt.

Nachträgliche Anschaffungs- oder Herstellungskosten, zum Beispiel aufgrund von Erweiterungs- oder Ersatzinvestitionen, werden nur dann als Teil der Anschaffungs- oder Herstellungskosten des Vermögenswerts oder – sofern einschlägig – als separater Vermögenswert erfasst, wenn es wahrscheinlich ist, dass daraus dem Konzern zukünftig wirtschaftlicher Nutzen zufließen wird und die Kosten des Vermögenswerts zuverlässig ermittelt werden können.

Aufwendungen für Reparaturen und Wartungen, die keine wesentliche Ersatzinvestition darstellen, werden in dem Geschäftsjahr aufwandswirksam in der Gewinn- und Verlustrechnung erfasst, in dem sie angefallen sind.

### Exploration und Evaluierung von mineralischen Ressourcen

Die Explorations- und Feldesentwicklungs-Ausgaben der Market Unit Pan-European Gas werden nach der sogenannten „Successful Efforts Method“ bilanziert. Im Einklang mit IFRS 6 „Exploration und Evaluierung von mineralischen Ressourcen“ (IFRS 6) werden die Ausgaben für Explorationsbohrungen, deren Ergebnis noch nicht endgültig feststeht, zunächst grundsätzlich als immaterieller Vermögenswert aktiviert.

Beim Nachweis von Öl- und/oder Gasreserven und genehmigter Feldesentwicklung werden die betreffenden Ausgaben in das Sachanlagevermögen umgebucht. Die Sachanlagen werden entsprechend der Produktionsmenge abgeschrieben. Für die wirtschaftlich nicht fündigen Bohrungen werden die zuvor aktivierten Ausgaben der Bohrungen sofort als Aufwand verrechnet. Andere aktivierte Ausgaben werden ebenfalls abgeschrieben, sobald keine entwickelbaren Reserven nachgewiesen werden konnten. Sonstige Aufwendungen für geologische und geophysikalische Arbeiten (Seismik) und Lizenzgebühren werden sofort ergebniswirksam erfasst.

### Fremdkapitalkosten

Fremdkapitalkosten, die im Zusammenhang mit dem Erwerb oder der Herstellung sogenannter qualifizierter Vermögenswerte vom Zeitpunkt der Anschaffung beziehungsweise ab Beginn der Herstellung bis zur Inbetriebnahme entstehen, werden aktiviert und anschließend mit dem betreffenden Vermögenswert abgeschrieben. Bei einer spezifischen Fremdfinanzierung werden die jeweiligen spezifischen Fremdkapitalkosten berücksichtigt. Bei nicht spezifischer Finanzierung wurde ein konzerneinheitlicher Fremdfinanzierungszinssatz von 4,5 Prozent für 2010 (2009: 4,5 Prozent) zugrunde gelegt. Andere Fremdkapitalkosten werden aufwandswirksam gebucht.

### Zuwendungen der öffentlichen Hand

Investitionszulagen oder -zuschüsse der öffentlichen Hand mindern nicht die Anschaffungs- oder Herstellungskosten der entsprechenden Vermögenswerte, sondern werden grundsätzlich passivisch abgegrenzt. Sie werden auf linearer Basis über die erwartete Nutzungsdauer der zugehörigen Vermögenswerte erfolgswirksam aufgelöst.

Zuwendungen der öffentlichen Hand werden dann zum Fair Value erfasst, wenn mit großer Sicherheit davon auszugehen ist, dass die Zuwendung erfolgen wird und der Konzern die notwendigen Bedingungen für den Erhalt der Zuwendung erfüllt.

Öffentliche Zuwendungen für Kosten werden über den Zeitraum ertragswirksam gebucht, in dem die entsprechenden Kosten, für deren Kompensation sie gewährt wurden, anfallen.

### Leasing

Leasing-Transaktionen werden in Einklang mit IAS 17 „Leasingverhältnisse“ (IAS 17) entsprechend den vertraglichen Regelungen und den daraus resultierenden Chancen und Risiken klassifiziert. Zudem konkretisiert IFRIC 4 „Feststellung, ob eine Vereinbarung ein Leasingverhältnis enthält“ (IFRIC 4) die Kriterien für eine Einstufung von Vereinbarungen über die Nutzung von Vermögenswerten als Leasing. Bei kumulativer Erfüllung der Kriterien in IFRIC 4 können auch Bezugs- beziehungsweise Lieferverträge im Strom- und Gasbereich sowie bestimmte Nutzungsrechte als Leasing zu klassifizieren sein. E.ON schließt Verträge sowohl als Leasinggeber als auch als Leasingnehmer ab.

Transaktionen, bei welchen E.ON als Leasingnehmer involviert ist, werden in Finanzierungsleasing- und Operating-Leasing-Verhältnisse (Operating Lease) unterschieden. Sind die wesentlichen Chancen und Risiken und somit das wirtschaftliche Eigentum der Gesellschaft zuzurechnen, werden solche Transaktionen als Finanzierungsleasing erfasst und das Leasingobjekt einschließlich der Verbindlichkeit in gleicher Höhe bei der Gesellschaft bilanziert.

Der Ansatz erfolgt zu Beginn der Laufzeit des Leasingverhältnisses mit dem niedrigeren Wert aus dem Fair Value des Leasingobjekts und dem Barwert der Mindestleasingzahlungen.

Das Leasingobjekt wird über die wirtschaftliche Nutzungsdauer beziehungsweise die kürzere Laufzeit des Leasingverhältnisses abgeschrieben. Die Verbindlichkeit wird in den Folgeperioden nach der Effektivzinsmethode fortentwickelt.

Alle übrigen Leasinggeschäfte, bei denen E.ON als Leasingnehmer auftritt, werden als Operating Lease behandelt; die Leasingzahlungen werden grundsätzlich linear über die Laufzeit des Leasingverhältnisses als Aufwand erfasst.

Leasing-Transaktionen, bei welchen E.ON Leasinggeber ist und die wesentlichen Chancen und Risiken aus der Nutzung des Leasingobjektes auf den Vertragspartner übertragen werden, sind als Finanzierungsleasing erfasst. Der Barwert der ausstehenden Mindestleasingzahlungen wird als Forderung bilanziert. Zahlungen des Leasingnehmers werden als Tilgungsleistungen beziehungsweise Zinsertrag behandelt. Die Erträge werden über die Laufzeit des Leasingverhältnisses nach der Effektivzinsmethode erfasst.

Alle übrigen Leasing-Transaktionen, bei denen E.ON als Leasinggeber auftritt, werden als Operating Lease behandelt; das Leasingobjekt bleibt bei E.ON bilanziert, und die Leasingzahlungen werden grundsätzlich linear über die Laufzeit des Leasingverhältnisses als Ertrag erfasst.

## Finanzinstrumente

### Originäre Finanzinstrumente

Originäre Finanzinstrumente werden bei Zugang zum Fair Value am Erfüllungstag bilanziert. Nicht konsolidierte Beteiligungen werden ebenso wie die Wertpapiere in Übereinstimmung mit IAS 39 „Finanzinstrumente: Ansatz und Bewertung“ (IAS 39) bewertet. E.ON kategorisiert finanzielle Vermögenswerte als zu Handelszwecken gehalten (Held-for-Trading), als weiterveräußerbare Wertpapiere (Available-for-Sale) sowie als Ausleihungen und Forderungen (Loans and Receivables). Das Management bestimmt die Kategorisierung der finanziellen Vermögenswerte beim erstmaligen Ansatz.

Die als weiterveräußerbar kategorisierten Wertpapiere werden fortlaufend zum Fair Value bilanziert. Daraus resultierende unrealisierte Gewinne und Verluste werden nach Abzug von latenten Steuern bis zur Realisierung als Eigenkapitalbestandteil (Other Comprehensive Income) ausgewiesen. Realisierte Gewinne und Verluste werden auf Basis von einzelnen Transaktionen ermittelt. Liegen objektive Hinweise für eine Wertminderung vor, werden zuvor im Other Comprehensive Income ausgewiesene unrealisierte Gewinne und Verluste im Finanzergebnis erfasst. Bei der Einschätzung einer möglichen Wertminderung berücksichtigt E.ON alle verfügbaren Informationen, wie Marktbedingungen, Dauer und Ausmaß

des Wertrückgangs. Liegt der Wert der als weiterveräußerbar klassifizierten Eigenkapitalinstrumente und ähnlicher langfristiger Investitionen zum Bilanzstichtag mindestens 20 Prozent unterhalb der Anschaffungskosten oder liegt der Wert seit mehr als zwölf Monaten durchschnittlich mindestens zehn Prozent unterhalb der Anschaffungskosten, ist dies ein objektiver Hinweis auf eine Wertminderung. Für Fremdkapitalinstrumente wird ein objektiver Hinweis auf eine Wertminderung angenommen, wenn sich das Rating von Investmentgrade zu Non-Investmentgrade verschlechtert hat. Wertaufholungen auf Eigenkapitalinstrumente werden ausschließlich erfolgsneutral vorgenommen, für Fremdkapitalinstrumente hingegen erfolgswirksam.

Ausleihungen und Forderungen (einschließlich der Forderungen aus Lieferungen und Leistungen) sind originäre finanzielle Vermögenswerte mit fixen beziehungsweise bestimmbareren Zahlungen, die nicht an einem aktiven Markt notiert sind. Ausleihungen und Forderungen werden unter den Forderungen und sonstigen Vermögenswerten ausgewiesen. Sie werden im Rahmen der Folgebewertung zu fortgeführten Anschaffungskosten bewertet. Für erkennbare Einzelrisiken werden Wertberichtigungen vorgenommen.

Originäre finanzielle Verbindlichkeiten (einschließlich der Verbindlichkeiten aus Lieferungen und Leistungen) im Anwendungsbereich des IAS 39 werden zu fortgeführten Anschaffungskosten (Amortized Cost) unter Anwendung der Effektivzinsmethode bewertet. Die Erstbewertung erfolgt zum Fair Value zuzüglich Transaktionskosten. In der Folgebewertung wird der Restbuchwert um die bis zur Fälligkeit verbleibenden Agio-Zuschreibungen und Disagio-Abschreibungen angepasst. Das Agio beziehungsweise Disagio wird über die Laufzeit im Finanzergebnis erfasst.

### Derivative Finanzinstrumente und Sicherungsgeschäfte

Derivative Finanzinstrumente und trennungspflichtige eingebettete derivative Finanzinstrumente werden sowohl bei erstmaliger Bilanzierung als auch in Folgeperioden zum Fair Value am Handelstag bewertet. Sie sind gemäß IAS 39 zwingend als Held-for-Trading zu kategorisieren, soweit sie nicht Bestandteil einer Sicherungsbeziehung (Hedge Accounting) sind. Gewinne und Verluste aus Fair-Value-Schwankungen werden sofort ergebniswirksam erfasst.

Im Wesentlichen werden Termingeschäfte und Währungsswaps im Devisenbereich sowie Zins- und Zins-/Währungsswaps im Zinsbereich eingesetzt. Die eingesetzten Instrumente im Commodity-Bereich umfassen sowohl physisch als auch durch Zahlung zu erfüllende strom-, gas-, kohle-, öl- und emissionsrechtbezogene Optionen und Termingeschäfte. Im Rahmen der operativen Geschäftstätigkeit werden Derivate im Commodity-Bereich auch zu Eigenhandelszwecken erworben.

Die Anforderungen gemäß IAS 39 an das Hedge Accounting umfassen insbesondere die Dokumentation der Sicherungsbeziehung zwischen Grund- und Sicherungsgeschäft, die Sicherungsstrategie sowie die regelmäßige retrospektive und prospektive Effektivitätsmessung. Bei der Beurteilung der Effektivität werden sämtliche Bestandteile der Fair-Value-Veränderungen von Derivaten berücksichtigt. Das Hedge Accounting wird als effektiv angesehen, wenn sich die Fair-Value-Veränderung des Sicherungsinstruments in einer Bandbreite von 80 bis 125 Prozent der gegenläufigen Fair-Value-Veränderung des Grundgeschäfts bewegt.

Im Rahmen von Fair Value Hedge Accounting wird neben der Fair-Value-Veränderung des Derivats auch die gegenläufige Fair-Value-Veränderung des Grundgeschäfts, soweit sie auf das gesicherte Risiko entfällt, erfolgswirksam erfasst. Wird ein derivatives Finanzinstrument nach IAS 39 als Sicherungsgeschäft in einem Cashflow Hedge eingesetzt, wird der erforderliche Teil der Fair-Value-Veränderung des Sicherungsinstruments im Eigenkapital als Bestandteil des Other Comprehensive Income ausgewiesen. Eine Umbuchung in die Gewinn- und Verlustrechnung wird in der Periode vorgenommen, in der die Cashflows des Grundgeschäfts erfolgswirksam werden. Entfällt das gesicherte Grundgeschäft, wird das Sicherungsergebnis sofort erfolgswirksam reklassifiziert. Der ineffektive Anteil der Fair-Value-Veränderung eines Sicherungsgeschäfts, für das ein Cashflow Hedge gebildet wurde, wird sofort im erforderlichen Umfang erfolgswirksam erfasst. Zur Sicherung von Währungsrisiken der Netto-Aktiva einer ausländischen Beteiligung (Hedge of a Net Investment) werden sowohl derivative als auch nicht derivative Finanzinstrumente eingesetzt. Die Effekte aus Fair-Value-Veränderungen beziehungsweise Stichtagsumrechnung dieser Instrumente werden gesondert im Eigenkapital als Bestandteil des Other Comprehensive Income unter dem Posten Währungsumrechnungsdifferenz erfasst.

Fair-Value-Änderungen, die erfolgswirksam erfasst werden müssen, werden in den sonstigen betrieblichen Erträgen und Aufwendungen ausgewiesen. Ergebnisse aus Zinsderivaten werden je Vertrag saldiert im Zinsergebnis ausgewiesen. Die Ergebnisse aus derivativen Eigenhandelsinstrumenten werden saldiert unter den Umsatzerlösen oder dem Materialaufwand ausgewiesen. In diesen Posten sind auch bestimmte realisierte Erfolgskomponenten, wenn sie mit dem Absatz von Produkten in Beziehung stehen, enthalten.

Unrealisierte Gewinne und Verluste, die sich bei der Zugangsbewertung eines Derivats bei Vertragsabschluss ergeben, werden nicht erfolgswirksam erfasst. Diese Gewinne und Verluste werden abgegrenzt und systematisch über die Laufzeit des Derivats erfolgswirksam aufgelöst. Eine Ausnahme von der erfolgsneutralen Abgrenzung besteht, sofern die Zugangsbewertung durch Marktpreise in einem aktiven Markt gestützt, durch einen Vergleich mit anderen beobachtbaren zeitnahen Transaktionen verifiziert oder durch eine Bewertungstechnik,

die nur auf beobachtbaren Marktdaten beruht, ermittelt wurde. In diesem Fall wird das Ergebnis der Zugangsbewertung erfolgswirksam erfasst.

IFRS 7 „Finanzinstrumente: Anhangangaben“ (IFRS 7) fordert umfangreiche qualitative und quantitative Angaben über das Ausmaß von Risiken aus Finanzinstrumenten. Weitere Informationen zu den Finanzinstrumenten sind in den Textziffern 30 und 31 zu finden.

### Vorräte

Die Bewertung der Vorräte erfolgt zu Anschaffungs- oder Herstellungskosten beziehungsweise zum niedrigeren Netto-Veräußerungswert. Rohstoffe, Fertigerzeugnisse und Handelswaren werden nach der Durchschnittskostenmethode bewertet. Bestandteile der Herstellungskosten sind neben dem Fertigungsmaterial und den Fertigungslöhnen anteilige Material- und Fertigungsgemeinkosten unter Annahme einer Normalauslastung. Aufwendungen der allgemeinen Verwaltung werden nicht aktiviert. Bestandsrisiken, die sich aus der Lagerdauer sowie geminderter Verwertbarkeit ergeben, werden durch angemessene Wertberichtigungen auf den Netto-Veräußerungswert berücksichtigt.

### Forderungen und sonstige Vermögenswerte

Forderungen und sonstige Vermögenswerte werden anfänglich zum Fair Value angesetzt, der im Regelfall dem Nominalbetrag entspricht. In der Folge werden sie zu fortgeführten Anschaffungskosten unter Verwendung der Effektivzinsmethode bewertet. Für erkennbare Einzelrisiken werden Wertberichtigungen vorgenommen, die im ausgewiesenen Nettobuchwert enthalten sind. Ist der Ausfall eines bestimmten Anteils des gesamten Forderungsbestands wahrscheinlich, werden Wertberichtigungen in dem Umfang vorgenommen, der dem erwarteten Nutzensausfall entspricht.

### Liquide Mittel

Die liquiden Mittel enthalten Schecks, Kassen- und Bankguthaben sowie kurzfristige weiterveräußerbare Wertpapiere. Bankguthaben und kurzfristige weiterveräußerbare Wertpapiere mit einer ursprünglichen Laufzeit von mehr als drei Monaten werden unter den Wertpapieren und Festgeldanlagen ausgewiesen. Die liquiden Mittel mit einer originären Laufzeit von weniger als drei Monaten werden den Zahlungsmitteln und Zahlungsmitteläquivalenten zugeordnet, soweit sie keiner Verfügungsbeschränkung unterliegen.

Zahlungsmittel, die einer Verfügungsbeschränkung unterliegen und deren Laufzeit mehr als zwölf Monate beträgt, werden unter den Finanzforderungen und sonstigen finanziellen Vermögenswerten ausgewiesen.



### Zur Veräußerung gehaltene Vermögenswerte und damit verbundene Schulden

Ein Ausweis erfolgt in diesen Posten, wenn einzelne langfristige Vermögenswerte oder Gruppen von Vermögenswerten und gegebenenfalls direkt zurechenbaren Schuldposten (Disposal Groups) vorliegen, die in ihrem jetzigen Zustand veräußert werden können und deren Veräußerung hinreichend wahrscheinlich ist. Voraussetzung für das Vorliegen einer Disposal Group ist, dass die Vermögenswerte und Schulden in einer einzigen Transaktion oder im Rahmen eines Gesamtplans zur Veräußerung bestimmt sind.

Bei einer nicht fortgeführten Aktivität (Discontinued Operation) handelt es sich um einen Geschäftsbereich (Component of an Entity), der entweder zur Veräußerung bestimmt oder bereits veräußert worden ist und sowohl aus betrieblicher Sicht als auch für Zwecke der Finanzberichterstattung eindeutig von den übrigen Unternehmensaktivitäten abgegrenzt werden kann. Außerdem muss der als nicht fortgeführte Aktivität qualifizierte Geschäftsbereich einen gesonderten wesentlichen Geschäftszweig (Major Business Line) oder einen bestimmten geografischen Geschäftsbereich des Konzerns repräsentieren.

Auf langfristige Vermögenswerte, die einzeln oder zusammen in einer Disposal Group zur Veräußerung bestimmt sind oder die zu einer nicht fortgeführten Aktivität gehören, werden keine planmäßigen Abschreibungen mehr vorgenommen. Sie werden zum niedrigeren Wert aus Buchwert und Fair Value abzüglich noch anfallender Veräußerungskosten angesetzt. Liegt der Fair Value unter dem Buchwert, erfolgt eine Wertminderung.

Das Ergebnis aus der Bewertung von zur Veräußerung vorgesehenen Geschäftsbereichen zum Fair Value abzüglich noch anfallender Veräußerungskosten sowie die Gewinne und Verluste aus der Veräußerung nicht fortgeführter Aktivitäten werden ebenso wie das Ergebnis aus der gewöhnlichen Geschäftstätigkeit dieser Geschäftsbereiche in der Gewinn- und Verlustrechnung des Konzerns gesondert als Ergebnis aus nicht fortgeführten Aktivitäten ausgewiesen. Die Vorjahreswerte der Gewinn- und Verlustrechnung werden entsprechend angepasst. Der Ausweis der betreffenden Vermögenswerte und Schulden erfolgt in einem separaten Bilanzposten. In der Kapitalflussrechnung werden die Zahlungsströme nicht fortgeführter Aktivitäten separat ausgewiesen und die Vorjahreswerte entsprechend angepasst. Eine Anpassung der Bilanz des Vorjahres erfolgt hingegen nicht.

### Eigenkapitalinstrumente

In Abgrenzung zum Fremdkapital ist Eigenkapital nach IFRS definiert als Residualanspruch an den Vermögenswerten des Konzerns nach Abzug aller Schulden. Das Eigenkapital ergibt sich somit als Restgröße aus den Vermögenswerten und Schulden.

E.ON ist Kaufverpflichtungen gegenüber Anteilseignern ohne beherrschenden Einfluss von Tochterunternehmen eingegangen. Durch diese Vereinbarungen erhalten die Aktionäre ohne beherrschenden Einfluss das Recht, ihre Anteile zu vorher festgelegten Bedingungen anzudienen. Keine der Vertragsgestaltungen führt dazu, dass die wesentlichen Chancen und Risiken zum Zeitpunkt des Vertragsabschlusses auf E.ON übergegangen sind. IAS 32 „Finanzinstrumente: Darstellung“ (IAS 32) sieht in diesem Fall vor, dass eine Verbindlichkeit in Höhe des Barwertes des zukünftigen wahrscheinlichen Ausübungspreises zu bilanzieren ist. Dieser Betrag wird aus einem separaten Posten innerhalb der Anteile ohne beherrschenden Einfluss umgegliedert und gesondert als Verbindlichkeit ausgewiesen. Die Umgliederung erfolgt unabhängig von der Wahrscheinlichkeit der Ausübung. Die Aufzinsung der Verbindlichkeit wird im Zinsaufwand erfasst. Läuft eine Kaufverpflichtung unausgeübt aus, wird die Verbindlichkeit in die Anteile ohne beherrschenden Einfluss zurückgegliedert. Ein etwaiger Differenzbetrag zwischen Verbindlichkeiten und Anteilen ohne beherrschenden Einfluss wird direkt im Eigenkapital erfasst.

Sofern Gesellschafter ein gesetzliches, nicht ausschließbares Kündigungsrecht besitzen (zum Beispiel bei deutschen Personengesellschaften), bedingt dieses Kündigungsrecht nach IAS 32 einen Verbindlichkeitsausweis der im Konzern vorhandenen Anteile ohne beherrschenden Einfluss an den betroffenen Unternehmen. Die Verbindlichkeit wird zum Barwert des vermutlichen Abfindungsbetrages bei einer eventuellen Kündigung ausgewiesen. Der Ansatz erfolgt unabhängig von der Wahrscheinlichkeit der Kündigung. Wertänderungen der Verbindlichkeit werden im sonstigen betrieblichen Ergebnis gezeigt. Aufzinsungseffekte und die Anteile ohne beherrschenden Einfluss am Ergebnis werden als Zinsaufwand ausgewiesen.

Wenn ein Konzernunternehmen Eigenkapitalanteile der E.ON AG kauft (Treasury Shares), wird der Wert der bezahlten Gegenleistung, einschließlich direkt zurechenbarer zusätzlicher Kosten (netto nach Ertragsteuern), vom Eigenkapital der E.ON AG abgezogen, bis die Aktien eingezogen, wieder ausgegeben oder weiterverkauft werden. Werden solche eigenen Anteile nachträglich wieder ausgegeben oder verkauft, wird die erhaltene Gegenleistung, netto nach Abzug direkt zurechenbarer zusätzlicher Transaktionskosten und zusammenhängender Ertragsteuern, im Eigenkapital der E.ON AG erfasst.

### Aktienbasierte Vergütungen

Die Bilanzierung der im E.ON-Konzern ausgegebenen aktienorientierten Vergütungspläne erfolgt im Einklang mit IFRS 2 „Aktienbasierte Vergütung“ (IFRS 2). Sowohl bei dem im Geschäftsjahr 2006 eingeführten E.ON Share Performance Plan als auch bei den noch vorhandenen Stock Appreciation Rights, die zwischen 1999 und 2005 im Rahmen des virtuellen Aktienoptionsprogramms der E.ON AG gewährt worden waren, handelt es sich um aktienbasierte Vergütungstransaktionen mit Barausgleich, die zu jedem Bilanzstichtag zum Fair Value bewertet werden. Der Vergütungsaufwand wird erfolgswirksam über den Zeitraum bis zur Unverfallbarkeit erfasst. E.ON ermittelt den Fair Value mittels Monte-Carlo-Simulationstechnik.

### Rückstellungen für Pensionen und ähnliche Verpflichtungen

Bei leistungsorientierten Versorgungsplänen werden die Rückstellungen gemäß IAS 19 „Leistungen an Arbeitnehmer“ (IAS 19) mittels der Methode der laufenden Einmalprämien (Projected Unit Credit Method) ermittelt, wobei zum Bilanzstichtag des Geschäftsjahres eine versicherungsmathematische Bewertung durchgeführt wird. Hierbei werden nicht nur die am Stichtag bekannten Rentenverpflichtungen und erworbenen Anwartschaften, sondern auch wirtschaftliche Trendannahmen berücksichtigt, die nach realistischen Erwartungen gewählt werden.

Versicherungsmathematische Gewinne und Verluste, die sich aus Abweichungen zwischen den rechnungsmäßig erwarteten und den tatsächlich eingetretenen Änderungen der Personenbestände sowie der Rechnungsannahmen ergeben können, werden vollständig in der Periode erfasst, in der sie auftreten. Sie werden außerhalb der Gewinn- und Verlustrechnung in der Aufstellung der im Konzerneigenkapital erfassten Erträge und Aufwendungen (Statements of Recognized Income and Expenses) ausgewiesen.

Der Dienstzeitaufwand, der die im Geschäftsjahr gemäß Leistungsplan hinzuerworbenen Ansprüche der aktiven Arbeitnehmer repräsentiert, wird im Personalaufwand ausgewiesen; der Zinsaufwand sowie die erwarteten Planvermögenserträge werden im Finanzergebnis erfasst.

Nachzuverrechnender Dienstzeitaufwand wird sofort in dem Umfang erfolgswirksam erfasst, in dem die Leistungen bereits unverfallbar sind, und ansonsten linear über den durchschnittlichen Zeitraum bis zur Unverfallbarkeit der geänderten Leistungen verteilt.

Der bilanzierte Betrag stellt den um den nicht erfassten nachzuverrechnenden Dienstzeitaufwand bereinigten Barwert der leistungsorientierten Verpflichtungen nach Verrechnung mit dem Fair Value des Planvermögens dar. Ein gegebenenfalls aus dieser Berechnung entstehender Vermögenswert ist

der Höhe nach beschränkt auf etwaigen noch nachzuverrechnenden Dienstzeitaufwand zuzüglich des Barwerts verfügbarer Rückerstattungen und der Verminderung künftiger Beitragszahlungen.

Zahlungen für beitragsorientierte Versorgungspläne werden bei Fälligkeit als Aufwand erfasst und innerhalb des Personalaufwands ausgewiesen. Zahlungen für staatliche Versorgungspläne werden wie die für beitragsorientierte Versorgungspläne behandelt, sofern die Verpflichtungen im Rahmen dieser Versorgungspläne denen aus beitragsorientierten Versorgungsplänen grundsätzlich entsprechen.

### Rückstellungen für Entsorgungs- und Rückbauverpflichtungen sowie übrige Rückstellungen

Nach IAS 37 „Rückstellungen, Eventualschulden, Eventualforderungen“ (IAS 37) werden Rückstellungen gebildet, wenn rechtliche oder faktische Verpflichtungen gegenüber außenstehenden Dritten vorliegen, die aus vergangenen Ereignissen resultieren und deren Erfüllung wahrscheinlich zu einem zukünftigen Ressourcenabfluss führen wird. Hierbei muss die Höhe der Verpflichtung zuverlässig geschätzt werden können. Der Ansatz der Rückstellung erfolgt zum voraussichtlichen Erfüllungsbetrag. Langfristige Verpflichtungen werden – sofern der aus der Diskontierung resultierende Zinseffekt (Unterschiedsbetrag zwischen Barwert und Rückzahlungsbetrag) wesentlich ist – mit dem Barwert ihres voraussichtlichen Erfüllungsbetrages angesetzt, wobei auch zukünftige Kostensteigerungen, die am Bilanzstichtag absehbar und wahrscheinlich sind, in die Bewertung einbezogen werden. Langfristige Verpflichtungen werden mit dem zum jeweiligen Bilanzstichtag gültigen Marktzinssatz diskontiert. Die Aufzinsungsbeträge sowie die Zinsänderungseffekte werden innerhalb des Finanzergebnisses ausgewiesen. Eine mit der Rückstellung zusammenhängende Erstattung wird, sofern ihre Vereinnahmung so gut wie sicher ist, als separater Vermögenswert aktiviert. Ein saldierter Ausweis innerhalb der Rückstellungen ist nicht zulässig. Geleistete Anzahlungen werden von den Rückstellungen abgesetzt.

Verpflichtungen, die aus der Stilllegung oder dem Rückbau von Sachanlagen resultieren, werden – sofern eine zuverlässige Schätzung möglich ist – in der Periode ihrer Entstehung mit ihren diskontierten Erfüllungsbeträgen passiviert. Zugleich werden die Buchwerte der entsprechenden Sachanlagen um denselben Betrag erhöht. In den Folgeperioden werden die aktivierten Stilllegungs- und Rückbaukosten über die voraussichtliche Restnutzungsdauer des entsprechenden Vermögenswertes abgeschrieben, während die Rückstellung jährlich aufgezinst wird.



Schätzungsänderungen ergeben sich insbesondere bei Abweichungen von der ursprünglich geschätzten Kostenentwicklung, bei Änderungen bezüglich des Zahlungszeitpunkts oder des Verpflichtungsumfangs sowie regelmäßig aus der Anpassung des Diskontierungszinssatzes an das aktuelle Marktzinsniveau. Die Anpassung von Rückstellungen für die Stilllegung beziehungsweise den Rückbau von Sachanlagen an Schätzungsänderungen erfolgt in der Regel erfolgsneutral durch eine Gegenbuchung in den Sachanlagen. Sofern die stillzulegende Sachanlage bereits vollständig abgeschrieben ist, wirken sich Schätzungsänderungen in der Gewinn- und Verlustrechnung aus.

Die Schätzwerte für Rückstellungen für nicht vertragliche Verpflichtungen im Kernenergiebereich beruhen auf externen Gutachten und werden laufend aktualisiert.

E.ON Sverige ist nach schwedischem Recht verpflichtet, Abgaben an Schwedens Fonds für Nuklearabfall zu leisten. Die erforderlichen Abgaben für nukleare Entsorgung hoch radioaktiven Abfalls und Stilllegung werden entsprechend der Stromerzeugung für das jeweilige Kernkraftwerk seitens der schwedischen Strahlenschutzbehörde berechnet, von Regierungsstellen genehmigt und in entsprechender Höhe von E.ON Sverige gezahlt. Gemäß IFRIC 5 „Rechte auf Anteile an Fonds für Entsorgung, Wiederherstellung und Umweltsanierung“ (IFRIC 5) wird für geleistete Zahlungen an den Nationalen Fonds für Nuklearabfall ein Ausgleichsanspruch für die Erstattung von Entsorgungs- und Stilllegungsaufwendungen innerhalb der sonstigen Vermögenswerte aktiviert. Entsprechend der üblichen Vorgehensweise in Schweden werden die Rückstellungen mit dem Realzins diskontiert.

Rückstellungen für bedingte Verpflichtungen zum Rückbau von Sachanlagen, bei denen Art, Umfang, Zeitpunkt und beizumessende Wahrscheinlichkeiten nicht verlässlich ermittelbar sind, werden nicht gebildet.

Bei Existenz belastender Verträge, bei denen die unvermeidbaren Kosten zur Erfüllung der vertraglichen Verpflichtung höher sind als der erwartete Nutzen aus dem Vertragsverhältnis, werden Rückstellungen für drohende Verluste aus schwebenden Geschäften gebildet. Entsprechende Rückstellungen werden mit dem niedrigeren Betrag aus Verpflichtungsüberhang bei Vertragserfüllung und eventuellen Straf- oder Entschädigungszahlungen im Falle einer Nichterfüllung des Vertrages angesetzt. Die Ermittlung der Verpflichtungen aus einem schwebenden Vertragsverhältnis erfolgt absatzmarktorientiert.

Eventualverbindlichkeiten sind mögliche Drittverpflichtungen aus vergangenen Ereignissen, die nicht gänzlich vom Unternehmen kontrollierbar sind, oder gegenwärtige Drittverpflichtungen aus vergangenen Ereignissen, bei denen der Abfluss von Ressourcen mit wirtschaftlichem Nutzen unwahrscheinlich

ist oder deren Höhe nicht ausreichend verlässlich bestimmt werden kann. Eventualverbindlichkeiten werden grundsätzlich nicht in der Bilanz erfasst.

### Ertragsteuern

Nach IAS 12 „Ertragsteuern“ (IAS 12) sind latente Steuern für temporäre Differenzen zwischen den Buchwerten der Vermögenswerte und Schulden in der Bilanz und ihren Steuerwerten zu bilden (Verbindlichkeits-Methode). Aktive und passive latente Steuern werden für temporäre Differenzen gebildet, die zu steuerpflichtigen oder abzugsfähigen Beträgen bei der Ermittlung des zu versteuernden Einkommens künftiger Perioden führen, es sei denn, die abweichenden Wertansätze resultieren aus dem erstmaligen Ansatz eines Vermögenswertes oder einer Schuld zu einem Geschäftsvorfall, der kein Unternehmenszusammenschluss ist und zum Zeitpunkt des Geschäftsvorfalles weder das Ergebnis vor Steuern noch das zu versteuernde Einkommen beeinflusst hat (sogenannte Initial Differences). IAS 12 verlangt außerdem die Bildung aktiver latenter Steuern auf noch nicht genutzte Verlustvorträge und Steuergutschriften. Aktive latente Steuern werden in dem Maße bilanziert, wie es wahrscheinlich ist, dass ein zu versteuerndes Ergebnis verfügbar sein wird, gegen das die temporären Differenzen und noch nicht genutzten Verlustvorträge verwendet werden können. Die Unternehmenseinheiten werden individuell daraufhin beurteilt, ob es wahrscheinlich ist, dass in künftigen Jahren ein positives steuerliches Ergebnis entsteht. Eine etwa bestehende Verlusthistorie wird bei dieser Analyse einbezogen. Für den Teil der aktiven latenten Steuern, für den diese Annahmen nicht zutreffen, wird der Wert der latenten Steuern vermindert.

Passive latente Steuern, die durch temporäre Differenzen im Zusammenhang mit Beteiligungen an Tochterunternehmen und assoziierten Unternehmen entstehen, werden angesetzt, es sei denn, dass der Zeitpunkt der Umkehrung der temporären Differenzen im Konzern bestimmt werden kann und es wahrscheinlich ist, dass sich die temporären Differenzen in absehbarer Zeit aufgrund dieses Einflusses nicht umkehren werden.

Zur Ermittlung der latenten Steuern sind die Steuersätze anzuwenden, die zu dem Zeitpunkt gelten, in dem sich die vorübergehenden Differenzen wahrscheinlich wieder ausgleichen werden. Die Auswirkungen von Steuersatz- oder Steuergesetzänderungen auf die aktiven und passiven latenten Steuern werden im Regelfall ergebniswirksam berücksichtigt. Eine Änderung über das Eigenkapital erfolgt bei latenten Steuern, die vormals erfolgsneutral gebildet wurden. Die Änderung erfolgt grundsätzlich in der Periode, in der das materielle Gesetzgebungsverfahren abgeschlossen ist.

Die latenten Steuern für inländische Unternehmen sind mit einem Gesamtsteuersatz von 30 Prozent (2009: 30 Prozent) ermittelt. Dabei werden neben der Körperschaftsteuer von 15 Prozent (2009: 15 Prozent) der Solidaritätszuschlag von 5,5 Prozent auf die Körperschaftsteuer (2009: 5,5 Prozent auf die Körperschaftsteuer) und der durchschnittliche Gewerbesteuersatz in Höhe von 14 Prozent (2009: 14 Prozent) im Konzern berücksichtigt. Für ausländische Gesellschaften werden die jeweiligen nationalen Steuersätze zugrunde gelegt.

Die wichtigsten temporären Differenzen sind in Textziffer 10 angegeben.

### Kapitalflussrechnung

Die Kapitalflussrechnung ist gemäß IAS 7 „Kapitalflussrechnungen“ (IAS 7) in Geschäftstätigkeit, Investitionstätigkeit und Finanzierungstätigkeit gegliedert. Zahlungsströme der nicht fortgeführten Aktivitäten werden in der Kapitalflussrechnung gesondert ausgewiesen. Gezahlte und erhaltene Zinsen, gezahlte und erstattete Ertragsteuern sowie erhaltene Dividenden sind Bestandteil des Cashflows aus der Geschäftstätigkeit, gezahlte Dividenden werden im Bereich der Finanzierungstätigkeit ausgewiesen. Bei Erwerben beziehungsweise Veräußerungen von Anteilen an Unternehmen gezahlte (beziehungsweise erhaltene) Kaufpreise werden abzüglich erworbener (beziehungsweise abgegebener) Zahlungsmittel und Zahlungsmitteläquivalente im Bereich der Investitionstätigkeit gezeigt, soweit hiermit eine Kontrollerlangung beziehungsweise ein Kontrollverlust einhergeht. Bei Erwerben beziehungsweise Veräußerungen ohne Kontrollerlangung beziehungsweise Kontrollverlust erfolgt ein Ausweis der korrespondierenden Zahlungsströme im Bereich der Finanzierungstätigkeit. Wechselkursbedingte Wertänderungen der Zahlungsmittel und Zahlungsmitteläquivalente werden gesondert ausgewiesen.

### Segmentberichterstattung

Gemäß IFRS 8 werden die Segmente der Gesellschaft – dem sogenannten „Management Approach“ folgend – nach der internen Berichtsstruktur abgegrenzt und das Adjusted EBIT als die intern verwendete Ergebnisgröße zur Performance-Messung als Segmentergebnis herangezogen (vergleiche Textziffer 33).

### Gliederung der Bilanz sowie der Gewinn- und Verlustrechnung

Die Konzernbilanz wird im Einklang mit IAS 1 „Darstellung des Abschlusses“ (IAS 1) nach der Fristigkeitenmethode aufgestellt. Dabei werden Vermögenswerte, die innerhalb von zwölf Monaten nach dem Bilanzstichtag realisiert werden, sowie Verbindlichkeiten, die innerhalb eines Jahres nach dem Bilanzstichtag fällig werden, grundsätzlich als kurzfristig ausgewiesen.

Die Gliederung der Gewinn- und Verlustrechnung erfolgt nach dem auch für interne Zwecke Anwendung findenden Gesamtkostenverfahren.

### Kapitalstrukturmanagement

E.ON verwendet zum Management der Kapitalstruktur die Steuerungsgröße Debt Factor. Dieser ergibt sich aus dem Verhältnis zwischen der wirtschaftlichen Netto-Verschuldung und dem Adjusted EBITDA. Die wirtschaftliche Netto-Verschuldung schließt neben den Finanzschulden auch Pensions- und Versorgungsrückstellungen ein, außerdem werden die Netto-Marktwerte der Währungsderivate aus Finanztransaktionen (ohne Transaktionen aus dem operativen Geschäft und dem Assetmanagement) einbezogen. Das von E.ON gesetzte mittelfristige Ziel für den Debt Factor ist ein Wert von kleiner oder gleich 3. E.ONs Rating-Ziel ist „Solid single A“.

Bei einem Adjusted EBITDA im Geschäftsjahr von 13.346 Mio € (2009: 12.975 Mio €) und einer wirtschaftlichen Netto-Verschuldung zum Bilanzstichtag in Höhe von 37.701 Mio € (2009: 44.665 Mio €) beträgt der Debt Factor 2,8 (2009: 3,4).

### Schätzungen und Annahmen sowie Ermessen bei der Anwendung der Rechnungslegungsgrundsätze

Die Aufstellung des Konzernabschlusses erfordert Schätzungen und Annahmen, die die Anwendung von Rechnungslegungsgrundsätzen im Konzern, den Ausweis und die Bewertung beeinflussen können. Die Schätzungen basieren auf Erfahrungen der Vergangenheit und weiteren Erkenntnissen über zu bilanzierende Geschäftsvorfälle. Die tatsächlichen Beträge können von diesen Schätzungen abweichen.

Die Schätzungen und die zugrunde liegenden Annahmen werden fortlaufend überprüft. Anpassungen hinsichtlich der für die Rechnungslegung relevanten Schätzungen werden in der Periode der Änderung berücksichtigt, sofern die Änderungen ausschließlich diese Periode beeinflussen. Sofern die Änderungen sowohl die aktuelle Berichtsperiode als auch zukünftige Perioden betreffen, werden diese in der laufenden Periode und in späteren Perioden berücksichtigt.

Schätzungen sind insbesondere erforderlich bei der Bewertung von Sachanlagen und immateriellen Vermögenswerten, namentlich in Zusammenhang mit Kaufpreisallokationen, dem Ansatz und der Bewertung aktiver latenter Steuern, der Bilanzierung von Pensions- und übrigen Rückstellungen, bei der Durchführung von Werthaltigkeitsprüfungen in Übereinstimmung mit IAS 36 sowie der Fair-Value-Ermittlung bestimmter Finanzinstrumente.

Die Grundlagen für die Einschätzungen bei den relevanten Themen werden in den jeweiligen Abschnitten erläutert.

### Neue Standards und Interpretationen

Das International Accounting Standards Board (IASB) und das International Financial Reporting Interpretations Committee (IFRIC) haben die folgenden Standards und Interpretationen verabschiedet, die von der EU in europäisches Recht übernommen wurden und im Berichtszeitraum 1. Januar 2010 bis 31. Dezember 2010 verpflichtend anzuwenden sind:

#### IFRS 1 „Erstmalige Anwendung der International Financial Reporting Standards“

Im November 2008 veröffentlichte das IASB eine geänderte Version des IFRS 1 „Erstmalige Anwendung der Financial Reporting Standards“ (IFRS 1). Ziel der Neufassung ist es, die Anwendung dieses Standards zu vereinfachen. Die geänderte Version des IFRS 1 ist für Geschäftsjahre anzuwenden, die am oder nach dem 31. Dezember 2009 beginnen. Die Übernahme in europäisches Recht ist durch die EU erfolgt.

Darüber hinaus verabschiedete das IASB im Juli 2009 sowie im Januar 2010 weitere Änderungen des IFRS 1, die im Wesentlichen Erleichterungen bei der erstmaligen Umstellung auf IFRS für bestimmte Sachverhalte definieren. Die Neufassung wurde von der EU in europäisches Recht übernommen. Demnach sind die Änderungen für Geschäftsjahre anzuwenden, die am oder nach dem 1. Januar 2010 beginnen, wobei eine vorzeitige Anwendung zulässig ist.

Da E.ON den Konzernabschluss bereits nach den IFRS aufstellt, sind die Neufassung des Standards sowie dessen Änderungen nicht relevant.

#### IFRS 3 „Unternehmenszusammenschlüsse“

Im Januar 2008 veröffentlichte das IASB im Rahmen des „Business Combinations II“-Projektes eine neue Fassung des IFRS 3 „Unternehmenszusammenschlüsse“ (IFRS 3). Wesentliche Änderungen gegenüber der alten Fassung ergeben sich insbesondere beim Ansatz und der Bewertung der durch einen Zusammenschluss übernommenen Vermögenswerte und Schulden, bei der Bewertung von Anteilen ohne beherrschenden Einfluss sowie der Goodwill-Ermittlung und bei der Abbildung von Transaktionen mit variablen Kaufpreisen. Der überarbeitete Standard ist für Transaktionen anzuwenden, die in Geschäftsjahren stattfinden, die am oder nach dem 1. Juli 2009 beginnen. Der Standard wurde von der EU in europäisches Recht übernommen. E.ON kann aufgrund des im Standard enthaltenen Wahlrechts bezüglich der Goodwill-Ermittlung, das einzeln ausgeübt werden kann, keine generelle Aussage über die Auswirkungen auf den Konzernabschluss tätigen.

#### IAS 27 „Konzern- und separate Einzelabschlüsse“

Im Januar 2008 veröffentlichte das IASB im Rahmen des „Business Combinations II“-Projektes eine überarbeitete Fassung des IAS 27 „Konzern- und separate Einzelabschlüsse“ (IAS 27), die Regelungen zur Konsolidierung enthält. Hier wurde insbesondere erstmals auf Transaktionen eingegangen, bei denen Anteile an einem (Tochter-)Unternehmen ge- oder verkauft werden, ohne dass es zu einer Änderung der Beherrschung des Unternehmens kommt. Wesentliche Änderungen gegenüber der alten Fassung ergeben sich zudem insbesondere beim Ansatz und der Bewertung eines verbleibenden Investments beim Verlust der Beherrschung an dem vormaligen Tochterunternehmen sowie beim Ansatz der auf Anteile ohne beherrschenden Einfluss entfallenden Verluste. Die Änderungen wurden in europäisches Recht übernommen und sind für Geschäftsjahre anzuwenden, die am oder nach dem 1. Juli 2009 beginnen. Die Änderungen des IAS 27 können transaktionsbezogene Auswirkungen auf den E.ON Konzernabschluss haben, die keine generelle Aussage über die Auswirkungen erlauben.

#### Sammelstandard zu Änderungen verschiedener International Financial Reporting Standards

Zusätzlich zu den dargestellten Änderungen einzelner Standards überarbeitet das IASB im sogenannten „Annual Improvements Process“ bestehende Standards. Diese Änderungen werden durch das IASB als kleine, nicht dringliche, aber notwendige Änderungen angesehen, die daher in einem Gesamtstandard zusammengefasst werden. Im April 2009 veröffentlichte das IASB zum zweiten Mal einen entsprechenden Sammelstandard. Die Änderungen sind auf Geschäftsjahre anzuwenden, die am oder nach dem 1. Januar 2010 beginnen. Der Sammelstandard wurde von der EU in das europäische Recht übernommen. Soweit Änderungen des Standards für E.ON relevant sind, wurden sie entsprechend umgesetzt. Die Änderungen haben keine wesentlichen Auswirkungen auf den Konzernabschluss.

#### Änderungen zu IFRS 2 „Anteilsbasierte Vergütung“

Im Juni 2009 hat das IASB Änderungen des IFRS 2 veröffentlicht, die die Bilanzierung von anteilsbasierten Vergütungen mit Barausgleich innerhalb eines Konzernverbunds klarstellen. Die Regelung betrifft dabei diejenigen Fälle, in denen ein Unternehmen Güter oder Dienstleistungen erhalten hat, bei denen aber nicht das Unternehmen selbst, sondern sein Mutterunternehmen oder ein anderes Konzernunternehmen zur Begleichung der Zahlung verpflichtet ist. Im Zuge der Änderung wurden die Vorschriften des IFRIC 8 „Anwendungsbereich IFRS 2“ und IFRIC 11 „Konzerninterne Geschäfte und Geschäfte mit eigenen Anteilen nach IFRS 2“ in den Standard integriert. Beide Interpretationen wurden daher durch das IASB zurückgezogen. Die Änderung des IFRS 2 ist erstmals auf Geschäftsjahre anzuwenden, die am oder nach dem

1. Januar 2010 beginnen, wobei eine frühere Anwendung zulässig ist. Die Übernahme der Änderung in europäisches Recht durch die EU ist erfolgt. Für E.ON ergeben sich aus der Änderung keine wesentlichen Auswirkungen auf den Konzernabschluss.

#### Änderung zu IAS 39 „Finanzinstrumente: Ansatz und Bewertung – Zulässige Grundgeschäfte im Rahmen von Sicherungsbeziehungen“

Im Juli 2008 hat das IASB Ergänzungen zu IAS 39 „Finanzinstrumente: Ansatz und Bewertung – Zulässige Grundgeschäfte im Rahmen von Sicherungsbeziehungen“ veröffentlicht. Im Wesentlichen werden die Grundsätze der Designation von Inflationsrisiken als Grundgeschäft sowie der Designation eines einseitigen Risikos in einem Grundgeschäft konkretisiert. Die Ergänzungen sind auf Geschäftsjahre anzuwenden, die am oder nach dem 1. Juli 2009 beginnen. Der Standard wurde von der EU in europäisches Recht übernommen. Aus der Änderung ergeben sich keine wesentlichen Auswirkungen für E.ON.

#### IFRIC 12

##### „Dienstleistungskonzessionsvereinbarungen“

Im November 2006 wurde IFRIC 12 „Dienstleistungskonzessionsvereinbarungen“ (IFRIC 12) veröffentlicht. Die Interpretation regelt die Bilanzierung von Vereinbarungen, bei denen die öffentliche Hand als Konzessionsgeber Aufträge für die Erfüllung öffentlicher Aufgaben an private Unternehmen als Konzessionsnehmer vergibt. Zur Erfüllung dieser Aufgaben nutzt das private Unternehmen Infrastruktur, die in der Verfügungsmacht der öffentlichen Hand verbleibt. Das private Unternehmen ist für den Bau, den Betrieb und die Erhaltungsmaßnahmen in Bezug auf die Infrastruktur verantwortlich. Die Interpretation ist von der EU in europäisches Recht übernommen worden und danach spätestens für Geschäftsjahre, die am oder nach dem 29. März 2009 beginnen, verpflichtend anzuwenden. Die Übergangsvorschriften sehen zudem eine rückwirkende Anwendung vor. In diesem Zusammenhang hat E.ON in den Vorjahreswerten entsprechende Umgliederungen im Wesentlichen vom Sachanlagevermögen in die immateriellen Vermögenswerte bei den rumänischen Netzaktivitäten in Höhe von rund 0,4 Mrd € vorgenommen.

#### IFRIC 15 „Immobilienfertigungsaufträge“

Im Juli 2008 wurde IFRIC 15 „Immobilienfertigungsaufträge“ (IFRIC 15) veröffentlicht. Die Interpretation regelt die Bilanzierung von Immobilienverkäufen, bei denen es vor Abschluss der Bauarbeiten zum Vertragsabschluss mit dem Erwerber kommt. IFRIC 15 definiert Kriterien, nach denen sich die Bilanzierung entweder nach IAS 11 „Fertigungsaufträge“ oder nach IAS 18 „Erträge“ zu richten hat. Daraus ergibt sich, zu welchem Zeitpunkt die Erträge aus der Errichtung erfasst werden sollten. Darüber hinaus wird geregelt, welche Anhangangaben zu machen sind. Die Interpretation wurde von der EU in europäisches Recht übernommen und ist danach für Geschäftsjahre anzuwenden, die nach dem 31. Dezember 2009 beginnen. Die erstmalige Anwendung von IFRIC 15 hat keine wesentlichen Auswirkungen auf den Konzernabschluss von E.ON.

#### IFRIC 16 „Absicherungen einer Nettoinvestition in einen ausländischen Geschäftsbetrieb“

Im Juli 2008 wurde IFRIC 16 „Absicherungen einer Nettoinvestition in einen ausländischen Geschäftsbetrieb“ (IFRIC 16) veröffentlicht. Die Interpretation regelt Zweifelsfragen in Verbindung mit der Sicherung eines ausländischen Geschäftsbetriebes. Erläutert wird, was als Risiko bei der Absicherung einer Nettoinvestition in einen ausländischen Geschäftsbetrieb anzusehen ist, wo innerhalb der Unternehmensgruppe das Sicherungsinstrument zur Minderung dieses Risikos gehalten werden darf und wie bei Abgang des ausländischen Geschäftsbetriebes zu verfahren ist. Die Interpretation wurde von der EU in europäisches Recht übernommen und ist für Geschäftsjahre anzuwenden, die nach dem 30. Juni 2009 beginnen. Für E.ON ergeben sich keine wesentlichen Änderungen aus der erstmaligen Anwendung dieser Interpretation.

#### IFRIC 17 „Sachdividenden an Eigentümer“

Im November 2008 wurde IFRIC 17 „Sachdividenden an Eigentümer“ (IFRIC 17) veröffentlicht. Die Interpretation regelt die Bewertung von Vermögenswerten, die keine Zahlungsmittel sind und die ein Unternehmen als Gewinnausschüttung an die Anteilseigner überträgt. Nach IFRIC 17 ist eine Dividendenverpflichtung anzusetzen, wenn die Dividende von den zuständigen Organen genehmigt wurde und nicht mehr im Ermessen des Unternehmens steht. Diese Verpflichtung ist zum beizulegenden Zeitwert der zu übertragenden Nettovermögenswerte zu bewerten. Die Differenz zwischen der Dividendenverpflichtung und dem Buchwert des zu übertragenden Vermögenswertes ist erfolgswirksam zu erfassen. Es sind zusätzliche Anhangangaben vorzunehmen, wenn die für die Ausschüttung vorgesehenen Vermögenswerte der Definition eines aufgegebenen Geschäftsbereichs entsprechen. Die Interpretation wurde von der EU in europäisches Recht übernommen und ist danach für Geschäftsjahre anzuwenden, die nach dem 31. Oktober 2009 beginnen. Aus der Anwendung der Interpretation ergeben sich keine Auswirkungen auf den Konzernabschluss.

### IFRIC 18 „Übertragung von Vermögenswerten von Kunden“

Im Januar 2009 wurde IFRIC 18 „Übertragung von Vermögenswerten von Kunden“ (IFRIC 18) veröffentlicht. IFRIC 18 kommt in den Fällen zur Anwendung, in denen ein Unternehmen von seinen Kunden ein Sachanlagegut oder die Finanzmittel zur Herstellung oder Anschaffung eines Vermögenswertes erhält, um den Kunden im Gegenzug Zugang zu einem Netzwerk, einer Dienstleistung oder der Lieferung von Gütern zu verschaffen. Die Interpretation wurde von der EU in europäisches Recht übernommen und ist danach spätestens für Geschäftsjahre, die nach dem 31. Oktober 2009 beginnen, verpflichtend anzuwenden. Für E.ON ergeben sich hieraus keine wesentlichen Auswirkungen auf den Konzernabschluss.

### Weitere Änderungen

Aufgrund rückwirkender Umgliederungen von Jahresabschlussposten hat E.ON die Eröffnungsbilanz der Vergleichsperiode (1. Januar 2009) veröffentlicht sowie die korrespondierenden Angaben im Anhang angepasst.

### In 2010 noch nicht anzuwendende Standards und Interpretationen

Das IASB und das IFRIC haben weitere Standards und Interpretationen verabschiedet. Die Anwendung dieser Regelungen erfolgt im Geschäftsjahr nicht, da zum jetzigen Zeitpunkt die Anerkennung durch die EU teilweise aussteht beziehungsweise die Standards und Interpretationen noch nicht verpflichtend anzuwenden sind:

#### IFRS 9 „Finanzinstrumente“

Im November 2009 veröffentlichte das IASB den neuen Standard IFRS 9 „Finanzinstrumente“ (IFRS 9). Danach werden alle Finanzinstrumente, die derzeit in den Anwendungsbereich des IAS 39 fallen, fortan nur noch in zwei Kategorien unterteilt: Finanzinstrumente, die zu fortgeführten Anschaffungskosten bewertet werden, und Finanzinstrumente, die zum beizulegenden Zeitwert bewertet werden. Im Oktober 2010 veröffentlichte das IASB eine erweiterte Version des IFRS 9. Sie umfasst zusätzliche Vorschriften für die Bilanzierung von finanziellen Vermögenswerten und Verbindlichkeiten. Der neue Standard wird voraussichtlich verpflichtend für Geschäftsjahre anzuwenden sein, die am oder nach dem 1. Januar 2013 beginnen, wobei eine vorzeitige Anwendung zulässig ist. Die Übernahme durch die EU in europäisches Recht ist noch nicht erfolgt. E.ON untersucht zurzeit die Auswirkungen auf den Konzernabschluss.

#### IAS 24 „Angaben über Beziehungen zu nahestehenden Unternehmen und Personen“

Im November 2009 verabschiedete das IASB Änderungen zu IAS 24 „Angaben über Beziehungen zu nahestehenden Unternehmen und Personen“ (IAS 24). Gegenstand der Neuerungen sind insbesondere eine Konkretisierung der Definition nahestehender Unternehmen (related parties) sowie die Reduzierung der Offenlegungserfordernisse bei Unternehmen, die

aufgrund staatlicher Kontrolle oder wesentlichen staatlichen Einflusses als einander nahestehend gelten. Die Übernahme in europäisches Recht durch die EU ist erfolgt. Danach sind die Änderungen verpflichtend für Geschäftsjahre anzuwenden, die am oder nach dem 1. Januar 2011 beginnen, wobei eine frühere Anwendung zulässig ist. E.ON untersucht zurzeit die Auswirkungen auf den Konzernabschluss.

### Sammelstandard zu Änderungen verschiedener International Financial Reporting Standards

Im Rahmen des sogenannten „Annual Improvements Process“ überarbeitet das IASB bestehende Standards. Im Mai 2010 veröffentlichte das IASB zum dritten Mal einen entsprechenden Sammelstandard. Dieser enthält Änderungen an IFRS sowie den dazugehörigen Grundlagen für Schlussfolgerungen. Die Übernahme des Sammelstandards durch die EU in europäisches Recht ist erfolgt. Danach ergeben sich zwei zeitlich abweichende Erstanwendungszeitpunkte. Die Änderungen sind entweder für Geschäftsjahre, die am oder nach dem 1. Juli 2010 beginnen, oder für Geschäftsjahre, die am oder nach dem 1. Januar 2011 beginnen, anzuwenden. Für E.ON ergeben sich keine wesentlichen Änderungen aus dem Sammelstandard.

#### Änderung zu IFRS 1 „Begrenzte Befreiung erstmaliger Anwender von Vergleichsangaben nach IFRS 7“ und zu IFRS 7 „Finanzinstrumente: Angaben“

Im Januar 2010 veröffentlichte das IASB Änderungen zu IFRS 1 und zu IFRS 7. Die Änderung der Standards bewirkt, dass Unternehmen, die erstmals IFRS anwenden, die Befreiung von Vergleichsangaben für die Bewertung zum beizulegenden Zeitwert und für das Liquiditätsrisiko in Anspruch nehmen können. Die Befreiung gilt in Fällen, in denen die Vergleichsperioden vor dem 31. Dezember 2009 enden. Die Änderung wurde von der EU in europäisches Recht übernommen und ist danach für Geschäftsjahre anzuwenden, die am oder nach dem 1. Juli 2010 beginnen. Die Neufassungen der Standards haben keine Auswirkungen auf den Konzernabschluss von E.ON, da dieser bereits nach IFRS aufgestellt wird.

#### Änderungen zu IFRS 7 „Offenlegung – Übertragung von finanziellen Vermögenswerten“

Im Oktober 2010 veröffentlichte das IASB Änderungen zu IFRS 7. Die neue Version des Standards soll Abschlusslesern ein besseres Verständnis bezüglich der Transfertransaktionen finanzieller Vermögensgegenstände (zum Beispiel Verbriefung von Kredit- und Einlagepositionen) geben. Die Änderungen umfassen insbesondere die Offenlegung möglicher Risiken, die beim Unternehmen, welches den Vermögensgegenstand übertragen hat, infolge eines anhaltenden Engagements verbleiben. Die verpflichtende Anwendung der Neufassung des IFRS 7 ist für Geschäftsjahre vorgesehen, die am oder nach dem 1. Juli 2011 beginnen. Die Übernahme in europäisches Recht steht noch aus. E.ON erwartet derzeit keine wesentlichen Auswirkungen für den Konzernabschluss.



### Änderungen zu IAS 12 „Ertragsteuern“

Im Dezember 2010 veröffentlichte das IASB Änderungen zu IAS 12 „Ertragsteuern“. Bei der Behandlung temporärer steuerlicher Differenzen im Zusammenhang mit als Finanzinvestitionen gehaltenen Immobilien ist grundsätzlich davon auszugehen, dass die Umkehrung dieser Differenzen durch Veräußerung und nicht durch fortgeführte Nutzung erfolgt. Die Änderung ist für Geschäftsjahre, die am oder nach dem 1. Januar 2012 beginnen, anzuwenden. Die Übernahme in europäisches Recht durch die EU steht noch aus. E.ON erwartet aus der Änderung keine Auswirkungen auf den Konzernabschluss.

### Änderung von IAS 32 „Finanzinstrumente: Darstellung“ – Klassifizierung von Bezugsrechten

Im Oktober 2009 hat das IASB eine Änderung zu IAS 32 „Finanzinstrumente: Darstellung“ veröffentlicht, die insbesondere die Klassifizierung von Bezugsrechten regelt. Danach sind bestimmte Bezugsrechte, Optionen und Optionsscheine in fremder Währung beim Emittenten, auf dessen Eigenkapitalinstrument sich die Bezugsrechte beziehen, als Eigenkapital und nicht mehr als derivative Verbindlichkeit zu erfassen. Die Änderung ist auf Geschäftsjahre anzuwenden, die am oder nach dem 1. Februar 2010 beginnen, wobei eine frühere Anwendung zulässig ist. Eine Übernahme der Änderung von der EU in europäisches Recht ist erfolgt. E.ON erwartet hieraus keine Auswirkungen auf den Konzernabschluss.

### Änderungen an IFRIC 14 „Vorauszahlungen im Rahmen von Mindestdotierungsverpflichtungen“

Im November 2009 wurde eine Änderung zu IFRIC 14 veröffentlicht. Die Änderung betrifft Unternehmen, die Mindestfinanzierungsvorschriften unterliegen und eine Vorauszahlung der Beiträge leisten. Gemäß der Änderung wird es nun gestattet,

dass ein Unternehmen den Nutzen aus einer solchen Vorauszahlung gegebenenfalls als Vermögenswert darstellt. Die Änderung wurde von der EU in europäisches Recht übernommen und ist demnach für Geschäftsjahre anzuwenden, die am oder nach dem 1. Januar 2011 beginnen, wobei eine frühzeitige Anwendung zulässig ist. Für E.ON ergeben sich hieraus keine Auswirkungen auf den Konzernabschluss.

### IFRIC 19 „Tilgung finanzieller Verbindlichkeiten durch Eigenkapitalinstrumente“

Im November 2009 wurde IFRIC 19 „Tilgung finanzieller Verbindlichkeiten durch Eigenkapitalinstrumente“ (IFRIC 19) veröffentlicht. IFRIC 19 konkretisiert die Bilanzierung von finanziellen Verbindlichkeiten, die durch die Übertragung von Eigenkapitalinstrumenten getilgt werden. Die ausgegebenen Finanzinstrumente stellen danach „gezahltes Entgelt“ im Sinne des IAS 39.41 dar. Der Kreditnehmer hat daher die Verbindlichkeit vollständig oder partiell auszubuchen. Jegliche Differenz zwischen dem Buchwert der getilgten finanziellen (Teil-)Verbindlichkeit und dem erstmaligen Bewertungsbetrag der ausgegebenen Eigenkapitalinstrumente wird erfolgswirksam erfasst. IFRIC 19 tritt für Geschäftsjahre in Kraft, die am oder nach dem 1. Juli 2010 beginnen, wobei eine vorzeitige Anwendung zulässig ist. Die EU hat die neue Interpretation in europäisches Recht übernommen. E.ON erwartet keine Auswirkungen auf den Konzernabschluss.

## (3) Konsolidierungskreis

Die Anzahl der konsolidierten Unternehmen hat sich wie folgt verändert:

| Konsolidierungskreis                                   | Inland     | Ausland    | Summe      |
|--------------------------------------------------------|------------|------------|------------|
| Konsolidierte Unternehmen zum 1. Januar 2009           | 151        | 495        | 646        |
| Zugänge                                                | 15         | 14         | 29         |
| Abgänge/Verschmelzungen                                | 21         | 68         | 89         |
| <b>Konsolidierte Unternehmen zum 31. Dezember 2009</b> | <b>145</b> | <b>441</b> | <b>586</b> |
| Zugänge                                                | 9          | 14         | 23         |
| Abgänge/Verschmelzungen                                | 8          | 121        | 129        |
| <b>Konsolidierte Unternehmen zum 31. Dezember 2010</b> | <b>146</b> | <b>334</b> | <b>480</b> |

Im Jahr 2010 wurden insgesamt 53 inländische und 53 ausländische Unternehmen nach der Equity-Methode bewertet (2009: 57 bzw. 74). Wesentliche Unternehmenserwerbe, Veräußerungen und nicht fortgeführte Aktivitäten werden in Textziffer 4 erläutert.

#### (4) Unternehmenserwerbe, Veräußerungen und nicht fortgeführte Aktivitäten

##### Nicht fortgeführte Aktivitäten im Jahr 2010

###### US-Midwest

Ende April 2010 hat E.ON mit der Pennsylvania Power & Light Corporation (PPL), Allentown, Pennsylvania, USA, Verträge über den Verkauf des in der Market Unit US-Midwest gebündelten Strom- und Gasgeschäftes in den USA geschlossen. Als Kaufpreis für das Eigenkapital sowie für die Übernahme bestimmter Verbindlichkeiten wurden rund 7,6 Mrd US-\$ (zum 1. November 2010 rund 5,5 Mrd €) vereinbart. Zusätzlich haben wir Pensionsverpflichtungen in Höhe von rund 0,8 Mrd US-\$ übertragen. Durch die Konkretisierung der Verkaufsabsicht war eine Überprüfung der Bewertung der US-Aktivitäten unter Berücksichtigung des zu erwartenden Veräußerungserlöses vorzunehmen. Diese Überprüfung führte im Vergleich zum tatsächlich vereinbarten Kaufpreis zu einem Goodwill-Impairment von rund 0,9 Mrd €; dieses war bereits im ersten Quartal 2010 zu erfassen. Die Market Unit US-Midwest wurde seit April als nicht fortgeführte Aktivität ausgewiesen, da die Voraussetzungen für einen solchen Ausweis erst mit weiterer Konkretisierung des Veräußerungsprozesses im April 2010 eingetreten waren. Die Transaktion konnte am 1. November 2010 vollzogen werden. Im Zusammenhang mit diesem Abgang waren im OCI erfasste Beträge von rund -0,2 Mrd € erfolgswirksam zu berücksichtigen.

Die nachfolgende Tabelle zeigt die wesentlichen Posten der Gewinn- und Verlustrechnung inklusive des Goodwill-Impairments im Jahr 2010 und nachlaufender Effekte aus der Abwicklung noch bestehender Vertragsverhältnisse der Western Kentucky Energy Corp. (WKE), Henderson, Kentucky, USA. Die wesentlichen Bilanzposten zum Abgangszeitpunkt waren das Sachanlagevermögen mit rund 5,7 Mrd €, betriebliche Forderungen und Vorräte mit 0,3 Mrd € beziehungsweise 0,2 Mrd € sowie Pensionsverpflichtungen und Finanzverbindlichkeiten mit 0,8 Mrd € beziehungsweise 0,5 Mrd €. Bezüglich WKE wird auf die Ausführungen in Textziffer 4 des Geschäftsberichtes 2009 verwiesen.

| Gewinn- und Verlustrechnung – US-Midwest – (Kurzfassung) |             |           |
|----------------------------------------------------------|-------------|-----------|
| in Mio €                                                 | 2010        | 2009      |
| Umsatzerlöse                                             | 1.563       | 1.934     |
| Sonstige Erträge/Aufwendungen, netto                     | -2.233      | -1.851    |
| <b>Ergebnis der gewöhnlichen Geschäftstätigkeit</b>      | <b>-670</b> | <b>83</b> |
| Steuern vom Einkommen und vom Ertrag                     | -149        | -36       |
| <b>Ergebnis aus nicht fortgeführten Aktivitäten</b>      | <b>-819</b> | <b>47</b> |

##### Abgangsgruppen und zur Veräußerung gehaltene Vermögenswerte im Jahr 2010

###### E.ON Rete

Mitte Dezember 2010 wurden die vertraglichen Vereinbarungen zum Verkauf von 100 Prozent der Anteile an der E.ON Rete S.r.l., Mailand, Italien, über die die Market Unit Italy das italienische Gasverteilnetz geführt hat, an ein Konsortium aus dem italienischen Infrastrukturfonds F2i SGR S.p.A. und AXA Private Equity zu einem Verkaufspreis von rund 0,3 Mrd € geschlossen. Zum 31. Dezember 2010 werden diese Aktivitäten als Abgangsgruppe ausgewiesen. Die wesentlichen Bilanzposten sind das immaterielle und das Sachanlagevermögen mit 0,1 Mrd € beziehungsweise 0,2 Mrd € sowie Verbindlichkeiten mit 0,2 Mrd €. Der Vollzug der Transaktion wird für die erste Jahreshälfte 2011 erwartet.

###### Stadtwerke Duisburg/Stadtwerke Karlsruhe

Infolge des Abgangs der Thüga-Gruppe im Jahr 2009 wurden die in der Market Unit Pan-European Gas bilanzierten Beteiligungen an der Stadtwerke Duisburg Aktiengesellschaft, Duisburg, (20 Prozent) sowie an der Stadtwerke Karlsruhe GmbH, Karlsruhe, (10 Prozent) zum 31. Dezember 2010 als zur Veräußerung gehaltene Vermögenswerte ausgewiesen. Im Laufe des vierten Quartals 2010 wurde die Veräußerung der Beteiligung an der Stadtwerke Karlsruhe GmbH an den Mitgesellschafter KVVH – Karlsruher Versorgungs-, Verkehrs- und Hafen GmbH, Karlsruhe – vereinbart. Vollzug der Transaktion erfolgte Anfang 2011. Auch für die Beteiligung an der Stadtwerke Duisburg AG wird eine Veräußerung im ersten Halbjahr 2011 angestrebt.

###### HSE

Infolge der Abgabe der Thüga-Gruppe konnte im Laufe des dritten Quartals 2010 ein konkreter Verhandlungsstand über die Abgabe der in der Market Unit Pan-European Gas bilanzierten 40-prozentigen Beteiligung an der HEAG Südthüringische Energie AG, Darmstadt, erreicht werden. Die Beteiligung wurde dementsprechend Ende August 2010 in die zur Veräußerung gehaltenen Vermögenswerte umgegliedert. Der Buchwert der Beteiligung beläuft sich auf rund 0,3 Mrd €. Der Vollzug der Transaktion soll im ersten Halbjahr 2011 erfolgen.

###### Europagas

Im Zuge von Portfoliooptimierungen wurde eine Veräußerung der 50-prozentigen Beteiligung an der Europagas a.s., Prag, Tschechische Republik, angestrebt, daher erfolgte der Ausweis zum 30. Juni 2010 als zur Veräußerung gehaltene Vermögenswerte. Die bei der Market Unit Pan-European Gas nach der Equity-Methode bilanzierte Beteiligung wies einen Buchwert von rund 0,2 Mrd € auf. Der Vollzug erfolgte Ende Juli 2010.



## BKW

Ebenfalls im Rahmen von Portfoliobereinigungen beschloss E.ON die Abgabe von etwa 21 Prozent der Anteile an der BKW FMB Energie AG (BKW), Bern, Schweiz. Im Juli 2010 konnte der erste Teil der Transaktion mit der Übernahme von rund 14 Prozent durch BKW selbst sowie die Groupe E SA, Fribourg, Schweiz, zu einem Preis von rund 0,3 Mrd € vollzogen werden. Der Buchwert der in der Market Unit Central Europe nach der Equity-Methode bilanzierten gesamten Anteile betrug zum 30. Juni 2010 rund 0,6 Mrd €, im Eigenkapital erfasste Währungsumrechnungsdifferenzen beliefen sich auf rund 0,1 Mrd €. Die Transaktion ist im Juli 2010 vollzogen worden. Ein wesentlicher Buchgewinn entstand nicht. Die verbleibenden rund 7 Prozent der Anteile, auf die seitens BKW eine Kaufoption bis September 2011 besteht, werden weiterhin als zur Veräußerung gehaltene Vermögenswerte ausgewiesen und mit dem Fair Value bewertet. Zum 31. Dezember 2010 beläuft sich der Buchwert auf rund 0,2 Mrd €.

## Beteiligung an OAO Gazprom

Im vierten Quartal wurde im Rahmen von Portfoliobereinigungen ein Großteil der gehaltenen Beteiligung an Gazprom an die russische Vnesheconombank (VEB), Moskau, Russische Föderation, veräußert. Der Veräußerungserlös aus diesem Geschäft beträgt circa 2,6 Mrd €. Der Buchgewinn beträgt circa 2,0 Mrd €. Der verbleibende bei der Market Unit Pan-European Gas bilanzierte Anteil wird als zur Veräußerung gehalten klassifiziert. Diese Anteile werden in 2011 abgegeben. Der Buchwert der weiterhin bilanzierten Beteiligung beträgt rund 0,9 Mrd €. Die zum 31. Dezember 2010 im OCI erfassten Wertänderungen betragen rund 0,6 Mrd €.

## Vereinbarung EU-Kommission

Im Dezember 2008 wurde die Verpflichtungszusage von E.ON an die Europäische Kommission, diverse Stromkapazitäten sowie das Höchstspannungsnetz in Deutschland abzugeben, wirksam. Die insgesamt abzugebenden Kapazitäten in Höhe von rund 5 GW einschließlich zugehöriger Aktiva und Verpflichtungen wurden seit Ende 2008 als Abgangsgruppe dargestellt. Die Netto-Buchwerte der Abgangsgruppe betrafen ausschließlich die Market Unit Central Europe mit einem Betrag von zunächst rund 0,4 Mrd €. Im Jahr 2009 wurde in mehreren Transaktionen die Abgabe wesentlicher Anteile der abzugebenden Stromkapazitäten durchgeführt. Im ersten Quartal 2010 erfolgte der Vollzug des Vertrages mit der Stadtwerke Hannover AG, Hannover, über weitere 0,3 GW Kapazität mit einem Veräußerungsgewinn von rund 0,2 Mrd €. Der Vollzug der Abgabe der restlichen Stromkapazitäten in Höhe von 0,3 GW erfolgte im April 2010.

Im November 2009 konnte eine Vereinbarung mit TenneT B.V., Arnheim, Niederlande, über die Abgabe des deutschen Höchstspannungsnetzes erzielt werden. Die Umgliederung des Höchstspannungsnetzes in die Abgangsgruppen wurde daher im vierten Quartal 2009 mit einem Netto-Buchwert von rund 0,8 Mrd € vorgenommen. Die wesentlichen Vermögenswerte und Schulden betrafen zum Abgangszeitpunkt das Sachanlage- und Umlaufvermögen mit 1,0 Mrd € beziehungsweise 0,7 Mrd € sowie Verbindlichkeiten und passive latente Steuern mit 0,9 Mrd € beziehungsweise 0,2 Mrd €. Ebenso wies die betreffende Einheit finanzielle Verpflichtungen aus Investitionstätigkeit in Höhe von rund 2 Mrd € auf. Die Vereinbarung wurde Ende Februar 2010 vollzogen. Unter Berücksichtigung von Kaufpreisanpassungen wurde ein Veräußerungsgewinn von 0,1 Mrd € erzielt.

Die Verpflichtung gegenüber der EU-Kommission konnte somit im April 2010 vollständig erfüllt werden.

## Unternehmenserwerbe im Jahr 2009

### Yushno Russkoje

Im Oktober 2008 haben sich E.ON und OAO Gazprom (Gazprom), Moskau, Russische Föderation, auf eine Beteiligung von E.ON am sibirischen Gasfeld Yushno Russkoje verständigt. Die Gegenleistung für die Beteiligung am Gasfeld beinhaltete – neben einer geringen Barzahlung – die von E.ON mittelbar gehaltenen Aktien an Gazprom im Wert von 2,3 Mrd € (entspricht 2,93 Prozent des Eigenkapitals von Gazprom). Die Beteiligung am Gasfeld erfolgt über die Übernahme von 25 Prozent minus 3 Aktien an der OAO Severneftegazprom, Krasnoselkup, Russische Föderation, die Inhaberin der Förderlizenz ist. Diese Beteiligung wird mit anteiligen Anschaffungskosten von 0,2 Mrd € als assoziiertes Unternehmen nach der Equity-Methode bilanziert. Wesentliche Effekte auf Basis der Kaufpreisallokation sind für diese Beteiligung nicht gegeben. Die Vermarktung des zuzurechnenden Gases erfolgt über die Projektgesellschaft ZAO Gazprom YRGM Development, Salekhard, Russische Föderation, deren Ergebnis E.ON über eine Vorzugsaktie zuzurechnen ist. Aufgrund der Zuordnung der wesentlichen Chancen und Risiken ist diese Gesellschaft im E.ON-Konzern seit Oktober 2009 voll zu konsolidieren.

Die nachfolgenden Daten beziehen sich auf ZAO Gazprom YRGM Development:

| Wesentliche Bilanzposten ZAO Gazprom YRGM Development |                                     |                     |                                     |
|-------------------------------------------------------|-------------------------------------|---------------------|-------------------------------------|
| in Mio €                                              | Buchwerte vor<br>Erstkonsolidierung | Kaufpreisallokation | Buchwerte bei<br>Erstkonsolidierung |
| Immaterielle Vermögenswerte                           | -                                   | 2.564               | 2.564                               |
| Sonstige Vermögenswerte                               | 1                                   | 4                   | 5                                   |
| <b>Summe Vermögenswerte</b>                           | <b>1</b>                            | <b>2.568</b>        | <b>2.569</b>                        |
| Langfristige Schulden                                 | -                                   | 513                 | 513                                 |
| <b>Summe Schulden</b>                                 | <b>0</b>                            | <b>513</b>          | <b>513</b>                          |
| <b>Nettovermögen</b>                                  | <b>1</b>                            | <b>2.055</b>        | <b>2.056</b>                        |
| Anteil der Gesellschafter der E.ON AG                 | -                                   | 2.055               | -                                   |
| Anteile ohne beherrschenden Einfluss                  | 1                                   | -                   | 1                                   |
| <b>Anschaffungskosten</b>                             |                                     | <b>2.193</b>        |                                     |
| <b>Verbleibender Goodwill</b>                         |                                     | <b>138</b>          | <b>138</b>                          |

Wesentliche Vermögenswerte im Zuge der Kaufpreisverteilung stellen vorteilhafte Gaslieferverträge dar, auf die der größte Teil des Unterschiedsbetrags entfällt. Die langfristigen Schulden beinhalten ausschließlich latente Steuern. Es verbleibt bei der Projektgesellschaft ein als Goodwill bilanzierter Differenzbetrag von 138 Mio €. Die Kaufpreisverteilung wurde zum 30. September 2010 abgeschlossen. Anpassungen waren nicht mehr vorzunehmen.

#### Langerlo-Vilvoorde NV

Im Zuge der Umsetzung der Verpflichtungszusage von E.ON an die Europäische Kommission, diverse Stromkapazitäten in Deutschland abzugeben, wurde mit Electrabel SA/NV (Electrabel), Brüssel, Belgien, wirtschaftlich der Tausch diverser Kraftwerkseinheiten und Stromlieferungen in Deutschland und Belgien vereinbart.

E.ON hat in diesem Zusammenhang in Belgien sämtliche Anteile an einer Kraftwerkseinheit, Langerlo-Vilvoorde NV, Vilvoorde, Belgien, übernommen. Diese Einheit betreibt kohle- und gasbefeuerte Kraftwerke an den Standorten Langerlo und Vilvoorde. Der Vollzug der Übernahme dieser Einheit erfolgte Anfang November 2009 im Austausch gegen die an Electrabel abgegebenen Kraftwerkseinheiten. Eine geringfügige Bar-Komponente wurde von E.ON bereits im Jahr 2009 geleistet.

Die Buchwerte vor Erstkonsolidierung sind grundsätzlich auf Basis der IFRS ermittelt, Anpassungen auf die im E.ON-Konzern angewandten Bilanzierungsgrundsätze wurden zusammen mit den Anpassungen aus der Kaufpreisallokation dargestellt.

Die Kaufpreisallokation wurde im November 2010 mit lediglich geringfügigen Anpassungen abgeschlossen.

| Wesentliche Bilanzposten Langerlo-Vilvoorde NV |                                     |                     |                                     |
|------------------------------------------------|-------------------------------------|---------------------|-------------------------------------|
| in Mio €                                       | Buchwerte vor<br>Erstkonsolidierung | Kaufpreisallokation | Buchwerte bei<br>Erstkonsolidierung |
| Immaterielle Vermögenswerte                    | -                                   | 12                  | 12                                  |
| Sachanlagen                                    | 512                                 | -122                | 390                                 |
| Sonstige Vermögenswerte                        | 17                                  | 69                  | 86                                  |
| <b>Summe Vermögenswerte</b>                    | <b>529</b>                          | <b>-41</b>          | <b>488</b>                          |
| Langfristige Schulden                          | 16                                  | 2                   | 18                                  |
| Kurzfristige Schulden                          | 25                                  | 41                  | 66                                  |
| <b>Summe Schulden</b>                          | <b>41</b>                           | <b>43</b>           | <b>84</b>                           |
| <b>Nettovermögen</b>                           | <b>488</b>                          | <b>-84</b>          | <b>404</b>                          |
| <b>Goodwill</b>                                |                                     | <b>66</b>           | <b>66</b>                           |

## Abgangsgruppen und zur Veräußerung gehaltene Vermögenswerte im Jahr 2009

### Endesa Europa/Viesgo

Im Zuge des Erwerbs der Endesa Europa/Viesgo-Aktivitäten wurde mit dem Anteilseigner ohne beherrschenden Einfluss der E.ON Produzione S.p.A. (E.ON Produzione), Sassari, Italien, der A2A S.p.A. (A2A), Mailand, Italien, vereinbart, den Anteil ohne beherrschenden Einfluss im Wesentlichen gegen Gewährung von gesellschaftseigenen Kraftwerkskapazitäten der Market Unit Italy im Wert von rund 1,4 Mrd € zu übernehmen. Die Abgangsgruppe wurde im Segment Neue Märkte ausgewiesen. Die Vereinbarung wurde im Juli 2009 vollzogen. Der Abgang der betreffenden Vermögenswerte und Schulden erfolgte daher im dritten Quartal 2009.

### Beteiligung an OAO Gazprom

Im Oktober 2008 haben sich E.ON und Gazprom auf eine Beteiligung von E.ON am sibirischen Gasfeld Yushno Russkoje verständigt. Gazprom hat als Gegenleistung die von E.ON mittelbar gehaltenen Aktien von Gazprom, die ungefähr die Hälfte des von E.ON gehaltenen Anteils von rund 6 Prozent am Eigenkapital von Gazprom ausmachen, übernommen. Die Anteile wurden seit Oktober 2008 als zur Veräußerung gehaltene Vermögenswerte ausgewiesen. Der Vollzug der betreffenden Verträge erfolgte im Oktober 2009. Mit dem Abgang der Beteiligung wurden im Other Comprehensive Income aufgelaufene Beträge aus der Fair-Value-Bewertung ergebniswirksam realisiert. Hieraus ergab sich ein Buchgewinn in Höhe von 1,8 Mrd €.

### Thüga

In 2009 hat E.ON Verhandlungen über einen Verkauf der in der Market Unit Pan-European Gas gehaltenen Thüga-Gruppe – mit Ausnahme der Beteiligungen an der GASAG Berliner Gaswerke Aktiengesellschaft, Berlin, an der HEAG Süd Hessische Energie AG, Darmstadt, an der Stadtwerke Duisburg Aktiengesellschaft, Duisburg, sowie an der Stadtwerke Karlsruhe GmbH, Karlsruhe – an ein kommunales Erwerberkonsortium (Integra/Kom9) geführt. Die Thüga-Gruppe wurde ausgehend von dem sich konkretisierenden Verhandlungsverlauf seit dem dritten Quartal 2009 als Abgangsgruppe ausgewiesen. Die wesentlichen Bilanzposten der Abgangsgruppe umfassten zum 30. September 2009 Finanzanlagen (rund 2,0 Mrd €), immaterielles Anlagevermögen (rund 0,9 Mrd €) sowie Rückstellungen und Verbindlichkeiten (rund 0,6 Mrd €). Im Oktober 2009 konnten bindende Verträge mit einem Kaufpreis von rund 2,9 Mrd € mit dem kommunalen Erwerberkonsortium unterzeichnet werden. Der Vollzug der Transaktion ist im Dezember 2009 erfolgt. Hieraus resultierte ein Veräußerungsgewinn von rund 0,3 Mrd €.

### Vermögensumschichtung VKE

In 2009 wurden zur externen Finanzierung der bestehenden leistungsorientierten Versorgungsverpflichtungen Arbeitgeberbeiträge von bestimmten inländischen Einheiten in das bestehende Contractual Trust Arrangement (CTA) in Höhe von 1,7 Mrd € geleistet. Die Sicherungsübereignung an den Pensionsabwicklungstrust e.V. (Treuhänder) erfolgte unter ausschließlicher und vollständiger Verwendung eines bislang über die Versorgungskasse Energie (VKE) voll konsolidierten Spezialfonds. Die im Other Comprehensive Income erfassten Beträge aus der Fair-Value-Bewertung wurden in Höhe von 0,1 Mrd € ergebniswirksam reklassifiziert.

### (5) Umsatzerlöse

Die Realisierung der Umsatzerlöse erfolgt grundsätzlich zum Zeitpunkt der Lieferung an den Kunden beziehungsweise mit Erfüllung der Leistung. Die Lieferung gilt als abgeschlossen, wenn die mit dem Eigentum verbundenen Risiken auf den Käufer übergegangen sind, das Entgelt vertraglich festgelegt ist und die Erfüllung der Forderung wahrscheinlich ist.

Die Umsatzerlöse resultieren überwiegend aus den Verkäufen von Strom und Gas an Industriekunden, gewerbliche Abnehmer und Endverbraucher. Darüber hinaus sind Erlöse aus der Verteilung von Strom und Gas, aus Lieferungen von Dampf, Wärme und Wasser sowie aus dem Eigenhandel enthalten.

Die Umsatzerlöse aus dem Verkauf von Strom und Gas an Industriekunden, gewerbliche Abnehmer und Endverbraucher werden realisiert, wenn sie vom Kunden auf Basis einer vertraglichen Vereinbarung abgenommen worden sind. Sie spiegeln den Wert der gelieferten Einheiten, einschließlich der geschätzten Werte für Einheiten zwischen der letzten Abrechnung und dem Periodenende, wider. Unrealisierte und realisierte Erlöse aus Eigenhandelsaktivitäten werden saldiert in den Umsatzerlösen erfasst.

Die Aufteilung der Umsatzerlöse nach Segmenten findet sich in Textziffer 33.

### (6) Andere aktivierte Eigenleistungen

Andere aktivierte Eigenleistungen belaufen sich auf 588 Mio € (2009: 532 Mio €) und resultieren im Wesentlichen aus Engineering-Leistungen im Netzbereich und im Zusammenhang mit Neubauprojekten.

### (7) Sonstige betriebliche Erträge und Aufwendungen

Die sonstigen betrieblichen Erträge setzen sich wie folgt zusammen:

| Sonstige betriebliche Erträge                             |               |               |
|-----------------------------------------------------------|---------------|---------------|
| in Mio €                                                  | 2010          | 2009          |
| Erträge aus Währungskursdifferenzen                       | 5.177         | 10.849        |
| Erträge aus derivativen Finanzinstrumenten                | 6.046         | 7.458         |
| Erträge aus dem Abgang von Beteiligungen und Wertpapieren | 3.424         | 5.156         |
| Erträge aus dem Abgang von Sachanlagevermögen             | 54            | 151           |
| Übrige                                                    | 1.260         | 1.328         |
| <b>Summe</b>                                              | <b>15.961</b> | <b>24.942</b> |

Grundsätzlich werden bei E.ON Derivate für die Absicherung (Hedging) von Commodity- sowie Devisen- und Zinsrisiken eingesetzt.

Die Aufwendungen und Erträge aus derivativen Finanzinstrumenten betreffen die Fair-Value-Bewertung und realisierte Ergebnisse aus Derivaten nach IAS 39 mit Ausnahme von Ergebniseffekten aus Zinsderivaten.

Die Erträge aus Währungskursdifferenzen enthalten im Wesentlichen realisierte Erträge aus Währungsderivaten in Höhe von 3.420 Mio € (2009: 9.113 Mio €) sowie Effekte aus der Stichtagskursumrechnung in Höhe von 1.480 Mio € (2009: 1.241 Mio €).

In den Erträgen aus dem Abgang von Beteiligungen und Wertpapieren sind im Wesentlichen Erträge aus der Veräußerung der Gazprom-Anteile in Höhe von 1.953 Mio € enthalten (vergleiche hierzu auch Textziffer 4). Weiterhin wurden Gewinne aus dem Verkauf von Wertpapieren in Höhe von 257 Mio € (2009: 314 Mio €) erzielt. Im Vorjahr waren darüber hinaus Erträge aus der Abgabe von Stromkapazitäten im Rahmen der Verpflichtungszusage an die EU-Kommission in Höhe von 2.359 Mio € enthalten.

Im Jahr 2010 waren in den übrigen sonstigen betrieblichen Erträgen vor allem Auflösungen von Wertberichtigungen und Rückstellungen sowie vereinnahmte Schadenersatzleistungen enthalten.

Die sonstigen betrieblichen Aufwendungen setzen sich folgendermaßen zusammen:

| <b>Sonstige betriebliche Aufwendungen</b>                  |               |               |
|------------------------------------------------------------|---------------|---------------|
| <b>in Mio €</b>                                            | <b>2010</b>   | <b>2009</b>   |
| Aufwendungen aus Währungskursdifferenzen                   | 4.936         | 11.095        |
| Aufwendungen aus derivativen Finanzinstrumenten            | 3.559         | 5.701         |
| Sonstige Steuern                                           | 326           | 233           |
| Verluste aus dem Abgang von Beteiligungen und Wertpapieren | 75            | 122           |
| Übrige                                                     | 4.701         | 5.333         |
| <b>Summe</b>                                               | <b>13.597</b> | <b>22.484</b> |

Die Aufwendungen aus Währungskursdifferenzen enthalten im Wesentlichen realisierte Aufwendungen aus Währungsderivaten in Höhe von 3.198 Mio € (2009: 9.344 Mio €) sowie Effekte aus der Stichtagskursumrechnung in Höhe von 1.413 Mio € (2009: 1.207 Mio €).

In den übrigen sonstigen betrieblichen Aufwendungen sind Konzessionsabgaben in Höhe von 473 Mio € (2009: 492 Mio €), externe Beratungs- und Prüfungskosten in Höhe von 292 Mio € (2009: 314 Mio €), Werbe- und Marketingaufwendungen in Höhe von 284 Mio € (2009: 234 Mio €) sowie Wertberichtigungen auf Forderungen aus Lieferungen und Leistungen in Höhe von 380 Mio € (2009: 378 Mio €) enthalten. Des Weiteren werden hier Fremdleistungen, IT-Aufwendungen und Versicherungsprämien ausgewiesen.

Die sonstigen betrieblichen Aufwendungen aus Explorations-tätigkeit beliefen sich auf 37 Mio € (2009: 41 Mio €).

## (8) Materialaufwand

Die Aufwendungen für Roh-, Hilfs- und Betriebsstoffe und bezogene Waren umfassen insbesondere den Bezug von Gas und Strom, von Brennstoffen für die Stromerzeugung sowie den Nuklearbereich. Des Weiteren sind hier Netznutzungsentgelte enthalten. Die Aufwendungen für bezogene Leistungen beinhalten im Wesentlichen Instandhaltungsaufwendungen.

| <b>Materialaufwand</b>                                              |               |               |
|---------------------------------------------------------------------|---------------|---------------|
| <b>in Mio €</b>                                                     | <b>2010</b>   | <b>2009</b>   |
| Aufwendungen für Roh-, Hilfs- und Betriebsstoffe und bezogene Waren | 70.165        | 58.335        |
| Aufwendungen für bezogene Leistungen                                | 3.410         | 2.688         |
| <b>Summe</b>                                                        | <b>73.575</b> | <b>61.023</b> |

## (9) Finanzergebnis

Das Finanzergebnis setzt sich wie folgt zusammen:

| Finanzergebnis                                        |               |               |
|-------------------------------------------------------|---------------|---------------|
| in Mio €                                              | 2010          | 2009          |
| Erträge aus Beteiligungen                             | 167           | 165           |
| Wertminderungen auf sonstige Finanzanlagen            | -48           | -353          |
| <b>Beteiligungsergebnis</b>                           | <b>119</b>    | <b>-188</b>   |
| Erträge aus Wertpapieren, Zinsen und ähnliche Erträge | 653           | 600           |
| <i>Available-for-Sale</i>                             | 208           | 277           |
| <i>Loans and Receivables</i>                          | 171           | 189           |
| <i>Held-for-Trading</i>                               | 78            | 44            |
| <i>Sonstige Zinserträge</i>                           | 196           | 90            |
| Zinsen und ähnliche Aufwendungen                      | -2.956        | -2.873        |
| <i>Amortized Cost</i>                                 | -1.535        | -1.698        |
| <i>Held-for-Trading</i>                               | -32           | -31           |
| <i>Sonstige Zinsaufwendungen</i>                      | -1.389        | -1.144        |
| <b>Zinsergebnis</b>                                   | <b>-2.303</b> | <b>-2.273</b> |
| <b>Finanzergebnis</b>                                 | <b>-2.184</b> | <b>-2.461</b> |

Zur Beschreibung der Bewertungskategorien wird auf Textziffer 2 verwiesen.

Die Veränderung des Finanzergebnisses gegenüber dem Vorjahr resultiert im Wesentlichen aus einer Verringerung der Wertminderungen auf die im Rahmen des Assetmanagements gehaltenen Wertpapiere (vergleiche Textziffer 31). Dies ist insbesondere auf die weitere Stabilisierung der Finanzmärkte zurückzuführen.

Die sonstigen Zinserträge enthalten überwiegend Erträge aus Leasingforderungen (Finanzierungsleasing) und Erträge für Steuern aus Vorjahren. In den sonstigen Zinsaufwendungen ist die Aufzinsung von Rückstellungen für Entsorgungs- und Rückbauverpflichtungen in Höhe von 722 Mio € (2009: 748 Mio €) enthalten. Außerdem wurde die Zinsbelastung aus Pensionsrückstellungen – gekürzt um die erwarteten Erträge aus Planvermögen – mit einem Betrag von 167 Mio € in den sonstigen Zinsaufwendungen berücksichtigt (2009: 214 Mio €). Für die vorzeitige Rückzahlung von Darlehen wurden 2010 Vorfälligkeitsentschädigungen in Höhe von insgesamt 65 Mio € gezahlt (2009: 0 Mio €). Für den vorzeitigen Rückerwerb von Anleihen ergab sich ein einmaliger Aufwand von rund 1 Mio € (2009: 13 Mio €). Dies entspricht der Differenz zwischen den gezahlten, am Marktwert orientierten Preisen für die Rückkäufe und dem Buchwert der Anleihen.

Gemäß IAS 32 führte die Aufzinsung von Verbindlichkeiten im Zusammenhang mit Put-Optionen zu einem Aufwand von 47 Mio € (2009: 67 Mio €).

Die Zinsaufwendungen sind um die aktivierten Fremdkapitalzinsen in Höhe von 316 Mio € (2009: 280 Mio €) vermindert.

Realisierte Erträge und Aufwendungen aus Zinsswaps werden in der Gewinn- und Verlustrechnung saldiert ausgewiesen.

## (10) Steuern vom Einkommen und vom Ertrag

Für die Geschäftsjahre 2010 und 2009 setzen sich die Steuern vom Einkommen und vom Ertrag einschließlich der latenten Steuern wie folgt zusammen:

| Steuern vom Einkommen und vom Ertrag        |              |              |
|---------------------------------------------|--------------|--------------|
| in Mio €                                    | 2010         | 2009         |
| Inländische Ertragsteuern                   | 987          | 1.484        |
| Ausländische Ertragsteuern                  | 684          | 492          |
| Übrige Steuern vom Einkommen und vom Ertrag | 10           | 33           |
| <b>Laufende Ertragsteuern</b>               | <b>1.681</b> | <b>2.009</b> |
| Inland                                      | 581          | 120          |
| Ausland                                     | -316         | 729          |
| <b>Latente Steuern</b>                      | <b>265</b>   | <b>849</b>   |
| <b>Steuern vom Einkommen und vom Ertrag</b> | <b>1.946</b> | <b>2.858</b> |

Der Rückgang des Steueraufwands um 912 Mio € im Vergleich zum Vorjahr ist im Wesentlichen ergebnisbedingt. Die effektive Steuerquote ist insbesondere durch höhere steuerfreie Ergebnisse aus der zum Jahresende erfolgten Veräußerung von Gesellschaftsanteilen von 25 Prozent im Jahr 2009 auf 22 Prozent in 2010 gesunken.

Mit dem am 13. Dezember 2006 in Kraft getretenen Gesetz über steuerliche Begleitmaßnahmen zur Einführung der Europäischen Gesellschaft und zur Änderung weiterer steuerrechtlicher Vorschriften (SEStEG) wurden die Vorschriften zum Körperschaftsteuerguthaben, das noch aus dem bis zum Jahr 2001 gültigen körperschaftsteuerlichen Anrechnungsverfahren resultiert, dahingehend geändert, dass die Realisierung des Körperschaftsteuerguthabens künftig nicht mehr an Gewinnausschüttungen gebunden ist. Stattdessen ist mit Ablauf des 31. Dezember 2006 ein unbedingter Anspruch auf Auszahlung des Guthabens in zehn gleichen Jahresraten im Zeitraum von 2008 bis 2017 entstanden. Die Forderung hieraus ist in den Ertragsteueransprüchen enthalten und beträgt im Berichtsjahr 958 Mio € (2009: 980 Mio €).

Die Verbindlichkeiten aus Ertragsteuern beinhalten im Wesentlichen die Ertragsteuern für das laufende Jahr und von den Steuerbehörden noch nicht abschließend geprüfte Vorjahreszeiträume.

Für den Unterschied zwischen dem Nettovermögen und dem steuerlichen Buchwert von Tochtergesellschaften und assoziierten Unternehmen (sogenannte „Outside Basis Differences“) wurden zum Stichtag 12 Mio € passive latente Steuern bilanziert (2009: 31 Mio €). Passive latente Steuern für Tochtergesellschaften und assoziierte Unternehmen wurden insoweit nicht bilanziert, als dass die Gesellschaft den Umkehreffekt steuern kann und es daher wahrscheinlich ist, dass sich die temporäre Differenz in absehbarer Zeit nicht umkehren wird. Für temporäre Differenzen von Tochterunternehmen und assoziierten Unternehmen in Höhe von 1.833 Mio € (2009: 1.933 Mio €) wurden passive latente Steuern nicht gebildet, da E.ON in der Lage ist, den zeitlichen Verlauf der Umkehrung zu steuern, und sich die temporären Differenzen in absehbarer Zeit nicht umkehren.

Steuersatzänderungen in Großbritannien, Ungarn und einigen anderen Staaten führten insgesamt zu einem Steuerertrag in Höhe von 54 Mio €. 2009 ergab sich durch Steuersatzänderungen im Ausland insgesamt ein latenter Steueraufwand in Höhe von 28 Mio €.

Die Unterschiede zwischen dem für 2010 in Deutschland geltenden Ertragsteuersatz von 30 Prozent (2009: 30 Prozent) und dem effektiven Steuersatz lassen sich wie folgt herleiten:

| Überleitungsrechnung zum effektiven Steueraufwand/-satz           |              |             |              |             |
|-------------------------------------------------------------------|--------------|-------------|--------------|-------------|
|                                                                   | 2010         |             | 2009         |             |
|                                                                   | in Mio €     | %           | in Mio €     | %           |
| Erwartete Ertragsteuern                                           | 2.719        | 30,0        | 3.450        | 30,0        |
| Ertragsteuerminderung für ausgeschüttete Dividenden               | -96          | -1,0        | -47          | -0,4        |
| Unterschied zu ausländischen Steuersätzen                         | -148         | -1,6        | -72          | -0,6        |
| Änderungen des Steuersatzes/Steuerrechts                          | -54          | -0,6        | 28           | 0,2         |
| Steuereffekte auf steuerfreies Einkommen                          | -743         | -8,2        | 38           | 0,3         |
| Steuereffekte auf Ergebnisse aus at equity bewerteten Unternehmen | -196         | -2,2        | -282         | -2,4        |
| Sonstiges <sup>1)</sup>                                           | 464          | 5,1         | -257         | -2,2        |
| <b>Effektiver Steueraufwand/-satz</b>                             | <b>1.946</b> | <b>21,5</b> | <b>2.858</b> | <b>24,9</b> |

1) davon in 2010: 358 Mio € wegen Goodwill-Impairment

Die Ertragsteuern, die im Zusammenhang mit den nicht fortgeführten Aktivitäten stehen, werden in der Gewinn- und Verlustrechnung unter dem Posten „Ergebnis aus nicht fortgeführten Aktivitäten“ ausgewiesen. Diese betreffen die Market Unit US-Midwest und belaufen sich auf 149 Mio € (2009: 36 Mio €). Vergleiche hierzu auch Textziffer 4.



Es ergeben sich die in der folgenden Tabelle dargestellten aktiven und passiven latenten Steuern zum 31. Dezember 2010 und 2009:

| Aktive und passive latente Steuern               |               |               |
|--------------------------------------------------|---------------|---------------|
| in Mio €                                         | 31. Dezember  |               |
|                                                  | 2010          | 2009          |
| Immaterielle Vermögenswerte                      | 256           | 407           |
| Sachanlagen                                      | 817           | 716           |
| Finanzanlagen                                    | 225           | 244           |
| Vorräte                                          | 23            | 22            |
| Forderungen                                      | 944           | 994           |
| Rückstellungen                                   | 5.410         | 4.934         |
| Verbindlichkeiten                                | 3.932         | 3.443         |
| Verlustvorräte                                   | 807           | 1.065         |
| Steuergutschriften                               | 23            | 126           |
| Sonstige                                         | 280           | 428           |
| <b>Zwischensumme</b>                             | <b>12.717</b> | <b>12.379</b> |
| Wertänderung                                     | -98           | -171          |
| <b>Aktive latente Steuern</b>                    | <b>12.619</b> | <b>12.208</b> |
| Immaterielle Vermögenswerte                      | 1.908         | 2.340         |
| Sachanlagen                                      | 6.553         | 6.788         |
| Finanzanlagen                                    | 204           | 211           |
| Vorräte                                          | 123           | 161           |
| Forderungen                                      | 4.943         | 4.060         |
| Rückstellungen                                   | 1.382         | 826           |
| Verbindlichkeiten                                | 733           | 647           |
| Sonstige                                         | 1.449         | 1.613         |
| <b>Passive latente Steuern</b>                   | <b>17.295</b> | <b>16.646</b> |
| <b>Aktive/Passive (-) latente Steuern, netto</b> | <b>-4.676</b> | <b>-4.438</b> |

Die latenten Steuern stellen sich bezüglich des Zeitraums ihrer Umkehrung und nach Saldierung wie folgt dar:

| Nettobetrag der aktiven und passiven latenten Steuern |                   |               |                   |               |                |               |
|-------------------------------------------------------|-------------------|---------------|-------------------|---------------|----------------|---------------|
| in Mio €                                              | 31. Dezember 2010 |               | 31. Dezember 2009 |               | 1. Januar 2009 |               |
|                                                       | Kurzfristig       | Langfristig   | Kurzfristig       | Langfristig   | Kurzfristig    | Langfristig   |
| Aktive latente Steuern                                | 83                | 2.496         | 237               | 3.025         | 122            | 2.323         |
| Wertänderung                                          | -1                | -97           | -1                | -170          | -57            | -122          |
| <b>Nettobetrag der aktiven latenten Steuern</b>       | <b>82</b>         | <b>2.399</b>  | <b>236</b>        | <b>2.855</b>  | <b>65</b>      | <b>2.201</b>  |
| Passive latente Steuern                               | -671              | -6.486        | -411              | -7.118        | -1.162         | -5.137        |
| <b>Aktive/Passive (-) latente Steuern, netto</b>      | <b>-589</b>       | <b>-4.087</b> | <b>-175</b>       | <b>-4.263</b> | <b>-1.097</b>  | <b>-2.936</b> |

Von den ausgewiesenen latenten Steuern sind insgesamt 54 Mio € direkt dem Eigenkapital belastet worden (2009: 335 Mio €). Darüber hinaus sind 64 Mio € laufende Ertragsteuern (2009: 106 Mio €) direkt im Eigenkapital erfasst.

Die im Other Comprehensive Income erfassten Ertragsteuern für die Jahre 2010 und 2009 gliedern sich wie folgt auf:

| Ertragsteuern auf Bestandteile des Other Comprehensive Income                                                                |                   |               |                    |                   |               |                    |
|------------------------------------------------------------------------------------------------------------------------------|-------------------|---------------|--------------------|-------------------|---------------|--------------------|
| in Mio €                                                                                                                     | 2010              |               |                    | 2009              |               |                    |
|                                                                                                                              | vor Ertragsteuern | Ertragsteuern | nach Ertragsteuern | vor Ertragsteuern | Ertragsteuern | nach Ertragsteuern |
| Cashflow Hedges                                                                                                              | -1                | 10            | 9                  | 207               | -84           | 123                |
| Weiterveräußerbare Wertpapiere                                                                                               | -1.658            | 70            | -1.588             | 772               | 74            | 846                |
| Währungsumrechnungsdifferenz                                                                                                 | 469               | 12            | 481                | 129               | 339           | 468                |
| Veränderung versicherungsmathematischer Gewinne/Verluste leistungsorientierter Pensionszusagen und ähnlicher Verpflichtungen | -722              | 230           | -492               | -1.500            | 434           | -1.066             |
| At equity bewertete Unternehmen                                                                                              | -15               | 2             | -13                | 23                | -             | 23                 |
| <b>Summe</b>                                                                                                                 | <b>-1.927</b>     | <b>324</b>    | <b>-1.603</b>      | <b>-369</b>       | <b>763</b>    | <b>394</b>         |

Die in 2010 finalisierte Kaufpreisanpassung der belgischen Kraftwerkseinheit führte zum 31. Dezember 2010 zu aktiven latenten Steuern in Höhe von 14 Mio €.

Die vorläufige Kaufpreisallokation auf den Erwerb der belgischen Kraftwerkseinheit führte zum 31. Dezember 2009 zu aktiven latenten Steuern in Höhe von 49 Mio € und zu passiven latenten Steuern in Höhe von 15 Mio €.

Im Zusammenhang mit der Beteiligung am Gasfeld Yushno Russkoje bestanden zum 31. Dezember 2009 aus der Kaufpreisallokation aktive latente Steuern in Höhe von 3 Mio € und passive latente Steuern in Höhe von 503 Mio €.

Aus der 2009 finalisierten Kaufpreisallokation des Erwerbs von Endesa Europa/Viesgo im Jahr 2008 verringerten sich die aktiven latenten Steuern von 254 Mio € um 94 Mio € auf 160 Mio € und die passiven latenten Steuern von 572 Mio € um 115 Mio € auf 457 Mio €.

Weitere Erwerbe im Jahr 2009 führten zum 31. Dezember 2009 insgesamt zu einem Ansatz von 3 Mio € aktiven latenten Steuern und 20 Mio € passiven latenten Steuern.

Die steuerlichen Verlustvorträge am Jahresende setzen sich wie folgt zusammen:

| Steuerliche Verlustvorträge  |              |              |
|------------------------------|--------------|--------------|
| in Mio €                     | 31. Dezember |              |
|                              | 2010         | 2009         |
| Inländische Verlustvorträge  | 706          | 907          |
| Ausländische Verlustvorträge | 4.121        | 4.968        |
| <b>Summe</b>                 | <b>4.827</b> | <b>5.875</b> |

Seit dem 1. Januar 2004 sind inländische Verlustvorträge unter Berücksichtigung eines Sockelbetrags von 1 Mio € nur noch zu 60 Prozent des zu versteuernden Einkommens verrechenbar. Diese körperschaftsteuerliche Regelung zur Mindestbesteuerung gilt entsprechend für gewerbesteuerliche Verlustvorträge. Innerhalb der ausländischen Verlustvorträge entfällt ein wesentlicher Teil auf Vorjahre. Insgesamt wurden auf zeitlich unbegrenzt nutzbare ausländische Verlustvorträge in Höhe von 2.133 Mio € keine latenten Steuern gebildet (2009: 2.066 Mio €).

Auf noch nicht genutzte Steuergutschriften in Höhe von 17 Mio € wurden keine latenten Steuern gebildet. Sämtliche Steuergutschriften verfallen nach 2015.

**(11) Personalbezogene Angaben****Personalaufwand**

Der Personalaufwand hat sich wie folgt entwickelt:

| <b>Personalaufwand</b>                                                             |              |              |
|------------------------------------------------------------------------------------|--------------|--------------|
| <b>in Mio €</b>                                                                    | <b>2010</b>  | <b>2009</b>  |
| Löhne und Gehälter                                                                 | 4.153        | 4.147        |
| Soziale Abgaben                                                                    | 668          | 644          |
| Aufwendungen für Altersversorgung<br>und für Unterstützung<br>für Altersversorgung | 460<br>453   | 367<br>361   |
| <b>Summe</b>                                                                       | <b>5.281</b> | <b>5.158</b> |

Im Jahr 2010 wurden im Rahmen des Mitarbeiteraktienprogramms insgesamt 980.897 Aktien beziehungsweise 0,05 Prozent (2009: 925.282 Aktien beziehungsweise 0,05 Prozent) des Grundkapitals der E.ON AG zu einem durchschnittlichen Anschaffungspreis von 22,70 € je Aktie über die Börse erworben (2009: Entnahme aus eigenem Bestand: 20,18 € je Aktie) und zu Vorzugspreisen zwischen 9,94 € und 17,95 € (2009: zwischen 6,66 € und 19,41 €) an die Mitarbeiter weitergegeben. Die durch Gewährung der Vorzugspreise entstandenen Kosten werden in dem Posten „Löhne und Gehälter“ als Personalaufwand erfasst.

Zur Entwicklung des Bestands an eigenen Aktien der E.ON AG werden weitere Informationen unter Textziffer 19 gegeben.

Seit dem Geschäftsjahr 2003 besteht für beschäftigte Mitarbeiter in Großbritannien die Möglichkeit, E.ON-Aktien im Rahmen eines Mitarbeiteraktienprogramms zu erwerben und zusätzlich Bonus-Aktien zu beziehen. Der Aufwand aus der Ausgabe der Bonus-Aktien wird ebenfalls unter „Löhne und Gehälter“ als Personalaufwand erfasst.

**Aktienbasierte Vergütung**

Als freiwilligen langfristigen variablen Vergütungsbestandteil erhalten die Vorstandsmitglieder der E.ON AG und bestimmte Führungskräfte des E.ON-Konzerns eine aktienbasierte Vergütung. Voraussetzung für die Gewährung ist der Besitz einer bestimmten Anzahl von Aktien der E.ON AG, die bis zum Ende der Laufzeit beziehungsweise bis zur vollständigen Ausübung gehalten werden müssen. Ziel dieser aktienbasierten Vergütung ist es, den Beitrag zur Steigerung des Unternehmenswerts zu honorieren und den langfristigen Unternehmenserfolg zu fördern. Durch diese variable Vergütungskomponente mit gleichzeitig langfristiger Anreizwirkung und Risikocharakter werden die Interessen der Anteilseigner und des Managements sinnvoll verknüpft.

| <b>Stock Appreciation Rights der E.ON AG</b>        |                   |                   |
|-----------------------------------------------------|-------------------|-------------------|
|                                                     | <b>7. Tranche</b> | <b>6. Tranche</b> |
| Ausgabedatum                                        | 3. Jan. 2005      | 2. Jan. 2004      |
| Laufzeit                                            | 7 Jahre           | 7 Jahre           |
| Sperrfrist                                          | 2 Jahre           | 2 Jahre           |
| Basiskurs <sup>1)</sup>                             | 20,37 €           | 14,93 €           |
| Basiskurs des STOXX Europe 600 Utilities (Price)    | 268,66            | 211,58            |
| Teilnehmer im Jahr der Ausgabe                      | 357               | 357               |
| Anzahl ausgegebener Optionen                        | 2,9 Mio           | 2,7 Mio           |
| Ausübungsschwelle (Kursanstieg gegenüber Basiskurs) | 10 %              | 10 %              |
| Ausübungsschwelle (Mindestkurs) <sup>1)</sup>       | 22,41 €           | 16,42 €           |
| Anzahl Bezugsrechte <sup>1)</sup>                   | 3                 | 3                 |
| Maximaler Ausübungsgewinn für drei Bezugsrechte     | 65,35 €           | 49,05 €           |

1) nach Aktiensplit vom 4. August 2008

Im Folgenden wird über das im Jahr 2005 beendete virtuelle Aktienoptionsprogramm der E.ON AG sowie über den im Jahr 2006 eingeführten E.ON Share Performance Plan berichtet.

### Virtuelles Aktienoptionsprogramm der E.ON AG

Von 1999 bis einschließlich 2005 hat E.ON jährlich virtuelle Aktienoptionen (Stock Appreciation Rights/SAR) im Rahmen des virtuellen Aktienoptionsprogramms der E.ON AG gewährt. Bis zum Ende der Laufzeit am 8. Dezember 2010 wurden die noch bestehenden SAR der sechsten Tranche vollständig ausgeübt. Noch vorhandene SAR der siebten Tranche können auch nach der Beendigung dieses Programms weiterhin nach den Regelungen der Optionsbedingungen in bestimmten Ausübungszeiträumen ausgeübt werden, sofern die Ausübungsschwellen überschritten werden.

Der Ausübungsgewinn wird in bar ausgezahlt und entspricht der Differenz zwischen dem Aktienkurs der E.ON AG bei Ausübung und dem adjustierten Basiskurs, multipliziert mit der Anzahl der ausgeübten Optionen und einem Bezugsfaktor von drei. Die Adjustierung des Basiskurses sowie die Einführung des Bezugsverhältnisses von drei ist mit dem Aktiensplit der E.ON-Aktie am 4. August 2008 erforderlich geworden, um bei unveränderter Anzahl von Aktienoptionen Wertneutralität zu gewährleisten. Um die Effekte aus außerordentlichen, nicht vorhergesehenen Entwicklungen nach oben hin zu begrenzen, wurde der maximal mögliche Ausübungsgewinn je Option für die SAR ab der sechsten Tranche auf 100 Prozent des Basiskurses bei Ausgabe festgelegt.

Die SAR wurden zum Bilanzstichtag im Rahmen der IFRS-Bewertung nach IFRS 2 auf Basis des rechnerischen Optionswertes (Fair Value) bewertet.

Für die Ermittlung dieser Optionswerte wird ein anerkanntes Optionspreismodell verwendet. In diesem Optionspreismodell wird eine große Anzahl unterschiedlicher Entwicklungspfade der E.ON-Aktie und des Vergleichsindex STOXX Europe 600 Utilities (Price) simuliert (Monte-Carlo-Simulation).

Zur Ermittlung der rechnerischen Optionswerte wird ein bestimmtes Ausübungsverhalten zugrunde gelegt. In Abhängigkeit von der Kursentwicklung der E.ON-Aktie wurden für die Tranchen individuelle Ausübungsquoten definiert. Es werden restlaufzeitkongruente historische Volatilitäten und Korrelationen der E.ON-Aktie verwendet. Als risikoloser Zinssatz wird der Zero-Swapsatz für die entsprechende Restlaufzeit zugrunde gelegt. In das Bewertungsmodell werden außerdem die Dividendenrenditen der E.ON-Aktie einbezogen. Die Dividendenrendite der E.ON-Aktie wird tranchen- und restlaufzeitabhängig auf Basis der Bloomberg Consensus-Schätzungen ermittelt. Der Durchschnitt der Xetra-Schlusskurse der E.ON-Aktie betrug im Geschäftsjahr 24,42 €. Der Xetra-Schlusskurs der E.ON-Aktie betrug am Jahresende 22,94 €. Der STOXX Europe 600 Utilities (Price) erreichte einen Schlusswert von 312,65 Punkten.

Die folgende Übersicht enthält weitere im Rahmen der Bewertung verwendete Parameter:

| SAR-Programm der E.ON AG – Bewertungsparameter des Optionspreismodells |            |
|------------------------------------------------------------------------|------------|
|                                                                        | 7. Tranche |
| Innerer Wert zum 31. Dezember 2010 <sup>1)</sup>                       | 7,70 €     |
| Rechnerischer Optionswert zum 31. Dezember 2010 <sup>1)</sup>          | 9,93 €     |
| Swapsatz                                                               | 1,10 %     |
| Volatilität der E.ON-Aktie                                             | 31,61 %    |
| Dividendenrendite der E.ON-Aktie                                       | 6,73 %     |
| 1) für drei Bezugsrechte                                               |            |

Im Geschäftsjahr 2010 wurden 10.000 SAR der Tranche sechs planmäßig ausgeübt. Die Summe der Ausübungsgewinne im SAR-Programm belief sich auf 0,2 Mio € (2009: 5,1 Mio €).

Die SAR der siebten Tranche waren am Bilanzstichtag ausübungsfähig.

Die Rückstellung für das SAR-Programm beträgt zum Bilanzstichtag 0,2 Mio € (2009: 1,0 Mio €). Im Geschäftsjahr 2010 ergab sich aufgrund einer rückläufigen Wertentwicklung der Aktienoptionen ein Ertrag aus der Auflösung der Rückstellung in Höhe von 0,6 Mio € (2009: Ertrag 0,6 Mio €). Der Bestand an SAR, die Rückstellungen und Aufwendungen aus dem virtuellen Aktienoptionsprogramm haben sich wie folgt entwickelt:

| Entwicklung des SAR-Programms der E.ON AG   |               |               |
|---------------------------------------------|---------------|---------------|
|                                             | 7. Tranche    | 6. Tranche    |
| Bestand SAR zum 31. Dezember 2008           | 26.000        | 10.000        |
| Zuteilungen in 2009                         | -             | -             |
| Ausübungen in 2009                          | -             | -             |
| Während der Laufzeit in 2009 verfallene SAR | 2.000         | -             |
| <b>Bestand SAR zum 31. Dezember 2009</b>    | <b>24.000</b> | <b>10.000</b> |
| Zuteilungen in 2010                         | -             | -             |
| Ausübungen in 2010                          | -             | 10.000        |
| Während der Laufzeit in 2010 verfallene SAR | -             | -             |
| <b>Bestand SAR zum 31. Dezember 2010</b>    | <b>24.000</b> | <b>0</b>      |
| Ausübungsgewinne 2010                       | -             | 0,2 Mio €     |
| Rückstellung zum 31. Dezember 2010          | 0,2 Mio €     | -             |
| Ertrag in 2010                              | 0,4 Mio €     | 0,2 Mio €     |

## E.ON Share Performance Plan

Im Geschäftsjahr 2010 wurden virtuelle Aktien (Performance-Rechte) im Rahmen der fünften Tranche des E.ON Share Performance Plans gewährt. Die Laufzeit der neuen Tranche beträgt erstmals vier Jahre.

| E.ON Share Performance Rechte          |              |              |                          |
|----------------------------------------|--------------|--------------|--------------------------|
|                                        | 5. Tranche   | 4. Tranche   | 3. Tranche <sup>1)</sup> |
| Ausgabedatum                           | 1. Jan. 2010 | 1. Jan. 2009 | 1. Jan. 2008             |
| Laufzeit                               | 4 Jahre      | 3 Jahre      | 3 Jahre                  |
| Zielwert bei Ausgabe                   | 27,25 €      | 27,93 €      | 136,26 €                 |
| Teilnehmer im Jahr der Ausgabe         | 558          | 581          | 555                      |
| Anzahl ausgegebener Performance-Rechte | 1.367.386    | 1.425.414    | 294.623                  |
| Maximaler Auszahlungsbetrag            | 81,75 €      | 83,79 €      | 408,78 €                 |

1) ausgegeben vor Aktiensplit in 2008

Jedes Performance-Recht berechtigt am Ende der Laufzeit zu einer Barauszahlung in Abhängigkeit vom dann festgestellten Endkurs der E.ON-Aktie sowie der relativen Performance der E.ON-Aktie im Verhältnis zum Vergleichsindex STOXX Europe 600 Utilities (Net Return) während der Laufzeit. Die Auszahlung entspricht dem Zielwert bei Ausgabe, wenn der Kurs der E.ON-Aktie am Ende der Laufzeit gehalten wurde und die Performance der E.ON-Aktie der des Vergleichsindex entspricht. Die Höhe des maximal an einen Planeteilnehmer auszuzahlenden Betrags je Performance-Recht ist auf das Dreifache des ursprünglich zugeteilten Zielwertes begrenzt.

Sowohl die Ermittlung des Zielwertes bei Ausgabe, des Endkurses als auch der relativen Performance erfolgt jeweils anhand von 60-Tage-Durchschnittskursen, um den Effekt von zufälligen, nicht nachhaltigen Kursentwicklungen zu reduzieren.

Die Berechnung des Auszahlungsbetrages erfolgt für alle Plan-  
 teilnehmer gleichzeitig auf den Tag des Laufzeitendes der  
 Tranche. Entspricht die Performance der E.ON-Aktie der Per-  
 formance des Index, so wird der Auszahlungsbetrag nicht  
 angepasst und der Endkurs kommt zur Auszahlung. Hat sich  
 die E.ON-Aktie dagegen besser entwickelt als der Index, so  
 erhöht sich der Auszahlungsbetrag proportional. Für den Fall,  
 dass sich die E.ON-Aktie schlechter entwickelt als der Index,  
 kommt es zu überproportionalen Abschlägen. Ab einer Unter-  
 performance von 20 Prozent erfolgt keine Auszahlung mehr.

Der Plan beinhaltet Anpassungsmechanismen, um zum Bei-  
 spiel den Effekt von zwischenzeitlichen Kapitalmaßnahmen zu  
 eliminieren. Nach dem Aktiensplit im Jahr 2008 wurden Adjus-  
 tierungsfaktoren für die dritte Tranche gebildet, um bei unver-  
 änderter Anzahl von Performance-Rechten Wertneutralität zu  
 gewährleisten. Aus diesem Grund war eine Bereinigung der  
 Zielwerte bei Ausgabe und der maximalen Auszahlungsbe-  
 träge um den Aktiensplit nicht erforderlich.

Für die Bilanzierung wird der finanzmathematische Wert (Fair  
 Value) gemäß IFRS 2 anhand eines anerkannten Optionspreis-  
 modells ermittelt. Dabei wird eine große Anzahl unterschied-  
 licher Entwicklungspfade der E.ON-Aktie (unter Berücksichtigung  
 der Effekte reinvestierter Dividenden und Kapitaladjustierungs-  
 faktoren) und des Vergleichsindex simuliert (sogenannte  
 Monte-Carlo-Simulation). Der Vergleichsindex weist zum Bilanz-  
 stichtag einen Stand von 628,76 Punkten auf. Da die Auszah-  
 lung für alle Planteilnehmer zu einem bestimmten Zeitpunkt  
 erfolgt, sind Annahmen zum Ausübungsverhalten in dieser  
 Planstruktur nicht vorgesehen und dementsprechend nicht  
 in dieses Optionspreismodell einbezogen. Dividendenzah-  
 lungen und Kapitalmaßnahmen werden durch entsprechende  
 Faktoren analog denen des Indexproviders berücksichtigt.

| E.ON Share Performance Plan – Bewertungsparameter des Preismodells |            |            |                          |
|--------------------------------------------------------------------|------------|------------|--------------------------|
|                                                                    | 5. Tranche | 4. Tranche | 3. Tranche <sup>1)</sup> |
| Innerer Wert zum 31. Dezember 2010                                 | 5,88 €     | 7,77 €     | 31,52 €                  |
| Rechnerischer Wert zum 31. Dezember 2010                           | 10,56 €    | 9,26 €     | 31,52 €                  |
| Swapsatz                                                           | 1,90 %     | 1,11 %     | -                        |
| Dividendenrendite der E.ON-Aktie                                   | 6,53 %     | 6,73 %     | -                        |
| Volatilität der E.ON-Aktie                                         | 38,10 %    | 20,11 %    | -                        |
| Volatilität des STOXX Europe 600 Utilities (Net Return)            | 27,79 %    | 16,84 %    | -                        |
| Korrelation E.ON-Aktie/STOXX Europe 600 Utilities (Net Return)     | 0,91       | 0,86       | -                        |

1) Laufzeitende am Bilanzstichtag erreicht und ausgegeben vor Aktiensplit in 2008

Im Geschäftsjahr 2010 wurden 1.367.386 Performance-Rechte  
 der fünften Tranche gewährt. Die Laufzeit der dritten Tranche  
 endete am 31. Dezember 2010. Der Auszahlungsbetrag wurde  
 für die 248.676 am Ende der Laufzeit ordentlich abgerechneten  
 Performance-Rechte der dritten Tranche mit 31,52 € pro Per-  
 formance-Recht festgestellt. Zum Bilanzstichtag wurde eine  
 Verbindlichkeit in Höhe der Summe der Auszahlungsbeträge  
 von 7,8 Mio € gebildet. Die Auszahlung und Auflösung der Ver-  
 bindlichkeit erfolgt im ersten Quartal 2011. Darüber hinaus  
 wurden im Verlauf des Jahres 2010 251.911 Performance-Rechte  
 der dritten bis fünften Tranche in Übereinstimmung mit den

Planbedingungen außerordentlich ausgezahlt. Die Summe der  
 außerordentlichen Auszahlungen betrug 6,8 Mio € (2009:  
 0,6 Mio €). Im Geschäftsjahr sind 12.640 Performance-Rechte  
 der dritten, vierten und fünften Tranche verfallen. Aufgrund  
 von Veränderungen des Konsolidierungskreises sind 79.716  
 Performance-Rechte der Tranche drei bis fünf aus dem Bestand  
 genommen worden. Am Jahresende beträgt die Rückstellung  
 10,7 Mio € (2009: 24,3 Mio €). Die Rückstellung entfällt jeweils  
 anteilig auf die bisher abgelaufene Zeit der jeweiligen Lauf-  
 zeit. Der Aufwand für den E.ON Share Performance Plan betrug  
 im Geschäftsjahr 2010 0,9 Mio € (2009: 29,3 Mio €).

| Entwicklung des E.ON Share Performance Plans  |                  |                  |                |
|-----------------------------------------------|------------------|------------------|----------------|
|                                               | 5. Tranche       | 4. Tranche       | 3. Tranche     |
| <b>Bestand zum 31. Dezember 2008</b>          | -                | -                | <b>291.244</b> |
| Zuteilungen in 2009                           | -                | 1.425.414        | -              |
| Abgerechnete Performance-Rechte in 2009       | -                | -                | 446            |
| Verfallene Performance-Rechte in 2009         | -                | 6.921            | 1.670          |
| Veränderungen des Konsolidierungskreises 2009 | -                | 19.604           | 5.038          |
| <b>Bestand zum 31. Dezember 2009</b>          | -                | <b>1.398.889</b> | <b>284.090</b> |
| Zuteilungen in 2010                           | 1.367.386        | -                | -              |
| Abgerechnete Performance-Rechte in 2010       | 59.374           | 165.581          | 275.632        |
| Verfallene Performance-Rechte in 2010         | 5.626            | 6.862            | 152            |
| Veränderungen des Konsolidierungskreises 2010 | 27.643           | 43.767           | 8.306          |
| <b>Bestand zum 31. Dezember 2010</b>          | <b>1.274.743</b> | <b>1.182.679</b> | -              |
| Auszahlungsbeträge in 2010                    | 1,2 Mio €        | 3,7 Mio €        | 9,7 Mio €      |
| Rückstellung zum 31. Dezember 2010            | 3,4 Mio €        | 7,3 Mio €        | -              |
| (-) Aufwand/(+) Ertrag in 2010                | -4,6 Mio €       | -0,5 Mio €       | 4,2 Mio €      |

Die vierte und fünfte Tranche waren am Bilanzstichtag noch nicht ordentlich auszahlungsfähig.

## Mitarbeiter

Im Berichtsjahr beschäftigte E.ON durchschnittlich 85.509 Mitarbeiter (2009: 87.884). Dabei sind 2.261 (2009: 2.608) Auszubildende nicht berücksichtigt. Die Mitarbeiter der Market Unit US-Midwest werden in der Tabelle nicht mehr ausgewiesen (siehe hierzu Textziffer 4).

Nach Segmenten setzt sich die Mitarbeiterzahl wie folgt zusammen:

| Mitarbeiter      |               |               |
|------------------|---------------|---------------|
|                  | 2010          | 2009          |
| Central Europe   | 48.829        | 49.369        |
| Pan-European Gas | 3.175         | 3.693         |
| UK               | 15.241        | 16.443        |
| Nordic           | 5.458         | 5.747         |
| Energy Trading   | 1.079         | 1.021         |
| Neue Märkte      | 8.378         | 8.483         |
| Corporate Center | 3.349         | 3.128         |
| <b>Summe</b>     | <b>85.509</b> | <b>87.884</b> |

## (12) Sonstige Angaben

### Deutscher Corporate Governance Kodex

Vorstand und Aufsichtsrat der E.ON AG haben die nach § 161 AktG vorgeschriebene Entsprechenserklärung am 13. Dezember 2010 abgegeben und den Aktionären auf der Internetseite der Gesellschaft ([www.eon.com](http://www.eon.com)) dauerhaft öffentlich zugänglich gemacht.

### Honorare und Dienstleistungen des Abschlussprüfers

Für die in den Geschäftsjahren 2010 und 2009 erbrachten Dienstleistungen des Abschlussprüfers des Konzernabschlusses, PricewaterhouseCoopers (PwC), Aktiengesellschaft,

Wirtschaftsprüfungsgesellschaft, (Inland) sowie von Gesellschaften des internationalen PwC-Netzwerkes sind folgende Honorare als Aufwand erfasst worden:

| Honorare des Abschlussprüfers   |           |           |
|---------------------------------|-----------|-----------|
| in Mio €                        | 2010      | 2009      |
| Abschlussprüfung                | 30        | 30        |
| <i>Inland</i>                   | 20        | 19        |
| Sonstige Bestätigungsleistungen | 25        | 29        |
| <i>Inland</i>                   | 18        | 22        |
| Steuerberatungsleistungen       | 1         | 2         |
| <i>Inland</i>                   | -         | 1         |
| Sonstige Leistungen             | 3         | 3         |
| <i>Inland</i>                   | 3         | 3         |
| <b>Summe</b>                    | <b>59</b> | <b>64</b> |
| <i>Inland</i>                   | 41        | 45        |



Die Honorare für Abschlussprüfungen betreffen die Prüfung des Konzernabschlusses und der gesetzlich vorgeschriebenen Abschlüsse der E.ON AG und ihrer verbundenen Unternehmen.

Die Honorare für sonstige Bestätigungsleistungen betreffen insbesondere die prüferische Durchsicht der Zwischenabschlüsse nach IFRS. Darüber hinaus sind hier die Honorare für projektbegleitende Prüfungen im Rahmen der Einführung von IT- und internen Kontrollsystemen, Due-Diligence-Leistungen im Zusammenhang mit Akquisitionen und Desinvestitionen sowie sonstige Pflichtprüfungen und freiwillige Prüfungen enthalten.

Die Honorare für Steuerberatungsleistungen entfallen vor allem auf die Einzelfallberatung im Zusammenhang mit M&A-Transaktionen, die laufende Beratung im Zusammenhang mit der Erstellung von Steuererklärungen und der Prüfung von Steuerbescheiden sowie auf die Beratung in sonstigen nationalen und internationalen Steuerangelegenheiten.

Die Honorare für sonstige Leistungen betreffen im Wesentlichen die fachliche Unterstützung bei IT- und sonstigen Projekten.

### Anteilsbesitzliste

Die Angaben zum Beteiligungsbesitz gemäß § 313 Abs. 2 HGB sind integraler Bestandteil des Anhangs und auf den Seiten 147 bis 161 dargestellt.

## (13) Ergebnis je Aktie

Das Ergebnis je Aktie (EPS) für den Konzernüberschuss wird wie folgt berechnet:

Die Ermittlung des verwässerten Ergebnisses je Aktie entspricht der Ermittlung des Basis-Ergebnisses je Aktie, da die E.ON AG keine potenziell verwässernden Stammaktien ausgegeben hat.

| Ergebnis je Aktie                                                                     |              |              |
|---------------------------------------------------------------------------------------|--------------|--------------|
| in Mio €                                                                              | 2010         | 2009         |
| Ergebnis aus fortgeführten Aktivitäten                                                | 7.117        | 8.642        |
| Abzüglich Anteile ohne beherrschenden Einfluss                                        | -428         | -245         |
| <b>Ergebnis aus fortgeführten Aktivitäten (Anteil der Gesellschafter der E.ON AG)</b> | <b>6.689</b> | <b>8.397</b> |
| Ergebnis aus nicht fortgeführten Aktivitäten                                          | -836         | 27           |
| Abzüglich Anteile ohne beherrschenden Einfluss                                        | -            | -4           |
| <b>Konzernüberschuss der Gesellschafter der E.ON AG</b>                               | <b>5.853</b> | <b>8.420</b> |
| in €                                                                                  |              |              |
| <b>Ergebnis je Aktie (Anteil der Gesellschafter der E.ON AG)</b>                      |              |              |
| aus fortgeführten Aktivitäten                                                         | 3,51         | 4,41         |
| aus nicht fortgeführten Aktivitäten                                                   | -0,44        | 0,01         |
| <b>aus Konzernüberschuss</b>                                                          | <b>3,07</b>  | <b>4,42</b>  |
| Zahl der im Umlauf befindlichen Aktien (gewichteter Durchschnitt) in Mio Stück        | 1.905        | 1.905        |

## (14) Goodwill, immaterielle Vermögenswerte und Sachanlagen

## Goodwill, immaterielle Vermögenswerte und Sachanlagen

| in Mio €                                                          | Anschaffungs- oder Herstellungskosten |                           |                                                 |              |               |                  | 31. Dezember 2010 |  |
|-------------------------------------------------------------------|---------------------------------------|---------------------------|-------------------------------------------------|--------------|---------------|------------------|-------------------|--|
|                                                                   | 1. Januar 2010                        | Währungs-<br>unterschiede | Verände-<br>rungen<br>Konsolidie-<br>rungskreis | Zugänge      | Abgänge       | Um-<br>buchungen |                   |  |
| <b>Goodwill</b>                                                   | <b>20.309</b>                         | <b>253</b>                | <b>-2.910</b>                                   | <b>0</b>     | <b>0</b>      | <b>-64</b>       | <b>17.588</b>     |  |
| Marketingbezogene immaterielle Vermögenswerte                     | 48                                    | -                         | 4                                               | -            | -             | -                | 52                |  |
| Kundenbezogene immaterielle Vermögenswerte                        | 2.392                                 | 43                        | -50                                             | 1            | -56           | -20              | 2.310             |  |
| Vertraglich bedingte immaterielle Vermögenswerte                  | 7.226                                 | 174                       | 33                                              | 42           | -398          | 42               | 7.119             |  |
| Technologiebezogene immaterielle Vermögenswerte                   | 804                                   | 19                        | -74                                             | 53           | -57           | 97               | 842               |  |
| Selbst erstellte immaterielle Vermögenswerte                      | 229                                   | 6                         | 2                                               | 27           | -             | -4               | 260               |  |
| <b>Immaterielle Vermögenswerte mit bestimmbarer Nutzungsdauer</b> | <b>10.699</b>                         | <b>242</b>                | <b>-85</b>                                      | <b>123</b>   | <b>-511</b>   | <b>115</b>       | <b>10.583</b>     |  |
| Immaterielle Vermögenswerte mit unbestimmbarer Nutzungsdauer      | 1.633                                 | 48                        | 4                                               | 2.607        | -2.500        | -51              | 1.741             |  |
| Geleistete Anzahlungen auf immaterielle Vermögenswerte            | 52                                    | 1                         | 3                                               | 39           | -5            | -18              | 72                |  |
| <b>Immaterielle Vermögenswerte</b>                                | <b>12.384</b>                         | <b>291</b>                | <b>-78</b>                                      | <b>2.769</b> | <b>-3.016</b> | <b>46</b>        | <b>12.396</b>     |  |
| Grundstücke und grundstücksgleiche Rechte                         | 3.049                                 | 199                       | 69                                              | 16           | -86           | 27               | 3.274             |  |
| Bauten                                                            | 8.269                                 | 148                       | -453                                            | 282          | -79           | 762              | 8.929             |  |
| Technische Anlagen und Maschinen                                  | 95.186                                | 2.026                     | -5.393                                          | 2.883        | -775          | 5.121            | 99.048            |  |
| Andere Anlagen, Betriebs- und Geschäftsausstattung                | 2.360                                 | 42                        | -105                                            | 166          | -170          | -108             | 2.185             |  |
| Geleistete Anzahlungen und Anlagen im Bau                         | 11.699                                | 311                       | -1.047                                          | 5.088        | -127          | -5.862           | 10.062            |  |
| <b>Sachanlagen</b>                                                | <b>120.563</b>                        | <b>2.726</b>              | <b>-6.929</b>                                   | <b>8.435</b> | <b>-1.237</b> | <b>-60</b>       | <b>123.498</b>    |  |

| Kumulierte Abschreibungen |                           |                                                 |         |         |                  |                      |                     |                      | Netto-<br>Buchwerte  |
|---------------------------|---------------------------|-------------------------------------------------|---------|---------|------------------|----------------------|---------------------|----------------------|----------------------|
| 1. Januar<br>2010         | Währungs-<br>unterschiede | Verände-<br>rungen<br>Konsolidie-<br>rungskreis | Zugänge | Abgänge | Um-<br>buchungen | Wertminde-<br>rungen | Zuschreibun-<br>gen | 31. Dezember<br>2010 | 31. Dezember<br>2010 |
| -3.408                    | 2                         | 1.473                                           | 0       | 0       | 0                | -1.067               | 0                   | -3.000               | 14.588               |
| -47                       | -                         | -1                                              | -       | -       | -                | -                    | -                   | -48                  | 4                    |
| -1.431                    | -34                       | 23                                              | -122    | 24      | 16               | -65                  | -                   | -1.589               | 721                  |
| -1.403                    | -8                        | 24                                              | -257    | 393     | 18               | -511                 | -                   | -1.744               | 5.375                |
| -582                      | -16                       | 17                                              | -85     | 56      | -34              | -5                   | -                   | -649                 | 193                  |
| -174                      | -5                        | -2                                              | -25     | -       | -                | -8                   | -                   | -214                 | 46                   |
| -3.637                    | -63                       | 61                                              | -489    | 473     | 0                | -589                 | 0                   | -4.244               | 6.339                |
| -82                       | -3                        | 3                                               | -       | 7       | -                | -27                  | 22                  | -80                  | 1.661                |
| 0                         | -                         | -                                               | -       | -       | -                | -2                   | -                   | -2                   | 70                   |
| -3.719                    | -66                       | 64                                              | -489    | 480     | 0                | -618                 | 22                  | -4.326               | 8.070                |
| -281                      | -7                        | 16                                              | -10     | 30      | -                | -89                  | 1                   | -340                 | 2.934                |
| -4.337                    | -73                       | 220                                             | -233    | 33      | -224             | -53                  | 1                   | -4.666               | 4.263                |
| -53.909                   | -833                      | 1.945                                           | -2.860  | 470     | -37              | -861                 | 43                  | -56.042              | 43.006               |
| -1.602                    | -26                       | 73                                              | -174    | 152     | 24               | -3                   | -                   | -1.556               | 629                  |
| -107                      | -2                        | -                                               | -1      | -       | 91               | -6                   | 1                   | -24                  | 10.038               |
| -60.236                   | -941                      | 2.254                                           | -3.278  | 685     | -146             | -1.012               | 46                  | -62.628              | 60.870               |

## Goodwill, immaterielle Vermögenswerte und Sachanlagen

| in Mio €                                                          | Anschaffungs- oder Herstellungskosten |                           |                                                 |              |               |                  | 31. Dezember 2009 |  |
|-------------------------------------------------------------------|---------------------------------------|---------------------------|-------------------------------------------------|--------------|---------------|------------------|-------------------|--|
|                                                                   | 1. Januar 2009                        | Währungs-<br>unterschiede | Verände-<br>rungen<br>Konsolidie-<br>rungskreis | Zugänge      | Abgänge       | Um-<br>buchungen |                   |  |
| <b>Goodwill</b>                                                   | <b>20.768</b>                         | <b>91</b>                 | <b>-364</b>                                     | <b>14</b>    | <b>-75</b>    | <b>-125</b>      | <b>20.309</b>     |  |
| Marketingbezogene immaterielle Vermögenswerte                     | 48                                    | -                         | -                                               | -            | -             | -                | 48                |  |
| Kundenbezogene immaterielle Vermögenswerte                        | 2.297                                 | 57                        | 39                                              | 2            | -7            | 4                | 2.392             |  |
| Vertraglich bedingte immaterielle Vermögenswerte                  | 4.782                                 | 1                         | 2.710                                           | 105          | -39           | -333             | 7.226             |  |
| Technologiebezogene immaterielle Vermögenswerte                   | 693                                   | 2                         | 4                                               | 77           | -52           | 80               | 804               |  |
| Selbst erstellte immaterielle Vermögenswerte                      | 201                                   | 13                        | -5                                              | 19           | -             | 1                | 229               |  |
| <b>Immaterielle Vermögenswerte mit bestimmbarer Nutzungsdauer</b> | <b>8.021</b>                          | <b>73</b>                 | <b>2.748</b>                                    | <b>203</b>   | <b>-98</b>    | <b>-248</b>      | <b>10.699</b>     |  |
| Immaterielle Vermögenswerte mit unbestimmbarer Nutzungsdauer      | 2.456                                 | 80                        | -192                                            | 1.750        | -2.480        | 19               | 1.633             |  |
| Geleistete Anzahlungen auf immaterielle Vermögenswerte            | 33                                    | -                         | -                                               | 51           | -10           | -22              | 52                |  |
| <b>Immaterielle Vermögenswerte</b>                                | <b>10.510</b>                         | <b>153</b>                | <b>2.556</b>                                    | <b>2.004</b> | <b>-2.588</b> | <b>-251</b>      | <b>12.384</b>     |  |
| Grundstücke und grundstücksgleiche Rechte                         | 3.033                                 | 77                        | -24                                             | 46           | -39           | -44              | 3.049             |  |
| Bauten                                                            | 8.257                                 | 5                         | 32                                              | 125          | -106          | -44              | 8.269             |  |
| Technische Anlagen und Maschinen                                  | 90.062                                | 874                       | -496                                            | 1.601        | -887          | 4.032            | 95.186            |  |
| Andere Anlagen, Betriebs- und Geschäftsausstattung                | 2.770                                 | 55                        | -81                                             | 206          | -255          | -335             | 2.360             |  |
| Geleistete Anzahlungen und Anlagen im Bau                         | 9.972                                 | 204                       | 71                                              | 6.460        | -39           | -4.969           | 11.699            |  |
| <b>Sachanlagen</b>                                                | <b>114.094</b>                        | <b>1.215</b>              | <b>-498</b>                                     | <b>8.438</b> | <b>-1.326</b> | <b>-1.360</b>    | <b>120.563</b>    |  |

| Kumulierte Abschreibungen |                           |                                                 |         |         |                  |                      |                     |                      | Netto-<br>Buchwerte  |
|---------------------------|---------------------------|-------------------------------------------------|---------|---------|------------------|----------------------|---------------------|----------------------|----------------------|
| 1. Januar<br>2009         | Währungs-<br>unterschiede | Verände-<br>rungen<br>Konsolidie-<br>rungskreis | Zugänge | Abgänge | Um-<br>buchungen | Wertminde-<br>rungen | Zuschreibun-<br>gen | 31. Dezember<br>2009 | 31. Dezember<br>2009 |
| -3.457                    | 49                        | 0                                               | 0       | 0       | 0                | 0                    | 0                   | -3.408               | 16.901               |
| -47                       | -                         | -                                               | -       | -       | -                | -                    | -                   | -47                  | 1                    |
| -1.130                    | -43                       | 6                                               | -150    | 4       | 2                | -120                 | -                   | -1.431               | 961                  |
| -1.365                    | -16                       | 7                                               | -188    | 11      | 160              | -20                  | 8                   | -1.403               | 5.823                |
| -529                      | -4                        | -                                               | -91     | 50      | 4                | -12                  | -                   | -582                 | 222                  |
| -141                      | -10                       | 6                                               | -23     | -       | -                | -6                   | -                   | -174                 | 55                   |
| -3.212                    | -73                       | 19                                              | -452    | 65      | 166              | -158                 | 8                   | -3.637               | 7.062                |
| -239                      | -4                        | -                                               | -       | 181     | -                | -32                  | 12                  | -82                  | 1.551                |
| 0                         | -                         | -                                               | -       | -       | -                | -                    | -                   | 0                    | 52                   |
| -3.451                    | -77                       | 19                                              | -452    | 246     | 166              | -190                 | 20                  | -3.719               | 8.665                |
| -267                      | -2                        | 11                                              | -28     | 7       | -                | -3                   | 1                   | -281                 | 2.768                |
| -4.148                    | -36                       | -61                                             | -230    | 3       | 140              | -10                  | 5                   | -4.337               | 3.932                |
| -51.659                   | -493                      | 427                                             | -2.764  | 603     | 16               | -71                  | 32                  | -53.909              | 41.277               |
| -1.938                    | -51                       | 61                                              | -187    | 248     | 265              | -                    | -                   | -1.602               | 758                  |
| -78                       | -7                        | -                                               | -2      | 1       | -                | -21                  | -                   | -107                 | 11.592               |
| -58.090                   | -589                      | 438                                             | -3.211  | 862     | 421              | -105                 | 38                  | -60.236              | 60.327               |

## a) Goodwill und immaterielle Vermögenswerte

### Goodwill

Die Veränderungen des Goodwills je Segment lassen sich für die Geschäftsjahre 2010 und 2009 wie folgt darstellen:

| Entwicklung des Goodwills nach Segmenten                                |                |                  |              |            |              |                |              |                                     |               |
|-------------------------------------------------------------------------|----------------|------------------|--------------|------------|--------------|----------------|--------------|-------------------------------------|---------------|
| in Mio €                                                                | Central Europe | Pan-European Gas | UK           | Nordic     | US-Midwest   | Energy Trading | Neue Märkte  | Corporate Center/<br>Konsolidierung | E.ON-Konzern  |
| Netto-Buchwert zum 1. Januar 2009                                       | 2.214          | 4.172            | 3.152        | 229        | 1.497        | 212            | 5.835        | -                                   | 17.311        |
| Veränderungen aus Unternehmenserwerben und -veräußerungen <sup>1)</sup> | 273            | -373             | -63          | -          | -            | -              | -262         | -                                   | -425          |
| Veränderung aus Impairment                                              | -              | -                | -            | -          | -            | -              | -            | -                                   | 0             |
| Sonstige Veränderungen <sup>2)</sup>                                    | -24            | -34              | 215          | -1         | -51          | 15             | -105         | -                                   | 15            |
| <b>Netto-Buchwert zum 31. Dezember 2009</b>                             | <b>2.463</b>   | <b>3.765</b>     | <b>3.304</b> | <b>228</b> | <b>1.446</b> | <b>227</b>     | <b>5.468</b> | <b>0</b>                            | <b>16.901</b> |
| Veränderungen aus Unternehmenserwerben und -veräußerungen <sup>1)</sup> | 47             | -38              | -            | -          | -1.446       | -              | -            | -                                   | -1.437        |
| Veränderung aus Impairment                                              | -              | -                | -            | -          | -            | -              | -1.067       | -                                   | -1.067        |
| Sonstige Veränderungen <sup>2)</sup>                                    | 55             | -53              | 100          | 24         | -            | 8              | 57           | -                                   | 191           |
| <b>Netto-Buchwert zum 31. Dezember 2010</b>                             | <b>2.565</b>   | <b>3.674</b>     | <b>3.404</b> | <b>252</b> | <b>0</b>     | <b>235</b>     | <b>4.458</b> | <b>0</b>                            | <b>14.588</b> |

1) Die Veränderungen aus Unternehmenserwerben und -veräußerungen beinhalten auch Effekte aus der Goodwill-Reallokation im Zuge der Errichtung der Market Units Energy Trading, Climate & Renewables und Italy sowie aus der in Q2/2009 erfolgten finalen Allokation des Goodwills aus dem Erwerb der Endesa Europa/Viesgo-Aktivitäten.

2) Die sonstigen Veränderungen beinhalten Effekte aus konzerninternen Umstrukturierungen, Umbuchungen, Währungskursdifferenzen sowie Umgliederungen in zur Veräußerung gehaltene Vermögenswerte.

Nach IFRS 3 unterliegt der Goodwill keiner planmäßigen Abschreibung, sondern wird mindestens jährlich auf der Betrachtungsebene der Cash Generating Units einem Impairment-Test unterzogen. Darüber hinaus ist der Goodwill einzelner Cash Generating Units bei Eintritt besonderer Ereignisse, die zu einer Verringerung des erzielbaren Betrags der jeweiligen Cash Generating Unit führen können, auch unterjährig einer solchen Werthaltigkeitsprüfung zu unterziehen.

Im Rahmen der Goodwill-Impairment-Tests werden zunächst die Fair Values abzüglich der Veräußerungskosten der Cash Generating Units auf Basis von Discounted-Cashflow-Verfahren ermittelt und – sofern vorhanden – anhand geeigneter Multiplikatoren plausibilisiert. Zudem werden Markttransaktionen oder Bewertungen Dritter für ähnliche Vermögenswerte berücksichtigt.

Die Bewertung basiert auf der vom Vorstand genehmigten Mittelfristplanung. Den Berechnungen für Zwecke der Impairment-Tests liegt grundsätzlich ein Detailplanungszeitraum von fünf Jahren zugrunde. In begründeten Ausnahmefällen wird hiervon abweichend ein längerer Detailplanungszeitraum zugrunde gelegt, dies ist insbesondere der Fall, wenn

regulatorische Vorgaben oder Rahmenbedingungen dieses erfordern. Für die über die Detailplanungsperiode hinausgehenden Cashflow-Annahmen werden auf Basis von Vergangenheitsanalysen und Zukunftsprognosen bereichsspezifische Wachstumsraten ermittelt. Die in 2010 verwendeten Wachstumsraten liegen zwischen 1,5 und 3,5 Prozent (2009: 1,2 und 3,8 Prozent). Die Basis für die Ableitung der nominalen Wachstumsraten bilden die langfristigen Inflationsraten, korrigiert um bereichsspezifische Entwicklungserwartungen der jeweiligen Geschäftsfelder (zum Beispiel regulatorische Rahmenbedingungen, Reinvestitionszyklen oder Wachstumsperspektiven). Die zur Diskontierung verwendeten Nachsteuerzinssätze werden auf Grundlage von Marktdaten je Cash Generating Unit ermittelt und betrugen zum Bewertungsstichtag zwischen 5,4 und 11,9 Prozent (2009: 5,8 und 12,4 Prozent).

Wesentliche Annahmen, auf denen die Ermittlung des erzielbaren Betrags durch das Management beruht, sind die Prognosen der Marktpreise für Rohstoffe, künftiger Strom- und Gaspreise auf den Großhandels- und Endverbrauchermärkten,

der unternehmensbezogenen Investitionstätigkeit, der regulatorischen Rahmenbedingungen sowie der Wachstumsraten und der Kapitalkosten. Während der erzielbare Betrag zur Bestimmung der Werthaltigkeit eines Geschäftsfeldes prinzipiell auf dem beizulegenden Zeitwert abzüglich Veräußerungskosten beruht, entspricht dieser bei der Market Unit Russia dem Konzept des Nutzungswertes.

Seit der letzten umfassenden Bewertung im Zusammenhang mit den Goodwill-Impairment-Tests Ende 2009 hat sich das Marktumfeld für unsere Energieversorgungsunternehmen in Italien und Spanien aufgrund der länger als erwartet anhaltenden negativen Auswirkungen der Finanz- und Wirtschaftskrise deutlich verschlechtert. Die Entwicklung von Strom- und Rohstoffpreisen führt in den genannten Märkten zu zum Teil signifikant geringeren Margen und Auslastungen unserer Kraftwerke. Darüber hinaus haben auch marktspezifische Faktoren die zu erwartende Ertragslage wesentlich beeinflusst.

In Italien wirken sich neben den Auswirkungen der Wirtschaftskrise und der nur unerwartet langsam voranschreitenden wirtschaftlichen Erholung auch Infrastrukturmaßnahmen auf Sardinien sowie Überkapazitäten negativ auf Margen und Auslastungen und damit auf das Ergebnis aus. Durch die Preisentwicklung in Spanien sind insbesondere die Margen von Gaskraftwerken eingebrochen. Darüber hinaus führen in Spanien neben der Wirtschaftskrise hohe Erzeugungsleistungen der Erneuerbaren Energien zu einem zusätzlichen Preis- und Margendruck. Insgesamt haben sich dadurch die Erwartungen von E.ON für die Ergebnisbeiträge in diesen Märkten mittel- bis langfristig verschlechtert. Dies gab bereits im dritten Quartal 2010 Anlass zur Erfassung eines Goodwill-Impairments nach IAS 36 im Wesentlichen bei den von Enel/Acciona und Endesa erworbenen Aktivitäten in den in Rede stehenden Ländern.

Im Rahmen der Impairment-Tests 2010 waren Wertminderungen des Goodwills in Höhe von 1,1 Mrd. € erforderlich, da die beizulegenden Zeitwerte abzüglich der Veräußerungskosten bei der Cash Generating Unit Italy Non Regulated (Impairment in Höhe von 957 Mio. €) sowie Spain Non Regulated (Impairment in Höhe von 110 Mio. €) nicht mehr durch den entsprechenden Buchwert gedeckt wurden. Darüber hinaus ergaben sich Wertminderungen auf sonstiges Anlagevermögen in Höhe von rund 1,5 Mrd. €. Dieser Betrag entfällt mit 689 Mio. € im Wesentlichen auf die Market Unit Italy und dort insbesondere auf immaterielle Vermögenswerte mit 430 Mio. € und Sachanlagevermögen mit 255 Mio. €. In Spanien und Frankreich (Market Unit Central Europe) war mit 338 Mio. € beziehungsweise mit 391 Mio. € das Sachanlagevermögen betroffen. Auf die spanischen Aktivitäten der Market Unit Climate & Renewables waren im Wesentlichen im Bereich der immateriellen Vermögenswerte Wertberichtigungen von 82 Mio. € zu erfassen.

### Immaterielle Vermögenswerte

Die planmäßigen Abschreibungen auf immaterielle Vermögenswerte betrugen 489 Mio. € im Jahr 2010 (2009: 452 Mio. €). Die Wertminderungen auf immaterielle Vermögenswerte beliefen sich auf 618 Mio. € (2009: 190 Mio. €) inklusive der zuvor genannten Wertminderungen in den betroffenen Market Units.

Zuschreibungen auf immaterielle Vermögenswerte wurden im Berichtsjahr in Höhe von 22 Mio. € (2009: 20 Mio. €) vorgenommen.

In den immateriellen Vermögenswerten sind Emissionsrechte verschiedener Handelssysteme mit einem Buchwert von 512 Mio. € (2009: 481 Mio. €) enthalten.

Im Berichtsjahr wurden 61 Mio. € (2009: 62 Mio. €) Forschungs- und Entwicklungsaufwendungen im Sinne von IAS 38 aufwandswirksam erfasst.

Auf Basis des Bestands an immateriellen Vermögenswerten mit bestimmbarer Nutzungsdauer werden die folgenden Abschreibungsbeträge für die folgenden fünf Berichtsjahre erwartet:

| Voraussichtlicher Abschreibungsaufwand |              |
|----------------------------------------|--------------|
| in Mio. €                              |              |
| 2011                                   | 418          |
| 2012                                   | 386          |
| 2013                                   | 322          |
| 2014                                   | 289          |
| 2015                                   | 279          |
| <b>Summe</b>                           | <b>1.694</b> |

Diese Schätzungen können insbesondere aufgrund von Akquisitionen und Veräußerungen von den tatsächlichen Beträgen in der Zukunft abweichen.

Auf immaterielle Vermögenswerte aus der Explorationstätigkeit entfallen zum 31. Dezember 2010 Buchwerte in Höhe von 535 Mio. € (2009: 448 Mio. €). Wertminderungen wurden in Höhe von 21 Mio. € erfasst (2009: 26 Mio. €).



## b) Sachanlagen

Im Berichtsjahr wurden Fremdkapitalzinsen in Höhe von 316 Mio € (2009: 338 Mio €) als Bestandteil der Anschaffungs- oder Herstellungskosten der Sachanlagen aktiviert.

Die planmäßigen Abschreibungen auf Sachanlagen beliefen sich im Jahr 2010 auf 3.278 Mio € (2009: 3.211 Mio €). In Höhe von 1.012 Mio € (2009: 105 Mio €) wurden Wertminderungen auf Sachanlagen inklusive der zuvor genannten Sachverhalte in Italien, Spanien und Frankreich erfasst. Zuschreibungen auf Sachanlagen wurden im Berichtsjahr in Höhe von 46 Mio € vorgenommen (2009: 38 Mio €).

Im Jahr 2010 unterlagen insbesondere Grundstücke und Gebäude sowie technische Anlagen und Maschinen in Höhe von 719 Mio € (2009: 5.188 Mio €) Veräußerungsbeschränkungen.

Bestimmte Kraftwerke, Gasspeicher und Leitungsnetze werden im Wege des Finanzierungsleasings genutzt und im E.ON-Konzernabschluss aktiviert, weil E.ON das wirtschaftliche Eigentum am geleasteten Vermögenswert zuzurechnen ist.

Die auf dieser Basis aktivierten Sachanlagen weisen zum Bilanzstichtag folgende Netto-Buchwerte auf:

| E.ON als Leasingnehmer – Buchwerte aktivierter Vermögenswerte |              |            |
|---------------------------------------------------------------|--------------|------------|
| in Mio €                                                      | 31. Dezember |            |
|                                                               | 2010         | 2009       |
| Grundstücke                                                   | 5            | -          |
| Bauten                                                        | 45           | 25         |
| Technische Anlagen und Maschinen                              | 530          | 308        |
| Andere Anlagen, Betriebs- und Geschäftsausstattung            | 6            | -          |
| <b>Netto-Buchwert der aktivierten Leasinggegenstände</b>      | <b>586</b>   | <b>333</b> |

Die entsprechenden Zahlungsverpflichtungen aus Finanzierungsleasing-Verträgen werden wie folgt fällig:

| E.ON als Leasingnehmer – Zahlungsverpflichtungen aus Finanzierungsleasing |                         |            |                        |            |            |            |
|---------------------------------------------------------------------------|-------------------------|------------|------------------------|------------|------------|------------|
| in Mio €                                                                  | Mindestleasingzahlungen |            | Enthaltener Zinsanteil |            | Barwerte   |            |
|                                                                           | 2010                    | 2009       | 2010                   | 2009       | 2010       | 2009       |
| Fälligkeit bis 1 Jahr                                                     | 48                      | 63         | 27                     | 19         | 21         | 44         |
| Fälligkeit 1-5 Jahre                                                      | 183                     | 147        | 102                    | 64         | 81         | 83         |
| Fälligkeit über 5 Jahre                                                   | 655                     | 281        | 309                    | 163        | 346        | 118        |
| <b>Summe</b>                                                              | <b>886</b>              | <b>491</b> | <b>438</b>             | <b>246</b> | <b>448</b> | <b>245</b> |

Der Barwert der Mindestleasingverpflichtungen wird unter den Leasingverbindlichkeiten ausgewiesen.

Zu den künftigen Verpflichtungen aus Operating-Lease-Verhältnissen, bei denen das wirtschaftliche Eigentum nicht bei E.ON als Leasingnehmer liegt, vergleiche Textziffer 27.

E.ON tritt auch als Leasinggeber auf. Die zukünftig zu vereinnehmenden Leasingraten aus Operating-Lease-Verhältnissen weisen nebenstehende Fälligkeitsstruktur auf:

| E.ON als Leasinggeber – Operating Lease   |            |            |
|-------------------------------------------|------------|------------|
| in Mio €                                  | 2010       | 2009       |
| Nominalwert der ausstehenden Leasingraten |            |            |
| Fälligkeit bis 1 Jahr                     | 93         | 54         |
| Fälligkeit 1-5 Jahre                      | 231        | 100        |
| Fälligkeit über 5 Jahre                   | 412        | 170        |
| <b>Summe</b>                              | <b>736</b> | <b>324</b> |

Zu Leasingforderungen aus Finanzierungsleasing-Verhältnissen vergleiche Textziffer 17.

## (15) At equity bewertete Unternehmen und sonstige Finanzanlagen

Die at equity bewerteten Unternehmen und sonstigen Finanzanlagen setzen sich wie folgt zusammen:

| At equity bewertete Unternehmen und sonstige Finanzanlagen |               |               |
|------------------------------------------------------------|---------------|---------------|
|                                                            | 31. Dezember  |               |
| in Mio €                                                   | 2010          | 2009          |
| At equity bewertete Unternehmen                            | 6.343         | 7.342         |
| Beteiligungen                                              | 2.201         | 5.461         |
| Langfristige Wertpapiere                                   | 3.903         | 3.670         |
| <b>Summe</b>                                               | <b>12.447</b> | <b>16.473</b> |

Die at equity bewerteten Unternehmen umfassen ausschließlich assoziierte Unternehmen und Gemeinschaftsunternehmen. Die Bilanz- und Ergebnisdaten der zehn Gemeinschaftsunternehmen sind insgesamt nicht wesentlich.

Seit dem dritten Quartal 2010 wird aufgrund der Änderungen der vertraglichen Verhältnisse die bisher als Gemeinschaftsunternehmen nach IAS 31 geführte Beteiligung an der Nord Stream AG, Zug, Schweiz, als assoziiertes Unternehmen bilanziert. Aus der mit der Umklassifizierung erforderlichen Neubewertung der bisherigen Beteiligung ergab sich ein nicht liquiditätswirksamer Ertrag von 103 Mio €.

Die langfristigen Wertpapiere umfassen im Wesentlichen festverzinsliche Wertpapiere.

Im Geschäftsjahr 2010 betrugen die Wertminderungen auf at equity bewertete Unternehmen 145 Mio € (2009: 62 Mio €) und auf sonstige Finanzanlagen 55 Mio € (2009: 269 Mio €). Der Buchwert der sonstigen Finanzanlagen, die wertberichtet sind, beträgt zum Geschäftsjahresende 250 Mio € (2009: 336 Mio €).

Der Rückgang der Beteiligungen ist im Wesentlichen auf den Abgang beziehungsweise die Ausweisänderung der Anteile an der OAO Gazprom zurückzuführen (siehe Textziffer 4).

Von den langfristigen Wertpapieren sind 393 Mio € (2009: 327 Mio €) zur Erfüllung versicherungsrechtlicher Verpflichtungen der VKE zweckgebunden (siehe Textziffer 31).

## Anteile an at equity bewerteten Unternehmen

Folgende Aufstellungen geben einen Überblick über wesentliche Posten der aggregierten Gewinn- und Verlustrechnungen sowie der aggregierten Bilanzen der at equity bewerteten Unternehmen:

| Ergebnisdaten der at equity bewerteten Unternehmen |        |        |
|----------------------------------------------------|--------|--------|
| in Mio €                                           | 2010   | 2009   |
| Umsatzerlöse                                       | 21.737 | 36.037 |
| Jahresergebnis                                     | 2.674  | 2.761  |

| Bilanzdaten der at equity bewerteten Unternehmen |               |               |
|--------------------------------------------------|---------------|---------------|
|                                                  | 31. Dezember  |               |
| in Mio €                                         | 2010          | 2009          |
| Langfristige Vermögenswerte                      | 23.764        | 23.142        |
| Kurzfristige Vermögenswerte                      | 9.408         | 12.080        |
| Rückstellungen                                   | 5.990         | 6.642         |
| Verbindlichkeiten und sonstige Passiva           | 14.275        | 14.520        |
| <b>Eigenkapital</b>                              | <b>12.907</b> | <b>14.060</b> |

Die von E.ON vereinnahmten Beteiligungserträge dieser Unternehmen betrugen im Berichtsjahr 783 Mio € (2009: 919 Mio €).

Auf at equity bewertete Unternehmen, deren Anteile marktgängig sind, entfallen Buchwerte in Höhe von 313 Mio € (2009: 833 Mio €). Diese Anteile weisen Fair Values von 277 Mio € (2009: 870 Mio €) auf.

Aus Beteiligungszugängen bei at equity bewerteten Unternehmen ergab sich insgesamt ein Goodwill von 17 Mio € (2009: 12 Mio €).

Von den Anteilen an assoziierten Unternehmen unterliegen zum Bilanzstichtag 509 Mio € (2009: 90 Mio €) Verfügungsbeschränkungen zur Sicherung von Fremdfinanzierungen.

**(16) Vorräte**

Das Vorratsvermögen setzt sich zum 31. Dezember 2010 und 2009 wie folgt zusammen:

| Vorräte                                      |              |              |
|----------------------------------------------|--------------|--------------|
| in Mio €                                     | 31. Dezember |              |
|                                              | 2010         | 2009         |
| Roh-, Hilfs- und Betriebsstoffe              | 2.163        | 2.258        |
| Handelswaren                                 | 1.614        | 2.110        |
| Unfertige Leistungen und fertige Erzeugnisse | 287          | 150          |
| <b>Summe</b>                                 | <b>4.064</b> | <b>4.518</b> |

Rohstoffe, Handelswaren und fertige Erzeugnisse werden grundsätzlich nach der Durchschnittskostenmethode bewertet.

Die Wertberichtigungen im Jahr 2010 beliefen sich auf 18 Mio € (2009: 42 Mio €). Zuschreibungen erfolgten in Höhe von 7 Mio € (2009: 1 Mio €). Der Buchwert der zu Netto-Veräußerungswerten angesetzten Vorräte beträgt 15 Mio € (2009: 12 Mio €).

Es liegen keine Sicherungsübereignungen von Vorräten vor.

**(17) Forderungen und sonstige Vermögenswerte**

Entsprechend ihren Restlaufzeiten setzen sich die Forderungen und sonstigen Vermögenswerte wie folgt zusammen:

| Forderungen und sonstige Vermögenswerte                                                    |                   |              |                   |              |
|--------------------------------------------------------------------------------------------|-------------------|--------------|-------------------|--------------|
| in Mio €                                                                                   | 31. Dezember 2010 |              | 31. Dezember 2009 |              |
|                                                                                            | Kurzfristig       | Langfristig  | Kurzfristig       | Langfristig  |
| Forderungen aus Finanzierungsleasing                                                       | 62                | 896          | 42                | 580          |
| Sonstige Finanzforderungen und finanzielle Vermögenswerte                                  | 1.612             | 2.461        | 1.687             | 2.072        |
| <b>Finanzforderungen und sonstige finanzielle Vermögenswerte</b>                           | <b>1.674</b>      | <b>3.357</b> | <b>1.729</b>      | <b>2.652</b> |
| Forderungen aus Lieferungen und Leistungen                                                 | 15.819            | -            | 11.577            | -            |
| Forderungen aus derivativen Finanzinstrumenten                                             | 7.567             | 3.068        | 7.556             | 2.365        |
| Übrige betriebliche Vermögenswerte                                                         | 4.106             | 954          | 3.874             | 1.023        |
| <b>Forderungen aus Lieferungen und Leistungen und sonstige betriebliche Vermögenswerte</b> | <b>27.492</b>     | <b>4.022</b> | <b>23.007</b>     | <b>3.388</b> |
| <b>Summe</b>                                                                               | <b>29.166</b>     | <b>7.379</b> | <b>24.736</b>     | <b>6.040</b> |

Zum Bilanzstichtag enthalten die sonstigen finanziellen Vermögenswerte Forderungen gegen Anteilseigner ohne beherrschenden Einfluss von Gemeinschaftskraftwerken in Höhe von 104 Mio € (2009: 631 Mio €) und Einlagen für Börsentermingeschäfte in Höhe von 572 Mio € (2009: 127 Mio €). Darüber hinaus ist, basierend auf den Vorgaben von IFRIC 5, in den sonstigen finanziellen Vermögenswerten mit 1.498 Mio € (2009: 1.266 Mio €) ein Erstattungsanspruch gegenüber Schwedens Fonds für Nuklearabfall im Zusammenhang mit der Stilllegung und dem Rückbau von Kernkraftwerken beziehungsweise der nuklearen Entsorgung enthalten. Da dieser Vermögenswert zweckgebunden ist, unterliegt er Restriktionen im Hinblick auf die Verfügbarkeit durch die Gesellschaft.

Die Altersstrukturanalyse für Forderungen aus Lieferungen und Leistungen stellt sich wie folgt dar:

| Altersstruktur Forderungen aus Lieferungen und Leistungen |            |            |
|-----------------------------------------------------------|------------|------------|
| in Mio €                                                  | 2010       | 2009       |
| Forderungen aus Lieferungen und Leistungen                | 15.819     | 11.577     |
| nicht wertgemindert und nicht überfällig                  | 13.838     | 9.530      |
| nicht wertgemindert und überfällig bis 60 Tage            | 1.217      | 1.119      |
| nicht wertgemindert und überfällig von 61 bis 90 Tage     | 108        | 121        |
| nicht wertgemindert und überfällig von 91 bis 180 Tage    | 199        | 309        |
| nicht wertgemindert und überfällig von 181 bis 360 Tage   | 118        | 158        |
| nicht wertgemindert und überfällig über 360 Tage          | 63         | 48         |
| <b>Nettowert wertberichtigte Forderungen</b>              | <b>276</b> | <b>292</b> |

Die einzelnen wertberichtigten Forderungen bestehen gegenüber einer Vielzahl von Endkunden, bei denen ein vollständiger Forderungseingang nicht mehr wahrscheinlich ist. Die Überwachung der Forderungsbestände erfolgt in den einzelnen Market Units.

Die Wertberichtigungen auf Forderungen aus Lieferungen und Leistungen haben sich wie folgt entwickelt:

| Wertberichtigungen auf Forderungen aus Lieferungen und Leistungen |             |             |
|-------------------------------------------------------------------|-------------|-------------|
| in Mio €                                                          | 2010        | 2009        |
| Stand zum 1. Januar                                               | -747        | -730        |
| Veränderung Konsolidierungskreis                                  | 6           | 1           |
| Wertminderungen                                                   | -380        | -382        |
| Zuschreibungen                                                    | 58          | 55          |
| Abgänge                                                           | 219         | 198         |
| Sonstiges <sup>1)</sup>                                           | 4           | 111         |
| <b>Stand zum 31. Dezember</b>                                     | <b>-840</b> | <b>-747</b> |

1) Unter „Sonstiges“ sind unter anderem Währungsumrechnungsdifferenzen erfasst.

Die Forderungen aus Finanzierungsleasing resultieren überwiegend aus bestimmten Stromlieferverträgen, die nach IFRIC 4 als Leasingverhältnis zu bilanzieren sind. Die Nominal- und Barwerte der ausstehenden Leasingzahlungen weisen die folgenden Fälligkeiten auf:

| E.ON als Leasinggeber – Finanzierungsleasing |                                                        |              |                                    |            |                                     |            |
|----------------------------------------------|--------------------------------------------------------|--------------|------------------------------------|------------|-------------------------------------|------------|
| in Mio €                                     | Bruttoinvestition in Finanzierungsleasing-Verhältnisse |              | Noch nicht realisierter Zinsertrag |            | Barwert der Mindestleasingzahlungen |            |
|                                              | 2010                                                   | 2009         | 2010                               | 2009       | 2010                                | 2009       |
| Fälligkeit bis 1 Jahr                        | 138                                                    | 92           | 76                                 | 50         | 62                                  | 42         |
| Fälligkeit 1-5 Jahre                         | 565                                                    | 352          | 251                                | 148        | 314                                 | 204        |
| Fälligkeit über 5 Jahre                      | 947                                                    | 785          | 365                                | 409        | 582                                 | 376        |
| <b>Summe</b>                                 | <b>1.650</b>                                           | <b>1.229</b> | <b>692</b>                         | <b>607</b> | <b>958</b>                          | <b>622</b> |

Der Barwert der ausstehenden Leasingzahlungen wird unter den Forderungen aus Finanzierungsleasing ausgewiesen.

## (18) Liquide Mittel

Die liquiden Mittel setzen sich entsprechend ihrer ursprünglichen Fälligkeit wie folgt zusammen:

| Liquide Mittel                                                                             |              |              |
|--------------------------------------------------------------------------------------------|--------------|--------------|
| in Mio €                                                                                   | 31. Dezember |              |
|                                                                                            | 2010         | 2009         |
| Wertpapiere und Festgeldanlagen                                                            | 1.697        | 1.722        |
| <i>Kurzfristige Wertpapiere mit einer ursprünglichen Fälligkeit von mehr als 3 Monaten</i> | 1.397        | 1.311        |
| <i>Festgeldanlagen mit einer ursprünglichen Fälligkeit von mehr als 3 Monaten</i>          | 300          | 411          |
| Zahlungsmittel und Zahlungsmitteläquivalente, die einer Verfügungsbeschränkung unterliegen | 433          | 184          |
| Zahlungsmittel und Zahlungsmitteläquivalente                                               | 6.143        | 4.210        |
| <b>Summe</b>                                                                               | <b>8.273</b> | <b>6.116</b> |

Im Berichtsjahr existieren keine verfügbungsbeschränkten Zahlungsmittel (2009: 6 Mio €) mit einer Fälligkeit von mehr als drei Monaten.

Darüber hinaus sind in den kurzfristigen Wertpapieren mit einer ursprünglichen Fälligkeit von mehr als drei Monaten Wertpapiere der VKE in Höhe von 89 Mio € (2009: 78 Mio €) enthalten, die zur Erfüllung versicherungsrechtlicher Verpflichtungen zweckgebunden sind (siehe Textziffer 31).

In den Zahlungsmitteln und Zahlungsmitteläquivalenten sind Barmittel, Schecks, Kassenbestände, Guthaben bei der Bundesbank und anderen Kreditinstituten mit einer ursprünglichen Fälligkeit von weniger als drei Monaten in Höhe von 3.295 Mio € (2009: 2.869 Mio €) ausgewiesen, sofern sie nicht verfügbungsbeschränkt sind.

### (19) Gezeichnetes Kapital

Das Grundkapital ist eingeteilt in 2.001.000.000 auf den Namen lautende nennwertlose Stückaktien (Aktien ohne Nennbetrag) und beträgt 2.001.000.000 € (2009: 2.001.000.000 €).

Gemäß Beschluss der Hauptversammlung vom 6. Mai 2010 ist die Gesellschaft ermächtigt, bis zum 5. Mai 2015 eigene Aktien zu erwerben. Auf die erworbenen Aktien dürfen zusammen mit anderen eigenen Aktien, die sich im Besitz der Gesellschaft befinden oder ihr nach den §§ 71a ff. AktG zuzurechnen sind, zu keinem Zeitpunkt mehr als zehn Prozent des Grundkapitals entfallen. Der Vorstand wurde auf der oben genannten Hauptversammlung ermächtigt, erworbene Aktien einzuziehen, ohne dass die Einziehung oder ihre Durchführung eines weiteren Hauptversammlungsbeschlusses bedarf. Die Gesamtzahl der im Umlauf befindlichen Aktien zum 31. Dezember 2010 betrug 1.905.408.843 (31. Dezember 2009: 1.905.456.817). Im Bestand der E.ON AG sowie einer Tochtergesellschaft befanden sich zum 31. Dezember 2010 95.591.157 eigene Aktien (31. Dezember 2009: 95.543.183) mit einem Konzernbuchwert von 3.531 Mio € (entsprechend 4,78 Prozent beziehungsweise einem rechnerischen Anteil von 95.591.157 € des Grundkapitals). Im Jahr 2010 wurden für das Mitarbeiteraktienprogramm 980.897 Aktien über die Börse erworben und an Mitarbeiter ausgegeben (in 2009: Entnahme von 925.282 Aktien aus dem eigenen Bestand). Zur Ausgabe von Aktien im Rahmen des Mitarbeiteraktienprogramms siehe auch Textziffer 11. Weiterhin wurden aus dem Bestand 1.129 Aktien an Mitarbeiter ausgegeben (2009: 1.169 Aktien).

Die Gesellschaft wurde durch die Hauptversammlung weiterhin ermächtigt, Aktien auch unter Einsatz von Put- oder Call-Optionen oder einer Kombination aus beiden zu erwerben. Erfolgt der Erwerb unter Einsatz von Derivaten in Form von Put- oder Call-Optionen oder einer Kombination aus beiden, müssen die Optionsgeschäfte mit einem Finanzinstitut oder über die Börse zu marktnahen Konditionen abgeschlossen werden. Im Berichtsjahr wurden über dieses Modell keine Aktien erworben.

### Genehmigtes Kapital

Der Vorstand wurde gemäß Beschluss der Hauptversammlung vom 6. Mai 2009 ermächtigt, mit Zustimmung des Aufsichtsrats bis zum 5. Mai 2014 das Grundkapital der Gesellschaft um bis zu 460 Mio € durch ein- oder mehrmalige Ausgabe neuer, auf den Namen lautender Stückaktien gegen Bar- und/oder Sacheinlagen mit der Möglichkeit der Bezugsrechtsbeschränkung der Aktionäre zu erhöhen (genehmigtes Kapital gemäß §§ 202 ff. AktG). Der Vorstand ist – mit Zustimmung des Aufsichtsrats – ermächtigt, über den Ausschluss des Bezugsrechts der Aktionäre zu entscheiden. Im November 2010 wurden 1.030.000 Aktien (entsprechend 0,05 Prozent beziehungsweise einem rechnerischen Anteil von 1.030.000 € des Grundkapitals) zu einem Kaufpreis von 23,4 Mio € für die Ausgabe an Mitarbeiter erworben.

### Bedingtes Kapital

Auf der Hauptversammlung vom 6. Mai 2010 wurde eine bis zum 5. Mai 2015 befristete bedingte Kapitalerhöhung des Grundkapitals – mit der Möglichkeit, das Bezugsrecht auszu-schließen – von 175 Mio € beschlossen. Die bedingte Kapitalerhöhung wird nur insoweit durchgeführt, wie die Inhaber von Options- oder Wandlungsrechten beziehungsweise die zur Wandlung Verpflichteten aus Options- oder Wandelanleihen, Genussrechten oder Gewinnschuldverschreibungen, die von der E.ON AG oder einer Konzerngesellschaft der E.ON AG im Sinne von § 18 AktG ausgegeben beziehungsweise garantiert werden, von ihren Options- beziehungsweise Wandlungsrechten Gebrauch machen oder, soweit sie zur Wandlung verpflichtet sind, ihre Verpflichtung zur Wandlung erfüllen, soweit nicht ein Barausgleich gewährt oder eigene Aktien oder Aktien einer anderen börsennotierten Gesellschaft zur Bedienung eingesetzt werden. Das bedingte Kapital wurde nicht in Anspruch genommen.

Die auf der Hauptversammlung vom 6. Mai 2009 beschlossenen bedingten Kapitalien I und II wurden mit Wirksamkeit des oben genannten bedingten Kapitals aufgehoben.

## Stimmrechtsverhältnisse

Nachfolgende Mitteilungen gemäß § 21 Abs. 1 WpHG zu den Stimmrechtsverhältnissen liegen vor:

| Angaben zu Beteiligungen am Kapital der E.ON AG |                      |                            |                                     |                 |             |             |
|-------------------------------------------------|----------------------|----------------------------|-------------------------------------|-----------------|-------------|-------------|
| Aktionäre                                       | Datum der Mitteilung | Veränderung Schwellenwerte | Erreichen der Stimmrechtsanteile am | Zurechnung      | Stimmrechte |             |
|                                                 |                      |                            |                                     |                 | in %        | absolut     |
| Staat Norwegen <sup>1)</sup>                    | 9. Jan. 2009         | 5%                         | 31. Dez. 2008                       | direkt/indirekt | 5,91        | 118.276.492 |
| BlackRock Inc., New York, USA <sup>2)</sup>     | 8. Juni 2010         | 5%                         | 4. Juni 2010                        | direkt/indirekt | 4,87        | 97.352.995  |

1) 4,17 Prozent (83.455.839 der Stimmrechte) werden dem Staat Norwegen nach § 22 Abs. 1 Satz 1 Nr. 1 WpHG, 1,74 Prozent (34.720.645 der Stimmrechte) nach § 22 Abs. 1 Satz 1 Nr. 1 und 2 WpHG und 0,005 Prozent (100.008 der Stimmrechte) nach § 22 Abs. 1 Satz 1 Nr. 1, Nr. 2 (in Verbindung mit Satz 2) und Nr. 6 (in Verbindung mit Satz 2) WpHG zugerechnet.  
 2) 4,87 Prozent (97.352.995 der Stimmrechte) werden der Gesellschaft gemäß § 22 Abs. 1 Satz 1 Nr. 6 WpHG zugerechnet.

## (20) Kapitalrücklage

Die Kapitalrücklage beträgt zum 31. Dezember 2010 unverändert 13.747 Mio € (2009: 13.747 Mio €).

## (21) Gewinnrücklagen

Die Gewinnrücklagen des E.ON-Konzerns setzen sich wie folgt zusammen:

| Gewinnrücklagen       |               |               |
|-----------------------|---------------|---------------|
| in Mio €              | 31. Dezember  |               |
|                       | 2010          | 2009          |
| Gesetzliche Rücklagen | 45            | 45            |
| Andere Rücklagen      | 28.981        | 26.564        |
| <b>Summe</b>          | <b>29.026</b> | <b>26.609</b> |

Für Ausschüttungen an die Aktionäre der E.ON AG stehen nach deutschem Aktienrecht die handelsrechtlichen Gewinnrücklagen sowie grundsätzlich auch der laufende handelsrechtliche Jahresüberschuss der E.ON AG zur Verfügung. Diese

Rücklagen belaufen sich zum 31. Dezember 2010 auf insgesamt 3.017 Mio € (2009: 1.810 Mio €). Hiervon ist die gesetzliche Rücklage mit 45 Mio € (2009: 45 Mio €) gemäß § 150 Abs. 3 und 4 AktG nicht ausschüttungsfähig. Die im Vorjahr ausgewiesene Rücklage für eigene Anteile (214 Mio €) wurde im Rahmen der Erstanwendung des Bilanzrechtsmodernisierungsgesetzes zum 1. Januar 2010 in die anderen Gewinnrücklagen umgebucht. Damit steht für Dividendenzahlungen aus den Gewinnrücklagen grundsätzlich ein Betrag von 2.972 Mio € (2009: 1.551 Mio €) zur Verfügung.

Für das Geschäftsjahr 2010 wird der Hauptversammlung die Ausschüttung einer Bardividende von 1,50 € je Aktie vorgeschlagen. Für das Geschäftsjahr 2009 wurde eine Dividende von 1,50 € je Aktie ausgeschüttet. Bezogen auf den Jahresendkurs 2010 beträgt die Dividendenrendite 6,5 Prozent. Bei einer Dividende von 1,50 € beträgt das Ausschüttungsvolumen 2.858 Mio €.



**(22) Veränderung des Other Comprehensive Income**

Im vierten Quartal 2010 wurde ein Großteil der Beteiligung an Gazprom veräußert. Im Zusammenhang mit dem Abgang dieser Anteile wurden circa 2 Mrd € ergebniswirksam reklassifiziert. Auf Anteile, die als zur Veräußerung gehalten klassifiziert werden, entfallen Bestandteile des Other Comprehensive Income in Höhe von 653 Mio € (2009: 22 Mio €).

Die nachfolgende Tabelle stellt den Anteil des OCI dar, der auf at equity bewertete Unternehmen entfällt.

| Anteil des OCI, der auf at equity bewertete Unternehmen entfällt |            |            |
|------------------------------------------------------------------|------------|------------|
| in Mio €                                                         | 2010       | 2009       |
| Stand zum 31. Dezember (brutto)                                  | 408        | 423        |
| Steueranteil                                                     | -          | -2         |
| <b>Stand zum 31. Dezember (netto)</b>                            | <b>408</b> | <b>421</b> |

**(23) Anteile ohne beherrschenden Einfluss**

| Anteile ohne beherrschenden Einfluss |              |              |
|--------------------------------------|--------------|--------------|
| in Mio €                             | 31. Dezember |              |
|                                      | 2010         | 2009         |
| Central Europe                       | 2.783        | 2.557        |
| Pan-European Gas                     | 50           | 51           |
| UK                                   | 65           | 62           |
| Nordic                               | 106          | 68           |
| US-Midwest                           | -            | 27           |
| Energy Trading                       | -            | -            |
| Neue Märkte                          | 929          | 767          |
| Corporate Center/Konsolidierung      | -1           | 75           |
| <b>Summe</b>                         | <b>3.932</b> | <b>3.607</b> |

Die Aufteilung der Anteile ohne beherrschenden Einfluss am Kapital auf Segmente entspricht der nebenstehenden Tabelle.

Der Anstieg der Anteile ohne beherrschenden Einfluss im Geschäftsjahr 2010 resultiert unter anderem aus höheren Ergebnisbeiträgen und aus Erstkonsolidierungseffekten.

## (24) Rückstellungen für Pensionen und ähnliche Verpflichtungen

Den Verpflichtungen für die Versorgungsansprüche der Mitarbeiter des E.ON-Konzerns in Höhe von 16,5 Mrd € stand zum 31. Dezember 2010 ein Planvermögen mit einem Fair Value von 13,3 Mrd € gegenüber. Dies entspricht einem Ausfinanzierungsgrad der Anwartschaften von 80 Prozent.

Neben dem ausgewiesenen Planvermögen wird durch die Versorgungskasse Energie (VKE) ein zusätzliches

Pensionsdeckungsvermögen in Höhe von 0,6 Mrd € (2009: 0,5 Mrd €) verwaltet, das kein Planvermögen gemäß IAS 19 darstellt, aber nahezu ausschließlich der Rückdeckung von Versorgungsansprüchen von Mitarbeitern in der Market Unit Central Europe dient (siehe Textziffer 31).

In den letzten Jahren hat sich der Finanzierungsstatus, gemessen als Unterschiedsbetrag aus dem Anwartschaftsbarwert der leistungsorientierten Versorgungsverpflichtungen und dem Fair Value des Planvermögens, wie folgt entwickelt:

| Fünf-Jahres-Entwicklung des Finanzierungsstatus                             |              |              |              |              |              |
|-----------------------------------------------------------------------------|--------------|--------------|--------------|--------------|--------------|
| in Mio €                                                                    | 31. Dezember |              |              |              |              |
|                                                                             | 2010         | 2009         | 2008         | 2007         | 2006         |
| Anwartschaftsbarwert aller leistungsorientierten Versorgungsverpflichtungen | 16.514       | 16.087       | 14.096       | 15.936       | 17.306       |
| Fair Value des Planvermögens                                                | -13.263      | -13.205      | -11.034      | -13.056      | -13.342      |
| <b>Finanzierungsstatus</b>                                                  | <b>3.251</b> | <b>2.882</b> | <b>3.062</b> | <b>2.880</b> | <b>3.964</b> |

## Darstellung der Versorgungsverpflichtungen

Als Ergänzung zu den Leistungen staatlicher Rentensysteme und der privaten Eigenvorsorge bestehen für die meisten Mitarbeiter im E.ON-Konzern betriebliche Versorgungszusagen.

Es bestehen sowohl leistungsorientierte (Defined-Benefit-Pläne) als auch beitragsorientierte Zusagen (Defined-Contribution-Pläne). Der überwiegende Teil der ausgewiesenen Versorgungsverpflichtungen resultiert aus Leistungszusagen der Konzerngesellschaften, bei denen sich die Altersrente nach den Bezügen der letzten Dienstjahre (endgehaltsabhängige Pensionspläne) oder nach Festbetragsstaffeln bemisst.

Zur Vermeidung künftiger Risiken aus betrieblichen Versorgungszusagen wurden zwischen 1998 und 2010 bei den wesentlichen inländischen und ausländischen Konzernunternehmen neu konzipierte Pensionspläne eingeführt. Nahezu alle Neueintritte bei den inländischen Market Units sowie bei den Market Units UK und Spain erhalten mittlerweile Versorgungszusagen, deren zukünftige Risiken kalkulierbar und steuerbar sind. Darüber hinaus wurden bei den deutschen Konzerngesellschaften größtenteils ab dem Jahr 2004 endgehaltsabhängige Leistungszusagen für bestehende Mitarbeiter in eine neu konzipierte Leistungszusage überführt.

Die Rückstellungen für Pensionen und ähnliche Verpflichtungen beinhalten in geringer Höhe auch Rückstellungen für Verpflichtungen aus der Kostenübernahme von Gesundheitsfürsorgeleistungen (post-employment health care benefits), die im Wesentlichen in den USA und in Spanien gewährt werden.

Im Rahmen rein beitragsorientierter Versorgungszusagen (Defined-Contribution-Pläne) erfüllt das Unternehmen seine

Verpflichtungen gegenüber Arbeitnehmern durch die Zahlung vereinbarter Beträge an externe Versorgungsträger und ähnliche Dienstleister.

### Verpflichtungsumfang

Die leistungsorientierten Versorgungsverpflichtungen, gemessen am Anwartschaftsbarwert, haben sich wie folgt entwickelt:

| Entwicklung des Anwartschaftsbarwertes                                                                  |               |              |              |               |              |              |
|---------------------------------------------------------------------------------------------------------|---------------|--------------|--------------|---------------|--------------|--------------|
| in Mio €                                                                                                | 2010          |              |              | 2009          |              |              |
|                                                                                                         | Gesamt        | Inland       | Ausland      | Gesamt        | Inland       | Ausland      |
| Stand Anwartschaftsbarwert zum 1. Januar                                                                | 16.087        | 8.285        | 7.802        | 14.096        | 8.047        | 6.049        |
| Dienstzeitaufwand für die im Geschäftsjahr hinzuerworbenen Versorgungsansprüche (employer service cost) | 241           | 147          | 94           | 211           | 136          | 75           |
| Kalkulatorischer Zinsaufwand (interest cost)                                                            | 840           | 446          | 394          | 842           | 450          | 392          |
| Veränderungen Konsolidierungskreis                                                                      | -913          | 1            | -914         | -28           | -66          | 38           |
| Nachzuverrechnender Dienstzeitaufwand (past service cost)                                               | 32            | 16           | 16           | 7             | -2           | 9            |
| Versicherungsmathematische Gewinne (-)/Verluste (actuarial gains [-]/losses)                            | 800           | 567          | 233          | 1.543         | 249          | 1.294        |
| Währungsunterschiede                                                                                    | 205           | -            | 205          | 309           | -            | 309          |
| Mitarbeiterbeiträge                                                                                     | 4             | -            | 4            | 15            | -            | 15           |
| Pensionszahlungen                                                                                       | -838          | -474         | -364         | -874          | -470         | -404         |
| Plankürzungen                                                                                           | -             | -            | -            | -2            | -            | -2           |
| Sonstige                                                                                                | 56            | 70           | -14          | -32           | -59          | 27           |
| <b>Stand Anwartschaftsbarwert zum 31. Dezember</b>                                                      | <b>16.514</b> | <b>9.058</b> | <b>7.456</b> | <b>16.087</b> | <b>8.285</b> | <b>7.802</b> |

Ausländische Versorgungsverpflichtungen entfallen nahezu vollständig auf die Market Units UK (2010: 6.848 Mio €; 2009: 6.321 Mio €) und Spain (2010: 407 Mio €; 2009: 373 Mio €) sowie im Vorjahr auch auf die Market Unit US-Midwest (916 Mio €). Der den Gesundheitsfürsorgeleistungen zuzuordnende Anteil des gesamten Verpflichtungsumfangs beträgt 15 Mio € (2009: 166 Mio € inklusive Market Unit US-Midwest).

Der Rückgang der ausländischen Versorgungsverpflichtungen ist vor allem in der Veräußerung der Market Unit US-Midwest in 2010 begründet, die in der Position „Veränderungen Konsolidierungskreis“ enthalten ist.

Die in 2010 entstandenen versicherungsmathematischen Verluste sind weitestgehend auf die Absenkung der Rechnungszinssätze im Inland und in der Market Unit UK zurückzuführen.

Unter der Position „Sonstige“ wurden in 2010 im Wesentlichen leistungsorientierte Versorgungsverpflichtungen aus dem Bilanzposten „Mit zur Veräußerung gehaltenen Vermögenswerten verbundene Schulden“ umgegliedert.

Die versicherungsmathematischen Annahmen zur Bewertung der leistungsorientierten Versorgungsverpflichtungen der Konzerngesellschaften zum Bilanzstichtag sowie zur Ableitung

des erwarteten Planvermögensertrages für das dem Bilanzstichtag nachfolgende Geschäftsjahr lauten für die Regionen Deutschland und Großbritannien wie folgt:

| Versicherungsmathematische Annahmen |                   |      |                   |      |
|-------------------------------------|-------------------|------|-------------------|------|
| in %                                | 31. Dezember 2010 |      | 31. Dezember 2009 |      |
|                                     | Deutschland       | UK   | Deutschland       | UK   |
| Rechnungszinssatz                   | 5,00              | 5,40 | 5,50              | 5,70 |
| Gehaltstrend                        | 2,75              | 4,00 | 2,75              | 4,00 |
| Rententrend <sup>1)</sup>           | 2,00              | 3,30 | 2,00              | 3,30 |
| Erwartete Planvermögensrendite      | 4,70              | 5,80 | 4,70              | 6,10 |

1) Der Rententrend für Deutschland gilt für Anspruchsberechtigte, die nicht einem 1%-Rententrend unterliegen.

Für die Berichtsperiode 2009 wurde am 31. Dezember 2008 eine erwartete Planvermögensrendite von 5,10 Prozent in Deutschland und 5,40 Prozent in Großbritannien zugrunde gelegt.

Darüber hinaus bestehen im Inland Pensionskassen, für die eine erwartete Planvermögensrendite von 4,50 Prozent (2009: 4,50 Prozent; 2008: 4,50 Prozent) für das folgende Geschäftsjahr ermittelt wurde.

Daneben werden auch andere unternehmensspezifische versicherungsmathematische Annahmen wie die Mitarbeiterfluktuation in die Berechnung einbezogen.

Für die bilanzielle Bewertung der betrieblichen Pensionsverpflichtungen im E.ON-Konzern wurden als biometrische Rechnungsgrundlagen jeweils die länderspezifisch anerkannten und auf einem aktuellen Stand befindlichen Sterbetafeln verwendet.

Die im E.ON-Konzern verwendeten Rechnungszinssätze basieren auf den regionenspezifischen, zum Bilanzstichtag ermittelten Renditen hochwertiger festverzinslicher Unternehmensanleihen mit einer der mittleren Laufzeit der Pensionsverpflichtungen entsprechenden Duration.

Zum 31. Dezember 2010 wurde im E.ON-Konzern eine einheitliche Veränderung der Rechnungszinssätze um  $\pm 0,5$  Prozentpunkte zu einer Veränderung des Anwartschaftsbarwertes (Defined Benefit Obligation) von -1.073 Mio € bzw. +1.219 Mio € führen.

## Darstellung des Planvermögens

Die Finanzierung leistungsorientierter Versorgungszusagen erfolgt sowohl bei den inländischen als auch bei den ausländischen Konzerngesellschaften größtenteils durch die Ansammlung zweckgebundener Vermögenswerte (Planvermögen) in eigens dafür errichteten und vom Unternehmen rechtlich separierten Pensionsvehikeln.

Im Rahmen des Contractual Trust Arrangement (CTA) für die deutschen Konzerngesellschaften wurden durch den E.ON Pension Trust e.V. am Bilanzstichtag Planvermögen in Höhe von 6.415 Mio € (2009: 6.481 Mio €) treuhänderisch verwaltet. Eine Umschichtung von Kapitalanlagen aus der Versorgungskasse Energie (VKE) in das CTA führte im Jahr 2009 zu einer Zunahme des inländischen Planvermögens um 1,7 Mrd €. Zusätzliches inländisches Planvermögen in Höhe von 283 Mio € (2009: 298 Mio €) wird im Wesentlichen von Pensionskassen der Market Unit Central Europe gehalten.

Das ausländische Planvermögen in Höhe von insgesamt 6.565 Mio € (2009: 6.426 Mio €) dient vor allem der Finanzierung der Pensionspläne der Market Units UK und Spain. Das Planvermögen der Market Unit UK wird größtenteils von unabhängigen Pensionsfonds (Pension Trusts) verwaltet und beläuft sich zum 31. Dezember 2010 auf 6.186 Mio € (2009: 5.575 Mio €). Das Deckungsvermögen der Market Unit Spain von insgesamt 312 Mio € (2009: 282 Mio €) besteht nahezu vollständig aus qualifizierten Versicherungsverträgen, die gemäß IAS 19 Planvermögen darstellen. Bedingt durch die Veräußerung der Market Unit US-Midwest ist deren Planvermögen im Gegensatz zum 31. Dezember 2009 nicht mehr im ausländischen Planvermögen enthalten.

Der Fair Value des Planvermögens, der dem Verpflichtungsumfang für leistungsorientierte Versorgungszusagen gegenübersteht, entwickelte sich wie nachfolgend dargestellt:

| Entwicklung des Planvermögens                                                   |               |              |              |               |              |              |
|---------------------------------------------------------------------------------|---------------|--------------|--------------|---------------|--------------|--------------|
| in Mio €                                                                        | 2010          |              |              | 2009          |              |              |
|                                                                                 | Gesamt        | Inland       | Ausland      | Gesamt        | Inland       | Ausland      |
| Fair Value des Planvermögens, Stand zum 1. Januar                               | 13.205        | 6.779        | 6.426        | 11.034        | 5.147        | 5.887        |
| Erwarteter Planvermögensertrag                                                  | 673           | 313          | 360          | 614           | 270          | 344          |
| Arbeitgeberbeiträge                                                             | 294           | 100          | 194          | 1.913         | 1.707        | 206          |
| Mitarbeiterbeiträge                                                             | 4             | -            | 4            | 15            | -            | 15           |
| Veränderungen Konsolidierungskreis                                              | -507          | -            | -507         | 22            | -            | 22           |
| Versicherungsmathematische Gewinne/Verluste (-)<br>(actuarial gains/losses [-]) | 221           | -40          | 261          | 43            | 67           | -24          |
| Währungsunterschiede                                                            | 179           | -            | 179          | 357           | -            | 357          |
| Pensionszahlungen                                                               | -807          | -454         | -353         | -762          | -367         | -395         |
| Planabgeltungen                                                                 | -             | -            | -            | -1            | -            | -1           |
| Sonstige                                                                        | 1             | -            | 1            | -30           | -45          | 15           |
| <b>Fair Value des Planvermögens, Stand zum 31. Dezember</b>                     | <b>13.263</b> | <b>6.698</b> | <b>6.565</b> | <b>13.205</b> | <b>6.779</b> | <b>6.426</b> |

Die von der VKE verwalteten langfristigen Kapitalanlagen und liquiden Mittel in Höhe von 0,6 Mrd € (2009: 0,5 Mrd €) gehen nicht in die Ermittlung des Finanzierungsstatus zum 31. Dezember 2010 ein, da sie kein Planvermögen gemäß IAS 19 darstellen. Für eine vollständige Beurteilung des Ausfinanzierungsgrades der Versorgungsverpflichtungen des E.ON-Konzerns ist dieses Deckungsvermögen, das im Wesentlichen der Rückdeckung von Versorgungsverpflichtungen der Market Unit Central Europe dient, zusätzlich zu berücksichtigen.

Das prinzipielle Anlageziel für das Planvermögen ist die zeitkongruente Abdeckung der aus den jeweiligen Versorgungszusagen resultierenden Zahlungsverpflichtungen. Das Planvermögen enthält nahezu keine selbst genutzten Immobilien sowie Aktien und Anleihen von E.ON-Konzernunternehmen.

Zur Umsetzung des Anlageziels verfolgt der E.ON-Konzern grundsätzlich eine an der Struktur der Versorgungsverpflichtungen ausgerichtete Anlagestrategie (LDI – Liability-Driven-Investment-Ansatz). Die langfristig ausgerichtete LDI-Strategie zielt auf ein Management des Finanzierungsstatus (funded status) und bewirkt, dass der Fair Value des Planvermögens die insbesondere durch Zins- und Inflationsschwankungen verursachten Wertänderungen des Anwartschaftsbarwertes bis zu

einem gewissen Grad periodengleich nachvollzieht. Bei der Umsetzung der LDI-Strategie können auch Derivate (zum Beispiel Zins- und Inflationsswaps) zum Einsatz kommen. Um langfristig den Finanzierungsstatus des E.ON-Konzerns positiv zu beeinflussen, wird ein Teil des Planvermögens zudem diversifiziert in Anlageklassen investiert, die langfristig eine über der für festverzinsliche Anleihen liegende Rendite erwarten lassen.

Die Ermittlung der Ziel-Portfoliostruktur für die einzelnen Planvermögen erfolgt auf der Basis regelmäßig durchgeführter Asset-Liability-Studien. Im Rahmen dieser Analysen wird die Ziel-Portfoliostruktur vor dem Hintergrund der bestehenden Anlagegrundsätze, des aktuellen Ausfinanzierungsgrades, des Kapitalmarktumfeldes und der Verpflichtungsstruktur überprüft und gegebenenfalls angepasst. Die langfristig erwarteten Renditen für die einzelnen Planvermögen resultieren aus der angestrebten Portfoliostruktur und den im Rahmen der Asset-Liability-Studien prognostizierten langfristigen Renditen für die einzelnen Anlageklassen.

Zum Bilanzstichtag war das Planvermögen in die folgenden Vermögenskategorien investiert:

| Vermögenskategorien des Planvermögens |                   |        |         |                   |        |         |
|---------------------------------------|-------------------|--------|---------|-------------------|--------|---------|
| in %                                  | 31. Dezember 2010 |        |         | 31. Dezember 2009 |        |         |
|                                       | Gesamt            | Inland | Ausland | Gesamt            | Inland | Ausland |
| Aktien                                | 16                | 13     | 18      | 17                | 13     | 21      |
| Schuldtitel                           | 66                | 70     | 62      | 64                | 66     | 62      |
| Immobilien                            | 9                 | 11     | 7       | 8                 | 11     | 5       |
| Sonstiges                             | 9                 | 6      | 13      | 11                | 10     | 12      |

## Pensionsrückstellung

Die bilanzierte Nettoverpflichtung des E.ON-Konzerns resultiert aus einer Gegenüberstellung von Anwartschaftsbarwert der leistungsorientierten Versorgungsverpflichtungen und Fair Value des Planvermögens, angepasst um noch nicht erfasste nachzuverrechnende Dienstzeitaufwendungen, und leitet sich wie folgt ab:

| Herleitung Pensionsrückstellung                                                                              |              |              |
|--------------------------------------------------------------------------------------------------------------|--------------|--------------|
| in Mio €                                                                                                     | 31. Dezember |              |
|                                                                                                              | 2010         | 2009         |
| Anwartschaftsbarwert der Versorgungsverpflichtungen mit (vollständiger oder teilweiser) Planvermögensdeckung | 16.080       | 15.715       |
| Fair Value des Planvermögens                                                                                 | -13.263      | -13.205      |
| Anwartschaftsbarwert der Versorgungsverpflichtungen ohne Planvermögensdeckung                                | 434          | 372          |
| <b>Finanzierungsstatus</b>                                                                                   | <b>3.251</b> | <b>2.882</b> |
| Nicht erfasster, nachzuverrechnender Dienstzeitaufwand                                                       | -11          | -10          |
| <b>Bilanzierter Betrag</b>                                                                                   | <b>3.240</b> | <b>2.872</b> |
| <i>ausgewiesen als betriebliche Forderungen</i>                                                              | -10          | -12          |
| <i>ausgewiesen als Rückstellungen für Pensionen und ähnliche Verpflichtungen</i>                             | 3.250        | 2.884        |

Unter Berücksichtigung der periodenbezogenen Zuführungen und Pensionszahlungen sowie saldierten versicherungsmathematischen Verlusten, die im Wesentlichen durch die Absenkung der Rechnungszinssätze im Inland und in der Market Unit UK bedingt sind, ergibt sich eine Erhöhung der bilanzierten Nettoverpflichtung zum 31. Dezember 2010. Mindernd wirkt der durch die Veräußerung bedingte Abgang der Pensionsrückstellungen der Market Unit US-Midwest.

## Beitrags- und Versorgungszahlungen

Im Jahr 2010 wurden zur Finanzierung der bestehenden leistungsorientierten Versorgungsverpflichtungen Arbeitgeberbeiträge in das Planvermögen in Höhe von 294 Mio € (2009: 1.913 Mio €) geleistet. Die Arbeitgeberbeiträge zum Planvermögen in 2009 beruhen vor allem auf einer Umschichtung von Kapitalanlagen aus der Versorgungskasse Energie (VKE) in das inländische CTA.

Für das folgende Geschäftsjahr werden insbesondere für die Finanzierung bestehender und neu entstandener Versorgungsanwartschaften konzernweit Arbeitgeberbeitragszahlungen in Höhe von 750 Mio € erwartet, die in Höhe von 175 Mio € auf ausländische Gesellschaften entfallen.

2010 erfolgten Pensionszahlungen für die Erfüllung von leistungsorientierten Versorgungsverpflichtungen in Höhe von 838 Mio € (2009: 874 Mio €). Für die zum 31. Dezember 2010 bestehenden Versorgungszusagen werden für die nächsten zehn Jahre folgende Pensionszahlungen prognostiziert:

| Erwartete Pensionszahlungen |              |              |              |
|-----------------------------|--------------|--------------|--------------|
| in Mio €                    | Gesamt       | Inland       | Ausland      |
| 2011                        | 851          | 494          | 357          |
| 2012                        | 854          | 496          | 358          |
| 2013                        | 874          | 506          | 368          |
| 2014                        | 891          | 514          | 377          |
| 2015                        | 910          | 522          | 388          |
| 2016-2020                   | 4.875        | 2.844        | 2.031        |
| <b>Summe</b>                | <b>9.255</b> | <b>5.376</b> | <b>3.879</b> |



## Pensionsaufwand

Der Gesamtaufwand leistungsorientierter Versorgungszusagen, der in den Rückstellungen für Pensionen und ähnliche Verpflichtungen sowie in den betrieblichen Forderungen

enthalten ist, setzt sich wie folgt zusammen (darin ist nicht mehr der Gesamtaufwand der leistungsorientierten Versorgungszusagen der Market Unit US-Midwest enthalten [siehe auch Textziffer 4]):

| Gesamtaufwand der leistungsorientierten Versorgungszusagen                                              |            |            |            |            |            |           |
|---------------------------------------------------------------------------------------------------------|------------|------------|------------|------------|------------|-----------|
| in Mio €                                                                                                | 2010       |            |            | 2009       |            |           |
|                                                                                                         | Gesamt     | Inland     | Ausland    | Gesamt     | Inland     | Ausland   |
| Dienstzeitaufwand für die im Geschäftsjahr hinzuerworbenen Versorgungsansprüche (employer service cost) | 241        | 147        | 94         | 192        | 136        | 56        |
| Kalkulatorischer Zinsaufwand (interest cost)                                                            | 840        | 446        | 394        | 788        | 450        | 338       |
| Erwarteter Planvermögensertrag (expected return on plan assets)                                         | -673       | -313       | -360       | -578       | -270       | -308      |
| Auswirkungen von Plankürzungen (effects of curtailments) oder Planabgeltungen (effects of settlements)  | -          | -          | -          | -2         | -          | -2        |
| Erfasster, nachzuverrechnender Dienstzeitaufwand (recognized past service cost)                         | 29         | 16         | 13         | 6          | -2         | 8         |
| <b>Summe</b>                                                                                            | <b>437</b> | <b>296</b> | <b>141</b> | <b>406</b> | <b>314</b> | <b>92</b> |

Versicherungsmathematische Gewinne und Verluste werden vollständig und periodengerecht erfasst. Sie werden außerhalb der Gewinn- und Verlustrechnung in der Aufstellung der im Konzerneigenkapital erfassten Erträge und Aufwendungen ausgewiesen.

Die tatsächlichen Vermögenserträge aus dem Planvermögen betragen in 2010 in Summe 894 Mio € (2009: 657 Mio € inklusive Market Unit US-Midwest).

Zusätzlich zum Gesamtaufwand für leistungsorientierte Versorgungszusagen wurden für ausschließlich beitragsorientierte Versorgungszusagen fest vereinbarte Beitragszahlungen an externe Versorgungsträger und ähnliche Dienstleister in Höhe von 74 Mio € (2009: 68 Mio €) geleistet. Darin sind nicht mehr Beitragszahlungen der Market Unit US-Midwest enthalten (siehe auch Textziffer 4).

Vom dargestellten Gesamtaufwand für leistungsorientierte Versorgungszusagen entfallen 0,9 Mio € (2009: 0,9 Mio €) auf Gesundheitsfürsorgeleistungen. Eine Veränderung der angenommenen Trends für die Steigerung der Gesundheitskosten um  $\pm 1,0$  Prozentpunkte führt zu einer Veränderung dieses Aufwands (nur Dienstzeit- und Zinskomponente) um +0,2 Mio € beziehungsweise -0,1 Mio € (2009: +0,2 Mio € beziehungsweise -0,1 Mio €). Der hierauf entfallende Verpflichtungsumfang würde sich entsprechend um +2,3 Mio € beziehungsweise -1,9 Mio € (2009: +6,9 Mio € beziehungsweise -6,0 Mio € inklusive Market Unit US-Midwest) verändern.

Die im Konzerneigenkapital erfassten versicherungsmathematischen Gewinne/Verluste aus leistungsorientierten Versorgungsverpflichtungen und zugehörigem Planvermögen entwickelten sich wie folgt:

| Kumulierte im Eigenkapital erfasste versicherungsmathematische Gewinne/Verluste                                 |             |            |
|-----------------------------------------------------------------------------------------------------------------|-------------|------------|
| in Mio €                                                                                                        | 2010        | 2009       |
| Kumulierte im Eigenkapital erfasste versicherungsmathematische Gewinne (+)/Verluste (-) zum 1. Januar           | 138         | 1.638      |
| Erfassung der versicherungsmathematischen Gewinne (+)/Verluste (-) des Berichtsjahres im Eigenkapital           | -722        | -1.500     |
| <b>Kumulierte im Eigenkapital erfasste versicherungsmathematische Gewinne (+)/Verluste (-) zum 31. Dezember</b> | <b>-584</b> | <b>138</b> |

In den Jahren 2006 bis 2010 haben sich folgende erfahrungsbedingte Anpassungen des Barwertes aller leistungsorientierten Versorgungsverpflichtungen und des Fair Values des Planvermögens ergeben:

| Erfahrungsbedingte Anpassungen                            |              |      |       |       |       |
|-----------------------------------------------------------|--------------|------|-------|-------|-------|
| in %                                                      | 31. Dezember |      |       |       |       |
|                                                           | 2010         | 2009 | 2008  | 2007  | 2006  |
| Erfahrungsbedingte Anpassungen des Verpflichtungsbetrages | -0,16        | 0,26 | 1,61  | 1,22  | 0,73  |
| Erfahrungsbedingte Anpassungen des Planvermögens          | 1,66         | 0,23 | -9,01 | -0,50 | -0,22 |

Die erfahrungsbedingten Anpassungen spiegeln die Effekte auf die im E.ON-Konzern bestehenden Verpflichtungsbeträge und das Planvermögen wider, die sich aus der Abweichung der tatsächlich eingetretenen Bestandsentwicklung von den zu Beginn des Geschäftsjahres unterstellten Annahmen

ergeben. Dazu zählen bei der Bewertung der Versorgungsverpflichtungen insbesondere die Entwicklung der Einkommenssteigerungen, Rentenerhöhungen, Mitarbeiterfluktuation sowie biometrische Daten wie Todes- und Invaliditätsfälle.

## (25) Übrige Rückstellungen

Die übrigen Rückstellungen setzen sich wie folgt zusammen:

| Übrige Rückstellungen                                               |                   |               |                   |               |
|---------------------------------------------------------------------|-------------------|---------------|-------------------|---------------|
| in Mio €                                                            | 31. Dezember 2010 |               | 31. Dezember 2009 |               |
|                                                                     | Kurzfristig       | Langfristig   | Kurzfristig       | Langfristig   |
| Nicht vertragliche Entsorgungsverpflichtungen im Kernenergiebereich | 99                | 8.855         | 206               | 8.901         |
| Vertragliche Entsorgungsverpflichtungen im Kernenergiebereich       | 365               | 4.959         | 217               | 4.160         |
| Verpflichtungen im Personalbereich                                  | 633               | 780           | 650               | 711           |
| Sonstige Rückbau- und Entsorgungsverpflichtungen                    | 315               | 1.374         | 319               | 1.246         |
| Beschaffungsmarktorientierte Verpflichtungen                        | 504               | 409           | 361               | 388           |
| Absatzmarktorientierte Verpflichtungen                              | 656               | 327           | 551               | 136           |
| Umweltschutzmaßnahmen und ähnliche Verpflichtungen                  | 76                | 797           | 68                | 523           |
| Sonstige                                                            | 2.302             | 2.880         | 2.343             | 2.743         |
| <b>Summe</b>                                                        | <b>4.950</b>      | <b>20.381</b> | <b>4.715</b>      | <b>18.808</b> |

Nachfolgend wird die Entwicklung der übrigen Rückstellungen dargestellt:

| Entwicklung der übrigen Rückstellungen                              |                          |                      |                                    |            |              |                 |            |             |                      |                             |
|---------------------------------------------------------------------|--------------------------|----------------------|------------------------------------|------------|--------------|-----------------|------------|-------------|----------------------|-----------------------------|
| in Mio €                                                            | Stand zum 1. Januar 2010 | Währungsunterschiede | Veränderungen Konsolidierungskreis | Aufzinsung | Zuführung    | Inanspruchnahme | Umbuchung  | Auflösung   | Schätzungsänderungen | Stand zum 31. Dezember 2010 |
| Nicht vertragliche Entsorgungsverpflichtungen im Kernenergiebereich | 9.107                    | 130                  | -                                  | 431        | 26           | -37             | -484       | -           | -219                 | 8.954                       |
| Vertragliche Entsorgungsverpflichtungen im Kernenergiebereich       | 4.377                    | 99                   | -                                  | 242        | 79           | -293            | 484        | -           | 336                  | 5.324                       |
| Verpflichtungen im Personalbereich                                  | 1.361                    | 2                    | -35                                | 2          | 844          | -733            | 18         | -46         | -                    | 1.413                       |
| Sonstige Rückbau- und Entsorgungsverpflichtungen                    | 1.565                    | 10                   | -83                                | 49         | 99           | -24             | -3         | -8          | 84                   | 1.689                       |
| Beschaffungsmarktorientierte Verpflichtungen                        | 749                      | 2                    | -                                  | 16         | 588          | -161            | -          | -281        | -                    | 913                         |
| Absatzmarktorientierte Verpflichtungen                              | 687                      | 5                    | 1                                  | 18         | 367          | -252            | 234        | -77         | -                    | 983                         |
| Umweltschutzmaßnahmen und ähnliche Verpflichtungen                  | 591                      | 4                    | 1                                  | 12         | 128          | -41             | 209        | -31         | -                    | 873                         |
| Sonstige                                                            | 5.086                    | 23                   | -81                                | 25         | 2.162        | -1.257          | -256       | -520        | -                    | 5.182                       |
| <b>Summe</b>                                                        | <b>23.523</b>            | <b>275</b>           | <b>-197</b>                        | <b>795</b> | <b>4.293</b> | <b>-2.798</b>   | <b>202</b> | <b>-963</b> | <b>201</b>           | <b>25.331</b>               |

Die Aufzinsung im Rahmen der Rückstellungsentwicklung ist im Finanzergebnis (vergleiche Textziffer 9) enthalten.

Die verwendeten Zinssätze betragen im Kernenergiebereich nach landesspezifischer Ermittlung zum 31. Dezember 2010 5,2 Prozent (2009: 5,2 Prozent) in Deutschland und 3,0 Prozent (2009: 3,0 Prozent) in Schweden. Bei den übrigen Rückstellungspositionen kommen in Abhängigkeit von der Laufzeit Zinssätze zwischen 0,7 und 4,4 Prozent (2009: 1,2 und 4,3 Prozent) zur Anwendung.

### Rückstellungen für nicht vertragliche Entsorgungsverpflichtungen im Kernenergiebereich

Die auf deutscher und schwedischer atomrechtlicher Grundlage basierenden Rückstellungen in Höhe von 9,0 Mrd € entfallen mit einem Betrag von 7,9 Mrd € auf die Geschäftstätigkeit in Deutschland und mit 1,1 Mrd € auf die schwedischen Aktivitäten. Die Rückstellungen beinhalten auf der Grundlage von Gutachten und Kostenschätzungen sämtliche nuklearen Verpflichtungen für die Entsorgung von abgebrannten Brennelementen und schwach radioaktiven Betriebsabfällen, die Stilllegung und den Rückbau der nuklearen Kraftwerksanlage.

Die Rückstellungen werden im Wesentlichen als langfristige Rückstellungen mit ihrem auf den Bilanzstichtag abgezinsten Erfüllungsbetrag bewertet.

Die in den Rückstellungen für nicht vertragliche nukleare Verpflichtungen erfassten Stilllegungsverpflichtungen beinhalten die erwarteten Kosten des Nachbetriebs der Anlage, der Demontage sowie der Beseitigung und Entsorgung der nuklearen Bestandteile des Kernkraftwerks.

Zusätzlich sind im Rahmen der Entsorgung von Brennelementen Kosten für durchzuführende Transporte zum Endlager sowie Kosten für eine endlagergerechte Konditionierung einschließlich erforderlicher Behälter berücksichtigt.

Die Stilllegungskosten sowie die Kosten der Entsorgung der Brennelemente und der schwach radioaktiven Betriebsabfälle enthalten jeweils auch die eigentlichen Endlagerkosten. Die Endlagerkosten umfassen insbesondere Investitions- und Betriebskosten der voraussichtlichen Endlager Gorleben und Konrad und basieren auf der Endlagervorausleistungsverordnung und Angaben des Bundesamtes für Strahlenschutz. Von den Rückstellungen wurden 839 Mio € (2009: 803 Mio €) geleistete Anzahlungen an das Bundesamt für Strahlenschutz abgesetzt. Diese Zahlungen werden jährlich auf Basis der Ausgaben des Bundesamtes für Strahlenschutz für die Errichtung der Endlager Gorleben und Konrad geleistet.

Sämtliche den Rückstellungen zugrunde liegenden Kostenansätze werden jährlich auf Basis externer Sachverständigen-gutachten aktualisiert. Bei der Bemessung der Rückstellungen in Deutschland wurden die Änderungen des Atomgesetzes vom 13. Dezember 2010 berücksichtigt.

In der Market Unit Central Europe ergaben sich 2010 Schätzungsänderungen in Höhe von -219 Mio € sowie Umgliederungen in die Rückstellungen für vertragliche Entsorgungsverpflichtungen in Höhe von -484 Mio €. In der Market Unit Nordic waren 2010 keine Schätzungsänderungen zu verzeichnen.

Die Rückstellungen setzen sich in technischer Hinsicht wie folgt zusammen:

| Rückstellungen für nicht vertragliche Entsorgungsverpflichtungen im Kernenergiebereich |                   |              |                   |            |
|----------------------------------------------------------------------------------------|-------------------|--------------|-------------------|------------|
| in Mio €                                                                               | 31. Dezember 2010 |              | 31. Dezember 2009 |            |
|                                                                                        | Deutschland       | Schweden     | Deutschland       | Schweden   |
| Stilllegung                                                                            | 6.055             | 347          | 6.444             | 230        |
| Brennelement- und Betriebsabfallentsorgung                                             | 2.674             | 717          | 2.562             | 674        |
| Geleistete Anzahlungen                                                                 | 839               | -            | 803               | -          |
| <b>Summe</b>                                                                           | <b>7.890</b>      | <b>1.064</b> | <b>8.203</b>      | <b>904</b> |

### Rückstellungen für vertragliche Entsorgungsverpflichtungen im Kernenergiebereich

Die auf deutscher und schwedischer atomrechtlicher Grundlage basierenden Rückstellungen in Höhe von 5,3 Mrd € entfallen mit einem Betrag von 4,3 Mrd € auf die Geschäftstätigkeit in Deutschland und mit 1,0 Mrd € auf die schwedischen

Aktivitäten. Die Rückstellungen beinhalten sämtliche vertraglichen nuklearen Verpflichtungen für die Entsorgung von abgebrannten Brennelementen und schwach radioaktiven Betriebsabfällen, die Stilllegung und den Rückbau der nuklearen Kraftwerksanlage, deren Bewertung auf zivilrechtlichen Verträgen beruht.

Die Rückstellungen werden im Wesentlichen als langfristige Rückstellungen mit ihrem auf den Bilanzstichtag abgezinsten Erfüllungsbetrag bewertet.

Von dem auf Deutschland entfallenden Anteil der Rückstellungen wurden 21 Mio € (2009: 32 Mio €) geleistete Anzahlungen an sonstige Entsorgungsunternehmen abgesetzt. Diese Anzahlungen betreffen Vorauszahlungen für die Lieferung von Zwischenlagerbehältern.

Die in den Rückstellungen erfassten Verpflichtungen beinhalten im Rahmen der Entsorgung von Brennelementen die vertragsgemäßen Kosten zum einen für die Restabwicklung der Wiederaufarbeitung und die damit verbundene Rückführung von Abfällen mit anschließender Zwischenlagerung in Gorleben und Ahaus und zum anderen die im Zusammenhang mit

dem Entsorgungspfad „direkte Endlagerung“ anfallenden Kosten für die standortnahe Zwischenlagerung einschließlich der erforderlichen Zwischenlagerbehälter. Des Weiteren sind die vertragsgemäßen Kosten des Stilllegungsbereichs sowie der Konditionierung von schwach radioaktiven Betriebsabfällen in den Rückstellungen berücksichtigt.

In der Market Unit Central Europe ergaben sich im Jahr 2010 Schätzungsänderungen in Höhe von -23 Mio € sowie Umgliederungen aus den Rückstellungen für nicht vertragliche Entsorgungsverpflichtungen in Höhe von 484 Mio €. Die Market Unit Nordic hat Schätzungsänderungen in Höhe von 359 Mio € zu verzeichnen.

Die Rückstellungen setzen sich in technischer Hinsicht wie folgt zusammen:

| Rückstellungen für vertragliche Entsorgungsverpflichtungen im Kernenergiebereich |                   |            |                   |            |
|----------------------------------------------------------------------------------|-------------------|------------|-------------------|------------|
| in Mio €                                                                         | 31. Dezember 2010 |            | 31. Dezember 2009 |            |
|                                                                                  | Deutschland       | Schweden   | Deutschland       | Schweden   |
| Stilllegung                                                                      | 2.365             | 317        | 2.023             | 136        |
| Brennelement- und Betriebsabfallentsorgung                                       | 1.997             | 666        | 1.841             | 409        |
| Geleistete Anzahlungen                                                           | 21                | -          | 32                | -          |
| <b>Summe</b>                                                                     | <b>4.341</b>      | <b>983</b> | <b>3.832</b>      | <b>545</b> |

## Verpflichtungen im Personalbereich

Die Rückstellungen für Personalaufwendungen betreffen vor allem Rückstellungen für Vorruhestandsregelungen, erfolgsabhängige Gehaltsbestandteile, Deputatverpflichtungen sowie andere Personalkosten.

## Sonstige Rückbau- und Entsorgungsverpflichtungen

Die Rückstellungen für sonstige Rückbau- und Entsorgungsverpflichtungen enthalten Stilllegungs- und Rückbauverpflichtungen für konventionelle und regenerative Kraftwerksanlagen inklusive der konventionellen Anlagenteile im Kernenergiebereich auf Basis zivilrechtlicher Vereinbarungen oder öffentlich-rechtlicher Auflagen. Außerdem werden hier Rückstellungen für Rekultivierung von Tagebau- und Gas-speicherstandorten sowie für den Rückbau von Infrastruktureinrichtungen ausgewiesen.

## Beschaffungsmarktorientierte Verpflichtungen

Die Rückstellungen für beschaffungsmarktorientierte Verpflichtungen enthalten unter anderem Rückstellungen für Verlustrisiken aus schwebenden Einkaufskontrakten.

## Absatzmarktorientierte Verpflichtungen

Die Rückstellungen für absatzmarktorientierte Verpflichtungen enthalten im Wesentlichen Verlustrisiken aus schwebenden Verkaufskontrakten sowie für Preisnachlässe.

## Umweltschutzmaßnahmen und ähnliche Verpflichtungen

Die Rückstellungen für Umweltschutzmaßnahmen betreffen vor allem Sanierungs- und Gewässerschutzmaßnahmen sowie die Beseitigung von Altlasten. Weiterhin werden in diesem Posten Rückstellungen für übrige Rekultivierungsmaßnahmen sowie Verpflichtungen zur Beseitigung von Bergschäden ausgewiesen.

## Sonstige

Die sonstigen Rückstellungen beinhalten im Wesentlichen Rückstellungen aus dem Strom- und Gasgeschäft. Darüber hinaus sind hier mögliche Verpflichtungen aus steuerlich bedingtem Zinsaufwand und sonstigen Steuern sowie diverse mögliche Ausgleichsverpflichtungen enthalten.

**(26) Verbindlichkeiten**

Die Verbindlichkeiten setzen sich zum 31. Dezember 2010 und 2009 wie folgt zusammen:

| Verbindlichkeiten                                                                                   |                   |               |               |                   |               |               |
|-----------------------------------------------------------------------------------------------------|-------------------|---------------|---------------|-------------------|---------------|---------------|
| in Mio €                                                                                            | 31. Dezember 2010 |               |               | 31. Dezember 2009 |               |               |
|                                                                                                     | Kurzfristig       | Langfristig   | Summe         | Kurzfristig       | Langfristig   | Summe         |
| <b>Finanzverbindlichkeiten</b>                                                                      | <b>3.611</b>      | <b>28.880</b> | <b>32.491</b> | <b>7.120</b>      | <b>30.657</b> | <b>37.777</b> |
| Verbindlichkeiten aus Lieferungen und Leistungen                                                    | 5.016             | -             | 5.016         | 4.635             | -             | 4.635         |
| Investitionszuschüsse                                                                               | 486               | 253           | 739           | 83                | 262           | 345           |
| Baukostenzuschüsse von Energieabnehmern                                                             | 337               | 2.603         | 2.940         | 322               | 2.895         | 3.217         |
| Verbindlichkeiten aus derivativen Finanzinstrumenten                                                | 7.214             | 1.647         | 8.861         | 7.307             | 2.885         | 10.192        |
| Erhaltene Anzahlungen                                                                               | 469               | 417           | 886           | 497               | 239           | 736           |
| Übrige betriebliche Verbindlichkeiten                                                               | 12.835            | 1.586         | 14.421        | 10.255            | 1.492         | 11.747        |
| <b>Verbindlichkeiten aus Lieferungen und Leistungen und sonstige betriebliche Verbindlichkeiten</b> | <b>26.357</b>     | <b>6.506</b>  | <b>32.863</b> | <b>23.099</b>     | <b>7.773</b>  | <b>30.872</b> |
| <b>Summe</b>                                                                                        | <b>29.968</b>     | <b>35.386</b> | <b>65.354</b> | <b>30.219</b>     | <b>38.430</b> | <b>68.649</b> |

**Finanzverbindlichkeiten**

Im Folgenden werden die wichtigsten Kreditvereinbarungen und Programme zur Emission von Schuldtiteln des E.ON-Konzerns beschrieben. Unter Anleihen werden die ausstehenden Schuldverschreibungen gezeigt, einschließlich derjenigen unter dem „Debt-Issuance-Programm“. Im Geschäftsjahr 2010 gab es keinen Verzug bei Darlehensverbindlichkeiten.

**Corporate Center****Covenants**

Im Rahmen der Finanzierungstätigkeit werden von der E.ON AG und der E.ON International Finance B.V. (EIF), Rotterdam, Niederlande, als Covenants im Wesentlichen Vereinbarungen wie Change-of-Control-Klauseln (Eigentümerwechsel), Negative-Pledge-Klauseln (Negativerklärungen), Pari-passu-Klauseln (Gleichrangerklärungen) sowie Cross-Default-Klauseln (Kündigungsklauseln mit Querverweis auf andere Verträge), jeweils beschränkt auf wesentliche Tatbestände, eingesetzt. Finanzielle Covenants, die an bilanzielle Kennzahlen gekoppelt sind, werden nicht eingesetzt.

**Debt-Issuance-Programm über 35 Mrd €**

E.ON AG und EIF verfügen über ein Debt-Issuance-Programm, mit dem von Zeit zu Zeit die Emission von Schuldtiteln in Form von öffentlichen und privaten Platzierungen an Investoren ermöglicht wird. Der nutzbare Programmrahmen beträgt insgesamt 35 Mrd €. Das Programm lief nach einem Jahr Gültigkeit plangemäß im Dezember 2010 aus und wurde aufgrund fehlenden kurz- bis mittelfristigen Finanzierungsbedarfs nicht umgehend aktualisiert. Eine erneute Verlängerung des Programms ist im Laufe des Jahres 2011 vorgesehen.

Zum Jahresende 2010 standen folgende Anleihen der EIF aus:

| Wesentliche Anleihen der E.ON International Finance B.V. <sup>1)</sup> |                         |            |               |  |
|------------------------------------------------------------------------|-------------------------|------------|---------------|--|
| Emissionsvolumen in<br>jeweiliger Währung                              | Anfängliche<br>Laufzeit | Fälligkeit | Kupon         |  |
| 500 Mio CHF                                                            | 2 Jahre                 | Feb 2011   | 2,000 %       |  |
| 1.100 Mio SEK                                                          | 2 Jahre                 | Mai 2011   | 3 mth STIB+95 |  |
| 750 Mio EUR                                                            | 3 Jahre                 | Sep 2011   | 5,000 %       |  |
| 750 Mio EUR                                                            | 2,5 Jahre               | Nov 2011   | 2,500 %       |  |
| 500 Mio GBP                                                            | 10 Jahre                | Mai 2012   | 6,375 %       |  |
| 300 Mio USD                                                            | 3 Jahre                 | Jun 2012   | 3,125 %       |  |
| 250 Mio CHF <sup>2)</sup>                                              | 4 Jahre                 | Sep 2012   | 3,250 %       |  |
| 1.750 Mio EUR                                                          | 5 Jahre                 | Okt 2012   | 5,125 %       |  |
| 250 Mio CHF                                                            | 4 Jahre                 | Dez 2012   | 3,875 %       |  |
| 750 Mio EUR                                                            | 4 Jahre                 | Mrz 2013   | 4,125 %       |  |
| 1.500 Mio EUR                                                          | 5 Jahre                 | Mai 2013   | 5,125 %       |  |
| 300 Mio CHF                                                            | 5 Jahre                 | Mai 2013   | 3,625 %       |  |
| 350 Mio GBP                                                            | 5 Jahre                 | Jan 2014   | 5,125 %       |  |
| 1.750 Mio EUR                                                          | 5 Jahre                 | Jan 2014   | 4,875 %       |  |
| 525 Mio CHF <sup>3)</sup>                                              | 5 Jahre                 | Feb 2014   | 3,375 %       |  |
| 1.000 Mio EUR                                                          | 6 Jahre                 | Jun 2014   | 5,250 %       |  |
| 225 Mio CHF                                                            | 7 Jahre                 | Dez 2014   | 3,250 %       |  |
| 1.250 Mio EUR                                                          | 7 Jahre                 | Sep 2015   | 5,250 %       |  |
| 1.500 Mio EUR                                                          | 7 Jahre                 | Jan 2016   | 5,500 %       |  |
| 900 Mio EUR                                                            | 15 Jahre                | Mai 2017   | 6,375 %       |  |
| 2.375 Mio EUR <sup>4)</sup>                                            | 10 Jahre                | Okt 2017   | 5,500 %       |  |
| 2.000 Mio USD <sup>5)</sup>                                            | 10 Jahre                | Apr 2018   | 5,800 %       |  |
| 850 Mio GBP <sup>6)</sup>                                              | 12 Jahre                | Okt 2019   | 6,000 %       |  |
| 1.400 Mio EUR <sup>7)</sup>                                            | 12 Jahre                | Mai 2020   | 5,750 %       |  |
| 975 Mio GBP <sup>8)</sup>                                              | 30 Jahre                | Jun 2032   | 6,375 %       |  |
| 900 Mio GBP                                                            | 30 Jahre                | Okt 2037   | 5,875 %       |  |
| 1.000 Mio USD <sup>5)</sup>                                            | 30 Jahre                | Apr 2038   | 6,650 %       |  |
| 700 Mio GBP                                                            | 30 Jahre                | Jan 2039   | 6,750 %       |  |

1) Listing: Alle Anleihen sind in Luxemburg gelistet, mit Ausnahme der CHF-Anleihen, welche an der SWX Swiss Exchange gelistet sind, sowie der beiden USD-Anleihen unter Rule 144A/Regulation S, die ungelistet sind.  
 2) Die Anleihe wurde aufgestockt von ursprünglich 200 Mio CHF auf 250 Mio CHF.  
 3) Die Anleihe wurde aufgestockt von ursprünglich 400 Mio CHF auf 525 Mio CHF.  
 4) Die Anleihe wurde in zwei Schritten aufgestockt von ursprünglich 1.750 Mio EUR auf 2.375 Mio EUR.  
 5) Anleihe unter Rule 144A/Regulation S.  
 6) Die Anleihe wurde aufgestockt von ursprünglich 600 Mio GBP auf 850 Mio GBP.  
 7) Die Anleihe wurde aufgestockt von ursprünglich 1.000 Mio EUR auf 1.400 Mio EUR.  
 8) Die Anleihe wurde aufgestockt von ursprünglich 850 Mio GBP auf 975 Mio GBP.

Zusätzlich ausstehend waren zum 31. Dezember 2010 Privatplatzierungen im Gesamtvolumen von rund 1,7 Mrd € sowie Schuldscheindarlehen im Gesamtvolumen von rund 1,4 Mrd €.

### Commercial-Paper-Programme über 10 Mrd € und 10 Mrd US-\$

Das Euro Commercial Paper Programm über 10 Mrd € ermöglicht es der E.ON AG sowie der EIF (unter unbedingter Garantie der E.ON AG), von Zeit zu Zeit Commercial Paper mit Laufzeiten von bis zu zwei Jahren abzüglich eines Tages an Investoren

auszugeben. Das US Commercial Paper Programm über 10 Mrd US-\$ ermöglicht es der E.ON AG und E.ON N.A. Funding LLC, einer 100-prozentigen US-Tochtergesellschaft, (unter unbedingter Garantie der E.ON AG) an Investoren von Zeit zu Zeit Commercial Paper mit Laufzeiten von bis zu 366 Tagen und Extendible Notes mit Laufzeiten von ursprünglich bis zu 397 Tagen (und anschließender Verlängerungsoption für den Investor) auszugeben. Zum 31. Dezember 2010 standen unter beiden Programmen keine Commercial Paper (2009: 1.520 Mio €) aus.

Revolvierende syndizierte Kreditlinie über 6 Mrd €  
Mit Wirkung zum 25. November 2010 hat E.ON eine neue syndizierte Kreditlinie mit einem Volumen von 6 Mrd € und einer Laufzeit von fünf Jahren abgeschlossen. Diese Kreditlinie ist nicht gezogen, sondern dient vielmehr als nachhaltige Liquiditätsreserve des Konzerns, unter anderem auch als Backup-Linie für die Commercial-Paper-Programme. Die neue syndizierte Kreditlinie ersetzt die zuvor bestehende Kreditlinie, deren beide Tranchen über Fälligkeiten im November 2010 beziehungsweise Dezember 2011 verfügten.

Die Fälligkeiten der Anleiheverbindlichkeiten der E.ON AG und der EIF zum 31. Dezember 2010 werden in der folgenden Tabelle dargestellt. Die Werte basieren auf den Daten der internen Liquiditätssteuerung und berücksichtigen ökonomische Sicherungen:

| Anleiheverbindlichkeiten der E.ON AG und der E.ON International Finance B.V. |        |                    |                    |                    |                    |                    |                             |                      |
|------------------------------------------------------------------------------|--------|--------------------|--------------------|--------------------|--------------------|--------------------|-----------------------------|----------------------|
| in Mio €                                                                     | Summe  | Fälligkeit in 2010 | Fälligkeit in 2011 | Fälligkeit in 2012 | Fälligkeit in 2013 | Fälligkeit in 2014 | Fälligkeit in 2015 bis 2021 | Fälligkeit nach 2021 |
| 31. Dezember 2010                                                            | 26.750 | -                  | 2.113              | 3.067              | 2.833              | 3.954              | 10.211                      | 4.572                |
| 31. Dezember 2009                                                            | 28.007 | 1.807              | 2.234              | 2.970              | 2.745              | 3.811              | 10.055                      | 4.385                |

### Finanzverbindlichkeiten nach Segmenten

Die Finanzverbindlichkeiten nach Segmenten setzen sich wie folgt zusammen:

| Finanzverbindlichkeiten nach Segmenten zum 31. Dezember |                |              |                  |            |            |           |  |
|---------------------------------------------------------|----------------|--------------|------------------|------------|------------|-----------|--|
| in Mio €                                                | Central Europe |              | Pan-European Gas |            | UK         |           |  |
|                                                         | 2010           | 2009         | 2010             | 2009       | 2010       | 2009      |  |
| Anleihen                                                | -              | -            | -                | -          | 571        | 9         |  |
| Commercial Paper                                        | -              | -            | -                | -          | -          | -         |  |
| Verbindlichkeiten gegenüber Kreditinstituten            | 507            | 848          | -                | 2          | 26         | 52        |  |
| Verbindlichkeiten aus Finanzierungsleasing              | 81             | 151          | 339              | 62         | -          | -         |  |
| Sonstige Finanzverbindlichkeiten                        | 628            | 698          | 117              | 66         | 12         | 13        |  |
| <b>Finanzverbindlichkeiten</b>                          | <b>1.216</b>   | <b>1.697</b> | <b>456</b>       | <b>130</b> | <b>609</b> | <b>74</b> |  |

Die Verbindlichkeiten gegenüber Kreditinstituten beinhalten unter anderem erhaltene Sicherheiten mit einem Fair Value von 313 Mio € (2009: 312 Mio €). Hierbei handelt es sich um von Banken hinterlegte Sicherheitsleistungen zur Begrenzung der Auslastung von Kreditlimits im Zusammenhang mit der Marktbewertung von Derivategeschäften. In den sonstigen Finanzverbindlichkeiten sind Schuldscheindarlehen in Höhe von 1.410 Mio € (2009: 1.410 Mio €) enthalten. Darüber hinaus beinhaltet der Posten erhaltene Margin-Zahlungen im Zusammenhang mit Börsentermingeschäften in Höhe von 21 Mio € (2009: 155 Mio €). Ebenfalls enthalten sind erhaltene Sicherheitsleistungen im Zusammenhang mit Lieferungen und Leistungen in Höhe von 7 Mio € (2009: 43 Mio €). E.ON kann diese erhaltenen Sicherheiten uneingeschränkt nutzen.

### Verbindlichkeiten aus Lieferungen und Leistungen und sonstige betriebliche Verbindlichkeiten

Die Verbindlichkeiten aus Lieferungen und Leistungen beliefen sich zum 31. Dezember 2010 auf 5.016 Mio € (2009: 4.635 Mio €).

Die noch nicht ertragswirksam gewordenen Investitionszuschüsse von 739 Mio € (2009: 345 Mio €) wurden überwiegend für Investitionen gewährt, wobei die bezuschussten Vermögenswerte im Eigentum der E.ON verbleiben und diese Zuschüsse nicht rückzahlbar sind. Analog zum Abschreibungsverlauf wird ihre Auflösung in den sonstigen betrieblichen Erträgen erfasst.



|  |  | Nordic       |              | Energy Trading |            | Neue Märkte |            | Corporate Center/<br>Konsolidierung |               | E.ON-Konzern  |               |
|--|--|--------------|--------------|----------------|------------|-------------|------------|-------------------------------------|---------------|---------------|---------------|
|  |  | 2010         | 2009         | 2010           | 2009       | 2010        | 2009       | 2010                                | 2009          | 2010          | 2009          |
|  |  | 279          | 536          | -              | -          | -           | -          | 26.650                              | 28.418        | 27.500        | 28.963        |
|  |  | -            | -            | -              | -          | -           | -          | -                                   | 1.520         | -             | 1.520         |
|  |  | 100          | 100          | -              | -          | 45          | 465        | 363                                 | 818           | 1.041         | 2.285         |
|  |  | 28           | 27           | -              | -          | -           | -          | -                                   | 5             | 448           | 245           |
|  |  | 679          | 561          | 4              | 155        | 296         | 311        | 1.766                               | 2.960         | 3.502         | 4.764         |
|  |  | <b>1.086</b> | <b>1.224</b> | <b>4</b>       | <b>155</b> | <b>341</b>  | <b>776</b> | <b>28.779</b>                       | <b>33.721</b> | <b>32.491</b> | <b>37.777</b> |

Die Baukostenzuschüsse in Höhe von 2.940 Mio € (2009: 3.217 Mio €) wurden von Kunden gemäß den allgemein verbindlichen Bedingungen für die Errichtung neuer Strom- und Gasanschlüsse gezahlt. Diese Zuschüsse sind branchenüblich, in der Regel nicht rückzahlbar und werden grundsätzlich entsprechend der Nutzungsdauer ergebniserhöhend aufgelöst und den Umsatzerlösen zugerechnet.

Die übrigen betrieblichen Verbindlichkeiten umfassen im Wesentlichen abgegrenzte Schulden in Höhe von 9.080 Mio € (2009: 5.846 Mio €) und Zinsverpflichtungen in Höhe von 1.045 Mio € (2009: 1.090 Mio €). Darüber hinaus sind in den übrigen betrieblichen Verbindlichkeiten die fortgeführten Stillhalterverpflichtungen für den Erwerb zusätzlicher Anteile

an bereits konsolidierten Tochterunternehmen sowie Anteile ohne beherrschenden Einfluss an voll konsolidierten Personengesellschaften in Höhe von 829 Mio € (2009: 653 Mio €) enthalten.

Von den Verbindlichkeiten aus Lieferungen und Leistungen und sonstigen betrieblichen Verbindlichkeiten entfallen 17 Mio € (2009: 6 Mio €) auf das Explorationsgeschäft.

## (27) Haftungsverhältnisse und sonstige finanzielle Verpflichtungen

E.ON ist im Rahmen seiner Geschäftstätigkeit Haftungsverhältnisse und sonstige finanzielle Verpflichtungen eingegangen, die eine Vielzahl zugrunde liegender Sachverhalte betreffen. Hierzu zählen insbesondere Garantien und Bürgschaften, Verpflichtungen aus Rechtsstreitigkeiten und Schadensersatzansprüchen (für weitere Informationen wird auf Textziffer 28 verwiesen), kurz- und langfristige, vertragliche und gesetzliche sowie sonstige Verpflichtungen.

### Haftungsverhältnisse

Die Eventualverbindlichkeiten des E.ON-Konzerns aus den bestehenden Haftungsverhältnissen belaufen sich zum 31. Dezember 2010 auf 252 Mio € (2009: 307 Mio €). Hinsichtlich dieser Eventualverbindlichkeiten besteht derzeit kein Anspruch auf Erstattung.

E.ON hat direkte und indirekte Garantien, bei denen es sich um bedingte Zahlungsverpflichtungen von E.ON in Abhängigkeit vom Eintritt eines bestimmten Ereignisses beziehungsweise von Änderungen eines Basiswerts in Beziehung zu einem Vermögenswert, einer Verbindlichkeit oder einem Eigenkapitaltitel des Garantieempfängers handelt, gegenüber Dritten für nahestehende Unternehmen und Konzernfremde gewährt. Diese beinhalten vor allem Finanz- und Gewährleistungsgarantien.

Darüber hinaus hat E.ON auch Freistellungsvereinbarungen abgeschlossen. Diese sind neben anderen Garantien Bestandteil von Vereinbarungen über den Verkauf von Beteiligungen, die von Konzerngesellschaften abgeschlossen wurden, und beinhalten vor allem die im Rahmen solcher Transaktionen üblichen Zusagen und Gewährleistungen, Haftungsrisiken für Umweltschäden sowie mögliche steuerliche Gewährleistungen. In manchen Fällen ist der Käufer der Beteiligungen verpflichtet, die Kosten teilweise zu übernehmen oder bestimmte Kosten abzudecken, bevor E.ON selbst verpflichtet ist, Zahlungen zu leisten. Teilweise werden Verpflichtungen zuerst von Rückstellungen der verkauften Gesellschaften abgedeckt. Garantien, die von Gesellschaften gegeben wurden, die nach der Garantievergabe von E.ON AG (beziehungsweise VEBA AG oder VIAG AG vor deren Fusion) verkauft wurden, sind in Form von Freistellungserklärungen in den meisten Fällen Bestandteil der jeweiligen Verkaufsverträge.

E.ON haftet darüber hinaus gesamtschuldnerisch aus Beteiligungen an Gesellschaften bürgerlichen Rechts, Personenhandelsgesellschaften und Arbeitsgemeinschaften.

Die Garantien von E.ON beinhalten auch die Deckungsvorsorge aus dem Betrieb von Kernkraftwerken. Für die Risiken aus nuklearen Schäden haben die deutschen Kernkraftwerksbetreiber nach Inkrafttreten des entsprechend novellierten Atomgesetzes (AtG) und der entsprechend novellierten Atomrechtlichen Deckungsvorsorge-Verordnung (AtDeckV) vom 27. April 2002 bis zu einem Maximalbetrag von 2,5 Mrd € je Schadensfall Deckungsvorsorge nachzuweisen.

Von dieser Vorsorge sind 255,6 Mio € über eine einheitliche Haftpflichtversicherung abgedeckt. Die Nuklear Haftpflicht GbR erfasst nur noch die solidarische Absicherung in Bezug auf Ansprüche im Zusammenhang mit behördlich angeordneten Evakuierungsmaßnahmen im Bereich zwischen 0,5 Mio € und 15 Mio €. Konzernunternehmen haben sich entsprechend ihren Anteilen an Kernkraftwerken verpflichtet, deren Betriebsgesellschaften liquiditätsmäßig so zu stellen, dass sie ihren Verpflichtungen aus ihrer Zugehörigkeit zur Nuklear Haftpflicht GbR jederzeit nachkommen können.

Zur Erfüllung der anschließenden Deckungsvorsorge in Höhe von 2.244,4 Mio € je Schadensfall haben E.ON Energie und die übrigen Obergesellschaften der deutschen Kernkraftwerksbetreiber mit Vertrag vom 11. Juli/27. Juli/21. August/28. August 2001 vereinbart, den haftenden Kernkraftwerksbetreiber im Schadensfall – nach Ausschöpfung seiner eigenen Möglichkeiten und der seiner Muttergesellschaft – finanziell so auszustatten, dass dieser seinen Zahlungsverpflichtungen nachkommen kann (Solidarvereinbarung). Vertragsgemäß beträgt der auf E.ON Energie entfallende Anteil bezüglich der Haftung, zuzüglich 5,0 Prozent für Schadensabwicklungskosten, am 31. Dezember 2010 unverändert zum Vorjahr 42,0 Prozent.

Die Gesellschaften der Market Unit Nordic haben entsprechend schwedischem Recht gegenüber staatlichen Einrichtungen Garantien abgegeben. Diese Garantien beziehen sich auf die Deckung möglicher Mehrkosten für die Entsorgung hoch radioaktiven Abfalls sowie Stilllegung und Rückbau der Kernkraftwerksanlagen, die über die in der Vergangenheit bereits finanzierten Abgaben hinausgehen. Darüber hinaus sind die Gesellschaften der Market Unit Nordic für alle Kosten der Entsorgung schwach radioaktiven Abfalls verantwortlich.

In Schweden haftet der Eigentümer von Kernkraftwerken für Schäden, die durch Unfälle in den entsprechenden Kernkraftwerken und durch Unfälle mit radioaktiven Substanzen, die im Zusammenhang mit dem Betrieb dieser Kernkraftwerke stehen, verursacht werden. Zum 31. Dezember 2010 war die Haftung begrenzt auf einen Betrag in Höhe von 3.143 Mio SEK

beziehungsweise 351 Mio € (2009: 3.392 Mio SEK beziehungsweise 331 Mio €) pro Schadensfall. Dieser Betrag muss gemäß „Law Concerning Nuclear Liability“ versichert werden. Die Market Unit Nordic hat die entsprechenden Versicherungen für ihre Kernkraftwerke vorgenommen. Am 1. Juli 2010 hat das schwedische Parlament ein neues Gesetz (Lag (2010:950) om ansvar och ersättning vid radiologiska olyckor) erlassen, das den Betreiber eines in Betrieb befindlichen Kernkraftwerks verpflichtet, eine Haftpflichtversicherung oder Deckungsvorsorge in Höhe von 1,2 Mrd € je Kraftwerk bereit zu stellen. Zum 31. Dezember 2010 waren die Bedingungen für das Inkrafttreten des Gesetzes noch nicht gegeben.

Außer von den Market Units Central Europe und Nordic werden keine weiteren Kernkraftwerke betrieben. Daher bestehen über die zuvor genannten hinaus keine weiteren vergleichbaren Haftungsverhältnisse.

### Sonstige finanzielle Verpflichtungen

Neben bilanzierten Rückstellungen und Verbindlichkeiten sowie ausgewiesenen Eventualverbindlichkeiten bestehen sonstige größtenteils langfristige finanzielle Verpflichtungen, die sich weitestgehend aus mit Dritten und nahestehenden Unternehmen geschlossenen Verträgen oder aufgrund gesetzlicher Bestimmungen ergeben.

Zum 31. Dezember 2010 besteht ein Bestellobligo für Investitionen in immaterielle Vermögenswerte und Sachanlagen in Höhe von 7,4 Mrd € (2009: 10,5 Mrd €). Von diesen Verpflichtungen sind 2,9 Mrd € innerhalb eines Jahres fällig. Hier sind vor allem Verpflichtungen für noch nicht vollzogene Investitionen, insbesondere bei den Market Units Central Europe, Pan-European Gas, UK, Russia und Climate & Renewables, im Zusammenhang mit Kraftwerksneubauprojekten, Modernisierungen von bestehenden Kraftwerksanlagen sowie Explorations- und Gasinfrastrukturprojekten enthalten. Die im Bestellobligo enthaltenen Verpflichtungen für Kraftwerksneubauten belaufen sich am 31. Dezember 2010 auf 2,6 Mrd €. Diese beinhalten auch Verpflichtungen für den Bau von Windkraftanlagen.

Darüber hinaus resultieren finanzielle Verpflichtungen aus Miet-, Pacht- und Operating-Lease-Verträgen. Die entsprechenden Mindestleasingzahlungen werden folgendermaßen fällig:

| E.ON als Leasingnehmer – Operating Lease |                         |              |
|------------------------------------------|-------------------------|--------------|
| in Mio €                                 | Mindestleasingzahlungen |              |
|                                          | 2010                    | 2009         |
| Fälligkeit bis 1 Jahr                    | 243                     | 220          |
| Fälligkeit 1-5 Jahre                     | 579                     | 511          |
| Fälligkeit über 5 Jahre                  | 940                     | 497          |
| <b>Summe</b>                             | <b>1.762</b>            | <b>1.228</b> |

Die in der Gewinn- und Verlustrechnung erfassten Aufwendungen aus solchen Verträgen betragen 263 Mio € (2009: 230 Mio €). Des Weiteren ergeben sich im Zusammenhang mit der Ver- und Rückmietung von Kraftwerksanlagen Zahlungsströme, die durch kompensierende betrags-, fristen- und währungskongruente Anlagen in Höhe von rund 0,4 Mrd € (2009: 0,4 Mrd €) zweckgebunden finanziert sind. Die Vereinbarung läuft 2030 aus.

Weitere langfristige vertragliche Verpflichtungen bestehen im E.ON-Konzern zum 31. Dezember 2010 im Wesentlichen zur Abnahme fossiler Brennstoffe wie Erdgas, Braun- und Steinkohle. Die finanziellen Verpflichtungen aus diesen Abnahmeverträgen belaufen sich am 31. Dezember 2010 auf rund 325 Mrd € (Fälligkeit bis 1 Jahr: 20,7 Mrd €).

Der Gasbezug erfolgt in der Regel über langfristige Abnahmeverträge mit großen internationalen Erdgasproduzenten. Im Allgemeinen handelt es sich hierbei um Take-or-pay-Verträge. Die Preise für das Erdgas werden grundsätzlich an Preise von Wettbewerbsenergien angelehnt, die die Wettbewerbssituation im Markt widerspiegeln. Die Regelungen der langfristigen Verträge werden in gewissen Abständen (in der Regel sind dies drei Jahre) im Rahmen von Verhandlungen der Vertragspartner überprüft und können sich insofern ändern. Bei Nichteinigung über Preisüberprüfungen entscheidet abschließend ein neutrales Schiedsgericht. Für die Berechnung der finanziellen Verpflichtungen, die aus diesen Verträgen resultieren, werden die gleichen Prämissen wie zu internen Planungszwecken angewendet. Weiterhin werden für die Berechnungen die individuellen Take-or-pay-Bestimmungen der jeweiligen Verträge herangezogen.

Vertragliche Verpflichtungen zur Stromabnahme bestehen zum 31. Dezember 2010 in Höhe von 17,2 Mrd € (Fälligkeit bis 1 Jahr: 5,2 Mrd €), unter anderem gegenüber Gemeinschaftskraftwerken bei der Market Unit Central Europe. Der Abnahmepreis für Strom aus Gemeinschaftskraftwerken basiert in der Regel auf den Produktionskosten des Stromerzeugers zuzüglich einer Gewinnmarge, welche generell auf Basis einer vereinbarten Kapitalrendite berechnet wird.

Weitere Abnahmeverpflichtungen bestehen zum 31. Dezember 2010 in Höhe von rund 3,0 Mrd € (Fälligkeit bis 1 Jahr: 0,4 Mrd €). Neben Abnahmeverpflichtungen für Wärme und Ersatzbrennstoffe bestehen bei den Market Units Central Europe und Nordic langfristige vertragliche Verpflichtungen zur Abnahme von Kernbrennelementen sowie insbesondere bei der Market Unit Central Europe von Leistungen im Zusammenhang mit der Wiederaufarbeitung der bis zum 30. Juni 2005 transportierten Brennelemente und der Zwischenlagerung der hieraus resultierenden Abfälle.

Zahlungsverpflichtungen ergeben sich zudem aus der am 14. Dezember 2010 in Kraft getretenen 11. Novelle des deutschen Atomgesetzes, die die Zuteilung zusätzlicher Strommengen für Kernkraftwerke vorsieht. Dies führt im Ergebnis zu einer Verlängerung der Laufzeiten der betreffenden kerntechnischen Anlagen. Vor diesem Hintergrund haben sich die Betreiber von Kernkraftwerken verpflichtet, Zahlungen in einen Fonds zu leisten, aus dem Maßnahmen zur Umsetzung des Energiekonzepts der Bundesregierung gefördert werden sollen. Der

zugrunde liegende Vertrag mit der Bundesrepublik Deutschland wurde am 10. Januar 2011 unterzeichnet. Er sieht vor, dass die Kernkraftwerksbetreiber ab 2017 einen noch zu indizierenden Förderbeitrag von derzeit 9,00 €/MWh für die zusätzlich eingespeisten Strommengen aus der Laufzeitverlängerung entrichten. Von 2011 bis 2016 sind von den deutschen Kernkraftwerksbetreibern pauschale Vorauszahlungen auf die Förderbeiträge, die sich über den Gesamtzeitraum auf 1,4 Mrd € summieren, zu leisten, die von 2017 bis 2022 in gleichen jährlichen Raten auf die Förderbeiträge angerechnet werden. Die auf E.ON entfallenden Vorausleistungen betragen maximal 0,6 Mrd €.

Weitere finanzielle Verpflichtungen bestehen zum 31. Dezember 2010 in Höhe von rund 5,0 Mrd € (Fälligkeit bis 1 Jahr: 1,4 Mrd €). Sie enthalten unter anderem finanzielle Verpflichtungen aus zu beziehenden Dienstleistungen, Verpflichtungen für Anteilserwerbe und zum Erwerb von als Finanzanlagen gehaltenen Immobilienfonds sowie Kapitalmaßnahmen.

## **(28) Schwebende Rechtsstreitigkeiten und Schadensersatzansprüche**

Gegen Konzernunternehmen sind verschiedene gerichtliche Prozesse (einschließlich Klagen wegen Produkthaftungsansprüchen und angeblicher Preisabsprachen), behördliche Untersuchungen und Verfahren sowie andere Ansprüche anhängig oder könnten in der Zukunft eingeleitet oder geltend gemacht werden. Dazu zählen insbesondere Klagen und Verfahren wegen angeblicher Preisabsprachen und marktmissbräuchlichen Verhaltens. Zudem sind Klagen gegen E.ON AG und US-Tochtergesellschaften im Zusammenhang mit der Veräußerung von VEBA Electronics im Jahr 2000 anhängig.

Deutschlandweit sind in der gesamten Branche eine Vielzahl von Gerichtsverfahren im Zusammenhang mit Preisanpassungsklauseln im vertrieblichen Endkundengeschäft mit Sonderkunden Strom und Gas anhängig. Die genannten Verfahren schließen Klagen auf Rückforderung von vereinnahmten Erhöhungsbeträgen im Zusammenhang mit der Feststellung der Unwirksamkeit von Preisanpassungsklauseln mit ein. Die höchstrichterliche Klärung der dort relevanten Rechtsfragen ist noch nicht endgültig abgeschlossen. Auch Konzernunternehmen führen in diesem Zusammenhang Rechtsmittelverfahren. Branchenweit ist eine Tendenz der Gerichte erkennbar, zulasten der Versorger zu entscheiden. Zum Beispiel ist im Juli 2010 gegen die EWE AG ein Urteil des BGH über die Wirksamkeit von Gaspreisanpassungen und die Rechtswirkungen

vorbehaltloser Zahlungen ergangen. Die möglichen Auswirkungen dieses Urteils auf die Gesellschaften des E.ON-Konzerns können derzeit noch nicht abschließend beurteilt werden. Im Übrigen bleibt die weitere Entwicklung der Rechtsprechung abzuwarten.

Die Europäische Kommission hat am 8. Juli 2009 gegen E.ON Ruhrgas und E.ON als Gesamtschuldner wegen angeblicher Marktabspraken mit GdF Suez ein Bußgeld in Höhe von 553 Mio € verhängt. E.ON Ruhrgas und E.ON haben im September 2009 gegen diese Bußgeldentscheidung Nichtigkeitsklage beim Europäischen Gericht Erster Instanz erhoben. Die Klageerhebung hat keine aufschiebende Wirkung. Das Bußgeld wurde fristgemäß im Oktober 2009 gezahlt. Folgeverfahren können nicht ausgeschlossen werden.

Seit der Sektoruntersuchung der europäischen Energiemärkte im Jahre 2005 hat die EU-Kommission gegen mehrere europäische Ferngasunternehmen Ermittlungen wegen des Verdachts wettbewerbswidrigen Verhaltens geführt, darunter E.ON Ruhrgas. Im Jahr 2009 hat sie gegen E.ON Ruhrgas die Vermutung geäußert, E.ON Ruhrgas habe durch langfristige Buchung nahezu aller Einspeisekapazitäten in das Netz der Open Grid Europe (vormals firmierend unter E.ON Gastransport GmbH) den Gashandelsmarkt abgeschottet. Da ein gerichtliches

Verfahren mit erheblichen unternehmerischen und verfahrensmäßigen Risiken verbunden wäre, wurden mit der EU-Kommission Ende 2009 Gespräche aufgenommen. In der Folge wurde mit der Kommission eine Übereinkunft getroffen, nach der E.ON Ruhrgas einen Teil seiner langfristigen Einspeisekapazitätsbuchungen an Open Grid Europe zurückgibt und sich zur Einhaltung bestimmter Buchungsquoten verpflichtet. Die EU-Kommission hat dieses Angebot am 4. Mai 2010 angenommen, die Verpflichtungen für bindend erklärt und das Verfahren eingestellt.

Rechtsstreitigkeiten sind vielen Unsicherheiten unterworfen; auch wenn der Ausgang einzelner Verfahren nicht mit Sicherheit vorausgesagt werden kann, werden sich daraus ergebende mögliche Verpflichtungen nach Einschätzungen des Vorstands weder einzeln noch zusammen einen wesentlichen Einfluss auf Finanzlage, Betriebsergebnis oder Liquidität des Konzerns haben.

## (29) Ergänzende Angaben zur Kapitalflussrechnung

| Ergänzende Angaben zur Kapitalflussrechnung                                                                           |      |       |
|-----------------------------------------------------------------------------------------------------------------------|------|-------|
| in Mio €                                                                                                              | 2010 | 2009  |
| <b>Nicht zahlungswirksame Investitionen und Finanzierungstätigkeiten</b>                                              |      |       |
| Tauschvorgänge bei Unternehmenstransaktionen                                                                          | 172  | 3.251 |
| Dotierung von externem Fondsvermögen für Pensionsverpflichtungen durch Übertragung von Termingeldern und Wertpapieren | -    | 1.705 |

Aus der Abgabe konsolidierter Beteiligungen und Aktivitäten sind E.ON als Gegenleistung im Berichtsjahr insgesamt 6.225 Mio € in bar zugeflossen (2009: 5.507 Mio €). Die mitveräußerten Zahlungsmittel betrugen 461 Mio € (2009: 664 Mio €). Der Verkauf dieser Aktivitäten führte zu Verminderungen bei den Vermögenswerten von 9.397 Mio € (2009: 4.797 Mio €) sowie bei den Rückstellungen und Verbindlichkeiten von 3.401 Mio € (2009: 1.246 Mio €).

Die Unternehmenstransaktionen umfassten im Vorjahr den zahlungsmittelneutralen Austausch von Stromkapazitäten im Rahmen der Umsetzung der Verpflichtungszusage von E.ON gegenüber der Europäischen Kommission sowie die Transaktion Yushno Russkoje, die nicht zahlungswirksame Bestandteile in Höhe von 2.303 Mio € enthielt. Im Berichtsjahr lagen keine wesentlichen zahlungswirksamen Erwerbe konsolidierter Beteiligungen und Aktivitäten vor.

Der operative Cashflow des E.ON-Konzerns lag im Jahr 2010 um 24 Prozent über dem Niveau des Vorjahres. Dieser Anstieg ist im Wesentlichen auf Verbesserungen im operativen Geschäft, den Wegfall der Bußgeldzahlung an die Europäische Kommission im Vorjahr sowie Steuererstattungen im Berichtsjahr zurückzuführen. Im Vorjahr wirkten dagegen Steuernachzahlungen belastend auf den operativen Cashflow. Im Berichtsjahr wirkten gegenläufig negative Effekte aus der Speicherbeschäftigung der Market Unit Pan-European Gas.

Die Auszahlungen für immaterielle Vermögenswerte, Sachanlagen und Beteiligungen lagen rund 4 Prozent unter dem Vorjahresniveau. Die Einzahlungen aus der Abgabe von Beteiligungen lagen deutlich über dem Vorjahreswert. Die Veräußerung der Market Unit US-Midwest, der Gazprom-Anteile sowie die Abgabe von Stromkapazitäten und des Höchstspannungsnetzes in Deutschland wirkten sich positiv auf den Cashflow aus Investitionstätigkeit aus. Dem stand eine höhere Mittelbindung für Festgeldanlagen, Wertpapiere und verfügbarsbeschränkte Zahlungsmittel gegenüber. Der Cashflow aus der Investitionstätigkeit nicht fortgeführter Aktivitäten umfasst die Investitionen der Market Unit US-Midwest. Der Vorjahreswert beinhaltet darüber hinaus eine Ausgleichszahlung im Zusammenhang mit der Veräußerung von WKE. Die verstärkte Netto-Rückzahlung von Fremdkapital spiegelt sich im Cashflow aus Finanzierungstätigkeit wider.

Aus der Explorationstätigkeit ergaben sich ein operativer Cashflow in Höhe von -70 Mio € (2009: -74 Mio €) sowie ein Cashflow aus Investitionstätigkeit in Höhe von -114 Mio € (2009: -87 Mio €).

### (30) Derivative Finanzinstrumente und Sicherungsgeschäfte

#### Strategie und Ziele

Der Einsatz von Derivaten ist gemäß E.ON-Richtlinien erlaubt, wenn ihnen bilanzierte Vermögenswerte oder Verbindlichkeiten, vertragliche Ansprüche oder Verpflichtungen beziehungsweise geplante Transaktionen zugrunde liegen. Die Eigenhandelsaktivitäten konzentrieren sich auf Energy Trading und bewegen sich im Rahmen der nachstehend beschriebenen Risikomanagement-Richtlinien.

Hedge Accounting gemäß IAS 39 wird insbesondere angewendet bei Zinsderivaten hinsichtlich der Sicherung langfristiger Verbindlichkeiten sowie bei Währungsderivaten zur Sicherung von Auslandsbeteiligungen (Hedge of a Net Investment in a Foreign Operation) und langfristigen Fremdwährungsforderungen und -verbindlichkeiten sowie Investitionsvorhaben. Im Commodity-Bereich werden Schwankungen zukünftiger Zahlungsströme gesichert, die insbesondere aus dem geplanten konzernexternen und -internen Stromein- und -verkauf sowie dem erwarteten Brennstoffeinkauf und Gasein- und -verkauf resultieren.

#### Fair Value Hedges

Fair Value Hedges dienen der Absicherung gegen das Risiko von Marktwertschwankungen. Fair Value Hedge Accounting wurde im Vorjahr insbesondere beim Tausch fester Zinsbindungen von in Euro und britischem Pfund denominierten langfristigen Finanzforderungen und -verbindlichkeiten in variable Zinsbindungen eingesetzt. Als Sicherungsinstrumente wurden Zinsswaps genutzt. Die Ergebnisse sind in der Regel in dem Posten der Gewinn- und Verlustrechnung ausgewiesen, in dem auch das gesicherte Grundgeschäft abgebildet wird. Bei Zinssicherungen erfolgt der Ausweis im sonstigen Zinsergebnis. Aus den Buchwertanpassungen der Grundgeschäfte

ergab sich im vergangenen Jahr ein Verlust von 5 Mio €, während im gleichen Zeitraum Erträge bei den zugeordneten Sicherungsgeschäften von 17 Mio € realisiert wurden. Die vorgenannten Fair Value Hedges sind im Jahr 2009 ausgelaufen. In 2010 erfolgte eine Absicherung einer Beteiligung gegen Marktpreisschwankungen mithilfe von Termingeschäften. Der unrealisierte Verlust auf die eingesetzten Termingeschäfte zur Sicherung des gehaltenen Beteiligungswerts beträgt zum 31. Dezember 2010 115 Mio €. Das entspricht dem beizulegenden Zeitwert. Der Gewinn auf die abgesicherten Anteile in Bezug auf Marktpreisschwankungen beträgt zum 31. Dezember 2010 107 Mio €.

#### Cashflow Hedges

Cashflow Hedges dienen der Absicherung gegen Risiken aus variablen Zahlungsströmen. Zur Begrenzung des Zinsänderungs- und Währungsrisikos werden insbesondere Zins- und Zins-/Währungsswaps eingesetzt. Diese Instrumente sichern Zahlungsströme aus verzinslichen langfristigen Finanzforderungen und -verbindlichkeiten sowie Investitionsvorhaben in Fremdwährungen und in Euro durch Cashflow Hedge Accounting in der funktionalen Währung der jeweiligen E.ON-Gesellschaft.

Zur Begrenzung der Schwankungen zukünftiger Zahlungsströme aus dem Stromgeschäft aufgrund variabler Marktpreise werden Futures eingesetzt, für die ebenfalls Cashflow Hedge Accounting angewendet wird.

Zum 31. Dezember 2010 sind bestehende Grundgeschäfte in Cashflow Hedges mit Laufzeiten bis zu 28 Jahren (2009: bis zu 29 Jahren) im Fremdwährungsbereich und mit Laufzeiten bis zu sechs Jahren (2009: bis zu elf Jahren) im Bereich der Zinssicherungen einbezogen. Im Commodity-Bereich betragen die Laufzeiten geplanter Grundgeschäfte bis zu drei Jahre (2009: bis zu drei Jahre).

Zum 31. Dezember 2010 ergab sich aus dem ineffektiven Teil von Cashflow Hedges ein Aufwand in Höhe von 6 Mio € (2009: Ertrag von 2 Mio €).



Nach den am Bilanzstichtag vorliegenden Informationen ergeben sich in den Folgeperioden die nachstehenden Effekte aus der Umgliederung des OCI in die Gewinn- und Verlustrechnung:

| Zeitpunkt der Umgliederung aus dem OCI <sup>1)</sup> in die Gewinn- und Verlustrechnung – 2010 |           |      |      |           |       |
|------------------------------------------------------------------------------------------------|-----------|------|------|-----------|-------|
| in Mio €                                                                                       | Buchwerte | 2011 | 2012 | 2013-2015 | >2015 |
| OCI – Fremdwährungs-Cashflow-Hedges                                                            | -133      | -8   | -8   | -20       | -97   |
| OCI – Zins-Cashflow-Hedges                                                                     | 40        | 2    | -1   | -17       | 56    |
| OCI – Commodity-Cashflow-Hedges                                                                | -12       | -5   | -7   | -         | -     |

1) OCI Other Comprehensive Income, Angaben vor Steuern

| Zeitpunkt der Umgliederung aus dem OCI <sup>1)</sup> in die Gewinn- und Verlustrechnung – 2009 |           |      |      |           |       |
|------------------------------------------------------------------------------------------------|-----------|------|------|-----------|-------|
| in Mio €                                                                                       | Buchwerte | 2010 | 2011 | 2012-2014 | >2014 |
| OCI – Fremdwährungs-Cashflow-Hedges                                                            | -61       | -38  | -18  | -34       | 29    |
| OCI – Zins-Cashflow-Hedges                                                                     | 14        | 1    | -    | -         | 13    |
| OCI – Commodity-Cashflow-Hedges                                                                | -62       | -83  | 15   | 6         | -     |

1) OCI Other Comprehensive Income, Angaben vor Steuern

Die Ergebnisse aus der Umgliederung werden in der Regel in dem Posten der Gewinn- und Verlustrechnung ausgewiesen, in dem auch das gesicherte Grundgeschäft abgebildet wird. Die Ergebnisse aus ineffektiven Teilen von Cashflow Hedges werden unter den sonstigen betrieblichen Erträgen beziehungsweise Aufwendungen erfasst. Bei Zinssicherungen erfolgt der Ausweis im sonstigen Zinsergebnis. Die Fair Values der innerhalb von Cashflow Hedges verwendeten Derivate betragen 242 Mio € (2009: 4 Mio €).

Im Jahr 2010 wurde ein Aufwand von 204 Mio € (2009: Ertrag von 45 Mio €) dem Other Comprehensive Income zugeführt. Im gleichen Zeitraum wurde ein Ertrag von 203 Mio € (2009: Ertrag von 162 Mio €) in die Gewinn- und Verlustrechnung umgegliedert.

## Net Investment Hedges

Zur Sicherung der Netto-Aktiva ausländischer Beteiligungen werden Devisentermingeschäfte, Devisenswaps, Währungsswaps und originäre Fremdwährungsdarlehen eingesetzt. Zum 31. Dezember 2010 wurden 558 Mio € (2009: 1.374 Mio €) aus Fair-Value-Veränderungen von Derivaten und der Stichtagskursumrechnung von originären Verbindlichkeiten im Zusammenhang mit Net Investment Hedges im Other Comprehensive Income in dem Posten Währungsumrechnung ausgewiesen. In 2010 ergab sich keine Ineffektivität aus den Net Investment Hedges (2009: Aufwand 1 Mio €).



## Bewertung derivativer Finanzinstrumente

Der Fair Value derivativer Finanzinstrumente ist abhängig von der Entwicklung der zugrunde liegenden Marktfaktoren. Die jeweiligen Fair Values werden in regelmäßigen Abständen ermittelt und überwacht. Der für alle derivativen Finanzinstrumente ermittelte Fair Value ist der Preis, zu dem eine Partei die Rechte und/oder Pflichten einer anderen Partei übernehmen würde. Die Fair Values der derivativen Finanzinstrumente werden mit marktüblichen Bewertungsmethoden unter Berücksichtigung der am Bewertungsstichtag vorliegenden Marktdaten ermittelt.

Die der Bewertung der eingesetzten derivativen Finanzinstrumente zugrunde liegenden Bewertungsmethoden und Annahmen stellen sich wie folgt dar:

- Devisen-, Strom-, Gas-, Kohle- und Öltermingeschäfte und -swaps sowie Derivate auf Emissionsrechte werden einzeln mit ihrem Terminkurs beziehungsweise -preis am Bilanzstichtag bewertet. Die Terminkurse beziehungsweise -preise basieren, soweit möglich, auf Marktnotierungen, gegebenenfalls unter Berücksichtigung von Terminauf- und -abschlägen.
- Die Marktpreise von Zins-, Strom- und Gasoptionen werden nach marktüblichen Bewertungsmethoden ermittelt. Caps, Floors und Collars werden anhand von Marktnotierungen oder auf der Grundlage von Optionspreismodellen bewertet.
- Die Fair Values von Instrumenten zur Sicherung von Zinsrisiken werden durch Diskontierung der zukünftigen Cashflows ermittelt. Die Diskontierung erfolgt anhand der marktüblichen Zinsen über die Restlaufzeit der Instrumente. Für Zins-, Währungs- und Zins-/Währungsswaps werden zum Bilanzstichtag für jede einzelne Transaktion die Barwerte ermittelt. Die Zinserträge werden im Zahlungszeitpunkt beziehungsweise bei der Abgrenzung zum Stichtag erfolgswirksam erfasst.

- Termingeschäfte auf Aktien werden auf Basis des Börsenkurses der zugrunde liegenden Aktien unter Berücksichtigung von Zeitkomponenten bewertet.
- Börsennotierte Stromtermingeschäfte und -optionen werden zum Bilanzstichtag einzeln mit den börsentäglich festgestellten Abrechnungspreisen bewertet, die von der jeweiligen Clearingstelle veröffentlicht werden. Gezahlte Initial Margins sind unter den sonstigen Vermögenswerten ausgewiesen. Während der Laufzeit erhaltene beziehungsweise gezahlte Variation Margins werden unter den sonstigen Verbindlichkeiten beziehungsweise sonstigen Vermögenswerten ausgewiesen.
- Bestimmte langfristige Energiekontrakte werden, sofern Marktpreise fehlen, anhand von auf internen Fundamentaldaten beruhenden Bewertungsmodellen bewertet. Eine hypothetische Änderung der internen Bewertungsparameter zum Bilanzstichtag um  $\pm 10$  Prozent würde zu einer theoretischen Minderung der Marktwerte um 156 Mio € beziehungsweise zu einem Anstieg um 164 Mio € führen.

Zu Jahresbeginn war ein Ertrag von 56 Mio € aus der Zugangsbewertung von Derivaten abgegrenzt. Nach Realisierungen in Höhe von 56 Mio € ergab sich zum Jahresende ein verbleibender abgegrenzter Ertrag von 112 Mio €, welcher gemäß der Vertragserfüllung in den Folgeperioden aufgelöst wird.

Die beiden folgenden Tabellen enthalten sowohl Derivate, die im Hedge Accounting nach IAS 39 stehen, als auch Derivate, bei denen auf die Anwendung von Hedge Accounting verzichtet wird.

**Gesamt volumen der währungs-, zins- und aktienbezogenen Derivate**

| in Mio €               | 31. Dezember 2010 |               | 31. Dezember 2009 |              |
|------------------------|-------------------|---------------|-------------------|--------------|
|                        | Nominalwert       | Fair Value    | Nominalwert       | Fair Value   |
| Devisentermingeschäfte | 31.116,2          | -87,4         | 16.949,2          | -42,2        |
| <b>Zwischensumme</b>   | <b>31.116,2</b>   | <b>-87,4</b>  | <b>16.949,2</b>   | <b>-42,2</b> |
| Währungsswaps          | 17.924,1          | 274,4         | 18.407,0          | 119,0        |
| Zins-/Währungsswaps    | 211,4             | 75,8          | 510,4             | -32,4        |
| <b>Zwischensumme</b>   | <b>18.135,5</b>   | <b>350,2</b>  | <b>18.917,4</b>   | <b>86,6</b>  |
| Zinsswaps              |                   |               |                   |              |
| Festzinszahler         | 2.468,0           | -128,9        | 1.595,4           | -129,7       |
| Festzinsempfänger      | 1.115,8           | 110,8         | 1.282,7           | 61,6         |
| Zinsfutures            | 133,8             | 1,4           | 188,8             | 1,7          |
| Zinsoptionen           | 2.000,0           | 71,3          | 127,7             | -            |
| <b>Zwischensumme</b>   | <b>5.717,6</b>    | <b>54,6</b>   | <b>3.194,6</b>    | <b>-66,4</b> |
| Sonstige Derivate      | 1.083,0           | -180,0        | 79,5              | 6,4          |
| <b>Zwischensumme</b>   | <b>1.083,0</b>    | <b>-180,0</b> | <b>79,5</b>       | <b>6,4</b>   |
| <b>Summe</b>           | <b>56.052,3</b>   | <b>137,4</b>  | <b>39.140,7</b>   | <b>-15,6</b> |

**Gesamt volumen der strom-, gas-, kohle-, öl- und emissionsrechtbezogenen Derivate**

| in Mio €                                         | 31. Dezember 2010 |                | 31. Dezember 2009 |               |
|--------------------------------------------------|-------------------|----------------|-------------------|---------------|
|                                                  | Nominalwert       | Fair Value     | Nominalwert       | Fair Value    |
| Stromtermingeschäfte                             | 65.052,8          | 763,6          | 49.623,4          | -584,4        |
| Börsengehandelte Stromtermingeschäfte            | 11.411,0          | -681,9         | 10.755,0          | 13,7          |
| Stromswaps                                       | 5.853,4           | -52,9          | 2.980,4           | 29,9          |
| Stromoptionen                                    | 44,7              | 18,9           | 145,5             | -6,2          |
| Kohletermin- und -swapgeschäfte                  | 8.316,2           | 300,7          | 7.975,9           | -28,2         |
| Börsengehandelte Kohletermingeschäfte            | 8.830,7           | 36,0           | 2.691,3           | 3,7           |
| Ölbezogene Derivate                              | 13.700,9          | 175,2          | 5.852,6           | -33,5         |
| Börsengehandelte ölbezogene Derivate             | 40,8              | 35,7           | 5.437,0           | 56,9          |
| Gastermingeschäfte                               | 28.070,8          | 938,5          | 23.914,3          | 255,5         |
| Gasswaps                                         | 5.074,0           | 11,4           | 6.271,0           | 16,3          |
| Gasoptionen                                      | 864,1             | 31,4           | -                 | -             |
| Börsengehandelte Gastermingeschäfte              | 1.585,2           | 51,0           | 1.100,9           | 1,4           |
| Emissionsrechtbezogene Derivate                  | 424,4             | -0,4           | 2.757,6           | 3,7           |
| Börsengehandelte emissionsrechtbezogene Derivate | 4.811,9           | 2,4            | 21,0              | 1,1           |
| Sonstige Derivate                                | 68,8              | 7,4            | 60,8              | 14,7          |
| Börsengehandelte sonstige Derivate               | 46,6              | -0,4           | -                 | -             |
| <b>Summe</b>                                     | <b>154.196,3</b>  | <b>1.636,6</b> | <b>119.586,7</b>  | <b>-255,4</b> |

**(31) Zusätzliche Angaben zu Finanzinstrumenten**

Die Buchwerte der Finanzinstrumente, die Aufteilung nach Bewertungskategorien gemäß IAS 39, die Fair Values und deren Bewertungsquellen nach Klassen sind in folgender Tabelle dargestellt, wobei die Änderungen des Standards Berücksichtigung gefunden haben:

| Buchwerte, Fair Values und Bewertungskategorien nach Klassen<br>im Anwendungsbereich des IFRS 7 zum 31. Dezember 2010 |               |                                                                    |                                                                 |               |                                                 |                                    |
|-----------------------------------------------------------------------------------------------------------------------|---------------|--------------------------------------------------------------------|-----------------------------------------------------------------|---------------|-------------------------------------------------|------------------------------------|
| in Mio €                                                                                                              | Buchwerte     | Summe<br>Buchwerte<br>im Anwen-<br>dungsbe-<br>reich des<br>IFRS 7 | Bewer-<br>tungs-<br>kategorien<br>gemäß<br>IAS 39 <sup>1)</sup> | Fair Value    | Anhand<br>von<br>Börsen-<br>kursen<br>ermittelt | Von Markt-<br>werten<br>abgeleitet |
| Beteiligungen                                                                                                         | 2.201         | 2.201                                                              | AfS                                                             | 2.201         | 182                                             | 239                                |
| Finanzforderungen und sonstige finanzielle Vermögenswerte                                                             | 5.031         | 5.008                                                              |                                                                 | 5.262         | -                                               | -                                  |
| <i>Forderungen aus Finanzierungsleasing</i>                                                                           | 958           | 958                                                                | n/a                                                             | 962           | -                                               | -                                  |
| <i>Sonstige Finanzforderungen und finanzielle Vermögenswerte</i>                                                      | 4.073         | 4.050                                                              | LaR                                                             | 4.300         | -                                               | -                                  |
| Forderungen aus Lieferungen und Leistungen und sonstige betriebliche Vermögenswerte                                   | 31.514        | 28.451                                                             |                                                                 | 28.451        | 602                                             | 9.127                              |
| <i>Forderungen aus Lieferungen und Leistungen</i>                                                                     | 15.819        | 15.819                                                             | LaR                                                             | 15.819        | -                                               | -                                  |
| <i>Derivate ohne Hedging-Beziehungen</i>                                                                              | 9.524         | 9.524                                                              | HfT                                                             | 9.524         | 602                                             | 8.016                              |
| <i>Derivate mit Hedging-Beziehungen</i>                                                                               | 1.111         | 1.111                                                              | n/a                                                             | 1.111         | -                                               | 1.111                              |
| <i>Sonstige betriebliche Vermögenswerte</i>                                                                           | 5.060         | 1.997                                                              | LaR                                                             | 1.997         | -                                               | -                                  |
| Wertpapiere und Festgeldanlagen                                                                                       | 5.600         | 5.600                                                              | AfS                                                             | 5.600         | 4.967                                           | 633                                |
| Zahlungsmittel und Zahlungsmitteläquivalente                                                                          | 6.143         | 6.143                                                              | AfS                                                             | 6.143         | 6.108                                           | 35                                 |
| Zahlungsmittel, die einer Verfügungsbeschränkung unterliegen                                                          | 433           | 433                                                                | AfS                                                             | 433           | 392                                             | 41                                 |
| Zur Veräußerung gehaltene Vermögenswerte                                                                              | 2.043         | 1.582                                                              | AfS                                                             | 1.582         | 895                                             | 687                                |
| <b>Summe Vermögenswerte</b>                                                                                           | <b>52.965</b> | <b>49.418</b>                                                      |                                                                 | <b>49.672</b> | <b>13.146</b>                                   | <b>10.762</b>                      |
| Finanzverbindlichkeiten                                                                                               | 32.491        | 32.456                                                             |                                                                 | 35.827        | -                                               | -                                  |
| <i>Anleihen</i>                                                                                                       | 27.500        | 27.500                                                             | AmC                                                             | 30.768        | -                                               | -                                  |
| <i>Commercial Paper</i>                                                                                               | -             | -                                                                  | AmC                                                             | -             | -                                               | -                                  |
| <i>Verbindlichkeiten gegenüber Kreditinstituten</i>                                                                   | 1.041         | 1.041                                                              | AmC                                                             | 1.041         | -                                               | -                                  |
| <i>Verbindlichkeiten Finanzierungsleasing</i>                                                                         | 448           | 448                                                                | n/a                                                             | 530           | -                                               | -                                  |
| <i>Sonstige Finanzverbindlichkeiten</i>                                                                               | 3.502         | 3.467                                                              | AmC                                                             | 3.488         | -                                               | -                                  |
| Verbindlichkeiten aus Lieferungen und Leistungen und sonstige betriebliche Verbindlichkeiten                          | 32.863        | 25.904                                                             |                                                                 | 25.904        | 1.117                                           | 7.381                              |
| <i>Verbindlichkeiten aus Lieferungen und Leistungen</i>                                                               | 5.016         | 5.016                                                              | AmC                                                             | 5.016         | -                                               | -                                  |
| <i>Derivate ohne Hedging-Beziehungen</i>                                                                              | 8.075         | 8.075                                                              | HfT                                                             | 8.075         | 1.117                                           | 6.595                              |
| <i>Derivate mit Hedging-Beziehungen</i>                                                                               | 786           | 786                                                                | n/a                                                             | 786           | -                                               | 786                                |
| <i>Verbindlichkeiten Put-Optionen nach IAS 32</i>                                                                     | 829           | 829                                                                | AmC                                                             | 829           | -                                               | -                                  |
| <i>Sonstige betriebliche Verbindlichkeiten</i>                                                                        | 18.157        | 11.198                                                             | AmC                                                             | 11.198        | -                                               | -                                  |
| <b>Summe Verbindlichkeiten</b>                                                                                        | <b>65.354</b> | <b>58.360</b>                                                      |                                                                 | <b>61.731</b> | <b>1.117</b>                                    | <b>7.381</b>                       |

1) AfS: Available-for-Sale; LaR: Loans and Receivables; HfT: Held-for-Trading; AmC: Amortized Cost. Zur Beschreibung der Bewertungskategorien wird auf Textziffer 2 verwiesen, wobei sich die Werte der zum Fair Value bilanzierten Finanzinstrumente (AfS, HfT, n/a) aus eigenen Bewertungsmethoden (Fair Value Stufe 3), aus der Differenz zwischen Fair Value und den aufgeführten Bewertungskategorien, ergeben.

Für die Zahlungsmittel und Zahlungsmitteläquivalente sowie für Forderungen aus Lieferungen und Leistungen gelten aufgrund der kurzen Restlaufzeit die Buchwerte als realistische Schätzung ihrer Fair Values.

Soweit sich der Wert für ein Finanzinstrument ohne erforderliche Anpassung aus einem aktiven Markt herleiten lässt, wird dieser Wert verwendet. Dies betrifft insbesondere gehaltene Aktien und begebene Anleihen.

| Buchwerte, Fair Values und Bewertungskategorien nach Klassen<br>im Anwendungsbereich des IFRS 7 zum 31. Dezember 2009 |               |                                                                    |                                                                 |               |                                                 |                                    |
|-----------------------------------------------------------------------------------------------------------------------|---------------|--------------------------------------------------------------------|-----------------------------------------------------------------|---------------|-------------------------------------------------|------------------------------------|
| in Mio €                                                                                                              | Buchwerte     | Summe<br>Buchwerte<br>im Anwen-<br>dungsbe-<br>reich des<br>IFRS 7 | Bewer-<br>tungs-<br>kategorien<br>gemäß<br>IAS 39 <sup>1)</sup> | Fair Value    | Anhand<br>von<br>Börsen-<br>kursen<br>ermittelt | Von Markt-<br>werten<br>abgeleitet |
| Beteiligungen                                                                                                         | 5.461         | 5.461                                                              | AfS                                                             | 5.461         | 3.815                                           | 493                                |
| Finanzforderungen und sonstige finanzielle Vermögenswerte                                                             | 4.381         | 4.373                                                              |                                                                 | 4.609         | -                                               | -                                  |
| <i>Forderungen aus Finanzierungsleasing</i>                                                                           | 622           | 622                                                                | n/a                                                             | 627           | -                                               | -                                  |
| <i>Sonstige Finanzforderungen und finanzielle Vermögenswerte</i>                                                      | 3.759         | 3.751                                                              | LaR                                                             | 3.982         | -                                               | -                                  |
| Forderungen aus Lieferungen und Leistungen und sonstige betriebliche Vermögenswerte                                   | 26.395        | 23.059                                                             |                                                                 | 23.059        | 2.013                                           | 7.754                              |
| <i>Forderungen aus Lieferungen und Leistungen</i>                                                                     | 11.577        | 11.577                                                             | LaR                                                             | 11.577        | -                                               | -                                  |
| <i>Derivate ohne Hedging-Beziehungen</i>                                                                              | 8.952         | 8.952                                                              | HfT                                                             | 8.952         | 2.013                                           | 6.785                              |
| <i>Derivate mit Hedging-Beziehungen</i>                                                                               | 969           | 969                                                                | n/a                                                             | 969           | -                                               | 969                                |
| <i>Sonstige betriebliche Vermögenswerte</i>                                                                           | 4.897         | 1.561                                                              | LaR                                                             | 1.561         | -                                               | -                                  |
| Wertpapiere und Festgeldanlagen                                                                                       | 5.392         | 5.392                                                              | AfS                                                             | 5.392         | 4.384                                           | 1.008                              |
| Zahlungsmittel und Zahlungsmitteläquivalente                                                                          | 4.210         | 4.210                                                              | AfS                                                             | 4.210         | 4.183                                           | 27                                 |
| Zahlungsmittel, die einer Verfügungsbeschränkung unterliegen                                                          | 184           | 184                                                                | AfS                                                             | 184           | 137                                             | 47                                 |
| Zur Veräußerung gehaltene Vermögenswerte                                                                              | 2.273         | 81                                                                 | AfS                                                             | 81            | -                                               | 81                                 |
| <b>Summe Vermögenswerte</b>                                                                                           | <b>48.296</b> | <b>42.760</b>                                                      |                                                                 | <b>42.996</b> | <b>14.532</b>                                   | <b>9.410</b>                       |
| Finanzverbindlichkeiten                                                                                               | 37.777        | 37.566                                                             |                                                                 | 41.518        | -                                               | -                                  |
| <i>Anleihen</i>                                                                                                       | 28.963        | 28.963                                                             | AmC                                                             | 32.799        | -                                               | -                                  |
| <i>Commercial Paper</i>                                                                                               | 1.520         | 1.520                                                              | AmC                                                             | 1.520         | -                                               | -                                  |
| <i>Verbindlichkeiten gegenüber Kreditinstituten</i>                                                                   | 2.285         | 2.285                                                              | AmC                                                             | 2.285         | -                                               | -                                  |
| <i>Verbindlichkeiten Finanzierungsleasing</i>                                                                         | 245           | 245                                                                | n/a                                                             | 356           | -                                               | -                                  |
| <i>Sonstige Finanzverbindlichkeiten</i>                                                                               | 4.764         | 4.553                                                              | AmC                                                             | 4.558         | -                                               | -                                  |
| Verbindlichkeiten aus Lieferungen und Leistungen und sonstige betriebliche Verbindlichkeiten                          | 30.872        | 24.163                                                             |                                                                 | 24.163        | 2.210                                           | 6.948                              |
| <i>Verbindlichkeiten aus Lieferungen und Leistungen</i>                                                               | 4.635         | 4.635                                                              | AmC                                                             | 4.635         | -                                               | -                                  |
| <i>Derivate ohne Hedging-Beziehungen</i>                                                                              | 9.505         | 9.505                                                              | HfT                                                             | 9.505         | 2.210                                           | 6.261                              |
| <i>Derivate mit Hedging-Beziehungen</i>                                                                               | 687           | 687                                                                | n/a                                                             | 687           | -                                               | 687                                |
| <i>Verbindlichkeiten Put-Optionen nach IAS 32</i>                                                                     | 653           | 653                                                                | AmC                                                             | 653           | -                                               | -                                  |
| <i>Sonstige betriebliche Verbindlichkeiten</i>                                                                        | 15.392        | 8.683                                                              | AmC                                                             | 8.683         | -                                               | -                                  |
| <b>Summe Verbindlichkeiten</b>                                                                                        | <b>68.649</b> | <b>61.729</b>                                                      |                                                                 | <b>65.681</b> | <b>2.210</b>                                    | <b>6.948</b>                       |

1) AfS: Available-for-Sale; LaR: Loans and Receivables; HfT: Held-for-Trading; AmC: Amortized Cost. Zur Beschreibung der Bewertungskategorien wird auf Textziffer 2 verwiesen, wobei sich die Werte der zum Fair Value bilanzierten Finanzinstrumente (AfS, HfT, n/a) aus eigenen Bewertungsmethoden (Fair Value Stufe 3), aus der Differenz zwischen Fair Value und den aufgeführten Bewertungskategorien, ergeben.

Der Fair Value von Anteilen an nicht börsennotierten Gesellschaften sowie nicht aktiv gehandelten Schuldtiteln wie Darlehen, Ausleihungen und Finanzverbindlichkeiten wird durch Diskontierung der zukünftigen Cashflows ermittelt. Die gegebenenfalls notwendige Diskontierung erfolgt anhand der aktuellen marktüblichen Zinsen über die Restlaufzeit der Finanzinstrumente. Für Beteiligungen mit einem Buchwert in Höhe

von 26 Mio € (2009: 310 Mio €) wurde auf eine Bewertung zum Fair Value aufgrund nicht verlässlich ermittelbarer Cashflows verzichtet. Es konnten keine Fair Values auf Basis vergleichbarer Transaktionen abgeleitet werden. Die Beteiligungen sind im Vergleich zur Gesamtposition des Konzerns unwesentlich.

Der Fair Value von Commercial Paper und Geldaufnahmen im Rahmen kurzfristiger Kreditfazilitäten sowie der Verbindlichkeiten aus Lieferungen und Leistungen wird wegen der kurzen Laufzeiten in Höhe des Buchwertes angesetzt.

Zur Fair-Value-Ermittlung von derivativen Finanzinstrumenten wird auf Textziffer 30 verwiesen. Die Überleitung der durch Bewertungsmethoden ermittelten Fair Values für Finanzinstrumente, die zum beizulegenden Zeitwert bilanziert werden, wird in der folgenden Tabelle dargestellt:

| Herleitung Fair Value Stufe 3 (durch Bewertungsmethoden ermittelt) |                                   |                                  |                                     |                 |                                       |                |                |                                |                                      |
|--------------------------------------------------------------------|-----------------------------------|----------------------------------|-------------------------------------|-----------------|---------------------------------------|----------------|----------------|--------------------------------|--------------------------------------|
| in Mio €                                                           | Stand<br>zum<br>1. Januar<br>2010 | Käufe<br>(inklusive<br>Zugängen) | Verkäufe<br>(inklusive<br>Abgängen) | Abwick-<br>lung | Gewinne/<br>Verluste<br>in der<br>GuV | Umgliederungen |                | Gewinne/<br>Verluste<br>im OCI | Stand<br>zum 31.<br>Dezember<br>2010 |
|                                                                    |                                   |                                  |                                     |                 |                                       | in<br>Stufe 3  | aus<br>Stufe 3 |                                |                                      |
| Beteiligungen                                                      | 1.153                             | 11                               | -171                                | -7              | 5                                     | 139            | -              | 650                            | 1.780                                |
| Derivative Finanzinstrumente                                       | -880                              | 315                              | -                                   | -6              | 1.176                                 | 23             | -              | -85                            | 543                                  |
| <b>Summe</b>                                                       | <b>273</b>                        | <b>326</b>                       | <b>-171</b>                         | <b>-13</b>      | <b>1.181</b>                          | <b>162</b>     | <b>0</b>       | <b>565</b>                     | <b>2.323</b>                         |

In den beiden nachfolgenden Tabellen sind die vertraglich vereinbarten (undiskontierten) Mittelabflüsse der Verbindlichkeiten im Anwendungsbereich des IFRS 7 dargestellt:

| Cashflow-Analyse zum 31. Dezember 2010                                                                             |                             |                             |                                  |                                |
|--------------------------------------------------------------------------------------------------------------------|-----------------------------|-----------------------------|----------------------------------|--------------------------------|
| in Mio €                                                                                                           | Mittel-<br>abflüsse<br>2011 | Mittel-<br>abflüsse<br>2012 | Mittel-<br>abflüsse<br>2013-2015 | Mittel-<br>abflüsse<br>ab 2016 |
| Anleihen                                                                                                           | 3.722                       | 4.540                       | 10.983                           | 21.662                         |
| Commercial Paper                                                                                                   | -                           | -                           | -                                | -                              |
| Verbindlichkeiten gegenüber Kreditinstituten                                                                       | 537                         | 59                          | 242                              | 287                            |
| Verbindlichkeiten Finanzierungsleasing                                                                             | 48                          | 48                          | 135                              | 655                            |
| Sonstige Finanzverbindlichkeiten                                                                                   | 1.040                       | 132                         | 1.386                            | 1.409                          |
| Finanzgarantien                                                                                                    | 1.219                       | -                           | -                                | -                              |
| <b>Mittelabflüsse Finanzverbindlichkeiten</b>                                                                      | <b>6.566</b>                | <b>4.779</b>                | <b>12.746</b>                    | <b>24.013</b>                  |
| Verbindlichkeiten aus Lieferungen und Leistungen                                                                   | 5.071                       | -                           | -                                | -                              |
| Derivate (mit/ohne Hedging-Beziehungen)                                                                            | 15.024                      | 5.473                       | 1.362                            | 390                            |
| Verbindlichkeiten Put-Optionen nach IAS 32                                                                         | 332                         | 18                          | 77                               | 402                            |
| Übrige betriebliche Verbindlichkeiten                                                                              | 11.029                      | 198                         | 4                                | 26                             |
| <b>Mittelabflüsse Verbindlichkeiten aus Lieferungen und Leistungen und sonstige betriebliche Verbindlichkeiten</b> | <b>31.456</b>               | <b>5.689</b>                | <b>1.443</b>                     | <b>818</b>                     |
| <b>Mittelabflüsse Verbindlichkeiten im Anwendungsbereich des IFRS 7</b>                                            | <b>38.022</b>               | <b>10.468</b>               | <b>14.189</b>                    | <b>24.831</b>                  |

Finanzgarantien wurden in einem Nominalvolumen von 1.219 Mio € (2009: 905 Mio €) an konzernexterne Gesellschaften vergeben. Dies stellt den Maximalbetrag dar, den E.ON begleichen müsste, wenn die Garantien in Anspruch genommen würden, wobei als Buchwert 59 Mio € angesetzt wurden.

| Cashflow-Analyse zum 31. Dezember 2009                                                                             |                             |                             |                                  |                                |
|--------------------------------------------------------------------------------------------------------------------|-----------------------------|-----------------------------|----------------------------------|--------------------------------|
| in Mio €                                                                                                           | Mittel-<br>abflüsse<br>2010 | Mittel-<br>abflüsse<br>2011 | Mittel-<br>abflüsse<br>2012-2014 | Mittel-<br>abflüsse<br>ab 2015 |
| Anleihen                                                                                                           | 4.211                       | 3.574                       | 12.807                           | 21.312                         |
| Commercial Paper                                                                                                   | 1.538                       | -                           | -                                | -                              |
| Verbindlichkeiten gegenüber Kreditinstituten                                                                       | 1.019                       | 209                         | 198                              | 1.099                          |
| Verbindlichkeiten Finanzierungsleasing                                                                             | 63                          | 39                          | 108                              | 281                            |
| Sonstige Finanzverbindlichkeiten                                                                                   | 2.301                       | 75                          | 656                              | 2.120                          |
| Finanzgarantien                                                                                                    | 905                         | -                           | -                                | -                              |
| <b>Mittelabflüsse Finanzverbindlichkeiten</b>                                                                      | <b>10.037</b>               | <b>3.897</b>                | <b>13.769</b>                    | <b>24.812</b>                  |
| Verbindlichkeiten aus Lieferungen und Leistungen                                                                   | 4.635                       | -                           | -                                | -                              |
| Derivate (mit/ohne Hedging-Beziehungen)                                                                            | 19.496                      | 6.515                       | 2.009                            | 124                            |
| Verbindlichkeiten Put-Optionen nach IAS 32                                                                         | 200                         | 10                          | 93                               | 349                            |
| Übrige betriebliche Verbindlichkeiten                                                                              | 8.995                       | 30                          | 66                               | 168                            |
| <b>Mittelabflüsse Verbindlichkeiten aus Lieferungen und Leistungen und sonstige betriebliche Verbindlichkeiten</b> | <b>33.326</b>               | <b>6.555</b>                | <b>2.168</b>                     | <b>641</b>                     |
| <b>Mittelabflüsse Verbindlichkeiten im Anwendungsbereich des IFRS 7</b>                                            | <b>43.363</b>               | <b>10.452</b>               | <b>15.937</b>                    | <b>25.453</b>                  |

Sofern finanzielle Verbindlichkeiten mit einem variablen Zinssatz ausgestattet sind, wurden zur Ermittlung der zukünftigen Zinszahlungen die am Bilanzstichtag fixierten Zinssätze auch für die folgenden Perioden verwendet. Sofern finanzielle Verbindlichkeiten jederzeit gekündigt werden können, werden diese, wie Verbindlichkeiten aus jederzeit ausübaren Put-Optionen, dem frühesten Laufzeitband zugeordnet. Im Jahr 2010 wurden alle Covenants eingehalten.

Bei brutto erfüllten Derivaten (in der Regel Währungsderivate und Commodity-Derivate) stehen den Auszahlungen korrespondierende Mittel- beziehungsweise Wareneinzufüsse gegenüber.

Das Nettoergebnis der Finanzinstrumente nach Bewertungskategorien gemäß IAS 39 stellt sich wie folgt dar:

| Nettoergebnis nach Bewertungskategorien <sup>1)</sup> |              |              |
|-------------------------------------------------------|--------------|--------------|
| in Mio €                                              | 2010         | 2009         |
| Loans and Receivables                                 | -141         | -141         |
| Available-for-Sale                                    | 2.724        | 2.195        |
| Held-for-Trading                                      | 2.635        | 1.754        |
| Amortized Cost                                        | -1.536       | -1.678       |
| <b>Summe</b>                                          | <b>3.682</b> | <b>2.130</b> |

1) Zur Beschreibung der Bewertungskategorien wird auf Textziffern 2 und 9 verwiesen.

Das Nettoergebnis der Bewertungskategorie Loans and Receivables umfasst neben Zinserträgen und -aufwendungen aus Finanzforderungen im Wesentlichen Wertberichtigungen auf Forderungen aus Lieferungen und Leistungen. Die Gewinne und Verluste aus der Veräußerung von Available-for-Sale-Wertpapieren und Beteiligungen werden in den sonstigen betrieblichen Erträgen und Aufwendungen ausgewiesen.

Das Nettoergebnis der Kategorie Amortized Cost ergibt sich im Wesentlichen aus den Zinsen der Finanzverbindlichkeiten, korrigiert um die aktivierten Bauzeitzinss.

Sowohl Marktwertänderungen aus den derivativen Finanzinstrumenten als auch die Erträge und Aufwendungen aus der Realisierung sind im Nettoergebnis der Bewertungskategorie Held-for-Trading enthalten. Die Veränderung wird vor allem durch die Marktbewertung von Commodity-Derivaten beeinflusst.



## Risikomanagement

### Grundsätze

Die vorgeschriebenen Abläufe, Verantwortlichkeiten und Maßnahmen im Rahmen des Finanz- und Risikomanagements sind in internen Konzernrichtlinien detailliert dargestellt. Die Market Units haben darüber hinaus eigene Richtlinien, die sich im Rahmen der Konzernrichtlinien bewegen, entwickelt. Um ein effizientes Risikomanagement im E.ON-Konzern zu gewährleisten, sind die Abteilungen Handel (Front Office), Finanzcontrolling (Middle Office) und Finanzabwicklung (Back Office) als voneinander unabhängige Einheiten aufgebaut. Die Risikosteuerung und -berichterstattung im Zins-, Währungs-, Kredit- und Liquiditätsbereich wird vom Finanzcontrolling durchgeführt, während die Risikosteuerung und -berichterstattung im Commodity-Bereich auf Konzernebene in einer gesonderten Abteilung durchgeführt wird.

E.ON setzt im Finanzbereich ein konzernweites System für Treasury, Risikomanagement und Berichterstattung ein. Bei diesem System handelt es sich um eine vollständig integrierte Standard-IT-Lösung, die fortlaufend aktualisiert wird. Das System dient zur Analyse und Überwachung von Risiken des E.ON-Konzerns in den Bereichen Liquidität, Fremdwährungen und Zinsen. Im Commodity-Bereich werden in den Market Units etablierte Systeme eingesetzt. Die konzernweite Überwachung und Steuerung von Kreditrisiken erfolgt im Finanzcontrolling mit Unterstützung einer Standardsoftware.

Gesonderte Risikokomitees sind für die Sicherstellung und Weiterentwicklung der durch den Vorstand der E.ON AG beschlossenen Strategie zur Risikopolitik im Commodity-, Treasury- und Kreditrisikobereich zuständig.

### 1. Liquiditätsmanagement

Wesentliche Ziele des Liquiditätsmanagements von E.ON sind die jederzeitige Sicherstellung der Zahlungsfähigkeit, die rechtzeitige Erfüllung vertraglicher Zahlungsverpflichtungen sowie die Kostenoptimierung im E.ON-Konzern.

Das Cashpooling und die externen Finanzierungen sind weitgehend auf die E.ON AG und bestimmte Finanzierungsgesellschaften zentralisiert. Die Mittel werden bedarfsgerecht intern an die anderen Konzernunternehmen weitergeleitet.

Die E.ON AG plant auf Basis von kurz- und mittelfristigen Liquiditätsplanungen den Finanzbedarf des Konzerns. Die Finanzierung des Konzerns wird entsprechend dem geplanten Finanzbedarf vorausschauend gesteuert und umgesetzt. In die Betrachtung einbezogen werden unter anderem der operative Cashflow, Investitionen und die Fälligkeit von Anleihen und Commercial Paper.

### 2. Preisrisiken

Im Rahmen der gewöhnlichen Geschäftstätigkeit ist der E.ON-Konzern Preisrisiken im Fremdwährungs-, Zins- und Commodity-Bereich sowie im Assetmanagement ausgesetzt. Aus diesen Risiken resultieren Ergebnis-, Eigenkapital-, Verschuldungs- und Cashflow-Schwankungen. Zur Begrenzung beziehungsweise Ausschaltung dieser Risiken hat E.ON verschiedene Strategien entwickelt, die den Einsatz derivativer Finanzinstrumente beinhalten.

### 3. Kreditrisiken

E.ON ist aufgrund seiner operativen Geschäftstätigkeit sowie durch den Einsatz von Finanzinstrumenten Kreditrisiken ausgesetzt. Kreditrisiken resultieren aus der Nicht- oder Teilerfüllung der Gegenleistung für erbrachte Vorleistungen, der Nicht- oder Teilerfüllung bestehender Forderungen durch die Geschäftspartner und aus Wiedereindeckungsrisiken bei schwebenden Geschäften. Die Überwachung und Steuerung der Kreditrisiken erfolgt durch konzernweit einheitliche Vorgaben zum Kreditrisikomanagement, welche die Identifikation, Bewertung und Steuerung umfassen.

Die nachstehend beschriebene Analyse der risikoreduzierenden Tätigkeiten der Gesellschaft sowie die mittels der Profit-at-Risk(PaR)-, Value-at-Risk(VaR)- und Sensitivitätsanalysen generierten Beträge stellen zukunftsorientierte und somit risikobehaftete und ungewisse Angaben dar. Aufgrund unvorhersehbarer Entwicklungen in den weltweiten Finanzmärkten können sich die tatsächlichen Ergebnisse wesentlich von den angeführten Hochrechnungen unterscheiden. Die in den Risikoanalysen verwendeten Methoden sind nicht als Prognosen zukünftiger Ereignisse oder Verluste anzusehen, da sich die Gesellschaft ebenfalls Risiken ausgesetzt sieht, die entweder nicht finanziell oder nicht quantifizierbar sind. Diese Risiken beinhalten hauptsächlich Länder-, Geschäfts- und Rechtsrisiken, welche nicht in den folgenden Analysen berücksichtigt wurden.

### Risikomanagement im Fremdwährungsbereich

Die E.ON AG übernimmt die Steuerung der Währungsrisiken des Konzerns.

Aufgrund der Beteiligungen an den geschäftlichen Aktivitäten außerhalb des Euro-Währungsraumes entstehen im E.ON-Konzern Translationsrisiken. Aus Wechselkursschwankungen ergeben sich bilanzielle Effekte aufgrund der Umrechnung der Bilanz- und GuV-Positionen der ausländischen Konzerngesellschaften in dem Konzernabschluss. Die Absicherung von Translationsrisiken erfolgt zum einen durch die Verschuldung in der entsprechenden lokalen Währung, die insbesondere auch Gesellschafterdarlehen in Fremdwährung beinhaltet. Darüber hinaus werden bei Bedarf derivative Finanzinstrumente eingesetzt. Die Sicherungsmaßnahmen werden als Absicherung einer Nettoinvestition in einen ausländischen Geschäftsbetrieb qualifiziert und im Rahmen von Hedge Accounting gemäß IFRS bilanziell abgebildet. Die Translationsrisiken des Konzerns werden regelmäßig überprüft und der Sicherungsgrad gegebenenfalls angepasst. Maßgrößen sind hierbei der jeweilige Debt Factor sowie der Unternehmenswert in der Fremdwährung.

Für den E.ON Konzern bestehen zusätzlich operative und finanzielle Transaktionsrisiken aus Transaktionen in Fremdwährung. Operative Transaktionsrisiken ergeben sich für die Konzerngesellschaften insbesondere durch den physischen und finanziellen Handel von Commodities, konzerninterne Beziehungen sowie Investitionsvorhaben in Fremdwährung. Die Tochtergesellschaften sind für die Steuerung der operativen Währungsrisiken verantwortlich. E.ON AG übernimmt die konzernweite Koordination der Absicherungsmaßnahmen der Konzerngesellschaften und setzt bei Bedarf externe derivative Finanzinstrumente ein.

Finanzielle Transaktionsrisiken ergeben sich aus Zahlungen, die aus finanziellen Forderungen und Verbindlichkeiten entstehen. Sie resultieren sowohl aus externen Finanzierungen in verschiedenen Fremdwährungen als auch aus konzerninternen Gesellschafterdarlehen in Fremdwährung. Die finanziellen Transaktionsrisiken werden grundsätzlich vollständig gesichert.

Der Ein-Tages-Value-at-Risk (99 Prozent Konfidenz) aus der Währungsumrechnung von Geldanlagen und -aufnahmen in Fremdwährung zuzüglich der Fremdwährungsderivate beträgt zum 31. Dezember 2010 149 Mio € (2009: 176 Mio €) und resultiert im Wesentlichen aus den Positionen in britischen Pfund, schwedischen Kronen und US-Dollar.

### Risikomanagement im Zinsbereich

Aus variabel verzinslichen Finanzverbindlichkeiten, Fälligkeiten beziehungsweise kurzfristigen Finanzierungen und Zinsderivaten, die auf variablen Zinsen basieren, ist E.ON Ergebnisrisiken ausgesetzt. Positionen, die auf Festzinsen basieren, führen hingegen zu Änderungen des Zeitwertes bei Schwankungen des Marktzinsniveaus. E.ON strebt einen bestimmten Mix von festverzinslichem und variablem Fremdkapital

im Zeitablauf an. Aufgrund der langfristigen Ausrichtung des Geschäftsmodells wird grundsätzlich ein hoher Anteil an Zinsfestschreibungen vor allem im Planungszeitraum angestrebt. Hierbei werden auch Zinsswaps eingesetzt. Nach Berücksichtigung von Zinsderivaten betrug zum 31. Dezember 2010 der Anteil der Finanzverbindlichkeiten mit Zinsfestschreibung 93 Prozent (2009: 88 Prozent). Das Volumen der Finanzverbindlichkeiten mit Zinsfestschreibung würde unter sonst gleichen Umständen von 23,7 Mrd € zum Jahresende 2010 über 20,3 Mrd € in 2011 auf 18,4 Mrd € in 2012 abnehmen. Die effektive Zinsduration der Finanzverbindlichkeiten nach Berücksichtigung von Zinsderivaten betrug 7,1 Jahre zum 31. Dezember 2010 (2009: 6,9 Jahre).

Der E.ON-Konzern hielt zum 31. Dezember 2010 Zinsderivate mit einem Nennwert von 5.718 Mio € (2009: 3.195 Mio €).

Eine Sensitivitätsanalyse wurde für das kurzfristige und variabel verzinsliche Fremdkapital unter Einbeziehung entsprechender Sicherungen sowohl des Zins- als auch des Währungsrisikos durchgeführt. Diese Kennzahl wird für das interne Risikocontrolling verwendet und spiegelt die ökonomische Position des E.ON-Konzerns wider. Eine Veränderung des Zinsniveaus um  $\pm 1$  Prozentpunkt (über alle Währungen) würde die Zinsbelastung im Folgejahr um 30 Mio € (2009: 40 Mio €) erhöhen beziehungsweise verringern.

### Risikomanagement im Commodity-Bereich

E.ON ist aufgrund schwankender Preise von Commodities erheblichen Risiken auf der Absatz- und Beschaffungsseite ausgesetzt. Dieses Risiko wird an einer potenziellen negativen Abweichung vom angestrebten Adjusted EBIT bemessen.

Das maximal zulässige Risiko aus Commodities wird im Rahmen der Mittelfristplanung vom Konzernvorstand zentral festgelegt und in Abstimmung mit den Market Units in eine dezentrale Limitstruktur überführt. Vor der Festlegung der Limite wurden die geplanten Investitionsvorhaben und alle sonstigen bekannten Verpflichtungen und quantifizierbaren Risiken berücksichtigt. Die Risikosteuerung und -berichterstattung einschließlich der Portfoliooptimierung für den Konzern wird zentral durch die Konzernleitung durchgeführt.

Commodity-Geschäfte werden bei E.ON im Wesentlichen innerhalb des Systemportfolios abgeschlossen, welches die operativen Grundgeschäfte, bestehende Absatz- und Bezugsverträge und zu Sicherungszwecken oder zur Kraftwerksoptimierung eingesetzte Commodity-Derivate umfasst. Das Risiko im Systemportfolio resultiert damit aus der offenen Position zwischen Planbeschaffung und -erzeugung sowie den Planabsatzmengen. Das Risiko für diese offenen Positionen wird über den Profit-at-Risk gemessen, welcher das Risiko unter Berücksichtigung der Höhe der offenen Position, der Preise, der Volatilität und der Liquidität der zugrunde liegenden Commodities angibt. Der PaR ist dabei definiert als die maximal zu erwartende negative Wertänderung des Portfolios bei einer Wahrscheinlichkeit von 95 Prozent, wenn die offene Position schnellstmöglich geschlossen wird.

E.ON setzt derivative Finanzinstrumente ein, um die Marktpreisrisiken aus den Commodities Strom, Gas, Kohle, Emissionsrechte und Öl zu reduzieren. Hierbei handelt es sich im Wesentlichen um Swaps und Termingeschäfte auf Strom, Gas, Kohle und Öl sowie emissionsrechtbezogene Derivate. Derivate im Commodity-Bereich werden durch die Market Units für die Zwecke des Preisrisikomanagements, der Systemoptimierung, des Lastenausgleichs oder auch zur Margenerhöhung eingesetzt. Eigenhandel ist hierbei nur in besonders engen Limiten zugelassen. Für das Eigenhandelsportfolio wird ein Fünf-Tages-Value-at-Risk als Risikomaß verwendet bei einem Konfidenzintervall von 95 Prozent.

Die Limite für jegliche Handelsaktivitäten einschließlich Eigenhandel werden durch handelsunabhängige Gremien festgesetzt und überwacht. Für das Systemportfolio wird ein mit Limiten versehener Planungshorizont von drei Jahren angesetzt. Die im Rahmen von Sicherungs- und Eigenhandelsaktivitäten angewandten Grenzwerte beinhalten Fünf-Tages-Value-at-Risk- und Profit-at-Risk-Kennziffern sowie Stop-Loss-Werte. Zusätzliche Kernelemente des Risikomanagementsystems umfassen die klare Funktionstrennung der Bereiche Disposition, Handel, Abwicklung und Kontrolle, konzernweit gültige Richtlinien für den Umgang mit Commodity-Risiken sowie eine handelsunabhängige Risikoberichterstattung. Monatlich findet eine Berichterstattung über die konzernweite Entwicklung der Risiken aus dem Commodity-Bereich an die Mitglieder des Risikokomitees statt.

Der E.ON-Konzern hielt zum 31. Dezember 2010 strom-, gas-, kohle-, öl- und emissionsrechtbezogene Derivate mit einem Nennwert von 154.196 Mio € (2009: 119.587 Mio €).

Der VaR für das Eigenhandelsportfolio betrug zum Stichtag 20 Mio € (2009: 11,5 Mio €). Der PaR für die im Systemportfolio gehaltenen finanziellen und physischen Commodity-Positionen über einen Planungshorizont von drei Jahren betrug zum 31. Dezember 2010 2.454 Mio € (2009: 2.845 Mio €).

Die Berechnung des PaR spiegelt die ökonomische Position des E.ON-Konzerns über einen Planungshorizont von drei Jahren wider und umfasst neben den Finanzinstrumenten im Anwendungsbereich des IFRS 7 auch die übrigen Positionen des Commodity-Bereichs. Diese ökonomische Position wird ebenfalls für das interne Risikocontrolling verwendet.

### Kreditrisikomanagement

Um Kreditrisiken aus der operativen Geschäftstätigkeit sowie dem Einsatz von Finanzinstrumenten zu minimieren, werden Transaktionen nur mit Geschäftspartnern geschlossen, welche die internen Mindestanforderungen erfüllen. Auf Basis der internen, sofern verfügbar auch externen, Bonitätseinstufungen werden Limite für das maximale Kreditrisiko vergeben. Der Prozess der Limitvergabe und -überwachung erfolgt dabei

im Rahmen von Mindestvorgaben, basierend auf einer konzernweiten Kreditrisikomanagement-Richtlinie. Nicht umfassend in diesem Prozess enthalten sind Langfristverträge des operativen Geschäfts und Transaktionen des Assetmanagements. Diese werden auf Ebene der zuständigen Market Units gesondert überwacht.

Grundsätzlich sind die jeweiligen Konzerngesellschaften für das Kreditrisikomanagement des operativen Geschäfts verantwortlich. In Abhängigkeit von der Art der Geschäftstätigkeit und der Höhe des Kreditlimits findet eine ergänzende Überwachung und Steuerung des Kreditrisikos sowohl durch die Market Unit als auch durch das Corporate Center statt. Das Risikokomitee wird monatlich über die Höhe der Kreditlimite sowie deren Auslastung informiert. Eine intensive, standardisierte Überwachung von quantitativen und qualitativen Frühwarnindikatoren sowie ein enges Monitoring der Bonität von Geschäftspartnern versetzen das Kreditrisikomanagement von E.ON in die Lage, frühzeitig risikominimierend zu agieren.

Soweit möglich werden im Rahmen des Kreditrisikomanagements mit Geschäftspartnern Sicherheiten zur Minderung des Kreditrisikos verhandelt. Als Sicherheiten werden Garantien der jeweiligen Mutterunternehmen oder der Nachweis von Gewinnabführungsverträgen in Verbindung mit Patronats-erklärungen (Letter of Awareness) akzeptiert. Darüber hinaus werden in geringerem Umfang Bankgarantien beziehungsweise -bürgschaften und die Hinterlegung von Barmitteln und Wertpapieren als Sicherheiten zur Reduzierung des Kreditrisikos eingefordert. Zur Höhe und den Hintergründen der als Sicherheiten erhaltenen finanziellen Vermögenswerte wird auf die Textziffern 18 und 26 verwiesen.

Derivative Transaktionen werden im Allgemeinen auf der Grundlage von Standardverträgen durchgeführt, bei denen eine Aufrechnung (Netting) aller offenen Transaktionen mit den Geschäftspartnern möglich ist. Für die Zins- und Währungsderivate im Bankenbereich wird diese Aufrechnungsmöglichkeit bilanziell nachvollzogen. Zur weiteren Reduzierung des Kreditrisikos werden mit ausgewählten Geschäftspartnern bilaterale Margining-Vereinbarungen getroffen. Obwohl ein Großteil der Transaktionen im Rahmen von Verträgen abgeschlossen wurde, die ein Netting erlauben, ist eine Aufrechnung der laufenden Transaktionen mit positiven und negativen

Fair Values in der nachfolgenden Tabelle nicht dargestellt. Somit wird das Kreditrisiko in der nachfolgenden Tabelle konservativer dargestellt, als es tatsächlich ist. Es entspricht der Summe der positiven Marktwerte. Da insbesondere Derivate

hohen Marktschwankungen unterliegen, können kurzfristig Kreditrisikokonzentrationen entstehen. Insgesamt weist der Derivatebestand zum 31. Dezember 2010 folgende Laufzeiten- und Bonitätsstruktur auf:

| Rating des Kontrahenten                |                   |                              |                  |                              |                     |                              |                    |                              |
|----------------------------------------|-------------------|------------------------------|------------------|------------------------------|---------------------|------------------------------|--------------------|------------------------------|
| Standard & Poor's und/<br>oder Moody's | 31. Dezember 2010 |                              |                  |                              |                     |                              |                    |                              |
|                                        | Summe             |                              | Davon bis 1 Jahr |                              | Davon 1 bis 5 Jahre |                              | Davon über 5 Jahre |                              |
|                                        | Nominal-<br>wert  | Kontra-<br>henten-<br>risiko | Nominal-<br>wert | Kontra-<br>henten-<br>risiko | Nominal-<br>wert    | Kontra-<br>henten-<br>risiko | Nominal-<br>wert   | Kontra-<br>henten-<br>risiko |
| in Mio €                               |                   |                              |                  |                              |                     |                              |                    |                              |
| AAA/Aaa bis AA-/Aa3                    | 40.518,4          | 2.268,8                      | 25.940,9         | 1.178,4                      | 11.042,5            | 840,2                        | 3.535,0            | 250,2                        |
| A+/A1 bis A-/A3                        | 71.180,5          | 4.009,4                      | 46.095,3         | 1.844,1                      | 18.576,8            | 1.260,9                      | 6.508,4            | 904,4                        |
| BBB+/Baa1 bis BBB-/Baa3                | 20.467,4          | 1.311,7                      | 15.484,3         | 870,1                        | 3.887,3             | 279,4                        | 1.095,8            | 162,2                        |
| BB+/Ba1 bis BB-/Ba3                    | 22.870,4          | 1.558,6                      | 15.733,3         | 1.096,2                      | 6.302,8             | 343,5                        | 834,3              | 118,9                        |
| Sonstige <sup>1)</sup>                 | 28.485,7          | 1.794,8                      | 13.166,6         | 898,3                        | 7.876,8             | 538,0                        | 7.442,3            | 358,5                        |
| <b>Summe</b>                           | <b>183.522,4</b>  | <b>10.943,3</b>              | <b>116.420,4</b> | <b>5.887,1</b>               | <b>47.686,2</b>     | <b>3.262,0</b>               | <b>19.415,8</b>    | <b>1.794,2</b>               |

1) Die Position „Sonstige“ umfasst hauptsächlich Kontrahenten, für die E.ON Sicherheiten von Geschäftspartnern der oben genannten Ratingkategorien erhalten hat.

| Rating des Kontrahenten                |                   |                              |                  |                              |                     |                              |                    |                              |
|----------------------------------------|-------------------|------------------------------|------------------|------------------------------|---------------------|------------------------------|--------------------|------------------------------|
| Standard & Poor's und/<br>oder Moody's | 31. Dezember 2009 |                              |                  |                              |                     |                              |                    |                              |
|                                        | Summe             |                              | Davon bis 1 Jahr |                              | Davon 1 bis 5 Jahre |                              | Davon über 5 Jahre |                              |
|                                        | Nominal-<br>wert  | Kontra-<br>henten-<br>risiko | Nominal-<br>wert | Kontra-<br>henten-<br>risiko | Nominal-<br>wert    | Kontra-<br>henten-<br>risiko | Nominal-<br>wert   | Kontra-<br>henten-<br>risiko |
| in Mio €                               |                   |                              |                  |                              |                     |                              |                    |                              |
| AAA/Aaa bis AA-/Aa3                    | 26.884,3          | 2.482,4                      | 14.527,5         | 1.675,1                      | 9.914,6             | 674,1                        | 2.442,2            | 133,2                        |
| A+/A1 bis A-/A3                        | 69.631,6          | 6.029,4                      | 41.217,8         | 3.128,4                      | 21.382,6            | 1.784,1                      | 7.031,2            | 1.116,9                      |
| BBB+/Baa1 bis BBB-/Baa3                | 8.300,6           | 369,6                        | 6.602,7          | 258,6                        | 1.597,9             | 111,0                        | 100,0              | -                            |
| BB+/Ba1 bis BB-/Ba3                    | 1.983,4           | 84,9                         | 402,6            | 13,5                         | 651,2               | 71,4                         | 929,6              | -                            |
| Sonstige <sup>1)</sup>                 | 31.922,3          | 1.849,4                      | 14.474,3         | 1.229,5                      | 10.238,1            | 503,0                        | 7.209,9            | 116,9                        |
| <b>Summe</b>                           | <b>138.722,2</b>  | <b>10.815,7</b>              | <b>77.224,9</b>  | <b>6.305,1</b>               | <b>43.784,4</b>     | <b>3.143,6</b>               | <b>17.712,9</b>    | <b>1.367,0</b>               |

1) Die Position „Sonstige“ umfasst hauptsächlich Kontrahenten, für die E.ON Sicherheiten von Geschäftspartnern der oben genannten Ratingkategorien erhalten hat.

Erhaltene Sicherheiten wurden nicht berücksichtigt. Bei mit Börsen abgeschlossenen Termin- und Optionskontrakten sowie bei börsengehandelten emissionsrechtbezogenen Derivaten mit einem Nominalwert von insgesamt 26.726 Mio € (2009: 20.005 Mio €) bestehen zum Bilanzstichtag keine Kreditrisiken.

Für die übrigen Finanzinstrumente entspricht das maximale Ausfallrisiko ihren Buchwerten.

Die Anlagen in Schuldinstrumenten sind nahezu vollständig der Kategorie Investment Grade zuzuordnen.

Bei E.ON erfolgt die Anlage liquider Mittel grundsätzlich bei Banken mit guter Bonität oder in erstklassig gerateten Geldmarktfonds. Konzernunternehmen, die aufgrund rechtlicher Beschränkungen nicht in das Cashpooling einbezogen sind, legen im geringen Umfang Gelder bei führenden lokalen Banken an. Neben der standardisierten Bonitätsprüfung und Limiterleitung werden die CDS-Level der Banken täglich überwacht.

## Assetmanagement

Zum Zweck der Finanzierung langfristiger Zahlungsverpflichtungen, unter anderem auch Entsorgungsverpflichtungen (siehe Textziffer 25), wurden per 31. Dezember 2010 von Gesellschaften der Market Unit Central Europe Kapitalanlagen in Höhe von insgesamt 4,7 Mrd € (2009: 4,8 Mrd €) gehalten.

Für dieses Finanzvermögen wird eine „Akkumulationsstrategie“ (Total-Return-Ansatz) verfolgt, mit einer breiten Diversifikation über die Assetklassen Geldmarkt, Renten, Immobilien und Aktien. Für die Ermittlung der Ziel-Portfoliostruktur werden in regelmäßigen Abständen Asset-Allocation-Studien durchgeführt. Der Großteil des Vermögens wird in Investmentfonds angelegt, die von externen Fondsmanagern verwaltet werden. Die fortlaufende Überwachung des Gesamtrisikos und der einzelnen Fondsmanager erfolgt durch das Konzern-Assetmanagement der E.ON AG, das Teil des Finanzbereichs der E.ON AG ist. Das Risikomanagement erfolgt auf Basis eines Risikobudgets, dessen Auslastung regelmäßig überwacht wird. Der Drei-Monats-VaR mit einem Konfidenzintervall von 98 Prozent beträgt für dieses Finanzvermögen insgesamt 107 Mio € (2009: 103 Mio €).

Zusätzlich verwaltet die Versorgungskasse Energie VVaG (VKE) zum Jahresende Finanzanlagen in Höhe von 0,6 Mrd € (2009: 0,5 Mrd €), die fast ausschließlich der Rückdeckung von Versorgungsansprüchen von Mitarbeitern in der Market Unit Central Europe dienen. Im Jahr 2009 wurden 2,1 Mrd € aus der VKE entnommen und zum Großteil (1,7 Mrd €) in das CTA überführt. Das verbleibende Vermögen der VKE stellt kein Planvermögen gemäß IAS 19 dar (siehe Textziffer 24) und wird unter den langfristigen und kurzfristigen Vermögenswerten in der Bilanz gezeigt. Der Großteil des über Geldmarkt-, Renten-, Immobilien- und Aktienanlagen diversifizierten Portfolios wird in Investmentfonds angelegt, die von externen Fondsmanagern verwaltet werden. Die VKE unterliegt den Regelungen des Versicherungsaufsichtsgesetzes (VAG) und der Geschäftsbetrieb untersteht der Aufsicht der Bundesanstalt für Finanzdienstleistungsaufsicht (BaFin). Die Kapitalanlage und das fortlaufende Risikomanagement erfolgt in dem von der BaFin vorgegebenen Regulierungsrahmen. Der Drei-Monats-VaR mit einem Konfidenzintervall von 98 Prozent beträgt für dieses Finanzvermögen 18,4 Mio € (2009: 19,3 Mio €).

## (32) Transaktionen mit nahestehenden Unternehmen und Personen

Im Rahmen der normalen Geschäftstätigkeit steht E.ON mit zahlreichen Unternehmen im Lieferungs- und Leistungsaustausch. Darunter befinden sich als nahestehende Unternehmen insbesondere at equity bewertete assoziierte Unternehmen. Weiterhin sind als nahestehende Unternehmen auch Gemeinschaftsunternehmen sowie zum Fair Value bilanzierte Beteiligungen und nicht voll konsolidierte Tochterunternehmen, deren Anteil am Umfang der nachfolgend genannten Transaktionen insgesamt von untergeordneter Bedeutung ist, berücksichtigt. Mit diesen Unternehmen wurden Transaktionen getätigt, die sich im Berichts- und Vorjahr wie folgt ausgewirkt haben:

| Transaktionen mit nahestehenden Unternehmen und Personen |       |       |
|----------------------------------------------------------|-------|-------|
| in Mio €                                                 | 2010  | 2009  |
| Erträge                                                  | 2.793 | 5.312 |
| Aufwendungen                                             | 2.270 | 3.060 |
| Forderungen                                              | 1.812 | 1.641 |
| Verbindlichkeiten                                        | 715   | 2.950 |

In den Aufwendungen sind im Vorjahr 100 Mio € enthalten, die der Abgangsgruppe US-Midwest (siehe Textziffer 4) zuzuordnen sind.

Erträge aus Transaktionen mit nahestehenden Unternehmen beruhen hauptsächlich auf Lieferungen von Gas und Strom an Weiterverteiler und kommunale Unternehmen, insbesondere an Stadtwerke. Die Geschäftsbeziehungen zu diesen Unternehmen unterscheiden sich grundsätzlich nicht von jenen Beziehungen, die mit kommunalen Unternehmen ohne Beteiligung von E.ON bestehen.

Aufwendungen mit nahestehenden Unternehmen entstehen vor allem durch Gas-, Kohle- und Strombezüge.

Die Forderungen gegen nahestehende Unternehmen beinhalten im Wesentlichen Forderungen aus Lieferungen und Leistungen.

E.ON weist gegenüber nahestehenden Unternehmen Verbindlichkeiten aus, von denen 132 Mio € (2009: 369 Mio €) aus Lieferungs- und Leistungsbeziehungen mit Gemeinschafts-Kernkraftwerken resultieren. Diese Verbindlichkeiten haben keine feste Laufzeit und werden mit 1,0 Prozent p.a. (2009: 1,0 Prozent) verzinst. E.ON bezieht von diesen Kraftwerken Strom auf Basis eines Kostenübernahmevertrags sowie zu einem Tarif auf Basis der Kosten zuzüglich einer Marge (cost plus fee). Die Abrechnung dieser Transaktionen erfolgt hauptsächlich über Verrechnungskonten. Im Vorjahr wies E.ON Finanzverbindlichkeiten in Höhe von 1.232 Mio € (2010: 0 Mio €) aus, die aus Termingeldanlagen dieser Gemeinschafts-Kernkraftwerke bei E.ON resultieren.



Entsprechend IAS 24 sind die Leistungen anzugeben, die dem Management in Schlüsselpositionen (Vorstandsmitglieder der E.ON AG) gewährt wurden. Der Aufwand für das Geschäftsjahr beträgt für kurzfristig fällige Leistungen 12,3 Mio € (2009: 12,3 Mio €) und für Leistungen aus Anlass der Beendigung des Dienstverhältnisses 12,3 Mio € (2009: 0,0 Mio €) sowie für Leistungen nach Beendigung des Dienstverhältnisses 2,0 Mio € (2009: 1,6 Mio €).

Als Leistung nach Beendigung des Dienstverhältnisses wird der aus den Pensionsrückstellungen resultierende Dienstzeitaufwand (service cost) ausgewiesen.

Der nach den Maßgaben von IFRS 2 ermittelte Aufwand für die im Geschäftsjahr bestehenden Tranchen des E.ON-Aktienoptionsprogramms und des E.ON Share Performance Planes beträgt 1,7 Mio € (2009: Aufwand 3,4 Mio €).

Detaillierte und individualisierte Angaben hinsichtlich der Vergütung finden sich im Vergütungsbericht auf den Seiten 168 bis 175.

### (33) Segmentberichterstattung

Die Segmentberichterstattung des E.ON-Konzerns ist an der internen Organisations- und Berichtsstruktur ausgerichtet.

- Central Europe fokussiert sich auf das Stromgeschäft sowie das Downstream-Gasgeschäft in Zentraleuropa.
- Pan European Gas ist für das Upstream- und Midstream-Gasgeschäft verantwortlich. Daneben hält die Market Unit überwiegend Energiebeteiligungen im europäischen Ausland.
- UK umfasst das Energiegeschäft in Großbritannien.
- Nordic konzentriert sich auf das Energiegeschäft in Nordeuropa.
- Energy Trading vereint die europäischen Handelsaktivitäten für Strom, Gas, Kohle, Öl und CO<sub>2</sub>-Zertifikate.
- Alle sonstigen Segmente werden im Einklang mit IFRS 8 zusammengefasst und als Segment Neue Märkte bezeichnet. Dies beinhaltet die Aktivitäten der Market Units Climate & Renewables, Italy und Russia sowie Spain.

Zudem beinhaltet Corporate Center/Konsolidierung, neben der E.ON AG selbst, die direkt von der E.ON AG geführten Beteiligungen sowie die auf Konzernebene durchzuführenden Konsolidierungen.

Nach IFRS sind veräußerte beziehungsweise zum Verkauf bestimmte Segmente oder wesentliche Unternehmensteile unter den nicht fortgeführten Aktivitäten auszuweisen. In den Geschäftsjahren 2010 und 2009 betrifft dies die Market Unit US-Midwest. Die entsprechenden Ergebnis- und Cash-flow-Größen zum 31. Dezember 2010 sind, ebenso wie die für die Vorperioden berichteten, um sämtliche Bestandteile der nicht fortgeführten Aktivitäten bereinigt (siehe Erläuterungen in Textziffer 4).

Zur internen Steuerung und als Indikator für die nachhaltige Ertragskraft eines Geschäfts dient bei E.ON das Adjusted EBIT, ein um außergewöhnliche Effekte bereinigtes Ergebnis vor Zinsen und Steuern. Zu den Bereinigungen zählen das wirtschaftliche Zinsergebnis, Netto-Buchgewinne, Aufwendungen für Restrukturierung/Kostenmanagement sowie das sonstige nicht operative Ergebnis.

Zur Ermittlung des wirtschaftlichen Zinsergebnisses wird das Zinsergebnis gemäß Gewinn- und Verlustrechnung nach wirtschaftlichen Kriterien abgegrenzt und um außergewöhnliche Effekte, das heißt um neutrale Zinsanteile, bereinigt. Bei den Netto-Buchgewinnen handelt es sich um einen Saldo aus Buchgewinnen und -verlusten aus Desinvestitionen, die in den sonstigen betrieblichen Erträgen und Aufwendungen enthalten sind. Bei den Aufwendungen für Restrukturierung/Kostenmanagement handelt es sich um außergewöhnliche Aufwendungen mit einmaligem Charakter. Im sonstigen nicht operativen Ergebnis werden sonstige nicht operative Aufwendungen und Erträge mit einmaligem beziehungsweise seltenem Charakter zusammengefasst. Je nach Einzelfall können hier unterschiedliche Posten der Gewinn- und Verlustrechnung betroffen sein. So sind zum Beispiel Effekte aus der Marktbeurteilung von Derivaten in den sonstigen betrieblichen Aufwendungen und Erträgen sowie Wertminderungen auf Sachanlagen in den Abschreibungen enthalten.

Durch die vorgenommenen Anpassungen können die in der Segmentberichterstattung ausgewiesenen Erfolgspositionen von den gemäß IFRS definierten Kennzahlen abweichen.



Die folgende Tabelle zeigt die Überleitung des Adjusted EBIT auf den Konzernüberschuss nach IFRS:

| Konzernüberschuss                                             |              |               |
|---------------------------------------------------------------|--------------|---------------|
| in Mio €                                                      | 2010         | 2009          |
| Adjusted EBIT                                                 | 9.454        | 9.291         |
| Wirtschaftliches Zinsergebnis                                 | -2.257       | -2.201        |
| Netto-Buchgewinne/-verluste                                   | 2.873        | 4.815         |
| Aufwendungen für Restrukturierung/<br>Kostenmanagement        | -621         | -443          |
| Sonstiges nicht operatives Ergebnis                           | -386         | 38            |
| <b>Ergebnis aus fortgeführten Aktivitäten<br/>vor Steuern</b> | <b>9.063</b> | <b>11.500</b> |
| Steuern vom Einkommen und vom<br>Ertrag                       | -1.946       | -2.858        |
| <b>Ergebnis aus fortgeführten Aktivitäten</b>                 | <b>7.117</b> | <b>8.642</b>  |
| Ergebnis aus nicht fortgeführten<br>Aktivitäten               | -836         | 27            |
| <b>Konzernüberschuss</b>                                      | <b>6.281</b> | <b>8.669</b>  |
| Anteil der Gesellschafter der E.ON AG                         | 5.853        | 8.420         |
| Anteile ohne beherrschenden Einfluss                          | 428          | 249           |

Im Geschäftsjahr 2010 lagen die Netto-Buchgewinne um 1,9 Mrd € unter dem Vorjahresniveau. Dies ist auf die Abgabe von Stromkapazitäten im Rahmen der Verpflichtungszusage gegenüber der EU-Kommission zurückzuführen. Die hieraus resultierenden Buchgewinne waren im Berichtszeitraum 2009 erheblich höher als im Jahr 2010. Im Jahr 2010 wirkten sich die Buchgewinne aus der Veräußerung von Gazprom-Anteilen und der Abgabe des Höchstspannungsnetzes (transpower) positiv aus.

Die Aufwendungen für Restrukturierung/Kostenmanagement sind 2010 im Vergleich zum Vorjahr um rund 178 Mio € gestiegen. Die Aufwendungen entfielen hierbei wie im Vorjahr im Wesentlichen auf Strukturmaßnahmen bei deutschen Regionalversorgern und auf Kosten in Verbindung mit der fortgeführten Umsetzung der im Jahr 2008 beschlossenen Konzernorganisationsstruktur. Im Jahr 2010 fielen darüber hinaus höhere Kosten im Rahmen unseres Projekts PerformtoWin als im Vorjahr an.

#### Segmentinformationen nach Bereichen

| in Mio €                                          | Central Europe |               | Pan-European Gas |               | UK            |               |
|---------------------------------------------------|----------------|---------------|------------------|---------------|---------------|---------------|
|                                                   | 2010           | 2009          | 2010             | 2009          | 2010          | 2009          |
| Außenumsatz                                       | 34.584         | 33.456        | 15.017           | 15.360        | 8.627         | 8.247         |
| Innenumsatz                                       | 8.067          | 7.963         | 5.879            | 5.280         | 1.920         | 1.850         |
| <b>Umsatzerlöse</b>                               | <b>42.651</b>  | <b>41.419</b> | <b>20.896</b>    | <b>20.640</b> | <b>10.547</b> | <b>10.097</b> |
| Adjusted EBITDA                                   | 6.462          | 6.466         | 2.031            | 2.275         | 1.342         | 1.080         |
| Planmäßige Abschreibungen                         | -1.651         | -1.573        | -533             | -465          | -454          | -427          |
| Impairments (-)/Wertaufholungen (+) <sup>1)</sup> | -68            | -61           | -27              | -56           | 2             | -4            |
| <b>Adjusted EBIT</b>                              | <b>4.743</b>   | <b>4.832</b>  | <b>1.471</b>     | <b>1.754</b>  | <b>890</b>    | <b>649</b>    |
| darin Equity-Ergebnis <sup>1)</sup>               | 274            | 292           | 477              | 713           | -20           | 1             |
| Operativer Cashflow                               | 6.050          | 5.180         | 1.255            | 645           | 1.386         | 1.562         |
| Investitionen                                     | 3.192          | 3.256         | 1.244            | 1.610         | 1.029         | 897           |
| Immaterielle Vermögenswerte und Sachanlagen       | 3.103          | 3.039         | 1.102            | 1.117         | 1.006         | 864           |
| Beteiligungen <sup>2)</sup>                       | 89             | 217           | 142              | 493           | 23            | 33            |

1) Die Adjusted-EBIT-wirksamen Impairments weichen aufgrund von Wertminderungen auf at equity bewertete Unternehmen und auf sonstige Finanzanlagen sowie aufgrund von im neutralen Ergebnis erfassten Impairments von den nach IFRS ausgewiesenen Beträgen ab. Wertminderungen auf at equity bewertete Unternehmen und auf sonstige Finanzanlagen werden nach IFRS im Ergebnis aus at equity bewerteten Unternehmen beziehungsweise im Finanzergebnis erfasst.

2) Die Investitionen in Beteiligungen enthalten neben at equity bewerteten Beteiligungen auch Erwerbe voll konsolidierter Unternehmen sowie Investitionen in nicht konsolidierungspflichtige Beteiligungen.

Das sonstige nicht operative Ergebnis war vor allem durch die außerplanmäßigen Wertberichtigungen auf den Goodwill von rund 1,1 Mrd € und auf das sonstige Anlagevermögen in Höhe von 1,5 Mrd € bei den von Enel/Acciona und Endesa erworbenen Aktivitäten in Italien, Spanien und Frankreich geprägt (siehe hierzu auch Textziffer 14). Dagegen resultierte aus der stichtagsbezogenen Marktbewertung von Derivaten, mit denen das operative Geschäft gegen Preisschwankungen abgesichert wird, zum 31. Dezember 2010 ein positiver Effekt von rund 2,7 Mrd € gegenüber etwa 1,1 Mrd € zum Vorjahresstichtag. Darüber hinaus war das Vorjahresergebnis vor allem durch das Bußgeld wegen angeblicher Marktabreden zwischen E.ON Ruhrgas und GdF Suez in Höhe von 553 Mio € belastet.

Eine weitere Anpassung im Rahmen der internen Erfolgsanalyse betrifft das Zinsergebnis, das nach wirtschaftlichen Kriterien dargestellt wird. Zur Ermittlung des wirtschaftlichen Zinsergebnisses wird das Zinsergebnis gemäß Gewinn- und Verlustrechnung nach wirtschaftlichen Kriterien abgegrenzt und um außergewöhnliche Effekte, das heißt um neutrale Zinsanteile, bereinigt.

#### Wirtschaftliches Zinsergebnis

| in Mio €                                      | 2010          | 2009          |
|-----------------------------------------------|---------------|---------------|
| Zinsergebnis laut Gewinn- und Verlustrechnung | -2.303        | -2.273        |
| Neutraler Zinsaufwand (+)/-ertrag (-)         | 46            | 72            |
| <b>Wirtschaftliches Zinsergebnis</b>          | <b>-2.257</b> | <b>-2.201</b> |

Das wirtschaftliche Zinsergebnis lag mit -2.257 Mio € auf dem Vorjahresniveau (2009: -2.201 Mio €). Hierbei stand den geringeren Zinsen aufgrund der im Jahresverlauf niedrigeren Netto-Verschuldung unter anderem ein höherer Zinsaufwand aus der einmaligen Berücksichtigung des Zinsnachteils aus den Vorausleistungen in den Fonds zur Förderung der Erneuerbaren Energien gegenüber.

Grundsätzlich werden konzerninterne Transaktionen zu Marktpreisen getätigt.

| Nordic       |              | Energy Trading |               | Neue Märkte  |              | Corporate Center/<br>Konsolidierung |                | E.ON-Konzern  |               |
|--------------|--------------|----------------|---------------|--------------|--------------|-------------------------------------|----------------|---------------|---------------|
| 2010         | 2009         | 2010           | 2009          | 2010         | 2009         | 2010                                | 2009           | 2010          | 2009          |
| 3.196        | 2.491        | 25.225         | 14.457        | 6.163        | 5.889        | 51                                  | 74             | 92.863        | 79.974        |
| 1.290        | 857          | 22.723         | 26.794        | 708          | 1.860        | -40.587                             | -44.604        | -             | -             |
| <b>4.486</b> | <b>3.348</b> | <b>47.948</b>  | <b>41.251</b> | <b>6.871</b> | <b>7.749</b> | <b>-40.536</b>                      | <b>-44.530</b> | <b>92.863</b> | <b>79.974</b> |
| 975          | 865          | 1.205          | 961           | 1.586        | 1.544        | -255                                | -216           | 13.346        | 12.975        |
| -386         | -309         | -4             | -10           | -651         | -660         | -73                                 | -62            | -3.752        | -3.506        |
| -9           | -7           | -5             | -2            | -27          | -22          | -6                                  | -26            | -140          | -178          |
| <b>580</b>   | <b>549</b>   | <b>1.196</b>   | <b>949</b>    | <b>908</b>   | <b>862</b>   | <b>-334</b>                         | <b>-304</b>    | <b>9.454</b>  | <b>9.291</b>  |
| 8            | -7           | -              | -             | 68           | 10           | 1                                   | -7             | 808           | 1.002         |
| 867          | 523          | 1.456          | 1.122         | 932          | 1.010        | -1.332                              | -1.452         | 10.614        | 8.590         |
| 730          | 1.104        | 16             | 53            | 1.975        | 1.881        | 100                                 | -146           | 8.286         | 8.655         |
| 726          | 810          | 15             | 41            | 1.835        | 1.788        | 117                                 | 172            | 7.904         | 7.831         |
| 4            | 294          | 1              | 12            | 140          | 93           | -17                                 | -318           | 382           | 824           |

**Zusätzliche Angaben auf Unternehmensebene**

Der Außenumsatz nach Produkten teilt sich wie folgt auf:

| Segmentinformationen nach Produkten |               |               |
|-------------------------------------|---------------|---------------|
| in Mio €                            | 2010          | 2009          |
| Strom                               | 55.167        | 47.022        |
| Gas                                 | 31.731        | 28.073        |
| Sonstige                            | 5.965         | 4.879         |
| <b>Summe</b>                        | <b>92.863</b> | <b>79.974</b> |

Unter dem Posten Sonstige sind insbesondere Umsätze aus Dienstleistungen und sonstigen Handelsaktivitäten enthalten.

Der Außenumsatz (nach Sitz der Kunden und Gesellschaften) und die Sachanlagen stellen sich nach Regionen wie folgt dar:

| Segmentinformationen nach Regionen       |             |        |                  |        |                |        |          |       |        |        |
|------------------------------------------|-------------|--------|------------------|--------|----------------|--------|----------|-------|--------|--------|
|                                          | Deutschland |        | Übriges Euroland |        | Übriges Europa |        | Sonstige |       | Summe  |        |
| in Mio €                                 | 2010        | 2009   | 2010             | 2009   | 2010           | 2009   | 2010     | 2009  | 2010   | 2009   |
| Außenumsatz nach Sitz des Kunden         | 49.824      | 42.670 | 13.457           | 12.032 | 29.188         | 25.178 | 394      | 94    | 92.863 | 79.974 |
| Außenumsatz nach Sitz der Gesellschaften | 62.966      | 51.477 | 7.925            | 8.648  | 21.782         | 19.760 | 190      | 89    | 92.863 | 79.974 |
| Sachanlagen                              | 20.562      | 19.454 | 9.214            | 9.742  | 28.484         | 23.905 | 2.610    | 7.226 | 60.870 | 60.327 |

Die Umsätze der Kategorien „Übriges Europa“ entfallen mit knapp der Hälfte auf Großbritannien. Aus der Kundenstruktur des Konzerns ergeben sich keine wesentlichen Konzentrationen auf bestimmte geografische Regionen oder Geschäftsbereiche. Aufgrund der großen Anzahl von Kunden und der Vielzahl der Geschäftsaktivitäten gibt es keine Kunden, deren Geschäftsvolumen im Vergleich zum Gesamtgeschäftsvolumen des Konzerns wesentlich ist.

Die Gasbezüge von E.ON stammen im Wesentlichen aus Russland, Norwegen, Deutschland, den Niederlanden und Dänemark.

### (34) Organbezüge

#### Aufsichtsrat

Unter der Voraussetzung, dass die Hauptversammlung am 5. Mai 2011 die vorgeschlagene Dividende beschließt, betragen die Gesamtbezüge der Mitglieder des Aufsichtsrats 4,9 Mio € (2009: 4,9 Mio €).

Im Geschäftsjahr 2010 bestanden keine Kredite gegenüber Mitgliedern des Aufsichtsrats.

Das System der Vergütung des Aufsichtsrats sowie die Bezüge jedes einzelnen Aufsichtsratsmitglieds sind im Vergütungsbericht, der Bestandteil des zusammengefassten Lageberichts ist, auf den Seiten 168 und 169 dargestellt.

Weitere Angaben zu den Mitgliedern des Aufsichtsrats finden sich auf den Seiten 180 und 181.

#### Vorstand

Die Gesamtbezüge des Vorstands betrugen 15,4 Mio € (2009: 16,1 Mio €) und enthalten die Grundvergütung, die Tantieme, die sonstigen Bezüge sowie die aktienbasierte Vergütung.

Die Gesamtbezüge der früheren Vorstandsmitglieder und ihrer Hinterbliebenen betrugen 25,4 Mio € (2009: 9,9 Mio €). Für die Pensionsverpflichtungen gegenüber früheren Vorstandsmitgliedern und ihren Hinterbliebenen sind 136,6 Mio € (2009: 109,1 Mio €) zurückgestellt.

Im Geschäftsjahr 2010 bestanden keine Kredite gegenüber Vorstandsmitgliedern.

Das System der Vergütung des Vorstands sowie die Bezüge jedes einzelnen Vorstandsmitglieds sind im Vergütungsbericht, der Bestandteil des zusammengefassten Lageberichts ist, auf den Seiten 170 bis 175 dargestellt.

Weitere Angaben zu den Mitgliedern des Vorstands finden sich auf der Seite 187.

---

### (35) Sonstige wesentliche Sachverhalte

#### Anleihenrückkäufe in 2011

Zur Schuldenreduzierung hat E.ON am 24. Januar 2011 Anleihegläubigern ein zweistufiges Angebot zum vorzeitigen Rückkauf mehrerer Anleihen unterbereitet. Im Rahmen dessen wurden Anleihen im Nennwert von 1,81 Mrd € zurückgekauft.

#### Veräußerungen in 2011

Im Rahmen unserer Strategie, Aktivitäten über 15 Mrd € bis Ende 2013 zu veräußern, wird E.ON das britische Stromverteilnetz an PPL verkaufen. Der voraussichtliche Kaufpreis für das Eigenkapital sowie für die Übernahme bestimmter Verbindlichkeiten beläuft sich auf rund 4,2 Mrd £ (rund 4,9 Mrd €). In den Verbindlichkeiten sind Pensionsverpflichtungen in Höhe von rund 0,2 Mrd £ enthalten. Der Vollzug der Transaktion wird für Anfang April 2011 erwartet. Der Veräußerungsgewinn wird sich auf etwa 0,2 Mrd € belaufen.

Wir versichern nach bestem Wissen, dass gemäß den anzuwendenden Rechnungslegungsgrundsätzen der Konzernabschluss ein den tatsächlichen Verhältnissen entsprechendes Bild der Vermögens-, Finanz- und Ertragslage des Konzerns vermittelt und im Konzernlagebericht, der mit dem Lagebericht der Gesellschaft zusammengefasst ist, der Geschäftsverlauf einschließlich des Geschäftsergebnisses und die Lage des Konzerns so dargestellt sind, dass ein den tatsächlichen Verhältnissen entsprechendes Bild vermittelt wird, sowie die wesentlichen Chancen und Risiken der voraussichtlichen Entwicklung des Konzerns beschrieben sind.

Düsseldorf, den 28. Februar 2011

Der Vorstand

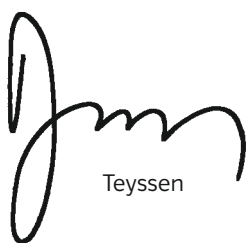

Teyssen



Kildahl



Maubach



Reutersberg



Schenck



Stachelhaus

## (36) Anteilsbesitzliste gemäß § 313 Abs. 2 HGB

| Angaben zum Beteiligungsbesitz gem. § 313 Abs. 2 HGB (Stand: 31. Dez. 2010)                              |                      |                                                                                                                                    |                      |
|----------------------------------------------------------------------------------------------------------|----------------------|------------------------------------------------------------------------------------------------------------------------------------|----------------------|
| Gesellschaft, Sitz                                                                                       | Kapital-<br>anteil % | Gesellschaft, Sitz                                                                                                                 | Kapital-<br>anteil % |
| <b>Market Unit Central Europe</b>                                                                        |                      |                                                                                                                                    |                      |
| „Veszprém-Kogeneráció“ Energiatermelő Zrt., HU, Győr <sup>2)</sup>                                       | 80,0                 | BauMineral GmbH, DE, Herten <sup>1), 8)</sup>                                                                                      | 100,0                |
| Abfallwirtschaft Südholstein GmbH (AWSH), DE, Elmenhorst <sup>5)</sup>                                   | 49,0                 | Bayernwerk AG, DE, München <sup>2)</sup>                                                                                           | 100,0                |
| Abfallwirtschaftsgesellschaft Dithmarschen mbH, DE, Heide <sup>5)</sup>                                  | 49,0                 | Berliner Erdgasspeicher Besitz- u. Verwaltungsgesellschaft bR, DE, Berlin <sup>4)</sup>                                            | 49,9                 |
| Abfallwirtschaftsgesellschaft Höxter mbH, DE, Höxter <sup>5)</sup>                                       | 49,0                 | Beteiligungsgesellschaft der Energieversorgungsunternehmen an der Kerntechnische Hilfsdienst GmbH GbR, DE, Karlsruhe <sup>5)</sup> | 44,0                 |
| Abfallwirtschaftsgesellschaft Rendsburg-Eckernförde mbH, DE, Borgstedt <sup>5)</sup>                     | 49,0                 | BEW Bayreuther Energie- und Wasserversorgungs-GmbH, DE, Bayreuth <sup>4)</sup>                                                     | 24,9                 |
| Abfallwirtschaftsgesellschaft Schleswig-Flensburg mbH, DE, Schleswig <sup>5)</sup>                       | 49,0                 | BHL Biomasse Heizanlage Lichtenfels GmbH, DE, Lichtenfels <sup>5)</sup>                                                            | 25,1                 |
| Abwasser und Service Satrup GmbH (ASG), DE, Satrup <sup>5)</sup>                                         | 49,0                 | BHO Biomasse Heizanlage Obernsees GmbH, DE, Hollfeld <sup>5)</sup>                                                                 | 40,7                 |
| Abwasserbeseitigung Nortorf-Land GmbH, DE, Nortorf <sup>5)</sup>                                         | 49,0                 | BHP Biomasse Heizwerk Pegnitz GmbH, DE, Pegnitz <sup>5)</sup>                                                                      | 46,5                 |
| Abwasserentsorgung Albersdorf GmbH, DE, Albersdorf <sup>5)</sup>                                         | 49,0                 | Bietergemeinschaft Tönsmeier MVA BI-HF, DE, Porta Westfalica <sup>5)</sup>                                                         | 50,0                 |
| Abwasserentsorgung Amt Achterwehr GmbH, DE, Achterwehr <sup>5)</sup>                                     | 49,0                 | Bioenergie Bad Füssing GmbH & Co. KG, DE, Bad Füssing <sup>5)</sup>                                                                | 25,0                 |
| Abwasserentsorgung Bargteheide GmbH, DE, Bargteheide <sup>5)</sup>                                       | 29,0                 | Bioenergie Bad Füssing Verwaltungs-GmbH, DE, Bad Füssing <sup>5)</sup>                                                             | 25,0                 |
| Abwasserentsorgung Berkenthin GmbH, DE, Berkenthin <sup>5)</sup>                                         | 44,0                 | Biogas Ducherow GmbH, DE, Ducherow <sup>2)</sup>                                                                                   | 80,0                 |
| Abwasserentsorgung Bleckede GmbH, DE, Bleckede <sup>5)</sup>                                             | 49,0                 | Biogas Roggenhagen GmbH, DE, Potsdam <sup>2)</sup>                                                                                 | 60,0                 |
| Abwasserentsorgung Brunsbüttel GmbH (ABG), DE, Brunsbüttel <sup>5)</sup>                                 | 49,0                 | Biogas Steyerberg GmbH, DE, Steyerberg <sup>2)</sup>                                                                               | 100,0                |
| Abwasserentsorgung Burg GmbH, DE, Burg <sup>5)</sup>                                                     | 44,0                 | Bioheizwerk Rötzing GmbH, DE, Rötzing <sup>5)</sup>                                                                                | 25,0                 |
| Abwasserentsorgung Friedrichskoog GmbH, DE, Friedrichskoog <sup>5)</sup>                                 | 49,0                 | BioMass Nederland b.v., NL, Maasvlakte <sup>1)</sup>                                                                               | 100,0                |
| Abwasserentsorgung Kappeln GmbH, DE, Kappeln <sup>5)</sup>                                               | 49,0                 | Biomasseheizkraftwerk Emden GmbH, DE, Emden <sup>2)</sup>                                                                          | 70,0                 |
| Abwasserentsorgung Kropp GmbH, DE, Kropp <sup>5)</sup>                                                   | 49,0                 | Biomasseheizkraftwerk Landesbergen GmbH, DE, Landesbergen <sup>5)</sup>                                                            | 50,0                 |
| Abwasserentsorgung Marne-Land GmbH, DE, Diekhusen-Fahrstedt <sup>5)</sup>                                | 49,0                 | Bioplyn Cetin, s.r.o., SK, Bratislava <sup>2)</sup>                                                                                | 71,5                 |
| Abwasserentsorgung Schladen GmbH, DE, Schladen <sup>5)</sup>                                             | 49,0                 | Bioplyn Hont, s.r.o., SK, Bratislava <sup>2)</sup>                                                                                 | 89,1                 |
| Abwasserentsorgung Schöppenstedt GmbH, DE, Schöppenstedt <sup>5)</sup>                                   | 49,0                 | Bioplyn Horovce, s.r.o., SK, Bratislava <sup>2)</sup>                                                                              | 95,5                 |
| Abwasserentsorgung St. Michaelisdonn, Averlak, Dingen, Eddelak GmbH, DE, St. Michaelisdonn <sup>5)</sup> | 25,1                 | Bioplyn Ladzany, s.r.o., SK, Bratislava <sup>2)</sup>                                                                              | 98,3                 |
| Abwasserentsorgung Tellingstedt GmbH, DE, Tellingstedt <sup>5)</sup>                                     | 35,0                 | BIOPLYN Trebon spol. s r.o., CZ, Třeboň <sup>5)</sup>                                                                              | 24,7                 |
| Abwasserentsorgung Uetersen GmbH, DE, Uetersen <sup>5)</sup>                                             | 49,0                 | Bio-Wärme Gräfelfing GmbH, DE, Gräfelfing <sup>5)</sup>                                                                            | 40,0                 |
| Abwassergesellschaft Bardowick mbH & Co. KG, DE, Bardowick <sup>5)</sup>                                 | 49,0                 | Biowärme Surheim GmbH, DE, Regensburg <sup>2)</sup>                                                                                | 100,0                |
| Abwassergesellschaft Bardowick Verwaltungs-GmbH, DE, Bardowick <sup>5)</sup>                             | 49,0                 | BKW Biokraftwerke Fürstenwalde GmbH, DE, Fürstenwalde/Spree <sup>5)</sup>                                                          | 48,8                 |
| Abwassergesellschaft Ilmenau mbH, DE, Melbeck <sup>5)</sup>                                              | 49,0                 | Blomberger Versorgungsbetriebe GmbH/E.ON Westfalen Weser AG-GbR, DE, Blomberg <sup>5)</sup>                                        | 50,0                 |
| Abwasserwirtschaft Fichtelberg GmbH, DE, Fichtelberg <sup>5)</sup>                                       | 25,0                 | BTB Bayreuther Thermalbad GmbH, DE, Bayreuth <sup>5)</sup>                                                                         | 33,3                 |
| Abwasserwirtschaft Kunststadt GmbH, DE, Burgkunststadt <sup>5)</sup>                                     | 30,0                 | Bützower Wärme GmbH, DE, Bützow <sup>5)</sup>                                                                                      | 20,0                 |
| ANCO Sp. z o.o., PL, Jarocin <sup>2)</sup>                                                               | 100,0                | Carbiogas b.v., NL, Nuenen <sup>5)</sup>                                                                                           | 33,3                 |
| Arena One GmbH, DE, München <sup>1), 8)</sup>                                                            | 100,0                | CEC Energieconsulting GmbH, DE, Kirchlingern <sup>2)</sup>                                                                         | 62,5                 |
| AVA Velsen GmbH, DE, Saarbrücken <sup>5)</sup>                                                           | 49,0                 | Croplin d.o.o., HR, Zagreb <sup>5)</sup>                                                                                           | 50,0                 |
| AWP GmbH, DE, Paderborn <sup>2)</sup>                                                                    | 100,0                | Csornai Kogenerációs Erőmű Kft., HU, Győr <sup>5)</sup>                                                                            | 50,0                 |
| B.V. NEA, NL, Dodewaard <sup>2)</sup>                                                                    | 25,0                 | Dampfversorgung Ostsee-Molkerei GmbH, DE, Wismar <sup>5)</sup>                                                                     | 50,0                 |
| Badlantic Betriebsgesellschaft mbH, DE, Ahrensburg <sup>5)</sup>                                         | 49,0                 | Debreceni Kombinált Ciklusú Erőmű Kft., HU, Debrecen <sup>1)</sup>                                                                 | 100,0                |
|                                                                                                          |                      | Dekonta Gebäude- und Industriedienste GmbH, DE, München <sup>2)</sup>                                                              | 100,0                |
|                                                                                                          |                      | Deutsche Gesellschaft für Wiederaufarbeitung von Kernbrennstoffen AG & Co. oHG, DE, Gorleben <sup>5)</sup>                         | 42,5                 |

1) Konsolidiertes verbundenes Unternehmen 2) Nicht konsolidiertes verbundenes Unternehmen aufgrund von untergeordneter Bedeutung (bewertet zu Anschaffungskosten)  
3) Gemeinschaftsunternehmen nach IAS 31 (bewertet nach Equity-Methode) 4) Assoziiertes Unternehmen (bewertet nach Equity-Methode) 5) Assoziiertes Unternehmen (bewertet zu Anschaffungskosten aufgrund untergeordneter Bedeutung) 6) Übrige Beteiligungen 7) Einbeziehung als konsolidiertes verbundenes Unternehmen nach SIC 12  
8) Für die Gesellschaft wird § 264 (3) HGB bzw. § 264b HGB in Anspruch genommen 9) Gewinnabführungsvertrag (Ergebnis nach Gewinnabführung)

## Angaben zum Beteiligungsbesitz gem. § 313 Abs. 2 HGB (Stand: 31. Dez. 2010)

| Gesellschaft, Sitz                                                                   | Kapital-<br>anteil % | Gesellschaft, Sitz                                                               | Kapital-<br>anteil % |
|--------------------------------------------------------------------------------------|----------------------|----------------------------------------------------------------------------------|----------------------|
| Donaukraftwerk Jochenstein AG, DE, Passau <sup>4)</sup>                              | 50,0                 | E.ON Energie 31. Beteiligungsgesellschaft mbH München, DE, München <sup>2)</sup> | 100,0                |
| Donau-Wasserkraft Aktiengesellschaft, DE, München <sup>1)</sup>                      | 100,0                | E.ON Energie 33. Beteiligungsgesellschaft mbH München, DE, München <sup>2)</sup> | 100,0                |
| Dunaújvárosi Szennyvíztisztító Szolgáltató Kft., HU, Dunaújváros <sup>5)</sup>       | 49,0                 | E.ON Energie 37. Beteiligungs-GmbH, DE, München <sup>2)</sup>                    | 100,0                |
| E—Bio Kyjov s.r.o., CZ, Otrokovice <sup>5)</sup>                                     | 24,5                 | E.ON Energie 38. Beteiligungs-GmbH, DE, München <sup>2)</sup>                    | 100,0                |
| E WIE EINFACH Strom & Gas GmbH, DE, Köln <sup>1), 8)</sup>                           | 100,0                | E.ON Energie 39. Beteiligungs-GmbH, DE, München <sup>2)</sup>                    | 100,0                |
| e.dialog GmbH, DE, Potsdam <sup>2)</sup>                                             | 100,0                | E.ON Energie AG, DE, München <sup>1), 8)</sup>                                   | 100,0                |
| e.discom Telekommunikation GmbH, DE, Rostock <sup>2)</sup>                           | 100,0                | E.ON Energie Human Resources International GmbH, DE, München <sup>1), 8)</sup>   | 100,0                |
| e.distherm Wärmedienstleistungen GmbH, DE, Potsdam <sup>1)</sup>                     | 100,0                | E.ON Energie Real Estate investment GmbH, DE, München <sup>2)</sup>              | 100,0                |
| e.inkasso GmbH, DE, Potsdam <sup>2)</sup>                                            | 100,0                | E.ON Energie România S.A., RO, Târgu Mureș <sup>1)</sup>                         | 51,0                 |
| E.ON Anlagenservice GmbH, DE, Gelsenkirchen <sup>1), 8)</sup>                        | 100,0                | E.ON Energie S.A.S., FR, Paris <sup>1)</sup>                                     | 100,0                |
| E.ON Asset Management GmbH & Co. EEA KG, DE, Grünwald <sup>1), 8)</sup>              | 100,0                | E.ON Energie, a.s., CZ, České Budějovice <sup>1)</sup>                           | 100,0                |
| E.ON Avacon AG, DE, Helmstedt <sup>1)</sup>                                          | 67,8                 | E.ON Energy from Waste AG, DE, Helmstedt <sup>1), 8)</sup>                       | 100,0                |
| E.ON Avacon Vertrieb GmbH, DE, Helmstedt <sup>1)</sup>                               | 100,0                | E.ON Energy from Waste Delfzijl B.V., NL, Farmsum <sup>1)</sup>                  | 100,0                |
| E.ON Avacon Wärme GmbH, DE, Sarstedt <sup>1)</sup>                                   | 100,0                | E.ON Energy from Waste Göppingen GmbH, DE, Göppingen <sup>1), 8)</sup>           | 100,0                |
| E.ON Bayern AG, DE, Regensburg <sup>1), 8)</sup>                                     | 100,0                | E.ON Energy from Waste Großräschen GmbH, DE, Großräschen <sup>1), 8)</sup>       | 100,0                |
| E.ON Bayern Vertrieb GmbH, DE, Regensburg <sup>1), 8)</sup>                          | 100,0                | E.ON Energy from Waste Hannover GmbH, DE, Hannover <sup>1)</sup>                 | 85,0                 |
| E.ON Bayern Verwaltungs AG, DE, München <sup>2)</sup>                                | 100,0                | E.ON Energy from Waste Helmstedt GmbH, DE, Helmstedt <sup>1), 8)</sup>           | 100,0                |
| E.ON Bayern Wärme 1. Beteiligungs-GmbH, DE, Regensburg <sup>2)</sup>                 | 100,0                | E.ON Energy from Waste Heringen GmbH, DE, Heringen <sup>1), 8)</sup>             | 100,0                |
| E.ON Bayern Wärme GmbH, DE, München <sup>1)</sup>                                    | 100,0                | E.ON Energy from Waste Leudelange S.à.r.l., LU, Leudelange <sup>1)</sup>         | 100,0                |
| E.ON Belgium n.v., BE, Brüssel <sup>1)</sup>                                         | 100,0                | E.ON Energy from Waste Polska Sp. z o.o., PL, Warschau <sup>2)</sup>             | 100,0                |
| E.ON Benelux CCS Project B.V., NL, Rotterdam <sup>2)</sup>                           | 100,0                | E.ON Energy from Waste Premnitz GmbH, DE, Premnitz <sup>1), 8)</sup>             | 100,0                |
| E.ON Benelux Holding b.v., NL, Rotterdam <sup>1)</sup>                               | 100,0                | E.ON Energy from Waste Saarbrücken GmbH, DE, Saarbrücken <sup>1), 8)</sup>       | 100,0                |
| E.ON Benelux Levering b.v., NL, Eindhoven <sup>1)</sup>                              | 100,0                | E.ON Energy from Waste Stapelfeld GmbH, DE, Stapelfeld <sup>1)</sup>             | 100,0                |
| E.ON Benelux n.v., NL, Rotterdam <sup>1)</sup>                                       | 100,0                | E.ON Energy From Waste UK Limited, GB, Coventry <sup>2)</sup>                    | 100,0                |
| E.ON Best Service GmbH, DE, Hamburg <sup>1)</sup>                                    | 100,0                | E.ON Energy Projects GmbH, DE, München <sup>1), 8)</sup>                         | 100,0                |
| E.ON Bulgaria EAD, BG, Sofia <sup>1)</sup>                                           | 100,0                | E.ON Energy Sales GmbH, DE, Essen <sup>1), 8)</sup>                              | 100,0                |
| E.ON Bulgaria Grid AD, BG, Varna <sup>1)</sup>                                       | 59,0                 | E.ON Engineering Corporation, US, Groveport, Ohio <sup>2)</sup>                  | 100,0                |
| E.ON Bulgaria Sales AD, BG, Varna <sup>1)</sup>                                      | 59,0                 | E.ON Erőművek Termelő és Üzemeltető Kft., HU, Budapest <sup>1)</sup>             | 100,0                |
| E.ON Bulgaria Trading EOOD, BG, Varna <sup>2)</sup>                                  | 100,0                | E.ON Észak-dunántúli Áramhálózati Zrt., HU, Győr <sup>1)</sup>                   | 100,0                |
| E.ON Česká republika, s.r.o., CZ, České Budějovice <sup>1)</sup>                     | 100,0                | E.ON EÜT Erőműüzemeltető és Szolgáltató Kft., HU, Debrecen <sup>2)</sup>         | 100,0                |
| E.ON Czech Holding AG, DE, München <sup>1), 8)</sup>                                 | 100,0                | E.ON Facility Management GmbH, DE, München <sup>1), 8)</sup>                     | 100,0                |
| E.ON Czech Holding Verwaltungs-GmbH, DE, München <sup>1), 8)</sup>                   | 100,0                | E.ON Fernwärme GmbH, DE, Gelsenkirchen <sup>1), 8)</sup>                         | 100,0                |
| E.ON Dél-dunántúli Áramhálózati Zrt., HU, Pécs <sup>1)</sup>                         | 100,0                | E.ON France Management S.A.S., FR, Paris <sup>2)</sup>                           | 100,0                |
| E.ON Dél-dunántúli Gázhálózati Zrt., HU, Pécs <sup>1)</sup>                          | 100,0                | E.ON France S.A.S., FR, Paris <sup>1)</sup>                                      | 100,0                |
| E.ON Distribuce, a.s., CZ, České Budějovice <sup>1)</sup>                            | 100,0                | E.ON Gaz Distribuție S.A., RO, Târgu Mureș <sup>1)</sup>                         | 51,0                 |
| E.ON edis AG, DE, Fürstenwalde/Spree <sup>1)</sup>                                   | 71,5                 | E.ON Gazdasági Szolgáltató Kft., HU, Győr <sup>1)</sup>                          | 100,0                |
| E.ON edis Contracting GmbH, DE, Fürstenwalde/Spree <sup>2)</sup>                     | 100,0                | E.ON Generation Belgium N.V., BE, Vilvoorde <sup>1)</sup>                        | 100,0                |
| E.ON edis energia Sp. z o.o., PL, Warschau <sup>1)</sup>                             | 100,0                | E.ON Hálózati Szolgáltató Kft., HU, Pécs <sup>1)</sup>                           | 100,0                |
| E.ON edis Vertrieb GmbH, DE, Fürstenwalde/Spree <sup>1)</sup>                        | 100,0                | E.ON Hanse AG, DE, Quickborn <sup>1)</sup>                                       | 73,8                 |
| E.ON Elektrárne s.r.o., SK, Trávnice <sup>1)</sup>                                   | 100,0                | E.ON Hanse Vertrieb GmbH, DE, Hamburg <sup>1)</sup>                              | 100,0                |
| E.ON Energiaszolgáltató Kft., HU, Budapest <sup>1)</sup>                             | 100,0                | E.ON Hanse Wärme GmbH, DE, Hamburg <sup>1)</sup>                                 | 100,0                |
| E.ON Energiatermelő Kft., HU, Debrecen <sup>1)</sup>                                 | 100,0                | E.ON Holding S.A.S., FR, Paris <sup>2)</sup>                                     | 100,0                |
| E.ON Energie 25. Beteiligungsgesellschaft mbH München, DE, München <sup>1), 8)</sup> | 100,0                |                                                                                  |                      |
| E.ON Energie 27. Beteiligungsgesellschaft mbH München, DE, München <sup>2)</sup>     | 100,0                |                                                                                  |                      |

1) Konsolidiertes verbundenes Unternehmen 2) Nicht konsolidiertes verbundenes Unternehmen aufgrund von untergeordneter Bedeutung (bewertet zu Anschaffungskosten)  
3) Gemeinschaftsunternehmen nach IAS 31 (bewertet nach Equity-Methode) 4) Assoziiertes Unternehmen (bewertet nach Equity-Methode) 5) Assoziiertes Unternehmen  
(bewertet zu Anschaffungskosten aufgrund untergeordneter Bedeutung) 6) Übrige Beteiligungen 7) Einbeziehung als konsolidiertes verbundenes Unternehmen nach SIC 12  
8) Für die Gesellschaft wird § 264 (3) HGB bzw. § 264b HGB in Anspruch genommen 9) Gewinnabführungsvertrag (Ergebnis nach Gewinnabführung)



Angaben zum Beteiligungsbesitz gem. § 313 Abs. 2 HGB (Stand: 31. Dez. 2010)

| Gesellschaft, Sitz                                                              | Kapital-<br>anteil % | Gesellschaft, Sitz                                                                                               | Kapital-<br>anteil % |
|---------------------------------------------------------------------------------|----------------------|------------------------------------------------------------------------------------------------------------------|----------------------|
| E.ON Hungária Zrt., HU, Budapest <sup>1)</sup>                                  | 100,0                | EFR Europäische Funk-Rundsteuerung GmbH, DE,<br>München <sup>5)</sup>                                            | 39,9                 |
| E.ON Inhouse Consulting GmbH, DE, München <sup>2)</sup>                         | 100,0                | EFR-CEE Szolgáltató Kft., HU, Budapest <sup>5)</sup>                                                             | 37,0                 |
| E.ON Invest GmbH, DE, Grünwald <sup>2)</sup>                                    | 100,0                | EGF EnergieGesellschaft Frankenberg mbH, DE,<br>Frankenberg/Eder <sup>2)</sup>                                   | 40,0                 |
| E.ON Kernkraft GmbH, DE, Hannover <sup>1), 8)</sup>                             | 100,0                | EH-SZER Energetikai és Távközlési Hálózatépítő és<br>Szerelő Kft., HU, Győr <sup>1)</sup>                        | 100,0                |
| E.ON Közép-dunántúli Gázhálózati Zrt., HU, Nagykanizsa <sup>1)</sup>            | 99,8                 | Eisenacher Versorgungs-Betriebe GmbH (EVB), DE,<br>Eisenach <sup>4)</sup>                                        | 25,1                 |
| E.ON Kraftwerke 6. Beteiligungs-GmbH, DE, Hannover <sup>2)</sup>                | 100,0                | EKS-Service Kft., HU, Budapest <sup>5)</sup>                                                                     | 50,0                 |
| E.ON Kraftwerke GmbH, DE, Hannover <sup>1), 8)</sup>                            | 100,0                | Elektrizitätswerk Schwandorf GmbH, DE, Schwandorf <sup>2)</sup>                                                  | 100,0                |
| E.ON Metering GmbH, DE, München <sup>2)</sup>                                   | 100,0                | Elektrociepłownia BIALYSTOK, S.A., PL, Białystok <sup>1)</sup>                                                   | 69,6                 |
| E.ON Mitte AG, DE, Kassel <sup>1)</sup>                                         | 73,3                 | Elmregia GmbH, DE, Schöningen <sup>5)</sup>                                                                      | 49,0                 |
| E.ON Mitte Natur GmbH, DE, Dillenburg <sup>1)</sup>                             | 100,0                | Első Magyar Szelerőmű Kft, HU, Kulcs <sup>2)</sup>                                                               | 74,7                 |
| E.ON Mitte Vertrieb GmbH, DE, Kassel <sup>1)</sup>                              | 100,0                | ENACO Energieanlagen- und Kommunikationstechnik<br>GmbH, DE, Maisach <sup>5)</sup>                               | 26,0                 |
| E.ON Mitte Wärme GmbH, DE, Kassel <sup>1)</sup>                                 | 100,0                | ENAG/Maingas Energieanlagen GmbH, DE, Eisenach <sup>5)</sup>                                                     | 50,0                 |
| E.ON Moldova Distributie S.A., RO, Iasi <sup>1)</sup>                           | 51,0                 | Energetika Malenovice, a.s., CZ, Zlin-Malenovice <sup>2)</sup>                                                   | 65,6                 |
| E.ON Netz GmbH, DE, Bayreuth <sup>1), 8)</sup>                                  | 100,0                | ENERGETIKA SERVIS s.r.o., CZ, České Budějovice <sup>2)</sup>                                                     | 80,0                 |
| E.ON New Build & Technology B.V., NL, Rotterdam <sup>2)</sup>                   | 100,0                | Energetyka Ciepłna Opolszczyzny S.A., PL, Opole <sup>5)</sup>                                                    | 45,7                 |
| E.ON New Build & Technology GmbH, DE, Gelsenkirchen <sup>1), 8)</sup>           | 100,0                | Energie- und Medienversorgung Schwarza GmbH (EMS),<br>DE, Rudolstadt/Schwarza <sup>1)</sup>                      | 100,0                |
| E.ON New Build & Technology Limited, GB, Coventry <sup>1)</sup>                 | 100,0                | Energie und Wasser Potsdam GmbH, DE, Potsdam <sup>4)</sup>                                                       | 35,0                 |
| E.ON New Built & Technology BVBA, BE, Vilvoorde <sup>2)</sup>                   | 100,0                | Energie und Wasser Wahlstedt/Bad Segeberg GmbH &<br>Co. KG (ews), DE, Bad Segeberg <sup>5)</sup>                 | 50,1                 |
| E.ON Power Plants Belgium BVBA, BE, Antwerpen <sup>2)</sup>                     | 100,0                | Energie-Agentur Weyhe GmbH, DE, Weyhe <sup>5)</sup>                                                              | 50,0                 |
| E.ON Regenerabile Romania S.R.L., RO, Iasi <sup>2)</sup>                        | 100,0                | Energieerzeugungswerke Geesthacht GmbH, DE,<br>Geesthacht <sup>5)</sup>                                          | 33,4                 |
| E.ON România S.R.L., RO, Târgu Mureș <sup>1)</sup>                              | 90,2                 | Energienetze Bayern GmbH, DE, Regensburg <sup>1)</sup>                                                           | 100,0                |
| E.ON Service Plus GmbH, DE, Landshut <sup>1)</sup>                              | 100,0                | Energienetze Schaaheim GmbH, DE, Regensburg <sup>2)</sup>                                                        | 100,0                |
| E.ON Servicii S.R.L., RO, Târgu Mureș <sup>1)</sup>                             | 100,0                | Energieversorgung Alzenau GmbH (EVA), DE, Alzenau <sup>5)</sup>                                                  | 50,0                 |
| E.ON Servisní, s.r.o., CZ, České Budějovice <sup>1)</sup>                       | 83,7                 | Energieversorgung Apolda GmbH, DE, Apolda <sup>4)</sup>                                                          | 49,0                 |
| E.ON Slovensko, a.s., SK, Bratislava <sup>1)</sup>                              | 100,0                | Energieversorgung Buching-Trauchgau (EBT) Gesell-<br>schaft mit beschränkter Haftung, DE, Halblech <sup>5)</sup> | 50,0                 |
| E.ON Thüringer Energie AG, DE, Erfurt <sup>1)</sup>                             | 53,0                 | Energieversorgung Greiz GmbH, DE, Greiz <sup>4)</sup>                                                            | 49,0                 |
| E.ON Tiszántúli Áramhálózati Zrt., HU, Debrecen <sup>1)</sup>                   | 100,0                | Energieversorgung Inselsberg GmbH, DE, Waltershausen <sup>5)</sup>                                               | 20,0                 |
| E.ON Trend s.r.o., CZ, České Budějovice <sup>1)</sup>                           | 100,0                | Energieversorgung Nordhausen GmbH, DE, Nordhausen <sup>4)</sup>                                                  | 40,0                 |
| E.ON Ügyfélszolgálati Kft., HU, Budapest <sup>1)</sup>                          | 100,0                | Energieversorgung Putzbrunn GmbH & Co. KG, DE,<br>Putzbrunn <sup>2)</sup>                                        | 100,0                |
| E.ON Vertrieb Deutschland GmbH, DE, München <sup>1)</sup>                       | 100,0                | Energieversorgung Putzbrunn Verwaltungs GmbH, DE,<br>Putzbrunn <sup>2)</sup>                                     | 100,0                |
| E.ON Wasserkraft 3. Beteiligungs GmbH i.L., DE, Landshut <sup>2)</sup>          | 100,0                | Energieversorgung Rudolstadt GmbH, DE, Rudolstadt <sup>5)</sup>                                                  | 23,9                 |
| E.ON Wasserkraft GmbH, DE, Landshut <sup>1), 8)</sup>                           | 100,0                | Energieversorgung Sehnde GmbH, DE, Sehnde <sup>5)</sup>                                                          | 30,0                 |
| E.ON Westfalen Weser 2. Vermögensverwaltungs-GmbH,<br>DE, Herford <sup>2)</sup> | 100,0                | Energie-Wende-Garching GmbH & Co. KG, DE, Garching <sup>5)</sup>                                                 | 33,3                 |
| E.ON Westfalen Weser AG, DE, Paderborn <sup>1)</sup>                            | 62,8                 | Energie-Wende-Garching Verwaltungs-GmbH, DE,<br>Garching <sup>5)</sup>                                           | 33,3                 |
| E.ON Westfalen Weser Energie-Service GmbH, DE,<br>Kirchlengern <sup>1)</sup>    | 100,0                | Energiewerke Isernhagen GmbH, DE, Isernhagen <sup>4)</sup>                                                       | 49,0                 |
| E.ON Westfalen Weser Vertrieb GmbH, DE, Paderborn <sup>1)</sup>                 | 100,0                | Energiewerke Zeulenroda GmbH, DE,<br>Zeulenroda-Triebes <sup>5)</sup>                                            | 49,0                 |
| EBS Kraftwerk GmbH, DE, Hürth <sup>5)</sup>                                     | 50,0                 | Energos Deutschland GmbH, DE, Helmstedt <sup>2)</sup>                                                            | 100,0                |
| EBY Gewerbeobjekt GmbH, DE, Regensburg <sup>2)</sup>                            | 100,0                | Enertec Hameln GmbH, DE, Hameln <sup>1)</sup>                                                                    | 100,0                |
| EBY Immobilien GmbH & Co. KG, DE, Regensburg <sup>2)</sup>                      | 100,0                | ENSECO GmbH, DE, Unterschleißheim <sup>5)</sup>                                                                  | 49,0                 |
| EBY Port 3 GmbH, DE, Regensburg <sup>1)</sup>                                   | 100,0                |                                                                                                                  |                      |
| EBY Port 5 GmbH, DE, Regensburg <sup>2)</sup>                                   | 100,0                |                                                                                                                  |                      |
| EC Skarżysko-Kamienna Sp. z o.o., PL,<br>Skarżysko-Kamienna <sup>2)</sup>       | 63,9                 |                                                                                                                  |                      |
| ECEBE Sp. z o.o., PL, Augustów <sup>2)</sup>                                    | 100,0                |                                                                                                                  |                      |
| E-Eko Malenovice s.r.o., CZ, Otrokovice <sup>5)</sup>                           | 24,5                 |                                                                                                                  |                      |
| EFG Erdgas Forchheim GmbH, DE, Forchheim <sup>5)</sup>                          | 24,9                 |                                                                                                                  |                      |
| EFM GmbH & Co. Beta KG, DE, Karlsfeld <sup>1), 8)</sup>                         | 100,0                |                                                                                                                  |                      |

1) Konsolidiertes verbundenes Unternehmen 2) Nicht konsolidiertes verbundenes Unternehmen aufgrund von untergeordneter Bedeutung (bewertet zu Anschaffungskosten)  
3) Gemeinschaftsunternehmen nach IAS 31 (bewertet nach Equity-Methode) 4) Assoziiertes Unternehmen (bewertet nach Equity-Methode) 5) Assoziiertes Unternehmen  
(bewertet zu Anschaffungskosten aufgrund untergeordneter Bedeutung) 6) Übrige Beteiligungen 7) Einbeziehung als konsolidiertes verbundenes Unternehmen nach SIC 12  
8) Für die Gesellschaft wird § 264 (3) HGB bzw. § 264b HGB in Anspruch genommen 9) Gewinnabführungsvertrag (Ergebnis nach Gewinnabführung)

## Angaben zum Beteiligungsbesitz gem. § 313 Abs. 2 HGB (Stand: 31. Dez. 2010)

| Gesellschaft, Sitz                                                                                      | Kapital-<br>anteil % | Gesellschaft, Sitz                                                                                         | Kapital-<br>anteil % |
|---------------------------------------------------------------------------------------------------------|----------------------|------------------------------------------------------------------------------------------------------------|----------------------|
| Entsorgungsgemeinschaft Oberhavel GbR, DE, Helmstedt <sup>2)</sup>                                      | 74,9                 | Gemeindewerke Wietze GmbH, DE, Wietze <sup>5)</sup>                                                        | 49,0                 |
| Entsorgungszentrum Salzgitter GmbH, DE, Salzgitter <sup>5)</sup>                                        | 50,0                 | Gemeinschaftskernkraftwerk Grohnde GmbH & Co. oHG, DE, Emmerthal <sup>1)</sup>                             | 100,0                |
| EPS Co-Gen Sp. z o.o., PL, Warschau <sup>2)</sup>                                                       | 100,0                | Gemeinschaftskernkraftwerk Grohnde Management GmbH, DE, Emmerthal <sup>2)</sup>                            | 83,2                 |
| EPS Polska Holding Sp. z o.o., PL, Warschau <sup>2)</sup>                                               | 100,0                | Gemeinschaftskernkraftwerk Isar 2 GmbH, DE, Essenbach <sup>2)</sup>                                        | 75,0                 |
| EPS Polska Sp. z o.o., PL, Warschau <sup>2)</sup>                                                       | 100,0                | Gemeinschaftskraftwerk Irsching GmbH, DE, Vohburg <sup>1)</sup>                                            | 50,2                 |
| ESN EnergieSystemeNord GmbH, DE, Schwentinental <sup>5)</sup>                                           | 47,5                 | Gemeinschaftskraftwerk Kiel Gesellschaft mit beschränkter Haftung, DE, Kiel <sup>3)</sup>                  | 50,0                 |
| European Nuclear Energy Leadership Academy GmbH, DE, Garching <sup>5)</sup>                             | 26,3                 | Gemeinschaftskraftwerk Staudinger GmbH & Co. KG, DE, Großkrotzenburg <sup>1)</sup>                         | 100,0                |
| EVG Energieversorgung Gemünden GmbH, DE, Gemünden am Main <sup>5)</sup>                                 | 49,0                 | Gemeinschaftskraftwerk Staudinger Verwaltungs-GmbH, DE, Großkrotzenburg <sup>2)</sup>                      | 100,0                |
| EVU Services GmbH, DE, Neumünster <sup>5)</sup>                                                         | 25,0                 | Gemeinschaftskraftwerk Veltheim Gesellschaft mit beschränkter Haftung, DE, Porta Westfalica <sup>1)</sup>  | 66,7                 |
| EVV Elektrizitätsversorgungsgesellschaft Velten mbH, DE, Velten <sup>5)</sup>                           | 35,0                 | Gemeinschaftskraftwerk Weser GmbH & Co. oHG, DE, Emmerthal <sup>1)</sup>                                   | 66,7                 |
| EW Eichsfeldgas GmbH, DE, Worbis <sup>2)</sup>                                                          | 49,0                 | Geothermie-Wärmegesellschaft Braunau-Simbach m.b.H., AT, Braunau am Inn <sup>5)</sup>                      | 20,0                 |
| ew wärme GmbH, DE, Bad Heiligenstadt <sup>5)</sup>                                                      | 49,0                 | GfS Gesellschaft für Simulatorschulung mbH, DE, Essen <sup>5)</sup>                                        | 41,7                 |
| ews Verwaltungsgesellschaft mbH, DE, Bad Segeberg <sup>5)</sup>                                         | 50,2                 | GHD E.ON Bayern AG & Co. KG, DE, Dingolfing <sup>2)</sup>                                                  | 75,0                 |
| EZH-SEON b.v., NL, Rotterdam <sup>1)</sup>                                                              | 100,0                | GLG Netz GmbH, DE, Gifhorn <sup>1)</sup>                                                                   | 100,0                |
| EZH-Systems, Inc., US, Delaware <sup>2)</sup>                                                           | 100,0                | GNR Gesellschaft zur energetischen Nutzung nachwachsender Rohstoffe mbH, DE, Brakel <sup>5)</sup>          | 33,3                 |
| EZV Energie- und Service GmbH & Co. KG Untermain, DE, Würth am Main <sup>5)</sup>                       | 28,9                 | GNS Gesellschaft für Nuklear-Service mbH, DE, Essen <sup>4)</sup>                                          | 48,0                 |
| EZV Energie- und Service Verwaltungsgesellschaft mbH, DE, Würth am Main <sup>5)</sup>                   | 28,8                 | GOLLIPP Bioerdgas GmbH & Co KG, DE, Nürnberg <sup>5)</sup>                                                 | 50,0                 |
| Fernwärmeverversorgung Freising Gesellschaft mit beschränkter Haftung (FFG), DE, Freising <sup>5)</sup> | 50,0                 | GOLLIPP Bioerdgas Verwaltungs GmbH, DE, Nürnberg <sup>5)</sup>                                             | 50,0                 |
| Fernwärmeverversorgung Herne GmbH, DE, Herne <sup>5)</sup>                                              | 50,0                 | Gondoskodás-Egymásért Alapítvány, HU, Debrecen <sup>2)</sup>                                               | 100,0                |
| Fitas Verwaltung GmbH & Co. Dritte Vermietungs-KG, DE, Pullach i. Isartal <sup>2)</sup>                 | 90,0                 | GRE Gesellschaft zur rationellen Energienutzung Horn-Bad Meinberg mbH, DE, Horn-Bad Meinberg <sup>5)</sup> | 50,0                 |
| FITAS Verwaltung GmbH & Co. REGIUM-Objekte KG, DE, Pullach i. Isartal <sup>2)</sup>                     | 90,0                 | Grenzkraftwerke Gesellschaft mit beschränkter Haftung, DE, Simbach am Inn <sup>5)</sup>                    | 50,0                 |
| Freizeitbad Reinbek Betriebsgesellschaft mbH, DE, Reinbek <sup>5)</sup>                                 | 49,0                 | GreyLogix GmbH, DE, Flensburg <sup>5)</sup>                                                                | 74,2                 |
| GAL Beteiligungs GmbH, DE, Porta Westfalica <sup>5)</sup>                                               | 50,0                 | Hamburg Netz GmbH, DE, Hamburg <sup>1)</sup>                                                               | 100,0                |
| Gasversorgung Bad Rodach GmbH, DE, Bad Rodach <sup>5)</sup>                                             | 50,0                 | Hamelner Stadtwerke UG (haftungsbeschränkt), DE, Hameln <sup>2)</sup>                                      | 100,0                |
| Gasversorgung Biedenkopf GmbH, DE, Biedenkopf <sup>5)</sup>                                             | 49,0                 | Harzwasserwerke GmbH, DE, Hildesheim <sup>4)</sup>                                                         | 20,8                 |
| Gasversorgung Ebermannstadt GmbH, DE, Ebermannstadt <sup>5)</sup>                                       | 50,0                 | Havelstrom Zehdenick GmbH, DE, Zehdenick <sup>5)</sup>                                                     | 49,0                 |
| Gasversorgung Greifswald GmbH, DE, Greifswald <sup>5)</sup>                                             | 49,0                 | Heizwerk Holzverwertungsgenossenschaft Stiftland eG & Co. oHG, DE, Neualbenreuth <sup>5)</sup>             | 50,0                 |
| Gasversorgung Grevesmühlen GmbH, DE, Grevesmühlen <sup>5)</sup>                                         | 49,0                 | HEUREKA-Gamma AG, CH, Baden-Dättwil <sup>2)</sup>                                                          | 100,0                |
| Gasversorgung im Landkreis Gifhorn GmbH (GLG), DE, Wolfsburg-Fallerleben <sup>1)</sup>                  | 95,0                 | HGC Hamburg Gas Consult GmbH, DE, Hamburg <sup>2)</sup>                                                    | 100,0                |
| Gasversorgung Unterfranken Gesellschaft mit beschränkter Haftung, DE, Würzburg <sup>4)</sup>            | 64,0                 | Hibernia Gamma Beteiligungsgesellschaft mbH, DE, Frankfurt/Main <sup>4)</sup>                              | 39,4                 |
| Gasversorgung Vorpommern GmbH, DE, Trassenheide <sup>5)</sup>                                           | 49,0                 | HMB Heizkraftwerk Meggle Betreibergesellschaft mbH, DE, Wasserburg <sup>5)</sup>                           | 50,0                 |
| Gasversorgung Wismar Land GmbH, DE, Lübow <sup>5)</sup>                                                 | 49,0                 | Hochtemperatur-Kernkraftwerk GmbH (HKG), Gemeinsames europäisches Unternehmen, DE, Hamm <sup>5)</sup>      | 26,0                 |
| Gasversorgung Wismar Land Vertrieb GmbH, DE, Lübow <sup>5)</sup>                                        | 49,0                 | HOCHTIEF Energy Management Harburg GmbH, DE, Hamburg <sup>5)</sup>                                         | 35,0                 |
| Gasversorgung Wunsiedel GmbH, DE, Wunsiedel <sup>5)</sup>                                               | 50,0                 | Holsteiner Wasser GmbH, DE, Neumünster <sup>5)</sup>                                                       | 50,0                 |
| Gaswerk Bad Sooden-Allendorf GmbH, DE, Bad Sooden-Allendorf <sup>5)</sup>                               | 49,0                 | HSE AVG Beteiligungs-GmbH, DE, Darmstadt <sup>5)</sup>                                                     | 50,0                 |
| Gelsenwasser Beteiligungs-GmbH, DE, München <sup>1), 8)</sup>                                           | 100,0                |                                                                                                            |                      |
| Gemeindewerke Leck GmbH, DE, Leck <sup>5)</sup>                                                         | 49,9                 |                                                                                                            |                      |
| Gemeindewerke Uetze GmbH, DE, Uetze <sup>5)</sup>                                                       | 49,0                 |                                                                                                            |                      |
| Gemeindewerke Wedemark GmbH, DE, Wedemark <sup>5)</sup>                                                 | 49,0                 |                                                                                                            |                      |

1) Konsolidiertes verbundenes Unternehmen 2) Nicht konsolidiertes verbundenes Unternehmen aufgrund von untergeordneter Bedeutung (bewertet zu Anschaffungskosten)  
3) Gemeinschaftsunternehmen nach IAS 31 (bewertet nach Equity-Methode) 4) Assoziiertes Unternehmen (bewertet nach Equity-Methode) 5) Assoziiertes Unternehmen (bewertet zu Anschaffungskosten aufgrund untergeordneter Bedeutung) 6) Übrige Beteiligungen 7) Einbeziehung als konsolidiertes verbundenes Unternehmen nach SIC 12  
8) Für die Gesellschaft wird § 264 (3) HGB bzw. § 264b HGB in Anspruch genommen 9) Gewinnabführungsvertrag (Ergebnis nach Gewinnabführung)

Angaben zum Beteiligungsbesitz gem. § 313 Abs. 2 HGB (Stand: 31. Dez. 2010)

| Gesellschaft, Sitz                                                                             | Kapital-<br>anteil % | Gesellschaft, Sitz                                                                               | Kapital-<br>anteil % |
|------------------------------------------------------------------------------------------------|----------------------|--------------------------------------------------------------------------------------------------|----------------------|
| HSN Magdeburg GmbH, DE, Magdeburg <sup>1)</sup>                                                | 74,9                 | LSW LandE-Stadtwerke Wolfsburg GmbH & Co. KG, DE, Wolfsburg <sup>4)</sup>                        | 57,0                 |
| Informační služby—energetika, a.s., CZ, Prag <sup>2)</sup>                                     | 100,0                | LSW LandE-Stadtwerke Wolfsburg Verwaltungs-GmbH, DE, Wolfsburg <sup>5)</sup>                     | 57,0                 |
| InfraServ-Bayernwerk Gendorf GmbH, DE, Burgkirchen/Alz <sup>5)</sup>                           | 50,0                 | LUMEN DISTRIBUČNÍ SOUSTAVY, s.r.o., CZ, České Budějovice <sup>5)</sup>                           | 34,0                 |
| Infrastrukturgesellschaft der Stadt Nienburg mbH, DE, Nienburg/Weser <sup>5)</sup>             | 49,9                 | LUMEN SYNERGY s.r.o., CZ, České Budějovice <sup>5)</sup>                                         | 34,0                 |
| INTERARGEM GbR, DE, Bielefeld <sup>2)</sup>                                                    | 66,7                 | Luna Lüneburg GmbH, DE, Lüneburg <sup>5)</sup>                                                   | 49,0                 |
| Interargem GmbH, DE, Bielefeld <sup>1)</sup>                                                   | 61,2                 | Maasvlakte CCS Project B.V., NL, Rotterdam <sup>5)</sup>                                         | 50,0                 |
| Isam-Immobilien-GmbH, DE, München <sup>2)</sup>                                                | 100,0                | Maasvlakte I b.v., NL, Rotterdam <sup>2)</sup>                                                   | 100,0                |
| Jihoceská plynárenská, a.s., CZ, České Budějovice <sup>2)</sup>                                | 100,0                | Maasvlakte II b.v., NL, Rotterdam <sup>2)</sup>                                                  | 100,0                |
| Jihomoravská plynárenská, a.s., CZ, Brno <sup>4)</sup>                                         | 43,7                 | Mainkraftwerk Schweinfurt Gesellschaft mit beschränkter Haftung, DE, München <sup>2)</sup>       | 75,0                 |
| Kernkraftwerk Brokdorf GmbH & Co. oHG, DE, Hamburg <sup>1)</sup>                               | 80,0                 | MEON Capital Verwaltungs GmbH (i.L.), DE, Grünwald <sup>2)</sup>                                 | 100,0                |
| Kernkraftwerk Brunsbüttel GmbH & Co. oHG, DE, Hamburg <sup>4)</sup>                            | 33,3                 | MEON Pensions GmbH & Co. KG, DE, Grünwald <sup>1), 8)</sup>                                      | 100,0                |
| Kernkraftwerk Gundremmingen GmbH, DE, Gundremmingen <sup>4)</sup>                              | 25,0                 | Měření dodávek plynu, a.s., CZ, Prag <sup>2)</sup>                                               | 100,0                |
| Kernkraftwerk Krümmel GmbH & Co. oHG, DE, Hamburg <sup>4)</sup>                                | 50,0                 | MESKAL Grundstücksverwaltungs AG & Co. KG, DE, Grünwald <sup>2)</sup>                            | 94,8                 |
| Kernkraftwerk Stade GmbH & Co. oHG, DE, Hamburg <sup>1)</sup>                                  | 66,7                 | Metegra GmbH, DE, Laatzen <sup>5)</sup>                                                          | 50,0                 |
| Kernkraftwerke Isar Verwaltungs GmbH, DE, Essenbach <sup>1), 8)</sup>                          | 100,0                | MFG Flughafen-Grundstücksverwaltungsgesellschaft mbH & Co. Gamma oHG, DE, Grünwald <sup>7)</sup> | 90,0                 |
| KGW—Kraftwerk Grenzach-Wyhlen GmbH, DE, München <sup>1)</sup>                                  | 69,8                 | Mittlere Donau Kraftwerke Aktiengesellschaft, DE, München <sup>2)</sup>                          | 60,0                 |
| Komáromi Kogenerációs Erőmű Kft., HU, Győr <sup>2)</sup>                                       | 100,0                | Müllheizkraftwerk Rothensee GmbH, DE, Magdeburg <sup>7)</sup>                                    | 51,0                 |
| KommEnergie GmbH, DE, Eichenau <sup>5)</sup>                                                   | 67,0                 | MVA Bielefeld-Herford GmbH, DE, Bielefeld <sup>1)</sup>                                          | 100,0                |
| Kommunale Energieversorgung GmbH Eisenhüttenstadt, DE, Eisenhüttenstadt <sup>5)</sup>          | 49,0                 | Nahwärme Bad Oeynhausen-Löhne GmbH, DE, Bad Oeynhausen <sup>2)</sup>                             | 65,4                 |
| Kommunale Klimaschutzgesellschaft Landkreis Celle gemeinnützige GmbH, DE, Celle <sup>5)</sup>  | 25,0                 | Nahwärmeversorgung Kirchlegern GmbH, DE, Kirchlegern <sup>5)</sup>                               | 50,0                 |
| Kommunale Klimaschutzgesellschaft Landkreis Uelzen gemeinnützige GmbH, DE, Celle <sup>5)</sup> | 25,0                 | Naturgas Emmerthal GmbH & Co. KG, DE, Emmerthal <sup>2)</sup>                                    | 84,6                 |
| Kraftverkehrsgesellschaft Paderborn mbH —KVP—, DE, Paderborn <sup>2)</sup>                     | 100,0                | NET—Norddeutsche Energie Technik GmbH, DE, Hamburg <sup>2)</sup>                                 | 100,0                |
| Kraftwerk Buer Betriebsgesellschaft mbH, DE, Gelsenkirchen <sup>5)</sup>                       | 50,0                 | Netz Veltheim GmbH, DE, Porta Westfalica <sup>1)</sup>                                           | 66,7                 |
| Kraftwerk Buer GbR, DE, Gelsenkirchen <sup>5)</sup>                                            | 50,0                 | Netzgesellschaft Gehrden mbH, DE, Gehrden <sup>5)</sup>                                          | 49,0                 |
| Kraftwerk Burghausen GmbH, DE, München <sup>1), 8)</sup>                                       | 100,0                | Netzgesellschaft Hemmingen mbH, DE, Hemmingen <sup>5)</sup>                                      | 49,0                 |
| Kraftwerk Hattorf GmbH, DE, München <sup>2)</sup>                                              | 100,0                | Netzgesellschaft Schwerin mbH (NGS), DE, Schwerin <sup>5)</sup>                                  | 40,0                 |
| Kraftwerk Obernburg GmbH, DE, Erlenbach am Main <sup>3)</sup>                                  | 50,0                 | Netzservice Mecklenburg-Vorpommern (NMV) GmbH, DE, Schwerin <sup>2)</sup>                        | 100,0                |
| Kraftwerk Plattling GmbH, DE, München <sup>1), 8)</sup>                                        | 100,0                | Neumünster Netz Beteiligungs-GmbH, DE, Neumünster <sup>1)</sup>                                  | 50,1                 |
| Kraftwerk Schkopau Betriebsgesellschaft mbH, DE, Schkopau <sup>1)</sup>                        | 55,6                 | Norddeutsche Gesellschaft zur Ablagerung von Mineralstoffen mbH, DE, Helmstedt <sup>2)</sup>     | 51,0                 |
| Kraftwerk Schkopau GbR, DE, Schkopau <sup>1)</sup>                                             | 58,1                 | NORD-direkt GmbH, DE, Neumünster <sup>2)</sup>                                                   | 100,0                |
| Kraftwerk Schwedt GmbH & Co. KG, DE, Schwedt <sup>1)</sup>                                     | 99,0                 | Nürnberger Straße 57 Grundstücks-Verwaltungs GmbH, DE, Würzburg <sup>2)</sup>                    | 100,0                |
| Kraftwerk Schwedt Verwaltungsgesellschaft mbH, DE, Schwedt <sup>2)</sup>                       | 100,0                | Nyiregyházi Kombinált Ciklusú Erőmű Kft., HU, Nyiregyháza <sup>1)</sup>                          | 100,0                |
| Kraftwerks-Simulator-Gesellschaft mbH, DE, Essen <sup>5)</sup>                                 | 41,7                 | oaza-Krupka, a.s., CZ, Liberec VI <sup>5)</sup>                                                  | 49,0                 |
| Kreiswerke Main-Kinzig GmbH, DE, Gelnhausen <sup>5)</sup>                                      | 24,5                 | Obere Donau Kraftwerke Aktiengesellschaft, DE, München <sup>2)</sup>                             | 60,0                 |
| Kurgan Grundstücks-Verwaltungsgesellschaft mbH & Co. OHG, DE, Grünwald <sup>1)</sup>           | 90,0                 | Oebisfelder Wasser und Abwasser GmbH, DE, Oebisfelde <sup>5)</sup>                               | 49,0                 |
| LandE GmbH, DE, Wolfsburg-Fallersleben <sup>1)</sup>                                           | 69,6                 | One World Hospitality (Proprietary) Ltd., ZA, Randburg <sup>5)</sup>                             | 50,0                 |
| Landgas Göhren GmbH, DE, Göhren <sup>5)</sup>                                                  | 40,6                 | Österreichisch-Bayerische Kraftwerke Aktiengesellschaft, DE, Simbach am Inn <sup>3)</sup>        | 50,0                 |
| Landwehr Wassertechnik GmbH, DE, Schöppenstedt <sup>2)</sup>                                   | 100,0                | PADES Personalservice GmbH, DE, München <sup>2)</sup>                                            | 100,0                |
| Lillo Energy N.V., BE, Antwerpen <sup>5)</sup>                                                 | 50,0                 |                                                                                                  |                      |
| Łobeska Energetyka Cieplna Sp. z o.o., PL, Łobez <sup>2)</sup>                                 | 100,0                |                                                                                                  |                      |

1) Konsolidiertes verbundenes Unternehmen 2) Nicht konsolidiertes verbundenes Unternehmen aufgrund von untergeordneter Bedeutung (bewertet zu Anschaffungskosten)  
 3) Gemeinschaftsunternehmen nach IAS 31 (bewertet nach Equity-Methode) 4) Assoziiertes Unternehmen (bewertet nach Equity-Methode) 5) Assoziiertes Unternehmen  
 (bewertet zu Anschaffungskosten aufgrund untergeordneter Bedeutung) 6) Übrige Beteiligungen 7) Einbeziehung als konsolidiertes verbundenes Unternehmen nach SIC 12  
 8) Für die Gesellschaft wird § 264 (3) HGB bzw. § 264b HGB in Anspruch genommen 9) Gewinnabführungsvertrag (Ergebnis nach Gewinnabführung)

## Angaben zum Beteiligungsbesitz gem. § 313 Abs. 2 HGB (Stand: 31. Dez. 2010)

| Gesellschaft, Sitz                                                                              | Kapital-<br>anteil % | Gesellschaft, Sitz                                                                              | Kapital-<br>anteil % |
|-------------------------------------------------------------------------------------------------|----------------------|-------------------------------------------------------------------------------------------------|----------------------|
| Peißenberger Kraftwerksgesellschaft mit beschränkter Haftung, DE, Peißenberg <sup>2)</sup>      | 100,0                | SCHLESWAG Abwasser GmbH, DE, Neumünster <sup>5)</sup>                                           | 100,0                |
| Peißenberger Wärmegeellschaft mbH, DE, Peißenberg <sup>5)</sup>                                 | 50,0                 | Schleswig-Holstein Netz AG, DE, Quickborn <sup>1)</sup>                                         | 98,4                 |
| PLEcon Pipeline Engineering Consulting GmbH, DE, Berlin <sup>2)</sup>                           | 85,0                 | Schleswig-Holstein Netz GmbH, DE, Rendsburg <sup>2)</sup>                                       | 100,0                |
| Pragoplyn, a.s., CZ, Prag <sup>1)</sup>                                                         | 100,0                | Schleswig-Holstein Netz Verwaltungs-GmbH, DE, Quickborn <sup>1)</sup>                           | 100,0                |
| Pražská plynárenská Distribuce, a.s., člen koncernu                                             |                      | SEC Energia Sp. z o.o., PL, Szczecin <sup>2)</sup>                                              | 100,0                |
| Pražská plynárenská, a.s., CZ, Prag <sup>1)</sup>                                               | 100,0                | SERVICE plus GmbH, DE, Neumünster <sup>2)</sup>                                                 | 100,0                |
| Pražská plynárenská Holding a.s., CZ, Prag <sup>4)</sup>                                        | 49,0                 | Service Plus Recycling GmbH, DE, Neumünster <sup>2)</sup>                                       | 100,0                |
| Pražská plynárenská Servis distribuce, a.s., člen koncernu                                      |                      | SKO ENERGO FIN, s.r.o., CZ, Mlada Boleslav <sup>4)</sup>                                        | 42,5                 |
| Pražská plynárenská, a.s., CZ, Prag <sup>2)</sup>                                               | 100,0                | SKO ENERGO, s.r.o., CZ, Mlada Boleslav <sup>5)</sup>                                            | 21,0                 |
| Pražská plynárenská Správa majetku, s.r.o., člen koncernu                                       |                      | Société des Eaux de l'Est S.A., FR, Saint Avold (Creutzwald) <sup>4)</sup>                      | 25,0                 |
| Pražská plynárenská, a.s., CZ, Prag <sup>2)</sup>                                               | 100,0                | Société Nationale d'Électricité et de Thermique, S.A. (SNET), FR, Rueil-Malmaison <sup>1)</sup> | 100,0                |
| Pražská plynárenská, a.s., CZ, Prag <sup>1)</sup>                                               | 49,3                 | Solar Energy s.r.o., CZ, Znojmo <sup>5)</sup>                                                   | 25,0                 |
| Promec Sp. z o.o., PL, Skarżysko-Kamienna <sup>2)</sup>                                         | 100,0                | SOTECTRAT Tratamento de Resíduos Sólidos, Portugal, Unipessoal Lda, PT, Funchal <sup>2)</sup>   | 100,0                |
| Prometheus, energetické služby, s.r.o., CZ, Prag <sup>2)</sup>                                  | 100,0                | Städtische Betriebswerke Luckenwalde GmbH, DE, Luckenwalde <sup>5)</sup>                        | 29,0                 |
| Przedsiębiorstwo Energetyki Cieplnej w Barlinku Sp. z o.o., PL, Barlinek <sup>2)</sup>          | 51,5                 | Städtische Werke Magdeburg GmbH, DE, Magdeburg <sup>4)</sup>                                    | 26,7                 |
| Purena GmbH, DE, Wolfenbüttel <sup>1)</sup>                                                     | 94,5                 | Stadtwerk Haßfurt GmbH, DE, Haßfurt <sup>5)</sup>                                               | 24,9                 |
| Q-Energie b.v., NL, Eindhoven <sup>2)</sup>                                                     | 53,3                 | Stadtwerke Arnstadt GmbH, DE, Arnstadt <sup>5)</sup>                                            | 44,0                 |
| Qenergy Sp. z o.o., PL, Warschau <sup>5)</sup>                                                  | 40,0                 | Stadtwerke Bad Bramstedt GmbH, DE, Bad Bramstedt <sup>5)</sup>                                  | 36,0                 |
| Rauschbergbahn Gesellschaft mit beschränkter Haftung, DE, Ruhpolding <sup>2)</sup>              | 77,4                 | Stadtwerke Bad Langensalza GmbH, DE, Bad Langensalza <sup>5)</sup>                              | 40,0                 |
| RDE Regionale Dienstleistungen Energie GmbH & Co. KG, DE, Würzburg <sup>2)</sup>                | 61,8                 | Stadtwerke Barth GmbH, DE, Barth <sup>5)</sup>                                                  | 49,0                 |
| RDE Verwaltungs-GmbH, DE, Würzburg <sup>2)</sup>                                                | 100,0                | Stadtwerke Bebra GmbH, DE, Bebra <sup>5)</sup>                                                  | 20,0                 |
| ReCon Projektentwicklungs- und Beteiligungsgesellschaft mbH, DE, München <sup>2)</sup>          | 100,0                | Stadtwerke Bergen GmbH, DE, Bergen <sup>5)</sup>                                                | 49,0                 |
| REGAS GmbH & Co KG, DE, Regensburg <sup>5)</sup>                                                | 50,0                 | Stadtwerke Blankenburg GmbH, DE, Blankenburg <sup>5)</sup>                                      | 30,0                 |
| REGAS Verwaltungs-GmbH, DE, Regensburg <sup>5)</sup>                                            | 50,0                 | Stadtwerke Bogen GmbH, DE, Bogen <sup>5)</sup>                                                  | 41,0                 |
| REGENSBURGER ENERGIE- UND WASSERVERSORGUNG AG, DE, Regensburg <sup>5)</sup>                     | 35,5                 | Stadtwerke Brandenburg an der Havel GmbH, DE, Brandenburg an der Havel <sup>4)</sup>            | 36,8                 |
| RegioCom GmbH, DE, Barleben <sup>5)</sup>                                                       | 50,0                 | Stadtwerke Bredstedt GmbH, DE, Bredstedt <sup>5)</sup>                                          | 49,9                 |
| regiolicht Niedersachsen GmbH, DE, Helmstedt <sup>2)</sup>                                      | 100,0                | Stadtwerke Burgdorf GmbH, DE, Burgdorf <sup>5)</sup>                                            | 49,0                 |
| Regnitzstromverwertung Aktiengesellschaft, DE, Erlangen <sup>5)</sup>                           | 33,3                 | Stadtwerke Ebermannstadt Versorgungsbetriebe GmbH, DE, Ebermannstadt <sup>5)</sup>              | 25,0                 |
| REWAG REGENSBURGER ENERGIE- UND WASSERVERSORGUNG AG & CO KG, DE, Regensburg <sup>4)</sup>       | 35,5                 | Stadtwerke Eggenfelden GmbH, DE, Eggenfelden <sup>5)</sup>                                      | 49,0                 |
| Rhein-Main-Donau Aktiengesellschaft, DE, München <sup>1)</sup>                                  | 77,5                 | Stadtwerke Eisenberg GmbH, DE, Eisenberg <sup>5)</sup>                                          | 49,0                 |
| R-KOM Regensburger Telekommunikationsgesellschaft mbH & Co. KG, DE, Regensburg <sup>5)</sup>    | 20,0                 | Stadtwerke Frankfurt (Oder) GmbH, DE, Frankfurt/Oder <sup>4)</sup>                              | 39,0                 |
| R-KOM Regensburger Telekommunikationsverwaltungs-gesellschaft mbH, DE, Regensburg <sup>5)</sup> | 20,0                 | Stadtwerke Garbsen GmbH, DE, Garbsen <sup>4)</sup>                                              | 24,9                 |
| RMD Consult Constructii Hidro & Energie S.R.L, RO, Bukarest <sup>2)</sup>                       | 80,0                 | Stadtwerke Geesthacht GmbH, DE, Geesthacht <sup>5)</sup>                                        | 24,9                 |
| RMD Wasserstraßen GmbH, DE, München <sup>2)</sup>                                               | 100,0                | Stadtwerke Gelnhäusen GmbH, DE, Gelnhäusen <sup>1)</sup>                                        | 100,0                |
| RMD-Consult GmbH Wasserbau und Energie, DE, München <sup>2)</sup>                               | 100,0                | Stadtwerke Gotha GmbH, DE, Gotha <sup>4)</sup>                                                  | 48,0                 |
| RuhrEnergie GmbH, EVR, DE, Gelsenkirchen <sup>1), 8)</sup>                                      | 100,0                | Stadtwerke Göttingen AG, DE, Göttingen <sup>2)</sup>                                            | 48,9                 |
| S.C. Salgaz S.A., RO, Salonta <sup>2)</sup>                                                     | 60,1                 | Stadtwerke Husum GmbH, DE, Husum <sup>5)</sup>                                                  | 49,9                 |
| Safetec Entsorgungs- und Sicherheitstechnik GmbH, DE, Heidelberg <sup>2)</sup>                  | 100,0                | Stadtwerke Lage GmbH, DE, Lage <sup>5)</sup>                                                    | 45,0                 |
| Salzgitter Gas GmbH, DE, Salzgitter <sup>5)</sup>                                               | 25,1                 | Stadtwerke Leinefelde GmbH, DE, Leinefelde-Worbis <sup>5)</sup>                                 | 49,0                 |
| Schlackeverwertung Breisgau GmbH, DE, Eschbach <sup>2)</sup>                                    | 51,0                 | Stadtwerke Lichtenau GmbH, DE, Lichtenau <sup>5)</sup>                                          | 25,0                 |
|                                                                                                 |                      | Stadtwerke Lübz GmbH, DE, Lübz <sup>5)</sup>                                                    | 25,0                 |
|                                                                                                 |                      | Stadtwerke Ludwigsfelde GmbH, DE, Ludwigsfelde <sup>5)</sup>                                    | 29,0                 |
|                                                                                                 |                      | Stadtwerke Mühlhausen GmbH, DE, Mühlhausen <sup>5)</sup>                                        | 23,9                 |

1) Konsolidiertes verbundenes Unternehmen 2) Nicht konsolidiertes verbundenes Unternehmen aufgrund von untergeordneter Bedeutung (bewertet zu Anschaffungskosten)  
3) Gemeinschaftsunternehmen nach IAS 31 (bewertet nach Equity-Methode) 4) Assoziiertes Unternehmen (bewertet nach Equity-Methode) 5) Assoziiertes Unternehmen  
(bewertet zu Anschaffungskosten aufgrund untergeordneter Bedeutung) 6) Übrige Beteiligungen 7) Einbeziehung als konsolidiertes verbundenes Unternehmen nach SIC 12  
8) Für die Gesellschaft wird § 264 (3) HGB bzw. § 264b HGB in Anspruch genommen 9) Gewinnabführungsvertrag (Ergebnis nach Gewinnabführung)



Angaben zum Beteiligungsbesitz gem. § 313 Abs. 2 HGB (Stand: 31. Dez. 2010)

| Gesellschaft, Sitz                                                                                          | Kapital-<br>anteil % | Gesellschaft, Sitz                                                                             | Kapital-<br>anteil % |
|-------------------------------------------------------------------------------------------------------------|----------------------|------------------------------------------------------------------------------------------------|----------------------|
| Stadtwerke Neunburg vorm Wald Strom GmbH, DE,<br>Neunburg vorm Wald <sup>5)</sup>                           | 24,9                 | Szczecinska Energetyka Ciepna Sp. z o.o., PL, Szczecin <sup>1)</sup>                           | 66,4                 |
| Stadtwerke Neustadt a. Rbge. GmbH & Co. KG, DE,<br>Neustadt a. Rbge. <sup>4)</sup>                          | 24,9                 | Szombathelyi Erőmű Zrt., HU, Szombathely <sup>2)</sup>                                         | 55,0                 |
| Stadtwerke Neustadt a. Rbge. Verwaltungs-GmbH, DE,<br>Neustadt a. Rbge. <sup>5)</sup>                       | 24,9                 | Szombathelyi Távhőszolgáltató Kft., HU, Szombathely <sup>5)</sup>                              | 25,0                 |
| Stadtwerke Neustadt an der Orla GmbH, DE, Neustadt an<br>der Orla <sup>5)</sup>                             | 20,0                 | Tapolcai Kogenerációs Erőmű Kft., HU, Győr <sup>2)</sup>                                       | 100,0                |
| Stadtwerke Niebüll GmbH, DE, Niebüll <sup>5)</sup>                                                          | 49,9                 | Technische Werke Delitzsch GmbH, DE, Delitzsch <sup>4)</sup>                                   | 25,1                 |
| Stadtwerke Parchim GmbH, DE, Parchim <sup>5)</sup>                                                          | 25,2                 | TEN Thüringer Energienetze GmbH, DE, Erfurt <sup>1)</sup>                                      | 100,0                |
| Stadtwerke Premnitz GmbH, DE, Premnitz <sup>5)</sup>                                                        | 35,0                 | Teplárna Kyjov, a.s., CZ, Kyjov <sup>2)</sup>                                                  | 99,3                 |
| Stadtwerke Pritzwalk GmbH, DE, Pritzwalk <sup>5)</sup>                                                      | 49,0                 | Teplárna Otrokovice a.s., CZ, Otrokovice <sup>1)</sup>                                         | 66,0                 |
| Stadtwerke Ribnitz-Damgarten GmbH, DE,<br>Ribnitz-Damgarten <sup>5)</sup>                                   | 39,0                 | Teplárna Tábor, a.s., CZ, Tábor <sup>1)</sup>                                                  | 51,5                 |
| Stadtwerke Schwedt GmbH, DE, Schwedt/Oder <sup>4)</sup>                                                     | 37,8                 | Terrakomp GmbH, DE, Helmstedt <sup>2)</sup>                                                    | 100,0                |
| Stadtwerke Sondershausen GmbH, DE, Sondershausen <sup>5)</sup>                                              | 23,9                 | THB Thüringer Breitband GmbH, DE, Weimar <sup>2)</sup>                                         | 100,0                |
| Stadtwerke Stadtroda GmbH, DE, Stadtroda <sup>5)</sup>                                                      | 24,9                 | Thüringer Energie Netzservice Geschäftsführungsgesell-<br>schaft mbH, DE, Erfurt <sup>2)</sup> | 100,0                |
| Stadtwerke Suhl/Zella-Mehlis GmbH, DE, Suhl <sup>4)</sup>                                                   | 44,4                 | Thüringer Energie Netzservice GmbH & Co. KG, DE, Erfurt <sup>2)</sup>                          | 100,0                |
| Stadtwerke Tornesch GmbH, DE, Tornesch <sup>5)</sup>                                                        | 49,0                 | Thüringer Netkom GmbH, DE, Weimar <sup>2)</sup>                                                | 100,0                |
| Stadtwerke Vilshofen GmbH, DE, Vilshofen <sup>5)</sup>                                                      | 41,0                 | TREA Breisgau Betriebsgesellschaft mbH, DE, Eschbach <sup>2)</sup>                             | 74,9                 |
| Stadtwerke Weilburg GmbH, DE, Weilburg an der Lahn <sup>5)</sup>                                            | 20,0                 | TREA Breisgau Energieverwertung GmbH, DE, Eschbach <sup>5)</sup>                               | 30,0                 |
| Stadtwerke Weimar Stadtversorgungs-GmbH, DE, Weimar <sup>4)</sup>                                           | 49,0                 | Überlandwerk Leinetal GmbH, DE, Gronau <sup>4)</sup>                                           | 48,0                 |
| Stadtwerke Wismar GmbH, DE, Wismar <sup>4)</sup>                                                            | 49,0                 | ÜE Überlandwerk Erding GmbH & Co. KG, DE, Erding <sup>5)</sup>                                 | 21,1                 |
| Stadtwerke Wittenberge GmbH, DE, Wittenberge <sup>5)</sup>                                                  | 22,7                 | ÜE Überlandwerk Erding Verwaltungsgesellschaft mbH,<br>DE, Erding <sup>5)</sup>                | 21,0                 |
| Stadtwerke Wolfenbüttel GmbH, DE, Wolfenbüttel <sup>4)</sup>                                                | 26,0                 | Umwelt- und Wärmeenergiegesellschaft Strasburg<br>GmbH, DE, Strasburg <sup>2)</sup>            | 100,0                |
| Stadtwerke Wolmirstedt GmbH, DE, Wolmirstedt <sup>5)</sup>                                                  | 49,4                 | Untere Iller AG, DE, Landshut <sup>2)</sup>                                                    | 60,0                 |
| Strom Germering GmbH, DE, Germering <sup>2)</sup>                                                           | 90,0                 | Uranit GmbH, DE, Jülich <sup>3)</sup>                                                          | 50,0                 |
| Stromnetzgesellschaft Bad Salzdetfurth mbH, DE, Bad<br>Salzdetfurth <sup>5)</sup>                           | 49,0                 | UTEG Gesellschaft für Umwelttechnik und Entsorgung<br>mbH, DE, Herford <sup>2)</sup>           | 100,0                |
| Stromversorgung Ahrensburg GmbH, DE, Ahrensburg <sup>2)</sup>                                               | 100,0                | Utilities Center Maasvlakte Leftbank b.v., NL, Rotterdam <sup>1)</sup>                         | 100,0                |
| Stromversorgung Angermünde GmbH, DE, Angermünde <sup>5)</sup>                                               | 49,0                 | UTM Umwelttechnik Mittelfranken GmbH i.L., DE,<br>Nürnberg <sup>5)</sup>                       | 30,0                 |
| Stromversorgung Ruppolding Gesellschaft mit<br>beschränkter Haftung, DE, Ruppolding <sup>2)</sup>           | 100,0                | Verkehrs-Servicegesellschaft Paderborn/Höxter mbH, DE,<br>Paderborn <sup>5)</sup>              | 37,0                 |
| Stromversorgung Zerbst GmbH & Co. KG, DE, Zerbst <sup>5)</sup>                                              | 30,0                 | Versorgungsbetrieb Waldbüttelbrunn GmbH, DE,<br>Waldbüttelbrunn <sup>5)</sup>                  | 49,0                 |
| Stromversorgung Zerbst Verwaltungs-GmbH, DE, Zerbst <sup>5)</sup>                                           | 30,0                 | Versorgungsbetriebe Helgoland GmbH, DE, Helgoland <sup>2)</sup>                                | 90,0                 |
| strotög GmbH Strom für Töging, DE, Töging am Inn <sup>5)</sup>                                              | 50,0                 | Versorgungskasse Energie (VVG), DE, Hannover <sup>1)</sup>                                     | 99,6                 |
| SüdWasser GmbH, DE, Erlangen <sup>2)</sup>                                                                  | 100,0                | Versuchsatomkraftwerk Kahl GmbH, DE, Karlstein <sup>5)</sup>                                   | 20,0                 |
| SULPUR Grundstücks-Vermietungsgesellschaft mbH & Co.<br>Objekt Erfurt KG i.L., DE, Schönefeld <sup>2)</sup> | 83,3                 | VEW-VKR Fernwärmeleitung Shamrock-Bochum GbR, DE,<br>Gelsenkirchen-Buer <sup>2)</sup>          | 55,1                 |
| Surschiste, S.A., FR, Mazingarbe <sup>2)</sup>                                                              | 100,0                | Volkswagen AG Preussen Elektra AG Offene Handelsge-<br>sellschaft, DE, Wolfsburg <sup>3)</sup> | 95,0                 |
| SVH Stromversorgung Haar GmbH, DE, Haar <sup>5)</sup>                                                       | 50,0                 | Wärme- und Wasserversorgung Friedensstadt GmbH, DE,<br>Trebbin OT Blankensee <sup>5)</sup>     | 50,0                 |
| SVI-Stromversorgung Ismaning GmbH, DE, Ismaning <sup>5)</sup>                                               | 49,0                 | Wärmeversorgung Schenefeld GmbH, DE, Schenefeld <sup>5)</sup>                                  | 40,0                 |
| SVO Energie GmbH, DE, Celle <sup>1)</sup>                                                                   | 98,2                 | Wärmeversorgung Sollstedt GmbH, DE, Sollstedt <sup>5)</sup>                                    | 49,0                 |
| SVO Holding GmbH, DE, Celle <sup>1)</sup>                                                                   | 64,0                 | Wärmeversorgungsgesellschaft Königs Wusterhausen<br>mbH, DE, Königs Wusterhausen <sup>2)</sup> | 50,1                 |
| SVO Vertrieb GmbH, DE, Celle <sup>1)</sup>                                                                  | 100,0                | Warmtebedrijf Exploitatie N.V., NL, Rotterdam <sup>5)</sup>                                    | 50,0                 |
| SWE Energie GmbH, DE, Erfurt <sup>4)</sup>                                                                  | 29,0                 | Wasser GmbH Salzhemmendorf, DE, Salzhemmendorf <sup>5)</sup>                                   | 49,0                 |
| SWE Netz GmbH, DE, Erfurt <sup>4)</sup>                                                                     | 29,0                 | Wasser- und Abwassergesellschaft Vienenburg mbH, DE,<br>Vienenburg <sup>5)</sup>               | 49,0                 |
| SWE Technische Service GmbH, DE, Erfurt <sup>5)</sup>                                                       | 25,1                 |                                                                                                |                      |
| SWN Stadtwerke Neustadt GmbH, DE, Neustadt bei<br>Coburg <sup>4)</sup>                                      | 25,1                 |                                                                                                |                      |
| SWS Energie GmbH, DE, Stralsund <sup>4)</sup>                                                               | 49,0                 |                                                                                                |                      |

1) Konsolidiertes verbundenes Unternehmen 2) Nicht konsolidiertes verbundenes Unternehmen aufgrund von untergeordneter Bedeutung (bewertet zu Anschaffungskosten)  
3) Gemeinschaftsunternehmen nach IAS 31 (bewertet nach Equity-Methode) 4) Assoziiertes Unternehmen (bewertet nach Equity-Methode) 5) Assoziiertes Unternehmen  
(bewertet zu Anschaffungskosten aufgrund untergeordneter Bedeutung) 6) Übrige Beteiligungen 7) Einbeziehung als konsolidiertes verbundenes Unternehmen nach SIC 12  
8) Für die Gesellschaft wird § 264 (3) HGB bzw. § 264b HGB in Anspruch genommen 9) Gewinnabführungsvertrag (Ergebnis nach Gewinnabführung)

## Angaben zum Beteiligungsbesitz gem. § 313 Abs. 2 HGB (Stand: 31. Dez. 2010)

| Gesellschaft, Sitz                                                                                               | Kapital-<br>anteil % | Gesellschaft, Sitz                                                                                                               | Kapital-<br>anteil % |
|------------------------------------------------------------------------------------------------------------------|----------------------|----------------------------------------------------------------------------------------------------------------------------------|----------------------|
| Wasserkraftnutzung im Landkreis Gifhorn GmbH, DE, Müden/Aller <sup>5)</sup>                                      | 50,0                 | E.ON Ruhrgas Dutch Holding B.V., NL, Den Haag <sup>2)</sup>                                                                      | 100,0                |
| Wasserversorgung Sarstedt GmbH, DE, Sarstedt <sup>5)</sup>                                                       | 49,0                 | E.ON Ruhrgas E & P Ägypten GmbH, DE, Essen <sup>1)</sup>                                                                         | 100,0                |
| Wasserwerk Gifhorn Beteiligungs-GmbH, DE, Gifhorn <sup>5)</sup>                                                  | 49,8                 | E.ON Ruhrgas E & P Algerien GmbH, DE, Essen <sup>1)</sup>                                                                        | 100,0                |
| Wasserwerk Gifhorn GmbH & Co KG, DE, Gifhorn <sup>5)</sup>                                                       | 49,8                 | E.ON Ruhrgas E & P GmbH, DE, Essen <sup>1)</sup>                                                                                 | 100,0                |
| Wasserwerks-Betriebsgemeinschaft Klein Heidorn GbR, DE, Neustadt a. Rbge. <sup>5)</sup>                          | 50,0                 | E.ON Ruhrgas GGH GmbH, DE, Essen <sup>2)</sup>                                                                                   | 100,0                |
| Wasserwirtschafts- und Betriebsgesellschaft Grafenwöhr GmbH, DE, Grafenwöhr <sup>5)</sup>                        | 49,0                 | E.ON Ruhrgas GPA GmbH, DE, Essen <sup>1), 8)</sup>                                                                               | 100,0                |
| WAZV-Abwasserentsorgung GmbH, DE, Nentershausen <sup>5)</sup>                                                    | 49,0                 | E.ON Ruhrgas GPD GmbH, DE, Essen <sup>1), 8)</sup>                                                                               | 100,0                |
| WBG GmbH, DE, Helmstedt <sup>1)</sup>                                                                            | 98,0                 | E.ON Ruhrgas International GmbH, DE, Essen <sup>1), 8)</sup>                                                                     | 100,0                |
| Weißmainkraftwerk Röhrenhof Aktiengesellschaft, DE, Berneck <sup>2)</sup>                                        | 93,5                 | E.ON Ruhrgas Nigeria Limited, NG, Lagos <sup>2)</sup>                                                                            | 100,0                |
| WEVG Salzgitter GmbH & Co. KG, DE, Salzgitter <sup>1)</sup>                                                      | 50,2                 | E.ON Ruhrgas Nord Stream Anbindungsleitungsgesellschaft mbH, DE, Essen <sup>2)</sup>                                             | 100,0                |
| WEVG Verwaltungs GmbH, DE, Salzgitter <sup>2)</sup>                                                              | 50,2                 | E.ON Ruhrgas Norge AS, NO, Stavanger <sup>1)</sup>                                                                               | 100,0                |
| WGS Wärme-gesellschaft mbH Saalfeld, DE, Saalfeld <sup>5)</sup>                                                  | 24,0                 | E.ON Ruhrgas Personalagentur GmbH, DE, Essen <sup>2)</sup>                                                                       | 100,0                |
| WINDENERGIEPARK WESTKÜSTE GmbH, DE, Kaiser-Wilhelm-Koog <sup>2)</sup>                                            | 80,0                 | E.ON Ruhrgas Polska Sp. z o.o., PL, Warschau <sup>2)</sup>                                                                       | 100,0                |
| WPG Westfälische Propan-GmbH, DE, Detmold <sup>5)</sup>                                                          | 22,2                 | E.ON Ruhrgas UK Caister Limited in liquidation, GB, London <sup>1)</sup>                                                         | 100,0                |
| WVM Wärmeversorgung Maßbach GmbH, DE, Maßbach <sup>5)</sup>                                                      | 22,2                 | E.ON Ruhrgas UK E&P Limited, GB, London <sup>1)</sup>                                                                            | 100,0                |
| Západoslovenská energetika a.s. (ZSE), SK, Bratislava <sup>4)</sup>                                              | 49,0                 | E.ON Ruhrgas UK Energy Trading Limited, GB, London <sup>1)</sup>                                                                 | 100,0                |
| <b>Market Unit Pan-European Gas</b>                                                                              |                      | E.ON Ruhrgas UK EU Limited, GB, London <sup>1)</sup>                                                                             | 100,0                |
| 3G Holdings Limited, GB, London <sup>5)</sup>                                                                    | 25,0                 | E.ON Ruhrgas UK North Sea Limited, GB, Aberdeen <sup>1)</sup>                                                                    | 100,0                |
| A/s Lätvijas Gāze, LV, Riga <sup>4)</sup>                                                                        | 47,2                 | E.ON Service GmbH, DE, Essen <sup>2), 8)</sup>                                                                                   | 100,0                |
| AB Lietūvis Dūjos, LT, Vilnius <sup>4)</sup>                                                                     | 38,9                 | E.ON Servicii Romania S.r.l., RO, Iasi <sup>2)</sup>                                                                             | 100,0                |
| Adria LNG d.o.o. za izradu studija, HR, Zagreb <sup>5)</sup>                                                     | 39,2                 | Ekopur d.o.o., SI, Ljubljana <sup>2)</sup>                                                                                       | 100,0                |
| AS EESTI GAAS, EE, Tallinn <sup>5)</sup>                                                                         | 33,7                 | Erdgasversorgungsgesellschaft Thüringen-Sachsen mbH (EVG), DE, Erfurt <sup>3)</sup>                                              | 50,0                 |
| BBL Company V.O.F., NL, Groningen <sup>4)</sup>                                                                  | 20,0                 | Etzel Gas-Lager GmbH & Co. KG, DE, Friedeburg-Etzel <sup>7)</sup>                                                                | 74,8                 |
| caplog-x GmbH, DE, Leipzig <sup>5)</sup>                                                                         | 25,0                 | Etzel Gas-Lager Management GmbH, DE, Friedeburg-Etzel <sup>5)</sup>                                                              | 74,8                 |
| COLONIA-CLUJ-NAPOCA-ENERGIE S.R.L. (CCNE), RO, Cluj-Napoca <sup>5)</sup>                                         | 33,3                 | Ferngas Nordbayern GmbH, DE, Nürnberg <sup>1)</sup>                                                                              | 70,0                 |
| DEUDAN-Deutsch/Dänische Erdgastransportgesellschaft mbH & Co. Kommanditgesellschaft, DE, Handewitt <sup>5)</sup> | 25,0                 | Frankengas GmbH, DE, Nürnberg <sup>4)</sup>                                                                                      | 30,9                 |
| DEUDAN-HOLDING-GmbH, DE, Hannover <sup>5)</sup>                                                                  | 49,0                 | Freya Pipeline GmbH & Co. KG, DE, Bonn <sup>4)</sup>                                                                             | 60,0                 |
| Deutsche Flüssigerdgas Terminal oHG, DE, Essen <sup>2)</sup>                                                     | 90,0                 | Gasag Berliner Gaswerke Aktiengesellschaft, DE, Berlin <sup>4)</sup>                                                             | 36,9                 |
| DFTG—Deutsche Flüssigerdgas Terminal Gesellschaft mit beschränkter Haftung, DE, Wilhelmshaven <sup>2)</sup>      | 90,0                 | GasLine Telekommunikationsnetz-Geschäftsführungsgesellschaft deutscher Gasversorgungsunternehmen mbH, DE, Straelen <sup>5)</sup> | 40,0                 |
| E.ON Austria Ges.m.b.H., AT, Wien <sup>1)</sup>                                                                  | 75,1                 | GasLINE Telekommunikationsnetzgesellschaft deutscher Gasversorgungsunternehmen mbH & Co. KG, DE, Straelen <sup>4)</sup>          | 40,0                 |
| E.ON Bioerdgas GmbH, DE, Essen <sup>1)</sup>                                                                     | 100,0                | Gasum Oy, FI, Espoo <sup>4)</sup>                                                                                                | 20,0                 |
| E.ON Direkt GmbH, DE, Essen <sup>1), 8)</sup>                                                                    | 100,0                | Gas-Union GmbH, DE, Frankfurt/Main <sup>4)</sup>                                                                                 | 25,9                 |
| E.ON Földgáz Holding GmbH, DE, Essen <sup>2)</sup>                                                               | 100,0                | Gasversorgung Frankenwald GmbH (GFW), DE, Helmbrechts <sup>5)</sup>                                                              | 50,0                 |
| E.ON Földgáz Storage ZRt., HU, Budapest <sup>1)</sup>                                                            | 100,0                | GGG Gesellschaft für Grundstücks- und Gebäudenutzung mbH, DE, Essen <sup>2)</sup>                                                | 100,0                |
| E.ON Földgáz Trade ZRt., HU, Budapest <sup>1)</sup>                                                              | 100,0                | HEAG Südheissische Energie AG (HSE), DE, Darmstadt <sup>4)</sup>                                                                 | 40,0                 |
| E.ON Gas Grid GmbH, DE, Essen <sup>1), 8)</sup>                                                                  | 100,0                | Hermann Seippel-Unterstützungseinrichtung GmbH, DE, Essen <sup>2)</sup>                                                          | 100,0                |
| E.ON Gas Mobil GmbH, DE, Essen <sup>2)</sup>                                                                     | 100,0                | Holford Gas Storage Limited, GB, Edinburgh <sup>1)</sup>                                                                         | 100,0                |
| E.ON Gas Storage GmbH, DE, Essen <sup>1), 8)</sup>                                                               | 100,0                | HUGE Kft., HU, Budapest <sup>2)</sup>                                                                                            | 100,0                |
| E.ON Gas Storage UK Limited, GB, Coventry <sup>1)</sup>                                                          | 100,0                | Inwestycyjna Spółka Energetyczna-IRB Sp. z o.o., PL, Warschau <sup>5)</sup>                                                      | 50,0                 |
| E.ON Ruhrgas AG, DE, Essen <sup>1), 8)</sup>                                                                     | 100,0                |                                                                                                                                  |                      |
| E.ON Ruhrgas Austria AG, AT, Wien <sup>1)</sup>                                                                  | 100,0                |                                                                                                                                  |                      |
| E.ON Ruhrgas BBL B.V., NL, Voorburg <sup>1)</sup>                                                                | 100,0                |                                                                                                                                  |                      |
| E.ON Ruhrgas Dogalgaz A.S., TR, Ankara <sup>2)</sup>                                                             | 100,0                |                                                                                                                                  |                      |

1) Konsolidiertes verbundenes Unternehmen 2) Nicht konsolidiertes verbundenes Unternehmen aufgrund von untergeordneter Bedeutung (bewertet zu Anschaffungskosten)  
3) Gemeinschaftsunternehmen nach IAS 31 (bewertet nach Equity-Methode) 4) Assoziiertes Unternehmen (bewertet nach Equity-Methode) 5) Assoziiertes Unternehmen (bewertet zu Anschaffungskosten aufgrund untergeordneter Bedeutung) 6) Übrige Beteiligungen 7) Einbeziehung als konsolidiertes verbundenes Unternehmen nach SIC 12  
8) Für die Gesellschaft wird § 264 (3) HGB bzw. § 264b HGB in Anspruch genommen 9) Gewinnabführungsvertrag (Ergebnis nach Gewinnabführung)

Angaben zum Beteiligungsbesitz gem. § 313 Abs. 2 HGB (Stand: 31. Dez. 2010)

| Gesellschaft, Sitz                                                                        | Kapital-<br>anteil % | Gesellschaft, Sitz                                                                      | Kapital-<br>anteil % |
|-------------------------------------------------------------------------------------------|----------------------|-----------------------------------------------------------------------------------------|----------------------|
| KGK Kommunalgas Nordbayern GmbH, DE, Bamberg <sup>1), 8)</sup>                            | 100,0                | Caremount Limited, IE, Dublin <sup>1)</sup>                                             | 100,0                |
| Livorno Holding S.r.l., IT, Rom <sup>5)</sup>                                             | 50,0                 | Cell Site Connection Services Limited, GB, Coventry <sup>1)</sup>                       | 100,0                |
| LIWACOM Informationstechnik GmbH, DE, Essen <sup>5)</sup>                                 | 33,3                 | Central Networks Contracting Limited, GB, Coventry <sup>2)</sup>                        | 100,0                |
| MEGAL Mittel-Europäische-Gasleitungsgesellschaft mbH & Co. KG, DE, Essen <sup>3)</sup>    | 51,0                 | Central Networks East plc, GB, Coventry <sup>1)</sup>                                   | 100,0                |
| MEGAL Verwaltungs-GmbH, DE, Essen <sup>2)</sup>                                           | 51,0                 | Central Networks Limited, GB, Coventry <sup>1)</sup>                                    | 100,0                |
| METHA-Methanhandel GmbH, DE, Essen <sup>1), 8)</sup>                                      | 100,0                | Central Networks Services Limited, GB, Coventry <sup>1)</sup>                           | 100,0                |
| Mittelrheinische Erdgastransportleitungsgesellschaft mbH, DE, Haan <sup>1), 8)</sup>      | 100,0                | Central Networks West plc, GB, Coventry <sup>1)</sup>                                   | 100,0                |
| Nafta a.s., SK, Gbely <sup>4)</sup>                                                       | 40,5                 | CHN Contractors Limited, GB, Coventry <sup>1)</sup>                                     | 100,0                |
| NetConnect Germany GmbH & Co. KG, DE, Ratingen <sup>5)</sup>                              | 59,9                 | CHN Electrical Services Limited, GB, Coventry <sup>1)</sup>                             | 100,0                |
| NetConnect Germany Management GmbH, DE, Ratingen <sup>5)</sup>                            | 59,9                 | CHN Group Ltd, GB, Coventry <sup>1)</sup>                                               | 100,0                |
| NETRA GmbH Norddeutsche Erdgas Transversale, DE, Schneiderkrug <sup>5)</sup>              | 33,3                 | CHN Special Projects Limited, GB, Coventry <sup>1)</sup>                                | 100,0                |
| NETRA GmbH Norddeutsche Erdgas Transversale & Co. KG, DE, Schneiderkrug <sup>4)</sup>     | 40,6                 | Citigen (London) Limited, GB, Coventry <sup>1)</sup>                                    | 100,0                |
| Nord Stream AG, CH, Zug <sup>4)</sup>                                                     | 15,5                 | Corby Power Limited, GB, Corby <sup>7)</sup>                                            | 50,0                 |
| Nordrheinische Erdgastransportleitungsgesellschaft mbH & Co. KG, DE, Haan <sup>3)</sup>   | 50,0                 | Cottam Development Centre Limited, GB, Coventry <sup>1)</sup>                           | 100,0                |
| Nordrheinische Erdgastransportleitungs-Verwaltungs-GmbH, DE, Haan <sup>5)</sup>           | 50,0                 | CPL Operations Limited, GB, Corby <sup>1)</sup>                                         | 100,0                |
| OAD Severnftgazprom, RU, Krasnoselkup <sup>4)</sup>                                       | 25,0                 | CT Services Holdings Limited, GB, Coventry <sup>1)</sup>                                | 100,0                |
| OLT Offshore LNG Toscana S.p.A., IT, Rom <sup>4)</sup>                                    | 46,8                 | Delcomm Limited, GB, Coventry <sup>1)</sup>                                             | 100,0                |
| OOO E.ON Ruhrgas E&P Russia, RU, Moskau <sup>2)</sup>                                     | 100,0                | Diamond Power Generation Limited, GB, Coventry <sup>1)</sup>                            | 100,0                |
| Open Grid Europe GmbH, DE, Essen <sup>1), 8)</sup>                                        | 100,0                | Dutchdelta Finance S.à.r.l., LU, Luxemburg <sup>1)</sup>                                | 100,0                |
| Open Grid Service GmbH, DE, Essen <sup>2)</sup>                                           | 100,0                | E.ON Energy Gas (Eastern) Limited, GB, Coventry <sup>1)</sup>                           | 100,0                |
| Panrusgáz Zrt., HU, Budapest <sup>5)</sup>                                                | 50,0                 | E.ON Energy Gas (Northwest) Limited, GB, Coventry <sup>2)</sup>                         | 100,0                |
| PEG Infrastruktur AG, CH, Zug <sup>1)</sup>                                               | 100,0                | E.ON Energy Limited, GB, Coventry <sup>1)</sup>                                         | 100,0                |
| PLEdoc Gesellschaft für Dokumentationserstellung und -pflege mbH, DE, Essen <sup>2)</sup> | 100,0                | E.ON Energy UK Limited, GB, Coventry <sup>2)</sup>                                      | 100,0                |
| Powerforum Zrt., HU, Budapest <sup>5)</sup>                                               | 50,0                 | E.ON Limited, GB, Coventry <sup>1)</sup>                                                | 100,0                |
| RAG-Beteiligungs-Aktiengesellschaft, AT, Maria Enzersdorf <sup>4)</sup>                   | 30,0                 | E.ON Retail Limited, GB, Coventry <sup>1)</sup>                                         | 100,0                |
| RGE Holding GmbH, DE, Essen <sup>1), 8)</sup>                                             | 100,0                | E.ON UK CHP Limited, GB, Coventry <sup>1)</sup>                                         | 100,0                |
| Rytu Skirstomije Tinklai AB, LT, Vilnius <sup>4)</sup>                                    | 20,3                 | E.ON UK CoGeneration Limited, GB, Coventry <sup>1)</sup>                                | 100,0                |
| S.C. Congaz S.A., RO, Constanța <sup>5)</sup>                                             | 28,6                 | E.ON UK Directors Limited, GB, Coventry <sup>2)</sup>                                   | 100,0                |
| Sea Power & Fuel S.r.l., IT, Genua <sup>5)</sup>                                          | 50,0                 | E.ON UK Energy Services Limited, GB, Coventry <sup>1)</sup>                             | 100,0                |
| Slovak Gas Holding B.V., NL, Zoetermeer <sup>3)</sup>                                     | 50,0                 | E.ON UK Energy Solutions Limited, GB, Coventry <sup>1)</sup>                            | 100,0                |
| store-x Storage Capacity Exchange GmbH, DE, Leipzig <sup>5)</sup>                         | 38,0                 | E.ON UK Finance Limited (in member's voluntary liquidation), GB, Coventry <sup>2)</sup> | 100,0                |
| Tauerngasleitung Ges.m.b.H., AT, Wals-Siezenheim <sup>5)</sup>                            | 46,2                 | E.ON UK Gas Limited, GB, Coventry <sup>1)</sup>                                         | 100,0                |
| Trans Europa Naturgas Pipeline Gesellschaft mbH & Co. KG, DE, Essen <sup>4)</sup>         | 51,0                 | E.ON UK Holding Company Limited, GB, Coventry <sup>1)</sup>                             | 100,0                |
| Trans Europa Naturgas Pipeline Verwaltungs-GmbH, DE, Essen <sup>5)</sup>                  | 50,0                 | E.ON UK Industrial Shipping Limited, GB, Coventry <sup>2)</sup>                         | 100,0                |
| UPP d.o.o. u likvidaciji, HR, Zagreb <sup>2)</sup>                                        | 100,0                | E.ON UK Ironbridge Limited, GB, Coventry <sup>2)</sup>                                  | 100,0                |
| ZAO Gazprom YRGM Development, RU, Salekhard <sup>7)</sup>                                 | 25,0                 | E.ON UK Pension Trustees Limited, GB, Coventry <sup>2)</sup>                            | 100,0                |
| <b>Market Unit UK</b>                                                                     |                      | E.ON UK plc, GB, Coventry <sup>1)</sup>                                                 | 100,0                |
| Aquila Power Investments Limited, GB, Coventry <sup>1)</sup>                              | 100,0                | E.ON UK Power Technology Limited, GB, Coventry <sup>1)</sup>                            | 100,0                |
| Aquila Sterling Limited, GB, Coventry <sup>1)</sup>                                       | 100,0                | E.ON UK Property Services Limited, GB, Coventry <sup>1)</sup>                           | 100,0                |
| Avon Energy Partners Holdings, GB, Coventry <sup>1)</sup>                                 | 100,0                | E.ON UK PS Limited, GB, Coventry <sup>1)</sup>                                          | 100,0                |
|                                                                                           |                      | E.ON UK Retail Limited, GB, Coventry <sup>2)</sup>                                      | 100,0                |
|                                                                                           |                      | E.ON UK Secretaries Limited, GB, Coventry <sup>2)</sup>                                 | 100,0                |
|                                                                                           |                      | E.ON UK Technical Services Limited, GB, Edinburgh <sup>1)</sup>                         | 100,0                |
|                                                                                           |                      | E.ON UK Trading Limited (in member's voluntary liquidation), GB, Coventry <sup>2)</sup> | 100,0                |
|                                                                                           |                      | E.ON UK Trustees Limited, GB, Coventry <sup>1)</sup>                                    | 100,0                |
|                                                                                           |                      | East Midlands Electricity Distribution Holdings, GB, Coventry <sup>1)</sup>             | 100,0                |

1) Konsolidiertes verbundenes Unternehmen 2) Nicht konsolidiertes verbundenes Unternehmen aufgrund von untergeordneter Bedeutung (bewertet zu Anschaffungskosten)  
3) Gemeinschaftsunternehmen nach IAS 31 (bewertet nach Equity-Methode) 4) Assoziiertes Unternehmen (bewertet nach Equity-Methode) 5) Assoziiertes Unternehmen  
(bewertet zu Anschaffungskosten aufgrund untergeordneter Bedeutung) 6) Übrige Beteiligungen 7) Einbeziehung als konsolidiertes verbundenes Unternehmen nach SIC 12  
8) Für die Gesellschaft wird § 264 (3) HGB bzw. § 264b HGB in Anspruch genommen 9) Gewinnabführungsvertrag (Ergebnis nach Gewinnabführung)



## Angaben zum Beteiligungsbesitz gem. § 313 Abs. 2 HGB (Stand: 31. Dez. 2010)

| Gesellschaft, Sitz                                                                   | Kapital-<br>anteil % | Gesellschaft, Sitz                                                                       | Kapital-<br>anteil % |
|--------------------------------------------------------------------------------------|----------------------|------------------------------------------------------------------------------------------|----------------------|
| East Midlands Electricity Distribution Limited, GB, Coventry <sup>2)</sup>           | 100,0                | Midlands Electricity Limited, GB, Coventry <sup>2)</sup>                                 | 100,0                |
| East Midlands Electricity Generation (Corby) Limited, GB, Coventry <sup>1)</sup>     | 100,0                | Midlands Electricity Metering Limited, GB, Coventry <sup>2)</sup>                        | 100,0                |
| East Midlands Electricity Limited, GB, Coventry <sup>1)</sup>                        | 100,0                | Midlands Gas Limited, GB, Coventry <sup>1)</sup>                                         | 100,0                |
| East Midlands Electricity Share Scheme Trustees Limited, GB, Coventry <sup>2)</sup>  | 100,0                | Midlands Generation (Overseas) Limited, GB, Coventry <sup>1)</sup>                       | 100,0                |
| Economy Power Limited, GB, Coventry <sup>1)</sup>                                    | 100,0                | Midlands Metering Services Limited, GB, Coventry <sup>2)</sup>                           | 100,0                |
| Electricity Pensions Administration Limited, GB, Coventry <sup>1)</sup>              | 100,0                | Midlands Power (UK) Limited, GB, Coventry <sup>1)</sup>                                  | 100,0                |
| EME Distribution No. 2 Limited, GB, Coventry <sup>1)</sup>                           | 100,0                | Midlands Power International Limited, GB, Coventry <sup>1)</sup>                         | 100,0                |
| Empower Training Services Limited (member's liquidation), GB, Coventry <sup>2)</sup> | 100,0                | Midlands Sales Limited, GB, Coventry <sup>2)</sup>                                       | 100,0                |
| Energy Collection Services Limited, GB, Coventry <sup>1)</sup>                       | 100,0                | Mucklow Hill (Two) Limited, GB, Coventry <sup>2)</sup>                                   | 100,0                |
| Enfield Energy Centre Limited, GB, Coventry <sup>1)</sup>                            | 100,0                | Power Technology Limited, GB, Coventry <sup>2)</sup>                                     | 100,0                |
| Enfield Energy Services (Europe) Limited, GB, Coventry <sup>1)</sup>                 | 100,0                | Powergas Limited, GB, Coventry <sup>2)</sup>                                             | 100,0                |
| Enfield Operations (UK) Limited, GB, Coventry <sup>1)</sup>                          | 100,0                | Powergen (East Midlands) Investments, GB, Coventry <sup>1)</sup>                         | 100,0                |
| Enizade Limited, GB, Coventry <sup>1)</sup>                                          | 100,0                | Powergen (East Midlands) Loan Notes, GB, Coventry <sup>1)</sup>                          | 100,0                |
| Ergon Energy Limited, GB, Coventry <sup>1)</sup>                                     | 100,0                | Powergen Australia Investments Limited, GB, Coventry <sup>1)</sup>                       | 100,0                |
| Ergon Finance Limited (member's liquidation), GB, Coventry <sup>2)</sup>             | 100,0                | Powergen CHP Limited, GB, Coventry <sup>2)</sup>                                         | 100,0                |
| Ergon Financial Management Ltd, MT, St. Julians <sup>1)</sup>                        | 100,0                | Powergen CoGeneration Limited, GB, Coventry <sup>2)</sup>                                | 100,0                |
| Ergon Holding Company Limited, GB, Coventry <sup>1)</sup>                            | 100,0                | Powergen Energy Solutions Limited, GB, Coventry <sup>2)</sup>                            | 100,0                |
| Ergon Holdings Ltd, MT, St. Julians <sup>1)</sup>                                    | 100,0                | Powergen Finance Limited, GB, Coventry <sup>1)</sup>                                     | 100,0                |
| Ergon Insurance Ltd, MT, St. Julians <sup>1)</sup>                                   | 100,0                | Powergen Gas Limited, GB, Coventry <sup>2)</sup>                                         | 100,0                |
| Ergon Nominees Limited, GB, Coventry <sup>1)</sup>                                   | 100,0                | Powergen Group Holdings Limited, GB, Coventry <sup>1)</sup>                              | 100,0                |
| Ergon Overseas Holdings Limited, GB, Coventry <sup>1)</sup>                          | 100,0                | Powergen Group Investments, GB, Coventry <sup>1)</sup>                                   | 100,0                |
| Ergon Power Limited, GB, Coventry <sup>2)</sup>                                      | 100,0                | Powergen Holdings B.V., NL, Amsterdam <sup>1)</sup>                                      | 100,0                |
| Ergon Properties Limited (member's liquidation), GB, Coventry <sup>2)</sup>          | 100,0                | Powergen Holdings Sarl, LU, Luxemburg <sup>1)</sup>                                      | 100,0                |
| Ganaz Limited, IE, Dublin <sup>1)</sup>                                              | 100,0                | Powergen International Limited, GB, Coventry <sup>1)</sup>                               | 100,0                |
| Gen Net.Com Limited, GB, Coventry <sup>2)</sup>                                      | 100,0                | Powergen Investments Limited (member's liquidation), GB, Coventry <sup>2)</sup>          | 100,0                |
| Hams Hall Management Company Limited, GB, Coventry <sup>4)</sup>                     | 46,6                 | Powergen Ireland Limited, GB, Coventry <sup>1)</sup>                                     | 100,0                |
| Horizon Nuclear Power Limited, GB, Gloucester <sup>3)</sup>                          | 50,0                 | Powergen Limited, GB, Coventry <sup>1)</sup>                                             | 100,0                |
| Horizon Nuclear Power Oldbury Limited, GB, Gloucester <sup>2)</sup>                  | 100,0                | Powergen LS SE, GB, Coventry <sup>1)</sup>                                               | 100,0                |
| Horizon Nuclear Power Services Limited, GB, Gloucester <sup>2)</sup>                 | 100,0                | Powergen Luxembourg Holdings Sarl, LU, Luxemburg <sup>1)</sup>                           | 100,0                |
| Horizon Nuclear Power Wylfa Limited, GB, Gloucester <sup>2)</sup>                    | 100,0                | Powergen Overseas Holdings Limited (in member's liquidation), GB, Coventry <sup>2)</sup> | 100,0                |
| Industry Development Services Limited, GB, Coventry <sup>1)</sup>                    | 100,0                | Powergen Power No. 1 Limited, GB, Coventry <sup>1)</sup>                                 | 100,0                |
| Infrastructure Alliance Limited, MT, St. Helier <sup>1)</sup>                        | 100,0                | Powergen Power No. 2 Limited, GB, Coventry <sup>1)</sup>                                 | 100,0                |
| Kinetica Limited, GB, Coventry <sup>2)</sup>                                         | 100,0                | Powergen Power No. 3 Limited, GB, Coventry <sup>1)</sup>                                 | 100,0                |
| Lighting for Staffordshire Holdings Limited, GB, Coventry <sup>1)</sup>              | 60,0                 | Powergen Renewables Developments Limited, GB, Coventry <sup>2)</sup>                     | 100,0                |
| Lighting for Staffordshire Limited, GB, Coventry <sup>1)</sup>                       | 100,0                | Powergen Renewables Limited, GB, Coventry <sup>2)</sup>                                  | 100,0                |
| Meter Services Limited, GB, Coventry <sup>2)</sup>                                   | 100,0                | Powergen Retail Gas Limited, GB, Coventry <sup>2)</sup>                                  | 100,0                |
| Metering Services Limited, GB, Coventry <sup>2)</sup>                                | 100,0                | Powergen Retail Limited, GB, Coventry <sup>1)</sup>                                      | 100,0                |
| Midlands Electricity Connections Limited, GB, Coventry <sup>2)</sup>                 | 100,0                | Powergen Retail Supply Limited, GB, Coventry <sup>1)</sup>                               | 100,0                |
| Midlands Electricity Electrical Contracting Limited, GB, Coventry <sup>2)</sup>      | 100,0                | Powergen Serang Limited, GB, Coventry <sup>2)</sup>                                      | 100,0                |
| Midlands Electricity Engineering Services Limited, GB, Coventry <sup>2)</sup>        | 100,0                | Powergen Share Trustees Limited (member's liquidation), GB, Coventry <sup>1)</sup>       | 100,0                |
| Midlands Electricity Group plc, GB, Coventry <sup>1)</sup>                           | 100,0                | Powergen UK Holding Company Limited, GB, Coventry <sup>1)</sup>                          | 100,0                |
|                                                                                      |                      | Powergen UK Investments, GB, Coventry <sup>1)</sup>                                      | 100,0                |
|                                                                                      |                      | Powergen UK Limited, GB, Coventry <sup>1)</sup>                                          | 100,0                |
|                                                                                      |                      | Powergen UK Securities, GB, Coventry <sup>1)</sup>                                       | 100,0                |
|                                                                                      |                      | Powergen US Funding, LLC, US, Wilmington <sup>1)</sup>                                   | 100,0                |
|                                                                                      |                      | Powergen US Holdings Limited, GB, Coventry <sup>1)</sup>                                 | 100,0                |

1) Konsolidiertes verbundenes Unternehmen 2) Nicht konsolidiertes verbundenes Unternehmen aufgrund von untergeordneter Bedeutung (bewertet zu Anschaffungskosten)  
3) Gemeinschaftsunternehmen nach IAS 31 (bewertet nach Equity-Methode) 4) Assoziiertes Unternehmen (bewertet nach Equity-Methode) 5) Assoziiertes Unternehmen  
(bewertet zu Anschaffungskosten aufgrund untergeordneter Bedeutung) 6) Übrige Beteiligungen 7) Einbeziehung als konsolidiertes verbundenes Unternehmen nach SIC 12  
8) Für die Gesellschaft wird § 264 (3) HGB bzw. § 264b HGB in Anspruch genommen 9) Gewinnabführungsvertrag (Ergebnis nach Gewinnabführung)

Angaben zum Beteiligungsbesitz gem. § 313 Abs. 2 HGB (Stand: 31. Dez. 2010)

| Gesellschaft, Sitz                                                                       | Kapital-<br>anteil % | Gesellschaft, Sitz                                                        | Kapital-<br>anteil % |
|------------------------------------------------------------------------------------------|----------------------|---------------------------------------------------------------------------|----------------------|
| Powergen US Investments, GB, Coventry <sup>1)</sup>                                      | 100,0                | E.ON Nord Sverige AB, SE, Malmö <sup>1)</sup>                             | 100,0                |
| Powergen US Securities Limited, GB, Coventry <sup>1)</sup>                               | 100,0                | E.ON Produktion Danmark A/S, DK, Herlev <sup>1)</sup>                     | 100,0                |
| Powergen Warm Front Limited (member's voluntary liquidation), GB, Coventry <sup>2)</sup> | 100,0                | E.ON Smart Living AB, SE, Malmö <sup>2)</sup>                             | 100,0                |
| Powergen Weather Limited, GB, Coventry <sup>2)</sup>                                     | 100,0                | E.ON Suomi Oy, FI, Helsinki <sup>1)</sup>                                 | 100,0                |
| PT Power Jawa Barat, ID, Jakarta <sup>4)</sup>                                           | 40,0                 | E.ON Sverige AB, SE, Malmö <sup>1)</sup>                                  | 100,0                |
| Raab Karcher Electronic Systems plc, GB, Coventry <sup>1)</sup>                          | 100,0                | E.ON Trading Nordic AB, SE, Malmö <sup>1)</sup>                           | 100,0                |
| Sisyphus Quebec Limited, GB, Coventry <sup>1)</sup>                                      | 100,0                | E.ON Varme Danmark ApS, DK, Herlev <sup>1)</sup>                          | 100,0                |
| Statco Six Limited, GB, London <sup>1)</sup>                                             | 100,0                | E.ON Värme Sverige AB, SE, Malmö <sup>1)</sup>                            | 100,0                |
| The Power Generation Company Limited, GB, Coventry <sup>2)</sup>                         | 100,0                | E.ON Värme Timrå AB, SE, Sundsvall <sup>1)</sup>                          | 90,9                 |
| Thor Cogeneration Limited, GB, Coventry <sup>1)</sup>                                    | 100,0                | E.ON Värmekraft Sverige AB, SE, Karlshamn <sup>1)</sup>                   | 100,0                |
| Thor Holdings Limited, GB, Coventry <sup>1)</sup>                                        | 100,0                | E.ON Vattenkraft Sverige AB, SE, Sundsvall <sup>1)</sup>                  | 100,0                |
| TXU Europe (AH Online) Limited, GB, Coventry <sup>1)</sup>                               | 100,0                | EC Serwis Sp. z o.o., PL, Slupsk <sup>1)</sup>                            | 100,0                |
| TXU Europe (AHG) Limited, GB, Coventry <sup>1)</sup>                                     | 100,0                | Elverket Vallentuna AB, SE, Vallentuna <sup>4)</sup>                      | 42,9                 |
| TXU Europe (AHGD) Limited, GB, Coventry <sup>1)</sup>                                    | 100,0                | Empec Ustka Sp. z o.o., PL, Ustka <sup>4)</sup>                           | 48,5                 |
| TXU Europe (AHST) Limited, GB, Coventry <sup>1)</sup>                                    | 100,0                | ES ElektroSandberg AB, SE, Malmö <sup>1)</sup>                            | 100,0                |
| TXU Europe Group Trustee Limited, GB, Coventry <sup>1)</sup>                             | 100,0                | Falkenbergs Biogas AB, SE, Malmö <sup>2)</sup>                            | 65,0                 |
| TXU Warm Front Limited, GB, Coventry <sup>2)</sup>                                       | 100,0                | Fennovoima Oy, FI, Helsingfors <sup>4)</sup>                              | 34,0                 |
| Utility Debt Services Limited, GB, Coventry <sup>2)</sup>                                | 100,0                | HEMAB Elförsäljning AB, SE, Malmö <sup>1)</sup>                           | 100,0                |
| Visioncash, GB, Coventry <sup>1)</sup>                                                   | 100,0                | Hjälmarkraft AB, SE, Sundsvall <sup>1)</sup>                              | 100,0                |
| Western Gas Limited, GB, Coventry <sup>1)</sup>                                          | 100,0                | Kalmar Energi Försäljning AB, SE, Kalmar <sup>4)</sup>                    | 40,0                 |
| <b>Market Unit Nordic</b>                                                                |                      | Kalmar Energi Holding AB, SE, Kalmar <sup>4)</sup>                        | 50,0                 |
| AB Svafo, SE, Stockholm <sup>5)</sup>                                                    | 22,0                 | Karlshamn Kraft AB, SE, Karlshamn <sup>1)</sup>                           | 70,0                 |
| Bergeforsens Kraftaktiebolag, SE, Bispgården <sup>4)</sup>                               | 40,0                 | Kärnkraftsäkerhet & Utbildning AB, SE, Nyköping <sup>5)</sup>             | 25,0                 |
| Bio Flow AB OY, FI, Helsingfors <sup>5)</sup>                                            | 49,0                 | Klåvbens AB, SE, Olofström <sup>5)</sup>                                  | 50,0                 |
| Björn Kraft Oy, FI, Kotka <sup>1)</sup>                                                  | 100,0                | Kolbäckens Kraft KB, SE, Sundsvall <sup>1)</sup>                          | 100,0                |
| Blåsjön Kraft AB, SE, Arbrå <sup>4)</sup>                                                | 50,0                 | MEC Koszalin Sp. z o.o., PL, Koszalin <sup>4)</sup>                       | 30,8                 |
| Brännälven Kraft AB, SE, Arbrå <sup>4)</sup>                                             | 19,1                 | Nordkraft Serviceaktiebolag, SE, Malmö <sup>1)</sup>                      | 100,0                |
| E.ON Biofor Sverige AB, SE, Malmö <sup>1)</sup>                                          | 100,0                | OKG AB, SE, Oskarshamn <sup>1)</sup>                                      | 54,5                 |
| E.ON Biogas Sverige AB, SE, Malmö <sup>1)</sup>                                          | 100,0                | Oskarshamns Energi AB, SE, Oskarshamn <sup>4)</sup>                       | 50,0                 |
| E.ON Danmark A/S, DK, Herlev <sup>1)</sup>                                               | 100,0                | Östersjöfrakt AB, SE, Örebro <sup>1)</sup>                                | 80,0                 |
| E.ON Elnät Stockholm AB, SE, Malmö <sup>1)</sup>                                         | 100,0                | Östrand Energi AB, SE, Sundsvall <sup>1)</sup>                            | 100,0                |
| E.ON Elnät Sverige AB, SE, Malmö <sup>1)</sup>                                           | 100,0                | Ostrowski Zaklad Ceoplowinczy S.A., PL, Ostrow Wielkopolski <sup>4)</sup> | 48,6                 |
| E.ON ES Kraftmontasje AS, NO, Vestnes <sup>1)</sup>                                      | 100,0                | Perstorps Fjärrvärme AB, SE, Perstorp <sup>4)</sup>                       | 50,0                 |
| E.ON ES Norge AS, NO, Vestnes <sup>1)</sup>                                              | 100,0                | Ringhals AB, SE, Varberg <sup>4)</sup>                                    | 29,6                 |
| E.ON ES Sverige AB, SE, Malmö <sup>1)</sup>                                              | 100,0                | Rosengård Invest AB, SE, Malmö <sup>5)</sup>                              | 25,0                 |
| E.ON ES Trafik & Belysning AB, SE, Malmö <sup>1)</sup>                                   | 100,0                | Sakab AB, SE, Kumla <sup>1)</sup>                                         | 100,0                |
| E.ON Fastigheter Sverige AB, SE, Malmö <sup>1)</sup>                                     | 100,0                | Sakab Sellbergs AB, SE, Örebro <sup>1)</sup>                              | 100,0                |
| E.ON Försäkring Sverige AB, SE, Malmö <sup>1)</sup>                                      | 100,0                | Söderåsens Bioenergi AB, SE, Billesholm <sup>2)</sup>                     | 51,0                 |
| E.ON Försäljning Sverige AB, SE, Malmö <sup>1)</sup>                                     | 100,0                | Sollefteåforsens AB, SE, Sundsvall <sup>4)</sup>                          | 50,0                 |
| E.ON Gas Sverige AB, SE, Malmö <sup>1)</sup>                                             | 100,0                | SQC Kvalificeringscentrum AB, SE, Stockholm <sup>5)</sup>                 | 33,3                 |
| E.ON Gashandel Sverige AB, SE, Malmö <sup>1)</sup>                                       | 100,0                | Stensjön Kraft AB, SE, Stockholm <sup>4)</sup>                            | 50,0                 |
| E.ON Gasification Development AB, SE, Malmö <sup>1)</sup>                                | 100,0                | Svensk Kärnbränslehantering AB, SE, Stockholm <sup>5)</sup>               | 34,0                 |
| E.ON JobCenter Sverige AB, SE, Malmö <sup>1)</sup>                                       | 100,0                | Svenskt Gastekniskt Center AB, SE, Malmö <sup>5)</sup>                    | 50,0                 |
| E.ON Kainuu Oy, FI, Kajaani <sup>1)</sup>                                                | 50,6                 | Sydskraft EC Slupsk Sp. z o.o., PL, Slupsk <sup>1)</sup>                  | 98,9                 |
| E.ON Kärnkraft Finland AB, FI, Kajaani <sup>1)</sup>                                     | 100,0                | Sydskraft Polen AB, SE, Malmö <sup>1)</sup>                               | 100,0                |
| E.ON Kärnkraft Sverige AB, SE, Malmö <sup>1)</sup>                                       | 100,0                | Sydskraft Term Sp. z o.o., PL, Poznań <sup>1)</sup>                       | 100,0                |
| E.ON Kundsupport Sverige AB, SE, Malmö <sup>1)</sup>                                     | 100,0                | Sydskraft Zlotow Sp. z o.o., PL, Zlotow <sup>1)</sup>                     | 85,0                 |
| E.ON Mälarkraft Värme AB, SE, Håbo <sup>1)</sup>                                         | 99,8                 | Treasury, SE, Malmö <sup>1)</sup>                                         | 100,0                |

1) Konsolidiertes verbundenes Unternehmen 2) Nicht konsolidiertes verbundenes Unternehmen aufgrund von untergeordneter Bedeutung (bewertet zu Anschaffungskosten)  
3) Gemeinschaftsunternehmen nach IAS 31 (bewertet nach Equity-Methode) 4) Assoziiertes Unternehmen (bewertet nach Equity-Methode) 5) Assoziiertes Unternehmen  
(bewertet zu Anschaffungskosten aufgrund untergeordneter Bedeutung) 6) Übrige Beteiligungen 7) Einbeziehung als konsolidiertes verbundenes Unternehmen nach SIC 12  
8) Für die Gesellschaft wird § 264 (3) HGB bzw. § 264b HGB in Anspruch genommen 9) Gewinnabführungsvertrag (Ergebnis nach Gewinnabführung)

## Angaben zum Beteiligungsbesitz gem. § 313 Abs. 2 HGB (Stand: 31. Dez. 2010)

| Gesellschaft, Sitz                                                              | Kapital-<br>anteil % | Gesellschaft, Sitz                                                                            | Kapital-<br>anteil % |
|---------------------------------------------------------------------------------|----------------------|-----------------------------------------------------------------------------------------------|----------------------|
| <b>Market Unit Italy</b>                                                        |                      | Beteiligungsgesellschaft e.disnatur mbH, DE, Potsdam <sup>2)</sup>                            |                      |
| AMGA—Azienda Multiservizi S.p.A., IT, Udine <sup>4)</sup>                       | 20,2                 | Bioenergie Merzig GmbH, DE, Merzig <sup>2)</sup>                                              | 51,0                 |
| CART Partecipazioni S.r.l., IT, Orio al Serio (BG) <sup>2)</sup>                | 100,0                | Bioerdgas Hallertau GmbH, DE, Wolnzach <sup>2)</sup>                                          | 64,9                 |
| Centro Energia Ferrara S.p.A, IT, Rom <sup>4)</sup>                             | 58,4                 | Bioerdgas Schwandorf GmbH, DE, Schwandorf <sup>2)</sup>                                       | 100,0                |
| Centro Energia Teverola S.p.A, IT, Rom <sup>4)</sup>                            | 58,4                 | CCE Énergies sarl, FR, La Camp du Castellet <sup>2)</sup>                                     | 100,0                |
| E.ON Energia S.p.A., IT, Verona <sup>1)</sup>                                   | 100,0                | Centrale Solare di Fiumesanto S.r.l., IT, Sassari <sup>2)</sup>                               | 100,0                |
| E.ON Europa Power and Fuel S.r.l in liquidazione, IT, Terni <sup>1)</sup>       | 100,0                | Centrale Solare di Santa Domenica S.r.l., IT, Scandale <sup>2)</sup>                          | 100,0                |
| E.ON Italia Power & Fuel S.r.l., IT, Terni <sup>1)</sup>                        | 100,0                | Champion WF Holdco, LLC, US, Wilmington <sup>1)</sup>                                         | 100,0                |
| E.ON Italia S.p.A., IT, Mailand <sup>1)</sup>                                   | 100,0                | Champion Wind Farm, LLC, US, Wilmington <sup>1)</sup>                                         | 100,0                |
| E.ON Produzione Centrale Livorno Ferraris S.p.A., IT, Mailand <sup>1)</sup>     | 75,0                 | COMPANHIA EÓLICA ARAGONESA, S.A., ES, Zaragoza <sup>4)</sup>                                  | 50,0                 |
| E.ON Produzione S.p.A., IT, Sassari <sup>1)</sup>                               | 100,0                | Compañía Productora de Energía para Consumo Interno, S.L., ES, Zaragoza <sup>1)</sup>         | 85,0                 |
| E.ON Rete S.r.l., IT, Mantua <sup>1)</sup>                                      | 100,0                | Cordova Wind Farm, LLC, US, Wilmington <sup>2)</sup>                                          | 100,0                |
| E.ON Servizi S.r.l., IT, Verona <sup>2)</sup>                                   | 100,0                | Desarrollos Eólicos del Valle del Ebro, S.A., ES, Zaragoza <sup>2)</sup>                      | 85,0                 |
| Energest S.r.l., IT, Mira (VE) <sup>2)</sup>                                    | 100,0                | DOTI Deutsche-Offshore-Testfeld- und Infrastruktur-GmbH & Co. KG, DE, Oldenburg <sup>4)</sup> | 26,0                 |
| Ergon Energia S.r.l. in liquidazione, IT, Brescia <sup>4)</sup>                 | 50,0                 | DOTI Management GmbH, DE, Oldenburg <sup>5)</sup>                                             | 26,0                 |
| Ergosud S.p.A, IT, Rom <sup>4)</sup>                                            | 50,0                 | e.disnatur Erneuerbare Energien GmbH, DE, Potsdam <sup>1)</sup>                               | 100,0                |
| G.E.I.—Gestione Energetica Impianti S.p.A., IT, Crema <sup>4)</sup>             | 48,9                 | E.ON Carbon Sourcing GmbH, DE, Düsseldorf <sup>1), 8)</sup>                                   | 100,0                |
| Generale Servizi S.r.l., IT, Gandino (BG) <sup>2)</sup>                         | 100,0                | E.ON Casting Renovables, S.L., ES, Teruel <sup>2)</sup>                                       | 50,0                 |
| Rota Gas S.r.l., IT, Mercato San Severino (SA) <sup>5)</sup>                    | 49,0                 | E.ON Climate & Renewables Canada Ltd., CA, Saint John <sup>2)</sup>                           | 100,0                |
| SO.MET. ENERGIA S.r.l., IT, Costigliole d'Asti (AT) <sup>1)</sup>               | 60,0                 | E.ON Climate & Renewables Carbon Sourcing Limited, GB, Coventry <sup>2)</sup>                 | 100,0                |
| Sunshine 1 S.r.l., IT, Mailand <sup>2)</sup>                                    | 100,0                | E.ON Climate & Renewables Carbon Sourcing Pte Ltd, SG, Singapur <sup>2)</sup>                 | 100,0                |
| Terminal Alpi Adriatico S.r.l., IT, Rom <sup>1)</sup>                           | 100,0                | E.ON Climate & Renewables Central Europe GmbH, DE, München <sup>1), 8)</sup>                  | 100,0                |
| UNIVERSAL SUN S.R.L., IT, Mailand <sup>5)</sup>                                 | 50,0                 | E.ON Climate & Renewables France Solar S.A.S., FR, La Ciotat <sup>2)</sup>                    | 100,0                |
| <b>Market Unit Spain</b>                                                        |                      | E.ON Climate & Renewables GmbH, DE, Düsseldorf <sup>1), 8)</sup>                              | 100,0                |
| Distribuidora de Gas Cuyana S.A., AR, Mendoza <sup>2)</sup>                     | 14,4                 | E.ON Climate & Renewables Italia S.r.l., IT, Mailand <sup>1)</sup>                            | 100,0                |
| Distribuidora de Gas del Centro S.A., AR, Córdoba <sup>1)</sup>                 | 45,9                 | E.ON Climate & Renewables Italia Solar S.r.l., IT, Mailand <sup>2)</sup>                      | 100,0                |
| E.ON Barras Eléctricas Galaico-Asturianas, S.A., ES, Lugo <sup>1)</sup>         | 54,9                 | E.ON Climate & Renewables North America, LLC, US, Wilmington <sup>1)</sup>                    | 100,0                |
| E.ON Barras Generación, S.A., ES, Lugo <sup>1)</sup>                            | 55,0                 | E.ON Climate & Renewables UK Blyth Limited, GB, Coventry <sup>1)</sup>                        | 100,0                |
| E.ON Comercializadora de Ultimo Recurso S.L., ES, Santander <sup>1)</sup>       | 100,0                | E.ON Climate & Renewables UK Developments Limited, GB, Coventry <sup>1)</sup>                 | 100,0                |
| E.ON Distribución, S.L., ES, Santander <sup>1)</sup>                            | 100,0                | E.ON Climate & Renewables UK Humber Wind Limited, GB, Coventry <sup>1)</sup>                  | 100,0                |
| E.ON Energía, S.L., ES, Santander <sup>1)</sup>                                 | 100,0                | E.ON Climate & Renewables UK Limited, GB, Coventry <sup>1)</sup>                              | 100,0                |
| E.ON España, S.L., ES, Santander <sup>1)</sup>                                  | 100,0                | E.ON Climate & Renewables UK London Array Limited, GB, Coventry <sup>1)</sup>                 | 100,0                |
| E.ON Europa, S.L., ES, Madrid <sup>1)</sup>                                     | 100,0                | E.ON Climate & Renewables UK Offshore Wind Limited, GB, Coventry <sup>1)</sup>                | 100,0                |
| E.ON Generación, S.L., ES, Santander <sup>1)</sup>                              | 100,0                | E.ON Climate & Renewables UK Operations Limited, GB, Coventry <sup>1)</sup>                   | 100,0                |
| E.ON Red S.L., ES, Santander <sup>1)</sup>                                      | 100,0                | E.ON Climate & Renewables UK Rampion Offshore Wind Limited, GB, Coventry <sup>1)</sup>        | 100,0                |
| E.ON Servicios, S.L., ES, Santander <sup>1)</sup>                               | 100,0                | E.ON Climate & Renewables UK Robin Rigg East Limited, GB, Coventry <sup>1)</sup>              | 100,0                |
| Inversora de Gas Cuyana S.A., AR, Mendoza <sup>2)</sup>                         | 24,0                 |                                                                                               |                      |
| Inversora de Gas del Centro S.A., AR, Córdoba <sup>1)</sup>                     | 75,0                 |                                                                                               |                      |
| E.ON Argentina S.A., AR, Buenos Aires <sup>1)</sup>                             | 100,0                |                                                                                               |                      |
| <b>Market Unit Climate &amp; Renewables</b>                                     |                      |                                                                                               |                      |
| 2PRCE Energies sarl, FR, La Camp du Castellet <sup>2)</sup>                     | 70,0                 |                                                                                               |                      |
| Aer les Éoliennes de la Bruyère S.A.R.L, FR, Nanterre <sup>1)</sup>             | 100,0                |                                                                                               |                      |
| Aerodis, S.A., FR, Rueil-Malmaison <sup>1)</sup>                                | 100,0                |                                                                                               |                      |
| Amrumbank-West GmbH, DE, Müden/Aller <sup>1)</sup>                              | 100,0                |                                                                                               |                      |
| Aplicaciones Industriales de Energías Limpias, S.L., ES, Zaragoza <sup>5)</sup> | 15,0                 |                                                                                               |                      |
| AWE-Arkona-Windpark Entwicklungs-GmbH, DE, Stralsund <sup>2)</sup>              | 98,0                 |                                                                                               |                      |

1) Konsolidiertes verbundenes Unternehmen 2) Nicht konsolidiertes verbundenes Unternehmen aufgrund von untergeordneter Bedeutung (bewertet zu Anschaffungskosten)  
3) Gemeinschaftsunternehmen nach IAS 31 (bewertet nach Equity-Methode) 4) Assoziiertes Unternehmen (bewertet nach Equity-Methode) 5) Assoziiertes Unternehmen (bewertet zu Anschaffungskosten aufgrund untergeordneter Bedeutung) 6) Übrige Beteiligungen 7) Einbeziehung als konsolidiertes verbundenes Unternehmen nach SIC 12  
8) Für die Gesellschaft wird § 264 (3) HGB bzw. § 264b HGB in Anspruch genommen 9) Gewinnabführungsvertrag (Ergebnis nach Gewinnabführung)

Angaben zum Beteiligungsbesitz gem. § 313 Abs. 2 HGB (Stand: 31. Dez. 2010)

| Gesellschaft, Sitz                                                               | Kapital-<br>anteil % | Gesellschaft, Sitz                                                   | Kapital-<br>anteil % |
|----------------------------------------------------------------------------------|----------------------|----------------------------------------------------------------------|----------------------|
| E.ON Climate & Renewables UK Robin Rigg West Limited, GB, Coventry <sup>1)</sup> | 100,0                | Farma Wiatrowa Barzowice Sp. z o.o., PL, Warschau <sup>2)</sup>      | 100,0                |
| E.ON Climate & Renewables UK Wind Limited, GB, Coventry <sup>1)</sup>            | 100,0                | Farma Wiatrowa Lebcz Sp. z o.o., PL, Warschau <sup>1)</sup>          | 100,0                |
| E.ON Climate & Renewables UK Zone Six Limited, GB, Coventry <sup>1)</sup>        | 100,0                | Flatlands Wind Farm, LLC, US, Wilmington <sup>2)</sup>               | 100,0                |
| E.ON Energie Odnawialne Sp. z o.o., PL, Szczecin <sup>1)</sup>                   | 100,0                | Forest Creek Investco, Inc., US, Wilmington <sup>1)</sup>            | 100,0                |
| E.ON Énergies Renouvelables S.A.S., FR, Paris <sup>2)</sup>                      | 100,0                | Forest Creek WF Holdco, LLC, US, Wilmington <sup>1)</sup>            | 100,0                |
| E.ON Iberia Services, S.L., ES, Málaga <sup>1)</sup>                             | 100,0                | Forest Creek Wind Farm, LLC, US, Wilmington <sup>1)</sup>            | 100,0                |
| E.ON Masdar Integrated Carbon LLC, AE, Abu Dhabi <sup>5)</sup>                   | 50,0                 | GCE Énergies sarl, FR, La Camp du Castellet <sup>2)</sup>            | 100,0                |
| E.ON Pastor Renovables, S.L., ES, A Coruña <sup>2)</sup>                         | 80,0                 | Geólica Magallón, S.L., ES, Zaragoza <sup>4)</sup>                   | 36,2                 |
| E.ON Renovables, S.L., ES, Madrid <sup>1)</sup>                                  | 100,0                | Guyane Conhilac Énergies sarl, FR, Cayenne <sup>2)</sup>             | 100,0                |
| E.ON Renováveis Portugal, SGPS S.A., PT, Lissabon <sup>1)</sup>                  | 100,0                | Helioenergy Electricidad Dos, S.A., ES, Sevilla <sup>4)</sup>        | 50,0                 |
| E.ON Vind Sverige AB, SE, Malmö <sup>1)</sup>                                    | 100,0                | Helioenergy Electricidad Uno, S.A., ES, Sevilla <sup>4)</sup>        | 50,0                 |
| EBG 1. Beteiligungsgesellschaft mbH, DE, Essen <sup>2)</sup>                     | 100,0                | Inadale WF Holdco, LLC, US, Wilmington <sup>1)</sup>                 | 100,0                |
| EC&R Asset Management, LLC, US, Wilmington <sup>1)</sup>                         | 100,0                | Inadale Wind Farm, LLC, US, Wilmington <sup>1)</sup>                 | 100,0                |
| EC&R Canada Ltd., CA, Saint John <sup>2)</sup>                                   | 100,0                | London Array Limited, GB, Coventry <sup>5)</sup>                     | 30,0                 |
| EC&R Development, LLC, US, Wilmington <sup>1)</sup>                              | 100,0                | Luminar S.r.l., IT, Mailand <sup>2)</sup>                            | 100,0                |
| EC&R Energy Marketing, LLC, US, Wilmington <sup>1)</sup>                         | 100,0                | MADINERGIE sarl, FR, Le Lamentin <sup>2)</sup>                       | 100,0                |
| EC&R Investco Mgmt II, LLC, US, Wilmington <sup>2)</sup>                         | 100,0                | Magic Valley Wind Farm I, LLC, US, Wilmington <sup>2)</sup>          | 100,0                |
| EC&R Investco Mgmt, LLC, US, Wilmington <sup>1)</sup>                            | 100,0                | MCE Énergies sarl, FR, La Camp du Castellet <sup>2)</sup>            | 100,0                |
| EC&R NA Solar PV, LLC, US, Wilmington <sup>2)</sup>                              | 100,0                | Mer. Wind S.r.l., IT, Rom <sup>1)</sup>                              | 100,0                |
| EC&R O&M, LLC, US, Wilmington <sup>1)</sup>                                      | 100,0                | Munnsville Investco, LLC, US, Wilmington <sup>1)</sup>               | 100,0                |
| EC&R Panther Creek WF I&II Holdco, LLC, US, Wilmington <sup>1)</sup>             | 100,0                | Munnsville WF Holdco, LLC, US, Wilmington <sup>1)</sup>              | 100,0                |
| EC&R Panther Creek WF III Holdco, LLC, US, Wilmington <sup>1)</sup>              | 100,0                | Munnsville Wind Farm, LLC, US, Wilmington <sup>1)</sup>              | 100,0                |
| EC&R Panther Creek Wind Farm I&II, LLC, US, Wilmington <sup>1)</sup>             | 100,0                | Nek Eólica, S.L., ES, Cádiz <sup>1)</sup>                            | 100,0                |
| EC&R Panther Creek Wind Farm III, LLC, US, Wilmington <sup>1)</sup>              | 100,0                | Netzanschluss Mürow Oberdorf GbR, DE, Bremerhaven <sup>5)</sup>      | 34,8                 |
| EC&R Papalote Creek I, LLC, US, Wilmington <sup>1)</sup>                         | 100,0                | Nordzucker Bioerdgas GmbH & Co. KG, DE, Braunschweig <sup>2)</sup>   | 50,0                 |
| EC&R Papalote Creek II, LLC, US, Wilmington <sup>1)</sup>                        | 100,0                | Nordzucker Bioerdgas Verwaltung-GmbH, DE, Braunschweig <sup>2)</sup> | 50,0                 |
| EC&R QSE, LLC, US, Wilmington <sup>1)</sup>                                      | 100,0                | Northeolic Montebuño, S.L., ES, Madrid <sup>2)</sup>                 | 100,0                |
| EC&R Services, LLC, US, Wilmington <sup>1)</sup>                                 | 100,0                | Northeolic Sierra de Ablanigo, S.L., ES, Madrid <sup>1)</sup>        | 100,0                |
| EC&R Sherman, LLC, US, Wilmington <sup>2)</sup>                                  | 100,0                | Northeolic Sierra de Tineo, S.L., ES, Madrid <sup>1)</sup>           | 100,0                |
| Elecdey ASCOY, S.A., ES, Murcia <sup>5)</sup>                                    | 19,5                 | Northeolic, S.A., ES, Madrid <sup>1)</sup>                           | 100,0                |
| Elecdey CARCELÉN, S.A., ES, Albacete <sup>4)</sup>                               | 23,0                 | Offshore Trassenplanungs GmbH, DE, Hannover <sup>2)</sup>            | 50,0                 |
| Energi E2, Energías Renovables Aragonesas, S.L.U., ES, Madrid <sup>1)</sup>      | 85,0                 | Offshore-Windpark Beta Baltic GmbH, DE, München <sup>2)</sup>        | 100,0                |
| Energías Eólicas Casa Requena, S.L., ES, Albacete <sup>1)</sup>                  | 100,0                | Offshore-Windpark Delta Nordsee GmbH, DE, München <sup>2)</sup>      | 100,0                |
| Energías Renovables de Euskadi, S.L., ES, Bilbao <sup>5)</sup>                   | 30,0                 | Parco Eolico di Florinas S.r.l., IT, Mailand <sup>1)</sup>           | 100,0                |
| Energías Renovables La Foresta, S.L., ES, Badajoz <sup>2)</sup>                  | 78,0                 | Parq Eolic De Les Basses, S.L., ES, Barcelona <sup>5)</sup>          | 50,0                 |
| Enrega, S.L., ES, La Coruña <sup>2)</sup>                                        | 75,0                 | Parque Eólico Barlavento, S.A., PT, Lissabon <sup>1)</sup>           | 90,0                 |
| Eólica de la Sierra del Almuerzo, S.A., ES, Soria <sup>1)</sup>                  | 100,0                | Parque Eólico de Valcaire, S.L., ES, Granada <sup>5)</sup>           | 45,0                 |
| Eólica de Levante, S.L., ES, Alicante <sup>5)</sup>                              | 25,0                 | Parque Eólico Santa Quiteria, S.L., ES, Zaragoza <sup>5)</sup>       | 41,7                 |
| Eólica de São Julião, Lda, PT, Lissabon <sup>4)</sup>                            | 45,0                 | Parque Eólico Sierra de Penadecabras S.L., ES, Madrid <sup>2)</sup>  | 80,0                 |
| EÓLICA MARÍTIMA Y PORTUARIA, SOCIEDAD LIMITADA, ES, Oviedo <sup>2)</sup>         | 70,0                 | PELCCÉ Énergies sarl, FR, La Ciotat <sup>2)</sup>                    | 100,0                |
| Eólicas de Vozmediano, S.L., ES, Soria <sup>5)</sup>                             | 50,0                 | Pioneer Trail Wind Farm, LLC, US, Wilmington <sup>2)</sup>           | 100,0                |
| Eoliser Serviços de Gestao para parques eolicos, Lda, PT, Lissabon <sup>1)</sup> | 100,0                | Promociones y Servicios Hidráulicos, S.A., ES, Madrid <sup>1)</sup>  | 100,0                |
| EOS PAX IIA, S.L., ES, Santiago de Compostela <sup>4)</sup>                      | 48,5                 | Pyron WF Holdco, LLC, US, Wilmington <sup>1)</sup>                   | 100,0                |
| EWC Windpark Cuxhaven GmbH, DE, München <sup>5)</sup>                            | 50,0                 | Pyron Wind Farm, LLC, US, Wilmington <sup>1)</sup>                   | 100,0                |
|                                                                                  |                      | Roscoe WF Holdco, LLC, US, Wilmington <sup>1)</sup>                  | 100,0                |
|                                                                                  |                      | Roscoe Wind Farm, LLC, US, Wilmington <sup>1)</sup>                  | 100,0                |
|                                                                                  |                      | San Juan de Bargas Eólica, S.L., ES, Zaragoza <sup>4)</sup>          | 47,0                 |

1) Konsolidiertes verbundenes Unternehmen 2) Nicht konsolidiertes verbundenes Unternehmen aufgrund von untergeordneter Bedeutung (bewertet zu Anschaffungskosten)  
3) Gemeinschaftsunternehmen nach IAS 31 (bewertet nach Equity-Methode) 4) Assoziiertes Unternehmen (bewertet nach Equity-Methode) 5) Assoziiertes Unternehmen  
(bewertet zu Anschaffungskosten aufgrund untergeordneter Bedeutung) 6) Übrige Beteiligungen 7) Einbeziehung als konsolidiertes verbundenes Unternehmen nach SIC 12  
8) Für die Gesellschaft wird § 264 (3) HGB bzw. § 264b HGB in Anspruch genommen 9) Gewinnabführungsvertrag (Ergebnis nach Gewinnabführung)



## Angaben zum Beteiligungsbesitz gem. § 313 Abs. 2 HGB (Stand: 31. Dez. 2010)

| Gesellschaft, Sitz                                                                                        | Kapital-<br>anteil % | Gesellschaft, Sitz                                                         | Kapital-<br>anteil % |
|-----------------------------------------------------------------------------------------------------------|----------------------|----------------------------------------------------------------------------|----------------------|
| Sand Bluff WF Holdco, LLC, US, Wilmington <sup>1)</sup>                                                   | 100,0                | E.ON Polska Sp. z o.o., PL, Warschau <sup>1)</sup>                         | 100,0                |
| Sand Bluff Wind Farm, LLC, US, Wilmington <sup>1)</sup>                                                   | 100,0                | E.ON Portfolio Solution GmbH, DE, Düsseldorf <sup>1)</sup>                 | 100,0                |
| Scarweather Sands Limited, GB, Coventry <sup>5)</sup>                                                     | 50,0                 | <b>Corporate Center</b>                                                    |                      |
| SCS Centrale Éolienne de Cernon, FR, Rueil-Malmaison <sup>5)</sup>                                        | 49,0                 | AV Packaging GmbH, DE, München <sup>7)</sup>                               | 0,0                  |
| SEE-Sul Energía Eólica, Lda, PT, Lissabon <sup>1)</sup>                                                   | 100,0                | Aviga GmbH, DE, Norderfriedrichskoog <sup>1)</sup>                         | 100,0                |
| Settlers Trail Wind Farm, LLC, US, Wilmington <sup>1)</sup>                                               | 100,0                | E.ON Achtzehnte Verwaltungs GmbH, DE, Düsseldorf <sup>2)</sup>             | 100,0                |
| Sinergia Andaluza, S.L., ES, Granada <sup>5)</sup>                                                        | 25,0                 | E.ON Beteiligungsverwaltungs GmbH, DE, Düsseldorf <sup>1)</sup>            | 100,0                |
| SINERGIA ARAGONESA, S.L., ES, Zaragoza <sup>5)</sup>                                                      | 20,0                 | E.ON Dreiundzwanzigste Verwaltungs GmbH, DE, Düsseldorf <sup>2)</sup>      | 100,0                |
| Sociedad Eólica Salmantina, S.L, ES, Salamanca <sup>1)</sup>                                              | 90,0                 | E.ON Energy Trading Holding GmbH, DE, Düsseldorf <sup>1)</sup>             | 100,0                |
| Stony Creek WF Holdco, LLC, US, Wilmington <sup>1)</sup>                                                  | 100,0                | E.ON Finanzanlagen GmbH, DE, Düsseldorf <sup>1)</sup>                      | 100,0                |
| Stony Creek Wind Farm, LLC, US, Wilmington <sup>1)</sup>                                                  | 100,0                | E.ON First Future Energy Holding B.V., NL, Rotterdam <sup>1)</sup>         | 100,0                |
| SV Civitella S.r.l., IT, Mailand <sup>2)</sup>                                                            | 100,0                | E.ON Generation GmbH, DE, Hannover <sup>1), 8)</sup>                       | 100,0                |
| SV VII S.r.l., IT, Mailand <sup>2)</sup>                                                                  | 100,0                | E.ON Gruga Geschäftsführungsgesellschaft mbH, DE, Düsseldorf <sup>2)</sup> | 100,0                |
| TPG Wind Limited, GB, Coventry <sup>4)</sup>                                                              | 50,0                 | E.ON Gruga Objektgesellschaft mbH & Co. KG, DE, Düsseldorf <sup>1)</sup>   | 100,0                |
| Tractaments de Juneda, S.A., ES, Lérida <sup>4)</sup>                                                     | 26,4                 | E.ON Iberia Holding GmbH, DE, Düsseldorf <sup>1)</sup>                     | 100,0                |
| Umspannwerk Miltzow-Mannhagen GbR, DE, Horst <sup>5)</sup>                                                | 36,8                 | E.ON INTERNATIONAL FINANCE B.V., NL, Rotterdam <sup>1)</sup>               | 100,0                |
| Unión de Generadores de Energía, S.A., ES, Zaragoza <sup>4)</sup>                                         | 50,0                 | E.ON IT Bulgaria EOOD, BG, Sofia <sup>2)</sup>                             | 100,0                |
| Valoritzacions Agroramaderes Les Garrigues, S.L., ES, Lérida <sup>4)</sup>                                | 36,8                 | E.ON IT Czech Republic s.r.o., CZ, České Budějovice <sup>2)</sup>          | 100,0                |
| Venado Wind Farm, LLC, US, Wilmington <sup>2)</sup>                                                       | 100,0                | E.ON IT GmbH, DE, Hannover <sup>1), 8)</sup>                               | 100,0                |
| WEA Schönerlinde GbR mbH Kiepsch & Bosse & Beteili-<br>gungsges. e.disnatur mbH, DE, Berlin <sup>2)</sup> | 70,0                 | E.ON IT Hungary Kft., HU, Budapest <sup>2)</sup>                           | 100,0                |
| Windpark Anhalt-Süd (Köthen) OHG, DE, Potsdam <sup>2)</sup>                                               | 83,3                 | E.ON IT Italia S.r.l., IT, Mailand <sup>2)</sup>                           | 100,0                |
| Windpark Mutzschen OHG, DE, Potsdam <sup>2)</sup>                                                         | 77,8                 | E.ON IT Netherlands B.V., NL, Rotterdam <sup>2)</sup>                      | 100,0                |
| Windpark Naundorf OHG, DE, Potsdam <sup>2)</sup>                                                          | 66,7                 | E.ON IT Romania S.R.L, RO, Iasi <sup>2)</sup>                              | 100,0                |
| Windpark Trebitz GmbH, DE, München <sup>2)</sup>                                                          | 100,0                | E.ON IT Slovakia s.r.o., SK, Bratislava <sup>2)</sup>                      | 51,0                 |
| Windy Hills Limited, GB, Country Tyrone <sup>1)</sup>                                                     | 100,0                | E.ON IT Sverige AB, SE, Malmö <sup>1)</sup>                                | 100,0                |
| Yorkshire Windpower Limited, GB, Coventry <sup>4)</sup>                                                   | 50,0                 | E.ON IT UK Limited, GB, Coventry <sup>1)</sup>                             | 100,0                |
| <b>Market Unit Russia</b>                                                                                 |                      | E.ON N.A. Funding, LLC, US, Wilmington <sup>2)</sup>                       | 100,0                |
| E.ON Russia Beteiligungs GmbH, DE, Düsseldorf <sup>2)</sup>                                               | 100,0                | E.ON Neunzehnte Verwaltungs GmbH, DE, Düsseldorf <sup>2)</sup>             | 100,0                |
| E.ON Russia Holding GmbH, DE, Düsseldorf <sup>1)</sup>                                                    | 100,0                | E.ON Nordic AB, SE, Malmö <sup>1)</sup>                                    | 100,0                |
| E.ON STS Energy Holding Ges.m.b.H., AT, Wien <sup>2)</sup>                                                | 50,0                 | E.ON Nordic Holding GmbH, DE, Düsseldorf <sup>1)</sup>                     | 100,0                |
| OA OGGK-4, RU, Surgut <sup>1)</sup>                                                                       | 78,3                 | E.ON North America Holding, LLC, US, Delaware <sup>1)</sup>                | 100,0                |
| OA O Shaturskaya Upravlyayuschaya Kompaniya, RU, Shatura <sup>2)</sup>                                    | 51,0                 | E.ON North America, Inc., US, Wilmington <sup>1)</sup>                     | 100,0                |
| OOO E.ON Russia, RU, Moskau <sup>2)</sup>                                                                 | 100,0                | E.ON RAG Beteiligungsgesellschaft mbH, DE, Düsseldorf <sup>1)</sup>        | 100,0                |
| OOO E.ON Russia Power, RU, Moskau <sup>1)</sup>                                                           | 100,0                | E.ON Risk Consulting GmbH, DE, Düsseldorf <sup>1)</sup>                    | 100,0                |
| OOO Teplosbyt, RU, Shatura <sup>2)</sup>                                                                  | 100,0                | E.ON Ruhrgas Holding GmbH, DE, Düsseldorf <sup>1)</sup>                    | 100,0                |
| <b>Market Unit Energy Trading</b>                                                                         |                      | E.ON Sechzehnte Verwaltungs GmbH, DE, Düsseldorf <sup>1)</sup>             | 100,0                |
| E.ON Energihandel Nordic AB, SE, Malmö <sup>1)</sup>                                                      | 100,0                | E.ON Siebzehnte Verwaltungs GmbH, DE, Düsseldorf <sup>2)</sup>             | 100,0                |
| E.ON Energy Trading Bulgarien EOOD, BG, Sofia <sup>2)</sup>                                               | 100,0                | E.ON US Holding GmbH, DE, Düsseldorf <sup>1)</sup>                         | 100,0                |
| E.ON Energy Trading NL Staff Company 2 B.V., NL, Voorburg <sup>1)</sup>                                   | 100,0                | E.ON US Investments Corp., US, Louisville <sup>1)</sup>                    | 100,0                |
| E.ON Energy Trading NL Staff Company B.V., NL, Rotterdam <sup>1)</sup>                                    | 100,0                | E.ON Vierundzwanzigste Verwaltungs GmbH, DE, Düsseldorf <sup>2)</sup>      | 100,0                |
| E.ON Energy Trading S.p.A., IT, Mailand <sup>1)</sup>                                                     | 100,0                | E.ON Zwanzigste Verwaltungs GmbH, DE, Düsseldorf <sup>2)</sup>             | 100,0                |
| E.ON Energy Trading SE, DE, Düsseldorf <sup>1), 8)</sup>                                                  | 100,0                | E.ON Zweiundzwanzigste Verwaltungs GmbH, DE, Düsseldorf <sup>2)</sup>      | 100,0                |
| E.ON Energy Trading Srbija d.o.o., RS, Belgrad <sup>1)</sup>                                              | 100,0                | ERKA Vermögensverwaltungsgesellschaft mbH, DE, Düsseldorf <sup>2)</sup>    | 100,0                |
| E.ON Energy Trading UK Staff Company Limited, GB, Coventry <sup>1)</sup>                                  | 100,0                | Fidelia Communications, Inc., US, Delaware <sup>2)</sup>                   | 100,0                |

1) Konsolidiertes verbundenes Unternehmen 2) Nicht konsolidiertes verbundenes Unternehmen aufgrund von untergeordneter Bedeutung (bewertet zu Anschaffungskosten)  
3) Gemeinschaftsunternehmen nach IAS 31 (bewertet nach Equity-Methode) 4) Assoziiertes Unternehmen (bewertet nach Equity-Methode) 5) Assoziiertes Unternehmen  
(bewertet zu Anschaffungskosten aufgrund untergeordneter Bedeutung) 6) Übrige Beteiligungen 7) Einbeziehung als konsolidiertes verbundenes Unternehmen nach SIC 12  
8) Für die Gesellschaft wird § 264 (3) HGB bzw. § 264b HGB in Anspruch genommen 9) Gewinnabführungsvertrag (Ergebnis nach Gewinnabführung)

Angaben zum Beteiligungsbesitz gem. § 313 Abs. 2 HGB (Stand: 31. Dez. 2010)

| Gesellschaft, Sitz                                                                                 | Kapital-<br>anteil % | Gesellschaft, Sitz                                                                           | Kapital-<br>anteil % |
|----------------------------------------------------------------------------------------------------|----------------------|----------------------------------------------------------------------------------------------|----------------------|
| FIDELIA Corporation, US, Wilmington <sup>1)</sup>                                                  | 100,0                | 000 E.ON IS, RU, Moskau <sup>2)</sup>                                                        | 100,0                |
| FIDELIA Holding, LLC, US, Wilmington <sup>1)</sup>                                                 | 100,0                | VEBA Electronics Beteiligungs GmbH, DE,<br>Norderfriedrichskoog <sup>1)</sup>                | 100,0                |
| FITAS Verwaltung GmbH & Co. Vermietungs-KG, DE,<br>Pöcking <sup>2)</sup>                           | 99,9                 | VEBA Electronics GmbH, DE, Norderfriedrichskoog <sup>1)</sup>                                | 100,0                |
| Gelsenberg GmbH & Co. KG, DE, Düsseldorf <sup>1)</sup>                                             | 100,0                | VEBA Electronics, LLC, US, Wilmington <sup>1)</sup>                                          | 100,0                |
| Gelsenberg Verwaltungs GmbH, DE, Düsseldorf <sup>2)</sup>                                          | 100,0                | VEBA Electronics US Holding GmbH, DE,<br>Norderfriedrichskoog <sup>1)</sup>                  | 100,0                |
| Gem. Ges. zur Förderung des E.ON-Instituts für<br>Energieforschung mbH, DE, Gorleben <sup>3)</sup> | 50,0                 | VEBA Investments Limited, GB, Coventry <sup>1)</sup>                                         | 100,0                |
| Hamburger Hof Versicherungs-Aktiengesellschaft, DE,<br>Düsseldorf <sup>2)</sup>                    | 100,0                | VEBA OIL SUPPLY AND TRADING, LLC, US, Red Bank <sup>1)</sup>                                 | 100,0                |
| HIBERNIA Industriewerte GmbH & Co. oHG, DE,<br>Düsseldorf <sup>2)</sup>                            | 100,0                | VEBACOM Holdings, LLC, US, Wilmington <sup>2)</sup>                                          | 100,0                |
| Induboden GmbH, DE, Düsseldorf <sup>2)</sup>                                                       | 100,0                | VIAG Connect Ges. für Telekommunikation Ges.m.b.H., AT,<br>Wien <sup>2)</sup>                | 100,0                |
| Induboden GmbH & Co. Grundstücksgesellschaft OHG,<br>DE, Düsseldorf <sup>1)</sup>                  | 100,0                | VR Telecommunication Beteiligungs-Verwaltungs GmbH,<br>DE, Düsseldorf <sup>2)</sup>          | 100,0                |
| Induboden GmbH & Co. Industriewerte OHG, DE,<br>Düsseldorf <sup>1)</sup>                           | 100,0                | VR Telecommunication Beteiligungs-Verwaltungs GmbH<br>& Co. KG, DE, Düsseldorf <sup>2)</sup> | 100,0                |
| MEON Verwaltungs GmbH, DE, Grünwald <sup>2)</sup>                                                  | 100,0                | VR Telecommunications Holding GmbH i.L., DE,<br>Düsseldorf <sup>2)</sup>                     | 100,0                |
| Montan GmbH Assekuranz-Makler, DE, Düsseldorf <sup>4)</sup>                                        | 44,3                 |                                                                                              |                      |

| Gesellschaft                                                       | Sitz                 | Kapitalanteil<br>% | Eigenkapital<br>Mio € | Ergebnis<br>Mio € |
|--------------------------------------------------------------------|----------------------|--------------------|-----------------------|-------------------|
| <b>Übrige Beteiligungen</b>                                        |                      |                    |                       |                   |
| Baumgarten-Oberkappel-Gasleitungsgesellschaft m.b.H. <sup>6)</sup> | AT, Wien             | 15,0               | 29,3                  | 23,2              |
| Centro Elettronico Sperimentale Italiano S.p.A. <sup>6)</sup>      | IT, Mailand          | 3,9                | 48,1                  | -8,0              |
| Enovos International S.A. <sup>6)</sup>                            | LU, Esch-sur-Alzette | 10,8               | 609,6                 | 140,5             |
| European Energy Exchange AG <sup>6)</sup>                          | DE, Leipzig          | 3,5                | 93,4                  | 7,2               |
| Forsmarks Kraftgrupp AB <sup>6)</sup>                              | SE, Östhammar        | 8,5                | 32,3                  | 0,1               |
| Gasnor AS <sup>6)</sup>                                            | NO, Avalsnes         | 14,0               | 33,6                  | 5,1               |
| GSB-Sonderabfall-Entsorgung Bayern GmbH <sup>6)</sup>              | DE, Baar-Ebenhausen  | 1,6                | 27,1                  | 11,1              |
| Holdigaz SA <sup>6)</sup>                                          | CH, Vevey            | 2,2                | 48,2                  | 7,7               |
| Interconnector (UK) Limited <sup>6)</sup>                          | GB, London           | 15,1               | 31,6                  | 60,1              |
| OAO Gazprom <sup>6)</sup>                                          | RU, Moskau           | 0,8                | 130,8                 | 18,0              |
| Powernext, S.A. <sup>6)</sup>                                      | FR, Paris            | 4,9                | 14,2                  | 0,2               |
| Stadtwerke Duisburg AG <sup>6), 9)</sup>                           | DE, Duisburg         | 20,0               | 154,4                 | 40,7              |
| Stadtwerke Karlsruhe GmbH <sup>6), 9)</sup>                        | DE, Karlsruhe        | 10,0               | 165,7                 | 24,9              |
| Stadtwerke Wertheim GmbH <sup>6)</sup>                             | DE, Wertheim         | 10,0               | 20,5                  | 3,1               |
| Trans Adriatic Pipeline AG <sup>6)</sup>                           | CH, Baar             | 15,0               | 15,4                  | 12,0              |
| Transitgas AG <sup>6)</sup>                                        | CH, Zürich           | 3,0                | 72,7                  | 2,1               |

1) Konsolidiertes verbundenes Unternehmen 2) Nicht konsolidiertes verbundenes Unternehmen aufgrund von untergeordneter Bedeutung (bewertet zu Anschaffungskosten)  
3) Gemeinschaftsunternehmen nach IAS 31 (bewertet nach Equity-Methode) 4) Assoziiertes Unternehmen (bewertet nach Equity-Methode) 5) Assoziiertes Unternehmen  
(bewertet zu Anschaffungskosten aufgrund untergeordneter Bedeutung) 6) Übrige Beteiligungen 7) Einbeziehung als konsolidiertes verbundenes Unternehmen nach SIC 12  
8) Für die Gesellschaft wird § 264 (3) HGB bzw. § 264b HGB in Anspruch genommen 9) Gewinnabführungsvertrag (Ergebnis nach Gewinnabführung)

### Erklärung zur Unternehmensführung (Bestandteil des zusammengefassten Lageberichts)

#### Erklärung von Vorstand und Aufsichtsrat der E.ON AG gemäß § 161 des Aktiengesetzes zum Deutschen Corporate Governance Kodex

Vorstand und Aufsichtsrat erklären, dass den vom Bundesministerium der Justiz im amtlichen Teil des elektronischen Bundesanzeigers bekannt gemachten Empfehlungen der „Regierungskommission Deutscher Corporate Governance Kodex“ (Fassung vom 26. Mai 2010) entsprochen wird.

Vorstand und Aufsichtsrat erklären weiter, dass seit Abgabe der letzten Erklärung den Empfehlungen der „Regierungskommission Deutscher Corporate Governance Kodex“ (Fassung vom 18. Juni 2009) entsprochen wurde.

Düsseldorf, den 13. Dezember 2010

Für den Aufsichtsrat der E.ON AG:  
gez. Ulrich Hartmann  
(Vorsitzender des Aufsichtsrats der E.ON AG)

Für den Vorstand der E.ON AG:  
gez. Dr. Johannes Teyssen  
(Vorsitzender des Vorstands der E.ON AG)

Diese Erklärung ist den Aktionären auf der Internetseite der Gesellschaft unter [www.eon.com](http://www.eon.com) dauerhaft öffentlich zugänglich gemacht.

#### Relevante Angaben zu Unternehmensführungspraktiken

##### Corporate Governance

Gute Corporate Governance ist bei E.ON die zentrale Grundlage für eine verantwortungsvolle und wertorientierte Unternehmensführung, die effiziente Zusammenarbeit von Vorstand und Aufsichtsrat, Transparenz in der Berichterstattung sowie ein angemessenes Risikomanagement.

Vorstand und Aufsichtsrat haben sich im abgelaufenen Geschäftsjahr intensiv mit der Einhaltung der Empfehlungen und Anregungen des Deutschen Corporate Governance Kodex befasst. Dabei wurde festgestellt, dass alle Empfehlungen vollständig und auch nahezu alle Anregungen des Kodex bei E.ON eingehalten werden.

##### Transparente Unternehmensführung

Transparenz der Unternehmensführung hat für den Vorstand und den Aufsichtsrat der E.ON AG einen hohen Stellenwert. Unsere Aktionäre, alle Teilnehmer am Kapitalmarkt, Finanzanalysten, Aktionärsvereinigungen sowie die Medien werden regelmäßig und aktuell über die Lage sowie über wesentliche geschäftliche Veränderungen des Unternehmens informiert. Zur umfassenden, gleichberechtigten und zeitnahen Information nutzen wir hauptsächlich das Internet.

Die Berichterstattung über die Lage und die Ergebnisse der E.ON AG erfolgt durch

- Zwischenberichte,
- den Geschäftsbericht,
- Bilanzpressekonferenzen,
- Telefonkonferenzen, jeweils mit Veröffentlichung der Quartalsergebnisse beziehungsweise des Jahresergebnisses, sowie
- zahlreiche Veranstaltungen mit Finanzanalysten im In- und Ausland.

Die Termine der regelmäßigen Finanzberichterstattung sind im Finanzkalender zusammengefasst.

Wenn außerhalb der regelmäßigen Berichterstattung bei der E.ON AG Tatsachen eintreten, die geeignet sind, den Börsenkurs der E.ON-Aktie erheblich zu beeinflussen, so werden diese durch Ad-hoc-Mitteilungen bekannt gemacht.

Gemäß § 10 des deutschen Wertpapierprospektgesetzes ist E.ON verpflichtet, einmal jährlich ein Dokument („jährliches Dokument“) mit einer Zusammenstellung der gesellschafts- und kapitalmarktrechtlichen Veröffentlichungen der vergangenen zwölf Monate zu veröffentlichen.

Der Finanzkalender, die Ad-hoc-Mitteilungen und das „jährliche Dokument“ stehen im Internet unter [www.eon.com](http://www.eon.com) zur Verfügung.



### Directors' Dealings

Personen mit Führungsaufgaben, insbesondere Mitglieder des Vorstands und des Aufsichtsrats der E.ON AG, sowie mit diesen in einer engen Beziehung stehende Personen sind gemäß § 15a Wertpapierhandelsgesetz verpflichtet, Geschäfte mit Aktien der E.ON AG oder sich darauf beziehenden Finanzinstrumenten offenzulegen. Mitteilungen über entsprechende Geschäfte im Jahr 2010 haben wir im Internet unter [www.eon.com](http://www.eon.com) veröffentlicht. Mitteilungspflichtiger Besitz nach Ziffer 6.6 des Deutschen Corporate Governance Kodex lag zum 31. Dezember 2010 nicht vor.

### Integrität

Integrität und rechtmäßiges Verhalten bestimmen unser Handeln. Grundlage hierfür ist der vom Vorstand beschlossene Verhaltenskodex, der die Bindung aller Mitarbeiter an die gesetzlichen Vorschriften und die internen Richtlinien betont. Geregelt wird der Umgang mit Geschäftspartnern, Dritten und staatlichen Stellen, insbesondere im Hinblick auf die Beachtung des Kartellrechts, die Gewährung und Annahme von Zuwendungen, die Einschaltung von Vermittlern und die Auswahl von Lieferanten und Anbietern von Dienstleistungen. Weitere Vorschriften betreffen unter anderem die Vermeidung von Interessenkonflikten (zum Beispiel Wettbewerbsverbot, Nebentätigkeiten, finanzielle Beteiligungen), den Umgang mit Informationen sowie mit Eigentum und Ressourcen des Unternehmens. Die Regelungen zur Compliance-Organisation gewährleisten die Aufklärung, Bewertung, Abstellung und Sanktionierung von gemeldeten Regelverstößen durch die zuständigen Compliance Officers und den Chief Compliance Officer des E.ON-Konzerns. Über Verstöße gegen den Verhaltenskodex kann auch anonym, zum Beispiel durch eine Whistleblower-Meldung, informiert werden. Die jeweils aktuelle Richtlinie ist auf [www.eon.com](http://www.eon.com) veröffentlicht.

### Beschreibung der Arbeitsweise von Vorstand und Aufsichtsrat sowie der Zusammensetzung und Arbeitsweise ihrer Ausschüsse

#### Der Vorstand

Der Vorstand der E.ON AG führt die Geschäfte der Gesellschaft in gemeinschaftlicher Verantwortung aller seiner Mitglieder. Er bestimmt die unternehmerischen Ziele des Gesamtkonzerns, seine grundsätzliche strategische Ausrichtung, die Unternehmenspolitik und die Konzernorganisation.

Der Vorstand besteht aus sechs Mitgliedern und hat einen Vorsitzenden. Mitglieder des Vorstands dürfen nicht älter als 65 Jahre sein. Er hat sich eine Geschäftsordnung gegeben und über seine Geschäftsverteilung in Abstimmung mit dem Aufsichtsrat beschlossen.

Der Vorstand informiert den Aufsichtsrat regelmäßig, zeitnah und umfassend über alle für das Unternehmen relevanten Fragen der Planung, der Geschäftsentwicklung, der Risikolage und des Risikomanagements. Er legt dem Aufsichtsrat außerdem jeweils in der letzten Sitzung eines Geschäftsjahres die Konzerninvestitions-, Finanz- und Personalplanung für das kommende Geschäftsjahr sowie die Mittelfristplanung vor.

Über wichtige Ereignisse, die für die Beurteilung der Lage und der Entwicklung oder für die Leitung des Unternehmens von wesentlicher Bedeutung sind, sowie über etwaige auftretende Mängel in unseren Überwachungssystemen unterrichtet der Vorsitzende des Vorstands den Aufsichtsratsvorsitzenden unverzüglich. Geschäfte und Maßnahmen, die der Zustimmung des Aufsichtsrats bedürfen, werden dem Aufsichtsrat rechtzeitig vorgelegt.

Die Vorstandsmitglieder sind verpflichtet, Interessenkonflikte dem Präsidialausschuss des Aufsichtsrats gegenüber unverzüglich offenzulegen und die anderen Vorstandsmitglieder hierüber zu informieren. Vorstandsmitglieder dürfen Nebentätigkeiten, insbesondere Aufsichtsratsmandate in konzernfremden Gesellschaften, nur mit Zustimmung des Präsidialausschusses des Aufsichtsrats übernehmen. Im abgelaufenen Geschäftsjahr ist es nicht zu Interessenkonflikten bei Vorstandsmitgliedern der E.ON AG gekommen. Wesentliche Geschäfte zwischen dem Unternehmen einerseits und den Vorstandsmitgliedern sowie ihnen nahestehenden Personen oder ihnen persönlich nahestehenden Unternehmungen andererseits bedürfen der Zustimmung des Präsidialausschusses des Aufsichtsrats. Entsprechende Verträge bestanden im Berichtszeitraum nicht.

Darüber hinaus haben wir ein zentrales Gremium eingerichtet, das zur Unterstützung des Vorstands für die korrekte und zeitnahe Veröffentlichung von finanzmarktrelevanten Informationen verantwortlich ist. Die Mitglieder des Gremiums stammen aus unterschiedlichen Fachbereichen der E.ON AG und sind aufgrund ihrer Tätigkeit für diese Aufgaben besonders geeignet.

### Der Aufsichtsrat

Der Aufsichtsrat hat 20 Mitglieder und setzt sich nach dem deutschen Mitbestimmungsgesetz zu gleichen Teilen aus Anteilseigner- und Arbeitnehmervertretern zusammen. Die Vertreter der Anteilseigner werden von der Hauptversammlung gewählt; hierfür unterbreitet der Aufsichtsrat Wahlvorschläge. Die zehn weiteren Mitglieder des Aufsichtsrats werden von Delegierten der Arbeitnehmer gewählt, wobei sich unter den Aufsichtsratsmitgliedern sieben Arbeitnehmer und drei Vertreter der Gewerkschaften befinden müssen. Mitglied des Aufsichtsrats kann nicht sein, wer

- bereits in zehn Handelsgesellschaften, die gesetzlich einen Aufsichtsrat zu bilden haben, Aufsichtsratsmitglied ist,
- gesetzlicher Vertreter eines von der Gesellschaft abhängigen Unternehmens ist,
- gesetzlicher Vertreter einer anderen Kapitalgesellschaft ist, deren Aufsichtsrat ein Vorstandsmitglied der Gesellschaft angehört, oder
- in den letzten zwei Jahren Vorstandsmitglied der Gesellschaft war, es sei denn, seine Wahl erfolgt auf Vorschlag von Aktionären, die mehr als 25 Prozent der Stimmrechte an der Gesellschaft halten.

Mindestens ein unabhängiges Mitglied des Aufsichtsrats muss über Sachverstand auf den Gebieten Rechnungslegung oder Abschlussprüfung verfügen.

Der Aufsichtsrat überwacht die Geschäftsführung und begleitet den Vorstand beratend. Bei grundlegenden Geschäften und Maßnahmen bedarf der Vorstand der Zustimmung des Aufsichtsrats. Hierzu zählen beispielsweise die Investitions-

Finanz- und Personalplanung für den Konzern, der Erwerb und die Veräußerung von Unternehmen oder Unternehmensbeteiligungen und Unternehmensteilen, deren Wert ein Prozent des Eigenkapitals der letzten Konzernbilanz übersteigt, sowie Finanzmaßnahmen, die diese Grenze übersteigen und nicht durch Beschlüsse zu Finanzplänen festgelegt sind, und der Abschluss, die Änderung und die Aufhebung von Unternehmensverträgen. Der Aufsichtsrat prüft den Jahresabschluss, den Lagebericht und den Vorschlag für die Verwendung des Bilanzgewinns sowie den Konzernabschluss und Konzernlagebericht auf Grundlage des vorbereitenden Berichts des Prüfungs- und Risikoausschusses. Über das Ergebnis der Prüfung berichtet der Aufsichtsrat schriftlich an die Hauptversammlung.

Der Aufsichtsrat hat sich eine Geschäftsordnung gegeben. In jedem Geschäftsjahr finden vier ordentliche Aufsichtsratsitzungen statt. Bei Abstimmungen im Aufsichtsrat hat bei Stimmengleichheit der Vorsitzende des Aufsichtsrats die ausschlaggebende Stimme, falls eine zweite Abstimmung erneut zu einer Stimmengleichheit führt.

Im Hinblick auf Ziffer 5.4.1 des Deutschen Corporate Governance Kodex hat der Aufsichtsrat Ziele für seine Zusammensetzung beschlossen, die über die ausdrücklichen gesetzlichen Regelungen hinaus wie folgt lauten:

„Der Aufsichtsrat ist so zusammenzusetzen, dass seine Mitglieder insgesamt über die zur ordnungsgemäßen Wahrnehmung der Aufgaben erforderlichen Kenntnisse, Fähigkeiten und fachlichen Erfahrungen verfügen. Jedes Mitglied des Aufsichtsrats muss diejenigen Mindestkenntnisse und -fähigkeiten

besitzen oder sich aneignen, die es braucht, um alle normalerweise anfallenden Geschäftsvorgänge auch ohne fremde Hilfe verstehen und beurteilen zu können. Dem Aufsichtsrat soll eine ausreichende Zahl unabhängiger Kandidaten angehören, wobei ein Mitglied als unabhängig anzusehen ist, wenn es in keiner geschäftlichen Beziehung zur Gesellschaft oder deren Vorstand steht, die einen Interessenkonflikt begründet. Dem Aufsichtsrat sollen nicht mehr als zwei ehemalige Vorstandsmitglieder angehören und die Mitglieder des Aufsichtsrats sollen keine Organfunktionen oder Beratungsaufgaben bei wesentlichen Wettbewerbern des Unternehmens wahrnehmen.

Jedem Aufsichtsratsmitglied muss für die Wahrnehmung seiner Mandate genügend Zeit zur Verfügung stehen. Wer dem Vorstand einer börsennotierten Gesellschaft angehört, soll daher nur Mitglied im Aufsichtsrat von E.ON sein oder bleiben, wenn er nicht mehr als drei Aufsichtsratsmandate in konzern-externen börsennotierten Gesellschaften oder in vergleichbaren konzernexternen Aufsichtsgremien wahrnimmt.

Die Mitglieder des Aufsichtsrats sollen in der Regel nicht älter als 70 Jahre sein.

Wesentliche Aufgabe des Aufsichtsrats ist die Überwachung des Vorstands und dessen Beratung. Vor diesem Hintergrund sollten die Vertreter der Anteilseigner im Aufsichtsrat mehrheitlich über Erfahrungen als Mitglied des Vorstands einer Aktiengesellschaft oder vergleichbarer Unternehmen oder Verbände verfügen, um die Aufgaben in qualifizierter Weise wahrnehmen zu können.

Darüber hinaus sollte der Aufsichtsrat insgesamt über ein besonderes Verständnis für die Energiewirtschaft und die geschäftlichen Aktivitäten des E.ON-Konzerns verfügen. Hierzu zählen auch Kenntnisse über die wesentlichen Märkte, auf denen der E.ON-Konzern tätig ist. Weiterhin sollen die internen und externen Stakeholder-Gruppen (Aktionäre/Investoren, Arbeitnehmer/Gewerkschaften, Gesellschaft/Politik) im Aufsichtsrat vertreten sein.

Erfüllen mehrere Kandidatinnen und Kandidaten für den Aufsichtsrat die allgemeinen und unternehmensspezifischen Qualifikationsanforderungen in gleicher Weise, beabsichtigt der Aufsichtsrat bei seinem Wahlvorschlag auch die Berücksichtigung weiterer Kriterien, um die Vielfalt (Diversity) des Aufsichtsrats zu vergrößern.

Mit Blick auf die internationale Ausrichtung des E.ON-Konzerns soll darauf geachtet werden, dass dem Aufsichtsrat eine ausreichende Anzahl an Mitgliedern angehört, die zumindest einen wesentlichen Teil ihrer beruflichen Tätigkeit im Ausland verbracht haben.

Außerdem hat sich der Aufsichtsrat insgesamt das Ziel gesetzt, die Anzahl von Frauen im Aufsichtsrat kontinuierlich zu erhöhen. Zurzeit sind je ein Vertreter der Anteilseigner und ein Vertreter der Arbeitnehmer Frauen. Spätestens mit der nächsten turnusgemäßen Neuwahl des Aufsichtsrats im Jahr 2013 soll diese Zahl verdoppelt werden. Ab der übernächsten turnusgemäßen Wahl zum Aufsichtsrat sollen – entsprechend dem Anteil der weiblichen Beschäftigten im E.ON-Konzern – 30 Prozent Frauen im Aufsichtsrat vertreten sein.“

Die Ziele für die Zusammensetzung des Aufsichtsrats werden erstmals bei den Vorschlägen für die Wahl von drei Aufsichtsratsmitgliedern der Anteilseigner auf der ordentlichen Hauptversammlung im Jahr 2011 berücksichtigt werden. Über den Stand der Umsetzung wird der Aufsichtsrat im nächsten Jahr ausführlich berichten.

Darüber hinaus sind die Aufsichtsratsmitglieder nach der Geschäftsordnung verpflichtet, Interessenkonflikte, insbesondere solche, die aufgrund einer Beratung oder Organfunktion bei Kunden, Lieferanten, Kreditgebern oder sonstigen Geschäftspartnern entstehen können, dem Aufsichtsrat gegenüber offenzulegen. Der Aufsichtsrat informiert in seinem Bericht an die Hauptversammlung, ob Interessenkonflikte auftraten und wie sie behandelt wurden. Wesentliche und nicht nur vorübergehende Interessenkonflikte in der Person eines Aufsichtsratsmitglieds sollen zur Beendigung des Mandats führen. Im Berichtsjahr kam es nicht zu Interessenkonflikten bei Aufsichtsratsmitgliedern der E.ON AG. Berater- und sonstige Dienstleistungs- und Werkverträge eines Aufsichtsratsmitglieds mit der Gesellschaft bedürfen der Zustimmung des Aufsichtsrats. Entsprechende Verträge bestanden im Berichtszeitraum nicht.

Der Aufsichtsrat hat folgende Ausschüsse eingerichtet und ihnen jeweils eine Geschäftsordnung gegeben:

Dem nach § 27 Abs. 3 Mitbestimmungsgesetz zu bildenden Vermittlungsausschuss gehören je zwei Mitglieder der Anteilseigner und der Arbeitnehmer an. Er unterbreitet dem Aufsichtsrat Vorschläge für die Bestellung von Vorstandsmitgliedern, wenn im ersten Wahlgang die erforderliche Mehrheit von zwei Dritteln der Stimmen der Aufsichtsratsmitglieder nicht erreicht wird, und tagt daher nur nach Bedarf.

Der Präsidialausschuss besteht aus den vier Mitgliedern des Vermittlungsausschusses. Er bereitet die Sitzungen des Aufsichtsrats vor und berät den Vorstand in Grundsatzfragen der strategischen Fortentwicklung des Unternehmens. In Eilfällen – wenn eine vorherige erforderliche Beschlussfassung des Aufsichtsrats nicht ohne wesentliche Nachteile für die Gesellschaft abgewartet werden kann – beschließt der Präsidialausschuss anstelle des Gesamtaufichtsrats. Der Präsidialausschuss bereitet darüber hinaus insbesondere Personalentscheidungen des Aufsichtsrats und die Beschlussfassung über die Festsetzung der Gesamtbezüge des einzelnen Vorstandsmitglieds im Sinne des § 87 AktG vor. Daneben ist er zuständig

für den Abschluss, die Änderung und Beendigung der Anstellungsverträge mit den Mitgliedern des Vorstands und für die Unterbreitung eines Vorschlags zur Beschlussfassung des Aufsichtsrats über das Vergütungssystem für den Vorstand einschließlich der wesentlichen Vertragselemente. Er befasst sich darüber hinaus mit Fragen der Corporate Governance und berichtet dem Aufsichtsrat mindestens einmal jährlich über den Stand, die Effektivität und eventuelle Verbesserungsmöglichkeiten der Corporate Governance des Unternehmens.

Der Prüfungs- und Risikoausschuss besteht aus vier Mitgliedern, die über besondere Kenntnisse auf dem Gebiet der Rechnungslegung beziehungsweise der Betriebswirtschaft verfügen. Der Vorsitzende verfügt als unabhängiger Experte – entsprechend den Vorgaben des Corporate Governance Kodex – über besondere Kenntnisse und Erfahrungen in der Anwendung von Rechnungslegungsgrundsätzen beziehungsweise internationalen Kontrollverfahren. Der Prüfungs- und Risikoausschuss befasst sich vornehmlich mit Fragen der Rechnungslegung, der Compliance und des Risikomanagements der Gesellschaft, der erforderlichen Unabhängigkeit des Abschlussprüfers, der Bestimmung der Prüfungsschwerpunkte und der Honorarvereinbarung mit dem Abschlussprüfer. Ferner bereitet er die Entscheidung des Aufsichtsrats über die Feststellung des Jahresabschlusses und die Billigung des Konzernabschlusses vor. Er prüft darüber hinaus die Quartalsabschlüsse und erörtert den Bericht über die prüferische Durchsicht der Quartalsabschlüsse mit dem Abschlussprüfer. Die Wirksamkeit der bei der E.ON AG und bei den Führungsgesellschaften unserer

Market Units für die Finanzpublizität relevanten Kontrollmechanismen wird regelmäßig durch die interne Revision überprüft. Der Prüfungs- und Risikoausschuss bereitet ferner den Vorschlag des Aufsichtsrats an die Hauptversammlung zur Wahl des Abschlussprüfers vor. Um dessen Unabhängigkeit zu gewährleisten, holt der Prüfungs- und Risikoausschuss von dem vorgesehenen Abschlussprüfer eine Erklärung über eventuell bestehende Ausschluss- und Befangenheitsgründe ein.

Im Rahmen der Erteilung des Prüfungsauftrags an den Abschlussprüfer wird vereinbart,

- dass der Vorsitzende des Prüfungs- und Risikoausschusses über mögliche Ausschluss- und Befangenheitsgründe, die während der Prüfung auftreten, unverzüglich unterrichtet wird,
- dass der Abschlussprüfer über alle für die Aufgaben des Aufsichtsrats wesentlichen Feststellungen und Vorkommnisse, die sich bei der Durchführung der Abschlussprüfung ergeben, unverzüglich berichtet und
- dass der Abschlussprüfer den Vorsitzenden des Prüfungs- und Risikoausschusses informiert beziehungsweise im Prüfungsbericht vermerkt, wenn er bei Durchführung der Abschlussprüfung Tatsachen feststellt, die eine Unrichtigkeit der vom Vorstand und Aufsichtsrat abgegebenen Erklärung zum Deutschen Corporate Governance Kodex ergeben.

Der Finanz- und Investitionsausschuss setzt sich aus sechs Mitgliedern zusammen. Er berät den Vorstand in allen Fragen der Konzernfinanzierung und der Investitionsplanung. Er entscheidet anstelle des Aufsichtsrats über die Zustimmung zum Erwerb und zur Veräußerung von Unternehmen, Unternehmensbeteiligungen und Unternehmensteilen sowie zu Finanzmaßnahmen, deren Wert ein Prozent des Eigenkapitals der letzten Konzernbilanz übersteigt. Überschreitet der Wert der genannten Geschäfte und Maßnahmen 2,5 Prozent des Eigenkapitals der letzten Konzernbilanz, bereitet er die Entscheidung des Aufsichtsrats vor.

Der Nominierungsausschuss besteht aus drei Aufsichtsratsmitgliedern der Anteilseigner. Vorsitzender des Nominierungsausschusses ist der Vorsitzende des Aufsichtsrats. Aufgabe des Nominierungsausschusses ist es, dem Aufsichtsrat Wahlvorschläge an die Hauptversammlung für geeignete Kandidaten zum Aufsichtsrat zu unterbreiten.

Alle Ausschüsse tagen turnusgemäß sowie darüber hinaus bei konkreten Anlässen entsprechend ihrer jeweiligen Zuständigkeit nach der Geschäftsordnung. Angaben zur Tätigkeit des Aufsichtsrats und seiner Ausschüsse im abgelaufenen Geschäftsjahr befinden sich im Bericht des Aufsichtsrats auf den Seiten 176 bis 179. Die Zusammensetzung des Aufsichtsrats und seiner Ausschüsse befindet sich auf den Seiten 180 und 181.

## Aktionäre und Hauptversammlung

Die Aktionäre der E.ON AG nehmen ihre Rechte in der Hauptversammlung wahr und üben dort ihr Stimmrecht aus. Sie werden regelmäßig mit einem Finanzkalender, der im Geschäftsbericht, in den Quartalsberichten sowie im Internet unter [www.eon.com](http://www.eon.com) veröffentlicht wird, über wesentliche Termine informiert.

Die Aktionäre haben die Möglichkeit, ihr Stimmrecht in der Hauptversammlung selbst auszuüben oder durch einen Bevollmächtigten ihrer Wahl oder einen weisungsgebundenen Stimmrechtsvertreter der Gesellschaft ausüben zu lassen.

Die Wahl des Abschlussprüfers erfolgt gemäß den gesetzlichen Bestimmungen durch die Hauptversammlung.

### Vergütungsbericht (Bestandteil des zusammengefassten Lageberichts)

Dieser Vergütungsbericht stellt die Vergütungssystematik sowie die individuellen Vergütungen für den Aufsichtsrat und den Vorstand der E.ON AG dar. Er berücksichtigt die geltenden Regelungen des Handelsgesetzbuches und des Aktiengesetzes in der Fassung des Gesetzes zur Angemessenheit der Vorstandsvergütung (VorstAG) sowie die Grundsätze des Deutschen Corporate Governance Kodex.

#### Das Vergütungssystem des Aufsichtsrats

Die Vergütung des Aufsichtsrats wird durch die Hauptversammlung bestimmt und in der Satzung der E.ON AG geregelt. Das Vergütungssystem trägt – im Einklang mit den gesetzlichen Vorschriften und entsprechend den Vorgaben des Deutschen Corporate Governance Kodex – der Verantwortung und dem Tätigkeitsumfang der Aufsichtsratsmitglieder sowie der wirtschaftlichen Lage und dem Erfolg der Gesellschaft Rechnung. Entsprechend dem Kodex erhalten die Mitglieder des Aufsichtsrats neben einer festen auch zwei variable erfolgsorientierte Vergütungskomponenten. Die kurzfristige variable Komponente ist dividendenabhängig, die langfristige variable Komponente richtet sich nach dem Dreijahresdurchschnitt des Konzernüberschusses.

**Fixe Vergütung:** Die Mitglieder des Aufsichtsrats erhalten neben dem Ersatz ihrer Auslagen, zu denen auch die auf ihre Bezüge entfallende Umsatzsteuer gehört, für jedes Geschäftsjahr eine feste Vergütung in Höhe von 55.000 €.

**Kurzfristige variable Vergütung:** Daneben erhalten die Aufsichtsratsmitglieder für jedes Geschäftsjahr eine variable Vergütung in Höhe von 345 € für je 0,01 € Dividende, die über 3 ⅓ Cent je Stückaktie hinaus für das abgelaufene Geschäftsjahr an die Aktionäre ausgeschüttet wird.

**Langfristige variable Vergütung:** Darüber hinaus wird eine weitere variable Vergütung in Höhe von 210 € für jede 0,01 € gezahlt, um die der Dreijahresdurchschnitt des Ergebnisses je Aktie (Anteil der Gesellschafter der E.ON AG) aus dem Konzernüberschuss den Betrag von 76 ⅔ Cent übersteigt.

Mitglieder des Aufsichtsrats, die nur während eines Teils des Geschäftsjahres dem Aufsichtsrat oder einem Ausschuss angehört haben, erhalten für jeden angefangenen Monat ihrer Tätigkeit eine zeitanteilige Vergütung. Die feste Vergütung

ist zahlbar nach Ablauf des Geschäftsjahres. Die variablen Vergütungen sind zahlbar nach Ablauf der Hauptversammlung, die über die Entlastung der Mitglieder des Aufsichtsrats für das jeweils abgelaufene Geschäftsjahr entscheidet.

Der Vorsitzende des Aufsichtsrats erhält insgesamt das Dreifache, sein Stellvertreter und jeder Vorsitzende eines Aufsichtsratsausschusses jeweils insgesamt das Doppelte und jedes Mitglied eines Ausschusses insgesamt das Anderthalbfache der Vergütung.

Die Mitglieder des Aufsichtsrats erhalten für ihre Teilnahme an den Sitzungen des Aufsichtsrats und der Aufsichtsratsausschüsse ein Sitzungsgeld von 1.000 € je Tag der Sitzung. Schließlich besteht zugunsten der Mitglieder des Aufsichtsrats eine Vermögensschadenhaftpflichtversicherung, welche die gesetzliche Haftpflicht aus der Aufsichtsrats Tätigkeit abdeckt. Diese sah für den Versicherungsfall bisher einen Selbstbehalt von 50 Prozent der jährlichen fixen Vergütung des Aufsichtsratsmitglieds vor. Gemäß der Vorschrift des Deutschen Corporate Governance Kodex wurde dieser Selbstbehalt mit Wirkung ab dem 16. Juni 2010 auf zehn Prozent des jeweiligen Schadens erhöht, insgesamt jedoch pro Jahr auf 150 Prozent der Jahresfixvergütung begrenzt.

Mit der jährlichen fixen Vergütung von 55.000 € soll der Unabhängigkeit des Aufsichtsrats Rechnung getragen werden, die zur Wahrnehmung seiner Überwachungsfunktion erforderlich ist. Außerdem haben die Mitglieder des Aufsichtsrats eine Reihe von Aufgaben, die sie unabhängig vom wirtschaftlichen Erfolg des Unternehmens erfüllen müssen. Auch in für das Unternehmen schwierigen Zeiten, in denen die Tätigkeit des Aufsichtsrats regelmäßig besonders anspruchsvoll ist, soll daher eine Mindestvergütung gewährleistet sein.

#### Änderung des Vergütungssystems des Aufsichtsrats ab 2011

Der Vorstand schlägt der Hauptversammlung am 5. Mai 2011 vor, das System der Aufsichtsratsvergütung zu ändern. Unter der Voraussetzung, dass die Hauptversammlung dem Vorschlag zustimmt, erhalten die Mitglieder des Aufsichtsrats ab dem

Geschäftsjahr 2011 ausschließlich eine feste Vergütung. Die Unabhängigkeit des Aufsichtsrats wird damit weiter gestärkt. Im Einzelnen ist folgende Vergütungsregelung vorgesehen:

Die Mitglieder des Aufsichtsrats erhalten neben dem Ersatz ihrer Auslagen, zu denen auch die auf ihre Bezüge entfallende Umsatzsteuer gehört, für jedes Geschäftsjahr eine feste Vergütung in Höhe von 140.000 €. Zusätzlich erhalten der Vorsitzende des Prüfungs- und Risikoausschusses 180.000 €, Mitglieder dieses Ausschusses 110.000 €, Vorsitzende weiterer Ausschüsse 140.000 €, Mitglieder dieser Ausschüsse 70.000 €.

Bei Mitgliedschaft in mehreren Ausschüssen wird nur die jeweils höchste Ausschussvergütung gezahlt.

Abweichend von dem vorstehend Beschriebenen erhält der Vorsitzende des Aufsichtsrats als feste Vergütung 440.000 €, sein Stellvertreter 320.000 €. Der Vorsitzende und der stellvertretende Vorsitzende des Aufsichtsrats erhalten keine zusätzliche Vergütung für ihre Tätigkeit in Ausschüssen.

### Die Vergütung des Aufsichtsrats

Unter der Voraussetzung, dass die Hauptversammlung von E.ON am 5. Mai 2011 die vorgeschlagene Dividende beschließt, betragen die Gesamtbezüge der Mitglieder des Aufsichtsrats 4,9 Mio € (Vorjahr: 4,9 Mio €).

Im Geschäftsjahr 2010 bestanden keine Kredite gegenüber Mitgliedern des Aufsichtsrats. Die Mitglieder des Aufsichtsrats sind auf den Seiten 180 und 181 angegeben.

| Gesamtvergütung des Aufsichtsrats 2010     |                  |                                 |                                 |                                                              |                  |
|--------------------------------------------|------------------|---------------------------------|---------------------------------|--------------------------------------------------------------|------------------|
| in €                                       | Feste Vergütung  | Kurzfristige variable Vergütung | Langfristige variable Vergütung | Aufsichtsrats-bezüge von Tochtergesellschaften <sup>1)</sup> | Summe            |
| Ulrich Hartmann                            | 165.000          | 151.800                         | 123.480                         | -                                                            | 440.280          |
| Erhard Ott                                 | 100.833          | 92.767                          | 75.460                          | 36.250                                                       | 305.310          |
| Werner Bartoschek                          | 82.500           | 75.900                          | 61.740                          | 78.000                                                       | 298.140          |
| Sven Bergelin                              | 55.000           | 50.600                          | 41.160                          | 63.288                                                       | 210.048          |
| Gabriele Gratz                             | 82.500           | 75.900                          | 61.740                          | 103.000                                                      | 323.140          |
| Jens P. Heyerdahl d.y. (bis 30. Juni 2010) | 27.500           | 25.300                          | 20.580                          | -                                                            | 73.380           |
| Wolf-Rüdiger Hinrichsen                    | 77.333           | 67.467                          | 54.880                          | -                                                            | 195.680          |
| Ulrich Hocker                              | 55.000           | 50.600                          | 41.160                          | -                                                            | 146.760          |
| Prof. Dr. Ulrich Lehner                    | 82.500           | 75.900                          | 61.740                          | -                                                            | 220.140          |
| Bård Mikkelsen (seit 19. Juli 2010)        | 27.500           | 25.300                          | 20.580                          | -                                                            | 73.380           |
| Hans Prüfer                                | 82.500           | 75.900                          | 61.740                          | -                                                            | 220.140          |
| Klaus Dieter Raschke                       | 82.500           | 75.900                          | 61.740                          | 45.470                                                       | 265.610          |
| Dr. Walter Reitler                         | 55.000           | 50.600                          | 41.160                          | 36.500                                                       | 183.260          |
| Hubertus Schmoldt                          | 77.917           | 71.683                          | 58.310                          | -                                                            | 207.910          |
| Dr. Henning Schulte-Noelle                 | 82.500           | 75.900                          | 61.740                          | -                                                            | 220.140          |
| Dr. Karen de Segundo                       | 55.000           | 50.600                          | 41.160                          | -                                                            | 146.760          |
| Dr. Theo Siegert                           | 110.000          | 101.200                         | 82.320                          | -                                                            | 293.520          |
| Prof. Dr. Wilhelm Simson                   | 55.000           | 50.600                          | 41.160                          | -                                                            | 146.760          |
| Dr. Georg Frhr. von Waldenfels             | 55.000           | 50.600                          | 41.160                          | -                                                            | 146.760          |
| Werner Wenning                             | 82.500           | 75.900                          | 61.740                          | -                                                            | 220.140          |
| Hans Wollitzer                             | 82.500           | 75.900                          | 61.740                          | 57.250                                                       | 277.390          |
| <b>Zwischensumme</b>                       | <b>1.572.083</b> | <b>1.446.317</b>                | <b>1.176.490</b>                | <b>419.758</b>                                               | <b>4.614.648</b> |
| Sitzungsgeld und Auslagenersatz            |                  |                                 |                                 |                                                              | 242.866          |
| <b>Summe</b>                               |                  |                                 |                                 |                                                              | <b>4.857.514</b> |

1) im Jahr 2010 zugeflossene Bezüge



## Das Vergütungssystem des Vorstands

Entsprechend der Vorgabe des Deutschen Corporate Governance Kodex (Fassung vom 18. Juni 2009), der die Festlegungen des Gesetzes zur Angemessenheit der Vorstandsvergütung (VorstAG) übernommen und zum Teil präzisiert hat, beschließt der Aufsichtsrat auf Vorschlag des Präsidiums das Vergütungssystem für den Vorstand und überprüft es regelmäßig.

Der Aufsichtsrat hat in seiner Sitzung am 14. Dezember 2009 das nachfolgend dargestellte Vergütungssystem beschlossen.

### Vergütungsbestandteile

Die Vergütung der Mitglieder des Vorstands setzt sich aus einer festen, monatlich zahlbaren Grundvergütung, einer jährlichen Tantieme und einer langfristigen variablen Vergütung zusammen.

Die Vergütungsbestandteile verhalten sich zueinander wie folgt:

- Grundgehalt: circa 30 bis 35 Prozent
- Jährliche Zieltantieme:  
bei 100 Prozent Zielerreichung: circa 40 bis 45 Prozent
- Langfristvergütung  
(Zuteilungswert): circa 20 bis 30 Prozent

### Jährliche Tantieme

Im Berichtsjahr galt die vom Aufsichtsrat am 14. Dezember 2009 beschlossene und zum 1. Januar 2010 in Kraft getretene Tantiemeregelung für den E.ON-Vorstand.

§ 87 des Aktiengesetzes in der Fassung des VorstAG verlangt die Ausrichtung der Vergütungsstruktur auf eine nachhaltige Unternehmensentwicklung. Zur Umsetzung dieser Bestimmungen hatte der Aufsichtsrat im Jahre 2009 mit den Vorstandsmitgliedern vereinbart, dem Tantiemesystem für den Vorstand mit Wirkung ab dem Jahr 2010 eine mehrjährige Bemessungsgrundlage beizugeben. Die Änderung betraf den unternehmenserfolgsabhängigen Teil der Tantieme. Lediglich bei Herrn Dr. Bernotat wurde aufgrund seines Ausscheidens aus dem Vorstand zum Ablauf des 30. April 2010 von einer Vertragsänderung abgesehen.

Die Höhe der jährlichen Tantieme bemisst sich danach, inwieweit bestimmte Ziele erreicht wurden. Dabei berücksichtigt das Zielvereinbarungssystem zu 70 Prozent unternehmenserfolgsspezifische Ziele und zu 30 Prozent die individuelle Leistung. Bei 100-prozentiger Zielerfüllung entspricht die Tantieme der vertraglich vereinbarten Zieltantieme. Die Tantieme ist der Höhe nach auf maximal 200 Prozent der Zieltantieme begrenzt. Mindestens wird eine Tantieme in Höhe von 30 Prozent der Zieltantieme gezahlt.

Die unternehmenserfolgsabhängige Zielerreichung wird zu gleichen Teilen aus der erzielten Kapitalrendite (ROCE) und dem operativen Erfolg (Adjusted EBIT) ermittelt.

Dabei richtet sich die Hälfte der unternehmenserfolgsabhängigen Tantieme, also 35 Prozent der Gesamttantieme, nach dem Unternehmenserfolg eines, nämlich des abgelaufenen, Jahres (einjährige Bemessungsgrundlage). Dieser Tantiemeteil wird auf der Grundlage der unternehmenserfolgsabhängigen Zielerreichung des abgelaufenen Jahres endgültig ermittelt und ausbezahlt.

Die andere Hälfte der unternehmenserfolgsabhängigen Tantieme, also ebenfalls 35 Prozent der Gesamttantieme, richtet sich nach dem Durchschnitt der unternehmenserfolgsabhängigen Zielerreichung im abgelaufenen Jahr sowie der Zielerreichung der zwei darauffolgenden Jahre (dreijährige Bemessungsgrundlage). Sie wird auf der Grundlage der Zielerreichung des abgelaufenen Jahres ermittelt und ausbezahlt. Jedoch steht sie unter dem Vorbehalt der Rückforderung bei negativen Entwicklungen in den Folgejahren. Nach Ablauf der auf das Bezugsjahr folgenden zwei Jahre erfolgt die endgültige Feststellung des Tantiemebetrags. Wenn die durchschnittliche Zielerreichung im Dreijahreszeitraum höher ist als die vorläufig ermittelte Zielerreichung im Einjahreszeitraum, dann kommt es zu einer entsprechenden Nachzahlung (Bonus). Ist die durchschnittliche Zielerreichung im Dreijahreszeitraum geringer, dann wird der sich ergebende Minderungsbetrag mit der nächsten fälligen Tantieme oder sonstigen Bezügen verrechnet beziehungsweise ist der Vorstand verpflichtet, diesen zu erstatten (Malus).

Den Zielwert für den ROCE-bezogenen Teil der Tantieme bilden die gewichteten Kapitalkosten (Weighted Average Capital Costs) des Vorjahrs zuzüglich eines vom Aufsichtsrat festzulegenden Zuschlags zur Erhöhung des Anspannungsgrads. Der Zuschlag liegt derzeit bei 2 Prozentpunkten. Die Zielerreichung beträgt 100 Prozent, wenn der tatsächlich erzielte ROCE diesem Zielwert entspricht. Fällt er um drei Prozentpunkte oder mehr dahinter zurück, dann beträgt die Zielerreichung insoweit 0 Prozent. Ist der ROCE mindestens drei Prozentpunkte höher, dann beträgt die Zielerreichung 200 Prozent. Zwischenwerte werden linear interpoliert.

Der Zielwert für den EBIT-bezogenen Teil der Tantieme ergibt sich aus dem zuvor dargestellten Ziel-ROCE, multipliziert mit dem Capital Employed des Vorjahres. Die Zielerreichung beträgt 100 Prozent, wenn das tatsächliche Adjusted EBIT diesem Zielwert entspricht. Die Zielerreichung beträgt 200 Prozent, wenn das tatsächlich erzielte Adjusted EBIT mindestens doppelt so hoch ist wie das Ziel-EBIT, und sie beträgt 0 Prozent bei einem Adjusted EBIT von 0. Zwischenwerte werden linear interpoliert.

Die Zielerreichung hinsichtlich des individuellen Tantiemeteils wird nach dem Ermessen des Aufsichtsrats festgesetzt. Dabei berücksichtigt der Aufsichtsrat insbesondere die Kriterien von § 87 AktG und des Deutschen Corporate Governance Kodex.

Infolge der im Jahre 2009 beschlossenen Änderungen sind ab dem Jahr 2010 über 60 Prozent der variablen Vergütung (bestehend aus der Tantieme und der langfristigen variablen Vergütung) von langfristigen Zielgrößen abhängig. Somit ist die Nachhaltigkeit der variablen Vergütung gewährleistet. Darüber hinaus wird dem Erfordernis der Nachhaltigkeit durch die vom Aufsichtsrat zu berücksichtigenden Kriterien des § 87 AktG und des Deutschen Corporate Governance Kodex bei der Festsetzung des individuellen Tantiemeteils Rechnung getragen.

Die Festsetzung der zeitanteiligen Tantieme für Herrn Dr. Bernotat richtete sich – in Abweichung von dem vorstehend Beschriebenen – noch nach dem vorherigen Tantiemesystem, das bis einschließlich 2009 für alle Vorstandsmitglieder galt. Hiernach wurde der unternehmenserfolgsabhängige Teil der Tantieme in vollem Umfang auf Basis der Zielerreichung des abgelaufenen Jahres ermittelt und ausbezahlt. Der individuelle Teil der Tantieme war nach schriftlich vereinbarten Zielen beziehungsweise Aufgabenschwerpunkten festzusetzen.

### Änderung des Tantiemesystems ab 2011

Im Zusammenhang mit der neuen Unternehmensstrategie hat der Aufsichtsrat mit Wirkung ab dem 1. Januar 2011 abermals eine Änderung des Tantiemesystems beschlossen. Zur Ermittlung der Gesamtzielerreichung wird künftig zunächst die Zielerreichung aus dem operativen Erfolg ermittelt. Sodann wird die Zielerreichung hinsichtlich des individuellen Tantiemeteils nach dem Ermessen des Aufsichtsrats festgesetzt. Beide Zielerreichungsgrade werden im Verhältnis 70 zu 30 gewichtet und sodann addiert. Das so ermittelte Zwischenergebnis wird schließlich mit einem auf der erzielten Kapitalrendite beruhenden Wertschöpfungsfaktor multipliziert.

Bemessungsgröße für die Zielerreichung aus dem operativen Erfolg sind künftig die erzielten Erträge vor Zinsen, Steuern und Abschreibungen (Adjusted EBITDA). Den Zielwert bildet die vom Aufsichtsrat genehmigte Planung (Budget) für das jeweilige Jahr. Die Zielerreichung beträgt 100 Prozent, wenn das tatsächlich erzielte Adjusted EBITDA diesem Zielwert entspricht. Fällt es um 30 Prozentpunkte oder mehr dahinter zurück, dann beträgt die Zielerreichung insoweit 0 Prozent. Ist das Adjusted EBITDA mindestens 30 Prozentpunkte höher, dann beträgt die Zielerreichung 200 Prozent. Zwischenwerte werden linear interpoliert.

Bemessungsgröße für den Wertschöpfungsfaktor ist die erzielte durchschnittliche Kapitalrendite (ROACE). Den Zielwert bilden die gewichteten Kapitalkosten (WACC) des abgelaufenen Jahres zuzüglich eines vom Aufsichtsrat festzulegenden Zuschlags zur Erhöhung des Anspannungsgrads. Der Zuschlag liegt derzeit bei 2 Prozentpunkten. Der Wertschöpfungsfaktor beträgt 100 Prozent, wenn der tatsächlich erzielte ROACE-Wert diesem Zielwert entspricht. Fällt er um 2 Prozentpunkte oder mehr dahinter zurück, dann beträgt der Faktor 50 Prozent. Ist der ROACE mindestens 2 Prozentpunkte höher, dann beträgt der Faktor 150 Prozent. Zwischenwerte werden linear interpoliert.

Für 35 Prozent der Gesamtantieme erfolgt die Bewertung der Zielerreichung auf Basis des abgelaufenen Jahres (einjährige Bemessungsgrundlage), für weitere 35 Prozent auf Basis eines Dreijahresdurchschnitts.

### Langfristige variable Vergütung

Als langfristigen variablen Vergütungsbestandteil erhalten die Vorstandsmitglieder eine aktienbasierte Vergütung im Rahmen des E.ON Share Performance Plans. Über die Zuteilung wird jedes Jahr erneut durch den Aufsichtsrat entschieden.

Zur Sicherstellung der Nachhaltigkeit der Vorstandsvergütung im Sinne des VorstAG beträgt die Laufzeit des Plans für alle ab dem Jahr 2010 erfolgenden Zuteilungen nicht mehr wie zuvor drei, sondern vier Jahre.

Die Wertentwicklung der zugeteilten Performance-Rechte richtet sich einerseits nach der Entwicklung des E.ON-Aktienkurses und andererseits nach der relativen Performance der E.ON-Aktie im Verhältnis zum STOXX Europe 600 Utilities (Net Return). Ziel dabei ist, den Beitrag des Vorstands zur Steigerung des Unternehmenswerts zu honorieren und den langfristigen Unternehmenserfolg zu fördern. Durch diese Vergütungskomponente mit gleichzeitig langfristiger Anreizwirkung und Risikocharakter werden die Interessen des Managements mit denen der Anteilseigner sinnvoll verknüpft.

Wie beim Tantiemesystem hat der Aufsichtsrat auch für den E.ON Share Performance Plan eine Änderung beschlossen. Für Performance-Rechte, die ab 2011 zugeteilt werden, richtet sich die Wertentwicklung einerseits nach der Entwicklung des E.ON-Aktienkurses und andererseits nach der durchschnittlichen Kapitalrendite (ROACE) im Verhältnis zu den gewichteten jährlichen Kapitalkosten (WACC) zuzüglich eines je Tranche vom Aufsichtsrat festzulegenden Zuschlags.

Für eine detaillierte Darstellung der aktienbasierten Vergütung wird auf Textziffer 11 im Anhang des Konzernabschlusses verwiesen.

### Vertragliche Nebenleistungen

Als vertragliche Nebenleistungen haben die Vorstandsmitglieder Anspruch auf einen Dienstwagen mit Fahrer zur dienstlichen wie privaten Nutzung, auf Telekommunikationsmittel zur dienstlichen wie privaten Nutzung, auf eine angemessene Versicherung gegen Unfall sowie auf eine jährliche ärztliche Untersuchung. Weiterhin besteht für die Mitglieder des Vorstands eine Vermögensschadenhaftpflichtversicherung. Diese sieht für den Versicherungsfall einen Selbstbehalt vor. Gemäß den Vorschriften des VorstAG beträgt dieser Selbstbehalt zehn Prozent des jeweiligen Schadens, ist insgesamt jedoch pro Jahr auf 150 Prozent der Jahresfixvergütung begrenzt.

### Abfindungs-Cap bei vorzeitiger Beendigung der Vorstandstätigkeit

Entsprechend dem Deutschen Corporate Governance Kodex besteht bei allen Vorstandsmitgliedern ein sogenannter Abfindungs-Cap. Danach dürfen Zahlungen an ein Vorstandsmitglied aufgrund vorzeitiger Beendigung der Vorstandstätigkeit ohne wichtigen Grund im Sinne von § 626 BGB den Wert von zwei Jahresgesamtvergütungen nicht überschreiten und nicht mehr als die Restlaufzeit des Anstellungsvertrags vergüten.

Bei Herrn Dr. Bernotat war die Einfügung eines Abfindungs-Caps nicht erforderlich, da er zum Ablauf des April 2010 planmäßig in den Ruhestand getreten ist, sodass keine Abfindung wegen vorzeitiger Vertragsbeendigung in Betracht kam.

### Change-in-Control-Klauseln

Im Berichtsjahr bestanden mit allen Vorstandsmitgliedern Change-in-Control-Vereinbarungen. Beim vorzeitigen Verlust der Vorstandsposition aufgrund eines Kontrollwechsels (Change-in-Control-Ereignis) haben die Mitglieder des Vorstands einen Anspruch auf Zahlung von Abgeltungs- und Abfindungsleistungen.

Die Change-in-Control-Regelung nimmt einen Kontrollwechsel in folgenden drei Fallgestaltungen an: Ein Dritter erwirbt mindestens 30 Prozent der Stimmrechte und erreicht damit die Pflichtangebotsschwelle gemäß dem WpÜG; die Gesellschaft schließt als abhängiges Unternehmen einen Unternehmensvertrag ab; die Gesellschaft wird mit einem anderen Unternehmen verschmolzen. Der Anspruch auf die Abgeltungs- und Abfindungsleistungen entsteht, wenn der Dienstvertrag des Vorstandsmitglieds innerhalb von 12 Monaten nach dem Kontrollwechsel durch einvernehmliche Beendigung, Zeitablauf oder durch Kündigung des Vorstandsmitglieds endet, im letzteren Fall aber nur, wenn seine Vorstandsposition infolge des Kontrollwechsels wesentlich berührt wird.

Entsprechend dem Deutschen Corporate Governance Kodex beträgt die Höhe eventueller Abfindungszahlungen 150 Prozent des Abfindungs-Caps, das heißt drei kapitalisierte Jahresgesamtbezüge (Jahresgrundgehalt, Zieltantieme und Nebenleistungen). Zur pauschalen Berücksichtigung von Abzinsung sowie Anrechnung anderweitigen Verdienstes wird die Zahlung zusätzlich um 20 Prozent gekürzt, wobei der Kürzungssatz ab dem 53. Lebensjahr stufenweise verringert wird.

### Ruhegeldansprüche

Die im Geschäftsjahr 2010 von außerhalb des E.ON-Konzerns neu bestellten Vorstandsmitglieder, Frau Stachelhaus und Herr Kildahl, haben eine beitragsorientierte Versorgungszusage nach dem „Beitragsplan E.ON Vorstand“ erhalten, dessen Bedingungen (mit Ausnahme der Beitragshöhe) dem seit 2008 für neu eingetretene Mitarbeiter und Führungskräfte der deutschen Konzerngesellschaften geltenden System entsprechen. Im Rahmen des Beitragsplans E.ON Vorstand schreibt das Unternehmen den Mitgliedern des Vorstands Beiträge auf ihrem Versorgungskonto gut. Die Höhe der jährlichen Beträge resultiert aus einem festgelegten Prozentsatz von den beitragsfähigen Bezügen (Grundvergütung und Zieltantieme). Dieser Prozentsatz wurde für den Vorstand nach Beratung durch einen externen Vergütungsexperten festgelegt. Der jährliche Basisbeitrag beträgt 13 Prozent der beitragsfähigen Bezüge. Zweite Beitragskomponente ist ein Erfolgsbeitrag, dessen Höhe von der Differenz zwischen dem Konzern-ROCE und den

Kapitalkosten des Vorjahres abhängig ist. Der Erfolgsbeitrag beträgt mindestens 1 Prozent und höchstens 6 Prozent der beitragsfähigen Bezüge. Dritte Komponente ist ein jährlicher Matchingbeitrag in Höhe von 4 Prozent der beitragsfähigen Bezüge. Voraussetzung für die Gewährung des Matchingbeitrags ist, dass das Vorstandsmitglied seinerseits einen Mindestbeitrag in gleicher Höhe durch Entgeltumwandlung leistet. Der durch das Unternehmen finanzierte Matchingbeitrag wird ausgesetzt, wenn und solange die positive Differenz zwischen Konzern-ROCE und Kapitalkosten ab dem dritten Jahr in Folge geringer als 0 Prozentpunkte ist. Die in einem Kalenderjahr für ein Vorstandsmitglied geleisteten Beiträge werden unter Verwendung eines für jedes Jahr anhand des Renditeniveaus langfristiger Bundesanleihen ermittelten Zinssatzes in einen auf Endalter 62 berechneten Kapitalbaustein umgerechnet. Im Versorgungsfall kommt das Guthaben des Versorgungskontos nach Wahl des Vorstandsmitglieds oder der Hinterbliebenen als lebenslange Rente, in Raten oder als Einmalbetrag zur Auszahlung. Im Falle der Verrentung wird die monatliche Rente so festgesetzt, dass ihr Barwert im Zeitpunkt des Versorgungsfalls, frühestens jedoch zum Zeitpunkt der Beendigung der Zahlungen aus dem Dienstvertrag an das Vorstandsmitglied beziehungsweise seine Hinterbliebenen unter Berücksichtigung einer Dynamisierung von 1 Prozent jährlich dem Versorgungsguthaben entspricht.

Für Herrn Dr. Teyssen, Herrn Prof. Dr. Maubach, Herrn Dr. Schenck, Herrn Dr. Reutersberg und die im Geschäftsjahr ausgeschiedenen Vorstandsmitglieder Herrn Dr. Bernotat, Herrn Dänzer-Vanotti und Herrn Feldmann gelten hinsichtlich ihrer Ruhegeldansprüche die nachfolgenden Ausführungen:

Diese Mitglieder des Vorstands haben nach dem Ausscheiden aus dem Unternehmen in drei Pensionsfällen einen Anspruch auf Ruhegeldzahlungen: bei Ausscheiden mit oder nach Erreichen der Regelaltersgrenze von 60 Jahren, bei Ausscheiden wegen dauerhafter Arbeitsunfähigkeit sowie im Fall der gesellschaftsseitig veranlassten vorzeitigen Beendigung oder Nichtverlängerung des Dienstvertrags (sogenannter Dritter Pensionsfall).

Im Fall des Erreichens der Regelaltersgrenze und bei dauerhafter Arbeitsunfähigkeit wird das Ruhegeld ab Eintritt des jeweiligen Pensionsfalls gezahlt und beträgt abhängig von der Dauer der Vorstandstätigkeit zwischen 50 und 75 Prozent des letzten Grundgehalts.

Im Dritten Pensionsfall beträgt das reguläre Ruhegeld ebenfalls zwischen 50 und 75 Prozent des letzten Grundgehalts und wird ab Vollendung des 60. Lebensjahrs gezahlt. Für die Zeit vom Ausscheiden bis zur Vollendung des 60. Lebensjahrs erhält das ausgeschiedene Vorstandsmitglied ein gekürztes vorzeitiges Ruhegeld (Übergangsgeld), wenn es im Zeitpunkt des Ausscheidens mehr als fünf Jahre in einer Topmanagement-Position im E.ON-Konzern tätig war und wenn die Ursache der vorzeitigen Beendigung oder Nichtverlängerung nicht auf sein Verschulden oder die Ablehnung eines mindestens gleichwertigen Angebots zur Vertragsverlängerung zurückgeht. Die Höhe des Übergangsgelds richtet sich zunächst ebenfalls nach dem durch die Dauer der Vorstandstätigkeit erdienten Prozentsatz von 50 bis 75 Prozent des letzten Grundgehalts. Der ermittelte Betrag wird dann um das Verhältnis der tatsächlichen gegenüber der möglichen Dauer der Tätigkeit im Topmanagement des E.ON-Konzerns bis zur Regelaltersgrenze gekürzt. Hiervon abweichend sahen die Vorstandsverträge, welche die Gesellschaft vor dem Geschäftsjahr 2006 abgeschlossen hatte, keine Kürzung des Übergangsgelds vor.

Soweit ein Bezieher von Ruhegeld (oder Übergangsgeld) im Rahmen früherer Tätigkeiten Ruhegeldansprüche oder Ansprüche auf Übergangsgeld erworben hat, werden diese Ansprüche zu 100 Prozent auf die Ruhegeld- beziehungsweise Übergangsgeldzahlungen der Gesellschaft angerechnet. Auf das Übergangsgeld werden darüber hinaus auch anderweitige Einkünfte aus einer Erwerbstätigkeit zu 50 Prozent angerechnet.

Laufende Ruhegeldzahlungen werden jährlich gemäß der Entwicklung des Verbraucherpreisindex für Deutschland angepasst.

Nach dem Tod eines aktiven oder ehemaligen Vorstandsmitglieds wird ein vermindertes Ruhegeld als Hinterbliebenenversorgung ausgezahlt. Witwen erhalten lebenslang 60 Prozent des Ruhegeldes, welches das Vorstandsmitglied am Todestag bezogen hat beziehungsweise bezogen hätte, wenn der Pensionsfall an diesem Tag eingetreten wäre. Das Witwengeld entfällt bei Wiederverheiratung. Unterhaltsberechtigten Kinder erhalten mindestens bis zur Erreichung des 18. Lebensjahres und darüber hinaus längstens bis zum 25. Lebensjahr für die Dauer der Schul- oder Berufsausbildung 20 Prozent des Ruhegeldes, welches das Vorstandsmitglied am Todestag bezogen hat beziehungsweise bezogen hätte. Vor dem Jahr 2006 erteilte Zusagen sehen abweichend hiervon Waisengelder in Höhe von 15 Prozent des Ruhegeldes vor. Übersteigen Witwen- und Waisengelder zusammen den Betrag des Ruhegeldes, erfolgt eine anteilige Kürzung der Waisengelder um den übersteigenden Betrag.

Die nachfolgende Darstellung vermittelt eine Übersicht über die Höhe der aktuellen Ruhegeldanwartschaften der Vorstandsmitglieder. Dabei werden auch die jeweiligen Zuführungen zu den Pensionsrückstellungen individuell aufgeführt. Hierbei handelt es sich nicht um gezahlte Vergütung, sondern auf Basis von IFRS ermittelten rechnerischen Aufwand. Darüber hinaus wird der Barwert der Pensionsverpflichtungen auf Basis der im Rahmen der internationalen Rechnungslegungsstandards

verwendeten Defined Benefit Obligation mit einem Rechnungszins von 5 Prozent aufgeführt.

Entsprechend den Vorschriften des Gesetzes zur Verbesserung der betrieblichen Altersversorgung (BetrAVG) tritt Unverfallbarkeit von Pensionsanwartschaften der Vorstandsmitglieder erst nach einer Zusagedauer von 5 Jahren ein. Dies gilt für beide im Vorstehenden beschriebenen Systeme.

| Vorstandspensionen                                      |                                                              |              |                                                               |                        |                               |
|---------------------------------------------------------|--------------------------------------------------------------|--------------|---------------------------------------------------------------|------------------------|-------------------------------|
|                                                         | Aktuelle Höhe der Ruhegeldanwartschaft zum 31. Dezember 2010 |              | Höhe der Zuführung zu den Pensionsrückstellungen im Jahr 2010 |                        | Barwert zum 31. Dezember 2010 |
|                                                         | in % des Grundgehalts                                        | absolut in € | in €                                                          | davon Zinsaufwand in € | in €                          |
| Dr. Wulf H. Bernotat (bis 30. April 2010) <sup>1)</sup> | -                                                            | -            | 536.953                                                       | 536.953                | 13.581.803                    |
| Dr. Johannes Teyssen                                    | 70                                                           | 784.000      | 758.605                                                       | 397.322                | 8.590.587                     |
| Christoph Dänzer-Vanotti (bis 12. Mai 2010)             | 50                                                           | 375.000      | 472.738                                                       | 173.020                | 5.171.717                     |
| Lutz Feldmann (bis 12. Mai 2010)                        | 60                                                           | 450.000      | 263.869                                                       | 195.644                | 2.854.189                     |
| Jørgen Kildahl (seit 13. Mai 2010) <sup>2)</sup>        | -                                                            | -            | 209.495                                                       | -                      | 209.495                       |
| Prof. Dr. Klaus-Dieter Maubach (seit 13. Mai 2010)      | 50                                                           | 350.000      | 280.475                                                       | 88.180                 | 3.004.887                     |
| Dr. Bernhard Reutersberg (seit 11. August 2010)         | 60                                                           | 420.000      | 379.517                                                       | 56.323                 | 6.810.972                     |
| Dr. Marcus Schenck                                      | 50                                                           | 375.000      | 439.221                                                       | 62.014                 | 1.763.103                     |
| Regine Stachelhaus (seit 24. Juni 2010) <sup>2)</sup>   | -                                                            | -            | 218.524                                                       | -                      | 218.524                       |

1) Pensionseintritt zum 1. Mai 2010  
2) Beitragsplan E.ON-Vorstand

## Die Vergütung des Vorstands

Im Jahr 2010 wurde keine generelle Anpassung der Vergütungshöhe vorgenommen. Mit der Ernennung von Herrn Dr. Teyssen zum Vorstandsvorsitzenden zum 1. Mai 2010 hat der Aufsichtsrat für Herrn Dr. Teyssen eine individuelle Gehaltsanpassung beschlossen.

Der Aufsichtsrat hat in seiner Sitzung am 8. März 2011 die Angemessenheit der Vergütung des Vorstands festgestellt. Dabei hat er gemäß den Vorgaben des VorstAG insbesondere

die horizontale und vertikale Üblichkeit geprüft. Hierzu wurde die Vergütung einerseits einem Marktvergleich mit Unternehmen ähnlicher Branche und Größe unterzogen. Andererseits wurde die Vergütung des Vorstands in Relation zu der Vergütung sämtlicher nachgeordneten Hierarchiestufen im E.ON-Konzern betrachtet.

Die Gesamtbezüge des Vorstands betrugen im Geschäftsjahr 2010 15,4 Mio € (2009: 16,1 Mio €). Für die einzelnen Mitglieder des Vorstands ergibt sich folgende Gesamtvergütung:

| Gesamtvergütung des Vorstands für 2010             |                  |                  |                 |                                                    |                   |                                                  |
|----------------------------------------------------|------------------|------------------|-----------------|----------------------------------------------------|-------------------|--------------------------------------------------|
| in €                                               | Grundvergütung   | Tantieme         | Sonstige Bezüge | Wert der gewährten Performance-Rechte (5. Tranche) | Summe             | Anzahl gewährter Performance-Rechte (5. Tranche) |
|                                                    |                  |                  |                 |                                                    |                   |                                                  |
| Dr. Wulf H. Bernotat (bis 30. April 2010)          | 413.333          | 600.000          | 7.450           | 306.170                                            | 1.326.953         | 16.514                                           |
| Dr. Johannes Teyssen                               | 1.080.000        | 2.337.000        | 27.966          | 793.772                                            | 4.238.738         | 42.814                                           |
| Christoph Dänzer-Vanotti (bis 12. Mai 2010)        | 274.194          | 402.150          | 6.300           | 435.449                                            | 1.118.093         | 23.487                                           |
| Lutz Feldmann (bis 12. Mai 2010)                   | 274.194          | 402.150          | 11.558          | 435.449                                            | 1.123.351         | 23.487                                           |
| Jørgen Kildahl (seit 13. Mai 2010)                 | 444.444          | 686.000          | 48.006          | 272.149                                            | 1.450.599         | 14.679                                           |
| Prof. Dr. Klaus-Dieter Maubach (seit 13. Mai 2010) | 421.213          | 786.000          | 60.379          | 34.021                                             | 1.301.613         | 1.835                                            |
| Dr. Bernhard Reutersberg (seit 11. August 2010)    | 273.106          | 421.000          | 9.847           | 34.021                                             | 737.974           | 1.835                                            |
| Dr. Marcus Schenck                                 | 750.000          | 1.530.000        | 26.351          | 544.297                                            | 2.850.648         | 29.358                                           |
| Regine Stachelhaus (seit 24. Juni 2010)            | 363.258          | 563.000          | 31.964          | 272.149                                            | 1.230.371         | 14.679                                           |
| <b>Summe</b>                                       | <b>4.293.742</b> | <b>7.727.300</b> | <b>229.821</b>  | <b>3.127.477</b>                                   | <b>15.378.340</b> | <b>168.688</b>                                   |



Die sonstigen Bezüge der Vorstandsmitglieder umfassen im Wesentlichen geldwerte Vorteile aus der privaten Nutzung von Dienst-Pkw sowie in Einzelfällen die vorübergehende Übernahme von Mieten für Zweitwohnsitze sowie die entsprechende Übernahme der Lohnsteuer.

Die im Geschäftsjahr zugeteilten Rechte aus dem E.ON Share Performance Plan der 5. Tranche (Performance-Rechte) wurden mit dem beizulegenden Zeitwert (Fair Value) zum Zeitpunkt der Gewährung von 18,54 € pro Stück angegeben und in die Gesamtvergütung des Vorstands einbezogen. Für die Ermittlung dieses Werts wird ein anerkanntes finanzmathematisches Optionspreismodell (Monte-Carlo-Simulation, basierend auf einem zweidimensionalen Black-Scholes-Modell) verwendet.

Für die interne Kommunikation mit dem Vorstand und Aufsichtsrat wird statt des finanzmathematischen Wertes der sogenannte Zielwert verwendet. Der Zielwert der Zuteilung entspricht dem Auszahlungsbetrag, der sich ergibt, wenn am Ende der Laufzeit der Kurs der E.ON-Aktie gehalten wird und die Performance der E.ON-Aktie der des Vergleichsindex entspricht. Im Jahr 2010 betrug der Zielwert der Zuteilung für den Vorstandsvorsitzenden 1.166.667 €, für Herrn Dr. Schenck 0,8 Mio €, für die Herren Dänzer-Vanotti und Feldmann jeweils 0,64 Mio €, für Herrn Dr. Bernotat 0,45 Mio € und für alle weiteren Vorstandsmitglieder jeweils 0,4 Mio €.

Als ergänzende Angabe ist gemäß § 314 Abs. 1 Nr. 6 a Satz 8 HGB der Aufwand der Gesellschaft für sämtliche im aktuellen Jahr und in Vorjahren gewährten und im Geschäftsjahr bestehenden Tranchen zeitanteilig auszuweisen. Für das Berichtsjahr ergibt sich für die im Jahr 2010 bestehenden Performance-Rechte gemäß IFRS 2 folgender bilanzieller Aufwand: Herr Dr. Bernotat 1,5 Mio €, Herr Feldmann und Herr Dänzer-Vanotti jeweils 0,1 Mio €, Herr Kildahl und Frau Stachelhaus jeweils 39 T€ sowie die Herren Prof. Dr. Maubach und Dr. Reutersberg jeweils 5 T€. Für die Herren Dr. Teyssen, und Dr. Schenck ergibt sich jeweils ein Ertrag von 0,1 Mio €.

Weitere detaillierte Informationen zur aktienbasierten Vergütung der E.ON AG sind in der Textziffer 11 des Anhangs des Konzernabschlusses dargestellt.

Herr Dr. Bernotat ist mit Ablauf des 30. April 2010 aus dem Vorstand der E.ON AG ausgeschieden und in den Ruhestand getreten. Er hat nach seinem Ausscheiden sonstige Bezüge in Höhe von 86 T€ erhalten.

Die Herren Dänzer-Vanotti und Feldmann sind in beiderseitigem Einvernehmen mit Ablauf des 12. Mai 2010 aus dem Vorstand ausgeschieden. Mit beiden Herren wurden Aufhebungsverträge unter Beachtung des Abfindungs-Caps geschlossen.

Der Dienstvertrag von Herrn Dänzer-Vanotti wurde zum 30. September 2010 beendet. Seine anteilige Tantieme für das Jahr 2010 wurde auf Basis einer Zielerreichung von 100 Prozent festgesetzt. In der Zeit von der Beendigung des Vorstandsamtes bis zur Vertragsbeendigung erhielt Herr Dänzer-Vanotti dienstvertragliche Bezüge in Höhe von 713.065 €. Zur Abgeltung seiner Ansprüche für die Restlaufzeit seines bis zum 30. November 2014 laufenden Dienstvertrags wurde mit Herrn Dänzer-Vanotti eine Abfindungssumme in Höhe von 5,19 Mio € vereinbart. Ab dem 1. Oktober 2012 bis zum 30. April 2015 hat er einen dienstvertraglichen Anspruch auf ein gekürztes Ruhegeld in Höhe von 200.212 € jährlich.

Der Dienstvertrag von Herrn Feldmann wurde zum 30. Juni 2010 beendet. Seine anteilige Tantieme für das Jahr 2010 wurde auf Basis einer Zielerreichung von 100 Prozent festgesetzt. In der Zeit von der Beendigung des Vorstandsamtes bis zur Vertragsbeendigung erhielt Herr Feldmann dienstvertragliche Bezüge in Höhe von 252.685 €. Zur Abgeltung seiner Ansprüche für die Restlaufzeit seines bis zum 30. November 2014 laufenden Dienstvertrags wurde mit Herrn Feldmann eine Abfindung in Höhe von 5,29 Mio € vereinbart. Ab dem 1. Dezember 2014 bis zum 31. März 2017 hat er einen dienstvertraglichen Anspruch auf ein gekürztes Ruhegeld in Höhe von 226.380 € jährlich.

Im Geschäftsjahr 2010 bestanden keine Kredite gegenüber Vorstandsmitgliedern.

Weitere Angaben zu den Mitgliedern des Vorstands finden sich auf der Seite 187.

## Die Bezüge der ehemaligen Vorstandsmitglieder

Die Gesamtbezüge der früheren Vorstandsmitglieder und ihrer Hinterbliebenen betrugen 25,4 Mio € (Vorjahr: 9,9 Mio €).

Für die Pensionsverpflichtungen gegenüber früheren Vorstandsmitgliedern und ihren Hinterbliebenen sind 136,6 Mio € (Vorjahr: 109,1 Mio €) zurückgestellt.

### Bericht des Aufsichtsrats

Der Aufsichtsrat hat im Geschäftsjahr 2010 seine Aufgaben und Pflichten nach Gesetz, Satzung und Geschäftsordnung umfassend und sorgfältig wahrgenommen. Er hat sich intensiv mit der Lage des Unternehmens beschäftigt.

Wir haben den Vorstand bei der Führung des Unternehmens regelmäßig beraten und seine Tätigkeit kontinuierlich überwacht. In alle Geschäftsvorgänge von besonderer Bedeutung für das Unternehmen waren wir unmittelbar eingebunden und haben diese auf Basis der Berichte des Vorstands ausführlich erörtert. In vier ordentlichen und vier außerordentlichen Sitzungen des Aufsichtsrats sowie einer Informationsveranstaltung zum Thema Erneuerbare Energien haben wir uns gründlich mit allen für das Unternehmen relevanten Fragen befasst. Zudem haben wir im Rahmen von zwei Aufsichtsratssitzungen zusammen mit dem Vorstand ausführlich über mögliche Marktentwicklungen, Grundsatzthemen und die zukünftige strategische Positionierung des E.ON-Konzerns beraten. Der Vorstand hat uns regelmäßig und zeitnah sowohl schriftlich als auch mündlich umfassend informiert. Die schriftlichen und mündlichen Berichte diskutierten wir ausführlich in unseren Sitzungen. Den Beschlussvorschlägen des Vorstands hat der Aufsichtsrat nach eingehender Prüfung und Beratung zugestimmt.

Darüber hinaus fand ein regelmäßiger Informationsaustausch zwischen dem Aufsichtsratsvorsitzenden und dem Vorstandsvorsitzenden statt. Auf diese Weise war der Aufsichtsrat stets über die aktuelle operative Entwicklung der Konzerngesellschaften, die wesentlichen Geschäftsvorfälle und die Entwicklung der Finanzkennzahlen informiert.

### Strategische Neuausrichtung und neue Konzernstruktur

Der Vorstand berichtete ausführlich über die strategische Neuausrichtung des E.ON-Konzerns, über die wir intensiv berieten. Der Aufsichtsrat unterstützt den neuen Kurs, mit dem E.ON sich in Europa künftig auf Wettbewerbsgeschäfte konzentrieren und dabei in zusammenwachsenden Energiemärkten verstärkt Synergien zwischen den Geschäften und Geschäftsfeldern nutzen wird. Außerdem liegt künftig ein neuer strategischer Schwerpunkt auf dem gezielten und substanziellen Aufbau des Geschäfts in den starken Wachstumsregionen außerhalb Europas. E.ON wird so in Zukunft als global tätiger,

spezialisierte Anbieter von Energielösungen auftreten. In Zusammenhang mit der neuen Strategie informierte uns der Vorstand auch umfassend über das Konzernprojekt Steering & Leadership. In diesem Projekt wurden neue Möglichkeiten untersucht, wie E.ON die Bedürfnisse seiner Strom- und Gaskunden und die Erwartungen der Stakeholder effizienter und effektiver erfüllen kann. Das Ergebnis eingehender Analysen ist die neue Struktur des E.ON-Konzerns. Seit Januar 2011 ist das Geschäft der bisherigen Market Units in globalen und regionalen Einheiten zusammengefasst. Zusätzlich wurde die globale Einheit „Neubau & Technologie“ geschaffen und Unterstützungsfunktionen (wie IT, Einkauf etc.) gebündelt.

Außerdem berichtete der Vorstand ausführlich über verschiedene Desinvestitionsprojekte. Dazu gehörten insbesondere die im November 2010 erfolgreich abgeschlossene Veräußerung von E.ON US-Midwest sowie der Verkauf der nach dem Erwerb des sibirischen Erdgasfelds Yushno Russkoje im Jahr 2009 verbliebenen Beteiligung an dem russischen Unternehmen Gazprom. Darüber hinaus berichtete der Vorstand über den jeweiligen Stand des Verkaufsprozesses der ehemaligen Thüga-Beteiligungen. Ferner informierte der Vorstand kontinuierlich über den aktuellen Stand des Effizienzsteigerungsprogramms PerformtoWin.

### Energiepolitische Rahmenbedingungen und Verfahren

Der Vorstand informierte uns detailliert über die gegenwärtige Marktsituation sowie die zunehmende politische Einflussnahme und die damit verbundenen Herausforderungen und Auswirkungen auf unsere Märkte und den E.ON-Konzern. Wesentliche Themen waren dabei das Energiekonzept der Bundesregierung, die Einführung der Brennelementesteuer und die Laufzeitverlängerung für Kernkraftwerke. Auch die ab 2013 vorgesehene Vollauktionierung von CO<sub>2</sub>-Zertifikaten war Gegenstand der Informationen. Zudem wurden die juristischen Auseinandersetzungen im Zusammenhang mit dem Bau des Steinkohlekraftwerks in Datteln ausführlich behandelt.



Darüber hinaus berichtete der Vorstand über die Erfüllung der Verpflichtungszusage des E.ON-Konzerns gegenüber der EU-Kommission zur Abgabe von Erzeugungskapazitäten sowie des Höchstspannungsnetzes. Ferner informierte der Vorstand über die Entscheidung der EU-Kommission, die Verpflichtungszusagen im Rahmen des Verfahrens gegen E.ON Ruhrgas und Open Grid Europe (vormals E.ON Gastransport) im Zusammenhang mit der Netznutzung als verbindlich zu erklären. Auch stellte der Vorstand regelmäßig ausführlich die laufenden Kartellverfahren im Strom- und Gasbereich dar.

## Wirtschaftliche Lage und Mittelfristplanung

Die wirtschaftliche Lage der Konzerngesellschaften haben wir vor dem Hintergrund der Entwicklung auf den nationalen und internationalen Energiemärkten, über die uns der Vorstand kontinuierlich informiert hat, ausführlich besprochen.

Wir berieten außerdem eingehend die Mittelfristplanung des Konzerns für die Jahre 2011 bis 2013 einschließlich des Investitionsprogramms, dessen Finanzierung und die konzernweite Personalarbeit. Im Rahmen der diesjährigen Mittelfristplanung haben sich hinreichend spezifizierte Hinweise dafür ergeben, dass die wirtschaftliche Lage angespannt ist. In diesem Zusammenhang erläuterte der Vorstand die Analysen zur Leistungssteigerung im Konzern sowie strukturelle Maßnahmen. Der Vorstand unterrichtete uns darüber hinaus, in welchem Umfang derivative Finanzinstrumente eingesetzt wurden und wie sich deren teilweise novellierte Regulierung auf das Geschäft auswirkt.

Weitere Themen unserer Beratungen waren ferner die Auswirkungen der weltweiten Finanz- und Wirtschaftskrise auf die wirtschaftliche Lage von E.ON und die verschiedenen notwendigen Maßnahmen zum Erhalt der kurzfristigen Handlungsfähigkeit des Konzerns. Der Vorstand informierte kontinuierlich detailliert über die marktwirtschaftliche Entwicklung. So sind beispielsweise die Rohstoffpreise deutlich niedriger als noch vor wenigen Jahren und das Gasgeschäft ist von Umbrüchen gekennzeichnet. Daneben hat uns der Vorstand regelmäßig über die Ratingsituation des Konzerns informiert.

## Corporate Governance

Der Aufsichtsrat hat auch im Geschäftsjahr 2010 intensiv die Weiterentwicklung der Corporate Governance bei E.ON behandelt. In diesem Zusammenhang haben wir im Rahmen der Umsetzung des Gesetzes zur Angemessenheit der Vorstandsvergütung (VorstAG) die Angemessenheit und Üblichkeit der Vergütung des Vorstands überprüft. Im Zusammenhang mit den

neuen Empfehlungen des Deutschen Corporate Governance Kodex haben wir Ziele für die Zusammensetzung des Aufsichtsrats ausführlich diskutiert und abschließend formuliert. Diese werden in der Erklärung zur Unternehmensführung auf den Seiten 164 und 165 des Geschäftsberichts veröffentlicht. Weiterhin haben wir die Effizienz der Arbeit des Aufsichtsrats erörtert. Darüber hinaus haben wir uns intensiv mit dem Bericht des Aufsichtsrats an die Hauptversammlung und dem Corporate-Governance-Bericht befasst. Wir haben zudem überprüft, dass die Corporate-Governance-Grundsätze gemäß der am 14. Dezember 2009 abgegebenen Entsprechenserklärung im Geschäftsjahr 2010 von der E.ON AG eingehalten wurden. Außerdem haben wir gemeinsam mit dem Vorstand erklärt, dass sämtliche Empfehlungen des Deutschen Corporate Governance Kodex in seiner aktuellen Fassung eingehalten werden. Die Entsprechenserklärung zum Deutschen Corporate Governance Kodex gemäß § 161 Aktiengesetz ist im Internet unter [www.eon.com](http://www.eon.com) und als Teil der „Erklärung zur Unternehmensführung“ auf Seite 162 des Geschäftsberichts veröffentlicht.

## Sitzungen der Ausschüsse

Das Präsidium des Aufsichtsrats hat insgesamt sechsmal getagt. Insbesondere wurden in diesem Gremium die Sitzungen des Aufsichtsrats und die Hauptversammlung der E.ON AG vorbereitet. Unter anderem hat das Präsidium dem Aufsichtsrat die Bestellung der neuen Vorstandsmitglieder im Mai und August 2010 empfohlen und den neuen Geschäftsverteilungsplan für den Vorstand beschlossen. Darüber hinaus hat es die Behandlung des Gesetzes zur Angemessenheit der Vorstandsvergütung (VorstAG) und des Vergütungssystems des Vorstands im Aufsichtsrat umfassend vorbereitet.

Der Finanz- und Investitionsausschuss kam in vier Sitzungen zusammen und hat in einem Umlaufverfahren über die Veräußerung der Anteile an dem schweizerischen Energieunternehmen BKW beschlossen. Schwerpunkte der ausführlichen Berichterstattung des Vorstands und Gegenstand intensiver Beratungen waren der Verkauf der Market Unit US-Midwest und die Veräußerung der Gazprom-Beteiligung. Ferner wurden die Finanzierungs- und Verschuldungssituation, die für 2010 vorgesehenen Finanzierungsmaßnahmen, die Refinanzierung der syndizierten Kreditlinie sowie die Mittelfristplanung für die Jahre 2011 bis 2013 behandelt. In den Sitzungen wurden darüber hinaus die entsprechenden Beschlüsse des Aufsichtsrats zu zustimmungspflichtigen Geschäften vorbereitet beziehungsweise im Rahmen der Bestimmungen der Geschäftsordnung selbst gefasst.

Der Prüfungs- und Risikoausschuss erörterte in sechs Sitzungen insbesondere den handelsrechtlichen Jahresabschluss, den Konzernabschluss und die Quartalsabschlüsse der E.ON AG nach International Financial Reporting Standards (IFRS) sowie Fragen der Rechnungslegung, des Risikomanagementsystems, der Risikolage und der Zusammenarbeit mit den Abschlussprüfern. Insbesondere wurden im Rahmen der Abschlüsse unter anderem der Gewinnverwendungsvorschlag, die Prüfungskosten und Prüfungsschwerpunkte des Abschlussprüfers sowie die Ergebnisse aus den Goodwill-Impairment-Tests ausführlich behandelt. Die Prüfung des internen Kontrollsystems und das Risikokontrollsystem bildeten weitere Prüfungsschwerpunkte. Ferner befasste sich der Ausschuss ausführlich mit dem Bericht aus dem Risikokomitee, den Prüfungs- und Beratungsleistungen des Abschlussprüfers, der Arbeit der internen Revision einschließlich der Prüfungsplanung und -schwerpunkte für 2011, dem Compliance-Bericht und dem E.ON-Compliance-System sowie anderen prüfungsrelevanten Themen. Der Vorstand berichtete zudem über schwebende Verfahren sowie rechtliche und regulatorische Risiken für das Geschäft des E.ON-Konzerns. Darüber hinaus hat sich der Ausschuss intensiv mit möglichen Auswirkungen des Kartellverfahrens im Zusammenhang mit der MEGAL-Pipeline befasst und Diskussionen im Aufsichtsrat hierzu vorbereitet.

### **Prüfung und Feststellung des Jahresabschlusses, Billigung des Konzernabschlusses, Gewinnverwendungsvorschlag**

Der Jahresabschluss der E.ON AG zum 31. Dezember 2010 sowie der mit dem Konzernlagebericht zusammengefasste Lagebericht wurden durch den von der Hauptversammlung gewählten und vom Aufsichtsrat beauftragten Abschlussprüfer, PricewaterhouseCoopers Aktiengesellschaft, Wirtschaftsprüfungsgesellschaft, Düsseldorf, geprüft und mit einem uneingeschränkten Bestätigungsvermerk versehen. Dies gilt auch für den Konzernabschluss, der nach den IFRS aufgestellt ist. Der vorliegende IFRS-Konzernabschluss befreit von der Pflicht, einen Konzernabschluss nach deutschem Recht aufzustellen. Ferner prüfte der Abschlussprüfer das Risikofrüherkennungssystem der E.ON AG. Diese Prüfung ergab, dass das System seine Aufgaben erfüllt. Die Abschlüsse, der zusammengefasste Lagebericht sowie die Prüfungsberichte des Abschlussprüfers wurden nach Vorprüfung durch den Prüfungs- und Risikoausschuss allen Mitgliedern des Aufsichtsrats ausgehändigt. Sie wurden im Prüfungs- und Risikoausschuss und in der Bilanzsitzung des Aufsichtsrats – jeweils in Gegenwart des Abschlussprüfers – ausführlich besprochen.

Den handelsrechtlichen Jahresabschluss, den Konzernabschluss und den zusammengefassten Lagebericht der E.ON AG sowie den Vorschlag des Vorstands für die Verwendung des Bilanzgewinns haben wir – in Kenntnis und unter Berücksichtigung des Berichts des Abschlussprüfers und der Ergebnisse der Vorprüfung durch den Prüfungs- und Risikoausschuss – in unserer Sitzung am 8. März 2011 geprüft. Es bestanden keine Einwände. Den Bericht des Abschlussprüfers haben wir zustimmend zur Kenntnis genommen.

Den vom Vorstand aufgestellten Jahresabschluss der E.ON AG sowie den Konzernabschluss haben wir gebilligt. Der Jahresabschluss ist damit festgestellt. Dem zusammengefassten Lagebericht, insbesondere den Aussagen zur weiteren Unternehmensentwicklung, stimmen wir zu.

Den Gewinnverwendungsvorschlag des Vorstands, der eine Dividende von 1,50 € pro dividendenberechtigter Aktie vorsieht, haben wir auch im Hinblick auf die Liquidität der Gesellschaft sowie ihre Finanz- und Investitionsplanung geprüft. Der Vorschlag entspricht dem Gesellschaftsinteresse unter Berücksichtigung der Aktionärsinteressen. Daher schließen wir uns dem Gewinnverwendungsvorschlag des Vorstands an.

### **Personelle Veränderungen im Aufsichtsrat und seinen Ausschüssen**

Herr Hubertus Schmoldt hat sein Amt als stellvertretender Vorsitzender des Aufsichtsrats zum Ablauf der Hauptversammlung am 6. Mai 2010 niedergelegt. Er bleibt jedoch Mitglied des Aufsichtsrats. Wir danken Herrn Schmoldt für die vertrauensvolle Zusammenarbeit als stellvertretender Vorsitzender des Aufsichtsrats. Der Aufsichtsrat wählte in der Sitzung am 9. März 2010 mit Ablauf der Hauptversammlung 2010 für die Dauer der verbleibenden Amtszeit Herrn Erhard Ott zu seinem stellvertretenden Vorsitzenden. Herr Ott hatte im Vorfeld der Sitzung mitgeteilt, dass er für den Fall seiner Wahl zum stellvertretenden Aufsichtsratsvorsitzenden seine Mitgliedschaft im Finanz- und Investitionsausschuss zum Ablauf der Hauptversammlung 2010 niederlegen werde. Der Aufsichtsrat wählte daher in der Folge mit Ablauf der Hauptversammlung 2010 für die Dauer der verbleibenden Amtszeit Herrn Wolf-Rüdiger Hinrichsen zum Mitglied des Finanz- und Investitionsausschusses. Da Herr Ott stellvertretender Ausschussvorsitzender war, ist auch hier eine Nachwahl zum Ablauf der Hauptversammlung 2010 notwendig gewesen. Die Mitglieder des Finanz- und Investitionsausschusses wählten Herrn Hans Wollitzer mit Ablauf der Hauptversammlung 2010 zum stellvertretenden Ausschussvorsitzenden.

Herr Jens P. Heyerdahl schied zum Ablauf des 30. Juni 2010 aus dem Aufsichtsrat aus. Er hat E.ON in diesem Gremium mit klugem Rat und unternehmerischer Weitsicht begleitet. Wir danken ihm für sein Engagement. Als sein Nachfolger bis zum Ablauf der nächsten Hauptversammlung wurde Herr Bård Mikkelsen mit Beschluss des Amtsgerichts Düsseldorf vom 19. Juli 2010 zum Mitglied des Aufsichtsrats bestellt.

In der Aufsichtsratssitzung am 13. Dezember 2010 haben die Herren Ulrich Hartmann und Professor Dr. Wilhelm Simson angekündigt, ihre jeweiligen Aufsichtsratsmandate mit Abschluss der nächsten Hauptversammlung am 5. Mai 2011 niederzulegen. Damit verbunden ist ein Wechsel im Vorsitz des Aufsichtsrats und in verschiedenen Ausschüssen. Beide Herren waren nach ihrem Ausscheiden aus dem Vorstand der Gesellschaft seit 2003 Mitglieder des Aufsichtsrats der E.ON AG, Herr Hartmann als Vorsitzender des Aufsichtsrats und des Präsidial-, Nominierungs- sowie des Finanz- und Investitionsausschusses und als Mitglied im Prüfungs- und Risikoausschuss.

### Personelle Veränderungen im Vorstand

Der Aufsichtsrat hatte bereits in seiner Sitzung am 10. August 2009 Herrn Dr. Johannes Teyssen mit Wirkung zum 1. Mai 2010 zum Vorsitzenden des Vorstands der E.ON AG bestellt. Herr Dr. Teyssen wurde Nachfolger von Herrn Dr. Wulf H. Bernotat, dessen Bestellung am 30. April 2010 endete. Wir danken Herrn Dr. Bernotat auch an dieser Stelle für seine Verdienste um den Konzern. Er hat die Fokussierung von E.ON zu einem reinen Energieunternehmen maßgeblich vorangetrieben und sich mit großem persönlichem Engagement für die erfolgreiche strategische Weiterentwicklung und internationale Ausrichtung des Konzerns eingesetzt.

In seiner Sitzung am 12. Mai 2010 hat der Aufsichtsrat einem organisatorischen und personellen Umbau des Vorstands zugestimmt und drei neue Vorstandsmitglieder bestellt. Der E.ON-Vorstand soll noch enger die operativen Geschäfte lenken und verantworten sowie angesichts sich schnell verändernder technischer und geschäftlicher Umfeldbedingungen die Innovationskraft des Konzerns stärken.

Die konventionelle und erneuerbare Stromerzeugung, das Gasgeschäft, das weltweite Trading sowie die energiewirtschaftliche Optimierung des Konzerns über alle Regionen und Produkte hinweg werden aus einem neuen Vorstandsressort zentral gesteuert. Hierfür hat der Aufsichtsrat Herrn Jørgen Kildahl bestellt.

Alle das Kerngeschäft unterstützenden Funktionen, insbesondere Personal, IT und Einkauf, verantwortet in der Konzernleitung Frau Regine Stachelhaus, die auch Arbeitsdirektorin des E.ON-Konzerns ist. Daneben ist sie im Vorstand für Recht und Compliance zuständig.

Zusätzlich wurde ein gesondertes Vorstandsressort für Technologie geschaffen, das von Herrn Professor Dr. Klaus-Dieter Maubach geleitet wird. Herr Professor Dr. Maubach übernimmt neben der Steuerung aller Forschungs- und Entwicklungsaktivitäten und -themen auch die Verantwortung für E.ON New Build & Technology. Von dieser internationalen Geschäftseinheit des Konzerns werden alle weltweiten Großinvestitionen geführt und realisiert.

Herr Dr. Marcus Schenck übernahm als CFO neben seinen bisherigen Aufgaben auch die Verantwortung für das Controlling, alle konzernweiten M&A-Aktivitäten und E.ON International Energy. Die IT-Aktivitäten wurden dem Ressort von Frau Stachelhaus zugeordnet.

Der Aufsichtsrat hat ferner Herrn Dr. Bernhard Reutersberg in seiner Sitzung am 10. August 2010 mit Wirkung zum 11. August 2011 zum Vorstand des Unternehmens bestellt. Herr Dr. Reutersberg verantwortet in seiner neuen Funktion die Führung der E.ON-Landesgesellschaften. Er steuert somit die Verteilungs- und Vertriebsgeschäfte des Konzerns sowie die politischen und regulatorischen Prozesse. Darüber hinaus koordiniert er die energiewirtschaftlichen Aktivitäten im russischen Markt.

Die Herren Lutz Feldmann und Christoph Dänzer-Vanotti schieden am 12. Mai 2010 aus dem E.ON-Vorstand aus. Wir danken Herrn Feldmann und Herrn Dänzer-Vanotti für ihr großes persönliches Engagement bei der erfolgreichen Fortentwicklung des E.ON-Konzerns.

Der Aufsichtsrat dankt den Vorständen, Betriebsräten sowie allen Mitarbeiterinnen und Mitarbeitern des E.ON-Konzerns für ihren Einsatz und die geleistete Arbeit sowie die im Geschäftsjahr 2010 erbrachten Leistungen.

Düsseldorf, den 8. März 2011

Der Aufsichtsrat

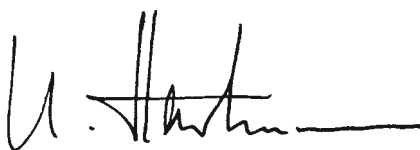

Ulrich Hartmann  
Vorsitzender

## Aufsichtsrat (einschließlich Angaben zu weiteren Mandaten von E.ON-Aufsichtsratsmitgliedern)

Ehrendvorsitzender des  
Aufsichtsrats

**Prof. Dr. Günter Vogelsang**  
Düsseldorf

Aufsichtsrat

**Ulrich Hartmann**

Vorsitzender des Aufsichtsrats der  
E.ON AG

- Deutsche Lufthansa AG  
(bis 29. April 2010)
- Henkel AG & Co. KGaA  
(bis 19. April 2010)

**Erhard Ott**

stellv. Vorsitzender des Aufsichtsrats  
der E.ON AG

- E.ON Energie AG  
(bis 31. Dezember 2010)
- Bremer Lagerhaus-Gesellschaft AG

**Werner Bartoschek**

Vorsitzender des Konzernbetriebsrats  
der E.ON Ruhrgas AG

- E.ON Ruhrgas AG

**Sven Bergelin**

Bundesfachgruppenleiter Energiewirt-  
schaft ver.di

- E.ON Avacon AG  
(bis April 2010)
- E.ON Energie AG
- E.ON Kernkraft GmbH

**Gabriele Gratz**

Vorsitzende des Betriebsrats  
der E.ON Ruhrgas AG

- E.ON Ruhrgas AG

**Jens P. Heyerdahl d.y.**  
(bis 30. Juni 2010)

Jurist

- Berner Gruppen AS
- Hamang Papierfabrik AS

**Wolf-Rüdiger Hinrichsen**

Vorsitzender des Betriebsrats der  
E.ON AG

**Ulrich Hocker**

Hauptgeschäftsführer der Deutsche  
Schutzvereinigung für Wertpapier-  
besitz e.V.

- Deutsche Telekom AG
- Feri Finance AG
- Gildemeister AG
- Gartmore SICAV
- Phoenix Mecano AG  
(Präsident des Verwaltungsrats)

**Prof. Dr. Ulrich Lehner**

Mitglied des Gesellschafterausschusses  
der Henkel AG & Co. KGaA

- Deutsche Telekom AG (Vorsitz)
- Henkel Management AG
- HSBC Trinkaus & Burkhardt AG
- Porsche Automobil Holding SE
- ThyssenKrupp AG
- Dr. Oetker KG (Beirat)
- Henkel AG & Co. KGaA  
(Gesellschafterausschuss)
- Novartis AG (Verwaltungsrat)

**Bård Mikkelsen**

(seit 19. Juli 2010)

Kaufmann, ehemaliger Vorsitzender des  
Vorstands der Statkraft AS

- Ganger Rolf ASA/Bonheur ASA  
(Gesellschafterausschuss)
- Bore Tech AB (Vorsitz)
- Cermag ASA (Vorsitz)
- Clean Energy Invest AS (Vorsitz)
- Saferoad AS
- Store Norske Spitsbergen  
Kulkompani AS (Vorsitz)
- Powel AS (Vorsitz)

**Hans Prüfer**

Vorsitzender des Konzernbetriebsrats  
der E.ON AG

**Klaus Dieter Raschke**

Vorsitzender des Konzernbetriebsrats  
der E.ON Energie AG

- E.ON Energie AG
- E.ON Kernkraft GmbH

**Dr. Walter Reitler**

Bereichsleiter HSE/CR-Steuerung  
E.ON Energie AG

- E.ON Energie AG

**Hubertus Schmoldt**

Volkswirt

- Bayer AG
- BP Europa SE
- DOW Olefinverbund GmbH
- RAG Aktiengesellschaft

Alle Angaben beziehen sich – wenn nicht anders angegeben – auf den 31. Dezember 2010 oder auf den Zeitpunkt des  
Ausscheidens aus dem Aufsichtsrat der E.ON AG.

- Aufsichtsratsmandate gemäß § 100 Abs. 2 AktG
- Mitgliedschaft in vergleichbaren in- und ausländischen Kontrollgremien von Wirtschaftsunternehmen

### Dr. Henning Schulte-Noelle

Vorsitzender des Aufsichtsrats der Allianz SE

- Allianz SE (Vorsitz)
- ThyssenKrupp AG (bis 21. Januar 2011)

### Dr. Karen de Segundo

Juristin

- British American Tobacco plc
- Ensus Ltd.
- Koninklijke Ahold N.V.
- Lonmin plc
- Pöyry Oyj

### Dr. Theo Siegert

geschäftsführender Gesellschafter de Haen-Carstanjen & Söhne

- Deutsche Bank AG
- ERGO AG (bis 12. Mai 2010)
- Merck KGaA
- DKSH Holding Ltd.
- E. Merck OHG
- Henkel AG & Co. KGaA

### Prof. Dr. Wilhelm Simson

Diplom-Chemiker

- Frankfurter Allgemeine Zeitung GmbH (bis 7. Juni 2010)
- Hochtief AG
- Freudenberg & Co. KG

### Dr. Georg Frhr. von Waldenfels

Rechtsanwalt

- Georgsmarienhütte Holding GmbH
- Rothenbaum Sport GmbH (Vorsitz)

### Werner Wenning

ehemaliger Vorsitzender des Vorstands der Bayer AG

- Deutsche Bank AG
- HDI V.a.G.
- Talanx AG
- Henkel AG & Co. KGaA (Gesellschafterausschuss)

### Hans Wollitzer

Vorsitzender des Gesamtbetriebsrats der E.ON Energie AG

- E.ON Energie AG
- E.ON Bayern AG

### Ausschüsse des Aufsichtsrats

#### Vermittlungsausschuss

Ulrich Hartmann, Vorsitzender  
Erhard Ott, stellv. Vorsitzender  
Hans Prüfer

Dr. Henning Schulte-Noelle

#### Präsidialausschuss

Ulrich Hartmann, Vorsitzender  
Erhard Ott, stellv. Vorsitzender  
Hans Prüfer

Dr. Henning Schulte-Noelle

#### Prüfungs- und Risikoausschuss

Dr. Theo Siegert, Vorsitzender  
Klaus Dieter Raschke,  
stellv. Vorsitzender

Werner Bartoschek

Ulrich Hartmann

#### Finanz- und Investitionsausschuss

Ulrich Hartmann, Vorsitzender  
Hans Wollitzer, stellv. Vorsitzender  
Gabriele Gratz

Wolf-Rüdiger Hinrichsen

Prof. Dr. Ulrich Lehner

Werner Wenning

#### Nominierungsausschuss

Ulrich Hartmann, Vorsitzender

Prof. Dr. Ulrich Lehner

Dr. Henning Schulte-Noelle

### **Angaben nach § 289 Abs. 4, § 315 Abs. 4 HGB (Bestandteil des zusammengefassten Lageberichts)**

#### **Zusammensetzung des gezeichneten Kapitals**

Das Grundkapital beträgt 2.001.000.000,00 € und ist eingeteilt in 2.001.000.000 Stück auf den Namen lautende Stückaktien (Aktien ohne Nennbetrag). Jede Aktie gewährt gleiche Rechte und eine Stimme in der Hauptversammlung.

#### **Beschränkungen, die Stimmrechte oder die Übertragung von Aktien betreffen**

Soweit Mitarbeiter im Rahmen des Mitarbeiteraktienprogramms bezuschusste Mitarbeiteraktien erworben haben, unterliegen diese einer Sperrfrist, die am Tag der Einbuchung der Aktien beginnt und jeweils am 31. Dezember des übernächsten Kalenderjahres endet. Vor Ablauf dieser Sperrfrist dürfen die so übertragenen Aktien von den Mitarbeitern grundsätzlich nicht veräußert werden.

Darüber hinaus stehen der Gesellschaft nach § 71b des Aktiengesetzes keine Rechte aus eigenen Aktien und damit auch keine Stimmrechte zu.

#### **Gesetzliche Vorschriften und Bestimmungen der Satzung über die Ernennung und Abberufung von Vorstandsmitgliedern und Änderungen der Satzung**

Der Vorstand der Gesellschaft besteht nach der Satzung der Gesellschaft aus mindestens zwei Mitgliedern. Die Bestellung stellvertretender Vorstandsmitglieder ist zulässig. Die Bestimmung der Anzahl der Mitglieder, ihre Bestellung und Abberufung erfolgt durch den Aufsichtsrat.

Vorstandsmitglieder bestellt der Aufsichtsrat auf höchstens fünf Jahre; eine wiederholte Bestellung oder Verlängerung der Amtszeit, jeweils für höchstens fünf Jahre, ist zulässig. Werden mehrere Personen zu Vorstandsmitgliedern bestellt, so kann der Aufsichtsrat ein Mitglied zum Vorsitzenden des Vorstands ernennen. Fehlt ein erforderliches Vorstandsmitglied, so hat in dringenden Fällen das Gericht auf Antrag eines Beteiligten das Mitglied zu bestellen. Der Aufsichtsrat kann die Bestellung zum Vorstandsmitglied und die Ernennung zum Vorsitzenden des Vorstandes widerrufen, wenn ein wichtiger Grund vorliegt (vergleiche im Einzelnen §§ 84, 85 des Aktiengesetzes, §§ 31, 33 des Mitbestimmungsgesetzes).

Eine Änderung der Satzung bedarf nach § 179 Aktiengesetz eines Beschlusses der Hauptversammlung. Die Beschlüsse der Hauptversammlung werden nach der Satzung der Gesellschaft mit einfacher Stimmenmehrheit und, soweit eine Kapitalmehrheit erforderlich ist, mit einfacher Kapitalmehrheit gefasst, falls nicht das Gesetz oder die Satzung zwingend etwas anderes vorschreibt.

Der Aufsichtsrat ist ermächtigt, Satzungsänderungen zu beschließen, die nur die Fassung betreffen (§ 24 der Satzung der Gesellschaft). Er ist ferner ermächtigt, die Fassung des § 3 der Satzung bei Ausnutzung des genehmigten oder bedingten Kapitals anzupassen.

#### **Befugnisse des Vorstands, Aktien auszugeben oder zurückzukaufen**

Der Vorstand ist gemäß Beschluss der Hauptversammlung vom 6. Mai 2010 bis zum 5. Mai 2015 ermächtigt, eigene Aktien zu erwerben. Auf die erworbenen Aktien dürfen zusammen mit anderen eigenen Aktien, die sich im Besitz der Gesellschaft befinden oder ihr nach §§ 71a ff. Aktiengesetz zuzurechnen sind, zu keinem Zeitpunkt mehr als zehn Prozent des Grundkapitals entfallen.

Der Erwerb erfolgt nach Wahl des Vorstands

- über die Börse,
- mittels eines an alle Aktionäre gerichteten öffentlichen Angebots beziehungsweise einer öffentlichen Aufforderung zur Abgabe eines Angebots,
- mittels eines öffentlichen Angebots beziehungsweise einer öffentlichen Aufforderung zur Abgabe eines Angebots auf Tausch von liquiden Aktien, die zum Handel an einem organisierten Markt im Sinne des Wertpapiererwerbs- und -übernahmegesetzes zugelassen sind, gegen Aktien der Gesellschaft oder
- durch Einsatz von Derivaten (Put- oder Call-Optionen oder einer Kombination aus beiden).

Die Ermächtigungen können einmal oder mehrmals, ganz oder in Teilbeträgen, in Verfolgung eines oder mehrerer Zwecke durch die Gesellschaft, aber auch durch Konzernunternehmen oder von Dritten für Rechnung der Gesellschaft oder der Konzernunternehmen ausgeübt werden.



Der Vorstand ist darüber hinaus ermächtigt, Aktien der Gesellschaft, die aufgrund der vorab beschriebenen Ermächtigung und/oder aufgrund vorangegangener Hauptversammlungs-ermächtigungen erworben werden beziehungsweise wurden, mit Zustimmung des Aufsichtsrats – neben der Veräußerung über die Börse oder durch Angebot mit Bezugsrecht an alle Aktionäre – unter Ausschluss des Bezugsrechts der Aktionäre wie folgt zu verwenden:

- Veräußerung gegen Barleistung
- Veräußerung gegen Sachleistung
- Erfüllung der Rechte von Gläubigern von durch die Gesellschaft oder ihre Konzerngesellschaften ausgegebenen Teilschuldverschreibungen mit Wandel- oder Optionsrechten beziehungsweise Wandlungspflichten
- Erwerbsangebot an und Übertragung auf Personen, die in einem Arbeitsverhältnis zu der Gesellschaft oder einem mit ihr verbundenen Unternehmen stehen

Die Ermächtigungen können einmal oder mehrmals, ganz oder in Teilbeträgen, einzeln oder gemeinsam durch die Gesellschaft, aber auch durch Konzernunternehmen oder von Dritten für Rechnung der Gesellschaft oder der Konzernunternehmen ausgeübt werden.

Der Vorstand ist ferner ermächtigt, eigene Aktien einzuziehen, ohne dass die Einziehung oder ihre Durchführung eines weiteren Hauptversammlungsbeschlusses bedarf.

Der Vorstand wird die Hauptversammlung über die Gründe und den Zweck des Erwerbs eigener Aktien, über die Zahl der erworbenen Aktien und den auf sie entfallenden Betrag des Grundkapitals, über ihren Anteil am Grundkapital sowie über den Gegenwert der Aktien jeweils unterrichten.

Der Vorstand ist gemäß § 3 Abs. 5 der Satzung ermächtigt, mit Zustimmung des Aufsichtsrats bis zum 5. Mai 2014 das Grundkapital der Gesellschaft um bis zu 460.000.000 € durch ein- oder mehrmalige Ausgabe neuer, auf den Namen lautender Stückaktien gegen Bar- und/oder Sacheinlagen zu erhöhen (Genehmigtes Kapital gemäß §§ 202 ff. Aktiengesetz). Dabei ist der Vorstand – mit Zustimmung des Aufsichtsrats – ermächtigt, das Bezugsrecht der Aktionäre bei Ausgabe von Aktien gegen Bareinlage in Höhe von bis zu zehn Prozent des Grundkapitals auszuschließen, wobei auf die Zehn-Prozent-Grenze diejenigen Aktien angerechnet werden, die unter Ausschluss des Bezugsrechts durch im Beschluss beschriebene Maßnahmen ausgegeben wurden. Bei Aktienaussgabe gegen Sacheinlage ist der Vorstand ermächtigt, mit Zustimmung des Aufsichtsrats das Bezugsrecht der Aktionäre auszuschließen, allerdings nur insoweit, als dass die unter der Ermächtigung nach § 3 Abs. 5 der Satzung ausgegebenen Aktien gegen

Sacheinlagen unter Ausschluss des Bezugsrechts der Aktionäre zusammen nicht mehr als 20 Prozent des Grundkapitals ausmachen dürfen. Außerdem darf die Summe der unter Ausschluss des Bezugsrechts gegen Bar- und Sacheinlagen ausgegebenen Aktien 20 Prozent des Grundkapitals nicht übersteigen.

Weiterhin hat die Hauptversammlung vom 6. Mai 2010 dem Vorstand die Ermächtigung zur Begebung von Teilschuldverschreibungen mit Wandlungs- oder Optionsrechten beziehungsweise Wandlungspflichten, Genussrechten und Gewinnschuldverschreibungen (beziehungsweise einer Kombination dieser Instrumente) erteilt. Danach kann der Vorstand mit Zustimmung des Aufsichtsrats bis zum 5. Mai 2015 einmalig oder mehrmals auf den Inhaber lautende Options- oder Wandelanleihen, Genussrechte oder Gewinnschuldverschreibungen oder eine Kombination dieser Instrumente im Gesamtnennbetrag von bis zu 5 Mrd € ausgeben und den Inhabern von Optionsanleihen Optionsrechte beziehungsweise den Inhabern von Wandelanleihen Wandlungsrechte für auf den Namen lautende Aktien der Gesellschaft mit einem anteiligen Betrag des Grundkapitals von insgesamt bis zu 175.000.000 € nach näherer Maßgabe der Options- beziehungsweise Wandelanleihebedingungen gewähren. Dabei ist sichergestellt, dass der Gesamtnennbetrag von bis zu 5 Mrd € insgesamt durch die Ausnutzung der Ermächtigung nur einmal ausgenutzt werden kann. Entsprechend der Ermächtigung ist das Grundkapital der Gesellschaft durch § 3 Abs. 3 und § 3 Abs. 4 der Satzung um jeweils bis zu 175.000.000 € bedingt erhöht. Auch hier ist der Vorstand ermächtigt, mit Zustimmung des Aufsichtsrats das Bezugsrecht der Aktionäre auf gegen Barzahlung ausgegebene Schuldverschreibungen, die mit Options- und/oder Wandlungsrecht oder Wandlungspflicht ausgegeben werden, vollständig auszuschließen.

### Wesentliche Vereinbarungen der Gesellschaft, die unter der Bedingung eines Kontrollwechsels infolge eines Übernahmeangebots stehen

Aus der Ministererlaubnis des deutschen Bundesministers für Wirtschaft und Technologie vom 5. Juli beziehungsweise 18. September 2002 zu den Zusammenschlussvorhaben E.ON/Gelsenberg und E.ON/Bergemann ergibt sich folgende Auflage: E.ON hat auf Verlangen des Bundesministeriums für Wirtschaft und Technologie sämtliche von ihr oder von verbundenen Unternehmen gehaltenen Aktien der Ruhrgas AG an einen Dritten zu veräußern, wenn ein anderes Unternehmen eine Stimmrechts- oder Kapitalmehrheit an E.ON erwirbt und der Erwerber begründeten Anlass zur Besorgnis gibt, dass energiepolitische Interessen der Bundesrepublik Deutschland beeinträchtigt werden. Der Erwerber der Ruhrgas-Aktien bedarf der Einwilligung des Bundesministeriums für Wirtschaft und Technologie; sie darf nur versagt werden, wenn der Erwerber begründeten Anlass zur Besorgnis gibt, dass energiepolitische Interessen der Bundesrepublik Deutschland beeinträchtigt werden. Diese Verpflichtung gilt für einen Zeitraum von zehn Jahren nach Vollzug der Zusammenschlüsse.

Das seit 2007 neu aufgenommene Fremdkapital enthält in der Regel eine Change-of-Control-Klausel, die ein Kündigungsrecht des Gläubigers vorsieht. Dies betrifft unter anderem Anleihen, die von der E.ON International Finance B.V. unter Garantie der E.ON AG begeben wurden, von der E.ON AG begebene Schulscheindarlehen sowie weitere Instrumente wie zum Beispiel Kreditverträge. Die Einräumung des Change-of-Control-Rechtes für Gläubiger hat sich als Teil guter Corporate Governance zum Marktstandard entwickelt. Weitere Informationen zu Finanzverbindlichkeiten finden Sie im zusammengefassten Lagebericht im Kapitel Finanzlage und in der Textziffer 26 des Anhangs.

### Entschädigungsvereinbarungen der Gesellschaft, die für den Fall eines Übernahmeangebots mit den Mitgliedern des Vorstands oder Arbeitnehmern getroffen sind

Die Mitglieder des Vorstands haben im Fall des vorzeitigen Verlusts der Vorstandsposition aufgrund eines Kontrollwechsels einen dienstvertraglichen Anspruch auf Zahlung von Abgeltungs- und Abfindungsleistungen (vergleiche die ausführliche Darstellung im Vergütungsbericht).

### Angaben nach § 289 Abs. 5 HGB zum internen Kontrollsystem im Hinblick auf den Rechnungslegungsprozess (Bestandteil des zusammengefassten Lageberichts)

#### Allgemeine Grundlagen

Der E.ON-Konzernabschluss wird in Anwendung von § 315 a Abs. 1 des Handelsgesetzbuchs (HGB) unter Beachtung der IFRS und der Interpretationen des International Financial Reporting Interpretations Committee (IFRIC) aufgestellt, die bis zum Ende der Berichtsperiode von der Europäischen Kommission für die Anwendung in der EU übernommen wurden und zum Bilanzstichtag verpflichtend anzuwenden sind (siehe Textziffer 1 im Anhang). Berichtspflichtige Segmente im Sinne der International Financial Reporting Standards (IFRS) sind unsere Market Units.

Der Jahresabschluss der E.ON AG ist nach den Vorschriften des HGB in der Fassung des am 29. Mai 2009 in Kraft getretenen Bilanzrechtsmodernisierungsgesetzes (BilMoG) und des Aktiengesetzes (AktG) aufgestellt.

E.ON erstellt einen zusammengefassten Lagebericht, der sowohl für den E.ON-Konzern als auch für die E.ON AG gilt.

#### Organisation der Rechnungslegung

Der Konzernabschluss wird im E.ON-Konzern in einem mehrstufigen Prozess mithilfe einer einheitlichen SAP-Konsolidierungssoftware erstellt. Die von den einzelnen Führungsgesellschaften unserer Market Units vorkonsolidierten und vom jeweiligen Abschlussprüfer geprüften Abschlüsse werden bei der E.ON AG zum Konzernabschluss zusammengefasst. Hierbei liegt die Verantwortung für die Betreuung und Unterstützung hinsichtlich des Konsolidierungssystems, für den konzern einheitlichen Kontenrahmen und für die Durchführung der zentralen Konsolidierungsmaßnahmen bei der E.ON AG. Einzelne Prozesse, die indirekten Einfluss auf die Rechnungslegung haben – wie zum Beispiel die Personalverwaltung –, sind bei einigen Einheiten bei internen Dienstleistern (Shared Service Centern) konzentriert.

Für die in den Konzernabschluss einbezogenen Gesellschaften gilt eine einheitliche Richtlinie zur Bilanzierung und Berichterstattung für die Konzernjahres- und -quartalsabschlüsse. Diese umfasst eine Beschreibung der allgemeinen Konsolidierungsprozesse des E.ON-Konzerns sowie die anzuwendenden Bilanzierungs- und Bewertungsgrundsätze in Übereinstimmung mit IFRS. Hier werden auch für unser Unternehmen typische Rechnungslegungsvorschriften – wie zum Beispiel zu den Entsorgungsverpflichtungen im Kernenergiebereich und zur Behandlung regulatorischer Verpflichtungen – erläutert. Darüber hinaus gilt ein verbindlicher Abschlussterminkalender.

Weitere Informationen mit Relevanz für die Rechnungslegung und Abschlusserstellung werden im Rahmen der Abschlussprozesse qualitativ und quantitativ zusammengetragen. Darüber hinaus werden relevante Informationen regelmäßig in festgelegten Prozessen mit allen relevanten Fachbereichen diskutiert und zur Sicherstellung der Vollständigkeit im Rahmen der Qualitätssicherung erfasst.

Der Jahresabschluss der E.ON AG wird ebenfalls mithilfe einer SAP-Software erstellt. Die laufende Buchhaltung und die Erstellung des Jahresabschlusses sind in funktionale Prozessschritte gegliedert. In alle Prozesse sind entweder automatisierte oder manuelle Kontrollen integriert. Die organisatorischen Regelungen stellen sicher, dass alle Geschäftsvorfälle und die Jahresabschlusserstellung vollständig, zeitnah, richtig und periodengerecht erfasst, verarbeitet und dokumentiert werden. Unter Berücksichtigung erforderlicher IFRS-Anpassungsbuchungen werden die relevanten Daten aus dem Einzelabschluss der E.ON AG mit SAP-gestützter Übertragungstechnik in das Konzern-Konsolidierungssystem übergeben.

Die nachfolgenden Erläuterungen zum internen Kontrollsystem und zu den allgemeinen IT-Kontrollen gelten gleichermaßen für den Konzern- wie für den Einzelabschluss.

### Internes Kontroll- und Risikomanagementsystem

Interne Kontrollen sind bei E.ON integraler Bestandteil der Rechnungslegungsprozesse. In einem konzernweit einheitlichen Rahmenwerk – Internal\_Controls@E.ON – haben wir Dokumentationsanforderungen und Verfahren für den Prozess der Finanzberichterstattung definiert. Dies umfasst den Geltungsbereich, Dokumentations- und Bewertungsstandards, einen Katalog der Managementkontrollen, einen Risikokatalog (generisches Modell), die Testaktivitäten der internen Revision und den abschließenden Freizeichnungsprozess. Die Einhaltung dieser Regelungen soll wesentliche Falschdarstellungen im Konzernabschluss, im zusammengefassten Lagebericht und in den Zwischenberichten aufgrund von Fehlern oder Betrug mit hinreichender Sicherheit verhindern.

### COSO-Modell

Unser internes Kontrollsystem basiert auf dem weltweit anerkannten COSO-Modell (COSO: The Committee of Sponsoring Organizations of the Treadway Commission). Der zentrale Risikokatalog (generisches Modell), in den unternehmens- und branchenspezifische Aspekte eingeflossen sind, definiert mögliche Risiken für die Rechnungslegung (Finanzberichterstattung) in den betrieblichen Funktionsbereichen und dient damit als Checkliste und Orientierungshilfe bei der Dokumentation.

Ein weiterer wichtiger Bestandteil des internen Kontrollsystems ist der Katalog der Managementkontrollen, welcher als Grundlage für ein funktionierendes internes Kontrollsystem dient. Dieser Katalog umfasst übergeordnete Kontrollen zur Abdeckung von potenziellen Risiken in verschiedenen Themenkomplexen und Prozessen, wie zum Beispiel Finanzpublizität, Corporate

Responsibility, Betrug, Kommunikationsprozess, Planung und Budgetierung, Investitionscontrolling und interne Revision.

### Zentrales Dokumentationssystem

Die Gesellschaften im Geltungsbereich nutzen ein zentrales Dokumentationssystem, um die wesentlichen Kontrollen zu dokumentieren. In diesem System sind der Geltungsbereich, detaillierte Dokumentationsanforderungen, Vorgaben für die Durchführung der Bewertung durch die Verantwortlichen und der finale Freizeichnungsprozess definiert.

### Geltungsbereich

In einem jährlich durchgeführten mehrstufigen Prozess wird anhand von qualitativen Kriterien und quantitativen Wesentlichkeitsaspekten festgelegt, welche Konzerngesellschaften Prozesse und Kontrollen der Finanzberichterstattung entsprechend dokumentieren und bewerten müssen. Die Auswahl basiert auf vorher festgelegten Positionen der Bilanz sowie Gewinn- und Verlustrechnung beziehungsweise Anhangangaben einer Gesellschaft aus dem Vorjahres-Konzernabschluss.

### Bewertung

Nachdem die Prozesse und Kontrollen in den Gesellschaften dokumentiert wurden, müssen die Verantwortlichen jährlich eine Bewertung des Designs und der operativen Effektivität der Prozesse inklusive der prozessinhärenten Kontrollen durchführen.

### Testen durch die interne Revision

Das Management einer Gesellschaft stützt sich neben der Bewertung der Prozessverantwortlichen in einer Gesellschaft auf die Überwachung des internen Kontrollsystems durch die interne Revision, die ein wesentlicher Bestandteil des Prozesses ist. Sie prüft im Rahmen einer risikoorientierten Prüfungsplanung das interne Kontrollsystem des Konzerns und identifiziert gegebenenfalls Schwachstellen. Auf Basis der eigenen Bewertung und der Prüfungsfeststellungen führt das lokale Management die finale Freizeichnung durch.

Nach einer Vorbewertung der Prozesse und Kontrollen durch die Verantwortlichen und die interne Revision erfolgt in den Market Units ein zweiter, qualitätssichernder Bewertungsprozess durch eigene Gremien oder durch die direkte Einbeziehung des Managements, bevor eine finale Meldung an die E.ON AG erfolgt.

### Freizeichnungsprozess

Der interne Beurteilungsprozess schließt mit einer formalen schriftlichen Wirksamkeitsbestätigung (Freizeichnung). Der Freizeichnungsprozess wird auf allen Ebenen des Konzerns durchgeführt und beginnt auf Business-Unit-Ebene, bevor er von der Market Unit und final durch die E.ON AG durchgeführt wird. Somit sind alle Hierarchieebenen des Konzerns formal einbezogen. Die finale Freizeichnung der Wirksamkeit

des internen Kontrollsystems der Finanzberichterstattung der E.ON AG wird durch den Vorstandsvorsitzenden und den Finanzvorstand der E.ON AG durchgeführt.

Der Prüfungs- und Risikoausschuss des Aufsichtsrats der E.ON AG wird regelmäßig durch die interne Revision über das interne Kontrollsystem der Finanzberichterstattung und gegebenenfalls über identifizierte wesentliche Schwachstellen in den zugrunde liegenden Prozessen im E.ON-Konzern informiert.

### Allgemeine IT-Kontrollen

Die Wirksamkeit der automatisierten Kontrollen in den Standardsystemen der Finanzbuchhaltung und den wesentlichen zusätzlichen Applikationen hängt maßgeblich von einem ordnungsgemäßen IT-Betrieb ab. Dementsprechend sind in unserem Dokumentationssystem Kontrollen für den IT-Bereich hinterlegt. Diese Kontrollen beziehen sich im Wesentlichen auf die Sicherstellung der IT-technischen Zugriffsbeschränkung von Systemen und Programmen, die Sicherung des operativen IT-Tagesbetriebs (zum Beispiel Notfalleingriffe) sowie auf die Programmänderungsverfahren. Darüber hinaus wird das zentrale Konsolidierungssystem bei der E.ON AG in Düsseldorf gepflegt. Ferner werden im E.ON-Konzern übergreifend IT-Dienstleistungen für die Mehrheit der Einheiten von unserer Konzerngesellschaft E.ON IT erbracht.

### Erläuternder Bericht des Vorstands zu den Angaben nach § 289 Abs. 4, § 315 Abs. 4 HGB sowie zu den Angaben nach § 289 Abs. 5 HGB

Der Vorstand hat sich mit den Angaben nach § 289 Abs. 4, § 315 Abs. 4 HGB im Lagebericht zum Stand 31. Dezember 2010 befasst und gibt hierzu folgende Erklärung ab:

Die im zusammengefassten Lagebericht der Gesellschaft enthaltenen Angaben zu den Übernahmehindernissen sind zutreffend und entsprechen den Kenntnissen des Vorstands. Daher beschränkt der Vorstand sich auf die folgenden Ausführungen:

Über die im Lagebericht gemachten Angaben hinaus (und gesetzliche Beschränkungen wie etwa das Stimmverbot nach § 136 des Aktiengesetzes) sind dem Vorstand keine Beschränkungen bekannt, die Stimmrechte oder die Übertragung von Aktien betreffen. Mitteilungen über Beteiligungen am Kapital der Gesellschaft, die zehn vom Hundert der Stimmrechte überschreiten, sind der Gesellschaft nicht gemacht worden und entfallen daher. Eine Beschreibung von Aktien mit Sonderrechten, die Kontrollbefugnis verleihen, entfällt, da solche Aktien nicht ausgegeben worden sind; ebenfalls entfallen kann

die Erläuterung besonderer Stimmrechtskontrolle bei Beteiligungen von Arbeitnehmern, da die am Kapital der Gesellschaft beteiligten Arbeitnehmer ihre Kontrollrechte – wie andere Aktionäre auch – unmittelbar ausüben.

Soweit mit den Mitgliedern des Vorstands für den Fall eines Kontrollwechsels eine Entschädigung vereinbart ist, dient die Vereinbarung dazu, die Unabhängigkeit der Mitglieder des Vorstands zu erhalten.

Darüber hinaus hat der Vorstand sich zusätzlich mit den Angaben im zusammengefassten Lagebericht nach § 289 Abs. 5 HGB befasst. Die im zusammengefassten Lagebericht enthaltenen Angaben zu den wesentlichen Merkmalen des internen Kontroll- und Risikomanagementsystems im Hinblick auf den Rechnungslegungsprozess sind vollständig und umfassend.

Interne Kontrollen sind bei E.ON integraler Bestandteil der Rechnungslegungsprozesse. In einem konzernweit einheitlichen Rahmenwerk sind die Dokumentationsanforderungen und Verfahren für den Prozess der Finanzberichterstattung definiert. Die Einhaltung dieser Regelungen soll wesentliche Falschdarstellungen im Konzernabschluss, im zusammengefassten Lagebericht und in den Zwischenberichten aufgrund von Fehlern oder Betrug mit hinreichender Sicherheit verhindern.

Düsseldorf, im Februar 2011

E.ON AG  
Der Vorstand

Dr. Teysen                      Kildahl                      Prof. Dr. Maubach

Dr. Reutersberg              Dr. Schenck              Stachelhaus

## Vorstand (einschließlich Angaben zu weiteren Mandaten von Vorstandsmitgliedern)

### Dr. Wulf H. Bernotat

geb. 1948 in Göttingen,  
Vorsitzender des Vorstands seit 2003  
(bis 30. April 2010)

- E.ON Energie AG<sup>1)</sup> (Vorsitz)  
(bis 30. April 2010)
- E.ON Ruhrgas AG<sup>1)</sup> (Vorsitz)  
(bis 5. Juli 2010)
- Allianz SE
- Bertelsmann AG
- Metro AG
- Deutsche Telekom AG
- E.ON Nordic AB<sup>2)</sup> (Vorsitz)  
(bis 4. Januar 2010)
- E.ON Sverige AB<sup>2)</sup> (Vorsitz)  
(bis 24. Juni 2010)
- E.ON US Investments Corp.<sup>2)</sup> (Vorsitz)  
(bis 30. April 2010)

### Dr. Johannes Teyssen

geb. 1959 in Hildesheim,  
Mitglied des Vorstands seit 2004  
Führungskräfte, Strategie und  
Unternehmensentwicklung, Investor  
Relations, Revision sowie Politik und  
Kommunikation  
Vorsitzender des Vorstands seit  
1. Mai 2010, Düsseldorf

- E.ON Energie AG<sup>1)</sup>
- E.ON Energy Trading SE<sup>1)</sup> (Vorsitz)  
(bis 30. Juni 2010)
- E.ON Ruhrgas AG<sup>1)</sup>
- Deutsche Bank AG
- Salzgitter AG
- E.ON US Investments Corp.<sup>2)</sup> (Vorsitz)
- E.ON Nordic AB<sup>2)</sup> (bis 24. Juni 2010)
- E.ON Sverige AB<sup>2)</sup>  
(bis 1. September 2010)
- E.ON Italia S.p.A.<sup>2)</sup> (bis 11. August 2010)

### Christoph Dänzer-Vanotti

geb. 1955 in Freiburg,  
Mitglied des Vorstands seit 2006  
(bis 12. Mai 2010)

- E.ON Energie AG<sup>1)</sup>
- E.ON Energy Trading SE<sup>1)</sup>  
(bis 30. Juni 2010)
- Deutsche Bahn AG
- E.ON Nordic AB<sup>2)</sup> (bis 30. Juni 2010)
- E.ON Sverige AB<sup>2)</sup> (bis 30. Juni 2010)

### Lutz Feldmann

geb. 1957 in Bonn,  
Mitglied des Vorstands seit 2006  
(bis 12. Mai 2010)

- E.ON Iberia Energía SL<sup>2)</sup>  
(bis 31. Mai 2010)
- E.ON Italia S.p.A.<sup>2)</sup> (bis 31. Mai 2010)
- OAO OGGK-4<sup>2)</sup>
- Thyssen'sche Handelsgesellschaft mbH<sup>2)</sup>

### Jørgen Kildahl

geb. 1963 in Bærum, Norwegen,  
Mitglied des Vorstands seit 2010  
Konventionelle und Erneuerbare  
Stromerzeugung, Gasgeschäft, welt-  
weites Trading, energiewirtschaftliche  
Optimierung des Konzerns über alle  
Regionen und Produkte hinweg,  
Düsseldorf (seit 13. Mai 2010)

- E.ON Ruhrgas AG<sup>1)</sup> (Vorsitz)
- E.ON Energy Trading SE<sup>1)</sup> (Vorsitz)
- E.ON Generation GmbH<sup>2)</sup> (Vorsitz)
- E.ON Sverige AB<sup>2)</sup>

### Prof. Dr. Klaus-Dieter Maubach

geb. 1962 in Schwelm,  
Mitglied des Vorstands seit 2010  
Forschungs- und Entwicklungsaktivitäten  
sowie -themen, E.ON New Build & Techno-  
logy, Steuerung aller Großinvestitionen des  
Konzerns, Düsseldorf (seit 13. Mai 2010)

- E.ON Ruhrgas AG<sup>1)</sup>
- E.ON Energy Trading SE<sup>1)</sup>
- E.ON New Build & Technology GmbH<sup>1)</sup>  
(Vorsitz)
- E.ON France S.A.S.<sup>2)</sup> (Vorsitz)
- E.ON Czech Holding AG<sup>2)</sup>
- E.ON Sverige AB<sup>2)</sup>
- Bayern LB

### Dr. Bernhard Reutersberg

geb. 1954 in Düsseldorf,  
Mitglied des Vorstands seit 2010  
Führung der Landesgesellschaften,  
Steuerung der Verteilungs- und Vertriebs-  
geschäfte des Konzerns sowie der poli-  
tischen und regulatorischen Prozesse,  
Koordination der energiewirtschaftlichen  
Aktivitäten im russischen Markt,  
Düsseldorf (seit 11. August 2010)

- E.ON Energie AG<sup>1)</sup> (Vorsitz)
- E.ON España S.L.<sup>2)</sup>
- E.ON Italia S.p.A.<sup>2)</sup>
- E.ON Sverige AB<sup>2)</sup> (Vorsitz)
- E.ON Benelux N.V.<sup>2)</sup> (Vorsitz)
- Nord Stream AG

### Dr. Marcus Schenck

geb. 1965 in Memmingen,  
Mitglied des Vorstands seit 2006  
Finanzen, Rechnungswesen, Controlling,  
Steuern, alle konzernweiten M&A-  
Aktivitäten und E.ON International  
Energy, Düsseldorf

- E.ON Energy Trading SE<sup>1)</sup>
- E.ON Ruhrgas AG<sup>1)</sup>
- E.ON IT GmbH<sup>1)</sup>
- Commerzbank AG
- SMS Group GmbH
- HSBC Trinkaus & Burkhardt AG  
(Mitglied des Verwaltungsrats)

### Regine Stachelhaus

geb. 1955 in Böblingen,  
Mitglied des Vorstands seit 2010  
Alle das Kerngeschäft unterstützende  
Funktionen, insbesondere Personal, IT,  
Einkauf, Recht und Compliance,  
Arbeitsdirektorin, Düsseldorf  
(seit 24. Juni 2010)

- E.ON Energie AG<sup>1)</sup>
- E.ON Ruhrgas AG<sup>1)</sup>
- E.ON IT GmbH<sup>1)</sup> (Vorsitz)

Alle Angaben beziehen sich – wenn nicht anders angegeben – auf den 31. Dezember 2010 oder auf den Zeitpunkt des Ausscheidens aus dem Vorstand der E.ON AG.

- Aufsichtsratsmandate gemäß § 100 Abs. 2 AktG
- Mitgliedschaft in vergleichbaren in- und ausländischen Kontrollgremien von Wirtschaftsunternehmen

1) Freigestellte Konzernmandate 2) Weitere Konzernmandate



| Mehrjahresübersicht <sup>1)</sup>                                                                                              |         |         |         |         |         |
|--------------------------------------------------------------------------------------------------------------------------------|---------|---------|---------|---------|---------|
| in Mio €                                                                                                                       | 2006    | 2007    | 2008    | 2009    | 2010    |
| <b>Umsatz und Ergebnis</b>                                                                                                     |         |         |         |         |         |
| Umsatz                                                                                                                         | 62.161  | 66.912  | 84.873  | 79.974  | 92.863  |
| Adjusted EBITDA                                                                                                                | 11.129  | 11.907  | 12.836  | 12.975  | 13.346  |
| Adjusted EBIT                                                                                                                  | 7.930   | 8.820   | 9.483   | 9.291   | 9.454   |
| Konzernüberschuss                                                                                                              | 6.082   | 7.724   | 1.621   | 8.669   | 6.281   |
| Konzernüberschuss der Gesellschafter der E.ON AG                                                                               | 5.586   | 7.204   | 1.283   | 8.420   | 5.853   |
| <b>Wertentwicklung</b>                                                                                                         |         |         |         |         |         |
| ROCE (in %)                                                                                                                    | 14,8    | 15,6    | 13,6    | 12,2    | 11,9    |
| Kapitalkosten vor Steuern (in %)                                                                                               | 9,0     | 9,1     | 9,1     | 9,1     | 8,3     |
| Value Added                                                                                                                    | 3.103   | 3.678   | 3.128   | 2.362   | 2.864   |
| <b>Vermögensstruktur</b>                                                                                                       |         |         |         |         |         |
| Langfristige Vermögenswerte                                                                                                    | 96.488  | 105.804 | 108.622 | 113.046 | 106.657 |
| Kurzfristige Vermögenswerte                                                                                                    | 31.087  | 31.490  | 48.107  | 39.568  | 46.224  |
| Gesamtvermögen                                                                                                                 | 127.575 | 137.294 | 156.729 | 152.614 | 152.881 |
| <b>Kapitalstruktur</b>                                                                                                         |         |         |         |         |         |
| Eigenkapital                                                                                                                   | 51.245  | 55.130  | 38.451  | 43.986  | 45.585  |
| <i>Gezeichnetes Kapital</i>                                                                                                    | 1.799   | 1.734   | 2.001   | 2.001   | 2.001   |
| <i>Minderheitsanteile</i>                                                                                                      | 2.533   | 5.756   | 3.960   | 3.607   | 3.932   |
| Langfristige Schulden                                                                                                          | 46.947  | 52.402  | 66.323  | 70.775  | 69.580  |
| <i>Rückstellungen</i>                                                                                                          | 22.100  | 20.963  | 22.757  | 21.692  | 23.631  |
| <i>Finanzverbindlichkeiten</i>                                                                                                 | 10.029  | 15.915  | 25.036  | 30.657  | 28.880  |
| <i>Übrige Verbindlichkeiten und Sonstiges</i>                                                                                  | 14.818  | 15.524  | 18.530  | 18.426  | 17.069  |
| Kurzfristige Schulden                                                                                                          | 29.383  | 29.762  | 51.955  | 37.853  | 37.716  |
| <i>Rückstellungen</i>                                                                                                          | 3.994   | 3.992   | 4.260   | 4.715   | 4.950   |
| <i>Finanzverbindlichkeiten</i>                                                                                                 | 3.443   | 5.549   | 16.022  | 7.120   | 3.611   |
| <i>Übrige Verbindlichkeiten und Sonstiges</i>                                                                                  | 21.946  | 20.221  | 31.673  | 26.018  | 31.527  |
| Gesamtkapital                                                                                                                  | 127.575 | 137.294 | 156.824 | 152.614 | 152.881 |
| <b>Cashflow/Investitionen</b>                                                                                                  |         |         |         |         |         |
| Operativer Cashflow <sup>2)</sup>                                                                                              | 6.720   | 8.434   | 6.397   | 8.590   | 10.614  |
| Zahlungswirksame Investitionen                                                                                                 | 4.639   | 10.616  | 17.756  | 8.655   | 8.286   |
| <b>Kennziffern</b>                                                                                                             |         |         |         |         |         |
| Eigenkapitalquote (in %)                                                                                                       | 40      | 40      | 25      | 29      | 30      |
| Deckung des langfristig gebundenen Vermögens (in %)<br>(langfristiges Kapital in Prozent des langfristig gebundenen Vermögens) | 102     | 102     | 96      | 102     | 108     |
| Wirtschaftliche Netto-Verschuldung (31. Dezember)                                                                              | -18.180 | -23.432 | -44.946 | -44.665 | -37.701 |
| Debt Factor <sup>3)</sup>                                                                                                      | 1,6     | 1,9     | 3,4     | 3,4     | 2,8     |
| Operativer Cashflow in % des Umsatzes                                                                                          | 11,2    | 12,7    | 7,8     | 11,1    | 11,4    |
| <b>Aktie<sup>4)</sup></b>                                                                                                      |         |         |         |         |         |
| Ergebnis je Aktie in € (Anteil der Gesellschafter der E.ON AG)                                                                 | 2,82    | 3,69    | 0,69    | 4,42    | 3,07    |
| Eigenkapital <sup>5)</sup> je Aktie (in €)                                                                                     | 24,62   | 26,06   | 18,11   | 21,19   | 21,86   |
| Höchstkurs (in €)                                                                                                              | 34,80   | 48,69   | 50,93   | 30,47   | 29,36   |
| Tiefstkurs (in €)                                                                                                              | 27,37   | 32,02   | 23,50   | 18,19   | 21,13   |
| Jahresendkurs <sup>6)</sup> (in €)                                                                                             | 34,28   | 48,53   | 28,44   | 29,23   | 22,94   |
| Dividende je Aktie <sup>7)</sup> (in €)                                                                                        | 1,12    | 1,37    | 1,50    | 1,50    | 1,50    |
| Dividendensumme                                                                                                                | 2.210   | 2.560   | 2.857   | 2.858   | 2.858   |
| Marktkapitalisierung <sup>8)</sup> (in Mrd €)                                                                                  | 67,6    | 92,0    | 54,2    | 55,7    | 43,7    |
| <b>Langfristiges Rating der E.ON AG</b>                                                                                        |         |         |         |         |         |
| Moody's                                                                                                                        | Aa3     | A2      | A2      | A2      | A2      |
| Standard & Poor's                                                                                                              | AA-     | A       | A       | A       | A       |
| <b>Mitarbeiter</b>                                                                                                             |         |         |         |         |         |
| Mitarbeiter (31. Dezember)                                                                                                     | 77.722  | 84.838  | 90.428  | 85.108  | 85.105  |

1) um nicht fortgeführte Aktivitäten angepasste Werte · 2) entspricht dem Cashflow aus der Geschäftstätigkeit fortgeführter Aktivitäten · 3) Verhältnis zwischen wirtschaftlicher Netto-Verschuldung und Adjusted EBITDA · 4) alle Angaben nach Aktiensplit beziehungsweise bereinigt um Aktiensplit · 5) Anteil der Gesellschafter der E.ON AG · 6) zum 30. Dezember · 7) für das jeweilige Geschäftsjahr; Vorschlag für 2010 · 8) auf Basis ausstehender Aktien



## Finanzglossar

### Adjusted EBIT

Bis Ende 2010 wichtigste interne Ergebniskennzahl und Indikator für die nachhaltige Ertragskraft unserer Geschäfte. Das Adjusted EBIT (Earnings before Interest and Taxes) ist ein bereinigtes Ergebnis aus fortgeführten Aktivitäten vor Finanzergebnis und Steuern. Bereinigt werden im Wesentlichen solche Aufwendungen und Erträge, die einmaligen beziehungsweise seltenen Charakter haben (vergleiche neutrales Ergebnis).

### Adjusted EBITDA

Earnings before Interest, Taxes, Depreciation and Amortization – entspricht dem Adjusted EBIT vor Abschreibungen beziehungsweise Amortisation.

### ADR

Abkürzung für: American Depositary Receipts. ADR werden von US-amerikanischen Banken ausgestellt und sind handelbare Aktienzertifikate über nicht-amerikanische Aktien. ADR erleichtern nicht-amerikanischen Unternehmen den Zugang zu US-Investoren.

### Anleihe

Inhaberschuldverschreibung, die das Recht auf Rückzahlung des Nennwertes zuzüglich einer Verzinsung verbriefte. Anleihen werden von der „öffentlichen Hand“, von Kreditinstituten oder Unternehmen begeben und über Banken verkauft. Sie dienen dem Emittenten zur mittel- und langfristigen Finanzierung durch Fremdkapital.

### At-equity-Bilanzierung

Verfahren zur Berücksichtigung von Beteiligungsgesellschaften, die nicht auf Basis einer Vollkonsolidierung mit allen Aktiva und Passiva in den Konzernabschluss einbezogen werden. Hierbei wird der Beteiligungsbuchwert um die Entwicklung des anteiligen Eigenkapitals der Beteiligung fortgeschrieben. Diese Veränderung geht in die Gewinn- und Verlustrechnung der Eigentümergesellschaft ein.

### Bereinigter Konzernüberschuss

Ergebnisgröße nach Zinsen, Steuern vom Einkommen und vom Ertrag sowie Minderheitsanteilen, die um außergewöhnliche Effekte bereinigt ist. Zu den Bereinigungen zählen – neben den Effekten aus der Marktbewertung von Derivaten – Buchgewinne und -verluste aus Desinvestitionen, Restrukturierungsaufwendungen und sonstige nicht operative Aufwendungen und Erträge mit einmaligem beziehungsweise seltenem Charakter (nach Steuern und Minderheitsanteilen). Darüber hinaus werden außergewöhnliche Steuereffekte und das Ergebnis aus nicht fortgeführten Aktivitäten beim bereinigten Konzernüberschuss nicht berücksichtigt.

### Beta-Faktor

Maß für das relative Risiko einer einzelnen Aktie im Vergleich zum Gesamtmarkt (Beta größer eins = höheres Risiko, Beta kleiner eins = niedrigeres Risiko).

### Capital Employed

Das Capital Employed spiegelt das im Konzern gebundene und zu verzinsende Kapital wider. Bei der Ermittlung wird das unverzinslich zur Verfügung stehende Kapital vom betrieblich gebundenen Anlage- und Umlaufvermögen der Geschäftsfelder abgezogen. Hierbei werden die übrigen Beteiligungen nicht zu Marktwerten, sondern zu ihren Anschaffungskosten angesetzt.

### Commercial Paper (CP)

Kurzfristige Schuldverschreibungen von Unternehmen und Kreditinstituten. CP werden im Regelfall auf abgezinster Basis emittiert. Die Rückzahlung erfolgt dann zum Nennbetrag.

### Contractual Trust Agreement (CTA)

Treuhandmodell für die Finanzierung von Pensionsrückstellungen. Im Rahmen des CTA überträgt das Unternehmen sicherungshalber für die Erfüllung seiner Pensionsverpflichtungen Vermögen auf einen unabhängigen und rechtlich selbstständigen Treuhänder.

### Credit Default Swap (CDS)

Finanzinstrument zur Absicherung von Ausfallrisiken bei Krediten, Anleihen oder Schuldnernamen.

### Debt Factor

Verhältnis von wirtschaftlicher Netto-Verschuldung zu Adjusted EBITDA. Der Debt Factor dient als Steuerungsgröße für die Kapitalstruktur.

### Debt-Issuance-Programm

Vertraglicher Rahmen und Musterdokumentation für die Begebung von Anleihen im In- und Ausland.

**Discontinued Operations**

Nicht fortgeführte Aktivitäten – abgrenzbare Geschäftseinheiten, die zum Verkauf bestimmt sind oder bereits veräußert wurden. Sie unterliegen besonderen Ausweisregeln.

**Eigenkapitalverzinsung**

Bei der Eigenkapitalverzinsung handelt es sich um die Verzinsung, die ein Eigenkapitalinvestor aus der Anlage (hier: in E.ON-Aktien) erhält. Diese Verzinsung berechnet sich nach Unternehmenssteuern, aber vor der individuellen Besteuerung auf Ebene des Investors.

**Equity-Bewertung**

(siehe At-equity-Bilanzierung)

**Fair Value**

Wert, zu dem Vermögensgegenstände, Schulden und derivative Finanzinstrumente zwischen sachverständigen, vertragswilligen und voneinander unabhängigen Geschäftspartnern gehandelt würden.

**Finanzderivate**

Vertragliche Vereinbarungen, die sich auf einen Basiswert (zum Beispiel Referenzzinssätze, Wertpapierpreise, Rohstoffpreise etc.) und einen Nominalbetrag (zum Beispiel Fremdwährungsbetrag, bestimmte Anzahl von Aktien etc.) beziehen.

**Geschäfts- oder Firmenwert (Goodwill)**

Im Konzernabschluss aus der Kapitalkonsolidierung nach Auflösung stiller Reserven/Lasten resultierender Wert aus der Aufrechnung des Beteiligungsbuchwertes der Muttergesellschaft mit dem anteiligen Eigenkapital der Tochtergesellschaft.

**Grundkapital**

Aktienkapital einer Aktiengesellschaft, entspricht zahlenmäßig dem Nennwert aller ausgegebenen Aktien. In der Bilanz wird es als gezeichnetes Kapital auf der Passivseite ausgewiesen.

**Impairment-Test**

Werthaltigkeitsprüfung, bei der der Buchwert eines Vermögensgegenstands mit seinem erzielbaren Betrag (Fair Value) verglichen wird. Für den Fall, dass der erzielbare Betrag den Buchwert unterschreitet, ist eine außerplanmäßige Abschreibung (Impairment) auf den Vermögensgegenstand vorzunehmen. Von besonderer Bedeutung für Firmenwerte (Goodwill), die mindestens einmal jährlich einem solchen Impairment-Test zu unterziehen sind.

**International Financial Reporting Standards (IFRS)**

Internationale Rechnungslegungsvorschriften, die aufgrund der Verordnung des Europäischen Parlaments und des Europäischen Rates von kapitalmarktorientierten EU-Unternehmen für Geschäftsjahre, die am oder nach dem 1. Januar 2005 beginnen, – spätestens jedoch ab 2007 – anzuwenden sind.

**Investitionen**

Zahlungswirksame Investitionen gemäß Kapitalflussrechnung.

**Kapitalflussrechnung**

Die Kapitalflussrechnung dient der Ermittlung und Darstellung des Zahlungsmittelflusses, den ein Unternehmen in einem Geschäftsjahr aus laufender Geschäfts-, Investitions- und Finanzierungstätigkeit erwirtschaftet oder verbraucht hat.

**Kapitalkosten**

Kapitalkosten für das eingesetzte Kapital werden als gewichteter Durchschnitt der Eigen- und Fremdkapitalkosten ermittelt (Weighted Average Cost of Capital, WACC). Eigenkapitalkosten entsprechen der Rendite, die Anleger bei einer Investition in Aktien erwarten. Die Fremdkapitalkosten orientieren sich an den Marktkonditionen für Kredite und Anleihen. In den Fremdkapitalkosten wird berücksichtigt, dass Fremdkapitalzinsen steuerlich abzugsfähig sind (Tax Shield).

**Kaufpreisverteilung**

Aufteilung des Kaufpreises nach einer Unternehmensakquisition auf die einzelnen Vermögensgegenstände und Schulden.

**Konsolidierung**

Der Konzernabschluss wird so aufgestellt, als ob alle Konzernunternehmen ein rechtlich einheitliches Unternehmen bilden. Alle Aufwendungen und Erträge sowie Zwischenergebnisse aus Lieferungen und Leistungen und sonstigen Transaktionen zwischen den Konzernunternehmen werden durch Aufrechnung (Aufwands- und Ertrags- sowie Zwischenergebniskonsolidierung) eliminiert. Beteiligungen an Konzernunternehmen werden gegen deren Eigenkapital aufgerechnet (Kapitalkonsolidierung) und alle konzerninternen Forderungen und Verbindlichkeiten eliminiert (Schuldenkonsolidierung), da solche Rechtsverhältnisse innerhalb einer juristischen Person nicht existieren. Aus der Summierung und Konsolidierung der verbleibenden Posten der Jahresabschlüsse ergeben sich die Konzernbilanz und die Konzern-Gewinn- und Verlustrechnung.

**Netto-Finanzposition**

Saldo aus einerseits liquiden Mitteln und langfristigen Wertpapieren sowie andererseits Finanzverbindlichkeiten gegenüber Kreditinstituten und Dritten und Beteiligungsverhältnissen.

**Neutrales Ergebnis**

Das neutrale Ergebnis enthält Geschäftsvorfälle, die einmaligen beziehungsweise seltenen Charakter haben. Hierzu zählen vor allem Buchgewinne und -verluste aus größeren Desinvestitionen sowie Restrukturierungsaufwendungen (vergleiche Adjusted EBIT).

### Operativer Cashflow

Aus der Geschäftstätigkeit fortgeführter Aktivitäten erwirtschafteter Mittelzufluss/-abfluss.

### Option

Recht, den zugrunde liegenden Optionsgegenstand (beispielsweise Wertpapiere oder Devisen) zu einem vorweg fest vereinbarten Preis (Basispreis) zu einem bestimmten Zeitpunkt beziehungsweise in einem bestimmten Zeitraum vom Kontrahenten (Stillhalter) zu kaufen (Kaufoption/Call) oder an ihn zu verkaufen (Verkaufsoption/Put).

### Purchase Price Allocation

(siehe Kaufpreisverteilung)

### Rating

Klassifikation kurz- und langfristiger Schuldtitel oder Schuldner entsprechend der Sicherheit der zukünftigen Zins- und Tilgungszahlungen in Bonitätsklassen oder Ratingkategorien. Die Hauptfunktion eines Ratings ist, Transparenz und somit Vergleichbarkeit für Investoren und Gläubiger hinsichtlich des Ausfallrisikos einer Finanzanlage zu schaffen.

### Rechnungsabgrenzungsposten

Eine im Jahresabschluss auszuweisende Position, die der zeitlichen Abgrenzung von Aufwendungen und Erträgen dient. Dabei können sowohl auf der Aktivseite (Ausgabe vor Bilanzstichtag, aber Aufwand nach Bilanzstichtag) als auch auf der Passivseite (Einnahme vor dem Bilanzstichtag, aber Ertrag nach Bilanzstichtag) Rechnungsabgrenzungsposten entstehen.

### ROCE

Return on Capital Employed – zentrales Renditemaß für die periodische Erfolgskontrolle unserer Geschäftsfelder. Der ROCE wird als Quotient aus dem Adjusted EBIT und dem investierten Kapital (Capital Employed) berechnet. Das Capital Employed spiegelt das im Konzern gebundene und zu verzinsende Vermögen wider.

### Stock Appreciation Rights (SAR)

SAR sind virtuelle Aktienoptionen, bei denen die Vergütung nicht in Aktien, sondern als Barvergütung erfolgt. Der Ausübungsgewinn entspricht der Differenz zwischen dem Kurs der E.ON-Aktie zum Zeitpunkt der Ausübung und dem Basispreis der virtuellen Aktienoption.

### Syndizierte Kreditlinie

Von einem Bankenkonsortium verbindlich zugesagte Kreditlinie.

### Tax Shield

Berücksichtigt den Entlastungseffekt von Fremdkapitalzinsen auf die Steuerschuld bei der Ermittlung von Kapitalkosten.

### Value Added

Zentraler Indikator für den absoluten Wertbeitrag einer Periode. Als Residualgewinn drückt er den Erfolgsüberschuss aus, der über die Kosten des Eigen- und Fremdkapitals hinaus erwirtschaftet wird. Der Value Added wird als Produkt von Rendite-Spread (ROCE – Kapitalkosten) und Kapitaleinsatz (Capital Employed) berechnet.

### Value at Risk (VaR)

Risikomaß, das den potenziellen Verlust angibt, den ein Portfolio mit einer gegebenen Konfidenzwahrscheinlichkeit (zum Beispiel 99 Prozent) über eine bestimmte Haltedauer (zum Beispiel einen Tag) nicht überschreiten wird. Aufgrund von Korrelationen zwischen einzelnen Transaktionen ist das Risiko eines Portfolios in der Regel geringer als die Summe der individuellen Risiken.

### Versicherungsmathematische Gewinne und Verluste

Die versicherungsmathematische Berechnung der Pensionsrückstellungen beruht im Wesentlichen auf zu prognostizierenden Parametern (wie zum Beispiel den Lohn- und Rententwicklungen). Wenn sich die tatsächlichen Entwicklungen später von den Annahmen unterscheiden, resultieren daraus versicherungsmathematische Gewinne oder Verluste.

### Werthaltigkeitsprüfung

(siehe Impairment-Test)

### Wirtschaftliche Netto-Verschuldung

Kennziffer, die die Netto-Finanzposition um die Marktwerte (netto) der Währungsderivate aus Finanztransaktionen (ohne Transaktionen aus dem operativen Geschäft und dem Assetmanagement) sowie um die Pensionsrückstellungen und die Rückstellungen für Entsorgungs- und Rückbauverpflichtungen erweitert, wobei Vorauszahlungen an den schwedischen Nuklearfonds abgezogen werden.

### Working Capital

Finanzkennzahl, die sich aus dem operativen Umlaufvermögen abzüglich der kurzfristigen operativen Verbindlichkeiten ergibt.

## Weitere Informationen

E.ON AG  
E.ON-Platz 1  
40479 Düsseldorf

T 02 11-45 79-0  
F 02 11-45 79-5 01  
info@eon.com  
www.eon.com

Für Journalisten  
T 02 11-45 79-453  
presse@eon.com

Für Analysten und Aktionäre  
T 02 11-45 79-5 49  
investorrelations@eon.com

Für Anleiheinvestoren  
T 02 11-45 79-5 63  
creditorrelations@eon.com

**Produktion:** Jung Produktion, Düsseldorf  
**Satz:** Addon Technical Solutions, Düsseldorf  
**Druck:** Druckpartner, Essen

**Print  kompensiert**  
Ident-Nr. 118391

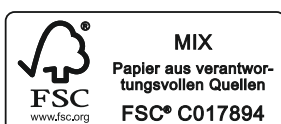

Das für diesen Geschäftsbericht verwendete Papier wurde aus Zellstoffen hergestellt, die aus verantwortungsvoll bewirtschafteten und gemäß den Bestimmungen des Forest Stewardship Council zertifizierten Forstbetrieben stammen.

## Finanzkalender

|                   |                                             |
|-------------------|---------------------------------------------|
| 5. Mai 2011       | Hauptversammlung 2011                       |
| 6. Mai 2011       | Dividendenzahlung                           |
| 11. Mai 2011      | Zwischenbericht Januar – März 2011          |
| 10. August 2011   | Zwischenbericht Januar – Juni 2011          |
| 9. November 2011  | Zwischenbericht Januar – September 2011     |
|                   |                                             |
| 14. März 2012     | Veröffentlichung des Geschäftsberichts 2011 |
| 3. Mai 2012       | Hauptversammlung 2012                       |
| 4. Mai 2012       | Dividendenzahlung                           |
| 9. Mai 2012       | Zwischenbericht Januar – März 2012          |
| 13. August 2012   | Zwischenbericht Januar – Juni 2012          |
| 13. November 2012 | Zwischenbericht Januar – September 2012     |
