# Supplementary material
Source: publisher site journal article supplement (https://www.degruyterbrill.com/publication/isbn/9783110432879/downloadAsset/9783110432879_Elektronischer_Anhang_2.zip)
Supplement: Supplementary file 47 [file E.ON Unser Verhalten.pdf › Korpustexte/Korpustexte pdf/E.ON/E.ON Unser Verhalten.pdf]

# Unser Verhalten

Wir lassen uns von diesen für uns wesentlichen Verhaltensweisen leiten:

## **Kundenorientierung**

Wir arbeiten täglich daran, unsere Kunden zufriedenzustellen und ihnen maßgeschneiderte Lösungen zu liefern. Unsere Kundenorientierung spiegelt sich in unseren Geschäftsabläufen und Organisationsstrukturen wider. Zu unseren Lieferanten wollen wir möglichst langfristige Beziehungen aufbauen, die beiden Seiten nachhaltig nutzen. Unsere Lieferanten und Geschäftspartner tragen wesentlich zur Qualität unseres Kundenservice bei.

## **Leistungswille**

Unsere Strategien konzentrieren sich auf die Bedürfnisse unserer Märkte. Unser Ziel ist profitables Wachstum als Grundlage für nachhaltigen Erfolg. Wir setzen uns ehrgeizige Ergebnisziele und wollen für die, die uns ihr Kapital anvertraut haben, hervorragende Renditen erwirtschaften. Wir suchen beständig nach den besten Lösungen. Wir arbeiten zuverlässig und ergebnisorientiert. Wir denken langfristig und haben zukünftige Herausforderungen schon heute im Auge. Wir arbeiten engagiert an der Verwirklichung unserer Vision und unserer Mission.

## **Veränderungsbereitschaft**

Wir geben uns mit dem Erreichten nie zufrieden. Wir sind offen für die Chancen der Zukunft. Wir fördern konstruktiven Wandel und gehen notwendige Veränderungen engagiert an. Innovation ist der Schlüssel für Verbesserungen. Wir wollen ständig besser werden. Wir begrüßen kreative Ideen und arbeiten daran, Probleme gar nicht erst entstehen zu lassen.

## **Zusammenarbeit**

Wir erreichen mehr, wenn wir zusammenarbeiten. Wir schätzen die Kenntnisse und Beiträge unserer Kollegen. Wir unterstellen einander guten Willen. Unser Motto heißt: "Ein Erfolg für alle ist ein Erfolg für jeden Einzelnen von uns." Gute Teamarbeit lebt von der aktiven Mitarbeit jedes Einzelnen sowie der Bereitschaft, seine Talente, Fähigkeiten und Kapazitäten in den Dienst der gemeinsamen Sache zu stellen. Sie lebt ebenfalls davon, dass wir die Auswirkungen unseres Handelns auf andere frühzeitig berücksichtigen.

## **Führungsverhalten**

Wir bringen nur dann Spitzenleistungen, wenn in allen Teilen des Unternehmens Menschen mit ausgeprägten Führungsfähigkeiten arbeiten. Jede Führungskraft stellt ihre Arbeit in den Dienst des gesamten Unternehmens. Wir werden Führungsfähigkeiten ausbauen und erfolgreiche Führung belohnen. Unsere Führungskräfte spornen ihre Teams durch Motivation, Rat, Coaching und Kreativität zu Höchstleistungen an. Sie erkennen und honorieren besonderes Wissen, besondere Kompetenz und Leistung. Jede Führungskraft ist ein Vorbild für unsere Werte und unser Verhalten.

## **Vielfalt und Weiterentwicklung**

Unsere Mitarbeiter sind unser wertvollstes Gut. Wir arbeiten in einer durch Vielfalt geprägten Welt. Diese Vielfalt wollen wir in unserem Konzern widerspiegeln und aktiv für die Erfüllung unserer Aufgaben nutzen. Unterschiedliche Perspektiven fördern die Weiterentwicklung von Unternehmen und Mitarbeitern. Wir streben Gleichwertigkeit, nicht Gleichartigkeit an. Wir investieren in unsere Mitarbeiter, indem wir ihnen mit ständiger Weiterbildung und gezielten Entwicklungsmaßnahmen helfen, ihr persönliches Potential auszuschöpfen.

<http://www.eon.com/de/corporate/2105.jsp>
