# Supplementary material
Source: publisher site journal article supplement (https://www.degruyterbrill.com/publication/isbn/9783110432879/downloadAsset/9783110432879_Elektronischer_Anhang_2.zip)
Supplement: Supplementary file 48 [file E.ON Unsere Werte.pdf › Korpustexte/Korpustexte pdf/E.ON/E.ON Unsere Werte.pdf]

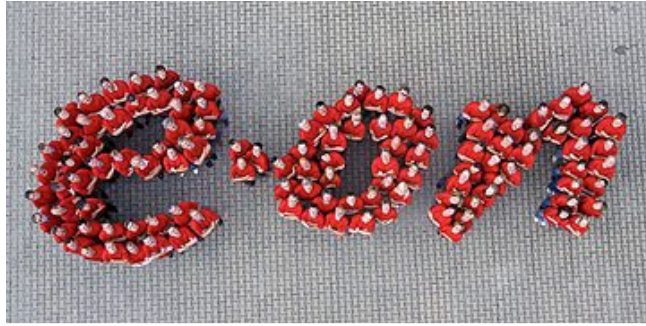

# Unsere Werte

## und wie wir sie leben

Zur Ausrichtung des Konzerns auf eine gemeinsame Kultur und damit zur Integration aller Konzernunternehmen unter dem Dach von E.ON wurde ein Prozess mit dem Namen OneE.ON gestartet. Dieser Prozess soll ein gemeinsames Verständnis entwickeln, das sich in der konkreten Arbeit bewährt und uns im Markt zu einem besonderen Unternehmen macht.

Unsere Werte und Verhaltensweisen, die Mitarbeiterinnen und Mitarbeiter in verschiedenen Ländern und Unternehmensteilen im Alltag leiten, erleichtern die Verständigung, verbessern den Wissensaustausch und die Zusammenarbeit über Bereichsgrenzen hinweg und wirken sich dadurch positiv auf den Erfolg des ganzen Konzerns aus.

### **Integrität**

Wir sind aufrichtig und ehrlich. Wir folgen den Gesetzen und handeln nach ethischen Grundsätzen. Wir kommen unseren Verpflichtungen nach und übernehmen persönlich Verantwortung für unser Handeln.

### **Offenheit**

Wir sind aufgeschlossen für neue Ideen und Veränderungen. Wir sind ehrlich im Umgang miteinander und tauschen unser Wissen und unsere Erfahrungen untereinander aus.

### **Vertrauen und gegenseitiger Respekt**

Wir gehen fair und anständig miteinander um. Wir vertrauen unseren Kollegen und verhalten uns selbst vertrauenswürdig.

### **Mut**

Wir handeln nach unseren Überzeugungen. Unsere gemeinsamen Werte haben Vorrang vor Eigeninteressen. Wir tun und sagen das, was wir für richtig halten, und fördern konstruktive Kritik.

### **Gesellschaftliche Verantwortung**

Wir zeigen Verantwortung für unsere Kollegen, Kunden und Lieferanten sowie für unsere Umwelt und die Gesellschaft, in der wir leben und arbeiten. Dort wo wir tätig sind, wollen wir die Lebensqualität verbessern. Dabei haben wir das Ziel, eine nachhaltig gesunde und sichere Umwelt zu schaffen. Wir nehmen Rücksicht auf die Bedürfnisse der heutigen Generation. In gleichem Maße nehmen wir unsere Verantwortung für künftige Generationen wahr.
