# Supplementary material
Source: publisher site journal article supplement (https://www.degruyterbrill.com/publication/isbn/9783110432879/downloadAsset/9783110432879_Elektronischer_Anhang_2.zip)
Supplement: Supplementary file 49 [file Fresenius Medical Care GB 2010.pdf › Korpustexte/Korpustexte pdf/Fresenius Medical Care/Fresenius Medical Care GB 2010.pdf]

E

R

F

—ERFAHRUNG—  
*Geschäftsbericht 2010*

A

H

R

U

N

G

## UNTERNEHMENSBERICHT

### 1.1 – 3

#### AN UNSERE AKTIONÄRE

Brief an unsere Aktionäre  
zu Beginn des Kapitels  
Vorstand s. 14

Bericht des Aufsichtsrats s. 16  
Kapitalmarkt und Aktie s. 20

### 2.1 – 11

#### UNSER GESCHÄFTSJAHR

Geschäftstätigkeit und Rahmenbedingungen s. 31  
Ertrags-, Finanz- und Vermögenslage s. 55  
Forschung und Entwicklung s. 68  
Unser Produktgeschäft s. 77  
Unser Geschäft mit Dialysedienstleistungen s. 82  
Mitarbeiterinnen und Mitarbeiter s. 90  
Verantwortung s. 96  
Risikobericht s. 104  
Nachtragsbericht s. 115  
Prognosebericht s. 116  
Erklärung zur Unternehmensführung und  
Corporate-Governance-Bericht s. 128

### 3.1 – 4

#### MANDATE UND GLOSSAR

Mandate s. 153  
Glossar s. 156  
Verzeichnis der Tabellen und Grafiken s. 162  
Stichwortverzeichnis s. 164

## FINANZBERICHT

### 4.1 – 6

#### DARSTELLUNG UND ANALYSE

Kritische Rechnungslegungsgrundsätze s. 169  
Finanz- und Ertragslage s. 174  
Operative Entwicklungen s. 178  
Liquidität und Mittelherkunft s. 184  
Neue Verlautbarungen und Änderungen  
der Rechnungslegungsvorschriften s. 192  
Quantitative und qualitative Offenlegung  
von Marktrisiken s. 193

### 5.1 – 9

#### KONZERNABSCHLUSS

Konzern-Gewinn- und Verlustrechnung s. 201  
Konzern-Gesamtergebnisrechnung s. 202  
Konzernbilanz s. 202  
Konzern-Cash-Flow-Rechnung s. 204  
Konzern-Eigenkapitalveränderungsrechnung s. 206  
Anmerkungen zum Konzernabschluss s. 208  
Bericht über das interne Kontrollsystem  
für die Finanzberichterstattung s. 269  
Bericht der unabhängigen Abschlussprüfer s. 270  
Bestätigungsvermerk: Bericht der unabhängigen  
Abschlussprüfer s. 272

### 6.1 – 8

#### WEITERE INFORMATIONEN

Finanzglossar s. 275  
Regionale Organisation s. 277  
Wesentliche Beteiligungen s. 278  
Fünf-Jahres-Übersicht s. 280  
Verzeichnis der Tabellen s. 282  
Stichwortverzeichnis s. 284  
Kontakte s. 285  
Impressum s. 286

#### WICHTIGE TERMINE 2011

Finanzkalender und wichtige Messen  
am Ende des Finanzberichts

## MAGAZIN

ERFAHRUNG  
zwischen den Berichten

# WAS BEDEUTET FÜR UNS ERFAHRUNG?

Erfahrung hat für Fresenius Medical Care einen besonderen Wert, obwohl und gerade weil wir ein noch junges Unternehmen sind.

Als wir vor rund 30 Jahren begannen, Dialyseprodukte herzustellen, gehörten wir zu den Pionieren unserer Branche. Damals lautete das Ziel: das Leben von Patienten mit chronischem Nierenversagen bestmöglich zu erhalten.

Inzwischen bieten wir nicht nur Produkte für die Dialyse an, sondern wir versorgen auch selbst Dialysepatienten – im größten Kliniknetz weltweit. Dank der Entwicklung von Medizin und Technik lautet unser Ziel inzwischen: die Lebensqualität von Patienten mit chronischem Nierenversagen kontinuierlich zu verbessern.

Von diesem beachtlichen Fortschritt bei der Behandlung der Patienten haben wir als führendes Dialyseunternehmen profitiert. Wir haben aber auch selbst maßgeblich dazu beigetragen – dank unserer einzigartigen Erfahrung.

---

# WAS MACHT UNSERE ERFAHRUNG EINZIGARTIG?

Als vertikal integriertes Unternehmen stellen wir nicht nur Produkte für die Dialyse her und entwickeln Therapieverfahren, sondern wir verwenden unsere Produkte und Verfahren auch täglich in den eigenen Kliniken.

Unsere Erfahrung ist deshalb einzigartig vielseitig: Sie reicht von der Beschaffung und komplexen Fertigungstechnologien über das Qualitätsmanagement bis hin zur umfassenden Versorgung von Patienten, auch auf Basis hoch entwickelter klinischer Qualitätsdatenbanken.

Unsere Erfahrung ist zudem einzigartig vernetzt: Der Austausch mit den Patienten, Ärzten und Dialysefachkräften in unseren Kliniken hilft uns dabei, unsere Leistungen und Produkte kontinuierlich zu verbessern – und dadurch Wert für unsere Anspruchsgruppen zu schaffen.

---

# ZUKUNFT LEBENSWEERT GESTALTEN.

Für Menschen. Weltweit.  
Jeden Tag.

Mehr als drei Jahrzehnte Erfahrung  
in der Dialyse, zukunftsweisende Forschung,  
Weltmarktführer bei Dialysetherapien  
und Dialyseprodukten – dafür steht  
Fresenius Medical Care.

Dank unserer innovativen Technologien  
und Behandlungskonzepte können  
nierenkranke Patienten heute mit deutlich  
mehr Zuversicht nach vorne schauen.  
Wir geben ihnen eine Zukunft mit  
höchstmöglicher Lebensqualität.

Die steigende Nachfrage nach  
modernen Dialyseverfahren nutzen wir  
und arbeiten konsequent am Wachstum des  
Unternehmens. Mit unseren Mitarbeitern  
setzen wir unsere Strategien für die  
Technologieführerschaft zielorientiert um.

Dabei bedienen wir als vertikal  
integriertes Unternehmen die gesamte  
Wertschöpfungskette in der Dialyse.

Unser Maßstab sind medizinische  
Standards auf höchstem Niveau.  
Wir tragen mit diesem Engagement  
gleichermaßen Verantwortung für unsere  
Patienten, Partner im Gesundheitssystem  
und Investoren, die auf die Zukunfts-  
und Ertragssicherheit von  
Fresenius Medical Care vertrauen.

---

# KOM AN UNSERE AKTIONÄRE

## KOMPETENZ

*Fresenius Medical Care steht für eine  
einzigartige Kompetenz bei  
Produkten und Dienstleistungen  
für Patienten mit chronischem  
Nierenversagen.*

## 1.1

Vorstand  
S. 14

## 1.2

Bericht des Aufsichtsrats  
S. 16

## 1.3

Kapitalmarkt und Aktie  
S. 20

---

## **SEHR GEEHRTE AKTIONÄRINNEN UND AKTIONÄRE, LIEBE GESCHÄFTSPARTNER UND FREUNDE UNSERES UNTERNEHMENS**

Zum Ende des Jahres 2010 kann Fresenius Medical Care nicht nur auf ein gelungenes Geschäftsjahr, sondern gleich auf mehrere zurückblicken:

Von 2005 bis 2010 haben wir unser unternehmerisches Handeln an der Wachstumsstrategie GOAL 10 ausgerichtet – und uns dabei sogar noch besser entwickelt, als wir es anfangs für möglich gehalten hatten. Auf diese Leistung und den Wert, den wir damit in den vergangenen Jahren für unsere Patienten, Kunden, Anteilseigner und für das Unternehmen selbst geschaffen haben, können wir sehr stolz sein.

GOAL steht für „Growth Opportunities to Assure Leadership“ – Wachstumschancen, um unsere Marktführerschaft zu sichern. Diese Chancen haben wir auch im Jahr 2010 erfolgreich genutzt: Wir haben in attraktiven Wachstumsmärkten, insbesondere in Asien und Osteuropa, Dialysezentren errichtet und erworben und so unser internationales Kliniknetz erweitert. Wir haben mit neuen und verbesserten Produkten und Verfahren unser ganzheitliches Behandlungskonzept ausgebaut. Und es ist uns gelungen, die horizontale Erweiterung unseres Portfolios voranzutreiben: Mit der in der Schweiz beheimateten Galenica-Gruppe haben wir ein Gemeinschaftsunternehmen gegründet, das nach Zustimmung der Kartellbehörden innovative Medikamente für Nierenpatienten entwickeln und vertreiben wird. Auch unsere Position im Geschäft der Heimtherapien – dem einzigen Bereich in der Dialyse, bei dem Fresenius Medical Care nicht Marktführer ist – konnten wir stärken; beigetragen hat dazu unter anderem die Akquisition des Peritonealdialyse-Geschäfts des schwedischen Medizintechnik-Unternehmens Gambro.

Alle Ziele, die wir uns für 2010 gesetzt hatten, haben wir erreicht – und dabei neue Rekorde eingefahren. Dank eines organischen Wachstums von 6 % konnten wir den Umsatz im Vergleich zum Vorjahr um 7 % auf 12,05 Milliarden US\$ – einen neuen Höchstwert – steigern. Damit haben wir auch unser GOAL-10-Umsatzziel erreicht, das wir in den vergangenen Jahren mehrfach angehoben hatten: 2006 waren wir noch von 11,5 Milliarden ausgegangen. Gleichzeitig ist es uns gelungen, das Konzernergebnis überproportional zum Umsatzwachstum zu steigern und hier im Vergleich zum Vorjahr ein Plus von 10 % auf 979 Millionen US\$ zu erzielen. Seit 2005 ist unser Konzernergebnis um durchschnittlich rund 17 % pro Jahr gestiegen – das GOAL-10-Ziel hatte „mehr als 10 %“ gelautet. Den Netto-Cashflow konnten wir im Vergleich zu 2009 um rund 11 % auf 861 Millionen US\$ erhöhen und unsere Netto-Finanzverbindlichkeiten im Verhältnis zum EBITDA auf unter 2,4 zurückführen. Wir freuen uns, Ihnen über eine so positive Entwicklung aller wichtigen Kennzahlen berichten zu können.



Die Zahl der Patienten, die wir versorgen, ist im Vergleich zum Vorjahr um ein Zehntel und seit 2005 sogar um fast zwei Drittel gestiegen: Mehr als 214.000 Patienten hat Fresenius Medical Care im vergangenen Jahr in über 2.750 eigenen Kliniken weltweit betreut. Die Teams in unseren Dialysezentren haben 2010 mehr als 31 Millionen Behandlungen durchgeführt. Weltweit haben wir mit unserem Produktgeschäft die Hälfte des Bedarfs an neuen Dialysegeräten gedeckt.

Auf Basis dieser Ergebnisse sind wir auch im vergangenen Jahr stärker gewachsen als der Dialysemarkt insgesamt. Wir konnten unsere Position als Marktführer festigen und unseren weltweiten Marktanteil ausbauen. Erneut haben wir dabei auch von den günstigen Rahmenbedingungen einer relativ konjunkturstabilen Branche profitiert; operative Herausforderungen bedingt durch die gesamtwirtschaftliche Entwicklung, wie gestiegene Kosten für Energie und Rohstoffe, konnten wir dank unserer langfristigen Unternehmensstrategie und starker Geschäftspartnerschaften weitgehend ausgleichen.

Solche Leistungen werden erst möglich durch den großen Einsatz, das außergewöhnliche Verantwortungsbewusstsein und die ehrliche Begeisterung unserer Mitarbeiterinnen und Mitarbeiter. Für dieses Engagement möchte ich mich von Herzen bedanken. Mein herzlicher Dank gilt auch meinen Vorstandskollegen und den Mitgliedern des Aufsichtsrats für unsere konstruktive Zusammenarbeit und das gegenseitige Vertrauen.

Damit auch Sie, unsere Aktionärinnen und Aktionäre, an diesem Erfolg teilhaben können, werden wir der Hauptversammlung eine Erhöhung der Dividende um rund 7 % auf 0,65 € je Stammaktie vorschlagen. Es wäre die vierzehnte Dividendenerhöhung in Folge – in jedem Jahr unserer Unternehmensgeschichte hätten unsere Anteilseigner somit stärker von der positiven Unternehmensentwicklung profitiert. Mit diesem Vorschlag wollen wir der operativen Ertragskraft Ihres Unternehmens und dessen Aussichten für die Zukunft Rechnung tragen.

Wie wird diese Zukunft aussehen? Mit der Wachstumsstrategie GOAL 13, die wir im September 2010 beschlossen haben, knüpfen wir an GOAL 10 an und gehen konsequent die vier strategischen Wege weiter, die wir damals festgelegt hatten. Das organische Wachstum bei unseren Produkten und Dienstleistungen, die Akquisition weiterer Dialysekliniken in attraktiven Märkten, die horizontale Erweiterung unseres Portfolios und der Ausbau unserer Position bei den Heimtherapien werden also wesentliche Ziele bleiben, mit denen wir unsere führende Marktposition festigen möchten. Im laufenden Geschäftsjahr 2011 wollen wir auf der Grundlage dieser Strategie einen Umsatz zwischen 12,8 und 13,0 Milliarden US \$ erzielen; dies würde einem Wachstum von 6 bis 8 % entsprechen. Das Konzernergebnis soll 2011 zwischen 1,035 und 1,055 Milliarden US \$ liegen.

Unsere wichtigste strategische Leitlinie bleibt dabei: Wir wollen die Lebensqualität von Menschen mit chronischem Nierenversagen kontinuierlich verbessern. Wir wissen, dass wir damit auch vor einigen Herausforderungen stehen: Weltweit gibt es immer mehr Dialysepatienten; zugleich werden die öffentlichen Mittel für deren Versorgung immer knapper – eine Lage, die sich durch die Finanz- und Wirtschaftskrise weiter verschärft hat. Genauso aber wissen wir, dass wir in einer ausgezeichneten Position sind, diese Herausforderungen gemeinsam mit unseren Partnern im Gesundheitswesen zu meistern. Als vertikal integriertes Dialyseunternehmen bieten wir hochwertige Dialyseprodukte und -dienstleistungen aus einer Hand an. Dadurch können wir Patienten ganzheitlich versorgen und so nicht nur zu einer höheren Behandlungsqualität, sondern auch zu geringeren Behandlungskosten beitragen. Weltweit wächst der Bedarf an solchen integrierten Versorgungskonzepten für Dialysepatienten; die Vergütung ist dabei immer häufiger an die Erfüllung bestimmter Qualitätsziele geknüpft.

Was gerade Fresenius Medical Care für solche Konzepte zum bevorzugten Partner macht, sehen Sie bereits auf dem Titel dieses Geschäftsberichts: Es ist die „Erfahrung“ – unsere einzigartige Erfahrung als Entwickler und Hersteller marktführender Dialyseprodukte, als Betreiber des größten Netzes von Dialysekliniken weltweit und als Unternehmen, das nicht nur kontinuierlich an der Verbesserung der Qualität und Effizienz seiner Leistungen arbeitet, sondern diese Leistung anhand eines ausgefeilten klinischen Qualitätsdatenmanagements auch belegen kann. Dieser Erfahrung haben wir es letztlich auch zu verdanken, dass wir auf das neue Komplettvergütungssystem für die Dialyse, das Anfang 2011 in den USA eingeführt wurde, sehr gut vorbereitet sind.

Wir blicken deshalb mit großer Zuversicht nach vorn und werden erneut alle Kompetenzen und Kapazitäten im Unternehmen dafür einsetzen, dass Sie, verehrte Aktionärinnen und Aktionäre, diese Zuversicht auch weiterhin mit uns teilen. Für die Unterstützung und das Vertrauen, dass Sie Ihrem Unternehmen in den vergangenen Jahren entgegengebracht haben, bedanke ich mich an dieser Stelle ganz herzlich. Ich freue mich auf ein weiteres spannendes Jahr als Teil dieses einzigartigen Unternehmens.

Mit den besten Grüßen



**DR. BEN J. LIPPS**  
Vorstandsvorsitzender

## VORSTAND

### DR. BEN J. LIPPS

*Vorsitzender*

Dr. Ben J. Lipps (70) ist seit 1999 Vorstandsvorsitzender von Fresenius Medical Care. Von 1996 bis 1999 war Dr. Lipps Vorstandsvorsitzender von Fresenius Medical Care North America und von 1985 bis 1996 Vorstandsvorsitzender von Fresenius USA. Der US-Amerikaner ist seit rund 40 Jahren im Bereich der Dialyse tätig. Nach dem Erwerb eines Master- und eines Dokortitels in Chemieingenieurwesen am Massachusetts Institute of Technology leitete Dr. Lipps ein Forschungsteam bei Dow Chemical, das Ende der 60er Jahre die erste künstliche Hohlfasermembran herstellte. — Bild 1

### RICE POWELL

*Stellvertretender Vorsitzender  
sowie Vorsitzender von Fresenius  
Medical Care North America*

Rice Powell (55) ist seit dem 1. Januar 2010 stellvertretender Vorstandsvorsitzender von Fresenius Medical Care sowie Vorsitzender von Fresenius Medical Care North America. Er ist seit 1997 im Unternehmen und wurde im Januar 2004 in dessen Vorstand sowie als Gesamtgeschäftsführer von Fresenius Medical Care North America berufen. Er ist seit über 30 Jahren im Bereich der Gesundheitsdienstleistungen aktiv. Von 1978 bis 1996 bekleidete er verschiedene Positionen, unter anderem bei Baxter International Inc., Biogen Inc. und Ergo Sciences Inc. in den USA. — Bild 2

### MICHAEL BROSNAN

*Finanzen*

Michael Brosnan (55) ist seit dem 1. Januar 2010 Finanzvorstand. Zuvor war er sieben Jahre als Finanzvorstand für Fresenius Medical

Care North America tätig. 1998 stieg er als Vice President of Finance and Administration bei Spectra Renal Management ein, dem Labordienstleistungsgeschäft von Fresenius Medical Care North America. In der Folge übernahm er mehrere Führungsfunktionen im Unternehmen. Zuvor bekleidete er leitende Positionen im Finanzbereich der Polaroid Corporation und war Partner bei der Wirtschaftsprüfungsgesellschaft KPMG. — Bild 3

### ROBERTO FUSTÉ

*Asien-Pazifik*

Roberto Fusté (58) ist das verantwortliche Vorstandsmitglied für die Region Asien-Pazifik. Nach Beendigung seines Studiums der Wirtschaftswissenschaften an der Universität Valencia gründete der Spanier 1983 die Firma Nephrocontrol S.A. Mit der Akquisition dieses Unternehmens durch die Fresenius-Gruppe im Jahr 1991 übernahm er verschiedene leitende Positionen, unter anderem in Lateinamerika und Asien-Pazifik. 1999 wurde er in den Vorstand von Fresenius Medical Care berufen. — Bild 4

### DR. EMANUELE GATTI

*Europa, Naher Osten, Afrika und Lateinamerika sowie Strategieentwicklung*

Dr. Emanuele Gatti (55) ist Vorstand für die Regionen Europa, Naher Osten, Afrika und Lateinamerika (EMEALA) und außerdem verantwortlich für die weltweite Strategieentwicklung sowie Forschung und Entwicklung in EMEALA. Nach dem Abschluss seines Studiums als Ingenieur der Biomedizin lehrte er an mehreren biomedizinischen Einrichtungen in Mailand, und auch heute ist er intensiv in Forschungs- und Entwicklungsarbeiten eingebunden. Er ist Gastprofessor an der

Donau-Universität in Krems, Österreich. Dr. Gatti ist seit 1989 für Fresenius Medical Care tätig und verantwortete das Dialysegeschäft in Südeuropa, bevor er 1997 in den Vorstand berufen wurde. — Bild 5

### DR. RAINER RUNTE

*Weltweit zuständig für Recht,  
Compliance, Intellectual Property,  
Corporate Business Development sowie  
Arbeitsdirektor für Deutschland*

Dr. Rainer Runte (51) ist das zuständige Vorstandsmitglied für Recht, Compliance, Intellectual Property und Corporate Business Development. Er wurde außerdem zum Arbeitsdirektor für Deutschland ernannt. Dr. Runte ist bereits seit 20 Jahren bei der Fresenius-Gruppe. Zuvor war er als wissenschaftlicher Mitarbeiter am Fachbereich Recht der Goethe-Universität in Frankfurt am Main und darauf folgend als Rechtsanwalt in einer wirtschaftsrechtlich ausgerichteten Anwaltskanzlei tätig. Im Jahr 1997 übernahm er die Position des Bereichsleiters Recht und ist seit 2002 Mitglied des Vorstands von Fresenius Medical Care. — Bild 6

### KENT WANZEK

*Produktion*

Kent Wanzenk (51) steuert seit dem 1. Januar 2010 als zuständiger Vorstand die weltweiten Produktionsaktivitäten von Fresenius Medical Care. Von 2004 an war er als President for Operations der Renal Therapies Group für Fresenius Medical Care North America tätig. Vor seinem Einstieg in das Unternehmen im Jahr 2003 arbeitete er in mehreren leitenden Positionen, unter anderem bei Philips Medical Systems, Perkin Elmer und Baxter Healthcare Corporation. — Bild 7

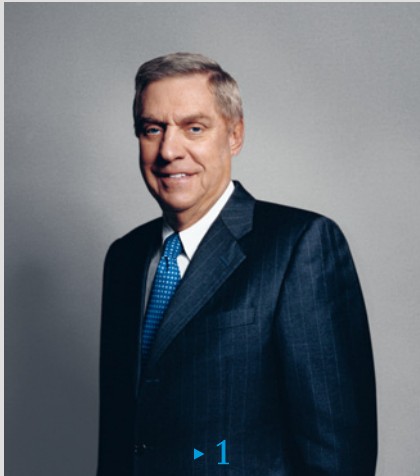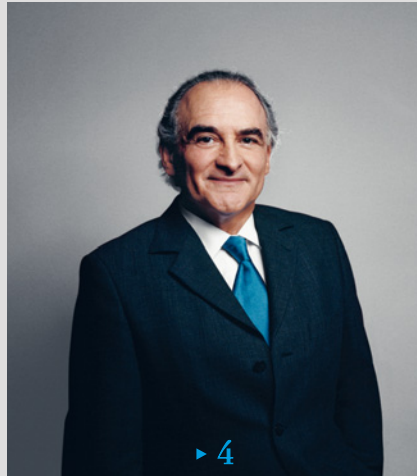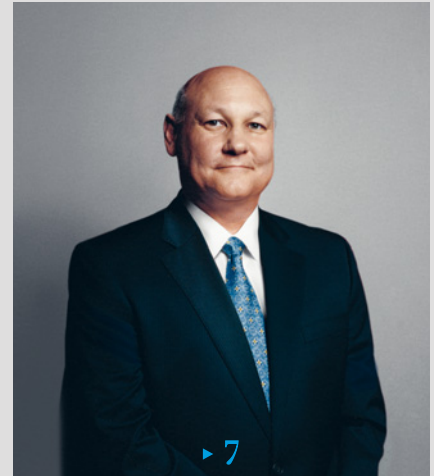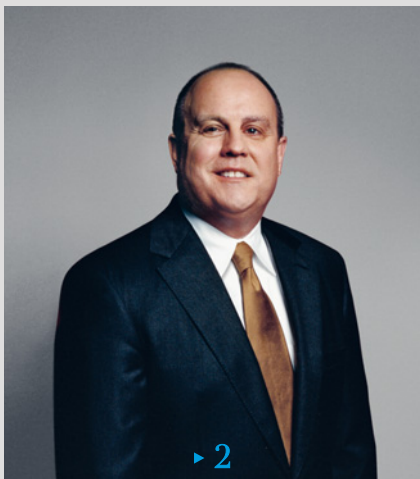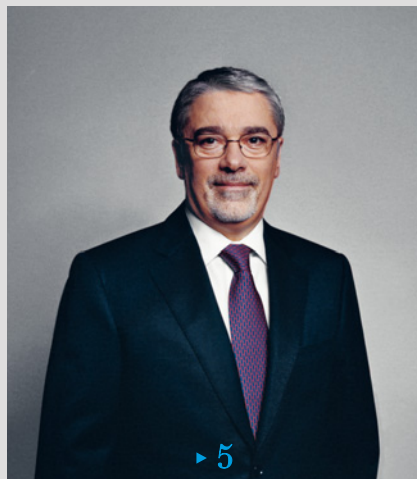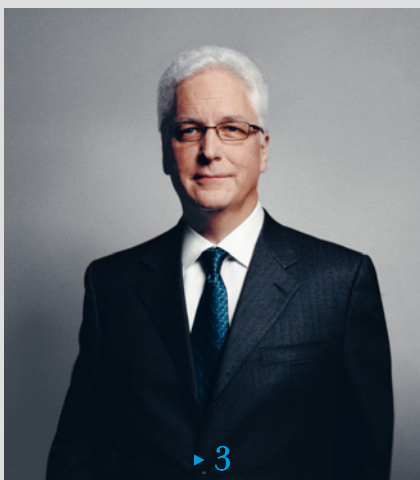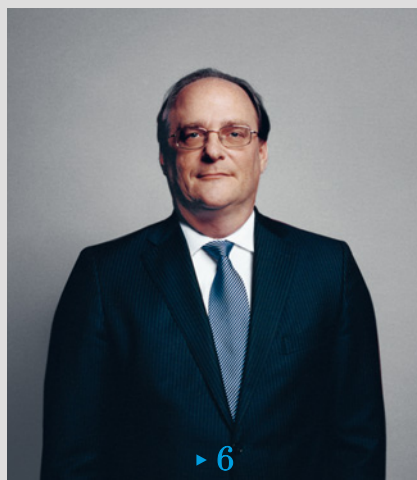

Informationen zu weiteren Mandaten  
unserer Vorstandsmitglieder finden Sie ab Seite 154.  
Altersangaben zum 31. Dezember 2010.

## BERICHT DES AUFSICHTSRATS

Der Aufsichtsrat der Fresenius Medical Care AG & Co. KGaA hat sich im Geschäftsjahr 2010 vorwiegend mit der Lage der Gesellschaft im weltweiten wirtschaftlichen Umfeld, mit der Finanzierung und der weiteren Entwicklung der us-Gesundheitsreform und deren Auswirkungen auf die Gesellschaft befasst.

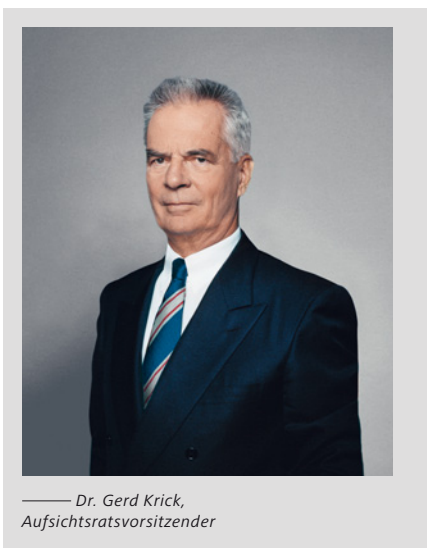

### Im Einzelnen

Der Aufsichtsrat hat sich im abgelaufenen Geschäftsjahr 2010 wiederum ausführlich mit der Lage und den Perspektiven des Unternehmens und verschiedenen Sonderthemen befasst sowie die ihm nach dem Gesetz, der Satzung, der Geschäftsordnung und dem Deutschen Corporate Governance Kodex zugewiesenen Aufgaben wahrgenommen. Wir haben den Vorstand der persönlich haftenden Gesellschafterin Fresenius Medical Care Management AG bei der Leitung des Unternehmens regelmäßig beraten und die Geschäftsführung der Gesellschaft im Rahmen unserer Verantwortung als Aufsichtsrat der Kommanditgesellschaft auf Aktien überwacht. Die Geschäftsführung unterrichtete uns in schriftlichen und mündlichen Berichten regelmäßig, zeitnah und umfassend über alle maßgeblichen Fragen der Geschäftspolitik sowie der Unternehmensplanung und Strategie, über den Gang der Geschäfte, über die Rentabilität, die Lage der Gesellschaft und des Konzerns sowie über die Risikosituation und das Risikomanagement. Alle für das Unternehmen

bedeutenden Geschäftsvorgänge haben wir auf Basis der Berichte des Vorstands der persönlich haftenden Gesellschafterin in den Ausschüssen und im Plenum ausführlich besprochen. Die strategische Ausrichtung des Unternehmens hat der Vorstand der persönlich haftenden Gesellschafterin mit uns erörtert. Wir haben wieder wie in den vergangenen Jahren die wirtschaftliche Entwicklung der Akquisitionen der Vorjahre geprüft und mit den Planungen und Prognosen im Zeitpunkt der jeweiligen Akquisitionen verglichen. Der Aufsichtsrat hat im Rahmen seiner gesetzlichen und satzungsmäßigen Zuständigkeit Beschlüsse gefasst.

### Sitzungen

Im Geschäftsjahr 2010 fanden vier Aufsichtsratssitzungen und mehrere Telefonkonferenzen statt. Kein Aufsichtsratsmitglied hat an weniger als der Hälfte der Sitzungen teilgenommen. Zwischen den Sitzungen sind schriftliche Informationen erteilt worden. Der Vorsitzende des Aufsichtsrats hat zwischen den Sitzungen engen Kontakt mit dem Vorstand der persönlich haftenden Gesellschafterin gehalten. Der Aufsichtsrat hat auch im vergangenen Jahr von der Möglichkeit Gebrauch gemacht, leitende Mitarbeiter bei der Präsentation ausgewählter Themen kennenzulernen.

### Schwerpunkte der Beratungen im Aufsichtsrat

Der Aufsichtsrat hat sich im Jahre 2010 intensiv und bei allen seinen Sitzungen mit der gesamtwirtschaftlichen Situation und deren Auswirkungen für die Gesellschaft befasst. Besonderes Augenmerk galt erneut den politischen Diskussionen beim Erstattungssystem in den USA und deren Auswirkungen auf die Gesellschaft; der Aufsichtsrat wurde regelmäßig über den Fortschritt der Beratungen des amerikanischen Gesetzgebers unterrichtet. Auch die Entwicklungen in den Erstattungssystemen in den anderen Ländern, in denen die Gesellschaft tätig ist, wurden erörtert und deren Auswirkungen auf die Planungen der Gesellschaft besprochen. Die Geschäftsentwicklung, die Wettbewerbssituation und die Planungen des Vorstands in den einzelnen Regionen nahmen erneut breiten Raum bei den Sitzungen ein. Erneut stand auch die Finanzierung der Gesellschaft im Fokus der Beratungen. Einen weiteren Beratungsgegenstand bildeten Akquisitionen, wie beispielsweise des Peritonealdialysegeschäfts von Gambro und des Dialysedienstleistungsgeschäfts der Euromedic.



### Prüfungs- und Corporate-Governance-Ausschuss

Der Prüfungs- und Corporate-Governance-Ausschuss tagte unter dem Vorsitz von Herrn Dr. Walter L. Weisman (unabhängiger Finanzexperte im Sinne von § 100 Abs. 5 AktG) im Berichtsjahr insgesamt vier Mal in Sitzungen und hielt mehrere Telefonkonferenzen ab. Er befasste sich mit dem Jahres- und dem Konzernabschluss, dem Gewinnverwendungsvorschlag und dem Bericht 20-F für die amerikanische Securities and Exchange Commission (SEC). Der Prüfungs- und Corporate-Governance-Ausschuss hat ferner jeweils die Quartalsberichte mit der Geschäftsführung erörtert. Der Prüfungs- und Corporate-Governance-Ausschuss hat sich von der Unabhängigkeit des Abschluss- und Konzernabschlussprüfers überzeugt, den Prüfungsauftrag an ihn erteilt, die Honorarvereinbarung mit ihm getroffen und die Prüfungsschwerpunkte mit ihm erörtert und festgelegt. Vertreter des Abschlussprüfers haben an allen Sitzungen des Prüfungs- und Corporate-Governance-Ausschusses teilgenommen und dabei über ihre Prüfungstätigkeit bzw. die prüferische Durchsicht der Quartalsabschlüsse sowie ohne Anwesenheit von Mitgliedern des Vorstands der persönlich haftenden Gesellschafterin von der Zusammenarbeit mit ihnen berichtet. Sie standen auch für ergänzende Auskünfte zur Verfügung.

Der Rechnungslegungsprozess, die Wirksamkeit des internen Kontrollsystems, des Risikomanagements und des internen Revisionssystems sowie die Abschlussprüfung wurden mehrfach erörtert. Die KPMG AG Wirtschaftsprüfungsgesellschaft hat im Rahmen der Abschlussprüfung das interne Kontrollsystem bezogen auf den Rechnungslegungsprozess und den Aufbau des Risikofrüherkennungssystems geprüft und nicht beanstandet. Über größere Einzelrisiken hat der Vorstand der persönlich haftenden Gesellschafterin periodisch Bericht erstattet. Der Vorstand der persönlich haftenden Gesellschafterin hat den Ausschuss ferner regelmäßig, d.h. in allen ordentlichen Sitzungen des Prüfungs- und Corporate-Governance-Ausschusses, über die Compliance-Situation der Gesellschaft informiert. Ferner hat der Leiter der internen Revision turnusmäßig dem Ausschuss Bericht erstattet.

Im Jahr 2010 hat sich der Prüfungs- und Corporate-Governance-Ausschuss erneut intensiv mit dem internen Kontrollsystem nach dem Sarbanes-Oxley

Act (SOX 404) bei der Gesellschaft befasst. Die Gesellschaft hat am 23. Februar 2011 den uneingeschränkten Prüfungsvermerk der KPMG AG Wirtschaftsprüfungsgesellschaft, Berlin, für die Umsetzung der Regelungen von SOX 404 im Geschäftsjahr 2010 erhalten.

Gegenstand der Prüfungen des Prüfungs- und Corporate-Governance-Ausschusses waren auch wieder die rechtlichen und geschäftlichen Beziehungen der Gesellschaft zur Fresenius SE bzw. mit ihr verbundener Unternehmen. Hier konnte jeweils bestätigt werden, dass diese Beziehungen solchen zwischen fremden Dritten (at arms' length) entsprechen. Der Prüfungs- und Corporate-Governance-Ausschuss hat den Wechsel des Prüfungsleiters für Nordamerika beim Abschlussprüfer begleitet. Der Prüfungs- und Corporate-Governance-Ausschuss hat jeweils den Gesamtaufsichtsrat vom Ergebnis seiner Beratungen unterrichtet.

### Gemeinsamer Ausschuss

Der Gemeinsame Ausschuss, dessen Zustimmung für bestimmte wesentliche Transaktionen und bestimmte Rechtsgeschäfte zwischen der Gesellschaft und der Fresenius SE bzw. mit ihr verbundener Unternehmen erforderlich ist, hat im Jahre 2010 nicht getagt, da keine zustimmungspflichtigen Geschäfte getätigt wurden.

### Nominierungsausschuss

Der Nominierungsausschuss der Gesellschaft, dem im Berichtsjahr Herr Dr. Gerd Krick (Vorsitzender), Dr. Walter L. Weisman und Dr. Dieter Schenk angehörten, erarbeitet Personalvorschläge des Aufsichtsrats und schlägt dem Aufsichtsrat der Gesellschaft geeignete Kandidaten für dessen Wahlvorschläge an die Hauptversammlung vor. Der Ausschuss tagte im Dezember 2010 im Hinblick auf die bei der Gesellschaft für 2011 anstehenden Aufsichtsratswahlen.

### Corporate Governance

Der Aufsichtsrat hat sich mit der Überprüfung seiner Effizienz und dem Informationsaustausch zwischen dem Vorstand der persönlich haftenden Gesellschafterin und dem Aufsichtsrat und zwischen dem Aufsichtsrat und dem Prüfungs- und Corporate-Governance-Ausschuss befasst. Beanstandungen haben sich hierbei nicht ergeben. Der Aufsichtsrat hat sich

mit den neuen gesetzlichen Regelungen und Rechnungslegungsvorschriften vertraut gemacht. Darüber hinaus hat er die Änderungen des Deutschen Corporate Governance Kodexes erörtert. Die Herren Johnston, Dr. Krick, Kringel, Dr. Schenk und Dr. Weisman sind auch Mitglieder des Aufsichtsrats der persönlich haftenden Gesellschafterin, der Fresenius Medical Care Management AG. Berater- oder sonstige Dienstleistungsbeziehungen zwischen Aufsichtsratsmitgliedern und der Gesellschaft bestanden auch im Berichtsjahr ausschließlich bei Herrn Dr. Schenk, der auch Partner der Anwaltskanzlei Noerr LLP ist, die im Berichtsjahr jeweils mit Zustimmung des Aufsichtsrats, bei Stimmenthaltung von Herrn Dr. Schenk, für das Unternehmen rechtsberatend tätig geworden ist. Im Berichtsjahr wurden von Fresenius Medical Care 1.207.685 € an die Rechtsanwaltssozietät Noerr LLP bezahlt. Dies entspricht weniger als 3 % der von Fresenius Medical Care weltweit gezahlten Rechts- und Beratungskosten. Der Aufsichtsrat hat festgestellt, dass ihm und den Ausschüssen eine nach seiner Auffassung ausreichende Anzahl unabhängiger Mitglieder angehört. Interessenkonflikte von Aufsichtsratsmitgliedern sind im Berichtsjahr nicht aufgetreten.

In der Aufsichtsratssitzung vom 1. Dezember 2010 hat der Aufsichtsrat die Entsprechenserklärung der Gesellschaft nach § 161 AktG zum Deutschen Corporate Governance Kodex erörtert und beschlossen. Die Entsprechenserklärung gilt in der auf der Internetseite der Gesellschaft dauerhaft zugänglich gemachten Fassung vom Dezember 2010. Die Ausnahmen von den Empfehlungen des Kodex betreffen unverändert die (fehlende) Altersgrenze für Vorstands- und Aufsichtsratsmitglieder; ferner wird in den Anfang 2010 neu abgeschlossenen Vorstandsanstellungsverträgen auf die Einführung eines Abfindungs-Caps verzichtet. Der Selbstbehalt in der D&O-Versicherung für den Aufsichtsrat entsprechend der Kodex-Empfehlung ist mit Wirkung ab 1. Juli 2010 angepasst worden. Auf konkrete Ziele (Quoten) für „Diversity“ bei der Zusammensetzung des Aufsichtsrats wird verzichtet. Die Zusammensetzung des Aufsichtsrats hat sich am Unternehmensinteresse auszurichten und muss die effektive Überwachung und Beratung des Vorstands gewährleisten. Deshalb kommt es hier vorrangig auf die zur ordnungsgemäßen Wahrnehmung dieser Aufgaben erforderlichen Kenntnisse, Fähigkeiten und fachlichen Erfahrungen des Einzelnen an.

Feste Diversity Quoten und Altersgrenzen würden demgegenüber die Auswahl geeigneter Kandidaten pauschal einschränken. Die derzeitige Satzung sieht darüber hinaus keine variable Vergütung für den Aufsichtsrat vor; der ordentlichen Hauptversammlung 2011 soll jedoch ein entsprechender Beschlussvorschlag zur Einführung einer am langfristigen Unternehmenserfolg orientierten Vergütungskomponente unterbreitet werden.

Der Corporate Governance Bericht der persönlich haftenden Gesellschafterin und des Aufsichtsrats findet sich zusammen mit der Erklärung zur Unternehmensführung gemäß § 289a HGB — ab Seite 128 des Geschäftsberichts. Wie die Erklärung zur Unternehmensführung für das Berichtsjahr war auch bereits die Erklärung zur Unternehmensführung für das Geschäftsjahr 2009 Gegenstand der Erörterung durch den Aufsichtsrat, der letztere in seiner Sitzung vom 22. Februar 2010 billigte.

#### Jahres- und Konzernabschluss

Der Jahresabschluss der Fresenius Medical Care AG & Co. KGaA und der Lagebericht wurden nach den Regeln des deutschen Handelsgesetzbuchs (HGB) aufgestellt, der Konzernabschluss und der Konzernlagebericht nach § 315a HGB in Übereinstimmung mit den „International Financial Reporting Standards“ (IFRS), wie sie in der Europäischen Union anzuwenden sind. Die Buchführung, der Jahresabschluss und der Lagebericht für die Fresenius Medical Care AG & Co. KGaA sowie der Konzernabschluss und der Konzernlagebericht für die Fresenius Medical Care AG & Co. KGaA, jeweils für das Geschäftsjahr 2010, wurden durch die durch Beschluss der Hauptversammlung vom 11. Mai 2010 zum Abschlussprüfer gewählte und vom Prüfungs- und Corporate-Governance-Ausschuss des Aufsichtsrats beauftragte KPMG AG Wirtschaftsprüfungsgesellschaft, Berlin, geprüft; die vorstehenden Unterlagen sind jeweils mit dem uneingeschränkten Bestätigungsvermerk versehen. Die Prüfungsberichte des Abschlussprüfers lagen dem Prüfungs- und Corporate-Governance-Ausschuss sowie dem Aufsichtsrat vor. Der Prüfungs- und Corporate-Governance-Ausschuss hat unter Berücksichtigung der Prüfungsberichte des Abschluss- und Konzernabschlussprüfers und der Gespräche mit ihm den Jahres- und den Konzernabschluss und die Lageberichte geprüft und hierüber dem Aufsichtsrat Bericht erstattet.

Der Aufsichtsrat hat den Jahresabschluss, den Lagebericht und den Vorschlag für die Verwendung des Bilanzgewinns sowie den Konzernabschluss und den Konzernlagebericht, jeweils für das Geschäftsjahr 2010, auch seinerseits geprüft. Die Unterlagen wurden ihm rechtzeitig zugeleitet. Mit dem Ergebnis der Prüfung des Jahresabschlusses sowie des Konzernabschlusses durch den Abschlussprüfer erklärt sich der Aufsichtsrat einverstanden. Die Vertreter des Abschluss- und Konzernabschlussprüfers, die die Prüfungsberichte unterzeichnet haben, haben auch an den Verhandlungen des Aufsichtsrats über den Jahres- und den Konzernabschluss teilgenommen, über die wesentlichen Ergebnisse ihrer Prüfung berichtet und für ergänzende Auskünfte zur Verfügung gestanden. Auch nach dem abschließenden Ergebnis der eigenen Prüfung durch den Aufsichtsrat sind gegen den Jahresabschluss und den Lagebericht der Gesellschaft sowie gegen den Konzernabschluss und den Konzernlagebericht keine Einwendungen zu erheben.

Der Aufsichtsrat billigte in der Sitzung vom 22. Februar 2011 den von der persönlich haftenden Gesellschafterin vorgelegten Jahresabschluss und Lagebericht der Fresenius Medical Care AG & Co. KGaA für das Jahr 2010. Gegenstand war dabei auch die Erklärung zur Unternehmensführung für das Berichtsjahr 2010. In dieser Sitzung ist ferner auch der Entwurf des Berichts gemäß Form 20-F zur Einreichung bei der Securities and Exchange Commission (SEC) erörtert worden, der neben anderen Angaben den Konzernabschluss und Konzernlagebericht in Übereinstimmung mit den US-amerikanischen Rechnungslegungsgrundsätzen (U.S. Generally Accepted Accounting Principles, U.S. GAAP) mit dem US-Dollar als Berichtswährung enthält. Der Konzernabschluss und der Konzernlagebericht sind vom Aufsichtsrat in seiner Sitzung vom 10. März 2011 gebilligt worden. Der Aufsichtsrat hat dem Gewinnverwendungsvorschlag der persönlich haftenden Gesellschafterin zugestimmt, der eine Dividende von € 0,65 für Stammaktien und von € 0,67 für Vorzugsaktien vorsieht.

#### Abhängigkeitsbericht

Die persönlich haftende Gesellschafterin Fresenius Medical Care Management AG hat gemäß § 312 AktG für das Geschäftsjahr 2010 einen Bericht über die Beziehungen zu verbundenen Unternehmen aufgestellt. Der Bericht enthält die Schlussfolgerung

der persönlich haftenden Gesellschafterin, dass die Gesellschaft nach den Umständen, die der persönlich haftenden Gesellschafterin in dem Zeitpunkt bekannt waren, in dem das Rechtsgeschäft vorgenommen oder die Maßnahme getroffen oder unterlassen wurde, bei jedem Rechtsgeschäft eine angemessene Gegenleistung erhielt und dadurch, dass die Maßnahme getroffen oder unterlassen wurde, nicht benachteiligt wurde.

Der Aufsichtsrat und der Prüfungs- und Corporate-Governance-Ausschuss haben den Bericht rechtzeitig erhalten und geprüft. Der Abschlussprüfer hat an den entsprechenden Verhandlungen teilgenommen, über die wesentlichen Ergebnisse seiner Prüfung berichtet und für ergänzende Auskünfte zur Verfügung gestanden. Der Aufsichtsrat und der Prüfungs- und Corporate-Governance-Ausschuss teilen die Auffassung des Abschlussprüfers, der diesen Bericht am 11. Februar 2011 mit folgendem Bestätigungsvermerk versehen hat:

„Nach unserer pflichtmäßigen Prüfung und Beurteilung bestätigen wir, dass (1) die tatsächlichen Angaben des Berichts richtig sind, (2) bei den im Bericht aufgeführten Rechtsgeschäften die Leistung der Gesellschaft nicht unangemessen hoch war, (3) bei den im Bericht aufgeführten Maßnahmen keine Umstände für eine wesentlich andere Beurteilung als die durch die persönlich haftende Gesellschafterin sprechen.“

Auch nach dem abschließenden Ergebnis der Prüfung durch den Aufsichtsrat sind keine Einwendungen gegen die Erklärung der persönlich haftenden Gesellschafterin am Schluss des Berichts über die Beziehungen zu verbundenen Unternehmen zu erheben.

Der Aufsichtsrat dankt den Mitgliedern des Vorstands der persönlich haftenden Gesellschafterin sowie allen Mitarbeiterinnen und Mitarbeitern für ihren Einsatz und für die im Jahre 2010 geleistete, engagierte Arbeit.

Bad Homburg v.d.H., 10. März 2011  
Der Aufsichtsrat

  
**DR. GERD KRICK**  
Vorsitzender



# KAPITALMARKT UND AKTIE

## AKTIENMARKT

Nach deutlichen Kursgewinnen von zum Teil mehr als 20 % im Jahr 2009 entwickelten sich die weltweiten Aktienmärkte – insbesondere die wichtigen Aktienindizes wie DAX und Dow Jones – Anfang 2010 zunächst noch sehr schwach und verzeichneten in den ersten beiden Monaten des Jahres zum Teil deutliche Kursverluste. Verantwortlich hierfür waren die anhaltende Unsicherheit über die allgemeine Verfassung des Finanzsektors sowie eine verhaltene Einschätzung zur gesamtwirtschaftlichen Entwicklung des Marktgeschehens. Gestützt durch positive Konjunktursignale setzte dann ab Anfang März eine kurzfristige Trendumkehr an den Aktienmärkten ein. Das zweite und dritte Quartal waren von einer Seitwärtsbewegung geprägt, hauptsächlich verursacht durch Unsicherheiten auf den internationalen Kapitalmärkten – allen voran die Ratingabstufungen für Griechenland, Irland und Portugal; zugleich verunsicherte die Besorgnis über die weitere Entwicklung der us-Konjunktur viele Marktteilnehmer. Zum Jahresende sorgten wiederum günstige Quartalsergebnisse und verbesserte Gewinnaussichten vieler Unternehmen sowie die überraschend kräftige Konjunkturerholung in der EU für steigende Notierungen und bescherten so einen positiven Jahresausklang an den Aktienmärkten.

Per saldo verzeichneten die weltweit führenden Aktienindizes 2010 unterschiedlich hohe Zuwachsraten: Der us-amerikanische Dow-Jones-Index lag zum Ende des Jahres 2010 bei 11.578 Punkten – ein Plus von 11 % gegenüber dem Stand zu Jahresbeginn. Nach einer Steigerung um 24 % im Jahr 2009 verbuchte der deutsche Aktienindex DAX im Jahresverlauf ein Plus von 16 %; er zählte damit zu den Indizes, die sich 2010 am besten entwickelten. Mit einem Stand von 5.957 Punkten ins Jahr gestartet, fiel er allerdings bis Anfang Februar zunächst auf den Jahrestiefststand von 5.434 Punkten. Zum Jahresende lag der DAX schließlich bei 6.914 Zählern.

Auch an den anderen europäischen Börsen war der allgemeine Trend positiv; die Zuwächse erreichten dort allerdings nicht das hohe Niveau von Dow Jones und DAX. Die asiatischen Märkte zeigten eine überwiegend verhaltene Performance: Die Kursgewinne des Singapurser Straits-Times-Index sowie des Hongkonger Hang-Seng-Index lagen 2010 bei 2 bzw. 3 %. Der japanische Nikkei-Index dagegen schloss das Jahr mit einem Minus von 3 %. Weitere Informationen zur Entwicklung der Aktienindizes enthält die Tabelle 1.3.1.

Das Börsenjahr 2010 wartete mit sehr heterogenen Entwicklungen für die einzelnen Branchen auf. Im

## AKTIENINDIZES/AKTIE

Tabelle 1.3.1

|                                        | Land/<br>Region | 1.1.2010 | 31.12.2010 | Veränderung | Hoch   | Tief  |
|----------------------------------------|-----------------|----------|------------|-------------|--------|-------|
| DAX                                    | DE              | 5.957    | 6.914      | 16 %        | 7.078  | 5.434 |
| Dow Jones                              | USA             | 10.428   | 11.578     | 11 %        | 11.585 | 9.686 |
| Nikkei                                 | JP              | 10.546   | 10.229     | – 3 %       | 11.339 | 8.824 |
| CAC                                    | FR              | 3.936    | 3.805      | – 3 %       | 4.066  | 3.331 |
| FTSE                                   | GB              | 5.413    | 5.900      | – 9 %       | 6.009  | 4.806 |
| DJ EURO STOXX 50                       | EU              | 2.965    | 2.807      | – 5 %       | 3.018  | 2.489 |
| DJ EURO STOXX Healthcare               | EU              | 366      | 389        | 6 %         | 397    | 347   |
| Fresenius Medical Care-Stammaktie in € | DE              | 36,94    | 43,23      | 17 %        | 45,79  | 36,10 |
| Fresenius Medical Care-ADR in US\$     | USA             | 53,01    | 57,69      | 9 %         | 64,01  | 47,41 |

Quelle: Reuters-Daten, eigene Berechnungen.

Zuge der sich verbessernden Konjunkturaussichten verbuchten die Aktien, die gemeinhin als zyklisch eingestuft werden – zum Beispiel aus exportorientierten Sektoren – die stärksten Kursgewinne. Dagegen schnitten Werte aus der Finanzbranche überwiegend schwach ab; Werte der Gesundheitsbranche (Healthcare-Sektor) zeigten im oben skizzierten Umfeld eine durchschnittliche Entwicklung.

### KURSENTWICKLUNG DER FRESENIUS MEDICAL CARE-AKTIE

Die Fresenius Medical Care-Aktie hat sich auch im Jahr 2010 positiv entwickelt: Der Kurs der Stammaktie erhöhte sich im vergangenen Jahr um 17 %, auf 43,23 € zum Jahresende. Mit dieser Performance lag unsere Stammaktie im vorderen Mittelfeld der im DAX enthaltenen Werte. Nach einem kontinuierlichen Aufwärtstrend in den ersten Monaten des Berichtsjahres verlief die Entwicklung über weite Strecken des zweiten Halbjahres seitwärtsgerichtet, konnte sich dann allerdings im vierten Quartal nicht an den positiven Trend des DAX anschließen. Zu den größten Einflussfaktoren auf die Entwicklung des Aktienkurses gehörten die Diskussionen über die us-amerikanische Gesundheitsreform und die Ausgestaltung der finalen „gebündelten“ Erstattungsrate für Medicare und Medicaid Patienten ab

1. Januar 2011 sowie die damit verbundenen Auswirkungen auf Unternehmen der Gesundheitsbranche. Gestützt wurde die Aktienkursentwicklung durch die positive Umsatz- und Gewinnentwicklung unseres Unternehmens: auch 2010 konnten wir wieder Rekordwerte bei Umsatz und Ertrag erzielen; siehe auch Kapitel „Ertragslage“ — ab Seite 55.

Das Jahreshoch erreichte die Fresenius Medical Care-Stammaktie am 1. Oktober 2010, das Jahrestief verzeichnete sie am 28. Januar 2010. Die Fresenius Medical Care-Aktie wird als defensiver Titel eingestuft. Dies zeigt sich auch in der geringen Schwankungsintensität der Aktie: Die Bandbreite, in der die Aktie im vergangenen Jahr gehandelt wurde, war mit einem Abstand vom Tiefst- zum Höchstkurs von nur 21 % weiterhin sehr gering, und auch die täglichen Schwankungen waren prozentual gesehen niedriger als im Durchschnitt der im DAX enthaltenen Aktien.

Auch im Geschäftsjahr 2010 spielten die Wechselkursrelationen von Euro zu us-Dollar eine wichtige Rolle für die Entwicklung unseres Aktienkurses. Für Fresenius Medical Care ist eine Aufwertung lokaler Währungen (insbesondere des Euro) gegenüber dem us-Dollar bilanziell betrachtet von Vorteil, da wir in us-Dollar berichten und sich somit bei der Umrechnung der Bilanz- und Ertragswerte (in lokaler Währung) entsprechend höhere us-Dollar-Werte

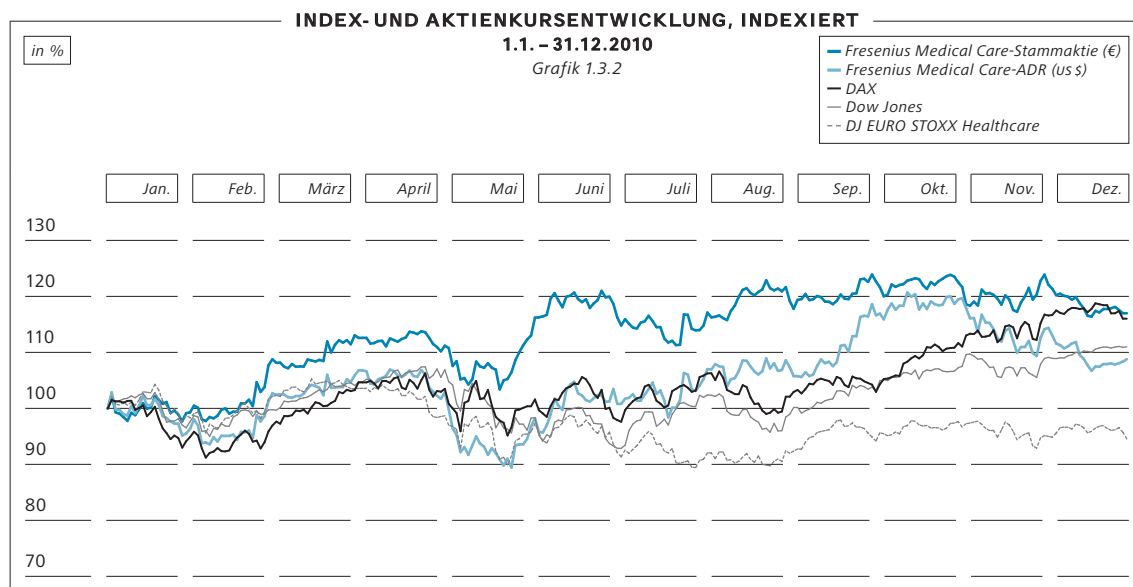

Quelle: Reuters-Daten

errechnen. Andererseits fallen in dieser Konstellation (Aufwertung des Euro) einige herkömmliche Bewertungskennzahlen, die üblicherweise auf Basis der us-Dollar-Werte berechnet werden, bei einer Umrechnung in Euro dann ungünstiger aus. Dies ist insofern von Bedeutung, als sich Anleger in erster Linie an der Euro-Notierung der Aktie orientieren.

Die an der New York Stock Exchange (NYSE) in Form von American Depositary Receipts (ADR) notierten Fresenius Medical Care-Aktien legten 2010 um 9 % zu. Jede Stamm- bzw. Vorzugs-ADR entspricht einer Stamm- bzw. Vorzugsaktie von Fresenius Medical Care. Die Kursentwicklung der ADR ist grundsätzlich an die der Stamm- und Vorzugsaktien gekoppelt, unter Berücksichtigung der Euro/us-Dollar-Wechselkursentwicklung – die Abwertung des us-Dollar im Vergleich zum Euro im Jahr 2010 von etwa 5 % wirkte sich folglich leicht negativ auf die Notierung unserer ADR aus; weitere Informationen zur Wechselkursentwicklung erhalten Sie im Kapitel „Wirtschaftliches Umfeld“ — ab Seite 39.

Allerdings zeigten die Fresenius Medical Care Aktien eine deutlich bessere Performance als Werte inner-

halb der engeren Vergleichsgruppe des Healthcare-Sektors. Beispielsweise stieg der Dow-Jones-Euro-Stoxx-Healthcare-Index, der aus den europaweit führenden und größten Unternehmen der Branche gebildet wird, im vergangenen Jahr lediglich um 6 %.

Die Kursentwicklung der Fresenius Medical Care-Vorzugsaktie verläuft üblicherweise parallel zu der der Stammaktie. Da die überwiegende Mehrheit der Vorzugsaktionäre das Angebot zur Umwandlung der Vorzugsaktien in Stammaktien im Februar 2006 wahrgenommen hat, ist die Anzahl der ausstehenden Vorzugsaktien und damit auch das handelbare Aktienvolumen inzwischen sehr gering. Weitere Aussagen zum Kursverlauf bei den Vorzugsaktien haben daher einen eher spekulativen Charakter.

Die Marktkapitalisierung von Fresenius Medical Care betrug zum 31. Dezember 2010 13,14 MRD €; das entspricht einer Erhöhung um mehr als 2 MRD € gegenüber dem Vorjahreswert von 11,05 MRD €. Das durchschnittliche Handelsvolumen unserer Aktie lag bei 0,83 MIO Stück je Handelstag (2009: 1,04 MIO Stück). Das Handelsvolumen bei den Vorzugsaktien war unverändert und erwartungsgemäß sehr gering

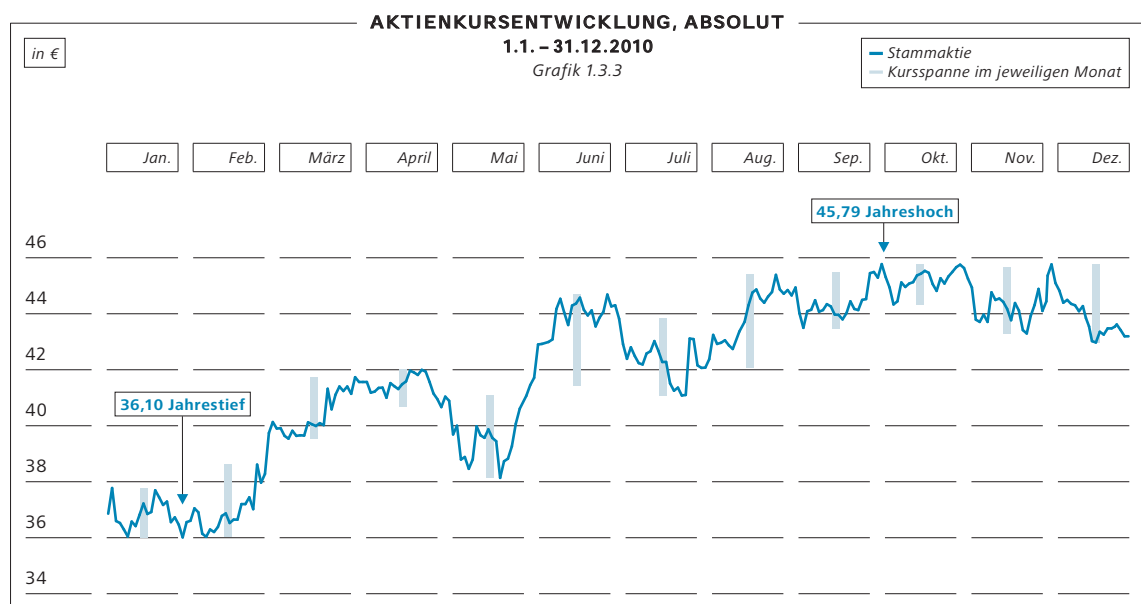

Quelle: Reuters-Daten.

und belief sich auf etwa 1.200 Stück pro Handelstag (2009: 1.144 Stück). Durch die sehr geringe Anzahl ausstehender Vorzugsaktien ist die tägliche Schwankungsbreite der Vorzugsaktie sehr viel ausgeprägter als die der Stammaktie.

Unsere Stammaktie hat ihre Position in den von der Deutschen Börse veröffentlichten Ranglisten im Jahr 2010 weiter gefestigt: Unser Gewicht im DAX erhöhte sich auf 1,36 % gegenüber dem Vorjahreswert von 1,31 %. Die Ranglisten dienen als Entscheidungsgrundlage für die Zusammensetzung des DAX. Sie werden monatlich nach den Kriterien Börsenumsatz und Marktkapitalisierung bezogen auf den Streubesitz erstellt. Bei der Marktkapitalisierung haben wir uns um zwei Plätze verbessert und liegen nun auf Rang 20. Beim Börsenumsatz haben wir allerdings drei Plätze von Position 26 auf Position 29 eingebüßt. Die Fresenius Medical Care-Aktie ist in einer Reihe weiterer wichtiger internationaler Aktienindizes wie Dow Jones, MSCI oder auch FTSE enthalten. Bereits im zweiten Jahr in Folge war unsere Stammaktie im Dow-Jones-Euro-Stoxx-Sustainability-Index vertreten – einem Nachhaltigkeitsindex, der neben ökonomischen auch ökologische und soziale Kriterien berücksichtigt.

## DIVIDENDE

Fresenius Medical Care verfolgt seit der Gründung im Jahr 1996 eine langfristige ergebnisorientierte Dividendenpolitik. Die Dividende wurde – vorbehaltlich einer entsprechenden Beschlussfassung auf der Hauptversammlung am 12. Mai 2011 – vierzehn Mal in Folge erhöht. In dieser Zeit ist die Dividende je Stammaktie von 0,17 € auf vergleichbarer Basis auf 0,65 € für das Geschäftsjahr 2010 gestiegen. Dies entspricht einer durchschnittlichen Erhöhung um etwa 10 % pro Jahr. Gegenüber der Vorjahresdividende von 0,61 € je Stammaktie ergibt sich ein Anstieg von 7 %. Auf Basis des Dividendenvorschlags und der Schlusskurse unserer Aktien Ende 2010 würde die Dividendenrendite für die Stammaktien etwa 1,5 % (2009: 1,7 %) betragen.

Die gesamte Ausschüttungssumme für das Jahr 2010 wird sich – vorausgesetzt, die Hauptversammlung nimmt den Dividendenvorschlag an – auf rund 197 Mio € belaufen. Bezogen auf einen Wechselkurs von 1,3362 US \$ zu 1 € zum Ende des Berichtsjahres errechnet sich daraus ein Ausschüttungsbetrag von etwa 263 Mio US \$. Basierend auf unserem Konzernergebnis von 979 Mio US \$ liegt die Ausschüttungsquote bei etwa 27 %.

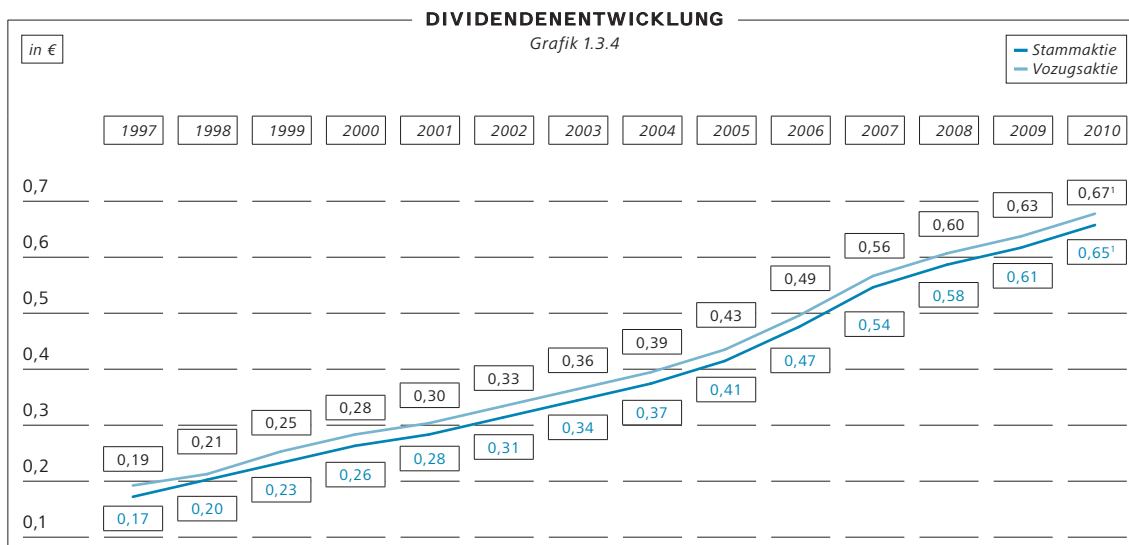

<sup>1</sup> Vorschlag zur Beschlussfassung durch die Hauptversammlung am 12. Mai 2011.

## AKTIONÄRSSTRUKTUR

Zum 31. Dezember 2010 belief sich das Grundkapital von Fresenius Medical Care auf etwa 302,2 Mio €. Die Zahl der ausstehenden Stammaktien betrug ungefähr 298,28 Mio Stück; von den Vorzugsaktien waren etwa 3,96 Mio Stück im Umlauf.

Zu Beginn des Geschäftsjahres 2011 haben wir erneut eine Analyse unserer Aktionärsstruktur in Auftrag gegeben. Rund 296,7 Mio Aktien und somit ein erneut sehr hoher Anteil von 98,2 % der etwa 302,2 Mio (zum Stichtag 31. Dezember 2010) der insgesamt ausstehenden Aktien konnten identifiziert und den Eigentümern zugeordnet werden. Bezogen auf die frei im Umlauf befindlichen Aktien (sogenannter Free Float = etwa 195,6 Mio Aktien) haben wir 97,2 % (Vorjahr: 98,0 %) der Aktien einzelnen Investoren zuordnen können. Der Anteil der Fresenius SE & Co. KGaA (vormals Fresenius SE) am Gesamtkapital hat sich im Vergleich zum Vorjahr von 35,6 auf 35,3 % reduziert. Die absolute Anzahl

der Unternehmensanteile, die sich zum Bilanzstichtag im Besitz der Fresenius SE & Co. KGaA befanden, blieb mit 106.603.026 Aktien unverändert.

Insgesamt haben wir 793 institutionelle Investoren (Vorjahr: 836) identifiziert. Die Top-20-Investoren unseres Unternehmens hielten circa 41 % der identifizierten Aktien auf Basis des Free Float (Vorjahr: 37 %). Drei der Top-20-Investoren haben ihren Sitz in Deutschland. Neun Investoren sind in Großbritannien, fünf in den USA, zwei in Frankreich und ein Investor ist in Norwegen beheimatet. Privatinvestoren hielten zum Zeitpunkt der Untersuchung 12,4 % der identifizierten Aktien, während der Anteil der Halter von ADR bei 2,2 % der Aktien lag. Der Anteil der institutionellen Investoren am gesamten identifizierten Aktienkapital auf Basis des Free Float betrug etwa 84 %.

Betrachtet man die regionale Aufteilung der identifizierten Aktien, so wurden 35,3 % der zugeordneten Aktien von Institutionen in Nordamerika

### ZAHL DER IDENTIFIZIERTEN AKTIEN

Tabelle 1.3.5

|                                                                         | Anzahl Aktien      | in %     | in % des Free Floats |
|-------------------------------------------------------------------------|--------------------|----------|----------------------|
| Anzahl Aktien, 31. Dezember 2010                                        | 302.236.169        | 100,0    | –                    |
| davon Stammaktien                                                       | 298.279.001        | 98,7     | –                    |
| davon Vorzugsaktien                                                     | 3.957.168          | 1,3      | –                    |
| Identifizierte Aktien inkl. Anteil Fresenius SE & Co. KGaA <sup>1</sup> | 296.741.429        | 98,2     | –                    |
| Nicht identifizierte Aktien                                             | 5.494.740          | 1,9      | 2,8                  |
| Fresenius SE & Co. KGaA <sup>1</sup>                                    | 106.603.026        | 35,3     | –                    |
| Free Float                                                              | 195.633.143        | 64,7     | –                    |
| <b>IDENTIFIZIERTE AKTIEN<br/>BASIEREND AUF FREE FLOAT</b>               | <b>190.138.403</b> | <b>–</b> | <b>97,2</b>          |

<sup>1</sup> Vormals Fresenius SE.

(einschließlich Kanada) gehalten. Der Aktienbesitz in Europa – ohne Deutschland – belief sich auf 51,1 % der insgesamt identifizierten Aktien. Den Großteil hiervon konnten wir mit 33,5 % Aktien in Großbritannien lokalisieren. In Deutschland wurden etwa 10,1 % Aktien unseres Unternehmens gehalten.

Die Anfang 2011 identifizierte Aktionärsbasis ist unserer Ansicht nach sowohl hinsichtlich ihrer regionalen Verteilung als auch hinsichtlich des Anteils privater und institutioneller Investoren nach wie vor sehr ausgewogen. Im Rahmen unserer Investor-Relations-Aktivitäten sehen wir unseren regionalen Fokus in den Jahren 2011 und 2012 weiterhin in Nordamerika und Europa sowie in einigen ausgewählten Ländern in Asien und im Nahen Osten.

Im Juli 2008 hat die Fresenius SE & Co. KGaA eine Pflichtumtauschanleihe auf Stammaktien von Fresenius Medical Care im Umfang von 554 Mio € platziert. Die Anleihe hat eine Laufzeit von drei Jahren und ist am 14. August 2011 fällig; zu diesem

Zeitpunkt hat die Fresenius SE & Co. KGaA als Emittentin den Anleihehabern maximal 16,8 Mio Aktien oder mindestens 14,24 Mio Aktien zu liefern, was 5,6 bzw. 4,7 % des gesamten gezeichneten Kapitals von Fresenius Medical Care entspricht. Bei Fälligkeit der Pflichtumtauschanleihe im Jahr 2011 reduziert sich der Anteil von Fresenius SE & Co. KGaA an Fresenius Medical Care somit um mindestens 4,7 %.

Im Jahr 2010 haben wir sechs Stimmrechtsmitteilungen gemäß § 21 Abs. 1 Wertpapierhandelsgesetz (WpHG) erhalten. Gemäß der letzten Meldung vom 14. September 2010 hat uns BlackRock Inc. mitgeteilt, dass sie über Tochtergesellschaften die Meldeschwelle von 3 % überschritten haben und 3,58 % der Fresenius Medical Care-Stammaktien halten. Am 1. Juni 2010 teilte uns Thornburg Investment Management mit, dass sie ebenfalls die Meldeschwelle von 3 % überschritten haben und 3,76 % der Fresenius Medical Care-Stammaktien halten. Alle Stimmrechtsmitteilungen sind auf unserer Internetseite [www.fmc-ag.de](http://www.fmc-ag.de) im Bereich Investor Relations zu finden.

#### GEOGRAFISCHE AUFTEILUNG DER IDENTIFIZIERTEN AKTIEN

Tabelle 1.3.6

|                                                                   | 2011               |            | 2010               |            |
|-------------------------------------------------------------------|--------------------|------------|--------------------|------------|
|                                                                   | Anzahl Aktien      | in %       | Anzahl Aktien      | in %       |
| Nordamerika (inkl. Kanada)                                        | 58.564.166         | 35,3       | 56.460.127         | 36,0       |
| Deutschland                                                       | 16.694.460         | 10,1       | 19.155.193         | 11,6       |
| Großbritannien                                                    | 55.552.514         | 33,5       | 50.043.733         | 30,3       |
| Frankreich                                                        | 10.525.656         | 6,3        | 9.738.403          | 5,9        |
| Norwegen                                                          | 4.149.440          | 2,5        | 3.804.976          | 2,3        |
| Rest Europa                                                       | 14.659.394         | 8,8        | 16.505.299         | 10,0       |
| Restliche Regionen                                                | 5.813.879          | 3,5        | 6.441.687          | 3,9        |
| <b>REGIONAL ZUZUORDNENDE AKTIEN</b>                               | <b>165.959.509</b> | <b>100</b> | <b>165.149.418</b> | <b>100</b> |
| Privatinvestoren                                                  | 24.178.894         | –          | 23.970.477         | –          |
| <b>GESAMTE IDENTIFIZIERTE AKTIEN<br/>BASIEREND AUF FREE FLOAT</b> | <b>190.138.403</b> | <b>–</b>   | <b>189.119.895</b> | <b>–</b>   |

## INVESTOR-RELATIONS-ARBEIT

Die umfassende, transparente und zeitnahe Information des Kapitalmarktes stand auch im Geschäftsjahr 2010 im Fokus unserer Investor-Relations-Arbeit: So gehörte die Offenlegung der Strategie und Führungsprinzipien von Fresenius Medical Care, die operative und finanzielle Geschäftsentwicklung ebenso wie die Perspektiven des Unternehmens an einen breit gefächerten Empfängerkreis dazu, der neben den Aktionären, anderen Kapitalmarktteilnehmern und Analysten auch Mitarbeiter, Journalisten sowie die Öffentlichkeit im Allgemeinen umfasst. Dabei ist unser Ziel, die wirtschaftliche Entwicklung des Unternehmens angemessen und genau darzustellen, sodass Investoren und potenzielle Investoren auf Basis dieser Informationen Investmententscheidungen treffen können und

alle anderen Zielgruppen einen ausgewogenen Überblick über das Unternehmen, seine Aktivitäten und seine Strategie erhalten. Durch eine effektive Finanzkommunikation möchten wir einen wesentlichen Beitrag zur langfristigen Wertsteigerung von Fresenius Medical Care leisten.

Fresenius Medical Care gewährt allen Aktionären einen gleichberechtigten und rechtzeitigen Zugang zu kursrelevanten Informationen. Alle Kommunikationskanäle sind darauf ausgerichtet, die selektive Bekanntmachung von Informationen, die den Aktienkurs wesentlich beeinflussen können, zu vermeiden. Fresenius Medical Care wählt je nach Information und Empfänger stets den Kommunikationsweg, der zum jeweiligen Zeitpunkt im Sinne einer effektiven Kommunikation am geeignetsten ist. Dabei erfüllen wir alle Gesetze und Richtlinien,

### AKTIENSTAMMDATEN

Tabelle 1.3.7

| Aktienart                                               | Stammaktie                | Vorzugsaktie              |
|---------------------------------------------------------|---------------------------|---------------------------|
|                                                         | Nennwertlose Inhaberaktie | Nennwertlose Inhaberaktie |
| <b>Börsenplätze/Börsenkürzel</b>                        |                           |                           |
| Deutschland: Frankfurter Wertpapierbörse/Prime Standard | FME                       | FME3                      |
| USA: New Yorker Wertpapierbörse (NYSE)                  | FMS                       | FMS/P                     |
| <b>Wertpapierkennnummern</b>                            |                           |                           |
| WKN                                                     | 578580                    | 578583                    |
| ISIN                                                    | DE0005785802              | DE0005785836              |
| CUSIP No. (NYSE)                                        | 358029106                 | 358029205                 |
| <b>Reuters</b>                                          |                           |                           |
| Xetra                                                   | FMEG.DE                   | FMEG_p.DE                 |
| Frankfurter Wertpapierbörse                             | FMEG.F                    | FMEG_p.F                  |
| ADR NYSE                                                | FMS.N                     | FMS_p.N                   |
| <b>Bloomberg</b>                                        |                           |                           |
| Xetra                                                   | FME GY                    | FME3 GY                   |
| Frankfurter Wertpapierbörse                             | FME GR                    | FME3 GR                   |
| ADR NYSE                                                | FMS US                    | FMS/P US                  |

die für uns in den USA und in Deutschland gelten. Dazu gehören unter anderem die Anforderungen der Deutschen Börse und der New Yorker Wertpapierbörse, des Deutschen Wertpapierhandelsgesetzes, der Deutsche Corporate Governance Kodex sowie der Sarbanes-Oxley Act. Nähere Informationen hierzu und zur Corporate Governance erhalten Sie — ab Seite 128.

Auf Gerüchte, die das Unternehmen betreffen, reagiert Fresenius Medical Care in der Regel nicht, es sei denn, diese enthalten materielle Informationen oder es ist zu erwarten, dass der Aktienkurs oder die entsprechenden Handelsaktivitäten maßgeblich beeinflusst werden.

Im Jahr 2010 haben wir den Kontakt zu Finanzanalysten sowie institutionellen und privaten Anlegern weltweit weiter verstärkt. Das Interesse an unserem Unternehmen vonseiten der Finanzanalysten ist weiterhin sehr groß, was sich in einer aktiven Beobachtung und Berichterstattung (der „Coverage“) durch etwa 35 Aktienanalysten, den sogenannten „Sell-Side-Analysten“, widerspiegelt.

Im vergangenen Jahr haben wir Fresenius Medical Care in mehr als 800 Einzelgesprächen mit Analysten und Investoren vorgestellt und Fragen zur geschäftlichen Entwicklung und Zukunft beantwortet. Darüber hinaus präsentierten wir unser Unternehmen und seine Perspektiven auf 22 Roadshows und 25 Investmentkonferenzen weltweit. Auch die Privatanleger sind uns äußerst wichtig. Deshalb waren wir mehrmals unter anderem bei Veranstaltungen der Deutschen Schutzvereinigung für Wertpapierbesitz (DSW) für Privataktionäre sowie der Schutzgemeinschaft der Kapitalanleger (SGK) präsent. Darüber hinaus haben wir Investoren und Analysten im Rahmen eines Kapitalmarkttag (Capital Market Day) in London umfassend über unser Unternehmen informiert. An zwei Tagen erfuhren die Teilnehmer alles Wichtige über die aktuelle Geschäftsentwicklung: an welchen neuen Produkten und Verfahren Fresenius Medical Care arbeitet, wie sich das Geschäft und der Dialysemarkt insgesamt in den

einzelnen Regionen entwickelt haben und welche Ziele sich das Unternehmen für die kommenden Jahre gesteckt hat. Ein besonderes Interesse der Teilnehmer galt der Frage, wie Fresenius Medical Care die Einführung eines neuen Pauschalvergütungssystems für die Dialyse in den USA bewertet und welche Chancen und Risiken dieses neue System für das Unternehmen mit sich bringt.

Für die Investor-Relations-Abteilung von Fresenius Medical Care verlief auch das Geschäftsjahr 2010 erfolgreich. Unser Unternehmen wurde im Berichtsjahr wiederholt für seine herausragende Arbeit prämiert: Die Zeitschrift „Capital“ und die Deutsche Vereinigung für Finanzanalyse und Asset Management (DVFA) zeichneten Fresenius Medical Care für die zweitbeste IR-Arbeit im DAX aus. Bei einer Untersuchung der us-amerikanischen Fachzeitschrift „Institutional Investor“ erreichte unser Unternehmen in der Kategorie „Healthcare“ zum dritten Mal in Folge Platz eins in Europa. Darüber hinaus errang der Geschäftsbericht 2009 beim Wettbewerb des manager magazin Platz sieben im DAX sowie in der Kategorie „Gestaltung“ Platz eins.

Auf unserer Internetseite [www.fmc-ag.de](http://www.fmc-ag.de) stellen wir unter anderem folgende Informationen zur Verfügung:

- ▶ Kursabfrage für unsere Aktien an der Frankfurter und der New Yorker Börse,
- ▶ Publikationen wie Quartalsberichte, Geschäftsberichte, Investor News und Ad-hoc-Mitteilungen,
- ▶ ganz- und unterjährige Berichterstattung in Form von Live-Übertragungen von Analystenveranstaltungen und Telefonkonferenzen, dazugehörige Informationen sowie Präsentationsmaterial,
- ▶ Live-Übertragung der Rede des Vorstandsvorsitzenden bei der Hauptversammlung,
- ▶ Finanzkalender mit Informationen zur Berichterstattung, Hauptversammlung und weiterer Veranstaltungen,
- ▶ direkte Kommunikation mit uns per E-Mail mit der Möglichkeit, automatisch über neue Entwicklungen informiert zu werden.



## KENNZAHLEN DER FRESENIUS MEDICAL CARE STAMMAKTIE

Tabelle 1.3.8

|                                    |              | 2010    | 2009      | 2008      | 2007      | 2006      |
|------------------------------------|--------------|---------|-----------|-----------|-----------|-----------|
| Grundkapital                       | in TSD US \$ | 369.002 | 365.672   | 363.076   | 361.384   | 359.527   |
| Zahl der Aktien                    | in MIO Stück | 298,28  | 295,75    | 293,93    | 292,79    | 291,45    |
| <b>Schlusskurse (Xetra-Handel)</b> |              |         |           |           |           |           |
| Höchstkurs                         | in €         | 45,79   | 37,71     | 39,10     | 38,67     | 36,29     |
| Tiefstkurs                         | in €         | 36,10   | 26,07     | 29,73     | 33,05     | 27,49     |
| Jahresende                         | in €         | 43,23   | 36,94     | 33,31     | 36,69     | 33,66     |
| Durchschnittlicher Tagesumsatz     | in Stück     | 824.535 | 1.040.200 | 1.498.696 | 1.676.946 | 1.311.126 |
| <b>Schlusskurse (ADR NYSE)</b>     |              |         |           |           |           |           |
| Höchstkurs                         | in US \$     | 64,01   | 54,96     | 59,01     | 56,70     | 47,60     |
| Tiefstkurs                         | in US \$     | 47,41   | 47,57     | 39,84     | 43,69     | 34,49     |
| Jahresende                         | in US \$     | 57,69   | 53,01     | 47,18     | 52,75     | 44,43     |
| <b>Marktkapitalisierung</b>        |              |         |           |           |           |           |
| Jahresende                         | in MIO €     | 13.143  | 11.045    | 9.919     | 10.876    | 9.928     |
| Jahresende                         | in MIO US \$ | 17.270  | 15.911    | 13.787    | 16.010    | 13.075    |
| Umrechnungskurs                    | US \$ zu €   | 1,3141  | 1,4406    | 1,3900    | 1,4720    | 1,3170    |
| <b>Indexgewichtung</b>             |              |         |           |           |           |           |
| DAX                                | in %         | 1,36    | 1,31      | 1,41      | 0,86      | 0,9       |
| <b>Dividende</b>                   |              |         |           |           |           |           |
| je Aktie <sup>1</sup>              | in €         | 0,65    | 0,61      | 0,58      | 0,54      | 0,47      |
| Dividendenrendite                  | in %         | 1,5     | 1,7       | 1,7       | 1,5       | 1,4       |
| Dividendensumme                    | in MIO €     | 197     | 183       | 173       | 160       | 139       |
| <b>Gewinn je Aktie (EPS)</b>       |              |         |           |           |           |           |
| Zahl der Aktien <sup>2</sup>       | in MIO Stück | 296,81  | 294,42    | 293,23    | 291,93    | 290,62    |
| Gewinn je Aktie (EPS)              | in US \$     | 3,25    | 2,99      | 2,75      | 2,43      | 1,82      |

<sup>1</sup> 2010: Vorschlag zur Beschlussfassung durch die Hauptversammlung am 12. Mai 2011.<sup>2</sup> Gewichteter Durchschnitt der im Umlauf befindlichen Aktien.

Für einen detaillierten Überblick siehe Fünf-Jahres-Übersicht im Finanzbericht ab Seite 280.

# UNSER GESCHÄFTSJAHR

## — INNOVATION —

*Wir wollen mit innovativen  
Technologien und Behandlungskonzepten  
die Lebensqualität von Nierenpatienten  
kontinuierlich verbessern.*

## 2.1

Geschäftstätigkeit  
und Rahmenbedingungen  
*S. 31*

## 2.2

Ertrags-, Finanz- und  
Vermögenslage  
*S. 55*

## 2.3

Forschung und Entwicklung  
*S. 68*

## 2.4

Unser Produktgeschäft  
*S. 77*

## 2.5

Unser Geschäft  
mit Dialysedienstleistungen  
*S. 82*

## 2.6

Mitarbeiterinnen und  
Mitarbeiter  
*S. 90*

## 2.7

Verantwortung  
*S. 96*

## 2.8

Risikobericht  
*S. 104*

## 2.9

Nachtragsbericht  
*S. 115*

## 2.10

Prognosebericht  
*S. 116*

## 2.11

Erklärung zur  
Unternehmensführung und  
Corporate-Governance-Bericht  
*S. 128*

---

# GESCHÄFTSTÄTIGKEIT UND RAHMENBEDINGUNGEN

## GESCHÄFTSTÄTIGKEIT UND KONZERNSTRUKTUR

Fresenius Medical Care ist der weltweit führende Anbieter von Produkten und Dienstleistungen, die bei einer Dialyse benötigt werden. Die Dialyse ist ein lebensnotwendiges Blutreinigungsverfahren, das die Funktion der Niere bei einem Nierenversagen ersatzweise übernimmt. Durch die Behandlung werden Schlackenstoffe und überschüssiges Wasser, die bei gesunden Menschen über den Harn ausgeschieden werden, aus dem Körper entfernt, da die Nieren des Patienten diese Aufgabe nicht mehr erfüllen können.

Als vertikal integriertes Unternehmen bietet Fresenius Medical Care Produkte und Dienstleistungen entlang der gesamten Wertschöpfungskette der Dialyse an. Im Berichtsjahr haben wir weltweit in 2.757 eigenen Dialysekliniken 214.648 Dialysepatienten betreut. Dieses Kliniknetz – das größte und internationalste überhaupt – bauen wir kontinuierlich aus, um der stetig wachsenden Zahl der Dialysepatienten Rechnung zu tragen. Zugleich sind wir mit mehr als 40 Produktionsstätten auf allen Kontinenten der führende Anbieter von Dialyseprodukten wie Dialysegeräten, Dialysatoren und damit verbundenem Einweg-Zubehör. Die – gemessen an der Produktionsmenge – größten Werke befinden sich in den USA (in Ogden, Utah, und in Walnut Creek, Kalifornien), in Deutschland (Schweinfurt und St. Wendel) und in Japan (Buzen). Daneben unterhalten wir Produktionsstätten in europäischen und asiatischen Ländern sowie in Lateinamerika. Diese Werke decken in der Regel den lokalen Bedarf an Dialyseprodukten ab und sind deshalb deutlich kleiner als die oben genannten größten Werke. Weitere Informationen zu unserer Fertigung finden Sie im Abschnitt „Unsere Produktionsstätten“ — ab Seite 77; eine Liste der wesentlichen Beteiligungen ist im Finanzbericht — ab Seite 278 enthalten.

Die Geschäftstätigkeit von Fresenius Medical Care ist regional organisiert und in drei operative Segmente gegliedert: Nordamerika, International und Asien-Pazifik. Für Berichtszwecke haben wir die operativen Segmente International und Asien-Pazifik zum Segment International zusammengefasst, weil die

wirtschaftlichen Gegebenheiten in den beiden Segmenten einander stark ähneln. Das gilt sowohl für die vertriebenen Produkte, die Patientenstrukturen und die Vertriebsmethoden für Produkte und Dienstleistungen als auch für das wirtschaftliche Umfeld. Die Hauptverwaltung von Fresenius Medical Care wie auch die Administration des operativen Segments International befindet sich in Bad Homburg v.d.H. in Deutschland, unweit von Frankfurt am Main. Unsere nordamerikanische Niederlassung ist in Waltham, Massachusetts, USA, angesiedelt, unsere Niederlassung für die Region Asien-Pazifik in Hongkong. Einen Überblick über die Standorte von Fresenius Medical Care gibt Grafik 2.1.1 — auf Seite 32.

## Leitung und Kontrolle

Seit Februar 2006 agiert Fresenius Medical Care in der Rechtsform einer Kommanditgesellschaft auf Aktien (KGaA). Die Organe von Fresenius Medical Care in der Rechtsform der AG & Co. KGaA sowie die Konzernleitungs- und -überwachungsstruktur werden im Corporate-Governance-Bericht — ab Seite 128 vorgestellt. Im Dezember 2009 hat Fresenius Medical Care seinen Vorstand neu strukturiert. Weitere Informationen hierzu finden Sie im Abschnitt „Für den Geschäftsverlauf wesentliche Ereignisse“ — ab Seite 50. Die Mitglieder des Vorstands werden — auf Seite 14 vorgestellt; Informationen zu den Mandaten von Vorstand sowie Aufsichtsrat finden Sie — ab Seite 153.

## Wichtige Produkte, Dienstleistungen und Geschäftsprozesse

Etwa 2,029 Mio Patienten unterzogen sich zum Ende des Jahres 2010 weltweit regelmäßig einer Dialysebehandlung. In der Dialyse unterscheidet man grundsätzlich zwischen zwei Behandlungsverfahren: der Hämodialyse (HD) und der Peritonealdialyse (PD). Gesteuert durch eine Hämodialyse-Maschine wird bei der HD das Blut des Patienten mittels eines Dialysators gereinigt. Bei der PD wird das Bauchfell, oder Peritoneum, des Patienten als filternde Membran genutzt. Das Geschäft von Fresenius Medical Care umfasst beide Behandlungsverfahren.

Als global führendes Unternehmen bieten wir in mehr als 115 Ländern der Welt Dienstleistungen und Produkte für Dialysepatienten an. Fresenius Medical Care ist mit diesem Angebotsspektrum im Wesentlichen in den folgenden Bereichen tätig:

### Hämodialyse

Fresenius Medical Care erbringt in über 35 Ländern weltweit Dialyседienstleistungen in eigenen Dialysekliniken. Zum größten Teil werden die Patienten dort mit Hilfe der Hämodialyse (HD) behandelt – mit einem Anteil von über 89 % an den Behandlungen weltweit das weitaus häufigste Verfahren in der Nierenersatztherapie. Die HD erfordert den Einsatz spezieller Produkte, allen voran Hämodialysegeräte und Dialysatoren, die als „künstliche Niere“ an das Gerät angeschlossen werden und

Schadstoffe aus dem Blut des Patienten filtern. Fresenius Medical Care stellt diese und weitere Dialyseprodukte weltweit führend her – für den Einsatz innerhalb und außerhalb der eigenen Kliniken. Weitere Informationen finden Sie im Kapitel „Dialysemarkt“ — ab Seite 42 sowie im Glossar auf Seite 159.

### Heimdialyse

Die beiden Therapieformen der Heimdialyse sind die Peritonealdialyse (PD) — siehe Seite 31 sowie Glossar auf Seite 160 und die Heim-Hämodialyse. Insgesamt

#### WESENTLICHE STANDORTE

Grafik 2.1.1

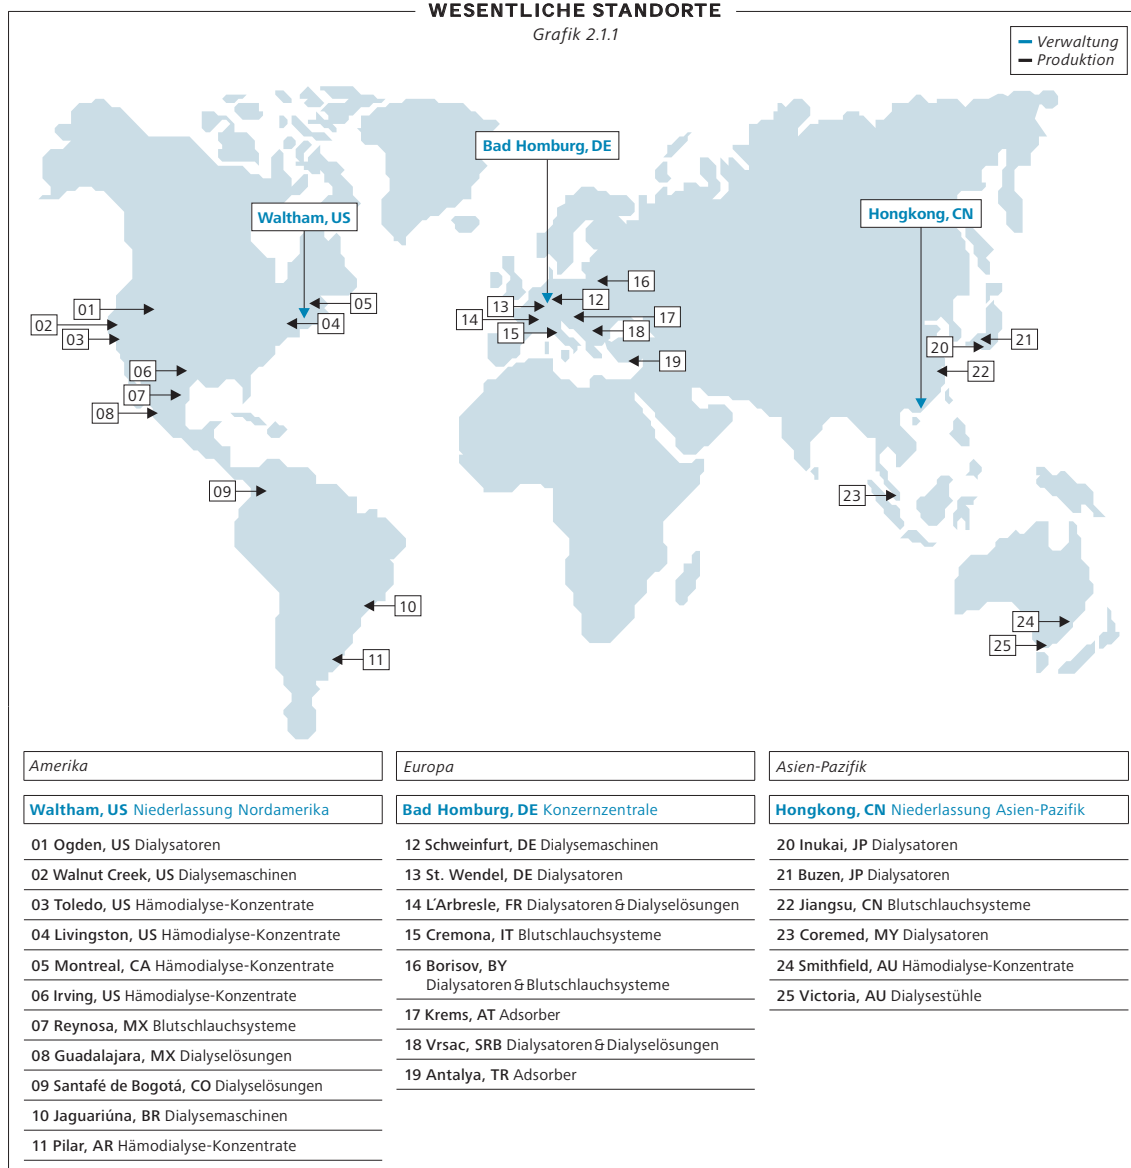

wurden im Berichtsjahr rund 11 % aller Dialysepatienten weltweit mittels PD versorgt. Die Heim-Hämodialyse ist noch immer ein kleiner Markt – nur etwa 0,5 % aller Patienten wurden Ende 2010 auf diese Weise behandelt. Insgesamt haben wir zum Ende des Berichtsjahres circa 39.000 PD-Patienten und ungefähr 3.000 Heim-Hämodialyse-Patienten versorgt; damit erhalten circa 18 % aller PD-Patienten und circa 28 % aller Heim-Hämodialyse-Patienten ihre Dialyseprodukte von uns.

#### Akutdialyse

In der Regel leiden Dialysepatienten an chronischem Nierenversagen – einer Krankheit, die sich meist über viele Jahre schrittweise entwickelt. Darüber hinaus können Menschen aber auch im akuten medizinischen Notfall auf eine Dialysebehandlung angewiesen sein, denn die Niere kann – etwa nach einem schweren Unfall – auch kurzfristig versagen. Auch für diese sogenannte Akutdialyse bietet Fresenius Medical Care Produkte und Dienstleistungen an.

#### Dialysemedikamente

Dialysemedikamente tragen zur horizontalen Erweiterung unseres Produktportfolios über das Angebot von Dialyседienstleistungen und -produkten hinaus bei; sie passen damit ideal zu unserer strategischen Ausrichtung. Üblicherweise werden bei der Behandlung von Dialysepatienten Medikamente eingesetzt, die zur Korrektur der Blutarmut sowie zur Regulierung des Mineralhaushalts benötigt werden. Das Spektrum umfasst blutbildende Substanzen (Erythropoietin, EPO), Eisenpräparate, Phosphatbinder, Vitamin-D-Präparate und sogenannte Kalzिमimetika, siehe auch Glossar — auf Seite 159. Im Berichtsjahr haben wir unsere bereits bestehenden Aktivitäten

im Bereich der Dialysemedikamente ausgeweitet und mit der Schweizer Galenica Ltd. ein gemeinsames Unternehmen, die Vifor Fresenius Medical Care Renal Pharma Ltd., gegründet, um Medikamente für Nierenkranke zu entwickeln und weltweit zu vertreiben. Die Produkte dieses Gemeinschaftsunternehmens werden zur Behandlung von Blutarmut und zur Regulierung des Knochenstoffwechsels bei Dialysepatienten und bei Patienten mit chronischem Nierenversagen eingesetzt, die noch keine Dialysebehandlung benötigen. Fresenius Medical Care ist zu 45 % an dem neuen Unternehmen beteiligt.

#### Labordienstleistungen

Labordienstleistungen ergänzen das Dienstleistungsportfolio von Fresenius Medical Care. Nierenfachärzte sind auf umfangreiche Labortests angewiesen, um die Dialysetherapie auf jeden Patienten individuell abstimmen zu können. Die Qualität der Testergebnisse trägt wesentlich zur Behandlungs- und damit zur Lebensqualität der Patienten bei. Im Geschäftsjahr 2010 hat unsere Tochtergesellschaft Spectra Laboratories in den USA mehr als 60 Mio Labordienstleistungen für circa 171.000 Patienten erbracht (2009: rund 158.000 Patienten).

#### Holiday Dialysis International (HDI)

Menschen, die eine regelmäßige Dialyse benötigen, sind in der Regel nur sehr eingeschränkt mobil; ein Urlaub oder Geschäftsreisen in andere Länder scheinen kaum möglich. Fresenius Medical Care bietet reisenden Hämo- und Peritonealdialyse-Patienten einen kostenfreien Buchungsservice für die Dialyseversorgung außerhalb ihres gewohnten Umfelds. Dabei greifen wir sowohl auf die eigenen weltweiten Kliniken zurück als auch auf zertifizierte Kliniken

### FRESENIUS MEDICAL CARE – WELTWEIT

Tabelle 2.1.2

| Fresenius Medical Care |             |               |               |
|------------------------|-------------|---------------|---------------|
| Berichtssegmente       | Nordamerika | International |               |
| Operative Segmente     | Nordamerika | International | Asien-Pazifik |
|                        | USA         | Europa        | Asien         |
|                        | Kanada      | Lateinamerika | Australien    |
|                        | Mexiko      | Naher Osten   |               |
|                        |             | Afrika        |               |

außerhalb unseres Netzes. So können Dialysepatienten in nahezu allen Gegenden der Welt ihre lebensnotwendige Behandlung erhalten.

#### Wesentliche Absatzmärkte und Wettbewerbsposition

##### Dialyседienstleistungen

Fresenius Medical Care ist im Bereich der Dialyседienstleistungen der weltweite Marktführer mit einem Marktanteil von etwa 11 %, gemessen an der Anzahl der behandelten Patienten. Wir versorgen die meisten Dialysepatienten und verfügen, verglichen mit unseren Wettbewerbern, über die größte Zahl von Dialysekliniken: Im Berichtsjahr behandelten wir rund 214.648 Patienten in 2.757 Kliniken weltweit. 64 % unserer Patienten haben wir in Nordamerika betreut, 18 % in Europa, 10 % in Lateinamerika und 8 % in der Region Asien-Pazifik.

##### Dialyseprodukte

Im Bereich der Dialyseprodukte hat die Bedeutung der Region Asien-Pazifik zugenommen: dort werden inzwischen 17 % der gesamten Produktumsätze von Fresenius Medical Care erwirtschaftet. Unverändert ist allerdings Europa unsere wichtigste Absatzregion mit einem Umsatzanteil von nahezu 50 %; in Nordamerika erwirtschaften wir 28 % unserer Produktumsätze, in Lateinamerika 7 %. Unser weltweiter Marktanteil bei den Dialyseprodukten betrug im Jahr 2010 rund 33 %; damit sind wir auch in diesem Bereich die Nummer eins geblieben. Der Marktanteil unserer Schlüsselprodukte Dialysatoren und Dialysemaschinen lag mit mehr als 45 % bzw. 55 % sogar noch deutlich darüber.

Weitere Angaben zu den wesentlichen Absatzmärkten und zur Marktposition von Fresenius Medical Care finden Sie im Kapitel „Dialysemarkt“ — ab Seite 42.

#### Rechtliche und wirtschaftliche Rahmenbedingungen

Fresenius Medical Care bietet lebensrettende Produkte und Dienstleistungen für nierenkranke Menschen an. Wir sind daher Konjunkturzyklen nur in relativ geringem Maße unterworfen. Dadurch unterscheiden wir uns beispielsweise von Konsumgüterherstellern, die einer eher zyklischen Produktnachfrage unterliegen. Die relative Unabhängigkeit unseres Geschäfts vom allgemeinen konjunkturellen Klima wird auch im

Zusammenhang mit der Finanz- und Wirtschaftskrise deutlich: Zwar werden geringfügig weniger Dialysemaschinen durch Geräte der neuesten Generation ersetzt, allerdings ist der Dialysemarkt im Ganzen davon nicht spürbar betroffen.

Beeinflusst wird das Geschäft von Fresenius Medical Care eher von staatlich festgelegten Erstattungsätzen und Vergütungssystemen. Die Vergütungssysteme für die Dialysebehandlung unterscheiden sich von Land zu Land, oft sogar innerhalb eines Landes. Fresenius Medical Care bietet in mehr als 35 Ländern mit unterschiedlichen Gesundheitssystemen und Vergütungsstrukturen Dialyседienstleistungen an. Dank dieser internationalen Erfahrung können wir die Bemühungen der nationalen Gesundheitssysteme unterstützen, passende Vergütungsstrukturen zu schaffen, unser Geschäft den lokalen Gegebenheiten anpassen und dabei profitabel agieren. Weitere Angaben hierzu finden Sie im Kapitel „Dialysemarkt“ — ab Seite 42.

Als lebensrettende Behandlung ist die Dialyse mit höchsten Anforderungen an Sicherheit und Qualität verbunden. Diese Anforderungen sind in zahlreichen gesetzlichen Regelungen, Standards und Normen – sowohl national als auch international – verankert, an denen sich unser unternehmerisches Handeln ausrichtet.

Nicht zuletzt tragen demografische Faktoren zu weiter wachsenden Dialysemärkten bei, unter anderem die älter werdende Bevölkerung und die steigende Zahl von Menschen, die an Diabetes und Bluthochdruck leiden – Erkrankungen, die dem chronischen Nierenversagen häufig vorausgehen. In den vergangenen Jahren wurden die Prognosen zur Häufigkeit dieser beiden Erkrankungen permanent nach oben korrigiert. Die „International Diabetes Federation“, ein weltweiter Diabetesverband, erwartet beispielsweise, dass die Zahl der an Diabetes erkrankten Menschen von über 300 Mio im Jahr 2011 auf 438 Mio im Jahr 2030 steigen wird. Einer Studie der Universität von Chicago zufolge wird sich allein in den USA die Zahl der Diabetes-Patienten bis 2034 auf 44 Mio erhöhen und damit im Vergleich zu 2010 fast verdoppeln. Zudem steigt die Lebenserwartung von Dialysepatienten dank der sich stetig weiter verbessernden Behandlungsqualität und des auch in den Entwicklungsländern steigenden Lebensstandards.

### Bilanzierung

Fresenius Medical Care bilanziert nach U.S. GAAP (United States Generally Accepted Accounting Principles – US-amerikanische Grundsätze ordnungsgemäßer Rechnungslegung) und in US-Dollar. Gleichzeitig werden Abschlüsse nach den Regeln der „International Financial Reporting Standards“ (IFRS) erstellt.

### STRATEGIE, ZIELE UND UNTERNEHMENSSTEUERUNG

Unsere langfristige Strategie ist darauf ausgerichtet, den Unternehmenswert dauerhaft zu erhöhen. Die Gesundheit der Patienten steht im Mittelpunkt unserer Geschäftsaktivitäten – die Lebensqualität und Lebenserwartung erkrankter Menschen zu steigern ist unser Ziel. Der Vorstand setzt eine Vielzahl unterschiedlicher Instrumente und Kennzahlen ein, um die Geschäftsentwicklung zu bewerten, seine Strategie auszuarbeiten und Entscheidungen über Investitionen zu fällen. Wir sehen uns weiterhin sehr gut positioniert, um unsere Wachstumsziele zu erreichen.

#### Steuerungsgrößen

Der Vorstand steuert das Unternehmen mit Hilfe einer Reihe finanzieller Kenngrößen. Darüber hinaus orientierte er sich 2010 bei seinen Entscheidungen an den Wachstumsstrategien GOAL 10 und GOAL 13. Da der Zielpunkt von GOAL 10 im Jahr 2010 erreicht wurde, haben wir im September 2010 neue Ziele festgelegt (GOAL 13). Sie unterstützen uns dabei, auch zukünftig unsere herausragende Marktposition zu behaupten und neue Wege in die Zukunft der Dialyse zu gehen. Fresenius Medical Care verfolgt parallel vier Ansätze, um im weltweiten Dialysemarkt erfolgreich zu sein und die eigenen Vorgaben zu

erreichen. Weitere Informationen dazu finden Sie im Abschnitt „Wachstumsstrategie“ — ab Seite 36.

Die Aktivitäten unserer Segmente steuern wir außerdem anhand ihrer operativen Ergebnisse, definiert als Ergebnis vor Zinsen und Ertragsteuern (Earnings before Interest and Taxes, EBIT). Die Kenngröße Ergebnis vor Zinsen, Ertragsteuern und Abschreibungen (Earnings before Interest, Taxes, Depreciation and Amortization, EBITDA) verwenden wir speziell um den Verschuldungsgrad zu ermitteln; so können wir die Kreditfähigkeit des Unternehmens beurteilen.

Die Zielgrößen, an denen der Vorstand die Segmente misst, sind so gewählt, dass sie genau die Erträge und Aufwendungen umfassen, über die die Segmente auch tatsächlich entscheiden können. Die Finanzierung beispielsweise ist eine zentrale Aufgabe, unterliegt aber nicht dem Einfluss der Segmente; deshalb gehen Zinsaufwendungen für die Finanzierung nicht in die Zielgröße für ein Segment ein. Darüber hinaus werden die Kosten der Zentralbereiche – im Wesentlichen Aufwendungen für Forschung- und Entwicklung, Rechtskosten, Aufwendungen für Rechnungswesen und Finanzen, Steuern sowie Beratungsleistungen – nicht berücksichtigt.

Anhand des Mittelzuflusses aus laufender Geschäftstätigkeit, dem operativen Cashflow, kann beurteilt werden, ob ein Unternehmen die Mittel selbst erwirtschaften kann, die für die Substanzerhaltung des in der Bilanz abgebildeten Vermögens und für Erweiterungsinvestitionen nötig sind.

Um den Verschuldungsgrad zu ermitteln, werden die Finanzverbindlichkeiten (Debt) ins Verhältnis zum EBITDA zuzüglich anderer nichtzahlungswirksamer

#### WESENTLICHE KENNZAHLEN

Tabelle 2.1.3

|                                            | 2010   | 2009   |
|--------------------------------------------|--------|--------|
| EBIT in MIO US\$                           | 1.924  | 1.756  |
| EBITDA in MIO US\$                         | 2.427  | 2.213  |
| Verschuldungsgrad (Debt-EBITDA-Verhältnis) | 2,38   | 2,46   |
| Return on Invested Capital (ROIC)          | 8,8 %  | 8,5 %  |
| Return on Operating Assets (ROOA)          | 12,5 % | 12,2 % |
| Return on Equity (ROE)                     | 13,3 % | 13,3 % |



Aufwendungen gesetzt. Der Verschuldungsgrad ist ein Indikator dafür, wie lange und in welcher Höhe Verbindlichkeiten bedient werden können. Er gibt verlässlicher als die alleinige Orientierung an der absoluten Höhe der Finanzverbindlichkeiten Auskunft darüber, ob ein Unternehmen in der Lage ist, seinen Zahlungsverpflichtungen nachzukommen. Fresenius Medical Care hat eine starke Marktposition in globalen, wachsenden und größtenteils nichtzyklischen Märkten. Zudem verfügen die meisten Kunden über eine hohe Kreditqualität, da die Dialysebranche generell durch stabile, planbare und nachhaltige Kapitalflüsse gekennzeichnet ist. Dadurch kann Fresenius Medical Care im Vergleich zu Unternehmen in anderen Branchen mit einem höheren Anteil an Fremdkapital arbeiten. Für das laufende Geschäftsjahr streben wir einen Verschuldungsgrad von weniger als 2,8 an; siehe auch „Prognosebericht“ — ab Seite 116.

Wir orientieren uns in der Unternehmenssteuerung außerdem an operativen Kennzahlen aus den folgenden unterschiedlichen Renditeberechnungen:

- Die Rendite auf das investierte Kapital Return on Invested Capital, (ROIC) – auch Kapitalrentabilität genannt – ist deshalb so relevant, weil sie Auskunft darüber gibt, wie effizient ein Unternehmen mit dem zur Verfügung stehenden Kapital arbeitet bzw. wie effizient der Kapitaleinsatz für ein bestimmtes Investitionsvorhaben ist. Der ROIC von Fresenius Medical Care lag 2010 bei 8,8 % und damit über dem vergleichbaren Vorjahreswert von 8,5 %.
- Die Rendite auf das betriebsnotwendige Kapital Return on Operating Assets, (ROOA) sagt aus, wie effizient mit dem im gesamten Unternehmen eingesetzten Kapital gewirtschaftet wurde, da der Gewinn ins Verhältnis zum Gesamtkapital gesetzt wird. Der ROOA von Fresenius Medical Care lag 2010 mit 12,5 % ebenfalls über dem Vorjahresniveau (2009: 12,2 %).
- Um die Rendite auf das Eigenkapital Return on Equity, (ROE) zu ermitteln, wird das Konzernergebnis (Ergebnis, das auf die Anteilseigner der Fresenius Medical Care AG & Co. KGaA entfällt) ins Verhältnis zum eingesetzten Eigenkapital (Eigenkapital der Anteilseigner der Fresenius Medical Care AG & Co. KGaA) gesetzt. Der ROE gibt somit

Auskunft über die Ertragskraft eines Unternehmens. Im vergangenen Geschäftsjahr ist der ROE (nach Steuern) konstant auf 13,3 % geblieben, hauptsächlich wegen des starken Anstiegs des Eigenkapitals.

► Zur Berechnung unserer Kapitalkosten ziehen wir den Kapitalkostensatz WACC (Weighted Average Cost of Capital) heran. Der WACC ist ein durchschnittlicher Gesamtkapitalkostensatz, der sich als gewogenes Mittel der Kosten für Eigen- und Fremdkapital ergibt. Der WACC von Fresenius Medical Care betrug im Jahr 2010 6,8, nach 6,9 % im Vorjahr. Der Vergleich des WACC mit der Kapitalrentabilität von 8,8 % zeigt, dass Fresenius Medical Care im Jahr 2010 nicht nur seine Kapitalkosten erwirtschaftet, sondern darüber hinaus auch den Unternehmenswert gesteigert hat.

Wir steuern unsere Investitionen mittels eines detaillierten Abstimmungs- und Bewertungsprozesses. Der Vorstand legt das Investitionsbudget für den Konzern sowie die Investitionsschwerpunkte fest. Bevor die konkreten Investitionsvorhaben oder Akquisitionen umgesetzt werden, prüft ein unternehmensinterner Ausschuss (Acquisition & Investment Committee, AIC) die einzelnen Projekte und Maßnahmen und berücksichtigt dabei Renditeanforderungen und Renditepotenziale. Die Investitionsprojekte werden auf Basis gängiger Methoden wie der Kapitalwert- und der Interner-Zinsfuß-Methode bewertet; Amortisationszeiten fließen ebenfalls in die Bewertung ein. Damit wollen wir sicherstellen, dass wir nur die Investitionen und Akquisitionen tätigen beziehungsweise umsetzen, die tatsächlich den Unternehmenswert steigern.

Details zur Entwicklung dieser Kenngrößen sowie weiterer Finanzzahlen finden Sie auch in den Kapiteln „Ertragslage“ — ab Seite 55, „Finanzlage“ — ab Seite 61 sowie im Finanzbericht — ab Seite 165.

### Wachstumsstrategie

Bereits im Frühjahr 2005 haben wir mit GOAL 10 eine langfristige Strategie mit definierten Zielgrößen vorgestellt. GOAL 10 steht für „Growth Opportunities to Assure Leadership in 2010“ (deutsch: Wachstumschancen, um die Marktführerschaft im Jahr 2010 zu sichern) und beschreibt vier Wege — siehe Grafik 2.1.6 auf Seite 38, die Fresenius Medical Care geht, um in einem möglichst breiten Spektrum des weltweiten

Dialysemarktes erfolgreich zu sein und die gesetzten langfristigen Wachstumsvorgaben zu erreichen. Da wir im Berichtsjahr unsere GOAL-10-Ziele erreicht haben, hat Fresenius Medical Care im September 2010 mit GOAL 13 neue Ziele festgelegt — siehe Tabelle 2.1.5. Dabei behalten wir die vier Wege weiterhin bei und beschreiten sie in einer finanziell verantwortungsvollen Weise, um unsere Position als Weltmarktführer in der Dialyse zu festigen.

Im Jahr 2010 haben wir einen Umsatz von 12,05 MRD US \$ erreicht. Das ist mehr als der noch zu Jahresbeginn erwartete Umsatz von über 12 MRD US \$ – und selbst diese Zahl liegt noch deutlich über dem ursprünglich avisierten GOAL-10-Ziel von 10 MRD US \$ aus dem Jahr 2005 und dem revidierten GOAL-10-Ziel von 11,5 MRD US \$ aus dem Jahr 2006. Auch unser zu Beginn des Jahres avisiertes Ziel beim Konzernergebnis in Höhe von 950 bis 980 MIO US \$ für 2010 haben wir mit 979 MIO US \$ erreicht. Das Konzernergebnis

ist seit 2005 um durchschnittlich etwa 17 % im Jahr gestiegen und damit deutlich stärker als der angestrebte GOAL-10-Zielwert von mehr als 10 %.

### Weg 1: Organisches Wachstum

Mit Dialyседienstleistungen und innovativen Dialyseprodukten wie den neu entwickelten Dialysemaschinen der Serien 5008 und 5008S sowie 2008T und 2008K wollen wir bis 2013 um etwa 5 bis 6 % pro Jahr wachsen. Im Produktgeschäft rechnen wir mit einem jährlichen organischen Zuwachs von 4 bis 5 %. Wir planen, unser Kliniknetz weltweit in allen bedeutenden Märkten und Wachstumsregionen auszuweiten und damit unsere führende Marktstellung zu behaupten und sogar noch zu verbessern. Gleichzeitig bauen wir unsere ganzheitlichen Behandlungskonzepte UltraCare und NephroCare (siehe Kapitel „Unser Geschäft mit Dialyседienstleistungen“ — ab Seite 82) weiter aus und kombinieren diese Angebote zum Beispiel mit Dialysemedikamenten.

## GOAL-10-ZIELE UND HISTORISCHE ENTWICKLUNG

Tabelle 2.1.4

|                                                               | Goal 10   | 2010   | 2009   | 2008   | 2007   | 2006   | 2005   |
|---------------------------------------------------------------|-----------|--------|--------|--------|--------|--------|--------|
| Umsatz in MIO US \$                                           | > 11.500  | 12.053 | 11.247 | 10.612 | 9.720  | 8.499  | 6.772  |
| Umsatzwachstum, pro Jahr                                      | ~ 6 – 9 % | 7 %    | 9 %    | 8 %    | 14 %   | 25 %   | 8 %    |
| Marktanteil im Dialysemarkt <sup>1</sup>                      | ~ 18 %    | 17,5 % | 17,3 % | 16,3 % | 15,7 % | 15,5 % | 12,9 % |
| Marktvolumen <sup>1</sup> in MRD US \$                        | ~ 67      | ~ 69   | ~ 65   | ~ 65   | ~ 62   | ~ 55   | ~ 52,5 |
| Wachstum Konzernergebnis <sup>2</sup> , pro Jahr <sup>3</sup> | > 10 %    | 10 %   | 9 %    | 14 %   | 25 %   | 24 %   | 17 %   |

<sup>1</sup> Interne Schätzungen.

<sup>2</sup> Ergebnis, das auf die Anteilseigner der Fresenius Medical Care AG & Co. KGaA entfällt.

<sup>3</sup> 2005 ohne Einmal- und Sonderaufwendungen.

2006 ohne Einmal- und Sonderaufwendungen und ohne die Effekte aus der Bilanzierungsänderung für Aktienoptionen (SFAS 123R).

## GOAL-13-ZIELE

Tabelle 2.1.5

|                                 | Ergebnisse 2010    | Goal 13                                                  |
|---------------------------------|--------------------|----------------------------------------------------------|
| Umsatz                          | 12,053 MRD US \$   | + 6 – 8 % <sup>1</sup>                                   |
| EBIT-Marge                      | 16,0 %             | 10 – 20 Basispunkte Verbesserung                         |
| Steuerquote                     | 35,2 %             | 35 – 36 %                                                |
| Konzernergebnis <sup>2</sup>    | 979 MIO US \$      | hohe einstellige oder niedrig zweistellige Wachstumsrate |
| Operativer Cash Flow            | 11 % des Umsatzes  | > 10 % des Umsatzes                                      |
| Investitionen und Akquisitionen | ~ 9 % des Umsatzes | ~ 7 % des Umsatzes                                       |

<sup>1</sup> Währungsbereinigtes jährliches Wachstum.

<sup>2</sup> Ergebnis, das auf die Anteilseigner der Fresenius Medical Care AG & Co. KGaA entfällt.

Mit dieser Strategie unterscheiden wir uns wesentlich von unseren Wettbewerbern.

### Weg 2: Akquisitionen

Weil wir langfristig wachsen und unsere Ertragskraft steigern wollen, überprüfen wir regelmäßig, ob wir das Netz unserer Dialysekliniken durch Zukäufe erweitern können. Hierbei konzentrieren wir uns auf besonders attraktive Regionen. Akquisitionen in Nordamerika werden allerdings einen kleineren finanziellen Umfang haben als in den vergangenen Jahren, da die Konsolidierung des Dialysemarktes in den USA schon am weitesten vorangeschritten ist. Wir gehen allerdings davon aus, dass der Großteil unseres zukünftigen Wachstums organisch generiert wird. Akquisitionen sollen uns dabei unterstützen, unsere langfristigen Ziele zu erreichen. Weitere Informationen zu Akquisitionen finden Sie im Abschnitt „Investitionen und Akquisitionen“

— ab Seite 63.

### Weg 3: Horizontale Erweiterung

Im Geschäftsjahr 2010 haben wir unsere Angebotspalette im Bereich der Dialysemedikamente sinnvoll und gemäß unserer Strategie — siehe auch Grafik 2.1.6

erweitert. Mit der Schweizer Galenica Ltd. haben wir 2010 ein Gemeinschaftsunternehmen gegründet, um Medikamente für Nierenkranke zu entwickeln und weltweit zu vertreiben. Die Produkte werden zur Behandlung von Blutarmut und zur Regulierung des Knochenstoffwechsels bei Dialysepatienten und bei Patienten mit chronischem Nierenversagen, die noch keine Dialysebehandlung benötigen, eingesetzt. Das Unternehmen mit Sitz in der Schweiz trägt den Namen Vifor Fresenius Medical Care Renal Pharma Ltd. und erweitert die bereits bestehende Zusammenarbeit zwischen Fresenius Medical Care und Galenica. Fresenius Medical Care wird zu 45 % an dem neuen Unternehmen beteiligt sein.

### Weg 4: Heimdialyse

Mit nach wie vor etwa 11 % führt nur ein relativ kleiner Teil der Patienten die Dialyse zu Hause durch. Die Mehrzahl der Dialysepatienten wird in darauf spezialisierten Dialysezentren behandelt. Wir wollen im Markt der Heimdialyse – der sowohl die Peritonealdialyse als auch die Heim-Hämodialyse umfasst – langfristig eine wichtige Rolle übernehmen. Dazu kombinieren wir unsere umfangreiche und innovative Produktpalette mit unserer

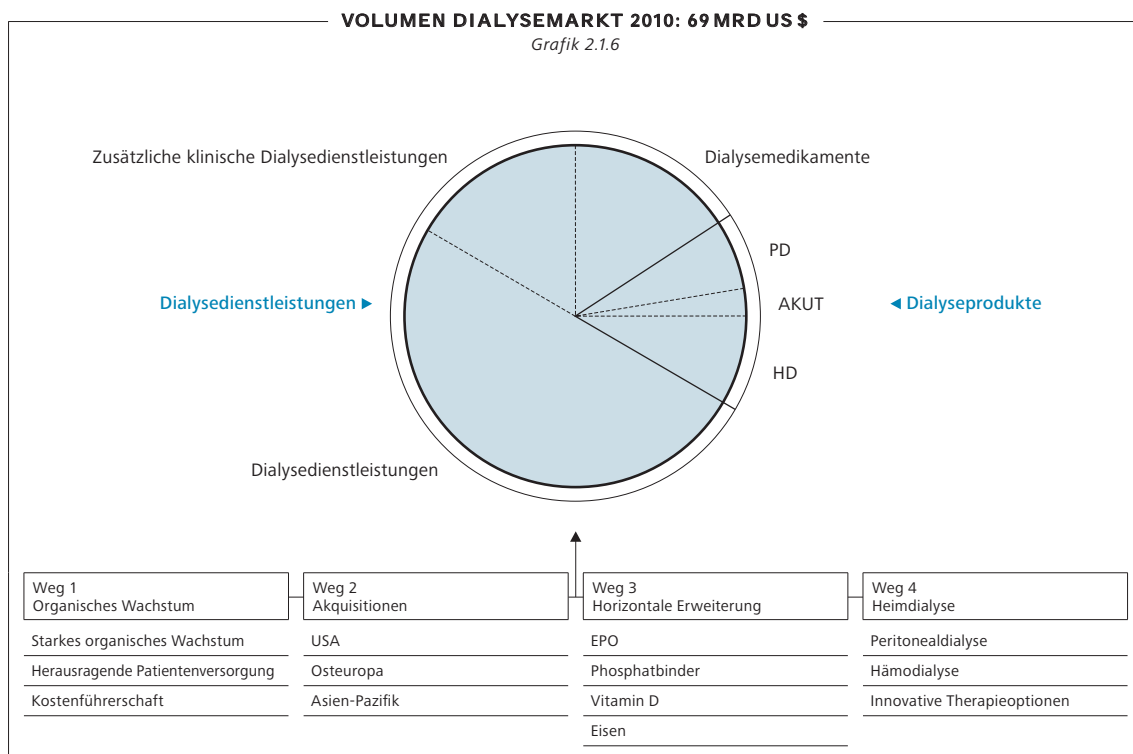

Kompetenz im Bereich der Dialysedienstleistungen. Mehr dazu erfahren Sie im Abschnitt „Heimdialyse“

— ab Seite 32.

Unsere Strategie berücksichtigt konkrete, messbare Wachstumsziele sowie langfristige, von uns prognostizierte Trends im Dialysemarkt. Wir erwarten nicht nur, dass die Patientenzahlen weiter steigen, sondern auch, dass künftig noch mehr Wert auf die Qualität der erbrachten Dienstleistungen und der zur Verfügung stehenden Produkte gelegt wird. Das Erfüllen bestimmter Qualitätskriterien dürfte darüber entscheiden, wie hoch die Vergütung für Dialysedienstleistungen sein wird. Weitere Informationen dazu finden Sie auch in den Abschnitten „Qualitätsmanagement“ — ab Seite 83 sowie „Dialysemarkt“ — ab Seite 42.

Darüber hinaus sind wir der Überzeugung, dass der Bedarf für eine ganzheitliche Betreuung von Nierenkranken steigen wird. Das bedeutet, dass im Fokus unseres Geschäfts nicht allein die einzelne Dienstleistung oder das einzelne Dialyseprodukt stehen wird, sondern die Verbindung aller Anwendungsbereiche rund um die Dialyse.

Unsere detaillierten Prognosen finden Sie im „Prognosebericht“ — ab Seite 116.

## WIRTSCHAFTLICHES UMFELD

Die Weltwirtschaft erlebte im ersten Halbjahr 2010 einen kräftigen Aufschwung, der in den darauffolgenden Monaten jedoch an Dynamik verlor. Der Dialysemarkt bleibt allerdings generell von makroökonomischen Einflüssen weitgehend unbeeinflusst: Er ist ein Wachstumsmarkt, der konjunkturunabhängig vom steigenden Bedarf an medizinischer Versorgung einer immer älter werdenden Bevölkerung bedingt ist. Fresenius Medical Care ist Konjunkturzyklen nur in relativ geringem Maße unterworfen, da wir lebensrettende Produkte und Dienstleistungen für nierenkranke Menschen anbieten.

### Gesamtwirtschaftliche Entwicklung

Das Bruttoinlandsprodukt (BIP) wuchs 2010 weltweit um 4,8 %, nach einem Minus von 0,9 % im Vorjahr. Impulsgeber für die dynamische Entwicklung im ersten Halbjahr 2010 waren die expansive Geld- und Fiskalpolitik einiger Länder sowie der sich ausweitende Welthandel. Zu Letzterem trugen vor allem die Schwellenländer bei, deren Volkswirtschaften am stärksten wuchsen. Für die Abschwächung des Aufschwungs in der zweiten Jahreshälfte waren insbesondere die in der Finanzkrise deutlich gewordenen Strukturprobleme – beispielsweise der GIPS-Staaten Griechenland, Irland, Portugal und Spanien – verantwortlich. Sie führten zu einer angespannten

## REALES BRUTTOINLANDSPRODUKT UND VERBRAUCHERPREISE

Tabelle 2.1.7

Veränderung gegenüber dem Vorjahr in %

|                         | Bruttoinlandsprodukt |             | Verbraucherpreise |            |
|-------------------------|----------------------|-------------|-------------------|------------|
|                         | 2010                 | 2009        | 2010              | 2009       |
| USA                     | 2,8                  | -2,6        | 1,6               | -0,3       |
| Deutschland             | 3,7                  | -4,7        | 1,1               | 0,2        |
| Euro-Raum               | 1,7                  | -4,1        | 1,5               | 0,3        |
| Großbritannien          | 1,7                  | -4,9        | 3,2               | 2,1        |
| Neue EU-Mitgliedsländer | 1,8                  | -4,0        | 1,7               | 3,3        |
| EU 27                   | 1,8                  | -4,0        | 1,8               | 0,7        |
| Russland                | 3,8                  | -7,9        | 6,9               | 11,7       |
| Japan                   | 3,3                  | -5,2        | -0,8              | -1,4       |
| China                   | 10,7                 | 8,6         | 3,4               | -0,7       |
| Ostasien und Hongkong   | 7,4                  | 0,0         | 3,0               | 1,8        |
| Lateinamerika           | 5,9                  | -2,1        | 6,6               | 6,5        |
| <b>WELTWEIT</b>         | <b>4,8</b>           | <b>-0,9</b> | <b>4,4</b>        | <b>3,1</b> |

Quelle: Monatsberichte der Deutschen Bundesbank, Institut für Weltwirtschaft an der Universität Kiel „Weltkonjunktur im Winter 2010“, 15. Dezember 2010.

Situation an den Finanzmärkten und zunehmend volatilen Wechselkursen.

### USA

Nach einem guten Start ins Jahr 2010 kam die wirtschaftliche Expansion in den USA in der zweiten Jahreshälfte deutlich langsamer voran. Ursachen für den verhaltenen Wachstumsverlauf waren die anhaltend hohe Arbeitslosigkeit und die niedrigen Immobilienpreise: Mit den sinkenden Budgets der Privathaushalte ging der private Konsum zurück und schließlich auch der Außenhandel. Die niedrigen Immobilienpreise verstärkten diesen Effekt noch.

### Europa

Im gesamten Euro-Raum verlief die wirtschaftliche Erholung 2010 eher zurückhaltend. Positive Impulse verzeichneten der Export, die Investitionstätigkeit und der Konsum. In den einzelnen Regionen entwickelte sich die Wirtschaft sehr unterschiedlich: In Deutschland wuchs das BIP im innereuropäischen Vergleich überdurchschnittlich. Länder mit hohen Staatsdefiziten, die zudem von geplatzten Immobilienpreisblasen betroffen waren, wiesen die niedrigsten Wachstumsraten auf; hierzu zählten vor allem die GIPS-Staaten.

### Asien

Asien verbuchte 2010 den stärksten Aufschwung aller Weltregionen, weil die Exporte und vor allem die Bauinvestitionen stark stiegen und zugleich der

private Konsum zunahm. Starke Zuwächse verzeichneten insbesondere China, Indien und ostasiatische Schwellenländer wie Taiwan und Singapur. In Japan kam die konjunkturelle Entwicklung im Jahresverlauf leicht ins Stocken.

### Lateinamerika

Lateinamerika erlebte in der ersten Jahreshälfte 2010 einen besonders starken Aufschwung, der sich aber in der zweiten Jahreshälfte nicht mit dem gleichen Tempo fortsetzte. Der Hauptgrund dafür war die weltweite konjunkturelle Abschwächung, speziell die geringere Nachfrage aus den USA und China und die auslaufenden staatlichen Konjunkturprogramme.

### Energie- und Rohstoffpreisentwicklung

Die Kosten für Energie und Rohstoffe zogen im Jahr 2010 wieder erheblich an. Dadurch erhöhten sich für viele Unternehmen die Produktionskosten und das Unternehmensergebnis sank, wenngleich in weniger starkem Maße. Für Fresenius Medical Care gilt, dass eine Erhöhung der Transport- und Energiekosten um 1 % das Ergebnis nach Steuern um ca. 0,3 % reduziert. Fresenius Medical Care schließt langfristige Lieferverträge ab, um die Folgen starker Preiserhöhungen auf das eigene Unternehmensergebnis abzumildern.

### Wechselkursentwicklung

Schon im Vorjahr waren die Wechselkurse großen Schwankungen unterworfen gewesen; diese hohe Volatilität setzte sich 2010 fort. Zwar erholte sich der

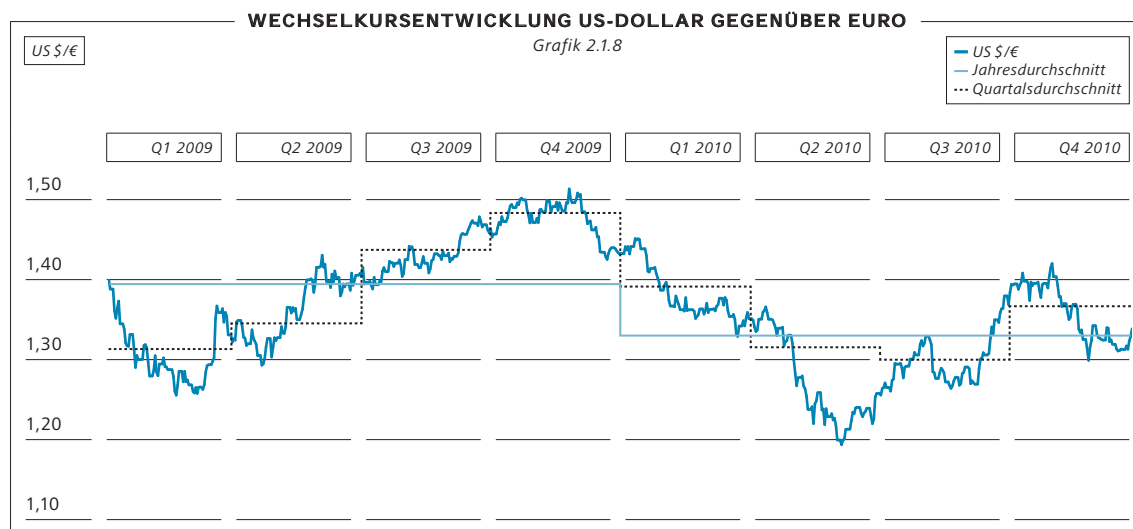

Quelle: Reuters-Daten, eigene Berechnungen.

us-Dollar in der ersten Jahreshälfte von seiner Abwertung gegenüber anderen wichtigen Währungen, in der zweiten Jahreshälfte sank sein Kurs jedoch erneut. Zum Stichtag 31. Dezember 2010 lag der Wechselkurs us-Dollar/Euro bei 1,3377 und damit circa 7 % unter dem Vorjahreswert von 1,4347; in der Jahresgesamtbetrachtung lag er durchschnittlich bei 1,3270, das entspricht einem Minus von circa 5 % gegenüber dem durchschnittlichen Vorjahreswert von 1,3940.

Für Fresenius Medical Care ist vor allem die Entwicklung der beiden Währungen us-Dollar und Euro zueinander entscheidend, weil wir einen Großteil unserer Umsätze in den USA und in der Euro-Zone erwirtschaften. Eine Aufwertung des Euro ist aus bilanzieller Sicht vorteilhaft, da wir in us-Dollar berichten und sich rechnerisch somit ein höherer Wert der in Euro erzielten Bilanzwerte ergibt (Translationseffekt).

Mit unserem globalen Netz an Fertigungsstätten tragen wir dem Nachfragegefüge in unserem Geschäft mit Dialyseprodukten Rechnung: Unsere Produktionsstätten sind zu einem großen Teil in den Märkten angesiedelt, die sie bedienen; Kosten fallen demnach in der gleichen Währung an, in der wir unseren Umsatz generieren. So sind wir von langfristigen Währungsschwankungen weitgehend unabhängig und minimieren unsere Transaktionsrisiken, also unsere Risiken durch Fremdwährungspositionen oder schwankende Wechselkurse. Im Dienstleistungsgeschäft ist das Risiko noch geringer, da wir die Leistungen vor Ort und damit in der jeweiligen Landeswährung erbringen. Da dies den

größeren Geschäftsbereich von Fresenius Medical Care betrifft, ist das Währungsrisiko insgesamt als minimal einzustufen.

Das Geschäft von Fresenius Medical Care ist durch die Volatilität der Wechselkurse – vor allem des Euro gegenüber dem us-Dollar sowie anderer Währungen an unseren verschiedenen Standorten weltweit gegenüber dem Euro – in der Regel kurzfristig beeinflusst. Für die Abwertung des Euro gegenüber dem us-Dollar im Geschäftsjahr 2010 waren vor allem zwei Gründe maßgeblich: die Erwartung der Marktteilnehmer hinsichtlich der künftigen Geld- und Finanzpolitik in den Vereinigten Staaten und die kurzfristige wirtschaftliche Entwicklung des Euro-Raums im Vergleich zu derjenigen in den USA. Die positiven Währungseffekte aus Warenbezügen in Euro gegenüber den lokalen Währungen relativierten sich zum einen durch den Negativeffekt aus der Abwertung des Euro gegenüber dem us-Dollar und zum anderen durch negative Effekte in einzelnen Ländern, etwa durch die Einstufung Venezuelas als Hochinflationsland. Die Sensitivitätsanalyse in Tabelle 2.1.9 zeigt, in welchem Ausmaß eine 10-prozentige Aufwertung verschiedener Währungen gegenüber dem us-Dollar unseren Umsatz beeinflusst.

Weitere Informationen zum wirtschaftlichen Umfeld finden Sie im Abschnitt „Vergleich des tatsächlichen mit dem prognostizierten Geschäftsverlauf“ — ab Seite 52 und im „Prognosebericht“ — ab Seite 116.

#### SENSITIVITÄTSANALYSE

Tabelle 2.1.9

| Um 10 % ggü. dem US\$ aufwertende Währung |                                                        |
|-------------------------------------------|--------------------------------------------------------|
|                                           | Wirkung auf den Umsatz von Fresenius Medical Care 2010 |
| Euro                                      | ~ 1,5 %                                                |
| Andere europäische Währungen              | ~ 0,05 %                                               |
| Renminbi und Hongkong-Dollar              | ~ 0,02 %                                               |
| Andere asiatische Währungen               | ~ 0,02 %                                               |

DIALYSEMARKT

Der Dialysemarkt wächst weltweit; Fresenius Medical Care war im Berichtsjahr weiterhin Marktführer. Als vertikal integrierter Anbieter mit jahrzehntelanger Erfahrung kann Fresenius Medical Care Patienten mit hochwertigen Dialyseprodukten und -dienstleistungen aus einer Hand versorgen und hat so die besten Voraussetzungen, seine exzellente Position auch in Zukunft zu festigen und sein Geschäft weiter auszubauen.

Den Wert des weltweiten Dialysemarktes schätzen wir für das Jahr 2010 auf rund 69 MRD US \$; das entspricht währungsbereinigt einem Wachstum gegenüber dem Vorjahr von 4 %. Wir gehen davon aus, dass sich dieses Marktvolumen in etwa wie folgt zusammensetzt: Dialyseprodukte mit einem Umsatz von rund 11,7 MRD US \$ und Dialyседienstleistungen (inklusive Dialysemedikamente) mit circa 57 MRD US \$ Umsatz. Detaillierte Informationen zur Datenbasis finden Sie im Abschnitt „Erhebung und Analyse von Marktdaten“ — ab Seite 46.

Dialyseprodukte

Zu den wichtigsten Dialyseprodukten zählen Dialysatoren, Maschinen für die Hämodialyse, Konzentrate und Dialyselösungen sowie Produkte für die Peritonealdialyse; siehe auch Glossar — ab Seite 160. Der weltweite Marktanteil der drei größten Hersteller von Dialyseprodukten lag im Jahr 2010 insgesamt bei circa 67 %, gemessen am Umsatz. Fresenius Medical Care kam auf einen Anteil von rund 33 % und war damit Marktführer, gefolgt von Baxter und Gambro. Der Marktanteil der restlichen, mehrheitlich japanischen Anbieter für Dialyseprodukte lag jeweils im einstelligen Prozentbereich.

Dialysatoren bilden die größte Produktgruppe im Dialysemarkt; das weltweite Absatzvolumen belief sich 2010 auf rund 203 Mio Stück. Ungefähr 92 Mio und damit fast die Hälfte kamen von Fresenius Medical Care – damit hielten wir mit weitem Abstand den größten Marktanteil. Je nach Material der Dialysmembran lassen sich Dialysatoren grundsätzlich in zwei Kategorien einteilen: zellulosebasierte und synthetische, also kunststoffbasierte Dialysatoren. Circa 90 % der weltweit eingesetzten Dialysatoren haben eine synthetische Membran. Mit der Entwicklung der leistungsstarken Faser Polysulfon (siehe Glossar — auf Seite 161) hat Fresenius Medical Care Pionierarbeit für die Weiterentwicklung und Produktion von Dialysatoren geleistet und neue Maßstäbe in der Dialyse gesetzt.

Dialysemaschinen sind ein weiteres wichtiges Segment in unserem Produktgeschäft, und auch hier sind wir mit weitem Abstand Marktführer. Von den etwa 69.000 Dialysemaschinen, die im Jahr 2010 verkauft wurden, stammen rund 55 % von Fresenius Medical Care.

In den USA, unserer wichtigsten Geschäftsregion, belief sich 2010 der Marktanteil von Fresenius Medical Care bei Dialysatoren und Dialysemaschinen im sogenannten unabhängigen Markt auf über 80 %. Als unabhängigen Markt definieren wir alle Dialyse-kliniken, die nicht von den größeren Dialyse-dienstleistungsunternehmen Fresenius Medical Care oder DaVita betrieben werden. Im Berichtsjahr stammten gut 85 % der Dialysegeräte, die insgesamt in den USA in Dialysekliniken installiert sind, von Fresenius Medical Care. Beim Erwerb neuer Geräte fiel die Wahl dieser Kunden sogar zu über 90 % auf unsere Produkte. Unser Gerät 2008K ist dabei das

MARKTPosition BEI WESENTLICHEN PRODUKTGRUPPEN 2010

Tabelle 2.1.10

|                                    | Position 1             | Position 2             | Position 3 |
|------------------------------------|------------------------|------------------------|------------|
| Dialysatoren                       | Fresenius Medical Care | Gambro                 | Nipro      |
| Dialysemaschinen                   | Fresenius Medical Care | Gambro                 | Nikkiso    |
| Konzentrate für die Hämodialyse    | Fresenius Medical Care | Fuso                   | Gambro     |
| Blutschlauchsysteme                | Fresenius Medical Care | Gambro                 | Kawasumi   |
| Produkte für die Peritonealdialyse | Baxter                 | Fresenius Medical Care | Gambro     |

Quelle: Basierend auf Unternehmensangaben und Schätzungen.



dominierende Dialysesystem in den USA: Über 100.000 Einheiten sind dort mittlerweile im Einsatz. Auch bei den Dialysatoren blicken wir auf eine positive Entwicklung im vergangenen Geschäftsjahr zurück: Mit mehr als 35 Mio verkauften Dialysatoren haben wir in den USA einen Absatzrekord erzielt.

Im Berichtsjahr war China nach den USA unser zweitgrößter Absatzmarkt für neu verkaufte Hämodialysegeräte; 2010 haben wir mehr als 3.800 Geräte dorthin geliefert. Mittlerweile stammt mit über 48 % schon

fast die Hälfte der Hämodialysegeräte, die in China im Einsatz sind, von Fresenius Medical Care. Mit einer aktuellen Wachstumsrate im Produktgeschäft von über 30 % gewinnt China als Absatzmarkt für Fresenius Medical Care weiter an Bedeutung. Dort gibt es zahlreiche Bestrebungen vonseiten der Regierung, ein modernes Gesundheitssystem mit entsprechenden Vergütungsstrukturen aufzubauen – eine entscheidende Voraussetzung für eine Öffnung des Marktes auch für die Dialysedienstleistungen internationaler Anbieter.

#### DIALYSEPRODUKTE 2010

Grafik 2.1.11

Marktanteil

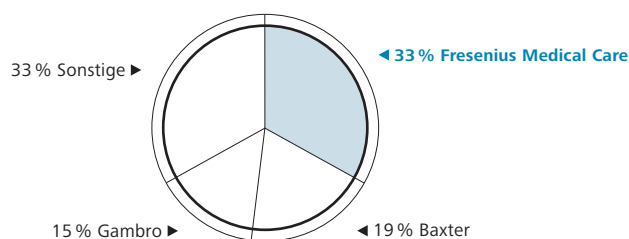

Quelle: Basierend auf Unternehmensangaben und Schätzungen, gemessen am Umsatz.

#### HÄMODIALYSE-PRODUKTE 2010

Grafik 2.1.12

Marktanteil

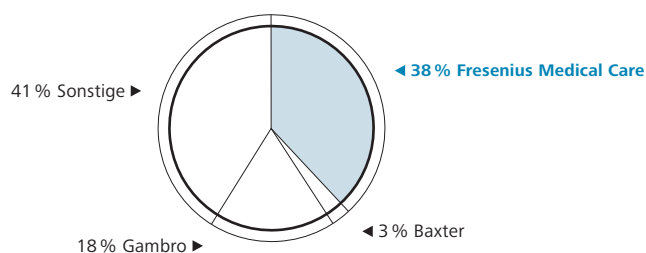

Quelle: Basierend auf Unternehmensangaben und Schätzungen, gemessen am Umsatz.

#### PERITONEALDIALYSE-PRODUKTE 2010

Grafik 2.1.13

Marktanteil

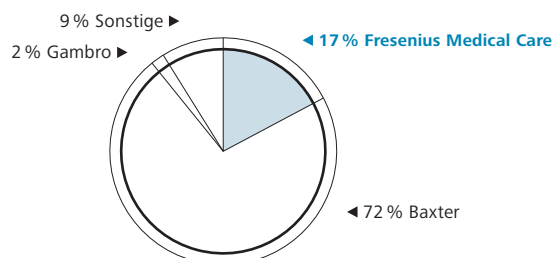

Quelle: Basierend auf Unternehmensangaben und Schätzungen, gemessen am Umsatz.



Bei der Peritonealdialyse verfügen wir über einen weltweiten Marktanteil, gemessen am Umsatz, von 17 %. In den USA belief sich unser Marktanteil auf 26 %. Derzeitiger Marktführer in der Peritonealdialyse ist das US-amerikanische Unternehmen Baxter. Weitere Informationen zu unserer Position im Markt für Heimdialyse, die sowohl die Heim-Hämodialyse als auch die Peritonealdialyse umfasst, finden Sie im Abschnitt „Heimdialyse“ — ab Seite 32.

Im August 2010 hat Fresenius Medical Care einen verbindlichen Rahmenvertrag zur Übernahme des globalen Peritonealdialyse-Geschäfts von Gambro unterzeichnet und die Übernahme noch am Ende des Berichtsjahres abgeschlossen. Mit dieser Akquisition will Fresenius Medical Care seine Aktivitäten im Bereich der Heimdialyse stärken, vor allem in Europa und der Region Asien-Pazifik. Würde man die Umsätze von Gambro bereits vollständig berücksichtigen, hätten sich die Marktanteile von Fresenius Medical Care bei Peritonealdialyse-Produkten von 17 % im Jahr 2009 auf 19 % im Berichtsjahr erhöht; — siehe auch Grafik 2.1.13 auf Seite 43.

### Dialyседienstleistungen

Dialyседienstleistungen sind Dialysebehandlungen, die von spezialisierten Ärzten und Pflegepersonal betreut werden. In der Regel erhalten Nierenpatienten

eine solche Behandlung in Kliniken oder Dialysezentren, die sie mehrmals pro Woche für mehrere Stunden aufsuchen – entweder am Tag oder über Nacht zur Behandlung während sie schlafen. Weitere Möglichkeiten der Behandlung sind die Heimdialyse, die ein Patient nach fachkundiger Anleitung und mit dem nötigen Zubehör meist selbstständig zu Hause durchführt, oder die Dialyse auf Urlaubsreisen – zum Beispiel auf einem Kreuzfahrtschiff oder am Ferienort; auch dafür bietet Fresenius Medical Care seine Serviceleistungen an. Den weitaus größten Teil der Dialyседienstleistungen aber macht die klassische Behandlung in Kliniken oder Zentren aus.

Die meisten Dialysepatienten wurden im vergangenen Jahr in einem von rund 29.000 Dialysezentren weltweit versorgt, durchschnittlich etwa 70 Patienten pro Zentrum. Je nachdem, ob die Gesundheitssysteme in den einzelnen Ländern eher staatlich oder eher privatwirtschaftlich organisiert sind, unterscheidet sich auch die Organisation der Zentren erheblich: In den USA und der EU gibt es jeweils über 5.000 Dialysekliniken; doch während in den USA nur circa 1 % der Patienten durch Kliniken in öffentlicher Trägerschaft versorgt werden, sind es in der EU rund 60 %. In Japan dagegen spielen private Nephrologen (Spezialisten für Nierenheilkunde) eine wichtige Rolle; in den von ihnen betriebenen

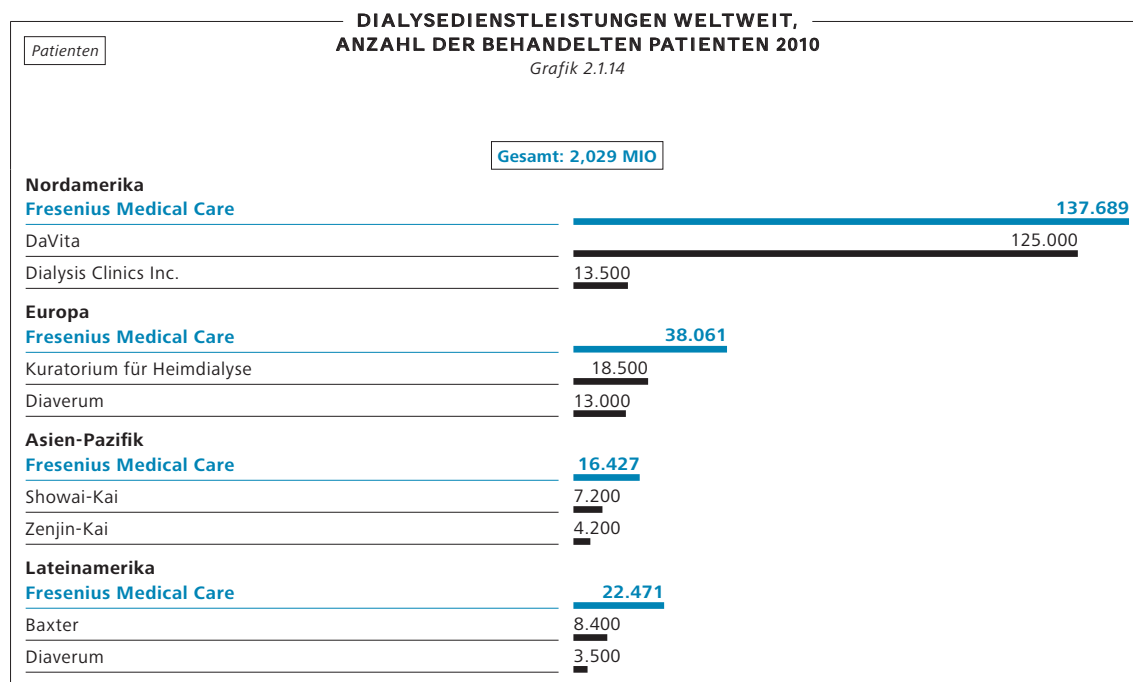

Quelle: Basierend auf Unternehmensangaben und Schätzungen.

Dialysezentren werden etwa 80 % der Dialysepatienten versorgt.

Fresenius Medical Care kann in einem Land eigene Therapiezentren betreiben, wenn das jeweilige Gesundheitssystem privatwirtschaftlich organisierte Unternehmen als Anbieter von medizinischen Dienstleistungen zulässt und es eine entsprechende Vergütungsordnung gibt. Seit einigen Jahren stehen die Gesundheitssysteme vieler Länder unter Druck, die Gesundheitskosten bei möglichst verbesserter Behandlungsqualität so gering wie möglich zu halten, und überlegen daher, inwieweit spezialisierte private Träger sie dabei unterstützen können. Andere Länder wiederum bauen ihre Gesundheitssysteme gerade erst auf und suchen für die Entwicklung moderner Behandlungsstandards den Austausch mit Gesundheitsunternehmen, die sich durch die hohe Qualität ihres Leistungsportfolios bereits einen Namen gemacht haben. In beiden Fällen ist Fresenius Medical Care als erfahrener, vertikal integrierter Anbieter der richtige Partner: Die Qualität und der Innovationsgrad unserer Produkte und Dienstleistungen bieten uns die besten Voraussetzungen, um unsere Position im Dialysemarkt kontinuierlich auszubauen.

In den USA betreuen Fresenius Medical Care und der zweitgrößte Anbieter, DaVita, zusammen genommen etwa 65 % aller Dialysepatienten; damit ist der Konzentrationsgrad bei den Dialysekliniken bereits relativ hoch. Im Berichtsjahr hat Fresenius Medical Care seine marktführende Position beibehalten und mit mehr als 134.000 Patienten circa 33 % der Dialysepatienten in den USA behandelt. Außerhalb der USA ist das Dialyседienstleistungsgeschäft wesentlich stärker fragmentiert: Mit 955 Dialysekliniken und mehr als 80.500 Patienten in 36 Ländern betreibt Fresenius Medical Care das mit Abstand größte und internationalste Kliniknetz.

Insgesamt hat Fresenius Medical Care im Berichtszeitraum seine eindeutige Führungsposition weiter ausgebaut: 214.648 Dialysepatienten (2009: 195.651) wurden in 2.757 Kliniken (2009: 2.553) behandelt. Um seine Marktposition bei Dialyседienstleistungen im asiatisch-pazifischen Raum zu stärken, hat Fresenius Medical Care die Asia Renal Care Ltd. übernommen. Das Unternehmen war nach Fresenius Medical Care der zweitgrößte Dialyседienstleister in der Region; es behandelte zum Ende des Berichtsjahres rund 5.300 Patienten in etwa 80 Kliniken.

#### BETREIBER VON DIALYSEKLINIKEN 2010

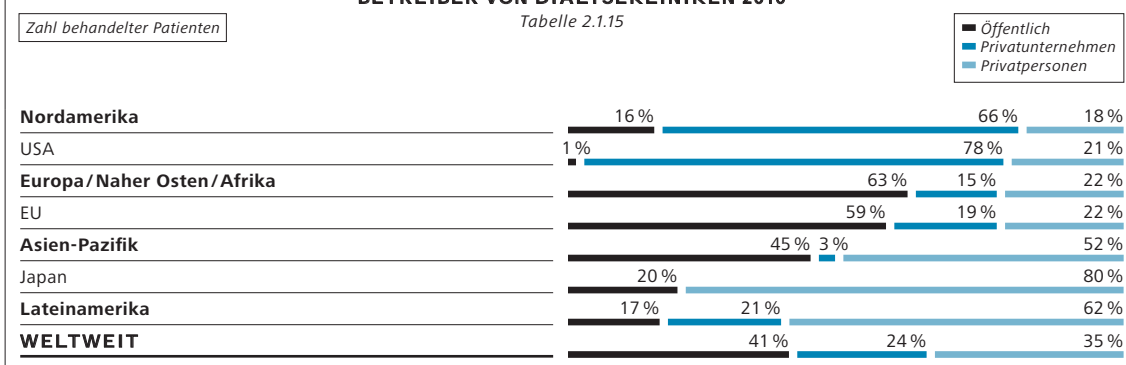

#### TOP 5-DIALYSEDIENTSTLEISTER WELTWEIT 2010

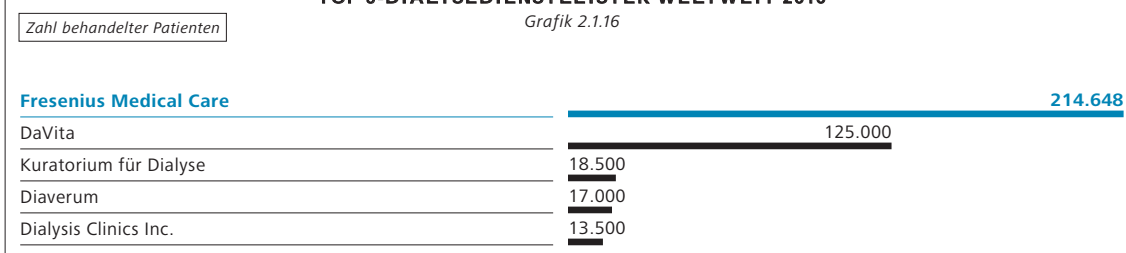

### Branchenspezifische Rahmenbedingungen

#### Erhebung und Analyse von Marktdaten

Eine wichtige Voraussetzung für unseren unternehmerischen Erfolg sind verlässliche Informationen darüber, wie sich der Dialysemarkt und seine Rahmenbedingungen entwickeln – sowohl auf globaler als auch auf nationaler und regionaler Ebene. Dazu gehören aktuelle und künftig zu erwartende Patientenzahlen, gesellschaftliche und medizinische Trends sowie die Position unserer Wettbewerber. Um repräsentative Marktinformationen zu ermitteln und zu verwalten, hat Fresenius Medical Care ein eigenes Instrument entwickelt: den mcs (Market & Competitor Survey), zu Deutsch „Markt- und Wettbewerber-Studie“. Die amerikanische Zeitschrift „Nature Reviews Nephrology“ hat den mcs im vergangenen Jahr als Industriestandard ausgezeichnet. Der mcs dient dazu, relevante Daten zum Dialysemarkt und zum Wettbewerb zu sammeln, zu analysieren und dann im Unternehmen weltweit zu verteilen und zu verwerten. Dazu fragen wir in den einzelnen Ländern Daten zur Zahl der Dialysepatienten, zur gewählten Behandlungsmethode, den verwendeten Produkten, dem Ort der Behandlung sowie der Struktur der Anbieter von Dienstleistungen ab. Die Daten werden dann mit offiziellen Angaben nationaler Verbände und den Ergebnissen vergangener Umfragen abgeglichen, um Aussagen über die Anzahl von Patienten und den Wert von Märkten sowohl weltweit als auch für einzelne Regionen treffen zu können. Gemeinsam mit öffentlich zugänglichen Daten unserer Mitbewerber nutzen wir die Ergebnisse zum einen als Grundlage für strategische Entscheidungen der Unternehmensleitung, der Forschung und Entwicklung oder des Marketings; zum anderen dienen die Ergebnisse der jährlichen Erhebung als Grundlage für

unsere externe Berichterstattung, etwa im Rahmen des Geschäftsberichts. Wenn nicht anders angegeben, basieren die Daten in diesem Kapitel auf Schätzungen auf der Grundlage des mcs. Durch die regelmäßige Anpassung unserer Erhebung tragen wir aktuellen Trends Rechnung, beispielsweise Veränderungen in der Nutzung bestimmter Behandlungsmethoden, aber auch in der Wettbewerbskonstellation, zum Beispiel durch neu auftretende Anbieter.

Fresenius Medical Care erhebt aus gutem Grund Marktinformationen mit seinem eigenen System: Zwar veröffentlichen anerkannte Organisationen vieler Länder Daten zu terminalem Nierenversagen, zur Demografie der Patienten und zu wichtigen Trends, doch sind diese Daten weder zeitnah verfügbar noch verlässlich oder detailliert genug, um aus ihnen ein vollständiges, aktuelles Bild der Patientenzahlen weltweit ableiten zu können. Außerdem werden dort – anders als beim mcs – keine Zahlen zur Nutzung von Dialyseprodukten wie etwa Dialysatoren oder Lösungen für die Peritonealdialyse erfasst.

Die Ergebnisse des mcs sind außerdem Teil eines Modells, mit dem wir Entwicklungen im weltweiten Dialysemarkt untersuchen. Der Gesamtmarkt wird über die Vergütungssätze in den einzelnen Ländern dargestellt. Hierbei berücksichtigen wir, welche Produkte und Leistungen über die Vergütungssätze abgegolten sind. Leistungen, die außerhalb der Erstattungen vergütet werden, werden zugerechnet. Darüber hinaus werden neben den Informationen des Produktmarktes auch Werte für Dialyседienstleistungen und den Pharmamarkt ermittelt und analysiert. Weitere Informationen zum mcs erhalten Sie im Geschäftsbericht 2009 — ab Seite 46.

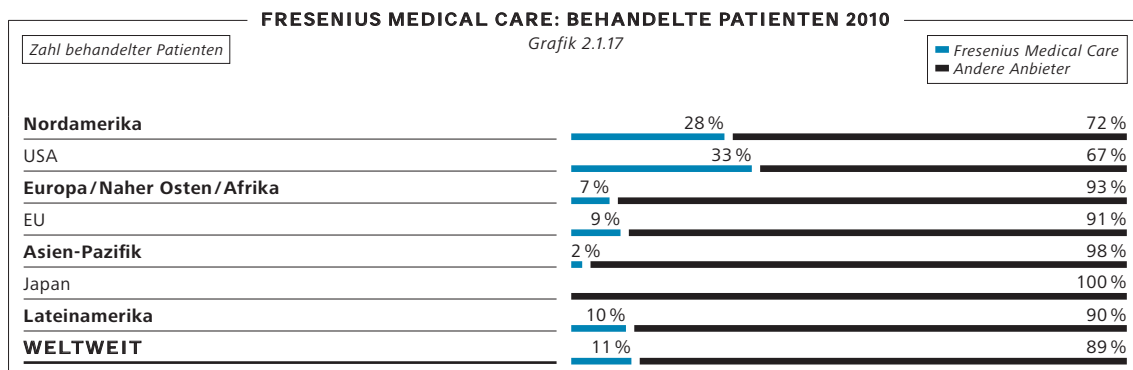

Quelle: Basierend auf Unternehmensangaben und Schätzungen.

### Patienten

Chronisches Nierenversagen ist ein weltweites Leiden: Zum Ende des Jahres 2010 wurden circa 2,621 MIO Patienten behandelt. Rund 2,029 MIO von ihnen in mehr als 145 Ländern erhielten eine Nierenersatztherapie in Form der Dialyse. Etwa 592.000 Nierenpatienten leben mit einer transplantierten Niere. Von den 2,029 MIO Patienten weltweit, die zum Jahresende 2010 regelmäßig eine Dialysebehandlung erhielten, wurden ca. 20 % in den USA, 16 % in der EU und 15 % in Japan betreut. Die verbleibenden 49 % aller Dialysepatienten verteilten sich auf 120 Staaten in unterschiedlichen Regionen der Welt. Die Zahl der Dialysepatienten weltweit stieg im Jahr 2010 um ca. 7 %, allerdings sind die regionalen Unterschiede nach wie vor erheblich.

Die Patientenzahlen der einzelnen Länder können anhand der Prävalenz, also der Krankheitshäufigkeit, miteinander verglichen werden. Die Prävalenz ist in diesem Fall die relative Zahl der Menschen, die in einem Land wegen terminaler Niereninsuffizienz behandelt werden; sie hat im Ländervergleich eine große Schwankungsbreite: von weit unter 100 bis über 2.000 Patienten pro MIO Einwohner (P.M.E.). Die höchste Prävalenz mit einem Wert von 2.700 P.M.E. weist Taiwan auf, gefolgt von Japan mit rund 2.490 P.M.E. und den USA mit rund 1.890 P.M.E. Der Durchschnitt in den 27 Ländern der EU liegt bei rund 1.030 P.M.E.. Dabei hat sich die Prävalenz in den letzten 10 Jahren stetig erhöht. Weltweit liegt die durchschnittliche Prävalenz bei rund 380 P.M.E. – deutlich niedriger als in den oben genannten Ländern. Das hat mehrere Gründe:

► Die Länder unterscheiden sich in ihrer Demografie, weil die Altersstrukturen der Bevölkerung weltweit variieren.

► Risikofaktoren für Nierenerkrankungen wie Diabetes und Bluthochdruck sind unterschiedlich stark verbreitet.

► Die Wahrscheinlichkeit, aus erblichen Gründen an der Niere zu erkranken – auch „genetische Disposition“ genannt – ist weltweit ebenfalls unterschiedlich stark ausgeprägt.

► Kulturelle Unterschiede wie die Ernährung spielen eine Rolle.

► Der Zugang zu Dialysebehandlungen ist in vielen Ländern weiterhin begrenzt, sodass eine Vielzahl von Menschen mit terminaler Niereninsuffizienz nicht behandelt – und somit auch nicht in der P.M.E.-Kalkulation erfasst werden können.

Ein Vergleich der Wirtschaftskraft der Länder – gemessen am Bruttoinlandsprodukt (BIP) – mit deren Prävalenzwerten lässt vermuten, dass wirtschaftliche Faktoren nicht nur die demografische Entwicklung beeinflussen, sondern auch die Behandlungsmöglichkeiten für Nierenpatienten: Vor allem in Ländern mit einem jährlichen BIP pro Kopf von weniger als 10.000 US \$ ist zu beobachten, dass nicht jeder Erkrankte Zugang zu einer Behandlung hat. Dagegen ist in Ländern, in denen das BIP über diesem Wert liegt, keine Wechselbeziehung zwischen Wirtschaftskraft und Prävalenz zu erkennen. Die

### DIALYSEPATIENTEN – REGIONALE ENTWICKLUNG

Tabelle 2.1.18

|                                  | 2010             | Veränderung  |
|----------------------------------|------------------|--------------|
| <b>Nordamerika</b>               | <b>492.000</b>   | <b>~5 %</b>  |
| USA                              | 402.000          | ~4 %         |
| <b>Europa/Naher Osten/Afrika</b> | <b>573.000</b>   | <b>~5 %</b>  |
| EU                               | 322.000          | ~3 %         |
| <b>Asien-Pazifik</b>             | <b>750.000</b>   | <b>~10 %</b> |
| Japan                            | 301.000          | ~3 %         |
| <b>Lateinamerika</b>             | <b>215.000</b>   | <b>~7 %</b>  |
| <b>WELTWEIT</b>                  | <b>2.029.000</b> | <b>~7 %</b>  |

Quelle: Basierend auf Unternehmensangaben und Schätzungen.

steigende weltweite Prävalenz zeigt aber, dass bezogen auf die Gesamtbevölkerung im Laufe der Jahre immer mehr Menschen eine Nierenersatztherapie erhalten.

In den USA, in Japan sowie in West- und Mitteleuropa verzeichneten wir 2010 unterdurchschnittliche Zuwachsraten bei der Zahl der Patienten. In diesen Regionen ist die Prävalenz bereits relativ hoch und der Zugang zu einer entsprechenden Behandlung, zumeist der Dialyse, sichergestellt. In ökonomisch schwächeren Regionen dagegen sind die Wachstumsraten überdurchschnittlich und erreichten teilweise zweistellige Werte – ein Hinweis darauf, dass der Zugang zur Dialysebehandlung in diesen Ländern derzeit noch beschränkt ist und schrittweise verbessert wird. Neben einem leichteren Zugang zur Dialyse und damit der genaueren Erfassung der Patienten führen jedoch auch weitere Faktoren zum Anstieg der weltweiten Prävalenz, etwa die zunehmende Verbreitung der nierenschädigenden Krankheiten Diabetes und Bluthochdruck sowie die allgemeine Alterung der Weltbevölkerung durch den wachsenden medizinischen Fortschritt.

Behandlungsmethoden

In der Dialyse unterscheidet man grundsätzlich zwischen zwei verschiedenen Behandlungsverfahren: der Hämodialyse (HD) und der Peritonealdialyse (PD). Gesteuert durch eine Hämodialyse-Maschine wird bei der HD das Blut eines Patienten durch Schläuche aus Kunststoff in einen speziellen Filter, den Dialysator, geleitet und nach der Reinigung wieder dem Körper des Patienten zugeführt. Bei der PD wird das Bauchfell (Peritoneum) eines Patienten als filternde Membran genutzt. Eine ausführlichere

Beschreibung von HD und PD finden Sie im Glossar — auf den Seiten 159 und 160. Die beiden Verfahren sind nicht für alle Patienten gleichermaßen geeignet: Da die PD in der Regel vom Patienten selbst durchgeführt wird, erfordert sie ein hohes Maß an Eigenverantwortung. Außerdem ist das Bauchfell eines Menschen nur für eine begrenzte Zeit als Membran nutzbar, idealerweise dann, wenn noch eine Restfunktion der Niere gegeben ist.

Von den 2,029 Mio Patienten, die zum Jahresende 2010 eine Dialysebehandlung erhielten, wurden 1,810 Mio – das sind über 89 % – mittels der HD und circa 219.000 mittels der PD behandelt. Im weltweiten Vergleich der Behandlungsmethoden dominiert somit die HD deutlich. In der Gruppe der 15 Länder, in denen zusammengekommen mehr als drei Viertel aller Dialysepatienten leben, ist die HD in jedem einzelnen Land – mit Ausnahme von Mexiko – das vorherrschende Behandlungsverfahren.

Die dritte mögliche Behandlung von Patienten mit terminaler Niereninsuffizienz ist die Transplantation. Circa 592.000 Patienten lebten zum Jahresende 2010 mit einer transplantierten Niere. Allerdings ist die Zahl der verfügbaren Spenderorgane weltweit seit Jahren deutlich geringer als die Zahl der Patienten, die auf den Wartelisten für eine Transplantation stehen; weniger als ein Viertel der Patienten mit terminaler Niereninsuffizienz leben deshalb mit einem Spenderorgan. Trotz anhaltender und umfangreicher Bemühungen regionaler Initiativen, das Bewusstsein und die Bereitschaft für eine Nierenspende zu erhöhen, hat sich der Anteil der Transplantationen an den Behandlungsmethoden in den vergangenen zehn Jahren nicht wesentlich verändert.

| PATIENTEN MIT CHRONISCHEM NIERENVERSAGEN |       |
|------------------------------------------|-------|
| in MIO                                   |       |
| Tabelle 2.1.19                           |       |
| Patienten mit chronischem Nierenversagen | 2,621 |
| davon Dialyse                            | 2,029 |
| Hämodialyse (HD)                         | 1,810 |
| Peritonealdialyse (PD)                   | 0,219 |
| davon Patienten mit Transplantaten       | 0,592 |

Quelle: Basierend auf Unternehmensangaben und Schätzungen.

### Kunden

Die wichtigsten Kunden von Fresenius Medical Care sind staatliche oder öffentliche Krankenversicherungen, privatwirtschaftlich organisierte Krankenversicherungen und Unternehmen. Der größte private Kunde – und zugleich der weltweit nach Fresenius Medical Care zweitgrößte Anbieter im Dialyседienstleistungssektor – ist das us-amerikanische Unternehmen DaVita.

### Gesundheits- und Vergütungssysteme

Da die Nierenersatztherapie eine lebensnotwendige medizinische Dienstleistung ist, werden die Kosten der Dialyse in der Regel nicht vom Patienten selbst getragen, sondern von dem Gesundheitssystem, das für ihn zuständig ist. Die Vergütungssysteme für Dialysebehandlungen – also die Struktur, nach der ein Gesundheitssystem die Kostenerstattung für Dialyседienstleistungen vorsieht – unterscheiden sich dabei von Land zu Land; oft variieren sie sogar innerhalb eines Landes. Kriterien bei der Vergütung sind zum Beispiel regionale Bedingungen, die Behandlungsmethode, regulative Aspekte oder der Status des Dialyседienstleisters (öffentlich oder privat). Fresenius Medical Care ist in mehr als 35 Ländern mit unterschiedlichen Gesundheitssystemen und Vergütungsstrukturen als Anbieter von Dialyседienstleistungen aktiv. Dank dieser internationalen Erfahrung sind wir in der Lage, die nationalen Gesundheitssysteme dabei zu unterstützen, passende Vergütungsstrukturen zu schaffen, unser Geschäft den lokalen Gegebenheiten anzupassen und dabei gewinnbringend zu handeln.

Im Mittelpunkt der aktuellen gesundheitspolitischen Diskussion steht in einigen Ländern eine Vergütung nach qualitativen Kriterien. Ziel eines solchen Vergütungsmodells ist eine hohe Behandlungsqualität bei insgesamt geringeren Gesamtkosten für die Behandlung eines Dialysepatienten. Welche Chancen eine an ganzheitlicher Qualität ausgerichtete Vergütung für Fresenius Medical Care als vertikal integriertes Unternehmen bietet, zeigt das Beispiel Portugal. In Portugal behandelt Fresenius Medical Care mehr als 4.300 Patienten in 34 Dialysezentren. Anfang 2008

einigten sich das Gesundheitsministerium und die nationale Vereinigung der privat betriebenen Dialysezentren auf eine neue, qualitätsorientierte Pauschalvergütung für die ambulante Versorgung von Hämodialyse-Patienten. Anstatt wie zuvor die Kosten einzelner Dialyседienstleistungen und -produkte zu erstatten, wurden diese zum Teil gebündelt, um eine umfassende Versorgung der Patienten, Qualitätsverbesserungen und eine Effizienzsteigerung des Gesundheitssystems bei der Dialyse zu erreichen. Im neuen Modell deckt die fixe Vergütung pro Patient und Woche alle notwendigen Dienstleistungen und den Einsatz von Dialyseprodukten ab. Voraussetzung ist, dass bestimmte Behandlungsergebnisse erzielt und qualitative Parameter eingehalten werden. Unsere Erfahrung im vergangenen Jahr belegt: Fresenius Medical Care bringt aufgrund seines hohen Qualitätsanspruchs und seiner etablierten Methoden zur Überwachung von Therapieergebnissen beste Voraussetzungen mit, um die Anforderungen des neuen Systems zu erfüllen. Für Fresenius Medical Care bedeutet die Reform, dass die Vergütungsrate mit den neu eingeschlossenen Leistungen um rund 50 % gestiegen ist. Außerdem sehen wir den erfolgreichen Start des Pauschalsystems in Portugal als Bestätigung unseres ganzheitlichen, qualitätsorientierten Ansatzes.

Eine vergleichbare Vergütungsstruktur wie in Portugal wurde nun auch in einem Teil Spaniens eingeführt: Fresenius Medical Care hat mit den Gesundheitsbehörden der spanischen Region Murcia eine Kooperationsvereinbarung zur Komplettversorgung von Dialysepatienten geschlossen. Die Vereinbarung ist ab Mitte des Jahres 2011 gültig und sieht vor, dass wir rund 200 Dialysepatienten in der Region behandeln und dafür mit qualitätsabhängigen Pauschalen bezahlt werden. Murcia ist die erste Region Spaniens, die ein solches Vergütungsmodell einführt. Bisher haben wir Patienten in dieser Region mit Dialysebehandlungen und -produkten auf Basis einer variablen Einzelvergütung je Behandlung (fee for service) versorgt. In Spanien behandeln wir derzeit mehr als 5.500 Patienten in 64 Dialysezentren.

Im Januar 2011 wurde auch in unserem größten Absatzmarkt – den USA – ein neues Pauschalvergütungssystem für die Dialyse eingeführt; es betrifft die Dialysebehandlung staatlich versicherter Patienten (Medicare-Patienten). Der entsprechende Gesetzentwurf wurde im Juli 2008 verabschiedet; im Juli 2010 veröffentlichte die Behörde des staatlichen Gesundheitsfürsorgeprogramms in den USA (Centers for Medicare and Medicaid Services, CMS) ihren finalen Bericht mit den entsprechenden Umsetzungsrichtlinien. Alle Produkte und Dienstleistungen, die derzeit gemäß dem Basis-Erstattungssatz (der sogenannten Composite Rate) vergütet werden, sowie bislang separat erstattete Leistungen – wie die Verabreichung bestimmter intravenös verabreichter Medikamente und die Durchführung von diagnostischen Labortests – werden künftig mit einem Pauschalbetrag erstattet. Dieser „gebündelte“ Erstattungssatz (englisch: „bundling“) wird an Merkmale der einzelnen Patienten, etwa Alter und Gewicht, angepasst unter Berücksichtigung von Angleichungen für Patienten, deren außergewöhnliche medizinisch notwendige Versorgung hohe Kosten verursacht. Ein weiteres besonderes Merkmal des neuen Erstattungssystems ist neben einem Inflationsausgleich ab dem Jahr 2012 die Orientierung an bestimmten Qualitätsparametern. Beispielsweise wird für Dialysekliniken, die bestimmte Kriterien nicht erfüllen, der Erstattungssatz ab dem Jahr 2012 gekürzt. Qualitätsparameter betreffen unter anderem die Patientenzufriedenheit, die Steuerung des Hämoglobin-Gehalts des Blutes (Anämie-Management) und den Mineralstoffwechsel der Knochen. Im Vorgriff auf das neue Erstattungssystem wurde der Basis-Erstattungssatz 2009 sowie 2010 um jeweils 1% erhöht.

Terminales Nierenversagen ist eine der wenigen chronischen Erkrankungen, deren Behandlung in den USA von der staatlichen Gesundheitsfürsorge erstattet wird. Die Versorgung von mehr als 85 % aller us-amerikanischen Dialysepatienten wird zumeist von Medicare und Medicaid finanziert, den beiden us-amerikanischen Gesundheitsfürsorgeprogrammen für die medizinische Versorgung von Senioren und einkommensschwachen Menschen ohne privaten

Krankenversicherungsschutz. Änderungen bei der Kostenerstattung von Medicare und Medicaid haben daher eine besondere Bedeutung für unser nordamerikanisches Geschäft. Fresenius Medical Care sieht sich mit seinem vertikalen Geschäftsmodell für das neue System gut gerüstet. Weitere Informationen zu den Neuerungen des Vergütungssystems in den USA finden Sie auch im Magazin 2010 — ab Seite 4.

## FÜR DEN GESCHÄFTSVERLAUF WESENTLICHE EREIGNISSE

### Akquisitionen und Desinvestitionen

Unsere Investitionsstrategie hat sich auch 2010 nicht geändert: Mit dem kontinuierlichen Ausbau unseres Kliniknetzes, unseres Produktgeschäfts und der Erweiterung unserer Produktionskapazitäten investieren wir verstärkt in künftiges Wachstum. Im vergangenen Geschäftsjahr haben wir insgesamt 618 Mio US \$ für Akquisitionen abzüglich Desinvestitionen aufgewendet; die Gesamtinvestitionen (netto) lagen bei 507 Mio US \$.

Um unsere Marktposition bei Dialysedienstleistungen im asiatisch-pazifischen Raum zu stärken, haben wir im Berichtsjahr die Asia Renal Care Ltd. übernommen. Das Unternehmen war nach Fresenius Medical Care der zweitgrößte Dialysedienstleister in der Region; es behandelte zum Ende des Berichtsjahres rund 5.300 Patienten in etwa 80 Kliniken. Die Übernahme wird jährlich rund 80 Mio US \$ zum Umsatz von Fresenius Medical Care beitragen und sich bereits 2011 positiv im Konzernergebnis niederschlagen.

Mit der Übernahme von Nikkiso Medical Korea Co. Ltd. haben wir zudem unsere führende Position im Geschäft mit Dialyseprodukten in der Republik Korea weiter ausgebaut. Die Akquisition wird jährlich rund 15 Mio US \$ zum Umsatz beitragen und sich ebenfalls ab 2011 positiv auf das Konzernergebnis auswirken.

In der russischen Region Krasnodar haben wir KNC (Kraevoy Nefrologicheskiy Centr), einen privaten Betreiber von Dialysekliniken, übernommen. Fresenius



Medical Care ist mit dieser Akquisition nunmehr für die Versorgung von etwa 1.000 Patienten in fünf Kliniken verantwortlich. Die Akquisition wird jährlich rund 25 Mio US \$ zum Umsatz beitragen und das Konzernergebnis ab 2011 positiv beeinflussen.

Darüber hinaus haben wir im Berichtsjahr das internationale Peritonealdialyse-Geschäft des schwedischen Unternehmens Gambro übernommen. Mit dieser Akquisition beabsichtigen wir, unsere Aktivitäten im Bereich der Heimdialyse zu stärken, vor allem in Europa und der Region Asien-Pazifik. Der Umsatzbeitrag beläuft sich jährlich auf rund 60 Mio US \$ und wirkt sich ab 2011 positiv auf das Konzernergebnis aus. Fresenius Medical Care hat die Übernahme Ende Dezember 2010 abgeschlossen.

Weitere Informationen finden Sie im Kapitel Finanzlage — ab Seite 61.

### Kooperationen

Auch im vergangenen Jahr haben wir unsere bestehenden Kooperationen fortgeführt, zum Beispiel die 2008 abgeschlossenen Lizenz- und Vertriebsvereinbarungen für die Vermarktung und den Vertrieb von intravenös verabreichten Eisenpräparaten. Hierüber haben wir im Geschäftsbericht 2008 — auf den Seiten 60 und 100 ausführlich berichtet.

Außerdem haben wir im Berichtsjahr mit der japanischen Gesellschaft Nikkiso Co. Ltd. eine exklusive Vertriebsvereinbarung für Hämodialyse- und Peritonealdialyse-Produkte in Japan geschlossen; die Vereinbarung ist auf eine Dauer von zehn Jahren ausgelegt. Durch die Kombination der effizienten Fertigungsverfahren von Fresenius Medical Care und Nikkisos starker Vertriebsorganisation wollen beide Unternehmen ihren Marktanteil in Japan weiter erhöhen, insbesondere bei Dialysatoren und Produkten für die Peritonealdialyse.

Darüber hinaus haben wir 2010 mit dem Unternehmen Galenica Ltd. ein gemeinsames Unternehmen — die Vifor Fresenius Medical Care Renal Pharma Ltd. — gegründet, um Medikamente für Nierenkranke zu entwickeln und weltweit zu vertreiben. Weitere

Informationen erhalten Sie im Abschnitt „Wachstumsstrategie“ — ab Seite 36.

### Geschäftsumfeld

Das Geschäftsumfeld sowie die rechtlichen Rahmenbedingungen, die für unser Geschäft von besonderer Relevanz sind, blieben 2010 weitgehend unverändert.

Im Januar 2011 ist in den USA, unserem größten Absatzmarkt, ein neues Vergütungssystem für die Dialyse eingeführt worden; es betrifft Dialysebehandlungen staatlich versicherter Patienten (Medicare-Patienten). Spezifische Produkte und Dienstleistungen, die vorher separat abgerechnet wurden, sind zu einem pauschalen Erstattungsbetrag zusammengefasst worden. Ein besonderes Merkmal dieses neuen Erstattungssystems ist neben einem Inflationsausgleich ab dem Jahr 2012 die Orientierung an bestimmten Qualitätsparametern, wie Steuerung des Hämoglobin-Gehalts des Blutes (Anämie-Management) und Mineralstoffwechsel der Knochen. Weitere Informationen hierzu finden Sie im Kapitel „Gesundheits- und Vergütungssysteme“ — auf Seite 49.

### Unternehmensleitung

Im Dezember 2009 hat Fresenius Medical Care Veränderungen im Vorstand der persönlich haftenden Gesellschafterin bekannt gegeben: Der Vertrag des Vorstandsvorsitzenden Dr. Ben Lipps wurde bis zum 31. Dezember 2012, und somit um ein weiteres Jahr, verlängert. Gleichzeitig wurde Rice Powell mit Wirkung zum 1. Januar 2010 als designierter Nachfolger von Dr. Lipps zum stellvertretenden Vorstandsvorsitzenden von Fresenius Medical Care sowie zum CEO von Fresenius Medical Care North America ernannt. Rice Powell ist seit 1997 für das Unternehmen tätig und gehört seit 2004 dem Vorstand an.

Ebenfalls zum 1. Januar 2010 hat Fresenius Medical Care Michael Brosnan zum neuen Finanzvorstand ernannt. Er ist bereits seit 1998 für das Unternehmen tätig; in den vorangegangenen sieben Jahren bekleidete er die Position des Finanzvorstands bei Fresenius Medical Care North America.

Darüber hinaus hat Kent Wanzek zum 1. Januar 2010 die neu geschaffene Position des Produktionsvorstands übernommen und steuert in dieser Funktion die weltweiten Produktionsaktivitäten von Fresenius Medical Care. Kent Wanzek ist bereits seit 1996 für das Unternehmen tätig.

Dr. Emanuele Gatti hat in Ergänzung zu seiner bisherigen Funktion als zuständiges Vorstandsmitglied für die Regionen Europa, Naher Osten, Afrika und Lateinamerika die Verantwortung für die Strategieentwicklung bei Fresenius Medical Care übernommen. Sein Vertrag wurde verlängert.

Für die weiterhin erfolgreiche Entwicklung in der Region Asien-Pazifik wird der verantwortliche Vorstand Roberto Fusté auch in Zukunft zuständig sein.

Die Bereiche Recht, Compliance, Corporate Governance und Intellectual Property werden wie bisher von Dr. Rainer Runte geführt, dessen Vertrag ebenfalls verlängert wurde. Er verantwortet seit dem Berichtsjahr zusätzlich den Bereich Personal in Deutschland als Arbeitsdirektor und betreut die Umsetzung der Projekte im Bereich Business Development.

Weitere Informationen zum Vorstand von Fresenius Medical Care erhalten Sie — ab Seite 14.

### Fazit

Im Geschäftsjahr 2010 sind keine weiteren wesentlichen Ereignisse eingetreten, die das operative Geschäft oder die rechtliche Struktur von Fresenius Medical Care wesentlich beeinflusst haben. Fresenius Medical Care hat seine außerordentlich positive Entwicklung im vergangenen Geschäftsjahr fortgesetzt und weist für das Berichtsjahr neue Rekordwerte bei Umsatz und Ertrag aus. Dazu haben alle Regionen und Segmente beigetragen.

Im Geschäftsjahr 2011 wurde in unserem größten Absatzmarkt, den USA, ein neues Vergütungssystem für die Dialyse eingeführt. Es betrifft die Dialysebehandlung staatlich versicherter Patienten. Die Versorgung von mehr als 80 % aller us-amerikanischen Dialysepatienten wird staatlich finanziert,

sodass Änderungen bei der Kostenerstattung eine besondere Bedeutung für unser nordamerikanisches Geschäft haben. Die Auswirkungen dieser neuen Vergütungsstruktur können wir für 2011 nur teilweise kompensieren; allerdings sind wir als vertikal integrierter Anbieter zuversichtlich, auf die veränderte Situation reagieren zu können.

### VERGLEICH DES TATSÄCHLICHEN MIT DEM PROGNOSTIZIERTEN GESCHÄFTSVERLAUF

Fresenius Medical Care blickt einmal mehr auf ein erfolgreiches Geschäftsjahr zurück: Wir konnten wiederum neue Bestmarken bei Umsatz und Ertrag erzielen und unsere ambitionierten Ziele für das Jahr 2010 erreichen.

Für das Berichtsjahr hatten wir mit einem Umsatz von mehr als 12 MRD US \$ gerechnet. Tatsächlich erreicht haben wir einen Umsatzzuwachs von 7 % auf 12,05 MRD US \$. Der währungsbereinigte Umsatzzuwachs lag ebenfalls bei 7 % und entsprach damit auch unseren Erwartungen. Unsere mittelfristigen Ziele sehen ein durchschnittliches jährliches währungsbereinigtes Umsatzwachstum von 6 bis 8 % vor; siehe auch Abschnitt „Wachstumsstrategie“ — ab Seite 36. Zum Umsatzwachstum im Jahr 2010 haben beide Segmente Nordamerika und International gleichermaßen beigetragen; die Umsatzentwicklung der einzelnen Regionen und Unternehmensbereiche finden Sie im Kapitel „Ertragslage“ — ab Seite 55.

Beim Konzernergebnis hatten wir zu Beginn des abgelaufenen Geschäftsjahres mit einem Wert zwischen 950 und 980 MIO US \$ für das Jahr 2010 gerechnet. Im November haben wir das Ziel dann auf 960 bis 980 MIO US \$ angehoben. Letztlich belief sich das Konzernergebnis im vergangenen Geschäftsjahr auf 979 MIO US \$ (+10 %) und lag damit am oberen Ende der von uns erwarteten Bandbreite. Die Geschäftsentwicklung verlief speziell in Nordamerika sehr gut, so dass sich die operative Marge für das Unternehmen insgesamt im vergangenen Geschäftsjahr auf 16 % (2009: 15,6 %) verbessert hat. Ursprünglich hatten wir mit einer operativen Marge auf Vorjahresniveau gerechnet.

Die effektive Steuerquote betrug im Berichtsjahr 35,2 % und entwickelte sich damit wie von uns mit 34,5 bis 35,5 % zu Beginn des Geschäftsjahres prognostiziert.

Die erwartete kontinuierliche Entwicklung der Dividende spiegelt sich in unserem Dividendenvorschlag wider: Vorbehaltlich der Zustimmung der Hauptversammlung wird die Dividende je Stammaktie um 7 % auf 0,65 € (Vorjahr: 0,61 €) steigen. Weitere Informationen zum Dividendenvorschlag finden Sie im Abschnitt „Dividende“ — auf Seite 23.

Für Investitionen hatten wir zu Jahresbeginn etwa 550 bis 650 MIO US \$ und für Akquisitionen bis zu 400 MIO US \$ vorgesehen. Im August haben wir den Rahmen für Akquisitionen auf bis zu 500 MIO US \$ angehoben. Diese Planungen haben wir fast vollständig eingehalten und 507 MIO US \$ für Investitionen (netto) sowie 618 MIO US \$ für Akquisitionen abzüglich Desinvestitionen verwendet. Weitere Informationen finden Sie im Kapitel „Finanzlage“ — ab Seite 61.

Der operative Cash Flow lag, getragen von der Ergebnisentwicklung und dem weiterhin guten Forderungsmanagement, im Zielbereich von mehr als 10 % des Umsatzes: Im Geschäftsjahr 2010 belief sich der operative Cash Flow auf 1,368 MRD US \$ und damit bei 11 % des Umsatzes.

Der Verschuldungsgrad (Debt-EBITDA-Verhältnis) sollte nach unseren Planungen bis zum Jahresende 2010 auf einen Wert von unter 2,5 sinken. Tatsächlich betrug das Debt-EBITDA-Verhältnis zum Bilanzstichtag 2,38 und entwickelte sich damit entsprechend unseren Planungen.

Die Zahl der Mitarbeiter (durchschnittlich Vollzeitbeschäftigte) von Fresenius Medical Care erhöhte sich von 67.988 zum Jahresende 2009 auf 73.452 Ende 2010 und erreichte damit die erwartete Zahl von über 70.000. Zu der Steigerung trugen das weiterhin starke organische Wachstum des Unternehmens sowie Akquisitionen in allen Regionen bei.

## ZIELE UND ERGEBNISSE FÜR 2010

Tabelle 2.1.20

|                                            | Ergebnisse 2010                  | Ziele 2010<br>nach Erhöhung im November                       | Ziele<br>erreicht |
|--------------------------------------------|----------------------------------|---------------------------------------------------------------|-------------------|
| Umsatz                                     | +7 % auf 12,05 MRD US \$         | > 12 MRD US \$                                                | ✓                 |
| Konzernergebnis <sup>1</sup>               | +10 % auf 979 MIO US \$          | 960 – 980 MIO US \$                                           | ✓                 |
|                                            | +7 % je Stammaktie<br>auf 0,65 € | kontinuierlicher Anstieg                                      | ✓                 |
| Investitionen, netto                       | 507 MIO US \$                    | 550 – 650 MIO US \$                                           |                   |
| Akquisitionen, netto                       | 618 MIO US \$                    | bis zu 500 MIO US \$                                          |                   |
| Steuerquote                                | 35,2 %                           | 34,5 – 35,5 %                                                 | ✓                 |
| Debt-EBITDA-Verhältnis                     | 2,38                             | < 2,5                                                         | ✓                 |
| Anzahl der Mitarbeiter                     | 73.452                           | > 70.000                                                      | ✓                 |
| Aufwendungen für Forschung und Entwicklung | 97 MIO US \$                     | ~ 95 MIO US \$                                                | ✓                 |
| Produkteinführungen                        | u. a.<br>Dialysemaschine 2008T   | weiterer Ausbau der<br>Produkt- und<br>Dienstleistungspalette | ✓                 |

<sup>1</sup> Ergebnis, das auf die Anteilseigner der Fresenius Medical Care AG & Co. KGaA entfällt.

<sup>2</sup> Vorschlag zur Beschlussfassung durch die Hauptversammlung am 12. Mai 2011.

Die Höhe der Aufwendungen für Forschung und Entwicklung, mit denen wir die Zukunftsfähigkeit von Fresenius Medical Care stärken und fördern, entsprach mit 97 Mio US \$ unserer Zielgröße von etwa 95 Mio US \$. Im Vordergrund steht die konstante Weiterentwicklung bestehender Produktgruppen. Details hierzu finden Sie im Kapitel „Forschung und Entwicklung“ — ab Seite 68.

Die gesamtwirtschaftliche Entwicklung im Berichtsjahr war von einem deutlichen Aufschwung gekennzeichnet. Wie von uns erwartet verzeichneten 2010 alle wichtigen Regionen per saldo Steigerungen beim Bruttoinlandsprodukt gegenüber dem Vorjahr. In einigen Schwellenländern wuchs die Wirtschaft stärker als in den für uns – gemessen an ihrem Anteil am Umsatzvolumen – wichtigsten Märkten USA und Europa. Das Dialysegeschäft von Fresenius Medical Care ist allerdings von der konjunkturellen Entwicklung weniger stark abhängig als andere Branchen. Weitere Informationen zur weltwirtschaftlichen Entwicklung finden Sie im Kapitel „Wirtschaftliches Umfeld“ — ab Seite 39.

Der Dialysemarkt hat sich unseren Erwartungen entsprechend positiv entwickelt: Das Marktvolumen stieg währungsbereinigt um circa 4 %, die Zahl der Patienten wuchs weltweit um etwa 7 %. Bei der Verteilung der Dialysepatienten nach Behandlungsmethoden ergaben sich gegenüber dem Vorjahr erwartungsgemäß keine wesentlichen Änderungen. Die Hämodialyse blieb auch 2010 die mit Abstand wichtigste Behandlungsmethode bei chronischem Nierenversagen.

## **GESAMTAUSSAGE DER UNTERNEHMENS- LEITUNG ZUM GESCHÄFTSVERLAUF**

Das Geschäftsjahr 2010 verlief außerordentlich erfolgreich: Umsatz und Ertrag stiegen auf neue historische Rekordwerte. Wir haben alle Ziele, die wir uns zu Beginn des Jahres gesteckt hatten, erreicht und teilweise sogar übertroffen.

Fresenius Medical Care ist stärker gewachsen als der Dialysemarkt insgesamt. Somit konnten wir unseren weltweiten Marktanteil weiter ausbauen. In Nordamerika, unserem mit Abstand größten Markt, haben wir unsere führende Marktposition klar behauptet. Auch in den Märkten außerhalb Nordamerikas – in Europa, Lateinamerika und Asien – verzeichneten wir zum Teil deutliche Zuwächse beim Umsatz, einhergehend mit einer Festigung unserer Marktposition.

Auch die Ertragskraft von Fresenius Medical Care ist im Berichtsjahr weiter gestiegen. Alle entsprechenden Kennzahlen haben sich erneut verbessert. Dies ist unter anderem im Zusammenhang zu sehen mit unseren weiterhin hohen Investitionen – in die Instandhaltung bestehender Kliniken, die Ausrüstung neuer Kliniken und den Ausbau der Produktionskapazitäten.

## ERTRAGS-, FINANZ- UND VERMÖGENSLAGE

### ERTRAGSLAGE

Das Geschäftsjahr 2010 ist erneut sehr erfolgreich verlaufen. Wir haben unsere Jahresziele erreicht und erneut Rekordwerte bei Umsatz und Ertrag erzielt. Alle Regionen und Bereiche haben zu unserem Wachstum und damit auch zu einer Verbesserung unserer Marktposition beigetragen.

#### Umsatz

Fresenius Medical Care verzeichnete im abgelaufenen Geschäftsjahr 2010 erneut ein deutliches Umsatzplus von 7 % auf 12,05 MRD US \$, währungsbereinigt lag der Zuwachs ebenfalls bei 7 %. Das organische Umsatzwachstum betrug 6 %, der Anteil von Akquisitionen abzüglich von Desinvestitionen an der Umsatzsteigerung 1 %. Zum Umsatzwachstum im Jahr 2010 haben beide Segmente – Nordamerika und International – beigetragen. Nordamerika ist nach wie vor unsere wichtigste Geschäftsregion: Hier haben wir im Berichtsjahr rund 67 % unseres Gesamtumsatzes und damit einen ähnlich hohen Anteil wie im Vorjahr erzielt.

Der Umsatz in Nordamerika stieg im vergangenen Geschäftsjahr um 7 % auf 8,13 MRD US \$. Das organische Umsatzwachstum lag bei 6 %, Akquisitionen hatten einen leicht positiven Effekt von 1 %. Wie in den Vorjahren erzielten wir in Nordamerika den weitaus größten Umsatzbeitrag von 90 % mit Dialysedienstleistungen.

Der Umsatz mit Dialysedienstleistungen wuchs in der Region Nordamerika um 7 % auf 7,30 MRD US \$. Das organische Umsatzwachstum lag ebenfalls bei 7 %. Die durchschnittliche Vergütung je Dialysebehandlung in den USA – unserem größten Markt – ist im Berichtsjahr um 3 % von 347 auf 356 US \$ gestiegen. Diese Zunahme basiert hauptsächlich auf der Erhöhung der Erstattungssätze, insbesondere der privaten Versicherungen.

Das Umsatzwachstum von 1 % auf 827 MIO US \$ bei den Dialyseprodukten in Nordamerika war hauptsächlich auf erhöhte Umsätze mit Blutschlauchsystemen, Lösungen, Konzentraten und Dialysegeräten zurückzuführen. Dies wurde teilweise aufgehoben durch niedrigere Arzneimittelumsätze.

Ebenfalls eine sehr gute operative Entwicklung verzeichnete das Segment International, das alle Regionen außerhalb Nordamerikas umfasst. Der Umsatz stieg 2010 um 8 % auf 3,92 MRD US \$. Das organische Umsatzwachstum belief sich auf 5 %, Akquisitionen abzüglich von Desinvestitionen hatten einen positiven Effekt von 3 %. Durch den starken Ausbau unseres Kliniknetzes hat sich auch im Segment International das Gewicht in Richtung Servicebereich verschoben; unverändert dominiert hier aber mit einem Umsatzanteil von 55 % das Geschäft mit Dialyseprodukten. Ein Grund für den im Vergleich zu Nordamerika niedrigeren Umsatzanteil des Dienstleistungsgeschäfts im Segment International ist die

### ENTWICKLUNG DES UMSATZES PRO QUARTAL

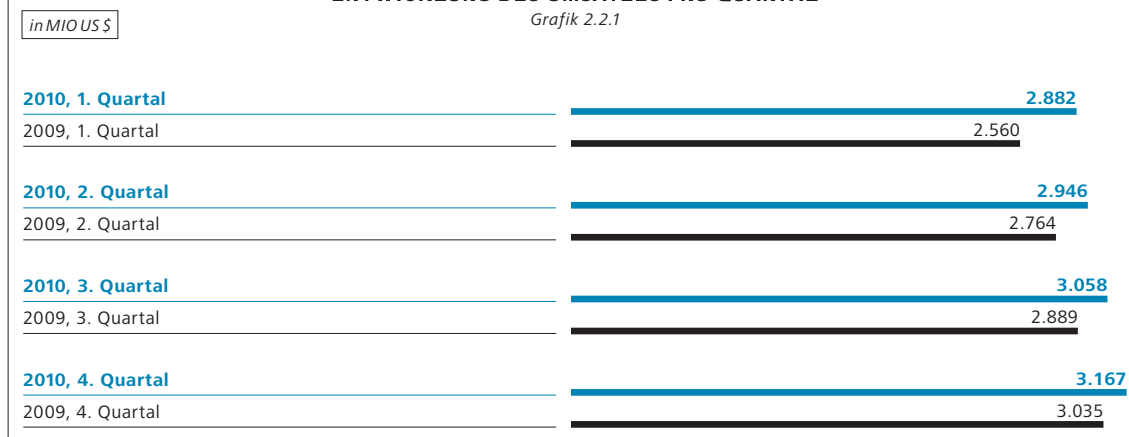

unterschiedliche Entwicklung und Ausgestaltung der Gesundheitssysteme. In einigen Ländern sind wir bislang nicht als Betreiber eigener Dialysekliniken tätig, weil die wirtschaftlichen und rechtlichen Rahmenbedingungen – etwa die entsprechenden Vergütungsstrukturen oder funktionierende Gesundheitssysteme – dafür häufig noch nicht gegeben sind.

Der Umsatz mit Dialysedienstleistungen im Segment International wuchs im Vergleich zum Vorjahr um 14 % auf 1,77 MRD US \$, der währungsbereinigte Zuwachs betrug 13 %, Akquisitionen trugen mit 8 % zum Umsatzwachstum bei, das organische Umsatzwachstum lag bei 6 %. Der Umsatz mit Dialyseprodukten stieg im abgelaufenen Geschäftsjahr um 4 % auf 2,16 MRD US \$, währungsbereinigt ergab sich die gleiche Steigerungsrate. Der höhere Absatz in weiten Teilen des Produktportfolios (zum Beispiel bei Dialysatoren, Lösungen und Konzentraten) wurde teilweise durch niedrigere Arzneimittelumsätze aufgehoben.

Zum Ende des Geschäftsjahres 2010 haben wir 2.757 Dialysekliniken betrieben, 8 % mehr als Ende 2009. Die Zahl der von uns zum Ende des Jahres behandelten Dialysepatienten belief sich auf 214.648, ein Plus von 10 %. Die Zahl der Behandlungen wuchs im Berichtsjahr um 8 % auf rund 31,67 MIO.

Die größte Geschäftsregion im Segment International ist Europa/Naher Osten/Afrika (EMEA). Hier erhöhte sich der Umsatz im abgelaufenen Geschäftsjahr um 3 % auf 2,55 MRD US \$. Das währungsbereinigte Umsatzplus lag bei 6 %; unsere Marktposition hat sich mit dieser guten Entwicklung weiter gefestigt. Der Anteil der Region am Gesamtumsatz betrug 21 % (2009: 22 %). Zum Ende des Berichtsjahres betreuten wir in 499 Dialyseeinrichtungen über 38.000 Patienten, das waren über 5.600 Patienten oder 17 % mehr als zwölf Monate zuvor. Im Geschäftsjahr 2010 haben wir mit Dialysedienstleistungen in dieser Region 1,08 MIO US \$ umgesetzt, ein Plus von 11 % gegenüber dem Vorjahr. Bereinigt um Wechselkurseffekte betrug das Umsatzplus 13 %. Der Umsatz mit Dialyseprodukten belief sich auf 1,47 MRD US \$, ein Minus von 2 %, währungsbereinigt verzeichneten wir ein Wachstum von 1 %.

Das Geschäft in Lateinamerika hat sich ebenfalls positiv entwickelt. Der Umsatz erhöhte sich um 16 % auf 597 MIO US \$; bereinigt um Währungseinflüsse ergab sich ein Plus von 9 %. Der Anteil am Gesamtumsatz blieb unverändert gegenüber dem Vorjahr. Der Umsatz mit Dialysedienstleistungen nahm um 15 % (währungsbereinigt 9 %) zu und belief sich auf 400 MIO US \$. Mit Dialyseprodukten haben wir 197 MIO US \$ umgesetzt und damit eine Steigerung von

#### UMSATZ NACH SEGMENTEN

Tabelle 2.2.2

| in MIO US \$            |               |               |             |
|-------------------------|---------------|---------------|-------------|
|                         | 2010          | 2009          | Veränderung |
| <b>Nordamerika</b>      |               |               |             |
| Dialyseprodukte         | 827           | 818           | 1 %         |
| Dialysedienstleistungen | 7.303         | 6.794         | 7 %         |
| <b>GESAMT</b>           | <b>8.130</b>  | <b>7.612</b>  | <b>7 %</b>  |
| <b>International</b>    |               |               |             |
| Dialyseprodukte         | 2.156         | 2.079         | 4 %         |
| Dialysedienstleistungen | 1.767         | 1.556         | 14 %        |
| <b>GESAMT</b>           | <b>3.923</b>  | <b>3.635</b>  | <b>8 %</b>  |
| <b>Weltweit</b>         |               |               |             |
| Dialyseprodukte         | 2.983         | 2.897         | 3 %         |
| Dialysedienstleistungen | 9.070         | 8.350         | 9 %         |
| <b>GESAMT</b>           | <b>12.053</b> | <b>11.247</b> | <b>7 %</b>  |

18 % gegenüber dem Vorjahr erzielt (währungsbereinigt 9 %). In den 193 Dialysekliniken dieser Geschäftsregion unterzogen sich zum Ende des Jahres 2010 mehr als 22.000 Patienten einer Dialysebehandlung.

Die Region Asien-Pazifik verzeichnete einen Umsatzanstieg von 22 % auf 777 MIO US \$. Währungsbereinigt lag das Umsatzwachstum bei 15 %. Der Beitrag dieser Region zum Gesamtumsatz belief sich auf 7 % gegenüber 5 % im Vorjahr. Der Umsatz mit Dialysedienstleistungen erhöhte sich um 25 % (währungsbereinigt 20 %) auf 284 MIO US \$. Der Umsatz mit Dialyseprodukten stieg im Berichtsjahr in dieser Region um 20 % (währungsbereinigt 12 %) auf 493 MIO US \$.

## Ergebnis

### Operatives Ergebnis (EBIT)

Das operative Ergebnis vor Zinsen und Steuern (EBIT) stieg im Jahr 2010 insgesamt um 10 % auf 1,92 MRD US \$. Die operative Marge lag bei 16,0 % und damit über dem Vorjahreswert von 15,6 %, maßgeblich infolge der verbesserten operativen Marge in Nordamerika.

Im Segment Nordamerika ist das operative Ergebnis im Jahr 2010 um 11 % auf 1,39 MRD US \$ gestiegen. Die operative Marge lag bei 17,0 %, nach 16,4 % im

Jahr 2009. Die Erhöhung der operativen Marge ist weitgehend eine Folge höherer Erstattungsätze sowie der vorteilhaften Entwicklung der Kosten für Arzneimittel.

Im Segment International verzeichneten wir einen Anstieg des operativen Ergebnisses von 6 % auf 678 MIO US \$. Die operative Marge verringerte sich von 17,5 % auf 17,3 %. Gründe hierfür waren niedrigere Bruttoergebnismargen bei neu erworbenen Dialysekliniken und der Einfluss der hohen Inflation in Venezuela. Zudem war im Jahr 2009 eine Bewertungsanpassung der Vorräte – mit entsprechend positivem Ergebniseffekt – vorgenommen worden. Positiv machten sich sowohl Größenvorteile aus dem Umsatzwachstum als auch günstige Währungseffekte bemerkbar.

Insbesondere bedingt durch höhere Kosten im Zusammenhang mit Akquisitionen und höheren Forschungs- und Entwicklungsaufwendungen sind im Verlauf des vergangenen Geschäftsjahres auch die Kosten für die Zentralbereiche erwartungsgemäß gestiegen. Der gesamte operative Aufwand für die Zentralbereiche lag im Jahr 2010 bei 140 MIO US \$, nach 131 MIO US \$ im Vorjahr.

### UMSATZENTWICKLUNG NACH SEGMENTEN

Tabelle 2.2.3

| in MIO US \$            |               |               |             |                      |                                |                        |
|-------------------------|---------------|---------------|-------------|----------------------|--------------------------------|------------------------|
|                         | 2010          | 2009          | Veränderung | Organisches Wachstum | Akquisitionen/Desinvestitionen | Anteil am Gesamtumsatz |
| Nordamerika             | 8.130         | 7.612         | 7 %         | 6 %                  | 1 %                            | 67 %                   |
| International           | 3.923         | 3.635         | 8 %         | 5 %                  | 3 % (netto)                    | 33 %                   |
| <b>GESAMT</b>           | <b>12.053</b> | <b>11.247</b> | <b>7 %</b>  | <b>6 %</b>           | <b>1 % (netto)</b>             | <b>100 %</b>           |
| Dialysedienstleistungen | 9.070         | 8.350         | 9 %         | 7 %                  | 2 % (netto)                    | 75 %                   |
| Dialyseprodukte         | 2.983         | 2.897         | 3 %         | 3 %                  | 0 %                            | 25 %                   |
| <b>GESAMT</b>           | <b>12.053</b> | <b>11.247</b> | <b>7 %</b>  | <b>6 %</b>           | <b>1 % (netto)</b>             | <b>100 %</b>           |

### UMSATZ NACH REGIONEN

Tabelle 2.2.4

| in MIO US \$              |               |               |             |                        |
|---------------------------|---------------|---------------|-------------|------------------------|
|                           | 2010          | 2009          | Veränderung | Anteil am Gesamtumsatz |
| Nordamerika               | 8.130         | 7.612         | 7 %         | 67 %                   |
| Europa/Naher Osten/Afrika | 2.549         | 2.479         | 3 %         | 21 %                   |
| Lateinamerika             | 597           | 517           | 16 %        | 5 %                    |
| Asien-Pazifik             | 777           | 639           | 22 %        | 7 %                    |
| <b>GESAMT</b>             | <b>12.053</b> | <b>11.247</b> | <b>7 %</b>  | <b>100 %</b>           |



**Ergebnis vor Steuern**

Das Ergebnis vor Steuern erhöhte sich auf 1,64 MRD US \$, ein Plus von 13 % gegenüber dem Vorjahreswert von 1,46 MRD US \$.

**Konzernergebnis**

Das Konzernergebnis (Ergebnis, das auf die Anteilseigner der Fresenius Medical Care AG & Co. KGaA entfällt) erhöhte sich im Geschäftsjahr 2010 um 10 % auf 979 MIO US \$, nach 891 MIO US \$ im Jahr 2009.

**Entwicklung weiterer wesentlicher Positionen der Gewinn- und Verlustrechnung****Bruttoergebnis**

Das Bruttoergebnis vom Umsatz betrug im Berichtsjahr 4,14 MRD US \$, ein Plus von 8 % gegenüber 2009. Die Bruttogewinnspanne lag bei 34,4 % und damit etwas über dem Vorjahreswert von 34,1 %. Die erhöhte Marge ist weitgehend eine Folge des Anstiegs der Bruttoergebnismarge in Nordamerika, teilweise ausgeglichen durch einen Rückgang im Segment International.

**PATIENTEN**

Tabelle 2.2.5

|                           | 2010           | 2009           | Veränderung |
|---------------------------|----------------|----------------|-------------|
| Nordamerika               | 137.689        | 132.262        | 4 %         |
| Europa/Naher Osten/Afrika | 38.061         | 32.409         | 17 %        |
| Lateinamerika             | 22.471         | 20.937         | 7 %         |
| Asien-Pazifik             | 16.427         | 10.007         | 64 %        |
| <b>GESAMT</b>             | <b>214.648</b> | <b>195.651</b> | <b>10 %</b> |

**BEHANDLUNGEN**

Tabelle 2.2.6

| in MIO                    |              |              |             |
|---------------------------|--------------|--------------|-------------|
|                           | 2010         | 2009         | Veränderung |
| Nordamerika               | 20,85        | 19,87        | 5 %         |
| Europa/Naher Osten/Afrika | 5,45         | 4,83         | 13 %        |
| Lateinamerika             | 3,39         | 3,22         | 5 %         |
| Asien-Pazifik             | 1,97         | 1,51         | 30 %        |
| <b>GESAMT</b>             | <b>31,67</b> | <b>29,43</b> | <b>8 %</b>  |

**KLINIKEN**

Tabelle 2.2.7

|                           | 2010         | 2009         | Veränderung |
|---------------------------|--------------|--------------|-------------|
| Nordamerika               | 1.823        | 1.784        | 2 %         |
| Europa/Naher Osten/Afrika | 499          | 435          | 15 %        |
| Lateinamerika             | 193          | 191          | 1 %         |
| Asien-Pazifik             | 242          | 143          | 69 %        |
| <b>GESAMT</b>             | <b>2.757</b> | <b>2.553</b> | <b>8 %</b>  |

Die Vertriebskosten und die allgemeinen Verwaltungskosten stiegen um 7 % auf 2,12 MRD US \$ (2009: 1,98 MRD US \$). Der Anteil dieser Kosten am Umsatz lag wie im Vorjahr bei 17,6 %.

Die Abschreibungen beliefen sich im Geschäftsjahr 2010 auf 503 MIO US \$, im Vergleich zu 457 MIO US \$ ein Jahr zuvor. Der Anstieg ist eine Folge unserer starken Investitionstätigkeit sowohl in Nordamerika als auch im Segment International.

Die Forschungs- und Entwicklungskosten erhöhten sich von 94 MIO US \$ im vergangenen Jahr auf 97 MIO US \$, hauptsächlich aufgrund zusätzlicher Forschungs- und Entwicklungsprogramme im Bereich der Hämodialysegeräte, der Heim-Hämodialyse und der extrakorporalen intensivmedizinischen Therapien.

#### Zinsergebnis

Die Nettozinsaufwendungen beliefen sich im Geschäftsjahr 2010 auf 280 MIO US \$, nach 300 MIO US \$ im Geschäftsjahr 2009. Diese positive Entwicklung beruht überwiegend auf niedrigeren durchschnittlichen kurzfristigen Zinssätzen. Nähere Angaben zu

unserer Finanzlage finden Sie — ab Seite 61 sowie im Finanzbericht in Anmerkung 9 — ab Seite 227.

#### Steuerquote

Die Ertragsteuern betrugen im vergangenen Geschäftsjahr 578 MIO US \$, gegenüber 491 MIO US \$ im Vorjahr. Dies entspricht einer effektiven Steuerquote von 35,2 %, nach 33,7 % im Jahr 2009. Wesentliche Gründe für die Erhöhung waren höhere unrealisierte Steuervorteile, niedrigere Steuereffekte aus internen Finanzierungen und die Auswirkung der nicht abzugsfähigen Verluste in Venezuela als Ergebnis der inflationsbereinigten Rechnungslegung. Diese Effekte wurden zum Teil durch die Auflösung von Wertberichtigungen auf aktive latente Steuern für steuerliche Verlustvorträge ausgeglichen.

#### Ergebnis je Aktie

Das Ergebnis je Aktie (Earnings per share, EPS) stieg 2010 um 9 % auf 3,25 US \$ pro Stammaktie, nach 2,99 US \$ im Vorjahr. Diese Zahlen gelten auch je Stamm-ADR (American Depositary Receipt). Die durchschnittlich gewichtete Zahl der ausstehenden Aktien betrug 2010 rund 300,7 MIO (2009: 298,3 MIO), davon 296,8 MIO

### OPERATIVES ERGEBNIS (EBIT)

Tabelle 2.2.8

| in MIO US \$    |              |              |             |
|-----------------|--------------|--------------|-------------|
|                 | 2010         | 2009         | Veränderung |
| Nordamerika     | 1.386        | 1.250        | 11 %        |
| International   | 678          | 637          | 6 %         |
| Zentralbereiche | (140)        | (131)        | 7 %         |
| <b>GESAMT</b>   | <b>1.924</b> | <b>1.756</b> | <b>10 %</b> |

### GEKÜRZTE GEWINN- UND VERLUSTRECHNUNG

Tabelle 2.2.9

| in MIO US \$                            |              |              |             |
|-----------------------------------------|--------------|--------------|-------------|
|                                         | 2010         | 2009         | Veränderung |
| Umsatzerlöse                            | 12.053       | 11.247       | 7 %         |
| Aufwendungen zur Erzielung des Umsatzes | 7.908        | 7.415        | 7 %         |
| <b>BRUTTOERGEBNIS VOM UMSATZ</b>        | <b>4.145</b> | <b>3.832</b> | <b>8 %</b>  |
| in % vom Umsatz                         | 34,4         | 34,1         | –           |
| <b>OPERATIVES ERGEBNIS (EBIT)</b>       | <b>1.924</b> | <b>1.756</b> | <b>10 %</b> |
| Zinsaufwand, netto                      | 280          | 300          | –7 %        |
| <b>ERGEBNIS VOR STEUERN</b>             | <b>1.644</b> | <b>1.456</b> | <b>13 %</b> |
| <b>KONZERNERGEBNIS<sup>1</sup></b>      | <b>979</b>   | <b>891</b>   | <b>10 %</b> |

<sup>1</sup> Ergebnis, das auf die Anteilseigner der Fresenius Medical Care AG & Co. KGaA entfällt.

Stammaktien (2009: 294,4 Mio Stammaktien). Der Anstieg der Zahl ausstehender Aktien resultiert aus der Ausübung von Aktienoptionen. Nähere Erläuterungen zur Herleitung des Ergebnisses je Aktie finden Sie — auf Seite 244 des Finanzberichts.

### Wertschöpfungsrechnung

Mit der Wertschöpfungsrechnung werden die von Fresenius Medical Care im Geschäftsjahr 2010 erbrachten wirtschaftlichen Leistungen veranschaulicht. Dafür werden sämtliche Vorleistungen, wie der wertmäßige Verbrauch bezogener Güter und Leistungen sowie die Abschreibungen, von der Unter-

nehmensleistung abgezogen. Die Wertschöpfung von Fresenius Medical Care belief sich im Geschäftsjahr 2010 auf 5,9 MRD US \$, nach 5,5 MRD US \$ im Jahr 2009 – ein Plus von 7,94 % gegenüber dem Vorjahr. Davon entfiel der größte Teil, 67 % bzw. 4 MRD US \$, auf die Mitarbeiterinnen und Mitarbeiter, gefolgt von 10 % für die öffentliche Hand. Darlehensgeber erhielten rund 305 Mio US \$ bzw. 5 %. Den Aktionären und anderen Gesellschaftern flossen rund 6 % bzw. 348 Mio US \$ zu. Zur inneren Stärkung des Geschäfts verblieben 718 Mio US \$ der Wertschöpfung im Unternehmen.

### ENTWICKLUNG DES NETTOERGEBNISSES PRO QUARTAL

Grafik 2.2.10

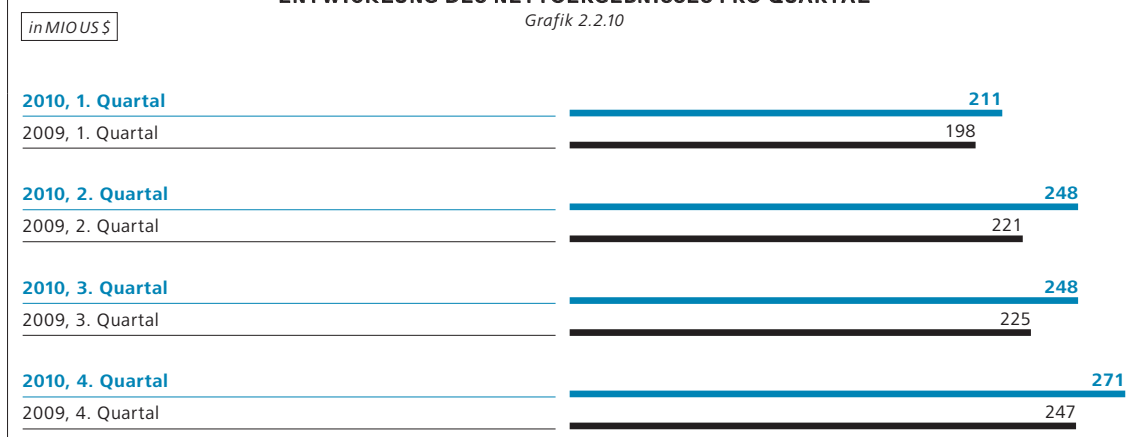

### WERTSCHÖPFUNGSRECHNUNG

Tabelle 2.2.11

in MIO US \$

|                                     | 2010         |              |  | 2009         |              |
|-------------------------------------|--------------|--------------|--|--------------|--------------|
| <b>Entstehung</b>                   |              |              |  |              |              |
| Unternehmensleistung                | 12.032       | 100 %        |  | 11.325       | 100 %        |
| Vorleistungen                       | (5.612)      | -47 %        |  | (5.382)      | -48 %        |
| Brutto-Wertschöpfung                | 6.420        | 53 %         |  | 5.943        | 52 %         |
| Abschreibungen                      | (503)        | -4 %         |  | (457)        | -4 %         |
| <b>NETTO-WERTSCHÖPFUNG</b>          | <b>5.917</b> | <b>49 %</b>  |  | <b>5.486</b> | <b>48 %</b>  |
| <b>Verwendung<sup>1</sup></b>       |              |              |  |              |              |
| Mitarbeiter                         | 3.968        | 67 %         |  | 3.709        | 68 %         |
| Öffentliche Hand                    | 578          | 10 %         |  | 491          | 9 %          |
| Darlehensgeber                      | 305          | 5 %          |  | 321          | 6 %          |
| Aktionäre und andere Gesellschafter | 348          | 6 %          |  | 329          | 6 %          |
| Unternehmen                         | 718          | 12 %         |  | 636          | 11 %         |
| <b>NETTO-WERTSCHÖPFUNG</b>          | <b>5.917</b> | <b>100 %</b> |  | <b>5.486</b> | <b>100 %</b> |

<sup>1</sup> Unter Annahme der Zustimmung zur Gewinnverwendung 2010.

### Auftragslage

Der Auftragsbestand ist aufgrund des Geschäftsmodells von Fresenius Medical Care, das zu knapp drei Viertel aus regelmäßig zu erbringenden Dienstleistungen besteht, keine wesentliche Kenngröße. Das Produktgeschäft ist mehrheitlich durch Verbrauchsgüter für die Einmalverwendung gekennzeichnet und wird nicht von projektbezogenen Aufträgen bestimmt, die zu wesentlichen Änderungen des Auftragsbestands innerhalb von Berichtsperioden führen könnten. Fresenius Medical Care berichtet daher nicht auf Basis dieser Finanzkennzahl. Generell lässt sich an der zuvor dargestellten Entwicklung der Patienten- und Behandlungszahlen die Stabilität unserer Auftragssituation erkennen. Unser Wachstum von 8 % bei den Behandlungen sowie 10 % bei den Patienten entspricht etwa dem jährlichen Wachstum des Dialysemarktes. Ein weiterer Faktor, der zur Stabilität der Auftragssituation beiträgt, ist, dass ein großer Teil der Behandlungskosten von öffentlichen Institutionen und Gesundheitssystemen getragen wird.

### FINANZLAGE

Unsere Investitions- und Finanzierungsstrategie hat sich im vergangenen Geschäftsjahr trotz der weiterhin bestehenden Verunsicherung an den Finanzmärkten nicht wesentlich geändert. Der Grund dafür ist unser Geschäftsmodell, das angesichts stabiler und hoher Cash Flows eine beständigere und höhere Verschuldung erlaubt, als dies in anderen Industrien der Fall sein mag. Wir sehen unsere Refinanzierungsmöglichkeiten weiterhin als sehr stabil und flexibel an und werden auch im laufenden Geschäftsjahr 2011 unsere Investitionen plangemäß fortsetzen. Unsere Finanzierungsaktivitäten sind darauf ausgerichtet, den Einsatz von nachrangigen Finanzierungsinstrumenten weiter zu reduzieren. Bei den Investitionen konzentrieren wir uns auf den Ausbau unseres Dialyseklarinetzes. Hier liegt der Schwerpunkt also eher im Dienstleistungsgeschäft, zumal wir unsere Fertigungskapazitäten für wesentliche Produktgruppen bereits in den Jahren zuvor stärker ausgeweitet hatten.

### Grundsätze und Ziele des Finanzmanagements

Neben der Optimierung der Finanzierungskosten hat die Sicherung der finanziellen Flexibilität die höchste Priorität in der Finanzierungsstrategie von

Fresenius Medical Care. Finanziell flexibel bleiben wir, indem wir eine breite Palette von Finanzierungsinstrumenten einsetzen und bei Investoren und Banken stark diversifizieren. Unser Finanzierungsprofil ist charakterisiert durch eine breite Streuung – vom kurzfristigen Forderungsverkaufsprogramm, das jährlich verlängert wird, bis zu vorrangigen Anleihen, die erst im Jahr 2021 fällig werden. Daneben können wir unseren Finanzierungsspielraum bedarfsweise über unterschiedlich strukturierte Kredite erweitern. Neben dieser Kombination aus kurz-, mittel- und langfristigen Finanzierungsinstrumenten wird der Finanzierungsbedarf im Wesentlichen über den operativen Cash Flow gedeckt.

Zentrales Finanzierungsinstrument ist die syndizierte Kreditvereinbarung mit zwei langfristigen Darlehen (Term Loan A, Term Loan B). Am 29. September 2010 haben wir unsere Kreditvereinbarung aus dem Jahr 2006 erweitert und um zwei Jahre verlängert.

Zusätzlich nutzen wir diverse andere mittel- und langfristige Finanzierungsinstrumente, darunter:

- ▶ nachrangige Anleihen (Trust Preferred Securities), die Mitte 2011 auslaufen;
- ▶ in geringerem Umfang vorrangige unbesicherte Euro-Schuldscheindarlehen mit festen und variablen Tranchen sowie
- ▶ vorrangige unbesicherte Anleihen in Euro und us-Dollar.

Unsere Finanzierungsaktivitäten sind darauf ausgerichtet, den Einsatz von nachrangigen Finanzierungsinstrumenten zu reduzieren und gegebenenfalls durch vorrangige Anleihen zu ersetzen. Mit den nur teilweise genutzten Kreditlinien sowie dem im September 2010 erneuerten und von 650 Mio US\$ auf 700 Mio US\$ erhöhten Rahmen des Forderungsverkaufsprogramms verfügen wir über ausreichende finanzielle Ressourcen. Als Zielgröße von zugesicherten und nicht genutzten Kreditlinien streben wir einen Korridor von 300 bis 500 Mio US\$ an. Unser kurzfristiger Refinanzierungsbedarf beschränkt sich auf die Zahlung in Höhe von 485 Mio € für unsere Akquisition der International Dialysis Centers, die Höhe der Dividendenzahlung von etwa 197 Mio € im Mai 2011, die Ablösung der Trust Preferred Securities im Juni 2011 in Höhe von 225 Mio US\$ und 300 Mio € sowie die

Verlängerung des Forderungsverkaufsprogramms im Oktober 2011. Die Refinanzierung wird im Einklang mit der beschriebenen Finanzierungsstrategie stehen.

In unserer langfristigen Finanzplanung orientieren wir uns in erster Linie am Verschuldungsgrad, definiert als Debt-EBITDA-Verhältnis. Dabei werden die Finanzverbindlichkeiten (Debt) zum Ergebnis vor Zinsen, Steuern und Abschreibungen (EBITDA) und anderen nicht zahlungswirksamen Aufwendungen ins Verhältnis gesetzt. Fresenius Medical Care verfügt über eine starke Marktposition im wachsenden und als nicht zyklisch angesehenen Dialysesektor. Dieser ist durch relativ stabile Cash Flows gekennzeichnet; unsere Marktposition wird darüber hinaus durch eine hohe Kreditqualität der meisten Kunden unterstützt. Dies erlaubt uns eine beständigere und höhere Verschuldung, als das in anderen Industrien der Fall sein mag. Zum Ende des Geschäftsjahres 2010 lag das Debt-EBITDA-Verhältnis bei 2,38, im Vergleich zu 2,46 im Vorjahr. Weitere Informationen enthält der Abschnitt „Strategie, Ziele und Unternehmenssteuerung“ — ab Seite 35. Zusätzliche Angaben zur Finanzierung finden Sie im Finanzbericht — ab Seite 184 im Abschnitt „Liquidität und Mittelherkunft“, in den Anmerkungen 8 und 9 des Finanzberichts — ab Seite 226 sowie im „Prognosebericht“ — ab Seite 116.

### Rating

Im Laufe des vergangenen Jahres haben die Ratingagenturen Standard & Poor's (im zweiten Quartal 2010) und Fitch (im dritten Quartal 2010) den Ausblick von Fresenius Medical Care jeweils von „stabil“ auf „positiv“ angehoben. Alle Unternehmensratings wurden im Berichtsjahr bestätigt. Das Rating von Moody's liegt weiterhin bei „Ba1“ (mit stabilem Ausblick); die Ratingagentur Fitch stuft das Unternehmensrating für Fresenius Medical Care mit „BB“ ein, und Standard & Poor's beließ das Unternehmensrating ebenfalls bei „BB“.

### Bedeutung außerbilanzieller Finanzierungsinstrumente für die Finanz- und Vermögenslage

Fresenius Medical Care ist nicht an außerbilanziellen Geschäften beteiligt, die sich gegenwärtig oder zukünftig aller Wahrscheinlichkeit nach wesentlich auf die Finanzlage, die Aufwendungen oder Erträge, die Ertragslage, die Liquidität, die Investitionsausgaben, das Vermögen oder die Kapitalausstattung auswirken werden.

### Liquiditätsanalyse

Quellen der Liquidität sind der operative Cash Flow und die von Dritten gewährten Kredite sowie der Einsatz weiterer Finanzierungsinstrumente nach Bedarf. Wir benötigen die Finanzmittel vornehmlich

## WESENTLICHE FINANZIERUNGSMITTEL VON FRESENIUS MEDICAL CARE

Tabelle 2.2.12

|                                | Jahr der Ausgabe | Betrag in MIO         | Kupon   | Fälligkeit |
|--------------------------------|------------------|-----------------------|---------|------------|
| Kreditvereinbarung Term Loan A | 2006             | 1.850 \$ <sup>1</sup> | –       | 31.03.2013 |
| Kreditvereinbarung Term Loan B | 2006             | 1.750 \$ <sup>1</sup> | –       | 31.03.2013 |
| Trust Preferred Securities IV  | 2001             | 225 \$                | 7,875 % | 15.06.2011 |
| Trust Preferred Securities V   | 2001             | 300 €                 | 7,375 % | 15.06.2011 |
| Schuldscheindarlehen           | 2009             | 155 €                 | –       | 27.10.2012 |
| Schuldscheindarlehen           | 2009             | 45 €                  | –       | 27.10.2014 |
| Anleihe 2010–2016              | 2010             | 250 €                 | 5,500 % | 15.07.2016 |
| Anleihe 2007–2017              | 2007             | 500 \$                | 6,875 % | 15.07.2017 |
| Anleihe 2011–2021              | 2011             | 650 \$                | 5,750 % | 15.02.2021 |
| Anleihe 2011–2021              | 2011             | 300 €                 | 5,250 % | 15.02.2021 |

<sup>1</sup> Zu Beginn vor Tilgungen.

zur Finanzierung des Nettoumlaufvermögens, zur Finanzierung von Akquisitionen, zum Auf- und Ausbau sowie der Ausrüstung eigener Dialysezentren und Produktionsstätten sowie zur Rückzahlung von Finanzverbindlichkeiten und Ausschüttung von Dividenden. Umfangreiche Angaben zur Liquidität finden Sie im Finanzbericht im Abschnitt „Liquidität und Mittelherkunft“ — ab Seite 184.

### Dividende

Fresenius Medical Care schlägt der Hauptversammlung die 14. Dividendenerhöhung in Folge vor: Die vorgeschlagene Dividende je Stammaktie soll von 0,61 € für das Geschäftsjahr 2009 auf 0,65 € für das Geschäftsjahr 2010 steigen, die Dividende je Vorzugsaktie auf 0,67 € (2009: 0,63 €). Dies entspricht einem Plus von 7 bzw. 6 % im Vergleich zum Vorjahr. Die gesamte erwartete Ausschüttungssumme dürfte sich auf rund 197 MIO € belaufen (2009: 183 MIO €). Weitere Informationen zur Dividende finden Sie im Abschnitt „Dividende“ — auf Seite 23.

### Investitionen und Akquisitionen

Wichtige Bereiche für Investitionen sind grundsätzlich die Instandhaltung von existierenden Kliniken sowie die Ausstattung von neuen Kliniken. Zusätzlich haben wir im vergangenen Jahr in die Instandhaltung und Erweiterung von Produktionsstätten investiert. Darüber hinaus trug die Aktivierung von Dialysemaschinen, die hauptsächlich an Kunden des Segments International ausgeliefert wurden, zum Investitionsaufwand bei. Diese Investitionen werden durch den operativen Cash Flow oder über existierende bzw. neue Kredite finanziert.

Im Jahr 2010 wendete Fresenius Medical Care 1.446 MIO US \$ für Investitionen, Akquisitionen und den Erwerb von immateriellen Vermögensgegenständen auf. Davon waren 1.288 MIO US \$ im Jahr 2010 zahlungswirksam. Auf das Segment Nordamerika entfielen hiervon 524 MIO US \$ und auf das Segment International 608 MIO US \$ und auf die Zentralbereiche 156 MIO US \$.

### RATING

Tabelle 2.2.13

|                                                 | Standard & Poor's | Moody's | Fitch   |
|-------------------------------------------------|-------------------|---------|---------|
| Unternehmensrating                              | BB                | Ba1     | BB      |
| Ausblick                                        | Positiv           | Stabil  | Positiv |
| Vorrangige besicherte Finanzverbindlichkeiten   | BBB –             | Baa3    | BBB –   |
| Vorrangige unbesicherte Finanzverbindlichkeiten | BB                | Ba2     | BB      |
| Nachrangige Finanzverbindlichkeiten             | BB                | Ba3     | B +     |

### NETTO-INVESTITIONEN UND AKQUISITIONEN NACH SEGMENTEN

Tabelle 2.2.14

|                 | 2010         | 2009       | davon Sachanlagen | davon Akquisitionen/ immaterielle Vermögensgegenstände und sonstige Investitionen | davon Desinvestitionen | Veränderung | Anteil am Gesamtvolumen |
|-----------------|--------------|------------|-------------------|-----------------------------------------------------------------------------------|------------------------|-------------|-------------------------|
| Nordamerika     | 513          | 418        | 286               | 237                                                                               | 10                     | 95          | 46 %                    |
| International   | 590          | 330        | 221               | 373                                                                               | 4                      | 260         | 52 %                    |
| Zentralbereiche | 22           | (50)       | –                 | 154                                                                               | 132                    | 72          | 2 %                     |
| <b>GESAMT</b>   | <b>1.125</b> | <b>698</b> | <b>507</b>        | <b>764</b>                                                                        | <b>146</b>             | <b>427</b>  | <b>100 %</b>            |

Insgesamt haben wir Netto-Investitionen in Sachanlagen in Höhe von 507 MIO US\$ getätigt, nach 562 MIO US\$ im Vorjahr. Ein großer Teil der Investitionsausgaben – 306 MIO US\$ – betraf die Instandhaltung bestehender Kliniken und die Ausrüstung neuer Kliniken. Zudem haben wir 124 MIO US\$ in die Instandhaltung und den Ausbau der Produktionskapazitäten investiert, vorwiegend in Deutschland und Nordamerika. 93 MIO US\$ entfielen bei unseren Vertriebsgesellschaften auf die Aktivierung von Geräten, die – vorwiegend im Segment International – Kunden zur Verfügung gestellt wurden. Ein geringerer Betrag in Höhe von 16 MIO US\$ ist durch Desinvestitionen zugeflossen. Die Investitionen in Sachanlagen machten etwa 4 % des Gesamtumsatzes aus und lagen somit leicht unter dem Vorjahresniveau von 5 %.

Circa 44 % der Netto-Investitionen wurden für Erweiterungsmaßnahmen ausgegeben, 56 % dienten der Instandhaltung bestehender Produktionsstätten und Dialysekliniken.

Auf Nordamerika entfielen rund 56 % unserer Nettoinvestitionen, gefolgt von Europa mit 31 %, Asien-Pazifik mit 8 % und Lateinamerika mit 5 %.

Für Akquisitionen, die vornehmlich den Erwerb von Dialysekliniken und des internationalen Peritonealdialyse-Geschäfts von Gambro betrafen, sowie für die Gründung eines Gemeinschaftsunternehmens mit Galenica für Medikamente zur Nierentherapie und den Erwerb von Lizenzen haben wir 2010 etwa 632 MIO US\$ aufgewendet. Davon entfielen 237 MIO US\$ auf das Segment Nordamerika und 373 MIO US\$ auf das Segment International und 22 MIO US\$ auf die Zentralbereiche.

Insgesamt haben wir im vergangenen Jahr 1.125 MIO US\$ für Investitionstätigkeiten und Akquisitionen unter Berücksichtigung von Desinvestitionen aufgewendet, 427 MIO US\$ mehr als im Vorjahr (698 MIO US\$).

#### Cash-Flow-Analyse

Der Mittelzufluss aus laufender Geschäftstätigkeit, auch als operativer Cash Flow bezeichnet, lag

#### NETTO-INVESTITIONEN IN SACHANLAGEN NACH REGIONEN

Grafik 2.2.15

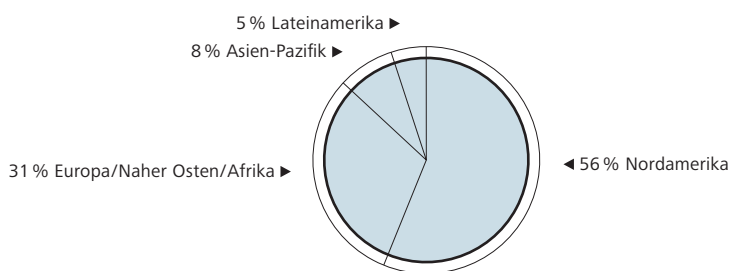

#### FORDERUNGSLAUFZEITEN

Tabelle 2.2.16

in Tagen

|               | 2010      | 2009      | Veränderung |
|---------------|-----------|-----------|-------------|
| Nordamerika   | 54        | 52        | 2           |
| International | 116       | 110       | 6           |
| <b>GESAMT</b> | <b>76</b> | <b>72</b> | <b>4</b>    |



im Jahr 2010 bei 1,37 MRD US \$, nach 1,34 MRD US \$ im Geschäftsjahr 2009. Das entspricht einer Steigerung von etwa 2 % gegenüber dem Vorjahr, hauptsächlich als Folge von Verbesserungen des Nettoumlaufvermögens, inklusive gesunkener Lagerbestände sowie eines gestiegenen Ergebnisses. Diese Steigerungen wurden teilweise durch höhere Ertragsteuerzahlungen ausgeglichen. Die Mittelzuflüsse wurden für Investitionsmaßnahmen (Sachanlagen und Akquisitionen) verwendet. Eine detaillierte Beschreibung weiterer Faktoren finden Sie im Finanzbericht im Abschnitt „Liquidität und Mittelherkunft“ — ab Seite 184.

Im Geschäftsjahr 2010 verzeichneten wir ein regional unterschiedliches Zahlungsverhalten unserer Kunden. Die Forderungslaufzeiten, das heißt die Anzahl der Tage bis zum Begleichen ausstehender Rechnungen, haben sich im vergangenen Jahr insgesamt leicht erhöht. Die Forderungslaufzeiten im Segment Nordamerika waren auch 2010 auf anhaltend niedrigem Niveau. Im Segment International trat die von uns erwartete Erhöhung der Forderungslaufzeiten ein; sie spiegelt im Wesentlichen

die durchschnittlichen Zahlungsverzögerungen bei staatlichen und privaten Stellen vor allem in Europa wider, bedingt noch durch die weltweite Finanzmarktkrise. Da wir einen Großteil unserer Erstattungen von staatlichen Gesundheitsorganisationen und privaten Versicherungsgesellschaften erhalten, gehen wir davon aus, dass die meisten Forderungen einbringlich sind. In den am stärksten von der globalen Finanzkrise betroffenen Ländern erwarten wir wie im vergangenen Jahr einen leichten Anstieg der Forderungslaufzeiten. Weitere Informationen erhalten Sie im folgenden Abschnitt „Vermögenslage“.

Wir haben im vergangenen Geschäftsjahr einen Free Cash Flow vor Akquisitionen und Dividenden in Höhe von 861 MIO US \$ erzielt, nach 777 MIO US \$ im Geschäftsjahr 2009. Unter Berücksichtigung der Zahlungen für Akquisitionen (abzüglich Veräußerungen) in Höhe von 618 MIO US \$ (2009: 136 MIO US \$) und Dividenden in Höhe von 263 MIO US \$ (2009: 232 MIO US \$) errechnet sich ein Free Cash Flow von 11 MIO US \$, nach 409 MIO US \$ im Vorjahr. Weitere Informationen erhalten Sie im Abschnitt „Investitionen und Akquisitionen“ — ab Seite 63.

#### GEKÜRZTE CASH-FLOW-RECHNUNG

Tabelle 2.2.17

in MIO US \$

|                                            | 2010    | 2009  | Veränderung |
|--------------------------------------------|---------|-------|-------------|
| Flüssige Mittel am Jahresanfang            | 301     | 222   | 36 %        |
| Cash Flow aus laufender Geschäftstätigkeit | 1.368   | 1.339 | 2 %         |
| Cash Flow aus Investitionstätigkeiten      | (1.125) | (698) | –           |
| Cash Flow aus Finanzierungstätigkeiten     | (15)    | (559) | –           |
| Wechselkursbedingte Veränderungen          | (6)     | (3)   | 139 %       |
| Flüssige Mittel am Jahresende              | 523     | 301   | 74 %        |
| Free Cash Flow                             | 861     | 777   | 11 %        |

Eine ausführliche Darstellung finden Sie im Finanzbericht ab Seite 204.

#### OPERATIVER CASH FLOW

Grafik 2.2.18

in MIO US \$

|      |       |
|------|-------|
| 2010 | 1.368 |
| 2009 | 1.339 |

## VERMÖGENSLAGE

Unsere Bilanzsumme hat sich im Berichtsjahr erhöht, und die Vermögenslage hat sich 2010 erneut verbessert. In den wesentlichen Bilanzkennzahlen spiegeln sich das nachhaltige Wachstum und der geschäftliche Erfolg unseres Unternehmens wider.

### Bilanz- und Vermögenslage

Die Bilanzsumme des Konzerns ist im Jahresvergleich um 8 % von 15,821 MRD US \$ auf 17,095 MRD US \$ gestiegen. Das Anlagevermögen erhöhte sich um 8 % und belief sich zum Jahresende 2010 auf 11,94 MRD US \$. Das entspricht – unverändert gegenüber dem Vorjahr – etwa 70 % der Konzernbilanzsumme. Die absolute Erhöhung des Anlagevermögens ist im Wesentlichen auf Investitionen in Sachanlagen und Akquisitionen zurückzuführen.

Das Anlagevermögen beinhaltet Firmenwerte (Goodwill) in Höhe von 8,14 MRD US \$, die hauptsächlich im Zusammenhang mit dem Erwerb der Renal Care Group im Jahr 2005 sowie der Gründung von Fresenius Medical Care im Jahr 1996 entstanden sind. Die Erhöhung des Goodwill gegenüber dem Vor-

jahreswert von 7,51 MRD US \$ resultiert zu einem großen Teil aus den im Berichtsjahr getätigten Akquisitionen. Die Sachanlagen erhöhten sich im Berichtsjahr um 4 % auf 2,53 MRD US \$, und zwar vor allem aufgrund von Investitionen (516 MIO US \$) und Akquisitionen (70 MIO US \$) abzüglich Abschreibungen (433 MIO US \$) und Abgängen (26 MIO US \$). Nähere Informationen dazu finden Sie im Abschnitt „Investitionen und Akquisitionen“ — ab Seite 63.

Das Umlaufvermögen stieg um 9 % auf 5,15 MRD US \$ (11 % zu konstanten Wechselkursen). Die Hauptursache hierfür war der Anstieg sowohl der flüssigen Mittel und der Forderungen aus Lieferungen und Leistungen als auch der sonstigen Vermögensgegenstände. Zum Ende des Geschäftsjahres 2010 verminderten sich die Vorräte im Konzern um 2 % auf 809 MIO US \$. Währungsbereinigt blieben die Vorräte nahezu unverändert. Diese positive Entwicklung ist hauptsächlich auf den Rückgang der Lagerreichweite der Vorräte zurückzuführen.

Die Forderungen aus Lieferungen und Leistungen stiegen 2010 um 13 % auf 2,57 MRD US \$. Währungsbereinigt entsprach das einer Erhöhung um 15 %. Dieser

### BILANZSTRUKTUR – AKTIVA

Grafik 2.2.19

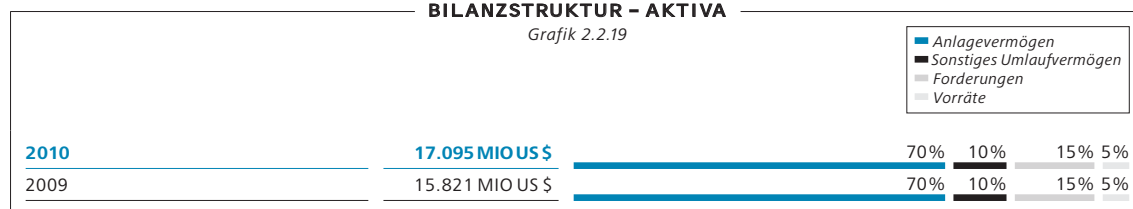

### BILANZSTRUKTUR – PASSIVA

Grafik 2.2.20

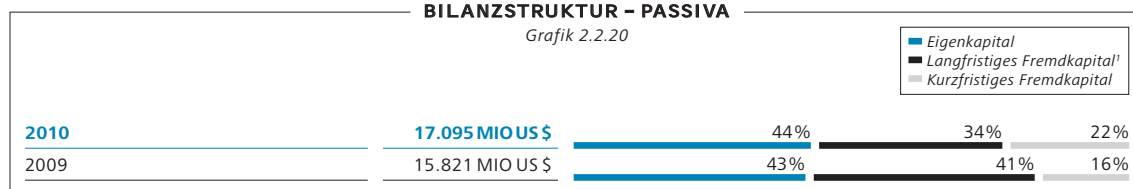

<sup>1</sup> Inklusive Anteile anderer Gesellschafter mit Put-Optionen.

Anstieg lag über dem Umsatzwachstum des Berichtsjahres von 7 % und spiegelt die Erhöhung der Forderungslaufzeiten wider. Weitere Informationen dazu finden Sie im Kapitel „Finanzlage“ — ab Seite 61.

### Eigenkapital

Auf der Passivseite der Bilanz erhöhte sich das Eigenkapital um 11 % auf 7,52 MRD US \$, nach 6,80 MRD US \$ im Jahr 2009. Dieser Anstieg war insbesondere bedingt durch das Konzernergebnis (Ergebnis, das auf die Anteilseigner der Fresenius Medical Care AG & Co. KGaA entfällt) von 979 MIO US \$ sowie Veränderungen aus der Ausübung von Aktienoptionen in Höhe von 102 MIO US \$. Gemindert wurde die Eigenkapitalbasis um die Zahlung der Dividende für das Geschäftsjahr 2009 in Höhe von 232 MIO US \$ und durch Währungsumrechnungseffekte von 111 MIO US \$. Die Eigenkapitalquote erhöhte sich im Berichtsjahr um einen Prozentpunkt auf 44 %.

Das Fremdkapital inklusive Anteile anderer Gesellschafter mit Put-Optionen stieg auf 9,57 MRD US \$, nach 9,02 MRD US \$ im Vorjahr. Die Finanzverbindlichkeiten betrugen 5,88 MRD US \$ (2009: 5,57 MRD US \$), davon entfielen 1.570 MIO US \$ auf kurzfristige Finanzverbindlichkeiten (2009: 484 MIO US \$). Die mittel- bis langfristigen Finanzverbindlichkeiten beliefen sich auf 4,31 MRD US \$, nach 5,08 MRD US \$ im Jahr 2009. Von den Finanzverbindlichkeiten sind 75 % in US \$ aufgenommen, nach 77 % im Vorjahr.

Im Konzern bestehen keine Rückstellungen, die von wesentlicher Bedeutung sind. Die größte Einzelrückstellung in Höhe von 115 MIO US \$ bezieht sich auf den Vergleich zur endgültigen Beilegung der Gläubigeranfechtungsforderungen sowie aller weiteren sich aus dem Insolvenzverfahren von w. R. Grace ergebenden Rechtsangelegenheiten im Zusammenhang mit der National-Medical-Care-Transaktion im Jahr 1996. Wir verweisen hierzu auch auf Anmerkung 18 des Finanzberichts — ab Seite 254.

## FORSCHUNG UND ENTWICKLUNG

Wir wollen mit unserer einzigartigen Erfahrung in der Bereitstellung hochwertiger Dialyseprodukte und -dienstleistungen weltweit der bevorzugte Partner für unsere Patienten und Kunden sein. Dazu soll unsere Forschung und Entwicklung (F&E) mit marktnahen Produktverbesserungen und Neuentwicklungen wesentlich beitragen. Unsere F&E-Teams richten ihre Arbeit eng an den Bedürfnissen unserer verschiedenen Anspruchsgruppen aus und beobachten aufmerksam, wie sich diese Bedürfnisse im Zuge gesellschaftlicher, wissenschaftlicher und gesundheitspolitischer Trends verändern. Dabei helfen ihnen besonders die Erfahrungen und Einschätzungen der Ärzte, Pfleger und Patienten in unserem eigenen Kliniknetz. Darüber hinaus tauschen sich unsere F&E-Mitarbeiter regelmäßig mit internationalen Experten und Forschungseinrichtungen aus und arbeiten mit diesen auch direkt zusammen, um die Lebensqualität von Nierenpatienten weiter zu verbessern. Das Ziel lautet hier: die führende Marktposition von Fresenius Medical Care in der Dialyse zu festigen und das Unternehmen auch in neueren, technologisch verwandten Therapiefeldern als innovativen Anbieter zu positionieren.

### AUSRICHTUNG DER FORSCHUNG UND ENTWICKLUNG

In unserem Kerngeschäft, der Versorgung von Patienten mit chronischem Nierenversagen, prägen insbesondere die folgenden Bedürfnisse und Trends unsere F&E-Arbeit:

► Der medizinische und technologische Fortschritt: Noch ist die Dialyse eine relativ junge Disziplin. Standardmäßig, also mit verlässlich wiederholbaren Ergebnissen, ist sie erst seit rund 50 Jahren im Einsatz. Die komplizierten Wechselwirkungen und Begleiterscheinungen, die auftreten, wenn die Nieren versagen, werden jedoch immer besser erforscht. Parallel zu den wachsenden medizinischen Erkenntnissen verbessern sich auch die technologischen Möglichkeiten, Patienten zu therapieren. Für die Forschung und Entwicklung von Fresenius Medical Care bedeutet das: Wir wollen neue Erkenntnisse zügig in marktreife Weiter- und Neuentwicklungen umsetzen und so entscheidend dazu beitragen, Patienten

immer schonender, sicherer und individueller zu behandeln. Technologische Trends, die dabei eine Rolle spielen, sind Neuerungen in der Informationstechnologie, Technologien zur schrittweisen Verkleinerung von Produkten sowie zur Vereinfachung ihrer Anwendung, die Integration verschiedener Behandlungselemente zu ganzheitlichen Therapiesystemen sowie der Einsatz vielversprechender Verfahren wie der Adsorber-Technologie. Ein Beispiel dafür, wie wir mit technologischen Innovationen die Behandlung für die Patienten noch sicherer gestalten, finden Sie

— ab Seite 69.

#### ► Die Zunahme von Begleiterkrankungen:

Patienten mit chronischem Nierenversagen werden immer älter – zum einen, weil die Gesellschaft allgemein altert und das Risiko, an terminaler Niereninsuffizienz zu erkranken, mit dem Alter steigt; zum anderen erhöht der medizinische Fortschritt auch die Lebenserwartung von Nierenkranken. Mit zunehmendem Alter der Patienten werden jedoch zugleich Begleiterkrankungen häufiger, etwa schwere Herz- und Gefäßleiden. Diese stellen sich typischerweise ein, wenn der Körper als Folge des Nierenversagens dauerhaft durch Überwässerung belastet ist. Begleiterscheinungen des chronischen Nierenversagens wie diese rücken mit ihrer zunehmenden Verbreitung und den neuen wissenschaftlichen Erkenntnissen immer stärker in den Fokus unserer Forschung und Entwicklung – in Form von Diagnose- und Therapiesystemen, die über die eigentliche Dialyse hinausgehen. Ein Beispiel für ein solches Diagnoseinstrument finden Sie — ab Seite 70.

#### ► Das anhaltende Wachstum der Patientenzahlen:

Immer mehr Menschen leiden an chronischem Nierenversagen – bis zum Jahr 2020 werden es voraussichtlich fast 4 Mio weltweit sein. Beschleunigt wird dieser Trend durch die Zunahme von Bluthochdruck und Diabetes – typischen Vorerkrankungen des Nierenversagens, die sich durch „Wohlstandsphänomene“ wie Bewegungsmangel, ungesunde Ernährung und Übergewicht rund um den Globus immer schneller verbreiten. Ein Schwerpunkt unserer Forschung und Entwicklung sind deshalb Heimtherapien – die Peritonealdialyse, die Heim-Hämodialyse und langfristig auch die tragbare künstliche Niere – sowie damit verbundene

Technologien und Produkte. Denn eine Behandlung zu Hause gewährt dafür geeigneten Patienten — siehe Seite 48 nicht nur größere Freiheiten in der Gestaltung ihres Lebensalltags; sie entlastet zunehmend auch die begrenzten Kapazitäten der Dialysekliniken und kann Menschen in Gebieten mit schwacher Gesundheitsinfrastruktur überhaupt erst den Zugang zu einer Behandlung ermöglichen. Ein Beispiel für unsere Arbeit auf dem Gebiet der Heimtherapien finden Sie — auf Seite 71.

► Der steigende Kostendruck im Gesundheitswesen: Eine alternde Bevölkerung, die Verbreitung chronischer Leiden und der Anspruch, in der Patientenversorgung neue oder verbesserte Technologien einzusetzen – diese Trends stellen Gesundheitssysteme vor große finanzielle Herausforderungen, wie auch der Weltgesundheitsbericht der WHO (World Health Organization) im Jahr 2010 hervorhebt. Die Finanz- und Wirtschaftskrise hat diese Situation in den vergangenen Jahren noch verschärft. Umso mehr gilt für Fresenius Medical Care ein Grundsatz, der auch in unseren internen Forschungsrichtlinien festgeschrieben ist: Innovationen müssen nicht nur hochwertig, sondern auch bezahlbar sein, damit die Patienten von ihnen profitieren können. Für uns sind dies auch aus unserer langjährigen Erfahrung als Betreiber eigener Dialysekliniken keine unvereinbaren Ansprüche. Denn eine hochwertige Behandlung ist zugleich kosteneffizient, indem sie Risiken und Komplikationen minimiert und dadurch Zusatzkosten, etwa für Krankenhausaufenthalte, vermeidet. Unsere Forschung und Entwicklung arbeitet gezielt

an Produkten und Dienstleistungen, die unsere Kunden dabei unterstützen, Patienten in hoher Qualität und zugleich zu tragbaren Kosten zu versorgen. Beispiele dafür finden Sie — ab Seite 72.

## F & E-PROJEKTE IM BERICHTSJAHR

Fresenius Medical Care hat im Berichtsjahr insgesamt rund 97 Mio US\$ für Forschung und Entwicklung aufgewendet (2009: 94 Mio US\$). Ähnlich wie in den Vorjahren entsprachen die F & E-Aufwendungen einem Anteil von rund 3 % unseres Umsatzes mit Dialyseprodukten. Unser Patentportfolio umfasste Ende 2010 rund 3.600 Schutzrechte in etwa 660 Patentfamilien – also Gruppen von Patenten, die zu einer Erfindung gehören. Im Berichtsjahr haben wir mit unseren Entwicklungen 85 weitere Patentfamilien geschaffen, um unsere Innovationen bei wichtigen Dialyseprodukten und Therapieverfahren auch künftig abzusichern. Einige wichtige Projekte, an denen unsere Forschung und Entwicklung im Jahr 2010 gearbeitet hat, stellen wir im Folgenden vor.

### Noch mehr Sicherheit bei der Behandlung: Venous Needle Disconnect

Wie alle blutreinigenden Verfahren, die extrakorporal – also außerhalb des menschlichen Körpers – durchgeführt werden, ist die Dialyse mit gewissen Risiken für den Patienten verbunden, die schlimmstenfalls sogar zum Tod führen können. Nationale sowie internationale Normen und Gesetze legen deshalb verbindliche Sicherheitsstandards für

## FORSCHUNGS- UND ENTWICKLUNGS-AUFWENDUNGEN

in Mio US\$

Tabelle 2.3.1

|               | 2010      | 2009      | 2008      | 2007      | 2006      |
|---------------|-----------|-----------|-----------|-----------|-----------|
| <b>GESAMT</b> | <b>97</b> | <b>94</b> | <b>80</b> | <b>67</b> | <b>51</b> |

## ZAHL DER PATENTE UND PATENTANMELDUNGEN

Tabelle 2.3.2

|               | 2010         | 2009         | 2008         | 2007         | 2006         |
|---------------|--------------|--------------|--------------|--------------|--------------|
| <b>GESAMT</b> | <b>3.601</b> | <b>2.850</b> | <b>2.402</b> | <b>1.932</b> | <b>1.752</b> |

Dialyseprodukte fest. Darüber hinaus haben wir eigene Qualitätsrichtlinien für die Forschung und Entwicklung geschaffen, die die gesetzlichen Anforderungen zum Teil übertreffen. Auch eine angemessene Schulung des Pflegepersonals sowie der Patienten selbst ist entscheidend, damit jede Behandlung so sicher und schonend wie möglich ist. Fresenius Medical Care arbeitet zudem im Rahmen eines kontinuierlichen Produktverbesserungsprozesses gezielt an Verfahren und Vorrichtungen, um die Gefahr, dass Patienten durch einen technischen Fehler oder durch menschliches Versagen zu Schaden kommen, so weit wie möglich zu minimieren.

Ein seltener, aber besonders gefährlicher Zwischenfall ist der Blutverlust während der Dialyse – etwa durch Leckagen im Blutschlachsystem oder wenn sich die Fixierung der venösen Nadel löst, die den Gefäßzugang des Patienten mit dem Blutschlachsystem verbindet. Der Blutverlust kann dann unmittelbar eintreten und innerhalb kurzer Zeit zum Tod führen. Diese Gefahr ist besonders hoch während der unüberwachten Dialyse, also der Behandlung zu Hause oder über Nacht – beides prinzipiell Methoden, die für viele Patienten besonders verträglich sind und sehr gute Ergebnisse erzielen. Zwar verfügen Dialysegeräte über eine integrierte Alarmfunktion: Sie messen kontinuierlich den Druck im extrakorporalen System, also im Kreislauf außerhalb des Körpers des Patienten; bei ungewöhnlichen Druckabfällen reagieren sie mit einem Alarmsignal, die Blutpumpe hält an und die venöse Klemme schließt sich, so dass kein Blut mehr den Körper des Patienten verlassen kann. Allerdings ist die Messtechnik von Standard-Dialysemaschinen bislang nicht in der Lage, sämtliche möglichen Auslöser eines Blutverlusts zuverlässig zu erkennen und schnell genug zu reagieren. Denn der Druckunterschied kann in einem solchen Fall minimal sein, vergleichbar mit dem Druckabfall, den ein Patient verursacht, wenn er hustet oder die Position seines Arms geringfügig verändert. Wäre die Standard-Messtechnik des Geräts dafür sensibel, wären die Konsequenz permanente Fehlalarme, die eine wirkungsvolle Behandlung verhindern, den Patienten erheblich beunruhigen und beim Pflegepersonal möglicherweise mit der Zeit zu Unaufmerksamkeit führen würden.

Die Dialysebranche arbeitet deshalb seit Jahren an Systemen, die den Schutz der Patienten vor Blutverlust weiter verbessern sollen. Ein Beispiel dafür ist der Wetness Detector, ein Sensor, der auf Feuchtigkeit reagiert; wir setzen ihn auch in unseren eigenen Dialysekliniken ein. Allerdings muss das Gerät genau an der Stelle angebracht sein, an der das Blut austritt, sonst reagiert es nicht. Fresenius Medical Care arbeitet deshalb derzeit an einem neuen Sicherheitssystem auf der Grundlage einer innovativen Software: Venous Needle Disconnect (VND). Das System ist in der Lage, extrakorporale Drucksignale intelligent auszuwerten: Es kann gewöhnliche Störgrößen als solche erkennen und reagiert bei potenziell gefährdenden, feinen Druckunregelmäßigkeiten – zum Beispiel verursacht durch das Verrutschen der Nadel, durch Leckagen oder abgeknickte Blutschlachsegmente – mit einem Alarm, der die notwendigen Sicherheitsreaktionen des Dialysegeräts aktiviert. Wir haben das VND-System im Jahr 2010 intensiv getestet und wollen es ab dem laufenden Geschäftsjahr in den Monitor unserer Dialysegeräte der Serien 4008 und 5008, sowohl in die Modelle für den Heim- als auch für den Klinikgebrauch, integrieren. Wenngleich sich das Risiko eines Blutverlusts auch durch VND nicht vollständig vermeiden lassen wird, sind wir überzeugt, mit dem neuen System eine besonders zuverlässige Technologie entwickelt zu haben, zu der es bislang im Dialysemarkt keine vergleichbare Alternative gibt.

#### **Begleiterkrankungen des Nierenversagens immer klarer im Blick: Der Body Composition Monitor**

Seit vielen Jahren sind Herz- und Gefäßerkrankungen eine der häufigsten Todesursachen von Dialysepatienten – und das in jeder Altersgruppe. Als wesentlicher Auslöser galt allgemein eine dauerhafte Überwässerung – typisch für das chronische Nierenversagen, bei dem der Körper überschüssige Flüssigkeit nicht mehr auf natürlichem Weg ausscheiden kann. Das Problem: Der Überwässerungszustand eines Patienten ließ sich nicht genau bestimmen – bis zur Entwicklung des Body Composition Monitors (BCM) von Fresenius Medical Care: Er kann die Zusammensetzung des menschlichen Körpers und dessen Flüssigkeitsgehalt exakt messen. Erst dieses Gerät – zusammen mit dem von Fresenius Medical Care entwickelten Auswertungsverfahren – hat es ermöglicht, schlüssig und methodisch einwandfrei zu zeigen,

dass die Überwässerung ab einem gewissen Grad ein erhebliches Sterblichkeitsrisiko für die Patienten darstellt und eine Korrektur dieses Zustands die Lebenserwartung deutlich erhöhen kann.

Seit der Einführung des BCM im Jahr 2007 ist sowohl unsere eigene als auch die externe Forschung mit und an dem Diagnosegerät erheblich vorangeschritten. Studien haben inzwischen gezeigt – und damit allgemeine Erwartungen bestätigt –, dass eine erhebliche Zahl von Hämodialyse-Patienten (rund ein Viertel) permanent in einem kritischen Maß überwässert sind und es mit Hilfe des BCM gelingt, Risikopatienten zu identifizieren, die ansonsten klinisch völlig unauffällig sind. Eine neue Erkenntnis, die unsere ebenso wie externe Forscher im Berichtsjahr auf Fachkongressen sowie in wissenschaftlichen Publikationen präsentiert haben, betrifft die Gruppe der Peritonealdialyse (PD)-Patienten: Bislang war angenommen worden, dass PD-Patienten seltener an Überwässerung leiden – allerdings ohne belastbare klinische Daten, die dies hätten belegen können. Mit Hilfe des BCM konnte inzwischen dargelegt werden, dass die „stillen“, also klinisch unauffälligen Risikopatienten in der PD-Population sogar noch stärker vertreten sind, als dies bei der Hämodialyse der Fall ist.

Eine Studie, die ein internationales Forscherteam von Fresenius Medical Care im Berichtsjahr publiziert hat, bestätigt, dass der BCM medizinischem Personal einen objektiven Richtwert für den Flüssigkeitszustand eines Patienten liefert und sich durch eine entsprechend abgestimmte Therapie die Überwässerung und dadurch auch der Bluthochdruck reduzieren lässt. Bei Patienten, bei denen wiederum eine Unterwässerung diagnostiziert wurde, konnten mit Hilfe der BCM-Diagnose Komplikationen während der Dialyse gezielt verringert werden. Ein weiterer Zusammenhang, der sich bei der Arbeit mit dem BCM immer klarer abzeichnet: Überwässerung kann die Wirksamkeit von Medikamenten, die gegen Begleiterkrankungen des Nierenversagens verabreicht werden, verringern – eine entscheidende Erkenntnis für den behandelnden Arzt.

Wegen dieser eindeutigen Ergebnisse gewinnt der BCM als Steuerungselement für den Flüssigkeitshaushalt von Patienten mit chronischem und akutem Nierenversagen – und damit auch für die Erkennung

und Behandlung von Begleitsymptomen – bei Fresenius Medical Care immer stärker an Bedeutung. Beispielsweise haben wir das Diagnosegerät im Berichtsjahr in unser Datenmanagementsystem für PD-Patienten, PatientOnline, integriert. Die BCM-Daten lassen sich dadurch auch bei der PD-Behandlung direkt in das Datenmanagement importieren und fließen unmittelbar in die Berechnung der korrekten Dialysedosis ein.

### Technologien für die wachsende Zahl von Patienten: Die Harnstoffmembran

Wie schon im Geschäftsbericht 2009 erwähnt, arbeitet Fresenius Medical Care seit einigen Jahren in einem regionenübergreifenden Expertenteam an der Entwicklung einer tragbaren künstlichen Niere – ein Dialysegerät, das so klein und leicht ist, dass Patienten es direkt am Körper tragen können. Zudem ist es einer echten Niere und ihrer natürlichen Funktion besonders ähnlich, denn es ist kontinuierlich in Betrieb. Nicht nur wegen der deutlich größeren Freiheit und Mobilität, die eine tragbare Niere dem Patienten gewähren würde, sehen wir für solch ein Gerät langfristig ein großes Marktpotenzial: Da das Blut kontinuierlich gereinigt wird, verspricht das Verfahren auch, gute Behandlungsergebnisse zu erzielen; angesichts des anhaltenden Wachstums bei der Zahl der Patienten kann es zudem langfristig dazu beitragen, die begrenzten Klinikkapazitäten zu entlasten und mehr Patienten kosteneffizient zu behandeln.

Die Idee eines am Körper tragbaren Dialysegeräts ist nicht neu: Sie beschäftigt die Wissenschaft schon seit rund vierzig Jahren, bislang jedoch ohne marktfähigen Erfolg. Wir erachten das System, an dem wir derzeit arbeiten, als die erste reale Chance seit vielen Jahren, einen echten Durchbruch bei der Behandlung chronisch nierenkranker Patienten zu erzielen. Unser Vorteil bei der Entwicklung ist, dass wir über langjährige Erfahrung und Kompetenz in Technologien verfügen, die wir für eine marktfähige Lösung als wesentlich erachten. Diese Kompetenz erweitern wir auch durch Zukäufe: Nach der Akquisition des amerikanischen Unternehmens Renal Solutions Inc. im Jahr 2007 – eines Spezialisten für die Aufbereitung von gebrauchtem Dialysat mit Adsorbern, die für die Verkleinerung von Dialysegeräten eine entscheidende Rolle spielt — siehe folgenden Absatz — haben



wir im Berichtsjahr das kalifornische Medizintechnik-Unternehmen Xcorporeal erworben; es arbeitet auf der Grundlage von Adsorbern an vielversprechenden Lösungen für mobile und am Körper tragbare Dialysegeräte für den Klinik- und Heimbereich.

Voraussetzung für ein tragbares System ist, dass dieses mit deutlich weniger Dialyselösung auskommt als die Standardverfahren der Peritoneal- und Hämodialyse: Die Menge an Dialysat muss dazu von derzeit rund 175 bis 360 Litern pro Woche (je nach Verfahren) auf etwa 150 bis 500 Milliliter Dialyselösung reduziert werden, die im Gerät zirkulieren und wiederholt wiederaufbereitet werden. Diese Wiederaufbereitung leisten die oben erwähnten Adsorber – Substanzen, die Gift- und Abfallstoffe in der Lösung effektiv binden (Adsorption). Eine entscheidende Ausnahme bildet jedoch der Harnstoff: Er konnte bislang von keinem Adsorber mit zufriedenstellenden Ergebnissen gebunden werden. Um auch Harnstoff aus gebrauchtem Dialysat wirkungsvoll zu entfernen, hat Fresenius Medical Care eine neuartige Hohlfasermembran entwickelt. Sie besteht aus zwei Lagen, die wegen ihrer Struktur und Zusammensetzung den Transport von Stoffen aktiv beeinflussen können: Die funktionale Beschichtung der Membran ermöglicht den Transport des Harnstoffs aus der Dialyselösung heraus, hält jedoch zugleich überlebenswichtige Elektrolyte zurück. Im Außenraum der Hohlaser wird der Harnstoff durch ein Enzym chemisch aufgespalten. Das dabei frei werdende Ammonium wird von Adsorbern gebunden; auch Reste des giftigen Ammoniiums können nicht erneut in das Dialysat gelangen.

Die Entwicklung der mehrlagigen Funktionsmembran baut auf unserer jahrzehntelangen Erfahrung in der Herstellung von Hohlfasermembranen aus Polysulfon auf: Fresenius Medical Care hat diesen besonders leistungsstarken und blutverträglichen Membrantyp entwickelt und setzt ihn seit den 80er Jahren in stetig weiterentwickelter Form als Kernelement seiner Dialysatoren ein. Inzwischen hat sich das Material weltweit als hochwertiger Therapiestandard bei blutreinigenden Verfahren durchgesetzt. Die Grundlage der neuen, mehrlagigen Membran ist eine innovative mikromechanische Technologie auf Siliziumbasis. Diese Technologie

dient der Herstellung der mikroskopisch kleinen Spindüsen, die benötigt werden, um in mehreren Ebenen gleichzeitig verschiedene Membranmaterialien, darunter auch Polysulfon, zu verarbeiten. Wir haben für den komplexen Aufbau dieser Spindüsen eine Reihe von Schutzrechten angemeldet.

Die zweilagige Harnstoffmembran, die wir für die Anwendung in einer tragbaren künstlichen Niere nun weiter optimieren wollen, ist ein erstes praktisches Ergebnis des neuen Spinnverfahrens. Die Technologie ist jedoch grundsätzlich für den Einsatz in allen Dialysesystemen auf Adsorber-Basis interessant, bei denen es auf eine Wiederaufbereitung von Dialysat ankommt, um letztlich mehr Patienten flexibel auch außerhalb von Kliniken therapieren zu können.

#### **Ganzheitliche Qualität und Ressourceneffizienz: Integrierte Anwendungen für Dialysekliniken**

Wir wollen den Patienten in unseren eigenen Kliniken und den Patienten unserer Kunden höchste Qualität zu tragbaren Kosten bieten. Ein Ansatz, den wir zunehmend verfolgen, um Qualität und Kosteneffizienz gleichermaßen zu steigern, ist das Angebot integrierter Therapiesysteme und Software-Lösungen. Diese Bündelung von Angeboten soll zum einen die therapeutische Leistung, zum anderen deren Erfassung und Kontrolle verbessern und so nicht nur zu einer höheren Behandlungsqualität, sondern auch zu einem effizienteren Einsatz personeller, medizinischer und finanzieller Ressourcen führen (über den wachsenden Bedarf an integrierten Leistungsangeboten erfahren Sie mehr im Abschnitt „Chancen“ — ab Seite 123).

Ein Beispiel für ein solches Therapiesystem ist unsere neue Hämodialyse-Maschine 2008T für den us-amerikanischen Markt, die wir in enger Zusammenarbeit mit dem Renal Research Institute (RRI) — siehe Seite 75 entwickelt haben. Nach ihrer Zulassung durch die us-Behörde für Lebensmittel- und Arzneimittelsicherheit FDA (Food and Drug Administration) haben wir sie im November 2010 anlässlich der bedeutendsten Branchenkonferenz der USA, der ASN Renal Week (Konferenz der American Society of Nephrology – Amerikanische Gesellschaft für Nierenheilkunde) auf den Markt gebracht – mit Erfolg: Bereits im Vorfeld der Markteinführung erhielten wir zahlreiche Bestellungen für unsere 2008T.

Die 2008T verfügt als erstes zugelassenes Hämodialysegerät auf dem us-amerikanischen Markt über eine integrierte Software-Plattform für die Eingabe und Verwaltung von klinischen Behandlungsdaten direkt an der Liege des Patienten. Das neue Modul soll Ärzte und Klinikpersonal dabei unterstützen, die Daten effizient und zeitnah zu erfassen, die die Behörden für die Abrechnung der Leistungen gemäß des neuen Vergütungssystems fordern; siehe den Abschnitt „Gesundheits- und Vergütungssysteme“ — ab Seite 49. Es soll zudem generell dazu beitragen, die Arbeitsabläufe im Klinikalltag zu vereinfachen und das klinische Daten- und Qualitätsmanagement weiter zu verbessern. Die 2008T lässt sich an verschiedene Datenmanagementsysteme anschließen, die in den USA in Dialysekliniken genutzt werden, und ist dadurch besonders flexibel. Mehrere Anbieter dialysebezogener Software haben ihre Produkte bereits für einen Einsatz mit dem neuen Gerät zertifizieren lassen. Darüber hinaus testen wir derzeit eine integrierte Infusionspumpe für intravenös zu verabreichende Eisenpräparate, die wir eigens für die 2008T entwickelt haben und die bereits von der FDA zugelassen wurde. Die Pumpe soll dem Klinikpersonal die genaue Dosierung und Verabreichung des Eisenpräparats erleichtern und dadurch auch die Sicherheit für den Patienten weiter erhöhen. Mit der Vermarktung dieses neuen Moduls wollen wir noch im laufenden Jahr beginnen.

Im Segment International haben wir im Berichtsjahr an der Weiterentwicklung unseres Software- und Dienstleistungsangebots für das Klinikdatenmanagement gearbeitet, dem TDMS (Therapy Data Management System). Auch hier geht der Trend immer mehr in Richtung integrierte Systemlösung, die von den Behandlungsdaten des einzelnen Dialyse- und Diagnosegeräts bis hin zum übergeordneten medizinischen Datenmanagementsystem alle Abläufe im Klinikalltag erfasst und dadurch zu effizienteren Prozessen, einer höheren Datenqualität und einer kontinuierlichen Verbesserung der Behandlungsqualität beiträgt. Im Jahr 2010 haben wir verschiedene Produkte im TDMS-Systemverbund noch enger aufeinander abgestimmt, um das Pflegepersonal in Dialysekliniken besser zu unterstützen.

Ein Beispiel ist das dataXchange panel (dXp), eine Software-Plattform für das Management von Behand-

lungsdaten, die im Monitor unserer Hämodialysegeräte-Serie 5008 integriert ist und die wir 2007 in den Markt eingeführt haben. 2010 haben wir die Funktionen des dXp erheblich erweitert, sodass es nun sämtliche Arbeitsschritte, die für eine Dialysebehandlung notwendig sind, erfasst und auf dem Bildschirm des 5008-Dialysesystems darstellt. Dazu gehört die Berechnung der überschüssigen Flüssigkeit im Körper eines Patienten auf Basis seines Körpergewichts; diese Daten sind notwendig, damit die Dialyседosis individuell eingestellt werden kann. Bei der Berechnung wird neben dem Gewicht des Patienten vor der Behandlung zum Beispiel auch die Flüssigkeitsmenge einbezogen, die er während der mehrstündigen Behandlung in Form von Getränken zu sich nehmen wird. Darüber hinaus erfasst das dXp die individuellen Behandlungseinstellungen eines Patienten, das heißt klinische Qualitätsziele wie den angestrebten Kt/V-Wert — siehe Seite 83, die Dauer der einzelnen Dialysesitzung sowie die Behandlungsparameter, die sein Arzt verschrieben hat, zum Beispiel den Blutfluss in Millilitern pro Minute oder die Zusammensetzung des Dialysats. Das neue dXp speichert außer dem Medikamentenplan des Patienten die genauen Spezifikationen der Verbrauchsgüter, die bei dessen Dialyse angewendet wurden, also zum Beispiel den Dialysatortyp oder das gewählte Dialysekonzentrat. Nicht zuletzt zeigt das Modul neuerdings an, ob ein Dialysegerät nach der Behandlung desinfiziert wurde – eine wertvolle Hilfestellung für das Pflegepersonal und eine weitere Maßnahme für mehr Patientensicherheit. Durch diese Erweiterungen haben wir das dXp in seiner Funktion als effiziente Datenschnittstelle zwischen der Liege des einzelnen Patienten und dem übergeordneten Klinik-Qualitätsdatenmanagementsystem wesentlich gestärkt.

Auf dem Gebiet der Peritonealdialyse haben wir im Berichtsjahr das medizinische Datenmanagementsystem PatientOnline ebenfalls zu einer integrierten Lösung weiterentwickelt: Es ist nun erstmals nicht nur für einen einzelnen Anwender – typischerweise den behandelnden Arzt – sondern für mehrere geschulte Nutzer als gemeinsame Datenbank zugänglich. Die neue Version von PatientOnline befindet sich derzeit im Feldtest; wir wollen sie 2011 einführen.

### Klinische Forschung

Neben der Neuentwicklung von Produkten und Verfahren sowie ihrer kontinuierlichen Weiterentwicklung, dem Sustaining Engineering, engagieren wir uns auch in der klinischen Forschung auf dem Gebiet des terminalen Nierenversagens, der Dialyse und technologisch verwandter blutreinigender Verfahren. Im Jahr 2010 haben wir zum Beispiel die Ergebnisse einer Studie präsentiert, die als eine von wenigen wissenschaftlichen Publikationen erste aussagekräftige Daten zur blutreinigenden Therapie von Patienten mit Leberzirrhose und einer raschen Abnahme der Leberfunktion liefert. Die Studie untersuchte, wie wirksam eine ergänzende Behandlung dieser schweren Leiden mit dem Prometheus-System von Fresenius Medical Care im Vergleich zur reinen Standardtherapie ist, und kam zu folgenden Ergebnissen: Zwar hat Prometheus insgesamt im Schnitt nicht zu einer höheren Überlebensrate der Patienten geführt; bei bestimmten Gruppen von Erkrankten jedoch – nämlich Patienten mit einer besonders schweren Einschränkung der Leberfunktion sowie Patienten, die zugleich an Nierenversagen litten – erhöhte Prometheus die Überlebensrate im Vergleich zur Standardbehandlung um 36 %.

Auch wenn sich nicht bei allen Gruppen ein signifikanter Unterschied zur Standardbehandlung ergab, ist das Ergebnis der Studie für Fresenius Medical Care dennoch bedeutend: Es zeigt, dass eine Entgiftung durch Prometheus bei bestimmten Krankheitsbildern wesentlich dazu beitragen kann, Patienten so lange stabil zu halten, bis sich ihre Leber regenerieren oder eine lebensrettende Lebertransplantation durchgeführt werden konnte. Bei einer Disziplin, die noch immer am Anfang steht, ist dies für uns ein wichtiges Signal, dass wir mit unserer Forschung und Entwicklung auf dem richtigen Weg sind. Wir werden diesen Weg in den kommenden Jahren sowohl intern als auch mit externen Partnern beharrlich weiterverfolgen, um für Patienten mit einer bislang fast

untherapierbaren, lebensbedrohlichen Krankheit Schritt für Schritt Besserungen zu erzielen.

### MITARBEITERINNEN UND MITARBEITER

Im Jahr 2010 haben weltweit insgesamt 503 Mitarbeiterinnen und Mitarbeiter (durchschnittlich Vollzeitbeschäftigte) in der Forschung und Entwicklung von Fresenius Medical Care gearbeitet (2009: 477). Ihr Hintergrund ist vielfältig: Mediziner arbeiten Seite an Seite mit Software-Spezialisten, Betriebswirten und Ingenieuren. Unsere größte F&E-Einheit ist mit rund 335 Mitarbeitern dem operativen Segment International zugeordnet; die Grafiken 2.3.4 und 2.3.5 enthalten einen Überblick über ihren Ausbildungsgrad und beruflichen Hintergrund. Die meisten F&E-Kollegen sind an den Standorten Schweinfurt und Bad Homburg beschäftigt; kleinere Teams arbeiten in St. Wendel und in Bukarest, Rumänien, wo ein F&E-Kompetenzzentrum eigens für Software-Entwicklungen angesiedelt ist. Auch in den Regionen Nordamerika und im asiatisch-pazifischen Raum gibt es eigene Teams für Forschung und Entwicklung.

Im September 2010 hat mit sechs Mitarbeitern eine neue F&E-Abteilung für Adsorber-Technologie — siehe Glossar auf Seite 156) im österreichischen Krems ihre Arbeit aufgenommen. Seit 2003 stellt Fresenius Medical Care in Krems Produkte für verschiedene Adsorber-Therapien her – zum Beispiel für das Prometheus-System zur Entgiftung von Patienten mit Leberversagen, für Verfahren, die bei schweren Autoimmunerkrankungen Antikörper aus der Blutbahn entfernen, sowie neuerdings auch für das DALI-Verfahren zur Behandlung der familiären Hypercholesterinämie, einer erblichen Stoffwechselerkrankung. Wir wollen unseren Standort in Krems in den kommenden Jahren zu einem Kompetenzzentrum für Adsorber-Technologien ausbauen, da wir ein hohes

ZAHL DER MITARBEITER IN F & E

Tabelle 2.3.3

| Durchschnittlich<br>Vollzeitbeschäftigte |            |            |            |            |
|------------------------------------------|------------|------------|------------|------------|
|                                          | 2010       | 2009       | 2008       | 2007       |
| <b>GESAMT</b>                            | <b>503</b> | <b>477</b> | <b>415</b> | <b>372</b> |

Potenzial für diese Technologien in neuen blutreinigenden Anwendungen und Therapien sehen.

### FORSCHUNGSKOOPERATIONEN

Wir arbeiten weltweit mit Universitäten und Forschungseinrichtungen zusammen, die in unserem Fachgebiet aktiv sind. Ein Beispiel ist die Donau-Universität Krems in Österreich, deren Forschung an extrakorporalen blutreinigenden Verfahren mit Adsorbieren wir seit fast zwanzig Jahren fördern. Diese langjährige Partnerschaft mit einem exzellenten Team von Spezialisten war letztlich auch einer der Gründe für unsere Entscheidung, in den Standort Krems weiter zu investieren — siehe Seite 74.

Auch in den USA halten wir engen Kontakt zu Forschungseinrichtungen und kooperieren dort unter anderem mit dem Renal Research Institute (RRI). Es wurde 1997 als Joint Venture von Fresenius Medical Care North America und dem Beth Israel Medical

Center, einem Krankenhaus in New York, gegründet und ist als eine führende Institution auf dem Gebiet der klinischen Behandlung und der Forschung rund um das chronische Nierenversagen weithin anerkannt. Gemeinsam befassen wir uns mit zum Teil grundlegenden Fragen der Dialysebehandlung. Dazu gehören die vielschichtigen Gründe, die zu Nierenerkrankungen führen, die Besonderheiten bei der Behandlung nierenkranker Kinder oder auch Themen wie die Mineralisierung der Knochen von Dialysepatienten oder die Auswirkungen von Nierenerkrankungen auf den natürlichen Säure-Basen-Haushalt im menschlichen Körper.

Unsere eigenen Forschungs- und Entwicklungsprojekte führen wir vor allem mit eigenen Mitarbeitern und Forschungsabteilungen durch; Leistungen Dritter für diese Zwecke haben wir bislang nur in geringem Umfang in Anspruch genommen. Im Zuge unserer Kooperation mit in- und ausländischen Hochschulen und anderen wissenschaftlichen Einrichtungen nutzen wir verschiedene Finanzierungsmodelle;

#### AUSBILDUNGSGRAD DER F & E-MITARBEITER IM SEGMENT INTERNATIONAL

Grafik 2.3.4

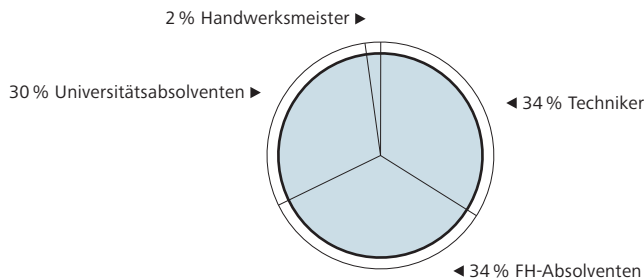

#### BERUFSGRUPPEN DER F & E-MITARBEITER IM SEGMENT INTERNATIONAL

Grafik 2.3.5

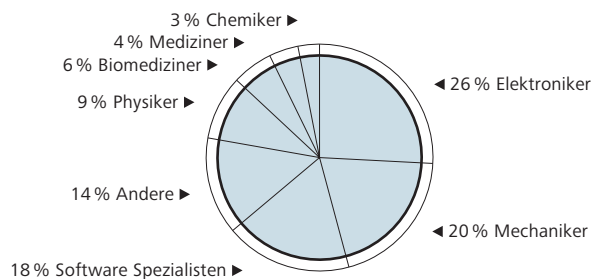

zum Teil werden unsere Forschungsk Kooperationen auch mit öffentlichen Geldern gefördert.

#### INNOVATIONSPROZESS UND -KULTUR

Bei Fresenius Medical Care durchläuft jede Produktidee einen strukturierten Entwicklungsprozess mit klar definierten Projektphasen, Meilensteinen und Berichtslinien. Dieser Ansatz soll sicherstellen, dass wir nur die Ideen weiterverfolgen, die Wert für die Patienten, Kunden und das Unternehmen schaffen. Als weiteren Erfolgsfaktor für unsere Forschung und Entwicklung sehen wir eine offene Innovationskultur, insbesondere den lebendigen fachlichen, kreativen und menschlichen Austausch, sowohl intern als auch außerhalb des Unternehmens.

Den Kern dieser Kultur bildet die vertikale Integration unseres Unternehmens, also die Tatsache, dass wir Dialyseprodukte entwickeln, herstellen und vertreiben und zugleich selbst Dialysebehandlungen anbieten. So profitieren unsere F&E-Teams unmittelbar von den Einschätzungen und Erfahrungen der Patienten, Pfleger und Ärzte in den Kliniken von

Fresenius Medical Care – ein erheblicher Vorteil im Vergleich zu den meisten unserer Wettbewerber. Unsere F&E-Mitarbeiter tauschen sich zudem regelmäßig mit dem technischen Service und dem Vertrieb aus, etwa zu Themen der Qualitätssicherung und -steigerung. Bei jährlichen internen Konferenzen diskutieren F&E-Mitarbeiter aller Regionen über gemeinsame Projekte sowie übergeordnete Themen und Trends in der Dialyse. Indem die Mitarbeiter internationale Fachveranstaltungen besuchen und dort eigene Beiträge zum wissenschaftlichen Diskurs leisten, tragen sie neue Ideen in ihre Teams und stärken zugleich den guten Ruf des Unternehmens in der internationalen Fachgemeinschaft. Nicht zuletzt richten wir den Blick über die Dialyse hinaus auch auf andere Branchen: Einige Mitarbeiter beschäftigen sich vornehmlich mit neuen Technologien aus den verschiedensten Bereichen und prüfen, ob diese Anknüpfungspunkte für unsere Entwicklungsarbeit bieten.

Zu unserer Innovationskultur gehört auch, dass wir verantwortungsvoll forschen und entwickeln. Was wir darunter verstehen, erfahren Sie im Kapitel „Verantwortung“ — ab Seite 96.

## UNSER PRODUKTGESCHÄFT

### VON DER BESCHAFFUNG BIS ZUM SUPPLY CHAIN MANAGEMENT

Als Branchenführer mit langjähriger Erfahrung in der Dialyse kann Fresenius Medical Care in seinem Produktgeschäft auf umfangreiche unternehmenseigene Ressourcen zurückgreifen: Produktionskapazitäten in allen Regionen, Know-how rund um hochkomplexe Fertigungstechnologien und -prozesse sowie umfassende Kompetenz in Qualitätsmanagement, Beschaffung und Logistik für anspruchsvolle medizinische Erzeugnisse. Dieses Potenzial wollen wir noch besser für unser Wachstum nutzen – mit dem neuen Geschäftsbereich GMO (Global Manufacturing Operations), der seit 2010 alle wesentlichen Aktivitäten rund um unsere Produkte weltweit koordiniert und den Wissens- und Technologieaustausch zwischen den Regionen gezielt fördern soll.

### UNSERE PRODUKTIONSSTÄTTEN

Fresenius Medical Care verfügt weltweit über mehr als 40 Produktionsstätten. Gemessen an der Fertigungsmenge liegen unsere größten Werke in den USA, Deutschland und Japan; einen Überblick über unsere wesentlichen Produktionsstandorte weltweit erhalten Sie in Grafik 2.1.1 — auf Seite 32. Geräte für die Hämodialyse (HD) und Peritonealdialyse (PD) produzieren wir an zwei Standorten: in Schweinfurt und im kalifornischen Walnut Creek (USA). Andere Produkte stellen wir direkt in den Regionen her, in denen die Nachfrage besonders hoch ist: Dialysatoren und die dafür benötigten Hohlfasern zum Beispiel fertigen und konfektionieren wir unter anderem an den Standorten Ogden, Utah, in den USA, im saarländischen St. Wendel, in L'Arbresle, Frankreich, und im japanischen Buzen. Konzentrate für die Hämodialyse werden an verschiedenen Standorten weltweit gefertigt – unter anderem in Deutschland, Italien, der Türkei, Marokko, den USA, Argentinien und Australien. Lösungen und Einwegzeugnisse für die Peritonealdialyse stellen wir ebenfalls weltweit her; den Großteil unserer PD-Lösungen liefern unsere Produktionsstandorte in St. Wendel und Ogden. Das Werk Reynosa in Mexiko ist, gemessen am Herstellungsvolumen, unternehmens- und auch weltweit der größte Produktionsstandort für Blutschlauchsysteme.

### NEUORGANISATION UNSERER WELTWEITEN PRODUKTION

Mit unseren Produkten sind wir in über 100 Ländern der Welt vertreten. Dort sind die Marktbedingungen zum Teil sehr unterschiedlich – angefangen von den rechtlichen Rahmenbedingungen bis hin zu den kulturell geprägten Bedürfnissen der Patienten und Kunden. Seit seiner Gründung hat Fresenius Medical Care diesen Unterschieden mit einem differenzierten Produktportfolio und einer dezentralen Unternehmensstruktur sehr erfolgreich Rechnung getragen. Die Produktion und wichtige Bereiche entlang der Fertigungskette, wie das Qualitätsmanagement für Produkte, der strategische Einkauf und das Supply Chain Management, lagen dabei größtenteils in der Verantwortung der jeweiligen Regionen.

Diese starke regionale Präsenz wird ein wesentlicher Wettbewerbsvorteil von Fresenius Medical Care bleiben – denn lokale Unterschiede prägen weiter unser Produktgeschäft. Dass wir diese Besonderheiten gut kennen, schafft Vertrauen in unser Unternehmen – eine wichtige Voraussetzung, wenn wir in einem Markt nicht nur Produkte anbieten, sondern auch eigene Dialysekliniken eröffnen möchten. Zugleich wird jedoch das chronische Nierenversagen zunehmend zu einem globalen Problem – und führt so die Märkte langfristig näher zusammen: Die Zahl der Dialysepatienten wächst weltweit, beschleunigt durch die alternde Bevölkerung in reichen und den wachsenden Wohlstand in ärmeren Ländern. Fettleibigkeit, Diabetes und Bluthochdruck – typische Vorerkrankungen des chronischen Nierenversagens – sind mittlerweile in allen Teilen der Erde auf dem Vormarsch; Begleiterkrankungen wie Herz- und Gefäßleiden ebenso. Staaten wollen ihrer Bevölkerung neue und verbesserte Behandlungsmethoden bieten; zugleich werden für sie, unabhängig von ihrem Entwicklungsstand, steigende Gesundheitskosten zunehmend zur Herausforderung.

Diese Entwicklungen ändern nichts an unserem grundsätzlichen Ziel, die Lebensqualität der Patienten mit innovativen Technologien und hochwertigen Produkten nachhaltig zu verbessern. Sie verleihen jedoch einem entscheidenden Faktor zusätzliches Gewicht: den Kosten. Der Preis muss unsere Kunden



weltweit ebenso dauerhaft überzeugen wie die Eigenschaften unserer Produkte, damit diese bevorzugt verwendet werden und wir Marktführer bleiben. Seit Jahren verbessern wir in den einzelnen Regionen kontinuierlich unsere Abläufe, um so kosteneffizient wie möglich hohe Qualität zu liefern. In Zukunft wollen wir dieses Potenzial noch besser nutzen. Deshalb haben wir im Berichtsjahr den Geschäftsbereich Global Manufacturing Operations (GMO) und parallel dazu ein eigenes Ressort im Vorstand geschaffen.

Im Januar 2010 hat GMO die Aufgabe übernommen, zentral sämtliche Bereiche im Unternehmen zu steuern, die unser Produktgeschäft wesentlich betreffen. Im Kern bedeutet das, unsere Kompetenzen bei Produktionsverfahren und -prozessen, im Qualitätsmanagement, im strategischen Einkauf und bei der Steuerung der Lieferkette regionenübergreifend eng aufeinander abzustimmen. Damit wollen wir:

- die Effizienz unserer Abläufe weiter steigern,
- Risiken – und damit Kosten – besser steuern,
- die Rentabilität des Kapitals erhöhen, das wir in der Fertigung einsetzen.

Welche Aufgaben und Aktivitäten sich aus diesen Zielen ableiten, zeigen wir im folgenden Abschnitt.

#### AUFGABENSPEKTRUM VON GMO UND AKTIVITÄTEN IM BERICHTSJAHR

Nach der Zusammenführung unserer bestehenden regionalen Einheiten für Produktion, Qualitätsmanagement und Beschaffung sowie von Teilen des Supply Chain Managements im zentralen Geschäftsbereich GMO umfasste der Bereich zum Ende des Jahres 2010 rund 11.000 Mitarbeiter und über 40 Produktionsstandorte in mehr als 30 Ländern. Das GMO-Führungsteam konnten wir intern und zugleich international ausgewogen besetzen. Wir gehen davon aus, dass GMO die überregionale Zusammenarbeit künftig weiter fördern und die Mobilität unserer Mitarbeiter erhöhen wird.

Das Aufgabenspektrum von GMO wollen wir im Folgenden ausführlicher vorstellen.

#### Produktion

Aus unseren bislang regional organisierten Produktionsstandorten entsteht, koordiniert von GMO, seit Januar 2010 ein integriertes Produktionsnetz, innerhalb dessen unsere Werke ihre Aktivitäten enger als bisher aufeinander abstimmen werden. In einem ersten Schritt haben wir dafür unsere weltweiten Fertigungskapazitäten und -kompetenzen auf die Frage hin überprüft, wo uns der Transfer von Wissen und Technologien, harmonisierte Abläufe, ähnliche Begriffssysteme und ein vergleichbares Reporting dabei helfen können, unser Kostenmanagement und unsere Produktionsleistung insgesamt weiter zu verbessern.

Standorte mit langjähriger Erfahrung in der Fertigung bestimmter Produkte haben wir zu unternehmensweiten Kompetenzzentren ernannt, die künftig mit ihrem Know-how bei Kerntechnologien und -materialien unsere dezentralen Produktionsstätten bei der Harmonisierung ihrer Abläufe beraten. Für Hohlfasern werden das zum Beispiel die Werke St. Wendel (Deutschland) und Ogden (USA) sein, für Blutschlachsysteme die Standorte Reynosa (Mexiko) und Cremona (Italien). Mit diesem Ansatz will GMO nicht nur den Austausch von Best Practices – also besonders erfolgreichen Verfahren und Methoden – zwischen den Regionen und Standorten fördern, sondern zugleich eine noch effektivere Schnittstelle zur Forschung und Entwicklung bilden.

Parallel hierzu loten wir neue Möglichkeiten aus, wie sich die Regionen gegenseitig mit Produkten und Teilerzeugnissen versorgen können, um so die Effizienz unserer Fertigung weiter zu erhöhen. Der Gedanke dabei ist allerdings nicht, unsere Produktlinien weltweit zu vereinheitlichen. Wir wollen vielmehr an unserem Wettbewerbsvorteil festhalten, differenzierte Bedürfnisse mit passgenauen Angeboten erfüllen zu können. Wenn jedoch unsere Produkte flexibel an lokale Anforderungen anpassbar sind und zugleich auf einheitlichen Kernmaterialien und -technologien basieren, dann können wir unsere Produktionskapazitäten weltweit flexibel und damit effizienter einsetzen, um Kundenwünsche zu erfüllen. Unser Standort Reynosa zum Beispiel stimmt als Kompetenzzentrum für Blutschlachsysteme seine Fertigung inzwischen eng mit derjenigen des Werkes Jiangsu in China ab.



Dank harmonisierter Abläufe sowie einheitlicher Materialien und Produktkomponenten können wir so von den Produktionskapazitäten und den vergleichsweise niedrigen Fertigungskosten in China unternehmensweit profitieren.

Unsere Regionen arbeiten bereits eng mit dem neuen Geschäftsbereich GMO zusammen, unter anderem bei der jährlichen und langfristigen Produktionsplanung. Darüber hinaus wollen wir die weltweite Harmonisierung unserer Abläufe weiter vorantreiben, indem wir in den kommenden Jahren einheitliche IT-Systeme für die Produktion in unseren Werken etablieren. Auch die überregionale Personalentwicklung in der Produktion erhält mit GMO neue Impulse: Wir schaffen attraktive Entwicklungsperspektiven in unserem weltweiten Produktionsnetz und hoffen so, von der Erfahrung unserer hochqualifizierten Ingenieure, Verfahrenstechniker, Werks- und Produktionsleiter besonders lange zu profitieren. Eine gezielte Förderung von Nachwuchskräften soll uns zusätzlich dabei unterstützen, qualifizierte Kandidaten für die Nachfolgeplanung in der Fertigung und Verfahrensentwicklung zu gewinnen.

### Qualitätsmanagement

Wir wollen Patienten und Kunden weltweit die bestmögliche Produkt- und Behandlungsqualität bieten. Um diesen Anspruch zu erfüllen, setzt Fresenius Medical Care in seinen Regionen umfassende Qualitätsmanagementsysteme ein. Diese regeln und überwachen die Einhaltung von Qualitäts- und Sicherheitsvorgaben in Bezug auf alle unsere Produkte und Verfahren – von deren Entwicklung und Herstellung über die Marktzulassung und Anwendung in den Kliniken bis hin zu der Schulung von Kunden und dem Umgang mit Reklamationen. Die Qualitätsmanagementsysteme verbinden interne Regelungen und Abläufe mit den Anforderungen externer Standards und Richtlinien, die sowohl in den jeweiligen Regionen als auch international für unser Geschäft relevant sind. Dazu gehören die ISO-Norm 9001:2000 für Qualitätsmanagementsysteme und die damit verbundene ISO-Norm 13485:2003 für die Herstellung von Medizinprodukten, die Richtlinien der us-amerikanischen Behörde für Lebensmittel- und Arzneimittelsicherheit FDA (Food and Drug Administration), die Medizinprodukte-Richtlinie Medical Device Directive (MDD) der EU oder die

Good Manufacturing Practices (GMP), Regelwerke zur sicheren und hochwertigen Fertigung von pharmazeutischen Produkten und medizintechnischen Geräten. Darüber hinaus wenden unsere Standorte im Qualitätsmanagement seit Jahren anerkannte Managementinstrumente wie Lean Management und Six Sigma an, die uns dabei unterstützen, die Qualität und Effizienz unserer Fertigung weiter zu verbessern.

Beim Qualitätsmanagement arbeiten wir in den Regionen eng mit lokalen Behörden zusammen, um eventuelle Probleme zeitnah zu lösen. Auch die unternehmensweite Vernetzung in Qualitätsfragen spielt für uns schon seit Längerem eine Rolle: Unsere Produktionsstandorte sind zum Teil nach mehreren regionalen Qualitätsstandards zugleich zertifiziert, damit wir Märkte weltweit flexibel mit unseren Produkten beliefern und dadurch mögliche Risiken bei der Versorgungssicherheit minimieren können. Diese Strategie werden wir mit GMO noch intensiver als bisher verfolgen und weitere Standorte mehrfach zertifizieren lassen. Darüber hinaus wollen wir das Qualitätsmanagement für unsere Produkte insgesamt harmonisieren. Denn wenn wir überregional vergleichbare Abläufe und Systeme zur Qualitätssicherung und -steigerung anwenden und Wissen austauschen, können wir weltweit noch flexibler und leistungsfähiger Produkte fertigen sowie Risiken bei der Einhaltung eigener Standards und externer regulatorischer Vorgaben noch effektiver kontrollieren. Auch dieser Ansatz soll uns dabei helfen, Kosten zu vermeiden und Wert für das gesamte Unternehmen zu schaffen.

Im Berichtsjahr haben wir für unsere Produktion erstmals die Positionen eines weltweiten Qualitätsverantwortlichen sowie eines zentralen Leiters für Lean-Management- und Six-Sigma-Projekte geschaffen. Eines unserer Projekte seit dem Start von GMO dient der Harmonisierung des Beschwerdemanagements: Wir haben überregional einheitliche Kriterien entwickelt, nach denen wir Beanstandungen unserer Kunden nun erfassen und bewerten; außerdem haben wir eine neue Reportingstruktur eingeführt, um über Bewertungsergebnisse einheitlich zu berichten. Auf dieser Grundlage können wir Verbesserungsmöglichkeiten künftig schneller und klarer erkennen und darauf aufbauend neue Methoden

und Ziele zur Fehlerbehebung entwickeln. Als nächsten Schritt planen wir, ein überregionales Datenmanagementsystem für das Beschwerdemanagement und die interne Dokumentation unserer Qualitätsprozesse aufzubauen.

Ein weiterer Schwerpunkt im Aufgabenspektrum von GMO ist es, die Abläufe unserer internen Audits im Qualitätsmanagement zu vereinheitlichen; zudem wollen wir unsere Kapazitäten und Aktivitäten im Bereich Lean Management und Six Sigma unternehmensweit bündeln, um unsere betriebliche Effizienz weiter zu steigern. Die überregionale Zusammenarbeit in diesem Bereich, der bislang in regionaler Verantwortung lag, haben wir im Berichtsjahr in Form eines Austauschs von Best Practices – also besonders erfolgreichen Verfahren und Methoden – und eines Benchmarkings, also eines internen Leistungsvergleichs, angestoßen.

#### **Strategischer Einkauf und Materialwirtschaft**

Weil wir unsere Wachstumsstrategie konsequent weiter verfolgen und die Märkte immer internationaler werden, wird es für Fresenius Medical Care im strategischen Einkauf zunehmend wichtiger, neben der regionalen auch die weltweite Entwicklung der Beschaffungsmärkte und der einzelnen Währungen genau zu beobachten. Dadurch können wir beim Erwerb von Rohstoffen und Komponenten für unsere Produktion von internationalen Preisvorteilen profitieren und Risiken – also potenzielle Kosten –, etwa in Verbindung mit Währungsschwankungen oder mit einer Abhängigkeit von einzelnen Lieferanten, noch besser ausgleichen. Von diesen Vorteilen wollen wir mit dem neuen Geschäftsbereich GMO noch mehr als bisher profitieren – durch eine intensivere Zusammenarbeit unserer Beschaffungsteams.

Unsere beiden Zentren für den strategischen Einkauf – das eine in Deutschland (Bad Homburg), das andere in den USA (Ogden, Utah) – haben dafür im Berichtsjahr ihre Beschaffungsstrategie eng miteinander abgestimmt. Die beiden wesentlichen Ziele: eine effiziente und flexible Versorgung mit Rohstoffen aus verschiedenen Währungsräumen sicherzustellen und unsere Beziehungen zu den wichtigsten Lieferanten des Unternehmens noch effektiver zu steuern. Insbesondere die im Folgenden

beschriebenen Projekte standen dabei im Berichtsjahr im Vordergrund.

#### **Sichern einer effizienten und flexiblen Rohstoffversorgung**

In überregionalen Projektteams überprüfen wir systematisch, welche Rohstoffe oder Komponenten von mehr als einem Standort oder einer Region benötigt werden, und koordinieren die Ausschreibungen und Verhandlungen für deren Beschaffung zentral. Ein Beispiel sind unsere beiden Werke für Dialysegeräte, Schweinfurt und Walnut Creek: Sie stimmen ihren Bedarf an Rohmaterialien und ihr Lieferantennetz nun enger als bisher aufeinander ab und profitieren dadurch in größerem Maße von Synergien. Damit wir Produkte unternehmensweit flexibel fertigen können, wollen wir zudem alle unsere Standorte mit Rohstoffen und Komponenten in konsistenter Qualität versorgen. Deshalb werden wir weiterhin Partnerschaften mit Lieferanten eingehen, die dauerhaft hohe Qualität liefern und dabei strenge Produktvorgaben erfüllen können; darunter auch multinational ausgerichtete Zulieferer, die in mehr als einer Region Rohmaterialien produzieren und liefern können.

#### **Steuern der unternehmensweit wichtigsten Lieferantenbeziehungen**

Wir wollen medizinische Produkte in höchster Qualität und zugleich zum besten Preis liefern. Unsere Beschaffungsstrategie ist deshalb darauf ausgerichtet, hochwertige Fertigungsmaterialien und -komponenten innerhalb einer partnerschaftlichen, auf Dauer angelegten Zusammenarbeit mit unseren Lieferanten zu optimalen wirtschaftlichen Bedingungen zu beziehen. Mit Hilfe unseres Lieferantenmanagements wählen wir Zulieferer sehr sorgfältig nach Eignung und Leistungsfähigkeit aus, entwickeln gemeinsam mit wichtigen Lieferanten innovative Produkte und Verfahren und vermeiden zugleich Risiken bei unserer Versorgung mit Rohstoffen, etwa, indem wir bei Kernmaterialien oder -komponenten einer Abhängigkeit von einem oder wenigen Lieferanten vorbeugen. Für unsere weltweit wichtigsten Zulieferer von Fertigungsmaterialien, -komponenten und -bauteilen haben wir im Berichtsjahr innerhalb von GMO ergänzend ein neues Risikomanagementsystem eingeführt. Es ermöglicht uns, unsere Versorgung mit Kernrohstoffen sowie die Beziehungen zu strategischen Lieferanten regionenübergreifend nach

einheitlichen Kriterien zu überwachen und dadurch mögliche Risiken noch früher zu erkennen. Zu diesen Kriterien gehören eine gleichbleibend hohe Lieferqualität, die kurz- und mittelfristige Lieferverfügbarkeit, die Wahrscheinlichkeit von Naturkatastrophen sowie Währungsrisiken.

### Supply Chain Management

Auf dem Gebiet des Supply Chain Managements ist GMO im Segment Nordamerika für die gesamte Steuerung der Lieferkette zuständig, von der Verteilung der Rohmaterialien an die Produktionswerke bis zur Lieferung der fertigen Produkte an die Kunden. Im Segment International steuert GMO einen Teil der Lieferkette – vom Rohmaterial bis zur Auslieferung der fertigen Produkte an unsere zentralen Verteilzentren, zum Beispiel Biebesheim in Deutschland; die weiteren Stufen sind in regionaler Verantwortung. Auch die Zusammenarbeit zwischen dem GMO-Produktionsnetz und unseren regionalen Supply-Chain-Management-Teams wollen wir stärken. Das Ziel dabei ist, die Steuerung unserer Lieferkette insgesamt effizienter zu gestalten, indem wir Risiken wie eine unzureichende Planung der Produktionsmengen oder eine unwirtschaftliche Verteilung von Produktionsaufträgen an unsere Werke möglichst vermeiden.

Im Segment International haben wir im Jahr 2010 beispielsweise ein neues Planungssystem für die Bedarfsermittlung und Lagerhaltung bei unseren wichtigsten Einweg-Erzeugnissen eingeführt, und zwar zunächst für Blutschlauchsysteme; ab 2011 werden wir es auch auf Dialyselösungen und Dialysatoren ausweiten. Dank des neuen Systems können wir für diese Produkte erstmals alle Aufgaben entlang

der Lieferkette für alle Regionen und Standorte im Segment International zentral steuern und planen. Der Bedarf, den unser Vertrieb meldet, wird dabei kontinuierlich mit den Produktionskapazitäten und der Lagerhaltung innerhalb unseres GMO-Netzwerks abgestimmt. Eine besondere Verteilungslogik sorgt dafür, dass Produktionsaufträge bei gleichen Produkten und Herstellverfahren effizient unter den jeweiligen Produktionswerken aufgeteilt werden. Dank standardisierter Technologien und Qualitätssysteme können die Werke die Mengen der einzelnen Produkte, die sie fertigen, flexibel an den Bedarf des Vertriebs anpassen. Steigt beispielsweise vorübergehend die Nachfrage nach einem Produkt, das überwiegend in einem bestimmten Werk hergestellt wird, kann ein zweites Werk kurzfristig seine Kapazitäten für dieses Produkt hochfahren und mitproduzieren.

Das neue System für die Bedarfsermittlung und Lagerhaltung basiert auf der Initiative SCALE. Wir haben 2009 in der Region EMEALA (Europa, Naher Osten, Afrika, Lateinamerika) mit der Arbeit an SCALE begonnen und werden diese noch bis Ende 2011 fortsetzen, um die Flexibilität und Wirtschaftlichkeit des Lieferkettenmanagements mit verschiedenen Maßnahmen zu erhöhen und zu vereinheitlichen. Neben einer standardisierten Planung von Produktionsbedarf und Lagerhaltung gehört zu den Teilprojekten von SCALE auch eine automatisierte Nachschubsteuerung, die dafür sorgt, dass unsere Landeslager mit Waren aufgefüllt werden, wenn ihr Bestand eine Untergrenze erreicht hat. So wollen wir sowohl die Servicequalität als auch die Wirtschaftlichkeit unserer Lieferkette weiter erhöhen und Kosten in Millionenhöhe einsparen.

## UNSER GESCHÄFT MIT DIALYSEDIENSTLEISTUNGEN

### VOM THERAPIEKONZEPT BIS ZUM SERVICE FÜR PATIENTEN UND PARTNER

Als vertikal integriertes Dialyseunternehmen liefern wir die Produkte, die wir fertigen, nicht nur an unsere Kunden, sondern setzen sie auch täglich in den eigenen Kliniken ein. Davon profitiert unser gesamtes Geschäft – denn der direkte Austausch mit Patienten, Ärzten und Dialysefachkräften hilft uns dabei, unsere Leistungen und Produkte kontinuierlich zu verbessern und die Bedürfnisse unserer wichtigsten Anspruchsgruppen stets im Blick zu behalten. Unsere im Markt einzigartige Erfahrung als Anbieter von sowohl Dialyseprodukten als auch Dialysedienstleistungen macht uns zudem für Partner im Gesundheitswesen immer häufiger zu einem geschätzten Berater – und öffnet uns dadurch die Türen zu neuen Märkten.

### THERAPIEKONZEPT VON FRESENIUS MEDICAL CARE

Ganzheitlich wie unser Geschäftsmodell der vertikalen Integration — siehe Grafik 2.5.1 ist auch unser Qualitätsverständnis bei Dialysetherapien und zusätzlichen Service-Angeboten: Mit den Marken UltraCare in Nordamerika sowie NephroCare in den Regionen EMEA (Europa, Naher Osten, Afrika, Lateinamerika) und Asien-Pazifik haben wir ein umfassendes Therapiekonzept zum Standard in unseren Kliniken und bei der Hemodialyse gemacht. Dieses Konzept fußt auf den folgenden Prinzipien:

► Unsere Qualitätsstandards bei Dialysedienstleistungen sind darauf ausgerichtet, den Patienten die besten verfügbaren Therapien zu bieten.

► Wir setzen in unseren Kliniken und bei der Betreuung von Hemodialyse-Patienten die unternehmens-eigenen hochwertigen Produkte, Medikamente und Verfahren ein; diese werden von unserer Forschung und Entwicklung stetig weiterentwickelt.

► Wir bieten unseren Patienten eine umfassende Therapie und medizinische Beratung durch qualifizierte, motivierte Klinikmitarbeiter und Ärzte.

► Wir schaffen in unseren Kliniken eine sichere und angenehme Atmosphäre für Patienten und Mitarbeiter.

► Wir steigern systematisch unsere Leistung und Effizienz, indem wir fortlaufend eigene klinische Behandlungsdaten erheben und miteinander vergleichen, nach externen wie internen Qualitätsstandards arbeiten und unsere Kliniken professionell führen.

Gemäß diesen Prinzipien gelten für unsere Dialysekliniken besondere Richtlinien, zum Beispiel für die Pflege der Patienten, die Hygiene im Klinikalltag, die Architektur unserer Einrichtungen und die Wasserreinheit bei der Behandlung. Spezialistenteams helfen den Ländern dabei, diese Standards umzusetzen und dauerhaft einzuhalten. Da wir unsere Patienten umfassend betreuen möchten, werden unsere Teams aus Ärzten und Dialysefachkräften in den Kliniken zum Teil durch Ernährungsspezialisten und Sozialpädagogen unterstützt. Für die Beratung rund um das

#### FRESENIUS MEDICAL CARE: EIN VERTIKAL INTEGRIERTES UNTERNEHMEN<sup>1</sup>

Grafik 2.5.1

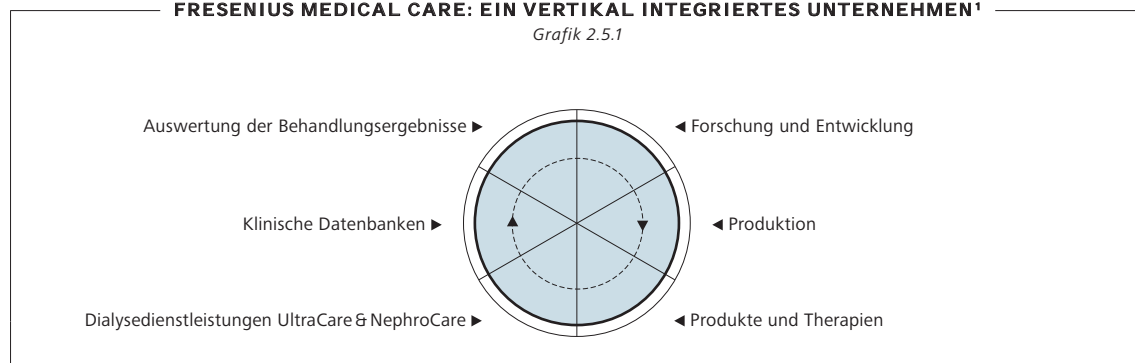

<sup>1</sup> Eigene Darstellung

Leben mit der Dialyse erstellen wir zudem eigene Aufklärungsmaterialien, wie Filme oder Patientenzeitschriften – zum Beispiel „PatientLine“ in den USA oder „NephroCare for me“ in der Region EMEA.

In Nordamerika fördern verschiedene Beiräte mit ihrer Arbeit die Weiterentwicklung unserer Standards und Services. Beispielsweise befasst sich ein Beirat für Sozialarbeit mit psychosozialen Belangen der Patienten und konzipiert Fortbildungsprogramme für unsere Sozialpädagogen; ein vergleichbares Gremium für Dialyseschwester entwickelt Richtlinien und Verfahren für den Klinikalltag weiter. Medizinische Beiräte unterstützen uns sowohl auf regionaler Ebene als auch unternehmensweit bei der Zusammenarbeit mit Nierenfachärzten, um die bestmöglichen Behandlungsergebnisse für unsere Patienten zu erzielen. Der Patientenbeirat setzt sich aus Patienten aller Regionen in den USA zusammen, in denen wir Kliniken betreiben; er berät uns unter anderem dabei, wie wir gesundheitliche Aufklärungsmaterialien noch anschaulicher gestalten können.

Auch im Segment International pflegen wir den direkten Dialog mit unseren Patienten, um unsere Dienstleistungen kontinuierlich zu verbessern. Zu diesem Zweck haben wir zum Beispiel in Großbritannien erstmals im vergangenen Jahr einen Runden Tisch durchgeführt, der nun regelmäßig stattfinden soll.

## QUALITÄTSMANAGEMENT

Wie erfolgreich wir das Markenversprechen von NephroCare und UltraCare einhalten, messen und vergleichen wir in den einzelnen Kliniken ebenso wie auf regionaler Ebene anhand bestimmter Leistungsindikatoren, die unter anderem in den Kennzahlensystemen „NephroCare Balanced Scorecard“ und „UltraScore“ festgelegt sind. Diese umfassen – neben branchenrelevanten klinischen Richtwerten — siehe Tabelle 2.5.2 auf Seite 84 — auch unternehmenseigene Qualitätsziele, die wir beispielsweise an unsere Service- und Beratungsleistungen knüpfen. In den USA zeichnen wir jährlich die Dialysezentren, die unsere Leistungsziele am besten erfüllen, mit dem Preis „UltraCare Center of Excellence Award“ aus. In der Region EMEA (Europa, Naher Osten, Afrika)

vergeben wir einmal im Jahr an das Management unserer leistungsstärksten Länder Auszeichnungen in verschiedenen Kategorien, darunter auch „Bestes neues Land“ für Länder, in denen die NephroCare Balanced Scorecard neu eingeführt wurde.

### Klinische Qualitätsdaten

In puncto Behandlungsqualität richten unsere Kliniken ihre Arbeit an allgemein anerkannten Qualitätsstandards unserer Branche aus, insbesondere den KDOQI-Richtlinien (Kidney Disease Outcomes Quality Initiative) aus den USA, dem EBP-G-Standard (European Best Practice Guidelines) aus Europa sowie zunehmend auch den KDIGO-Richtlinien (Kidney Disease: Improving Global Outcomes), einer noch jungen weltweiten Initiative. Gemäß diesen Richtlinien erheben wir mittels klinischer Datenmanagementsysteme laufend bestimmte medizinische Parameter, die wir anonymisiert auswerten – mit dem Ziel, die Qualität unserer Dialysebehandlungen zu messen und kontinuierlich zu verbessern. Einer dieser Parameter ist der Kt/V-Wert. Er gibt anhand eines „Markers“ Aufschluss darüber, ob ein Patient bei der Dialyse wirkungsvoll entgiftet wurde; bei der Berechnung des Kt/V-Wertes wird dessen Körpergröße berücksichtigt. Ein Marker ist die Konzentration einer spezifischen Substanz im Blut, die auf eine bestimmte Erkrankung hinweist. Im Fall des chronischen Nierenversagens nutzt man als Marker den Harnstoff, der von einer gesunden Niere in großen Mengen ausgeschieden wird und beim Dialysepatienten durch die Nierenersatztherapie aus dem Blut gefiltert werden muss. Ein weiterer Qualitätsindikator ist der Albuminwert im Blut; Albumin ist ein Eiweiß (Protein), das auf den allgemeinen Ernährungszustand eines Patienten schließen lässt. Darüber hinaus streben wir für die Patienten gemeinsam mit ihrem jeweiligen Nierenfacharzt einen bestimmten Hämoglobin-Wert an. Hämoglobin ist der Bestandteil der roten Blutkörperchen, der Sauerstoff im Körper transportiert; ein zu geringer Anteil davon im Blut weist auf Blutarmut (Anämie) hin. Diese ist bei Patienten mit chronischem Nierenversagen typisch und wird begleitend zur Dialyse mit Eisenpräparaten und dem Hormonpräparat Erythropoietin (EPO) behandelt, um die Bildung von roten Blutkörperchen zu ermöglichen. Der Phosphatwert schließlich zeigt an, ob die Therapie des Patienten mittels Dialyse und Medikamenten ausreicht,

um über die Nahrung aufgenommenes Phosphat im Körper zu binden. Beim gesunden Menschen wird überschüssiges Phosphat von der Niere ausgeschieden; eine kranke Niere kann dies nicht leisten. Ein zu hoher Phosphatgehalt im Blut kann unter anderem zu Knochenerkrankungen, Beeinträchtigungen der Nebenschilddrüse und Gefäßverkalkungen führen. Auch die Anzahl der Tage, die Patienten losgelöst von der Dialyse im Krankenhaus verbringen müssen, ist für uns ein wichtiger Indikator – denn Krankenhaustage schränken die Lebensqualität der Dialysepatienten erheblich ein und sind zudem sehr kostenintensiv.

Darüber hinaus erfassen wir die Anzahl der Patienten, bei denen als Gefäßzugang für die Dialysebehandlung ein Hämodialyse-Katheter genutzt wird — siehe Glossar auf Seite 159, und setzen uns mit verschiedenen Initiativen dafür ein, dass diese Zahl weiter zurückgeht. Hintergrund dafür ist, dass Katheter mit schweren Entzündungen und zusätzlichen Krankenhaustagen in Verbindung gebracht werden. In den USA zum Beispiel hat sich im Berichtsjahr durch diese Initiativen (ein Beispiel dafür finden Sie — auf Seite 87) die Anzahl der Patienten mit einem Katheter um 5 % reduziert.

Weitere Informationen zu Qualitätsdaten finden Sie in der Tabelle 2.5.2.

### Qualitätsmanagementsysteme

Wie an unseren Produktionsstandorten haben wir auch in unseren Dialysezentren Qualitäts-

managementsysteme etabliert, deren Umsetzung wir regelmäßig extern prüfen lassen. In Europa zum Beispiel übernimmt dies der TÜV: Die Sachverständigenorganisation kontrolliert in Audits – standardisierten Inspektionen – jährlich unsere Klinikorganisation, sowohl nach der Norm ISO 9001 als auch nach den Kriterien des TÜV-Zertifizierungszeichens „Good Dialysis Practice“ (auf Deutsch etwa „gute Dialysepraxis“). In den USA werden unsere Kliniken von den Centers for Medicare and Medicaid Services (CMS), den Behörden des staatlichen Gesundheitsfürsorgeprogramms, auditiert.

Nierenfachärzte sind auf umfangreiche Labortests angewiesen, um die Dialysetherapie individuell auf den Patienten abstimmen zu können. Im Jahr 2010 hat unsere Tochtergesellschaft für Labordienstleistungen, Spectra Laboratories, als erstes medizinisches Testlabor in den USA eine Zertifizierung nach der Norm ISO 15189-2007 erhalten; in dieser Norm sind Qualitätsanforderungen für medizinische Labors festgeschrieben. Unsere Qualitätsmanagementsysteme überprüfen wir regelmäßig auch in unternehmensinternen Audits; sie werden von Mitarbeitern durchgeführt, die wir eigens dafür aus- und weiterbilden.

### Qualitätsbefragungen und -projekte

Die Zufriedenheit unserer Patienten und Klinikmitarbeiter messen wir jeweils auch mit Hilfe regelmäßiger Befragungen. Beispielsweise waren gemäß einer landesweiten Umfrage in den USA im Berichtsjahr 93 % der Klinik- und Heimtherapie-Patienten mit

## QUALITÄTSDATEN

Tabelle 2.5.2

Jeweils bezogen auf das  
letzte Quartal, in %

|                                 | USA  |      | Europa/Naher Osten/Afrika |      |
|---------------------------------|------|------|---------------------------|------|
|                                 | 2010 | 2009 | 2010                      | 2009 |
| Kt/V > 1,2                      | 97   | 96   | 95                        | 95   |
| Hämoglobin = 10–12 g/dl         | 71   | 64   | 54                        | 52   |
| Hämoglobin = 10–13 g/dl         | 89   | 88   | 77                        | 77   |
| Hämoglobin < 10 g/dl            | 7    | 7    | 12                        | 11   |
| Albumin ≥ 3,5 g/dl <sup>1</sup> | 84   | 83   | 86                        | 86   |
| Kein Katheter                   | 76   | 73   | 82                        | 83   |
| Phosphat 3,5–5,5 mg/dl          | 57   | 55   | 59                        | 61   |
| Krankenhaustage pro Patient     | 9,9  | 10,0 | 9,7                       | 8,6  |

<sup>1</sup> Internationaler Standard BCR CRM470.



unseren Leistungen zufrieden bis sehr zufrieden. Wir führen diese Befragung als festen Bestandteil von UltraCare jährlich gemeinsam mit einem unabhängigen Partner durch – wegen des wachsenden Anteils spanischsprachiger Einwanderer in den USA nicht nur auf Englisch, sondern auch auf Spanisch. Den umfassenden Fragebogen zur Qualität von Betreuung und Service beantworteten 2010 über 65.000 und damit rund die Hälfte unserer Patienten in den USA. Stärken von Fresenius Medical Care sind demnach neben der Einhaltung strenger Hygienestandards auch die Umgangsformen unserer Dialysefachkräfte, Ernährungsspezialisten und Sozialpädagogen: Die überwiegende Mehrheit unserer Patienten empfindet diesen Umgang als respektvoll, zuvorkommend und fürsorglich. Besser werden müssen wir laut Umfrage zum Beispiel bei den Wartezeiten vor der Behandlung, die ein Teil der Patienten als zu lang empfindet; einige Patienten wünschen sich zudem noch mehr Aufklärung zur Heimdialyse und bestärken uns damit in unserem Ansatz, zu diesem Thema besondere Aufklärungsprogramme anzubieten und weiter auszubauen — *siehe Seite 87*. Unsere Dialysekliniken können die Ergebnisse der Befragung auch individuell für ihre Einrichtung abrufen; wir stellen ihnen ein Instrument zur Verfügung, mit dem sie den Fragebogen auswerten und als Grundlage für Verbesserungen nutzen können.

Als Teil unseres Therapiekonzepts NephroCare führen wir ebenfalls regelmäßig Umfragen durch, um Verbesserungsmöglichkeiten zu erkennen, auch bei unseren Klinikmitarbeitern. Hier ist es unser Ziel, die Identifikation des Personals mit dem Unternehmen zu fördern. Die Mitarbeiterbefragungen finden in den einzelnen Ländern alle zwei Jahre statt, 2010 in Ungarn, Slowenien, Polen, Rumänien, Portugal, Argentinien und Kolumbien. Die Beteiligung an der Umfrage lag in diesen Ländern zwischen 80 und 90 % der Mitarbeiter. Besonders schätzen die Befragten die gute Ausstattung ihres Arbeitsplatzes, etwa den hohen technischen Stand der Geräte und des Zubehörs, die ihnen zur Behandlung der Patienten zur Verfügung stehen. Eines der Ergebnisse auch bei der aktuellen Befragung war, dass die Mitarbeiter sich mit den hohen Qualitätsstandards von Fresenius Medical Care identifizieren: Fast alle Befragten würden die Klinik, in der sie arbeiten, Verwandten oder Freunden zur Dialysebehandlung empfehlen. Mehr Förderung

wünschen sich die Mitarbeiter noch beim fachlichen Erfahrungsaustausch, zum Beispiel durch die Möglichkeit, mehr Konferenzen zu besuchen, und allgemein bei ihrer Weiterbildung. Diesem Thema wollen wir uns im Rahmen des Programms „NephroCare Excellence“ — *siehe folgenden Absatz* in den kommenden Jahren verstärkt widmen.

Im Segment International ist unser Geschäft mit Dialyседienstleistungen – anders als im nordamerikanischen Markt – von einer hohen Vielfalt und Komplexität der Gesundheits- und Vergütungssysteme geprägt; zudem steht hier der Eintritt in neue Märkte auf unserer Agenda. In manchen Regionen ist bei unserem Markteintritt noch gar keine Versorgungsinfrastruktur für Dialysepatienten vorhanden; in diesem Fall sind wir mit der Errichtung unserer Dialysekliniken die Ersten, die überhaupt in den Aufbau einer tragfähigen Versorgung investieren. Dialysezentren, die wir akquirieren, entsprechen wiederum beim Erwerb möglicherweise noch nicht unseren Qualitäts- und Managementstandards. Weil diese Standards für die Lebensqualität unserer Patienten, die Zufriedenheit unserer Mitarbeiter und unseren wirtschaftlichen Erfolg entscheidend sind und wir zugleich unter solch heterogenen Bedingungen tätig sind und weiter wachsen, haben wir in der Region EMEALA die Initiative „NephroCare Excellence“ gestartet. Sie führt erstmals alle unsere Qualitätsrichtlinien für die Gestaltung des Klinikalltags sowie beispielhafte Qualitäts- und Effizienzprojekte einzelner Länder in einem umfassenden Programm zusammen. Das NephroCare-Excellence-Programm soll die einzelnen Länder dabei unterstützen, die Qualitätsstandards und -instrumente von NephroCare in allen Kliniken effizient, systematisch und innerhalb eines festgelegten Zeitplans einzuführen. Unser Ziel lautet hier, die Abläufe in unserem Kliniknetz zu harmonisieren, die Identifikation der Klinikmitarbeiter mit den Werten von NephroCare zu stärken und die noch junge Marke sowohl im Unternehmen als auch außerhalb noch stärker ins Bewusstsein unserer Zielgruppen zu rücken. Dadurch wollen wir die Qualität unserer Leistungen insgesamt kontinuierlich weiter erhöhen.

Das NephroCare-Excellence-Programm besteht aus mehreren Stufen. Das Erfüllen der Anforderungen auf den einzelnen Stufen stellt unterschiedlich hohe



Ansprüche an die Kliniken. Die ersten Programmstufen sehen vor, dass die Kliniken innerhalb eines festgelegten Zeitraums die grundlegenden Qualitätsstandards von NephroCare einführen und umsetzen; dazu gehören zum Beispiel die korrekte Messung der Behandlungsqualität anhand unserer klinischen Datenbank, die Einhaltung unserer Richtlinien für die Pflege der Patienten und die Herstellung hochreinen Wassers für die Behandlung sowie die Einführung des Compliance-Programms von Fresenius Medical Care. Die fortgeschrittenen Stufen widmen sich der weiteren Qualitätssteigerung und bauen zum Teil auf vorangegangenen Stufen auf. Ein Beispiel ist das Thema Kommunikation mit den Patienten: Eine Anforderung in diesem Bereich ist, dass die Patienten in unseren Kliniken Zugang zu Informationsmaterialien, etwa unserer Patientenzeitschrift, sowie zu bestimmten Beratungsleistungen durch unsere Mitarbeiter haben. Die nächste Stufe von NephroCare Excellence erfordert dann, dass die Klinik Instrumente zum sogenannten „Patient Empowerment“ einführt, also zur Stärkung des Selbstvertrauens des Patienten und zu seiner Befähigung, aktiv zur Verbesserung seiner Lebensqualität beizutragen. Beispiele dafür sind unsere Patientenbefragung sowie Trainingsprogramme, bei denen die Patienten angeleitet werden, wie sie gesunde Mahlzeiten zubereiten, ihren Gefäßzugang richtig pflegen oder sich körperlich fit halten können. Die Einstufung der Länder und ihrer Kliniken innerhalb des Programms, die zu erreichenden Ziele sowie der dafür vorgesehene Zeitplan werden gemeinsam vom Klinikmanagement vor Ort und einem zentralen NephroCare-Excellence-Projektteam festgelegt und regelmäßig überprüft.

Im Jahr 2010 haben wir in den Ländern der Region EMEALA bereits erste Projekte innerhalb des NephroCare-Excellence-Programms umgesetzt; wir planen, das Programm als Rückgrat unseres Qualitätsmanagements in den kommenden Jahren weiterzuentwickeln und zusätzliche Inhalte zu integrieren. Dabei werden wir auch die Erfahrungen einbeziehen, die wir in der ersten Phase des Programms in den einzelnen Ländern gesammelt haben.

## SERVICE FÜR PATIENTEN UND PARTNER

Ein ganzheitliches Verständnis von Qualität – das bedeutet für Fresenius Medical Care, dass wir Patienten auch über die Versorgung mit Dialyseprodukten und -dienstleistungen hinaus bestmöglich betreuen möchten. Unser Kernangebot als Dialyseunternehmen ergänzen wir deshalb durch Zusatzangebote wie die Beratung für Patienten und Partner im Gesundheitswesen sowie weitere Services.

### Beratung für Patienten

Je umfassender ein Nierenpatient über seine Krankheit informiert ist – und über seine eigenen Möglichkeiten, den Krankheitsverlauf günstig zu beeinflussen – desto besser die Ergebnisse der Behandlung. Deshalb legt Fresenius Medical Care großen Wert auf eine intensive gesundheitliche Beratung und Schulung von Dialysepatienten. Im Berichtsjahr haben wir unser Beratungsangebot weiter ausgebaut. Ein Beispiel ist die Serie „Thrive! with UltraCare“ (auf Deutsch etwa „Gut leben mit UltraCare“), die wir 2010 um eine neue Reihe von Videos und Hörspielen erweitert haben. Darin sprechen Dialysepatienten, die in Kliniken von Fresenius Medical Care betreut werden, über Themen, die vielen Patienten Schwierigkeiten bereiten, aber auf den Behandlungserfolg einen erheblichen Einfluss haben: Warum es zum Beispiel entscheidend ist, jeden Behandlungstermin wahrzunehmen, warum ein Patient darauf achten muss, sich gesund zu ernähren, sich zu bewegen und wenig Flüssigkeit zu sich zu nehmen, oder wie er mit Depressionen umgehen kann. Diese treten bei den Patienten aufgrund der Einschränkungen durch die Nierenerkrankung häufiger auf. Unsere Patienten in den USA können sich die Thrive!-Materialien in den Kliniken oder zu Hause mit ihren Familien ansehen und -hören. Mit Hilfe der Trainingsmodule des Programms sollen außerdem unsere Klinikmitarbeiter befähigt werden, sich besser in die Patienten hineinzuversetzen, um noch stärker auf deren Bedürfnisse eingehen und sie dadurch zur noch disziplinierteren Einhaltung ihres Therapieplans motivieren zu können.

An Patienten mit Vorstufen des chronischen Nierenversagens richtet sich unser Treatment Options Program (TOPs), auf Deutsch etwa „Programm zu Behandlungsmöglichkeiten“. Wir bieten es in den USA seit 2006 kostenlos auf Englisch und Spanisch an, um die Patienten und ihre Familien über die verschiedenen Behandlungsmöglichkeiten beim chronischen Nierenversagen aufzuklären – von der Hämodialyse-Behandlung in der Klinik über eine Peritonealdialyse-Therapie zu Hause bis hin zur Nierentransplantation. Zudem erläutern wir den Patienten, wie wichtig es für die Qualität der Therapie ist, frühzeitig vor Beginn der Dialyse einen geeigneten Gefäßzugang legen zu lassen, um das Risiko einer Infektion zu minimieren und für einen optimalen Blutfluss während der Behandlung zu sorgen: Es ist erwiesen, dass ein Zugang in Form einer arteriovenösen Fistel — siehe Glossar auf Seite 156 das Risiko von Komplikationen und zusätzlichen Krankenhaustagen im Vergleich zum Hämodialyse-Katheter deutlich verringert. Von September 2006 bis Oktober 2010 haben wir mit TOPs bereits mehr als 146.500 Patienten geschult; rund 90 Prozent der befragten Patienten gaben an, das Programm bei ihrer Orientierung hilfreich gefunden zu haben. Im Segment International nutzen wir das Programm Kidney Options, um Patienten – ähnlich wie bei TOPs – eine erste Orientierung zum Verlauf des chronischen Nierenversagens und möglichen Therapieformen zu geben. Inzwischen ist die Aufklärungsserie in 28 Sprachen verfügbar und wird weltweit in über 40 Ländern eingesetzt.

Beginnen Patienten schließlich mit der Dialyse, so ist diese erste Phase der Therapie für sie häufig besonders schwierig: Der Lebensalltag ändert sich einschneidend; sie müssen die Zeit für eine mehrstündige Behandlung mehrmals in der Woche einplanen, die Auswahl an Speisen, die sie zu sich nehmen dürfen, ist eingeschränkt. Täglich müssen sie zahlreiche Medikamente einnehmen – und das bei stark reduzierter Trinkmenge. Vielen Patienten fällt es schwer, die notwendige Disziplin für diesen Behandlungsplan aufzubringen – besonders dann, wenn sie wenig über ihre Krankheit wissen. Um sie

gerade in dieser ersten schwierigen Phase auch über ihren Besuch in unserer Klinik hinaus noch intensiver zu betreuen, hat Fresenius Medical Care 2010 in Nordamerika das Programm RightStart eingeführt, das wir sukzessive auf alle unsere Kliniken in den USA ausweiten: Jeder neue Dialysepatient erhält künftig während der ersten Monate seiner Behandlung einen wöchentlichen Besuch oder Anruf von einer Dialysefachkraft, die auf das Case Management spezialisiert ist — siehe Glossar Seite 157. Dieser Case Manager informiert den Patienten umfassend über den Krankheits- und Behandlungsverlauf, über die Bedeutung eines hochwertigen Gefäßzugangs, über eine gesunde Ernährung und besondere Behandlungsanforderungen, wenn der Patient außerdem an Diabetes leidet (zusätzliche Untersuchungen und Glukosetests). Er beantwortet Fragen des Patienten und arbeitet mit dem Team der Dialyseklinik eng zusammen, damit dieses die Therapie möglichst eng auf die Bedürfnisse des Patienten abstimmen kann. RightStart soll die Klinikteams dabei unterstützen, die Lebensqualität der Patienten in der kritischen ersten Therapiephase zu verbessern, und zugleich das Selbstbewusstsein der Patienten stärken – denn diese tragen erheblich zum Behandlungserfolg bei, wenn sie Eigeninitiative zeigen, fundierte Informationsangebote nutzen und bewusst Entscheidungen für ihre Gesundheit treffen.

#### Beratung für Partner im Gesundheitswesen

In der komplexen – und vergleichsweise jungen – medizinischen Disziplin der Dialyse sind kontinuierliche Schulungsangebote für Ärzte und Pflegepersonal ebenso wichtig wie die Beratung der Patienten. Im Rahmen des Advanced Renal Education Program (AREP), unserem internetbasierten Weiterbildungsprogramm in den USA zu Themen rund um die Behandlung und Pflege von Dialysepatienten, bieten wir beispielsweise ganz- und halbtägige Seminare für Nephrologen sowie E-Learning-Kurse für Ärzte und Pflegepersonal an. Verstärkt schulen wir auch Ärzte in Asien, Afrika und dem Nahen Osten zu Qualitätsthemen in der Dialyse, wo Behandlungsstandards zum Teil noch entwickelt

werden und die Nachfrage nach einer professionellen Beratung entsprechend groß ist. Weltweit organisiert Fresenius Medical Care außerdem Fachtagungen, Vorträge und Workshops gemeinsam mit internationalen Experten der Nierenheilkunde.

Auch Gesundheitsbehörden und -organisationen beraten wir: In Russland zum Beispiel unterstützt Fresenius Medical Care Initiativen, in denen neue Qualitätsstandards in der Dialyse erarbeitet werden. Den Rahmen dafür bietet unter anderem eine deutsch-russische Nichtregierungsorganisation, die gemeinsame Projekte der beiden Länder zur Verbesserung der medizinischen Versorgung koordiniert. Durch ihr Know-how gelten deutsche Gesundheitsunternehmen in Russland als verlässliche und qualifizierte Partner.

#### Weitere Serviceangebote

Zu unserem Service gehören neben Beratungs- und Schulungsprogrammen weitere Angebote. Ein Beispiel ist die Versandapotheke Fresenius Rx, die wir in den USA betreiben. Dialysepatienten müssen in der Regel täglich zahlreiche verschiedene Medikamente einnehmen. Weil viele Menschen mit chronischem Nierenversagen zudem unter Begleiterkrankungen wie Diabetes oder Herz- und Gefäßkrankheiten leiden, erhalten sie häufig Rezepte von verschiedenen Ärzten. Fresenius Rx ist auf die Bedürfnisse von Nierenpatienten spezialisiert und unterstützt sowohl sie als auch Ärzte und Kliniken:

- Ein Team von Apothekern überprüft alle Rezepte eines Patienten auf mögliche Wechselwirkungen und führt alle Verschreibungen in einer Liste zusammen, die regelmäßig an die Dialyseklinik und die behandelnden Ärzte geschickt wird. So tragen wir zu Transparenz und damit zu einer sicheren Behandlung bei.
- Wir liefern die Medikamente kostenlos an die Patienten; diese werden informiert, wenn eine neue Sendung unterwegs ist. Läuft ein Arzneimittelrezept demnächst ab und muss erneuert werden, benachrichtigen wir wiederum den Arzt. So stellen wir Unregelmäßigkeiten bei der Medikamenteneinnahme eines Patienten fest und unterstützen dadurch den Behandlungserfolg.

- Ein Team von Spezialisten ist 24 Stunden am Tag und sieben Tage die Woche für Rückfragen von Patienten oder Ärzten erreichbar.

#### Dialysedienstleistungen in Krisensituationen

Bei extremen Witterungsverhältnissen oder gar Naturkatastrophen wie schweren Stürmen oder Fluten werden in Nordamerika professionelle Noteinsatzteams von Fresenius Medical Care aktiv. Um die lebenserhaltende Dialysebehandlung für die Patienten fortzuführen, übernehmen diese Teams, zum Beispiel während der Hurrikan-Saison, die Koordination von Notunterkünften, den Einsatz von Generatoren, die Verteilung von Nahrungsmitteln und Treibstoff sowie die Einteilung zusätzlicher Mitarbeiter. Der übergeordnete Krisenstab (Incident Command Center) von Fresenius Medical Care North America steht dabei in engem Kontakt mit dem us-weiten Krisennetzwerk Kidney Community Emergency Response Coalition (KCER), einem Zusammenschluss verschiedener Organisationen und Einrichtungen – etwa Patienten- und Berufsverbänden in der Nierenheilkunde, Dialyseanbietern, Krankenhäusern sowie Behörden wie der Zulassungsstelle für Lebensmittel und Medikamente FDA und den Centers for Medicare and Medicaid Services (CMS). Durch die Zusammenarbeit mit KCER können wir unser Krisenmanagement bei Bedarf auch eng mit den Aktivitäten staatlicher Einrichtungen koordinieren, zum Beispiel denen der Federal Emergency Management Agency (FEMA), einer nationalen Koordinationsstelle der Vereinigten Staaten für Katastrophenhilfe, und des Heimat-schutzministeriums (United States Department of Homeland Security), dem die FEMA unterstellt ist.

Im Jahr 2010 haben vor allem starke Schneestürme die Noteinsatzteams beschäftigt. Hierbei konnten wir dank unserer Notfallpläne auch Patienten anderer Dialyseanbieter versorgen. Ein weiteres wichtiges Einsatzgebiet im Berichtsjahr war Haiti, wo wir innerhalb von 72 Stunden Dialysematerialien an die Organisation „Ärzte ohne Grenzen“ geliefert haben; Näheres dazu im Kapitel „Verantwortung“ — ab Seite 96 sowie in unserem Magazin — ab Seite 40. 2010 hat Fresenius Medical Care North America für sein Krisenmanagementsystem und seine gute Zusammenarbeit mit externen

Kriseneinrichtungen eine Auszeichnung vom US-amerikanischen Zweig der International Association of Emergency Managers (IAEM) erhalten. IAEM ist ein gemeinnütziger internationaler Verband, der sich weltweit unter anderem mit Publikationen, Seminaren und Konferenzen für ein professionelles Krisen- und Katastrophenmanagement einsetzt.

In der Region EMEALA haben wir in den vergangenen Jahren ebenfalls eine Krisenmanagement-Organisation aufgebaut, um Patienten und Mitarbeiter in Notfallsituationen, zum Beispiel bei Naturkatastrophen oder Pandemien, zu schützen und die Patienten auch unter schwierigen Rahmenbedingungen bestmöglich zu versorgen. Nachdem sich unsere Aktivitäten 2009 auf Pandemien und ganz konkret das H1N1-Virus (das „Schweinegrippe“-Virus) konzentriert hatten, dessen Auswirkungen auf unser

Geschäft dank eines umfassenden Notfallplans sehr gering waren, wollen wir das Krisenmanagement in den kommenden Jahren für andere Notfallszenarien weiter ausbauen. Einen größeren Einsatz im Berichtsjahr hatten unsere Teams in Chile, nach dem schweren Erdbeben Ende Februar. Hier konnten wir innerhalb von 48 Stunden nach der Katastrophe fast alle eigenen Kliniken wieder in Betrieb nehmen und die Versorgung der Patienten unserer einzigen nicht mehr betriebsfähigen Klinik organisieren. Darüber hinaus haben wir Wasseraufbereitungsspezialisten, die auch öffentliche Kliniken und Dialysezentren anderer privater Anbieter unterstützten, in die Region entsendet und in enger Zusammenarbeit mit dem chilenischen Gesundheitsministerium Kapazitäten geschaffen, um bis zu 400 zusätzliche Patienten aus Gebieten zu behandeln, die vom Erdbeben betroffen waren.

## MITARBEITERINNEN UND MITARBEITER

Seinen wirtschaftlichen Erfolg und die führende Position im Dialysemarkt verdankt Fresenius Medical Care dem Engagement seiner Mitarbeiterinnen und Mitarbeiter. Um möglichst lange von ihrer Erfahrung zu profitieren, bieten wir ihnen ein anspruchsvolles Arbeitsumfeld und langfristige Perspektiven für ihre berufliche Entwicklung. Indem wir neue Talente gewinnen und ihre Entwicklung in unserem wachsenden internationalen Unternehmen gezielt fördern, investieren wir zugleich weiter in unsere eigene Zukunft.

### MITARBEITERENTWICKLUNG WELTWEIT

Zum Ende des Jahres 2010 arbeiteten 73.452 Mitarbeiterinnen und Mitarbeiter (durchschnittlich Vollzeitbeschäftigte) bei Fresenius Medical Care. Damit ist unsere Beschäftigtenzahl erneut gewachsen: um 5.464 bzw. 8 % gegenüber dem Vorjahr. Die Gründe für diesen weiteren Anstieg waren einerseits das fortgesetzte organische Wachstum unseres Dialyседienstleistungsgeschäfts und andererseits die Akquisitionen in allen Regionen, insbesondere im Bereich der Dialysekliniken. Unsere Akquisitionen trugen im Berichtsjahr mit 3,7 % zum Wachstum der weltweiten Mitarbeiterzahl bei. Wir mussten erneut keine Mitarbeiterinnen oder Mitarbeiter aufgrund

von Werkschließungen oder ähnlichen Maßnahmen entlassen. So setzte sich auch 2010 der Trend der Vorjahre fort: In den vergangenen 10 Jahren ist die Zahl der Mitarbeiter im Durchschnitt um mehr als 7 % pro Jahr gestiegen.

In der Region Asien-Pazifik wuchs die Belegschaft im vergangenen Jahr um 30 % und damit prozentual am stärksten, gefolgt von der Region EMEA (Europa, Naher Osten, Afrika) mit einer Steigerung der Beschäftigtenzahl von 12 %. 2010 unterstützten Akquisitionen – zum überwiegenden Teil im Bereich des Kliniknetzes – unser organisches Wachstum in diesen Regionen; in Asien war dafür insbesondere der Erwerb des Klinikbetreibers Asia Renal Care verantwortlich — siehe auch Seite 50. Auch in den übrigen Regionen vergrößerte sich die Anzahl unserer Kliniken und damit die Belegschaft.

In Deutschland waren zum Ende des Berichtsjahres wie bereits im Vorjahr circa 3.600 Menschen für Fresenius Medical Care tätig; das entspricht rund 5,2 % der Gesamtbelegschaft und macht unseren hohen Internationalisierungsgrad deutlich. Das Durchschnittsalter der Mitarbeiter von Fresenius Medical Care in Deutschland betrug 41,8 Jahre und erhöhte sich damit leicht gegenüber dem Vorjahr (41,1). Die durchschnittliche Betriebszugehörigkeit

### ZAHL DER MITARBEITER

Grafik 2.6.1

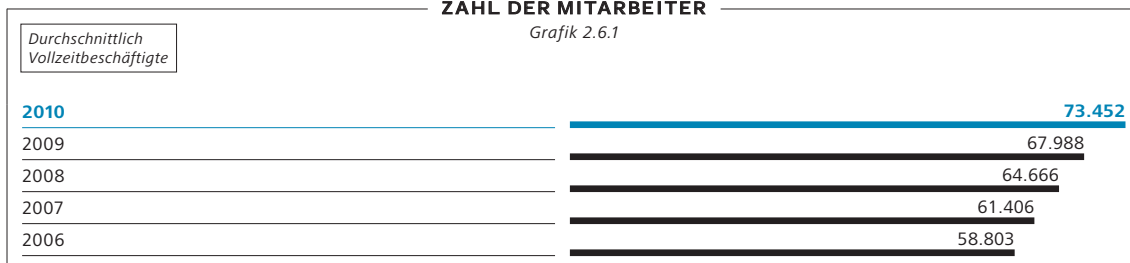

### MITARBEITER NACH REGIONEN

Tabelle 2.6.2

Durchschnittlich  
Vollzeitbeschäftigte

|                           | 2010          | 2009          | Veränderung  |
|---------------------------|---------------|---------------|--------------|
| Nordamerika               | 44.129        | 42.175        | 4,6 %        |
| Europa/Naher Osten/Afrika | 17.231        | 15.388        | 12,0 %       |
| Lateinamerika             | 6.951         | 6.467         | 7,5 %        |
| Asien-Pazifik             | 5.141         | 3.958         | 29,9 %       |
| <b>GESAMT</b>             | <b>73.452</b> | <b>67.988</b> | <b>8,0 %</b> |

stieg von 10,9 Jahren 2009 auf 11,1 Jahre 2010. Die Fluktuationsrate belief sich auf 2,8 % und bewegte sich damit erneut auf einem niedrigen Niveau; im Vorjahr hatte sie bei 1,9 % gelegen.

Der weltweite Personalaufwand bei Fresenius Medical Care betrug im Berichtsjahr 3,97 MRD US \$ und war damit rund 7 % höher als 2009 mit 3,71 MRD US \$. Das heißt, dass wie im Vorjahr rund 33 % des Umsatzes in den Personalaufwand flossen. Pro Mitarbeiter wurden 2010 durchschnittlich 54 TSD US \$ aufgewendet (2009: 54,6 TSD US \$).

## PERSONALMARKETING UND -REKRUTIERUNG

Fresenius Medical Care ermöglicht Studenten, in verschiedenen Bereichen des Unternehmens Praxiserfahrung zu sammeln: Wir betreuen Praktika, studentische Forschungs-, Projekt- und Abschlussarbeiten und arbeiten eng mit Hochschulen zusammen, damit uns junge Menschen frühzeitig als attraktiven Arbeitgeber kennenlernen können. Ein Beispiel ist die Fachhochschule Würzburg-Schweinfurt (FHWS): Wegen ihrer sehr guten Ausbildung in den Bereichen Wirtschaftsingenieurwesen, Kunststofftechnik, Maschinenbau, Ingenieurinformatik und insbesondere in der Elektrotechnik mit den Schwerpunkten Medizin- und Automatisierungstechnik sind ihre Studenten und Absolventen vor allem für unser Werk Schweinfurt interessant, wo wir Dialysegeräte entwickeln und fertigen. Im Jahr 2009 hat der Standort deshalb mit der FHWS einen Kooperationsvertrag geschlossen, der unter anderem Exkursionen von Studenten zum Werk sowie Semesterprojekte mit verschiedenen Bereichen unseres Unternehmens umfasst.

Um junge Talente früh an Fresenius Medical Care zu binden, bilden wir auch gemeinsam mit der FHWS aus – im dualen Studiengang Elektrotechnik und im „Studium mit vertiefter Praxis“, bei dem besonders motivierte und leistungsfähige Studenten mehrmonatige Praxisphasen im Werk Schweinfurt, aber auch an internationalen Standorten von Fresenius Medical Care durchlaufen. Die Frage, wie die akademische Ausbildung im Ingenieurwesen und in der technischen Entwicklung zukunftsfähig und praxisnah gestaltet werden kann, war auch ein Schwerpunkt des ersten Netzwerktags, der 2010 zwischen Werk und Hochschule stattfand: Unter dem Motto „Brücken bauen – Synergien schaffen“ trafen mehr als 20 Professoren der FHWS aus den technischen Fachbereichen mit Führungskräften von Fresenius Medical Care zusammen, um Kontakte zu intensivieren und sich fachlich auszutauschen.

Attraktive Einstiegsmöglichkeiten für Hochschulabsolventen bieten auch unser Traineeprogramm sowie das Graduate Development Program; beide Programme bereiten qualifizierte Kandidaten auf eine Fach-, Projekt- oder Führungskarriere im Unternehmen vor. Das 18-monatige Traineeprogramm schult Berufseinsteiger im Rahmen mehrmonatiger Praxisstationen – eine davon in der Regel im Ausland – und durch begleitende Seminare für eine Tätigkeit in einer bestimmten Fachrichtung, etwa im Controlling oder Marketing. Das Graduate Development Program (auf Deutsch etwa „Entwicklungsprogramm für Absolventen“) wiederum macht junge Berufstätige in bis zu zwölf Monaten fit für ein bestimmtes Stellenprofil im In- oder Ausland. Fester Bestandteil beider Programme sind Seminare und Workshops der Fresenius-Gruppe, die insbesondere die sozialen und

### MITARBEITER NACH REGIONEN

Grafik 2.6.3

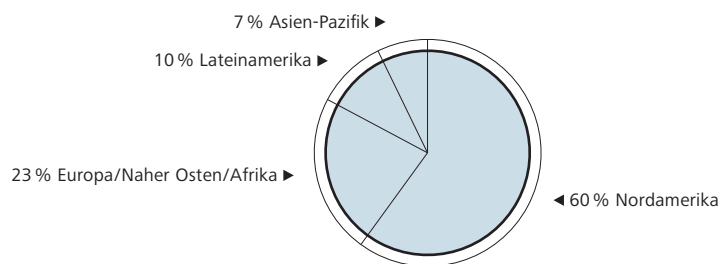

kommunikativen Fähigkeiten der Berufseinsteiger schulen.

Mit interessanten Nachwuchsforschern kommen wir auch über die klassische Personalrekrutierung hinaus immer wieder ins Gespräch, indem wir in der Forschung und Entwicklung mit internationalen Hochschulen kooperieren oder junge Wissenschaftler fördern, zum Beispiel mit Promotionsstipendien.

## PERSONALENTWICKLUNG

Unsere Mitarbeiterinnen und Mitarbeiter sollen ihre individuellen Fähigkeiten optimal im Unternehmen einbringen und im Rahmen von Fach-, Führungs- oder Projektleiterlaufbahnen weiterentwickeln können. Lebenslanges Lernen, kontinuierliches Feedback zur eigenen Leistung und berufliche Herausforderungen, die den Eignungen der Mitarbeiter bestmöglich entsprechen – darunter auch die Chance, im Ausland zu arbeiten – sind die wichtigsten Elemente unserer Personalentwicklung. Das Personalmanagement unterstützt unsere Führungskräfte durch Beratung und umfassende Fortbildung darin, diese Instrumente unternehmensweit einzusetzen.

### Bedarfsgerechte Förderung von Mitarbeitern

In Zusammenarbeit mit der Donau-Universität Krems

in Österreich, mit der wir auch in der Forschung kooperieren (siehe dazu Kapitel „Forschung und Entwicklung“ — auf Seite 68), bieten wir ein berufsbegleitendes MBA-Programm (Managementstudium) für qualifizierte Mitarbeiter ohne wirtschaftswissenschaftliche Ausbildung an. Auf diese Weise bereiten wir als forschendes Dialyseunternehmen insbesondere Naturwissenschaftler und Mediziner auf Management- und Führungsaufgaben vor. Die berufliche Weiterentwicklung unserer Mitarbeiter in der Forschung und Entwicklung fördern wir mit einem Seminarprogramm, das vom Projektmanagement bis hin zu rechtlichen und wissenschaftlich-technischen Themen vielfältige Lerninhalte bietet.

Als einer der größten Arbeitgeber für medizinisches Personal weltweit spielt die Aus- und Weiterbildung von Dialysefachkräften für uns eine wichtige Rolle. In den USA zum Beispiel haben wir 2008 das Ultra-Care Clinical Advancement Program (UCAP) als Personalentwicklungsprogramm eingeführt, zunächst als Pilotprojekt. Dieses Pilotprogramm haben wir in den vergangenen zwei Jahren auf zusätzliche Kliniken ausgeweitet und auf der Grundlage regelmäßiger Gruppendiskussionen (Fokusgruppen) mit Programmteilnehmern kontinuierlich weiterentwickelt. Ende 2010 waren für UCAP rund 300 Dialysefachkräfte registriert; wir rechnen bis Ende 2011 mit weiteren 400 Teilnehmern. UCAP richtet sich mit

## MITARBEITER NACH SEGMENTEN

Tabelle 2.6.4

|                         | 2010          | 2009          | 2008          |
|-------------------------|---------------|---------------|---------------|
| <b>Nordamerika</b>      |               |               |               |
| Dialysedienstleistungen | 36.488        | 35.188        | 33.694        |
| Dialyseprodukte         | 7.557         | 6.916         | 6.752         |
| <b>GESAMT</b>           | <b>44.045</b> | <b>42.104</b> | <b>40.446</b> |
| <b>International</b>    |               |               |               |
| Dialysedienstleistungen | 19.647        | 16.413        | 15.180        |
| Dialyseprodukte         | 9.584         | 9.312         | 8.903         |
| <b>GESAMT</b>           | <b>29.231</b> | <b>25.725</b> | <b>24.083</b> |
| Zentralbereiche         | 176           | 159           | 137           |
| <b>WELTWEIT</b>         | <b>73.452</b> | <b>67.988</b> | <b>64.666</b> |



fünf verschiedenen Entwicklungsstufen sowohl an neue als auch an erfahrene Mitarbeiter in Kliniken sowie im Heimtherapie- und Akutdialysebereich. Das Programm unterstützt Dialyseschwester und -pfleger beim Aufbau und der Erweiterung ihrer Fach- und Führungskenntnisse und fördert ihre Bindung an das Unternehmen – auch, indem es auf weitere Karriereschritte vorbereitet, etwa eine Position als Klinikleiter oder -leiterin, als Pädagoge für die gesundheitliche Schulung von Patienten, oder als Mentor für Klinikmitarbeiter. Mit seinen Ausbildungsinhalten zur klinischen Praxis und Behandlungsqualität vermittelt das Programm zudem Kerninhalte unseres ganzheitlichen Therapiekonzepts UltraCare (weitere Informationen dazu im Abschnitt „Unser Geschäft mit Dialyседienstleistungen“ — ab Seite 82) und soll so auch dazu beitragen, die Qualität unserer Dialyседienstleistungen weiter zu erhöhen. Im Jahr 2011 werden wir UCAP in weiteren Kliniken in den USA einführen und schließlich allen Dialysefachkräften in Nordamerika anbieten. Wie schon im Jahr 2010 befragen wir Teilnehmer auch im aktuellen Geschäftsjahr, welche Erfahrungen sie mit UCAP gemacht haben – so können wir das Programm immer besser auf die Bedürfnisse unserer Mitarbeiter zuschneiden.

Um insbesondere Führungskräfte im Klinikumfeld zu fördern und sie in ihrer Vorbildfunktion zu motivieren, nutzen wir über die klassische Fortbildung hinaus auch Angebote wie unser Mentorenprogramm Mentor Connection in den USA, bei dem erfahrene Klinikleiter neuen Kollegen beratend zur Seite stehen. Zudem verleihen wir Auszeichnungen an Klinikleiter, die sich besonders stark für Patienten und Mitarbeiter einsetzen und sehr gute Behandlungsergebnisse in den von ihnen geführten Dialysezentren vorweisen können.

Das Top-Management von Fresenius Medical Care nimmt am Programm von Fresenius für die Entwicklung der oberen Führungskräfteebene – dem Fresenius Advanced Management Program – teil. Dieses Programm wird im Jahr 2011 neu ausgerichtet; als Kooperationspartner konnte die renommierte Harvard Business School gewonnen werden.

### Weiterentwicklung des Fortbildungsangebots

Ein Medium, das für die Personalentwicklung von Fresenius Medical Care über alle Funktionsbereiche hinweg an Bedeutung gewinnt, ist das E-Learning – digitale Fortbildungsangebote über das Inter- und Intranet. Ende 2010 waren bereits rund 11.500 Mitarbeiter im Online Learning Center der Region EMEALA (Europa, Naher Osten, Afrika, Lateinamerika) angemeldet – fast doppelt so viele wie Ende 2009. Auch in den USA haben wir im Berichtsjahr ein E-Learning-Portal eingeführt: das Learning Management System. Es wird vorerst für die verpflichtende Compliance-Schulung aller Mitarbeiter eingesetzt und soll in den kommenden Jahren zu einem Bildungsangebot mit vielfältigen Inhalten ausgebaut werden. Fresenius Medical Care will elektronische Lernangebote im Sinne eines integrierten Lernens („Blended Learning“) stärker in die Personalentwicklung einbinden: Indem wir das E-Learning mit der direkten Kommunikation in Präsenzkursen und dem praktischen Lernen am Arbeitsplatz verknüpfen, können wir unsere Mitarbeiter effizient auf die zunehmende Komplexität unseres international tätigen, schnell wachsenden Unternehmens vorbereiten und zugleich ihren individuellen Ansprüchen an Lerntempo, Flexibilität und Mobilität besser gerecht werden.

### Berufsausbildung junger Menschen

In Deutschland investieren wir in die Zukunftsfähigkeit des Unternehmens auch, indem wir junge Menschen ausbilden. Fresenius Medical Care ist sehr international ausgerichtet und hat in Deutschland vergleichsweise wenige Mitarbeiter — siehe Seite 90. Da wir im Verbund mit dem Fresenius-Konzern ausbilden, können wir jungen Frauen und Männern jedoch vielseitige Perspektiven in den verschiedensten Ausbildungsberufen bieten – vom Elektroniker für Geräte und Systeme über den Fachinformatiker, Chemie- und Biologielaboranten bis hin zum Industriekaufmann und Industriemechaniker. 2010 haben wir unser Angebot an Ausbildungsgängen erneut erweitert. In Schweinfurt zum Beispiel boten wir erstmals eine zweijährige Ausbildung zum Industrieelektriker an, die auch für sehr gute Hauptschüler geeignet ist; ab 2011 wird das Werk zudem Systeminformatiker ausbilden.

Im Berichtsjahr beschäftigten wir gemeinsam mit dem Fresenius-Konzern (ohne den Geschäftsbereich Helios Kliniken, deren Ausbildung separat koordiniert wird) 369 Auszubildende. An allen Ausbildungsstandorten in Deutschland hat sich damit die Anzahl der Ausbildungsplätze um 14 % weiter erhöht (2009: +7 %).

Darüber hinaus waren im Jahr 2010 49 Studenten in den dualen Studiengängen eingeschrieben, die wir im Verbund mit Fresenius und mehreren Hochschulen anbieten, zum Beispiel Wirtschaftsinformatik oder Internationale Betriebswirtschaft. 2011 kommen einige neue duale Studiengänge hinzu, beispielsweise Healthcare Management. Dieser Studiengang verbindet die internationale Betriebswirtschaftslehre mit naturwissenschaftlichen und gesundheitsökonomischen Inhalten wie Sozial- und Versicherungssysteme und bereitet auf eine Tätigkeit in der Gesundheitsbranche vor – zum Beispiel in einem pharmazeutischen oder Medizintechnik-Unternehmen.

Durch Initiativen wie ein jährliches Unternehmensplanspiel, bei dem Auszubildende aller Fachrichtungen, Jahrgänge und Standorte in die Rolle von Unternehmern schlüpfen, erwerben die jungen Menschen über die fachliche Ausbildung hinaus auch soziale Kompetenzen, die im Berufsleben wichtig sind, etwa Teamgeist und Verantwortungsbewusstsein. Im Berichtsjahr wurden erneut Auszubildende von Fresenius Medical Care für ihre herausragenden Leistungen mit Staats- und Kammerpreisen ausgezeichnet. In den vergangenen Jahren konnten wir alle Auszubildenden und Berufsakademie-Studenten mit einem guten Abschluss übernehmen – und viele auch an unser Unternehmen binden: Am Standort Schweinfurt zum Beispiel sind rund 60 % aller ehemaligen Auszubildenden seit Beginn der Ausbildungsaktivitäten vor mehr als 25 Jahren noch heute im Unternehmen tätig. Alle dual Studierenden, die übernommen werden konnten, arbeiten auch nach drei Jahren noch in der Fresenius-Gruppe – rund die Hälfte davon bei Fresenius Medical Care.

In Zusammenarbeit mit Schulen bieten wir gemeinsam mit Fresenius Informationstage, Betriebserkundungen, Praktika und Bewerbungstrainings an, um auch weiterhin junge Menschen für einen

Berufseinstieg bei Fresenius Medical Care zu interessieren. Nicht zuletzt dank dieser Initiativen – und gegen den allgemeinen Trend am Ausbildungsmarkt – sind für das Ausbildungsjahr 2010 erneut mehr gute Bewerbungen eingegangen als im Vorjahr. Zudem unterstützen wir Projekte, die die Chancen junger Menschen auf dem Arbeitsmarkt verbessern sollen: Ab 2011 bieten wir zum Beispiel Praktikumsplätze im Rahmen der bundesweiten „Joblinge-Initiative“ an, deren Ziel es ist, Hauptschülern einen Ausbildungsplatz zu vermitteln. Auch am Girls' Day haben wir uns 2010 wieder beteiligt. Der bundesweite Aktionstag soll Mädchen für technische und naturwissenschaftliche Berufe begeistern, die noch immer als Männerdomäne gelten.

#### Vielfalt im Unternehmen (Diversity)

Fresenius Medical Care achtet und fördert Vielfalt (Diversity). Wir sind überzeugt, dass erst durch verschiedene Sichtweisen, Meinungen, kulturelle Prägungen und Erfahrungswerte die Potenziale ausgeschöpft werden können, die uns erfolgreich machen. Einer der wichtigsten Faktoren dabei ist die internationale Prägung vor allem unserer Führungskräfte. Vielfalt heißt für uns auch, dass wir etwaige Hürden für die Entwicklung und Förderung weiblicher Mitarbeiter identifizieren und weiter abbauen wollen. Die Berücksichtigung von Frauen wird auch bei zukünftigen Besetzungsentscheidungen für Führungspositionen angestrebt und durch konkrete Maßnahmen wie flexible Arbeitszeiten und Teilzeitprogramme gefördert. Dennoch werden wir dazu keine festen Quoten vorsehen, da diese die Auswahl geeigneter Kandidaten pauschal einschränken würde. Wir sind überzeugt, dass eine offene Unternehmenskultur nur dann Bestand hat, wenn alle Mitarbeiterinnen und Mitarbeiter unter gleichen Voraussetzungen eingestellt und gefördert werden. Grundsätzlich richtet sich die Auswahl am Unternehmensinteresse aus, so dass es bei der Besetzung von Positionen vorrangig auf die Qualifikation des Einzelnen ankommt.

#### ERFOLGSBETEILIGUNG

Indem wir unsere Mitarbeiter am Unternehmensergebnis beteiligen, stärken wir ihre Identifikation mit Fresenius Medical Care. Die Höhe der jährlichen

Erfolgsbeteiligung für die Mitarbeiter in Deutschland ist abhängig vom jeweiligen operativen Ergebnis (EBIT) der Fresenius-Gruppe. Im Jahr 2010 erhielt jeder berechnete Mitarbeiter für das vorangegangene Geschäftsjahr 1.749 €. Zwei Drittel des Betrags wurden in Form von Aktien ausgeschüttet; das verbleibende Drittel konnten sich die Mitarbeiter bar auszahlen lassen oder zum Kauf von weiteren Aktien nutzen.

### AKTIONSOPTIONSPLAN

Unsere Führungskräfte partizipieren über Aktienoptionspläne am wirtschaftlichen Erfolg des Unternehmens und an der Entwicklung der Fresenius Medical Care-Aktie. Das Aktienoptionsprogramm wurde im Jahr 2006 eingeführt und ist unmittelbar an den Unternehmenserfolg gekoppelt. Danach erhalten die Führungskräfte des Konzerns verteilt über fünf Jahre insgesamt bis zu 15 Mio Bezugsrechte auf Inhaber-Stammaktien. Diese können sie nach Ablauf einer Wartezeit von drei Jahren unter der Bedingung ausüben, dass das bereinigte Ergebnis je Stammaktie (Earnings per Share – EPS) in jedem dieser drei Jahre mindestens um 8 % gestiegen ist. Wird diese Hürde nur in einem oder zwei Jahren genommen, reduzieren sich die Bezugsrechte entsprechend. Wird sie gänzlich verfehlt, verfallen die Bezugsrechte vollständig. Etwa 650 Führungskräfte weltweit haben im Jahr 2010 an dem Programm teilgenommen. Es ist geplant, im Geschäftsjahr 2011 ein neues Programm mit langfristig orientierten Vergütungskomponenten für die nächsten fünf Jahre einzurichten. Weitere Informationen zur Ausgestaltung des Aktienoptionsplans finden Sie im Finanzbericht — ab Seite 245.

### LANGZEITKONTEN

Ergänzend zu anderen Arbeitszeitmodellen haben wir in Deutschland im Berichtsjahr Langzeitkonten eingeführt: Neben tariflichen Leistungen können die Mitarbeiter eigene Beiträge wie Urlaubsanspruch oder Gehaltsanteile in diese persönlichen Zeitwertkonten einbringen und ihr Guthaben später für die persönliche Weiterbildung, die häusliche Pflege naher Angehöriger oder für einen flexiblen Übergang in den Ruhestand nutzen. Mit diesem Angebot wollen wir unseren Mitarbeitern eine attraktive langfristige Perspektive im Unternehmen bieten und dadurch möglichst lange von ihrer Erfahrung profitieren.

### WEITERE ANGEBOTE FÜR DIE MITARBEITER

An unseren Standorten tragen wir mit verschiedenen Angeboten und Initiativen dazu bei, dass die Mitarbeiterinnen und Mitarbeiter gesund, fit und motiviert zur Arbeit kommen. Dazu gehören Gleit- und Teilarbeitszeitmodelle, um die Vereinbarkeit von Familie und Beruf zu erleichtern, betriebliche Sportkurse, Veranstaltungen und Informationsangebote rund um das Thema Gesundheit oder auch vertrauliche Beratungsgespräche und weitere Unterstützungsangebote für Mitarbeiter mit persönlichen Sorgen, wie wir sie in den USA in Zusammenarbeit mit einem externen Partner anbieten. Tage der offenen Tür in unseren Werken und Kliniken, Mitarbeiterfeste oder gemeinsame Projekte wie Spendenaktionen stärken die Identifikation unserer Mitarbeiter mit dem Unternehmen und seinen Werten.

### ERFOLGSBETEILIGUNG<sup>1</sup>

Tabelle 2.6.5

|                             | 2010  | 2009  | 2008  | 2007  | 2006  |
|-----------------------------|-------|-------|-------|-------|-------|
| Wert in €                   | 1.749 | 1.586 | 1.527 | 1.444 | 1.000 |
| Zahl der Bezugsberechtigten | 2.918 | 2.765 | 2.581 | 2.483 | 2.436 |

<sup>1</sup> Die Erfolgsbeteiligung wird rückwirkend ausgezahlt und gilt für das jeweils im Vorjahr erzielte Konzern-EBIT der Fresenius-Gruppe.

## VERANTWORTUNG

### VERANTWORTUNG GEGENÜBER DER UMWELT UND UNSEREN ANSPRUCHSGRUPPEN

Als vertikal integriertes Dialyseunternehmen stellen wir nicht nur Produkte rund um die Dialyse her und entwickeln Therapieverfahren, sondern wir verwenden unsere Produkte und Verfahren auch täglich in den eigenen Kliniken. Unser Verständnis von Verantwortung setzt daher bereits am Geschäftsmodell an: Weil wir im ständigen Austausch mit den Patienten, Mitarbeitern und Ärzten in unserem weltweiten Kliniknetz stehen, behalten wir die Bedürfnisse unserer wichtigsten Anspruchsgruppen immer im Blick und können so unsere Leistung kontinuierlich weiter verbessern. Darüber hinaus arbeiten wir mit Partnern im Gesundheitswesen, internationalen Experten sowie Branchen- und Patientenverbänden zusammen, um auch über unser Kernangebot hinaus die Lebensqualität von Nierenpatienten weiter zu erhöhen. Das Umweltmanagement an unseren Standorten und in den Kliniken bauen wir stetig aus, damit wir die Auswirkungen unseres Geschäfts auf die Umwelt reduzieren und auch in Zukunft wirtschaftlich erfolgreich bleiben können. Was wir unter Verantwortung verstehen, ist auch in den Unternehmenswerten von Fresenius Medical Care verankert: Qualität, Ehrlichkeit und Rechtschaffenheit, Innovation und Fortschritt sowie Respekt und Würde.

### VERANTWORTUNG GEGENÜBER DER UMWELT

Das Umweltmanagement ist ein Faktor unseres wirtschaftlichen Erfolgs: Es trägt dazu bei, dass wir immer strenger werdende Umweltauflagen umsetzen können und unsere betrieblichen Abläufe so ressourceneffizient und damit kostensparend wie möglich gestalten. Darüber hinaus unterstützt es zunehmend unsere Geschäftsbereiche, mit umweltfreundlichen Produkten und Dienstleistungen Mehrwert für unsere Kunden zu schaffen. Nicht zuletzt sorgt es dafür, dass wir als Unternehmen unsere Verantwortung gegenüber der Umwelt wahrnehmen.

#### Umweltmanagement in unseren Regionen

Unsere Geschäftsregionen EMEA (Europa, Naher Osten, Afrika), Nordamerika, Asien-Pazifik und Lateinamerika weiten ihre Umweltaktivitäten von

Jahr zu Jahr aus. Die zuständigen Umweltmanager entwickeln – zum Teil gemeinsam mit externen Beratern – kurz- und langfristige lokale Strategien für mehr Umweltschutz in den Werken und Kliniken und zur Förderung des Umweltbewusstseins bei den Mitarbeitern. Darüber hinaus koordinieren sie die Umwelt-Audits, die externe Behörden und Einrichtungen sowie unternehmenseigene Prüfer in den Werken und Kliniken vornehmen.

#### Region EMEA

In der Region EMEA ist das Umweltmanagement Teil unseres Integrierten Managementsystems. Die Sachverständigenorganisation TÜV überprüft regelmäßig die Umsetzung der Umweltmanagement-Norm ISO 14001 in unserer Konzernzentrale, in den zertifizierten Werken sowie in den nationalen Klinikorganisationen in Europa. Ende 2010 waren unsere sieben größten europäischen Produktionsstandorte (2009: fünf) und die Medizingeräteentwicklung nach ISO 14001 zertifiziert; darüber hinaus haben wir das Umweltmanagementsystem inzwischen in 255 unserer europäischen Dialysekliniken implementiert (2009: 204 Kliniken).

Von 2007 bis Ende 2010 haben wir in Europa zudem erstmals ein eigenes Umweltprogramm durchgeführt: In zahlreichen Projekten arbeiteten unsere Umweltmanager mit ihren Kollegen aus Forschung und Entwicklung, Produktion, Klinikmanagement, Logistik und Vertrieb zusammen, um umweltfreundlichere Produkte zu entwickeln, Ressourcen wie Energie, Wasser und Produktionsmaterialien einzusparen, ressourceneffiziente Produktionstechnologien und Verpackungslösungen einzuführen sowie gesetzliche Anforderungen an den Umweltschutz, etwa die EU-Chemikalienverordnung REACH, fristgerecht zu erfüllen.

Zu den Projekten unseres Umweltprogramms gehörte zum Beispiel eine Energieeffizienz-Initiative an unseren größten europäischen Produktionsstandorten, dank der wir inzwischen jährlich über 1 Mio € an Energiekosten einsparen. Ein weiteres Projekt war die Einführung der Klinik-Software e-con 5, mit der wir seit 2008 in unseren europäischen Dialysezentren Daten wie beispielsweise den Wasser- und Energieverbrauch sowie die Abfallentsorgung erfassen. Alle drei Faktoren spielen eine wichtige Rolle bei unseren

Bemühungen, Ressourcen zu schonen und Abläufe umweltfreundlicher zu gestalten. Inzwischen werden 313 unserer europäischen Kliniken e-con 5 an (2009: 261); mit der kontinuierlichen Einführung der Software bauen wir in Europa schrittweise ein umfangreiches Umwelt-Datenmanagementsystem auf. Schon jetzt profitieren wir von e-con 5: Unsere Landeszentralen können durch den monatlichen Vergleich der Öko-Effizienz ihrer Kliniken rasch Verbesserungsmöglichkeiten erkennen und in ihrer Investitionsplanung berücksichtigen.

Derzeit erarbeiten wir ein zweites Umweltprogramm für Europa, das noch im laufenden Geschäftsjahr eingeführt werden soll. Wie beim ersten Programm legen unsere Umweltmanager gemeinsam mit den jeweiligen Geschäftsbereichen Umweltziele für die einzelnen Stufen entlang der Wertschöpfungskette fest, also beispielsweise für die Forschung und Entwicklung oder für unsere Dialysekliniken. Im Vergleich zum ersten Programm wollen wir jedoch mehr messbare Ziele formulieren. Darüber hinaus werden wir im Jahr 2011 damit beginnen, die bestehenden lokalen Systeme für den Arbeitsschutz zu einem zentralen Managementsystem für Arbeitssicherheit zusammenzuführen und in unser Integriertes Managementsystem in Europa einzubinden.

Auch Umweltinitiativen mit externen Partnern werden wir fortsetzen, zum Beispiel das Projekt „Go Green in Dialysis“ (auf Deutsch etwa „Initiative grüne Dialyse“), das wir 2010 gemeinsam mit EDTNA/ERCA (European Dialysis and Transplant Nurses Association/European Renal Care Association), dem europäischen Verband für Pflegefachkräfte in der Nierenheilkunde, gestartet haben. Ende 2011 soll der Umweltleitfaden für Dialysefachkräfte veröffentlicht werden, den wir derzeit im Rahmen von „Go Green in Dialysis“ erarbeiten. Er wird die Klinikmitarbeiter dabei unterstützen, die Abläufe an ihrem Arbeitsplatz umweltfreundlicher zu gestalten, etwa durch einen sparsameren Verbrauch von Wasser, Strom und Dialysekonzentrat sowie durch ein verbessertes Abfallmanagement.

#### **Region Nordamerika**

In den USA haben wir für unser Produktgeschäft ein formelles, zertifiziertes Programm zur Überwachung der Umwelt- und Arbeitssicherheitsstandards

etabliert, das alle Produktionswerke und Labore jährlich durchlaufen. In den Audits wird überprüft, inwieweit wir die Richtlinien der us-amerikanischen Arbeitsschutzbehörde, des Verkehrsministeriums sowie der us-Umweltschutzbehörde beachten, aber auch die staatlichen und lokalen Gesetze. Das Umweltmanagement in den Kliniken wird sowohl intern als auch durch staatliche Behörden überprüft; ein Kriterium ist dabei die Einhaltung von Richtlinien für die Entsorgung medizinischer Abfälle. Derzeit evaluieren wir, ob wir unsere Kliniken und Produktionsstandorte in den USA zusätzlich nach der Umweltnorm ISO 14001 zertifizieren lassen.

Wie in den anderen Regionen unterstützen sowohl Umweltverantwortliche im Unternehmen als auch externe Partner die Werke und Kliniken in den USA dabei, ihre Abläufe umweltfreundlicher zu gestalten – zum Beispiel durch Recyclingprogramme. In den Kliniken betreiben wir seit einigen Jahren mit einem spezialisierten Entsorgungsunternehmen ein Mehrwegsystem für Sammelbehälter für medizinische Abfälle. Am Standort Ogden, unserem größten Produktionswerk in den USA, führen wir Stoffe aus allen Bereichen des Standorts der Wiederverwertung zu, darunter verschiedene Kunststoffe und Pappe. Im Werk Walnut Creek arbeiten wir mit einem Recycling-Unternehmen zusammen, das auf die Abfalltrennung und -verwertung bei medizinischen und elektronischen Geräten spezialisiert ist, und bereiten so Komponenten gebrauchter Dialysemaschinen als Ersatzteile wieder auf.

Im Oktober 2010 haben wir in den USA einen externen Dienstleister beauftragt, der seither den Energie- und Wasserverbrauch sämtlicher Dialysekliniken laufend erhebt und dokumentiert. Auch die entsprechenden Verbrauchsrechnungen begleitet er in unserem Auftrag. Auf diese Weise erfassen wir den Ressourcenverbrauch unserer Dialysezentren nach einheitlichen Kriterien und erkennen dadurch künftig leichter Möglichkeiten, unsere Energieeffizienz weiter zu verbessern.

Für eine möglichst umweltverträgliche Ausstattung der Gebäude und Innenräume unserer Kliniken in den USA sorgen interne Richtlinien, nach denen wir energieeffiziente Beleuchtungs- und Klimatisierungssysteme sowie umweltfreundliche Bodenbeläge und

Wandfarben einsetzen und bei der Isolierung von Dächern, Wänden, Türen und Fenstern Industriestandards einhalten oder übertreffen. Auch bei der Anschaffung von Wasseraufbereitungsanlagen für die Dialyse achten wir zunehmend auf Ressourcen- und Energieeffizienz. Seit 2010 bereiten wir für eine unserer Kliniken erstmals auch eine Umweltzertifizierung nach dem us-amerikanischen LEED-Standard vor. LEED steht für „Leadership in Energy and Environmental Design“ (auf Deutsch etwa „Führerschaft in energie- und umweltschonendem Gebäudedesign“); dieser Standard legt Richtlinien für ressourcenschonendes und nachhaltiges Bauen fest. Mehrere Mitarbeiter unserer Abteilung für Immobilien- und Baumanagement bereiten sich derzeit auf ihre formelle Akkreditierung als LEED-Experten vor. Sie werden zunächst gemeinsam mit dem Verpächter der erwähnten Klinik die anstehende Zertifizierung koordinieren und künftig auch allgemein mit den Verpächtern unserer Kliniken zusammenarbeiten, um umweltfreundliche Gebäudestandards in den Zentren zu etablieren. Wir planen in den kommenden Jahren, weitere Kliniken nach dem LEED-Standard zertifizieren zu lassen.

#### **Regionen Asien-Pazifik und Lateinamerika**

In Asien-Pazifik inspizieren die lokalen Behörden regelmäßig unter anderem die Abwassersysteme und unseren Energieverbrauch. Darüber hinaus überprüft ein Team von Fresenius Medical Care in jährlichen Audits, inwieweit wir in der Produktion, der Logistik, den Laboren und der Verwaltung die Unternehmensrichtlinien für Ressourceneffizienz und Umweltschutz einhalten, und ermittelt Verbesserungsmöglichkeiten. Dazu nutzen die Prüfer auch die Daten zum Strom-, Gas- und Wasserverbrauch sowie zur Abfallentsorgung, die wir in den Produktionswerken laufend erheben. Am Standort Jiangsu in China haben wir 2010 infolge eines internen Audits mehrere Energieeffizienz-Projekte umgesetzt; beispielsweise nutzen wir nun die konstant temperierte Umluft eines unserer Fertigungsbereiche zur Klimatisierung des Warenlagers. Da unsere Produkte in einem festgelegten Temperaturbereich gelagert werden müssen, sparen wir dadurch je nach Jahreszeit Energie für die Beheizung oder Kühlung der Halle. Am Standort Buzen in Japan haben wir dank unseres Umweltmanagements im Jahr 2010 eine Recyclingrate von fast 94 % erreicht. Darin

enthalten sind alle im Werk entstehenden Abfälle mit Ausnahme des separat behandelten Abwassers; ebenfalls enthalten ist die thermische Verwertung von Abfällen, also die Nutzung der Wärmeenergie, die bei der Müllverbrennung durch einen lizenzierten Entsorger entsteht. Wir haben uns zum Ziel gesetzt, diese hohe Recyclingrate im Jahr 2011 erneut zu erreichen.

In Australien entstand 2010 mit unserer finanziellen und fachlichen Unterstützung die – nach unserer Kenntnis – erste Dialyseeinheit der Welt, die mit Solarstrom betrieben wird. Ein Geschäftspartner, der nephrologische Leiter eines australischen Gesundheitsdienstleisters, errichtete die Solaranlage mit Fördermitteln von Fresenius Medical Care auf dem Dach seiner Dialyseeinheit. Mit seinem Stromanbieter vereinbarte er, dass die so gewonnene Energie in das lokale Elektrizitätsnetz eingespeist und mit den Gesamtstromkosten verrechnet wird. So konnte das Zentrum sogar in den vergleichsweise sonnenarmen Monaten des australischen Winters im Jahr 2010 über 90 % seines Elektrizitätsbedarfs für die Dialysegeräte sowie für die Anlage zur Wasseraufbereitung selbst gewinnen; im Jahresschnitt erzeugte die Klinik sogar mehr Strom, als sie für beides benötigte. Das Gemeinschaftsprojekt stieß in der Fachwelt auf einiges Interesse, unter anderem im Rahmen der bedeutendsten Branchenkonferenz in den USA, der ASN Renal Week — *siehe auch Seite 72.*

In der Region Lateinamerika haben wir im Umweltmanagement ebenfalls weitere Fortschritte erzielt. Beispielsweise bauen wir in Kolumbien seit 2010 für die gesamte Länderorganisation – also für die Kliniken und die Produktion – ein Umweltmanagementsystem gemäß der Norm ISO 14001 auf. Dabei wollen wir in erster Linie die Kriterien der Norm bestmöglich umsetzen und unsere Mitarbeiter danach schulen; eine offizielle Zertifizierung streben wir derzeit nicht an. In Argentinien erfassen wir seit 2010 kontinuierlich den Wasser- und Energieverbrauch sowie die Entsorgung von medizinischem Abfall in allen Dialysezentren. In der Produktion wollen wir bis Ende des Jahres 2012 ebenfalls ein umfassendes Umweltmanagement-Programm einführen. In beiden Geschäftsbereichen arbeiten wir mit einer externen argentinischen Beratung zusammen, um das Umweltmanagement voranzutreiben. In Venezuela



haben wir 2010 eine Umwelt-Aufklärungskampagne für unsere Klinikmitarbeiter zu den Themen Abfallentsorgung, Energie- und Wasserverbrauch gestartet, die wir im laufenden Geschäftsjahr fortsetzen wollen.

### **Umweltfreundliche Produkte und Dienstleistungen**

Wir befassen uns zunehmend mit der Frage, wie Fresenius Medical Care seine Erzeugnisse und Verfahren umweltfreundlicher gestalten kann. Das Ziel ist dabei, den Kunden Mehrwert zu bieten, indem wir ihnen helfen, Kosten einzusparen oder Umweltauflagen leichter zu erfüllen.

#### **Produktentwicklung**

In der Forschung und Entwicklung arbeiten wir grundsätzlich daran, unsere Produkte und Verfahren umweltverträglicher zu gestalten – indem wir neue Materialien mit verbesserten Umwelteigenschaften nutzen, neue Technologien entwickeln, die den Ressourcenverbrauch der Dialysegeräte weiter reduzieren, und nicht zuletzt indem wir Energie und Rohstoffe in der Produktion effizient einsetzen. Im Rahmen des ersten Umweltprogramms der Region EMEA — *siehe ab Seite 96* haben wir zum Beispiel den smartbag entwickelt, eine Verpackung für Flüssigkonzentrate, die mit medizinisch reinem Wasser zu Dialyselösung — *siehe Glossar Seite 157* für die Hämodialyse-Behandlung verarbeitet werden. Der smartbag ist PVC-frei; seine Herstellung erfordert nur etwa ein Fünftel des Produktionsmaterials eines herkömmlichen Konzentratkanisters. Zudem lässt sich der Beutel gut recyceln, da er aus Polyolefinen besteht. Die umweltverträglichen Eigenschaften des smartbag bestätigte auch eine Ökobilanz-Analyse, die das Umweltmanagement der Region EMEA im Berichtsjahr gemeinsam mit der Forschung und Entwicklung sowie einer Hochschule durchgeführt hat. Eine Ökobilanz untersucht die Umwelteinflüsse von Produkten über ihren gesamten Lebenszyklus – von der Rohstoffgewinnung über die Herstellung, den Vertrieb und die Nutzung bis hin zur Entsorgung. In den kommenden Jahren wird unser Umweltmanagement insgesamt noch enger mit der Forschung und Entwicklung zusammenarbeiten, um die Entwicklung von umweltfreundlichen neuen Produkten oder Produktgenerationen voranzutreiben. Unsere Ökobilanz-Analyse im Jahr 2010 hat bestätigt, dass

solche Untersuchungen dabei eine wichtige Hilfe sein können – indem sie die Umweltverträglichkeit unserer Produkte messbar und weitere Verbesserungsmöglichkeiten klarer erkennbar machen.

#### **Modell der CO<sub>2</sub>-neutralen Dialyseklinik**

Auch im Geschäft mit Dialysesdienstleitungen haben wir im Berichtsjahr an einem umweltfreundlichen Konzept gearbeitet, das Kunden, zum Beispiel Krankenkassen, durch seine Ressourcen- und damit Kosteneffizienz langfristig Mehrwert bieten könnte. Gemeinsam mit der Deutschen Energieagentur (dena) haben wir ein Modell für eine CO<sub>2</sub>-neutrale Dialyseklinik entwickelt: Nach diesem Modell spart eine Klinik durch ihre umweltfreundliche Strom- und Wärmeversorgung ebenso große Mengen des Treibhausgases CO<sub>2</sub> (Kohlendioxid) ein, wie sie durch ihren Energieverbrauch für die Dialyse, die Wasseraufbereitung und den sonstigen Betrieb erzeugt. Möglich machen dies zum Beispiel Solarzellen auf dem Dach zur Stromerzeugung, eine Anlage zur Rückgewinnung von Wärme aus dem Abwasser der Dialysebehandlung, eine besondere Wärmedämmung der Gebäudehülle und Wände sowie eine bestimmte Anordnung der Fenster, um Tageslicht möglichst effizient zu nutzen. Unser gemeinsames Modell mit der dena basiert auf dem Standardgrundriss eines europäischen Dialysezentrums von Fresenius Medical Care; wir haben dafür den Energieverbrauch von bestehenden Dialysezentren in verschiedenen Ländern im Detail analysiert. Das Modell betrachtet die gesamte Klinik als geschlossenes System, in dem Dämmung, erneuerbare Energien und eine effiziente Rückgewinnung von Energie eng aufeinander abgestimmt zusammenwirken. Wir wollen das Modell im kommenden Jahr optimieren und den Bau einer Modellklinik prüfen; ob wir dieses Bauprojekt anschließend umsetzen, hängt unter anderem davon ab, ob sich geeignete Partner und Fördermittel finden.

### **VERANTWORTUNG GEGENÜBER UNSEREN ANSPRUCHSGRUPPEN**

Fresenius Medical Care trägt als Hersteller und Anbieter lebenserhaltender medizinischer Produkte und Dienstleistungen eine besondere Verantwortung für seine Anspruchsgruppen, allen voran Patienten



und Geschäftspartner. Den Umgang mit ihnen und unsere Abläufe in der Forschung und Entwicklung richten wir nach unternehmenseigenen sowie branchenrelevanten Standards und Gesetzen aus. Darüber hinaus engagieren wir uns als Dienstleister in unseren Kliniken, als Partner in und gemeinsam mit Verbänden, als Nachbar in unserem Umfeld und als Unternehmen in der Gesellschaft für eine bessere Lebensqualität von Nierenpatienten. Dadurch wollen wir nicht nur unserer Verantwortung gerecht werden, sondern zugleich unseren guten Ruf im Dialysemarkt stärken.

#### Verhalten gegenüber Patienten und Geschäftspartnern

Für einen verantwortungsvollen, korrekten und gesetzeskonformen Umgang unserer Mitarbeiter mit Patienten und Geschäftspartnern gibt der Unternehmenskodex von Fresenius Medical Care den Rahmen vor; zum „Unternehmenskodex“ — siehe Seite 130. Er enthält unter anderem spezifische Verhaltensrichtlinien für Management und Mitarbeiter in den Kliniken sowie im Vertrieb und Marketing. Diese Richtlinien betreffen beispielsweise die korrekte Abrechnung von Produkten und Dienstleistungen, faires Verhalten im Wettbewerb und den respektvollen, integren Umgang mit den Patienten. Unsere Mitarbeiter in Marketing und Vertrieb erhalten ein spezifisches Compliance-Training, das speziell auf ihr Tätigkeitsfeld zugeschnitten ist. In den USA richten wir uns in der Zusammenarbeit mit unseren Partnern im Gesundheitswesen zusätzlich an den Verhaltenskodizes der us-amerikanischen Branchenverbände PhRMA für Pharmazieunternehmen sowie AdvaMed für Medizintechnik-Hersteller aus.

#### Forschung und Entwicklung

Wenn Fresenius Medical Care neue medizinische Geräte oder pharmazeutische Produkte auf den Markt bringen will, sind wir gesetzlich verpflichtet, deren Wirksamkeit und Sicherheit anhand sogenannter klinischer Prüfungen zu belegen und umfassend zu dokumentieren. Dies bedeutet: Die Neuentwicklung muss über einen bestimmten Zeitraum im klinischen Umfeld bei einer Gruppe von Patienten angewendet werden. Zum Vergleich werden eine oder mehrere weitere Gruppen von Patienten mit bereits erhältlichen Produkten und Methoden behandelt, die dem aktuellen Stand der Forschung und Technik entsprechen.

Für unsere Branche gelten umfassende Richtlinien und Gesetze, die dafür sorgen sollen, dass im Rahmen einer solchen Prüfung keine ethischen Prinzipien verletzt, Ärzte und Einrichtungen, die die Prüfung im Auftrag der Unternehmen durchführen, sorgfältig nach ihrer Qualifikation ausgewählt und wissenschaftlich saubere Methoden angewendet werden. Nach diesen Regelwerken richtet auch Fresenius Medical Care seine klinische Forschung aus. Dazu gehört beispielsweise die Erklärung von Helsinki des Weltärztebundes, die grundlegende ethische Prinzipien der klinischen Forschung fest schreibt, sowie internationale Richtlinien wie Good Clinical Practice (GCP – auf Deutsch etwa „gute klinische Praxis“), außerdem die EU-Richtlinien für Arzneimittel wie die Richtlinie 2001/20/EC, die EU-Medizinprodukte-Richtlinie Medical Device Directive (MDD) und die ISO-Norm 14155, die Kriterien festlegt, nach denen eine klinische Prüfung durchzuführen und ein Prüfbericht in der klinischen Forschung zu erstellen sind. Darüber hinaus richten wir uns nach nationalen Gesetzen und Richtlinien wie dem Arzneimittelgesetz (AMG) und dem Medizinproduktegesetz (MPG) in Deutschland oder den Richtlinien der us-amerikanischen Behörde für Lebensmittel- und Arzneimittelsicherheit FDA (Food and Drug Administration). Eigene Handlungsanweisungen von Fresenius Medical Care für die Mitarbeiter, sogenannte Standard Operating Procedures, führen diese Richtlinien mit internen Vorgaben zusammen, damit eine klinische Prüfung in unserem Auftrag ordnungsgemäß abläuft und dokumentiert wird. Bevor eine Prüfung überhaupt beginnen kann, müssen Ethikkommissionen in den jeweiligen Ländern unserem Antrag zustimmen. Dass sich Hersteller von medizintechnischen und pharmazeutischen Produkten an diese Vorgaben halten, ist nicht zuletzt eine wichtige Voraussetzung dafür, dass sie ihre Forschungsergebnisse in wissenschaftlichen Medien publizieren können.

Tierversuche nutzen wir zur Zulassung von neuen Produkten und Therapieformen, soweit diese vom Gesetzgeber vorgeschrieben sind. Diese Untersuchungen werden ausschließlich von externen Forschungseinrichtungen in anerkannten Versuchslaboren durchgeführt und grundsätzlich durch eine Ethikkommission für Tierversuche gebilligt. Fresenius Medical Care führt keine eigenen Tier-

versuche durch. Grundsätzlich ist unsere Strategie, Tierversuche zu vermeiden und alternative Verfahren anzuwenden.

### Soziales Engagement

Als Dialyseunternehmen ist es unser Ziel, die Lebensqualität von Nierenpatienten kontinuierlich zu verbessern. Dieses Ziel verfolgen wir auch über unser Kernangebot von Produkten und Dienstleistungen hinaus, indem wir uns auf vielfältige Art und Weise für ein lebenswertes Leben mit der Dialyse, den Zugang von Patienten zu einer hochwertigen Behandlung und für die gesundheitliche Aufklärung über das chronische Nierenversagen einsetzen.

#### Engagement für die Lebensqualität von Patienten

Fresenius Medical Care arbeitet weltweit mit regionalen und überregionalen Verbänden und Einrichtungen zusammen, die sich für die Interessen von Dialysepatienten einsetzen. Darüber hinaus entwickeln wir eigene Initiativen, um Patienten dabei zu unterstützen, ein gesünderes und aktiveres Leben zu führen. In den USA zum Beispiel fördern wir das Renal Support Network, einen gemeinnützigen Verband von und für Patienten mit chronischem Nierenversagen, dessen Ziel es ist, Patienten und ihre Familien gesundheitlich aufzuklären, ihnen mehr Zuversicht im Lebensalltag zu geben und ihre Eigeninitiative zu stärken. In Brasilien unterstützen wir sowohl finanziell als auch fachlich die Fundação do Rim, eine gemeinnützige Stiftung, die sich speziell für die Bedürfnisse junger Dialysepatienten zwischen 0 und 21 Jahren engagiert. Die Stiftung setzt sich gegenüber Behörden und der Öffentlichkeit für eine angemessene Versorgung der Kinder und Jugendlichen mit Medikamenten ein sowie für deren Zugang zu einer Nierentransplantation oder die Einrichtung von mehr pädiatrischen Dialyseeinheiten in Krankenhäusern. Zugleich organisiert sie besondere Angebote für die jungen Patienten wie Bewegungs-, Kunst- und Musiktherapiekurse und schult Eltern im richtigen Umgang mit der Krankheit ihrer Kinder. In Australien organisieren wir jährlich gemeinsam mit einem Kinderkrankenhaus in Sydney das „Kidney Kids Camp“, ein Ausflugswochenende für junge Peritonealdialyse-Patienten, bei dem sowohl für Spiel und Spaß als auch für eine sichere Dialysebehandlung unter der Aufsicht professioneller

Dialysefachkräfte gesorgt ist. Die Initiative soll den nierenkranken Kindern ein unbeschwertes Wochenende mit Gleichaltrigen ermöglichen und zugleich die Eltern entlasten, die normalerweise die Behandlung durchführen.

In Kolumbien haben wir eine eigene Stiftung gegründet, um die Gesundheit und das Wohlbefinden unserer Patienten auch über die eigentliche Dialysebehandlung hinaus zu fördern. Die Fundación Fresenius finanziert sich aus Spenden der Wirtschaft, unserer Mitarbeiter und von Privatpersonen; in regelmäßigen Berichten legen wir Rechenschaft über die Verwendung dieser Mittel ab. Im Berichtsjahr haben wir unsere Öffentlichkeitsarbeit für die Stiftung ausgeweitet, um noch mehr Spenden zu gewinnen und damit die Palette von Leistungen für die Patienten zu erweitern. Wir haben 2010 zum Beispiel über 6.300 Patienten regelmäßig eine gesunde warme Mahlzeit angeboten und monatlich mehr als 2.400 – und damit rund 40 % – unserer Patienten kostenlose Fahrten zwischen ihrem Zuhause und dem Dialysezentrum ermöglicht. Außerdem fanden gemeinsame Unternehmungen wie Ausflugsfahrten, kulturelle Veranstaltungen, Bastelkurse oder eine Halloween-Feier für nierenkranke Kinder statt. Besonders bedürftige Patienten haben wir mit Lebensmitteln versorgt. Für mittellose Peritonealdialyse-Patienten, die zu Hause nicht über ausreichend Platz verfügen, um eine sichere Behandlung durchzuführen, errichteten wir spezielle Zelte und ließen die Patienten durch eine Dialysefachkraft in der sicheren Nutzung und ordnungsgemäßen Reinigung dieser Zelte schulen.

Rund 35 % Prozent unserer Patienten in Argentinien – das geht aus ihren Anmeldedaten hervor – haben keinen Primärschulabschluss, den man in dem Land nach sieben Jahren erwirbt. Welche konkreten Schwierigkeiten sich daraus im Alltag ergeben, trat insbesondere in Kunsttherapie- und Erzählworkshops mit den Patienten zutage. Der niedrige Bildungsstand schränkt ihre Lebensqualität zusätzlich ein: Er erschwert ihnen, auf einem ohnehin angespannten Arbeitsmarkt eine Beschäftigung zu finden, und verstärkt typische Schwierigkeiten im Leben mit der Dialyse, allen voran das disziplinierte Einhalten des Behandlungsplans und die Einnahme von Medikamenten. Um diesen Patienten

neue Chancen zu eröffnen und ihre Eigeninitiative zu stärken, haben wir ein gemeinsames Projekt mit dem Bildungsministerium der Provinz Buenos Aires gestartet: Das Ministerium entsendet Lehrer aus seinem Programm für die Erwachsenenbildung in vier unserer Dialysekliniken. Von diesen Lehrern wurden im Jahr 2010 rund 80 unserer Dialysepatienten mit der Aussicht unterrichtet, dass sie ihren Schulabschluss nachholen können. Ein Fokus liegt auf dem Lesen und Schreiben, das viele der teilnehmenden Patienten nicht sicher beherrschen. Im Berichtsjahr haben wir mit einer Feier den ersten erfolgreichen Primärschulabsolventen gratuliert; wir wollen das Projekt im laufenden Geschäftsjahr auf andere Kliniken ausweiten.

#### **Spenden und Notfallhilfe**

In Krisensituationen sowie für Einrichtungen, die rasch konkrete Hilfe benötigen, spenden wir Geld, Dialysegeräte und medizinisches Zubehör. Wie schon bei den schweren Erdbeben in Italien und China in den vergangenen Jahren, schickten wir Anfang des Jahres 2010 Hilfsmittel zur Versorgung von Dialysepatienten auch nach Haiti. Wir spendeten rund zwölf Tonnen Dialysegeräte und -zubehör, die wir per Schiff und mit einem gecharterten Frachtflugzeug transportierten. Außerdem übernahmen wir eine führende Rolle bei der Organisation der Hilfsleistungen des Nothilfe-Bündnisses der us-amerikanischen Dialysebranche, KCER — siehe Seite 88 und Magazin — ab Seite 40. Mehrere Klinikschwestern und -pfleger von Fresenius Medical Care leisteten zudem als Ehrenamtliche auf eigene Initiative für verschiedene gemeinnützige Einrichtungen medizinische Nothilfe in Haiti. In Brasilien spendeten wir im Berichtsjahr Hämodialysegeräte an die neue Abteilung für pädiatrische Nephrologie eines Krankenhauses in Rio de Janeiro. Dank dieser Geräte können Kinder mit chronischem Nierenversagen, die aus anderen Gründen in dem Krankenhaus behandelt werden müssen, ihre Dialysetherapie fortsetzen.

#### **Förderung von Wissen und Weiterbildung**

Fresenius Medical Care organisiert und fördert weltweit wissenschaftliche Konferenzen und Fortbildungen mit internationalen Experten der Nierenheilkunde für Ärzte und Dialysefachkräfte und trägt so zur Qualität in der Dialyse bei. Dies gilt insbesondere für Regionen, in denen moderne gesundheitliche

Versorgungsstandards derzeit noch entwickelt werden. Ein Beispiel für dieses Engagement finden Sie in unserem Magazin — ab Seite 26. Zudem beteiligen wir uns an Projekten, die junge Mediziner für die Nierenheilkunde begeistern und den Nachwuchs in diesem Bereich fördern sollen. In Brasilien zum Beispiel haben wir im Berichtsjahr eine Initiative der nationalen Gesellschaft für Nephrologie unterstützt: Medizinstudenten am Ende ihrer Ausbildung wurden für Forschungsprojekte ausgezeichnet, in denen sie Lösungen für eine bessere Prävention chronischer Nierenleiden in der Bevölkerung erarbeitet haben. Auch in Venezuela organisieren wir nephrologische Fachkonferenzen für Ärzte und Medizinstudenten. Im Rahmen einer Vereinbarung mit der Hochschule Universidad Central de Venezuela vergeben wir zudem klinische Praktika in der Dialyse an Studenten der Krankenpflege.

#### **Projekte für eine bessere Patientenversorgung**

Darüber hinaus beteiligen wir uns an lokalen Projekten für eine bessere Versorgung von Dialysepatienten. Von 2008 bis Ende 2010 haben wir beispielsweise in einem Public-Private-Partnership-Projekt — siehe auch Seite 124 mit der indonesischen Gesellschaft für Nierenheilkunde, Pernefri, und einer Entwicklungsbank zusammengearbeitet. Ziel dieses Projekts war es, den Zugang zu Dialysebehandlungen sowie die Behandlungsqualität im ländlichen Indonesien zu verbessern. Im Rahmen der Partnerschaft erweiterten wir die Dialyseeinheiten von vier öffentlichen Krankenhäusern um insgesamt 40 Hämodialysegeräte und vier Wasseraufbereitungsanlagen. Auf diese Weise entstanden insgesamt Kapazitäten für rund 240 zusätzliche Patienten, die zuvor aufgrund der fehlenden Infrastruktur nicht hätten behandelt werden können. Zudem bildeten wir gemeinsam mit Pernefri 20 Internisten sowie 60 Krankenschwestern und -pfleger auf dem Gebiet der Dialyse aus. Dieses Engagement wollen wir künftig in ähnlichen Projekten fortsetzen.

Das Renal Research Institute, ein Joint Venture von Fresenius Medical Care Nordamerika mit einem Krankenhaus in New York, ist Partner der Sustainable Kidney Care Foundation. Diese Stiftung fördert Projekte in Tansania, Afrika, in denen Patienten mit akutem Nierenversagen in Regionen ohne eine bestehende Versorgungsstruktur Zugang zu einer

Dialysebehandlung erhalten. Das akute Nierenversagen tritt dort häufig infolge anderer schwerer Erkrankungen wie HIV oder Tuberkulose auf.

#### **Sensibilisierung der breiten Öffentlichkeit**

Nicht zuletzt beteiligt sich Fresenius Medical Care auch an der gesundheitlichen Aufklärung der breiten Öffentlichkeit. In Taiwan zum Beispiel organisieren wir jährlich gemeinsam mit der nationalen Gesellschaft für Nierenheilkunde und mehreren Krankenhäusern eine Aufklärungsveranstaltung, die das Bewusstsein der Bevölkerung für einen gesunden Lebensstil schärfen und die Früherkennung von Nierenerkrankungen fördern soll. In den USA haben wir 2010 erneut die „Kidney Walks“ sowie weitere Sportveranstaltungen und Spendenaktionen unterstützt, die die National Kidney Foundation (Nationale Nierenstiftung der USA) in allen Teilen des Landes organisiert. Auch die Kidney Walks sollen

die Öffentlichkeit für die Symptome einer chronischen Nierenerkrankung sensibilisieren. Die Spenden kommen der Arbeit der Stiftung zugute, die neben gesundheitlichen Aufklärungsangeboten auch Forschungsstipendien für Ärzte auf dem Gebiet der Nierenheilkunde vergibt, die Interessen von Dialysepatienten in der Öffentlichkeit vertritt, die nephrologische Forschung fördert und sich für Organspenden einsetzt, damit mehr Patienten eine Nierentransplantation erhalten können. In Brasilien haben wir 2010 anlässlich des weltweiten World Kidney Day („Tag der Niere“) verschiedene Aufklärungsinitiativen für unsere Mitarbeiter, Patienten und für die Öffentlichkeit gestartet; unter anderem organisierten wir Vorträge über die Funktion der Niere, eine gesunde Ernährung sowie Herz- und Gefäßkrankheiten und boten kostenlose Blutdruckmessungen und Glukosetests zur Erkennung von Diabetes an.

## RISIKOBERICHT

### RISIKO- UND CHANCENMANAGEMENT

Fresenius Medical Care ist als weltweit tätiges Unternehmen einer Vielzahl von Risiken ausgesetzt, die direkt mit unserem unternehmerischen Handeln verknüpft sind. Chancen für unser Geschäft können wir letztlich nur dann nutzen, wenn wir auch bereit sind, gewisse Risiken einzugehen. Als Anbieter lebenserhaltender Produkte und Dienstleistungen für Nierenpatienten sind wir Konjunkturzyklen nur in geringem Maß unterworfen. Gleichzeitig bilden unsere technologische Erfahrung und unsere umfangreiche Marktkennntnis eine solide Basis, um sowohl Risiken als auch Chancen für unser Geschäft so frühzeitig und verlässlich wie möglich zu erkennen und einzuschätzen.

#### Risikomanagement

Risikomanagement verstehen wir als die fortwährende Aufgabe, das Spektrum möglicher und tatsächlicher Entwicklungen im Unternehmen sowie in unserem Umfeld zu erfassen, zu analysieren, zu bewerten und – wenn möglich – in korrigierende Maßnahmen umzusetzen. Unser weitreichendes Risikomanagementsystem, dessen Grundsätze in konzernweiten Richtlinien festgeschrieben sind und das wir im folgenden Abschnitt näher beschreiben, ist damit ein wichtiger Bestandteil der Steuerung von Fresenius Medical Care. Es ermöglicht dem Management, Risiken, die das Wachstum oder das Fortbestehen von Fresenius Medical Care gefährden könnten, bereits im Anfangsstadium zu identifizieren und ihre Auswirkungen soweit wie möglich zu minimieren.

#### Chancenmanagement

Wir identifizieren Chancen anhand umfangreicher quantitativer und qualitativer Analysen von Marktdaten, Forschungsvorhaben und generellen gesellschaftlichen Gesundheitstrends. Auch die enge Zusammenarbeit unserer Strategie- und Planungsabteilungen mit den Verantwortlichen für Mergers & Acquisitions (sämtliche Aktivitäten, die mit dem Erwerb, dem Verkauf und der Fusion von Unternehmen oder Unternehmensteilen zu tun haben) sorgt dafür, dass wir Chancen weltweit frühzeitig identifizieren. Dabei werden gesamtwirtschaftliche, branchenspezifische, regionale oder lokale Entwicklungen so früh wie möglich antizipiert, um unser

Geschäftsmodell entsprechend auszurichten. Einen Überblick über die wichtigsten Chancen, die wir für unser Unternehmen nutzen wollen, finden Sie im „Prognosebericht“ — ab Seite 116.

### RISIKOMANAGEMENTSYSTEM

Unser Risikomanagement ist Teil des integrierten Managementsystems und basiert sowohl auf einem konzernweiten Controlling als auch auf einem internen Überwachungssystem. Im Rahmen dieses Überwachungssystems werden die branchen- und marktbezogenen Risiken, die in den einzelnen Regionen auftreten, identifiziert, bewertet, aggregiert und bis zur Konzernebene kommuniziert. Zweimal im Jahr legen die verantwortlichen Risikomanager dem Vorstand aggregierte Statusberichte vor. Diese enthalten qualitative und quantitative Einschätzungen der Eintrittswahrscheinlichkeit und der möglichen Schadenshöhe der identifizierten Risiken, die den Konzern gefährden könnten. Im Fall von wesentlichen neu erkannten Risiken wird der Vorstand zudem direkt und umgehend informiert; zu unserer „Risikoberichterstattung“ — siehe Grafik 2.8.1 auf Seite 105. Das Risikomanagement und die Befassung mit dem Statusbericht sind darüber hinaus regelmäßiger Bestandteil der Sitzungen des Prüfungs- und Corporate-Governance-Ausschusses des Aufsichtsrats. Weitere Informationen finden Sie im „Bericht des Aufsichtsrats“ — ab Seite 16.

Über das Risikoreporting hinaus ist auch das klassische Berichtswesen gegenüber der Unternehmensführung eine wichtige Grundlage für die Risiko-steuerung und -kontrolle sowie das zeitnahe Ergreifen von Maßnahmen der Risikovorsorge. Daher wird das Management von Fresenius Medical Care monatlich und quartalsweise über die Branchensituation, das operative und nichtoperative Geschäft sowie über Analysen der Vermögens-, Finanz- und Ertragslage informiert.

Das Risikomanagementsystem wird auch durch unsere interne Revisionsabteilung gestärkt. Die Abteilung arbeitet gemäß dem international anerkannten Standard des Fachverbandes Institute of Internal Auditors (IIA) und ist als globale Einheit überregional tätig. Die jährliche Festlegung der

durchzuführenden weltweiten Revisionen erfolgt unter Anwendung eines Auswahlmodells, in dem verschiedene Risiken berücksichtigt werden. Dieser Revisionsplan wird vom Vorstand geprüft und abschließend vom Prüfungs- und Corporate-Governance-Ausschuss des Aufsichtsrats genehmigt. Der Plan umfasst Bilanzprüfungen einzelner Einheiten, aber auch ganzheitliche Revisionen aller Geschäftsprozesse eines Tochterunternehmens oder einer Geschäftseinheit. Alle Prüfungsberichte aus dem Prüfungsplan werden dem Vorstand und dem externen Abschlussprüfer vorgelegt. Zu den Aufgaben der Revision gehört auch die Überwachung der Umsetzung der in den Berichten dokumentierten Maßnahmen. Der Vorstand wird regelmäßig über den Umsetzungsfortschritt informiert. Darüber hinaus wird dem Prüfungs- und Corporate-Governance-Ausschuss des Aufsichtsrats über die Ergebnisse Auskunft erteilt. Im Geschäftsjahr 2010 wurden insgesamt 33 Prüfungen durchgeführt. Dazu gehörten auch so genannte Full Scope Audits – Revisionen sämtlicher Geschäftsprozesse –, unter anderem an unseren Standorten in Argentinien und China.

Bei Fresenius Medical Care sind Umfang und Ausrichtung der Organisation und der Systeme zur Identifikation und Bewertung von Risiken funktionsfähig eingerichtet. Mittels unternehmensspezifischer Maßnahmen ist die Entwicklung von Gegenmaßnahmen beziehungsweise die Vermeidung von Risiken

möglich. Das bestehende System ist geeignet, solche Entwicklungen frühzeitig zu erkennen, die den Fortbestand des Konzerns gefährden können. Dennoch kann keine absolute Sicherheit gegeben werden, dass dies eine vollumfängliche Identifikation und Steuerung der Risiken ermöglicht.

### INTERNES KONTROLL- UND RISIKO-MANAGEMENTSYSTEM IM HINBLICK AUF DEN KONZERNRECHNUNGSLEGUNGSPROZESS

Die Korrektheit und Verlässlichkeit der Rechnungslegungsprozesse und der Finanzberichterstattung und damit die Erstellung eines regelkonformen Jahresabschlusses und Lageberichts sowie Konzernabschlusses und Konzernlageberichts wird durch eine Vielzahl von Maßnahmen und interne Kontrollen sichergestellt. Insbesondere der in der Regel vierstufige Berichtsprozess sichert eine intensive Erörterung und Kontrolle. Auf jeder Berichtsebene (lokale Einheit, Region, Unternehmensbereich, Konzern) werden die Finanzdaten und Kennzahlen erörtert und regelmäßig auf Monats- und Quartalsbasis mit den Vorjahreszahlen, den Budgetwerten und der aktuellen Hochrechnung verglichen. Zusätzlich werden alle Sachverhalte, Annahmen und Schätzungen, die eine relevante Auswirkung auf die extern berichteten Konzern- und Segmentzahlen haben, intensiv

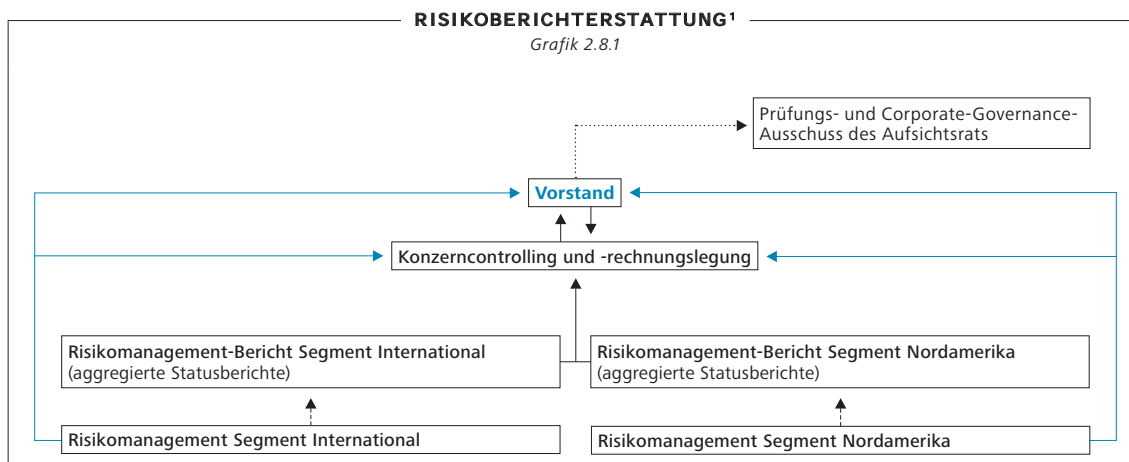

<sup>1</sup> Eigene Darstellung

-- Evaluation allgemeiner und spezifischer Risiken und Identifikation neuer Risiken;  
 --- Konsolidierung der Risiken im Risikomanagement-Bericht  
 — Weiterleitung und Erörterung des Risikomanagement-Berichts  
 — Adhoc-Risikoberichterstattung (wesentliche neue Risiken)  
 ---- Weiterleitung des Risikomanagement-Berichts



mit den Abteilungen besprochen, die für die Erstellung des Jahres- und Konzernabschlusses zuständig sind. Quartalsweise werden diese Vorgänge im Prüfungs- und Corporate-Governance-Ausschuss des Aufsichtsrats erörtert.

Das interne Kontrollsystem für die Finanzberichterstattung von Fresenius Medical Care hat zum Ziel, die Einhaltung der Rechnungslegungsvorschriften sicherzustellen und enthält Richtlinien sowie Anweisungen, die

1. das Führen von Aufzeichnungen regeln, um die richtige und ordnungsgemäße Darstellung von Transaktionen zu garantieren,
2. das Führen von Aufzeichnungen festlegen, um die Veräußerung von Vermögensgegenständen in hinreichendem Detail zu gewährleisten,
3. hinreichende Sicherheit gewährleisten, dass die Transaktionen von Fresenius Medical Care in erforderlicher Weise aufgezeichnet werden, damit auf dieser Basis der Abschluss in Übereinstimmung mit den Rechnungslegungsgrundsätzen erstellt werden kann,
4. gewährleisten, dass die Erfassung von Erträgen und Aufwendungen nur nach Genehmigung des Managements erfolgen (Vier-Augen-Prinzip),
5. hinreichende Sicherheit bieten in Hinblick auf die Vermeidung oder die rechtzeitige Aufdeckung von unerlaubtem Erwerb sowie unerlaubter Nutzung

oder Veräußerung von Vermögensgegenständen des Konzerns, die eine erhebliche Auswirkung auf den Abschluss der Gesellschaft beziehungsweise des Konzerns haben könnten.

Weitere grundlegende Faktoren, die eine zuverlässige Finanzberichterstattung und die ordnungsgemäße Erfassung von Transaktionen in der Buchhaltung sicherstellen, sind Kontrollmechanismen – beispielsweise systemtechnische und manuelle Abstimmungen – sowie die Trennung bestimmter Personalfunktionen, um möglichen Interessenskonflikten vorzubeugen. Zusätzlich tragen die vom Management durchgeführten Bewertungen dazu bei, dass Risiken mit direktem Einfluss auf die Finanzberichterstattung identifiziert werden und Kontrollen zur Risikominimierung eingerichtet sind. Darüber hinaus erörtern wir Änderungen der Rechnungslegungsvorschriften kontinuierlich und schulen die mit der Finanzberichterstattung betrauten Mitarbeiter entsprechend regelmäßig und umfassend.

Fresenius Medical Care hat in seinen Regionen umfassende Qualitätsmanagementsysteme und ein Compliance-Programm implementiert. Dadurch wollen wir gewährleisten, dass unsere Geschäftsaktivitäten an anerkannten Standards sowie lokalen Gesetzen und Verordnungen ausgerichtet sind. Teil des Compliance-Programms ist der Unternehmenskodex, der in allen Regionen implementiert ist. Er bestärkt die Mitarbeiter weltweit darin, sich sowohl innerhalb des Konzerns als auch den Patienten, externen Partnern und der Öffentlichkeit gegenüber

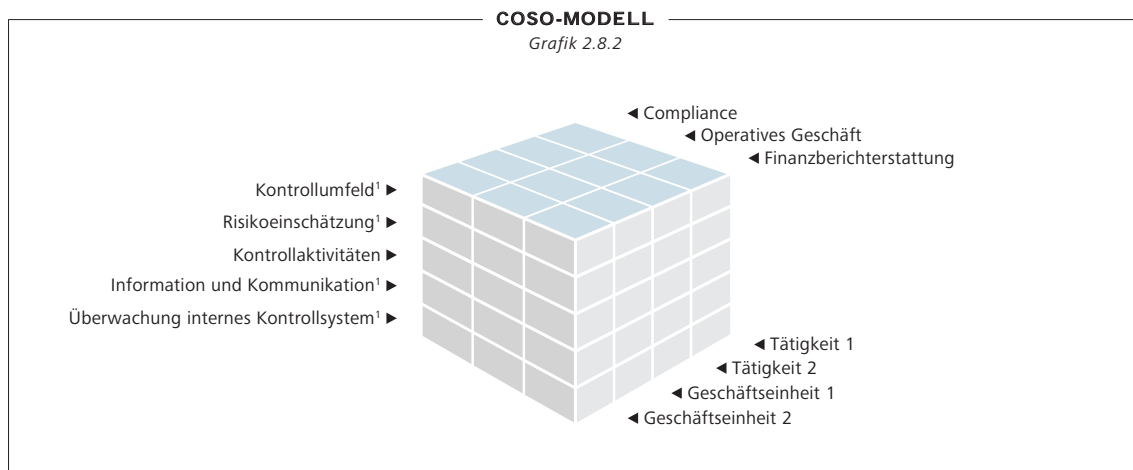

<sup>1</sup> Kontrollen auf Unternehmensebene (Entity Level Controls).



stets professionell und verantwortungsvoll zu verhalten sowie die lokalen Gesetze und unternehmenseigenen Standards stets zu beachten. Weitere Informationen dazu finden Sie im Abschnitt „Compliance“ — ab Seite 130.

## BESONDERE KONTROLL- UND TRANSPARENZANFORDERUNGEN DER USA

Aufgrund der Notierung der Aktie von Fresenius Medical Care an der New Yorker Börse unterliegen wir den Vorschriften des in den USA verabschiedeten Sarbanes-Oxley Act. Der Abschnitt 404 dieses US-Bundesgesetzes fordert, dass der Vorstand US-börsennotierter Gesellschaften die Verantwortung für die Implementierung und Einhaltung eines adäquaten internen Kontrollsystems zur Sicherstellung einer zuverlässigen Finanzberichterstattung übernimmt. Auf der Grundlage dieser Forderung werden die Rechtmäßigkeit und Effizienz unserer Geschäftsabläufe sowie die Effektivität unseres internen Kontrollsystems für die Finanzberichterstattung regelmäßig intern und extern geprüft.

Um die Wirksamkeit des internen Kontrollsystems für die Finanzberichterstattung zu beurteilen, wenden wir die Kriterien des COSO-Modells an, — siehe Grafik 2.8.2 auf Seite 106. Dieses Modell basiert auf dem von der US-Börsenaufsichtsbehörde Securities and Exchange Commission (SEC) anerkannten Standard des Committee of Sponsoring Organizations of the Treadway Commission (Internal Control – Integrated Framework). In Anlehnung an das COSO-Modell wird das interne Kontrollsystem für die Finanzberichterstattung in fünf Ebenen eingeteilt und entsprechend bewertet: Neben dem Kontrollumfeld werden die Risikoeinschätzung, die Kontrollaktivitäten, die Informations- und Kommunikationswege sowie die Überwachung des internen Kontrollsystems dokumentiert, getestet und beurteilt. Die Kontrollen auf Unternehmensebene (Entity Level Controls) bilden dabei die Basis aller internen Kontrollen von Fresenius Medical Care.

Unsere Prüfung des internen Kontrollsystems für die Finanzberichterstattung orientiert sich an einer entsprechenden Richtlinie der SEC (Richtlinie für die Bewertung des internen Kontrollsystems für die

Finanzberichterstattung durch das Management). Die Definitionen und Anforderungen dieser Richtlinie sind in einer speziellen Software umgesetzt, die wir zur Einhaltung des Sarbanes-Oxley Act 404 anwenden. Sie unterstützt die risikobasierte Betrachtungsweise, steigert die Effizienz des Managements interner Kontrollen, verbessert die Qualität der Daten und unterstützt das Management bei der Überwachung und Beurteilung des internen Kontrollsystems.

Regionale Projektteams koordinieren dabei die Bewertung des internen Kontrollsystems. Das Management beurteilt dessen Funktionsfähigkeit jeweils für das laufende Geschäftsjahr. Soweit notwendig, werden externe Berater hinzugezogen. Ein Lenkungsausschuss trifft sich in regelmäßigen Abständen, um sich über Änderungen und neue Anforderungen aus dem Sarbanes-Oxley Act zu informieren, mögliche Kontrollschwächen zu diskutieren und Maßnahmen abzuleiten. Zudem überprüft der Prüfungs- und Corporate-Governance-Ausschuss des Aufsichtsrats im Rahmen seiner Sitzungen regelmäßig die Beurteilungen durch das Management.

Das Management hat die Beurteilung der Wirksamkeit des internen Kontrollsystems für die Finanzberichterstattung des Konzerns zum 31. Dezember 2010 durchgeführt. Auf der Grundlage dieser Evaluierung hat das Management festgestellt, dass das interne Kontrollsystem für die Finanzberichterstattung zum 31. Dezember 2010 wirksam war.

Dem internen Kontrollsystem für die Finanzberichterstattung sind inhärente Grenzen auferlegt, unabhängig davon, wie sorgfältig es ausgestaltet ist. Als Konsequenz kann nicht mit absoluter Sicherheit gewährleistet werden, dass die Ziele der Finanzberichterstattung erreicht noch dass falsche Angaben mit absoluter Sicherheit verhindert oder aufgedeckt werden. Selbst wenn das interne Kontrollsystem für die Finanzberichterstattung als wirksam beurteilt wird, kann nur hinreichende Sicherheit in Hinblick auf die Aufstellung und Darstellung des Abschlusses gewahrt werden. Ebenso sind Prognosen zur Beurteilung der Wirksamkeit in künftigen Perioden mit dem Risiko behaftet, dass Kontrollen wegen geänderter Verhältnisse unzureichend werden oder sich der Grad der Einhaltung vorhandener Richtlinien und Verfahren verschlechtert.

## RISIKOFELDER

Die folgenden Risiken können eine Auswirkung auf unsere Geschäftstätigkeit haben:

### Risiken aufgrund wirtschaftlicher Rahmenbedingungen

Außer der allgemeinen Entwicklung der Weltwirtschaft beobachten und bewerten wir speziell die politischen, rechtlichen und finanzwirtschaftlichen Rahmenbedingungen unseres Geschäftsumfelds sehr sorgfältig. Darüber hinaus analysieren wir stetig und intensiv länderspezifische Risiken, da wir uns mit unserem Angebot überwiegend an internationale Absatzmärkte richten.

### Gesamtwirtschaftliches Risiko

Der Dialysemarkt ist ein Wachstumsmarkt, der von makroökonomischen Einflüssen weitgehend unbeeinflusst ist. Dies liegt unter anderem daran, dass eine immer älter werdende Bevölkerung immer umfassender medizinisch versorgt werden muss. Aufgrund der stabilen Nachfrage nach Dialyseprodukten und -dienstleistungen ist Fresenius Medical Care Konjunkturzyklen nur in relativ geringem Maße unterworfen. In den Ländern, die von der globalen Finanzkrise am stärksten betroffen sind, erwarten wir analog zur Entwicklung im vergangenen Geschäftsjahr auch im laufenden Jahr einen leichten Anstieg der Forderungslaufzeiten. Da wir den überwiegenden Teil unserer Kostenerstattungen von staatlichen Gesundheitsorganisationen und privaten Versicherungsgesellschaften erhalten, gehen wir davon aus, dass die meisten unserer Forderungen einbringlich sind. Weitere Informationen dazu finden Sie in den Kapiteln „Wirtschaftliches Umfeld“ — ab Seite 39 und „Prognosebericht“ — ab Seite 116.

### Branchenrisiken

Von wesentlicher Bedeutung für Fresenius Medical Care sind Risiken, die im Zusammenhang mit einer Veränderung der Marktbedingungen im Gesundheitssektor stehen. Wichtige Faktoren sind hier die Entwicklung neuer Produkte und Therapien durch Wettbewerber sowie regulatorische Änderungen im Gesundheitssektor.

### Unternehmensstrategie und Wettbewerb

Dem Risiko, dass ein Wettbewerber durch seine Produkte oder Verfahren unsere eigenen Absatzchancen schmälert oder dass unsere Strategie wichtigen Trends im Markt nicht gerecht wird, begegnen wir mit unseren Aktivitäten in der Forschung und Entwicklung: Wir arbeiten eng mit Medizinnern und Wissenschaftlern zusammen und sind dadurch in der Lage, wichtige technologische Innovationen frühzeitig aufzugreifen und weiterzuentwickeln. Diese Kooperationen gewährleisten einen hohen Kenntnisstand innerhalb von Fresenius Medical Care über die aktuellen Fortschritte im Bereich alternativer Behandlungsmethoden und ermöglichen es uns, unsere Unternehmensstrategie zu reflektieren und gegebenenfalls anzupassen. Auf dieser Basis analysieren und bewerten wir Entwicklungstrends kontinuierlich und überprüfen unsere Projektfortschritte in der Forschung und Entwicklung.

Darüber hinaus beobachten wir umfassend das Marktgeschehen – insbesondere die Produkte unserer Wettbewerber und die Neueinführungen dialysebezogener Produkte. Hierzu unterhält Fresenius Medical Care eigene Strategieabteilungen, mit deren Hilfe wir Veränderungen antizipieren und auf neue Marktsituationen rasch reagieren können. Ihre wesentliche Aufgabe ist, Informationen über den Dialysemarkt und über Aktivitäten, die das Geschäft des Konzerns beeinflussen könnten, zu ermitteln, zu analysieren und intern regelmäßig zu kommunizieren.

Nicht zuletzt profitieren wir im Wettbewerb sowohl von unserer langjährigen Erfahrung und führenden Position in der Dialysebranche als auch von den Synergien, die sich aus dem Zusammenspiel der verschiedenen technischen, medizinischen und akademischen Einrichtungen innerhalb unseres vertikal integrierten Konzerns ergeben.

### Gesetzliche Rahmenbedingungen im Gesundheitssektor

In unserem streng reglementierten Geschäftsumfeld können Gesetzesänderungen, auch in Bezug auf Kostenerstattungen, einschneidende wirtschaftliche und strategische Auswirkungen auf den

unternehmerischen Erfolg von Fresenius Medical Care haben. Daher beobachten wir gesetzgeberische Aktivitäten und Planungen nicht nur aufmerksam, sondern arbeiten intensiv mit staatlichen Gesundheitseinrichtungen zusammen. Ausführlichere Informationen zu den Veränderungen der Kostenerstattung in unserem wichtigsten Absatzmarkt, den USA, finden Sie im Abschnitt „Gesundheits- und Vergütungssysteme“ — ab Seite 49.

### Risiken des operativen Geschäfts

Möglichen Risiken unseres Geschäfts mit Produkten und Dienstleistungen begegnen wir mit einer Reihe vorbeugender und qualitätserhöhender Maßnahmen.

#### Qualitätsrisiken in der Produktion

Dafür, dass wir gesetzliche und unternehmensinterne Produkt- und Produktionsvorschriften einhalten, sorgen in erster Linie die umfassenden Qualitätsmanagementsysteme in unseren Regionen. Bei der Umsetzung der Vorschriften können die entsprechenden Mitarbeiter auf dokumentierte Verfahrens- und Arbeitsanweisungen zurückgreifen. Um auch direkt vor Ort zu überwachen, ob diese Anweisungen eingehalten werden, führen unsere Qualitätsmanagement-Beauftragten regelmäßig Audits (Überprüfungen) in Produktionsstandorten durch. Hierbei werden alle qualitätsrelevanten Bereiche und Aspekte einbezogen – von der Leitung und Verwaltung über die Entwicklung und Produktion bis zur Kundenzufriedenheit. Zudem werden die Produktionsprozesse in unseren Werken extern geprüft, in Europa etwa durch den TÜV, in den USA durch die Food and Drug Administration (FDA), die US-Behörde für Lebens- und Arzneimittel.

Darüber hinaus wenden wir in unseren Werken die Methoden „Lean Management“ und „Six Sigma“ an. Mit diesen Managementinstrumenten analysieren wir alle Produktionsabläufe und stimmen sie noch besser aufeinander ab, um die Fehlerquote auf Dauer zu reduzieren. Unser Ziel lautet hier, immer konstantere Fertigungsergebnisse zu erzielen und die Qualität unserer Produkte und der damit verbundenen Produktionsprozesse kontinuierlich weiter zu steigern. Seit 2010 wird unser Qualitätsmanagement vom neuen Geschäftsbereich Global Manufacturing Operations (GMO) zentral koordiniert; damit wollen

wir Qualitätsrisiken künftig noch besser steuern. Weitere Informationen finden Sie im Abschnitt „Unser Produktgeschäft“ — ab Seite 77.

#### Qualitätsrisiken bei unseren Dienstleistungen

In unseren Dialysekliniken erbringen wir medizinische Leistungen am Patienten, die grundsätzlich und naturgemäß in einem risikorelevanten Bereich stattfinden. In diesem Kontext können Betriebsrisiken, beispielsweise im Bereich Hygiene, entstehen. Diesen Risiken beugen wir durch eine strikte Aufbau- und Ablauforganisation, kontinuierliche Personalschulungen und eine an den Bedürfnissen der Patienten ausgerichtete Arbeitsweise vor. In Europa zum Beispiel ist unser nach ISO 9001 zertifiziertes Klinik-Qualitätsmanagementsystem Teil des integrierten Managementsystems. Das ISO-9001-Zertifikat bestätigt uns zudem „Good Dialysis Practice“ (auf Deutsch etwa „gute Dialysepraxis“). Mit unserem Qualitätsverbesserungsprogramm setzen wir in den USA die Standards der Kidney Disease Outcomes Quality Initiative (KDOQI) und des Center for Medicare and Medicaid Services (CMS) erfolgreich um. Sowohl die Behandlungsdaten als auch die Abläufe werden jährlich in internen Audits überprüft, um eine kontinuierliche Verbesserung der Prozesse und Behandlungsergebnisse zu erreichen. Darüber hinaus wird unser Klinik-Qualitätsmanagementsystem auch jährlich von externen Institutionen überprüft, zum Beispiel vom TÜV oder Medicare und CMS in den USA. Damit sind wir in der Lage, Qualitätsmängel und -risiken rasch zu erkennen und zeitnah Gegenmaßnahmen einzuleiten.

Unser Qualitätsmanagement schließt auch das Umweltmanagement mit ein, da die Herstellung von Dialyseprodukten mit dem Verbrauch von Umweltressourcen und das Betreiben von Dialysekliniken mit der Entstehung von klinischen Abfällen verbunden ist. Weitere Informationen dazu finden Sie im Kapitel „Verantwortung“ — ab Seite 96.

#### Sicherheitsrisiken bei Produkten und Verfahren

Wie alle blutreinigenden Verfahren, die extrakorporal – also außerhalb des menschlichen Körpers – durchgeführt werden, ist die Dialyse mit gewissen Risiken für den Patienten verbunden, die schlimmstenfalls sogar zum Tod führen können. Nationale wie

internationale Normen und Gesetze legen deshalb verbindliche Sicherheitsstandards für Dialyseprodukte fest. Darüber hinaus haben wir eigene Qualitätsrichtlinien für die Forschung und Entwicklung geschaffen, die die gesetzlichen Anforderungen zum Teil übertreffen. Unsere Arbeit in der Forschung und Entwicklung dokumentieren wir zudem in umfassenden wissenschaftlichen Studien und Veröffentlichungen; für die Anwender unserer Produkte erstellen wir detaillierte Produktinformationen und Gebrauchsanleitungen, und Risiko- und Fehleranalysen führen wir sorgfältig nach strengsten Kriterien durch. Fresenius Medical Care arbeitet darüber hinaus im Rahmen eines kontinuierlichen Produktverbesserungsprozesses gezielt an Verfahren und Vorrichtungen, um die Gefahr, dass Patienten durch einen technischen Fehler oder durch menschliches Versagen zu Schaden kommen, so weit wie möglich zu minimieren.

#### **Risiken in der Forschung und Entwicklung**

Die Entwicklung neuer Produkte und Therapien ist grundsätzlich mit dem Risiko verbunden, dass das angestrebte Entwicklungsziel nicht oder deutlich später als geplant erreicht wird. Bis zur Zulassung bzw. Markteinführung eines Produkts sind zum Teil kostenaufwendige und umfangreiche präklinische und klinische Prüfungen notwendig. Möglichen Risiken im Bereich Forschung und Entwicklung begegnen wir mit der kontinuierlichen Analyse und Evaluierung von Entwicklungstrends sowie mit der Überprüfung der Projektfortschritte. Zudem wird auch in der klinischen und chemisch-pharmazeutischen Forschung und Entwicklung kontinuierlich die strikte Einhaltung gesetzlicher Vorgaben überwacht. Die für Dialyseprodukte Verantwortlichen entwickeln die neuesten Technologien und Produkte in enger Zusammenarbeit mit Vertretern aus Medizin und Wissenschaft. Bereits in der Entwicklungsphase werden Handelsbeziehungen aufgebaut. Weitere Informationen finden Sie im Kapitel „Forschung und Entwicklung“ — ab Seite 68.

#### **Beschaffungsrisiken**

Dem Risiko mangelnder Güte von fremdbezogenen Rohstoffen, Halbfertigprodukten und Bauteilen begegnen wir im Wesentlichen durch umfassende Qualitätsanforderungen an die Lieferanten. Hierzu gehören – neben der Zertifizierung der Lieferanten

durch externe Institute sowie der regelmäßigen Auditierung unserer Zulieferer – eine umfangreiche Evaluierung von Vorabmustern sowie regelmäßige Qualitätskontrollen durch Fresenius Medical Care. Wir beziehen ausschließlich qualitativ hochwertige Produkte, die nachweislich sicher und für ihren Verwendungszweck geeignet sind, von qualifizierten Lieferanten, die den Spezifikationen und Anforderungen von Fresenius Medical Care entsprechen und über langjährige Erfahrung in der Herstellung dieser Materialien verfügen. Diese Zulieferer werden im Rahmen unseres anspruchsvollen Lieferantenmanagementsystems kontinuierlich bewertet.

Unsere Einkaufsstrategie zielt darauf ab, Partnerschaften zu strategischen Lieferanten im Rahmen von Langfristverträgen aufzubauen und zu entwickeln sowie uns gleichzeitig für alle versorgungs- oder preiskritischen Vorprodukte mindestens zwei Bezugsquellen zu sichern („dual sourcing“, „multiple sourcing“). Dank dieser Strategie befürchten wir auch bei wieder steigender Marktnachfrage keine Lieferengpässe. Marktbedingte Abhängigkeiten von Zulieferern strategisch relevanter Materialien akzeptieren wir nur in Ausnahmefällen und unter genau definierten Auflagen. Im Zuge der Einführung des neuen Geschäftsbereichs Global Manufacturing Operations (GMO) haben wir 2010 für unsere unternehmensweit wichtigsten Lieferanten ein neues Risikomanagementsystem eingeführt; weitere Informationen dazu erhalten Sie im Abschnitt „Strategischer Einkauf und Materialwirtschaft“ — ab Seite 80.

Marktbedingten Preisschwankungen von Rohstoffen ist auch Fresenius Medical Care unterworfen. Durch kontinuierliche Marktanalysen, eine bedarfsgerechte Gestaltung von Lieferantenbeziehungen und -verträgen sowie eine einzelfallbezogene Prüfung des Einsatzes von Finanzinstrumenten sind wir jedoch in der Lage, solche Schwankungen teilweise auszugleichen. Mit einer intensiveren überregionalen Zusammenarbeit unserer Beschaffungsteams innerhalb des neuen Geschäftsbereichs GMO wollen wir künftig noch stärker von internationalen Preisvorteilen profitieren und Risiken in Verbindung mit Währungsschwankungen oder mit einer Abhängigkeit von einzelnen Lieferanten noch besser steuern. Weitere Informationen dazu finden Sie im Abschnitt „Strategischer Einkauf und Materialwirtschaft“ — ab Seite 80.

### Personalrisiken

Der Erfolg unseres Unternehmens ist maßgeblich vom Engagement, der Motivation und den Fähigkeiten unserer Mitarbeiter abhängig. Dem Risiko, nicht ausreichend qualifiziertes Personal gewinnen und an Fresenius Medical Care binden zu können, wirken wir vorsorglich durch umfassende Personalmarketing- und Rekrutierungsmaßnahmen und durch zielgruppengerechte Personalentwicklungsprogramme entgegen.

Unser weiteres Wachstum bei Dialyседienstleistungen hängt insbesondere davon ab, inwieweit es uns gelingt, qualifiziertes Pflegepersonal anzuwerben und zu halten. Vor allem in den USA, wo wir die meisten unserer Dialysekliniken betreiben, ist der Wettbewerb um solche Mitarbeiter intensiv. Wir bauen deshalb derzeit verschiedene Maßnahmen und Initiativen aus, mit denen wir die Zufriedenheit des Klinikpersonals weiter erhöhen, die hohe Motivation aufrechterhalten und die Fluktuationsquote in unseren Kliniken weiter senken wollen. Dabei orientieren wir uns auch an den Ergebnissen umfangreicher Zufriedenheitsanalysen unter den Klinikmitarbeitern. Ein Beispiel für eine solche Initiative ist das Fortbildungsprogramm UltraCare Clinical Advancement Program (UCAP) in den USA; weitere Informationen dazu — ab Seite 92. Im Fresenius Medical Care Institute of Dialysis Nursing (F.I.D.N.) auf den Philippinen bilden wir Dialysefachkräfte selbst aus, um unseren Kliniken qualifiziertes und motiviertes Fachpersonal zu vermitteln und so den hohen Standard unserer Behandlungsqualität zu sichern.

Dem allgemeinen Risiko, qualifiziertes Personal könnte nicht zu Fresenius Medical Care finden oder nicht bei uns bleiben, nimmt sich unser Personalmanagement an. Es hat die Aufgabe, neue Talente zu gewinnen und ihre Entwicklung gezielt zu fördern. Fresenius Medical Care bietet ein anspruchsvolles Arbeitsumfeld und langfristige Perspektiven für die berufliche Entwicklung. Zudem profitieren unsere Mitarbeiter von leistungsbezogenen Bonuszahlungen sowie attraktiven Sozialleistungen. Ausführliche Informationen zu unserem Personalmanagement finden Sie im Abschnitt „Mitarbeiterinnen und Mitarbeiter“ — ab Seite 90.

### Risiken durch die Nichteinhaltung von Gesetzen und Standards

Für die Mitarbeiter von Fresenius Medical Care in allen Regionen gilt ein Unternehmenskodex, der die Rahmenbedingungen für ihr Handeln sowohl innerhalb des Unternehmens als auch gegenüber unseren Patienten, externen Partnern und der Öffentlichkeit vorgibt und sie darin bestärkt, die lokalen Gesetze und unternehmenseigenen Standards stets zu beachten. Mit diesem Kodex und unserem Compliance-Programm wollen wir unseren eigenen Erwartungen wie auch denen unserer Partner entsprechen und unsere Geschäftsaktivitäten an anerkannten Standards sowie lokalen Gesetzen und Verordnungen ausrichten. Nähere Erläuterungen zum Compliance-Programm von Fresenius Medical Care finden Sie — ab Seite 130. Mitarbeiter, die mit vertraulichen oder aktienkursrelevanten Tatsachen, sogenannten „Insider“-Informationen, in Kontakt kommen, verpflichten sich darüber hinaus in einer Vertraulichkeitserklärung, die entsprechenden Vorschriften einzuhalten und mit den Informationen verantwortungsvoll umzugehen.

### Risiko einer Abhängigkeit von wesentlichen Kunden

Neben einer Reihe oftmals staatlicher oder öffentlicher Krankenversicherungsträger gehören auch privatwirtschaftlich tätige Krankenversicherungen und Unternehmen zu den Kunden von Fresenius Medical Care. Unser größter privatwirtschaftlicher Kunde – und zugleich der zweitgrößte Anbieter im Dialyседienstleistungssektor weltweit – ist der us-amerikanische Dialyseklinikbetreiber DaVita.

Der Umsatz, den Fresenius Medical Care mit DaVita im Jahr 2010 erzielte, betrug jedoch nur etwa 1 % des Gesamtumsatzes von Fresenius Medical Care. Daher stufen wir das Risiko, das sich aus Beziehungen zu wesentlichen Kunden ergibt, als vergleichsweise gering ein.

### Akquisitionen und Investitionen

Finanzwirtschaftliche Risiken, die im Zuge von Akquisitionen und Investitionen entstehen können, lassen wir bereits im Vorfeld durch interne und bei Bedarf durch externe Fachleute überprüfen. Mögliche Akquisitionen und Investitionen werden in einem unternehmensinternen Ausschuss (Acquisition Investment

Committee, AIC) anhand von Mindestanforderungen in Bezug auf verschiedene Messgrößen analysiert. Diese sollen die Rentabilität der Akquisitionen- und Investitionsentscheidungen sicherstellen. Die Rentabilität der getätigten Akquisitionen und Investitionen wird auch im Nachhinein auf Basis dieser Kennzahlen überwacht. Nähere Informationen zur Unternehmenssteuerung finden Sie — ab Seite 35.

### Finanzrisiken

Zu den für unsere Gesellschaft wesentlichen Finanzrisiken zählen das Währungs- und das Zinsrisiko.

Wir betreiben ein aktives Risikomanagement für die Währungs- und Zinsrisiken, die sich aus unserer Geschäftstätigkeit ergeben. Das Risikomanagement basiert dabei auf Strategien, die in enger Zusammenarbeit mit dem Vorstand definiert wurden und, wenn erforderlich, angepasst werden. Dazu gehören Richtlinien, die sämtliche Phasen und Ebenen des Risikomanagementprozesses regeln: die Verantwortlichkeiten für die Ermittlung von Risiken, die sorgsame Anwendung von Finanzinstrumenten zu Absicherungszwecken und eine präzise Berichterstattung. Zur Absicherung der Zins- und Währungsrisiken werden derivative Finanzinstrumente eingesetzt; diese verwenden wir jedoch ausschließlich im Zusammenhang mit bestehenden Grundgeschäften und nicht zu Handels- oder Spekulationszwecken. Bei allen Transaktionen arbeiten wir mit Banken mit guten Ratings zusammen (beim überwiegenden Teil der Banken mindestens „A“), deren Auswahl vom Vorstand genehmigt wurde.

Wir setzen Zinssicherungsinstrumente zur Vermeidung von Zinsänderungsrisiken aus variabel verzinsten langfristigen Krediten ein. Der Nominalwert der entsprechenden Sicherungsgeschäfte belief sich zum 31. Dezember 2010 auf 2,15 MRD US \$. Somit waren von den Finanzverbindlichkeiten des Konzerns zum 31. Dezember 2010 rund 64 % durch Festsatzfinanzierungen bzw. durch Zinssicherungen gegen einen Zinsanstieg geschützt – lediglich etwa 36 % der Verbindlichkeiten unterlagen somit dem Risiko steigender Zinssätze. Auf Basis der derzeitigen hohen Absicherung – so das Ergebnis einer Sensitivitätsanalyse – würde sich das Konzernergebnis (Ergebnis, das auf die Anteilseigner der Fresenius Medical Care

AG & Co. KGaA entfällt) im Falle eines Anstiegs der für das Unternehmen relevanten Referenzzinssätze um 50 Basispunkte um weniger als 1 % verändern. Die Zinsderivate laufen zu verschiedenen Terminen zwischen 2011 und 2012 aus. Des Weiteren setzt der Konzern Zinssicherungsgeschäfte im Hinblick auf die Aufnahme zukünftiger Verbindlichkeiten ein. Der Nominalwert der entsprechenden Sicherungsgeschäfte belief sich zum 31. Dezember 2010 auf 1,025 MRD US \$. Die Zinsderivate werden im Januar 2011 bzw. Juni 2012 wirksam.

Unsere Fremdwährungsrisiken entstehen in erster Linie aus Transaktionen wie Käufen und Verkäufen in fremder Währung zwischen Konzerngesellschaften, die in verschiedenen Regionen und Währungsräumen ansässig sind. Ein Hauptteil dieser Transaktionsrisiken ist dabei auf Produktverkäufe aus dem Euro-Raum an internationale Konzerngesellschaften zurückzuführen. Das Währungsrisiko ergibt sich daher aus Veränderungen des Euro gegenüber verschiedenen anderen Währungen. Zur Sicherung dieser Risiken verwenden wir überwiegend Devisentermingeschäfte. Der Nominalwert aller Kurssicherungsgeschäfte, vorwiegend für die Absicherung von Euro gegen US-Dollar und gegen verschiedene andere Währungen, belief sich am 31. Dezember 2010 im Konzern auf 2,6 MRD US \$. Basierend auf einer Sensitivitätsanalyse schätzt Fresenius Medical Care den Effekt für das operative Ergebnis auf etwa 13 MIO US \$. Dabei wird unterstellt, dass sich die Wechselkurse aller nicht abgesicherten Grundgeschäfte in Fremdwährung um 10 % zu Ungunsten von Fresenius Medical Care verändern. Weitere Informationen dazu finden Sie im Abschnitt „Liquidität und Mittelherkunft“ — ab Seite 184 des Finanzberichts.

### Debitorenrisiken

Das Risiko von Zahlungsverzögerungen bzw. -ausfällen von Kunden minimieren wir durch eine Bewertung der Kreditwürdigkeit von Neukunden sowie durch Nachfolgebewertungen und eine Prüfung des Kreditlimits. Außenstände bestehender Kunden werden überwacht und das Ausfallrisiko der Forderungen bewertet. Weitere Informationen zu ausstehenden Forderungen finden Sie — auf Seite 171 des Finanzberichts.



### Rechtsrisiken

Risiken, die sich im Zusammenhang mit Rechtsstreitigkeiten ergeben, werden in unserem Unternehmen fortlaufend identifiziert, bewertet und berichtet. Fresenius Medical Care ist in verschiedene Rechtsstreitigkeiten involviert, die sich unter anderem aus der operativen Geschäftstätigkeit ergeben. Einzelheiten zu offenen rechtlichen Verfahren und weitere Informationen zu wesentlichen Rechtsrisiken, denen sich Fresenius Medical Care ausgesetzt sieht, finden Sie unter Anmerkung 18 — ab Seite 254 des Finanzberichts.

### IT-Risiken

Mit unserem kontinuierlichen Wachstum und der zunehmenden Internationalisierung von Fresenius Medical Care werden die Abläufe im Unternehmen komplexer. Entsprechend erhöht sich unsere Abhängigkeit von Informations- und Kommunikationstechnologien, mit denen wir Abläufe strukturieren und zunehmend überregional harmonisieren können. Fresenius Medical Care nutzt ständig aktualisierte sowie neu entwickelte Hard- und Software, um potenziellen Sicherheitsrisiken bei der Informationstechnologie (IT) vorzubeugen. Anhand unseres „Information Security Management Systems (ISMS)“, basierend auf dem international anerkannten Sicherheitsstandard ISO 27002, entwickeln wir die IT-Sicherheitsrichtlinien und Abläufe innerhalb von Fresenius Medical Care kontinuierlich weiter. Geschäftsdaten werden regelmäßig mit Backups gesichert; die Häufigkeit dieser Sicherungen hängt von der Bedeutung des jeweiligen IT-Systems für unser Geschäft ab. Mögliche IT-Risiken deckt ein detaillierter Notfallplan ab, der permanent verbessert und getestet wird. Um eine höchstmögliche Verfügbarkeit und Datensicherheit unserer IT-Systeme zu gewährleisten, betreibt Fresenius Medical Care drei geografisch voneinander getrennte Rechenzentren. Jedes von ihnen verfügt über einen Katastrophennotfallplan. Kritische Systeme werden gespiegelt und somit als Kopie doppelt vorgehalten. Dies betrifft beispielsweise klinische Systeme sowie die Kommunikationsinfrastruktur und -server. Zur Minimierung organisatorischer Risiken, etwa Manipulationen oder unzulässige Zugriffe, ist ein Zugriffsschutz durch Passwörter eingerichtet; diese müssen alle 45 bis 90 Tage geändert werden. Darüber hinaus gelten Unternehmensrichtlinien zum Datenschutz,

die auch die Vergabe von Zugriffsrechten regeln. Ihre Einhaltung wird unter anderem durch Kontrollen mit Bezug auf Abschnitt 404 des Sarbanes-Oxley Act überprüft. Operative und sicherheitsbezogene Prüfungen, sowohl intern als auch durch externe Prüfer, finden jährlich statt.

### Sonstige operative Risiken

Risiken, die im Zuge der Errichtung neuer Produktionsstätten und der Einführung neuer Technologien entstehen könnten, werden bereits in der Planung bedacht und kontinuierlich überprüft. Beim Bau neuer Produktionseinheiten orientieren wir uns an internen Meilensteinen, deren Einhaltung der ständigen Überwachung unterliegt. Mit weiteren vorbeugenden Maßnahmen wirken wir insbesondere der Beeinträchtigung von Dialyседienstleistungen aufgrund von Umwelteinflüssen entgegen: Viele der unternehmenseigenen Dialysekliniken verfügen über Notstromaggregate, die selbst bei generellem Stromausfall gewährleisten, dass die lebenswichtigen Dialysebehandlungen fortgeführt werden können. Darüber hinaus übernimmt beispielsweise in den USA ein Noteinsatzteam von Fresenius Medical Care im Fall von Naturkatastrophen wie Hurrikans die professionelle Koordination von Hilfsmaßnahmen und ermöglicht somit die Dialysebehandlung für die Patienten der betroffenen Regionen. Weitere Informationen hierzu finden Sie im Abschnitt „Dialyседienstleistungen in Krisensituationen“ — ab Seite 88.

## BEURTEILUNG DER GESAMTRISIKOSITUATION

Grundlage der Einschätzung des Gesamtrisikos durch den Vorstand ist das von Fresenius Medical Care eingesetzte Risikomanagementsystem, das regelmäßig von Dritten und vom leitenden Management überprüft wird. Im Zuge der unternehmensweiten Überprüfung des Integrierten Managementsystems wird die Effektivität des implementierten Risikomanagementsystems überwacht; soweit erforderlich, werden Nachbesserungen vorgenommen. Unser Risikomanagement und die Überprüfung des zugehörigen Managementsystems wird der Vorstand auch weiterhin ausbauen, um potenzielle Risiken noch schneller erkennen, untersuchen, einschätzen und entsprechende Gegenmaßnahmen einleiten



zu können. Gemäß der — ab Seite 104 beschriebenen Grundlagen zur Einschätzung der Risikofaktoren gehen wir zum jetzigen Zeitpunkt davon aus, dass keine der genannten Risiken zu einer dauerhaften und wesentlichen Beeinträchtigung der Ertrags-, Finanz- und Vermögenslage von Fresenius Medical

Care führen werden. Im Vergleich zum Jahr 2009 wurden zudem keine wesentlichen Veränderungen der Risiken identifiziert. Organisatorisch haben wir alle Voraussetzungen geschaffen, um frühzeitig über sich abzeichnende Risikosituationen Kenntnis zu erlangen.

## NACHTRAGSBERICHT

### WIRTSCHAFTS- UND GESCHÄFTSUMFELD

Im Januar 2011 hat Fresenius Medical Care einen Kaufvertrag zur Übernahme von „International Dialysis Centers (IDC)“, dem Dialyседienstleistungsge-schäft von Euromedic International unterzeichnet. Mit dieser Akquisition möchten wir unsere Position im Dienstleistungsgeschäft in Osteuropa ausbauen, ein wesentliches Element unserer Wachstumsstrategie. IDC behandelt in neun Ländern mehr als 8.200 Patienten in 70 Dialysekliniken, den Großteil in Mittel- und Osteuropa. Der Kaufpreis beträgt 485 MIO €. Die Übernahme bedarf noch der Zustimmung der zuständigen Kartellbehörden und wird voraussichtlich noch im zweiten Quartal 2011 abgeschlossen. Danach wird die Akquisition jährlich rund 180 MIO US\$ zum Umsatz von Fresenius Medical Care beitragen und sich bereits im ersten Jahr nach Abschluss positiv auf das Konzernergebnis auswirken.

Nach der Übernahme von IDC hat Fresenius Medical Care im Januar zwei vorrangige, unbesicherte Anleihen über 650 MIO US\$ (Kupon von 5,75 %) und 300 MIO € (Kupon von 5,25 %) erfolgreich bei institutionellen Investoren platziert. Beide Anleihen werden im Jahr 2021 fällig. Der Nettoemissionserlös in Höhe von etwa 1,35 MRD US\$ wird zur Rückzahlung von Finanzverbindlichkeiten, für Akquisitionen einschließlich der Übernahme von IDC und für allgemeine Geschäftszwecke zur Unterstützung der Unternehmensaktivitäten im Dienstleistungs- und Produktgeschäft verwendet.

Ebenfalls im Januar 2011 hat Fresenius Medical Care den Abschluss einer Kooperationsvereinbarung über die Komplettversorgung von Dialysepatienten in der spanischen Region Murcia bekannt gegeben. Die Vereinbarung ist ab Mitte des Jahres 2011 gültig und sieht vor, dass wir rund 200 Dialysepatienten in der Region behandeln und pro Patient eine pauschale Vergütung erhalten, die an die Qualität der von Fresenius Medical Care erbrachten Leistungen gekoppelt ist. Murcia ist die erste Region Spaniens, die die Vergütungsstruktur von einer variablen Einzelvergütung je Behandlung (fee for service) auf eine pauschale Vergütung umstellt. Weitere Informationen finden Sie auch im Abschnitt „Gesundheits- und Vergütungssysteme“ — ab Seite 49.

Darüber hinaus sind zwischen dem Bilanzstichtag 31. Dezember 2010 und der Drucklegung des Geschäftsberichts am 11. März 2011 keine weiteren wesentlichen Ereignisse eingetreten. Grundsätzliche Veränderungen des Wirtschafts- und Geschäftsumfelds haben sich in unserem Tätigkeitsbereich ebenfalls nicht ergeben. Die Dialyse ist weiterhin eine medizinisch notwendige und lebensrettende Behandlung bei akutem oder chronischem Nierenversagen, für die es – abgesehen von der Nierentransplantation – keine vergleichbare Behandlungsalternative gibt. Fresenius Medical Care ist somit in einem relativ stabilen Geschäftsfeld aktiv, das auch konjunkturellen Entwicklungen nur bedingt unterworfen ist.

Wir planen derzeit keine weiteren Veränderungen, die zu wesentlichen Beeinträchtigungen der Ertrags-, Finanz- und Vermögenslage unseres Unternehmens führen könnten – weder in der Organisationsstruktur, der Verwaltung oder der Rechtsform noch im Personalbereich.

### GESAMTAUSSAGE ZUR WIRTSCHAFTLICHEN LAGE

Die Geschäftsentwicklung von Fresenius Medical Care in den ersten Wochen des Jahres 2011 entsprach unseren Erwartungen.

Wie im nachfolgenden Prognosebericht dargelegt, verzeichnen wir weltweit eine fortgesetzt gute Nachfrage nach unseren Dialyseprodukten und -dienstleistungen. Insgesamt beurteilte der Vorstand die Geschäftsentwicklung unseres Unternehmens bei Erstellung des vorliegenden Berichts weiterhin als positiv. Wir gehen aus heutiger Sicht davon aus, dass wir Umsatz und Ertrag den Prognosen entsprechend steigern und auch die weiteren Finanzkennzahlen wie geplant erreichen können. Zum Zeitpunkt des Drucktermins stimmten unsere Erwartungen im Wesentlichen mit der aktuellen Geschäftsentwicklung überein.

# PROGNOSEBERICHT

Nachdem wir im vergangenen Geschäftsjahr erneut unsere Ziele erreicht und teilweise übertroffen haben, erwarten wir auch für das Geschäftsjahr 2011 eine positive Geschäftsentwicklung und wiederum neue Rekordwerte bei Umsatz und Ertrag. Wir sehen uns auf einem guten Weg, in den folgenden Jahren unseren nachhaltigen Wachstumskurs fortzusetzen.

## GESCHÄFTSPOLITIK

Fresenius Medical Care ist Weltmarktführer in der Dialyse. Wir wollen diese Position, speziell auch bei den wichtigsten Produktgruppen Dialysatoren und Dialysemaschinen, in den kommenden Jahren festigen und wenn möglich weiter ausbauen. Wir beabsichtigen, unser vertikal integriertes Geschäftsmodell beizubehalten; wesentliche Änderungen der Geschäftspolitik sind nicht vorgesehen. Bereits im Jahr 2005 hatten wir unsere langfristige Wachstumsstrategie formuliert, die wir in ihren Grundzügen auch weiterverfolgen. Im Herbst 2010 haben wir unsere neuen mittelfristigen Ziele (GOAL 13) definiert; weitere Informationen hierzu erhalten Sie im Abschnitt „Wachstumsstrategie“ — ab Seite 36.

## GESAMTWIRTSCHAFTLICHE RAHMENBEDINGUNGEN

Im Jahr 2010 belebte sich die Konjunktur rascher als von Experten erwartet. Diese Dynamik dürfte sich 2011 allerdings nicht fortsetzen, da die Konjunkturprogramme in vielen Ländern inzwischen ausgelaufen sind. Dennoch ist mit einem moderaten Aufwärtstrend der weltweiten gesamtwirtschaftlichen Entwicklung zu rechnen, da das niedrige Zinsniveau für eine anhaltende Investitionstätigkeit sorgt und die stabile Arbeitsmarktlage den privaten Konsum begünstigt. Das Bruttoinlandsprodukt (BIP) dürfte 2011 um etwa 3,6 % zunehmen, nach einem Plus von 4,8 % im Jahr zuvor.

### USA

Im laufenden Jahr ist als Folge der sich abschwächenden Investitionstätigkeit mit einer nachlassenden wirtschaftlichen Expansion zu rechnen. Zudem befindet sich der Arbeits- und Immobilienmarkt weiterhin in einer Krise, was den privaten Konsum belastet. Per saldo dürfte das BIP der USA 2011 um 2,5 % zunehmen.

## REALES BRUTTOINLANDSPRODUKT UND VERBRAUCHERPREISE

Tabelle 2.10.1

Erwartete Veränderung gegenüber dem Vorjahr in %

|                         | Bruttoinlandsprodukt |            |            | Verbraucherpreise |            |            |
|-------------------------|----------------------|------------|------------|-------------------|------------|------------|
|                         | 2010                 | 2011       | 2012       | 2010              | 2011       | 2012       |
| USA                     | 2,8                  | 2,5        | 3,0        | 1,6               | 0,9        | 1,1        |
| Deutschland             | 3,7                  | 2,3        | 1,3        | 1,1               | 1,6        | 2,0        |
| Euro-Raum               | 1,7                  | 1,3        | 1,3        | 1,5               | 1,6        | 1,7        |
| Großbritannien          | 1,7                  | 1,3        | 1,6        | 3,2               | 2,7        | 1,5        |
| Neue EU-Mitgliedsländer | 1,8                  | 1,4        | 1,4        | 1,7               | 1,8        | 1,6        |
| EU 27                   | 1,8                  | 1,4        | 1,5        | 1,8               | 1,9        | 1,7        |
| Russland                | 3,8                  | 4,0        | 4,5        | 6,9               | 7,5        | 6,8        |
| Japan                   | 3,3                  | 1,5        | 1,6        | -0,8              | -0,4       | -0,6       |
| China                   | 10,7                 | 8,1        | 8,5        | 3,4               | 4,5        | 4,5        |
| Ostasien und Hongkong   | 7,4                  | 3,9        | 5,4        | 3,0               | 2,4        | 3,4        |
| Lateinamerika           | 5,9                  | 3,2        | 4,5        | 6,6               | 5,9        | 6,8        |
| <b>WELTWEIT</b>         | <b>4,8</b>           | <b>3,6</b> | <b>4,0</b> | <b>4,4</b>        | <b>3,9</b> | <b>4,0</b> |

Quellen: Institut für Weltwirtschaft an der Universität Kiel, „Weltkonjunktur im Winter 2010“, 15. Dezember 2010, Monatsberichte der Deutschen Bundesbank und Europäischen Zentralbank.

### Europa

Im Euro-Raum ist analog zur Entwicklung in den USA mit einem abgeschwächten Wachstum zu rechnen. Die deutsche Wirtschaft dürfte 2011 etwas stärker als der Durchschnitt des Euro-Raums zulegen. Ein stabiler Arbeitsmarkt und niedrige Zinsen begünstigen den privaten Konsum und die Investitionstätigkeit.

### Asien

In Asien ist im laufenden Jahr mit einer uneinheitlichen Entwicklung der Konjunktur zu rechnen. Wachstumsimpulse gehen weiterhin von den Schwellenländern wie China und Indien aus. In Japan ist dagegen nur ein moderates Wachstum zu erwarten.

### Lateinamerika

In Lateinamerika dürfte insbesondere die restriktive Geldpolitik zu einer Verringerung der Expansionsgeschwindigkeit führen. Getragen wird das Wachstum von einer guten Binnennachfrage und hohen Rohstoffpreisen. Insgesamt wird das BIP in dieser Region 2011 voraussichtlich ein Plus von 3,2 % aufweisen, nach einem Wachstum von 5,9 % im Jahr 2010.

## DIALYSEMARKT

Fresenius Medical Care erwartet für das Geschäftsjahr 2011 einen Anstieg der weltweiten Patientenzahlen von etwa 6 %. Dabei sollten die zum Teil erheblichen regionalen Unterschiede unverändert bestehen bleiben: Für die USA, Japan, West- und Mitteleuropa rechnen wir mit Zuwachsraten bei der Zahl der Patienten von etwa 3 bis 5 %. In diesen Regionen ist die Prävalenz der Patienten mit terminaler Niereninsuffizienz bereits relativ hoch und der Zugang zu einer entsprechenden Behandlung, zumeist der Dialyse, sichergestellt. In ökonomisch schwächeren Regionen liegen die Zuwachsraten noch deutlich höher – bei bis zu 10 % –, in einzelnen Ländern sogar noch darüber. Auch in den nächsten

Jahren erwarten wir einen ungebrochenen Trend hin zu steigenden Patientenzahlen sowie ähnlich hohe Zuwachsraten von etwa 6 % jährlich.

Nicht zuletzt tragen demografische Faktoren zu weiter wachsenden Dialysemärkten bei, unter anderem die älter werdende Bevölkerung und die steigende Zahl von Menschen, die an Diabetes und Bluthochdruck leiden – Erkrankungen, die dem terminalen Nierenversagen häufig vorausgehen. Zudem steigt die Lebenserwartung von Dialysepatienten dank der sich stetig weiter verbessernden Behandlungsqualität und des auch in den Entwicklungsländern steigenden Lebensstandards.

Infolge der erwarteten unterschiedlichen Wachstumsraten wird in Zukunft ein höherer Anteil der Dialysepatienten in Asien, Lateinamerika, Osteuropa, dem Nahen Osten und Afrika behandelt werden. Hierin offenbart sich das große Potenzial für das gesamte Spektrum der Dialyседienstleistungen und -produkte, da mehr als 80 % der Weltbevölkerung in diesen Regionen lebt.

Hinsichtlich der Behandlungsmodalitäten erwarten wir in den Jahren 2011 und 2012 keine wesentlichen Änderungen. Die Hämodialyse wird auch in Zukunft mit rund 89 % die vorherrschende Behandlungsmethode sein. Die Peritonealdialyse sollte die Behandlungsart der Wahl von rund 11 % aller Dialysepatienten bleiben.

Das Volumen des weltweiten Dialysemarktes, das im vergangenen Jahr nach vorläufigen Schätzungen etwa 69 MRD US\$ betrug, sollte sich nach unseren Erwartungen jährlich um etwa 4 % erhöhen. Voraussetzung dafür ist, dass die Wechselkursrelationen im Prognosezeitraum stabil bleiben. Damit könnte sich der Gesamtmarkt bis zum Jahr 2012 auf etwa 75 MRD US\$ belaufen, was nahezu einer Verdopplung innerhalb eines Zeitraums von etwa zehn Jahren gleichkäme.

## WACHSTUMS- UND KÜNFTIGE ABSATZMÄRKTE

In den wesentlichen Wachstumsmärkten Osteuropas und Asiens sind wir bereits seit einigen Jahren mit eigenen Vertriebsorganisationen im Produktgeschäft vertreten und nehmen hier führende Marktpositionen ein. Kleinere Wachstumsmärkte bedienen wir über Distributoren. Wir wollen weiterhin unser lokales Produktangebot und die lokale Produktion strategisch ausweiten. Auch Akquisitionen können uns dabei unterstützen, unser Produktgeschäft zu stärken: Im Berichtsjahr haben wir beispielsweise das Peritonealdialyse-Geschäft des schwedischen Medizintechnik-Unternehmens Gambro erworben und damit unsere Aktivitäten im Bereich der Hemodialyse

insbesondere in Europa und der Region Asien-Pazifik ausgeweitet. Zugleich nutzen wir Akquisitionen wie diejenigen von Asia Renal Care in Asien oder KNC in Russland im Jahr 2010 — *siehe auch Seite 50*, um unser Kliniknetz in diesen Regionen auszubauen, im Berichtsjahr beispielsweise in Ländern wie Korea, Malaysia, Singapur, den Philippinen und Thailand. In Asien wird für uns neben China, wo wir im Berichtsjahr sowohl unser Produktgeschäft als auch unsere Kooperationen mit Krankenhäusern auf dem Gebiet der Dialyседienstleistungen erneut stark erweitert haben, mittelfristig auch der indische Markt zunehmend interessant: Hier sind wir seit den 1990er Jahren über Distributoren auf dem Produktmarkt vertreten; seit der Gründung unserer Tochtergesellschaft Fresenius Medical Care India

### ERWARTETES WACHSTUM DER PATIENTENZAHL 2011<sup>1</sup>

Tabelle 2.10.2

|                                  | Veränderung   |
|----------------------------------|---------------|
| <b>Nordamerika</b>               | <b>~ 5 %</b>  |
| USA                              | ~ 4 %         |
| <b>Europa/Naher Osten/Afrika</b> | <b>~ 4 %</b>  |
| EU                               | ~ 3 %         |
| <b>Asien-Pazifik</b>             | <b>~ 10 %</b> |
| Japan                            | ~ 3 %         |
| <b>Lateinamerika</b>             | <b>~ 7 %</b>  |
| <b>WELTWEIT</b>                  | <b>~ 6 %</b>  |

<sup>1</sup> Interne Schätzung.

### ANZAHL DIALYSEPATIENTEN WELTWEIT – PROGNOSE BIS 2020<sup>1</sup>

Grafik 2.10.3

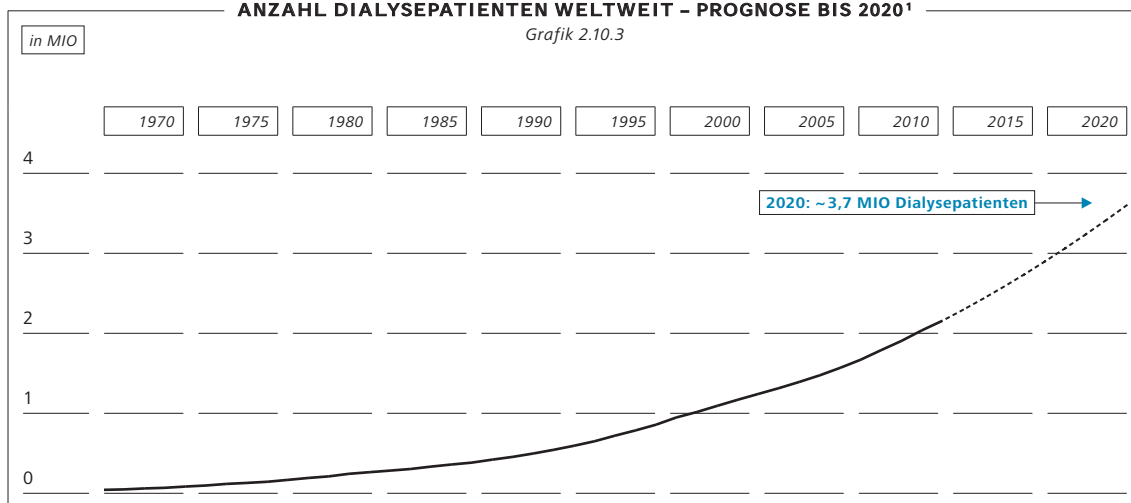

<sup>1</sup> Interne Schätzung.

im Jahr 2006 ist das Produktgeschäft im Schnitt um mehr als 30 % jährlich gewachsen. Die regionalen und lokalen Gesundheitsbehörden in Indien fördern das Modell der Public Private Partnerships (PPP) — siehe dazu auch Seite 124; ab dem laufenden Geschäftsjahr wollen wir mit größeren regionalen und städtischen öffentlichen Krankenhäusern entsprechende Versorgungsverträge abschließen. Wir erwarten, dass die zunehmende Bedeutung der Märkte China und Indien in den kommenden Jahren unser Wachstum in der Region auch insgesamt beschleunigen wird.

## GESCHÄFTLICHE ENTWICKLUNG VON FRESENIUS MEDICAL CARE 2011 UND 2012

### Währungskursrelationen

Die Prognosen von Fresenius Medical Care zum Geschäftsverlauf im Jahr 2011 basieren auf einem Wechselkurs von 1,3326 US \$ je Euro. Dieser Wert entspricht dem Stichtagskurs vom 31. Dezember 2010. Wie im Kapitel „Wirtschaftliches Umfeld“ — ab Seite 39 dargelegt, ist die Währungsrelation des us-Dollar zum Euro für Fresenius Medical Care von besonderer Bedeutung. Darüber hinaus berücksichtigt Fresenius Medical Care in seinen Prognosen auch weitere — speziell für die wirtschaftliche Entwicklung der Tochtergesellschaften — relevante Wechselkurse, etwa des taiwanesischen Dollar zum us-Dollar oder des chinesischen Yuan zum Euro. Volatile Wechselkurse beeinflussen sowohl die Prognose der Ergebnisse, die die Tochtergesellschaften erzielen, als auch die Umrechnung dieser Ergebnisse in us-Dollar.

### Umsatz

Im laufenden Geschäftsjahr wollen wir unseren Umsatz weiter deutlich erhöhen: Er soll um 6 bis 8 % auf 12,8 bis 13,0 MRD US \$ steigen. Wir wollen die positive Entwicklung auch danach fortsetzen und prognostizieren für das Jahr 2012 einen Anstieg des Umsatzes von noch einmal 6 bis 8 % auf Basis konstanter Wechselkurse.

### Konzernergebnis

Im Geschäftsjahr 2011 wollen wir ein Konzernergebnis (Ergebnis, das auf die Anteilseigner der Fresenius Medical Care AG & Co. KGaA entfällt)

zwischen 1,035 und 1,055 MRD US \$ erwirtschaften. Im darauffolgenden Jahr soll das Konzernergebnis stärker als der Umsatz ansteigen. Zum Zeitpunkt der Drucklegung dieses Geschäftsberichts erwarten wir keine Einmaleffekte, die einen wesentlichen Einfluss auf das Konzernergebnis im Jahr 2011 haben könnten.

### Ergebnis je Aktie

Für die Geschäftsjahre 2011 und 2012 gehen wir parallel zur erwarteten Entwicklung des Konzernergebnisses von einem Wachstum des Ergebnisses je Aktie aus.

### Dividende

Der Konzern verfolgt eine langfristige ergebnisorientierte Dividendenpolitik. Die Dividende wurde — vorbehaltlich der Beschlussfassung auf der Hauptversammlung am 12. Mai 2011 — 14 Mal in Folge erhöht. In diesem Zeitraum ist die Dividende je Stammaktie von 0,17 € auf vergleichbarer Basis auf 0,65 € für das Geschäftsjahr 2010 gestiegen. Auch für die Jahre 2011 und 2012 plant das Unternehmen, diesen Trend beizubehalten. Die Ausschüttungsquote soll in beiden Jahren konstant bei knapp einem Drittel des Konzernergebnisses liegen. Informationen zur vorgeschlagenen Dividendenerhöhung finden Sie im Abschnitt „Dividende“ — auf Seite 23.

### Investitionen und Akquisitionen

Wir streben an, für Investitionen in Sachanlagen und Akquisitionen im Geschäftsjahr 2011 etwa 14 % des Umsatzes aufzuwenden. Davon sollten im Geschäftsjahr 2011 rund 5 % auf Investitionen entfallen; 9 % sollten für Akquisitionen und Beteiligungen verwendet werden, das entspricht absolut etwa 1,2 MRD US \$. Im Geschäftsjahr 2012 planen wir rund 7 % des Umsatzes für Investitionen in Sachanlagen und Akquisitionen einzusetzen.

Außer für die ständige Modernisierung unserer Dialysekliniken und Produktionsanlagen sollen die Investitionen insbesondere für die Eröffnung neuer Dialysekliniken, die Erweiterung der weltweiten Produktionskapazitäten und für Dialysemaschinen im Rahmen langfristiger Lieferverträge verwendet werden. Weitere Investitionen dienen der Rationalisierung der Produktion und der verbesserten Verwaltung von Patientendaten sowie der Leistungsabrechnung. Darüber hinaus beabsichtigt der Konzern, weiter gezielt — auch durch den Erwerb von

Beteiligungen – zu akquirieren, um das weltweite Geschäft zu stärken. Der Fokus liegt auf der Ausweitung unseres Netzes von Dialysekliniken und der Kooperation mit Herstellern von Medikamenten für Dialysepatienten.

### Steuern

Für das Geschäftsjahr 2011 rechnen wir mit einer Steuerquote zwischen 34,5 und 35 % und für das Geschäftsjahr 2012 mit einer Steuerquote zwischen 35 und 36 %.

### Cash Flow

Der operative Cash Flow soll auch in den Jahren 2011 und 2012 ein Niveau von mehr als 10 % vom Umsatz erreichen. In den am stärksten von der aktuellen globalen Finanzkrise betroffenen Ländern erwarten wir wie im vergangenen Jahr einen leichten Anstieg der Forderungslaufzeiten. Auch in den USA könnte die Einführung des neuen Vergütungssystems zu längeren Forderungslaufzeiten führen. Ein weiterhin zielorientiertes Management des Umlaufvermögens soll die Erreichung der Cash-Flow-Ziele sicherstellen. Bei einem prognostizierten Umsatz von 12,8 bis 13 MRD US \$ würde der operative Cash Flow im Geschäftsjahr 2011 bei mindestens etwa 1,28 bis 1,3 MRD US \$ liegen.

### Debt-EBITDA-Verhältnis

Fresenius Medical Care orientiert sich in seiner langfristigen Finanzplanung am Verhältnis der Finanzverbindlichkeiten zum Ergebnis vor Zinsen, Steuern und Abschreibungen (Debt-EBITDA-Verhältnis), das zum Ende des Jahres 2010 bei 2,38 lag. Aufgrund des erhöhten Akquisitionsvolumens erwarten wir einen Anstieg dieser Verhältniszahl auf bis zu 2,8 zum Jahresende 2011; für 2012 soll sie allerdings nicht weiter ansteigen.

### Finanzierung

Sicherung der finanziellen Flexibilität hat höchste Priorität in der Finanzierungsstrategie von Fresenius Medical Care. Die Finanzierungsaktivitäten werden auch in den nächsten Jahren darauf ausgerichtet sein, den Einsatz nachrangiger Finanzierungsinstrumente zu reduzieren und diese gegebenenfalls durch vorrangige Anleihen zu ersetzen. Wir sehen unsere Refinanzierungsmöglichkeiten weiterhin als sehr stabil und flexibel an und beabsichtigen, unsere Investitionen plangemäß fortzusetzen. Neben den genutzten Instrumenten hat Fresenius Medical Care genügend Finanzierungsspielraum im Wesentlichen in Form einer syndizierten Kreditlinie, die bei Bedarf

## ZIELE 2011/2012

Tabelle 2.10.4

|                                            | Ergebnisse 2010                   | Ziele 2011                                              | Ziele 2012                                              |
|--------------------------------------------|-----------------------------------|---------------------------------------------------------|---------------------------------------------------------|
| Umsatz                                     | 12,05 MRD US \$                   | 12,8 – 13,0 MRD US \$                                   | Steigerung von 6 – 8 %<br>währungsbereinigt             |
| Konzernergebnis <sup>1</sup>               | 979 MIO US \$                     | 1,035 – 1,055 MRD US \$                                 | Steigerung > Umsatzwachstum                             |
| Gewinn je Aktie                            | 3,25 US \$                        | Steigerung > Umsatzwachstum                             | Steigerung > Umsatzwachstum                             |
| Dividende                                  | 0,65 € je Stammaktie <sup>2</sup> | kontinuierlicher Anstieg                                | kontinuierlicher Anstieg                                |
| Investitionen, netto                       | 507 MIO US \$                     | ~ 5 % des Umsatzes                                      | ~ 7 % vom Umsatz <sup>3</sup>                           |
| Akquisitionen, netto                       | 486 MIO US \$                     | ~ 1,2 MRD US \$                                         | ~ 7 % vom Umsatz <sup>3</sup>                           |
| Steuerquote                                | 35,2 %                            | 34,5 – 35,0 %                                           | 35 – 36 %                                               |
| Debt-EBITDA-Verhältnis                     | 2,38                              | < 2,8                                                   | < 2,8                                                   |
| Mitarbeiter <sup>4</sup>                   | 73.452                            | > 78.000                                                | > 82.000                                                |
| Aufwendungen für Forschung und Entwicklung | 97 MIO US \$                      | ~ 105 MIO US \$                                         | ~ 115 MIO US \$                                         |
| Produkteinführungen                        | u.a. Dialysemaschine 2008T        | weiterer Ausbau der Produkt- und Dienstleistungspalette | weiterer Ausbau der Produkt- und Dienstleistungspalette |

<sup>1</sup> Ergebnis, das auf die Anteilseigner der Fresenius Medical Care AG & Co. KGaA entfällt.

<sup>2</sup> Vorschlag zur Beschlussfassung durch die Hauptversammlung am 12. Mai 2011.

<sup>3</sup> Bezogen auf Investitionen in Sachanlagen und Akquisitionen.

<sup>4</sup> Durchschnittlich Vollzeitbeschäftigte.



revolvierend in Anspruch genommen werden kann. Mittelfristig verfolgen wir das Ziel, dass unser Kreditportfolio ausschließlich aus erstrangigen unbesicherten Finanzverbindlichkeiten besteht. Mit den nur teilweise genutzten Kreditlinien sowie dem Forderungsverkaufsprogramm verfügt Fresenius Medical Care über ausreichende finanzielle Ressourcen, die wir in den kommenden Jahren stabil halten werden. Hierbei wird ein Zielwert von zugesicherten und nicht genutzten Kreditfazilitäten von mindestens 300 bis 500 Mio US \$ verfolgt.

Unser kurzfristiger Refinanzierungsbedarf beschränkt sich auf die Zahlung in Höhe von 485 Mio € für unsere Akquisition der International Dialysis Centers, die Höhe der Dividendenzahlung von etwa 197 Mio € im Mai 2011, die Ablösung der Trust Preferred Securities im Juni 2011 in Höhe von 225 Mio US \$ und 300 Mio € sowie die Verlängerung des Forderungsverkaufsprogramms im Oktober 2011.

Weitere Informationen hierzu finden Sie im Kapitel „Finanzlage“ — ab Seite 61.

## RECHTLICHE UNTERNEHMENSSTRUKTUR UND ORGANISATION

Die Konzernobergesellschaft von Fresenius Medical Care firmiert seit dem Geschäftsjahr 2006 in der Rechtsform einer Kommanditgesellschaft auf Aktien. Auf absehbare Zeit planen wir keine Änderung der Rechtsform. Wie bereits im Abschnitt „Geschäftstätigkeit und Konzernstruktur“ — ab Seite 31 beschrieben, ist Fresenius Medical Care regional organisiert und gliedert sich in drei operative Segmente – Nordamerika, International und Asien-Pazifik – wobei die beiden letztgenannten für Berichtszwecke zum Segment International zusammengefasst sind. Wir beabsichtigen, diese Organisationsstruktur in den Jahren 2011 und 2012 beizubehalten. Den Anforderungen der jeweiligen Märkte begegnen wir mit einer dezentralen Organisationsstruktur, die größtmögliche Flexibilität gewährleistet. Dieses Prinzip des „Unternehmens im Unternehmen“ mit klar definierten Verantwortlichkeiten hat sich seit vielen Jahren bewährt; deshalb halten wir daran fest.

## KÜNFTIGE PRODUKTE UND DIENSTLEISTUNGEN

Im laufenden Geschäftsjahr 2011 wollen wir etwa 105 Mio US \$ für Forschung und Entwicklung aufwenden. Für 2012 gehen wir von Forschungs- und Entwicklungsaufwendungen in Höhe von etwa 115 Mio US \$ aus. Die Zahl der in diesem Bereich beschäftigten Mitarbeiter (derzeit 503 durchschnittlich Vollzeitbeschäftigte) dürfte in den Jahren 2011 und 2012 nur geringfügig steigen.

Als vertikal integriertes Unternehmen, das sowohl Dialyseprodukte fertigt als auch eigene Dialyseskliniken betreibt, wollen wir ein komplettes Portfolio hochwertiger Produkte und Dienstleistungen für die Behandlung des chronischen Nierenversagens anbieten, das sich flexibel an lokale Marktbedingungen und an die sich zum Teil dynamisch verändernden Gesundheitssysteme und Vergütungsstrukturen anpassen lässt. Angesichts der wachsenden Herausforderung von Gesundheitssystemen, immer mehr Patienten umfassend, hochwertig und zugleich kosteneffizient zu versorgen, wollen wir dieses umfangreiche Portfolio zunehmend nutzen, um unseren Partnern im Gesundheitswesen ganzheitliche, oder integrierte, Konzepte zur Patientenversorgung anzubieten. Aufgrund unseres Geschäftsmodells und unserer langjährigen Erfahrung als Betreiber eines internationalen Kliniknetzes sind wir in einer besonders guten Position, solche Komplettlösungen aus einer Hand auf einem hohen Qualitätsniveau anzubieten; siehe dazu Abschnitt „Chancen“ — ab Seite 123.

Ein Schwerpunkt unserer Arbeit in der Forschung und Entwicklung werden entsprechend Innovationen sein, die zusätzliche Behandlungselemente in unsere Angebote integrieren oder diese noch besser aufeinander abstimmen – immer mit dem Ziel, Qualität, Sicherheit und Kosteneffizienz der Therapie gleichermaßen zu verbessern. Zum Beispiel werden wir an Vorrichtungen für unsere Hämodialysegeräte arbeiten, die die Handhabung des Blutschlauchsystems sowie seiner Anschlüsse auf wenige Arbeitsschritte reduzieren und dadurch das Klinikpersonal entlasten sollen. Auch die Integration der Dosierung sowie der Verabreichung bestimmter Medikamente

in den Ablauf des Dialysegeräts wird uns weiter beschäftigen, ebenso wie neue Zusatzfunktionen zur Steigerung der Behandlungsqualität und -sicherheit.

Im Sinne einer zunehmend ganzheitlichen Patientenversorgung werden wir auch in der Software-Entwicklung für das klinische Qualitätsdatenmanagement weiter an integrierten Systemlösungen arbeiten. Diese sollen dazu beitragen, dass eine größere Datenmenge rascher und einfacher erfasst wird, die Qualität der Daten steigt und so auch die Behandlung kontinuierlich verbessert werden kann. Langfristig denkbar ist zum Beispiel, dass nicht nur die vollständige Historie der Hämodialyse-Therapie eines Patienten erfasst wird, sondern das Datenmanagement bereits ab den Vorstadien des chronischen Nierenversagens eingesetzt wird, um die Behandlung besser zu koordinieren und dadurch gegebenenfalls auch Vorsorgemaßnahmen gezielter anzuwenden. Auch eine gemeinsame Datenmanagementlösung für Peritoneal- und Hämodialyse-Patienten könnte zu einer besseren Abstimmung und damit Qualität der Therapie beitragen. Diese beiden Patientengruppen werden derzeit in der Regel in getrennten IT-Systemen erfasst, obwohl viele PD-Patienten aufgrund der begrenzten Nutzbarkeit des menschlichen Bauchfells als Dialysmembran häufig nach einer gewissen Zeit zur Hämodialyse wechseln.

Weiterhin wird uns allgemein die Frage beschäftigen, wie wir neue wissenschaftliche und technologische Erkenntnisse nutzen können, um die Lebensqualität einer wachsenden Zahl von Patienten mit chronischem Nierenversagen weiter zu verbessern – etwa durch Innovationen in den Heimtherapien. Die Sicherheit der Behandlung wird ein Schwerpunkt der kontinuierlichen Verbesserung unserer Produkte und Dienstleistungen bleiben, und auch mit den Begleiterkrankungen des chronischen Nierenversagens werden wir uns weiter auseinandersetzen. Beispielsweise planen wir die Veröffentlichung einer Studie über die linksventrikuläre Hypertrophie (vergrößerte linke Herzkammer) bei Dialysepatienten, die wir mit Hilfe des Diagnoseinstruments Body Composition Monitor (BCM) durchführen; siehe dazu Kapitel „Forschung und Entwicklung“ — ab Seite 68.

Darüber hinaus arbeiten wir weiter daran, das blutreinigende Verfahren der Dialyse für andere Krankheitsfelder nutzbar zu machen, etwa bei Erkrankungen der Leber, bei Sepsis oder bestimmten Autoimmun- und Stoffwechselleiden. Langfristig forschen wir auch an neuen Therapieansätzen für schwere Nieren- und Leberleiden auf der Grundlage der regenerativen Medizin. Dabei kooperieren wir mit international anerkannten wissenschaftlichen Einrichtungen und Universitäten, die auf der Grundlage von adulten Leber- und Nierenstammzellen forschen.

Nicht zuletzt wollen wir verstärkt dazu beitragen, dass unsere Produkte und Dienstleistungen während ihres Lebenszyklus die Umwelt so wenig wie möglich belasten.

## MITARBEITERINNEN UND MITARBEITER

Infolge der erwarteten Geschäftsausweitung rechnen wir auch im kommenden Jahr mit steigenden Mitarbeiterzahlen in allen Regionen, insbesondere in unseren Dialysekliniken. Zum Ende des Geschäftsjahres 2011 werden voraussichtlich mehr als 78.000 Mitarbeiter (durchschnittlich Vollzeitbeschäftigte) bei Fresenius Medical Care tätig sein. Damit würde die Zahl der Mitarbeiter gegenüber 2010 um mehr als 6 % steigen. Für das Jahr 2012 erwarten wir, dass sich dieser Trend beim Belegschaftswachstum fortsetzt.

Entsprechend unserer Wachstumsstrategie sehen wir besonders vielversprechende Geschäftsperspektiven in Asien; deswegen werden die Mitarbeiterzahlen dort zum Teil kräftig steigen. Dennoch erwarten wir keine wesentlichen Änderungen bei der weltweiten Verteilung unserer Mitarbeiter – die meisten unserer Beschäftigten werden auch künftig in Nordamerika tätig sein.

## KÜNFTIGE VERWENDUNG NEUER TECHNOLOGIEN UND PROZESSE

Mit Hilfe des neuen Geschäftsbereichs Global Manufacturing Operations (GMO) wollen wir unsere Regionen dabei unterstützen, ihren Patienten und Kunden

auch in Zukunft höchste Produktqualität zum besten Preis zu liefern und zugleich den regional verantwortlichen Vorständen und ihren Teams ermöglichen, sich in ihrer Arbeit auf die Entwicklung und das Wachstum ihres Geschäfts mit Dialyседienstleistungen zu konzentrieren. Im Jahr 2011 wird ein Schwerpunkt von GMO sein, die Abläufe entlang der Fertigungskette in der Region Asien-Pazifik sowie in den kleineren Produktionswerken in Europa und Lateinamerika vollständig in den neuen Geschäftsbereich zu integrieren.

Die weltweite Harmonisierung unserer Abläufe entlang der Fertigungskette wollen wir weiter vorantreiben, zum Beispiel indem wir die regionalen Produktionssysteme in den kommenden Jahren auf eine gemeinsame Informationstechnologie umstellen. Auch im Qualitätsmanagement werden wir einheitliche IT-Systeme einführen, etwa für die interne Dokumentation unserer Abläufe sowie für das Beschwerdemanagement.

Im strategischen Einkauf werden wir unser Lieferantenmanagement sowohl regional als auch überregional weiter ausbauen. Damit wollen wir unsere Versorgung mit hochwertigen Rohmaterialien und Halbfertigprodukten zu günstigen Konditionen dauerhaft sicherstellen – gerade angesichts der gestiegenen Rohstoffnachfrage auf den weltweiten Beschaffungsmärkten eine wichtige Aufgabe. Nachdem sich der neue Geschäftsbereich GMO im Jahr 2010 darauf konzentriert hat, die Einkaufsstrategien insbesondere bei Produktionsmaterialien überregional aufeinander abzustimmen, wollen wir im laufenden Geschäftsjahr verstärkt prüfen, wo wir beim „indirekten Bedarf“ unternehmensweit Synergien erzielen können. Dazu gehören alle Güter und Dienstleistungen, die nicht direkt in unsere Fertigung eingehen, zum Beispiel Informationstechnologie, Energie, Fracht- oder Beratungsleistungen.

Bei der Steuerung der Lieferkette wollen wir die Zusammenarbeit zwischen dem GMO-Produktionsnetz und unseren regionalen Supply-Chain-Management-Teams stärken, um unsere Flexibilität und Effizienz entlang der Fertigungskette stetig zu erhöhen und uns so auch für unser weiteres Wachstum bestmöglich vorzubereiten. Darüber hinaus werden

wir auch weiterhin regionale Initiativen starten wie das Projekt SCALE im Segment International (siehe Abschnitt „Unser Produktgeschäft“ — ab Seite 77), um unsere Abläufe zunehmend zu harmonisieren. Innerhalb von SCALE werden wir beispielsweise weitere Produktgruppen in unser neues, zentrales Planungssystem für Produktionsbedarf und Lagerhaltung integrieren; im Jahr 2011 sind das Dialyselösungen und Dialysatoren.

## CHANCEN

Fresenius Medical Care kann als vertikal integriertes Dialyseunternehmen fast alle Produkte und Dienstleistungen anbieten, die ein Patient mit chronischem Nierenversagen für seine Versorgung benötigt. Unser internationales Netz von inzwischen mehr als 2.700 Dialysekliniken in über 35 Ländern ist das größte und internationalste weltweit – und steht damit für einen Erfahrungsschatz in der Dialyse, der in der Branche einzigartig ist. Dank dieser Erfahrung wissen wir: Hohe Qualität ist zum einen der Schlüssel zu mehr Lebensqualität für den Patienten; zum anderen kann sie aber auch wesentlich dazu beitragen, Kosten im Gesundheitswesen zu senken. Aus diesem Verständnis und aus unserem Geschäftsmodell ergeben sich einige Chancen für unser weiteres Wachstum, die wir im Folgenden näher beschreiben.

### Branchenspezifische Chancen

#### Patientenwachstum und demografische Entwicklung

Die Zahl der Menschen, die an chronischem Nierenversagen leiden und eine Dialysebehandlung benötigen, nimmt Schätzungen zufolge weltweit jährlich um etwa 6 % zu. Im Jahr 2011 wird sie voraussichtlich bei rund 2,15 Mio liegen; bis 2020 bei fast 4 Mio. Einige gesellschaftliche Trends tragen zu diesem Patientenwachstum bei. Dazu zählen, etwa in Europa oder den USA, die älter werdende Bevölkerung sowie die steigende Zahl der Menschen, die an Diabetes und Bluthochdruck leiden. Beide Erkrankungen gehen dem terminalen Nierenversagen häufig voraus. In den Entwicklungs- und Schwellenländern wiederum sind die wachsende Bevölkerung und ein zunehmender Wohlstand wichtige Faktoren, durch die der Bedarf an Dialyseprodukten und -dienstleistungen

weiter ansteigt. Wir wollen zur Deckung dieser Nachfrage auch in Zukunft wesentlich beitragen.

#### **Änderung rechtlicher und politischer Rahmenbedingungen**

Ob und in welcher Form privatwirtschaftliche Unternehmen Dialysebehandlungen anbieten können, hängt von dem jeweiligen Gesundheitssystem eines Landes und dessen rechtlichen Rahmenbedingungen ab. Für Fresenius Medical Care bieten sich Chancen, neue Märkte zu erschließen oder Marktanteile auszubauen, wenn ein Land sich für private Dialyseanbieter öffnet oder die Zusammenarbeit zwischen öffentlichen und privaten Anbietern zulässt. Auf diese Entscheidungen haben zunehmend die folgenden Faktoren wesentlichen Einfluss:

- In vielen Ländern werden die Mittel für die Finanzierung, das Management und die Bereitstellung von Gesundheitsleistungen immer knapper – eine Lage, die sich durch die Finanz- und Wirtschaftskrise weiter verschärft hat.
- Zugleich stehen Gesundheitssysteme vor der Herausforderung, ihre Bevölkerung immer umfassender medizinisch zu versorgen – aufgrund der längeren Lebenserwartung der Menschen und der damit verbundenen Zunahme von Begleiterkrankungen oder weil eine funktionsfähige Gesundheitsversorgung noch im Aufbau begriffen ist.
- Die Dialyse ist ein aufwendiges lebenserhaltendes Verfahren, das in puncto Expertise und Effizienz hohe Anforderungen an ein Gesundheitssystem stellt.

Aus diesen Gründen suchen öffentliche Gesundheitsträger immer häufiger gemeinsam mit privaten Anbietern nach Lösungen für eine hochwertige zukunftsfähige Versorgung von Patienten mit chronischem Nierenversagen – eine enorme Chance für Fresenius Medical Care.

Ein Beispiel ist Deutschland, gemessen an der Zahl der Dialysepatienten der fünftgrößte Markt weltweit. Mit unseren Produkten sind wir hier führend. Dialysezentren werden zwar überwiegend von niedergelassenen Ärzten, Krankenhäusern oder

gemeinnützigen Organisationen betrieben; seit einigen Jahren jedoch kann Fresenius Medical Care unter dem Dach von Medizinischen Versorgungszentren (MVZ) Dialyседienstleistungen anbieten: Das sind ärztlich geleitete Einrichtungen zur ambulanten Krankenversorgung, die Fachärzte mit unterschiedlicher Spezialisierung als Angestellte beschäftigen. Ende 2010 waren wir an acht Versorgungszentren beteiligt (2009: vier). Als erfahrener Partner wollen wir unsere Kunden auch weiterhin beim Aufbau von neuen Versorgungsstrukturen im deutschen Gesundheitswesen unterstützen und so die Chance wahrnehmen, unser Geschäft langfristig zu stärken. Auch in Japan, wo Dialysezentren zum größten Teil in der Hand privater Nierenfachärzte sind, könnten sich auf lange Sicht neue Absatzchancen für privatwirtschaftlich tätige Unternehmen wie Fresenius Medical Care ergeben – sollten diese als Klinikbetreiber im größten Dialysemarkt Asiens zugelassen werden.

#### **Public Private Partnerships**

In einigen Ländern zeichnet sich die öffentlich-private Partnerschaft (Public Private Partnership – PPP) als vielversprechendes Geschäftsmodell für Fresenius Medical Care ab. Es handelt sich dabei um vertraglich festgelegte Projektkooperationen zwischen öffentlicher Hand und privatwirtschaftlichen Unternehmen, bei denen sich beide Partner zu einem vereinbarten Verhältnis die Finanzierung, Aufgaben, Risiken und Chancen eines Projekts teilen. Unsere breite Kompetenz in der Dialyse ist auch hier ein Wettbewerbsvorteil, denn wir können flexibel für unterschiedliche Versorgungsstufen geeignete Angebote unterbreiten – ob für Krankenhäuser, Krankenkassen, Gemeinden oder Staaten. Je nach Vertrag errichten wir neue Dialysekliniken und stateten diese aus, bilden medizinisches Personal in Fragen der Qualität, Hygiene und Ernährung aus oder führen die Kliniken zu vereinbarten Konditionen selbst. So bietet PPP eine Chance für beide Partner: Die öffentliche Hand profitiert von privatwirtschaftlichen Investitionen in eine Dialyseinfrastruktur nach hohen Behandlungsstandards, vom Wissenstransfer in Qualitäts-, Technologie- und Managementfragen sowie von der operativen Effizienz eines weltweit tätigen Dialyseunternehmens – und erhält so wesentliche Unterstützung, um mehr Patienten besser und zugleich kostengünstiger zu versorgen. Fresenius

Medical Care wiederum kann durch das PPP-Modell neue Märkte erschließen, Marktanteile ausbauen und sein Angebot um weitere Versorgungsformen ergänzen. Partnerschaften dieser Art sind nicht zuletzt auch ein erster möglicher Schritt in die vollständige Privatisierung. An einer PPP-Initiative sind wir derzeit zum Beispiel in Italien beteiligt; weitere Projekte planen wir unter anderem in Indonesien, Abu Dhabi, Portugal, Brasilien und der Türkei. Die Verträge sind dabei an den jeweiligen Bedürfnissen der Partner und den lokalen rechtlichen Rahmenbedingungen ausgerichtet.

#### **Wachsender Bedarf an integrierter Versorgung**

Mit dem Kostendruck auf der einen und der Patientenentwicklung auf der anderen Seite wächst im Gesundheitswesen weltweit der Bedarf an einem ganzheitlichen – oder integrierten – Versorgungskonzept (Disease Management) für Patienten mit chronischem Nierenversagen. Dem liegt folgendes Prinzip zugrunde: Sämtliche Gesundheitsleistungen und Behandlungsschritte, die mit der Therapie eines Nierenpatienten verbunden sind – in einem weiteren möglichen Schritt auch die Behandlung seiner Begleiterkrankungen – werden als ganzheitliches Programm genau auf die individuellen Bedürfnisse des Patienten und die Erfordernisse seines Krankenversicherers abgestimmt. Je nach Vertrag – und abhängig davon, welche Elemente ein Gesundheitssystem als Teil der Grundbehandlung vorschreibt – gehören dazu neben der eigentlichen Dialyse zum Beispiel ergänzende medizinische Tests, Medikamente für Nierenkranke, das Legen und die medizinische Versorgung des Gefäßzugangs, über den ein Patient mit dem Dialysegerät verbunden wird (Vascular Access Management – VAM) oder auch die Fahrt des Patienten zum Dialysezentrum. Mit dieser umfassenden Betreuung aus einer Hand sollen Behandlungsschritte besser koordiniert und kontrolliert, Komplikationen minimiert und dadurch zusätzliche Krankenhausaufenthalte – eine erhebliche Belastung für den Patienten – soweit möglich vermieden werden; die Behandlungs- und Lebensqualität des Patienten steigen, während die Gesamtkosten der Behandlung sinken.

Immer häufiger vergüten Kostenträger die Komponenten einer solchen Komplett-Therapie nicht

mehr separat, sondern als „Leistungsbündel“ pauschal – geknüpft an vertraglich festgelegte messbare Behandlungsziele, über die der Dialyseanbieter regelmäßig Rechenschaft ablegen muss (pay for performance). Diese Qualitätsparameter orientieren sich in der Regel an den national und international etablierten Richtlinien für eine gute Behandlungspraxis bei Nierenpatienten und übertreffen diese auch zum Teil. Eine Nichterfüllung der Kriterien führt zur Kürzung der Vergütung bis hin zum Entzug der Lizenz.

Eine integrierte Versorgung gemäß des Pay-for-Performance-Modells bietet Chancen für alle Anspruchsgruppen: Die Lebensqualität der Dialysepatienten kann nachhaltig verbessert werden; die Bündelung der Versorgung bei einem Anbieter senkt durch den effizienteren Ressourceneinsatz die Gesamtkosten der Behandlung und macht diese Kosten für die öffentliche Hand und die Krankenversicherer zudem besser kontrollier- und kalkulierbar; Dialyseanbieter wiederum können ihr Leistungsspektrum erweitern, indem sie die vertraglich geforderten Zusatzleistungen erbringen.

Fresenius Medical Care ist aus mehreren Gründen in einer besonders guten Position, integrierte Behandlungsprogramme für chronisch nierenkranke Menschen auf einem hohen Qualitätsniveau anzubieten:

- ▶ Als Hersteller marktführender Dialyseprodukte und Betreiber des größten internationalen Dialyseklinernetzes weltweit haben wir langjährige Erfahrung in der umfassenden Versorgung von Dialysepatienten.
- ▶ Wir genießen dank der hohen Qualität und Sicherheit unserer Produkte und Dienstleistungen einen sehr guten Ruf in der Branche.
- ▶ Wir nutzen ausgereifte interne Feedback-Instrumente, um den Behandlungserfolg unserer Kliniken zu messen, zu vergleichen und Verbesserungsmöglichkeiten schnell zu erkennen.

Erste positive Erfahrungen mit pauschal vergüteten qualitätsorientierten Versorgungsmodellen haben wir in Portugal gemacht, wo ein solches System im Jahr 2008 eingeführt wurde. Auch in

Argentinien werden wir zum Teil nach dem Pay-for-Performance-Prinzip vergütet. Im Berichtsjahr haben wir zudem mit den Gesundheitsbehörden der spanischen Region Murcia eine Kooperationsvereinbarung über die Komplettversorgung von rund 200 Dialysepatienten abgeschlossen. Der erste Vertrag seiner Art in Spanien soll ab Mitte 2011 in Kraft treten; er gilt für zunächst sechs Jahre. Weitere Informationen zur integrierten Versorgung und Vergütung, unter anderem auch zum neuen „gebündelten“ Vergütungssystem in den USA, erhalten Sie im Abschnitt „Gesundheits und Vergütungssysteme“ — ab Seite 49.

### Chancen in Zusammenhang mit unserer Geschäftstätigkeit

#### Horizontale Erweiterung unseres Portfolios

Dialysemittel ergänzen unser Angebot von Dialyседienstleistungen und -produkten und tragen damit zur horizontalen Erweiterung unseres Portfolios bei. Sie bieten – passend zu unserer strategischen Ausrichtung (siehe dazu — Seite 35) und zum allgemeinen Trend einer integrierten Versorgung (siehe oben) – weitere Wachstumschancen für uns. Bei der Behandlung von Dialysepatienten werden Medikamente üblicherweise zur Korrektur von Blutarmut (Anämie) und zur Regulierung des Mineralhaushalts benötigt – beides Folgen des chronischen Nierenversagens. Anämie wird bei Dialysepatienten in der Regel mit dem Hormonpräparat Erythropoietin (EPO) sowie mit intravenös zu verabreichenden Eisenpräparaten therapiert. Das Marktvolumen solcher intravenös verabreichten Eisenpräparate für Nierenpatienten betrug im Jahr 2010 rund 1,1 MRD US \$. Phosphatbinder zur Regulierung des Knochenstoffwechsels werden von mehr als 80 % aller Dialysepatienten benötigt; hier lag das Marktvolumen im Jahr 2010 bei rund 1,2 MRD US \$.

In den vergangenen Geschäftsjahren waren Lizenzvereinbarungen über intravenös zu verabreichende Eisenpräparate sowie die Integration des Phosphatbinders PhosLo® in unser Produktportfolio wesentliche Schritte, um an diesem Markt teilzuhaben. Im Jahr 2010 hat Fresenius Medical Care seine bestehende Zusammenarbeit mit dem Pharmaunternehmen Galenica erweitert und Vifor Fresenius Medical Care Renal Pharma gegründet – ein Joint Venture,

dessen Geschäft die Entwicklung und der weltweite Vertrieb von Medikamenten für Nierenkranke ist. Auf beiden Gebieten strebt das Gemeinschaftsunternehmen, an dem Fresenius Medical Care zu 45 % beteiligt ist, eine führende Marktposition an.

#### Neue Produkte und Technologien

Wenn die Patientenzahlen so stark ansteigen wie angenommen, der Kostendruck zunimmt und die Kapazität der Kliniken möglicherweise nicht mehr ausreicht, um dort alle Patienten zu behandeln, werden Heimtherapien in der Dialyse weiter an Bedeutung gewinnen. Aus dieser Entwicklung ergeben sich Wachstumschancen für Fresenius Medical Care. Deshalb erweitern wir mit hochwertigen Produkten und Therapieprogrammen sowie Akquisitionen unsere Kompetenz in der Peritonealdialyse (PD); siehe dazu — Seite 51. Mit der Adsorber-Technologie verfügen wir bereits über ein Schlüsselverfahren für den Ausbau weiterer Formen der Heimtherapie: der Heim-Hämodialyse sowie der tragbaren künstlichen Niere, an deren Entwicklung wir langfristig in einem regionenübergreifenden Team arbeiten; siehe dazu — Seite 71. Adsorber setzen wir ein, um einfaches Leitungswasser für die Dialyse nutzbar zu machen und Dialyseflüssigkeit wiederaufzubereiten – wesentliche Voraussetzungen für die Dialyse außerhalb von medizinischen Versorgungseinrichtungen. Wir werden unser Angebot auch in Zukunft um innovative Produkte und Verfahren erweitern, um Wachstumschancen zu nutzen – zunehmend auch gezielt, um die Nachfrage nach einer integrierten Versorgung bestmöglich zu bedienen; siehe dazu auch — ab Seite 125.

#### Interne Organisation und Prozesse

Eine Reihe von Chancen, unser Unternehmen langfristig erfolgreicher zu machen, bieten sich Fresenius Medical Care durch die Organisation und Gestaltung seines operativen Geschäfts. Beispielsweise analysieren wir anhand der Management-Methoden „Lean“ und „Six Sigma“ weltweit unsere Produktionsabläufe, um sie bestmöglich aufeinander abzustimmen und dadurch sowohl unsere Fehlerquoten als auch die Produktionszyklen weiter zu verringern. Das Umweltmanagement in unseren Produktionsstätten und Kliniken bauen wir systematisch aus, um unsere Betriebseffizienz zu verbessern,



etwa durch das Einsparen von Ressourcen; siehe hierzu — ab Seite 96.

Im Berichtsjahr haben wir unsere weltweite Produktion mit der Einheit „Global Manufacturing Operations“ (GMO) neu organisiert; hinzu kam auch eine entsprechende Position im Vorstand; näheres — ab Seite 51. Durch den Aufbau eines integrierten Produktionsnetzes und die Harmonisierung von Qualitätsmanagement und Supply Chain Management (Steuerung der Lieferkette) ergeben sich aus unserer Sicht unter anderem die folgenden Chancen:

- ▶ weitere Steigerung der Effizienz unserer Abläufe,
- ▶ bessere Steuerung von Risiken- und damit Kosten,
- ▶ Erhöhung der Rentabilität des Kapitals, das wir in der Fertigung einsetzen.

#### **Akquisitionen**

Mit dem Ausbau unseres weltweiten Kliniknetzes durch Akquisitionen investieren wir in unser künftiges Wachstum; das gilt auch für den Zukauf von

Know-how und von interessanten Technologien auf dem Gebiet der Forschung und Entwicklung. Die enge Abstimmung unserer Strategie- und Planungsabteilungen mit den Managern, die unsere Akquisitionen verantworten, sorgt dafür, dass wir potenziell geeignete Zukäufe weltweit frühzeitig identifizieren. Zu unseren Akquisitionen im Berichtsjahr — siehe ab Seiten 50 und 63.

#### **Geschäftsmodell von Fresenius Medical Care**

Eine Chance für das künftige Wachstum unseres Unternehmens ergibt sich nicht zuletzt aus unserem Geschäftsmodell: Als vertikal integriertes Dialyseunternehmen bieten wir nicht nur fast alle Produkte für Patienten mit chronischem Nierenversagen an; wir setzen diese auch täglich in unseren eigenen Kliniken ein. So profitieren wir bei der Entwicklung und Herstellung neuer Produkte sowie bei der Ausrichtung unseres Klinikmanagements erheblich von den Rückmeldungen unserer Patienten, Ärzte und Dialysefachkräfte weltweit.



## ERKLÄRUNG ZUR UNTERNEHMENSFÜHRUNG UND CORPORATE-GOVERNANCE-BERICHT

Der Vorstand der Fresenius Medical Care Management AG und der Aufsichtsrat der Fresenius Medical Care AG & Co. KGaA berichten in dieser Erklärung gemäß § 289a HGB sowie gemäß Ziffer 3.10 des Deutschen Corporate Governance Kodex über die Unternehmensführung.

Die Erklärung zur Unternehmensführung ist auch auf der Website des Unternehmens unter [www.fmc-ag.de](http://www.fmc-ag.de) im Bereich Investor Relations/Corporate Governance/Erklärung zur Unternehmensführung dauerhaft zugänglich gemacht.

### DEUTSCHER CORPORATE GOVERNANCE KODEX UND ENTSPRECHENSERKLÄRUNG FÜR DAS GESCHÄFTSJAHR 2010

Der Deutsche Corporate Governance Kodex beinhaltet wesentliche Empfehlungen zur Leitung und Überwachung deutscher börsennotierter Gesellschaften mit dem Ziel, die in Deutschland geltenden Regeln für die Unternehmensleitung und -überwachung für Investoren transparenter zu gestalten. Durch diesen Kodex soll sowohl das Vertrauen der Öffentlichkeit als auch das Vertrauen der Mitarbeiter und Kunden in die Leitung und Überwachung börsennotierter Aktiengesellschaften gefördert werden.

Der Vorstand der Fresenius Medical Care Management AG und der Aufsichtsrat der Fresenius Medical Care AG & Co. KGaA unterstützen die im Deutschen Corporate Governance Kodex formulierten Grundsätze. Der überwiegende Teil der im Kodex aufgeführten Vorgaben, Empfehlungen und Anregungen sind bei Fresenius Medical Care seit Bestehen des Unternehmens integraler und gelebter Bestandteil des Unternehmensalltags. Umfangreiche Informationen zum Thema Corporate Governance sind auf unserer Internetseite [www.fmc-ag.de](http://www.fmc-ag.de) im Bereich Investor Relations abrufbar. Nach Veröffentlichung einer unterjährig geänderten Entsprechenserklärung im März 2010, hat Fresenius Medical Care die nach § 161 des Aktiengesetzes geforderte jährliche Entsprechenserklärung gemäß der geltenden Fassung des Deutschen Corporate Governance Kodex vom 18. Juni 2009, respektive vom 26. Mai 2010 abgegeben und den Aktionären auf der Website des Unternehmens unter [www.fmc-ag.de](http://www.fmc-ag.de) im Bereich Investor

Relations/Corporate Governance/Entsprechenserklärung dauerhaft zugänglich gemacht. Die Fresenius Medical Care AG & Co. KGaA entsprach und entspricht den oben genannten Empfehlungen des Deutschen Corporate Governance Kodex. Lediglich die in der wie folgt abgegebenen Entsprechenserklärung genannten Empfehlungen wurden bzw. werden nicht angewendet:

### Erklärung des Vorstands der Fresenius Medical Care Management AG und des Aufsichtsrats der Fresenius Medical Care AG & Co. KGaA zum Deutschen Corporate Governance Kodex gemäß § 161 AktG

Der Aufsichtsrat der Fresenius Medical Care AG & Co. KGaA und der Vorstand der persönlich haftenden Gesellschafterin der Fresenius Medical Care AG & Co. KGaA (nachfolgend der Vorstand) erklären, dass den von dem Bundesministerium der Justiz im amtlichen Teil des elektronischen Bundesanzeigers bekannt gemachten Empfehlungen der „Regierungskommission Deutscher Corporate Governance Kodex“ in der Fassung vom 18. Juni 2009 seit Abgabe der letzten Entsprechenserklärung entsprochen wurde. Lediglich die folgenden Empfehlungen wurden nicht angewendet:

### Kodex Ziffer 3.8 Absatz 3: „Selbstbehalt für den Aufsichtsrat in D & O-Versicherung“

Gemäß Kodex Ziffer 3.8 Abs. 3 soll in einer D & O-Versicherung für den Aufsichtsrat ein Selbstbehalt vereinbart werden, der dem vom Gesetz zur Angemessenheit der Vorstandsvergütung eingeführten zwingenden Mindestselbstbehalt für Vorstandsmitglieder entspricht. Dieser beträgt 10 % des Schadens bis zur Höhe des Eineinhalbfachen der festen jährlichen Vergütung. Bis zum Ende des Monats Juni 2010 handelte es sich bei der D & O-Versicherung von Fresenius Medical Care um eine Gruppenversicherung für eine Vielzahl von Personen, die keinen Selbstbehalt in der empfohlenen Höhe vorsah. Für den Vorstand der Fresenius Medical Care Management AG wurde mit Wirkung ab dem 1. Juli 2010 ein Selbstbehalt vereinbart, der den Vorgaben des Gesetzes zur Angemessenheit der Vorstandsvergütung entspricht. Für die Mitglieder des Aufsichtsrats wurde zum 1. Juli 2010 ein entsprechender Selbstbehalt eingeführt.

**Kodex Ziffer 4.2.3 Absatz 4:****„Abfindungs-Cap“**

Gemäß Ziffer 4.2.3 Absatz 4 des Kodex soll bei Abschluss von Vorstandsverträgen darauf geachtet werden, dass Zahlungen an ein Vorstandsmitglied bei vorzeitiger Beendigung der Vorstandstätigkeit ohne wichtigen Grund einschließlich Nebenleistungen den Wert von zwei Jahresvergütungen nicht überschreiten (Abfindungs-Cap) und nicht mehr als die Restlaufzeit des Anstellungsvertrages vergüten. Für die Berechnung des Abfindungs-Caps soll auf die Gesamtvergütung des abgelaufenen Geschäftsjahres und gegebenenfalls auch auf die voraussichtliche Gesamtvergütung für das laufende Geschäftsjahr abgestellt werden.

Auch die mit Beginn des Jahres 2010 neu gefassten Anstellungsverträge für Mitglieder des Vorstands enthalten keine Abfindungsregelungen für den Fall einer vorzeitigen Beendigung der Vorstandstätigkeit ohne wichtigen Grund. Derartige Abfindungsregelungen widersprechen dem von Fresenius Medical Care im Einklang mit dem Aktiengesetz praktizierten Konzept, die Anstellungsverträge der Vorstandsmitglieder regelmäßig für die Dauer der Bestellungsperiode abzuschließen. Eine vorzeitige Beendigung des Anstellungsvertrags setzt damit grundsätzlich einen wichtigen Grund voraus.

**Kodex Ziffer 5.1.2 und Ziffer 5.4.1.:****„Altersgrenze für Vorstands- und Aufsichtsratsmitglieder“**

Gemäß Ziffer 5.4.1 des Kodex soll bei Vorschlägen zur Wahl von Aufsichtsratsmitgliedern auf eine festzulegende Altersgrenze für Aufsichtsratsmitglieder geachtet werden. Ebenso soll gemäß Ziffer 5.1.2 des Kodex für Vorstandsmitglieder eine Altersgrenze festgelegt werden. Fresenius Medical Care wird – wie in der Vergangenheit – auch künftig von der Festlegung von Altersgrenzen für Aufsichtsratsmitglieder und für Mitglieder des Vorstands absehen, da dies die Auswahl qualifizierter Kandidaten pauschal einschränken würde.

**Kodex Ziffer 5.4.6:****„Vergütung des Aufsichtsrats“**

Gemäß Ziffer 5.4.6 des Kodex sollen Mitglieder des Aufsichtsrats neben einer festen eine erfolgsorientierte Vergütung erhalten. Diese erfolgsorientierte Vergütung sollte auch auf den langfristigen Unter-

nehmenserfolg bezogene Bestandteile enthalten. Die Mitglieder des Aufsichtsrats der Fresenius Medical Care erhalten derzeit ausschließlich eine feste Vergütung. Die mögliche Einführung einer an den Unternehmenserfolg gebundenen erfolgsorientierten Vergütung für Mitglieder des Aufsichtsrats wird derzeit noch geprüft.

Im Hinblick auf die von dem Bundesministerium der Justiz im amtlichen Teil des elektronischen Bundesanzeigers bekannt gemachten Empfehlungen der „Regierungskommission Deutscher Corporate Governance Kodex“ in der Fassung vom 26. Mai 2010 erklären der Aufsichtsrat der Fresenius Medical Care AG & Co. KGaA und der Vorstand ferner, dass diesen Empfehlungen entsprochen wird. Neben den bereits vorab dargestellten Abweichungen von den Empfehlungen gemäß Kodex Ziffern 4.2.3 Absatz 4, 5.1.2, 5.4.1 und 5.4.6 (die auch in der Fassung vom 26. Mai 2010 in entsprechender Weise nicht angewendet werden) werden lediglich die folgenden Empfehlungen nicht angewendet:

**Kodex Ziffer 5.4.1 Absatz 2 und Absatz 3:****„Benennung konkreter Ziele zur Zusammensetzung des Aufsichtsrats und deren Berücksichtigung bei Wahlvorschlägen“**

Gemäß Ziffer 5.4.1 Absatz 2 und 3 des Kodex soll der Aufsichtsrat konkrete Ziele für seine Zusammensetzung benennen und bei seinen Wahlvorschlägen berücksichtigen. Die Zielsetzung des Aufsichtsrats und der Stand der Umsetzung sollen im Corporate Governance Bericht veröffentlicht werden. Von diesen Empfehlungen wird abgewichen. Die Zusammensetzung des Aufsichtsrats von Fresenius Medical Care hat sich am Unternehmensinteresse auszurichten und muss die effektive Überwachung und Beratung des Vorstands gewährleisten. Deshalb kommt es bei der Zusammensetzung des Aufsichtsrats vorrangig auf die zur ordnungsgemäßen Wahrnehmung dieser Aufgaben erforderlichen Kenntnisse, Fähigkeiten und fachlichen Erfahrungen des Einzelnen an. Feste Diversity Quoten und Altersgrenzen würden demgegenüber die Auswahl geeigneter Kandidaten pauschal einschränken.

Bad Homburg, Dezember 2010

Fresenius Medical Care AG & Co. KGaA  
Aufsichtsrat und Vorstand  
(der Fresenius Medical Care Management AG)

Diese und alle vorangegangenen Entsprechenserklärungen sind gemäß Ziffer 3.10 des Deutschen Corporate Governance Kodex auf unserer Internetseite unter [www.fmc-ag.de](http://www.fmc-ag.de) im Bereich Investor Relations/Corporate Governance/Entsprechenserklärung dauerhaft zugänglich.

### Compliance

Weltweit aktiv zu sein bedeutet, weltweit Verantwortung zu tragen. Als globaler Marktführer in der Dialyse ist sich Fresenius Medical Care seiner Verantwortung bewusst.

Wir richten die Geschäftsaktivitäten des Unternehmens an den lokalen Gesetzen und Verordnungen aus. In den Geschäftsbeziehungen zu unseren Patienten, Kunden, Lieferanten und sonstigen Geschäftspartnern, zu Behörden und Kostenträgern, zu unseren Mitarbeiterinnen und Mitarbeitern, Aktionären und der Öffentlichkeit agieren wir mit Professionalität, Ehrlichkeit und Rechtschaffenheit.

Unter Compliance verstehen wir die Beachtung definierter ethischer und rechtlicher Grundsätze bei unseren geschäftlichen Aktivitäten. Die Befolgung der Compliance-Grundsätze ist integraler Bestandteil unserer Unternehmenskultur. Das Compliance-Programm von Fresenius Medical Care haben wir in allen Regionen implementiert. Unsere Compliance-Grundsätze gelten somit auch für alle Tochtergesellschaften.

Unser Compliance-Programm beinhaltet einen vom Vorstand verabschiedeten Unternehmenskodex, der weltweit in jedem Geschäftsfeld Anwendung findet und der unsere langfristigen Interessen mit

denjenigen unserer Partner verbindet. Dieser Unternehmenskodex beschreibt unsere Unternehmensstandards und unterstreicht unsere Verpflichtung, in Übereinstimmung mit den geltenden Gesetzen und Verordnungen sowie mit unseren eigenen Unternehmensrichtlinien zu operieren.

Er basiert auf den Grundsätzen unseres Unternehmens: Qualität, Ehrlichkeit und Rechtschaffenheit, Innovation und Fortschritt, sowie Respekt, Zusammenarbeit und Würde. Unsere Unternehmenskultur und -politik sowie unser gesamtes unternehmerisches Handeln orientieren sich an diesen Werten. Jeder Mitarbeiter ist aufgerufen, durch die Einhaltung der Gesetze sowie der Prinzipien und Regeln des Unternehmenskodex dazu beizutragen, dass Fresenius Medical Care als integerer und verlässlicher Partner im Gesundheitswesen für Patienten, Kunden, Lieferanten, Behörden und die Öffentlichkeit wahrgenommen wird.

Alle Mitarbeiter haben die Möglichkeit, mögliche Verstöße gegen geltendes Recht oder Unternehmensrichtlinien zu melden. Hinweise zu Verstößen können auch anonym erfolgen.

Weitere Einzelheiten können der Veröffentlichung des Unternehmenskodex' auf der Webseite des Unternehmens unter [www.fmc-ag.de](http://www.fmc-ag.de) im Bereich Unser Konzern/Compliance/Unternehmenskodex entnommen werden.

Das für Compliance zuständige Vorstandsmitglied berichtet in seiner Eigenschaft als Chief Corporate Compliance Officer über das Thema Compliance regelmäßig im Audit and Corporate Governance

### ORGANISATIONSSTRUKTUR DES COMPLIANCE-PROGRAMMS

Grafik 2.11.1

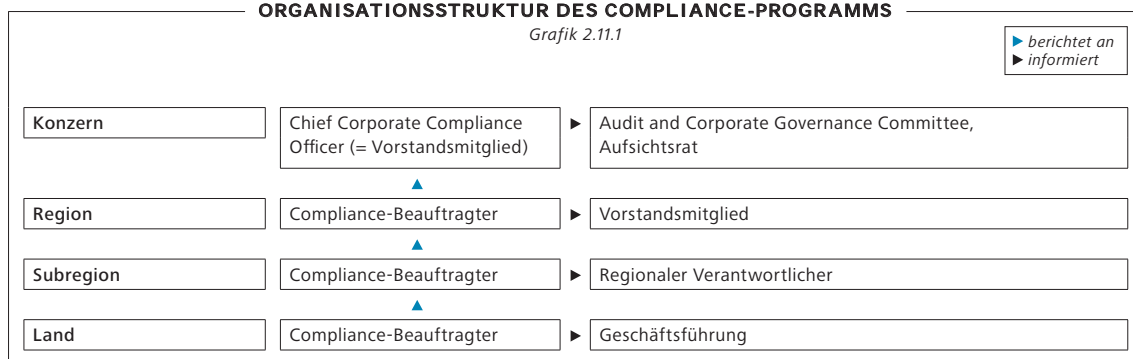

Committee der Fresenius Medical Care AG & Co. KGaA und im Aufsichtsrat der Fresenius Medical Care Management AG.

Im Jahr 2010 haben wir unsere Aktivitäten in der Compliance-Schulung weiter fortgesetzt. Unter anderem hatten die lokalen Compliance-Verantwortlichen bei Konferenzen die Möglichkeit, ihre Erfahrungen mit den Compliance-Beauftragten ihrer jeweiligen Geschäftsregionen auszutauschen. Wie die Grafik 2.11.1 zeigt, kommt den Compliance-Beauftragten eine zentrale Aufgabe zu: Sie setzen sich dafür ein, den Unternehmenskodex und dessen Ziele bei den Mitarbeitern bekannt zu machen und sie über das Compliance-Programm zu schulen. Gleichzeitig fungieren sie als Ansprechpartner für unsere Mitarbeiter und sind über eigens dafür eingerichtete Telefonnummern oder per E-Mail zu erreichen. Natürlich sind die lokalen Compliance-Beauftragten auch persönlich ansprechbar.

Im Berichtsjahr haben wir mit unseren regionalen Compliance-Konferenzen das Netzwerk und die weltweite Zusammenarbeit in der Compliance Organisation gestärkt sowie den Austausch unternehmensweiter Compliance-Themen gefördert.

Außerdem haben wir unsere Ressourcen zur strategischen Stärkung unseres Compliance-Programms eingesetzt, z.B. durch Trainingsangebote für die Mitarbeiter im Intranet und durch eine verstärkte Kommunikation des Themas im Unternehmen.

Unser Compliance-Programm ist zudem ein integraler Bestandteil unseres Risiko- und Chancenmanagements.

### Risiko- und Chancenmanagement

Bei Fresenius Medical Care sorgt ein umfassendes Managementsystem dafür, dass Risiken und Chancen frühzeitig erkannt, das Risikoprofil optimiert und Kosten, die daraus entstehen könnten, durch frühzeitiges Eingreifen auf ein Minimum reduziert werden. Unser Risikomanagement ist integraler Bestandteil unseres täglichen Geschäfts und wird regelmäßig geprüft. Unser internes Kontrollsystem wird regelmäßig vom Vorstand sowie von der internen Revision geprüft.

Weitere Informationen zum Risiko- und Chancenmanagement, zu unserem internen Kontrollsystem und zum Compliance-Programm bei Fresenius Medical Care finden Sie im Lagebericht des Einzelbeschlusses im Abschnitt Risikomanagement ([www.fmc-ag.de](http://www.fmc-ag.de) im Bereich Investor Relations/Publikationen 2010/ Einzelabschluss nach HGB) sowie — ab Seite 104.

### Konzernleitungs- und Überwachungsstruktur

Die Rechtsform von Fresenius Medical Care ist die einer Kommanditgesellschaft auf Aktien (KGaA). In dieser Rechtsform gehören die Hauptversammlung, der Aufsichtsrat und die persönlich haftende Gesellschafterin, die Fresenius Medical Care Management AG, zu den wichtigsten Organen der Gesellschaft. Im Berichtsjahr 2010 haben sich keine wesentlichen Änderungen in der Konzernleitungs- und Überwachungsstruktur ergeben.

Die Satzung von Fresenius Medical Care, die auch die Kompetenzen der Unternehmensorgane bestimmt, ist im Internet unter [www.fmc-ag.de](http://www.fmc-ag.de) im Bereich Investor Relations/Corporate Governance/Satzung zu finden.

Fresenius Medical Care strebt eine Corporate Governance an, die auch weiterhin größtmögliche Transparenz gewährleistet. Über den Vorstand der persönlich haftenden Gesellschafterin werden die Geschäfte der Gesellschaft geführt. Neben dem weiterhin bestehenden Aufsichtsrat der Gesellschaft hat auch die Fresenius Medical Care Management AG einen eigenen Aufsichtsrat.

### Aktionäre

Die Aktionäre der Gesellschaft nehmen ihre Rechte auf der Hauptversammlung wahr und üben dort ihr Stimmrecht aus. Jede Stammaktie der Fresenius Medical Care AG & Co. KGaA gewährt eine Stimme, wobei die Vorzugsaktien der Fresenius Medical Care AG & Co. KGaA kein Stimmrecht verleihen. Als Ausgleich dafür bekommen diese Aktionäre ein Vorecht bei der Gewinnverteilung sowie eine höhere Dividende. Aktien mit Mehr- oder Vorzugsstimmrechten bestehen nicht. In der Hauptversammlung kann die persönlich haftende Gesellschafterin (soweit sie Aktionärin der Fresenius Medical Care AG & Co. KGaA wäre, was im Berichtsjahr nicht der Fall war) bzw.

ihre Alleinaktionärin Fresenius SE & Co. KGaA (vormals Fresenius SE) grundsätzlich das Stimmrecht aus den von ihnen gehaltenen Aktien ausüben. Hinsichtlich bestimmter Beschlussgegenstände bestehen für die persönlich haftende Gesellschafterin bzw. ihre Alleinaktionärin Fresenius SE & Co. KGaA jedoch vom Gesetz vorgegebene Stimmrechtsausschlüsse. Dies betrifft unter anderem die Wahl des Aufsichtsrats, die Entlastung der persönlich haftenden Gesellschafterin und der Mitglieder des Aufsichtsrats sowie die Wahl des Abschlussprüfers. Auf diese Weise wird gewährleistet, dass die Kommanditaktionäre über diese – insbesondere die Kontrolle der Geschäftsleitung betreffenden – Fragen allein entscheiden können.

#### Hauptversammlung

Entsprechend den Grundsätzen des Deutschen Corporate Governance Kodex haben Aktionäre in der jährlichen Hauptversammlung die Möglichkeit, ihr Stimmrecht selbst auszuüben oder durch einen Bevollmächtigten ihrer Wahl oder einen weisungsgebundenen Stimmrechtsvertreter der Gesellschaft ausüben zu lassen. Weisungen zur Stimmrechtsausübung an diesen Stimmrechtsvertreter können vor und während der Hauptversammlung bis zum Ende der Generaldebatte erteilt werden.

Sämtliche Dokumente und Informationen zur Hauptversammlung werden auf unserer Internetseite unter [www.fmc-ag.de](http://www.fmc-ag.de) im Bereich Investor Relations/Hauptversammlung zugänglich gemacht.

Die ordentliche Hauptversammlung der Fresenius Medical Care AG & Co. KGaA fand im Berichtsjahr am 11. Mai 2010 in Frankfurt am Main statt. Über 75 % des Stammaktienkapitals und rund 2,6 % des Vorzugsaktienkapitals waren vertreten. Im Jahr 2009 waren über 74 % des Stammaktienkapitals und 4 % des Vorzugsaktienkapitals bei der ordentlichen Hauptversammlung vertreten gewesen. Alle Aktionäre, die nicht teilnehmen konnten, hatten die Möglichkeit, die Hauptversammlungsrede unseres Vorstandsvorsitzenden in einer Live-Übertragung über das Internet zu verfolgen. Die Rede ist auf unserer Internetseite unter [www.fmc-ag.de](http://www.fmc-ag.de) im Bereich Investors Relations/Hauptversammlung 2010 abrufbar. Auf der Hauptversammlung wurde über die Feststellung des Jahresabschlusses, die Verwendung des Bilanzgewinns, die Entlastung der persönlich haftenden

Gesellschafterin und des Aufsichtsrats, die Billigung des Systems zur Vergütung der Vorstandsmitglieder der persönlich haftenden Gesellschafterin und über die Wahl des Abschlussprüfers abgestimmt. Weitere Beschlussfassungen betrafen die Aufhebung bestehender und die Schaffung neuer genehmigter Kapitalien nebst Bezugsrechtsausschlüssen und entsprechender Satzungsänderungen. Ferner wurde über Satzungsänderungen zur Anpassung der Satzung an Änderungen des Aktiengesetzes Beschluss gefasst. Die Abstimmungsergebnisse der ordentlichen Hauptversammlung sind auf unserer Internetseite unter [www.fmc-ag.de](http://www.fmc-ag.de) im Bereich Investors Relations/Hauptversammlung 2010 abrufbar.

#### Arbeitsweise von Vorstand und Aufsichtsrat sowie Zusammensetzung und Arbeitsweise von deren Ausschüssen

Das deutsche Aktiengesetz schreibt für Aktiengesellschaften sowie für Kommanditgesellschaften auf Aktien und somit auch für die Fresenius Medical Care AG & Co. KGaA ein duales Führungssystem vor. Ein solches duales Führungssystem besteht aus einem Vorstand und einem Aufsichtsrat, wobei Geschäftsleitung und -kontrolle dabei streng voneinander getrennt sind. Der Vorstand leitet das Unternehmen in eigener Verantwortung und die Mitglieder des Vorstands tragen gemeinsam die Verantwortung für die Unternehmensleitung. Der Aufsichtsrat überwacht und berät den Vorstand und ist in Entscheidungen von grundlegender Bedeutung für das Unternehmen eingebunden. Aufgaben und Verantwortlichkeiten der beiden Organe sind gesetzlich jeweils klar festgelegt. Für die Rechtsform der KGaA ergibt sich dabei die Besonderheit, dass deren Geschäfte von einer persönlich haftenden Gesellschafterin geführt werden. Im Fall der Fresenius Medical Care AG & Co. KGaA ist dies die Fresenius Medical Care Management AG, deren Vorstand die Geschäftsleitung der KGaA übernimmt. Beide Gesellschaften, die Fresenius Medical Care AG & Co. KGaA sowie die Fresenius Medical Care Management AG verfügen über einen eigenen Aufsichtsrat.

#### Persönlich haftende Gesellschafterin – Vorstand und Aufsichtsrat

Die persönlich haftende Gesellschafterin – die Fresenius Medical Care Management AG –, vertreten

durch ihren Vorstand, leitet die Gesellschaft in eigener Verantwortung und führt deren Geschäfte. Ihr Handeln und ihre Entscheidungen richtet sie dabei am Unternehmensinteresse aus. Im Rahmen der Besetzung von Führungspositionen achtete der Vorstand bei der Auswahl aus fachlich qualifizierten Kandidaten auf Vielfalt (Diversity), insbesondere eine angemessene Berücksichtigung von Frauen. Rund ein Drittel der Teilnehmer an den Aktienoptionsprogrammen, die den Führungskräften vorbehalten sind, sind weiblich. Der Vorstand der persönlich haftenden Gesellschafterin bestand im Berichtsjahr aus sieben Personen.

Die Mitglieder des Vorstands und ihre Zuständigkeitsbereiche werden im Anhang des Einzelabschlusses unter „Vorstand der persönlich haftenden Gesellschafterin Fresenius Medical Care Management AG“ ([www.fmc-ag.de](http://www.fmc-ag.de) im Bereich Investor Relations/ Publikationen 2010/Einzelabschluss nach HGB), unter [www.fmc-ag.de](http://www.fmc-ag.de) im Bereich Unser Konzern/Management/Vorstand sowie — ab Seite 14 vorgestellt.

Neben dem Gesetz, der Satzung und den hier erläuterten Grundsätzen führt der Vorstand der persönlich haftenden Gesellschafterin die Geschäfte unserer Gesellschaft nach der Geschäftsordnung, die der Aufsichtsrat der persönlich haftenden Gesellschafterin in Ausführung der Ziffer 4.2.1 des Deutschen Corporate Governance Kodex beschlossen hat. Diese Geschäftsordnung bestimmt die Grundsätze der Zusammenarbeit im Kollegialorgan und regelt den Geschäftsverteilungsplan. Angelegenheiten von besonderer Bedeutung und Tragweite beschließt nach der Geschäftsordnung der Gesamtvorstand. Die Verhandlungen des Vorstands werden durch den Vorstandsvorsitzenden oder, bei dessen Verhinderung, durch das für das kaufmännische Ressort zuständige Vorstandsmitglied, oder, wenn auch dieses verhindert ist, durch das an Lebensjahren älteste anwesende Vorstandsmitglied geleitet. Der Vorsitzende bestimmt die Reihenfolge der Verhandlungsgegenstände und die Art der Abstimmung. Soweit nicht zwingende Rechtsvorschriften oder die Satzung Einstimmigkeit oder ein Handeln sämtlicher Vorstandsmitglieder verlangen, beschließt der Vorstand in Sitzungen grundsätzlich mit einfacher Mehrheit der abgegebenen Stimmen, außerhalb der Sitzungen mit einfacher Mehrheit seiner Mitglieder.

Die Geschäftsordnung bestimmt, dass Vorstandssitzungen bei Bedarf, jedoch mindestens einmal monatlich stattfinden. In der Praxis finden Vorstandssitzungen in der Regel zweimal monatlich statt.

Die Geschäftsordnung regelt für verschiedene Fälle, dass der Vorstand der persönlich haftenden Gesellschafterin die vorherige Zustimmung des Aufsichtsrats oder des zuständigen Aufsichtsratsausschusses der persönlich haftenden Gesellschafterin einzuholen hat.

Als Aktiengesellschaft verfügt die persönlich haftende Gesellschafterin über einen eigenen Aufsichtsrat, der aus sechs Mitgliedern besteht und dessen Vorsitzender Herr Dr. Ulf M. Schneider ist. Der Aufsichtsrat bestellt die Vorstandsmitglieder und überwacht und berät den Vorstand der persönlich haftenden Gesellschafterin bei der Leitung des Unternehmens. Er hat sich entsprechend der Empfehlung in Ausführung der Ziffer 5.1.3 des Deutschen Corporate Governance Kodex eine Geschäftsordnung gegeben. Die Unabhängigkeitsvoraussetzungen des Aufsichtsrats der persönlich haftenden Gesellschafterin werden über ein sogenanntes Pooling Agreement gewährleistet, dem die Fresenius SE & Co. KGaA (vormals Fresenius SE) beigetreten ist. Nach dem Pooling Agreement müssen mindestens ein Drittel (und mindestens zwei) der Mitglieder des Aufsichtsrats der persönlich haftenden Gesellschafterin unabhängige Mitglieder sein. Im Sinne des Pooling Agreement ist ein „unabhängiges Mitglied“ ein Mitglied des Aufsichtsrats, das keine wesentliche geschäftliche oder berufliche Verbindung mit der Fresenius Medical Care AG & Co. KGaA, ihrer persönlich haftenden Gesellschafterin, der Fresenius SE & Co. KGaA (vormals Fresenius SE) oder deren persönlich haftender Gesellschafterin, der Fresenius Management SE bzw. irgendeinem verbundenen Unternehmen dieser Gesellschaften hat.

#### Aufsichtsrat der Gesellschaft

Der Aufsichtsrat der Fresenius Medical Care AG & Co. KGaA berät und überwacht die Geschäftsführung durch die persönlich haftende Gesellschafterin und nimmt die ihm sonst durch Gesetz und Satzung zugewiesenen Aufgaben wahr. Er wird in die Strategie und Planung sowie in alle Fragen von grundlegender Bedeutung für das Unternehmen eingebunden.



Der Aufsichtsrat der Fresenius Medical Care AG & Co. KGaA besteht aus sechs Mitgliedern. Im Berichtsjahr waren dies die Herren Dr. Gerd Krick (Vorsitzender), Dr. Dieter Schenk (stellvertretender Vorsitzender), Prof. Dr. Bernd Fahrholz, William P. Johnston, John Gerhard Kringel und Dr. Walter L. Weisman. Weitergehende Angaben zu Mitgliedschaften der vorbenannten Aufsichtsratsmitglieder in anderen gesetzlich zu bildenden Aufsichtsräten und vergleichbaren in- und ausländischen Kontrollgremien von Wirtschaftsunternehmen finden sich im Anhang des Einzelabschlusses unter „Aufsichtsrat“ ([www.fmc-ag.de](http://www.fmc-ag.de) im Bereich Investor Relations/Publikationen 2010/ Einzelabschluss nach HGB), unter [www.fmc-ag.de](http://www.fmc-ag.de) im Bereich Unser Konzern/Management/Aufsichtsrat sowie — auf Seite 153.

Alle sechs Mitglieder des Aufsichtsrats werden von der Hauptversammlung nach den Bestimmungen des Aktiengesetzes gewählt. Dieser Beschluss der Hauptversammlung bedarf einer Mehrheit von mindestens drei Viertel der abgegebenen Stimmen, wobei die Fresenius SE & Co. KGaA (vormals Fresenius SE) – wie oben beschrieben – diesbezüglich vom Stimmrecht ausgeschlossen ist. Bei den Vorschlägen zur Wahl von Aufsichtsratsmitgliedern wird vorrangig auf die zur ordnungsgemäßen Wahrnehmung der Aufgaben erforderlichen Kenntnisse, Fähigkeiten und fachlichen Erfahrungen des Einzelnen geachtet. Die Zusammensetzung des Aufsichtsrats von Fresenius Medical Care hat sich am Unternehmensinteresse auszurichten und muss die effektive Überwachung und Beratung des Vorstands gewährleisten. Feste Diversity Quoten und Altersgrenzen würden demgegenüber die Auswahl geeigneter Kandidaten pauschal einschränken. Aus diesem Grund hat der Aufsichtsrat von der Benennung konkreter Ziele für seine Zusammensetzung sowie deren Berücksichtigung bei seinen Wahlvorschlägen und der Veröffentlichung des Stands der Umsetzung im Corporate Governance Bericht abgesehen und in der aktuellen Entsprechenserklärung entsprechende Abweichungen erklärt. Die entsprechende Entsprechenserklärung findet sich vorstehend in dieser Erklärung und kann auch auf unserer Internetseite unter [www.fmc-ag.de](http://www.fmc-ag.de) im Bereich Investor Relations/Corporate Governance/Entsprechenserklärung abgerufen werden.

Es herrscht eine klare Trennung zwischen den Mitgliedern des Aufsichtsrats und Vorstands: Eine gleichzeitige Tätigkeit in Aufsichtsrat und Vorstand ist rechtlich unzulässig. Im Aufsichtsrat der Fresenius Medical Care AG & Co. KGaA waren im Berichtsjahr keine Mitglieder vertreten, die in den vergangenen zwei Jahren dem Vorstand der persönlich haftenden Gesellschafterin angehörten. Die Mitglieder des Aufsichtsrats der Gesellschaft sind in ihren Entscheidungen unabhängig und nicht an Vorgaben oder Weisungen nahestehender Dritter gebunden. Dem Gremium gehört eine ausreichende Anzahl von insgesamt fünf unabhängigen Mitgliedern an, die in keiner geschäftlichen oder persönlichen Beziehung zur Gesellschaft oder zu deren Vorstand stehen. Einzelheiten zu der Behandlung potentiell auftretender Interessenkonflikte werden in einem nachfolgenden Abschnitt „Vermeidung von Interessenkonflikten“ dargestellt.

Die Amtsperiode des Aufsichtsrats beträgt fünf Jahre, die laufende Amtsperiode endet mit der ordentlichen Hauptversammlung des Jahres 2011. Der Aufsichtsrat hat sich entsprechend der Empfehlung gemäß Ziffer 5.1.3 des Deutschen Corporate Governance Kodex eine Geschäftsordnung gegeben.

Einzelheiten zur Wahl, Konstituierung und Amtszeit des Aufsichtsrats, zu dessen Sitzungen und Beschlussfassungen sowie zu seinen Rechten und Pflichten regelt die Satzung der Gesellschaft in den §§ 8 ff., die auf der Internetseite der Gesellschaft unter [www.fmc-ag.de](http://www.fmc-ag.de) im Bereich Investor Relations/Corporate Governance/Satzung eingesehen werden können. Darüber hinaus hat sich der Aufsichtsrat der Gesellschaft eine Geschäftsordnung gegeben, die unter anderem die Formalien seiner Einberufung sowie dessen Beschlussfassungen regelt. Demgemäß tritt der Aufsichtsrat mindestens zweimal pro Kalenderhalbjahr zusammen. Die Verhandlungen des Aufsichtsrats werden durch den Vorsitzenden oder, bei dessen Verhinderung, durch seinen Stellvertreter geleitet, der auch die Reihenfolge der Verhandlungsgegenstände und die Art der Abstimmung bestimmt. Der Aufsichtsrat entscheidet grundsätzlich mit einfacher Mehrheit der an der Beschlussfassung teilnehmenden Stimmen, soweit



nicht das Gesetz zwingend andere Mehrheiten vorschreibt. Gegenüber Dritten wird der Aufsichtsrat durch den Vorsitzenden vertreten. Die Koordination der Arbeit sowie die Leitung des Aufsichtsrats übernimmt der Aufsichtsratsvorsitzende.

Des Weiteren hat der Aufsichtsrat der Fresenius Medical Care AG & Co. KGaA Ausschüsse eingerichtet, hinsichtlich derer nachstehend nähere Angaben gemacht werden. Die Mitglieder des Aufsichtsrats sowie auch der Ausschüsse führen hinsichtlich ihrer Tätigkeit regelmäßig Effizienzprüfungen durch, die im Wege einer offenen Diskussion im Plenum stattfinden. Dabei wird jeweils auch der Umfang und die Darstellung der Vorlagen erörtert, sowie Ablauf und Strukturierung der Sitzungen besprochen. Die vorgenommenen Überprüfungen haben ergeben, dass Aufsichtsrat und Ausschüsse effizient organisiert sind und auch das Zusammenwirken von Aufsichtsrat und Vorstand der persönlich haftenden Gesellschafterin sehr gut funktioniert.

Die Mitglieder des Aufsichtsrats der Fresenius Medical Care AG & Co. KGaA informieren sich regelmäßig durch unternehmensinterne wie auch durch externe Quellen über den aktuellen Stand der Anforderungen an die Überwachungstätigkeit. Neben Informationen, die von verschiedenen unternehmensexternen Sachkundigen zur Verfügung gestellt werden, berichten insoweit auch Experten aus den Fachbereichen des Unternehmens regelmäßig über maßgebliche Entwicklungen, unter anderem beispielsweise über relevante gesetzliche Neuregelungen oder Entwicklungen in der Rechtsprechung sowie auch über aktuelle Entwicklungen in Vorschriften zur Rechnungslegung und Prüfung nach U.S. GAAP und IFRS. Auf diese Weise stellt der Aufsichtsrat mit angemessener Unterstützung des Unternehmens eine fortdauernde Qualifizierung seiner Mitglieder sowie die Weiterentwicklung und Aktualisierung ihrer Fachkenntnisse, Urteilsfähigkeit und Erfahrung sicher, die zur ordnungsgemäßen Wahrnehmung der Aufgaben des Aufsichtsrats einschließlich seiner Ausschüsse erforderlich ist.

Im Berichtsjahr haben vier Sitzungen des Aufsichtsrats der Fresenius Medical Care AG & Co. KGaA

stattgefunden. Zusätzlich hat der Aufsichtsrat mehrmals Themen in Telefonkonferenzen erörtert. Wesentliche Beratungsgegenstände waren unter anderem die Entwicklungen der Erstattungssysteme in den USA und in anderen Ländern, die Finanzierung des Unternehmens, Akquisitionen sowie die Geschäftsentwicklung und die Wettbewerbssituation.

#### **Zusammenwirken von persönlich haftender Gesellschafterin und Aufsichtsrat der Gesellschaft**

Gute Unternehmensführung setzt eine vertrauensvolle und effiziente Zusammenarbeit zwischen der Geschäftsleitung und dem Aufsichtsrat voraus. Die persönlich haftende Gesellschafterin und der Aufsichtsrat der Gesellschaft arbeiten zum Wohle des Unternehmens eng zusammen. Das gemeinsame Ziel ist die nachhaltige Steigerung des Unternehmenswertes unter Wahrung der Grundsätze zu Corporate Governance und Compliance. Die persönlich haftende Gesellschafterin berichtet dem Aufsichtsrat der Gesellschaft regelmäßig über alle relevanten Fragen der Geschäftspolitik, der Unternehmensplanung und der strategischen Weiterentwicklung, über die Rentabilität der Gesellschaft, den Gang der Geschäfte sowie die Lage des Konzerns einschließlich der Risikolage.

Im abgelaufenen Geschäftsjahr hat der Aufsichtsrat die Geschäftsführung des Unternehmens, d.h. den Vorstand der persönlich haftenden Gesellschafterin, bei der Leitung des Unternehmens regelmäßig beraten und die Geschäftsführung der Gesellschaft im Rahmen seiner Verantwortung als Aufsichtsrat der Kommanditgesellschaft auf Aktien überwacht.

#### **Vermeidung von Interessenkonflikten**

Die Mitglieder des Vorstands der persönlich haftenden Gesellschafterin und des Aufsichtsrats der Fresenius Medical Care AG & Co. KGaA sowie der Aufsichtsrat der Fresenius Medical Care Management AG verfolgen bei ihren Entscheidungen und in Zusammenhang mit ihrer Tätigkeit weder persönliche Interessen noch gewähren sie anderen Personen ungerechtfertigte Vorteile. Nebentätigkeiten oder Geschäfte der Organe mit dem Unternehmen

sind dem Aufsichtsrat unverzüglich offenzulegen und von diesem zu genehmigen. Der Aufsichtsrat berichtet der Hauptversammlung über etwaige Interessenkonflikte und deren Behandlung. Der Vorsitzende des Vorstands der Fresenius Medical Care Management AG Dr. Ben J. Lipps war im Berichtsjahr unverändert mit Zustimmung des Aufsichtsrats der Fresenius Medical Care Management AG zugleich Mitglied des Vorstands der Fresenius SE. Die Mitglieder des Aufsichtsrats der Fresenius Medical Care AG & Co. KGaA Herr Dr. Krick (Vorsitzender) und Herr Dr. Schenk (stellvertretender Vorsitzender) waren im Berichtsjahr auch Mitglieder des Aufsichtsrats der Fresenius SE. Nach dem Formwechsel der Fresenius SE in die Fresenius SE & Co. KGaA, der am 28. Januar 2011 wirksam geworden ist, sind beide Herren nun Mitglieder des Aufsichtsrats der Fresenius Management SE, der persönlich haftenden Gesellschafterin der Fresenius SE & Co. KGaA. Herr Dr. Krick ist ferner Mitglied des Aufsichtsrats der Fresenius SE & Co. KGaA. Herr Dr. Schenk ist weiterhin Vorsitzender des Verwaltungsrats der Else Kröner-Fresenius-Stiftung, alleinige Gesellschafterin der Fresenius Management SE, und Mit-Testamentsvollstrecker nach Frau Else Kröner. Herr Dr. Krick bezieht von der Fresenius SE & Co. KGaA eine Pension im Hinblick auf seine frühere Tätigkeit im Vorstand der Gesellschaft. Berater- oder sonstige Dienstleistungsbeziehungen zwischen Aufsichtsratsmitgliedern und der Gesellschaft bestanden auch im Berichtsjahr ausschließlich bei Herrn Dr. Schenk, der im Geschäftsjahr 2010 Aufsichtsratsmitglied unserer Gesellschaft, Aufsichtsratsmitglied der Fresenius SE (bis zum Rechtsformwechsel der Fresenius SE in die Fresenius SE & Co. KGaA, der ab dem 28. Januar 2011 wirksam wurde) sowie der Fresenius Management SE und zugleich Partner der international agierenden Rechtsanwaltssozietät Noerr LLP war. Die Rechtsanwaltssozietät Noerr LLP ist in dem Geschäftsjahr 2010 für das Unternehmen rechtsberatend tätig geworden. Hinsichtlich bestimmter spezifischer Aufträge für zukünftiges Tätigwerden der Anwaltskanzlei Noerr LLP sowie abschließend hinsichtlich der Tätigkeiten in den ersten drei Quartalen des Berichtsjahrs hat der Aufsichtsrat der Mandatierung bei Stimmenthaltung von Herrn Dr. Schenk bereits

zugestimmt. Die im vierten Quartal des Berichtsjahrs erfolgten Dienstleistungen werden abschließend im März 2011 Gegenstand der Aufsichtsratssitzung sein.

Im Berichtsjahr 2010 wurden von der Fresenius Medical Care 1.207.685 € an die Rechtsanwaltssozietät Noerr LLP bezahlt. Dies entspricht weniger als 3 % der von Fresenius Medical Care weltweit gezahlten Rechts- und Beratungskosten.

Relevante Interessenkonflikte von Vorstands- und Aufsichtsratsmitgliedern, die dem Aufsichtsrat unverzüglich offenzulegen sind, traten im Berichtsjahr nicht auf.

#### Ausschüsse des Aufsichtsrats

Der Aufsichtsrat der Fresenius Medical Care AG & Co. KGaA hat ein Audit and Corporate Governance Committee eingerichtet, dem im Berichtsjahr die Herren Dr. Walter L. Weisman (Vorsitzender), Prof. Dr. Bernd Fahrholz, William P. Johnston und Dr. Gerd Krick angehörten. Weitergehende Angaben zu Mitgliedschaften der vorbenannten Ausschussmitglieder in anderen gesetzlich zu bildenden Aufsichtsräten und vergleichbaren in- und ausländischen Kontrollgremien von Wirtschaftsunternehmen finden sich im Anhang des Einzelabschlusses unter „Aufsichtsrat“ ([www.fmc-ag.de](http://www.fmc-ag.de) im Bereich Investor Relations/Publicationen 2010/Einzelabschluss nach HGB), unter [www.fmc-ag.de](http://www.fmc-ag.de) im Bereich Unser Konzern/Management/Aufsichtsrat sowie — auf Seite 153.

Das Audit and Corporate Governance Committee unterstützt und berät den Aufsichtsrat der Gesellschaft und nimmt die ihm gesetzlich und im Rahmen des Deutschen Corporate Governance Kodex vorgegebenen Aufgaben wahr; unbeschadet der Zuständigkeit des Aufsichtsrats prüft es ferner den Bericht der persönlich haftenden Gesellschafterin über die Beziehungen zu verbundenen Unternehmen. Zudem befasst sich das Audit and Corporate Governance Committee mit dem Bericht gemäß Form 20-F, der neben anderen Angaben den Konzernabschluss sowie den Konzernlagebericht beinhaltet. Das Audit and Corporate Governance Committee hat sich mit Zustimmung des Aufsichtsrats unserer Gesellschaft eine Geschäftsordnung gegeben.

Die Geschäftsordnung des Audit and Corporate Governance Committees sieht vor, dass diesem zwischen drei und fünf Mitgliedern angehören können. Mindestens zwei der Mitglieder müssen entsprechend der Satzung der Gesellschaft unabhängig sein, was bedeutet, dass sie, abgesehen von der Mitgliedschaft im Aufsichtsrat der persönlich haftenden Gesellschafterin, keine wesentlichen geschäftlichen, beruflichen oder persönlichen Beziehungen mit der Gesellschaft oder einem mit ihr verbundenen Unternehmen haben. Die Frage der Unabhängigkeit beurteilt dabei allein der Aufsichtsrat der Gesellschaft, wobei eine solche i.d.R. dann angenommen wird, wenn das betreffende Mitglied den Anforderungen an die Unabhängigkeit entsprechend § 100 Abs. 5 AktG und den Vorgaben der New York Stock Exchange genügt. Des Weiteren ist erforderlich, dass die Mitglieder des Audit and Corporate Governance Committees über Fachkenntnisse auf dem Gebiet Finanzen und Rechnungslegung verfügen.

Die Mitglieder des Audit und Corporate Governance Committees Herr Dr. Weisman, Herr Johnston und Herr Prof. Dr. Fahrholz sind als unabhängige Mitglieder anzusehen und verfügen über Fachkenntnisse auf dem Gebiet Finanzen und Rechnungslegung. Die Mitglieder wurden auf Grundlage ihrer besonderen Fachkenntnisse, ihrer Unabhängigkeit und ihrer Erfahrung in das Committee berufen. Das Audit and Corporate Governance Committee tritt zusammen, wenn die Umstände dies erforderlich machen, in jedem Fall aber mindestens vier Mal pro Jahr. Versammlungen des Audit and Corporate Governance Committees werden von einem jeweils zu bestimmenden Vorsitzenden geleitet, der kein ehemaliges Mitglied des Vorstands der Gesellschaft sein sollte. Beschlussfähigkeit wird durch die Mehrheit der Mitglieder des Gremiums begründet. Im Nachgang zu den Versammlungen berichtet der Prüfungs- und Corporate Governance Ausschuss regelmäßig durch seinen Vorsitzenden an den Aufsichtsrat der Gesellschaft und spricht mit diesem diejenigen Themen an, die in den Zuständigkeitsbereich des Audit and Corporate Governance Committees fallen. Der Aufsichtsrat hat im Einvernehmen mit dem Audit and Corporate Governance Committee die KPMG AG

Wirtschaftsprüfungsgesellschaft als Abschlussprüfer für das Berichtsjahr vorgeschlagen.

Dem Nominierungsausschuss der Gesellschaft gehörten im Berichtsjahr ferner Herr Dr. Gerd Krick (Vorsitzender), Dr. Walter L. Weisman und Dr. Dieter Schenk und damit zwei unabhängige Mitglieder an. Der Nominierungsausschuss erarbeitet Personalvorschläge des Aufsichtsrats und schlägt dem Aufsichtsrat der Gesellschaft geeignete Kandidaten für dessen Wahlvorschläge an die Hauptversammlung vor. Weitergehende Angaben zu Mitgliedschaften der vorbenannten Ausschussmitglieder in anderen gesetzlich zu bildenden Aufsichtsräten und vergleichbaren in- und ausländischen Kontrollgremien von Wirtschaftsunternehmen finden sich im Anhang des Einzelabschlusses unter „Aufsichtsrat“ ([www.fmc-ag.de](http://www.fmc-ag.de) im Bereich Investor Relations/Publikationen 2010/Einzelabschluss nach HGB), unter [www.fmc-ag.de](http://www.fmc-ag.de) im Bereich Unser Konzern/Management/Aufsichtsrat sowie — ab Seite 153.

Des Weiteren hat die Fresenius Medical Care AG & Co. KGaA bereits in 2006 einen Gemeinsamen Ausschuss eingerichtet, dessen Zusammensetzung und Tätigkeit in den §§ 13a ff. der Satzung der Gesellschaft geregelt ist; die genannten Bestimmungen können auf der Internetseite der Gesellschaft unter [www.fmc-ag.de](http://www.fmc-ag.de) im Bereich Investor Relations/Corporate Governance/Satzung eingesehen werden. Der Gemeinsame Ausschuss wird nur bei Bedarf einberufen, namentlich in Fällen bestimmter, in der Satzung vordefinierter Rechtsgeschäfte, die als wesentliche Transaktionen einzustufen sind und hinsichtlich derer die persönlich haftende Gesellschafterin der Zustimmung des Gremiums bedarf.

Der Gemeinsame Ausschuss setzt sich aus jeweils zwei Mitgliedern des Aufsichtsrats der persönlich haftenden Gesellschafterin sowie des Aufsichtsrats der Gesellschaft zusammen, wobei der Vorsitzende des Gremiums durch die persönlich haftende Gesellschafterin bestimmt wird. Für die persönlich haftende Gesellschafterin wurden Herr Dr. Ulf M. Schneider und Herr Dr. Gerd Krick als Mitglieder des Gemeinsamen Ausschusses benannt. Mit Beschluss vom 9. Mai 2006 hat ferner die Hauptversammlung der

Gesellschaft die Herren Dr. Walter L. Weisman und John Gerhard Kringel als Mitglieder des Gemeinsamen Ausschusses seitens der Fresenius Medical Care AG & Co. KGaA bestimmt. Weitergehende Angaben zu Mitgliedschaften der vorbenannten Ausschussmitglieder in anderen gesetzlich zu bildenden Aufsichtsräten und vergleichbaren in- und ausländischen Kontrollgremien von Wirtschaftsunternehmen finden sich – zu Herrn Dr. Ulf M. Schneider – nachstehend – im Anhang des Einzelabschlusses unter „Aufsichtsrat“ (www.fmc-ag.de im Bereich Investor Relations/Publikationen 2010/Einzelabschluss nach HGB), unter www.fmc-ag.de im Bereich Unser Konzern/Management/Aufsichtsrat sowie — ab Seite 153.

Die Beschlussfähigkeit des Ausschusses setzt die Teilnahme von mindestens drei Mitgliedern voraus. Beschlüsse werden grundsätzlich mit einfacher Mehrheit der Stimmen gefasst. Soweit der Gemeinsame Ausschuss zusammengetreten ist, berichtet er der Hauptversammlung über seine Tätigkeit; insoweit finden die §§ 171 Abs. 2, Satz 1 und Satz 2 (erster Halbsatz) sowie 176 Abs. 1 Satz 1 AktG entsprechende Anwendung. Sind Beschlüsse durch Ausübung der Zweitstimme des Vorsitzenden zustande gekommen, ist dies im Bericht des Gemeinsamen Ausschusses offenzulegen.

Im Berichtsjahr hat der Gemeinsame Ausschuss nicht getagt, da die hierfür erforderlichen Voraussetzungen nicht gegeben waren.

Des Weiteren bestanden auf der Ebene des Aufsichtsrats der persönlich haftenden Gesellschafterin, der Fresenius Medical Care Management AG, weitere Ausschüsse, die der Steigerung der Effizienz der Aufsichtsrats Tätigkeit dienen sollen und die komplexe Spezialthemen wie die Vorstandsbesetzung und -vergütung, die Personalvorschläge des Aufsichtsrats sowie regulatorische Vorgaben und die Leistungserstattung im Dialysebereich behandeln. Diese Ausschüsse haben nur beratende Funktion. Dem Human Resources Committee gehörten im Berichtsjahr die Herren Dr. Ulf M. Schneider (Vorsitzender), Dr. Gerd Krick, William P. Johnston und Dr. Walter L. Weisman an. Mitglieder des Regulatory and

Reimbursement Assessment Committees waren in 2010 die Herren William P. Johnston (Vorsitzender), John Gerhard Kringel und Dr. Dieter Schenk. Dem Nominierungsausschuss der Gesellschaft gehörten im Berichtsjahr ferner Herr Dr. Ulf M. Schneider (Vorsitzender), Dr. Gerd Krick und Dr. Walter L. Weisman und damit zwei unabhängige Mitglieder an. Der Nominierungsausschuss erarbeitet Personalvorschläge des Aufsichtsrats und schlägt dem Aufsichtsrat der Gesellschaft geeignete Kandidaten für dessen Wahlvorschläge an die Hauptversammlung vor. Hinsichtlich der Mitgliedschaften der vorbenannten Ausschussmitglieder in anderen gesetzlich zu bildenden Aufsichtsräten und vergleichbaren in- und ausländischen Kontrollgremien von Wirtschaftsunternehmen werden im Anhang des Einzelabschlusses unter „Aufsichtsrat“ (www.fmc-ag.de im Bereich Investor Relations/Publikationen 2010/Einzelabschluss nach HGB), unter www.fmc-ag.de im Bereich Unser Konzern/Management/Aufsichtsrat sowie — auf Seite 153 Angaben gemacht. Im Hinblick auf Herrn Dr. Schneider ist für das Berichtsjahr ferner folgendes zu nennen:

#### **Dr. Ulf M. Schneider**

Vorsitzender des Vorstands der Fresenius SE  
(bis zum 28. Januar 2011),  
Vorsitzender des Vorstands der  
Fresenius Management SE

#### **Aufsichtsrat**

Fresenius Kabi AG (Vorsitzender)  
HELIOS Kliniken GmbH (Vorsitzender)  
Fresenius Medical Care Groupe France S.A.S.,  
Frankreich (Vorsitzender)  
Fresenius Kabi Austria GmbH, Österreich  
(bis zum 30. Juni 2010)  
Fresenius Kabi España S.A., Spanien  
Fresenius HemoCare Netherlands B.V., Niederlande

#### **Sonstige**

APP Pharmaceuticals, Inc., USA  
(Board of Directors)  
Fresenius Kabi Pharmaceuticals Holding,  
Inc., USA (Board of Directors)  
FHC (Holdings), Ltd., Großbritannien  
(Board of Directors)

## VERGÜTUNG VON VORSTAND UND AUFSICHTSRAT

### Vergütungsbericht

Der Vergütungsbericht der Fresenius Medical Care AG & Co. KGaA fasst die wesentlichen Elemente des Systems zur Vergütung des Vorstands der Fresenius Medical Care Management AG als persönlich haftende Gesellschafterin der Fresenius Medical Care AG & Co. KGaA zusammen und erläutert in diesem Zusammenhang vor allem die Höhe und Struktur der Vorstandsvergütungen. Der Vergütungsbericht ist Bestandteil des Konzernlageberichts. Der Vergütungsbericht wird auf der Basis der Empfehlungen des Deutschen Corporate Governance Kodex erstellt und beinhaltet ferner die Angaben, die nach den maßgeblichen gesetzlichen Vorschriften, vor allem gemäß dem Handelsgesetzbuch, erforderlich sind.

#### I. Vergütung des Vorstands

Für die Festlegung der Vorstandsvergütung ist das Aufsichtsratsplenum der Fresenius Medical Care Management AG zuständig. Der Aufsichtsrat wird dabei von einem Personalausschuss, dem Human Resources Committee, unterstützt. Das Human Resources Committee setzte sich im Berichtsjahr aus den Herren Dr. Ulf M. Schneider, Dr. Gerd Krick, William P. Johnston und Dr. Walter Weisman zusammen.

Die Vergütung der Vorstandsmitglieder der Fresenius Medical Care Management AG berücksichtigte im Berichtsjahr auch bereits die nach Maßgabe des am 5. August 2009 in Kraft getretenen Gesetzes zur Angemessenheit der Vorstandsvergütung (VorstAG) neu formulierten Anforderungen. Das System der Vorstandsvergütung wurde zu Beginn des Berichtsjahrs von einem unabhängigen externen Vergütungsexperten geprüft und im Weiteren der Hauptversammlung der Fresenius Medical Care AG & Co. KGaA zur Billigung vorgelegt. Die Hauptversammlung hat das System der Vorstandsvergütung am 11. Mai 2010 mit einer Mehrheit von 99,26 % der abgegebenen Stimmen durch Beschluss gebilligt.

Zielsetzung des Vergütungssystems ist es, die Mitglieder des Vorstands an der nachhaltigen

Entwicklung des Unternehmens entsprechend ihren Aufgaben und Leistungen sowie den Erfolgen bei der Gestaltung der wirtschaftlichen und finanziellen Lage des Unternehmens unter Berücksichtigung des Vergleichsumfelds angemessen teilhaben zu lassen.

Die Vergütung des Vorstands ist in ihrer Gesamtheit leistungsorientiert und setzte sich im Geschäftsjahr 2010 aus drei Komponenten zusammen:

- ▶ erfolgsunabhängige Vergütung (Grundgehalt),
- ▶ erfolgsbezogene Vergütung (variabler Bonus),
- ▶ Komponente mit langfristiger Anreizwirkung (Aktienoptionen, aktienbasierte Vergütung mit Barausgleich).

Die Ausgestaltung der einzelnen Komponenten folgt dabei den nachstehenden Kriterien:

Die erfolgsunabhängige Vergütung wurde im Geschäftsjahr 2010 in zwölf monatlichen Raten als Grundgehalt ausbezahlt. Zusätzlich haben die Mitglieder des Vorstands Nebenleistungen erhalten, die im Wesentlichen aus Versicherungsleistungen, der Privatnutzung der Firmen-Pkw, Sonderzahlungen wie z.B. Auslandszulagen, Wohnkostenzuschüssen, Erstattung von Honoraren zur Erstellung von Einkommenssteuerunterlagen, und Gebührenerstattungen sowie Zuschüssen zur Renten- und Krankenversicherung bestehen.

Die erfolgsbezogene Vergütung wird auch für das Geschäftsjahr 2010 in Form einer kurzfristig ausgerichteten Barzahlungskomponente (Jahresbonus) und als längerfristig orientierte aktienbasierte Vergütungskomponente (Aktienoptionen, aktienbasierte Vergütung mit Barausgleich) gewährt. Die Höhe der jeweiligen erfolgsbezogenen Vergütungskomponenten ist von der Erreichung individueller sowie gemeinsamer Ziele abhängig:

Die Zielvorgaben für die Vorstandsmitglieder werden über die Kennzahlen operative Ergebnismarge, Wachstum des Jahresüberschusses des Konzerns (EAT Wachstum) sowie an der Entwicklung des Free Cash Flow (Cash Flow vor Akquisitionen) gemessen. Alle Werte werden aus der Gegenüberstellung von

Soll- mit Ist-Werten ermittelt. Des Weiteren findet eine Unterteilung in Zielsetzungen auf Konzern-ebene und in solche Zielsetzungen statt, die in einzelnen Regionen zu erfüllen sind. Schließlich werden die verschiedenen Zielparameter im Hinblick auf ihren relativen Anteil am Gesamtbetrag der variablen Vergütung in Abhängigkeit der jeweiligen (regionalen) Verantwortungsbereiche der Vorstandsmitglieder unterschiedlich gewichtet.

Die für die variable Vergütung relevante Untergrenze für das zu erreichende EAT Wachstum lag bei mindestens 6 % während die höchste insoweit relevante Zuwachsrate mit 15 % festgesetzt war (Kappung). Daneben wurden die Mitglieder des Vorstands mit Konzernfunktionen als auch die Vorstände mit Regionalverantwortung an der Entwicklung des jeweiligen Free Cash Flow im Konzern bzw. in den relevanten Regionen während des Berichtszeitraums gemessen, wobei die vergütbaren Ziele im Rahmen eines Korridors von Raten zwischen 3 und 6 % des Free Cash Flow in Bezug auf den Umsatz lagen. Die im Berichtszeitraum erzielten regionalen operativen Ergebnismargen wurden ferner zugunsten der betreffenden Vorstände mit Regionalverantwortung jeweils in einem Zielkorridor zwischen 13 und 18,5 % vergütet.

Grundsätzlich wird die Vergütung des EAT Wachstums für Mitglieder des Vorstands mit Konzernfunktionen – das sind die Herren Dr. Ben Lipps, Michael Brosnan und Dr. Rainer Runte – mit 80 % Anteil an der variablen Vergütung höher gewichtet als bei Vorständen, die für die regionalen Ergebnisse (das sind die Herren Roberto Fusté, Dr. Emanuele Gatti und Rice Powell) oder für den Bereich Global Manufacturing Operations (Herr Kent Wanzek) verantwortlich zeichnen. Dort ist der Anteil mit 60 % bemessen. Die Zielerreichung des Free Cash Flow wird mit 20 % am variablen Vergütungsanteil für alle Vorstandsmitglieder einheitlich bemessen; ebenso wird auch die Bewertung der operativen Ergebnismargen in den Regionen mit 20 % am variablen Vergütungsanteil gewichtet.

Die durch Barzahlung zu erfüllenden Bonuskomponenten setzten sich im Berichtsjahr sodann grundsätzlich anteilig aus einem kurzfristig ausgerichteten

Jahresbonus sowie aus einer weiteren durch Barausgleich abzugelenden aktienbasierten Vergütungskomponente (langfristig) zusammen, die sich an der Kursentwicklung der Stammaktien der Fresenius Medical Care AG & Co. KGaA orientiert. Im Falle der jährlichen Zielerreichung erfolgte, respektive erfolgt die Barzahlung nach Abschluss des jeweiligen Geschäftsjahres. Die im Falle der jährlichen Zielerreichung ebenfalls jährlich einzuräumende aktienbasierte erfolgsbezogene Vergütung unterliegt einer dreijährigen Wartezeit, wobei in Sonderfällen (z.B. Berufsunfähigkeit, Übergang in den Ruhestand, Nichtverlängerung ausgelaufener Anstellungsverträge durch das Unternehmen) eine kürzere Frist gelten kann. Die Höhe der baren Auszahlung dieser aktienbasierten Vergütung richtet sich nach dem Kurswert der Stammaktie der Fresenius Medical Care AG & Co. KGaA bei Ausübung nach Ablauf der dreijährigen Wartefrist. Die aktienbasierte Vergütung wird aus diesem Grund den Vergütungsbestandteilen mit langfristiger Anreizwirkung zugerechnet. Die Zielerreichung der vorab benannten und insoweit zu Grunde gelegten Kennzahlen wird mit maximal 120 % bewertet und mit einem festen Multiplikator versehen, so dass eine Begrenzungsmöglichkeit der variablen Bezüge vorgesehen ist. Bei der Festlegung der variablen Vergütung wird darauf geachtet, dass der Anteil der langfristigen Vergütungsbestandteile (einschließlich der nachstehend beschriebenen Aktioptionskomponente) mindestens 50 % der gesamten variablen Bezüge beträgt. Sofern dies rechnerisch nicht der Fall sein sollte, sehen die Verträge der Vorstandsmitglieder vor, dass der Anteil des kurzfristigen Jahresbonus verringert und der Anteil der langfristigen aktienbasierten Barvergütungskomponente entsprechend erhöht wird, um diese Quote zu erreichen. Für die gesamte erfolgsbezogene Vergütung ist der für die Mitglieder des Vorstands jeweils maximal erreichbare Bonus betragsmäßig gedeckelt. Die aktienbasierten Vergütungskomponenten enthalten ferner eine Begrenzung für den Fall außerordentlicher Entwicklungen. Darüber hinaus kann der Aufsichtsrat eine Ermessenstantieme für besondere Leistungen gewähren.

In einigen Fällen galt für die Geschäftsjahre 2006, 2007 und 2008 zudem eine besondere Bonuskom-



ponente, deren Zielerreichung zwar nur innerhalb dieses dreijährigen Zeitraums gemessen wurde, deren Auszahlung jedoch zum Teil ebenfalls einer mehrjährigen Wartezeit unterliegt und insoweit bis zum Jahr 2012 erfolgt. Diese Bonuskomponente enthielt auch Sonderbestandteile, die an das Erreichen von außerordentlichen finanziellen Zielen anknüpften, die im Zusammenhang mit speziellen Integrationsmaßnahmen (wie z.B. im Zusammenhang mit der Übernahme der Renal Care Group in den USA) standen und insoweit das Erreichen eines außergewöhnlichen Ergebnisanstiegs erforderten. Der vorliegende Bericht berücksichtigt auch solche Leistungen, die auf dieser früheren Bonuskomponente beruhen, jedoch erst im Berichtsjahr ausgeübt wurden und zur Auszahlung kamen.

Für die Geschäftsjahre 2010 und 2009 stellte sich die Höhe der Barvergütung des Vorstands der Fresenius Medical Care Management AG ohne Komponenten mit langfristiger Anreizwirkung wie in Tabelle 2.11.2 abgebildet dar.

Neben der vorstehend beschriebenen aktienbasierten Vergütungskomponente mit Barausgleich wurden als

weitere Komponente mit langfristiger Anreizwirkung im Geschäftsjahr 2010 Aktienoptionen auf Basis des Aktienoptionsplans 2006 gewährt. Die Grundzüge des Aktienoptionsplans 2006 werden im Anhang des Einzelabschlusses unter dem Stichwort „Bedingtes Kapital IV“ sowie — ab Seite 245 näher dargestellt.

Zum 1. Januar 2010 existierten bei der Gesellschaft noch drei weitere, durch bedingtes Kapital abgesicherte Mitarbeiterbeteiligungsprogramme, die deren Teilnehmer zum Bezug von Wandelschuldverschreibungen oder Aktienoptionen berechtigten, aus denen jedoch im Geschäftsjahr 2010 keine weiteren Bezugsrechte mehr ausgegeben werden konnten. In Anknüpfung an diese erfolgreichen Mitarbeiterbeteiligungsprogramme der vergangenen Geschäftsjahre hatte die Fresenius Medical Care AG & Co. KGaA den durch die Hauptversammlung am 9. Mai 2006 beschlossenen und mit Beschluss der Hauptversammlung vom 15. Mai 2007 (Aktiensplit im Verhältnis 1:3) geänderten Aktienoptionsplan 2006 implementiert.

Aus diesem Aktienoptionsplan wurden im Berichtsjahr 2010 insgesamt 2.817.879 (2009: 2.585.196) Aktien-

Tabelle 2.11.2

|                    | Erfolgsunabhängige Vergütung |              |                        |            | Erfolgsbezogene Vergütung/Bonus |              | Barvergütung (ohne Komponenten mit langfristiger Anreizwirkung) |              |
|--------------------|------------------------------|--------------|------------------------|------------|---------------------------------|--------------|-----------------------------------------------------------------|--------------|
|                    | Gehalt                       |              | Sonstiges <sup>1</sup> |            |                                 |              |                                                                 |              |
|                    | 2010                         | 2009         | 2010                   | 2009       | 2010                            | 2009         | 2010                                                            | 2009         |
|                    |                              |              |                        |            |                                 |              |                                                                 |              |
| Dr. Ben J. Lipps   | 905                          | 860          | 354                    | 251        | 1.172                           | 1.200        | 2.431                                                           | 2.311        |
| Michael Brosnan    | 490                          | –            | 138                    | –          | 619                             | –            | 1.247                                                           | –            |
| Roberto Fusté      | 450                          | 400          | 185                    | 185        | 558                             | 519          | 1.193                                                           | 1.104        |
| Dr. Emanuele Gatti | 650                          | 550          | 105                    | 111        | 819                             | 732          | 1.574                                                           | 1.393        |
| Rice Powell        | 716                          | 538          | 27                     | 28         | 995                             | 868          | 1.738                                                           | 1.434        |
| Dr. Rainer Runte   | 425                          | 380          | 36                     | 30         | 550                             | 451          | 1.011                                                           | 861          |
| Kent Wanzek        | 377                          | –            | 19                     | –          | 548                             | –            | 944                                                             | –            |
| <b>GESAMT</b>      | <b>4.013</b>                 | <b>2.728</b> | <b>864</b>             | <b>605</b> | <b>5.261</b>                    | <b>3.770</b> | <b>10.138</b>                                                   | <b>7.103</b> |

<sup>1</sup> Enthalten sind Versicherungsleistungen, die Privatnutzung der Firmen-PKW, Wohnkostenzuschüsse, Zuschüsse zur Renten- und Krankenversicherung und sonstige Nebenleistungen.



optionen zugeteilt, wovon 423.300 (2009: 348.600) auf die Mitglieder des Vorstands entfielen.

Für die Geschäftsjahre 2010 und 2009 sind die Anzahl und der Wert der ausgegebenen Aktienoptionen sowie auch der Wert der aktienbasierten Vergütung mit Barausgleich in der Tabelle 2.11.3 individualisiert dargestellt.

Die angegebenen Werte der im Geschäftsjahr 2010 an die Mitglieder des Vorstands gewährten Aktienoptionen entsprechen deren Zeitwert (Fair Value) zum Zeitpunkt ihrer Gewährung, somit einem Wert in Höhe von 8,07 € (2009: 7,64 €) pro Aktienoption. Der Ausübungskurs für die gewährten Aktienoptionen beträgt 42,68 € (2009: 31,97 €).

Am Ende des Geschäftsjahres 2010 hielten die Mitglieder des Vorstands insgesamt 2.178.699 Aktienoptionen (2009: 2.041.121 Aktienoptionen).

Die Entwicklung und der Stand der Aktienoptionen des Vorstands im Geschäftsjahr 2010 sind in Tabelle 2.11.4 näher dargestellt.

Aufgrund der im Geschäftsjahr 2010 erreichten Ziele wurden ferner Ansprüche auf aktienbasierte Vergütungen mit Barausgleich im Wert von insgesamt 1.963 TSD € (2009: 1.103 TSD €) erworben, auf Basis dessen die Zuteilung der Anzahl aktienbasierter Vergütungsansprüche erfolgt. Da die konkrete Zuteilung erst im März 2011 erfolgt, wird auch erst zu diesem Zeitpunkt auf Basis dann aktueller

#### KOMPONENTEN MIT LANGFRISTIGER ANREIZWIRKUNG

Tabelle 2.11.3

|                    | Aktienoptionen |                |               |              | Aktienbasierte Vergütung<br>mit Barausgleich<br>Wert in TSD € |              | Gesamt<br>Wert in TSD € |              |
|--------------------|----------------|----------------|---------------|--------------|---------------------------------------------------------------|--------------|-------------------------|--------------|
|                    | Anzahl         |                | Wert in TSD € |              | 2010                                                          | 2009         | 2010                    | 2009         |
|                    | 2010           | 2009           | 2010          | 2009         |                                                               |              |                         |              |
| Dr. Ben J. Lipps   | 99.600         | 99.600         | 804           | 761          | 391                                                           | 341          | 1.195                   | 1.102        |
| Michael Brosnan    | 49.800         | –              | 402           | –            | 227                                                           | –            | 629                     | –            |
| Roberto Fusté      | 49.800         | 49.800         | 402           | 380          | 156                                                           | 126          | 558                     | 506          |
| Dr. Emanuele Gatti | 49.800         | 49.800         | 402           | 380          | 417                                                           | 244          | 819                     | 624          |
| Rice Powell        | 74.700         | 49.800         | 603           | 380          | 406                                                           | 242          | 1.009                   | 622          |
| Dr. Rainer Runte   | 49.800         | 49.800         | 402           | 380          | 183                                                           | 150          | 585                     | 530          |
| Kent Wanzek        | 49.800         | –              | 402           | –            | 183                                                           | –            | 585                     | –            |
| <b>GESAMT</b>      | <b>423.300</b> | <b>298.800</b> | <b>3.417</b>  | <b>2.281</b> | <b>1.963</b>                                                  | <b>1.103</b> | <b>5.380</b>            | <b>3.384</b> |

Kursverhältnisse der Stammaktie der Fresenius Medical Care AG & Co. KGaA die konkrete Anzahl von Anteilen solcher aktienbasierter Vergütungsansprüche durch

den Aufsichtsrat festgelegt werden, die sodann als Grundlage und Multiplikator für die Ermittlung der Auszahlung nach der dreijährigen Wartefrist dient.

Tabelle 2.11.4

|                    | Am 1. Januar 2010 ausstehende Optionen |                                    | Im Geschäftsjahr gewährte Optionen |                                    |
|--------------------|----------------------------------------|------------------------------------|------------------------------------|------------------------------------|
|                    | Anzahl                                 | Durchschnittl. Ausübungspreis in € | Anzahl                             | Durchschnittl. Ausübungspreis in € |
| Dr. Ben J. Lipps   | 703.416                                | 28,44                              | 99.600                             | 42,68                              |
| Michael Brosnan    | 230.481                                | 28,01                              | 49.800                             | 42,68                              |
| Roberto Fusté      | 316.076                                | 26,48                              | 49.800                             | 42,68                              |
| Dr. Emanuele Gatti | 326.076                                | 26,15                              | 49.800                             | 42,68                              |
| Rice Powell        | 226.977                                | 30,63                              | 74.700                             | 42,68                              |
| Dr. Rainer Runte   | 257.553                                | 30,01                              | 49.800                             | 42,68                              |
| Kent Wanzek        | 56.526                                 | 33,29                              | 49.800                             | 42,68                              |
| <b>GESAMT</b>      | <b>2.117.105</b>                       | <b>28,30</b>                       | <b>423.300</b>                     | <b>42,68</b>                       |

  

|                    | Im Geschäftsjahr ausgeübte Optionen |                                    |                                | Im Geschäftsjahr verfallene Optionen |                                    |
|--------------------|-------------------------------------|------------------------------------|--------------------------------|--------------------------------------|------------------------------------|
|                    | Anzahl                              | Durchschnittl. Ausübungspreis in € | Durchschnittl. Aktienkurs in € | Anzahl                               | Durchschnittl. Ausübungspreis in € |
| Dr. Ben J. Lipps   | 204.146                             | 24,49                              | 43,14                          | –                                    | –                                  |
| Michael Brosnan    | 10.683                              | 27,26                              | 44,86                          | –                                    | –                                  |
| Roberto Fusté      | 25.890                              | 13,12                              | 41,09                          | –                                    | –                                  |
| Dr. Emanuele Gatti | –                                   | –                                  | –                              | –                                    | –                                  |
| Rice Powell        | 77.577                              | 24,54                              | 43,09                          | –                                    | –                                  |
| Dr. Rainer Runte   | 22.884                              | 22,40                              | 43,10                          | –                                    | –                                  |
| Kent Wanzek        | 20.526                              | 32,51                              | 44,38                          | –                                    | –                                  |
| <b>GESAMT</b>      | <b>361.706</b>                      | <b>24,09</b>                       | <b>43,10</b>                   | <b>–</b>                             | <b>–</b>                           |

  

|                    | Am 31. Dezember 2010 ausstehende Optionen |                                    |                                          |                                     | Am 31. Dezember 2010 ausübare Optionen |                                    |
|--------------------|-------------------------------------------|------------------------------------|------------------------------------------|-------------------------------------|----------------------------------------|------------------------------------|
|                    | Anzahl                                    | Durchschnittl. Ausübungspreis in € | Durchschnittl. verbl. Laufzeit in Jahren | Bandbreite an Ausübungspreisen in € | Anzahl                                 | Durchschnittl. Ausübungspreis in € |
| Dr. Ben J. Lipps   | 598.870                                   | 32,15                              | 4,4                                      | 14.47–42.68                         | 300.070                                | 27,61                              |
| Michael Brosnan    | 269.598                                   | 30,75                              | 4,5                                      | 11.42–42.68                         | 153.798                                | 25,61                              |
| Roberto Fusté      | 339.986                                   | 29,87                              | 4,1                                      | 11.42–42.68                         | 190.586                                | 24,50                              |
| Dr. Emanuele Gatti | 375.876                                   | 28,34                              | 3,9                                      | 11.42–42.68                         | 226.476                                | 22,82                              |
| Rice Powell        | 224.100                                   | 36,75                              | 5,2                                      | 31.97–42.68                         | 49.800                                 | 33,91                              |
| Dr. Rainer Runte   | 284.469                                   | 32,84                              | 4,4                                      | 14.47–42.68                         | 135.069                                | 28,56                              |
| Kent Wanzek        | 85.800                                    | 38,92                              | 5,9                                      | 31.97–42.68                         | –                                      | –                                  |
| <b>GESAMT</b>      | <b>2.178.699</b>                          | <b>31,79</b>                       | <b>4,4</b>                               | <b>11.42–42.68</b>                  | <b>1.055.799</b>                       | <b>26,15</b>                       |

Die Höhe der gesamten Vergütung des Vorstands der Fresenius Medical Care Management AG stellte sich für die Geschäftsjahre 2010 und 2009 damit wie in Tabelle 2.11.5 dar.

Die Komponenten mit langfristiger Anreizwirkung, d.h. die Aktienoptionen sowie die aktienbasierte Vergütung mit Barausgleich, können erst nach Ablauf festgelegter Mindestlaufzeiten (Erdienungszeiträume) ausgeübt werden. Ihr Wert wird auf die Erdienungszeiträume verteilt und als Aufwand im jeweiligen Geschäftsjahr berücksichtigt. Der auf die Geschäftsjahre 2010 und 2009 entfallende Aufwand ist in Tabelle 2.11.6 ausgewiesen.

## II. Zusagen an Mitglieder des Vorstands für den Fall der Beendigung ihrer Tätigkeit

Für die Vorstandsmitglieder Roberto Fusté, Dr. Emanuele Gatti und Dr. Rainer Runte bestehen einzelvertragliche Pensionszusagen. Hinsichtlich dieser Pensionszusagen bestehen für Fresenius Medical Care zum 31.12.2010 Pensionsverpflichtungen in Höhe von 6.061 TSD € (31.12.2009: 2.937 TSD €).

Die Pensionszusagen sehen jeweils ab dem endgültigen Ausscheiden aus der aktiven Erwerbstätigkeit, frühestens jedoch ab Vollendung des

65. Lebensjahres, ein von der Höhe des letzten Grundgehalts abhängiges Ruhegehalt und eine Hinterbliebenenversorgung vor. Für das Vorstandsmitglied Dr. Emanuele Gatti ist die Pensionszusage mit Wirkung zum Geschäftsjahr 2010 insofern geändert worden, als das Alter, ab dem frühestens Ruhegehalt bezogen werden kann, von 65 auf 60 Jahre herabgesetzt worden ist. Durch die Änderung hat sich der Barwert der Pensionszusage um 1.496 TSD € erhöht.

Hinsichtlich des Ruhegehalts erhöht sich der von 30 % vom letzten Grundgehalt ausgehende Prozentsatz mit jedem vollen Dienstjahr um 1,5 %-Punkte, wobei maximal 45 % erreicht werden können. Laufende Ruhegehälter erhöhen sich nach Maßgabe der gesetzlichen Vorschriften (§ 16 BetrAVG). Spätere Einkünfte aus einer Erwerbstätigkeit des Vorstandsmitglieds sind mit 30 % ihres Bruttobetrages auf die Pension anzurechnen. Ebenso sind eventuelle Beträge anzurechnen, die die Vorstandsmitglieder beziehungsweise ihre Hinterbliebenen aus sonstigen betrieblichen Versorgungsansparungen des Vorstandsmitgliedes, auch aus Anstellungsverhältnissen mit anderen Unternehmen, zustehen. Im Fall des Todes eines der Vorstandsmitglieder erhält die Witwe eine Pension in Höhe von 60 % des zu diesem Zeitpunkt sich ergebenden Pensionsanspruches.

Tabelle 2.11.5

|                    | Barvergütung<br>(ohne Komponenten mit<br>langfristiger Anreizwirkung) |              | Komponenten<br>mit langfristiger<br>Anreizwirkung |              | Gesamtvergütung<br>(einschließlich Komponenten<br>mit langfristiger Anreizwirkung) |               |
|--------------------|-----------------------------------------------------------------------|--------------|---------------------------------------------------|--------------|------------------------------------------------------------------------------------|---------------|
|                    | 2010                                                                  | 2009         | 2010                                              | 2009         | 2010                                                                               | 2009          |
|                    | in TSD €                                                              |              |                                                   |              |                                                                                    |               |
| Dr. Ben J. Lipps   | 2.431                                                                 | 2.311        | 1.195                                             | 1.102        | 3.626                                                                              | 3.413         |
| Michael Brosnan    | 1.247                                                                 | –            | 629                                               | –            | 1.876                                                                              | –             |
| Roberto Fusté      | 1.193                                                                 | 1.104        | 558                                               | 506          | 1.751                                                                              | 1.610         |
| Dr. Emanuele Gatti | 1.574                                                                 | 1.393        | 819                                               | 624          | 2.393                                                                              | 2.017         |
| Rice Powell        | 1.738                                                                 | 1.434        | 1.009                                             | 622          | 2.747                                                                              | 2.056         |
| Dr. Rainer Runte   | 1.011                                                                 | 861          | 585                                               | 530          | 1.596                                                                              | 1.391         |
| Kent Wanzek        | 944                                                                   | –            | 585                                               | –            | 1.529                                                                              | –             |
| <b>GESAMT</b>      | <b>10.138</b>                                                         | <b>7.103</b> | <b>5.380</b>                                      | <b>3.384</b> | <b>15.518</b>                                                                      | <b>10.487</b> |

Ferner erhalten leibliche eheliche Kinder des verstorbenen Vorstandsmitgliedes bis zum Abschluss der Ausbildung, längstens jedoch bis zur Vollendung des 25. Lebensjahres, eine Waisenpension in Höhe von 20 % des sich zu diesem Zeitpunkt ergebenden Pensionsanspruches. Alle Waisenpensionen und die Witwenpension erreichen zusammen jedoch höchstens 90 % des Pensionsanspruches des Vorstandsmitgliedes. Scheidet ein Vorstandsmitglied vor Vollendung des 65. bzw. (im Falle von Herrn Dr. Gatti) des 60. Lebensjahres aus dem Vorstand der Fresenius Medical Care Management AG auf andere Weise als durch Eintritt der Berufs- oder Erwerbsunfähigkeit aus, bleiben die Anwartschaften auf die vorgenannten Versorgungsleistungen erhalten, jedoch vermindert sich die bei Eintritt eines Versorgungsfalles zu zahlende Pension im Verhältnis der tatsächlichen Dienstzeit als Vorstandsmitglied zur möglichen Dienstzeit bis zur Vollendung des 65. bzw. (im Falle von Herrn Dr. Gatti) des 60. Lebensjahres.

Mit dem Vorstandsvorsitzenden Dr. Ben Lipps wurde ferner anstelle einer Pensionsregelung einzelvertraglich vereinbart, dass er unter Beachtung eines Wettbewerbsverbots bei Beendigung des zwischen ihm und der Fresenius Medical Care Management AG geschlossenen Anstellungsverhältnisses für einen

Zeitraum von 10 Jahren für die Gesellschaft eine beratende Tätigkeit ausüben kann. Die seitens der Fresenius Medical Care Management AG hierfür zu gewährende Gegenleistung würde sich p.a. wertmäßig auf etwa 33 % der im Geschäftsjahr 2010 an ihn ausbezahlten erfolgsunabhängigen Vergütungskomponente belaufen. Der Barwert dieser Zusage betrug 2.153 TSD € zum 31.12.2010.

Die Vorstandsmitglieder Rice Powell, Michael Brosnan und Kent Wanzek nahmen im Berichtsjahr an dem us-basierten 401(k) Savings Plan teil. Dieser Plan ermöglicht es generell Mitarbeiter(innen) in den USA einen Teil ihrer Bruttovergütung in Programmen zur Ruhestandsvorsorge zu investieren. Das Unternehmen unterstützt diese Investition bei festgestellten Mitarbeiter(innen) frühestens nach einer Betriebszugehörigkeit von einem Jahr mit 50 % der getätigten Einlagen, bis zu einer Grenze von 6 % des Einkommens, wobei der Zuschuss des Unternehmens auf 3 % vom Einkommen begrenzt ist, bzw. maximal 16.500 US \$ (bzw. 22.000 US \$ bei Mitarbeiter(innen) ab 50 Jahren) beträgt. Den vorgenannten Vorstandsmitgliedern wurde einzelvertraglich die Möglichkeit zur Teilnahme an diesem Plan eingeräumt; im abgelaufenen Geschäftsjahr wurden diesbezüglich vom Unternehmen jeweils 9.383,50 US \$ geleistet.

Tabelle 2.11.6

| in TSD €           |                                                                                       |              |                                                                                                         |              |                                            |              |
|--------------------|---------------------------------------------------------------------------------------|--------------|---------------------------------------------------------------------------------------------------------|--------------|--------------------------------------------|--------------|
|                    | Aufwand für Komponenten mit langfristiger Anreizwirkung durch Eigenkapitalinstrumente |              | Aufwand für Komponenten mit langfristiger Anreizwirkung durch aktienbasierte Vergütung mit Barausgleich |              | Gesamtaufwand für aktienbasierte Vergütung |              |
|                    | 2010                                                                                  | 2009         | 2010                                                                                                    | 2009         | 2010                                       | 2009         |
| Dr. Ben J. Lipps   | 879                                                                                   | 945          | 860                                                                                                     | 912          | 1.739                                      | 1.857        |
| Michael Brosnan    | 56                                                                                    | –            | –                                                                                                       | –            | 56                                         | –            |
| Roberto Fusté      | 439                                                                                   | 472          | 46                                                                                                      | –            | 485                                        | 472          |
| Dr. Emanuele Gatti | 439                                                                                   | 472          | 321                                                                                                     | 304          | 760                                        | 776          |
| Rice Powell        | 467                                                                                   | 472          | 537                                                                                                     | 577          | 1.004                                      | 1.049        |
| Dr. Rainer Runte   | 439                                                                                   | 472          | 379                                                                                                     | 364          | 818                                        | 836          |
| Kent Wanzek        | 56                                                                                    | –            | –                                                                                                       | –            | 56                                         | –            |
| <b>GESAMT</b>      | <b>2.775</b>                                                                          | <b>2.833</b> | <b>2.143</b>                                                                                            | <b>2.157</b> | <b>4.918</b>                               | <b>4.990</b> |

Die Vorstandsmitglieder Dr. Ben Lipps, Rice Powell und Michael Brosnan haben ferner unverfallbare Ansprüche aus der Teilnahme an Pensionsplänen für Mitarbeiter der Fresenius Medical Care North America erworben, die die Zahlung eines Ruhegehaltes ab Vollendung des 65. Lebensjahres und die Zahlung reduzierter Leistungen ab Vollendung des 55. Lebensjahres vorsehen. Durch Plankürzungen im März 2002 sind die Ansprüche aus den Pensionsplänen auf dem damaligen Stand eingefroren worden.

Die Zuführung zur Pensionsrückstellung betrug im Geschäftsjahr 2010 3.217 TSD € (2009: 958 TSD €). Die Pensionsverpflichtungen stellen sich wie in Tabelle 2.11.7 dar.

Für alle Vorstandsmitglieder wurde ein nachvertragliches Wettbewerbsverbot vereinbart. Sofern dieses zur Anwendung kommt, erhalten die Vorstände für die Dauer von maximal zwei Jahren für jedes Jahr der sie jeweils betreffenden Geltung des Wettbewerbsverbotes eine Karenzentschädigung in Höhe der halben Jahresgrundvergütung. Die Anstellungsverträge der Vorstandsmitglieder enthalten keine ausdrücklichen Regelungen für den Fall eines „Change of Control“.

Für Herrn Mats Wahlstrom, der zum 31. Dezember 2009 aus dem Vorstand ausgeschieden ist, wurde eine Regelung getroffen, gemäß derer sämtliche für ihn ausstehenden aktienbasierten Vergütungen mit Barausgleich aus der besonderen Bonuskomponente der Jahre 2006 bis 2008 zum Zeitpunkt seines

Ausscheidens aus dem Vorstand am 31.12.2009 als unverfallbar zugeteilt wurden. Herr Wahlstrom hat die daraus entstehenden Ausübungsrechte vereinbarungsgemäß vollständig im Monat Februar 2010 in Höhe von 1.723 TSD € wahrgenommen.

Alle Vorstandsmitglieder haben einzelvertragliche Zusagen zur Fortzahlung ihrer Bezüge im Krankheitsfall für maximal 12 Monate erhalten, wobei ab sechs Monaten krankheitsbedingtem Ausfall gegebenenfalls Versicherungsleistungen zur Anrechnung gebracht werden. Im Falle des Versterbens eines Vorstandsmitglieds werden den Hinterbliebenen nach dem Monat des Versterbens noch drei Monatsbezüge ausbezahlt, längstens jedoch bis zum Ende des jeweiligen Anstellungsvertrages.

### III. Sonstiges

Im Geschäftsjahr 2010 wurden an die Mitglieder des Vorstands der Fresenius Medical Care Management AG keine Darlehen oder Vorschusszahlungen auf zukünftige Vergütungsbestandteile gewährt.

Die Bezüge der Vorstandsmitglieder Michael Brosnan und Kent Wanzek wurden zum Teil in den USA (US-Dollar) und zum Teil in Deutschland (Euro) ausbezahlt. Für den in Deutschland ausgezahlten Betrag bestehen Nettovereinbarungen, wobei unterschiedliche Steuersätze in beiden Ländern die Brutto-bezüge nachträglich verändern können. Da die tatsächliche Steuerlast erst zeitversetzt im Rahmen der Steuererklärungen ermittelt werden kann, ergeben sich gegebenenfalls nachgehend Korrekturen,

#### ENTWICKLUNG DER PENSIONSVERPFLICHTUNGEN

Tabelle 2.11.7

| in TSD €           |                      |              |                         |
|--------------------|----------------------|--------------|-------------------------|
|                    | Stand 1. Januar 2010 | Zuführung    | Stand 31. Dezember 2010 |
| Dr. Ben J. Lipps   | 341                  | 60           | 401                     |
| Michael Brosnan    | 40                   | 11           | 51                      |
| Roberto Fusté      | 1.212                | 583          | 1.795                   |
| Dr. Emanuele Gatti | 1.225                | 2.232        | 3.457                   |
| Rice Powell        | 76                   | 22           | 98                      |
| Dr. Rainer Runte   | 500                  | 309          | 809                     |
| <b>GESAMT</b>      | <b>3.394</b>         | <b>3.217</b> | <b>6.611</b>            |

die dann in zukünftigen Vergütungsberichten nachträglich enthalten sein werden.

Die Fresenius Medical Care Management AG hat sich verpflichtet, die Mitglieder des Vorstands von Ansprüchen, die gegen sie aufgrund ihrer Tätigkeit für die Gesellschaft und deren konzernverbundene Unternehmen erhoben werden, soweit solche Ansprüche über ihre Verantwortlichkeit nach deutschem Recht hinausgehen, im Rahmen des gesetzlich Zulässigen freizustellen. Zur Absicherung derartiger Verpflichtungen hat die Gesellschaft eine Directors & Officers Versicherung mit einem Selbstbehalt abgeschlossen, der den Vorgaben des Gesetzes zur Angemessenheit der Vorstandsvergütung (VorstAG) entspricht. Die Freistellung gilt für die Zeit, in der das jeweilige Mitglied des Vorstands amtiert sowie für Ansprüche in diesem Zusammenhang nach jeweiliger Beendigung der Vorstandstätigkeit.

Frühere Mitglieder des Vorstands erhielten im Geschäftsjahr 2010 keine anderen als die unter Ziffer II. benannten Bezüge. Für diesen Personenkreis besteht eine Pensionsverpflichtung von 499 TSD € (2009: 379 TSD €).

#### **IV. Weitere Anpassungen des Systems zur Vergütung der Vorstandsmitglieder**

Aus dem Aktienoptionsplan 2006 der Fresenius Medical Care können mit dem Ablauf des Geschäftsjahres 2010 keine Aktienoptionen mehr an Mitglieder des Vorstands und Mitarbeiter begeben werden. Die Zuteilungen aus dem bisherigen Aktienoptionsplan bilden jedoch einen wesentlichen Bestandteil der Vergütungskomponente mit langfristiger Anreizwirkung. Es ist geplant, im Geschäftsjahr 2011 ein neues Programm mit langfristig orientierten Vergütungskomponenten für die nächsten fünf Jahre einzurichten.

Das neue Vergütungskonzept mit langfristiger Anreizwirkung basiert auf einem Kombinationsplan, der zum einen ein Aktienoptionsprogramm enthält, das mit einem bedingten Kapital hinterlegt ist. Die weitere Komponente des neuen Vergütungskonzeptes ist eine ebenfalls langfristig ausgerichtete und aktienbasierte Vergütungskomponente mit Barausgleich.

Der mit einem bedingten Kapital hinterlegte Aktienoptionsplan orientiert sich in der Ausgestaltung im Wesentlichen an den Kriterien des bisherigen Aktienoptionsplans 2006. Der Plan entspricht aber auch den durch das VorstAG geänderten Anforderungen, insbesondere im Hinblick auf die auf vier Jahre verlängerten Wartezeiten und setzt weiterhin die Erreichung anspruchsvoller Erfolgsziele voraus. Der neue Aktienoptionsplan bedarf zu seiner Einführung der Zustimmung der Aktionäre in der ordentlichen Hauptversammlung der Fresenius Medical Care AG & Co. KGaA.

Der weitere Bestandteil des neuen, langfristigen Vergütungssystems ist eine zusätzliche, selbständige, langfristig ausgerichtete und aktienbasierte Vergütungskomponente mit Barausgleich. Die Gewährung dieser Vergütungskomponente soll nunmehr ebenfalls einer vierjährigen Wartezeit unterliegen und ebenfalls weiterhin die Erreichung anspruchsvoller Erfolgsziele voraussetzen. Die Höhe der Barauszahlung nach Maßgabe dieser aktienbasierten Vergütungskomponente wird sich nach dem Kurswert der Stammaktie der Fresenius Medical Care AG & Co. KGaA bei Ausübung nach Ablauf der vierjährigen Wartezeit richten.

Verglichen mit dem Aktienoptionsplan 2006 soll die Anzahl der zu gewährenden Aktienoptionen in Anbetracht der zusätzlich geplanten langfristig ausgerichteten aktienbasierten Vergütungskomponente mit Barausgleich insgesamt geringer ausfallen.

Die Gewährung von Aktienoptionen, respektive der aktienbasierten Vergütung mit Barausgleich soll sowohl für Vorstandsmitglieder als auch für sonstige Führungskräfte zur Verfügung stehen. In Übereinstimmung mit der aktienrechtlichen Kompetenzordnung soll die Gewährung an Vorstandsmitglieder durch den Aufsichtsrat und an sonstige Führungskräfte durch den Vorstand erfolgen.

#### **Vergütung des Aufsichtsrats der Fresenius Medical Care AG & Co. KGaA**

Die Vergütung des Aufsichtsrats der Fresenius Medical Care AG & Co. KGaA (FMC AG & CO. KGAA) ist in § 13 der Satzung geregelt.

Entsprechend dieser Bestimmung werden den Mitgliedern des Aufsichtsrats die in Ausübung ihres Amtes entstandenen Auslagen erstattet, zu denen auch die anfallende Mehrwertsteuer zählt.

Als Vergütung erhält jedes Mitglied des Aufsichtsrats für jedes volle Geschäftsjahr eine Festvergütung von je 80.000 US \$, zahlbar in vier gleichen Raten am Ende eines Kalenderquartals. Beschließt die Hauptversammlung mit einer Mehrheit von drei Viertel der abgegebenen Stimmen unter Berücksichtigung des Jahresergebnisses eine höhere Vergütung, so gilt diese.

Der Vorsitzende des Aufsichtsrats erhält eine zusätzliche Vergütung in Höhe von 80.000 US \$ und sein Stellvertreter eine zusätzliche Vergütung in Höhe von 40.000 US \$ jeweils für jedes volle Geschäftsjahr. Als Mitglied eines Ausschusses erhält ein Aufsichtsratsmitglied der FMC AG & CO. KGAA zusätzlich jährlich 30.000 US \$ bzw. als Vorsitzender eines Ausschusses 50.000 US \$, jeweils zahlbar in gleichen Raten am Ende eines Kalenderquartals.

Soweit ein Mitglied des Aufsichtsrats der FMC AG & CO. KGAA gleichzeitig Mitglied des Aufsichtsrats der persönlich haftenden Gesellschafterin Fresenius Medical Care Management AG ist und für seine Tätigkeit im Aufsichtsrat der Fresenius Medical Care Management AG Vergütungen erhält, werden die Vergütungen

für die Tätigkeit als Mitglied des Aufsichtsrates der FMC AG & CO. KGAA auf die Hälfte reduziert. Das Gleiche gilt hinsichtlich der zusätzlichen Vergütung für den Vorsitzenden des Aufsichtsrates der FMC AG & CO. KGAA bzw. seinen Stellvertreter, soweit dieser gleichzeitig Vorsitzender bzw. sein Stellvertreter im Aufsichtsrat der Fresenius Medical Care Management AG ist. Soweit der Stellvertreter des Aufsichtsratsvorsitzenden der FMC AG & CO. KGAA gleichzeitig Vorsitzender des Aufsichtsrats der Fresenius Medical Care Management AG ist, erhält er für seine Tätigkeit als Stellvertreter des Aufsichtsratsvorsitzenden der FMC AG & CO. KGAA insoweit keine zusätzliche Vergütung.

Die Gesamtbezüge des Aufsichtsrats der FMC AG & CO. KGAA sowie die individuellen Bezüge der einzelnen Aufsichtsratsmitglieder für das Geschäftsjahr 2010 sind in Tabelle 2.11.8 im Einzelnen dargestellt.

Die Vergütung des Aufsichtsrats der Fresenius Medical Care Management AG und die Vergütung für deren Ausschüsse wurde gemäß § 7 der Satzung der FMC AG & CO. KGAA an die FMC AG & CO. KGAA weiterbelastet. Im Geschäftsjahr 2010 belief sich die Vergütung des Aufsichtsrats der Fresenius Medical Care Management AG insgesamt auf 596 TSD € und die darin enthaltene Vergütung für deren Ausschüsse insgesamt auf 310 TSD € auf Basis der jeweils stichtagsbezogenen Währungsumrechnung im Auszahlungszeitpunkt.

Tabelle 2.11.8

Tabelle 2.11.8

in TSD €¹

|                          | Festvergütung für die Tätigkeit im Aufsichtsrat der FMC AG & CO. KGAA |            | Vergütung für Ausschusstätigkeit in FMC AG & CO. KGAA |            | Gesamtvergütung |            |
|--------------------------|-----------------------------------------------------------------------|------------|-------------------------------------------------------|------------|-----------------|------------|
|                          | 2010                                                                  | 2009       | 2010                                                  | 2009       | 2010            | 2009       |
| Dr. Gerd Krick           | 91                                                                    | 86         | 23                                                    | 22         | 114             | 108        |
| Dr. Dieter Schenk        | 45                                                                    | 43         | –                                                     | –          | 45              | 43         |
| Dr. Walter L. Weisman    | 30                                                                    | 29         | 38                                                    | 36         | 68              | 65         |
| John Gerhard Kringel²    | 30                                                                    | 29         | –                                                     | 7          | 30              | 36         |
| William P. Johnston      | 30                                                                    | 29         | 23                                                    | 22         | 53              | 51         |
| Prof. Dr. Bernd Fahrholz | 60                                                                    | 58         | 23                                                    | 22         | 83              | 80         |
| <b>GESAMT</b>            | <b>286</b>                                                            | <b>274</b> | <b>107</b>                                            | <b>109</b> | <b>393</b>      | <b>383</b> |

<sup>1</sup> Ausweis ohne Umsatz- und Quellensteuer; Umrechnung der US-Dollar-Beträge mit dem jeweiligen Durchschnittskurs für das entsprechende Kalenderjahr.

<sup>2</sup> Ausschusstätigkeit in der FMC AG & CO. KGAA bis einschliesslich Q2 des Jahres 2009.



Die Gesamtvergütung des Aufsichtsrats inklusive der von der Fresenius Medical Care Management AG an die FMC AG & CO. KGaA vorgenommenen Weiterbelastung ist in Tabelle 2.11.9 aufgelistet.

## INFORMATIONEN ÜBER DIRECTORS' DEALINGS UND AKTIENBESITZ

Nach § 15a des Wertpapierhandelsgesetzes (WpHG) sind die Mitglieder des Vorstands und des Aufsichtsrats sowie weitere Mitarbeiter, die Führungsaufgaben wahrnehmen, verpflichtet, das Unternehmen über den Erwerb oder den Verkauf von Aktien der Fresenius Medical Care und sich darauf beziehenden Finanzinstrumenten zu informieren, wenn das Volumen von 5.000€ innerhalb eines Jahres überschritten wird. Während des Geschäftsjahres 2010 sind uns insgesamt sieben Meldungen nach § 15a WpHG zugegangen, die wir entsprechend den Regelungen auf unseren Internetseiten unter [www.fmc-ag.de](http://www.fmc-ag.de) im Bereich Investor Relations/Corporate Governance/Wertpapiergeschäfte/Meldung nach § 15a WpHG veröffentlicht haben und auch im „Jährlichen Dokument“ unter [www.fmc-ag.de](http://www.fmc-ag.de) im Bereich Investor Relations/Corporate Governance/§ 10 Wertpapierprospektgesetz 2010 darlegen.

## TRANSPARENZ UNSERER BERICHTERSTATTUNG

Fresenius Medical Care erfüllt sämtliche Anforderungen, die der Deutsche Corporate Governance Kodex unter Ziffer 6 im Hinblick auf die Transparenz stellt. In unserer regelmäßigen Berichterstattung richten wir unser Augenmerk darauf, unsere Aktionäre gleichzeitig und einheitlich über unser Unternehmen zu informieren. Dabei kommt der Ad-hoc-Berichterstattung und unserer Unternehmenswebsite eine besondere Bedeutung zu. Hier erhalten institutionelle Anleger und Privataktionäre gleichermaßen einen unmittelbaren und zeitnahen Zugang zu den von uns veröffentlichten Nachrichten. Sämtliche Ad-hoc-Mitteilungen und weitere Nachrichten an Investoren und die Presse werden auch auf unseren Internetseiten unter [www.fmc-ag.de](http://www.fmc-ag.de) im Bereich Investor Relations/News publiziert.

Über wesentliche Termine werden unsere Aktionäre regelmäßig anhand eines Finanzkalenders unterrichtet, der auf der Internetseite von Fresenius Medical Care unter [www.fmc-ag.de](http://www.fmc-ag.de) im Bereich Investor Relations/Finanzkalender veröffentlicht ist.

Tabelle 2.11.9

in TSD €<sup>1</sup>

|                                       | Festvergütung für Aufsichtsratsstätigkeit in Fresenius Medical Care Management AG |            | Festvergütung für Aufsichtsratsstätigkeit in Fresenius Medical Care AG & Co. KGaA |            | Vergütung für Ausschusstätigkeit in Fresenius Medical Care Management AG |            | Vergütung für Ausschusstätigkeit in Fresenius Medical Care AG & Co. KGaA |            | Gesamtvergütung |            |
|---------------------------------------|-----------------------------------------------------------------------------------|------------|-----------------------------------------------------------------------------------|------------|--------------------------------------------------------------------------|------------|--------------------------------------------------------------------------|------------|-----------------|------------|
|                                       | 2010                                                                              | 2009       | 2010                                                                              | 2009       | 2010                                                                     | 2009       | 2010                                                                     | 2009       | 2010            | 2009       |
| Dr. Gerd Krick                        | 30                                                                                | 29         | 91                                                                                | 86         | 45                                                                       | 29         | 23                                                                       | 22         | 189             | 166        |
| Dr. Dieter Schenk                     | 45                                                                                | 43         | 45                                                                                | 43         | 38                                                                       | 22         | –                                                                        | –          | 128             | 108        |
| Dr. Ulf M. Schneider <sup>2</sup>     | 121                                                                               | 115        | –                                                                                 | –          | 53                                                                       | 36         | –                                                                        | –          | 174             | 151        |
| Dr. Walter L. Weisman                 | 30                                                                                | 29         | 30                                                                                | 29         | 38                                                                       | 22         | 38                                                                       | 36         | 136             | 116        |
| John Gerhard Kringel <sup>3</sup>     | 30                                                                                | 29         | 30                                                                                | 29         | 45                                                                       | 29         | –                                                                        | 7          | 105             | 94         |
| William P. Johnston                   | 30                                                                                | 29         | 30                                                                                | 29         | 91                                                                       | 57         | 23                                                                       | 22         | 174             | 137        |
| Prof. Dr. Bernd Fahrholz <sup>4</sup> | –                                                                                 | –          | 60                                                                                | 58         | –                                                                        | –          | 23                                                                       | 22         | 83              | 80         |
| <b>GESAMT</b>                         | <b>286</b>                                                                        | <b>274</b> | <b>286</b>                                                                        | <b>274</b> | <b>310</b>                                                               | <b>195</b> | <b>107</b>                                                               | <b>109</b> | <b>989</b>      | <b>852</b> |

<sup>1</sup> Ausweis ohne Umsatz- und Quellensteuer; Umrechnung der US-Dollar-Beträge mit dem jeweiligen Durchschnittskurs für das entsprechende Kalenderjahr.

<sup>2</sup> Vorsitzender des Aufsichtsrats der Fresenius Medical Care Management AG, jedoch kein Mitglied des Aufsichtsrats der Fresenius Medical Care AG & Co. KGaA; Festvergütung durch Fresenius Medical Care Management AG ausbezahlt.

<sup>3</sup> Ausschusstätigkeit in der Fresenius Medical Care AG & Co. KGaA bis einschliesslich Q2 des Jahres 2009.

<sup>4</sup> Mitglied des Aufsichtsrats der Fresenius Medical Care AG & Co. KGaA, nicht aber des Aufsichtsrats der Management AG; Festvergütung durch KGaA ausbezahlt.

## **RECHNUNGSLEGUNG UND ABSCHLUSS, BÖRSENNOTIERUNG**

Fresenius Medical Care bilanziert nach den us-amerikanischen Rechnungslegungsgrundsätzen „Generally Accepted Accounting Principles“ (U.S. GAAP) und in us-Dollar. Entsprechend werden der Konzernabschluss sowie die unterjährig konsolidierten Quartalsabschlüsse in Übereinstimmung mit diesen Grundsätzen erstellt. Die Veröffentlichung des Konzernabschlusses erfolgt innerhalb der ersten 90 Tage nach Ende eines Geschäftsjahres, die Veröffentlichung der Quartalsabschlüsse erfolgt innerhalb der ersten 45 Tage nach Ende des Quartals.

Gemäß den gesetzlichen Anforderungen werden weiterhin ein Konzernabschluss und ein Konzernlagebericht sowie Quartalsabschlüsse nach den Regeln der „International Financial Reporting Standards“ (IFRS), wie sie in der EU anzuwenden sind, aufgestellt.

Der Jahresabschluss und der Lagebericht der Fresenius Medical Care AG & Co. KGaA werden in Übereinstimmung mit dem deutschen Handelsgesetzbuch (HGB) erstellt. Der Jahresabschluss ist für die Verwendung des Bilanzgewinns maßgeblich. Darüber hinaus erscheint jährlich ein Geschäftsbericht von Fresenius Medical Care, der gleichermaßen an den Anforderungen von U.S. GAAP, IFRS und HGB ausgerichtet ist.

Die Aktien von Fresenius Medical Care sind sowohl in den USA (als American Depositary Receipts) als auch in Deutschland an der Börse notiert. Wir

unterliegen daher einer Vielzahl von Vorschriften und Empfehlungen zur Führung, Verwaltung und Überwachung unseres Unternehmens. Zum einen beachten wir neben den zwingenden aktienrechtlichen und handelsrechtlichen Vorschriften das Regelwerk der Deutschen Börse und befolgen in weiten Teilen zudem das auf freiwillige Übernahme ausgelegte Regelwerk des Deutschen Corporate Governance Kodex. Zum anderen unterliegen wir als nicht us-amerikanisches Unternehmen (sogenannter foreign private issuer) den Vorschriften, die sich aus der Notierung des Unternehmens in den USA ergeben. Hervorzuheben sind hierbei der Sarbanes-Oxley Act (SOX) und Teile der Corporate-Governance-Regeln der New York Stock Exchange. Der Sarbanes-Oxley Act beinhaltet Vorschriften betreffend Unternehmen und deren Wirtschaftsprüfer, die die Verbesserung der Rechnungslegung, die Unabhängigkeit der Wirtschaftsprüfer und weitere Punkte zum Ziel haben. Durch die Erweiterung von Vorschriften für die Finanzberichterstattung und die internen Kontrollsysteme soll das Vertrauen von Aktionären und anderen Interessengruppen in die Unternehmen gestärkt werden. Wir erfüllen die auf unser Unternehmen anwendbaren derzeitigen gesetzlichen Anforderungen vollständig.

Die Erklärung von Fresenius Medical Care zu den wesentlichen Unterschieden der Corporate-Governance-Systeme in Deutschland und den USA, die den Börsenzulassungsbestimmungen der New York Stock Exchange folgt, kann im Internet unter [www.fmc-ag.de](http://www.fmc-ag.de) im Bereich Investor Relations/Corporate Governance/NYSE-Erklärung eingesehen werden.

# MANDATE UND GLOSSAR

## — INTEGRATION —

*Unser Geschäftsmodell der vertikalen Integration schafft Wert für unsere Anspruchsgruppen und ist ein entscheidender Vorteil im Wettbewerb.*

## 3.1

Mandate  
S. 153

## 3.2

Glossar  
S. 156

## 3.3

Verzeichnis der  
Tabellen und Grafiken  
S. 162

## 3.4

Stichwortverzeichnis  
S. 164

---

**MANDATE****FRESENIUS MEDICAL CARE AG & CO. KGAA****AUFSICHTSRAT****Dr. Gerd Krick**

Vorsitzender  
Königstein, Deutschland

**Aufsichtsrat**

Fresenius Management SE (seit dem 11. März 2010;  
Vorsitzender seit dem 12. Mai 2010)  
Fresenius SE & Co. KGaA (seit dem 28. Januar 2011;  
designierter Vorsitzender)  
Fresenius SE (bis zum 28. Januar 2011; Vorsitzender)  
Fresenius Medical Care Management AG  
Vamed AG, Österreich (Vorsitzender)

**Dr. Dieter Schenk**

Stellvertretender Vorsitzender  
Rechtsanwalt und Steuerberater  
München, Deutschland

**Aufsichtsrat**

Fresenius Management SE (seit dem 11. März 2010;  
stellvertretender Vorsitzender seit dem 12. Mai 2010)  
Fresenius SE (bis zum 28. Januar 2011;  
stellvertretender Vorsitzender)  
Fresenius Medical Care Management AG  
(stellvertretender Vorsitzender)  
Gabor Shoes AG (Vorsitzender)  
Greiffenberger AG (stellvertretender Vorsitzender)  
TOPTICA Photonics AG (Vorsitzender)

**Verwaltungsrat**

Else Kröner-Fresenius-Stiftung (Vorsitzender)

**Dr. Walter L. Weisman**

Ehemaliger Präsident und Vorstandsvorsitzender  
von American Medical International, Inc.  
Los Angeles, USA

**Aufsichtsrat**

Fresenius Medical Care Management AG

**Board of Directors**

Occidental Petroleum Corporation

**Kuratorium**

California Institute of Technology (Senior Trustee)  
Los Angeles County Museum of Art (Life Trustee)  
Sundance Institute (Vorsitzender)

**John Gerhard Kringel**

Ehemaliger Senior Vice President der Abbott  
Laboratories, Inc.  
Durango, Colorado, USA

**Aufsichtsrat**

Fresenius Medical Care Management AG

**Sonstige**

Natures View, LLC  
Alpenglow Development, LLC  
Justice, LLC  
River Walk, LLC

**William P. Johnston**

Ehemaliger Vorsitzender des Board of Directors  
der Renal Care Group, Inc.  
Nashville, Tennessee, USA

**Aufsichtsrat**

Fresenius Medical Care Management AG

**Sonstige**

The Carlyle Group (Senior Advisor)  
The Hartford Mutual Funds, Inc.  
(Mitglied des Board of Directors)  
LifeCare Holdings, Inc.  
(Mitglied des Board of Directors)  
Multiplan, Inc. (Mitglied des Board of Directors  
bis zum 31. August 2010)  
Georgia O'Keeffe Museum  
(Mitglied des Board of Directors)  
HCR-Manor Care, Inc.  
(Mitglied des Board of Directors)

**Prof. Dr. Bernd Fahrholz**

Rechtsanwalt  
Berlin, Deutschland

**Aufsichtsrat**

SMARTRAC N.V., (Vorsitzender)  
Amsterdam, Niederlande

**AUFSICHTSRATAUSSCHUSS****Prüfungs- und Corporate-Governance-Ausschuss**

Dr. Walter L. Weisman (Vorsitzender)  
Dr. Gerd Krick  
William P. Johnston  
Prof. Dr. Bernd Fahrholz

## FRESENIUS MEDICAL CARE MANAGEMENT AG PERSÖNLICH HAFTENDE GESELLSCHAFTERIN DER FRESENIUS MEDICAL CARE AG & CO. KGAA

### AUFSICHTSRAT

#### Dr. Ulf M. Schneider

Vorsitzender  
Frankfurt am Main, Deutschland

#### Vorstand

Fresenius Management SE,  
persönlich haftende Gesellschafterin der  
Fresenius SE & Co. KGaA (Vorsitzender)  
Fresenius SE (bis zum 28. Januar 2011; Vorsitzender)

#### Aufsichtsrat

Fresenius Kabi AG (Vorsitzender)  
HELIOS Kliniken GmbH (Vorsitzender)  
Fresenius Kabi Austria GmbH, Österreich  
(bis 30. Juni 2010)  
Fresenius Kabi España S.A., Spanien  
Fresenius Medical Care Groupe France S.A.S.,  
Frankreich (Vorsitzender)  
Fresenius HemoCare Netherlands B.V., Niederlande

#### Board of Directors

FHC (Holdings), Ltd., Großbritannien  
APP Pharmaceuticals, Inc., USA  
Fresenius Kabi Pharmaceuticals Holding, Inc., USA

#### Dr. Dieter Schenk

Stellvertretender Vorsitzender  
München, Deutschland

#### Dr. Gerd Krick

Königstein, Deutschland

#### Dr. Walter L. Weisman

Los Angeles, USA

#### John Gerhard Kringel

Durango, Colorado, USA

#### William P. Johnston

Nashville, Tennessee, USA

### VORSTAND

#### Dr. Ben J. Lipps

Vorstandsvorsitzender  
Boston, Massachusetts, USA

#### Vorstand

Fresenius Medical Care Holdings Inc.  
(Vorstandsvorsitzender), USA  
Fresenius Management SE,  
persönlich haftende Gesellschafterin  
der Fresenius SE & Co. KGaA  
Fresenius SE (bis zum 28. Januar 2011)

#### Verwaltungsrat

Vifor Fresenius Medical Care Renal Pharma Ltd.,  
Schweiz

#### Rice Powell

Stellvertretender Vorstandsvorsitzender von  
Fresenius Medical Care und Vorstandsvorsitzender  
von Fresenius Medical Care North America  
Boston, Massachusetts, USA

#### Vorstand

Fresenius Medical Care Holdings Inc., USA

#### Verwaltungsrat

Vifor Fresenius Medical Care Renal Pharma Ltd.,  
Schweiz (stellvertretender Vorsitzender)

#### Michael Brosnan

Finanzvorstand  
Boston, Massachusetts, USA

#### Vorstand

Fresenius Medical Care Holdings Inc., USA

#### Verwaltungsrat

Vifor Fresenius Medical Care Renal Pharma Ltd.,  
Schweiz

**Dr. Emanuele Gatti**

Vorstand für die Regionen Europa, Lateinamerika,  
Nahost und Afrika, verantwortlich für die globale  
Strategieentwicklung  
Bad Homburg v.d.H., Deutschland

**Vorstand**

Fresenius Medical Care España S.A., Spanien  
(Vorsitzender)  
National Medical Care of Spain, S.A., Spanien

**Aufsichtsrat**

Fresenius Medical Care Groupe France S.A.S.,  
Frankreich (stellvertretender Vorsitzender)

**Roberto Fusté**

Vorstand für die Region Asien-Pazifik  
Hongkong, China

**Dr. Rainer Runte**

Vorstand weltweit zuständig für Recht,  
Compliance, Intellectual Property, Corporate  
Business Development sowie Arbeitsdirektor  
für Deutschland  
Bad Homburg v.d.H., Deutschland

**Vorstand**

Fresenius Medical Care Holdings Inc., USA

**Aufsichtsrat**

Fresenius Medical Care Groupe France S.A.S.,  
Frankreich  
Fresenius Medical Care SGPS, S.A., Portugal  
Fresenius Medical Care Japan, K.K., Japan  
Fresenius-Kawasumi Co., Ltd., Japan

**Verwaltungsrat**

Vifor Fresenius Medical Care Renal Pharma Ltd.,  
Schweiz

**Kent Wanzek**

Produktionsvorstand  
Boston, Massachusetts, USA



## GLOSSAR

Wenn nicht anders angegeben, sind alle im Geschäftsbericht 2010 von Fresenius Medical Care genannten Marken in einzelnen Ländern gesetzlich geschützte Warenzeichen und Eigentum von Fresenius Medical Care oder werden von Fresenius Medical Care oder deren Tochtergesellschaften aufgrund von Lizenzen genutzt.

**A***Adsorbersysteme/SORB-Technologie*

Technologie, mit der Leitungswasser für die — *Dialyse* aufbereitet werden kann, sodass die — *Dialyselösung* wiederverwendbar wird. Eignet sich als wasser- und raumsparende Technologie besonders gut für die Heim-Hämodialyse und ist somit ein wichtiger Schritt auf dem Weg zu einer tragbaren künstlichen Niere. Im Mittelpunkt der Technologie stehen sogenannte Adsorber – Substanzen, die Giftstoffe in Flüssigkeiten binden und auf diese Weise aus der Flüssigkeit entfernen können.

*Akutes Nierenversagen*

Akuter Verlust der Nierenfunktion. Je nach Schwere des Nierenfunktionsverlusts kann eine zwischenzeitliche Dialysebehandlung erforderlich sein. Anders als beim chronischen Nierenversagen kann die Dialyse in diesem Fall die Funktion der Niere bei vielen Patienten wieder vollständig herstellen.

*Albumin*

Ein Eiweiß (Protein), das Aufschluss über den allgemeinen Ernährungszustand eines Patienten gibt.

*Anämie*

Herabgesetzte Fähigkeit des Blutes, Sauerstoff zu transportieren, gemessen als reduzierter Hämoglobin-Gehalt im Blut.

*Arterie*

Ein Blutgefäß für den Transport des Blutes vom Herzen in den Körper.

*Arteriovenöse (AV) Fistel (Shunt)*

Eine direkte, operativ hergestellte Verbindung zwischen einer — *Arterie* und einer — *Vene* im Unterarm eines Patienten. Nach der Operation entwickelt sich ein großes Blutgefäß mit einem hohen Blutfluss, das als Zugang für die — *Hämodialyse* dient. Ein funktionierender Gefäßzugang ist für die Durchführung der Hämodialyse unerlässlich.

*Automatisierte Peritonealdialyse (APD)*

Maschinenunterstützte Variante der — *Peritonealdialyse-Behandlung*, die meist über Nacht angewendet wird.

**B***BCM – Body Composition Monitor*

Gerät, das die Zusammensetzung des menschlichen Körpers und dessen Flüssigkeitsgehalt exakt messen und damit auch den Grad der Überwässerung von Dialysepatienten bestimmen kann.

*BIBAG*

Bikarbonat-Trockenkonzentrat zur ONLINE-Herstellung von flüssigem Bikarbonat-Konzentrat für die Hämodialyse mit den Hämodialysegeräten der Serie 4008 und 5008 — *ONLINEplus System*.

*Biofine*

Umweltfreundliches Material zur Herstellung von Beutelfolien, Schläuchen und anderem Zubehör für die Peritoneal- und Akutdialyse. Biofine ist recycelbar und PVC-frei.

*Blut*

Im Körper zirkulierende Flüssigkeit, bestehend aus Blutplasma und Blutzellen (rote Blutzellen, weiße Blutzellen, Blutplättchen etc.). Die Hauptfunktion des Blutes ist der Transport von Sauerstoff, Nährstoffen und Hormonen zu den Zellen und der Abtransport von Ausscheidungsstoffen (wie Kohlenstoffdioxid und Harnstoff). Das Blut reguliert außerdem den Wasser- und Elektrolythaushalt und unterstützt als Teil des Immunsystems die Abwehr von Fremdstoffen.

*Blutdruck*

Vom Blut auf die Blutgefäßwände ausgeübter Druck. Sofern nicht anders angezeigt, wird der Blutdruck als arterieller Blutdruck definiert, d. h. als Druck in den großen Arterien wie der Oberarmarterie. Der arterielle Blutdruck ist höher als der Blutdruck in den anderen Blutgefäßen.

*Blutgerinnung (Koagulation)*

Ein komplexer Prozess, bei dem das Blut stabile Klümpchen bildet und dadurch zur Blutstillung beiträgt. Eine beschädigte Gefäßwand wird mit einem Fibringerinnsel bedeckt, das die Blutung unterbricht und die Heilung der Gefäßbeschädigung begünstigt.

Gerinnungsstörungen können zu erhöhten Blutungen und/oder zu Thrombosen und Embolien führen. Bei der Dialysebehandlung wird die Gerinnung des Blutes durch Zugabe von Gerinnungshemmern (Antikoagulanzen, z.B. Heparin) verhindert.

#### Blutschlauchsystem

Schlauchsystem, das den Blutkreislauf des Patienten während der Dialysebehandlung mit dem — *Dialysator* verbindet.

#### Blutzellen, Rote (Erythrozyten)

Für den Transport von Sauerstoff verantwortliche Blutzellen. Sie werden durch — *Erythropoietin* produziert, ein in der Niere entstehendes Hormon.

#### Blutzellen, Weiße (Leukozyten)

Für die Infektionsabwehr im Körper verantwortliche Blutzellen. Sie sind an allergischen Reaktionen beteiligt und erneuern zerstörte, alte oder tote Zellen im Körper.

## C

#### Case Manager (Fallmanager)

Ein Case Manager hat die Aufgabe, im Interesse eines Patienten dessen Behandlung ganzheitlich zu planen, zu koordinieren und zu evaluieren. Er kommuniziert sowohl mit dem Patienten als auch mit sämtlichen Leistungsträgern; stationäre und ambulante Behandlungsformen werden miteinander kombiniert. Ziel des Case Managements ist es, eine hochwertige und zugleich kosteneffiziente Versorgung sicherzustellen, die den Bedürfnissen des einzelnen Patienten bestmöglich gerecht wird. Die Position des Case Managers ist meist von Pflegefachkräften besetzt.

#### Chronisches Nierenversagen

Permanenter Ausfall der — *Niere* (terminale Niereninsuffizienz) durch den langsamen und progressiven Verlust der Nierenfunktion über Jahre hinweg. Da die Wiederherstellung der Nierenfunktion nicht mehr möglich ist, muss sich der Patient einer Nierenersatztherapie, d.h. einer — *Nierentransplantation* oder einer — *Dialyse*, unterziehen. Chronisches Nierenversagen geht einher mit Begleiterkrankungen wie der renalen — *Anämie*, Bluthochdruck und anderen Herz-Kreislauf-Problemen sowie Knochenerkrankungen, Appetitverlust und Unterernährung.

#### Composite Rate

Die von Medicare — *Medicare/Medicaid* für die Dialysebehandlung angesetzte Basis-Erstattungsrate.

## D

#### Diabetes

Ein hoher Blutzuckerhaushalt durch die Unfähigkeit des Körpers, den Glukosehaushalt in den Körperzellen effizient zu regulieren. Insulin hilft normalerweise bei der Regulierung des Glukosehaushalts.

#### Dialysator

Spezieller Filter, der in der Hämodialyse zur Entfernung von Schadstoffen und Endprodukten des Stoffwechsels sowie zur Abscheidung überschüssigen Wassers aus dem Blut verwendet wird. Häufig als „künstliche Niere“ bezeichnet.

#### Dialyse

Form der Nierenersatztherapie, bei der eine halbdurchlässige Membran – in der Peritonealdialyse das Peritoneum (Bauchfell), in der Hämodialyse die Membran des Dialysators – zur Reinigung des Blutes eines Patienten genutzt wird.

#### Dialysemembran

Eine halbdurchlässige Barriere zwischen dem Blut und der Dialysierflüssigkeit im Dialysator.

#### Dialysierflüssigkeit (Dialyselösung, Dialysat)

Bei der Dialyse verwendete Flüssigkeit, um die während der Behandlung herausgefilterten Stoffe und überschüssiges Wasser aus dem Blut abzutransportieren.

#### Diffusion

Konzentrationsaustausch von zwei Flüssigkeiten, die durch eine halbdurchlässige Membran getrennt sind. Die Moleküle wandern von einer Flüssigkeit in die andere; Stoffwechselgifte treten somit durch die Membran in die Dialysierflüssigkeit.

#### Disease Management

Ganzheitliches Konzept der Patientenbehandlung unter Berücksichtigung aller mit der Krankheit verbundenen medizinischen Aspekte.

E

Eisenpräparate

Präparate zur Behandlung von Blutarmut infolge von Eisenmangel bei Dialysepatienten. Ein Beispiel dafür ist das Präparat Venofer®.

Erythropoese-stimulierende Substanzen

Erythropoiesis-Stimulating Agents, ESA. Rekombinantes, also künstlich hergestelltes, Human-EPO. Wird üblicherweise Dialysepatienten verschrieben, die an Anämie leiden.

Erythropoietin (EPO)

Hormon, das die Produktion roter Blutkörperchen anregt.

EuCliD

European Clinical Database. Klinische Datenbank zur Qualitätssicherung in der Dialysebehandlung. Die Datenbank erfasst die Behandlungsdaten von Dialysepatienten und ermöglicht einen effizienten Vergleich der Behandlungsqualität in verschiedenen Dialyseeinrichtungen.

F

Food and Drug Administration (FDA)

us-amerikanische Behörde für Lebensmittel- und Arzneimittelsicherheit.

G

Gerinnungshemmer

Ein Mittel (z. B. Heparin), das die Blutgerinnung verhindert.

Glomeruläre Filtration (GFR)

Die nationale Nierenstiftung der USA (National Kidney Foundation) teilt Nierenerkrankungen anhand der sogenannten glomerulären Filtrationsrate (GFR) in fünf Stufen ein. Die GFR gibt die Flüssigkeitsmenge an, die von den Nieren pro Minute aus dem Blut gefiltert wird (Primärharn). Bei gesunden Nieren beläuft sie sich auf mehr als 90 ml/min (Stufe 1). Bei einer GFR von weniger als 15 ml/min (Stufe 5) ist eine Dialysetherapie oder Organtransplantation notwendig. Bei Erkrankungen der Stufe 4 (GFR von 15 bis 29 ml/min) sind die Nieren bereits schwer geschädigt; mit hoher Wahrscheinlichkeit wird in diesen Fällen in naher Zukunft eine Dialysetherapie oder eine Organtransplantation notwendig.

Stadien der chronischen Nierenerkrankung

| Beschreibung                             | GFR (mL/min/1.73m²) |
|------------------------------------------|---------------------|
| 1. Nierenschaden mit normaler oder ▲ GFR | ≥ 90                |
| 2. Nierenschaden mit leichter ▼ GFR      | 60 – 89             |
| 3. Moderat¹ ▼ GFR                        | 30 – 59             |
| 4. Schwer ▼ GFR                          | 15 – 29             |
| 5. Nierenversagen²                       | < 15 (oder Dialyse) |

GFR: Glomeruläre Filtrationsrate ▲ erhöht ▼ verringert  
¹ Behandlung: 1–5 T falls Nierentransplantatempfänger  
² Behandlung: 5 D falls dialysepflichtig (HD oder PD)

H

Hämodiafiltration (HDF)

Spezielle Form der Behandlung von Patienten mit chronischem Nierenversagen, in der die Vorteile der — Hämodialyse und der — Hämofiltration kombiniert genutzt werden, d.h. es werden hohe Eliminationsraten für Substanzen mit niedrigem und hohem Molekulargewicht mittels Diffusion bzw. Konvektion erzielt.

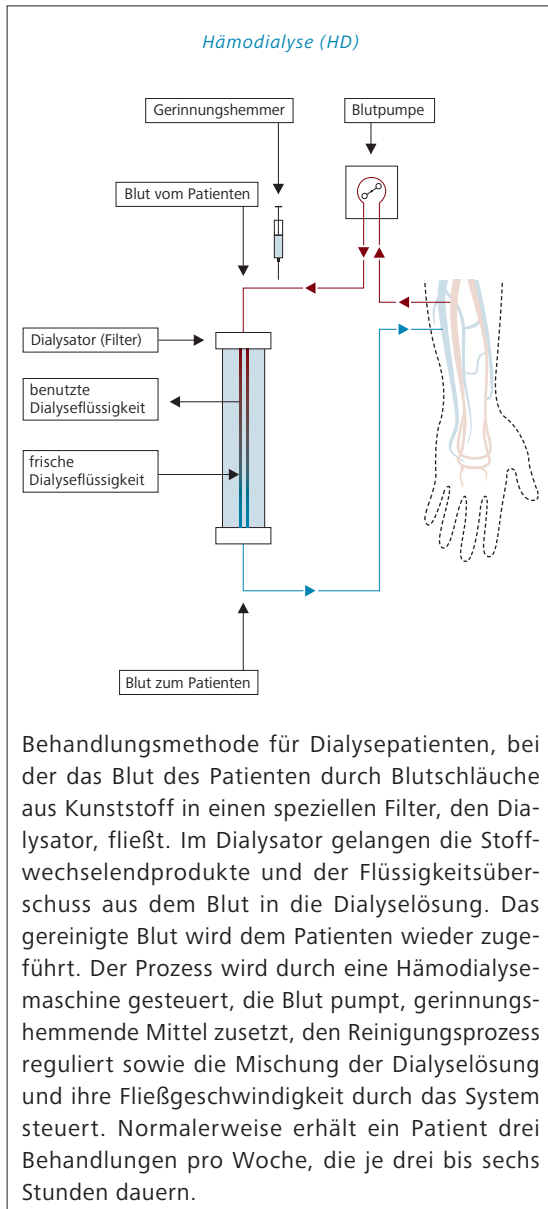

#### *Hämofiltration*

Behandlungsmethode für Patienten mit chronischem Nierenversagen, bei der keine Dialysierflüssigkeit verwendet wird. Die gelösten Teilchen werden mittels konvektiver Kräfte bei der Filterung des Plasmawassers durch eine halbdurchlässige Membran entfernt. Das durch den Filtervorgang fehlende Volumen wird durch die Infusion einer Ersatzlösung (Substitutionslösung) ausgeglichen.

#### *Hämoglobin*

Bestandteil der roten Blutzellen, die Sauerstoff durch den Körper transportieren.

#### *Heparin*

Universell gerinnungshemmende Substanz, die bei der Hämodialyse verabreicht wird, um die Blutgerinnung zu verlangsamen.

#### *ISO*

(Internal organisation for standardization). Internationale Normierungsorganisation.

#### *K*

#### *Kalzimimetika*

Eine Erweiterung der Therapieoptionen zur wirkungsvolleren Beeinflussung des Knochen- und Mineralstoffwechsels bei chronisch Nierenkranken. Kalzimimetika werden bei einer Schilddrüsenüberfunktion verabreicht, die bei Dialysepatienten häufig auftritt. Darüber hinaus haben Kalzimimetika einen positiven Effekt auf den Kalziumhaushalt der Knochen.

#### *Katheter*

Flexibler Schlauch, der operativ durch die Haut in ein Blutgefäß oder einen Hohlraum im Körper eingeführt wird und Flüssigkeiten in den Körper oder aus dem Körper heraus transportiert. Bei der — Peritonealdialyse wird die Dialysierflüssigkeit mit Hilfe eines Katheters in die Bauchhöhle eingebracht und wieder abgeführt. Bei der — Hämodialyse kann ein Katheter als Gefäßzugang für die Dialysebehandlung genutzt werden. Hierbei wird der Katheter meist in die obere Hohlvene, gelegentlich auch in die Leistenvene eingeführt.

#### *Kontinuierliche Ambulante Peritonealdialyse*

(Continuous Ambulatory Peritoneal Dialysis, CAPD) Behandlungsmethode, bei der die Dialyselösung üblicherweise viermal täglich manuell ausgetauscht wird.

#### *Kt/V*

Indikator bei der Bewertung der Behandlungsqualität. Dabei wird das Produkt aus Reinigungsleistung der Dialysebehandlung ( $\kappa$ ) und Behandlungsdauer ( $t$ ) ins Verhältnis gesetzt zur Rate der Reinigung von bestimmten Schadstoffen ( $v$ ).

**L***Lean Six Sigma*

Qualitätsmanagementsystem zur Beschreibung, Messung, Analyse, Verbesserung und Überwachung von Prozessen mit dem Ziel der Qualitätssteigerung.

*Liberty Cyclor*

Neuartiges Gerät mit *PIN-Technologie* für die *automatisierte Peritonealdialyse*, das ausschließlich in den USA vertrieben wird. Der Cyclor steuert automatisch den Austausch von verbrauchter und frischer Dialysierflüssigkeit. Er verfügt u. a. über einen modernen Pumpmechanismus und eine Patientendatensoftware; darüber hinaus ist er sehr bedienerfreundlich.

**M***Medicare/Medicaid*

Gesundheitsfürsorgeprogramm der us-amerikanischen Social Security Administration, das Krankenkassen und medizinischen Einrichtungen Kosten für die medizinische Versorgung von Patienten im Alter von über 65 Jahren, von Patienten mit chronischem Nierenversagen und von behinderten Menschen sowie Bedürftigen erstattet.

**N***Nieren*

Befinden sich in der hinteren Bauchhöhle, jeweils rechts und links neben der Wirbelsäule. Die jeweils rund 12 cm langen und nur rund 160 g wiegenden Organe sind für den Körper lebenswichtig. Durch die Filtration von Ausscheidungsstoffen und die Produktion von Urin gewährleisten die Nieren einen ausgeglichenen Säure-Basen-Haushalt. Innerhalb von 24 Stunden werden ca. 1.500 Liter Blut durch die Nieren transportiert.

*Nierentransplantation*

Chirurgische Implantation einer Spenderniere.

**O***ONLINEplus System*

System der ONLINE-Hämodiafiltration und ONLINE-Hämodifiltration für die Hämodialysegeräte der Serie 4008 und 5008. ONLINE bedeutet, dass das Dialysegerät die Infusionslösung für die Behandlung automatisch herstellt. Die ONLINE-Methode ist eine sichere, anwenderfreundliche, ressourcenschonende und kosteneffiziente Alternative zu fertigen Infusionslösungen in Beuteln.

*Osmose*

Einseitiger Übertritt von Wasser aus dem Blut durch eine halbdurchlässige Filtermembran. Im Gegensatz zur Diffusion wandern die Moleküle bei der Osmose nur in eine Richtung.

**P***Peritonealdialyse (PD)*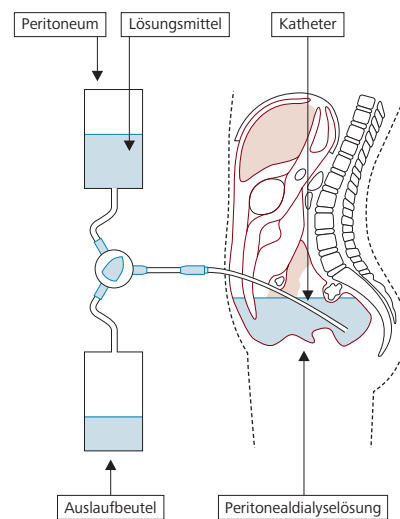

Behandlungsmethode, bei der das Peritoneum (Bauchfell), das die Innenwand der Bauchhöhle auskleidet und die inneren Organe bedeckt, als Dialysemembran dient. Durch einen operativ eingesetzten Katheter wird sterile Dialyselösung in die Bauchhöhle eingebracht und wieder abgeführt, um Toxine (Schadstoffe) aufzunehmen und zusammen mit überschüssigem Wasser zu entfernen. Die meisten Behandlungen werden vom Patienten selbst zu Hause oder am Arbeitsplatz mehrmals am Tag oder in der Nacht mittels einer Maschine, des Cyclers, durchgeführt.

*Phosphatbinder*

Phosphatbinder binden überschüssiges über die Nahrung aufgenommenes Phosphat im Darm. Überschüssiges Phosphat wird von gesunden Nieren ausgeschieden. Dieser Filterprozess kann bei Patienten mit chronischem Nierenversagen nur teilweise durch die Dialyse ersetzt werden. Ein zu hoher Phosphatgehalt im Blut kann zahlreiche Nebenwirkungen verursachen, wie Knochenerkrankungen, Beeinträchtigungen der Schilddrüse und Gefäßverkalkungen. Phosphatbinder für chronisch Nierenkranke sind zum Beispiel die Präparate PhosLo® oder OsvaRen®.

*PIN-Technologie*

Automatischer Verschluss, der das Kontaminationsrisiko bei der Diskonnektion von Peritonealdialysesystemen verhindert.

*Polysulfon*

Ein Polymer, aus dem Dialysatormembranen hergestellt werden. Es zeichnet sich durch eine äußerst hohe Wärmestabilität, chemische Beständigkeit und Blutverträglichkeit aus.

*Prävalenz*

Anzahl der Patienten, die innerhalb eines bestimmten Zeitraums eine spezifische Krankheit haben.

*Puffer*

Substanz, die pH-Veränderungen reduziert, die in einem System entstehen, dem eine saure oder basische Komponente beigelegt wird.

**S***Shunt*

—— arteriovenöse (AV) Fistel

*Supply-Chain-Management*

Lieferkettenmanagement zur Planung aller Aufgaben von der Lieferantenwahl, über die Beschaffung und die Lagerung bis hin zum Transport zum Kunden mit dem Ziel der Effizienzsteigerung in der Wertschöpfungskette.

**T***Terminales Nierenversagen (terminale Niereninsuffizienz)*

Liegt dann vor, wenn die —— Nieren den Körper nicht mehr entgiften, diese Funktion endgültig verloren ist und Nierenersatztherapien notwendig werden.

*Transplantation*

Entnahme eines Organs oder Gewebes aus dem Körper zur Verpflanzung an eine andere Stelle oder in einen anderen Körper.

**V***Vene*

Ein Blutgefäß für den Transport des Blutes zum Herzen hin.

*Das Finanzglossar finden Sie im Finanzbericht*

—— ab Seite 275.

## VERZEICHNIS DER TABELLEN UND GRAFIKEN IM UNTERNEHMENSBERICHT

### Kapitel 1

#### An unsere Aktionäre

Aktienindizes /Aktie

Tabelle 1.3.1 — Seite 20

Index- und Aktienkursentwicklung, indexiert

Grafik 1.3.2 — Seite 21

Aktienkursentwicklung, absolut

Grafik 1.3.3 — Seite 22

Dividendenentwicklung

Grafik 1.3.4 — Seite 23

Zahl der identifizierten Aktien

Tabelle 1.3.5 — Seite 24

Geografische Aufteilung der identifizierten Aktien

Tabelle 1.3.6 — Seite 25

Aktienstammdaten

Tabelle 1.3.7 — Seite 26

Kennzahlen der Fresenius Medical Care Stammaktie

Tabelle 1.3.8 — Seite 28

### Kapitel 2

#### Unser Geschäftsjahr

Wesentliche Standorte

Grafik 2.1.1 — Seite 32

Fresenius Medical Care – weltweit

Tabelle 2.1.2 — Seite 33

Wesentliche Kennzahlen

Tabelle 2.1.3 — Seite 35

GOAL-10-Ziele und historische Entwicklung

Tabelle 2.1.4 — Seite 37

GOAL-13-Ziele

Tabelle 2.1.5 — Seite 37

Volumen Dialysemarkt 2010: 69 MRD US \$

Grafik 2.1.6 — Seite 38

Reales Bruttoinlandsprodukt und Verbraucherpreise

Tabelle 2.1.7 — Seite 39

Wechselkursentwicklung us-Dollar gegenüber Euro

Grafik 2.1.8 — Seite 40

Sensitivitätsanalyse

Tabelle 2.1.9 — Seite 41

Marktposition bei wesentlichen Produktgruppen 2010

Tabelle 2.1.10 — Seite 42

Dialyseprodukte 2010

Grafik 2.1.11 — Seite 43

Hämodialyse-Produkte 2010

Grafik 2.1.12 — Seite 43

Peritonealdialyse-Produkte 2010

Grafik 2.1.13 — Seite 43

Dialyседienstleistungen weltweit,  
Anzahl der behandelten Patienten 2010

Grafik 2.1.14 — Seite 44

Betreiber von Dialysekliniken 2010

Tabelle 2.1.15 — Seite 45

Top 5-Dialyседienstleister weltweit 2010

Grafik 2.1.16 — Seite 45

Fresenius Medical Care: Behandelte Patienten 2010

Grafik 2.1.17 — Seite 46

Dialysepatienten – Regionale Entwicklung

Tabelle 2.1.18 — Seite 47

Patienten mit chronischem Nierenversagen

Tabelle 2.1.19 — Seite 48

Ziele und Ergebnisse für 2010

Tabelle 2.1.20 — Seite 53

Entwicklung des Umsatzes pro Quartal

Grafik 2.2.1 — Seite 55

Umsatz nach Segmenten

Tabelle 2.2.2 — Seite 56

Umsatzentwicklung nach Segmenten

Tabelle 2.2.3 — Seite 57

Umsatz nach Regionen

Tabelle 2.2.4 — Seite 57

Patienten

Tabelle 2.2.5 — Seite 58

Behandlungen

Tabelle 2.2.6 — Seite 58

Kliniken

Tabelle 2.2.7 — Seite 58

Operatives Ergebnis (EBIT)

Tabelle 2.2.8 — Seite 59

Gekürzte Gewinn- und Verlustrechnung

Tabelle 2.2.9 — Seite 59

Entwicklung des Nettoergebnisses pro Quartal

Grafik 2.2.10 — Seite 60

Wertschöpfungsrechnung

Tabelle 2.2.11 — Seite 60

Wesentliche Finanzierungsinstrumente  
von Fresenius Medical Care

Tabelle 2.2.12 — Seite 62



## Rating

Tabelle 2.2.13 — Seite 63

## Netto-Investitionen und Akquisitionen nach Segmenten

Tabelle 2.2.14 — Seite 63

## Netto-Investitionen in Sachanlagen nach Regionen

Grafik 2.2.15 — Seite 64

## Forderungslaufzeiten

Tabelle 2.2.16 — Seite 64

## Gekürzte Cash-Flow-Rechnung

Tabelle 2.2.17 — Seite 65

## Operativer Cash Flow

Grafik 2.2.18 — Seite 65

## Bilanzstruktur – Aktiva

Grafik 2.2.19 — Seite 66

## Bilanzstruktur – Passiva

Grafik 2.2.20 — Seite 66

## Forschungs- und Entwicklungsaufwendungen

Tabelle 2.3.1 — Seite 69

## Zahl der Patente und Patentanmeldungen

Tabelle 2.3.2 — Seite 69

## Zahl der Mitarbeiter in F&amp;E

Tabelle 2.3.3 — Seite 74

## Ausbildungsgrad der F&amp;E-Mitarbeiter im Segment International

Grafik 2.3.4 — Seite 75

## Berufsgruppen der F&amp;E-Mitarbeiter im Segment International

Grafik 2.3.5 — Seite 75

## Fresenius Medical Care: Ein vertikal integriertes Unternehmen

Grafik 2.5.1 — Seite 82

## Qualitätsdaten

Tabelle 2.5.2 — Seite 84

## Zahl der Mitarbeiter

Grafik 2.6.1 — Seite 90

## Mitarbeiter nach Regionen

Tabelle 2.6.2 — Seite 90

## Mitarbeiter nach Regionen

Grafik 2.6.3 — Seite 91

## Mitarbeiter nach Segmenten

Tabelle 2.6.4 — Seite 92

## Erfolgsbeteiligung

Tabelle 2.6.5 — Seite 95

## Risikoberichterstattung

Grafik 2.8.1 — Seite 105

## coso-Modell

Grafik 2.8.2 — Seite 106

## Reales Bruttoinlandsprodukt und Verbraucherpreise

Tabelle 2.10.1 — Seite 116

## Erwartetes Wachstum der Patientenzahl 2011

Tabelle 2.10.2 — Seite 118

## Anzahl Dialysepatienten weltweit – Prognose bis 2020

Grafik 2.10.3 — Seite 118

## Ziele 2011/2012

Tabelle 2.10.4 — Seite 120

## Organisationsstruktur des Compliance-Programms

Grafik 2.11.1 — Seite 130

## Komponenten mit langfristiger Anreizwirkung

Tabelle 2.11.3 — Seite 142

## Entwicklung der Pensionsverpflichtungen

Tabelle 2.11.7 — Seite 146

# STICHWORTVERZEICHNIS

## IM UNTERNEHMENSBERICHT

### A

Aktie — Seite 20  
 Aktionärsstruktur — Seite 24  
 Aus- und Weiterbildung — Seite 74, 91

### B

Bilanz — Seite 66

### C

Cash Flow — Seite 64, 120  
 Compliance — Seite 130  
 Corporate Governance — Seite 17, 104, 128

### D

Dialysedienstleistung — Seite 34, 37, 44, 55, 82, 118  
 Dialysemarkt — Seite 42  
 Dialyseprodukte — Seite 34, 37, 42, 55, 69, 77  
 Dividende — Seite 23, 119

### E

EBIT (Ergebnis vor Zinsen und Ertragsteuern) — Seite 35, 57  
 EBITDA (Ergebnis vor Zinsen, Ertragsteuern und Abschreibungen) — Seite 35  
 Ergebnis je Aktie — Seite 59, 119  
 Erklärung zur Unternehmensführung — Seite 128  
 Ertragslage — Seite 55

### F

Finanzlage — Seite 61  
 Finanzinstrumente — Seite 61  
 Forschung und Entwicklung — Seite 66

### G

Gewinn- und Verlustrechnung — Seite 58

### I

Investition — Seite 36, 53, 63, 111, 119  
 Investor Relations — Seite 26

### K

Konzernergebnis — Seite 52, 58, 119

### M

Mandate — Seite 153  
 Mitarbeiterinnen und Mitarbeiter — Seite 90

### N

Nachtragsbericht — Seite 115

### P

Patente — Seite 69  
 Produktion — Seite 31, 77, 96  
 Prognosebericht — Seite 116

### Q

Qualität — Seite 72, 79, 83, 109, 125

### R

Rating — Seite 62  
 Risikobericht — Seite 104

### S

Steuern — Seite 59  
 Strategie — Seite 35

### U

Umsatz — Seite 52, 55, 119  
 Umwelt — Seite 96

### V

Vermögenslage — Seite 66  
 Wirtschaftliches Umfeld — Seite 39, 116

### Z

Ziele — Seite 35

# FINANZBERICHT

## 4.1 – 6

### DARSTELLUNG UND ANALYSE

- Kritische Rechnungslegungsgrundsätze s. 169
- Finanz- und Ertragslage s. 174
- Operative Entwicklungen s. 178
- Liquidität und Mittelherkunft s. 184
- Neue Verlautbarungen und Änderungen der Rechnungslegungsvorschriften s. 192
- Quantitative und qualitative Offenlegung von Marktrisiken s. 193

## 5.1 – 9

### KONZERNABSCHLUSS

- Konzern-Gewinn- und Verlustrechnung s. 201
- Konzern-Gesamtergebnisrechnung s. 202
- Konzernbilanz s. 202
- Konzern-Cash-Flow-Rechnung s. 204
- Konzern-Eigenkapitalveränderungsrechnung s. 206
- Anmerkungen zum Konzernabschluss s. 208
- Bericht über das interne Kontrollsystem für die Finanzberichterstattung s. 269
- Bericht der unabhängigen Abschlussprüfer s. 270
- Bestätigungsvermerk: Bericht der unabhängigen Abschlussprüfer s. 272

## 6.1 – 8

### WEITERE INFORMATIONEN

- Finanzglossar s. 275
- Regionale Organisation s. 277
- Wesentliche Beteiligungen s. 278
- Fünf-Jahres-Übersicht s. 280
- Verzeichnis der Tabellen s. 282
- Stichwortverzeichnis s. 284
- Kontakte s. 285
- Impressum s. 286

### WICHTIGE TERMINE 2011

- Finanzkalender und wichtige Messen  
*am Ende des Finanzberichts*

## OPERATIVES GESCHÄFT

Kennzahlen

in MIO US \$

|                                                                                  | 2010    | 2009    | Veränderung |
|----------------------------------------------------------------------------------|---------|---------|-------------|
| <b>Ausgewählte Kennzahlen</b>                                                    |         |         |             |
| Umsatz                                                                           | 12.053  | 11.247  | 7 %         |
| Ergebnis vor Zinsen, Ertragsteuern und Abschreibungen (EBITDA)                   | 2.427   | 2.213   | 10 %        |
| Ergebnis vor Zinsen und Ertragsteuern (EBIT)                                     | 1.924   | 1.756   | 10 %        |
| Konzernergebnis <sup>1</sup>                                                     | 979     | 891     | 10 %        |
| Netto-Cash Flow aus laufender Geschäftstätigkeit                                 | 1.368   | 1.339   | 2 %         |
| Free Cash Flow <sup>2</sup>                                                      | 861     | 777     | 11 %        |
| Investitionen in Sachanlagen, netto                                              | 507     | 562     | -10 %       |
| Akquisitionen, Investitionen und Erwerb von immateriellen Vermögenswerten, netto | 618     | 136     | 354 %       |
| Ergebnis je Stammaktie in US \$                                                  | 3,25    | 2,99    | 9 %         |
| Dividende je Stammaktie <sup>3</sup> in €                                        | 0,65    | 0,61    | 7 %         |
| EBIT-Marge in %                                                                  | 16,0    | 15,6    | –           |
| Return on invested capital (ROIC) in %                                           | 8,8     | 8,5     | –           |
| Eigenkapitalquote in %                                                           | 44,0    | 43,0    | –           |
| <b>Sonstige Angaben</b>                                                          |         |         |             |
| Mitarbeiter (Durchschnittlich Vollzeitbeschäftigte)                              | 73.452  | 67.988  | 8 %         |
| Patienten                                                                        | 214.648 | 195.651 | 10 %        |
| Dialysekliniken                                                                  | 2.757   | 2.553   | 8 %         |
| Behandlungen in MIO                                                              | 31,7    | 29,4    | 8 %         |

## UMSATZ

in MIO US \$

|      |        |
|------|--------|
| 2010 | 12.053 |
| 2009 | 11.247 |

KONZERNERGEBNIS<sup>1</sup>

in MIO US \$

|      |     |
|------|-----|
| 2010 | 979 |
| 2009 | 891 |

## ERGEBNIS JE STAMMAKTIE

in US \$

|      |      |
|------|------|
| 2010 | 3,25 |
| 2009 | 2,99 |

<sup>1</sup> Ergebnis, das auf die Anteilseigner der Fresenius Medical Care AG & Co. KGaA entfällt.<sup>2</sup> Vor Akquisitionen und Dividenden.<sup>3</sup> 2010: Vorschlag zur Beschlussfassung durch die Hauptversammlung am 12. Mai 2011.

Falls nicht anders gekennzeichnet, werden alle Zahlen in diesem Geschäftsbericht in US \$ sowie in Übereinstimmung mit U.S. GAAP berichtet. Abbildungen beziehen sich auf das Geschäftsjahr 2010. Eine detaillierte Mehrjahresübersicht befindet sich ab Seite 280.

*Mit der Notierung der Fresenius Medical Care AG & Co. KGaA an der New Yorker Börse ist Fresenius Medical Care verpflichtet, der Securities and Exchange Commission (SEC) einen Jahresbericht in der Form 20-F einzureichen. Der hier vorgelegte Geschäftsbericht basiert zum Teil auf diesem Jahresbericht. Darüber hinaus werden in der Form 20-F zusätzliche Angaben gemacht. Die Form 20-F kann bei der Gesellschaft angefordert werden.*

*Der von der KPMG Deutsche Treuhand-Gesellschaft Aktiengesellschaft Wirtschaftsprüfungsgesellschaft mit einem uneingeschränkten Bestätigungsvermerk versehene Jahresabschluss der Fresenius Medical Care AG & Co. KGaA wird beim Betreiber des elektronischen Bundesanzeigers eingereicht, der diesen Jahresabschluss dem Unternehmensregister übermittelt. Dieser Abschluss kann bei der Gesellschaft angefordert werden.*

*Der von der KPMG Deutsche Treuhand-Gesellschaft Aktiengesellschaft Wirtschaftsprüfungsgesellschaft mit einem uneingeschränkten Bestätigungsvermerk versehene Konzernabschluss nach § 315a HGB wird beim Betreiber des elektronischen Bundesanzeigers elektronisch eingereicht, der diesen Konzernabschluss dem Unternehmensregister übermittelt. Dieser Abschluss kann bei der Gesellschaft angefordert werden.*

*Die Publikationen können auch im Internet unter [www.fmc-ag.de](http://www.fmc-ag.de) eingesehen werden.*

# DARSTELLUNG UND ANALYSE

## EFFIZIENZ

*Wir verbessern kontinuierlich  
unsere betrieblichen Abläufe, um  
unseren Partnern im Gesundheitswesen  
hohe Qualität zu tragbaren  
Kosten zu liefern.*

## 4.1

Kritische Rechnungs-  
legungsgrundsätze  
S. 169

## 4.2

Finanz- und Ertragslage  
S. 174

## 4.3

Operative Entwicklungen  
S. 178

## 4.4

Liquidität und  
Mittelherkunft  
S. 184

## 4.5

Neue Verlautbarungen  
und Änderungen der  
Rechnungslegungsvorschriften  
S. 192

## 4.6

Quantitative und qualitative  
Offenlegung von Marktrisiken  
S. 193

---



## DARSTELLUNG UND ANALYSE DES GESCHÄFTSVERLAUFS UND DER LAGE DES KONZERNS

Die folgende Darstellung und Analyse des Geschäftsverlaufs und der Lage der Fresenius Medical Care AG & Co. KGaA und ihrer Tochterunternehmen (FMC AG & Co. KGaA oder die Gesellschaft) sollte in Verbindung mit dem beigefügten Konzernabschluss und dem zugehörigen Konzernanhang gelesen werden. Einige der im weiteren Bericht enthaltenen Angaben, einschließlich Aussagen zu künftigen Umsätzen, Kosten und Investitionsausgaben sowie zu möglichen Veränderungen in der Branche oder zu den Wettbewerbsbedingungen und der Finanzlage, enthalten zukunftsbezogene Aussagen. Diese zukunftsbezogenen Aussagen wurden auf der Grundlage von Erwartungen und Einschätzungen des Vorstands der persönlich haftenden Gesellschafterin als gesetzlichem Vertreter der Gesellschaft (im Folgenden der Vorstand) über künftige, die Gesellschaft möglicherweise betreffende Ereignisse formuliert. Es ist jedoch nicht sicher, ob diese Ereignisse eintreten und ob die Auswirkungen wie vorhergesehen eintreffen werden. Da solche Aussagen Risiken und Unsicherheiten enthalten, können die tatsächlichen Ergebnisse wesentlich von denen abweichen, die in den zukunftsbezogenen Aussagen zum Ausdruck kommen oder in ihnen implizit enthalten sind. Solche Aussagen schließen auch die Aussagen ein, die die Gesellschaft in den Abschnitten „Prognosebericht“, „Risikobericht“ im Unternehmensbericht sowie — in Anmerkung 18 beschrieben hat.

Die Geschäftstätigkeit der Gesellschaft ist darüber hinaus weiteren Risiken und Unsicherheiten ausgesetzt, die im Rahmen der veröffentlichten Berichte der Gesellschaft dargestellt sind. Veränderungen in jedem dieser Bereiche könnten dazu führen, dass die Ergebnisse von den Ergebnissen wesentlich abweichen, die sie oder andere vorhergesagt haben oder vorhersagen werden.

### Kapitel 4.1

## KRITISCHE RECHNUNGSLEGUNGSGRUNDSÄTZE

Die im Konzernabschluss dargestellte Vermögens-, Finanz- und Ertragslage der Gesellschaft wird durch die angewendeten Rechnungslegungsgrundsätze sowie durch die Annahmen und Schätzungen beeinflusst, die dem Konzernabschluss der Gesellschaft zu Grunde liegen. Die kritischen Rechnungslegungsgrundsätze, die Beurteilungen im Rahmen der Entwicklung und Anwendung dieser Grundsätze sowie die Sensitivität der berichteten Ergebnisse in Bezug auf Änderungen in den Rechnungslegungsgrundsätzen, Annahmen und Schätzungen stellen Faktoren dar, in deren Kontext der vorliegende Konzernabschluss der Gesellschaft, sowie die Darstellungen zur operativen Entwicklung zu betrachten ist.

### WERTHALTIGKEIT VON FIRMENWERTEN UND IMMATERIELLEN VERMÖGENSWERTEN

Das Wachstum der Gesellschaft durch Akquisitionen hat zu einem erheblichen Umfang an immateriellen Vermögenswerten geführt – u.a. Firmenwerte, Markennamen und Managementverträge. Zum 31. Dezember 2010 belief sich der Buchwert des Firmenwertes auf 8.140 Mio US \$ und der Buchwert der immateriellen Vermögenswerte mit unbestimmbarer Nutzungsdauer, die nicht der planmäßigen Abschreibung unterliegen auf 215 Mio US \$. Dies entspricht etwa 49 % der Bilanzsumme.

In Übereinstimmung mit den aktuellen Rechnungslegungsvorschriften überprüft die Gesellschaft mindestens jährlich für jede Berichtseinheit Firmenwerte und immaterielle Vermögenswerte mit unbestimmter Nutzungsdauer auf einen erforderlichen Abschreibungsbedarf und wenn für die Gesellschaft Ereignisse oder Veränderungen darauf hindeuten, dass der Buchwert dieser Vermögenswerte nicht mehr werthaltig ist

— siehe Anmerkung 1f.

Um die Vorschriften der aktuellen Rechnungslegungsvorschriften des Impairmenttests zu erfüllen, werden die Zeitwerte der Berichtseinheiten (reporting units) mit deren Buchwerten verglichen. Der Zeitwert der Berichtseinheiten wird durch Anwendung eines Discounted Cash Flow Verfahrens (DCF-Verfahren) unter Berücksichtigung der spezifischen gewichteten Gesamtkapitalkosten (WACC) der Berichtseinheiten ermittelt. Zur Ermittlung der diskontierten zukünftigen Zahlungsflüsse wird eine Vielzahl von Annahmen getroffen. Diese betreffen insbesondere zukünftige Erstattungsätze und Verkaufspreise, Anzahl der Behandlungen, Absatzmengen und Kosten. Zur Bestimmung der diskontierten Zahlungsmittelzuflüsse werden in allen Bereichen das Budget der nächsten drei Jahre sowie Projektionen für die Jahre vier bis zehn und entsprechende Wachstumsraten für alle nachfolgenden Jahre zugrunde gelegt. Projektionen von bis zu zehn Jahren sind durch den weitgehend gleichförmigen und konjunkturunabhängigen Verlauf des Geschäfts der Gesellschaft möglich. Die Gründe hierfür sind der kontinuierliche Bedarf an unseren Dialysedienstleistungen und Dialyseprodukten sowie die Tatsache, dass die Gesellschaft einen Großteil ihrer Erstattungen für Dialysedienstleistungen von staatlichen Gesundheitsorganisationen erhält. Der WACC der Gesellschaft für das Jahr 2010 besteht aus einer Basisrate von 6,38 %. Diese Basisrate wird dann für jede Berichtseinheit um die jeweiligen länderspezifischen Risikoraten angepasst.

Falls der Zeitwert der Berichtseinheit niedriger als der Buchwert ist, werden in einem zweiten Schritt der Zeitwert und der Buchwert des Firmenwertes miteinander verglichen. Falls der Zeitwert des Firmenwertes niedriger ist als der Buchwert, wird die Differenz als außerplanmäßige Abschreibung gebucht.

Ein länger anhaltender Abschwung im Gesundheitswesen mit einem niedrigeren als erwarteten Anstieg der Erstattungsraten und/oder höheren als erwarteten Kosten für die Erbringung der Gesundheitsdienstleistungen sowie für die Herstellung und den Vertrieb von Produkten könnte die Schätzungen der Gesellschaft der zukünftigen Cashflows bestimmter Länder oder Segmente negativ beeinflussen. Weiterhin könnten Veränderungen im makroökonomischen Umfeld der Betriebseinheit den Abzinsungssatz beeinflussen. Die mögliche Folge wäre, dass die künftigen operativen Ergebnisse und die Finanzlage der Gesellschaft in wesentlichem Umfang negativ durch zusätzliche außerplanmäßige Abschreibungen auf Firmenwerte und immaterielle Vermögenswerte mit unbestimmbarer Nutzungsdauer beeinflusst werden.

## RECHTLICHE EVENTUALVERBINDLICHKEITEN

Wie — in Anmerkung 18 beschrieben, ist die Gesellschaft in verschiedene Rechtsstreitigkeiten involviert. Der Ausgang dieser Rechtsangelegenheiten könnte einen wesentlichen Einfluss auf die Vermögens-, Finanz- und Ertragslage oder Cash Flows der Gesellschaft haben.

Die Gesellschaft analysiert regelmäßig entsprechende Informationen und bildet die erforderlichen Rückstellungen für möglicherweise aus solchen Verfahren resultierende Verbindlichkeiten einschließlich der geschätzten Kosten für Rechtsleistungen und Rechtsberatungskosten im Zusammenhang mit diesen Rechtsstreitigkeiten. Für diese Analysen nutzt die Gesellschaft sowohl ihre interne Rechtsabteilung als auch externe Ressourcen. Die Bildung einer Rückstellung für Rechtsstreitigkeiten richtet sich nach der Wahrscheinlichkeit eines für die Gesellschaft nachteiligen Ausgangs und der Möglichkeit, einen Verlustbetrag zuverlässig schätzen zu können.

Die Erhebung einer Klage oder die formelle Geltendmachung eines Anspruches, bzw. die Bekanntgabe einer solchen Klage oder der Geltendmachung eines Anspruches, bedeutet nicht zwangsläufig, dass eine Rückstellung zu bilden ist.

## WERTBERICHTIGUNG AUF ZWEIFELHAFTE FORDERUNGEN

Forderungen aus Lieferungen und Leistungen sind für die Gesellschaft ein wesentlicher Bilanzposten und die Wertberichtigungen auf zweifelhafte Forderungen bedürfen einer umfangreichen Schätzung und Beurteilung durch das Management. Die Forderungen aus Lieferungen und Leistungen nach Wertberichtigung betrugen 2.573 MIO US \$ bzw. 2.286 MIO US \$ im Jahr 2010 bzw. 2009. Die Wertberichtigungen auf zweifelhafte Forderungen betrugen 277 MIO US \$ und 266 MIO US \$ zum Jahresende 2010 und zum Jahresende 2009. Etwa die Hälfte der Forderungen der Gesellschaft stehen im Zusammenhang mit dem Geschäft des Segments Nordamerika.

Die Umsätze aus den Dialysedienstleistungen werden in Höhe der erwarteten Erstattungsbeträge in Übereinstimmung mit den vertraglichen Vereinbarungen mit Dritten fakturiert und verbucht. Im Rahmen der Medicare- und Medicaid-Programme werden die gesetzlich verordneten Netto-Erstattungssätze je Behandlung in Rechnung gestellt. Die Umsätze mit privaten Versicherungen, mit denen die Gesellschaft vertragliche Vereinbarungen geschlossen hat, werden auf Basis von aktuellen vertraglich festgelegten Erstattungssätzen fakturiert. Die Abrechnung mit den verbleibenden privaten Versicherungen erfolgt auf Basis von Standardsätzen für Dienstleistungen. Im Segment Nordamerika werden für Umsätze mit privaten Versicherungen, mit denen vertraglich vereinbarte Erstattungssätze nicht vorher festgelegt sind, vertragliche Abzüge basierend auf historischen Zahlungsverhalten berücksichtigt. Die vertraglichen Abzüge sowie die Wertberichtigungen auf zweifelhafte Forderungen werden vierteljährlich auf ihre Angemessenheit hin überprüft. Für die dargestellten Perioden gab es keine materiellen Veränderungen bei den Schätzungen der vertraglichen Abzüge.

Die Wertberichtigung auf zweifelhafte Forderungen orientiert sich an dem bisherigen örtlichen Zahlungsverhalten sowie an den Erfahrungen hinsichtlich der Einziehung von Forderungen. Die Gesellschaft vertreibt Dialyseprodukte direkt oder über Vertriebshändler in über 120 verschiedenen Ländern sowie Dialysedienstleistungen über Kliniken, die sie in mehr als 35 Ländern besitzt oder betreibt. In den meisten Fällen werden die Kosten für Dialysedienstleistungen von staatlichen Einrichtungen erstattet oder durch staatlich geförderte Gesundheitsprogramme übernommen. Hinsichtlich des örtlichen Zahlungsverhaltens und den Praktiken bei der Einziehung von Forderungen existieren je nach Land und Art der Versicherungsträger deutliche Unterschiede. Im Besonderen vergeht bei öffentlichen Gesundheitseinrichtungen in zahlreichen Ländern außerhalb der USA ein beträchtlicher Zeitraum, bis Zahlungen geleistet werden. Die Unterschiede im Zahlungsverhalten sind vor allem auf den Zeitpunkt zurückzuführen, zu dem die örtliche, bundesstaatliche oder Bundesregierung den Gesundheitsprogrammträger finanziert, der die Dienstleistungen und Produkte von der Gesellschaft erhält bzw. erwirbt. Die Einziehung von Forderungen aus Produktverkäufen an Dialysekliniken unterliegt denselben Beeinträchtigungen, da diese Käufer der Produkte ebenso von staatlichen Einrichtungen oder staatlich geförderten Gesundheitsprogrammen rückvergütet werden.

In dem Segment Nordamerika beginnt die Einziehung von Forderungen üblicherweise 30 Tage nach der Erbringung der Leistung oder nach Ablauf der vertraglich vereinbarten Zahlungsfrist. Im Falle von Medicare und Medicaid wird die Einziehung von Forderungen nach Ablauf der Zahlungsfrist eingeleitet. Die Frist beginnt, sobald die Leistung zur Zahlung freigegeben wurde. Ihre Dauer richtet sich nach den Erfahrungen mit Medicare und Medicaid. In allen Fällen, bei denen eine Selbstbeteiligung erforderlich ist, beginnt die Einziehung von Forderungen üblicherweise innerhalb von 30 Tagen nach Erbringung der Leistung. In den Fällen, bei denen ein Anspruch auf einen geringeren als den erwarteten Erstattungsbetrag anerkannt wird, oder der Anspruch abgelehnt wird, beginnt die Einziehung von Forderungen üblicherweise nach der Anerkennung des geringeren Erstattungsbetrags, beziehungsweise nach der Ablehnung des Anspruchs. Die Einziehung von Forderungen kann auf unternehmensinterne Bemühungen beschränkt sein, bei denen Mitarbeiter im Rechnungswesen und im Vertrieb sowie, wo es angemessen ist, Mitarbeiter des örtlichen Managements tätig werden. Falls erforderlich, können externe Inkassobüros eingeschaltet werden.

Ein erheblicher Anteil der Versicherungsträger im Segment International sind staatliche Einrichtungen, deren Zahlungen oft von lokalen Gesetzen und Regulierungen bestimmt werden. Abhängig von den lokalen Gegebenheiten kann die Einziehung von Forderungen lange dauern. Bei privaten Versicherungen wird zur Einziehung von Forderungen das gleiche Verfahren wie in den USA eingeleitet.

Aufgrund der zahlreichen Tochtergesellschaften und der verschiedenen Länder, in denen die Gesellschaft tätig ist, berücksichtigt die Gesellschaft bei der Bestimmung, wann eine Wertberichtigung erforderlich ist, die angemessenen lokalen Gegebenheiten und Umstände, die für eine Forderung relevant sind. Während hinsichtlich des Zahlungsverhaltens und der Einziehung von Forderungen je nach Land und Behörde deutliche Unterschiede existieren, stellen die staatlichen Versicherungen üblicherweise ein geringes Kreditrisiko dar. Dementsprechend weist der Zeitraum bis zum Eingang der Forderungen für sich allein genommen nicht auf ein erhöhtes Kreditrisiko hin. Vielmehr ist es der Grundsatz der Gesellschaft, auf lokaler Ebene unter Berücksichtigung lokaler Gegebenheiten zu bestimmen, wann Forderungen als uneinbringlich klassifiziert werden. In allen Fällen werden Forderungen regelmäßig, üblicherweise monatlich, lokal überprüft. Eine Forderung gilt als uneinbringlich und wird wertberichtigt, wenn alle Bemühungen, eine Forderung einzuziehen, erschöpft sind, einschließlich der Einschaltung von Inkassobüros (falls erforderlich und zulässig), und eine angemessene Überprüfung durch das Management erfolgt ist.

Die Schätzung der Wertberichtigungen auf zweifelhafte Forderungen im Dialyседienstleistungs-Geschäft orientiert sich hauptsächlich an den bisherigen Einziehungserfahrungen und dem örtlichen Zahlungsverhalten. Für das nordamerikanische Geschäft basieren die Wertberichtigungen insbesondere auf einer Analyse des bisherigen Zahlungsverhaltens sowie der Altersstruktur der Forderungen. In gewissen zeitlichen Abständen überprüft die Gesellschaft die Forderungen auf Abweichungen vom bisherigen Zahlungsverhalten, um die Angemessenheit der Wertberichtigungen sicherzustellen. Der Wertberichtigungsbedarf im Segment International und für das Produktgeschäft basiert ebenfalls auf Schätzungen, die unter anderem auch die Altersstruktur der Forderungen, die Vertragspartner und das bisherige Zahlungsverhalten berücksichtigen. Wertberichtigungen werden für jede Forderung einzeln vorgenommen, wenn alle Bemühungen zum Einzug der Forderung erschöpft sind. Da die Gesellschaft einen Großteil ihrer Erstattungen von staatlichen Gesundheitsorganisationen und privaten Versicherungsgesellschaften erhält, geht sie davon aus, dass die meisten ihrer Forderungen einbringlich sind, wenn auch in unmittelbarer Zukunft möglicherweise im Segment International langsamer, insbesondere in den weiterhin am stärksten von der globalen Finanzmarktkrise betroffenen Ländern. Für eine Erläuterung bzgl. der ungünstigen Entwicklungen bei den Forderungslaufzeiten im Jahr 2010 — siehe Kapitel 4.4. Veränderungen im Zahlungsverhalten, eine Verschlechterung der Altersstruktur der Forderungen sowie Schwierigkeiten beim Einzug von Forderungen könnten eine Anhebung der Schätzung des Wertberichtigungsbedarfs auf zweifelhafte Forderungen erfordern. Solche zusätzlichen Wertberichtigungen auf Forderungen könnten die künftige operative Entwicklung der Gesellschaft in wesentlichem Umfang nachteilig beeinflussen.

Wenn zusätzlich zu den bestehenden Wertberichtigungen der Gesellschaft 1% des Bruttobetrags der Forderungen aus Lieferungen und Leistungen beispielsweise zum 31. Dezember 2010 uneinbringlich gewesen wäre, entweder durch eine Veränderung der geschätzten vertraglichen Abzüge oder durch uneinbringliche Forderungen, hätte dies das operative Ergebnis der Gesellschaft für das Geschäftsjahr 2010 um etwa 1,5 % verringert.

Die folgende Tabelle zeigt den Anteil und die Altersstruktur der größten Schuldner oder Schuldnergruppen an den Forderungen aus Lieferungen und Leistungen zum 31. Dezember 2010 und 2009. Mit Ausnahme von Medicare und Medicaid entfallen in beiden Jahren nicht mehr als 5 % der gesamten Forderungen aus Lieferungen und Leistungen auf einen einzelnen Schuldner. Im Segment International sind die Schuldner der Forderungen aus Lieferungen und Leistungen hauptsächlich staatliche oder von Regierungen geförderte Organisationen in den verschiedenen Ländern. Die ausstehenden Beträge, die von der Zustimmung externer Schuldner abhängen, belaufen sich zum 31. Dezember 2010 auf weniger als 3 %.

#### ALTERSSTRUKTUR DER FORDERUNGEN

Tabelle 4.1.1

in MIO US \$,  
zum 31. Dezember 2010

|                                                                                               | nicht<br>überfällig | bis zu 3<br>Monate<br>überfällig | 3 bis 6<br>Monate<br>überfällig | 6 bis 12<br>Monate<br>überfällig | über 12<br>Monate<br>überfällig | Summe        | Anteil an<br>Gesamt-<br>forderungen<br>in % |
|-----------------------------------------------------------------------------------------------|---------------------|----------------------------------|---------------------------------|----------------------------------|---------------------------------|--------------|---------------------------------------------|
| U.S. Medicare und Medicaid Gesundheitsprogramme                                               | 372                 | 85                               | 41                              | 28                               | 20                              | 546          | 21                                          |
| U.S. private Versicherungen                                                                   | 270                 | 152                              | 48                              | 39                               | 22                              | 531          | 21                                          |
| U.S. Krankenhäuser                                                                            | 88                  | 28                               | 3                               | 2                                | 3                               | 124          | 5                                           |
| Selbstzahler der U.S. Patienten                                                               | –                   | 3                                | 3                               | 1                                | –                               | 7            | –                                           |
| Andere Nordamerika                                                                            | 1                   | 1                                | –                               | –                                | –                               | 2            | –                                           |
| Käufer von Produkten und Versicherungsträger für Dialysebehandlungen im Segment International | 777                 | 227                              | 116                             | 112                              | 131                             | 1.363        | 53                                          |
| <b>GESAMT</b>                                                                                 | <b>1.508</b>        | <b>496</b>                       | <b>211</b>                      | <b>182</b>                       | <b>176</b>                      | <b>2.573</b> | <b>100</b>                                  |

#### ALTERSSTRUKTUR DER FORDERUNGEN

Tabelle 4.1.2

in MIO US \$,  
zum 31. Dezember 2009

|                                                                                               | nicht<br>überfällig | bis zu 3<br>Monate<br>überfällig | 3 bis 6<br>Monate<br>überfällig | 6 bis 12<br>Monate<br>überfällig | über 12<br>Monate<br>überfällig | Summe        | Anteil an<br>Gesamt-<br>forderungen<br>in % |
|-----------------------------------------------------------------------------------------------|---------------------|----------------------------------|---------------------------------|----------------------------------|---------------------------------|--------------|---------------------------------------------|
| U.S. Medicare und Medicaid Gesundheitsprogramme                                               | 287                 | 74                               | 32                              | 22                               | 22                              | 437          | 19                                          |
| U.S. private Versicherungen                                                                   | 256                 | 140                              | 52                              | 40                               | 30                              | 518          | 23                                          |
| U.S. Krankenhäuser                                                                            | 88                  | 19                               | 3                               | 2                                | 2                               | 114          | 5                                           |
| Selbstzahler der U.S. Patienten                                                               | 2                   | 6                                | 6                               | 3                                | 1                               | 18           | 1                                           |
| Andere Nordamerika                                                                            | 2                   | 1                                | –                               | –                                | –                               | 3            | –                                           |
| Käufer von Produkten und Versicherungsträger für Dialysebehandlungen im Segment International | 699                 | 232                              | 106                             | 86                               | 73                              | 1.196        | 52                                          |
| <b>GESAMT</b>                                                                                 | <b>1.334</b>        | <b>472</b>                       | <b>199</b>                      | <b>153</b>                       | <b>128</b>                      | <b>2.286</b> | <b>100</b>                                  |

## SELBSTVERSICHERUNGSPROGRAMME

Über das Versicherungsprogramm für Berufs-, Produkt- und allgemeine Haftpflichtrisiken sowie für Pkw-Schäden und Arbeitnehmer-Entschädigungsansprüche ist, die FMCH, die in Nordamerika ansässige größte Tochtergesellschaft der Gesellschaft teilweise selbst versichert. Die Absicherung aller anderen eingetretenen Schadensfälle übernimmt die Gesellschaft, bis zu einer festgesetzten Schadenshöhe selbst. Wird diese überschritten, treten andere externe Versicherungen ein. Die im Geschäftsjahr bilanzierten Verbindlichkeiten stellen Schätzungen von zukünftigen Zahlungen für die gemeldeten sowie für die bereits entstandenen, aber noch nicht gemeldeten Schadensfälle dar. Die Schätzungen basieren auf historischen Erfahrungen und gegenwärtigem Anspruchsverhalten. Diese Erfahrungen beziehen sowohl die Anspruchshäufigkeit (Anzahl) als auch die Anspruchshöhe (Kosten) ein und werden zur Schätzung der bilanzierten Beträge mit Erwartungen hinsichtlich einzelner Ansprüche kombiniert.

Kapitel 4.2

# FINANZ- UND ERTRAGSLAGE

## ÜBERBLICK

Das Geschäft der Gesellschaft besteht vorwiegend aus der Erbringung von Dialyседienstleistungen sowie aus der Produktion und dem Vertrieb von Produkten und Geräten für die Behandlung von Patienten mit terminaler Niereninsuffizienz. In den USA führt die Gesellschaft zusätzlich klinische Labortests durch. Die Gesellschaft schätzt, dass die Bereitstellung von Dialyседienstleistungen und der Vertrieb von Dialyseprodukten und -geräten einen weltweiten Markt von über 69 MRD US\$ mit einem erwarteten jährlichen weltweiten Patientenzuwachs von etwa 6 % darstellt. Der Patientenzuwachs wird durch Faktoren wie die alternde Bevölkerung und die steigende Lebenserwartung, den Mangel an Spenderorganen für Nierentransplantationen, ein steigendes Aufkommen und die verbesserte Behandlung von Diabetes und Bluthochdruck, welche häufig einem terminalen Nierenversagen vorangehen, sowie eine höhere Überlebensrate der von diesen Erkrankungen betroffenen Patienten, Verbesserungen bei der Behandlungsqualität, durch die das Leben des Patienten verlängert wird, und die sich verbessernden Lebensstandards in den Entwicklungsländern, welche eine lebensrettende Dialysebehandlung ermöglichen, verursacht. Der Schlüssel zu kontinuierlichem Wachstum der Umsätze ist die Fähigkeit der Gesellschaft, neue Patienten zur Steigerung der Anzahl der jährlich durchgeführten Behandlungen zu gewinnen. Daher geht die Gesellschaft davon aus, dass die Anzahl der jährlich durchgeführten Behandlungen ein aussagefähiger Indikator für kontinuierliches Umsatzwachstum und Erfolg ist. Zusätzlich beeinflussen das Erstattungsumfeld sowie das Umfeld für die Verordnung von Zusatzdienstleistungen das Geschäft der Gesellschaft erheblich. In der Vergangenheit erlebte die Gesellschaft im Allgemeinen stabile Erstattungen für ihre Dialysebehandlungen, und sie erwartet diese auch in der Zukunft. Das beinhaltet den Ausgleich von ungünstigen Änderungen der Erstattungssätze in gewissen Ländern durch günstige Änderungen in anderen Ländern. Ein Großteil der Behandlungen wird von staatlichen Institutionen wie Medicare in den USA bezahlt. Als Konsequenz des Drucks zur Kostenreduzierung im Gesundheitswesen waren die Steigerungen der Erstattungssätze in der Vergangenheit begrenzt. Die Fähigkeit der Gesellschaft, die Preise für ihre Dienstleistungen zu beeinflussen, ist beschränkt.

Ein Großteil der Dialyседienstleistungen, die die Gesellschaft in den USA erbringt, wird durch das Medicare-Programm bezahlt. Die Medicare-Zahlungen für vor dem 1. Januar 2011 erbrachte Dialyседienstleistungen basierten auf einem Mischsatz, der einen Arzneimittelzuschlag und Anpassungen aufgrund der

Fall-Zusammensetzung und aufgrund von regionalen Lohnindizes enthielt. Der Arzneimittelzuschlag wurde mit dem sogenannten „Medicare Prescription Drug, Improvement and Modernization Act of 2003“-Gesetz (MMA) eingeführt, um die Differenz zwischen der Medicare-Erstattung für separat abrechenbare Arzneimittel vor Einführung des MMA und dem im MMA vorgeschriebenen neuen, auf dem durchschnittlichen Verkaufspreis basierenden Erstattungssystem zu berücksichtigen.

Für das Kalenderjahr 2010 haben die Centers for Medicare and Medicaid Services (CMS) den Arzneimittelzuschlag für das Kalenderjahr 2009 unverändert in Höhe von 20,33 US \$ je Behandlung übernommen, während der Basisanteil des Erstattungssatzes wie vom „Medicare Improvements for Patients and Providers Act of 2008“-Gesetz (MIPPA) vorgeschrieben um 1 % erhöht wurde. Daher hat sich der in Dollar konstant gebliebene Arzneimittelzuschlag 2010 auf 15 % der gesamten Erstattung je Behandlung verringert. 2011 wird sich der Arzneimittelzuschlag auf 14,7 % verringern. Anders als bei vielen anderen Medicare-Programmen unterlag der Basisanteil des Erstattungssatzes in der Vergangenheit keiner automatischen jährlichen Anpassung. Da keine entsprechende Gesetzesänderung vorgenommen wurde, blieb dieser Teil der Gesamtvergütung entsprechend unverändert. Der Kongress hat mit dem MIPPA den Basisanteil des Erstattungssatzes für 2010 um 1 % erhöht. Des Weiteren hat der Kongress eine Klausel eliminiert, nach der in der Vergangenheit an Krankenhäuser angeschlossene Einrichtungen etwas höhere Vergütungen erhielten als unabhängige (oder freistehende) Kliniken. Für 2010 betrug der Basis-Erstattungssatz sowohl für unabhängige als auch für an Krankenhäuser angeschlossene Einrichtungen 135,15 US \$ und lag damit um 1 % höher als im Jahr 2009. Die CMS haben die lohnindexbasierte Anpassung für Dialyseeinrichtungen aktualisiert, die sich 2008 zu 25 % aus einer alten – auf den statistischen Ballungsgebieten (MSA – metropolitan statistical area) beruhenden – Anpassung und zu 75 % aus einer neuen – auf den statistischen Kerngebieten (CBSA – core-based statistical area) basierenden – Anpassung berechnete. 2009 haben die CMS den Übergang von der MSA Definition auf die CBSA Definition abgeschlossen, so dass die Zahlungen an Einrichtungen nunmehr auf dem CBSA-Satz basieren. Für 2010 haben die CMS die Untergrenze für den Lohnindex von 0,70 auf 0,65 herabgesetzt.

Bis zum 1. Januar 2011 waren bestimmte andere Artikel und Dienstleistungen, die die Gesellschaft in ihren Dialysezentren bereitstellte bzw. erbrachte, im Erstattungssatz enthalten und wurden von Medicare separat erstattet. Zu den Wesentlichen gehörten Medikamente wie blutbildungsanregende Substanzen (erythropoietin-stimulating agents, ESA), Vitamin-D- und Eisen-Präparate, die mit 106 % des vom Hersteller an die CMS gemeldeten durchschnittlichen Verkaufspreises erstattet wurden. Produkte und Nebendienstleistungen für Patienten mit terminaler Niereninsuffizienz, die ihre Dialysebehandlungen zu Hause durchführen, wurden ebenfalls separat erstattet. Die Erstattungsstruktur hierfür war mit dem Erstattungssatz für Behandlungen in Dialysezentren vergleichbar.

Mit der Einführung des MIPPA in 2008 hat der Kongress die Entwicklung eines Pauschalvergütungssystems (PVS) bei terminaler Niereninsuffizienz vorgeschrieben, das für ab dem 1. Januar 2011 erbrachte Dienstleistungen gültig sein soll. Am 26. Juli 2010 haben die CMS endgültige Vorschriften erlassen, mit denen nach den Maßgaben des MIPPA ein Pauschalvergütungssystem (PVS) mit Anpassungen aufgrund von Fall-Zusammensetzungen für Dialysezentren für die Behandlung von terminaler Niereninsuffizienz eingeführt wird. Mit dem PVS nehmen die CMS die Erstattungen an die Dialysezentren mit einer Zahlung pro Dialysebehandlung vor, und damit auch für (i) alle Produkte und Dienstleistungen, die im Erstattungssatz enthalten waren, (ii) oral zu verabreichende Vitamin-D-Präparate und oral zu verabreichendes Levocarnitin (ein Aminosäurederivat) sowie alle in der Vergangenheit nach Part B des Medicare-Programms separat erstattete und an Patienten mit terminaler Niereninsuffizienz verabreichte blutbildungsanregende Substanzen sowie sonstige Medikamente (mit Ausnahme von Impfungen), (iii) die meisten diagnostischen Labortests und (iv) sonstige zur Behandlung von terminaler Niereninsuffizienz an Patienten erbrachte Dienstleistungen und gelieferte Produkte. Medikamente zur Behandlung von terminaler Niereninsuffizienz, die nur in oral zu verabreichender Form vorliegen, werden im Rahmen des PVS ab Januar 2014 mit einem angepassten Vergütungsbetrag erstattet, der



vom Gesundheitsministerium unter Berücksichtigung der in den Dialysezentren für die Verabreichung dieser Medikamente zusätzlich anfallenden Kosten festgelegt wird. Der anfängliche pvs Basis-Erstattungssatz ist auf 229,63 US \$ je Dialysebehandlung festgesetzt. Dies entspricht 98 % der geschätzten nach dem derzeitigen Erstattungssystem berechneten Kosten des Medicare-Programms für Dialyседienstleistungen für 2011. Dieser Basis-Erstattungssatz ist Anpassungen aufgrund der Fall-Zusammensetzung unterworfen, die Merkmale der einzelnen Patienten (z.B. Alter, Größe der Körperoberfläche, Körpermassenzahl, Länge der Dialysebehandlung) sowie Sterblichkeitszusammenhänge widerspiegeln. Außerdem werden Anpassungen aufgrund von (i) bestimmten Einzelfällen von Patienten mit extrem hohen Kosten aufgrund von außergewöhnlichen medizinisch notwendigen Versorgungserfordernissen, (ii) unverhältnismäßig hohen Kosten von Kliniken mit geringen Fallzahlen im Vergleich zu anderen Kliniken, (iii) der Durchführung von Heimdialyses Schulungen, (iv) Lohn- und Lohnnebenkosten in der Region, in der der Dienstleister angesiedelt ist und (v) dem sog. Übergangsfaktor (Transition-Adjustor) vorgenommen.

Ab 2012 wird der Erstattungsbetrag erstmalig jährlichen Anpassungen unterliegen, die auf dem Anstieg der Kosten eines „Warenkorbs“ aus bestimmten Produkten und Dienstleistungen des Gesundheitswesens abzüglich einer Produktivitätsanpassung beruhen. Die Qualitätsstandards des pvs, bei denen der Fokus im ersten Jahr auf den Bereichen Anämie-Management und Hämodialyse-Adäquanz liegt, werden ab dem 1. Januar 2012 dem leistungsorientierten Erstattungssystem zugrunde liegen (sogenanntes Qualitätssteigerungsprogramm, qsp). Für Dialysekliniken, die die festgelegten Qualitätsstandards nicht erreichen, werden die Erstattungen um bis zu 2 % gekürzt. Diese Qualitätsstandards wurden auf der Grundlage des Jahres 2010 als erstem Leistungszeitraum ermittelt.

Das pvs wird phasenweise über einen Zeitraum von vier Jahren eingeführt, so dass die Implementierung für alle Dialysezentren zum 1. Januar 2014 abgeschlossen sein wird. Dienstleister konnten sich jedoch im November 2010 freiwillig für eine volle Umstellung auf das neue System ab Januar 2011 entscheiden.

Aufgrund der oben genannten Maßnahmen der cms und basierend auf der Einschätzung durch die cms geht die Gesellschaft davon aus, dass das pvs zu geringeren durchschnittlichen Erstattungssätzen führt. Dennoch haben fast alle us-amerikanischen Kliniken der Gesellschaft sich entschieden, ab dem 1. Januar 2011 ohne Einschränkungen dem pvs zu unterliegen. Die Pläne der Gesellschaft, die Auswirkungen der Maßnahmen der cms zu begrenzen, umfassen zwei Maßnahmen. Erstens arbeitet die Gesellschaft mit anderen Anbietern, den cms und dem us-Kongress an einer Überarbeitung der Berechnung des Übergangsfaktors für 2011 zu ihren Gunsten. Zweitens arbeitet die Gesellschaft mit Klinikleitungen und behandelnden Ärzten an einer Änderung der Abläufe bei der Behandlung der Patienten und verhandelt über Kosteneinsparungen beim Arzneimittelkauf. Abschließend führt die Gesellschaft mit dem Ziel, Effizienzsteigerungen und verbesserte Patientenbehandlungserfolge zu erreichen, neue Initiativen zur Verbesserung der Patientenversorgung bei Dialysebeginn, zur Steigerung des Anteils der Heimdialysepatienten und zur Generierung von weiteren Kosteneinsparungen in ihren Kliniken ein. Die Gesellschaft überprüft derzeit die Auswirkungen des pvs und des oben genannten Maßnahmenplans auf ihr Geschäft.

Das „Patient Protection and Affordable Care Act“-Gesetz wurde in den USA am 23. März 2010 verabschiedet und danach vom „Health Care and Educational Affordability Reconciliation Act“-Gesetz geändert (geändertes Gesetz im Folgenden ACA). Das ACA wird weitreichende Reformen des Gesundheitssystems einführen, einschließlich (i) Bestimmungen, die allen Amerikanern den Zugang zu einer erschwinglichen Krankenversicherung ermöglichen, (ii) der Ausweitung des Medicaid-Programms, (iii) einer ab 2011 von Arzneimittelfirmen zu zahlenden und anhand des Absatzes von Marken-Medikamenten an staatliche Gesundheitsprogramme errechneten Branchenabgabe, (iv) einer Umsatzsteuer in Höhe von 2,3 % auf Umsätze der Hersteller mit medizinischen Geräten ab 2013, (v) Erhöhungen der Medicare-Rabatte für verschreibungspflichtige Medikamente zum 1. Januar 2010, (vi) Reformen des privaten Versicherungsmarktes zum Schutze der

Verbraucher, wie z.B. Verbote von Lebens- und Jahresobergrenzen, Abdeckung bestehender Erkrankungen sowie Begrenzung von Verwaltungskosten und Wartezeiten, (vii) Bestimmungen zur Förderung der integrierten Gesundheitsversorgung, Effizienz und Abstimmung zwischen Gesundheitsdienstleistern sowie (viii) Bestimmungen zur Verringerung von Verschwendung und Betrug bei Gesundheitsprogrammen. Die im ACA enthaltene Umsatzsteuer auf medizinische Geräte, die Erhöhungen der Medicaid-Rabatte für Medikamente und die jährliche Abgabe der pharmazeutischen Industrie wird sich negativ auf das Ergebnis und den Cash Flow des Produktgeschäftes der Gesellschaft auswirken. Die Gesellschaft erwartet, dass sich die Vorschriften des ACA zur integrierten Gesundheitsversorgung und zum Verbraucherschutz bei privaten Versicherungen leicht positiv auswirken werden.

Mit Wirkung zum 15. Februar 2011 hat die us-Veteranenbehörde (Department of Veterans Affairs, VA) Regelungen erlassen, die die Erstattungssätze für nicht auf Verträgen basierende Dialysedienstleistungen auf die Medicare-Erstattungssätze absenken. Aufgrund der Verabschiedung dieser neuen Regelungen erwartet die Gesellschaft Schwankungen in ihren Gesamt-VA-Erstattungssätzen sowohl für auf Verträgen basierende als auch für nicht auf Verträgen basierende Dienstleistungen. Zusätzlich kann es zu einer Verringerung der Anzahl der in den Kliniken der Gesellschaft behandelten VA-Patienten kommen.

Die Geschäftstätigkeit der Gesellschaft ist in drei operativen Segmenten organisiert: Nordamerika, International und Asien-Pazifik. Die Gesellschaft hat die operativen Segmente International und Asien-Pazifik für Berichtszwecke zum Segment „International“ zusammengefasst. Diese Zusammenfassung erfolgte aufgrund der Ähnlichkeit der in den beiden Segmenten vorherrschenden wirtschaftlichen Gegebenheiten. Die Ähnlichkeit bezieht sich unter anderem auf die erbrachten Dienstleistungen, die vertriebenen Produkte, die Art der Patientenstrukturen, die Vertriebsmethoden für Produkte und Dienstleistungen sowie das wirtschaftliche Umfeld. Die für die Rentabilität und den Cash Flow aller Bereiche eines Segments zuständigen Mitglieder des Vorstands der persönlich haftenden Gesellschafterin überwachen das Management des jeweiligen Segments. Die Rechnungslegungsgrundsätze der operativen Segmente sind die gleichen wie für die nach den in den USA allgemein anerkannten Grundsätzen der Rechnungslegung (U.S. GAAP) aufgestellten Konzernabschlüsse der Gesellschaft. Der Vorstand beurteilt die Segmente anhand einer Zielgröße, die so gewählt ist, dass sie alle Aufwendungen und Erträge beinhaltet, die im Entscheidungsbereich der Segmente liegen.

Das operative Ergebnis ist aus Sicht des Vorstands der Gesellschaft der Maßstab, der am besten dazu geeignet ist, die Ertragskraft des Unternehmens zu beurteilen. Die Finanzierung ist eine zentrale Aufgabe, die nicht dem Einfluss der Segmente unterliegt. Daher sind Zinsaufwendungen für die Finanzierung keine Zielgröße für die Segmente. Auch die Steueraufwendungen unterliegen nach Ansicht der Gesellschaft nicht dem Einfluss der Segmente. Die Kosten der Zentralbereiche, die im Wesentlichen aus bestimmten Aufwendungen der Konzernzentrale in den Bereichen Rechnungswesen und Finanzen, Beratungsleistungen etc. bestehen, werden ebenfalls nicht berücksichtigt, da es sich nach Ansicht der Gesellschaft auch hier um Kosten handelt, die nicht der Kontrolle der einzelnen Segmente unterliegen. Zudem wurden bestimmte Akquisitionen und immaterielle Vermögenswerte nicht den Geschäftssegmenten zugeordnet, sondern unter den Zentralbereichen ausgewiesen. Daher werden diese Komponenten nicht in die Analyse der Segmentergebnisse einbezogen, sondern in der folgenden Darstellung der operativen Entwicklung des Konzerns erläutert.

## Kapitel 4.3

## OPERATIVE ENTWICKLUNGEN

Die folgende Tabelle fasst den finanziellen Erfolg und ausgewählte operative Entwicklungen der Gesellschaft nach wesentlichen Geschäftssegmenten für die angegebenen Geschäftsjahre zusammen. Umsätze zwischen den Segmenten betreffen hauptsächlich den Verkauf von medizinischen Geräten und Verbrauchsmaterialien vom Segment International an das Segment Nordamerika. Die Informationen sind nach dem Managementansatz aufbereitet, d.h. in der gleichen Art und Weise und auf der gleichen Basis, mit der das Management intern finanzielle Informationen zur Unterstützung von operativen Entscheidungen und zur Beurteilung der Leistung der Geschäftsführung verarbeitet.

| SEGMENTDATEN                                                                                    |               |               |
|-------------------------------------------------------------------------------------------------|---------------|---------------|
| Tabelle 4.3.1                                                                                   |               |               |
| in MIO US \$                                                                                    |               |               |
|                                                                                                 | 2010          | 2009          |
| <b>Umsatzerlöse</b>                                                                             |               |               |
| Nordamerika                                                                                     | 8.135         | 7.615         |
| International                                                                                   | 4.012         | 3.713         |
| <b>GESAMT</b>                                                                                   | <b>12.147</b> | <b>11.328</b> |
| <b>Umsätze zwischen den Segmenten</b>                                                           |               |               |
| Nordamerika                                                                                     | 5             | 3             |
| International                                                                                   | 89            | 78            |
| <b>GESAMT</b>                                                                                   | <b>94</b>     | <b>81</b>     |
| <b>Umsatzerlöse mit Dritten</b>                                                                 |               |               |
| Nordamerika                                                                                     | 8.130         | 7.612         |
| International                                                                                   | 3.923         | 3.635         |
| <b>GESAMT</b>                                                                                   | <b>12.053</b> | <b>11.247</b> |
| <b>Abschreibungen</b>                                                                           |               |               |
| Nordamerika                                                                                     | 287           | 265           |
| International                                                                                   | 207           | 183           |
| Zentralbereiche                                                                                 | 9             | 9             |
| <b>GESAMT</b>                                                                                   | <b>503</b>    | <b>457</b>    |
| <b>Operatives Ergebnis (EBIT)</b>                                                               |               |               |
| Nordamerika                                                                                     | 1.386         | 1.250         |
| International                                                                                   | 678           | 637           |
| Zentralbereiche                                                                                 | (140)         | (131)         |
| <b>GESAMT</b>                                                                                   | <b>1.924</b>  | <b>1.756</b>  |
| Zinserträge                                                                                     | 25            | 21            |
| Zinsaufwendungen                                                                                | (305)         | (321)         |
| Ertragsteuern                                                                                   | (578)         | (491)         |
| Ergebnis nach Ertragsteuern                                                                     | 1.066         | 965           |
| Abzüglich auf andere Gesellschafter entfallendes Ergebnis                                       | 87            | 74            |
| <b>KONZERNERGEBNIS (ERGEBNIS, DAS AUF DIE ANTEILSEIGNER DER FMC AG &amp; CO. KGAA ENTFÄLLT)</b> | <b>979</b>    | <b>891</b>    |

## KERNPUNKTE

Der Umsatz stieg um 7 % auf 12.053 MIO US \$ (7 % zu konstanten Wechselkursen), hauptsächlich zurückzuführen auf ein organische Wachstum von 6 %. Das operative Ergebnis stieg um 10 %. Das Konzernergebnis (Ergebnis, das auf die Anteilseigner der FMC AG & CO. KGAA entfällt) stieg um 10 %.

## KONZERNABSCHLUSS

### ZENTRALE INDIKATOREN FÜR DEN KONZERNABSCHLUSS

Tabelle 4.3.2

|                                                                                                      | 2010       | 2009       | Veränderung<br>wie berichtet | Veränderung zu<br>konstanten<br>Wechselkursen |
|------------------------------------------------------------------------------------------------------|------------|------------|------------------------------|-----------------------------------------------|
| Anzahl der Behandlungen                                                                              | 31.670.702 | 29.425.758 | 8 %                          | –                                             |
| Organisches Behandlungswachstum                                                                      | 4,6 %      | 4,1 %      | –                            | –                                             |
| Umsatz in MIO US \$                                                                                  | 12.053     | 11.247     | 7 %                          | 7 %                                           |
| Bruttoergebnis in % vom Umsatz                                                                       | 34,4 %     | 34,1 %     | –                            | –                                             |
| Vertriebs- und allgemeine Verwaltungskosten in % vom Umsatz                                          | 17,6 %     | 17,6 %     | –                            | –                                             |
| Konzernergebnis (Ergebnis, das auf die Anteilseigner der<br>FMC AG & CO. KGAA entfällt) in MIO US \$ | 979        | 891        | 10 %                         | –                                             |

Die Behandlungen stiegen im Geschäftsjahr 2010 gegenüber dem Vorjahr um 8 % an. Hierzu trugen das organische Behandlungswachstum 5 % und Akquisitionen 4 % bei. Gegenläufig wirkte sich der Effekt von Klinikverkäufen und -schließungen (1 %) aus.

Am 31. Dezember 2010 besaß, betrieb oder leitete die Gesellschaft (ohne von der Gesellschaft geleitete, aber nicht konsolidierte Kliniken in den USA) 2.757 Kliniken im Vergleich zu 2.553 Kliniken am 31. Dezember 2009. Im Geschäftsjahr 2010 übernahm die Gesellschaft 168 Kliniken, eröffnete 90 Kliniken und schloss oder verkaufte 54 Kliniken. Die Anzahl der behandelten Patienten in Kliniken, die die Gesellschaft besitzt, betreibt oder leitet (ohne von der Gesellschaft geleitete, aber nicht konsolidierte Kliniken in den USA), stieg um 10 % von 195.651 am 31. Dezember 2009 auf 214.648 am 31. Dezember 2010. Einschließlich der 30 Kliniken, die die Gesellschaft in den USA leitet, aber nicht konsolidiert, betrug die Gesamtanzahl der Patienten 216.286.

Die Umsätze stiegen im Geschäftsjahr 2010 gegenüber dem Geschäftsjahr 2009 um 7 % (7 % zu konstanten Wechselkursen) aufgrund des Umsatzwachstums sowohl aus Dialyседienstleistungen als auch aus Dialyseprodukten.

Der Umsatz aus Dialyседienstleistungen erhöhte sich um 9 % (9 % zu konstanten Wechselkursen) von 8.350 MIO US \$ im Geschäftsjahr 2009 auf 9.070 MIO US \$ im Geschäftsjahr 2010. Der Anstieg ist hauptsächlich zurückzuführen auf ein organisches Wachstum von 5 %, dem Beitrag aus Akquisitionen von 3 % und einer Steigerung der Erlöse je Behandlung von 2 %. Dies wurde teilweise ausgeglichen durch Klinikverkäufe und -schließungen (1 %).

Der Umsatz aus dem Vertrieb von Dialyseprodukten stieg von 2.897 MIO US \$ im Geschäftsjahr 2009 um 3 % (3 % zu konstanten Wechselkursen) auf 2.983 MIO US \$ im Geschäftsjahr 2010. Die Erhöhung ist zurückzuführen auf gestiegene Umsätze mit Hämodialyseprodukten, insbesondere Dialysatoren, Lösungen und Konzentraten,

Blutschläuchen und Produkten für die Akutdialyse sowie für Dialysegeräte. Gegenläufig wirkten sich sinkende Umsätze von Arzneimitteln zur Behandlung von Nierenerkrankungen aus.

Der Anstieg der Bruttoergebnismarge ergab sich aus einem Anstieg der Bruttoergebnismarge in Nordamerika, teilweise ausgeglichen durch einen Rückgang im Segment International. Der Anstieg in Nordamerika beruhte auf gestiegenen Erlösen je Behandlung und günstigeren Kosten für Arzneimittel. Die Verringerung im Segment International ist auf die positive Auswirkung aus der im Vorjahreszeitraum 2009 vorgenommenen Anpassung der Bewertung der Vorräte und geringere Bruttoergebnismargen kürzlich erworbener Kliniken zurückzuführen. Diese Effekte wurden teilweise durch positive Auswirkungen von Wechselkursänderungen in Europa und Asien Pazifik und Wachstum im chinesischen Produktgeschäft ausgeglichen.

Die Vertriebskosten und die allgemeinen Verwaltungskosten stiegen von 1.982 MIO US \$ im Geschäftsjahr 2009 auf 2.124 MIO US \$ im Geschäftsjahr 2010. In Prozent vom Umsatz blieben die Vertriebs- und allgemeinen Verwaltungskosten im Geschäftsjahr 2010 unverändert bei 17,6 % im Vergleich zum Geschäftsjahr 2009. Dies ist auf einen Anstieg in Nordamerika zurückzuführen, der durch einen Rückgang im Segment International ausgeglichen wurde. Der Anstieg in Nordamerika resultierte aus einem höheren Personalaufwand und Spenden an us-amerikanische Wohlfahrtsverbände zu Gunsten von Patienten mit terminaler Niereninsuffizienz, teilweise ausgeglichen durch Größenvorteile. Der Rückgang im Segment International beruht im Wesentlichen auf Größenvorteilen und stärkerem Wachstum im Bereich Dialysesdienstleistungen, der sich durch niedrigere Vertriebs- und allgemeine Verwaltungskosten in Prozent vom Umsatz auszeichnet. Dies wurde teilweise ausgeglichen durch eine einmalige Neubewertung der Bilanz der in Venezuela operierenden Tochtergesellschaften der Gesellschaft, die durch die Abwertung des venezolanischen Bolivar in Folge einer Hochinflation notwendig geworden war. Die Aufwendungen für Wertberichtigungen auf Forderungen betrugen im Geschäftsjahr 2010 218 MIO US \$ gegenüber 210 MIO US \$ im Geschäftsjahr 2009 und entsprachen damit 1,8 % bzw. 1,9 % vom Umsatz im Geschäftsjahr 2010 bzw. 2009.

Die Forschungs- und Entwicklungskosten stiegen von 94 MIO US \$ im Geschäftsjahr 2009 auf 97 MIO US \$ im Geschäftsjahr 2010.

Das operative Ergebnis erhöhte sich von 1.756 MIO US \$ im Geschäftsjahr 2009 auf 1.924 MIO US \$ im Geschäftsjahr 2010. In Prozent vom Umsatz (operative Marge) stieg es von 15,6 % im Geschäftsjahr 2009 auf 16,0 % für das Geschäftsjahr 2010 aufgrund des wie vorstehend beschriebenen Anstiegs der Bruttoergebnismargen.

Der Zinsaufwand sank um 5 % von 321 MIO US \$ auf 305 MIO US \$ für das Geschäftsjahr 2009 und 2010, hauptsächlich aufgrund gesunkener kurzfristiger Zinssätze.

Die Ertragsteuern stiegen von 491 MIO US \$ im Geschäftsjahr 2009 auf 578 MIO US \$ im Geschäftsjahr 2010. Der effektive Steuersatz erhöhte sich von 33,7 % im Geschäftsjahr 2009 auf 35,2 % für das Geschäftsjahr 2010. Wesentliche Gründe für die Erhöhung waren höhere unrealisierte Steuervorteile, niedrigere Steuereffekte aus internen Finanzierungen und die Auswirkung der nicht abzugsfähigen Verluste in Venezuela als Ergebnis der inflationsbereinigten Rechnungslegung. Diese Effekte wurden zum Teil durch die Auflösung von Wertberichtigungen auf aktive latente Steuern für steuerliche Verlustvorträge aufgrund von Anpassungen in der Geschäftstätigkeit der entsprechenden Gesellschaften ausgeglichen.

Das Ergebnis, das auf die Anteilseigner der FMC AG & CO. KGAA entfällt, erhöhte sich von 891 MIO US \$ für das Geschäftsjahr 2009 auf 979 MIO US \$ für das Geschäftsjahr 2010. Der Anstieg ist auf die oben angeführten Gründe zurückzuführen.

Die Gesellschaft beschäftigte zum 31. Dezember 2010 73.452 Personen (ermittelt auf Vollzeitbeschäftigungsbasis) im Vergleich zu 67.988 Personen zum 31. Dezember 2009, ein Anstieg von 8 %, der hauptsächlich aus dem allgemeinen Wachstum der Geschäftsbereiche der Gesellschaft und Akquisitionen resultiert.

Die folgenden Erörterungen beziehen sich auf die operativen Segmente der Gesellschaft und auf die Kenngrößen, welche die Gesellschaft zur Führung dieser Segmente zu Grunde legt.

## SEGMENT NORDAMERIKA

### ZENTRALE INDIKATOREN FÜR DAS SEGMENT NORDAMERIKA

Tabelle 4.3.3

|                                  | 2010       | 2009       | Veränderung |
|----------------------------------|------------|------------|-------------|
| Anzahl der Behandlungen          | 20.850.242 | 19.867.465 | 5 %         |
| Organisches Behandlungswachstum  | 4,3 %      | 3,5 %      | –           |
| Umsatz in MIO US \$              | 8.130      | 7.612      | 7 %         |
| Abschreibungen in MIO US \$      | 287        | 265        | 8 %         |
| Operatives Ergebnis in MIO US \$ | 1.386      | 1.250      | 11 %        |
| Operative Marge                  | 17 %       | 16,4 %     | –           |

### Umsatzerlöse

Die Behandlungen stiegen im Geschäftsjahr 2010 um 5 % gegenüber dem Geschäftsjahr 2009, hauptsächlich aufgrund des organischen Behandlungswachstums von 4 % und des Beitrags aus Akquisitionen von 2 %, teilweise ausgeglichen durch Klinikverkäufe und -schließungen (1 %). Zum 31. Dezember 2010 wurden 137.689 Patienten (4 % mehr als im gleichen Vorjahreszeitraum) in den 1.823 Kliniken behandelt, die die Gesellschaft im Segment Nordamerika besitzt oder betreibt, verglichen mit 132.262 behandelten Patienten in 1.784 Kliniken im Geschäftsjahr 2009. Der Durchschnittserlös je Behandlung in Nordamerika betrug im Geschäftsjahr 2010 349 US \$ und 341 US \$ im Geschäftsjahr 2009. In den USA betrug der Durchschnittserlös je Behandlung 356 US \$ für das Geschäftsjahr 2010 und 347 US \$ für das Geschäftsjahr 2009. Der Anstieg beruhte im Wesentlichen auf einer Steigerung der Umsätze mit privaten Versicherern und einer Verbesserung im Mix der Versicherer. Zusätzlich wurde der Medicare-Erstattungssatz für 2010 um 1 % erhöht.

Der Umsatz des Segments Nordamerika verbesserte sich im Geschäftsjahr 2010 aufgrund eines Anstiegs der Umsätze im Geschäftszweig Dialysedienstleistungen um 7 % von 6.794 MIO US \$ im Geschäftsjahr 2009 auf 7.303 MIO US \$ und der Umsätze mit Dialyseprodukten um 1 % von 818 MIO US \$ im Geschäftsjahr 2009 auf 827 MIO US \$.

Der Anstieg der Umsätze aus Dialysedienstleistungen wurde getragen von einem organischen Behandlungswachstum von 4 %, den um 3 % gestiegenen Erlösen je Behandlung, und einem Beitrag aus Akquisitionen von 1 %. Dies wurde teilweise ausgeglichen durch Klinikverkäufe und -schließungen (1 %). Die Verabreichung von EPO betrug im Geschäftsjahr 2010 bzw. 2009 etwa 19 % bzw. 21 % der Gesamtumsätze aus Dialysedienstleistungen im Segment Nordamerika.

Das Umsatzwachstum aus dem Vertrieb von Dialyseprodukten war hauptsächlich auf einen gestiegenen Absatz von Blutschläuchen, Lösungen und Konzentraten sowie von Dialysegeräten zurückzuführen. Dies wurde teilweise ausgeglichen durch einen Rückgang der Umsätze von Arzneimitteln zur Behandlung von Nierenerkrankungen.

#### Operatives Ergebnis

Das operative Ergebnis verbesserte sich von 1.250 MIO US \$ im Geschäftsjahr 2009 auf 1.386 MIO US \$ im gleichen Zeitraum 2010. Die operative Marge stieg von 16,4 % im Geschäftsjahr 2009 auf 17,0 % im Geschäftsjahr 2010, im Wesentlichen aufgrund von gestiegenen Erlösen je Behandlung und niedrigeren Kosten für Arzneimittel, teilweise ausgeglichen durch den Anstieg der Kosten je Behandlung von 283 US \$ im Geschäftsjahr 2009 auf 285 US \$ im Geschäftsjahr 2010. Der Anstieg der Kosten je Behandlung ist auf einen höheren Personalaufwand und Spenden an us-amerikanische Wohlfahrtsverbände zu Gunsten von Patienten mit terminaler Niereninsuffizienz zurückzuführen.

#### SEGMENT INTERNATIONAL

##### ZENTRALE INDIKATOREN FÜR DAS SEGMENT INTERNATIONAL

Tabelle 4.3.4

|                                  | 2010       | 2009      | Veränderung<br>wie berichtet | Veränderung zu<br>konstanten<br>Wechselkursen |
|----------------------------------|------------|-----------|------------------------------|-----------------------------------------------|
| Anzahl der Behandlungen          | 10.820.460 | 9.558.293 | 13 %                         | –                                             |
| Organisches Behandlungswachstum  | 5,1 %      | 5,3 %     | –                            | –                                             |
| Umsatz in MIO US \$              | 3.923      | 3.635     | 8 %                          | 8 %                                           |
| Abschreibungen in MIO US \$      | 207        | 183       | 13 %                         | –                                             |
| Operatives Ergebnis in MIO US \$ | 678        | 637       | 6 %                          | –                                             |
| Operative Marge                  | 17,3 %     | 17,5 %    | –                            | –                                             |



### Umsatzerlöse

Die Behandlungen stiegen im Geschäftsjahr 2010 um 13 % gegenüber dem Geschäftsjahr 2009, hauptsächlich aufgrund des Beitrags aus Akquisitionen von 9 % und des organischen Wachstums von 5 %, teilweise ausgeglichen durch Klinikverkäufe und -schließungen (1 %). Zum 31. Dezember 2010 wurden 76.959 Patienten (21 % mehr als im gleichen Vorjahreszeitraum) in den 934 Kliniken behandelt, die die Gesellschaft im Segment International besitzt, betreibt oder leitet, verglichen mit 63.389 behandelten Patienten in 769 Kliniken zum 31. Dezember 2009. Der Durchschnittserlös je Behandlung blieb konstant bei 163 US \$ im Geschäftsjahr 2009 und 2010.

Die Umsätze des Segments International stiegen im Geschäftsjahr 2010 um 8 % (8 % zu konstanten Wechselkursen) im Vergleich zum Geschäftsjahr 2009 aufgrund des Umsatzwachstums sowohl bei Dialyседienstleistungen als auch bei Dialyseprodukten. Der Anstieg ergab sich aus einem organischen Umsatzwachstum im Geschäftsjahr 2010 von 5 % und aus Akquisitionen in Höhe von 4 %. Dies wurde teilweise ausgeglichen durch Klinikverkäufe und -schließungen (1 %).

Einschließlich der Akquisitionseffekte stieg der Umsatz in der Region Europa um 3 % (6 % zu konstanten Wechselkursen), in der Region Lateinamerika um 16 % (9 % zu konstanten Wechselkursen) und in der Region Asien Pazifik um 22 % (15 % zu konstanten Wechselkursen) an.

Im Segment International verbesserte sich der Gesamtumsatz aus Dialyседienstleistungen um 14 % (13 % zu konstanten Wechselkursen) von 1.556 MIO US \$ im Geschäftsjahr 2009 auf 1.767 MIO US \$ im Geschäftsjahr 2010. Die Steigerung ist zu 8 % die Folge eines Zuwachses aufgrund von Akquisitionen, zu 5 % des organischen Behandlungswachstums und zu 1 % der positiven Effekte der gestiegenen Erlöse je Behandlung sowie zu 1 % einem positiven Währungsumrechnungseffekt. Diese Effekte wurden teilweise ausgeglichen durch Klinikverkäufe und -schließungen (1 %).

Der Gesamtumsatz aus Dialyseprodukten verbesserte sich im Verlauf des Geschäftsjahres 2010 um 4 % (4 % zu konstanten Wechselkursen) von 2.079 MIO US \$ im Geschäftsjahr 2009 auf 2.156 MIO US \$ im Geschäftsjahr 2010. Das Umsatzwachstum aus dem Vertrieb von Dialyseprodukten ist auf gestiegene Umsätze mit Dialysatoren, Lösungen und Konzentraten für die Hämodialyse, Dialysegeräte sowie Blutschläuchen und Produkten für die Akutdialyse zurückzuführen. Gegenläufig wirkten sich sinkende Umsätze von Arzneimitteln aus.

### Operatives Ergebnis

Das operative Ergebnis stieg um 6 % von 637 MIO US \$ im Geschäftsjahr 2009 auf 678 MIO US \$ im Geschäftsjahr 2010. Die operative Marge sank von 17,5 % für das Jahr 2009 auf 17,3 % für das Geschäftsjahr 2010 aufgrund der positiven Auswirkung aus der im Vorjahreszeitraum 2009 vorgenommenen Anpassung der Vorräte und geringeren Margen kürzlich erworbener Kliniken sowie aufgrund der einmaligen Neubewertung der Bilanz der in Venezuela operierenden Tochtergesellschaften der Gesellschaft, infolge der Hochinflation. Dies wurde teilweise durch Größenvorteile, Gewinne aus Wechselkursänderungen in Europa und Asien-Pazifik sowie Wachstum im chinesischen Produktgeschäft ausgeglichen.

## LIQUIDITÄT UND MITTELHERKUNFT

Wesentliche Quellen der Liquidität waren in der Vergangenheit der Cash Flow aus laufender Geschäftstätigkeit, Darlehen von Dritten und von verbundenen Unternehmen sowie die Ausgabe von Aktien und Anleihen. Die Gesellschaft benötigt diese Liquidität vornehmlich zur Finanzierung des Nettoumlaufvermögens, zur Finanzierung von Akquisitionen und der Entwicklung von eigenständigen Dialysezentren, zur Anschaffung von Ausrüstung für bestehende oder neue Dialysezentren und Produktionsstätten, zur Rückzahlung von Finanzverbindlichkeiten und für Dividendenausschüttungen.

Zum 31. Dezember 2010 verfügte die Gesellschaft über liquide Mittel in Höhe von 523 MIO US\$. Für Informationen über die Nutzung und Verfügbarkeit der Kreditvereinbarung 2006 der Gesellschaft — siehe Anmerkung 9.

### LAUFENDE GESCHÄFTSTÄTIGKEIT

Die Gesellschaft hat für das Geschäftsjahr 2010 bzw. 2009 einen Cash Flow aus der laufenden Geschäftstätigkeit in Höhe von 1.368 MIO US\$ bzw. 1.339 MIO US\$ generiert. Der Cash Flow aus der laufenden Geschäftstätigkeit wird beeinflusst durch die Rentabilität des Geschäfts der Gesellschaft, die Entwicklung ihres Nettoumlaufvermögens, insbesondere des Forderungsbestands, und des Cash Flows aufgrund verschiedener Einzelsachverhalte (insbesondere Zahlungen aufgrund von nicht anerkannten steuerlichen Abzügen und Rechtsstreitigkeiten). Der Anstieg des Cash Flow des Jahres 2010 im Vergleich zu dem Cash Flow des Jahres 2009 ergab sich im Wesentlichen aus Verbesserungen des Nettoumlaufvermögens, inklusive gesunkener Lagerbestände, sowie einem gestiegenen Ergebnis. Diese Steigerungen wurden teilweise ausgeglichen durch höhere Ertragsteuerzahlungen. Zusätzlich entwickelten sich die Forderungslaufzeiten im Jahr 2010 im Vergleich zu 2009 ungünstig.

Die Rentabilität des Geschäfts der Gesellschaft hängt wesentlich von den Erstattungssätzen ab. Etwa 75 % der Umsätze der Gesellschaft entfallen auf Dialysebehandlungen, wobei ein erheblicher Anteil entweder von staatlichen Gesundheitsorganisationen oder von privaten Versicherungsgesellschaften erstattet wird. Im Geschäftsjahr 2010 resultierten etwa 32 % des Konzernumsatzes aus den Erstattungen von staatlichen US-Gesundheitsprogrammen wie Medicare und Medicaid. Gesetzesänderungen können sowohl die Erstattungssätze für einen erheblichen Teil der von der Gesellschaft erbrachten Dienstleistungen als auch den Umfang der Leistungen betreffen. Eine Senkung der Erstattungssätze oder eine Verringerung des Leistungsumfanges könnte wesentliche negative Auswirkungen auf das Geschäft, die Finanzlage und das operative Ergebnis der Gesellschaft haben und damit auf die Fähigkeit der Gesellschaft, Cash Flow zu erzeugen. In der Vergangenheit blieben die Erstattungssätze für Dialysebehandlungen im Allgemeinen stabil und die Gesellschaft erwartet dies nach der Einführung des neuen Pauschalvergütungssystems (PVS) in den USA im Jahr 2011 für die Behandlung von Patienten mit terminaler Niereninsuffizienz auch in den späteren Jahren. Das umfasst auch den Ausgleich von ungünstigen Änderungen der Erstattungssätze in gewissen Ländern durch günstige Änderungen in anderen Ländern — siehe „Überblick“.

Das Nettoumlaufvermögen betrug zum 31. Dezember 2010 1.363 MIO US\$, eine Verringerung gegenüber 2.118 MIO US\$ zum 31. Dezember 2009. Die Hauptursache bestand in der Umgliederung der genusscheinähnlichen Wertpapiere in kurzfristige Verbindlichkeiten, dem Anstieg der kurzfristigen Darlehen aus dem Forderungsverkaufsprogramm, dem Anstieg der Rückstellungen und sonstigen kurzfristigen Verbindlichkeiten sowie dem Anstieg von übernommenen kurzfristigen Schulden im Rahmen von Akquisitionen, teilweise ausgeglichen durch einen Anstieg sowohl der flüssigen Mittel, der Forderungen aus Lieferungen und Leistungen als auch der sonstigen kurzfristigen Vermögenswerte. Da die genusscheinähnlichen Wertpapiere der Gesellschaft am 15. Juni 2011 fällig werden, wurden im 2. Quartal 2010 626 MIO US\$ in die kurzfristigen Verbindlichkeiten umgegliedert. Zum 31. Dezember 2009 erfolgte der Ausweis mit 656 MIO US\$ unter den

langfristigen Verbindlichkeiten. Das Verhältnis von Umlaufvermögen zu kurzfristigen Verbindlichkeiten betrug zum 31. Dezember 2010 1,4.

Im Fokus der Finanzierungsaktivitäten der Gesellschaft steht die Vereinheitlichung des Ranges der Finanzierungsinstrumente und die Verlängerung der durchschnittlichen Laufzeiten der Finanzierungen. Außerdem ist in den nächsten Jahren die Beibehaltung von ausreichendem finanziellem Spielraum beabsichtigt. Im abgelaufenen Geschäftsjahr erfolgten langfristige Finanzierungen durch die Ausgabe einer vorrangigen Anleihe mit einem Nominalbetrag von 250 MIO € sowie durch die Erweiterung und Verlängerung der Kreditvereinbarung 2006. Mit den nur teilweise genutzten Kreditlinien sowie dem kürzlich erneuerten und von 650 MIO US \$ auf 700 MIO US \$ erhöhten Rahmen des Forderungsverkaufsprogramms verfügt die Gesellschaft über ausreichende finanzielle Ressourcen. Durch die Erlangung von zusätzlichen Finanzierungen wie zum Beispiel durch die Ausgabe von Anleihen in Höhe von 1.050 MIO US \$ am 3. Februar 2011 — siehe „Finanzierungstätigkeit“, soll der finanzielle Spielraum auch weiterhin aufrechterhalten werden. Hierbei wird eine Zielgröße von zugesicherten und nicht genutzten Kreditfazilitäten von mindestens 300 MIO US \$ bis 500 MIO US \$ angestrebt.

Der Cash Flow aus der laufenden Geschäftstätigkeit hängt auch von der Einziehung der Forderungen ab. Kunden und staatliche Einrichtungen haben im Allgemeinen unterschiedliche Forderungslaufzeiten. Eine Verlängerung dieser Forderungslaufzeiten könnte einen wesentlichen negativen Effekt auf die Fähigkeit der Gesellschaft zur Generierung von Cash Flow haben. Des Weiteren könnte die Gesellschaft bei der Durchsetzung und Einziehung der Forderungen auf Schwierigkeiten mit den Rechtssystemen einiger Länder stoßen. Der Forderungsbestand zum 31. Dezember 2010 bzw. 31. Dezember 2009 entsprach nach Wertberichtigungen etwa 76 bzw. 72 Nettotagesumsätzen.

Die folgende Tabelle stellt eine Übersicht über die Entwicklung der Forderungslaufzeiten nach operativen Segmenten dar:

| ENTWICKLUNG DER FORDERUNGSLAUFZEITEN |           |           |
|--------------------------------------|-----------|-----------|
| Tabelle 4.4.1                        |           |           |
| in Tagen, zum 31. Dezember           |           |           |
|                                      | 2010      | 2009      |
| Nordamerika                          | 54        | 52        |
| International                        | 116       | 110       |
| <b>GESAMT</b>                        | <b>76</b> | <b>72</b> |

Die Forderungslaufzeiten (DSO) im Segment Nordamerika entwickelten sich zwischen dem 31. Dezember 2009 und dem 31. Dezember 2010 auf anhaltend niedrigem Niveau. Die Erhöhung der Forderungslaufzeiten im Segment International spiegelt im Wesentlichen durchschnittliche Zahlungsverzögerungen bei staatlichen und privaten Stellen vor allem in Europa wider, die von der weltweiten Finanzmarktkrise betroffen sind. Da die Gesellschaft einen Großteil ihrer Erstattungen von staatlichen Gesundheitsorganisationen und privaten Versicherungsgesellschaften erhält, geht sie davon aus, dass die meisten ihrer Forderungen einbringlich sind, wenn auch in unmittelbarer Zukunft möglicherweise im Segment International langsamer, insbesondere in den weiterhin am stärksten von der globalen Finanzmarktkrise betroffenen Ländern. Zins- und Ertragsteuerzahlungen haben ebenfalls einen wesentlichen Einfluss auf den Cash Flow aus der laufenden Geschäftstätigkeit. Die Gesellschaft geht für 2011 von einem leichten Anstieg der DSO im Segment Nordamerika aus. Der Grund für den Anstieg liegt in der Einführung des pvs für die Behandlung von Patienten mit terminaler Niereninsuffizienz zum 1. Januar 2011 aufgrund des Koordinationsbedarfs des Versicherungsschutzes zwischen der us-amerikanischen Bundesregierung und den Regierungen der Bundesstaaten.

Die Gesellschaft hat mehrere steuerliche und andere Sachverhalte identifiziert, die ihren Cash Flow aus der laufenden Geschäftstätigkeit in unmittelbarer Zukunft wie folgt beeinflussen werden oder beeinflussen könnten:

Die Gesellschaft hat gegen die Versagung der Abzugsfähigkeit der von der Fresenius Medical Care Holdings, Inc. (FMCH) in den Steuererklärungen für Vorjahre der FMCH geltend gemachten zivilrechtlichen Vergleichszahlungen durch den Internal Revenue Service (IRS) Anträge auf Erstattung eingereicht. Aufgrund der von der Gesellschaft mit dem IRS geschlossenen Vergleichsvereinbarung hat die Gesellschaft im September 2008 eine Teilerstattung in Höhe von 37 Mio US \$, einschließlich Zinsen erhalten und sich das Recht bewahrt, die Erstattung aller anderen nicht anerkannten Abzüge auf dem Klagewege vor den us-Gerichten weiter zu verfolgen. Am 22. Dezember 2008 hat die Gesellschaft in dem Verfahren *Fresenius Medical Care Holdings, Inc. vs. United States* bei dem us-Bezirksgericht für den Bezirk von Massachusetts eine Klage auf vollständige Erstattung eingereicht. Am 24. Juni 2010 lehnte das Gericht den Antrag von FMCH auf ein Urteil im beschleunigten Verfahren ab und der Rechtsstreit wird vor Gericht weitergeführt.

Die Gesellschaft hat im Steuerjahr 1997 eine Abschreibung auf den Buchwert einer ihrer Tochtergesellschaften vorgenommen, deren steuerliche Anerkennung als Aufwand im Jahr 2003 im Rahmen der für die Jahre 1996 und 1997 durchgeführten Betriebsprüfung versagt wurde. Die Gesellschaft hat vor dem zuständigen deutschen Finanzgericht Klage erhoben, um die Entscheidung der Finanzbehörde anzufechten. Im Januar 2011 wurde ein Vergleich mit den Steuerbehörden erzielt, wonach die endgültige Veranlagung, Schätzungen zur Folge, günstiger ausfällt als der bisher berücksichtigte Steuervorteil. Der voraussichtlich zusätzliche Steuerertrag aus diesem Sachverhalt wird in 2011 erfasst.

Die steuerliche Betriebsprüfung der FMCH durch den IRS für die Jahre 2002 bis 2006 wurde nunmehr abgeschlossen. Der IRS hat die Abzugsfähigkeit für konzerninternes genussrechtsähnliches Kapital in diesem Prüfungszeitraum nicht anerkannt. Die Gesellschaft hat gegen die Nichtanerkennung der Abzüge Einspruch eingelegt und wird alle Rechtsmittel nutzen. Ein nachteiliger Ausgang bezüglich der Nichtanerkennung der Abzugsfähigkeit für konzerninternes genussrechtsähnliches Kapital könnte erhebliche negative Auswirkungen auf das Ergebnis sowie die Finanzlage der Gesellschaft haben. Zusätzlich schlug die IRS weitere Anpassungen vor, welche im Konzernabschluss Berücksichtigung fanden.

Die Gesellschaft unterliegt derzeit und in der Zukunft steuerlichen Betriebsprüfungen in den USA, in Deutschland sowie in weiteren Ländern. Die Gesellschaft hat im Zusammenhang mit einigen dieser Betriebsprüfungen, einschließlich der vorstehend beschriebenen, Mitteilungen über nachteilige Anpassungen und Nichtanerkennungen erhalten. Die Gesellschaft hat unter anderem Einsprüche gegen diese Festsetzungen eingelegt. Wenn die Einwände und Einsprüche der Gesellschaft nicht erfolgreich sein sollten, könnte die Gesellschaft gezwungen sein, zusätzliche Steuerzahlungen zu leisten, einschließlich Zahlungen an us-bundesstaatliche Behörden, die das Ergebnis der Anpassungen unserer Steuererklärungen in den USA sind. Im Hinblick auf andere mögliche Anpassungen und Versagungen in steuerlichen Angelegenheiten, die gegenwärtig untersucht werden und für die nur vorläufige Vereinbarungen getroffen wurden, wird nicht erwartet, dass eine nachteilige Entscheidung wesentliche Auswirkungen auf die Ertragslage der Gesellschaft haben könnte. Die Gesellschaft ist gegenwärtig nicht in der Lage, den Zeitpunkt für diese potenziellen Steuernachzahlungen zu bestimmen.

Am 2. April 2001 beantragten die W.R. Grace & Co. und einige ihrer Tochtergesellschaften die Reorganisation nach Chapter 11 des us-amerikanischen Konkursrechts (das Grace Chapter 11-Insolvenzverfahren). Die Vergleichsvereinbarung mit den Asbest-Gläubigerausschüssen im Namen der W.R. Grace & Co.-Konkursmasse — siehe Anmerkung 18 sieht nach der stattgefundenen Genehmigung der Vergleichsvereinbarung durch das us-Bezirksgericht und der den Vergleich einschließenden Bestätigung des Sanierungsplans der W.R. Grace

eine von der Gesellschaft zu leistende Zahlung in Höhe von 115 Mio US \$ vor. Am 31. Januar 2011 genehmigte das us-Konkursgericht den Sanierungsplan von W.R. Grace & Co. einschließlich der Vergleichsvereinbarung und empfahl dem us-Bezirksgericht die Genehmigung des Plans. Die Rückstellung, die im Jahr 2001 zur Abdeckung der Verpflichtungen der Gesellschaft aus mit dem Zusammenschluss von 1996 verbundenen Rechtsangelegenheiten gebucht wurde, beinhaltet die Zahlung von 115 Mio US \$. Die Zahlungsverpflichtung ist unverzinslich.

Sollten die oben dargestellten potenziellen Steuernachzahlungen und die Vergleichszahlung für das Grace Chapter 11-Verfahren gleichzeitig fällig werden, könnte sich dies in der entsprechenden Berichtsperiode wesentlich negativ auf den Mittelzufluss aus der laufenden Geschäftstätigkeit auswirken. Die Gesellschaft erwartet jedoch, dass der Cash Flow aus der laufenden Geschäftstätigkeit und, wenn notwendig, die Kreditvereinbarung sowie andere Liquiditätsquellen zur Erfüllung aller derartigen Verpflichtungen bei deren Fälligkeit ausreichen.

## INVESTITIONSTÄTIGKEIT

Für die Investitionstätigkeit verwendete die Gesellschaft in den Jahren 2010 bzw. 2009 Cash Flow in Höhe von 1.125 Mio US \$ bzw. 698 Mio US \$.

Die Investitionen in Sachanlagen betrugen nach Abzug von Einnahmen aus Abgängen 507 Mio US \$ für das Geschäftsjahr 2010 und 562 Mio US \$ für das Geschäftsjahr 2009. Für das Jahr 2010 betrugen die Investitionen in Sachanlagen im Segment Nordamerika 286 Mio US \$ und im Segment International 221 Mio US \$. Die Investitionen in Sachanlagen in 2009 betrugen 295 Mio US \$ im Segment Nordamerika und 267 Mio US \$ im Segment International. Der größte Teil der Investitionsausgaben wurde für die Instandhaltung bestehender Kliniken, die Ausrüstung neuer Kliniken, die Instandhaltung und den Ausbau der Produktionskapazitäten, vorwiegend in Nordamerika und Deutschland sowie für Dialysegeräte, die Kunden, überwiegend im Segment International, zur Verfügung gestellt wurden, verwendet. Die Investitionen in Sachanlagen betrugen in den Jahren 2010 bzw. 2009 etwa 4 % bzw. 5 % der Umsatzerlöse.

Für Akquisitionen, die vornehmlich den Erwerb von Dialysekliniken und den Erwerb des internationalen Peritonealdialyse-Geschäfts von Gambro betreffen, sowie für die Gründung eines Gemeinschaftsunternehmens mit Galenica, Ltd. (abhängig von der Zustimmung der Kartellbehörden in einigen Regionen) für Medikamente zur Nierentherapie und den Erwerb von Lizenzen investierte die Gesellschaft in 2010 Mittel in Höhe von etwa 632 Mio US \$ (237 Mio US \$ im Segment Nordamerika, 373 Mio US \$ im Segment International und 22 Mio US \$ in den Zentralbereichen), im Vergleich zu 188 Mio US \$ im Geschäftsjahr 2009 (124 Mio US \$ im Segment Nordamerika und 64 Mio US \$ im Segment International). Zusätzlich investierte die Gesellschaft während des Geschäftsjahrs 2010 100 Mio € (133 Mio US \$ zum 30. September 2010) in kurzfristige Termingeldanlagen bei Banken. Diese kurzfristigen Termingeldanlagen bei Banken wurden im vierten Quartal 2010 zurückgezahlt. Des Weiteren verzeichnete die Gesellschaft in den Jahren 2010 bzw. 2009 Einzahlungen von 14 Mio US \$ bzw. 2 Mio US \$ im Zusammenhang mit Veräußerungen von Anteilen an verbundenen Unternehmen und Beteiligungen. In 2008 vergab die Gesellschaft ein Darlehen in Höhe von 50 Mio US \$ an ihre Muttergesellschaft Fresenius SE & Co. KGaA (bis zum 27. Januar 2011 Fresenius SE), Bad Homburg v.d.H. (im Folgenden Fresenius SE), welches am 30. April 2009 zurückgezahlt worden ist.

Für 2011 sind Investitionen in Sachanlagen in Höhe von etwa 5 % des Umsatzes sowie Akquisitionen im Umfang von rund. 1.200 Mio US \$ vorgesehen, einschliesslich der am 4. Januar 2011 bekannt gegebenen Übernahme des International Dialysis Centers von 485 Mio €, dem Dialyседienstleistungsgeschäfts von Euromedic International.

## FINANZIERUNGSTÄTIGKEIT

Die Mittelverwendung für die Finanzierungstätigkeit betrug im Jahr 2010 netto 15 MIO US \$ verglichen mit 558 MIO US \$ im Jahr 2009.

Im Laufe des Jahres 2010 wurden die Mittel zur Reduzierung von Verbindlichkeiten und zur Zahlung von Dividenden verwendet. Dies wurde teilweise durch die Begebung einer vorrangigen Anleihe im Januar 2010 und Inanspruchnahmen unter dem Forderungsverkaufsprogramm sowie weiterer kurzfristiger Finanzverbindlichkeiten ausgeglichen. Im Jahr 2009 wurden die Mittel im Wesentlichen für die Tilgung des kurzfristig fälligen Anteils langfristiger Finanzverbindlichkeiten inklusive der Euro-Schuldscheindarlehen in Höhe von 279 MIO US \$ (200 MIO €), die am 27. Juli 2009 fällig und zurückgezahlt wurden, zur Reduzierung des ausstehenden Betrages aus dem Forderungsverkaufsprogramm sowie zur Zahlung von Dividenden verwendet. Teilweise wurde dies durch die Aufnahme langfristiger Finanzverbindlichkeiten ausgeglichen.

Die folgende Tabelle enthält eine Übersicht über die der Gesellschaft zur Verfügung stehenden Liquiditätsquellen zum 31. Dezember 2010:

| VERFÜGBARE LIQUIDITÄTSQUELLEN           |              |            |              |
|-----------------------------------------|--------------|------------|--------------|
| Tabelle 4.4.2                           |              |            |              |
| in MIO US \$                            |              |            |              |
|                                         | Gesamt       | Laufzeit   |              |
|                                         |              | 1 Jahr     | 2 – 5 Jahren |
| Forderungsverkaufsprogramm <sup>1</sup> | 190          | 190        | –            |
| Kreditvereinbarung 2006                 | 997          | –          | 997          |
| Sonstige nicht genutzte Kreditlinien    | 234          | 234        | –            |
| <b>GESAMT</b>                           | <b>1.421</b> | <b>424</b> | <b>997</b>   |

<sup>1</sup> Abhängig von der Verfügbarkeit eines ausreichenden Bestandes an Forderungen, die die festgelegten Kriterien erfüllen.

Der Betrag an Garantien und sonstigen finanziellen Verpflichtungen ist zum 31. Dezember 2010 nicht wesentlich.

Ohne den kurzfristig fälligen Anteil langfristiger Verbindlichkeiten bestanden zum 31. Dezember 2010 kurzfristige Finanzverbindlichkeiten in Höhe von 671 MIO US \$.

Die folgende Tabelle zeigt die Verpflichtungen zum 31. Dezember 2010 hinsichtlich zukünftiger Zahlungen im Rahmen langfristiger Kredite, der genussscheinähnlichen Wertpapiere und sonstiger langfristiger Verpflichtungen sowie Verpflichtungen aus der Nutzung von Kreditlinien und Garantiegewährungen.

| <b>VERTRAGLICHE ZAHLungsverPFLICHTUNGEN</b> |               |                          |                   |                      |
|---------------------------------------------|---------------|--------------------------|-------------------|----------------------|
| <i>in MIO US \$</i>                         |               |                          |                   |                      |
|                                             | <i>Gesamt</i> | <i>Zahlung fällig in</i> |                   |                      |
|                                             |               | <i>1 Jahr</i>            | <i>2–5 Jahren</i> | <i>über 5 Jahren</i> |
| Genussscheinähnliche Wertpapiere            | 650           | 650                      | –                 | –                    |
| Langfristige Schulden <sup>1,2</sup>        | 5.142         | 435                      | 3.770             | 937                  |
| Finanzleasing-Verpflichtungen               | 16            | 5                        | 8                 | 3                    |
| Mietverträge                                | 2.796         | 490                      | 1.396             | 910                  |
| Unwiderrufbare Kaufverpflichtungen          | 2.164         | 374                      | 1.071             | 719                  |
| Sonstige langfristige Verpflichtungen       | 33            | 24                       | 9                 | –                    |
| Garantien                                   | 122           | –                        | 122               | –                    |
| <b>GESAMT</b>                               | <b>10.923</b> | <b>1.978</b>             | <b>6.376</b>      | <b>2.569</b>         |

<sup>1</sup> Die Zinszahlungen wurden – unter Einbeziehung der Tilgungspläne – auf Basis fixierter oder angenommener variabler Zinssätze ermittelt.

Dafür wurden die maßgeblichen Zinssätze (z.B. Libor, Prime), die entsprechenden Margen und die Effekte der jeweiligen Zinsswaps berücksichtigt.

<sup>2</sup> Beinhaltet nicht die am 3. Februar 2011 ausgegebenen und 2021 fälligen 5,75 % und 5,25 % Anleihen.

Zur Besicherung der Verbindlichkeiten aus der Kreditvereinbarung 2006 sind die Anteile am Stammkapital wesentlicher Tochtergesellschaften, darunter die Anteile an FMCH und an Fresenius Medical Care Deutschland GmbH (D-GmbH), an die Gläubiger verpfändet worden. Die Kreditvereinbarung 2006, die Kreditvereinbarungen mit der EIB, die Euro-Schuldscheindarlehen, die Anleihen und die Schuldverschreibungen der Gesellschaft im Zusammenhang mit den genussscheinähnlichen Wertpapieren enthalten Verpflichtungen, die der Gesellschaft die Einhaltung bestimmter finanzieller Kennzahlen und anderer finanzieller Kriterien vorschreiben. Die Kreditvereinbarung 2006 verpflichtet die Gesellschaft zur Einhaltung eines bestimmten konsolidierten Fixkostendeckungsgrads (Verhältnis des konsolidierten EBITDA (Summe aus EBITDA und Mietaufwendungen für Leasingverträge) zu konzernbezogenen fixen Kosten gemäß der Definition in der Kreditvereinbarung 2006) sowie eines maximalen Konzern-Verschuldungsgrads (Verhältnis der Finanzverbindlichkeiten zum EBITDA entsprechend der Festlegung in der Kreditvereinbarung 2006). Weitere Verpflichtungen in einem oder mehreren der genannten Verträge beschränken die Möglichkeiten der Gesellschaft zur Veräußerung von Vermögenswerten, zur Aufnahme weiterer Verbindlichkeiten sowie zur Zahlung von Dividenden. Darüber hinaus ist die Gesellschaft Beschränkungen in Bezug auf bestimmte Zahlungen, die Gewährung von Sicherungsrechten sowie in Bezug auf den Abschluss von Sale-und-Leaseback-Transaktionen unterworfen.

Die Verletzung der Verpflichtungen aus einem der Verträge für unsere langfristigen Verbindlichkeiten wie z.B. der Kreditvereinbarung 2006, der Kreditvereinbarungen mit der EIB, der Euro-Schuldscheindarlehen, der Anleihen oder der genussscheinähnlichen Wertpapiere könnte wiederum zu weiteren Kündigungsgründen in einem oder mehreren anderen Finanzierungsverträgen der Gesellschaft führen. Bei Vertragsverletzung kann der ausstehende Saldo der Kreditvereinbarung 2006 auf Verlangen der Gläubiger dieser Kredite fällig gestellt werden. In diesem Fall wäre es – aufgrund von sogenannten „Cross-Default“-Klauseln – den Gläubigern der Gesellschaft gestattet, ihre Darlehen vorzeitig fällig zu stellen. Zum 31. Dezember 2010 hat die Gesellschaft alle in der Kreditvereinbarung 2006 und sonstigen Kreditvereinbarungen festgelegten Verpflichtungen erfüllt. Für Information bezüglich der vorrangigen Kreditvereinbarung 2006, der Kreditvereinbarungen mit der EIB, des Euro-Schuldscheindarlehen, der Anleihen — siehe Anmerkung 9. Für eine Beschreibung der Genussscheinähnlichen Wertpapiere — siehe Anmerkung 11.



Obwohl die Gesellschaft gegen die weltweite Finanzmarktkrise nicht immun ist, geht sie davon aus, dass sie gut positioniert ist, um ihr Geschäft kontinuierlich auszuweiten und gleichzeitig ihren finanziellen Verpflichtungen bei Fälligkeit nachzukommen. Das Geschäft der Gesellschaft ist im Allgemeinen nicht zyklisch. Ein wesentlicher Anteil ihrer Forderungen besteht gegenüber staatlichen Stellen. Obwohl Zahlungsmoral und Einzugspraktiken nicht nur zwischen einzelnen Ländern, sondern auch zwischen einzelnen Behörden eines Landes variieren, stellen staatliche Schuldner meist ein geringes Kreditrisiko dar. Ein begrenzter Zugang zu Kapital oder steigende Finanzierungskosten könnten es jedoch den Kunden der Gesellschaft erschweren, Geschäfte mit der Gesellschaft und im Allgemeinen zu tätigen. Eine hierdurch verursachte Zurückhaltung oder Verzögerung beim Bezug der Dialyseprodukte der Gesellschaft durch die Kunden kann die Geschäftstätigkeit der Gesellschaft beeinträchtigen — siehe „Operative Entwicklungen“. Sofern die aktuelle Lage auf den Finanz- und Kreditmärkten anhält oder sich verschlechtert, könnten sich auch die Finanzierungskosten der Gesellschaft erhöhen und die finanzielle Flexibilität der Gesellschaft einschränken.

Im Rahmen seiner ergebnisorientierten Ausschüttungspolitik wird der Vorstand der persönlich haftenden Gesellschafterin der Hauptversammlung am 12. Mai 2011 eine im Jahr 2011 zu zahlende Dividende für das Geschäftsjahr 2010 von 0,65 € je Stammaktie (2010 für 2009 gezahlt: 0,61 €) und von 0,67 € je Vorzugsaktie (2010 für 2009 gezahlt: 0,63 €) vorschlagen. Die erwartete Dividendenzahlung liegt insgesamt bei etwa 197 MIO € (schätzungsweise 263 MIO US \$ basierend auf dem Stichtagskurs vom 31. Dezember 2010) für das Jahr 2010, im Vergleich zu einer Dividendenzahlung von 183 MIO € (232 MIO US \$), die für das Jahr 2009 gezahlt wurde. Die Kreditvereinbarung 2006 beschränkt die Dividendenausschüttung und bestimmte andere Zahlungen der Gesellschaft für den Erwerb eigener Aktien im Jahr 2011 auf insgesamt 330 MIO US \$.

Am 3. Februar 2011 haben Fresenius Medical Care us Finance, Inc. und die FMC Finance VII S.A. vorrangige, unbesicherte Anleihen in Höhe von 650 MIO US \$ und 300 MIO € (circa 412 MIO US \$ am Ausgabetag) platziert. Die Anleihen werden am 15. Februar 2021 fällig. Der Coupon der von der Fresenius Medical Care us Finance, Inc. begebenen Anleihe beträgt 5,75 %. Bei einem Ausgabekurs von 99,06 % liegt die Rückzahlungsrendite bei 5,875 %. Die Anleihe der FMC Finance VII S.A. hat einen Coupon von 5,25 % und wurde zum Nennwert ausgegeben. Der Emissionserlös wurde bzw. wird zur Rückzahlung von Finanzverbindlichkeiten unter dem Forderungsverkaufsprogramm und der Kreditvereinbarung 2006 verwendet. Ausserdem wird die Verwendung für Akquisitionen einschliesslich der am 4. Januar 2011 verkündeten Übernahme von International Dialysis Centers und für allgemeine Geschäftszwecke erfolgen. Die Anleihen der Fresenius Medical Care us Finance, Inc. und der FMC Finance VII S.A. werden durch die Gesellschaften FMC AG & CO. KGAA, Fresenius Medical Care Holdings, Inc. und Fresenius Medical Care Deutschland GmbH gesamtschuldnerisch garantiert.

Am 29. September 2010 hat die Gesellschaft die Kreditvereinbarung 2006 angepasst und verlängert. Im Wesentlichen wurden die folgenden Änderungen vereinbart:

- Die revolvingierende Kreditfazilität wurde von 1.000 MIO US \$ auf 1.200 MIO US \$ erhöht und die Laufzeit wurde vom 31. März 2011 auf den 31. März 2013 verlängert.
- Das Darlehen A wurde um 50 MIO US \$ auf 1.365 MIO US \$ erhöht, und die Laufzeit wurde ebenfalls um 2 Jahre verlängert. Die Tilgung erfolgt vierteljährlich in Höhe von 30 MIO US \$ und begann am 31. Dezember 2010. Der Restbetrag ist am 31. März 2013 fällig.
- Die Verpflichtung zur vorzeitigen Tilgung des Darlehens B wurde aufgehoben. Diese Verpflichtung sah vor, dass das Darlehen B bereits am 1. März 2011 zurückzuzahlen ist, falls die Trust Preferred Securities, die am 15. Juni 2011 fällig sind, bis zu diesem Zeitpunkt weder zurückgezahlt noch refinanziert sind oder falls deren Laufzeit nicht verlängert worden ist.

► Die Definition des Verschuldungsgrads, der für die Ermittlung der anwendbaren Marge verwendet wird, wurde so angepasst, dass für die Berechnung der Finanzverbindlichkeiten zukünftig liquide Mittel von bis zu 250 MIO US \$ (bisher 30 MIO US \$) abgezogen werden dürfen. Zur Bestimmung des Zinssatzes für die entsprechende Zinsperiode wird die anwendbare Marge auf den LIBOR aufgeschlagen. Außerdem wurden Höchstbeträge für bestimmte außerhalb der Kreditvereinbarung 2006 erlaubte Kreditaufnahmen angehoben und zusätzliche Flexibilität für bestimmte Arten von Finanzanlagen eingeräumt.

► Die Beschränkungen in Bezug auf Dividendenausschüttungen und andere festgelegte Zahlungen wurden von 300 MIO US \$ für 2010 auf 330 MIO US \$ für 2011 angehoben und steigen danach bis zum Jahr 2013 pro Jahr um 30 MIO US \$ an.

Am 28. September 2010 wurde das Forderungsverkaufsprogramm um ein Jahr verlängert und der Rahmen von 650 MIO US \$ auf 700 MIO US \$ erhöht.

Am 17. Februar 2010 wurde im Rahmen der Vereinbarung mit der Europäischen Investitionsbank (EIB) aus dem Jahr 2009 ein Darlehen in Höhe von 50 MIO € (67 MIO US \$ zum Stichtagskurs 31. Dezember 2010) ausgezahlt (Darlehen 2009). Das Darlehen ist im Jahr 2014 zur Rückzahlung fällig. Des Weiteren hat die Gesellschaft am 15. März 2010 die verbleibenden 80,8 MIO US \$ aus der 2005 von der EIB bereitgestellten revolving Kreditlinie (Revolvierende Kreditlinie 2005) in Anspruch genommen. Das Darlehen ist 2013 fällig. Die Verzinsung beider Darlehen ist variabel und an den EURIBOR bzw. den LIBOR mit einem Aufschlag gebunden. Die Zinssätze werden alle drei Monate angepasst.

Am 20. Januar 2010 hat die FMC Finance VI S.A., eine hundertprozentige Tochtergesellschaft der Gesellschaft, eine vorrangige, unbesicherte Anleihe in Höhe von 250 MIO € mit einem Coupon von 5,50 % und einem Ausgabekurs von 98,6636 % platziert. Diese Anleihe wird am 15. Juli 2016 fällig; die Rückzahlungsrendite lag bei 5,75 %. Der Emissionserlös wurde zur Rückzahlung kurzfristiger Finanzverbindlichkeiten und für allgemeine Geschäftszwecke verwendet. Die Anleihe wird durch Fresenius Medical Care AG & Co. KGaA, Fresenius Medical Care Holdings, Inc. und Fresenius Medical Care Deutschland GmbH gesamtschuldnerisch garantiert.

Zusätzlich zu der oben beschriebenen jährlichen Verlängerung des Forderungsverkaufsprogramms entsteht der Finanzierungsbedarf der Gesellschaft im Jahr 2011 aus der Kaufpreiszahlung in Höhe von 485 MIO € für die am 4. Januar 2011 bekannt gegebene Übernahme des International Dialysis Centers von Euromedic International, der Dividendenzahlung von schätzungsweise 263 MIO US \$ im Mai 2011 sowie der Rückzahlung der fälligen genussscheinähnlichen Wertpapiere in Höhe von circa 626 MIO US \$ — *siehe Anmerkung 11*. Die Gesellschaft geht davon aus, dass die erwartete Dividendenzahlung sowie die Zahlung für die Übernahme des International Dialysis Centers von Euromedic International aus dem Cash Flow und den zu diesem Zeitpunkt bestehenden Kreditfazilitäten bezahlt wird. Die Rückzahlung der im Juni 2011 fälligen genussscheinähnlichen Wertpapiere soll durch Kapitalmarkttransaktionen finanziert werden. Die Verpflichtungen aus den Finanzierungsverträgen der Gesellschaft räumen gegenwärtig ausreichend Flexibilität zur Deckung des Finanzierungsbedarfs der Gesellschaft ein. Generell geht die Gesellschaft davon aus, dass sie auch künftig über eine angemessene Finanzierung verfügen wird, um ihre Ziele und ihr Wachstum erreichen zu können.

## ANGABE ZUR FINANZKENNZAHL – EBITDA

EBITDA (Ergebnis vor Zinsen, Steuern und Abschreibungen) betrug im Geschäftsjahr 2010 etwa 2.427 MIO US \$ oder 20,1 % vom Umsatz, und im Geschäftsjahr 2009 2.213 MIO US \$ oder 19,7 % vom Umsatz. Die Kennzahl EBITDA ist die Basis für die Beurteilung der Einhaltung der Kennziffern, die der Gesellschaft im Rahmen der Kreditvereinbarung 2006, des Euro-Schuldscheindarlehens und der Kreditvereinbarung mit der Europäischen Investitionsbank vorgegeben wurden, sowie Verpflichtungen im Zusammenhang mit den Anleihen und den genusscheinähnlichen Wertpapieren. EBITDA sollte nicht als Alternative zu dem nach U.S. GAAP ermittelten Jahresüberschuss oder zum Cash Flow aus laufender Geschäftstätigkeit, Investitionstätigkeit oder Finanzierungstätigkeit ausgelegt werden. Außerdem steht nicht das gesamte EBITDA dem Vorstand zur freien Verfügung. Beispielsweise unterliegt ein wesentlicher Teil solcher Mittel, wie an anderer Stelle in diesem Bericht ausführlicher beschrieben, vertraglichen Beschränkungen und wird benötigt, um Bankverbindlichkeiten zu bedienen, notwendige Investitionsausgaben zu tätigen und von Zeit zu Zeit sonstige, an anderer Stelle in diesem Bericht in weiteren Einzelheiten beschriebene Verpflichtungen zu erfüllen. Es ist möglich, dass das hier berechnete EBITDA mit ähnlich benannten Kenngrößen anderer Gesellschaften nicht vergleichbar ist. Eine Überleitung des EBITDA auf den Cash Flow der laufenden Geschäftstätigkeit, welches nach Auffassung der Gesellschaft die am direktesten vergleichbare Finanzkennzahl unter U.S. GAAP ist, stellt sich wie folgt dar:

| <b>ÜBERLEITUNG DES EBITDA ZUM CASH FLOW<br/>AUS DER LAUFENDEN GESCHÄFTSTÄTIGKEIT</b> |                  |                  |
|--------------------------------------------------------------------------------------|------------------|------------------|
| <i>in TSD US \$</i>                                                                  |                  |                  |
| <i>Tabelle 4.4.4</i>                                                                 |                  |                  |
|                                                                                      | 2010             | 2009             |
| EBITDA                                                                               | 2.427.029        | 2.212.681        |
| Zinsaufwendungen, netto                                                              | (280.064)        | (299.963)        |
| Ertragsteuern, netto                                                                 | (578.345)        | (490.413)        |
| Veränderung der latenten Steuern                                                     | 14.687           | 22.002           |
| Veränderungen bei operativen Aktiva und Passiva                                      | (236.647)        | (139.494)        |
| Personalaufwand                                                                      | 27.981           | 33.746           |
| Sonstiges                                                                            | (6.516)          | 58               |
| <b>CASH FLOW AUS LAUFENDER GESCHÄFTSTÄTIGKEIT</b>                                    | <b>1.368.125</b> | <b>1.338.617</b> |

Kapitel 4.5

## NEUE VERLAUTBARUNGEN UND ÄNDERUNGEN DER RECHNUNGSLEGUNGSVORSCHRIFTEN

Für Informationen bezüglich neuer Verlautbarungen und Änderungen der Rechnungslegungsvorschriften  
—— siehe Anmerkung 1t.

## QUANTITATIVE UND QUALITATIVE OFFENLEGUNG VON MARKTRISIKEN

### MARKTRISIKEN

Die Gesellschaft betreibt ihr Geschäft auf Märkten mit hoher Wettbewerbsintensität und unterliegt laufenden Veränderungen der Geschäfts-, Wirtschafts- und Wettbewerbsbedingungen. Das Geschäft wird insbesondere von folgenden Faktoren beeinflusst:

- ▶ Veränderungen in den Kostenerstattungssätzen,
- ▶ intensiver Wettbewerb,
- ▶ Wechselkurs- und Zinsschwankungen,
- ▶ unsichere Akzeptanz bei der Einführung neuer Produkte,
- ▶ technologische Entwicklungen in der Branche,
- ▶ Unsicherheiten über den Ausgang von Rechtsstreitigkeiten oder Ermittlungsverfahren sowie über die Entwicklung von staatlichen Regulierungen im Gesundheitssektor,
- ▶ Verfügbarkeit von Finanzierungsmöglichkeiten.

Die Geschäftstätigkeit ist weiteren Risiken und Unsicherheiten ausgesetzt, die die Gesellschaft in zeitlichen Abständen im Rahmen der von ihr zu veröffentlichenden Berichte darstellt; siehe „Risikobericht“ — ab Seite 104. Veränderungen in jedem dieser Bereiche können dazu führen, dass Ergebnisse der Gesellschaft wesentlich von denen abweichen, die die Gesellschaft oder andere vorhergesagt haben oder vorhersagen könnten.

### Erstattungssätze

Die Gesellschaft erwirtschaftete 2010 etwa 32 % ihrer weltweiten Umsatzerlöse aus Quellen, die den Regulierungen von staatlichen us-amerikanischen Gesundheitsprogrammen unterliegen. In der Vergangenheit haben sich die Erstattungssätze dieser Programme als Ergebnis von Kosteneinsparungen zum Abbau des us-Haushaltsdefizits und von Maßnahmen der Gesundheitsreform geändert. Dies betrifft insbesondere den Medicare-Erstattungssatz, den Erstattungssatz für EPO, die Erstattungssätze für andere Dialyse- und sonstige Leistungen und Produkte, sowie andere wesentliche Aspekte dieser Programme. Die Erstattungssätze können sich in der Zukunft ändern. Zum 1. Januar 2011 wird der Medicare-Erstattungssatz für Dialysedienstleistungen von Dialysekliniken zur Behandlung von terminaler Niereninsuffizienz anhand eines Pauschalvergütungssystems bestimmt.

Ein erheblicher Anteil der Umsätze der Gesellschaft stammt aus der Kostenerstattung durch nicht-staatliche Versicherungsträger. In der Vergangenheit lagen die Erstattungssätze dieser Versicherungsträger im Allgemeinen über denen vergleichbarer staatlicher Programme in den jeweiligen Ländern. Die nicht-staatlichen Versicherungsträger führen jedoch ebenfalls Maßnahmen zur Kostenbegrenzung durch, die einen erheblichen Druck auf die Höhe der Erstattungen zur Folge haben, die die Gesellschaft für ihre Leistungen und Produkte erhält.

### Inflation

Die Auswirkungen der Inflation auf das operative Ergebnis waren für die im Konzernabschluss dargestellten Zeiträume nicht wesentlich. Allerdings unterliegt der überwiegende Teil der Umsatzerlöse im Bereich der Dialysebehandlung bestimmten Erstattungssätzen, die von staatlicher Seite festgelegt werden. Ein weiterer beträchtlicher Anteil der Umsätze, vor allem in den USA, stammt von Kunden, deren Umsätze ebenfalls von den regulierten Erstattungssätzen abhängen. Private Versicherungsträger üben zusätzlichen Druck auf die Erstattungssätze aus. Gestiegene Betriebskosten, die der Inflation unterliegen, wie etwa für Löhne und für Verbrauchsmaterialien, können möglicherweise nicht durch Preissteigerungen ausgeglichen werden, wenn keine entsprechende Anhebung der an die Gesellschaft und ihre Kunden zu zahlenden Vergütungen erfolgt. Dadurch könnten wesentliche negative Auswirkungen auf das Geschäft, die finanzielle Lage und das operative Ergebnis der Gesellschaft eintreten.

### Management von Währungs- und Zinsrisiken

Die Gesellschaft ist hauptsächlich Marktrisiken aus der Veränderung von Wechselkursen und Zinssätzen ausgesetzt. Zur Steuerung der Risiken aus Veränderungen von Devisenkursen und Zinssätzen tritt die Gesellschaft im Rahmen der vom Vorstand der persönlich haftenden Gesellschafterin festgelegten Limite in Sicherungsgeschäfte nur mit Banken ein, deren Rating im Allgemeinen mindestens der Kategorie „A“ entspricht. Die Gesellschaft schließt derivative Finanzinstrumente nicht für Handels- oder Spekulationszwecke ab.

Die Fresenius SE führt auf der Basis eines Dienstleistungsvertrags für die Gesellschaft und ihre anderen Tochtergesellschaften deren Aktivitäten auf dem Gebiet der Finanzinstrumente durch. Dies geschieht grundsätzlich unter der Kontrolle einer zentralen Abteilung. Die Fresenius SE hat im Einverständnis mit der Gesellschaft Richtlinien für die Risikobeurteilung und für die Kontrolle des Einsatzes von Finanzinstrumenten festgelegt. Sie beinhalten eine klare Trennung der Verantwortlichkeiten in Bezug auf die Ausführung auf der einen und die Abwicklung, Buchhaltung und Kontrolle auf der anderen Seite.

### Fremdwährungsrisiken

Die Gesellschaft betreibt ihr Geschäft weltweit in verschiedenen Währungen, obwohl ihre Geschäftstätigkeit hauptsächlich in den USA und in Deutschland stattfindet. Für die Finanzberichterstattung ist der US-Dollar die Berichtswährung. Daher beeinflussen Wechselkursänderungen zwischen dem US-Dollar und den lokalen Währungen, in denen die Jahresabschlüsse der internationalen Tochtergesellschaften erstellt werden, das im Konzernabschluss ausgewiesene Geschäftsergebnis und die finanzielle Lage der Gesellschaft. Die Gesellschaft hat bei der Konsolidierung der Bilanzen der nicht auf US-Dollar-Basis geführten Tochtergesellschaften die Umrechnung in US-Dollar mit dem Wechselkurs am Bilanzstichtag vorgenommen. Erträge und Aufwendungen werden mit dem Durchschnittskurs der Berichtsperiode umgerechnet.

Die Fremdwährungsrisiken ergeben sich aus Transaktionen wie Verkäufen und Einkäufen in fremder Währung. Die Gesellschaft fakturiert die Verkäufe von in ihren europäischen Produktionsstätten hergestellten Produkten an internationale Geschäftseinheiten überwiegend in Euro. Dadurch werden die Tochtergesellschaften von Wechselkursänderungen zwischen dem Euro und den Währungen betroffen, in denen sie ihre lokalen Geschäftstätigkeiten durchführen. Zur Sicherung der bestehenden oder zu erwartenden Transaktionsrisiken setzt die Gesellschaft Devisentermingeschäfte und in geringem Umfang Devisenoptionen ein. Es ist ein von der Gesellschaft konsequent verfolgter Grundsatz, Devisengeschäfte ausschließlich zur Absicherung von Währungsrisiken einzusetzen. Die Gesellschaft hat solche Instrumente für keine anderen Zwecke als die Risikoabsicherung genutzt.

Im Zusammenhang mit Konzerndarlehen in fremder Währung tätigt die Gesellschaft in der Regel Devisen-swapgeschäfte um sicherzustellen, dass aus diesen Darlehen keine Wechselkursrisiken entstehen.

Die Gesellschaft ist dem Risiko ausgesetzt, dass die Vertragspartner bei derivativen Finanzinstrumenten ihre Leistungsverpflichtungen nicht erfüllen. Es wird jedoch nicht erwartet, dass Vertragspartner ihren Verpflichtungen nicht nachkommen. Das gegenwärtige Kreditrisiko der Gesellschaft aus Devisenterminkontrakten ergibt sich aus dem Marktwert der Kontrakte, die zum Berichtszeitpunkt einen positiven Marktwert haben. Die folgende Tabelle liefert Informationen über die Devisenterminkontrakte zum 31. Dezember 2010. Die Werte sind in den entsprechenden US-Dollar-Gegenwerten angegeben. Die Tabelle zeigt die Nominalbeträge nach Fälligkeitsjahr, die Marktwerte der Kontrakte, die die unrealisierten Gewinne (Verluste) aus den zum 31. Dezember 2010 bestehenden Kontrakten darstellen, und das in den Kontrakten mit positiven Marktwerten enthaltene Kreditrisiko zum 31. Dezember 2010. Alle Kontrakte sind innerhalb von 59 Monaten nach dem Bilanzstichtag fällig.

**FREMDWÄHRUNGSRISSKO**

Tabelle 4.6.1

in MIO US \$,  
31. Dezember

|                                      | Nominalwert  |            |           |           |           |              | Markt-<br>wert | Kredit-<br>risiko |
|--------------------------------------|--------------|------------|-----------|-----------|-----------|--------------|----------------|-------------------|
|                                      | 2011         | 2012       | 2013      | 2014      | 2015      | Gesamt       |                |                   |
| Kauf von € gegen US \$               | 725          | 20         | –         | –         | –         | 745          | (42)           | 3                 |
| Verkauf von € gegen US \$            | 421          | –          | –         | –         | –         | 421          | (5)            | –                 |
| Kauf von € gegen andere Währungen    | 781          | 102        | 33        | 31        | 29        | 976          | (19)           | 3                 |
| Verkauf von € gegen andere Währungen | 249          | 89         | 60        | 31        | 29        | 458          | 1              | 1                 |
| Sonstige                             | 33           | 1          | –         | –         | –         | 34           | –              | 1                 |
| <b>GESAMT</b>                        | <b>2.209</b> | <b>212</b> | <b>93</b> | <b>62</b> | <b>58</b> | <b>2.634</b> | <b>(65)</b>    | <b>8</b>          |

In der folgenden Tabelle sind die jährlichen Höchst- und Tiefstkurse der vergangenen fünf Jahre für den Euro gegenüber dem us-Dollar sowie die Durchschnittskurse angegeben. Die Europäische Zentralbank (EZB) bestimmt diese Kurse (Referenzkurse) regelmäßig anhand der täglichen Bildung des Durchschnitts der Kurse von Zentralbanken innerhalb und außerhalb des europäischen Bankensystems. Die EZB veröffentlicht den Referenzkurs täglich um 14:15 Uhr. Bei der Erstellung des Geschäftsberichts und zur Umrechnung bestimmter us-Dollar-Beträge für diesen Bericht wurden folgende Durchschnitts- und Stichtagskurse us-Dollar pro Euro verwendet: Durchschnittskurs 1,3259 US \$ und Stichtagskurs 1,3362 US \$.

**WECHSELKURSE**

Tabelle 4.6.2

US \$ je €

|             | Jahres-<br>höchstkurs | Jahres-<br>tiefstkurs | Jahresdurch-<br>schnittskurs | Jahres-<br>endkurs |
|-------------|-----------------------|-----------------------|------------------------------|--------------------|
| <b>2010</b> | <b>1,4563</b>         | <b>1,1942</b>         | <b>1,3259</b>                | <b>1,3362</b>      |
| 2009        | 1,5120                | 1,2555                | 1,3948                       | 1,4406             |
| 2008        | 1,5990                | 1,2460                | 1,4713                       | 1,3917             |
| 2007        | 1,4874                | 1,2893                | 1,3705                       | 1,4721             |
| 2006        | 1,3331                | 1,1826                | 1,2558                       | 1,3170             |

Am 18. Februar 2011 betrug der Referenzkurs in us-Dollar pro Euro 1,3627 US \$.

#### **Sensitivitätsanalyse Fremdwährungsrisiko**

Für die Abschätzung und Quantifizierung der Transaktionsrisiken in fremder Währung betrachtet die Gesellschaft die mit hinreichender Wahrscheinlichkeit eintretenden Zahlungsströme der nächsten drei Monate als relevante Bemessungsgrundlage für die Durchführung einer Sensitivitätsanalyse. Für diese Analyse wird unterstellt, dass sich alle Wechselkurse, in denen der Konzern zum Stichtag ungesicherte Währungspositionen hatte, um 10 % negativ ändern. Durch Multiplikation der ermittelten ungesicherten Risikopositionen mit diesem Faktor ergibt sich ein maximal möglicher negativer Einfluss der Transaktionsrisiken auf die Ertragslage der Gesellschaft in Höhe von 13 MIO US \$.

#### **Zinsrisiken**

Die Gesellschaft ist im Hinblick auf variabel verzinsliche Verbindlichkeiten Zinsänderungsrisiken ausgesetzt. Die Gesellschaft geht Darlehens- und Anleiheverbindlichkeiten ein und hat ein Forderungsverkaufsprogramm aufgelegt, um ihre allgemeinen Unternehmenszwecke, die Investitionstätigkeit und ihren Betriebsmittelbedarf zu finanzieren. Infolgedessen setzt die Gesellschaft Finanzderivate, vor allem Zinsswaps, ein, um sich durch den Tausch von variablen Zinsen in Festzinssätze gegen Zinsänderungsrisiken aus variabel verzinsten Krediten abzusichern.

Die Gesellschaft nutzt als Cash Flow Hedges klassifizierte Zinsswaps, um einen wesentlichen Teil der überwiegend in US-Dollar zu leistenden variablen Zinszahlungen, die im Rahmen der Kreditvereinbarung 2006 fällig sind, in fixe Zinszahlungen umzuwandeln. Weitere Zinsswaps wurden im Hinblick auf die Aufnahme zukünftiger Verbindlichkeiten abgeschlossen.

Die Zinsswaps haben einen Nominalwert von 3.175 MIO US \$ und einen negativen Marktwert von 125 MIO US \$. Sie laufen zu verschiedenen Terminen in den Jahren 2011 und 2012 aus. Der durchschnittliche Zinssatz der Swaps beträgt 4,26 %. Die aus den Swap-Vereinbarungen resultierenden Zinsverbindlichkeiten und Zinsforderungen werden abgegrenzt und als Anpassung des Zinsaufwands zum jeweiligen Bilanzstichtag erfasst.

Die nachstehende Tabelle zeigt für die wesentlichen Verbindlichkeiten und die entsprechenden Zinsswaps jeweils die Nominalbeträge sowie die entsprechend gewichteten durchschnittlichen Zinssätze nach dem Jahr der Fälligkeit.



**ZINSÄNDERUNGSRISIKO**

Tabelle 4.6.3

in MIO US \$

|                                                                                                                       | 2011   | 2012   | 2013  | 2014 | 2015 | Danach | Gesamt | Marktwert<br>31. Dez.<br>2010 |
|-----------------------------------------------------------------------------------------------------------------------|--------|--------|-------|------|------|--------|--------|-------------------------------|
| <b>Variabel verzinsten<br/>US \$ Finanzierungen</b>                                                                   |        |        |       |      |      |        |        |                               |
| Tilgungszahlungen<br>Kreditvereinbarung 2006<br>Variabler Zinssatz = 1,77 %                                           | 217    | 1.262  | 1.475 | –    | –    | –      | 2.954  | 2.938                         |
| Forderungsverkaufsprogramm<br>Variabler Zinssatz = 0,33 %                                                             | 510    | –      | –     | –    | –    | –      | 510    | 510                           |
| EIB Darlehen<br>Variabler Zinssatz = 0,43 %                                                                           | –      | –      | 165   | –    | –    | –      | 165    | 165                           |
| <b>Variabel verzinsten<br/>€ Finanzierungen</b>                                                                       |        |        |       |      |      |        |        |                               |
| Schuldscheindarlehen 2009/2012<br>Variabler Zinssatz = 6,253 %                                                        | –      | 160    | –     | –    | –    | –      | 160    | 162                           |
| Schuldscheindarlehen 2009/2014<br>Variabler Zinssatz = 6,753 %                                                        | –      | 5      | 5     | 31   | –    | –      | 41     | 41                            |
| EIB Darlehen<br>Variabler Zinssatz = 1,8176 %                                                                         | –      | –      | –     | 187  | –    | –      | 187    | 187                           |
| <b>Festverzinsliche<br/>US \$ Finanzierungen</b>                                                                      |        |        |       |      |      |        |        |                               |
| Genussscheinähnliche<br>Wertpapiere der Fresenius<br>Medical Care Capital Trusts<br>Festzins = 7,375 %/emittiert 2001 | 225    | –      | –     | –    | –    | –      | 225    | 239                           |
| Anleihe 2007/2017;<br>Festzins = 6,875 %                                                                              | –      | –      | –     | –    | –    | 494    | 494    | 531                           |
| <b>Festverzinsliche<br/>€ Finanzierungen</b>                                                                          |        |        |       |      |      |        |        |                               |
| Genussscheinähnliche<br>Wertpapiere der Fresenius<br>Medical Care Capital Trusts<br>Festzins = 7,375 %/emittiert 2001 | 401    | –      | –     | –    | –    | –      | 401    | 415                           |
| Schuldscheindarlehen 2009/2012<br>Festzins = 7,4065 %                                                                 | –      | 47     | –     | –    | –    | –      | 47     | 52                            |
| Schuldscheindarlehen 2009/2014<br>Festzins = 8,3835 %                                                                 | –      | 2      | 2     | 15   | –    | –      | 19     | 22                            |
| Anleihe 2010/2016<br>Festzins = 5,50 %                                                                                | –      | –      | –     | –    | –    | 330    | 330    | 349                           |
| <b>Zinsderivate</b>                                                                                                   |        |        |       |      |      |        |        |                               |
| Nominalvolumen<br>der US \$ Payer Swaps                                                                               | 1.650  | 1.525  | –     | –    | –    | –      | 3.175  | (125)                         |
| durchschnittlich gezahlter<br>Festzins = 4,26 %                                                                       | 4,08 % | 4,45 % | –     | –    | –    | –      | 4,26 % | –                             |
| erhaltener Zins = 3-Monats-\$-LIBOR                                                                                   | –      | –      | –     | –    | –    | –      | –      | –                             |

Die oben angegebenen variablen Zinssätze sind die am 31. Dezember 2010 jeweiligen verwendeten Zinssätze.

#### **Sensitivitätsanalyse Zinsrisiko**

Zur Analyse der Auswirkungen von Änderungen der für die Gesellschaft relevanten Referenzzinsen auf die Ertragslage der Gesellschaft wird der Anteil der Finanzverbindlichkeiten ermittelt, der originär zu variablen Sätzen verzinst wird und nicht durch den Einsatz von Zinsswaps oder Zinsoptionen gegen einen Anstieg der Referenzzinsen gesichert ist. Für den auf diese Weise ermittelten Teil der Finanzverbindlichkeiten wird unterstellt, dass die Referenzzinssätze am Berichtsstichtag jeweils einheitlich um 0,5 % höher gewesen wären als sie tatsächlich waren. Der daraus folgende zusätzliche jährliche Zinsaufwand wird zum Konzernergebnis ins Verhältnis gesetzt. Diese Analyse ergibt, dass ein Anstieg der für die Gesellschaft relevanten Referenzzinssätze um 0,5 % einen Einfluss auf das Konzernergebnis von weniger als 1 % hätte.

# KONZERNABSCHLUSS

## ZUVERSICHT

*Unsere erfolgreiche Entwicklung  
in den vergangenen Jahren  
und unser stabiles wirtschaftliches  
Umfeld lassen uns positiv gestimmt  
in die Zukunft blicken.*

## 5.1

Konzern-Gewinn- und  
Verlustrechnung  
*S. 201*

## 5.2

Konzern-  
Gesamtergebnisrechnung  
*S. 202*

## 5.3

Konzernbilanz  
*S. 202*

## 5.4

Konzern-Cash-Flow-Rechnung  
*S. 204*

## 5.5

Konzern-Eigenkapital-  
veränderungsrechnung  
*S. 206*

## 5.6

Anmerkungen zum  
Konzernabschluss  
*S. 208*

## 5.7

Bericht über das  
interne Kontrollsystem für  
die Finanzberichterstattung  
*S. 269*

## 5.8

Bericht der unabhängigen  
Abschlussprüfer  
*S. 270*

## 5.9

Bestätigungsvermerk:  
Bericht der unabhängigen  
Abschlussprüfer  
*S. 272*

---

# KONZERN-GEWINN- UND VERLUSTRECHNUNG

## KONZERN-GEWINN- UND VERLUSTRECHNUNG

in TSD US \$, mit Ausnahme  
der Beträge je Aktie

Tabelle 5.1.1

|                                                                                                 | Ziffer  | 2010              | 2009              |
|-------------------------------------------------------------------------------------------------|---------|-------------------|-------------------|
| <b>Umsatzerlöse</b>                                                                             |         |                   |                   |
| Dialyседienstleistungen                                                                         | 1 I     | 9.070.546         | 8.350.233         |
| Dialyseprodukte                                                                                 |         | 2.982.944         | 2.897.244         |
| <b>GESAMT</b>                                                                                   | 21      | <b>12.053.490</b> | <b>11.247.477</b> |
| <b>Umsatzkosten</b>                                                                             |         |                   |                   |
| Dialyседienstleistungen                                                                         |         | 6.345.135         | 5.945.724         |
| Dialyseprodukte                                                                                 |         | 1.563.634         | 1.470.241         |
| <b>GESAMT</b>                                                                                   |         | <b>7.908.769</b>  | <b>7.415.965</b>  |
| Bruttoergebnis vom Umsatz                                                                       |         | 4.144.721         | 3.831.512         |
| <b>Betriebliche Aufwendungen</b>                                                                |         |                   |                   |
| Vertriebs- und allgemeine Verwaltungskosten                                                     |         | 2.124.384         | 1.982.106         |
| Forschungs- und Entwicklungsaufwendungen                                                        | 1 J     | 96.532            | 93.810            |
| <b>OPERATIVES ERGEBNIS</b>                                                                      |         | <b>1.923.805</b>  | <b>1.755.596</b>  |
| <b>Sonstige (Erträge) Aufwendungen</b>                                                          |         |                   |                   |
| Zinserträge                                                                                     |         | (25.409)          | (21.397)          |
| Zinsaufwendungen                                                                                |         | 305.473           | 321.360           |
| Ergebnis vor Ertragsteuern                                                                      |         | 1.643.741         | 1.455.633         |
| Ertragsteuern                                                                                   | 1 K, 16 | 578.345           | 490.413           |
| Ergebnis nach Ertragsteuern                                                                     |         | 1.065.396         | 965.220           |
| Abzüglich auf andere Gesellschafter entfallendes Ergebnis                                       |         | 86.879            | 74.082            |
| <b>KONZERNERGEBNIS (ERGEBNIS, DAS AUF DIE ANTEILSEIGNER DER FMC AG &amp; CO. KGAA ENTFÄLLT)</b> |         | <b>978.517</b>    | <b>891.138</b>    |
| <b>ERGEBNIS JE STAMMAKTIE</b>                                                                   | 14      | <b>3,25</b>       | <b>2,99</b>       |
| <b>ERGEBNIS JE STAMMAKTIE BEI VOLLER VERWÄSSERUNG</b>                                           | 14      | <b>3,24</b>       | <b>2,99</b>       |

Der nachfolgende Anhang ist integraler Bestandteil des Konzernabschlusses.

Kapitel 5.2

# KONZERN-GESAMTERGEBNISRECHNUNG

| KONZERN-GESAMTERGEBNISRECHNUNG                                                        |        |                  |                  |
|---------------------------------------------------------------------------------------|--------|------------------|------------------|
| in TSD US \$                                                                          |        | Tabelle 5.2.1    |                  |
|                                                                                       | Ziffer | 2010             | 2009             |
| <b>ERGEBNIS NACH ERTRAGSTEUERN</b>                                                    |        | <b>1.065.396</b> | <b>965.220</b>   |
| (Verlust) Gewinn aus Cash Flow Hedges                                                 | 19, 20 | (8.109)          | 30.082           |
| Versicherungsmathematischer (Verlust) Gewinn aus leistungsorientierten Pensionsplänen | 20     | (35.654)         | 9.708            |
| (Verlust) Gewinn aus Währungsumrechnungsdifferenzen                                   | 20     | (110.888)        | 82.545           |
| Ertragsteuern auf Komponenten des Übrigen Comprehensive Income                        | 19, 20 | 12.821           | (18.971)         |
| <b>ÜBRIGES COMPREHENSIVE (LOSS) INCOME, NETTO</b>                                     | 20     | <b>(141.830)</b> | <b>103.364</b>   |
| <b>GESAMTERGEBNIS</b>                                                                 |        | <b>923.566</b>   | <b>1.068.584</b> |
| Auf andere Gesellschafter entfallendes Gesamtergebnis                                 |        | 89.370           | 75.886           |
| <b>AUF DIE ANTEILSEIGNER DER FMC AG &amp; CO. KGAA ENTFALLENDEN GESAMTERGEBNIS</b>    |        | <b>834.196</b>   | <b>992.698</b>   |

Der nachfolgende Anhang ist integraler Bestandteil des Konzernabschlusses.

Kapitel 5.3

# KONZERNBILANZ

| KONZERNBILANZ                                                                                                                                          |         |                   |                   |
|--------------------------------------------------------------------------------------------------------------------------------------------------------|---------|-------------------|-------------------|
| in TSD US \$, mit Ausnahme der Beträge je Aktie und der Aktienstückzahl, 31. Dezember                                                                  |         | Tabelle 5.3.1     |                   |
|                                                                                                                                                        | Ziffer  | 2010              | 2009              |
| <b>Aktiva</b>                                                                                                                                          |         |                   |                   |
| <b>Kurzfristige Vermögenswerte</b>                                                                                                                     |         |                   |                   |
| Flüssige Mittel                                                                                                                                        | 1 B     | 522.870           | 301.225           |
| Forderungen aus Lieferungen und Leistungen abzüglich Wertberichtigungen auf zweifelhafte Forderungen (277.139 US \$ in 2010 und 266.449 US \$ in 2009) |         | 2.573.258         | 2.285.909         |
| Forderungen gegen verbundene Unternehmen                                                                                                               |         | 113.976           | 272.886           |
| Vorräte                                                                                                                                                | 4       | 809.097           | 821.654           |
| Sonstige kurzfristige Vermögenswerte                                                                                                                   |         | 783.231           | 729.306           |
| Latente Steuern                                                                                                                                        | 1 K, 16 | 350.162           | 316.820           |
| <b>SUMME KURZFRISTIGE VERMÖGENSWERTE</b>                                                                                                               |         | <b>5.152.594</b>  | <b>4.727.800</b>  |
| <b>Langfristige Vermögenswerte</b>                                                                                                                     |         |                   |                   |
| Sachanlagen                                                                                                                                            | 1 E, 5  | 2.527.292         | 2.419.570         |
| Immaterielle Vermögenswerte                                                                                                                            | 1 F, 6  | 692.544           | 859.195           |
| Firmenwerte                                                                                                                                            | 1 F, 6  | 8.140.468         | 7.511.434         |
| Latente Steuern                                                                                                                                        | 1 K, 16 | 93.168            | 64.749            |
| Beteiligungen an assoziierten Unternehmen                                                                                                              | 21      | 250.373           | 5.795             |
| Sonstige langfristige Vermögenswerte                                                                                                                   |         | 238.222           | 232.772           |
| <b>SUMME AKTIVA</b>                                                                                                                                    |         | <b>17.094.661</b> | <b>15.821.315</b> |

Der nachfolgende Anhang ist integraler Bestandteil des Konzernabschlusses.

**KONZERNBILANZ**

Tabelle 5.3.2

in TSD US \$, mit Ausnahme der Beträge  
je Aktie und der Aktienstückzahl, 31. Dezember

|                                                                                                                                  | Ziffer    | 2010              | 2009              |
|----------------------------------------------------------------------------------------------------------------------------------|-----------|-------------------|-------------------|
| <b>Passiva</b>                                                                                                                   |           |                   |                   |
| <b>Kurzfristige Verbindlichkeiten</b>                                                                                            |           |                   |                   |
| Verbindlichkeiten aus Lieferungen und Leistungen                                                                                 |           | 420.637           | 362.407           |
| Verbindlichkeiten gegenüber verbundenen Unternehmen                                                                              |           | 121.887           | 277.429           |
| Rückstellungen und sonstige kurzfristige Verbindlichkeiten                                                                       | 7         | 1.537.423         | 1.335.553         |
| Kurzfristige Darlehen und sonstige Finanzverbindlichkeiten                                                                       | 8         | 670.671           | 316.344           |
| Kurzfristige Darlehen von verbundenen Unternehmen                                                                                | 8         | 9.683             | 10.440            |
| Kurzfristig fälliger Anteil der langfristigen Verbindlichkeiten und Verbindlichkeiten aus aktivierten Leasingverträgen           | 9         | 263.982           | 157.634           |
| Genussscheinähnliche Wertpapiere der Fresenius Medical Care Capital Trusts, kurzfristiger Anteil                                 | 11        | 625.549           | –                 |
| Rückstellungen für Ertragsteuern                                                                                                 | 1 K, 16   | 117.542           | 116.978           |
| Latente Steuern                                                                                                                  | 1 K, 16   | 22.349            | 32.930            |
| <b>SUMME KURZFRISTIGE VERBINDLICHKEITEN</b>                                                                                      |           | <b>3.789.723</b>  | <b>2.609.715</b>  |
| Langfristige Verbindlichkeiten und Verbindlichkeiten aus aktivierten Leasingverträgen abzüglich des kurzfristig fälligen Anteils | 9         | 4.309.676         | 4.427.921         |
| Rückstellungen und sonstige langfristige Verbindlichkeiten                                                                       |           | 294.015           | 307.112           |
| Pensionsrückstellungen                                                                                                           | 10        | 190.150           | 147.327           |
| Rückstellungen für Ertragsteuern                                                                                                 | 1 K, 16   | 200.581           | 215.921           |
| Latente Steuern                                                                                                                  | 1 K, 16   | 506.896           | 427.530           |
| Genussscheinähnliche Wertpapiere der Fresenius Medical Care Capital Trusts                                                       | 11        | –                 | 656.096           |
| <b>SUMME VERBINDLICHKEITEN</b>                                                                                                   |           | <b>9.291.041</b>  | <b>8.791.622</b>  |
| Anteile anderer Gesellschafter mit Put-Optionen                                                                                  | 12        | 279.709           | 231.303           |
| <b>Eigenkapital der Anteilseigner der FMC AG &amp; CO. KGAA</b>                                                                  |           |                   |                   |
| Vorzugsaktien, ohne Nennwert, Nominalwert 1,00 €, 12.356.880 Aktien genehmigt, 3.957.168 ausgegeben und in Umlauf                |           | 4.440             | 4.343             |
| Stammaktien, ohne Nennwert, Nominalwert 1,00 €, 373.436.220 Aktien genehmigt, 298.279.001 ausgegeben und in Umlauf               |           | 369.002           | 365.672           |
| Kapitalrücklage                                                                                                                  |           | 3.339.781         | 3.243.466         |
| Bilanzgewinn                                                                                                                     |           | 3.858.080         | 3.111.530         |
| Kumulierter übriger Comprehensive (Loss)                                                                                         | 20        | (194.045)         | (49.724)          |
| <b>SUMME EIGENKAPITAL DER ANTEILSEIGNER DER FMC AG &amp; CO. KGAA</b>                                                            | <b>13</b> | <b>7.377.258</b>  | <b>6.675.287</b>  |
| Anteile anderer Gesellschafter ohne Put-Optionen                                                                                 |           | 146.653           | 123.103           |
| <b>SUMME EIGENKAPITAL</b>                                                                                                        | <b>13</b> | <b>7.523.911</b>  | <b>6.798.390</b>  |
| <b>SUMME PASSIVA</b>                                                                                                             |           | <b>17.094.661</b> | <b>15.821.315</b> |

Der nachfolgende Anhang ist integraler Bestandteil des Konzernabschlusses.



# KONZERN-CASH-FLOW-RECHNUNG

| KONZERN-CASH-FLOW-RECHNUNG                                                                                             |         |                  |                  |
|------------------------------------------------------------------------------------------------------------------------|---------|------------------|------------------|
| in TSD US \$                                                                                                           |         | Tabelle 5.4.1    |                  |
|                                                                                                                        | Ziffer  | 2010             | 2009             |
| <b>Cash Flow aus laufender Geschäftstätigkeit</b>                                                                      |         |                  |                  |
| Ergebnis nach Ertragsteuer                                                                                             |         | 1.065.396        | 965.220          |
| Überleitung vom Ergebnis nach Ertragsteuer auf den Cash Flow aus laufender Geschäftstätigkeit:                         |         |                  |                  |
| Abschreibungen                                                                                                         | 22      | 503.224          | 457.085          |
| Veränderung der latenten Steuern, netto                                                                                |         | 14.687           | 22.002           |
| Gewinn aus Desinvestitionen                                                                                            |         | (5.888)          | (1.250)          |
| (Gewinn) Verlust aus Anlagenabgängen                                                                                   |         | (628)            | 1.308            |
| Personalaufwand aus Aktienoptionen                                                                                     | 15      | 27.981           | 33.746           |
| Veränderungen bei Aktiva und Passiva, ohne Auswirkungen aus den Veränderungen des Konsolidierungskreises:              |         |                  |                  |
| Forderungen aus Lieferungen und Leistungen, netto                                                                      |         | (300.274)        | (41.994)         |
| Vorräte                                                                                                                | 4       | 18.326           | (88.933)         |
| Sonstige Vermögenswerte                                                                                                |         | (60.305)         | (147.105)        |
| Forderungen gegen verbundene Unternehmen                                                                               |         | 125.962          | (144.224)        |
| Verbindlichkeiten gegenüber verbundenen Unternehmen                                                                    |         | (135.001)        | 138.506          |
| Verbindlichkeiten aus Lieferungen und Leistungen, Rückstellungen und sonstige kurz- und langfristige Verbindlichkeiten |         | 124.279          | 71.092           |
| Steuerrückstellungen                                                                                                   | 1 K, 16 | (9.634)          | 73.164           |
| <b>CASH FLOW AUS LAUFENDER GESCHÄFTSTÄTIGKEIT</b>                                                                      |         | <b>1.368.125</b> | <b>1.338.617</b> |

Der nachfolgende Anhang ist integraler Bestandteil des Konzernabschlusses.

**KONZERN-CASH-FLOW-RECHNUNG**

in TSD US \$

Tabelle 5.4.2

|                                                                                                                                                                                                | Ziffer  | 2010               | 2009             |
|------------------------------------------------------------------------------------------------------------------------------------------------------------------------------------------------|---------|--------------------|------------------|
| <b>Cash Flow aus Investitionstätigkeit</b>                                                                                                                                                     |         |                    |                  |
| Erwerb von Sachanlagen                                                                                                                                                                         | 1E,5,21 | (523.629)          | (573.606)        |
| Erlöse aus dem Verkauf von Sachanlagen                                                                                                                                                         | 1E,5,21 | 16.108             | 11.730           |
| Erwerb von Anteilen an verbundenen und assoziierten Unternehmen, Beteiligungen und Erwerb von immateriellen Vermögenswerten sowie Investitionen, netto                                         | 22, 23  | (764.338)          | (188.113)        |
| Erlöse aus Desinvestitionen                                                                                                                                                                    |         | 146.835            | 51.965           |
| <b>CASH FLOW AUS INVESTITIONSTÄTIGKEIT</b>                                                                                                                                                     |         | <b>(1.125.024)</b> | <b>(698.024)</b> |
| <b>Cash Flow aus Finanzierungstätigkeit</b>                                                                                                                                                    |         |                    |                  |
| Einzahlungen aus kurzfristigen Darlehen und sonstigen Finanzverbindlichkeiten                                                                                                                  | 8       | 281.022            | 107.192          |
| Tilgung kurzfristiger Darlehen und sonstiger Finanzverbindlichkeiten                                                                                                                           | 8       | (258.561)          | (169.175)        |
| Einzahlungen aus kurzfristigen Darlehen von verbundenen Unternehmen                                                                                                                            | 8       | –                  | 18.830           |
| Tilgung kurzfristiger Darlehen von verbundenen Unternehmen                                                                                                                                     | 8       | –                  | (118.422)        |
| Einzahlungen aus langfristigen Verbindlichkeiten und Verbindlichkeiten aus aktivierten Leasingverträgen (nach Abzug von Kosten der Fremdkapitalaufnahme in Höhe von 31.458 US \$ im Jahr 2010) | 9       | 947.346            | 709.540          |
| Tilgung von langfristigen Verbindlichkeiten und Verbindlichkeiten aus aktivierten Leasingverträgen                                                                                             |         | (1.072.941)        | (566.241)        |
| Anstieg (Rückgang) des Forderungsverkaufsprogramms                                                                                                                                             |         | 296.000            | (325.000)        |
| Einzahlungen aus der Ausübung von Aktienoptionen                                                                                                                                               | 15      | 109.518            | 72.394           |
| Dividendenzahlungen                                                                                                                                                                            | 13      | (231.967)          | (231.940)        |
| Ausschüttung entfallend auf Anteile anderer Gesellschafter                                                                                                                                     |         | (111.550)          | (68.004)         |
| Kapitaleinlagen anderer Gesellschafter                                                                                                                                                         |         | 26.416             | 12.699           |
| <b>CASH FLOW AUS FINANZIERUNGSTÄTIGKEIT</b>                                                                                                                                                    |         | <b>(14.717)</b>    | <b>(558.127)</b> |
| <b>WECHSELKURSBEDINGTE VERÄNDERUNG DER FLÜSSIGEN MITTEL</b>                                                                                                                                    |         | <b>(6.739)</b>     | <b>(2.825)</b>   |
| <b>Flüssige Mittel</b>                                                                                                                                                                         |         |                    |                  |
| Nettoerhöhung der flüssigen Mittel                                                                                                                                                             |         | 221.645            | 79.641           |
| Flüssige Mittel am Anfang des Jahres                                                                                                                                                           |         | 301.225            | 221.584          |
| <b>FLÜSSIGE MITTEL AM ENDE DES JAHRES</b>                                                                                                                                                      |         | <b>522.870</b>     | <b>301.225</b>   |

Der nachfolgende Anhang ist integraler Bestandteil des Konzernabschlusses.

# KONZERN-EIGENKAPITAL- VERÄNDERUNGSRECHNUNG

## KONZERN-EIGENKAPITALVERÄNDERUNGSRECHNUNG

in TSD US \$, mit Ausnahme  
der Anzahl der Aktien

Tabelle 5.5.1

|                                                                 | Ziffer | Vorzugsaktien        |              | Stammaktien          |                |
|-----------------------------------------------------------------|--------|----------------------|--------------|----------------------|----------------|
|                                                                 |        | Anzahl<br>der Aktien | Betrag       | Anzahl<br>der Aktien | Betrag         |
| <b>STAND AM 31. DEZEMBER 2008</b>                               |        | <b>3.810.540</b>     | <b>4.240</b> | <b>293.932.036</b>   | <b>363.076</b> |
| Erlöse aus der Ausübung von<br>Aktienoptionen und Steuereffekte | 15     | 73.788               | 103          | 1.814.599            | 2.596          |
| Personalaufwand aus Aktienoptionen                              | 15     | –                    | –            | –                    | –              |
| Dividendenzahlungen                                             | 13     | –                    | –            | –                    | –              |
| Erwerb/Verkauf von Anteilen<br>anderer Gesellschafter           |        | –                    | –            | –                    | –              |
| Kapitaleinlage anderer Gesellschafter                           |        | –                    | –            | –                    | –              |
| Bewertung Anteile<br>anderer Gesellschafter mit Put-Optionen    | 12     | –                    | –            | –                    | –              |
| Ergebnis nach Ertragsteuer                                      |        | –                    | –            | –                    | –              |
| Übriges Comprehensive Income (Loss)                             | 20     | –                    | –            | –                    | –              |
| Gesamtergebnis                                                  |        | –                    | –            | –                    | –              |
| <b>STAND AM 31. DEZEMBER 2009</b>                               |        | <b>3.884.328</b>     | <b>4.343</b> | <b>295.746.635</b>   | <b>365.672</b> |
| Erlöse aus der Ausübung von<br>Aktienoptionen und Steuereffekte | 15     | 72.840               | 97           | 2.532.366            | 3.330          |
| Personalaufwand aus Aktienoptionen                              | 15     | –                    | –            | –                    | –              |
| Dividendenzahlungen                                             | 13     | –                    | –            | –                    | –              |
| Erwerb/Verkauf von Anteilen<br>anderer Gesellschafter           |        | –                    | –            | –                    | –              |
| Kapitaleinlage anderer Gesellschafter                           |        | –                    | –            | –                    | –              |
| Bewertung Anteile<br>anderer Gesellschafter mit Put-Optionen    | 12     | –                    | –            | –                    | –              |
| Ergebnis nach Ertragsteuern                                     |        | –                    | –            | –                    | –              |
| Übriges Comprehensive Income (Loss)                             | 20     | –                    | –            | –                    | –              |
| Gesamtergebnis                                                  |        | –                    | –            | –                    | –              |
| <b>STAND AM 31. DEZEMBER 2010</b>                               |        | <b>3.957.168</b>     | <b>4.440</b> | <b>298.279.001</b>   | <b>369.002</b> |

Der nachfolgende Anhang ist integraler Bestandteil des Konzernabschlusses.

## KONZERN-EIGENKAPITALVERÄNDERUNGSRECHNUNG

in TSD US \$, mit Ausnahme  
der Anzahl der Aktien

Tabelle 5.5.2

|                                                                 | Ziffer | Kapital-<br>rücklage | Bilanz-<br>gewinn | Kumuliertes<br>Übriges<br>Compre-<br>hensive<br>Income<br>(Loss) | Summe<br>Eigenkapital<br>der Anteils-<br>eigner der<br>FMC AG &<br>CO. KGAA | Anteile<br>anderer Ge-<br>sellschafter<br>ohne Put-<br>Optionen | Summe<br>Eigenkapital |
|-----------------------------------------------------------------|--------|----------------------|-------------------|------------------------------------------------------------------|-----------------------------------------------------------------------------|-----------------------------------------------------------------|-----------------------|
| <b>STAND AM 31. DEZEMBER 2008</b>                               |        | <b>3.188.089</b>     | <b>2.452.332</b>  | <b>(151.284)</b>                                                 | <b>5.856.453</b>                                                            | <b>104.167</b>                                                  | <b>5.960.620</b>      |
| Erlöse aus der Ausübung von<br>Aktienoptionen und Steuereffekte | 15     | 64.585               | –                 | –                                                                | 67.284                                                                      | –                                                               | 67.284                |
| Personalaufwand aus Aktienoptionen                              | 15     | 33.746               | –                 | –                                                                | 33.746                                                                      | –                                                               | 33.746                |
| Dividendenzahlungen                                             | 13     | –                    | (231.940)         | –                                                                | (231.940)                                                                   | (44.569)                                                        | (276.509)             |
| Erwerb/Verkauf von Anteilen<br>anderer Gesellschafter           |        | (3.138)              | –                 | –                                                                | (3.138)                                                                     | 12.929                                                          | 9.791                 |
| Kapitaleinlage anderer Gesellschafter                           |        | –                    | –                 | –                                                                | –                                                                           | 3.285                                                           | 3.285                 |
| Bewertung Anteile<br>anderer Gesellschafter mit Put-Optionen    | 12     | (39.816)             | –                 | –                                                                | (39.816)                                                                    | –                                                               | (39.816)              |
| Ergebnis nach Ertragsteuer                                      |        | –                    | 891.138           | –                                                                | 891.138                                                                     | 45.487                                                          | 936.625               |
| Übriges Comprehensive Income (Loss)                             | 20     | –                    | –                 | 101.560                                                          | 101.560                                                                     | 1.804                                                           | 103.364               |
| Gesamtergebnis                                                  |        | –                    | –                 | –                                                                | 992.698                                                                     | 47.291                                                          | 1.039.989             |
| <b>STAND AM 31. DEZEMBER 2009</b>                               |        | <b>3.243.466</b>     | <b>3.111.530</b>  | <b>(49.724)</b>                                                  | <b>6.675.287</b>                                                            | <b>123.103</b>                                                  | <b>6.798.390</b>      |
| Erlöse aus der Ausübung von<br>Aktienoptionen und Steuereffekte | 15     | 98.819               | –                 | –                                                                | 102.246                                                                     | –                                                               | 102.246               |
| Personalaufwand aus Aktienoptionen                              | 15     | 27.981               | –                 | –                                                                | 27.981                                                                      | –                                                               | 27.981                |
| Dividendenzahlungen                                             | 13     | –                    | (231.967)         | –                                                                | (231.967)                                                                   | (58.617)                                                        | (290.584)             |
| Erwerb/Verkauf von Anteilen<br>anderer Gesellschafter           |        | (6.263)              | –                 | –                                                                | (6.263)                                                                     | 17.295                                                          | 11.032                |
| Kapitaleinlage anderer Gesellschafter                           |        | –                    | –                 | –                                                                | –                                                                           | 4.392                                                           | 4.392                 |
| Bewertung Anteile<br>anderer Gesellschafter mit Put-Optionen    | 12     | (24.222)             | –                 | –                                                                | (24.222)                                                                    | –                                                               | (24.222)              |
| Ergebnis nach Ertragsteuern                                     |        | –                    | 978.517           | –                                                                | 978.517                                                                     | 58.040                                                          | 1.036.557             |
| Übriges Comprehensive Income (Loss)                             | 20     | –                    | –                 | (144.321)                                                        | (144.321)                                                                   | 2.440                                                           | (141.881)             |
| Gesamtergebnis                                                  |        | –                    | –                 | –                                                                | 834.196                                                                     | 60.480                                                          | 894.676               |
| <b>STAND AM 31. DEZEMBER 2010</b>                               |        | <b>3.339.781</b>     | <b>3.858.080</b>  | <b>(194.045)</b>                                                 | <b>7.377.258</b>                                                            | <b>146.653</b>                                                  | <b>7.523.911</b>      |

Der nachfolgende Anhang ist integraler Bestandteil des Konzernabschlusses.

## ANMERKUNGEN ZUM KONZERNABSCHLUSS

Wenn nicht anders angegeben, Zahlenangaben in Tausend, mit Ausnahme der Beträge je Aktie.

### 1. DIE GESELLSCHAFT, GRUNDLAGE DER DARSTELLUNG, GESUNDHEITSREFORM UND WESENTLICHE GRUNDSÄTZE DER RECHNUNGSLEGUNG

#### Die Gesellschaft

Die Fresenius Medical Care AG & Co. KGaA (FMC AG & Co. KGaA oder die Gesellschaft) ist der weltweit führende integrierte Anbieter von Dialyседienstleistungen und Dialyseprodukten für die Behandlung von Patienten mit terminaler Niereninsuffizienz. Als vertikal integriertes Unternehmen bietet die Gesellschaft Dialyседienstleistungen in eigenen Kliniken oder Kliniken, die sie betreibt, an und versorgt diese mit einer weiten Produktpalette. Zusätzlich verkauft die Gesellschaft Dialyseprodukte an andere Dialyседienstleister. In den USA führt die Gesellschaft darüber hinaus klinische Labortests durch und bietet stationäre Dialysebehandlungen sowie andere Dienstleistungen im Rahmen von Verträgen mit Krankenhäusern an. In dem vorliegenden Bericht beziehen sich die Begriffe FMC AG & Co. KGaA oder die Gesellschaft in Abhängigkeit vom Kontext auf die Gesellschaft oder auf die Gesellschaft und deren Tochtergesellschaften auf konsolidierter Basis.

#### Grundlage der Darstellung

Der beigefügte Konzernabschluss wurde in Übereinstimmung mit den us-amerikanischen Rechnungslegungsgrundsätzen, den „United States Generally Accepted Accounting Principles“ (U.S. GAAP) aufgestellt.

Die Gesellschaft hat Anteile anderer Gesellschafter mit Put-Optionen in der Konzern-Bilanz umgebucht und neu bewertet. Demzufolge wurden zum 31. Dezember 2009 und 2008 von dem Posten Anteile anderer Gesellschafter 85.658 US \$ bzw. 56.337 US \$ sowie von dem Posten Kapitalrücklage 145.645 US \$ bzw. 105.829 US \$ in den Posten Anteile anderer Gesellschafter mit Put-Optionen umgebucht. Des Weiteren benannte die Gesellschaft die Posten mit den verbleibenden Anteilen anderer Gesellschafter in Anteile anderer Gesellschafter ohne Put-Optionen um. Die Konzern-Eigenkapitalveränderungsrechnung wurde entsprechend angepasst. Die vorgenommenen Änderungen hatten keinen Einfluss auf die Konzern-Gewinn- und Verlustrechnung.

Um der Berichterstattung des aktuellen Jahres zu entsprechen, wurden im Konzernabschluss des vergangenen Jahres bestimmte Posten angepasst.

#### us-amerikanische Gesundheitsreform

Das „Patient Protection and Affordable Care Act“-Gesetz wurde in den USA am 23. März 2010 verabschiedet und danach vom „Health Care and Educational Affordability Reconciliation Act“-Gesetz geändert (das geänderte Gesetz wird im Folgenden als ACA abgekürzt). ACA wird weitreichende Reformen des Gesundheitssystems einführen, einschließlich (i) Bestimmungen, die allen Amerikanern den Zugang zu einer erschwinglichen Krankenversicherung ermöglichen, (ii) der Ausweitung des Medicaid-Programms, (iii) einer ab 2011 von Arzneimittelfirmen zu zahlenden und anhand des Absatzes von Marken-Medikamenten an staatliche Gesundheitsprogramme errechneten Branchenabgabe, (iv) eine Umsatzsteuer in Höhe von 2,3 % auf Umsätze der Hersteller mit medizinischen Geräten ab 2013, (v) Erhöhungen der Medicaid-Rabatte für verschreibungspflichtige Medikamente zum 1. Januar 2010, (vi) Reformen des privaten Versicherungsmarktes zum Schutze der Verbraucher, wie z.B. Verbote von Lebens- und Jahresobergrenzen, Abdeckung bestehender Erkrankungen, Verwaltungskostengrenzen sowie Begrenzung von Wartezeiten, (vii) Bestimmungen zur Förderung der integrierten Gesundheitsversorgung, Effizienz und Abstimmung zwischen Gesundheitsdienstleistern sowie (viii) Bestimmungen zur Verringerung von Verschwendung und Betrug bei Gesundheitsprogrammen. Die im ACA enthaltene Umsatzsteuer auf medizinische Geräte, die Erhöhungen der Medicaid-Rabatte für Medikamente und die jährliche Abgabe der pharmazeutischen Industrie wird sich negativ auf das Ergebnis und die Zahlungsmittelzuflüsse des Produktgeschäfts der Gesellschaft auswirken. Die Gesellschaft erwartet, dass sich die Vorschriften des ACA zur integrierten Gesundheitsversorgung und zum Verbraucherschutz bei privaten Versicherungen leicht positiv auswirken werden.

### Wesentliche Grundsätze der Rechnungslegung

#### a) Konsolidierungsgrundsätze und Konsolidierungskreis

Der Konzernabschluss umfasst alle Unternehmen, die unter der rechtlichen oder tatsächlichen Kontrolle der Gesellschaft stehen. Darüber hinaus bezieht die Gesellschaft Zweckgesellschaften (Variable Interest Entities (VIEs)) in den Konzernabschluss ein, wenn die Gesellschaft als Meistbegünstigter betrachtet wird. In Übereinstimmung mit den Rechnungslegungsgrundsätzen bezieht die Gesellschaft auch Kliniken in den Konzernabschluss ein, die von ihr geleitet werden und für deren finanzielle Kontrolle sie sorgt. Anteile an assoziierten Unternehmen (Stimmrechtsanteile üblicherweise zwischen 20 % und 50 %) werden nach der Equity-Methode bilanziert. Die Anteile anderer Gesellschafter spiegeln den Anteil von anderen Gesellschaftern an den Nettovermögenswerten konsolidierter Tochtergesellschaften wider. Alle wesentlichen konzern-internen Aufwendungen und Erträge sowie konzerninterne Forderungen und Verbindlichkeiten werden gegenseitig aufgerechnet.

Die Gesellschaft geht verschiedene Vereinbarungen mit bestimmten Dialysekliniken und einer Distributionsgesellschaft ein, die Managementdienstleistungen, Finanzierungen und die Lieferung von Produkten umfassen. Da die Kliniken und die Distributionsgesellschaft ein negatives Eigenkapital aufweisen und nicht in der Lage sind, sich selbst zu finanzieren, unterstützt die Gesellschaft ihre Geschäftstätigkeit finanziell durch die Vergabe von Darlehen. Neben der Verzinsung der Darlehen erhält die Gesellschaft als Ausgleich für die Finanzierung Exklusivverträge für die Lieferung von Produkten, einen Anspruch auf einen Anteil am Gewinn, sofern einer erwirtschaftet wird, sowie ein Vorverkaufsrecht, sollten die Eigentümer das Geschäft oder die Vermögenswerte verkaufen. Die Kliniken und die Distributionsgesellschaft sind VIEs, bei denen die Gesellschaft als Meistbegünstigter bestimmt wurde, und müssen daher voll konsolidiert werden. Sie erwirtschafteten im Jahr 2010 und im Jahr 2009 einen Umsatz von rund 132.697 US \$ bzw. 112.573 US \$. Die Gesellschaft gewährte diesen VIEs Darlehen und Kredite in Höhe von 110.600 US \$ im Jahr 2010 bzw. 42.300 US \$ im Jahr 2009. Die folgende Tabelle zeigt die Buchwerte der Vermögenswerte und Schulden der VIEs zum 31. Dezember 2010 und 2009:

| BUCHWERTE VIES                                                                                  |           |          |
|-------------------------------------------------------------------------------------------------|-----------|----------|
| Tabelle 5.6.1                                                                                   |           |          |
| in TSD US \$                                                                                    |           |          |
|                                                                                                 | 2010      | 2009     |
| Forderungen aus Lieferungen und Leistungen, netto                                               | 60.070    | 50.730   |
| Sonstiges Umlaufvermögen                                                                        | 26.981    | 20.029   |
| Sachanlagen, immaterielle Vermögenswerte und sonstige Aktiva                                    | 29.597    | 13.841   |
| Firmenwerte                                                                                     | 56.883    | 21.606   |
| Verbindlichkeiten aus Lieferungen und Leistungen, Rückstellungen und sonstige Verbindlichkeiten | (105.662) | (42.931) |
| Langfristige Darlehen an verbundene Unternehmen                                                 | (12.998)  | (17.016) |
| Eigenkapital                                                                                    | (54.870)  | (46.258) |

#### b) Flüssige Mittel

Die flüssigen Mittel enthalten Barmittel und kurzfristige liquide Anlagen mit einer Fälligkeit von ursprünglich bis zu drei Monaten.

**c) Wertberichtigungen auf Forderungen aus Lieferungen und Leistungen**

Die Bestimmung der Wertberichtigungen auf zweifelhafte Forderungen für Dialyседienstleistungen basiert hauptsächlich auf dem Zahlungsverhalten der Vertragspartner in der Vergangenheit. Die im Segment Nordamerika gebildeten Wertberichtigungen werden auf Basis des vergangenen Zahlungsverhaltens, der unterschiedlichen Vertragspartner sowie der Altersstruktur ermittelt. In gewissen Abständen werden die Forderungen auf Veränderungen im Zahlungsverhalten überprüft, um die Angemessenheit der Wertberichtigung sicherzustellen. Die Wertberichtigungen im Segment International sowie im Produktgeschäft werden auf Basis von Schätzungen anhand verschiedener Faktoren, einschließlich Altersstruktur, Vertragspartner und vergangenem Zahlungsverhalten ermittelt.

**d) Vorräte**

Die Vorräte werden entweder zu Anschaffungs- bzw. Herstellungskosten bewertet (nach der Durchschnittskosten- bzw. Fifo-Methode) oder zum niedrigeren Nettoveräußerungswert angesetzt — *siehe Anmerkung 4*. In die Herstellungskosten werden neben den direkt zurechenbaren Kosten auch Fertigungs- und Materialgemeinkosten sowie Abschreibungen einbezogen.

**e) Sachanlagen**

Die Gegenstände des Sachanlagevermögens werden zu Anschaffungs- und Herstellungskosten abzüglich kumulierter Abschreibungen bewertet — *siehe Anmerkung 5*. Wesentliche Verbesserungen der Vermögenswerte über ihren ursprünglichen Zustand hinaus werden aktiviert. Reparatur- und Instandhaltungsaufwendungen, die nicht zu einer Verlängerung der Nutzungsdauer führen, werden aufwandswirksam behandelt. Vermögenswerte, die aufgrund von Finanzierungsleasingverträgen zu bilanzieren sind, werden zum Barwert der zukünftigen Mindestleasingzahlungen zu Beginn des Leasingvertrags abzüglich kumulierter Abschreibungen angesetzt. Abschreibungen werden nach der linearen Methode über die geschätzte Nutzungsdauer der Vermögenswerte vorgenommen, die für Gebäude und Einbauten zwischen 5 und 50 Jahren (im gewogenen Durchschnitt 12 Jahre) und für technische Anlagen, Maschinen und Ausstattungen zwischen 3 und 15 Jahren (im gewogenen Durchschnitt 10 Jahre) liegt. Geleaste Geschäftsausstattung (Finanzierungsleasing) und Mietereinbauten werden grundsätzlich linear über die geschätzte Nutzungsdauer des Vermögenswertes oder, falls diese kürzer ist, über die Laufzeit des Mietvertrags abgeschrieben. Innerbetrieblich genutzte Firmware, die in die von ihr zu unterstützende Computeranlage integriert ist, wird als Sachanlagevermögen behandelt. Die Gesellschaft aktiviert Zinsen aus der Aufnahme von Darlehen für qualifizierte Vermögenswerte. Die in den Jahren 2010 und 2009 aktivierten Zinsen beliefen sich auf 5.918 US \$ bzw. 10.395 US \$.

**f) Immaterielle Vermögenswerte sowie Firmenwerte**

Die Bilanzierung von immateriellen Vermögenswerten, die im Rahmen von Unternehmenszusammenschlüssen erworben wurden, wie zum Beispiel Verträge über Wettbewerbsverzicht, Technologie, Vertriebsrechte, Patente, Lizenzen zur Behandlung von Patienten und Lizenzen zur Fertigung, Distribution und zum Verkauf von Arzneimitteln, Markennamen, Managementverträge, Anwendersoftware, Akutdialyseverträge, Leasingverträge und Lizenzen, erfolgt getrennt vom Firmenwert — *siehe Anmerkung 6*.

Firmenwerte und immaterielle Vermögenswerte mit unbegrenzter Nutzungsdauer werden nicht planmäßig abgeschrieben, sondern jährlich und bei Eintritt bestimmter Ereignisse auch unterjährig auf außerplanmäßigen Abschreibungsbedarf hin überprüft. Als immaterielle Vermögenswerte mit unbegrenzter Nutzungsdauer weist die Gesellschaft Markennamen und bestimmte Managementverträge aus, da es aufgrund einer Analyse aller relevanten Faktoren keine vorhersehbare Begrenzung des Zeitraums gibt, in dem diese Vermögenswerte voraussichtlich Netto-Zahlungsmittelzuflüsse für die Gesellschaft generieren werden. Immaterielle Vermögenswerte mit begrenzter Nutzungsdauer werden nach der linearen Methode über die jeweilige Restnutzungsdauer auf ihren Restwert abgeschrieben. Verträge über Wettbewerbsverzicht haben eine durchschnittliche Nutzungsdauer von 8 Jahren. Für Technologie liegt die Nutzungsdauer bei 15 Jahren.



Lizenzen zur Fertigung, Distribution und zum Verkauf von Arzneimitteln werden über eine durchschnittliche Nutzungsdauer von 13 Jahren abgeschrieben. Alle anderen immateriellen Vermögenswerte werden über ihre gewichtete durchschnittliche Nutzungsdauer von 6 Jahren abgeschrieben. Die gewichtete durchschnittliche Nutzungsdauer aller immateriellen Vermögenswerte mit begrenzter Nutzungsdauer beträgt 11 Jahre. Immaterielle Vermögenswerte mit begrenzter Nutzungsdauer werden bei Eintritt bestimmter Ereignisse auf außerplanmäßigen Abschreibungsbedarf hin überprüft.

Zur Durchführung des jährlichen Impairment-Tests von Firmenwerten hat die Gesellschaft einzelne Berichtseinheiten (Reporting Units) festgelegt und den Buchwert jeder Berichtseinheit durch Zuordnung der Vermögenswerte und Verbindlichkeiten, einschließlich vorhandener Firmenwerte und immaterieller Vermögenswerte, bestimmt. Eine Berichtseinheit wird in der Regel eine Ebene unter der Segmentebene nach Regionen oder rechtlichen Einheiten festgelegt. Im Segment Nordamerika wurden zwei Berichtseinheiten (Renal Therapy Group und Fresenius Medical Services) festgelegt. Im Segment International wurden zwei Berichtseinheiten bestimmt (Europa und Latein Amerika), während es im Segment Asien Pazifik nur eine Berichtseinheit gibt.

In einem ersten Schritt des Impairment-Tests vergleicht die Gesellschaft den Zeitwert jeder Berichtseinheit mit deren Buchwert. Der Zeitwert einer Berichtseinheit wird durch Anwendung eines Discounted-Cash-Flow-Verfahrens unter Einbeziehung der spezifischen gewichteten Gesamtkapitalkosten nach Steuern (weighted average cost of capital, WACC) bestimmt. Zur Ermittlung der diskontierten zukünftigen Zahlungsmittelzuflüsse wird eine Vielzahl von Annahmen getroffen. Diese betreffen insbesondere zukünftige Erstattungssätze und Verkaufspreise, Anzahl der Behandlungen, Absatzmengen und Kosten. Zur Bestimmung der Zahlungsmittelzuflüsse werden in allen Bereichen das Budget der nächsten drei Jahre sowie Projektionen für die Jahre vier bis zehn und entsprechende Wachstumsraten für alle nachfolgenden Jahre zugrunde gelegt. Projektionen von bis zu zehn Jahren sind durch den weitgehend gleichförmigen und konjunkturunabhängigen Verlauf des Geschäfts der Gesellschaft möglich. Die Gründe hierfür sind der kontinuierliche Bedarf an unseren Dialyседienstleistungen und Dialyseprodukten sowie die Tatsache, dass die Gesellschaft einen Großteil ihrer Erstattungen für Dialyседienstleistungen von staatlichen Gesundheitsorganisationen erhält. Die Wachstumsraten der jeweiligen Berichtseinheiten für den Zeitraum nach den zehn Jahren liegen wie in den Vorjahren in der nordamerikanischen Berichtseinheit Renal Therapy Group bei 1 %, in der nordamerikanischen Berichtseinheit Fresenius Medical Services bei 1 %, in Europa bei 0 %, in Lateinamerika bei 4 % und in Asien Pazifik bei 4 %. Der Abzinsungsfaktor ermittelt sich aus den gewichteten durchschnittlichen Kapitalkosten (WACC) der jeweiligen Berichtseinheit. Der WACC der Gesellschaft für das Jahr 2010 besteht aus einer Basisrate von 6,38 %. Zusätzlich zu der Basisrate werden die jeweiligen länderspezifischen Risiken in Form von Zuschlägen berücksichtigt. Im Jahr 2010 lagen die WACCs der Berichtseinheiten zwischen 6,38 % und 13,56 %.

Ist der Zeitwert der Berichtseinheit niedriger als der Buchwert, wird in einem zweiten Schritt der Zeitwert des Firmenwertes der Berichtseinheit mit dem Buchwert des Firmenwertes verglichen. Ist der Zeitwert des Firmenwertes niedriger als der Buchwert, wird die Differenz als außerplanmäßige Abschreibung berücksichtigt.

Um die Werthaltigkeit von einzeln abgrenzbaren immateriellen Vermögenswerten mit unbegrenzter Nutzungsdauer zu beurteilen, vergleicht die Gesellschaft die Zeitwerte der immateriellen Vermögenswerte mit ihren Buchwerten. Der beizulegende Zeitwert eines immateriellen Vermögenswertes wird unter Anwendung eines Discounted-Cash-Flow-Verfahrens oder – sofern angemessen – anderer Methoden ermittelt.

#### g) Finanzinstrumente

Derivative Finanzinstrumente wie Devisenterminkontrakte und Zinsswaps, werden als Vermögenswerte oder Verbindlichkeiten zum Marktwert in der Bilanz ausgewiesen — siehe Anmerkung 19. Die Marktwertänderungen der derivativen Finanzinstrumente, die als Fair Value Hedges klassifiziert werden, und der dazugehörigen

gesicherten Grundgeschäfte werden periodengerecht ergebniswirksam erfasst. Der effektive Teil der Marktwertveränderungen der als Cash Flow Hedges klassifizierten Finanzinstrumente wird erfolgsneutral im Eigenkapital (Kumuliertes Übriges Comprehensive Income (Loss)) ausgewiesen. Der ineffektive Teil der Cash Flow Hedges wird sofort ergebniswirksam gebucht. Marktwertveränderungen von Derivaten, die für Sicherungszwecke abgeschlossen wurden und für die kein Hedge Accounting angewandt wird, werden erfolgswirksam erfasst und gleichen somit grundsätzlich die gegenläufigen Marktwertänderungen der zugrunde liegenden Geschäfte in der Gewinn- und Verlustrechnung aus.

#### **h) Fremdwährungsumrechnung**

Im vorliegenden Konzernabschluss ist der US\$ die Berichtswährung. Die Vermögenswerte und Verbindlichkeiten der Muttergesellschaft und der nicht-u.s.-amerikanischen Tochtergesellschaften werden zu Stichtagskursen umgerechnet. Aufwendungen und Erträge werden zu Durchschnittskursen des Geschäftsjahres umgerechnet. Währungsumrechnungsdifferenzen werden erfolgsneutral im Eigenkapital (Kumuliertes Übriges Comprehensive Income (Loss)) erfasst. Außerdem werden Währungsumrechnungsdifferenzen von bestimmten konzerninternen Fremdwährungsdarlehen, die als Anlage mit Eigenkapitalcharakter betrachtet werden, ebenfalls als Währungsumrechnungsdifferenz im Eigenkapital (Kumuliertes Übriges Comprehensive Income (Loss)) erfasst.

#### **i) Grundsätze der Umsatzrealisierung**

Umsätze aus Dialyседienstleistungen werden in Höhe derjenigen Beträge realisiert, mit deren Erzielung auf Grund bestehender Erstattungsvereinbarungen mit Dritten gerechnet wird. Die Realisierung erfolgt zu dem Zeitpunkt, zu dem die Leistung erbracht ist und die damit zusammenhängenden Produkte geliefert werden. Zu diesem Zeitpunkt ist die erstattende Institution zur Zahlung verpflichtet. Im Rahmen der Medicare- und Medicaid-Programme in Nordamerika sowie der Programme im Segment International, die andere staatliche erstattenden Institutionen betreffen, erfolgt die Abrechnung auf Basis von im Vorfeld festgelegten Erstattungssätzen pro Behandlung, die sich aus gesetzlichen oder sonstigen Vereinbarungen ergeben. Die Abrechnung an die Mehrzahl der nicht-staatlichen Versicherungen erfolgt auf Basis von Standardvereinbarungen, wobei vertraglich vereinbarte Abzüge berücksichtigt werden, um die nach den Erstattungsvereinbarungen zu erwartenden Zahlungseingänge realistisch abzuschätzen.

Umsätze aus Produktlieferungen werden zu dem Zeitpunkt realisiert, in dem das wirtschaftliche Eigentum auf den Käufer übergeht, entweder zum Zeitpunkt der Lieferung, bei Annahme durch den Kunden oder zu einem anderen Zeitpunkt, der den Eigentumsübergang eindeutig definiert. Da die Rücksendung von Produkten untypisch ist, werden dafür keine Wertberichtigungen gebildet. Falls eine Rücksendung von Waren erfolgt, werden die Umsätze, die Forderungen und die Aufwendungen zur Erzielung der Umsatzerlöse entsprechend vermindert. Die Umsatzerlöse sind abzüglich Skonti, Preisnachlässen und Rabatten ausgewiesen.

Ein kleinerer Teil der internationalen Produktumsätze wird auf Basis von Verträgen generiert, die dem Kunden, üblicherweise einer Gesundheitseinrichtung, das Recht gewähren, Geräte zu nutzen. Im selben Vertrag willigt der Kunde ein, die Verbrauchsmaterialien, die er für die Behandlung benötigt, zum Standardpreis zuzüglich eines Aufschlags zu beziehen. Die Gesellschaft realisiert auf Basis solcher Verträge keinen Umsatz für die Lieferung der Dialysegeräte, sondern der Umsatz für die Dialysegeräte wird beim Verkauf der Verbrauchsmaterialien realisiert. In anderen Verträgen dieser Art mit der vertraglichen Struktur eines Mietkaufvertrages geht das Eigentum an dem Dialysegerät bei der Installation des Dialysegerätes beim Kunden auf diesen (Nutzer) über. Auf Basis solcher Verträge erfolgt die Umsatzrealisierung gemäß den Bilanzierungsrichtlinien für Mietkaufverträge.

Jede Umsatzsteuer, die von einer staatlichen Behörde erhoben wird, wird Netto ausgewiesen; ebenso wird der Umsatz abzüglich der Steuer dargestellt.

**j) Forschungs- und Entwicklungsaufwendungen**

Forschungs- und Entwicklungskosten werden bei ihrer Entstehung als Aufwand erfasst.

**k) Ertragsteuern**

Aktive und passive latente Steuern werden für zukünftige Auswirkungen, die sich aus temporären Differenzen zwischen den im Konzernabschluss zugrunde gelegten Werten für die bestehenden Aktiva und Passiva und den steuerlich angesetzten Werten der Einzelgesellschaften, sowie auf ergebniswirksame Konsolidierungsmaßnahmen und steuerliche Verlustvorträge, deren Realisierung als wahrscheinlich angesehen wird, gebildet. Die latenten Steuern werden auf Basis der Steuersätze ermittelt, die nach der derzeitigen Rechtslage in den einzelnen Ländern zum Realisationszeitpunkt der temporären Differenzen gelten bzw. in Kürze gelten werden. Die Erfassung latenter Steueransprüche aus steuerlichen Verlustvorträgen bzw. deren Nutzbarkeit, wird aufgrund der Ergebnisplanung der Gesellschaft sowie konkret umsetzbarer Steuerstrategien beurteilt. Wertberichtigungen werden gebildet um den Buchwert eines latenten Steueranspruchs zu reduzieren bis zu dem Umfang, in dem es wahrscheinlich ist, dass ein ausreichend zu versteuerndes Ergebnis zur Verfügung stehen wird, um den latenten Steueranspruch zu nutzen — *siehe Anmerkung 16.*

Die Gesellschaft erfasst Zinsen und sonstige Zuschläge im Zusammenhang mit Ertragsteuerverpflichtungen als Ertragsteueraufwand.

**l) Außerplanmäßige Abschreibungen**

Die Gesellschaft prüft die Buchwerte ihres Sachanlagevermögens und ihrer immateriellen Vermögenswerte mit begrenzter Nutzungsdauer auf außerplanmäßigen Abschreibungsbedarf, wenn Ereignisse oder Veränderungen darauf hindeuten, dass der Buchwert dieser Vermögenswerte nicht werthaltig ist. Die Werthaltigkeit dieser Vermögenswerte wird durch einen Vergleich zwischen dem Buchwert und den erwarteten zukünftigen Zahlungsströmen der betreffenden Vermögenswerte überprüft. Falls für die Vermögenswerte Abwertungsbedarf besteht, wird eine Abwertung auf den niedrigeren Marktwert vorgenommen. Die Gesellschaft nutzt zur Ermittlung des Marktwertes das Discounted-Cash-Flow-Verfahren oder – sofern angemessen – andere Bewertungsverfahren.

Vermögenswerte, die zum Verkauf bestimmt sind, werden mit dem Buchwert oder dem niedrigeren beizulegenden Zeitwert abzüglich der Kosten der Veräußerung bilanziert. Für diese Vermögenswerte werden keine weiteren planmäßigen Abschreibungen vorgenommen, sofern die Veräußerung beabsichtigt ist. Vermögenswerte, deren Abgang anders als durch Verkauf erfolgen soll, gelten bis zu ihrem tatsächlichen Abgang als genutzt.

Über das Verfahren beim Abschreibungsbedarf von Firmenwerten — *siehe Anmerkung 1f.*

**m) Kosten der Fremdkapitalaufnahme**

Aufwendungen, die im Zusammenhang mit der Aufnahme von Fremdkapital anfallen, werden abgegrenzt und über die Laufzeit der zugrunde liegenden Verbindlichkeiten ergebniswirksam verteilt — *siehe Anmerkung 9.*

**n) Selbstversicherungsprogramme**

Über das Versicherungsprogramm für Berufs-, Produkt- und allgemeine Haftpflichtrisiken sowie für Pkw-Schäden und Arbeitnehmer-Entschädigungsansprüche trägt die in Nordamerika ansässige größte Tochtergesellschaft der Gesellschaft die Risiken teilweise selbst. Die Absicherung aller anderen eingetretenen Schadensfälle übernimmt die Gesellschaft, bis zu einer festgesetzten Schadenshöhe selbst. Wird diese überschritten, treten andere externe Versicherungen ein. Die im Geschäftsjahr bilanzierten Verbindlichkeiten stellen Schätzungen von zukünftigen Zahlungen für die gemeldeten sowie für die bereits entstandenen, aber noch nicht gemeldeten Schadensfälle dar. Die Schätzungen basieren auf historischen Erfahrungen und dem

gegenwärtigen Anspruchsverhalten. Diese Erfahrungen beziehen sowohl die Anspruchshäufigkeit (Anzahl) als auch die Anspruchshöhe (Kosten) ein und werden zur Schätzung der bilanzierten Beträge mit Erwartungen hinsichtlich einzelner Ansprüche kombiniert.

**o) Verwendung von Schätzungen**

Die Erstellung von Konzernabschlüssen nach u.s. GAAP macht Schätzungen und Annahmen durch die Unternehmensleitung erforderlich, die die Höhe der Aktiva und Passiva, die Angabe von Eventualforderungen und -verbindlichkeiten zum Bilanzstichtag sowie die Höhe der Erträge und Aufwendungen des Geschäftsjahres beeinflussen. Die tatsächlichen Ergebnisse können von diesen Schätzungen abweichen.

**p) Risikokonzentration**

Die Gesellschaft produziert und vertreibt Erzeugnisse für alle Arten von Dialyse, hauptsächlich für Gesundheitseinrichtungen, in der ganzen Welt. Die Gesellschaft betreibt weiterhin Dialysekliniken, führt klinische Laboruntersuchungen durch und stellt ergänzende medizinische Dienstleistungen bereit. Die Gesellschaft führt laufende Überprüfungen der finanziellen Lage ihrer Kunden durch und verlangt von den Kunden üblicherweise keine Sicherheiten.

Etwa 32 % des erwirtschafteten weltweiten Umsatzes der Gesellschaft im Jahr 2010 (33 % im Jahr 2009) unterliegen den Regularien der staatlichen Gesundheitsprogramme in den USA „Medicare und Medicaid“, und werden von US-Regierungsbehörden verwaltet. Für Konzentrationsrisiken aus den Lieferantenbeziehungen

—— siehe Anmerkung 4.

**q) Rechtskosten**

Die Gesellschaft ist im normalen Geschäftsverlauf Gegenstand von Rechtsstreitigkeiten, Gerichtsverfahren und Ermittlungen hinsichtlich verschiedenster Aspekte ihrer Geschäftstätigkeit —— siehe Anmerkung 18. Die Gesellschaft analysiert regelmäßig entsprechende Informationen und bildet die erforderlichen Rückstellungen für möglicherweise aus solchen Verfahren resultierende Verbindlichkeiten einschließlich der geschätzten Kosten für Rechtsleistungen und Rechtsberatungskosten im Zusammenhang mit diesen Rechtsstreitigkeiten. Für diese Analysen nutzt die Gesellschaft sowohl ihre interne Rechtsabteilung als auch externe Ressourcen. Die Bildung einer Rückstellung für Rechtsstreitigkeiten richtet sich nach der Wahrscheinlichkeit eines für die Gesellschaft nachteiligen Ausgangs und der Möglichkeit, einen Verlustbetrag zuverlässig schätzen zu können.

Die Erhebung einer Klage oder die formelle Geltendmachung eines Anspruches, bzw. die Bekanntgabe einer solchen Klage oder der Geltendmachung eines Anspruches, bedeutet nicht zwangsläufig, dass eine Rückstellung zu bilden ist.

**r) Ergebnis je Stammaktie und je Vorzugsaktie**

Das Ergebnis je Stammaktie und das Ergebnis je Vorzugsaktie wird auf der Grundlage der gewichteten durchschnittlichen Anzahl der ausstehenden Stammaktien und Vorzugsaktien für die dargestellten Jahre nach der sogenannten „two class method“ ermittelt. Das Ergebnis je Stammaktie ergibt sich aus dem Konzernergebnis abzüglich des Vorzugsbetrages der Vorzugsaktien, geteilt durch den gewichteten Durchschnitt der während des Geschäftsjahres im Umlauf befindlichen Anzahl von Stammaktien und Vorzugsaktien. Zur Ermittlung des Ergebnisses je Vorzugsaktie wird der Vorzugsbetrag zu dem Ergebnis je Stammaktie hinzugerechnet. Das verwässerte Ergebnis je Aktie enthält die Auswirkung aller potenziell verwässernden Wandel- und Optionsrechte, indem diese behandelt werden, als hätten sich die entsprechenden Aktien während des Geschäftsjahres im Umlauf befunden.

Die Ansprüche im Rahmen der Mitarbeiterbeteiligung der Gesellschaft können zu einem Verwässerungseffekt führen — siehe Anmerkung 15.

#### s) Pensionen und pensionsähnliche Verpflichtungen

Die Gesellschaft bilanzierte die Unterdeckung ihrer leistungsorientierten Pensionspläne, die sich aus der Differenz zwischen der Pensionsverpflichtung und dem beizulegenden Zeitwert des Planvermögens ergab, als eine Rückstellung. Änderungen des Finanzierungsstatus nach Steuern werden in dem Jahr, in dem sie entstehen, im Kumulierten Übrigen Comprehensive Income (Loss) erfasst. Diese Änderungen setzen sich zusammen aus ungetilgten versicherungsmathematischen Gewinnen oder Verlusten, ungetilgtem Dienstzeitaufwand oder anderen Kosten, die nicht als Bestandteil des Pensionsaufwands berücksichtigt wurden. Anschließend werden die versicherungsmathematischen Gewinne und Verluste und der Dienstzeitaufwand früherer Jahre bei Realisierung im Pensionsaufwand berücksichtigt. Der Bewertungsstichtag der Gesellschaft zur Bestimmung des Finanzierungsstatus ist für alle Pläne der 31. Dezember.

#### t) Neue Verlautbarungen: Kürzlich umgesetzte Rechnungslegungsverlautbarungen

Im Juli 2010 verabschiedete das Financial Accounting Standards Board (FASB) Accounting Standards Update 2010-20 (ASU 2010-20), Disclosures about the Credit Quality of Financing Receivables and the Allowance for Credit Losses. ASU 2010-20 ist eine Aktualisierung von FASB ASC Topic 310, Receivables und erfordert erweiterte Angabepflichten auf disaggregierter Basis über:

- ▶ die Art des dem Portfolio von Finanzforderungen inhärenten Kreditrisikos,
- ▶ die Art und Weise, wie dieses Risiko im Rahmen der Ermittlung der Wertberichtigungen auf Kreditverluste analysiert und bewertet wird und
- ▶ die Veränderungen der Wertberichtigungen auf Kreditverluste unter Angabe der Gründe für die Veränderungen.

Die von ASU 2010-20 erforderten Angaben zum Ende der Berichtsperiode sind für Perioden und Geschäftsjahre anzugeben, die am oder nach dem 15. Dezember 2010 enden. Angaben zu Aktivitäten während der Berichtsperiode sind für Perioden und Geschäftsjahre anzugeben, die am oder nach dem 15. Dezember 2010 beginnen. Die Gesellschaft wendet die Anforderungen von ASU 2010-20 zum 31. Dezember 2010 an.

Im Juni 2009 verabschiedete das FASB Accounting Standards Update 2009-17 (ASU 2009-17) (ursprünglich unter dem Namen FASB Standard Nr. 167 geführt), ASC 810, Consolidations-Improvements to Financial Reporting by Enterprises Involved with Variable Interest Entities. ASU 2009-17 verpflichtet berichtende Unternehmen, ehemalige Qualifying Special Purposes Entities (QSPE) für die Konsolidierung zu bewerten. ASU 2009-17 ersetzt eine quantitative Bewertungsmethode zur Bestimmung des Hauptbegünstigten einer Variable Interest Entity (VIE) durch eine qualitative Bewertungsmethode, mit dem Ziel eine Mehrheitsbeteiligung zu identifizieren. Des Weiteren verlangt ASU 2009-17 häufigere Bewertungen, um sicherzustellen, dass es sich bei dem identifizierten Unternehmen weiterhin um den Hauptbegünstigten der VIE handelt. Darüber hinaus klärt ASU 2009-17 die Charakteristika von VIEs, ohne diese signifikant zu ändern. ASU 2009-17 erweitert für Jahres- und Zwischenabschlüsse die Angabepflichten zu Risiken in Bezug auf anhaltende Beteiligungen an übertragenem Finanzvermögen.

Die in ASU 2009-17 enthaltenen Änderungen sind wirksam ab dem ersten Geschäftsjahr, das nach dem 15. November 2009 beginnt, und für alle folgenden Quartale und Geschäftsjahre anzuwenden. Alle ehemaligen QSPEs und sonstige VIEs müssten aufgrund der geänderten Konsolidierungsvorschriften zum ersten Geschäftsjahr beginnend nach dem 15. November 2009 neu bewertet werden. Eine frühere Anwendung war nicht gestattet. Die Gesellschaft hat die von ASU 2009-17 vorgeschriebenen Änderungen ab dem 1. Januar 2010 angewendet.

Im Juni 2009 verabschiedete das FASB Accounting Standard Update 2009-16 (ASU 2009-16) (ursprünglich unter den Namen FASB Standard Nr. 166 geführt), ASC 860, Transfer and Servicing – Accounting for Transfers of Financial Assets. ASU 2009-16 streicht das Konzept der QSPEs und erhöht die Anforderungen an den Ausweis von Übertragungen von Teilen finanzieller Vermögenswerte als Verkäufe. ASU 2009-16 klärt die Ausbuchungskriterien für finanzielle Vermögenswerte, ändert die Bewertung von Ansprüchen, die der Veräußerer bei erstmaligem Ansatz zurück behält (Retained Interests), und hebt die Vorschriften für die Umklassifizierung von Verbriefungen garantierter Hypotheken auf. ASU 2009-16 erweitert für Jahres- und Zwischenabschlüsse die Angabepflichten zu Risiken in Zusammenhang mit VIEs.

ASU 2009-16 ist wirksam ab dem ersten Geschäftsjahr, das nach dem 15. November 2009 beginnt, und für alle folgenden Quartale und Geschäftsjahre. Die Angabepflichten sind auf Übertragungen anzuwenden, die sowohl vor als auch nach Inkrafttreten von ASU 2009-16 aufgetreten sind. Eine frühere Anwendung ist nicht gestattet. Die Gesellschaft hat die Anforderungen von ASU 2009-16 ab dem 1. Januar 2010 angenommen.

## 2. WESENTLICHE EREIGNISSE SEIT ENDE DES GESCHÄFTSJAHRES

Am 3. Februar 2011 haben Fresenius Medical Care us Finance, Inc. und die FMC Finance VII S.A. vorrangige, unbesicherte Anleihen in Höhe von 650.000 US \$ und 300.000 € platziert. Die Anleihen werden am 15. Februar 2021 fällig. Der Coupon der von der Fresenius Medical Care us Finance, Inc. begebenen Anleihe beträgt 5,75 %. Bei einem Ausgabekurs von 99,060 % liegt die Rückzahlungsrendite bei 5,875 %. Die Anleihe der FMC Finance VII S.A. hat einen Coupon von 5,25 % und wurde zum Nennwert ausgegeben. Die Emittenten, beides hundertprozentige Tochtergesellschaften der Gesellschaft, haben jederzeit das Recht, die Anleihen zu 100 % des Nennwerts zuzüglich aufgelaufener Zinsen und bestimmten in den Anleihebedingungen festgelegten Aufschlägen zurückzukaufen. Die Anleihegläubiger haben das Recht, einen Rückkauf der Anleihe durch die Emittenten zu 101 % des Nennwerts zuzüglich aufgelaufener Zinsen zu fordern, wenn es nach einem Kontrollwechsel zu einer Herabstufung des Ratings der jeweiligen Anleihen kommt. Der Emissionserlös in Höhe von rund 1.035.000 US \$ wurde bzw. wird zur Rückzahlung von Finanzverbindlichkeiten unter dem Forderungsverkaufsprogramm und der Kreditvereinbarung 2006 verwendet. Außerdem erfolgt die Verwendung für Akquisitionen einschließlich der am 4. Januar 2011 verkündeten Übernahme von International Dialysis Centers und für allgemeine Geschäftszwecke. Die Anleihen der Fresenius Medical Care us Finance, Inc. und der FMC Finance VII S.A. werden durch die Gesellschaften FMC AG & CO. KGAA, Fresenius Medical Care Holdings, Inc. und Fresenius Medical Care Deutschland GmbH gesamtschuldnerisch garantiert.

Am 4. Januar 2011 gab die Gesellschaft die Unterzeichnung eines Kaufvertrages zum Erwerb des International Dialysis Centers (IDC) von Euromedic International (Euromedic) für 485.000 € (circa 650.000 US \$ zum 4. Januar 2011) bekannt. Das IDC ist das Dialysedienstleistungsgeschäft von Euromedic, es behandelt derzeit 8.200 Hämodialysepatienten in insgesamt 70 Kliniken in 9 Ländern überwiegend in Mittel- und Osteuropa. Die Übernahme bedarf noch der Zustimmung der zuständigen Kartellbehörden und wird voraussichtlich in der ersten Jahreshälfte 2011 abgeschlossen.

### 3. GESCHÄFTSBEZIEHUNGEN MIT NAHESTEHENDEN UNTERNEHMEN UND PERSONEN

#### a) Dienstleistungsvereinbarungen und Mietverträge

Das Mutterunternehmen der Gesellschaft, Fresenius SE & Co. KGaA, ist eine Kommanditgesellschaft auf Aktien, die aus einer formwechselnden Umwandlung zum 28. Januar 2011 der Fresenius SE, einer Europäischen Gesellschaft (Societas Europaea, SE), hervorging, die vor dem 13. Juli 2007 als deutsche Aktiengesellschaft unter Fresenius AG firmierte. In diesem Konzernabschluss bezeichnet „Fresenius SE“ sowohl die vorgenannte, seit dem 28. Januar 2011 als Kommanditgesellschaft auf Aktien geführte Gesellschaft, als auch die Gesellschaft vor und nach der Umwandlung der Fresenius AG in eine Europäische Gesellschaft. Die Fresenius SE ist die alleinige Aktionärin der Fresenius Medical Care Management AG (Management AG), der persönlich haftenden Gesellschafterin, und ist mit einer Beteiligung von 35,7 % der stimmberechtigten Aktien der Gesellschaft zum 31. Dezember 2010 deren größte Anteilseignerin.

Die Gesellschaft hat mit der Fresenius SE und einigen Tochtergesellschaften der Fresenius SE, die nicht auch Tochtergesellschaften der FMC AG & CO. KGAA sind (im Folgenden einheitlich als Fresenius SE Gesellschaften bezeichnet), Dienstleistungsvereinbarungen geschlossen. Sie umfassen u.a. Verwaltungsdienstleistungen, Management-Informationsdienstleistungen, Lohn- und Gehaltsabrechnung, Versicherungen, IT-Dienstleistungen und Steuer- und Finanzdienstleistungen. Für die Jahre 2010 und 2009 stellte die Fresenius SE der Gesellschaft auf der Grundlage dieser Dienstleistungsvereinbarungen 59.501 US \$ und 68.234 US \$ in Rechnung. Die Gesellschaft übernimmt ihrerseits bestimmte Dienstleistungen für die Fresenius SE Gesellschaften, die u.a. Forschung und Entwicklung, Zentraleinkauf und Lagerung umfassen. Für die Jahre 2010 und 2009 nahmen die Fresenius SE Gesellschaften Dienstleistungen der Gesellschaft in Höhe von 6.115 US \$ und 13.540 US \$ in Anspruch.

Entsprechend den Mietverträgen für Immobilien einschließlich Mietverträge für die Konzernzentrale in Bad Homburg v.d.H. (Deutschland) und für die Standorte Schweinfurt und St. Wendel (Deutschland), die mit Fresenius SE Gesellschaften abgeschlossen wurden, zahlte die Gesellschaft in den Jahren 2010 und 2009 Fresenius SE Gesellschaften 23.807 US \$ bzw. 23.109 US \$. Die Mehrzahl der Mietverträge läuft 2016 aus und enthält Verlängerungsoptionen.

Die Satzung der Gesellschaft sieht vor, dass der Management AG als persönlich haftender Gesellschafterin alle Aufwendungen im Zusammenhang mit der Geschäftsführungstätigkeit einschließlich der Vergütung der Mitglieder des Aufsichtsrats und des Vorstands erstattet werden. Für ihre Geschäftsführungstätigkeit erhielt die Management AG in den Jahren 2010 und 2009 insgesamt 16.123 US \$ bzw. 7.783 US \$, inklusive 80 US \$ bzw. 84 US \$ für die Jahre 2010 und 2009 als Kompensation für die Risikoübernahme als persönlich haftende Gesellschafterin. Die Satzung der Gesellschaft fixiert diesen jährlichen Betrag für die Übernahme der unbeschränkten Haftung auf 4 % des von der persönlich haftenden Gesellschafterin investierten Kapitals (1.500 €).

#### b) Produkte

Die Gesellschaft verkaufte in 2010 und 2009 Produkte in Höhe von 15.413 US \$ bzw. 13.601 US \$ an die Fresenius SE Gesellschaften. In den Jahren 2010 und 2009 tätigte die Gesellschaft Einkäufe bei Fresenius SE Gesellschaften in Höhe von 43.474 US \$ bzw. 43.320 US \$.



Zusätzlich zu den oben angeführten Einkäufen bezieht die Gesellschaft momentan Heparin über einen unabhängigen Beschaffungsverband von der APP Pharmaceuticals Inc. (APP Inc.). Im September 2008 kaufte die Fresenius Kabi AG, die eine hundertprozentige Tochtergesellschaft der Fresenius SE ist, sämtliche Anteile an der APP Inc. Die Gesellschaft hat keinen direkten Liefervertrag mit APP Inc. und bestellt nicht direkt bei APP Inc. In den Jahren 2010 und 2009 bezog die Fresenius Medical Care Holdings, Inc. (FMCH) über den zu marktüblichen Konditionen abgeschlossenen Vertrag mit dem Beschaffungsverband Heparin von APP Inc. im Wert von etwa 30.703 US \$ bzw. 31.300 US \$. Der Vertrag wurde von dem Beschaffungsverband und im Namen aller seiner Mitglieder ausgehandelt.

#### c) Erhaltene und gewährte Darlehen von Fresenius SE und von der persönlich haftenden Gesellschafterin

Im Laufe des Jahres 2010 hat die Gesellschaft im Rahmen der Cash Pooling Vereinbarung liquide Mittel bei der Fresenius SE angelegt. Der am 31. Dezember 2010 ausstehende Betrag in Höhe von 24.600 € (32.871 US \$ zum 31. Dezember 2010), der mit einem Zinssatz von 1,942 % verzinst wurde, wurde am 3. Januar 2011 vollständig zurückgezahlt.

Am 19. August 2009 erhielt die Gesellschaft von der persönlich haftenden Gesellschafterin ein Darlehen in Höhe von 1.500 € (2.004 US \$ zum 31. Dezember 2010) zu einem Zinssatz von 1,335 %, das ursprünglich am 19. August 2010 fällig war. Die Laufzeit wurde dann jedoch auf den 19. August 2011 verlängert.

Während des 2. Quartals 2009 reklassifizierte die Gesellschaft Verbindlichkeiten gegenüber der Fresenius SE in Höhe von 77.745 € (109.885 US \$ zum 30. Juni 2009) von „Verbindlichkeiten gegenüber verbundenen Unternehmen“ in „Kurzfristige Darlehen von verbundenen Unternehmen“. Der Betrag entspricht der Gewerbesteuerverbindlichkeit der Jahre 1997-2001. Innerhalb dieser Periode zahlte die Fresenius SE die Gewerbesteuer im Namen der Gesellschaft. Von diesem Betrag standen zum 31. Dezember 2010 5.747 € (7.679 US \$ zum 31. Dezember 2010) aus. Diese werden zu 6 % verzinst und im Jahr 2011 zurückgezahlt.

Die Gesellschaft hat mit der Fresenius SE eine Darlehensvereinbarung abgeschlossen, nach der die Gesellschaft oder bestimmte Tochtergesellschaften ein oder mehrere kurzfristige Darlehen in Höhe von bis zu 400.000 US \$ erhalten können. Diese Vereinbarung läuft bis zum 31. März 2013 — siehe Anmerkung 8. Im Rahmen dieses Vertrages erhielt die Gesellschaft im Geschäftsjahr 2010 Darlehen zwischen 10.000 € und 86.547 € mit Zinssätzen zwischen 0,968 % und 1,879 %. Am 31. Dezember 2010 standen jedoch keine Darlehen aus.

#### d) Sonstiges

Während des 3. Quartals 2009 erwarb die Gesellschaft eine Produktionslinie von der Fresenius SE zu einem Kaufpreis von netto 3.416 US \$.

Der Vorsitzende des Aufsichtsrats der Gesellschaft ist auch der Vorsitzende des Aufsichtsrats der Fresenius SE. Er ist auch Mitglied im Aufsichtsrat der persönlich haftenden Gesellschafterin der Gesellschaft.

Der stellvertretende Vorsitzende des Aufsichtsrats der Gesellschaft ist Mitglied des Aufsichtsrats der persönlich haftenden Gesellschafterin der Fresenius SE und stellvertretender Vorsitzender des Aufsichtsrats der persönlich haftenden Gesellschafterin der Gesellschaft. Er ist auch Partner einer Anwaltskanzlei, die für die Gesellschaft und bestimmte Tochtergesellschaften tätig war. Die Gesellschaft und bestimmte Tochtergesellschaften haben dieser Anwaltskanzlei in 2010 bzw. 2009 etwa 1.601 US \$ bzw. 1.445 US \$ für die Inanspruchnahme von Rechtsberatungsleistungen gezahlt. Fünf der sechs Mitglieder des Aufsichtsrats der Gesellschaft, einschließlich dem Vorsitzenden und dem stellvertretenden Vorsitzenden, sind auch Mitglieder des Aufsichtsrats der persönlich haftenden Gesellschafterin der Gesellschaft.

#### 4. VORRÄTE

Zum 31. Dezember 2010 und 2009 setzten sich die Vorräte wie folgt zusammen:

| VORRÄTE                         |                |                |
|---------------------------------|----------------|----------------|
| Tabelle 5.6.2                   |                |                |
| in TSD US \$                    |                |                |
|                                 | 2010           | 2009           |
| Roh-, Hilfs- und Betriebsstoffe | 158.163        | 154.599        |
| Unfertige Erzeugnisse           | 56.345         | 63.683         |
| Fertige Erzeugnisse             | 475.641        | 481.047        |
| Verbrauchsmaterialien           | 118.948        | 122.325        |
| <b>GESAMT</b>                   | <b>809.097</b> | <b>821.654</b> |

Die Gesellschaft hat sich in bestimmten, unwiderruflichen Einkaufsverträgen verpflichtet, zu festgelegten Bedingungen Rohstoffe im Wert von etwa 2.164.532 US \$ zu kaufen, von denen zum 31. Dezember 2010 374.083 US \$ für Käufe im Geschäftsjahr 2011 vorgesehen sind. Die Laufzeit dieser Vereinbarungen beträgt 1 bis 8 Jahre. Die Gesellschaft war zum 31. Dezember 2009 verpflichtet Rohstoffe im Wert von etwa 2.414.214 US \$ zu kaufen, von denen 407.889 US \$ für Käufe im Geschäftsjahr 2010 vorgesehen waren. In Abhängigkeit vom Ausgang der Neuverhandlungen bestimmter Lieferverträge hat die Gesellschaft Eventualverbindlichkeiten in Höhe von bis zu 60.400 US \$.

Die Vorräte beinhalten zum 31. Dezember 2010 bzw. 2009 einen Wert von 32.987 US \$ bzw. 34.788 US \$ für das Produkt Erythropoietin (EPO), das in den USA von einem einzigen Anbieter bezogen wird. Im Oktober 2006 hat die Gesellschaft einen fünfjährigen Exklusivvertrag bezüglich Beschaffung und Lieferung mit ihrem EPO Lieferanten abgeschlossen. Mit der Verabreichung von EPO wurden in den Jahren 2010 bzw. 2009 etwa 19 % bzw. 21 % des Gesamtumsatzes im Bereich Dialysedienstleistungen im Segment Nordamerika erzielt. Verzögerungen, Lieferunterbrechungen oder Beendigungen der Belieferung mit EPO können die Ertragslage der Gesellschaft negativ beeinflussen.

## 5. SACHANLAGEN

Zum 31. Dezember 2010 und 2009 setzten sich die Anschaffungs- und Herstellungskosten sowie die kumulierten Abschreibungen des Sachanlagevermögens wie folgt zusammen:

| ANSCHAFFUNGS- UND HERSTELLUNGSKOSTEN                             |                  |                                             |                                                    |                |                  |                  |                  |
|------------------------------------------------------------------|------------------|---------------------------------------------|----------------------------------------------------|----------------|------------------|------------------|------------------|
| Tabelle 5.6.3                                                    |                  |                                             |                                                    |                |                  |                  |                  |
| in TSD US \$                                                     |                  |                                             |                                                    |                |                  |                  |                  |
|                                                                  | 1. Jan. 2010     | Währungs-<br>umrech-<br>nungs-<br>differenz | Verände-<br>rungen im<br>Konsolidie-<br>rungskreis | Zugänge        | Um-<br>buchungen | Abgänge          | 31. Dez.<br>2010 |
| Grundstücke und Grundstückseinrichtungen                         | 44.837           | 1.838                                       | 949                                                | 2.826          | 55               | –                | 50.505           |
| Gebäude und Einbauten                                            | 1.727.681        | (9.561)                                     | 20.514                                             | 42.519         | 113.435          | (37.620)         | 1.856.968        |
| Technische Anlagen und Maschinen                                 | 2.630.925        | (42.755)                                    | 54.254                                             | 313.883        | 68.969           | (131.633)        | 2.893.643        |
| Andere Anlagen und Mietanlagen aus Finanzierungsleasingverträgen | 29.557           | 250                                         | 55                                                 | 1.774          | (1.081)          | (2.149)          | 28.406           |
| Anlagen im Bau                                                   | 259.711          | (5.144)                                     | 16.019                                             | 154.586        | (183.913)        | (2.447)          | 238.812          |
| <b>SACHANLAGEN</b>                                               | <b>4.692.711</b> | <b>(55.372)</b>                             | <b>91.791</b>                                      | <b>515.588</b> | <b>(2.535)</b>   | <b>(173.849)</b> | <b>5.068.334</b> |

| ABSCHREIBUNGEN                                                   |                  |                                             |                                                    |                |                  |                  |                  |
|------------------------------------------------------------------|------------------|---------------------------------------------|----------------------------------------------------|----------------|------------------|------------------|------------------|
| Tabelle 5.6.4                                                    |                  |                                             |                                                    |                |                  |                  |                  |
| in TSD US \$                                                     |                  |                                             |                                                    |                |                  |                  |                  |
|                                                                  | 1. Jan. 2010     | Währungs-<br>umrech-<br>nungs-<br>differenz | Verände-<br>rungen im<br>Konsolidie-<br>rungskreis | Zugänge        | Um-<br>buchungen | Abgänge          | 31. Dez.<br>2010 |
| Grundstücke und Grundstückseinrichtungen                         | –                | –                                           | –                                                  | –              | –                | –                | –                |
| Gebäude und Einbauten                                            | 768.458          | (4.615)                                     | 521                                                | 141.275        | (1.056)          | (31.443)         | 873.140          |
| Technische Anlagen und Maschinen                                 | 1.490.673        | (33.021)                                    | 21.057                                             | 288.158        | 700              | (114.631)        | 1.652.936        |
| Andere Anlagen und Mietanlagen aus Finanzierungsleasingverträgen | 14.010           | 182                                         | –                                                  | 3.497          | (977)            | (1.746)          | 14.966           |
| Anlagen im Bau                                                   | –                | –                                           | –                                                  | –              | –                | –                | –                |
| <b>SACHANLAGEN</b>                                               | <b>2.273.141</b> | <b>(37.454)</b>                             | <b>21.578</b>                                      | <b>432.930</b> | <b>(1.333)</b>   | <b>(147.820)</b> | <b>2.541.042</b> |

| BUCHWERT                                                         |                  |                  |
|------------------------------------------------------------------|------------------|------------------|
| Tabelle 5.6.5                                                    |                  |                  |
| in TSD US \$, 31. Dezember                                       |                  |                  |
|                                                                  | 2010             | 2009             |
| Grundstücke und Grundstückseinrichtungen                         | 50.505           | 44.837           |
| Gebäude und Einbauten                                            | 983.828          | 959.223          |
| Technische Anlagen und Maschinen                                 | 1.240.707        | 1.140.252        |
| Andere Anlagen und Mietanlagen aus Finanzierungsleasingverträgen | 13.440           | 15.547           |
| Anlagen im Bau                                                   | 238.812          | 259.711          |
| <b>SACHANLAGEN</b>                                               | <b>2.527.292</b> | <b>2.419.570</b> |

Die Abschreibungen auf Sachanlagen betrugen für die Jahre 2010 und 2009 432.930 US \$ bzw. 396.860 US \$.

In den technischen Anlagen und Maschinen sind zum 31. Dezember 2010 und 2009 Beträge in Höhe von 416.392 US \$ bzw. 364.118 US \$ für Cycler für die Peritonealdialyse enthalten, die die Gesellschaft auf monatlicher Basis an Kunden mit terminaler Niereninsuffizienz vermietet, sowie für Hämodialysegeräte, die die Gesellschaft im Rahmen von Operating-Leasingverträgen an Ärzte vermietet.

Die kumulierten Abschreibungen auf andere Anlagen und Mietanlagen aus Finanzierungsleasingverträgen beliefen sich zum 31. Dezember 2010 und 2009 auf 14.966 US \$ bzw. 14.010 US \$.

## 6. IMMATERIELLE VERMÖGENSWERTE UND FIRMENWERTE

Zum 31. Dezember 2010 und 2009 entwickelten sich die Anschaffungs- und Herstellungskosten und die kumulierten Abschreibungen der immateriellen Vermögenswerte wie folgt:

| ANSCHAFFUNGS- UND HERSTELLUNGSKOSTEN                                                           |                  |                                        |                                                    |               |                  |                 |                  |
|------------------------------------------------------------------------------------------------|------------------|----------------------------------------|----------------------------------------------------|---------------|------------------|-----------------|------------------|
| Tabelle 5.6.6                                                                                  |                  |                                        |                                                    |               |                  |                 |                  |
| in TSD US \$                                                                                   |                  |                                        |                                                    |               |                  |                 |                  |
|                                                                                                | 1. Jan. 2010     | Währungs-<br>umrechnungs-<br>differenz | Verände-<br>rungen im<br>Konsolidie-<br>rungskreis | Zugänge       | Um-<br>buchungen | Abgänge         | 31. Dez.<br>2010 |
| <b>Immaterielle Vermögenswerte,<br/>die der planmäßigen<br/>Abschreibung unterliegen</b>       |                  |                                        |                                                    |               |                  |                 |                  |
| Verträge über Wettbewerbsverzicht                                                              | 224.579          | (346)                                  | 26.239                                             | 189           | –                | (7.086)         | 243.575          |
| Technologie                                                                                    | 100.016          | 25                                     | 10.809                                             | –             | –                | –               | 110.850          |
| Lizenzen und Vertriebsrechte                                                                   | 184.219          | (8.054)                                | 5.014                                              | 51.414        | 867              | –               | 233.460          |
| Geleistete Anzahlungen auf<br>immaterielle Vermögenswerte                                      | 67.113           | (631)                                  | –                                                  | 8.004         | (5.707)          | (12.998)        | 55.781           |
| Selbsterstellte Software                                                                       | 31.230           | (284)                                  | –                                                  | 10.558        | 5.451            | –               | 46.955           |
| Sonstige                                                                                       | 277.468          | (1.932)                                | 18.344                                             | 6.672         | 1.328            | (15.859)        | 286.021          |
| <b>GESAMT</b>                                                                                  | <b>884.625</b>   | <b>(11.222)</b>                        | <b>60.406</b>                                      | <b>76.837</b> | <b>1.939</b>     | <b>(35.943)</b> | <b>976.642</b>   |
| <b>Immaterielle Vermögenswerte,<br/>die nicht der planmäßigen<br/>Abschreibung unterliegen</b> |                  |                                        |                                                    |               |                  |                 |                  |
| Markennamen                                                                                    | 241.673          | 77                                     | –                                                  | –             | –                | –               | 241.750          |
| Managementverträge                                                                             | 241.522          | 149                                    | –                                                  | –             | (236.614)        | –               | 5.057            |
| <b>GESAMT</b>                                                                                  | <b>483.195</b>   | <b>226</b>                             | <b>–</b>                                           | <b>–</b>      | <b>(236.614)</b> | <b>–</b>        | <b>246.807</b>   |
| <b>IMMATERIELLE<br/>VERMÖGENSWERTE</b>                                                         | <b>1.367.820</b> | <b>(10.996)</b>                        | <b>60.406</b>                                      | <b>76.837</b> | <b>(234.675)</b> | <b>(35.943)</b> | <b>1.223.449</b> |
| <b>FIRMENWERTE</b>                                                                             | <b>7.960.502</b> | <b>(16.984)</b>                        | <b>429.665</b>                                     | <b>–</b>      | <b>214.706</b>   | <b>–</b>        | <b>8.587.889</b> |

**ABSCHREIBUNGEN**

Tabelle 5.6.7

in TSD US \$

|                                                                                                | 1. Jan. 2010   | Währungs-<br>umrech-<br>nungs-<br>differenz | Verände-<br>rungen im<br>Konsolidie-<br>rungskreis | Zugänge       | Um-<br>buchungen | Abgänge         | 31. Dez.<br>2010 |
|------------------------------------------------------------------------------------------------|----------------|---------------------------------------------|----------------------------------------------------|---------------|------------------|-----------------|------------------|
| <b>Immaterielle Vermögenswerte,<br/>die der planmäßigen<br/>Abschreibung unterliegen</b>       |                |                                             |                                                    |               |                  |                 |                  |
| Verträge über Wettbewerbsverzicht                                                              | 157.717        | (232)                                       | –                                                  | 16.818        | –                | (6.502)         | 167.801          |
| Technologie                                                                                    | 18.109         | –                                           | –                                                  | 7.237         | –                | –               | 25.346           |
| Lizenzen und Vertriebsrechte                                                                   | 59.677         | (3.202)                                     | –                                                  | 12.918        | –                | 796             | 70.189           |
| Geleistete Anzahlungen auf<br>immaterielle Vermögenswerte                                      | –              | –                                           | –                                                  | –             | –                | –               | –                |
| Selbsterstellte Software                                                                       | 9.405          | (223)                                       | –                                                  | 12.684        | –                | (5)             | 21.861           |
| Sonstige                                                                                       | 210.484        | (1.408)                                     | 64                                                 | 20.637        | 1.130            | (16.525)        | 214.382          |
| <b>GESAMT</b>                                                                                  | <b>455.392</b> | <b>(5.065)</b>                              | <b>64</b>                                          | <b>70.294</b> | <b>1.130</b>     | <b>(22.236)</b> | <b>499.579</b>   |
| <b>Immaterielle Vermögenswerte,<br/>die nicht der planmäßigen<br/>Abschreibung unterliegen</b> |                |                                             |                                                    |               |                  |                 |                  |
| Markennamen                                                                                    | 31.325         | 1                                           | –                                                  | –             | –                | –               | 31.326           |
| Managementverträge                                                                             | 21.908         | –                                           | –                                                  | –             | (21.908)         | –               | –                |
| <b>GESAMT</b>                                                                                  | <b>53.233</b>  | <b>1</b>                                    | <b>–</b>                                           | <b>–</b>      | <b>(21.908)</b>  | <b>–</b>        | <b>31.326</b>    |
| <b>IMMATERIELLE<br/>VERMÖGENSWERTE</b>                                                         | <b>508.625</b> | <b>(5.064)</b>                              | <b>64</b>                                          | <b>70.294</b> | <b>(20.778)</b>  | <b>(22.236)</b> | <b>530.905</b>   |
| <b>FIRMENWERTE</b>                                                                             | <b>449.068</b> | <b>(1.802)</b>                              | <b>155</b>                                         | <b>–</b>      | <b>–</b>         | <b>–</b>        | <b>447.421</b>   |

| <b>BUCHWERT</b>                                                                        |                  |                  |
|----------------------------------------------------------------------------------------|------------------|------------------|
| <i>Tabelle 5.6.8</i>                                                                   |                  |                  |
| <i>in TSD US \$</i><br><i>31. Dezember</i>                                             |                  |                  |
|                                                                                        | 2010             | 2009             |
| <b>Immaterielle Vermögenswerte, die der planmäßigen Abschreibung unterliegen</b>       |                  |                  |
| Verträge über Wettbewerbsverzichte                                                     | 75.774           | 66.862           |
| Technologie                                                                            | 85.504           | 81.907           |
| Lizenzen und Vertriebsrechte                                                           | 163.271          | 124.542          |
| Geleistete Anzahlungen auf immaterielle Vermögenswerte                                 | 55.781           | 67.113           |
| Selbsterstellte Software                                                               | 25.094           | 21.825           |
| Sonstige                                                                               | 71.639           | 66.984           |
| <b>GESAMT</b>                                                                          | <b>477.063</b>   | <b>429.233</b>   |
| <b>Immaterielle Vermögenswerte, die nicht der planmäßigen Abschreibung unterliegen</b> |                  |                  |
| Markennamen                                                                            | 210.424          | 210.348          |
| Managementverträge                                                                     | 5.057            | 219.614          |
| <b>GESAMT</b>                                                                          | <b>215.481</b>   | <b>429.962</b>   |
| <b>IMMATERIELLE VERMÖGENSWERTE</b>                                                     | <b>692.544</b>   | <b>859.195</b>   |
| <b>FIRMENWERTE</b>                                                                     | <b>8.140.468</b> | <b>7.511.434</b> |

Die Abschreibungen auf immaterielle Vermögenswerte beliefen sich in den Jahren 2010 und 2009 auf 70.294 US \$ bzw. 60.225 US \$. Die erwarteten planmäßigen Abschreibungen auf immaterielle Vermögenswerte für die nächsten fünf Jahre zeigt die folgende Tabelle:

| <b>ERWARTETER ABSCHREIBUNGSAUFWAND</b> |        |        |        |        |        |
|----------------------------------------|--------|--------|--------|--------|--------|
| <i>Tabelle 5.6.9</i>                   |        |        |        |        |        |
| <i>in TSD US \$</i>                    |        |        |        |        |        |
|                                        | 2011   | 2012   | 2013   | 2014   | 2015   |
| Erwarteter Abschreibungsaufwand        | 67.585 | 61.644 | 58.389 | 57.353 | 53.260 |

### Firmenwerte

Eine Änderung der Bestimmungen des Bundesstaates New York ermöglicht es seit 2010, direkt Anteile an Kliniken in diesem Bundesstaat zu halten, was zuvor durch bundesstaatliche Gesetze untersagt war. Aufgrund dieses Verbotes verwendete die Gesellschaft in der Vergangenheit eine Kombination von Verwaltungsdienstleistungsverträgen, Vereinbarungen über die Option zum Erwerb von Anteilen und Käufen einzelner Vermögensgegenstände, um solche Kliniken nach den ursprünglich als Emerging Issues Task Force 97-2 Application of FASB Statement No. 94 and APB Opinion No. 16 to Physicians Practice Management Entities and Certain Other Entities with Contractual Management Arrangements herausgegebenen und nunmehr im FASB Accounting Standards Codification Topic 810-10 Consolidation: Overall enthaltenen Vorschriften konsolidieren zu können. Im Rahmen derartiger Transaktionen wurde ein Teil des Kaufpreises den identifizierbaren immateriellen Vermögenswerten zugeordnet, während der als immaterieller Vermögenswert „Administrative Services Agreement“ klassifizierte verbleibende Teil als Äquivalent zum Firmenwert behandelt und in der Bilanz der Gesellschaft zum 31. Dezember 2009 innerhalb der immateriellen Vermögenswerte in dem Posten Managementverträge ausgewiesen wurde. Mit der am 1. April 2010 erhaltenen regulatorischen Genehmigung hat die Gesellschaft sämtliche Anteile an diesen Kliniken erlangt und daher, übereinstimmend mit der Behandlung anderer Klinikakquisitionen, bei denen die Gesellschaft die Beherrschung durch den Erwerb des rechtlichen Eigentums erlangt hat, mit Wirkung zum 1. April 2010 im Segment Nordamerika 214.706 US \$ des immateriellen Vermögenswertes „Administrative Services Agreements“ aus dem Posten „Managementverträge“ in den Posten „Firmenwerte“ umgegliedert.

Mit Ausnahme der oben dargestellten Umgliederungen resultiert die Buchwerterhöhung der Firmenwerte im Wesentlichen aus Akquisitionen und Wechselkursänderungen. In den Geschäftsjahren 2010 und 2009 handelte es sich vor allem um Akquisitionen von Dialysekliniken im normalen Geschäftsverlauf sowie der Übernahme des internationalen Peritonealdialysegeschäfts von Gambro. Die Buchwerte teilen sich wie folgt auf die Segmente auf:

| FIRMENWERTE                       |                  |                |                |                  |
|-----------------------------------|------------------|----------------|----------------|------------------|
| in TSD US \$                      |                  |                |                |                  |
| Table 5.6.10                      |                  |                |                |                  |
|                                   | Nordamerika      | International  | Konzern        | Gesamt           |
| <b>STAND AM 1. JANUAR 2009</b>    | <b>6.571.411</b> | <b>578.682</b> | <b>159.817</b> | <b>7.309.910</b> |
| Zugänge                           | 123.303          | 52.011         | –              | 175.314          |
| Umbuchungen                       | –                | –              | –              | –                |
| Währungsumrechnung                | (3)              | 26.213         | –              | 26.210           |
| <b>STAND AM 31. DEZEMBER 2009</b> | <b>6.694.711</b> | <b>656.906</b> | <b>159.817</b> | <b>7.511.434</b> |
| Zugänge                           | 115.040          | 314.338        | 132            | 429.510          |
| Umbuchungen                       | 214.706          | –              | –              | 214.706          |
| Währungsumrechnung                | 288              | (15.470)       | –              | (15.182)         |
| <b>STAND AM 31. DEZEMBER 2010</b> | <b>7.024.745</b> | <b>955.774</b> | <b>159.949</b> | <b>8.140.468</b> |



## 7. RÜCKSTELLUNGEN UND SONSTIGE KURZFRISTIGE VERBINDLICHKEITEN

Die Rückstellungen und sonstigen kurzfristigen Verbindlichkeiten setzen sich zum 31. Dezember 2010 und 2009 wie folgt zusammen:

| RÜCKSTELLUNGEN UND SONSTIGE KURZFRISTIGE VERBINDLICHKEITEN |                  |                  |
|------------------------------------------------------------|------------------|------------------|
| in TSD US \$                                               |                  |                  |
|                                                            | Tabelle 5.6.11   |                  |
|                                                            | 2010             | 2009             |
| Verbindlichkeiten aus Löhnen, Gehältern und Boni           | 389.434          | 334.227          |
| Kreditorische Debitoren                                    | 169.657          | 192.626          |
| Versicherungsprämien                                       | 163.240          | 169.866          |
| Derivative Finanzinstrumente                               | 124.171          | 15.773           |
| Sonderaufwendungen für Rechtsstreitigkeiten                | 115.000          | 115.000          |
| Sonstige                                                   | 575.921          | 508.061          |
| <b>GESAMT</b>                                              | <b>1.537.423</b> | <b>1.335.553</b> |

Im Jahr 2001 hat die Gesellschaft Sonderaufwendungen in Höhe von 258.159 US \$ gebucht. Dies geschah im Hinblick auf Rechtsangelegenheiten, die aus Transaktionen im Zusammenhang mit der Fusionsvereinbarung und dem Reorganisationsplan vom 4. Februar 1996 zwischen der W.R. Grace & Co. und der Fresenius SE (dem Zusammenschluss) resultieren, sowie im Hinblick auf geschätzte Verpflichtungen und Rechtskosten, die sich im Zusammenhang mit dem Insolvenzverfahren der W.R. Grace & Co. nach Chapter 11 des US-amerikanischen Konkursrechts (das Grace Chapter 11-Insolvenzverfahren) ergeben, und im Hinblick auf Kosten für die Regulierung schwebender Rechtsstreitigkeiten mit bestimmten privaten Versicherungen. Im zweiten Quartal 2003 bestätigte das für das Grace Chapter 11-Insolvenzverfahren zuständige Gericht einen endgültigen Vergleichsvertrag zwischen der Gesellschaft, den Asbest-Gläubigerausschüssen und W.R. Grace & Co. Gemäß der Vergleichsvereinbarung wird die Gesellschaft nach Bestätigung des Reorganisations- und Sanierungsplans 115.000 US \$ ohne Zinsen zahlen — siehe Anmerkung 18. Mit Ausnahme dieser Vergleichszahlung sind alle in der Rückstellung für Sonderaufwendungen für Rechtsstreitigkeiten enthaltenen Sachverhalte reguliert.

Die Position „Sonstige“ in der obigen Tabelle beinhaltet unter anderem Rückstellungen für betriebliche Aufwendungen, Zinsabgrenzungen, einbehaltene Steuern, Mehrwertsteuer, Rechtskosten, Arztkosten, Provisionen, den kurzfristigen Teil der Pensionsrückstellung, Bonuszahlungen und Rabatte sowie Mietzahlungen.

## 8. KURZFRISTIGE DARLEHEN, SONSTIGE FINANZVERBINDLICHKEITEN UND KURZFRISTIGE DARLEHEN VON VERBUNDENEN UNTERNEHMEN

Zum 31. Dezember 2010 und 2009 setzten sich die kurzfristigen Darlehen und sonstigen Finanzverbindlichkeiten sowie die kurzfristigen Darlehen von verbundenen Unternehmen wie folgt zusammen:

| <b>KURZFRISTIGE DARLEHEN</b>                                                                                         |                |                |
|----------------------------------------------------------------------------------------------------------------------|----------------|----------------|
| <i>in TSD US \$</i>                                                                                                  |                |                |
|                                                                                                                      | <b>2010</b>    | <b>2009</b>    |
| Verbindlichkeiten aus Kreditlinien                                                                                   | 131.791        | 95.720         |
| Forderungsverkaufsprogramm                                                                                           | 510.000        | 214.000        |
| Sonstige Finanzverbindlichkeiten                                                                                     | 28.880         | 6.624          |
| <b>KURZFRISTIGE DARLEHEN UND SONSTIGE FINANZVERBINDLICHKEITEN</b>                                                    | <b>670.671</b> | <b>316.344</b> |
| Kurzfristige Darlehen von verbundenen Unternehmen, siehe Anmerkung 3c                                                | 9.683          | 10.440         |
| <b>KURZFRISTIGE DARLEHEN, SONSTIGE FINANZVERBINDLICHKEITEN UND KURZFRISTIGE DARLEHEN VON VERBUNDENEN UNTERNEHMEN</b> | <b>680.354</b> | <b>326.784</b> |

### Verbindlichkeiten aus Kreditlinien, Forderungsverkaufsprogramm und sonstige Finanzverbindlichkeiten

#### Kreditlinien

Zum 31. Dezember 2010 und 2009 wies die Gesellschaft kurzfristige Darlehen in Höhe von 131.791 US \$ bzw. 95.720 US \$ aus. Diese betrafen Kredite, die die Gesellschaft oder einzelne Tochtergesellschaften der Gesellschaft im Rahmen von Kreditvereinbarungen bei Geschäftsbanken aufgenommen haben. Im Durchschnitt wurden die Darlehen zum 31. Dezember 2010 und 2009 mit 4,19 % bzw. 2,94 % p.a. verzinst.

Ohne die Mittel aus der Kreditvereinbarung 2006 — siehe Anmerkung 9 standen der Gesellschaft am 31. Dezember 2010 und 2009 freie Kreditlinien mit Geschäftsbanken in Höhe von 234.370 US \$ bzw. von 208.952 US \$ zur Verfügung. Einige dieser Kreditlinien sind durch Vermögenswerte der jeweiligen Tochtergesellschaft, die die Vereinbarung geschlossen hat, besichert oder werden durch die Gesellschaft garantiert. In bestimmten Fällen können diese Kreditvereinbarungen auch bestimmte Unterlassungs- und Leistungsverpflichtungen für die jeweiligen Kreditnehmer beinhalten.

#### Forderungsverkaufsprogramm

Die Gesellschaft hat eine Rahmenvereinbarung über Forderungsverkäufe abgeschlossen (das Forderungsverkaufsprogramm), die üblicherweise im Oktober jedes Jahres erneuert wird, zuletzt am 28. September 2010. Dabei wurde die Rahmenvereinbarung von 650.000 US \$ auf 700.000 US \$ erhöht. Im Rahmen dieses Programms werden zunächst bestimmte Forderungen an die NMC Funding Corp. (die NMC Funding), eine 100 %ige Tochtergesellschaft, verkauft. NMC Funding tritt anschließend Eigentumsrechte aus diesen Forderungen anteilig an bestimmte Bankinvestoren ab. Gemäß den vertraglichen Bestimmungen des Forderungsverkaufsprogramms behält sich NMC Funding das Recht vor, jederzeit an die Banken übertragene Eigentumsrechte zurückzufordern. Folglich verbleiben die Forderungen in der Konzernbilanz und die Erlöse aus der Abtretung werden als kurzfristige Finanzverbindlichkeiten ausgewiesen.

Zum 31. Dezember 2010 betrugen die ausstehenden kurzfristigen Verbindlichkeiten aus dem Forderungsverkaufsprogramm 510.000 US \$. Die NMC Funding zahlt den Bankinvestoren Zinsen, die auf der Grundlage des Zinses für Geldmarktpapiere (commercial paper rate) für die jeweils gewählten Tranchen ermittelt werden. Im Jahr 2010 lag der durchschnittliche Zinssatz bei 1,86 %. Jährliche Refinanzierungskosten einschließlich Rechtskosten und Bankgebühren werden über die Laufzeit des Forderungsverkaufsprogramms abgeschrieben.

#### Sonstige Finanzverbindlichkeiten

Am 31. Dezember 2010 und 2009 hatte die Gesellschaft 28.880 US \$ bzw. 6.624 US \$ sonstige Finanzverbindlichkeiten, die im Wesentlichen aus dem Kauf von Anteilen anderer Gesellschafter und den abgeschlossenen Lizenz- und Vertriebsvereinbarungen für Venofer® resultieren — siehe Anmerkung 9.

#### Kurzfristige Darlehen von verbundenen Unternehmen

Im Laufe der Jahre 2010 und 2009 hat die Gesellschaft im Rahmen der bestehenden Darlehensvereinbarungen mit der Fresenius SE zeitweise Darlehen von der Fresenius SE erhalten. Im Geschäftsjahr 2010 betrugen diese Darlehen zwischen 10.000 € und 86.547 € mit Zinssätzen zwischen 0,968 % und 1,879 %. Im Geschäftsjahr 2009 betrugen diese Darlehen zwischen 1.300 € und 72.000 € mit Zinssätzen zwischen 1,05 % und 2,05 %. Am 31. Dezember 2010 und 2009 bestand außerdem ein Darlehen zwischen der Gesellschaft und der Fresenius SE in Höhe von 7.679 US \$ (5.747 €) bzw. 8.279 US \$ (5.747 €) zu einem Zinssatz von 6 %. Des Weiteren wurde der Gesellschaft von der persönlich haftenden Gesellschafterin ein Darlehen in Höhe von 2.004 US \$ (1.500 €) und 2.161 US \$ (1.500 €) mit einem Zinssatz von 1,421 % bzw. 1,335 % am 31. Dezember 2010 und 2009 gewährt. Die jährlichen Zinsaufwendungen für die Kredite betrugen 179 US \$ und 188 US \$ für das Jahr 2010 bzw. 2009.

### 9. LANGFRISTIGE VERBINDLICHKEITEN UND VERBINDLICHKEITEN AUS AKTIVIERTEN LEASINGVERTRÄGEN

Zum 31. Dezember 2010 und 2009 setzten sich die langfristigen Verbindlichkeiten und die Verbindlichkeiten aus aktivierten Leasingverträgen wie folgt zusammen:

| LANGFRISTIGE VERBINDLICHKEITEN                   |                  |                  |
|--------------------------------------------------|------------------|------------------|
| in TSD US \$                                     |                  |                  |
| Tabelle 5.6.13                                   |                  |                  |
|                                                  | 2010             | 2009             |
| Kreditvereinbarung 2006                          | 2.953.890        | 3.522.040        |
| Anleihen                                         | 824.446          | 493.344          |
| Euro-Schuldscheindarlehen                        | 267.240          | 288.120          |
| Kredit der Europäischen Investitionsbank         | 351.686          | 213.460          |
| Verpflichtungen aus aktivierten Leasingverträgen | 15.439           | 17.600           |
| Sonstige                                         | 160.957          | 50.991           |
|                                                  | <b>4.573.658</b> | <b>4.585.555</b> |
| Abzüglich kurzfristig fälliger Anteile           | (263.982)        | (157.634)        |
| <b>GESAMT</b>                                    | <b>4.309.676</b> | <b>4.427.921</b> |

### Erstrangige Verbindlichkeiten

Die erstrangigen Verbindlichkeiten der Gesellschaft bestehen im Wesentlichen aus den Aufnahmen unter der Kreditvereinbarung 2006, den Anleihen, den Euro-Schuldscheindarlehen, und den Aufnahmen unter den Kreditfazilitäten mit der Europäischen Investitionsbank. Diese Verbindlichkeiten sind nachfolgend beschrieben.

#### Kreditvereinbarung 2006

Am 31. März 2006 wurden die Gesellschaft, die Fresenius Medical Care Holdings, Inc. (FMCH) und bestimmte weitere Tochterunternehmen der Gesellschaft inklusive Fresenius Medical Care Deutschland GmbH (D-GmbH), als Kreditnehmer und/oder Garantiegeber Vertragspartner in einer syndizierten Kreditvereinbarung (Kreditvereinbarung 2006) in Höhe von 4.600.000 US \$ mit der Bank of America (N.A.), Deutsche Bank AG (Zweigniederlassung New York), The Bank of Nova Scotia, Credit Suisse (Zweigniederlassung Cayman Islands), JP Morgan Chase Bank (Landesgesellschaft USA) und weiteren Darlehensgebern. Diese Vereinbarung ersetzte eine frühere Kreditvereinbarung.

Seit Abschluss dieser Kreditvereinbarung wurden sowohl Vertragsanpassungen als auch freiwillige vorzeitige Tilgungen vorgenommen, die zu einer Veränderung des Kreditrahmens führten. Die letzte Anpassung in Verbindung mit einer Verlängerung der Fresenius Medical Care-Kreditvereinbarung 2006 erfolgte am 29. September 2010. Im Zusammenhang damit wurden die revolvingende Kreditfazilität von 1.000.000 US \$ auf 1.200.000 US \$ und das Darlehen A um 50.000 US \$ auf 1.365.000 US \$ erhöht. Die Laufzeit beider Fazilitäten wurde außerdem vom 31. März 2011 auf den 31. März 2013 verlängert. Des Weiteren wurde die Verpflichtung zur vorzeitigen Tilgung des Darlehens B aufgehoben. Diese sah vor, dass das Darlehen B bereits am 1. März 2011 zurückzuzahlen ist, falls die Trust Preferred Securities, die am 15. Juni 2011 fällig sind, bis zu diesem Zeitpunkt weder zurückgezahlt noch refinanziert sind oder falls deren Laufzeit nicht verlängert worden ist. Die Definition des Verschuldungsgrades wurde dahingehend angepasst, dass zukünftig flüssige Mittel von bis zu 250.000 US \$ statt 30.000 US \$ von den Finanzverbindlichkeiten abgezogen werden dürfen. Außerdem wurden Höchstbeträge für bestimmte außerhalb der Kreditvereinbarung erlaubte Kreditaufnahmen angehoben und zusätzliche Flexibilität für bestimmte Arten von Finanzanlagen eingeräumt. Die Vertragsparteien einigten sich weiterhin auf eine Anhebung der in der Fresenius Medical Care-Kreditvereinbarung 2006 enthaltenen Beschränkungen in Bezug auf Dividendenausschüttungen und andere eingeschränkte Zahlungen bis zu 330.000 US \$ für das Jahr 2011. Danach erhöhen sie sich jährlich um 30.000 US \$ bis zum Jahr 2013.

Zum 31. Dezember 2010 bestand die Kreditvereinbarung 2006 aus:

- Einer revolvingenden Kreditfazilität in Höhe von 1.200.000 US \$, die am 31. März 2013 zur Rückzahlung fällig wird. Von dieser Fazilität sind bis zu 400.000 US \$ für Letters of Credit, bis zu 400.000 US \$ für Kreditaufnahmen in bestimmten anderen Währungen als US-Dollar, bis zu 150.000 US \$ als Kurzfristlinie (Swingline) in US-Dollar, bis zu 250.000 US \$ als „Competitive Loan Facility“ und bis zu 50.000 US \$ als Kurzfristlinie (Swingline) in bestimmten Nicht-US-Dollar-Währungen verfügbar. Die Gesamtnutzung des revolvingenden Kredites darf 1.200.000 US \$ nicht überschreiten.

► Einem Darlehen (Darlehen A) in Höhe von 1.335.000 US \$, dessen Laufzeit am 31. März 2013 endet. Die Tilgung erfolgt vierteljährlich in Höhe von 30.000 US \$ und reduziert das Darlehen A schrittweise bis zum 31. Dezember 2012. Der Restbetrag ist am 31. März 2013 fällig.

► Einem Darlehen (Darlehen B) in Höhe von 1.537.764 US \$, dessen Laufzeit am 31. März 2013 endet. Die Tilgung erfolgt ebenfalls vierteljährlich, wobei die nächsten fünf Tilgungszahlungen in Höhe von jeweils 4.036 US \$ vorzunehmen sind und die letzten vier Tilgungen in Höhe von jeweils 379.396 US \$ zu leisten sind.

In Abhängigkeit von der gewählten Zinsperiode kann die Gesellschaft zwischen folgenden Zinsvarianten entscheiden: Entweder sie zahlt Zinsen auf Basis LIBOR zuzüglich einer bestimmten Marge oder auf Basis des höheren Wertes aus (A) der Prime Rate der Bank of America oder (B) der um 0,5 % erhöhten Federal Funds Rate zuzüglich einer bestimmten Marge.

Die jeweilige Marge ist variabel und hängt vom Verschuldungsgrad der Gesellschaft ab. Dieser wird gemäß den Festlegungen in der Kreditvereinbarung 2006 als Quotient aus Finanzverbindlichkeiten abzüglich bis zu 250.000 US \$ flüssige Mittel und EBITDA (Ergebnis vor Zinsen, Steuern und Abschreibungen gemäß Definition der Kreditvereinbarung 2006) ermittelt.

Zusätzlich zu den verbindlich festgelegten Tilgungsraten muss die ausstehende Verbindlichkeit aus der Kreditvereinbarung 2006 entsprechend vorgeschriebener Rückzahlungsklauseln getilgt werden. Dies erfolgt durch Teile der Netto-Erlöse aus der Veräußerung von bestimmten Vermögenswerten, aus Mittelzuflüssen von Finanzierungen, die durch Vermögenswerte besichert sind (außer aus dem bestehenden Forderungsverkaufsprogramm der Gesellschaft), aus der Emission von nachrangigen Schuldverschreibungen mit Ausnahme bestimmter Transaktionen zwischen Konzerngesellschaften sowie aus bestimmten Eigenkapitalmaßnahmen und dem überschüssigen Cash Flow.

Die Kreditvereinbarung 2006 enthält Unterlassungs- und Leistungsverpflichtungen der Gesellschaft und ihrer Tochterunternehmen und sonstige Zahlungsbeschränkungen. Die Beschränkungen durch diese Vertragsklauseln betreffen u.a. die Verschuldung sowie die Investitionen der Gesellschaft und verpflichten die Gesellschaft, bestimmte, in der Vereinbarung festgelegte Finanzkennzahlen einzuhalten. Zusätzlich enthält die Kreditvereinbarung 2006 Beschränkungen in Bezug auf Dividendenausschüttungen und andere eingeschränkte Zahlungen, die für das Jahr 2011 bei 330.000 US \$ liegen und sich danach jährlich um 30.000 US \$ erhöhen. In Übereinstimmung mit den Beschränkungen aus der Kreditvereinbarung 2006 wurden im Mai 2010 Dividenden in Höhe von 231.967 US \$ gezahlt. Bei Nichteinhaltung der Kreditbedingungen ist die ausstehende Verbindlichkeit aus der Kreditvereinbarung 2006 sofort fällig und auf Verlangen der Gläubiger zu zahlen. Zum 31. Dezember 2010 hat die Gesellschaft alle in der Kreditvereinbarung 2006 festgelegten Verpflichtungen erfüllt.

Die Gesellschaft zahlte im Zusammenhang mit der Fresenius Medical Care-Kreditvereinbarung 2006 etwa 85.828 US \$ und im Zusammenhang mit der Anpassung und Verlängerung dieser Vereinbarung in 2010 etwa 21.115 US \$ an Gebühren, die über die Laufzeit der Kreditvereinbarung verteilt werden.

Die folgende Tabelle zeigt die zur Verfügung stehenden Fazilitäten und die Inanspruchnahmen aus der Kreditvereinbarung 2006 zum 31. Dezember 2010 und 2009:

| <b>VERFÜGBARER UND IN ANSPRUCH GENOMMENER KREDIT</b> |                       |                  |
|------------------------------------------------------|-----------------------|------------------|
| <i>in TSD US \$, 31. Dezember</i>                    |                       |                  |
|                                                      | <i>Tabelle 5.6.14</i> |                  |
|                                                      | 2010                  | 2009             |
| <b>Kreditfazilitäten</b>                             |                       |                  |
| Revolvierender Kredit                                | 1.200.000             | 1.000.000        |
| Darlehen (Loan A)                                    | 1.335.000             | 1.373.418        |
| Darlehen (Loan B)                                    | 1.537.764             | 1.553.908        |
| <b>GESAMT</b>                                        | <b>4.072.764</b>      | <b>3.927.326</b> |
| <b>Inanspruchnahmen</b>                              |                       |                  |
| Revolvierender Kredit                                | 81.126                | 594.714          |
| Darlehen (Loan A)                                    | 1.335.000             | 1.373.418        |
| Darlehen (Loan B)                                    | 1.537.764             | 1.553.908        |
| <b>GESAMT</b>                                        | <b>2.953.890</b>      | <b>3.522.040</b> |

Zusätzlich hatte die Gesellschaft zum 31. Dezember 2010 und 2009 Letters of Credit in Höhe von 121.518 US \$ und 97.287 US \$ genutzt, die nicht in den oben genannten Inanspruchnahmen zu diesen Zeitpunkten enthalten waren.

### Anleihen

Zum 31. Dezember 2010 setzten sich die Anleihen der Gesellschaft wie folgt zusammen:

| <b>ANLEIHEN</b>                                          |                       |               |             |                |
|----------------------------------------------------------|-----------------------|---------------|-------------|----------------|
| <i>in TSD, mit Ausnahme der Nominalbeträge, in US \$</i> |                       |               |             |                |
|                                                          | <i>Tabelle 5.6.15</i> |               |             |                |
|                                                          | Nominalbetrag         | Fälligkeit    | Nominalzins | Buchwert       |
| <b>Emittent/Transaktion</b>                              |                       |               |             |                |
| FMC Finance III S.A. 2007/2017                           | 500.000 US \$         | 15. Juli 2017 | 6 7/8 %     | 494.231        |
| FMC Finance VI S.A. 2010/2016                            | 250.000 €             | 15. Juli 2016 | 5,50 %      | 330.215        |
| <b>GESAMT</b>                                            |                       |               |             | <b>824.446</b> |

Im Januar 2010 wurde eine vorrangige Anleihe in Höhe von 250.000 € (353.300 US \$ am Ausgabebetrag) mit einem Coupon von 5,50 % platziert. Die Anleihe wird am 15. Juli 2016 fällig. Bei einem Ausgabekurs von 98,6636 % lag die Rückzahlungsrendite bei 5,75 %. Der Emissionserlös wurde zur Rückzahlung kurzfristiger Finanzverbindlichkeiten und für allgemeine Geschäftszwecke verwendet.

Im Juli 2007 wurde eine vorrangige Anleihe in Höhe von 500.000 US \$ mit einem Coupon von 6 7/8 % emittiert. Die effektive Verzinsung der 6 7/8 % Anleihe beträgt aufgrund des Disagios 7 1/8 %.

Alle Anleihen sind unbesichert und werden durch die Gesellschaft und ihre Tochtergesellschaften, FMCH und D-GmbH gesamtschuldnerisch garantiert. Die Emittenten haben jederzeit das Recht, die Anleihen zu 100 %

des Nennwerts zuzüglich aufgelaufener Zinsen und bestimmten in den Anleihebedingungen festgelegten Aufschlägen zurückzukaufen. Die Anleihegläubiger haben das Recht, einen Rückkauf der Anleihe durch die Emittenten zu 101 % des Nennwerts zuzüglich aufgelaufener Zinsen zu fordern, wenn es nach einem Kontrollwechsel zu einer Herabstufung des Ratings der jeweiligen Anleihen kommt.

Die Gesellschaft ist zum Schutz der Anleihegläubiger verschiedene Verpflichtungen eingegangen, die unter bestimmten Umständen den Spielraum der Gesellschaft und ihrer Tochtergesellschaften im Hinblick auf die Aufnahme von Verbindlichkeiten, die Belastung oder Veräußerung von Vermögensgegenständen, das Eingehen von Sale-Leaseback-Transaktionen sowie Zusammenschlüsse oder Verschmelzungen mit anderen Gesellschaften einschränken. Zum 31. Dezember 2010 hat die Gesellschaft alle Verpflichtungen aus den Anleihebedingungen erfüllt.

#### Euro-Schuldscheindarlehen

Am 27. April 2009 hat die Gesellschaft Schuldscheindarlehen in Höhe von 200.000 € (267.240 US \$ zum 31. Dezember 2010) ausgegeben. Die vorrangigen und unbesicherten Schuldscheindarlehen werden von FMCH und der D-GmbH garantiert. Die Schuldscheindarlehen bestehen aus 4 Tranchen mit Laufzeiten von 3,5 und 5,5 Jahren und fest- und variabelverzinslichen Tranchen. Die Erlöse aus der Begebung wurden zur Tilgung der fälligen Schuldscheindarlehen aus dem Jahr 2005 verwendet.

#### Kreditvereinbarungen mit der Europäischen Investitionsbank

Die Gesellschaft hat in den Jahren 2005, 2006 und 2009 verschiedene Darlehensverträge mit der Europäischen Investitionsbank (EIB) abgeschlossen. Die EIB ist die nicht-gewinnorientierte Finanzierungsinstitution der Europäischen Union, die langfristige Finanzierungen für spezifische Investitions- und Forschungsprojekte zu günstigen Konditionen – normalerweise im Umfang von bis zu 50 % der Projektkosten – bereitstellt.

Die folgende Tabelle zeigt die maximal verfügbaren Kreditrahmen und die Inanspruchnahmen, die der Gesellschaft unter den vier Fazilitäten zur Verfügung stehen zum 31. Dezember 2010 und 2009:

| <b>VERFÜGBARER UND IN ANSPRUCH GENOMMENER KREDIT</b> |                   |                                                |                |                                                       |                |
|------------------------------------------------------|-------------------|------------------------------------------------|----------------|-------------------------------------------------------|----------------|
| <i>Tabelle 5.6.16</i>                                |                   |                                                |                |                                                       |                |
|                                                      | <i>Fälligkeit</i> | <i>Kreditrahmen<br/>31. Dezember, in TSD €</i> |                | <i>Inanspruchnahme<br/>31. Dezember, in TSD US \$</i> |                |
|                                                      |                   | <b>2010</b>                                    | 2009           | <b>2010</b>                                           | 2009           |
| Revolvierende Kreditlinie                            | 2013              | 90.000                                         | 90.000         | 115.812                                               | 35.000         |
| Darlehen 2005                                        | 2013              | 41.000                                         | 41.000         | 48.806                                                | 48.806         |
| Darlehen 2006                                        | 2014              | 90.000                                         | 90.000         | 120.258                                               | 129.654        |
| Darlehen 2009                                        | 2014              | 50.000                                         | 50.000         | 66.810                                                | –              |
| <b>GESAMT</b>                                        |                   | <b>271.000</b>                                 | <b>271.000</b> | <b>351.686</b>                                        | <b>213.460</b> |

Die Aufnahmen unter der revolvingenden Kreditlinie und dem Darlehen 2005 sind in us-Dollar denominated, die anderen Aufnahmen erfolgten in Euro.

Im Dezember 2009 hatte die Gesellschaft einen Darlehensvertrag in Höhe von 50.000 € abgeschlossen, dessen Auszahlung am 17. Februar 2010 in voller Höhe erfolgte. Der Kredit hat eine Laufzeit von 4 Jahren und wird durch die FMCH und die D-GmbH garantiert.

Am 15. März 2010 nahm die Gesellschaft die verbleibende Summe von 80.812 US \$ in Anspruch, die noch aus der revolvingierenden Kreditvereinbarung zur Verfügung stand. Gemäß den Regelungen der Kreditvereinbarung konnte die Gesellschaft Ziehungen dieser Kreditlinie bis zum 15. März 2010 und in maximaler Höhe von 90.000 € vornehmen. Dieser Betrag entsprach zum Zeitpunkt der erstmaligen Kreditaufnahme 115.800 US \$.

Die Auszahlung des Darlehen 2006 erfolgte vollständig im Februar 2008 und das Darlehen 2005 wurde in voller Höhe im September 2005 ausgezahlt.

Die Kredite der EIB werden mit variablen Zinssätzen verzinst, die quartalsch angepasst werden. Die US-Dollar-Kredite der Gesellschaft hatten am 31. Dezember 2010 einen Zinssatz von 0,432 % und 0,384 %. Die Euro-Kredite der Gesellschaft hatten am 31. Dezember 2010 einen Zinssatz von 1,018 % und 3,257 % und am 31. Dezember 2009 einen Zinssatz von 0,695 %.

Die Gesellschaft hat die zur Verfügung stehenden Fazilitäten der EIB zum 31. Dezember 2010 in voller Höhe in Anspruch genommen. Die Inanspruchnahmen unter den Kreditvereinbarungen 2005 und 2006 werden durch Bankgarantien besichert. Das Darlehen 2009 wird von der FMCH und der D-GmbH garantiert. Alle Kreditvereinbarungen mit der EIB enthalten übliche Auflagen und Verpflichtungen. Zum 31. Dezember 2010 hat die Gesellschaft die entsprechenden Auflagen und Verpflichtungen erfüllt.

#### Sonstige

Im Zusammenhang mit bestimmten in 2010 getätigten Akquisitionen und Investitionen, darunter auch die Gründung eines Gemeinschaftsunternehmens mit Galenica, Ltd. (Galenica), weist die Gesellschaft ausstehende Kaufpreiszahlungen in Höhe von 139.277 US \$ aus, davon 119.090 US \$ in den kurzfristig fälligen Anteilen der langfristigen Verbindlichkeiten. Dieses im Dezember 2010 gegründete Gemeinschaftsunternehmen mit dem Namen Vifor Fresenius Medical Care Renal Pharma Ltd. soll die bereits bestehende Zusammenarbeit zwischen der Gesellschaft und Galenica ausweiten. Die Produkte des Gemeinschaftsunternehmens dienen der Behandlung von Blutarmut und der Regulierung des Knochenstoffwechsels bei Dialysepatienten und bei Patienten mit chronischem Nierenversagen, die noch keine Dialysebehandlung benötigen. Galenica bringt in das neue Unternehmen die Lizenzen (bzw. deren wirtschaftlichen Vorteil in den USA) der weltweit eingesetzten intravenös zu verabreichenden Eisenpräparate Venofer® und Ferinject® zur Behandlung von Patienten mit chronischem Nierenversagen der Stufen III bis V ein. Die Vermarktung der Produkte auf anderen medizinischen Gebieten verbleibt in der alleinigen Verantwortung von Galenica und seinen bisherigen Partnern. Galenica überträgt exklusiv an das Gemeinschaftsunternehmen auch die weltweiten Rechte an PA21, einem neuartigen Phosphatbinder auf Eisenbasis. Die kürzlich bekannt gegebene Vereinbarung zur Entwicklung und Vermarktung des Produkts in Japan bleibt jedoch bestehen. Die Gesellschaft wird zu 45 % an dem neuen Gemeinschaftsunternehmen mit Sitz in der Schweiz beteiligt sein.



### Jährliche Zahlungen

Die Gesamtsummen der jährlichen Zahlungen im Rahmen der Kreditvereinbarung 2006, der Anleihen, der Euro-Schuldscheindarlehen, der Kreditvereinbarungen der EIB, der Verbindlichkeiten aus aktivierten Leasingverträgen und anderen Kreditaufnahmen (ohne die genussscheinähnlichen Wertpapiere der Gesellschaft — siehe Anmerkung 11) für die fünf Jahre nach dem 31. Dezember 2010 sowie die Folgejahre betragen:

| JÄHRLICHE ZAHLUNGEN |         |           |           |         |       |              |                  |
|---------------------|---------|-----------|-----------|---------|-------|--------------|------------------|
| Tabelle 5.6.17      |         |           |           |         |       |              |                  |
| in TSD US \$        |         |           |           |         |       |              |                  |
|                     | 2011    | 2012      | 2013      | 2014    | 2015  | Nachfolgende | Gesamt           |
| Jährliche Zahlungen | 263.982 | 1.500.184 | 1.734.568 | 236.368 | 1.631 | 846.528      | <b>4.583.261</b> |

## 10. PENSIONEN UND PENSIONSÄHNLICHE VERPFLICHTUNGEN

### Grundlagen

Die Gesellschaft hat Pensionsverpflichtungen und bildet Pensionsrückstellungen für laufende und zukünftige Leistungen an berechnete aktive und ehemalige Mitarbeiter der Gesellschaft. Je nach rechtlicher, wirtschaftlicher und steuerlicher Gegebenheit eines Landes bestehen dabei unterschiedliche Systeme der Alterssicherung. Die Gesellschaft unterhält zwei Arten von Versorgungssystemen. Dies sind zum einen leistungs- und zum anderen beitragsorientierte Versorgungspläne. Die Höhe der Pensionsleistungen hängt bei leistungsorientierten Versorgungsplänen grundsätzlich von der gesamten bzw. einem Teil der Beschäftigungsdauer sowie dem letzten Gehalt der Mitarbeiter ab. In beitragsorientierten Versorgungsplänen werden die Pensionsleistungen durch die Höhe der Mitarbeiterbeiträge, der Arbeitgeberbeiträge sowie der Erträge aus dem Planvermögen festgelegt. Die Beiträge können durch gesetzliche Höchstbeträge begrenzt sein.

Im Falle des Ausscheidens eines Mitarbeiters ist die Gesellschaft bei leistungsorientierten Pensionsplänen verpflichtet, die zugesagten Leistungen an den ehemaligen Mitarbeiter zu zahlen, wenn diese fällig werden. Leistungsorientierte Versorgungspläne können rückstellungs- oder fondsfinanziert sein. Die Gesellschaft hat zwei bedeutende leistungsorientierte Versorgungspläne, einen fondsfinanzierten Plan in Nordamerika und einen rückstellungsfinanzierten Plan in Deutschland.

Die Höhe der Pensionsverpflichtungen aus leistungsorientierten Versorgungsplänen wird auf Basis versicherungsmathematischer Annahmen berechnet, wodurch Schätzungen erforderlich werden. Die Annahmen zur Lebenserwartung, der Abzinsungsfaktor sowie der erwartete Gehalts- und Rententrend beeinflussen als wesentliche Parameter die Höhe der Pensionsverpflichtung. Im Rahmen des fondsfinanzierten Plans der Gesellschaft werden Vermögenswerte für die Erbringung der zukünftigen Zahlungsverpflichtungen reserviert. Der erwartete Ertrag aus diesem Planvermögen wird in der entsprechenden Periode als Ertrag erfasst. Versicherungsmathematische Gewinne und Verluste entstehen, wenn sich die tatsächlichen Werte der Parameter eines Jahres von den versicherungsmathematischen Annahmen für dieses Jahr unterscheiden sowie bei Abweichungen des tatsächlichen vom erwarteten Ertrag auf das Planvermögen. Die Pensionsrückstellungen der Gesellschaft werden durch diese versicherungsmathematischen Gewinne oder Verluste beeinflusst.

Die Pensionsverpflichtungen der Gesellschaft werden bei einem fondsfinanzierten Versorgungsplan mit dem zum beizulegenden Zeitwert bewerteten Planvermögen saldiert (Finanzierungsstatus). Übersteigt die Verpflichtung aus den Pensionszusagen das Planvermögen, so wird in der Bilanz eine Pensionsrückstellung gebildet. Übersteigt das Planvermögen die Verpflichtung aus der Pensionszusage und hat das Unternehmen einen Anspruch auf Rückerstattung oder Minderung künftiger Beitragszahlungen an den Fonds, so wird in der Bilanz ein Vermögenswert unter den sonstigen Aktiva ausgewiesen.

Bei beitragsorientierten Versorgungsplänen zahlt die Gesellschaft festgelegte Beiträge während der Dienstzeit eines Mitarbeiters. Durch diese Beiträge sind alle Verpflichtungen der Gesellschaft abgegolten. Die Gesellschaft unterhält einen beitragsorientierten Versorgungsplan für Mitarbeiter in Nordamerika.

#### Leistungsorientierte Pensionspläne

Im 1. Quartal 2002 kürzte die nordamerikanische Tochtergesellschaft FMCH die leistungsorientierten Pensionspläne sowie die ergänzenden Pensionspläne für leitende Mitarbeiter. Durch diese Plankürzung werden im Wesentlichen alle gemäß den Plänen anspruchsberechtigten Mitarbeiter keine zusätzlichen Versorgungsansprüche für zukünftige Leistungen mehr erhalten. Die Gesellschaft hat alle Pensionsverpflichtungen der Gesellschaft aus den unverfallbaren und eingefrorenen Pensionsansprüchen der Mitarbeiter zum Zeitpunkt der Plankürzung beibehalten. Jedes Jahr führt FMCH dem Pensionsplan mindestens den Betrag zu, der sich aufgrund gesetzlicher Vorschriften (Employee Retirement Income Security Act of 1974) ergibt. Für 2010 sahen die gesetzlichen Vorschriften keine Mindestzuführung für den leistungsorientierten Pensionsplan vor. Im Jahr 2010 wurden dennoch freiwillige Zuführungen von 600 US \$ getätigt. Die erwarteten Zuführungen für das Geschäftsjahr 2011 betragen 661 US \$.

Am 31. Dezember 2010 beträgt die Pensionsverpflichtung für alle leistungsorientierten Versorgungspläne 425.472 US \$ (2009: 386.852 US \$) und setzt sich zusammen aus der Pensionsverpflichtung des nordamerikanischen Versorgungsplanes in Höhe von 282.792 US \$ (2009: 261.282 US \$), der durch Fonds gedeckt ist, und des deutschen rückstellungsfinanzierten Versorgungsplanes in Höhe von 142.680 US \$ (2009: 125.570 US \$).

Im Folgenden werden die Veränderung der Pensionsverpflichtungen, die Veränderung des Planvermögens und der Finanzierungsstatus der Versorgungspläne dargestellt. Die Rentenzahlungen in der Veränderung der Pensionsverpflichtung beinhalten Zahlungen sowohl aus dem fondsfinanzierten als auch aus dem rückstellungsfinanzierten Versorgungsplan. Dagegen beinhalten die Rentenzahlungen in der Veränderung des Planvermögens lediglich diejenigen Rentenzahlungen, die über den Pensionsfonds geleistet werden.

| FINANZIERUNGSSTATUS                                |                |                |
|----------------------------------------------------|----------------|----------------|
| VON LEISTUNGSORIENTIERTEN PENSIONSPLÄNEN           |                |                |
| Tabelle 5.6.18                                     |                |                |
| in TSD US \$                                       |                |                |
|                                                    | 2010           | 2009           |
| <b>Entwicklung der Pensionsverpflichtungen</b>     |                |                |
| Pensionsverpflichtungen am 1. Januar               | 386.852        | 353.961        |
| Währungsumrechnungs(-gewinn) -verlust              | (8.898)        | 4.235          |
| Laufender Dienstzeitaufwand                        | 7.982          | 7.500          |
| Zinsaufwand                                        | 22.615         | 21.397         |
| Übertragungen                                      | 181            | 96             |
| Versicherungsmathematische Verluste                | 26.655         | 13.216         |
| Tatsächliche Rentenzahlungen                       | (9.915)        | (7.560)        |
| Plankürzungen und Planabgeltungen                  | –              | (5.993)        |
| <b>PENSIONSVERPFLICHTUNGEN AM 31. DEZEMBER</b>     | <b>425.472</b> | <b>386.852</b> |
| <b>Entwicklung des Planvermögens</b>               |                |                |
| Marktwert des Planvermögens am 1. Januar           | 236.633        | 214.616        |
| Tatsächliche Erträge des Planvermögens             | 3.191          | 29.382         |
| Arbeitgeberbeiträge                                | 600            | 759            |
| Auszahlung von Leistungsverpflichtungen            | (8.099)        | (6.063)        |
| Planabgeltungen                                    | –              | (2.061)        |
| <b>MARKTWERT DES PLANVERMÖGENS AM 31. DEZEMBER</b> | <b>232.325</b> | <b>236.633</b> |
| <b>FINANZIERUNGSSTATUS ZUM JAHRESENDE</b>          | <b>193.147</b> | <b>150.219</b> |

Die Gesellschaft hat zum 31. Dezember 2010 und 2009 eine Pensionsrückstellung in Höhe von 193.147 US \$ bzw. 150.219 US \$. Die Pensionsrückstellung beinhaltet einen kurzfristigen Teil in Höhe von 2.997 US \$ (2009: 2.892 US \$), der in der Bilanz unter dem Posten „Rückstellungen und sonstige kurzfristige Verbindlichkeiten“ ausgewiesen wird. Der langfristige Teil in Höhe von 190.150 US \$ (2009: 147.327 US \$) wird in der Bilanz als langfristige Pensionsrückstellung ausgewiesen. Von den Bezugsberechtigten sind 85 % in Nordamerika und ein Großteil der verbleibenden 15 % in Deutschland beschäftigt.

Der Anwartschaftsbarwert für alle leistungsorientierten Pensionspläne zum 31. Dezember 2010 und 2009 betrug 394.276 US \$ bzw. 367.182 US \$. Der Anwartschaftsbarwert für alle leistungsorientierten Pensionspläne, deren Anwartschaftsbarwert zum 31. Dezember 2010 und 2009 das Planvermögen übersteigt, betrug 394.276 US \$ bzw. 367.182 US \$. Das entsprechende Planvermögen hatte zum 31. Dezember 2010 und 2009 einen beizulegenden Zeitwert von 232.325 US \$ bzw. 236.633 US \$.

Die pensionsbedingten Änderungen des Kumulierten Übrigen Comprehensive Income vor Steuern entfallen auf versicherungsmathematische Verluste (Gewinne). Zum 31. Dezember 2010 ist kein ungetilgter Dienstzeitaufwand früherer Jahre im Kumulierten Übrigen Comprehensive Income enthalten.

| KUMULIERTES ÜBRIGES COMPREHENSIVE INCOME (LOSS)<br>FÜR PENSIONSBEWERTUNGEN |                                                          |
|----------------------------------------------------------------------------|----------------------------------------------------------|
| in TSD US \$                                                               |                                                          |
|                                                                            | Versicherungs-<br>mathematische<br>Verluste<br>(Gewinne) |
| <b>SUMME DER PENSIONSBEDINGTEN ÄNDERUNGEN ZUM 1. JANUAR 2009</b>           | <b>76.926</b>                                            |
| Zugänge                                                                    | (4.331)                                                  |
| Abgänge                                                                    | (5.404)                                                  |
| Währungsumrechnungsdifferenzen                                             | 27                                                       |
| <b>SUMME DER PENSIONSBEDINGTEN ÄNDERUNGEN ZUM 31. DEZEMBER 2009</b>        | <b>67.218</b>                                            |
| Zugänge                                                                    | 40.917                                                   |
| Abgänge                                                                    | (5.313)                                                  |
| Währungsumrechnungsdifferenzen                                             | 50                                                       |
| <b>SUMME DER PENSIONSBEDINGTEN ÄNDERUNGEN ZUM 31. DEZEMBER 2010</b>        | <b>102.872</b>                                           |

Es wird erwartet, dass im kommenden Geschäftsjahr versicherungsmathematische Verluste in Höhe von 8.086 US \$ erfolgswirksam aufgelöst werden.

Die Zinssätze der einzelnen Pläne basieren auf den Renditen von Portfolios aus Eigen- und Fremdkapitalinstrumenten mit hohem Rating und Laufzeiten, die den Zeithorizont der jeweiligen Pensionsverpflichtung widerspiegeln. Der Zinssatz der Gesellschaft ergibt sich aus dem mit den Pensionsverpflichtungen der einzelnen Pläne zum 31. Dezember 2010 gewichteten Durchschnitt dieser Zinssätze. Den errechneten Pensionsverpflichtungen liegen folgende gewichtete durchschnittliche Annahmen zum 31. Dezember 2010 und 2009 zugrunde:

| GEWICHTETE, DURCHSCHNITTliche ANNAHMEN<br>FÜR DIE PENSIONSVERPFLICHTUNGEN |      |      |
|---------------------------------------------------------------------------|------|------|
| in %                                                                      |      |      |
|                                                                           | 2010 | 2009 |
| Zinssatz                                                                  | 5,70 | 6,00 |
| Gehaltsdynamik                                                            | 4,00 | 4,01 |

Aus den leistungsorientierten Versorgungsplänen ergab sich ein Pensionsaufwand zum 31. Dezember 2010 und 2009 aus den folgenden Komponenten:

| <b>BESTANDTEILE DES PENSIONS-AUFWANDS</b>                |                       |               |
|----------------------------------------------------------|-----------------------|---------------|
| <i>in TSD US \$</i>                                      |                       |               |
|                                                          | <i>Tabelle 5.6.21</i> |               |
|                                                          | 2010                  | 2009          |
| Laufender Dienstzeitaufwand                              | 7.982                 | 7.500         |
| Zinsaufwand                                              | 22.615                | 21.397        |
| Erwartete Erträge des Planvermögens                      | (17.453)              | (15.767)      |
| Tilgung von versicherungsmathematischen Verlusten, netto | 5.313                 | 4.592         |
| Aufwand aus der Abgeltung eines Plans                    | –                     | 812           |
| <b>PENSIONS-AUFWAND</b>                                  | <b>18.457</b>         | <b>18.534</b> |

Dem errechneten Pensionsaufwand liegen folgende gewichtete durchschnittliche Annahmen zum 31. Dezember 2010 und 2009 zugrunde:

| <b>GEWICHTETE, DURCHSCHNITTliche ANNAHMEN FÜR DEN PENSIONS-AUFWAND</b> |                       |      |
|------------------------------------------------------------------------|-----------------------|------|
| <i>in %</i>                                                            |                       |      |
|                                                                        | <i>Tabelle 5.6.22</i> |      |
|                                                                        | 2010                  | 2009 |
| Zinssatz                                                               | 6,00                  | 6,15 |
| Erwartete Erträge des Planvermögens                                    | 7,50                  | 7,50 |
| Gehaltsdynamik                                                         | 4,01                  | 4,19 |

Die folgende Tabelle zeigt die erwarteten zukünftigen aggregierten Rentenzahlungen der kommenden fünf Jahre und danach:

| <b>ERWARTETE ZUKÜNFTIGE ZAHLUNGEN</b> |                       |        |        |        |        |                     |
|---------------------------------------|-----------------------|--------|--------|--------|--------|---------------------|
| <i>in TSD US \$</i>                   |                       |        |        |        |        |                     |
|                                       | <i>Tabelle 5.6.23</i> |        |        |        |        |                     |
|                                       | 2011                  | 2012   | 2013   | 2014   | 2015   | 2016<br>bis<br>2020 |
| Erwartete zukünftige Zahlungen        | 11.224                | 12.489 | 13.462 | 14.796 | 16.304 | 108.387             |

### Planvermögen

Die folgende Tabelle zeigt die Marktwerte des Planvermögens der Gesellschaft zum 31. Dezember 2010 und 2009:

| PLANVERMÖGEN                                                 |                |                                                                         |                                                                   |
|--------------------------------------------------------------|----------------|-------------------------------------------------------------------------|-------------------------------------------------------------------|
| Tabelle 5.6.24                                               |                |                                                                         |                                                                   |
| in TSD US \$                                                 |                |                                                                         |                                                                   |
| Planvermögen nach Kategorien                                 | Gesamt         | Marktwertberechnung zum 31. Dezember 2010                               |                                                                   |
|                                                              |                | Quotierte Marktpreise auf aktiven Märkten für identische Vermögenswerte | Direkt oder indirekt beobachtbare Marktpreise auf aktiven Märkten |
|                                                              |                | (Level 1)                                                               | (Level 2)                                                         |
| <b>Kapitalinvestitionen</b>                                  |                |                                                                         |                                                                   |
| Stammaktien                                                  | 2.565          | 2.565                                                                   | –                                                                 |
| Indexfonds <sup>1</sup>                                      | 65.621         | –                                                                       | 65.621                                                            |
| <b>Festverzinsliche Wertpapiere</b>                          |                |                                                                         |                                                                   |
| Staatsanleihen <sup>2</sup>                                  | 4.479          | 1.967                                                                   | 2.512                                                             |
| Unternehmensanleihen <sup>3</sup>                            | 152.564        | –                                                                       | 152.564                                                           |
| Sonstige festverzinsliche Wertpapiere <sup>4</sup>           | 2.442          | –                                                                       | 2.442                                                             |
| U.S. Treasury Geldmarktfonds <sup>5</sup>                    | 4.232          | 4.232                                                                   | –                                                                 |
| <b>Sonstige Investments</b>                                  |                |                                                                         |                                                                   |
| Flüssige Mittel, Geldmarkt- und Investmentfonds <sup>6</sup> | 422            | 422                                                                     | –                                                                 |
| <b>GESAMT</b>                                                | <b>232.325</b> | <b>9.186</b>                                                            | <b>223.139</b>                                                    |
| Planvermögen nach Kategorien                                 | Gesamt         | Marktwertberechnung zum 31. Dezember 2009                               |                                                                   |
|                                                              |                | Quotierte Marktpreise auf aktiven Märkten für identische Vermögenswerte | Direkt oder indirekt beobachtbare Marktpreise auf aktiven Märkten |
|                                                              |                | (Level 1)                                                               | (Level 2)                                                         |
| <b>Kapitalinvestitionen</b>                                  |                |                                                                         |                                                                   |
| Stammaktien                                                  | 5.904          | 5.904                                                                   | –                                                                 |
| Indexfonds <sup>1</sup>                                      | 71.406         | –                                                                       | 71.406                                                            |
| <b>Festverzinsliche Wertpapiere</b>                          |                |                                                                         |                                                                   |
| Staatsanleihen <sup>2</sup>                                  | 3.655          | 394                                                                     | 3.261                                                             |
| Unternehmensanleihen <sup>3</sup>                            | 149.367        | –                                                                       | 149.367                                                           |
| Sonstige festverzinsliche Wertpapiere <sup>4</sup>           | 163            | –                                                                       | 163                                                               |
| U.S. Treasury Geldmarktfonds <sup>5</sup>                    | 5.776          | 5.776                                                                   | –                                                                 |
| <b>Sonstige Investments</b>                                  |                |                                                                         |                                                                   |
| Flüssige Mittel, Geldmarkt- und Investmentfonds <sup>6</sup> | 362            | 362                                                                     | –                                                                 |
| <b>GESAMT</b>                                                | <b>236.633</b> | <b>12.436</b>                                                           | <b>224.197</b>                                                    |

<sup>1</sup> Diese Kategorie beinhaltet nicht aktiv gemanagte eigenkapitalbasierte Indexfonds, die den S & P 500, S & P 400, Russell 2000, MSCI EAFE Index, MSCI Emerging Markets Index für 2010 und 2009 sowie zusätzlich in 2009 den Barclays Capital Long Corporate Index.

<sup>2</sup> Diese Kategorie beinhaltet festverzinsliche Wertpapiere der U.S.-Regierung und von der Regierung geförderten Instanzen.

<sup>3</sup> Diese Kategorie beinhaltet „investment grade“ Anleihen von U.S.-Emittenten diverser Industrien.

<sup>4</sup> Diese Kategorie beinhaltet privat platzierte Anleihen sowie hypothekarisch besicherte Anleihen.

<sup>5</sup> Diese Kategorie beinhaltet Fonds, die in U.S. Treasury Schatzanweisungen sowie in U.S. Treasury besicherte Instrumente investieren.

<sup>6</sup> Diese Kategorie beinhaltet flüssige Mittel, Geldmarktfonds sowie Investmentfonds, die in Unternehmensanleihen höchster Bonität investieren.

Der Ermittlung der Marktwerte des Planvermögens wurden folgende Methoden und Inputs zugrunde gelegt:

- ▶ Stammaktien werden zu ihrem Marktpreis am Bilanzstichtag bewertet.
- ▶ Die Marktwerte der Indexfonds basieren auf Marktpreisen.
- ▶ Der Marktwert für einen Großteil der Staatsanleihen basiert auf Marktpreisen (Level 2).  
Die verbleibenden Staatsanleihen werden zum Marktpreis bewertet (Level 1).
- ▶ Die Marktwerte der Unternehmensanleihen und der sonstigen Anleihen basieren auf Marktpreisen zum Bilanzstichtag.
- ▶ Flüssige Mittel werden zu ihrem Nominalwert angesetzt, der dem Marktwert entspricht.
- ▶ u.s. Treasury Geldmarktfonds sowie andere Geldmarkt- und Investmentfonds werden zu ihrem Marktpreis bewertet.

#### Investitionspolitik und Strategie für das Planvermögen

Die Gesellschaft überprüft regelmäßig die Annahme über die erwartete langfristige Rendite des Planvermögens des nordamerikanischen fondsfinanzierten Versorgungsplans. Im Rahmen dieser Überprüfung wird durch unabhängige Aktuarien in Beraterfunktion eine Bandbreite für die erwartete langfristige Rendite des gesamten Planvermögens ermittelt, indem die erwarteten zukünftigen Renditen für jede Klasse von Vermögenswerten mit dem Anteil der jeweiligen Klasse am gesamten Planvermögen gewichtet werden. Die ermittelte Renditebandbreite basiert sowohl auf aktuelle ökonomische Rahmendaten berücksichtigenden Prognosen langfristiger Renditen, als auch auf historischen Marktdaten über vergangene Renditen, Korrelationen und Volatilitäten der einzelnen Klassen von Vermögenswerten. Im Geschäftsjahr 2010 betrug die erwartete langfristige Rendite der Gesellschaft auf das Planvermögen 7,50 %.

Ziel der globalen Investitionsstrategie der Gesellschaft ist es, etwa 98 % der Vermögenswerte in Investments mit langfristigem Wachstum zu binden und etwa 2 % der Vermögenswerte für kurzfristige Rentenzahlungen zur Verfügung zu haben. Dabei soll eine breite Diversifikation der Vermögenswerte, der Anlagestrategie und des Anlagemanagements der entsprechenden Funds erzielt werden.

Die Strategie der Gesellschaft strebt eine Verteilung der Vermögenswerte von 35 % auf Aktien und 65 % auf langfristige us-Anleihen an und berücksichtigt, dass es einen zeitlichen Horizont für investierte Fonds von mehr als 5 Jahren geben wird. Das gesamte Portfolio wird an einem Index gemessen, der die Benchmark der jeweiligen Anlagenkategorien sowie die angestrebte Verteilung der Vermögenswerte widerspiegelt. Entsprechend der Richtlinie darf nicht in Aktien der Gesellschaft oder anderer nahestehender Unternehmen investiert werden. Die Maßstäbe für die Entwicklung der separaten Anlagekategorien beinhalten: S & P 500 Index, S & P 400 Index, Russell 2000 Growth Index, MSCI EAFE Index, MSCI Emerging Markets Index, Barclays Capital Long Term Government Index and Barclays Capital 20 Year US Treasury Strip Index.

#### Beitragsorientierte Pensionspläne

Die meisten Mitarbeiter von FMCH haben das Recht, an dem beitragsorientierten 401(k) Plan teilzunehmen. Die Mitarbeiter können bis zu 75 % ihres Gehalts im Rahmen dieses Planes anlegen. Dabei gilt für Mitarbeiter im Alter von unter fünfzig Jahren ein jährlicher Maximalbetrag von 16,5 US \$ und für Mitarbeiter ab einem Alter von fünfzig Jahren ein Maximalbetrag von 22,00 US \$. Die Gesellschaft zahlt ihrerseits 50 % des Mitarbeiterbeitrages ein, allerdings maximal 3 % des Gehalts des betreffenden Mitarbeiters. Der Gesamtaufwand der Gesellschaft aus diesem beitragsorientierten Plan im Jahr 2010 und 2009 betrug 31.583 US \$ bzw. 28.567 US \$.

## 11. GENUSSSCHEINÄHNLICHE WERTPAPIERE

Die Gesellschaft hat im Juni 2001 über Fresenius Medical Care Capital Trusts genusscheinähnliche Wertpapiere (Trust Preferred Securities) ausgegeben. Bei diesen Gesellschaften handelt es sich um entsprechend den Gesetzen des Staates Delaware, USA, geregelte Trusts. Die Gesellschaft hält 100 % am Stammkapital dieser Trusts. Das Vermögen jedes Trusts besteht ausschließlich aus einer Forderung aus nachrangigen Schuldverschreibungen (Senior Subordinated Note), die die Gesellschaft oder eine ihrer 100 %igen Tochtergesellschaften begeben haben. Die Gesellschaft, Fresenius Medical Care Deutschland GmbH (D-GmbH) und FMCH haben den jeweiligen Fresenius Medical Care Capital Trusts Zahlung und Leistung für diese nachrangige Forderung garantiert. Die Trust Preferred Securities werden von der Gesellschaft sowie von FMCH und der D-GmbH durch eine Reihe von Verpflichtungen garantiert.

Die Trust Preferred Securities gewähren den Inhabern das Recht auf Ausschüttung in Höhe eines festen jährlichen Prozentsatzes auf den Nominalbetrag der Wertpapiere. Sie sind nach 10 Jahren abzulösen, voraussichtlich am 15. Juni 2011. Auf Verlangen der Inhaber können vorzeitige Ablösungen im Falle eines Wechsels des Mehrheitseigners in Verbindung mit einer Herabsetzung im Rating oder aufgrund weiterer festgelegter Tatbestände einschließlich nicht erfolgter Zinszahlungen erforderlich werden. Die Inhaber der Trust Preferred Securities haben bei Liquidation des Trusts Anspruch auf Rückzahlung des Nominalbetrags der Trust Preferred Securities. Die Inhaber der Trust Preferred Securities haben bis auf wenige, genau bestimmte Ausnahmen kein Stimmrecht im Trust.

Die nachrangigen Schuldverschreibungen, die von den Fresenius Medical Care Trusts gehalten werden, enthalten Unterlassungs- und Leistungsverpflichtungen für die Gesellschaft und ihre Tochterunternehmen sowie sonstige Zahlungsbeschränkungen. Die Beschränkungen durch diese Vertragsklauseln betreffen u.a. die Verschuldung sowie die Investitionen der Gesellschaft und verpflichten die Gesellschaft, bestimmte in der Vereinbarung festgelegte Kennzahlen einzuhalten. Zum 31. Dezember 2010 hat die Gesellschaft alle in der Vereinbarung über die Trust Preferred Securities festgelegten Verpflichtungen erfüllt.

Die zum 31. Dezember 2010 und 2009 ausstehenden genusscheinähnlichen Wertpapiere zeigt die folgende Tabelle:

| GENUSSSCHEINÄHNLICHE WERTPAPIERE                  |                  |                |          |                              |                |                |
|---------------------------------------------------|------------------|----------------|----------|------------------------------|----------------|----------------|
| in TSD, mit Ausnahme der Nominalbeträge, in US \$ |                  | Tabelle 5.6.25 |          |                              |                |                |
|                                                   | Jahr der Ausgabe | Nominalbetrag  | Zinssatz | Verbindliche Tilgungstermine | 2010           | 2009           |
| Fresenius Medical Care Capital Trust IV           | 2001             | 225.000 \$     | 7% %     | 15. Juni 2011                | 224.835        | 224.451        |
| Fresenius Medical Care Capital Trust V            | 2001             | 300.000 €      | 7% %     | 15. Juni 2011                | 400.714        | 431.645        |
| <b>GESAMT</b>                                     |                  |                |          |                              | <b>625.549</b> | <b>656.096</b> |



## 12. ANTEILE ANDERER GESELLSCHAFTER MIT PUT-OPTIONEN

Die Gesellschaft kann auf Grund geschriebener Put-Optionen dazu verpflichtet werden, die Anteile, die andere Gesellschafter an einigen ihrer Tochtergesellschaften halten, zu erwerben. Bei Ausübung dieser Put-Optionen innerhalb eines festgelegten Zeitraums wäre die Gesellschaft dazu verpflichtet, sämtliche oder Teile der Anteile anderer Gesellschafter zum geschätzten Marktwert zu erwerben. Zur Schätzung dieser Marktwerte setzt die Gesellschaft den höheren Wert aus Netto-Buchwert der Anteile anderer Gesellschafter und Gewinnmultiplikatoren an, wobei die Gewinnmultiplikatoren auf historischen Gewinnen, dem Entwicklungsstadium des zugrunde liegenden Geschäftes und anderen Faktoren beruhen. In Abhängigkeit von den Marktgegebenheiten können die geschätzten Marktwerte der Anteile anderer Gesellschafter schwanken und die finalen Kaufpreisverpflichtungen für die Anteile anderer Gesellschafter erheblich von den derzeitigen Schätzungen abweichen.

Zum 31. Dezember 2010 und 2009 betragen diese Verpflichtungen im Rahmen der Put-Optionen 279.709 US \$ bzw. 231.303 US \$ wovon 95.159 US \$ zum 31. Dezember 2010 ausübbar waren. In den letzten zwei Geschäftsjahren wurden in drei Fällen Put-Optionen in Höhe von insgesamt 6.535 US \$ ausgeübt.

Im Folgenden werden die Veränderungen der Anteile anderer Gesellschafter mit Put-Optionen zum 31. Dezember 2010 und 2009 dargestellt:

| ANTEILE ANDERER GESELLSCHAFTER MIT PUT-OPTIONEN    |                |                |
|----------------------------------------------------|----------------|----------------|
| in TSD US \$                                       |                |                |
|                                                    | Tabelle 5.6.26 |                |
|                                                    | 2010           | 2009           |
| <b>ANFANGSSTAND</b>                                | <b>231.303</b> | <b>162.166</b> |
| Dividendenzahlungen                                | (38.964)       | (16.930)       |
| Erwerb/Verkauf von Anteilen anderer Gesellschafter | 28.969         | 12.548         |
| Kapitaleinlage anderer Gesellschafter              | 5.289          | 5.108          |
| Veränderung der Anteile anderer Gesellschafter     | 24.222         | 39.816         |
| Ergebnis nach Ertragsteuer                         | 28.839         | 28.595         |
| Übriges Comprehensive Income (Loss)                | 51             | –              |
| <b>ENDSTAND</b>                                    | <b>279.709</b> | <b>231.303</b> |

### 13. KONZERN-EIGENKAPITAL

#### Grundkapital

Die persönlich haftende Gesellschafterin hat keine Eigenkapitalanteile an der Gesellschaft und partizipiert daher weder an den Vermögenswerten noch an den Gewinnen und Verlusten der Gesellschaft. Allerdings wird die persönlich haftende Gesellschafterin für alle Auslagen im Zusammenhang mit der Geschäftsführung der Gesellschaft einschließlich der Vergütung der Mitglieder des Vorstands und des Aufsichtsrats entschädigt

—— siehe Anmerkung 3.

Die Hauptversammlung einer Kommanditgesellschaft auf Aktien kann genehmigtes Kapital schaffen. Die Schaffung von genehmigtem Kapital erfordert einen Beschluss mit einer Mehrheit von drei Vierteln des bei der Beschlussfassung vertretenen Grundkapitals, durch den der Vorstand ermächtigt wird, innerhalb eines Zeitraums von nicht mehr als fünf Jahren Aktien bis zu einem bestimmten Betrag auszugeben. Der Nennbetrag des genehmigten Kapitals darf die Hälfte des ausgegebenen Grundkapitals, das zur Zeit der Ermächtigung vorhanden ist, nicht übersteigen.

Weiterhin kann die Hauptversammlung einer Kommanditgesellschaft auf Aktien zum Zweck der Ausgabe (i) von Aktien an Inhaber von Wandelschuldverschreibungen oder sonstigen Wertpapieren, die ein Recht zum Bezug von Aktien einräumen, (ii) von Aktien, die als Gegenleistung bei einem Zusammenschluss mit einem anderen Unternehmen dienen, oder (iii) von Aktien, die Führungskräften oder Arbeitnehmern angeboten werden, ein bedingtes Kapital schaffen, wobei jeweils ein Beschluss mit einer Mehrheit von drei Vierteln des bei der Beschlussfassung vertretenen Grundkapitals erforderlich ist. Der Nennbetrag des bedingten Kapitals darf die Hälfte und für den Fall, dass das bedingte Kapital zum Zweck der Ausgabe von Aktien an Führungskräfte und Arbeitnehmer geschaffen wird, 10 % des ausgegebenen Grundkapitals, das zur Zeit der Beschlussfassung vorhanden ist, nicht übersteigen.

In einer Kommanditgesellschaft auf Aktien bedürfen sämtliche Kapitalerhöhungsbeschlüsse zu ihrer Wirksamkeit zusätzlich der Zustimmung durch die bzw. den persönlich haftenden Gesellschafter.

#### Genehmigtes Kapital

Die Management AG wurde durch den Beschluss der ordentlichen Hauptversammlung vom 11. Mai 2010 ermächtigt, in der Zeit bis zum 10. Mai 2015 das Grundkapital der Gesellschaft mit Zustimmung des Aufsichtsrats einmalig oder mehrfach um bis zu insgesamt 35.000 € gegen Bareinlagen durch Ausgabe neuer Inhaberstammaktien zu erhöhen (Genehmigtes Kapital 2010/I). Die persönlich haftende Gesellschafterin wurde ferner ermächtigt, mit Zustimmung des Aufsichtsrats über den Ausschluss des Bezugsrechts der Aktionäre zu entscheiden. Ein Bezugsrechtsausschluss ist jedoch nur für Spitzenbeträge zulässig. Die neuen Aktien können auch von durch die persönlich haftende Gesellschafterin bestimmten Kreditinstituten mit der Verpflichtung übernommen werden, sie den Aktionären anzubieten (mittelbares Bezugsrecht). Die Ermächtigung der persönlich haftenden Gesellschafterin zur Erhöhung des Grundkapitals (Genehmigtes Kapital I) durch den Beschluss der Hauptversammlung vom 30. August 2005 wurde aufgehoben. Das Genehmigte Kapital 2010/I wurde bisher nicht genutzt.

Die persönlich haftende Gesellschafterin wurde durch den Beschluss der ordentlichen Hauptversammlung vom 11. Mai 2010 ferner ermächtigt, in der Zeit bis zum 10. Mai 2015 das Grundkapital der Gesellschaft mit Zustimmung des Aufsichtsrats einmalig oder mehrfach um bis zu insgesamt 25.000 € gegen Bareinlagen und/oder Sacheinlagen durch Ausgabe neuer Inhaberstammaktien zu erhöhen (Genehmigtes Kapital 2010/II).

Die persönlich haftende Gesellschafterin wurde ferner ermächtigt, mit Zustimmung des Aufsichtsrats über den Ausschluss des Bezugsrechts der Aktionäre zu entscheiden. Ein Bezugsrechtsausschluss ist jedoch nur zulässig, wenn im Fall einer Kapitalerhöhung gegen Bareinlagen der auf die neuen Aktien entfallende anteilige Betrag des Grundkapitals 10 % des Grundkapitals nicht übersteigt und der Ausgabebetrag der neuen Aktien den Börsenpreis in Deutschland der bereits börsennotierten Aktien gleicher Gattung und Ausstattung zum Zeitpunkt der endgültigen Festlegung des Ausgabebetrags durch die persönlich haftende Gesellschafterin nicht wesentlich unterschreitet oder im Falle einer Kapitalerhöhung gegen Sacheinlagen die Gewährung von Aktien zum Zwecke des Erwerbs von Unternehmen, Unternehmensteilen oder einer Beteiligung an einem Unternehmen erfolgen soll. Die Ermächtigung der persönlich haftenden Gesellschafterin zur Erhöhung des Grundkapitals (Genehmigtes Kapital II) durch den Beschluss der Hauptversammlung vom 30. August 2005 wurde aufgehoben. Das Genehmigte Kapital 2010/II wurde bisher nicht genutzt.

Das Genehmigte Kapital 2010/I und das Genehmigte Kapital 2010/II der Gesellschaft wurden mit Eintragung in das Handelsregister im Amtsgericht Hof an der Saale am 25. Mai 2010 wirksam.

#### Bedingtes Kapital

Durch Beschluss der Hauptversammlung am 9. Mai 2006, geändert durch die Hauptversammlung am 15. Mai 2007 zur Ermöglichung des Aktiensplits im Verhältnis drei zu eins, wurde das bedingte Kapital der Gesellschaft um 15.000 € erhöht. Dies entsprach 15 Mio Stammaktien ohne Nennwert, im Nominalwert von 1,00 € je Aktie. Die bedingte Kapitalerhöhung kann nur durch die Ausübung von Aktienoptionen unter dem Aktienoptionsplan 2006 erfolgen, wobei jede ausgegebene Aktienoption für eine Aktie ausübbar ist — siehe Anmerkung 15. Die Gesellschaft hat das Recht, die Aktienoptionen durch eigene Aktien, die sie hält oder zurückkauft, zu bedienen, statt durch die Ausgabe von neuen Aktien das Kapital zu erhöhen.

Im Rahmen der anderen Mitarbeiterbeteiligungsprogramme, hat die Gesellschaft an Mitarbeiter der Gesellschaft sowie an Mitglieder des Vorstands der persönlich haftenden Gesellschafterin der Gesellschaft und an leitende und sonstige Mitarbeiter verbundener Unternehmen Wandelschuldverschreibungen und Bezugsrechte ausgegeben, die deren Inhaber zum Bezug von Vorzugsaktien, oder aufgrund der in 2005 angebotenen Umwandlungsmöglichkeit von Stammaktien, berechtigen. Zum 31. Dezember 2010 waren im Rahmen dieser Programme 58.663 Wandelschuldverschreibungen und Optionen für Vorzugsaktien mit einer durchschnittlich verbleibenden Laufzeit von 3,38 Jahren und 12.152.108 Wandelschuldverschreibungen und Optionen für Stammaktien mit einer durchschnittlich verbleibenden Laufzeit von 4,8 Jahren ausgegeben. Im Jahr 2010 wurden 72.840 Optionen für Vorzugsaktien und 2.532.366 Optionen für Stammaktien unter diesen Mitarbeiterbeteiligungsprogrammen ausgeübt — siehe Anmerkung 15.

Als Folge des Aktiensplits im Verhältnis drei zu eins der Gesellschaft für Stamm- und Vorzugsaktien am 15. Juni 2007, dem die Aktionäre der Gesellschaft auf der ordentlichen Hauptversammlung vom 15. Mai 2007 zugestimmt hatten, erhöhte sich das bedingte Kapital der Gesellschaft um 6.557 US \$ (4.454 €). Zum 31. Dezember 2010 betrug das für alle Programme zur Verfügung stehende bedingte Kapital 31.477 US \$ (23.557 €), davon 17.476 US \$ (13.079 €) für den Aktienoptionsplan 2006 und 14.001 US \$ (10.478 €) für alle anderen Pläne.

#### Dividenden

Nach deutschem Recht ist der Bilanzgewinn, wie er sich aus dem nach deutschen handelsrechtlichen Vorschriften (HGB) aufgestellten Jahresabschluss der FMC AG & CO. KGAA ergibt, Grundlage für die Ausschüttung von Dividenden an die Aktionäre.

Sollten in zwei aufeinander folgenden Jahren nach dem Jahr, von dem an die Vorzugsaktien Anspruch auf Dividende haben, für Vorzugsaktien keine Dividenden beschlossen werden, erhalten die Aktionäre der Vorzugsaktien die gleichen Stimmrechte wie Aktionäre von Stammaktien bis zu dem Zeitpunkt, an dem die ausstehenden Dividenden bezahlt werden. Die Zahlung von Dividenden durch die Gesellschaft ist zusätzlich an Beschränkungen durch die Kreditvereinbarung 2006 gebunden — siehe Anmerkung 9.

Am 12. Mai 2010 sind Barausschüttungen in Höhe von insgesamt 231.967 US \$ für 2009 bei einem Betrag von 0,63 € je Vorzugsaktie und von 0,61 € je Stammaktie geleistet worden.

Am 8. Mai 2009 sind Barausschüttungen in Höhe von insgesamt 231.940 US \$ für 2008 bei einem Betrag von 0,60 € je Vorzugsaktie und von 0,58 € je Stammaktie geleistet worden.

#### 14. ERGEBNIS JE AKTIE

Die folgende Tabelle stellt eine Überleitung der Zähler und Nenner für die Ermittlung des Ergebnisses je Aktie vor und bei voller Verwässerung zum 31. Dezember 2010 und 2009 dar:

| <b>ÜBERLEITUNG ERGEBNIS JE AKTIE</b><br><b>VOR UND BEI VOLLER VERWÄSSERUNG</b><br><i>Tabelle 5.6.27</i> |                |                |
|---------------------------------------------------------------------------------------------------------|----------------|----------------|
| <i>in TSD US \$, mit Ausnahme der Angaben zu Aktien</i>                                                 |                |                |
|                                                                                                         | 2010           | 2009           |
| <b>Zähler</b>                                                                                           |                |                |
| Konzernergebnis (Ergebnis, das auf die Anteilseigner der FMC AG & CO. KGAA entfällt)                    | 978.517        | 891.138        |
| abzüglich: Dividenden auf Vorzugsaktien                                                                 | 104            | 107            |
| <b>ERGEBNIS, DAS FÜR ALLE AKTIENGATTUNGEN ZUR VERFÜGUNG STEHT</b>                                       | <b>978.413</b> | <b>891.031</b> |
| <b>Nenner</b>                                                                                           |                |                |
| Durchschnittlich ausstehende Aktien                                                                     |                |                |
| Stammaktien                                                                                             | 296.808.978    | 294.418.795    |
| Vorzugsaktien                                                                                           | 3.912.348      | 3.842.586      |
| Summe aller ausstehenden Aktiengattungen                                                                | 300.721.326    | 298.261.381    |
| Potenziell verwässernde Stammaktien                                                                     | 1.311.042      | –              |
| Potenziell verwässernde Vorzugsaktien                                                                   | 35.481         | 66.314         |
| Summe aller ausstehenden Stammaktien bei voller Verwässerung                                            | 298.120.020    | 294.418.795    |
| Summe aller ausstehender Vorzugsaktien bei voller Verwässerung                                          | 3.947.829      | 3.908.900      |
| Ergebnis je Stammaktie                                                                                  | 3,25           | 2,99           |
| Vorzüge                                                                                                 | 0,03           | 0,03           |
| Ergebnis je Vorzugsaktie                                                                                | 3,28           | 3,02           |
| Ergebnis je Stammaktie bei voller Verwässerung                                                          | 3,24           | 2,99           |
| Vorzüge                                                                                                 | 0,03           | 0,03           |
| Ergebnis je Vorzugsaktie bei voller Verwässerung                                                        | 3,27           | 3,02           |

## 15. AKTIONSOPTIONEN

Der Personalaufwand aus Aktienoptionen im Jahr 2010 bzw. 2009 betrug 27.981 US \$ bzw. 33.746 US \$. In beiden Jahren wurden keine Personalaufwendungen aktiviert. Die Gesellschaft zeigt außerdem einen im Zusammenhang stehenden latenten Steuerertrag in Höhe von 8.020 US \$ bzw. 9.740 US \$ für 2010 bzw. 2009.

### Aktionsoptionspläne und sonstige aktienbasierte Vergütungspläne

Die Gesellschaft hat zum 31. Dezember 2010 ausstehende Optionen aus verschiedenen aktienbasierten Vergütungsplänen.

#### Incentive Plan

Die Mitglieder des Vorstands waren für das Geschäftsjahr 2010 berechtigt, eine erfolgsbezogene Vergütung, in Abhängigkeit von der Erreichung bestimmter Ziele, zu beziehen. Die Zielvorgaben für die Vorstandsmitglieder werden über die Kennzahlen operative Ergebnismarge, Wachstum des Jahresüberschusses des Konzerns (EAT-Wachstum) sowie an der Entwicklung des Free Cash Flow (Cash Flow vor Akquisitionen) gemessen. Alle Werte werden aus der Gegenüberstellung von Soll- mit Ist-Werten ermittelt. Es findet eine Unterteilung der Zielvorgaben in Zielsetzungen auf Konzernebene und in solche Zielsetzungen, die in einzelnen Regionen zu erfüllen sind, statt.

Die Bonuskomponente für das Berichtsjahr 2010 setzt sich anteilig zusammen aus einer Barzahlung (kurzfristig) und aus einer aktienbasierten Vergütungskomponente (langfristig), die in bar gezahlt wird. In Abhängigkeit von der Erreichung der jährlichen Zielvorgaben erfolgt die Barzahlung für das Jahr 2010 nach Abschluss des Geschäftsjahrs. Die aktienbasierte erfolgsbezogene Vergütung unterliegt einer dreijährigen Wartezeit, wobei in Sonderfällen eine kürzere Frist gelten kann. Die Höhe der Barauszahlung dieser aktienbasierten Vergütung richtet sich nach dem Kurswert der Stammaktie der FMC AG & CO. KGAA bei Ausübung nach Ablauf der dreijährigen Wartezeit. Für die gesamte erfolgsbezogene Vergütung ist der für die Mitglieder des Vorstands jeweils maximal erreichbare Bonus betragsmäßig gedeckelt.

Im Geschäftsjahr 2006 hat die Management AG für die Mitglieder des Vorstands einen dreijährigen erfolgsbezogenen Vergütungsplan für die Geschäftsjahre 2008, 2007 und 2006 in Form eines variablen Bonus eingeführt. Eine besondere Bonuskomponente für einige Vorstandsmitglieder setzt sich dabei jeweils hälftig aus einer Barzahlung sowie einer Vergütung zusammen, die sich an der Kursentwicklung der Stammaktien der Gesellschaft orientiert. Die Höhe dieser Bonuskomponente ist von der Erreichung bestimmter Erfolgsziele abhängig. Die Zielvorgaben werden unter Bezug auf die Kennzahlen „Umsatzwachstum“, „operatives Ergebnis“, „Jahresüberschuss“ und „Cash-Flow-Entwicklung“ gemessen. Im Falle der jährlichen Zielerreichung erfolgte die Barzahlung nach Abschluss des jeweiligen Geschäftsjahres. Die in diesen Fällen dann ebenfalls jährlich eingeräumte aktienbasierte Vergütung unterliegt einer dreijährigen Wartezeit, die mit Ende des jeweiligen Geschäftsjahres begann, in dem die Zielvorgaben erfüllt wurden, und wurde über eben diese Wartezeit verteilt und erfolgswirksam erfasst. Die Auszahlung dieser aktienbasierten Vergütung entspricht dem Kurswert der FMC AG & CO. KGAA Stammaktie bei Ausübung z.B. am Ende der Wartezeit und erfolgt auch in bar. Die aktienbasierte Vergütung wird während der dreijährigen Wartezeit in jedem Geschäftsjahr neu bewertet, um den Zeitwert der Aktien zum 31. Dezember und alle im Verlauf des Geschäftsjahres erfassten Wertänderungen zu berücksichtigen.

Die aktienbasierte Vergütung, die unter diesen Plänen angefallen ist, betrug für die Jahre 2010 und 2009 2.603 US \$ bzw. 1.537 US \$.

#### Fresenius Medical Care AG & Co. KGaA Aktienoptionsplan 2006

Durch Zustimmung der ordentlichen Hauptversammlung der Gesellschaft wurde am 9. Mai 2006 der FMC AG & CO. KGaA Aktienoptionsplan (angepasster Plan 2006) geschaffen. Dieser Plan wurde am 15. Mai 2007 überarbeitet. Zur Erfüllung der aus dem Aktienoptionsplan entstehenden Bezugsrechte wurde das Grundkapital der Gesellschaft um bis zu 15.000 € durch die Ausgabe von bis zu 15 Mio Stück nennwertloser Inhaber-Stammaktien mit einem Nominalwert von je 1,00 € bedingt erhöht. Gemäß dem angepassten Plan 2006 können bis zu 15 Mio Optionen ausgegeben werden, wovon jede zum Bezug einer Stammaktie berechtigt. Auf die Mitglieder des Vorstands der Management AG, der persönlich haftenden Gesellschafterin der Gesellschaft, entfallen bis zu 3 Mio Aktienoptionen, bis zu 3 Mio Optionen sind für die Mitglieder der Geschäftsführung direkt oder indirekt verbundener Unternehmen bestimmt; bis zu 9 Mio Aktienoptionen sind für Führungskräfte der Gesellschaft und ihrer verbundenen Unternehmen bestimmt. Für die bezugsberechtigten Mitglieder des Vorstands der persönlich haftenden Gesellschafterin legt deren Aufsichtsrat die Zuteilung der Aktienoptionen fest und sorgt insoweit für die Abwicklung des angepassten Plans 2006. Dies beinhaltet Beschlüsse über Anpassung und Verfall von Optionen. Für alle weiteren Bezugsberechtigten übernimmt dies die persönlich haftende Gesellschafterin.

Unter dem angepassten Plan 2006 können die Optionen am letzten Montag im Juli und/oder dem ersten Montag im Dezember gewährt werden. Der Ausübungskurs der unter dem angepassten Plan 2006 gewährten Optionen entspricht dem durchschnittlichen Schlusskurs, der für die Stammaktien der Gesellschaft an der Frankfurter Wertpapierbörse während der 30 Kalendertage unmittelbar vor dem jeweiligen Zuteilungszeitpunkt notiert wurde. Die unter dem angepassten Plan 2006 gewährten Optionen haben eine Laufzeit von sieben Jahren, können jedoch erst nach einer dreijährigen Wartezeit ausgeübt werden. Die Optionen werden ausübbar, wenn die Erfolgsziele über einen Zeitraum von drei Jahren ab dem Tag der Zuteilung erreicht werden. In jedem dieser Jahre gilt das Erfolgsziel als erreicht, wenn sich das bereinigte Ergebnis je Stammaktie (EPS) der Gesellschaft, wie es unter dem angepassten Plan 2006 errechnet wird, während der Wartezeit jährlich um mindestens 8 % erhöht; Ausgangswert ist das EPS im Jahr der Zuteilung gegenüber dem EPS vor dem Jahr der Zuteilung. Die Kalkulation der EPS unter dem angepassten Plan 2006 schließt unter anderem die Kosten des Rechtsformwechsels und die Kosten der Umwandlung von Vorzugsaktien in Stammaktien aus. Für jede Zuteilung gilt, dass ein Drittel der zugeteilten Optionen für jedes Jahr, in dem das Ziel von 8 % für das EPS nicht erreicht oder übertroffen wird, verfällt. In den Jahren 2010 und 2009 wurden die Erfolgsziele erreicht. Die Ausübung eines oder mehrerer Anteile einer Zuteilung für ein oder mehrere Jahre, in denen das Erfolgsziel erreicht wurde, kann erst nach Ablauf der gesamten dreijährigen Wartezeit erfolgen.

Im Laufe des Jahres 2010 gewährte die Gesellschaft 2.817.879 Aktienoptionen mit einem gewichteten durchschnittlichen Ausübungspreis von 57,07 US \$ (42,71 €) und einem gewichteten durchschnittlichen Marktwert von 10,47 US \$ pro Option. Hiervon wurden 423.300 an den Vorstand der Management AG ausgegeben. Der Marktwert aller ausgegebenen Optionen beträgt 29.515 US \$ und wird linear über die dreijährige Wartezeit der Aktienoptionen amortisiert. Mit Wirkung vom Dezember 2010 können keine weiteren gewährten Optionen unter dem angepassten Plan 2006 ausgegeben werden.

Im Laufe des Jahres 2009 gewährte die Gesellschaft 2.585.196 Aktienoptionen mit einem gewichteten durchschnittlichen Ausübungspreis in Höhe von 46,22 US \$ (32,08 €) und einem gewichteten durchschnittlichen Marktwert in Höhe von 10,95 US \$ pro Option. Hiervon wurden 348.600 an den Vorstand der Management AG ausgegeben. Der Marktwert aller ausgegebenen Optionen beträgt 28.318 US \$ und wird über die nächsten drei Jahre, bis zum Zeitpunkt der Unverfallbarkeit der Aktienoptionen, linear verteilt.

Bei den unter dem angepassten Plan 2006 gewährten Optionen für bezugsberechtigte Mitglieder aus den USA handelt es sich um nicht qualifizierte Aktienoptionen gemäß dem United States Internal Revenue Code (dem amerikanischen Bundessteuergesetz) in der angepassten Fassung von 1986. Bezugsberechtigte oder deren Erben können die unter dem angepassten Plan 2006 gewährten Optionen nicht übertragen, verpfänden, abtreten oder anderweitig veräußern.

#### Fresenius Medical Care International Aktienoptionsplan 2001

Unter dem Fresenius Medical Care Plan 2001 (Plan 2001) wurden Optionen in Form von Wandelschuldverschreibungen im Gesamtnennbetrag von ursprünglich bis zu 10.240 € an die Mitglieder des Vorstands und Mitarbeiter der Gesellschaft ausgegeben, die zu einer Zeichnung von bis zu 4 Mio stimmrechtslosen Vorzugsaktien berechtigten. Die Wandelschuldverschreibungen hatten ursprünglich einen Nennwert von 2,56 € und werden mit 5,5 % verzinst. Im Zusammenhang mit dem in 2007 erfolgten Aktiensplit wurde der Gesamtnennbetrag im selben Verhältnis angepasst, wie das gezeichnete Kapital durch die Kapitalerhöhung. Der Nennwert der Wandelschuldverschreibungen wurde im Zusammenhang mit dem Aktiensplit auf 0,85 € angepasst. Der Zinssatz wurde nicht geändert. Mit Ausnahme der Vorstandsmitglieder können bezugsberechtigte Mitarbeiter den Kauf dieser Wertpapiere durch ein Darlehen finanzieren, das dieselben Konditionen wie die Wandelschuldverschreibungen aufweist und durch diese gesichert wird. Die Gesellschaft hat das Recht, ihre Verpflichtung in Bezug auf die Wandelschuldverschreibung gegen die Verpflichtung der Mitarbeiter aus dem zugehörigen Darlehen aufzurechnen. Die Verpflichtungen aus den Wandelschuldverschreibungen und die Darlehensforderungen an die Mitarbeiter werden wie Aktienoptionen betrachtet und schlagen sich daher nicht im Konzernabschluss nieder. Die Aktienoptionen haben eine Laufzeit von 10 Jahren und können frühestens nach Ablauf von zwei, drei oder vier Jahren nach Ausgabedatum ausgeübt werden. Der Personalaufwand aus den unter diesem Plan gewährten Optionen wird linear über die jeweilige Wartezeit verteilt. Die an Vorstandsmitglieder gewährten Wandelschuldverschreibungen, die nicht durch ein Darlehen der Gesellschaft finanziert wurden, werden in der Bilanz als Verbindlichkeit ausgewiesen.

Nach Gewährung des Bezugsrechts hatten die begünstigten Personen das Recht, zwischen Aktienoptionen mit einem Kursziel oder Aktienoptionen ohne Kursziel auszuwählen. Der Wandlungspreis für die Aktienoptionen, die einem Kursziel unterliegen, entspricht dem Kurs der Vorzugsaktien zum Zeitpunkt, zu dem die Kurssteigerung des Aktienkurses gegenüber dem Basispreis erstmalig mindestens 25 % beträgt. Der Basispreis wird durch den Durchschnittskurs der Vorzugsaktien während der 30 Handelstage vor dem Ausgabetag bestimmt. Im Falle der Wahl von Aktienoptionen ohne Kursziel erhalten die bezugsberechtigten Personen 15 % weniger Wandelschuldverschreibungen als bei der Wahl von Aktienoptionen mit einem Kursziel. Der Wandlungspreis von Aktienoptionen ohne Kursziel entspricht dem Basispreis. Jede Aktienoption berechtigt den Inhaber, nach Zahlung des entsprechenden Wandlungspreises eine Vorzugsaktie zu erwerben. Seit Mai 2006 können aus dem Plan 2001 keine Aktienoptionen mehr ausgegeben werden. Nach dem Jahr 2005 wurden keine Aktienoptionen unter dem Plan 2001 gewährt.

Zum 31. Dezember 2010 hielten die Mitglieder des Vorstands der Management AG, der persönlich haftenden Gesellschafterin der Gesellschaft 2.178.699 Aktienoptionen für Stammaktien. Mitarbeiter der Gesellschaft hielten 9.973.409 Aktienoptionen für Stamm- und 58.663 Aktienoptionen für Vorzugsaktien aus den verschiedenen aktienbasierten Vergütungsplänen der Gesellschaft. Die folgende Tabelle zeigt die Überleitung der ausstehenden Aktienoptionen am 31. Dezember 2010 im Vergleich zum 31. Dezember 2009.





### Marktwertinformationen

Die Gesellschaft wendet für die Schätzung der Marktwerte der nach dem Plan 2006 gewährten Optionen ein Binomialmodell an. Optionsbewertungsmodelle verlangen die Berücksichtigung von sehr subjektiven Annahmen einschließlich der erwarteten Aktienkursvolatilität. Die Annahmen der Gesellschaft beruhen auf Erfahrungen aus der Vergangenheit sowie auf Marktentwicklungen und Erfahrungen anderer Unternehmen ähnlicher Größe und vergleichbarer Industriezweige. Die erwartete Volatilität basiert auf historischen Volatilitäten der Aktie der Gesellschaft. Zur Berücksichtigung einer erwarteten frühzeitigen Ausübung wurde eine frühzeitige Ausübung der Optionen mit erfüllter Wartezeit angenommen, sobald der Aktienkurs eine Kursschwelle von 155 % des Ausübungspreises erreicht. Die Aktienoptionen der Gesellschaft haben Eigenschaften, die wesentlich von den Eigenschaften gehandelter Optionen abweichen. Veränderungen in den subjektiven Annahmen können sich wesentlich auf den Marktwert der Optionen auswirken. Die Annahmen für die Schätzung der Marktwerte der Optionen in den Jahren 2010 und 2009 lauteten wie folgt:

#### GEWICHTETE DURCHSCHNITTliche ANNAHMEN

Tabelle 5.6.30

|                                                                     | 2010    | 2009    |
|---------------------------------------------------------------------|---------|---------|
| Erwartete Dividendenrendite                                         | 1,98 %  | 2,39 %  |
| Risikoloser Zinssatz                                                | 2,28 %  | 3,11 %  |
| Erwartete Volatilität                                               | 22,92 % | 25,85 % |
| Erwartete Laufzeit der Optionen                                     | 7 Jahre | 7 Jahre |
| gewichteter durchschnittlicher Ausübungspreis in €                  | 42,71   | 32,08   |
| gewichteter durchschnittlicher Aktienkurs zum Ausgabebetrag in US\$ | 57,07   | 46,22   |

## 16. ERTRAGSTEUERN

Das Ergebnis vor Ertragsteuern ist den folgenden geographischen Regionen zuzuordnen:

#### ZUSAMMENSETZUNG DES ERGEBNISSES VOR ERTRAGSTEUERN

Tabelle 5.6.31

| in TSD US\$   |                  |                  |
|---------------|------------------|------------------|
|               | 2010             | 2009             |
| Deutschland   | 303.954          | 296.326          |
| USA           | 1.084.756        | 904.083          |
| Sonstige      | 255.031          | 255.224          |
| <b>GESAMT</b> | <b>1.643.741</b> | <b>1.455.633</b> |

Die Steueraufwendungen (-erträge) für die Jahre 2010 und 2009 setzen sich wie folgt zusammen:

| <b>ZUSAMMENSETZUNG DES ERTRAGSTEUERAUFWANDES (-ERTRAGES)</b> |                       |                |
|--------------------------------------------------------------|-----------------------|----------------|
| <i>in TSD US \$</i>                                          |                       |                |
|                                                              | <i>Tabelle 5.6.32</i> |                |
|                                                              | <b>2010</b>           | <b>2009</b>    |
| <b>Laufende Steuern</b>                                      |                       |                |
| Deutschland                                                  | 100.635               | 68.442         |
| USA                                                          | 355.739               | 318.589        |
| Sonstige                                                     | 101.206               | 81.236         |
| <b>LAUFENDE STEUERN GESAMT</b>                               | <b>557.580</b>        | <b>468.267</b> |
| <b>Latente Steuern</b>                                       |                       |                |
| Deutschland                                                  | (16.479)              | 5.041          |
| USA                                                          | 52.648                | 22.498         |
| Sonstige                                                     | (15.404)              | (5.393)        |
| <b>LATENTE STEUERN GESAMT</b>                                | <b>20.765</b>         | <b>22.146</b>  |
| <b>GESAMT</b>                                                | <b>578.345</b>        | <b>490.413</b> |

Im Geschäftsjahr 2010 und 2009 unterlag die Gesellschaft einem Körperschaftsteuersatz von 15 % zuzüglich des Solidaritätszuschlags in Höhe von 5,5 % der Körperschaftsteuerbelastung.

Nachfolgend wird die Überleitung vom erwarteten Steueraufwand zum ausgewiesenen Steueraufwand gezeigt. Die Berechnung des erwarteten Steueraufwandes erfolgt durch Anwendung des deutschen Körperschaftsteuersatzes (einschließlich Solidaritätszuschlag) zuzüglich des effektiven Gewerbesteuersatzes auf das Ergebnis vor Ertragsteuern. Der daraus resultierende kombinierte Ertragsteuersatz beträgt 28,71 % bzw. 29,13 % für das Geschäftsjahr 2010 bzw. 2009.

| <b>ÜBERLEITUNG VOM ERWARTETEN ZUM TATSÄCHLICHEN ERTRAGSTEUERAUFWAND</b> |                       |                |
|-------------------------------------------------------------------------|-----------------------|----------------|
| <i>in TSD US \$</i>                                                     |                       |                |
|                                                                         | <i>Tabelle 5.6.33</i> |                |
|                                                                         | <b>2010</b>           | <b>2009</b>    |
| Erwarteter Steueraufwand                                                | 471.836               | 423.953        |
| Steuerfreie Erträge                                                     | (24.088)              | (33.284)       |
| Steuersatzunterschiede                                                  | 117.946               | 96.237         |
| Nicht abzugsfähige Betriebsausgaben                                     | 6.934                 | 3.947          |
| Steuern für Vorjahre                                                    | 11.994                | 6.663          |
| Veränderungen von Wertberichtigungen                                    | (2.259)               | 8.950          |
| Ergebnisanteil der Minderheiten am Konzernergebnis                      | (26.870)              | (26.876)       |
| Sonstige                                                                | 22.852                | 10.823         |
| <b>ERTRAGSTEUERN</b>                                                    | <b>578.345</b>        | <b>490.413</b> |
| <b>EFFEKTIVER STEUERSATZ</b>                                            | <b>35,2 %</b>         | <b>33,7 %</b>  |

Der steuerliche Effekt aus zeitlichen Unterschieden, die zu aktiven und passiven latenten Steuern führen, ergibt sich zum 31. Dezember 2010 und 2009 wie folgt:

| BILANZIERTE AKTIVE UND PASSIVE LATENTE STEUERN<br>NACH SACHVERHALTEN<br><i>Tabelle 5.6.34</i>                                                   |                 |                 |
|-------------------------------------------------------------------------------------------------------------------------------------------------|-----------------|-----------------|
| in TSD US \$                                                                                                                                    | 2010            | 2009            |
| <b>Aktive latente Steuern</b>                                                                                                                   |                 |                 |
| Forderungen, insbesondere aufgrund von Wertberichtigungen auf zweifelhafte Forderungen                                                          | 28.538          | 37.571          |
| Vorräte, insbesondere aufgrund steuerlich zusätzlich zu aktivierender Kosten und unterschiedlicher Wertberichtigung                             | 35.172          | 33.798          |
| Sachanlagen, immaterielle Vermögensgegenstände sowie sonstige Vermögensgegenstände insbesondere aufgrund von Unterschieden bei der Abschreibung | 79.244          | 50.925          |
| Rückstellungen und Wertberichtigungen für Bilanzierungszwecke, gegenwärtig steuerlich nicht absetzbar                                           | 310.730         | 291.767         |
| Kumulierte steuerliche Vorträge für Verluste, anrechenbare Steuerguthaben und Zinsen                                                            | 93.165          | 78.730          |
| Derivative Finanzinstrumente                                                                                                                    | 60.199          | 52.283          |
| Personalaufwand aus Aktienoptionen                                                                                                              | 24.112          | 22.981          |
| Sonstige                                                                                                                                        | 12.626          | 21.530          |
| <b>AKTIVE LATENTE STEUERN, BRUTTO</b>                                                                                                           | <b>643.786</b>  | <b>589.585</b>  |
| Abzüglich: Wertberichtigung                                                                                                                     | (71.799)        | (63.497)        |
| <b>AKTIVE LATENTE STEUERN, NETTO</b>                                                                                                            | <b>571.987</b>  | <b>526.088</b>  |
| <b>Passive latente Steuern</b>                                                                                                                  |                 |                 |
| Forderungen                                                                                                                                     | 12.549          | 10.670          |
| Vorräte, insbesondere aufgrund steuerlich abzugsfähiger Wertberichtigungen                                                                      | 7.730           | 9.643           |
| Rückstellungen steuerlich absetzbar vor Berücksichtigung für Bilanzierungszwecke                                                                | 45.370          | 14.941          |
| Sachanlagen und immaterielle Vermögensgegenstände, insbesondere aufgrund von Unterschieden bei der Abschreibung                                 | 510.284         | 513.254         |
| Derivative Finanzinstrumente                                                                                                                    | –               | 3.128           |
| Sonstige                                                                                                                                        | 81.969          | 53.343          |
| <b>PASSIVE LATENTE STEUERN</b>                                                                                                                  | <b>657.902</b>  | <b>604.979</b>  |
| <b>GESAMTE PASSIVE LATENTE STEUERN, NETTO</b>                                                                                                   | <b>(85.915)</b> | <b>(78.891)</b> |

Die Wertberichtigungen stiegen um 8.302 US \$ im Jahr 2010 und um 7.328 US \$ im Jahr 2009.

Die Verfallbarkeit der steuerlichen Verlustvorträge stellt sich wie folgt dar:

| <b>VORTRAGSFÄHIGKEIT BESTEHENDER VERLUSTVORTRÄGE</b> |        |        |        |        |        |       |        |       |                 |                          |                |
|------------------------------------------------------|--------|--------|--------|--------|--------|-------|--------|-------|-----------------|--------------------------|----------------|
| <i>Tabelle 5.6.35</i>                                |        |        |        |        |        |       |        |       |                 |                          |                |
| <i>in TSD US \$</i>                                  |        |        |        |        |        |       |        |       |                 |                          |                |
| 2011                                                 | 2012   | 2013   | 2014   | 2015   | 2016   | 2017  | 2018   | 2019  | 2020 und danach | Unbegrenzt vortragsfähig | Gesamt         |
| 6.919                                                | 17.067 | 13.949 | 19.539 | 20.078 | 27.730 | 9.444 | 13.201 | 4.507 | 5.476           | 155.064                  | <b>292.974</b> |

Grundlage für die Beurteilung der Werthaltigkeit latenter Steuern ist die Einschätzung der Wahrscheinlichkeit, dass aktive latente Steuern in Zukunft tatsächlich realisierbar sind bzw. passive latente Steuern sich in Zukunft umkehren. Die Realisierung aktiver latenter Steuern hängt von der Erzielung eines steuerpflichtigen Gewinns in den Perioden ab, in denen sich die zeitlichen Unterschiede zwischen Handels- und Steuerbilanz umkehren. Hierbei werden die Umkehrung bestehender passiver latenter Steuern und der erwartete zukünftige steuerpflichtige Gewinn berücksichtigt. Ausgehend von dem steuerpflichtigen Gewinn früherer Jahre und dem zukünftig erwarteten steuerpflichtigen Gewinn für die Perioden, in denen die aktiven latenten Steuern zu Steuerentlastungen führen, hält es die Gesellschaft für wahrscheinlich, dass die zum 31. Dezember 2010 ausgewiesenen aktiven latenten Steuern genutzt werden können.

Die Gesellschaft berücksichtigt Ertragsteuern für Ergebnisse ausländischer verbundener Unternehmen, welche nicht reinvestiert werden. Zum 31. Dezember 2010 passivierte die Gesellschaft latente Steuern in Höhe von 11.603 US \$ auf Gewinne, welche voraussichtlich in 2011 und den folgenden Jahren ausgeschüttet werden. Gewinne bei ausländischen Tochtergesellschaften in Höhe von etwa 3.411.518 US \$ wurden nicht in die Berechnung einbezogen, weil diese Gewinne dauerhaft investiert bleiben sollen. Auf diese Gewinne könnten weitere Steuern anfallen, wenn sie entweder ausgeschüttet oder als ausgeschüttet betrachtet werden; die Berechnung solcher zusätzlichen Steuern wäre mit einem unverhältnismäßig hohen Aufwand verbunden. Diese Steuern würden überwiegend aus ausländischer Quellensteuer auf Dividenden von ausländischen Tochtergesellschaften und der deutschen Einkommensteuer von ungefähr 1,4 % auf alle Dividenden und Veräußerungsgewinne bestehen.

Die FMC AG & CO. KGAA und ihre Tochtergesellschaften sind Gegenstand regelmäßiger steuerlicher Betriebsprüfungen in Deutschland und in den USA, sowie laufender steuerlicher Betriebsprüfungen in anderen Ländern.

In Deutschland ist die Betriebsprüfung für die Jahre 1998 bis 2001 abgeschlossen. Die Gesellschaft hat die sich aus der Betriebsprüfung ergebenden zusätzlichen Aufwendungen erfasst und in der Folge alle offenen Beträge an die Finanzbehörden gezahlt. Derzeit findet die steuerliche Betriebsprüfung für die Jahre 2002 bis 2005 statt. Zum 31. Dezember 2010 wurden alle vorgeschlagenen Anpassungen als immateriell eingestuft und im Konzernabschluss berücksichtigt. Die Jahre 2006 bis 2010 sind steuerlich noch nicht geprüft.

Die Gesellschaft hat im Steuerjahr 1997 eine Abschreibung auf den Buchwert einer ihrer Tochtergesellschaften vorgenommen, deren steuerliche Anerkennung als Aufwand im Jahr 2003 in der für die Jahre 1996 und 1997 durchgeführten Betriebsprüfung versagt wurde. Die Gesellschaft hat vor dem zuständigen deutschen Finanzgericht Klage erhoben, um die Entscheidung der Finanzbehörde anzufechten. Im Januar 2011 wurde ein Vergleich mit den Steuerbehörden erzielt, welcher Schätzungen zur Folge etwas günstiger ausfällt als der bisher berücksichtigte Steuervorteil. Der voraussichtlich zusätzliche Steuerertrag aus diesem Sachverhalt wird in 2011 erfasst.

In den USA hat die Gesellschaft gegen die Versagung der Abzugsfähigkeit der von der Fresenius Medical Care Holdings, Inc. (FMCH) in den Steuererklärungen für Vorjahre der FMCH geltend gemachten zivilrechtlichen Vergleichszahlungen durch den Internal Revenue Service (IRS) Anträge auf Erstattung eingereicht. Aufgrund der von der Gesellschaft mit dem IRS geschlossenen Vergleichsvereinbarung hat die Gesellschaft im September 2008 eine Teilerstattung in Höhe von 37.000 US \$, einschließlich Zinsen, erhalten und sich das Recht bewahrt, die Erstattung aller anderen nicht anerkannten Abzüge auf dem Klagewege vor den US-Gerichten weiter zu verfolgen. Am 22. Dezember 2008 hat die Gesellschaft in dem Verfahren FMCH vs. United States bei dem US-Bezirksgericht für den Bezirk von Massachusetts eine Klage auf vollständige Erstattung eingereicht. Am 24. Juni 2010 lehnte das Gericht den Antrag von FMCH auf ein Urteil im beschleunigten Verfahren ab, und der Rechtsstreit wird vor Gericht weitergeführt.

Die steuerliche Betriebsprüfung der FMCH durch den IRS für die Jahre 2002 bis 2006 wurde nunmehr abgeschlossen. Der IRS hat die Abzugsfähigkeit für konzerninternes genussrechtsähnliches Kapital in diesem Prüfungszeitraum nicht anerkannt. Die Gesellschaft hat gegen die Nichtanerkennung der Abzüge Einspruch eingelegt und wird alle Rechtsmittel nutzen. Ein nachteiliger Ausgang bezüglich der Nichtanerkennung der Abzugsfähigkeit für konzerninternes genussrechtsähnliches Kapital könnte erhebliche negative Auswirkungen auf das Ergebnis sowie die Finanzlage der Gesellschaft haben. Zusätzlich schlug der IRS weitere Anpassungen vor, welche im Konzernabschluss Berücksichtigung fanden.

Die steuerliche Betriebsprüfung der FMCH durch den IRS für die Jahre 2007 und 2008 findet derzeit statt, für die Jahre 2009 und 2010 steht die steuerliche Betriebsprüfung noch aus. Außerdem werden in einigen US-Bundesstaaten steuerliche Betriebsprüfungen durchgeführt, während in anderen US-Bundesstaaten die steuerliche Betriebsprüfung für verschiedene Jahre noch aussteht. Alle bisher bekannten Ergebnisse wurden im Konzernabschluss berücksichtigt.

Neben Deutschland und den USA finden weltweit länderspezifische steuerliche Betriebsprüfungen von Tochtergesellschaften der FMC AG & CO. KGAA statt. Die Gesellschaft schätzt die Auswirkungen dieser steuerlichen Betriebsprüfungen auf den Konzernabschluss als nicht wesentlich ein.

Die nachfolgende Tabelle zeigt die Anfangs- und Endwerte unsicherer Steuervorteile:

| UNSICHERE STEUERVORTEILE (OHNE ZINSEN)                |                |                |
|-------------------------------------------------------|----------------|----------------|
| in TSD US \$                                          |                |                |
| Tabelle 5.6.36                                        |                |                |
|                                                       | 2010           | 2009           |
| <b>STAND AM 1. JANUAR 2010</b>                        | <b>410.016</b> | <b>379.327</b> |
| Anstieg unsicherer Steuervorteile Vorjahre            | 12.782         | 59.833         |
| Rückgang unsicherer Steuervorteile Vorjahre           | (11.429)       | (13.911)       |
| Anstieg unsicherer Steuervorteile laufendes Jahr      | 13.588         | 7.587          |
| Veränderung auf Grund von Einigung mit Finanzbehörden | (34.410)       | (8.599)        |
| Verminderung wegen Verjährung                         | (129)          | –              |
| Währungsumrechnung                                    | (14.518)       | (14.221)       |
| <b>STAND AM 31. DEZEMBER 2010</b>                     | <b>375.900</b> | <b>410.016</b> |

Zum 31. Dezember 2010 bestehende unsichere Steuervorteile in Höhe von 347.081 US \$ würden bei ihrem Ansatz den effektiven Steuersatz beeinflussen. Als Ergebnis der oben beschriebenen Vergleichsvereinbarung für 1997 erwartet die Gesellschaft, dass sich der Betrag der unsicheren Steuervorteile vom 31. Dezember 2010 um

ungefähr 196.000 US \$ in 2011 verringert. Dies beruht auf dem zuvor genannten Vergleich im Januar 2011 mit den deutschen Finanzbehörden. Ein geringer Teil dieses Betrages wird als zusätzlicher Steuerertrag in 2011 zu erfassen sein. Die Gesellschaft ist zum jetzigen Zeitpunkt nicht in der Lage, den Zeitpunkt oder die Größenordnung von Veränderungen der anderen Positionen der unsicheren Steuervorteile zu prognostizieren.

Im Geschäftsjahr 2010 erfasste die Gesellschaft Aufwendungen in Höhe von 10.650 US \$ für Zinsen und sonstige Zuschläge. Zum 31. Dezember 2010 hatte die Gesellschaft Rückstellungen in Höhe von 57.378 US \$ für derartige Zinsen und sonstige Zuschläge gebildet.

## 17. OPERATIVES LEASING

Die Gesellschaft mietet Betriebsstätten sowie Maschinen, Anlagen und Einrichtungen im Rahmen verschiedener Miet- und Leasingverträge, die zu unterschiedlichen Terminen bis 2034 auslaufen. In den Jahren 2010 und 2009 betrugen die Aufwendungen hierfür 563.182 US \$ bzw. 532.465 US \$. Für Informationen zu Miet- und Leasingverträgen mit verbundenen Unternehmen — siehe Anmerkung 3a.

Die zukünftigen Mindestmietzahlungen aus nicht kündbaren Miet- und Leasingverträgen für die fünf Jahre nach dem 31. Dezember 2010 und danach betragen:

| ZUKÜNFTIGE MINDESTMIEZAHLUNGEN  |         |         |         |         |         |            |                  |
|---------------------------------|---------|---------|---------|---------|---------|------------|------------------|
| in TSD US \$                    |         |         |         |         |         |            |                  |
|                                 | 2011    | 2012    | 2013    | 2014    | 2015    | Folgejahre | Gesamt           |
| Zukünftige Mindestmietzahlungen | 489.481 | 427.901 | 376.255 | 319.724 | 272.369 | 910.381    | <b>2.796.111</b> |

Tabelle 5.6.37

## 18. RECHTLICHE VERFAHREN

Die FMC AG & CO. KGAA ist regelmäßig in zahlreiche Klagen, Rechtsstreitigkeiten, behördliche und steuerbehördliche Prüfungen, Ermittlungen und sonstige Rechtsangelegenheiten involviert, die sich größtenteils aus der gewöhnlichen Geschäftstätigkeit der Erbringung von Dienstleistungen und Lieferung von Produkten im Gesundheitswesen ergeben. Der genaue Ausgang von Rechtsstreitigkeiten und anderen Rechtsangelegenheiten kann stets nur schwer vorhergesagt werden, und es können sich Resultate ergeben, die von der Einschätzung der Gesellschaft abweichen. Die Gesellschaft ist überzeugt, stichhaltige Einwände gegen die in anhängigen Rechtsangelegenheiten geltend gemachten Ansprüche oder Vorwürfe zu besitzen und wird sich vehement verteidigen. Dennoch ist es möglich, dass die Entscheidung einer oder mehrerer derzeit anhängiger oder drohender rechtlicher Angelegenheiten erhebliche nachteilige Auswirkungen auf die Geschäftstätigkeit der Gesellschaft sowie auf ihre Finanz- und Ertragslage haben könnten.

### Zivilrechtsstreitigkeiten

Die Gesellschaft wurde ursprünglich als Ergebnis einer Reihe von Transaktionen in Übereinstimmung mit der Fusionsvereinbarung und dem Reorganisationsplan vom 4. Februar 1996 zwischen w.R. Grace & Co. und Fresenius SE (vormals: Fresenius AG) gegründet (der Zusammenschluss). Zum Zeitpunkt des Zusammenschlusses hatte und hat noch heute eine Tochtergesellschaft der w.R. Grace & Co., die w.R. Grace & Co.-Conn., erhebliche Verbindlichkeiten aus Rechtsverfahren im Zusammenhang mit Produzentenhaftung (einschließlich Asbestansprüchen), Steuerverbindlichkeiten für die Zeit vor dem Zusammenschluss und weitere

Verbindlichkeiten, die nicht mit der National Medical Care, Inc. (NMC) in Verbindung stehen, welche vor dem Zusammenschluss das Dialysegeschäft von W.R. Grace & Co. betrieb. Im Zusammenhang mit dem Zusammenschluss hatte sich W.R. Grace & Co.-Conn. verpflichtet, die Gesellschaft, Fresenius Medical Care Holdings, Inc. (FMCH) und NMC von allen Verpflichtungen der W.R. Grace & Co. freizustellen, die sich auf Ereignisse vor oder nach dem Zusammenschluss beziehen mit Ausnahme von Verpflichtungen, die im Zusammenhang mit dem Geschäftsbetrieb der NMC stehen. Am 2. April 2001 beantragten W.R. Grace & Co. und einige ihrer Tochtergesellschaften die Reorganisation nach „Chapter 11 des us-amerikanischen Konkursrechts“ (das Grace Chapter 11-Insolvenzverfahren).

Vor und nach Beginn des Grace Chapter 11-Insolvenzverfahrens wurde gegen W.R. Grace & Co. und FMCH Sammelklage erhoben, sowohl von Klägern, die sich als Gläubiger von W.R. Grace & Co.-Conn. ausgeben, als auch von Asbest-Gläubigerausschüssen des Grace Chapter 11-Insolvenzverfahrens. Dabei wird im Wesentlichen behauptet, dass der Zusammenschluss eine betrügerische Übertragung gewesen sei, gegen das Gesetz gegen betrügerische Transfers verstoße und eine Verschwörung darstelle. Alle Verfahren dieser Art wurden entweder zunächst ausgesetzt und an das us-Bezirksgericht überwiesen oder sind beim us-Bezirksgericht als Teil des Grace Chapter 11-Insolvenzverfahrens anhängig.

Im Jahr 2003 hat die Gesellschaft eine Vereinbarung in Bezug auf die im Rahmen des Grace Chapter 11-Insolvenzverfahrens anhängigen Angelegenheiten geschlossen. Die Vereinbarung regelt alle Ansprüche gegen die Gesellschaft im Hinblick auf den Vorwurf der betrügerischen Übertragung sowie steuerliche und andere Ansprüche gegen die Gesellschaft. Gemäß den ergänzten Regelungen der Vergleichsvereinbarung werden die Behauptung der betrügerischen Übertragung und andere von den Asbestklägern erhobene Behauptungen öffentlich fallen gelassen, und die Gesellschaft wird Schutz vor allen vorhandenen und allen potenziellen künftigen Ansprüchen im Zusammenhang mit W.R. Grace & Co. erhalten, einschließlich solcher aus betrügerischer Übertragung und aus Asbestansprüchen sowie Freistellungen von Einkommensteuerforderungen, die sich auf die bei der Bestätigung des W.R. Grace & Co. Reorganisations- und Sanierungsplans nicht zur NMC gehörenden Mitglieder der steuerlichen Organschaft W.R. Grace & Co. beziehen. Nachdem der W.R. Grace & Co. Reorganisations- und Sanierungsplan bestätigt worden ist, wird die Gesellschaft gemäß der Vergleichsvereinbarung insgesamt 115.000 US\$ ohne Zinsen an die W.R. Grace & Co.-Konkursmasse bzw. an eine andere vom Gericht festgelegte Stelle zahlen. Es wurden keine Schuldanerkenntnisse erklärt, und es werden keine Schuldanerkenntnisse erklärt werden. Die Vergleichsvereinbarung wurde vom us-Bezirksgericht genehmigt. Am 31. Januar 2011 genehmigte das us-Konkursgericht den Sanierungsplan von W.R. Grace & Co. einschließlich der Vergleichsvereinbarung und empfahl dem us-Bezirksgericht die Genehmigung des Plans. Nach dem Zusammenschluss war W.R. Grace & Co. in einer mehrstufigen Transaktion im Zusammenhang mit der Sealed Air Corporation (Sealed Air, früher bekannt als Grace Holding, Inc.) involviert. Die Gesellschaft befindet sich in einem Rechtsstreit mit Sealed Air, um ihren Anspruch auf Entschädigung durch Sealed Air für alle Verluste und Aufwendungen der Gesellschaft in Verbindung mit Steuerverbindlichkeiten vor dem Zusammenschluss und im Zusammenhang mit anderen Ansprüchen aus dem Zusammenschluss geltend zu machen. Gemäß der Vergleichsvereinbarung wird dieser Rechtsstreit bei endgültiger Bestätigung eines Sanierungsplans, der den Bedingungen der Zahlungsverpflichtungen der Gesellschaft in Verbindung mit dem Rechtsstreit gerecht wird, öffentlich fallen gelassen.

Am 4. April 2003 hat FMCH eine Feststellungsklage (Fresenius USA, Inc., et al., v. Baxter International, Inc., et al.) mit der Geschäftsnr. C 03-1431 beim us-Bundesbezirksgericht für Nordkalifornien eingereicht, mit der gerichtlich festgestellt werden soll, dass FMCH keine Patente der Firma Baxter International, Inc., ihrer Tochtergesellschaften oder ihrer verbundenen Unternehmen (Baxter) verletzt, dass die Patente ungültig sind und dass Baxter kein Recht und keine Befugnis hat, FMCH wegen der angeblichen Verletzung von Patenten der Firma Baxter eine Klage anzudrohen oder einen Prozess gegen FMCH zu führen. Allgemein betreffen die geltend gemachten Patente die Verwendung von Touchscreen-Schnittstellen für Hämodialysegeräte. Baxter hat

Widerklage gegen FMCH auf Schadensersatz in Höhe von über 140.000 US \$ und auf Erlass einer einstweiligen Verfügung erhoben und behauptet, dass FMCH vorsätzlich die Baxter-Patente verletzte. Am 17. Juli 2006 hatte das Gericht der Klage von FMCH durch Geschworenenurteil stattgegeben und festgestellt, dass die fraglichen Baxter-Patente offensichtlich ungültig und/oder angesichts des Stands der Technik dispositiv sind.

Am 13. Februar 2007 hat das Gericht dem Antrag von Baxter, das zugunsten von FMCH ergangene Urteil aufzuheben, stattgegeben, die Patente wieder in Kraft gesetzt und deren Verletzung festgestellt. In Folge einer im Rahmen des Verfahrens im Hinblick auf Schadensersatz erfolgten Verhandlung hat das Gericht am 6. November 2007 Baxter durch Geschworenenurteil 14.300 US \$ zuerkannt. Am 4. April 2008 hat das Gericht Baxters Antrag auf ein neues Verfahren abgelehnt. Für den seit dem 7. November 2007 fortgesetzten Verkauf der mit Touchscreens ausgerüsteten FMCH-Hämodialysegeräte 2008K setzte das Gericht die Zahlung einer Lizenzgebühr an Baxter in Höhe von 10 % des Verkaufspreises sowie für zugehörige Einwegartikel, Ersatzteile und Wartung in Höhe von 7 % des Verkaufspreises fest und untersagte den Verkauf des Geräts 2008K ab dem 1. Januar 2009. Die Gesellschaft hat gegen die Entscheidung des Gerichts bei dem US-Bundesberufungsgericht Rechtsmittel eingelegt. Die Gesellschaft hat im Oktober 2008 die Durchführung konstruktiver Veränderungen an dem Gerät 2008K abgeschlossen, die das Risiko weiterer, auf der ursprünglichen bezirksgerichtlichen Entscheidung basierender Ansprüche auf Lizenzzahlungen beseitigen. Am 10. September 2009 hob das Berufungsgericht die Entscheidung des Bezirksgerichts auf und stellte die Unwirksamkeit der behaupteten Ansprüche hinsichtlich zwei der drei strittigen Patente fest. Hinsichtlich des dritten Patents bestätigte das Berufungsgericht die Entscheidung des Bezirksgerichts, jedoch hob es die Untersagung des Verkaufs und die Zubilligung von Schadensersatz auf. Diese Streitpunkte wurden zur nochmaligen Überprüfung im Lichte der Entscheidung über die Unwirksamkeit der meisten Ansprüche an das Bezirksgericht zurückverwiesen. Demzufolge besteht für FMCH kein Erfordernis mehr, Zahlungen auf das gerichtlich anerkannte Treuhandkonto zu leisten, das zur Hinterlegung der durch das Bezirksgericht angeordneten Lizenzgebühren eingerichtet worden war. Bereits einbezahlte Beträge bleiben jedoch bis zur abschließenden Entscheidung über den Fall hinterlegt. Am 18. März 2010 haben das US Patent- und Markenamt (USPTO) und das US Board of Patent Appeals and Interferences (Beschwerdekammer) in einem separaten Prüfungsverfahren (Re-examination) das verbliebene Baxter-Patent für unwirksam erklärt. Am 5. Oktober 2010 legte Baxter beim US-Bundesberufungsgericht Berufung gegen die Entscheidung des Boards ein.

Am 28. April 2008 hat Baxter bei dem US-Bundesbezirksgericht für Nord-Illinois, Eastern Division (Chicago), eine Klage (Baxter International, Inc. and Baxter Healthcare Corporation v. Fresenius Medical Care Holdings, Inc. and Fresenius USA, Inc., Geschäftsnr. CV 2389) eingereicht, in der die Verletzung von vier 2007 und 2008 erteilten Patenten durch Hämodialysemaschinen von FMCH behauptet wird. Sämtliche dieser Patente basieren auf einem der Patente, das bereits durch den vorab beschriebenen Rechtsstreit mit Baxter vom April 2003 streitgegenständlich ist. Die neuen Patente laufen im April 2011 aus und beziehen sich auf Trendkurven, deren Anzeige auf Touchscreen-Schnittstellen erfolgt, sowie auf der Erfassung von Ultrafiltrations-Profilen (Ultrafiltration meint die Entziehung von Flüssigkeiten aus dem Körper eines Patienten durch osmotischen Druck). Das Gericht hat das Verfahren zurzeit ausgesetzt. Die Gesellschaft geht davon aus, dass ihre Hämodialysemaschinen keine gültigen Patentansprüche dieser Patente von Baxter verletzen. Alle geltend gemachten Patente sind nun in dem anhängigen separaten Überprüfungsverfahren (Re-examination) vor dem USPTO abgewiesen.

Am 17. Oktober 2006 haben Baxter und die DEKA Products Limited Partnership (DEKA) bei dem US-Bundesbezirksgericht für Ost-Texas eine Klage mit der Bezeichnung Baxter Healthcare Corporation and DEKA Products Limited Partnership v. Fresenius Medical Care Holdings, Inc. d/b/a Fresenius Medical Care North America and Fresenius USA, Inc., Geschäftsnr. CV438 TJW eingereicht, die im weiteren Verlauf an den Gerichtsbezirk Nordkalifornien übertragen wurde. In der Klageschrift wurde behauptet, der Liberty™ Cycloer der FMCH verletze neun von Baxter gehaltene oder an Baxter lizenzierte Patente. Während und nach dem Beweisverfahren



(Discovery) wurden sieben der geltend gemachten Patente als Klagegegenstand fallengelassen. Zum Abschluss der Verhandlung am 28. Juli 2010 hat die Jury in einem Urteil zugunsten von FMCH befunden, dass der Liberty™ Cycler keine der geltend gemachten Ansprüche aus den Baxter Patenten verletzt. Baxter hat beim Bezirksgericht die Aufhebung des Juryurteils beantragt.

In Deutschland war eine Patentrechtsstreitigkeit zwischen Gambro Industries (Gambro) auf der einen Seite und der Fresenius Medical Care Deutschland GmbH (FMC D-GmbH) sowie der FMC AG & CO. KGAA (nachfolgend insgesamt Fresenius Medical Care) auf der anderen Seite anhängig. Fresenius Medical Care und Gambro haben dieses und weitere laufende Patentrechtsverfahren zwischen den Parteien durch entsprechende Vergleichsvereinbarungen sowie durch die Vereinbarung einer Reihe von Patentlizenzen beigelegt.

#### Sonstige Rechtsstreitigkeiten und potenzielle Risiken

Renal Care Group, Inc. (RCG) ist als Beklagte in einer Klage mit der Bezeichnung Indiana State District Council of Laborers and Hod Carriers Pension Fund v. Gary Brukardt et al. benannt, die ursprünglich am 13. September 2006 beim Chancery Court für den Bundesstaat Tennessee, Zwanzigster Gerichtsbezirk in Nashville eingereicht wurde. In Folge der Klageabweisung durch das erstinstanzliche Gericht, der Einlegung der teilweisen Berufung durch den Kläger sowie der teilweisen Aufhebung durch das Berufungsgericht, hat der Klagegegenstand den Anspruch einer Sammelklage im Namen der ehemaligen Aktionäre von RCG und ist auf Schadensersatz ausschließlich gegen einzelne frühere Mitglieder des Board of Directors von RCG gerichtet. Die jeweiligen Beklagten könnten jedoch Ansprüche auf Freistellung und Aufwandsentschädigung gegenüber der Gesellschaft haben. Die Gesellschaft rechnet damit, dass sie das Verfahren, welches zur Verhandlung bei dem Chancery Court fortgeführt wird, als Beklagte fortsetzen wird, und geht davon aus, dass die Beklagten obsiegen werden.

Am 17. Juli 2007 hat die us-Staatsanwaltschaft, resultierend aus einem im Jahr 2005 begonnenen Ermittlungsverfahren, eine Zivilklage gegen Renal Care Group, Inc., ihre Tochtergesellschaft RCG Supply Company und FMCH in ihrer Eigenschaft als aktuelle Muttergesellschaft von RCG vor dem United States Bezirksgericht für das Eastern District von Missouri erhoben. Mit der Klage werden Schadensersatzansprüche und Strafmaßnahmen im Hinblick auf die Geschäftstätigkeit der Method II Zulieferungsgesellschaft von RCG im Jahr 2005 vor dem Erwerb von RCG durch FMCH im Jahr 2006 geltend gemacht. Die Klage läuft unter United States of America ex. rel. Julie Williams et al. vs. Renal Care Group, Renal Care Group Supply Company und FMCH. Am 11. August 2009 hat das Bezirksgericht in Missouri dem Antrag der RCG stattgegeben, gemäß dem der Verhandlungsort an das us-Berufsgericht für den „Middle District“ von Tennessee (Nashville) verlegt wird. Am 22. März 2010 hat das Bezirksgericht Tennessee ein Urteil über ca. 23.000 us \$ Schadenersatz und Zinsen bezüglich des Klagepunktes der ungerechtfertigten Bereicherung gegen die Beklagten erlassen, aber alle sechs in der Klageschrift geltend gemachten Klagebegehren nach dem False Claims Act abgelehnt. Die Gesellschaft legte beim us-Berufungsgericht für den Sechsten Bezirk Rechtsmittel gegen die Entscheidung des Bezirksgerichts Tennessee ein und erwirkte einen Aufschub der Vollstreckung der Entscheidung für die Dauer des Berufungsverfahrens. Die us-Staatsanwaltschaft hat Anschlussberufung eingelegt, jedoch das Gericht zusätzlich um eine vorläufige oder ergänzende Entscheidung ersucht. Am 23. Juni 2010 erließ das Bezirksgericht Tennessee die vorläufige Entscheidung, dass es damit rechne, ein Urteil gegen die Gesellschaft in Höhe von 104.000 us \$ auf Grundlage des False Claims Act zu erlassen, sofern das Verfahren an das Bezirksgericht zurückverwiesen wird. Am 23. September 2010 verwies das Berufungsgericht das Verfahren zurück an das Bezirksgericht Tennessee, um diesem die Änderung oder Ergänzung des ursprünglichen Urteils zu ermöglichen. Im Anschluss daran kann die Gesellschaft Berufung bei dem Berufungsgericht einlegen. Die Gesellschaft ist der Ansicht, dass RCG die Leitung der Method II Zulieferungsgesellschaft im Einklang mit geltendem Recht durchgeführt hat, dass eine Stattgabe der von den Vereinigten Staaten geltend gemachten Klagebegehren nicht zu erwarten ist und dass sie ihre Position im Verfahren am Ende durchsetzen wird.

Am 27. November 2007 hat das Bundesbezirksgericht für den „Western District“ von Texas (El Paso) zwei Anzeigen, die zuvor versiegelt durch eine so genannte qui tam-Anzeigeerstatlerin, eine frühere Angestellte einer dortigen Klinik der FMCH, eingereicht worden waren, entsiegelt und deren Zustellung zugelassen. Im Rahmen des ersten Verfahrens wurde behauptet, ein Nephrologe habe in seiner Praxis zum Zwecke der Behandlung von Patienten unrechtmäßig einen Assistenten beschäftigt, der hierfür nicht approbiert gewesen sei. Abrechnungen des Nephrologen und der FMCH gegenüber Medicare hätten daher gegen das Gesetz betreffend unberechtigte Forderungen (False Claims Act) verstoßen. Im Rahmen des zweiten Verfahrens wurde behauptet, FMCH habe sich gegenüber der Anzeigeerstatlerin unrechtmäßig verhalten, indem ihr Arbeitsverhältnis durch eine vom Arbeitgeber durch dessen Verhalten herbeigeführte arbeitnehmerseitige Kündigung beendet worden sei. Die Staatsanwaltschaft des „Western District“ of Texas lehnte es ab, sich in das Verfahren einzuschalten und den Vorgang im Namen der Vereinigten Staaten zu verfolgen. Am 30. März 2010 hat das Bezirksgericht auf Grundlage einer Juryentscheidung vom 25. Februar 2010 und Entscheidungen des Gerichts von Rechts wegen während der Verhandlung ein endgültiges Urteil zu Gunsten der Beklagten in allen Klagepunkten erlassen. Die Klägerin hat beim Bezirksgericht Berufung gegen das Urteil eingelegt.

Die Gesellschaft hat gegen die Versagung der Abzugsfähigkeit der von der Fresenius Medical Care Holdings, Inc. (FMCH) in den Steuererklärungen für Vorjahre der FMCH geltend gemachten zivilrechtlichen Vergleichszahlungen durch den Internal Revenue Service (IRS) Anträge auf Erstattung eingereicht. Aufgrund der von der Gesellschaft mit dem IRS geschlossenen Vergleichsvereinbarung hat die Gesellschaft im September 2008 eine Teilerstattung in Höhe von 37.000 US \$, einschließlich Zinsen erhalten und sich das Recht bewahrt, die Erstattung aller anderen nicht anerkannten Abzüge auf dem Klagewege vor den US-Gerichten weiter zu verfolgen. Am 22. Dezember 2008 hat die Gesellschaft in dem Verfahren Fresenius Medical Care Holdings, Inc. v United States bei dem US-Bezirksgericht für den Bezirk von Massachusetts eine Klage auf vollständige Erstattung eingereicht. Am 24. Juni 2010 lehnte das Gericht den Antrag von FMCH auf ein Urteil im beschleunigten Verfahren ab und der Rechtsstreit wird vor Gericht weitergeführt.

Die Gesellschaft hat im Steuerjahr 1997 eine Abschreibung auf eine ihrer Tochtergesellschaften vorgenommen, deren steuerliche Anerkennung als Aufwand im Jahr 2003 im Abschluss der für die Jahre 1996 und 1997 durchgeführten Betriebsprüfung versagt wurde. Die Gesellschaft hat vor dem zuständigen deutschen Finanzgericht Klage erhoben, um die Entscheidung der Finanzbehörde anzufechten. Im Januar 2011 schloss die Gesellschaft einen Vergleich mit der Steuerbehörde, der als geringfügig vorteilhafter als der ursprünglich anerkannte Steuervorteil eingeschätzt wird. Der zusätzliche Vorteil wird für das Jahr 2011 anerkannt.

Die steuerliche Betriebsprüfung durch den IRS für die Jahre 2002 bis 2006 wurde nunmehr abgeschlossen. Der IRS hat die Abzugsfähigkeit für konzerninternes genussrechtsähnliches Kapital in diesem Prüfungszeitraum nicht anerkannt. Die Gesellschaft hat gegen die Nichtanerkennung der Abzüge Einspruch eingelegt. Sie wird alle Rechtsmittel nutzen. Ein nachteiliger Ausgang hinsichtlich der Abzugsfähigkeit des konzerninternen genussrechtsähnlichen Kapitals könnte erhebliche negative Auswirkungen auf das Ergebnis sowie die Finanzlage der Gesellschaft haben. Zusätzlich schlug die IRS weitere Anpassungen vor, welche im Konzernabschluss Berücksichtigung fanden.

Die Gesellschaft ist im normalen Geschäftsverlauf Gegenstand von Rechtsstreitigkeiten, Gerichtsverfahren und Ermittlungen hinsichtlich verschiedenster Aspekte ihrer Geschäftstätigkeit. Die Gesellschaft analysiert regelmäßig entsprechende Informationen und bildet die erforderlichen Rückstellungen für möglicherweise aus solchen Verfahren resultierende Verbindlichkeiten einschließlich der geschätzten Rechtsberatungskosten.

Die Geschäftstätigkeit der Gesellschaft unterliegt, wie die anderer Gesundheitsdienstleister, strengen staatlichen Regulierungen und Kontrollen. Die Gesellschaft muss Vorschriften und Auflagen einhalten, die sich auf die Sicherheit und Wirksamkeit medizinischer Produkte und Zulieferungen, auf den Betrieb von Produktionsanlagen, Labors und Dialysekliniken sowie auf den Umwelt- und Arbeitsschutz beziehen. Die Gesellschaft muss ebenfalls die us-Gesetze über das Verbot illegaler Provisionen, gegen betrügerische Zahlungsanforderungen an staatliche Einrichtungen, das Stark Statut sowie andere us-Bundes- und Staatsgesetze gegen Betrug und Missbrauch einhalten. Die zu beachtenden Gesetze und Regulierungen können geändert werden, oder Kontrollbehörden oder Gerichte können die Vorschriften oder geschäftliche Tätigkeiten anders auslegen als die Gesellschaft. In den USA hat die Durchsetzung der Vorschriften für die amerikanische Bundesregierung und für einige Bundesstaaten eine hohe Priorität erlangt.

Außerdem ermuntern die Bestimmungen des False Claims Act (betrügerische Zahlungsanforderungen), die dem Anzeigenden eine Beteiligung an den verhängten Bußgeldern zusichern, private Kläger, sogenannte Whistleblower-Aktionen einzuleiten. Im Mai 2009 wurde der Anwendungsbereich des False Claim Act erweitert und enthält nun zusätzliche Schutzmaßnahmen für sogenannte Whistleblower sowie Verfahrensbestimmungen, die einen Whistleblower darin unterstützen, in einem Fall nach dem False Claims Act vorzugehen. Angesichts dieses von Regulierungen geprägten Umfeldes werden die geschäftlichen Aktivitäten und Praktiken der Gesellschaft auch in Zukunft Gegenstand intensiver Überprüfungen durch Regulierungsbehörden und Dritte sowie von Untersuchungsverlangen, Vorlagebeschlüssen, anderen Anfragen, Rechtsansprüchen und Gerichtsverfahren sein, die sich auf die Einhaltung der relevanten Gesetze und Regulierungen beziehen. Die Gesellschaft wird nicht in jedem Falle von vornherein wissen, dass Untersuchungen oder Aktionen gegen sie angelaufen sind; das gilt insbesondere für Whistleblower-Aktionen, die von den Gerichten zunächst vertraulich behandelt werden.

Die Gesellschaft betreibt eine große Anzahl und Vielfalt von Betriebsstätten in allen Teilen der USA. In einem derart dezentralisierten System ist es häufig schwierig, das wünschenswerte Maß an Aufsicht und Kontrolle über Tausende von Mitarbeitern sicherzustellen, die bei einer Vielzahl von Tochterunternehmen beschäftigt sind. Bei der Führung, dem Management und der Kontrolle dieser Mitarbeiter verlässt sich die Gesellschaft auf ihre Führungsstruktur, auf ihre Regelungskompetenz und juristischen Ressourcen sowie auf die effektive Umsetzung ihres Programms zur Einhaltung von Verhaltensregeln. Trotzdem kommt es gelegentlich vor, dass die Gesellschaft feststellen muss, dass Mitarbeiter absichtlich oder versehentlich unangemessene oder falsche Abrechnungen eingereicht haben. Das rechtswidrige Verhalten solcher Mitarbeiter kann dazu führen, dass gegenüber der Gesellschaft Haftungsansprüche u.a. nach dem Anti-Kickback Statut, dem Stark Statut und dem False Claims Act geltend gemacht werden.

Es werden zunehmend Prozesse gegen Ärzte, Krankenhäuser und andere Akteure des Gesundheitswesens wegen fachlicher Fahrlässigkeit, Behandlungsfehler, Produkthaftung, Mitarbeiterentschädigungs- und ähnlicher Ansprüche angestrengt, von denen viele zu hohen Schadensersatzforderungen und zu erheblichen Anwaltskosten führen. Gegen die Gesellschaft sind auf Grund der Art ihres Geschäfts solche Prozesse geführt worden und werden gegenwärtig geführt, und es ist damit zu rechnen, dass auch in Zukunft von Zeit zu Zeit solche Verfahren angestrengt werden. Obwohl die Gesellschaft in angemessenem Umfang versichert ist, kann sie nicht garantieren, dass die Obergrenzen des Versicherungsschutzes immer ausreichend sein werden oder dass alle geltend gemachten Ansprüche durch die Versicherungen abgedeckt sind. Ein erfolgreich durchgesetzter Schadensersatzanspruch gegen die Gesellschaft oder gegen irgendeine ihrer Tochtergesellschaften, der den Versicherungsschutz übersteigt, könnte eine wesentliche negative Auswirkung auf die Geschäftstätigkeit der Gesellschaft sowie auf ihre Finanz- und Ertragslage haben. Jeder Schadensersatzanspruch, gleichgültig ob er berechtigt ist, kann das Ansehen und das Geschäft der Gesellschaft negativ beeinflussen.

Gegen die Gesellschaft sind auch Schadensersatzansprüche erhoben und Gerichtsverfahren eingeleitet worden, die sich auf angebliche Patentrechtsverletzungen und von der Gesellschaft erworbene oder veräußerte Unternehmen beziehen. Diese Ansprüche und Verfahren können sich sowohl auf den Geschäftsbetrieb als auch auf das Akquisitions- oder Veräußerungsgeschäft beziehen. Die Gesellschaft hat eigene Rechtsansprüche und Schadensersatzforderungen gestellt, wo dies angebracht war. Eine erfolgreiche Klage gegen die Gesellschaft oder eine ihrer Tochtergesellschaften könnte wesentliche ungünstige Auswirkungen auf die Geschäftstätigkeit der Gesellschaft sowie auf ihre Finanz- und Ertragslage haben. Sämtliche Ansprüche, unabhängig von ihrem sachlichen Gehalt oder dem Ausgang eines möglichen Verfahrens, können wesentliche ungünstige Auswirkungen auf den Ruf und die Geschäftstätigkeit der Gesellschaft haben.

#### **Rückstellung für Sonderaufwendungen für Rechtsangelegenheiten**

Zum 31. Dezember 2001 hat die Gesellschaft eine Rückstellung für Sonderaufwendungen für Rechtsangelegenheiten in Höhe von 258.159 US \$ (vor Steuern) gebildet, die ihre Einschätzung der Ausgaben widerspiegelt, die im Zusammenhang mit der Verteidigung und Regelung von Steuerforderungen aus der Zeit vor dem Zusammenschluss, von Ansprüchen im Zusammenhang mit dem Zusammenschluss sowie von Ansprüchen privater Versicherungen auftreten können. Die Aufwendungen aus der Vergleichsvereinbarung und den Vergleichen mit den Versicherungen wurden zulasten dieser Rückstellung gebucht. Mit Ausnahme der vorgeschlagenen Zahlung in Höhe von 115.000 US \$ gemäß der Vergleichsvereinbarung in dem Grace Chapter 11-Insolvenzverfahren sind alle in der Rückstellung für Sonderaufwendungen für Rechtsangelegenheiten enthaltenen Sachverhalte beglichen. Die Gesellschaft ist der Auffassung, dass die verbleibende Rückstellung die geschätzten künftigen Aufwendungen im Zusammenhang mit der fortgesetzten Verteidigung und Regelung dieser verbleibenden Angelegenheit angemessen widerspiegelt. Es besteht aber keine Gewähr dafür, dass die tatsächlichen Kosten, die der Gesellschaft entstehen, den Rückstellungsbetrag nicht überschreiten werden.

### **19. FINANZINSTRUMENTE**

Als weltweiter Anbieter von Dienstleistungen und Produkten für Menschen mit chronischem Nierenversagen in mehr als 120 Ländern ist die Gesellschaft einer Konzentration von Kreditrisiken ausgesetzt, die in der Natur der Erstattungssysteme liegt. Diese Erstattungssysteme werden vorwiegend durch die Regierungen der Länder bestimmt, in denen die Gesellschaft operiert. Änderungen der Erstattungssätze oder des Leistungsumfangs könnten wesentliche negative Auswirkungen auf das Geschäft, die Finanzlage und das operative Ergebnis der Gesellschaft haben und damit auf die Fähigkeit der Gesellschaft, Zahlungsmittelzuflüsse zu erzeugen. In der Vergangenheit blieben die Erstattungssätze für Dialysebehandlungen im Allgemeinen stabil und die Gesellschaft erwartet dies nach der Einführung des neuen Pauschalvergütungssystems in den USA auch in den späteren Jahren. Das umfasst auch den Ausgleich von ungünstigen Änderungen der Erstattungssätze in gewissen Ländern durch günstige Änderungen in anderen Ländern. Da die Gesellschaft einen Großteil ihrer Erstattungen von staatlichen Gesundheitsorganisationen und private Versicherungsgesellschaften erhält, geht sie davon aus, dass die meisten ihrer Forderungen einbringlich sind, wenn auch in unmittelbarer Zukunft möglicherweise im Segment International langsamer, insbesondere in den weiterhin am stärksten von der globalen Finanzkrise betroffenen Ländern.

### Nicht-Derivative Finanzinstrumente

In der folgenden Tabelle sind die Buchwerte sowie die Marktwerte der Nicht-Derivativen Finanzinstrumente der Gesellschaft zum 31. Dezember 2010 und zum 31. Dezember 2009 dargestellt:

| <div> <div>in TSD US \$,<br/>31. Dezember</div> <div> <b>BUCH- UND MARKTWERT</b><br/> <b>NICHT-DERIVATIVER FINANZINSTRUMENTE</b><br/> Tabelle 5.6.38 </div> </div> |           |           |           |           |
|--------------------------------------------------------------------------------------------------------------------------------------------------------------------|-----------|-----------|-----------|-----------|
|                                                                                                                                                                    | 2010      |           | 2009      |           |
|                                                                                                                                                                    | Buchwert  | Marktwert | Buchwert  | Marktwert |
| <b>Aktiva</b>                                                                                                                                                      |           |           |           |           |
| Flüssige Mittel                                                                                                                                                    | 522.870   | 522.870   | 301.225   | 301.225   |
| Forderungen                                                                                                                                                        | 2.687.234 | 2.687.234 | 2.558.795 | 2.558.795 |
| <b>Passiva</b>                                                                                                                                                     |           |           |           |           |
| Kurzfristige Verbindlichkeiten                                                                                                                                     | 542.524   | 542.524   | 639.836   | 639.836   |
| Kurzfristige Darlehen                                                                                                                                              | 670.671   | 670.671   | 316.344   | 316.344   |
| Kurzfristige Darlehen von verbundenen Unternehmen                                                                                                                  | 9.683     | 9.683     | 10.440    | 10.440    |
| Langfristige Verbindlichkeiten (ohne Kreditvereinbarung 2006, Euro-Schuldscheindarlehen und vorrangige Anleihen)                                                   | 528.082   | 528.082   | 282.051   | 282.051   |
| Kreditvereinbarung 2006                                                                                                                                            | 2.953.890 | 2.937.504 | 3.522.040 | 3.429.470 |
| Euro-Schuldscheindarlehen                                                                                                                                          | 267.240   | 276.756   | 288.120   | 299.621   |
| Vorrangige Anleihen                                                                                                                                                | 824.446   | 880.366   | 493.344   | 498.750   |
| Genussscheinähnliche Wertpapiere                                                                                                                                   | 625.549   | 643.828   | 656.096   | 688.026   |
| Anteile anderer Gesellschafter mit Put-Optionen                                                                                                                    | 279.709   | 279.709   | 231.303   | 231.303   |

Die Buchwerte in der Tabelle sind Bestandteil der angezeigten Bilanzposten beziehungsweise im Falle der Langfristigen Verbindlichkeiten wie — in Anmerkung 9 vermerkt.

Im Folgenden werden die wesentlichen Methoden und Annahmen erläutert, die bei der Ermittlung der Marktwerte von Nicht-Derivativen Finanzinstrumenten angewendet werden:

Flüssige Mittel werden zu ihrem Nominalwert angesetzt, der dem Marktwert entspricht.

Kurzfristige Finanzinstrumente, wie Forderungen und Verbindlichkeiten aus Lieferungen und Leistungen sowie kurzfristige Darlehen werden mit dem Buchwert angesetzt, der aufgrund der kurzen Laufzeit dieser Instrumente eine angemessene Schätzung des Marktwertes darstellt.

Die Marktwerte der wesentlichen langfristigen Finanzinstrumente werden anhand vorhandener Marktinformationen ermittelt. Finanzinstrumente, für die Kursnotierungen verfügbar sind, werden mit den zum Bilanzstichtag aktuellen Kursnotierungen bewertet. Der Marktwert der anderen langfristigen Finanzinstrumente ergibt sich als Barwert der entsprechenden zukünftigen Zahlungsströme. Für die Ermittlung dieser Barwerte werden die am Bilanzstichtag gültigen Zinssätze und Kreditmargen der Gesellschaft berücksichtigt.

Die Bewertung der Anteile anderer Gesellschafter mit Put-Optionen erfolgt zu signifikanten nicht-beobachtbaren Werten für die keine oder nur wenig Marktdaten zu Verfügung stehen (Level 3) — siehe Anmerkung 12 für weitere Erörterungen über die Bewertungsmethode der Gesellschaft zur Ermittlung der Marktwerte dieser Anteile anderer Gesellschafter mit Put-Optionen.

Das Kreditrisiko aus Finanzforderungen der Gesellschaft ist unwesentlich und jegliche Einflüsse auf das operative Ergebnis aus Wertberichtigungen durch Kreditausfälle von Finanzforderungen sind immateriell.

#### Derivative Finanzinstrumente

Die Gesellschaft ist Marktrisiken aus Veränderungen von Zinssätzen und Wechselkursen ausgesetzt. Zur Steuerung der Zins- und Währungsrisiken tritt die Gesellschaft im Rahmen der von der persönlich haftenden Gesellschafterin festgelegten Limite in verschiedene Sicherungsgeschäfte mit Banken mit einem hohen Rating ein. Quartalsweise erfolgt eine Bewertung des Kreditrisikos der Geschäftspartner, welches derzeit als niedrig eingestuft wird. Die Geschäftspolitik der Gesellschaft welche konsequent verfolgt wird, beinhaltet, dass Finanzinstrumente nur zum Zwecke der Absicherung von Kurs- und Zinsrisiken eingesetzt werden.

In gewissen Fällen schließt die Gesellschaft Derivate ab, für die kein Hedge Accounting angewandt wird, die jedoch zur Absicherung von wirtschaftlichen Risiken genutzt werden (economic hedges). Die Gesellschaft verwendet Finanzinstrumente nicht für spekulative Zwecke.

Die Gesellschaft hat Richtlinien für die Risikobeurteilung und für die Kontrolle des Einsatzes von Finanzinstrumenten festgelegt. Sie beinhalten eine klare Trennung der Verantwortlichkeiten in Bezug auf die Ausführung auf der einen und die Abwicklung, Buchhaltung und Kontrolle auf der anderen Seite.

#### Management des Währungsrisikos

Die Gesellschaft führt ihre Geschäfte weltweit in verschiedenen Währungen, wobei sie jedoch hauptsächlich in Deutschland und in den USA tätig ist. Für die Finanzberichterstattung ist der US-Dollar die Berichtswährung. Daher beeinflussen Translationsrisiken aus der Änderung von Wechselkursen zwischen dem US-Dollar und den lokalen Währungen, in denen die Jahresabschlüsse der ausländischen Tochtergesellschaften erstellt werden, das im Konzernabschluss ausgewiesene Jahresergebnis und die finanzielle Lage.

Die Fremdwährungsrisiken der Gesellschaft ergeben sich aus Transaktionen wie Käufen und Verkäufen in fremder Währung. Die Gesellschaft fakturiert die Verkäufe der in ihren europäischen Produktionsstätten hergestellten Produkte an internationale Geschäftseinheiten überwiegend in Euro und fakturiert in geringem Umfang Verkäufe von Produkten in anderen nicht-funktionalen Währungen. Dadurch werden die Tochtergesellschaften der Gesellschaft Wechselkursänderungen zwischen dem Euro und den Währungen ausgesetzt, in denen sie ihre lokalen Geschäftstätigkeiten durchführen. Zur Sicherung der bestehenden oder zu erwartenden Transaktionsrisiken setzt die Gesellschaft Devisentermingeschäfte und in geringem Umfang Devisenoptionen ein. Zum 31. Dezember 2010 waren keine Devisenoptionen im Bestand.

Marktwertänderungen von Devisenterminkontrakten, die als Cash Flow Hedges für geplante Wareneinkäufe und -verkäufe bestimmt und designiert sind, werden in Höhe des effektiven Teils erfolgsneutral im Eigenkapital (Kumuliertes Übriges Comprehensive Income (Loss)) abgegrenzt. Im Zusammenhang mit Konzerndarlehen in fremder Währung tätigt die Gesellschaft in der Regel Devisenswapgeschäfte. Dadurch wird sichergestellt, dass aus konzerninternen Darlehen in fremder Währung keine Wechselkursrisiken entstehen. Sofern für diese Derivate Cash Flow Hedge Accounting angewandt wird, werden deren Marktwertänderungen in Höhe des effektiven Teils ebenfalls erfolgsneutral im Kumulierten Übrigen Comprehensive Income (Loss) abgegrenzt. Diese Beträge werden in der Folgezeit zeitgleich mit den Ergebniswirkungen der abgesicherten Transaktion in der Gewinn- und Verlustrechnung bei Devisenterminkontrakten die Wareneinkäufe betreffen als Umsatzkosten und bei Konzerndarlehen als Vertriebs- und allgemeine Verwaltungskosten erfasst. Der Nominalwert aller Devisenkontrakte, die als Cash Flow Hedges designiert wurden, betrug 1.026.937 US \$ und 1.076.217 US \$ zum 31. Dezember 2010 bzw. 31. Dezember 2009.

Die Gesellschaft schließt auch Derivate für geplante Wareneinkäufe und -verkäufe und Konzerndarlehen in Fremdwährungen ein, für die kein Hedge Accounting angewandt wird, die jedoch, wie oben definiert, zur Absicherung von wirtschaftlichen Risiken genutzt werden (economic hedges). In diesen Fällen werden die Marktwertänderungen in der Gewinn- und Verlustrechnung erfasst und gleichen somit im Wesentlichen die gegenläufigen Marktwertänderungen der zugrundeliegenden Geschäfte in der Gewinn- und Verlustrechnung aus. Der Nominalwerte der Kontrakte für die kein Hedge Accounting angewandt wird, betrugen 1.607.312 US \$ und 750.812 US \$ zum 31. Dezember 2010 bzw. 31. Dezember 2009.

#### Management des Zinsrisikos

Die Gesellschaft setzt Derivate, vor allem Zinsswaps und in gewissen Umfang Zinsoptionen ein, um sich gegen Zinsänderungsrisiken abzusichern. Diese Zinsderivate sind als Cash Flow Hedges designiert. Der Großteil der Zinsswaps dient dazu, einen wesentlichen Teil der in us-Dollar zu leistenden variablen Zinszahlungen, die im Rahmen der Kreditvereinbarung 2006 fällig sind, in fixe Zinszahlungen umzuwandeln. Die anderen Zinsswaps wurden im Hinblick auf die Aufnahme zukünftiger Verbindlichkeiten abgeschlossen. Die Zinsswaps die zu verschiedenen Zeitpunkten zwischen 2011 und 2012 auslaufen, tragen einen durchschnittlichen Zinssatz von 4,26 %. Die aus den Swap-Vereinbarungen resultierenden Zinsverbindlichkeiten und Zinsforderungen werden abgegrenzt und als Anpassung des Zinsaufwands erfasst.

Die Nominalwerte der Zinsswaps betrugen 3.175.000 US \$ und 2.400.000 US \$ zum 31. Dezember 2010 bzw. 2009.

### Bewertung der Derivativen Finanzinstrumente

Die folgende Tabelle zeigt die derivativen Finanzinstrumente der Gesellschaft zum 31. Dezember 2010 und zum 31. Dezember 2009:

| <b>BEWERTUNG DERIVATIVE FINANZINSTRUMENTE</b>                              |                           |                            |                           |                            |
|----------------------------------------------------------------------------|---------------------------|----------------------------|---------------------------|----------------------------|
| <i>in TSD US \$,<br/>31. Dezember</i>                                      |                           | <i>Tabelle 5.6.39</i>      |                           |                            |
|                                                                            | <b>2010</b>               |                            | <b>2009</b>               |                            |
|                                                                            | <i>Aktiva<sup>2</sup></i> | <i>Passiva<sup>2</sup></i> | <i>Aktiva<sup>2</sup></i> | <i>Passiva<sup>2</sup></i> |
| <b>Als Cash Flow Hedge klassifizierte Derivate<sup>1</sup></b>             |                           |                            |                           |                            |
| kurzfristig                                                                |                           |                            |                           |                            |
| Fremdwährungskontrakte                                                     | 3.703                     | (51.816)                   | 8.899                     | (9.251)                    |
| Zinskontrakte in US \$                                                     | –                         | (51.604)                   | –                         | (305)                      |
| Zinskontrakte in Yen                                                       | –                         | (0)                        | –                         | –                          |
| langfristig                                                                |                           |                            |                           |                            |
| Fremdwährungskontrakte                                                     | 810                       | (486)                      | 5.284                     | (830)                      |
| Zinskontrakte in US \$                                                     | –                         | (73.221)                   | –                         | (105.810)                  |
| Zinskontrakte in Yen                                                       | –                         | –                          | –                         | (3)                        |
| <b>GESAMT</b>                                                              | <b>4.513</b>              | <b>(177.127)</b>           | <b>14.183</b>             | <b>(116.199)</b>           |
| <b>Nicht als Sicherungsinstrumente klassifizierte Derivate<sup>1</sup></b> |                           |                            |                           |                            |
| kurzfristig                                                                |                           |                            |                           |                            |
| Fremdwährungskontrakte                                                     | 3.517                     | (20.751)                   | 7.696                     | (6.217)                    |
| langfristig                                                                |                           |                            |                           |                            |
| Fremdwährungskontrakte                                                     | 509                       | (213)                      | 9                         | –                          |
| <b>GESAMT</b>                                                              | <b>4.026</b>              | <b>(20.964)</b>            | <b>7.705</b>              | <b>(6.217)</b>             |

<sup>1</sup> Zum 31. Dezember 2010 und 31. Dezember 2009 erfolgte die Bewertung von Derivaten der Gesellschaft basierend auf signifikanten sonstigen beobachtbaren Werten (Level 2) in Übereinstimmung mit der Marktwert-Hierarchie der Kodifizierung.

<sup>2</sup> Derivative Finanzinstrumente werden in jeder Berichtsperiode zum Marktwert bewertet, demzufolge entspricht der Buchwert zum Berichtstermin auch dem Marktwert.

Der kurzfristig fällige Teil der Zinssicherungsgeschäfte und der Devisenkontrakte, der in der vorhergehenden Tabelle als Vermögenswert bzw. Verbindlichkeit gezeigt ist, wird in der Bilanz unter sonstige kurzfristige Vermögenswerte bzw. unter Rückstellungen und sonstige kurzfristige Verbindlichkeiten ausgewiesen. Der als Vermögenswert bzw. Verbindlichkeit ausgewiesene langfristig fällige Teil ist in den sonstigen langfristigen Vermögenswerten bzw. in den sonstigen langfristigen Verbindlichkeiten enthalten.

Im Folgenden werden die wesentlichen Methoden und Annahmen erläutert, die bei der Ermittlung der Marktwerte von derivativen Finanzinstrumenten angewendet werden:

Bei Zinsswaps erfolgt die Bewertung durch Abzinsung der zukünftigen Zahlungsströme auf Basis der am Bilanzstichtag für die Restlaufzeit der Kontrakte geltenden Marktzinssätze. Für die Ermittlung der Marktwerte von Devisentermingeschäften wird der kontrahierte Terminkurs mit dem Terminkurs des Bilanzstichtags für die Restlaufzeit des jeweiligen Kontrakts verglichen. Der daraus resultierende Wert wird unter Berücksichtigung aktueller Marktzinssätze der entsprechenden Währung auf dem Bilanzstichtag diskontiert.



Die Gesellschaft bezieht bei der Ermittlung der Marktwerte der als Verbindlichkeiten bilanzierten derivativen Finanzinstrumente das eigene Kreditrisiko mit ein. Für die Bewertung der als Vermögenswerte bilanzierten derivativen Finanzinstrumente wurde das Kreditrisiko der Vertragspartner mit einbezogen.

#### EINFLUSS DER DERIVATE AUF DIE GESAMTERGEBNISRECHNUNG

in TSD US \$

Tabelle 5.6.40

|                                                    | Im kumulierten übrigen Comprehensive Income angesetztter Gewinn/(Verlust) aus Derivaten (Effektiver Anteil) |               | Ausweis des (Gewinns)/Verlusts nach Umbuchung aus kumuliertem übrigen Comprehensive Income in das Ergebnis (Effektiver Anteil) | Im Ergebnis angesetztter (Gewinn)/Verlust nach Umbuchung aus kumuliertem übrigen Comprehensive Income (Effektiver Anteil) |                |
|----------------------------------------------------|-------------------------------------------------------------------------------------------------------------|---------------|--------------------------------------------------------------------------------------------------------------------------------|---------------------------------------------------------------------------------------------------------------------------|----------------|
|                                                    | 2010                                                                                                        | 2009          |                                                                                                                                | 2010                                                                                                                      | 2009           |
| <b>Als Cash Flow Hedge klassifizierte Derivate</b> |                                                                                                             |               |                                                                                                                                |                                                                                                                           |                |
| Zinskontrakte in US \$                             | (18.710)                                                                                                    | 42.832        | Zinsertrag/-aufwand                                                                                                            | –                                                                                                                         | (33)           |
| Zinskontrakte in Yen                               | 2                                                                                                           | 6             | Zinsertrag/-aufwand                                                                                                            | –                                                                                                                         | –              |
| Fremdwährungskontrakte                             | 3.046                                                                                                       | (6.785)       | Umsatzkosten                                                                                                                   | 7.553                                                                                                                     | (5.938)        |
| <b>GESAMT</b>                                      | <b>(15.662)</b>                                                                                             | <b>36.053</b> |                                                                                                                                | <b>7.553</b>                                                                                                              | <b>(5.971)</b> |

#### EINFLUSS DER DERIVATE AUF DIE GESAMTERGEBNISRECHNUNG

in TSD US \$

Tabelle 5.6.41

|                                                                | Ausweis des im Ergebnis aus Derivaten angesetzten (Gewinns)/Verlusts | Im Ergebnis aus Derivaten angesetztter (Gewinn)/Verlust |
|----------------------------------------------------------------|----------------------------------------------------------------------|---------------------------------------------------------|
|                                                                |                                                                      | 2010 2009                                               |
| <b>Nicht als Sicherungsinstrumente klassifizierte Derivate</b> |                                                                      |                                                         |
|                                                                | Vertriebs- und allgemeine Verwaltungskosten                          |                                                         |
| Fremdwährungskontrakte                                         |                                                                      | 72.454 (3.309)                                          |
| Fremdwährungskontrakte                                         | Zinsertrag/-aufwand                                                  | (8.622) 3.883                                           |
| <b>GESAMT</b>                                                  |                                                                      | <b>63.832 574</b>                                       |

Bezüglich des zum 31. Dezember 2010 im kumulierten übrigen Comprehensive Income ausgewiesenen Verlustes geht die Gesellschaft davon aus, in den kommenden 12 Monaten einen Verlust in Höhe von 3,745 US \$ als Aufwand in die Gewinn- und Verlustrechnung umzubuchen.

Die Gesellschaft erwartet in den kommenden 12 Monaten zusätzlichen Zinsaufwand in Höhe von 63.812 US \$. Dieser Zinsaufwand wird momentan im übrigen Comprehensive Income ausgewiesen. Der Betrag spiegelt den aktuellen Marktwert der zusätzlich erwarteten Zinszahlungen zum 31. Dezember 2010 wider und resultiert aus eingegangenen Zinsswaps zur Reduzierung der Volatilität von Zinszahlungen aus der Kreditvereinbarung 2006 und aus zukünftigen Verbindlichkeiten.

Zum 31. Dezember 2010 hatte die Gesellschaft Devisenkontrakte mit einer maximalen Laufzeit von 59 Monaten und Zinsswaps mit einer maximalen Laufzeit von 20 Monaten im Bestand.

## 20. ÜBRIGES COMPREHENSIVE INCOME (LOSS)

Änderungen im Übrigen Comprehensive Income (Loss) waren für 2010 und 2009 wie folgt:

| ÜBRIGES COMPREHENSIVE INCOME (LOSS)                                                                  |                  |               |                  |                |                 |                |
|------------------------------------------------------------------------------------------------------|------------------|---------------|------------------|----------------|-----------------|----------------|
| Tabelle 5.6.42                                                                                       |                  |               |                  |                |                 |                |
| in TSD US \$                                                                                         |                  |               |                  |                |                 |                |
|                                                                                                      | 2010             |               |                  | 2009           |                 |                |
|                                                                                                      | Vor Steuern      | Steuereffekt  | Netto            | Vor Steuern    | Steuereffekt    | Netto          |
| <b>Übriges Comprehensive Income (Loss) aus Cash Flow Hedges</b>                                      |                  |               |                  |                |                 |                |
| Veränderungen der unrealisierten Gewinne/Verluste aus Cash Flow Hedges während des Berichtszeitraums | (15.662)         | 2.241         | (13.421)         | 36.053         | (16.419)        | 19.634         |
| Umgliederung realisierter Gewinne und Verluste                                                       | 7.553            | (1.928)       | 5.625            | (5.971)        | 1.375           | (4.596)        |
| <b>ÜBRIGES COMPREHENSIVE INCOME (LOSS) AUS CASH FLOW HEDGES INSGESAMT</b>                            | <b>(8.109)</b>   | <b>313</b>    | <b>(7.796)</b>   | <b>30.082</b>  | <b>(15.044)</b> | <b>15.038</b>  |
| Währungsumrechnungsdifferenzen                                                                       | (110.888)        | –             | (110.888)        | 82.545         | –               | 82.545         |
| Unterschied aus der Pensionsbewertung                                                                | (35.654)         | 12.508        | (23.146)         | 9.708          | (3.927)         | 5.781          |
| <b>ÜBRIGES COMPREHENSIVE INCOME (LOSS)</b>                                                           | <b>(154.651)</b> | <b>12.821</b> | <b>(141.830)</b> | <b>122.335</b> | <b>(18.971)</b> | <b>103.364</b> |

## 21. SEGMENT-BERICHTERSTATTUNG

Die Gesellschaft hat drei Geschäftssegmente identifiziert: Nordamerika, International und Asien-Pazifik. Sie ergeben sich aus der Art, wie die Gesellschaft ihre Geschäfte steuert. Alle Segmente sind im Wesentlichen tätig in den Bereichen Dialysedienstleistungen, Produktion und Vertrieb von Produkten und Ausrüstungen für die Behandlung von terminaler Niereninsuffizienz. In den USA führt die Gesellschaft zusätzlich klinische Labortests durch und bietet stationäre Dialysebehandlung sowie andere Dienstleistungen im Rahmen von Verträgen mit Kliniken an. Die Gesellschaft hat die operativen Segmente International und Asien-Pazifik zum Segment „International“ zusammengefasst. Diese Zusammenfassung erfolgte wegen der Ähnlichkeit der in den beiden Segmenten vorherrschenden wirtschaftlichen Gegebenheiten. Die Ähnlichkeit bezieht sich u.a. auf die Erbringung von Dienstleistungen sowie die vertriebenen Produkte, auf die Art der Patientenstrukturen, auf die Vertriebsmethoden für Produkte und Dienstleistungen sowie auf das wirtschaftliche Umfeld.

Die Zielgrößen, an denen die Segmente vom Vorstand der persönlich haftenden Gesellschafterin gemessen werden, sind so gewählt, dass diese alle Erträge und Aufwendungen beinhalten, die im Entscheidungsbereich der Segmente liegen. Der Vorstand der persönlich haftenden Gesellschafterin ist davon überzeugt, dass der dafür am besten geeignete Maßstab das operative Ergebnis der Segmente ist, welches die Ertragskraft der Gesellschaft misst. Finanzierung ist eine zentrale Aufgabe, die nicht dem Einfluss der Segmente unterliegt. Daher gehen Zinsaufwendungen für die Finanzierung nicht in die Zielgröße für ein Segment ein. Darüber hinaus werden die Kosten der Zentralbereiche, die im Wesentlichen Aufwendungen der Konzernzentrale in den Bereichen Rechnungswesen und Finanzen, Beratungsleistungen etc. beinhalten, nicht berücksichtigt, da es sich nach Ansicht der Gesellschaft um Kosten handelt, die nicht der Kontrolle der einzelnen Segmente unterliegen. Auch die Steueraufwendungen unterliegen nach Ansicht der Gesellschaft nicht dem Einfluss der Segmente. Zusätzlich werden manche Akquisitionen und immateriellen Vermögenswerte nicht den einzelnen Segmenten zugeordnet, sondern den Zentralbereichen.

# SEGMENT-BERICHTERSTATTUNG

in TSD US \$

Tabelle 5.6.43

|                                                                                                                          | Nord-<br>amerika | Inter-<br>national | Summe<br>Segmente | Konzern          | Gesamt            |
|--------------------------------------------------------------------------------------------------------------------------|------------------|--------------------|-------------------|------------------|-------------------|
| <b>2010</b>                                                                                                              |                  |                    |                   |                  |                   |
| Umsatzerlöse mit Dritten                                                                                                 | 8.129.737        | 3.923.301          | 12.053.038        | 452              | 12.053.490        |
| Umsatzerlöse zwischen den Segmenten                                                                                      | 5.419            | 88.965             | 94.384            | (94.384)         | –                 |
| <b>UMSATZERLÖSE</b>                                                                                                      | <b>8.135.156</b> | <b>4.012.266</b>   | <b>12.147.422</b> | <b>(93.932)</b>  | <b>12.053.490</b> |
| Abschreibungen                                                                                                           | (287.062)        | (207.072)          | (494.134)         | (9.090)          | (503.224)         |
| <b>OPERATIVES ERGEBNIS</b>                                                                                               | <b>1.385.651</b> | <b>677.630</b>     | <b>2.063.281</b>  | <b>(139.476)</b> | <b>1.923.805</b>  |
| Aktiva der Segmente                                                                                                      | 11.720.495       | 4.787.479          | 16.507.974        | 586.687          | 17.094.661        |
| davon Beteiligungen an assoziierten Unternehmen                                                                          | 243.452          | 6.921              | 250.373           | –                | 250.373           |
| Investitionen in Sachanlagen und immaterielle Vermögenswerte sowie Akquisitionen und sonstige Investitionen <sup>1</sup> | 524.330          | 608.263            | 1.132.593         | 155.374          | 1.287.967         |
| <b>2009</b>                                                                                                              |                  |                    |                   |                  |                   |
| Umsatzerlöse mit Dritten                                                                                                 | 7.611.500        | 3.635.373          | 11.246.873        | 604              | 11.247.477        |
| Umsatzerlöse zwischen den Segmenten                                                                                      | 2.752            | 77.856             | 80.608            | (80.608)         | –                 |
| <b>UMSATZERLÖSE</b>                                                                                                      | <b>7.614.252</b> | <b>3.713.229</b>   | <b>11.327.481</b> | <b>(80.004)</b>  | <b>11.247.477</b> |
| Abschreibungen                                                                                                           | (264.785)        | (183.405)          | (448.190)         | (8.895)          | (457.085)         |
| <b>OPERATIVES ERGEBNIS</b>                                                                                               | <b>1.249.769</b> | <b>636.665</b>     | <b>1.886.434</b>  | <b>(130.838)</b> | <b>1.755.596</b>  |
| Aktiva der Segmente                                                                                                      | 11.202.999       | 4.253.058          | 15.456.057        | 365.258          | 15.821.315        |
| davon Beteiligungen an assoziierten Unternehmen                                                                          | –                | 5.795              | 5.795             | –                | 5.795             |
| Investitionen in Sachanlagen und immaterielle Vermögenswerte sowie Akquisitionen und sonstige Investitionen <sup>2</sup> | 422.537          | 338.000            | 760.537           | 1.182            | 761.719           |

<sup>1</sup> In den Akquisitionen und Investitionen des Segments Nordamerika, International und Konzern sind nicht-zahlungswirksame Akquisitionen und sonstige Investitionen von 122.847 US \$, 32.935 US \$ und 2.125 US \$ nicht enthalten.

<sup>2</sup> In den Akquisitionen des Segments International sind für 2009 nicht-zahlungswirksame Akquisitionen in Höhe von 4.151 US \$ nicht enthalten.

Für die Darstellung der geographischen Aufteilung werden die Umsätze den Ländern zugewiesen, in denen sich der Sitz des Endverbrauchers der Produkte befindet bzw. in dem die Dienstleistung erbracht wurde. In der nachfolgenden Tabelle werden Informationen zur geographischen Aufteilung der Geschäftstätigkeit der Gesellschaft dargestellt:

| <b>GEOGRAPHISCHE AUFTEILUNG</b> |                                 |                                    |                                 |                                    |
|---------------------------------|---------------------------------|------------------------------------|---------------------------------|------------------------------------|
| <i>in TSD US \$</i>             |                                 |                                    |                                 |                                    |
| <i>Tabelle 5.6.44</i>           |                                 |                                    |                                 |                                    |
|                                 | <b>2010</b>                     |                                    | <b>2009</b>                     |                                    |
|                                 | <i>Umsatzerlöse mit Dritten</i> | <i>Langfristige Vermögenswerte</i> | <i>Umsatzerlöse mit Dritten</i> | <i>Langfristige Vermögenswerte</i> |
| Deutschland                     | 374.883                         | 471.537                            | 358.060                         | 350.194                            |
| Nordamerika                     | 8.129.737                       | 9.236.166                          | 7.611.500                       | 8.864.165                          |
| Übrige Länder                   | 3.548.870                       | 2.139.877                          | 3.277.917                       | 1.809.114                          |
| <b>GESAMT</b>                   | <b>12.053.490</b>               | <b>11.847.580</b>                  | <b>11.247.477</b>               | <b>11.023.473</b>                  |

## 22. ZUSÄTZLICHE INFORMATIONEN ZUR KONZERN-CASH-FLOW-RECHNUNG

Die folgende Übersicht liefert zusätzliche Informationen in Bezug auf die Konzern-Cash-Flow-Rechnung:

| <b>ZUSÄTZLICHE ANGABEN ZUR KONZERN-CASH-FLOW-RECHNUNG</b>       |                  |                  |
|-----------------------------------------------------------------|------------------|------------------|
| <i>in TSD US \$</i>                                             |                  |                  |
| <i>Tabelle 5.6.45</i>                                           |                  |                  |
|                                                                 | <b>2010</b>      | <b>2009</b>      |
| <b>Zusätzliche Angaben zum Cash Flow</b>                        |                  |                  |
| Zinszahlungen                                                   | 264.525          | 332.731          |
| Zahlungen für Ertragsteuern <sup>1</sup>                        | 520.766          | 425.945          |
| Cash Flow für Ertragsteuern aus der Ausübung von Aktienoptionen | 13.313           | 8.123            |
| <b>Zusätzliche Offenlegung von Cash-Flow-Informationen</b>      |                  |                  |
| Zusätzliche Informationen zu Akquisitionen:                     |                  |                  |
| Ausgaben für erworbene Vermögenswerte                           | (668.198)        | (241.745)        |
| Übernommene Verbindlichkeiten                                   | 102.698          | 20.574           |
| Anteile anderer Gesellschafter                                  | 36.141           | 35.448           |
| Als Teil des Kaufpreises aufgenommene Schulden                  | 31.666           | 4.151            |
| Barzahlungen                                                    | (497.693)        | (181.572)        |
| Abzüglich erworbene Barmittel                                   | 16.318           | 7.059            |
| <b>NETTOAUSZAHLUNGEN FÜR AKQUISITIONEN</b>                      | <b>(481.375)</b> | <b>(174.513)</b> |

<sup>1</sup> Abzüglich Steuererstattungen.

## BERICHT ÜBER DAS INTERNE KONTROLLSYSTEM FÜR DIE FINANZBERICHTERSTATTUNG

Das Management der Gesellschaft ist für die Einrichtung und Aufrechterhaltung eines angemessenen internen Kontrollsystems für die Finanzberichterstattung, gemäß Exchange Act Rule 13a - 15f, verantwortlich. Unter diesem internen Kontrollsystem versteht die Gesellschaft einen Prozess, der von bzw. unter Aufsicht des Vorstandsvorsitzenden und Finanzvorstands so ausgestaltet wird, dass mit hinreichender Sicherheit die Zuverlässigkeit der Finanzberichterstattung sowie die Erstellung des extern zu berichtenden Abschlusses in Übereinstimmung mit den us-amerikanischen Rechnungslegungsgrundsätzen, den „Generally Accepted Accounting Principles“ (U.S. GAAP) gewährleistet ist.

Das Management der Gesellschaft hat die Beurteilung der Wirksamkeit des internen Kontrollsystems für die Finanzberichterstattung zum 31. Dezember 2010 durchgeführt. Diese Beurteilung des Managements basiert auf den Kriterien, die in dem vom Committee of Sponsoring Organizations of the Treadway Commission (COSO) herausgegebenen Arbeitspapier „Internal Control – Integrated Framework“ festgelegt sind. Die Beurteilung durch das Management folgte zudem der am 23. Mai 2007 durch die Security and Exchange Commission herausgegebenen Richtlinie. Auf Grundlage dieser Evaluierung hat das Management festgestellt, dass das interne Kontrollsystem für die Finanzberichterstattung zum 31. Dezember 2010 wirksam ist.

Das interne Kontrollsystem für die Finanzberichterstattung der Gesellschaft enthält Richtlinien und Anweisungen, die (1) das Führen von Aufzeichnungen regeln, um die richtige und ordentliche Darstellung von Transaktionen sowie die Veräußerung von Vermögensgegenständen in hinreichendem Detail sicherzustellen, (2) hinreichende Sicherheit gewähren, dass die Transaktionen der Gesellschaft in erforderlicher Weise aufgezeichnet werden, um die Erstellung des Abschlusses in Übereinstimmung mit den us-amerikanischen Rechnungslegungsgrundsätzen sicherzustellen, und zudem gewährleistet, dass die Einnahmen und Ausgaben der Gesellschaft nur nach Genehmigung des Managements erfolgen und (3) hinreichende Sicherheit in Hinblick auf die Vermeidung oder die rechtzeitige Aufdeckung von unerlaubtem Erwerb, unerlaubter Nutzung oder Veräußerung von Vermögensgegenständen der Gesellschaft gewährleistet, die eine erhebliche Auswirkung auf den Abschluss der Gesellschaft haben könnten.

Dem internen Kontrollsystem für die Finanzberichterstattung sind inhärente Grenzen auferlegt, unabhängig davon wie sorgfältig es ausgestaltet ist. Als Konsequenz kann nicht mit absoluter Sicherheit gewährleistet werden, dass die Ziele der Finanzberichterstattung erreicht noch dass falsche Angaben mit absoluter Sicherheit verhindert oder aufgedeckt werden. Selbst wenn das interne Kontrollsystem für die Finanzberichterstattung als wirksam beurteilt wird, kann nur hinreichende Sicherheit in Hinblick auf die Aufstellung und Darstellung des Abschlusses gewahrt werden. Ebenso sind Prognosen zur Beurteilung der Wirksamkeit in künftigen Perioden mit dem Risiko behaftet, dass Kontrollen wegen geänderter Verhältnisse unzureichend werden oder sich der Grad der Einhaltung vorhandener Richtlinien und Verfahren verschlechtert.

Die Wirksamkeit des internen Kontrollsystems für die Finanzberichterstattung zum 31. Dezember 2010 wurde von KPMG AG Wirtschaftsprüfungsgesellschaft, einer unabhängigen Wirtschaftsprüfungsgesellschaft, geprüft wie aus dem abgedruckten Testat ersichtlich — siehe Seite 272.

23. Februar 2011

Fresenius Medical Care AG & Co. KGaA, vertreten durch  
Fresenius Medical Care Management AG, die persönlich haftende Gesellschafterin

**DR. BEN J. LIPPS**  
Vorstandsvorsitzender

**MICHAEL BROSNAN**  
Finanzvorstand

## BERICHT DER UNABHÄNGIGEN ABSCHLUSSPRÜFER

### AN DEN AUFSICHTSRAT DER FRESENIUS MEDICAL CARE AG & CO. KGAA

Wir haben das interne Kontrollsystem für die Finanzberichterstattung der Fresenius Medical Care AG & Co. KGaA (Fresenius Medical Care oder die Gesellschaft) zum 31. Dezember 2010 geprüft. Dieses basiert auf den Kriterien des Internal Control – Integrated Framework herausgegeben vom Committee of Sponsoring Organizations of the Treadway Commission (COSO). Der Vorstand der persönlich haftenden Gesellschafterin ist für die Aufrechterhaltung der Wirksamkeit des internen Kontrollsystems für die Finanzberichterstattung und die Einschätzung der Wirksamkeit dieses internen Kontrollsystems für die Finanzberichterstattung im Bericht des Vorstands der persönlich haftenden Gesellschafterin über das interne Kontrollsystem für die Finanzberichterstattung verantwortlich. Unsere Aufgabe ist es, auf der Grundlage unserer Prüfung eine Beurteilung des internen Kontrollsystems für die Finanzberichterstattung der Gesellschaft abzugeben.

Wir haben unsere Prüfung unter Beachtung der Standards des us-amerikanischen Public Company Accounting Oversight Board (USA) durchgeführt. Danach ist die Prüfung so zu planen und durchzuführen, dass mit hinreichender Sicherheit beurteilt werden kann, ob in allen wesentlichen Belangen ein wirksames internes Kontrollsystem für die Finanzberichterstattung aufrechterhalten wurde. Im Rahmen der Prüfung des internen Kontrollsystems für die Finanzberichterstattung haben wir uns ein Verständnis über das interne Kontrollsystem für die Finanzberichterstattung verschafft, das Risiko eingeschätzt, dass eine wesentliche Schwäche im internen Kontrollsystem für die Finanzberichterstattung vorliegt und basierend auf dieser Einschätzung den Aufbau und die Wirksamkeit der internen Kontrollen getestet und beurteilt. Fallweise haben wir weitere erforderliche Prüfungshandlungen durchgeführt. Wir sind der Auffassung, dass unsere Prüfung eine hinreichend sichere Grundlage für unsere Beurteilung bildet.

Das interne Kontrollsystem für die Finanzberichterstattung eines Unternehmens dient dazu, eine hinreichende Sicherheit bezüglich der Zuverlässigkeit der Finanzberichterstattung sowie der Erstellung von Abschlüssen zu externen Zwecken im Einklang mit den u.s. Generally Accepted Accounting Principles zu gewährleisten. Das interne Kontrollsystem für die Finanzberichterstattung eines Unternehmens beinhaltet diejenigen Richtlinien und Verfahren, welche (1) eine Buchführung sicherstellen, die in angemessenem Detaillierungsgrad richtig und zutreffend die Transaktionen und die Verfügung über Vermögensgegenstände der Gesellschaft widerspiegelt; (2) mit hinreichender Sicherheit gewährleisten, dass Transaktionen so erfasst werden, dass die Erstellung von Abschlüssen in Übereinstimmung mit den u.s. Generally Accepted Accounting Principles möglich ist, und dass Einzahlungen und Auszahlungen des Unternehmens nur gemäß der vom Vorstand erteilten Befugnisse erfolgen; sowie (3) hinreichende Sicherheit bezüglich der Vermeidung oder rechtzeitiger Aufdeckung von nicht autorisiertem Erwerb, Gebrauch oder Abgang von Vermögensgegenständen des Unternehmens bieten, soweit dies einen wesentlichen Einfluss auf den Konzernabschluss haben könnte.

Auf Grund der ihm innewohnenden Grenzen kann das interne Kontrollsystem Falschaussagen der Finanzberichterstattung gegebenenfalls nicht verhindern oder aufdecken. Ebenso sind Prognosen zur Beurteilung dessen Wirksamkeit in künftigen Perioden mit dem Risiko behaftet, dass Kontrollen bei einer Änderung der Verhältnisse nicht angepasst werden oder sich der Grad der Einhaltung der Richtlinien und Verfahren verschlechtert.

Nach unserer Überzeugung verfügte Fresenius Medical Care basierend auf den Kriterien des von coso herausgegebenen Internal Control – Integrated Framework zum 31. Dezember 2010 in allen wesentlichen Belangen über ein wirksames internes Kontrollsystem für die Finanzberichterstattung.

Wir haben weiterhin nach den Grundsätzen des Public Company Accounting Oversight Board (USA) den Konzernabschluss der Fresenius Medical Care bestehend aus den Bilanzen zum 31. Dezember 2010 und 2009 und den Gewinn- und Verlustrechnungen, Gesamtergebnisrechnungen, Kapitalflussrechnungen und Eigenkapitalveränderungsrechnungen für die drei zum 31. Dezember 2010, 2009 und 2008 endenden Geschäftsjahre geprüft und haben diesem in unserem Bericht vom 23. Februar 2011 einen uneingeschränkten Bestätigungsvermerk erteilt.

*23. Februar 2011*

Frankfurt am Main, Deutschland

**KPMG AG**

*Wirtschaftsprüfungsgesellschaft*

## BESTÄTIGUNGSVERMERK: BERICHT DER UNABHÄNGIGEN ABSCHLUSSPRÜFER

### AN DEN AUFSICHTSRAT DER FRESENIUS MEDICAL CARE AG & CO. KGAA

Wir haben den von der Fresenius Medical Care AG & Co. KGaA (Fresenius Medical Care oder die Gesellschaft) aufgestellten Konzernabschluss, bestehend aus den Bilanzen zum 31. Dezember 2010 und 2009 und den Gewinn- und Verlustrechnungen, Gesamtergebnisrechnungen, Kapitalflussrechnungen und Eigenkapitalveränderungsrechnungen für die drei Geschäftsjahre zum 31. Dezember 2010, 2009 und 2008 endenden Geschäftsjahre geprüft. Die Aufstellung des Konzernabschlusses liegt in der Verantwortung des Vorstands der persönlich haftenden Gesellschafterin. Unsere Aufgabe ist es, auf Grundlage der von uns durchgeführten Prüfung eine Beurteilung über den Konzernabschluss abzugeben.

Wir haben unsere Konzernabschlussprüfung nach den Grundsätzen des Public Company Accounting Oversight Board (USA) durchgeführt. Danach ist eine Prüfung so zu planen und durchzuführen, dass mit hinreichender Sicherheit beurteilt werden kann, ob der Konzernabschluss frei von wesentlichen Fehlaussagen ist. Im Rahmen der Prüfung werden die Nachweise für die Wertansätze und Angaben im Konzernabschluss auf Basis von Stichproben beurteilt. Die Prüfung beinhaltet die Beurteilung der angewandten Bilanzierungsgrundsätze und der wesentlichen Einschätzungen des Vorstands der persönlich haftenden Gesellschafterin sowie die Würdigung der Gesamtdarstellung des Konzernabschlusses. Wir sind der Auffassung, dass unsere Prüfung eine hinreichend sichere Grundlage für diese Beurteilung bildet.

Nach unserer Beurteilung auf Grund der bei der Prüfung gewonnenen Erkenntnisse vermittelt der Konzernabschluss unter Beachtung der u.s. Generally Accepted Accounting Principles in allen wesentlichen Belangen ein den tatsächlichen Verhältnissen entsprechendes Bild der Vermögenslage der Fresenius Medical Care zum 31. Dezember 2010 und 2009 sowie der Finanz- und Ertragslage des Konzerns für die drei Geschäftsjahre zum 31. Dezember 2010, 2009 und 2008 endenden Geschäftsjahre.

Daneben haben wir nach den Grundsätzen des Public Company Accounting Oversight Board (USA) die Wirksamkeit des internen Kontrollsystems über die Finanzberichterstattung der Fresenius Medical Care zum 31. Dezember 2010 geprüft. Das interne Kontrollsystem über die Finanzberichterstattung basiert auf Kriterien, die im Internal Control – Integrated Framework herausgegeben vom Committee of Sponsoring Organizations of the Treadway Commission (COSO) festgelegt sind. In unserem Bericht vom 23. Februar 2011 haben wir einen uneingeschränkten Bestätigungsvermerk zur Wirksamkeit des internen Kontrollsystems über die Finanzberichterstattung der Gesellschaft erteilt.

23. Februar 2011

Frankfurt am Main, Deutschland

**KPMG AG**

Wirtschaftsprüfungsgesellschaft



## WEITERE INFORMATIONEN

### MOTIVATION

*Die Lebensqualität von Nieren-  
patienten kontinuierlich zu verbessern  
ist und bleibt unser größter  
Ansporn als weltweit führendes  
Dialyseunternehmen.*

## 6.1

Finanzglossar  
S. 275

## 6.2

Regionale Organisation  
S. 277

## 6.3

Wesentliche Beteiligungen  
S. 278

## 6.4

Fünf-Jahres-Übersicht  
S. 280

## 6.5

Verzeichnis der Tabellen  
S. 282

## 6.6

Stichwortverzeichnis  
S. 284

## 6.7

Kontakte  
S. 285

## 6.8

Impressum  
S. 286

---

# FINANZGLOSSAR

## A

### Aktienindex

Kennzahl für die Kursentwicklung des Aktienmarktes insgesamt und/oder von einzelnen Aktiengruppen (z.B. DAX, DOW JONES, STOXX). Aktienindizes sollen den Kapitalanlegern eine Orientierungshilfe für die Tendenz am Aktienmarkt bieten. Ein Index errechnet sich aus einer gewogenen Messzahl für die durchschnittliche Entwicklung der börsennotierten Unternehmen, die im jeweiligen Index enthalten sind. Aktienindizes werden als Kurs- oder als Performance-Index berechnet.

### American Depositary Receipt (ADR)

Ausgegebene Hinterlegungsscheine für nichtamerikanische Aktien, die anstelle der Aktien selbst an den us-Börsen gehandelt werden. Aktien von Fresenius Medical Care sind als Stammaktien und als Vorzugsaktien an der New York Stock Exchange in Form von ADR gelistet.

## D

### DAX

Abkürzung für „Deutscher Aktien Index“ – Berechnungsgrundlage sind die gewichteten Kurse der 30 größten (nach Börsenkapitalisierung und Börsenumsatz) börsennotierten deutschen Unternehmen.

### Debt/EBITDA-Verhältnis

Wichtige Kenngröße in der Unternehmenssteuerung; sie wird ermittelt, indem die Finanzverbindlichkeiten (Debt) des Unternehmens zum Ergebnis vor Zinsen, Steuern und Abschreibungen (EBITDA) und anderer nicht zahlungswirksamer Aufwendungen ins Verhältnis gesetzt werden.

### Dividende

Anteil am Gewinn einer Gesellschaft. Der auszusüttende Gewinn, geteilt durch die Anzahl der ausstehenden Aktien, ergibt die Dividende pro Aktie, die in der Regel einmal im Jahr ausgeschüttet wird. Die Aktionäre erhalten sie in Form einer Barzahlung, in Aktien oder Sachwerten.

## E

### EBIT (Earnings Before Interest and Taxes)

Operatives Ergebnis vor Zinsen und Steuern. Es wird gewöhnlich für die Beurteilung der Ertragssituation eines Unternehmens herangezogen. Damit ist das

EBIT das operative Ergebnis vor dem Finanz- und damit dem Beteiligungsergebnis.

### EBITDA

(Earnings Before Interest, Taxes, Depreciation and Amortization)

Ergebnis vor Zinsen, Ertragsteuern und Abschreibungen. Entspricht dem operativen Cash Flow vor Steuern.

## E

### Economies of Scale (Skaleneffekte)

Sinkende Erzeugungskosten je Produktionseinheit mit steigender Ausbringungsmenge. Kostenverminderung als Folge der Aufteilung der Fixkosten auf einen wachsenden Ausstoß, sodass die Durchschnittskosten fallen.

## F

### Forderungslaufzeiten (Days Sales Outstanding, DSO)

Kennzahl, die angibt, nach wie vielen Tagen eine Forderung im Durchschnitt beglichen wird. Je kürzer die Forderungslaufzeit, desto niedriger ist die Zinsbelastung für den Kreditgeber und damit umso geringer das Risiko des Forderungsausfalls.

### Free Float

Englische Bezeichnung für „Streubesitz“. Zum Streubesitz zählen nach der Definition der Deutschen Börse alle Aktien, die nicht von Großaktionären (Anteil am Aktienkapital von über 5 %) gehalten werden, also vom breiten Publikum erworben und gehandelt werden können.

## K

### Kommanditgesellschaft auf Aktien (KGaA)

Gesellschaftsform mit eigener Rechtspersönlichkeit (juristische Person), bei der mindestens ein Gesellschafter (der persönlich haftende Gesellschafter oder Komplementäraktionär) den Gesellschaftsgläubigern unbeschränkt haftet und die übrigen (Kommanditaktionäre) an dem in Aktien zerlegten Grundkapital beteiligt sind, ohne persönlich für die Verbindlichkeiten der Gesellschaft zu haften.

## M

### Marktkapitalisierung

Der Gesamtmarktwert aller im Umlauf befindlichen Aktien einer Gesellschaft berechnet durch Anzahl der Aktien, multipliziert mit dem Börsenkurs.

---

**O**

---

*Operative Marge*

Operatives Ergebnis vor Zinsen und Ertragsteuern (EBIT) im Verhältnis zum Umsatz.

---

**R**

---

*Rating*

Das Rating ist eine auf den internationalen Kapitalmärkten anerkannte Einstufung der Kreditwürdigkeit eines Unternehmens. Es wird von unabhängigen Ratingagenturen wie z.B. Standard & Poor's, Moody's oder Fitch auf Basis einer Unternehmensanalyse publiziert.

*Return on Equity (ROE)*

Die Eigenkapitalrendite zeigt den Ertrag eines Unternehmens im Verhältnis zum Eigenkapital.

*Return On Invested Capital (ROIC)*

Rendite auf das eingesetzte bereinigte Kapital eines Unternehmens geteilt durch das durchschnittlich investierte Kapital. Das investierte Kapital umfasst das Umlauf- und Anlagevermögen zuzüglich der kumulierten Abschreibungen auf den Firmenwert (Goodwill), abzüglich der Barmittel, geldnahen Werte, aktiven latenten Steuern, Verbindlichkeiten aus Lieferungen und Leistungen (einschließlich derer gegenüber verbundenen Unternehmen), Rückstellungen und sonstigen Verbindlichkeiten (einschließlich Steuerrückstellungen).

*Return On Operating Assets (ROOA)*

EBIT geteilt durch das durchschnittliche Betriebsvermögen. Das Betriebsvermögen umfasst Barmittel und geldnahe Werte, Forderungen (einschließlich derer an verbundene Unternehmen), Vorräte, im Voraus geleistete Zahlungen und sonstiges Umlaufvermögen, abzüglich aktiver latenter Steuern und Verbindlichkeiten aus Lieferungen und Leistungen (einschließlich derer gegenüber verbundenen Unternehmen).

---

**S**

---

*Sarbanes-Oxley Act (SOX)*

Gesetz für Unternehmen und deren Wirtschaftsprüfer, das die Verbesserung der Rechnungslegung zum Ziel hat. Die Erweiterung von Vorschriften bei der Finanzberichterstattung und den internen Kontrollsystemen soll das Vertrauen von Aktionären und anderen Interessengruppen in die Unternehmen stärken. Dabei nimmt das Gesetz die Unternehmensleitung hinsichtlich der Vollständigkeit und Richtigkeit der Angaben stärker in die Pflicht. Die neuen und erweiterten Regelungen gelten für alle an einer us-Börse gelisteten Unternehmen.

*Securities and Exchange Commission (SEC)*

us-Wertpapier- und Börsenaufsichtsbehörde.

*Stamm- und Vorzugsaktien*

Das Grundkapital der Gesellschaft ist eingeteilt in Stamm- und Vorzugsaktien, beide sind Inhaberk Aktien. Vorzugsaktien sind nicht stimmberechtigt, bieten jedoch eine höhere Dividende als Stammaktien; zudem hat die Ausschüttung der Mindestdividende für Vorzugsaktien Vorrang vor der Ausschüttung einer Dividende für Stammaktien.

---

**U**

---

*U.S. GAAP**(United States Generally Accepted Accounting Principles)*

us-amerikanische Grundsätze ordnungsmäßiger Rechnungslegung.

---

**V**

---

*Volatilität*

Kursschwankung eines Wertpapiers bzw. einer Währung. Oftmals wird diese in Form der Standardabweichung aus der Kurshistorie bzw. implizit aus einer Preissetzungsformel berechnet.

---

**W**

---

*Working Capital*

Kennzahl, die sich aus dem Umlaufvermögen abzüglich kurzfristiger Verbindlichkeiten errechnet. Je höher das Working Capital, umso gesicherter die Liquidität des Unternehmens.

## REGIONALE ORGANISATION

## EUROPA/NAHER OSTEN/AFRIKA

Tabelle 6.2.1

|                       |                                                     |                    | <div> <div>Produktion</div> <div>Verkauf</div> <div>Dialysedienstleistungen</div> </div> |       |
|-----------------------|-----------------------------------------------------|--------------------|------------------------------------------------------------------------------------------|-------|
| Deutschland           | Fresenius Medical Care Deutschland GmbH             | Bad Homburg v.d.H. | <div><div></div><div></div><div></div></div>                                             | 100 % |
| Frankreich            | Fresenius Medical Care Groupe France S.A.S.         | Fresnes            | <div><div></div><div></div><div></div></div>                                             | 100 % |
| Großbritannien        | Fresenius Medical Care (U.K.) Ltd.                  | Nottinghamshire    | <div><div></div><div></div><div></div></div>                                             | 100 % |
| Serbien               | Fresenius Medical Care Srbija d.o.o.                | Vrsac              | <div><div></div><div></div><div></div></div>                                             | 100 % |
| Italien               | Fresenius Medical Care Italia S.p.A.                | Cremona            | <div><div></div><div></div><div></div></div>                                             | 100 % |
| Spanien               | National Medical Care of Spain S.A.                 | Madrid             | <div><div></div><div></div><div></div></div>                                             | 100 % |
| Südafrika             | Fresenius Medical Care South Africa (PTY) Ltd.      | Gauteng            | <div><div></div><div></div><div></div></div>                                             | 100 % |
| Türkei                | Fresenius Medikal Hizmetler A.Ş.                    | Istanbul           | <div><div></div><div></div><div></div></div>                                             | 100 % |
| Belgien               | Fresenius Medical Care Belgium N.V.                 | Antwerpen          | <div><div></div><div></div><div></div></div>                                             | 100 % |
| Marokko               | Fresenius Medical Care Maroc S.A.                   | Casablanca         | <div><div></div><div></div><div></div></div>                                             | 100 % |
| Irland                | Fresenius Medical Care (Ireland) Limited            | Dublin             | <div><div></div><div></div><div></div></div>                                             | 100 % |
| Polen                 | Fresenius Medical Care Polska S.A.                  | Poznan             | <div><div></div><div></div><div></div></div>                                             | 100 % |
| Portugal              | NephroCare Portugal S.A.                            | Lissabon           | <div><div></div><div></div><div></div></div>                                             | 100 % |
| Rumänien              | Fresenius Medical Care Romania Srl                  | Bukarest           | <div><div></div><div></div><div></div></div>                                             | 100 % |
| Russland              | ZAO Fresenius SP                                    | Moskau             | <div><div></div><div></div><div></div></div>                                             | 100 % |
| Slowakei              | Fresenius Medical Care Slovensko, spol. s r.o.      | Piešťany           | <div><div></div><div></div><div></div></div>                                             | 100 % |
| Slowenien             | Fresenius Medical Care Slovenija d.o.o.             | Zreče              | <div><div></div><div></div><div></div></div>                                             | 100 % |
| Tschechische Republik | Fresenius Medical Care Ceska republika spol. s r.o. | Prag               | <div><div></div><div></div><div></div></div>                                             | 100 % |
| Ungarn                | FMC Dializis Center Kft                             | Budapest           | <div><div></div><div></div><div></div></div>                                             | 100 % |
| Schweden              | Fresenius Medical Care Sverige AB                   | Stockholm          | <div><div></div><div></div><div></div></div>                                             | 100 % |
| Ukraine               | Fresenius Medical Care Ukraine TOV                  | Kiev               | <div><div></div><div></div><div></div></div>                                             | 100 % |
| Finnland              | Fresenius Medical Care Suomi Oy                     | Helsinki           | <div><div></div><div></div><div></div></div>                                             | 100 % |
| Libanon               | Fresenius Medical Care Lebanon s.a.r.l.             | Beirut             | <div><div></div><div></div><div></div></div>                                             | 99 %  |
| Niederlande           | Fresenius Medical Care Nederland B.V.               | Nieuwkuijk         | <div><div></div><div></div><div></div></div>                                             | 100 % |
| Österreich            | Fresenius Medical Care Austria GmbH                 | Wien               | <div><div></div><div></div><div></div></div>                                             | 100 % |
| Dänemark              | Fresenius Medical Care Danmark A/S                  | Albertslund        | <div><div></div><div></div><div></div></div>                                             | 100 % |
| Schweiz               | Fresenius Medical Care (Schweiz) AG                 | Stans              | <div><div></div><div></div><div></div></div>                                             | 100 % |
| Bosnien & Herzegowina | Fresenius Medical Care BH d.o.o.                    | Sarajevo           | <div><div></div><div></div><div></div></div>                                             | 100 % |
| Estland               | OU Fresenius Medical Care Estonia                   | Tartu              | <div><div></div><div></div><div></div></div>                                             | 100 % |

## NORDAMERIKA

|        |                                      |               |                                              |       |
|--------|--------------------------------------|---------------|----------------------------------------------|-------|
| USA    | Fresenius Medical Care Holdings Inc. | New York      | <div><div></div><div></div><div></div></div> | 100 % |
|        | National Medical Care Inc.           | Delaware      | <div><div></div><div></div><div></div></div> | 100 % |
|        | Fresenius USA Inc.                   | Massachusetts | <div><div></div><div></div><div></div></div> | 100 % |
|        | Renal Care Group, Inc.               | Delaware      | <div><div></div><div></div><div></div></div> | 100 % |
| Mexiko | Fresenius Medical Care Mexico S.A.   | Guadalajara   | <div><div></div><div></div><div></div></div> | 100 % |

## LATEINAMERIKA

|             |                                          |                   |                                              |       |
|-------------|------------------------------------------|-------------------|----------------------------------------------|-------|
| Argentinien | Fresenius Medical Care Argentina S.A.    | Buenos Aires      | <div><div></div><div></div><div></div></div> | 100 % |
| Kolumbien   | Fresenius Medical Care Colombia S.A.     | Bogotá            | <div><div></div><div></div><div></div></div> | 100 % |
| Brasilien   | Fresenius Medical Care Ltda.             | Sao Paulo         | <div><div></div><div></div><div></div></div> | 100 % |
| Chile       | Fresenius Medical Care Chile S.A.        | Santiago de Chile | <div><div></div><div></div><div></div></div> | 100 % |
| Venezuela   | Fresenius Medical Care de Venezuela C.A. | Caracas           | <div><div></div><div></div><div></div></div> | 100 % |
| Peru        | Fresenius Medical Care del Peru S.A.     | Lima              | <div><div></div><div></div><div></div></div> | 100 % |

## ASIEN-PAZIFIK

|             |                                                |              |                                              |       |
|-------------|------------------------------------------------|--------------|----------------------------------------------|-------|
| Australien  | Fresenius Medical Care Australia PTY Ltd.      | Sydney       | <div><div></div><div></div><div></div></div> | 100 % |
| Japan       | Fresenius-Kawasumi Co. Ltd.                    | Tokio        | <div><div></div><div></div><div></div></div> | 70 %  |
| China       | Fresenius Medical Care (Shanghai) Co., Ltd.    | Shanghai     | <div><div></div><div></div><div></div></div> | 100 % |
|             | Fresenius Medical Care Hong Kong Limited       | Hong Kong    | <div><div></div><div></div><div></div></div> | 100 % |
| Singapur    | Fresenius Medical Care Singapore Pte. Ltd.     | Singapur     | <div><div></div><div></div><div></div></div> | 100 % |
| Taiwan      | Fresenius Medical Care Taiwan Co., Ltd.        | Taipeh       | <div><div></div><div></div><div></div></div> | 100 % |
| Indien      | Fresenius Medical Care India Private Limited   | Neu Delhi    | <div><div></div><div></div><div></div></div> | 100 % |
| Indonesien  | PT Fresenius Medical Care Indonesia            | Jakarta      | <div><div></div><div></div><div></div></div> | 100 % |
| Malaysia    | Fresenius Medical Care Malaysia Sdn. Bhd.      | Kuala Lumpur | <div><div></div><div></div><div></div></div> | 100 % |
| Philippinen | Fresenius Medical Care Philippines, Inc.       | Makati City  | <div><div></div><div></div><div></div></div> | 100 % |
| Südkorea    | Fresenius Medical Care Korea Ltd.              | Seoul        | <div><div></div><div></div><div></div></div> | 100 % |
| Thailand    | Fresenius Medical Care (Thailand) Ltd.         | Bangkok      | <div><div></div><div></div><div></div></div> | 100 % |
| Pakistan    | Fresenius Medical Care Pakistan (Private) Ltd. | Lahore       | <div><div></div><div></div><div></div></div> | 100 % |

Vereinfachte Darstellung der regionalen Organisation von Fresenius Medical Care. Verfolgtes Geschäftsfeld im jeweiligen Land in 2010.  
Einige Prozentsätze ergeben sich aus direkt und indirekt gehaltenen Anteilen.

## Kapitel 6.3

## WESENTLICHE BETEILIGUNGEN

## WESENTLICHE BETEILIGUNGEN 2010

in MIO US \$, mit Ausnahme  
der Angaben zu Mitarbeitern

Tabelle 6.3.1

| Name und Sitz der Gesellschaft   |                                               | Beteili-<br>gungen <sup>1</sup><br>in % | Umsatz <sup>2</sup> | Jahres-<br>überschuss/<br>(-verlust) <sup>2</sup> | Eigenkapital<br>31. Dez. <sup>2</sup> | Mitarbeiter<br>31. Dez. <sup>4</sup> |
|----------------------------------|-----------------------------------------------|-----------------------------------------|---------------------|---------------------------------------------------|---------------------------------------|--------------------------------------|
| <b>Europa/Naher Osten/Afrika</b> |                                               |                                         |                     |                                                   |                                       |                                      |
| Deutschland                      | FMC Deutschland GmbH, Bad Homburg v. d. H.    | 100                                     | 1.590,3             | 0,0                                               | 806,9                                 | 3.068                                |
|                                  | FMC GmbH, Bad Homburg v. d. H.                | 100                                     | 325,0               | 0,0                                               | 60,5                                  | 254                                  |
| Frankreich                       | FMC France S.A.S., Fresnes                    | 100                                     | 126,3               | 3,2                                               | 20,6                                  | 190                                  |
|                                  | FMC SMAD S.A., Savigny                        | 100                                     | 117,5               | 11,0                                              | 44,5                                  | 341                                  |
| Großbritannien                   | FMC (U.K.) Ltd., Nottinghamshire              | 100                                     | 99,2                | 8,0                                               | 28,6                                  | 203                                  |
| Italien                          | FMC Italia S.p.A., Palazzo Pignano/Cremona    | 100                                     | 128,8               | 10,1                                              | 63,9                                  | 183                                  |
|                                  | SIS-TER S.p.A., Palazzo Pignano/Cremona       | 100                                     | 76,6                | 4,5                                               | 22,0                                  | 274                                  |
| Spanien                          | FMC Espana S.A., Madrid                       | 100                                     | 117,4               | 3,6                                               | 46,5                                  | 170                                  |
|                                  | NMC of Spain S.A., Madrid                     | 100                                     | 12,7                | (4,2)                                             | 77,5                                  | 1.538                                |
| Südafrika                        | FMC South Africa (Pty.) Ltd., Johannesburg    | 100                                     | 33,7                | 1,3                                               | 15,2                                  | 333                                  |
| Türkei                           | Fresenius Medikal Hizmetler A.S., Istanbul    | 100                                     | 108,8               | 0,2                                               | 47,3                                  | 237                                  |
| Belgien                          | FMC Belgium N.V., Antwerpen                   | 100                                     | 40,9                | 2,4                                               | 11,6                                  | 53                                   |
| Marokko                          | FMC Maroc S.A., Casablanca                    | 100                                     | 20,0                | 3,1                                               | 9,0                                   | 60                                   |
| Serbien                          | FMC Srbija d.o.o., Vrsac                      | 100                                     | 55,4                | 6,7                                               | 35,0                                  | 428                                  |
| Polen                            | FMC Polska S.A., Poznan                       | 100                                     | 44,3                | 4,2                                               | 16,5                                  | 62                                   |
|                                  | Fresenius Nephrocare Polska Sp.z.o.o., Poznan | 100                                     | 74,5                | 0,5                                               | 20,0                                  | 863                                  |
| Portugal                         | FMC Portugal S.A., Maia                       | 100                                     | 48,2                | 3,1                                               | 12,4                                  | 46                                   |
|                                  | Nephrocare Portugal S.A., Lissabon            | 100                                     | 158,2               | 23,6                                              | 55,0                                  | 964                                  |
| Rumänien                         | FMC Romania Srl, Bukarest                     | 100                                     | 30,7                | 0,8                                               | 12,8                                  | 67                                   |
| Slowakei                         | FMC Slovensko spol s.r.o., Piestany           | 100                                     | 18,7                | 0,9                                               | 11,4                                  | 23                                   |
| Slowenien                        | FMC Slovenija d.o.o., Zrece                   | 100                                     | 8,8                 | 0,5                                               | 3,5                                   | 11                                   |
|                                  | Nefrodial d.o.o., Zrece                       | 100                                     | 13,2                | 0,5                                               | 4,2                                   | 96                                   |
| Tschechische Republik            | FMC Ceska Republika spol. s.r.o., Prag        | 100                                     | 46,8                | 4,4                                               | 22,8                                  | 60                                   |
| Ungarn                           | FMC Hungary Ltd., Budapest                    | 100                                     | 34,7                | 1,0                                               | 26,2                                  | 44                                   |
|                                  | FMC Dializis Center Kft., Budapest            | 100                                     | 47,5                | 0,3                                               | 1,1                                   | 667                                  |
| Dänemark                         | FMC Danmark A/S, Albertslund                  | 100                                     | 11,3                | 0,7                                               | 2,9                                   | 25                                   |
| Finnland                         | FMC Suomi OY, Helsinki                        | 100                                     | 17,9                | 0,6                                               | 5,0                                   | 25                                   |
| Libanon                          | FMC Lebanon S.a.r.L., Beirut                  | 99                                      | 3,8                 | 0,1                                               | 0,9                                   | 11                                   |
| Niederlande                      | FMC Nederland B.V., Nieuwkuijk                | 100                                     | 26,1                | 1,2                                               | 6,8                                   | 39                                   |
| Österreich                       | FMC Austria GmbH, Wien                        | 100                                     | 26,5                | 1,6                                               | 3,8                                   | 27                                   |
| Russland                         | ZAO Fresenius S.P., Moskau                    | 100                                     | 62,0                | 5,2                                               | 16,8                                  | 150                                  |
| Schweden                         | FMC Sverige AB, Stockholm                     | 100                                     | 20,3                | 1,8                                               | 5,6                                   | 29                                   |
| Schweiz                          | FMC (Schweiz) AG, Stans                       | 100                                     | 34,4                | 3,8                                               | 10,1                                  | 42                                   |
| Estland                          | OÜ FMC Estonia, Tartu                         | 100                                     | 2,1                 | (0,4)                                             | 0,8                                   | 22                                   |
| Ukraine                          | Fresenius Medical Care Ukraine TOV, Kiev      | 100                                     | 9,1                 | 0,2                                               | 5,5                                   | 88                                   |

## WESENTLICHE BETEILIGUNGEN 2010

Tabelle 6.3.1

in MIO US \$, mit Ausnahme  
der Angaben zu Mitarbeitern

|                                       |                                                     | Beteili-<br>gungen <sup>1</sup><br>in % | Umsatz <sup>2</sup> | Jahres-<br>überschuss/<br>(-verlust) <sup>2</sup> | Eigenkapital<br>31. Dez. <sup>2</sup> | Mitarbeiter<br>31. Dez. <sup>4</sup> |
|---------------------------------------|-----------------------------------------------------|-----------------------------------------|---------------------|---------------------------------------------------|---------------------------------------|--------------------------------------|
| <b>Name und Sitz der Gesellschaft</b> |                                                     |                                         |                     |                                                   |                                       |                                      |
| <b>Nordamerika</b>                    |                                                     |                                         |                     |                                                   |                                       |                                      |
| USA                                   | FMC Holdings Inc., New York                         | 100                                     | 8.025,1             | 597,5                                             | 4.723,1                               | 42.585                               |
| Mexiko                                | FMC de Mexico S.A., Guadalajara <sup>3</sup>        | 100                                     | 118,7               | (6,1)                                             | 26,7                                  | 1.543                                |
| <b>Lateinamerika</b>                  |                                                     |                                         |                     |                                                   |                                       |                                      |
| Argentinien                           | FMC Argentina S.A., Buenos Aires                    | 100                                     | 160,6               | 13,6                                              | 71,3                                  | 2.518                                |
| Kolumbien                             | FMC Colombia S.A., Bogota                           | 100                                     | 117,4               | 11,0                                              | 110,1                                 | 1.169                                |
| Brasilien                             | FMC Ltda., Sao Paulo                                | 100                                     | 142,4               | 16,2                                              | 99,0                                  | 553                                  |
| Chile                                 | Pentafarma S.A., Santiago de Chile                  | 100                                     | 14,2                | 1,6                                               | 7,3                                   | 59                                   |
| Venezuela                             | FMC de Venezuela C.A., Caracas                      | 100                                     | 22,9                | (2,8)                                             | 10,3                                  | 579                                  |
| Peru                                  | FMC del Peru S.A., Lima                             | 100                                     | 5,0                 | 0,7                                               | 0,2                                   | 21                                   |
| <b>Asien-Pazifik</b>                  |                                                     |                                         |                     |                                                   |                                       |                                      |
| Australien                            | FMC Australia Pty. Ltd., Sydney                     | 100                                     | 99,1                | (1,5)                                             | 48,9                                  | 368                                  |
| Japan                                 | FMC Japan K.K., Tokio                               | 100                                     | 64,3                | (7,1)                                             | (23,3)                                | 596                                  |
|                                       | Fresenius-Kawasumi Co. Ltd., Tokio                  | 70                                      | 11,0                | 0,7                                               | 24,1                                  | 62                                   |
| China                                 | FMC Shanghai Co. Ltd., Shanghai                     | 100                                     | 115,4               | 14,8                                              | 49,1                                  | 177                                  |
|                                       | Fresenius Medical Care (Jiangsu) Co. Ltd., Changshu | 100                                     | 13,6                | (1,7)                                             | 16,8                                  | 353                                  |
|                                       | FMC Hong Kong Ltd., Hongkong                        | 100                                     | 25,7                | (0,1)                                             | 44,7                                  | 40                                   |
|                                       | BioCare Technology Co. Ltd., Hongkong               | 100                                     | 25,5                | (0,7)                                             | 17,8                                  | 11                                   |
|                                       | Excelsior Renal Service Co. Ltd., Hongkong          | 51                                      | 30,2                | 2,7                                               | 5,7                                   | 809                                  |
| Singapur                              | FMC Singapore Pte. Ltd., Singapur                   | 100                                     | 7,7                 | 0,3                                               | 4,7                                   | 62                                   |
| Taiwan                                | FMC Taiwan Co., Ltd., Taipeh                        | 100                                     | 55,6                | 4,6                                               | 23,3                                  | 96                                   |
|                                       | Jiate Excelsior Co., Ltd., Taipeh                   | 51                                      | 10,0                | 0,2                                               | 10,7                                  | 147                                  |
| Indien                                | FMC India Pvt. Ltd., Neu Dehli                      | 100                                     | 17,0                | 1,8                                               | 2,3                                   | 80                                   |
| Indonesien                            | PT FMC Indonesia, Jarkata                           | 100                                     | 10,2                | 1,9                                               | 8,0                                   | 35                                   |
| Malaysia                              | FMC Malaysia Sdn. Bhd., Kuala Lumpur                | 100                                     | 19,3                | 3,1                                               | 14,1                                  | 147                                  |
| Philippinen                           | FMC Philippines Inc., Makati City                   | 100                                     | 12,9                | 3,2                                               | 9,7                                   | 40                                   |
|                                       | FMC Renalcare Corp., Makati City                    | 100                                     | 0,4                 | (0,1)                                             | 0,3                                   | 17                                   |
| Südkorea                              | FMC Korea Ltd., Seoul                               | 100                                     | 82,7                | 2,4                                               | 51,5                                  | 163                                  |
|                                       | Fresenius Medical Korea Ltd., Seoul                 | 100                                     | 12,9                | (0,4)                                             | 5,2                                   | 17                                   |
|                                       | NephroCare Korea Inc., Seoul                        | 100                                     | 6,1                 | 0,7                                               | 1,9                                   | 6                                    |
| Thailand                              | FMC (Thailand) Ltd., Bangkok                        | 100                                     | 18,8                | 0,1                                               | 8,9                                   | 41                                   |
| Pakistan                              | FMC Pakistan (Private) Limited, Lahore              | 100                                     | 4,8                 | 0,7                                               | 1,7                                   | 30                                   |

<sup>1</sup> Direkte und indirekte Beteiligungen.

<sup>2</sup> Diese Zahlen entsprechen den lokalen Abschlüssen der jeweiligen Länder und spiegeln nicht die Werte wider, die in den Konzernabschluss eingehen. Eigenkapital und Jahresüberschuss (-verlust) werden zum Stichtag am Jahresende berechnet, Umsätze zum Durchschnittskurs am Jahresende.

<sup>3</sup> Im US-GAAP Abschluss des Teilkonzerns FMC Holdings Inc. enthalten.

<sup>4</sup> Durchschnittlich Vollzeitbeschäftigte.

## Kapitel 6.4

## FÜNF-JAHRES-ÜBERSICHT

## FÜNF-JAHRES-ÜBERSICHT

Tabelle 6.4.1

in TSD US \$, mit Ausnahme  
der Beträge je Aktie

|                                                                                                 | 2010              | 2009              | 2008              | 2007              | 2006              |
|-------------------------------------------------------------------------------------------------|-------------------|-------------------|-------------------|-------------------|-------------------|
| <b>Gewinn- und Verlustrechnung</b>                                                              |                   |                   |                   |                   |                   |
| Umsatzerlöse                                                                                    | 12.053.490        | 11.247.477        | 10.612.323        | 9.720.314         | 8.499.038         |
| Umsatzkosten                                                                                    | 7.908.769         | 7.415.965         | 6.983.475         | 6.364.519         | 5.621.482         |
| Bruttoergebnis vom Umsatz                                                                       | 4.144.721         | 3.831.512         | 3.628.848         | 3.355.795         | 2.877.556         |
| Vertriebs- und allgemeine Verwaltungskosten                                                     | 2.124.384         | 1.982.106         | 1.876.177         | 1.709.150         | 1.548.369         |
| Ertrag aus dem Verkauf von Kliniken                                                             | –                 | –                 | –                 | –                 | (40.233)          |
| Forschungs- und Entwicklungsaufwendungen                                                        | 96.532            | 93.810            | 80.239            | 66.523            | 51.293            |
| Operatives Ergebnis (EBIT)                                                                      | 1.923.805         | 1.755.596         | 1.672.432         | 1.580.122         | 1.318.127         |
| Nettozinsergebnis                                                                               | 280.064           | 299.963           | 336.742           | 371.047           | 351.246           |
| Ergebnis vor Ertragsteuern und Anteilen anderer Gesellschafter                                  | 1.643.741         | 1.455.633         | 1.335.690         | 1.209.075         | 966.881           |
| Ertragsteuern <sup>1</sup>                                                                      | 578.345           | 490.413           | 475.702           | 453.765           | 404.467           |
| Abzüglich auf andere Gesellschafter entfallendes Ergebnis <sup>1</sup>                          | 86.879            | 74.082            | 42.381            | 38.180            | 25.668            |
| <b>KONZERNERGEBNIS (ERGEBNIS, DAS AUF DIE ANTEILSEIGNER DER FMC AG &amp; CO. KGAA ENTFÄLLT)</b> | <b>978.517</b>    | <b>891.138</b>    | <b>817.607</b>    | <b>717.130</b>    | <b>536.746</b>    |
| Ergebnis je Stammaktie                                                                          | 3,25              | 2,99              | 2,75              | 2,43              | 1,82              |
| Ergebnis je Vorzugsaktie                                                                        | 3,28              | 3,02              | 2,78              | 2,45              | 1,85              |
| Ergebnis vor Zinsen, Steuern und Abschreibungen (EBITDA)                                        | 2.427.029         | 2.212.681         | 2.088.103         | 1.943.451         | 1.626.825         |
| Personalaufwand                                                                                 | 3.967.732         | 3.708.951         | 3.506.423         | 3.189.348         | 2.766.599         |
| Abschreibungen auf materielle Vermögenswerte                                                    | 432.909           | 396.838           | 368.304           | 329.327           | 265.488           |
| Abschreibungen auf immaterielle Vermögenswerte                                                  | 70.315            | 60.247            | 47.367            | 34.002            | 43.210            |
| <b>Ohne Einmalaufwendungen<sup>2</sup></b>                                                      |                   |                   |                   |                   |                   |
| EBITDA                                                                                          | 2.427.029         | 2.212.681         | 2.088.103         | 1.943.451         | 1.623.503         |
| EBIT                                                                                            | 1.923.805         | 1.755.596         | 1.672.432         | 1.580.122         | 1.314.805         |
| Konzernergebnis (Ergebnis, das auf die Anteilseigner der FMC AG & CO. KGAA entfällt)            | 978.517           | 891.138           | 817.607           | 717.130           | 574.386           |
| Ergebnis je Stammaktie                                                                          | 3,25              | 2,99              | 2,75              | 2,43              | 1,95              |
| <b>Bilanz</b>                                                                                   |                   |                   |                   |                   |                   |
| Umlaufvermögen                                                                                  | 5.152.594         | 4.727.800         | 4.211.997         | 3.859.472         | 3.411.916         |
| Anlagevermögen                                                                                  | 11.942.067        | 11.093.515        | 10.707.679        | 10.310.793        | 9.632.765         |
| <b>SUMME AKTIVA</b>                                                                             | <b>17.094.661</b> | <b>15.821.315</b> | <b>14.919.676</b> | <b>14.170.265</b> | <b>13.044.681</b> |
| Kurzfristige Verschuldung                                                                       | 1.569.885         | 484.418           | 1.139.599         | 974.387           | 495.941           |
| Sonstiges kurzfristiges Fremdkapital                                                            | 2.219.838         | 2.125.297         | 2.004.813         | 2.052.106         | 1.879.764         |
| Kurzfristiges Fremdkapital                                                                      | 3.789.723         | 2.609.715         | 3.144.412         | 3.026.493         | 2.375.705         |
| Langfristige Verschuldung                                                                       | 4.309.676         | 5.084.017         | 4.598.075         | 4.668.008         | 5.083.169         |
| Sonstiges langfristiges Fremdkapital <sup>1</sup>                                               | 1.191.642         | 1.097.890         | 1.054.403         | 792.321           | 629.771           |
| Langfristiges Fremdkapital <sup>1</sup>                                                         | 5.501.318         | 6.181.907         | 5.652.478         | 5.460.329         | 5.712.940         |
| Summe Fremdkapital <sup>1,3</sup>                                                               | 9.291.041         | 8.791.622         | 8.796.890         | 8.486.822         | 8.088.645         |
| Anteile anderer Gesellschafter mit Put-Optionen <sup>3</sup>                                    | 279.709           | 231.303           | 162.166           | 116.539           | 92.309            |
| Eigenkapital <sup>1,3</sup>                                                                     | 7.523.911         | 6.798.390         | 5.960.620         | 5.566.904         | 4.863.727         |
| <b>SUMME PASSIVA</b>                                                                            | <b>17.094.661</b> | <b>15.821.315</b> | <b>14.919.676</b> | <b>14.170.265</b> | <b>13.044.681</b> |
| Gesamtverschuldung                                                                              | 5.879.561         | 5.568.435         | 5.737.674         | 5.642.395         | 5.579.110         |
| Working Capital <sup>4</sup>                                                                    | 3.047.756         | 2.717.503         | 2.322.184         | 1.922.366         | 1.647.152         |
| <b>Rating</b>                                                                                   |                   |                   |                   |                   |                   |
| Standard & Poor's <sup>5</sup>                                                                  |                   |                   |                   |                   |                   |
| Unternehmensrating                                                                              | BB                | BB                | BB                | BB                | BB                |
| Nachrangige Schuldverschreibungen                                                               | BB                | BB                | BB                | B+                | B+                |
| Moody's                                                                                         |                   |                   |                   |                   |                   |
| Unternehmensrating                                                                              | Ba1               | Ba1               | Ba1               | Ba2               | Ba2               |
| Nachrangige Schuldverschreibungen                                                               | Ba3               | Ba3               | Ba3               | B1                | B1                |
| Fitch                                                                                           |                   |                   |                   |                   |                   |
| Unternehmensrating                                                                              | BB                | BB                | BB                |                   |                   |
| Nachrangige Schuldverschreibungen                                                               | B+                | B+                | B+                |                   |                   |

<sup>1</sup> Aufgrund der Einführung des neuen Rechnungslegungsstandards ASC 810 (U.S. GAAP) im Jahr 2009 wurden Steueraufwendungen im Zusammenhang mit Anteilen anderer Gesellschafter für die Jahre 2008, 2007 und 2006 reklassifiziert in Anteile anderer Gesellschafter. Der daraus resultierende Effekt hat keine Wirkung auf das Konzernergebnis, das auf Anteilseigner der FMC AG & CO. KGAA entfällt. In der Bilanz wurden die Anteile anderer Gesellschafter im Eigenkapital ausgewiesen. Die Zahlen aus 2008, 2007 und 2006 wurden entsprechend angepasst.

<sup>2</sup> 2006 ohne Restrukturierungsaufwendungen und Abschreibungen von Know-how aus Entwicklungsprojekten, ohne Einmalaufwendungen für den Rechtsformwechsel, dem Gewinn aus Klinikverkäufen und der Abschreibung von abgegrenzten Gebühren der Kreditvereinbarung 2003.



## FÜNF-JAHRES-ÜBERSICHT

Tabelle 6.4.1

in TSD US \$, mit Ausnahme  
der Beträge je Aktie

|                                                                                                                                                           | 2010        | 2009        | 2008        | 2007        | 2006        |
|-----------------------------------------------------------------------------------------------------------------------------------------------------------|-------------|-------------|-------------|-------------|-------------|
| <b>Cash Flow</b>                                                                                                                                          |             |             |             |             |             |
| Cash Flow aus laufender Geschäftstätigkeit                                                                                                                | 1.368.125   | 1.338.617   | 1.016.398   | 1.199.574   | 907.830     |
| Nettoinvestitionen in Sachanlagen <sup>6</sup>                                                                                                            | (507.521)   | (561.876)   | (673.510)   | (543.053)   | (445.627)   |
| Operativer Cash Flow nach Nettoinvestitionen in Sachanlagen (Free Cash Flow) <sup>6</sup>                                                                 | 860.604     | 776.741     | 342.888     | 656.521     | 462.203     |
| Erwerb (netto) von Anteilen an verbundenen und assoziierten Unternehmen, Beteiligungen und immateriellen Vermögenswerten sowie Investitionen <sup>6</sup> | (764.338)   | (188.113)   | (276.473)   | (263.395)   | (4.311.190) |
| Erlöse aus Desinvestitionen                                                                                                                               | 146.835     | 51.965      | 58.582      | 29.495      | 515.705     |
| <b>Aktien-Kennzahlen</b>                                                                                                                                  |             |             |             |             |             |
| Schlusskurse Frankfurt, Xetra in €                                                                                                                        |             |             |             |             |             |
| Stammaktien                                                                                                                                               | 43,23       | 36,94       | 33,31       | 36,69       | 33,66       |
| Vorzugsaktien                                                                                                                                             | 35,21       | 33,31       | 33,50       | 35,39       | 31,67       |
| Schlusskurse New York in US \$                                                                                                                            |             |             |             |             |             |
| ADS-Stammaktien                                                                                                                                           | 57,66       | 53,01       | 47,18       | 52,75       | 44,43       |
| ADS-Vorzugsaktien                                                                                                                                         | 48,00       | 45,60       | 43,00       | 46,84       | 40,00       |
| Durchschnittlich ausstehende Anzahl an Stammaktien                                                                                                        | 296.808.978 | 294.418.795 | 293.233.477 | 291.929.141 | 290.621.904 |
| Durchschnittlich ausstehende Anzahl an Vorzugsaktien                                                                                                      | 3.912.348   | 3.842.586   | 3.795.248   | 3.739.470   | 3.575.376   |
| Dividendensumme in TSD €                                                                                                                                  | 196.533     | 182.853     | 172.767     | 160.220     | 138.800     |
| Dividende je Stammaktie <sup>7</sup> in €                                                                                                                 | 0,65        | 0,61        | 0,58        | 0,54        | 0,47        |
| Dividende je Vorzugsaktie <sup>7</sup> in €                                                                                                               | 0,67        | 0,63        | 0,60        | 0,56        | 0,49        |
| <b>Mitarbeiter</b>                                                                                                                                        |             |             |             |             |             |
| Durchschnittlich Vollzeitbeschäftigte                                                                                                                     | 73.452      | 67.988      | 64.666      | 61.406      | 56.803      |
| <b>Operative Kennzahlen in %</b>                                                                                                                          |             |             |             |             |             |
| EBITDA-Rendite <sup>8</sup>                                                                                                                               | 20,1        | 19,7        | 19,7        | 20,0        | 19,1        |
| EBIT-Rendite <sup>8</sup>                                                                                                                                 | 16,0        | 15,6        | 15,8        | 16,3        | 15,5        |
| Anstieg Ergebnis je Aktie                                                                                                                                 | 8,9         | 8,5         | 13,5        | 32,9        | 17,0        |
| Organisches Wachstum (wechselkursbereinigt)                                                                                                               | 5,6         | 8,1         | 7,3         | 6,4         | 10,2        |
| Rendite auf das investierte Kapital (ROIC) <sup>9</sup>                                                                                                   | 8,8         | 8,5         | 8,6         | 8,4         | 7,4         |
| Rendite auf das betriebsnotwendige Kapital (ROOA) <sup>9</sup>                                                                                            | 12,5        | 12,2        | 12,3        | 12,5        | 11,3        |
| Eigenkapitalrendite vor Steuern <sup>1,3,9,10</sup>                                                                                                       | 22,3        | 21,8        | 22,8        | 22,0        | 20,3        |
| Eigenkapitalrendite nach Steuern <sup>1,3,9,10</sup>                                                                                                      | 13,3        | 13,3        | 14,0        | 13,1        | 11,9        |
| Cash-Flow-Rendite auf das investierte Kapital (CFROIC) <sup>9</sup>                                                                                       | 14,3        | 14,4        | 14,5        | 14,4        | 16,0        |
| Verschuldungsgrad (Gesamtverschuldung/EBITDA) <sup>11</sup>                                                                                               | 2,4         | 2,5         | 2,7         | 2,8         | 3,2         |
| Verhältnis zwischen Eigen- und Fremdkapital ((Gesamtverschuldung – flüssige Mittel)/Eigenkapital) <sup>1,3</sup>                                          | 0,7         | 0,8         | 0,9         | 1,0         | 1,1         |
| EBITDA/Netto-Zinsergebnis                                                                                                                                 | 8,7         | 7,4         | 6,2         | 5,2         | 4,6         |
| Cash Flow aus laufender Geschäftstätigkeit im Verhältnis zum Umsatz                                                                                       | 11,4        | 11,9        | 9,6         | 12,3        | 10,7        |
| Eigenkapitalquote (Eigenkapital/Gesamtvermögen) <sup>1,3</sup>                                                                                            | 44,0        | 43,0        | 40,0        | 39,3        | 37,3        |
| <b>Dialyседienstleistungen</b>                                                                                                                            |             |             |             |             |             |
| Behandlungen in MIO                                                                                                                                       | 31,7        | 29,4        | 27,9        | 26,4        | 23,7        |
| Patienten                                                                                                                                                 | 214.648     | 195.651     | 184.086     | 173.863     | 163.517     |
| Dialysekliniken                                                                                                                                           | 2.757       | 2.553       | 2.388       | 2.238       | 2.108       |

<sup>3</sup> Die Gesellschaft hat die Anteile anderer Gesellschafter mit Put-Optionen von Eigenkapital in eine Mezzanine-Position in der Bilanz reklassifiziert.

In diesem Zusammenhang wurden die Werte des Eigenkapitals rückwirkend bis ins Jahr 2006 angepasst.

<sup>4</sup> Umlaufvermögen abzüglich kurzfristigem Fremdkapital (ohne Berücksichtigung kurzfristiger Verschuldung und der Rückstellungen für Sonderaufwendungen, die in den Rückstellungen und sonstigen kurzfristigen Verbindlichkeiten enthalten sind).

<sup>5</sup> Standard & Poor's hat das Unternehmensrating auf „BB“ und die nachrangigen Schuldverschreibungen auf „B+“ nach Abschluss der Renal Care Group Akquisition in 2006 gesenkt.

<sup>6</sup> 2007, 2006: Anpassung der Nettoinvestitionen in Sachanlagen durch Herausnahme der Angaben für erworbene immaterielle Vermögenswerte und entsprechender Ausweis unter Erwerb (netto) von Anteilen an verbundenen und assoziierten Unternehmen, Beteiligungen und immateriellen Vermögenswerten sowie Investitionen.

<sup>7</sup> 2010: Vorschlag zur Beschlussfassung durch die Hauptversammlung am 12. Mai 2011.

<sup>8</sup> 2006: EBITDA-Rendite von 19,1% bzw. EBIT-Rendite von 15,5% ohne Restrukturierungsaufwendungen und Abschreibungen von Know-how aus Entwicklungsprojekten, ohne Einmalaufwendungen für den Rechtsformwechsel und dem Gewinn aus Klinikverkäufen.

<sup>9</sup> 2006: Auf pro-forma-Basis inklusive RCG nach Klinikverkäufen, ohne Restrukturierungsaufwendungen und Abschreibungen von Know-how aus Entwicklungsprojekten, ohne Gewinn aus Klinikverkäufen sowie ohne Abschreibung von abgegrenzten Gebühren der Kreditvereinbarung 2003.

<sup>10</sup> Die Eigenkapital-Rendite wird kalkuliert auf der Basis des auf die Anteilseigner der FMC AG & CO. KGAA entfallenden Ergebnisses und der Summe des Eigenkapitals der Anteilseigner der FMC AG & CO. KGAA.

<sup>11</sup> Korrektur um zahlungsunwirksamen Aufwand in Höhe von 44,6 MIO US \$ in 2010, in Höhe von 50,8 MIO US \$ in 2009, in Höhe von 44,4 MIO US \$ in 2008, in Höhe von 40,7 MIO US \$ in 2007, in Höhe von 35,0 MIO US \$ auf pro-forma-Basis inklusive RCG nach Klinikverkäufen, ohne Restrukturierungsaufwendungen und Abschreibungen von Know-how aus Entwicklungsprojekten sowie ohne Gewinn aus Klinikverkäufen in 2006.

# VERZEICHNIS DER TABELLEN IM FINANZBERICHT

Operatives Geschäft  
Kennzahlen — Seite 165

## Kapitel 4

### Darstellung und Analyse

Altersstruktur der Forderungen  
Tabelle 4.1.1 — Seite 173

Altersstruktur der Forderungen  
Tabelle 4.1.2 — Seite 173

Segmentdaten  
Tabelle 4.3.1 — Seite 178

Zentrale Indikatoren für den Konzernabschluss  
Tabelle 4.3.2 — Seite 179

Zentrale Indikatoren für das Segment Nordamerika  
Tabelle 4.3.3 — Seite 181

Zentrale Indikatoren für das Segment International  
Tabelle 4.3.4 — Seite 182

Entwicklung der Forderungslaufzeiten  
Tabelle 4.4.1 — Seite 185

Verfügbare Liquiditätsquellen  
Tabelle 4.4.2 — Seite 188

Vertragliche Zahlungsverpflichtungen  
Tabelle 4.4.3 — Seite 189

Überleitung des EBITDA  
zum Cash Flow aus der laufenden Geschäftstätigkeit  
Tabelle 4.4.4 — Seite 192

Fremdwährungsrisiko  
Tabelle 4.6.1 — Seite 195

Wechselkurse  
Tabelle 4.6.2 — Seite 195

Zinsänderungsrisiko  
Tabelle 4.6.3 — Seite 197

## Kapitel 5

### Konzernabschluss

Konzern-Gewinn- und Verlustrechnung  
Tabelle 5.1.1 — Seite 201

Konzern-Gesamtergebnisrechnung  
Tabelle 5.2.1 — Seite 202

Konzernbilanz  
Tabelle 5.3.1 — Seite 202

Konzernbilanz  
Tabelle 5.3.2 — Seite 203

Konzern-Cash-Flow-Rechnung  
Tabelle 5.4.1 — Seite 204

Konzern-Cash-Flow-Rechnung  
Tabelle 5.4.2 — Seite 205

Konzern-Eigenkapitalveränderungsrechnung  
Tabelle 5.5.1 — Seite 206

Konzern-Eigenkapitalveränderungsrechnung  
Tabelle 5.5.2 — Seite 207

Buchwerte VIEs  
Tabelle 5.6.1 — Seite 209

Vorräte  
Tabelle 5.6.2 — Seite 219

Anschaffungs- und Herstellungskosten  
Tabelle 5.6.3 — Seite 220

Abschreibungen  
Tabelle 5.6.4 — Seite 220

Buchwert  
Tabelle 5.6.5 — Seite 220

Anschaffungs- und Herstellungskosten  
Tabelle 5.6.6 — Seite 221

Abschreibungen  
Tabelle 5.6.7 — Seite 222

Buchwert  
Tabelle 5.6.8 — Seite 223

Erwarteter Abschreibungsaufwand  
Tabelle 5.6.9 — Seite 223

Firmenwerte  
Tabelle 5.6.10 — Seite 224

Rückstellungen und sonstige kurzfristige Verbindlichkeiten  
Tabelle 5.6.11 — Seite 225

Kurzfristige Darlehen  
Tabelle 5.6.12 — Seite 226

Langfristige Verbindlichkeiten  
Tabelle 5.6.13 — Seite 227

Verfügbarer und in Anspruch genommener Kredit  
Tabelle 5.6.14 — Seite 230

Anleihen  
Tabelle 5.6.15 — Seite 230

Verfügbarer und in Anspruch genommener Kredit  
Tabelle 5.6.16 — Seite 231

Jährliche Zahlungen  
Tabelle 5.6.17 — Seite 233

Finanzierungsstatus von leistungsorientierten Pensionsplänen  
Tabelle 5.6.18 — Seite 235

Kumuliertes übriges Comprehensive Income (Loss)  
für Pensionsbewertungen  
Tabelle 5.6.19 — Seite 236

Gewichtete, durchschnittliche Annahmen  
für die Pensionsverpflichtungen  
Tabelle 5.6.20 — Seite 236

Bestandteile des Pensionsaufwands  
Tabelle 5.6.21 — Seite 237

Gewichtete, durchschnittliche Annahmen  
für den Pensionsaufwand  
Tabelle 5.6.22 — Seite 237

Erwartete zukünftige Zahlungen  
Tabelle 5.6.23 — Seite 237

Planvermögen  
Tabelle 5.6.24 — Seite 238

Genussscheinähnliche Wertpapiere  
Tabelle 5.6.25 — Seite 240

Anteile anderer Gesellschafter mit Put-Optionen  
Tabelle 5.6.26 — Seite 241

Überleitung Ergebnis je Aktie vor und bei voller Verwässerung  
Tabelle 5.6.27 — Seite 244

Überleitung der ausstehenden Aktienoptionen  
Tabelle 5.6.28 — Seite 248

Optionen mit erfüllter Wartezeit und ausübbarer Optionen  
Tabelle 5.6.29 — Seite 248

Gewichtete durchschnittliche Annahmen  
Tabelle 5.6.30 — Seite 249

Zusammensetzung des Ergebnisses vor Ertragsteuern  
Tabelle 5.6.31 — Seite 249

Zusammensetzung des Ertragsteueraufwandes (-ertrages)  
Tabelle 5.6.32 — Seite 250

Überleitung vom erwarteten zum tatsächlichen  
Ertragsteueraufwand  
Tabelle 5.6.33 — Seite 250

Bilanzierte aktive und passive latente Steuern nach Sachverhalten  
Tabelle 5.6.34 — Seite 251

Vortragsfähigkeit bestehender Verlustvorträge  
Tabelle 5.6.35 — Seite 252

Unsichere Steuervorteile (ohne Zinsen)  
Tabelle 5.6.36 — Seite 253

Zukünftige Mindestmietzahlungen  
Tabelle 5.6.37 — Seite 254

Buch- und Marktwert nicht-derivativer Finanzinstrumente  
Tabelle 5.6.38 — Seite 261

Bewertung derivative Finanzinstrumente  
Tabelle 5.6.39 — Seite 264

Einfluss der Derivate auf die Gesamtergebnisrechnung  
Tabelle 5.6.40 — Seite 265

Einfluss der Derivate auf die Gesamtergebnisrechnung  
Tabelle 5.6.41 — Seite 265

Übriges Comprehensive Income (Loss)  
Tabelle 5.6.42 — Seite 266

Segment-Berichterstattung  
Tabelle 5.6.43 — Seite 267

Geographische Aufteilung  
Tabelle 5.6.44 — Seite 268

Zusätzliche Angaben zur Konzern-Cash-Flow-Rechnung  
Tabelle 5.6.45 — Seite 268

## Kapitel 6 Weitere Informationen

Regionale Organisation  
Tabelle 6.2.1 — Seite 277

Wesentliche Beteiligungen 2010  
Tabelle 6.3.1 — Seite 278

Fünf-Jahres-Übersicht  
Tabelle 6.4.1 — Seite 280

## STICHWORTVERZEICHNIS IM FINANZBERICHT

### A

Abschreibung — Seite 221  
Akquisition — Seite 187, 232  
Aktienoption — Seite 243, 245

### B

Bestätigungsvermerk — Seite 272  
Bilanz — Seite 202

### C

Cash Flow — Seite 184, 204, 268

### D

Derivative Finanzinstrumente — Seite 211, 261  
Dividende — Seite 243

### E

EBIT (Ergebnis vor Zinsen und Ertragsteuern) — Seite 178  
EBITDA (Ergebnis vor Zinsen, Ertragsteuern und Abschreibungen) — Seite 192  
Eigenkapital — Seite 206, 242  
Ergebnis je Aktie — Seite 214, 244  
Ertragsteuern — Seite 249

### F

Finanzinstrumente — Seite 211, 260  
Finanz- und Ertragslage — Seite 174  
Firmenwert/Goodwill — Seite 169, 210, 221

### G

Genussscheinähnliche Wertpapiere — Seite 240  
Gewinn- und Verlustrechnung — Seite 201

### I

Investition — Seite 187

### K

Konzernabschluss — Seite 179, 201  
Konzernergebnis — Seite 178, 201

### L

Leasing — Seite 210, 220, 227, 254  
Liquidität und Mittelherkunft — Seite 184

### M

Marktrisiken — Seite 193

### O

Operative Entwicklung — Seite 178

### P

Pension — Seite 215, 233

### S

Sachanlagen — Seite 220  
Segment-Berichterstattung — Seite 178, 266

### U

Übriges Comprehensive Income (Loss) — Seite 266  
Umsatz — Seite 178, 212

### V

Verbindlichkeiten — Seite 225  
Vorräte — Seite 210, 219

## KONTAKTE

### Fresenius Medical Care

61346 Bad Homburg v.d.H.  
Tel. + 49 6172 609 0  
[www.fmc-ag.de](http://www.fmc-ag.de)

### Investor Relations

#### Oliver Maier

Leiter Investor Relations &  
Corporate Communications  
Tel. + 49 6172 609 25 25  
Fax + 49 6172 609 23 01  
E-Mail: [ir@fmc-ag.de](mailto:ir@fmc-ag.de)

#### Gerrit Jost

Tel. + 49 6172 609 25 25  
Fax + 49 6172 609 23 01  
E-Mail: [ir@fmc-ag.de](mailto:ir@fmc-ag.de)

### Nordamerika

### Investor Relations

#### Terry L. Morris

Tel. + 1 800 948 25 38  
Fax + 1 615 345 56 05  
E-Mail: [ir@fmc-ag.de](mailto:ir@fmc-ag.de)

### Transfer Agent

#### The Bank of New York Mellon

P.O. Box 358516  
Pittsburgh, PA 15252-8516, USA  
Tel. + 1 866 246 71 90  
(gebührenfrei in den USA)  
Tel. + 1 201 680 68 25 (International)  
E-Mail: [shrrelations@bnymellon.com](mailto:shrrelations@bnymellon.com)  
[www.bnymellon.com/shareowner](http://www.bnymellon.com/shareowner)

## Kapitel 6.8

## IMPRESSUM

Änderungen vorbehalten.

Dieser Geschäftsbericht erscheint auch in  
englischer Sprache und ist auf Anfrage erhältlich.

Die Geschäftsberichte, Zwischenberichte sowie weitere Informationen  
zum Unternehmen sind auch auf unserer Internetseite abrufbar:  
[www.fmc-ag.de](http://www.fmc-ag.de).

Gedruckte Exemplare des Geschäftsberichts können Sie im Internet,  
telefonisch oder schriftlich bei Investor Relations bestellen.

Herausgeber: Fresenius Medical Care AG & Co. KGaA

Redaktion: Investor Relations

Redaktionsschluss: 11. März 2011

Konzeption und Gestaltung: häfelinger + wagner design, München

Fotografie: Matthias Ziegler, David Maupilé (Magazin Seite 26–39)

Lektorat: Textpertise, Heike Virchow

Produktion: Eberl Print GmbH, Immenstadt i. Allgäu

Dieser Geschäftsbericht enthält zukunftsbezogene Aussagen,  
die auf Planungen, Prognosen und Schätzungen basieren und gewissen Risiken  
und Unsicherheiten unterliegen. Sollten die den Angaben zugrunde  
gelegten Annahmen nicht eintreffen oder Risiken – wie auch in den bei der sec  
eingereichten Unterlagen angegeben – eintreten, so können die tatsächlichen  
Ergebnisse von den zum Zeitpunkt der Erstellung dieses Geschäftsberichts  
erwarteten abweichen. Wir übernehmen keinerlei Verpflichtung zur Aktualisierung  
zukunftsbezogener Aussagen.

Titel, Text und Abbildungen sind urheberrechtlich geschützt.  
Nachdruck, auch auszugsweise, nur mit vorheriger schriftlicher Zustimmung  
von Fresenius Medical Care AG & Co. KGaA.

Fresenius Medical Care AG & Co. KGaA

Sitz und Handelsregister: Hof an der Saale, HRB 4019

Aufsichtsratsvorsitzender: Dr. Gerd Krick

Persönlich haftender Gesellschafter:

Fresenius Medical Care Management AG

Sitz und Handelsregister: Hof an der Saale, HRB 3894

Vorstand: Dr. Ben J. Lipps (Vorsitzender), Roberto Fusté, Dr. Emanuele Gatti,

Rice Powell, Michael Brosnan, Dr. Rainer Runte, Kent Wanzek

Aufsichtsratsvorsitzender: Dr. Ulf M. Schneider

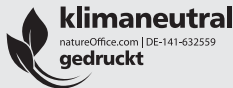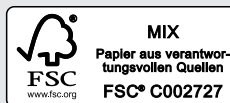

*Die Herstellung und das Papier des Geschäftsberichts 2010 von Fresenius Medical Care  
sind zertifiziert nach den Kriterien des Forest Stewardship Councils (FSC®). Der FSC® schreibt strenge  
Kriterien bei der Waldbewirtschaftung vor und vermeidet damit unkontrollierte Abholzung,  
Verletzung der Menschenrechte und Belastung der Umwelt.*

*Da die Produkte mit FSC®-Siegel verschiedene Stufen des Handels und der Verarbeitung durchlaufen,  
werden auch Verarbeitungsbetriebe von Papier, z.B. Druckereien, nach den Regeln des FSC® zertifiziert.*

*Des Weiteren wurde der Geschäftsbericht 2010 klimaneutral hergestellt.*

*Das bedeutet, dass die CO<sub>2</sub>-Emissionen, die durch die Produktion entstanden sind,  
über zertifizierte Klimaschutzprojekte ausgeglichen wurden.*

## FINANZKALENDER

### 4. MAI

Veröffentlichung zum  
1. Quartal 2011

### 12. MAI

Hauptversammlung  
*Frankfurt am Main*

### 13. MAI

Dividendenzahlung  
*Vorbehaltlich der Zustimmung durch  
die Hauptversammlung*

### 2. AUGUST

Veröffentlichung zum  
2. Quartal 2011

### 2. NOVEMBER

Veröffentlichung zum  
3. Quartal 2011

## WICHTIGE MESSEN

### 23.–26. JUNI

ERA-EDTA Kongress  
(European Renal Association –  
European Dialysis and Transplant Association)  
*Prag, Tschechien*

### 10.–13. SEPTEMBER

EDTNA Kongress  
(European Dialysis and  
Transplant Nurses Association)  
*Ljubljana, Slowenien*

### 21.–24. OKTOBER

EuroPD Kongress  
(10<sup>th</sup> European Peritoneal Dialysis Meeting)  
*Birmingham, England*

### 8.–13. NOVEMBER

Annual Meeting of the ASN  
(American Society of Nephrology)  
*Philadelphia, Pennsylvania, USA*
