# Supplementary material
Source: publisher site journal article supplement (https://www.degruyterbrill.com/publication/isbn/9783110432879/downloadAsset/9783110432879_Elektronischer_Anhang_2.zip)
Supplement: Supplementary file 50 [file Fresenius Medical Care Kurzprofil 2010.pdf › Korpustexte/Korpustexte pdf/Fresenius Medical Care/Fresenius Medical Care Kurzprofil 2010.pdf]

— FRESENIUS MEDICAL CARE —  
*Kurzprofil 2010*

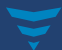

**FRESENIUS  
MEDICAL CARE**



# ZUKUNFT LEBENSWEERT GESTALTEN

Für Menschen. Weltweit. Jeden Tag.  
Mehr als drei Jahrzehnte Erfahrung in der Dialyse,  
zukunftsweisende Forschung, Weltmarktführer  
bei Dialysetherapien und Dialyseprodukten –  
das ist Fresenius Medical Care.

Dank unserer innovativen Technologien und  
Behandlungskonzepte können nierenkranke Patienten  
heute mit deutlich mehr Zuversicht nach  
vorn schauen. Wir geben ihnen eine Zukunft  
mit höchstmöglicher Lebensqualität.

Als vertikal integriertes Unternehmen  
bedienen wir die gesamte Wertschöpfungskette  
in der Dialyse. Die steigende Nachfrage nach modernen  
Dialyseverfahren nutzen wir und arbeiten konsequent  
am weiteren Wachstum des Unternehmens.  
Unsere Strategien zum Erhalt und Ausbau unserer  
Technologieführerschaft setzen wir zielorientiert um.

Unser Maßstab sind medizinische Standards  
auf höchstem Niveau. Wir tragen mit diesem  
Engagement Verantwortung für unsere Patienten,  
aber auch für unsere Partner im Gesundheitssystem und  
für unsere Investoren, die auf die Zukunfts- und Ertrags-  
sicherheit von Fresenius Medical Care vertrauen.

## OPERATIVES GESCHÄFT

in MIO US \$

Tabelle 1

|                                                                | 2010   | 2009   | Veränderung |
|----------------------------------------------------------------|--------|--------|-------------|
| <b>Ausgewählte Kennzahlen</b>                                  |        |        |             |
| Umsatz                                                         | 12.053 | 11.247 | 7 %         |
| Ergebnis vor Zinsen, Ertragsteuern und Abschreibungen (EBITDA) | 2.427  | 2.213  | 10 %        |
| Ergebnis vor Zinsen und Ertragsteuern (EBIT)                   | 1.924  | 1.756  | 10 %        |
| Konzernergebnis <sup>1</sup>                                   | 979    | 891    | 10 %        |
| Operativer Cash Flow                                           | 1.368  | 1.339  | 2 %         |
| Free Cash Flow <sup>2</sup>                                    | 861    | 777    | 11 %        |
| Investitionen, netto                                           | 507    | 562    | -10 %       |
| Akquisitionen, netto                                           | 618    | 136    | 354 %       |
| Ergebnis je Stammaktie in US \$                                | 3,25   | 2,99   | 9 %         |
| Dividende je Stammaktie <sup>3</sup> in €                      | 0,65   | 0,61   | 7 %         |
| EBIT-Marge in %                                                | 16,0   | 15,6   | -           |
| Return on invested capital (ROIC) in %                         | 8,8    | 8,5    | -           |
| Eigenkapitalquote in %                                         | 44,0   | 43,0   | -           |

<sup>1</sup> Ergebnis, das auf die Anteilseigner der Fresenius Medical Care AG & Co. KGaA entfällt.

<sup>2</sup> Vor Akquisitionen und Dividenden.

<sup>3</sup> 2010: Vorschlag zur Beschlussfassung durch die Hauptversammlung am 12. Mai 2011.

## UMSATZ NACH REGIONEN

Grafik 2

Gesamt: 12.053 MIO US \$

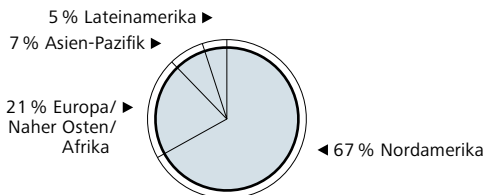

## UMSATZ NACH SEGMENTEN

Grafik 3

Nordamerika

Gesamt: 8.130 MIO US \$

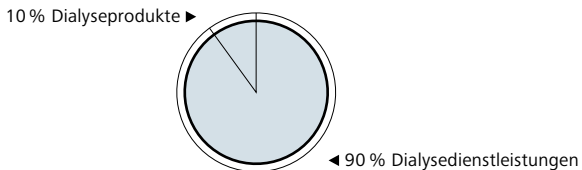

International

Gesamt: 3.923 MIO US \$

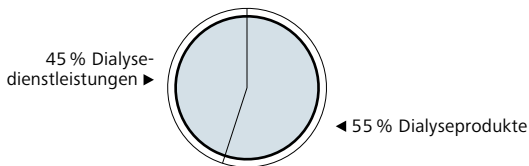

**FRESENIUS MEDICAL CARE:  
PATIENTEN WELTWEIT**

Grafik 4

Patienten

Gesamt: 214.648

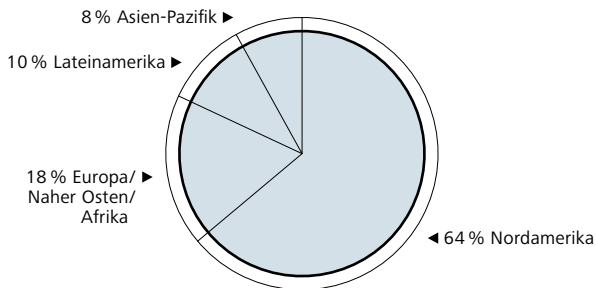

**FRESENIUS MEDICAL CARE:  
KLINIKEN WELTWEIT**

Tabelle 5

Anzahl

|                           | 2010         | 2009         | Veränderung |
|---------------------------|--------------|--------------|-------------|
| Nordamerika               | 1.823        | 1.784        | 2 %         |
| Europa/Naher Osten/Afrika | 499          | 435          | 15 %        |
| Lateinamerika             | 193          | 191          | 1 %         |
| Asien-Pazifik             | 242          | 143          | 69 %        |
| <b>GESAMT</b>             | <b>2.757</b> | <b>2.553</b> | <b>8 %</b>  |

## DIALYSEDIENSTLEISTUNGEN

### WELTWEIT 2010

Grafik 6

Patienten

Gesamt: 2,029 MIO

| Region               | Unternehmen                   | Patienten (MIO) |
|----------------------|-------------------------------|-----------------|
| <b>Nordamerika</b>   | <b>Fresenius Medical Care</b> | <b>137.689</b>  |
|                      | DaVita                        | 125.000         |
|                      | Dialysis Clinics Inc.         | 13.500          |
| <b>Europa</b>        | <b>Fresenius Medical Care</b> | <b>38.061</b>   |
|                      | Kuratorium für Heimdialyse    | 18.500          |
|                      | Diaverum                      | 13.000          |
| <b>Asien-Pazifik</b> | <b>Fresenius Medical Care</b> | <b>16.427</b>   |
|                      | Showai-Kai                    | 7.200           |
|                      | Zenjin-Kai                    | 4.200           |
| <b>Lateinamerika</b> | <b>Fresenius Medical Care</b> | <b>22.471</b>   |
|                      | Baxter                        | 8.400           |
|                      | Diaverum                      | 3.500           |

Quelle: Basierend auf Unternehmensangaben und Schätzungen.

## MARKTPosition BEI WESENTLICHEN PRODUKTGRUPPEN 2010

Tabelle 7

|                                    | Position 1             | Position 2             | Position 3 |
|------------------------------------|------------------------|------------------------|------------|
| Dialysatoren                       | Fresenius Medical Care | Gambro                 | Nipro      |
| Dialysemaschinen                   | Fresenius Medical Care | Gambro                 | Nikkiso    |
| Konzentrate für die Hämodialyse    | Fresenius Medical Care | Fuso                   | Gambro     |
| Blutschlauchsysteme                | Fresenius Medical Care | Gambro                 | Kawasumi   |
| Produkte für die Peritonealdialyse | Baxter                 | Fresenius Medical Care | Gambro     |

Quelle: Basierend auf Unternehmensangaben und Schätzungen.

## WESENTLICHE STANDORTE

Grafik 8

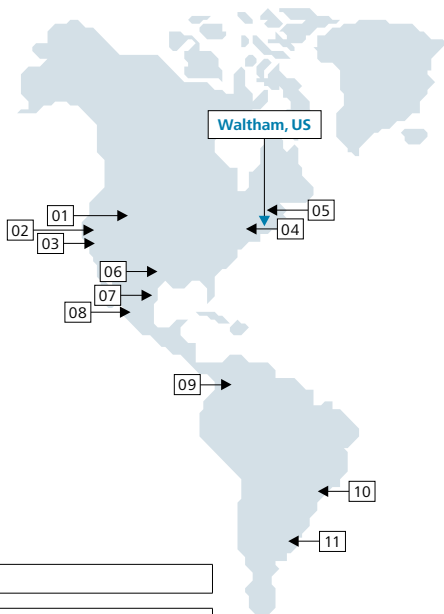

Amerika

Waltham, US Niederlassung Nordamerika

01 Ogden, US Dialysatoren

02 Walnut Creek, US Dialysemaschinen

03 Toledo, US Hämodialyse-Konzentrate

04 Livingston, US Hämodialyse-Konzentrate

05 Montreal, CA Hämodialyse-Konzentrate

06 Irving, US Hämodialyse-Konzentrate

07 Reynosa, MX Blutschlauchsysteme

08 Guadalajara, MX Dialyselösungen

09 Santafé de Bogotá, CO Dialyselösungen

10 Jaguariúna, BR Dialysemaschinen

11 Pilar, AR Hämodialyse-Konzentrate



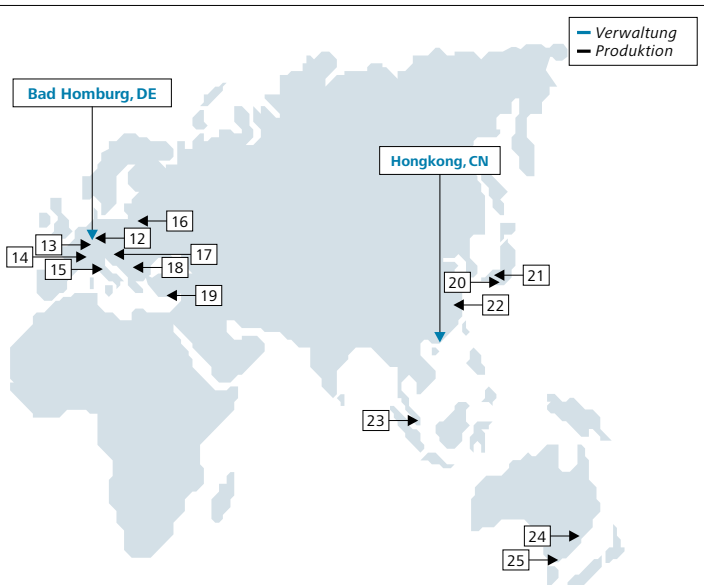

### Europa

#### Bad Homburg, DE Konzernzentrale

12 Schweinfurt, DE Dialysemaschinen

13 St. Wendel, DE Dialysatoren

14 L'Arbresle, FR  
Dialysatoren & Dialyselösungen

15 Cremona, IT Blutschlauchsysteme

16 Borisov, BY  
Dialysatoren & Blutschlauchsysteme

17 Krems, AT Adsorber

18 Vrsac, SRB Dialysatoren & Dialyselösungen

19 Antalya, TR Adsorber

### Asien-Pazifik

#### Hongkong, CN Niederlassung Asien-Pazifik

20 Inukai, JP Dialysatoren

21 Buzen, JP Dialysatoren

22 Jiangsu, CN Blutschlauchsysteme

23 Coremed, MY Dialysatoren

24 Smithfield, AU Hämodialyse-Konzentrate

25 Victoria, AU Dialysetühle

**73.452**

Mitarbeiter weltweit

**MEHR ALS 40**

Produktionsstätten weltweit

**214.648**

Patienten weltweit

**2.757**

Kliniken weltweit

**RUND 31,7 MILLIONEN**

Dialysebehandlungen weltweit

Fresenius Medical Care ist der weltweit führende Anbieter von Produkten und Dienstleistungen für Menschen mit chronischem Nierenversagen, von denen sich weltweit mehr als zwei Millionen Patienten regelmäßig einer Dialysebehandlung unterziehen.

Fresenius Medical Care ist zudem der weltweit führende Anbieter von Dialyseprodukten wie Hämodialyse-Geräten, Dialysatoren und damit verbundenen Einweg-Produkten. Fresenius Medical Care ist an der Börse Frankfurt (FME, FME3) und an der Börse New York (FMS, FMS/P) notiert.

## 4. MAI

Veröffentlichung zum 1. Quartal 2011

## 12. MAI

Hauptversammlung  
*Frankfurt am Main*

## 13. MAI

Dividendenzahlung  
*vorbehaltlich der Zustimmung  
durch die Hauptversammlung*

## 2. AUGUST

Veröffentlichung zum 2. Quartal 2011

## 2. NOVEMBER

Veröffentlichung zum 3. Quartal 2011

### Impressum

*Änderungen vorbehalten*

*Fresenius Medical Care AG & Co. KGaA*

*Sitz und Handelsregister: Hof an der Saale, HRB 4019*

*Aufsichtsratsvorsitzender: Dr. Gerd Krick*

*Persönlich haftende Gesellschafterin:*

*Fresenius Medical Care Management AG*

*Sitz und Handelsregister: Hof an der Saale, HRB 3894*

*Vorstand: Dr. Ben J. Lipps (Vorsitzender), Roberto Fusté,*

*Dr. Emanuele Gatti, Rice Powell, Michael Brosnan,*

*Dr. Rainer Runte, Kent Wanzek*

*Aufsichtsratsvorsitzender: Dr. Ulf M. Schneider*

---
