# Supplementary material
Source: publisher site journal article supplement (https://www.degruyterbrill.com/publication/isbn/9783110432879/downloadAsset/9783110432879_Elektronischer_Anhang_2.zip)
Supplement: Supplementary file 51 [file Fresenius Medical Care Unsere Vision.pdf › Korpustexte/Korpustexte pdf/Fresenius Medical Care/Fresenius Medical Care Unsere Vision.pdf]

## Unsere Vision

### **Zukunft lebenswert gestalten. Für Dialysepatienten. Weltweit. Jeden Tag.**

Mehr als drei Jahrzehnte Erfahrung in der Dialyse, zukunftsweisende Forschung, Weltmarktführer bei Dialysetherapien und Dialyseprodukten – dafür steht Fresenius Medical Care.

Dank unserer innovativen Technologien und Behandlungskonzepte können nierenkranke Patienten heute mit deutlich mehr Zuversicht nach vorn schauen. Wir geben ihnen eine Zukunft. Eine Zukunft mit höchstmöglicher Lebensqualität. Die steigende Nachfrage nach modernen Dialyseverfahren nutzen wir und arbeiten konsequent am Wachstum des Unternehmens. Mit unseren Mitarbeitern setzen wir unsere Strategien für die Technologieführerschaft zielorientiert um. Dabei bedienen wir als vertikal integriertes Unternehmen die gesamte Wertschöpfungskette in der Dialyse.

Unser Maßstab sind medizinische Standards auf höchstem Niveau. Wir tragen mit diesem Engagement gleichermaßen Verantwortung für unsere Patienten, Partner im Gesundheitssystem und Investoren, die auf die Zukunfts- und Ertragssicherheit von Fresenius Medical Care vertrauen.
