# Supplementary material
Source: publisher site journal article supplement (https://www.degruyterbrill.com/publication/isbn/9783110432879/downloadAsset/9783110432879_Elektronischer_Anhang_2.zip)
Supplement: Supplementary file 52 [file Fresenius Auf einen Blick 2010.pdf › Korpustexte/Korpustexte pdf/Fresenius/Fresenius Auf einen Blick 2010.pdf]

# Qualität und Fortschritt ...

Fresenius ist ein Gesundheitskonzern mit Produkten und Dienstleistungen für die Dialyse, das Krankenhaus und die medizinische Versorgung von Patienten zuhause. Weitere Arbeitsfelder sind die Krankenhaus-Trägerschaft sowie Engineering- und Dienstleistungen für Krankenhäuser und andere Gesundheitseinrichtungen. Mehr als 130.000 Mitarbeiterinnen und Mitarbeiter engagieren sich in rund 100 Ländern im Dienste der Gesundheit.

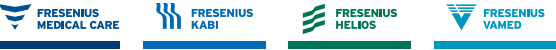

## UMSATZ NACH UNTERNEHMENSBEREICHEN

| in Mio. €              | 2009  | 2008  | Veränderung |
|------------------------|-------|-------|-------------|
| Fresenius Medical Care | 8.064 | 7.213 | 12 %        |
| Fresenius Kabi         | 3.086 | 2.495 | 24 %        |
| Fresenius Helios       | 2.416 | 2.123 | 14 %        |
| Fresenius Vamed        | 618   | 524   | 18 %        |

# ... für unsere Patienten

Fresenius ist global präsent und bietet eine umfassende Produkt- und Dienstleistungspalette. Unsere Wachstumschancen sehen wir vor allem in der Weiterentwicklung unserer Produkte und Dienstleistungen, in der Qualitätssteigerung, im medizinischen Fortschritt und in unserer internationalen Expansion. Auch in Zukunft wollen wir dazu beitragen, die Lebensqualität unserer Patienten zu verbessern.

## KONZERNZAHLEN

| in Mio. €                      | 2009             | 2008                | 2007           |
|--------------------------------|------------------|---------------------|----------------|
| <b>Ergebnis</b>                |                  |                     |                |
| Umsatz                         | 14.164           | 12.336              | 11.358         |
| EBIT                           | 2.054            | 1.727 <sup>1</sup>  | 1.609          |
| EBIT-Marge                     | 14,5 %           | 14,0 % <sup>1</sup> | 14,2 %         |
| Konzernergebnis <sup>2</sup>   | 514 <sup>1</sup> | 450 <sup>1</sup>    | 410            |
| Operativer Cashflow            | 1.553            | 1.074               | 1.296          |
| <b>Bilanz</b>                  |                  |                     |                |
| Bilanzsumme                    | 20.882           | 20.544              | 15.324         |
| Eigenkapitalquote <sup>3</sup> | 37 %             | 34 %                | 40 %           |
| Akquisitionen                  | 260              | 3.853               | 618            |
| Investitionen <sup>4</sup>     | 671              | 764                 | 700            |
| <b>Mitarbeiter (31.12.)</b>    | <b>130.510</b>   | <b>122.217</b>      | <b>114.181</b> |

<sup>1</sup> 2008 vor Sondereinflüssen aus der APP-Akquisition; 2009 vor Sondereinflüssen aus den Marktwertveränderungen der Pflichtumtauschleihe (MEB) und des Besserungsscheins (CVR).  
<sup>2</sup> Ergebnis, das auf die Anteilseigner der Fresenius SE entfällt.  
<sup>3</sup> Eigenkapital inklusive Anteilen anderer Gesellschafter am Eigenkapital.  
<sup>4</sup> Investitionen in Sachanlagen, immaterielle Vermögenswerte.

## KENNDATEN DER FRESENIUS-AKTIEN

|                                   | 2009              | 2008              | 2007        |
|-----------------------------------|-------------------|-------------------|-------------|
| Anzahl der Aktien                 | 161.315.376       | 161.143.734       | 155.164.770 |
| Marktkapitalisierung <sup>1</sup> | 7.538             | 6.270             | 8.759       |
| Je Aktie in €                     |                   |                   |             |
| Dividende Stammaktie              | 0,75              | 0,70              | 0,66        |
| Dividende Vorzugsaktie            | 0,76              | 0,71              | 0,67        |
| Ergebnis Stammaktie               | 3,18 <sup>2</sup> | 2,85 <sup>3</sup> | 2,64        |
| Ergebnis Vorzugsaktie             | 3,19 <sup>2</sup> | 2,86 <sup>3</sup> | 2,65        |

<sup>1</sup> In Mio. €; Gesamtzahl der Stamm- und Vorzugsaktien, multipliziert mit dem jeweiligen Xetra-Jahresschlusskurs an der Frankfurter Wertpapierbörse.  
<sup>2</sup> Bereinigt um die Sondereinflüsse aus den Marktwertveränderungen der Pflichtumtauschleihe (MEB) und des Besserungsscheins (CVR) im Zusammenhang mit der Akquisition von APP Pharmaceuticals.  
<sup>3</sup> Vor Sondereinflüssen aus der APP-Akquisition.

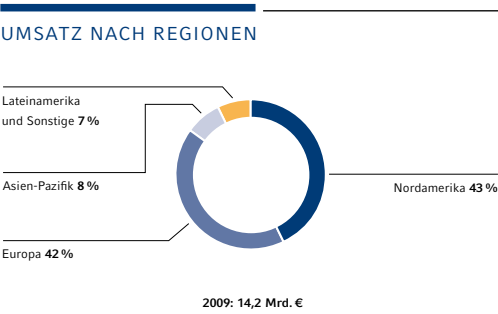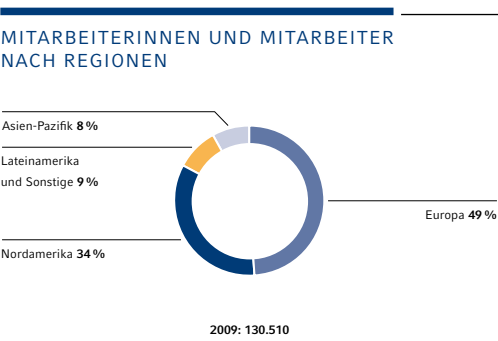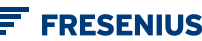

**Konzernzentrale**  
Fresenius SE  
Else-Kröner-Straße 1  
Bad Homburg

**Postanschrift**  
Fresenius SE  
61346 Bad Homburg

[www.fresenius.de](http://www.fresenius.de)

**Kontakt für Aktionäre**  
Investor Relations  
T +49 6172 608-2637  
F +49 6172 608-2488  
[ir-fre@fresenius.com](mailto:ir-fre@fresenius.com)

**Kontakt für Presse**  
Konzern-Kommunikation  
T +49 6172 608-2302  
F +49 6172 608-2294  
[pr-fre@fresenius.com](mailto:pr-fre@fresenius.com)

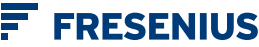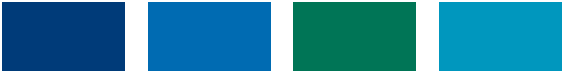

# Qualität und Fortschritt

Auf einen Blick 2010

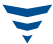

FRESENIUS  
MEDICAL CARE

DIALYSEPRODUKTE,  
DIALYSEDIENSTLEISTUNGEN

Fresenius Medical Care ist der weltweit führende Anbieter von **Dialyседienstleistungen** und **Dialyseprodukten** für Menschen mit chronischem Nierenversagen. Mehr als 1,89 Millionen Nierenkranke müssen sich regelmäßig einer Dialysebehandlung unterziehen. In über 2.550 Dialysekliniken in Nordamerika, Europa, Lateinamerika, Asien-Pazifik und Afrika betreut Fresenius Medical Care mehr als 195.000 Dialysepatienten (Stand 31.12.2009). Das Unternehmen bietet außerdem Produkte für die **Hämodialyse** und die **Peritonealdialyse** wie Dialysegeräte, Dialysatoren und damit verbundene Einweg-Produkte an. Weitere Informationen unter [www.fmc-ag.de](http://www.fmc-ag.de).

KENNZAHLEN

|                              | 2009<br>in Mio. US\$ | 2008<br>in Mio. US\$ | Veränderung |
|------------------------------|----------------------|----------------------|-------------|
| Umsatz                       | 11.247               | 10.612               | 6 %         |
| EBIT                         | 1.756                | 1.672                | 5 %         |
| Konzernergebnis <sup>1</sup> | 891                  | 818                  | 9 %         |
| Operativer Cashflow          | 1.339                | 1.016                | 32 %        |
| Investitionen/Akquisitionen  | 766                  | 1.011                | -24 %       |
| F & E-Aufwand                | 94                   | 80                   | 18 %        |
| Mitarbeiter (31.12.)         | 71.617               | 68.050               | 5 %         |

<sup>1</sup> Ergebnis, das auf die Anteilseigner der Fresenius Medical Care AG & Co. KGaA entfällt.

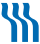

FRESENIUS  
KABI

INFUSIONSTHERAPIE, I.V.-ARZNEIMITTEL,  
KLINISCHE ERNÄHRUNG,  
MEDIZINTECHNISCHE PRODUKTE/  
TRANSFUSIONSTECHNOLOGIE

Fresenius Kabi ist Marktführer in der **Infusionstherapie** und in der **klinischen Ernährung** in Europa und hält führende Positionen in den für das Unternehmen wichtigsten Ländern Lateinamerikas und der Region Asien-Pazifik. Im Bereich der **intravenös zu verabreichenden generischen Arzneimittel** (I.V.-Arzneimittel) zählt Fresenius Kabi zu den führenden globalen Anbietern. Das Unternehmen ist spezialisiert auf die Therapie und Versorgung von chronisch und kritisch Kranken innerhalb und außerhalb des Krankenhauses. Dafür bietet Fresenius Kabi Infusionslösungen, Blutvolumenersatzlösungen, I.V.-Arzneimittel, parenterale und enterale Ernährungsprodukte sowie die dazugehörigen medizintechnischen Produkte zur Applikation an. Ferner stellt das Unternehmen im Bereich der Transfusionstechnologie Produkte für Blutbanken und Blutspendedienste her.

KENNZAHLEN

|                              | 2009<br>in Mio. € | 2008<br>in Mio. € | Veränderung |
|------------------------------|-------------------|-------------------|-------------|
| Umsatz                       | 3.086             | 2.495             | 24 %        |
| EBIT                         | 607               | 443               | 37 %        |
| Konzernergebnis <sup>1</sup> | 200               | 200               | 0 %         |
| Operativer Cashflow          | 397               | 205               | 94 %        |
| Investitionen/Akquisitionen  | 157               | 3.749             | -96 %       |
| F & E-Aufwand                | 129               | 109               | 18 %        |
| Mitarbeiter (31.12.)         | 21.872            | 20.457            | 7 %         |

<sup>1</sup> Ergebnis, das auf die Anteilseigner der Fresenius Kabi AG entfällt.

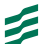

FRESENIUS  
HELIOS

KRANKENHAUS-TRÄGERSCHAFT

Fresenius Helios betreibt insgesamt 61 eigene Kliniken mit mehr als 18.500 Betten, darunter fünf Maximalversorger in Berlin-Buch, Erfurt, Krefeld, Schwerin und Wuppertal. Neben den 42 Akutkrankenhäusern gehören zur HELIOS-Gruppe auch 19 Kliniken für Rehabilitationsmedizin. Damit nimmt Fresenius Helios im deutschen Klinikmarkt eine **führende Position** bei der **Privatisierung von Krankenhäusern** ein. Fresenius Helios ist einer der größten privaten Anbieter von stationärer und ambulanter Patientenversorgung in Deutschland. Ziel ist es, höchste medizinische und pflegerische Qualität innerhalb des gesamten Versorgungsspektrums anzubieten. Über 33.000 Mitarbeiter versorgen jährlich rund 600.000 Patienten stationär und mehr als 1,6 Millionen Patienten ambulant.

KENNZAHLEN

|                              | 2009<br>in Mio. € | 2008<br>in Mio. € | Veränderung |
|------------------------------|-------------------|-------------------|-------------|
| Umsatz                       | 2.416             | 2.123             | 14 %        |
| EBIT                         | 205               | 175               | 17 %        |
| Konzernergebnis <sup>1</sup> | 107               | 80                | 34 %        |
| Operativer Cashflow          | 219               | 225               | -3 %        |
| Investitionen/Akquisitionen  | 203               | 140               | 45 %        |
| Mitarbeiter (31.12.)         | 33.364            | 30.088            | 11 %        |

<sup>1</sup> Ergebnis, das auf die Anteilseigner der HELIOS Kliniken GmbH entfällt.

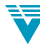

FRESENIUS  
VAMED

ENGINEERING- UND DIENSTLEISTUNGEN  
FÜR KRANKENHÄUSER UND  
ANDERE GESUNDHEITSEINRICHTUNGEN

Fresenius Vamed ist ein weltweit führender Anbieter im Bereich der **Planung, Errichtung** und des **Managements von Gesundheitseinrichtungen**. Das Portfolio reicht von der Projektentwicklung sowie der Planung und der schlüsselfertigen Errichtung über das Facility Management bis hin zur Gesamtbetriebsführung. Die VAMED AG mit Sitz in Wien, Österreich, hat seit ihrer Gründung 1982 in über 50 Ländern rund 500 Gesundheitsprojekte realisiert. Entsprechend ihrer Philosophie „Alles aus einer Hand“ ist die VAMED-Gruppe ein kompetenter Partner im Gesundheitswesen.

KENNZAHLEN

|                              | 2009<br>in Mio. € | 2008<br>in Mio. € | Veränderung |
|------------------------------|-------------------|-------------------|-------------|
| Umsatz                       | 618               | 524               | 18 %        |
| EBIT                         | 36                | 30                | 20 %        |
| Konzernergebnis <sup>1</sup> | 27                | 26                | 4 %         |
| Operativer Cashflow          | 29                | 27                | 7 %         |
| Investitionen/Akquisitionen  | 7                 | 39                | -82 %       |
| Auftragseingang              | 539               | 425               | 27 %        |
| Mitarbeiter (31.12.)         | 2.849             | 2.802             | 2 %         |

<sup>1</sup> Ergebnis, das auf die Anteilseigner der VAMED AG entfällt.
