# Supplementary material
Source: publisher site journal article supplement (https://www.degruyterbrill.com/publication/isbn/9783110432879/downloadAsset/9783110432879_Elektronischer_Anhang_2.zip)
Supplement: Supplementary file 53 [file Fresenius Auf einen Blick 2011.pdf › Korpustexte/Korpustexte pdf/Fresenius/Fresenius Auf einen Blick 2011.pdf]

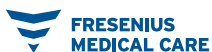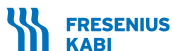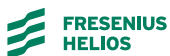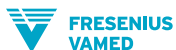

# Das Beste erreichen ...

Fresenius ist ein weltweit tätiger Gesundheitskonzern mit Produkten und Dienstleistungen für die Dialyse, das Krankenhaus und die medizinische Versorgung von Patienten zuhause. Weitere Arbeitsfelder sind das Krankenhaus-Management sowie Engineering- und Dienstleistungen für Krankenhäuser und andere Gesundheitseinrichtungen. Mehr als 137.000 Mitarbeiterinnen und Mitarbeiter arbeiten in rund 100 Ländern engagiert im Dienste der Gesundheit.

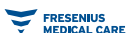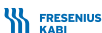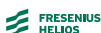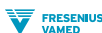

## UMSATZ NACH UNTERNEHMENSBEREICHEN

| in Mio. €              | 2010  | 2009  | Veränderung |
|------------------------|-------|-------|-------------|
| Fresenius Medical Care | 9.091 | 8.064 | 13 %        |
| Fresenius Kabi         | 3.672 | 3.086 | 19 %        |
| Fresenius Helios       | 2.520 | 2.416 | 4 %         |
| Fresenius Vamed        | 713   | 618   | 15 %        |

## ... für unsere Patienten

Wachstumschancen für die Zukunft sehen wir in der Weiterentwicklung unserer Produkte und Dienstleistungen, in konsequenter Qualitätssteigerung und in fortgesetzter internationaler Expansion. Den Bestrebungen im Gesundheitswesen, Kosten zu sparen, werden wir mit medizinischer Innovation und gleichzeitig mit Effizienzsteigerungen begegnen. Auch in Zukunft wollen wir dazu beitragen, die Lebensqualität von Patienten weltweit zu verbessern.

## KONZERNZAHLEN

| in Mio. €                      | 2010                   | 2009             | 2008                |
|--------------------------------|------------------------|------------------|---------------------|
| <b>Ergebnis</b>                |                        |                  |                     |
| Umsatz                         | <b>15.972</b>          | 14.164           | 12.336              |
| EBIT                           | <b>2.418</b>           | 2.054            | 1.727 <sup>1</sup>  |
| EBIT-Marge                     | <b>15,1 %</b>          | 14,5 %           | 14,0 % <sup>1</sup> |
| Konzernergebnis <sup>2</sup>   | <b>660<sup>1</sup></b> | 514 <sup>1</sup> | 450 <sup>1</sup>    |
| Operativer Cashflow            | <b>1.911</b>           | 1.553            | 1.074               |
| <b>Bilanz</b>                  |                        |                  |                     |
| Bilanzsumme                    | <b>23.577</b>          | 20.882           | 20.544              |
| Eigenkapitalquote <sup>3</sup> | <b>38 %</b>            | 36 %             | 34 %                |
| Akquisitionen                  | <b>644</b>             | 260              | 3.853               |
| Investitionen <sup>4</sup>     | <b>758</b>             | 671              | 764                 |
| <b>Mitarbeiter (31.12.)</b>    | <b>137.552</b>         | 130.510          | 122.217             |

<sup>1</sup> 2008 vor Sondereinflüssen aus der APP-Akquisition; 2010 und 2009 vor Sondereinflüssen aus den Marktwertveränderungen der Pflichtumtauschanleihe und des Besserungsscheins. Diese sind nicht liquiditätswirksam.

<sup>2</sup> Ergebnis, das auf die Anteilseigner der Fresenius SE & Co. KGaA entfällt.

<sup>3</sup> Eigenkapital inklusive Anteile anderer Gesellschafter am Eigenkapital.

<sup>4</sup> Investitionen in Sachanlagen, immaterielle Vermögenswerte.

## KENNDATEN DER FRESENIUS-AKTIE

|                                   | 2010                    | 2009              | 2008              |
|-----------------------------------|-------------------------|-------------------|-------------------|
| Anzahl der Aktien                 | <b>162.450.090</b>      | 161.315.376       | 161.143.734       |
| Marktkapitalisierung <sup>1</sup> | <b>10.301</b>           | 7.538             | 6.270             |
| Je Aktie in €                     |                         |                   |                   |
| Dividende Stammaktie              | <b>0,86</b>             | 0,75              | 0,70              |
| Dividende Vorzugsaktie            | <b>n.a.</b>             | 0,76              | 0,71              |
| Ergebnis Stammaktie               | <b>4,08<sup>2</sup></b> | 3,18 <sup>2</sup> | 2,85 <sup>3</sup> |
| Ergebnis Vorzugsaktie             | <b>4,08<sup>2</sup></b> | 3,19 <sup>2</sup> | 2,86 <sup>3</sup> |

<sup>1</sup> In Mio. €; Gesamtzahl der Stamm- und Vorzugsaktien, multipliziert mit dem jeweiligen Xetra-Jahresschlusskurs an der Frankfurter Wertpapierbörse.

<sup>2</sup> Bereinigt um die Sondereinflüsse aus den Marktwertveränderungen der Pflichtumtauschanleihe (MEB) und des Besserungsscheins (CVR) im Zusammenhang mit der Akquisition von APP Pharmaceuticals.

<sup>3</sup> Vor Sondereinflüssen aus der APP-Akquisition.

Fresenius Medical Care ist der weltweit führende Anbieter von **Dialyседienstleistungen** und **Dialyseprodukten** für Menschen mit chronischem Nierenversagen. Mehr als zwei Millionen Nierenkranke müssen sich regelmäßig einer Dialysebehandlung unterziehen. In 2.757 Dialysekliniken in Nordamerika, Europa, Lateinamerika, Asien und Afrika betreut Fresenius Medical Care 214.648 Dialysepatienten (Stand 31.12.2010). Das Unternehmen bietet außerdem Produkte für die **Hämodialyse** und die **Peritonealdialyse** wie Dialysegeräte, Dialysatoren und damit verbundene Einweg-Produkte an. Weitere Informationen unter [www.fmc-ag.de](http://www.fmc-ag.de).

## KENNZAHLEN

|                              | 2010<br>in Mio. US\$ | 2009<br>in Mio. US\$ | Veränderung |
|------------------------------|----------------------|----------------------|-------------|
| Umsatz                       | <b>12.053</b>        | 11.247               | 7 %         |
| EBIT                         | <b>1.924</b>         | 1.756                | 10 %        |
| Konzernergebnis <sup>1</sup> | <b>979</b>           | 891                  | 10 %        |
| Operativer Cashflow          | <b>1.368</b>         | 1.339                | 2 %         |
| Investitionen/Akquisitionen  | <b>1.314</b>         | 766                  | 72 %        |
| F & E-Aufwand                | <b>97</b>            | 94                   | 3 %         |
| Mitarbeiter (31.12.)         | <b>77.442</b>        | 71.617               | 8 %         |

<sup>1</sup> Ergebnis, das auf die Anteilseigner der Fresenius Medical Care AG & Co. KGaA entfällt.

Fresenius Kabi ist Marktführer in der **Infusionstherapie** und in der **klinischen Ernährung** in Europa und hält führende Positionen in den für das Unternehmen wichtigsten Ländern Lateinamerikas und der Region Asien-Pazifik. Im Bereich der **intravenös zu verabreichenden generischen Arzneimittel** (I.V.-Arzneimittel) zählt Fresenius Kabi zu den führenden globalen Anbietern. Das Unternehmen ist auf die Therapie und Versorgung von chronisch und kritisch Kranken im Krankenhaus und zuhause spezialisiert. Dafür bietet Fresenius Kabi I.V.-Arzneimittel, Infusionslösungen, Blutvolumenersatzstoffe, parenterale (intravenös zu verabreichende) und enterale (Trink- und Sondennahrungen, die über den Magen-Darm-Trakt aufgenommen werden) Ernährungsprodukte sowie die dazugehörigen medizintechnischen Produkte zur Verabreichung an. Ferner stellt das Unternehmen im Bereich der Transfusionstechnologie Produkte für Blutbanken und Blutspendedienste her.

## KENNZAHLEN

|                              | 2010<br>in Mio. € | 2009<br>in Mio. € | Veränderung |
|------------------------------|-------------------|-------------------|-------------|
| Umsatz                       | 3.672             | 3.086             | 19 %        |
| EBIT                         | 737               | 607               | 21 %        |
| Konzernergebnis <sup>1</sup> | 294               | 200               | 47 %        |
| Operativer Cashflow          | 567               | 397               | 43 %        |
| Investitionen/Akquisitionen  | 205               | 157               | 31 %        |
| F&E-Aufwand                  | 143               | 129               | 11 %        |
| Mitarbeiter (31.12.)         | 22.851            | 21.872            | 4 %         |

<sup>1</sup> Ergebnis, das auf die Anteilseigner der Fresenius Kabi AG entfällt.

Fresenius Helios ist **einer der größten deutschen privaten Krankenhausbetreiber**. Zur HELIOS Kliniken Gruppe gehören insgesamt 63 eigene Kliniken mit mehr als 18.500 Betten, darunter fünf Maximalversorger in Berlin-Buch, Erfurt, Krefeld, Schwerin und Wuppertal. Neben den 43 Akutkrankenhäusern gehören zu Fresenius Helios auch 20 Kliniken für Rehabilitationsmedizin. Ziel ist es, höchste medizinische und pflegerische Qualität innerhalb des gesamten akutstationären und ambulanten Versorgungsspektrums anzubieten. Über 33.000 Mitarbeiter versorgen jährlich mehr als zwei Millionen Patienten, davon rund 600.000 Patienten stationär.

## KENNZAHLEN

|                              | 2010<br>in Mio. € | 2009<br>in Mio. € | Veränderung |
|------------------------------|-------------------|-------------------|-------------|
| Umsatz                       | 2.520             | 2.416             | 4 %         |
| EBIT                         | 235               | 205               | 15 %        |
| Konzernergebnis <sup>1</sup> | 131               | 107               | 22 %        |
| Operativer Cashflow          | 311               | 219               | 42 %        |
| Investitionen/Akquisitionen  | 179               | 203               | -12 %       |
| Mitarbeiter (31.12.)         | 33.321            | 33.364            | 0 %         |

<sup>1</sup> Ergebnis, das auf die Anteilseigner der HELIOS Kliniken GmbH entfällt.

Fresenius Vamed ist ein weltweit tätiger Komplettanbieter im Bereich der **Planung, Errichtung** und des **Managements von Gesundheitseinrichtungen**. Das Portfolio reicht von der Projektentwicklung sowie der Planung und der schlüsselfertigen Errichtung über das Facility Management bis hin zur Gesamtbetriebsführung. Das Unternehmen mit Sitz in Wien, Österreich hat seit seiner Gründung im Jahr 1982 in über 60 Ländern rund 500 Gesundheitsprojekte erfolgreich realisiert. Entsprechend seiner Philosophie „Alles aus einer Hand“ ist Fresenius Vamed ein kompetenter Partner im Gesundheitswesen.

## KENNZAHLEN

|                              | 2010<br>in Mio. € | 2009<br>in Mio. € | Veränderung |
|------------------------------|-------------------|-------------------|-------------|
| Umsatz                       | 713               | 618               | 15 %        |
| EBIT                         | 41                | 36                | 14 %        |
| Konzernergebnis <sup>1</sup> | 30                | 27                | 11 %        |
| Operativer Cashflow          | 47                | 29                | 62 %        |
| Investitionen/Akquisitionen  | 14                | 7                 | 100 %       |
| Auftragseingang              | 625               | 539               | 16 %        |
| Mitarbeiter (31.12.)         | 3.110             | 2.849             | 9 %         |

<sup>1</sup> Ergebnis, das auf die Anteilseigner der VAMED AG entfällt.

## UMSATZ NACH REGIONEN

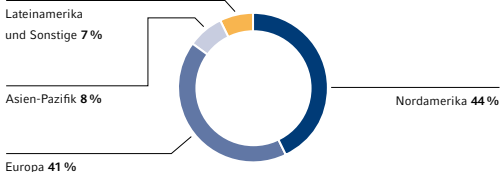

2010: 16,0 Mrd. €

## MITARBEITERINNEN UND MITARBEITER NACH REGIONEN

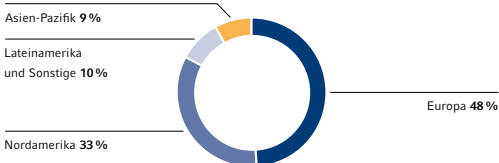

2010: 137.552

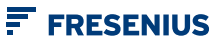

**Konzernzentrale**  
Else-Kröner-Straße 1  
Bad Homburg v. d. H.

**Postanschrift**  
Fresenius SE & Co. KGaA  
61346 Bad Homburg v. d. H.

[www.fresenius.de](http://www.fresenius.de)

**Kontakt für Presse**  
Konzern-Kommunikation  
T +49 6172 608-2302  
F +49 6172 608-2294  
[pr-fre@fresenius.com](mailto:pr-fre@fresenius.com)

**Kontakt für Aktionäre**  
Investor Relations  
T +49 6172 608-2637  
F +49 6172 608-2488  
[ir-fre@fresenius.com](mailto:ir-fre@fresenius.com)
