# Supplementary material
Source: publisher site journal article supplement (https://www.degruyterbrill.com/publication/isbn/9783110432879/downloadAsset/9783110432879_Elektronischer_Anhang_2.zip)
Supplement: Supplementary file 55 [file HeidelbergCement Corporate Mission.pdf › Korpustexte/Korpustexte pdf/HeidelbergCement/HeidelbergCement Corporate Mission.pdf]



Corporate Mission

For better building

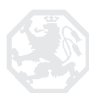

**HEIDELBERGER  
ZEMENT**

Corporate Mission

For better building

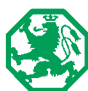

**HEIDELBERGER  
ZEMENT**

# The Mission

The Heidelberger Corporate Image

**Building worldwide growth  
by building a better world.**

The Heidelberger Business Culture

**Building on local responsibility  
for international success.**

The Heidelberger Employee Policy

**Building our business on  
the knowledge of our people.**

The Heidelberger Market Strategy

**Building our growth on  
a solid base of earnings.**

The Heidelberger Customer Philosophy

**Building customer satisfaction  
because their success is our success.**

The Heidelberger Quality Standard

**Building on quality products  
to build our reputation.**

The Heidelberger Commitment to Environmental Protection

**Building on environmental care  
also makes economic sense.**

The Heidelberger Commitment to Innovation

**Building on new technologies  
determines our future success.**

# Die Leitsätze

Das Heidelberger Selbstverständnis

**Wir bauen auf weltweites Wachstum.**

**Weil wir helfen wollen, eine bessere Welt zu bauen.**

Die Heidelberger Unternehmenskultur

**Wir bauen auf lokale Verantwortung für globale Ziele.**

**Weil wir weltweit zu den Besten gehören.**

Die Heidelberger Mitarbeiterpolitik

**Wir bauen auf kompetente Mitarbeiter.**

**Weil ihr Wissen uns weiterbringt.**

Die Heidelberger Marktstrategie

**Wir bauen auf Gewinne.**

**Weil unser Wachstum ein solides Fundament braucht.**

Die Heidelberger Kundenphilosophie

**Wir bauen auf zufriedene Kunden.**

**Weil wir mit ihrem Erfolg wachsen.**

Der Heidelberger Qualitätsstandard

**Wir bauen auf die Qualität unserer Produkte.**

**Weil sie unser Markenzeichen ist.**

Die Heidelberger Umweltschutzverpflichtung

**Wir bauen auf Umweltschutz.**

**Weil Ökologie ökonomisch ist.**

Das Heidelberger Innovationsbekenntnis

**Wir bauen auf neue Technologien.**

**Weil wir Zukunft damit aktiv gestalten.**

# Contents

|                                                            |    |
|------------------------------------------------------------|----|
| The Heidelberger<br>Corporate Image                        | 2  |
| The Heidelberger<br>Business Culture                       | 4  |
| The Heidelberger<br>Employee Policy                        | 6  |
| The Heidelberger<br>Market Strategy                        | 8  |
| The Heidelberger<br>Customer Philosophy                    | 10 |
| The Heidelberger<br>Quality Standard                       | 12 |
| The Heidelberger Commitment<br>to Environmental Protection | 14 |
| The Heidelberger Commitment<br>to Innovation               | 16 |

# Inhalt

|                                               |    |
|-----------------------------------------------|----|
| Das Heidelberger<br>Selbstverständnis         | 3  |
| Die Heidelberger<br>Unternehmenskultur        | 5  |
| Die Heidelberger<br>Mitarbeiterpolitik        | 7  |
| Die Heidelberger<br>Marktstrategie            | 9  |
| Die Heidelberger<br>Kundenphilosophie         | 11 |
| Der Heidelberger<br>Qualitätsstandard         | 13 |
| Die Heidelberger<br>Umweltschutzverpflichtung | 15 |
| Das Heidelberger<br>Innovationsbekenntnis     | 17 |



Dear Employees,

Between January and April 2000 over 300 of our colleagues worldwide met to discuss the new company philosophy of Heidelberger Zement. Every region of our Group had the opportunity to bring in its ideas about the company's future.

The Vorstand of Heidelberger Zement followed this process closely and supported the outcome. Hans Bauer received the input from the regions on behalf of the Vorstand. At the same time, he presented the ideas of the Vorstand and answered questions of the workshop participants. During a two-day retreat in June 2000, the Vorstand then evaluated the results of the workshops and approved a final version of the text. We are now in a position to present the result of this intensive process.

The key to success of Heidelberger Zement is a corporate culture which emphasizes openness and mutual respect. Our philosophy highlights our future path to all employees of our expanded company and should continue to strengthen our team spirit.

However, it is not our intention that this piece of paper should lie about gathering dust – but rather that it be accepted as a document that shapes the spirit and corporate image of Heidelberger Zement. Therefore, the Vorstand encourages lively debate of the philosophy at employee meetings, live events and any other occasions where our people gather. For only if the new philosophy becomes a living reality in the Heidelberger Zement family will it completely fulfill its purpose.

Heidelberg, September 2000



Hans Bauer

Liebe Mitarbeiterinnen und Mitarbeiter,

von Januar bis April 2000 haben weltweit mehr als 300 unserer Kolleginnen und Kollegen in 15 Workshops das neue Unternehmensleitbild von Heidelberger Zement diskutiert. Jede Region unserer Gruppe hatte Gelegenheit, ihre Vorstellungen über die Zukunft des Unternehmens einzubringen.

Der Vorstand von Heidelberger Zement hat diesen Prozess gefördert und aktiv begleitet. In seinem Auftrag nahm Hans Bauer die Beiträge aus den Regionen entgegen. Zugleich präsentierte er die Vorstellungen des Vorstandes und stellte sich den Fragen der Teilnehmerinnen und Teilnehmer der Workshops. Während einer zweitägigen Klausurtagung wertete der Vorstand im Juni 2000 die Ergebnisse der Workshops aus und verabschiedete eine endgültige Textfassung. Das Ergebnis dieses intensiven Diskussionsprozesses legen wir Ihnen hiermit vor.

Eine von Offenheit und gegenseitigem Respekt geprägte Unternehmenskultur ist Grundlage des Erfolgs von Heidelberger Zement. Das neue Leitbild soll dem gewachsenen Unternehmen und seinen Mitarbeiterinnen und Mitarbeitern Orientierung auf dem gemeinsamen Weg in die Zukunft geben. Es soll das Wir-Gefühl in der Heidelberger Zement Gruppe weiter stärken.

Der Vorstand würde sich freuen, wenn es am Arbeitsplatz, in Betriebsversammlungen und bei vielen anderen Veranstaltungen und Gelegenheiten zu lebhaften Diskussionen führt. Denn es ist nicht unsere Absicht, dass das Geschriebene ein Stück Papier bleibt, das rasch in Vergessenheit gerät. Vielmehr wünschen wir uns, dass es angenommen wird und nachhaltig den Geist und das Selbstverständnis in unserem Unternehmen prägt. Denn nur wenn das neue Leitbild ein Stück gelebte Realität in der Heidelberger Zement Familie wird, hat es seinen Zweck vollständig erfüllt.

Heidelberg, im September 2000



Hans Bauer



# The Heidelberger Corporate Image

The Heidelberger Zement Group is one unit – a leading, globally active, market-oriented company. We contribute to the improvement of the quality of life in many countries through the development, production and sale of building materials and related services. We respect the law in all our activities and participate in shaping national and supra-national conditions. We support educational and charitable initiatives in the vicinity of our activities and participate as good citizens in political, cultural and social events at local and regional levels.

We are among the world's best and we want to continue to grow. Prerequisites for this are an especially well-qualified management plus committed, well-trained employees and satisfied customers.

Our economic goals are to continuously increase our earnings through leadership in cost efficiency and the long-term, profit-oriented growth of the Group. We strive for a balanced presence in mature and developing markets to deliver our shareholders adequate dividends and an increasing market value of the company. We generate the necessary cash flow to maintain and improve our existing activities and finance our external growth.

Financial stability and flexibility is the standard for our efforts and safeguards entrepreneurial freedom of action.

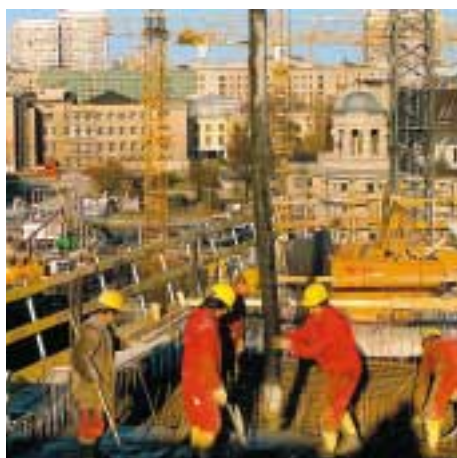



Building worldwide growth  
by building a better world.



Wir bauen auf weltweites  
Wachstum.

Weil wir helfen wollen,  
eine bessere Welt zu bauen.

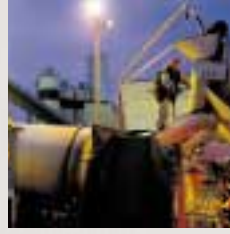

# Das Heidelberger Selbstverständnis

Die Heidelberger Zement Gruppe ist eine Einheit - ein weltweit tätiges, führendes und marktorientiertes Unternehmen. Mit Entwicklung, Produktion und Vertrieb von Baustoffen sowie den damit verbundenen Dienstleistungen tragen wir in vielen Ländern zur Verbesserung der Lebensqualität bei. Bei allen unseren Aktivitäten respektieren wir die Gesetze und beteiligen uns an der Gestaltung staatlicher und supranationaler Rahmenbedingungen. Wir unterstützen Bildungs- und Wohltätigkeitsinitiativen im Umfeld unserer Aktivitäten und wirken als gute Bürger am politischen, kulturellen und sozialen Geschehen auf lokaler und regionaler Ebene mit.

Wir gehören weltweit zu den Besten und wollen weiter wachsen. Voraussetzung dafür sind ein besonders qualifiziertes Management, engagierte, gut ausgebildete Mitarbeiter und zufriedene Kunden.

Unser wirtschaftliches Ziel ist eine kontinuierliche Steigerung der Ergebnisse durch Kostenführerschaft und ein langfristiges am Ergebnis orientiertes Wachstum der Gruppe. Wir streben eine ausgewogene Präsenz in reifen und sich entwickelnden Märkten an und sichern dadurch unseren Aktionären eine angemessene Dividende und einen steigenden Unternehmenswert. Wir erwirtschaften den notwendigen Cashflow, um unsere vorhandenen Aktivitäten zu erhalten, zu verbessern und externes Wachstum zu finanzieren.

Die Erhaltung der finanziellen Stabilität und Flexibilität ist der Maßstab für unser Vorgehen und sichert unternehmerische Handlungsfreiheit.

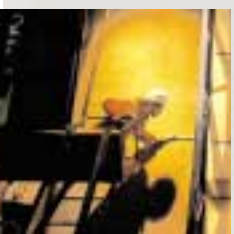

# The Heidelberger Business Culture

We are a growth-oriented international company with decentralized and regionally oriented management, decision-making and organizational structures. The dynamism and strength of our company relies upon these structures rather than just upon its legal corporate structure. The Vorstand shares responsibility in leading the company. It delegates regional and central management duties and responsibilities to its members.

Harmonized management guidelines and the principle of goal agreement are the worldwide foundations for consistent delegation of responsibility, duties and decision-making powers. We support responsible entrepreneurial actions by providing the necessary freedom based on mutual trust and organized teamwork.

We act responsibly towards customers, employees, business partners, co-owners, shareholders and the environment. We promote national identities and cultures in order to be as close and creative to local markets as possible. We ensure that human rights are observed throughout our Group.

We demonstrate respect and appreciation for our employees and their representatives. Our treatment of each other is marked by active and open communication.

Our information policy is to provide open communication and make use of the latest technologies. We inform truthfully and responsibly.

The language of communication throughout the Group is English.

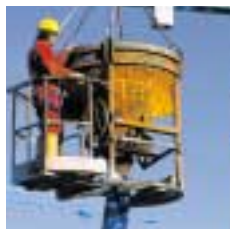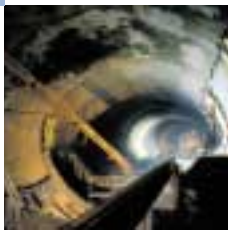



Building on local responsibility for  
international success.



Wir bauen auf lokale  
Verantwortung für globale Ziele.

Weil wir weltweit zu den  
Besten gehören.

# Die Heidelberger Unternehmenskultur

Wir sind ein wachstumsorientiertes internationales Unternehmen mit dezentral und regional ausgerichteter Führungs-, Entscheidungs- und Organisationsstruktur. Unsere dezentrale Führungsorganisation hat Vorrang vor der gesellschaftsrechtlichen Gliederung der Heidelberger Zement Gruppe. Der Vorstand führt das Unternehmen in gemeinsamer Verantwortung. Er überträgt seinen Mitgliedern regionale und zentrale Führungsaufgaben und Verantwortung.

Einheitliche Management-Leitlinien und das Prinzip der Zielvereinbarung sind dabei weltweit verbindliche Grundlage für konsequente Delegation von Verantwortung, Aufgaben und Entscheidungsbefugnissen. Unternehmerisches, eigenverantwortliches Handeln unterstützen wir durch Schaffung der notwendigen Gestaltungsräume. Hierzu gehören gegenseitiges Vertrauen und die Förderung von organisierter Teamarbeit.

Wir handeln verantwortungsvoll gegenüber Kunden, Mitarbeitern, Geschäftspartnern und Mitgesellschaftern, den Aktionären und der Umwelt. Wir fördern den Erhalt nationaler Identitäten und Kulturen, um möglichst marktnah und kreativ zu sein. Wir sorgen dafür, dass in unserer Gruppe die Menschenrechte beachtet werden.

Unseren Mitarbeitern sowie ihren Interessenvertretern begegnen wir mit Respekt und Wertschätzung. Der Umgang untereinander ist von einer aktiven und offenen Kommunikation geprägt.

Unsere Informationspolitik ist transparent und bedient sich der neuesten Technologien. Wir informieren wahrheitsgetreu und verantwortungsbewusst.

Die Sprache der Kommunikation im Konzern ist Englisch.

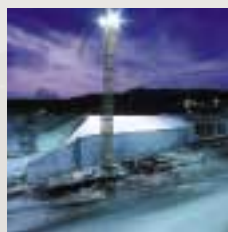



# The Heidelberger Employee Policy

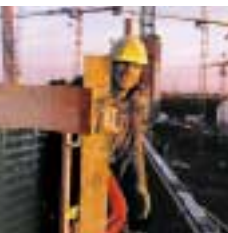

We are committed to success in all our international ventures. To achieve this we strive to be a model employer to gain the help and support of all our employees. Consequently, we are interested in long-term employment relationships that offer opportunities for personal development and ongoing education. Only through focused and continuous employee development can we achieve long lasting technical, social and leadership capabilities. We recruit and educate talented new people, largely from domestic sources, but also, where necessary, internationally. Whenever practical, we will identify qualified internal candidates to fill positions.

We expect a high degree of professionalism and credibility from our managers, as well as fairness and openness in all their undertakings. Our managers should be role models with respect to their technical qualifications and their interpersonal skills. They should distinguish themselves through their teamwork skills and their loyalty. Typically, they will have local experience, but with an outward-looking attitude.

International management competence is of great importance to us. We, therefore, encourage employees to take on international duties. Foreign assignments are subject to special rules that demand special considerations. We expect our employees to be future-oriented and motivated and, through continuous learning, to see change as opportunity.

Our remuneration systems depend on performance and results and are adapted to national cultures and circumstances. We will do our best to support employees in difficult career or personal situations.

All appropriate safety measures should be taken at the workplace.

Dishonesty towards our company and improper conduct towards employees are penalized.



Building our business on  
the knowledge of our people.



Wir bauen auf kompetente  
Mitarbeiter.

Weil ihr Wissen uns weiterbringt.

# Die Heidelberger Mitarbeiterpolitik

Wir wollen im internationalen Wettbewerb gewinnen. Wir sind ein attraktiver Arbeitgeber, der an langfristigen Arbeitsverhältnissen interessiert ist, und bietet Möglichkeiten für persönliche Entwicklung und Weiterbildung an. Durch eine gezielte und kontinuierliche Personalentwicklung schaffen wir nachhaltige Fach-, Sozial- und Führungskompetenz. Wir rekrutieren und qualifizieren begabte Nachwuchskräfte weitgehend national, aber auch - wo notwendig - international. Die Besetzung von Stellen erfolgt - wo immer möglich - aus dem eigenen Unternehmen.

Von den Führungskräften erwarten wir hohe Professionalität und Glaubwürdigkeit sowie Fairness und Offenheit. Sie erfüllen eine Vorbildfunktion durch ihre menschliche und fachliche Qualifikation sowie durch soziale Fähigkeiten, und sie zeichnen sich aus durch ihre Integrationsfähigkeit und Loyalität. Unsere Führungskräfte verfügen in der Regel über lokale Erfahrungen und haben eine weltoffene Grundeinstellung.

Die Entwicklung von internationaler Managementkompetenz ist von großer Bedeutung. Deshalb fördern wir Mitarbeiter, die bereit sind, internationale Aufgaben zu übernehmen. Auslandseinsätze unterliegen besonderen Regelungen und werden speziell betreut. Wir erwarten zukunftsorientierte und motivierte Mitarbeiter, die durch kontinuierliches Lernen die Veränderung als Chance begreifen.

Unsere Vergütungssysteme sind leistungs- und ergebnisorientiert und richten sich nach den nationalen Gegebenheiten. Langjährige verdiente Mitarbeiter können in schwierigen beruflichen oder privaten Situationen mit unserer Unterstützung rechnen.

Am Arbeitsplatz werden alle notwendigen Maßnahmen zur Sicherheit getroffen.

Unehrliches Verhalten gegenüber unserem Unternehmen und Fehlverhalten gegenüber Mitarbeitern wird sanktioniert.

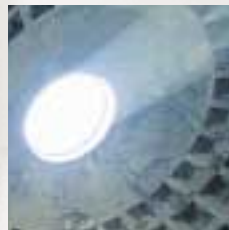

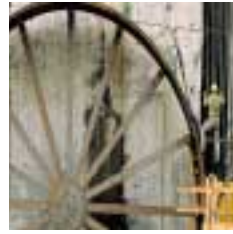

# The Heidelberger Market Strategy

Profits are the prerequisite for investment in research, new products and facilities. We optimize costs based on benchmarking and improve earnings through active management of the value-added chain. Optimization of production and logistics costs are of prime importance. We consider social as well as economic aspects in all our decisions and actions.

For control of our long-term profitability, we use a common system as a measure of our success.

Wherever possible, we work to become the market leader and to build up our position through vertical integration. To optimize our production capacity and to help us build strength in distant markets, we conduct international trade in cement as well as clinker.

We respect fair competition.

We use the power of our regional brand and company names, but make clear that they belong to the Heidelberger Zement Group. In this way, all our employees enjoy the advantages of local name recognition and the worldwide strength of the Heidelberger Zement Group.



Building our growth on  
a solid base of earnings.



Wir bauen auf Gewinne.

Weil unser Wachstum ein  
solides Fundament braucht.

# Die Heidelberger Marktstrategie

Gewinn ist die Voraussetzung für Investitionen in Forschung, neue Produkte, Anlagen und Umweltschutz. Wir betreiben Kostenoptimierung auf der Basis von Benchmarking und verbessern das Ergebnis durch aktives Management der Wertschöpfungskette. Dabei steht die Optimierung von Produktions- und Logistikkosten im Vordergrund. Bei allen Entscheidungen und Maßnahmen berücksichtigen wir neben wirtschaftlichen auch soziale Aspekte.

Zur Steuerung unserer langfristigen Profitabilität setzen wir ein einheitlich definiertes System zur Messung unseres unternehmerischen Erfolgs ein.

Wir arbeiten daran, wo immer es möglich ist, Marktführer zu werden, und bauen unsere Position durch vertikale Integration aus. Zur Optimierung unserer Kapazitätsauslastung betreiben wir internationalen Handel mit Zement und Klinker. Damit können wir auch im Wettbewerb reagieren.

Wir respektieren unsere Wettbewerber, erwarten Respekt für uns und reagieren auf Marktbewegungen angemessen.

Im fairen Wettbewerb nutzen wir die Kraft unserer regionalen Marken- und Firmennamen, verdeutlichen aber ihre Zugehörigkeit zur Heidelberger Zement Gruppe. So können sich alle Mitarbeiter öffentlich mit unserem Unternehmen identifizieren und sympathisch selbstbewusst auftreten.

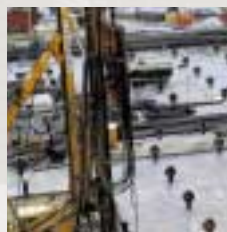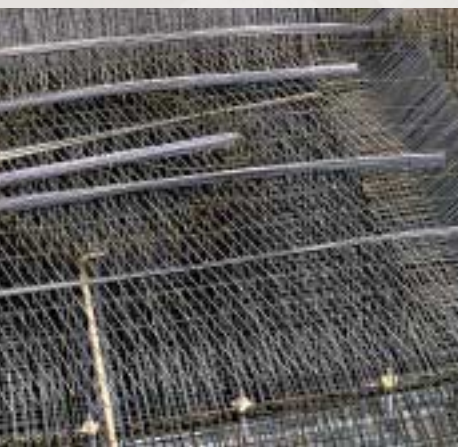



# The Heidelberger Customer Philosophy

Our capability grows with our size, our knowledge, our innovativeness, and our ability to link all our units into a powerfully performing team. We want to help our customers experience this as a concrete advantage in their own success because we are successful only when our customers are successful. We strive for long-term customer relationships based on reliability and integrity. We achieve lasting customer satisfaction through innovative products, competitive prices and unassailable quality.

We value our business partnerships and work for our mutual success.

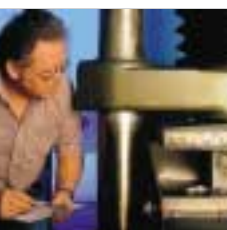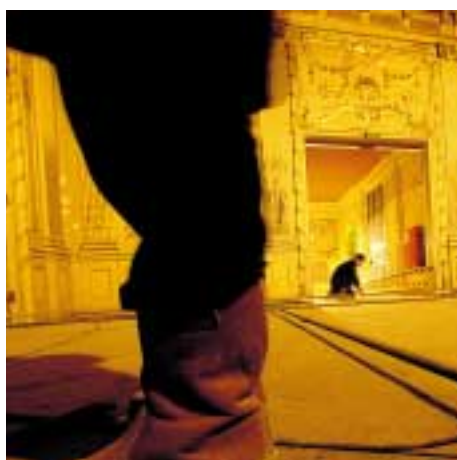



Building customer satisfaction  
because their success is our success.



Wir bauen auf zufriedene Kunden.

Weil wir mit ihrem Erfolg wachsen.

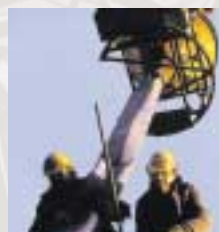

# Die Heidelberger Kundenphilosophie

Unsere Leistungskraft wächst mit unserer Größe, unserem Wissen, unserer Innovationsfähigkeit und der Verknüpfung aller unserer Bereiche zu einem schlagkräftigen Leistungsverbund. Das wollen wir unseren Kunden als konkreten Vorteil für ihren eigenen Erfolg erlebbar machen. Denn nur wenn unsere Kunden erfolgreich sind, haben auch wir Erfolg. Wir streben eine langfristige, von Verlässlichkeit und Integrität geprägte Kundenbeziehung an. Nachhaltige Kundenzufriedenheit erreichen wir durch innovative Produkte, marktgerechte Preise und unangreifbare Qualität.

Wir schätzen unsere unternehmerischen Partnerschaften und arbeiten auf einen gemeinsamen Erfolg hin.

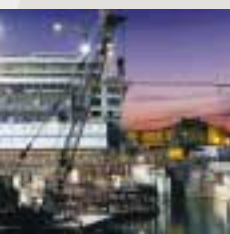

# The Heidelberger Quality Standard

Cement, concrete, aggregates and certain other building materials - these are our fields of competence. In these areas, we produce the products that the market wants and needs. And so we contribute to a better quality of life, work and mobility.

It is the declared goal of every employee to make our products and services into a recognized byword for quality worldwide. This positioning allows us to achieve market leadership.

Our competitive strength is of strategic importance. It can be achieved only through economically and ecologically innovative production technologies and the high quality standards we promote.

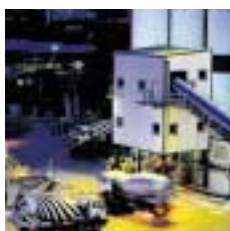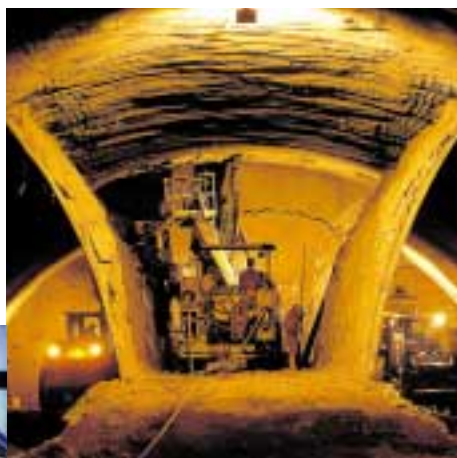



Building on quality products  
to build our reputation.



Wir bauen auf die Qualität  
unserer Produkte.

Weil sie unser Markenzeichen ist.

# Der Heidelberger Qualitätsstandard

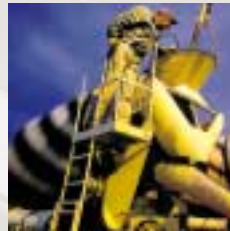

Zement, Beton und Zuschlagstoffe sowie Baustoffe – das sind unsere Kompetenzfelder. In diesen Bereichen produzieren wir die Produkte, die der Markt wünscht und braucht. Damit tragen wir zur besseren Infrastruktur für Wohnen, Arbeiten und Mobilität bei.

Es ist erklärtes Ziel jedes Mitarbeiters, unsere Produkte und Dienstleistungen weltweit zu einem anerkannten Begriff für Qualität zu machen; diese Positionierung ermöglicht uns die Marktführerschaft.

Von strategischer Bedeutung ist unsere Wettbewerbsfähigkeit. Erreichbar ist sie nur durch ökonomisch wie ökologisch innovative Produktionstechnologien und von uns geförderte hohe Qualitätsstandards.



# The Heidelberger Commitment to Environmental Protection

Environmental protection benefits everyone: our employees, communities and customers. It also makes good economic sense. We use secondary fuels and raw materials and ensure their continued availability. We strive to conserve resources and optimize our production processes and products through continuous improvement. We build on modern, proven and environmentally sound technologies. This helps to ensure the lasting supply of raw materials, which is of critical importance to us.

Our future goal is steady and sustainable development.

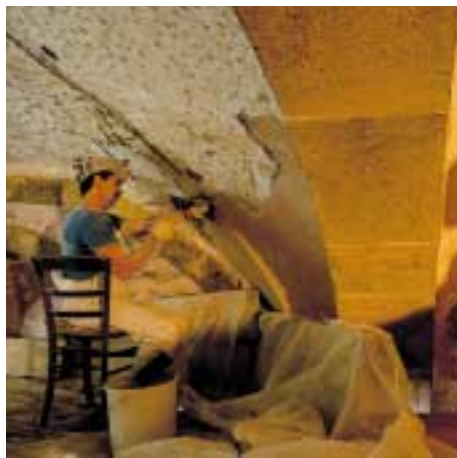



Building on environmental care  
also makes economic sense.



Wir bauen auf Umweltschutz.

Weil Ökologie ökonomisch ist.

# Die Heidelberger Umweltschutz- verpflichtung

Umweltschutz besitzt besondere Bedeutung für unsere Mitarbeiter, Mitbürger und Kunden. Er ist auch ökonomisch sinnvoll. Wir setzen gezielt sekundäre Brenn- und Rohstoffe ein und sichern deren Verfügbarkeit. Wir sind bestrebt, Ressourcen zu schonen und unsere Herstellverfahren und Produkte in einem kontinuierlichen Verbesserungsprozess zu optimieren. Wir bauen auf moderne, bewährte Umweltschutztechnologien. Diese tragen auch zu einer weitreichenden Rohstoffvorsorge bei, die für uns von höchster Bedeutung ist.

Unser Ziel ist eine nachhaltige, zukunftsverträgliche Entwicklung.

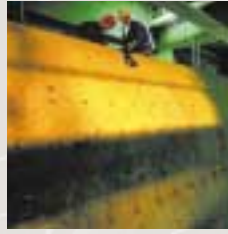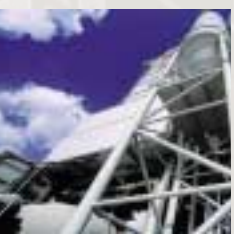

# The Heidelberger Commitment to Innovation

Our product quality is based on the use of modern, tested production processes. For this reason we involve ourselves in the development of improved technologies and innovative, low-cost production processes that achieve lasting economic and ecological benefits. In addition, long-term capital investment in our production facilities requires continuous maintenance.

To achieve a competitive advantage, we practice knowledge management through the targeted exchange of information and experience. We generate this from internal projects, external cooperation and activities within the operating businesses.

We promote the reputation and use of concrete and of other building materials containing cement and we research and develop promising new applications with our customers.

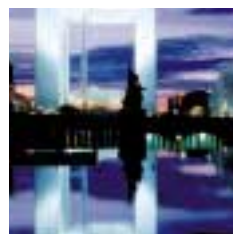



Building on new technologies  
determines our future success.



Wir bauen auf neue  
Technologien.

Weil wir Zukunft damit  
aktiv gestalten.

# Das Heidelberger Innovationsbekenntnis

Unsere Produktqualität beruht auf dem Einsatz moderner, erprobter Produktionsverfahren. Aus diesem Grund engagieren wir uns bei der Entwicklung verbesserter Technologien und innovativer, kostengünstigerer Produktionsverfahren - Verfahren, die nachhaltig ökonomische Vorteile und gleichzeitig auch ökologischen Fortschritt realisieren. Daneben erfordert langfristige Kapitalbindung in unseren Produktionsanlagen laufende Substanzerhaltung.

Um im Wettbewerb Vorteile zu erzielen, praktizieren wir Wissensmanagement durch gezielten Austausch von Wissen und Erfahrung. Dies generieren wir aus internen Projekten, externer Zusammenarbeit und aus Aktivitäten im operativen Geschäft.

Wir fördern das Ansehen und die Anwendung von Beton und anderen zementgebundenen Baustoffen und erforschen bzw. entwickeln mit unseren Kunden neue, erfolgversprechende Anwendungen.

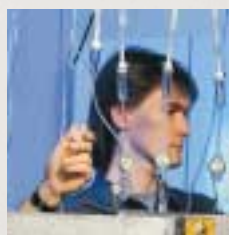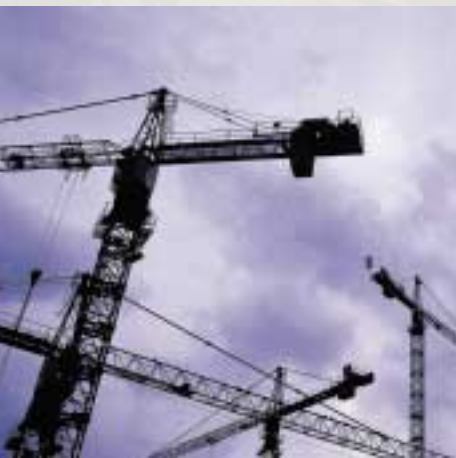



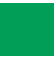

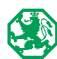

**HEIDELBERGER  
ZEMENT**

Heidelberg Zement  
Berliner Straße 6  
D-69120 Heidelberg
